# Supplementary material for: Phase Stability of Iron Nitride Fe4N at High Pressure—Pressure-Dependent Evolution of Phase Equilibria in the Fe–N System
Source: Materials (Basel). 2021 Jul 15;14(14):3963. doi: 10.3390/ma14143963 (PMC8307547; doi:10.3390/ma14143963)
Supplement: Supplementary file 1 [file materials-14-03963-s001.zip]

Archive with 28 entries (28 files):
- cifs/epsilon1-hex-orig-super1-eq-CONTCAR-findsym.cif
- cifs/epsilon2-hex-orig-super2-eq-CONTCAR-findsym.cif
- cifs/epsilon3-e-fe24n6-eq-CONTCAR-findsym.cif
- xrd_data/2-1000_pawley.txt
- xrd_data/2-400_riet.txt
- xrd_data/2-500_riet.txt
- xrd_data/2-550a_riet.txt
- xrd_data/2-550b_riet.txt
- xrd_data/2-600_riet.txt
- xrd_data/2-800_riet.txt
- xrd_data/3-400_riet.txt
- xrd_data/4.5-400_riet.txt
- xrd_data/4-1000_pawley.txt
- xrd_data/4-250_riet.txt
- xrd_data/4-300_riet.txt
- xrd_data/4-400a_riet.txt
- xrd_data/4-400b_riet.txt
- xrd_data/4-450_riet.txt
- xrd_data/4-500_riet.txt
- xrd_data/4-600_riet.txt
- xrd_data/5-300_riet.txt
- xrd_data/5-350_riet.txt
- xrd_data/5-400_riet.txt
- xrd_data/6-400_riet.txt
- xrd_data/8-400_riet.txt
- xrd_data/initial_1_fe4n_riet.txt
- xrd_data/initial_2_fe+fe4n_riet.txt
- suppl.pdf
