# Supplementary material for: Phase Stability of Iron Nitride Fe4N at High Pressure—Pressure-Dependent Evolution of Phase Equilibria in the Fe–N System
Source: Materials (Basel). 2021 Jul 15;14(14):3963. doi: 10.3390/ma14143963 (PMC8307547; doi:10.3390/ma14143963)
Supplement: Supplementary file 1 [file materials-14-03963-s001.zip › cifs/epsilon1-hex-orig-super1-eq-CONTCAR-findsym.cif]

# CIF file created by FINDSYM, version 6.0

data_findsym-output
_audit_creation_method FINDSYM
 
_cell_length_a    5.2649000000
_cell_length_b    5.2649000000
_cell_length_c    12.8813000000
_cell_angle_alpha 90.0000000000
_cell_angle_beta  90.0000000000
_cell_angle_gamma 120.0000000000
_cell_volume      309.2221390263
 
_symmetry_space_group_name_H-M "P 61 2 2"
_symmetry_Int_Tables_number 178
_space_group.reference_setting '178:P 61 2 (0 0 5)'
_space_group.transform_Pp_abc a,b,c;0,0,0
 
loop_
_space_group_symop_id
_space_group_symop_operation_xyz
1 x,y,z
2 x-y,x,z+1/6
3 -y,x-y,z+1/3
4 -x,-y,z+1/2
5 -x+y,-x,z+2/3
6 y,-x+y,z+5/6
7 x-y,-y,-z
8 x,x-y,-z+1/6
9 y,x,-z+1/3
10 -x+y,y,-z+1/2
11 -x,-x+y,-z+2/3
12 -y,-x,-z+5/6
 
loop_
_atom_site_label
_atom_site_type_symbol
_atom_site_symmetry_multiplicity
_atom_site_Wyckoff_label
_atom_site_fract_x
_atom_site_fract_y
_atom_site_fract_z
_atom_site_occupancy
_atom_site_fract_symmform
Fe1 Fe   6 b 0.66407 0.32813 0.25000  1.00000 Dx,2Dx,0 
Fe2 Fe   6 b 0.16040 0.32080 0.25000  1.00000 Dx,2Dx,0 
Fe3 Fe  12 c 0.67160 0.82990 -0.08620 1.00000 Dx,Dy,Dz 
N1  N    6 a 0.49667 0.00000 0.00000  1.00000 Dx,0,0   
