# Supplementary material for: Phase Stability of Iron Nitride Fe4N at High Pressure—Pressure-Dependent Evolution of Phase Equilibria in the Fe–N System
Source: Materials (Basel). 2021 Jul 15;14(14):3963. doi: 10.3390/ma14143963 (PMC8307547; doi:10.3390/ma14143963)
Supplement: Supplementary file 1 [file materials-14-03963-s001.zip › cifs/epsilon2-hex-orig-super2-eq-CONTCAR-findsym.cif]

# CIF file created by FINDSYM, version 6.0

data_findsym-output
_audit_creation_method FINDSYM
 
_cell_length_a    8.6092000000
_cell_length_b    9.1159401065
_cell_length_c    5.2723225067
_cell_angle_alpha 90.0000000000
_cell_angle_beta  90.0000000000
_cell_angle_gamma 90.0000000000
_cell_volume      413.7768872836
 
_symmetry_space_group_name_H-M "F d d 2"
_symmetry_Int_Tables_number 43
_space_group.reference_setting '043:F 2 -2d'
_space_group.transform_Pp_abc a,b,c;0,0,0
 
loop_
_space_group_symop_id
_space_group_symop_operation_xyz
1 x,y,z
2 -x,-y,z
3 -x+1/4,y+1/4,z+1/4
4 x+1/4,-y+1/4,z+1/4
5 x,y+1/2,z+1/2
6 -x,-y+1/2,z+1/2
7 -x+1/4,y+3/4,z+3/4
8 x+1/4,-y+3/4,z+3/4
9 x+1/2,y,z+1/2
10 -x+1/2,-y,z+1/2
11 -x+3/4,y+1/4,z+3/4
12 x+3/4,-y+1/4,z+3/4
13 x+1/2,y+1/2,z
14 -x+1/2,-y+1/2,z
15 -x+3/4,y+3/4,z+1/4
16 x+3/4,-y+3/4,z+1/4
 
loop_
_atom_site_label
_atom_site_type_symbol
_atom_site_symmetry_multiplicity
_atom_site_Wyckoff_label
_atom_site_fract_x
_atom_site_fract_y
_atom_site_fract_z
_atom_site_occupancy
_atom_site_fract_symmform
Fe1 Fe  16 b 0.12860 0.08850 0.49310 1.00000 Dx,Dy,Dz 
Fe2 Fe  16 b 0.12160 0.08410 0.00590 1.00000 Dx,Dy,Dz 
N1  N    8 a 0.00000 0.00000 0.75200 1.00000 0,0,Dz 
