# Supplementary material for: Phase Stability of Iron Nitride Fe4N at High Pressure—Pressure-Dependent Evolution of Phase Equilibria in the Fe–N System
Source: Materials (Basel). 2021 Jul 15;14(14):3963. doi: 10.3390/ma14143963 (PMC8307547; doi:10.3390/ma14143963)
Supplement: Supplementary file 1 [file materials-14-03963-s001.zip › xrd_data/2-400_riet.txt]

'y-axis saved as Sqrt(y)
'x,Yobs,Ycalc,Diff,fe4n,alpha,Bkg
20,7.93725393,0,0,0,0,0
20.010492,6.70820393,0,0,0,0,0
20.020983,7.28010989,0,0,0,0,0
20.031475,7.28010989,0,0,0,0,0
20.041966,7.68114575,0,0,0,0,0
20.052458,7.48331477,0,0,0,0,0
20.06295,6.164414,0,0,0,0,0
20.073441,7.93725393,0,0,0,0,0
20.083933,7.07106781,0,0,0,0,0
20.094424,7.61577311,0,0,0,0,0
20.104916,7.28010989,0,0,0,0,0
20.115408,8.1240384,0,0,0,0,0
20.125899,8,0,0,0,0,0
20.136391,7.28010989,0,0,0,0,0
20.146882,6.55743852,0,0,0,0,0
20.157374,7.41619849,0,0,0,0,0
20.167866,9.16515139,0,0,0,0,0
20.178357,7.61577311,0,0,0,0,0
20.188849,7.21110255,0,0,0,0,0
20.19934,7.54983444,0,0,0,0,0
20.209832,7.07106781,0,0,0,0,0
20.220324,8.30662386,0,0,0,0,0
20.230815,7,0,0,0,0,0
20.241307,6.8556546,0,0,0,0,0
20.251798,7.68114575,0,0,0,0,0
20.26229,6.55743852,0,0,0,0,0
20.272782,7.54983444,0,0,0,0,0
20.283273,7.21110255,0,0,0,0,0
20.293765,7.54983444,0,0,0,0,0
20.304256,7.81024968,0,0,0,0,0
20.314748,7.41619849,0,0,0,0,0
20.32524,7.34846923,0,0,0,0,0
20.335731,6.8556546,0,0,0,0,0
20.346223,7.87400787,0,0,0,0,0
20.356714,7.41619849,0,0,0,0,0
20.367206,7.81024968,0,0,0,0,0
20.377698,7.48331477,0,0,0,0,0
20.388189,7.07106781,0,0,0,0,0
20.398681,6.8556546,0,0,0,0,0
20.409172,8.06225775,0,0,0,0,0
20.419664,7.41619849,0,0,0,0,0
20.430156,7.81024968,0,0,0,0,0
20.440647,7.74596669,0,0,0,0,0
20.451139,7.28010989,0,0,0,0,0
20.46163,6.92820323,0,0,0,0,0
20.472122,6.63324958,0,0,0,0,0
20.482614,7.21110255,0,0,0,0,0
20.493105,7.81024968,0,0,0,0,0
20.503597,8.18535277,0,0,0,0,0
20.514088,8.42614977,0,0,0,0,0
20.52458,6.92820323,0,0,0,0,0
20.535072,7.81024968,0,0,0,0,0
20.545563,7.74596669,0,0,0,0,0
20.556055,8.06225775,0,0,0,0,0
20.566546,8.18535277,0,0,0,0,0
20.577038,8.42614977,0,0,0,0,0
20.58753,6.164414,0,0,0,0,0
20.598021,7,0,0,0,0,0
20.608513,7.21110255,0,0,0,0,0
20.619004,7,0,0,0,0,0
20.629496,6.55743852,0,0,0,0,0
20.639988,7.21110255,0,0,0,0,0
20.650479,7.14142843,0,0,0,0,0
20.660971,7.21110255,0,0,0,0,0
20.671462,7.07106781,0,0,0,0,0
20.681954,7.54983444,0,0,0,0,0
20.692446,7.34846923,0,0,0,0,0
20.702937,6.70820393,0,0,0,0,0
20.713429,7,0,0,0,0,0
20.72392,7.21110255,0,0,0,0,0
20.734412,8,0,0,0,0,0
20.744904,7.07106781,0,0,0,0,0
20.755395,7.68114575,0,0,0,0,0
20.765887,7.34846923,0,0,0,0,0
20.776378,7.61577311,0,0,0,0,0
20.78687,7.68114575,0,0,0,0,0
20.797362,7.21110255,0,0,0,0,0
20.807853,7.54983444,0,0,0,0,0
20.818345,7.14142843,0,0,0,0,0
20.828836,6.8556546,0,0,0,0,0
20.839328,7,0,0,0,0,0
20.84982,7,0,0,0,0,0
20.860311,6.92820323,0,0,0,0,0
20.870803,6.8556546,0,0,0,0,0
20.881294,7.41619849,0,0,0,0,0
20.891786,7,0,0,0,0,0
20.902278,7.21110255,0,0,0,0,0
20.912769,7.21110255,0,0,0,0,0
20.923261,7,0,0,0,0,0
20.933752,7.87400787,0,0,0,0,0
20.944244,7.34846923,0,0,0,0,0
20.954736,7.61577311,0,0,0,0,0
20.965227,7.54983444,0,0,0,0,0
20.975719,6.78232998,0,0,0,0,0
20.98621,7.81024968,0,0,0,0,0
20.996702,6.8556546,0,0,0,0,0
21.007194,7,0,0,0,0,0
21.017685,7,0,0,0,0,0
21.028177,7.28010989,0,0,0,0,0
21.038668,7.48331477,0,0,0,0,0
21.04916,7.61577311,0,0,0,0,0
21.059652,7.14142843,0,0,0,0,0
21.070143,7.54983444,0,0,0,0,0
21.080635,6.92820323,0,0,0,0,0
21.091126,6.70820393,0,0,0,0,0
21.101618,7.41619849,0,0,0,0,0
21.11211,7.28010989,0,0,0,0,0
21.122601,7.21110255,0,0,0,0,0
21.133093,6.63324958,0,0,0,0,0
21.143584,7.48331477,0,0,0,0,0
21.154076,7.54983444,0,0,0,0,0
21.164568,6.55743852,0,0,0,0,0
21.175059,6.32455532,0,0,0,0,0
21.185551,6.40312424,0,0,0,0,0
21.196042,7.61577311,0,0,0,0,0
21.206534,7.14142843,0,0,0,0,0
21.217026,6.55743852,0,0,0,0,0
21.227517,7.61577311,0,0,0,0,0
21.238009,7.14142843,0,0,0,0,0
21.2485,7.28010989,0,0,0,0,0
21.258992,7.28010989,0,0,0,0,0
21.269484,7.61577311,0,0,0,0,0
21.279975,6.78232998,0,0,0,0,0
21.290467,6.55743852,0,0,0,0,0
21.300958,7,0,0,0,0,0
21.31145,7.48331477,0,0,0,0,0
21.321942,7.34846923,0,0,0,0,0
21.332433,6.70820393,0,0,0,0,0
21.342925,6.92820323,0,0,0,0,0
21.353416,7.54983444,0,0,0,0,0
21.363908,6.8556546,0,0,0,0,0
21.3744,7.54983444,0,0,0,0,0
21.384891,7.54983444,0,0,0,0,0
21.395383,7.21110255,0,0,0,0,0
21.405874,8.42614977,0,0,0,0,0
21.416366,7.48331477,0,0,0,0,0
21.426858,6.4807407,0,0,0,0,0
21.437349,6.78232998,0,0,0,0,0
21.447841,6.32455532,0,0,0,0,0
21.458332,7.14142843,0,0,0,0,0
21.468824,7.81024968,0,0,0,0,0
21.479316,7.41619849,0,0,0,0,0
21.489807,7.14142843,0,0,0,0,0
21.500299,6.92820323,0,0,0,0,0
21.51079,7.81024968,0,0,0,0,0
21.521282,7.21110255,0,0,0,0,0
21.531774,7.74596669,0,0,0,0,0
21.542265,7.07106781,0,0,0,0,0
21.552757,6.4807407,0,0,0,0,0
21.563248,6.78232998,0,0,0,0,0
21.57374,7.48331477,0,0,0,0,0
21.584232,6.70820393,0,0,0,0,0
21.594723,8.18535277,0,0,0,0,0
21.605215,6.164414,0,0,0,0,0
21.615706,7.68114575,0,0,0,0,0
21.626198,7.07106781,0,0,0,0,0
21.63669,7.41619849,0,0,0,0,0
21.647181,7.14142843,0,0,0,0,0
21.657673,7.28010989,0,0,0,0,0
21.668164,7.28010989,0,0,0,0,0
21.678656,7.21110255,0,0,0,0,0
21.689148,7.81024968,0,0,0,0,0
21.699639,8.1240384,0,0,0,0,0
21.710131,7.28010989,0,0,0,0,0
21.720622,7.14142843,0,0,0,0,0
21.731114,7.61577311,0,0,0,0,0
21.741606,6.4807407,0,0,0,0,0
21.752097,6.63324958,0,0,0,0,0
21.762589,8.1240384,0,0,0,0,0
21.77308,7.07106781,0,0,0,0,0
21.783572,6.244998,0,0,0,0,0
21.794064,7.07106781,0,0,0,0,0
21.804555,7.41619849,0,0,0,0,0
21.815047,7.07106781,0,0,0,0,0
21.825538,7.28010989,0,0,0,0,0
21.83603,7.14142843,0,0,0,0,0
21.846522,7.14142843,0,0,0,0,0
21.857013,7.21110255,0,0,0,0,0
21.867505,7.41619849,0,0,0,0,0
21.877996,6.32455532,0,0,0,0,0
21.888488,8.54400375,0,0,0,0,0
21.89898,7,0,0,0,0,0
21.909471,7.34846923,0,0,0,0,0
21.919963,6.70820393,0,0,0,0,0
21.930454,7.34846923,0,0,0,0,0
21.940946,7.81024968,0,0,0,0,0
21.951438,7,0,0,0,0,0
21.961929,7.93725393,0,0,0,0,0
21.972421,6.92820323,0,0,0,0,0
21.982912,7.54983444,0,0,0,0,0
21.993404,6.55743852,0,0,0,0,0
22.003896,7.54983444,0,0,0,0,0
22.014387,6.92820323,0,0,0,0,0
22.024879,6.70820393,0,0,0,0,0
22.03537,7.68114575,0,0,0,0,0
22.045862,7.74596669,0,0,0,0,0
22.056354,6.244998,0,0,0,0,0
22.066845,8.06225775,0,0,0,0,0
22.077337,7.41619849,0,0,0,0,0
22.087828,7.68114575,0,0,0,0,0
22.09832,7.54983444,0,0,0,0,0
22.108812,7,0,0,0,0,0
22.119303,6.55743852,0,0,0,0,0
22.129795,7.68114575,0,0,0,0,0
22.140286,7,0,0,0,0,0
22.150778,7.34846923,0,0,0,0,0
22.16127,6.78232998,0,0,0,0,0
22.171761,7.14142843,0,0,0,0,0
22.182253,7.14142843,0,0,0,0,0
22.192744,8,0,0,0,0,0
22.203236,6.63324958,0,0,0,0,0
22.213728,6.8556546,0,0,0,0,0
22.224219,7.54983444,0,0,0,0,0
22.234711,6.78232998,0,0,0,0,0
22.245202,6.70820393,0,0,0,0,0
22.255694,7.87400787,0,0,0,0,0
22.266186,6.70820393,0,0,0,0,0
22.276677,6.8556546,0,0,0,0,0
22.287169,7.28010989,0,0,0,0,0
22.29766,7.93725393,0,0,0,0,0
22.308152,7.07106781,0,0,0,0,0
22.318644,7.54983444,0,0,0,0,0
22.329135,7.14142843,0,0,0,0,0
22.339627,7.61577311,0,0,0,0,0
22.350118,7.28010989,0,0,0,0,0
22.36061,7.61577311,0,0,0,0,0
22.371102,6.63324958,0,0,0,0,0
22.381593,8.06225775,0,0,0,0,0
22.392085,7.54983444,0,0,0,0,0
22.402576,6.40312424,0,0,0,0,0
22.413068,6.8556546,0,0,0,0,0
22.42356,6.78232998,0,0,0,0,0
22.434051,7.87400787,0,0,0,0,0
22.444543,7.61577311,0,0,0,0,0
22.455034,7.74596669,0,0,0,0,0
22.465526,7.41619849,0,0,0,0,0
22.476018,7.41619849,0,0,0,0,0
22.486509,7.34846923,0,0,0,0,0
22.497001,7.28010989,0,0,0,0,0
22.507492,7.41619849,0,0,0,0,0
22.517984,6.78232998,0,0,0,0,0
22.528476,6.4807407,0,0,0,0,0
22.538967,6.92820323,0,0,0,0,0
22.549459,7,0,0,0,0,0
22.55995,6.92820323,0,0,0,0,0
22.570442,7.28010989,0,0,0,0,0
22.580934,6.40312424,0,0,0,0,0
22.591425,7,0,0,0,0,0
22.601917,6.8556546,0,0,0,0,0
22.612408,5.83095189,0,0,0,0,0
22.6229,7.54983444,0,0,0,0,0
22.633392,6.70820393,0,0,0,0,0
22.643883,7.07106781,0,0,0,0,0
22.654375,6.55743852,0,0,0,0,0
22.664866,7.34846923,0,0,0,0,0
22.675358,7.41619849,0,0,0,0,0
22.68585,6.70820393,0,0,0,0,0
22.696341,7.28010989,0,0,0,0,0
22.706833,6.244998,0,0,0,0,0
22.717324,7,0,0,0,0,0
22.727816,7.07106781,0,0,0,0,0
22.738308,6.78232998,0,0,0,0,0
22.748799,7.61577311,0,0,0,0,0
22.759291,7.61577311,0,0,0,0,0
22.769782,8.1240384,0,0,0,0,0
22.780274,6.8556546,0,0,0,0,0
22.790766,7.54983444,0,0,0,0,0
22.801257,8,0,0,0,0,0
22.811749,7,0,0,0,0,0
22.82224,7.28010989,0,0,0,0,0
22.832732,6.70820393,0,0,0,0,0
22.843224,6.70820393,0,0,0,0,0
22.853715,6.32455532,0,0,0,0,0
22.864207,6.40312424,0,0,0,0,0
22.874698,6.8556546,0,0,0,0,0
22.88519,7,0,0,0,0,0
22.895682,7.21110255,0,0,0,0,0
22.906173,6.78232998,0,0,0,0,0
22.916665,6.8556546,0,0,0,0,0
22.927156,6.40312424,0,0,0,0,0
22.937648,7.68114575,0,0,0,0,0
22.94814,6.32455532,0,0,0,0,0
22.958631,7.34846923,0,0,0,0,0
22.969123,6.4807407,0,0,0,0,0
22.979614,6.70820393,0,0,0,0,0
22.990106,7.48331477,0,0,0,0,0
23.000598,7.41619849,0,0,0,0,0
23.011089,7.07106781,0,0,0,0,0
23.021581,7.41619849,0,0,0,0,0
23.032072,6.70820393,0,0,0,0,0
23.042564,7.41619849,0,0,0,0,0
23.053056,7,0,0,0,0,0
23.063547,7,0,0,0,0,0
23.074039,7.14142843,0,0,0,0,0
23.08453,6.70820393,0,0,0,0,0
23.095022,6.92820323,0,0,0,0,0
23.105514,6.63324958,0,0,0,0,0
23.116005,6.40312424,0,0,0,0,0
23.126497,6.8556546,0,0,0,0,0
23.136988,5.65685425,0,0,0,0,0
23.14748,6.8556546,0,0,0,0,0
23.157972,7.14142843,0,0,0,0,0
23.168463,6.4807407,0,0,0,0,0
23.178955,6.32455532,0,0,0,0,0
23.189446,6.4807407,0,0,0,0,0
23.199938,6.4807407,0,0,0,0,0
23.21043,6.78232998,0,0,0,0,0
23.220921,6.92820323,0,0,0,0,0
23.231413,6.55743852,0,0,0,0,0
23.241904,7.14142843,0,0,0,0,0
23.252396,6.63324958,0,0,0,0,0
23.262888,6.92820323,0,0,0,0,0
23.273379,6.78232998,0,0,0,0,0
23.283871,6.78232998,0,0,0,0,0
23.294362,7.68114575,0,0,0,0,0
23.304854,7,0,0,0,0,0
23.315346,7.48331477,0,0,0,0,0
23.325837,6.4807407,0,0,0,0,0
23.336329,6.78232998,0,0,0,0,0
23.34682,5.91607978,0,0,0,0,0
23.357312,7.74596669,0,0,0,0,0
23.367804,7.07106781,0,0,0,0,0
23.378295,7.61577311,0,0,0,0,0
23.388787,7.28010989,0,0,0,0,0
23.399278,6.63324958,0,0,0,0,0
23.40977,7.48331477,0,0,0,0,0
23.420262,7.28010989,0,0,0,0,0
23.430753,7.21110255,0,0,0,0,0
23.441245,6.92820323,0,0,0,0,0
23.451736,6.63324958,0,0,0,0,0
23.462228,6.63324958,0,0,0,0,0
23.47272,7.14142843,0,0,0,0,0
23.483211,6.244998,0,0,0,0,0
23.493703,7,0,0,0,0,0
23.504194,7.07106781,0,0,0,0,0
23.514686,6.8556546,0,0,0,0,0
23.525178,7,0,0,0,0,0
23.535669,6.40312424,0,0,0,0,0
23.546161,7.48331477,0,0,0,0,0
23.556652,6.63324958,0,0,0,0,0
23.567144,6.92820323,0,0,0,0,0
23.577636,6.55743852,0,0,0,0,0
23.588127,6.244998,0,0,0,0,0
23.598619,5.29150262,0,0,0,0,0
23.60911,6.40312424,0,0,0,0,0
23.619602,7.07106781,0,0,0,0,0
23.630094,7,0,0,0,0,0
23.640585,7.28010989,0,0,0,0,0
23.651077,6.8556546,0,0,0,0,0
23.661568,6.63324958,0,0,0,0,0
23.67206,7.28010989,0,0,0,0,0
23.682552,6.55743852,0,0,0,0,0
23.693043,6.08276253,0,0,0,0,0
23.703535,7.41619849,0,0,0,0,0
23.714026,7,0,0,0,0,0
23.724518,6.08276253,0,0,0,0,0
23.73501,6.70820393,0,0,0,0,0
23.745501,6.4807407,0,0,0,0,0
23.755993,6.164414,0,0,0,0,0
23.766484,6.164414,0,0,0,0,0
23.776976,6.92820323,0,0,0,0,0
23.787468,7.07106781,0,0,0,0,0
23.797959,5.65685425,0,0,0,0,0
23.808451,7.07106781,0,0,0,0,0
23.818942,6.32455532,0,0,0,0,0
23.829434,6.4807407,0,0,0,0,0
23.839926,7,0,0,0,0,0
23.850417,6.63324958,0,0,0,0,0
23.860909,7.21110255,0,0,0,0,0
23.8714,6.92820323,0,0,0,0,0
23.881892,7.07106781,0,0,0,0,0
23.892384,6.32455532,0,0,0,0,0
23.902875,7.21110255,0,0,0,0,0
23.913367,6.55743852,0,0,0,0,0
23.923858,6.63324958,0,0,0,0,0
23.93435,6.244998,0,0,0,0,0
23.944842,6.70820393,0,0,0,0,0
23.955333,7.34846923,0,0,0,0,0
23.965825,7.21110255,0,0,0,0,0
23.976316,6.55743852,0,0,0,0,0
23.986808,7.34846923,0,0,0,0,0
23.9973,7.14142843,0,0,0,0,0
24.007791,5.56776436,0,0,0,0,0
24.018283,6.55743852,0,0,0,0,0
24.028774,6.244998,0,0,0,0,0
24.039266,6.78232998,0,0,0,0,0
24.049758,6.4807407,0,0,0,0,0
24.060249,6.244998,0,0,0,0,0
24.070741,7.14142843,0,0,0,0,0
24.081232,6.32455532,0,0,0,0,0
24.091724,6.92820323,0,0,0,0,0
24.102216,6.08276253,0,0,0,0,0
24.112707,6.55743852,0,0,0,0,0
24.123199,7.34846923,0,0,0,0,0
24.13369,6.164414,0,0,0,0,0
24.144182,6.63324958,0,0,0,0,0
24.154674,6.164414,0,0,0,0,0
24.165165,6.40312424,0,0,0,0,0
24.175657,6.78232998,0,0,0,0,0
24.186148,6.164414,0,0,0,0,0
24.19664,6.40312424,0,0,0,0,0
24.207132,6.92820323,0,0,0,0,0
24.217623,6.92820323,0,0,0,0,0
24.228115,6.70820393,0,0,0,0,0
24.238606,6,0,0,0,0,0
24.249098,6.32455532,0,0,0,0,0
24.25959,7.21110255,0,0,0,0,0
24.270081,6.92820323,0,0,0,0,0
24.280573,6.92820323,0,0,0,0,0
24.291064,6.32455532,0,0,0,0,0
24.301556,7.07106781,0,0,0,0,0
24.312048,6.32455532,0,0,0,0,0
24.322539,6.164414,0,0,0,0,0
24.333031,6.8556546,0,0,0,0,0
24.343522,7.81024968,0,0,0,0,0
24.354014,6.92820323,0,0,0,0,0
24.364506,6.8556546,0,0,0,0,0
24.374997,7,0,0,0,0,0
24.385489,6.70820393,0,0,0,0,0
24.39598,6.70820393,0,0,0,0,0
24.406472,6.32455532,0,0,0,0,0
24.416964,6.70820393,0,0,0,0,0
24.427455,7.14142843,0,0,0,0,0
24.437947,7,0,0,0,0,0
24.448438,7.21110255,0,0,0,0,0
24.45893,6.244998,0,0,0,0,0
24.469422,6.244998,0,0,0,0,0
24.479913,6.4807407,0,0,0,0,0
24.490405,6.164414,0,0,0,0,0
24.500896,6.244998,0,0,0,0,0
24.511388,6.40312424,0,0,0,0,0
24.52188,6.70820393,0,0,0,0,0
24.532371,5.74456265,0,0,0,0,0
24.542863,6.70820393,0,0,0,0,0
24.553354,7.34846923,0,0,0,0,0
24.563846,7.21110255,0,0,0,0,0
24.574338,6,0,0,0,0,0
24.584829,6,0,0,0,0,0
24.595321,6.70820393,0,0,0,0,0
24.605812,6.40312424,0,0,0,0,0
24.616304,6.8556546,0,0,0,0,0
24.626796,7.14142843,0,0,0,0,0
24.637287,6.32455532,0,0,0,0,0
24.647779,7.41619849,0,0,0,0,0
24.65827,6,0,0,0,0,0
24.668762,7.48331477,0,0,0,0,0
24.679254,6.55743852,0,0,0,0,0
24.689745,6.78232998,0,0,0,0,0
24.700237,6.8556546,0,0,0,0,0
24.710728,7.54983444,0,0,0,0,0
24.72122,6.40312424,0,0,0,0,0
24.731712,6.70820393,0,0,0,0,0
24.742203,6.78232998,0,0,0,0,0
24.752695,5.56776436,0,0,0,0,0
24.763186,6.244998,0,0,0,0,0
24.773678,6.08276253,0,0,0,0,0
24.78417,6.08276253,0,0,0,0,0
24.794661,7,0,0,0,0,0
24.805153,6.63324958,0,0,0,0,0
24.815644,6.55743852,0,0,0,0,0
24.826136,7.07106781,0,0,0,0,0
24.836628,6.55743852,0,0,0,0,0
24.847119,6.92820323,0,0,0,0,0
24.857611,7.07106781,0,0,0,0,0
24.868102,6.70820393,0,0,0,0,0
24.878594,6.70820393,0,0,0,0,0
24.889086,7.48331477,0,0,0,0,0
24.899577,6.40312424,0,0,0,0,0
24.910069,6.32455532,0,0,0,0,0
24.92056,6.32455532,0,0,0,0,0
24.931052,6.63324958,0,0,0,0,0
24.941544,6.8556546,0,0,0,0,0
24.952035,6.244998,0,0,0,0,0
24.962527,5.56776436,0,0,0,0,0
24.973018,6.78232998,0,0,0,0,0
24.98351,6.40312424,0,0,0,0,0
24.994002,6.4807407,0,0,0,0,0
25.004493,6.55743852,0,0,0,0,0
25.014985,6.55743852,0,0,0,0,0
25.025476,6.70820393,0,0,0,0,0
25.035968,6.70820393,0,0,0,0,0
25.04646,6.55743852,0,0,0,0,0
25.056951,7.14142843,0,0,0,0,0
25.067443,6.70820393,0,0,0,0,0
25.077934,6.08276253,0,0,0,0,0
25.088426,5.91607978,0,0,0,0,0
25.098918,6.4807407,0,0,0,0,0
25.109409,7.34846923,0,0,0,0,0
25.119901,7.34846923,0,0,0,0,0
25.130392,6.8556546,0,0,0,0,0
25.140884,5.91607978,0,0,0,0,0
25.151376,6.40312424,0,0,0,0,0
25.161867,6.4807407,0,0,0,0,0
25.172359,5.91607978,0,0,0,0,0
25.18285,6.92820323,0,0,0,0,0
25.193342,5.38516481,0,0,0,0,0
25.203834,6.40312424,0,0,0,0,0
25.214325,6.40312424,0,0,0,0,0
25.224817,6.40312424,0,0,0,0,0
25.235308,7.14142843,0,0,0,0,0
25.2458,7.41619849,0,0,0,0,0
25.256292,6.92820323,0,0,0,0,0
25.266783,6.8556546,0,0,0,0,0
25.277275,7,0,0,0,0,0
25.287766,7.21110255,0,0,0,0,0
25.298258,6.63324958,0,0,0,0,0
25.30875,5.83095189,0,0,0,0,0
25.319241,6.4807407,0,0,0,0,0
25.329733,6.244998,0,0,0,0,0
25.340224,6.78232998,0,0,0,0,0
25.350716,6.40312424,0,0,0,0,0
25.361208,6,0,0,0,0,0
25.371699,5.74456265,0,0,0,0,0
25.382191,6.63324958,0,0,0,0,0
25.392682,6,0,0,0,0,0
25.403174,6.8556546,0,0,0,0,0
25.413666,6.4807407,0,0,0,0,0
25.424157,7.21110255,0,0,0,0,0
25.434649,7.61577311,0,0,0,0,0
25.44514,5.47722558,0,0,0,0,0
25.455632,6.40312424,0,0,0,0,0
25.466124,6.08276253,0,0,0,0,0
25.476615,7.81024968,0,0,0,0,0
25.487107,6.244998,0,0,0,0,0
25.497598,6.32455532,0,0,0,0,0
25.50809,5.83095189,0,0,0,0,0
25.518582,6,0,0,0,0,0
25.529073,6.63324958,0,0,0,0,0
25.539565,6.63324958,0,0,0,0,0
25.550056,6.40312424,0,0,0,0,0
25.560548,6.70820393,0,0,0,0,0
25.57104,6.55743852,0,0,0,0,0
25.581531,6.78232998,0,0,0,0,0
25.592023,6.40312424,0,0,0,0,0
25.602514,6.40312424,0,0,0,0,0
25.613006,6.78232998,0,0,0,0,0
25.623498,6.244998,0,0,0,0,0
25.633989,6.08276253,0,0,0,0,0
25.644481,6.70820393,0,0,0,0,0
25.654972,6.55743852,0,0,0,0,0
25.665464,6.63324958,0,0,0,0,0
25.675956,5.91607978,0,0,0,0,0
25.686447,6.55743852,0,0,0,0,0
25.696939,6.40312424,0,0,0,0,0
25.70743,6.70820393,0,0,0,0,0
25.717922,6.4807407,0,0,0,0,0
25.728414,5.83095189,0,0,0,0,0
25.738905,6.32455532,0,0,0,0,0
25.749397,5.91607978,0,0,0,0,0
25.759888,5.91607978,0,0,0,0,0
25.77038,6.4807407,0,0,0,0,0
25.780872,6.70820393,0,0,0,0,0
25.791363,5.83095189,0,0,0,0,0
25.801855,6.70820393,0,0,0,0,0
25.812346,5.65685425,0,0,0,0,0
25.822838,6,0,0,0,0,0
25.83333,6.63324958,0,0,0,0,0
25.843821,7.21110255,0,0,0,0,0
25.854313,6.4807407,0,0,0,0,0
25.864804,6.164414,0,0,0,0,0
25.875296,6.32455532,0,0,0,0,0
25.885788,6.4807407,0,0,0,0,0
25.896279,7.28010989,0,0,0,0,0
25.906771,6.78232998,0,0,0,0,0
25.917262,6.70820393,0,0,0,0,0
25.927754,6.08276253,0,0,0,0,0
25.938246,6,0,0,0,0,0
25.948737,5.38516481,0,0,0,0,0
25.959229,6.40312424,0,0,0,0,0
25.96972,6.164414,0,0,0,0,0
25.980212,6.08276253,0,0,0,0,0
25.990704,7.07106781,0,0,0,0,0
26.001195,6.244998,0,0,0,0,0
26.011687,5.38516481,0,0,0,0,0
26.022178,5.38516481,0,0,0,0,0
26.03267,7,0,0,0,0,0
26.043162,7.07106781,0,0,0,0,0
26.053653,5.47722558,0,0,0,0,0
26.064145,6.92820323,0,0,0,0,0
26.074636,6.244998,0,0,0,0,0
26.085128,6.32455532,0,0,0,0,0
26.09562,5.91607978,0,0,0,0,0
26.106111,5.74456265,0,0,0,0,0
26.116603,6.55743852,0,0,0,0,0
26.127094,5.74456265,0,0,0,0,0
26.137586,6.63324958,0,0,0,0,0
26.148078,6.4807407,0,0,0,0,0
26.158569,6.55743852,0,0,0,0,0
26.169061,6.70820393,0,0,0,0,0
26.179552,6.08276253,0,0,0,0,0
26.190044,6.8556546,0,0,0,0,0
26.200536,5.83095189,0,0,0,0,0
26.211027,6.63324958,0,0,0,0,0
26.221519,5.74456265,0,0,0,0,0
26.23201,7,0,0,0,0,0
26.242502,6.70820393,0,0,0,0,0
26.252994,6.08276253,0,0,0,0,0
26.263485,6.164414,0,0,0,0,0
26.273977,6.70820393,0,0,0,0,0
26.284468,7,0,0,0,0,0
26.29496,5.56776436,0,0,0,0,0
26.305452,5.47722558,0,0,0,0,0
26.315943,5.83095189,0,0,0,0,0
26.326435,6.08276253,0,0,0,0,0
26.336926,6.8556546,0,0,0,0,0
26.347418,5.56776436,0,0,0,0,0
26.35791,6.40312424,0,0,0,0,0
26.368401,6.244998,0,0,0,0,0
26.378893,6.164414,0,0,0,0,0
26.389384,6.63324958,0,0,0,0,0
26.399876,6.63324958,0,0,0,0,0
26.410368,5.19615242,0,0,0,0,0
26.420859,6.244998,0,0,0,0,0
26.431351,6.32455532,0,0,0,0,0
26.441842,6.78232998,0,0,0,0,0
26.452334,6.92820323,0,0,0,0,0
26.462826,5.74456265,0,0,0,0,0
26.473317,5.74456265,0,0,0,0,0
26.483809,5.91607978,0,0,0,0,0
26.4943,6.32455532,0,0,0,0,0
26.504792,5.47722558,0,0,0,0,0
26.515284,5.74456265,0,0,0,0,0
26.525775,6.70820393,0,0,0,0,0
26.536267,6.8556546,0,0,0,0,0
26.546758,6.164414,0,0,0,0,0
26.55725,6.92820323,0,0,0,0,0
26.567742,6.164414,0,0,0,0,0
26.578233,6.55743852,0,0,0,0,0
26.588725,6.08276253,0,0,0,0,0
26.599216,5.47722558,0,0,0,0,0
26.609708,5.91607978,0,0,0,0,0
26.6202,6.70820393,0,0,0,0,0
26.630691,6.244998,0,0,0,0,0
26.641183,6.92820323,0,0,0,0,0
26.651674,6.164414,0,0,0,0,0
26.662166,5.74456265,0,0,0,0,0
26.672658,7,0,0,0,0,0
26.683149,6.92820323,0,0,0,0,0
26.693641,6.40312424,0,0,0,0,0
26.704132,6,0,0,0,0,0
26.714624,6.08276253,0,0,0,0,0
26.725116,5.91607978,0,0,0,0,0
26.735607,6.8556546,0,0,0,0,0
26.746099,6.55743852,0,0,0,0,0
26.75659,5.56776436,0,0,0,0,0
26.767082,6.32455532,0,0,0,0,0
26.777574,6.244998,0,0,0,0,0
26.788065,6.63324958,0,0,0,0,0
26.798557,6.32455532,0,0,0,0,0
26.809048,7.07106781,0,0,0,0,0
26.81954,5.38516481,0,0,0,0,0
26.830032,5.74456265,0,0,0,0,0
26.840523,5.56776436,0,0,0,0,0
26.851015,6.63324958,0,0,0,0,0
26.861506,6.40312424,0,0,0,0,0
26.871998,6.32455532,0,0,0,0,0
26.88249,5.19615242,0,0,0,0,0
26.892981,6.40312424,0,0,0,0,0
26.903473,6,0,0,0,0,0
26.913964,6.55743852,0,0,0,0,0
26.924456,6.40312424,0,0,0,0,0
26.934948,6.164414,0,0,0,0,0
26.945439,7.07106781,0,0,0,0,0
26.955931,6.63324958,0,0,0,0,0
26.966422,6.244998,0,0,0,0,0
26.976914,6.55743852,0,0,0,0,0
26.987406,6.70820393,0,0,0,0,0
26.997897,6.244998,0,0,0,0,0
27.008389,6.40312424,0,0,0,0,0
27.01888,6.40312424,0,0,0,0,0
27.029372,6.164414,0,0,0,0,0
27.039864,6.244998,0,0,0,0,0
27.050355,5.65685425,0,0,0,0,0
27.060847,6.4807407,0,0,0,0,0
27.071338,6,0,0,0,0,0
27.08183,5.19615242,0,0,0,0,0
27.092322,5.65685425,0,0,0,0,0
27.102813,6.164414,0,0,0,0,0
27.113305,6.70820393,0,0,0,0,0
27.123796,6.8556546,0,0,0,0,0
27.134288,6.63324958,0,0,0,0,0
27.14478,6.40312424,0,0,0,0,0
27.155271,6.32455532,0,0,0,0,0
27.165763,6.70820393,0,0,0,0,0
27.176254,7,0,0,0,0,0
27.186746,6.164414,0,0,0,0,0
27.197238,6.244998,0,0,0,0,0
27.207729,6.244998,0,0,0,0,0
27.218221,6.32455532,0,0,0,0,0
27.228712,6.4807407,0,0,0,0,0
27.239204,7.07106781,0,0,0,0,0
27.249696,7.28010989,0,0,0,0,0
27.260187,6.92820323,0,0,0,0,0
27.270679,6.78232998,0,0,0,0,0
27.28117,6.4807407,0,0,0,0,0
27.291662,7.14142843,0,0,0,0,0
27.302154,5.91607978,0,0,0,0,0
27.312645,6.63324958,0,0,0,0,0
27.323137,6.32455532,0,0,0,0,0
27.333628,6.8556546,0,0,0,0,0
27.34412,6.92820323,0,0,0,0,0
27.354612,5.74456265,0,0,0,0,0
27.365103,5.91607978,0,0,0,0,0
27.375595,5.74456265,0,0,0,0,0
27.386086,6.55743852,0,0,0,0,0
27.396578,6.70820393,0,0,0,0,0
27.40707,7.07106781,0,0,0,0,0
27.417561,6.8556546,0,0,0,0,0
27.428053,5.91607978,0,0,0,0,0
27.438544,6.244998,0,0,0,0,0
27.449036,6.32455532,0,0,0,0,0
27.459528,6.40312424,0,0,0,0,0
27.470019,6.92820323,0,0,0,0,0
27.480511,6,0,0,0,0,0
27.491002,6.32455532,0,0,0,0,0
27.501494,6.40312424,0,0,0,0,0
27.511986,6.32455532,0,0,0,0,0
27.522477,5,0,0,0,0,0
27.532969,6.40312424,0,0,0,0,0
27.54346,7,0,0,0,0,0
27.553952,6.40312424,0,0,0,0,0
27.564444,6.164414,0,0,0,0,0
27.574935,6.55743852,0,0,0,0,0
27.585427,6.164414,0,0,0,0,0
27.595918,6.4807407,0,0,0,0,0
27.60641,6.55743852,0,0,0,0,0
27.616902,6.55743852,0,0,0,0,0
27.627393,5.29150262,0,0,0,0,0
27.637885,6.08276253,0,0,0,0,0
27.648376,6.78232998,0,0,0,0,0
27.658868,6.63324958,0,0,0,0,0
27.66936,6.63324958,0,0,0,0,0
27.679851,5.65685425,0,0,0,0,0
27.690343,5.83095189,0,0,0,0,0
27.700834,5.74456265,0,0,0,0,0
27.711326,5.65685425,0,0,0,0,0
27.721818,6,0,0,0,0,0
27.732309,6.55743852,0,0,0,0,0
27.742801,5,0,0,0,0,0
27.753292,5.83095189,0,0,0,0,0
27.763784,7.21110255,0,0,0,0,0
27.774276,5.74456265,0,0,0,0,0
27.784767,6.40312424,0,0,0,0,0
27.795259,6.08276253,0,0,0,0,0
27.80575,5,0,0,0,0,0
27.816242,6,0,0,0,0,0
27.826734,5.83095189,0,0,0,0,0
27.837225,6.70820393,0,0,0,0,0
27.847717,6.244998,0,0,0,0,0
27.858208,6.4807407,0,0,0,0,0
27.8687,5.91607978,0,0,0,0,0
27.879192,6.4807407,0,0,0,0,0
27.889683,6.164414,0,0,0,0,0
27.900175,6.70820393,0,0,0,0,0
27.910666,6.4807407,0,0,0,0,0
27.921158,7.07106781,0,0,0,0,0
27.93165,6.4807407,0,0,0,0,0
27.942141,6.8556546,0,0,0,0,0
27.952633,6.4807407,0,0,0,0,0
27.963124,6.78232998,0,0,0,0,0
27.973616,6.8556546,0,0,0,0,0
27.984108,6.63324958,0,0,0,0,0
27.994599,5.91607978,0,0,0,0,0
28.005091,6.92820323,0,0,0,0,0
28.015582,6.32455532,0,0,0,0,0
28.026074,6.164414,0,0,0,0,0
28.036566,5.47722558,0,0,0,0,0
28.047057,6.55743852,0,0,0,0,0
28.057549,5.83095189,0,0,0,0,0
28.06804,6.244998,0,0,0,0,0
28.078532,6.4807407,0,0,0,0,0
28.089024,6.63324958,0,0,0,0,0
28.099515,5.47722558,0,0,0,0,0
28.110007,6.244998,0,0,0,0,0
28.120498,6.78232998,0,0,0,0,0
28.13099,6.164414,0,0,0,0,0
28.141482,6.164414,0,0,0,0,0
28.151973,5.65685425,0,0,0,0,0
28.162465,6.55743852,0,0,0,0,0
28.172956,6.92820323,0,0,0,0,0
28.183448,7.07106781,0,0,0,0,0
28.19394,5.38516481,0,0,0,0,0
28.204431,6.164414,0,0,0,0,0
28.214923,6.244998,0,0,0,0,0
28.225414,5.83095189,0,0,0,0,0
28.235906,6.40312424,0,0,0,0,0
28.246398,6.244998,0,0,0,0,0
28.256889,6.244998,0,0,0,0,0
28.267381,6.244998,0,0,0,0,0
28.277872,6.164414,0,0,0,0,0
28.288364,6.32455532,0,0,0,0,0
28.298856,6.244998,0,0,0,0,0
28.309347,4.89897949,0,0,0,0,0
28.319839,5.91607978,0,0,0,0,0
28.33033,5.56776436,0,0,0,0,0
28.340822,5.65685425,0,0,0,0,0
28.351314,6.244998,0,0,0,0,0
28.361805,6.8556546,0,0,0,0,0
28.372297,5.83095189,0,0,0,0,0
28.382788,6.8556546,0,0,0,0,0
28.39328,6.40312424,0,0,0,0,0
28.403772,5.74456265,0,0,0,0,0
28.414263,6.55743852,0,0,0,0,0
28.424755,5.83095189,0,0,0,0,0
28.435246,5.74456265,0,0,0,0,0
28.445738,6.164414,0,0,0,0,0
28.45623,6,0,0,0,0,0
28.466721,5.29150262,0,0,0,0,0
28.477213,5.83095189,0,0,0,0,0
28.487704,6.70820393,0,0,0,0,0
28.498196,6.8556546,0,0,0,0,0
28.508688,5.74456265,0,0,0,0,0
28.519179,6.244998,0,0,0,0,0
28.529671,7,0,0,0,0,0
28.540162,6,0,0,0,0,0
28.550654,5.09901951,0,0,0,0,0
28.561146,5.83095189,0,0,0,0,0
28.571637,6.08276253,0,0,0,0,0
28.582129,6.164414,0,0,0,0,0
28.59262,6.244998,0,0,0,0,0
28.603112,5.74456265,0,0,0,0,0
28.613604,6,0,0,0,0,0
28.624095,6.70820393,0,0,0,0,0
28.634587,6.164414,0,0,0,0,0
28.645078,6.244998,0,0,0,0,0
28.65557,6.164414,0,0,0,0,0
28.666062,6.32455532,0,0,0,0,0
28.676553,5.83095189,0,0,0,0,0
28.687045,6.92820323,0,0,0,0,0
28.697536,6,0,0,0,0,0
28.708028,6.32455532,0,0,0,0,0
28.71852,6.55743852,0,0,0,0,0
28.729011,6.8556546,0,0,0,0,0
28.739503,6.164414,0,0,0,0,0
28.749994,5.29150262,0,0,0,0,0
28.760486,6.63324958,0,0,0,0,0
28.770978,6.55743852,0,0,0,0,0
28.781469,6.4807407,0,0,0,0,0
28.791961,5.65685425,0,0,0,0,0
28.802452,6.32455532,0,0,0,0,0
28.812944,6.4807407,0,0,0,0,0
28.823436,6.08276253,0,0,0,0,0
28.833927,5.29150262,0,0,0,0,0
28.844419,6.40312424,0,0,0,0,0
28.85491,5.91607978,0,0,0,0,0
28.865402,5.29150262,0,0,0,0,0
28.875894,6.244998,0,0,0,0,0
28.886385,5.47722558,0,0,0,0,0
28.896877,6.40312424,0,0,0,0,0
28.907368,5.91607978,0,0,0,0,0
28.91786,6.244998,0,0,0,0,0
28.928352,6.4807407,0,0,0,0,0
28.938843,6,0,0,0,0,0
28.949335,5.74456265,0,0,0,0,0
28.959826,6.4807407,0,0,0,0,0
28.970318,5.56776436,0,0,0,0,0
28.98081,7,0,0,0,0,0
28.991301,5.19615242,0,0,0,0,0
29.001793,7.07106781,0,0,0,0,0
29.012284,5.83095189,0,0,0,0,0
29.022776,5.56776436,0,0,0,0,0
29.033268,6.08276253,0,0,0,0,0
29.043759,6.4807407,0,0,0,0,0
29.054251,5.83095189,0,0,0,0,0
29.064742,6.08276253,0,0,0,0,0
29.075234,6.4807407,0,0,0,0,0
29.085726,6.244998,0,0,0,0,0
29.096217,6.08276253,0,0,0,0,0
29.106709,5.47722558,0,0,0,0,0
29.1172,6,0,0,0,0,0
29.127692,6.244998,0,0,0,0,0
29.138184,6.4807407,0,0,0,0,0
29.148675,6.164414,0,0,0,0,0
29.159167,6.70820393,0,0,0,0,0
29.169658,6.32455532,0,0,0,0,0
29.18015,6.244998,0,0,0,0,0
29.190642,5.56776436,0,0,0,0,0
29.201133,6.40312424,0,0,0,0,0
29.211625,6.244998,0,0,0,0,0
29.222116,6.244998,0,0,0,0,0
29.232608,5.83095189,0,0,0,0,0
29.2431,5.83095189,0,0,0,0,0
29.253591,6.08276253,0,0,0,0,0
29.264083,6.244998,0,0,0,0,0
29.274574,6.8556546,0,0,0,0,0
29.285066,6.164414,0,0,0,0,0
29.295558,5.91607978,0,0,0,0,0
29.306049,6.4807407,0,0,0,0,0
29.316541,5.19615242,0,0,0,0,0
29.327032,6.8556546,0,0,0,0,0
29.337524,5.09901951,0,0,0,0,0
29.348016,6.32455532,0,0,0,0,0
29.358507,5.56776436,0,0,0,0,0
29.368999,6.40312424,0,0,0,0,0
29.37949,6.4807407,0,0,0,0,0
29.389982,6.164414,0,0,0,0,0
29.400474,5.09901951,0,0,0,0,0
29.410965,6.63324958,0,0,0,0,0
29.421457,7.14142843,0,0,0,0,0
29.431948,5.47722558,0,0,0,0,0
29.44244,5.29150262,0,0,0,0,0
29.452932,5.74456265,0,0,0,0,0
29.463423,4.69041576,0,0,0,0,0
29.473915,6.70820393,0,0,0,0,0
29.484406,6.08276253,0,0,0,0,0
29.494898,6.40312424,0,0,0,0,0
29.50539,5.83095189,0,0,0,0,0
29.515881,5.65685425,0,0,0,0,0
29.526373,6.70820393,0,0,0,0,0
29.536864,7.07106781,0,0,0,0,0
29.547356,6.164414,0,0,0,0,0
29.557848,6.70820393,0,0,0,0,0
29.568339,6.55743852,0,0,0,0,0
29.578831,5.83095189,0,0,0,0,0
29.589322,6.164414,0,0,0,0,0
29.599814,5.83095189,0,0,0,0,0
29.610306,5.74456265,0,0,0,0,0
29.620797,5.19615242,0,0,0,0,0
29.631289,5.65685425,0,0,0,0,0
29.64178,6.92820323,0,0,0,0,0
29.652272,5.74456265,0,0,0,0,0
29.662764,6.55743852,0,0,0,0,0
29.673255,6.78232998,0,0,0,0,0
29.683747,5.38516481,0,0,0,0,0
29.694238,6.164414,0,0,0,0,0
29.70473,5.91607978,0,0,0,0,0
29.715222,6.63324958,0,0,0,0,0
29.725713,5.91607978,0,0,0,0,0
29.736205,5.38516481,0,0,0,0,0
29.746696,6.70820393,0,0,0,0,0
29.757188,5.83095189,0,0,0,0,0
29.76768,5.91607978,0,0,0,0,0
29.778171,5.65685425,0,0,0,0,0
29.788663,6.8556546,0,0,0,0,0
29.799154,6.244998,0,0,0,0,0
29.809646,5.74456265,0,0,0,0,0
29.820138,6.08276253,0,0,0,0,0
29.830629,5.91607978,0,0,0,0,0
29.841121,6.70820393,0,0,0,0,0
29.851612,6.55743852,0,0,0,0,0
29.862104,6.70820393,0,0,0,0,0
29.872596,7,0,0,0,0,0
29.883087,6.55743852,0,0,0,0,0
29.893579,6.08276253,0,0,0,0,0
29.90407,6.4807407,0,0,0,0,0
29.914562,6.70820393,0,0,0,0,0
29.925054,6.08276253,0,0,0,0,0
29.935545,6.4807407,0,0,0,0,0
29.946037,5.38516481,0,0,0,0,0
29.956528,6.08276253,0,0,0,0,0
29.96702,6.08276253,0,0,0,0,0
29.977512,6.63324958,0,0,0,0,0
29.988003,7,0,0,0,0,0
29.998495,5.91607978,6.35601158,-0.663273546,6.35601158,0,6.35534376
30.008986,4.69041576,6.3562149,-1.29065841,6.3562149,0,6.35554634
30.019478,6.08276253,6.35641298,-0.523116098,6.35641298,0,6.35574369
30.02997,6.08276253,6.35660582,-0.523300386,6.35660582,0,6.35593579
30.040461,6.55743852,6.35679342,0.447934265,6.35679342,0,6.35612264
30.050953,5.56776436,6.35697581,-0.888375737,6.35697581,0,6.35630429
30.061444,6.32455532,6.35715298,-0.180548225,6.35715298,0,6.35648072
30.071936,6,6.35732497,-0.597766654,6.35732497,0,6.35665196
30.082428,6.244998,6.35749178,-0.335400926,6.35749178,0,6.35681802
30.092919,5.65685425,6.3576534,-0.837137473,6.3576534,0,6.35697889
30.103411,6.32455532,6.35780987,-0.182358304,6.35780987,0,6.35713461
30.113902,5.38516481,6.35796118,-0.986304402,6.35796118,0,6.35728516
30.124394,5.38516481,6.35810737,-0.986378507,6.35810737,0,6.35743059
30.134886,5.74456265,6.35824842,-0.783380991,6.35824842,0,6.35757089
30.145377,5.74456265,6.35838435,-0.783467745,6.35838435,0,6.35770606
30.155869,6.32455532,6.35851519,-0.184282043,6.35851519,0,6.35783613
30.16636,5.83095189,6.35864092,-0.726422074,6.35864092,0,6.3579611
30.176852,5.65685425,6.35876159,-0.837799104,6.35876159,0,6.358081
30.187344,6.08276253,6.35887718,-0.525466127,6.35887718,0,6.35819582
30.197835,5.38516481,6.3589877,-0.986824653,6.3589877,0,6.35830557
30.208327,6.55743852,6.35909319,0.445359782,6.35909319,0,6.35841029
30.218818,5.09901951,6.35920854,-1.12258141,6.35920854,0,6.35850995
30.22931,5.91607978,6.35930396,-0.66575084,6.35930396,0,6.3586046
30.239802,6.4807407,6.35939437,0.348347992,6.35939437,0,6.35869422
30.250293,6.08276253,6.35947977,-0.526039204,6.35947977,0,6.35877884
30.260785,6.32455532,6.35956019,-0.18709588,6.35956019,0,6.35885847
30.271276,5.91607978,6.35963561,-0.665999873,6.35963561,0,6.35893311
30.281768,6.08276253,6.35970608,-0.52625426,6.35970608,0,6.35900278
30.29226,6.8556546,6.35977158,0.704189621,6.35977158,0,6.35906749
30.302751,6.70820393,6.35983213,0.5902303,6.35983213,0,6.35912724
30.313243,7.07106781,6.35988774,0.84331493,6.35988774,0,6.35918206
30.323734,6.63324958,6.35993842,0.522791695,6.35993842,0,6.35923195
30.334226,5.29150262,6.3599842,-1.03367382,6.3599842,0,6.35927692
30.344718,6.32455532,6.36002506,-0.188334126,6.36002506,0,6.35931698
30.355209,5.83095189,6.36006103,-0.727398884,6.36006103,0,6.35935215
30.365701,6.40312424,6.36009212,0.207441842,6.36009212,0,6.35938243
30.376192,6.55743852,6.36011833,0.444207375,6.36011833,0,6.35940783
30.386684,6.244998,6.36013968,-0.33932534,6.36013968,0,6.35942837
30.397176,6.244998,6.36015619,-0.339349653,6.36015619,0,6.35944406
30.407667,5.65685425,6.36016784,-0.83863794,6.36016784,0,6.35945491
30.418159,6.4807407,6.36017467,0.347226187,6.36017467,0,6.35946092
30.42865,6.63324958,6.36017668,0.522563774,6.36017668,0,6.35946211
30.439142,6.63324958,6.36017388,0.522566453,6.36017388,0,6.35945849
30.449634,5.56776436,6.36016628,-0.890169603,6.36016628,0,6.35945007
30.460125,6,6.3601539,-0.600128236,6.3601539,0,6.35943686
30.470617,5.74456265,6.36013674,-0.784585298,6.36013674,0,6.35941887
30.481108,6,6.36011481,-0.600095665,6.36011481,0,6.35939611
30.4916,6.40312424,6.36008812,0.207451483,6.36008812,0,6.35936859
30.502092,5.83095189,6.36005669,-0.727395897,6.36005669,0,6.35933633
30.512583,6.244998,6.36002052,-0.339149704,6.36002052,0,6.35929932
30.523075,6.78232998,6.35997963,0.64988488,6.35997963,0,6.35925759
30.533566,6.63324958,6.35993402,0.522795907,6.35993402,0,6.35921115
30.544058,5.74456265,6.35988371,-0.78442403,6.35988371,0,6.35915999
30.55455,6.40312424,6.3598287,0.208075804,6.3598287,0,6.35910414
30.565041,5.65685425,6.35976901,-0.83840012,6.35976901,0,6.35904361
30.575533,6.164414,6.35970464,-0.441917007,6.35970464,0,6.35897839
30.586024,6.08276253,6.35963562,-0.526187316,6.35963562,0,6.35890852
30.596516,5.83095189,6.35956194,-0.727055736,6.35956194,6.35883398,6.35883398
30.607008,5.29150262,6.35964109,-1.03350785,6.35948361,6.3589123,6.3587548
30.617499,5.91607978,6.35955829,-0.665941822,6.35940066,6.35882865,6.358671
30.627991,6.08276253,6.35947087,-0.526030738,6.35931308,6.35874036,6.35858256
30.638482,6,6.35937884,-0.599482141,6.3592209,6.35864747,6.35848951
30.648974,5.56776436,6.3592822,-0.88967288,6.3591241,6.35854997,6.35839185
30.659466,6.32455532,6.35918096,-0.186079669,6.35902271,6.35844787,6.3582896
30.669957,6.55743852,6.35907516,0.445380024,6.35891675,6.3583412,6.35818277
30.680449,6.08276253,6.35896477,-0.525549466,6.35880621,6.35822994,6.35807136
30.69094,6.55743852,6.35884983,0.445632909,6.35869111,6.35811413,6.35795539
30.701432,6,6.35873033,-0.59894101,6.35857145,6.35799376,6.35783486
30.711924,6.78232998,6.35860629,0.650940621,6.35844725,6.35786884,6.35770978
30.722415,6.55743852,6.35847773,0.446050216,6.35831853,6.3577394,6.35758018
30.732907,6.32455532,6.35834463,-0.183818695,6.35818528,6.35760542,6.35744605
30.743398,5.38516481,6.35820704,-0.98642903,6.35804753,6.35746694,6.35730741
30.75389,5.83095189,6.35806493,-0.726025504,6.35790526,6.35732395,6.35716426
30.764382,6.70820393,6.35791832,0.591849313,6.35775849,6.35717646,6.35701661
30.774873,6,6.35776725,-0.598136483,6.35760726,6.3570245,6.35686449
30.785365,6.32455532,6.35761169,-0.181814119,6.35745154,6.35686805,6.35670788
30.795856,6.32455532,6.35745169,-0.181373558,6.35729138,6.35670715,6.35654682
30.806348,6.40312424,6.35728721,0.214095829,6.35712674,6.35654177,6.35638128
30.81684,6.70820393,6.3571183,0.592524798,6.35695766,6.35637196,6.35621131
30.827331,5.83095189,6.35694496,-0.725253794,6.35678417,6.35619772,6.35603691
30.837823,6.55743852,6.35676719,0.447963547,6.35660623,6.35601904,6.35585807
30.848314,6,6.35658501,-0.597147396,6.3564239,6.35583597,6.35567483
30.858806,6.4807407,6.35639842,0.352622007,6.35623714,6.35564846,6.35548717
30.869298,5.83095189,6.35620743,-0.724745151,6.35604599,6.35545656,6.3552951
30.879789,6.164414,6.35601207,-0.437719168,6.35585047,6.3552603,6.35509867
30.890281,6.40312424,6.35581232,0.217513023,6.35565055,6.35505963,6.35489784
30.900772,5.74456265,6.35560822,-0.781694044,6.35544629,6.35485462,6.35469266
30.911264,6.78232998,6.35539975,0.653398983,6.35523765,6.35464522,6.35448311
30.921756,6.70820393,6.35518693,0.594152339,6.35502467,6.35443148,6.3542692
30.932247,5.19615242,6.35496979,-1.0764838,6.35480737,6.35421342,6.35405098
30.942739,5.38516481,6.35474831,-0.984674312,6.35458572,6.35399101,6.3538284
30.95323,7.54983444,6.35452252,1.09330321,6.35435977,6.3537643,6.35360152
30.963722,6.32455532,6.35429241,-0.172444455,6.35412949,6.35353325,6.35337031
30.974214,6.40312424,6.354058,0.221509008,6.35389491,6.35329791,6.3531348
30.984705,6.55743852,6.35381932,0.451241852,6.35365606,6.35305829,6.35289501
30.995197,5.74456265,6.35357633,-0.780393288,6.35341291,6.35281437,6.35265092
31.005688,6.63324958,6.3533291,0.529075121,6.35316551,6.35256619,6.35240258
31.01618,5.74456265,6.35307758,-0.780073671,6.35291382,6.35231373,6.35214995
31.026672,7.07106781,6.35282181,0.847493956,6.35265788,6.35205701,6.35189307
31.037163,6.55743852,6.35256182,0.452633083,6.35239772,6.35179608,6.35163196
31.047655,7.07106781,6.35229757,0.847803188,6.3521333,6.35153088,6.35136659
31.058146,5.83095189,6.35202912,-0.721856788,6.35186468,6.35126148,6.35109702
31.068638,6.08276253,6.35175643,-0.518646216,6.35159182,6.35098783,6.35082321
31.07913,6.40312424,6.35147953,0.227254718,6.35131476,6.35070998,6.35054518
31.089621,6.164414,6.35119846,-0.432185677,6.35103352,6.35042795,6.35026299
31.100113,6.40312424,6.35091318,0.22849739,6.35074807,6.35014171,6.34997657
31.110604,6.8556546,6.35062375,0.710655229,6.35045846,6.34985131,6.349686
31.121096,6.40312424,6.35033011,0.229769717,6.35016466,6.34955671,6.34939123
31.131588,6.244998,6.35003232,-0.324089993,6.34986669,6.34925795,6.3490923
31.142079,5.65685425,6.34973041,-0.832391829,6.34956461,6.34895506,6.34878924
31.152571,6.55743852,6.34942432,0.456085742,6.34925835,6.348648,6.34848201
31.163062,7,6.34911413,0.806774981,6.34894798,6.34833683,6.34817067
31.173554,6.8556546,6.34879979,0.711937367,6.34863347,6.34802151,6.34785517
31.184046,7.07106781,6.34848133,0.850050873,6.34831483,6.34770207,6.34753556
31.194537,6.32455532,6.34815879,-0.153634207,6.34799212,6.34737855,6.34721186
31.205029,6.32455532,6.34783213,-0.152567381,6.34766529,6.3470509,6.34688404
31.21552,7.28010989,6.34750141,0.965716565,6.34733439,6.34671919,6.34655215
31.226012,5.09901951,6.34716657,-1.11720502,6.34699938,6.34638337,6.34621615
31.236504,7,6.34682767,0.808190775,6.34666031,6.34604347,6.34587608
31.246995,6.8556546,6.34648474,0.713561392,6.3463172,6.34569954,6.34553198
31.257487,6.164414,6.34613772,-0.426290652,6.34597001,6.34535152,6.34518379
31.267978,6.164414,6.3457867,-0.42587873,6.3456188,6.3449995,6.34483158
31.27847,5.74456265,6.3454316,-0.775157373,6.34526353,6.3446434,6.3444753
31.288962,6.70820393,6.34507248,0.602603895,6.34490423,6.34428327,6.344115
31.299453,6.8556546,6.34470937,0.714804328,6.34454095,6.34391915,6.34375071
31.309945,6.63324958,6.34434223,0.537501028,6.34417362,6.34355099,6.34338237
31.320436,6,6.34397111,-0.586490505,6.34380233,6.34317887,6.34301006
31.330928,6,6.34359597,-0.586170601,6.34342701,6.34280271,6.34263373
31.34142,7.14142843,6.34321685,0.893426872,6.34304771,6.34242257,6.34225341
31.351911,6.244998,6.34283441,-0.312788132,6.34266509,6.34203849,6.34186915
31.362403,6.4807407,6.34244735,0.37187813,6.34227785,6.3416504,6.34148088
31.372894,5.47722558,6.34205638,-0.929962796,6.34188669,6.3412584,6.3410887
31.383386,6.55743852,6.34166141,0.464518149,6.34149155,6.3408624,6.34069252
31.393878,7.28010989,6.34126251,0.96894137,6.34109247,6.34046247,6.3402924
31.404369,6.4807407,6.34085972,0.374006659,6.34068949,6.34005864,6.33988839
31.414861,6.40312424,6.34045296,0.250342313,6.34028256,6.33965085,6.33948042
31.425352,5.29150262,6.34004234,-1.02398228,6.33987175,6.33923918,6.33906857
31.435844,7,6.33962776,0.812632903,6.33945699,6.33882356,6.33865277
31.446336,7.14142843,6.3392093,0.895666864,6.33903834,6.33840405,6.33823307
31.456827,6.164414,6.33878698,-0.417579908,6.33861584,6.33798069,6.33780953
31.467319,7.07106781,6.33836075,0.855983097,6.33818943,6.3375534,6.33738206
31.47781,5.83095189,6.33793069,-0.712024432,6.33775918,6.33712229,6.33695076
31.488302,6.164414,6.33749672,-0.416032111,6.33732503,6.33668726,6.33651555
31.498794,5.74456265,6.3370589,-0.769737783,6.33688702,6.33624838,6.33607648
31.509285,5.83095189,6.33661728,-0.711101529,6.33644522,6.3358057,6.33563361
31.519777,6.244998,6.33617178,-0.301949964,6.33599953,6.33535913,6.33518686
31.530268,6.8556546,6.33572249,0.721063178,6.33555006,6.33490878,6.33473632
31.54076,5.29150262,6.33526935,-1.02164902,6.33509672,6.33445456,6.33428192
31.551252,5.19615242,6.33481239,-1.06708011,6.33463958,6.33399653,6.3338237
31.561743,7.41619849,6.33435167,1.04011866,6.33417867,6.33353473,6.33336172
31.572235,7.14142843,6.33388711,0.898633028,6.33371393,6.3330691,6.33289589
31.582726,6.164414,6.33341881,-0.411101944,6.33324544,6.33259972,6.33242632
31.593218,5.74456265,6.33294669,-0.767061956,6.33277313,6.33212651,6.33195293
31.60371,6.244998,6.3324708,-0.295758012,6.33229705,6.33164953,6.33147576
31.614201,7.07106781,6.33199119,0.859695654,6.33181725,6.33116884,6.33099488
31.624693,6.70820393,6.33150779,0.613755769,6.33133366,6.33068434,6.33051019
31.635184,6.55743852,6.33102069,0.475833836,6.33084637,6.33019614,6.3300218
31.645676,6.70820393,6.3305298,0.614551978,6.33035529,6.32970416,6.32952963
31.656168,7.14142843,6.33003518,0.900773692,6.32986048,6.32920844,6.32903372
31.666659,6.92820323,6.3295369,0.773735313,6.329362,6.32870905,6.32853413
31.677151,6.164414,6.32903485,-0.405734946,6.32885977,6.3282059,6.32803079
31.687642,6.164414,6.32852915,-0.405111273,6.32835387,6.32769908,6.32752378
31.698134,6.92820323,6.3280197,0.774715128,6.32784423,6.32718852,6.32701303
31.708626,6.63324958,6.32750657,0.552940335,6.3273309,6.32667427,6.32649859
31.719117,6.164414,6.3269898,-0.403206894,6.32681395,6.32615639,6.32598051
31.729609,6.32455532,6.32646932,-0.0437492505,6.32629327,6.32563479,6.32545871
31.7401,6.40312424,6.32594522,0.27781112,6.32576898,6.32510956,6.3249333
31.750592,6.55743852,6.32541742,0.481685694,6.32524098,6.32458063,6.32440417
31.761084,6,6.32488597,-0.569987689,6.32470933,6.32404805,6.3238714
31.771575,7.61577311,6.32435093,1.13640758,6.3241741,6.32351188,6.32333503
31.782067,6.4807407,6.32381221,0.39614201,6.32363518,6.32297203,6.32279498
31.792558,5.83095189,6.32326991,-0.701653775,6.32309269,6.3224286,6.32225135
31.80305,5.83095189,6.32272396,-0.701264616,6.32254654,6.32188149,6.32170405
31.813542,6.55743852,6.32217439,0.485040343,6.32199678,6.32133078,6.32115315
31.824033,7.21110255,6.32162128,0.943123148,6.32144347,6.32077652,6.32059869
31.834525,6.78232998,6.32106452,0.679165268,6.32088651,6.32021862,6.32004058
31.845016,5.74456265,6.32050424,-0.758908156,6.32032603,6.31965718,6.31947895
31.855508,6.08276253,6.31994032,-0.487009025,6.31976191,6.31909211,6.31891367
31.866,5.83095189,6.31937284,-0.698871192,6.31919423,6.31852346,6.31834483
31.876491,6.40312424,6.31880185,0.290383173,6.31862304,6.31795131,6.31777248
31.886983,6.78232998,6.31822726,0.681250854,6.31804825,6.31737555,6.31719652
31.897474,6.70820393,6.31764917,0.624943804,6.31746997,6.3167963,6.31661707
31.907966,6.92820323,6.3170675,0.781751706,6.31688809,6.31621346,6.31603403
31.918458,6.63324958,6.3164823,0.562820827,6.31630269,6.31562708,6.31544745
31.928949,6.78232998,6.31589363,0.682961457,6.31571382,6.31503724,6.3148574
31.939441,5.47722558,6.3153014,-0.915464811,6.31512138,6.31444382,6.31426378
31.949932,6.55743852,6.31470571,0.492679219,6.3145255,6.31384695,6.31366671
31.960424,6,6.31410647,-0.560452027,6.31392606,6.31324653,6.31306608
31.970916,6.4807407,6.31350375,0.408946147,6.31332312,6.31264261,6.31246196
31.981407,6.92820323,6.3128976,0.784414198,6.31271677,6.31203527,6.31185441
31.991899,6.63324958,6.31228791,0.56653479,6.31210688,6.31142439,6.31124333
32.00239,6.40312424,6.31167482,0.302406044,6.31149359,6.3108101,6.31062884
32.012882,6,6.31105821,-0.557725931,6.31087677,6.31019229,6.31001082
32.023374,6.164414,6.31043816,-0.382131067,6.31025651,6.30957102,6.30938935
32.033865,6.40312424,6.30981471,0.305466079,6.30963286,6.30894637,6.30876449
32.044357,6.164414,6.30918777,-0.380491486,6.30900572,6.30831822,6.30813613
32.054848,6.164414,6.30855747,-0.379662304,6.3083752,6.3076867,6.30750441
32.06534,6,6.30792368,-0.554908714,6.30774121,6.30705169,6.30686919
32.075832,7.14142843,6.30728648,0.913313718,6.3071038,6.30641327,6.30623056
32.086323,6.244998,6.30664594,-0.24829003,6.30646305,6.3057715,6.30558859
32.096815,6,6.30600193,-0.553174416,6.30581884,6.30512627,6.30494315
32.107306,6.164414,6.3053546,-0.375420565,6.3051713,6.30447771,6.30429438
32.117798,6.40312424,6.30470383,0.313720274,6.30452031,6.3038257,6.30364215
32.12829,6.63324958,6.30404968,0.573759448,6.30386595,6.30317031,6.30298656
32.138781,5.47722558,6.30339222,-0.908937096,6.30320828,6.30251161,6.30232765
32.149273,7.14142843,6.30273134,0.915804066,6.30254719,6.30184949,6.30166531
32.159764,5.74456265,6.30206717,-0.746662257,6.30188281,6.30118407,6.30099969
32.170256,7,6.3013996,0.83582319,6.30121502,6.30051524,6.30033065
32.180748,6.78232998,6.30072868,0.693975002,6.3005439,6.29984307,6.29965826
32.191239,5.91607978,6.3000545,-0.619656934,6.2998695,6.29916763,6.29898261
32.201731,6.40312424,6.29937693,0.322098289,6.29919172,6.2984888,6.29830357
32.212222,6.164414,6.29869611,-0.366445231,6.29851069,6.29780672,6.29762127
32.222714,6.70820393,6.29801192,0.640462344,6.29782628,6.29712126,6.2969356
32.233206,6.32455532,6.29732442,0.165017865,6.29713857,6.29643249,6.29624662
32.243697,6.244998,6.2966337,-0.227234911,6.29644764,6.2957405,6.29555441
32.254189,6.55743852,6.29593963,0.511369626,6.29575335,6.29504515,6.29485884
32.26468,6.164414,6.29524234,-0.361702007,6.29505585,6.29434658,6.29416006
32.275172,6,6.29454172,-0.542716981,6.29435501,6.29364467,6.29345793
32.285664,6.70820393,6.29383783,0.643712746,6.2936509,6.2929395,6.29275254
32.296155,6.244998,6.29313076,-0.219391789,6.29294361,6.29223113,6.29204396
32.306647,6.70820393,6.29242036,0.644812819,6.292233,6.29151944,6.29133205
32.317138,6.08276253,6.29170679,-0.457104213,6.29151921,6.29080457,6.29061696
32.32763,6.4807407,6.29098992,0.435603924,6.29080212,6.2900864,6.28989857
32.338122,5.74456265,6.29026982,-0.738719956,6.2900818,6.28936499,6.28917694
32.348613,7.14142843,6.28954657,0.922974464,6.28935833,6.28864043,6.28845216
32.359105,6.40312424,6.28882003,0.338089048,6.28863157,6.28791258,6.2877241
32.369596,6.70820393,6.28809036,0.648161686,6.28790168,6.2871816,6.28699289
32.380088,6.70820393,6.28735742,0.648726838,6.28716852,6.28644734,6.28625841
32.39058,5.74456265,6.28662129,-0.73624632,6.28643217,6.28570988,6.28552073
32.401071,6.55743852,6.28588204,0.521110815,6.2856927,6.28496931,6.28477994
32.411563,6.78232998,6.28513955,0.70511732,6.28494998,6.28422548,6.28403589
32.422054,6.63324958,6.28439395,0.590640014,6.28420417,6.28347856,6.28328874
32.432546,6.40312424,6.28364513,0.345657507,6.28345512,6.28272839,6.28253835
32.443038,5.83095189,6.28289314,-0.672265755,6.28270291,6.28197506,6.2817848
32.453529,6.32455532,6.28213808,0.205954467,6.28194762,6.28121866,6.28102817
32.464021,5.83095189,6.2813798,-0.67113926,6.28118912,6.28045903,6.28026832
32.474512,6.40312424,6.28061846,0.350008251,6.28042755,6.27969634,6.2795054
32.485004,6.40312424,6.27985392,0.351098727,6.27966279,6.27893044,6.27873928
32.495496,6.244998,6.27908626,-0.184630068,6.2788949,6.27816142,6.27797004
32.505987,5.74456265,6.27831556,-0.730583953,6.27812397,6.27738936,6.27719775
32.516479,6.4807407,6.27754168,0.450776023,6.27734986,6.27661411,6.27642227
32.52697,6.70820393,6.27676477,0.656840289,6.27657273,6.27583583,6.27564376
32.537462,5.65685425,6.27598469,-0.786848424,6.27579243,6.27505438,6.27486209
32.547954,6.164414,6.27520153,-0.332847603,6.27500903,6.27426984,6.27407732
32.558445,6.92820323,6.27441536,0.808571497,6.27422264,6.27348229,6.27328954
32.568937,6.40312424,6.27362605,0.359858565,6.2734331,6.2726916,6.27249861
32.579428,6,6.27283375,-0.5223349,6.27264056,6.2718979,6.27170469
32.58992,5.74456265,6.27203831,-0.726275198,6.2718449,6.27110107,6.27090763
32.600412,6.63324958,6.27123982,0.601672468,6.27104618,6.27030119,6.27010752
32.610903,6,6.27043836,-0.520036888,6.27024449,6.26949833,6.26930443
32.621395,7.07106781,6.26963379,0.895228473,6.26943969,6.26869236,6.26849822
32.631886,7.07106781,6.26882627,0.895679375,6.26863193,6.26788342,6.26768905
32.642378,6.32455532,6.26801564,0.237780734,6.26782107,6.26707138,6.26687678
32.65287,6.4807407,6.267202,0.462102477,6.2670072,6.26625632,6.26606149
32.663361,7,6.26638542,0.856513033,6.26619039,6.26543833,6.26524326
32.673853,6.244998,6.26556577,-0.143414672,6.26537049,6.26461725,6.26442195
32.684344,6.08276253,6.26474319,-0.426591914,6.26454768,6.26379325,6.26359771
32.694836,5.74456265,6.26391755,-0.72066282,6.26372181,6.26296617,6.2627704
32.705328,6.32455532,6.26308892,0.247924182,6.26289294,6.26213611,6.2619401
32.715819,6.63324958,6.2622574,0.609091278,6.26206118,6.26130314,6.2611069
32.726311,5.09901951,6.26142282,-1.07814809,6.26122637,6.26046713,6.26027065
32.736802,6.63324958,6.26058537,0.610462296,6.26038868,6.25962822,6.25943151
32.747294,6.70820393,6.25974487,0.669670858,6.25954795,6.25878628,6.25858933
32.757786,6.08276253,6.25890143,-0.419689054,6.25870427,6.25794138,6.25774419
32.768277,6.70820393,6.25805513,0.670931296,6.25785773,6.25709362,6.25689619
32.778769,6.32455532,6.25720581,0.259517847,6.25700817,6.25624283,6.25604516
32.78926,6.8556546,6.25635364,0.774145311,6.25615576,6.2553892,6.25519129
32.799752,6.32455532,6.25549847,0.26278671,6.25530035,6.25453255,6.2543344
32.810244,6.63324958,6.25464038,0.615312282,6.25444202,6.25367299,6.2534746
32.820735,6.32455532,6.25377946,0.266037329,6.25358086,6.25281059,6.25261196
32.831227,6.40312424,6.25291556,0.387567644,6.25271672,6.25194521,6.25174633
32.841718,6.08276253,6.25204884,-0.41144418,6.25184976,6.251077,6.25087789
32.85221,6.63324958,6.25117916,0.618118455,6.25097983,6.25020582,6.25000647
32.862702,6.244998,6.25030659,-0.0728600578,6.25010702,6.24933176,6.24913216
32.873193,5.83095189,6.24943122,-0.646899782,6.24923141,6.24845489,6.24825505
32.883685,6.55743852,6.24855291,0.55577479,6.24835285,6.24757507,6.24737498
32.894176,6.4807407,6.24767181,0.482772086,6.24747151,6.24669247,6.24649213
32.904668,6.164414,6.24678777,-0.287008313,6.24658723,6.24580692,6.24560634
32.91516,6.164414,6.24590089,-0.285459078,6.2457001,6.24491851,6.24471769
32.925651,6.08276253,6.24501124,-0.402801083,6.2448102,6.24402734,6.24382627
32.936143,6.8556546,6.24411868,0.782007625,6.24391739,6.24313325,6.24293193
32.946634,6.63324958,6.24322336,0.624520791,6.24302183,6.24223641,6.24203484
32.957126,6.32455532,6.24232514,0.286758051,6.24212336,6.24133665,6.24113484
32.967618,6.40312424,6.2414241,0.402119556,6.24122207,6.24043407,6.24023201
32.978109,6.55743852,6.24052034,0.562954873,6.24031806,6.23952876,6.23932645
32.988601,5.47722558,6.23961368,-0.873148386,6.23941115,6.23862056,6.238418
32.999092,6.244998,6.23870431,0.0793327574,6.23850154,6.23770964,6.23750683
33.009584,6.164414,6.23779207,-0.270883855,6.23758904,6.23679584,6.23659278
33.020076,6.70820393,6.23687703,0.686532518,6.23667376,6.23587924,6.23567593
33.030567,7.21110255,6.23595931,0.987493412,6.23575578,6.23495995,6.23475639
33.041059,6.164414,6.23503873,-0.265753128,6.23483495,6.2340378,6.23383399
33.05155,6.40312424,6.23411547,0.411106763,6.23391143,6.23311296,6.2329089
33.062042,6.63324958,6.23318936,0.632503141,6.23298507,6.23218528,6.23198096
33.072534,5.65685425,6.23226049,-0.758555367,6.23205596,6.23125483,6.23105026
33.083025,6.08276253,6.23132897,-0.385443178,6.23112418,6.23032172,6.23011689
33.093517,6.55743852,6.23039462,0.571877523,6.23018958,6.22938578,6.2291807
33.104008,7.48331477,6.22945763,1.11975763,6.22925232,6.22844718,6.22824185
33.1145,6.55743852,6.22851781,0.573516095,6.22831226,6.22750577,6.22730018
33.124992,6.32455532,6.22757528,0.311416188,6.22736946,6.22656163,6.22635578
33.135483,6.8556546,6.22663012,0.793110637,6.22642405,6.22561485,6.22540875
33.145975,6.70820393,6.22568216,0.694637873,6.22547583,6.22466528,6.22445892
33.156466,6.244998,6.22473159,0.142360152,6.224525,6.22371309,6.22350647
33.166958,5.65685425,6.22377823,-0.752943541,6.22357138,6.2227581,6.22255122
33.17745,6.78232998,6.22282218,0.748002545,6.22261507,6.22180042,6.22159328
33.187941,6.40312424,6.22186353,0.425747231,6.22165617,6.22084014,6.22063275
33.198433,6.4807407,6.22090212,0.509743639,6.2206945,6.21987709,6.21966944
33.208924,5.83095189,6.21993813,-0.623687609,6.21973025,6.21891146,6.21870354
33.219416,6.63324958,6.21897138,0.643644468,6.21876324,6.21794306,6.21773488
33.229908,5.74456265,6.21800197,-0.688069273,6.21779357,6.21697199,6.21676356
33.240399,6.32455532,6.21703,0.327910534,6.21682134,6.21599837,6.21578967
33.250891,6.32455532,6.21605529,0.329393423,6.21584636,6.21502199,6.21481303
33.261382,5.29150262,6.21507804,-0.961028311,6.21486884,6.21404307,6.21383384
33.271874,6.244998,6.21409805,0.175783803,6.2138886,6.21306141,6.21285192
33.282366,6.4807407,6.21311544,0.517325099,6.21290572,6.21207712,6.21186737
33.292857,6.40312424,6.2121303,0.437028532,6.21192031,6.2110903,6.21088028
33.303349,7,6.21114245,0.888176532,6.2109322,6.21010076,6.20989047
33.31384,6.70820393,6.21015208,0.705727887,6.20994157,6.2091087,6.20889815
33.324332,6.32455532,6.20915902,0.339700314,6.20894823,6.20811394,6.20790312
33.334824,6.4807407,6.20816335,0.522089402,6.2079523,6.20711657,6.20690548
33.345315,7.07106781,6.20716519,0.929463618,6.20695388,6.2061167,6.20590535
33.355807,5.56776436,6.20616435,-0.798999369,6.20595277,6.20511415,6.20490253
33.366298,6.244998,6.20516103,0.199592003,6.20494918,6.20410911,6.20389722
33.37679,6.244998,6.20415504,0.202096415,6.20394291,6.20310139,6.20288923
33.387282,6.32455532,6.20314648,0.348437719,6.20293408,6.2020911,6.20187867
33.397773,7,6.20213545,0.89323264,6.20192279,6.20107834,6.20086564
33.408265,6.164414,6.20112177,-0.191592719,6.20090884,6.20006292,6.19984995
33.418756,6.55743852,6.20010564,0.597773269,6.19989244,6.19904505,6.19883181
33.429248,5.74456265,6.19908687,-0.674184119,6.19887339,6.19802453,6.19781101
33.43974,7,6.19806556,0.89550792,6.19785181,6.19700147,6.19678768
33.450231,6.244998,6.19704182,0.218988986,6.1968278,6.19597597,6.1957619
33.460723,6.164414,6.19601546,-0.17776798,6.19580116,6.19494784,6.1947335
33.471214,6.4807407,6.19498667,0.534559657,6.1947721,6.19391728,6.19370267
33.481706,6.92820323,6.19395527,0.856882697,6.19374043,6.19288411,6.19266922
33.492198,6.32455532,6.19292137,0.362813936,6.19270624,6.19184842,6.19163326
33.502689,6.78232998,6.19188506,0.76840414,6.19166966,6.19081033,6.19059489
33.513181,6.70820393,6.19084616,0.719275868,6.19063048,6.18976963,6.18955392
33.523672,5.91607978,6.18980486,-0.523187425,6.18958891,6.18872654,6.18851055
33.534164,5.47722558,6.18876099,-0.843525585,6.18854476,6.18768086,6.18746459
33.544656,7.34846923,6.18771463,1.07738322,6.18749812,6.1866327,6.18641615
33.555147,6.63324958,6.18666591,0.668269162,6.18644912,6.18558216,6.18536533
33.565639,6.78232998,6.18561461,0.772473539,6.18539755,6.18452905,6.18431194
33.57613,6.70820393,6.18456096,0.723631792,6.18434361,6.18347357,6.18325618
33.586622,6.70820393,6.18350475,0.72436122,6.18328712,6.18241553,6.18219786
33.597114,6,6.1824461,-0.427137096,6.18222819,6.18135504,6.18113709
33.607605,6.08276253,6.1813851,-0.314042307,6.18116691,6.1802922,6.18007397
33.618097,6.4807407,6.18032157,0.548105039,6.18010309,6.17922682,6.1790083
33.628588,6.92820323,6.1792557,0.865417547,6.17903694,6.1781591,6.1779403
33.63908,6.92820323,6.17818731,0.866034597,6.17796826,6.17708885,6.17686976
33.649572,5.83095189,6.1771165,-0.588357545,6.17689717,6.17601617,6.1757968
33.660063,5.83095189,6.17604337,-0.587444872,6.17582376,6.17494118,6.17472152
33.670555,6.92820323,6.17496774,0.867891405,6.17474784,6.17386367,6.17364373
33.681046,6.40312424,6.17388981,0.478784327,6.17366962,6.17278385,6.17256363
33.691538,6.78232998,6.17280937,0.780718009,6.1725889,6.17170153,6.17148102
33.70203,6.244998,6.17172655,0.270686991,6.17150579,6.17061682,6.17039602
33.712521,7.07106781,6.17064145,0.948907986,6.1704204,6.16952981,6.16930872
33.723013,6.63324958,6.16955386,0.680952069,6.16933252,6.16844032,6.16821894
33.733504,6.32455532,6.168464,0.395083936,6.16824238,6.16734855,6.16712689
33.743996,5.65685425,6.16737168,-0.714505022,6.16714976,6.16625431,6.16603235
33.754488,6.32455532,6.16627699,0.397842098,6.16605478,6.16515769,6.16493545
33.764979,5.09901951,6.16518004,-1.0325505,6.16495755,6.16405882,6.16383628
33.775471,6.164414,6.16408065,0.018258051,6.16385786,6.16295749,6.16273466
33.785962,5.83095189,6.16297901,-0.57621794,6.16275593,6.16185391,6.16163079
33.796454,6.40312424,6.16187493,0.491171364,6.16165155,6.16074788,6.16052447
33.806946,6.32455532,6.16076851,0.404705828,6.16054485,6.15963951,6.1594158
33.817437,5.83095189,6.15965988,-0.573330604,6.15943591,6.15852892,6.15830491
33.827929,6.8556546,6.15854881,0.834928613,6.15832455,6.15741588,6.15719158
33.83842,6.63324958,6.15743554,0.689792755,6.15721098,6.15630064,6.15607604
33.848912,6,6.15631984,-0.395373042,6.15609499,6.15518296,6.15495807
33.859404,5.91607978,6.15520184,-0.489001085,6.1549767,6.15406298,6.15383779
33.869895,6.244998,6.15408165,0.301523375,6.15385621,6.1529408,6.15271531
33.880387,6,6.15295906,-0.391099809,6.15273332,6.15181621,6.15159042
33.890878,6.8556546,6.15183429,0.838939994,6.15160825,6.15068943,6.15046335
33.90137,6.78232998,6.15070712,0.794747042,6.15048078,6.14956025,6.14933387
33.911862,7.21110255,6.14957768,1.03030329,6.14935104,6.14842879,6.14820211
33.922353,6.92820323,6.14844608,0.883038592,6.14821914,6.14729516,6.14706818
33.932845,5.74456265,6.1473121,-0.63462544,6.14708485,6.14615915,6.14593187
33.943336,5.29150262,6.14617596,-0.924485446,6.14594842,6.14502098,6.1447934
33.953828,6.08276253,6.14503747,-0.249549467,6.14480962,6.14388045,6.14365256
33.96432,5.74456265,6.14389672,-0.631928852,6.14366857,6.14273765,6.14250946
33.974811,6.78232998,6.14275384,0.799735046,6.14252539,6.14159271,6.14136422
33.985303,6.08276253,6.14160861,-0.242582112,6.14137986,6.14044542,6.14021662
33.995794,6.63324958,6.14046126,0.701988833,6.1402322,6.139296,6.13906689
34.006286,6.32455532,6.13931157,0.430399525,6.1390822,6.13814423,6.13791482
34.016778,7.68114575,6.13815966,1.24216991,6.13792998,6.13699023,6.13676052
34.027269,6.08276253,6.13700564,-0.232901499,6.13677566,6.13583412,6.1356041
34.037761,5.91607978,6.1358493,-0.468795814,6.13561901,6.13467569,6.13444535
34.048252,6.63324958,6.13469086,0.706086905,6.13446027,6.13351515,6.13328451
34.058744,6.32455532,6.13353012,0.437064301,6.13329921,6.13235229,6.13212134
34.069236,6.4807407,6.13236718,0.590231753,6.13213596,6.13118723,6.13095597
34.079727,6.78232998,6.13120216,0.80692492,6.13097063,6.13002008,6.12978851
34.090219,6.08276253,6.13003484,-0.217421967,6.12980301,6.12885064,6.12861875
34.10071,6.40312424,6.12886546,0.523697219,6.12863331,6.12767911,6.12744692
34.111202,6.55743852,6.12769379,0.655549182,6.12746133,6.1265053,6.1262728
34.121694,5.65685425,6.12651996,-0.685321611,6.12628719,6.12532931,6.12509649
34.132185,6.8556546,6.12534407,0.854582077,6.12511099,6.12415127,6.12391813
34.142677,6.40312424,6.12416592,0.528165047,6.12393252,6.12297094,6.1227375
34.153168,6.8556546,6.12298573,0.855960789,6.12275201,6.12178857,6.12155481
34.16366,5.91607978,6.12180328,-0.453567517,6.12156924,6.12060394,6.12036986
34.174152,5.29150262,6.12061868,-0.910558104,6.12038434,6.11941715,6.11918276
34.184643,6.55743852,6.11943207,0.661820562,6.1191974,6.11822834,6.11799363
34.195135,6.4807407,6.11824321,0.602077644,6.11800823,6.11703728,6.11680225
34.205626,6.08276253,6.11705234,-0.185175076,6.11681704,6.11584419,6.11560885
34.216118,6.32455532,6.11585924,0.456832666,6.11562362,6.11464887,6.1144132
34.22661,5.91607978,6.11466402,-0.445627911,6.11442808,6.11345142,6.11321544
34.237101,6.08276253,6.11346681,-0.175226355,6.11323055,6.11225198,6.11201567
34.247593,7.14142843,6.11226738,1.01447575,6.1120308,6.1110503,6.11081367
34.258084,6.63324958,6.11106596,0.722622736,6.11082906,6.10984664,6.10960969
34.268576,6.244998,6.10986234,0.367608022,6.10962512,6.10864076,6.10840348
34.279068,6.55743852,6.10865663,0.669911855,6.10841908,6.10743278,6.10719518
34.289559,6.164414,6.10744895,0.238673519,6.10721108,6.10622283,6.10598491
34.300051,5.29150262,6.10623909,-0.902627533,6.10600089,6.10501068,6.10477243
34.310542,6.32455532,6.10502726,0.468538217,6.10478874,6.10379656,6.10355799
34.321034,6.55743852,6.10381325,0.673517092,6.1035744,6.10258025,6.10234136
34.331526,5.56776436,6.10259718,-0.731322651,6.10235801,6.10136188,6.10112265
34.342017,6.55743852,6.10137917,0.675321665,6.10113967,6.10014155,6.099902
34.352509,6.63324958,6.100159,0.730130526,6.09991917,6.09891905,6.09867918
34.363,5.19615242,6.09893689,-0.950149708,6.09869673,6.09769462,6.09745441
34.373492,6.32455532,6.09771263,0.476280058,6.09747214,6.09646801,6.09622748
34.383984,6.92820323,6.09648633,0.911985144,6.09624551,6.09523937,6.0949985
34.394475,7.07106781,6.09525812,0.987830803,6.09501697,6.0940088,6.0937676
34.404967,5.65685425,6.09402776,-0.661190981,6.09378628,6.09277608,6.09253455
34.415458,6.55743852,6.09279551,0.681647283,6.09255369,6.09154145,6.09129959
34.42595,6.244998,6.09156112,0.3917102,6.09131897,6.09030468,6.09006249
34.436442,6.8556546,6.09032472,0.874831344,6.09008224,6.08906589,6.08882337
34.446933,6,6.08908644,-0.298473508,6.08884362,6.08782521,6.08758235
34.457425,5.19615242,6.08784603,-0.944295299,6.08760289,6.0865824,6.08633921
34.467916,6.70820393,6.08660376,0.788416246,6.08636027,6.08533771,6.08509418
34.478408,6.244998,6.08535937,0.399548028,6.08511555,6.0840909,6.08384703
34.4889,5.91607978,6.084113,-0.409918553,6.08386885,6.0828421,6.08259789
34.499391,7.28010989,6.08286477,1.09418697,6.08262028,6.08159143,6.08134688
34.509883,6.32455532,6.08161445,0.492890319,6.08136962,6.08033866,6.08009377
34.520374,6.244998,6.08036228,0.405753268,6.08011711,6.07908403,6.0788388
34.530866,5.83095189,6.07910803,-0.498152724,6.07886252,6.07782731,6.07758174
34.541358,5.56776436,6.07785182,-0.714204073,6.07760597,6.07656862,6.07632271
34.551849,7.14142843,6.07659378,1.03190826,6.07634758,6.07530809,6.07506184
34.562341,6.8556546,6.07533366,0.883357762,6.07508713,6.07404548,6.07379889
34.572832,7.68114575,6.07407173,1.26770423,6.07382485,6.07278104,6.07253411
34.583324,7.21110255,6.07280774,1.066909,6.07256051,6.07151453,6.07126725
34.593816,7.21110255,6.07154181,1.0675021,6.07129424,6.07024608,6.06999846
34.604307,6.78232998,6.07027408,0.843834052,6.07002616,6.06897581,6.06872785
34.614799,6.40312424,6.0690043,0.578031088,6.06875604,6.06770349,6.06745518
34.62529,5.83095189,6.06773272,-0.486601304,6.06748412,6.06642937,6.06618071
34.635782,6.63324958,6.06645912,0.752854876,6.06621016,6.0651532,6.06490419
34.646274,6.08276253,6.0651836,0.132585555,6.0649343,6.06387511,6.06362575
34.656765,6.70820393,6.0639063,0.802681524,6.06365665,6.06259523,6.06234553
34.667257,6.78232998,6.06262723,0.848352963,6.06237723,6.06131333,6.06106327
34.677748,6.08276253,6.06134615,0.146343378,6.06109579,6.06002964,6.05977923
34.68824,6.92820323,6.06006305,0.931740404,6.05981234,6.05874393,6.05849317
34.698732,6.244998,6.05877807,0.431532072,6.05852701,6.05745633,6.05720522
34.709223,6,6.05749133,-0.239773507,6.05723993,6.05616697,6.0559155
34.719715,5.91607978,6.0562026,-0.37432983,6.05595084,6.05487559,6.05462378
34.730206,5.83095189,6.05491213,-0.473244371,6.05466001,6.05358247,6.0533303
34.740698,5.91607978,6.05361967,-0.370863702,6.0533672,6.05228735,6.05203482
34.75119,6.55743852,6.05232535,0.710713146,6.05207252,6.05099036,6.05073747
34.761681,6.164414,6.0510293,0.336726451,6.05077611,6.04969162,6.04943838
34.772173,5.83095189,6.04973128,-0.467738586,6.04947774,6.04839091,6.04813731
34.782664,5.56776436,6.04843154,-0.69330165,6.04817764,6.04708847,6.04683451
34.793156,6.164414,6.04712984,0.342467757,6.04687558,6.04578405,6.04552974
34.803648,6.164414,6.0458263,0.344365648,6.04557168,6.0444778,6.04422312
34.814139,6.40312424,6.04452106,0.598834846,6.04426608,6.04316982,6.04291478
34.824631,6.4807407,6.04321388,0.661458103,6.04295853,6.04185989,6.04160449
34.835122,6.40312424,6.04195788,0.600971179,6.04170218,6.04054825,6.04029249
34.845614,6.63324958,6.04064709,0.769806785,6.04039103,6.03923466,6.03897854
34.856106,6.63324958,6.0393345,0.770658862,6.03907807,6.03791926,6.03766277
34.866597,6.70820393,6.03802023,0.818647486,6.03776343,6.03660216,6.03634531
34.877089,6.08276253,6.03670403,0.214612443,6.03644687,6.03528313,6.03502591
34.88758,6.08276253,6.03538616,0.217661128,6.03512864,6.03396242,6.03370483
34.898072,5.74456265,6.03406638,-0.538055514,6.03380849,6.03263978,6.03238183
34.908564,6,6.03274482,-0.180955292,6.03248656,6.03131534,6.03105702
34.919055,6.244998,6.0314216,0.462143268,6.03116297,6.02998924,6.02973055
34.929547,5.56776436,6.03009648,-0.679950083,6.02983748,6.02866123,6.02840217
34.940038,7.28010989,6.02876972,1.11863317,6.02851035,6.02733156,6.02707214
34.95053,6.244998,6.02744106,0.466429993,6.02718132,6.02599999,6.02574019
34.961022,6.40312424,6.02611064,0.614014326,6.02585053,6.02466665,6.02440648
34.971513,6.40312424,6.0247786,0.615098071,6.02451812,6.02333167,6.02307112
34.982005,5.83095189,6.02344468,-0.438739996,6.02318382,6.02199479,6.02173387
34.992496,6.40312424,6.02210914,0.617264205,6.02184791,6.02065629,6.020395
35.002988,6.4807407,6.02077173,0.678210121,6.02051012,6.0193159,6.01905424
35.01348,5.83095189,6.01943258,-0.434143628,6.0191706,6.01797377,6.01771173
35.023971,6.164414,6.01809184,0.382520806,6.01782948,6.01663002,6.0163676
35.034463,6.55743852,6.01674923,0.735315777,6.0164865,6.01528441,6.01502161
35.044954,5.74456265,6.01540504,-0.5204252,6.01514192,6.01393718,6.013674
35.055446,6.70820393,6.01405899,0.833153611,6.0137955,6.0125881,6.01232454
35.065938,6.32455532,6.01271124,0.558430016,6.01244736,6.01123729,6.01097336
35.076429,5.65685425,6.0113619,-0.595405453,6.01109765,6.0098849,6.00962058
35.086921,6.70820393,6.01001074,0.835579557,6.0097461,6.00853065,6.00826595
35.097412,6.8556546,6.008658,0.920324182,6.00839298,6.00717483,6.00690974
35.107904,6.4807407,6.00730344,0.688067769,6.00703804,6.00581717,6.0055517
35.118396,6.63324958,6.0059472,0.792024232,6.00568141,6.0044578,6.00419195
35.128887,6.63324958,6.0045894,0.79288094,6.00432323,6.00309687,6.00283064
35.139379,6.40312424,6.00322979,0.632372083,6.00296323,6.00173412,6.0014675
35.14987,6,6.00186863,-0.0432276643,6.00160169,6.00036981,6.0001028
35.160362,5.56776436,6.00050568,-0.657830764,6.00023835,5.99900368,5.99873628
35.170854,6.4807407,5.99914106,0.693973805,5.99887334,5.99763588,5.99736809
35.181345,6.78232998,5.99777491,0.885751137,5.9975068,5.99626653,5.99599835
35.191837,6.32455532,5.99640697,0.572842343,5.99613847,5.99489538,5.99462681
35.202328,6.40312424,5.99503751,0.638816659,5.99476863,5.9935227,5.99325374
35.21282,7.21110255,5.99366628,1.10337495,5.993397,5.99214822,5.99187887
35.223312,6.32455532,5.9922934,0.576421647,5.99202373,5.99077209,5.99050235
35.233803,6.4807407,5.99091902,0.699872614,5.99064896,5.98939444,5.9891243
35.244295,6,5.98954288,0.102260069,5.98927242,5.98801501,5.98774448
35.254786,5.91607978,5.98816524,-0.268487344,5.98789438,5.98663407,5.98636314
35.265278,5.38516481,5.98678584,-0.775642336,5.98651459,5.98525136,5.98498004
35.27577,5.56776436,5.98540483,-0.646251084,5.98513318,5.98386702,5.9835953
35.286261,6.244998,5.98402233,0.510857777,5.98375028,5.98248118,5.98220906
35.296753,6.40312424,5.98263809,0.64844903,5.98236565,5.98109358,5.98082106
35.307244,7.41619849,5.98125238,1.19789236,5.98097954,5.97970449,5.97943158
35.317736,7,5.97986494,1.01001736,5.97959169,5.97831366,5.97804035
35.328228,7,5.9784759,1.01070475,5.97820226,5.97692122,5.9766475
35.338719,6.55743852,5.97708541,0.761809108,5.97681136,5.9755273,5.97525318
35.349211,6.70820393,5.97569319,0.855868412,5.97541874,5.97413165,5.97385713
35.359702,5.74456265,5.97429953,-0.479308757,5.97402467,5.97273454,5.97245961
35.370194,7.14142843,5.97290416,1.08098301,5.9726289,5.97133569,5.97106036
35.380686,6,5.97150721,0.168798062,5.97123155,5.96993526,5.96965952
35.391177,7.07106781,5.97010884,1.04926592,5.96983276,5.96853338,5.96825724
35.401669,6.63324958,5.96870876,0.815193732,5.96843228,5.96712979,5.96685323
35.41216,5.91607978,5.96730726,-0.226334877,5.96703037,5.96572475,5.96544779
35.422652,6.40312424,5.96590407,0.661226259,5.96562677,5.96431801,5.96404064
35.433144,6.55743852,5.96449934,0.770025447,5.96422162,5.96290971,5.96263192
35.443635,5.91607978,5.96309319,-0.216825746,5.96281507,5.96149997,5.96122178
35.454127,6,5.96168537,0.195741244,5.96140683,5.96008855,5.95980994
35.464618,6.55743852,5.96027614,0.772762824,5.95999719,5.9586757,5.95839668
35.47511,7.07106781,5.95886525,1.05461015,5.95858589,5.95726118,5.95698174
35.485602,6.63324958,5.95745284,0.822068575,5.95717306,5.9558451,5.95556525
35.496093,5.83095189,5.95603904,-0.353676605,5.95575884,5.95442763,5.95414736
35.506585,5.56776436,5.95462358,-0.621980079,5.95434297,5.95300848,5.9527278
35.517076,6.32455532,5.95320675,0.609383763,5.95292572,5.95158794,5.95130684
35.527568,5.74456265,5.95178827,-0.455220416,5.95150683,5.95016573,5.94988421
35.53806,6.244998,5.95036829,0.542798032,5.95008643,5.94874201,5.94846006
35.548551,6.55743852,5.94894695,0.780058698,5.94866467,5.9473169,5.94703453
35.559043,7.61577311,5.94752398,1.29160719,5.94724127,5.94589014,5.94560735
35.569534,5.09901951,5.94609965,-0.920369565,5.94581652,5.944462,5.9441788
35.580026,5.91607978,5.9446737,-0.169097362,5.94439015,5.94303223,5.9427486
35.590518,7.07106781,5.94324627,1.06198943,5.94296229,5.94160096,5.9413169
35.601009,6.244998,5.9418175,0.550618288,5.9415331,5.94016832,5.93988384
35.611501,6.63324958,5.94038712,0.832383601,5.94010229,5.93873406,5.93844915
35.621992,6,5.93895541,0.247072033,5.93867016,5.93729845,5.93701311
35.632484,6.244998,5.9375221,0.554505093,5.93723642,5.93586121,5.93557545
35.642976,6.40312424,5.93608733,0.683400984,5.93580122,5.9344225,5.93413631
35.653467,5.91607978,5.93465125,-0.136277156,5.9343647,5.93298245,5.93269583
35.663959,5.83095189,5.93321357,-0.319783801,5.9329266,5.93154079,5.93125374
35.67445,6.55743852,5.93177459,0.79098921,5.93148719,5.93009781,5.92981032
35.684942,6.63324958,5.93033404,0.838400587,5.9300462,5.92865322,5.9283653
35.695434,5.56776436,5.92889204,-0.600938998,5.92860377,5.92720718,5.92691882
35.705925,5.91607978,5.92744875,-0.106625376,5.92716005,5.92575982,5.92547103
35.716417,5.74456265,5.9260039,-0.425959217,5.92571476,5.92431087,5.92402164
35.726908,6.63324958,5.92455776,0.841838356,5.92426818,5.92286062,5.92257095
35.7374,6.244998,5.92311007,0.56735168,5.92282005,5.92140878,5.92111868
35.747892,7.28010989,5.92166096,1.16552517,5.92137051,5.91995552,5.91966498
35.758383,5.91607978,5.92021058,-0.0642712966,5.91991969,5.91850095,5.91820997
35.768875,5.83095189,5.91875866,-0.296322065,5.91846732,5.91704483,5.9167534
35.779366,5.56776436,5.91730548,-0.591220022,5.9170137,5.91558741,5.91529555
35.789858,5.56776436,5.91585076,-0.589988471,5.91555854,5.91412844,5.91383613
35.80035,5.47722558,5.91439465,-0.661187624,5.91410199,5.91266805,5.9123753
35.810841,6.92820323,5.91293729,1.00760406,5.91264418,5.91120639,5.9109132
35.821333,6.92820323,5.91147841,1.00832773,5.91118486,5.90974319,5.90944955
35.831824,6.70820393,5.91001829,0.893412356,5.90972429,5.90827872,5.90798463
35.842316,6.08276253,5.90855666,0.417379763,5.90826222,5.90681271,5.90651818
35.852808,6.70820393,5.90709366,0.895047635,5.90679877,5.90534531,5.90505033
35.863299,7.28010989,5.90562944,1.17238238,5.90533409,5.90387666,5.90358123
35.873791,6.164414,5.90416371,0.510147321,5.90386792,5.90240649,5.9021106
35.884282,5.83095189,5.90269677,-0.267852344,5.90240052,5.90093507,5.90063873
35.894774,6.4807407,5.90122834,0.76125709,5.90093164,5.89946213,5.89916534
35.905266,5.74456265,5.89975856,-0.393949127,5.89946141,5.89798782,5.89769058
35.915757,6.40312424,5.89828758,0.710518584,5.89798997,5.89651228,5.89621458
35.926249,6.164414,5.89681512,0.517299606,5.89651705,5.89503524,5.89473708
35.93674,6.92820323,5.89534147,1.01629807,5.89504294,5.89355698,5.89325836
35.947232,6.32455532,5.89386634,0.656268981,5.89356736,5.89207721,5.89177814
35.957724,6.32455532,5.8923899,0.657392898,5.89209046,5.8905961,5.89029657
35.968215,6.55743852,5.89091227,0.816410591,5.89061237,5.88911377,5.88881378
35.978707,5.38516481,5.88943319,-0.710118568,5.88913283,5.88762997,5.88732951
35.989198,6.08276253,5.88795293,0.441372401,5.88765211,5.88614496,5.88584404
35.99969,6.40312424,5.88647123,0.718785786,5.88616995,5.88465847,5.88435709
36.010182,6.8556546,5.88498823,0.985224022,5.88468648,5.88317066,5.88286881
36.020673,6.08276253,5.88350407,0.446383763,5.88320185,5.88168165,5.88137934
36.031165,5.65685425,5.88201847,-0.474514722,5.88171579,5.88019118,5.8798884
36.041656,6.78232998,5.88053173,0.949630589,5.88022858,5.87869953,5.87839629
36.052148,6,5.87904356,0.347787928,5.87873994,5.87720643,5.87690271
36.06264,7.61577311,5.87755411,1.31841534,5.87725002,5.87571201,5.87540783
36.073131,6.164414,5.87606352,0.536982757,5.87575896,5.87421642,5.87391177
36.083623,6,5.87457152,0.354158828,5.8742665,5.87271939,5.87241427
36.094114,6,5.8730784,0.356260576,5.8727729,5.87122121,5.87091561
36.104606,5.47722558,5.87158387,-0.627979537,5.8712779,5.86972158,5.86941551
36.115098,6,5.87008809,0.360432949,5.86978164,5.86822067,5.86791412
36.125589,6.4807407,5.86859119,0.782399838,5.86828427,5.8667186,5.86641158
36.136081,6.55743852,5.8670929,0.830870399,5.8667855,5.86521512,5.86490761
36.146572,5.74456265,5.86559351,-0.347894909,5.86528563,5.86371049,5.86340251
36.157064,6.164414,5.86409274,0.54801575,5.86378438,5.86220445,5.86189599
36.167556,6.164414,5.86259073,0.549384448,5.86228189,5.86069713,5.86038819
36.178047,6.4807407,5.86108763,0.787180452,5.86077831,5.85918869,5.85887927
36.188539,5.91607978,5.85958317,0.237690169,5.85927336,5.85767885,5.85736894
36.19903,4.89897949,5.85807762,-0.979335558,5.85776733,5.85616788,5.85585749
36.209522,5.38516481,5.85657071,-0.686590056,5.85625994,5.85465552,5.85434465
36.220014,6.78232998,5.85506259,0.962947243,5.85475133,5.85314191,5.85283055
36.230505,6.78232998,5.8535534,0.963730553,5.85324166,5.85162719,5.85131534
36.240997,6.08276253,5.85204287,0.480332865,5.85173064,5.85011109,5.84979875
36.251488,5.19615242,5.85053128,-0.808936867,5.85021856,5.84859389,5.84828106
36.26198,5.65685425,5.84901835,-0.438365257,5.84870514,5.84707531,5.84676199
36.272472,6,5.84750423,0.390507073,5.84719052,5.84555549,5.84524169
36.282963,5.74456265,5.84598906,-0.318475141,5.84567487,5.8440346,5.8437203
36.293455,6.55743852,5.84447257,0.844373112,5.84415788,5.84251234,5.84219754
36.303946,5.91607978,5.84295505,0.270415855,5.84263987,5.840989,5.84067371
36.314438,6.244998,5.84143621,0.635265134,5.84112053,5.8394643,5.83914851
36.32493,6.4807407,5.8399162,0.800515147,5.83960002,5.83793838,5.8376221
36.335421,5.91607978,5.83839517,0.278719595,5.8380785,5.83641141,5.83609463
36.345913,5.29150262,5.83687284,-0.738491852,5.83655566,5.83488309,5.8345658
36.356404,6.164414,5.8353495,0.573641445,5.83503182,5.83335371,5.83303592
36.366896,5.83095189,5.83382486,-0.0536000216,5.83350668,5.83182298,5.8315047
36.377388,7,5.83229907,1.08060211,5.8319804,5.83029107,5.82997228
36.387879,6.40312424,5.83077229,0.756539453,5.83045311,5.82875811,5.82843882
36.398371,6.08276253,5.82924423,0.503506006,5.82892455,5.82722383,5.82690403
36.408862,7.28010989,5.82771518,1.20515339,5.82739499,5.8256885,5.8253682
36.419354,6,5.82618486,0.416911425,5.82586416,5.82415186,5.82383105
36.429846,6.32455532,5.82465342,0.707037411,5.82433221,5.82261404,5.82229272
36.440337,5.74456265,5.823121,-0.280282638,5.82279929,5.8210752,5.82075337
36.450829,6.244998,5.82158733,0.650700139,5.8212651,5.81953504,5.8192127
36.46132,6.4807407,5.82005269,0.812827171,5.81972995,5.81799388,5.81767102
36.471812,6.63324958,5.8185168,0.902625493,5.81819355,5.8164514,5.81612803
36.482304,5.83095189,5.81697981,0.118203568,5.81665604,5.81490778,5.81458389
36.492795,6.40312424,5.81544187,0.766604437,5.81511759,5.81336315,5.81303875
36.503287,6.40312424,5.8139027,0.767607672,5.8135779,5.81181722,5.81149231
36.513778,6.32455532,5.81236259,0.715676417,5.81203727,5.81027031,5.80994487
36.52427,7,5.81082125,1.09049473,5.81049541,5.8087221,5.80839615
36.534762,6.70820393,5.80927883,0.948116608,5.80895247,5.80717276,5.80684629
36.545253,7.07106781,5.80773549,1.12398057,5.80740861,5.80562244,5.80529544
36.555745,7.48331477,5.80619093,1.29503816,5.80586353,5.80407084,5.80374332
36.566236,6.08276253,5.80464546,0.527368056,5.80431754,5.80251827,5.80219023
36.576728,4.79583152,5.80309879,-1.00362706,5.80277034,5.80096443,5.80063586
36.58722,6,5.80155106,0.44547608,5.80122208,5.79940948,5.79908038
36.597711,5.19615242,5.80000244,-0.777077868,5.79967293,5.79785356,5.79752393
36.608203,5.83095189,5.79845262,0.180275555,5.79812258,5.79629638,5.79596623
36.618694,5.74456265,5.79690191,-0.228777764,5.79657135,5.79473825,5.79440756
36.629186,7.28010989,5.79535002,1.21850723,5.79501893,5.79317887,5.79284765
36.639678,6.40312424,5.79379711,0.780594087,5.79346548,5.79161839,5.79128664
36.650169,6.164414,5.79224332,0.610057936,5.79191116,5.79005697,5.78972469
36.660661,5.74456265,5.79068836,-0.214768977,5.79035566,5.78849431,5.78816149
36.671152,5.29150262,5.78913254,-0.705428887,5.7887993,5.78693072,5.78659736
36.681644,6.40312424,5.78757556,0.784569104,5.78724179,5.78536589,5.78503199
36.692136,7.07106781,5.78601758,1.13360056,5.78568327,5.78379999,5.78346555
36.702627,6.8556546,5.78445874,1.03498592,5.78412389,5.78223316,5.78189818
36.713119,5.91607978,5.78289877,0.364939739,5.78256338,5.78066511,5.78032959
36.72361,6.92820323,5.78133796,1.07091796,5.78100202,5.77909614,5.77876008
36.734102,6.164414,5.77977601,0.620191899,5.77943953,5.77752596,5.77718935
36.744594,6.40312424,5.77821309,0.790513219,5.77787607,5.77595472,5.77561757
36.755085,5.47722558,5.77664934,-0.547196277,5.77631177,5.77438257,5.77404487
36.765577,5.65685425,5.77508448,-0.343846227,5.77474636,5.77280923,5.77247098
36.776068,6.40312424,5.7735188,0.793476803,5.77318014,5.77123498,5.77089618
36.78656,6.32455532,5.77195202,0.743372923,5.7716128,5.76965954,5.76932019
36.797052,6.08276253,5.77038428,0.558908085,5.77004452,5.76808306,5.76774316
36.807543,5.83095189,5.76881575,0.249271226,5.76847543,5.76650569,5.76616524
36.818035,6.244998,5.76724613,0.691195971,5.76690526,5.76492714,5.76458613
36.828526,5.56776436,5.76567572,-0.444872293,5.76533429,5.76334771,5.76300615
36.839018,6.70820393,5.76410423,0.971647931,5.76376225,5.7617671,5.76142498
36.84951,5.83095189,5.76253182,0.261572318,5.76218927,5.76018547,5.75984279
36.860001,5.83095189,5.76095863,0.264562394,5.76061553,5.75860298,5.75825973
36.870493,5.56776436,5.75938439,-0.437744246,5.75904073,5.75701931,5.75667551
36.880984,6,5.75780938,0.492128659,5.75746516,5.75543479,5.75509042
36.891476,6.08276253,5.75623333,0.57142734,5.75588854,5.7538491,5.75350417
36.901968,6,5.75465637,0.495321742,5.75431102,5.75226242,5.75191692
36.912459,6.08276253,5.75307868,0.574181029,5.75273276,5.75067488,5.75032882
36.922951,5.19615242,5.75149995,-0.745216427,5.75115346,5.74908619,5.74873956
36.933442,5.74456265,5.74992049,-0.0731972676,5.74957343,5.74749667,5.74714947
36.943934,6,5.74834,0.501657251,5.74799238,5.745906,5.74555823
36.954426,5.91607978,5.74675865,0.41148649,5.74641046,5.74431434,5.743966
36.964917,6,5.74517659,0.504800367,5.74482782,5.74272186,5.74237294
36.975409,5,5.74359352,-0.862318689,5.74324418,5.74112824,5.74077875
36.9859,5.65685425,5.74200975,-0.291814161,5.74165984,5.7395338,5.73918374
36.996392,6.08276253,5.74042499,0.585096178,5.7400745,5.73793824,5.73758759
37.006884,6.08276253,5.7388394,0.586449601,5.73848833,5.73634171,5.73599048
37.017375,6.4807407,5.73725312,0.862257259,5.73690147,5.73474436,5.73439256
37.027867,6,5.73566587,0.514134355,5.73531364,5.73314591,5.73279352
37.038358,6.08276253,5.73407795,0.590495203,5.73372513,5.73154665,5.73119368
37.04885,6.32455532,5.73248906,0.769458417,5.73213567,5.72994628,5.72959273
37.059342,6.08276253,5.73089938,0.593180539,5.7305454,5.72834496,5.72799082
37.069833,6,5.72930905,0.520279688,5.72895448,5.72674285,5.72638813
37.080325,6.08276253,5.72771777,0.595856325,5.72736262,5.72513964,5.72478433
37.090816,5.47722558,5.72612586,-0.498899076,5.72577012,5.72353565,5.72317975
37.101308,5.83095189,5.72453303,0.326219049,5.72417669,5.72193057,5.72157407
37.1118,6.32455532,5.72293942,0.775639027,5.7225825,5.72032455,5.71996746
37.122291,6.92820323,5.7213452,1.0985709,5.72098769,5.71871776,5.71836008
37.132783,5.56776436,5.71975008,-0.389853454,5.71939197,5.71710989,5.71675161
37.143274,6.244998,5.71815436,0.725839955,5.71779565,5.71550125,5.71514238
37.153766,5.74456265,5.71655774,0.167346654,5.71619844,5.71389154,5.71353207
37.164258,6,5.7149604,0.533891003,5.71460049,5.71228092,5.71192085
37.174749,6.40312424,5.71336248,0.830518971,5.71300197,5.71066954,5.71030887
37.185241,4.79583152,5.71176369,-0.957043449,5.71140258,5.7090571,5.70869582
37.195732,6,5.71016434,0.538363873,5.70980263,5.7074439,5.70708202
37.206224,5.74456265,5.70856414,0.189732726,5.70820183,5.70582966,5.70546717
37.216716,6,5.70696325,0.541328694,5.70660033,5.70421451,5.70385142
37.227207,5.65685425,5.70536182,-0.22024434,5.70499829,5.70259863,5.70223492
37.237699,6.08276253,5.70375956,0.615632168,5.70339543,5.7009817,5.70061739
37.24819,6.32455532,5.70215679,0.788922383,5.70179205,5.69936404,5.69899911
37.258682,5.19615242,5.70055321,-0.710211792,5.70018786,5.69774534,5.6973798
37.269174,5.19615242,5.69894898,-0.70908149,5.69858301,5.69612576,5.69575961
37.279665,6.244998,5.69734426,0.740036306,5.69697768,5.69450546,5.69413869
37.290157,5.74456265,5.69573876,0.220961276,5.69537156,5.69288413,5.69251675
37.300648,6.164414,5.69413279,0.685770525,5.69376497,5.69126209,5.69089409
37.31114,6.4807407,5.69252605,0.887814532,5.69215762,5.68963903,5.68927041
37.321632,5.56776436,5.69091872,-0.350933547,5.69054966,5.6880151,5.68764586
37.332123,6.244998,5.68931094,0.745444201,5.68894126,5.68639048,5.68602061
37.342615,6.40312424,5.68770243,0.845826108,5.68733213,5.68476484,5.68439434
37.353106,6,5.6860935,0.560273589,5.68572258,5.6831385,5.68276738
37.363598,5.56776436,5.68448386,-0.34164236,5.68411231,5.68151116,5.68113941
37.37409,4.69041576,5.68287368,-0.996221821,5.6825015,5.67988298,5.6795106
37.384581,5,5.6812631,-0.825386639,5.68089029,5.6782541,5.6778811
37.395073,5.65685425,5.67965185,-0.150988754,5.67927841,5.67662424,5.6762506
37.405564,6.08276253,5.67804024,0.636177874,5.67766617,5.67499369,5.67461942
37.416056,5.38516481,5.67642798,-0.53968803,5.67605327,5.67336216,5.67298725
37.426548,5,5.67481522,-0.821471377,5.67443988,5.6717298,5.67135426
37.437039,5.83095189,5.67320215,0.397177225,5.67282617,5.67009677,5.66972059
37.447531,6.63324958,5.67158845,0.980643221,5.67121184,5.66846277,5.66808594
37.458022,6.32455532,5.67002053,0.809033245,5.66964328,5.6668281,5.66645064
37.468514,6.32455532,5.66840598,0.810030456,5.66802809,5.66519246,5.66481435
37.479006,6.164414,5.66679101,0.70542398,5.66641247,5.66355601,5.66317726
37.489497,6.08276253,5.66517579,0.646209517,5.66479661,5.66191891,5.66153951
37.499989,5.47722558,5.66356002,-0.431664742,5.6631802,5.66028085,5.65990081
37.51048,6.4807407,5.66194404,0.904873837,5.66156356,5.65864215,5.65826145
37.520972,5.56776436,5.66032754,-0.304241966,5.65994641,5.65700249,5.65662114
37.531464,6.55743852,5.65871069,0.948012569,5.65832892,5.65536203,5.65498003
37.541955,5.83095189,5.65709368,0.416963086,5.65671125,5.65372095,5.65333829
37.552447,6.244998,5.6554762,0.767803227,5.65509312,5.65207891,5.6516956
37.562938,5.83095189,5.65385859,0.420824553,5.65347485,5.65043626,5.65005229
37.57343,5.65685425,5.65224055,0.0679242024,5.65185616,5.64879266,5.64840803
37.583922,5.47722558,5.65062226,-0.416409279,5.65023721,5.64714828,5.646763
37.594413,6.32455532,5.64900389,0.821919355,5.64861818,5.64550329,5.64511734
37.604905,5.47722558,5.64738516,-0.412504044,5.64699879,5.64385737,5.64347076
37.615396,5.38516481,5.64576639,-0.510491513,5.64537936,5.64221084,5.64182356
37.625888,5.29150262,5.6441473,-0.593838933,5.6437596,5.64056339,5.64017545
37.63638,4.79583152,5.64252806,-0.920161149,5.6421397,5.63891518,5.63852657
37.646871,5.65685425,5.64090886,0.126275062,5.64051982,5.63726637,5.63687708
37.657363,5.74456265,5.6392894,0.324458386,5.6388997,5.63561665,5.63522669
37.667854,5.56776436,5.63767003,-0.264396795,5.63727965,5.63396633,5.6335757
37.678346,6.8556546,5.63605045,1.10435689,5.63565941,5.63231511,5.6319238
37.688838,5.83095189,5.63443086,0.443306928,5.63403914,5.63066314,5.63027116
37.699329,5.09901951,5.63281143,-0.730610649,5.63241904,5.6290106,5.62861793
37.709821,5.19615242,5.63119189,-0.659575219,5.63079882,5.62735715,5.62696381
37.720312,6.164414,5.62957257,0.731328537,5.62917882,5.62570313,5.62530911
37.730804,5.65685425,5.6279532,0.170003079,5.62755877,5.62404822,5.62365351
37.741296,6.8556546,5.62633397,1.10874733,5.62593885,5.62239258,5.62199719
37.751787,6.164414,5.62471505,0.734642055,5.62431925,5.62073638,5.6203403
37.762279,5.56776436,5.62309619,-0.235227188,5.62269971,5.6190793,5.61868253
37.77277,5.56776436,5.62147773,-0.23176144,5.62108055,5.61742165,5.61702419
37.783262,5.65685425,5.61985939,0.192340477,5.61946153,5.61576314,5.61536499
37.793754,6.63324958,5.61824138,1.00747616,5.61784282,5.61410391,5.61370507
37.804245,6,5.61662388,0.619173741,5.61622463,5.61244414,5.61204459
37.814737,5.19615242,5.61500664,-0.647189473,5.6146067,5.6107835,5.61038326
37.825228,5.29150262,5.61339,-0.567351199,5.61298937,5.60912231,5.60872137
37.83572,6.4807407,5.61177372,0.932183982,5.61137239,5.60746027,5.60705863
37.846212,6.4807407,5.61015799,0.933050215,5.60975597,5.60579754,5.6053952
37.856703,5.91607978,5.60854303,0.554559966,5.6081403,5.60413427,5.60373122
37.867195,4.79583152,5.60692857,-0.900609264,5.60652514,5.60247015,5.6020664
37.877686,6.40312424,5.60531499,0.893201685,5.60491085,5.60080551,5.60040105
37.888178,5.56776436,5.60370203,-0.189572336,5.6032972,5.59914003,5.59873486
37.89867,5.29150262,5.60208993,-0.557303601,5.60168438,5.59747386,5.59706799
37.909161,6.4807407,5.60047889,0.938222688,5.60007263,5.59580718,5.59540059
37.919653,4.69041576,5.59886868,-0.953127965,5.59846172,5.59413967,5.59373237
37.930144,5.91607978,5.59725968,0.56464157,5.59685201,5.59247165,5.59206363
37.940636,4.89897949,5.59565167,-0.834668906,5.59524328,5.5908028,5.59039406
37.951128,5.65685425,5.59404488,0.250617984,5.59363577,5.5891333,5.58872383
37.961619,5.38516481,5.59243954,-0.455274351,5.59202972,5.58746329,5.5870531
37.972111,5.19615242,5.59083545,-0.628238037,5.59042492,5.58579246,5.58538155
37.982602,5,5.58923301,-0.767615146,5.58882176,5.58412114,5.58370951
37.993094,6.08276253,5.58763201,0.703655112,5.58722004,5.58244901,5.58203665
38.003586,5.83095189,5.58603272,0.494893094,5.58562002,5.58077623,5.58036314
38.014077,5.56776436,5.5844354,-0.129116357,5.58402197,5.57910297,5.57868915
38.024569,6.40312424,5.58283986,0.905695522,5.58242571,5.57742891,5.57701436
38.03506,5.09901951,5.58124654,-0.694425679,5.58083166,5.57575437,5.57533908
38.045552,5.47722558,5.57965527,-0.320046387,5.57923966,5.57407904,5.57366301
38.056044,5.56776436,5.57806634,-0.10149864,5.57765,5.57240307,5.57198631
38.066535,5.91607978,5.57648005,0.582751858,5.57606299,5.57072664,5.57030914
38.077027,6.55743852,5.57489628,0.99123269,5.57447847,5.56904942,5.56863118
38.087518,5.29150262,5.57331548,-0.53086049,5.57289694,5.56737174,5.56695276
38.09801,5.74456265,5.57173754,0.415722386,5.57131827,5.56569328,5.56527355
38.108502,6.63324958,5.57016281,1.03106099,5.5697428,5.56401421,5.56359373
38.118993,5.74456265,5.56859164,0.419488982,5.56817089,5.56233468,5.56191346
38.129485,6.63324958,5.56702395,1.03258202,5.56660246,5.56065439,5.56023241
38.139976,5.19615242,5.56546028,-0.607707049,5.56503804,5.55897365,5.55855091
38.150468,5.56776436,5.56390058,0.0621593457,5.56347759,5.55729214,5.55686866
38.16096,6.32455532,5.56234527,0.873046422,5.56192153,5.55561004,5.55518579
38.171451,5.47722558,5.56079478,-0.289083381,5.5603703,5.5539275,5.55350249
38.181943,5.74456265,5.55924912,0.430480572,5.5588239,5.5522442,5.55181844
38.192434,5.29150262,5.55770893,-0.51595185,5.55728296,5.55056048,5.55013395
38.202926,6.32455532,5.55617427,0.876573472,5.55574754,5.54887601,5.54844871
38.213418,6.164414,5.55464565,0.780876654,5.55421817,5.54719095,5.54676289
38.223909,5.47722558,5.55312365,-0.275496053,5.55269541,5.54550547,5.54507665
38.234401,5.29150262,5.55160841,-0.510005671,5.55117941,5.54381926,5.54338966
38.244892,5.38516481,5.55010069,-0.406122989,5.54967094,5.54213263,5.54170226
38.255384,5.65685425,5.54860073,0.329019032,5.54817022,5.54044526,5.54001412
38.265876,5.83095189,5.54710922,0.532768877,5.54667795,5.53875733,5.53832541
38.276367,5.56776436,5.54562691,0.148786607,5.54519488,5.53706899,5.53663629
38.286859,5.29150262,5.54415417,-0.502644551,5.54372137,5.53537993,5.53494645
38.29735,5.29150262,5.54269198,-0.501187949,5.54225843,5.53369047,5.53325621
38.307842,6.32455532,5.54124085,0.885050549,5.54080653,5.53200029,5.53156525
38.318334,5.38516481,5.53980174,-0.393239022,5.53936665,5.53030956,5.52987373
38.328825,6.164414,5.5383757,0.791225826,5.53793985,5.52861844,5.52818182
38.339317,5.19615242,5.53696345,-0.583790226,5.53652683,5.52692661,5.52648921
38.349808,6,5.53556636,0.681493686,5.53512897,5.5252344,5.5247962
38.3603,6.244998,5.53418534,0.843097066,5.53374718,5.52354149,5.52310249
38.370792,6.244998,5.53282183,0.84390531,5.53238291,5.52184804,5.52140824
38.381283,5.91607978,5.53147739,0.620163201,5.5310377,5.52015421,5.51971362
38.391775,5.29150262,5.53015334,-0.488518899,5.52971288,5.51845969,5.5180183
38.402266,6.244998,5.52885166,0.846254299,5.52841043,5.5167648,5.51632261
38.412758,5.65685425,5.52757402,0.359555594,5.52713203,5.51506922,5.51462623
38.42325,6.244998,5.52632267,0.847747207,5.52587991,5.51337313,5.51292932
38.433741,6,5.52510006,0.689129842,5.52465653,5.51167667,5.51123206
38.444233,4.79583152,5.52390856,-0.853274306,5.52346427,5.50997953,5.50953411
38.454724,5.56776436,5.5227513,0.212162814,5.52230624,5.50828204,5.50783581
38.465216,5.83095189,5.52163129,0.556165989,5.52118546,5.50658388,5.50613683
38.475708,5.91607978,5.52055224,0.628909806,5.52010564,5.50488521,5.50443735
38.486199,6.244998,5.51951829,0.851750966,5.51907093,5.5031862,5.50273752
38.496691,5.47722558,5.51853379,-0.203244222,5.51808567,5.50148652,5.50103702
38.507182,5.38516481,5.51760402,-0.36392199,5.51715515,5.49978651,5.49933618
38.517674,6.4807407,5.51673458,0.981838131,5.51628495,5.49808584,5.49763468
38.528166,5.83095189,5.51593209,0.561266255,5.51548171,5.49638467,5.49593269
38.538657,5.09901951,5.51520401,-0.645123626,5.51475288,5.49468318,5.49423037
38.549149,5,5.51455866,-0.717327444,5.51410679,5.49298104,5.49252739
38.55964,5.47722558,5.51400585,-0.191781845,5.51355325,5.49127857,5.4908241
38.570132,5.29150262,5.51355665,-0.471226089,5.51310332,5.48957546,5.48912015
38.580624,5.29150262,5.51322411,-0.470873114,5.51277006,5.48787188,5.48741573
38.591115,4.89897949,5.51302357,-0.783609651,5.51256881,5.48616798,5.48571099
38.601607,5.09901951,5.51297338,-0.643392467,5.51251792,5.48446344,5.48400561
38.612098,5.29150262,5.51309608,-0.470737138,5.51263992,5.4827586,5.48229992
38.62259,5.09901951,5.51342012,-0.643739552,5.5129633,5.48105313,5.48059361
38.633082,6,5.51398247,0.697149578,5.51352499,5.4793472,5.47888683
38.643573,6.8556546,5.51483247,1.15793874,5.51437436,5.47764097,5.47717974
38.654065,5.56776436,5.51603825,0.227433757,5.51557953,5.47593411,5.47547204
38.664556,5.56776436,5.51769431,0.223763395,5.51723502,5.47422697,5.47376404
38.675048,5.74456265,5.51993415,0.473949891,5.51947434,5.47251921,5.47205542
38.68554,5.65685425,5.52294393,0.365937594,5.52248366,5.470811,5.47034636
38.696031,6,5.5269804,0.687764205,5.52651976,5.46910251,5.468637
38.706523,5.74456265,5.5323921,0.460619738,5.53193121,5.46739342,5.46692704
38.717014,5.38516481,5.53963426,-0.393026025,5.53917326,5.46568405,5.4652168
38.727506,6,5.54928678,0.671351786,5.54882587,5.46397407,5.46350596
38.737998,5.38516481,5.56205079,-0.420578155,5.56159022,5.46226366,5.46179468
38.748489,6.70820393,5.57873284,1.06276577,5.57827294,5.46055299,5.46008313
38.758981,5.47722558,5.60021011,-0.350691511,5.59975126,5.45884172,5.45837099
38.769472,5.65685425,5.62734527,0.17178178,5.62688793,5.45713019,5.45665858
38.779964,5.74456265,5.66090437,0.289237404,5.66044903,5.45541808,5.45494559
38.790456,5.74456265,5.70141273,0.207725582,5.70095993,5.45370554,5.45323217
38.800947,5.09901951,5.74902182,-0.806227203,5.74857206,5.45199275,5.4515185
38.811439,6.40312424,5.80338821,0.774426259,5.80294198,5.45027939,5.44980424
38.82193,5.56776436,5.8635108,-0.543825739,5.86306845,5.44856577,5.44808974
38.832422,5.29150262,5.92766294,-0.797596587,5.9272247,5.44685159,5.44637466
38.842914,5.65685425,5.993257,-0.58000237,5.99282288,5.445137,5.44465918
38.853405,5.56776436,6.05679686,-0.699308588,6.05636663,5.44342217,5.44294345
38.863897,6.244998,6.11392096,0.362045625,6.11349409,5.44170677,5.44122716
38.874388,6.08276253,6.15962592,-0.277242482,6.15920155,5.43999115,5.43951063
38.88488,6.4807407,6.18898464,0.540144482,6.18856162,5.43827496,5.43779355
38.895372,6.32455532,6.19823281,0.355418785,6.19780976,5.43655839,5.43607606
38.905863,6.08276253,6.18594149,-0.321214817,6.18551694,5.43484159,5.43435836
38.916355,6.55743852,6.15350415,0.635558317,6.15307669,5.43312424,5.4326401
38.926846,6.92820323,6.10466554,0.907489777,6.10423398,5.43140668,5.43092162
38.937338,6.32455532,6.04434856,0.529345594,6.04391201,5.42968857,5.42920259
38.94783,5.83095189,5.97754377,-0.38287318,5.97710164,5.42797008,5.42748319
38.958321,5.47722558,5.90863051,-0.656814231,5.90818253,5.42625138,5.42576357
38.968813,6.40312424,5.84109082,0.749688883,5.84063694,5.42453215,5.42404342
38.979304,5.65685425,5.77752827,-0.347381671,5.77706868,5.42281271,5.42232306
38.989796,6.08276253,5.71968089,0.602562563,5.71921591,5.42109275,5.42060216
39.000288,5.65685425,5.66855861,-0.1081867,5.6680887,5.41937242,5.4188809
39.010779,5.65685425,5.62453138,0.179785622,5.62405705,5.4176519,5.41715945
39.021271,5.29150262,5.5874441,-0.544005031,5.58696586,5.41593085,5.41543747
39.031762,5.38516481,5.55678483,-0.414270474,5.5563032,5.41420962,5.4137153
39.042254,4.79583152,5.53179224,-0.857881526,5.53130766,5.41248787,5.41199261
39.052746,5.91607978,5.51160522,0.635983151,5.51111809,5.41076577,5.41026956
39.063237,5.83095189,5.49535247,0.579309441,5.49486313,5.40904349,5.40854634
39.073729,5.65685425,5.48222137,0.417890993,5.48173008,5.4073207,5.4068226
39.08422,5.91607978,5.47151156,0.666759494,5.47101853,5.40559773,5.40509869
39.094712,5.19615242,5.46264066,-0.516224987,5.46214604,5.40387427,5.40337427
39.105204,6.63324958,5.45515158,1.08540223,5.4546555,5.40215047,5.40164952
39.115695,5.29150262,5.44869565,-0.396475761,5.44819819,5.4004265,5.39992459
39.126187,5.65685425,5.44301299,0.462429734,5.44251422,5.39870204,5.39819917
39.136678,5.83095189,5.43791748,0.626924571,5.43741744,5.39697742,5.39647358
39.14717,5.74456265,5.43327421,0.557932287,5.43277295,5.39525231,5.39474751
39.157662,6,5.42898842,0.755653084,5.42848596,5.39352687,5.39302111
39.168153,5.19615242,5.4249922,-0.478372011,5.42448857,5.39180129,5.39129455
39.178645,4.89897949,5.42123507,-0.72267253,5.42073028,5.39007522,5.38956752
39.189136,5.29150262,5.41768066,-0.355215477,5.41717473,5.38834901,5.38784033
39.199628,4.79583152,5.41429974,-0.7864275,5.41379268,5.38662233,5.38611266
39.21012,5,5.41107005,-0.641147446,5.41056187,5.38489533,5.38438469
39.220611,5.47722558,5.40797345,0.263157984,5.40746417,5.3831682,5.38265657
39.231103,6,5.40499398,0.771366336,5.4044836,5.3814406,5.38092799
39.241594,5,5.40211917,-0.634128668,5.4016077,5.37971287,5.37919927
39.252086,4.79583152,5.39933727,-0.776856322,5.39882471,5.37798467,5.37747008
39.262578,5.74456265,5.39663885,0.589850657,5.39612521,5.37625619,5.3757406
39.273069,4.69041576,5.39401568,-0.838808634,5.39350097,5.37452757,5.37401099
39.283561,5,5.39145984,-0.625667512,5.39094405,5.37279851,5.37228093
39.294052,5.65685425,5.38896525,0.517579943,5.38844839,5.37106932,5.37055074
39.304544,5.47722558,5.38652567,0.301164251,5.38600774,5.36933969,5.3688201
39.315036,5.91607978,5.38413621,0.72934462,5.38361721,5.36760978,5.36708918
39.325527,5.29150262,5.38179254,-0.30048281,5.38127248,5.36587975,5.36535815
39.336019,6.40312424,5.37949016,1.01174803,5.37896903,5.36414929,5.36362667
39.34651,4.69041576,5.37722589,-0.828740087,5.3767037,5.36241872,5.36189509
39.357002,5.83095189,5.37499606,0.675245019,5.3744728,5.36068772,5.36016306
39.367494,5.56776436,5.37279798,0.441549983,5.37227366,5.35895645,5.35843077
39.377985,5.47722558,5.37062924,0.326490948,5.37010385,5.35722508,5.35669838
39.388477,5.09901951,5.36848707,-0.519102647,5.36796062,5.35549329,5.35496556
39.398968,5.65685425,5.36636977,0.538966119,5.36584226,5.3537614,5.35323265
39.40946,5.56776436,5.36427501,0.451097942,5.36374643,5.35202909,5.35149931
39.419952,5.19615242,5.36220125,-0.407490892,5.36167161,5.35029654,5.34976571
39.430443,5,5.36014711,-0.60012258,5.3596164,5.34856389,5.34803203
39.440935,6,5.35811076,0.801179903,5.35757899,5.34683084,5.34629794
39.451426,5.74456265,5.35609129,0.623274703,5.35555844,5.3450977,5.34456376
39.461918,4.89897949,5.35408712,-0.674616654,5.3535532,5.34336416,5.34282917
39.47241,5.65685425,5.35209734,0.552047921,5.35156235,5.34163038,5.34109434
39.482901,4.47213595,5.35012116,-0.937008649,5.3495851,5.33989652,5.33935943
39.493393,5.29150262,5.34815729,-0.238022407,5.34762015,5.33816227,5.33762413
39.503884,5.56776436,5.34620525,0.470700656,5.34566704,5.33642795,5.33588875
39.514376,5.74456265,5.34426392,0.632691651,5.34372463,5.33469324,5.33415298
39.524868,5.19615242,5.34233277,-0.38233538,5.34179239,5.33295831,5.33241698
39.535359,4.69041576,5.34041132,-0.806223021,5.33986986,5.33122331,5.33068092
39.545851,4.89897949,5.33849861,-0.662962388,5.33795607,5.32948793,5.32894447
39.556342,5.09901951,5.33659446,-0.487416604,5.33605083,5.3277525,5.32720796
39.566834,4.79583152,5.33469798,-0.734075238,5.33415326,5.32601668,5.32547107
39.577326,5.74456265,5.33280888,0.641680427,5.33226306,5.32428065,5.32373397
39.587817,4.79583152,5.33092689,-0.731502134,5.33037999,5.32254458,5.32199681
39.598309,5.91607978,5.32905126,0.766177864,5.32850326,5.32080814,5.32025929
39.6088,4.79583152,5.32718196,-0.728937885,5.32663286,5.31907165,5.31852171
39.619292,4.58257569,5.32531828,-0.861825149,5.32476808,5.3173348,5.31678377
39.629784,5.38516481,5.32346007,0.248404376,5.32290877,5.31559775,5.31504563
39.640275,5.38516481,5.32160721,0.252106331,5.32105479,5.31386067,5.31330745
39.650767,5.91607978,5.31975904,0.772218067,5.31920552,5.31212323,5.31156891
39.661258,5.29150262,5.31791567,-0.162520902,5.31736103,5.31038576,5.30983034
39.67175,5.19615242,5.31607648,-0.346300532,5.31552073,5.30864794,5.30809141
39.682242,5.19615242,5.31424143,-0.343640813,5.31368457,5.30690993,5.3063523
39.692733,5,5.31241047,-0.558936913,5.31185249,5.3051719,5.30461316
39.703225,5,5.31058305,-0.557299788,5.31002395,5.30343353,5.30287367
39.713716,5.09901951,5.30875933,-0.457973601,5.3081991,5.30169514,5.30113416
39.724208,5.56776436,5.30693878,0.510710858,5.30637743,5.29995641,5.29939432
39.7347,6.08276253,5.30512141,0.881839623,5.30455892,5.29821751,5.29765429
39.745191,5.09901951,5.30330723,-0.451981989,5.30274361,5.2964786,5.29591426
39.755683,5.91607978,5.30149575,0.783954099,5.300931,5.29473936,5.29417388
39.766174,4.79583152,5.29968718,-0.709827907,5.29912129,5.29300012,5.29243351
39.776666,5.09901951,5.29788104,-0.445938927,5.297314,5.29126055,5.2906928
39.787158,5.19615242,5.29607738,-0.31610909,5.2955092,5.28952082,5.28895193
39.797649,5.38516481,5.29427626,0.301477283,5.29370693,5.28778109,5.28721107
39.808141,4.89897949,5.29247721,-0.627293973,5.29190674,5.28604105,5.28546988
39.818632,5.47722558,5.2906805,0.431908645,5.29010887,5.28430102,5.2837287
39.829124,5.09901951,5.28888566,-0.435736332,5.28831288,5.28256067,5.2819872
39.839616,5.29150262,5.2870928,0.0664065249,5.28651885,5.28082018,5.28024555
39.850107,5.47722558,5.28530197,0.43809086,5.28472687,5.2790797,5.27850392
39.860599,4.89897949,5.28351278,-0.620107483,5.2829365,5.27733892,5.27676197
39.87109,5.47722558,5.28172547,0.442153942,5.28114802,5.27559816,5.27502005
39.881582,4.79583152,5.27993963,-0.695778777,5.27936102,5.2738571,5.27327782
39.892074,5.29150262,5.27815537,0.115530314,5.27757558,5.27211591,5.27153545
39.902565,5.74456265,5.27637279,0.684244006,5.27579182,5.27037474,5.26979312
39.913057,5,5.27459148,-0.524014771,5.27400933,5.26863329,5.26805048
39.923548,4.69041576,5.27281173,-0.763148722,5.2722284,5.26689187,5.26630788
39.93404,5.65685425,5.27103315,0.621144994,5.27044863,5.26515016,5.26456499
39.944532,5.83095189,5.26925584,0.749463846,5.26867013,5.26340832,5.26282197
39.955023,4.89897949,5.26748016,-0.60704256,5.26689325,5.26166654,5.26107899
39.965515,4.12310563,5.26570526,-1.06892452,5.26511716,5.25992447,5.25933572
39.976006,5.47722558,5.26393166,0.461837539,5.26334237,5.25818245,5.25759251
39.986498,5.09901951,5.26215899,-0.403905283,5.26156849,5.25644015,5.25584901
39.99699,6.164414,5.26038737,0.950803151,5.25979566,5.25469775,5.2541054
40.007481,5.38516481,5.25861693,0.355735681,5.25802402,5.2529554,5.25236184
40.017973,4.79583152,5.2568473,-0.678981425,5.25625317,5.25121278,5.25061801
40.028464,4.35889894,5.25507877,-0.946667751,5.25448343,5.24947023,5.24887424
40.038956,3.74165739,5.25331099,-1.22949323,5.25271442,5.24772741,5.24713021
40.049448,5.09901951,5.25154407,-0.39054393,5.25094629,5.24598449,5.24538607
40.059939,5,5.24977817,-0.499778125,5.24917916,5.24424164,5.243642
40.070431,6,5.24801292,0.867171886,5.24741268,5.24249854,5.24189766
40.080922,5.56776436,5.24624862,0.56702358,5.24564715,5.24075551,5.2401534
40.091414,5.83095189,5.24448492,0.76581132,5.2438822,5.23901223,5.23840889
40.101906,5.09901951,5.24272195,-0.379081039,5.24211799,5.23726886,5.23666428
40.112397,5,5.24095986,-0.490876623,5.24035466,5.23552558,5.23491976
40.122889,4.79583152,5.23919829,-0.665857919,5.23859185,5.23378205,5.23317498
40.13338,5.47722558,5.23743756,0.489681545,5.23682987,5.23203861,5.23143029
40.143872,5.19615242,5.23567731,-0.198808664,5.23506836,5.23029493,5.22968536
40.154364,5,5.23391768,-0.483650373,5.23330748,5.22855118,5.22794035
40.164855,4.89897949,5.23215883,-0.5772169,5.23154737,5.22680752,5.22619543
40.175347,5.74456265,5.23040041,0.71705107,5.22978768,5.22506363,5.22445028
40.185838,5.09901951,5.22864273,-0.360032238,5.22802873,5.22331984,5.22270522
40.19633,5.09901951,5.22688543,-0.357583442,5.22627016,5.22157583,5.22095993
40.206822,5.47722558,5.22512868,0.502092517,5.22451214,5.21983175,5.21921458
40.217313,5.38516481,5.22337262,0.402233994,5.2227548,5.21808778,5.21746933
40.227805,5,5.22161691,-0.470762051,5.2209978,5.21634359,5.21572386
40.238296,5.19615242,5.21986186,-0.153978699,5.21924147,5.21459951,5.2139785
40.248788,4.89897949,5.21810714,-0.564913843,5.21748546,5.21285522,5.21223291
40.25928,4.58257569,5.21635288,-0.796101242,5.21572991,5.21111087,5.21048728
40.269771,5.29150262,5.21459926,0.277314557,5.21397499,5.20936665,5.20874176
40.280263,5.47722558,5.21284592,0.514178623,5.21222035,5.20762222,5.20699603
40.290754,4.12310563,5.21109319,-1.04306642,5.21046631,5.20587792,5.20525042
40.301246,5.38516481,5.20934072,0.419313834,5.20871254,5.20413341,5.2035046
40.311738,6.32455532,5.20758867,1.05686643,5.20695918,5.20238886,5.20175874
40.322229,4.89897949,5.2058372,-0.553947389,5.20520639,5.20064445,5.20001302
40.332721,5,5.20408596,-0.45175874,5.20345383,5.19889984,5.19826709
40.343212,4.69041576,5.20233528,-0.715485516,5.20170184,5.19715537,5.19652129
40.353704,5.74456265,5.20058483,0.73754852,5.19995005,5.19541071,5.1947753
40.364196,4.79583152,5.19883475,-0.63482535,5.19819864,5.19366602,5.19302928
40.374687,6.164414,5.19708521,0.983528747,5.19644777,5.19192148,5.19128341
40.385179,4.79583152,5.19533586,-0.632063555,5.19469709,5.19017675,5.18953734
40.39567,4.69041576,5.19358704,-0.709345671,5.19294692,5.18843217,5.18779142
40.406162,4.47213595,5.1918384,-0.848352785,5.19119694,5.18668741,5.18604531
40.416654,4.69041576,5.19009011,-0.706876475,5.1894473,5.18494264,5.18429919
40.427145,4.79583152,5.18834232,-0.626506824,5.18769816,5.18319803,5.18255323
40.437637,5.09901951,5.1865947,-0.295931055,5.18594918,5.18145324,5.18080708
40.448128,5.65685425,5.18484758,0.687027417,5.1842007,5.17970862,5.17906109
40.45862,5,5.18310061,-0.427902569,5.18245236,5.17796383,5.17731494
40.469112,4.47213595,5.18135396,-0.84215082,5.18070434,5.17621903,5.17556877
40.479603,5.47722558,5.17960779,0.545543569,5.1789568,5.17447441,5.17382277
40.490095,4.89897949,5.17786176,-0.528093058,5.1772094,5.17272962,5.17207661
40.500586,4.79583152,5.17611621,-0.616672268,5.17546246,5.17098501,5.17033062
40.511078,4.35889894,5.17437079,-0.903034799,5.17371566,5.16924024,5.16858446
40.52157,4.69041576,5.17262567,-0.694413359,5.17196915,5.16749549,5.16683832
40.532061,4.58257569,5.17088101,-0.767010639,5.1702231,5.16575091,5.16509235
40.542553,4.47213595,5.16913648,-0.834865575,5.16847718,5.16400619,5.16334622
40.553044,5.29150262,5.16739241,0.352292798,5.1667317,5.16226165,5.16160028
40.563536,5.09901951,5.16564845,-0.258125815,5.16498634,5.16051696,5.15985419
40.574028,5.29150262,5.16390478,0.357208406,5.16324125,5.1587723,5.15810812
40.584519,4.58257569,5.16216155,-0.761305363,5.16149662,5.15702783,5.15636224
40.595011,4.47213595,5.16041844,-0.829627918,5.15975209,5.15528323,5.15461621
40.605502,5.19615242,5.15867577,0.193588884,5.15800799,5.15353882,5.15287038
40.615994,4.79583152,5.1569332,-0.600917366,5.15626401,5.15179428,5.15112441
40.626486,4.47213595,5.15519091,-0.826471391,5.15452029,5.15004977,5.14937847
40.636977,5.65685425,5.15344906,0.709510527,5.152777,5.14830547,5.14763273
40.647469,4.69041576,5.15170731,-0.679184475,5.15103381,5.14656104,5.14588687
40.65796,5.47722558,5.149966,0.572066063,5.14929105,5.14481682,5.1441412
40.668452,5,5.14822478,-0.384999713,5.14754839,5.14307248,5.14239541
40.678944,4.79583152,5.14648383,-0.592159019,5.14580599,5.14132819,5.14064967
40.689435,4.47213595,5.14474331,-0.820126424,5.14406401,5.13958411,5.13890413
40.699927,4.79583152,5.14300288,-0.589212489,5.14232213,5.13783992,5.13715848
40.710418,4.12310563,5.14126288,-1.00903779,5.14058067,5.13609594,5.13541304
40.72091,4.89897949,5.13952298,-0.490452337,5.1388393,5.13435186,5.13366749
40.731402,5.38516481,5.13778334,0.497374576,5.13709818,5.13260784,5.13192199
40.741893,5.19615242,5.13604412,0.245169944,5.13535749,5.13086404,5.13017672
40.752385,4.69041576,5.134305,-0.666250131,5.13361688,5.12912014,5.12843134
40.762876,4.58257569,5.1325663,-0.741613512,5.1318767,5.12737648,5.12668618
40.773368,5.38516481,5.13082769,0.504318469,5.1301366,5.12563271,5.12494092
40.78386,5.47722558,5.12908934,0.590030708,5.12839676,5.12388902,5.12319573
40.794351,5.19615242,5.12735141,0.262299469,5.12665733,5.12214556,5.12145078
40.804843,4.89897949,5.12561358,-0.476061015,5.12491799,5.12040201,5.11970572
40.815334,4.58257569,5.12387616,-0.735731247,5.12317907,5.11865871,5.11796091
40.825826,4.69041576,5.12213884,-0.657056376,5.12144024,5.11691532,5.116216
40.836318,4.35889894,5.12040178,-0.872641297,5.11970166,5.11517201,5.11447117
40.846809,5,5.11866514,-0.344478062,5.1179635,5.11342895,5.11272659
40.857301,6,5.11692859,0.939718795,5.11622542,5.11168581,5.11098192
40.867792,5,5.11519246,-0.339400146,5.11448776,5.10994293,5.10923751
40.878284,4.79583152,5.11345643,-0.563582205,5.1127502,5.10819997,5.10749301
40.888776,5.38516481,5.11172065,0.522918882,5.11101288,5.1064571,5.1057486
40.899267,4.24264069,5.1099853,-0.93131338,5.10927599,5.10471449,5.10400445
40.909759,3.87298335,5.10825004,-1.11142552,5.10753918,5.10297182,5.10226022
40.92025,4.89897949,5.10651521,-0.455560889,5.1058028,5.10122941,5.10051626
40.930742,5.29150262,5.10478047,0.432113585,5.1040665,5.09948694,5.09877223
40.941234,4.79583152,5.103046,-0.554269314,5.10233046,5.09774457,5.09702829
40.951725,5.19615242,5.10131195,0.307961808,5.10059485,5.09600247,5.09528463
40.962217,5.09901951,5.099578,-0.0236322289,5.09885933,5.09426032,5.0935409
40.972708,4.79583152,5.09784447,-0.549557048,5.09712423,5.09251845,5.09179745
40.9832,5,5.09611105,-0.31001782,5.09538922,5.09077652,5.09005393
40.993692,4.69041576,5.09437789,-0.635580152,5.09365448,5.0890347,5.08831053
41.004183,5.74456265,5.09264516,0.807414073,5.09192016,5.08729317,5.08656741
41.014675,5,5.09091254,-0.301517057,5.09018594,5.0855516,5.08482423
41.025166,4.24264069,5.08918034,-0.920075897,5.08845214,5.08381031,5.08308134
41.035658,4.89897949,5.08744825,-0.434129897,5.08671845,5.08206898,5.08133841
41.04615,4.79583152,5.08571643,-0.538409613,5.08498502,5.08032778,5.07959559
41.056641,5,5.08398505,-0.289801745,5.08325202,5.07858687,5.07785307
41.067133,5.91607978,5.08225378,0.913140738,5.08151913,5.07684593,5.0761105
41.077624,5.09901951,5.08052294,0.136002114,5.07978667,5.07510529,5.07436823
41.088116,5.09901951,5.07879221,0.142222722,5.07805431,5.07336462,5.07262592
41.098608,4,5.07706176,-1.03781586,5.07632222,5.07162408,5.07088375
41.109099,4.35889894,5.07533175,-0.846423539,5.07459057,5.06988385,5.06914188
41.119591,4,5.07360185,-1.0361476,5.07285903,5.0681436,5.06739998
41.130082,4.35889894,5.0718724,-0.844377558,5.07112793,5.06640365,5.06565838
41.140574,4.35889894,5.07014307,-0.843352907,5.06939695,5.06466369,5.06391676
41.151066,5.65685425,5.06841402,0.76709858,5.06766623,5.06292388,5.06217528
41.161557,4.58257569,5.06668542,-0.695779937,5.06593597,5.06118438,5.06043412
41.172049,5.29150262,5.06495693,0.475968159,5.06420582,5.05944487,5.05869294
41.18254,6,5.0632289,0.967869359,5.06247611,5.05770568,5.05695207
41.193032,4.79583152,5.061501,-0.515431348,5.06074653,5.05596649,5.05521119
41.203524,5.65685425,5.05977338,0.77271008,5.05901723,5.05422745,5.05347046
41.214015,4.35889894,5.05804622,-0.836150273,5.05728838,5.05248874,5.05173006
41.224507,5.29150262,5.05631919,0.484957142,5.05555965,5.05075003,5.04998965
41.234998,4,5.05459262,-1.0269336,5.05383138,5.04901165,5.04824956
41.24549,4.35889894,5.05286618,-0.833046961,5.05210323,5.04727327,5.04650948
41.255982,5.38516481,5.05114004,0.577948757,5.05037538,5.04553507,5.04476956
41.266473,4.79583152,5.04941436,-0.503570096,5.04864799,5.0437972,5.04302997
41.276965,5,5.04768883,-0.218377712,5.04692073,5.04205934,5.04129038
41.287456,5.38516481,5.04596375,0.582409695,5.04519393,5.04032182,5.03955114
41.297948,5.74456265,5.04423882,0.836853526,5.04346727,5.03858432,5.0378119
41.30844,5.91607978,5.0425142,0.934647305,5.04174091,5.036847,5.03607284
41.318931,5.19615242,5.04079005,0.394160341,5.04001501,5.03511003,5.03433412
41.329423,5.38516481,5.03906604,0.588301593,5.03828926,5.03337308,5.03259541
41.339914,5.47722558,5.03734251,0.663236806,5.03656398,5.03163648,5.03085706
41.350406,6.08276253,5.03561914,1.02330025,5.03483884,5.02989991,5.02911872
41.360898,5.09901951,5.03389607,0.255192946,5.03311401,5.02816352,5.02738057
41.371389,4.69041576,5.03217349,-0.584600491,5.03138966,5.0264275,5.02564277
41.381881,5.38516481,5.03045107,0.595578491,5.02966546,5.02469151,5.023905
41.392372,5.65685425,5.02872913,0.79254345,5.02794174,5.02295588,5.02216759
41.402864,5.38516481,5.02700735,0.598462578,5.02621818,5.02122029,5.02043021
41.413356,4.89897949,5.0252859,-0.355396131,5.02449493,5.0194849,5.01869302
41.423847,5.56776436,5.02356493,0.737698739,5.02277217,5.01774988,5.0169562
41.434339,5.91607978,5.02184414,0.945640337,5.02104957,5.01601491,5.01521942
41.44483,5.38516481,5.02012383,0.604186208,5.01932746,5.0142803,5.013483
41.455322,4.69041576,5.0184037,-0.572702315,5.01760551,5.01254575,5.01174663
41.465814,4.47213595,5.0166839,-0.737934922,5.01588389,5.01081141,5.01001046
41.476305,5.65685425,5.01496461,0.801180155,5.01416277,5.00907744,5.00827466
41.486797,4.89897949,5.01324549,-0.338032547,5.01244182,5.00734353,5.00653892
41.497288,5.09901951,5.01152687,0.295791548,5.01072137,5.00561001,5.00480355
41.50778,4.35889894,5.00980844,-0.806789623,5.00900109,5.00387654,5.00306823
41.518272,5.38516481,5.00809035,0.614063887,5.00728115,5.0021433,5.00133314
41.528763,5.56776436,5.00637277,0.749260696,5.00556172,5.00041044,4.99959842
41.539255,5.09901951,5.00465538,0.307187455,5.00384247,4.99867765,4.99786377
41.549746,5.29150262,5.00293851,0.537181642,5.00212373,4.99694526,4.9961295
41.560238,4.89897949,5.00122182,-0.319753554,5.00040517,4.99521293,4.9943953
41.57073,4.47213595,4.99950549,-0.726202132,4.99868696,4.99348084,4.99266132
41.581221,4.89897949,4.99778969,-0.314340897,4.99696927,4.99174915,4.99092774
41.591713,4.79583152,4.99607408,-0.447484695,4.99525177,4.99001753,4.98919423
41.602204,4.69041576,4.99435899,-0.551310469,4.99353479,4.98828632,4.98746111
41.612696,3.60555128,4.99264411,-1.17774905,4.99181801,4.98655518,4.98572807
41.623188,5.09901951,4.9909296,0.328770311,4.99010159,4.98482429,4.98399527
41.633679,4.47213595,4.98921561,-0.719082513,4.98838569,4.98309381,4.98226287
41.644171,3.60555128,4.98750184,-1.17556394,4.98667,4.98136342,4.98053055
41.654662,4.47213595,4.98578861,-0.716695647,4.98495484,4.97963344,4.97879864
41.665154,5.29150262,4.98407558,0.554461035,4.98323988,4.97790355,4.97706682
41.675646,5.19615242,4.98236294,0.46237375,4.9815253,4.97617392,4.97533524
41.686137,5.38516481,4.98065084,0.636014127,4.97981125,4.97444471,4.97360408
41.696629,3.87298335,4.97893896,-1.05164424,4.97809742,4.97271559,4.971873
41.70712,4.79583152,4.97722762,-0.42590621,4.97638413,4.9709869,4.97014235
41.717612,5.38516481,4.97551652,0.640037727,4.97467106,4.96925831,4.96841179
41.728104,4.79583152,4.9738058,-0.421869972,4.97295837,4.96752998,4.96668148
41.738595,5.09901951,4.97209563,0.356263778,4.97124623,4.96580209,4.96495161
41.749087,5,4.9703857,0.172088052,4.96953432,4.9640743,4.96322183
41.759578,5,4.96867633,0.176984941,4.96782296,4.96234694,4.96149248
41.77007,3.87298335,4.9669672,-1.04593683,4.96611183,4.9606197,4.95976324
41.780562,4.89897949,4.96525846,-0.257447035,4.96440109,4.95889273,4.95803426
41.791053,5,4.96355029,0.190918061,4.96269092,4.9571662,4.95630572
41.801545,4.89897949,4.96184237,-0.250724719,4.96098098,4.95543979,4.95457729
41.812036,4.89897949,4.96013502,-0.247296447,4.95927161,4.95371383,4.9528493
41.822528,5,4.95842791,0.203892338,4.95756248,4.95198798,4.95112142
41.83302,4.47213595,4.95672122,-0.696121591,4.95585375,4.95026242,4.94939382
41.843511,4.12310563,4.95501511,-0.912090723,4.9541456,4.94853732,4.94766667
41.854003,5.56776436,4.95330926,0.783871869,4.9524377,4.94681234,4.94593963
41.864494,5.38516481,4.95160398,0.658453357,4.95073037,4.94508781,4.94421305
41.874986,5.47722558,4.94989897,0.726172571,4.9490233,4.94336342,4.94248658
41.885478,4.89897949,4.94819439,-0.221844314,4.94731665,4.94163932,4.94076041
41.895969,5.74456265,4.94649039,0.8933489,4.94561058,4.93991568,4.9390347
41.906461,5.56776436,4.94478666,0.789289365,4.94390477,4.93819218,4.93730911
41.916952,4.47213595,4.94308353,-0.686256202,4.94219955,4.93646914,4.93558398
41.927444,4.89897949,4.94138067,-0.205915479,4.9404946,4.93474625,4.93385898
41.937936,4.47213595,4.93967825,-0.683770644,4.93879008,4.93302366,4.93213429
41.948427,5.38516481,4.93797643,0.668721449,4.93708615,4.93130154,4.93041006
41.958919,4.24264069,4.93627489,-0.832847048,4.9353825,4.92957957,4.92868596
41.96941,4.58257569,4.93457396,-0.593294419,4.93367945,4.92785808,4.92696234
41.979902,4.24264069,4.9328947,-0.830815268,4.93197668,4.92615814,4.92523886
41.990394,4.35889894,4.93119452,-0.756502201,4.93027435,4.92443713,4.92351569
42.000885,5.56776436,4.92949497,0.798917641,4.92857263,4.9227166,4.92179299
42.011377,5.38516481,4.9277957,0.676290696,4.92687119,4.92099623,4.92007045
42.021868,5.09901951,4.92609706,0.415839459,4.92517037,4.91927635,4.91834838
42.03236,4.24264069,4.92439871,-0.825686397,4.92346985,4.91755662,4.91662646
42.042852,4.24264069,4.92270083,-0.824657592,4.92176977,4.91583723,4.91490487
42.053343,5.47722558,4.92100358,0.745802922,4.92007032,4.91411832,4.91318376
42.063835,4.58257569,4.91930663,-0.580285219,4.91837117,4.91239958,4.9114628
42.074326,4,4.91761032,-0.957919786,4.91667264,4.91068133,4.90974234
42.084818,4.79583152,4.91591431,-0.346529639,4.91497442,4.90896326,4.90802204
42.09531,4.58257569,4.91421886,-0.575884683,4.91327675,4.90724552,4.90630206
42.105801,5.47722558,4.91252398,0.751466298,4.91157963,4.90552828,4.90458259
42.116293,5,4.91082941,0.298614445,4.90988282,4.90381122,4.90286328
42.126784,4.89897949,4.90913549,-0.100777024,4.90818665,4.90209467,4.90114446
42.137276,4.79583152,4.9074419,-0.334081393,4.90649081,4.90037829,4.89942582
42.147768,5.09901951,4.9057488,0.439625655,4.90479544,4.89866226,4.89770752
42.158259,5.09901951,4.90405635,0.441546336,4.90310072,4.89694674,4.89598972
42.168751,4.47213595,4.90236423,-0.655917888,4.90140632,4.89523141,4.89427211
42.179242,5.56776436,4.90067277,0.816756751,4.89971258,4.89351659,4.89255499
42.189734,4,4.89898165,-0.948146431,4.89801917,4.89180196,4.89083806
42.200226,4.89897949,4.89729104,0.0410907037,4.89632625,4.89008769,4.88912148
42.210717,4.47213595,4.89560109,-0.650741989,4.894634,4.88837394,4.88740541
42.221209,4.89897949,4.89391149,0.0711898521,4.89294208,4.88666038,4.88568953
42.2317,3.87298335,4.89222256,-1.00957378,4.89125083,4.88494735,4.88397417
42.242192,5.09901951,4.89053399,0.456602154,4.88955992,4.88323452,4.882259
42.252684,4.79583152,4.88884593,-0.304982629,4.88786952,4.88152205,4.88054418
42.263175,4.24264069,4.88715855,-0.802818698,4.8861798,4.87981011,4.87882989
42.273667,4,4.88547153,-0.940994969,4.88449043,4.87809838,4.8771158
42.284158,5.47722558,4.8837852,0.770350812,4.88280173,4.87638719,4.87540223
42.29465,4.47213595,4.88209924,-0.640283751,4.8811134,4.8746762,4.87368886
42.305142,5.38516481,4.8804138,0.710458305,4.87942559,4.87296559,4.87197586
42.315633,5.56776436,4.87872906,0.830081501,4.87773846,4.87125551,4.87026339
42.326125,5,4.8770447,0.350649825,4.8760517,4.86954566,4.86855113
42.336616,5,4.87536104,0.35304244,4.87436564,4.86783634,4.86683941
42.347108,3.74165739,4.87367775,-1.06396446,4.87267995,4.86612725,4.86512789
42.3576,4.69041576,4.87199501,-0.426121174,4.87099479,4.86441854,4.86341675
42.368091,3.87298335,4.87031298,-0.998663927,4.86931033,4.86271037,4.86170615
42.378583,5.19615242,4.86863134,0.572294573,4.86762626,4.86100244,4.85999577
42.389074,4.58257569,4.86695042,-0.533267966,4.86594289,4.85929505,4.85828594
42.399566,4,4.86526989,-0.930198843,4.86425991,4.8575879,4.85657632
42.410058,4.47213595,4.86358992,-0.625662818,4.86257748,4.85588114,4.85486709
42.420549,5.74456265,4.86191067,0.939495598,4.86089576,4.85417494,4.85315841
42.431041,4.79583152,4.86023182,-0.25377214,4.85921444,4.85246897,4.85144996
42.441532,4.24264069,4.85855371,-0.784801261,4.85753384,4.85076356,4.84974206
42.452024,4.24264069,4.856876,-0.783731659,4.85585364,4.8490584,4.84803439
42.462516,4.35889894,4.85519887,-0.704485574,4.85417401,4.84735363,4.84632711
42.473007,4.79583152,4.85352247,-0.240189401,4.8524951,4.84564944,4.8446204
42.483499,4.79583152,4.8518465,-0.236674824,4.85081661,4.84394548,4.84291392
42.49399,4.79583152,4.85017126,-0.233108856,4.84913885,4.8422421,4.841208
42.504482,4.47213595,4.84849645,-0.613482273,4.84746151,4.84053897,4.83950232
42.514974,4,4.84682223,-0.920229447,4.84578475,4.83883625,4.83779705
42.525465,4.47213595,4.84514877,-0.610747748,4.84410873,4.83713411,4.83609234
42.535957,3.87298335,4.84347573,-0.98513572,4.84243313,4.83543222,4.83438788
42.546448,3.87298335,4.84180346,-0.9842866,4.84075829,4.83373091,4.83268399
42.55694,4.79583152,4.84013162,-0.210475886,4.83908387,4.83202986,4.83098035
42.567432,4.69041576,4.83846039,-0.384765683,4.83741005,4.83032923,4.82927712
42.577923,5,4.83678993,0.403992667,4.83573699,4.82862918,4.82757447
42.588415,4.58257569,4.83511991,-0.502537775,4.83406437,4.8269294,4.82587208
42.598906,4.58257569,4.83345067,-0.500874209,4.83239252,4.82523021,4.82417026
42.609398,4.47213595,4.83178188,-0.599704867,4.83072111,4.82353129,4.8224687
42.61989,4.79583152,4.83011372,-0.185154508,4.82905031,4.8218328,4.82076757
42.630381,4.47213595,4.82844633,-0.596917393,4.82738028,4.8201349,4.81906702
42.640873,5,4.82677941,0.416197777,4.82571072,4.81843728,4.81736673
42.651364,5.09901951,4.82511328,0.523360521,4.82404193,4.81674025,4.81566704
42.661856,4.47213595,4.82344762,-0.5927155,4.8223736,4.8150435,4.81396761
42.672348,5.09901951,4.82178259,0.526532923,4.8207059,4.81334719,4.81226861
42.682839,4.69041576,4.82011837,-0.360142482,4.81903898,4.81165149,4.8105702
42.693331,4.47213595,4.81845462,-0.58848846,4.81737254,4.80995607,4.80887207
42.703822,5.74456265,4.81679168,0.963208683,4.8157069,4.80826125,4.80717454
42.714314,4.58257569,4.81512923,-0.482238045,4.81404173,4.80656672,4.80547728
42.724806,4.58257569,4.81346742,-0.480511945,4.8123772,4.80487264,4.80378047
42.735297,4.89897949,4.81180643,0.295250827,4.81071348,4.80317917,4.80208426
42.745789,4.58257569,4.81014594,-0.477043236,4.80905025,4.801486,4.80038832
42.75628,4.24264069,4.80848627,-0.752227083,4.80738782,4.79979344,4.798693
42.766772,5.83095189,4.80682711,1.01199051,4.80572589,4.79810118,4.79699796
42.777264,4.58257569,4.80516861,-0.471797532,4.80406462,4.79640937,4.79530337
42.787755,4.58257569,4.80351094,-0.470037489,4.80240417,4.79471819,4.79360939
42.798247,4.69041576,4.80185378,-0.333823338,4.80074423,4.79302731,4.79191571
42.808738,5.29150262,4.80019746,0.700931638,4.79908511,4.79133705,4.79022264
42.81923,4.12310563,4.79854166,-0.821849158,4.7974265,4.7896471,4.78852986
42.829722,4.24264069,4.79688655,-0.744476906,4.79576857,4.78795761,4.78683754
42.840213,4.35889894,4.79523228,-0.660555327,4.79411147,4.78626876,4.78514584
42.850705,4.24264069,4.79357855,-0.742251885,4.7924549,4.78458021,4.78345444
42.861196,4.89897949,4.79192566,0.327190802,4.79079916,4.7828923,4.78176367
42.871688,4.24264069,4.79027332,-0.74002205,4.78914396,4.7812047,4.7800732
42.88218,5.19615242,4.78862168,0.638381346,4.78748945,4.77951758,4.7783832
42.892671,4.89897949,4.7869709,0.334676839,4.78583579,4.7778311,4.77669382
42.903163,4.24264069,4.78532067,-0.736668163,4.78418267,4.77614494,4.77500475
42.913654,4.79583152,4.78367131,0.110273365,4.78253041,4.77445942,4.77331632
42.924146,5,4.78202251,0.4668806,4.78087869,4.77277423,4.7716282
42.934638,3.74165739,4.78037442,-1.01917468,4.77922769,4.77108952,4.76994055
42.945129,4.35889894,4.77872721,-0.647941565,4.77757755,4.76940545,4.76825354
42.955621,4.47213595,4.77708058,-0.552217913,4.77592798,4.76772172,4.76656685
42.966112,5.38516481,4.77543483,0.780852086,4.77427927,4.76603864,4.7648808
42.976604,5.09901951,4.77378965,0.570289279,4.77263114,4.76435589,4.76319508
42.987096,4.69041576,4.77214521,-0.285883637,4.77098373,4.76267363,4.76150983
42.997587,4.24264069,4.77050167,-0.726540422,4.7693372,4.76099203,4.75982523
43.008079,4.79583152,4.76885872,0.164233996,4.76769125,4.75931077,4.75814096
43.01857,4.58257569,4.76721667,-0.429698699,4.7660462,4.75763017,4.75645734
43.029062,4.47213595,4.76557521,-0.541700338,4.76440173,4.7559499,4.75477405
43.039554,4.58257569,4.76393451,-0.425862437,4.762758,4.75427015,4.75309125
43.050045,4.69041576,4.76229472,-0.268102526,4.76111518,4.75259105,4.7514091
43.060537,4.89897949,4.76065554,0.371919268,4.75947295,4.75091231,4.74972729
43.071028,4.69041576,4.75901729,-0.261918931,4.75783164,4.74923423,4.74804614
43.08152,5.38516481,4.75737964,0.79232895,4.75619092,4.7475565,4.74636532
43.092012,3.87298335,4.75574277,-0.939552779,4.75455097,4.74587929,4.74468501
43.102503,4.58257569,4.75410683,-0.41416318,4.75291194,4.74420274,4.74300536
43.112995,4.47213595,4.75247152,-0.529467249,4.75127353,4.74252656,4.74132605
43.123486,4.69041576,4.75083715,-0.245807634,4.74963605,4.74085105,4.73964741
43.133978,4.89897949,4.74920342,0.387009134,4.74799919,4.7391759,4.73796912
43.14447,5,4.74757047,0.502423654,4.74636311,4.73750127,4.73629134
43.154961,4.58257569,4.74593848,-0.404181625,4.74472797,4.73582732,4.73461422
43.165453,3.46410162,4.74430714,-1.13146167,4.74309346,4.73415374,4.73293746
43.175944,4.47213595,4.74267675,-0.520135362,4.74145991,4.73248084,4.73126138
43.186436,4.89897949,4.74104702,0.397407181,4.739827,4.73080831,4.72958565
43.196928,4.12310563,4.7394181,-0.785055714,4.73819488,4.72913631,4.72791043
43.207419,4.47213595,4.73779015,-0.515416528,4.73656373,4.727465,4.7262359
43.217911,4.58257569,4.73616287,-0.391901999,4.73493324,4.72579406,4.72456173
43.228402,3.87298335,4.73453657,-0.928198915,4.73330371,4.72412382,4.72288824
43.238894,4.35889894,4.73291095,-0.611565207,4.73167485,4.72245395,4.72121511
43.249386,4.24264069,4.73128615,-0.699031807,4.7300468,4.72078462,4.71954251
43.259877,3.74165739,4.72966235,-0.99398439,4.72841974,4.71911599,4.7178706
43.270369,4.12310563,4.72803924,-0.777774785,4.72679335,4.71744775,4.71619906
43.28086,4.47213595,4.72641713,-0.504263002,4.72516795,4.7157802,4.71452821
43.291352,4.89897949,4.72479571,0.417353294,4.72354324,4.71411304,4.71285773
43.301844,4.58257569,4.72317515,-0.374965942,4.72191937,4.71244643,4.71118778
43.312335,5.47722558,4.7215556,0.869292799,4.7202965,4.71078052,4.70951853
43.322827,4,4.71993677,-0.848490876,4.71867432,4.70911501,4.70784966
43.333318,3.74165739,4.71831895,-0.988261889,4.71705316,4.7074502,4.70618149
43.34381,4.47213595,4.71670185,-0.49453604,4.7154327,4.70578579,4.7045137
43.354302,4.79583152,4.71508563,0.284158223,4.71381311,4.70412193,4.70284645
43.364793,3.31662479,4.71347044,-1.18188225,4.71219454,4.70245879,4.7011799
43.375285,5.19615242,4.71185598,0.695914103,4.71057668,4.70079605,4.69951374
43.385776,4.58257569,4.71024257,-0.357305019,4.70895986,4.69913403,4.69784829
43.396268,4.35889894,4.7086299,-0.591380552,4.70734377,4.69747241,4.69618323
43.40676,4.35889894,4.70701813,-0.590016258,4.70572856,4.69581136,4.69451871
43.417251,4.69041576,4.70540741,-0.122440406,4.7041144,4.69415102,4.69285491
43.427743,4.24264069,4.70379745,-0.679085242,4.70250098,4.6924911,4.6911915
43.438234,5.29150262,4.70218856,0.767667938,4.70088862,4.6908319,4.68952881
43.448726,4.47213595,4.70058043,-0.477958653,4.699277,4.68917312,4.68786652
43.459218,4.12310563,4.69897322,-0.758859405,4.69766629,4.6875149,4.68620478
43.469709,4.89897949,4.69736709,0.449012685,4.69605666,4.68585742,4.68454376
43.480201,5,4.69576175,0.551577967,4.69444778,4.68420036,4.68288315
43.490692,5.09901951,4.69415749,0.636287691,4.69283999,4.68254403,4.68122326
43.501184,5.47722558,4.69255402,0.885816887,4.69123297,4.68088812,4.67956377
43.511676,4.24264069,4.6909515,-0.66956016,4.68962688,4.67923279,4.67790485
43.522167,4.12310563,4.68935008,-0.75249216,4.68802189,4.67757819,4.67624666
43.532659,6.164414,4.68774946,1.21518087,4.68641768,4.67592403,4.67458888
43.54315,3.87298335,4.68614996,-0.901757514,4.68481458,4.67427061,4.67293183
43.553642,5.38516481,4.68455127,0.837026603,4.68321227,4.67261761,4.67127519
43.564134,4.35889894,4.68295356,-0.56925795,4.68161093,4.67096521,4.66961913
43.574625,4.35889894,4.68135697,-0.567853878,4.68001069,4.66931355,4.6679638
43.585117,3.87298335,4.67976121,-0.898208143,4.67841128,4.66766233,4.66630889
43.595608,3.46410162,4.6781666,-1.10184617,4.67681299,4.66601186,4.66465472
43.6061,4,4.67657282,-0.822540466,4.67521553,4.66436182,4.66300098
43.616592,4.69041576,4.67498004,0.124240577,4.67361905,4.66271238,4.66134781
43.627083,5.09901951,4.67338841,0.652404092,4.67202371,4.6610637,4.65969539
43.637575,3.46410162,4.67179765,-1.09895224,4.67042921,4.65941546,4.65804339
43.648066,4.89897949,4.67020804,0.478300579,4.66883587,4.65776798,4.65639214
43.658558,4.47213595,4.66861931,-0.443264425,4.66724338,4.65612094,4.65474132
43.66905,4.58257569,4.66703159,-0.290612973,4.6656519,4.65447451,4.65309109
43.679541,5,4.66544506,0.57840724,4.66406158,4.65282885,4.65144161
43.690033,4.69041576,4.66385942,0.162961161,4.66247214,4.65118363,4.64979257
43.700524,5.56776436,4.66227497,0.951572066,4.66088387,4.64953918,4.64814427
43.711016,4.12310563,4.66069141,-0.733202417,4.65929649,4.64789518,4.64649642
43.721508,4.47213595,4.65910891,-0.43240369,4.65771014,4.6462518,4.64484917
43.731999,4.24264069,4.65752761,-0.644117166,4.65612499,4.64460919,4.64320267
43.742491,4,4.65594723,-0.809905692,4.65454074,4.64296704,4.64155661
43.752982,4.89897949,4.65436807,0.494582062,4.65295769,4.64132566,4.63991132
43.763474,4,4.65278983,-0.807954104,4.65137556,4.63968474,4.63826647
43.773966,5.56776436,4.65121268,0.957367057,4.64979449,4.63804445,4.63662223
43.784457,3.87298335,4.64963677,-0.881279423,4.64821464,4.63640494,4.63497875
43.794949,5.38516481,4.6480618,0.858547034,4.64663573,4.63476589,4.63333573
43.80544,4.24264069,4.64648808,-0.635489881,4.64505804,4.63312762,4.63169347
43.815932,4.58257569,4.64491531,-0.249679029,4.6434813,4.63148983,4.63005166
43.826424,4.24264069,4.64334366,-0.633011038,4.64190566,4.62985267,4.62841047
43.836915,4.69041576,4.64177328,0.220550405,4.64033127,4.62821629,4.62677006
43.847407,4.58257569,4.64020387,-0.240058695,4.63875784,4.62658039,4.6251301
43.857898,4.69041576,4.63863575,0.227552222,4.63718568,4.62494527,4.62349091
43.86839,5.19615242,4.63706861,0.747719074,4.63561449,4.62331064,4.62185219
43.878882,4,4.63550262,-0.79718418,4.63404443,4.62167664,4.62021409
43.889373,4.47213595,4.63393792,-0.402246155,4.63247565,4.62004344,4.61857677
43.899865,5,4.63237424,0.606321498,4.63090787,4.61841073,4.61693992
43.910356,5.47722558,4.63081187,0.920007448,4.62934138,4.61677881,4.61530385
43.920848,5,4.62925052,0.608892007,4.6277759,4.61514737,4.61366824
43.93134,3.87298335,4.62769035,-0.868738745,4.62621158,4.61351659,4.61203327
43.941831,3.87298335,4.62613152,-0.867841098,4.62464858,4.6118866,4.61039909
43.952323,5.19615242,4.62457373,0.756028238,4.62308661,4.61025711,4.60876537
43.962814,3.87298335,4.62301728,-0.866044995,4.62152597,4.60862842,4.60713245
43.973306,5,4.62146189,0.615254506,4.61996637,4.60700023,4.60550001
43.983798,4.89897949,4.61990772,0.528272437,4.61840796,4.60537269,4.6038682
43.994289,5.09901951,4.61835491,0.693299792,4.61685091,4.60374596,4.60223719
44.004781,4.58257569,4.61680319,-0.185006731,4.61529492,4.60211974,4.60060666
44.015272,4.58257569,4.61525284,-0.180768213,4.6137403,4.60049432,4.59897692
44.025764,5.19615242,4.61370359,0.763183353,4.61218675,4.59886941,4.59734767
44.036256,5.29150262,4.61215559,0.824225108,4.61063444,4.59724516,4.59571907
44.046747,4.69041576,4.610609,0.282500902,4.60908351,4.59562172,4.59409126
44.057239,4,4.60906352,-0.78042522,4.60753369,4.5939988,4.59246395
44.06773,4,4.60751947,-0.779435352,4.60598527,4.59237669,4.59083743
44.078222,5.19615242,4.60597654,0.768229053,4.60443796,4.5907551,4.58921142
44.088714,3.74165739,4.60443491,-0.928858183,4.60289193,4.58913418,4.58758605
44.099205,3.74165739,4.60289472,-0.928028735,4.60134732,4.58751408,4.58596149
44.109697,5.38516481,4.60135569,0.885329949,4.59980386,4.58589449,4.58433743
44.120188,4.58257569,4.59981811,-0.131310393,4.59826183,4.58427574,4.58271418
44.13068,4.89897949,4.59828172,0.548359162,4.59672097,4.5826575,4.58109143
44.141172,4.47213595,4.59674665,-0.353002395,4.59518141,4.58103995,4.57946934
44.151663,4.58257569,4.59521306,-0.112416036,4.59364332,4.57942322,4.57784806
44.162155,4.89897949,4.59368067,0.552538516,4.59210641,4.57780702,4.57622729
44.172646,4.12310563,4.59214979,-0.68486799,4.59057099,4.57619165,4.57460734
44.183138,5.09901951,4.59062012,0.713021312,4.58903676,4.57457681,4.57298789
44.19363,4.79583152,4.58909183,0.454686372,4.58750389,4.57296266,4.57136912
44.204121,5.09901951,4.58756506,0.715160441,4.58597252,4.57134934,4.56975116
44.214613,4.69041576,4.58603953,0.323073097,4.58444239,4.56973656,4.56813371
44.225104,4.35889894,4.58451555,-0.474991169,4.58291377,4.56812462,4.56651709
44.235596,5,4.58299284,0.645760918,4.58138641,4.56651322,4.56490099
44.246088,4.89897949,4.58147154,0.563478436,4.57986044,4.56490251,4.56328556
44.256579,5.19615242,4.57995181,0.784984467,4.57833602,4.56329264,4.56167095
44.267071,4.79583152,4.57843337,0.466259745,4.57681288,4.56168332,4.56005687
44.277562,4,4.57691653,-0.759550214,4.57529131,4.56007484,4.55844362
44.288054,4.89897949,4.57540099,0.568839602,4.57377103,4.55846691,4.55683089
44.298546,4.24264069,4.57388692,-0.575539951,4.57225219,4.55685968,4.55521884
44.309037,4.24264069,4.57237447,-0.574224508,4.57073496,4.5552533,4.55360763
44.319529,3.74165739,4.57086336,-0.910607476,4.56921905,4.55364748,4.55199694
44.33002,4.24264069,4.56935389,-0.571588318,4.56770476,4.5520425,4.5503871
44.340512,4.79583152,4.56784578,0.477478522,4.56619181,4.55043809,4.54877778
44.351004,4.58257569,4.56633919,0.127422537,4.56468036,4.54883437,4.54716915
44.361495,5.19615242,4.56483427,0.794555318,4.56317055,4.54723152,4.54556136
44.371987,5.19615242,4.56333074,0.7955009,4.56166212,4.54562923,4.54395411
44.382478,3.87298335,4.5618289,-0.829967202,4.56015536,4.5440278,4.5423477
44.39297,3.87298335,4.56032848,-0.829062804,4.55865,4.54242693,4.54074183
44.403462,4.47213595,4.55882963,-0.294437891,4.55714619,4.54082677,4.53913666
44.413953,4.24264069,4.5573325,-0.560973984,4.55564408,4.53922748,4.53753233
44.424445,4.79583152,4.55583682,0.489892545,4.5541434,4.53762876,4.53592854
44.434936,4.58257569,4.55434288,0.168026224,4.55264444,4.53603091,4.53432561
44.445428,4.58257569,4.55285042,0.172410191,4.55114694,4.53443363,4.53272322
44.45592,4.69041576,4.55135959,0.372902365,4.54965104,4.53283707,4.53112153
44.466411,4.79583152,4.54987053,0.495944546,4.5481569,4.53124138,4.5295207
44.476903,4.12310563,4.54838298,-0.65213293,4.54666425,4.52964627,4.52792042
44.487394,5,4.54689724,0.673129079,4.54517338,4.52805203,4.52632099
44.497886,5.19615242,4.54541303,0.806684194,4.54368403,4.52645837,4.52472212
44.508378,4.58257569,4.54393051,0.196583782,4.54219634,4.52486544,4.52312396
44.518869,4.12310563,4.54244983,-0.647567915,4.54071047,4.52327339,4.52152665
44.529361,4.89897949,4.54097072,0.598338336,4.53922615,4.52168192,4.51992991
44.539852,4.89897949,4.53949348,0.59957152,4.53774367,4.52009134,4.51833403
44.550344,4.89897949,4.53801783,0.600800843,4.53626277,4.51850134,4.5167387
44.560836,4.47213595,4.53654394,-0.253787281,4.53478361,4.51691208,4.5151441
44.571327,3.60555128,4.53507195,-0.964116526,4.53330632,4.51532371,4.51355036
44.581819,4.24264069,4.5336016,-0.539407929,4.53183065,4.51373593,4.51195718
44.59231,4.35889894,4.53213318,-0.416214175,4.53035689,4.51214904,4.51036488
44.602802,4.12310563,4.53066643,-0.638404892,4.52888478,4.51056273,4.50877314
44.613294,4.24264069,4.5292015,-0.535313754,4.52741446,4.50897718,4.50718212
44.623785,4.79583152,4.52773855,0.517776957,4.5259461,4.50739252,4.50559198
44.634277,4.12310563,4.5262773,-0.63495801,4.52447942,4.50580846,4.50400241
44.644768,4.69041576,4.52481806,0.406936976,4.52301473,4.50422529,4.50241371
44.65526,4.58257569,4.52336055,0.243341613,4.52155175,4.50264273,4.50082559
44.665752,4,4.52190495,-0.72242989,4.52009064,4.50106091,4.4992382
44.676243,4.89897949,4.52045138,0.615246374,4.51863156,4.49948,4.49765169
44.686735,4,4.51899961,-0.720416276,4.51717424,4.49789969,4.49606576
44.697226,4.47213595,4.51754991,-0.213105513,4.51571897,4.49632029,4.49448071
44.707718,4,4.51610204,-0.71840242,4.5142655,4.4947415,4.49289624
44.71821,3.74165739,4.51465613,-0.879203473,4.51281399,4.49316347,4.4913125
44.728701,4.58257569,4.51321236,0.263369208,4.51136457,4.49158634,4.48972965
44.739193,4.58257569,4.51177045,0.266092558,4.509917,4.49000983,4.48814739
44.749684,3.87298335,4.5103307,-0.798340372,4.50847156,4.48843423,4.48656602
44.760176,3.87298335,4.50889285,-0.797439341,4.507028,4.48685924,4.48498523
44.770668,4.69041576,4.50745706,0.42773672,4.50558648,4.48528502,4.48340519
44.781159,4.35889894,4.50602348,-0.383568163,4.50414714,4.48371172,4.48182604
44.791651,4.69041576,4.50459186,0.431072968,4.50270973,4.48213904,4.48024748
44.802142,5.09901951,4.50316248,0.771917764,4.50127455,4.48056727,4.47866982
44.812634,5.19615242,4.5017351,0.833317063,4.49984133,4.47899613,4.47709275
44.823126,5,4.50030986,0.706887643,4.49841024,4.47742576,4.47551643
44.833617,4.24264069,4.49888693,-0.506207703,4.49698142,4.47585632,4.47394101
44.844109,4.47213595,4.49746604,-0.159154284,4.49555463,4.4742875,4.47236618
44.8546,4.24264069,4.4960475,-0.503395282,4.49413015,4.47271961,4.47079226
44.865092,4,4.49463104,-0.703300108,4.49270774,4.47115235,4.46921894
44.875584,4.24264069,4.49321683,-0.500575813,4.49128755,4.46958587,4.46764638
44.886075,5,4.49180502,0.712877955,4.48986973,4.46802032,4.46607472
44.896567,4.47213595,4.49039536,-0.135127375,4.48845404,4.4664554,4.46450366
44.907058,4.58257569,4.48898814,0.305920825,4.48704076,4.46489142,4.46293352
44.91755,4.79583152,4.48758312,0.555201229,4.48562965,4.46332807,4.46136398
44.928042,4.58257569,4.48618044,0.310475847,4.48422086,4.46176552,4.4597952
44.938533,4.89897949,4.48478027,0.643583105,4.48281455,4.4602039,4.45822733
44.949025,5.65685425,4.48338236,1.08326907,4.48141047,4.45864292,4.45666008
44.959516,3.87298335,4.481987,-0.780386862,4.48000892,4.45708288,4.45509374
44.970008,4.69041576,4.48059395,0.458063112,4.47860965,4.45552349,4.45352802
44.9805,5.91607978,4.47920335,1.19869781,4.47721281,4.45396489,4.45196306
44.990991,4,4.47781538,-0.69124191,4.47581856,4.45240723,4.45039902
45.001483,5,4.47642978,0.723581522,4.47442666,4.45085023,4.4488356
45.011974,4.69041576,4.47504685,0.46407856,4.47303741,4.44929417,4.44727309
45.022466,5.47722558,4.47366635,1.00177803,4.47165055,4.44773877,4.44571121
45.032958,3.74165739,4.47228843,-0.854769583,4.47026625,4.44618416,4.44415011
45.043449,4.69041576,4.47091325,0.468510951,4.46888466,4.44463051,4.44258992
45.053941,4,4.46954058,-0.685230308,4.46750555,4.44307751,4.44103036
45.064432,4.35889894,4.46817069,-0.33056278,4.46612921,4.44152547,4.43947173
45.074924,5.74456265,4.46680337,1.13038015,4.46475539,4.43997409,4.43791373
45.085416,3.60555128,4.46543877,-0.927301187,4.46338426,4.43842351,4.4363565
45.095907,4.12310563,4.46407704,-0.583927572,4.46201598,4.4368739,4.4348002
45.106399,4.24264069,4.46271795,-0.469123927,4.46065031,4.43532495,4.43324454
45.11689,4.12310563,4.46136179,-0.581597937,4.45928755,4.43377696,4.43168981
45.127382,4.79583152,4.46000833,0.579502542,4.45792745,4.43222963,4.43013571
45.137874,5.09901951,4.45865773,0.800226084,4.45657019,4.43068312,4.4285824
45.148365,3.87298335,4.45731015,-0.764412716,4.45521591,4.42913758,4.42703002
45.158857,5.09901951,4.45596536,0.801906576,4.4538644,4.42759271,4.42547828
45.169348,4.79583152,4.45462365,0.584130017,4.45251594,4.4260488,4.42392748
45.17984,3.87298335,4.45328479,-0.761775192,4.4511703,4.42450557,4.42237732
45.190332,4.24264069,4.45194895,-0.457502199,4.44982764,4.42296316,4.42082795
45.200823,4.89897949,4.45061628,0.669599285,4.44848814,4.42142173,4.41927952
45.211315,3.87298335,4.44928657,-0.759146378,4.44715155,4.41988097,4.41773174
45.221806,5,4.4479601,0.742993877,4.44581818,4.41834118,4.4161849
45.232298,3.87298335,4.44663665,-0.757399038,4.44448779,4.41680208,4.4146387
45.24279,5,4.44531638,0.744770848,4.44316056,4.41526381,4.41309331
45.253281,5,4.44399946,0.745654435,4.44183665,4.41372651,4.41154886
45.263773,4.47213595,4.44268567,0.171610843,4.44051583,4.41218991,4.41000506
45.274264,3.16227766,4.4413753,-1.13097199,4.4391984,4.41065428,4.40846221
45.284756,4.89897949,4.44006813,0.677429961,4.43788415,4.40911934,4.40692002
45.295248,4.79583152,4.43876433,0.597550992,4.43657323,4.40758524,4.40537863
45.305739,4.69041576,4.43746407,0.502943031,4.43526581,4.40605212,4.40383818
45.316231,4.89897949,4.43616712,0.680303141,4.43396168,4.4045197,4.4022984
45.326722,4.69041576,4.43487379,0.505511596,4.43266113,4.40298826,4.40075957
45.337214,4.89897949,4.43358386,0.682199113,4.43136396,4.40145752,4.39922141
45.347706,5.38516481,4.43229749,0.976149227,4.43007032,4.39992762,4.39768405
45.358197,4.47213595,4.43101487,0.202783352,4.42878038,4.39839872,4.39614765
45.368689,4.58257569,4.42973577,0.390947467,4.42749394,4.39687051,4.39461191
45.37918,3.60555128,4.4284605,-0.907143442,4.42621129,4.3953433,4.39307713
45.389672,4.35889894,4.42718885,-0.261323373,4.42493223,4.39381679,4.39154302
45.400164,4.35889894,4.42592099,-0.25888616,4.42365692,4.39229114,4.39000973
45.410655,4.89897949,4.42465708,0.688710682,4.42238554,4.39076648,4.38847739
45.421147,4.69041576,4.42339694,0.516738637,4.42111789,4.38924252,4.38694573
45.431638,4.89897949,4.42214085,0.690535035,4.41985426,4.38771957,4.38541503
45.44213,5.19615242,4.42088862,0.880490659,4.41859445,4.38619733,4.38388501
45.452622,4.47213595,4.41964042,0.229119032,4.41733864,4.38467595,4.3823558
45.463113,4.12310563,4.41839643,-0.543406663,4.416087,4.38315557,4.38082757
45.473605,3.60555128,4.41715645,-0.90089132,4.41483934,4.38163591,4.37930001
45.484096,4.47213595,4.41592077,0.23709742,4.41359595,4.38011725,4.37777342
45.494588,3.87298335,4.41468921,-0.736006704,4.41235664,4.37859932,4.37624751
45.50508,4.58257569,4.41346196,0.411234407,4.4111216,4.37708224,4.37472243
45.515571,4.79583152,4.41223917,0.61934833,4.409891,4.37556618,4.37319832
45.526063,4.58257569,4.41102067,0.41419201,4.40866465,4.37405084,4.37167489
45.536554,3.87298335,4.40980676,-0.732682343,4.40744284,4.37253651,4.37015244
45.547046,4.47213595,4.40859726,0.252068827,4.40622542,4.37102291,4.36863067
45.557538,4.24264069,4.40739235,-0.405896122,4.40501255,4.36951018,4.36710973
45.568029,4,4.4061922,-0.637332097,4.4038044,4.36799847,4.36558978
45.578521,4.35889894,4.40499665,-0.214703769,4.40260082,4.36648749,4.36407051
45.589012,4.24264069,4.40380599,-0.40145399,4.40140209,4.36497752,4.36255222
45.599504,4.35889894,4.40262006,-0.209095961,4.40020806,4.36346829,4.36103463
45.609996,4.58257569,4.40143905,0.425601515,4.39901889,4.36195994,4.35951787
45.620487,3.46410162,4.40026312,-0.967554392,4.39783479,4.36045261,4.3580021
45.630979,4.24264069,4.39909212,-0.395539425,4.39665558,4.35894602,4.35648702
45.64147,4.35889894,4.39792636,-0.197553583,4.39548156,4.35744046,4.35497293
45.651962,3.87298335,4.39676568,-0.72372808,4.39431259,4.35593563,4.35345953
45.662454,5.29150262,4.39561026,0.946515905,4.39314884,4.35443169,4.35194698
45.672945,4.89897949,4.3944603,0.71029514,4.39199051,4.35292878,4.35043542
45.683437,4.47213595,4.39331564,0.280749552,4.39083745,4.35142662,4.34892455
45.693928,4.69041576,4.39217659,0.546112777,4.38968996,4.34992548,4.34741468
45.70442,5,4.39104302,0.78035696,4.3885479,4.3484251,4.34590551
45.714912,4.79583152,4.3899151,0.63711571,4.38741146,4.34692561,4.34439719
45.725403,4.89897949,4.38879303,0.714273377,4.38628083,4.34542715,4.34288987
45.735895,3.60555128,4.38767668,-0.884378543,4.38515589,4.34392944,4.34138325
45.746386,4.24264069,4.38656636,-0.379375373,4.38403693,4.34243278,4.33987763
45.756878,5.65685425,4.38546194,1.12756034,4.38292383,4.34093687,4.33837271
45.76737,4.35889894,4.38436362,-0.159576547,4.3818168,4.33944185,4.33686865
45.777861,4.58257569,4.38327159,0.446434882,4.38071601,4.33794788,4.33536559
45.788353,5.09901951,4.38218575,0.84666036,4.37962138,4.33645467,4.33386324
45.798844,5.19615242,4.38110639,0.902798998,4.37853318,4.33496251,4.33236189
45.809336,3.74165739,4.38003342,-0.798984374,4.37745133,4.33347111,4.33086126
45.819828,3.74165739,4.37896703,-0.798316755,4.37637603,4.33198061,4.32936149
45.830319,4.58257569,4.37790743,0.452402767,4.37530748,4.33049116,4.32786272
45.840811,5,4.37685453,0.789395636,4.37424558,4.32900248,4.32636467
45.851302,3.74165739,4.37580863,-0.796336139,4.37319064,4.32751485,4.32486762
45.861794,4,4.37476965,-0.612184329,4.37214258,4.32602799,4.3233713
45.872286,4.47213595,4.3737378,0.313684796,4.37110161,4.32454204,4.32187584
45.882777,4.47213595,4.3727133,0.315313584,4.37006795,4.32305715,4.32038139
45.893269,4.89897949,4.37169606,0.726142839,4.3690415,4.32157303,4.31888766
45.90376,4,4.37068641,-0.608840217,4.36802261,4.32008997,4.31739495
45.914252,4.47213595,4.36968427,0.320080743,4.36701118,4.31860769,4.31590296
45.924744,3.74165739,4.36868988,-0.791853831,4.36600745,4.31712632,4.31441184
45.935235,4.58257569,4.36770344,0.46354315,4.36501165,4.31564602,4.31292173
45.945727,4.79583152,4.36672492,0.65506229,4.36402371,4.3141665,4.31143236
45.956218,5.56776436,4.36575463,1.09636205,4.36304396,4.31268804,4.309944
45.96671,3.74165739,4.36479253,-0.789389092,4.36207235,4.31121037,4.30845637
45.977202,4.58257569,4.36383885,0.467693114,4.36110913,4.30973362,4.30696961
45.987693,5.47722558,4.36289383,1.05561913,4.36015452,4.30825794,4.30548388
45.998185,4.35889894,4.36195744,-0.055303639,4.3592085,4.30678305,4.30399888
46.008676,4.47213595,4.36103001,0.333325587,4.3582714,4.30530924,4.3025149
46.019168,3.74165739,4.36011152,-0.786418551,4.35734319,4.30383621,4.30103166
46.02966,4.47213595,4.35920223,0.336056131,4.35642414,4.30236411,4.2995493
46.040151,4.24264069,4.35830238,-0.340090717,4.35551448,4.3008931,4.29806796
46.050643,4.12310563,4.35741198,-0.484052012,4.35461422,4.29942287,4.29658736
46.061134,4.69041576,4.35653135,0.577827315,4.3537237,4.29795373,4.29510779
46.071626,3.87298335,4.35566053,-0.694749724,4.35284294,4.29648538,4.29362896
46.082118,4.12310563,4.35479976,-0.481346168,4.35197218,4.29501797,4.29215101
46.092609,4.58257569,4.35394932,0.478148903,4.35111172,4.29355165,4.2906741
46.103101,5.19615242,4.35310924,0.918173829,4.35026156,4.29208612,4.28919793
46.113592,5.19615242,4.35227988,0.918625356,4.34942207,4.29062168,4.28772278
46.124084,4.58257569,4.35146127,0.480743616,4.3485933,4.28915805,4.28624839
46.134576,4.58257569,4.35065371,0.481582793,4.34777552,4.28769537,4.28477489
46.145067,4.24264069,4.34985748,-0.327439751,4.34696904,4.28623377,4.28330242
46.155559,4.12310563,4.34907264,-0.475359884,4.3461739,4.28477298,4.2818307
46.16605,4.35889894,4.34829958,0.102953204,4.34539049,4.28331328,4.28036002
46.176542,3.46410162,4.34753837,-0.939913163,4.34461888,4.2818544,4.27889009
46.187034,4.58257569,4.34678932,0.485578393,4.34385938,4.28039647,4.27742106
46.197525,4.47213595,4.34605274,0.355081983,4.34311232,4.27893963,4.27595306
46.208017,4.58257569,4.34532874,0.487080029,4.34237778,4.27748361,4.27448582
46.218508,3.87298335,4.34461771,-0.686756409,4.34165617,4.27602869,4.27301961
46.229,4.58257569,4.34391978,0.488524222,4.34094761,4.27457459,4.27155417
46.239492,4.47213595,4.34323528,0.359027401,4.34025243,4.27312145,4.27008963
46.249983,4.35889894,4.34256455,0.127806064,4.33957098,4.27166941,4.26862613
46.260475,4.24264069,4.34190775,-0.315066766,4.33890342,4.2702182,4.26716339
46.270966,4.35889894,4.3412653,0.132791741,4.33825014,4.26876809,4.26570169
46.281458,4.35889894,4.34063736,0.135135426,4.33761134,4.26731881,4.26424076
46.29195,4,4.34002431,-0.583116036,4.33698738,4.2658705,4.26278074
46.302441,4.35889894,4.33942652,0.139543615,4.33637863,4.26442329,4.26132176
46.312933,3.46410162,4.33884421,-0.935276746,4.33578531,4.26297692,4.25986354
46.323424,4.12310563,4.3382778,-0.463866552,4.33520786,4.26153165,4.25840638
46.333916,4.58257569,4.33772755,0.494821323,4.3346465,4.26008722,4.25694998
46.344408,5.29150262,4.33719386,0.976887281,4.33410166,4.25864377,4.2554945
46.354899,4.69041576,4.33667714,0.594759295,4.33357375,4.25720143,4.25404006
46.365391,5.09901951,4.33617766,0.87340818,4.33306303,4.25575993,4.2525864
46.375882,4.24264069,4.33569591,-0.305049549,4.33256998,4.25431955,4.25113378
46.386374,5,4.33523219,0.815332942,4.33209492,4.25288001,4.24968195
46.396866,4.12310563,4.33478696,-0.460088395,4.3316383,4.25144145,4.24823103
46.407357,4,4.33436066,-0.578239278,4.33120057,4.25000402,4.24678116
46.417849,4.24264069,4.33395366,-0.302180368,4.33078209,4.24856743,4.24533207
46.42834,3.74165739,4.33356648,-0.769356283,4.33038338,4.24713196,4.24388403
46.438832,4,4.33319949,-0.577234349,4.33000482,4.24569735,4.24243678
46.449324,4.47213595,4.33285322,0.373206021,4.32964692,4.24426372,4.24099045
46.459815,4.35889894,4.33252818,0.162390789,4.3293102,4.24283123,4.23954517
46.470307,3.87298335,4.3322248,-0.677673558,4.3289951,4.24139958,4.23810068
46.480798,4.24264069,4.33194366,-0.298836031,4.3287022,4.23996907,4.23665724
46.49129,4.47213595,4.33168525,0.37476754,4.32843198,4.23853941,4.23521459
46.501782,4.58257569,4.33145013,0.5011243,4.328185,4.23711076,4.23377287
46.512273,4.69041576,4.3312389,0.599313657,4.32796186,4.23568323,4.23233221
46.522765,3.60555128,4.3310521,-0.851763362,4.32776311,4.23425657,4.23089233
46.533256,5.29150262,4.33089037,0.980108287,4.32758938,4.23283105,4.22945353
46.543748,4.79583152,4.3307543,0.681965706,4.32744127,4.23140639,4.22801551
46.55424,4.35889894,4.33064455,0.168090432,4.32731943,4.22998273,4.22657842
46.564731,4,4.33056179,-0.574945034,4.32722453,4.22856022,4.22514239
46.575223,4.89897949,4.3305067,0.753971345,4.32715725,4.22713857,4.22370716
46.585714,4.89897949,4.33047998,0.753989063,4.32711831,4.22571807,4.222273
46.596206,5.09901951,4.33048237,0.876662504,4.32710843,4.22429845,4.22083963
46.606698,4.79583152,4.33051462,0.682141408,4.32712836,4.22287983,4.21940719
46.617189,4,4.33057752,-0.574958708,4.3271789,4.22146236,4.21797583
46.627681,4.47213595,4.33067187,0.376117117,4.32726085,4.22004577,4.21654526
46.638172,4.24264069,4.3307985,-0.296913809,4.32737503,4.21863034,4.21511577
46.648664,5.19615242,4.33095829,0.930158123,4.32752233,4.21721578,4.21368707
46.659156,5,4.33115213,0.817831201,4.32770364,4.21580224,4.21225931
46.669647,5,4.33138091,0.817691318,4.32791984,4.21438986,4.21083263
46.680139,4.12310563,4.33164564,-0.456661815,4.32817196,4.21297836,4.20940675
46.69063,5.19615242,4.33194725,0.929626361,4.32846092,4.21156802,4.20798195
46.701122,4.47213595,4.33228683,0.373964064,4.3287878,4.21015857,4.20655795
46.711614,4,4.33266542,-0.576771547,4.32915365,4.20875014,4.20513489
46.722105,4.47213595,4.33308406,0.37289663,4.32955952,4.20734288,4.20371291
46.732597,4.79583152,4.33354398,0.679917308,4.33000663,4.20593651,4.20229174
46.743088,4.58257569,4.33404626,0.498527261,4.33049607,4.2045313,4.20087165
46.75358,4.89897949,4.33459224,0.751257108,4.33102916,4.20312699,4.19945237
46.764072,4.12310563,4.33518313,-0.460518736,4.33160713,4.20172372,4.19803403
46.774563,3.46410162,4.33582018,-0.9336587,4.33223122,4.20032161,4.19661678
46.785055,4.12310563,4.33650489,-0.461951578,4.33290294,4.19892041,4.19520034
46.795546,5.29150262,4.33723852,0.976864423,4.33362355,4.19752038,4.19378498
46.806038,5,4.3380227,0.813619872,4.33439468,4.19612125,4.19237043
46.81653,4.69041576,4.33885889,0.592922314,4.33521779,4.19472317,4.19095684
46.827021,5,4.33974857,0.812558568,4.33609436,4.19332626,4.18954433
46.837513,5.38516481,4.34069357,1.02199375,4.33702622,4.19193026,4.18813264
46.848004,4.89897949,4.34169542,0.746514613,4.3380149,4.19053544,4.18672204
46.858496,4.89897949,4.34275608,0.745803867,4.33906237,4.18914153,4.18531226
46.868988,4,4.34387731,-0.586410528,4.34017039,4.18774867,4.18390343
46.879479,3.87298335,4.34506091,-0.687079007,4.34134075,4.186357,4.18249569
46.889971,3.60555128,4.34630911,-0.860672897,4.3425757,4.18496624,4.18108877
46.900462,4.12310563,4.34762375,-0.473833439,4.34387707,4.18357667,4.17968294
46.910954,5.29150262,4.34900726,0.970822006,4.34524728,4.18218803,4.17827794
46.921446,3.31662479,4.35046175,-1.01677773,4.34668847,4.18080044,4.17687389
46.931937,3.60555128,4.35198943,-0.863966521,4.34820283,4.17941403,4.17547094
46.942429,4.58257569,4.35359303,0.478521329,4.34979311,4.17802856,4.17406881
46.95292,4.79583152,4.35527481,0.663744467,4.35146155,4.17664428,4.17266778
46.963412,4.12310563,4.35703773,-0.483665282,4.35321113,4.17526093,4.17126758
46.973904,4,4.35888442,-0.599069629,4.35504448,4.17387865,4.16986834
46.984395,4.35889894,4.36081757,-0.0438021716,4.35696429,4.17249756,4.1684702
46.994887,4.47213595,4.36284058,0.330598503,4.35897395,4.17111741,4.16707288
47.005378,4.24264069,4.36495621,-0.349736362,4.36107624,4.16973846,4.16567667
47.01587,4,4.36716815,-0.605944017,4.36327485,4.16836045,4.16428129
47.026362,4.79583152,4.36947965,0.652956261,4.36557303,4.16698351,4.16288687
47.036853,4.35889894,4.37189404,-0.113996055,4.36797412,4.16560778,4.16149356
47.047345,4.24264069,4.37441557,-0.363008107,4.37048237,4.16423299,4.16010108
47.057836,4.58257569,4.37704767,0.453351989,4.3731012,4.16285942,4.1587097
47.068328,4.35889894,4.37979495,-0.144554518,4.37583525,4.16148678,4.15731916
47.07882,4.69041576,4.38266147,0.554756059,4.37868856,4.16011524,4.15592958
47.089311,4.12310563,4.38565144,-0.512392251,4.38166536,4.1587449,4.15454112
47.099803,3.46410162,4.38877016,-0.961596872,4.38477094,4.15737552,4.15315349
47.110294,4,4.39202196,-0.626116567,4.38800965,4.15600735,4.15176697
47.120786,4.47213595,4.39541265,0.276989723,4.39138731,4.15464014,4.15038129
47.131278,4.89897949,4.39894736,0.707129494,4.39490904,4.15327402,4.14899658
47.141769,4.24264069,4.40263144,-0.399988445,4.39858019,4.15190912,4.14761298
47.152261,5,4.40647159,0.770407953,4.40240747,4.15054519,4.14623022
47.162752,5.19615242,4.41047333,0.886385407,4.40639643,4.14918248,4.14484858
47.173244,4.35889894,4.41464407,-0.236104055,4.41055446,4.14782073,4.14346778
47.183736,5.09901951,4.41903073,0.824614323,4.41488812,4.14650312,4.14208795
47.194227,4.58257569,4.4235594,0.398768477,4.41940428,4.14514373,4.14070924
47.204719,4.24264069,4.42827902,-0.430857677,4.42411151,4.14378531,4.13933137
47.21521,3.60555128,4.43319679,-0.909750246,4.42901697,4.14242813,4.13795462
47.225702,3.31662479,4.43832215,-1.05910215,4.43413016,4.14107193,4.13657872
47.236194,4.69041576,4.44366362,0.496741518,4.43945959,4.13971683,4.1352038
47.246685,3.46410162,4.44923012,-0.992536398,4.44501417,4.13836297,4.13382999
47.257177,3.16227766,4.45503269,-1.13699385,4.45080497,4.13701009,4.13245703
47.267668,4.58257569,4.46108073,0.348561277,4.45684141,4.13565845,4.13108519
47.27816,4.24264069,4.46738655,-0.474073684,4.46313579,4.13430779,4.12971421
47.288652,5,4.4739613,0.725285255,4.46969928,4.13295826,4.12834421
47.299143,4.24264069,4.48081673,-0.488032828,4.47654364,4.13160996,4.12697533
47.309635,4,4.4879673,-0.698546559,4.48368335,4.13026266,4.1256073
47.320126,5.09901951,4.4954255,0.776913129,4.49113091,4.12891661,4.12424039
47.330618,4.47213595,4.50320752,-0.176271275,4.49890251,4.12757156,4.12287434
47.34111,4.35889894,4.51132822,-0.390421916,4.50701304,4.12622763,4.12150928
47.351601,3.16227766,4.51980329,-1.16512902,4.51547822,4.12488495,4.12014534
47.362093,4.79583152,4.52865191,0.516894197,4.52431722,4.12354328,4.11878226
47.372584,4.69041576,4.53789098,0.390544212,4.53354696,4.12220286,4.1174203
47.383076,4.47213595,4.54754205,-0.2746017,4.54318902,4.12086345,4.1160592
47.393568,4.89897949,4.55762526,0.584255274,4.55326356,4.11952517,4.1146991
47.404059,5.19615242,4.56816192,0.792458521,4.5637919,4.11818816,4.11334012
47.414551,5.29150262,4.57917785,0.843993348,4.57479989,4.11685216,4.111982
47.425042,4.47213595,4.59069626,-0.344325866,4.58631076,4.11551742,4.11062501
47.435534,5,4.60274638,0.63028059,4.59835377,4.1141837,4.10926888
47.446026,4.24264069,4.61535593,-0.610504088,4.61095666,4.11285113,4.10791375
47.456517,4.47213595,4.62855434,-0.395497646,4.62414889,4.11151983,4.10655975
47.467009,5.19615242,4.64237704,0.744160859,4.63796591,4.11018955,4.10520661
47.4775,4.69041576,4.65685644,0.18319203,4.65244017,4.10886055,4.10385461
47.487992,4.89897949,4.67203294,0.47638907,4.6676121,4.10753257,4.10250347
47.498484,4.58257569,4.6879454,-0.324607005,4.68352059,4.10620575,4.10115333
47.508975,3.60555128,4.70463529,-1.04837208,4.70020714,4.10488021,4.09980432
47.519467,4.24264069,4.72215211,-0.692467634,4.7177213,4.1035557,4.09845619
47.529958,5.19615242,4.74054211,0.674989123,4.73610935,4.10223248,4.09710918
47.54045,4.89897949,4.75986222,0.372984264,4.75542828,4.1009103,4.09576305
47.550942,4.69041576,4.78016811,-0.299586973,4.77573377,4.09958928,4.09441792
47.561433,5.74456265,4.80151943,0.971104124,4.79708554,4.09826955,4.09307393
47.571925,5.47722558,4.82398691,0.808231814,4.81955437,4.09695087,4.09173081
47.582416,4.12310563,4.84763797,-0.85119466,4.84320772,4.09563348,4.09038882
47.592908,5,4.87255477,0.356994714,4.86812781,4.09431715,4.08904771
47.6034,5.09901951,4.89881886,0.447437877,4.89439624,4.09300198,4.08770761
47.613891,4.79583152,4.92651811,-0.361506004,4.92210095,4.09168812,4.08636865
47.624383,4.24264069,4.95575615,-0.844461639,4.95134562,4.09037532,4.08503056
47.634874,4.58257569,4.98663368,-0.635655559,4.98223103,4.08906382,4.08369361
47.645366,5.09901951,5.01927233,0.282395433,5.01487887,4.08775338,4.08235754
47.655858,4.89897949,5.05379475,-0.393465706,5.04941187,4.08644413,4.08102248
47.666349,5.19615242,5.09033392,0.325297553,5.08596308,4.08513619,4.07968856
47.676841,5.19615242,5.12904584,0.259049387,5.12468858,4.08382932,4.07835552
47.687332,4.24264069,5.17008525,-0.963039235,5.1657432,4.08252377,4.07702362
47.697824,4.69041576,5.21363759,-0.723340746,5.20931246,4.08121928,4.07569261
47.708316,5.74456265,5.25989301,0.696182189,5.2555866,4.079916,4.0743626
47.718807,4.58257569,5.3090592,-0.852340018,5.30477342,4.07861404,4.07303374
47.729299,5.19615242,5.36137949,-0.406481326,5.35711633,4.07731316,4.07170577
47.73979,5.83095189,5.41710096,0.643312471,5.41286252,4.07601361,4.07037894
47.750282,4.79583152,5.47651933,-0.825038064,5.47230782,4.07471514,4.069053
47.760774,4.24264069,5.53994604,-1.13899313,5.53576378,4.07341788,4.06772807
47.771265,5,5.60772923,-0.779569903,5.60357866,4.07212196,4.06640429
47.781757,5.83095189,5.68028458,0.388158881,5.67616826,4.07082712,4.0650814
47.792248,5.09901951,5.75805999,-0.811813081,5.75398065,4.06953363,4.06375965
47.80274,5.09901951,5.84161194,-0.861738025,5.83757246,4.06824124,4.06243879
47.813232,6.164414,5.93157992,0.482528838,5.92758338,4.06695007,4.06111896
47.823723,5.65685425,6.02874559,-0.609828943,6.0247953,4.06566024,4.05980027
47.834215,4.69041576,6.13411943,-1.20154221,6.13021903,4.06437152,4.05848247
47.844706,5.19615242,6.24894571,-1.02605715,6.24509921,4.06308415,4.05716582
47.855198,6.40312424,6.37488571,0.168043218,6.37109767,4.0617979,4.05585007
47.86569,5.47722558,6.5140634,-1.01825234,6.51033901,4.06051288,4.05453534
47.876181,5.83095189,6.66923928,-0.915580357,6.66558455,4.05922921,4.05322175
47.886673,6.55743852,6.84402186,-0.535334789,6.84044378,4.05794667,4.05190907
47.897164,7.48331477,7.04290061,0.663637072,7.03940725,4.05666549,4.05059753
47.907656,6.4807407,7.27149848,-0.889245623,7.26809903,4.05538544,4.0492869
47.918148,7.21110255,7.53645577,-0.570397423,7.53316037,4.05410663,4.04797729
47.928639,7.07106781,7.84535746,-0.879937298,7.84217685,4.05282919,4.04666883
47.939131,8.94427191,8.20655048,0.858907112,8.20349546,4.05155289,4.04536127
47.949622,8.60232527,8.62840612,-0.161495666,8.62548667,4.05027797,4.04405486
47.960114,8.36660027,9.11894971,-0.867380796,9.11617416,4.04900419,4.04274936
47.970606,9.2736185,9.68477865,-0.641217713,9.68215279,4.04773166,4.04144488
47.981097,9.2736185,10.330364,-1.02798127,10.3278905,4.04646053,4.04014156
47.991589,10.198039,11.0575921,-0.927120845,11.0552701,4.04519054,4.03883914
48.00208,11.7473401,11.8647667,-0.342675663,11.8625923,4.04392194,4.03753788
48.012572,12.1655251,12.7469251,-0.762495933,12.7448914,4.0426545,4.03623752
48.023064,13.7477271,13.6951972,0.22919398,13.6932952,4.04138833,4.0349382
48.033555,13.9283883,14.6970969,-0.876760303,14.695316,4.04012357,4.03364003
48.044047,15.7480157,15.7369745,0.105077353,15.7353031,4.03885996,4.03234276
48.054538,16.1554944,16.7953824,-0.799930008,16.7938088,4.03759777,4.03104666
48.06503,16.4620776,17.849822,-1.17802563,17.8483341,4.03633674,4.02975146
48.075522,17.8885438,18.8737498,-0.992575439,18.8723357,4.035077,4.0284573
48.086013,18.547237,19.836531,-1.13547084,19.8351789,4.03381868,4.02716429
48.096505,20.1494417,20.7035252,-0.744367843,20.7022233,4.03256154,4.0258722
48.106996,20.4939015,21.4362167,-0.970729184,21.4349531,4.03130582,4.02458126
48.117488,21.1660105,21.9953372,-0.910673777,21.9940996,4.03005129,4.02329124
48.12798,22.627417,22.3452439,0.531199651,22.3440197,4.02879806,4.02200226
48.138471,21.2132034,22.4607508,-1.11693661,22.4595268,4.02754626,4.02071443
48.148963,21.977261,22.3329438,-0.59639148,22.3317066,4.02629566,4.01942752
48.159454,20.7123152,21.9715841,-1.12217153,21.9703203,4.0250465,4.01814177
48.169946,21.1660105,21.402398,-0.486196945,21.401094,4.02379854,4.01685693
48.180438,19.7230829,20.6613245,-0.968628728,20.659967,4.02255191,4.01557314
48.190929,19.3132079,19.7879204,-0.688993808,19.7864957,4.02130672,4.01429051
48.201421,18.4661853,18.8202686,-0.59504902,18.8187632,4.02006275,4.01300879
48.211912,16.7630546,17.7931801,-1.014951,17.7915797,4.01882023,4.01172824
48.222404,15.6204994,16.7367998,-1.05655123,16.7350897,4.01757893,4.01044861
48.232896,14.7986486,15.6774643,-0.937451721,15.6756293,4.01633897,4.00917002
48.243387,14.8996644,14.6377922,0.511734539,14.6358167,4.01510048,4.00789259
48.253879,12.489996,13.6366658,-1.0708267,13.6345344,4.01386322,4.00661608
48.26437,11.4455231,12.6899435,-1.11553593,12.6876413,4.01262743,4.00534074
48.274862,11.7046999,11.8096657,-0.323984217,11.8071791,4.01139288,4.00406632
48.285354,11.045361,11.004534,0.202056938,11.0018516,4.0101597,4.00279295
48.295845,10.2469508,10.2795636,-0.180590137,10.2766771,4.00892799,4.00152074
48.306337,9.16515139,9.63601135,-0.686192362,9.63291601,4.00769754,4.00024945
48.316828,9.11043358,9.0720961,0.195799592,9.06879115,4.00646858,3.99897934
48.32732,8.1240384,8.58306732,-0.67751673,8.57955573,4.00524088,3.99771014
48.337812,9.32737905,8.16226504,1.07940447,8.15855298,4.00401456,3.996442
48.348303,8.18535277,7.80174476,0.61936097,7.79784067,4.00278974,3.99517502
48.358795,8,7.49299463,0.712043096,7.48890816,4.00156619,3.99390897
48.369286,7.14142843,7.22781251,-0.293911695,7.22355364,4.00034416,3.99264409
48.379778,7.48331477,6.99857642,0.696231539,6.99415465,3.9991234,3.99138014
48.39027,7.14142843,6.79870425,0.585426491,6.79412822,3.99790405,3.99011723
48.400761,6.32455532,6.62268231,-0.546010065,6.61795954,3.99668622,3.9888555
48.411253,5.83095189,6.4660039,-0.796901505,6.46114076,3.99546968,3.98759469
48.421744,5.29150262,6.32516467,-1.01669172,6.32016653,3.99425467,3.98633506
48.432236,6.40312424,6.19739917,0.453569257,6.19227049,3.99304097,3.98507636
48.442728,6.55743852,6.08061542,0.69052379,6.07536,3.99182869,3.98381871
48.453219,4.89897949,5.97320764,-1.03644979,5.96782874,3.99061795,3.98256223
48.463711,5.19615242,5.87390877,-0.823259587,5.86840921,3.98940854,3.98130668
48.474202,4.89897949,5.78176182,-0.939564968,5.77614417,3.98820067,3.98005231
48.484694,5.91607978,5.69596939,0.46915924,5.69023598,3.98699413,3.97879887
48.495186,4.47213595,5.61589764,-1.06946794,5.61005062,3.98578904,3.97754648
48.505677,5.83095189,5.54101929,0.538453906,5.53506071,3.98458552,3.97629527
48.516169,5.74456265,5.47086248,0.523163615,5.46479425,3.98338333,3.97504499
48.52666,4.79583152,5.4050433,-0.780520194,5.39886725,3.98218273,3.97379589
48.537152,5.65685425,5.34319737,0.560050783,5.33691523,3.98098347,3.97254773
48.547644,5.38516481,5.28501786,0.316460027,5.27863128,3.97978569,3.97130062
48.558135,6.164414,5.23022802,0.966532968,5.2237386,3.9785895,3.97005468
48.568627,5.09901951,5.1785621,-0.282032949,5.17197132,3.97739468,3.96880969
48.579118,5.19615242,5.12979885,0.257591863,5.12310816,3.97620146,3.96756587
48.58961,5.56776436,5.08371797,0.695734427,5.0769287,3.97500961,3.96632299
48.600102,4.58257569,5.0401321,-0.676429157,5.03324554,3.97381927,3.96508116
48.610593,4.69041576,4.99886941,-0.555386037,4.99188678,3.97263054,3.96384052
48.621085,4.35889894,4.95976084,-0.775152822,4.95268328,3.97144321,3.96260082
48.631576,3.46410162,4.92266659,-1.20771064,4.91549519,3.9702575,3.96136229
48.642068,4.47213595,4.88744388,-0.644443891,4.88017964,3.9690732,3.9601247
48.65256,4.35889894,4.85397192,-0.703614224,4.84661578,3.96789043,3.95888818
48.663051,5.09901951,4.82213913,0.526194243,4.814692,3.9667093,3.95765284
48.673543,5.09901951,4.79183369,0.554243468,4.78429639,3.9655296,3.95641843
48.684034,4.89897949,4.76296414,0.368802582,4.75533745,3.96435155,3.95518521
48.694526,4.35889894,4.73543488,-0.613625243,4.7277195,3.96317494,3.95395293
48.705018,4.12310563,4.70916565,-0.765545573,4.70136225,3.96199989,3.95272172
48.715509,5.19615242,4.68408189,0.715591041,4.67619107,3.96082651,3.95149168
48.726001,4.69041576,4.6601074,0.174092965,4.65212973,3.95965459,3.95026259
48.736492,4.79583152,4.63718078,0.398309854,4.62911678,3.95848435,3.94903468
48.746984,4.58257569,4.61523621,-0.180722191,4.60708633,3.95731558,3.94780772
48.757476,4.58257569,4.59421895,-0.107903894,4.5859836,3.95614841,3.94658183
48.767967,5,4.57407791,0.652627069,4.56575749,3.95498293,3.94535711
48.778459,4,4.55475982,-0.744822009,4.54635465,3.95381895,3.94413334
48.78895,3.74165739,4.53622249,-0.891383815,4.52773287,3.95265668,3.94291076
48.799442,4.69041576,4.51841944,0.414724394,4.5098456,3.95149592,3.94168913
48.809934,5.47722558,4.50131249,0.987883132,4.49265466,3.95033678,3.94046856
48.820425,4.35889894,4.48486586,-0.354918183,4.47612422,3.94917938,3.93924917
48.830917,4,4.46904141,-0.68486598,4.4602161,3.94802351,3.93803074
48.841408,5.29150262,4.45380955,0.915255743,4.44490067,3.94686938,3.93681349
48.8519,4,4.43913671,-0.662673913,4.43014434,3.9457168,3.93559719
48.862392,4.35889894,4.42499575,-0.257092995,4.41591993,3.94456588,3.93438196
48.872883,5.09901951,4.41136107,0.829251735,4.40220181,3.94341673,3.93316791
48.883375,4.35889894,4.39820481,-0.19825707,4.38896209,3.94226915,3.93195482
48.893866,5.91607978,4.38550583,1.23716367,4.3761796,3.94112336,3.93074291
48.904358,4.79583152,4.3732394,0.65007086,4.36382958,3.93997915,3.92953196
48.91485,4.12310563,4.36138585,-0.488139554,4.35189233,3.93883663,3.92832208
48.925341,3.46410162,4.34992657,-0.941182742,4.34034922,3.93769593,3.92711338
48.935833,4.35889894,4.33884079,0.141626822,4.32917945,3.93655684,3.92590564
48.946324,4.35889894,4.32811318,0.175458729,4.31836767,3.93541957,3.92469908
48.956816,4.69041576,4.31772519,0.610483886,4.30789529,3.93428393,3.92349348
48.967308,5.09901951,4.30766232,0.889582596,4.2977478,3.93315003,3.92228895
48.977799,4,4.29791083,-0.545812083,4.28791143,3.93201798,3.92108561
48.988291,4.47213595,4.28845497,0.428580197,4.27837041,3.93088759,3.91988323
48.998782,4.69041576,4.27928347,0.641195985,4.26911344,3.92975907,3.91868204
49.009274,4.24264069,4.27038216,-0.166557725,4.26012634,3.92863221,3.9174818
49.019766,5.19615242,4.26174023,0.966649985,4.25139826,3.92750714,3.91628264
49.030257,4.58257569,4.25334737,0.573784216,4.24291888,3.92638398,3.91508467
49.040749,4.47213595,4.24519144,0.476386935,4.23467604,3.92526251,3.91388765
49.05124,4.79583152,4.23726407,0.747373704,4.22666135,3.92414296,3.91269183
49.061732,4.79583152,4.22955427,0.752513958,4.21886379,3.92302512,3.91149696
49.072224,5.65685425,4.22205385,1.19783154,4.21127515,3.92190913,3.91030317
49.082715,4.58257569,4.214755,0.606482233,4.20388762,3.92079508,3.90911057
49.093207,3.46410162,4.20764823,-0.862291488,4.19669166,3.91968278,3.90791894
49.103698,4.69041576,4.20072723,0.699777486,4.18968098,3.91857245,3.90672849
49.11419,3.87298335,4.19398338,-0.566568646,4.18284689,3.91746389,3.905539
49.124682,4.58257569,4.1874104,0.628621742,4.17618314,3.91635722,3.9043506
49.135173,4.58257569,4.18100231,0.633698184,4.1696837,3.91525255,3.90316338
49.145665,4.35889894,4.17475157,0.429123956,4.16334102,3.91414968,3.90197712
49.156156,3.74165739,4.16865342,-0.653449336,4.15715032,3.91304884,3.90079206
49.166648,4.58257569,4.16270097,0.647977411,4.15110469,3.91194983,3.89960796
49.17714,5.29150262,4.15688938,1.06518226,4.14519927,3.91085276,3.89842495
49.187631,4.47213595,4.151214,0.566499739,4.13942942,3.90975775,3.89724312
49.198123,4.89897949,4.1456688,0.867934724,4.13378905,3.90866461,3.89606226
49.208614,4.47213595,4.14025013,0.57609533,4.12827451,3.90757355,3.89488259
49.219106,5.47722558,4.13495243,1.15856512,4.12288022,3.90648438,3.89370388
49.229598,4,4.12977193,-0.360238716,4.1176024,3.90539721,3.89252626
49.240089,4.79583152,4.12470501,0.819223116,4.1124374,3.90431217,3.89134983
49.250581,3.87298335,4.11974675,-0.496752864,4.10738029,3.90322906,3.89017437
49.261072,4.24264069,4.11489436,0.357416177,4.10242827,3.90214809,3.8890001
49.271564,5.29150262,4.11014331,1.08690354,4.09757676,3.90106908,3.8878268
49.282056,4.47213595,4.10549063,0.60551245,4.09282279,3.89999214,3.88665458
49.292547,4.69041576,4.10093346,0.767777508,4.0881635,3.8989174,3.88548355
49.303039,4,4.09646777,-0.310592615,4.08359482,3.89784465,3.8843135
49.31353,3.87298335,4.09209141,-0.468089806,4.07911459,3.89677412,3.88314463
49.324022,4.12310563,4.08780064,0.187896199,4.07471904,3.89570562,3.88197674
49.334514,4.35889894,4.08359312,0.524695935,4.07040581,3.89463927,3.88080993
49.345005,4.89897949,4.07946657,0.905269524,4.06617263,3.89357518,3.87964432
49.355497,4.35889894,4.07541767,0.532429598,4.06201613,3.89251316,3.87847967
49.365988,4.35889894,4.07144473,0.536147568,4.05793462,3.89145344,3.87731622
49.37648,4.79583152,4.06754465,0.853397253,4.05392497,3.89039583,3.87615375
49.386972,4.47213595,4.06371557,0.639077763,4.04998529,3.88934045,3.87499236
49.397463,4.69041576,4.05995567,0.794015169,4.04611378,3.8882874,3.87383216
49.407955,4.12310563,4.05626216,0.258541027,4.04230759,3.88723652,3.87267293
49.418446,5,4.05263376,0.973327408,4.03856543,3.88618801,3.8715149
49.428938,4.24264069,4.04906784,0.439969145,4.03488466,3.8851417,3.87035785
49.43943,5.09901951,4.04556292,1.02638034,4.03126376,3.8840977,3.86920188
49.449921,3.74165739,4.04211754,-0.54814246,4.02770129,3.88305614,3.86804711
49.460413,3.87298335,4.03872935,-0.407119157,4.02419483,3.88201682,3.86689331
49.470904,4,4.03539736,-0.188141864,4.0207434,3.88097997,3.8657407
49.481396,4,4.03211934,-0.179218707,4.01734474,3.87994541,3.86458908
49.491888,3.46410162,4.02889411,-0.751526776,4.01399763,3.87891326,3.86343854
49.502379,4.24264069,4.0257205,0.465746918,4.01070092,3.87788363,3.86228919
49.512871,3.74165739,4.02259649,-0.530036884,4.00745252,3.87685636,3.86114082
49.523362,4.89897949,4.01952132,0.937794307,4.0042517,3.87583165,3.85999365
49.533854,4.69041576,4.01649311,0.820927919,4.00109651,3.87480933,3.85884746
49.544346,3.46410162,4.01351089,-0.741221476,3.99798597,3.87378953,3.85770235
49.554837,4.24264069,4.01057373,0.481733286,3.99491914,3.87277236,3.85655844
49.565329,4.12310563,4.00767989,0.339743632,3.99189424,3.87175764,3.85541551
49.57582,4.12310563,4.0048288,0.343913973,3.9889107,3.87074561,3.85427378
49.586312,4.12310563,4.00201884,0.347975267,3.98596683,3.86973608,3.85313302
49.596804,5.19615242,3.99924922,1.09403071,3.98306186,3.86872917,3.85199336
49.607295,4.35889894,3.9965192,0.601979855,3.98019501,3.86772501,3.85085489
49.617787,3.87298335,3.99382727,-0.34762613,3.97736474,3.86672343,3.8497174
49.628278,4.35889894,3.99117302,0.606404093,3.97457061,3.86572465,3.84858111
49.63877,4.58257569,3.98855502,0.770727367,3.97181117,3.8647285,3.8474458
49.649262,4,3.98597266,0.118437084,3.96908578,3.86373509,3.84631158
49.659753,4,3.98342532,0.128742671,3.96639381,3.86274457,3.84517855
49.670245,4.35889894,3.98091172,0.614806657,3.96373391,3.86175675,3.84404651
49.680736,5,3.97843153,1.0107267,3.96110577,3.86077186,3.84291567
49.691228,4.12310563,3.97598352,0.383564991,3.9585081,3.85978974,3.8417858
49.70172,5,3.9735672,1.0131302,3.95594037,3.8588105,3.84065703
49.712211,3.87298335,3.97118208,-0.313366776,3.95340211,3.85783429,3.83952946
49.722703,4.47213595,3.96882702,0.709442693,3.95089209,3.85686092,3.83840287
49.733194,3.87298335,3.96650181,-0.30580788,3.94841011,3.85589063,3.83727748
49.743686,3.87298335,3.96420535,-0.302029806,3.94595503,3.85492326,3.83615307
49.754178,4,3.96193726,0.195096746,3.94352641,3.85395893,3.83502975
49.764669,4.58257569,3.95969715,0.789226549,3.94112387,3.85299777,3.83390763
49.775161,4.24264069,3.95748401,0.534000632,3.93874634,3.85203963,3.83278649
49.785652,4.12310563,3.95529771,0.409643641,3.93639367,3.85108472,3.83166656
49.796144,5.29150262,3.95313729,1.1568774,3.93406484,3.85013289,3.83054761
49.806636,4.24264069,3.95100244,0.540035409,3.93175951,3.84918428,3.82942975
49.817127,4.69041576,3.94889286,0.86111724,3.92947737,3.84823901,3.82831309
49.827619,4.24264069,3.94680765,0.543905357,3.92721746,3.84729693,3.82719741
49.83811,4.47213595,3.94474674,0.726215679,3.9249797,3.84635826,3.82608293
49.848602,2.64575131,3.94270929,-1.13884063,3.92276316,3.84542287,3.82496944
49.859094,4.24264069,3.94069505,0.549495804,3.92056758,3.84449087,3.82385705
49.869585,4.24264069,3.93870378,0.551304727,3.91839271,3.8435624,3.82274585
49.880077,5.38516481,3.93673471,1.20350742,3.91623767,3.84263732,3.82163564
49.890568,4.69041576,3.9347878,0.869268637,3.91410245,3.84171586,3.82052662
49.90106,4.24264069,3.9328623,0.556577389,3.9119862,3.84079787,3.8194186
49.911552,4.35889894,3.93095803,0.654171932,3.90988872,3.83988348,3.81831167
49.922043,4.79583152,3.92907481,0.930997699,3.90780981,3.83897284,3.81720593
49.932535,3,3.92721193,-0.962918446,3.90574868,3.83806581,3.81610119
49.943026,4.47213595,3.92536943,0.739436626,3.90370533,3.83716261,3.81499764
49.953518,4.47213595,3.92354662,0.740668165,3.90167902,3.83626311,3.81389509
49.96401,4.35889894,3.92174338,0.661177405,3.89966958,3.83536745,3.81279362
49.974501,4.47213595,3.91995957,0.743085715,3.89767686,3.83447577,3.81169336
49.984993,4,3.91819457,0.28601648,3.89570012,3.83358795,3.81059408
49.995484,4.24264069,3.91644844,0.571132427,3.89373943,3.8327042,3.80949601
50.005976,4,3.91472057,0.292026424,3.89179409,3.83182441,3.80839892
50.016468,4.69041576,3.91301087,0.881705669,3.88986396,3.83094872,3.80730293
50.026959,5,3.91131927,1.04339865,3.88794894,3.83007726,3.80620814
50.037451,3.31662479,3.90964518,-0.770078174,3.88604836,3.82920994,3.80511434
50.047942,4.35889894,3.90798872,0.67149849,3.88416229,3.82834697,3.80402174
50.058434,5,3.90634934,1.04577754,3.8822901,3.82748824,3.80293012
50.068926,5.38516481,3.90472698,1.21673244,3.8804317,3.82663391,3.80183961
50.079417,4.47213595,3.90312161,0.754330398,3.87858699,3.8257841,3.80075029
50.089909,3.87298335,3.9015327,-0.168965554,3.87675537,3.82493873,3.79966196
50.1004,5.29150262,3.8999604,1.17963648,3.87493693,3.82409802,3.79857484
50.110892,4.79583152,3.8984042,0.947326406,3.87313108,3.82326188,3.7974887
50.121384,4.89897949,3.89686411,1.00105713,3.87133776,3.82243045,3.79640366
50.131875,5.38516481,3.89534009,1.22058376,3.86955691,3.82160389,3.79531982
50.142367,5.19615242,3.8938317,1.14119268,3.86778795,3.82078211,3.79423697
50.152858,4.24264069,3.89233908,0.591862824,3.86603101,3.81996533,3.79315532
50.16335,4.69041576,3.89086182,0.894177803,3.86428553,3.81915348,3.79207466
50.173842,4.58257569,3.8893999,0.832571793,3.86255148,3.81834671,3.7909951
50.184333,4.12310563,3.88795336,0.484925009,3.86082881,3.81754518,3.78991674
50.194825,4.47213595,3.88652179,0.765254313,3.85911699,3.81674881,3.78883937
50.205316,4.58257569,3.88510536,0.835146896,3.85741616,3.81595785,3.7877632
50.215808,3.31662479,3.88370368,-0.753046407,3.85572581,3.81517221,3.78668803
50.2263,4.79583152,3.8823168,0.95577964,3.8540459,3.81439208,3.78561395
50.236791,5.19615242,3.88094476,1.14682504,3.85237643,3.8136176,3.78454106
50.247283,4.24264069,3.87958721,0.602539194,3.85071689,3.81284872,3.78346918
50.257774,4.35889894,3.87824432,0.693292594,3.84906743,3.81208569,3.78239849
50.268266,4.47213595,3.87691578,0.771505136,3.84742756,3.81132845,3.78132879
50.278758,3.87298335,3.87560164,-0.0511692942,3.84579729,3.81057718,3.7802602
50.289249,4.69041576,3.87430197,0.903390162,3.84417661,3.80983204,3.7791928
50.299741,4.58257569,3.87301647,0.842353382,3.84256505,3.809093,3.77812639
50.310232,4.24264069,3.87174534,0.609011778,3.84096276,3.80836031,3.77706118
50.320724,4.79583152,3.87048829,0.961947623,3.8393693,3.80763393,3.77599697
50.331216,4.58257569,3.86924542,0.844588819,3.83778467,3.80691405,3.77493386
50.341707,4.58257569,3.86801681,0.845315849,3.83620888,3.80620085,3.77387194
50.352199,4.58257569,3.86680221,0.846033975,3.83464149,3.80549432,3.77281102
50.36269,5.09901951,3.86560183,1.11059339,3.83308266,3.8047947,3.7717513
50.373182,4.58257569,3.86441544,0.847443363,3.83153197,3.80410199,3.77069257
50.383674,4.12310563,3.86324315,0.509767077,3.82998943,3.80341639,3.76963494
50.394165,4.58257569,3.86208508,0.848817185,3.82845507,3.80273809,3.76857851
50.404657,5.09901951,3.86094101,1.11268976,3.82692846,3.80206709,3.76752307
50.415148,4.79583152,3.85981119,0.967481438,3.82540979,3.80140367,3.76646883
50.42564,3.31662479,3.85869542,-0.736254457,3.82389864,3.80074783,3.76541559
50.436132,4.69041576,3.85759383,0.912590778,3.82239504,3.8000998,3.76436345
50.446623,5,3.85650658,1.06934252,3.82089903,3.79945977,3.7633125
50.457115,4.69041576,3.85543349,0.913773643,3.8194102,3.79882779,3.76226255
50.467606,4.35889894,3.85437482,0.710298613,3.81792874,3.79820413,3.76121379
50.478098,4.12310563,3.85333044,0.519398873,3.81645425,3.79758884,3.76016604
50.48859,4.47213595,3.85230049,0.787296299,3.81498678,3.79698214,3.75911938
50.499081,4.47213595,3.85128516,0.787940856,3.81352637,3.79638428,3.75807391
50.509573,4.47213595,3.85028433,0.788575695,3.81207263,3.7957953,3.75702945
50.520064,4.24264069,3.84929827,0.627170167,3.81062575,3.79521551,3.75598618
50.530556,4.79583152,3.84832689,0.973398497,3.80918535,3.79464498,3.75494391
50.541048,4.89897949,3.84737039,1.02547994,3.8077515,3.79408397,3.75390273
50.551539,3.46410162,3.84642896,-0.618326243,3.80632422,3.79353272,3.75286275
50.562031,4.47213595,3.84550254,0.791601803,3.80490316,3.79299135,3.75182377
50.572522,4.24264069,3.84459144,0.630911445,3.8034885,3.79246016,3.75078599
50.583014,4,3.8436956,0.39535351,3.8020799,3.79193927,3.7497492
50.593506,4,3.84281527,0.396465294,3.8006774,3.79142895,3.74871351
50.603997,4.47213595,3.84195067,0.793842103,3.79928105,3.7909295,3.74767902
50.614489,3.16227766,3.8411018,-0.823907849,3.79789052,3.79044105,3.74664552
50.62498,3.31662479,3.84026899,-0.723632644,3.79650598,3.78996395,3.74561322
50.635472,4.89897949,3.83945226,1.02933339,3.7951271,3.78949835,3.74458192
50.645964,3.87298335,3.83865186,0.18528757,3.79375393,3.78904456,3.74355172
50.656455,4.12310563,3.83786808,0.534076349,3.79238654,3.7886029,3.74252271
50.666947,5.19615242,3.83710096,1.16578363,3.79102458,3.78817356,3.7414947
50.677438,5.19615242,3.83635088,1.16610529,3.78966826,3.78775692,3.74046788
50.68793,4.58257569,3.8356179,0.864267199,3.78831724,3.78735318,3.73944206
50.698422,4.12310563,3.83490236,0.536845667,3.78697159,3.7869627,3.73841734
50.708913,3.87298335,3.83420455,0.196923331,3.78563136,3.78658582,3.73739381
50.719405,4,3.83352461,0.408013962,3.78429625,3.78622282,3.73637128
50.729896,4.12310563,3.83286294,0.538741766,3.78296643,3.78587408,3.73534995
50.740388,4.35889894,3.83221969,0.725726706,3.7816416,3.78553989,3.73432962
50.75088,3.46410162,3.83159524,-0.606212524,3.78032182,3.78522066,3.73331038
50.761371,4.35889894,3.83098995,0.726573463,3.77900715,3.78491677,3.73229233
50.771863,4.35889894,3.83040402,0.726976564,3.77769729,3.78462856,3.73127529
50.782354,4.79583152,3.82983791,0.98284974,3.77639244,3.78435649,3.73025943
50.792846,5.09901951,3.82929187,1.12682192,3.77509228,3.7841009,3.72924458
50.803338,4.79583152,3.82876631,0.983394738,3.77379689,3.78386226,3.72823082
50.813829,3.60555128,3.82826168,-0.47192203,3.77250633,3.78364102,3.72721826
50.824321,4.89897949,3.82777827,1.03498851,3.77122031,3.78343761,3.72620669
50.834812,3.74165739,3.82731659,-0.292675937,3.76993903,3.78325252,3.72519632
50.845304,3.74165739,3.826877,-0.291923979,3.76866217,3.78308623,3.72418695
50.855796,4.24264069,3.82645998,0.64512069,3.76738983,3.78293924,3.72317867
50.866287,3.46410162,3.82606606,-0.601634809,3.76612207,3.7828121,3.72217158
50.876779,4.47213595,3.82569564,0.804015119,3.76485859,3.78270533,3.7211655
50.88727,3.60555128,3.82534932,-0.46882624,3.76359961,3.7826195,3.7201606
50.897762,4,3.82502755,0.41829708,3.76234482,3.7825552,3.71915671
50.908254,4.24264069,3.82473094,0.646459394,3.76109431,3.78251303,3.71815391
50.918745,3.74165739,3.82446008,-0.287754572,3.75984815,3.78249362,3.7171523
50.929237,3.87298335,3.82421553,0.220834365,3.75860606,3.78249763,3.71615169
50.939728,4.58257569,3.82399796,0.87096368,3.75736823,3.78252572,3.71515227
50.95022,4.58257569,3.82380799,0.87107273,3.75613439,3.7825786,3.71415385
50.960712,4.58257569,3.82364633,0.871165521,3.75490461,3.78265701,3.71315653
50.971203,4.12310563,3.82351369,0.547349918,3.75367897,3.78276168,3.71216039
50.981695,4.24264069,3.8234108,0.647479643,3.7524572,3.78289343,3.71116526
50.992186,4.47213595,3.82333844,0.805479679,3.75123948,3.78305305,3.71017131
51.002678,4.58257569,3.82329741,0.871365756,3.75002556,3.78324141,3.70917837
51.01317,4.58257569,3.82328856,0.871370836,3.74881551,3.78345938,3.70818652
51.023661,3.46410162,3.82331276,-0.599342261,3.74760941,3.78370787,3.70719585
51.034153,4,3.82337093,0.420272618,3.74640699,3.78398787,3.70620619
51.044644,4,3.823464,0.420161869,3.74520845,3.78430032,3.70521771
51.055136,4.58257569,3.823593,0.871196129,3.74401353,3.78464633,3.70423024
51.065628,5.09901951,3.82375895,1.12927435,3.74282229,3.78502693,3.70324386
51.076119,5.47722558,3.82396291,1.28579262,3.74163484,3.78544321,3.70225866
51.086611,3.74165739,3.82420605,-0.287312839,3.7404509,3.78589643,3.70127447
51.097102,4.79583152,3.82448951,0.985566847,3.73927066,3.78638771,3.70029146
51.107594,3.46410162,3.82481457,-0.600593838,3.73809389,3.78691841,3.69930946
51.118086,4,3.8251825,0.418111832,3.73692064,3.78748983,3.69832854
51.128577,3.74165739,3.82559459,-0.289719176,3.73575102,3.78810329,3.69734881
51.139069,4.24264069,3.82605233,0.645436564,3.73458475,3.78876035,3.69637009
51.14956,3.16227766,3.82655711,-0.815033402,3.73342205,3.78946238,3.69539254
51.160052,3.46410162,3.82711055,-0.602502228,3.73226265,3.79021111,3.694416
51.170544,4.24264069,3.82771422,0.64414786,3.73110664,3.79100811,3.69344055
51.181035,4.35889894,3.82836974,0.728374355,3.7299541,3.79185503,3.69246628
51.191527,3.87298335,3.829079,0.20953365,3.72880479,3.79275382,3.69149302
51.202018,4.69041576,3.82984369,0.927670236,3.72765889,3.7937062,3.69052094
51.21251,2.44948974,3.83066591,-1.17523452,3.72651617,3.79471431,3.68954985
51.223002,3.46410162,3.8315476,-0.606173228,3.7253767,3.79578014,3.68857986
51.233493,2.82842712,3.83249079,-1.00202977,3.72424057,3.79690573,3.68761106
51.243985,4,3.8334979,0.408046694,3.72310755,3.79809357,3.68664325
51.254476,4,3.83457105,0.406729578,3.72197781,3.7993458,3.68567663
51.264968,3.31662479,3.83571291,-0.720477701,3.72085112,3.80066515,3.684711
51.27546,3.16227766,3.83692594,-0.82136976,3.71972757,3.80205412,3.68374647
51.285951,4.12310563,3.83821273,0.533753587,3.71860724,3.80351531,3.68278312
51.296443,4.12310563,3.83957636,0.532474665,3.71748989,3.80505186,3.68182076
51.306934,3.16227766,3.84101954,-0.823857927,3.71637571,3.80666653,3.68085959
51.317426,4.24264069,3.8425457,0.632530624,3.71526447,3.80836278,3.67989942
51.327918,4.35889894,3.84415799,0.717454496,3.71415626,3.81014382,3.67894034
51.338409,5.19615242,3.84585973,1.16202095,3.71305116,3.81201298,3.67798244
51.348901,3.60555128,3.8476549,-0.49204027,3.71194893,3.81397433,3.67702553
51.359392,4.24264069,3.84954702,0.626971824,3.71084977,3.81603138,3.67606981
51.369884,4,3.8515405,0.385304429,3.70975345,3.81818863,3.67511509
51.380376,4.12310563,3.85363945,0.519101314,3.70866006,3.82045023,3.67416145
51.390867,4,3.85584819,0.379673288,3.70756967,3.82282053,3.673209
51.401359,4.12310563,3.85817191,0.514717121,3.70648206,3.82530478,3.67225754
51.41185,4.35889894,3.86061521,0.705892153,3.70539742,3.82790762,3.67130726
51.422342,4.58257569,3.86318388,0.848169685,3.70431553,3.83063491,3.67035798
51.432834,4.24264069,3.86588333,0.613805632,3.70323647,3.83349211,3.66940979
51.443325,3.16227766,3.86871926,-0.840500805,3.70216033,3.83648495,3.66846278
51.453817,4.24264069,3.87169851,0.609050223,3.70108688,3.83962036,3.66751676
51.464308,4.79583152,3.87482722,0.959689693,3.70001631,3.84290449,3.66657192
51.4748,3.87298335,3.87811305,-0.0716219466,3.6989484,3.84634512,3.66562808
51.485292,4.24264069,3.88156325,0.600897196,3.69788324,3.84994952,3.66468533
51.495783,3.46410162,3.88518545,-0.648909725,3.69682091,3.85372539,3.66374375
51.506275,4.12310563,3.8889888,0.483856202,3.6957612,3.85768196,3.66280317
51.516766,4.35889894,3.89298161,0.682581372,3.69470428,3.86182759,3.66186376
51.527258,4.35889894,3.89717421,0.679503298,3.69364995,3.8661727,3.66092536
51.53775,4.58257569,3.90157643,0.825226796,3.69259829,3.87072718,3.65998803
51.548241,4.24264069,3.90619869,0.580036202,3.69154939,3.87550153,3.65905189
51.558733,3.46410162,3.91105344,-0.668544555,3.69050302,3.88050828,3.65811674
51.569224,4,3.91615211,0.289565005,3.68945938,3.88575894,3.65718276
51.579716,4.58257569,3.92150884,0.81306018,3.68841826,3.89126776,3.65624978
51.590208,4.79583152,3.92713725,0.932037701,3.68737974,3.89704843,3.65531789
51.600699,4.35889894,3.93305183,0.652569624,3.6863439,3.90311554,3.65438717
51.611191,5.09901951,3.9392698,1.07691676,3.68531054,3.90948642,3.65345744
51.621682,4,3.94580725,0.232793361,3.68427983,3.91617725,3.65252889
51.632174,4.79583152,3.9526839,0.918230702,3.68325158,3.92320789,3.65160133
51.642666,3.31662479,3.959919,-0.802056238,3.68222586,3.93059768,3.65067486
51.653157,4.24264069,3.96753313,0.524506965,3.68120277,3.93836732,3.64974956
51.663649,4.35889894,3.97555062,0.619151294,3.68018208,3.9465413,3.64882525
51.67414,5.09901951,3.98399461,1.0559474,3.679164,3.95514287,3.64790211
51.684632,4.58257569,3.99289321,0.767907861,3.67814831,3.96420031,3.64697997
51.695124,4.47213595,4.00227427,0.685464573,3.6771351,3.97374162,3.64605891
51.705615,3.46410162,4.01216772,-0.740314872,3.67612445,3.98379685,3.64513903
51.716107,5.38516481,4.02260876,1.16728576,3.67511617,3.99440143,3.64422013
51.726598,3.60555128,4.03363149,-0.654278394,3.67411042,4.0055896,3.64330241
51.73709,5.56776436,4.04527703,1.23389113,3.67310702,4.01740271,3.64238568
51.747582,3.87298335,4.0575867,-0.429654927,3.67210604,4.02988226,3.64147003
51.758073,4.12310563,4.0706052,0.229129718,3.67110757,4.04307316,3.64055555
51.768565,4.69041576,4.08438484,0.778479876,3.67011142,4.05702798,3.63964206
51.779056,3.31662479,4.09897735,-0.884506959,3.66911775,4.07179866,3.63872974
51.789548,5.09901951,4.11444457,0.9922575,3.66812638,4.08744733,3.63781841
51.80004,4.35889894,4.13084966,0.477545054,3.66713739,4.10403744,3.63690816
51.810531,3.87298335,4.14826141,-0.524669481,3.66615087,4.12163801,3.63599908
51.821023,4.79583152,4.16676005,0.793140258,3.66516661,4.14032965,3.63509099
51.831514,5,4.1864265,0.901983092,3.66418479,4.16019356,3.63418407
51.842006,4.58257569,4.20735691,0.61255105,3.66320523,4.18132629,3.63327814
51.852498,4.47213595,4.22965111,0.4924275,3.66222801,4.20382804,3.63237329
51.862989,4,4.25341863,-0.503407024,3.66125321,4.22780871,3.6314696
51.873481,3.74165739,4.27878702,-0.732891283,3.66028063,4.2533963,3.6305669
51.883972,4,4.30588747,-0.553070948,3.65931046,4.28072243,3.62966537
51.894464,4.35889894,4.33487535,0.154995477,3.65834251,4.30994298,3.62876483
51.904956,4.47213595,4.36591457,0.325916231,3.65737685,4.34122237,3.62786536
51.915447,4.79583152,4.39918669,0.629797454,3.65641358,4.37474266,3.62696706
51.925939,3.74165739,4.43490333,-0.83261392,3.6554525,4.41071608,3.62606975
51.93643,4.12310563,4.47328705,-0.591761292,3.65449379,4.44936578,3.6251736
51.946922,5.09901951,4.51460162,0.764472295,3.65353726,4.49095619,3.62427844
51.957414,5.19615242,4.55913267,0.79813517,3.652583,4.53577362,3.62338436
51.967905,4.35889894,4.60720378,-0.498301949,3.65163109,4.58414237,3.62249144
51.978397,5.09901951,4.65920098,0.663188162,3.65068134,4.63644934,3.6215995
51.988888,5.83095189,4.71555618,1.05612297,3.64973393,4.69312732,3.62070873
51.99938,5.09901951,4.77680977,0.567635221,3.64878866,4.75471787,3.61981895
52.009872,4.69041576,4.8436141,-0.39140559,3.64784564,4.82187471,3.61893024
52.020363,5.09901951,4.91680812,0.426862262,3.64690493,4.89543863,3.61804268
52.030855,4.24264069,4.99753517,-0.868846641,3.64596637,4.97655558,3.61715612
52.041346,5,5.08733771,-0.295529542,3.64503011,5.06677159,3.61627071
52.051838,4.89897949,5.18842275,-0.53799932,3.64409597,5.16829888,3.6153863
52.06233,5.19615242,5.3038865,-0.328228697,3.64316405,5.28424065,3.61450295
52.072821,6,5.43808457,0.749610186,3.64223443,5.41896182,3.61362076
52.083313,6.40312424,5.59706938,0.897805581,3.64130691,5.57852639,3.61273956
52.093804,5.19615242,5.78887267,-0.769883271,3.64038169,5.77097887,3.61185951
52.104296,6,6.02384607,-0.154421732,3.63945856,6.00668317,3.61098046
52.114788,7.28010989,6.3144634,0.982673133,3.63853763,6.29812129,3.61010247
52.125279,6.70820393,6.67478068,0.182820278,3.63761897,6.65934944,3.60922563
52.135771,7.74596669,7.1194127,0.791551636,3.6367024,7.10497157,3.60834979
52.146262,7.48331477,7.66167416,-0.422326155,3.6357881,7.64827904,3.60747509
52.156754,9.48683298,8.31205427,1.08387209,3.63487589,8.29972873,3.60660138
52.167246,8.83176087,9.07623751,-0.494445798,3.63396585,9.0649688,3.60572874
52.177737,9.89949494,9.95400383,-0.233471391,3.63305806,9.94374563,3.60485725
52.188229,10.9087121,10.9389241,-0.173816033,3.63215236,10.9296043,3.60398675
52.19872,11.61895,12.0177841,-0.631533113,3.6312489,12.0093139,3.6031174
52.209212,12.8840987,13.1716629,-0.536250106,3.63034751,13.1639462,3.60224903
52.219704,14.1421356,14.3758761,-0.483467121,3.62944829,14.3688158,3.60138173
52.230195,15.7480157,15.6008246,0.383654938,3.6285513,15.5943277,3.60051558
52.240687,16.881943,16.8127163,0.263109704,3.62765638,16.8066957,3.59965042
52.251178,18.8679623,17.972722,0.946171365,3.6267637,17.9670973,3.5987864
52.26167,19.4164878,19.0374289,0.615677618,3.62587308,19.0321254,3.59792336
52.272162,21.1187121,19.9578607,1.07742812,3.6249846,19.9528079,3.59706139
52.282653,20.8566536,20.6814212,0.418607753,3.62409836,20.6765508,3.59620057
52.293145,21.6333077,21.157436,0.689834503,3.62321418,21.1526805,3.59534073
52.303636,21.1660105,21.3464329,-0.424761563,3.62233222,21.3417246,3.59448204
52.314128,21.3072758,21.2313826,0.275487028,3.62145232,21.2266537,3.59362433
52.32462,20.3715488,20.8229696,-0.671878579,3.62057456,20.8181527,3.59276768
52.335111,20.4694895,20.1561511,0.559766407,3.61969902,20.1511796,3.59191218
52.345603,18.6815417,19.279717,-0.773417956,3.61882553,19.2745243,3.59105766
52.356094,18.3575598,18.2463993,0.333407304,3.61795427,18.2409172,3.59020428
52.366586,17.2046505,17.1058859,0.314268422,3.61708506,17.1000431,3.58935188
52.377078,16.3095064,15.9031386,0.637469853,3.61621798,15.8968589,3.58850055
52.387569,14.7986486,14.6780514,0.347271074,3.61535313,14.6712525,3.58765036
52.398061,14.0356688,13.4654876,0.755103469,3.61449032,13.4580815,3.58680114
52.408552,12.5698051,12.2962743,0.523001686,3.61362974,12.2881692,3.58595307
52.419044,10.8627805,11.1959892,-0.577242361,3.61277121,11.1870927,3.58510598
52.429536,10.4403065,10.1852452,0.505035959,3.61191482,10.175471,3.58425995
52.440027,8.94427191,9.27870348,-0.57830059,3.61106064,9.26797944,3.58341505
52.450519,8.36660027,8.48438226,-0.343193815,3.61020852,8.47265913,3.58257114
52.46101,8.77496439,7.80418603,0.98528085,3.60935862,7.79144583,3.58172836
52.471502,7.41619849,7.23367669,0.427225693,3.60851078,7.21993609,3.58088657
52.481994,7.41619849,6.76363284,0.807815357,3.60766507,6.7489414,3.58004583
52.492485,6.92820323,6.38135316,0.739493116,3.60682159,6.36578537,3.57920622
52.502977,6.55743852,6.07239823,0.696448343,3.60598017,6.05604177,3.5783676
52.513468,6.32455532,5.82255135,0.708522388,3.60514098,5.80549605,3.57753011
52.52396,5,5.61882459,-0.786654045,3.60430385,5.6011535,3.5766936
52.534452,5.65685425,5.45036915,0.454406319,3.60346887,5.43215403,3.57585814
52.544943,5.09901951,5.30857965,-0.457777391,3.60263611,5.28987961,3.57502382
52.555435,4.79583152,5.1869104,-0.625363,3.60180543,5.1677727,3.57419047
52.565926,5,5.08062733,-0.283949524,3.60097698,5.06108961,3.57335826
52.576418,5.29150262,4.98631181,0.552440774,3.60015061,4.96640417,3.57252702
52.58691,5.47722558,4.90157484,0.758716505,3.5993264,4.88132192,3.57169683
52.597401,4.58257569,4.8247223,-0.492083945,3.59850442,4.80414487,3.57086778
52.607893,4.12310563,4.75451276,-0.794611312,3.59768453,4.73362874,3.5700397
52.618384,4.79583152,4.69005081,0.325239475,3.59686689,4.66887618,3.56921275
52.628876,4.12310563,4.63062455,-0.712403623,3.59605134,4.60917375,3.56838677
52.639368,4.12310563,4.57568241,-0.672738275,3.59523796,4.55396872,3.56756185
52.649859,4.79583152,4.52476818,0.520637438,3.59442684,4.50280392,3.56673806
52.660351,3.16227766,4.47748054,-1.14682295,3.59361782,4.45527714,3.56591523
52.670842,4.24264069,4.43348991,-0.436862936,3.59281106,4.41105809,3.56509354
52.681334,3.31662479,4.39249007,-1.03723926,3.59200641,4.36983977,3.56427282
52.691826,4.24264069,4.35422167,-0.334037403,3.59120396,4.33136224,3.56345314
52.702317,3.31662479,4.31845285,-1.00091361,3.59040377,4.295393,3.56263459
52.712809,5,4.2849659,0.845596887,3.58960572,4.26171375,3.56181702
52.7233,4.24264069,4.25357808,-0.104582009,3.58880994,4.23014122,3.56100057
52.733792,4.47213595,4.22411285,0.498019183,3.5880163,4.20049833,3.56018509
52.744284,4,4.19641943,-0.443192321,3.58722488,4.17263384,3.55937065
52.754775,4.35889894,4.17036116,0.43420938,3.58643575,4.14641064,3.55855734
52.765267,4.47213595,4.14580692,0.571252166,3.58564877,4.12169715,3.557745
52.775758,4.58257569,4.12264717,0.678180306,3.5848641,4.09838346,3.55693378
52.78625,4,4.10077348,-0.317448388,3.58408159,4.07636073,3.55612353
52.796742,3.31662479,4.08009358,-0.873767012,3.58330133,4.05553636,3.55531432
52.807233,4,4.0605231,-0.246014427,3.58252339,4.03582564,3.55450624
52.817725,4.12310563,4.04197951,0.284826468,3.58174763,4.01714571,3.55369912
52.828216,3.87298335,4.02439447,-0.389115817,3.58097421,3.99942797,3.55289312
52.838708,4.35889894,4.00769867,0.592621525,3.58020298,3.9826028,3.55208809
52.8492,4,3.99183348,0.090368789,3.57943403,3.96661131,3.5512841
52.859691,4,3.97674488,0.152496291,3.57866744,3.95139927,3.55048122
52.870183,2.82842712,3.96237899,-1.06487176,3.57790306,3.93691252,3.54967932
52.880674,3.16227766,3.9486917,-0.886799887,3.57714105,3.92310678,3.54887853
52.891166,3.60555128,3.93563716,-0.574531014,3.57638128,3.90993597,3.5480787
52.901658,3.31662479,3.92317687,-0.778814536,3.57562382,3.8973614,3.54727991
52.912149,3.60555128,3.91127515,-0.552923025,3.57486875,3.88534721,3.54648224
52.922641,3,3.89989565,-0.948628299,3.57411595,3.87385689,3.54568554
52.933132,3.74165739,3.88900909,-0.383864168,3.57336555,3.86286099,3.54488994
52.943624,3.74165739,3.87858416,-0.370036183,3.57261743,3.85232805,3.54409531
52.954116,3.46410162,3.86859488,-0.635997853,3.57187166,3.84223194,3.54330172
52.964607,4.12310563,3.85901702,0.513895523,3.57112833,3.8325483,3.54250924
52.975099,4.12310563,3.84982535,0.522762161,3.57038731,3.82325176,3.54171772
52.98559,4.69041576,3.84099992,0.921637584,3.56964874,3.81432228,3.54092731
52.996082,3.87298335,3.8325188,0.20115801,3.5689125,3.80573777,3.54013786
53.006574,3.87298335,3.82436399,0.220497983,3.56817866,3.79748014,3.53934944
53.017065,3.31662479,3.81651862,-0.707031706,3.56744731,3.78953244,3.53856214
53.027557,4.24264069,3.80896477,0.658540748,3.56671831,3.78187661,3.53777579
53.038048,3.31662479,3.80168853,-0.696465177,3.56599182,3.77449867,3.53699056
53.04854,3.87298335,3.79467415,0.279837807,3.56526771,3.76738276,3.53620628
53.059032,4.47213595,3.78790889,0.82718019,3.56454607,3.76051607,3.53542303
53.069523,4,3.78138078,0.46756734,3.56382696,3.75388656,3.53464089
53.080015,4,3.77507677,0.474260724,3.56311027,3.74748105,3.53385971
53.090506,3.74165739,3.76898698,-0.165316643,3.56239614,3.74128965,3.53307963
53.100998,3.16227766,3.76309985,-0.77512721,3.56168445,3.73530069,3.53230051
53.11149,4.35889894,3.75740621,0.775559626,3.56097529,3.72950493,3.53152242
53.121981,3.31662479,3.75189739,-0.65975192,3.56026873,3.72389364,3.53074543
53.132473,3.74165739,3.74656368,-0.0700449156,3.55956465,3.71845705,3.52996939
53.142964,3.60555128,3.74139797,-0.368573867,3.5588632,3.71318799,3.52919446
53.153456,4.79583152,3.7363916,1.02929098,3.55816426,3.70807773,3.52842049
53.163948,4,3.73153785,0.518133329,3.55746791,3.70311949,3.52764753
53.174439,4.58257569,3.72683034,0.925065053,3.55677424,3.69830685,3.52687568
53.184931,4,3.72226173,0.527008797,3.55608312,3.69363239,3.52610479
53.195422,3.16227766,3.71782681,-0.745351693,3.5553947,3.68909088,3.52533499
53.205914,3.74165739,3.71351898,0.167745067,3.55470887,3.68467564,3.52456614
53.216406,4.35889894,3.70933324,0.805956389,3.55402571,3.68038164,3.52379832
53.226897,3.16227766,3.70526484,-0.736876638,3.5533453,3.67620407,3.5230316
53.237389,4.47213595,3.70130812,0.877968016,3.55266752,3.67213722,3.52226582
53.24788,4,3.69745923,0.550037065,3.55199253,3.66817721,3.52150114
53.258372,4,3.69371306,0.553431968,3.55132022,3.66431887,3.52073741
53.268864,4.24264069,3.69006584,0.743353785,3.55065065,3.66055839,3.51997471
53.279355,3.31662479,3.68651397,-0.608185154,3.54998393,3.65689214,3.51921309
53.289847,4.58257569,3.68305305,0.948431678,3.54931993,3.65331565,3.51845243
53.300338,4.24264069,3.67968018,0.75030694,3.54865881,3.64982601,3.51769286
53.31083,4.69041576,3.67639136,1.00698778,3.54800046,3.64641914,3.51693423
53.321322,3.60555128,3.67318372,-0.260062382,3.54734496,3.64309215,3.51617662
53.331813,4.69041576,3.6700545,1.01012933,3.54669239,3.63984225,3.51542011
53.342305,3.46410162,3.66700021,-0.45044266,3.54604265,3.63666589,3.51466454
53.352796,4,3.66401867,0.579638964,3.54539589,3.63356088,3.51391006
53.363288,3.87298335,3.6611067,0.460300605,3.544752,3.63052396,3.51315652
53.37378,3,3.65826208,-0.811333519,3.54411107,3.6275529,3.51240401
53.384271,4.35889894,3.65548269,0.838699144,3.54347319,3.62464554,3.51165257
53.394763,3.87298335,3.65276573,0.469273501,3.54283824,3.62179902,3.51090209
53.405254,3.31662479,3.65010955,-0.577481392,3.54220639,3.61901167,3.51015268
53.415746,3.74165739,3.64751158,0.306831895,3.54157752,3.61628087,3.50940423
53.426238,2.82842712,3.64497009,-0.903627671,3.54095174,3.61360487,3.50865678
53.436729,3.87298335,3.64248345,0.480104043,3.54032911,3.610982,3.50791042
53.447221,3.87298335,3.64004938,0.482632327,3.53970955,3.60840992,3.507165
53.457712,4.12310563,3.63766663,0.696734523,3.53909321,3.60588735,3.50642066
53.468204,4.47213595,3.63533309,0.914769294,3.53847999,3.60341215,3.50567726
53.478696,3.31662479,3.63304743,-0.562514572,3.53786998,3.60098295,3.50493488
53.489187,3.60555128,3.63080837,-0.158924793,3.53726326,3.59859842,3.50419357
53.499679,3.46410162,3.62861402,-0.405601288,3.53665975,3.59625664,3.5034532
53.51017,2.64575131,3.62646345,-0.990309111,3.5360596,3.59395665,3.50271391
53.520662,3.46410162,3.62435491,-0.400316498,3.53546271,3.59169665,3.50197556
53.531154,3.74165739,3.62228737,0.345499656,3.53486918,3.58947556,3.50123822
53.541645,4.24264069,3.62025981,0.788911195,3.53427909,3.58729235,3.50050196
53.552137,4,3.61827069,0.617842464,3.53369236,3.5851454,3.49976663
53.562628,4.24264069,3.61631927,0.791404708,3.53310915,3.58303397,3.49903238
53.57312,3.46410162,3.61440414,-0.387688692,3.53252936,3.58095656,3.49829906
53.583612,3.74165739,3.61252445,0.359350718,3.53195309,3.57891232,3.49756674
53.594103,3.74165739,3.61067941,0.361908796,3.53138044,3.57690041,3.49683551
53.604595,4.79583152,3.60886773,1.08947868,3.53081131,3.57491949,3.4961052
53.615086,3.87298335,3.60708887,0.515649564,3.53024587,3.57296899,3.49537597
53.625578,3.87298335,3.60534163,0.517341009,3.52968404,3.57104763,3.49464767
53.63607,3.74165739,3.60362534,0.371526639,3.52912591,3.56915473,3.49392037
53.646561,2.64575131,3.60193939,-0.977848701,3.52857157,3.56728964,3.49319414
53.657053,2.64575131,3.60028269,-0.977001219,3.52802096,3.56545119,3.49246884
53.667544,3.46410162,3.59865483,-0.366814965,3.52747422,3.56363897,3.49174462
53.678036,4.35889894,3.59705481,0.872836834,3.5269313,3.56185187,3.49102132
53.688528,3.87298335,3.59548209,0.526783876,3.52639227,3.56008936,3.49029902
53.699019,4.89897949,3.5939362,1.14238491,3.52585725,3.55835091,3.48957779
53.709511,4.12310563,3.59241622,0.72848432,3.52532617,3.55663552,3.48885748
53.720002,3.60555128,3.59092185,0.120952182,3.52479918,3.55494288,3.48813825
53.730494,4.47213595,3.58945222,0.939512499,3.52427622,3.55327204,3.48741993
53.740986,4.24264069,3.58800694,0.809094397,3.52375739,3.55162257,3.48670262
53.751477,4.24264069,3.58658563,0.809972258,3.52324279,3.54999404,3.48598637
53.761969,4,3.5851875,0.644059393,3.52273237,3.54838559,3.48527104
53.77246,3.74165739,3.58381234,0.397297178,3.52222628,3.54679699,3.48455678
53.782952,3.87298335,3.58245942,0.539002711,3.52172447,3.54522741,3.48384344
53.793444,2.44948974,3.58112844,-1.06378508,3.52122704,3.54367651,3.48313109
53.803935,3.74165739,3.57981909,0.402291308,3.5207341,3.54214395,3.48241981
53.814427,3.74165739,3.57853071,0.403889434,3.52024561,3.54062897,3.48170944
53.824918,4.47213595,3.57726316,0.945977164,3.51976172,3.53913141,3.48100014
53.83541,3.60555128,3.57601582,0.171858833,3.51928238,3.53765054,3.48029175
53.845902,3.87298335,3.57478845,0.546072248,3.51880772,3.53618608,3.47958436
53.856393,3,3.57358082,-0.757351184,3.51833783,3.53473777,3.47887802
53.866885,3.60555128,3.57239237,0.182095874,3.51787268,3.53330493,3.4781726
53.877376,2.82842712,3.57122301,-0.861856071,3.51741243,3.53188745,3.47746824
53.887868,4.69041576,3.57007222,1.05846282,3.51695706,3.5304847,3.4767648
53.89836,3.16227766,3.56893983,-0.637700687,3.51650667,3.52909644,3.47606234
53.908851,4.12310563,3.56782565,0.745171106,3.51606138,3.52772248,3.47536094
53.919343,3.74165739,3.56672922,0.41824415,3.51562117,3.5263622,3.47466045
53.929834,4.12310563,3.56565049,0.746629183,3.51518619,3.52501554,3.47396101
53.940326,3.46410162,3.56458902,-0.316997482,3.51475644,3.52368193,3.47326249
53.950818,3.74165739,3.56354468,0.422034009,3.51433203,3.5223612,3.47256496
53.961309,3.46410162,3.56251736,-0.31371284,3.51391309,3.52105317,3.47186847
53.971801,4.12310563,3.56150665,0.749399075,3.51349959,3.51975731,3.47117289
53.982292,4,3.56051255,0.662938494,3.51309172,3.51847358,3.47047837
53.992784,3.60555128,3.55953469,0.214514766,3.51268946,3.51720147,3.46978476
54.003276,3.60555128,3.55857298,0.21674476,3.51229295,3.51594085,3.46909212
54.013767,3.60555128,3.55762736,0.218915318,3.51190231,3.51469158,3.46840054
54.024259,3.16227766,3.55669748,-0.628028517,3.51151755,3.51345317,3.46770986
54.03475,3.31662479,3.55578337,-0.489038428,3.51113883,3.51222562,3.46702023
54.045242,4,3.55488474,0.667169592,3.51076618,3.51100847,3.46633151
54.055734,3.74165739,3.55400152,0.433192641,3.51039972,3.5098016,3.46564376
54.066225,3.31662479,3.5531337,-0.486321814,3.5100396,3.50860492,3.46495706
54.076717,4,3.55228098,0.669118088,3.50968583,3.50741799,3.46427126
54.087208,4.35889894,3.55144345,0.898585276,3.50933859,3.50624082,3.46358651
54.0977,4.24264069,3.55062083,0.831877311,3.50899793,3.50507298,3.46290266
54.108192,4.69041576,3.54981312,1.06799,3.50866397,3.50391441,3.46221978
54.118683,3.16227766,3.54902034,-0.621886385,3.50833686,3.50276502,3.46153795
54.129175,3.46410162,3.54824224,-0.290070038,3.50801666,3.5016244,3.46085702
54.139666,2.64575131,3.54747893,-0.949593397,3.50770353,3.5004926,3.46017712
54.150158,3.74165739,3.5467302,0.441505589,3.50739754,3.49936922,3.45949813
54.16065,3.60555128,3.54599609,0.244039321,3.50709884,3.4982542,3.45882011
54.171141,4.69041576,3.54527661,1.07011175,3.50680759,3.4971475,3.45814312
54.181633,3.60555128,3.54457161,0.246940604,3.50652385,3.49604873,3.45746704
54.192124,3.46410162,3.5438812,-0.282452809,3.50624782,3.49495795,3.45679199
54.202616,3.87298335,3.54320524,0.5742631,3.50597957,3.4938748,3.45611784
54.213108,3.60555128,3.54254377,0.25101295,3.50571927,3.49279924,3.45544465
54.223599,3.74165739,3.54189688,0.446945759,3.50546709,3.49173122,3.4547725
54.234091,3.87298335,3.54126443,0.575950449,3.50522313,3.49067041,3.45410124
54.244582,3.31662479,3.54064656,-0.473309384,3.50498758,3.48961688,3.45343102
54.255074,3.74165739,3.54004319,0.449014691,3.50476055,3.48857027,3.45276169
54.265566,3,3.53945441,-0.7344756,3.50454223,3.48753058,3.45209333
54.276057,3.60555128,3.5388803,0.258207238,3.5043328,3.48649778,3.45142599
54.286549,3.46410162,3.5383208,-0.272431986,3.50413238,3.48547153,3.45075954
54.29704,3.31662479,3.53777608,-0.470267255,3.50394119,3.48445193,3.45009413
54.307532,3.46410162,3.53724609,-0.270452359,3.50375936,3.48343866,3.4494296
54.318024,4,3.53673096,0.680638698,3.5035871,3.4824317,3.44876604
54.328515,2,3.53623081,-1.23944778,3.50342461,3.48143104,3.4481035
54.339007,4.24264069,3.53574563,0.840770513,3.50327205,3.48043639,3.44744185
54.349498,3.74165739,3.53527561,0.454292611,3.50312964,3.47944782,3.44678123
54.35999,4,3.53482076,0.682040498,3.50299757,3.47846506,3.44612149
54.370482,4,3.53438124,0.682362634,3.50287606,3.47748808,3.44546271
54.380973,3.60555128,3.5339572,0.2675707,3.50276533,3.47651689,3.44480495
54.391465,3.16227766,3.53354869,-0.609320136,3.50266557,3.47555121,3.44414808
54.401956,3.74165739,3.53315593,0.456619602,3.50257705,3.47459113,3.44349223
54.412448,3.46410162,3.53277898,-0.262063665,3.50249997,3.47363638,3.44283726
54.42294,4.47213595,3.53241804,0.969390485,3.50243459,3.47268695,3.44218325
54.433431,2.82842712,3.53207331,-0.838836207,3.50238116,3.47174286,3.44153025
54.443923,3.87298335,3.53174488,0.584156198,3.50233993,3.47080385,3.44087814
54.454414,2.64575131,3.53143301,-0.941106637,3.50231115,3.46987,3.44022704
54.464906,3,3.53113783,-0.728792035,3.50229511,3.46894106,3.43957683
54.475398,4,3.53085957,0.684938268,3.50229209,3.46801704,3.43892757
54.485889,4.12310563,3.53059846,0.769744869,3.50230236,3.46709796,3.43827931
54.496381,4.12310563,3.53035469,0.769903201,3.50232624,3.46618356,3.43763194
54.506872,3.60555128,3.53012852,0.274632038,3.50236401,3.46527395,3.43698558
54.517364,3.31662479,3.52992016,-0.46183912,3.50241601,3.46436888,3.4363401
54.527856,3.60555128,3.5297299,0.275356823,3.50248256,3.46346836,3.43569557
54.538347,2.82842712,3.529558,-0.837335581,3.50256397,3.46257243,3.43505204
54.548839,3.16227766,3.52940473,-0.605910113,3.50266062,3.46168083,3.43440939
54.55933,4.47213595,3.52927039,0.971012649,3.50277283,3.46079368,3.43376775
54.569822,4.12310563,3.52915527,0.770681745,3.50290101,3.45991074,3.43312698
54.580314,4.24264069,3.52905971,0.844737224,3.50304552,3.45903204,3.43248716
54.590805,4.89897949,3.52898403,1.17046805,3.50320673,3.45815759,3.43184834
54.601297,3.16227766,3.52892858,-0.605517068,3.50338508,3.45728718,3.4312104
54.611788,3.60555128,3.52889372,0.276871018,3.50358096,3.45642091,3.43057345
54.62228,2.82842712,3.52887981,-0.836930513,3.50379483,3.45555856,3.42993739
54.632772,3.46410162,3.52888726,-0.254530236,3.50402712,3.45470015,3.42930226
54.643263,3.46410162,3.52891646,-0.254587594,3.50427827,3.45384572,3.42866812
54.653755,4,3.52896784,0.686317824,3.50454879,3.45299505,3.42803487
54.664246,3.31662479,3.52904184,-0.460887245,3.50483914,3.45214825,3.4274026
54.674738,3.46410162,3.52913893,-0.25502414,3.50514987,3.4513051,3.42677122
54.68523,3.16227766,3.52925957,-0.605790314,3.50548148,3.45046565,3.42614076
54.695721,3.31662479,3.52940424,-0.461280226,3.50583448,3.44962991,3.4255113
54.706213,3,3.52957349,-0.727717998,3.5062095,3.44879768,3.42488271
54.716704,4.35889894,3.52976781,0.91056638,3.50660705,3.44796908,3.42425511
54.727196,4.35889894,3.52998781,0.910445569,3.50702782,3.44714391,3.42362838
54.737688,4.24264069,3.53023404,0.844041852,3.50747237,3.44632218,3.42300258
54.748179,3.60555128,3.53050708,0.273941964,3.50794132,3.44550395,3.42237777
54.758671,3.46410162,3.53080759,-0.258275007,3.50843542,3.44468901,3.42175383
54.769162,3.74165739,3.53113619,0.458825892,3.50895528,3.44387748,3.42113087
54.779654,4.12310563,3.53149359,0.769163202,3.50950169,3.44306915,3.42050878
54.790146,3.31662479,3.53188049,-0.463956568,3.51007538,3.44226407,3.41988762
54.800637,3.87298335,3.53229755,0.583682956,3.51067703,3.44146228,3.41926744
54.811129,3.74165739,3.53274563,0.457068654,3.51130757,3.44066358,3.41864812
54.82162,3.31662479,3.53322543,-0.465403736,3.5119677,3.43986808,3.41802979
54.832112,4.35889894,3.53373786,0.908383778,3.51265842,3.43907561,3.41741232
54.842604,2.64575131,3.53428372,-0.942619972,3.51338055,3.43828619,3.41679578
54.853095,3,3.53486386,-0.731343874,3.51413494,3.43749987,3.41618021
54.863587,3.87298335,3.53547931,0.580950977,3.5149227,3.43671647,3.41556551
54.874078,3.87298335,3.53613091,0.580389901,3.51574468,3.43593609,3.41495178
54.88457,3.31662479,3.53681979,-0.469249398,3.51660207,3.43515856,3.41433892
54.895062,4.12310563,3.53754693,0.765218071,3.51749587,3.43438391,3.41372697
54.905553,3.74165739,3.53831334,0.450936853,3.51842712,3.4336122,3.41311599
54.916045,3.46410162,3.5391203,-0.273895398,3.51939714,3.43284323,3.41250588
54.926536,4.24264069,3.53996884,0.838255241,3.52040698,3.43207713,3.41189674
54.937028,3.60555128,3.54086034,0.254344135,3.52145807,3.43131373,3.41128846
54.94752,2.82842712,3.541796,-0.844611669,3.52255165,3.43055305,3.41068109
54.958011,3.87298335,3.54277705,0.574635792,3.52368895,3.42979515,3.41007469
54.968503,3,3.54380509,-0.737431412,3.52487163,3.42903985,3.40946914
54.978994,3.74165739,3.54488135,0.443594454,3.52610093,3.42828728,3.40886457
54.989486,3.46410162,3.54600755,-0.286192136,3.52737863,3.42753725,3.40826085
54.999978,3.31662479,3.54718518,-0.480167044,3.52870622,3.42678981,3.40765804
55.010469,4.24264069,3.54841575,0.833201617,3.53008525,3.42604501,3.40705619
55.020961,3.87298335,3.54970122,0.568579038,3.53151771,3.42530268,3.4064552
55.031452,3.16227766,3.55104314,-0.62351061,3.53300518,3.42456293,3.40585517
55.041944,3.60555128,3.55244364,0.230450949,3.53454982,3.4238256,3.40525599
55.052436,3.60555128,3.55390454,0.227259185,3.53615348,3.42309074,3.40465772
55.062927,3.60555128,3.55542774,0.223882852,3.53781809,3.42235838,3.40406041
55.073419,3.31662479,3.55701569,-0.490296743,3.53954611,3.42162837,3.40346394
55.08391,3.16227766,3.55867029,-0.6295972,3.5413395,3.42090083,3.40286844
55.094402,3.46410162,3.56039423,-0.31031051,3.54320095,3.42017558,3.40227379
55.104894,3.60555128,3.56218978,0.208234236,3.54513277,3.41945269,3.40168003
55.115385,3.46410162,3.56405933,-0.316160893,3.54713737,3.41873219,3.40108724
55.125877,4,3.56600591,0.658782274,3.54921783,3.41801392,3.40049529
55.136368,3.87298335,3.56803198,0.552224016,3.5513766,3.417298,3.39990429
55.14686,3.87298335,3.57014087,0.550311256,3.55361707,3.41658428,3.39931414
55.157352,3.74165739,3.57233547,0.411487446,3.55594215,3.4158728,3.39872488
55.167843,3.60555128,3.5746188,0.175876302,3.55835487,3.4151636,3.39813658
55.178335,3,3.57699471,-0.759601679,3.56085912,3.41445654,3.39754912
55.188826,3.87298335,3.5794663,0.541772132,3.56345803,3.41375173,3.39696261
55.199318,3.31662479,3.58203781,-0.515182508,3.56615586,3.41304901,3.39637694
55.20981,4,3.58471293,0.644427709,3.56895634,3.41234843,3.39579216
55.220301,3.31662479,3.58749553,-0.520452439,3.57186334,3.41165005,3.39520833
55.230793,3.60555128,3.59039051,0.123129071,3.57488182,3.41095371,3.39462534
55.241284,3.31662479,3.59340188,-0.526096079,3.57801579,3.41025952,3.3940433
55.251776,4.24264069,3.59653504,0.803806973,3.5812707,3.40956733,3.39346209
55.262268,3.87298335,3.59979478,0.522674434,3.58465137,3.4088772,3.39288177
55.272759,3.74165739,3.60318612,0.372117271,3.58816282,3.40818917,3.3923024
55.283251,3.31662479,3.60671535,-0.538600559,3.59181139,3.40750309,3.39172386
55.293742,4.12310563,3.61038773,0.716043225,3.59560234,3.40681908,3.39114626
55.304234,4,3.61421023,0.621119774,3.59954272,3.40613699,3.39056949
55.314726,3.60555128,3.61818912,-0.112418189,3.60363881,3.40545688,3.38999361
55.325217,4.35889894,3.622331,0.858235365,3.60789721,3.40477878,3.38941867
55.335709,4.47213595,3.62664405,0.91950634,3.61232615,3.40410256,3.38884455
55.3462,4.24264069,3.63113523,0.781988141,3.61693264,3.40342832,3.38827138
55.356692,3,3.6358137,-0.797379269,3.62172584,3.40275593,3.38769903
55.367184,3,3.64068776,-0.800429736,3.62671411,3.40208544,3.38712757
55.377675,4.12310563,3.64576619,0.690897558,3.63190623,3.40141689,3.38655704
55.388167,4.35889894,3.65105978,0.841331777,3.63731306,3.40075014,3.38598734
55.398658,4.47213595,3.65657793,0.903082511,3.642944,3.4000853,3.38541857
55.40915,3.60555128,3.66233276,-0.238288654,3.64881122,3.39942224,3.38485062
55.419642,3.74165739,3.66833547,0.2707802,3.65492597,3.39876101,3.38428355
55.430133,4,3.67459792,0.570440253,3.66130012,3.39810165,3.38371741
55.440625,4,3.68113457,0.564681704,3.6679482,3.39744402,3.3831521
55.451116,3.87298335,3.68795827,0.43014541,3.67488305,3.39678824,3.38258771
55.461608,3.46410162,3.69508536,-0.480607679,3.6821211,3.39613417,3.38202414
55.4721,4.89897949,3.70253118,1.09382279,3.68967771,3.39548186,3.38146145
55.482591,4.12310563,3.71031204,0.642490147,3.69756921,3.39483136,3.38089968
55.493083,3.60555128,3.71844764,-0.336000541,3.70581539,3.39418253,3.38033873
55.503574,4.12310563,3.72695585,0.629404305,3.71443413,3.39353549,3.3797787
55.514066,3.60555128,3.73585909,-0.360981735,3.72344791,3.39289009,3.37921949
55.524558,4.47213595,3.74517878,0.852617837,3.73287821,3.39224639,3.37866115
55.535049,4.47213595,3.75493774,0.846875563,3.74274786,3.39160444,3.37810374
55.545541,3.60555128,3.76516333,-0.399514778,3.75308432,3.39096411,3.37754713
55.556032,4,3.7758809,0.473412187,3.76391296,3.3903255,3.37699145
55.566524,4.47213595,3.78712184,0.827655794,3.77526525,3.38968849,3.37643657
55.577016,4.12310563,3.79891663,0.569375973,3.78717171,3.38905312,3.37588257
55.587507,3.60555128,3.81129788,-0.45359299,3.79966502,3.38841944,3.37532947
55.597999,4.47213595,3.82430443,0.804879823,3.81278409,3.38778733,3.37477719
55.60849,4.24264069,3.83797297,0.636134987,3.82656565,3.38715688,3.37422583
55.618982,3.87298335,3.85234845,0.143648501,3.84105477,3.38652798,3.37367527
55.629474,3.46410162,3.86747524,-0.635117015,3.85629583,3.38590067,3.37312558
55.639965,4.24264069,3.88340103,0.599366047,3.87233663,3.38527499,3.37257679
55.650457,4.35889894,3.90018224,0.677286276,3.88923367,3.38465084,3.37202881
55.660948,4.12310563,3.91787331,0.45302573,3.90704146,3.3840283,3.37148175
55.67144,4.69041576,3.93654023,0.868260061,3.92582607,3.38340725,3.37093548
55.681932,4.58257569,3.95624915,0.791407953,3.94565376,3.38278775,3.37039008
55.692423,3.74165739,3.97707167,-0.485195099,3.9665962,3.38216984,3.36984558
55.702915,4.35889894,3.99909198,0.599839111,3.9887377,3.3815534,3.36930188
55.713406,4.24264069,4.02239302,0.469305516,4.01216127,3.38093853,3.36875909
55.723898,4.47213595,4.04707436,0.651967481,4.03696662,3.38032511,3.3682171
55.73439,4.58257569,4.07323758,0.713679278,4.06325542,3.37971318,3.36767596
55.744881,3.60555128,4.10099333,-0.703876447,4.09113841,3.37910281,3.36713572
55.755373,3.60555128,4.13047124,-0.724513606,4.12074538,3.37849385,3.36659629
55.765864,4,4.1618018,-0.402245948,4.15220692,3.37788643,3.36605775
55.776356,3.87298335,4.19514109,-0.567589414,4.18567924,3.37728041,3.36552001
55.786848,4.35889894,4.23065166,0.358116303,4.22132503,3.37667585,3.36498312
55.797339,3.87298335,4.26851332,-0.628911739,4.25932423,3.37607279,3.36444712
55.807831,5,4.3089387,0.831300968,4.29988964,3.37547112,3.36391192
55.818322,5,4.35215126,0.804890512,4.34324485,3.37487093,3.36337762
55.828814,5,4.39842414,0.775613213,4.38966322,3.37427211,3.36284411
55.839306,4.69041576,4.44806109,0.492295308,4.43944869,3.37367471,3.36231144
55.849797,4,4.50142257,-0.708111978,4.49296198,3.37307877,3.36177967
55.860289,4.47213595,4.55896495,-0.294667595,4.55065979,3.37248418,3.36124868
55.87078,4.69041576,4.62123395,0.263024345,4.61308829,3.37189103,3.36071859
55.881272,4.58257569,4.68895533,-0.326158911,4.6809738,3.37129922,3.36018929
55.891764,5.19615242,4.76305425,0.658101946,4.75524226,3.37070879,3.35966082
55.902255,4.89897949,4.84475253,0.232866811,4.83711649,3.37011978,3.35913324
55.912747,5.56776436,4.93569987,0.795024839,4.92824756,3.36953208,3.35860645
55.923238,6.244998,5.03803767,1.09861746,5.03077854,3.3689458,3.35808055
55.93373,6,5.15461052,0.919450639,5.14755607,3.36836082,3.35755543
55.944222,5.47722558,5.28903017,0.433814948,5.28219416,3.36777717,3.35703115
55.954713,5.74456265,5.44580174,0.546590257,5.43920023,3.36719492,3.35650775
55.965205,6.244998,5.6304174,0.783951913,5.62406852,3.36661395,3.35598513
55.975696,6.164414,5.84915916,0.561475595,5.84308225,3.36603436,3.35546339
55.986188,7.28010989,6.10902849,1.08216514,6.10324287,3.36545603,3.35494244
55.99668,6.244998,6.41719572,-0.414967134,6.4117189,3.36487901,3.35442231
56.007171,7.54983444,6.78048966,0.877123009,6.77533532,3.36430335,3.35390306
56.017663,8.48528137,7.20487885,1.13154873,7.20005522,3.36372894,3.35338459
56.028154,8.71779789,7.69452412,1.01156995,7.69003259,3.36315588,3.352867
56.038646,9.16515139,8.25155605,0.955821812,8.24739096,3.36258404,3.35235019
56.049138,9.11043358,8.87531545,0.484889809,8.87146449,3.36201349,3.3518342
56.059629,9.8488578,9.56225095,0.535356753,9.55869631,3.36144427,3.35131908
56.070121,10.2469508,10.3061147,-0.243236395,10.3028347,3.36087626,3.35080474
56.080612,11.2249722,11.0975561,0.356953835,11.0945267,3.36030958,3.35029127
56.091104,11.9163753,11.9249035,-0.0923480958,11.9220996,3.35974409,3.34977857
56.101596,13.7840488,12.7738232,1.00509977,12.7712199,3.35917986,3.34926669
56.112087,14.4568323,13.6277207,0.910555629,13.6252937,3.35861693,3.34875569
56.122579,15.1986842,14.4680725,0.854758214,14.4657988,3.35805518,3.34824545
56.13307,16.0934769,15.2738179,0.905350246,15.2716757,3.35749473,3.34773608
56.143562,17.7482393,16.0219221,1.31389393,16.0198909,3.35693545,3.34722748
56.154054,17.8044938,16.686928,1.05714984,16.6849882,3.35637739,3.34671969
56.164545,18.973666,17.241903,1.31596464,17.2400356,3.35582061,3.34621277
56.175037,17.4068952,17.6602847,-0.503378138,17.6584712,3.35526499,3.34570662
56.185528,18.5741756,17.9186519,0.809644189,17.916874,3.35471064,3.34520132
56.19602,19,18.000918,0.999540896,17.9991528,3.354183,3.3446968
56.206512,18.8944436,17.9015804,0.996425217,17.8998147,3.35363101,3.34419308
56.217003,17.7200451,17.627178,0.304741091,17.6253942,3.35308026,3.34369022
56.227495,17.6635217,17.1945776,0.684794936,17.1927585,3.35253064,3.34318813
56.237986,17.2916165,16.6276997,0.814810894,16.6258283,3.35198227,3.34268689
56.248478,16.5227116,15.9532433,0.754631248,15.9513029,3.35143502,3.34218641
56.25897,15.1986842,15.1980908,0.0243589269,15.1960645,3.35088895,3.34168674
56.269461,14.4913767,14.3875251,0.322260215,14.3853957,3.35034409,3.34118792
56.279953,13.7840488,13.544371,0.489568936,13.5421207,3.34980035,3.34068987
56.290444,13.7113092,12.6894755,1.01085788,12.6870859,3.34925783,3.34019266
56.300936,12.4096736,11.8411664,0.753994203,11.8386186,3.3487164,3.33969621
56.311428,10.7703296,11.0158281,-0.495478031,11.0131034,3.34817613,3.33920056
56.321919,9.69535971,10.227567,-0.729525412,10.2246472,3.34763706,3.33870576
56.332411,10.1488916,9.48783829,0.813051829,9.48470667,3.34709907,3.33821172
56.342902,9.74679434,8.80572048,0.970089617,8.80236326,3.34656228,3.33771852
56.353394,9.16515139,8.18721516,0.988906581,8.18362244,3.34602657,3.33722608
56.363886,7.81024968,7.63559412,0.417918117,7.63176111,3.34549198,3.33673443
56.374377,6.8556546,7.15125092,-0.543687709,7.14717871,3.34495858,3.33624363
56.384869,7.48331477,6.73184653,0.866872683,6.7275421,3.34442624,3.33575357
56.39536,7.68114575,6.37302478,1.14373116,6.36850053,3.34389507,3.33526436
56.405852,7,6.0687111,0.965033106,6.06398347,3.34336496,3.3347759
56.416344,6.244998,5.81201117,0.658017346,5.80709907,3.34283596,3.33428823
56.426835,6.92820323,5.59575003,1.15431937,5.59067319,3.34230811,3.3338014
56.437327,5,5.41297803,-0.642633669,5.40775552,3.34178132,3.33331532
56.447818,5.47722558,5.25747869,0.468771674,5.25212805,3.34125567,3.33283007
56.45831,5.83095189,5.12385108,0.840892867,5.11838772,3.34073106,3.33234556
56.468802,5.83095189,5.00767457,0.907346308,5.00211171,3.34020754,3.33186185
56.479293,5,4.90541692,0.307543625,4.89976572,3.33968515,3.33137897
56.489785,5.38516481,4.81430539,0.755552393,4.80857517,3.33916379,3.33089683
56.500276,4.47213595,4.73225311,-0.510016821,4.72645176,3.33864356,3.33041552
56.510768,5,4.65765645,0.585101318,4.65179064,3.33812436,3.32993495
56.52126,5.38516481,4.58932655,0.892097671,4.58340208,3.33760622,3.32945517
56.531751,5.19615242,4.52636303,0.81840662,4.520385,3.33708919,3.32897621
56.542243,5.47722558,4.46805944,1.00457261,4.46203243,3.33657318,3.32849799
56.552734,4,4.4138827,-0.643337155,4.40781088,3.33605828,3.3280206
56.563226,4.47213595,4.36338684,0.329771308,4.35727405,3.33554438,3.32754395
56.573718,4.58257569,4.31621827,0.51609827,4.31006807,3.33503153,3.32706807
56.584209,4.24264069,4.27207847,-0.171574425,4.26589421,3.33451978,3.32659302
56.594701,4.89897949,4.23069888,0.817484315,4.22448369,3.33400902,3.3261187
56.605192,5,4.191859,0.898966629,4.18561584,3.33349935,3.3256452
56.615684,4.79583152,4.15534922,0.800301385,4.14908087,3.33299067,3.32517243
56.626176,4.35889894,4.12099184,0.48775722,4.11470092,3.33248302,3.32470044
56.636667,4,4.08862618,-0.297701498,4.08231518,3.33197645,3.32422927
56.647159,3.74165739,4.05809805,-0.562530586,4.05176929,3.33147086,3.32375883
56.65765,4.47213595,4.0292783,0.665475507,4.02293401,3.33096634,3.3232892
56.668142,5.09901951,4.00203875,1.04736849,3.99568098,3.33046279,3.3228203
56.678634,5,3.97626987,1.0117955,3.96990059,3.32996025,3.32235217
56.689125,3.60555128,3.95187113,-0.58848947,3.94549219,3.32945878,3.32188485
56.699617,3.60555128,3.92874395,-0.568500371,3.92235708,3.32895827,3.32141826
56.710108,3.87298335,3.90680621,-0.183909928,3.90041305,3.32845882,3.32095248
56.7206,4.24264069,3.8859745,0.597215358,3.87957661,3.32796032,3.32048742
56.731092,3.16227766,3.86617793,-0.838987644,3.85977674,3.32746282,3.32002313
56.741583,4.79583152,3.84735096,0.973899669,3.84094785,3.32696637,3.31955964
56.752075,3.31662479,3.82942813,-0.71610288,3.82302439,3.32647086,3.31909688
56.762566,3.46410162,3.81235556,-0.590130448,3.80595241,3.32597639,3.31863492
56.773058,4.79583152,3.79607724,0.999877136,3.7896758,3.32548286,3.31817368
56.78355,2.44948974,3.78054588,-1.15371406,3.77414724,3.32499032,3.3177132
56.794041,4.12310563,3.76571756,0.597819426,3.75932274,3.3244988,3.31725353
56.804533,3.87298335,3.75154756,0.348476371,3.7451575,3.32400822,3.31679457
56.815024,4.35889894,3.7379996,0.787971662,3.73161519,3.32351866,3.31633641
56.825516,4,3.72503519,0.524370867,3.71865728,3.32303003,3.31587897
56.836008,4.35889894,3.71262204,0.80391349,3.70625142,3.32254236,3.31542228
56.846499,3.46410162,3.70072975,-0.486444378,3.69436716,3.32205571,3.31496639
56.856991,4.58257569,3.68932687,0.945118417,3.68297301,3.32156998,3.31451121
56.867482,3.87298335,3.67838851,0.441129049,3.67204404,3.32108526,3.31405683
56.877974,3.46410162,3.66788721,-0.451426175,3.66155274,3.32060145,3.31360316
56.888466,2.44948974,3.65780042,-1.09923186,3.65147654,3.32011859,3.31315024
56.898957,3,3.64810697,-0.805050914,3.64179423,3.31963673,3.31269811
56.909449,3.31662479,3.63878434,-0.567591002,3.63248324,3.31915578,3.31224669
56.91994,3.31662479,3.62981498,-0.55963398,3.62352601,3.31867582,3.31179606
56.930432,3.31662479,3.62117906,-0.551864356,3.61490266,3.31819676,3.31134614
56.940924,3.74165739,3.61286047,0.358882867,3.60659708,3.31771864,3.31089696
56.951415,3.74165739,3.60484407,0.369882843,3.59859407,3.31724151,3.31044857
56.961907,2.82842712,3.59711333,-0.876747517,3.5908771,3.31676527,3.31000088
56.972398,4.35889894,3.58965572,0.877065118,3.5834336,3.31629001,3.30955398
56.98289,3.31662479,3.58245658,-0.515588782,3.5762489,3.31581563,3.30910778
56.993382,3.46410162,3.57550423,-0.3337703,3.56931129,3.31534218,3.30866232
57.003873,3.74165739,3.5687876,0.415776123,3.56260969,3.31486971,3.30821765
57.014365,3.87298335,3.56229438,0.557394799,3.55613176,3.31439811,3.30777367
57.024856,3.87298335,3.55601545,0.56299902,3.54986837,3.31392748,3.30733047
57.035348,3.16227766,3.54993978,-0.622625187,3.54380847,3.31345772,3.30688797
57.04584,3.16227766,3.54405876,-0.617884374,3.53794343,3.31298888,3.30644621
57.056331,4.24264069,3.53836419,0.839211832,3.53226505,3.31252099,3.30600523
57.066823,3.87298335,3.53284671,0.58321234,3.52676394,3.31205398,3.30556494
57.077314,3.31662479,3.5274996,-0.459211077,3.52143337,3.31158791,3.30512542
57.087806,3.60555128,3.52231444,0.288507942,3.51626491,3.31112271,3.3046866
57.098298,3.60555128,3.51728477,0.297096798,3.51125209,3.31065841,3.30424851
57.108789,3.46410162,3.51240443,-0.219779009,3.50638873,3.31019505,3.30381119
57.119281,4,3.50766621,0.701665016,3.50166762,3.30973255,3.30337456
57.129772,3.74165739,3.50306507,0.488459123,3.4970837,3.309271,3.3029387
57.140264,3.74165739,3.4985945,0.493014086,3.49263046,3.30881029,3.30250353
57.150756,3.87298335,3.49424958,0.615413493,3.48830296,3.30835047,3.30206908
57.161247,3.74165739,3.49002563,0.5016291,3.48409652,3.30789158,3.30163541
57.171739,3.60555128,3.48591701,0.34588186,3.48000549,3.30743354,3.30120242
57.18223,3.46410162,3.48191992,-0.133485242,3.47602605,3.30697643,3.30077019
57.192722,3.74165739,3.47802923,0.51344733,3.47215307,3.30652015,3.30033865
57.203214,3,3.47424115,-0.688651692,3.46838278,3.30606476,3.29990783
57.213705,3,3.4705521,-0.685968005,3.46471155,3.30561028,3.29947777
57.224197,4.47213595,3.4669576,1.00258584,3.46113491,3.30515664,3.29904839
57.234688,4,3.46345474,0.732492497,3.45764996,3.30470391,3.29861978
57.24518,3.74165739,3.46003944,0.530676878,3.45425259,3.30425202,3.29819184
57.255672,3.74165739,3.45670877,0.533805788,3.45093987,3.30380099,3.29776462
57.266163,3.16227766,3.45345993,-0.539613071,3.44770901,3.30335087,3.29733815
57.276655,3.60555128,3.45028932,0.394032937,3.4445564,3.30290157,3.29691237
57.287146,3.31662479,3.44719472,-0.361344617,3.44147981,3.30245317,3.29648733
57.297638,3.87298335,3.44417283,0.654836252,3.43847592,3.30200559,3.29606298
57.30813,3.31662479,3.44122135,-0.352982385,3.43554246,3.30155887,3.29563933
57.318621,3.87298335,3.4383381,0.659276307,3.43267721,3.30111305,3.29521644
57.329113,4,3.43552014,0.75131875,3.42987726,3.30066804,3.29479421
57.339604,4,3.43276575,0.753149554,3.42714087,3.30022392,3.29437274
57.350096,2.64575131,3.43007224,-0.885618954,3.42446534,3.29978061,3.29395194
57.360588,3.74165739,3.42743781,0.560552923,3.42184888,3.29933815,3.29353185
57.371079,3.60555128,3.4248607,0.425077136,3.41928972,3.29889657,3.2931125
57.381571,4.35889894,3.42233853,0.967760513,3.41678548,3.29845579,3.29269382
57.392062,3.74165739,3.41986996,0.567263104,3.4143348,3.2980159,3.29227588
57.402554,4.12310563,3.41745275,0.840031472,3.41193547,3.2975768,3.29185861
57.413046,4.12310563,3.41508548,0.84143933,3.40958604,3.29713854,3.29144204
57.423537,3.46410162,3.41276675,0.226571983,3.40728513,3.29670116,3.29102622
57.434029,3.31662479,3.41049458,-0.30638177,3.40503074,3.29626456,3.29061105
57.44452,3.16227766,3.40826792,-0.495974049,3.40282182,3.29582884,3.29019663
57.455012,3,3.40608491,-0.637247921,3.40065652,3.29539391,3.28978287
57.465504,3.16227766,3.40394442,-0.491596131,3.39853369,3.2949598,3.2893698
57.475995,3.31662479,3.40184531,-0.29192554,3.3964522,3.29452655,3.28895747
57.486487,3.60555128,3.39978593,0.453613649,3.39441041,3.29409409,3.2885458
57.496978,3.74165739,3.39776546,0.586422991,3.39240747,3.29366249,3.28813487
57.50747,3.60555128,3.39578234,0.458005384,3.39044184,3.29323167,3.28772459
57.517962,3.16227766,3.39383565,-0.481204726,3.38851258,3.29280166,3.287315
57.528453,2.82842712,3.39192448,-0.750664608,3.3866188,3.29237251,3.28690614
57.538945,4,3.39004742,0.780994607,3.38475909,3.29194413,3.28649794
57.549436,3.16227766,3.38820384,-0.475316929,3.3829328,3.2915166,3.28609047
57.559928,2.82842712,3.38639242,-0.746970744,3.38113861,3.29108984,3.28568365
57.57042,3.60555128,3.3846124,0.47004136,3.37937577,3.29066389,3.28527751
57.580911,2.44948974,3.38286305,-0.96611247,3.37764355,3.29023878,3.28487211
57.591403,3,3.38114317,-0.61736794,3.37594074,3.28981444,3.28446735
57.601894,3.87298335,3.37945227,0.70251767,3.37426685,3.28939093,3.28406331
57.612386,2.82842712,3.37778921,-0.741189641,3.37262075,3.28896819,3.28365993
57.622878,3.46410162,3.37615338,0.296560677,3.37100182,3.28854624,3.28325722
57.633369,3.74165739,3.37454419,0.605898671,3.36940946,3.28812513,3.28285524
57.643861,4.69041576,3.3729606,1.14780449,3.36784266,3.28770477,3.2824539
57.654352,3.87298335,3.37140223,0.708223918,3.366301,3.28728525,3.28205328
57.664844,3.46410162,3.3698681,0.306974784,3.36478353,3.28686647,3.2816533
57.675336,3.74165739,3.36835771,0.610982552,3.36328974,3.28644848,3.28125401
57.685827,3.31662479,3.36687057,-0.224155713,3.36181914,3.28603132,3.28085542
57.696319,3.16227766,3.3654058,-0.450697397,3.36037084,3.2856149,3.28045748
57.70681,4.12310563,3.36396309,0.871287859,3.35894454,3.28519931,3.28006025
57.717302,2.64575131,3.36254159,-0.846634681,3.35753939,3.28478446,3.27966366
57.727794,4.47213595,3.3611409,1.0540375,3.35615498,3.28437038,3.27926774
57.738285,3.46410162,3.35976062,0.323018573,3.35479091,3.28395713,3.27887253
57.748777,3.60555128,3.35839996,0.497143153,3.35344641,3.2835446,3.27847796
57.759268,3.60555128,3.3570587,0.498490299,3.35212124,3.2831329,3.27808409
57.76976,3.60555128,3.35573609,0.499815151,3.35081466,3.28272192,3.27769086
57.780252,3.16227766,3.3544318,-0.438353902,3.34952633,3.28231172,3.2772983
57.790743,3.60555128,3.35314551,0.502400006,3.34825593,3.28190232,3.27690644
57.801235,3.46410162,3.35187652,0.335000135,3.34700278,3.28149365,3.27651522
57.811726,3,3.35062467,-0.592135686,3.34576669,3.28108579,3.27612469
57.822218,4.35889894,3.3493893,1.00474357,3.34454702,3.28067865,3.2757348
57.83271,2.82842712,3.34817013,-0.720932041,3.34334348,3.28027227,3.27534557
57.843201,3.46410162,3.3469669,0.342249491,3.34215582,3.27986669,3.27495704
57.853693,4.58257569,3.345779,1.11211361,3.34098342,3.27946183,3.27456913
57.864184,4,3.3446063,0.809563893,3.33982616,3.27905777,3.27418192
57.874676,3.31662479,3.34344823,-0.163778627,3.33868345,3.27865442,3.27379534
57.885168,4,3.34230455,0.810984247,3.33755508,3.27825182,3.27340942
57.895659,3.46410162,3.34117505,0.350608851,3.33644081,3.27785002,3.27302419
57.906151,3.31662479,3.34005919,-0.153082968,3.33534012,3.27744892,3.27263958
57.916642,3.16227766,3.33895686,-0.420332254,3.3342529,3.27704862,3.27225566
57.927134,2.23606798,3.33786757,-1.04966642,3.33317865,3.27664902,3.27187237
57.937626,3.46410162,3.33679112,0.356805956,3.33211718,3.27625017,3.27148973
57.948117,3.60555128,3.33572734,0.519445799,3.3310683,3.27585209,3.27110777
57.958609,3.87298335,3.33467573,0.733694497,3.33003153,3.27545472,3.27072644
57.9691,3.87298335,3.33363624,0.734402551,3.32900682,3.27505813,3.27034579
57.979592,3.46410162,3.3326084,0.362619928,3.32799369,3.27466224,3.26996576
57.990084,4.12310563,3.33159207,0.889670476,3.326992,3.27426709,3.26958637
58.000575,3.31662479,3.33058709,-0.118162163,3.3260016,3.27387271,3.26920767
58.011067,3.60555128,3.32959303,0.525317285,3.32502205,3.27347902,3.26882959
58.021558,3.16227766,3.32860984,-0.407838428,3.32405332,3.27308611,3.26845218
58.03205,3.31662479,3.32763713,-0.104939675,3.32309499,3.27269389,3.26807538
58.042542,3.46410162,3.32667475,0.370711299,3.32214693,3.27230239,3.26769923
58.053033,3.46410162,3.32572259,0.371993317,3.32120902,3.27191166,3.26732376
58.063525,3.16227766,3.32478025,-0.403116103,3.32028088,3.27152162,3.2669489
58.074016,4,3.32384772,0.82228479,3.31936247,3.27113234,3.26657471
58.084508,3.46410162,3.32292462,0.375735268,3.31845343,3.27074375,3.26620113
58.095,3.74165739,3.32201085,0.647801308,3.31755366,3.27035587,3.26582818
58.105491,3.74165739,3.32110631,0.648499097,3.31666305,3.26996875,3.26545591
58.115983,3.46410162,3.32021064,0.379329642,3.31578125,3.26958232,3.26508425
58.126474,3.60555128,3.31932384,0.53500228,3.31490825,3.26919663,3.26471325
58.136966,3.74165739,3.31844556,0.650547329,3.31404372,3.26881163,3.26434286
58.147458,3,3.31757573,-0.563538576,3.31318757,3.26842733,3.2639731
58.157949,3.46410162,3.31671426,0.383910611,3.31233972,3.26804379,3.26360401
58.168441,2.44948974,3.31586083,-0.93079057,3.31149984,3.26766092,3.26323552
58.178932,4.24264069,3.31501544,0.963133035,3.31066795,3.26727879,3.26286769
58.189424,4.35889894,3.3141778,1.02211601,3.30984373,3.26689733,3.26250046
58.199916,3.31662479,3.31334782,0.05724485,3.30902712,3.26651658,3.26213386
58.210407,3.87298335,3.31252544,0.748637365,3.30821805,3.26613657,3.26176792
58.220899,4.35889894,3.31171037,1.02332232,3.30741623,3.26575723,3.26140258
58.23139,3.46410162,3.31090263,0.391406417,3.30662167,3.26537862,3.2610379
58.241882,3.74165739,3.31010193,0.656928808,3.30583409,3.26500068,3.26067381
58.252374,4.12310563,3.30930821,0.902107207,3.30505344,3.26462343,3.26031034
58.262865,3.46410162,3.30852143,0.394436539,3.30427966,3.26424692,3.25994753
58.273357,3.46410162,3.30774131,0.395424206,3.30351248,3.26387106,3.25958532
58.283848,3.31662479,3.30696788,0.0982695632,3.30275193,3.26349594,3.25922375
58.29434,3.31662479,3.30620088,0.102097555,3.30199775,3.26312147,3.25886278
58.304832,3.16227766,3.30544026,-0.37836834,3.30124989,3.26274769,3.25850242
58.315323,3.46410162,3.30468599,0.399268868,3.30050832,3.26237463,3.25814272
58.325815,3,3.3039378,-0.551305545,3.29977278,3.26200223,3.2577836
58.336306,3.60555128,3.30319575,0.549868645,3.29904331,3.26163055,3.25742513
58.346798,3.31662479,3.30245958,0.119017708,3.29831967,3.26125952,3.25706724
58.35729,3,3.30172925,-0.549298875,3.29760182,3.26088917,3.25670997
58.367781,3.46410162,3.30100475,0.403852525,3.29688973,3.26051954,3.25635335
58.378273,3.60555128,3.30028584,0.552508314,3.29618316,3.26015055,3.2559973
58.388764,3.46410162,3.29957255,0.405621822,3.29548217,3.25978228,3.2556419
58.399256,2.82842712,3.29886467,-0.685884496,3.29478653,3.25941465,3.25528708
58.409748,3.87298335,3.29816216,0.75816963,3.2940962,3.25904769,3.25493287
58.420239,4.24264069,3.29746501,0.972201461,3.29341117,3.25868145,3.2545793
58.430731,3.46410162,3.29677299,0.409058218,3.29273122,3.25831584,3.25422631
58.441222,3.74165739,3.29608616,0.667511221,3.2920564,3.25795094,3.25387396
58.451714,2.44948974,3.2954043,-0.919736132,3.2913865,3.25758667,3.25352217
58.462206,3.46410162,3.29472739,0.411551,3.29072149,3.25722308,3.253171
58.472697,3.46410162,3.29405542,0.412366573,3.29006137,3.25686018,3.25282046
58.483189,4.47213595,3.29338819,1.08570151,3.28940593,3.25649792,3.25247049
58.49368,3.60555128,3.29272575,0.559308075,3.28875523,3.25613635,3.25212116
58.504172,3.16227766,3.2920679,-0.360264121,3.28810905,3.25577542,3.25177239
58.514664,3.31662479,3.29141462,0.158777107,3.28746741,3.25541515,3.25142423
58.525155,3,3.29076591,-0.539227145,3.28683027,3.25505557,3.25107669
58.535647,3.87298335,3.29012158,0.763453837,3.28619746,3.25469661,3.25072973
58.546138,4.12310563,3.28948169,0.913030086,3.28556903,3.25433835,3.25038339
58.55663,3.31662479,3.28884603,0.166669602,3.28494479,3.25398071,3.25003761
58.567122,3.46410162,3.28821462,0.419388833,3.28432474,3.25362372,3.24969244
58.577613,3.46410162,3.28758745,0.420135893,3.28370887,3.25326743,3.24934788
58.588105,3.87298335,3.28696433,0.765518791,3.28309701,3.25291175,3.24900389
58.598596,3.16227766,3.28634532,-0.352232397,3.2824892,3.25255675,3.24866052
58.609088,3.31662479,3.28573025,0.175768423,3.28188528,3.25220237,3.24831772
58.61958,4.35889894,3.28511912,1.03623348,3.28128525,3.25184864,3.2479755
58.630071,3.74165739,3.28451193,0.676125329,3.28068911,3.25149559,3.2476339
58.640563,3.16227766,3.2839085,-0.34875613,3.28009668,3.25114315,3.24729286
58.651054,3.46410162,3.2833089,0.425197268,3.27950802,3.25079138,3.24695244
58.661546,2.82842712,3.28271296,-0.674007294,3.27892298,3.25044023,3.24661257
58.672038,4.35889894,3.28212068,1.03767927,3.27834155,3.25008972,3.24627329
58.682529,4,3.28153207,0.847624874,3.27776373,3.24973988,3.24593463
58.693021,4.24264069,3.28094697,0.980659837,3.27718938,3.24939064,3.24559651
58.703512,3.46410162,3.28036544,0.428644581,3.27661854,3.24904208,3.24525901
58.714004,3.74165739,3.27978731,0.679610236,3.27605106,3.24869412,3.24492206
58.724496,4.47213595,3.27921261,1.0922103,3.27548696,3.24834679,3.2445857
58.734987,3.46410162,3.27864133,0.430651004,3.27492622,3.24800013,3.24424994
58.745479,4.35889894,3.27807332,1.03962764,3.27436872,3.24765407,3.24391473
58.75597,3.74165739,3.27750864,0.681284627,3.27381449,3.24730867,3.24358012
58.766462,3,3.27694715,-0.526257687,3.27326341,3.24696387,3.24324606
58.776954,3,3.27638886,-0.525726979,3.27271547,3.24661969,3.24291258
58.787445,3.31662479,3.27583377,0.201967882,3.27217069,3.24627618,3.24257971
58.797937,3.74165739,3.27528173,0.682917019,3.27162892,3.24593325,3.24224737
58.808428,2.82842712,3.27473282,-0.668061148,3.27109022,3.24559099,3.24191564
58.81892,3.16227766,3.27418689,-0.334528371,3.27055446,3.24524931,3.24158445
58.829412,4,3.27364395,0.852265245,3.27002164,3.24490825,3.24125383
58.839903,3.87298335,3.27310402,0.774518771,3.26949178,3.24456785,3.24092381
58.850395,4,3.27256695,0.852896857,3.26896475,3.24422803,3.24059433
58.860886,3.87298335,3.27203281,0.775209992,3.26844059,3.24388887,3.24026545
58.871378,2.23606798,3.27150147,-1.01756252,3.26791919,3.24355028,3.2399371
58.88187,3.87298335,3.27097293,0.7758933,3.26740055,3.24321232,3.23960932
58.892361,2.82842712,3.27044722,-0.66484592,3.26688468,3.24287499,3.23928213
58.902853,3.46410162,3.2699242,0.440655666,3.26637146,3.24253825,3.23895548
58.913344,3.31662479,3.26940393,0.217303608,3.26586096,3.24220215,3.23862942
58.923836,3.16227766,3.26888629,-0.326509769,3.26535303,3.24186663,3.23830389
58.934328,3.74165739,3.26837129,0.68795792,3.2648477,3.24153171,3.23797892
58.944819,3.74165739,3.26785894,0.688330184,3.26434498,3.24119744,3.23765454
58.955311,4,3.26734913,0.855950273,3.26384475,3.24086374,3.23733069
58.965802,3.16227766,3.26684191,-0.323363963,3.26334707,3.24053067,3.23700742
58.976294,3.31662479,3.26633716,0.224249027,3.26285182,3.24019818,3.23668469
58.986786,3.87298335,3.2658349,0.779197306,3.26235902,3.23986629,3.23636251
58.997277,3.16227766,3.26533515,-0.321025688,3.26186868,3.23953503,3.23604091
59.007769,3.31662479,3.26483778,0.227567588,3.26138068,3.23920433,3.23571984
59.01826,3,3.26434286,-0.514142845,3.26089508,3.23887427,3.23539935
59.028752,3.31662479,3.26385027,0.229727046,3.26041178,3.23854478,3.23507938
59.039244,4,3.26336003,0.858277325,3.25993078,3.23821587,3.23475997
59.049735,3,3.26287216,-0.512710602,3.25945211,3.2378876,3.23444113
59.060227,3.74165739,3.26238654,0.692293902,3.25897565,3.23755989,3.23412281
59.070718,4.47213595,3.26190323,1.10010578,3.25850146,3.23723279,3.23380507
59.08121,3.74165739,3.26142213,0.692990085,3.25802943,3.23690626,3.23348785
59.091702,3.46410162,3.26094324,0.45073093,3.25755959,3.23658032,3.23317117
59.102193,3.74165739,3.2604666,0.693679166,3.25709194,3.236255,3.23285507
59.112685,2.82842712,3.25999209,-0.656936041,3.25662638,3.23593023,3.23253948
59.123176,4,3.25951977,0.860511612,3.25616298,3.23560608,3.23222446
59.133668,3.74165739,3.25904953,0.694699834,3.25570162,3.23528248,3.23190996
59.14416,3.60555128,3.25858139,0.589041496,3.25524232,3.23495947,3.23159599
59.154651,2.23606798,3.25811538,-1.0109636,3.25478511,3.23463707,3.2312826
59.165143,3.46410162,3.25765139,0.454367943,3.25432988,3.23431522,3.23096972
59.175634,3.46410162,3.25718947,0.454875962,3.25387668,3.23399398,3.2306574
59.186126,3.46410162,3.25672953,0.455381247,3.25342542,3.23367328,3.23034559
59.196618,3.16227766,3.25627159,-0.306584296,3.25297612,3.23335317,3.23003432
59.207109,3.46410162,3.25581567,0.456383555,3.2525288,3.23303366,3.22972361
59.217601,3.87298335,3.25536165,0.785889111,3.25208336,3.23271469,3.22941341
59.228092,3.31662479,3.25490962,0.248425389,3.25163985,3.23239633,3.22910376
59.238584,3.60555128,3.25445945,0.592530017,3.25119818,3.23207851,3.22879463
59.249076,3.60555128,3.25401119,0.592908161,3.25075837,3.23176126,3.22848602
59.259567,3.46410162,3.25356484,0.458842863,3.25032044,3.23144461,3.22817797
59.270059,3.16227766,3.25312031,-0.301401149,3.24988428,3.2311285,3.22787042
59.28055,3.87298335,3.25267767,0.787594871,3.24944998,3.23081298,3.22756343
59.291042,3.60555128,3.2522368,0.594402621,3.24901742,3.230498,3.22725694
59.301534,4.47213595,3.25179774,1.10468919,3.24858663,3.23018359,3.22695097
59.312025,3.74165739,3.25136051,0.700212026,3.24815763,3.22986977,3.22664556
59.322517,3.31662479,3.250925,0.2563197,3.24773032,3.22955648,3.22634064
59.333008,3.31662479,3.25049129,0.25716434,3.24730477,3.22924379,3.22603628
59.3435,4.12310563,3.25005928,0.934369492,3.24688088,3.22893162,3.22573241
59.353992,3.46410162,3.24962898,0.463111898,3.24645868,3.22862001,3.22542906
59.364483,3.60555128,3.24920044,0.596951287,3.24603818,3.22830899,3.22512626
59.374975,3.46410162,3.24877353,0.464034569,3.2456193,3.2279985,3.22482395
59.385466,3.31662479,3.24834835,0.261297618,3.24520209,3.22768859,3.22452218
59.395958,3.60555128,3.24792477,0.598018815,3.24478647,3.22737921,3.22422091
59.40645,3.46410162,3.24750284,0.465401733,3.24437245,3.22707038,3.22392015
59.416941,3.87298335,3.24708258,0.791138905,3.24396007,3.22676213,3.22361994
59.427433,4,3.24666389,0.867949372,3.24354922,3.2264544,3.22332021
59.437924,3.31662479,3.24624683,0.265288442,3.24313998,3.22614725,3.22302102
59.448416,3,3.24583132,-0.495813797,3.24273225,3.22584062,3.22272232
59.458908,3.74165739,3.24541738,0.704443047,3.24232605,3.22553453,3.22242413
59.469399,2.82842712,3.24500503,-0.645428468,3.24192141,3.22522902,3.22212648
59.479891,2.82842712,3.24459419,-0.645110117,3.24151825,3.22492403,3.22182931
59.490382,2.82842712,3.24418491,-0.644792823,3.24111661,3.22461961,3.22153268
59.500874,3,3.24377711,-0.493737893,3.24071642,3.2243157,3.22123652
59.511366,3.60555128,3.24337081,0.601814314,3.2403177,3.22401233,3.22094088
59.521857,2.64575131,3.24296603,-0.772796689,3.23992047,3.22370954,3.22064576
59.532349,3.74165739,3.2425627,0.70646634,3.23952465,3.22340725,3.22035113
59.54284,3.60555128,3.24216086,0.602818723,3.23913029,3.22310553,3.22005702
59.553332,2,3.24176044,-1.11434305,3.23873732,3.22280431,3.21976339
59.563824,3.46410162,3.24136146,0.471953553,3.23834575,3.22250363,3.21947026
59.574315,3,3.24096394,-0.490880781,3.23795562,3.22220352,3.21917766
59.584807,2.44948974,3.2405678,-0.88942569,3.23756683,3.22190391,3.21888554
59.595298,3.46410162,3.2401731,0.473210856,3.23717945,3.22160485,3.21859394
59.60579,3.46410162,3.23977976,0.473626287,3.2367934,3.2213063,3.21830281
59.616282,3.46410162,3.23938779,0.474039897,3.23640869,3.22100828,3.21801217
59.626773,4.24264069,3.23899723,1.00182007,3.23602536,3.22071082,3.21772206
59.637265,3.31662479,3.238608,0.279314868,3.23564332,3.22041386,3.21743242
59.647756,3.60555128,3.23822014,0.606078488,3.23526264,3.22011745,3.2171433
59.658248,3.46410162,3.23783359,0.475676389,3.23488322,3.21982153,3.21685464
59.66874,4,3.23744836,0.873242028,3.2345051,3.21952614,3.21656648
59.679231,3,3.23706449,-0.486892683,3.2341283,3.21923131,3.21627884
59.689723,3.87298335,3.23668188,0.797685068,3.23375274,3.21893696,3.21599166
59.700214,3.31662479,3.2363006,0.283415221,3.23337847,3.21864316,3.21570499
59.710706,3.46410162,3.23592058,0.47768299,3.23300543,3.21834986,3.21541879
59.721198,3.31662479,3.23554182,0.284750708,3.23263364,3.21805707,3.21513307
59.731689,3.60555128,3.23516437,0.608594201,3.23226312,3.21776483,3.21484787
59.742181,3.46410162,3.23478814,0.478866862,3.23189378,3.21747307,3.21456312
59.752672,3.16227766,3.23441319,-0.268580592,3.2315257,3.21718186,3.21427889
59.763164,3,3.23403945,-0.483776236,3.23115879,3.21689113,3.21399511
59.773656,3,3.23366693,-0.48339107,3.23079308,3.21660092,3.21371181
59.784147,2.64575131,3.23329566,-0.766514415,3.2304286,3.21631124,3.21342903
59.794639,3.46410162,3.23292557,0.480807703,3.23006526,3.21602205,3.21314669
59.80513,2.64575131,3.23255671,-0.766032244,3.22970313,3.21573339,3.21286487
59.815622,2.23606798,3.23218901,-0.998058632,3.22934212,3.21544522,3.21258349
59.826114,3.74165739,3.23182249,0.714027236,3.22898228,3.21515755,3.2123026
59.836605,2.44948974,3.23145718,-0.88428923,3.22862361,3.21487041,3.2120222
59.847097,3.31662479,3.23109301,0.292458173,3.22826604,3.21458375,3.21174226
59.857588,3.87298335,3.23073002,0.80140709,3.22790964,3.21429762,3.21146281
59.86808,4.24264069,3.23036815,1.00611756,3.22755433,3.21401197,3.21118382
59.878572,3.60555128,3.23000742,0.612816329,3.22720013,3.21372682,3.21090529
59.889063,3.31662479,3.22964786,0.294918513,3.22684708,3.21344219,3.21062727
59.899555,2.82842712,3.22928939,-0.633136846,3.22649508,3.21315804,3.21034969
59.910046,3.60555128,3.22893207,0.613693086,3.22614421,3.21287441,3.2100726
59.920538,4.69041576,3.22857583,1.20906573,3.22579439,3.21259125,3.20979596
59.93103,2.44948974,3.22822069,-0.882457332,3.22544564,3.21230859,3.20951979
59.941521,3.60555128,3.22786667,0.614560495,3.225098,3.21202645,3.20924411
59.952013,3.16227766,3.22751371,-0.255413493,3.22475138,3.21174477,3.20896887
59.962504,4.58257569,3.22716187,1.16422241,3.22440585,3.21146361,3.20869412
59.972996,2.82842712,3.22681106,-0.631176626,3.22406133,3.21118292,3.2084198
59.983488,3.31662479,3.22646131,0.300272336,3.22371786,3.21090272,3.20814596
59.993979,3.60555128,3.22611266,0.615985887,3.22337544,3.21062303,3.2078726
60.004471,3.16227766,3.22576503,-0.251966999,3.22303402,3.21034381,3.20759967
60.014962,4.35889894,3.22541847,1.0646504,3.22269365,3.2100651,3.20732723
60.025454,4.12310563,3.22507292,0.947645876,3.22235426,3.20978685,3.20705523
60.035946,3.31662479,3.2247284,0.303144178,3.22201587,3.20950908,3.20678368
60.046437,3.74165739,3.22438493,0.719216556,3.22167852,3.20923182,3.20651262
60.056929,2.64575131,3.22404245,-0.760454562,3.22134212,3.20895502,3.20624199
60.06742,3.74165739,3.22370101,0.71969186,3.22100675,3.20867873,3.20597183
60.077912,3.74165739,3.22336055,0.719928357,3.22067232,3.20840289,3.20570211
60.088404,3.46410162,3.22302108,0.490999527,3.22033886,3.20812753,3.20543284
60.098895,3.60555128,3.22268264,0.6187638,3.2200064,3.20785267,3.20516405
60.109387,3.16227766,3.22234514,-0.245086687,3.21967487,3.20757826,3.20489569
60.119878,2.82842712,3.22200866,-0.627360773,3.21934433,3.20730436,3.2046278
60.13037,2.82842712,3.22167313,-0.627093295,3.21901471,3.20703091,3.20436034
60.140862,3.87298335,3.22133855,0.807245187,3.21868602,3.20675792,3.20409332
60.151353,4.12310563,3.22100498,0.949789793,3.21835831,3.20648544,3.20382678
60.161845,3.87298335,3.22067232,0.807657741,3.2180315,3.2062134,3.20356066
60.172336,3.60555128,3.22034065,0.620653389,3.21770564,3.20594186,3.20329501
60.182828,3.46410162,3.22000988,0.494056404,3.21738067,3.20567077,3.20302978
60.19332,3,3.21968006,-0.468700396,3.21705662,3.20540014,3.202765
60.203811,3.74165739,3.2193512,0.722707538,3.2167335,3.20513,3.20250068
60.214303,2.82842712,3.21902324,-0.624976889,3.21641126,3.20486031,3.20223678
60.224794,2.64575131,3.21869623,-0.756931248,3.21608995,3.2045911,3.20197335
60.235286,4,3.2183701,0.884098355,3.2157695,3.20432234,3.20171033
60.245778,3.46410162,3.21804488,0.496041059,3.21544994,3.20405404,3.20144776
60.256269,3,3.2177206,-0.466605404,3.21513129,3.20378622,3.20118564
60.266761,3.60555128,3.21739719,0.62302013,3.21481349,3.20351884,3.20092394
60.277252,3,3.21707471,-0.465912769,3.21449659,3.20325195,3.2006627
60.287744,3.31662479,3.21675308,0.316024853,3.21418053,3.20298549,3.20040187
60.298236,3.46410162,3.21643234,0.497663816,3.21386533,3.20271948,3.20014147
60.308727,3.60555128,3.21611251,0.62405029,3.21355102,3.20245396,3.19988154
60.319219,3.60555128,3.21579353,0.624305815,3.21323753,3.20218887,3.19962201
60.32971,3.60555128,3.21547544,0.624560514,3.21292492,3.20192426,3.19936294
60.340202,4,3.21515819,0.885912982,3.21261312,3.20166008,3.19910427
60.350694,3.16227766,3.2148418,-0.229268703,3.21230216,3.20139634,3.19884603
60.361185,2.44948974,3.21452629,-0.874663679,3.21199206,3.20113309,3.19858825
60.371677,3.87298335,3.21421161,0.811647545,3.21168277,3.20087026,3.19833087
60.382168,4.12310563,3.2138978,0.953523898,3.21137433,3.20060791,3.19807394
60.39266,3,3.21358481,-0.462152362,3.21106667,3.20034598,3.19781742
60.403152,2.23606798,3.21327265,-0.98853663,3.21075984,3.20008449,3.19756132
60.413643,2.82842712,3.21296135,-0.620108237,3.21045384,3.19982348,3.19730567
60.424135,3.46410162,3.21265085,0.501448664,3.21014863,3.19956288,3.19705041
60.434626,3.31662479,3.21234121,0.322929687,3.20984424,3.19930276,3.19679561
60.445118,3.60555128,3.21203235,0.627310866,3.20954062,3.19904305,3.1965412
60.45561,3,3.21172431,-0.460135104,3.2092378,3.19878379,3.19628721
60.466101,4.24264069,3.21141712,1.01549179,3.2089358,3.19852499,3.19603367
60.476593,3.46410162,3.21111069,0.502982029,3.20863455,3.19826661,3.19578052
60.487084,2.82842712,3.2108051,-0.618367188,3.20833412,3.19800869,3.19552781
60.497576,3.31662479,3.21050028,0.325767565,3.20803444,3.19775118,3.19527549
60.508068,3.46410162,3.21019626,0.503890223,3.20773552,3.19749411,3.19502359
60.518559,3.74165739,3.20989305,0.729221732,3.20743741,3.1972375,3.19477213
60.529051,4,3.2095906,0.889049715,3.20714004,3.1969813,3.19452106
60.539542,2.82842712,3.20928897,-0.61714005,3.20684345,3.19672556,3.19427043
60.550034,3.74165739,3.20898808,0.729841975,3.2065476,3.19647022,3.19402018
60.560526,2.64575131,3.20868797,-0.750291047,3.2062525,3.19621532,3.19377035
60.571017,3.87298335,3.20838865,0.815226774,3.20595818,3.19596087,3.19352095
60.581509,4.12310563,3.20809008,0.95656445,3.20566459,3.19570683,3.19327193
60.592,3.60555128,3.2077923,0.630681361,3.20537176,3.19545324,3.19302335
60.602492,3.60555128,3.20749525,0.630916817,3.20507964,3.19520006,3.19277515
60.612984,3.16227766,3.20719895,-0.211946435,3.20478826,3.1949473,3.19252736
60.623475,2.82842712,3.20690344,-0.615204286,3.20449765,3.19469499,3.19228
60.633967,3.31662479,3.20660864,0.331686818,3.20420773,3.19444308,3.19203302
60.644458,3.60555128,3.20631463,0.631851763,3.20391857,3.19419162,3.19178646
60.65495,3.60555128,3.20602132,0.63208382,3.20363011,3.19394055,3.19154029
60.665442,3,3.20572875,-0.453573317,3.20334236,3.19368991,3.19129451
60.675933,3,3.20543695,-0.453251531,3.20305536,3.19343971,3.19104916
60.686425,2.64575131,3.20514585,-0.747926828,3.20276904,3.19318991,3.19080419
60.696916,3.60555128,3.20485551,0.633005346,3.20248346,3.19294055,3.19055964
60.707408,3,3.20456586,-0.452289577,3.20219856,3.19269158,3.19031547
60.7179,3.46410162,3.20427694,0.509730004,3.20191436,3.19244303,3.19007169
60.728391,3.46410162,3.20398876,0.510012602,3.2016309,3.19219491,3.18982833
60.738883,3.46410162,3.20370127,0.51029437,3.2013481,3.19194719,3.18958535
60.749374,3,3.20341452,-0.45101499,3.20106602,3.19169991,3.18934278
60.759866,3.46410162,3.20312845,0.510855324,3.2007846,3.19145301,3.18910058
60.770358,3.31662479,3.20284309,0.337315429,3.20050388,3.19120653,3.18885878
60.780849,3.60555128,3.20255846,0.634817151,3.20022386,3.19096047,3.18861739
60.791341,3.31662479,3.2022745,0.338157194,3.19994451,3.19071481,3.18837636
60.801832,3.46410162,3.20199127,0.511967134,3.19966585,3.19046957,3.18813575
60.812324,3.31662479,3.2017087,0.338992756,3.19938785,3.19022472,3.18789551
60.822816,3.74165739,3.20142683,0.735003783,3.19911052,3.18998028,3.18765566
60.833307,3.74165739,3.20114567,0.735195022,3.19883389,3.18973626,3.18741621
60.843799,3.87298335,3.20086516,0.819828141,3.1985579,3.18949263,3.18717713
60.85429,3.31662479,3.20058537,0.340645589,3.1982826,3.18924942,3.18693846
60.864782,4.58257569,3.20030623,1.17569956,3.19800794,3.18900659,3.18670014
60.875274,3.60555128,3.20002777,0.636807272,3.19773394,3.18876416,3.18646222
60.885765,3.60555128,3.19975001,0.637025322,3.19746062,3.18852216,3.18622469
60.896257,3.60555128,3.1994729,0.637242792,3.19718793,3.18828053,3.18598753
60.906748,3.60555128,3.19919648,0.637459641,3.19691592,3.18803932,3.18575077
60.91724,3.31662479,3.1989207,0.343080293,3.19664453,3.18779849,3.18551436
60.927732,3.46410162,3.19864559,0.515224249,3.19637379,3.18755805,3.18527834
60.938223,3.31662479,3.19837116,0.343880252,3.19610372,3.18731803,3.18504272
60.948715,3.60555128,3.19809737,0.638321162,3.19583426,3.18707838,3.18480745
60.959206,3.16227766,3.19782426,-0.188538055,3.19556548,3.18683915,3.18457258
60.969698,3.16227766,3.19755178,-0.187814046,3.1952973,3.18660029,3.18433806
60.98019,3.16227766,3.19727995,-0.187088977,3.19502976,3.18636182,3.18410391
60.990681,3.60555128,3.19700879,0.639173283,3.19476288,3.18612376,3.18387017
61.001173,3.60555128,3.19673826,0.639384876,3.1944966,3.18588607,3.18363677
61.011664,4.12310563,3.19646839,0.962619984,3.19423098,3.18564878,3.18340377
61.022156,3.16227766,3.19619915,-0.184177865,3.19396596,3.18541187,3.18317111
61.032648,4,3.19593054,0.896699203,3.19370156,3.18517534,3.18293883
61.043139,3.31662479,3.1956626,0.347796195,3.19343781,3.18493922,3.18270693
61.053631,3,3.19539527,-0.442035366,3.19317465,3.18470346,3.18247538
61.064122,3.60555128,3.19512859,0.640642399,3.19291214,3.1844681,3.18224423
61.074614,3.31662479,3.19486253,0.348944501,3.19265022,3.18423311,3.18201341
61.085106,4,3.19459709,0.897442428,3.19238891,3.1839985,3.18178296
61.095597,3.31662479,3.1943323,0.349703426,3.19212824,3.18376429,3.1815529
61.106089,3.31662479,3.19406812,0.350080948,3.19186815,3.18353043,3.18132318
61.11658,3.74165739,3.19380458,0.740170793,3.1916087,3.18329698,3.18109384
61.127072,3.31662479,3.19354165,0.350832074,3.19134982,3.18306389,3.18086484
61.137564,3.60555128,3.19327933,0.642084067,3.19109156,3.18283117,3.18063621
61.148055,3.74165739,3.19301765,0.740702191,3.19083391,3.18259884,3.18040795
61.158547,2.64575131,3.19275657,-0.739598036,3.19057685,3.18236688,3.18018004
61.169038,3.87298335,3.19249612,0.824916497,3.19032041,3.1821353,3.1799525
61.17953,2.82842712,3.19223626,-0.603165928,3.19006454,3.18190408,3.1797253
61.190022,4.24264069,3.19197701,1.02501886,3.18980926,3.18167323,3.17949845
61.200513,2.82842712,3.1917184,-0.602736489,3.18955461,3.18144277,3.17927198
61.211005,3.31662479,3.19146037,0.353785841,3.18930052,3.18121266,3.17904585
61.221496,3.74165739,3.19120297,0.741926154,3.18904705,3.18098294,3.17882009
61.231988,3.16227766,3.19094615,-0.16931771,3.18879414,3.18075357,3.17859466
61.24248,3.60555128,3.19068993,0.644097312,3.18854182,3.18052456,3.17836958
61.252971,4,3.19043434,0.89975867,3.18829012,3.18029594,3.17814488
61.263463,3.16227766,3.19017932,-0.167037892,3.18803897,3.18006766,3.1779205
61.273954,3.31662479,3.18992492,0.35594925,3.18778843,3.17983977,3.1776965
61.284446,3,3.1896711,-0.435512456,3.18753845,3.17961223,3.17747282
61.294938,3.31662479,3.18941787,0.35666079,3.18728904,3.17938504,3.17724949
61.305429,3.31662479,3.18916526,0.357014745,3.18704025,3.17915824,3.17702653
61.315921,2.82842712,3.18891322,-0.600404944,3.186792,3.17893177,3.17680389
61.326412,3.46410162,3.1886618,0.524823607,3.18654436,3.17870569,3.17658162
61.336904,3.46410162,3.18841094,0.525062546,3.18629727,3.17847994,3.17635967
61.347396,3,3.18816067,-0.433774905,3.18605076,3.17825455,3.17613806
61.357887,2.44948974,3.18791101,-0.859314417,3.18580484,3.17802954,3.17591682
61.368379,3.16227766,3.18766192,-0.159324371,3.18555947,3.17780486,3.17569589
61.37887,4.12310563,3.18741343,0.96731184,3.1853147,3.17758056,3.17547533
61.389362,3.74165739,3.18716551,0.744642116,3.18507047,3.17735659,3.17525509
61.399854,3.60555128,3.18691817,0.647018631,3.18482682,3.17713298,3.17503518
61.410345,3.31662479,3.18667143,0.360490439,3.18458375,3.17690973,3.17481564
61.420837,2.82842712,3.18642526,-0.598329453,3.18434124,3.17668682,3.17459641
61.431328,3,3.18617969,-0.431485445,3.18409931,3.17646428,3.17437753
61.44182,3.46410162,3.18593468,0.527415338,3.18385793,3.17624206,3.17415897
61.452312,3.31662479,3.18569024,0.36184879,3.18361711,3.1760202,3.17394075
61.462803,3,3.18544641,-0.430634896,3.18337688,3.1757987,3.17372288
61.473295,4.24264069,3.18520314,1.02831782,3.1831372,3.17557752,3.17350532
61.483786,3.31662479,3.18496046,0.362855792,3.1828981,3.17535672,3.17328811
61.494278,3,3.18471835,-0.429788722,3.18265954,3.17513623,3.17307121
61.50477,3.31662479,3.1844768,0.363521647,3.18242155,3.17491609,3.17285464
61.515261,3.46410162,3.18423586,0.529023398,3.18218414,3.17469632,3.17263843
61.525753,3.31662479,3.18399547,0.364183086,3.18194727,3.17447686,3.17242252
61.536244,3.60555128,3.18375568,0.649457925,3.18171099,3.17425776,3.17220695
61.546736,3.46410162,3.18351644,0.52970291,3.18147525,3.17403899,3.1719917
61.557228,3.31662479,3.18327778,0.3651671,3.18124007,3.17382055,3.17177677
61.567719,3.87298335,3.18303972,0.830628455,3.18100548,3.17360247,3.17156218
61.578211,2.64575131,3.1828022,-0.732837562,3.18077142,3.17338471,3.1713479
61.588702,3,3.18256529,-0.427276597,3.18053795,3.1731673,3.17113396
61.599194,3.60555128,3.18232893,0.650555414,3.18030502,3.17295021,3.17092032
61.609686,3.74165739,3.18209314,0.748040268,3.18007266,3.17273345,3.170707
61.620177,3.60555128,3.18185796,0.65091729,3.17984088,3.17251705,3.17049402
61.630669,3.16227766,3.18162332,-0.139088689,3.17960964,3.17230095,3.17028135
61.64116,3.16227766,3.18138929,-0.138244814,3.17937898,3.17208521,3.17006901
61.651652,3.46410162,3.18115581,0.531926505,3.17914887,3.17186978,3.16985696
61.662144,4.24264069,3.18092291,1.0303969,3.17891932,3.17165468,3.16964524
61.672635,3.60555128,3.1806906,0.651813373,3.17869036,3.17143993,3.16943385
61.683127,3.87298335,3.18045886,0.832180564,3.17846195,3.17122548,3.16922276
61.693618,3.16227766,3.18022771,-0.133977796,3.17823412,3.17101139,3.169012
61.70411,2.44948974,3.17999712,-0.854697244,3.17800684,3.17079759,3.16880153
61.714602,3.46410162,3.17976712,0.53323025,3.17778013,3.17058413,3.16859138
61.725093,3.31662479,3.17953771,0.370252721,3.177554,3.170371,3.16838156
61.735585,4.35889894,3.17930887,1.08608935,3.17732843,3.17015818,3.16817202
61.746076,2.82842712,3.17908064,-0.592160038,3.17710345,3.1699457,3.16796282
61.756568,3,3.17885296,-0.422910113,3.17687903,3.16973353,3.16775391
61.76706,3.46410162,3.17862588,0.534299295,3.17665518,3.16952167,3.1675453
61.777551,2.64575131,3.1783994,-0.72982744,3.17643192,3.16931015,3.16733703
61.788043,1,3.1781735,-1.47586364,3.17620923,3.16909894,3.16712904
61.798534,3.74165739,3.1779482,0.75080569,3.17598713,3.16888806,3.16692137
61.809026,3.46410162,3.17772348,0.535143098,3.17576559,3.16867747,3.16671399
61.819518,2.64575131,3.17749935,-0.729210561,3.17554464,3.1684672,3.16650691
61.830009,3.31662479,3.17727585,0.373294716,3.1753243,3.16825727,3.16630016
61.840501,3.16227766,3.17705292,-0.121553509,3.17510452,3.16804763,3.16609369
61.850992,3.46410162,3.17683061,0.535976684,3.17488535,3.16783833,3.16588754
61.861484,3.31662479,3.17660889,0.374186992,3.17466675,3.16762931,3.16568167
61.871976,3.31662479,3.17638777,0.374482339,3.17444875,3.16742061,3.1654761
61.882467,2.82842712,3.17616728,-0.58969497,3.17423137,3.16721224,3.16527085
61.892959,3.16227766,3.17594739,-0.116917609,3.17401457,3.16700416,3.16506588
61.90345,3.46410162,3.17572813,0.537004177,3.17379839,3.1667964,3.16486122
61.913942,3.16227766,3.17550947,-0.115029596,3.1735828,3.16658894,3.16465684
61.924434,2.82842712,3.17529143,-0.588951869,3.17336782,3.16638178,3.16445276
61.934925,3.31662479,3.17507404,0.376232313,3.17315348,3.16617495,3.16424899
61.945417,3.87298335,3.17485725,0.835539403,3.17293973,3.1659684,3.16404549
61.955908,3,3.17464112,-0.417900852,3.17272663,3.16576217,3.16384231
61.9664,4.12310563,3.17442561,0.974002062,3.17251413,3.16555623,3.1636394
61.976892,2.64575131,3.17421074,-0.726952147,3.17230226,3.1653506,3.16343678
61.987383,3.46410162,3.17399653,0.538614042,3.17209105,3.16514528,3.16323447
61.997875,2.64575131,3.17378295,-0.726657857,3.17188045,3.16494025,3.16303243
62.008366,2.82842712,3.17357005,-0.587488661,3.17167052,3.16473553,3.16283069
62.018858,3.74165739,3.17335779,0.753856482,3.17146122,3.16453109,3.16262923
62.02935,2.64575131,3.1731462,-0.726219585,3.17125257,3.16432696,3.16242805
62.039841,2.44948974,3.17293529,-0.850556024,3.17104461,3.16412314,3.16222718
62.050333,2.23606798,3.17272505,-0.967810451,3.17083729,3.16391959,3.16202658
62.060824,3.16227766,3.1725155,-0.101182232,3.17063067,3.16371636,3.16182628
62.071316,3.16227766,3.17230663,-0.100144752,3.1704247,3.16351341,3.16162624
62.081808,3.87298335,3.17209846,0.837188683,3.17021942,3.16331075,3.16142649
62.092299,3.60555128,3.171891,0.65852887,3.17001485,3.1631084,3.16122703
62.102791,3.16227766,3.17168424,-0.0969875287,3.16981097,3.16290632,3.16102784
62.113282,3,3.17147822,-0.414099284,3.16960781,3.16270456,3.16082895
62.123774,3.16227766,3.1712729,-0.0948432411,3.16940534,3.16250306,3.16063032
62.134266,3.46410162,3.17106832,0.5413255,3.16920361,3.16230186,3.16043197
62.144757,3.46410162,3.1708645,0.541513726,3.16900262,3.16210096,3.16023391
62.155249,2,3.17066141,-1.08197108,3.16880236,3.16190033,3.16003612
62.16574,3.74165739,3.17045911,0.755776605,3.16860286,3.1617,3.15983861
62.176232,4.89897949,3.17025756,1.3148087,3.16840412,3.16149995,3.15964137
62.186724,3.46410162,3.17005679,0.542259003,3.16820614,3.16130018,3.1594444
62.197215,3.46410162,3.16985683,0.542443345,3.16800897,3.16110071,3.15924772
62.207707,3,3.16965766,-0.411895206,3.16781257,3.1609015,3.15905129
62.218198,2.64575131,3.16945932,-0.723676733,3.16761699,3.1607026,3.15885516
62.22869,3,3.1692618,-0.411414388,3.16742222,3.16050396,3.15865928
62.239182,3.31662479,3.16906511,0.384134971,3.16722828,3.1603056,3.15846367
62.249673,3.74165739,3.1688693,0.756827644,3.1670352,3.16010754,3.15826835
62.260165,2.64575131,3.16867434,-0.723134173,3.16684296,3.15990974,3.15807327
62.270656,3.31662479,3.16848028,0.384895447,3.16665162,3.15971223,3.15787849
62.281148,3.16227766,3.16828711,-0.0775206264,3.16646114,3.15951499,3.15768395
62.29164,2.82842712,3.16809485,-0.582810193,3.16627157,3.15931802,3.15748968
62.302131,4,3.16790353,0.912193217,3.16608295,3.15912134,3.15729569
62.312623,2.23606798,3.16771315,-0.965217683,3.16589524,3.15892493,3.15710195
62.323114,4,3.16752376,0.912401359,3.16570851,3.1587288,3.15690849
62.333606,2.44948974,3.16732774,-0.847253207,3.16551514,3.15853293,3.15671528
62.344098,2.82842712,3.16714033,-0.581990725,3.16533038,3.15833733,3.15652233
62.354589,3.16227766,3.16695396,-0.0683835064,3.16514665,3.15814202,3.15632966
62.365081,3.16227766,3.16676863,-0.067014713,3.16496394,3.15794696,3.15613723
62.375572,3.74165739,3.16658439,0.758335675,3.16478232,3.15775219,3.15594508
62.386064,2.64575131,3.16640123,-0.721560752,3.16460177,3.15755767,3.15575317
62.396556,3,3.16621919,-0.40769988,3.16442233,3.15736342,3.15556151
62.407047,3.74165739,3.16603832,0.758695635,3.16424405,3.15716945,3.15537014
62.417539,3.87298335,3.16585861,0.840907092,3.16406692,3.15697574,3.155179
62.42803,3.46410162,3.16568012,0.546279685,3.163891,3.1567823,3.15498813
62.438522,2.82842712,3.16550285,-0.580582232,3.16371629,3.15658911,3.15479751
62.449014,3.60555128,3.16532685,0.6634941,3.16354285,3.15639619,3.15460713
62.459505,2.82842712,3.16515217,-0.580280148,3.16337071,3.15620354,3.15441703
62.469997,3,3.16497882,-0.406175844,3.16319989,3.15601114,3.15422716
62.480488,3.74165739,3.16480685,0.759506773,3.16303045,3.15581902,3.15403757
62.49098,3.31662479,3.16463628,0.389857039,3.1628624,3.15562715,3.1538482
62.501472,3.16227766,3.16446716,-0.0467921358,3.1626958,3.15543553,3.15365909
62.511963,3.31662479,3.16429956,0.390288646,3.1625307,3.15524419,3.15347024
62.522455,3.31662479,3.16413349,0.390501347,3.16236711,3.15505308,3.15328162
62.532946,3.60555128,3.16396902,0.664516558,3.16220513,3.15486226,3.15309327
62.543438,2.64575131,3.16380618,-0.719760283,3.16204476,3.15467167,3.15290515
62.55393,3.60555128,3.16364503,0.664760294,3.16188608,3.15448134,3.15271727
62.564421,3,3.16348564,-0.404333575,3.16172915,3.15429128,3.15252966
62.574913,1.73205081,3.16332805,-1.19636,3.16157401,3.15410145,3.15234228
62.585404,2.64575131,3.16317234,-0.719319834,3.16142074,3.1539119,3.15215515
62.595896,3.16227766,3.16301854,-0.0272191714,3.16126938,3.15372258,3.15196825
62.606388,3.16227766,3.16286675,-0.0242712609,3.16112002,3.15353351,3.1517816
62.616879,3.16227766,3.16271705,-0.0209617306,3.16097273,3.15334471,3.1515952
62.627371,3.60555128,3.16256949,0.665568767,3.16082758,3.15315614,3.15140903
62.637862,4,3.16242417,0.915191688,3.16068467,3.15296784,3.15122311
62.648354,3.31662479,3.16228116,0.392865917,3.16054405,3.15277976,3.15103741
62.658846,3.87298335,3.16214056,0.843114932,3.16040583,3.15259194,3.15085196
62.669337,3,3.16200247,-0.402495305,3.16027012,3.15240438,3.15066675
62.679829,3,3.16186698,-0.402326951,3.160137,3.15221705,3.15048177
62.69032,2.64575131,3.16173421,-0.718319494,3.16000659,3.15202998,3.15029704
62.700812,4.12310563,3.16160425,0.980561765,3.15987899,3.15184313,3.15011253
62.711304,2.82842712,3.16147724,-0.577104947,3.15975434,3.15165653,3.14992825
62.721795,2.82842712,3.16135333,-0.576997575,3.15963276,3.15147019,3.14974422
62.732287,2.64575131,3.16123261,-0.717970262,3.15951438,3.15128407,3.14956041
62.742778,3,3.16111526,-0.401391655,3.15939936,3.15109821,3.14937685
62.75327,3.31662479,3.16100141,0.394491289,3.15928783,3.15091258,3.1491935
62.763762,3.31662479,3.16089124,0.394630901,3.15917997,3.15072718,3.14901039
62.774253,3.31662479,3.16078493,0.394765571,3.15907597,3.15054204,3.14882752
62.784745,3.16227766,3.16068265,0.0399375323,3.15897599,3.15035712,3.14864486
62.795236,4.12310563,3.16058462,0.981081549,3.15888025,3.15017245,3.14846244
62.805728,3.74165739,3.16049103,0.762342678,3.15878895,3.149988,3.14828024
62.81622,2.82842712,3.16040211,-0.576172707,3.15870231,3.14980378,3.14809826
62.826711,3.16227766,3.16031813,0.0442666172,3.1586206,3.14961982,3.14791653
62.837203,3.60555128,3.16023931,0.667316988,3.15854406,3.14943607,3.147735
62.847694,3.16227766,3.16016597,0.0459531644,3.15847298,3.14925258,3.14755372
62.858186,2.44948974,3.16009837,-0.842976055,3.15840764,3.1490693,3.14737264
62.868678,3,3.16003686,-0.400046068,3.15834838,3.14888624,3.14719178
62.879169,3.31662479,3.15998177,0.39578153,3.15829554,3.14870344,3.14701117
62.889661,2.82842712,3.15993347,-0.575765881,3.15824949,3.14852085,3.14683075
62.900152,3.31662479,3.15989238,0.395894449,3.15821063,3.1483385,3.14665058
62.910644,2.82842712,3.1598589,-0.575701113,3.15817938,3.14815637,3.14647061
62.921136,3.74165739,3.1598335,0.762773808,3.15815622,3.14797446,3.14629085
62.931627,2.23606798,3.1598167,-0.961118476,3.15814164,3.1477928,3.14611133
62.942119,3.16227766,3.15980903,0.0496853541,3.15813619,3.14761134,3.14593202
62.95261,3.74165739,3.15981106,0.762788518,3.15814045,3.14743012,3.14575293
62.963102,4.24264069,3.15982345,1.04058505,3.15815505,3.14724912,3.14557404
62.973594,3.60555128,3.15984687,0.667610968,3.15818068,3.14706833,3.14539537
62.984085,3,3.15988207,-0.399852563,3.15821809,3.14688779,3.14521693
62.994577,3,3.15992987,-0.399912328,3.1582681,3.14670745,3.14503869
63.005068,2.64575131,3.15999114,-0.717105173,3.15833158,3.14652734,3.14486068
63.01556,3,3.16006686,-0.400083565,3.15840951,3.14634744,3.14468286
63.026052,2.82842712,3.16015807,-0.57596089,3.15850293,3.14616776,3.14450525
63.036543,2.82842712,3.16026592,-0.576054509,3.15861299,3.14598832,3.14432787
63.047035,3,3.16039169,-0.400489313,3.15874096,3.14580907,3.14415069
63.057526,3,3.16053674,-0.400670363,3.15888822,3.14563006,3.14397373
63.068018,3,3.16070263,-0.40087732,3.15905632,3.14545125,3.14379696
63.07851,3,3.16089102,-0.401112234,3.15924694,3.14527265,3.1436204
63.089001,4.58257569,3.16110379,1.19225497,3.15946192,3.14509429,3.14344406
63.099493,2.23606798,3.16134306,-0.961912203,3.15970342,3.14491612,3.14326791
63.109984,2.82842712,3.16161115,-0.577220949,3.15997374,3.14473818,3.14309198
63.120476,3.74165739,3.16191077,0.761410937,3.1602756,3.14456044,3.14291624
63.130968,2.44948974,3.16224498,-0.844248324,3.16061206,3.14438291,3.14274071
63.141459,3.74165739,3.16261728,0.760946848,3.16098662,3.1442056,3.14256539
63.151951,3.74165739,3.16303195,0.760674331,3.16140357,3.14402849,3.14239026
63.162442,2.82842712,3.16349392,-0.578849541,3.16186782,3.14385161,3.14221535
63.172934,4.47213595,3.16400935,1.14373363,3.16238557,3.14367491,3.14204062
63.183426,2.64575131,3.16458571,-0.720301601,3.16296426,3.14349843,3.14186609
63.193917,3.60555128,3.16523228,0.663565366,3.16361319,3.14332216,3.14169178
63.204409,3.31662479,3.16596097,0.388154379,3.16434427,3.14314609,3.14151765
63.2149,3,3.16678658,-0.408395125,3.16517231,3.14297024,3.14134374
63.225392,3.16227766,3.16772826,-0.0738281829,3.16611648,3.14279458,3.14117
63.235884,3.16227766,3.1688101,-0.0808234952,3.16720086,3.14261912,3.14099646
63.246375,2,3.17006254,-1.08169429,3.16845592,3.14244388,3.14082314
63.256867,3.16227766,3.17152423,-0.0961590747,3.16992033,3.14226882,3.14064999
63.267358,2.82842712,3.17324271,-0.58721,3.17164165,3.14209399,3.14047705
63.27785,3.87298335,3.17527705,0.83528815,3.17367898,3.14191934,3.14030429
63.288342,4,3.17769828,0.906808538,3.17610337,3.14174488,3.14013172
63.298833,3,3.18059081,-0.424959769,3.1789993,3.14157065,3.13995936
63.309325,3,3.18405406,-0.429015216,3.18246621,3.14139659,3.13978718
63.319816,4,3.18820034,0.900999255,3.18661648,3.14122275,3.1396152
63.330308,2.82842712,3.19315624,-0.603928073,3.19157676,3.14104909,3.13944339
63.3408,3.31662479,3.19905765,0.342880653,3.19748298,3.14087563,3.13927178
63.351291,2.64575131,3.20604648,-0.748528669,3.20447713,3.14070238,3.13910037
63.361783,2.64575131,3.21426728,-0.753999977,3.21270382,3.14052931,3.13892913
63.372274,3.74165739,3.22385514,0.719584777,3.2222982,3.14035645,3.13875809
63.382766,3.31662479,3.23493282,0.285818065,3.23338307,3.14018376,3.13858722
63.393258,3.74165739,3.24759487,0.702895811,3.246053,3.14001127,3.13841654
63.403749,2.44948974,3.26189857,-0.901337246,3.26036529,3.13983898,3.13824606
63.414241,2.64575131,3.27785747,-0.795051045,3.27633346,3.13966687,3.13807575
63.424732,2.64575131,3.29542081,-0.806020782,3.29390672,3.13949497,3.13790564
63.435224,3,3.31447505,-0.56078075,3.31297143,3.13932324,3.13773569
63.445716,4,3.33482346,0.81558356,3.33333077,3.1391517,3.13756592
63.456207,3.46410162,3.35618187,0.328511404,3.35470043,3.13898036,3.13739635
63.466699,3.60555128,3.37817749,0.47683727,3.37670742,3.13880919,3.13722695
63.47719,3.46410162,3.40032796,0.252534461,3.39886916,3.13863823,3.13705774
63.487682,4.12310563,3.42205361,0.837288488,3.42060576,3.13846744,3.1368887
63.498174,3.46410162,3.4426647,0.14641352,3.44122718,3.13829683,3.13671983
63.508665,3,3.46138246,-0.679251395,3.45995437,3.13812642,3.13655116
63.519157,4.24264069,3.4773794,0.874792137,3.47595953,3.13795618,3.13638264
63.529648,3.16227766,3.48982987,-0.572321775,3.48841669,3.13778614,3.13621432
63.54014,3,3.49801243,-0.705699955,3.49660416,3.13761626,3.13604616
63.550632,3.16227766,3.50140271,-0.582344441,3.49999741,3.13744657,3.13587817
63.561123,3.46410162,3.49976722,-0.188853396,3.49836287,3.13727707,3.13571038
63.571615,4.24264069,3.49320408,0.865700067,3.49179869,3.13710774,3.13554274
63.582106,3.46410162,3.48212555,-0.134253258,3.48071728,3.1369386,3.13537529
63.592598,3.31662479,3.46718149,-0.388016369,3.46576874,3.13676962,3.13520799
63.60309,4.12310563,3.44916475,0.820939018,3.44774622,3.13660082,3.13504087
63.613581,4.12310563,3.42891259,0.833182477,3.42748727,3.13643222,3.13487393
63.624073,3.31662479,3.40722517,-0.300998971,3.40579238,3.13626378,3.13470714
63.634564,3,3.38483332,-0.620349352,3.38339266,3.13609552,3.13454054
63.645056,2.82842712,3.36236045,-0.730707417,3.36091177,3.13592743,3.1343741
63.655548,3.31662479,3.34033094,-0.153968021,3.33887432,3.13575951,3.13420782
63.666039,4.12310563,3.31916567,0.89662699,3.31770138,3.13559178,3.13404172
63.676531,3.74165739,3.29918181,0.665188374,3.29771027,3.13542421,3.13387577
63.687022,3,3.28061431,-0.529730417,3.27913607,3.13525682,3.13371001
63.697514,3.60555128,3.2636086,0.584758645,3.26212428,3.13508959,3.13354439
63.708006,3.60555128,3.24824261,0.597753014,3.24675289,3.13492253,3.13337894
63.718497,4.24264069,3.23453052,1.00404689,3.23303612,3.13475566,3.13321367
63.728989,3.46410162,3.22243008,0.491600994,3.22093169,3.13458894,3.13304854
63.73948,3.46410162,3.21186277,0.502233856,3.21036108,3.13442241,3.1328836
63.749972,3.60555128,3.20271532,0.634693589,3.20121097,3.13425602,3.13271879
63.760464,3.60555128,3.19485792,0.640853616,3.19335149,3.13408981,3.13255415
63.770955,3.46410162,3.18814992,0.525311044,3.18664194,3.13392377,3.13238969
63.781447,3,3.1824465,-0.427137564,3.18093743,3.13375789,3.13222536
63.791938,2.64575131,3.17760944,-0.729286039,3.17609968,3.13359219,3.13206121
63.80243,2.82842712,3.17350726,-0.587435216,3.17199716,3.13342663,3.13189721
63.812922,2.64575131,3.17002192,-0.724065336,3.16851177,3.13326124,3.13173336
63.823413,3,3.16704882,-0.408716058,3.16553884,3.13309603,3.13156968
63.833905,2.64575131,3.16449669,-0.720239809,3.1629871,3.13293096,3.13140615
63.844396,2.64575131,3.16228929,-0.718705765,3.16078023,3.13276607,3.13124278
63.854888,3.60555128,3.1603623,0.66722483,3.1588539,3.13260133,3.13107955
63.86538,3.31662479,3.15866368,0.397443221,3.15715604,3.13243674,3.13091648
63.875871,2.82842712,3.15715131,-0.573344738,3.15564453,3.13227234,3.13075358
63.886363,2.82842712,3.15579117,-0.572157362,3.1542853,3.13210807,3.13059081
63.896854,3.46410162,3.15455679,0.556367529,3.15305189,3.13194398,3.13042821
63.907346,3,3.15342685,-0.391697398,3.15192297,3.13178003,3.13026574
63.917838,2.44948974,3.15238492,-0.838388443,3.15088209,3.13161623,3.13010343
63.928329,3.74165739,3.15141805,0.768270354,3.1499163,3.13145261,3.12994128
63.938821,3.31662479,3.15051572,0.407564802,3.14901508,3.13128913,3.12977926
63.949312,3.31662479,3.14966988,0.408601165,3.14817036,3.13112582,3.12961741
63.959804,3.74165739,3.14887371,0.769924463,3.14737533,3.13096264,3.12945569
63.970296,3.74165739,3.14812185,0.770412574,3.14662464,3.13079962,3.12929412
63.980787,3.31662479,3.14740986,0.411357427,3.14591382,3.13063677,3.12913271
63.991279,3,3.14673377,-0.383058446,3.14523892,3.13047405,3.12897143
64.00177,3.60555128,3.14609046,0.677835387,3.1445968,3.1303115,3.12881031
64.012262,3.74165739,3.14547697,0.772127201,3.14398452,3.13014909,3.12864932
64.022754,2.82842712,3.14489087,-0.562551108,3.14339963,3.12998682,3.12848847
64.033245,3.31662479,3.14433002,0.415084053,3.14283999,3.12982472,3.12832778
64.043737,3.16227766,3.14379233,0.13596076,3.14230352,3.12966275,3.12816722
64.054228,3.46410162,3.14327615,0.566414572,3.14178857,3.12950095,3.12800681
64.06472,3.60555128,3.14277977,0.680273111,3.14129342,3.12933927,3.12784653
64.075212,3,3.1423018,-0.377229112,3.14081668,3.12917775,3.1276864
64.085703,2.23606798,3.14184097,-0.95172107,3.14035709,3.12901638,3.12752641
64.096195,4.47213595,3.14139599,1.15357703,3.13991334,3.12885515,3.12736655
64.106686,3.60555128,3.14096585,0.681605035,3.13948444,3.12869407,3.12720684
64.117178,3.74165739,3.14054946,0.7753115,3.13906929,3.12853312,3.12704726
64.12767,3.74165739,3.14014595,0.775571682,3.13866702,3.12837232,3.12688781
64.138161,3.16227766,3.13975451,0.150077147,3.13827682,3.12821167,3.12672852
64.148653,3.16227766,3.13937428,0.151338612,3.13789783,3.12805115,3.12656934
64.159144,2.82842712,3.13900463,-0.557294814,3.13752941,3.12789078,3.12641032
64.169636,3.31662479,3.13864483,0.421876711,3.13717085,3.12773054,3.12625141
64.180128,3,3.1382943,-0.371879417,3.13682155,3.12757044,3.12609264
64.190619,2.44948974,3.13795252,-0.829736568,3.136481,3.1274105,3.12593402
64.201111,3.74165739,3.13761889,0.777199136,3.1361486,3.12725067,3.12577551
64.211602,2.64575131,3.13729301,-0.701100345,3.13582395,3.127091,3.12561715
64.222094,2.44948974,3.13697435,-0.829146918,3.13550653,3.12693146,3.12545891
64.232586,3.31662479,3.13666255,0.424219561,3.13519595,3.12677205,3.1253008
64.243077,2.23606798,3.13635725,-0.948835745,3.13489187,3.12661278,3.12514283
64.253569,2.44948974,3.13605802,-0.828594159,3.13459386,3.12645364,3.12498498
64.26406,2.64575131,3.1357646,-0.700009492,3.13430165,3.12629465,3.12482727
64.274552,2.82842712,3.13547661,-0.554120463,3.13401487,3.12613578,3.12466967
64.285044,3.60555128,3.1351938,0.685826126,3.13373327,3.12597704,3.1245122
64.295535,3.16227766,3.13491592,0.165413847,3.1334566,3.12581845,3.12435488
64.306027,3.74165739,3.13464266,0.779111496,3.13318454,3.12565997,3.12419766
64.316518,3.87298335,3.13437385,0.859423933,3.13291693,3.12550164,3.12404058
64.32701,4,3.13410921,0.930532533,3.13265348,3.12534343,3.12388362
64.337502,3,3.13384855,-0.36585318,3.13239401,3.12518535,3.12372678
64.347993,3.46410162,3.13359171,0.574899908,3.13213836,3.12502741,3.12357007
64.358485,2.64575131,3.13333846,-0.698274407,3.13188629,3.12486958,3.12341348
64.368976,3.16227766,3.13308867,0.170847851,3.13163769,3.1247119,3.12325702
64.379468,3.46410162,3.13284214,0.575551453,3.13139233,3.12455432,3.12310067
64.38996,3,3.13259874,-0.364141096,3.1311501,3.12439688,3.12294443
64.400451,3,3.13235834,-0.363810864,3.13091087,3.12423958,3.12278834
64.410943,3.60555128,3.13212078,0.688062857,3.13067447,3.12408238,3.12263235
64.421434,3.74165739,3.13188596,0.780878622,3.13044081,3.12392533,3.12247649
64.431926,3.46410162,3.13165373,0.576582936,3.13020973,3.12376838,3.12232074
64.442418,4.12310563,3.131424,0.99583213,3.12998115,3.12361156,3.1221651
64.452909,3.31662479,3.13119667,0.430613658,3.12975496,3.12345488,3.1220096
64.463401,2.64575131,3.13097161,-0.696577559,3.12953104,3.1232983,3.1218542
64.473892,3.31662479,3.13074876,0.431133425,3.12930933,3.12314186,3.12169893
64.484384,4.12310563,3.130528,0.996281903,3.1290897,3.12298553,3.12154376
64.494876,4,3.13030925,0.932572116,3.12887208,3.12282931,3.1213887
64.505367,3.16227766,3.13009246,0.17940234,3.12865641,3.12267324,3.12123377
64.515859,3.74165739,3.12987751,0.782163585,3.12844258,3.12251726,3.12107894
64.52635,3.74165739,3.12966437,0.782299822,3.12823056,3.12236142,3.12092424
64.536842,2.64575131,3.12945294,-0.695486611,3.12802023,3.12220568,3.12076964
64.547334,3.31662479,3.12924315,0.432876007,3.12781155,3.12205006,3.12061515
64.557825,3.46410162,3.12903498,0.578849404,3.12760448,3.12189456,3.12046078
64.568317,2.82842712,3.12882833,-0.548088681,3.12739891,3.12173917,3.12030651
64.578808,3,3.12862317,-0.358640724,3.12719484,3.12158391,3.12015237
64.5893,2.64575131,3.12841942,-0.694743194,3.12699218,3.12142875,3.11999832
64.599792,2.82842712,3.12821704,-0.547530741,3.12679088,3.12127371,3.11984437
64.610283,2.82842712,3.128016,-0.547347128,3.12659092,3.12111879,3.11969055
64.620775,2.64575131,3.12781623,-0.694308951,3.12639221,3.12096397,3.11953683
64.631266,3.87298335,3.12761771,0.863345606,3.12619476,3.12080928,3.11938322
64.641758,3.60555128,3.12742037,0.691470106,3.12599848,3.12065468,3.1192297
64.65225,2.64575131,3.12722418,-0.693882458,3.12580334,3.12050019,3.1190763
64.662741,3.31662479,3.12702912,0.435425848,3.12560934,3.12034583,3.11892301
64.673233,3.16227766,3.12683513,0.188261876,3.12541639,3.12019157,3.11876981
64.683724,2.23606798,3.12664219,-0.943702398,3.1252245,3.12003742,3.11861672
64.694216,3.60555128,3.12645025,0.692171237,3.12503359,3.11988337,3.11846373
64.704708,3.31662479,3.12625929,0.436308947,3.12484366,3.11972943,3.11831084
64.715199,3.31662479,3.1260693,0.436526622,3.1246547,3.11957561,3.11815806
64.725691,3.60555128,3.12588021,0.692582897,3.12446662,3.11942189,3.11800538
64.736182,3.46410162,3.12569202,0.581729828,3.12427946,3.11926828,3.1178528
64.746674,3.60555128,3.12550469,0.692853945,3.12409313,3.11911476,3.11770032
64.757166,2.44948974,3.12531819,-0.822087857,3.12390764,3.11896135,3.11754793
64.767657,3.60555128,3.12513252,0.693122466,3.12372298,3.11880806,3.11739565
64.778149,2.64575131,3.12494763,-0.692240073,3.12353908,3.11865486,3.11724346
64.78864,3.74165739,3.12476352,0.785425913,3.12335596,3.11850177,3.11709139
64.799132,3,3.12458014,-0.352959124,3.12317357,3.11834877,3.11693939
64.809624,3.46410162,3.12439749,0.582841424,3.1229919,3.11819587,3.11678749
64.820115,3,3.12421556,-0.352442278,3.12281095,3.11804309,3.1166357
64.830607,3.16227766,3.1240343,0.195559104,3.12263066,3.1178904,3.11648399
64.841098,3.46410162,3.12385372,0.58330772,3.12245105,3.11773782,3.11633239
64.85159,3.16227766,3.12367377,0.196478717,3.12227207,3.11758532,3.11618087
64.862082,3.16227766,3.12349446,0.196934505,3.12209371,3.11743293,3.11602945
64.872573,4.12310563,3.12331578,0.999894917,3.12191598,3.11728064,3.11587813
64.883065,2.64575131,3.12313768,-0.690931525,3.12173883,3.11712844,3.11572689
64.893556,3.31662479,3.12296019,0.440073407,3.12156228,3.11697635,3.11557576
64.904048,3.16227766,3.12278324,0.198732022,3.12138627,3.11682434,3.1154247
64.91454,2.64575131,3.12260686,-0.690547279,3.12121082,3.11667243,3.11527373
64.925031,3.16227766,3.12243103,0.199616215,3.12103592,3.11652063,3.11512287
64.935523,3,3.12225571,-0.34965084,3.12086152,3.1163689,3.11497208
64.946014,3.46410162,3.12208092,0.58482535,3.12068766,3.11621729,3.1148214
64.956506,2,3.12190663,-1.05920094,3.12051427,3.11606575,3.11467079
64.966998,3.74165739,3.12173282,0.787352886,3.12034137,3.11591431,3.11452027
64.977489,3.60555128,3.12155951,0.695695167,3.12016897,3.11576298,3.11436984
64.987981,4,3.12138665,0.937343773,3.11999701,3.11561172,3.1142195
64.998472,3,3.12121427,-0.348158397,3.11982552,3.11546056,3.11406925
65.008964,2.64575131,3.12104232,-0.689413523,3.11965446,3.11530949,3.11391907
65.019456,3.16227766,3.1208708,0.203486748,3.11948383,3.1151585,3.11376898
65.029947,3.31662479,3.12069973,0.442634224,3.11931364,3.11500762,3.11361898
65.040439,3.87298335,3.12052907,0.867441225,3.11914384,3.11485681,3.11346906
65.05093,3.60555128,3.12035883,0.696557571,3.11897447,3.1147061,3.11331923
65.061422,2.23606798,3.12018897,-0.940277082,3.11880548,3.11455547,3.11316947
65.071914,2.23606798,3.1200195,-0.940186964,3.11863687,3.11440492,3.1130198
65.082405,3.16227766,3.11985044,0.205978687,3.11846866,3.11425448,3.11287022
65.092897,1.73205081,3.11968174,-1.17797747,3.11830081,3.1141041,3.1127207
65.103388,2.64575131,3.11951342,-0.688303789,3.11813333,3.11395383,3.11257128
65.11388,2.82842712,3.11934544,-0.539368443,3.1179662,3.11380363,3.11242193
65.124372,3.31662479,3.11917782,0.444350053,3.11779941,3.11365351,3.11227265
65.134863,2.82842712,3.11901056,-0.539057916,3.11763299,3.11350348,3.11212347
65.145355,3.60555128,3.11884363,0.697644357,3.11746688,3.11335353,3.11197435
65.155846,3.16227766,3.11867704,0.208807615,3.11730111,3.11320368,3.11182532
65.166338,2.82842712,3.11851076,-0.538594132,3.11713565,3.11305389,3.11167636
65.17683,3.16227766,3.11834481,0.20960165,3.1169705,3.11290418,3.11152747
65.187321,3.74165739,3.11817918,0.78960636,3.11680569,3.11275457,3.11137867
65.197813,2.44948974,3.11801385,-0.817633235,3.11664115,3.11260502,3.11122994
65.208304,3,3.11784884,-0.343291181,3.11647693,3.11245557,3.11108129
65.218796,2.23606798,3.1176841,-0.938944154,3.11631299,3.11230618,3.1109327
65.229288,3.31662479,3.11751966,0.44621198,3.11614934,3.11215687,3.11078419
65.239779,3.31662479,3.11735552,0.446395868,3.11598598,3.11200766,3.11063576
65.250271,3.46410162,3.11719164,0.588990637,3.11582288,3.1118585,3.11048739
65.260762,3.46410162,3.11702806,0.589129488,3.11566007,3.11170944,3.11033911
65.271254,3.74165739,3.11686473,0.790438267,3.11549751,3.11156044,3.11019089
65.281746,3,3.11670167,-0.341616264,3.11533521,3.11141152,3.11004273
65.292237,3.46410162,3.11653889,0.589544508,3.11517318,3.11126268,3.10989466
65.302729,1.73205081,3.11637635,-1.17657364,3.1150114,3.11111391,3.10974665
65.31322,3.16227766,3.11621407,0.214624294,3.11484987,3.11096522,3.10959872
65.323712,4.12310563,3.11605203,1.0035206,3.11468857,3.11081659,3.10945084
65.334204,3,3.11589024,-0.340426551,3.11452752,3.11066804,3.10930303
65.344695,3.87298335,3.1157287,0.870203798,3.11436671,3.11051957,3.10915531
65.355187,3.60555128,3.11556738,0.699988498,3.11420612,3.11037116,3.10900763
65.365678,3.31662479,3.11540631,0.448573832,3.11404577,3.11022284,3.10886004
65.37617,3,3.11524545,-0.339478203,3.11388564,3.11007457,3.1087125
65.386662,4.12310563,3.11508482,1.00400239,3.11372572,3.10992638,3.10856502
65.397153,3.87298335,3.11492442,0.870665793,3.11356603,3.10977826,3.10841763
65.407645,3.16227766,3.11476423,0.217975753,3.11340655,3.10963021,3.10827028
65.418136,3,3.11460427,-0.338532523,3.11324728,3.10948223,3.10812301
65.428628,2.44948974,3.1144445,-0.815447583,3.11308821,3.10933431,3.10797579
65.43912,2.82842712,3.11428495,-0.534656732,3.11292935,3.10918646,3.10782864
65.449611,3,3.11412561,-0.337824818,3.1127707,3.10903869,3.10768156
65.460103,3.60555128,3.11396646,0.701131099,3.11261223,3.10889097,3.10753452
65.470594,3.46410162,3.11380752,0.591856482,3.11245397,3.10874333,3.10738757
65.481086,2.82842712,3.11364876,-0.534061456,3.11229588,3.10859574,3.10724066
65.491578,2.44948974,3.1134902,-0.814862232,3.11213799,3.10844822,3.10709381
65.502069,3.87298335,3.11333184,0.87157989,3.11198029,3.10830077,3.10694703
65.512561,4.24264069,3.11317366,1.06276386,3.11182276,3.10815338,3.1068003
65.523052,3.46410162,3.11301567,0.592525059,3.11166543,3.10800606,3.10665364
65.533544,3.74165739,3.11285785,0.792968812,3.11150826,3.10785879,3.10650702
65.544036,3.74165739,3.11270021,0.793068204,3.11135126,3.10771158,3.10636047
65.554527,3.16227766,3.11254276,0.223013225,3.11119445,3.10756445,3.10621398
65.565019,3,3.11238547,-0.335239426,3.11103779,3.10741737,3.10606753
65.57551,3.74165739,3.11222837,0.793365626,3.11088132,3.10727036,3.10592116
65.586002,3.74165739,3.11207142,0.793464533,3.110725,3.1071234,3.10577483
65.596494,3,3.11191464,-0.334536457,3.11056884,3.1069765,3.10562855
65.606985,2.44948974,3.11175804,-0.813798683,3.11041285,3.10682967,3.10548234
65.617477,3.16227766,3.11160159,0.225113469,3.11025701,3.10668288,3.10533617
65.627968,4,3.11144531,0.942631791,3.11010133,3.10653617,3.10519007
65.63846,3,3.11128917,-0.333600318,3.1099458,3.1063895,3.10504401
65.648952,3.60555128,3.11113319,0.703148692,3.10979041,3.10624289,3.10489799
65.659443,2.44948974,3.11097738,-0.813318904,3.10963519,3.10609635,3.10475205
65.669935,3.74165739,3.11082171,0.794251647,3.10948011,3.10594985,3.10460614
65.680426,3.60555128,3.1106662,0.703480687,3.10932518,3.10580342,3.1044603
65.690918,3.46410162,3.11051082,0.594635008,3.10917038,3.10565703,3.10431449
65.70141,3.31662479,3.11035559,0.45416869,3.10901572,3.10551069,3.10416874
65.711901,3.31662479,3.11020052,0.454339378,3.10886122,3.10536443,3.10402304
65.722393,3.16227766,3.11004558,0.228543398,3.10870684,3.1052182,3.10387738
65.732884,2.64575131,3.10989079,-0.681277825,3.10855261,3.10507204,3.10373179
65.743376,3.31662479,3.10973612,0.454850162,3.1083985,3.10492592,3.10358622
65.753868,4,3.10958159,0.943619843,3.10824452,3.10477985,3.10344071
65.764359,2.64575131,3.10942721,-0.680937516,3.10809068,3.10463385,3.10329525
65.774851,3.87298335,3.10927295,0.873905255,3.10793696,3.10448788,3.10314983
65.785342,3.16227766,3.10911884,0.230561974,3.10778338,3.10434198,3.10300447
65.795834,2.82842712,3.10896484,-0.529658109,3.10762991,3.10419611,3.10285914
65.806326,2.64575131,3.10881097,-0.680484867,3.10747657,3.1040503,3.10271385
65.816817,4,3.10865724,0.944109509,3.10732336,3.10390454,3.10256862
65.827309,3.16227766,3.10850362,0.231892312,3.10717025,3.10375883,3.10242342
65.8378,2.64575131,3.10835013,-0.680146178,3.10701728,3.10361317,3.10227828
65.848292,2.82842712,3.10819676,-0.528932543,3.10686442,3.10346755,3.10213317
65.858784,3.31662479,3.10804351,0.456707,3.10671167,3.10332197,3.1019881
65.869275,3.60555128,3.10789039,0.705450841,3.10655904,3.10317645,3.10184309
65.879767,3.31662479,3.10773737,0.457042035,3.10640652,3.10303097,3.1016981
65.890258,2.82842712,3.10758448,-0.52835344,3.10625412,3.10288554,3.10155317
65.90075,3,3.1074317,-0.327767747,3.10610182,3.10274015,3.10140826
65.911242,3.31662479,3.10727902,0.457543186,3.10594962,3.1025948,3.1012634
65.921733,2,3.10712648,-1.05220078,3.10579755,3.10244951,3.10111858
65.932225,2.23606798,3.10697403,-0.933223472,3.10564557,3.10230425,3.1009738
65.942716,2.82842712,3.1068217,-0.527631097,3.10549371,3.10215905,3.10082906
65.953208,3.87298335,3.10666947,0.875393557,3.10534194,3.10201387,3.10068435
65.9637,3.16227766,3.10651734,0.236136234,3.10519027,3.10186874,3.10053968
65.974191,3.31662479,3.10636533,0.458540574,3.10503871,3.10172366,3.10039505
65.984683,3.87298335,3.10621342,0.875654002,3.10488724,3.10157861,3.10025045
65.995174,3.74165739,3.10606162,0.797242605,3.10473588,3.10143362,3.1001059
66.005666,2.64575131,3.1059099,-0.678349904,3.10458461,3.10128865,3.09996137
66.016158,3.46410162,3.10575829,0.598617845,3.10443343,3.10114372,3.09981688
66.026649,3.16227766,3.10560679,0.238056438,3.10428236,3.10099884,3.09967244
66.037141,2.82842712,3.10545538,-0.526334735,3.10413136,3.10085399,3.09952801
66.047632,3.16227766,3.10530407,0.238691403,3.10398048,3.10070919,3.09938363
66.058124,3.74165739,3.10515285,0.797812343,3.10382967,3.10056442,3.09923928
66.068616,2.82842712,3.10500173,-0.525903604,3.10367895,3.10041968,3.09909495
66.079107,3.16227766,3.10485071,0.239639216,3.10352834,3.10027499,3.09895067
66.089599,2.82842712,3.10469977,-0.525616438,3.1033778,3.10013033,3.09880641
66.10009,2.82842712,3.10454893,-0.525472935,3.10322736,3.09998571,3.09866219
66.110582,3.46410162,3.10439817,0.59975282,3.10307699,3.09984112,3.09851799
66.121074,3,3.1042475,-0.322873815,3.1029267,3.09969656,3.09837383
66.131565,3,3.10409693,-0.322640564,3.10277652,3.09955205,3.0982297
66.142057,2.44948974,3.10394644,-0.808984979,3.1026264,3.09940756,3.09808559
66.152548,3.60555128,3.10379604,0.708346829,3.10247638,3.09926312,3.09794152
66.16304,3.16227766,3.10364572,0.242140327,3.10232642,3.0991187,3.09779747
66.173532,3,3.10349548,-0.321707139,3.10217655,3.09897431,3.09765345
66.184023,3.74165739,3.10334534,0.798944331,3.10202676,3.09882997,3.09750947
66.194515,3.60555128,3.10319527,0.708770771,3.10187704,3.09868564,3.0973655
66.205006,2.64575131,3.10304529,-0.676235152,3.10172742,3.09854136,3.09722157
66.215498,3.46410162,3.10289538,0.601004355,3.10157785,3.0983971,3.09707765
66.22599,3,3.10274555,-0.320539464,3.10142836,3.09825286,3.09693376
66.236481,3.87298335,3.10259581,0.877717231,3.10127895,3.09810868,3.09678991
66.246973,4.89897949,3.10244613,1.34034822,3.10112961,3.0979645,3.09664607
66.257464,3,3.10229655,-0.319838316,3.10098035,3.09782037,3.09650227
66.267956,3.46410162,3.10214703,0.60162662,3.10083114,3.09767626,3.09635847
66.278448,3.60555128,3.10199758,0.709615176,3.10068201,3.09753217,3.09621471
66.288939,3.31662479,3.10184822,0.463439934,3.10053296,3.09738812,3.09607097
66.299431,3,3.10169892,-0.318902676,3.10038397,3.09724409,3.09592725
66.309922,2,3.1015497,-1.04954738,3.10023506,3.0971001,3.09578356
66.320414,3.31662479,3.10140055,0.46392267,3.1000862,3.09695612,3.09563988
66.330906,3,3.10125146,-0.318200346,3.09993741,3.09681216,3.09549623
66.341397,4.12310563,3.10110246,1.01094172,3.09978869,3.09666825,3.0953526
66.351889,3.46410162,3.10095351,0.60261771,3.09964003,3.09652435,3.09520898
66.36238,4,3.10080465,0.948259117,3.09949144,3.09638048,3.0950654
66.372872,3.31662479,3.10065584,0.464724601,3.09934291,3.09623663,3.09492182
66.383364,2.64575131,3.10050709,-0.674355826,3.09919443,3.0960928,3.09477827
66.393855,3,3.10035843,-0.316793982,3.09904603,3.095949,3.09463474
66.404347,3.31662479,3.10020981,0.465204231,3.09889768,3.09580522,3.09449122
66.414838,2.23606798,3.10006128,-0.9295124,3.0987494,3.09566147,3.09434773
66.42533,3.16227766,3.09991279,0.249729588,3.09860116,3.09551773,3.09420424
66.435822,3.46410162,3.09976437,0.603603549,3.09845299,3.09537401,3.09406077
66.446313,3.16227766,3.09961602,0.250323062,3.09830488,3.09523033,3.09391733
66.456805,3.87298335,3.09946773,0.879497368,3.09815682,3.09508665,3.09377389
66.467296,3.31662479,3.0993195,0.466160153,3.09800883,3.09494301,3.09363048
66.477788,3.60555128,3.09917132,0.711603788,3.09786088,3.09479937,3.09348708
66.48828,3.16227766,3.09902321,0.251504383,3.09771298,3.09465576,3.09334368
66.498771,3,3.09887516,-0.314444207,3.09756515,3.09451217,3.09320032
66.509263,3.74165739,3.09872716,0.801829302,3.09741737,3.09436859,3.09305695
66.519754,3.74165739,3.09857923,0.801921543,3.09726964,3.09422504,3.09291362
66.530246,3.31662479,3.09843134,0.467111821,3.09712196,3.0940815,3.09277028
66.540738,3.46410162,3.0982835,0.604828993,3.09697432,3.09393797,3.09262695
66.551229,3.16227766,3.09813574,0.253262549,3.09682676,3.09379448,3.09248365
66.561721,2.23606798,3.09798802,-0.928396489,3.09667922,3.09365098,3.09234035
66.572212,3.74165739,3.09784036,0.802382093,3.09653175,3.09350752,3.09219708
66.582704,2.82842712,3.09769275,-0.518908106,3.09638432,3.09336406,3.0920538
66.593196,3,3.09754518,-0.312322244,3.09623693,3.09322061,3.09191053
66.603687,3.87298335,3.09739769,0.880673412,3.0960896,3.09307719,3.09176728
66.614179,2.82842712,3.09725023,-0.518481535,3.09594231,3.09293377,3.09162403
66.62467,2.64575131,3.09710283,-0.671827002,3.09579508,3.09279038,3.0914808
66.635162,3.16227766,3.09695547,0.255582057,3.09564787,3.09264699,3.09133757
66.645654,3.87298335,3.09680816,0.88100805,3.09550072,3.09250362,3.09119435
66.656145,3.16227766,3.09666092,0.256157656,3.09535362,3.09236027,3.09105115
66.666637,3.31662479,3.0965137,0.469159981,3.09520655,3.09221691,3.09090794
66.677128,2.64575131,3.09636655,-0.67127881,3.09505953,3.09207359,3.09076475
66.68762,3.16227766,3.09621943,0.257017949,3.09491255,3.09193026,3.09062156
66.698112,3.46410162,3.09607236,0.606654146,3.0947656,3.09178694,3.09047837
66.708603,3.60555128,3.09592535,0.713880889,3.09461872,3.09164364,3.0903352
66.719095,3.87298335,3.09577837,0.881592295,3.09447186,3.09150035,3.09019202
66.729586,4.12310563,3.09563145,1.01364401,3.09432505,3.09135707,3.09004886
66.740078,2.82842712,3.09548456,-0.516776,3.09417827,3.09121379,3.0899057
66.75057,2.64575131,3.09533771,-0.670512044,3.09403152,3.09107052,3.08976253
66.761061,3.31662479,3.09519092,0.470567603,3.09388483,3.09092728,3.08961939
66.771553,3.87298335,3.09504416,0.882008609,3.09373817,3.09078402,3.08947623
66.782044,3.60555128,3.09489745,0.714600463,3.09359155,3.09064079,3.08933309
66.792536,2.23606798,3.09475078,-0.92665139,3.09344496,3.09049756,3.08918994
66.803028,3.16227766,3.09460414,0.260141348,3.0932984,3.09035433,3.08904679
66.813519,3,3.09445756,-0.307339481,3.0931519,3.09021112,3.08890366
66.824011,3.16227766,3.094311,0.260704162,3.09300541,3.0900679,3.08876051
66.834502,3.74165739,3.0941645,0.804669429,3.09285897,3.0899247,3.08861738
66.844994,3.74165739,3.09401802,0.804760441,3.09271256,3.08978149,3.08847424
66.855486,3,3.09387158,-0.306384691,3.09256617,3.08963829,3.0883311
66.865977,2.44948974,3.09372519,-0.80264279,3.09241984,3.08949511,3.08818797
66.876469,3,3.09357883,-0.305906566,3.09227352,3.08935192,3.08804482
66.88696,2.64575131,3.09343251,-0.669089831,3.09212725,3.08920874,3.08790169
66.897452,2.44948974,3.09328622,-0.802369292,3.091981,3.08906556,3.08775855
66.907944,3.46410162,3.09313997,0.609066209,3.09183477,3.08892237,3.0876154
66.918435,3.60555128,3.09299376,0.715931221,3.0916886,3.08877921,3.08747226
66.928927,2.44948974,3.09284758,-0.802095902,3.09154243,3.08863603,3.08732911
66.939418,2.44948974,3.09270144,-0.802004801,3.09139632,3.08849287,3.08718596
66.94991,3.31662479,3.09255533,0.47335976,3.09125021,3.0883497,3.08704281
66.960402,2.82842712,3.09240925,-0.513791905,3.09110414,3.08820652,3.08689964
66.970893,2.82842712,3.09226321,-0.51364977,3.09095811,3.08806337,3.08675649
66.981385,3.74165739,3.0921172,0.805940563,3.09081209,3.08792019,3.08661332
66.991876,3.46410162,3.09197123,0.610024908,3.09066612,3.08777704,3.08647015
67.002368,3.60555128,3.09182528,0.716746817,3.09052016,3.08763386,3.08632697
67.01286,3,3.09167936,-0.30278599,3.09037422,3.08749069,3.08618379
67.023351,3,3.09153348,-0.302545007,3.09022832,3.08734753,3.08604061
67.033843,2.82842712,3.09138762,-0.512796742,3.09008244,3.08720436,3.08589741
67.044334,2.82842712,3.09124181,-0.512654547,3.0899366,3.08706119,3.08575421
67.054826,3.87298335,3.09109601,0.884243934,3.08979076,3.08691802,3.085611
67.065318,4.12310563,3.09095024,1.01595048,3.08964495,3.08677483,3.08546778
67.075809,2.82842712,3.09080452,-0.512227873,3.08949918,3.08663166,3.08532456
67.086301,3.16227766,3.09065881,0.267616988,3.08935342,3.08648847,3.08518132
67.096792,2.44948974,3.09051314,-0.800639368,3.0892077,3.0863453,3.08503809
67.107284,3,3.09036749,-0.300611852,3.08906198,3.0862021,3.08489484
67.117776,3.74165739,3.09022186,0.80711556,3.08891629,3.0860589,3.08475157
67.128267,3.31662479,3.09007627,0.47597113,3.08877064,3.08591571,3.08460831
67.138759,3.31662479,3.0899307,0.476124028,3.08862499,3.0857725,3.08446503
67.14925,3.74165739,3.08978517,0.807386041,3.08847938,3.0856293,3.08432175
67.159742,3,3.08963965,-0.299398811,3.08833377,3.08548608,3.08417844
67.170234,3.16227766,3.08949415,0.269784186,3.08818819,3.08534285,3.08403512
67.180725,4.47213595,3.0893487,1.17591975,3.08804264,3.08519963,3.08389181
67.191217,3.60555128,3.08920325,0.718573602,3.08789709,3.08505639,3.08374847
67.201708,3.46410162,3.08905785,0.61240817,3.08775158,3.08491315,3.08360513
67.2122,3.16227766,3.08891245,0.270860124,3.08760608,3.08476989,3.08346176
67.222692,3.16227766,3.08876708,0.271128342,3.08746059,3.08462663,3.08331838
67.233183,3,3.08862175,-0.297694052,3.08731514,3.08448337,3.08317501
67.243675,2.64575131,3.08847642,-0.665375919,3.08716969,3.08434009,3.0830316
67.254166,3.74165739,3.08833114,0.808285995,3.08702427,3.08419681,3.08288819
67.264658,2.82842712,3.08818586,-0.509665316,3.08687886,3.08405351,3.08274476
67.27515,3,3.0880406,-0.296716369,3.08673346,3.0839102,3.08260131
67.285641,2.82842712,3.08789538,-0.509380269,3.08658809,3.0837669,3.08245786
67.296133,4.58257569,3.08775017,1.22263058,3.08644273,3.08362357,3.08231438
67.306624,3,3.087605,-0.295981411,3.0862974,3.08348024,3.08217089
67.317116,3.46410162,3.08745983,0.613711486,3.08615207,3.08333689,3.08202738
67.327608,3.16227766,3.08731468,0.273793684,3.08600676,3.08319352,3.08188385
67.338099,4.24264069,3.08716957,1.07492843,3.08586147,3.08305016,3.08174032
67.348591,2.64575131,3.08702446,-0.664283936,3.08571619,3.08290677,3.08159676
67.359082,3.60555128,3.08687939,0.720188788,3.08557094,3.08276339,3.08145319
67.369574,4,3.08673432,0.95564935,3.08542568,3.08261997,3.08130959
67.380066,3.74165739,3.08658927,0.809362783,3.08528045,3.08247655,3.08116597
67.390557,4.12310563,3.08644426,1.01816569,3.08513524,3.08233312,3.08102235
67.401049,3.60555128,3.08629925,0.720591441,3.08499003,3.08218967,3.08087869
67.41154,3.31662479,3.08615427,0.480073448,3.08484484,3.08204621,3.08073503
67.422032,2.82842712,3.0860093,-0.507525546,3.08469966,3.08190273,3.08059134
67.432524,3.31662479,3.08586435,0.48037531,3.08455449,3.08175923,3.08044762
67.443015,3.46410162,3.08571943,0.615127778,3.08440935,3.08161573,3.0803039
67.453507,3.31662479,3.08557452,0.480676891,3.08426421,3.0814722,3.08016015
67.463998,2.64575131,3.08542963,-0.663082439,3.08411909,3.08132867,3.08001638
67.47449,4.24264069,3.08528475,1.07580478,3.08397397,3.08118511,3.07987259
67.484982,3.74165739,3.08513989,0.810257673,3.08382887,3.08104153,3.07972877
67.495473,3.60555128,3.08499506,0.72149582,3.08368379,3.08089795,3.07958494
67.505965,3.31662479,3.08485023,0.481429705,3.0835387,3.08075434,3.07944107
67.516456,3.46410162,3.08470543,0.615951445,3.08339365,3.08061073,3.0792972
67.526948,3.87298335,3.08456064,0.887931703,3.08324859,3.08046708,3.07915329
67.53744,3.16227766,3.08441586,0.279037275,3.08310354,3.08032341,3.07900935
67.547931,3.60555128,3.08427111,0.721997343,3.08295852,3.08017975,3.07886541
67.558423,3.87298335,3.08412637,0.88817621,3.08281349,3.08003604,3.07872143
67.568914,2.82842712,3.08398165,-0.505524012,3.08266849,3.07989234,3.07857743
67.579406,3.46410162,3.08383694,0.616656044,3.08252349,3.07974859,3.0784334
67.589898,3.31662479,3.08369224,0.482630863,3.0823785,3.07960483,3.07828935
67.600389,2.23606798,3.08354757,-0.92058655,3.08223353,3.07946107,3.07814528
67.610881,3.31662479,3.08340291,0.482930516,3.08208856,3.07931727,3.07800117
67.621372,3.60555128,3.08325827,0.722698419,3.08194361,3.07917346,3.07785705
67.631864,3.31662479,3.08311364,0.483229919,3.08179866,3.07902962,3.07771289
67.642356,3.16227766,3.08296902,0.281617904,3.08165371,3.07888575,3.0775687
67.652847,2.82842712,3.08282443,-0.504378133,3.08150879,3.07874188,3.0774245
67.663339,3.74165739,3.08267984,0.811774322,3.08136387,3.07859797,3.07728026
67.67383,3.74165739,3.08253528,0.811863357,3.08121897,3.07845406,3.07713601
67.684322,3.87298335,3.08239072,0.889152759,3.08107407,3.0783101,3.07699171
67.694814,3.46410162,3.08224617,0.617944529,3.08092918,3.07816613,3.07684738
67.705305,3.31662479,3.08210166,0.484275884,3.0807843,3.07802214,3.07670304
67.715797,3.16227766,3.08195714,0.283408744,3.08063943,3.07787812,3.07655866
67.726288,3.16227766,3.08181266,0.283663536,3.08049458,3.07773409,3.07641426
67.73678,4,3.08166817,0.958296314,3.08034972,3.07759002,3.07626982
67.747272,3.60555128,3.0815237,0.723897487,3.08020487,3.07744592,3.07612535
67.757763,3.60555128,3.08137926,0.723997246,3.08006005,3.07730182,3.07598086
67.768255,3.31662479,3.08123482,0.48517004,3.07991522,3.07715768,3.07583633
67.778746,3,3.08109041,-0.284763782,3.07977042,3.07701352,3.07569178
67.789238,3,3.080946,-0.284510107,3.07962561,3.07686932,3.07554718
67.79973,3.46410162,3.08080161,0.619112276,3.07948081,3.0767251,3.07540255
67.810221,2.82842712,3.08065724,-0.502225162,3.07933603,3.07658087,3.07525791
67.820713,2.64575131,3.08051287,-0.659364513,3.07919125,3.0764366,3.07511322
67.831204,3.31662479,3.08036854,0.486061987,3.07904649,3.07629231,3.07496851
67.841696,2.82842712,3.0802242,-0.501793857,3.07890173,3.07614798,3.07482376
67.852188,3,3.08007988,-0.282983885,3.07875697,3.07600363,3.07467897
67.862679,2.23606798,3.07993559,-0.91862267,3.07861224,3.07585926,3.07453416
67.873171,2.44948974,3.0797913,-0.793915332,3.07846751,3.07571485,3.07438931
67.883662,3.74165739,3.07964704,0.813640185,3.0783228,3.07557042,3.07424443
67.894154,2.82842712,3.07950278,-0.501074498,3.07817808,3.07542596,3.07409951
67.904646,2.23606798,3.07935853,-0.91830853,3.07803338,3.07528146,3.07395455
67.915137,2.44948974,3.07921432,-0.793551875,3.0778887,3.07513695,3.07380957
67.925629,2,3.07907011,-1.03878299,3.07774401,3.0749924,3.07366454
67.93612,3.60555128,3.07892593,0.725689567,3.07759935,3.07484783,3.07351949
67.946612,3.46410162,3.07878175,0.620741385,3.07745469,3.07470321,3.07337439
67.957104,2.82842712,3.07863759,-0.500210417,3.07731004,3.07455857,3.07322926
67.967595,3.87298335,3.07849345,0.891341625,3.07716541,3.07441391,3.0730841
67.978087,3,3.07834933,-0.279909495,3.07702078,3.0742692,3.0729389
67.988578,3.16227766,3.07820523,0.289952466,3.07687618,3.07412448,3.07279366
67.99907,2.82842712,3.07806113,-0.499633875,3.07673157,3.07397971,3.07264838
68.009562,3.16227766,3.07791706,0.290448968,3.07658697,3.07383491,3.07250306
68.020053,3.16227766,3.07777301,0.290696831,3.07644241,3.0736901,3.07235772
68.030545,3.16227766,3.07762897,0.290944476,3.07629783,3.07354523,3.07221233
68.041036,3.46410162,3.07748496,0.621785052,3.07615329,3.07340035,3.07206691
68.051528,4,3.07734096,0.960551424,3.07600875,3.07325542,3.07192143
68.06202,2.82842712,3.07719698,-0.498768336,3.07586421,3.07311046,3.07177592
68.072511,2.82842712,3.07705303,-0.498624009,3.07571971,3.07296548,3.07163039
68.083003,3.31662479,3.07690908,0.489607708,3.0755752,3.07282045,3.0714848
68.093494,3.46410162,3.07676517,0.622363593,3.07543073,3.07267541,3.07133918
68.103986,3.16227766,3.07662127,0.29267113,3.07528625,3.07253031,3.07119352
68.114478,3.74165739,3.07647739,0.815585679,3.07514179,3.07238518,3.07104781
68.124969,3.87298335,3.07633354,0.892552411,3.07499736,3.07224003,3.07090207
68.135461,3.74165739,3.0761897,0.815762027,3.07485293,3.07209483,3.07075628
68.145952,3.87298335,3.0760459,0.89271353,3.07470854,3.07194961,3.07061046
68.156444,2.82842712,3.07590211,-0.497468573,3.07456414,3.07180434,3.07046459
68.166936,2.64575131,3.07575834,-0.655749209,3.07441976,3.07165903,3.07031867
68.177427,3.60555128,3.0756146,0.727967494,3.07427542,3.07151371,3.07017273
68.187919,4.24264069,3.07547088,1.08035633,3.07413107,3.07136833,3.07002673
68.19841,3,3.0753272,-0.274458011,3.07398676,3.07122293,3.0698807
68.208902,2.23606798,3.07518353,-0.916032506,3.07384246,3.07107748,3.06973462
68.219394,3.16227766,3.07503988,0.295360416,3.07369818,3.07093199,3.06958849
68.229885,2.64575131,3.07489628,-0.655091574,3.07355393,3.07078648,3.06944234
68.240377,3.31662479,3.07475269,0.49180494,3.07340969,3.07064092,3.06929612
68.250868,2.82842712,3.07460914,-0.496167329,3.07326548,3.07049534,3.06914988
68.26136,3.74165739,3.07446561,0.81681808,3.07312129,3.0703497,3.06900357
68.271852,2.23606798,3.07432211,-0.915562193,3.07297712,3.07020403,3.06885723
68.282343,3,3.07417865,-0.272357575,3.07283298,3.07005833,3.06871085
68.292835,3.31662479,3.07403521,0.49253384,3.07268886,3.06991257,3.06856442
68.303326,3.46410162,3.07389181,0.624667755,3.07254477,3.0697668,3.06841795
68.313818,3,3.07374844,-0.271566631,3.0724007,3.06962097,3.06827142
68.32431,3.46410162,3.07360509,0.62489721,3.07225666,3.0694751,3.06812485
68.334801,3.60555128,3.0734618,0.729444636,3.07211266,3.0693292,3.06797824
68.345293,3,3.07331853,-0.270773939,3.07196867,3.06918326,3.06783158
68.355784,2.23606798,3.0731753,-0.914935695,3.07182473,3.06903728,3.06768488
68.366276,3.60555128,3.07303211,0.729739111,3.0716808,3.06889125,3.06753812
68.376768,3.16227766,3.07288895,0.298979455,3.07153691,3.06874518,3.06739132
68.387259,3.16227766,3.07274584,0.299218684,3.07139306,3.06859909,3.06724448
68.397751,2.82842712,3.07260276,-0.494141311,3.07124924,3.06845294,3.06709758
68.408242,2.44948974,3.07245974,-0.789284482,3.07110546,3.06830676,3.06695065
68.418734,2.82842712,3.07231674,-0.493851817,3.07096171,3.06816052,3.06680365
68.429226,3,3.07217379,-0.268651803,3.07081799,3.06801425,3.06665661
68.439717,2.64575131,3.0720309,-0.652900903,3.07067433,3.06786794,3.06650953
68.450209,2.82842712,3.07188804,-0.493417589,3.07053069,3.06772159,3.06636239
68.4607,3,3.07174525,-0.26785303,3.07038711,3.0675752,3.06621522
68.471192,2.44948974,3.07160249,-0.788741239,3.07024356,3.06742875,3.06606798
68.481684,3.60555128,3.07145978,0.73081564,3.07010005,3.06728227,3.06592069
68.492175,2.44948974,3.07131713,-0.788560327,3.0699566,3.06713575,3.06577336
68.502667,4,3.07117453,0.963755919,3.06981319,3.06698918,3.06562598
68.513158,3.46410162,3.07103199,0.626952647,3.06966983,3.06684257,3.06547855
68.52365,3.16227766,3.0708895,0.302304743,3.06952652,3.06669591,3.06533106
68.534142,2,3.07074707,-1.03476909,3.06938325,3.06654921,3.06518352
68.544633,3.74165739,3.07060471,0.819178049,3.06924006,3.06640247,3.06503595
68.555125,3.46410162,3.0704624,0.627406737,3.0690969,3.06625568,3.0648883
68.565616,3.16227766,3.07032017,0.303244936,3.06895382,3.06610886,3.06474063
68.576108,3.60555128,3.07017799,0.731692071,3.06881078,3.06596197,3.06459288
68.5866,3,3.07003588,-0.264642923,3.0686678,3.06581505,3.06444508
68.597091,2.82842712,3.06989385,-0.491392636,3.0685249,3.06566809,3.06429725
68.607583,3,3.06975188,-0.264105806,3.06838205,3.06552107,3.06414935
68.618074,3.16227766,3.06960999,0.304413644,3.06823928,3.06537402,3.06400141
68.628566,3.60555128,3.06946817,0.732176961,3.06809656,3.06522691,3.0638534
68.639058,3.46410162,3.06932643,0.628311375,3.06795392,3.06507975,3.06370534
68.649549,3.16227766,3.06918478,0.305111254,3.06781137,3.06493256,3.06355724
68.660041,3.60555128,3.0690432,0.732467112,3.06766887,3.06478532,3.06340907
68.670532,3.60555128,3.06890173,0.732563683,3.06752647,3.06463803,3.06326087
68.681024,3,3.06876032,-0.262221894,3.06738414,3.06449069,3.06311259
68.691516,3.60555128,3.06861901,0.732756622,3.06724189,3.0643433,3.06296426
68.702007,2.23606798,3.0684778,-0.912364963,3.06709974,3.06419588,3.06281589
68.712499,2.64575131,3.06833668,-0.650065665,3.06695767,3.06404839,3.06266746
68.72299,2.82842712,3.06819567,-0.489661665,3.06681571,3.06390088,3.06251898
68.733482,3.87298335,3.06805475,0.89717813,3.06667382,3.0637533,3.06237043
68.743974,2.82842712,3.06791393,-0.489373896,3.06653204,3.06360567,3.06222182
68.754465,3.31662479,3.06777324,0.498850226,3.06639036,3.06345801,3.06207318
68.764957,2.64575131,3.06763265,-0.649523931,3.06624879,3.06331028,3.06192446
68.775448,3.74165739,3.06749218,0.821075638,3.06610733,3.06316252,3.06177571
68.78594,2.82842712,3.06735182,-0.488799243,3.06596597,3.0630147,3.06162688
68.796432,3.31662479,3.06721159,0.499412857,3.06582473,3.06286683,3.061478
68.806923,3,3.06707149,-0.258981647,3.06568362,3.06271892,3.06132907
68.817415,3.87298335,3.06693152,0.897803893,3.06554262,3.06257095,3.06118007
68.827906,3.74165739,3.06679168,0.821502101,3.06540176,3.06242294,3.06103103
68.838398,3.16227766,3.06665198,0.309234021,3.06526101,3.06227487,3.06088192
68.84889,3.74165739,3.06651242,0.821672056,3.06512041,3.06212675,3.06073275
68.859381,3.74165739,3.06637302,0.821756879,3.06497996,3.0619786,3.06058354
68.869873,3.16227766,3.06623376,0.309909505,3.06483964,3.06183038,3.06043425
68.880364,3.46410162,3.06609467,0.630877917,3.06469948,3.06168212,3.06028492
68.890856,2.64575131,3.06595573,-0.648231762,3.06455947,3.0615338,3.06013552
68.901348,3.60555128,3.06581695,0.734666129,3.06441961,3.06138543,3.05998606
68.911839,2.82842712,3.06567837,-0.48708443,3.06427993,3.06123702,3.05983655
68.922331,2.82842712,3.06553994,-0.486942317,3.06414042,3.06108854,3.05968697
68.932822,3.46410162,3.06540172,0.631426873,3.06400109,3.06094003,3.05953735
68.943314,3,3.06526367,-0.255467555,3.06386193,3.06079145,3.05938765
68.953806,3.60555128,3.06512582,0.735136352,3.06372295,3.06064282,3.0592379
68.964297,2.64575131,3.06498818,-0.647485036,3.06358419,3.06049415,3.05908809
68.974789,3,3.06485074,-0.254658091,3.06344561,3.06034542,3.05893822
68.98528,3,3.06471353,-0.254388545,3.06330726,3.06019664,3.05878829
68.995772,3.74165739,3.06457653,0.822849231,3.06316911,3.0600478,3.0586383
69.006264,3.31662479,3.06443976,0.502180277,3.06303118,3.05989891,3.05848824
69.016755,3.16227766,3.06430324,0.313008659,3.06289349,3.05974998,3.05833813
69.027247,3,3.06416695,-0.253311967,3.06275603,3.05960098,3.05818795
69.037738,3.46410162,3.06403093,0.632511409,3.06261883,3.05945194,3.05803772
69.04823,2.82842712,3.06389516,-0.485250489,3.06248187,3.05930284,3.05788742
69.058722,3.46410162,3.06375966,0.632725812,3.06234517,3.05915368,3.05773706
69.069213,2,3.06362446,-1.0313217,3.06220876,3.05900448,3.05758664
69.079705,3.16227766,3.06348953,0.314305795,3.06207261,3.05885522,3.05743615
69.090196,4.12310563,3.06335491,1.02944194,3.06193677,3.05870591,3.05728562
69.100688,2.23606798,3.06322059,-0.90947931,3.06180122,3.05855654,3.057135
69.11118,3.16227766,3.06308659,0.314946132,3.06166599,3.05840711,3.05698433
69.121671,2.44948974,3.06295294,-0.783238915,3.06153109,3.05825764,3.0568336
69.132163,2.82842712,3.06281962,-0.484140984,3.06139651,3.0581081,3.0566828
69.142654,3.46410162,3.06268666,0.633573164,3.06126229,3.05795852,3.05653195
69.153146,2.44948974,3.06255406,-0.782984239,3.06112842,3.05780888,3.05638102
69.163638,3.46410162,3.06242184,0.633782119,3.06099492,3.05765917,3.05623003
69.174129,2.82842712,3.06229003,-0.483593737,3.06086182,3.05750943,3.05607899
69.184621,2.82842712,3.06215861,-0.483457841,3.0607291,3.05735961,3.05592787
69.195112,4.12310563,3.06202763,1.0300864,3.06059682,3.05720976,3.0557767
69.205604,3.60555128,3.06189707,0.737329104,3.06046495,3.05705984,3.05562545
69.216096,3,3.06176696,-0.248529603,3.06033352,3.05690985,3.05547413
69.226587,2.82842712,3.06163734,-0.482918437,3.06020257,3.05675983,3.05532277
69.237079,3,3.06150819,-0.248008456,3.06007208,3.05660974,3.05517133
69.24757,2.82842712,3.06137956,-0.482651468,3.05994211,3.0564596,3.05501983
69.258062,3.60555128,3.06125145,0.737766785,3.05981263,3.0563094,3.05486826
69.268554,3,3.06112387,-0.247232423,3.0596837,3.05615914,3.05471662
69.279045,3,3.06099687,-0.246975447,3.05955533,3.05600883,3.05456493
69.289537,3.16227766,3.06087044,0.318444996,3.05942752,3.05585845,3.05441316
69.300028,3.16227766,3.06074464,0.318642469,3.05930032,3.05570804,3.05426134
69.31052,2.82842712,3.06061945,-0.481863386,3.05917373,3.05555754,3.05410944
69.321012,3,3.06049491,-0.245957135,3.05904779,3.055407,3.05395747
69.331503,2.82842712,3.06037107,-0.48160559,3.05892253,3.05525641,3.05380545
69.341995,3.31662479,3.06024792,0.506336717,3.05879796,3.05510574,3.05365334
69.352486,3.31662479,3.06012552,0.506457574,3.05867413,3.05495504,3.05350119
69.362978,3.31662479,3.06000386,0.50657766,3.05855103,3.05480426,3.05334895
69.37347,3,3.05988301,-0.244710045,3.05842872,3.05465342,3.05319665
69.383961,3.46410162,3.05976298,0.63587627,3.05830724,3.05450254,3.05304429
69.394453,3.46410162,3.05964381,0.635969972,3.0581866,3.05435159,3.05289186
69.404944,2.44948974,3.05952554,-0.781047884,3.05806686,3.05420059,3.05273937
69.415436,2.23606798,3.05940819,-0.907380963,3.05794802,3.05404952,3.05258679
69.425928,3.31662479,3.05929181,0.507279985,3.05783014,3.0538984,3.05243415
69.436419,2.64575131,3.05917645,-0.642981441,3.05771328,3.05374722,3.05228146
69.446911,3.46410162,3.05906212,0.63642713,3.05759744,3.05359598,3.05212868
69.457402,3.16227766,3.05894891,0.321447899,3.05748271,3.05344469,3.05197584
69.467894,3,3.05883683,-0.242563035,3.0573691,3.05329333,3.05182293
69.478386,3,3.05872594,-0.242334347,3.05725667,3.0531419,3.05166995
69.488877,3.87298335,3.0586163,0.902422876,3.05714548,3.05299043,3.05151691
69.499369,3.31662479,3.05850795,0.508052003,3.05703558,3.05283889,3.05136378
69.50986,3.74165739,3.05840097,0.826593259,3.05692703,3.05268731,3.05121061
69.520352,4.12310563,3.0582954,1.03189642,3.05681988,3.05253565,3.05105735
69.530844,3.31662479,3.0581913,0.508363539,3.0567142,3.05238392,3.05090402
69.541335,2.23606798,3.05808877,-0.906653621,3.05661008,3.05223216,3.05075063
69.551827,3,3.05798784,-0.240806642,3.05650755,3.05208032,3.05059716
69.562318,4.35889894,3.05788862,1.1406184,3.05640671,3.05192843,3.05044363
69.57281,3.31662479,3.05779116,0.50875695,3.05630763,3.05177647,3.05029002
69.583302,3.31662479,3.05769555,0.508850897,3.0562104,3.05162445,3.05013634
69.593793,3.87298335,3.05760191,0.902984738,3.05611512,3.05147238,3.0499826
69.604285,3,3.05751029,-0.239813039,3.05602185,3.05132024,3.04982878
69.614776,2.64575131,3.05742083,-0.641614772,3.05593073,3.05116805,3.0496749
69.625268,2.44948974,3.0573336,-0.779643415,3.05584184,3.05101579,3.04952094
69.63576,3,3.05724872,-0.239267055,3.05575529,3.05086346,3.0493669
69.646251,3,3.05716633,-0.239094823,3.05567122,3.05071109,3.04921281
69.656743,2.82842712,3.05708654,-0.478183453,3.05558973,3.05055865,3.04905863
69.667234,3,3.05700949,-0.238766595,3.05551097,3.05040615,3.04890439
69.677726,3,3.05693531,-0.238611202,3.05543508,3.05025358,3.04875007
69.688218,2.44948974,3.05686415,-0.779342294,3.05536221,3.05010095,3.04859568
69.698709,3.60555128,3.0567962,0.740780045,3.05529253,3.04994828,3.04844123
69.709201,3.16227766,3.0567316,0.324878527,3.05522619,3.04979552,3.04828669
69.719692,2.44948974,3.05667056,-0.77921808,3.0551634,3.04964272,3.04813209
69.730184,2.82842712,3.05661325,-0.477688314,3.05510434,3.04948985,3.04797741
69.740676,3.16227766,3.05655989,0.325142687,3.05504922,3.04933691,3.04782265
69.751167,3,3.05651072,-0.237719828,3.05499827,3.04918392,3.04766784
69.761659,3.16227766,3.05646595,0.325287121,3.05495172,3.04903086,3.04751294
69.77215,2.44948974,3.05642586,-0.779061046,3.05490984,3.04887775,3.04735798
69.782642,3.60555128,3.0563907,0.74105369,3.05487289,3.04872456,3.04720293
69.793134,2.23606798,3.05636079,-0.905700179,3.05484117,3.04857132,3.04704781
69.803625,3,3.05633644,-0.237352982,3.054815,3.04841802,3.04689263
69.814117,3,3.05631798,-0.23731409,3.05479472,3.04826465,3.04673737
69.824608,3.46410162,3.05630578,0.638588941,3.05478069,3.04811123,3.04658204
69.8351,3.16227766,3.05630023,0.325541741,3.05477331,3.04795773,3.04642662
69.845592,3.16227766,3.05630177,0.325539383,3.054773,3.04780417,3.04627113
69.856083,3.74165739,3.05631084,0.827856596,3.05478022,3.04765056,3.04611559
69.866575,4.58257569,3.05632795,1.235414,3.05479547,3.04749687,3.04595995
69.877066,3.16227766,3.05635362,0.325459731,3.05481928,3.04734314,3.04580425
69.887558,2.82842712,3.05638845,-0.477452956,3.05485223,3.04718933,3.04564846
69.89805,2.44948974,3.05643306,-0.779065669,3.05489496,3.04703545,3.0454926
69.908541,3.87298335,3.05648813,0.903601247,3.05494814,3.04688153,3.04533668
69.919033,2.64575131,3.05655443,-0.640939248,3.05501255,3.04672753,3.04518067
69.929524,3.46410162,3.05663276,0.638332869,3.05508899,3.04657348,3.0450246
69.940016,3.60555128,3.05672405,0.740828744,3.05517837,3.04641935,3.04486844
69.950508,2.44948974,3.05682928,-0.779319917,3.05528169,3.04626516,3.0447122
69.960999,2.82842712,3.05694955,-0.478040189,3.05540005,3.04611092,3.04455591
69.971491,2.44948974,3.05708613,-0.77948469,3.05553471,3.0459566,3.04439952
69.981982,2.44948974,3.05724039,-0.779583637,3.05568706,3.04580224,3.04424307
69.992474,2.64575131,3.05741397,-0.641609426,3.05585872,3.04564779,3.04408653
70.002966,3,3.05760869,-0.240018095,3.05605152,3.04549329,3.04392992
70.013457,3.31662479,3.05782667,0.508722045,3.05626758,3.04533873,3.04377325
70.023949,3.60555128,3.05807049,0.739919446,3.05650948,3.04518409,3.04361648
70.03444,2.64575131,3.0583431,-0.642333083,3.05678018,3.04502941,3.04345965
70.044932,3.31662479,3.05864817,0.507913986,3.05708334,3.04487465,3.04330273
70.055424,3,3.05899007,-0.242878708,3.05742333,3.04471982,3.04314574
70.065915,2.44948974,3.05937409,-0.780950928,3.05780546,3.04456495,3.04298868
70.076407,3,3.05980688,-0.244554459,3.05823637,3.04440999,3.04283153
70.086898,3,3.06029641,-0.245553264,3.05872403,3.04425499,3.04267432
70.09739,3.60555128,3.06085263,0.738037019,3.05927842,3.04409991,3.04251702
70.107882,2.82842712,3.06148763,-0.482763408,3.0599116,3.04394476,3.04235964
70.118373,4.12310563,3.06221609,1.02999492,3.06063829,3.04378956,3.0422022
70.128865,3.31662479,3.06305602,0.503556122,3.06147649,3.04363429,3.04204467
70.139356,3.87298335,3.06402875,0.899419034,3.06244754,3.04347896,3.04188707
70.149848,2.44948974,3.06516,-0.784646583,3.06357719,3.04332356,3.04172938
70.16034,3.46410162,3.06647979,0.63057262,3.06489545,3.04316809,3.04157162
70.170831,3.16227766,3.06802289,0.307009394,3.06643714,3.04301258,3.04141379
70.181323,4.12310563,3.06982962,1.02629236,3.06824258,3.04285698,3.04125587
70.191814,4.47213595,3.07194476,1.18329675,3.07035658,3.04270134,3.04109788
70.202306,3.16227766,3.07441869,0.296410146,3.07282954,3.04254561,3.04093981
70.212798,2,3.07730553,-1.0379333,3.07571562,3.04238982,3.04078165
70.223289,3.16227766,3.08066267,0.285683374,3.07907222,3.04223398,3.04062344
70.233781,2.82842712,3.08455043,-0.506086262,3.08295971,3.04207807,3.04046512
70.244272,3,3.08902808,-0.298375743,3.08743738,3.0419221,3.04030675
70.254764,3.16227766,3.09415443,0.261004281,3.09256406,3.04176605,3.04014828
70.265256,3.46410162,3.09998243,0.603422892,3.09839275,3.04160994,3.03998973
70.275747,3.87298335,3.10655714,0.875457711,3.10496851,3.04145378,3.03983112
70.286239,3.60555128,3.11391448,0.701168164,3.11232728,3.04129754,3.03967242
70.29673,2,3.12207339,-1.05927966,3.12048801,3.04114125,3.03951365
70.307222,2.82842712,3.13103766,-0.550100481,3.12945449,3.04098488,3.03935479
70.317714,3.31662479,3.14078741,0.419329681,3.1392068,3.04082844,3.03919585
70.328205,3,3.15127749,-0.388944075,3.1496998,3.04067196,3.03903685
70.338697,4,3.16243747,0.915184424,3.16086299,3.04051539,3.03887775
70.349188,3.16227766,3.17416138,-0.109012474,3.17259036,3.04035878,3.03871858
70.35968,4,3.18631282,0.902046109,3.18474542,3.04020209,3.03855932
70.370172,3.74165739,3.19871429,0.736846723,3.19715061,3.04004533,3.03839999
70.380663,3.46410162,3.21114761,0.502945326,3.20958761,3.03988852,3.03824059
70.391155,3.46410162,3.22335574,0.490658611,3.22179927,3.03973164,3.03808109
70.401646,2,3.23503492,-1.11132125,3.23348168,3.0395747,3.03792153
70.412138,3.60555128,3.24584842,0.599752325,3.24429797,3.03941768,3.03776187
70.42263,3.74165739,3.25542957,0.697300379,3.25388128,3.0392606,3.03760214
70.433121,3.87298335,3.26340522,0.780754844,3.26185831,3.03910347,3.03744233
70.443613,4,3.26942672,0.854735793,3.26788025,3.03894626,3.03728244
70.454104,3.87298335,3.27320014,0.77445672,3.27165302,3.038789,3.03712248
70.464596,3.74165739,3.27452735,0.683469118,3.27297842,3.03863166,3.03696242
70.475088,3.60555128,3.27333024,0.576386184,3.27177829,3.03847426,3.03680228
70.485579,4.24264069,3.26966454,0.986395533,3.26810837,3.0383168,3.03664208
70.496071,4.24264069,3.26370967,0.98940943,3.26214817,3.03815927,3.03648178
70.506562,3,3.25574547,-0.505712837,3.25417764,3.03800168,3.03632142
70.517054,4.12310563,3.24611327,0.936478702,3.24453824,3.03784402,3.03616096
70.527546,3.60555128,3.23518401,0.608578073,3.2336011,3.03768629,3.03600042
70.538037,4.12310563,3.22332669,0.948566778,3.22173538,3.03752852,3.03583981
70.548529,3.46410162,3.21088325,0.503208069,3.20928316,3.03737066,3.03567911
70.55902,2.82842712,3.19816409,-0.608059998,3.19655499,3.03721275,3.03551834
70.569512,2.82842712,3.18543339,-0.597500009,3.1838152,3.03705477,3.03535748
70.580004,4.35889894,3.17291655,1.08902819,3.17128929,3.03689672,3.03519653
70.590495,3.31662479,3.16079803,0.394748981,3.15916182,3.03673862,3.03503552
70.600987,3.31662479,3.14922049,0.409150703,3.14757552,3.03658044,3.03487442
70.611478,3.31662479,3.13829598,0.422289957,3.13664252,3.03642221,3.03471324
70.62197,3.46410162,3.12810013,0.57965635,3.12643849,3.0362639,3.03455197
70.632462,3.31662479,3.11868299,0.444906503,3.11701352,3.03610553,3.03439062
70.642953,2.82842712,3.11006883,-0.53069926,3.10839189,3.03594711,3.0342292
70.653445,3.60555128,3.10225726,0.709432175,3.10057324,3.03578861,3.03406769
70.663936,3,3.09523259,-0.308597774,3.09354185,3.03563005,3.03390611
70.674428,2.82842712,3.08896108,-0.510425266,3.087264,3.03547143,3.03374443
70.68492,3.31662479,3.08339958,0.482933958,3.08169651,3.03531273,3.03358267
70.695411,2.64575131,3.07849644,-0.657833663,3.07678771,3.03515399,3.03342084
70.705903,3,3.07419338,-0.272384612,3.07247928,3.03499517,3.03325892
70.716394,3.60555128,3.07043155,0.731518783,3.06871235,3.0348363,3.03309693
70.726886,3.46410162,3.06715034,0.630040696,3.06542629,3.03467735,3.03293484
70.737378,2.64575131,3.06429204,-0.646947239,3.06256335,3.03451833,3.03277267
70.747869,4.12310563,3.06180195,1.03019594,3.06006879,3.03435927,3.03261043
70.758361,3.74165739,3.05962879,0.825850228,3.05789132,3.03420013,3.0324481
70.768852,2.82842712,3.05772701,-0.478852675,3.05598537,3.03404094,3.03228569
70.779344,2.64575131,3.05605532,-0.640549767,3.05430961,3.03388167,3.03212319
70.789836,3.16227766,3.05457808,0.328176136,3.0528284,3.03372234,3.03196061
70.800327,2.82842712,3.05326452,-0.474170221,3.05151093,3.03356295,3.03179796
70.810819,2.44948974,3.05208804,-0.776272049,3.05033059,3.03340349,3.03163522
70.82131,3.87298335,3.05102669,0.906618254,3.04926544,3.03324399,3.0314724
70.831802,3.31662479,3.05006178,0.516297409,3.04829675,3.0330844,3.03130949
70.842294,2.82842712,3.04917813,-0.469841465,3.04740936,3.03292475,3.03114649
70.852785,3.46410162,3.04836326,0.644777753,3.04659077,3.03276505,3.03098343
70.863277,3,3.04760677,-0.218189757,3.04583056,3.03260527,3.03082027
70.873768,3.31662479,3.04690044,0.519349935,3.04512052,3.03244545,3.03065704
70.88426,3,3.04623732,-0.215028638,3.0444537,3.03228554,3.03049372
70.894752,3.74165739,3.04561193,0.834293388,3.04382461,3.03212558,3.03033031
70.905243,3.31662479,3.04501979,0.521157368,3.04322877,3.03196556,3.03016683
70.915735,2.82842712,3.04445703,-0.464790177,3.04266231,3.03180547,3.03000325
70.926226,2.82842712,3.04392067,-0.464212819,3.04212223,3.03164533,3.02983961
70.936718,2.82842712,3.04340797,-0.463660274,3.04160582,3.03148512,3.02967587
70.94721,2.82842712,3.0429168,-0.463130304,3.04111092,3.03132484,3.02951204
70.957701,3.60555128,3.04244531,0.750403871,3.04063569,3.03116451,3.02934815
70.968193,3.46410162,3.04199175,0.649699828,3.04017838,3.0310041,3.02918416
70.978684,3.31662479,3.04155478,0.524471168,3.03973766,3.03084365,3.0290201
70.989176,3.16227766,3.04113306,0.348058331,3.03931216,3.03068312,3.02885594
70.999668,3.16227766,3.04072548,0.348643341,3.0389008,3.03052253,3.0286917
71.010159,3,3.04033107,-0.200825974,3.03850259,3.03036189,3.02852739
71.020651,3.87298335,3.03994884,0.912707243,3.03811654,3.03020118,3.02836298
71.031142,2.23606798,3.03957801,-0.89638721,3.03774188,3.03004041,3.0281985
71.041634,3,3.03921776,-0.198034739,3.03737779,3.02987957,3.02803393
71.052126,3.31662479,3.03886742,0.527026915,3.03702359,3.02971867,3.02786927
71.062617,2.64575131,3.03852639,-0.626717703,3.03667868,3.02955772,3.02770454
71.073109,2.64575131,3.03819401,-0.62645247,3.0363424,3.0293967,3.02753971
71.0836,3,3.0378698,-0.194601632,3.03601427,3.02923563,3.02737482
71.094092,2.23606798,3.03755319,-0.895257063,3.03569373,3.02907448,3.02720982
71.104584,3.60555128,3.03724375,0.753861742,3.03538035,3.02891328,3.02704474
71.115075,3,3.03694108,-0.192200629,3.03507371,3.02875202,3.0268796
71.125567,3.46410162,3.03664473,0.653801874,3.03477336,3.02859069,3.02671435
71.136058,3.60555128,3.03635437,0.754451396,3.034479,3.02842932,3.02654904
71.14655,3.16227766,3.03606961,0.355257728,3.03419021,3.02826787,3.02638362
71.157042,3.60555128,3.03579015,0.754825227,3.0339067,3.02810636,3.02621812
71.167533,3.31662479,3.03551573,0.53019719,3.03362821,3.0279448,3.02605256
71.178025,3,3.03524601,-0.187739206,3.0333544,3.02778317,3.02588689
71.188516,3,3.03498078,-0.187031506,3.03308506,3.02762149,3.02572116
71.199008,2.64575131,3.03471976,-0.623673351,3.0328199,3.02745974,3.02555532
71.2095,2.82842712,3.03446274,-0.453911457,3.03255872,3.02729793,3.0253894
71.219991,2.64575131,3.03420952,-0.62326416,3.03230133,3.02713607,3.02522342
71.230483,2.64575131,3.03395988,-0.623063856,3.03204749,3.02697414,3.02505733
71.240974,3.31662479,3.03371366,0.531893907,3.03179705,3.02681216,3.02489117
71.251466,3.31662479,3.03347065,0.532122297,3.03154979,3.02665011,3.02472492
71.261958,3.87298335,3.03323071,0.916380182,3.03130558,3.026488,3.02455858
71.272449,3.74165739,3.0329937,0.841821647,3.03106428,3.02632585,3.02439217
71.282941,3.16227766,3.03275944,0.359886396,3.0308257,3.02616362,3.02422566
71.293432,2.44948974,3.03252784,-0.763569313,3.03058975,3.02600135,3.02405909
71.303924,4,3.03229872,0.98371809,3.03035627,3.02583901,3.02389241
71.314416,3.16227766,3.03207199,0.360840234,3.03012514,3.02567661,3.02372565
71.324907,3.60555128,3.03184755,0.757432326,3.02989629,3.02551416,3.02355882
71.335399,2.64575131,3.03162525,-0.621187527,3.02966956,3.02535164,3.02339189
71.34589,2.44948974,3.03140505,-0.762833734,3.02944489,3.02518908,3.02322489
71.356382,2.82842712,3.03118679,-0.450288428,3.02922214,3.02502645,3.02305779
71.366874,2.82842712,3.03097042,-0.450048102,3.02900125,3.02486375,3.02289061
71.377365,3,3.03075586,-0.175373492,3.02878215,3.02470102,3.02272335
71.387857,3.31662479,3.030543,0.534866142,3.02856472,3.02453821,3.022556
71.398348,2.23606798,3.0303318,-0.891214801,3.02834892,3.02437537,3.02238858
71.40884,3.16227766,3.03012215,0.363531998,3.02813465,3.02421245,3.02222106
71.419332,3.16227766,3.029914,0.363818176,3.02792184,3.02404947,3.02205345
71.429823,2.64575131,3.0297073,-0.619641822,3.02771047,3.02388645,3.02188578
71.440315,2.44948974,3.02950196,-0.76158533,3.02750043,3.02372336,3.021718
71.450806,2,3.02929795,-1.01454322,3.02729169,3.02356023,3.02155016
71.461298,2.64575131,3.02909519,-0.619147704,3.02708417,3.02339703,3.02138221
71.47179,2.64575131,3.02889364,-0.618984916,3.02687783,3.02323377,3.02121419
71.482281,3.46410162,3.02869326,0.659854796,3.02667264,3.02307047,3.02104609
71.492773,3.16227766,3.02849398,0.365764512,3.02646851,3.02290711,3.02087789
71.503264,3.46410162,3.02829579,0.660155912,3.02626544,3.0227437,3.02070962
71.513756,3.87298335,3.0280986,0.919176125,3.02606335,3.02258022,3.02054126
71.524248,2.82842712,3.02790239,-0.446626541,3.02586222,3.02241669,3.0203728
71.534739,3.16227766,3.02770715,0.366838534,3.02566201,3.02225311,3.02020428
71.545231,3.46410162,3.0275128,0.660748679,3.02546267,3.02208947,3.02003566
71.555722,3,3.02731934,-0.165285622,3.02526419,3.02192579,3.01986697
71.566214,3.16227766,3.0271267,0.367628839,3.0250665,3.02176204,3.01969818
71.576706,4.24264069,3.02693486,1.10259051,3.02486958,3.02159824,3.01952931
71.587197,3,3.02674383,-0.163535394,3.02467343,3.0214344,3.01936036
71.597689,3,3.02655352,-0.162952496,3.02447798,3.02127049,3.01919132
71.60818,3,3.02636394,-0.162369777,3.02428323,3.02110654,3.01902221
71.618672,2.64575131,3.02617505,-0.616785,3.02408913,3.02094253,3.01885299
71.629164,3.46410162,3.02598682,0.661902408,3.02389566,3.02077846,3.0186837
71.639655,2.64575131,3.02579925,-0.616480282,3.02370282,3.02061436,3.01851433
71.650147,3,3.02561228,-0.160038378,3.02351055,3.02045018,3.01834486
71.660638,3.31662479,3.02542593,0.539628446,3.02331887,3.02028598,3.01817533
71.67113,3.60555128,3.02524014,0.761781555,3.02312771,3.0201217,3.01800569
71.681622,3.16227766,3.0250549,0.370435906,3.02293707,3.01995738,3.01783597
71.692113,2.82842712,3.02487022,-0.44321901,3.02274695,3.01979301,3.01766618
71.702605,3.60555128,3.02468603,0.76214516,3.0225573,3.01962859,3.01749629
71.713096,3.31662479,3.02450236,0.540483512,3.02236813,3.01946412,3.01732633
71.723588,3.31662479,3.02431916,0.540652966,3.02217939,3.0192996,3.01715627
71.73408,1.41421356,3.02413642,-1.26882736,3.02199109,3.01913502,3.01698613
71.744571,3,3.02395415,-0.154771294,3.02180321,3.01897041,3.01681591
71.755063,3.60555128,3.0237723,0.762744371,3.02161572,3.01880573,3.0166456
71.765554,2.64575131,3.02359089,-0.614686566,3.02142863,3.01864102,3.01647522
71.776046,2.64575131,3.02340986,-0.614539297,3.0212419,3.01847624,3.01630474
71.786538,3.16227766,3.02322922,0.37289199,3.02105552,3.01831142,3.01613417
71.797029,2.82842712,3.02304899,-0.441159679,3.0208695,3.01814657,3.01596354
71.807521,3.31662479,3.0228691,0.541992334,3.02068379,3.01798165,3.0157928
71.818012,2.82842712,3.02268959,-0.440752153,3.02049843,3.0178167,3.015622
71.828504,2.23606798,3.0225104,-0.886815888,3.02031335,3.01765168,3.01545109
71.838996,3,3.02233154,-0.149437419,3.02012856,3.01748662,3.0152801
71.849487,3.16227766,3.02215303,0.37433225,3.01994408,3.01732153,3.01510905
71.859979,2.44948974,3.02197481,-0.756627427,3.01975986,3.01715637,3.01493789
71.87047,3.46410162,3.0217969,0.66505993,3.01957592,3.01699119,3.01476666
71.880962,3,3.02161928,-0.14703496,3.01939221,3.01682594,3.01459534
71.891454,3.31662479,3.02144194,0.543307328,3.01920875,3.01666065,3.01442392
71.901945,3.87298335,3.02126489,0.92288594,3.01902555,3.01649533,3.01425245
71.912437,3,3.02108809,-0.145217386,3.01884255,3.01632995,3.01408087
71.922928,3.60555128,3.02091157,0.764617362,3.01865979,3.01616454,3.01390922
71.93342,2.23606798,3.02073528,-0.885814483,3.01847723,3.01599907,3.01373747
71.943912,3.87298335,3.02055923,0.923268172,3.01829486,3.01583356,3.01356564
71.954403,2.82842712,3.02038343,-0.438128189,3.01811271,3.01566801,3.01339374
71.964895,1.41421356,3.02020785,-1.2672783,3.01793073,3.01550241,3.01322174
71.975386,3.31662479,3.02003251,0.544602863,3.01774895,3.01533679,3.01304967
71.985878,3.16227766,3.01985737,0.37738613,3.01756733,3.0151711,3.0128775
71.99637,3.74165739,3.01968244,0.849691092,3.01738588,3.01500537,3.01270525
72.006861,2.82842712,3.01950772,-0.437127668,3.0172046,3.01483962,3.01253293
72.017353,3.87298335,3.01933319,0.923931899,3.01702346,3.01467381,3.01236051
72.027844,3.31662479,3.01915887,0.545404364,3.01684249,3.01450798,3.01218802
72.038336,2.23606798,3.01898472,-0.884825825,3.01666164,3.01434208,3.01201543
72.048828,3.60555128,3.01881075,0.7659899,3.01648094,3.01417615,3.01184276
72.059319,3.87298335,3.01863697,0.924308593,3.01630038,3.0140102,3.01167002
72.069811,3.46410162,3.01846335,0.667561431,3.01611993,3.01384419,3.01149718
72.080302,4,3.01828991,0.990812841,3.01593963,3.01367815,3.01132427
72.090794,3.31662479,3.01811662,0.546359009,3.01575942,3.01351206,3.01115126
72.101286,3.46410162,3.01794349,0.66795069,3.01557933,3.01334594,3.01097817
72.111777,3.16227766,3.01777053,0.380140934,3.01539936,3.01317979,3.01080501
72.122269,2.64575131,3.0175977,-0.609792089,3.01521948,3.01301359,3.01063175
72.13276,3.46410162,3.01742504,0.668338669,3.01503972,3.01284737,3.01045842
72.143252,3,3.0172525,-0.131348776,3.01486004,3.01268109,3.01028499
72.153744,2.64575131,3.0170801,-0.609367534,3.01468045,3.01251478,3.01011148
72.164235,3.16227766,3.01690786,0.381273923,3.01450096,3.01234845,3.00993791
72.174727,3.16227766,3.01673572,0.381499588,3.01432154,3.01218207,3.00976423
72.185218,1.73205081,3.01656374,-1.13336355,3.01414222,3.01201567,3.00959048
72.19571,3.74165739,3.01639186,0.851625224,3.01396296,3.01184922,3.00941664
72.206202,3.31662479,3.01622011,0.548091853,3.01378377,3.01168273,3.00924271
72.216693,3,3.0160485,-0.126682655,3.01360467,3.01151623,3.00906872
72.227185,2.64575131,3.01587698,-0.608379543,3.01342561,3.01134968,3.00889462
72.237676,3.31662479,3.0157056,0.548561022,3.01324664,3.01118311,3.00872046
72.248168,3.46410162,3.01553431,0.669751677,3.01306772,3.01101649,3.0085462
72.25866,3.46410162,3.01536313,0.669879458,3.01288885,3.01084985,3.00837186
72.269151,3.16227766,3.01519207,0.38351739,3.01271005,3.01068318,3.00819745
72.279643,3.16227766,3.0150211,0.383740219,3.01253129,3.01051648,3.00802294
72.290134,3.87298335,3.01485026,0.926354733,3.0123526,3.01034975,3.00784836
72.300626,2.64575131,3.01467949,-0.607394584,3.01217393,3.01018298,3.00767368
72.311118,2.44948974,3.01450883,-0.751677512,3.01199532,3.01001619,3.00749892
72.321609,2.44948974,3.01433827,-0.751564055,3.01181675,3.00984938,3.0073241
72.332101,3.31662479,3.0141678,0.549960902,3.01163822,3.00968252,3.00714917
72.342592,3.46410162,3.01399743,0.670898044,3.01145973,3.00951566,3.00697418
72.353084,3.60555128,3.01382714,0.769236074,3.01128127,3.00934875,3.00679909
72.363576,3.16227766,3.01365693,0.385513587,3.01110284,3.00918181,3.00662392
72.374067,3,3.01348684,-0.116132835,3.01092445,3.00901487,3.00644868
72.384559,2.44948974,3.01331681,-0.750884188,3.01074608,3.00884788,3.00627334
72.39505,3.60555128,3.01314688,0.769678114,3.01056775,3.00868089,3.00609793
72.405542,3.16227766,3.01297701,0.386394417,3.01038943,3.00851385,3.00592243
72.416034,3.74165739,3.01280723,0.853727212,3.01021114,3.00834679,3.00574684
72.426525,3.46410162,3.01263755,0.671910757,3.01003288,3.00817973,3.00557119
72.437017,3,3.01246793,-0.11165988,3.00985462,3.00801262,3.00539544
72.447508,3,3.0122984,-0.110898158,3.0096764,3.00784551,3.00521962
72.458,3,3.01212893,-0.110131442,3.00949817,3.00767836,3.00504371
72.468492,3.31662479,3.01195954,0.551964897,3.00931996,3.0075112,3.00486771
72.478983,3.87298335,3.01179024,0.928004905,3.00914179,3.00734402,3.00469165
72.489475,4.35889894,3.011621,1.16072303,3.0089636,3.00717681,3.00451548
72.499966,1.73205081,3.01145184,-1.13110611,3.00878544,3.0070096,3.00433926
72.510458,2.82842712,3.01128275,-0.427616207,3.00860727,3.00684236,3.00416293
72.52095,2.82842712,3.01111372,-0.427418522,3.00842911,3.00667509,3.00398652
72.531441,2.44948974,3.01094478,-0.749303031,3.00825098,3.00650783,3.00381005
72.541933,3.46410162,3.01077589,0.673294682,3.00807283,3.00634053,3.00363348
72.552424,4,3.01060708,0.99468232,3.00789469,3.00617324,3.00345685
72.562916,2.64575131,3.01043833,-0.603893217,3.00771655,3.00600591,3.00328011
72.573408,3.46410162,3.01026964,0.673670522,3.0075384,3.00583857,3.0031033
72.583899,3.31662479,3.01010104,0.55364587,3.00736027,3.00567123,3.00292641
72.594391,2.82842712,3.00993249,-0.426034462,3.00718212,3.00550386,3.00274944
72.604882,3.46410162,3.00976402,0.674045695,3.00700398,3.00533649,3.00257239
72.615374,3.16227766,3.00959559,0.390745526,3.00682583,3.0051691,3.00239525
72.625866,2.82842712,3.00942724,-0.425441079,3.00664766,3.0050017,3.00221803
72.636357,3.16227766,3.00925896,0.391176049,3.00646951,3.0048343,3.00204074
72.646849,2.44948974,3.00909073,-0.748064828,3.00629133,3.00466688,3.00186336
72.65734,3.31662479,3.00892258,0.554709123,3.00611317,3.00449946,3.00168591
72.667832,3.31662479,3.00875448,0.554860626,3.00593497,3.00433202,3.00150836
72.678324,2.44948974,3.00858644,-0.747727687,3.00575677,3.00416457,3.00133073
72.688815,3.31662479,3.00841848,0.555163323,3.00557857,3.00399714,3.00115304
72.699307,2.23606798,3.00825056,-0.878739201,3.00540034,3.00382968,3.00097525
72.709798,2.82842712,3.00808272,-0.423857995,3.00522211,3.00366223,3.0007974
72.72029,3.31662479,3.00791493,0.555616645,3.00504386,3.00349476,3.00061945
72.730782,2.82842712,3.00774721,-0.423462019,3.00486558,3.00332729,3.00044142
72.741273,3.46410162,3.00757956,0.675664161,3.00468731,3.00315983,3.00026333
72.751765,3,3.00741195,-0.0860926971,3.00450901,3.00299235,3.00008513
72.762256,3.60555128,3.00724443,0.773502973,3.00433071,3.00282489,2.99990688
72.772748,2.64575131,3.00707695,-0.601103681,3.00415237,3.00265741,2.99972853
72.78324,2,3.00690953,-1.00344882,3.00397401,3.00248993,2.99955009
72.793731,3.16227766,3.00674219,0.394379856,3.00379566,3.00232248,2.9993716
72.804223,2,3.0065749,-1.00328206,3.00361726,3.002155,2.99919301
72.814714,2.82842712,3.00640768,-0.421877418,3.00343886,3.00198755,2.99901435
72.825206,4,3.00624051,0.996874861,3.00326042,3.00182008,2.9988356
72.835698,3.16227766,3.00607341,0.395226838,3.00308196,3.00165262,2.99865677
72.846189,3.16227766,3.00590638,0.395438086,3.0029035,3.00148518,2.99847788
72.856681,3,3.0057394,-0.0757588308,3.00272499,3.00131774,2.99829888
72.867172,3,3.0055725,-0.0746491816,3.00254648,3.00115031,2.99811983
72.877664,3.16227766,3.00540565,0.396070716,3.00236793,3.00098288,2.99794068
72.888156,2.82842712,3.00523886,-0.420489875,3.00218935,3.00081546,2.99776145
72.898647,3.46410162,3.00507215,0.677517131,3.00201077,3.00064807,2.99758216
72.909139,3.60555128,3.00490549,0.775013408,3.00183214,3.00048067,2.99740277
72.91963,3,3.00473892,-0.0688397801,3.0016535,3.0003133,2.99722333
72.930122,3.16227766,3.00457239,0.397121232,3.00147482,3.00014592,2.99704378
72.940614,2.64575131,3.00440593,-0.598877796,3.00129611,2.99997857,2.99686416
72.951105,3.60555128,3.00423955,0.775442925,3.00111739,2.99981124,2.99668447
72.961597,3.74165739,3.00407322,0.858827206,3.00093863,2.99964391,2.99650469
72.972088,2,3.00390697,-1.00195158,3.00075985,2.99947662,2.99632485
72.98258,2.82842712,3.00374078,-0.418704735,3.00058103,2.99930933,2.99614491
72.993072,3.87298335,3.00357466,0.932420876,3.00040218,2.99914206,2.99596489
73.003563,2.82842712,3.00340862,-0.418307892,3.00022332,2.99897483,2.99578481
73.014055,4,3.00324263,0.998377367,3.0000444,2.9988076,2.99560464
73.024546,3.31662479,3.00307673,0.559953619,2.99986548,2.99864041,2.9954244
73.035038,4.24264069,3.00291089,1.11343154,2.99968651,2.99847323,2.99524407
73.04553,2.64575131,3.00274512,-0.59748959,2.9995075,2.99830608,2.99506367
73.056021,3.74165739,3.00257944,0.859696428,2.99932849,2.99813897,2.9948832
73.066513,3,3.00241381,-0.0491305777,2.99914942,2.99797187,2.99470263
73.077004,3.46410162,3.00224828,0.679597923,2.99897034,2.99780481,2.99452201
73.087496,3,3.0020828,-0.045637739,2.99879121,2.99763777,2.99434129
73.097988,3.74165739,3.0019174,0.860081382,2.99861204,2.99747076,2.99416049
73.108479,3.46410162,3.0017521,0.679962881,2.99843286,2.9973038,2.99397964
73.118971,3.60555128,3.00158685,0.777151482,2.99825363,2.99713686,2.99379869
73.129462,2.44948974,3.0014217,-0.742921231,2.99807439,2.99696996,2.99361767
73.139954,3,3.00125661,-0.0354487024,2.99789509,2.99680309,2.99343657
73.150446,4.12310563,3.0010916,1.05925163,2.99771576,2.99663625,2.99325539
73.160937,3.16227766,3.00092669,0.401685161,2.99753641,2.99646947,2.99307415
73.171429,3,3.00076185,-0.0276015801,2.99735701,2.99630272,2.99289281
73.18192,3.31662479,3.0005971,0.5621634,2.99717759,2.99613602,2.99271141
73.192412,3.31662479,3.00043242,0.562309849,2.99699812,2.99596935,2.99252992
73.202904,3,3.00026783,-0.0163655942,2.99681862,2.99580272,2.99234836
73.213395,2.23606798,3.00010334,-0.874091165,2.9966391,2.99563615,2.99216673
73.223887,2.82842712,2.99993892,-0.414139832,2.99645952,2.99546962,2.99198501
73.234378,3.16227766,2.99977461,0.403116669,2.99627993,2.99530315,2.99180324
73.24487,3,2.99961037,0.0197390121,2.99610028,2.99513671,2.99162137
73.255362,3,2.99944622,0.0235324741,2.99592059,2.99497032,2.99143942
73.265853,2.64575131,2.99928218,-0.59458462,2.99574089,2.99480401,2.99125741
73.276345,3.60555128,2.99911822,0.778738118,2.99556114,2.99463773,2.99107532
73.286836,3.87298335,2.99895437,0.934895171,2.99538136,2.99447152,2.99089316
73.297328,2.64575131,2.99879059,-0.594171088,2.99520153,2.99430535,2.99071091
73.30782,3,2.99862692,0.0370551292,2.99502167,2.99413925,2.99052858
73.318311,3.16227766,2.99846336,0.404739798,2.99484178,2.99397321,2.9903462
73.328803,2.44948974,2.99829988,-0.740817209,2.99466184,2.99380723,2.99016372
73.339294,3.46410162,2.99813652,0.682616361,2.99448188,2.99364132,2.98998119
73.349786,3.16227766,2.99797325,0.405344809,2.99430187,2.99347547,2.98979857
73.360278,2.82842712,2.99781008,-0.411561603,2.99412181,2.99330968,2.98961586
73.370769,3,2.99764703,0.0485074202,2.99394174,2.99314398,2.98943311
73.381261,2.64575131,2.99748407,-0.593070623,2.99376162,2.99297833,2.98925026
73.391752,3,2.99732124,0.0517567125,2.99358147,2.99281276,2.98906735
73.402244,3,2.99715851,0.0533056675,2.99340127,2.99264726,2.98888435
73.412736,3,2.99699588,0.0548098463,2.99322103,2.99248183,2.98870128
73.423227,3.16227766,2.99683338,0.406748418,2.99304077,2.9923165,2.98851815
73.433719,3.60555128,2.99667099,0.780307816,2.99286045,2.99215122,2.98833492
73.44421,3.46410162,2.99650872,0.683807642,2.99268011,2.99198605,2.98815165
73.454702,2.64575131,2.99634656,-0.592110844,2.99249972,2.99182094,2.98796828
73.465194,4,2.99618452,1.00190592,2.99231929,2.99165592,2.98778483
73.475685,3.16227766,2.99602262,0.407743844,2.99213884,2.991491,2.98760133
73.486177,2.44948974,2.99586082,-0.739169182,2.99195834,2.99132615,2.98741774
73.496668,2.64575131,2.99569917,-0.591563908,2.99177781,2.99116141,2.9872341
73.50716,4,2.99553763,1.0022287,2.99159723,2.99099675,2.98705036
73.517652,3,2.99537621,0.0679984383,2.99141661,2.99083218,2.98686655
73.528143,3,2.99521495,0.0691740853,2.99123597,2.99066772,2.98668268
73.538635,3.87298335,2.9950538,0.936978948,2.99105527,2.99050335,2.98649873
73.549126,3.87298335,2.9948928,0.937064857,2.99087455,2.99033909,2.98631471
73.559618,2.44948974,2.99473192,-0.73840516,2.99069378,2.99017492,2.98613061
73.57011,3.46410162,2.99457119,0.685222905,2.99051297,2.99001086,2.98594644
73.580601,3.74165739,2.99441061,0.864434371,2.99033213,2.98984691,2.98576221
73.591093,3.31662479,2.99425015,0.567780448,2.99015125,2.98968307,2.98557789
73.601584,3.46410162,2.99408986,0.685574032,2.98997034,2.98951935,2.98539352
73.612076,3.31662479,2.9939297,0.568062573,2.98978937,2.98935573,2.98520905
73.622568,2.64575131,2.99376969,-0.589930829,2.98960837,2.98919222,2.98502452
73.633059,3.60555128,2.99360985,0.782266848,2.98942735,2.98902886,2.98483993
73.643551,3.31662479,2.99345015,0.568484511,2.98924627,2.98886559,2.98465525
73.654042,3,2.99329062,0.0819107928,2.98906517,2.98870247,2.98447052
73.664534,2.64575131,2.99313124,-0.589389451,2.98888401,2.98853946,2.9842857
73.675026,2.64575131,2.99297201,-0.589254361,2.98870282,2.98837657,2.9841008
73.685517,3,2.99281297,0.0847763613,2.9885216,2.98821384,2.98391586
73.696009,3,2.99265408,0.0857083669,2.98834033,2.98805122,2.98373082
73.7065,3.46410162,2.99249537,0.686735937,2.98815904,2.98788875,2.98354573
73.716992,3.31662479,2.99233682,0.569462882,2.9879777,2.98772641,2.98336056
73.727484,3.16227766,2.99217844,0.412430869,2.98779632,2.98756421,2.98317531
73.737975,2.64575131,2.99202025,-0.588446211,2.98761491,2.98740217,2.98299001
73.748467,2,2.99186223,-0.995922805,2.98743345,2.98724026,2.98280462
73.758958,3.74165739,2.99170441,0.865998254,2.98725197,2.98707852,2.98261918
73.76945,3.31662479,2.99154676,0.570156146,2.98707044,2.98691692,2.98243365
73.779942,3.87298335,2.9913893,0.938932399,2.98688887,2.98675547,2.98224805
73.790433,3.87298335,2.99123204,0.939016138,2.98670728,2.9865942,2.9820624
73.800925,3,2.99107496,0.0944724323,2.98652563,2.98643307,2.98187667
73.811416,3.16227766,2.99091809,0.413955996,2.98634397,2.98627213,2.98169088
73.821908,3,2.99076141,0.0961175742,2.98616225,2.98611134,2.981505
73.8324,3.16227766,2.99060493,0.414334076,2.98598049,2.98595072,2.98131905
73.842891,3.16227766,2.99044868,0.414522596,2.98579871,2.98579029,2.98113306
73.853383,3.16227766,2.99029262,0.414710797,2.98561688,2.98563002,2.98094697
73.863874,3.46410162,2.99013678,0.68845104,2.98543503,2.98546995,2.98076084
73.874366,2.64575131,2.98998115,-0.586711033,2.98525313,2.98531005,2.98057461
73.884858,1.73205081,2.98982573,-1.12150565,2.98507118,2.98515033,2.98038832
73.895349,2.82842712,2.98967056,-0.401551284,2.98488922,2.98499083,2.98020198
73.905841,3.46410162,2.98951559,0.68890204,2.98470721,2.9848315,2.98001556
73.916332,3.74165739,2.98936087,0.867350283,2.98452518,2.98467238,2.97982908
73.926824,2.44948974,2.98920637,-0.734654089,2.98434309,2.98451346,2.97964252
73.937316,2.23606798,2.98905211,-0.867746582,2.98416097,2.98435474,2.97945588
73.947807,2.23606798,2.9888981,-0.867657837,2.98397883,2.98419624,2.9792692
73.958299,3.60555128,2.98874432,0.785370584,2.98379663,2.98403794,2.97908244
73.96879,2.44948974,2.98859081,-0.734235019,2.98361442,2.98387988,2.97889562
73.979282,3,2.98843753,0.107528936,2.98343216,2.98372202,2.97870872
73.989774,3,2.98828451,0.108238136,2.98324985,2.98356438,2.97852175
74.000265,3.60555128,2.98813176,0.78576047,2.98306754,2.98340699,2.97833473
74.010757,4.12310563,2.98764431,1.06558027,2.98288516,2.98291434,2.97814763
74.021248,3.16227766,2.98749241,0.418073265,2.98270278,2.98275772,2.97796048
74.03174,3.16227766,2.98734076,0.418254594,2.98252034,2.98260134,2.97777324
74.042232,3,2.98718938,0.113184002,2.98233786,2.98244519,2.97758594
74.052723,3.31662479,2.9870383,0.574096235,2.98215537,2.98228932,2.97739859
74.063215,2.44948974,2.9868875,-0.73307418,2.98197282,2.98213368,2.97721116
74.073706,3.87298335,2.98673699,0.941406582,2.98179026,2.98197831,2.97702367
74.084198,3.60555128,2.98658677,0.786742972,2.98160765,2.9818232,2.97683611
74.09469,2.64575131,2.98643685,-0.583682736,2.981425,2.98166835,2.97664848
74.105181,3.60555128,2.98628724,0.786933309,2.98124234,2.98151379,2.9764608
74.115673,3.74165739,2.98613793,0.869206221,2.98105962,2.9813595,2.97627304
74.126164,2.82842712,2.98598895,-0.39694058,2.98087689,2.9812055,2.97608523
74.136656,3.31662479,2.98584027,0.575138696,2.98069411,2.98105177,2.97589733
74.147148,3.87298335,2.98569192,0.94196148,2.9805113,2.98089834,2.97570937
74.157639,3.87298335,2.98554391,0.942040042,2.98032847,2.98074522,2.97552137
74.168131,3,2.98539621,0.120846124,2.98014559,2.98059239,2.97533328
74.178622,4,2.98524888,1.00734856,2.97996269,2.98043988,2.97514515
74.189114,4.12310563,2.98510187,1.06677259,2.97977975,2.98028767,2.97495693
74.199606,3.46410162,2.98495522,0.692204016,2.97959677,2.98013578,2.97476865
74.210097,3.16227766,2.98480893,0.421270377,2.97941378,2.97998423,2.97458033
74.220589,3.60555128,2.98466299,0.787964646,2.97923074,2.979833,2.97439192
74.23108,3.46410162,2.98451744,0.692520164,2.97904768,2.97968211,2.97420347
74.241572,3.60555128,2.98437224,0.788149119,2.97886458,2.97953156,2.97401493
74.252064,2.82842712,2.98422743,-0.39471547,2.97868144,2.97938135,2.97382633
74.262555,3.46410162,2.98408301,0.692833749,2.97849829,2.97923152,2.97363769
74.273047,2.82842712,2.98393898,-0.394349909,2.9783151,2.97908203,2.97344897
74.283538,1,2.98379535,-1.4084727,2.97813188,2.97893292,2.9732602
74.29403,3.31662479,2.98365212,0.577037842,2.97794863,2.97878418,2.97307135
74.304522,3,2.9835093,0.128416126,2.97776534,2.97863581,2.97288243
74.315013,3.31662479,2.98336691,0.577284921,2.97758203,2.97848785,2.97269348
74.325505,2.23606798,2.98322493,-0.864382414,2.97739868,2.97834026,2.97250444
74.335996,3.16227766,2.98308341,0.423313424,2.97721532,2.9781931,2.97231536
74.346488,3,2.9829423,0.130605123,2.97703191,2.97804632,2.9721262
74.35698,2.64575131,2.98280165,-0.580560363,2.97684847,2.97789996,2.97193697
74.367471,2.82842712,2.98266146,-0.392726792,2.97666502,2.97775404,2.97174771
74.377963,3,2.98252172,0.132205454,2.97648153,2.97760854,2.97155836
74.388454,3.60555128,2.98238246,0.789410422,2.97629802,2.97746349,2.97136897
74.398946,2.64575131,2.98224367,-0.580079614,2.97611447,2.97731887,2.97117951
74.409438,2.82842712,2.98210536,-0.39201816,2.97593089,2.9771747,2.97098998
74.419929,2.64575131,2.98196756,-0.579841575,2.97574729,2.97703101,2.97080041
74.430421,2.64575131,2.98183025,-0.579723159,2.97556366,2.97688778,2.97061076
74.440912,3.16227766,2.98169346,0.424951992,2.97538001,2.97674504,2.97042106
74.451404,3.46410162,2.98155718,0.694654182,2.97519632,2.97660277,2.97023129
74.461896,3.16227766,2.98142143,0.425271949,2.9750126,2.976461,2.97004146
74.472387,3.60555128,2.98128623,0.790104455,2.97482887,2.97631975,2.96985159
74.482879,3.87298335,2.98115155,0.944368462,2.97464509,2.97617899,2.96966164
74.49337,3,2.98101745,0.137777171,2.97446131,2.97603878,2.96947165
74.503862,3,2.9808839,0.138260986,2.97427749,2.97589908,2.96928158
74.514354,3.31662479,2.98075092,0.57954626,2.97409364,2.97575993,2.96909145
74.524845,3,2.98061854,0.139217302,2.97390978,2.97562134,2.96890128
74.535337,2.64575131,2.98048674,-0.578563249,2.97372587,2.9754833,2.96871103
74.545828,3,2.98035556,0.140158615,2.97354196,2.97534585,2.96852075
74.55632,3.60555128,2.98022498,0.790775753,2.97335801,2.97520896,2.96833038
74.566812,3.74165739,2.98009503,0.872675402,2.97317403,2.97507267,2.96813996
74.577303,3.31662479,2.97996572,0.580223289,2.97299005,2.974937,2.9679495
74.587795,3.16227766,2.97983706,0.427130665,2.97280602,2.97480193,2.96775896
74.598286,3.31662479,2.97970906,0.580444428,2.97262199,2.97466749,2.96756838
74.608778,3,2.97958172,0.142892562,2.97243791,2.97453369,2.96737773
74.61927,3.46410162,2.97945506,0.696165611,2.97225382,2.97440053,2.96718702
74.629761,2.64575131,2.97932911,-0.57756194,2.97206971,2.97426805,2.96699627
74.640253,3.31662479,2.97920385,0.580879456,2.97188557,2.97413622,2.96680545
74.650744,3,2.97907932,0.144639827,2.97170142,2.9740051,2.96661458
74.661236,3.87298335,2.97895551,0.94553045,2.97151723,2.97387467,2.96642364
74.671728,3,2.97883245,0.145490717,2.97133302,2.97374494,2.96623265
74.682219,3.60555128,2.97871016,0.791732983,2.97114881,2.97361595,2.96604161
74.692711,2.82842712,2.97858863,-0.387506776,2.97096455,2.97348769,2.96585051
74.703202,3.46410162,2.97846789,0.696874253,2.97078029,2.9733602,2.96565936
74.713694,2.64575131,2.97834794,-0.576711915,2.970596,2.97323346,2.96546814
74.724186,3.16227766,2.97822881,0.429009147,2.97041168,2.9731075,2.96527687
74.734677,3.74165739,2.97811052,0.873811689,2.97022736,2.97298235,2.96508555
74.745169,3,2.97799306,0.148347363,2.970043,2.972858,2.96489417
74.75566,2.64575131,2.97787647,-0.576303011,2.96985864,2.97273448,2.96470274
74.766152,3.31662479,2.97776075,0.582120299,2.96967424,2.9726118,2.96451125
74.776644,3.16227766,2.97764592,0.429687961,2.96948982,2.97248997,2.9643197
74.787135,2.64575131,2.977532,-0.576004073,2.96930541,2.97236904,2.96412811
74.797627,3.16227766,2.977419,0.429951923,2.96912095,2.97224898,2.96393645
74.808118,3.16227766,2.97730696,0.430082203,2.96893649,2.97212984,2.96374475
74.81861,3.74165739,2.97719586,0.874334905,2.968752,2.97201162,2.96355299
74.829102,3.16227766,2.97708574,0.430339306,2.96856749,2.97189434,2.96336116
74.839593,3.16227766,2.97697663,0.430466062,2.96838298,2.97177803,2.96316931
74.850085,3.60555128,2.97686852,0.792895172,2.96819844,2.97166269,2.96297738
74.860576,2.82842712,2.97676146,-0.385141964,2.96801389,2.97154837,2.96278541
74.871068,4.24264069,2.97665544,1.1251601,2.96782932,2.97143505,2.96259338
74.88156,2.44948974,2.97655049,-0.725989496,2.96764472,2.97132278,2.96240129
74.892051,2.82842712,2.97644665,-0.384733056,2.96746013,2.97121157,2.96220917
74.902543,2.82842712,2.97634391,-0.384599516,2.9672755,2.97110144,2.96201698
74.913034,2.82842712,2.97624232,-0.384467422,2.96709088,2.97099242,2.96182475
74.923526,3.31662479,2.97614188,0.583509132,2.96690622,2.97088451,2.96163245
74.934018,3,2.97604263,0.154781701,2.96672155,2.97077775,2.9614401
74.944509,3.31662479,2.97594458,0.583678173,2.96653688,2.97067217,2.96124772
74.955001,3.60555128,2.97584776,0.793538606,2.96635218,2.97056778,2.96105527
74.965492,2.64575131,2.97575219,-0.574457032,2.96616748,2.97046461,2.96086278
74.975984,3.16227766,2.9756579,0.431995095,2.96598275,2.97036268,2.96067023
74.986476,1.73205081,2.97556491,-1.11512963,2.96579801,2.97026201,2.96047762
74.996967,1.73205081,2.97547325,-1.11508854,2.96561327,2.97016265,2.96028498
75.007459,3,2.97538294,0.156898237,2.9654285,2.9700646,2.96009227
75.01795,2.44948974,2.97529403,-0.725123633,2.96524374,2.96996791,2.95989953
75.028442,2.64575131,2.97520651,-0.573981881,2.96505895,2.96987258,2.95970673
75.038934,3.60555128,2.97512044,0.793996751,2.96487414,2.96977865,2.95951387
75.049425,2.64575131,2.97503584,-0.573833186,2.96468935,2.96968617,2.95932098
75.059917,1.73205081,2.97495273,-1.11485511,2.96450452,2.96959515,2.95912802
75.070408,2.64575131,2.97487116,-0.573689676,2.9643197,2.96950562,2.95893503
75.0809,3,2.97479114,0.158772992,2.96413485,2.96941761,2.95874198
75.091392,4.12310563,2.97471271,1.07163096,2.96395,2.96933116,2.95854887
75.101883,2.23606798,2.97463592,-0.859399757,2.96376515,2.96924631,2.95835574
75.112375,2.82842712,2.97456078,-0.38227432,2.96358027,2.96916308,2.95816253
75.122866,4.47213595,2.97448734,1.22378454,2.9633954,2.96908151,2.9579693
75.133358,3,2.97441563,0.159951144,2.96321051,2.96900164,2.957776
75.14385,3,2.97434569,0.160169639,2.96302561,2.96892349,2.95758266
75.154341,2.44948974,2.97427755,-0.724422398,2.96284071,2.96884712,2.95738928
75.164833,2.44948974,2.97421126,-0.72437664,2.9626558,2.96877255,2.95719584
75.175324,2.64575131,2.97414685,-0.573058062,2.96247089,2.96869984,2.95700237
75.185816,3.60555128,2.97408437,0.794648922,2.96228596,2.96862901,2.95680883
75.196308,3.60555128,2.97402385,0.794687001,2.96210102,2.9685601,2.95661524
75.206799,3,2.97396534,0.161352595,2.96191609,2.96849318,2.95642163
75.217291,3.46410162,2.97390888,0.700137653,2.96173114,2.96842827,2.95622796
75.227782,4,2.97385453,1.01298839,2.9615462,2.96836543,2.95603425
75.238274,3.16227766,2.97380231,0.434137475,2.96136124,2.96830469,2.95584048
75.248766,3.87298335,2.97375229,0.948277942,2.96117628,2.96824611,2.95564666
75.259257,3.46410162,2.97370452,0.700283585,2.96099133,2.96818973,2.95545282
75.269749,3.60555128,2.97365903,0.794916503,2.96080635,2.96813561,2.95525891
75.28024,3.31662479,2.97361589,0.585669618,2.96062139,2.9680838,2.95506498
75.290732,2.64575131,2.97357514,-0.57255902,2.96043641,2.96803435,2.95487098
75.301224,2.23606798,2.97353685,-0.858760078,2.96025143,2.96798731,2.95467694
75.311715,2.64575131,2.97350107,-0.572494328,2.96006646,2.96794275,2.95448287
75.322207,3.31662479,2.97346785,0.58579599,2.95988147,2.96790072,2.95428874
75.332698,2.23606798,2.97343726,-0.858702091,2.9596965,2.96786128,2.95409458
75.34319,1.41421356,2.97340935,-1.24867762,2.95951151,2.96782448,2.95390036
75.353682,2.82842712,2.9733842,-0.380732285,2.95932652,2.9677904,2.9537061
75.364173,3.31662479,2.97336186,0.585886449,2.95914154,2.9677591,2.95351181
75.374665,3.46410162,2.9733424,0.700542085,2.95895655,2.96773065,2.95331746
75.385156,2.64575131,2.9733259,-0.572341319,2.95877157,2.96770511,2.95312308
75.395648,3.16227766,2.97331241,0.434701333,2.95858658,2.96768255,2.95292864
75.40614,3.46410162,2.97330202,0.700570907,2.95840159,2.96766305,2.95273416
75.416631,2.44948974,2.9732948,-0.723743778,2.95821662,2.96764669,2.95253966
75.427123,3.31662479,2.97329083,0.585947067,2.95803163,2.96763353,2.95234509
75.437614,3.16227766,2.97329018,0.434726906,2.95784666,2.96762366,2.95215051
75.448106,3.16227766,2.97329294,0.43472373,2.95766168,2.96761717,2.95195586
75.458598,3.16227766,2.97329919,0.434716536,2.9574767,2.96761413,2.95176116
75.469089,3.87298335,2.97330903,0.948511633,2.95729174,2.96761464,2.95156645
75.479581,3.60555128,2.97332253,0.795128129,2.95710677,2.96761878,2.95137168
75.490072,2.64575131,2.9733398,-0.572353467,2.95692182,2.96762665,2.95117688
75.500564,2.64575131,2.97336093,-0.572371924,2.95673685,2.96763834,2.95098202
75.511056,3.16227766,2.97338602,0.434616662,2.95655189,2.96765395,2.95078713
75.521547,3.87298335,2.97341516,0.948455684,2.95636696,2.96767359,2.95059221
75.532039,3.31662479,2.97344847,0.585812527,2.95618201,2.96769735,2.95039723
75.54253,2.82842712,2.97348605,-0.380866027,2.95599709,2.96772535,2.95020223
75.553022,2.82842712,2.97352803,-0.380921122,2.95581215,2.9677577,2.95000717
75.563514,2.82842712,2.9735745,-0.380982117,2.95562722,2.96779452,2.94981208
75.574005,2.64575131,2.97362559,-0.57260307,2.95544232,2.96783591,2.94961696
75.584497,2.82842712,2.97368142,-0.381122421,2.95525741,2.96788202,2.94942178
75.594988,3.16227766,2.97374213,0.434206784,2.95507252,2.96793296,2.94922659
75.60548,3.74165739,2.97380784,0.876270246,2.95488763,2.96798888,2.94903133
75.615972,3.31662479,2.9738787,0.585445209,2.95470274,2.9680499,2.94883604
75.626463,3.16227766,2.97395483,0.433961789,2.95451789,2.96811615,2.94864073
75.636955,3.16227766,2.97403639,0.433867803,2.95433302,2.96818781,2.94844536
75.647446,3,2.97412352,0.160861671,2.95414818,2.968265,2.94824997
75.657938,2.44948974,2.9742164,-0.724380187,2.95396334,2.9683479,2.94805453
75.66843,3.60555128,2.97431517,0.794503684,2.95377851,2.96843666,2.94785905
75.678921,2.64575131,2.97442,-0.573296333,2.95359371,2.96853144,2.94766355
75.689413,2.23606798,2.97453107,-0.859338752,2.9534089,2.96863243,2.94746799
75.699904,3.46410162,2.97464855,0.699609226,2.95322412,2.96873979,2.94727242
75.710396,3.31662479,2.97477264,0.584681242,2.95303934,2.96885373,2.94707679
75.720888,3,2.97490352,0.158418687,2.95285457,2.96897443,2.94688112
75.731379,3,2.97504139,0.157982958,2.95266984,2.96910208,2.94668544
75.741871,2.82842712,2.97518646,-0.383091816,2.9524851,2.96923691,2.9464897
75.752362,3.60555128,2.97533895,0.793859138,2.95230039,2.96937911,2.94629395
75.762854,2.23606798,2.97549908,-0.859901797,2.95211568,2.96952892,2.94609814
75.773346,3.16227766,2.97566708,0.431984466,2.95193099,2.96968658,2.9459023
75.783837,3,2.97584318,0.155424654,2.95174633,2.96985229,2.94570644
75.794329,3,2.97602765,0.154830078,2.95156168,2.97002635,2.94551053
75.80482,2.82842712,2.97622072,-0.38443932,2.95137705,2.97020897,2.9453146
75.815312,3.16227766,2.97642269,0.431109004,2.95119243,2.97040046,2.94511862
75.825804,3.31662479,2.97663382,0.583087445,2.95100782,2.97060109,2.9449226
75.836295,3.46410162,2.97685439,0.698030962,2.95082326,2.97081113,2.94472657
75.846787,3.16227766,2.97708473,0.430340476,2.95063869,2.9710309,2.94453049
75.857278,3.74165739,2.97732513,0.87426098,2.95045416,2.9712607,2.94433439
75.86777,3,2.97757593,0.149746677,2.95026964,2.97150088,2.94413824
75.878262,2.82842712,2.97783747,-0.38653635,2.95008513,2.97175177,2.94394206
75.888753,3,2.97811008,0.147952433,2.94990066,2.97201369,2.94374586
75.899245,3.31662479,2.97839416,0.581575987,2.9497162,2.97228707,2.94354961
75.909736,2.23606798,2.97869005,-0.86175523,2.94953178,2.97257223,2.94335335
75.920228,3.74165739,2.97899821,0.873303598,2.94934737,2.97286963,2.94315704
75.93072,2.64575131,2.97931902,-0.577553212,2.94916297,2.97317966,2.9429607
75.941211,3.46410162,2.97965289,0.69602351,2.94897862,2.97350272,2.94276434
75.951703,2.44948974,2.98000032,-0.728361573,2.94879428,2.97383932,2.94256793
75.962194,3.46410162,2.98036174,0.695514111,2.94860997,2.97418988,2.94237152
75.972686,3.16227766,2.98073768,0.426075083,2.94842568,2.97455495,2.94217505
75.983178,2.64575131,2.98112865,-0.579117724,2.94824141,2.97493502,2.94197855
75.993669,3.60555128,2.98107425,0.790238586,2.94759108,2.97533059,2.94178204
76.004161,4,2.9814973,1.00920895,2.94740718,2.97574229,2.94158548
76.014652,2.82842712,2.981937,-0.391803369,2.94722333,2.97617063,2.94138891
76.025144,3.16227766,2.98239407,0.424126858,2.9470395,2.97661631,2.94119229
76.035636,2.64575131,2.98286909,-0.580618445,2.94685569,2.97707994,2.94099564
76.046127,4.12310563,2.98336269,1.06758744,2.94667192,2.97756213,2.94079898
76.056619,3.31662479,2.98387567,0.576844101,2.94648817,2.97806368,2.94060228
76.06711,3,2.98440867,0.124865249,2.94630446,2.97858523,2.94040556
76.077602,3.46410162,2.98496255,0.692198716,2.94612077,2.97912766,2.9402088
76.088094,4.12310563,2.98553808,1.06656811,2.94593711,2.97969173,2.94001201
76.098585,2.23606798,2.98613605,-0.866064704,2.9457535,2.98027822,2.93981521
76.109077,3.74165739,2.98675745,0.868849777,2.9455699,2.98088815,2.93961836
76.119568,2.64575131,2.98740311,-0.584509876,2.94538635,2.98152232,2.9394215
76.13006,2.82842712,2.98807412,-0.399558494,2.94520282,2.98218184,2.9392246
76.140552,2.64575131,2.98877145,-0.585679208,2.94501932,2.98286768,2.93902767
76.151043,3.46410162,2.98949611,0.68891618,2.94483587,2.98358086,2.93883074
76.161535,2.64575131,2.99024938,-0.586939582,2.94465244,2.98432265,2.93863375
76.172026,2.64575131,2.99103232,-0.587606167,2.94446907,2.98509411,2.93843676
76.182518,2.64575131,2.99184632,-0.5882984,2.94428571,2.98589664,2.93823973
76.19301,3.31662479,2.99269264,0.569150376,2.94410239,2.98673151,2.93804267
76.203501,3.60555128,2.99357259,0.782290664,2.94391912,2.98760002,2.9378456
76.213993,2.64575131,2.99448781,-0.590539162,2.94373587,2.98850381,2.93764849
76.224484,2.44948974,2.99543968,-0.738884253,2.94355268,2.98944428,2.93745137
76.234976,2.23606798,2.99643002,-0.871987408,2.94336951,2.99042323,2.93725421
76.245468,2.44948974,2.99746046,-0.740250442,2.94318638,2.99144232,2.93705703
76.255959,1.73205081,2.99853273,-1.12538079,2.9430033,2.99250326,2.93685983
76.266451,2.44948974,2.99964897,-0.741727191,2.94282025,2.99360821,2.9366626
76.276942,2.44948974,3.000811,-0.742510106,2.94263726,2.99475899,2.93646536
76.287434,3.46410162,3.0020212,0.679764967,2.94245429,2.99595799,2.93626808
76.297926,2.82842712,3.00328177,-0.418156239,2.94227137,2.99720739,2.93607077
76.308417,4,3.00459498,0.997699865,2.9420885,2.9985095,2.93587346
76.318909,3.31662479,3.00596366,0.557369829,2.94190566,2.99986714,2.93567611
76.3294,3.87298335,3.00739029,0.930372536,2.94172288,3.00128278,2.93547876
76.339892,3.74165739,3.00887802,0.856025332,2.94154013,3.0027596,2.93528136
76.350384,3.60555128,3.01042979,0.771441174,2.94135743,3.00430054,2.93508394
76.360875,2.82842712,3.01204872,-0.428510909,2.94117479,3.00590873,2.93488652
76.371367,3.46410162,3.0137386,0.671090916,2.94099217,3.00758794,2.93468906
76.381858,3.16227766,3.01550279,0.383112079,2.94080963,3.00934158,2.93449159
76.39235,3.60555128,3.01734559,0.766945687,2.94062711,3.01117392,2.93429409
76.402842,3.16227766,3.01927102,0.378162184,2.94044464,3.01308902,2.93409656
76.413333,3.16227766,3.02128339,0.375492044,2.94026224,3.01509118,2.93389903
76.423825,3.74165739,3.02338784,0.847507843,2.94007987,3.01718556,2.93370147
76.434316,3,3.02558911,-0.15996598,2.93989756,3.01937691,2.9335039
76.444808,2.82842712,3.02789308,-0.446616121,2.9397153,3.02167111,2.93330629
76.4553,3.16227766,3.0303054,0.363279861,2.93953308,3.02407384,2.93310867
76.465791,3.31662479,3.0328321,0.532721963,2.93935093,3.02659112,2.93291104
76.476283,2.44948974,3.03548039,-0.765500259,2.93916882,3.02923019,2.93271337
76.486774,2.44948974,3.03825697,-0.767311686,2.93898678,3.03199777,2.93251571
76.497266,2.44948974,3.04117011,-0.769207623,2.93880477,3.03490214,2.932318
76.507758,3.31662479,3.0442279,0.521916554,2.93862282,3.03795141,2.93212028
76.518249,3.31662479,3.04743901,0.518831171,2.93844095,3.04115426,2.93192256
76.528741,3.46410162,3.0508137,0.64287473,2.93825911,3.04452097,2.93172481
76.539232,2.44948974,3.05436178,-0.777735197,2.93807735,3.04806139,2.93152705
76.549724,3.87298335,3.05809521,0.902711548,2.93789563,3.05178748,2.93132926
76.560216,3.16227766,3.06202589,0.316625598,2.93771396,3.05571118,2.93113145
76.570707,3.31662479,3.06616672,0.500457858,2.93753237,3.05984541,2.93093364
76.581199,2.82842712,3.07053296,-0.492042514,2.93735083,3.06420546,2.9307358
76.59169,3.16227766,3.07513963,0.295191511,2.93716936,3.06880638,2.93053796
76.602182,3.46410162,3.08000503,0.619755266,2.93698794,3.07366651,2.93034008
76.612674,3,3.08514801,-0.291801316,2.93680657,3.07880474,2.93014219
76.623165,3.74165739,3.09058957,0.806887738,2.93662529,3.0842421,2.9299443
76.633657,2.82842712,3.09635492,-0.517617423,2.93644406,3.09000387,2.92974638
76.644148,3.31662479,3.10247055,0.462768025,2.9362629,3.09611657,2.92954846
76.65464,3.16227766,3.10896931,0.230886004,2.93608179,3.10261314,2.92935051
76.665132,3.46410162,3.11588773,0.590096508,2.93590075,3.10953014,2.92915254
76.675623,3,3.12326894,-0.351096769,2.93571979,3.11691083,2.92895458
76.686115,3.16227766,3.13116696,0.176382252,2.93553888,3.12480929,2.92875658
76.696606,3.60555128,3.13964426,0.682573813,2.93535806,3.13328815,2.92855859
76.707098,3.16227766,3.14878097,0.116175261,2.93517728,3.14242765,2.92836057
76.71759,3.46410162,3.15867361,0.552655416,2.93499658,3.15232451,2.92816253
76.728081,3.87298335,3.16944234,0.838773515,2.93481596,3.16309913,2.9279645
76.738573,3.60555128,3.18124054,0.651391385,2.9346354,3.17490516,2.92776644
76.749064,3.31662479,3.19425516,0.349813714,2.93445492,3.18792988,2.92756838
76.759556,3.87298335,3.20872422,0.815020935,2.9342745,3.20241177,2.92737029
76.770048,3.74165739,3.22493868,0.718831486,2.93409415,3.21864227,2.92717219
76.780539,3.74165739,3.24325601,0.705975479,2.93391389,3.23697949,2.9269741
76.791031,3.46410162,3.264117,0.447196389,2.93373369,3.25786496,2.92677598
76.801522,2.64575131,3.28804417,-0.801431755,2.93355358,3.28182203,2.92657787
76.812014,3.87298335,3.31566614,0.746536811,2.93337353,3.30948031,2.92637972
76.822506,3.74165739,3.34770925,0.627652876,2.93319356,3.3415672,2.92618157
76.832997,4.12310563,3.38500359,0.859128651,2.93301368,3.37891387,2.92598342
76.843489,3.31662479,3.42848936,-0.33446161,2.93283387,3.4224617,2.92578524
76.85398,2.82842712,3.4791781,-0.806691374,2.93265415,3.47322323,2.92558708
76.864472,4.24264069,3.53816028,0.839333314,2.93247449,3.53228985,2.92538888
76.874964,3.60555128,3.60654012,-0.0314458791,2.93229491,3.6007664,2.92519067
76.885455,4.12310563,3.68540005,0.661593211,2.93211543,3.67973554,2.92499248
76.895947,4.69041576,3.77577165,0.956370281,2.93193602,3.77022866,2.92479426
76.906438,5.19615242,3.87852367,1.14788011,2.9317567,3.8731138,2.92459604
76.91693,3.87298335,3.99436693,-0.348401466,2.93157746,3.98910056,2.9243978
76.927422,4.24264069,4.12373519,0.344826758,2.93139829,4.11862101,2.92419955
76.937913,4.79583152,4.26675929,0.727373517,2.93121924,4.26180388,2.92400132
76.948405,5.29150262,4.42327615,0.931786712,2.93104025,4.41848382,2.92380305
76.958896,6.08276253,4.59271344,1.22067567,2.93086136,4.58808603,2.9236048
76.969388,5.09901951,4.77419754,0.569931555,2.93068255,4.76973455,2.92340652
76.97988,4.79583152,4.96645483,-0.413065742,2.93050382,4.9621535,2.92320824
76.990371,5.74456265,5.16787083,0.759402278,2.9303252,5.1637264,2.92300997
77.000863,6,5.37657422,0.789573161,2.93014666,5.37258029,2.92281167
77.011354,4.89897949,5.59032935,-0.831474513,2.92996822,5.58647809,2.92261338
77.021846,6.40312424,5.80671265,0.772276887,2.92978986,5.80299518,2.92241508
77.032338,6.40312424,6.02298946,0.616550708,2.92961159,6.01939605,2.92221676
77.042829,5,6.2361798,-1.11183623,2.92943343,6.23270007,2.92201846
77.053321,6.244998,6.44311685,-0.44510544,2.92925536,6.43973996,2.92182014
77.063812,7,6.64030116,0.599748983,2.92907739,6.63701583,2.92162182
77.074304,7.61577311,6.82406026,0.889782473,2.92889951,6.82085488,2.92142349
77.084796,6.55743852,6.99044653,-0.658033439,2.92872172,6.98730908,2.92122515
77.095287,6.32455532,7.13538826,-0.900462625,2.92854405,7.1323063,2.92102683
77.105779,6.164414,7.25489304,-1.04426004,2.92836646,7.25185369,2.92082849
77.11627,6.70820393,7.34520962,-0.798126362,2.92818898,7.34219955,2.92063016
77.126762,6.78232998,7.40325115,-0.787985513,2.9280116,7.40025659,2.9204318
77.137254,6.92820323,7.4268639,-0.7061591,2.92783431,7.42387076,2.92023345
77.147745,7,7.41514275,-0.644315726,2.92765715,7.41213672,2.92003511
77.158237,6.8556546,7.36854069,-0.71616066,2.92748007,7.36550738,2.91983675
77.168728,6.92820323,7.28881305,-0.600507967,2.92730312,7.28573816,2.91963841
77.17922,6.70820393,7.17876019,-0.685971031,2.92712625,7.17562959,2.91944005
77.189712,7,7.04193792,-0.2047875,2.92694949,7.0387377,2.91924168
77.200203,7,6.88231065,0.343058811,2.92677286,6.87902715,2.91904334
77.210695,6.92820323,6.70391164,0.473594329,2.92659632,6.70053142,2.91884497
77.221186,7,6.51075396,0.69946125,2.9264199,6.50726377,2.91864663
77.231678,6.32455532,6.30658759,0.134043756,2.92624358,6.30297436,2.91844826
77.24217,6.164414,6.09497434,0.263514068,2.92606738,6.09122519,2.91824989
77.252661,6.8556546,5.87922631,0.988143861,2.9258913,5.87532866,2.91805154
77.263153,5.91607978,5.66234401,0.503721925,2.92571532,5.65828567,2.91785318
77.273644,6.32455532,5.44716614,0.936690548,2.92553947,5.44293555,2.91765483
77.284136,5.38516481,5.23620046,0.385958999,2.92536372,5.23178694,2.91745647
77.294628,6.55743852,5.0317576,1.23518457,2.92518809,5.02715168,2.9172581
77.305119,5.09901951,4.83586603,0.512984875,2.92501259,4.83105985,2.91705976
77.315611,5.91607978,4.65019274,1.12511646,2.9248372,4.64518033,2.9168614
77.326102,4.79583152,4.47615095,0.565403016,2.92466194,4.47092868,2.91666306
77.336594,4.79583152,4.31473514,0.693611116,2.92448679,4.30930189,2.91646471
77.347086,4.89897949,4.16663281,0.855772561,2.92431176,4.16099017,2.91626636
77.357577,3.74165739,4.03216871,-0.538991024,2.92413687,4.026321,2.91606803
77.368069,4.58257569,3.91128624,0.819322561,2.92396209,3.90524029,2.91586968
77.37856,4.69041576,3.80366823,0.94167273,2.92378745,3.79743313,2.91567136
77.389052,4.35889894,3.70868455,0.806358723,2.92361292,3.70227113,2.91547302
77.399544,4.24264069,3.62552456,0.785567394,2.92343852,3.61894488,2.91527468
77.410035,4.89897949,3.55321937,1.16006901,2.92326426,3.54648618,2.91507637
77.420527,3.60555128,3.49068582,0.338918071,2.92309012,3.48381194,2.91487805
77.431018,2.82842712,3.43683108,-0.780002539,2.92291613,3.42982904,2.91467975
77.44151,3.46410162,3.39055077,0.271202597,2.92274225,3.38343232,2.91448143
77.452002,4.69041576,3.35080751,1.15741447,2.9225685,3.34358347,2.91428312
77.462493,5.47722558,3.31663968,1.46989316,2.92239491,3.30931975,2.91408483
77.472985,3.60555128,3.28717145,0.564251561,2.92222143,3.27976414,2.91388654
77.483476,2.23606798,3.26164382,-1.01270719,2.92204811,3.2541565,2.91368826
77.493968,3.87298335,3.23939158,0.795984781,2.92187491,3.23183054,2.91348998
77.50446,3.87298335,3.21985762,0.808161944,2.92170185,3.21222819,2.9132917
77.514951,3.60555128,3.20257594,0.634803385,2.92152895,3.19488258,2.91309345
77.525443,3.74165739,3.18715754,0.744647463,2.92135617,3.17940399,2.91289518
77.535934,4.12310563,3.17329095,0.97458436,2.92118355,3.16548032,2.91269695
77.546426,3.60555128,3.16071896,0.666957505,2.92101106,3.15285386,2.9124987
77.556918,3.16227766,3.1492384,0.114189592,2.92083871,3.14132101,2.91230046
77.567409,2.82842712,3.13868633,-0.557009165,2.92066653,3.13071852,2.91210225
77.577901,3.60555128,3.12892954,0.690377965,2.92049447,3.12091287,2.91190402
77.588392,3,3.11986477,-0.34621492,2.92032259,3.11180061,2.91170583
77.598884,2.82842712,3.11140554,-0.53195716,2.92015083,3.10329506,2.91150763
77.609376,3.31662479,3.10348402,0.461671709,2.91997923,3.09532825,2.91130943
77.619867,3.60555128,3.09604455,0.713797395,2.9198078,3.08784441,2.91111127
77.630359,2.23606798,3.08903895,-0.923564276,2.91963651,3.08079524,2.91091309
77.64085,3,3.08242929,-0.287105012,2.91946538,3.07414276,2.91071495
77.651342,3.60555128,3.0761808,0.727578501,2.9192944,3.0678521,2.91051679
77.661834,3,3.07026522,-0.265075872,2.91912358,3.06189496,2.91031865
77.672325,3.31662479,3.06465775,0.501963181,2.91895293,3.05624648,2.91012054
77.682817,4,3.05933492,0.969878898,2.91878242,3.05088313,2.90992242
77.693308,4.24264069,3.05427773,1.09012061,2.91861209,3.04578588,2.90972434
77.7038,3.16227766,3.04946716,0.335872744,2.91844191,3.04093566,2.90952624
77.714292,4,3.04488733,0.977298662,2.9182719,3.03631657,2.90932816
77.724783,2.64575131,3.0405237,-0.628309151,2.91810207,3.03191403,2.90913011
77.735275,3.31662479,3.03636175,0.529398754,2.91793238,3.02771349,2.90893205
77.745766,3,3.03238969,-0.179971349,2.91776289,3.02370313,2.90873403
77.756258,2.64575131,3.02859514,-0.618743747,2.91759354,3.01987054,2.908536
77.76675,3.46410162,3.02496776,0.662671755,2.91742437,3.01620537,2.90833798
77.777241,2,3.02149795,-1.01069182,2.91725539,3.01269798,2.90814
77.787733,3,3.01817583,-0.134817772,2.91708656,3.00933848,2.90794202
77.798224,3.16227766,3.01499349,0.383776201,2.91691793,3.00611893,2.90774406
77.808716,3.31662479,3.01194235,0.551980473,2.91674946,3.00303074,2.90754611
77.819208,2.64575131,3.00901534,-0.602713888,2.91658117,3.00006683,2.90734816
77.829699,3.16227766,3.00620583,0.395059268,2.91641307,2.99722054,2.90715026
77.840191,2.44948974,3.00350685,-0.744323257,2.91624514,2.99448487,2.90695235
77.850682,2.44948974,3.00091292,-0.742578736,2.91607741,2.99185436,2.90675447
77.861174,2.82842712,2.99841794,-0.412299422,2.91590984,2.98932286,2.9065566
77.871666,3.74165739,2.99601692,0.86350476,2.91574247,2.98688539,2.90635874
77.882157,3.16227766,2.99370518,0.410575797,2.91557529,2.98453725,2.90616091
77.892649,2,2.99147768,-0.995729722,2.91540829,2.9822734,2.90596309
77.90314,4,2.98933056,1.00532057,2.9152415,2.98008996,2.9057653
77.913632,2.82842712,2.98725937,-0.398537631,2.91507488,2.97798245,2.90556751
77.924124,3,2.98526053,0.12140622,2.91490846,2.97594731,2.90536973
77.934615,3.46410162,2.98333067,0.69337648,2.91474225,2.97398115,2.905172
77.945107,3.46410162,2.98146608,0.69471975,2.91457622,2.97208024,2.90497427
77.955598,3.16227766,2.97966398,0.427333218,2.9144104,2.9702418,2.90477657
77.96609,2.64575131,2.97792106,-0.576341695,2.91424477,2.96846251,2.90457887
77.976582,2.82842712,2.97623471,-0.384457522,2.91407934,2.96673976,2.9043812
77.987073,2.64575131,2.97460246,-0.57345545,2.91391413,2.96507106,2.90418356
77.997565,2.82842712,2.97302153,-0.38025571,2.91374911,2.96345363,2.90398592
78.008056,3,2.97148988,0.168849407,2.91358431,2.96188542,2.90378833
78.018548,2.64575131,2.97000501,-0.569432785,2.9134197,2.96036392,2.90359073
78.02904,3.31662479,2.96856499,0.589965935,2.91325531,2.95888719,2.90339316
78.039531,2.82842712,2.96716797,-0.372479329,2.91309114,2.9574534,2.90319562
78.050023,3.74165739,2.96581184,0.880820948,2.91292717,2.95606041,2.90299809
78.060514,3.46410162,2.96449509,0.706828498,2.91276343,2.9547067,2.9028006
78.071006,3.16227766,2.96321579,0.446163499,2.91259989,2.95339035,2.90260312
78.081498,1.73205081,2.9619725,-1.10901834,2.91243658,2.95210989,2.90240565
78.091989,3.46410162,2.96076382,0.709463036,2.91227349,2.95086396,2.90220823
78.102481,3.31662479,2.9595881,0.597525473,2.91211062,2.94965086,2.90201081
78.112972,2.44948974,2.95844422,-0.713410456,2.91194798,2.9484695,2.90181344
78.123464,3.74165739,2.95733068,0.885622213,2.91178556,2.94731834,2.90161607
78.133956,2.64575131,2.95624638,-0.55722084,2.91162336,2.94619629,2.90141872
78.144447,3.16227766,2.95519024,0.455068584,2.91146141,2.94510229,2.90122142
78.154939,2.64575131,2.95416099,-0.555346446,2.91129968,2.94403503,2.90102412
78.16543,3.16227766,2.95315775,0.457296302,2.91113819,2.94299365,2.90082687
78.175922,3.16227766,2.95217935,0.458364817,2.91097693,2.94197696,2.90062962
78.186414,3.16227766,2.95122494,0.459404742,2.9108159,2.94098411,2.9004324
78.196905,3.46410162,2.9502937,0.716803957,2.91065513,2.94001428,2.90023522
78.207397,2.44948974,2.94938459,-0.707032425,2.91049458,2.93906642,2.90003805
78.217888,3.46410162,2.94849697,0.718056159,2.91033429,2.9381399,2.89984092
78.22838,2.44948974,2.94762988,-0.705790431,2.91017424,2.93723373,2.89964381
78.238872,3.16227766,2.94678265,0.464214397,2.91001443,2.93634727,2.89944672
78.249363,3.74165739,2.94595467,0.892021702,2.90985488,2.93547989,2.89924967
78.259855,3.60555128,2.94514508,0.812653796,2.90969557,2.93463072,2.89905264
78.270346,2.82842712,2.9443534,-0.340479476,2.90953653,2.93379928,2.89885565
78.280838,3.74165739,2.94357884,0.893352419,2.90937773,2.93298478,2.89865867
78.29133,2.64575131,2.9428209,-0.545040903,2.90921919,2.93218671,2.89846172
78.301821,2.44948974,2.94207906,-0.701847078,2.90906092,2.93140457,2.89826482
78.312313,3.74165739,2.94135266,0.894597523,2.9089029,2.93063766,2.89806792
78.322804,3.46410162,2.9406413,0.723505576,2.90874515,2.9298856,2.89787108
78.333296,2.23606798,2.93994435,-0.838973402,2.90858766,2.92914776,2.89767424
78.343788,3.31662479,2.9392614,0.614299107,2.90843044,2.92842371,2.89747744
78.354279,3.46410162,2.93859206,0.724920381,2.9082735,2.92771308,2.89728069
78.364771,3.31662479,2.93793576,0.615377148,2.90811682,2.92701527,2.89708394
78.375262,3.31662479,2.9372922,0.61589982,2.90796043,2.92633001,2.89688725
78.385754,3.74165739,2.93666087,0.897215982,2.90780431,2.92565675,2.89669057
78.396246,3,2.93604143,0.252900319,2.90764846,2.92499516,2.89649392
78.406737,3,2.93543357,0.25409925,2.90749291,2.92434495,2.89629732
78.417229,3,2.93483682,0.255270793,2.90733763,2.92370562,2.89610073
78.42772,3.16227766,2.93425095,0.47752142,2.90718265,2.92307694,2.8959042
78.438212,3,2.93367553,0.257535384,2.90702794,2.92245848,2.89570767
78.448704,2.82842712,2.93311028,-0.32354776,2.90687353,2.92184996,2.89551119
78.459195,2.82842712,2.93255496,-0.322688449,2.90671942,2.92125115,2.89531475
78.469687,2.82842712,2.93200917,-0.321841651,2.9065656,2.92066163,2.89511833
78.480178,3.16227766,2.93147274,0.480421605,2.90641209,2.92008122,2.89492196
78.49067,3.16227766,2.93094529,0.480970236,2.90625886,2.91950956,2.8947256
78.501162,2.82842712,2.93042662,-0.319373594,2.90610594,2.91894642,2.89452928
78.511653,2.23606798,2.92991652,-0.832975713,2.90595334,2.91839161,2.89433302
78.522145,3,2.92941465,0.26567904,2.90580103,2.91784478,2.89413677
78.532636,2.64575131,2.92892088,-0.532136794,2.90564905,2.9173058,2.89394057
78.543128,3.60555128,2.92843489,0.822870819,2.90549737,2.91677434,2.89374439
78.55362,2.44948974,2.92795652,-0.691712927,2.90534601,2.91625023,2.89354825
78.564111,2.64575131,2.92748559,-0.530786475,2.90519498,2.91573332,2.89335216
78.574603,3,2.92702183,0.270144718,2.90504425,2.9152233,2.89315609
78.585094,3.60555128,2.92656513,0.824006158,2.90489387,2.91472007,2.89296008
78.595586,3,2.92611521,0.271817576,2.90474379,2.91422335,2.89276408
78.606078,3,2.92567193,0.272631741,2.90459405,2.913733,2.89256812
78.616569,3.74165739,2.92523518,0.903560848,2.90444466,2.9132489,2.89237222
78.627061,2.82842712,2.92480469,-0.310447369,2.90429558,2.91277078,2.89217633
78.637552,3.74165739,2.9243804,0.904033733,2.90414686,2.91229857,2.89198051
78.648044,3,2.92396205,0.275749794,2.90399846,2.91183203,2.8917847
78.658536,2.44948974,2.92354955,-0.688520012,2.90385041,2.91137103,2.89158893
78.669027,3.46410162,2.92314279,0.735499035,2.90370272,2.91091549,2.89139322
78.679519,3.46410162,2.92274154,0.735771755,2.90355537,2.91046517,2.89119753
78.69001,3.31662479,2.92234576,0.627916423,2.90340838,2.91002002,2.8910019
78.700502,3.16227766,2.92195523,0.490226921,2.90326174,2.90957981,2.89080629
78.710994,2.82842712,2.92156986,-0.305192954,2.90311545,2.90914447,2.89061072
78.721485,2.82842712,2.92118958,-0.304569298,2.90296954,2.9087139,2.89041521
78.731977,3,2.92081419,0.281399733,2.90282398,2.90828791,2.89021973
78.742468,1.73205081,2.92044365,-1.09013432,2.9026788,2.90786646,2.8900243
78.75296,3.46410162,2.92007777,0.737579722,2.90253398,2.90744935,2.8898289
78.763452,3,2.91971649,0.283343452,2.90238953,2.90703652,2.88963353
78.773943,3.46410162,2.91935973,0.738066312,2.90224547,2.9066279,2.88943823
78.784435,3.60555128,2.91900734,0.82857947,2.90210179,2.90622331,2.88924295
78.794926,3.46410162,2.91865927,0.738540686,2.9019585,2.90582272,2.88904774
78.805418,3.46410162,2.91831537,0.738773471,2.90181558,2.90542596,2.88885254
78.81591,3.46410162,2.91797559,0.739003401,2.90167305,2.90503298,2.8886574
78.826401,3.46410162,2.91763986,0.739230516,2.90153093,2.90464372,2.88846231
78.836893,4.24264069,2.91730804,1.15123093,2.9013892,2.90425802,2.88826725
78.847384,3.74165739,2.91698011,0.908117437,2.90124788,2.90387586,2.88807225
78.857876,3.16227766,2.91665592,0.495602399,2.90110695,2.9034971,2.88787728
78.868368,3.87298335,2.91633544,0.978083793,2.90096642,2.90312169,2.88768235
78.878859,3,2.91601861,0.289795424,2.90082633,2.90274959,2.88748749
78.889351,3.31662479,2.91570531,0.633182028,2.90068663,2.90238064,2.88729265
78.899842,3.46410162,2.91539552,0.740746984,2.90054737,2.90201485,2.88709788
78.910334,3.31662479,2.91508912,0.633668423,2.90040851,2.90165207,2.88690314
78.920826,2.23606798,2.91478607,-0.823843487,2.90027008,2.90129228,2.88670844
78.931317,2.44948974,2.91448633,-0.681906585,2.9001321,2.90093543,2.88651381
78.941809,4,2.9141898,1.04202217,2.89999453,2.90058139,2.8863192
78.9523,3,2.91389645,0.293434062,2.89985741,2.90023018,2.88612466
78.962792,3.16227766,2.91360619,0.498669704,2.89972073,2.89988165,2.88593016
78.973284,3,2.91331897,0.294416418,2.89958448,2.89953578,2.88573569
78.983775,2.82842712,2.91303478,-0.290873958,2.8994487,2.89919255,2.8855413
78.994267,3.46410162,2.91275351,0.742528183,2.89931336,2.89885184,2.88534694
79.004758,3,2.91247516,0.295845975,2.89917849,2.89851365,2.88515264
79.01525,2.64575131,2.91219962,-0.516186316,2.89904407,2.89817787,2.88495837
79.025742,3.60555128,2.91192688,0.832841157,2.89891011,2.89784447,2.88476416
79.036233,2.82842712,2.91165692,-0.288495741,2.89877663,2.89751345,2.88457001
79.046725,2.82842712,2.91138963,-0.288032123,2.89864361,2.89718468,2.88437589
79.057216,3.16227766,2.91112502,0.50115131,2.89851109,2.89685818,2.88418184
79.067708,2.82842712,2.91086301,-0.287116506,2.89837903,2.89653384,2.88398783
79.0782,3.31662479,2.91060358,0.637197939,2.89824746,2.89621164,2.88379386
79.088691,3,2.9103467,0.299421608,2.89811639,2.89589158,2.88359997
79.099183,2.82842712,2.9100923,-0.285771188,2.89798581,2.89557356,2.88340611
79.109674,2.82842712,2.90984038,-0.285330075,2.89785573,2.89525757,2.88321231
79.120166,3.60555128,2.90959086,0.834242423,2.89772615,2.89494354,2.88301856
79.130658,3.31662479,2.90934372,0.638185764,2.89759708,2.89463144,2.88282485
79.141149,2.64575131,2.90909896,-0.513174096,2.89746853,2.89432128,2.88263122
79.151641,2,2.9088565,-0.953339658,2.89734048,2.89401294,2.88243762
79.162132,3.16227766,2.90861635,0.503647998,2.89721298,2.89370646,2.88224409
79.172624,2.82842712,2.90837844,-0.282756634,2.89708598,2.89340174,2.8820506
79.183116,2,2.90814275,-0.952965241,2.89695952,2.89309877,2.88185716
79.193607,3,2.90790928,0.303464528,2.89683361,2.89279755,2.8816638
79.204099,2.44948974,2.90767796,-0.676896015,2.89670823,2.89249799,2.88147047
79.21459,2.44948974,2.9074488,-0.676726721,2.8965834,2.89220011,2.88127721
79.225082,3,2.90722173,0.304595254,2.89645912,2.89190383,2.881084
79.235574,2,2.90699675,-0.952363772,2.89633539,2.89160914,2.88089083
79.246065,3.60555128,2.90677386,0.835929073,2.89621224,2.89131604,2.88069774
79.256557,2.64575131,2.90655299,-0.510687454,2.89608964,2.89102444,2.88050469
79.267048,2.82842712,2.90633415,-0.2791183,2.89596763,2.89073438,2.88031172
79.27754,3.16227766,2.90611729,0.506122884,2.89584618,2.89044577,2.88011878
79.288032,3.46410162,2.90590239,0.747127312,2.89572532,2.89015861,2.8799259
79.298523,3.16227766,2.90568947,0.506545345,2.89560506,2.8898729,2.8797331
79.309015,2.82842712,2.90547846,-0.277581226,2.89548538,2.88958856,2.87954033
79.319506,4.12310563,2.90526938,1.10355618,2.89536631,2.88930562,2.87934764
79.329998,3.87298335,2.90506217,0.983829851,2.89524783,2.889024,2.87915499
79.34049,3,2.90485683,0.308452858,2.89512997,2.88874371,2.8789624
79.350981,2.44948974,2.90465337,-0.674658157,2.89501274,2.88846474,2.87876989
79.361473,3.74165739,2.90445173,0.914989432,2.89489611,2.88818702,2.87857742
79.371964,2.82842712,2.90425192,-0.275363028,2.89478013,2.88791059,2.87838503
79.382456,2.64575131,2.9040539,-0.50823478,2.89466477,2.88763536,2.87819267
79.392948,3.16227766,2.90385767,0.50835026,2.89455006,2.88736135,2.87800038
79.403439,2.64575131,2.90366324,-0.507850299,2.894436,2.88708856,2.87780817
79.413931,2.82842712,2.90347054,-0.273940537,2.89432258,2.88681691,2.877616
79.424422,3.31662479,2.90327961,0.642919262,2.89420983,2.88654643,2.87742391
79.434914,3,2.9030904,0.311303072,2.89409774,2.88627707,2.87723186
79.445406,4.12310563,2.9029029,1.10462787,2.89398632,2.88600881,2.87703988
79.455897,3,2.90271713,0.311902015,2.89387559,2.88574168,2.87684797
79.466389,3.16227766,2.90253304,0.509651467,2.89376554,2.8854756,2.87665611
79.47688,2.64575131,2.90235065,-0.506556358,2.89365619,2.8852106,2.87646433
79.487372,2.82842712,2.90216992,-0.271556253,2.89354753,2.88494662,2.87627259
79.497864,4.12310563,2.90199086,1.10504062,2.89343957,2.88468366,2.87608092
79.508355,2.64575131,2.90181346,-0.506025838,2.89333233,2.88442174,2.87588933
79.518847,2.64575131,2.90163769,-0.505852132,2.89322581,2.88416079,2.87569778
79.529338,3.16227766,2.90146357,0.510699604,2.89312002,2.88390083,2.87550632
79.53983,3.16227766,2.90129107,0.510868468,2.89301496,2.88364181,2.8753149
79.550322,2.64575131,2.90112018,-0.505340352,2.89291064,2.88338374,2.87512355
79.560813,4.24264069,2.90095092,1.15831333,2.89280708,2.88312662,2.87493229
79.571305,2,2.90078325,-0.949096018,2.89270426,2.8828704,2.87474106
79.581796,3.16227766,2.90061719,0.511527581,2.89260222,2.8826151,2.87454993
79.592288,3.46410162,2.90045271,0.750765545,2.89250094,2.88236066,2.87435884
79.60278,3.31662479,2.90028981,0.645240248,2.89240044,2.8821071,2.87416782
79.613271,3,2.90012851,0.31602451,2.89230073,2.88185443,2.87397688
79.623763,2.44948974,2.89996876,-0.67117734,2.89220181,2.88160258,2.87378599
79.634254,3.60555128,2.8998106,0.84008373,2.89210371,2.88135159,2.87359519
79.644746,3.74165739,2.89965399,0.91760743,2.8920064,2.8811014,2.87340443
79.655238,3.74165739,2.89949894,0.917691914,2.89190992,2.88085202,2.87321375
79.665729,3.31662479,2.89934546,0.645971619,2.89181427,2.88060346,2.87302315
79.676221,2,2.89919351,-0.948258148,2.89171945,2.88035567,2.8728326
79.686712,3.87298335,2.89904314,0.986884092,2.89162548,2.88010868,2.87264214
79.697204,3.60555128,2.89889429,0.840628923,2.89153236,2.87986243,2.87245173
79.707696,3,2.89874699,0.318202784,2.8914401,2.87961694,2.87226139
79.718187,2.44948974,2.89860124,-0.670157818,2.89134872,2.87937221,2.87207113
79.728679,3,2.89845703,0.318658084,2.89125822,2.87912819,2.87188093
79.73917,4.12310563,2.89831436,1.10670288,2.89116861,2.87888492,2.87169082
79.749662,2.82842712,2.89817322,-0.264094861,2.89107989,2.87864233,2.87150076
79.760154,2.82842712,2.89803362,-0.263830425,2.89099208,2.87840045,2.87131077
79.770645,3.87298335,2.89789557,0.987465331,2.8909052,2.87815929,2.87112087
79.781137,2.64575131,2.89775904,-0.502003711,2.89081923,2.87791879,2.87093102
79.791628,3.31662479,2.89762406,0.647302658,2.89073421,2.87767898,2.87074127
79.80212,3.31662479,2.89749061,0.647405734,2.89065014,2.87743982,2.87055156
79.812612,1.73205081,2.89735869,-1.07949427,2.89056701,2.87720131,2.87036194
79.823103,2.64575131,2.89722833,-0.501474844,2.89048487,2.87696347,2.8701724
79.833595,3,2.8970995,0.320781082,2.89040369,2.87672625,2.86998291
79.844086,2.23606798,2.89697222,-0.812960173,2.89032351,2.87648969,2.86979352
79.854578,4.47213595,2.89684648,1.25510537,2.89024432,2.87625372,2.86960419
79.86507,3.16227766,2.89672228,0.515320658,2.89016614,2.87601837,2.86941493
79.875561,2.23606798,2.89659965,-0.812730994,2.89008899,2.87578364,2.86922576
79.886053,3.46410162,2.89647855,0.753407633,2.89001286,2.8755495,2.86903664
79.896544,2.64575131,2.89635903,-0.50060735,2.88993779,2.87531597,2.86884762
79.907036,3.16227766,2.89624105,0.515787365,2.88986376,2.875083,2.86865866
79.917528,3.31662479,2.89612464,0.648459826,2.88979079,2.8748506,2.86846978
79.928019,2,2.89600981,-0.946577949,2.88971892,2.8746188,2.86828098
79.938511,3.31662479,2.89589655,0.648635679,2.88964812,2.87438754,2.86809225
79.949002,3.31662479,2.89578487,0.648721762,2.88957843,2.87415685,2.86790361
79.959494,3.16227766,2.89567476,0.516336035,2.88950985,2.87392669,2.86771503
79.969986,2.23606798,2.89556624,-0.812094985,2.8894424,2.87369708,2.86752653
79.980477,3.31662479,2.89545933,0.64897262,2.88937609,2.87346802,2.86733812
79.990969,3,2.89535401,0.323490332,2.88931092,2.87323947,2.86714977
80.00146,3.60555128,2.8952503,0.842793555,2.88924693,2.87301146,2.86696152
80.011952,2.23606798,2.8951482,-0.811837557,2.8891841,2.87278395,2.86677333
80.022444,3.31662479,2.89504771,0.64928967,2.88912247,2.87255695,2.86658522
80.032935,2.82842712,2.89494887,-0.257918098,2.88906205,2.87233048,2.8663972
80.043427,3.16227766,2.89485165,0.517132487,2.88900283,2.87210449,2.86620925
80.053918,2.23606798,2.89475609,-0.811596025,2.88894486,2.87187901,2.8660214
80.06441,3.46410162,2.89466216,0.754612121,2.88888813,2.87165399,2.8658336
80.074902,3.60555128,2.8945699,0.843197117,2.88883265,2.87142946,2.86564589
80.085393,3,2.89447931,0.324839482,2.88877846,2.87120543,2.86545827
80.095885,3,2.89439039,0.324976316,2.88872555,2.87098185,2.86527072
80.106376,3.60555128,2.89430317,0.843355265,2.88867394,2.87075876,2.86508327
80.116868,2.82842712,2.89421764,-0.256496618,2.88862366,2.87053611,2.86489588
80.12736,3.46410162,2.89413381,0.754962119,2.8885747,2.87031391,2.86470858
80.137851,3,2.89405171,0.325496983,2.8885271,2.87009219,2.86452137
80.148343,3.16227766,2.89397133,0.517982939,2.88848087,2.86987089,2.86433423
80.158834,2.23606798,2.8938927,-0.811063946,2.88843602,2.86965006,2.86414719
80.169326,2.64575131,2.89381581,-0.498060741,2.88839256,2.86942964,2.86396021
80.179818,2.82842712,2.89374069,-0.255565179,2.88835052,2.86920966,2.86377332
80.190309,2.82842712,2.89366734,-0.255421642,2.88830991,2.86899013,2.86358653
80.200801,2.44948974,2.89359577,-0.666412808,2.88827075,2.868771,2.8633998
80.211292,3.31662479,2.89352601,0.650460434,2.88823305,2.86855231,2.86321318
80.221784,3.16227766,2.89345806,0.518478157,2.88819684,2.86833402,2.86302663
80.232276,3.46410162,2.89339193,0.755453296,2.88816213,2.86811613,2.86284016
80.242767,2.82842712,2.89332765,-0.254755818,2.88812894,2.86789868,2.86265379
80.253259,2.44948974,2.89326522,-0.66616475,2.88809729,2.86768161,2.86246749
80.26375,2.23606798,2.89320466,-0.810639673,2.88806719,2.86746496,2.86228129
80.274242,3.16227766,2.89314597,0.518779034,2.88803867,2.86724869,2.86209517
80.284734,2.82842712,2.89308919,-0.254287368,2.88801174,2.86703281,2.86190913
80.295225,1.41421356,2.89303432,-1.21606775,2.88798643,2.86681733,2.86172319
80.305717,3,2.89298138,0.327136999,2.88796275,2.86660222,2.86153733
80.316208,3,2.89293039,0.327214923,2.88794073,2.86638752,2.86135157
80.3267,2.82842712,2.89288136,-0.253878391,2.88792038,2.86617317,2.86116587
80.337192,3,2.89283431,0.327361711,2.88790172,2.86595919,2.86098027
80.347683,2.64575131,2.89278926,-0.497029122,2.88788479,2.86574561,2.86079478
80.358175,3.60555128,2.89274622,0.844277831,2.88786959,2.86553237,2.86060935
80.368666,4,2.89270522,1.05228075,2.88785615,2.86531952,2.86042403
80.379158,2.82842712,2.89266626,-0.25345441,2.88784449,2.86510701,2.86023878
80.38965,3,2.89262938,0.327674564,2.88783464,2.86489486,2.86005363
80.400141,2.82842712,2.89259459,-0.253312981,2.88782662,2.86468308,2.85986858
80.410633,2.64575131,2.89256191,-0.496800361,2.88782045,2.86447164,2.8596836
80.421124,3,2.89253136,0.327824097,2.88781615,2.86426056,2.85949873
80.431616,2.44948974,2.89250296,-0.665592383,2.88781376,2.86404981,2.85931394
80.442108,3,2.89247674,0.3279074,2.88781328,2.8638394,2.85912923
80.452599,3,2.89245271,0.327944037,2.88781476,2.86362935,2.85894464
80.463091,3.31662479,2.8924309,0.651301693,2.8878182,2.86341962,2.85876012
80.473582,3,2.89241132,0.32800713,2.88782365,2.86321024,2.85857571
80.484074,2.44948974,2.89239401,-0.665510532,2.88783112,2.86300118,2.85839137
80.494566,3.31662479,2.89237899,0.651341542,2.88784065,2.86279244,2.85820713
80.505057,2.82842712,2.89236627,-0.252861916,2.88785225,2.86258406,2.858023
80.515549,3.60555128,2.89235589,0.844508959,2.88786596,2.86237597,2.85783894
80.52604,2.23606798,2.89234788,-0.810111041,2.88788181,2.86216823,2.857655
80.536532,2.82842712,2.89234224,-0.252814394,2.88789982,2.86196078,2.85747113
80.547024,3.46410162,2.89233902,0.756149849,2.88792002,2.86175366,2.85728735
80.557515,2.82842712,2.89233824,-0.252806475,2.88794244,2.86154686,2.85710369
80.568007,2,2.89233992,-0.944637455,2.88796711,2.86134036,2.85692011
80.578498,3.60555128,2.8923441,0.844515942,2.88799406,2.86113419,2.85673663
80.58899,3.46410162,2.8923508,0.756142062,2.88802333,2.86092831,2.85655324
80.599482,2,2.89236005,-0.944648108,2.88805494,2.86072273,2.85636994
80.609973,3,2.89237188,0.328067254,2.88808893,2.86051747,2.85618676
80.620465,2.82842712,2.89238632,-0.252901549,2.88812532,2.8603125,2.85600365
80.630956,2,2.8924034,-0.944671053,2.88816416,2.86010784,2.85582066
80.641448,3.16227766,2.89242315,0.519475221,2.88820547,2.85990346,2.85563775
80.65194,3.87298335,2.89244561,0.990221052,2.8882493,2.85969938,2.85545494
80.662431,3.60555128,2.89247081,0.844440919,2.88829566,2.85949561,2.85527224
80.672923,3.31662479,2.89249878,0.651249578,2.88834461,2.85929211,2.85508962
80.683414,3.16227766,2.89252955,0.519372808,2.88839617,2.85908891,2.85490712
80.693906,3.46410162,2.89256316,0.756001625,2.88845039,2.85888599,2.8547247
80.704398,3.87298335,2.89259964,0.990143274,2.8885073,2.85868334,2.85454238
80.714889,2.82842712,2.89263904,-0.253400693,2.88856694,2.85848101,2.85436018
80.725381,2.82842712,2.89268138,-0.25348423,2.88862934,2.85827893,2.85417805
80.735872,2.82842712,2.8927267,-0.253573615,2.88869455,2.85807715,2.85399605
80.746364,2.82842712,2.89277505,-0.253668937,2.88876262,2.85787563,2.85381413
80.756856,2.64575131,2.89282647,-0.497066551,2.88883357,2.85767439,2.8536323
80.767347,3,2.89288098,0.327290426,2.88890745,2.85747344,2.8534506
80.777839,3.87298335,2.89293863,0.989972076,2.88898431,2.85727274,2.85326898
80.78833,3.74165739,2.89299947,0.921226312,2.88906417,2.85707233,2.85308748
80.798822,3.87298335,2.89306354,0.989908991,2.88914711,2.85687217,2.85290606
80.809314,3.46410162,2.89313087,0.75562606,2.88923315,2.85667229,2.85272475
80.819805,3.60555128,2.89320151,0.844008152,2.88932234,2.85647268,2.85254356
80.830297,3.16227766,2.89327552,0.51865416,2.88941473,2.85627332,2.85236245
80.840788,2.23606798,2.89335293,-0.810731119,2.88951036,2.85607425,2.85218146
80.85128,2.44948974,2.89343379,-0.666291261,2.88960929,2.85587542,2.85200056
80.861772,2.23606798,2.89351815,-0.810833009,2.88971157,2.85567684,2.85181976
80.872263,3,2.89360604,0.326180864,2.88981723,2.85547855,2.85163908
80.882755,2.82842712,2.89369755,-0.255480766,2.88992635,2.85528049,2.85145849
80.893246,2.64575131,2.89379269,-0.498037525,2.89003896,2.85508271,2.85127802
80.903738,3.60555128,2.89389153,0.843599277,2.89015513,2.85488516,2.85109764
80.91423,3.16227766,2.89399413,0.517960931,2.89027491,2.85468787,2.85091736
80.924721,2.64575131,2.89410053,-0.498346484,2.89039833,2.85449085,2.85073721
80.935213,3,2.89421079,0.325252527,2.89052549,2.85429406,2.85055715
80.945704,3,2.89432496,0.325076971,2.8906564,2.85409754,2.85037721
80.956196,2.64575131,2.89444312,-0.49869009,2.89079117,2.85390125,2.85019735
80.966688,3,2.8945653,0.324707095,2.89092983,2.8537052,2.85001761
80.977179,2.64575131,2.89469157,-0.498939131,2.89107243,2.85350942,2.84983799
80.987671,1.41421356,2.894822,-1.21680255,2.89121907,2.85331387,2.84965846
80.998162,3.16227766,2.89495663,0.517030979,2.89136977,2.85311857,2.84947905
81.008654,3.31662479,2.89509555,0.649252834,2.89152463,2.85292351,2.84929974
81.019146,3.46410162,2.89523881,0.754229941,2.89168371,2.85272868,2.84912053
81.029637,3.60555128,2.89538647,0.842712766,2.89184705,2.85253411,2.84894145
81.040129,3.16227766,2.89553862,0.516467853,2.89201475,2.85233976,2.84876246
81.05062,3.31662479,2.8956953,0.648790795,2.89218686,2.85214567,2.8485836
81.061112,3.16227766,2.8958566,0.516159914,2.89236347,2.8519518,2.84840483
81.071604,2.82842712,2.8960226,-0.259991296,2.89254466,2.85175816,2.84822617
81.082095,3.46410162,2.89619334,0.753596892,2.89273046,2.85156478,2.84804763
81.092587,3.31662479,2.89636893,0.64827144,2.89292099,2.85137161,2.84786919
81.103078,3,2.89654942,0.321637346,2.89311631,2.85117869,2.84769088
81.11357,2.64575131,2.89673491,-0.500982636,2.89331651,2.85098599,2.84751266
81.124062,3,2.89692548,0.321052211,2.89352167,2.85079351,2.84733455
81.134553,2.44948974,2.89712118,-0.669052639,2.89373184,2.85060129,2.84715658
81.145045,3,2.89732213,0.320433878,2.89394716,2.85040927,2.84697869
81.155536,3.74165739,2.89752838,0.918764933,2.89416767,2.85021751,2.84680094
81.166028,2.64575131,2.89774007,-0.501984816,2.89439349,2.85002595,2.84662328
81.17652,3.16227766,2.89795725,0.51412101,2.8946247,2.84983462,2.84644574
81.187011,3,2.89817999,0.319092473,2.89486137,2.84964353,2.84626832
81.197503,3.31662479,2.89840844,0.646696487,2.89510364,2.84945265,2.846091
81.207994,2.82842712,2.89864265,-0.264982117,2.89535155,2.84926201,2.84591381
81.218486,3.16227766,2.89888275,0.513220141,2.89560526,2.84907158,2.84573672
81.228978,2.23606798,2.89912882,-0.81428548,2.89586484,2.84888137,2.84555975
81.239469,2.64575131,2.89938094,-0.503616554,2.89613036,2.8486914,2.8453829
81.249961,2.82842712,2.89963927,-0.266856043,2.89640199,2.84850163,2.84520616
81.260452,3.74165739,2.89990386,0.917471268,2.89667977,2.8483121,2.84502954
81.270944,2.64575131,2.90017487,-0.504404158,2.89696388,2.84812277,2.84485303
81.281436,2.64575131,2.90045238,-0.504679173,2.89725439,2.84793366,2.84467663
81.291927,2.64575131,2.90073648,-0.504960564,2.8975514,2.84774478,2.84450036
81.302419,3.74165739,2.90102735,0.916858789,2.89785507,2.84755611,2.8443242
81.31291,2.64575131,2.90132504,-0.505543005,2.89816548,2.84736766,2.84414816
81.323402,2.82842712,2.90162974,-0.270559815,2.8984828,2.84717942,2.84397223
81.333894,2.44948974,2.90194154,-0.672645371,2.89880712,2.84699139,2.84379642
81.344385,2.82842712,2.90226053,-0.271723038,2.89913856,2.8468036,2.84362074
81.354877,3,2.90258692,0.312110684,2.89947729,2.846616,2.84344516
81.365368,3.31662479,2.90292077,0.643198276,2.89982339,2.84642863,2.84326971
81.37586,4,2.90326228,1.04725246,2.90017707,2.84624146,2.84309437
81.386352,2.44948974,2.90361156,-0.67388561,2.90053843,2.8460545,2.84291915
81.396843,3.46410162,2.90396872,0.748420269,2.90090758,2.84586776,2.84274406
81.407335,2.82842712,2.90433397,-0.275511969,2.90128474,2.84568123,2.84256908
81.417826,3.74165739,2.9047074,0.914849709,2.90166999,2.84549491,2.84239423
81.428318,2.64575131,2.90508923,-0.50925231,2.90206356,2.8453088,2.84221949
81.43881,2.23606798,2.90547958,-0.818175776,2.90246556,2.84512289,2.84204486
81.449301,3.46410162,2.90587858,0.747143253,2.90287613,2.8449372,2.84187038
81.459793,2.44948974,2.90628646,-0.675867382,2.90329551,2.84475171,2.841696
81.470284,4,2.90670333,1.04560828,2.90372379,2.84456644,2.84152175
81.480776,3.46410162,2.90712942,0.746305695,2.90416123,2.84438136,2.84134762
81.491268,3.16227766,2.90756489,0.504690762,2.90460795,2.84419649,2.8411736
81.501759,3.74165739,2.90800988,0.913042995,2.90506411,2.84401184,2.84099972
81.512251,3.60555128,2.90846464,0.834917141,2.90552998,2.84382738,2.84082595
81.522742,3.31662479,2.9089293,0.63851037,2.90600566,2.84364315,2.84065232
81.533234,2.44948974,2.90940413,-0.678169879,2.90649145,2.8434591,2.8404788
81.543726,2.64575131,2.90988929,-0.513943557,2.90698749,2.84327525,2.8403054
81.554217,2.23606798,2.91038494,-0.82116805,2.90749395,2.84309163,2.84013214
81.564709,2.64575131,2.9108914,-0.514917553,2.90801114,2.84290819,2.83995898
81.5752,2.64575131,2.91140877,-0.515419692,2.90853917,2.84272497,2.83978597
81.585692,2.82842712,2.91193738,-0.288981418,2.90907838,2.84254194,2.83961307
81.596184,2.64575131,2.91247742,-0.516455333,2.90962895,2.84235911,2.83944029
81.606675,2.64575131,2.91302906,-0.516989121,2.91019104,2.8421765,2.83926765
81.617167,3.16227766,2.91359265,0.498683272,2.91076502,2.84199407,2.83909513
81.627658,2.82842712,2.91416834,-0.292816006,2.91135103,2.84181186,2.83892274
81.63815,2.82842712,2.91475648,-0.293818571,2.91194942,2.84162983,2.83875047
81.648642,2.82842712,2.91535728,-0.2948392,2.91256041,2.841448,2.83857832
81.659133,2.64575131,2.91597095,-0.519826548,2.91318421,2.8412664,2.83840631
81.669625,3.60555128,2.91659789,0.830032161,2.91382121,2.84108497,2.83823442
81.680116,3.16227766,2.91723825,0.495014555,2.91447158,2.84090376,2.83806267
81.690608,3.46410162,2.91789245,0.739059647,2.91513572,2.84072273,2.83789103
81.7011,3,2.91856073,0.285375656,2.91581388,2.8405419,2.83771952
81.711591,3,2.91924333,0.284177173,2.91650629,2.84036128,2.83754815
81.722083,3.60555128,2.9199407,0.828016049,2.91721342,2.84018085,2.8373769
[truncated: 421,693 more chars]
