# Supplementary material for: Phase Stability of Iron Nitride Fe4N at High Pressure—Pressure-Dependent Evolution of Phase Equilibria in the Fe–N System
Source: Materials (Basel). 2021 Jul 15;14(14):3963. doi: 10.3390/ma14143963 (PMC8307547; doi:10.3390/ma14143963)
Supplement: Supplementary file 1 [file materials-14-03963-s001.zip › xrd_data/2-500_riet.txt]

'y-axis saved as Sqrt(y)
'x,Yobs,Ycalc,Diff,gamma,fe4n,Bkg
20,8.18535277,0,0,0,0,0
20.010492,7.28010989,0,0,0,0,0
20.020983,7.41619849,0,0,0,0,0
20.031475,8,0,0,0,0,0
20.041966,8.18535277,0,0,0,0,0
20.052458,8,0,0,0,0,0
20.06295,8.06225775,0,0,0,0,0
20.073441,8.06225775,0,0,0,0,0
20.083933,8.30662386,0,0,0,0,0
20.094424,8.54400375,0,0,0,0,0
20.104916,6.55743852,0,0,0,0,0
20.115408,7.28010989,0,0,0,0,0
20.125899,8.42614977,0,0,0,0,0
20.136391,8.24621125,0,0,0,0,0
20.146882,8.24621125,0,0,0,0,0
20.157374,7.21110255,0,0,0,0,0
20.167866,7.34846923,0,0,0,0,0
20.178357,7.41619849,0,0,0,0,0
20.188849,6.8556546,0,0,0,0,0
20.19934,8.1240384,0,0,0,0,0
20.209832,7,0,0,0,0,0
20.220324,6.78232998,0,0,0,0,0
20.230815,8.1240384,0,0,0,0,0
20.241307,7.41619849,0,0,0,0,0
20.251798,7.74596669,0,0,0,0,0
20.26229,8.30662386,0,0,0,0,0
20.272782,8.18535277,0,0,0,0,0
20.283273,8.06225775,0,0,0,0,0
20.293765,7.34846923,0,0,0,0,0
20.304256,7.54983444,0,0,0,0,0
20.314748,7.54983444,0,0,0,0,0
20.32524,8.60232527,0,0,0,0,0
20.335731,8.18535277,0,0,0,0,0
20.346223,7.74596669,0,0,0,0,0
20.356714,7,0,0,0,0,0
20.367206,7.61577311,0,0,0,0,0
20.377698,7.41619849,0,0,0,0,0
20.388189,7.48331477,0,0,0,0,0
20.398681,6.70820393,0,0,0,0,0
20.409172,7,0,0,0,0,0
20.419664,8.18535277,0,0,0,0,0
20.430156,8.36660027,0,0,0,0,0
20.440647,7.28010989,0,0,0,0,0
20.451139,7.14142843,0,0,0,0,0
20.46163,7.74596669,0,0,0,0,0
20.472122,8.36660027,0,0,0,0,0
20.482614,8.48528137,0,0,0,0,0
20.493105,7,0,0,0,0,0
20.503597,7.81024968,0,0,0,0,0
20.514088,7.48331477,0,0,0,0,0
20.52458,7.14142843,0,0,0,0,0
20.535072,7.28010989,0,0,0,0,0
20.545563,8.18535277,0,0,0,0,0
20.556055,7.87400787,0,0,0,0,0
20.566546,7.54983444,0,0,0,0,0
20.577038,7.48331477,0,0,0,0,0
20.58753,7.07106781,0,0,0,0,0
20.598021,7.07106781,0,0,0,0,0
20.608513,7.61577311,0,0,0,0,0
20.619004,8.30662386,0,0,0,0,0
20.629496,8.24621125,0,0,0,0,0
20.639988,7.68114575,0,0,0,0,0
20.650479,7.14142843,0,0,0,0,0
20.660971,7.93725393,0,0,0,0,0
20.671462,7.81024968,0,0,0,0,0
20.681954,8.48528137,0,0,0,0,0
20.692446,8.18535277,0,0,0,0,0
20.702937,8.42614977,0,0,0,0,0
20.713429,7.48331477,0,0,0,0,0
20.72392,7.87400787,0,0,0,0,0
20.734412,8.24621125,0,0,0,0,0
20.744904,7.68114575,0,0,0,0,0
20.755395,8.24621125,0,0,0,0,0
20.765887,7.61577311,0,0,0,0,0
20.776378,8.24621125,0,0,0,0,0
20.78687,8,0,0,0,0,0
20.797362,7.48331477,0,0,0,0,0
20.807853,7.14142843,0,0,0,0,0
20.818345,7.21110255,0,0,0,0,0
20.828836,8.1240384,0,0,0,0,0
20.839328,7.93725393,0,0,0,0,0
20.84982,7.87400787,0,0,0,0,0
20.860311,7.68114575,0,0,0,0,0
20.870803,7.34846923,0,0,0,0,0
20.881294,8.18535277,0,0,0,0,0
20.891786,6.70820393,0,0,0,0,0
20.902278,8.06225775,0,0,0,0,0
20.912769,8.36660027,0,0,0,0,0
20.923261,8.30662386,0,0,0,0,0
20.933752,7.74596669,0,0,0,0,0
20.944244,7.61577311,0,0,0,0,0
20.954736,8.06225775,0,0,0,0,0
20.965227,7.68114575,0,0,0,0,0
20.975719,8.48528137,0,0,0,0,0
20.98621,7.68114575,0,0,0,0,0
20.996702,9.32737905,0,0,0,0,0
21.007194,7.21110255,0,0,0,0,0
21.017685,7.54983444,0,0,0,0,0
21.028177,8.48528137,0,0,0,0,0
21.038668,7.68114575,0,0,0,0,0
21.04916,7.54983444,0,0,0,0,0
21.059652,7.48331477,0,0,0,0,0
21.070143,8.88819442,0,0,0,0,0
21.080635,7.07106781,0,0,0,0,0
21.091126,7.28010989,0,0,0,0,0
21.101618,7.41619849,0,0,0,0,0
21.11211,7.54983444,0,0,0,0,0
21.122601,7.34846923,0,0,0,0,0
21.133093,7.07106781,0,0,0,0,0
21.143584,7.41619849,0,0,0,0,0
21.154076,7,0,0,0,0,0
21.164568,7.34846923,0,0,0,0,0
21.175059,6.78232998,0,0,0,0,0
21.185551,7.61577311,0,0,0,0,0
21.196042,7.74596669,0,0,0,0,0
21.206534,8,0,0,0,0,0
21.217026,7.68114575,0,0,0,0,0
21.227517,6.8556546,0,0,0,0,0
21.238009,6.92820323,0,0,0,0,0
21.2485,7.54983444,0,0,0,0,0
21.258992,8.30662386,0,0,0,0,0
21.269484,8.54400375,0,0,0,0,0
21.279975,8.36660027,0,0,0,0,0
21.290467,8.18535277,0,0,0,0,0
21.300958,8.48528137,0,0,0,0,0
21.31145,7.34846923,0,0,0,0,0
21.321942,7.21110255,0,0,0,0,0
21.332433,6.78232998,0,0,0,0,0
21.342925,7.68114575,0,0,0,0,0
21.353416,7.14142843,0,0,0,0,0
21.363908,7.54983444,0,0,0,0,0
21.3744,6.32455532,0,0,0,0,0
21.384891,6.92820323,0,0,0,0,0
21.395383,8.77496439,0,0,0,0,0
21.405874,8,0,0,0,0,0
21.416366,6.70820393,0,0,0,0,0
21.426858,7.93725393,0,0,0,0,0
21.437349,7.34846923,0,0,0,0,0
21.447841,7.81024968,0,0,0,0,0
21.458332,7.93725393,0,0,0,0,0
21.468824,7.81024968,0,0,0,0,0
21.479316,6.4807407,0,0,0,0,0
21.489807,8.18535277,0,0,0,0,0
21.500299,7.74596669,0,0,0,0,0
21.51079,7.81024968,0,0,0,0,0
21.521282,8.77496439,0,0,0,0,0
21.531774,6.55743852,0,0,0,0,0
21.542265,7.07106781,0,0,0,0,0
21.552757,7,0,0,0,0,0
21.563248,8.06225775,0,0,0,0,0
21.57374,7.28010989,0,0,0,0,0
21.584232,6.92820323,0,0,0,0,0
21.594723,7.21110255,0,0,0,0,0
21.605215,6.92820323,0,0,0,0,0
21.615706,6.40312424,0,0,0,0,0
21.626198,6.92820323,0,0,0,0,0
21.63669,7.68114575,0,0,0,0,0
21.647181,7.41619849,0,0,0,0,0
21.657673,7.07106781,0,0,0,0,0
21.668164,7.61577311,0,0,0,0,0
21.678656,7.28010989,0,0,0,0,0
21.689148,7.14142843,0,0,0,0,0
21.699639,7.28010989,0,0,0,0,0
21.710131,7.54983444,0,0,0,0,0
21.720622,7.48331477,0,0,0,0,0
21.731114,7.28010989,0,0,0,0,0
21.741606,7.41619849,0,0,0,0,0
21.752097,7.81024968,0,0,0,0,0
21.762589,7.54983444,0,0,0,0,0
21.77308,7.21110255,0,0,0,0,0
21.783572,7.48331477,0,0,0,0,0
21.794064,6.164414,0,0,0,0,0
21.804555,7.21110255,0,0,0,0,0
21.815047,8.30662386,0,0,0,0,0
21.825538,7.93725393,0,0,0,0,0
21.83603,7.07106781,0,0,0,0,0
21.846522,8.54400375,0,0,0,0,0
21.857013,7.87400787,0,0,0,0,0
21.867505,7.41619849,0,0,0,0,0
21.877996,7.74596669,0,0,0,0,0
21.888488,7.87400787,0,0,0,0,0
21.89898,7.61577311,0,0,0,0,0
21.909471,7.28010989,0,0,0,0,0
21.919963,7.68114575,0,0,0,0,0
21.930454,7.28010989,0,0,0,0,0
21.940946,7.81024968,0,0,0,0,0
21.951438,7.28010989,0,0,0,0,0
21.961929,7.87400787,0,0,0,0,0
21.972421,7.93725393,0,0,0,0,0
21.982912,7.48331477,0,0,0,0,0
21.993404,7.81024968,0,0,0,0,0
22.003896,7.81024968,0,0,0,0,0
22.014387,7.34846923,0,0,0,0,0
22.024879,6.70820393,0,0,0,0,0
22.03537,6.8556546,0,0,0,0,0
22.045862,7.07106781,0,0,0,0,0
22.056354,7.68114575,0,0,0,0,0
22.066845,7.14142843,0,0,0,0,0
22.077337,7.21110255,0,0,0,0,0
22.087828,7.81024968,0,0,0,0,0
22.09832,6.70820393,0,0,0,0,0
22.108812,7.81024968,0,0,0,0,0
22.119303,6.55743852,0,0,0,0,0
22.129795,8.1240384,0,0,0,0,0
22.140286,7.68114575,0,0,0,0,0
22.150778,6.63324958,0,0,0,0,0
22.16127,7.81024968,0,0,0,0,0
22.171761,8.06225775,0,0,0,0,0
22.182253,7.14142843,0,0,0,0,0
22.192744,7.54983444,0,0,0,0,0
22.203236,7.28010989,0,0,0,0,0
22.213728,7,0,0,0,0,0
22.224219,7.74596669,0,0,0,0,0
22.234711,7.68114575,0,0,0,0,0
22.245202,7.54983444,0,0,0,0,0
22.255694,6.8556546,0,0,0,0,0
22.266186,6.8556546,0,0,0,0,0
22.276677,6.92820323,0,0,0,0,0
22.287169,6.92820323,0,0,0,0,0
22.29766,7.61577311,0,0,0,0,0
22.308152,7.07106781,0,0,0,0,0
22.318644,7.54983444,0,0,0,0,0
22.329135,6.8556546,0,0,0,0,0
22.339627,6.8556546,0,0,0,0,0
22.350118,7.34846923,0,0,0,0,0
22.36061,7.81024968,0,0,0,0,0
22.371102,8.06225775,0,0,0,0,0
22.381593,7.87400787,0,0,0,0,0
22.392085,7.07106781,0,0,0,0,0
22.402576,7.81024968,0,0,0,0,0
22.413068,7.68114575,0,0,0,0,0
22.42356,6.55743852,0,0,0,0,0
22.434051,7.28010989,0,0,0,0,0
22.444543,8.1240384,0,0,0,0,0
22.455034,7.34846923,0,0,0,0,0
22.465526,6.92820323,0,0,0,0,0
22.476018,7.74596669,0,0,0,0,0
22.486509,7.48331477,0,0,0,0,0
22.497001,7.54983444,0,0,0,0,0
22.507492,7.28010989,0,0,0,0,0
22.517984,7.14142843,0,0,0,0,0
22.528476,6.92820323,0,0,0,0,0
22.538967,6.78232998,0,0,0,0,0
22.549459,6.55743852,0,0,0,0,0
22.55995,7.07106781,0,0,0,0,0
22.570442,7.54983444,0,0,0,0,0
22.580934,7.34846923,0,0,0,0,0
22.591425,8.1240384,0,0,0,0,0
22.601917,6.78232998,0,0,0,0,0
22.612408,6.63324958,0,0,0,0,0
22.6229,7,0,0,0,0,0
22.633392,7.48331477,0,0,0,0,0
22.643883,6.92820323,0,0,0,0,0
22.654375,7.68114575,0,0,0,0,0
22.664866,6.63324958,0,0,0,0,0
22.675358,7.14142843,0,0,0,0,0
22.68585,7.07106781,0,0,0,0,0
22.696341,6.40312424,0,0,0,0,0
22.706833,6.63324958,0,0,0,0,0
22.717324,7.41619849,0,0,0,0,0
22.727816,7.61577311,0,0,0,0,0
22.738308,7.14142843,0,0,0,0,0
22.748799,7.21110255,0,0,0,0,0
22.759291,7.07106781,0,0,0,0,0
22.769782,7.54983444,0,0,0,0,0
22.780274,6.32455532,0,0,0,0,0
22.790766,8.18535277,0,0,0,0,0
22.801257,7.34846923,0,0,0,0,0
22.811749,6.244998,0,0,0,0,0
22.82224,6.92820323,0,0,0,0,0
22.832732,7.28010989,0,0,0,0,0
22.843224,8.06225775,0,0,0,0,0
22.853715,6.55743852,0,0,0,0,0
22.864207,6.92820323,0,0,0,0,0
22.874698,8,0,0,0,0,0
22.88519,6.55743852,0,0,0,0,0
22.895682,7.21110255,0,0,0,0,0
22.906173,7.87400787,0,0,0,0,0
22.916665,6.92820323,0,0,0,0,0
22.927156,7.41619849,0,0,0,0,0
22.937648,7.14142843,0,0,0,0,0
22.94814,7.34846923,0,0,0,0,0
22.958631,7.74596669,0,0,0,0,0
22.969123,6.92820323,0,0,0,0,0
22.979614,7.54983444,0,0,0,0,0
22.990106,7.34846923,0,0,0,0,0
23.000598,7.34846923,0,0,0,0,0
23.011089,7.21110255,0,0,0,0,0
23.021581,7.81024968,0,0,0,0,0
23.032072,7.28010989,0,0,0,0,0
23.042564,7.54983444,0,0,0,0,0
23.053056,6.78232998,0,0,0,0,0
23.063547,7.07106781,0,0,0,0,0
23.074039,6.92820323,0,0,0,0,0
23.08453,6.32455532,0,0,0,0,0
23.095022,6.92820323,0,0,0,0,0
23.105514,8.42614977,0,0,0,0,0
23.116005,6.8556546,0,0,0,0,0
23.126497,6.63324958,0,0,0,0,0
23.136988,7.54983444,0,0,0,0,0
23.14748,6.4807407,0,0,0,0,0
23.157972,7.07106781,0,0,0,0,0
23.168463,7.68114575,0,0,0,0,0
23.178955,7.93725393,0,0,0,0,0
23.189446,7.28010989,0,0,0,0,0
23.199938,7.28010989,0,0,0,0,0
23.21043,6.92820323,0,0,0,0,0
23.220921,6.8556546,0,0,0,0,0
23.231413,7.21110255,0,0,0,0,0
23.241904,6.244998,0,0,0,0,0
23.252396,7.93725393,0,0,0,0,0
23.262888,7.41619849,0,0,0,0,0
23.273379,7.07106781,0,0,0,0,0
23.283871,7.81024968,0,0,0,0,0
23.294362,7.41619849,0,0,0,0,0
23.304854,8,0,0,0,0,0
23.315346,6.4807407,0,0,0,0,0
23.325837,7.68114575,0,0,0,0,0
23.336329,7.61577311,0,0,0,0,0
23.34682,6.32455532,0,0,0,0,0
23.357312,7.21110255,0,0,0,0,0
23.367804,7.07106781,0,0,0,0,0
23.378295,7.54983444,0,0,0,0,0
23.388787,6.63324958,0,0,0,0,0
23.399278,7.14142843,0,0,0,0,0
23.40977,7.28010989,0,0,0,0,0
23.420262,6.8556546,0,0,0,0,0
23.430753,6.78232998,0,0,0,0,0
23.441245,6.08276253,0,0,0,0,0
23.451736,7.48331477,0,0,0,0,0
23.462228,5.65685425,0,0,0,0,0
23.47272,7.34846923,0,0,0,0,0
23.483211,6.70820393,0,0,0,0,0
23.493703,6.8556546,0,0,0,0,0
23.504194,7.07106781,0,0,0,0,0
23.514686,7.07106781,0,0,0,0,0
23.525178,6,0,0,0,0,0
23.535669,6.70820393,0,0,0,0,0
23.546161,6.244998,0,0,0,0,0
23.556652,6.70820393,0,0,0,0,0
23.567144,6.92820323,0,0,0,0,0
23.577636,7.68114575,0,0,0,0,0
23.588127,7,0,0,0,0,0
23.598619,7,0,0,0,0,0
23.60911,6.4807407,0,0,0,0,0
23.619602,7.54983444,0,0,0,0,0
23.630094,6.78232998,0,0,0,0,0
23.640585,6.92820323,0,0,0,0,0
23.651077,7.07106781,0,0,0,0,0
23.661568,6.40312424,0,0,0,0,0
23.67206,6.8556546,0,0,0,0,0
23.682552,7.41619849,0,0,0,0,0
23.693043,6.244998,0,0,0,0,0
23.703535,7.48331477,0,0,0,0,0
23.714026,7,0,0,0,0,0
23.724518,6.32455532,0,0,0,0,0
23.73501,7.14142843,0,0,0,0,0
23.745501,6.40312424,0,0,0,0,0
23.755993,6.40312424,0,0,0,0,0
23.766484,6.40312424,0,0,0,0,0
23.776976,7.41619849,0,0,0,0,0
23.787468,7.14142843,0,0,0,0,0
23.797959,7.21110255,0,0,0,0,0
23.808451,6.40312424,0,0,0,0,0
23.818942,6.4807407,0,0,0,0,0
23.829434,7.21110255,0,0,0,0,0
23.839926,6.32455532,0,0,0,0,0
23.850417,6.92820323,0,0,0,0,0
23.860909,7.34846923,0,0,0,0,0
23.8714,7.41619849,0,0,0,0,0
23.881892,6.70820393,0,0,0,0,0
23.892384,7.28010989,0,0,0,0,0
23.902875,6.32455532,0,0,0,0,0
23.913367,7.07106781,0,0,0,0,0
23.923858,5.74456265,0,0,0,0,0
23.93435,6.63324958,0,0,0,0,0
23.944842,7.54983444,0,0,0,0,0
23.955333,7.21110255,0,0,0,0,0
23.965825,5.65685425,0,0,0,0,0
23.976316,7.14142843,0,0,0,0,0
23.986808,7.41619849,0,0,0,0,0
23.9973,7.68114575,0,0,0,0,0
24.007791,7.68114575,0,0,0,0,0
24.018283,7.41619849,0,0,0,0,0
24.028774,8,0,0,0,0,0
24.039266,7.48331477,0,0,0,0,0
24.049758,7.74596669,0,0,0,0,0
24.060249,6.8556546,0,0,0,0,0
24.070741,6.78232998,0,0,0,0,0
24.081232,5.74456265,0,0,0,0,0
24.091724,7.14142843,0,0,0,0,0
24.102216,7.21110255,0,0,0,0,0
24.112707,6.164414,0,0,0,0,0
24.123199,7.61577311,0,0,0,0,0
24.13369,6.70820393,0,0,0,0,0
24.144182,6.92820323,0,0,0,0,0
24.154674,6.55743852,0,0,0,0,0
24.165165,7,0,0,0,0,0
24.175657,6.92820323,0,0,0,0,0
24.186148,7.21110255,0,0,0,0,0
24.19664,7.93725393,0,0,0,0,0
24.207132,7.41619849,0,0,0,0,0
24.217623,6.63324958,0,0,0,0,0
24.228115,6,0,0,0,0,0
24.238606,7.74596669,0,0,0,0,0
24.249098,6.4807407,0,0,0,0,0
24.25959,7.34846923,0,0,0,0,0
24.270081,6.78232998,0,0,0,0,0
24.280573,6.164414,0,0,0,0,0
24.291064,7.21110255,0,0,0,0,0
24.301556,6.40312424,0,0,0,0,0
24.312048,7.07106781,0,0,0,0,0
24.322539,6.164414,0,0,0,0,0
24.333031,7.48331477,0,0,0,0,0
24.343522,7.14142843,0,0,0,0,0
24.354014,8.06225775,0,0,0,0,0
24.364506,6.55743852,0,0,0,0,0
24.374997,6.32455532,0,0,0,0,0
24.385489,6.63324958,0,0,0,0,0
24.39598,6,0,0,0,0,0
24.406472,8.24621125,0,0,0,0,0
24.416964,6.78232998,0,0,0,0,0
24.427455,6.63324958,0,0,0,0,0
24.437947,7.68114575,0,0,0,0,0
24.448438,7.34846923,0,0,0,0,0
24.45893,7.21110255,0,0,0,0,0
24.469422,6.55743852,0,0,0,0,0
24.479913,7.34846923,0,0,0,0,0
24.490405,8.1240384,0,0,0,0,0
24.500896,7.41619849,0,0,0,0,0
24.511388,6.55743852,0,0,0,0,0
24.52188,6.8556546,0,0,0,0,0
24.532371,6.8556546,0,0,0,0,0
24.542863,6.92820323,0,0,0,0,0
24.553354,7.21110255,0,0,0,0,0
24.563846,5.47722558,0,0,0,0,0
24.574338,5.91607978,0,0,0,0,0
24.584829,6.55743852,0,0,0,0,0
24.595321,5.83095189,0,0,0,0,0
24.605812,6.55743852,0,0,0,0,0
24.616304,6.32455532,0,0,0,0,0
24.626796,6.63324958,0,0,0,0,0
24.637287,6.4807407,0,0,0,0,0
24.647779,7.28010989,0,0,0,0,0
24.65827,6.55743852,0,0,0,0,0
24.668762,6.63324958,0,0,0,0,0
24.679254,6.08276253,0,0,0,0,0
24.689745,6.8556546,0,0,0,0,0
24.700237,7.21110255,0,0,0,0,0
24.710728,7.34846923,0,0,0,0,0
24.72122,6.78232998,0,0,0,0,0
24.731712,6.40312424,0,0,0,0,0
24.742203,7,0,0,0,0,0
24.752695,6.164414,0,0,0,0,0
24.763186,7.48331477,0,0,0,0,0
24.773678,6.70820393,0,0,0,0,0
24.78417,6.92820323,0,0,0,0,0
24.794661,7.28010989,0,0,0,0,0
24.805153,6.55743852,0,0,0,0,0
24.815644,6.08276253,0,0,0,0,0
24.826136,7.54983444,0,0,0,0,0
24.836628,6.92820323,0,0,0,0,0
24.847119,6.63324958,0,0,0,0,0
24.857611,6.92820323,0,0,0,0,0
24.868102,5.83095189,0,0,0,0,0
24.878594,6.244998,0,0,0,0,0
24.889086,6.244998,0,0,0,0,0
24.899577,6.164414,0,0,0,0,0
24.910069,6.8556546,0,0,0,0,0
24.92056,6.244998,0,0,0,0,0
24.931052,5.65685425,0,0,0,0,0
24.941544,7,0,0,0,0,0
24.952035,6,0,0,0,0,0
24.962527,6.78232998,0,0,0,0,0
24.973018,6.78232998,0,0,0,0,0
24.98351,7.07106781,0,0,0,0,0
24.994002,6.70820393,0,0,0,0,0
25.004493,6.8556546,0,0,0,0,0
25.014985,7.07106781,0,0,0,0,0
25.025476,6.63324958,0,0,0,0,0
25.035968,6.92820323,0,0,0,0,0
25.04646,6.63324958,0,0,0,0,0
25.056951,6.164414,0,0,0,0,0
25.067443,7.07106781,0,0,0,0,0
25.077934,6.78232998,0,0,0,0,0
25.088426,6.70820393,0,0,0,0,0
25.098918,6.92820323,0,0,0,0,0
25.109409,7.48331477,0,0,0,0,0
25.119901,5.91607978,0,0,0,0,0
25.130392,6.32455532,0,0,0,0,0
25.140884,6.4807407,0,0,0,0,0
25.151376,6.70820393,0,0,0,0,0
25.161867,6.55743852,0,0,0,0,0
25.172359,6.244998,0,0,0,0,0
25.18285,6.244998,0,0,0,0,0
25.193342,5.65685425,0,0,0,0,0
25.203834,7.61577311,0,0,0,0,0
25.214325,6.78232998,0,0,0,0,0
25.224817,6.4807407,0,0,0,0,0
25.235308,6.244998,0,0,0,0,0
25.2458,6.63324958,0,0,0,0,0
25.256292,6.92820323,0,0,0,0,0
25.266783,6.40312424,0,0,0,0,0
25.277275,6.92820323,0,0,0,0,0
25.287766,7.14142843,0,0,0,0,0
25.298258,5.83095189,0,0,0,0,0
25.30875,6.4807407,0,0,0,0,0
25.319241,6.92820323,0,0,0,0,0
25.329733,6.40312424,0,0,0,0,0
25.340224,6.70820393,0,0,0,0,0
25.350716,6.55743852,0,0,0,0,0
25.361208,6.08276253,0,0,0,0,0
25.371699,7.28010989,0,0,0,0,0
25.382191,7.68114575,0,0,0,0,0
25.392682,6.78232998,0,0,0,0,0
25.403174,5.91607978,0,0,0,0,0
25.413666,7.48331477,0,0,0,0,0
25.424157,6.70820393,0,0,0,0,0
25.434649,6.63324958,0,0,0,0,0
25.44514,7,0,0,0,0,0
25.455632,6.63324958,0,0,0,0,0
25.466124,6.63324958,0,0,0,0,0
25.476615,7.14142843,0,0,0,0,0
25.487107,6.78232998,0,0,0,0,0
25.497598,6.4807407,0,0,0,0,0
25.50809,6.92820323,0,0,0,0,0
25.518582,5.83095189,0,0,0,0,0
25.529073,7.21110255,0,0,0,0,0
25.539565,6.78232998,0,0,0,0,0
25.550056,6.8556546,0,0,0,0,0
25.560548,7.14142843,0,0,0,0,0
25.57104,6.55743852,0,0,0,0,0
25.581531,7.14142843,0,0,0,0,0
25.592023,6.92820323,0,0,0,0,0
25.602514,6.63324958,0,0,0,0,0
25.613006,5.91607978,0,0,0,0,0
25.623498,6.4807407,0,0,0,0,0
25.633989,7,0,0,0,0,0
25.644481,7,0,0,0,0,0
25.654972,6.244998,0,0,0,0,0
25.665464,6.32455532,0,0,0,0,0
25.675956,7.07106781,0,0,0,0,0
25.686447,7.48331477,0,0,0,0,0
25.696939,6.40312424,0,0,0,0,0
25.70743,7,0,0,0,0,0
25.717922,7.34846923,0,0,0,0,0
25.728414,5.91607978,0,0,0,0,0
25.738905,6.40312424,0,0,0,0,0
25.749397,6.32455532,0,0,0,0,0
25.759888,6.63324958,0,0,0,0,0
25.77038,5.91607978,0,0,0,0,0
25.780872,6.8556546,0,0,0,0,0
25.791363,6.4807407,0,0,0,0,0
25.801855,7,0,0,0,0,0
25.812346,6.32455532,0,0,0,0,0
25.822838,6.70820393,0,0,0,0,0
25.83333,7.34846923,0,0,0,0,0
25.843821,7.21110255,0,0,0,0,0
25.854313,5.65685425,0,0,0,0,0
25.864804,6.32455532,0,0,0,0,0
25.875296,6.8556546,0,0,0,0,0
25.885788,6.8556546,0,0,0,0,0
25.896279,6.8556546,0,0,0,0,0
25.906771,7.21110255,0,0,0,0,0
25.917262,5.19615242,0,0,0,0,0
25.927754,7.61577311,0,0,0,0,0
25.938246,6.92820323,0,0,0,0,0
25.948737,7,0,0,0,0,0
25.959229,7.14142843,0,0,0,0,0
25.96972,7.48331477,0,0,0,0,0
25.980212,6.40312424,0,0,0,0,0
25.990704,6.63324958,0,0,0,0,0
26.001195,5.38516481,0,0,0,0,0
26.011687,5.83095189,0,0,0,0,0
26.022178,6.92820323,0,0,0,0,0
26.03267,7.54983444,0,0,0,0,0
26.043162,6.244998,0,0,0,0,0
26.053653,6.63324958,0,0,0,0,0
26.064145,6.78232998,0,0,0,0,0
26.074636,6.8556546,0,0,0,0,0
26.085128,6.8556546,0,0,0,0,0
26.09562,7.34846923,0,0,0,0,0
26.106111,5.74456265,0,0,0,0,0
26.116603,7.21110255,0,0,0,0,0
26.127094,6.78232998,0,0,0,0,0
26.137586,6.32455532,0,0,0,0,0
26.148078,5.65685425,0,0,0,0,0
26.158569,6.244998,0,0,0,0,0
26.169061,6.244998,0,0,0,0,0
26.179552,6.70820393,0,0,0,0,0
26.190044,6.40312424,0,0,0,0,0
26.200536,5,0,0,0,0,0
26.211027,5.74456265,0,0,0,0,0
26.221519,6.63324958,0,0,0,0,0
26.23201,6.40312424,0,0,0,0,0
26.242502,5.74456265,0,0,0,0,0
26.252994,6.70820393,0,0,0,0,0
26.263485,6.244998,0,0,0,0,0
26.273977,6.164414,0,0,0,0,0
26.284468,6.63324958,0,0,0,0,0
26.29496,7.14142843,0,0,0,0,0
26.305452,6.4807407,0,0,0,0,0
26.315943,6.40312424,0,0,0,0,0
26.326435,5.74456265,0,0,0,0,0
26.336926,6.4807407,0,0,0,0,0
26.347418,6,0,0,0,0,0
26.35791,7.07106781,0,0,0,0,0
26.368401,7.21110255,0,0,0,0,0
26.378893,7.07106781,0,0,0,0,0
26.389384,6.4807407,0,0,0,0,0
26.399876,7.07106781,0,0,0,0,0
26.410368,5.91607978,0,0,0,0,0
26.420859,5.74456265,0,0,0,0,0
26.431351,5.09901951,0,0,0,0,0
26.441842,6.55743852,0,0,0,0,0
26.452334,6.63324958,0,0,0,0,0
26.462826,5.47722558,0,0,0,0,0
26.473317,6.40312424,0,0,0,0,0
26.483809,7,0,0,0,0,0
26.4943,7,0,0,0,0,0
26.504792,7.07106781,0,0,0,0,0
26.515284,6.70820393,0,0,0,0,0
26.525775,6.32455532,0,0,0,0,0
26.536267,6.4807407,0,0,0,0,0
26.546758,6.55743852,0,0,0,0,0
26.55725,5.83095189,0,0,0,0,0
26.567742,6.70820393,0,0,0,0,0
26.578233,5.56776436,0,0,0,0,0
26.588725,6.8556546,0,0,0,0,0
26.599216,6.4807407,0,0,0,0,0
26.609708,6.78232998,0,0,0,0,0
26.6202,6.8556546,0,0,0,0,0
26.630691,6,0,0,0,0,0
26.641183,6.08276253,0,0,0,0,0
26.651674,6.244998,0,0,0,0,0
26.662166,5.19615242,0,0,0,0,0
26.672658,6.32455532,0,0,0,0,0
26.683149,5.91607978,0,0,0,0,0
26.693641,6.4807407,0,0,0,0,0
26.704132,6.40312424,0,0,0,0,0
26.714624,6.08276253,0,0,0,0,0
26.725116,7,0,0,0,0,0
26.735607,6.70820393,0,0,0,0,0
26.746099,7.07106781,0,0,0,0,0
26.75659,7,0,0,0,0,0
26.767082,6.55743852,0,0,0,0,0
26.777574,5.83095189,0,0,0,0,0
26.788065,6.4807407,0,0,0,0,0
26.798557,6.08276253,0,0,0,0,0
26.809048,6.08276253,0,0,0,0,0
26.81954,7,0,0,0,0,0
26.830032,6.92820323,0,0,0,0,0
26.840523,6.08276253,0,0,0,0,0
26.851015,6.78232998,0,0,0,0,0
26.861506,7,0,0,0,0,0
26.871998,6.92820323,0,0,0,0,0
26.88249,6.32455532,0,0,0,0,0
26.892981,6.244998,0,0,0,0,0
26.903473,6.70820393,0,0,0,0,0
26.913964,6.40312424,0,0,0,0,0
26.924456,6.55743852,0,0,0,0,0
26.934948,6.244998,0,0,0,0,0
26.945439,7.28010989,0,0,0,0,0
26.955931,6.32455532,0,0,0,0,0
26.966422,6.32455532,0,0,0,0,0
26.976914,6.92820323,0,0,0,0,0
26.987406,6.92820323,0,0,0,0,0
26.997897,6.70820393,0,0,0,0,0
27.008389,6.164414,0,0,0,0,0
27.01888,6.40312424,0,0,0,0,0
27.029372,6.8556546,0,0,0,0,0
27.039864,6.8556546,0,0,0,0,0
27.050355,6.32455532,0,0,0,0,0
27.060847,6.63324958,0,0,0,0,0
27.071338,6.8556546,0,0,0,0,0
27.08183,6.63324958,0,0,0,0,0
27.092322,5.56776436,0,0,0,0,0
27.102813,5.56776436,0,0,0,0,0
27.113305,7.14142843,0,0,0,0,0
27.123796,5.83095189,0,0,0,0,0
27.134288,6,0,0,0,0,0
27.14478,6.08276253,0,0,0,0,0
27.155271,6.63324958,0,0,0,0,0
27.165763,6.4807407,0,0,0,0,0
27.176254,7.07106781,0,0,0,0,0
27.186746,6.8556546,0,0,0,0,0
27.197238,6.4807407,0,0,0,0,0
27.207729,5.83095189,0,0,0,0,0
27.218221,7.68114575,0,0,0,0,0
27.228712,7.54983444,0,0,0,0,0
27.239204,6.40312424,0,0,0,0,0
27.249696,6.55743852,0,0,0,0,0
27.260187,6.70820393,0,0,0,0,0
27.270679,7.54983444,0,0,0,0,0
27.28117,7.61577311,0,0,0,0,0
27.291662,7.61577311,0,0,0,0,0
27.302154,7,0,0,0,0,0
27.312645,6.32455532,0,0,0,0,0
27.323137,6.55743852,0,0,0,0,0
27.333628,7.54983444,0,0,0,0,0
27.34412,6.92820323,0,0,0,0,0
27.354612,7.28010989,0,0,0,0,0
27.365103,5.91607978,0,0,0,0,0
27.375595,7.14142843,0,0,0,0,0
27.386086,6.78232998,0,0,0,0,0
27.396578,6.40312424,0,0,0,0,0
27.40707,6.92820323,0,0,0,0,0
27.417561,6.4807407,0,0,0,0,0
27.428053,5.56776436,0,0,0,0,0
27.438544,6.244998,0,0,0,0,0
27.449036,7,0,0,0,0,0
27.459528,6.08276253,0,0,0,0,0
27.470019,7.07106781,0,0,0,0,0
27.480511,6,0,0,0,0,0
27.491002,6.63324958,0,0,0,0,0
27.501494,6.244998,0,0,0,0,0
27.511986,5.19615242,0,0,0,0,0
27.522477,6.40312424,0,0,0,0,0
27.532969,6.40312424,0,0,0,0,0
27.54346,6.55743852,0,0,0,0,0
27.553952,6.8556546,0,0,0,0,0
27.564444,5.09901951,0,0,0,0,0
27.574935,5.74456265,0,0,0,0,0
27.585427,7,0,0,0,0,0
27.595918,6,0,0,0,0,0
27.60641,6.32455532,0,0,0,0,0
27.616902,5.29150262,0,0,0,0,0
27.627393,5.56776436,0,0,0,0,0
27.637885,6.70820393,0,0,0,0,0
27.648376,6.70820393,0,0,0,0,0
27.658868,7.07106781,0,0,0,0,0
27.66936,7.28010989,0,0,0,0,0
27.679851,6.08276253,0,0,0,0,0
27.690343,6.40312424,0,0,0,0,0
27.700834,6.4807407,0,0,0,0,0
27.711326,7.21110255,0,0,0,0,0
27.721818,6.4807407,0,0,0,0,0
27.732309,6.08276253,0,0,0,0,0
27.742801,7.21110255,0,0,0,0,0
27.753292,6,0,0,0,0,0
27.763784,6,0,0,0,0,0
27.774276,6.32455532,0,0,0,0,0
27.784767,6.4807407,0,0,0,0,0
27.795259,6.63324958,0,0,0,0,0
27.80575,5.91607978,0,0,0,0,0
27.816242,6.164414,0,0,0,0,0
27.826734,6.92820323,0,0,0,0,0
27.837225,6.63324958,0,0,0,0,0
27.847717,6.40312424,0,0,0,0,0
27.858208,7.41619849,0,0,0,0,0
27.8687,7.07106781,0,0,0,0,0
27.879192,7.07106781,0,0,0,0,0
27.889683,6.63324958,0,0,0,0,0
27.900175,5.56776436,0,0,0,0,0
27.910666,6.78232998,0,0,0,0,0
27.921158,7,0,0,0,0,0
27.93165,6.4807407,0,0,0,0,0
27.942141,5.29150262,0,0,0,0,0
27.952633,6.164414,0,0,0,0,0
27.963124,5.91607978,0,0,0,0,0
27.973616,5.09901951,0,0,0,0,0
27.984108,6.244998,0,0,0,0,0
27.994599,5.83095189,0,0,0,0,0
28.005091,5.91607978,0,0,0,0,0
28.015582,7.14142843,0,0,0,0,0
28.026074,6.78232998,0,0,0,0,0
28.036566,6.4807407,0,0,0,0,0
28.047057,6.164414,0,0,0,0,0
28.057549,6.4807407,0,0,0,0,0
28.06804,6.40312424,0,0,0,0,0
28.078532,5.74456265,0,0,0,0,0
28.089024,6.70820393,0,0,0,0,0
28.099515,6,0,0,0,0,0
28.110007,7.07106781,0,0,0,0,0
28.120498,6.55743852,0,0,0,0,0
28.13099,7,0,0,0,0,0
28.141482,6.8556546,0,0,0,0,0
28.151973,6.63324958,0,0,0,0,0
28.162465,6.78232998,0,0,0,0,0
28.172956,5.91607978,0,0,0,0,0
28.183448,6.78232998,0,0,0,0,0
28.19394,6.164414,0,0,0,0,0
28.204431,6.4807407,0,0,0,0,0
28.214923,6.244998,0,0,0,0,0
28.225414,5.65685425,0,0,0,0,0
28.235906,6.08276253,0,0,0,0,0
28.246398,7.07106781,0,0,0,0,0
28.256889,6.78232998,0,0,0,0,0
28.267381,6.40312424,0,0,0,0,0
28.277872,6.63324958,0,0,0,0,0
28.288364,5.91607978,0,0,0,0,0
28.298856,6.32455532,0,0,0,0,0
28.309347,6.40312424,0,0,0,0,0
28.319839,6.244998,0,0,0,0,0
28.33033,5.91607978,0,0,0,0,0
28.340822,6.78232998,0,0,0,0,0
28.351314,6.55743852,0,0,0,0,0
28.361805,7,0,0,0,0,0
28.372297,5.65685425,0,0,0,0,0
28.382788,7.07106781,0,0,0,0,0
28.39328,6.40312424,0,0,0,0,0
28.403772,5.38516481,0,0,0,0,0
28.414263,6.32455532,0,0,0,0,0
28.424755,6.70820393,0,0,0,0,0
28.435246,6.70820393,0,0,0,0,0
28.445738,6.32455532,0,0,0,0,0
28.45623,6.08276253,0,0,0,0,0
28.466721,5.56776436,0,0,0,0,0
28.477213,6.40312424,0,0,0,0,0
28.487704,6.32455532,0,0,0,0,0
28.498196,6.32455532,0,0,0,0,0
28.508688,5.83095189,0,0,0,0,0
28.519179,7,0,0,0,0,0
28.529671,6.164414,0,0,0,0,0
28.540162,7.07106781,0,0,0,0,0
28.550654,6.8556546,0,0,0,0,0
28.561146,6.8556546,0,0,0,0,0
28.571637,7.14142843,0,0,0,0,0
28.582129,6.164414,0,0,0,0,0
28.59262,6.4807407,0,0,0,0,0
28.603112,5.47722558,0,0,0,0,0
28.613604,6.4807407,0,0,0,0,0
28.624095,7.34846923,0,0,0,0,0
28.634587,6.164414,0,0,0,0,0
28.645078,6.70820393,0,0,0,0,0
28.65557,6.08276253,0,0,0,0,0
28.666062,6.92820323,0,0,0,0,0
28.676553,6.32455532,0,0,0,0,0
28.687045,6.8556546,0,0,0,0,0
28.697536,5.65685425,0,0,0,0,0
28.708028,6.08276253,0,0,0,0,0
28.71852,7.14142843,0,0,0,0,0
28.729011,6.40312424,0,0,0,0,0
28.739503,6.70820393,0,0,0,0,0
28.749994,6.70820393,0,0,0,0,0
28.760486,6.32455532,0,0,0,0,0
28.770978,6.32455532,0,0,0,0,0
28.781469,6.55743852,0,0,0,0,0
28.791961,6.40312424,0,0,0,0,0
28.802452,6.164414,0,0,0,0,0
28.812944,6.244998,0,0,0,0,0
28.823436,6.244998,0,0,0,0,0
28.833927,6.164414,0,0,0,0,0
28.844419,6.63324958,0,0,0,0,0
28.85491,6.55743852,0,0,0,0,0
28.865402,6.55743852,0,0,0,0,0
28.875894,6.78232998,0,0,0,0,0
28.886385,6.164414,0,0,0,0,0
28.896877,5.83095189,0,0,0,0,0
28.907368,5.47722558,0,0,0,0,0
28.91786,6.63324958,0,0,0,0,0
28.928352,5.74456265,0,0,0,0,0
28.938843,6.08276253,0,0,0,0,0
28.949335,6.55743852,0,0,0,0,0
28.959826,6.63324958,0,0,0,0,0
28.970318,6.40312424,0,0,0,0,0
28.98081,6.32455532,0,0,0,0,0
28.991301,6.164414,0,0,0,0,0
29.001793,6.55743852,0,0,0,0,0
29.012284,5.74456265,0,0,0,0,0
29.022776,6.08276253,0,0,0,0,0
29.033268,6.4807407,0,0,0,0,0
29.043759,6.08276253,0,0,0,0,0
29.054251,6.78232998,0,0,0,0,0
29.064742,6.55743852,0,0,0,0,0
29.075234,6.4807407,0,0,0,0,0
29.085726,5.91607978,0,0,0,0,0
29.096217,6.4807407,0,0,0,0,0
29.106709,6.4807407,0,0,0,0,0
29.1172,5.38516481,0,0,0,0,0
29.127692,6.8556546,0,0,0,0,0
29.138184,6.8556546,0,0,0,0,0
29.148675,4.79583152,0,0,0,0,0
29.159167,7.14142843,0,0,0,0,0
29.169658,6.4807407,0,0,0,0,0
29.18015,6.8556546,0,0,0,0,0
29.190642,7.54983444,0,0,0,0,0
29.201133,6.63324958,0,0,0,0,0
29.211625,6.08276253,0,0,0,0,0
29.222116,5.65685425,0,0,0,0,0
29.232608,5.65685425,0,0,0,0,0
29.2431,6.32455532,0,0,0,0,0
29.253591,6.244998,0,0,0,0,0
29.264083,6.08276253,0,0,0,0,0
29.274574,7.34846923,0,0,0,0,0
29.285066,6.164414,0,0,0,0,0
29.295558,6.70820393,0,0,0,0,0
29.306049,5.65685425,0,0,0,0,0
29.316541,6.40312424,0,0,0,0,0
29.327032,6.55743852,0,0,0,0,0
29.337524,6.32455532,0,0,0,0,0
29.348016,6.164414,0,0,0,0,0
29.358507,6.164414,0,0,0,0,0
29.368999,6.55743852,0,0,0,0,0
29.37949,6.40312424,0,0,0,0,0
29.389982,6.40312424,0,0,0,0,0
29.400474,5.56776436,0,0,0,0,0
29.410965,6.244998,0,0,0,0,0
29.421457,7.21110255,0,0,0,0,0
29.431948,5.56776436,0,0,0,0,0
29.44244,6.08276253,0,0,0,0,0
29.452932,6.164414,0,0,0,0,0
29.463423,6.32455532,0,0,0,0,0
29.473915,6.63324958,0,0,0,0,0
29.484406,6.164414,0,0,0,0,0
29.494898,7,0,0,0,0,0
29.50539,5.74456265,0,0,0,0,0
29.515881,6.4807407,0,0,0,0,0
29.526373,6.92820323,0,0,0,0,0
29.536864,6,0,0,0,0,0
29.547356,6.70820393,0,0,0,0,0
29.557848,6.78232998,0,0,0,0,0
29.568339,5.65685425,0,0,0,0,0
29.578831,6.32455532,0,0,0,0,0
29.589322,6.32455532,0,0,0,0,0
29.599814,6.164414,0,0,0,0,0
29.610306,6.32455532,0,0,0,0,0
29.620797,5.83095189,0,0,0,0,0
29.631289,6.92820323,0,0,0,0,0
29.64178,6.4807407,0,0,0,0,0
29.652272,5.83095189,0,0,0,0,0
29.662764,6.164414,0,0,0,0,0
29.673255,7,0,0,0,0,0
29.683747,5.83095189,0,0,0,0,0
29.694238,6.08276253,0,0,0,0,0
29.70473,7.54983444,0,0,0,0,0
29.715222,5.91607978,0,0,0,0,0
29.725713,7.61577311,0,0,0,0,0
29.736205,6.55743852,0,0,0,0,0
29.746696,6.63324958,0,0,0,0,0
29.757188,6.63324958,0,0,0,0,0
29.76768,5.47722558,0,0,0,0,0
29.778171,5.83095189,0,0,0,0,0
29.788663,5.83095189,0,0,0,0,0
29.799154,6.70820393,0,0,0,0,0
29.809646,5.65685425,0,0,0,0,0
29.820138,6.63324958,0,0,0,0,0
29.830629,7,0,0,0,0,0
29.841121,7.28010989,0,0,0,0,0
29.851612,7.14142843,0,0,0,0,0
29.862104,5.74456265,0,0,0,0,0
29.872596,6.4807407,0,0,0,0,0
29.883087,6.40312424,0,0,0,0,0
29.893579,6.78232998,0,0,0,0,0
29.90407,6.78232998,0,0,0,0,0
29.914562,5.65685425,0,0,0,0,0
29.925054,6.70820393,0,0,0,0,0
29.935545,6.78232998,0,0,0,0,0
29.946037,6.78232998,0,0,0,0,0
29.956528,6.40312424,0,0,0,0,0
29.96702,7,0,0,0,0,0
29.977512,6.70820393,0,0,0,0,0
29.988003,7.07106781,0,0,0,0,0
29.998495,6.4807407,6.26451454,0.465001251,6.26374915,6.26410593,6.2633405
30.008986,6.55743852,6.26867115,0.537370802,6.26790545,6.26826247,6.26749672
30.019478,5.29150262,6.27279933,-0.990604215,6.27203331,6.27239058,6.27162451
30.02997,6.164414,6.27689884,-0.335387592,6.27613249,6.27649,6.27572361
30.040461,6.164414,6.28096942,-0.341402131,6.28020274,6.2805605,6.27979377
30.050953,7,6.28501198,0.845569641,6.28424497,6.28460298,6.28383592
30.061444,6,6.2890259,-0.537611287,6.28825854,6.28861681,6.2878494
30.071936,5.56776436,6.29301206,-0.85161476,6.29224437,6.29260288,6.29183514
30.082428,6.40312424,6.29697023,0.325812841,6.29620219,6.29656096,6.29579286
30.092919,6.40312424,6.30090016,0.319724999,6.30013176,6.3004908,6.29972235
30.103411,7.21110255,6.30480274,0.9519978,6.30403398,6.30439328,6.30362447
30.113902,6.92820323,6.30867735,0.787099662,6.30790823,6.30826779,6.30749863
30.124394,7.48331477,6.31252487,1.08203046,6.31175538,6.31211521,6.31134567
30.134886,5.56776436,6.31634505,-0.865205572,6.31557519,6.31593528,6.31516538
30.145377,6.244998,6.32013766,-0.27411614,6.31936743,6.31972779,6.31895751
30.155869,6.55743852,6.32390355,0.483254562,6.32313294,6.32349358,6.32272292
30.16636,7,6.32764214,0.819974303,6.32687115,6.32723206,6.32646102
30.176852,7.34846923,6.33135427,1.00852118,6.33058289,6.33094408,6.33017264
30.187344,6.4807407,6.33503969,0.381708009,6.33426792,6.33462939,6.33385757
30.197835,6.55743852,6.3386982,0.467696828,6.33792603,6.33828778,6.33751556
30.208327,5.83095189,6.34233061,-0.715107486,6.34155804,6.34192008,6.34114745
30.218818,6.55743852,6.34593635,0.45989365,6.34516338,6.3455257,6.34475267
30.22931,6.40312424,6.34951624,0.231534004,6.34874286,6.34910547,6.34833203
30.239802,6.70820393,6.35307005,0.595931105,6.35229625,6.35265915,6.3518853
30.250293,6.40312424,6.35659757,0.215700417,6.35582335,6.35618654,6.35541227
30.260785,6,6.36009958,-0.600082982,6.35932494,6.35968843,6.35891374
30.271276,6.78232998,6.36357555,0.647112377,6.36280049,6.36316427,6.36238916
30.281768,5.56776436,6.36702626,-0.894014484,6.36625076,6.36661485,6.3658393
30.29226,6,6.37045148,-0.608647258,6.36967555,6.37003994,6.36926396
30.302751,6.08276253,6.37385103,-0.539526176,6.37307465,6.37343934,6.37266292
30.313243,7.28010989,6.37722565,0.950202212,6.37644883,6.37681383,6.37603696
30.323734,6.08276253,6.38057482,-0.545721805,6.37979756,6.38016286,6.37938555
30.334226,7.28010989,6.3838993,0.946683997,6.38312158,6.3834872,6.38270944
30.344718,5.74456265,6.38719888,-0.801645953,6.38642071,6.38678664,6.38600842
30.355209,6.32455532,6.39047337,-0.256745097,6.38969473,6.39006098,6.3892823
30.365701,5.74456265,6.39372349,-0.805705185,6.3929444,6.39331096,6.39253181
30.376192,7,6.39694875,0.776563743,6.39616919,6.39653607,6.39575646
30.386684,6,6.40014987,-0.632574007,6.39936984,6.39973704,6.39895696
30.397176,6.63324958,6.40332666,0.479502785,6.40254615,6.40291367,6.40213311
30.407667,7.41619849,6.40647892,1.00484803,6.40569793,6.40606578,6.40528474
30.418159,5.74456265,6.40960737,-0.815502741,6.40882589,6.40919407,6.40841254
30.42865,6.8556546,6.41271151,0.665539697,6.41192955,6.41229805,6.41151604
30.439142,6.40312424,6.41579206,-0.112551404,6.4150096,6.41537844,6.41459593
30.449634,6.40312424,6.41884881,-0.125397654,6.41806586,6.41843503,6.41765202
30.460125,6.63324958,6.42188159,0.459747745,6.42109814,6.42146765,6.42068414
30.470617,6.78232998,6.42489109,0.597861937,6.42410713,6.42447698,6.42369297
30.481108,7.28010989,6.42787683,0.923164699,6.42709236,6.42746255,6.42667803
30.4916,7,6.43083949,0.754427273,6.43005451,6.43042504,6.42964001
30.502092,5.56776436,6.43377889,-0.930599016,6.43299339,6.43336427,6.43257872
30.512583,7.14142843,6.43669486,0.839484109,6.43590884,6.43628006,6.435494
30.523075,7.07106781,6.43958805,0.794657008,6.43880151,6.43917308,6.43838649
30.533566,5.65685425,6.44245802,-0.88634292,6.44167095,6.44204287,6.44125575
30.544058,6.08276253,6.44530542,-0.602115345,6.44451782,6.44489009,6.44410244
30.55455,6.164414,6.44813007,-0.532650041,6.44734193,6.44771456,6.44692637
30.565041,6.244998,6.45093181,-0.453799305,6.45014313,6.45051612,6.44972739
30.575533,6.40312424,6.45371127,-0.224915611,6.45292204,6.45329539,6.45250612
30.586024,6.92820323,6.45646802,0.686829823,6.45567825,6.45605196,6.45526214
30.596516,6.55743852,6.4592027,0.313425952,6.45841237,6.45878645,6.45799607
30.607008,7.61577311,6.46191512,1.07417782,6.46112424,6.46149868,6.46070775
30.617499,6.92820323,6.46460514,0.680880376,6.4638137,6.46418851,6.46339702
30.627991,6.8556546,6.46727337,0.623202399,6.46648136,6.46685654,6.46606449
30.638482,5.65685425,6.46991939,-0.901701249,6.46912682,6.46950237,6.46870975
30.648974,7.54983444,6.47254381,1.03792612,6.47175066,6.47212659,6.47133339
30.659466,6.164414,6.47514646,-0.557433817,6.47435274,6.47472905,6.47393527
30.669957,6.244998,6.47772721,-0.482420157,6.47693291,6.47730959,6.47651524
30.680449,6.32455532,6.48028662,-0.394628058,6.47949174,6.4798688,6.47907387
30.69094,6.40312424,6.48282432,-0.282312039,6.48202885,6.4824063,6.48161078
30.701432,6,6.48534088,-0.696664111,6.48454482,6.48492265,6.48412654
30.711924,6.70820393,6.48783615,0.469433466,6.48703949,6.48741771,6.486621
30.722415,6.244998,6.49030999,-0.495289805,6.48951273,6.48989134,6.48909403
30.732907,6.32455532,6.49276296,-0.410131244,6.4919651,6.4923441,6.49154619
30.743398,6.55743852,6.49519468,0.249487161,6.49439621,6.49477561,6.49397709
30.75389,6.55743852,6.49760571,0.244607461,6.49680664,6.49718643,6.4963873
30.764382,6.63324958,6.49999592,0.365039264,6.49919622,6.49957641,6.49877667
30.774873,7.07106781,6.50236515,0.75412377,6.50156484,6.50194543,6.50114507
30.785365,6.32455532,6.50471396,-0.424450989,6.50391303,6.50429402,6.50349304
30.795856,6.4807407,6.50704199,-0.162176726,6.50624043,6.50662183,6.50582022
30.806348,7.14142843,6.50934976,0.79503375,6.50854758,6.50892938,6.50812714
30.81684,7.21110255,6.51163715,0.836340479,6.51083433,6.51121654,6.51041367
30.827331,6.70820393,6.51390403,0.440794624,6.51310057,6.51348319,6.51267968
30.837823,6.8556546,6.51615092,0.582669448,6.51534682,6.51572985,6.5149257
30.848314,6.40312424,6.51837746,-0.339489655,6.51757272,6.51795617,6.51715137
30.858806,6.63324958,6.52058419,0.33565666,6.51977879,6.52016266,6.51935721
30.869298,5.74456265,6.52277096,-0.882161161,6.52196491,6.5223492,6.5215431
30.879789,6.92820323,6.52493766,0.635031943,6.52413096,6.52451566,6.52370891
30.890281,5.65685425,6.52708479,-0.932861479,6.52627743,6.52666255,6.52585514
30.900772,5.29150262,6.52921202,-1.11252389,6.52840399,6.52878954,6.52798147
30.911264,7.28010989,6.53131984,0.865326558,6.53051114,6.53089712,6.53008838
30.921756,6.70820393,6.53340813,0.418085881,6.53259876,6.53298517,6.53217576
30.932247,6.4807407,6.53547678,-0.23395743,6.53466674,6.53505358,6.53424349
30.942739,6.244998,6.53752626,-0.54085882,6.53671554,6.53710282,6.53629205
30.95323,6.244998,6.53955627,-0.542732231,6.53874487,6.53913258,6.53832113
30.963722,5.83095189,6.54156728,-0.842980062,6.54075519,6.54114334,6.5403312
30.974214,6.08276253,6.54355917,-0.678820034,6.54274639,6.54313498,6.54232215
30.984705,7.28010989,6.54553183,0.857075291,6.54471836,6.54510739,6.54429387
30.995197,6.70820393,6.54748573,0.400896743,6.54667156,6.54706104,6.54624682
31.005688,6.32455532,6.54946507,-0.474246511,6.5486057,6.54904013,6.5481807
31.01618,7.54983444,6.55138131,0.999226264,6.55052123,6.5509561,6.55009597
31.026672,7.21110255,6.55327883,0.81106333,6.55241803,6.55285336,6.55199251
31.037163,6.92820323,6.55515753,0.610774673,6.55429601,6.55473181,6.55387024
31.047655,6.55743852,6.55701785,0.0205102758,6.55615562,6.55659187,6.55572958
31.058146,7.21110255,6.55885952,0.807615645,6.55799656,6.55843328,6.55757026
31.068638,6.63324958,6.56068296,0.269381916,6.55981927,6.56025645,6.55939271
31.07913,6.78232998,6.56248808,0.468873013,6.56162366,6.5620613,6.56119682
31.089621,6.40312424,6.56427478,-0.401435602,6.56340962,6.56384774,6.56298252
31.100113,7.28010989,6.56604348,0.845024503,6.56517757,6.56561616,6.5647502
31.110604,5.83095189,6.56779391,-0.858395025,6.56692726,6.56736633,6.56649962
31.121096,6.63324958,6.5695265,0.252434313,6.5686591,6.56909864,6.56823118
31.131588,5.91607978,6.57124114,-0.809420382,6.57037299,6.570813,6.5699448
31.142079,5.91607978,6.57293775,-0.810467744,6.57206884,6.57250934,6.57164037
31.152571,7.34846923,6.57461672,0.879688868,6.57374705,6.57418804,6.57331831
31.163062,7.21110255,6.57627782,0.79675889,6.57540739,6.57584886,6.57497837
31.173554,6.32455532,6.57792143,-0.503354857,6.57705023,6.57749219,6.57662093
31.184046,6.78232998,6.57954747,0.450313793,6.5786755,6.57911794,6.57824591
31.194537,6.8556546,6.58115586,0.523926278,6.58028311,6.58072604,6.57985324
31.205029,7.21110255,6.58274697,0.792688831,6.58187344,6.58231687,6.58144328
31.21552,6.78232998,6.58432058,0.444982479,6.58344626,6.58389019,6.58301582
31.226012,6.55743852,6.58587705,-0.168637272,6.58500195,6.58544638,6.58457122
31.236504,6.55743852,6.58741632,-0.173140969,6.58654042,6.58698536,6.5861094
31.246995,6.40312424,6.5889383,-0.431061555,6.58806161,6.58850705,6.5876303
31.257487,6.92820323,6.59044336,0.581171118,6.58956587,6.59001181,6.58913427
31.267978,6.164414,6.59193128,-0.653848055,6.59105299,6.59149944,6.59062109
31.27847,6.8556546,6.59340242,0.512105636,6.59252332,6.59297028,6.59209112
31.288962,6.70820393,6.5948567,0.336670811,6.59397679,6.59442426,6.59354429
31.299453,6.8556546,6.59629405,0.509274531,6.59541333,6.59586131,6.59498053
31.309945,5.91607978,6.59771483,-0.825611921,6.59683328,6.59728179,6.59640018
31.320436,5.91607978,6.59911882,-0.826461757,6.59823645,6.59868548,6.59780305
31.330928,7,6.60050636,0.632055089,6.59962317,6.60007272,6.59918947
31.34142,6.164414,6.6018774,-0.661410157,6.60099337,6.60144345,6.60055936
31.351911,6.244998,6.60323186,-0.598526408,6.602347,6.6027976,6.60191268
31.362403,5.74456265,6.60457007,-0.927365854,6.60368438,6.60413551,6.60324975
31.372894,7.68114575,6.60589185,1.0369445,6.60500531,6.60545698,6.60457038
31.383386,6.4807407,6.60719752,-0.355607677,6.60631013,6.60676233,6.60587488
31.393878,6.55743852,6.60848701,-0.225939115,6.60759877,6.6080515,6.60716321
31.404369,6,6.60976027,-0.780871479,6.60887118,6.60932445,6.6084353
31.414861,6.63324958,6.61101761,0.149103906,6.61012766,6.61058147,6.60969146
31.425352,7.14142843,6.61225885,0.72744043,6.61136804,6.6118224,6.61093153
31.435844,6.08276253,6.6134843,-0.728506535,6.61259263,6.61304753,6.61215579
31.446336,7.21110255,6.61469391,0.77227498,6.61380136,6.61425681,6.61336421
31.456827,7.54983444,6.61588762,0.96640924,6.6149942,6.6154502,6.61455672
31.467319,6.92820323,6.61706572,0.557797011,6.61617143,6.61662798,6.61573363
31.47781,6.55743852,6.61822807,-0.246555359,6.61733289,6.61779,6.61689477
31.488302,5.65685425,6.61937494,-0.981081387,6.61847888,6.61893654,6.61804042
31.498794,6.32455532,6.62050628,-0.544013749,6.61960933,6.62006755,6.61917055
31.509285,7.34846923,6.62162205,0.852553326,6.62072421,6.621183,6.6202851
31.519777,6,6.62272254,-0.789127707,6.6218238,6.62228315,6.62138435
31.530268,5.83095189,6.62380758,-0.890424443,6.62290794,6.62336786,6.62246816
31.54076,7.07106781,6.62487746,0.667974815,6.62397691,6.6244374,6.6235368
31.551252,6,6.62593212,-0.791158722,6.62503067,6.62549173,6.62459022
31.561743,6.78232998,6.62697154,0.394155355,6.62606917,6.62653081,6.62562838
31.572235,7,6.62799597,0.609921332,6.62709269,6.6275549,6.62665156
31.582726,6.40312424,6.62900528,-0.475269438,6.62810107,6.62856387,6.6276596
31.593218,5.65685425,6.62999972,-0.986481356,6.62909459,6.62955796,6.62865278
31.60371,6.8556546,6.63097925,0.473999315,6.6300732,6.63053715,6.62963104
31.614201,6.32455532,6.63194385,-0.554426306,6.63103686,6.63150141,6.63059436
31.624693,6.63324958,6.63289376,0.0188632537,6.63198584,6.63245097,6.63154299
31.635184,7.21110255,6.63382886,0.759785296,6.63291999,6.63338572,6.63247679
31.645676,6,6.63474938,-0.796711603,6.63383957,6.63430589,6.63339602
31.656168,7.21110255,6.6356553,0.758582398,6.63474454,6.63521146,6.63430064
31.666659,5.83095189,6.63654659,-0.897549269,6.63563488,6.63610239,6.63519063
31.677151,6.32455532,6.63742347,-0.559346184,6.63651081,6.63697893,6.6360662
31.687642,6.40312424,6.63828585,-0.484934652,6.63737223,6.63784095,6.63692727
31.698134,6.4807407,6.63913395,-0.397986493,6.63821936,6.63868868,6.63777404
31.708626,7.28010989,6.63996773,0.800088845,6.63905218,6.63952211,6.63860649
31.719117,6.63324958,6.64078718,-0.0868193504,6.63987066,6.6403412,6.63942461
31.729609,7.28010989,6.64159252,0.799072822,6.64067502,6.64114617,6.64022861
31.7401,7.07106781,6.64238364,0.654739777,6.64146516,6.64193693,6.64101839
31.750592,6.08276253,6.64316075,-0.748597504,6.64224129,6.64271368,6.64179416
31.761084,6.70820393,6.64392385,0.253535177,6.6430034,6.64347641,6.6425559
31.771575,7.14142843,6.6446729,0.704808859,6.64375146,6.64422509,6.64330359
31.782067,5.74456265,6.64540812,-0.949128795,6.64448568,6.64495994,6.64403744
31.792558,6.55743852,6.64612941,-0.297810147,6.64520597,6.64568086,6.64475736
31.80305,6.63324958,6.64683697,-0.11656496,6.64591253,6.64638805,6.64546355
31.813542,6.55743852,6.64753079,-0.300153736,6.64660534,6.64708149,6.64615598
31.824033,6.70820393,6.64821086,0.244934842,6.6472844,6.64776118,6.64683466
31.834525,6.32455532,6.64887735,-0.569492787,6.64794988,6.64842731,6.64749977
31.845016,6.55743852,6.64953021,-0.303466126,6.64860172,6.64907979,6.64815123
31.855508,6.244998,6.65016961,-0.636530922,6.6492401,6.64971881,6.64878923
31.866,6.78232998,6.65079554,0.362676771,6.649865,6.65034435,6.64941375
31.876491,7.87400787,6.651408,1.10571238,6.65047642,6.65095643,6.65002479
31.886983,6.4807407,6.65200716,-0.413843518,6.65107454,6.6515552,6.65062252
31.897474,6.40312424,6.65259295,-0.499468429,6.6516593,6.65214061,6.65120689
31.907966,6.32455532,6.65316555,-0.573245345,6.65223085,6.65271281,6.65177806
31.918458,6.40312424,6.65372494,-0.500600344,6.6527892,6.65327182,6.65233601
31.928949,6.70820393,6.65427114,0.232234349,6.65333434,6.65381763,6.65288077
31.939441,7.14142843,6.6548043,0.697584499,6.65386644,6.65435039,6.65341248
31.949932,7.41619849,6.65532436,0.87228099,6.65438545,6.65487006,6.65393109
31.960424,7.21110255,6.65583149,0.745165125,6.65489151,6.65537679,6.65443676
31.970916,7,6.65632568,0.586237429,6.65538463,6.65587059,6.65492948
31.981407,6.92820323,6.65680694,0.520957095,6.65586482,6.65635145,6.65540927
31.991899,7.14142843,6.65727541,0.695811053,6.65633221,6.65681952,6.65587626
32.00239,6.55743852,6.65773105,-0.316689958,6.65678678,6.65727477,6.65633043
32.012882,6.40312424,6.65817401,-0.505024531,6.65722866,6.65771732,6.6567719
32.023374,6.40312424,6.6586043,-0.505450351,6.65765785,6.6581472,6.65720069
32.033865,6.63324958,6.65902191,-0.16053762,6.65807437,6.65856441,6.6576168
32.044357,6.164414,6.65942698,-0.703571589,6.65847835,6.65896908,6.65802037
32.054848,7.28010989,6.65981949,0.787585167,6.65886976,6.65936118,6.65841137
32.06534,6.08276253,6.66019957,-0.759892779,6.65924872,6.65974084,6.65878993
32.075832,7.14142843,6.66056721,0.693441575,6.65961526,6.66010807,6.65915605
32.086323,6.70820393,6.66092244,0.21744307,6.65996938,6.66046289,6.65950976
32.096815,6,6.66126538,-0.813182257,6.6603112,6.66080542,6.65985117
32.107306,6.70820393,6.66159601,0.21588867,6.66064071,6.66113563,6.66018026
32.117798,6.244998,6.66191445,-0.645690677,6.66095801,6.66145365,6.66049715
32.12829,6.244998,6.6622207,-0.645927785,6.66126314,6.66175948,6.66080185
32.138781,7.07106781,6.6625148,0.63918152,6.6615561,6.66205316,6.66109439
32.149273,7,6.66279684,0.58069197,6.661837,6.66233478,6.66137487
32.159764,6.08276253,6.66306682,-0.761777058,6.66210584,6.66260433,6.66164329
32.170256,5.91607978,6.66332484,-0.864433372,6.66236271,6.66286193,6.66189973
32.180748,6.244998,6.66357092,-0.646972118,6.66260764,6.66310758,6.66214424
32.191239,6.70820393,6.66380509,0.210710327,6.66284066,6.66334133,6.66237682
32.201731,6.244998,6.66402744,-0.647324836,6.66306185,6.66356325,6.66259758
32.212222,6.8556546,6.66423798,0.437511855,6.66327122,6.66377335,6.66280653
32.222714,7.07106781,6.66443679,0.637676271,6.66346886,6.66397173,6.66300373
32.233206,6.70820393,6.66462389,0.208758329,6.66365479,6.6641584,6.66318923
32.243697,6.55743852,6.66479933,-0.327659588,6.66382905,6.6643334,6.66336306
32.254189,6.63324958,6.66496318,-0.178083114,6.66399172,6.66449681,6.66352528
32.26468,7.74596669,6.66511545,1.03963996,6.6641428,6.66464865,6.66367593
32.275172,7,6.66525622,0.578570462,6.66428238,6.66478898,6.66381507
32.285664,6.70820393,6.66538552,0.206926095,6.66441049,6.66491784,6.66394274
32.296155,6.70820393,6.66550339,0.206641086,6.66452717,6.66503527,6.66405897
32.306647,6,6.6656099,-0.815849189,6.66463247,6.66514133,6.66416383
32.317138,7.34846923,6.66570506,0.826295446,6.66472642,6.66523605,6.66425734
32.32763,7.68114575,6.66578895,1.00764914,6.6648091,6.66531949,6.66433957
32.338122,6.78232998,6.6658616,0.341274642,6.66488053,6.66539169,6.66441055
32.348613,5.47722558,6.66592305,-1.09027404,6.66494076,6.66545268,6.66447033
32.359105,6.92820323,6.66597335,0.512083859,6.66498984,6.66550253,6.66451895
32.369596,7.14142843,6.66601254,0.689504086,6.6650278,6.66554127,6.66455646
32.380088,6.55743852,6.66604068,-0.329548412,6.6650547,6.66556896,6.66458291
32.39058,6.78232998,6.6660578,0.340987073,6.66507058,6.66558562,6.66459833
32.401071,6.32455532,6.66606394,-0.584387392,6.66507549,6.6655913,6.66460278
32.411563,6,6.66605916,-0.816124476,6.66506946,6.66558606,6.66459629
32.422054,6.8556546,6.66604349,0.435443574,6.66505254,6.66556993,6.66457891
32.432546,7.41619849,6.66601699,0.866130188,6.66502477,6.66554296,6.66455068
32.443038,6.32455532,6.66597968,-0.584315289,6.66498621,6.66550519,6.66451165
32.453529,6.40312424,6.66593162,-0.512647425,6.66493688,6.66545667,6.66446186
32.464021,7.68114575,6.66587285,1.00760751,6.66487684,6.66539743,6.66440135
32.474512,6.4807407,6.66580341,-0.430189159,6.66480613,6.66532752,6.66433017
32.485004,6.40312424,6.66572334,-0.512444247,6.66472479,6.66524698,6.66424836
32.495496,7.28010989,6.66563269,0.783885959,6.66463285,6.66515586,6.66415595
32.505987,6.63324958,6.66553151,-0.179671727,6.66453038,6.66505421,6.66405301
32.516479,7,6.66541982,0.578429062,6.6644174,6.66494204,6.66393955
32.52697,7.21110255,6.66529769,0.738786076,6.66429397,6.66481943,6.66381564
32.537462,7.07106781,6.66516512,0.637104926,6.66416011,6.66468639,6.6636813
32.547954,6.8556546,6.66502219,0.436614715,6.66401587,6.66454298,6.66353659
32.558445,7.07106781,6.66486894,0.637337328,6.66386131,6.66438925,6.66338155
32.568937,6.40312424,6.66470539,-0.511450048,6.66369644,6.66422521,6.6632162
32.579428,6.8556546,6.6645316,0.437176162,6.66352134,6.66405095,6.66304061
32.58992,6.55743852,6.6643476,-0.326969527,6.66333601,6.66386645,6.66285479
32.600412,7.28010989,6.66415342,0.784828942,6.6631405,6.66367179,6.6626588
32.610903,7.14142843,6.66394914,0.69099876,6.66293489,6.66346702,6.6624527
32.621395,6.70820393,6.66373476,0.210877152,6.66271917,6.66325215,6.66223649
32.631886,7,6.66351035,0.580077276,6.66249342,6.66302725,6.66201025
32.642378,6.70820393,6.66327592,0.211962281,6.66225765,6.66279233,6.66177398
32.65287,7.41619849,6.66303153,0.867851921,6.6620119,6.66254744,6.66152774
32.663361,6.78232998,6.66277724,0.345764001,6.66175625,6.66229265,6.66127159
32.673853,6.92820323,6.66251304,0.515451443,6.66149069,6.66202796,6.66100554
32.684344,6.164414,6.66223902,-0.705567163,6.66121531,6.66175344,6.66072966
32.694836,6.55743852,6.66195518,-0.323290356,6.6609301,6.6614691,6.66044394
32.705328,5.56776436,6.66166157,-1.04589541,6.66063511,6.66117498,6.66014845
32.715819,6.92820323,6.66135826,0.516570389,6.66033042,6.66087118,6.65984326
32.726311,6.244998,6.66104524,-0.645017244,6.66001602,6.66055765,6.65952835
32.736802,6.55743852,6.66072261,-0.321378412,6.65969199,6.66023451,6.65920382
32.747294,7.61577311,6.66039033,0.977436838,6.65935833,6.65990173,6.65886964
32.757786,7.14142843,6.66004849,0.693815492,6.65901508,6.65955937,6.65852589
32.768277,6.4807407,6.65969715,-0.42303245,6.65866234,6.65920752,6.65817264
32.778769,6.244998,6.65933629,-0.643691145,6.65830007,6.65884615,6.65780985
32.78926,6.8556546,6.65896601,0.443495878,6.65792837,6.65847535,6.65743764
32.799752,7.48331477,6.65858627,0.908145638,6.65754722,6.6580951,6.65705597
32.810244,6,6.65819716,-0.811293513,6.65715669,6.65770547,6.65666492
32.820735,7.28010989,6.65779875,0.788866995,6.65675685,6.65730654,6.65626456
32.831227,6.164414,6.657391,-0.702123209,6.65634767,6.65689827,6.65585486
32.841718,6.55743852,6.65697403,-0.315492481,6.65592925,6.65648078,6.65543592
32.85221,7.28010989,6.65654779,0.789659483,6.65550157,6.65605401,6.65500772
32.862702,6.32455532,6.65611236,-0.5758099,6.65506469,6.65561806,6.65457031
32.873193,6.4807407,6.65566782,-0.418242902,6.6546187,6.65517299,6.6541238
32.883685,6.92820323,6.65521413,0.52248359,6.65416355,6.65471877,6.65366811
32.894176,6.4807407,6.6547514,-0.4171459,6.65369936,6.65425551,6.65320339
32.904668,6,6.65427959,-0.808875508,6.65322608,6.65378317,6.65272958
32.91516,6.4807407,6.65379877,-0.416002491,6.65274379,6.65330182,6.65224676
32.925651,7.07106781,6.65330903,0.646342617,6.65225257,6.65281154,6.651755
32.936143,6.70820393,6.65281032,0.235358482,6.65175237,6.65231229,6.65125427
32.946634,6.78232998,6.65230276,0.360592884,6.65124332,6.65180419,6.65074468
32.957126,6.8556546,6.65178629,0.451517789,6.65072536,6.65128718,6.65022618
32.967618,5.65685425,6.651261,-0.997199451,6.65019857,6.65076135,6.64969885
32.978109,8.1240384,6.65072697,1.21380041,6.64966304,6.65022678,6.64916277
32.988601,6.08276253,6.65018414,-0.753273927,6.6491187,6.64968341,6.64861789
32.999092,7.14142843,6.64963265,0.701281528,6.6485657,6.64913137,6.64806434
33.009584,5.47722558,6.64907242,-1.08251875,6.64800395,6.6485706,6.64750205
33.020076,7.54983444,6.64850355,0.949384475,6.64743356,6.64800118,6.64693111
33.030567,7.48331477,6.64792613,0.913995975,6.64685461,6.64742321,6.64635161
33.041059,6.92820323,6.64734008,0.529965235,6.64626702,6.64683661,6.64576347
33.05155,7.34846923,6.64674555,0.83768949,6.64567095,6.64624152,6.64516684
33.062042,7.54983444,6.64614245,0.950627152,6.64506631,6.64563787,6.64456164
33.072534,5.74456265,6.64553089,-0.949193469,6.6444532,6.64502575,6.64394797
33.083025,7.21110255,6.64491095,0.752457044,6.6438317,6.64440525,6.64332592
33.093517,6.4807407,6.64428255,-0.40440308,6.64320174,6.64377629,6.6426954
33.104008,7.28010989,6.64364585,0.797786966,6.64256347,6.64313902,6.64205657
33.1145,6.8556546,6.64300075,0.461144067,6.6419168,6.64249337,6.64140934
33.124992,6.4807407,6.64234736,-0.402003306,6.64126183,6.64183941,6.6407538
33.135483,6.78232998,6.64168576,0.375025626,6.64059866,6.64117725,6.64009006
33.145975,7.07106781,6.64101588,0.655783452,6.63992718,6.64050679,6.63941802
33.156466,6.08276253,6.64033786,-0.746709669,6.63924757,6.63982821,6.63873784
33.166958,7,6.63965162,0.60029025,6.63855973,6.63914139,6.63804942
33.17745,7.21110255,6.63895724,0.756402874,6.63786375,6.63844644,6.63735287
33.187941,7.21110255,6.63825484,0.756867035,6.63715974,6.63774347,6.63664829
33.198433,6.40312424,6.63754431,-0.484169471,6.6364476,6.63703236,6.63593557
33.208924,6.78232998,6.63682582,0.381450073,6.63572749,6.6363133,6.63521488
33.219416,7.21110255,6.63609927,0.758289706,6.63499931,6.63558617,6.63448612
33.229908,6.78232998,6.63536476,0.38336044,6.63426317,6.63485107,6.63374939
33.240399,6,6.63462238,-0.796631899,6.63351916,6.63410811,6.6330048
33.250891,7.61577311,6.63387204,0.990909212,6.63276717,6.63335719,6.63225223
33.261382,7.34846923,6.63311391,0.845786806,6.63200739,6.63259847,6.63149186
33.271874,6.244998,6.63234787,-0.622374381,6.6312397,6.63183184,6.63072358
33.282366,6.78232998,6.63157403,0.388273037,6.6304642,6.63105741,6.6299475
33.292857,6.92820323,6.6307925,0.545353764,6.62968101,6.63027529,6.62916371
33.303349,6.40312424,6.63000316,-0.476318093,6.62889,6.62948536,6.62837211
33.31384,6.78232998,6.6292062,0.391310345,6.62809136,6.6286878,6.62757287
33.324332,6,6.62840148,-0.792717784,6.62728496,6.62788249,6.62676588
33.334824,7,6.62758913,0.610254756,6.62647092,6.62706954,6.62595125
33.345315,6.32455532,6.62676925,-0.549739876,6.62564935,6.62624906,6.62512907
33.355807,6.40312424,6.62594172,-0.472035464,6.62482011,6.62542093,6.62429924
33.366298,6.63324958,6.62510672,0.0902378123,6.62398341,6.62458533,6.62346193
33.37679,7.48331477,6.62426413,0.926849851,6.62313911,6.62374213,6.62261702
33.387282,6.164414,6.62341405,-0.677495425,6.62228732,6.62289145,6.62176463
33.397773,5.91607978,6.62255661,-0.84052176,6.62142815,6.6220334,6.62090486
33.408265,6.55743852,6.62169167,-0.25348204,6.62056148,6.62116785,6.62003758
33.418756,6.8556546,6.62081942,0.484597956,6.6196875,6.62029499,6.61916298
33.429248,6.164414,6.61993973,-0.674926463,6.61880607,6.61941469,6.61828094
33.43974,7,6.61905272,0.617209268,6.61791731,6.61852707,6.61739157
33.450231,5.38516481,6.61815849,-1.11040249,6.61702133,6.61763222,6.61649497
33.460723,6.63324958,6.61725692,0.126462101,6.616118,6.61673003,6.61559102
33.471214,6.40312424,6.61634819,-0.461761796,6.61520751,6.61582069,6.61467992
33.481706,6.78232998,6.61543218,0.408531277,6.61428973,6.61490405,6.61376151
33.492198,7.41619849,6.61450899,0.895371151,6.61336476,6.61398024,6.61283592
33.502689,6.4807407,6.61357874,-0.364469539,6.61243273,6.61304937,6.61190327
33.513181,6.92820323,6.6126413,0.561748996,6.6114935,6.6121113,6.61096341
33.523672,5.65685425,6.61169685,-0.97716048,6.61054726,6.61116623,6.61001654
33.534164,6.70820393,6.61074527,0.312183704,6.60959387,6.61021401,6.60906253
33.544656,6.78232998,6.60978666,0.415383349,6.60863346,6.60925477,6.60810148
33.555147,7.81024968,6.60882114,1.09609695,6.60766613,6.60828862,6.60713352
33.565639,5.83095189,6.60784857,-0.881417425,6.60669174,6.60731542,6.60615849
33.57613,6.164414,6.60686916,-0.665173026,6.6057105,6.60633537,6.60517662
33.586622,7.87400787,6.60588274,1.12611062,6.60472225,6.60534832,6.60418773
33.597114,6.55743852,6.60488945,-0.217832338,6.60372712,6.60435439,6.60319196
33.607605,5.91607978,6.60388941,-0.829342887,6.60272524,6.6033537,6.60218943
33.618097,7,6.60288245,0.630172636,6.60171643,6.6023461,6.60117998
33.628588,6.4807407,6.6018688,-0.348034622,6.60070092,6.6013318,6.60016383
33.63908,6.4807407,6.60084829,-0.346565416,6.59967854,6.60031065,6.59914081
33.649572,6.40312424,6.59982104,-0.443505136,6.59864943,6.59928275,6.59811105
33.660063,6.63324958,6.59878719,0.185640475,6.59761371,6.59824826,6.59707467
33.670555,5.83095189,6.59774657,-0.875668132,6.5965712,6.59720698,6.59603151
33.681046,7.61577311,6.5966994,1.0094918,6.59552214,6.59615916,6.5949818
33.691538,7,6.59564552,0.635888736,6.59446636,6.59510462,6.59392536
33.70203,5.91607978,6.59458504,-0.823714304,6.59340398,6.59404348,6.59286233
33.712521,6.244998,6.5935181,-0.59035591,6.59233513,6.59297589,6.59179282
33.723013,6.78232998,6.59244452,0.435758487,6.59125964,6.59190165,6.59071667
33.733504,5.83095189,6.59136455,-0.872016429,6.59017774,6.59082101,6.58963411
33.743996,6,6.59027799,-0.768295509,6.58908925,6.58973379,6.58854496
33.754488,7.21110255,6.58918498,0.788617506,6.58799431,6.58864012,6.58744935
33.764979,6.92820323,6.58808565,0.583196001,6.58689304,6.58754012,6.58634741
33.775471,6.40312424,6.58697983,-0.428783851,6.58578527,6.58643363,6.58523897
33.785962,6.78232998,6.58586774,0.443240614,6.58467122,6.58532087,6.58412426
33.796454,6.32455532,6.58474921,-0.510092039,6.58355073,6.58420167,6.58300309
33.806946,5.56776436,6.58362436,-1.0078988,6.58242391,6.58307615,6.5818756
33.817437,6.63324958,6.58249334,0.225291457,6.58129091,6.58194445,6.58074192
33.827929,7,6.58135595,0.647027085,6.58015154,6.58080638,6.57960187
33.83842,6.08276253,6.58021244,-0.70530129,6.57900604,6.57966219,6.57845569
33.848912,7,6.57906262,0.648796873,6.57785422,6.57851169,6.57730319
33.859404,7,6.57790662,0.649687143,6.57669622,6.577355,6.5761445
33.869895,7,6.57674458,0.650580836,6.57553216,6.57619228,6.57497976
33.880387,7.07106781,6.5755763,0.703911578,6.57436187,6.57502332,6.57380879
33.890878,6.63324958,6.57440204,0.242585115,6.57318559,6.57384837,6.57263181
33.90137,6.32455532,6.5732216,-0.498664497,6.57200311,6.57266724,6.57144865
33.911862,6.78232998,6.57203512,0.458579183,6.57081459,6.57148006,6.57025943
33.922353,4.69041576,6.57084273,-1.37128661,6.56962015,6.57028698,6.5690643
33.932845,7.54983444,6.56964423,0.990045555,6.56841961,6.56908779,6.56786306
33.943336,6.70820393,6.56843989,0.373850293,6.5672132,6.56788275,6.56665596
33.953828,6.32455532,6.56722949,-0.492619705,6.56600074,6.56667165,6.56544279
33.96432,7.07106781,6.56601318,0.710671955,6.56478235,6.56545464,6.56422371
33.974811,6.08276253,6.5647911,-0.694282777,6.56355819,6.56423186,6.56299884
33.985303,6.164414,6.56356305,-0.631782435,6.56232804,6.5630031,6.56176799
33.995794,6.63324958,6.56232927,0.266308668,6.56109217,6.56176862,6.56053141
34.006286,7,6.56108957,0.662503152,6.55985036,6.56052821,6.55928889
34.016778,6.40312424,6.55984409,-0.395878582,6.55860277,6.55928202,6.55804059
34.027269,7.14142843,6.55859297,0.763436613,6.55734952,6.55803018,6.55678663
34.037761,6.244998,6.55733599,-0.558872072,6.55609042,6.55677249,6.55552681
34.048252,7,6.55607343,0.666278148,6.55482572,6.55550921,6.5542614
34.058744,6.70820393,6.55480507,0.391661674,6.55355522,6.55424013,6.55299018
34.069236,5.91607978,6.55353105,-0.79840545,6.55227905,6.55296539,6.55171329
34.079727,5.91607978,6.55225152,-0.797603744,6.55099736,6.55168514,6.55043088
34.090219,7,6.55096626,0.6700998,6.54970993,6.55039916,6.54914273
34.10071,6.8556546,6.54967554,0.553153739,6.54841704,6.54910772,6.54784911
34.111202,6.40312424,6.54837915,-0.381123219,6.54711847,6.5478106,6.54654981
34.121694,6.55743852,6.54707722,0.101790502,6.54581435,6.54650794,6.54524496
34.132185,6.244998,6.54576991,-0.548426759,6.54450484,6.5451999,6.54393473
34.142677,6.78232998,6.54445699,0.487722248,6.54318972,6.54388625,6.54261887
34.153168,6.92820323,6.54313874,0.620535645,6.54186926,6.54256727,6.54129767
34.16366,6.4807407,6.54181494,-0.247132025,6.54054323,6.54124273,6.53997091
34.174152,7.28010989,6.54048572,0.860014052,6.53921178,6.53991277,6.53863873
34.184643,5.91607978,6.53915125,-0.78934876,6.53787507,6.53857756,6.53730128
34.195135,7,6.53781129,0.679844624,6.53653287,6.53723686,6.53595833
34.205626,6.164414,6.53646612,-0.60996075,6.53518545,6.53589095,6.53461016
34.216118,7.14142843,6.53511551,0.778660976,6.53383258,6.5345396,6.53325655
34.22661,7.14142843,6.53375962,0.779531148,6.53247441,6.53318295,6.53189763
34.237101,7.14142843,6.53239859,0.780403639,6.5311111,6.53182118,6.53053358
34.247593,7.41619849,6.53103219,0.940832768,6.52974242,6.53045403,6.52916414
34.258084,7.34846923,6.52966071,0.904880391,6.52836864,6.52908179,6.52778961
34.268576,7,6.5282839,0.686815914,6.52698953,6.52770423,6.52640974
34.279068,6.244998,6.52690193,-0.530946257,6.52560524,6.5263215,6.5250247
34.289559,7.07106781,6.52551494,0.738615511,6.52421593,6.52493375,6.52363463
34.300051,6.40312424,6.5241227,-0.347848329,6.52282136,6.52354075,6.5222393
34.310542,6.244998,6.52272549,-0.526998571,6.52142182,6.52214278,6.52083899
34.321034,6.32455532,6.52132308,-0.44358512,6.52001706,6.5207396,6.51943347
34.331526,6.244998,6.51991561,-0.524325868,6.51860724,6.51933137,6.51802288
34.342017,6.32455532,6.51850326,-0.440395205,6.51719252,6.51791825,6.51660739
34.352509,6.244998,6.51708576,-0.521620323,6.51577265,6.51649998,6.51518675
34.363,6.92820323,6.51566342,0.642292623,6.51434793,6.51507686,6.51376125
34.373492,6.32455532,6.51423598,-0.435523431,6.5129181,6.51364865,6.51233065
34.383984,6.08276253,6.51280361,-0.655775172,6.51148333,6.5122155,6.5108951
34.394475,7.21110255,6.51136646,0.836502297,6.51004377,6.51077758,6.50945477
34.404967,5.74456265,6.50992428,-0.874849493,6.50859917,6.50933462,6.50800939
34.415458,7.14142843,6.50847738,0.79558221,6.50714984,6.50788693,6.50655928
34.42595,6.4807407,6.50702549,-0.162125846,6.50569552,6.50643426,6.50510417
34.436442,6.08276253,6.50556878,-0.650235533,6.50423636,6.50497676,6.50364423
34.446933,6.63324958,6.50410741,0.359363566,6.50277254,6.50351461,6.50217962
34.457425,6.92820323,6.50264112,0.652351216,6.50130379,6.50204753,6.50071008
34.467916,6.40312424,6.50117022,-0.313122952,6.49983042,6.50057584,6.49923591
34.478408,6.63324958,6.49969445,0.365451958,6.49835216,6.49909927,6.49775686
34.4889,6.78232998,6.49821396,0.533025346,6.49686919,6.49761799,6.49627309
34.499391,6.164414,6.49672893,-0.576467632,6.49538166,6.49613216,6.49478476
34.509883,6.40312424,6.4952391,-0.303504297,6.49388931,6.49464152,6.49329161
34.520374,6.92820323,6.49374476,0.65913464,6.49239245,6.49314638,6.49179395
34.530866,6.78232998,6.49224565,0.538594773,6.49089082,6.49164648,6.49029151
34.541358,7,6.49074195,0.713623184,6.48938457,6.49014197,6.48878446
34.551849,6.40312424,6.48923381,-0.293444332,6.48787389,6.48863302,6.48727297
34.562341,6.78232998,6.48772098,0.542778967,6.48635849,6.48711937,6.48575676
34.572832,6.244998,6.48620375,-0.49112702,6.48483869,6.48560133,6.48423615
34.583324,5.74456265,6.48468186,-0.860301817,6.48331423,6.48407863,6.48271087
34.593816,6.40312424,6.48315549,-0.282897948,6.48178526,6.48255144,6.48118109
34.604307,5.91607978,6.48162479,-0.752027262,6.48025197,6.48101992,6.47964697
34.614799,6.70820393,6.48008949,0.477613277,6.47871406,6.47948381,6.47810825
34.62529,6.32455532,6.47854991,-0.39242145,6.47717187,6.47794341,6.47656523
34.635782,6.78232998,6.47700579,0.552561486,6.47562511,6.47639846,6.47501765
34.646274,7.21110255,6.47545727,0.85769766,6.47407396,6.47484912,6.47346567
34.656765,6.08276253,6.47390455,-0.625413476,6.47251858,6.47329556,6.47190946
34.667257,7,6.47234733,0.726397049,6.4709587,6.47173751,6.47034875
34.677748,6.244998,6.47078594,-0.475171483,6.46939464,6.47017529,6.46878386
34.68824,6,6.4692201,-0.684996421,6.46782612,6.46860861,6.4672145
34.698732,5.83095189,6.46764998,-0.797933633,6.46625331,6.46703766,6.46564085
34.709223,7.21110255,6.46607575,0.863149351,6.46467638,6.46546259,6.46406308
34.719715,6.244998,6.46449713,-0.468507349,6.46309505,6.46388313,6.46248091
34.730206,6.32455532,6.46291445,-0.371966574,6.46150964,6.46229961,6.46089466
34.740698,7,6.46132742,0.73394317,6.45991988,6.46071174,6.45930406
34.75119,6.55743852,6.45973622,0.312573681,6.45832593,6.45911968,6.45770926
34.761681,6.55743852,6.45814101,0.31511508,6.45672796,6.45752363,6.45611044
34.772173,6.40312424,6.45654152,-0.231121783,6.4551257,6.45592328,6.45450733
34.782664,6.244998,6.45493806,-0.458192166,6.45351946,6.45431897,6.45290024
34.793156,6.08276253,6.45333036,-0.608742825,6.45190897,6.45271041,6.45128889
34.803648,6.8556546,6.45171858,0.635559612,6.45029439,6.45109778,6.44967345
34.814139,6.78232998,6.4501029,0.576391429,6.4486759,6.44948124,6.4480541
34.824631,6.70820393,6.44848304,0.50962819,6.44705321,6.44786052,6.44643055
34.835122,6.55743852,6.44685932,0.332534518,6.44542666,6.44623593,6.44480313
34.845614,6.55743852,6.44523145,0.334973246,6.44379594,6.44460719,6.44317154
34.856106,6.70820393,6.44359961,0.514397052,6.44216124,6.44297448,6.44153597
34.866597,5.74456265,6.44196397,-0.835105574,6.44052272,6.44133797,6.43989659
34.877089,6.92820323,6.44032424,0.698483353,6.43888011,6.43969737,6.4382531
34.88758,6.32455532,6.43868075,-0.337824554,6.43723373,6.43805301,6.43660585
34.898072,6.32455532,6.43703321,-0.335377239,6.43558329,6.43640459,6.43495453
34.908564,6.08276253,6.4353818,-0.59381754,6.43392896,6.4347523,6.43329932
34.919055,7,6.43372669,0.752511333,6.43227092,6.43309631,6.4316404
34.929547,7.07106781,6.43206759,0.799374893,6.43060887,6.43143633,6.42997747
34.940038,7.41619849,6.43040484,0.992871417,6.42894316,6.42977269,6.42831087
34.95053,6.4807407,6.42873812,0.22804073,6.42727348,6.42810509,6.4266403
34.961022,7,6.42706764,0.756922958,6.42560001,6.42643371,6.42496594
34.971513,6.40312424,6.42539355,-0.149229057,6.42392293,6.42475873,6.42328797
34.982005,6.32455532,6.42371556,-0.314897197,6.42224194,6.42307985,6.42160608
34.992496,7.28010989,6.42203402,0.926323845,6.42055738,6.42139741,6.41992063
35.002988,7.07106781,6.42034862,0.806671675,6.41886895,6.41971111,6.41823129
35.01348,6.70820393,6.41865954,0.538093295,6.41717682,6.41802113,6.41653826
35.023971,5.83095189,6.41696696,-0.765516205,6.41548118,6.41632764,6.41484172
35.034463,6,6.41527057,-0.644414904,6.41378173,6.41463035,6.41314136
35.044954,6.63324958,6.41357072,0.468699115,6.4120788,6.41292959,6.41143752
35.055446,7.34846923,6.41186711,0.967782064,6.41037208,6.41122507,6.40972989
35.065938,6.40312424,6.41015991,-0.0838788876,6.40866177,6.40951695,6.40801867
35.076429,6.63324958,6.4084493,0.474131079,6.40694805,6.40780543,6.40630403
35.086921,6.70820393,6.40673498,0.54906188,6.40523059,6.4060902,6.40458566
35.097412,6.164414,6.4050173,-0.490513302,6.40350976,6.4043716,6.4028639
35.107904,7.74596669,6.40329595,1.1587367,6.40178524,6.40264932,6.40113846
35.118396,6.4807407,6.4015711,0.281370933,6.40005721,6.40092355,6.39940951
35.128887,7.14142843,6.39984294,0.861153581,6.39832586,6.39919446,6.39767723
35.139379,6.70820393,6.39811116,0.556859743,6.39659087,6.39746176,6.39594132
35.14987,6.55743852,6.39637611,0.401325823,6.3948526,6.39572577,6.39420211
35.160362,6,6.39463747,-0.628201777,6.39311073,6.39398621,6.39245931
35.170854,6.55743852,6.39289544,0.405639109,6.39136545,6.39224324,6.39071309
35.181345,6.4807407,6.39115019,0.299316744,6.38961693,6.39049705,6.38896364
35.191837,6,6.3894014,-0.624020355,6.38786487,6.38874732,6.38721063
35.202328,7.07106781,6.38764944,0.826691218,6.38610962,6.38699442,6.38545444
35.21282,6.92820323,6.38589398,0.736416489,6.38435085,6.38523802,6.38369473
35.223312,7.48331477,6.38413522,1.04841764,6.38258876,6.38347831,6.38193169
35.233803,7.34846923,6.38237333,0.982901776,6.38082353,6.38171547,6.38016551
35.244295,6,6.38060799,-0.616934351,6.37905485,6.37994918,6.37839587
35.254786,7,6.37883957,0.788137315,6.37728306,6.37817981,6.37662313
35.265278,6.70820393,6.37706775,0.575444339,6.37550784,6.37640702,6.37484696
35.27577,6.63324958,6.3752927,0.507894561,6.3737294,6.37463101,6.37306755
35.286261,6.63324958,6.37351461,0.509641999,6.3719479,6.37285197,6.37128509
35.296753,6.08276253,6.37173318,-0.5375599,6.37016303,6.37106957,6.36949926
35.307244,6.4807407,6.36994874,0.332854259,6.36837515,6.36928417,6.36771041
35.317736,7.21110255,6.36816098,0.918118492,6.36658393,6.36749545,6.36591822
35.328228,6.164414,6.3663701,-0.449395253,6.36478956,6.36570359,6.36412288
35.338719,6.244998,6.36457626,-0.345800903,6.36299223,6.36390878,6.36232458
35.349211,6.55743852,6.36277916,0.44120218,6.36119162,6.3621107,6.36052299
35.359702,6.92820323,6.36097915,0.753142802,6.35938808,6.36030971,6.35871848
35.370194,6.70820393,6.3591759,0.590785942,6.35758129,6.35850549,6.3569107
35.380686,5.83095189,6.35736961,-0.725546495,6.35577143,6.35669821,6.35509986
35.391177,6,6.35556046,-0.596288908,6.3539587,6.35488808,6.35328615
35.401669,6,6.35374813,-0.594767289,6.35214277,6.35307476,6.35146923
35.41216,6.8556546,6.35193297,0.70973349,6.35032401,6.35125861,6.34964948
35.422652,6.164414,6.35011467,-0.430929999,6.34850207,6.34943932,6.34782655
35.433144,6.63324958,6.3482934,0.53381287,6.34667715,6.34761705,6.34600063
35.443635,5.83095189,6.34646936,-0.717995452,6.34484945,6.34579202,6.34417193
35.454127,7,6.34464223,0.809541706,6.34301863,6.34396388,6.34234011
35.464618,7.74596669,6.34281235,1.18454816,6.34118505,6.34213301,6.34050553
35.47511,6.40312424,6.34097941,0.249288639,6.33934839,6.34029906,6.33866787
35.485602,6,6.33914359,-0.582360365,6.33750884,6.33846224,6.3368273
35.496093,6.164414,6.33730509,-0.415801743,6.33566658,6.33662273,6.33498404
35.506585,6.164414,6.33546357,-0.413581394,6.33382128,6.3347802,6.33313773
35.517076,6.32455532,6.3336194,-0.0952054662,6.33197332,6.33293501,6.33128875
35.527568,6.70820393,6.33177224,0.613540291,6.33012234,6.33108684,6.32943676
35.53806,6.32455532,6.32992229,-0.0732596292,6.32826856,6.32923587,6.32758195
35.548551,6.92820323,6.32806974,0.77468283,6.32641216,6.32738229,6.32572453
35.559043,6.55743852,6.32621425,0.480857848,6.3245528,6.32552578,6.32386414
35.569534,6.40312424,6.3243562,0.280656442,6.32269085,6.3236667,6.32200117
35.580026,6.40312424,6.32249524,0.283952458,6.32082598,6.32180471,6.32013527
35.590518,6.08276253,6.32063157,-0.487718194,6.31895838,6.31994001,6.31826663
35.601009,6,6.31876538,-0.564593108,6.31708824,6.31807278,6.31639546
35.611501,6.32455532,6.31689633,0.0875156557,6.31521522,6.3162027,6.3145214
35.621992,5.65685425,6.3150248,-0.81127711,6.31333969,6.31433013,6.31264484
35.632484,6,6.31315044,-0.559598465,6.31146132,6.31245473,6.31076542
35.642976,6.92820323,6.31127345,0.785448774,6.3095803,6.3105767,6.30888336
35.653467,6.8556546,6.30939403,0.739094425,6.30769682,6.30869623,6.30699883
35.663959,6.32455532,6.30751183,0.130550722,6.30581054,6.30681297,6.3051115
35.67445,6.55743852,6.30562722,0.501808031,6.30392184,6.30492732,6.30322174
35.684942,7,6.30373987,0.834422032,6.30203037,6.30303891,6.30132921
35.695434,6.244998,6.30184997,-0.238436513,6.30013632,6.30114795,6.29943411
35.705925,5.74456265,6.29995771,-0.745248324,6.2982399,6.29925463,6.29753663
35.716417,7.07106781,6.29806275,0.879207063,6.29634075,6.29735861,6.29563642
35.726908,6.55743852,6.29616547,0.511148759,6.29443926,6.29546026,6.29373386
35.7374,6.78232998,6.29426552,0.698616106,6.29253508,6.29355924,6.29182861
35.747892,7.07106781,6.29236309,0.882442472,6.2906284,6.29165575,6.28992086
35.758383,6.4807407,6.2904584,0.436213598,6.28871942,6.28974998,6.2880108
35.768875,6.08276253,6.28855107,-0.45363922,6.28680779,6.28784158,6.2860981
35.779366,6.8556546,6.2866415,0.754329567,6.2848939,6.28593093,6.28418313
35.789858,6.63324958,6.28472934,0.590356025,6.28297739,6.28401769,6.28226553
35.80035,6.4807407,6.28281479,0.444888648,6.28105846,6.28210205,6.28034552
35.810841,5.91607978,6.28089804,-0.604001865,6.2791373,6.28018421,6.27842328
35.821333,6.55743852,6.27897874,0.527692893,6.27721358,6.27826382,6.27649846
35.831824,6.70820393,6.27705727,0.656617593,6.27528766,6.27634126,6.27457146
35.842316,6.8556546,6.27513328,0.761919494,6.2733592,6.27441618,6.2726419
35.852808,6.164414,6.27320698,-0.329837806,6.2714284,6.27248878,6.27071
35.863299,6.08276253,6.27127856,-0.434184325,6.26949545,6.27055926,6.26877595
35.873791,6.55743852,6.26934766,0.536740964,6.26756,6.26862726,6.2668394
35.884282,6.32455532,6.26741468,0.239041091,6.26562244,6.26669317,6.26490073
35.894774,6,6.26547925,-0.515246784,6.26368241,6.26475664,6.26295959
35.905266,6.70820393,6.26354158,0.66683008,6.2617401,6.26281785,6.26101617
35.915757,7.21110255,6.26160186,0.97442326,6.25979573,6.26087702,6.25907068
35.926249,6.244998,6.25965975,-0.121085706,6.25784893,6.25893379,6.25712276
35.93674,6.40312424,6.25771562,0.381324821,6.25590008,6.25698855,6.2551728
35.947232,6.32455532,6.25576912,0.262271232,6.25394884,6.25504093,6.25322044
35.957724,6.55743852,6.25382045,0.55101549,6.2519954,6.25309114,6.25126587
35.968215,5.91607978,6.25186982,-0.57947393,6.25003997,6.25113937,6.24930931
35.978707,7.21110255,6.24991686,0.980400782,6.24808218,6.24918528,6.24735039
35.989198,6.4807407,6.24796196,0.482471492,6.24612242,6.24722925,6.2453895
35.99969,6.164414,6.24600476,-0.285640961,6.24416033,6.24527092,6.24342627
36.010182,5.74456265,6.24404547,-0.706740987,6.24219612,6.24331049,6.24146092
36.020673,5.74456265,6.24208428,-0.705352136,6.24022999,6.24134816,6.23949365
36.031165,6,6.24012084,-0.490021266,6.23826157,6.23938357,6.23752408
36.041656,7.21110255,6.23815554,0.986380766,6.23629125,6.23741712,6.23555262
36.052148,5.83095189,6.23618801,-0.636581582,6.23431868,6.23544844,6.23357889
36.06264,7.28010989,6.23421845,1.02268834,6.23234405,6.23347774,6.23160311
36.073131,6.78232998,6.23224708,0.741675743,6.23036757,6.2315052,6.22962547
36.083623,6.40312424,6.23027352,0.415753195,6.22838887,6.22953049,6.22764562
36.094114,5.74456265,6.22829817,-0.695510979,6.22640835,6.22755398,6.22566393
36.104606,5.91607978,6.22632066,-0.556992712,6.22442564,6.22557531,6.22368006
36.115098,5.74456265,6.22434121,-0.692660495,6.22244094,6.22359469,6.22169419
36.125589,6.40312424,6.22236,0.425163773,6.22045447,6.22161231,6.21970655
36.136081,5.83095189,6.22037669,-0.624039095,6.21846584,6.21962782,6.21771675
36.146572,6.164414,6.21839165,-0.232330899,6.21647546,6.21764161,6.21572519
36.157064,6.63324958,6.21640453,0.645635387,6.21448296,6.21565331,6.21373151
36.167556,6.70820393,6.21441553,0.702700795,6.21248854,6.21366313,6.21173591
36.178047,6.63324958,6.21242485,0.648710054,6.21049241,6.21167126,6.2097386
36.188539,5.83095189,6.21043212,-0.616019666,6.2084942,6.20967735,6.2077392
36.19903,6,6.20843775,-0.456549835,6.20649431,6.20768179,6.20573811
36.209522,5.47722558,6.20644137,-0.853941327,6.20449236,6.20568421,6.20373497
36.220014,6.4807407,6.20444317,0.525640115,6.20248856,6.20368482,6.20172997
36.230505,6.70820393,6.20244336,0.711168454,6.20048312,6.20168382,6.19972333
36.240997,6.4807407,6.20044158,0.529432823,6.19847566,6.19968084,6.19771467
36.251488,6.164414,6.19843823,-0.184456565,6.19646658,6.19767627,6.19570439
36.26198,6.8556546,6.19643292,0.811924675,6.19445552,6.19566976,6.19369212
36.272472,6.8556546,6.19442588,0.813159716,6.19244268,6.19366151,6.19167806
36.282963,5.38516481,6.19241729,-0.898472307,6.19042825,6.19165171,6.18966242
36.293455,6.164414,6.1904068,-0.161222833,6.18841188,6.18964,6.18764483
36.303946,6.55743852,6.18839481,0.607489685,6.18639396,6.18762678,6.18562569
36.314438,7.28010989,6.18638093,1.04581497,6.18437412,6.18561168,6.18360462
36.32493,6.32455532,6.18436538,0.374419474,6.18235256,6.18359491,6.18158183
36.335421,6.78232998,6.18234836,0.774584808,6.18032948,6.18157666,6.17955753
36.345913,5.19615242,6.1803295,-0.992056993,6.17830453,6.17955657,6.17753134
36.356404,5.91607978,6.1783092,-0.51208341,6.17627808,6.17753504,6.17550366
36.366896,6.40312424,6.17628709,0.476274235,6.17424978,6.17551169,6.17347412
36.377388,5.56776436,6.17426337,-0.778780464,6.17221983,6.17348673,6.17144293
36.387879,5.91607978,6.17223826,-0.506121008,6.17018843,6.17146037,6.16941028
36.398371,7.41619849,6.17021137,1.11623793,6.16815521,6.16943223,6.16737581
36.408862,6.78232998,6.16818311,0.783675236,6.16612057,6.16740272,6.16533992
36.419354,6.92820323,6.1661531,0.872954827,6.16408413,6.16537146,6.16330223
36.429846,6.55743852,6.16412155,0.627149879,6.16204611,6.16333866,6.16126295
36.440337,5.91607978,6.16208868,-0.495992835,6.1600067,6.16130452,6.15922228
36.450829,7,6.16005409,0.916485629,6.15796554,6.15926867,6.15717985
36.46132,6,6.1580182,-0.397515033,6.15592301,6.15723152,6.15513606
36.471812,5.91607978,6.15598063,-0.489796742,6.15387876,6.15519268,6.15309054
36.482304,6.55743852,6.15394159,0.635214087,6.15183298,6.15315236,6.15104348
36.492795,5.74456265,6.15190128,-0.638230863,6.14978588,6.15111078,6.1489951
36.503287,6.40312424,6.14985933,0.503254315,6.14773708,6.14906755,6.14694503
36.513778,5.83095189,6.14781614,-0.562906964,6.14568699,6.14702308,6.14489366
36.52427,5.91607978,6.14577134,-0.479261473,6.14363523,6.144977,6.14284061
36.534762,6.32455532,6.14372513,0.425241327,6.141582,6.1429295,6.14078609
36.545253,6.55743852,6.14167773,0.64479516,6.13952752,6.1408808,6.13873031
36.555745,6,6.13962874,-0.373669296,6.1374714,6.13883052,6.1366729
36.566236,6.92820323,6.13757859,0.889170762,6.13541405,6.13677907,6.13461425
36.576728,6.63324958,6.13552688,0.705494649,6.13335508,6.13472606,6.13255398
36.58722,5.65685425,6.13347383,-0.690376407,6.13129472,6.13267171,6.13049231
36.597711,6.244998,6.13141965,0.337013866,6.12923316,6.13061622,6.12842944
36.608203,6,6.12936396,-0.359672018,6.12717002,6.12855922,6.12636499
36.618694,6.63324958,6.12730716,0.711296295,6.12510571,6.12650111,6.12429936
36.629186,6,6.12524888,-0.353905182,6.12303985,6.12444151,6.12223218
36.639678,6.164414,6.12318932,0.203038632,6.12097264,6.12238063,6.12016366
36.650169,6.08276253,6.12112869,-0.195872811,6.1189043,6.12031867,6.11809399
36.660661,5.83095189,6.11906661,-0.536763186,6.11683444,6.11825527,6.1160228
36.671152,6,6.1170035,-0.342057738,6.11476347,6.11619082,6.1139505
36.681644,6.08276253,6.11493896,-0.179377889,6.11269101,6.11412495,6.11187671
36.692136,6.63324958,6.11287321,0.721371176,6.11061727,6.11205786,6.10980162
36.702627,6.70820393,6.11080645,0.772914923,6.10854244,6.10998977,6.10772546
36.713119,6,6.10873832,-0.329754935,6.10646616,6.10792029,6.10564783
36.72361,6,6.1066692,-0.326602518,6.10438883,6.10584983,6.10356915
36.734102,5.56776436,6.10459873,-0.732689819,6.10231006,6.10377801,6.10148902
36.744594,5.47722558,6.10252712,-0.790760103,6.10023006,6.10170504,6.09940767
36.755085,6.8556546,6.10045456,0.869022462,6.09814905,6.09963112,6.0973253
36.765577,6.244998,6.09838068,0.382906403,6.09606663,6.09755589,6.09524152
36.776068,6.55743852,6.0963059,0.679067468,6.09398322,6.09547974,6.09315674
36.78656,6.55743852,6.09422982,0.680594378,6.09189843,6.09340229,6.09107059
36.797052,6.40312424,6.09215265,0.557648262,6.08981247,6.09132375,6.08898325
36.807543,5.91607978,6.09007462,-0.417126879,6.08772555,6.08924434,6.08689496
36.818035,6.4807407,6.08799532,0.626694005,6.08563729,6.08716367,6.08480532
36.828526,7.68114575,6.08591518,1.26302437,6.08354809,6.08508215,6.08271473
36.839018,5.83095189,6.08383381,-0.50287366,6.08145756,6.0829994,6.08062282
36.84951,6.4807407,6.08175142,0.631655978,6.07936593,6.08091562,6.07852979
36.860001,5.74456265,6.07966823,-0.578883045,6.07727339,6.07883103,6.07643586
36.870493,6,6.07758384,-0.278538754,6.07517955,6.07674525,6.07434063
36.880984,6.08276253,6.07549867,0.085228307,6.07308484,6.07465868,6.07224452
36.891476,5.29150262,6.07341233,-0.884256584,6.07098886,6.07257094,6.07014714
36.901968,6.55743852,6.07132504,0.697218394,6.06889183,6.07048224,6.06804869
36.912459,6.63324958,6.069237,0.75100771,6.06679394,6.06839279,6.0659494
36.922951,6.8556546,6.06714784,0.887979034,6.06469482,6.06630222,6.06384886
36.933442,6.32455532,6.06505796,0.509408839,6.06259488,6.06421092,6.0617475
36.943934,6.244998,6.06296697,0.426650942,6.06049372,6.06211852,6.05964492
36.954426,5.91607978,6.0608751,-0.380519797,6.05839156,6.06002522,6.05754133
36.964917,6.92820323,6.05878255,0.932427307,6.05628861,6.05793124,6.05543695
36.975409,5.56776436,6.05668893,-0.699231414,6.05418447,6.0558362,6.05333138
36.9859,6.08276253,6.05459467,0.167832841,6.05207956,6.0537405,6.05122504
36.996392,6.40312424,6.05249936,0.592135857,6.0499735,6.05164376,6.04911753
37.006884,6.4807407,6.05040324,0.656001115,6.04786648,6.04954619,6.04700907
37.017375,5.09901951,6.0483065,-0.974313595,6.04575873,6.047448,6.04489987
37.027867,5.09901951,6.04620876,-0.973236478,6.04364984,6.04534882,6.04278954
37.038358,5.38516481,6.04411043,-0.811754658,6.04154025,6.04324904,6.04067849
37.04885,6.08276253,6.04201114,0.201869747,6.03942954,6.04114829,6.03856632
37.059342,5.91607978,6.03991108,-0.351896714,6.03731793,6.03904677,6.03645326
37.069833,6.08276253,6.03781048,0.212018986,6.03520565,6.03694471,6.0343395
37.080325,5.83095189,6.03570895,-0.452500886,6.03309228,6.03484171,6.03222467
37.090816,6.55743852,6.0336069,0.723762136,6.03097825,6.03273819,6.03010917
37.101308,6.70820393,6.03150394,0.822617769,6.02886317,6.03063376,6.0279926
37.1118,5.91607978,6.02940029,-0.336631113,6.02674724,6.02852863,6.02587519
37.122291,5.91607978,6.02729616,-0.333491198,6.02463068,6.02642302,6.02375715
37.132783,5.74456265,6.02519117,-0.529743829,6.02251309,6.02431654,6.02163807
37.143274,6.63324958,6.02308573,0.781129856,6.02039489,6.02220961,6.01951838
37.153766,6.08276253,6.02097945,0.248562027,6.01827569,6.02010184,6.01739769
37.164258,6.8556546,6.01887255,0.914757921,6.01615569,6.01799344,6.01527619
37.174749,6.08276253,6.01676523,0.256899389,6.01403512,6.01588463,6.01315411
37.185241,6.164414,6.01465713,0.386984336,6.01191356,6.01377502,6.01103105
37.195732,5.91607978,6.01254864,-0.310594358,6.00979145,6.01166502,6.00890743
37.206224,6,6.01043938,-0.102173294,6.00766839,6.00955425,6.00678285
37.216716,5.65685425,6.00832957,-0.592853543,6.00554458,6.00744293,6.00465752
37.227207,5.29150262,6.00621943,-0.845409252,6.00342024,6.00533126,6.00253166
37.237699,5.56776436,6.00410855,-0.66056354,6.00129497,6.00321887,6.00040487
37.24819,5.74456265,6.00199737,-0.507380258,5.9991692,6.00110616,5.99827756
37.258682,6.08276253,5.9998855,0.287883717,5.99704252,5.99899275,5.99614935
37.269174,6.55743852,5.99777314,0.74810787,5.99491515,5.99687886,5.99402044
37.279665,7.14142843,5.99566052,1.07040549,5.9927873,5.9947647,5.99189105
37.290157,6.32455532,5.99354724,0.575333014,5.99065857,5.99264988,5.98976077
37.300648,5.47722558,5.99143374,-0.717083093,5.98852938,5.99053483,5.98763004
37.31114,6.08276253,5.98931961,0.305684351,5.98639934,5.98841915,5.98549844
37.321632,6.08276253,5.98720507,0.30912369,5.98426865,5.98630306,5.98336619
37.332123,5.74456265,5.98509035,-0.490436241,5.98213753,5.98418678,5.98123351
37.342615,6.55743852,5.98297506,0.757933682,5.98000558,5.98206992,5.9791
37.353106,6.32455532,5.98085961,0.586255674,5.97787323,5.9799529,5.97696607
37.363598,6.55743852,5.97874361,0.760719997,5.97574006,5.97783534,5.97483133
37.37409,6.63324958,5.97662729,0.810322338,5.9736063,5.97571744,5.97269599
37.384581,6.32455532,5.97451086,0.591645552,5.97147216,5.97359944,5.97056027
37.395073,6.164414,5.97239394,0.43820094,5.96933723,5.97148093,5.96842376
37.405564,6.8556546,5.97027694,0.940945087,5.96720194,5.96936235,5.96628688
37.416056,6.164414,5.96815949,0.443006225,5.9650659,5.9672433,5.96414924
37.426548,5.83095189,5.96604179,-0.367545772,5.9629293,5.96512401,5.96201104
37.437039,6.08276253,5.96392407,0.344729547,5.96079237,5.96300469,5.95987251
37.447531,5.91607978,5.96180594,-0.213836757,5.9586547,5.96088496,5.95773324
37.458022,5.56776436,5.95968783,-0.62603791,5.95651672,5.95876524,5.95559365
37.468514,6.55743852,5.95756934,0.774512223,5.95437803,5.95664515,5.95345334
37.479006,6.164414,5.9554507,0.457125037,5.95223883,5.95452489,5.95131252
37.489497,6.4807407,5.95333214,0.726229002,5.95009935,5.95240471,5.94917141
37.499989,6.40312424,5.95121325,0.672243249,5.94795917,5.9502842,5.94702962
37.51048,6.244998,5.94909447,0.54397015,5.94581873,5.9481638,5.94488754
37.520972,6,5.94697542,0.230270662,5.94367762,5.94604311,5.9427448
37.531464,4.24264069,5.94485631,-1.30468986,5.94153606,5.94392237,5.94060159
37.541955,6.08276253,5.94273738,0.374199351,5.93939425,5.94180179,5.93845814
37.552447,5.65685425,5.94061822,-0.532695009,5.9372518,5.93968099,5.93631404
37.562938,5.91607978,5.93849928,-0.14973141,5.93510913,5.9375604,5.93416972
37.57343,6.164414,5.93638016,0.47752889,5.93296583,5.93543964,5.93202477
37.583922,6.164414,5.9342611,0.479742539,5.93082213,5.93331892,5.9298794
37.594413,6,5.93214231,0.260495082,5.92867822,5.93119847,5.92773383
37.604905,7.07106781,5.93002342,1.06819679,5.92653372,5.92907791,5.92558766
37.615396,5.74456265,5.92790485,-0.428184781,5.92438905,5.92695768,5.92344131
37.625888,5.91607978,5.92578623,-0.0985212982,5.92224379,5.92483738,5.92129437
37.63638,6.70820393,5.92366778,0.885740457,5.92009816,5.92271725,5.91914706
37.646871,5.91607978,5.92154972,-0.0739590152,5.91795239,5.92059751,5.9169996
37.657363,5.91607978,5.91943168,-0.0578955877,5.91580606,5.91847779,5.91485158
37.667854,5.74456265,5.9173141,-0.415633791,5.9136596,5.91635851,5.91270342
37.678346,6.63324958,5.91519658,0.84738008,5.9115126,5.9142393,5.91055472
37.688838,6.40312424,5.91307937,0.700032047,5.90936528,5.91212039,5.9084057
37.699329,6.244998,5.91096269,0.577957874,5.90721785,5.91000201,5.90625656
37.709821,6.40312424,5.90884618,0.703049116,5.90506991,5.90788379,5.90410691
37.720312,6.4807407,5.90673025,0.75763477,5.90292188,5.90576615,5.90195716
37.730804,5.38516481,5.90461455,-0.72072862,5.90077336,5.90364874,5.89980691
37.741296,6.40312424,5.9024993,0.707548538,5.89862456,5.90153177,5.89765639
37.751787,5.83095189,5.90038475,-0.263501142,5.89647569,5.89941549,5.89550579
37.762279,6,5.89827051,0.318950608,5.89432636,5.89729952,5.89335472
37.77277,5.83095189,5.89615703,-0.255352965,5.89217698,5.89518431,5.8912036
37.783262,5.38516481,5.89404395,-0.713357652,5.89002715,5.89306949,5.88905202
37.793754,5.91607978,5.89193149,0.155397204,5.88787708,5.89095529,5.8869002
37.804245,6.32455532,5.88981991,0.659344683,5.88572699,5.88884196,5.88474836
37.814737,5.19615242,5.88770884,-0.831598709,5.88357647,5.88672913,5.88259608
37.825228,5.47722558,5.88559871,-0.639040796,5.88142595,5.88461726,5.8804438
37.83572,6.55743852,5.88348919,0.820944175,5.87927502,5.88250597,5.8782911
37.846212,6.08276253,5.8813805,0.448756095,5.8771239,5.88039552,5.8761382
37.856703,6.164414,5.87927289,0.533986056,5.87497279,5.87828615,5.87398532
37.867195,6.32455532,5.87716602,0.668871659,5.8728213,5.8761775,5.87183205
37.877686,7.07106781,5.87506034,1.09362127,5.87066985,5.87407004,5.86967881
37.888178,6.244998,5.87295548,0.609952879,5.86851803,5.8719634,5.8675252
37.89867,4.89897949,5.87085172,-0.985835804,5.86636605,5.86985785,5.86537142
37.909161,6.92820323,5.8687493,1.02929779,5.86421414,5.86775364,5.86321771
37.919653,6.40312424,5.86664788,0.732445465,5.86206188,5.86565042,5.86106364
37.930144,6.32455532,5.86454792,0.678238453,5.8599097,5.86354867,5.85890965
37.940636,5.91607978,5.86244909,0.231583014,5.85775719,5.86144803,5.85675533
37.951128,5.91607978,5.86035165,0.236068065,5.85560456,5.85934878,5.85460088
37.961619,7,5.85825587,1.06852428,5.85345204,5.85725119,5.85244654
37.972111,6.78232998,5.85616143,0.962376515,5.85129922,5.85515493,5.85029188
37.982602,5.74456265,5.85406879,-0.330917121,5.84914651,5.85306047,5.84813734
37.993094,6.70820393,5.85197763,0.925324969,5.84699351,5.85096749,5.8459825
38.003586,5.91607978,5.84988825,0.257277152,5.84484044,5.84887627,5.84382759
38.014077,6.63324958,5.84780092,0.886255416,5.84268751,5.8467871,5.84167281
38.024569,5.91607978,5.84571533,0.265262981,5.84053431,5.84469968,5.83951776
38.03506,6,5.84363199,0.395433955,5.83838127,5.84261449,5.83736286
38.045552,5.74456265,5.84155058,-0.311428859,5.83622799,5.84053123,5.83520771
38.056044,6.32455532,5.83947142,0.696479649,5.83407466,5.83845022,5.83305252
38.066535,6.55743852,5.83739481,0.848553897,5.83192152,5.83637175,5.8308975
38.077027,5.91607978,5.83532047,0.284181833,5.82976815,5.83429555,5.82874225
38.087518,5.38516481,5.83324892,-0.669390851,5.82761498,5.83222213,5.8265872
38.09801,5,5.83117989,-0.911690678,5.82546159,5.83015123,5.82443192
38.108502,5.83095189,5.82911372,0.0428739418,5.82330821,5.82808318,5.82227665
38.118993,5.38516481,5.82705074,-0.664745016,5.82115505,5.82601833,5.82012159
38.129485,6.08276253,5.82499072,0.507712331,5.8190017,5.82395642,5.81796633
38.139976,5.83095189,5.8229342,0.089541578,5.81684858,5.82189801,5.8158113
38.150468,6.08276253,5.82088096,0.511743653,5.81469529,5.81984288,5.8136561
38.16096,5.56776436,5.81883139,-0.501065886,5.81254204,5.8177914,5.81150093
38.171451,4.79583152,5.81678585,-1.01042284,5.81038904,5.81574396,5.80934601
38.181943,5.38516481,5.81474416,-0.655423036,5.8082359,5.81370037,5.80719094
38.192434,6.70820393,5.81270693,0.946307032,5.80608303,5.81166123,5.80503613
38.202926,6.32455532,5.810674,0.716855161,5.80393002,5.80962638,5.80288118
38.213418,6.55743852,5.80864579,0.865328107,5.80177708,5.80759625,5.8007263
38.223909,5.19615242,5.80662276,-0.781326015,5.79962444,5.8055713,5.79857171
38.234401,6.244998,5.8046048,0.663621274,5.79747169,5.80355141,5.79641701
38.244892,6.78232998,5.80259258,0.989816852,5.79531925,5.80153726,5.7942626
38.255384,5.56776436,5.80058603,-0.482515981,5.7931667,5.79952878,5.79210809
38.265876,6.08276253,5.79858568,0.533082406,5.79101427,5.79752648,5.78995369
38.276367,6.164414,5.79659206,0.606483257,5.78886217,5.79553092,5.78779961
38.286859,6.32455532,5.79460519,0.727976741,5.78670999,5.7935421,5.78564545
38.29735,6.08276253,5.79262583,0.538643385,5.78455815,5.79156079,5.78349163
38.307842,6,5.79065407,0.457543364,5.78240626,5.78958707,5.78133774
38.318334,6.08276253,5.78869055,0.542284039,5.78025451,5.78762159,5.77918399
38.328825,4.79583152,5.78673597,-0.995441837,5.77810312,5.78566505,5.7770306
38.339317,6.164414,5.78479051,0.616135936,5.7759517,5.78371763,5.77487717
38.349808,6.63324958,5.78285513,0.922168342,5.77380065,5.78178027,5.77272411
38.3603,5.47722558,5.78093011,-0.551093941,5.77164957,5.77985328,5.77057101
38.370792,6.40312424,5.77901633,0.790005003,5.76949869,5.77793753,5.7684181
38.381283,5.38516481,5.77711476,-0.626059068,5.7673482,5.77603398,5.76626558
38.391775,6.08276253,5.7752259,0.554559856,5.7651977,5.77414313,5.76411305
38.402266,6,5.77335105,0.476076623,5.76304762,5.7722663,5.76196092
38.412758,6.55743852,5.77149094,0.886536847,5.76089754,5.7704042,5.7598088
38.42325,5.56776436,5.76964699,-0.449313505,5.75874768,5.76855826,5.75765689
38.433741,6.244998,5.76782078,0.690780152,5.75659826,5.76673006,5.75550541
38.444233,5.91607978,5.76601363,0.387383726,5.75444887,5.76492092,5.75335396
38.454724,6.08276253,5.76422786,0.564388757,5.75229992,5.76313315,5.75120294
38.465216,6.32455532,5.7624655,0.749726498,5.75015101,5.76136879,5.74905196
38.475708,4.58257569,5.76072961,-1.08542799,5.74800236,5.7596309,5.74690123
38.486199,5.29150262,5.7590239,-0.683755274,5.74585418,5.7579232,5.74475096
38.496691,5.38516481,5.75735246,-0.610071845,5.74370606,5.75624977,5.74260075
38.507182,5.56776436,5.75572114,-0.433539818,5.74155842,5.75461645,5.74045101
38.517674,5.91607978,5.75413653,0.402421732,5.73941085,5.75302986,5.73830134
38.528166,5.91607978,5.75260751,0.404317042,5.73726357,5.75149886,5.73615195
38.538657,5.19615242,5.75114515,-0.744978339,5.73511679,5.75003452,5.73400306
38.549149,5.74456265,5.74976287,-0.0721126042,5.73297011,5.74865028,5.73185426
38.55964,5.56776436,5.74847807,-0.425104346,5.73082394,5.74736352,5.72970596
38.570132,6.164414,5.74731174,0.645834545,5.72867788,5.74619526,5.72755777
38.580624,6.244998,5.74629023,0.706192443,5.72653214,5.74517184,5.72540989
38.591115,5.29150262,5.74544565,-0.673752945,5.72438693,5.74432538,5.72326254
38.601607,5,5.74481669,-0.863027631,5.72224185,5.74369458,5.72111531
38.612098,6.4807407,5.74445004,0.858073805,5.72009732,5.74332613,5.71896862
38.62259,5.91607978,5.74440092,0.414341476,5.71795293,5.74327527,5.71682207
38.633082,5.91607978,5.74473417,0.413939139,5.71580889,5.74360685,5.71467586
38.643573,5.91607978,5.74552465,0.412983212,5.71366541,5.74439575,5.71253021
38.654065,6.40312424,5.74685806,0.810102574,5.71152209,5.74572767,5.71038472
38.664556,6.244998,5.7488302,0.704391796,5.70937936,5.74769846,5.70823979
38.675048,6.40312424,5.75154765,0.807202939,5.70723679,5.7504147,5.70609504
38.68554,5.29150262,5.75512545,-0.680898542,5.70509461,5.75399144,5.70395066
38.696031,5.91607978,5.75968545,0.395467231,5.70295303,5.75855059,5.70180687
38.706523,5.29150262,5.76535557,-0.688369773,5.70081163,5.76422006,5.69966327
38.717014,5.91607978,5.77226279,0.379232114,5.69867085,5.77112688,5.69752027
38.727506,6.40312424,5.7805335,0.789044192,5.69653027,5.77939746,5.69537747
38.737998,5.09901951,5.79028385,-0.831423082,5.69439011,5.78914796,5.69323508
38.748489,5.83095189,5.80161536,0.171279127,5.69225057,5.80047992,5.69109331
38.758981,5.56776436,5.81461251,-0.496838148,5.69011125,5.81347784,5.68895176
38.769472,5.29150262,5.82932795,-0.733365751,5.68797258,5.82819438,5.68681084
38.779964,5.91607978,5.84578601,0.265129728,5.68583414,5.84465387,5.68467014
38.790456,6.08276253,5.86396669,0.467756173,5.68369615,5.8628363,5.68252989
38.800947,6.70820393,5.88380351,0.907964988,5.68155881,5.88267517,5.68039029
38.811439,6.08276253,5.90518525,0.421399192,5.67942172,5.90405923,5.67825094
38.82193,6,5.92793848,0.268442772,5.67728531,5.92681502,5.67611224
38.832422,5.19615242,5.9518418,-0.86930396,5.67514916,5.9507211,5.67397381
38.842914,6.8556546,5.97660994,0.937573814,5.67301349,5.97549214,5.67183585
38.853405,6.244998,6.00190061,0.493049076,5.6708785,6.00078576,5.66969857
38.863897,5.65685425,6.02732408,-0.608662328,5.6687438,6.02621219,5.66756156
38.874388,6.164414,6.05242982,0.334640382,5.66660979,6.0513208,5.66542525
38.88488,5.83095189,6.07673093,-0.495761067,5.66447608,6.0756246,5.66328922
38.895372,6.40312424,6.09969505,0.550844071,5.66234288,6.09859115,5.6611537
38.905863,6.244998,6.12076325,0.3524695,5.66021039,6.11966141,5.65901888
38.916355,5.65685425,6.13937118,-0.694634388,5.65807821,6.13827095,5.65688437
38.926846,6.70820393,6.15495781,0.743805168,5.65594676,6.15385862,5.65475058
38.937338,5.74456265,6.16700712,-0.649957288,5.65381564,6.16590834,5.65261711
38.94783,6.244998,6.17507088,0.264437363,5.65168505,6.17397179,5.65048416
38.958321,6.55743852,6.17880925,0.615328588,5.64955521,6.17770909,5.64835196
38.968813,7.07106781,6.17802026,0.945011934,5.6474257,6.1769182,5.64622008
38.979304,6.164414,6.17265885,-0.0908011153,5.64529695,6.17155408,5.64408896
38.989796,6.164414,6.16283988,0.0396752324,5.64316856,6.16173159,5.64195818
39.000288,6.8556546,6.14882954,0.840728888,5.64104073,6.14771695,5.63982797
39.010779,5.83095189,6.1310198,-0.54778454,5.63891366,6.1299022,5.63769851
39.021271,6.08276253,6.10988824,-0.164698835,5.63678697,6.10876498,5.63556942
39.031762,5.74456265,6.0859767,-0.58430647,5.63466107,6.08484722,5.6334411
39.042254,6,6.0598437,-0.244629729,5.63253554,6.05870754,5.63131316
39.052746,6.70820393,6.03205499,0.822282764,5.63041061,6.03091176,5.62918581
39.063237,5.19615242,6.0031583,-0.898335058,5.62828647,6.00200772,5.62705924
39.073729,4.89897949,5.973661,-1.03666847,5.62616273,5.97250288,5.62493307
39.08422,6.164414,5.94404019,0.469439894,5.6240398,5.94287443,5.6228077
39.094712,5.91607978,5.91471391,0.03695771,5.62191729,5.91354048,5.62068273
39.105204,6.40312424,5.88605632,0.719074351,5.61979539,5.88487527,5.61855838
39.115695,5.83095189,5.85838597,-0.165632364,5.61767431,5.85719744,5.61643484
39.126187,6,5.83195687,0.409930639,5.61555366,5.83076102,5.61431172
39.136678,5.74456265,5.80697627,-0.249827195,5.61343385,5.80577334,5.61218943
39.14717,5.29150262,5.7835863,-0.701486759,5.61131447,5.78237654,5.61006757
39.157662,6,5.76188339,0.487971936,5.60919574,5.76066711,5.60794635
39.168153,5.91607978,5.74191468,0.417330928,5.60707786,5.74069219,5.60582597
39.178645,6.164414,5.72367826,0.66387931,5.60496044,5.72244989,5.60370604
39.189136,5.56776436,5.70714181,-0.373332894,5.60284387,5.70590788,5.60158696
39.199628,6.08276253,5.6922355,0.624921618,5.60072777,5.69099633,5.59946834
39.21012,5.83095189,5.67886982,0.389977014,5.59861234,5.67762571,5.59735039
39.220611,5.65685425,5.66693689,-0.100412377,5.59649779,5.66568813,5.5952333
39.231103,4.89897949,5.65631396,-0.870249662,5.59438372,5.65506081,5.59311669
39.241594,6.70820393,5.64687634,1.03020755,5.59227053,5.64561905,5.59100095
39.252086,5.83095189,5.63849435,0.438699833,5.59015783,5.63723313,5.5888857
39.262578,6.55743852,5.6310436,0.962494117,5.58804584,5.62977864,5.58677114
39.273069,6,5.6244051,0.612857979,5.58593474,5.62313657,5.58465748
39.283561,6,5.61846608,0.617684325,5.58382415,5.61719413,5.58254431
39.294052,4.89897949,5.6131256,-0.845071662,5.58171447,5.61185035,5.58043205
39.304544,6,5.60829098,0.625866614,5.57960531,5.60701254,5.57832029
39.315036,4.89897949,5.60388164,-0.839584512,5.57749687,5.60260008,5.57620925
39.325527,5.91607978,5.59982727,0.562363328,5.57538935,5.59854268,5.57409913
39.336019,6.244998,5.59606639,0.805562913,5.57328237,5.59477882,5.57198953
39.34651,5.65685425,5.59254816,0.253586444,5.57117633,5.59125765,5.56988086
39.357002,6,5.58922869,0.640914432,5.56907082,5.58793528,5.56777273
39.367494,6.55743852,5.58607242,0.98557907,5.56696606,5.58477614,5.56566533
39.377985,5.47722558,5.58305014,-0.325306879,5.56486226,5.58175101,5.56355888
39.388477,6.08276253,5.58013725,0.708960702,5.56275901,5.57883529,5.56145298
39.398968,5.83095189,5.57731489,0.503623874,5.56065672,5.57601011,5.55934803
39.40946,5.56776436,5.57456691,-0.0824775637,5.55855499,5.57325932,5.55724364
39.419952,4.89897949,5.57188112,-0.82030582,5.55645404,5.57057073,5.55514001
39.430443,5.09901951,5.56924784,-0.685731966,5.55435406,5.56793465,5.55303735
39.440935,6,5.56665867,0.65828666,5.55225466,5.56534268,5.55093526
39.451426,5,5.56410783,-0.751071121,5.55015625,5.56278904,5.54883414
39.461918,6,5.56158982,0.662125504,5.54805842,5.56026823,5.54673361
39.47241,6.08276253,5.55910087,0.723644709,5.54596139,5.55777648,5.54463387
39.482901,6,5.55663797,0.665854364,5.54386536,5.55531078,5.54253511
39.493393,6.244998,5.55419801,0.831143783,5.54176994,5.55286801,5.54043696
39.503884,6,5.55177928,0.669492883,5.53967552,5.55044648,5.5383398
39.514376,5.38516481,5.5493795,-0.405234117,5.53758171,5.54804388,5.53624325
39.524868,6.55743852,5.54699735,1.00520703,5.53548872,5.54565891,5.5341475
39.535359,5.91607978,5.54463174,0.609465378,5.53339676,5.54329048,5.53205277
39.545851,5.83095189,5.54228106,0.537280965,5.53130542,5.54093698,5.52995866
39.556342,6.244998,5.53994475,0.83967449,5.52921511,5.53859783,5.52786558
39.566834,4.79583152,5.53762146,-0.861272278,5.52712543,5.53627171,5.52577312
39.577326,5,5.5353106,-0.731649234,5.5250366,5.53395801,5.52368149
39.587817,5.29150262,5.53301166,-0.49143569,5.52294881,5.53165621,5.5215909
39.598309,5.56776436,5.53072353,0.192459961,5.52086167,5.52936523,5.51950095
39.6088,5.19615242,5.52844602,-0.576449132,5.51877559,5.52708486,5.51741204
39.619292,4.89897949,5.52617816,-0.791958756,5.51669016,5.52481413,5.51532379
39.629784,4.89897949,5.52391962,-0.790531552,5.5146056,5.52255272,5.51323639
39.640275,5.83095189,5.52167015,0.556131053,5.5125221,5.52030037,5.51115004
39.650767,5.56776436,5.51942886,0.219853362,5.51043927,5.51805619,5.50906436
39.661258,5.56776436,5.51719578,0.224874599,5.50835752,5.51582022,5.50697975
39.67175,5.09901951,5.51497008,-0.644942299,5.50627645,5.51359162,5.50489581
39.682242,6.40312424,5.51275163,0.943595574,5.50419626,5.51137026,5.50281275
39.692733,5,5.5105403,-0.714521026,5.50211716,5.50915601,5.50073076
39.703225,5.65685425,5.50833535,0.385381503,5.50003876,5.50694814,5.49864946
39.713716,5.09901951,5.50613691,-0.638057517,5.49796145,5.50474677,5.49656925
39.724208,5.65685425,5.50394429,0.39103703,5.49588484,5.50255122,5.49448973
39.7347,5.38516481,5.50175745,-0.341456642,5.49380914,5.50036143,5.49241111
39.745191,5.65685425,5.49957634,0.396582789,5.49173455,5.49817737,5.49033358
39.755683,5.91607978,5.49740034,0.647054437,5.48966068,5.49599841,5.48825677
39.766174,5.91607978,5.49522964,0.648729637,5.48758792,5.49382474,5.48618106
39.776666,5.47722558,5.49306364,-0.125849361,5.48551588,5.49165576,5.48410607
39.787158,5.56776436,5.49090235,0.277239995,5.48344477,5.48949149,5.482032
39.797649,5,5.4887458,-0.699103572,5.48137479,5.48733196,5.47995904
39.808141,4.79583152,5.48659343,-0.831120875,5.47930555,5.48517659,5.47788682
39.818632,4.58257569,5.48444549,-0.949668254,5.47723744,5.48302563,5.47581572
39.829124,5.38516481,5.48230141,-0.311667461,5.47517008,5.48087854,5.47374535
39.839616,6.32455532,5.48016128,0.918909158,5.47310366,5.47873538,5.47167593
39.850107,5.47722558,5.47802516,-0.0282769196,5.4710384,5.47659623,5.46960765
39.860599,5.38516481,5.47589252,-0.30121042,5.46897389,5.47446056,5.46754011
39.87109,5,5.47376367,-0.688304923,5.46691054,5.47232865,5.46547372
39.881582,5.47722558,5.47163807,0.0747496075,5.46484795,5.4702,5.46340809
39.892074,5.91607978,5.46951584,0.668254401,5.46278633,5.4680747,5.46134341
39.902565,5.56776436,5.46739708,0.316807966,5.46072588,5.46595286,5.4592799
39.913057,4.89897949,5.46528128,-0.752530264,5.45866621,5.46383398,5.45721715
39.923548,5.38516481,5.46316878,-0.279291919,5.45660771,5.46171839,5.45515557
39.93404,6.244998,5.46105909,0.885403248,5.45455,5.45960559,5.45309477
39.944532,5.29150262,5.45895232,-0.409206179,5.45249327,5.45749571,5.45103494
39.955023,5,5.45684861,-0.675905769,5.45043773,5.45538888,5.44897629
39.965515,5.29150262,5.45474748,-0.404035716,5.44838299,5.45328463,5.44691843
39.976006,5.19615242,5.45264928,-0.506455184,5.44632944,5.45118329,5.44486175
39.986498,5,5.45055353,-0.671232841,5.4442767,5.44908439,5.44280587
39.99699,5.29150262,5.44846038,-0.396178943,5.44222497,5.44698809,5.44075099
40.007481,5.29150262,5.44636997,-0.393531886,5.44017443,5.44489451,5.4386973
40.017973,5.09901951,5.44428185,-0.587590277,5.43812472,5.44280322,5.43664442
40.028464,5.19615242,5.44219636,-0.496028165,5.43607622,5.44071455,5.43459274
40.038956,5.19615242,5.44011307,-0.493923727,5.43402854,5.43862807,5.43254188
40.049448,5.09901951,5.43803212,-0.582247892,5.43198189,5.43654392,5.43049203
40.059939,5.09901951,5.43595367,-0.580460298,5.42993647,5.43446225,5.42844339
40.070431,6.164414,5.43387728,0.85471441,5.42789187,5.43238264,5.42639559
40.080922,5,5.43180331,-0.657117423,5.42584851,5.43030544,5.424349
40.091414,6.244998,5.42973132,0.902921192,5.42380599,5.42823021,5.42230325
40.101906,5.09901951,5.42766148,-0.573273028,5.42176452,5.42615712,5.42025853
40.112397,5.83095189,5.42559395,0.636677272,5.41972429,5.42408633,5.41821504
40.122889,5.19615242,5.4235283,-0.476839465,5.41768491,5.42201741,5.41617239
40.13338,6,5.4214649,0.760614951,5.41564677,5.41995073,5.41413098
40.143872,4.35889894,5.41940332,-1.02980793,5.4136095,5.41788586,5.41209043
40.154364,5.38516481,5.41734373,-0.179384851,5.4115733,5.41582298,5.41005092
40.164855,5.29150262,5.41528631,-0.351829059,5.40953835,5.41376225,5.40801267
40.175347,5.47722558,5.41323063,0.252972221,5.40750427,5.41170325,5.40597527
40.185838,6.40312424,5.41117706,0.995965448,5.40547145,5.40964636,5.40393913
40.19633,5.29150262,5.4091252,-0.342961477,5.40343952,5.40759115,5.40190386
40.206822,6,5.4070752,0.770016103,5.40140867,5.40553781,5.39986966
40.217313,3.87298335,5.40502725,-1.23775761,5.39937909,5.4034865,5.39783672
40.227805,4.89897949,5.40298094,-0.709930597,5.3973504,5.40143682,5.39580467
40.238296,5.09901951,5.40093663,-0.549469852,5.39532299,5.39938914,5.39377388
40.248788,4.89897949,5.39889392,-0.707046278,5.39329648,5.39734304,5.39174398
40.25928,6.164414,5.39685299,0.876105592,5.39127106,5.39529871,5.38971517
40.269771,5.74456265,5.39481402,0.591395491,5.38924694,5.39325632,5.38768764
40.280263,5.47722558,5.3927766,0.290601067,5.38722372,5.39121548,5.385661
40.290754,4.89897949,5.39074109,-0.701257163,5.38520181,5.38917655,5.38363565
40.301246,5.74456265,5.38870712,0.596536278,5.3831808,5.38713913,5.38161121
40.311738,4.35889894,5.38667484,-1.01379283,5.38116091,5.3851034,5.37958786
40.322229,5.74456265,5.38464444,0.599931832,5.37914233,5.38306954,5.37756581
40.332721,5.29150262,5.38261553,-0.30184915,5.37712467,5.38103716,5.37554468
40.343212,5.65685425,5.38058848,0.525609904,5.37510832,5.37900662,5.37352485
40.353704,4.79583152,5.37856288,-0.763368431,5.3730929,5.37697753,5.37150594
40.364196,5.47722558,5.37653893,0.317311584,5.37107862,5.37495008,5.36948814
40.374687,5.47722558,5.37451681,0.320482084,5.36906565,5.37292444,5.36747166
40.385179,5.29150262,5.37249611,-0.284593555,5.36705363,5.37090021,5.36545611
40.39567,5.65685425,5.37047722,0.535142061,5.36504293,5.36887779,5.36344188
40.406162,6.32455532,5.36845975,0.977801398,5.36303319,5.36685676,5.36142858
40.416654,5.19615242,5.36644387,-0.412663839,5.36102459,5.36483732,5.35941642
40.427145,5.29150262,5.36442977,-0.270050261,5.35901732,5.36281965,5.35740558
40.437637,4.79583152,5.36241705,-0.752718759,5.35701101,5.36080335,5.35539569
40.448128,5.56776436,5.36040611,0.455366069,5.35500605,5.35878881,5.35338713
40.45862,5,5.35839653,-0.598662286,5.35300205,5.35677564,5.35137952
40.469112,4.89897949,5.35638852,-0.676320215,5.35099921,5.35476401,5.34937306
40.479603,5.74456265,5.35438225,0.624644216,5.34899772,5.35275411,5.34736794
40.490095,5.74456265,5.35237734,0.626247003,5.34699721,5.35074556,5.34536379
40.500586,5.09901951,5.35037416,-0.501352813,5.34499805,5.34873873,5.34336098
40.511078,5,5.34837232,-0.590230736,5.34299987,5.34673323,5.34135914
40.52157,5.38516481,5.34637202,0.196958852,5.34100287,5.34472926,5.33935846
40.532061,4.69041576,5.34437343,-0.808676493,5.33900723,5.34272698,5.33735913
40.542553,5.56776436,5.34237617,0.47475066,5.33701259,5.34072603,5.33536078
40.553044,5.47722558,5.34038062,0.369925601,5.33501931,5.33872677,5.3333638
40.563536,5.29150262,5.3383864,-0.216526618,5.33302703,5.33672883,5.33136779
40.574028,5.29150262,5.33639368,-0.211875103,5.33103594,5.33473238,5.32937297
40.584519,5.09901951,5.33440266,-0.485163009,5.32904623,5.33273762,5.32737951
40.595011,5.56776436,5.33241295,0.485130306,5.32705752,5.33074415,5.32538704
40.605502,5.91607978,5.33042493,0.7652809,5.3250702,5.32875236,5.32339595
40.615994,6.55743852,5.32843821,1.10860287,5.32308389,5.32676187,5.32140585
40.626486,5,5.32645299,-0.571360644,5.32109878,5.32477285,5.31941695
40.636977,5.65685425,5.32446944,0.576528238,5.31911506,5.3227855,5.31742943
40.647469,5.74456265,5.32248719,0.649673344,5.31713236,5.32079944,5.31544291
40.65796,5.38516481,5.32050662,0.254279745,5.31515107,5.31881504,5.31345778
40.668452,5,5.31852734,-0.564382262,5.3131708,5.31683192,5.31147367
40.678944,4.69041576,5.31654954,-0.791286153,5.31119174,5.31485026,5.30949075
40.689435,5.09901951,5.3145734,-0.464277813,5.30921409,5.31287027,5.30750923
40.699927,5.83095189,5.31259855,0.719967597,5.30723747,5.31089154,5.30552874
40.710418,5.19615242,5.31062537,-0.338338509,5.30526227,5.30891447,5.30354964
40.72091,5.56776436,5.30865347,0.509029364,5.3032881,5.30693867,5.30157157
40.731402,5,5.30668304,-0.553789708,5.30131517,5.30496432,5.29959471
40.741893,4.79583152,5.30471427,-0.71336018,5.29934365,5.30299163,5.29761926
40.752385,5.29150262,5.30274678,-0.106038468,5.29737318,5.3010202,5.29564485
40.762876,5,5.30078094,-0.548434994,5.29540414,5.29905041,5.29367185
40.773368,5.47722558,5.29881639,0.422385119,5.29343615,5.29708189,5.29169988
40.78386,6,5.29685329,0.838538434,5.2914694,5.29511482,5.28972915
40.794351,4.69041576,5.29489185,-0.777480607,5.28950408,5.29314939,5.28775984
40.804843,4.35889894,5.29293169,-0.966453696,5.28753982,5.29118522,5.28579157
40.815334,5.38516481,5.29097318,0.30690655,5.285577,5.28922269,5.28382473
40.825826,5.65685425,5.28901594,0.606496753,5.28361525,5.28726142,5.28185894
40.836318,5.09901951,5.28706016,-0.43363654,5.28165475,5.2853016,5.27989439
40.846809,5,5.28510603,-0.533953213,5.2796957,5.28334342,5.27793128
40.857301,5.29150262,5.28315318,0.0913752819,5.27773772,5.2813865,5.27596922
40.867792,5.47722558,5.28120197,0.442745527,5.27578119,5.27943121,5.2740086
40.878284,4.79583152,5.27925204,-0.695284486,5.27382573,5.27747718,5.27204904
40.888776,4,5.27730357,-1.13017856,5.27187155,5.2755246,5.27009074
40.899267,6.08276253,5.27535674,0.898557615,5.26991882,5.27357365,5.26813389
40.909759,5.74456265,5.27341119,0.686404732,5.26796718,5.27162396,5.2661781
40.92025,6.08276253,5.27146729,0.900719293,5.266017,5.26967591,5.26422376
40.930742,5.09901951,5.26952465,-0.412922681,5.2640679,5.26772911,5.2622705
40.941234,4.35889894,5.26758348,-0.953249464,5.26212009,5.26578376,5.2603185
40.951725,5,5.26564396,-0.515406597,5.26017375,5.26384005,5.25836796
40.962217,4.24264069,5.26370571,-1.01047762,5.2582285,5.2618976,5.2564185
40.972708,4.79583152,5.26176911,-0.68259621,5.25628473,5.25995678,5.25447051
40.9832,5.09901951,5.25983378,-0.401016547,5.25434206,5.25801722,5.2525236
40.993692,5,5.25789992,-0.50783848,5.25240068,5.25607911,5.25057796
41.004183,4,5.25596771,-1.12069965,5.25046078,5.25414263,5.24863379
41.014675,5.19615242,5.25403677,-0.24059166,5.24852199,5.25220742,5.24669072
41.025166,5,5.25210748,-0.502103057,5.24658469,5.25027384,5.24474912
41.035658,5.47722558,5.25017947,0.476493551,5.24464849,5.24834153,5.24280862
41.04615,4.89897949,5.24825293,-0.590993605,5.24271361,5.24641067,5.2408694
41.056641,5,5.24632803,-0.496314449,5.24078021,5.24448144,5.23893166
41.067133,4.58257569,5.24440442,-0.813528564,5.23884793,5.24255348,5.23699503
41.077624,5.29150262,5.24248246,0.221404978,5.23691714,5.24062716,5.23505988
41.088116,3.87298335,5.24056178,-1.16943509,5.23498749,5.23870211,5.23312584
41.098608,5.29150262,5.23864257,0.229913137,5.23305914,5.23677851,5.23119309
41.109099,5.19615242,5.23672502,-0.201426394,5.2311323,5.23485655,5.22926184
41.119591,5.19615242,5.23480875,-0.196612114,5.22920659,5.23293586,5.2273317
41.130082,6.244998,5.23289413,1.00603373,5.22728238,5.23101681,5.22540305
41.140574,4.47213595,5.2309808,-0.871117013,5.22535931,5.22909904,5.22347552
41.151066,5.91607978,5.22906895,0.828861165,5.22343757,5.22718272,5.2215493
41.161557,4.58257569,5.22715875,-0.802859303,5.22151733,5.22526804,5.21962458
41.172049,5.65685425,5.22524985,0.656966056,5.21959824,5.22335464,5.21770098
41.18254,5.56776436,5.2233426,0.586874567,5.21768066,5.22144289,5.21577889
41.193032,4.35889894,5.22143665,-0.928729083,5.21576424,5.21953241,5.21385792
41.203524,4.79583152,5.21953218,-0.650922928,5.21384914,5.2176234,5.21193828
41.214015,5.09901951,5.21762937,-0.344397816,5.21193557,5.21571603,5.21002014
41.224507,5.29150262,5.21572786,0.275272167,5.21002315,5.21380995,5.20810314
41.234998,5.09901951,5.21382801,-0.338834018,5.20811225,5.21190551,5.20618764
41.24549,5.56776436,5.21192946,0.596518991,5.20620251,5.21000236,5.2042733
41.255982,5.29150262,5.21003239,0.285429905,5.20429412,5.20810068,5.20236027
41.266473,5.29150262,5.20813737,0.288730408,5.20238725,5.20620103,5.20044877
41.276965,4.58257569,5.20624328,-0.789726272,5.20048155,5.20430228,5.19853841
41.287456,5.19615242,5.20435085,-0.0905451883,5.19857739,5.20240519,5.19662956
41.297948,4.69041576,5.20245974,-0.715572481,5.19667439,5.20050939,5.19472188
41.30844,5.09901951,5.20057011,-0.31867004,5.19477275,5.19861507,5.19281552
41.318931,5.19615242,5.19868215,-0.0502964065,5.19287264,5.1967224,5.19091069
41.329423,5.19615242,5.19679551,-0.0253591028,5.19097371,5.19483103,5.18900702
41.339914,6,5.19491054,0.897267777,5.18907632,5.19294131,5.18710488
41.350406,5.09901951,5.19302688,-0.306606207,5.18718011,5.19105289,5.18520389
41.360898,5.38516481,5.19114472,0.440477112,5.18528526,5.18916595,5.18330426
41.371389,5.09901951,5.18926424,-0.300407597,5.18339196,5.18728068,5.18140615
41.381881,5.56776436,5.18738508,0.616748966,5.18149984,5.1853967,5.17950921
41.392372,5.09901951,5.18550759,-0.294088555,5.17960928,5.18351439,5.17761381
41.402864,4.58257569,5.18363143,-0.775277845,5.1777199,5.18163339,5.17571958
41.413356,5.91607978,5.18175677,0.85692649,5.1758319,5.17975387,5.1738267
41.423847,5.91607978,5.1798838,0.858018638,5.17394545,5.17787602,5.17193536
41.434339,5.38516481,5.17801215,0.455140259,5.17206019,5.17599947,5.17004519
41.44483,4.89897949,5.17614219,-0.526462444,5.17017649,5.1741246,5.16815657
41.455322,5.47722558,5.17427356,0.550410771,5.16829399,5.17225104,5.16626913
41.465814,5.09901951,5.17240644,-0.27090021,5.16641287,5.17037897,5.16438305
41.476305,5.47722558,5.17054101,0.553791088,5.16453332,5.16850858,5.16249852
41.486797,4.24264069,5.16867691,-0.962307758,5.16265496,5.1666395,5.16061518
41.497288,5.74456265,5.1668145,0.760097456,5.16077817,5.1647721,5.15873338
41.50778,4.24264069,5.16495344,-0.960371152,5.1589026,5.16290601,5.15685277
41.518272,5.29150262,5.16309389,0.358341645,5.1570284,5.16104143,5.15497353
41.528763,5.56776436,5.16123603,0.637595741,5.15515578,5.15917853,5.15309585
41.539255,4,5.15937952,-1.07674487,5.15328438,5.15731695,5.15121936
41.549746,5.38516481,5.15752471,0.477116438,5.15141454,5.15545705,5.14934442
41.560238,5.56776436,5.15567125,0.641944793,5.14954592,5.15359848,5.14747069
41.57073,4.24264069,5.1538193,-0.954556765,5.1476787,5.15174142,5.14559833
41.581221,5.47722558,5.15196907,0.570312641,5.14581305,5.14988604,5.14372753
41.591713,5.19615242,5.15012018,0.214551262,5.14394863,5.14803199,5.14185794
41.602204,3.74165739,5.148273,-1.18600827,5.14208579,5.14617963,5.1399899
41.612696,5,5.14642717,-0.382658031,5.14022417,5.14432861,5.13812308
41.623188,5.47722558,5.14458287,0.576751854,5.13836395,5.1424791,5.13625763
41.633679,4.89897949,5.14274029,-0.493721381,5.13650532,5.14063128,5.13439376
41.644171,4.79583152,5.14089906,-0.587424495,5.13464792,5.13878481,5.13253109
41.654662,5.47722558,5.13905955,0.581520446,5.13279211,5.13694002,5.13067
41.665154,5.29150262,5.13722139,0.392786492,5.13093753,5.13509658,5.12881012
41.675646,5.19615242,5.13538478,0.246510935,5.12908436,5.13325466,5.12695163
41.686137,4.79583152,5.13354989,-0.581135408,5.12723279,5.13141444,5.12509471
41.696629,4.24264069,5.13171636,-0.942908092,5.12538245,5.12957557,5.12323901
41.70712,5.47722558,5.12988455,0.589356452,5.1235337,5.1277384,5.12138489
41.717612,5.19615242,5.12805411,0.260956535,5.1216862,5.12590257,5.11953198
41.728104,4.89897949,5.12622522,-0.476702982,5.11984011,5.12406828,5.11768048
41.738595,5.74456265,5.12439805,0.787505299,5.11799562,5.12223569,5.11583056
41.749087,4.47213595,5.12257226,-0.806496314,5.11615238,5.12040446,5.11398186
41.759578,5,5.12074819,-0.347488408,5.11431073,5.11857493,5.11213474
41.77007,5.38516481,5.11892551,0.515983817,5.11247034,5.11674677,5.11028885
41.780562,5.29150262,5.11710438,0.417610159,5.11063137,5.11492014,5.10844436
41.791053,5.56776436,5.11528498,0.67266588,5.108794,5.11309522,5.10660146
41.801545,5.56776436,5.11346696,0.674015877,5.10695789,5.11127166,5.10475979
41.812036,5.09901951,5.11165068,-0.112388448,5.10512338,5.10944982,5.10291971
41.822528,5.29150262,5.10983578,0.426223932,5.10329013,5.10762934,5.10108086
41.83302,6,5.10802245,0.944445631,5.10145832,5.10581041,5.09924343
41.843511,5.29150262,5.10621085,0.430455303,5.09962811,5.10399319,5.09740758
41.854003,4.58257569,5.10440065,-0.722374527,5.09779916,5.10217735,5.09557297
41.864494,5.47722558,5.10259219,0.612073022,5.09597182,5.10036323,5.09373996
41.874986,5.09901951,5.10078513,-0.0420191807,5.09414574,5.09855048,5.09190818
41.885478,5.83095189,5.09897963,0.855553776,5.09232111,5.09673928,5.09007783
41.895969,4.24264069,5.09717588,-0.924410727,5.09049808,5.09492981,5.08824906
41.906461,5.47722558,5.09537353,0.61794178,5.08867633,5.09312171,5.08642155
41.916952,5.56776436,5.09357293,0.688615592,5.08685619,5.09131535,5.08459563
41.927444,5.83095189,5.09177373,0.85975471,5.08503732,5.08951036,5.08277095
41.937936,5.38516481,5.08997612,0.543312701,5.0832199,5.08770694,5.0809477
41.948427,6.8556546,5.08818025,1.32946393,5.0814041,5.08590524,5.07912605
41.958919,5.47722558,5.08638579,0.625171802,5.07958957,5.08410493,5.07730565
41.96941,4.89897949,5.08459309,-0.430828975,5.07777666,5.08230636,5.07548686
41.979902,6.08276253,5.0828018,0.999980364,5.07596503,5.08050918,5.07366931
41.990394,5.09901951,5.0810121,0.134191701,5.07415484,5.07871356,5.0718532
42.000885,5.74456265,5.07922416,0.815682836,5.07234629,5.07691968,5.07003868
42.011377,5.65685425,5.07743763,0.761194204,5.07053901,5.07512719,5.06822543
42.021868,5.83095189,5.07565287,0.869079412,5.06873336,5.07333645,5.06641378
42.03236,5.56776436,5.07386953,0.702776517,5.06692899,5.0715471,5.06460339
42.042852,5.65685425,5.07208778,0.764700246,5.06512608,5.06975933,5.06279443
42.053343,5.29150262,5.0703078,0.470313534,5.0633248,5.0679733,5.06098708
42.063835,6,5.06852925,0.965127324,5.0615248,5.06618868,5.05918099
42.074326,5.09901951,5.06675246,0.179630312,5.05972644,5.0644058,5.05737651
42.084818,5.47722558,5.06497711,0.642065779,5.05792936,5.06262433,5.0555733
42.09531,5.56776436,5.06320336,0.710324576,5.05613375,5.06084444,5.05377153
42.105801,5.19615242,5.06143138,0.367043651,5.05433977,5.0590663,5.05197136
42.116293,6.164414,5.05966084,1.05107239,5.05254708,5.05728957,5.05017247
42.126784,5.47722558,5.05789207,0.647559652,5.05075602,5.05551459,5.04837518
42.137276,5.29150262,5.05612474,0.48515758,5.04896626,5.05374103,5.04657917
42.147768,4.47213595,5.05435903,-0.763035434,5.04717797,5.05196906,5.0447846
42.158259,4.47213595,5.05259509,-0.761878689,5.04539132,5.05019884,5.04299165
42.168751,4.47213595,5.0508326,-0.760721134,5.04360596,5.04843005,5.04119996
42.179242,5.56776436,5.04907189,0.720203077,5.04182224,5.04666301,5.0394099
42.189734,5.29150262,5.04731263,0.494155838,5.04003982,5.0448974,5.03762111
42.200226,5.47722558,5.04555499,0.657016429,5.03825887,5.04313338,5.03583376
42.210717,5.91607978,5.04379913,0.933959662,5.03647957,5.04137113,5.03404804
42.221209,5.19615242,5.04204473,0.392565526,5.03470157,5.03961031,5.03226359
42.2317,5,5.04029212,-0.200728969,5.03292521,5.03785125,5.03048076
42.242192,5.19615242,5.03854096,0.397003096,5.03115015,5.03609362,5.02869921
42.252684,4.69041576,5.03679144,-0.588536895,5.02937657,5.03433759,5.02691911
42.263175,5.29150262,5.0350437,0.506417732,5.02760464,5.03258334,5.02514063
42.273667,5.19615242,5.03329743,0.403552959,5.02583401,5.03083052,5.02336344
42.284158,4.89897949,5.03155296,-0.364106402,5.02406503,5.02907948,5.02158786
42.29465,5,5.02980995,-0.172655582,5.02229737,5.02732987,5.01981357
42.305142,5,5.02806858,-0.167536791,5.02053118,5.02558187,5.01804074
42.315633,4.24264069,5.026329,-0.885261722,5.01876664,5.02383566,5.01626953
42.326125,4.89897949,5.0245909,-0.354417011,5.01700341,5.02209088,5.0144996
42.336616,5.47722558,5.02285461,0.674070447,5.01524183,5.02034789,5.0127313
42.347108,4.79583152,5.02111979,-0.474645408,5.01348157,5.01860634,5.01096429
42.3576,5,5.01938661,-0.139235798,5.01172279,5.01686641,5.00919874
42.368091,4.89897949,5.01765524,-0.344493472,5.00996566,5.01512826,5.00743481
42.378583,4.47213595,5.01592535,-0.737420771,5.00820985,5.01339157,5.00567217
42.389074,5.19615242,5.01419727,0.426562015,5.0064557,5.01165666,5.00391116
42.399566,4.58257569,5.01247068,-0.655663771,5.00470286,5.00992321,5.00215144
42.410058,4.47213595,5.01074573,-0.733900387,5.00295151,5.00819139,5.00039318
42.420549,4.58257569,5.00902261,-0.653029027,5.00120181,5.00646135,4.99863655
42.431041,5.65685425,5.00730097,0.805948684,4.99945344,5.00473278,4.99688122
42.441532,4.89897949,5.00558115,-0.326499102,4.99770672,5.003006,4.99512751
42.452024,5.19615242,5.00386282,0.43850838,4.99596133,5.00128068,4.9933751
42.462516,5.19615242,5.00214616,0.440461424,4.99421743,4.99955699,4.99162415
42.473007,4.35889894,5.00043131,-0.800957158,4.99247518,4.99783511,4.98987483
42.483499,6.164414,4.99871797,1.07967404,4.99073426,4.99611469,4.98812681
42.49399,5.74456265,4.99700645,0.864613322,4.988995,4.99439607,4.98638043
42.504482,5.56776436,4.99529643,0.756616104,4.98725707,4.99267892,4.98463534
42.514974,5,4.99358808,0.080074441,4.98552063,4.99096342,4.98289171
42.525465,4.35889894,4.99188157,-0.79560205,4.98378585,4.98924971,4.98114972
42.535957,5.47722558,4.99017656,0.697888974,4.9820524,4.98753749,4.97940903
42.546448,5.38516481,4.98847338,0.629834445,4.98032061,4.98582707,4.97766997
42.55694,4.89897949,4.98677171,-0.296297533,4.97859015,4.98411814,4.97593221
42.567432,5.83095189,4.98507172,0.919717441,4.97686119,4.98241085,4.97419593
42.577923,4.79583152,4.98337357,-0.433061254,4.9751339,4.98070537,4.97246127
42.588415,4.69041576,4.98167694,-0.539686185,4.97340793,4.97900138,4.97072792
42.598906,4.79583152,4.97998215,-0.429127747,4.97168363,4.9772992,4.9689962
42.609398,5.29150262,4.97828887,0.559655026,4.96996067,4.97559851,4.96726579
42.61989,5.47722558,4.97659729,0.707550909,4.9682392,4.97389948,4.96553685
42.630381,3.87298335,4.97490755,-1.04972577,4.9665194,4.97220226,4.96380954
42.640873,5,4.97321933,0.163648007,4.96480094,4.97050654,4.96208354
42.651364,4.69041576,4.97153296,-0.53020487,4.96308414,4.96881264,4.96035918
42.661856,5,4.96984813,0.173642942,4.96136868,4.96712024,4.95863612
42.672348,5.09901951,4.96816499,0.361738204,4.95965472,4.9654295,4.95691453
42.682839,4.58257569,4.9664837,-0.6196031,4.95794242,4.96374058,4.95519458
42.693331,4.58257569,4.96480394,-0.618246107,4.95623147,4.96205317,4.95347594
42.703822,4.58257569,4.96312605,-0.616887634,4.95452219,4.96036759,4.95175893
42.714314,4.35889894,4.96144969,-0.776241424,4.95281424,4.95868351,4.95004324
42.724806,3.74165739,4.95977504,-1.10368367,4.95110781,4.95700111,4.94832901
42.735297,5.19615242,4.95810225,0.48790386,4.94940303,4.95532053,4.94661643
42.745789,5.29150262,4.956431,0.578853715,4.94769961,4.95364147,4.94490515
42.75628,4.58257569,4.95476162,-0.610070424,4.94599785,4.95196425,4.94319552
42.766772,5.29150262,4.95309379,0.581729178,4.94429743,4.95028854,4.94148719
42.777264,4.89897949,4.95142766,-0.229015673,4.94259853,4.9486145,4.93978034
42.787755,4.24264069,4.94976341,-0.840905896,4.94090129,4.94694231,4.93807512
42.798247,4.24264069,4.94810072,-0.839916681,4.93920539,4.94527164,4.93637122
42.808738,5,4.9464399,0.231430561,4.93751117,4.94360281,4.93466896
42.81923,4.89897949,4.94478063,-0.214012026,4.9358183,4.94193551,4.93296801
42.829722,4.12310563,4.94312309,-0.905548157,4.93412693,4.9402699,4.93126853
42.840213,4.79583152,4.94146743,-0.381622722,4.93243723,4.93860613,4.92957069
42.850705,4.69041576,4.93981333,-0.499397203,4.93074889,4.93694389,4.92787417
42.861196,5.74456265,4.93816111,0.897998629,4.92906221,4.9352835,4.92617929
42.871688,4.79583152,4.93651046,-0.375071912,4.92737689,4.93362465,4.92448572
42.88218,5.29150262,4.93486154,0.597194339,4.92569307,4.93196749,4.92279362
42.892671,5,4.93321451,0.258428882,4.92401093,4.93031218,4.92110317
42.903163,4.89897949,4.93156906,-0.180525821,4.92233013,4.92865842,4.91941403
42.913654,5.19615242,4.92992549,0.51597183,4.92065101,4.92700651,4.91772653
42.924146,4.89897949,4.92828351,-0.171184179,4.91897324,4.92535615,4.91604034
42.934638,4.12310563,4.92664326,-0.896402609,4.91729699,4.92370749,4.91435563
42.945129,4.89897949,4.92500491,-0.161323982,4.9156224,4.92206069,4.91267256
42.955621,4.79583152,4.92336815,-0.357122704,4.91394917,4.92041545,4.91099081
42.966112,4.12310563,4.92173329,-0.8936597,4.91227762,4.91877207,4.90931069
42.976604,4.47213595,4.92010001,-0.669301171,4.91060741,4.91713024,4.90763189
42.987096,5.29150262,4.91846849,0.610765204,4.90893872,4.91549012,4.90595457
42.997587,4.89897949,4.91683887,-0.133638999,4.90727171,4.91385188,4.90427889
43.008079,5,4.91521085,0.291185774,4.90560604,4.91221519,4.90260452
43.01857,5.29150262,4.91358473,0.614750267,4.90394206,4.91058038,4.9009318
43.029062,5.09901951,4.91196022,0.432503519,4.90227943,4.90894713,4.89926039
43.039554,4.79583152,4.91033747,-0.338387268,4.90061831,4.90731561,4.89759045
43.050045,4.58257569,4.90871663,-0.5710875,4.89895887,4.90568596,4.89592216
43.060537,6,4.9070974,1.04541982,4.89730078,4.90405789,4.89425518
43.071028,4.35889894,4.90548009,-0.739311262,4.89564437,4.90243169,4.89258984
43.08152,5.19615242,4.90386439,0.540636696,4.89398931,4.90080707,4.89092582
43.092012,5.47722558,4.90225046,0.758271138,4.89233578,4.89918418,4.88926328
43.102503,3.60555128,4.90063845,-1.13801897,4.89068391,4.89756318,4.88760238
43.112995,3.87298335,4.89902806,-1.01293865,4.88903341,4.89594375,4.88594279
43.123486,5.19615242,4.89741961,0.546564558,4.88738458,4.89432622,4.88428484
43.133978,5.29150262,4.89581277,0.629038829,4.88573711,4.89271028,4.88262821
43.14447,4.69041576,4.89420772,-0.451433229,4.88409115,4.89109607,4.88097305
43.154961,4.35889894,4.8926046,-0.730551612,4.88244687,4.88948376,4.87931954
43.165453,4.89897949,4.89100311,0.0893105329,4.88080395,4.88787304,4.87766734
43.175944,4.79583152,4.88940357,-0.305895477,4.87916271,4.88626422,4.87601677
43.186436,5.47722558,4.88780565,0.767736883,4.87752282,4.884657,4.87436753
43.196928,5.56776436,4.88620953,0.825563341,4.87588446,4.88305153,4.87271976
43.207419,4.58257569,4.88461536,-0.549581352,4.87424776,4.88144796,4.87107363
43.217911,5.29150262,4.88302282,0.639124242,4.87261243,4.879846,4.86942882
43.228402,5.09901951,4.88143224,0.466462508,4.87097878,4.87824594,4.86778564
43.238894,4.79583152,4.87984331,-0.289847865,4.86934648,4.8766475,4.86614378
43.249386,4.58257569,4.87825618,-0.543765099,4.86771571,4.87505081,4.8645034
43.259877,5.29150262,4.876671,0.644074235,4.86608661,4.87345604,4.86286465
43.270369,4.35889894,4.87508748,-0.718462623,4.86445887,4.87186288,4.86122722
43.28086,4.89897949,4.87350593,0.159604384,4.8628328,4.87027165,4.85959142
43.291352,5.38516481,4.87192603,0.716406852,4.8612081,4.86868203,4.85795694
43.301844,4.24264069,4.87034795,-0.792279787,4.85958492,4.86709418,4.85632394
43.312335,5,4.86877184,0.362254282,4.85796341,4.86550826,4.85469257
43.322827,4.69041576,4.86719739,-0.420454077,4.85634326,4.86392396,4.85306251
43.333318,5.29150262,4.86562492,0.652593061,4.85472479,4.8623416,4.85143409
43.34381,4.47213595,4.86405412,-0.626033679,4.85310768,4.86076086,4.84980699
43.354302,3.74165739,4.86248515,-1.05869154,4.8514921,4.85918191,4.84818136
43.364793,4.79583152,4.86091816,-0.255120836,4.84987818,4.8576049,4.84655737
43.375285,5.47722558,4.85935286,0.7860488,4.84826563,4.85602952,4.84493469
43.385776,4.12310563,4.85778954,-0.857137043,4.84665475,4.85445609,4.84331364
43.396268,5.29150262,4.8562279,0.659753528,4.84504524,4.85288429,4.84169391
43.40676,4.79583152,4.85466811,-0.242562548,4.84343725,4.8513143,4.84007565
43.417251,5.19615242,4.85311031,0.585697968,4.84183093,4.84974625,4.83845902
43.427743,4.35889894,4.85155421,-0.701894058,4.84022597,4.84817985,4.83684371
43.438234,4.58257569,4.85000011,-0.517130943,4.83862269,4.8466154,4.83523002
43.448726,4.79583152,4.84844771,-0.229382178,4.83702078,4.84505261,4.83361766
43.459218,5.56776436,4.84689716,0.849038987,4.83542038,4.84349163,4.83200676
43.469709,4.89897949,4.84534862,0.231583388,4.83382165,4.84193261,4.83039749
43.480201,4.47213595,4.84380179,-0.609644025,4.8322243,4.84037526,4.82878954
43.490692,5.19615242,4.84225698,0.594891122,4.83062861,4.83881986,4.82718322
43.501184,4.69041576,4.84071388,-0.387683011,4.82903429,4.83726614,4.82557821
43.511676,5.83095189,4.83917265,0.995881141,4.82744149,4.83571424,4.82397467
43.522167,4.69041576,4.83763344,-0.38368956,4.82585035,4.83416431,4.82237275
43.532659,5.47722558,4.83609596,0.8007057,4.82426059,4.83261606,4.82077215
43.54315,4,4.8345605,-0.913542829,4.8226725,4.83106979,4.81917318
43.553642,3.74165739,4.83302678,-1.04468627,4.82108577,4.8295252,4.81757552
43.564134,4.24264069,4.83149494,-0.767368396,4.81950056,4.82798245,4.81597932
43.574625,4.79583152,4.82996514,-0.184752852,4.81791703,4.82644168,4.81438475
43.585117,5.09901951,4.82843708,0.520175386,4.81633485,4.82490261,4.8127915
43.595608,5.56776436,4.82691106,0.860728354,4.81475435,4.82336553,4.81119986
43.6061,4,4.8253868,-0.908508006,4.81317522,4.82183014,4.80960954
43.616592,5,4.82386443,0.419685083,4.8115976,4.82029661,4.80802068
43.627083,5.74456265,4.82234411,0.960322098,4.81002166,4.81876508,4.80643344
43.637575,4.58257569,4.82082556,-0.488108456,4.80844708,4.81723525,4.80484752
43.648066,4.47213595,4.81930906,-0.589213973,4.80687417,4.81570743,4.80326321
43.658558,4.89897949,4.81779433,0.284930087,4.80530262,4.81418133,4.80168022
43.66905,5.09901951,4.81628152,0.531731129,4.8037326,4.81265709,4.80009869
43.679541,4.79583152,4.81477077,-0.137619947,4.80216424,4.81113487,4.79851878
43.690033,5.19615242,4.81326181,0.618781557,4.80059725,4.80961437,4.79694018
43.700524,4.47213595,4.81175491,-0.582768357,4.79903193,4.80809589,4.79536319
43.711016,4.79583152,4.81024981,-0.120076161,4.79746797,4.80657914,4.79378752
43.721508,4.12310563,4.80874664,-0.828034427,4.79590553,4.80506428,4.79221331
43.731999,4.79583152,4.80724555,-0.10683645,4.79434476,4.80355144,4.7906407
43.742491,5.09901951,4.80574626,0.54154709,4.79278535,4.80204035,4.78906941
43.752982,4.35889894,4.80424906,-0.667345578,4.79122761,4.8005313,4.78749974
43.763474,3.87298335,4.80275367,-0.96424599,4.78967124,4.79902399,4.78593137
43.773966,4.24264069,4.80126024,-0.747408557,4.78811639,4.79751859,4.78436446
43.784457,4.58257569,4.7997689,-0.466039922,4.7865632,4.79601523,4.78279916
43.794949,4.12310563,4.79827939,-0.821689579,4.78501137,4.79451363,4.78123516
43.80544,4.79583152,4.79679198,-0.0309912784,4.78346121,4.79301408,4.77967278
43.815932,5.19615242,4.7953064,0.633124015,4.78191242,4.79151631,4.7781117
43.826424,4.58257569,4.7938228,-0.45961626,4.78036515,4.79002045,4.77655209
43.836915,4.58257569,4.79234132,-0.458001772,4.77881954,4.78852666,4.77499407
43.847407,5,4.79086168,0.457316437,4.77727529,4.78703464,4.77343736
43.857898,4.79583152,4.78938416,0.0802954551,4.77573271,4.7855447,4.77188226
43.86839,4.12310563,4.7879085,-0.815354447,4.77419149,4.78405655,4.77032847
43.878882,4.24264069,4.78643483,-0.737423994,4.77265179,4.78257033,4.76877612
43.889373,5.74456265,4.78496331,0.979591415,4.77111375,4.7810862,4.76722538
43.899865,4.12310563,4.78349364,-0.812642615,4.76957708,4.77960387,4.76567595
43.910356,4.89897949,4.78202613,0.341984435,4.76804207,4.77812363,4.76412811
43.920848,4.89897949,4.78056049,0.344120608,4.76650843,4.7766452,4.76258158
43.93134,5.19615242,4.77909687,0.645798382,4.7649763,4.77516872,4.7610365
43.941831,5,4.77763541,0.471555496,4.76344583,4.77369435,4.75949302
43.952323,5.19615242,4.77617584,0.648056,4.76191672,4.77222181,4.75795084
43.962814,4,4.77471845,-0.880180917,4.76038928,4.77075137,4.75641025
43.973306,4.24264069,4.77326295,-0.728438233,4.7588632,4.76928277,4.75487097
43.983798,3.31662479,4.77180949,-1.20631037,4.75733864,4.76781615,4.75333314
43.994289,4.58257569,4.77035822,-0.433338808,4.75581573,4.76635165,4.7517969
44.004781,5.19615242,4.76890886,0.653638709,4.75429419,4.764889,4.75026196
44.015272,3.87298335,4.7674617,-0.945768657,4.75277431,4.76342848,4.74872861
44.025764,5.29150262,4.76601646,0.724904243,4.75125579,4.76196982,4.74719656
44.036256,5.29150262,4.76457329,0.725898981,4.74973878,4.76051316,4.74566596
44.046747,5,4.76313233,0.486690525,4.74822343,4.75905865,4.74413694
44.057239,4,4.76169332,-0.872750431,4.74670945,4.75760601,4.74260923
44.06773,4.47213595,4.76025652,-0.536768632,4.74519712,4.75615552,4.7410831
44.078222,4.79583152,4.75882168,0.192379438,4.74368616,4.75470692,4.73955827
44.088714,5.29150262,4.75738893,0.730830826,4.74217671,4.75326035,4.73803488
44.099205,5.29150262,4.75595841,0.73180886,4.74066891,4.75181595,4.73651307
44.109697,4.58257569,4.75452987,-0.414673581,4.73916248,4.75037345,4.73499256
44.120188,5.29150262,4.75310358,0.7337568,4.7376577,4.74893312,4.73347364
44.13068,4.47213595,4.75167927,-0.528718559,4.73615429,4.74749471,4.73195601
44.141172,5.29150262,4.75025708,0.735693917,4.73465239,4.74605836,4.73043981
44.151663,4.12310563,4.74883716,-0.791031943,4.73315213,4.7446242,4.7289252
44.162155,4.69041576,4.74741924,-0.238754017,4.73165325,4.74319197,4.72741188
44.172646,5.19615242,4.7460036,0.670931312,4.73015601,4.74176194,4.72590013
44.183138,5.83095189,4.74458997,1.04228687,4.72866014,4.74033386,4.72438968
44.19363,4.47213595,4.74317849,-0.52061746,4.72716578,4.73890786,4.72288066
44.204121,4.58257569,4.74176932,-0.398990753,4.72567306,4.73748408,4.72137322
44.214613,4.89897949,4.74036217,0.398267892,4.72418172,4.73606227,4.71986707
44.225104,4.69041576,4.73895734,-0.220321528,4.72269202,4.73464269,4.71836249
44.235596,4.58257569,4.73755455,-0.393673535,4.72120368,4.73322508,4.7168592
44.246088,4.47213595,4.73615395,-0.513826811,4.71971686,4.73180958,4.71535735
44.256579,5.09901951,4.73475568,0.603542739,4.71823167,4.73039634,4.71385706
44.267071,4.35889894,4.73335947,-0.611931801,4.71674786,4.72898509,4.71235806
44.277562,4.35889894,4.73196561,-0.610791837,4.71526569,4.72757611,4.71086062
44.288054,4.79583152,4.73057383,0.255455846,4.71378488,4.72616913,4.70936448
44.298546,4.69041576,4.72918428,-0.196897233,4.71230558,4.7247643,4.70786975
44.309037,4.69041576,4.72779709,-0.19334252,4.71082793,4.72336175,4.7063766
44.319529,5.65685425,4.72641201,0.964594342,4.70935164,4.72196123,4.70488473
44.33002,4.69041576,4.7250293,-0.186047143,4.70787699,4.72056302,4.70339442
44.340512,4.58257569,4.72364871,-0.375596885,4.70640371,4.71916684,4.70190539
44.351004,4.69041576,4.72227039,-0.178478661,4.70493193,4.71777284,4.70041779
44.361495,4.69041576,4.72089447,-0.174581529,4.70346179,4.71638117,4.69893175
44.371987,4.58257569,4.71952069,-0.370060805,4.70199302,4.71499156,4.69744699
44.382478,5.09901951,4.71814934,0.617146805,4.70052589,4.71360428,4.69596378
44.39297,4.79583152,4.71678014,0.28116078,4.69906012,4.71221909,4.69448186
44.403462,4.58257569,4.71541325,-0.364468861,4.69759586,4.71083611,4.69300135
44.413953,5.38516481,4.71404879,0.819216708,4.69613324,4.70945549,4.6915224
44.424445,4.24264069,4.71268653,-0.685598893,4.69467197,4.70807698,4.69004472
44.434936,5.29150262,4.71132672,0.761692785,4.69321235,4.70670084,4.6885686
44.445428,4.69041576,4.70996912,-0.139833346,4.69175409,4.70532682,4.68709375
44.45592,4.69041576,4.70861387,-0.134900379,4.69029734,4.70395507,4.68562032
44.466411,4.89897949,4.7072611,0.437856577,4.68884222,4.70258571,4.68414844
44.476903,5,4.70591057,0.542300129,4.68738846,4.7012185,4.68267783
44.487394,4.47213595,4.70456254,-0.482106404,4.68593634,4.6998537,4.68120877
44.497886,5,4.70321676,0.544778153,4.68448559,4.69849107,4.67974098
44.508378,4.79583152,4.70187338,0.306525925,4.68303633,4.69713074,4.67827459
44.518869,5.29150262,4.70053253,0.768745793,4.68158871,4.69577286,4.67680976
44.529361,4.24264069,4.69919396,-0.67568726,4.68014245,4.69441717,4.67534619
44.539852,4.12310563,4.69785794,-0.758124209,4.67869783,4.69306394,4.67388417
44.550344,4.69041576,4.69652423,-0.0781567041,4.67725456,4.69171292,4.67242341
44.560836,4.12310563,4.69519296,-0.756364552,4.6758128,4.69036425,4.67096405
44.571327,4.79583152,4.69386427,0.319323112,4.67437267,4.68901807,4.66950624
44.581819,4.12310563,4.69253792,-0.75460738,4.6729339,4.68767414,4.66804969
44.59231,4.58257569,4.69121418,-0.329603519,4.67149677,4.68633271,4.66659468
44.602802,5,4.68989279,0.556872708,4.67006099,4.68499355,4.66514093
44.613294,3.60555128,4.6885739,-1.04068373,4.66862672,4.68365679,4.66368858
44.623785,4.12310563,4.68725764,-0.751100536,4.66719407,4.68232258,4.66223777
44.634277,4.35889894,4.68594378,-0.571878341,4.66576279,4.68099065,4.66078822
44.644768,5.56776436,4.68463258,0.939750917,4.66433314,4.67966129,4.6593402
44.65526,4.89897949,4.68332379,0.464387438,4.66290484,4.67833425,4.65789343
44.665752,4.47213595,4.68201757,-0.458128377,4.66147805,4.67700967,4.65644806
44.676243,5.47722558,4.68071403,0.892474955,4.66005288,4.67568768,4.65500422
44.686735,4.69041576,4.67941295,0.10489427,4.65862908,4.67436805,4.65356164
44.697226,5.38516481,4.67811459,0.840862781,4.6572069,4.67305103,4.65212058
44.707718,4.58257569,4.67681871,-0.306990257,4.65578608,4.67173639,4.65068078
44.71821,4.89897949,4.67552545,0.472709246,4.65436676,4.67042427,4.64924236
44.728701,4.24264069,4.67423495,-0.656958343,4.65294907,4.66911481,4.64780548
44.739193,4.79583152,4.67294697,0.350548929,4.65153273,4.66780776,4.64636984
44.749684,5.38516481,4.67166177,0.844691088,4.65011803,4.66650339,4.64493572
44.760176,5.19615242,4.67037913,0.725102266,4.64870468,4.66520146,4.64350285
44.770668,4.89897949,4.66909917,0.479458358,4.64729283,4.66390212,4.64207136
44.781159,4.69041576,4.66782203,0.150312097,4.6458826,4.66260549,4.6406414
44.791651,5.56776436,4.66654749,0.949324428,4.64447373,4.66131135,4.63921268
44.802142,4.79583152,4.66527581,0.361324948,4.64306649,4.66001996,4.63778547
44.812634,5.38516481,4.66400674,0.84921026,4.64166061,4.65873108,4.63635951
44.823126,4.69041576,4.66274044,0.166359006,4.64025622,4.65744485,4.63493493
44.833617,5.38516481,4.66147704,0.850698402,4.63885345,4.6561614,4.63351186
44.844109,4.79583152,4.6602163,0.368259716,4.63745204,4.65488052,4.63209004
44.8546,4.89897949,4.6589585,0.489919365,4.63605226,4.65360245,4.63066972
44.865092,5.38516481,4.6577034,0.85291348,4.63465384,4.65232697,4.62925064
44.875584,3.87298335,4.65645115,-0.885137164,4.6332569,4.65105422,4.62783293
44.886075,5,4.65520186,0.587195142,4.6318616,4.64978434,4.62641674
44.896567,4.79583152,4.65395534,0.37666455,4.63046764,4.64851709,4.62500177
44.907058,5.09901951,4.65271183,0.668062637,4.62907532,4.64725273,4.62358832
44.91755,5.19615242,4.6514711,0.738025283,4.62768435,4.64599105,4.62217609
44.928042,5.83095189,4.65023331,1.08660875,4.62629487,4.64473218,4.62076524
44.938533,4.69041576,4.64899858,0.203512115,4.62490701,4.64347625,4.61935588
44.949025,5.09901951,4.64776669,0.671753541,4.62352051,4.64222305,4.61794776
44.959516,4.58257569,4.64653791,-0.252907522,4.62213563,4.64097283,4.61654113
44.970008,4.35889894,4.64531201,-0.535175735,4.62075211,4.63972536,4.61513574
44.9805,5.38516481,4.64408913,0.860857523,4.61937008,4.6384808,4.6137317
44.990991,4.47213595,4.64286941,-0.413199053,4.61798968,4.63723927,4.61232916
45.001483,4.24264069,4.64165264,-0.631673926,4.61661062,4.63600056,4.61092785
45.011974,4.24264069,4.64043906,-0.63071259,4.61523319,4.63476492,4.60952803
45.022466,5.47722558,4.63922847,0.91542182,4.61385712,4.63353214,4.60812943
45.032958,4.35889894,4.638021,-0.52832003,4.61248254,4.63230235,4.60673219
45.043449,3.74165739,4.63681679,-0.946128639,4.61110957,4.6310757,4.60533644
45.053941,5,4.63561563,0.603642584,4.60973797,4.62985196,4.6039419
45.064432,5.19615242,4.63441778,0.749489591,4.60836798,4.6286314,4.60254886
45.074924,4.47213595,4.63322302,-0.401356529,4.60699935,4.6274138,4.60115703
45.085416,4.69041576,4.63203149,0.241628362,4.60563222,4.62619931,4.59976656
45.095907,4.47213595,4.63084334,-0.398380956,4.60426669,4.62498805,4.59837756
45.106399,5.83095189,4.62965836,1.09603537,4.60290253,4.62377982,4.59698978
45.11689,5.83095189,4.62847679,1.09657426,4.60153999,4.62257487,4.59560348
45.127382,4.69041576,4.62729844,0.251231615,4.6001788,4.62137301,4.5942184
45.137874,4.58257569,4.62612344,-0.208680962,4.59881911,4.62017435,4.59283466
45.148365,4.79583152,4.62495193,0.413375846,4.59746103,4.61897906,4.59145239
45.158857,4.69041576,4.62378372,0.258131823,4.59610431,4.61778691,4.59007133
45.169348,4.12310563,4.62261905,-0.706762638,4.59474921,4.61659817,4.58869175
45.17984,3.87298335,4.62145773,-0.865144141,4.59339546,4.61541263,4.58731338
45.190332,5.09901951,4.6202999,0.69189567,4.59204321,4.61423043,4.58593634
45.200823,4.35889894,4.61914568,-0.510143842,4.59069257,4.61305171,4.58456078
45.211315,4.47213595,4.6179949,-0.381914843,4.58934329,4.61187627,4.58318641
45.221806,5.19615242,4.6168478,0.761120635,4.58799563,4.61070437,4.58181352
45.232298,4.24264069,4.61570419,-0.610789245,4.58664933,4.60953581,4.58044183
45.24279,5.09901951,4.61456421,0.696028237,4.58530452,4.60837073,4.57907147
45.253281,4.79583152,4.61342799,0.427087265,4.58396133,4.60720926,4.57770257
45.263773,4.79583152,4.61229536,0.428411211,4.58261949,4.60605123,4.57633487
45.274264,5.19615242,4.61116655,0.76484369,4.58127927,4.60489687,4.57496863
45.284756,5,4.61004139,0.624466658,4.57994042,4.603746,4.57360359
45.295248,5.09901951,4.60892002,0.700071064,4.57860305,4.60259876,4.57223987
45.305739,4.47213595,4.60780257,-0.368329493,4.5772673,4.60145529,4.57087761
45.316231,4.12310563,4.60668887,-0.695401496,4.57593291,4.6003154,4.56951655
45.326722,4.89897949,4.60557915,0.541664408,4.57460014,4.59917935,4.56815693
45.337214,3.74165739,4.60447326,-0.928878825,4.57326873,4.59804695,4.56679851
45.347706,5.09901951,4.60337132,0.704022865,4.57193881,4.59691835,4.56544141
45.358197,4.24264069,4.60227348,-0.599693914,4.57061051,4.59579368,4.56408576
45.368689,4.24264069,4.60117956,-0.598781156,4.56928357,4.59467277,4.56273129
45.37918,4.58257569,4.60008981,-0.132340921,4.56795824,4.59355587,4.56137828
45.389672,4.58257569,4.59900407,-0.128173223,4.56663428,4.5924428,4.56002644
45.400164,5,4.59792247,0.634095837,4.56531182,4.59133371,4.55867592
45.410655,4.47213595,4.59684516,-0.3531419,4.56399096,4.59022874,4.55732685
45.421147,3.74165739,4.59577197,-0.924183195,4.56267148,4.58912771,4.55597895
45.431638,4.58257569,4.59470314,-0.110124684,4.56135361,4.58803088,4.5546325
45.44213,4.69041576,4.59363852,0.311090401,4.56003711,4.58693808,4.55328722
45.452622,4.89897949,4.59257825,0.553535212,4.5587221,4.58584946,4.55194325
45.463113,5.74456265,4.59152248,1.07379708,4.55740871,4.58476515,4.55060072
45.473605,5.38516481,4.59047104,0.891455979,4.55609668,4.583685,4.54925936
45.484096,3.60555128,4.58942419,-0.991903683,4.55478627,4.58260926,4.54791944
45.494588,5.65685425,4.58838177,1.03366943,4.55347724,4.58153776,4.54658069
45.50508,4.79583152,4.58734392,0.456604425,4.55216969,4.58047066,4.54524324
45.515571,4.24264069,4.5863108,-0.586233838,4.55086377,4.57940809,4.54390721
45.526063,4.35889894,4.58528225,-0.475797551,4.54955921,4.57834992,4.54257236
45.536554,4.58257569,4.58425853,-0.0410223475,4.54825627,4.57729638,4.54123893
45.547046,5.09901951,4.58323948,0.718178275,4.54695471,4.57624733,4.53990668
45.557538,4.79583152,4.58222526,0.462175579,4.54565464,4.57520291,4.53857571
45.568029,4.35889894,4.58121601,-0.471505108,4.54435619,4.57416328,4.53724617
45.578521,4.58257569,4.5802116,0.0486219661,4.54305911,4.57312829,4.53591779
45.589012,5.19615242,4.57921227,0.785455378,4.54176366,4.57209819,4.53459083
45.599504,5.29150262,4.57821789,0.844561857,4.54046958,4.57107284,4.53326503
45.609996,5.19615242,4.57722861,0.786717109,4.539177,4.57005239,4.53194052
45.620487,4.58257569,4.57624459,0.0795682548,4.53788604,4.569037,4.53061742
45.630979,6.164414,4.57526569,1.26061426,4.53659645,4.56802652,4.52929548
45.64147,5.47722558,4.57429216,0.950228087,4.53530849,4.56702122,4.52797495
45.651962,4.24264069,4.57332388,-0.575050599,4.53402191,4.56602096,4.52665558
45.662454,4.47213595,4.572361,-0.316583398,4.53273683,4.56502589,4.52533749
45.672945,5.56776436,4.57140369,0.998178679,4.53145337,4.56403618,4.5240208
45.683437,4.12310563,4.57045182,-0.668839436,4.53017129,4.5630517,4.52270527
45.693928,4.12310563,4.56950564,-0.668131732,4.52889084,4.5620727,4.52139114
45.70442,4.79583152,4.56856504,0.476724748,4.52761177,4.56109907,4.52007816
45.714912,4.89897949,4.56763018,0.575629486,4.52633421,4.56013096,4.51876646
45.725403,5.29150262,4.56670122,0.851352688,4.52505827,4.55916854,4.51745615
45.735895,4.24264069,4.56577806,-0.568451735,4.52378372,4.55821169,4.51614699
45.746386,4,4.56486095,-0.751572318,4.52251079,4.55726067,4.51483923
45.756878,4.24264069,4.56394978,-0.566841332,4.52123926,4.55631537,4.51353261
45.76737,4.24264069,4.56304473,-0.56604244,4.51996923,4.55537597,4.51222725
45.777861,5.56776436,4.56214596,1.00280527,4.51870083,4.55444261,4.51092329
45.788353,6.08276253,4.56125337,1.23349469,4.51743382,4.55351521,4.50962047
45.798844,5.19615242,4.56036723,0.797361394,4.51616844,4.55259403,4.50831903
45.809336,6.164414,4.55948744,1.26685696,4.51490446,4.55167896,4.50701874
45.819828,5.47722558,4.55861418,0.958442168,4.51364199,4.55077019,4.5057197
45.830319,4.58257569,4.55774763,0.157569254,4.51238115,4.54986789,4.50442205
45.840811,3.60555128,4.55688769,-0.975364759,4.51112171,4.54897196,4.50312554
45.851302,4,4.55603463,-0.745677298,4.5098639,4.54808268,4.5018304
45.861794,4,4.55518839,-0.745109648,4.50860749,4.54719997,4.50053639
45.872286,4.58257569,4.55434913,0.168007625,4.5073526,4.546324,4.49924364
45.882777,3.74165739,4.55351704,-0.901032551,4.50609935,4.54545495,4.49795227
45.893269,5.29150262,4.55269207,0.859540899,4.5048475,4.54459275,4.49666202
45.90376,4.58257569,4.55187446,0.175217691,4.5035973,4.54373768,4.49537314
45.914252,4.69041576,4.55106416,0.373298266,4.50234849,4.54288968,4.49408539
45.924744,5.29150262,4.55026138,0.860953683,4.50110121,4.54204891,4.49279889
45.935235,4.12310563,4.54946628,-0.652962982,4.49985558,4.54121559,4.49151375
45.945727,4.35889894,4.54867884,-0.43563734,4.49861135,4.54038965,4.49022974
45.956218,4,4.54789931,-0.740202206,4.49736877,4.53957137,4.48894709
45.96671,4.89897949,4.54712766,0.59317099,4.4961276,4.53876071,4.48766556
45.977202,5.09901951,4.5463641,0.743407973,4.49488796,4.53795786,4.48638527
45.987693,4.69041576,4.54560881,0.38053508,4.49364997,4.53716303,4.48510634
45.998185,5,4.54486178,0.674639324,4.4924134,4.53637617,4.48382853
46.008676,5.29150262,4.54412328,0.86451104,4.49117848,4.53559758,4.48255207
46.019168,5.47722558,4.5433933,0.966349973,4.48994498,4.53482722,4.48127673
46.02966,4.69041576,4.54267205,0.384374437,4.48871302,4.53406531,4.48000262
46.040151,5.09901951,4.54195973,0.746364375,4.48748271,4.53331206,4.47872986
46.050643,4.89897949,4.54125635,0.598099601,4.48625383,4.53256747,4.47745821
46.061134,5.09901951,4.54056219,0.747300021,4.48502661,4.5318318,4.47618791
46.071626,5.65685425,4.53987726,1.05687132,4.48380082,4.53110508,4.47491871
46.082118,4.79583152,4.53920179,0.506586353,4.48257657,4.53038753,4.47365075
46.092609,5.38516481,4.53853599,0.920124349,4.48135399,4.52967935,4.47238412
46.103101,5.09901951,4.53787989,0.74909253,4.48013285,4.52898059,4.4711186
46.113592,5,4.53723379,0.680269216,4.47891337,4.52829152,4.46985442
46.124084,4.79583152,4.53659773,0.509150068,4.47769533,4.52761218,4.46859134
46.134576,4.89897949,4.53597194,0.602501074,4.47647884,4.52694282,4.46732948
46.145067,5.09901951,4.53535666,0.750774836,4.47526403,4.52628366,4.46606895
46.155559,4.89897949,4.53475195,0.603512667,4.47405066,4.52563476,4.46480952
46.16605,5.09901951,4.53415811,0.751572623,4.47283897,4.52499642,4.46355143
46.176542,4.58257569,4.53357521,0.221360528,4.47162873,4.52436871,4.46229442
46.187034,3.74165739,4.53300352,-0.889576376,4.47042005,4.52375188,4.46103863
46.197525,4.24264069,4.53244327,-0.538333155,4.46921306,4.52314619,4.45978417
46.208017,4.58257569,4.53189458,0.225124669,4.46800752,4.52255173,4.4585308
46.218508,4.12310563,4.53135775,-0.638946103,4.46680367,4.5219688,4.45727875
46.229,4.47213595,4.53083289,-0.242274511,4.46560128,4.52139752,4.45602779
46.239492,4.12310563,4.53032029,-0.638133734,4.46440047,4.52083816,4.45477803
46.249983,4.58257569,4.52982021,0.229685628,4.46320135,4.52029099,4.4535296
46.260475,3.87298335,4.52933279,-0.81015396,4.4620037,4.51975614,4.45228224
46.270966,4,4.52885836,-0.727226482,4.46080775,4.51923395,4.45103621
46.281458,5,4.52839707,0.686733519,4.45961327,4.51872456,4.44979125
46.29195,4.79583152,4.52794923,0.517573462,4.45842038,4.51822827,4.44854749
46.302441,4.35889894,4.52751514,-0.410629025,4.4572292,4.51774538,4.44730505
46.312933,5.38516481,4.52709497,0.926320591,4.4560395,4.51727606,4.44606367
46.323424,5,4.52668908,0.687975959,4.45485151,4.51682067,4.44482361
46.333916,4.35889894,4.52629767,-0.409143893,4.45366501,4.5163794,4.44358463
46.344408,4.89897949,4.52592107,0.610785085,4.45248011,4.51595258,4.44234683
46.354899,4.89897949,4.5255596,0.611080915,4.45129693,4.51554054,4.44111034
46.365391,4.58257569,4.52521351,0.239504047,4.45011525,4.51514349,4.43987491
46.375882,4.58257569,4.52488316,0.240192698,4.44893529,4.51476184,4.43864079
46.386374,4.79583152,4.52456883,0.520828856,4.44775684,4.51439581,4.43740774
46.396866,3.74165739,4.52427086,-0.884654437,4.44658001,4.51404578,4.43617586
46.407357,4.35889894,4.52398963,-0.406313529,4.44540491,4.51371211,4.43494529
46.417849,4.79583152,4.52372543,0.521637899,4.44423132,4.51339509,4.43371577
46.42834,4.47213595,4.52347866,-0.226589293,4.44305947,4.51309513,4.43248755
46.438832,5.47722558,4.52324966,0.976716906,4.44188915,4.51281253,4.43126039
46.449324,4.89897949,4.52303882,0.613140002,4.44072046,4.51254771,4.4300344
46.459815,5,4.52284656,0.69076294,4.43955352,4.51230107,4.42880971
46.470307,5.09901951,4.52267323,0.759174735,4.43838811,4.51207298,4.42758606
46.480798,4.89897949,4.5225193,0.613563517,4.43722446,4.51186387,4.42636371
46.49129,5,4.52238514,0.691096854,4.43606235,4.51167413,4.4251424
46.501782,5,4.52227122,0.691179269,4.43490189,4.51150423,4.42392227
46.512273,4.58257569,4.52217799,0.245759436,4.4337432,4.51135462,4.42270341
46.522765,3.74165739,4.52210592,-0.88342998,4.43258606,4.51122574,4.42148561
46.533256,5.29150262,4.52205548,0.877181365,4.4314307,4.51111808,4.42026908
46.543748,4.58257569,4.52202716,0.246066127,4.4302769,4.51103213,4.41905359
46.55424,4.24264069,4.52202147,-0.528564838,4.42912477,4.51096839,4.41783927
46.564731,4.58257569,4.52203895,0.246042152,4.42797444,4.51092739,4.41662622
46.575223,4.35889894,4.52208014,-0.403956921,4.42682567,4.51090966,4.41541421
46.585714,4,4.52214558,-0.722596414,4.4256787,4.51091576,4.41420347
46.596206,5.91607978,4.52223586,1.18061167,4.42453332,4.51094626,4.41299377
46.606698,4.47213595,4.52235157,-0.224088412,4.42338963,4.51100175,4.41178522
46.617189,4.58257569,4.52249332,0.245117073,4.42224775,4.51108284,4.41057794
46.627681,4.89897949,4.52266175,0.613447421,4.42110746,4.51119017,4.40937169
46.638172,5.56776436,4.52285749,1.02220686,4.419969,4.51132437,4.40816671
46.648664,4.24264069,4.52308125,-0.529566393,4.41883215,4.51148614,4.40696275
46.659156,4.24264069,4.52333371,-0.529804704,4.41769701,4.51167614,4.40575994
46.669647,4.89897949,4.52361556,0.612669506,4.41656371,4.51189509,4.40455839
46.680139,3.46410162,4.5239276,-1.0294785,4.41543203,4.51214376,4.40335786
46.69063,5.29150262,4.52427052,0.875917861,4.4143022,4.51242286,4.40215859
46.701122,5.47722558,4.5246452,0.976002242,4.413174,4.51273324,4.40096034
46.711614,4.58257569,4.52505241,0.239840121,4.41204755,4.5130757,4.39976323
46.722105,5.65685425,4.52549297,1.06365468,4.41092296,4.51345102,4.39856737
46.732597,5.29150262,4.52596782,0.874948458,4.40980002,4.51386017,4.39737253
46.743088,4.35889894,4.52647779,-0.40936395,4.40867895,4.51430396,4.39617893
46.75358,4,4.5270239,-0.72596412,4.40755955,4.51478342,4.39498635
46.764072,4.47213595,4.52760709,-0.235523109,4.40644192,4.51529946,4.3937949
46.774563,4.58257569,4.52822829,0.233125296,4.40532618,4.51585304,4.3926047
46.785055,5,4.52888866,0.686375508,4.40421213,4.5164453,4.3914155
46.795546,3.87298335,4.52958915,-0.810312166,4.40309998,4.5170772,4.39022755
46.806038,4.47213595,4.53033101,-0.241236511,4.40198952,4.51774996,4.3890406
46.81653,5.38516481,4.53111532,0.924147978,4.40088087,4.51846469,4.38785478
46.827021,4.58257569,4.53194321,0.225016641,4.39977414,4.5192225,4.38667018
46.837513,5,4.53281606,0.683508554,4.39866913,4.52002477,4.3854866
46.848004,4.89897949,4.53373499,0.604354608,4.39756606,4.52087264,4.38430424
46.858496,4.58257569,4.53470152,0.218801675,4.39646472,4.52176759,4.38312289
46.868988,5,4.53571694,0.681383196,4.39536522,4.52271093,4.38194265
46.879479,4.58257569,4.53678258,0.213993263,4.39426767,4.523704,4.38076364
46.889971,4.89897949,4.53790013,0.600898793,4.39317189,4.52474846,4.37958562
46.900462,4.47213595,4.53907092,-0.258717918,4.39207807,4.52584566,4.37840883
46.910954,5.09901951,4.54029677,0.747477585,4.39098602,4.52699742,4.37723304
46.921446,4.79583152,4.54157926,0.504234339,4.38989585,4.52820529,4.37605835
46.931937,4.35889894,4.54291996,-0.428976714,4.38880768,4.52947089,4.37488487
46.942429,4.69041576,4.54432095,0.382223506,4.38772131,4.53079625,4.37371239
46.95292,4.58257569,4.54578382,0.191812079,4.38663694,4.532183,4.37254112
46.963412,5,4.54731079,0.672821823,4.38555439,4.53363333,4.37137084
46.973904,5,4.54890376,0.671636988,4.38447376,4.53514915,4.37020166
46.984395,5.09901951,4.55056465,0.740577383,4.38339517,4.5367324,4.36903369
46.994887,5.29150262,4.55229599,0.859771269,4.38231842,4.53838557,4.3678667
47.005378,5.47722558,4.55409971,0.960794392,4.38124372,4.54011063,4.36670092
47.01587,4.35889894,4.55597854,-0.443936475,4.38017088,4.54191029,4.36553612
47.026362,5.19615242,4.55793477,0.798885254,4.37910002,4.54378686,4.36437241
47.036853,5,4.5599708,0.663346965,4.37803123,4.54574273,4.36320991
47.047345,4.58257569,4.56208969,0.143129315,4.37696434,4.54778095,4.36204838
47.057836,4.89897949,4.56429385,0.578520213,4.37589954,4.54990396,4.36088804
47.068328,4.89897949,4.5665866,0.576535239,4.37483666,4.55211507,4.35972868
47.07882,5.19615242,4.56897081,0.791947989,4.3737758,4.55441714,4.35857041
47.089311,5.09901951,4.5714494,0.726340219,4.37271707,4.55681314,4.35741333
47.099803,4.12310563,4.57402651,-0.67150643,4.37166028,4.55930717,4.35625721
47.110294,5.19615242,4.57670446,0.787050168,4.37060565,4.56190157,4.35510229
47.120786,4.12310563,4.5794877,-0.675560563,4.36955298,4.5646008,4.35394833
47.131278,5.19615242,4.58237979,0.783436426,4.36850239,4.56740842,4.35279545
47.141769,5.19615242,4.5853844,0.781516488,4.36745399,4.57032813,4.35164376
47.152261,3.87298335,4.58850625,-0.845885871,4.36640759,4.57336462,4.35049303
47.162752,4.35889894,4.59174909,-0.482545491,4.3653634,4.57652169,4.34934347
47.173244,4,4.59511808,-0.77143897,4.36432124,4.57980448,4.34819488
47.183736,4.12310563,4.59861769,-0.689573824,4.36328121,4.58321747,4.34704736
47.194227,3.60555128,4.60225254,-0.998349268,4.36224344,4.58676533,4.34590101
47.204719,4.79583152,4.60602855,0.435663827,4.36120773,4.59045396,4.34475562
47.21521,4.69041576,4.60995051,0.283663977,4.3601743,4.59428817,4.3436114
47.225702,4.24264069,4.61402489,-0.609413001,4.35914296,4.59827445,4.34246814
47.236194,3.87298335,4.61825739,-0.863292557,4.35811382,4.6024185,4.34132593
47.246685,5.19615242,4.62265391,0.757296847,4.35708701,4.60672627,4.3401849
47.257177,4.35889894,4.62722195,-0.517999039,4.35606233,4.61120525,4.33904481
47.267668,4.89897949,4.63196765,0.51673188,4.35503999,4.61586162,4.33790589
47.27816,4.24264069,4.63689927,-0.627900135,4.35401982,4.62070364,4.33676791
47.288652,5.56776436,4.64202411,0.962153965,4.35300193,4.62573865,4.33563098
47.299143,4.35889894,4.64734982,-0.537076232,4.35198643,4.63097433,4.33449522
47.309635,4.35889894,4.65288599,-0.542205724,4.35097314,4.63642029,4.3333604
47.320126,5.09901951,4.65864062,0.663610499,4.34996228,4.64208455,4.33222673
47.330618,5.09901951,4.66462432,0.659086633,4.34895366,4.64797777,4.331094
47.34111,5.19615242,4.67084663,0.724779822,4.34794741,4.65410951,4.32996232
47.351601,5.56776436,4.67731754,0.943634901,4.34694362,4.6604898,4.32883179
47.362093,3.46410162,4.68404946,-1.10451249,4.34594213,4.66713108,4.32770219
47.372584,4.35889894,4.69105297,-0.576328052,4.34494316,4.67404399,4.32657374
47.383076,4.35889894,4.69834189,-0.582617321,4.34394651,4.68124238,4.32544622
47.393568,5,4.70592881,0.542283316,4.34295232,4.68873889,4.32431974
47.404059,4,4.71382697,-0.844882812,4.34196068,4.69654682,4.32319441
47.414551,5.38516481,4.72205268,0.814316971,4.34097144,4.70468251,4.32207
47.425042,5,4.7306201,0.519018209,4.3399848,4.7131602,4.32094673
47.435534,4.24264069,4.73954749,-0.704916164,4.33900059,4.7219982,4.31982439
47.446026,5,4.74885171,0.50114697,4.33801893,4.73121344,4.31870307
47.456517,5,4.7585506,0.491375007,4.33703993,4.74082382,4.31758289
47.467009,4.35889894,4.76866588,-0.640130408,4.33606343,4.75085114,4.31646363
47.4775,5.09901951,4.77921682,0.565511004,4.33508963,4.76131475,4.31534551
47.487992,4.47213595,4.7902279,-0.563996402,4.33411836,4.77223921,4.3142283
47.498484,4.58257569,4.80172211,-0.468130766,4.33314976,4.78364761,4.31311211
47.508975,4.47213595,4.81372382,-0.584455189,4.33218392,4.79556441,4.31199705
47.519467,4.47213595,4.82626249,-0.595085314,4.3312207,4.80801916,4.3108829
47.529958,4.89897949,4.83936475,0.244161284,4.33026029,4.82103863,4.30976988
47.54045,4.24264069,4.85306404,-0.781295948,4.32930253,4.83465634,4.30865776
47.550942,5.47722558,4.86739224,0.780918263,4.32834756,4.8489043,4.30754666
47.561433,5.09901951,4.88238328,0.465441982,4.32739547,4.86381659,4.30643668
47.571925,5.47722558,4.89807779,0.761017596,4.32644612,4.87943397,4.30532761
47.582416,4.89897949,4.91451337,-0.124635011,4.32549971,4.89579418,4.30421965
47.592908,5,4.93173651,0.261272818,4.32455609,4.91294389,4.30311259
47.6034,5,4.94979231,0.224070736,4.32361538,4.93092833,4.30200654
47.613891,4.79583152,4.96872894,-0.415809353,4.32267769,4.9497959,4.3009016
47.624383,5.74456265,4.98860371,0.869458991,4.32174288,4.96960406,4.29979756
47.634874,4.58257569,5.00947068,-0.653372012,4.32081114,4.99040711,4.29869463
47.645366,4.58257569,5.03139599,-0.669940514,4.31988235,5.01227136,4.29759259
47.655858,4,5.05444478,-1.02686162,4.3189566,5.03526222,4.29649156
47.666349,5.56776436,5.07868706,0.699340619,4.31803403,5.05944993,4.29539162
47.676841,5.09901951,5.10420546,-0.0720135228,4.31711448,5.08491737,4.29429258
47.687332,4.79583152,5.13107962,-0.579006126,4.31619817,5.11174448,4.29319463
47.697824,4.12310563,5.15940586,-1.01798833,4.31528495,5.14002785,4.29209758
47.708316,4.69041576,5.18928069,-0.70630371,4.31437495,5.1698643,4.29100151
47.718807,4.47213595,5.22080836,-0.865258575,4.31346829,5.20135842,4.28990655
47.729299,4.79583152,5.25411123,-0.67696359,4.31256482,5.23463292,4.28881246
47.73979,5.29150262,5.28930969,0.0468288049,4.31166476,5.26980855,4.28771947
47.750282,5.29150262,5.32654815,-0.187204504,4.31076797,5.30703013,4.28662735
47.760774,5.47722558,5.36597375,0.333544336,4.30987458,5.34644519,4.28553623
47.771265,5.09901951,5.40774663,-0.55563218,4.3089847,5.38821432,4.28444619
47.781757,5.19615242,5.45205428,-0.50586743,4.30809822,5.43252547,4.28335702
47.792248,4.89897949,5.4990856,-0.774665161,4.30721533,5.47956803,4.28226894
47.80274,5.19615242,5.54906644,-0.594065669,4.30633591,5.52956838,4.28118173
47.813232,5.38516481,5.60223256,-0.4659053,4.30546009,5.58276281,4.2800955
47.823723,4.58257569,5.65884521,-1.0374341,4.30458798,5.63941318,4.27901035
47.834215,5.65685425,5.71921331,-0.249717955,4.30371948,5.69982903,4.27792607
47.844706,5.47722558,5.78366229,-0.55356726,4.30285478,5.76433648,4.27684286
47.855198,5.09901951,5.85258818,-0.868083326,4.30199378,5.83333232,4.27576052
47.86569,5,5.92642897,-0.962511801,4.30113659,5.90725538,4.27467915
47.876181,5.56776436,6.00569762,-0.66176526,4.30028335,5.98661959,4.27359885
47.886673,5.91607978,6.09102972,-0.418270178,4.29943394,6.07206168,4.27251941
47.897164,6.244998,6.18316299,0.248666462,4.29858858,6.16432067,4.27144104
47.907656,6.08276253,6.28304479,-0.447529062,4.29774716,6.26434561,4.27036353
47.918148,6.63324958,6.39183286,0.49134176,4.2969098,6.37329622,4.26928698
47.928639,6.08276253,6.51099388,-0.654393883,4.29607664,6.4926417,4.26821149
47.939131,5.19615242,6.64243704,-1.20261574,4.29524758,6.62429431,4.26713686
47.949622,6.78232998,6.78855179,-0.0788784177,4.29442283,6.77064723,4.26606329
47.960114,7.34846923,6.95243938,0.629309027,4.29360228,6.93480622,4.26499057
47.970606,7.21110255,7.13796307,0.270443112,4.29278609,7.12063958,4.26391881
47.981097,7.48331477,7.34990702,0.365250264,4.29197437,7.33293686,4.2628481
47.991589,7.21110255,7.59412692,-0.618889623,4.29116705,7.57755915,4.26177823
48.00208,7.74596669,7.87741026,-0.362551466,4.29036433,7.86129831,4.26070942
48.012572,7.54983444,8.20752995,-0.810984287,4.28956613,8.19192991,4.25964146
48.023064,8.42614977,8.59278439,-0.408209034,4.28877259,8.57775201,4.25857444
48.033555,8.42614977,9.04157896,-0.784492951,4.28798384,9.02716584,4.25750847
48.044047,9.89949494,9.5619304,0.581003041,4.28719982,9.54817996,4.25644334
48.054538,10.8166538,10.1604237,0.810080291,4.28642073,10.1473672,4.25537925
48.06503,10.1488916,10.8418221,-0.832424519,4.2856465,10.8294758,4.254316
48.075522,11.8743421,11.6080202,0.516063796,4.28487729,11.5963842,4.25325369
48.086013,12.2474487,12.4576384,-0.458464447,4.28411323,12.4466971,4.25219242
48.096505,13.5277493,13.3859546,0.376556255,4.28335426,13.3756787,4.25113198
48.106996,13.820275,14.3842112,-0.750956903,4.2826006,14.3745602,4.25007258
48.117488,15.8745079,15.4403003,0.658944268,4.28185219,15.431226,4.24901401
48.12798,15.7480157,16.5382357,-0.888943166,4.28110918,16.5296847,4.24795637
48.138471,17,17.6584834,-0.811469884,4.28037174,17.6503997,4.24689976
48.148963,18.3847763,18.7782547,-0.627278585,4.2796398,18.7705814,4.24584398
48.159454,19.7230829,19.870553,-0.384018286,4.27891359,19.8632326,4.24478923
48.169946,20.9523268,20.9046332,0.218388658,4.27819307,20.8976086,4.2437353
48.180438,22.7156334,21.8450233,0.933064888,4.2774784,21.8382365,4.24268229
48.190929,21.9317122,22.6523498,-0.848903779,4.27676974,22.6457418,4.24163031
48.201421,23.8327506,23.2856679,0.739650402,4.27606706,23.2791772,4.24057915
48.211912,23.4733892,23.7064494,-0.482763072,4.27537058,23.7000117,4.23952901
48.222404,22.6495033,23.8856487,-1.11182076,4.27468029,23.8791967,4.23847968
48.232896,23.8117618,23.8098582,0.0436304496,4.27399636,23.8033217,4.23743127
48.243387,23.0217289,23.4849583,-0.680609607,4.27331895,23.4782657,4.23638388
48.253879,21.8403297,22.9343577,-1.04595793,4.27264805,22.927436,4.2353373
48.26437,21.9544984,22.1935685,-0.488947988,4.2719839,22.1863441,4.23429173
48.274862,19.9749844,21.3030199,-1.15240424,4.2713265,21.2954175,4.23324698
48.285354,19.3132079,20.3030706,-0.994918413,4.27067602,20.2950128,4.23220313
48.295845,17.7763888,19.2308545,-1.20601231,4.27003265,19.2222606,4.23116029
48.306337,17.0587221,18.1188814,-1.02964038,4.2693964,18.1096664,4.23011825
48.316828,16.2788206,16.9957938,-0.846742705,4.26876752,16.9858684,4.22907722
48.32732,15.6524758,15.8858788,-0.483117998,4.26814601,15.8751495,4.22803699
48.337812,14.1774469,14.8101152,-0.795404502,4.26753209,14.7984861,4.22699767
48.348303,13.190906,13.7859428,-0.771386333,4.26692594,13.7733182,4.22595934
48.358795,12.083046,12.8269327,-0.862488709,4.2663276,12.8132204,4.22492181
48.369286,12,11.9433854,0.237938282,4.26573732,11.9285014,4.22388528
48.379778,11.4017543,11.1415203,0.510131263,4.26515515,11.1253937,4.22284955
48.39027,9.79795897,10.4241798,-0.791341136,4.26458131,10.4067569,4.22181471
48.400761,9.74679434,9.7907775,-0.209721607,4.264016,9.77202551,4.22078086
48.411253,9.59166305,9.23759594,0.595035381,4.26345929,9.2175032,4.2197478
48.421744,9.16515139,8.75884054,0.637425176,4.26291145,8.73741586,4.21871574
48.432236,8.77496439,8.34693328,0.654240861,4.26237255,8.32420192,4.21768446
48.442728,8.83176087,7.99363076,0.915494461,4.26184283,7.96962985,4.21665407
48.453219,7.68114575,7.69054183,-0.0969333835,4.26132251,7.66531508,4.21562466
48.463711,7.81024968,7.42960719,0.616962305,4.2608117,7.40319974,4.21459604
48.474202,7.61577311,7.20366685,0.641955025,4.26031068,7.17612205,4.2135684
48.484694,7.34846923,7.00643838,0.584834039,4.25981955,6.97779495,4.21254154
48.495186,6.70820393,6.83273065,-0.352883435,4.25933859,6.80302185,4.21151557
48.505677,6.55743852,6.67831117,-0.34766743,4.25886803,6.64756451,4.21049056
48.516169,5.65685425,6.53975834,-0.939629765,4.25840802,6.50799564,4.20946634
48.52666,6.63324958,6.41442717,0.467784579,4.25795886,6.38166557,4.20844309
48.537152,6.244998,6.30020084,-0.23495286,4.25752071,6.26645325,4.20742062
48.547644,5.91607978,6.19545579,-0.528560313,4.25709384,6.16073187,4.20639902
48.558135,6.164414,6.09891489,0.255927937,4.25667854,6.06322175,4.20537838
48.568627,6.164414,6.00953868,0.393542024,4.25627499,5.97288113,4.20435852
48.579118,5.65685425,5.92652362,-0.519297,4.25588352,5.88890497,4.20333963
48.58961,5.47722558,5.8491822,-0.609882471,4.25550434,5.81060421,4.2023215
48.600102,4.79583152,5.77696425,-0.990521444,4.25513775,5.73742765,4.20130424
48.610593,5.19615242,5.70940342,-0.716415384,4.25478407,5.66890807,4.20028794
48.621085,6.08276253,5.64608016,0.660819466,4.25444354,5.60462488,4.19927241
48.631576,6,5.5866525,0.642921067,4.25411653,5.54423552,4.19825783
48.642068,5.19615242,5.53079634,-0.578484156,4.25380327,5.48741498,4.19724402
48.65256,6.164414,5.4782393,0.828356626,4.25350414,5.43389027,4.19623106
48.663051,5.56776436,5.42873631,0.372864653,4.25321949,5.38341572,4.19521906
48.673543,5.83095189,5.3820524,0.66999962,4.25294961,5.33575551,4.19420781
48.684034,5.29150262,5.33799234,-0.215614733,4.25269491,5.2907139,4.19319752
48.694526,5.65685425,5.29636165,0.600410362,4.25245571,5.24809558,4.19218798
48.705018,5,5.25699512,-0.506946864,4.25223241,5.20773474,4.19117929
48.715509,5.74456265,5.21974113,0.724445664,4.25202542,5.16947917,4.19017155
48.726001,5.74456265,5.18445031,0.748406531,4.25183511,5.13317864,4.18916456
48.736492,4.89897949,5.1509991,-0.502015553,4.25166194,5.09870908,4.18815851
48.746984,5.38516481,5.11926116,0.515658463,4.25150629,5.06594326,4.18715321
48.757476,4.89897949,5.0891295,-0.436061933,4.25136864,5.0347736,4.18614876
48.767967,5.83095189,5.06050518,0.877750939,4.25124945,5.00510055,4.18514524
48.778459,6.55743852,5.03328898,1.23456451,4.25114919,4.97682397,4.18414247
48.78895,5.83095189,5.00739963,0.907497804,4.25106835,4.94986207,4.18314064
48.799442,4.24264069,4.98275214,-0.860297305,4.25100745,4.92412893,4.18213954
48.809934,5.65685425,4.95927509,0.835212047,4.25096701,4.89955249,4.18113928
48.820425,6.08276253,4.93690206,1.07044872,4.25094758,4.8760657,4.18013996
48.830917,5.65685425,4.91556525,0.860981417,4.25094972,4.85359978,4.17914137
48.841408,6.92820323,4.89520987,1.42583076,4.25097402,4.83209938,4.17814371
48.8519,5.29150262,4.87577731,0.644767641,4.25102108,4.8115049,4.17714679
48.862392,5.56776436,4.85721876,0.842938669,4.25109154,4.79176684,4.17615069
48.872883,5.09901951,4.83948864,0.509441723,4.25118604,4.77283891,4.17515552
48.883375,5.74456265,4.82253956,0.96022033,4.25130526,4.75467267,4.17416108
48.893866,5.91607978,4.80633385,1.05344479,4.25144988,4.73722983,4.17316756
48.904358,6.08276253,4.79083022,1.136632,4.25162066,4.72046802,4.17217477
48.91485,5.65685425,4.7759947,0.938541183,4.25181832,4.70435248,4.17118281
48.925341,6.63324958,4.76179541,1.36801103,4.25204364,4.68885058,4.17019176
48.935833,5.65685425,4.74819865,0.953234282,4.25229745,4.67392741,4.16920143
48.946324,5.56776436,4.7351781,0.912461653,4.25258055,4.65955595,4.16821202
48.956816,5.65685425,4.72270419,0.966514388,4.25289387,4.64570542,4.16722333
48.967308,5.56776436,4.71075293,0.925749121,4.25323828,4.63235093,4.16623545
48.977799,6,4.69930175,1.14048159,4.25361468,4.61946903,4.16524849
48.988291,4.89897949,4.68832634,0.458969654,4.25402412,4.60703404,4.16426224
48.998782,4.79583152,4.67780812,0.343545349,4.25446755,4.59502657,4.1632769
49.009274,5.29150262,4.66772568,0.789795504,4.25494608,4.58342382,4.16229227
49.019766,5.74456265,4.65806195,1.04235344,4.25546079,4.57220764,4.16130846
49.030257,4.47213595,4.64880082,-0.420315192,4.25601275,4.56136088,4.16032554
49.040749,5.19615242,4.63992461,0.745806817,4.25660327,4.55086432,4.15934334
49.05124,5.47722558,4.63142019,0.919676782,4.25723345,4.54070382,4.15836204
49.061732,5.47722558,4.623272,0.924096086,4.25790471,4.53086216,4.15738144
49.072224,5.91607978,4.61546786,1.14044374,4.25861832,4.52132594,4.15640165
49.082715,4.47213595,4.60799631,-0.368592392,4.25937561,4.5120824,4.15542275
49.093207,5.29150262,4.60084453,0.831058415,4.26017817,4.50311691,4.15444456
49.103698,5.19615242,4.5940033,0.775982682,4.26102737,4.49441902,4.15346726
49.11419,4.89897949,4.58746138,0.558138068,4.26192495,4.48597552,4.15249066
49.124682,4.79583152,4.58121022,0.463272381,4.26287247,4.47777635,4.15151486
49.135173,4.24264069,4.5752418,-0.576715795,4.26387156,4.46981192,4.15053994
49.145665,5.19615242,4.56954696,0.791584146,4.2649242,4.4620709,4.14956573
49.156156,5.83095189,4.56411942,1.12553653,4.26603207,4.45454546,4.14859239
49.166648,5.65685425,4.55895128,1.04780865,4.26719734,4.44722535,4.14761976
49.17714,4.69041576,4.55403676,0.369295275,4.26842194,4.44010291,4.14664791
49.187631,4.79583152,4.54937048,0.496448428,4.2697079,4.43317082,4.14567694
49.198123,4.89897949,4.54494623,0.59500694,4.27105769,4.4264202,4.14470667
49.208614,4.35889894,4.54076,-0.426451707,4.27247339,4.41984514,4.14373727
49.219106,4.35889894,4.53680661,-0.421791017,4.27395774,4.41343753,4.14276856
49.229598,4.35889894,4.5330825,-0.417353035,4.27551314,4.40719149,4.14180064
49.240089,5.19615242,4.52958449,0.816436116,4.27714215,4.4011014,4.14083359
49.250581,4.47213595,4.5263088,-0.232750601,4.27884787,4.39516016,4.13986722
49.261072,4.47213595,4.52325336,-0.226091589,4.28063294,4.38936329,4.13890173
49.271564,5.19615242,4.5204153,0.822032312,4.28250079,4.3837043,4.13793691
49.282056,5.09901951,4.51779302,0.762382115,4.28445449,4.37817863,4.13697288
49.292547,4.79583152,4.51538526,0.529571777,4.28649727,4.3727819,4.13600971
49.303039,4.35889894,4.51319041,-0.392799529,4.28863307,4.36750839,4.13504722
49.31353,5.47722558,4.5112082,0.982861831,4.29086527,4.36235467,4.13408559
49.324022,5.38516481,4.50943788,0.935802825,4.29319823,4.35731549,4.13312464
49.334514,4.35889894,4.50787972,-0.385980275,4.2956359,4.35238727,4.13216446
49.345005,4.24264069,4.50653427,-0.513705734,4.2981824,4.34756656,4.13120514
49.355497,4.12310563,4.5054021,-0.618301285,4.30084283,4.34284874,4.13024649
49.365988,4.79583152,4.50448469,0.539765538,4.30362152,4.33823112,4.1292887
49.37648,5.38516481,4.50378348,0.938819115,4.30652411,4.33370942,4.12833158
49.386972,4.69041576,4.50330064,0.432568056,4.30955572,4.32928081,4.12737522
49.397463,4.24264069,4.50303868,-0.510292063,4.31272173,4.32494257,4.12641971
49.407955,5,4.50300047,0.704981939,4.31602872,4.32069088,4.12546487
49.418446,4.79583152,4.50318941,0.540964062,4.31948241,4.31652367,4.12451088
49.428938,5.19615242,4.50360938,0.83219171,4.32309012,4.31243738,4.12355756
49.43943,4.58257569,4.50426473,0.279840966,4.32685862,4.30842978,4.12260499
49.449921,4.47213595,4.50516021,-0.18172578,4.33079499,4.30449869,4.12165327
49.460413,4.24264069,4.50630138,-0.513479011,4.33490788,4.30064093,4.1207022
49.470904,5,4.50769397,0.70164523,4.33920492,4.2968549,4.11975198
49.481396,4.35889894,4.50934476,-0.387873459,4.34369577,4.29313762,4.11880242
49.491888,4.58257569,4.51126079,0.267048499,4.34838947,4.28948731,4.11785361
49.502379,4.79583152,4.51344965,0.531396159,4.35329553,4.28590221,4.11690564
49.512871,4.89897949,4.51592021,0.618917826,4.35842548,4.28237967,4.11595832
49.523362,4.24264069,4.51868125,-0.525395625,4.36378962,4.27891842,4.11501184
49.533854,4.89897949,4.52174327,0.614195583,4.36940094,4.27551597,4.11406601
49.544346,3.74165739,4.52511685,-0.885132457,4.37527169,4.27217087,4.11312092
49.554837,4.58257569,4.52881334,0.231867098,4.38141486,4.26888172,4.11217667
49.565329,4.47213595,4.53284607,-0.246394234,4.38784605,4.26564624,4.11123306
49.57582,3.87298335,4.53722794,-0.815012023,4.39457947,4.26246349,4.11029029
49.586312,4.79583152,4.5419745,0.503842256,4.40163282,4.25933131,4.10934816
49.596804,5.29150262,4.54710126,0.862786974,4.40902306,4.25624854,4.10840676
49.607295,4.58257569,4.55262481,0.173063227,4.41676821,4.25321406,4.1074662
49.617787,4,4.55856469,-0.747371855,4.4248898,4.25022591,4.10652627
49.628278,5,4.5649397,0.659591007,4.43340778,4.24728336,4.10558717
49.63877,4,4.57177255,-0.756156433,4.44234678,4.24438456,4.10464871
49.649262,4,4.57908585,-0.760976906,4.45173071,4.24152858,4.10371097
49.659753,4.12310563,4.58690388,-0.68102735,4.4615851,4.2387145,4.10277406
49.670245,4.12310563,4.59525511,-0.687131343,4.47194026,4.23594063,4.10183779
49.680736,5.29150262,4.60416716,0.829056974,4.48282485,4.2332064,4.10090232
49.691228,4.47213595,4.61367322,-0.376214383,4.49427382,4.23051024,4.0999675
49.70172,5,4.62380657,0.613346093,4.50632166,4.22785136,4.0990334
49.712211,4.47213595,4.63460305,-0.403072073,4.51900537,4.22522903,4.09810011
49.722703,4.35889894,4.64610461,-0.535915724,4.53236864,4.22264179,4.09716745
49.733194,4.69041576,4.65835233,0.179062656,4.54645353,4.22008919,4.0962356
49.743686,5.19615242,4.6713954,0.724401145,4.56131094,4.21756986,4.09530438
49.754178,5.47722558,4.68528363,0.889911202,4.57699181,4.21508317,4.09437388
49.764669,4.47213595,4.70007085,-0.47742528,4.59355117,4.21262851,4.09344418
49.775161,4.24264069,4.71581996,-0.687880273,4.61105356,4.2102046,4.09251511
49.785652,5.19615242,4.73259339,0.680851699,4.62956245,4.20781113,4.09158684
49.796144,4.58257569,4.75046555,-0.409743647,4.64915392,4.20544687,4.09065919
49.806636,5.29150262,4.76951272,0.722488688,4.66990544,4.20311131,4.08973226
49.817127,4.24264069,4.78981775,-0.739714176,4.69190106,4.20080397,4.08880612
49.827619,4.58257569,4.81147727,-0.478436593,4.71523913,4.1985237,4.08788061
49.83811,4.47213595,4.83458885,-0.60204061,4.7400183,4.19627028,4.08695589
49.848602,5.19615242,4.85926832,0.580417176,4.76635614,4.19404262,4.08603178
49.859094,5.56776436,4.88563618,0.825910519,4.79437442,4.19184033,4.08510839
49.869585,5.38516481,4.91382483,0.686542042,4.82420689,4.18966298,4.08418578
49.880077,5,4.94398913,0.236666148,4.85601022,4.18750958,4.08326379
49.890568,4.12310563,4.97628983,-0.923679707,4.88994642,4.18537997,4.08234259
49.90106,4.79583152,5.0109195,-0.463775778,4.92621003,4.18327318,4.081422
49.911552,5.74456265,5.04808649,0.834551468,4.96501101,4.18118888,4.08050211
49.922043,5.19615242,5.08802956,0.328820409,5.00658986,4.17912674,4.07958301
49.932535,4.79583152,5.13103974,-0.57897169,5.05124011,4.17708587,4.07866451
49.943026,5.29150262,5.17744768,0.337720214,5.09929466,4.17506616,4.0777468
49.953518,4.12310563,5.22767662,-1.05098573,5.15118017,4.17306674,4.07682969
49.96401,6.164414,5.28224274,0.939239727,5.2074166,4.17108736,4.07591328
49.974501,6.164414,5.34180857,0.906975982,5.26867142,4.16912773,4.07499765
49.984993,5.19615242,5.40725979,-0.459464218,5.33583729,4.16718707,4.07408262
49.995484,6.08276253,5.47974283,0.776543431,5.41006904,4.1652653,4.07316836
50.005976,5.29150262,5.56081397,-0.518952161,5.49293457,4.16336165,4.07225471
50.016468,5.19615242,5.65251597,-0.675546847,5.58649073,4.1614759,4.07134175
50.026959,6.164414,5.75753331,0.637872003,5.69343913,4.15960785,4.07042955
50.037451,6.4807407,5.87937033,0.775480732,5.81730442,4.15775675,4.06951796
50.047942,6.32455532,6.02240799,0.549679296,5.96248852,4.1559226,4.06860714
50.058434,6,6.19207347,-0.438261871,6.13443936,4.15410468,4.06769691
50.068926,5.91607978,6.39474016,-0.69185286,6.33954592,4.15230282,4.06678736
50.079417,8.06225775,6.63760346,1.19358883,6.58501011,4.15051686,4.06587858
50.089909,6.92820323,6.92844076,-0.0154120825,6.87860315,4.14874612,4.06497039
50.1004,8.36660027,7.27495285,1.04481932,7.22800219,4.14699062,4.06406297
50.110892,8,7.68434668,0.561830328,7.64037476,4.14524972,4.06315613
50.121384,9.05538514,8.16243567,0.944960037,8.12148051,4.14352328,4.06224998
50.131875,9.48683298,8.71305184,0.879648304,8.67509034,4.14181116,4.06134458
50.142367,9.2736185,9.3377011,-0.253145423,9.30265012,4.14011276,4.06043977
50.152858,10.6301458,10.0348594,0.77154808,10.0025819,4.13842812,4.05953572
50.16335,11.61895,10.8002928,0.904796817,10.7706111,4.13675665,4.05863225
50.173842,12.4096736,11.6266645,0.884878015,11.5993732,4.13509824,4.05772945
50.184333,11.8743421,12.5038629,-0.793423494,12.4787421,4.13345278,4.05682741
50.194825,14.6287388,13.4194999,1.09965402,13.396327,4.13181972,4.05592594
50.205316,14.6628783,14.3585652,0.551645811,14.3371224,4.13019913,4.05502523
50.215808,14.7309199,15.3042782,-0.757204309,15.2843581,4.12859044,4.0541251
50.2263,16.0623784,16.2375366,-0.418519025,16.2189444,4.12699359,4.05322564
50.236791,16.9705627,17.1370943,-0.408082807,17.1196484,4.1254085,4.05232692
50.247283,17.3493516,17.9796212,-0.793895226,17.9631523,4.12383465,4.05142878
50.257774,17.9722008,18.7390066,-0.875674501,18.7233556,4.12227211,4.05053138
50.268266,18.547237,19.3873737,-0.916589721,19.3723892,4.12072039,4.04963456
50.278758,19.3132079,19.8959615,-0.763383004,19.8814971,4.11917943,4.04873839
50.289249,20.0748599,20.238264,-0.404232765,20.2241768,4.11764917,4.04784297
50.299741,20.1494417,20.3941397,-0.494669561,20.3802896,4.11612913,4.04694812
50.310232,21.0713075,20.3536405,0.847152263,20.3398905,4.11461941,4.04605401
50.320724,20.904545,20.1194189,0.8860734,20.1056357,4.11311952,4.04516047
50.331216,20.9523268,19.7060318,1.11637586,19.692087,4.11162945,4.04426758
50.341707,20.5426386,19.1368037,1.18567907,19.1225735,4.11014914,4.04337543
50.352199,19.7989899,18.4393693,1.16602771,18.4247328,4.10867815,4.04248385
50.36269,18.6547581,17.6424475,1.00613647,17.6272857,4.10721659,4.04159299
50.373182,17.8325545,16.7731067,1.02929483,16.7572995,4.10576402,4.04070271
50.383674,16.3401346,15.8563404,0.695553199,15.8397656,4.10432041,4.03981307
50.394165,14.7986486,14.9147391,-0.340720515,14.8972708,4.10288575,4.03892416
50.404657,13.3041347,13.9683656,-0.815003615,13.9498745,4.1014596,4.03803581
50.415148,13.190906,13.0355516,0.394150179,13.0159066,4.1000421,4.03714818
50.42564,11.5758369,12.1322018,-0.745898721,12.111273,4.09863282,4.03626112
50.436132,11.3137085,11.2723202,0.20344113,11.2499842,4.09723176,4.0353747
50.446623,10.3923048,10.4675185,-0.274251093,10.4436655,4.09583891,4.03448901
50.457115,9.59166305,9.72656329,-0.367287686,9.70110515,4.09445388,4.03360387
50.467606,8.24621125,9.05570898,-0.899720916,9.02858869,4.09307678,4.03271945
50.478098,8,8.45800266,-0.67675894,8.42920157,4.09170724,4.03183559
50.48859,7.74596669,7.93379107,-0.433387093,7.90333432,4.09034525,4.03095236
50.499081,7.41619849,7.48070315,-0.253977675,7.44866006,4.08899082,4.03006985
50.509573,7,7.09395743,-0.306524768,7.06043605,4.08764357,4.02918789
50.520064,6.8556546,6.76723776,0.297349696,6.7323758,4.08630364,4.02830665
50.530556,6.164414,6.49305826,-0.57327503,6.45701016,4.08497065,4.02742596
50.541048,5.83095189,6.26367818,-0.657819342,6.22660283,4.08364463,4.0265459
50.551539,6.4807407,6.07156525,0.639668236,6.0336153,4.08232558,4.02566655
50.562031,5,5.90978455,-0.953826268,5.87109883,4.08101315,4.02478775
50.572522,5.38516481,5.77237464,-0.622261872,5.73307464,4.07970748,4.02390966
50.583014,5.74456265,5.65431051,0.300419929,5.61449919,4.07840822,4.02303211
50.593506,5,5.55157849,-0.742683304,5.51134159,4.0771154,4.02215519
50.603997,5.38516481,5.46102797,-0.275432682,5.42043623,4.07582902,4.02127898
50.614489,5.47722558,5.38021529,0.311464739,5.3393269,4.07454876,4.02040331
50.62498,4.58257569,5.30731935,-0.851318775,5.26618263,4.07327477,4.01952834
50.635472,5.56776436,5.24094489,0.571681269,5.19960038,4.0720067,4.01865391
50.645964,4.24264069,5.18006078,-0.968204574,5.13854311,4.07074458,4.0177801
50.656455,4.58257569,5.12388534,-0.735737484,5.08222457,4.06948845,4.016907
50.666947,5.38516481,5.07180259,0.559787654,5.03002522,4.06823799,4.01603443
50.677438,6.40312424,5.02334767,1.17463891,4.98147743,4.06699334,4.01516256
50.68793,5.65685425,4.97812921,0.823847706,4.93618754,4.06575418,4.01429123
50.698422,5,4.93583701,0.253304147,4.89384346,4.06452055,4.01342051
50.708913,4.47213595,4.89620876,-0.651208724,4.85418126,4.06329249,4.01255049
50.719405,4.89897949,4.85900758,0.19992974,4.81696263,4.06206968,4.011681
50.729896,4.47213595,4.82403989,-0.593214912,4.78199268,4.06085229,4.0108122
50.740388,4.69041576,4.79112079,-0.31734056,4.74908537,4.05964,4.00994393
50.75088,4.35889894,4.76009427,-0.633399817,4.7180836,4.05843285,4.00907628
50.761371,4.47213595,4.73081931,-0.508609234,4.68884535,4.05723089,4.00820931
50.771863,4.89897949,4.70316007,0.442514877,4.66123387,4.05603382,4.00734287
50.782354,4.47213595,4.67700357,-0.452623042,4.63513531,4.0548418,4.00647712
50.792846,4.35889894,4.65223696,-0.541606885,4.61043603,4.05365453,4.0056119
50.803338,4.69041576,4.62876432,0.248297071,4.58703936,4.05247206,4.00474728
50.813829,4.58257569,4.60649773,-0.154667499,4.56485669,4.05129444,4.00388335
50.824321,5.19615242,4.58535036,0.781538267,4.54380054,4.05012137,4.00301994
50.834812,4.79583152,4.56525056,0.48018847,4.52379866,4.04895303,4.00215721
50.845304,4.58257569,4.54612491,0.190920876,4.5047771,4.04778912,4.001295
50.855796,4.79583152,4.52791144,0.517609973,4.48667332,4.04662969,4.0004334
50.866287,4.58257569,4.51055285,0.26837073,4.46942955,4.04547481,3.99957247
50.876779,4.69041576,4.49399149,0.44319778,4.45298772,4.04432418,3.99871206
50.88727,3.74165739,4.47818042,-0.8582092,4.43730042,4.04317797,3.99785233
50.897762,4.58257569,4.46307028,0.345695554,4.42231794,4.04203591,3.99699312
50.908254,5,4.44861977,0.742549817,4.4079986,4.04089806,3.9961345
50.918745,4.58257569,4.4347905,0.384428395,4.39430367,4.03976446,3.99527656
50.929237,5.29150262,4.42154305,0.932716234,4.3811934,4.03863485,3.99441913
50.939728,4.12310563,4.40884582,-0.534546717,4.36863592,4.03750939,3.99356237
50.95022,4.69041576,4.39666468,0.541988083,4.35659682,4.03638783,3.99270613
50.960712,4.58257569,4.3849714,0.444527049,4.34504761,4.0352702,3.99185047
50.971203,4.24264069,4.3737396,-0.362075845,4.33396167,4.03415658,3.99099549
50.981695,3.87298335,4.3629416,-0.699970181,4.32331111,4.03304671,3.99014101
50.992186,4.69041576,4.35255564,0.58125736,4.31307395,4.03194074,3.98928721
51.002678,4.79583152,4.34255752,0.673256272,4.30322582,4.03083842,3.9884339
51.01317,4.79583152,4.33292748,0.680370518,4.29374677,4.02973981,3.98758119
51.023661,3.87298335,4.32364701,-0.67131488,4.28461811,4.02864498,3.98672914
51.034153,4,4.31469619,-0.560977884,4.27581979,4.02755367,3.9858776
51.044644,3.74165739,4.30605973,-0.751267157,4.26733635,4.02646604,3.98502671
51.055136,3.87298335,4.29772007,-0.651718282,4.25915012,4.02538185,3.98417633
51.065628,4.89897949,4.28966311,0.780587197,4.25124689,4.02430116,3.98332654
51.076119,4.47213595,4.2818756,0.436188443,4.24361323,4.02322403,3.9824774
51.086611,4,4.27434287,-0.523777501,4.23623443,4.02215022,3.98162876
51.097102,3.60555128,4.26705402,-0.813328187,4.22909944,4.02107989,3.98078078
51.107594,4.24264069,4.25999601,-0.131739613,4.22219518,4.02001281,3.9799333
51.118086,5.19615242,4.25315863,0.971078676,4.21551131,4.01894902,3.97908639
51.128577,3.74165739,4.24653218,-0.710545421,4.20903805,4.01788861,3.97824014
51.139069,4.12310563,4.24010569,-0.342052729,4.20276438,4.01683134,3.97739439
51.14956,4.69041576,4.23387124,0.67568078,4.19668228,4.01577736,3.97654929
51.160052,4,4.22781899,-0.477303878,4.19078188,4.01472644,3.97570468
51.170544,5.19615242,4.22194139,0.987021293,4.18505554,4.01367865,3.97486065
51.181035,3.60555128,4.21623127,-0.781460166,4.17949604,4.01263406,3.97401726
51.191527,3.87298335,4.21068024,-0.581116938,4.17409497,4.01159244,3.97317437
51.202018,4,4.20528249,-0.453081104,4.16884641,4.01055394,3.97233212
51.21251,4.24264069,4.20003045,0.206422481,4.16374281,4.00951834,3.97149037
51.223002,4.69041576,4.19491847,0.703915687,4.15877844,4.00848571,3.97064918
51.233493,4.24264069,4.18994116,0.229563778,4.15394788,4.00745612,3.96980864
51.243985,4.12310563,4.18509203,-0.248970681,4.14924461,4.00642934,3.96896859
51.254476,5,4.18036673,0.905335999,4.14466424,4.00540553,3.96812918
51.264968,4.35889894,4.17575937,0.427948096,4.14020086,4.00438448,3.96729025
51.27546,4.58257569,4.17126566,0.641334572,4.13585015,4.00336625,3.96645189
51.285951,4.69041576,4.16688151,0.723556668,4.13160797,4.00235091,3.96561417
51.296443,4.69041576,4.16260179,0.726508066,4.12746921,4.00133823,3.96477693
51.306934,4,4.15842325,-0.39802418,4.12343056,4.0003284,3.96394033
51.317426,5.47722558,4.15434121,1.1501671,4.11948735,3.99932117,3.96310421
51.327918,4.89897949,4.15035239,0.865232396,4.11563626,3.99831664,3.96226865
51.338409,4.24264069,4.14645363,0.310140379,4.11187413,3.99731486,3.96143373
51.348901,4.79583152,4.14264085,0.808202121,4.10819685,3.99631563,3.96059929
51.359392,4,4.13891159,-0.372708451,4.10460195,3.99531909,3.95976548
51.369884,3.87298335,4.13526208,-0.51213156,4.10108566,3.99432506,3.95893215
51.380376,4.24264069,4.13168978,0.333092936,4.09764542,3.99333358,3.95809937
51.390867,4.24264069,4.12819226,0.338302277,4.09427877,3.99234474,3.95726723
51.401359,3.87298335,4.12476618,-0.501779671,4.09098241,3.99135833,3.95643555
51.41185,4.35889894,4.12140969,0.487328688,4.08775443,3.9903745,3.95560452
51.422342,4.47213595,4.11811973,0.594992629,4.0845918,3.98939305,3.95477395
51.432834,4.69041576,4.1148943,0.758631309,4.0814925,3.98841405,3.95394393
51.443325,5.19615242,4.11173149,1.04135533,4.07845462,3.98743757,3.95311454
51.453817,4.24264069,4.1086286,0.366076614,4.07547544,3.98646341,3.95228562
51.464308,5,4.10558418,0.945735595,4.07255352,3.98549173,3.95145733
51.4748,3.74165739,4.10259573,-0.600781441,4.06968635,3.98452233,3.95062951
51.485292,4.12310563,4.09966167,0.153114206,4.06687236,3.98355527,3.94980223
51.495783,4.12310563,4.0967805,0.162250207,4.06411003,3.98259064,3.94897558
51.506275,4.79583152,4.09394996,0.83778372,4.06139713,3.98162822,3.94814939
51.516766,4.12310563,4.09116897,0.178708294,4.05873253,3.98066818,3.94732383
51.527258,4.69041576,4.08843542,0.775873918,4.05611417,3.97971032,3.94649872
51.53775,4.12310563,4.08574808,0.193280994,4.05354079,3.97875472,3.94567417
51.548241,3.46410162,4.08310576,-0.786768161,4.05101119,3.97780144,3.94485023
51.558733,4.35889894,4.08050655,0.527629031,4.0485235,3.97685029,3.94402675
51.569224,4,4.07794963,-0.279194609,4.04607686,3.97590143,3.94320389
51.579716,3.87298335,4.07543323,-0.449944311,4.04366953,3.97495466,3.94238149
51.590208,4.47213595,4.07295636,0.631806609,4.04130053,3.97401006,3.94155963
51.600699,3.87298335,4.07051808,-0.444448799,4.03896887,3.9730677,3.94073839
51.611191,4.47213595,4.06811678,0.635625027,4.036673,3.97212738,3.9399176
51.621682,3.74165739,4.06575183,-0.569292929,4.03441225,3.97118928,3.93909743
51.632174,4.47213595,4.06342171,0.639307628,4.03218515,3.97025318,3.93827771
51.642666,4.47213595,4.06112566,0.64110085,4.02999089,3.96931918,3.93745853
51.653157,4.47213595,4.05886289,0.642863175,4.02782872,3.96838733,3.93663996
51.663649,4.24264069,4.05663206,0.43128718,4.02569728,3.96745746,3.93582185
51.67414,4.47213595,4.05443266,0.646299693,4.02359608,3.96652971,3.93500434
51.684632,3.87298335,4.05226342,-0.42341478,4.02152385,3.96560391,3.93418729
51.695124,4.79583152,4.0501237,0.863543756,4.01947995,3.96468013,3.93337077
51.705615,4,4.0480129,-0.219118463,4.01746378,3.96375843,3.93255485
51.716107,4.69041576,4.04592983,0.802798813,4.01547416,3.96283863,3.93173939
51.726598,3.60555128,4.04387412,-0.662059549,4.01351072,3.9619209,3.93092453
51.73709,3.60555128,4.04184467,-0.660525091,4.01157238,3.96100504,3.93011012
51.747582,4.35889894,4.03984097,0.564852171,4.00965861,3.96009113,3.92929624
51.758073,5,4.03786252,0.980886068,4.00776892,3.95917925,3.92848296
51.768565,5.09901951,4.0359083,1.03107285,4.00590231,3.9582692,3.92767012
51.779056,4.69041576,4.03397805,0.810208438,4.0040585,3.95736116,3.92685789
51.789548,4.58257569,4.03207078,0.741960185,4.00223653,3.95645492,3.92604611
51.80004,3.74165739,4.03018609,-0.537148683,4.00043599,3.95555058,3.92523484
51.810531,4.69041576,4.0283236,0.813690459,3.99865649,3.9546482,3.92442418
51.821023,4.58257569,4.02648238,0.745716644,3.99689714,3.9537476,3.92361396
51.831514,4.35889894,4.02466227,0.578132059,3.99515775,3.95284895,3.92280434
51.842006,4.47213595,4.02286239,0.670278724,3.99343747,3.95195205,3.92199516
51.852498,4.89897949,4.02108242,0.936961614,3.99173597,3.95105699,3.9211865
51.862989,4.89897949,4.01932205,0.937900546,3.99005294,3.95016384,3.92037844
51.873481,4.47213595,4.01758047,0.674207298,3.98838759,3.94927242,3.91957081
51.883972,4.47213595,4.01585757,0.675483814,3.98673979,3.94838289,3.91876378
51.894464,4,4.01415258,-0.118964607,3.9851088,3.94749507,3.91795719
51.904956,3.87298335,4.01246523,-0.373472737,3.98349435,3.94660903,3.91715111
51.915447,3.87298335,4.01079528,-0.3712303,3.98189618,3.94572485,3.91634562
51.925939,4.12310563,4.00914201,0.337584972,3.98031361,3.94484236,3.91554058
51.93643,5.29150262,4.00750535,1.13313603,3.97874654,3.94396171,3.91473612
51.946922,4.12310563,4.00588462,0.342375537,3.97719432,3.94308273,3.91393209
51.957414,4.89897949,4.0042796,0.945885768,3.97565672,3.94220548,3.91312858
51.967905,4.12310563,4.0026901,0.347009399,3.97413356,3.94133005,3.91232566
51.978397,4.58257569,4.00111548,0.762535386,3.9726242,3.94045626,3.91152317
51.988888,4,3.9995557,0.0210783739,3.9711286,3.93958428,3.91072127
51.99938,3.74165739,3.99801015,-0.506312913,3.96964617,3.93871391,3.90991979
52.009872,4.58257569,3.99647867,0.76556974,3.96817673,3.93784525,3.90911883
52.020363,4.69041576,3.99496109,0.833939246,3.96672013,3.93697837,3.90831845
52.030855,3.87298335,3.99345685,-0.347092926,3.96527581,3.93611308,3.9075185
52.041346,4.12310563,3.99196593,0.362132156,3.96384375,3.93524956,3.90671914
52.051838,5.29150262,3.99048778,1.14062038,3.96242341,3.93438763,3.9059202
52.06233,5.09901951,3.98902227,1.05356406,3.96101467,3.93352736,3.90512177
52.072821,4.69041576,3.98756929,0.83835939,3.95961739,3.93266884,3.90432391
52.083313,3.60555128,3.9861283,-0.616909255,3.95823107,3.93181188,3.90352649
52.093804,4.24264069,3.98469934,0.507879266,3.95685573,3.93095665,3.90272964
52.104296,4.89897949,3.98328188,0.956920896,3.95549086,3.93010298,3.90193322
52.114788,5.47722558,3.98187585,1.22284493,3.95413638,3.92925095,3.9011373
52.125279,4.69041576,3.98048113,0.842576185,3.95279218,3.92840062,3.90034196
52.135771,5.09901951,3.97909726,1.05826379,3.9514578,3.92755183,3.89954704
52.146262,4,3.97772428,0.149250544,3.95013327,3.92670474,3.8987527
52.156754,4.58257569,3.97636171,0.778597445,3.94881815,3.92585918,3.89795878
52.167246,3.60555128,3.9750095,-0.607830757,3.94751236,3.92501523,3.89716535
52.177737,4.24264069,3.97366758,0.518626174,3.94621583,3.92417295,3.8963725
52.188229,4.69041576,3.97233549,0.847396169,3.94492812,3.9233322,3.89558008
52.19872,3,3.97101331,-0.985400077,3.9436493,3.92249311,3.89478822
52.209212,4.69041576,3.96970061,0.848949441,3.94237895,3.92165553,3.89399678
52.219704,3.74165739,3.96839733,-0.476172176,3.94111701,3.92081953,3.89320584
52.230195,4.47213595,3.96710343,0.710656405,3.93986343,3.91998519,3.89241547
52.240687,4,3.96581849,0.18488241,3.93861782,3.91915235,3.89162551
52.251178,4.79583152,3.96454261,0.911750466,3.93738025,3.91832115,3.89083613
52.26167,4.47213595,3.96327538,0.713344643,3.93615033,3.91749144,3.89004716
52.272162,4.58257569,3.96201676,0.787755632,3.93492802,3.91666329,3.88925868
52.282653,4.69041576,3.96076673,0.854194959,3.9337133,3.91583678,3.88847077
52.293145,4.69041576,3.95952491,0.854921547,3.93250578,3.91501175,3.88768327
52.303636,3.31662479,3.95829138,-0.801040944,3.93130557,3.91418834,3.88689634
52.314128,4,3.95706579,0.207205724,3.93011228,3.91336641,3.88610982
52.32462,4.24264069,3.9558481,0.535530189,3.92892592,3.91254602,3.8853238
52.335111,4.89897949,3.95463831,0.971772181,3.92774644,3.91172725,3.88453833
52.345603,4.58257569,3.95343606,0.793183227,3.92657352,3.91090995,3.88375328
52.356094,4.35889894,3.95224146,0.637697018,3.92540724,3.91009426,3.88296878
52.366586,4.24264069,3.95105414,0.53998754,3.92424727,3.90928002,3.8821847
52.377078,3.60555128,3.94987412,-0.586790292,3.92309359,3.90846732,3.88140111
52.387569,3.46410162,3.94870139,-0.696132009,3.92194621,3.90765623,3.88061807
52.398061,3.74165739,3.94753561,-0.453738055,3.92080479,3.90684659,3.87983544
52.408552,4.35889894,3.9463769,0.642278793,3.91966944,3.90603855,3.87905338
52.419044,4.35889894,3.94522492,0.643174955,3.91853984,3.90523197,3.87827172
52.429536,4.35889894,3.94407969,0.644064632,3.917416,3.9044269,3.87749054
52.440027,4,3.94294122,0.238869799,3.91629791,3.90362343,3.87670992
52.450519,4.69041576,3.94180918,0.865220536,3.91518528,3.90282141,3.8759297
52.46101,3.87298335,3.94068371,-0.26019293,3.9140782,3.90202098,3.87515004
52.471502,4,3.93956448,0.245836366,3.91297639,3.901222,3.87437079
52.481994,3.46410162,3.93845152,-0.688730649,3.91187985,3.90042453,3.87359202
52.492485,3.74165739,3.93734485,-0.442365753,3.9107886,3.89962866,3.87281379
52.502977,3.74165739,3.93624416,-0.441119905,3.90970234,3.89883423,3.87203598
52.513468,4,3.93514958,0.254657458,3.90862119,3.89804138,3.87125871
52.52396,3.74165739,3.93406082,-0.438638159,3.90754487,3.89724998,3.87048185
52.534452,3.74165739,3.93297791,-0.437402013,3.90647339,3.89646009,3.86970547
52.544943,4.89897949,3.93190086,0.983401557,3.90540678,3.8956718,3.86892963
52.555435,4.35889894,3.93082941,0.654270233,3.90434476,3.89488494,3.8681542
52.565926,3.87298335,3.92976367,-0.238286212,3.90328745,3.89409968,3.86737931
52.576418,4.12310563,3.92870337,0.440910716,3.90223458,3.89331585,3.86660483
52.58691,3.87298335,3.92764854,-0.233805886,3.90118617,3.89253355,3.86583082
52.597401,4.58257569,3.92659921,0.80992375,3.90014226,3.89175283,3.86505736
52.607893,4.47213595,3.92555513,0.739311051,3.89910257,3.89097356,3.86428429
52.618384,4.24264069,3.92451641,0.564025072,3.89806724,3.89019588,3.86351177
52.628876,4.24264069,3.92348279,0.564940611,3.897036,3.88941965,3.86273965
52.639368,4,3.92245432,0.278470243,3.89600889,3.88864494,3.861968
52.649859,3.87298335,3.92143104,-0.220108358,3.89498594,3.88787183,3.8611969
52.660351,4.89897949,3.92041267,0.98922536,3.89396689,3.88710017,3.86042619
52.670842,4.69041576,3.91939937,0.878075388,3.89295188,3.88633011,3.85965602
52.681334,4.69041576,3.91839088,0.878649461,3.89194066,3.8855615,3.85888625
52.691826,3.46410162,3.91738725,-0.673264908,3.89093325,3.88479442,3.85811695
52.702317,4.35889894,3.91638851,0.665214574,3.88992971,3.88402895,3.85734819
52.712809,4,3.91539443,0.290870366,3.88892979,3.88326494,3.85657983
52.7233,3.31662479,3.91440514,-0.773162563,3.88793361,3.88250254,3.855812
52.733792,4.35889894,3.9134204,0.667441789,3.88694094,3.88174161,3.85504457
52.744284,4.58257569,3.91244026,0.818618001,3.88595183,3.88098222,3.8542776
52.754775,3.87298335,3.91146477,-0.196166832,3.88496631,3.88022445,3.85351117
52.765267,3.87298335,3.91049369,-0.193675886,3.88398414,3.87946816,3.85274513
52.775758,4.35889894,3.90952717,0.670351976,3.88300547,3.87871349,3.85197963
52.78625,4.89897949,3.90856498,0.995195714,3.88203006,3.8779603,3.85121452
52.796742,4,3.90760716,0.303961908,3.88105795,3.87720868,3.85044988
52.807233,5.09901951,3.90665377,1.09195501,3.8800892,3.87645868,3.84968577
52.817725,3.87298335,3.90570458,-0.180890113,3.87912358,3.87571019,3.84892205
52.828216,3.60555128,3.90475974,-0.54699951,3.87816121,3.87496333,3.84815886
52.838708,4.12310563,3.90381903,0.46828047,3.87720189,3.87421799,3.84739606
52.8492,4.24264069,3.9028825,0.582887802,3.87624565,3.87347422,3.84663373
52.859691,3.60555128,3.9019502,-0.544425319,3.87529254,3.8727321,3.84587192
52.870183,4.79583152,3.90102193,0.945943757,3.87434235,3.87199151,3.84511051
52.880674,4,3.90009782,0.316073053,3.87339522,3.87125258,3.84434962
52.891166,3.74165739,3.89917767,-0.396888256,3.87245092,3.87051518,3.84358912
52.901658,3.74165739,3.89826154,-0.395732423,3.87150951,3.86977938,3.84282908
52.912149,3,3.89734947,-0.947285316,3.87057105,3.86904527,3.84206957
52.922641,4.12310563,3.89644127,0.476092806,3.8696353,3.8683127,3.84131045
52.933132,4.58257569,3.89553707,0.828877931,3.86870243,3.86758182,3.84055185
52.943624,4,3.89463668,0.324597161,3.8677722,3.8668525,3.83979364
52.954116,4,3.89374016,0.325975209,3.86684469,3.86612482,3.83903588
52.964607,4,3.89284757,0.32734146,3.86591994,3.86539885,3.83827866
52.975099,4.12310563,3.8919587,0.480777414,3.86499775,3.86467445,3.83752181
52.98559,4,3.89107371,0.330039827,3.86407825,3.86395178,3.83676549
52.996082,3.46410162,3.8901924,-0.652756301,3.86316125,3.8632307,3.83600956
53.006574,4.12310563,3.88931484,0.483519171,3.86224679,3.86251129,3.83525408
53.017065,4.24264069,3.88844107,0.595146715,3.86133493,3.86179363,3.83449912
53.027557,4.35889894,3.88757093,0.686533332,3.86042547,3.86107758,3.83374454
53.038048,4.35889894,3.88670454,0.687164029,3.85951856,3.8603633,3.83299049
53.04854,4.89897949,3.88584173,1.00654744,3.85861399,3.85965064,3.83223682
53.059032,4.35889894,3.88498256,0.688415854,3.85771181,3.8589397,3.8314836
53.069523,4,3.88412709,0.340401109,3.8568121,3.85823054,3.8307309
53.080015,4.47213595,3.88327514,0.767372673,3.85591464,3.85752304,3.82997858
53.090506,3.87298335,3.88242685,-0.0971777007,3.85501959,3.85681734,3.82922679
53.100998,4,3.88158206,0.344119083,3.85412674,3.85611332,3.82847537
53.11149,3.60555128,3.88074081,-0.524585112,3.85323616,3.85541106,3.8277244
53.121981,4.58257569,3.87990319,0.838255631,3.85234791,3.85471062,3.82697395
53.132473,4.47213595,3.87906901,0.770108396,3.85146179,3.85401189,3.82622388
53.142964,4.35889894,3.87823843,0.693296846,3.85057794,3.85331502,3.82547432
53.153456,3.60555128,3.87741126,-0.52140194,3.84969618,3.85261987,3.82472515
53.163948,3.60555128,3.87658758,-0.520611469,3.84881656,3.85192653,3.82397642
53.174439,4.69041576,3.87576745,0.902578701,3.84793915,3.85123507,3.82322821
53.184931,4.12310563,3.87495071,0.498151501,3.84706375,3.85054538,3.82248037
53.195422,4.79583152,3.8741375,0.96004897,3.84619051,3.84985758,3.82173305
53.205914,4.24264069,3.87332766,0.607711305,3.84531925,3.84917158,3.82098611
53.216406,4.35889894,3.87252125,0.697407837,3.84445002,3.84848744,3.82023961
53.226897,4,3.87171835,0.358164274,3.84358288,3.84780524,3.81949362
53.237389,2.64575131,3.8709188,-1.10687284,3.84271766,3.84712487,3.81874801
53.24788,3.31662479,3.87012274,-0.743974425,3.84185449,3.84644646,3.81800292
53.258372,3.87298335,3.86933,0.0604428765,3.84099319,3.8457699,3.81725819
53.268864,4,3.86854068,0.362573195,3.84013382,3.84509527,3.81651391
53.279355,4.79583152,3.86775483,0.963367374,3.83927645,3.84442265,3.81577015
53.289847,3.46410162,3.86697229,-0.634720945,3.8384209,3.84375192,3.81502675
53.300338,3.60555128,3.86619323,-0.510531049,3.8375673,3.84308323,3.81428387
53.31083,4.24264069,3.86541748,0.614184997,3.83671548,3.84241646,3.81354136
53.321322,3.46410162,3.86464511,-0.632885058,3.83586551,3.8417517,3.81279929
53.331813,3.31662479,3.86387621,-0.739764433,3.83501743,3.84108901,3.81205773
53.342305,3.46410162,3.86311061,-0.631671591,3.83417109,3.84042829,3.81131654
53.352796,3.87298335,3.86234848,0.103125498,3.83332661,3.83976969,3.81057587
53.363288,4,3.86158966,0.372035408,3.83248383,3.83911309,3.80983556
53.37378,3.87298335,3.86083422,0.110223078,3.8316428,3.83845858,3.80909569
53.384271,4.47213595,3.86008224,0.782338617,3.8308036,3.83780622,3.80835633
53.394763,4.12310563,3.85933359,0.513587419,3.82996604,3.83715593,3.80761733
53.405254,3.74165739,3.8585884,-0.341951768,3.82913028,3.83650783,3.80687885
53.415746,3.74165739,3.85784654,-0.340865295,3.82829613,3.83586183,3.80614073
53.426238,3.31662479,3.85710808,-0.735175684,3.82746366,3.835218,3.80540306
53.436729,4.35889894,3.8563731,0.708890576,3.82663294,3.83457642,3.80466588
53.447221,4,3.85564146,0.379945445,3.82580378,3.833937,3.80392908
53.457712,4.24264069,3.85491331,0.622677585,3.82497635,3.83329987,3.80319278
53.468204,2.82842712,3.85418852,-1.01279879,3.82415046,3.83266494,3.80245685
53.478696,5.09901951,3.85346717,1.11604316,3.82332619,3.83203228,3.80172135
53.489187,3.60555128,3.85274933,-0.497190162,3.82250359,3.83140198,3.80098636
53.499679,3.16227766,3.85203488,-0.830516237,3.82168249,3.83077393,3.80025174
53.51017,3.87298335,3.85132396,0.147171287,3.82086305,3.83014829,3.79951762
53.520662,3.60555128,3.85061644,-0.495040573,3.82004508,3.82952495,3.79878386
53.531154,3.87298335,3.84991242,0.151891179,3.81922867,3.82890401,3.79805054
53.541645,4.58257569,3.84921195,0.856366593,3.81841386,3.82828553,3.79731772
53.552137,4.35889894,3.84851493,0.714411652,3.8176005,3.82766943,3.79658526
53.562628,4.79583152,3.84782151,0.973658059,3.81678873,3.82705585,3.79585331
53.57312,4.35889894,3.84713155,0.715379193,3.81597838,3.8264447,3.79512172
53.583612,4.35889894,3.84644515,0.715858777,3.81516952,3.82583606,3.79439056
53.594103,4.47213595,3.84576239,0.791437657,3.81436222,3.82523002,3.79365991
53.604595,3.16227766,3.84508315,-0.826320451,3.8135563,3.82462649,3.79292961
53.615086,3.16227766,3.84440758,-0.825911566,3.81275192,3.82402561,3.79219982
53.625578,3.87298335,3.84373556,0.17101984,3.8119489,3.8234273,3.79147039
53.63607,3.87298335,3.84306719,0.172962882,3.81114732,3.82283164,3.79074139
53.646561,3.46410162,3.84240254,-0.615061724,3.81034724,3.82223873,3.79001289
53.657053,4.58257569,3.84174151,0.86071725,3.8095485,3.82164846,3.78928475
53.667544,3.74165739,3.84108425,-0.315320251,3.80875124,3.821061,3.78855711
53.678036,4.12310563,3.84043065,0.531671871,3.8079553,3.82047626,3.78782983
53.688528,3.74165739,3.8397808,-0.313246565,3.80716074,3.81989432,3.78710298
53.699019,4,3.83913478,0.401080065,3.80636764,3.81931528,3.78637663
53.709511,3.74165739,3.8384925,-0.311183411,3.80557583,3.81873906,3.78565063
53.720002,4.69041576,3.83785411,0.923342652,3.80478545,3.8181658,3.78492514
53.730494,4.24264069,3.8372195,0.636726931,3.80399635,3.81759544,3.7842
53.740986,4.24264069,3.83658878,0.637222026,3.80320859,3.81702805,3.78347529
53.751477,5.09901951,3.83596202,1.12385831,3.80242224,3.81646374,3.78275108
53.761969,4,3.83533913,0.405784261,3.80163713,3.81590243,3.78202723
53.77246,3.87298335,3.83472028,0.195609482,3.80085342,3.81534426,3.78130387
53.782952,3.87298335,3.83410536,0.197175016,3.80007094,3.81478918,3.78058087
53.793444,4.35889894,3.83349447,0.724847895,3.79928976,3.81423726,3.77985829
53.803935,3.74165739,3.83288771,-0.302043576,3.79850995,3.81368862,3.77913621
53.814427,3.74165739,3.83228499,-0.301044182,3.79773135,3.81314318,3.77841449
53.824918,3.16227766,3.83168646,-0.818174062,3.7969541,3.81260109,3.77769326
53.83541,4.12310563,3.83109204,0.540382815,3.79617805,3.81206229,3.77697239
53.845902,5,3.83050183,1.08143339,3.79540326,3.81152688,3.77625195
53.856393,4,3.82991593,0.412412499,3.7946298,3.81099496,3.775532
53.866885,3.46410162,3.82933426,-0.604344808,3.79385752,3.81046646,3.7748124
53.877376,3.31662479,3.82875698,-0.715634116,3.79308655,3.80994155,3.77409329
53.887868,4,3.82818401,0.414506922,3.79231674,3.80942017,3.77337455
53.89836,4.24264069,3.82761546,0.644224515,3.79154817,3.80890241,3.77265622
53.908851,3.87298335,3.82705143,0.214317332,3.79078089,3.80838838,3.77193839
53.919343,4.35889894,3.82649185,0.729662316,3.79001476,3.80787804,3.77122091
53.929834,4,3.82593688,0.41720873,3.78924991,3.80737153,3.77050392
53.940326,3.87298335,3.82538646,0.218167116,3.78848619,3.80686881,3.76978729
53.950818,4.35889894,3.82484069,0.730792893,3.78772367,3.80636999,3.76907108
53.961309,3.87298335,3.82429969,0.220643743,3.78696242,3.80587518,3.76835536
53.971801,3.60555128,3.82376339,-0.467131793,3.78620228,3.80538433,3.76764
53.982292,3.74165739,3.82323196,-0.285612619,3.78544339,3.8048976,3.76692512
53.992784,3.46410162,3.82270534,-0.59883531,3.78468561,3.80441496,3.7662106
54.003276,3.60555128,3.82218366,-0.465437842,3.78392901,3.80393652,3.7654965
54.013767,3,3.82166702,-0.906458502,3.78317364,3.80346239,3.76478288
54.024259,3.31662479,3.82115537,-0.71030316,3.78241936,3.80299255,3.76406962
54.03475,3.74165739,3.82064888,-0.281054261,3.7816663,3.80252715,3.76335685
54.045242,4,3.82014753,0.424090171,3.78091433,3.80206616,3.76264444
54.055734,4.24264069,3.81965141,0.650376256,3.7801635,3.80160972,3.76193244
54.066225,3.16227766,3.81916065,-0.810483186,3.77941389,3.80115793,3.76122093
54.076717,4.24264069,3.81867523,0.651126299,3.77866534,3.80071079,3.76050977
54.087208,4,3.8181953,0.426385621,3.777918,3.80026844,3.7597991
54.0977,4,3.81772085,0.426941619,3.77717171,3.79983089,3.75908878
54.108192,2.64575131,3.81725201,-1.08235886,3.77642655,3.79939827,3.75837888
54.118683,3.16227766,3.81678888,-0.809018678,3.77568258,3.79897068,3.75766946
54.129175,3.31662479,3.81633147,-0.706899342,3.77493965,3.79854814,3.7569604
54.139666,3.46410162,3.81587994,-0.593109035,3.77419791,3.79813081,3.75625182
54.150158,4.24264069,3.81543429,0.653610276,3.7734572,3.79771869,3.7555436
54.16065,3.87298335,3.81499466,0.240808409,3.7727176,3.79731193,3.75483579
54.171141,4.79583152,3.81456116,0.990590917,3.77197917,3.79691065,3.75412846
54.181633,4.47213595,3.81413381,0.811173315,3.77124177,3.79651486,3.75342149
54.192124,3.46410162,3.81371278,-0.591279262,3.77050553,3.79612475,3.752715
54.202616,4,3.81329809,0.432090161,3.76977031,3.79574033,3.75200886
54.213108,4.24264069,3.81288988,0.655553815,3.76903618,3.79536175,3.75130314
54.223599,4.58257569,3.81248829,0.877546242,3.7683032,3.79498914,3.7505979
54.234091,4.24264069,3.81209334,0.656161069,3.76757123,3.79462255,3.74989302
54.244582,3.31662479,3.81170522,-0.703619518,3.76684041,3.79426214,3.74918861
54.255074,4.12310563,3.81132396,0.558374131,3.76611059,3.79390798,3.74848456
54.265566,5.19615242,3.81094971,1.17694635,3.76538185,3.7935602,3.74778092
54.276057,4.79583152,3.81058262,0.99259705,3.76465425,3.79321896,3.74707776
54.286549,3.60555128,3.81022275,-0.452406311,3.76392764,3.79288431,3.74637495
54.29704,4.79583152,3.80987027,0.992955815,3.76320216,3.79255645,3.74567263
54.307532,3.31662479,3.80952526,-0.702068709,3.76247768,3.79223544,3.74497065
54.318024,3.87298335,3.80918787,0.252577655,3.76175425,3.79192144,3.74426909
54.328515,4.35889894,3.80885827,0.741647267,3.76103195,3.79161462,3.74356801
54.339007,3.46410162,3.80853653,-0.586885781,3.76031064,3.79131506,3.74286728
54.349498,3.16227766,3.80822286,-0.803707159,3.75959044,3.79102296,3.74216703
54.35999,3.74165739,3.80791733,-0.257410064,3.75887123,3.79073841,3.74146713
54.370482,3.31662479,3.80762012,-0.700710591,3.75815306,3.79046159,3.74076764
54.380973,4.12310563,3.80733142,0.561937901,3.75743601,3.79019268,3.74006863
54.391465,4.24264069,3.80705133,0.65999194,3.75671994,3.78993178,3.73936997
54.401956,3.60555128,3.80678005,-0.448585305,3.75600497,3.78967911,3.73867179
54.412448,3.16227766,3.80651771,-0.802645656,3.75529098,3.7894348,3.73797396
54.42294,3.87298335,3.8062645,0.258299917,3.75457802,3.78919903,3.73727654
54.433431,4.58257569,3.80602062,0.881223625,3.75386617,3.788972,3.7365796
54.443923,3.87298335,3.8057862,0.259224129,3.75315529,3.78875386,3.73588301
54.454414,3.31662479,3.80556147,-0.699240072,3.75244551,3.78854483,3.7351869
54.464906,3.74165739,3.80534658,-0.252367181,3.7517367,3.78834507,3.73449113
54.475398,4.12310563,3.80514175,0.563882855,3.75102891,3.7881548,3.73379578
54.485889,3.60555128,3.8049472,-0.446537707,3.75032223,3.78797423,3.73310091
54.496381,3.87298335,3.8047631,0.261190063,3.74961651,3.78780354,3.73240638
54.506872,4.47213595,3.80458969,0.817035043,3.74891188,3.78764298,3.73171233
54.517364,3.87298335,3.80442717,0.261832335,3.74820821,3.78749275,3.73101863
54.527856,3.60555128,3.80427579,-0.445785274,3.74750557,3.78735308,3.73032534
54.538347,4.24264069,3.80413577,0.662197035,3.74680403,3.78722423,3.72963253
54.548839,4.12310563,3.80400735,0.564887842,3.74610344,3.78710641,3.72894006
54.55933,4,3.80389079,0.442842193,3.74540394,3.78699989,3.72824807
54.569822,4.79583152,3.80378633,0.996014655,3.7447054,3.78690491,3.72755643
54.580314,2.82842712,3.80369424,-0.987556132,3.74400788,3.78682176,3.7268652
54.590805,4.58257569,3.8036148,0.882587615,3.74331146,3.7867507,3.72617444
54.601297,4.35889894,3.80354827,0.745218541,3.74261599,3.786692,3.72548404
54.611788,3.87298335,3.80349496,0.263606503,3.74192161,3.78664597,3.7247941
54.62228,3.74165739,3.80345515,-0.248591556,3.74122818,3.7866129,3.72410452
54.632772,4,3.80342916,0.443363107,3.74053578,3.78659309,3.72341534
54.643263,3.87298335,3.80341729,0.263753772,3.73984446,3.78658688,3.72272664
54.653755,3,3.80341989,-0.896336928,3.7391541,3.78659458,3.72203829
54.664246,4,3.80343728,0.443353948,3.73846483,3.78661652,3.72135041
54.674738,4.24264069,3.80346981,0.66269969,3.73777652,3.78665308,3.72066288
54.68523,3.60555128,3.80351784,-0.444934337,3.73708923,3.7867046,3.71997576
54.695721,3.60555128,3.80358174,-0.445006136,3.73640303,3.78677144,3.71928911
54.706213,3.74165739,3.80366189,-0.24900704,3.73571778,3.78685401,3.71860281
54.716704,3.60555128,3.80375869,-0.445204911,3.73503363,3.78695269,3.71791698
54.727196,4.79583152,3.80387255,0.995971373,3.73435044,3.78706789,3.7172315
54.737688,4.79583152,3.80400389,0.995905436,3.73366827,3.78720005,3.71654643
54.748179,3.74165739,3.80415312,-0.24999147,3.73298719,3.78734957,3.71586184
54.758671,4.12310563,3.80432074,0.564610388,3.73230707,3.78751695,3.71517758
54.769162,4,3.80450716,0.442145725,3.73162805,3.78770261,3.71449381
54.779654,4,3.80471291,0.441912992,3.73094999,3.78790707,3.71381037
54.790146,3.31662479,3.80493846,-0.698794443,3.73027296,3.78813081,3.71312735
54.800637,5.09901951,3.80518432,1.13746877,3.72959703,3.78837433,3.7124448
54.811129,2.64575131,3.80545104,-1.07689356,3.72892207,3.78863821,3.7117626
54.82162,3.87298335,3.80573915,0.25931486,3.7282482,3.78892294,3.71108087
54.832112,3.46410162,3.80604925,-0.584762891,3.7275753,3.78922916,3.71039948
54.842604,3.46410162,3.80638192,-0.58504727,3.72690345,3.78955742,3.70971851
54.853095,4.12310563,3.80673773,0.562465904,3.72623269,3.78990831,3.709038
54.863587,3.87298335,3.80711738,0.256643652,3.72556291,3.79028254,3.70835785
54.874078,5.56776436,3.80752146,1.32674146,3.72489423,3.79068067,3.70767816
54.88457,3.31662479,3.80795071,-0.700946445,3.72422653,3.79110348,3.70699882
54.895062,3.46410162,3.80840581,-0.586774398,3.72355988,3.79155163,3.70631989
54.905553,4.47213595,3.80888744,0.81440071,3.72289434,3.7920258,3.70564143
54.916045,3.74165739,3.80939645,-0.260267286,3.72222978,3.79252685,3.70496331
54.926536,3.60555128,3.80993352,-0.452086545,3.72156634,3.79305546,3.70428567
54.937028,3.74165739,3.81049958,-0.26237795,3.72090389,3.79361256,3.70360837
54.94752,4.24264069,3.81109541,0.65692106,3.7202425,3.79419894,3.70293149
54.958011,4.24264069,3.81172183,0.656444097,3.71958222,3.79481542,3.70225507
54.968503,3,3.81237988,-0.901321189,3.71892294,3.79546303,3.701579
54.978994,3.16227766,3.81307038,-0.806717248,3.71826479,3.7961426,3.7009034
54.989486,3.46410162,3.81379443,-0.591348303,3.71760764,3.79685523,3.70022814
54.999978,5,3.814553,1.08878235,3.71695156,3.7976019,3.69955329
55.010469,3.46410162,3.81534706,-0.592659638,3.71629662,3.79838359,3.69887892
55.020961,4,3.81617788,0.42874482,3.71564268,3.79920155,3.69820489
55.031452,4.24264069,3.81704644,0.652375849,3.71498989,3.80005679,3.69753133
55.041944,3.31662479,3.8179541,-0.708046121,3.71433811,3.80095065,3.69685811
55.052436,4.12310563,3.81890202,0.551546555,3.71368741,3.8018843,3.6961853
55.062927,3.74165739,3.81989141,-0.279703447,3.71303787,3.80285896,3.69551297
55.073419,4.12310563,3.82092378,0.549710692,3.71238935,3.80387614,3.69484098
55.08391,3.74165739,3.82200036,-0.283448354,3.71174199,3.80493707,3.69416946
55.094402,4,3.8231228,0.420567715,3.71109566,3.80604341,3.69349828
55.104894,2.44948974,3.82429253,-1.17251984,3.71045043,3.8071966,3.69282751
55.115385,4.47213595,3.82551101,0.804129929,3.70980637,3.8083981,3.69215722
55.125877,4.47213595,3.82678014,0.803340409,3.70916336,3.8096498,3.69148726
55.136368,3.87298335,3.8281014,0.211853587,3.70852152,3.81095321,3.69081778
55.14686,4.35889894,3.82947685,0.727613973,3.70788074,3.81231038,3.69014864
55.157352,4.79583152,3.83090824,0.982305087,3.70724107,3.81372306,3.68947991
55.167843,3.74165739,3.8323974,-0.301230823,3.70660259,3.81519311,3.68881166
55.178335,4.35889894,3.83394665,0.724535914,3.70596519,3.81672284,3.68814374
55.188826,4.12310563,3.83555786,0.536234801,3.70532897,3.81831413,3.6874763
55.199318,3.16227766,3.83723358,-0.821557008,3.70469383,3.81996953,3.6868092
55.20981,4.24264069,3.83897599,0.635346121,3.70405984,3.82169125,3.68614251
55.220301,4.24264069,3.84078739,0.633918999,3.70342705,3.82348157,3.68547629
55.230793,3.60555128,3.84267068,-0.486949081,3.70279536,3.82534342,3.68481041
55.241284,3.46410162,3.8446282,-0.616868372,3.70216488,3.82727914,3.684145
55.251776,4,3.84666315,0.391582499,3.70153551,3.82929194,3.68347994
55.262268,3.31662479,3.84877828,-0.729488515,3.7009073,3.83138459,3.68281529
55.272759,3.60555128,3.8509765,-0.495404101,3.70028033,3.83355999,3.68215111
55.283251,4.24264069,3.85326146,0.624002586,3.69965448,3.83582183,3.68148727
55.293742,4,3.85563614,0.379952441,3.69902988,3.83817308,3.6808239
55.304234,4.89897949,3.85810458,1.02023277,3.6984064,3.8406178,3.68016088
55.314726,3.74165739,3.8606703,-0.344982486,3.69778412,3.84315954,3.67949826
55.325217,4.47213595,3.86333701,0.780255692,3.6971631,3.845802,3.67883611
55.335709,3.87298335,3.86610936,0.0829095152,3.69654324,3.84854985,3.67817431
55.3462,3.46410162,3.86899119,-0.636309337,3.69592464,3.85140696,3.67751298
55.356692,4.35889894,3.87198764,0.6977903,3.69530721,3.85437849,3.676852
55.367184,3.60555128,3.87510345,-0.519184147,3.69469101,3.85746918,3.67619142
55.377675,4.24264069,3.87834307,0.603570719,3.6940761,3.86068351,3.67553131
55.388167,4,3.88171265,0.343929277,3.69346237,3.86402765,3.67487155
55.398658,3.46410162,3.88521721,-0.648934198,3.69284995,3.86750665,3.67421225
55.40915,4.47213595,3.88886338,0.76372284,3.69223873,3.87112715,3.6735533
55.419642,3.74165739,3.89265714,-0.388586868,3.69162877,3.87489517,3.67289476
55.430133,2.64575131,3.89660476,-1.1184156,3.69102014,3.87881701,3.67223669
55.440625,3.46410162,3.90071403,-0.660766537,3.69041272,3.88290046,3.67157897
55.451116,4.47213595,3.90499159,0.753089877,3.68980666,3.88715222,3.67092171
55.461608,3.74165739,3.90944613,-0.409620238,3.68920182,3.891581,3.6702648
55.4721,4.24264069,3.91408555,0.57319729,3.68859829,3.89619474,3.6696083
55.482591,4.12310563,3.91891822,0.451871008,3.68799613,3.90100183,3.66895227
55.493083,3.87298335,3.92395438,-0.225767653,3.68739522,3.90601258,3.66829658
55.503574,4,3.92920298,0.2660771,3.6867957,3.91123595,3.66764137
55.514066,3.87298335,3.93467552,-0.248379087,3.68619746,3.9166835,3.66698649
55.524558,5.09901951,3.94038266,1.07639995,3.68560056,3.92236594,3.66633203
55.535049,4.79583152,3.94633568,0.921680987,3.68500507,3.92829459,3.66567804
55.545541,3.46410162,3.9525483,-0.698889612,3.68441089,3.93448323,3.66502439
55.556032,4,3.95903274,0.2024037,3.68381814,3.94094412,3.66437121
55.566524,4.24264069,3.96580449,0.526152254,3.68322671,3.94769283,3.66371838
55.577016,3.46410162,3.97287814,-0.713285727,3.68263667,3.954744,3.66306596
55.587507,4,3.98026917,0.140466472,3.68204809,3.96211319,3.66241401
55.597999,3.60555128,3.98799626,-0.618421362,3.68146086,3.96981914,3.6617624
55.60849,3.87298335,3.99607637,-0.350846155,3.68087511,3.97787889,3.66111126
55.618982,4.12310563,4.00453076,0.34434702,3.68029073,3.98631378,3.66046047
55.629474,4.12310563,4.01337973,0.331248998,3.6797078,3.99514421,3.65981009
55.639965,4.47213595,4.02264492,0.670440923,3.67912638,4.0043919,3.65916018
55.650457,4.47213595,4.03235225,0.663161896,3.67854637,4.01408287,3.65851061
55.660948,4.47213595,4.04252574,0.655446579,3.67796788,4.02424123,3.65786152
55.67144,3.60555128,4.05319506,-0.66906187,3.67739083,4.03489679,3.65721277
55.681932,4.12310563,4.06438908,0.242314979,3.67681528,4.04607852,3.65656443
55.692423,3.87298335,4.07613865,-0.450727528,3.6762413,4.05781741,3.65591656
55.702915,4,4.08848045,-0.297456641,3.67566878,4.07015026,3.65526904
55.713406,4,4.10144922,-0.318510936,3.67509786,4.08311196,3.65462199
55.723898,3.60555128,4.11508735,-0.713817953,3.67452843,4.09674506,3.65397528
55.73439,5.09901951,4.1294367,0.984673963,3.67396056,4.11109158,3.65332899
55.744881,4.12310563,4.14454235,-0.146412871,3.67339432,4.12619677,3.65268316
55.755373,3.74165739,4.16045751,-0.647147686,3.67282962,4.14211402,3.65203768
55.765864,3.60555128,4.17723364,-0.756096799,3.67226657,4.158895,3.65139267
55.776356,4.79583152,4.1949331,0.775176382,3.67170508,4.17660228,3.65074801
55.786848,4.47213595,4.21361868,0.50844594,3.67114522,4.19529887,3.65010376
55.797339,4.24264069,4.23335869,0.0963431129,3.67058707,4.21505333,3.64945998
55.807831,3.46410162,4.25423388,-0.888893842,3.67003051,4.23594666,3.64881655
55.818322,3,4.2763251,-1.12974559,3.66947569,4.25806001,3.64817359
55.828814,3.74165739,4.29973081,-0.747043122,3.66892251,4.28149214,3.64753098
55.839306,4.58257569,4.3245547,0.507957675,3.66837103,4.30634707,3.64688877
55.849797,3.60555128,4.35091426,-0.863344069,3.66782132,4.33274268,3.64624704
55.860289,4.47213595,4.37895308,0.305258704,3.6672733,4.36082299,3.64560566
55.87078,3.87298335,4.40882855,-0.732014482,3.66672709,4.3907459,3.64496474
55.881272,4.24264069,4.44074141,-0.445085079,3.6661826,4.42271276,3.64432418
55.891764,4,4.4749275,-0.689149839,3.66563989,4.45696013,3.64368402
55.902255,5.19615242,4.5116807,0.827328061,3.66509905,4.49378279,3.64304434
55.912747,3.60555128,4.55138534,-0.972540007,3.66455998,4.53356625,3.642405
55.923238,3.60555128,4.59451846,-0.994468291,3.6640228,4.57678898,3.64176614
55.93373,5.19615242,4.64171596,0.744604903,3.66348743,4.62408881,3.64112763
55.944222,3.60555128,4.69378933,-1.04318649,3.66295395,4.67627957,3.64048952
55.954713,4.35889894,4.75178993,-0.626810166,3.66242241,4.73441563,3.63985189
55.965205,4.89897949,4.81709038,0.286162724,3.66189274,4.79987336,3.63921461
55.975696,5.65685425,4.89141227,0.874895412,3.66136507,4.87437875,3.6385778
55.986188,5.65685425,4.97694525,0.824565948,3.6608393,4.96012669,3.63794134
55.99668,5.74456265,5.07635908,0.817437197,3.66031551,5.05979264,3.63730529
56.007171,6,5.19285675,0.898411517,3.65979378,5.17658548,3.63666971
56.017663,5,5.33021435,-0.574642799,3.65927402,5.31428691,3.63603448
56.028154,5.47722558,5.49264397,-0.124170817,3.65875636,5.47711336,3.63539972
56.038646,6.55743852,5.68477865,0.93416266,3.65824072,5.66970035,3.63476532
56.049138,6.70820393,5.91137304,0.892653849,3.65772717,5.89680198,3.63413132
56.059629,7.41619849,6.17707075,1.11316115,3.65721578,6.16305784,3.6334978
56.070121,7.21110255,6.48618411,0.851421425,3.65670649,6.47277277,3.63286463
56.080612,6.55743852,6.84217974,-0.533611486,3.65619941,6.82940248,3.63223193
56.091104,7.93725393,7.24761456,0.830445288,3.65569447,7.23549102,3.63159958
56.101596,7.87400787,7.70366131,0.412730621,3.65519175,7.69219714,3.63096765
56.112087,8.1240384,8.2100193,-0.293224999,3.65469131,8.19920662,3.63033618
56.122579,9.32737905,8.76499375,0.749923531,3.65419309,8.7548128,3.62970507
56.13307,10.2469508,9.3651315,0.939052324,3.65369722,9.35555267,3.62907443
56.143562,9.11043358,10.0056922,-0.946181067,3.65320362,9.99667877,3.62844414
56.154054,9.94987437,10.6803462,-0.854676442,3.65271237,10.6718566,3.62781427
56.164545,10.4403065,11.3814504,-0.970125709,3.65222355,11.3734404,3.62718487
56.175037,11.61895,12.1003943,-0.693861876,3.65173709,12.0928188,3.62655582
56.185528,12.5299641,12.8272567,-0.545245469,3.65125311,12.8200707,3.62592724
56.19602,13.2287566,13.5514711,-0.568079671,3.65077156,13.544631,3.62529902
56.206512,13.56466,14.2614392,-0.834733061,3.65029251,14.2549029,3.62467121
56.217003,15.8429795,14.9448215,0.947712001,3.64981603,14.9385483,3.62404387
56.227495,16.1864141,15.588789,0.77306214,3.64934208,15.5827403,3.62341689
56.237986,17.3493516,16.1796658,1.08152011,3.64887076,16.1738041,3.62279038
56.248478,17.4642492,16.7035964,0.872154129,3.64840204,16.6978851,3.62216422
56.25897,16.9705627,17.1465148,-0.419466429,3.64793598,17.1409181,3.62153848
56.269461,18.6547581,17.4950155,1.07691348,3.64747266,17.4894975,3.62091321
56.279953,19.8997487,17.7374028,1.47049174,3.64701204,17.7319274,3.62028829
56.290444,19.2613603,17.8646887,1.18180862,3.64655424,17.8592192,3.61966385
56.300936,18.8148877,17.8719112,0.971069795,3.64609921,17.8664103,3.61903976
56.311428,17.4355958,17.758754,-0.568470092,3.64564703,17.7531839,3.61841609
56.321919,16.8522995,17.5296789,-0.823030612,3.64519778,17.5240007,3.61779289
56.332411,17.3493516,17.193155,0.395217072,3.64475142,17.1873292,3.61717005
56.342902,16.7032931,16.7607307,-0.239661375,3.64430807,16.7547166,3.61654768
56.353394,15.3297097,16.2455626,-0.957002015,3.64386769,16.239318,3.61592566
56.363886,15.4272486,15.6616616,-0.484162169,3.64343037,15.6551424,3.61530406
56.374377,14.106736,15.0230893,-0.95726347,3.64299619,15.0162487,3.61468294
56.384869,14.2126704,14.3433383,-0.361480163,3.64256511,14.3361263,3.61406217
56.39536,13.3790882,13.6355701,-0.506440432,3.64213726,13.6279334,3.61344187
56.405852,11.7898261,12.9120062,-1.05933003,3.64171261,12.9038877,3.61282194
56.416344,11.4891253,12.1843307,-0.83378978,3.64129124,12.1756691,3.61220242
56.426835,12,11.4634165,0.732518613,3.64087324,11.4541475,3.61158337
56.437327,11.4455231,10.7590239,0.828552498,3.64045859,10.7490801,3.61096468
56.447818,10.7703296,10.0801582,0.830765547,3.64004741,10.069471,3.61034646
56.45831,9.43398113,9.43441033,-0.0207170024,3.63963968,9.42291154,3.60972861
56.468802,9.94987437,8.82828181,1.05905267,3.63923548,8.81590654,3.60911116
56.479293,9.21954446,8.26685594,0.976057642,3.63883492,8.25354578,3.6084942
56.489785,8.60232527,7.75356217,0.921283399,3.63843797,7.73926845,3.60787759
56.500276,8.36660027,7.2904824,1.03736101,3.63804476,7.27517004,3.60726146
56.510768,7.07106781,6.87797035,0.439428561,3.63765527,6.86162032,3.60664569
56.52126,7.14142843,6.51504572,0.791443437,3.63726962,6.4976569,3.60603033
56.531751,6.78232998,6.1994019,0.763497274,3.63688788,6.1809911,3.60541545
56.542243,6.92820323,5.92757521,1.00031396,3.63651005,5.90817504,3.60480093
56.552734,6.70820393,5.69543794,1.00636276,3.63613628,5.67509378,3.60418688
56.563226,4.79583152,5.49831698,-0.838144053,3.63576654,5.47708235,3.6035732
56.573718,6.164414,5.33146983,0.91265775,3.63540094,5.30940212,3.60295993
56.584209,5.47722558,5.19027812,0.53567477,3.6350396,5.16743447,3.60234714
56.594701,4.69041576,5.07042625,-0.616449906,3.6346825,5.04686025,3.60173471
56.605192,5.29150262,4.96812045,0.568667016,3.63432978,4.94388035,3.60112275
56.615684,4.58257569,4.88005942,-0.54542069,3.63398147,4.85518684,3.60051116
56.626176,4.47213595,4.80351155,-0.575652325,3.63363765,4.7780415,3.59989998
56.636667,5.19615242,4.73624745,0.678162942,3.63329845,4.71020866,3.59928929
56.647159,4.24264069,4.67646847,-0.658656041,3.63296387,4.64988398,3.59867895
56.65765,4.12310563,4.62278145,-0.706877515,3.63263406,4.59566962,3.59806909
56.668142,4.79583152,4.57408446,0.470900271,3.63230905,4.54645962,3.59745959
56.678634,5.09901951,4.52954021,0.754638524,3.63198894,4.50141361,3.59685051
56.689125,4.79583152,4.48850389,0.554371389,3.63167386,4.4598843,3.59624191
56.699617,3.74165739,4.45046739,-0.841908549,3.63136383,4.42136158,3.59563367
56.710108,5.19615242,4.41504907,0.883800518,3.631059,4.38546236,3.59502591
56.7206,3.46410162,4.38193621,-0.958036845,3.63075942,4.35187264,3.59441852
56.731092,4.58257569,4.35088754,0.481339955,3.6304652,4.32035024,3.59381154
56.741583,4.47213595,4.32170621,0.387852736,3.63017647,4.29069759,3.59320504
56.752075,5,4.29422068,0.84010673,3.62989327,4.26274243,3.5925989
56.762566,4.89897949,4.26829525,0.794156303,3.62961577,4.23634857,3.59199325
56.773058,2.64575131,4.24380315,-1.26414075,3.62934402,4.21138868,3.59138795
56.78355,3.74165739,4.22063985,-0.692085588,3.62907814,4.18775783,3.59078308
56.794041,4.35889894,4.19871207,0.40023352,3.62881829,4.1653624,3.59017869
56.804533,3.87298335,4.17793,-0.552219751,3.62856452,4.14411207,3.58957466
56.815024,3.60555128,4.15821993,-0.743416878,3.628317,4.12393287,3.58897111
56.825516,3.46410162,4.13950734,-0.821830715,3.62807581,4.10474985,3.58836793
56.836008,4.12310563,4.12172932,0.0370985506,3.62784108,4.08649979,3.58776516
56.846499,3.60555128,4.10482789,-0.706595082,3.62761298,4.06912443,3.58716288
56.856991,4.58257569,4.08874498,0.702730901,3.62739158,4.05256528,3.58656096
56.867482,3.87298335,4.07343303,-0.447716077,3.62717706,4.03677458,3.58595953
56.877974,4.12310563,4.05884235,0.253502018,3.62696952,4.0217022,3.58535846
56.888466,2.82842712,4.04493113,-1.1029524,3.62676913,4.00730609,3.58475781
56.898957,3.60555128,4.03166049,-0.652770417,3.62657604,3.99354712,3.58415764
56.909449,3.74165739,4.01899067,-0.526624426,3.62639037,3.98038512,3.58355784
56.91994,3.31662479,4.00688952,-0.830821719,3.6262123,3.96778777,3.58295852
56.930432,3.31662479,3.99532263,-0.823831193,3.62604196,3.95572024,3.58235957
56.940924,3.60555128,3.98426129,-0.615394195,3.62587953,3.94415362,3.58176104
56.951415,4.58257569,3.97367869,0.780318531,3.6257252,3.93306083,3.58116299
56.961907,3.60555128,3.9635469,-0.598327354,3.62557909,3.92241358,3.58056532
56.972398,3.87298335,3.95384369,-0.284359537,3.62544141,3.91218944,3.57996812
56.98289,3.74165739,3.94454469,-0.450430132,3.62531233,3.90236366,3.57937129
56.993382,3.87298335,3.93562978,-0.2502927,3.62519204,3.89291589,3.57877488
57.003873,3.60555128,3.92708009,-0.56703511,3.62508073,3.88382703,3.57817896
57.014365,3.74165739,3.91887561,-0.420972945,3.62497859,3.87507668,3.57758341
57.024856,4.24264069,3.91100068,0.575881942,3.62488584,3.866649,3.57698834
57.035348,4.79583152,3.90343769,0.944665988,3.62480267,3.858526,3.57639364
57.04584,3.60555128,3.89617232,-0.539092801,3.6247293,3.8506931,3.57579936
57.056331,4,3.88919106,0.332879766,3.62466597,3.84313656,3.57520557
57.066823,4.24264069,3.88247931,0.600134468,3.62461287,3.83584138,3.57461215
57.077314,3.87298335,3.87602588,-0.0551591525,3.62457027,3.82879619,3.57401921
57.087806,3.74165739,3.86981785,-0.35799506,3.62453839,3.82198765,3.57342664
57.098298,4.58257569,3.86384485,0.847779949,3.62451748,3.81540515,3.5728345
57.108789,3.31662479,3.85809709,-0.735848015,3.6245078,3.80903863,3.57224284
57.119281,4.12310563,3.85256376,0.520136391,3.62450962,3.80287685,3.57165155
57.129772,3.60555128,3.84723677,-0.491615189,3.62452321,3.79691153,3.57106075
57.140264,4,3.84210651,0.397358141,3.62454884,3.7911326,3.57047032
57.150756,4.24264069,3.83716539,0.636769422,3.62458681,3.78553222,3.56988032
57.161247,3.87298335,3.83240623,0.201437614,3.62463741,3.78010291,3.5692908
57.171739,4.12310563,3.82782095,0.543401025,3.62470096,3.77483612,3.56870166
57.18223,3.60555128,3.82340364,-0.466746577,3.62477776,3.76972572,3.568113
57.192722,4.35889894,3.81914709,0.734678061,3.62486815,3.764764,3.56752471
57.203214,2.82842712,3.81504571,-0.993286756,3.62497247,3.75994506,3.56693685
57.213705,3.46410162,3.81109419,-0.589060752,3.62509105,3.75526329,3.56634948
57.224197,4,3.80728643,0.438991533,3.62522427,3.75071207,3.56576248
57.234688,4.24264069,3.80361813,0.66258777,3.62537248,3.74628682,3.56517597
57.24518,4.35889894,3.80008384,0.747539368,3.6255361,3.74198154,3.56458983
57.255672,3.87298335,3.79667942,0.276231661,3.6257155,3.73779174,3.56400412
57.266163,3.16227766,3.79340095,-0.794432685,3.62591108,3.73371315,3.5634189
57.276655,3.60555128,3.79024384,-0.429758732,3.62612329,3.72974058,3.56283405
57.287146,3.16227766,3.78720494,-0.790523421,3.62635253,3.72587056,3.56224969
57.297638,3.87298335,3.78428013,0.297830849,3.62659931,3.72209836,3.56166571
57.30813,4.58257569,3.78146639,0.895047096,3.62686406,3.71842054,3.56108216
57.318621,3.16227766,3.77876084,-0.785164429,3.62714724,3.7148338,3.56049909
57.329113,3.16227766,3.77616003,-0.783506458,3.62744941,3.71133401,3.5599164
57.339604,3.74165739,3.77366169,-0.178897468,3.62777103,3.70791853,3.5593342
57.350096,3,3.77126276,-0.878215668,3.62811269,3.70458359,3.55875238
57.360588,3,3.76896105,-0.876904242,3.62847492,3.7013265,3.55817098
57.371079,3.46410162,3.76675449,-0.550138964,3.62885826,3.69814472,3.55759008
57.381571,3.60555128,3.76464056,-0.398859975,3.62926337,3.6950349,3.55700955
57.392062,4.58257569,3.76261765,0.905515347,3.62969079,3.69199503,3.55642951
57.402554,3,3.76068356,-0.87217175,3.63014124,3.68902204,3.55584985
57.413046,4.47213595,3.75883677,0.844570415,3.63061535,3.68611384,3.55527063
57.423537,3.87298335,3.75707586,0.340451888,3.63111376,3.68326843,3.55469189
57.434029,4,3.75539904,0.494571494,3.63163726,3.68048309,3.55411353
57.44452,3.74165739,3.75380529,-0.110217507,3.6321865,3.67775626,3.55353566
57.455012,3.87298335,3.75229308,0.347405045,3.63276234,3.67508543,3.55295817
57.465504,4.35889894,3.75086147,0.779767578,3.63336554,3.67246896,3.55238112
57.475995,3.87298335,3.74950957,0.351388353,3.63399685,3.66990525,3.55180456
57.486487,3.16227766,3.74823624,-0.765479316,3.63465724,3.66739207,3.55122837
57.496978,3.60555128,3.74704094,-0.376151117,3.63534749,3.66492822,3.55065268
57.50747,4.35889894,3.74592274,0.782927966,3.63606864,3.66251161,3.55007736
57.517962,3,3.74488119,-0.863065,3.6368216,3.66014095,3.54950249
57.528453,3.87298335,3.74391589,0.359259589,3.63760727,3.65781495,3.5489281
57.538945,4.47213595,3.74302627,0.853879196,3.63842686,3.65553176,3.5483541
57.549436,3.87298335,3.74221221,0.361622915,3.63928127,3.65329046,3.54778058
57.559928,2.82842712,3.74147337,-0.955534533,3.6401718,3.65108929,3.54720745
57.57042,3.31662479,3.74080973,-0.651294814,3.64109952,3.64892721,3.54663476
57.580911,4.24264069,3.74022133,0.708815457,3.64206557,3.64680321,3.54606256
57.591403,4.35889894,3.73970818,0.786886752,3.64307138,3.64471573,3.54549074
57.601894,4.79583152,3.73927056,1.02789151,3.64411809,3.64266404,3.54491941
57.612386,3.46410162,3.73890868,-0.524220431,3.64520726,3.64064667,3.54434847
57.622878,3.46410162,3.73862296,-0.523947846,3.64634022,3.63866279,3.54377796
57.633369,4.89897949,3.73841392,1.07729549,3.64751836,3.63671157,3.54320795
57.643861,3.60555128,3.7382821,-0.364322414,3.64874344,3.63479169,3.54263832
57.654352,4,3.73822821,0.511636386,3.65001685,3.63290259,3.54206919
57.664844,3.46410162,3.73825304,-0.523594712,3.65134054,3.63104302,3.54150044
57.675336,3.16227766,3.73835749,-0.758999229,3.65271613,3.6292123,3.54093213
57.685827,3.16227766,3.73854255,-0.759121129,3.65414534,3.62740978,3.54036431
57.696319,4.47213595,3.73880937,0.856344899,3.65563036,3.62563431,3.53979688
57.70681,4.58257569,3.73915913,0.918377138,3.65717292,3.62388546,3.53922995
57.717302,2.64575131,3.73959324,-1.04586898,3.65877542,3.62216216,3.5386634
57.727794,4.24264069,3.74011315,0.708891764,3.6604399,3.62046386,3.53809729
57.738285,3.87298335,3.74072039,0.363679744,3.6621685,3.61879003,3.53753168
57.748777,4,3.74141679,0.508510772,3.66396395,3.61713968,3.53696645
57.759268,4.12310563,3.74220409,0.617172209,3.66582842,3.61551249,3.53640172
57.76976,3.74165739,3.74308443,-0.0377761901,3.66776491,3.61390752,3.53583737
57.780252,3.46410162,3.74405988,-0.529110822,3.66977599,3.61232433,3.53527347
57.790743,4.35889894,3.74513262,0.783432396,3.67186437,3.61076248,3.53471007
57.801235,3.16227766,3.74630533,-0.764217032,3.67403346,3.60922113,3.53414705
57.811726,2.82842712,3.74758039,-0.958724811,3.67628603,3.60770002,3.53358453
57.822218,3.31662479,3.74896083,-0.657522654,3.67862585,3.60619833,3.53302239
57.83271,3.31662479,3.75044952,-0.658653725,3.68105621,3.60471571,3.53246071
57.843201,3.74165739,3.75204946,-0.101941509,3.68358055,3.60325181,3.53189951
57.853693,4.12310563,3.75376431,0.607734578,3.68620319,3.60180588,3.53133871
57.864184,3.74165739,3.75559732,-0.118067488,3.68892771,3.60037772,3.53077841
57.874676,4,3.75755264,0.492389441,3.69175887,3.59896664,3.53021849
57.885168,3.87298335,3.75963413,0.336673758,3.69470093,3.59757232,3.52965902
57.895659,3.46410162,3.76184584,-0.545659444,3.6977583,3.59619449,3.52910005
57.906151,3.16227766,3.76419275,-0.775831872,3.70093655,3.59483249,3.52854147
57.916642,3,3.76667922,-0.875602205,3.7042403,3.59348618,3.52798339
57.927134,3.31662479,3.76931084,-0.672819475,3.70767572,3.59215492,3.5274257
57.937626,4.79583152,3.77209279,1.01179975,3.71124831,3.59083849,3.52686845
57.948117,3.46410162,3.77503057,-0.55761004,3.7149639,3.58953665,3.52631171
57.958609,3.60555128,3.77813088,-0.415427015,3.7188297,3.5882488,3.52575536
57.9691,4.69041576,3.78139955,0.953423414,3.72285179,3.58697486,3.5251995
57.979592,3.31662479,3.78484416,-0.684265571,3.72703825,3.58571427,3.52464404
57.990084,3.74165739,3.78847175,-0.216366275,3.73139642,3.58446683,3.52408903
58.000575,4.24264069,3.79228978,0.671081894,3.73593404,3.58323235,3.52353452
58.011067,4.47213595,3.79630733,0.822087965,3.74066069,3.58201031,3.5229804
58.021558,3.46410162,3.80053257,-0.580026681,3.74558473,3.58080064,3.52242678
58.03205,3.31662479,3.80497585,-0.698821194,3.750717,3.57960285,3.52187356
58.042542,4.24264069,3.80964706,0.658022514,3.75606764,3.57841678,3.52132078
58.053033,5.09901951,3.81455675,1.13334142,3.76164748,3.57724228,3.52076851
58.063525,3.87298335,3.81971781,0.230793279,3.76746987,3.57607886,3.52021663
58.074016,3.46410162,3.8251422,-0.600866532,3.77354698,3.57492651,3.51966525
58.084508,4.47213595,3.83084511,0.80080637,3.77989445,3.57378476,3.51911427
58.095,3.87298335,3.83684153,0.190110001,3.78652754,3.57265349,3.51856374
58.105491,3.74165739,3.84314796,-0.318575855,3.79346303,3.57153258,3.51801371
58.115983,3.87298335,3.84978465,0.152311178,3.80072164,3.5704216,3.51746408
58.126474,2.82842712,3.85677165,-1.01407324,3.80832367,3.56932054,3.51691495
58.136966,3.87298335,3.86413442,0.0940687518,3.81629506,3.56822899,3.51636622
58.147458,3.74165739,3.87189976,-0.360891081,3.82466297,3.56714685,3.51581794
58.157949,3.87298335,3.88009844,-0.0843510065,3.83345852,3.56607402,3.51527016
58.168441,4.35889894,3.88876862,0.685660501,3.84272045,3.56501012,3.51472278
58.178932,4.35889894,3.89795135,0.678931212,3.8524902,3.56395514,3.5141759
58.189424,4.35889894,3.90769866,0.671714433,3.86282048,3.56290872,3.51362943
58.199916,2.44948974,3.91806917,-1.21184959,3.87377046,3.56187078,3.5130834
58.210407,3.87298335,3.92913249,-0.236958114,3.88541043,3.56084124,3.51253788
58.220899,3.60555128,3.94097524,-0.579157978,3.89782791,3.55981974,3.51199277
58.23139,4.24264069,3.95369618,0.537535586,3.9111225,3.55880631,3.51144815
58.241882,4.58257569,3.96741895,0.784319289,3.92541901,3.5578006,3.51090394
58.252374,4.35889894,3.98228759,0.613686692,3.94086266,3.55680256,3.51036017
58.262865,4.47213595,3.99847434,0.688230787,3.95762706,3.55581213,3.50981692
58.273357,4.35889894,4.01619003,0.585413455,3.97592478,3.55482896,3.50927407
58.283848,3.16227766,4.03567838,-0.934559102,3.99600128,3.55385312,3.50873172
58.29434,4.12310563,4.05723609,0.256650611,4.01815549,3.55288427,3.50818977
58.304832,4.24264069,4.08120651,0.401788717,4.04273306,3.55192237,3.50764828
58.315323,3.74165739,4.10799085,-0.605254873,4.07013772,3.55096738,3.50710729
58.325815,3.46410162,4.13806346,-0.820951793,4.10084681,3.55001898,3.50656671
58.336306,4.35889894,4.1719584,0.432366216,4.13539724,3.54907725,3.50602664
58.346798,4.12310563,4.21029772,-0.295283067,4.17441433,3.54814186,3.50548697
58.35729,4.69041576,4.25377177,0.660790427,4.21859151,3.54721281,3.50494775
58.367781,4.58257569,4.30314699,0.528610164,4.26869812,3.54629004,3.50440904
58.378273,5.19615242,4.35927944,0.91480762,4.3255931,3.54537329,3.50387074
58.388764,5.19615242,4.42307176,0.87925006,4.39018112,3.54446261,3.50333294
58.399256,4.69041576,4.49550571,0.441486188,4.46344564,3.54355771,3.50279555
58.409748,5.38516481,4.577583,0.898655553,4.54638886,3.54265859,3.50225862
58.420239,5.09901951,4.67031768,0.654753261,4.64002421,3.54176523,3.5017222
58.430731,4.47213595,4.77474089,-0.550095386,4.74538121,3.54087734,3.50118618
58.441222,4.47213595,4.89180338,-0.647817435,4.86340732,3.53999502,3.50065067
58.451714,5.09901951,5.02242505,0.276757048,4.99501814,3.53911798,3.50011557
58.462206,6,5.16738321,0.912478377,5.14098526,3.53824623,3.49958092
58.472697,5.91607978,5.32730789,0.76731473,5.30193193,3.53737976,3.49904679
58.483189,6,5.50270488,0.705191548,5.47835677,3.53651831,3.49851306
58.49368,6.4807407,5.69381614,0.887087686,5.67049378,3.53566195,3.49797984
58.504172,6.63324958,5.90073696,0.855869511,5.8784307,3.53481045,3.49744704
58.514664,7.21110255,6.12327423,1.04299009,6.10196685,3.5339638,3.49691469
58.525155,5.47722558,6.36098756,-0.94008616,6.34065492,3.533122,3.49638285
58.535647,6.70820393,6.61326337,0.308124269,6.59387546,3.53228481,3.49585142
58.546138,6.4807407,6.87915182,-0.631198167,6.86067342,3.53145231,3.4953205
58.55663,7.74596669,7.15757061,0.767069801,7.13996264,3.53062427,3.49478999
58.567122,7.28010989,7.44713769,-0.408690352,7.43035796,3.52980069,3.49425995
58.577613,6.55743852,7.74625809,-1.09033003,7.73026232,3.52898159,3.49373041
58.588105,8.1240384,8.05323129,0.26609607,8.03797418,3.52816673,3.49320129
58.598596,8.18535277,8.36606336,-0.425100685,8.35149908,3.52735621,3.49267268
58.609088,8.30662386,8.68272163,-0.613268102,8.66880467,3.52654979,3.49214447
58.61958,8.30662386,9.00094258,-0.833257893,8.98762813,3.5257475,3.49161674
58.630071,9.21954446,9.3183406,-0.314318533,9.30558486,3.52494934,3.49108951
58.640563,7.61577311,9.63251793,-1.42012141,9.62027861,3.52415509,3.4905627
58.651054,9.53939201,9.94087045,-0.633623258,9.92910667,3.52336486,3.4900364
58.661546,9.48683298,10.2408457,-0.868339077,10.2295184,3.52257842,3.48951051
58.672038,9.48683298,10.5297547,-1.02123537,10.5188262,3.5217958,3.48898509
58.682529,10.198039,10.8048852,-0.779003306,10.7943197,3.52101701,3.48846018
58.693021,10.2956301,11.0635995,-0.876338615,11.0533627,3.52024185,3.48793568
58.703512,11.1803399,11.3031846,-0.350492039,11.2932435,3.5194704,3.4874117
58.714004,10.6301458,11.5210804,-0.943893304,11.5114037,3.51870247,3.48688813
58.724496,10.5830052,11.7147619,-1.06384054,11.7053193,3.51793809,3.48636503
58.734987,11.1355287,11.8818688,-0.863909738,11.872631,3.51717726,3.48584244
58.745479,12.4096736,12.0203007,0.62399758,12.0112396,3.5164198,3.48532027
58.75597,11.2694277,12.128184,-0.926691051,12.1192723,3.5156658,3.48479861
58.766462,11.9582607,12.2040375,-0.495758763,12.1952487,3.51491506,3.48427737
58.776954,12.5698051,12.2467611,0.568369568,12.2380695,3.51416762,3.4837566
58.787445,12.8062485,12.255728,0.741970675,12.2471082,3.51342349,3.48323634
58.797937,12.7671453,12.2308006,0.732355576,12.2222281,3.51268249,3.4827165
58.808428,13.0766968,12.1723452,0.950974055,12.1637958,3.51194472,3.48219717
58.81892,12.6095202,12.0811887,0.72686418,12.0726388,3.51121,3.48167826
58.829412,12.9614814,11.9586162,1.00143159,11.9500425,3.51047834,3.48115982
58.839903,12.9614814,11.8063086,1.07478966,11.7976882,3.50974977,3.4806419
58.850395,12.489996,11.6262182,0.929396471,11.6175284,3.50902413,3.4801244
58.860886,12.7279221,11.4206144,1.14337558,11.4118325,3.5083015,3.47960741
58.871378,12.2882057,11.1918778,1.04705681,11.1829813,3.50758171,3.47909084
58.88187,11.8321596,10.9425788,0.943175907,10.9335453,3.50686479,3.47857474
58.892361,11.3137085,10.6753777,0.798956067,10.6661845,3.50615077,3.47805916
58.902853,11.1803399,10.3928993,0.887378505,10.3835236,3.50543948,3.477544
58.913344,10.9544512,10.0978849,0.925508637,10.0883038,3.50473101,3.47702936
58.923836,9.59166305,9.79295087,-0.44865112,9.7831412,3.50402519,3.47651513
58.934328,9.89949494,9.48076025,0.64709712,9.47069876,3.50332207,3.47600138
58.944819,9.48683298,9.16392196,0.568252605,9.15358536,3.50262166,3.47548815
58.955311,8.83176087,8.8448789,-0.114533979,8.83424394,3.50192381,3.47497534
58.965802,9.43398113,8.5261002,0.952827862,8.51514394,3.50122861,3.47446304
58.976294,8.71779789,8.20982327,0.712723381,8.19852324,3.5005359,3.47395117
58.986786,7.61577311,7.89824608,-0.531481865,7.88658069,3.49984571,3.47343978
58.997277,7.07106781,7.59341656,-0.722736985,7.5813655,3.49915809,3.4729289
59.007769,7.48331477,7.29713141,0.431489698,7.284676,3.49847286,3.47241844
59.01826,7.61577311,7.01111637,0.777596766,6.99824019,3.49779012,3.47190851
59.028752,6.70820393,6.73678949,-0.169072627,6.7234788,3.49710973,3.471399
59.039244,5.91607978,6.4754353,-0.747900742,6.46167972,3.49643171,3.47088996
59.049735,6.55743852,6.22810705,0.573874091,6.21390007,3.4957561,3.47038144
59.060227,6,5.9955542,0.0666768107,5.98089357,3.49508274,3.46987335
59.070718,6.78232998,5.77837402,1.00197603,5.76326225,3.49441174,3.46936578
59.08121,5.38516481,5.57683902,-0.437806133,5.56128347,3.49374295,3.46885863
59.091702,5.19615242,5.3910457,-0.441467187,5.37505874,3.49307639,3.46835196
59.102193,5.19615242,5.22085858,-0.15718192,5.20445737,3.49241211,3.46784581
59.112685,4.58257569,5.0658867,-0.695205725,5.04909275,3.49174995,3.46734009
59.123176,5,4.9256123,0.272741087,4.90845099,3.49109002,3.46683489
59.133668,4.35889894,4.79930445,-0.663630548,4.78180415,3.49043217,3.46633012
59.14416,4.35889894,4.68614376,-0.572053156,4.66833507,3.48977644,3.46582582
59.154651,4.69041576,4.58521171,0.324351741,4.56712655,3.48912286,3.46532204
59.165143,5.09901951,4.4955021,0.776863831,4.47717275,3.48847129,3.46481869
59.175634,4.35889894,4.41601514,-0.238989959,4.39747349,3.48782183,3.46431587
59.186126,5.19615242,4.34572052,0.922188646,4.32699733,3.48717433,3.46381347
59.196618,4.35889894,4.2836355,0.27434183,4.26475987,3.48652883,3.46331156
59.207109,4.12310563,4.22881982,-0.325137201,4.20981881,3.48588538,3.46281016
59.217601,4.79583152,4.18037901,0.784507818,4.16127733,3.48524383,3.46230919
59.228092,4.89897949,4.13750808,0.872623289,4.11832805,3.48460429,3.46180875
59.238584,4.58257569,4.09946143,0.695064217,4.08022291,3.4839666,3.46130874
59.249076,3.87298335,4.06558344,-0.438862268,4.04630393,3.48333081,3.46080921
59.259567,4.47213595,4.03529385,0.660940323,4.01598866,3.48269697,3.4603102
59.270059,3.60555128,4.00807768,-0.634449686,3.98876008,3.48206493,3.45981162
59.28055,4.69041576,3.98349902,0.840783406,3.96418045,3.48143479,3.45931357
59.291042,4,3.9611748,0.197041101,3.94186507,3.48080642,3.45881595
59.301534,3.74165739,3.94078481,-0.446236954,3.92149232,3.48017986,3.45831881
59.312025,4.24264069,3.92205752,0.566200646,3.90278945,3.47955515,3.45782219
59.322517,3.46410162,3.90475933,-0.663820546,3.88552181,3.47893215,3.45732601
59.333008,3.31662479,3.88870042,-0.756356815,3.86949867,3.47831096,3.45683036
59.3435,3.46410162,3.87371629,-0.640011462,3.85455478,3.47769145,3.45633513
59.353992,3.87298335,3.85967362,0.1153678,3.8405562,3.47707367,3.45584039
59.364483,3.31662479,3.84646108,-0.727898547,3.82739105,3.47645765,3.45534617
59.374975,4,3.83398227,0.407452728,3.81496249,3.47584326,3.45485239
59.385466,2.82842712,3.82216095,-0.996861989,3.80319387,3.4752306,3.45435914
59.395958,4.12310563,3.81092895,0.558727726,3.79201675,3.47461954,3.45386632
59.40645,3.60555128,3.80023184,-0.44122621,3.78137641,3.47401013,3.45337398
59.416941,3.74165739,3.79002345,-0.219922852,3.77122643,3.4734024,3.45288217
59.427433,3.46410162,3.78026166,-0.562281109,3.76152453,3.47279623,3.45239079
59.437924,4.12310563,3.77091377,0.593457541,3.75223782,3.47219171,3.45189995
59.448416,3.74165739,3.76194809,-0.142445431,3.74333447,3.47158872,3.45140954
59.458908,4,3.75333933,0.496649447,3.73478907,3.4709873,3.45091961
59.469399,3.31662479,3.74506518,-0.654553577,3.72657918,3.4703875,3.45043021
59.479891,3.31662479,3.73710356,-0.648443341,3.71868265,3.46978918,3.44994125
59.490382,3.60555128,3.72943757,-0.351974846,3.71108246,3.46919245,3.44945281
59.500874,4.12310563,3.72204914,0.633290206,3.70376049,3.46859718,3.44896482
59.511366,4.35889894,3.71492388,0.802480568,3.69670225,3.46800341,3.44847731
59.521857,3.46410162,3.70804857,-0.493909865,3.68989446,3.4674112,3.44799033
59.532349,2.82842712,3.70140916,-0.934335075,3.68332301,3.4668204,3.44750378
59.54284,2.64575131,3.69499509,-1.02432601,3.67697729,3.46623113,3.44701777
59.553332,3.74165739,3.6887942,0.229919964,3.67084509,3.46564326,3.4465322
59.563824,4,3.68279686,0.563207901,3.66491672,3.46505683,3.44604711
59.574315,3.60555128,3.67699405,-0.267287817,3.65918313,3.46447188,3.44556255
59.584807,2.23606798,3.67137571,-1.19804329,3.6536342,3.46388831,3.44507844
59.595298,3.16227766,3.66593447,-0.709687823,3.64826252,3.46330619,3.44459485
59.60579,4.24264069,3.66066136,0.762875698,3.64305911,3.46272542,3.44411171
59.616282,3.87298335,3.65554941,0.466298119,3.63801695,3.46214603,3.44362905
59.626773,4.24264069,3.650592,0.769446999,3.63312938,3.46156808,3.44314692
59.637265,4,3.6457816,0.595162496,3.62838886,3.46099144,3.44266523
59.647756,3.46410162,3.64111274,-0.4207269,3.62378986,3.4604162,3.44218408
59.658248,2.82842712,3.63657855,-0.898972428,3.61932551,3.45984226,3.44170337
59.66874,4.12310563,3.63217382,0.700665263,3.61499057,3.45926965,3.44122315
59.679231,4.24264069,3.62789355,0.78405812,3.61078002,3.45869842,3.44074346
59.689723,3.31662479,3.62373185,-0.55417241,3.60668795,3.45812845,3.44026421
59.700214,3.74165739,3.61968465,0.349245951,3.60271025,3.45755984,3.43978549
59.710706,3.31662479,3.61574659,-0.546920286,3.59884156,3.45699248,3.43930722
59.721198,2.44948974,3.61191367,-1.07815766,3.59507786,3.4564264,3.43882944
59.731689,3.87298335,3.60818209,0.514588438,3.59141532,3.45586165,3.43835219
59.742181,3.16227766,3.60454716,-0.665033459,3.58784926,3.45529811,3.43787538
59.752672,3.46410162,3.60100583,-0.370005698,3.5843766,3.45473589,3.43739911
59.763164,4.12310563,3.59755383,0.724949514,3.58099305,3.45417487,3.43692329
59.773656,3.16227766,3.59418807,-0.657198912,3.57769552,3.45361509,3.43644795
59.784147,3.87298335,3.5909056,0.531109917,3.57448104,3.45305659,3.43597315
59.794639,3.74165739,3.5877027,0.3923706,3.57134588,3.45249927,3.43549879
59.80513,3.60555128,3.584577,0.144824981,3.56828767,3.45194322,3.43502497
59.815622,3.74165739,3.58152509,0.400165341,3.56530297,3.45138832,3.4345516
59.826114,3.46410162,3.57854455,-0.338294161,3.56238938,3.45083463,3.43407872
59.836605,3.46410162,3.5756331,-0.333963296,3.55954458,3.45028218,3.43360637
59.847097,2.82842712,3.5727877,-0.862763338,3.55676555,3.44973086,3.43313447
59.857588,4.58257569,3.57000655,1.00626495,3.55405046,3.44918078,3.4326631
59.86808,2.64575131,3.56728686,-0.959966431,3.55139654,3.44863181,3.43219219
59.878572,3,3.56462675,-0.751416494,3.54880188,3.44808401,3.43172176
59.889063,4.12310563,3.5620244,0.749053556,3.54626465,3.44753741,3.43125187
59.899555,4,3.55947734,0.663718812,3.54378241,3.44699192,3.43078243
59.910046,3.31662479,3.55698417,-0.4902646,3.54135372,3.44644761,3.43031353
59.920538,4,3.55454261,0.667425946,3.53897631,3.44590439,3.42984508
59.93103,3.87298335,3.55215116,0.566420505,3.53664868,3.44536229,3.42937712
59.941521,3.74165739,3.54980838,0.438005716,3.53436938,3.44482137,3.42890969
59.952013,3.16227766,3.54751224,-0.620672681,3.53213638,3.44428151,3.42844272
59.962504,3,3.54526164,-0.738418334,3.52994857,3.44374282,3.42797629
59.972996,3.31662479,3.54305469,-0.475846504,3.52780407,3.44320517,3.4275103
59.983488,4.24264069,3.54089019,0.837705493,3.52570168,3.44266861,3.42704481
59.993979,3.87298335,3.53876701,0.578114464,3.52364024,3.4421332,3.42657986
60.004471,3.31662479,3.53668344,-0.469104093,3.52161806,3.44159882,3.42611536
60.014962,2.44948974,3.53463863,-1.0417048,3.51963428,3.44106556,3.42565139
60.025454,4.35889894,3.53263099,0.908992823,3.51768733,3.44053333,3.42518788
60.035946,4.12310563,3.53065957,0.769705171,3.51577624,3.44000216,3.42472487
60.046437,3.87298335,3.52872346,0.586736645,3.51390009,3.4394721,3.42426239
60.056929,4.12310563,3.5268212,0.772194549,3.51205744,3.43894305,3.42380037
60.06742,3.46410162,3.52495216,-0.246679023,3.51024764,3.43841509,3.42333888
60.077912,2.23606798,3.52311497,-1.13448094,3.50846935,3.43788812,3.42287785
60.088404,2.64575131,3.52130889,-0.935712337,3.5067218,3.43736219,3.42241732
60.098895,4,3.51953315,0.693157158,3.50500423,3.43683734,3.42195732
60.109387,3.46410162,3.51778656,-0.231700112,3.50331544,3.43631347,3.42149778
60.119878,3.16227766,3.51606858,-0.594803262,3.50165491,3.43579067,3.42103878
60.13037,4,3.51437809,0.696865779,3.50002151,3.43526883,3.42058024
60.140862,4.12310563,3.51271445,0.781275353,3.4984146,3.434748,3.42012219
60.151353,3.87298335,3.51107707,0.601586469,3.49683359,3.43422823,3.41966468
60.161845,3.60555128,3.5094649,0.309978027,3.49527744,3.43370941,3.41920763
60.172336,3,3.50787754,-0.712655277,3.49374574,3.43319164,3.41875112
60.182828,3.31662479,3.50631402,-0.435533276,3.49223752,3.43267481,3.41829507
60.19332,3.74165739,3.50477383,0.486706844,3.49075227,3.43215896,3.41783951
60.203811,3.16227766,3.50325648,-0.58393392,3.48928951,3.43164414,3.4173845
60.214303,3.60555128,3.50176107,0.322164871,3.48784833,3.43113026,3.41692994
60.224794,4.12310563,3.50028729,0.789188401,3.48642843,3.43061739,3.41647592
60.235286,3.60555128,3.4988343,0.326675647,3.48502897,3.43010544,3.41602236
60.245778,4.58257569,3.49740167,1.04171686,3.48364952,3.42959446,3.4155693
60.256269,4.24264069,3.49598902,0.864090078,3.4822897,3.42908448,3.41511679
60.266761,3.74165739,3.49459556,0.497053139,3.48094872,3.42857541,3.41466473
60.277252,3,3.49322106,-0.702296989,3.47962635,3.42806734,3.41421321
60.287744,4.12310563,3.49186477,0.794506672,3.47832186,3.42756017,3.41376216
60.298236,3.31662479,3.49052637,-0.417015079,3.4770349,3.42705394,3.4133116
60.308727,3.74165739,3.48920551,0.50244589,3.47576515,3.42654869,3.41286158
60.319219,3.74165739,3.48790153,0.503741855,3.47451193,3.42604433,3.41241203
60.32971,3.31662479,3.48661424,-0.41229777,3.47327506,3.42554096,3.41196302
60.340202,2.64575131,3.48534299,-0.916292356,3.4720539,3.42503846,3.41151447
60.350694,4.24264069,3.48408752,0.870949581,3.47084818,3.42453688,3.41106642
60.361185,2.64575131,3.48284754,-0.914929631,3.46965762,3.42403627,3.41061891
60.371677,4.24264069,3.48162246,0.872363585,3.46848162,3.42353653,3.41017187
60.382168,3.31662479,3.48041215,-0.404706516,3.46732007,3.42303774,3.40972537
60.39266,3.31662479,3.47921604,-0.403226053,3.46617238,3.42253982,3.40927933
60.403152,4.58257569,3.4780339,1.05097184,3.46503833,3.4220428,3.40883379
60.413643,3,3.47686551,-0.690554491,3.46391771,3.42154674,3.4083888
60.424135,4.35889894,3.47571033,0.939781152,3.46280998,3.42105152,3.40794427
60.434626,3.46410162,3.47456828,-0.102306729,3.46171505,3.42055724,3.40750028
60.445118,3,3.47343885,-0.688068925,3.46063241,3.42006381,3.40705676
60.45561,3,3.47232184,-0.68725675,3.45956189,3.41957126,3.40661374
60.466101,3,3.47121709,-0.68645254,3.4585033,3.41907965,3.40617126
60.476593,3.16227766,3.47012411,-0.554839122,3.45745618,3.41858887,3.40572925
60.487084,3.31662479,3.46904285,-0.390407555,3.45642045,3.41809901,3.40528778
60.497576,2.23606798,3.46797284,-1.1099121,3.45539566,3.41760999,3.40484678
60.508068,3,3.46691394,-0.683311013,3.45438168,3.41712183,3.40440628
60.518559,3.46410162,3.465866,-0.0420046291,3.45337834,3.4166346,3.40396633
60.529051,3.31662479,3.4648286,-0.384972477,3.45238524,3.41614818,3.40352684
60.539542,3.60555128,3.46380169,0.376496459,3.45140232,3.41566267,3.4030879
60.550034,3.16227766,3.46278487,-0.548185377,3.45042919,3.41517797,3.40264943
60.560526,4,3.46177801,0.733636144,3.44946572,3.41469413,3.40221145
60.571017,2.82842712,3.460781,-0.795206811,3.44851179,3.4142112,3.40177403
60.581509,4,3.45979344,0.734987454,3.44756703,3.41372906,3.40133707
60.592,3.60555128,3.45881533,0.383061277,3.44663141,3.41324783,3.40090066
60.602492,3,3.45784629,-0.676643401,3.44570457,3.41276739,3.40046471
60.612984,4.24264069,3.45688622,0.886427924,3.44478641,3.4122878,3.40002927
60.623475,3,3.45593504,-0.675229617,3.44387683,3.41180909,3.39959438
60.633967,4,3.45499237,0.73824632,3.4429755,3.41133118,3.39915996
60.644458,3.46410162,3.45405824,0.100216658,3.4420824,3.41085415,3.39872608
60.65495,3.74165739,3.45313229,0.537145325,3.4411972,3.41037791,3.39829267
60.665442,4.35889894,3.45221445,0.95219982,3.44031983,3.4099025,3.39785976
60.675933,3.16227766,3.45130464,-0.537612299,3.43945021,3.40942796,3.39742741
60.686425,3.31662479,3.45040255,-0.365756424,3.43858802,3.4089542,3.39699552
60.696916,3.74165739,3.44950819,0.540508276,3.43773328,3.40848132,3.39656418
60.707408,4.47213595,3.44862124,1.01168904,3.43688568,3.40800921,3.39613331
60.7179,4.47213595,3.44774165,1.01212366,3.43604516,3.40753792,3.39570295
60.728391,4.12310563,3.44686936,0.82233586,3.43521166,3.40706749,3.39527313
60.738883,3.31662479,3.44600407,-0.359693309,3.43438489,3.40659783,3.39484379
60.749374,3.87298335,3.4451458,0.654092915,3.43356488,3.40612903,3.39441499
60.759866,3,3.44429428,-0.666554034,3.43275134,3.405661,3.39398667
60.770358,3.31662479,3.44344945,-0.356124504,3.43194422,3.40519377,3.39355885
60.780849,3.74165739,3.44261128,0.546851085,3.43114349,3.4047274,3.39313158
60.791341,4.47213595,3.44177948,1.01506477,3.43034887,3.40426179,3.39270478
60.801832,2.44948974,3.44095409,-0.995723027,3.4295604,3.40379702,3.39227853
60.812324,4,3.44013485,0.748241372,3.42877781,3.40333301,3.39185275
60.822816,3.87298335,3.43932172,0.658529895,3.42800108,3.4028698,3.39142748
60.833307,3.31662479,3.43851468,-0.349127326,3.42723017,3.40240743,3.39100276
60.843799,2.44948974,3.43771346,-0.994094421,3.42646483,3.40194581,3.39057852
60.85429,3.31662479,3.43691812,-0.346833281,3.4257051,3.40148503,3.39015482
60.864782,2.23606798,3.43612839,-1.09547269,3.42495074,3.401025,3.38973159
60.875274,4.47213595,3.43534427,1.01822968,3.42420173,3.40056576,3.38930888
60.885765,3.74165739,3.43456573,0.554158514,3.42345804,3.40010734,3.38888671
60.896257,3.16227766,3.43379252,-0.521070882,3.42271944,3.39964967,3.38846502
60.906748,3,3.43302471,-0.658046134,3.42198598,3.39919283,3.38804388
60.91724,3.31662479,3.43226207,-0.340054812,3.42125744,3.39873673,3.38762321
60.927732,2.64575131,3.43150456,-0.88642724,3.4205338,3.39828141,3.38720305
60.938223,3.60555128,3.43075219,0.4180898,3.41981504,3.39782692,3.38678344
60.948715,3.16227766,3.43000473,-0.517423496,3.41910095,3.39737316,3.38636431
60.959206,3,3.42926224,-0.655181077,3.41839158,3.39692022,3.38594572
60.969698,3.87298335,3.4285245,0.666677465,3.41768673,3.39646801,3.38552761
60.98019,4.12310563,3.42779151,0.833854975,3.41698637,3.39601657,3.38511002
60.990681,3.74165739,3.42706325,0.560886921,3.41629051,3.39556595,3.38469297
61.001173,3.16227766,3.42633952,-0.513869494,3.41559894,3.39511606,3.3842764
61.011664,4,3.42562038,0.75787837,3.41491173,3.39466699,3.38386038
61.022156,3.46410162,3.42490562,0.197979779,3.41422866,3.39421863,3.38344483
61.032648,3.60555128,3.42419525,0.425859157,3.41354974,3.39377105,3.3830298
61.043139,3.31662479,3.42348927,-0.326901331,3.41287497,3.39332427,3.38261532
61.053631,4.12310563,3.42278747,0.836850137,3.41220416,3.39287822,3.38220132
61.064122,3.60555128,3.42208993,0.428323876,3.41153737,3.39243297,3.38178786
61.074614,4.47213595,3.42139645,1.02505585,3.41087441,3.39198844,3.38137489
61.085106,3.46410162,3.42070704,0.208313653,3.41021528,3.39154467,3.38096242
61.095597,3.87298335,3.42002169,0.673024258,3.40955999,3.39110171,3.38055051
61.106089,3.31662479,3.41934023,-0.3204925,3.40890836,3.39065946,3.38013908
61.11658,4,3.41866273,0.762454768,3.40826046,3.39021801,3.3797282
61.127072,3.87298335,3.41798899,0.674532693,3.4076161,3.38977728,3.37931779
61.137564,3.74165739,3.41731904,0.569507111,3.40697529,3.3893373,3.3789079
61.148055,4,3.41665287,0.763771646,3.40633805,3.38889812,3.37849856
61.158547,2.44948974,3.41599032,-0.983107612,3.40570419,3.38845965,3.3780897
61.169038,4.24264069,3.41533145,0.90956541,3.4050738,3.38802198,3.37768139
61.17953,3.46410162,3.4146761,0.22231851,3.40444669,3.38758502,3.37727356
61.190022,3.74165739,3.41402426,0.572392456,3.40382289,3.3871488,3.37686625
61.200513,3.31662479,3.41337597,-0.311048515,3.4032024,3.38671338,3.37645948
61.211005,3.87298335,3.41273104,0.678418973,3.40258507,3.38627867,3.3760532
61.221496,3.46410162,3.41208956,0.228061512,3.40197095,3.38584475,3.37564747
61.231988,4,3.41145136,0.767169239,3.40135989,3.38541154,3.37524222
61.24248,4,3.41081645,0.767582927,3.40075191,3.38497907,3.37483748
61.252971,4,3.41018485,0.767994236,3.40014702,3.38454739,3.3744333
61.263463,3.16227766,3.40955641,-0.497271302,3.39954507,3.38411642,3.37402959
61.273954,4.12310563,3.40893119,0.845088419,3.39894612,3.38368623,3.37362645
61.284446,3.16227766,3.40830904,-0.496015503,3.39835003,3.38325675,3.37322377
61.294938,2.82842712,3.40768998,-0.761093197,3.39775681,3.38282801,3.37282162
61.305429,2.23606798,3.40707403,-1.08213033,3.39716648,3.38240005,3.37242002
61.315921,2.82842712,3.40646103,-0.760285409,3.39657889,3.3819728,3.3720189
61.326412,3.46410162,3.40585106,0.241351513,3.39599412,3.38154634,3.37161834
61.336904,3.16227766,3.40524398,-0.492916136,3.39541201,3.38112057,3.37121825
61.347396,4.12310563,3.4046398,0.847623637,3.39483259,3.38069555,3.37081868
61.357887,3.87298335,3.40403854,0.684795449,3.39425589,3.38027131,3.37041967
61.368379,4.47213595,3.40344006,1.03377749,3.39368174,3.37984777,3.37002113
61.37887,3,3.40284444,-0.634700275,3.39311024,3.37942501,3.36962316
61.389362,2.64575131,3.40225153,-0.86977021,3.39254124,3.37900295,3.36922566
61.399854,4.12310563,3.40166135,0.849378756,3.39197476,3.37858163,3.36882868
61.410345,3.74165739,3.40107394,0.583595276,3.39141083,3.3781611,3.36843225
61.420837,3.46410162,3.40048915,0.252215126,3.3908493,3.37774126,3.36803631
61.431328,3.74165739,3.39990705,0.584594165,3.39029026,3.37732221,3.36764092
61.44182,4.12310563,3.39932751,0.8507515,3.38973356,3.37690385,3.36724601
61.452312,2.82842712,3.39875056,-0.755197613,3.38917924,3.37648624,3.36685162
61.462803,3.46410162,3.39817622,0.256759412,3.38862731,3.3760694,3.36645779
61.473295,3.60555128,3.39760435,0.456011975,3.38807765,3.37565327,3.36606444
61.483786,2.44948974,3.39703504,-0.973419386,3.38753033,3.37523791,3.36567164
61.494278,3.16227766,3.39646816,-0.483932326,3.38698521,3.37482326,3.36527933
61.50477,2.23606798,3.39590372,-1.0769567,3.38644234,3.37440935,3.36488753
61.515261,4.12310563,3.39534176,0.853090773,3.38590172,3.37399622,3.36449629
61.525753,4,3.39478214,0.77795749,3.38536324,3.37358379,3.36410554
61.536244,3.74165739,3.39422496,0.589433992,3.38482697,3.37317214,3.36371534
61.546736,3.31662479,3.39367007,-0.277570308,3.38429279,3.37276119,3.36332562
61.557228,3.46410162,3.3931175,0.266428436,3.38376071,3.37235099,3.36293642
61.567719,3.60555128,3.3925673,0.461501872,3.38323078,3.37194157,3.36254778
61.578211,3.46410162,3.39201932,0.268481459,3.38270286,3.37153285,3.36215962
61.588702,2.82842712,3.39147366,-0.750364266,3.38217703,3.37112491,3.36177201
61.599194,3.46410162,3.39093018,0.270502196,3.38165317,3.37071768,3.36138489
61.609686,3.74165739,3.39038892,0.592679063,3.38113131,3.3703112,3.36099829
61.620177,3.74165739,3.3898499,0.593133616,3.38061148,3.3699055,3.36061225
61.630669,3.60555128,3.38931301,0.465014263,3.38009356,3.3695005,3.36022669
61.64116,3.87298335,3.38877833,0.695848416,3.37957762,3.36909629,3.35984169
61.651652,3.74165739,3.38824573,0.594484361,3.37906355,3.3686928,3.35945717
61.662144,3.60555128,3.38771525,0.466729068,3.37855137,3.36829005,3.35907317
61.672635,3.31662479,3.38718692,-0.265635339,3.37804112,3.36788808,3.35868973
61.683127,2.64575131,3.38666063,-0.860760893,3.37753268,3.36748683,3.35830677
61.693618,3.31662479,3.38613644,-0.26365062,3.37702612,3.36708638,3.35792437
61.70411,2.64575131,3.38561425,-0.860152858,3.37652134,3.36668663,3.35754246
61.714602,2.82842712,3.38509409,-0.746101177,3.37601835,3.36628764,3.35716106
61.725093,3,3.38457599,-0.620141914,3.3755172,3.36588944,3.35678022
61.735585,3.16227766,3.38405984,-0.470937556,3.37501777,3.36549196,3.35639987
61.746076,3.87298335,3.38354572,0.699598189,3.37452013,3.36509528,3.35602007
61.756568,3.60555128,3.38303351,0.471717883,3.37402418,3.36469932,3.35564076
61.76706,3.87298335,3.38252326,0.700328557,3.37352994,3.36430412,3.35526197
61.777551,3.46410162,3.38201499,0.286507643,3.37303745,3.36390972,3.35488374
61.788043,3.31662479,3.38150859,-0.254722976,3.3725466,3.36351605,3.35450599
61.798534,3.60555128,3.38100414,0.473864048,3.37205746,3.36312318,3.3541288
61.809026,3.87298335,3.38050154,0.70177048,3.37156993,3.36273104,3.3537521
61.819518,4,3.38000082,0.787400267,3.37108403,3.36233967,3.35337592
61.830009,1.73205081,3.37950201,-1.28353076,3.3705998,3.36194911,3.35300029
61.840501,3,3.37900501,-0.61563383,3.37011713,3.36155928,3.35262515
61.850992,3.46410162,3.3785099,0.292560615,3.3696361,3.36117027,3.35225057
61.861484,3.16227766,3.37801657,-0.464477032,3.3691566,3.360782,3.35187648
61.871976,3.60555128,3.37752506,0.477520903,3.36867867,3.36039452,3.3515029
61.882467,4.35889894,3.3770354,0.990890276,3.36820233,3.36000785,3.35112989
61.892959,3.31662479,3.3765475,-0.244791148,3.36772748,3.35962193,3.35075736
61.90345,3.74165739,3.37606142,0.604645324,3.3672542,3.35923683,3.35038539
61.913942,4,3.37557707,0.79020436,3.36678239,3.35885249,3.3500139
61.924434,2.82842712,3.37509449,-0.73936957,3.36631207,3.35846894,3.34964294
61.934925,3.16227766,3.3746137,-0.460799351,3.36584328,3.35808623,3.34927253
61.945417,2.82842712,3.37413462,-0.738720172,3.36537592,3.35770428,3.34890262
61.955908,3.31662479,3.37365732,-0.238814835,3.36491007,3.35732317,3.34853326
61.9664,3.60555128,3.3731817,0.48204728,3.36444562,3.35694283,3.34816438
61.976892,3.16227766,3.3727078,-0.458726645,3.3639826,3.3565633,3.34779603
61.987383,4.12310563,3.37223565,0.866527538,3.36352105,3.35618462,3.34742824
61.997875,3.46410162,3.37176517,0.303869132,3.36306087,3.35580673,3.34706093
62.008366,3.16227766,3.37129642,-0.457185696,3.36260214,3.35542969,3.34669419
62.018858,4.12310563,3.37082932,0.867338633,3.36214475,3.35505344,3.34632793
62.02935,3,3.3703639,-0.608575306,3.36168874,3.35467802,3.34596219
62.039841,3.16227766,3.36990021,-0.455656171,3.36123415,3.35430347,3.34559701
62.050333,3.46410162,3.36943813,0.30767431,3.36078087,3.35392972,3.34523232
62.060824,3.16227766,3.36897777,-0.454642838,3.36032898,3.35355685,3.34486819
62.071316,3.60555128,3.36851902,0.486859583,3.35987838,3.3531848,3.34450454
62.081808,3.46410162,3.36806193,0.309902707,3.35942911,3.3528136,3.34414142
62.092299,2.23606798,3.36760653,-1.06373801,3.3589812,3.35244329,3.34377885
62.102791,4.35889894,3.36715272,0.995864559,3.35853456,3.35207381,3.34341678
62.113282,3.74165739,3.36670061,0.612337145,3.35808925,3.35170524,3.34305526
62.123774,2.82842712,3.36625008,-0.733364139,3.3576452,3.35133751,3.34269423
62.134266,3.60555128,3.3658012,0.489642808,3.35720242,3.35097066,3.34233372
62.144757,2.82842712,3.36535398,-0.73275293,3.35676095,3.35060473,3.34197377
62.155249,4.24264069,3.36490835,0.936873702,3.3563207,3.35023967,3.34161431
62.16574,3.16227766,3.36446439,-0.449651791,3.35588174,3.34987554,3.34125541
62.176232,3.46410162,3.36402202,0.316353597,3.35544399,3.34951228,3.340897
62.186724,2.82842712,3.36358126,-0.731542302,3.35500746,3.34914995,3.34053911
62.197215,3.74165739,3.36314218,0.615235899,3.35457221,3.34878857,3.34018178
62.207707,4.47213595,3.36270467,1.05329544,3.35413813,3.34842809,3.33982493
62.218198,3.16227766,3.36226882,-0.447203717,3.3537053,3.34806858,3.33946865
62.22869,2.64575131,3.36183456,-0.846217024,3.35327363,3.34770999,3.33911285
62.239182,2.82842712,3.36140192,-0.730051231,3.35284316,3.34735236,3.33875758
62.249673,3.16227766,3.36097095,-0.445750258,3.35241391,3.34699573,3.33840286
62.260165,3.31662479,3.36054157,-0.2095633,3.35198579,3.34664004,3.33804864
62.270656,3.60555128,3.36011385,0.495416414,3.35155889,3.34628538,3.33769497
62.281148,3.60555128,3.35968773,0.495846294,3.3511331,3.34593168,3.33734179
62.29164,3.46410162,3.35926324,0.323787545,3.35070847,3.34557898,3.33698914
62.302131,2.64575131,3.35884043,-0.844446045,3.35028503,3.34522735,3.33663704
62.312623,3.74165739,3.35841923,0.61906232,3.34986269,3.3448767,3.33628543
62.323114,3,3.35799972,-0.598330775,3.34944152,3.34452714,3.33593438
62.333606,3.60555128,3.35758182,0.497965318,3.34902143,3.3441786,3.33558382
62.344098,2.64575131,3.35716558,-0.843453774,3.34860247,3.34383113,3.33523378
62.354589,3.74165739,3.35675105,0.620408201,3.34818465,3.34348478,3.3348843
62.365081,4,3.35633816,0.802285387,3.3477679,3.3431395,3.33453532
62.375572,2.82842712,3.35592699,-0.726291859,3.34735229,3.34279536,3.33418688
62.386064,3.60555128,3.35551747,0.5000338,3.34693773,3.34245231,3.33383894
62.396556,3.60555128,3.35510966,0.500441418,3.34652425,3.34211042,3.33349152
62.407047,3.87298335,3.3547036,0.719916483,3.34611189,3.34176971,3.33314466
62.417539,3.87298335,3.35429923,0.720197276,3.34570057,3.34143016,3.33279829
62.42803,3.46410162,3.35389663,0.331971358,3.34529035,3.34109183,3.33245248
62.438522,4.47213595,3.35349575,1.05765789,3.34488115,3.34075469,3.33210716
62.449014,4.12310563,3.35309663,0.877501567,3.34447301,3.34041879,3.33176236
62.459505,3.74165739,3.35269932,0.623665026,3.34406595,3.34008418,3.33141811
62.469997,3.74165739,3.35230377,0.623982061,3.3436599,3.33975081,3.33107436
62.480488,3.16227766,3.35191008,-0.435468044,3.34325492,3.33941878,3.33073117
62.49098,2.64575131,3.35151817,-0.840099317,3.34285094,3.33908805,3.33038846
62.501472,3.46410162,3.35112812,0.336115304,3.34244797,3.33875867,3.33004628
62.511963,3.46410162,3.35073997,0.336692213,3.34204607,3.33843069,3.32970466
62.522455,3.31662479,3.35035367,-0.183654251,3.34164515,3.33810409,3.32936353
62.532946,4.12310563,3.34996933,0.879281693,3.34124527,3.33777896,3.32902295
62.543438,2.64575131,3.34958689,-0.838949091,3.34084635,3.33745525,3.32868286
62.55393,4.12310563,3.34920641,0.879715417,3.34044844,3.33713304,3.3283433
62.564421,3.31662479,3.34882796,-0.179452419,3.34005155,3.33681239,3.3280043
62.574913,2.82842712,3.3484515,-0.721127153,3.33965562,3.33649326,3.32766578
62.585404,3.46410162,3.34807712,0.340623692,3.33926071,3.33617576,3.32732782
62.595896,3.46410162,3.34770478,0.341169799,3.33886673,3.33585987,3.32699035
62.606388,2.64575131,3.34733457,-0.83760567,3.33847373,3.33554565,3.32665341
62.616879,3.46410162,3.34696654,0.342250015,3.33808174,3.33523317,3.32631702
62.627371,3.46410162,3.34660067,0.342784105,3.33769067,3.33492241,3.32598113
62.637862,4,3.34623707,0.808556078,3.3373006,3.33461349,3.32564578
62.648354,3.46410162,3.34587571,0.343839947,3.33691144,3.33430638,3.32531093
62.658846,3.60555128,3.34551666,0.509935892,3.33652324,3.33400118,3.32497661
62.669337,3.60555128,3.34516002,0.510285465,3.33613602,3.33369795,3.32464284
62.679829,3.87298335,3.34480576,0.726758272,3.33574969,3.3333967,3.32430956
62.69032,2.82842712,3.34445401,-0.71835011,3.33536435,3.33309755,3.32397683
62.700812,3.46410162,3.34410474,0.346405644,3.3349799,3.33280049,3.3236446
62.711304,3.60555128,3.34375807,0.511657311,3.33459637,3.33250561,3.32331289
62.721795,4,3.34341408,0.810299895,3.3342138,3.33221302,3.32298174
62.732287,3,3.34307277,-0.585724144,3.33383212,3.33192273,3.32265107
62.742778,2.82842712,3.34273429,-0.717152118,3.33345139,3.33163487,3.32232097
62.75327,4.12310563,3.34239863,0.883576255,3.33307153,3.33134947,3.32199135
62.763762,4,3.34206591,0.811131364,3.33269258,3.33106662,3.32166226
62.774253,3,3.34173625,-0.584582115,3.33231457,3.33078646,3.32133372
62.784745,3.74165739,3.34140967,0.632651338,3.33193742,3.33050901,3.32100567
62.795236,3.31662479,3.34108633,-0.156401858,3.3315612,3.33023443,3.32067818
62.805728,4,3.34076627,0.811932098,3.33118584,3.32996277,3.32035117
62.81622,4.24264069,3.34044962,0.949837391,3.33081136,3.32969417,3.3200247
62.826711,4.12310563,3.34013652,0.884855413,3.33043781,3.32942877,3.31969877
62.837203,3.87298335,3.33982705,0.730175528,3.33006509,3.32916664,3.31937334
62.847694,4.12310563,3.33952137,0.885202948,3.32969329,3.32890796,3.31904846
62.858186,3.74165739,3.33921957,0.634379872,3.32932233,3.32865282,3.31872407
62.868678,3.16227766,3.33892181,-0.420290559,3.32895223,3.32840139,3.31840021
62.879169,3.60555128,3.33862829,0.516645898,3.32858304,3.32815386,3.3180769
62.889661,3.46410162,3.33833911,0.354630103,3.32821467,3.32791034,3.31775408
62.900152,3.60555128,3.33805448,0.517200921,3.3278472,3.32767105,3.31743181
62.910644,4.35889894,3.33777455,1.010507,3.32748054,3.32743613,3.31711004
62.921136,3.31662479,3.33749954,-0.144480978,3.32711474,3.32720582,3.31678879
62.931627,3.31662479,3.33722969,-0.143544055,3.32674982,3.32698034,3.31646809
62.942119,3,3.33696516,-0.580486999,3.32638571,3.32675988,3.31614788
62.95261,4.12310563,3.33670624,0.886791623,3.32602248,3.32654473,3.31582823
62.963102,3.16227766,3.33645316,-0.417343382,3.32566005,3.32633511,3.31550906
62.973594,3.31662479,3.3362062,-0.139933603,3.32529846,3.32613131,3.31519042
62.984085,4,3.3359657,0.814882997,3.32493773,3.32593368,3.31487233
62.994577,3.60555128,3.33573193,0.519441377,3.3245778,3.32574248,3.31455474
63.005068,4.35889894,3.33550529,1.01162921,3.32421873,3.32555812,3.31423769
63.01556,3.31662479,3.33528611,-0.136606443,3.32386045,3.32538095,3.31392114
63.026052,3,3.33507484,-0.578856496,3.32350299,3.32521141,3.31360511
63.036543,3.60555128,3.33487197,0.520268497,3.32314638,3.32504997,3.31328963
63.047035,3.16227766,3.33467796,-0.415211146,3.32279055,3.32489714,3.31297464
63.057526,3.74165739,3.33449342,0.63809401,3.32243557,3.32475351,3.3126602
63.068018,3.74165739,3.33431897,0.638230689,3.32208136,3.32461971,3.31234626
63.07851,4.58257569,3.33415537,1.11732731,3.32172795,3.3244965,3.31203283
63.089001,3.74165739,3.33400347,0.63847781,3.32137538,3.32438473,3.31171996
63.099493,3.87298335,3.33386423,0.734247313,3.32102358,3.32428537,3.31140758
63.109984,2.64575131,3.33373882,-0.829450125,3.32067261,3.3241996,3.31109575
63.120476,2.44948974,3.33362858,-0.940286571,3.32032241,3.32412876,3.31078441
63.130968,3.60555128,3.33353513,0.521551666,3.31997299,3.32407449,3.31047359
63.141459,3.31662479,3.33346043,-0.129752243,3.3196244,3.32403874,3.31016332
63.151951,2.44948974,3.3334068,-0.940168632,3.31927656,3.32402385,3.30985355
63.162442,2.44948974,3.33337707,-0.940152819,3.31892953,3.32403265,3.30954432
63.172934,4.24264069,3.33337465,0.953554422,3.31858326,3.32406857,3.30923559
63.183426,3.46410162,3.33340372,0.361521643,3.31823777,3.3241358,3.30892737
63.193917,3.46410162,3.33346929,0.361430935,3.31789308,3.32423937,3.30861971
63.204409,2.44948974,3.33357749,-0.940259405,3.31754914,3.32438542,3.30831253
63.2149,4.12310563,3.33373565,0.888464955,3.317206,3.3245813,3.30800591
63.225392,3.74165739,3.33395263,0.638517622,3.3168636,3.32483591,3.30769977
63.235884,3,3.334239,-0.578134071,3.31652196,3.32515984,3.30739416
63.246375,3.46410162,3.33460729,0.3598532,3.31618112,3.32556564,3.30708909
63.256867,3,3.33507238,-0.578854371,3.31584101,3.32606825,3.30678452
63.267358,2.64575131,3.33565157,-0.830602349,3.3155017,3.32668501,3.30648049
63.27785,3.60555128,3.33636515,0.518831496,3.31516311,3.32743627,3.30617696
63.288342,3.31662479,3.33723633,-0.143567208,3.31482527,3.32834528,3.30587395
63.298833,3,3.33829153,-0.581628348,3.31448822,3.32943854,3.30557148
63.309325,3.16227766,3.33956089,-0.421050146,3.31415189,3.33074626,3.3052695
63.319816,3,3.34107758,-0.584018473,3.31381634,3.3323017,3.30496807
63.330308,3.46410162,3.34287874,0.348170762,3.3134815,3.33414208,3.30466713
63.3408,3,3.34500435,-0.587370709,3.31314741,3.3363075,3.30436672
63.351291,3.46410162,3.3474972,0.341473881,3.31281409,3.33884082,3.30406684
63.361783,2.82842712,3.35040316,-0.722479088,3.31248148,3.34178802,3.30376746
63.372274,3,3.35376876,-0.59478463,3.31214965,3.34519574,3.30346863
63.382766,3.74165739,3.3576424,0.619689424,3.31181851,3.34911251,3.30317028
63.393258,3.60555128,3.36207118,0.493437027,3.31148811,3.35358548,3.30287246
63.403749,4,3.36710012,0.795550047,3.31115847,3.35865979,3.30257518
63.414241,3,3.3727723,-0.610550821,3.31082953,3.3643786,3.30227839
63.424732,3.46410162,3.37912369,0.291509734,3.31050135,3.37077792,3.30198214
63.435224,3.87298335,3.38618545,0.697709033,3.31017387,3.37788897,3.30168639
63.445716,3.31662479,3.39397811,-0.278124654,3.3098471,3.38573229,3.30139115
63.456207,3.46410162,3.40251104,0.248174481,3.3095211,3.39431722,3.30109646
63.466699,4.24264069,3.41178324,0.911513823,3.30919578,3.40364272,3.30080226
63.47719,3.31662479,3.42177588,-0.324270087,3.30887121,3.41368988,3.30050861
63.487682,2.44948974,3.43245763,-0.991447368,3.30854732,3.42442724,3.30021544
63.498174,3.46410162,3.44377697,0.142564515,3.30822415,3.43580314,3.29992279
63.508665,4.24264069,3.45566371,0.887117228,3.30790172,3.44774717,3.29963069
63.519157,4,3.4680318,0.729361503,3.30757998,3.46017305,3.29933907
63.529648,4.47213595,3.48077102,0.995673107,3.30725897,3.4729703,3.299048
63.54014,4,3.4937561,0.711508188,3.30693864,3.48601334,3.29875742
63.550632,3.87298335,3.50683857,0.605098984,3.30661901,3.49915337,3.29846735
63.561123,3.60555128,3.51985078,0.292746465,3.30630012,3.51222238,3.29817783
63.571615,3.60555128,3.53261071,0.270075116,3.3059819,3.52503796,3.2978888
63.582106,4.47213595,3.54491483,0.962923221,3.30566441,3.53739617,3.29760031
63.592598,3.87298335,3.55655042,0.562523712,3.30534759,3.54908391,3.29731231
63.60309,4.35889894,3.56729104,0.8897235,3.30503147,3.5598743,3.29702482
63.613581,3.46410162,3.57690618,-0.335863914,3.30471607,3.56953641,3.29673788
63.624073,4.12310563,3.58517174,0.73343976,3.30440133,3.57784575,3.29645142
63.634564,4,3.59187379,0.638847561,3.30408732,3.58458804,3.29616551
63.645056,4.12310563,3.59682705,0.725450605,3.30377397,3.58957768,3.29588009
63.655548,3.16227766,3.59988221,-0.661516856,3.3034613,3.59266516,3.29559518
63.666039,4.12310563,3.60094023,0.722610127,3.30314935,3.59375127,3.29531081
63.676531,4.35889894,3.59996029,0.871170852,3.30283806,3.59279519,3.29502693
63.687022,3.16227766,3.59696272,-0.659306503,3.30252748,3.58981732,3.29474359
63.697514,3,3.59202696,-0.769432881,3.30221756,3.58489727,3.29446074
63.708006,3.46410162,3.58528569,-0.348115027,3.30190831,3.57816801,3.2941784
63.718497,3.74165739,3.57691447,0.405885346,3.30159977,3.56980545,3.29389661
63.728989,3.31662479,3.56711634,-0.500491306,3.30129188,3.56001301,3.2936153
63.73948,4.24264069,3.55611517,0.828568355,3.3009847,3.54901499,3.29333453
63.749972,3.87298335,3.54413786,0.573450506,3.30067816,3.53703876,3.29305425
63.760464,5.47722558,3.53141247,1.39492405,3.30037229,3.52431277,3.29277448
63.770955,3.31662479,3.51815905,-0.448925676,3.30006713,3.51105754,3.29249525
63.781447,4.24264069,3.50458112,0.859103933,3.29976261,3.49747696,3.29221651
63.791938,4.47213595,3.49087152,0.990587925,3.29945878,3.48376427,3.2919383
63.80243,3.60555128,3.47720035,0.358260979,3.29915559,3.47008992,3.29166059
63.812922,4,3.46372287,0.73230945,3.29885307,3.45660948,3.29138338
63.823413,3.46410162,3.4505749,0.116304413,3.29855124,3.44345906,3.29110672
63.833905,4.35889894,3.43786876,0.959703175,3.29825005,3.43075121,3.29083054
63.844396,3.16227766,3.42570207,-0.51324888,3.29794954,3.41858378,3.2905549
63.854888,3.60555128,3.41414831,0.437496245,3.29764967,3.4070304,3.29027974
63.86538,3.87298335,3.40326578,0.685359442,3.29735045,3.39614951,3.2900051
63.875871,3.60555128,3.39309475,0.460930067,3.29705193,3.38598147,3.28973099
63.886363,3.46410162,3.38365596,0.283629436,3.29675403,3.3765471,3.28945737
63.896854,3.46410162,3.37495888,0.298567804,3.29645681,3.36785588,3.28918428
63.907346,2.64575131,3.36699604,-0.849261285,3.29616022,3.35990033,3.28891168
63.917838,3.16227766,3.35975099,-0.444379717,3.29586428,3.35266398,3.28863959
63.928329,3.31662479,3.35319738,-0.191239607,3.29556902,3.34612042,3.28836804
63.938821,3.31662479,3.34729925,-0.175141266,3.29527438,3.34023364,3.28809697
63.949312,3.46410162,3.34201734,0.349405599,3.29498041,3.33496427,3.28782644
63.959804,3.31662479,3.33730616,-0.143810173,3.29468707,3.33026673,3.28755639
63.970296,3.16227766,3.33311943,-0.4133301,3.29439437,3.32609467,3.28728685
63.980787,3.16227766,3.32940978,-0.408817959,3.29410234,3.32240058,3.28701785
63.991279,4.24264069,3.32612907,0.95734613,3.29381093,3.31913623,3.28674933
64.00177,3.74165739,3.3232319,0.646858165,3.29352019,3.31625612,3.28648134
64.012262,4.12310563,3.32067378,0.895785604,3.29323006,3.31371566,3.28621384
64.022754,2.64575131,3.31841383,-0.820160059,3.29294057,3.31147391,3.28594685
64.033245,4.24264069,3.31641423,0.962406599,3.29265175,3.30949292,3.28568039
64.043737,3.87298335,3.31463992,0.747223816,3.29236354,3.30773759,3.28541441
64.054228,4,3.31306008,0.828818385,3.29207599,3.30617703,3.28514897
64.06472,4.12310563,3.3116467,0.900810152,3.29178904,3.30478315,3.28488401
64.075212,4.69041576,3.31037551,1.17475114,3.29150273,3.30353166,3.28461956
64.085703,3.46410162,3.30922538,0.393543177,3.29121708,3.30240135,3.28435564
64.096195,3.16227766,3.30817773,-0.381968673,3.29093204,3.30137362,3.2840922
64.106686,3.46410162,3.30721704,0.396086574,3.29064765,3.30043292,3.28382929
64.117178,3.74165739,3.30632979,0.659793602,3.29036386,3.29956569,3.28356687
64.12767,3.46410162,3.30550481,0.398242141,3.2900807,3.29876074,3.28330495
64.138161,3.46410162,3.30473274,0.399210311,3.28979819,3.2980087,3.28304357
64.148653,3.74165739,3.30400556,0.661552586,3.28951629,3.29730153,3.28278266
64.159144,3.16227766,3.30331688,-0.375551889,3.28923503,3.29663281,3.28252229
64.169636,3.46410162,3.30266116,0.40179653,3.28895437,3.29599702,3.28226239
64.180128,3.16227766,3.30203402,-0.373840014,3.28867433,3.29538974,3.28200301
64.190619,3.60555128,3.30143182,0.551470267,3.28839494,3.29480734,3.28174415
64.201111,3.60555128,3.30085142,0.551996242,3.28811614,3.29424669,3.28148577
64.211602,4.89897949,3.30029044,1.26439276,3.28783799,3.29370536,3.28122792
64.222094,3.16227766,3.29974667,-0.370768136,3.28756043,3.29318118,3.28097056
64.232586,3.31662479,3.29921845,0.131933085,3.28728349,3.29267247,3.28071369
64.243077,4,3.29870438,0.837433952,3.28700718,3.29217782,3.28045736
64.253569,3.60555128,3.29820312,0.554389892,3.28673147,3.29169592,3.2802015
64.26406,4.24264069,3.29771374,0.972073528,3.28645639,3.29122579,3.27994618
64.274552,3.74165739,3.29723525,0.666649937,3.28618191,3.29076647,3.27969133
64.285044,3.16227766,3.29676691,-0.366727753,3.28590803,3.29031722,3.27943698
64.295535,4.24264069,3.29630808,0.972796284,3.28563479,3.28987739,3.27918317
64.306027,3,3.29585807,-0.54392837,3.28536213,3.28944629,3.27892983
64.316518,3.46410162,3.29541644,0.410713011,3.28509011,3.28902348,3.27867701
64.32701,3.60555128,3.2949826,0.557286884,3.28481866,3.28860838,3.27842468
64.337502,2.82842712,3.29455618,-0.682736444,3.28454783,3.2882006,3.27817285
64.347993,3.60555128,3.29413679,0.558045232,3.28427762,3.28779977,3.27792154
64.358485,3.46410162,3.29372401,0.412768224,3.284008,3.28740545,3.27767071
64.368976,3.46410162,3.29331756,0.413260275,3.283739,3.28701738,3.27742041
64.379468,2.64575131,3.29291706,-0.804466126,3.28347058,3.28663517,3.27717058
64.38996,3,3.29252225,-0.540853265,3.28320276,3.28625857,3.27692126
64.400451,3.60555128,3.29213291,0.559837801,3.28293557,3.28588733,3.27667246
64.410943,3.60555128,3.29174871,0.560180837,3.28266895,3.28552115,3.27642413
64.421434,4.47213595,3.29136947,1.08663079,3.28240295,3.28515985,3.27617633
64.431926,3.46410162,3.29099492,0.416060922,3.28213753,3.28480314,3.275929
64.442418,2.82842712,3.29062489,-0.679851279,3.2818727,3.28445086,3.27568218
64.452909,3.87298335,3.2902592,0.763363704,3.28160849,3.28410285,3.27543588
64.463401,3.16227766,3.28989762,-0.357239357,3.28134485,3.28375884,3.27519005
64.473892,3.46410162,3.28954003,0.417805675,3.28108184,3.28341875,3.27494474
64.484384,3.87298335,3.28918622,0.76406618,3.28081938,3.28308234,3.27469991
64.494876,3.74165739,3.28883606,0.672920002,3.28055752,3.2827495,3.27445558
64.505367,3.16227766,3.28848944,-0.355262972,3.28029628,3.28242012,3.27421177
64.515859,4.12310563,3.28814616,0.913761163,3.2800356,3.28209399,3.27396844
64.52635,3,3.28780617,-0.536475692,3.27977554,3.28177106,3.27372562
64.536842,4.35889894,3.28746927,1.03509887,3.27951603,3.28145113,3.27348328
64.547334,3.16227766,3.28713538,-0.353352122,3.27925712,3.28113414,3.27324143
64.557825,2.82842712,3.28680444,-0.677035679,3.27899882,3.28082,3.27300011
64.568317,3.16227766,3.28647626,-0.352418221,3.27874107,3.28050855,3.27275926
64.578808,4.47213595,3.28615083,1.08902944,3.27848394,3.28019976,3.27251892
64.5893,3.31662479,3.28582799,0.175490185,3.27822736,3.27989347,3.27227906
64.599792,3.16227766,3.28550767,-0.351041325,3.27797137,3.27958963,3.2720397
64.610283,3,3.28518984,-0.534031684,3.27771599,3.27928819,3.27180085
64.620775,3.74165739,3.28487435,0.675857261,3.27746116,3.27898901,3.27156248
64.631266,3.87298335,3.28456119,0.7670868,3.27720693,3.27869207,3.27132462
64.641758,2.82842712,3.28425022,-0.675146724,3.27695326,3.27839726,3.27108723
64.65225,3.31662479,3.28394142,0.18078542,3.27670017,3.27810452,3.27085034
64.662741,3.46410162,3.28363475,0.42481392,3.27644768,3.27781383,3.27061397
64.673233,3,3.28333008,-0.532287595,3.27619574,3.27752507,3.27037806
64.683724,3.16227766,3.28302743,-0.347490673,3.2759444,3.27723825,3.27014268
64.694216,3.60555128,3.28272667,0.568176562,3.27569361,3.27695324,3.26990776
64.704708,2.44948974,3.28242779,-0.912654394,3.2754434,3.27667002,3.26967333
64.715199,3,3.28213075,-0.53115982,3.27519378,3.27638858,3.26943942
64.725691,3,3.28183547,-0.530881786,3.27494471,3.27610881,3.26920598
64.736182,3.74165739,3.28154195,0.678318096,3.27469624,3.27583073,3.26897306
64.746674,3.31662479,3.28125009,0.188081645,3.27444831,3.27555422,3.2687406
64.757166,4.12310563,3.28095987,0.917684998,3.27420096,3.27527929,3.26850863
64.767657,3.46410162,3.28067129,0.428287666,3.27395419,3.27500592,3.26827718
64.778149,2.44948974,3.28038425,-0.911534152,3.27370797,3.27473402,3.26804619
64.78864,3,3.28009878,-0.52924359,3.27346234,3.2744636,3.26781572
64.799132,4,3.27981478,0.848637275,3.27321726,3.27419458,3.26758572
64.809624,3.60555128,3.27953224,0.570980767,3.27297274,3.27392696,3.2673562
64.820115,3.31662479,3.27925117,0.193322593,3.2727288,3.27366072,3.2671272
64.830607,3,3.27897147,-0.528177499,3.27248541,3.27339579,3.26689866
64.841098,2.23606798,3.27869318,-1.0210902,3.27224261,3.27313218,3.26667063
64.85159,4.24264069,3.27841621,0.981949327,3.27200034,3.27286983,3.26644307
64.862082,2.82842712,3.27814056,-0.670606764,3.27175864,3.27260873,3.266216
64.872573,3,3.27786623,-0.527130182,3.27151752,3.27234888,3.26598944
64.883065,3.31662479,3.27759315,0.197564276,3.27127694,3.2720902,3.26576335
64.893556,3.87298335,3.27732134,0.771791427,3.27103694,3.27183272,3.26553776
64.904048,3.46410162,3.27705073,0.432493797,3.27079747,3.27157638,3.26531264
64.91454,3.46410162,3.27678133,0.432805141,3.27055856,3.27132117,3.265088
64.925031,3.31662479,3.27651313,0.200278961,3.27032023,3.2710671,3.26486387
64.935523,3.74165739,3.27624607,0.682210612,3.27008244,3.27081409,3.26464021
64.946014,4.58257569,3.27598018,1.14306409,3.26984522,3.27056219,3.26441705
64.956506,3.31662479,3.27571538,0.20226074,3.26960854,3.27031132,3.26419436
64.966998,4.12310563,3.2754517,0.920681231,3.26937241,3.27006148,3.26397215
64.977489,3.46410162,3.27518913,0.434640644,3.26913685,3.26981269,3.26375045
64.987981,3.46410162,3.2749276,0.434941391,3.26890183,3.26956489,3.26352921
64.998472,3.31662479,3.27466716,0.204835622,3.26866737,3.2693181,3.26330848
65.008964,2.82842712,3.27440773,-0.667817795,3.26843345,3.26907226,3.26308821
65.019456,3.60555128,3.27414933,0.575675207,3.26820008,3.26882738,3.26286842
65.029947,2.64575131,3.27389197,-0.792553252,3.26796727,3.26858347,3.26264913
65.040439,3,3.27363558,-0.523101881,3.267735,3.26834047,3.26243031
65.05093,3.60555128,3.2733802,0.576342849,3.26750329,3.26809841,3.26221199
65.061422,4.12310563,3.27312576,0.921943525,3.26727211,3.26785724,3.26199413
65.071914,3.16227766,3.27287229,-0.332557705,3.26704147,3.26761697,3.26177676
65.082405,3.74165739,3.27261978,0.6848632,3.2668114,3.2673776,3.26155988
65.092897,3.46410162,3.27236819,0.437873753,3.26658186,3.26713908,3.26134347
65.103388,4,3.27211755,0.853160274,3.26635288,3.26690145,3.26112756
65.11388,4,3.27186779,0.853306632,3.26612442,3.26666464,3.2609121
65.124372,2.64575131,3.27161894,-0.791117962,3.2658965,3.26642867,3.26069713
65.134863,3.16227766,3.271371,-0.330292816,3.26566915,3.26619356,3.26048265
65.145355,3,3.27112393,-0.520695619,3.26544231,3.26595925,3.26026864
65.155846,3.74165739,3.27087775,0.686133835,3.26521604,3.26572577,3.26005512
65.166338,3.46410162,3.27063241,0.439851348,3.26499029,3.26549308,3.25984207
65.17683,4,3.27038792,0.854173331,3.26476507,3.26526118,3.25962949
65.187321,2.64575131,3.2701443,-0.790185417,3.26454042,3.26503009,3.2594174
65.197813,3.87298335,3.2699015,0.776583442,3.26431628,3.26479975,3.25920578
65.208304,3,3.26965955,-0.519287545,3.26409269,3.26457021,3.25899465
65.218796,2.82842712,3.2694184,-0.664071742,3.26386962,3.26434141,3.25878398
65.229288,4.12310563,3.26917807,0.924082009,3.26364709,3.26411336,3.25857379
65.239779,3.16227766,3.26893856,-0.326589801,3.26342511,3.26388608,3.25836409
65.250271,2.44948974,3.26869983,-0.905102251,3.26320365,3.26365953,3.25815485
65.260762,2.64575131,3.26846191,-0.789120142,3.26298274,3.26343373,3.2579461
65.271254,3.46410162,3.26822476,0.442579777,3.26276234,3.26320864,3.25773781
65.281746,3,3.26798838,-0.517675941,3.26254247,3.26298427,3.25752999
65.292237,3.46410162,3.2677528,0.443112645,3.26232315,3.26276064,3.25732266
65.302729,2.44948974,3.26751796,-0.904449124,3.26210434,3.26253769,3.25711579
65.31322,3.46410162,3.26728391,0.443641421,3.26188608,3.26231547,3.25690942
65.323712,2.23606798,3.26705058,-1.01537313,3.26166833,3.26209393,3.25670349
65.334204,2.82842712,3.266818,-0.662110927,3.26145111,3.26187309,3.25649804
65.344695,3.31662479,3.26658619,0.22369309,3.26123443,3.26165295,3.25629309
65.355187,4,3.26635509,0.856530738,3.26101827,3.26143347,3.25608858
65.365678,4.12310563,3.26612475,0.925732615,3.26080264,3.2612147,3.25588456
65.37617,3.74165739,3.26589511,0.689755229,3.26058753,3.26099657,3.255681
65.386662,3,3.26566619,-0.515428165,3.26037293,3.26077911,3.25547791
65.397153,4,3.26543801,0.857065917,3.26015888,3.26056234,3.2552753
65.407645,3.74165739,3.26521052,0.690251305,3.25994533,3.26034621,3.25507315
65.418136,3.60555128,3.26498376,0.583581626,3.25973233,3.26013075,3.25487149
65.428628,3.16227766,3.26475768,-0.320125006,3.25951983,3.25991592,3.25467027
65.43912,1.73205081,3.2645323,-1.23793436,3.25930784,3.25970174,3.25446953
65.449611,3.16227766,3.26430763,-0.319421301,3.2590964,3.25948822,3.25426927
65.460103,3.31662479,3.26408363,0.229218593,3.25888546,3.25927532,3.25406947
65.470594,3.46410162,3.26386033,0.447483276,3.25867505,3.25906307,3.25387014
65.481086,3.87298335,3.2636377,0.780605949,3.25846515,3.25885143,3.25367127
65.491578,2.44948974,3.26341574,-0.902178473,3.25825576,3.25864042,3.25347287
65.502069,3.16227766,3.26319448,-0.317674073,3.2580469,3.25843006,3.25327495
65.512561,3.74165739,3.26297386,0.691869586,3.25783855,3.25822029,3.25307747
65.523052,3.16227766,3.26275393,-0.316979927,3.25763073,3.25801116,3.25288048
65.533544,3.60555128,3.26253465,0.585676215,3.2574234,3.25780263,3.25268394
65.544036,3.46410162,3.26231602,0.449205517,3.25721659,3.2575947,3.25248787
65.554527,3.46410162,3.26209807,0.449448049,3.25701031,3.2573874,3.25229227
65.565019,3.46410162,3.26188075,0.449689748,3.25680452,3.25718069,3.25209712
65.57551,3.87298335,3.26166409,0.781869077,3.25659927,3.25697459,3.25190246
65.586002,3.16227766,3.26144807,-0.314913331,3.2563945,3.25676907,3.25170824
65.596494,3.87298335,3.26123268,0.782144913,3.25619025,3.25656415,3.25151448
65.606985,1.73205081,3.26101796,-1.23651411,3.25598652,3.25635984,3.2513212
65.617477,4.12310563,3.26080384,0.928602057,3.25578329,3.2561561,3.25112837
65.627968,3.46410162,3.26059039,0.451122186,3.25558058,3.25595297,3.25093602
65.63846,3,3.26037754,-0.510272027,3.25537836,3.2557504,3.25074411
65.648952,3.46410162,3.26016532,0.451593062,3.25517665,3.25554841,3.25055266
65.659443,3.60555128,3.25995375,0.587875436,3.25497547,3.25534702,3.25036169
65.669935,3,3.25974277,-0.509649657,3.25477477,3.25514619,3.25017116
65.680426,3.60555128,3.25953244,0.588233658,3.25457459,3.25494595,3.24998111
65.690918,3.31662479,3.2593227,0.239378547,3.2543749,3.25474627,3.2497915
65.70141,4.12310563,3.25911358,0.929511726,3.25417572,3.25454715,3.24960235
65.711901,2.82842712,3.25890508,-0.656108192,3.25397705,3.25434862,3.24941368
65.722393,3.31662479,3.25869718,0.240681552,3.25377887,3.25415063,3.24922544
65.732884,3.74165739,3.2584899,0.695102498,3.25358121,3.25395323,3.24903768
65.743376,4,3.25828321,0.861229812,3.25338403,3.25375637,3.24885036
65.753868,4.35889894,3.25807712,1.04920056,3.25318736,3.25356006,3.2486635
65.764359,4.35889894,3.25787165,1.04929848,3.2529912,3.25336434,3.24847711
65.774851,2.64575131,3.25766675,-0.782250241,3.25279552,3.25316914,3.24829116
65.785342,3.16227766,3.25746247,-0.308520355,3.25260035,3.25297452,3.24810569
65.795834,3,3.25725876,-0.507206824,3.25240567,3.25278043,3.24792065
65.806326,3,3.25705564,-0.507006553,3.25221149,3.25258689,3.24773606
65.816817,4.12310563,3.25685314,0.930726861,3.25201781,3.25239391,3.24755195
65.827309,3.31662479,3.25665119,0.244895075,3.25182462,3.25220146,3.24736827
65.8378,3.74165739,3.25644985,0.696568398,3.25163194,3.25200957,3.24718507
65.848292,2.82842712,3.25624908,-0.654080998,3.25143973,3.2518182,3.2470023
65.858784,3.31662479,3.25604888,0.246121737,3.25124802,3.25162738,3.24681998
65.869275,3.87298335,3.25584928,0.785578808,3.25105682,3.2514371,3.24663813
65.879767,3.74165739,3.25565024,0.697142128,3.2508661,3.25124735,3.24645672
65.890258,4.35889894,3.25545179,1.05045093,3.25067588,3.25105815,3.24627577
65.90075,2.82842712,3.2552539,-0.653319809,3.25048614,3.25086946,3.24609526
65.911242,3.46410162,3.25505657,0.457214437,3.25029688,3.2506813,3.2459152
65.921733,4.58257569,3.25485984,1.15226553,3.25010814,3.25049369,3.2457356
65.932225,3.46410162,3.25466365,0.457643928,3.24991986,3.25030659,3.24555644
65.942716,3.46410162,3.25446805,0.457857586,3.24973209,3.25012004,3.24537774
65.953208,3.16227766,3.25427299,-0.303307314,3.24954479,3.24993399,3.24519947
65.9637,3.74165739,3.25407849,0.698268499,3.24935798,3.24974846,3.24502166
65.974191,3.60555128,3.25388457,0.593014927,3.24917167,3.24956348,3.2448443
65.984683,3.31662479,3.25369119,0.250865694,3.24898583,3.24937899,3.24466738
65.995174,3.87298335,3.25349839,0.787073666,3.2488005,3.24919505,3.24449092
66.005666,3.60555128,3.25330612,0.593502444,3.24861563,3.2490116,3.24431489
66.016158,3.87298335,3.25311441,0.787317556,3.24843124,3.24882867,3.24413931
66.026649,2.64575131,3.25292327,-0.779212397,3.24824735,3.24864627,3.24396419
66.037141,3.31662479,3.25273266,0.252768925,3.24806393,3.24846437,3.24378949
66.047632,3.46410162,3.25254262,0.459955429,3.24788101,3.24828299,3.24361526
66.058124,3.87298335,3.25235311,0.787800889,3.24769855,3.24810211,3.24344146
66.068616,2.82842712,3.25216414,-0.650950853,3.24751657,3.24792174,3.24326809
66.079107,3.16227766,3.25197573,-0.299496367,3.24733509,3.24774189,3.24309519
66.089599,3.87298335,3.25178785,0.78815956,3.24715407,3.24756254,3.24292272
66.10009,2.44948974,3.25160053,-0.895606382,3.24697355,3.2473837,3.2427507
66.110582,4,3.25141374,0.865208798,3.24679348,3.24720535,3.24257911
66.121074,3.31662479,3.25122748,0.255728983,3.2466139,3.24702751,3.24240796
66.131565,3.31662479,3.25104177,0.256091813,3.2464348,3.24685019,3.24223726
66.142057,2.44948974,3.25085659,-0.895190955,3.24625617,3.24667334,3.24206699
66.152548,3.60555128,3.25067196,0.595717484,3.24607803,3.24649702,3.24189718
66.16304,3.31662479,3.25048784,0.257171058,3.24590034,3.24632118,3.24172779
66.173532,4,3.25030425,0.865849726,3.24572313,3.24614583,3.24155883
66.184023,3.16227766,3.25012121,-0.296384133,3.24554641,3.245971,3.24139034
66.194515,3.74165739,3.24993869,0.701226567,3.24537015,3.24579664,3.24122226
66.205006,3.46410162,3.24975671,0.462973981,3.24519437,3.2456228,3.24105464
66.215498,3.60555128,3.24957524,0.596637275,3.24501905,3.24544943,3.24088744
66.22599,4.12310563,3.24939429,0.934725272,3.2448442,3.24527655,3.24072067
66.236481,3.87298335,3.24921389,0.789790768,3.24466983,3.24510418,3.24055436
66.246973,3,3.24903399,-0.499033055,3.24449592,3.24493229,3.24038847
66.257464,3.60555128,3.24885463,0.59724086,3.24432249,3.24476089,3.24022302
66.267956,3.60555128,3.24867578,0.597390576,3.24414951,3.24458997,3.240058
66.278448,3.16227766,3.24849744,-0.293632047,3.243977,3.24441954,3.23989341
66.288939,3,3.24831964,-0.498316805,3.24380498,3.2442496,3.23972927
66.299431,2.82842712,3.24814234,-0.647854314,3.2436334,3.24408014,3.23956555
66.309922,3.60555128,3.24796557,0.597984705,3.2434623,3.24391117,3.23940227
66.320414,3.74165739,3.2477893,0.70275749,3.24329166,3.24374268,3.23923942
66.330906,2.23606798,3.24761354,-1.00575621,3.24312147,3.24357466,3.23907699
66.341397,3,3.24743831,-0.497431716,3.24295177,3.24340714,3.23891501
66.351889,3.60555128,3.24726358,0.59857138,3.24278251,3.24324008,3.23875345
66.36238,3.60555128,3.24708937,0.598716881,3.24261373,3.24307351,3.23859233
66.372872,3.87298335,3.24691566,0.791244393,3.2424454,3.24290741,3.23843162
66.383364,3,3.24674245,-0.496731769,3.24227753,3.24274179,3.23827135
66.393855,3.31662479,3.24656977,0.264679094,3.24211013,3.24257665,3.23811151
66.404347,2.64575131,3.24639757,-0.775013718,3.24194317,3.24241198,3.2379521
66.414838,3.46410162,3.2462259,0.466771587,3.24177669,3.24224779,3.23779312
66.42533,3.46410162,3.24605471,0.466954923,3.24161066,3.24208407,3.23763456
66.435822,3,3.24588403,-0.49586695,3.24144508,3.24192081,3.23747642
66.446313,3,3.24571387,-0.495695336,3.24127997,3.24175804,3.23731872
66.456805,2.44948974,3.24554419,-0.892218831,3.2411153,3.24159573,3.23716144
66.467296,3.87298335,3.24537502,0.792217348,3.2409511,3.2414339,3.23700459
66.477788,4.12310563,3.24520634,0.936962801,3.24078735,3.24127252,3.23684816
66.48828,2.44948974,3.24503815,-0.891935204,3.24062404,3.24111161,3.23669215
66.498771,3.16227766,3.24487048,-0.287389659,3.24046121,3.24095118,3.23653658
66.509263,2.82842712,3.24470328,-0.645194666,3.24029881,3.24079121,3.23638141
66.519754,3.46410162,3.2445366,0.468577653,3.24013688,3.24063171,3.23622669
66.530246,3.87298335,3.24437039,0.792851155,3.23997539,3.24047266,3.23607237
66.540738,3.60555128,3.24420468,0.601121117,3.23981435,3.24031408,3.23591847
66.551229,2.82842712,3.24403947,-0.644680034,3.23965377,3.24015597,3.23576501
66.561721,3.87298335,3.24387474,0.79316367,3.23949362,3.23999831,3.23561195
66.572212,3.16227766,3.24371051,-0.285364419,3.23933395,3.23984113,3.23545933
66.582704,3.16227766,3.24354676,-0.285077353,3.2391747,3.23968439,3.23530711
66.593196,3.74165739,3.24338349,0.705885186,3.2390159,3.23952811,3.23515532
66.603687,3.87298335,3.24322073,0.793575843,3.23885756,3.23937231,3.23500395
66.614179,2.82842712,3.24305843,-0.643918712,3.23869966,3.23921694,3.23485299
66.62467,3.46410162,3.24289664,0.470324331,3.23854221,3.23906205,3.23470246
66.635162,3.46410162,3.24273531,0.470495804,3.2383852,3.2389076,3.23455234
66.645654,3.16227766,3.24257447,-0.283366919,3.23822862,3.23875361,3.23440263
66.656145,4.35889894,3.24241413,1.05663845,3.23807251,3.23860008,3.23425335
66.666637,2.82842712,3.24225425,-0.643293962,3.23791683,3.238447,3.23410447
66.677128,3,3.24209486,-0.492031364,3.2377616,3.23829438,3.23395602
66.68762,2.64575131,3.24193594,-0.772129932,3.2376068,3.2381422,3.23380797
66.698112,4.12310563,3.2417775,0.938790777,3.23745244,3.23799047,3.23366034
66.708603,4.35889894,3.24161955,1.05701438,3.23729853,3.2378392,3.23351313
66.719095,3.46410162,3.24146207,0.471846955,3.23714505,3.23768838,3.23336632
66.729586,3.60555128,3.24130507,0.603528132,3.23699202,3.23753801,3.23321994
66.740078,4.24264069,3.24114853,1.0007458,3.23683942,3.23738808,3.23307395
66.75057,3.60555128,3.24099247,0.603787052,3.23668725,3.2372386,3.23292838
66.761061,4.12310563,3.2408369,0.93929161,3.23653554,3.23708958,3.23278323
66.771553,3.46410162,3.24068178,0.472673074,3.23638424,3.23694099,3.23263848
66.782044,3.16227766,3.24052715,-0.279731103,3.2362334,3.23679286,3.23249415
66.792536,4.12310563,3.24037298,0.93953853,3.23608298,3.23664516,3.23235021
66.803028,3.16227766,3.24021927,-0.279180248,3.23593299,3.2364979,3.23220669
66.813519,2.64575131,3.24006605,-0.770918114,3.23578345,3.2363511,3.23206358
66.824011,2.44948974,3.23991328,-0.889057669,3.23563433,3.23620474,3.23192087
66.834502,2.82842712,3.239761,-0.641353157,3.23548565,3.23605882,3.23177858
66.844994,3,3.23960916,-0.489498889,3.2353374,3.23591334,3.23163668
66.855486,3.60555128,3.23945779,0.605056593,3.23518957,3.23576829,3.23149519
66.865977,3.74165739,3.23930691,0.708766874,3.23504219,3.2356237,3.23135412
66.876469,3,3.23915647,-0.489036263,3.23489522,3.23547954,3.23121344
66.88696,3.31662479,3.2390065,0.278600584,3.2347487,3.23533582,3.23107318
66.897452,3.16227766,3.23885699,-0.276729708,3.23460259,3.23519253,3.2309333
66.907944,3.74165739,3.23870794,0.709189289,3.2344569,3.23504968,3.23079383
66.918435,3.74165739,3.23855936,0.709294032,3.23431166,3.23490728,3.23065478
66.928927,2.64575131,3.23841123,-0.769844088,3.23416683,3.2347653,3.23051611
66.939418,4,3.23826357,0.872775129,3.23402244,3.23462377,3.23037786
66.94991,3,3.23811636,-0.48797168,3.23387847,3.23448266,3.23024
66.960402,4.12310563,3.2379696,0.940816678,3.23373491,3.23434198,3.23010253
66.970893,3.31662479,3.23782332,0.280715996,3.23359179,3.23420175,3.22996548
66.981385,3.16227766,3.23767748,-0.274590272,3.23344909,3.23406194,3.22982882
66.991876,3.46410162,3.2375321,0.475993184,3.23330682,3.23392257,3.22969256
67.002368,3.16227766,3.23738717,-0.274061145,3.23316495,3.23378363,3.2295567
67.01286,3.46410162,3.23724269,0.476297095,3.23302351,3.23364511,3.22942123
67.023351,2.82842712,3.23709868,-0.639274242,3.2328825,3.23350703,3.22928617
67.033843,4.24264069,3.23695511,1.00283876,3.2327419,3.23336938,3.22915149
67.044334,3.46410162,3.236812,0.476749007,3.23260173,3.23323216,3.22901722
67.054826,3.60555128,3.23666933,0.607356524,3.23246196,3.23309536,3.22888333
67.065318,2.82842712,3.23652711,-0.638827037,3.23232261,3.23295898,3.22874984
67.075809,3,3.23638535,-0.486194765,3.2321837,3.23282305,3.22861676
67.086301,4,3.23624403,0.873931332,3.23204518,3.23268753,3.22848406
67.096792,4.35889894,3.23610317,1.05962058,3.2319071,3.23255244,3.22835176
67.107284,3,3.23596274,-0.485759959,3.23176941,3.23241777,3.22821984
67.117776,3.46410162,3.23582276,0.477785369,3.23163214,3.23228352,3.22808832
67.128267,2.64575131,3.23568323,-0.768070259,3.2314953,3.23214971,3.22795719
67.138759,2.64575131,3.23554414,-0.767979708,3.23135885,3.23201631,3.22782645
67.14925,2,3.23540551,-1.11148797,3.23122284,3.23188335,3.22769611
67.159742,3,3.23526731,-0.485043614,3.23108722,3.23175079,3.22756614
67.170234,3,3.23512955,-0.484901586,3.23095201,3.23161865,3.22743657
67.180725,3,3.23499224,-0.484759985,3.23081722,3.23148695,3.2273074
67.191217,3.74165739,3.23485537,0.711900288,3.23068283,3.23135566,3.2271786
67.201708,4.12310563,3.23471894,0.942542668,3.23054887,3.23122479,3.2270502
67.2122,3,3.23458295,-0.48433764,3.23041529,3.23109433,3.22692217
67.222692,3.87298335,3.23444739,0.799084447,3.23028213,3.23096429,3.22679454
67.233183,1.73205081,3.23431229,-1.22566777,3.23014938,3.23083469,3.22666729
67.243675,3.16227766,3.23417761,-0.268141658,3.23001703,3.23070548,3.22654043
67.254166,2.64575131,3.23404338,-0.767002,3.2298851,3.2305767,3.22641396
67.264658,2.82842712,3.23390957,-0.636775038,3.22975356,3.23044833,3.22628786
67.27515,3.60555128,3.2337762,0.609733606,3.22962242,3.23032037,3.22616214
67.285641,3.74165739,3.23364328,0.712751081,3.2294917,3.23019284,3.22603682
67.296133,4,3.23351078,0.875493698,3.22936137,3.23006571,3.22591187
67.306624,3.87298335,3.23337873,0.799752846,3.22923145,3.22993901,3.22578731
67.317116,3.31662479,3.2332471,0.288751955,3.22910193,3.22981271,3.22566312
67.327608,2.23606798,3.2331159,-0.99852287,3.2289728,3.22968682,3.22553931
67.338099,4.47213595,3.23298514,1.11317151,3.22884409,3.22956135,3.22541589
67.348591,2.64575131,3.23285481,-0.766226792,3.22871576,3.22943628,3.22529284
67.359082,3.16227766,3.23272491,-0.265419017,3.22858784,3.22931164,3.22517018
67.369574,3.31662479,3.23259544,0.289878165,3.22846031,3.22918739,3.22504789
67.380066,3.87298335,3.23246639,0.80032303,3.22833318,3.22906355,3.22492598
67.390557,2.23606798,3.23233779,-0.998133163,3.22820646,3.22894013,3.22480445
67.401049,3.74165739,3.2322096,0.713756112,3.22808011,3.22881711,3.22468328
67.41154,3.16227766,3.23208185,-0.264204826,3.22795418,3.22869451,3.22456251
67.422032,4.35889894,3.23195452,1.06157639,3.22782863,3.22857231,3.2244421
67.432524,2.64575131,3.23182761,-0.765556201,3.22770348,3.22845051,3.22432206
67.443015,3,3.23170114,-0.481353443,3.22757872,3.22832913,3.22420241
67.453507,3.46410162,3.23157508,0.482210053,3.22745435,3.22820814,3.22408311
67.463998,3.87298335,3.23144946,0.800958106,3.22733039,3.22808757,3.22396421
67.47449,3.87298335,3.23132425,0.801036264,3.2272068,3.2279674,3.22384566
67.484982,3.16227766,3.23119946,-0.262529625,3.2270836,3.22784763,3.22372749
67.495473,3.46410162,3.23107511,0.482728187,3.22696081,3.22772827,3.22360969
67.505965,3.60555128,3.23095117,0.612045835,3.22683839,3.22760931,3.22349226
67.516456,3.74165739,3.23082766,0.714723529,3.22671637,3.22749075,3.22337521
67.526948,3.60555128,3.23070457,0.612247262,3.22659473,3.22737259,3.22325851
67.53744,3.60555128,3.23058189,0.612347441,3.22647348,3.22725484,3.22314218
67.547931,3,3.23045964,-0.480062121,3.22635262,3.22713749,3.22302624
67.558423,3.31662479,3.2303378,0.293746472,3.22623214,3.22702053,3.22291064
67.568914,3.74165739,3.23021639,0.71515103,3.22611205,3.22690399,3.22279543
67.579406,2.82842712,3.23009539,-0.633773038,3.22599234,3.22678783,3.22268057
67.589898,3.16227766,3.2299748,-0.260186747,3.22587301,3.22667207,3.22256608
67.600389,2.82842712,3.22985465,-0.633583082,3.22575407,3.22655673,3.22245196
67.610881,4.58257569,3.22973489,1.16311685,3.22563551,3.22644177,3.22233819
67.621372,3,3.22961557,-0.479182189,3.22551734,3.22632722,3.2222248
67.631864,4.12310563,3.22949665,0.945308932,3.22539954,3.22621305,3.22211176
67.642356,3,3.22937814,-0.478934384,3.22528212,3.22609928,3.22199909
67.652847,3.60555128,3.22926006,0.6134258,3.22516509,3.22598592,3.22188678
67.663339,3.16227766,3.22914239,-0.258582145,3.22504842,3.22587295,3.22177483
67.67383,4.58257569,3.22902513,1.16342192,3.22493215,3.22576038,3.22166325
67.684322,3.16227766,3.22890828,-0.258129077,3.22481624,3.22564819,3.22155201
67.694814,3.74165739,3.22879184,0.716146316,3.22470071,3.2255364,3.22144114
67.705305,3,3.22867582,-0.47820061,3.22458557,3.22542502,3.22133063
67.715797,3.16227766,3.22856021,-0.25745397,3.22447079,3.22531401,3.22122047
67.726288,4.12310563,3.22844501,0.945865008,3.2243564,3.22520342,3.22111068
67.73678,3.31662479,3.22833022,0.297144029,3.22424236,3.2250932,3.22100124
67.747272,3.60555128,3.22821583,0.614276359,3.22412871,3.22498338,3.22089215
67.757763,3.87298335,3.22810186,0.803045131,3.22401543,3.22487396,3.22078343
67.768255,3.60555128,3.2279883,0.614461536,3.22390252,3.22476492,3.22067506
67.778746,2.82842712,3.22787515,-0.632019005,3.22378999,3.22465628,3.22056704
67.789238,3.31662479,3.2277624,0.298097962,3.22367782,3.22454802,3.22045937
67.79973,3.60555128,3.22765005,0.614736711,3.22356602,3.22444016,3.22035206
67.810221,4.35889894,3.22753812,1.06365446,3.2234546,3.22433269,3.2202451
67.820713,3.31662479,3.22742659,0.298660671,3.22334354,3.22422561,3.22013849
67.831204,3.16227766,3.22731548,-0.255025135,3.22323285,3.22411892,3.22003224
67.841696,3.31662479,3.22720476,0.29903182,3.22312252,3.22401262,3.21992633
67.852188,3.16227766,3.22709445,-0.254591412,3.22301256,3.2239067,3.21982077
67.862679,3.46410162,3.22698455,0.486946677,3.22290297,3.22380118,3.21971557
67.873171,3.87298335,3.22687504,0.803808622,3.22279374,3.22369604,3.2196107
67.883662,4,3.22676595,0.879337276,3.22268489,3.22359129,3.2195062
67.894154,4.24264069,3.22665726,1.00796003,3.22257638,3.22348693,3.21940203
67.904646,4.69041576,3.22654897,1.20990363,3.22246824,3.22338295,3.21929821
67.915137,4.12310563,3.22644109,0.946923725,3.22236047,3.22327937,3.21919474
67.925629,2.82842712,3.2263336,-0.630798282,3.22225306,3.22317616,3.21909162
67.93612,3.74165739,3.22622652,0.717935139,3.22214601,3.22307335,3.21898884
67.946612,3.16227766,3.22611984,-0.252670099,3.22203931,3.22297092,3.2188864
67.957104,3.46410162,3.22601356,0.487942679,3.22193298,3.22286887,3.2187843
67.967595,2.64575131,3.22590769,-0.761679969,3.22182701,3.22276722,3.21868256
67.978087,4.35889894,3.22580221,1.06447017,3.22172139,3.22266594,3.21858115
67.988578,2.64575131,3.22569714,-0.761541743,3.22161613,3.22256506,3.21848009
67.99907,3.60555128,3.22559246,0.616407996,3.22151123,3.22246455,3.21837936
68.009562,3.74165739,3.22548818,0.718449169,3.22140668,3.22236443,3.21827897
68.020053,3.31662479,3.22538431,0.302060393,3.22130249,3.2222647,3.21817893
68.030545,3.74165739,3.22528083,0.718593458,3.22119865,3.22216535,3.21807922
68.041036,2.23606798,3.22517776,-0.994539985,3.22109517,3.22206639,3.21797985
68.051528,2.82842712,3.22507508,-0.62979993,3.22099204,3.2219678,3.21788082
68.06202,3.16227766,3.22497279,-0.250389962,3.22088926,3.2218696,3.21778212
68.072511,3.16227766,3.22487092,-0.250186447,3.22078683,3.22177179,3.21768377
68.083003,3.74165739,3.22476943,0.718949202,3.22068476,3.22167435,3.21758574
68.093494,3.46410162,3.22466835,0.489319182,3.22058304,3.22157731,3.21748806
68.103986,3.60555128,3.22456766,0.6172387,3.22048166,3.22148064,3.21739071
68.114478,2.64575131,3.22446737,-0.760733894,3.22038062,3.22138435,3.21729369
68.124969,3.31662479,3.22436748,0.303738881,3.22027995,3.22128845,3.21719701
68.135461,3.74165739,3.22426798,0.719297854,3.22017962,3.22119293,3.21710065
68.145952,3.74165739,3.22416889,0.719366731,3.22007964,3.2210978,3.21700464
68.156444,3,3.22407019,-0.473360527,3.21997999,3.22100304,3.21690894
68.166936,4,3.22397188,0.880924582,3.2198807,3.22090866,3.21681358
68.177427,3.87298335,3.22387398,0.805673238,3.21978175,3.22081468,3.21671856
68.187919,3.31662479,3.22377647,0.304710231,3.21968314,3.22072107,3.21662386
68.19841,3,3.22367936,-0.472947521,3.21958489,3.22062785,3.21652949
68.208902,2.64575131,3.22358264,-0.760152173,3.21948696,3.220535,3.21643545
68.219394,3.31662479,3.22348631,0.305185973,3.21938938,3.22044254,3.21634173
68.229885,3.60555128,3.22339039,0.618191622,3.21929215,3.22035046,3.21624834
68.240377,3.74165739,3.22329486,0.719973975,3.21919525,3.22025876,3.21615528
68.250868,3,3.22319974,-0.472440193,3.21909869,3.22016745,3.21606254
68.26136,3.60555128,3.223105,0.618422411,3.21900247,3.22007652,3.21597013
68.271852,4.24264069,3.22301066,1.00976732,3.21890659,3.21998596,3.21587804
68.282343,3,3.22291672,-0.472140571,3.21881105,3.2198958,3.21578628
68.292835,3.60555128,3.22282317,0.618650229,3.21871584,3.21980601,3.21569483
68.303326,3.16227766,3.22273003,-0.24587063,3.21862097,3.21971662,3.21560372
68.313818,3,3.22263727,-0.471844541,3.21852644,3.2196276,3.21551291
68.32431,3.16227766,3.22254491,-0.245493895,3.21843223,3.21953896,3.21542243
68.334801,2.23606798,3.22245296,-0.993169161,3.21833837,3.21945071,3.21533228
68.345293,3.16227766,3.2223614,-0.24511984,3.21824483,3.21936284,3.21524244
68.355784,3.31662479,3.22227024,0.307171861,3.21815164,3.21927536,3.21515292
68.366276,2.82842712,3.22217947,-0.627496888,3.21805876,3.21918825,3.21506372
68.376768,3.16227766,3.2220891,-0.244563771,3.21796622,3.21910154,3.21497483
68.387259,4.12310563,3.22199913,0.949266291,3.21787402,3.21901521,3.21488626
68.397751,3.46410162,3.22190956,0.492130121,3.21778214,3.21892926,3.21479801
68.408242,2.64575131,3.22182039,-0.758992148,3.21769059,3.2188437,3.21471008
68.418734,3.46410162,3.22173162,0.492310877,3.21759937,3.21875852,3.21462245
68.429226,3.87298335,3.22164324,0.807056446,3.21750847,3.21867373,3.21453514
68.439717,3.74165739,3.22155527,0.721181057,3.21741791,3.21858933,3.21444815
68.450209,3.46410162,3.22146769,0.492578849,3.21732766,3.21850532,3.21436147
68.4607,3,3.22138052,-0.470510919,3.21723775,3.21842169,3.2142751
68.471192,3.74165739,3.22129375,0.721362348,3.21714815,3.21833845,3.21418904
68.481684,3.74165739,3.22120738,0.721422214,3.21705888,3.2182556,3.21410329
68.492175,3.87298335,3.22112141,0.807379671,3.21696994,3.21817314,3.21401786
68.502667,2.64575131,3.22103584,-0.758475137,3.21688132,3.21809106,3.21393273
68.513158,4.24264069,3.22095069,1.01078682,3.21679302,3.21800939,3.21384791
68.52365,3,3.22086593,-0.46996375,3.21670504,3.21792809,3.2137634
68.534142,3.46410162,3.22078157,0.493274817,3.21661737,3.21784719,3.21367919
68.544633,3.31662479,3.22069763,0.309721106,3.21653004,3.21776669,3.2135953
68.555125,2.82842712,3.22061408,-0.626248319,3.21644301,3.21768657,3.2135117
68.565616,3.60555128,3.22053095,0.620500059,3.21635631,3.21760686,3.21342842
68.576108,3.16227766,3.22044822,-0.24118574,3.21626992,3.21752753,3.21334544
68.5866,3,3.2203659,-0.469431464,3.21618385,3.2174486,3.21326276
68.597091,3.87298335,3.220284,0.807898107,3.2160981,3.21737008,3.21318039
68.607583,3.74165739,3.22020249,0.722118338,3.21601266,3.21729194,3.21309831
68.618074,2.82842712,3.22012141,-0.625854844,3.21592754,3.21721422,3.21301655
68.628566,3.87298335,3.22004073,0.808048646,3.21584272,3.21713688,3.21293508
68.639058,4.24264069,3.21996047,1.01127653,3.21575822,3.21705995,3.21285391
68.649549,3.31662479,3.21988063,0.31103724,3.21567404,3.21698342,3.21277304
68.660041,3.46410162,3.21980119,0.494267563,3.21559017,3.21690729,3.21269247
68.670532,3.87298335,3.21972218,0.808245732,3.21550661,3.21683158,3.21261221
68.681024,3.60555128,3.21964358,0.621214691,3.21542335,3.21675626,3.21253223
68.691516,3.87298335,3.2195654,0.808342713,3.2153404,3.21668135,3.21245255
68.702007,2.82842712,3.21948765,-0.625348327,3.21525777,3.21660685,3.21237318
68.712499,3.16227766,3.21941032,-0.23902439,3.21517544,3.21653276,3.21229409
68.72299,4.47213595,3.21933342,1.11928662,3.21509343,3.21645909,3.21221531
68.733482,3.16227766,3.21925693,-0.238703308,3.21501171,3.21638583,3.21213682
68.743974,3.16227766,3.21918087,-0.238543939,3.2149303,3.21631298,3.21205861
68.754465,3.87298335,3.21910525,0.808627292,3.2148492,3.21624055,3.21198071
68.764957,2.44948974,3.21903005,-0.877234466,3.2147684,3.21616854,3.21190309
68.775448,3.16227766,3.21895529,-0.238070644,3.21468791,3.21609696,3.21182578
68.78594,3.31662479,3.21888096,0.312640097,3.21460771,3.21602579,3.21174874
68.796432,3.74165739,3.21880707,0.723083896,3.21452782,3.21595504,3.211672
68.806923,3.46410162,3.21873362,0.495346342,3.21444824,3.21588473,3.21159555
68.817415,3.60555128,3.2186606,0.622005365,3.21436894,3.21581484,3.21151939
68.827906,3.74165739,3.21858804,0.723235336,3.21428996,3.21574539,3.21144352
68.838398,3.60555128,3.21851591,0.622121665,3.21421127,3.21567637,3.21136793
68.84889,2.82842712,3.21844423,-0.624513495,3.21413287,3.21560779,3.21129262
68.859381,3.31662479,3.21837301,0.313451403,3.21405479,3.21553965,3.21121761
68.869873,3.31662479,3.21830223,0.31356428,3.21397699,3.21547194,3.21114288
68.880364,3.31662479,3.21823192,0.313676379,3.21389949,3.21540469,3.21106844
68.890856,3,3.21816206,-0.467078215,3.21382228,3.21533787,3.21099428
68.901348,3.60555128,3.21809266,0.622461739,3.21374537,3.21527151,3.2109204
68.911839,3.60555128,3.21802373,0.622517104,3.21366876,3.21520561,3.21084681
68.922331,3,3.21795526,-0.46685679,3.21359243,3.21514015,3.2107735
68.932822,3.31662479,3.21788727,0.314225266,3.21351641,3.21507517,3.21070047
68.943314,3.87298335,3.21781975,0.809421766,3.21344067,3.21501064,3.21062772
68.953806,4.12310563,3.21775271,0.951500352,3.21336522,3.21494657,3.21055525
68.964297,3.60555128,3.21768615,0.622788187,3.21329006,3.21488299,3.21048306
68.974789,3.46410162,3.21762007,0.496469075,3.21321519,3.21481987,3.21041115
68.98528,3.46410162,3.21755449,0.496535118,3.21314062,3.21475724,3.21033952
68.995772,4.24264069,3.2174894,1.01249755,3.21306633,3.21469508,3.21026816
69.006264,3.16227766,3.2174248,-0.234834285,3.21299232,3.21463341,3.21019708
69.016755,3.60555128,3.21736071,0.623049406,3.21291861,3.21457224,3.21012628
69.027247,4.89897949,3.21729713,1.29679696,3.21284518,3.21451155,3.21005574
69.037738,3.31662479,3.21723406,0.315262959,3.21277204,3.21445138,3.20998549
69.04823,4.24264069,3.2171715,1.01265453,3.21269918,3.2143917,3.20991551
69.058722,3.46410162,3.21710946,0.496983052,3.2126266,3.21433254,3.2098458
69.069213,3.74165739,3.21704796,0.724299268,3.21255431,3.2142739,3.20977636
69.079705,4.24264069,3.21698698,1.01274563,3.21248229,3.21421577,3.2097072
69.090196,3.74165739,3.21692655,0.724383075,3.21241057,3.21415818,3.20963831
69.100688,2.64575131,3.21686665,-0.755721736,3.21233912,3.21410112,3.20956968
69.11118,3.46410162,3.21680731,0.497286945,3.21226794,3.2140446,3.20950132
69.121671,2.82842712,3.21674853,-0.623154398,3.21219706,3.21398862,3.20943324
69.132163,3.46410162,3.21669031,0.497404573,3.21212645,3.2139332,3.20936542
69.142654,3.74165739,3.21663266,0.7245859,3.21205612,3.21387835,3.20929787
69.153146,3,3.21657559,-0.465376822,3.21198606,3.21382405,3.20923059
69.163638,3,3.2165191,-0.465316127,3.21191628,3.21377033,3.20916357
69.174129,3.60555128,3.21646321,0.623769241,3.21184678,3.2137172,3.20909682
69.184621,3.60555128,3.21640792,0.623813561,3.21177755,3.21366466,3.20903033
69.195112,3.16227766,3.21635324,-0.232541565,3.21170859,3.21361272,3.20896411
69.205604,4,3.21629918,0.885268786,3.21163991,3.21356138,3.20889814
69.216096,3.74165739,3.21624574,0.724852845,3.2115715,3.21351067,3.20883244
69.226587,2.82842712,3.21619295,-0.622708457,3.21150337,3.21346058,3.20876701
69.237079,3.87298335,3.2161408,0.810458234,3.2114355,3.21341113,3.20870183
69.24757,3.31662479,3.21608931,0.317073304,3.21136791,3.21336233,3.20863692
69.258062,4.47213595,3.21603849,1.12075754,3.21130058,3.21331419,3.20857226
69.268554,4.24264069,3.21598834,1.01323854,3.21123352,3.21326671,3.20850786
69.279045,3,3.21593889,-0.464692258,3.21116674,3.21321993,3.20844372
69.289537,3,3.21589015,-0.464639802,3.21110021,3.21317383,3.20837984
69.300028,4.12310563,3.21584212,0.95250381,3.21103396,3.21312844,3.20831622
69.31052,3.16227766,3.21579481,-0.231337748,3.21096797,3.21308376,3.20825285
69.321012,3.46410162,3.21574825,0.498350641,3.21090225,3.21303982,3.20818973
69.331503,4,3.21570245,0.885605751,3.2108368,3.21299664,3.20812687
69.341995,2.23606798,3.21565742,-0.989742111,3.2107716,3.21295421,3.20806427
69.352486,4.12310563,3.21561318,0.952623977,3.21070667,3.21291256,3.20800192
69.362978,3.16227766,3.21556974,-0.230850783,3.210642,3.2128717,3.20793981
69.37347,3,3.21552713,-0.46424899,3.21057759,3.21283166,3.20787796
69.383961,3.16227766,3.21548535,-0.230667917,3.21051345,3.21279244,3.20781637
69.394453,2.82842712,3.21544442,-0.622107145,3.21044956,3.21275408,3.20775502
69.404944,3.60555128,3.21540438,0.6246174,3.21038594,3.21271658,3.20769393
69.415436,3.16227766,3.21536523,-0.230407393,3.21032257,3.21267996,3.20763308
69.425928,3.16227766,3.21532699,-0.230324403,3.21025945,3.21264425,3.20757248
69.436419,3,3.2152897,-0.463993208,3.2101966,3.21260948,3.20751213
69.446911,2.64575131,3.21525336,-0.754653596,3.210134,3.21257565,3.20745202
69.457402,3.31662479,3.21521801,0.318444307,3.21007167,3.2125428,3.20739216
69.467894,3.60555128,3.21518367,0.624794048,3.21000958,3.21251095,3.20733254
69.478386,2.23606798,3.21515037,-0.989485923,3.20994774,3.21248013,3.20727317
69.488877,3.16227766,3.21511813,-0.229870553,3.20988617,3.21245036,3.20721405
69.499369,3.60555128,3.21508698,0.624871421,3.20982484,3.21242168,3.20715516
69.50986,2.82842712,3.21505696,-0.621795653,3.20976377,3.21239411,3.20709653
69.520352,3.60555128,3.21502809,0.624918547,3.20970294,3.21236769,3.20703813
69.530844,2.82842712,3.2150004,-0.62175017,3.20964237,3.21234244,3.20697997
69.541335,2.82842712,3.21497393,-0.621728888,3.20958205,3.2123184,3.20692205
69.551827,3.31662479,3.21494873,0.318866845,3.20952197,3.21229561,3.20686437
69.562318,3.60555128,3.21492481,0.62500117,3.20946215,3.21227411,3.20680694
69.57281,4,3.21490223,0.886057429,3.20940257,3.21225394,3.20674974
69.583302,3.16227766,3.21488103,-0.229354239,3.20934324,3.21223513,3.20669277
69.593793,3.74165739,3.21486124,0.725807236,3.20928416,3.21221773,3.20663605
69.604285,3.74165739,3.21484292,0.725819856,3.20922531,3.21220179,3.20657955
69.614776,3.60555128,3.21482612,0.625080119,3.20916672,3.21218736,3.2065233
69.625268,3.31662479,3.21481088,0.319082923,3.20910837,3.21217448,3.20646728
69.63576,3,3.21479726,-0.463462249,3.20905025,3.21216321,3.20641149
69.646251,3.60555128,3.21478531,0.625112763,3.20899239,3.21215361,3.20635594
69.656743,2.44948974,3.21477509,-0.874805893,3.20893476,3.21214574,3.20630062
69.667234,2.64575131,3.21476668,-0.754331071,3.20887738,3.21213965,3.20624553
69.677726,3,3.21476012,-0.463422182,3.20882023,3.21213542,3.20619067
69.688218,3.87298335,3.21475549,0.811312427,3.20876333,3.2121331,3.20613604
69.698709,3.74165739,3.21475287,0.725881889,3.20870666,3.21213279,3.20608164
69.709201,3.46410162,3.21475233,0.499348863,3.20865023,3.21213455,3.20602747
69.719692,3.16227766,3.21475395,-0.229077039,3.20859404,3.21213846,3.20597353
69.730184,3.46410162,3.21475782,0.499343363,3.20853808,3.21214462,3.20591982
69.740676,2.64575131,3.21476403,-0.754329319,3.20848236,3.21215311,3.20586633
69.751167,3.31662479,3.21477268,0.319142774,3.20842688,3.21216403,3.20581307
69.761659,3.87298335,3.21478387,0.811294939,3.20837163,3.21217748,3.20576003
69.77215,3.87298335,3.21479771,0.811286411,3.20831661,3.21219358,3.20570722
69.782642,3.31662479,3.21481431,0.319077547,3.20826182,3.21221243,3.20565463
69.793134,4,3.2148338,0.886096043,3.20820727,3.21223417,3.20560226
69.803625,3.16227766,3.21485631,-0.229300359,3.20815295,3.21225892,3.20555012
69.814117,3.31662479,3.21488199,0.318971469,3.20809885,3.21228683,3.2054982
69.824608,3.31662479,3.21491098,0.318926021,3.20804499,3.21231805,3.2054465
69.8351,1.73205081,3.21494346,-1.2177408,3.20799135,3.21235274,3.20539502
69.845592,2.64575131,3.21497959,-0.754472184,3.20793795,3.21239108,3.20534375
69.856083,2.64575131,3.21501956,-0.754498676,3.20788477,3.21243326,3.20529271
69.866575,4,3.2150636,0.885966362,3.20783182,3.21247951,3.20524189
69.877066,3,3.21511193,-0.46380161,3.20777909,3.21253003,3.20519128
69.887558,3.87298335,3.21516481,0.811060128,3.20772659,3.2125851,3.20514089
69.89805,3.74165739,3.21522253,0.725558309,3.20767431,3.212645,3.20509071
69.908541,3.87298335,3.21528538,0.810985797,3.20762226,3.21271004,3.20504076
69.919033,3,3.21535375,-0.464062228,3.20757042,3.21278058,3.20499101
69.929524,3.16227766,3.21542802,-0.230543629,3.20751882,3.21285703,3.20494148
69.940016,3.74165739,3.21550868,0.725361087,3.20746743,3.21293986,3.20489216
69.950508,4.24264069,3.21559624,1.01343201,3.20741626,3.21302959,3.20484305
69.960999,3.31662479,3.21569132,0.317700282,3.20736532,3.21312682,3.20479416
69.971491,3.74165739,3.21579464,0.725163943,3.20731459,3.21323231,3.20474547
69.981982,2.44948974,3.21590702,-0.875452613,3.20726408,3.21334685,3.204697
69.992474,3.60555128,3.21602945,0.624116833,3.20721378,3.21347144,3.20464873
70.002966,3.74165739,3.21616307,0.724909866,3.20716371,3.21360722,3.20460067
70.013457,2.82842712,3.21630921,-0.622801803,3.20711385,3.21375551,3.20455283
70.023949,4.12310563,3.21646947,0.952174433,3.2070642,3.21391794,3.20450518
70.03444,2.44948974,3.2166457,-0.875874393,3.20701478,3.21409633,3.20445775
70.044932,3.87298335,3.2168401,0.810026697,3.20696556,3.2142929,3.20441052
70.055424,3.31662479,3.21705523,0.315546451,3.20691655,3.21451021,3.20436349
70.065915,3.74165739,3.21729407,0.724129349,3.20686777,3.21475125,3.20431667
70.076407,3.16227766,3.21756018,-0.235122361,3.20681919,3.21501957,3.20427005
70.086898,3.60555128,3.2178576,0.622650527,3.20677082,3.2153192,3.20422364
70.09739,3.60555128,3.21819109,0.622382668,3.20672266,3.21565493,3.20417742
70.107882,3.74165739,3.21856609,0.723250505,3.20667471,3.2160322,3.20413141
70.118373,2.82842712,3.21898882,-0.624949352,3.20662697,3.21645721,3.2040856
70.128865,4,3.21946647,0.883478085,3.20657944,3.21693719,3.20403999
70.139356,2.23606798,3.22000706,-0.991937034,3.20653212,3.21748015,3.20399458
70.149848,3.87298335,3.22061978,0.807690267,3.206485,3.21809528,3.20394936
70.16034,3.74165739,3.22131478,0.721347768,3.20643808,3.21879276,3.20390434
70.170831,3.74165739,3.22210331,0.720800998,3.20639138,3.21958382,3.20385953
70.181323,3.46410162,3.22299796,0.491023066,3.20634487,3.22048108,3.2038149
70.191814,3.31662479,3.2240122,0.304323173,3.20629857,3.221498,3.20377048
70.202306,3.31662479,3.22516094,0.302429914,3.20625247,3.22264953,3.20372624
70.212798,3.60555128,3.2264599,0.615703969,3.20620657,3.22395139,3.2036822
70.223289,2.44948974,3.2279257,-0.882290175,3.20616088,3.2254202,3.20363836
70.233781,3.31662479,3.22957618,0.295040011,3.20611538,3.22707383,3.2035947
70.244272,4.24264069,3.23142924,1.0055901,3.20607009,3.22893018,3.20355124
70.254764,3.60555128,3.2335038,0.609956946,3.20602499,3.23100818,3.20350797
70.265256,3.16227766,3.23581835,-0.271183864,3.20598009,3.23332636,3.20346489
70.275747,3.31662479,3.23839102,0.279702998,3.20593539,3.23590284,3.203422
70.286239,3.46410162,3.24124003,0.472082182,3.20589089,3.23875585,3.2033793
70.29673,3,3.24438143,-0.494349505,3.20584658,3.24190147,3.20333679
70.307222,3.31662479,3.24783083,0.262286023,3.20580247,3.2453553,3.20329446
70.317714,3,3.25160083,-0.501598274,3.20575855,3.24912996,3.20325232
70.328205,3.74165739,3.25570124,0.697105552,3.20571482,3.25323526,3.20321037
70.338697,3.74165739,3.26013983,0.693914662,3.20567129,3.25767898,3.2031686
70.349188,3.74165739,3.26491899,0.69046245,3.20562795,3.26246351,3.20312701
70.35968,2.82842712,3.27003854,-0.664538499,3.2055848,3.26758865,3.20308561
70.370172,3.31662479,3.27549214,0.202811869,3.20554184,3.27304807,3.20304439
70.380663,3,3.28126801,-0.530347063,3.20549907,3.27882997,3.20300336
70.391155,4,3.28735033,0.844185803,3.20545649,3.28491852,3.20296251
70.401646,3,3.29371495,-0.541954752,3.2054141,3.29128955,3.20292184
70.412138,3.60555128,3.3003337,0.552464995,3.2053719,3.29791486,3.20288134
70.42263,3.46410162,3.30716998,0.396145975,3.20532988,3.30475783,3.20284103
70.433121,3.31662479,3.31418031,0.0494417156,3.20528805,3.31177493,3.2028009
70.443613,2.64575131,3.32131631,-0.821927611,3.2052464,3.31891777,3.20276094
70.454104,4.79583152,3.32851999,1.21132635,3.20520495,3.32612829,3.20272116
70.464596,4,3.33572917,0.815028118,3.20516367,3.33334428,3.20268156
70.475088,3.74165739,3.34287285,0.631493894,3.20512257,3.34049469,3.20264213
70.485579,3.16227766,3.34987359,-0.433123461,3.20508166,3.34750202,3.20260288
70.496071,4,3.35665,0.802091015,3.20504093,3.35428483,3.2025638
70.506562,4.47213595,3.3631129,1.05310163,3.20500039,3.36075388,3.2025249
70.517054,4.12310563,3.3691717,0.868293688,3.20496002,3.3668185,3.20248616
70.527546,3.74165739,3.37473171,0.605743904,3.20491983,3.37238397,3.2024476
70.538037,4.12310563,3.3796986,0.862210547,3.20487982,3.37735588,3.20240922
70.548529,3.16227766,3.38398258,-0.47085552,3.20483998,3.38164439,3.202371
70.55902,3.60555128,3.3874988,0.466960893,3.20480033,3.38516459,3.20233295
70.569512,3.60555128,3.39017453,0.464087004,3.20476085,3.3878437,3.20229507
70.580004,3.74165739,3.39195054,0.591360166,3.20472155,3.38962247,3.20225736
70.590495,3.87298335,3.39278603,0.692962707,3.20468242,3.39046006,3.20221982
70.600987,3,3.39266115,-0.6266268,3.20464346,3.39033661,3.20218244
70.611478,3.31662479,3.39157791,-0.273775679,3.20460469,3.38925414,3.20214524
70.62197,3.46410162,3.38956009,0.273022934,3.20456608,3.38723645,3.20210819
70.632462,3.60555128,3.38665201,0.467866721,3.20452764,3.38432787,3.20207131
70.642953,3.87298335,3.3829158,0.700048242,3.20448938,3.38059059,3.2020346
70.653445,4.58257569,3.3784264,1.09733736,3.20445128,3.37609959,3.20199804
70.663936,3.87298335,3.37327015,0.706903949,3.20441336,3.37094127,3.20196166
70.674428,3.31662479,3.3675376,-0.225638679,3.2043756,3.36520623,3.20192543
70.68492,4.12310563,3.3613233,0.872801423,3.20433801,3.35898909,3.20188936
70.695411,3.46410162,3.35472166,0.33072641,3.20430059,3.35238433,3.20185346
70.705903,4.35889894,3.34782262,1.00552291,3.20426334,3.34548193,3.20181771
70.716394,3.60555128,3.34071449,0.514622954,3.20422625,3.33837029,3.20178213
70.726886,3.46410162,3.33347762,0.361419424,3.20418933,3.33112979,3.2017467
70.737378,3.74165739,3.32618828,0.644568928,3.20415257,3.32383676,3.20171142
70.747869,3.60555128,3.31891629,0.535383028,3.20411598,3.31656107,3.20167631
70.758361,3.16227766,3.31172255,-0.386581021,3.20407955,3.30936366,3.20164135
70.768852,4,3.30466382,0.833868205,3.20404328,3.30230133,3.20160655
70.779344,4.12310563,3.29778721,0.908470373,3.20400717,3.29542124,3.2015719
70.789836,3.74165739,3.29113497,0.671209668,3.20397123,3.28876565,3.2015374
70.800327,3.74165739,3.28474251,0.675954791,3.20393544,3.28237001,3.20150306
70.810819,3.31662479,3.27863682,0.19490504,3.20389981,3.27626133,3.20146887
70.82131,3.16227766,3.27284095,-0.332510583,3.20386435,3.27046268,3.20143484
70.831802,4.47213595,3.26736966,1.09761846,3.20382903,3.26498883,3.20140095
70.842294,3.31662479,3.26223375,0.233218862,3.20379388,3.25985059,3.20136721
70.852785,3.60555128,3.25743868,0.590010678,3.20375888,3.25505341,3.20133363
70.863277,4,3.25298379,0.864300995,3.20372404,3.25059666,3.20130019
70.873768,3.31662479,3.24886601,0.260305164,3.20368936,3.24647726,3.2012669
70.88426,3.16227766,3.24507694,-0.287748644,3.20365482,3.2426868,3.20123375
70.894752,3.74165739,3.24160626,0.707142934,3.20362044,3.23921495,3.20120075
70.905243,3.46410162,3.23844095,0.47503754,3.20358622,3.23604869,3.2011679
70.915735,3.60555128,3.23556509,0.608264898,3.20355214,3.23317208,3.2011352
70.926226,3.31662479,3.23296239,0.289244537,3.20351822,3.23056882,3.20110264
70.936718,3.16227766,3.23061448,-0.261413126,3.20348444,3.22822055,3.20107022
70.94721,3.87298335,3.22850317,0.802795226,3.20345082,3.22610903,3.20103794
70.957701,3.74165739,3.22660996,0.717668047,3.20341735,3.22421577,3.20100581
70.968193,3.46410162,3.22491596,0.489066101,3.20338402,3.22252187,3.20097382
70.978684,3.74165739,3.22340341,0.719898591,3.20335084,3.22100953,3.20094197
70.989176,3.16227766,3.22205455,-0.244493137,3.20331781,3.21966102,3.20091026
70.999668,3.74165739,3.22085296,0.721667806,3.20328492,3.21845987,3.20087869
71.010159,3.46410162,3.21978312,0.494285848,3.20325218,3.21739055,3.20084725
71.020651,3,3.21883026,-0.467792968,3.20321958,3.2164383,3.20081596
71.031142,3.60555128,3.21798117,0.622551285,3.20318713,3.2155899,3.2007848
71.041634,2.82842712,3.21722343,-0.62353533,3.20315482,3.2148329,3.20075378
71.052126,3.16227766,3.21654601,-0.232955684,3.20312265,3.21415628,3.20072289
71.062617,3.60555128,3.21593897,0.624189319,3.20309062,3.21355008,3.20069214
71.073109,3.46410162,3.21539327,0.498706672,3.20305874,3.21300526,3.20066152
71.0836,3,3.2149011,-0.463574271,3.20302699,3.21251401,3.20063104
71.094092,3.74165739,3.21445541,0.726086757,3.20299538,3.21206926,3.20060069
71.104584,3.16227766,3.21405012,-0.227535632,3.20296391,3.21166494,3.20057047
71.115075,3,3.21367997,-0.462255306,3.20293259,3.21129577,3.20054038
71.125567,3.60555128,3.21334026,0.626267527,3.20290139,3.21095707,3.20051043
71.136058,3.46410162,3.21302709,0.501073374,3.20287034,3.21064491,3.2004806
71.14655,3,3.21273698,-0.461234192,3.20283941,3.21035583,3.2004509
71.157042,3.60555128,3.21246704,0.626964302,3.20280863,3.21008692,3.20042133
71.167533,2.44948974,3.21221479,-0.873341313,3.20277798,3.20983572,3.20039189
71.178025,4,3.21197806,0.887705998,3.20274746,3.20960004,3.20036257
71.188516,3.16227766,3.21175508,-0.222435212,3.20271707,3.20937811,3.20033339
71.199008,2.23606798,3.21154428,-0.987662038,3.20268682,3.20916836,3.20030432
71.2095,3,3.21134436,-0.459722047,3.20265669,3.2089695,3.20027538
71.219991,3.74165739,3.21115423,0.728356475,3.2026267,3.20878042,3.20024657
71.230483,4.58257569,3.21097291,1.17115447,3.20259684,3.20860016,3.20021788
71.240974,2.82842712,3.21079962,-0.618362752,3.2025671,3.20842792,3.20018931
71.251466,3,3.21063362,-0.458948389,3.2025375,3.20826298,3.20016086
71.261958,4.24264069,3.21047435,1.01595588,3.20250802,3.20810476,3.20013253
71.272449,3.31662479,3.21032128,0.326042194,3.20247867,3.20795274,3.20010433
71.282941,4.24264069,3.21017394,1.01610371,3.20244944,3.20780645,3.20007624
71.293432,3.60555128,3.21003195,0.628903268,3.20242034,3.20766552,3.20004828
71.303924,4.24264069,3.20989495,1.01624098,3.20239137,3.20752956,3.20002043
71.314416,3.46410162,3.20976263,0.504320325,3.20236252,3.20739827,3.19999269
71.324907,2.82842712,3.20963471,-0.617420106,3.20233379,3.2072714,3.19996508
71.335399,4.35889894,3.20951093,1.07209515,3.20230518,3.20714866,3.19993758
71.34589,4.24264069,3.20939109,1.01648886,3.2022767,3.20702984,3.1999102
71.356382,2.44948974,3.20927494,-0.87165658,3.20224833,3.20691472,3.19988293
71.366874,3.60555128,3.20916231,0.62959429,3.20222009,3.20680311,3.19985578
71.377365,4,3.20905303,0.889351996,3.20219197,3.20669485,3.19982874
71.387857,3.87298335,3.20894691,0.814884305,3.20216396,3.20658976,3.19980181
71.398348,3.74165739,3.20884384,0.729940783,3.20213608,3.20648769,3.19977499
71.40884,3.31662479,3.20874364,0.328452661,3.2021083,3.2063885,3.19974828
71.419332,3.31662479,3.20864619,0.32860097,3.20208065,3.20629206,3.19972169
71.429823,3.16227766,3.20855138,-0.215113282,3.20205311,3.20619825,3.1996952
71.440315,2.64575131,3.20845908,-0.750138499,3.20202569,3.20610694,3.19966883
71.450806,3.87298335,3.20836919,0.815238714,3.20199838,3.20601804,3.19964256
71.461298,4.12310563,3.20828158,0.956464345,3.20197119,3.20593142,3.1996164
71.47179,3.31662479,3.20819618,0.329284993,3.20194411,3.20584701,3.19959034
71.482281,3.16227766,3.2081129,-0.214091669,3.20191714,3.2057647,3.19956439
71.492773,3.87298335,3.20803164,0.815445711,3.20189028,3.20568441,3.19953855
71.503264,3.87298335,3.20795232,0.815494343,3.20186353,3.20560606,3.19951281
71.513756,3.87298335,3.20787486,0.815541834,3.2018369,3.20552957,3.19948717
71.524248,4.35889894,3.20779919,1.07289317,3.20181037,3.20545485,3.19946164
71.534739,4.79583152,3.20772525,1.26020089,3.20178395,3.20538186,3.19943621
71.545231,3.46410162,3.20765295,0.506407604,3.20175764,3.20531052,3.19941088
71.555722,3.87298335,3.20758225,0.81572121,3.20173143,3.20524076,3.19938566
71.566214,4.12310563,3.20751308,0.956866004,3.20170534,3.20517252,3.19936053
71.576706,3.74165739,3.20744537,0.730898089,3.20167934,3.20510575,3.1993355
71.587197,4,3.20737909,0.890292598,3.20165346,3.2050404,3.19931058
71.597689,3.87298335,3.20731417,0.815885517,3.20162767,3.2049764,3.19928574
71.60818,4.47213595,3.20725057,1.12467123,3.20160199,3.20491372,3.19926101
71.618672,4,3.20718824,0.890399776,3.20157642,3.2048523,3.19923638
71.629164,3.60555128,3.20712713,0.63120848,3.20155094,3.2047921,3.19921184
71.639655,4.47213595,3.20706721,1.12475275,3.20152557,3.20473308,3.19918739
71.650147,4.24264069,3.20700843,1.01766019,3.20150029,3.20467519,3.19916304
71.660638,4.79583152,3.20695075,1.26050814,3.20147512,3.20461841,3.19913879
71.67113,4.12310563,3.20689413,0.957189372,3.20145005,3.20456268,3.19911462
71.681622,4.12310563,3.20683854,0.957218408,3.20142507,3.20450797,3.19909055
71.692113,4.35889894,3.20678396,1.07336619,3.20140019,3.20445426,3.19906657
71.702605,4.58257569,3.20673033,1.17296435,3.20137541,3.2044015,3.19904268
71.713096,3.31662479,3.20667764,0.331582797,3.20135073,3.20434967,3.19901889
71.723588,4.47213595,3.20662584,1.12494894,3.20132614,3.20429874,3.19899518
71.73408,3.60555128,3.20657492,0.631645748,3.20130164,3.20424867,3.19897156
71.744571,4.24264069,3.20652485,1.01789775,3.20127724,3.20419945,3.19894803
71.755063,2.82842712,3.2064756,-0.614856468,3.20125294,3.20415104,3.19892458
71.765554,3.74165739,3.20642715,0.731594314,3.20122872,3.20410343,3.19890123
71.776046,3.74165739,3.20637946,0.731626905,3.2012046,3.20405657,3.19887796
71.786538,4,3.20633252,0.890880173,3.20118057,3.20401046,3.19885477
71.797029,4,3.20628631,0.890906108,3.20115663,3.20396507,3.19883167
71.807521,3.46410162,3.2062408,0.507799979,3.20113278,3.20392037,3.19880865
71.818012,3.16227766,3.20619597,-0.209566966,3.20110902,3.20387636,3.19878572
71.828504,3.87298335,3.20615181,0.816597536,3.20108534,3.203833,3.19876287
71.838996,3.87298335,3.20610829,0.816624182,3.20106176,3.20379029,3.19874009
71.849487,3.74165739,3.20606541,0.7318415,3.20103826,3.20374819,3.19871741
71.859979,2.82842712,3.20602312,-0.614488404,3.20101485,3.2037067,3.1986948
71.87047,4.12310563,3.20598144,0.95766601,3.20099152,3.2036658,3.19867227
71.880962,4.12310563,3.20594033,0.957687475,3.20096828,3.20362547,3.19864982
71.891454,4.24264069,3.20589977,1.01820475,3.20094512,3.20358569,3.19862745
71.901945,3.60555128,3.20585977,0.632211597,3.20092205,3.20354645,3.19860516
71.912437,4,3.2058203,0.891167606,3.20089905,3.20350774,3.19858294
71.922928,3.31662479,3.20578134,0.332931594,3.20087615,3.20346954,3.1985608
71.93342,3.16227766,3.20574289,-0.208483165,3.20085332,3.20343184,3.19853873
71.943912,3.60555128,3.20570493,0.632334048,3.20083057,3.20339462,3.19851674
71.954403,4,3.20566745,0.891253361,3.2008079,3.20335788,3.19849482
71.964895,3.60555128,3.20563043,0.632392954,3.20078531,3.20332159,3.19847298
71.975386,3,3.20559387,-0.453424599,3.2007628,3.20328576,3.19845121
71.985878,3.60555128,3.20555775,0.632450417,3.20074037,3.20325036,3.19842951
71.99637,3.74165739,3.20552206,0.732212626,3.20071801,3.20321539,3.19840788
72.006861,3,3.20548679,-0.453306512,3.20069573,3.20318084,3.19838633
72.017353,4.12310563,3.20545194,0.957942424,3.20067353,3.20314669,3.19836484
72.027844,3.46410162,3.20541749,0.508609995,3.2006514,3.20311294,3.19834342
72.038336,2.64575131,3.20538343,-0.748085633,3.20062934,3.20307957,3.19832207
72.048828,3.87298335,3.20472159,0.817472786,3.20060736,3.20241798,3.19830079
72.059319,3.31662479,3.20468884,0.334568312,3.20058546,3.20238591,3.19827957
72.069811,3.60555128,3.20465644,0.633162565,3.20056362,3.20235419,3.19825842
72.080302,2.82842712,3.20462441,-0.613349234,3.20054185,3.20232283,3.19823734
72.090794,2.82842712,3.20459272,-0.6133234,3.20052016,3.20229181,3.19821632
72.101286,2.82842712,3.20456137,-0.613297843,3.20049853,3.20226112,3.19819537
72.111777,3.60555128,3.20453036,0.633262125,3.20047698,3.20223077,3.19817448
72.122269,3.87298335,3.20449967,0.817608513,3.20045549,3.20220073,3.19815365
72.13276,2.64575131,3.2044693,-0.747474404,3.20043407,3.20217101,3.19813288
72.143252,2.82842712,3.20443923,-0.613198262,3.20041272,3.20214158,3.19811218
72.153744,4.24264069,3.20440948,1.01893631,3.20039144,3.20211246,3.19809153
72.164235,3.87298335,3.20438002,0.817681678,3.20037022,3.20208364,3.19807095
72.174727,3.46410162,3.20435085,0.509657496,3.20034906,3.20205509,3.19805043
72.185218,3.87298335,3.20432197,0.817717172,3.20032797,3.20202683,3.19802996
72.19571,4.24264069,3.20429337,1.01899329,3.20030695,3.20199884,3.19800956
72.206202,3.31662479,3.20426504,0.33520106,3.20028598,3.20197112,3.1979892
72.216693,4.12310563,3.20423698,0.958576364,3.20026508,3.20194366,3.19796891
72.227185,3.31662479,3.20420918,0.33528437,3.20024424,3.20191646,3.19794867
72.237676,3.46410162,3.20418164,0.509823473,3.20022346,3.20188951,3.19792849
72.248168,2.82842712,3.20415435,-0.612965925,3.20020274,3.2018628,3.19790836
72.25866,2.82842712,3.20412731,-0.612943865,3.20018208,3.20183634,3.19788829
72.269151,3.31662479,3.20410051,0.335446395,3.20016148,3.20181011,3.19786827
72.279643,4.12310563,3.20407394,0.958661403,3.20014094,3.20178412,3.1978483
72.290134,2.82842712,3.20404761,-0.61287885,3.20012046,3.20175835,3.19782838
72.300626,3.46410162,3.2040215,0.509980501,3.20010003,3.2017328,3.19780852
72.311118,3.74165739,3.20399562,0.73325423,3.20007965,3.20170747,3.1977887
72.321609,3.31662479,3.20396996,0.335640926,3.20005934,3.20168235,3.19776894
72.332101,3.31662479,3.20394451,0.335678836,3.20003908,3.20165745,3.19774922
72.342592,3.60555128,3.20391927,0.63374443,3.20001887,3.20163275,3.19772955
72.353084,3.46410162,3.20389424,0.510105258,3.19999871,3.20160824,3.19770993
72.363576,3.46410162,3.20386941,0.510129596,3.19997861,3.20158394,3.19769036
72.374067,3.87298335,3.20384478,0.818008902,3.19995856,3.20155983,3.19767083
72.384559,3.60555128,3.20382035,0.633822475,3.19993856,3.20153591,3.19765135
72.39505,2.82842712,3.2037961,-0.612673631,3.19991861,3.20151217,3.19763191
72.405542,3.60555128,3.20377205,0.633860576,3.19989871,3.20148862,3.19761252
72.416034,4,3.20374817,0.892329439,3.19987886,3.20146524,3.19759317
72.426525,4.12310563,3.20372448,0.958843649,3.19985906,3.20144204,3.19757386
72.437017,3.60555128,3.20370097,0.633916641,3.19983931,3.20141902,3.1975546
72.447508,3.46410162,3.20367763,0.510317534,3.1998196,3.20139616,3.19753538
72.458,3,3.20365446,-0.45128091,3.19979994,3.20137346,3.19751619
72.468492,2.64575131,3.20363146,-0.746913748,3.19978032,3.20135093,3.19749705
72.478983,3.74165739,3.20360862,0.733518073,3.19976075,3.20132856,3.19747795
72.489475,3.87298335,3.20358595,0.818167096,3.19974123,3.20130635,3.19745888
72.499966,2.23606798,3.20356344,-0.98361347,3.19972175,3.20128429,3.19743986
72.510458,3.74165739,3.20354108,0.733564114,3.19970231,3.20126238,3.19742087
72.52095,2.64575131,3.20351887,-0.746838376,3.19968291,3.20124061,3.19740192
72.531441,3.60555128,3.20349682,0.634077643,3.19966356,3.201219,3.197383
72.541933,3,3.20347491,-0.451081933,3.19964424,3.20119752,3.19736412
72.552424,2.64575131,3.20345315,-0.746794376,3.19962497,3.20117619,3.19734528
72.562916,3.46410162,3.20343153,0.510558599,3.19960573,3.20115499,3.19732647
72.573408,3,3.20341005,-0.451010036,3.19958654,3.20113393,3.19730769
72.583899,3.87298335,3.20338871,0.818287622,3.19956738,3.201113,3.19728894
72.594391,3.74165739,3.20336751,0.73368241,3.19954826,3.2010922,3.19727023
72.604882,2.64575131,3.20334644,-0.746722925,3.19952918,3.20107153,3.19725155
72.615374,4.35889894,3.2033255,1.07497602,3.19951013,3.20105098,3.1972329
72.625866,3.31662479,3.20330468,0.336630522,3.19949112,3.20103055,3.19721427
72.636357,3,3.203284,-0.450870266,3.19947214,3.20101025,3.19719568
72.646849,2.82842712,3.20326343,-0.612238768,3.1994532,3.20099006,3.19717712
72.65734,3.16227766,3.20324299,-0.202398946,3.19943429,3.20096999,3.19715858
72.667832,2,3.20322267,-1.09691507,3.19941541,3.20095004,3.19714007
72.678324,3.87298335,3.20320247,0.818401417,3.19939657,3.2009302,3.19712159
72.688815,3,3.20318238,-0.450757562,3.19937776,3.20091046,3.19710314
72.699307,4.12310563,3.2031624,0.959136706,3.19935897,3.20089084,3.19708471
72.709798,3.74165739,3.20314254,0.733835707,3.19934022,3.20087132,3.1970663
72.72029,3.46410162,3.20312279,0.510860869,3.1993215,3.20085191,3.19704792
72.730782,3.16227766,3.20310314,-0.202053163,3.19930281,3.20083259,3.19702956
72.741273,3,3.2030836,-0.45064798,3.19928414,3.20081338,3.19701122
72.751765,3.60555128,3.20306416,0.634418719,3.1992655,3.20079427,3.19699291
72.762256,2.64575131,3.20304483,-0.746520944,3.19924689,3.20077525,3.19697462
72.772748,3.31662479,3.2030256,0.337044795,3.19922831,3.20075633,3.19695634
72.78324,3.31662479,3.20300646,0.337073183,3.19920975,3.2007375,3.19693809
72.793731,3.46410162,3.20298742,0.510993339,3.19919121,3.20071876,3.19691986
72.804223,2.23606798,3.20296848,-0.983310989,3.1991727,3.20070011,3.19690164
72.814714,3.16227766,3.20294963,-0.201672924,3.19915422,3.20068156,3.19688345
72.825206,3.31662479,3.20293087,0.337185292,3.19913575,3.20066308,3.19686527
72.835698,2.82842712,3.2029122,-0.611951857,3.19911731,3.20064469,3.19684711
72.846189,3.31662479,3.20289362,0.337240521,3.19909889,3.20062639,3.19682896
72.856681,3.46410162,3.20287513,0.511103207,3.19908049,3.20060816,3.19681083
72.867172,3.31662479,3.20285672,0.337295226,3.19906211,3.20059002,3.19679271
72.877664,3.87298335,3.2028384,0.818623815,3.19904375,3.20057195,3.19677461
72.888156,3.46410162,3.20282015,0.511156983,3.1990254,3.20055396,3.19675652
72.898647,3.16227766,3.20280199,-0.201306566,3.19900708,3.20053605,3.19673845
72.909139,2.44948974,3.20278391,-0.867925209,3.19898877,3.20051821,3.19672038
72.91963,2.82842712,3.20276591,-0.611832317,3.19897048,3.20050044,3.19670233
72.930122,4.12310563,3.20274798,0.959352722,3.19895221,3.20048274,3.19668429
72.940614,3.46410162,3.20273013,0.511245037,3.19893395,3.20046512,3.19666625
72.951105,3.87298335,3.20271235,0.818700798,3.19891571,3.20044756,3.19664823
72.961597,3.87298335,3.20269464,0.818711612,3.19889748,3.20043007,3.19663022
72.972088,4.69041576,3.20267701,1.21972897,3.19887927,3.20041264,3.19661221
72.98258,2.82842712,3.20265944,-0.611745303,3.19886106,3.20039528,3.19659421
72.993072,3.87298335,3.20264194,0.818743797,3.19884287,3.20037798,3.19657622
73.003563,4,3.20262451,0.892958839,3.1988247,3.20036074,3.19655824
73.014055,3,3.20260714,-0.450119034,3.19880653,3.20034356,3.19654025
73.024546,3.16227766,3.20258984,-0.200778943,3.19878837,3.20032644,3.19652228
73.035038,3.31662479,3.2025726,0.337716132,3.19877022,3.20030938,3.19650431
73.04553,3.16227766,3.20255543,-0.200693216,3.19875209,3.20029238,3.19648634
73.056021,3.60555128,3.20253831,0.63483302,3.19873396,3.20027543,3.19646838
73.066513,3.16227766,3.20252125,-0.200608061,3.19871583,3.20025853,3.19645041
73.077004,3.31662479,3.20250426,0.337817309,3.19869772,3.20024169,3.19643246
73.087496,3.74165739,3.20248731,0.734282012,3.19867961,3.20022489,3.19641449
73.097988,3.60555128,3.20247043,0.634886485,3.19866151,3.20020815,3.19639653
73.108479,3.31662479,3.2024536,0.337892283,3.19864341,3.20019146,3.19637858
73.118971,2.64575131,3.20243682,-0.746113601,3.19862531,3.20017481,3.19636062
73.129462,3.74165739,3.20242009,0.734327785,3.19860723,3.20015822,3.19634265
73.139954,3.31662479,3.20240342,0.337966529,3.19858914,3.20014166,3.19632469
73.150446,2,3.20238679,-1.09653399,3.19857105,3.20012516,3.19630672
73.160937,2.82842712,3.20237021,-0.611508863,3.19855297,3.20010869,3.19628875
73.171429,2.44948974,3.20235369,-0.867677326,3.19853489,3.20009227,3.19627078
73.18192,3.31662479,3.2023372,0.33806447,3.19851681,3.20007589,3.1962528
73.192412,3.60555128,3.20232077,0.635004337,3.19849873,3.20005955,3.19623481
73.202904,2.44948974,3.20230437,-0.867648911,3.19848065,3.20004325,3.19621682
73.213395,3,3.20228803,-0.449764414,3.19846257,3.20002699,3.19619882
73.223887,2.82842712,3.20227172,-0.611428325,3.19844448,3.20001076,3.19618082
73.234378,3.46410162,3.20225546,0.511709055,3.1984264,3.19999457,3.1961628
73.24487,3.46410162,3.20223923,0.511724908,3.19840831,3.19997842,3.19614478
73.255362,3.46410162,3.20222305,0.511740722,3.19839021,3.19996229,3.19612675
73.265853,3.87298335,3.2022069,0.819009428,3.19837212,3.19994621,3.19610871
73.276345,3.60555128,3.20219079,0.63510667,3.19835401,3.19993015,3.19609066
73.286836,3.87298335,3.20217472,0.819029074,3.1983359,3.19991413,3.19607259
73.297328,3.74165739,3.20215868,0.734505754,3.19831779,3.19989813,3.19605452
73.30782,3.87298335,3.20214268,0.819048634,3.19829967,3.19988216,3.19603643
73.318311,3,3.20212671,-0.449585045,3.19828154,3.19986623,3.19601833
73.328803,2.82842712,3.20211078,-0.611296696,3.1982634,3.19985032,3.19600022
73.339294,3.16227766,3.20209487,-0.199542506,3.19824525,3.19983443,3.19598209
73.349786,3.16227766,3.202079,-0.199502724,3.19822709,3.19981857,3.19596395
73.360278,3.16227766,3.20206315,-0.199463008,3.19820893,3.19980274,3.19594579
73.370769,3.16227766,3.20204734,-0.199423361,3.19819075,3.19978693,3.19592761
73.381261,3.60555128,3.20203155,0.635232026,3.19817256,3.19977114,3.19590942
73.391752,3,3.20201579,-0.449461665,3.19815436,3.19975537,3.19589121
73.402244,3.31662479,3.20200005,0.338562752,3.19813615,3.19973962,3.19587298
73.412736,3.16227766,3.20198434,-0.199265358,3.19811792,3.1997239,3.19585474
73.423227,3.16227766,3.20196866,-0.199225999,3.19809968,3.19970819,3.19583647
73.433719,3.31662479,3.201953,0.33863224,3.19808142,3.1996925,3.19581819
73.44421,3.16227766,3.20193736,-0.199147428,3.19806315,3.19967683,3.19579988
73.454702,2.44948974,3.20192174,-0.867428382,3.19804487,3.19966117,3.19578155
73.465194,2.23606798,3.20190614,-0.982770658,3.19802656,3.19964553,3.1957632
73.475685,4,3.20189057,0.893369707,3.19800825,3.1996299,3.19574483
73.486177,3.74165739,3.20187501,0.734698834,3.19798991,3.19961429,3.19572644
73.496668,3.16227766,3.20185947,-0.198951781,3.19797155,3.19959869,3.19570802
73.50716,4.12310563,3.20184395,0.959823774,3.19795318,3.1995831,3.19568958
73.517652,3.31662479,3.20182844,0.338816096,3.19793478,3.19956752,3.19567111
73.528143,3.46410162,3.20181296,0.51214125,3.19791637,3.19955196,3.19565262
73.538635,2.64575131,3.20179748,-0.745685034,3.19789794,3.1995364,3.1956341
73.549126,3.46410162,3.20178202,0.512171449,3.19787948,3.19952086,3.19561555
73.559618,2.82842712,3.20176658,-0.611015098,3.197861,3.19950532,3.19559698
73.57011,2.82842712,3.20175114,-0.611002468,3.1978425,3.19948978,3.19557838
73.580601,3.60555128,3.20173572,0.635464834,3.19782398,3.19947426,3.19555975
73.591093,2.64575131,3.20172031,-0.745633286,3.19780543,3.19945874,3.19554109
73.601584,4.24264069,3.20170491,1.0202626,3.19778686,3.19944322,3.1955224
73.612076,3.16227766,3.20168952,-0.198524198,3.19776827,3.19942771,3.19550368
73.622568,3.16227766,3.20167413,-0.198485451,3.19774964,3.1994122,3.19548493
73.633059,3.60555128,3.20165876,0.635525385,3.197731,3.1993967,3.19546615
73.643551,2.82842712,3.20164339,-0.610914289,3.19771232,3.19938119,3.19544734
73.654042,2.64575131,3.20162803,-0.745571407,3.19769362,3.19936569,3.19542849
73.664534,3.16227766,3.20161268,-0.198330577,3.19767489,3.19935019,3.19540961
73.675026,3.16227766,3.20159733,-0.198291874,3.19765613,3.19933468,3.1953907
73.685517,3.60555128,3.20158198,0.635585787,3.19763734,3.19931918,3.19537175
73.696009,3.31662479,3.20156664,0.339202227,3.19761853,3.19930367,3.19535276
73.7065,4,3.2015513,0.893559566,3.19759968,3.19928817,3.19533374
73.716992,3.16227766,3.20153596,-0.198137081,3.1975808,3.19927265,3.19531469
73.727484,3,3.20152063,-0.448910488,3.19756189,3.19925714,3.19529559
73.737975,4.12310563,3.20150529,0.960000174,3.19754295,3.19924162,3.19527646
73.748467,3.16227766,3.20148996,-0.198020947,3.19752397,3.19922609,3.19525729
73.758958,2.64575131,3.20147462,-0.745468516,3.19750496,3.19921056,3.19523809
73.76945,4.47213595,3.20145928,1.12724295,3.19748592,3.19919502,3.19521884
73.779942,3.31662479,3.20144394,0.339383043,3.19746684,3.19917947,3.19519955
73.790433,3.74165739,3.2014286,0.735002577,3.19744773,3.19916391,3.19518022
73.800925,3.16227766,3.20141325,-0.197827173,3.19742858,3.19914835,3.19516085
73.811416,3,3.2013979,-0.448773774,3.1974094,3.19913277,3.19514144
73.821908,3.31662479,3.20138254,0.339473485,3.19739017,3.19911718,3.19512198
73.8324,2.23606798,3.20136718,-0.982496414,3.19737091,3.19910159,3.19510249
73.842891,3,3.20135181,-0.448722424,3.19735162,3.19908598,3.19508295
73.853383,2.82842712,3.20133644,-0.610663011,3.19733228,3.19907036,3.19506336
73.863874,2.23606798,3.20132106,-0.98247294,3.19731291,3.19905472,3.19504373
73.874366,2.64575131,3.20130566,-0.745355186,3.19729349,3.19903907,3.19502405
73.884858,3.74165739,3.20129026,0.735096676,3.19727403,3.19902341,3.19500433
73.895349,2.23606798,3.20127485,-0.982449427,3.19725454,3.19900773,3.19498457
73.905841,4,3.20125943,0.893722869,3.197235,3.19899204,3.19496475
73.916332,3.16227766,3.201244,-0.197398942,3.19721542,3.19897633,3.19494489
73.926824,3.31662479,3.20122856,0.339700208,3.1971958,3.1989606,3.19492498
73.937316,3.46410162,3.2012131,0.512726547,3.19717613,3.19894486,3.19490501
73.947807,3.16227766,3.20119764,-0.197281463,3.19715642,3.19892909,3.19488501
73.958299,2.44948974,3.20118215,-0.867001967,3.19713666,3.19891331,3.19486494
73.96879,3.31662479,3.20116666,0.339791306,3.19711686,3.19889751,3.19484484
73.979282,2.82842712,3.20115115,-0.610511279,3.19709702,3.19888168,3.19482467
73.989774,3.31662479,3.20113562,0.339836976,3.19707712,3.19886584,3.19480446
74.000265,3.16227766,3.20112008,-0.197084801,3.19705719,3.19884997,3.19478419
74.010757,3.46410162,3.20110452,0.512832425,3.1970372,3.19883409,3.19476387
74.021248,2.64575131,3.20108894,-0.745209791,3.19701716,3.19881818,3.1947435
74.03174,3.16227766,3.20107335,-0.196966212,3.19699708,3.19880224,3.19472307
74.042232,3,3.20105774,-0.44839462,3.19697695,3.19878628,3.19470259
74.052723,3.74165739,3.2010421,0.73526545,3.19695677,3.1987703,3.19468206
74.063215,3.31662479,3.20102645,0.339997556,3.19693653,3.19875429,3.19466146
74.073706,3.60555128,3.20101078,0.636034979,3.19691625,3.19873826,3.19464081
74.084198,2.23606798,3.20099509,-0.982307035,3.19689592,3.1987222,3.19462011
74.09469,3,3.20097937,-0.44830723,3.19687553,3.19870611,3.19459934
74.105181,3.60555128,3.20096364,0.636072039,3.19685509,3.19868999,3.19457852
74.115673,3.16227766,3.20094788,-0.196647442,3.1968346,3.19867385,3.19455764
74.126164,3.16227766,3.20093209,-0.196607311,3.19681405,3.19865768,3.1945367
74.136656,2.44948974,3.20091629,-0.866848629,3.19679345,3.19864147,3.1945157
74.147148,3.46410162,3.20090046,0.513031343,3.19677279,3.19862524,3.19449464
74.157639,3.60555128,3.2008846,0.636134164,3.19675208,3.19860898,3.19447352
74.168131,3.60555128,3.20086872,0.636146647,3.19673132,3.19859268,3.19445233
74.178622,3.74165739,3.20085281,0.735394163,3.1967105,3.19857636,3.19443109
74.189114,2.82842712,3.20083688,-0.610253842,3.19668961,3.19856,3.19440978
74.199606,3.31662479,3.20082091,0.340299687,3.19666868,3.19854361,3.19438841
74.210097,3.31662479,3.20080492,0.340323178,3.19664768,3.19852718,3.19436697
74.220589,4.24264069,3.20078891,1.02071141,3.19662663,3.19851072,3.19434547
74.23108,3.16227766,3.20077286,-0.196201934,3.19660551,3.19849423,3.19432391
74.241572,2.44948974,3.20075678,-0.86675662,3.19658434,3.1984777,3.19430228
74.252064,3,3.20074067,-0.448040929,3.1965631,3.19846113,3.19428058
74.262555,3.46410162,3.20072454,0.513202765,3.19654181,3.19844453,3.19425882
74.273047,3,3.20070837,-0.448004874,3.19652045,3.1984279,3.19423699
74.283538,3,3.20069217,-0.447986794,3.19649903,3.19841122,3.19421509
74.29403,2.64575131,3.20067593,-0.74493263,3.19647755,3.19839451,3.19419313
74.304522,3.74165739,3.20065967,0.735525472,3.19645601,3.19837775,3.19417109
74.315013,3.31662479,3.20064337,0.340560452,3.1964344,3.19836096,3.19414899
74.325505,3.16227766,3.20062704,-0.195829965,3.19641273,3.19834413,3.19412681
74.335996,3.16227766,3.20061067,-0.195788173,3.19639099,3.19832726,3.19410457
74.346488,4.35889894,3.20059427,1.07624564,3.19636919,3.19831035,3.19408225
74.35698,2.82842712,3.20057783,-0.610041558,3.19634732,3.1982934,3.19405986
74.367471,4,3.20056135,0.89411333,3.19632538,3.1982764,3.1940374
74.377963,3.16227766,3.20054484,-0.195619995,3.19630338,3.19825937,3.19401487
74.388454,3.31662479,3.2005283,0.340729357,3.19628131,3.19824229,3.19399226
74.398946,3.74165739,3.20051171,0.735626044,3.19625917,3.19822517,3.19396958
74.409438,2.82842712,3.20049509,-0.609973738,3.19623696,3.198208,3.19394683
74.419929,4.12310563,3.20047842,0.960534851,3.19621469,3.19819079,3.193924
74.430421,2.64575131,3.20046172,-0.744788837,3.19619234,3.19817353,3.19390109
74.440912,3,3.20044498,-0.447710826,3.19616993,3.19815623,3.19387812
74.451404,3,3.2004282,-0.447692084,3.19614744,3.19813888,3.19385506
74.461896,3.60555128,3.20041138,0.636506006,3.19612488,3.19812149,3.19383192
74.472387,3.60555128,3.20039452,0.636519251,3.19610226,3.19810405,3.19380871
74.482879,4,3.20037761,0.894216073,3.19607955,3.19808656,3.19378542
74.49337,3.74165739,3.20036067,0.735728699,3.19605678,3.19806903,3.19376205
74.503862,3.16227766,3.20034368,-0.19510515,3.19603393,3.19805144,3.1937386
74.514354,3.46410162,3.20032665,0.513590273,3.19601101,3.19803381,3.19371507
74.524845,3.87298335,3.20030957,0.820166918,3.19598801,3.19801613,3.19369147
74.535337,2.82842712,3.20029245,-0.609807615,3.19596494,3.1979984,3.19366778
74.545828,3.60555128,3.20027529,0.636612901,3.1959418,3.19798062,3.19364401
74.55632,3.16227766,3.20025808,-0.194885659,3.19591857,3.19796278,3.19362015
74.566812,3.31662479,3.20024083,0.341150942,3.19589527,3.1979449,3.19359622
74.577303,3.60555128,3.20022353,0.636653556,3.1958719,3.19792696,3.1935722
74.587795,3.16227766,3.20020618,-0.194752453,3.19584844,3.19790897,3.1935481
74.598286,3.46410162,3.20018879,0.513724469,3.19582491,3.19789093,3.19352392
74.608778,3,3.20017134,-0.447405123,3.1958013,3.19787284,3.19349965
74.61927,3.31662479,3.20015385,0.341278385,3.1957776,3.19785469,3.19347529
74.629761,3.16227766,3.20013632,-0.194573015,3.19575384,3.19783649,3.19345085
74.640253,3.87298335,3.20011873,0.820283253,3.19572998,3.19781823,3.19342632
74.650744,3.60555128,3.2001011,0.636749698,3.19570605,3.19779992,3.19340171
74.661236,3.46410162,3.20008341,0.513827016,3.19568204,3.19778155,3.19337701
74.671728,3.46410162,3.20006568,0.513844274,3.19565795,3.19776313,3.19335222
74.682219,2.44948974,3.20004789,-0.866347592,3.19563377,3.19774465,3.19332734
74.692711,3.60555128,3.20003006,0.636805481,3.19560951,3.19772611,3.19330238
74.703202,3.74165739,3.20001217,0.735965501,3.19558517,3.19770752,3.19327732
74.713694,3.46410162,3.19999423,0.513913793,3.19556074,3.19768886,3.19325218
74.724186,3.16227766,3.19997624,-0.19416121,3.19553623,3.19767015,3.19322694
74.734677,4,3.19995819,0.894450562,3.19551163,3.19765139,3.19320162
74.745169,3.60555128,3.19994009,0.636876112,3.19548695,3.19763256,3.1931762
74.75566,3.46410162,3.19992194,0.513984117,3.19546219,3.19761367,3.19315069
74.766152,3.31662479,3.19990374,0.341644632,3.19543733,3.19759472,3.19312509
74.776644,2.82842712,3.19988548,-0.609473831,3.19541239,3.19757571,3.19309939
74.787135,3.60555128,3.19986716,0.636933367,3.19538736,3.19755664,3.19307361
74.797627,3.60555128,3.19984879,0.636947789,3.19536225,3.19753751,3.19304772
74.808118,3.16227766,3.19983036,-0.193785203,3.19533704,3.19751832,3.19302175
74.81861,4.12310563,3.19981188,0.960881753,3.19531175,3.19749907,3.19299568
74.829102,3,3.19979334,-0.446982485,3.19528637,3.19747975,3.19296951
74.839593,4.12310563,3.19977475,0.960901076,3.1952609,3.19746037,3.19294325
74.850085,3.31662479,3.19975609,0.34186064,3.19523533,3.19744092,3.19291689
74.860576,2,3.19973738,-1.09532524,3.19520968,3.19742142,3.19289043
74.871068,2,3.19971861,-1.09531667,3.19518393,3.19740185,3.19286388
74.88156,3,3.19969978,-0.446877817,3.1951581,3.19738221,3.19283722
74.892051,3.74165739,3.1996809,0.736190525,3.19513217,3.19736251,3.19281048
74.902543,3.16227766,3.19966195,-0.193350175,3.19510615,3.19734274,3.19278363
74.913034,2.82842712,3.19964294,-0.609274831,3.19508003,3.19732291,3.19275668
74.923526,3.46410162,3.19962388,0.514273991,3.19505382,3.19730301,3.19272963
74.934018,3.31662479,3.19960475,0.342081922,3.19502752,3.19728304,3.19270248
74.944509,2.64575131,3.19958556,-0.74420041,3.19500112,3.19726301,3.19267523
74.955001,1.73205081,3.19956631,-1.21141054,3.19497462,3.19724291,3.19264788
74.965492,3,3.199547,-0.44670684,3.19494804,3.19722274,3.19262043
74.975984,3.74165739,3.19952763,0.736294616,3.19492135,3.1972025,3.19259287
74.986476,2.64575131,3.19950819,-0.744148424,3.19489457,3.19718219,3.19256521
74.996967,2.44948974,3.19948869,-0.866024796,3.19486769,3.19716182,3.19253745
75.007459,3.16227766,3.19946913,-0.192850893,3.19484071,3.19714137,3.19250958
75.01795,4.12310563,3.1994495,0.961070301,3.19481363,3.19712086,3.19248161
75.028442,4,3.19942981,0.89474588,3.19478646,3.19710027,3.19245353
75.038934,3.46410162,3.19941005,0.514481837,3.19475918,3.19707962,3.19242535
75.049425,2.44948974,3.19939024,-0.865967952,3.19473181,3.19705889,3.19239707
75.059917,2.82842712,3.19937035,-0.609051086,3.19470434,3.19703809,3.19236867
75.070408,4.47213595,3.1993504,1.12817798,3.19467676,3.19701723,3.19234017
75.0809,3.16227766,3.19933038,-0.19249084,3.19464909,3.19699628,3.19231157
75.091392,3.46410162,3.1993103,0.514578774,3.19462131,3.19697527,3.19228285
75.101883,3.31662479,3.19929015,0.34254144,3.19459343,3.19695418,3.19225403
75.112375,2.82842712,3.19926993,-0.608968645,3.19456545,3.19693302,3.19222509
75.122866,2.82842712,3.19924965,-0.608951991,3.19453737,3.19691179,3.19219605
75.133358,3.31662479,3.1992293,0.342630253,3.19450918,3.19689048,3.1921669
75.14385,3.87298335,3.19920888,0.820837661,3.19448089,3.1968691,3.19213764
75.154341,3.16227766,3.19918839,-0.192121663,3.19445249,3.19684764,3.19210827
75.164833,4.24264069,3.19916784,1.02150519,3.19442399,3.19682611,3.19207878
75.175324,3.46410162,3.19914721,0.514737217,3.19439539,3.1968045,3.19204919
75.185816,3.46410162,3.19912652,0.51475732,3.19436667,3.19678282,3.19201948
75.196308,3.31662479,3.19910575,0.3428105,3.19433785,3.19676106,3.19198966
75.206799,2.82842712,3.19908492,-0.608816715,3.19430893,3.19673922,3.19195972
75.217291,3.46410162,3.19906401,0.514818029,3.1942799,3.19671731,3.19192968
75.227782,3.16227766,3.19904304,-0.191742998,3.19425076,3.19669532,3.19189952
75.238274,3.31662479,3.19902199,0.342932647,3.19422151,3.19667325,3.19186924
75.248766,3.46410162,3.19900087,0.514879349,3.19419215,3.19665111,3.19183885
75.259257,3.31662479,3.19897968,0.342994327,3.19416269,3.19662888,3.19180834
75.269749,4.69041576,3.19895842,1.22125237,3.19413311,3.19660658,3.19177772
75.28024,2.64575131,3.19893709,-0.743764597,3.19410343,3.1965842,3.19174698
75.290732,3.16227766,3.19891568,-0.191410603,3.19407364,3.19656174,3.19171613
75.301224,3.87298335,3.1988942,0.821029322,3.19404373,3.1965392,3.19168515
75.311715,3,3.19887265,-0.445951395,3.19401371,3.19651658,3.19165407
75.322207,2,3.19885102,-1.09492055,3.19398358,3.19649389,3.19162286
75.332698,3.87298335,3.19882932,0.821068831,3.19395335,3.19647111,3.19159153
75.34319,3,3.19880755,-0.445878397,3.19392299,3.19644825,3.19156008
75.353682,3,3.1987857,-0.445853895,3.19389252,3.19642531,3.19152852
75.364173,3.31662479,3.19876377,0.343308924,3.19386195,3.19640229,3.19149683
75.374665,3.60555128,3.19874177,0.637816198,3.19383125,3.19637918,3.19146502
75.385156,2.44948974,3.1987197,-0.865580705,3.19380044,3.196356,3.1914331
75.395648,3.74165739,3.19869755,0.736858085,3.19376952,3.19633273,3.19140105
75.40614,3.46410162,3.19867532,0.515195392,3.19373848,3.19630938,3.19136888
75.416631,3.16227766,3.19865302,-0.190723262,3.19370733,3.19628595,3.19133658
75.427123,4.69041576,3.19863064,1.22138655,3.19367606,3.19626243,3.19130417
75.437614,3.31662479,3.19860819,0.343535443,3.19364467,3.19623883,3.19127163
75.448106,3.60555128,3.19858566,0.63793857,3.19361317,3.19621515,3.19123897
75.458598,3.31662479,3.19856305,0.343601141,3.19358155,3.19619138,3.19120618
75.469089,3.16227766,3.19854036,-0.190427678,3.19354981,3.19616753,3.19117327
75.479581,3.31662479,3.1985176,0.343667274,3.19351795,3.19614359,3.19114023
75.490072,3,3.19849475,-0.4455275,3.19348598,3.19611957,3.19110707
75.500564,3.16227766,3.19847183,-0.190247657,3.19345388,3.19609547,3.19107378
75.511056,3.74165739,3.19844883,0.737026836,3.19342167,3.19607128,3.19104037
75.521547,3.60555128,3.19842575,0.638063886,3.19338933,3.196047,3.19100683
75.532039,3.74165739,3.19840259,0.737058202,3.19335688,3.19602264,3.19097316
75.54253,4.12310563,3.19837936,0.961626886,3.1933243,3.19599819,3.19093936
75.553022,3.74165739,3.19835604,0.737089782,3.19329161,3.19597365,3.19090544
75.563514,3,3.19833264,-0.445345531,3.19325879,3.19594903,3.19087138
75.574005,3.31662479,3.19830917,0.343970382,3.19322585,3.19592432,3.19083721
75.584497,3.16227766,3.19828561,-0.189757603,3.19319278,3.19589953,3.19080289
75.594988,2.82842712,3.19826197,-0.608140483,3.1931596,3.19587465,3.19076845
75.60548,2.64575131,3.19823825,-0.743294653,3.19312629,3.19584967,3.19073388
75.615972,2.64575131,3.19821445,-0.743278642,3.19309285,3.19582461,3.19069918
75.626463,3,3.19819057,-0.445185996,3.1930593,3.19579947,3.19066435
75.636955,3.60555128,3.19816661,0.638266926,3.19302561,3.19577423,3.19062938
75.647446,2.82842712,3.19814256,-0.6080423,3.19299181,3.19574891,3.19059429
75.657938,2.82842712,3.19811844,-0.608022459,3.19295787,3.19572349,3.19055906
75.66843,4.24264069,3.19809423,1.02203056,3.19292381,3.19569799,3.19052369
75.678921,3.46410162,3.19806994,0.515782589,3.19288963,3.1956724,3.1904882
75.689413,2.82842712,3.19804556,-0.607962529,3.19285532,3.19564672,3.19045257
75.699904,3.60555128,3.19802111,0.638380897,3.19282088,3.19562095,3.19041681
75.710396,3.16227766,3.19799656,-0.188994456,3.19278631,3.19559509,3.19038091
75.720888,4.12310563,3.19797194,0.9618387,3.19275162,3.19556913,3.19034488
75.731379,3.16227766,3.19794723,-0.188863905,3.1927168,3.19554309,3.19030871
75.741871,3.31662479,3.19792244,0.344532069,3.19268184,3.19551696,3.19027241
75.752362,3,3.19789757,-0.444856798,3.19264676,3.19549074,3.19023597
75.762854,2.44948974,3.19787261,-0.865091249,3.19261155,3.19546442,3.19019939
75.773346,3.31662479,3.19784757,0.344640716,3.19257621,3.19543801,3.19016268
75.783837,3.46410162,3.19782244,0.516022454,3.19254074,3.19541152,3.19012583
75.794329,3.87298335,3.19779723,0.821697096,3.19250514,3.19538493,3.19008884
75.80482,3.16227766,3.19777193,-0.188399239,3.19246941,3.19535825,3.19005171
75.815312,3.46410162,3.19774655,0.516095984,3.19243355,3.19533147,3.19001445
75.825804,3.16227766,3.19772108,-0.188264236,3.19239755,3.19530461,3.18997704
75.836295,3.60555128,3.19769553,0.638635846,3.19236142,3.19527765,3.1899395
75.846787,3.16227766,3.19766989,-0.188128235,3.19232516,3.1952506,3.18990181
75.857278,3.16227766,3.19764417,-0.188059859,3.19228877,3.19522345,3.18986399
75.86777,3.74165739,3.19761836,0.737590013,3.19225224,3.19519622,3.18982602
75.878262,2.82842712,3.19759246,-0.607589778,3.19221558,3.19516888,3.18978791
75.888753,3.16227766,3.19756648,-0.187853195,3.19217879,3.19514146,3.18974967
75.899245,3.16227766,3.19754041,-0.187783795,3.19214186,3.19511394,3.18971128
75.909736,4,3.19751426,0.895815684,3.19210479,3.19508633,3.18967275
75.920228,3.60555128,3.19748802,0.638798292,3.19206759,3.19505863,3.18963407
75.93072,3.46410162,3.19746169,0.516371888,3.19203025,3.19503083,3.18959525
75.941211,3.46410162,3.19743527,0.516397463,3.19199278,3.19500293,3.18955629
75.951703,3.16227766,3.19740877,-0.187432951,3.19195517,3.19497494,3.18951718
75.962194,2.82842712,3.19738218,-0.607416709,3.19191743,3.19494686,3.18947794
75.972686,3.87298335,3.19735551,0.821965839,3.19187955,3.19491868,3.18943854
75.983178,3.46410162,3.19732874,0.516500606,3.19184152,3.19489041,3.189399
75.993669,3.31662479,3.19730189,0.345431472,3.19180337,3.19486204,3.18935932
76.004161,3.16227766,3.19727495,-0.187075619,3.19176507,3.19483358,3.18931948
76.014652,3.31662479,3.19724792,0.34550958,3.19172664,3.19480502,3.18927951
76.025144,3,3.1972208,-0.444095489,3.19168806,3.19477637,3.18923938
76.035636,3.74165739,3.1971936,0.737877895,3.19164934,3.19474762,3.18919911
76.046127,2.82842712,3.19716631,-0.607238983,3.19161049,3.19471877,3.18915869
76.056619,2.82842712,3.19713893,-0.607216436,3.1915715,3.19468983,3.18911812
76.06711,2.64575131,3.19711146,-0.742536293,3.19153236,3.19466079,3.18907741
76.077602,3.16227766,3.1970839,-0.1865643,3.19149309,3.19463166,3.18903655
76.088094,3.31662479,3.19705625,0.345786842,3.19145367,3.19460243,3.18899553
76.098585,3.31662479,3.19702852,0.345826943,3.19141411,3.1945731,3.18895437
76.109077,3.46410162,3.19700069,0.516818077,3.19137441,3.19454368,3.18891306
76.119568,3.74165739,3.19697278,0.738027512,3.19133457,3.19451416,3.1888716
76.13006,3.31662479,3.19694477,0.345947996,3.19129458,3.19448454,3.18882999
76.140552,3.74165739,3.19691668,0.738065515,3.19125445,3.19445483,3.18878822
76.151043,3.31662479,3.1968885,0.346029317,3.19121417,3.19442502,3.18874631
76.161535,2.82842712,3.19686023,-0.606986908,3.19117376,3.19439511,3.18870424
76.172026,3.16227766,3.19683187,-0.185887633,3.1911332,3.19436511,3.18866203
76.182518,2.82842712,3.19680342,-0.60694011,3.19109249,3.19433501,3.18861966
76.19301,3,3.19677488,-0.443593149,3.19105164,3.19430481,3.18857713
76.203501,3.46410162,3.19674625,0.517064174,3.19101064,3.19427451,3.18853446
76.213993,3,3.19671754,-0.443528506,3.1909695,3.19424412,3.18849163
76.224484,3.60555128,3.19668873,0.639423605,3.19092822,3.19421363,3.18844865
76.234976,3,3.19665983,-0.443463448,3.19088678,3.19418304,3.18840551
76.245468,2.44948974,3.19663084,-0.86437324,3.1908452,3.19415235,3.18836221
76.255959,3.74165739,3.19660176,0.738278824,3.19080347,3.19412157,3.18831877
76.266451,2.82842712,3.1965726,-0.606749925,3.1907616,3.19409069,3.18827516
76.276942,3.87298335,3.19654334,0.822459729,3.19071958,3.19405971,3.18823141
76.287434,2.82842712,3.19651399,-0.606701629,3.1906774,3.19402863,3.18818749
76.297926,3.16227766,3.19648455,-0.184951054,3.19063508,3.19399745,3.18814342
76.308417,3.16227766,3.19645503,-0.184871215,3.19059262,3.19396618,3.18809919
76.318909,3.31662479,3.19642541,0.346697827,3.19055,3.19393481,3.18805481
76.3294,3.60555128,3.1963957,0.639652699,3.19050723,3.19390334,3.18801027
76.339892,3.16227766,3.1963659,-0.18463001,3.19046432,3.19387177,3.18796557
76.350384,3,3.19633601,-0.443098196,3.19042125,3.1938401,3.18792071
76.360875,3.16227766,3.19630603,-0.184467812,3.19037804,3.19380834,3.18787569
76.371367,3.60555128,3.19627596,0.639746287,3.19033467,3.19377647,3.18783052
76.381858,3.31662479,3.19624581,0.346956747,3.19029115,3.19374451,3.18778518
76.39235,3,3.19621556,-0.44296225,3.19024748,3.19371245,3.18773969
76.402842,3.31662479,3.19618521,0.347044055,3.19020366,3.19368029,3.18769403
76.413333,2.23606798,3.19615479,-0.979840195,3.19015969,3.19364803,3.18764822
76.423825,3.16227766,3.19612426,-0.183974467,3.19011556,3.19361568,3.18760225
76.434316,3.60555128,3.19609366,0.639888756,3.19007129,3.19358323,3.18755611
76.444808,3,3.19606295,-0.442789966,3.19002685,3.19355067,3.18750981
76.4553,3.60555128,3.19603216,0.639936804,3.18998227,3.19351802,3.18746335
76.465791,3.16227766,3.19600128,-0.183639926,3.18993753,3.19348527,3.18741673
76.476283,3.60555128,3.19597031,0.639985129,3.18989264,3.19345242,3.18736995
76.486774,3.46410162,3.19593925,0.517843957,3.18984759,3.19341948,3.18732301
76.497266,3.87298335,3.1959081,0.822845823,3.18980239,3.19338643,3.1872759
76.507758,2.82842712,3.19587686,-0.60617632,3.18975703,3.19335329,3.18722862
76.518249,3,3.19584553,-0.442544378,3.18971153,3.19332005,3.18718119
76.528741,2.23606798,3.1958141,-0.979666334,3.18966586,3.19328671,3.18713359
76.539232,3.74165739,3.19578259,0.738833399,3.18962004,3.19325327,3.18708583
76.549724,2.82842712,3.19575099,-0.606072494,3.18957406,3.19321974,3.1870379
76.560216,3.46410162,3.1957193,0.518056285,3.18952792,3.1931861,3.1869898
76.570707,3,3.19568752,-0.442365824,3.18948163,3.19315237,3.18694154
76.581199,3.31662479,3.19565565,0.34780618,3.18943518,3.19311854,3.18689312
76.59169,2.82842712,3.19533119,-0.605726068,3.18909551,3.19308461,3.18684453
76.602182,3.16227766,3.19529937,-0.18171878,3.18904897,3.19305058,3.18679577
76.612674,3.60555128,3.19526747,0.640534004,3.18900228,3.19301646,3.18674685
76.623165,3.60555128,3.19523547,0.640558979,3.18895543,3.19298223,3.18669776
76.633657,2.82842712,3.19520338,-0.605620555,3.18890842,3.19294791,3.1866485
76.644148,2.82842712,3.19517121,-0.60559399,3.18886126,3.1929135,3.18659908
76.65464,2.82842712,3.19513894,-0.605567349,3.18881393,3.19287898,3.18654948
76.665132,3.46410162,3.19510658,0.518647311,3.18876644,3.19284436,3.18649972
76.675623,3.60555128,3.19507414,0.640684896,3.18871879,3.19280965,3.18644979
76.686115,2.82842712,3.19504161,-0.605486978,3.18867098,3.19277484,3.18639969
76.696606,3,3.19500898,-0.441598216,3.18862302,3.19273994,3.18634942
76.707098,3.16227766,3.19497627,-0.180827576,3.18857489,3.19270493,3.18629898
76.71759,3.74165739,3.19494347,0.739401052,3.18852659,3.19266983,3.18624837
76.728081,3,3.19491059,-0.44148679,3.18847815,3.19263464,3.1861976
76.738573,3.46410162,3.19487761,0.518868006,3.18842953,3.19259934,3.18614665
76.749064,3.16227766,3.19484454,-0.180462973,3.18838076,3.19256395,3.18609553
76.759556,3.31662479,3.19481139,0.349017764,3.18833182,3.19252846,3.18604424
76.770048,3.31662479,3.19477815,0.349065383,3.18828272,3.19249287,3.18599278
76.780539,3.87298335,3.19474482,0.823552381,3.18823345,3.19245719,3.18594115
76.791031,2.44948974,3.19471141,-0.863262221,3.18818403,3.19242141,3.18588934
76.801522,2.82842712,3.1946779,-0.605186565,3.18813444,3.19238554,3.18583737
76.812014,2.23606798,3.19464431,-0.979069116,3.18808468,3.19234957,3.18578522
76.822506,3.74165739,3.19461063,0.739626091,3.18803477,3.1923135,3.18573289
76.832997,3.46410162,3.19457687,0.519157728,3.18798469,3.19227734,3.1856804
76.843489,3.31662479,3.19454302,0.349402024,3.18793444,3.19224108,3.18562773
76.85398,3.31662479,3.19450908,0.349450584,3.18788403,3.19220473,3.18557489
76.864472,2.64575131,3.19447505,-0.740758897,3.18783345,3.19216828,3.18552187
76.874964,3.46410162,3.19444094,0.519288622,3.18778271,3.19213174,3.18546868
76.885455,3,3.19440675,-0.440915805,3.18773181,3.1920951,3.18541532
76.895947,3.31662479,3.19437246,0.349646003,3.18768073,3.19205836,3.18536177
76.906438,3.87298335,3.1943381,0.823799277,3.1876295,3.19202154,3.18530806
76.91693,4,3.19430364,0.897605903,3.18757809,3.19198461,3.18525417
76.927422,3,3.1942691,-0.440759688,3.18752652,3.1919476,3.1852001
76.937913,2.82842712,3.19423448,-0.604820102,3.18747478,3.19191049,3.18514586
76.948405,3.31662479,3.19419977,0.349892868,3.18742287,3.19187328,3.18509143
76.958896,3.31662479,3.19416498,0.349942581,3.1873708,3.19183599,3.18503684
76.969388,2.23606798,3.1941301,-0.97880648,3.18731856,3.19179859,3.18498206
76.97988,3.31662479,3.19409514,0.350042355,3.18726615,3.19176111,3.18492711
76.990371,3.87298335,3.1940601,0.82396799,3.18721358,3.19172353,3.18487199
77.000863,3.87298335,3.19402497,0.823989307,3.18716083,3.19168586,3.18481668
77.011354,3.31662479,3.19398976,0.350192848,3.18710792,3.1916481,3.1847612
77.021846,2.82842712,3.19395446,-0.60458857,3.18705484,3.19161024,3.18470553
77.032338,2.82842712,3.19391909,-0.604559312,3.18700158,3.19157229,3.18464969
77.042829,3,3.19388363,-0.440322188,3.18694816,3.19153426,3.18459367
77.053321,3.60555128,3.19384809,0.641641012,3.18689457,3.19149612,3.18453747
77.063812,3.16227766,3.19381247,-0.177580422,3.18684081,3.1914579,3.1844811
77.074304,2.82842712,3.19377676,-0.60444159,3.18678688,3.19141959,3.18442454
77.084796,3.31662479,3.19374097,0.35054788,3.18673278,3.19138118,3.1843678
77.095287,2.44948974,3.19370511,-0.86267918,3.18667851,3.19134269,3.18431088
77.105779,3,3.19366916,-0.440078586,3.18662407,3.19130411,3.18425378
77.11627,3.74165739,3.19363314,0.7402866,3.18656946,3.19126543,3.1841965
77.126762,3.46410162,3.19359703,0.520100554,3.18651467,3.19122667,3.18413904
77.137254,3,3.19356084,-0.439955498,3.18645971,3.19118782,3.18408139
77.147745,3.60555128,3.19352458,0.641893059,3.18640459,3.19114888,3.18402357
77.158237,4,3.19348823,0.898060003,3.18634928,3.19110984,3.18396556
77.168728,3.31662479,3.19345181,0.350960084,3.18629382,3.19107073,3.18390738
77.17922,3.74165739,3.19341205,0.74043591,3.18623817,3.19102826,3.18384901
77.189712,3.46410162,3.19337547,0.520313505,3.18618235,3.19098897,3.18379045
77.200203,2.82842712,3.19333882,-0.604079212,3.18612636,3.19094959,3.18373172
77.210695,3.16227766,3.19330209,-0.176137518,3.1860702,3.19091012,3.1836728
77.221186,4,3.19326528,0.898184124,3.18601386,3.19087057,3.1836137
77.231678,4.24264069,3.19322839,1.02440827,3.18595735,3.19083093,3.18355441
77.24217,2.64575131,3.19319143,-0.739891965,3.18590067,3.1907912,3.18349494
77.252661,4.35889894,3.1931544,1.07969651,3.18584381,3.19075139,3.18343529
77.263153,3.60555128,3.19311728,0.64221024,3.18578678,3.19071149,3.18337544
77.273644,2.44948974,3.1930801,-0.862316854,3.18572957,3.19067151,3.18331542
77.284136,4.12310563,3.19304284,0.964397629,3.18567219,3.19063145,3.18325521
77.294628,3.60555128,3.1930055,0.642297262,3.18561463,3.19059129,3.18319482
77.305119,3,3.1929681,-0.439281341,3.1855569,3.19055106,3.18313424
77.315611,3.74165739,3.19293062,0.740760941,3.185499,3.19051074,3.18307348
77.326102,4.35889894,3.19289306,1.07981752,3.18544092,3.19047035,3.18301253
77.336594,3.46410162,3.19285544,0.520812997,3.18538266,3.19042986,3.18295139
77.347086,3.74165739,3.19281774,0.740837126,3.18532422,3.1903893,3.18289006
77.357577,3.60555128,3.19277997,0.642472802,3.18526562,3.19034866,3.18282856
77.368069,3.74165739,3.19274213,0.740888151,3.18520683,3.19030793,3.18276686
77.37856,3,3.19270423,-0.438980896,3.18514787,3.19026712,3.18270498
77.389052,3.87298335,3.19266625,0.824813372,3.18508873,3.19022623,3.1826429
77.399544,3,3.1926282,-0.438894291,3.18502941,3.19018527,3.18258064
77.410035,4,3.19259008,0.898559912,3.18496992,3.19014422,3.1825182
77.420527,3.31662479,3.1925519,0.352239822,3.18491025,3.19010309,3.18245556
77.431018,3.16227766,3.19251365,-0.173884986,3.1848504,3.19006189,3.18239274
77.44151,2.64575131,3.19247533,-0.739407883,3.18479038,3.19002061,3.18232973
77.452002,3,3.19243694,-0.438676351,3.18473017,3.18997925,3.18226653
77.462493,3.87298335,3.19239849,0.82497567,3.18466979,3.18993782,3.18220314
77.472985,3.46410162,3.19235997,0.521288445,3.18460923,3.1898963,3.18213956
77.483476,4,3.19232139,0.898709413,3.1845485,3.18985472,3.1820758
77.493968,3.60555128,3.19228274,0.642859652,3.18448758,3.18981306,3.18201184
77.50446,3.60555128,3.19224403,0.64288976,3.18442648,3.18977132,3.18194769
77.514951,3,3.19220526,-0.438412203,3.18436521,3.18972951,3.18188336
77.525443,2.82842712,3.19216642,-0.603108031,3.18430375,3.18968762,3.18181883
77.535934,3.46410162,3.19212753,0.521511351,3.18424212,3.18964566,3.18175411
77.546426,3.31662479,3.19208856,0.352896906,3.18418031,3.18960363,3.1816892
77.556918,2.64575131,3.19204954,-0.739119903,3.18411831,3.18956153,3.1816241
77.567409,2.64575131,3.19201046,-0.739093466,3.18405615,3.18951936,3.18155881
77.577901,3.46410162,3.19197132,0.521661092,3.18399379,3.18947711,3.18149333
77.588392,2.44948974,3.19193212,-0.861650962,3.18393126,3.1894348,3.18142766
77.598884,2.44948974,3.19189286,-0.86162818,3.18386855,3.18939241,3.18136179
77.609376,2.44948974,3.19185355,-0.861605364,3.18380565,3.18934996,3.18129573
77.619867,2.44948974,3.19181418,-0.861582517,3.18374258,3.18930744,3.18122948
77.630359,2.82842712,3.19177475,-0.602783229,3.18367932,3.18926485,3.18116304
77.64085,2.82842712,3.19173526,-0.602750478,3.18361589,3.18922219,3.18109641
77.651342,2.82842712,3.19169572,-0.602717677,3.18355227,3.18917947,3.18102958
77.661834,4,3.19165613,0.899079459,3.18348847,3.18913668,3.18096255
77.672325,3.31662479,3.19161648,0.35356514,3.18342449,3.18909383,3.18089534
77.682817,2.82842712,3.19157678,-0.602618997,3.18336033,3.18905091,3.18082793
77.693308,3,3.19153703,-0.437649438,3.18329599,3.18900793,3.18076033
77.7038,3.74165739,3.19149723,0.741727822,3.18323146,3.18896488,3.18069254
77.714292,3.74165739,3.19145737,0.741754688,3.18316675,3.18892177,3.18062454
77.724783,3,3.19141747,-0.437512819,3.18310187,3.1888786,3.18055637
77.735275,3.16227766,3.19137751,-0.170586787,3.18303679,3.18883537,3.18048798
77.745766,3,3.19133751,-0.437421436,3.18297154,3.18879209,3.18041942
77.756258,3.74165739,3.19129746,0.74186247,3.1829061,3.18874873,3.18035065
77.76675,3,3.19125736,-0.437329812,3.18284047,3.18870532,3.18028168
77.777241,3.46410162,3.19121722,0.522383375,3.18277467,3.18866186,3.18021253
77.787733,3.31662479,3.19117704,0.354186045,3.18270868,3.18861834,3.18014317
77.798224,3.46410162,3.19113681,0.522460342,3.18264252,3.18857476,3.18007363
77.808716,3,3.19109653,-0.43714589,3.18257616,3.18853112,3.18000388
77.819208,3.74165739,3.19105621,0.742025051,3.18250962,3.18848743,3.17993394
77.829699,3.46410162,3.19101585,0.522576083,3.1824429,3.18844369,3.1798638
77.840191,3.16227766,3.19097545,-0.169404221,3.18237599,3.18839989,3.17979347
77.850682,4.12310563,3.19093501,0.965489831,3.18230891,3.18835604,3.17972294
77.861174,2.64575131,3.19089453,-0.738338147,3.18224163,3.18831214,3.17965221
77.871666,3.60555128,3.19085401,0.643969926,3.18217417,3.18826819,3.17958129
77.882157,3.87298335,3.19081346,0.825935766,3.18210653,3.18822419,3.17951017
77.892649,2.82842712,3.19077286,-0.601951608,3.1820387,3.18818014,3.17943885
77.90314,3.31662479,3.19073224,0.354813405,3.1819707,3.18813604,3.17936734
77.913632,4.12310563,3.19069157,0.965615893,3.1819025,3.18809189,3.17929563
77.924124,3.46410162,3.19065088,0.522925176,3.18183411,3.1880477,3.17922371
77.934615,4.12310563,3.19061015,0.965658054,3.18176555,3.18800346,3.17915161
77.945107,3.31662479,3.19056939,0.355042819,3.18169679,3.18795918,3.1790793
77.955598,3.60555128,3.1905286,0.644222538,3.18162786,3.18791486,3.1790068
77.96609,4,3.19048777,0.899728973,3.18155874,3.18787049,3.1789341
77.976582,3.31662479,3.19044692,0.355215241,3.18148942,3.18782608,3.17886119
77.987073,2.82842712,3.19040605,-0.601646842,3.18141993,3.18778163,3.1787881
77.997565,4,3.19036514,0.899797121,3.18135025,3.18773714,3.17871479
78.008056,2.44948974,3.19032421,-0.860717416,3.18128039,3.18769261,3.1786413
78.018548,3,3.19028326,-0.436214691,3.18121034,3.18764804,3.1785676
78.02904,3.60555128,3.19024228,0.644444722,3.18114009,3.18760344,3.1784937
78.039531,3,3.19020128,-0.436120714,3.18106967,3.1875588,3.17841961
78.050023,4,3.19016025,0.899910966,3.18099906,3.18751413,3.17834531
78.060514,3.87298335,3.19011921,0.826355936,3.18092827,3.18746942,3.17827082
78.071006,2.82842712,3.19007815,-0.60137428,3.18085728,3.18742468,3.17819612
78.081498,3.60555128,3.19003707,0.644603916,3.18078611,3.18737991,3.17812122
78.091989,3.16227766,3.18999597,-0.166488175,3.18071476,3.18733511,3.17804613
78.102481,3.60555128,3.18995486,0.64466768,3.18064321,3.18729028,3.17797083
78.112972,3.60555128,3.18991373,0.644699575,3.18057148,3.18724543,3.17789533
78.123464,3.31662479,3.18987259,0.356022752,3.18049956,3.18720054,3.17781963
78.133956,3,3.18983144,-0.435696495,3.18042745,3.18715563,3.17774373
78.144447,3,3.18979027,-0.435649255,3.18035516,3.1871107,3.17766763
78.154939,2.82842712,3.1897491,-0.601100635,3.18028268,3.18706574,3.17759133
78.16543,2.44948974,3.18970792,-0.860359329,3.18021002,3.18702076,3.17751483
78.175922,3,3.18966673,-0.435507436,3.18013716,3.18697575,3.17743812
78.186414,3.60555128,3.18962553,0.644923055,3.18006412,3.18693073,3.17736121
78.196905,2.23606798,3.18958433,-0.976481619,3.17999089,3.18688569,3.1772841
78.207397,3,3.18954312,-0.435365507,3.17991747,3.18684063,3.17720679
78.217888,3,3.18950192,-0.435318183,3.17984387,3.18679556,3.17712928
78.22838,3.31662479,3.18946071,0.356600727,3.17977007,3.18675047,3.17705156
78.238872,3.31662479,3.1894195,0.356658502,3.17969609,3.18670537,3.17697364
78.249363,3.31662479,3.1893783,0.356716259,3.17962192,3.18666025,3.17689553
78.259855,3.16227766,3.1893371,-0.164497529,3.17954756,3.18661513,3.1768172
78.270346,3.74165739,3.1892959,0.743210256,3.17947302,3.18656999,3.17673868
78.280838,2.82842712,3.18925471,-0.600689258,3.17939828,3.18652485,3.17665995
78.29133,3.16227766,3.18921352,-0.164121492,3.17932336,3.1864797,3.17658102
78.301821,3.31662479,3.18917235,0.357004816,3.17924825,3.18643454,3.17650189
78.312313,3.60555128,3.18913119,0.645306198,3.17917295,3.18638938,3.17642255
78.322804,3.60555128,3.18909004,0.645338082,3.17909746,3.18634422,3.17634301
78.333296,3.60555128,3.18904889,0.645369957,3.17902178,3.18629905,3.17626326
78.343788,4.12310563,3.18900777,0.966487381,3.17894591,3.18625389,3.17618331
78.354279,3,3.18896666,-0.434702957,3.17886986,3.18620873,3.17610316
78.364771,3.87298335,3.18892557,0.827077855,3.17879362,3.18616357,3.1760228
78.375262,3.16227766,3.1888845,-0.16311603,3.17871719,3.18611841,3.17594225
78.385754,2.82842712,3.18884345,-0.600346835,3.17864056,3.18607326,3.17586148
78.396246,2.64575131,3.18880242,-0.736920013,3.17856375,3.18602812,3.17578051
78.406737,3,3.18876142,-0.434466818,3.17848675,3.18598299,3.17569934
78.417229,4,3.18872044,0.900710589,3.17840956,3.18593787,3.17561796
78.42772,2.23606798,3.18867949,-0.976018191,3.17833219,3.18589276,3.17553638
78.438212,3.31662479,3.18863856,0.357751628,3.17825462,3.18584766,3.17545459
78.448704,3.31662479,3.18859767,0.357808776,3.17817686,3.18580258,3.17537259
78.459195,3.31662479,3.18855681,0.357865865,3.17809892,3.18575752,3.1752904
78.469687,3.87298335,3.18851599,0.827325425,3.17802078,3.18571247,3.175208
78.480178,3.31662479,3.1884752,0.357979875,3.17794246,3.18566745,3.17512539
78.49067,2.64575131,3.18843445,-0.736670303,3.17786394,3.18562245,3.17504258
78.501162,3.31662479,3.18839373,0.358093644,3.17778523,3.18557747,3.17495956
78.511653,3.46410162,3.18835306,0.525117655,3.17770635,3.18553251,3.17487634
78.522145,2.64575131,3.18831243,-0.736587485,3.17762726,3.18548759,3.17479291
78.532636,2.44948974,3.18827185,-0.859524351,3.17754799,3.18544269,3.17470928
78.543128,3.31662479,3.18823131,0.358320354,3.17746853,3.18539783,3.17462543
78.55362,1.73205081,3.18819082,-1.20670627,3.17738887,3.18535299,3.17454138
78.564111,2.64575131,3.18815039,-0.736477479,3.17730904,3.18530819,3.17445714
78.574603,3.16227766,3.18811,-0.160724424,3.177229,3.18526343,3.17437267
78.585094,2.64575131,3.18806967,-0.736422678,3.17714879,3.18521871,3.17428801
78.595586,2.82842712,3.18802939,-0.599668467,3.17706837,3.18517402,3.17420314
78.606078,2.82842712,3.18798918,-0.599634932,3.17698777,3.18512938,3.17411806
78.616569,3,3.18794902,-0.433530877,3.17690698,3.18508478,3.17403278
78.627061,3,3.18790893,-0.433484631,3.176826,3.18504023,3.17394729
78.637552,3.74165739,3.1878689,0.744169665,3.17674483,3.18499573,3.17386159
78.648044,3.16227766,3.18782893,-0.159847649,3.17666347,3.18495127,3.17377569
78.658536,3.46410162,3.18778903,0.525654432,3.17658192,3.18490687,3.17368957
78.669027,3,3.18774921,-0.43330037,3.17650018,3.18486252,3.17360326
78.679519,3.16227766,3.18770946,-0.159473498,3.17641825,3.18481823,3.17351673
78.69001,3,3.18766978,-0.433208704,3.17633613,3.184774,3.17343001
78.700502,2.82842712,3.18763018,-0.59933551,3.17625382,3.18472982,3.17334306
78.710994,3.74165739,3.18759066,0.744356589,3.17617132,3.18468571,3.17325591
78.721485,3.60555128,3.18755122,0.64652924,3.17608863,3.18464166,3.17316857
78.731977,2.82842712,3.18751186,-0.599236794,3.17600575,3.18459768,3.173081
78.742468,3.16227766,3.18747259,-0.158729114,3.17592268,3.18455377,3.17299324
78.75296,3.16227766,3.18743341,-0.158605636,3.17583942,3.18450993,3.17290526
78.763452,4,3.18739432,0.90144644,3.17575597,3.18446616,3.17281707
78.773943,2.44948974,3.18735532,-0.858991022,3.17567233,3.18442247,3.17272869
78.784435,4.12310563,3.18731641,0.967361985,3.1755885,3.18437886,3.17264008
78.794926,3.74165739,3.18727761,0.744566837,3.17550449,3.18433532,3.17255128
78.805418,2.44948974,3.18723891,-0.858923258,3.17542027,3.18429187,3.17246226
78.81591,2.82842712,3.1872003,-0.598976775,3.17533587,3.18424851,3.17237304
78.826401,3,3.18716181,-0.432622015,3.17525129,3.18420523,3.17228361
78.836893,3.46410162,3.18712342,0.526287182,3.17516651,3.18416204,3.17219397
78.847384,3.46410162,3.18708514,0.526323545,3.17508154,3.18411895,3.17210413
78.857876,3.60555128,3.18704697,0.646919084,3.17499638,3.18407595,3.17201407
78.868368,3,3.18700892,-0.432445283,3.17491103,3.18403305,3.1719238
78.878859,2.44948974,3.18697099,-0.858767285,3.17482549,3.18399025,3.17183334
78.889351,3.31662479,3.18693318,0.360127213,3.17473976,3.18394755,3.17174265
78.899842,3.16227766,3.1868955,-0.15690072,3.17465385,3.18390496,3.17165177
78.910334,4.24264069,3.18685793,1.0275129,3.17456774,3.18386247,3.17156067
78.920826,3.31662479,3.1868205,0.360283624,3.17448144,3.1838201,3.17146936
78.931317,2.23606798,3.1867832,-0.975046269,3.17439495,3.18377784,3.17137785
78.941809,2.64575131,3.18674604,-0.735523437,3.17430827,3.18373569,3.17128612
78.9523,2.64575131,3.18670901,-0.735498267,3.17422141,3.18369367,3.17119419
78.962792,2.44948974,3.18667212,-0.858593257,3.17413435,3.18365177,3.17110205
78.973284,2.44948974,3.18663538,-0.858571859,3.1740471,3.18360999,3.1710097
78.983775,2.82842712,3.18659879,-0.598474444,3.17395967,3.18356834,3.17091714
78.994267,3.46410162,3.18656234,0.526819968,3.17387204,3.18352682,3.17082437
79.004758,3.31662479,3.18652604,0.360692037,3.17378423,3.18348543,3.1707314
79.01525,3.74165739,3.1864899,0.74509562,3.17369622,3.18344418,3.17063821
79.025742,3.16227766,3.18645392,-0.155487178,3.17360803,3.18340307,3.17054481
79.036233,2.82842712,3.18641811,-0.598323476,3.17351965,3.18336211,3.17045122
79.046725,2.82842712,3.18638245,-0.59829368,3.17343107,3.18332128,3.1703574
79.057216,3.46410162,3.18634697,0.527024332,3.17334232,3.18328061,3.17026338
79.067708,3.16227766,3.18631165,-0.155029009,3.17325336,3.18324009,3.17016915
79.0782,3.16227766,3.18627651,-0.154915634,3.17316422,3.18319972,3.1700747
79.088691,2.44948974,3.18624156,-0.85834248,3.1730749,3.18315952,3.16998006
79.099183,3.60555128,3.18620678,0.647568143,3.17298538,3.18311947,3.1698852
79.109674,2.64575131,3.18617218,-0.735133234,3.17289568,3.18307959,3.16979013
79.120166,3.46410162,3.18613778,0.52722276,3.17280578,3.18303988,3.16969485
79.130658,2.82842712,3.18610356,-0.598060562,3.17271569,3.18300034,3.16959936
79.141149,4.35889894,3.18606954,1.08297248,3.17262542,3.18296098,3.16950367
79.151641,3.60555128,3.18603572,0.647700202,3.17253495,3.18292179,3.16940776
79.162132,3,3.18600211,-0.431279618,3.17244431,3.18288279,3.16931165
79.172624,3.74165739,3.1859687,0.745445296,3.17235347,3.18284397,3.16921532
79.183116,3,3.1859355,-0.431202384,3.17226244,3.18280535,3.16911878
79.193607,2.82842712,3.18590251,-0.597892453,3.17217122,3.18276691,3.16902204
79.204099,3.16227766,3.18586974,-0.153597135,3.17207982,3.18272868,3.16892508
79.21459,3.74165739,3.18583719,0.745533495,3.17198823,3.18269064,3.16882792
79.225082,3.46410162,3.18580487,0.527538382,3.17189644,3.18265281,3.16873055
79.235574,2.23606798,3.18577278,-0.974527987,3.17180447,3.18261518,3.16863296
79.246065,3.46410162,3.18574092,0.527598994,3.17171232,3.18257777,3.16853517
79.256557,3.46410162,3.18570929,0.527628963,3.17161997,3.18254058,3.16843717
79.267048,3.31662479,3.18567791,0.361865829,3.17152744,3.1825036,3.16833896
79.27754,3.16227766,3.18564677,-0.152869599,3.17143472,3.18246685,3.16824053
79.288032,2.82842712,3.18561589,-0.59765271,3.17134181,3.18243033,3.1681419
79.298523,3.46410162,3.18558525,0.527746493,3.17124872,3.18239404,3.16804306
79.309015,4.24264069,3.18555488,1.02814678,3.17115543,3.18235798,3.16794401
79.319506,3.16227766,3.18552477,-0.152470018,3.17106197,3.18232217,3.16784475
79.329998,3,3.18549492,-0.430691211,3.1709683,3.1822866,3.16774528
79.34049,3,3.18546534,-0.430656873,3.17087445,3.18225128,3.16764559
79.350981,3.74165739,3.18543604,0.745802482,3.17078043,3.18221622,3.16754571
79.361473,3.46410162,3.18540702,0.527915326,3.1706862,3.18218141,3.1674456
79.371964,2.82842712,3.18537829,-0.597453903,3.1705918,3.18214687,3.1673453
79.382456,3.31662479,3.18534984,0.362318846,3.17049721,3.18211259,3.16724477
79.392948,3,3.18532169,-0.43049006,3.17040242,3.18207859,3.16714404
79.403439,3.74165739,3.18529384,0.745897812,3.17030746,3.18204486,3.16704311
79.413931,3.16227766,3.18526629,-0.151620022,3.17021231,3.18201141,3.16694195
79.424422,3.16227766,3.18523905,-0.151530169,3.17011697,3.18197825,3.1668406
79.434914,4,3.18521212,0.902656012,3.17002144,3.18194538,3.16673903
79.445406,4,3.18518552,0.902670751,3.16992573,3.1819128,3.16663725
79.455897,3.46410162,3.18515923,0.528149963,3.16982984,3.18188053,3.16653526
79.466389,3.16227766,3.18513327,-0.151180734,3.16973375,3.18184856,3.16643306
79.47688,4,3.18510765,0.902713878,3.16963749,3.1818169,3.16633066
79.487372,3.16227766,3.18508237,-0.151012282,3.16954103,3.18178556,3.16622804
79.497864,3.16227766,3.18505743,-0.150929684,3.16944438,3.18175454,3.1661252
79.508355,3.31662479,3.18503284,0.362756045,3.16934756,3.18172385,3.16602217
79.518847,3.60555128,3.18500861,0.648492612,3.16925055,3.18169348,3.16591892
79.529338,2.44948974,3.18498474,-0.857610047,3.16915336,3.18166346,3.16581547
79.53983,3.16227766,3.18496123,-0.150610649,3.16905597,3.18163377,3.1657118
79.550322,4.24264069,3.18493809,1.02844669,3.1689584,3.18160444,3.16560792
79.560813,3.16227766,3.18491534,-0.15045822,3.16886066,3.18157546,3.16550384
79.571305,2.64575131,3.18489296,-0.734262658,3.16876272,3.18154684,3.16539954
79.581796,3.60555128,3.18487098,0.648598718,3.16866461,3.18151858,3.16529504
79.592288,2.82842712,3.18484939,-0.597011109,3.1685663,3.18149069,3.16519033
79.60278,2.44948974,3.1848282,-0.85751878,3.16846781,3.18146319,3.1650854
79.613271,3.46410162,3.18480742,0.528482916,3.16836914,3.18143606,3.16498027
79.623763,2.23606798,3.18478706,-0.974022113,3.16827028,3.18140932,3.16487492
79.634254,3,3.18476711,-0.429845449,3.16817125,3.18138298,3.16476938
79.644746,4.12310563,3.18474759,0.968688824,3.16807202,3.18135704,3.16466361
79.655238,3.74165739,3.1847285,0.746276682,3.16797261,3.18133151,3.16455764
79.665729,3.31662479,3.18470985,0.36320096,3.16787303,3.18130639,3.16445146
79.676221,3.74165739,3.18469165,0.746301371,3.16777325,3.1812817,3.16434507
79.686712,2.64575131,3.1846739,-0.734113472,3.1676733,3.18125743,3.16423847
79.697204,3,3.18465661,-0.429716894,3.16757316,3.18123359,3.16413166
79.707696,3.16227766,3.18463978,-0.149539705,3.16747284,3.18121019,3.16402464
79.718187,3.16227766,3.18462343,-0.149485024,3.16737234,3.18118725,3.16391742
79.728679,3.16227766,3.18460756,-0.149431923,3.16727165,3.18116475,3.16380998
79.73917,2.44948974,3.18459218,-0.857381148,3.16717079,3.18114272,3.16370234
79.749662,4,3.18457728,0.903007594,3.16706974,3.18112115,3.16359448
79.760154,4.12310563,3.1845629,0.968784151,3.16696851,3.18110006,3.16348642
79.770645,2.64575131,3.18454902,-0.734028409,3.1668671,3.18107946,3.16337815
79.781137,3.31662479,3.18453565,0.363440695,3.1667655,3.18105934,3.16326966
79.791628,3,3.18452281,-0.429561187,3.16666374,3.18103972,3.16316098
79.80212,3,3.18451051,-0.42954686,3.16656178,3.18102061,3.16305208
79.812612,3.31662479,3.18449874,0.363491476,3.16645964,3.18100201,3.16294297
79.823103,3.31662479,3.18448752,0.363506909,3.16635733,3.18098393,3.16283366
79.833595,3,3.18447685,-0.429507686,3.16625483,3.18096638,3.16272413
79.844086,2.82842712,3.18446675,-0.596690562,3.16615216,3.18094937,3.1626144
79.854578,3.74165739,3.18445722,0.746458415,3.16604929,3.18093289,3.16250445
79.86507,3.16227766,3.18444827,-0.148897993,3.16594625,3.18091698,3.1623943
79.875561,2.23606798,3.18443991,-0.973843897,3.16584304,3.18090162,3.16228395
79.886053,3.87298335,3.18443215,0.829789851,3.16573965,3.18088684,3.16217337
79.896544,2.23606798,3.18442499,-0.973836236,3.16563608,3.18087263,3.16206261
79.907036,3.16227766,3.18441845,-0.148797813,3.16553232,3.18085901,3.16195162
79.917528,3.46410162,3.18441253,0.528856393,3.16542838,3.18084598,3.16184042
79.928019,4.24264069,3.18440724,1.02870474,3.16532428,3.18083356,3.16172903
79.938511,3,3.1844026,-0.429421238,3.16521999,3.18082175,3.16161741
79.949002,3.16227766,3.18439861,-0.148731123,3.16511553,3.18081057,3.1615056
79.959494,3.31662479,3.18439527,0.363633766,3.16501088,3.18080002,3.16139357
79.969986,3.60555128,3.18439261,0.648967383,3.16490605,3.1807901,3.16128134
79.980477,3,3.18439063,-0.4294073,3.16480106,3.18078084,3.1611689
79.990969,2.82842712,3.18438934,-0.596625688,3.16469588,3.18077224,3.16105625
80.00146,3.31662479,3.18438874,0.363642748,3.16459053,3.18076432,3.1609434
80.011952,2.44948974,3.18438886,-0.857262571,3.164485,3.18075707,3.16083034
80.022444,3.74165739,3.18438969,0.746503645,3.16437929,3.18075051,3.16071706
80.032935,3.31662479,3.18439126,0.363639285,3.16427341,3.18074465,3.16060359
80.043427,3.16227766,3.18439357,-0.148714182,3.16416734,3.18073951,3.1604899
80.053918,4,3.18439663,0.90310762,3.16406112,3.18073508,3.16037601
80.06441,3.16227766,3.18440045,-0.148737309,3.1639547,3.18073139,3.16026191
80.074902,3,3.18440504,-0.429424081,3.16384811,3.18072844,3.1601476
80.085393,3.60555128,3.18441042,0.648953662,3.16374136,3.18072625,3.16003309
80.095885,3.74165739,3.18441659,0.746485628,3.16363442,3.18072482,3.15991836
80.106376,3.31662479,3.18442358,0.36359485,3.16352731,3.18072417,3.15980344
80.116868,3,3.18443138,-0.429454742,3.16342003,3.1807243,3.1596883
80.12736,4.47213595,3.18444001,1.13476691,3.16331256,3.18072524,3.15957296
80.137851,3.31662479,3.18444948,0.363559226,3.16320494,3.18072699,3.15945741
80.148343,3,3.18445981,-0.429487843,3.16309713,3.18072956,3.15934165
80.158834,2.82842712,3.184471,-0.596694123,3.16298916,3.18073296,3.1592257
80.169326,3,3.18448308,-0.429514931,3.162881,3.18073722,3.15910953
80.179818,4.12310563,3.18449604,0.968818653,3.16277267,3.18074233,3.15899315
80.190309,3.46410162,3.18450991,0.528764316,3.16266418,3.18074832,3.15887658
80.200801,3.87298335,3.1845247,0.82973408,3.16255551,3.1807552,3.15875978
80.211292,3.87298335,3.18454042,0.829724607,3.16244667,3.18076297,3.1586428
80.221784,3.60555128,3.18455709,0.648840649,3.16233766,3.18077166,3.1585256
80.232276,3.31662479,3.18457471,0.363386955,3.16222847,3.18078127,3.15840819
80.242767,3.16227766,3.18459331,-0.14938422,3.16211912,3.18079182,3.15829058
80.253259,3.60555128,3.18461289,0.648797648,3.16200959,3.18080333,3.15817276
80.26375,3.31662479,3.18463347,0.3633061,3.1618999,3.1808158,3.15805475
80.274242,3.16227766,3.18465506,-0.149590791,3.16179003,3.18082926,3.15793652
80.284734,3,3.18467769,-0.429741424,3.16167999,3.18084371,3.15781808
80.295225,3.60555128,3.18470136,0.648729462,3.16156979,3.18085917,3.15769945
80.305717,3.46410162,3.18472609,0.528559858,3.16145941,3.18087566,3.15758061
80.316208,3.31662479,3.18475189,0.363143079,3.16134887,3.18089319,3.15746157
80.3267,2.44948974,3.18477879,-0.857489969,3.16123816,3.18091178,3.15734231
80.337192,2.82842712,3.18480679,-0.596975433,3.16112727,3.18093144,3.15722285
80.347683,3.31662479,3.18483591,0.363027377,3.16101623,3.18095218,3.1571032
80.358175,3.74165739,3.18486618,0.746184434,3.16090501,3.18097404,3.15698333
80.368666,3,3.18489759,-0.4299972,3.16079363,3.18099701,3.15686326
80.379158,3.31662479,3.18493018,0.362897517,3.16068208,3.18102112,3.15674299
80.38965,3.31662479,3.18496396,0.362850973,3.16057035,3.18104638,3.1566225
80.400141,3.31662479,3.18499894,0.362802765,3.16045847,3.18107282,3.15650183
80.410633,3.74165739,3.18503515,0.746071198,3.16034642,3.18110045,3.15638094
80.421124,2.82842712,3.1850726,-0.597198022,3.16023421,3.18112928,3.15625985
80.431616,4,3.18511131,0.902711851,3.16012182,3.18115933,3.15613855
80.442108,3.31662479,3.1851513,0.362592728,3.16000927,3.18119064,3.15601705
80.452599,2.82842712,3.18519259,-0.59729847,3.15989657,3.18122319,3.15589536
80.463091,3.46410162,3.18523519,0.528078048,3.15978368,3.18125704,3.15577345
80.473582,4,3.18527913,0.902618898,3.15967065,3.18129218,3.15565135
80.484074,3,3.18532442,-0.430493229,3.15955744,3.18132864,3.15552903
80.494566,3,3.18537109,-0.43054743,3.15944407,3.18136644,3.15540651
80.505057,2.64575131,3.18541915,-0.734620881,3.15933054,3.1814056,3.15528381
80.515549,4.12310563,3.18546863,0.968316578,3.15921685,3.18144613,3.15516088
80.52604,3.16227766,3.18551954,-0.152452891,3.159103,3.18148807,3.15503777
80.536532,3,3.18557192,-0.430780595,3.15898897,3.18153143,3.15491444
80.547024,2.64575131,3.18562578,-0.734761503,3.15887479,3.18157623,3.15479091
80.557515,3.31662479,3.18568113,0.361861383,3.15876045,3.1816225,3.15466719
80.568007,4.12310563,3.18573801,0.96817747,3.15864595,3.18167025,3.15454325
80.578498,4,3.18579644,0.902332291,3.15853129,3.18171951,3.15441912
80.58899,2.82842712,3.18585643,-0.59785392,3.15841646,3.1817703,3.15429479
80.599482,2.82842712,3.18591803,-0.59790543,3.15830147,3.18182266,3.15417025
80.609973,3.31662479,3.18598123,0.361446482,3.15818634,3.18187658,3.15404552
80.620465,4.47213595,3.18604608,1.13405903,3.15807103,3.18193211,3.15392057
80.630956,4,3.18611259,0.902157085,3.15795558,3.18198927,3.15379544
80.641448,3.46410162,3.1861808,0.527181955,3.15783995,3.18204808,3.15367009
80.65194,3.74165739,3.18625073,0.745256104,3.15772417,3.18210857,3.15354455
80.662431,3.74165739,3.18632239,0.745208024,3.15760824,3.18217076,3.15341881
80.672923,4.24264069,3.18639582,1.02773774,3.15749215,3.18223468,3.15329286
80.683414,2.82842712,3.18647105,-0.598367717,3.15737591,3.18230035,3.15316673
80.693906,4.58257569,3.1865481,1.18153612,3.1572595,3.18236782,3.15304038
80.704398,3,3.18662701,-0.432003483,3.15714293,3.18243709,3.15291383
80.714889,2,3.18670779,-1.08936118,3.15702622,3.18250819,3.15278709
80.725381,4.12310563,3.18679048,0.967633788,3.15690935,3.18258117,3.15266015
80.735872,3.87298335,3.1868751,0.828316515,3.15679233,3.18265604,3.15253301
80.746364,4.24264069,3.18696169,1.02746241,3.15667514,3.18273284,3.15240566
80.756856,3.31662479,3.18705028,0.359964594,3.1565578,3.1828116,3.15227811
80.767347,3.74165739,3.18714089,0.744658644,3.15644032,3.18289233,3.15215038
80.777839,3.31662479,3.18723357,0.359709916,3.15632267,3.18297509,3.15202243
80.78833,2.82842712,3.18732832,-0.599083632,3.15620489,3.18305989,3.1518943
80.798822,4,3.18742521,0.901429303,3.15608694,3.18314678,3.15176596
80.809314,3.46410162,3.18752425,0.525906228,3.15596883,3.18323578,3.15163742
80.819805,3.16227766,3.18762548,-0.159209978,3.15585059,3.18332692,3.15150869
80.830297,2.64575131,3.18772893,-0.736191294,3.15573219,3.18342024,3.15137975
80.840788,3,3.18783463,-0.433398932,3.15561364,3.18351578,3.15125063
80.85128,3,3.18794264,-0.433523517,3.15549494,3.18361357,3.15112129
80.861772,3.16227766,3.18805297,-0.160546921,3.15537608,3.18371365,3.15099176
80.872263,3.60555128,3.18816566,0.646053878,3.15525709,3.18381605,3.15086204
80.882755,2.82842712,3.18828076,-0.599878021,3.15513794,3.18392081,3.15073212
80.893246,2.44948974,3.1883983,-0.859597902,3.15501865,3.18402796,3.15060201
80.903738,3.87298335,3.18851832,0.827324016,3.1548992,3.18413755,3.15047168
80.91423,3.46410162,3.18864086,0.524843555,3.1547796,3.18424962,3.15034117
80.924721,2.82842712,3.18876595,-0.600282284,3.15465987,3.1843642,3.15021046
80.935213,3.74165739,3.18889364,0.743480829,3.15453998,3.18448133,3.15007955
80.945704,2.44948974,3.18902397,-0.859961759,3.15441996,3.18460106,3.14994846
80.956196,3.31662479,3.18915699,0.357026326,3.15429978,3.18472343,3.14981715
80.966688,4.58257569,3.18929274,1.18037407,3.15417945,3.18484849,3.14968565
80.977179,4.12310563,3.18943125,0.966268274,3.15405899,3.18497626,3.14955397
80.987671,4.47213595,3.18957258,1.13250314,3.15393838,3.18510681,3.14942208
80.998162,3.46410162,3.18971676,0.523817575,3.15381763,3.18524017,3.14929001
81.008654,3.16227766,3.18986386,-0.166090952,3.15369673,3.18537639,3.14915772
81.019146,3.46410162,3.19001392,0.523533852,3.15357569,3.18551553,3.14902525
81.029637,2.23606798,3.19016697,-0.976779907,3.15345451,3.18565761,3.14889259
81.040129,3,3.19032308,-0.43626033,3.15333319,3.18580271,3.14875972
81.05062,3.46410162,3.19048227,0.523086362,3.15321173,3.18595085,3.14862667
81.061112,3.16227766,3.19064464,-0.168424992,3.15309013,3.18610211,3.14849342
81.071604,3.87298335,3.19081021,0.825937732,3.15296838,3.18625653,3.14835997
81.082095,3.46410162,3.19097902,0.522611323,3.1528465,3.18641415,3.14822634
81.092587,3.31662479,3.19115116,0.35422257,3.15272448,3.18657504,3.1480925
81.103078,4,3.19132665,0.899262669,3.15260232,3.18673924,3.14795848
81.11357,3.31662479,3.19150558,0.353721934,3.15248002,3.18690683,3.14782426
81.124062,3.16227766,3.191688,-0.171494419,3.15235758,3.18707786,3.14768984
81.134553,3.60555128,3.19187393,0.643177538,3.15223502,3.18725236,3.14755525
81.145045,4.35889894,3.19206348,1.08020158,3.15211231,3.18743042,3.14742044
81.155536,3.46410162,3.19225667,0.521387516,3.15198947,3.18761209,3.14728546
81.166028,3.46410162,3.19245361,0.521198628,3.15186649,3.18779744,3.14715027
81.17652,2.44948974,3.19265432,-0.86206994,3.15174337,3.18798653,3.14701489
81.187011,4,3.19285887,0.898410334,3.15162013,3.1881794,3.14687933
81.197503,3,3.19306736,-0.439394306,3.15149675,3.18837615,3.14674357
81.207994,2.64575131,3.1932798,-0.739951682,3.15137324,3.18857683,3.14660763
81.218486,3.46410162,3.19349632,0.52019736,3.15124959,3.18878152,3.14647148
81.228978,2.82842712,3.19371696,-0.604392122,3.15112581,3.18899028,3.14633515
81.239469,3.74165739,3.19394177,0.740078112,3.15100191,3.18920317,3.14619863
81.249961,3.31662479,3.19417087,0.349934159,3.15087787,3.1894203,3.14606191
81.260452,4.12310563,3.19440429,0.963691513,3.1507537,3.18964169,3.14592502
81.270944,3.74165739,3.19464215,0.739604784,3.1506294,3.18986747,3.14578792
81.281436,2.82842712,3.1948845,-0.605357232,3.15050497,3.19009769,3.14565063
81.291927,1.73205081,3.19513141,-1.20957869,3.15038042,3.19033242,3.14551316
81.302419,3.74165739,3.19538299,0.739103782,3.15025574,3.19057177,3.14537549
81.31291,3.60555128,3.19563928,0.640243701,3.15013093,3.19081579,3.14523765
81.323402,2.82842712,3.19590042,-0.606195756,3.15000599,3.19106459,3.1450996
81.333894,3.46410162,3.19616647,0.517624525,3.14988093,3.19131826,3.14496137
81.344385,4.12310563,3.19643748,0.962636038,3.14975575,3.19157684,3.14482296
81.354877,3.16227766,3.19671361,-0.185569271,3.14963043,3.19184049,3.14468434
81.365368,2.82842712,3.1969949,-0.607097827,3.149505,3.19210923,3.14454555
81.37586,3.16227766,3.19728148,-0.187093067,3.14937944,3.19238322,3.14440656
81.386352,3,3.19757342,-0.444492322,3.14925376,3.19266252,3.14426739
81.396843,3.46410162,3.19787081,0.515975585,3.14912796,3.19294721,3.14412804
81.407335,4.12310563,3.19817379,0.961733764,3.14900203,3.19323745,3.14398848
81.417826,3,3.19848241,-0.445513651,3.14887599,3.19353327,3.14384876
81.428318,3.60555128,3.19879684,0.63777303,3.14874983,3.19383484,3.14370883
81.43881,3,3.19911714,-0.446225439,3.14862354,3.19414223,3.14356872
81.449301,3.46410162,3.19944341,0.514449422,3.14849714,3.19445554,3.14342843
81.459793,3.16227766,3.19977581,-0.19364438,3.14837062,3.19477492,3.14328795
81.470284,3.74165739,3.20011439,0.73589605,3.14824399,3.19510044,3.14314729
81.480776,3.46410162,3.20045934,0.513461075,3.14811723,3.19543226,3.14300643
81.491268,3.46410162,3.20081074,0.513118769,3.14799035,3.19577049,3.14286539
81.501759,3,3.20116869,-0.44851833,3.14786337,3.19611521,3.14272418
81.512251,4,3.20153338,0.893569597,3.14773627,3.19646661,3.14258276
81.522742,2.44948974,3.20190486,-0.867418649,3.14760906,3.19682475,3.14244118
81.533234,3.31662479,3.20228333,0.338144138,3.14748173,3.19718983,3.1422994
81.543726,2.82842712,3.20266891,-0.611753039,3.14735428,3.19756195,3.14215743
[truncated: 424,137 more chars]
