# Supplementary material for: Phase Stability of Iron Nitride Fe4N at High Pressure—Pressure-Dependent Evolution of Phase Equilibria in the Fe–N System
Source: Materials (Basel). 2021 Jul 15;14(14):3963. doi: 10.3390/ma14143963 (PMC8307547; doi:10.3390/ma14143963)
Supplement: Supplementary file 1 [file materials-14-03963-s001.zip › xrd_data/2-550a_riet.txt]

'y-axis saved as Sqrt(y)
'x,Yobs,Ycalc,Diff,epsilon,gamma,Bkg
20,9.05538514,0,0,0,0,0
20.010492,8,0,0,0,0,0
20.020983,8.60232527,0,0,0,0,0
20.031475,8.24621125,0,0,0,0,0
20.041966,7.41619849,0,0,0,0,0
20.052458,7.68114575,0,0,0,0,0
20.06295,8.06225775,0,0,0,0,0
20.073441,7.41619849,0,0,0,0,0
20.083933,7.68114575,0,0,0,0,0
20.094424,6.78232998,0,0,0,0,0
20.104916,8,0,0,0,0,0
20.115408,7.07106781,0,0,0,0,0
20.125899,7.54983444,0,0,0,0,0
20.136391,7.48331477,0,0,0,0,0
20.146882,7.48331477,0,0,0,0,0
20.157374,7.21110255,0,0,0,0,0
20.167866,7,0,0,0,0,0
20.178357,8.54400375,0,0,0,0,0
20.188849,7.34846923,0,0,0,0,0
20.19934,7.34846923,0,0,0,0,0
20.209832,6.78232998,0,0,0,0,0
20.220324,7.61577311,0,0,0,0,0
20.230815,6.92820323,0,0,0,0,0
20.241307,8.48528137,0,0,0,0,0
20.251798,7.28010989,0,0,0,0,0
20.26229,7.61577311,0,0,0,0,0
20.272782,7.41619849,0,0,0,0,0
20.283273,7.61577311,0,0,0,0,0
20.293765,6.92820323,0,0,0,0,0
20.304256,7.28010989,0,0,0,0,0
20.314748,8.18535277,0,0,0,0,0
20.32524,7.93725393,0,0,0,0,0
20.335731,6.63324958,0,0,0,0,0
20.346223,7.81024968,0,0,0,0,0
20.356714,7.68114575,0,0,0,0,0
20.367206,8.48528137,0,0,0,0,0
20.377698,7.93725393,0,0,0,0,0
20.388189,7.34846923,0,0,0,0,0
20.398681,8.54400375,0,0,0,0,0
20.409172,8.30662386,0,0,0,0,0
20.419664,7.41619849,0,0,0,0,0
20.430156,7.68114575,0,0,0,0,0
20.440647,7.87400787,0,0,0,0,0
20.451139,7.54983444,0,0,0,0,0
20.46163,7.93725393,0,0,0,0,0
20.472122,7.81024968,0,0,0,0,0
20.482614,7.68114575,0,0,0,0,0
20.493105,7.61577311,0,0,0,0,0
20.503597,7.54983444,0,0,0,0,0
20.514088,7.61577311,0,0,0,0,0
20.52458,7.74596669,0,0,0,0,0
20.535072,7.48331477,0,0,0,0,0
20.545563,7.87400787,0,0,0,0,0
20.556055,7.28010989,0,0,0,0,0
20.566546,8.1240384,0,0,0,0,0
20.577038,7.07106781,0,0,0,0,0
20.58753,8.06225775,0,0,0,0,0
20.598021,8.06225775,0,0,0,0,0
20.608513,7.87400787,0,0,0,0,0
20.619004,7.34846923,0,0,0,0,0
20.629496,7.74596669,0,0,0,0,0
20.639988,6.78232998,0,0,0,0,0
20.650479,7.68114575,0,0,0,0,0
20.660971,6.92820323,0,0,0,0,0
20.671462,7.28010989,0,0,0,0,0
20.681954,7.74596669,0,0,0,0,0
20.692446,7.28010989,0,0,0,0,0
20.702937,6.92820323,0,0,0,0,0
20.713429,7.68114575,0,0,0,0,0
20.72392,8.48528137,0,0,0,0,0
20.734412,7.81024968,0,0,0,0,0
20.744904,7.81024968,0,0,0,0,0
20.755395,7.41619849,0,0,0,0,0
20.765887,7.07106781,0,0,0,0,0
20.776378,7.34846923,0,0,0,0,0
20.78687,8,0,0,0,0,0
20.797362,7.74596669,0,0,0,0,0
20.807853,8.60232527,0,0,0,0,0
20.818345,7.87400787,0,0,0,0,0
20.828836,7.87400787,0,0,0,0,0
20.839328,7.14142843,0,0,0,0,0
20.84982,8,0,0,0,0,0
20.860311,7.14142843,0,0,0,0,0
20.870803,7.14142843,0,0,0,0,0
20.881294,7.41619849,0,0,0,0,0
20.891786,7.48331477,0,0,0,0,0
20.902278,7.87400787,0,0,0,0,0
20.912769,7.07106781,0,0,0,0,0
20.923261,7.61577311,0,0,0,0,0
20.933752,8.18535277,0,0,0,0,0
20.944244,7.41619849,0,0,0,0,0
20.954736,7.21110255,0,0,0,0,0
20.965227,7.74596669,0,0,0,0,0
20.975719,7.48331477,0,0,0,0,0
20.98621,7.81024968,0,0,0,0,0
20.996702,7.93725393,0,0,0,0,0
21.007194,7.87400787,0,0,0,0,0
21.017685,8,0,0,0,0,0
21.028177,7.34846923,0,0,0,0,0
21.038668,7.74596669,0,0,0,0,0
21.04916,7.21110255,0,0,0,0,0
21.059652,7.48331477,0,0,0,0,0
21.070143,8.42614977,0,0,0,0,0
21.080635,7.93725393,0,0,0,0,0
21.091126,7.54983444,0,0,0,0,0
21.101618,7.93725393,0,0,0,0,0
21.11211,7.74596669,0,0,0,0,0
21.122601,7.07106781,0,0,0,0,0
21.133093,8,0,0,0,0,0
21.143584,8.24621125,0,0,0,0,0
21.154076,6.92820323,0,0,0,0,0
21.164568,8.1240384,0,0,0,0,0
21.175059,6.8556546,0,0,0,0,0
21.185551,7.07106781,0,0,0,0,0
21.196042,7.54983444,0,0,0,0,0
21.206534,7.14142843,0,0,0,0,0
21.217026,7.61577311,0,0,0,0,0
21.227517,7.54983444,0,0,0,0,0
21.238009,6.244998,0,0,0,0,0
21.2485,7.41619849,0,0,0,0,0
21.258992,7.93725393,0,0,0,0,0
21.269484,6.92820323,0,0,0,0,0
21.279975,7.81024968,0,0,0,0,0
21.290467,7.87400787,0,0,0,0,0
21.300958,7.28010989,0,0,0,0,0
21.31145,7.21110255,0,0,0,0,0
21.321942,7.28010989,0,0,0,0,0
21.332433,7,0,0,0,0,0
21.342925,6.92820323,0,0,0,0,0
21.353416,7.81024968,0,0,0,0,0
21.363908,7.28010989,0,0,0,0,0
21.3744,7.74596669,0,0,0,0,0
21.384891,6.92820323,0,0,0,0,0
21.395383,7.74596669,0,0,0,0,0
21.405874,7.68114575,0,0,0,0,0
21.416366,7.14142843,0,0,0,0,0
21.426858,7.21110255,0,0,0,0,0
21.437349,7.81024968,0,0,0,0,0
21.447841,6.70820393,0,0,0,0,0
21.458332,7.74596669,0,0,0,0,0
21.468824,7.41619849,0,0,0,0,0
21.479316,7.81024968,0,0,0,0,0
21.489807,7.48331477,0,0,0,0,0
21.500299,7.41619849,0,0,0,0,0
21.51079,7,0,0,0,0,0
21.521282,6.78232998,0,0,0,0,0
21.531774,7.54983444,0,0,0,0,0
21.542265,7.61577311,0,0,0,0,0
21.552757,8.18535277,0,0,0,0,0
21.563248,7.61577311,0,0,0,0,0
21.57374,7.74596669,0,0,0,0,0
21.584232,8.18535277,0,0,0,0,0
21.594723,7.21110255,0,0,0,0,0
21.605215,7.34846923,0,0,0,0,0
21.615706,7.34846923,0,0,0,0,0
21.626198,7.81024968,0,0,0,0,0
21.63669,7.41619849,0,0,0,0,0
21.647181,7,0,0,0,0,0
21.657673,8.36660027,0,0,0,0,0
21.668164,7.34846923,0,0,0,0,0
21.678656,7.48331477,0,0,0,0,0
21.689148,7.21110255,0,0,0,0,0
21.699639,7.61577311,0,0,0,0,0
21.710131,7.34846923,0,0,0,0,0
21.720622,7.34846923,0,0,0,0,0
21.731114,7.21110255,0,0,0,0,0
21.741606,7.87400787,0,0,0,0,0
21.752097,7.48331477,0,0,0,0,0
21.762589,7.28010989,0,0,0,0,0
21.77308,7.61577311,0,0,0,0,0
21.783572,7.14142843,0,0,0,0,0
21.794064,6.78232998,0,0,0,0,0
21.804555,7.61577311,0,0,0,0,0
21.815047,7.28010989,0,0,0,0,0
21.825538,7.14142843,0,0,0,0,0
21.83603,7.81024968,0,0,0,0,0
21.846522,6.8556546,0,0,0,0,0
21.857013,7.61577311,0,0,0,0,0
21.867505,6.78232998,0,0,0,0,0
21.877996,7.14142843,0,0,0,0,0
21.888488,8.18535277,0,0,0,0,0
21.89898,7.87400787,0,0,0,0,0
21.909471,7.14142843,0,0,0,0,0
21.919963,6.70820393,0,0,0,0,0
21.930454,6.40312424,0,0,0,0,0
21.940946,6.244998,0,0,0,0,0
21.951438,7.28010989,0,0,0,0,0
21.961929,7.21110255,0,0,0,0,0
21.972421,8.71779789,0,0,0,0,0
21.982912,7.81024968,0,0,0,0,0
21.993404,7,0,0,0,0,0
22.003896,7.54983444,0,0,0,0,0
22.014387,6.8556546,0,0,0,0,0
22.024879,6.164414,0,0,0,0,0
22.03537,7.14142843,0,0,0,0,0
22.045862,6.70820393,0,0,0,0,0
22.056354,6.63324958,0,0,0,0,0
22.066845,7.81024968,0,0,0,0,0
22.077337,7.68114575,0,0,0,0,0
22.087828,6.40312424,0,0,0,0,0
22.09832,6.08276253,0,0,0,0,0
22.108812,7.21110255,0,0,0,0,0
22.119303,7.07106781,0,0,0,0,0
22.129795,7.54983444,0,0,0,0,0
22.140286,7.21110255,0,0,0,0,0
22.150778,7.54983444,0,0,0,0,0
22.16127,7.21110255,0,0,0,0,0
22.171761,7.41619849,0,0,0,0,0
22.182253,7.61577311,0,0,0,0,0
22.192744,8.18535277,0,0,0,0,0
22.203236,7.07106781,0,0,0,0,0
22.213728,7.28010989,0,0,0,0,0
22.224219,6.92820323,0,0,0,0,0
22.234711,7.81024968,0,0,0,0,0
22.245202,7.34846923,0,0,0,0,0
22.255694,6.4807407,0,0,0,0,0
22.266186,8.06225775,0,0,0,0,0
22.276677,7.21110255,0,0,0,0,0
22.287169,6.78232998,0,0,0,0,0
22.29766,6.92820323,0,0,0,0,0
22.308152,7.74596669,0,0,0,0,0
22.318644,7.54983444,0,0,0,0,0
22.329135,7.07106781,0,0,0,0,0
22.339627,7.87400787,0,0,0,0,0
22.350118,6,0,0,0,0,0
22.36061,6.92820323,0,0,0,0,0
22.371102,8.36660027,0,0,0,0,0
22.381593,7.41619849,0,0,0,0,0
22.392085,6.92820323,0,0,0,0,0
22.402576,6.63324958,0,0,0,0,0
22.413068,6.70820393,0,0,0,0,0
22.42356,7.28010989,0,0,0,0,0
22.434051,7.41619849,0,0,0,0,0
22.444543,7.68114575,0,0,0,0,0
22.455034,7.07106781,0,0,0,0,0
22.465526,6.63324958,0,0,0,0,0
22.476018,7.81024968,0,0,0,0,0
22.486509,7.28010989,0,0,0,0,0
22.497001,6.63324958,0,0,0,0,0
22.507492,7.93725393,0,0,0,0,0
22.517984,7.14142843,0,0,0,0,0
22.528476,6.70820393,0,0,0,0,0
22.538967,7.21110255,0,0,0,0,0
22.549459,7.68114575,0,0,0,0,0
22.55995,6.92820323,0,0,0,0,0
22.570442,6.164414,0,0,0,0,0
22.580934,6.63324958,0,0,0,0,0
22.591425,7.21110255,0,0,0,0,0
22.601917,7.21110255,0,0,0,0,0
22.612408,7.41619849,0,0,0,0,0
22.6229,7.61577311,0,0,0,0,0
22.633392,7.54983444,0,0,0,0,0
22.643883,6.78232998,0,0,0,0,0
22.654375,6.92820323,0,0,0,0,0
22.664866,6.4807407,0,0,0,0,0
22.675358,6.55743852,0,0,0,0,0
22.68585,6.92820323,0,0,0,0,0
22.696341,6.8556546,0,0,0,0,0
22.706833,8.30662386,0,0,0,0,0
22.717324,7.21110255,0,0,0,0,0
22.727816,7.81024968,0,0,0,0,0
22.738308,7.41619849,0,0,0,0,0
22.748799,7.61577311,0,0,0,0,0
22.759291,7.48331477,0,0,0,0,0
22.769782,7.28010989,0,0,0,0,0
22.780274,6.63324958,0,0,0,0,0
22.790766,7.07106781,0,0,0,0,0
22.801257,6.08276253,0,0,0,0,0
22.811749,7.21110255,0,0,0,0,0
22.82224,7.81024968,0,0,0,0,0
22.832732,6,0,0,0,0,0
22.843224,6.244998,0,0,0,0,0
22.853715,6.55743852,0,0,0,0,0
22.864207,7.28010989,0,0,0,0,0
22.874698,6.8556546,0,0,0,0,0
22.88519,6.40312424,0,0,0,0,0
22.895682,6,0,0,0,0,0
22.906173,6.8556546,0,0,0,0,0
22.916665,5.91607978,0,0,0,0,0
22.927156,8,0,0,0,0,0
22.937648,7,0,0,0,0,0
22.94814,7.07106781,0,0,0,0,0
22.958631,6.55743852,0,0,0,0,0
22.969123,6.63324958,0,0,0,0,0
22.979614,6.4807407,0,0,0,0,0
22.990106,5.74456265,0,0,0,0,0
23.000598,6.4807407,0,0,0,0,0
23.011089,7.54983444,0,0,0,0,0
23.021581,7,0,0,0,0,0
23.032072,6.8556546,0,0,0,0,0
23.042564,7.14142843,0,0,0,0,0
23.053056,7,0,0,0,0,0
23.063547,6.08276253,0,0,0,0,0
23.074039,6.32455532,0,0,0,0,0
23.08453,7.34846923,0,0,0,0,0
23.095022,6.8556546,0,0,0,0,0
23.105514,6.63324958,0,0,0,0,0
23.116005,5.47722558,0,0,0,0,0
23.126497,7.14142843,0,0,0,0,0
23.136988,7.28010989,0,0,0,0,0
23.14748,6.70820393,0,0,0,0,0
23.157972,7.48331477,0,0,0,0,0
23.168463,7.28010989,0,0,0,0,0
23.178955,6.55743852,0,0,0,0,0
23.189446,7.28010989,0,0,0,0,0
23.199938,6.32455532,0,0,0,0,0
23.21043,7.48331477,0,0,0,0,0
23.220921,7.14142843,0,0,0,0,0
23.231413,6.32455532,0,0,0,0,0
23.241904,7.41619849,0,0,0,0,0
23.252396,6.92820323,0,0,0,0,0
23.262888,6.55743852,0,0,0,0,0
23.273379,6.244998,0,0,0,0,0
23.283871,6.244998,0,0,0,0,0
23.294362,7.07106781,0,0,0,0,0
23.304854,7.87400787,0,0,0,0,0
23.315346,7.68114575,0,0,0,0,0
23.325837,6.32455532,0,0,0,0,0
23.336329,7.07106781,0,0,0,0,0
23.34682,6.32455532,0,0,0,0,0
23.357312,6.70820393,0,0,0,0,0
23.367804,7.41619849,0,0,0,0,0
23.378295,7.48331477,0,0,0,0,0
23.388787,7,0,0,0,0,0
23.399278,6.63324958,0,0,0,0,0
23.40977,6,0,0,0,0,0
23.420262,6.55743852,0,0,0,0,0
23.430753,6.63324958,0,0,0,0,0
23.441245,6.92820323,0,0,0,0,0
23.451736,6.244998,0,0,0,0,0
23.462228,7.74596669,0,0,0,0,0
23.47272,6.92820323,0,0,0,0,0
23.483211,5.83095189,0,0,0,0,0
23.493703,6.92820323,0,0,0,0,0
23.504194,6.78232998,0,0,0,0,0
23.514686,6.08276253,0,0,0,0,0
23.525178,6.78232998,0,0,0,0,0
23.535669,6.70820393,0,0,0,0,0
23.546161,7.34846923,0,0,0,0,0
23.556652,6.8556546,0,0,0,0,0
23.567144,6.4807407,0,0,0,0,0
23.577636,7.14142843,0,0,0,0,0
23.588127,6.164414,0,0,0,0,0
23.598619,6.32455532,0,0,0,0,0
23.60911,6.4807407,0,0,0,0,0
23.619602,6.08276253,0,0,0,0,0
23.630094,7.48331477,0,0,0,0,0
23.640585,7.41619849,0,0,0,0,0
23.651077,7.34846923,0,0,0,0,0
23.661568,6.55743852,0,0,0,0,0
23.67206,6.8556546,0,0,0,0,0
23.682552,6.8556546,0,0,0,0,0
23.693043,6.4807407,0,0,0,0,0
23.703535,7,0,0,0,0,0
23.714026,7.41619849,0,0,0,0,0
23.724518,6.92820323,0,0,0,0,0
23.73501,6.8556546,0,0,0,0,0
23.745501,7.54983444,0,0,0,0,0
23.755993,6.63324958,0,0,0,0,0
23.766484,6.78232998,0,0,0,0,0
23.776976,7.14142843,0,0,0,0,0
23.787468,6.32455532,0,0,0,0,0
23.797959,6.32455532,0,0,0,0,0
23.808451,6.244998,0,0,0,0,0
23.818942,7.21110255,0,0,0,0,0
23.829434,6.244998,0,0,0,0,0
23.839926,6.70820393,0,0,0,0,0
23.850417,6,0,0,0,0,0
23.860909,7,0,0,0,0,0
23.8714,7.28010989,0,0,0,0,0
23.881892,5.83095189,0,0,0,0,0
23.892384,7.14142843,0,0,0,0,0
23.902875,6.70820393,0,0,0,0,0
23.913367,6.40312424,0,0,0,0,0
23.923858,6.92820323,0,0,0,0,0
23.93435,8.18535277,0,0,0,0,0
23.944842,6.164414,0,0,0,0,0
23.955333,6.78232998,0,0,0,0,0
23.965825,7.28010989,0,0,0,0,0
23.976316,6.40312424,0,0,0,0,0
23.986808,6.244998,0,0,0,0,0
23.9973,6.63324958,0,0,0,0,0
24.007791,6.32455532,0,0,0,0,0
24.018283,6.70820393,0,0,0,0,0
24.028774,6.63324958,0,0,0,0,0
24.039266,6.164414,0,0,0,0,0
24.049758,6,0,0,0,0,0
24.060249,5.19615242,0,0,0,0,0
24.070741,6.78232998,0,0,0,0,0
24.081232,6.70820393,0,0,0,0,0
24.091724,6.32455532,0,0,0,0,0
24.102216,5.91607978,0,0,0,0,0
24.112707,6.55743852,0,0,0,0,0
24.123199,6.4807407,0,0,0,0,0
24.13369,7.14142843,0,0,0,0,0
24.144182,6.244998,0,0,0,0,0
24.154674,6.32455532,0,0,0,0,0
24.165165,7.28010989,0,0,0,0,0
24.175657,7.48331477,0,0,0,0,0
24.186148,6.70820393,0,0,0,0,0
24.19664,6.78232998,0,0,0,0,0
24.207132,6.92820323,0,0,0,0,0
24.217623,7.61577311,0,0,0,0,0
24.228115,6.92820323,0,0,0,0,0
24.238606,6.244998,0,0,0,0,0
24.249098,6.55743852,0,0,0,0,0
24.25959,7.74596669,0,0,0,0,0
24.270081,7.28010989,0,0,0,0,0
24.280573,6.40312424,0,0,0,0,0
24.291064,6.32455532,0,0,0,0,0
24.301556,6.63324958,0,0,0,0,0
24.312048,6.8556546,0,0,0,0,0
24.322539,6.244998,0,0,0,0,0
24.333031,6.78232998,0,0,0,0,0
24.343522,6.63324958,0,0,0,0,0
24.354014,6.164414,0,0,0,0,0
24.364506,6.78232998,0,0,0,0,0
24.374997,7.54983444,0,0,0,0,0
24.385489,7.14142843,0,0,0,0,0
24.39598,7.07106781,0,0,0,0,0
24.406472,6.55743852,0,0,0,0,0
24.416964,6.244998,0,0,0,0,0
24.427455,7.07106781,0,0,0,0,0
24.437947,6.63324958,0,0,0,0,0
24.448438,6.70820393,0,0,0,0,0
24.45893,6.92820323,0,0,0,0,0
24.469422,6.40312424,0,0,0,0,0
24.479913,6.63324958,0,0,0,0,0
24.490405,5.91607978,0,0,0,0,0
24.500896,7.07106781,0,0,0,0,0
24.511388,6.32455532,0,0,0,0,0
24.52188,6.244998,0,0,0,0,0
24.532371,6.244998,0,0,0,0,0
24.542863,6.164414,0,0,0,0,0
24.553354,7,0,0,0,0,0
24.563846,6.32455532,0,0,0,0,0
24.574338,7.07106781,0,0,0,0,0
24.584829,6.63324958,0,0,0,0,0
24.595321,7,0,0,0,0,0
24.605812,7.14142843,0,0,0,0,0
24.616304,6.78232998,0,0,0,0,0
24.626796,6.63324958,0,0,0,0,0
24.637287,7.41619849,0,0,0,0,0
24.647779,6,0,0,0,0,0
24.65827,7.21110255,0,0,0,0,0
24.668762,6.40312424,0,0,0,0,0
24.679254,7,0,0,0,0,0
24.689745,7.34846923,0,0,0,0,0
24.700237,6.4807407,0,0,0,0,0
24.710728,6.244998,0,0,0,0,0
24.72122,6.4807407,0,0,0,0,0
24.731712,6.40312424,0,0,0,0,0
24.742203,6.8556546,0,0,0,0,0
24.752695,7.21110255,0,0,0,0,0
24.763186,6.8556546,0,0,0,0,0
24.773678,5.65685425,0,0,0,0,0
24.78417,6.92820323,0,0,0,0,0
24.794661,6.92820323,0,0,0,0,0
24.805153,7,0,0,0,0,0
24.815644,7,0,0,0,0,0
24.826136,7,0,0,0,0,0
24.836628,6,0,0,0,0,0
24.847119,6.63324958,0,0,0,0,0
24.857611,7.41619849,0,0,0,0,0
24.868102,6.70820393,0,0,0,0,0
24.878594,7.34846923,0,0,0,0,0
24.889086,7.07106781,0,0,0,0,0
24.899577,7.34846923,0,0,0,0,0
24.910069,6.32455532,0,0,0,0,0
24.92056,6.08276253,0,0,0,0,0
24.931052,6.92820323,0,0,0,0,0
24.941544,6.40312424,0,0,0,0,0
24.952035,6.63324958,0,0,0,0,0
24.962527,6.78232998,0,0,0,0,0
24.973018,6.63324958,0,0,0,0,0
24.98351,6.32455532,0,0,0,0,0
24.994002,6.40312424,0,0,0,0,0
25.004493,6.8556546,0,0,0,0,0
25.014985,6.63324958,0,0,0,0,0
25.025476,6.8556546,0,0,0,0,0
25.035968,7.07106781,0,0,0,0,0
25.04646,6.78232998,0,0,0,0,0
25.056951,6.70820393,0,0,0,0,0
25.067443,6.92820323,0,0,0,0,0
25.077934,6.63324958,0,0,0,0,0
25.088426,6.78232998,0,0,0,0,0
25.098918,6.92820323,0,0,0,0,0
25.109409,6.78232998,0,0,0,0,0
25.119901,6.32455532,0,0,0,0,0
25.130392,6.78232998,0,0,0,0,0
25.140884,6.40312424,0,0,0,0,0
25.151376,6.40312424,0,0,0,0,0
25.161867,6.08276253,0,0,0,0,0
25.172359,7.14142843,0,0,0,0,0
25.18285,7.61577311,0,0,0,0,0
25.193342,6.55743852,0,0,0,0,0
25.203834,7.28010989,0,0,0,0,0
25.214325,6.63324958,0,0,0,0,0
25.224817,6.40312424,0,0,0,0,0
25.235308,6.32455532,0,0,0,0,0
25.2458,7.14142843,0,0,0,0,0
25.256292,6.08276253,0,0,0,0,0
25.266783,7.14142843,0,0,0,0,0
25.277275,7.34846923,0,0,0,0,0
25.287766,6.08276253,0,0,0,0,0
25.298258,7.28010989,0,0,0,0,0
25.30875,6.4807407,0,0,0,0,0
25.319241,7.07106781,0,0,0,0,0
25.329733,6.55743852,0,0,0,0,0
25.340224,6.32455532,0,0,0,0,0
25.350716,6.40312424,0,0,0,0,0
25.361208,6.08276253,0,0,0,0,0
25.371699,6.40312424,0,0,0,0,0
25.382191,6.92820323,0,0,0,0,0
25.392682,6.32455532,0,0,0,0,0
25.403174,6.55743852,0,0,0,0,0
25.413666,6.55743852,0,0,0,0,0
25.424157,5.91607978,0,0,0,0,0
25.434649,6.4807407,0,0,0,0,0
25.44514,6.70820393,0,0,0,0,0
25.455632,5.91607978,0,0,0,0,0
25.466124,6.70820393,0,0,0,0,0
25.476615,6.92820323,0,0,0,0,0
25.487107,5.74456265,0,0,0,0,0
25.497598,5.29150262,0,0,0,0,0
25.50809,6.78232998,0,0,0,0,0
25.518582,6.70820393,0,0,0,0,0
25.529073,5.91607978,0,0,0,0,0
25.539565,5.56776436,0,0,0,0,0
25.550056,6.40312424,0,0,0,0,0
25.560548,6.55743852,0,0,0,0,0
25.57104,6.70820393,0,0,0,0,0
25.581531,5.91607978,0,0,0,0,0
25.592023,7.28010989,0,0,0,0,0
25.602514,6.32455532,0,0,0,0,0
25.613006,6.32455532,0,0,0,0,0
25.623498,6.08276253,0,0,0,0,0
25.633989,5.74456265,0,0,0,0,0
25.644481,6.55743852,0,0,0,0,0
25.654972,7.14142843,0,0,0,0,0
25.665464,6.70820393,0,0,0,0,0
25.675956,7,0,0,0,0,0
25.686447,5.91607978,0,0,0,0,0
25.696939,6.92820323,0,0,0,0,0
25.70743,6,0,0,0,0,0
25.717922,6.32455532,0,0,0,0,0
25.728414,5.65685425,0,0,0,0,0
25.738905,6.55743852,0,0,0,0,0
25.749397,6.92820323,0,0,0,0,0
25.759888,6.4807407,0,0,0,0,0
25.77038,6.32455532,0,0,0,0,0
25.780872,6.32455532,0,0,0,0,0
25.791363,6,0,0,0,0,0
25.801855,7.14142843,0,0,0,0,0
25.812346,7.21110255,0,0,0,0,0
25.822838,6.92820323,0,0,0,0,0
25.83333,5.65685425,0,0,0,0,0
25.843821,6.55743852,0,0,0,0,0
25.854313,5.56776436,0,0,0,0,0
25.864804,6.164414,0,0,0,0,0
25.875296,5.29150262,0,0,0,0,0
25.885788,6.244998,0,0,0,0,0
25.896279,6,0,0,0,0,0
25.906771,6.92820323,0,0,0,0,0
25.917262,5.47722558,0,0,0,0,0
25.927754,6.92820323,0,0,0,0,0
25.938246,6.4807407,0,0,0,0,0
25.948737,6.4807407,0,0,0,0,0
25.959229,6.244998,0,0,0,0,0
25.96972,7,0,0,0,0,0
25.980212,6.40312424,0,0,0,0,0
25.990704,6.08276253,0,0,0,0,0
26.001195,7.21110255,0,0,0,0,0
26.011687,6.8556546,0,0,0,0,0
26.022178,7.21110255,0,0,0,0,0
26.03267,6.244998,0,0,0,0,0
26.043162,6.164414,0,0,0,0,0
26.053653,6.63324958,0,0,0,0,0
26.064145,5.91607978,0,0,0,0,0
26.074636,5.74456265,0,0,0,0,0
26.085128,5.83095189,0,0,0,0,0
26.09562,6.8556546,0,0,0,0,0
26.106111,6.4807407,0,0,0,0,0
26.116603,6.244998,0,0,0,0,0
26.127094,7,0,0,0,0,0
26.137586,5.91607978,0,0,0,0,0
26.148078,6.63324958,0,0,0,0,0
26.158569,5.91607978,0,0,0,0,0
26.169061,7.28010989,0,0,0,0,0
26.179552,7.07106781,0,0,0,0,0
26.190044,6.55743852,0,0,0,0,0
26.200536,6.08276253,0,0,0,0,0
26.211027,6.32455532,0,0,0,0,0
26.221519,6.63324958,0,0,0,0,0
26.23201,6.164414,0,0,0,0,0
26.242502,5.47722558,0,0,0,0,0
26.252994,5.83095189,0,0,0,0,0
26.263485,6.08276253,0,0,0,0,0
26.273977,6.164414,0,0,0,0,0
26.284468,5.09901951,0,0,0,0,0
26.29496,6.70820393,0,0,0,0,0
26.305452,6.40312424,0,0,0,0,0
26.315943,5.65685425,0,0,0,0,0
26.326435,7.28010989,0,0,0,0,0
26.336926,6.4807407,0,0,0,0,0
26.347418,7.07106781,0,0,0,0,0
26.35791,5.74456265,0,0,0,0,0
26.368401,7.48331477,0,0,0,0,0
26.378893,6.92820323,0,0,0,0,0
26.389384,5.91607978,0,0,0,0,0
26.399876,6.32455532,0,0,0,0,0
26.410368,6,0,0,0,0,0
26.420859,6.63324958,0,0,0,0,0
26.431351,6.40312424,0,0,0,0,0
26.441842,5.56776436,0,0,0,0,0
26.452334,7,0,0,0,0,0
26.462826,6.40312424,0,0,0,0,0
26.473317,6.92820323,0,0,0,0,0
26.483809,6.8556546,0,0,0,0,0
26.4943,6.8556546,0,0,0,0,0
26.504792,5.74456265,0,0,0,0,0
26.515284,6,0,0,0,0,0
26.525775,6.40312424,0,0,0,0,0
26.536267,5.83095189,0,0,0,0,0
26.546758,6.8556546,0,0,0,0,0
26.55725,6.32455532,0,0,0,0,0
26.567742,5.56776436,0,0,0,0,0
26.578233,5.74456265,0,0,0,0,0
26.588725,6.164414,0,0,0,0,0
26.599216,5.91607978,0,0,0,0,0
26.609708,6.32455532,0,0,0,0,0
26.6202,6.244998,0,0,0,0,0
26.630691,6.70820393,0,0,0,0,0
26.641183,6.40312424,0,0,0,0,0
26.651674,5.83095189,0,0,0,0,0
26.662166,6.32455532,0,0,0,0,0
26.672658,5.83095189,0,0,0,0,0
26.683149,6.32455532,0,0,0,0,0
26.693641,6,0,0,0,0,0
26.704132,6.4807407,0,0,0,0,0
26.714624,6.92820323,0,0,0,0,0
26.725116,6.244998,0,0,0,0,0
26.735607,6.4807407,0,0,0,0,0
26.746099,5.56776436,0,0,0,0,0
26.75659,6.244998,0,0,0,0,0
26.767082,7.54983444,0,0,0,0,0
26.777574,6.55743852,0,0,0,0,0
26.788065,5.91607978,0,0,0,0,0
26.798557,6.08276253,0,0,0,0,0
26.809048,5.74456265,0,0,0,0,0
26.81954,6.78232998,0,0,0,0,0
26.830032,5.91607978,0,0,0,0,0
26.840523,6.244998,0,0,0,0,0
26.851015,5.74456265,0,0,0,0,0
26.861506,6.40312424,0,0,0,0,0
26.871998,6.164414,0,0,0,0,0
26.88249,6.40312424,0,0,0,0,0
26.892981,6.08276253,0,0,0,0,0
26.903473,6.244998,0,0,0,0,0
26.913964,6.244998,0,0,0,0,0
26.924456,6,0,0,0,0,0
26.934948,5.47722558,0,0,0,0,0
26.945439,5.65685425,0,0,0,0,0
26.955931,6.70820393,0,0,0,0,0
26.966422,7.07106781,0,0,0,0,0
26.976914,5.47722558,0,0,0,0,0
26.987406,5.65685425,0,0,0,0,0
26.997897,6.40312424,0,0,0,0,0
27.008389,5.91607978,0,0,0,0,0
27.01888,6.244998,0,0,0,0,0
27.029372,7,0,0,0,0,0
27.039864,5.83095189,0,0,0,0,0
27.050355,5.38516481,0,0,0,0,0
27.060847,6.78232998,0,0,0,0,0
27.071338,6.08276253,0,0,0,0,0
27.08183,6.55743852,0,0,0,0,0
27.092322,6.08276253,0,0,0,0,0
27.102813,6.4807407,0,0,0,0,0
27.113305,6.70820393,0,0,0,0,0
27.123796,6.63324958,0,0,0,0,0
27.134288,6.32455532,0,0,0,0,0
27.14478,5.91607978,0,0,0,0,0
27.155271,6.164414,0,0,0,0,0
27.165763,7.28010989,0,0,0,0,0
27.176254,6.164414,0,0,0,0,0
27.186746,6,0,0,0,0,0
27.197238,6.32455532,0,0,0,0,0
27.207729,6.32455532,0,0,0,0,0
27.218221,6.244998,0,0,0,0,0
27.228712,6.78232998,0,0,0,0,0
27.239204,6.08276253,0,0,0,0,0
27.249696,7.14142843,0,0,0,0,0
27.260187,6,0,0,0,0,0
27.270679,6.63324958,0,0,0,0,0
27.28117,6.32455532,0,0,0,0,0
27.291662,6.32455532,0,0,0,0,0
27.302154,6,0,0,0,0,0
27.312645,5.91607978,0,0,0,0,0
27.323137,4.58257569,0,0,0,0,0
27.333628,6.4807407,0,0,0,0,0
27.34412,6.244998,0,0,0,0,0
27.354612,5.74456265,0,0,0,0,0
27.365103,6.78232998,0,0,0,0,0
27.375595,5.74456265,0,0,0,0,0
27.386086,7,0,0,0,0,0
27.396578,6.63324958,0,0,0,0,0
27.40707,5.91607978,0,0,0,0,0
27.417561,5.74456265,0,0,0,0,0
27.428053,6.63324958,0,0,0,0,0
27.438544,7,0,0,0,0,0
27.449036,6.78232998,0,0,0,0,0
27.459528,6.08276253,0,0,0,0,0
27.470019,6,0,0,0,0,0
27.480511,6.164414,0,0,0,0,0
27.491002,6.55743852,0,0,0,0,0
27.501494,6.70820393,0,0,0,0,0
27.511986,6.40312424,0,0,0,0,0
27.522477,6.164414,0,0,0,0,0
27.532969,6.4807407,0,0,0,0,0
27.54346,6.92820323,0,0,0,0,0
27.553952,6.70820393,0,0,0,0,0
27.564444,6.4807407,0,0,0,0,0
27.574935,6.32455532,0,0,0,0,0
27.585427,6.32455532,0,0,0,0,0
27.595918,6.32455532,0,0,0,0,0
27.60641,7.07106781,0,0,0,0,0
27.616902,5.56776436,0,0,0,0,0
27.627393,5.91607978,0,0,0,0,0
27.637885,6.4807407,0,0,0,0,0
27.648376,6.164414,0,0,0,0,0
27.658868,6.55743852,0,0,0,0,0
27.66936,5.83095189,0,0,0,0,0
27.679851,6.40312424,0,0,0,0,0
27.690343,5.38516481,0,0,0,0,0
27.700834,7,0,0,0,0,0
27.711326,6.244998,0,0,0,0,0
27.721818,6.244998,0,0,0,0,0
27.732309,6.40312424,0,0,0,0,0
27.742801,5.91607978,0,0,0,0,0
27.753292,6,0,0,0,0,0
27.763784,5.91607978,0,0,0,0,0
27.774276,6.55743852,0,0,0,0,0
27.784767,5.91607978,0,0,0,0,0
27.795259,6,0,0,0,0,0
27.80575,6.164414,0,0,0,0,0
27.816242,5.83095189,0,0,0,0,0
27.826734,7.14142843,0,0,0,0,0
27.837225,6.4807407,0,0,0,0,0
27.847717,6.244998,0,0,0,0,0
27.858208,7.07106781,0,0,0,0,0
27.8687,6.40312424,0,0,0,0,0
27.879192,6.32455532,0,0,0,0,0
27.889683,5.91607978,0,0,0,0,0
27.900175,5.47722558,0,0,0,0,0
27.910666,6.08276253,0,0,0,0,0
27.921158,6,0,0,0,0,0
27.93165,6.70820393,0,0,0,0,0
27.942141,5.74456265,0,0,0,0,0
27.952633,5.38516481,0,0,0,0,0
27.963124,6.40312424,0,0,0,0,0
27.973616,6.55743852,0,0,0,0,0
27.984108,6.4807407,0,0,0,0,0
27.994599,6.244998,0,0,0,0,0
28.005091,6.8556546,0,0,0,0,0
28.015582,6.70820393,0,0,0,0,0
28.026074,6.08276253,0,0,0,0,0
28.036566,5.83095189,0,0,0,0,0
28.047057,5,0,0,0,0,0
28.057549,6.55743852,0,0,0,0,0
28.06804,6.244998,0,0,0,0,0
28.078532,6.244998,0,0,0,0,0
28.089024,6.8556546,0,0,0,0,0
28.099515,6.63324958,0,0,0,0,0
28.110007,6.63324958,0,0,0,0,0
28.120498,6.63324958,0,0,0,0,0
28.13099,5.65685425,0,0,0,0,0
28.141482,6.164414,0,0,0,0,0
28.151973,6.244998,0,0,0,0,0
28.162465,6.40312424,0,0,0,0,0
28.172956,6.78232998,0,0,0,0,0
28.183448,5.83095189,0,0,0,0,0
28.19394,5.74456265,0,0,0,0,0
28.204431,5.83095189,0,0,0,0,0
28.214923,5.91607978,0,0,0,0,0
28.225414,6.244998,0,0,0,0,0
28.235906,5.83095189,0,0,0,0,0
28.246398,6.164414,0,0,0,0,0
28.256889,7.07106781,0,0,0,0,0
28.267381,6.4807407,0,0,0,0,0
28.277872,6.4807407,0,0,0,0,0
28.288364,7,0,0,0,0,0
28.298856,6.40312424,0,0,0,0,0
28.309347,6.32455532,0,0,0,0,0
28.319839,6.08276253,0,0,0,0,0
28.33033,6.40312424,0,0,0,0,0
28.340822,6.55743852,0,0,0,0,0
28.351314,7,0,0,0,0,0
28.361805,6.164414,0,0,0,0,0
28.372297,6.78232998,0,0,0,0,0
28.382788,6.32455532,0,0,0,0,0
28.39328,5.83095189,0,0,0,0,0
28.403772,6.55743852,0,0,0,0,0
28.414263,5.29150262,0,0,0,0,0
28.424755,5.74456265,0,0,0,0,0
28.435246,7.28010989,0,0,0,0,0
28.445738,5.91607978,0,0,0,0,0
28.45623,6.164414,0,0,0,0,0
28.466721,6.63324958,0,0,0,0,0
28.477213,5.83095189,0,0,0,0,0
28.487704,7.41619849,0,0,0,0,0
28.498196,6,0,0,0,0,0
28.508688,6,0,0,0,0,0
28.519179,6.92820323,0,0,0,0,0
28.529671,5.38516481,0,0,0,0,0
28.540162,6.70820393,0,0,0,0,0
28.550654,6.63324958,0,0,0,0,0
28.561146,6.164414,0,0,0,0,0
28.571637,5.91607978,0,0,0,0,0
28.582129,7.07106781,0,0,0,0,0
28.59262,6,0,0,0,0,0
28.603112,5.65685425,0,0,0,0,0
28.613604,6.55743852,0,0,0,0,0
28.624095,7.21110255,0,0,0,0,0
28.634587,7.14142843,0,0,0,0,0
28.645078,6.32455532,0,0,0,0,0
28.65557,6.4807407,0,0,0,0,0
28.666062,6,0,0,0,0,0
28.676553,5.56776436,0,0,0,0,0
28.687045,6,0,0,0,0,0
28.697536,5.65685425,0,0,0,0,0
28.708028,6.164414,0,0,0,0,0
28.71852,6.40312424,0,0,0,0,0
28.729011,6,0,0,0,0,0
28.739503,6.244998,0,0,0,0,0
28.749994,5.47722558,0,0,0,0,0
28.760486,5.91607978,0,0,0,0,0
28.770978,6.08276253,0,0,0,0,0
28.781469,6.40312424,0,0,0,0,0
28.791961,6.92820323,0,0,0,0,0
28.802452,6.08276253,0,0,0,0,0
28.812944,5.38516481,0,0,0,0,0
28.823436,7.14142843,0,0,0,0,0
28.833927,6,0,0,0,0,0
28.844419,6.92820323,0,0,0,0,0
28.85491,6.55743852,0,0,0,0,0
28.865402,6.08276253,0,0,0,0,0
28.875894,5.74456265,0,0,0,0,0
28.886385,6.92820323,0,0,0,0,0
28.896877,6.40312424,0,0,0,0,0
28.907368,6.32455532,0,0,0,0,0
28.91786,5.65685425,0,0,0,0,0
28.928352,5.74456265,0,0,0,0,0
28.938843,6.78232998,0,0,0,0,0
28.949335,6.92820323,0,0,0,0,0
28.959826,6.55743852,0,0,0,0,0
28.970318,6.4807407,0,0,0,0,0
28.98081,5.29150262,0,0,0,0,0
28.991301,6.70820393,0,0,0,0,0
29.001793,7,0,0,0,0,0
29.012284,6.164414,0,0,0,0,0
29.022776,6.40312424,0,0,0,0,0
29.033268,6.92820323,0,0,0,0,0
29.043759,6.08276253,0,0,0,0,0
29.054251,5.83095189,0,0,0,0,0
29.064742,6.32455532,0,0,0,0,0
29.075234,6.8556546,0,0,0,0,0
29.085726,5.38516481,0,0,0,0,0
29.096217,6,0,0,0,0,0
29.106709,5.74456265,0,0,0,0,0
29.1172,5.91607978,0,0,0,0,0
29.127692,5.83095189,0,0,0,0,0
29.138184,6.08276253,0,0,0,0,0
29.148675,6.70820393,0,0,0,0,0
29.159167,6,0,0,0,0,0
29.169658,6.244998,0,0,0,0,0
29.18015,6,0,0,0,0,0
29.190642,6.164414,0,0,0,0,0
29.201133,6.40312424,0,0,0,0,0
29.211625,6.164414,0,0,0,0,0
29.222116,5.65685425,0,0,0,0,0
29.232608,7.48331477,0,0,0,0,0
29.2431,6.08276253,0,0,0,0,0
29.253591,6.63324958,0,0,0,0,0
29.264083,7.68114575,0,0,0,0,0
29.274574,6,0,0,0,0,0
29.285066,6.40312424,0,0,0,0,0
29.295558,6.164414,0,0,0,0,0
29.306049,5.29150262,0,0,0,0,0
29.316541,6.40312424,0,0,0,0,0
29.327032,6.164414,0,0,0,0,0
29.337524,6.55743852,0,0,0,0,0
29.348016,6.32455532,0,0,0,0,0
29.358507,6.63324958,0,0,0,0,0
29.368999,6.32455532,0,0,0,0,0
29.37949,5.19615242,0,0,0,0,0
29.389982,7.34846923,0,0,0,0,0
29.400474,5.74456265,0,0,0,0,0
29.410965,6.70820393,0,0,0,0,0
29.421457,5.65685425,0,0,0,0,0
29.431948,6.55743852,0,0,0,0,0
29.44244,5.56776436,0,0,0,0,0
29.452932,6.164414,0,0,0,0,0
29.463423,5.91607978,0,0,0,0,0
29.473915,6,0,0,0,0,0
29.484406,6.244998,0,0,0,0,0
29.494898,5.83095189,0,0,0,0,0
29.50539,6.244998,0,0,0,0,0
29.515881,7.21110255,0,0,0,0,0
29.526373,6.164414,0,0,0,0,0
29.536864,6,0,0,0,0,0
29.547356,7.34846923,0,0,0,0,0
29.557848,6.244998,0,0,0,0,0
29.568339,6,0,0,0,0,0
29.578831,5.47722558,0,0,0,0,0
29.589322,6.08276253,0,0,0,0,0
29.599814,6,0,0,0,0,0
29.610306,5.47722558,0,0,0,0,0
29.620797,7.48331477,0,0,0,0,0
29.631289,6.08276253,0,0,0,0,0
29.64178,6,0,0,0,0,0
29.652272,6.8556546,0,0,0,0,0
29.662764,6.40312424,0,0,0,0,0
29.673255,6.55743852,0,0,0,0,0
29.683747,6.55743852,0,0,0,0,0
29.694238,6.70820393,0,0,0,0,0
29.70473,5.91607978,0,0,0,0,0
29.715222,6.40312424,0,0,0,0,0
29.725713,5.83095189,0,0,0,0,0
29.736205,7,0,0,0,0,0
29.746696,6.244998,0,0,0,0,0
29.757188,5.74456265,0,0,0,0,0
29.76768,5.38516481,0,0,0,0,0
29.778171,5.65685425,0,0,0,0,0
29.788663,5.91607978,0,0,0,0,0
29.799154,7.87400787,0,0,0,0,0
29.809646,5.19615242,0,0,0,0,0
29.820138,6.4807407,0,0,0,0,0
29.830629,6.92820323,0,0,0,0,0
29.841121,5.38516481,0,0,0,0,0
29.851612,6.164414,0,0,0,0,0
29.862104,5.83095189,0,0,0,0,0
29.872596,6.70820393,0,0,0,0,0
29.883087,5.91607978,0,0,0,0,0
29.893579,6.244998,0,0,0,0,0
29.90407,6.244998,0,0,0,0,0
29.914562,6,0,0,0,0,0
29.925054,6.164414,0,0,0,0,0
29.935545,6.164414,0,0,0,0,0
29.946037,7.21110255,0,0,0,0,0
29.956528,6.244998,0,0,0,0,0
29.96702,6.40312424,0,0,0,0,0
29.977512,7.41619849,0,0,0,0,0
29.988003,6.40312424,0,0,0,0,0
29.998495,7.14142843,6.16211018,0.989605096,6.16177949,6.16191998,6.16158928
30.008986,7.34846923,6.16385692,1.08839897,6.16352603,6.16366648,6.16333559
30.019478,6.4807407,6.16559247,0.561380646,6.16526139,6.16540179,6.16507071
30.02997,5.09901951,6.1673167,-1.03358463,6.16698543,6.16712578,6.1667945
30.040461,6.55743852,6.16902948,0.623224718,6.16869802,6.16883832,6.16850685
30.050953,6.70820393,6.17073116,0.733125343,6.17039952,6.17053976,6.17020811
30.061444,6.63324958,6.17242147,0.678843213,6.17208963,6.17222983,6.17189798
30.071936,6.40312424,6.17410076,0.478563977,6.17376872,6.17390887,6.17357682
30.082428,6.4807407,6.17576889,0.552242528,6.17543666,6.17557675,6.17524451
30.092919,6.40312424,6.17742574,0.475077355,6.17709332,6.17723336,6.17690093
30.103411,6.244998,6.17907167,0.256761227,6.17873905,6.17887904,6.17854641
30.113902,6.55743852,6.18070639,0.613785089,6.18037357,6.18051351,6.18018068
30.124394,5.83095189,6.18233024,-0.59277175,6.18199723,6.18213711,6.18180409
30.134886,5.91607978,6.18394311,-0.517555142,6.18360989,6.18374973,6.1834165
30.145377,5.74456265,6.18554487,-0.664064922,6.18521145,6.18535123,6.18501781
30.155869,5.19615242,6.18713586,-0.995481508,6.18680224,6.18694197,6.18660834
30.16636,6.63324958,6.1887158,0.666733662,6.18838199,6.18852166,6.18818783
30.176852,6.55743852,6.19028505,0.605931909,6.18995102,6.19009065,6.18975661
30.187344,5.91607978,6.19184346,-0.525132058,6.19150924,6.1916488,6.19131457
30.197835,6.70820393,6.19339094,0.717504702,6.1930565,6.19319602,6.19286158
30.208327,6,6.1949278,-0.44150628,6.19459316,6.19473262,6.19439797
30.218818,5.47722558,6.19645378,-0.84807323,6.19611894,6.19625834,6.19592349
30.22931,6,6.19796921,-0.44493731,6.19763416,6.19777351,6.19743845
30.239802,5.74456265,6.19947397,-0.674471146,6.19913872,6.19927801,6.19894274
30.250293,6.08276253,6.20096796,-0.343810163,6.20063249,6.20077173,6.20043625
30.260785,6.40312424,6.20245148,0.447965128,6.2021158,6.20225499,6.2019193
30.271276,6.63324958,6.20392429,0.655229189,6.2035884,6.20372753,6.20339163
30.281768,6.92820323,6.2053867,0.850186175,6.2050506,6.20518967,6.20485356
30.29226,6.244998,6.20683859,0.195344327,6.20650228,6.20664129,6.20630497
30.302751,6,6.20827987,-0.456376893,6.20794334,6.2080823,6.20774576
30.313243,6.164414,6.20971083,-0.212830518,6.20937409,6.20951299,6.20917624
30.323734,5.47722558,6.21113124,-0.856682944,6.21079429,6.21093313,6.21059616
30.334226,6.244998,6.2125414,0.180157162,6.21220422,6.21234301,6.21200583
30.344718,6.32455532,6.21394119,0.332587026,6.2136038,6.21374253,6.21340513
30.355209,5.47722558,6.21533052,-0.859130344,6.21499292,6.21513158,6.21479397
30.365701,6.63324958,6.21670969,0.645399016,6.21637187,6.21651047,6.21617264
30.376192,5.38516481,6.21807846,-0.912641031,6.21774041,6.21787896,6.2175409
30.386684,6.32455532,6.21943712,0.324219376,6.21909885,6.21923734,6.21889906
30.397176,5.91607978,6.22078557,-0.552001614,6.22044708,6.2205855,6.22024701
30.407667,5.65685425,6.22212371,-0.751844038,6.221785,6.22192336,6.22158464
30.418159,6.164414,6.22345183,-0.242976999,6.22311289,6.22325119,6.22291225
30.42865,6.55743852,6.2247697,0.576774503,6.22443054,6.22456878,6.22422961
30.439142,6.63324958,6.2260776,0.638100289,6.22573822,6.2258764,6.22553701
30.449634,6.8556546,6.22737544,0.792640622,6.22703584,6.22717395,6.22683433
30.460125,5.83095189,6.22866313,-0.63064351,6.2283233,6.22846135,6.2281215
30.470617,5.91607978,6.22994094,-0.560233123,6.22960088,6.22973886,6.22939879
30.481108,6.32455532,6.23120864,0.305526885,6.23086835,6.23100627,6.23066598
30.4916,6.164414,6.23246652,-0.260868782,6.23212601,6.23226386,6.23192333
30.502092,5.38516481,6.23371449,-0.921167563,6.23337374,6.23351153,6.23317077
30.512583,5.74456265,6.23495244,-0.700278369,6.23461146,6.23474919,6.2344082
30.523075,5.83095189,6.23618065,-0.636575806,6.23583944,6.2359771,6.23563588
30.533566,7.28010989,6.23739891,1.0211322,6.23705747,6.23719506,6.23685361
30.544058,6.70820393,6.23860749,0.685271076,6.23826581,6.23840333,6.23806164
30.55455,5.65685425,6.23980628,-0.763512954,6.23946437,6.23960182,6.2392599
30.565041,6.32455532,6.24099521,0.289067651,6.24065307,6.24079045,6.24044829
30.575533,6.63324958,6.24217454,0.62535993,6.24183215,6.24196947,6.24162708
30.586024,6.32455532,6.24334406,0.284975897,6.24300144,6.24313869,6.24279605
30.596516,5.83095189,6.24450402,-0.643080189,6.24416116,6.24429834,6.24395547
30.607008,5.83095189,6.24565435,-0.643973957,6.24531125,6.24544836,6.24510525
30.617499,5.56776436,6.24679496,-0.824033129,6.24645162,6.24658866,6.24624531
30.627991,7.28010989,6.24792609,1.01596447,6.24758251,6.24771948,6.24737589
30.638482,6.164414,6.24904756,-0.29091848,6.24870374,6.24884064,6.24849681
30.648974,6.4807407,6.25015961,0.480188592,6.24981555,6.24995237,6.2496083
30.659466,5.29150262,6.25126216,-0.97967318,6.25091785,6.2510546,6.25071028
30.669957,6.32455532,6.25235513,0.268700931,6.25201058,6.25214725,6.25180269
30.680449,5.19615242,6.25343876,-1.0282443,6.25309396,6.25323056,6.25288575
30.69094,6.244998,6.25451286,-0.0975441367,6.25416781,6.25430434,6.25395928
30.701432,5.74456265,6.25557767,-0.714853146,6.25523238,6.25536882,6.25502352
30.711924,6.8556546,6.25663311,0.773964787,6.25628757,6.25642394,6.25607839
30.722415,6.32455532,6.25767911,0.25860435,6.25733332,6.25746962,6.25712382
30.732907,5.91607978,6.2587159,-0.585351274,6.25836986,6.25850608,6.25816003
30.743398,5,6.2597433,-1.12238287,6.25939701,6.25953315,6.25918685
30.75389,6.08276253,6.26076153,-0.421899281,6.260415,6.26055105,6.26020451
30.764382,6.78232998,6.26177053,0.721498059,6.26142374,6.26155972,6.26121292
30.774873,6.40312424,6.26277023,0.374638504,6.26242319,6.26255908,6.26221203
30.785365,6.32455532,6.26376083,0.246565377,6.26341354,6.26354935,6.26320205
30.795856,6.55743852,6.26474219,0.541014172,6.26439464,6.26453037,6.26418281
30.806348,6.32455532,6.26571451,0.242571256,6.2653667,6.26550235,6.26515453
30.81684,6.4807407,6.26667772,0.46266941,6.26632965,6.26646522,6.26611714
30.827331,6.40312424,6.26763175,0.368093037,6.26728343,6.26741892,6.26707058
30.837823,6.164414,6.26857683,-0.322742659,6.26822825,6.26836365,6.26801505
30.848314,6.70820393,6.26951278,0.662337642,6.26916394,6.26929926,6.2689504
30.858806,7.07106781,6.27043982,0.89477818,6.27009072,6.27022595,6.26987684
30.869298,6.4807407,6.27135788,0.457583675,6.27100852,6.27114366,6.27079429
30.879789,6.08276253,6.2722669,-0.435320993,6.27191728,6.27205233,6.27170269
30.890281,5.38516481,6.27316707,-0.942338722,6.27281719,6.27295215,6.27260225
30.900772,6.32455532,6.27405826,0.224715509,6.27370811,6.27384299,6.27349282
30.911264,6.78232998,6.27494065,0.712312663,6.27459024,6.27472502,6.2743746
30.921756,6,6.27581419,-0.525180151,6.27546351,6.2755982,6.27524751
30.932247,6,6.27667882,-0.526002678,6.27632787,6.27646247,6.27611152
30.942739,6.55743852,6.27753472,0.529059357,6.27718351,6.27731802,6.27696679
30.95323,6.63324958,6.27838176,0.595707828,6.27803028,6.2781647,6.2778132
30.963722,5.47722558,6.27922013,-0.895541488,6.27886838,6.2790027,6.27865094
30.974214,6.4807407,6.28004977,0.447985414,6.27969775,6.27983197,6.27947994
30.984705,6.70820393,6.28087062,0.653707361,6.28051833,6.28065245,6.28030015
30.995197,5.91607978,6.28168286,-0.604651206,6.2813303,6.28146433,6.28111176
31.005688,5.83095189,6.28248637,-0.671963154,6.28213354,6.28226747,6.28191463
31.01618,6.244998,6.28328133,-0.19566126,6.28292822,6.28306205,6.28270893
31.026672,6.92820323,6.28406767,0.802580564,6.28371429,6.28384802,6.28349463
31.037163,6.4807407,6.28484535,0.442600665,6.28449169,6.28462532,6.28427165
31.047655,6.244998,6.28561454,-0.201535464,6.28526061,6.28539414,6.28504019
31.058146,5.74456265,6.28637512,-0.736079123,6.28602091,6.28615434,6.28580012
31.068638,6.32455532,6.28712726,0.19346333,6.28677277,6.28690609,6.28655159
31.07913,5.47722558,6.28787091,-0.900358446,6.28751614,6.28764936,6.28729458
31.089621,5.29150262,6.28860601,-0.998550645,6.28825097,6.28838408,6.28802902
31.100113,6.55743852,6.28933275,0.517789319,6.28897742,6.28911042,6.28875508
31.110604,7.14142843,6.29005099,0.922701165,6.28969538,6.28982828,6.28947266
31.121096,5.56776436,6.2907609,-0.850292031,6.29040501,6.2905378,6.29018189
31.131588,6.40312424,6.29146244,0.334158344,6.29110626,6.29123894,6.29088276
31.142079,6.244998,6.29215556,-0.217157915,6.2917991,6.29193167,6.2915752
31.152571,5.74456265,6.29284042,-0.740457811,6.29248367,6.29261613,6.29225937
31.163062,5.74456265,6.2935169,-0.740914473,6.29315987,6.29329222,6.29293517
31.173554,5.91607978,6.29418517,-0.614902747,6.29382786,6.29396008,6.29360275
31.184046,6.244998,6.29484518,-0.223264824,6.29448758,6.29461969,6.29426207
31.194537,5.56776436,6.29549689,-0.853072404,6.295139,6.29527099,6.29491309
31.205029,7.07106781,6.29614045,0.880299589,6.29578226,6.29591414,6.29555595
31.21552,6.55743852,6.29677575,0.510551441,6.29641728,6.29654904,6.29619055
31.226012,7.34846923,6.29740295,1.02521524,6.29704418,6.29717582,6.29681704
31.236504,6.55743852,6.29802199,0.509329491,6.29766294,6.29779446,6.29743539
31.246995,5.56776436,6.29863286,-0.854908473,6.29827351,6.29840491,6.29804554
31.257487,6.70820393,6.29923568,0.639506256,6.29887604,6.29900731,6.29864765
31.267978,6.4807407,6.29983037,0.425335552,6.29947043,6.29960157,6.29924162
31.27847,6.244998,6.30041705,-0.235412515,6.30005682,6.30018784,6.29982759
31.288962,6.164414,6.3009957,-0.369569609,6.30063517,6.30076606,6.30040552
31.299453,6.08276253,6.30156628,-0.46776463,6.30120545,6.30133622,6.30097537
31.309945,6.4807407,6.30212892,0.422624864,6.3017678,6.30189843,6.30153729
31.320436,6.63324958,6.30268354,0.574948726,6.30232212,6.30245262,6.30209118
31.330928,6.32455532,6.30323027,0.146030995,6.30286854,6.30299891,6.30263717
31.34142,6.164414,6.30376907,-0.373302914,6.30340704,6.30353728,6.30317524
31.351911,5.19615242,6.30429991,-1.05268585,6.30393758,6.30406768,6.30370534
31.362403,5.65685425,6.30482293,-0.804965015,6.30446029,6.30459026,6.30422761
31.372894,6.244998,6.30533803,-0.245642075,6.30497509,6.30510492,6.30474197
31.383386,6.78232998,6.30584534,0.690278671,6.3054821,6.30561178,6.30524853
31.393878,7.07106781,6.30634483,0.874484408,6.30598128,6.30611083,6.30574727
31.404369,5.83095189,6.30683648,-0.689843885,6.30647263,6.30660203,6.30623816
31.414861,6.08276253,6.3073204,-0.473875375,6.30695624,6.3070855,6.30672132
31.425352,6.4807407,6.30779652,0.415865574,6.30743205,6.30756117,6.30719668
31.435844,5.65685425,6.30826496,-0.807100183,6.30790018,6.30802914,6.30766435
31.446336,7,6.30872568,0.831429085,6.30836059,6.3084894,6.3081243
31.456827,6.08276253,6.30917866,-0.475832042,6.30881326,6.30894193,6.30857651
31.467319,6.55743852,6.30962402,0.497809705,6.30925831,6.30938683,6.3090211
31.47781,6.40312424,6.31006169,0.305061547,6.30969566,6.30982403,6.30945799
31.488302,6.40312424,6.31049177,0.30435582,6.31012543,6.31025364,6.30988729
31.498794,6.164414,6.31091425,-0.382753501,6.31054759,6.31067564,6.31030897
31.509285,6.4807407,6.31132909,0.411596411,6.31096212,6.31109002,6.31072303
31.519777,6.32455532,6.31173641,0.11322061,6.31136913,6.31149686,6.31112956
31.530268,6.92820323,6.31213615,0.784899407,6.31176855,6.31189612,6.3115285
31.54076,5.74456265,6.3125284,-0.753635027,6.31216048,6.31228789,6.31191995
31.551252,4.89897949,6.31291315,-1.18908942,6.3125449,6.31267215,6.31230389
31.561743,6.164414,6.31329037,-0.385845004,6.31292181,6.31304889,6.31268031
31.572235,6.08276253,6.31366017,-0.480518091,6.31329128,6.31341819,6.31304929
31.582726,6.4807407,6.31402248,0.408311418,6.31365328,6.31378002,6.3134108
31.593218,5.91607978,6.31437741,-0.631108256,6.31400788,6.31413445,6.31376491
31.60371,6,6.31472494,-0.561003511,6.31435508,6.31448148,6.31411161
31.614201,6.244998,6.31506505,-0.264701814,6.31469487,6.31482109,6.3144509
31.624693,6.40312424,6.31539783,0.296186445,6.31502732,6.31515337,6.31478285
31.635184,6.08276253,6.31572323,-0.482660027,6.3153524,6.31547827,6.31510742
31.645676,7,6.31604134,0.82701793,6.31567018,6.31579587,6.31542469
31.656168,6.55743852,6.31635215,0.491005471,6.31598066,6.31610617,6.31573466
31.666659,5.65685425,6.31665565,-0.8122816,6.31628383,6.31640915,6.31603731
31.677151,5.56776436,6.31695191,-0.865556206,6.31657976,6.31670489,6.31633272
31.687642,6.55743852,6.3172409,0.49009961,6.31686841,6.31699336,6.31662086
31.698134,7.28010989,6.31752269,0.981115285,6.31714987,6.31727462,6.3169018
31.708626,5.83095189,6.31779727,-0.69774306,6.31742413,6.31754868,6.31717552
31.719117,6.4807407,6.31806465,0.403331194,6.31769117,6.31781553,6.31744203
31.729609,5.74456265,6.31864472,-0.757682039,6.31827092,6.31807523,6.3177014
31.7401,5.56776436,6.31889809,-0.866679717,6.31852396,6.31832776,6.31795359
31.750592,6.4807407,6.31914437,0.401990461,6.3187699,6.31857318,6.31819867
31.761084,6.244998,6.31938353,-0.272737116,6.31900872,6.31881148,6.31843664
31.771575,7.14142843,6.31961559,0.906538935,6.31924044,6.31904268,6.3186675
31.782067,5.29150262,6.31984059,-1.01407,6.31946511,6.31926682,6.3188913
31.792558,6.08276253,6.32005853,-0.487130374,6.3196827,6.31948389,6.31910802
31.80305,6.8556546,6.32026946,0.731700173,6.31989329,6.31969394,6.31931774
31.813542,6.70820393,6.32047337,0.622680143,6.32009686,6.31989698,6.31952043
31.824033,6.08276253,6.32067027,-0.487757874,6.32029342,6.320093,6.31971611
31.834525,6.63324958,6.32086022,0.558918027,6.32048302,6.32028206,6.31990482
31.845016,6,6.32104319,-0.566606736,6.32066564,6.32046414,6.32008656
31.855508,6.32455532,6.32121925,0.0577587476,6.32084135,6.3206393,6.32026137
31.866,6.244998,6.32138838,-0.276388105,6.32101014,6.32080754,6.32042926
31.876491,6.08276253,6.3215506,-0.488659466,6.32117201,6.32096886,6.32059023
31.886983,6.8556546,6.32170596,0.730717894,6.32132702,6.32112331,6.32074433
31.897474,6.8556546,6.32185444,0.730616289,6.32147515,6.32127088,6.32089155
31.907966,6.08276253,6.32199609,-0.489115076,6.32161645,6.32141161,6.32103193
31.918458,6.40312424,6.32213091,0.284593263,6.32175092,6.32154552,6.32116548
31.928949,6.92820323,6.32225892,0.77842425,6.32187857,6.3216726,6.32129221
31.939441,6.244998,6.32238015,-0.278176467,6.32199944,6.32179289,6.32141216
31.949932,7,6.32249459,0.823107167,6.32211353,6.32190641,6.32152532
31.960424,6.164414,6.3226023,-0.397728922,6.32222088,6.32201318,6.32163173
31.970916,5.83095189,6.32270327,-0.701249866,6.3223215,6.3221132,6.3217314
31.981407,7,6.32279752,0.822923133,6.32241539,6.3222065,6.32182434
31.991899,5.91607978,6.32288507,-0.637812897,6.32250259,6.32229311,6.32191059
32.00239,6.164414,6.32296595,-0.398185814,6.3225831,6.32237302,6.32199014
32.012882,6.164414,6.32304016,-0.398278997,6.32265695,6.32244628,6.32206303
32.023374,7.14142843,6.32310773,0.904610797,6.32272416,6.32251288,6.32212928
32.033865,6.164414,6.32316868,-0.398440299,6.32278474,6.32257285,6.32218888
32.044357,6.55743852,6.32322301,0.48395817,6.32283872,6.32262622,6.32224188
32.054848,5.83095189,6.32327076,-0.701654375,6.32288609,6.32267298,6.32228828
32.06534,6.32455532,6.32331193,0.035261706,6.3229269,6.32271317,6.3223281
32.075832,6.32455532,6.32334655,0.0347673388,6.32296116,6.3227468,6.32236136
32.086323,6,6.32337463,-0.568660384,6.32298887,6.32277388,6.32238808
32.096815,6.244998,6.3233962,-0.27999678,6.32301006,6.32279444,6.32240827
32.107306,6.92820323,6.32341125,0.777683725,6.32302475,6.32280849,6.32242195
32.117798,6.164414,6.32341983,-0.398755348,6.32303296,6.32281606,6.32242915
32.12829,6.70820393,6.32342194,0.620307983,6.32303469,6.32281715,6.32242987
32.138781,6,6.3234176,-0.56869816,6.32302998,6.32281178,6.32242413
32.149273,5.56776436,6.32340682,-0.869276975,6.32301883,6.32279998,6.32241195
32.159764,6.55743852,6.32338963,0.483785996,6.32300127,6.32278176,6.32239336
32.170256,5.74456265,6.32336605,-0.760791298,6.3229773,6.32275713,6.32236835
32.180748,5.56776436,6.32333608,-0.869236282,6.32294696,6.32272612,6.32233696
32.191239,6,6.32329975,-0.568594537,6.32291025,6.32268874,6.32229921
32.201731,5.47722558,6.32325707,-0.919799702,6.32286719,6.32264501,6.32225509
32.212222,6.4807407,6.32320806,0.396903812,6.32281781,6.32259494,6.32220465
32.222714,6.78232998,6.32315275,0.677626178,6.32276211,6.32253855,6.32214788
32.233206,5.65685425,6.32309113,-0.816233347,6.32270011,6.32247586,6.3220848
32.243697,6,6.32302324,-0.568351332,6.32263184,6.32240689,6.32201545
32.254189,6.70820393,6.32294908,0.620689017,6.32255729,6.32233165,6.32193983
32.26468,7,6.32286868,0.822879894,6.32247651,6.32225016,6.32185795
32.275172,6.70820393,6.32278205,0.620823553,6.32238949,6.32216243,6.32176984
32.285664,6.92820323,6.3226892,0.778147818,6.32229626,6.32206848,6.32167551
32.296155,7.28010989,6.32259017,0.978529364,6.32219684,6.32196835,6.32157498
32.306647,6.55743852,6.32248496,0.484720093,6.32209124,6.32186201,6.32146826
32.317138,6.164414,6.32237359,-0.397441295,6.32197948,6.32174952,6.32135538
32.32763,6.8556546,6.32225606,0.730341385,6.32186156,6.32163087,6.32123633
32.338122,6.244998,6.32213241,-0.277730821,6.32173752,6.32150608,6.32111116
32.348613,6.244998,6.32200329,-0.277498281,6.32160801,6.32137519,6.32097987
32.359105,6.4807407,6.32186743,0.398589093,6.32147176,6.32123818,6.32084247
32.369596,6,6.32172551,-0.567208521,6.32132944,6.3210951,6.32069899
32.380088,6.78232998,6.3215775,0.678787508,6.32118104,6.32094594,6.32054943
32.39058,7,6.32142345,0.823757579,6.32102659,6.32079072,6.32039382
32.401071,6.70820393,6.32126339,0.622045454,6.32086612,6.32062948,6.32023218
32.411563,6.63324958,6.32109729,0.558705908,6.32069963,6.3204622,6.3200645
32.422054,5.65685425,6.32092521,-0.814905493,6.32052715,6.32028894,6.31989084
32.432546,7.41619849,6.32074714,1.04663812,6.32034867,6.32010967,6.31971117
32.443038,5.47722558,6.32056309,-0.918334099,6.32016423,6.31992442,6.31952552
32.453529,5.56776436,6.32037312,-0.867530262,6.31997385,6.31973324,6.31933393
32.464021,6.164414,6.32017719,-0.394668454,6.31977752,6.3195361,6.31913639
32.474512,6.244998,6.31997537,-0.273819956,6.31957529,6.31933305,6.31893293
32.485004,6.78232998,6.31976762,0.680119374,6.31936714,6.31912407,6.31872355
32.495496,6.70820393,6.31955399,0.623417954,6.3191531,6.3189092,6.31850827
32.505987,6,6.3193345,-0.565096898,6.31893321,6.31868847,6.31828713
32.516479,6.244998,6.31910915,-0.272233626,6.31870744,6.31846186,6.31806011
32.52697,6.40312424,6.31887797,0.290252076,6.31847585,6.31822942,6.31782727
32.537462,5.91607978,6.31864095,-0.634477081,6.31823842,6.31799113,6.31758856
32.547954,5.38516481,6.31839812,-0.966040017,6.31799518,6.31774703,6.31734405
32.558445,7.07106781,6.31814952,0.867708642,6.31774617,6.31749715,6.31709375
32.568937,5.38516481,6.31789513,-0.965779644,6.31749136,6.31724146,6.31683765
32.579428,5.83095189,6.317635,-0.697626763,6.31723081,6.31698002,6.3165758
32.58992,7.07106781,6.31736909,0.868158234,6.31696449,6.31671281,6.31630817
32.600412,6.244998,6.31709746,-0.268513429,6.31669244,6.31643986,6.3160348
32.610903,6.63324958,6.31682014,0.562520614,6.3164147,6.31616122,6.31575574
32.621395,6.78232998,6.31653709,0.682490213,6.31613124,6.31587684,6.31547094
32.631886,6.08276253,6.31624839,-0.483203746,6.31584211,6.31558679,6.31518047
32.642378,6.164414,6.31595399,-0.389281376,6.31554729,6.31529104,6.3148843
32.65287,6.08276253,6.31565394,-0.482588242,6.31524682,6.31498963,6.31458246
32.663361,5.83095189,6.31534828,-0.695985909,6.31494074,6.3146826,6.31427501
32.673853,7,6.31503697,0.827624934,6.314629,6.31436991,6.31396189
32.684344,6.08276253,6.31472008,-0.481619715,6.31431168,6.31405163,6.31364319
32.694836,5.74456265,6.31439757,-0.75487411,6.31398874,6.31372772,6.31331885
32.705328,6.55743852,6.31406948,0.493324482,6.31366023,6.31339823,6.31298893
32.715819,7.48331477,6.31373586,1.08147072,6.31332618,6.31306319,6.31265347
32.726311,6.8556546,6.31339666,0.736381653,6.31298655,6.31272257,6.31231241
32.736802,6.244998,6.31305196,-0.260871551,6.31264142,6.31237643,6.31196585
32.747294,6.164414,6.31270172,-0.385081438,6.31229074,6.31202474,6.31161372
32.757786,5.38516481,6.31234597,-0.962902466,6.31193456,6.31166753,6.31125608
32.768277,6.32455532,6.31198476,0.112118497,6.31157292,6.31130487,6.31089298
32.778769,5.74456265,6.31161805,-0.753030814,6.31120577,6.31093668,6.31052436
32.78926,6.70820393,6.31124592,0.63004604,6.3108332,6.31056306,6.3101503
32.799752,6.40312424,6.31086831,0.30373661,6.31045515,6.31018395,6.30977075
32.810244,6,6.31048527,-0.557212051,6.31007168,6.30979941,6.30938577
32.820735,6.8556546,6.31009685,0.738618811,6.30968282,6.30940947,6.30899539
32.831227,7.21110255,6.309703,0.949420639,6.30928853,6.30901409,6.30859957
32.841718,6.164414,6.3093038,-0.380643927,6.30888888,6.30861335,6.30819839
32.85221,7.28010989,6.3088992,0.985500225,6.30848384,6.30820719,6.30779179
32.862702,7.48331477,6.30848923,1.08389369,6.30807343,6.30779567,6.30737982
32.873193,6.63324958,6.30807397,0.570241711,6.30765772,6.30737883,6.30696253
32.883685,6.63324958,6.30765334,0.570610408,6.30723665,6.30695662,6.30653987
32.894176,7.21110255,6.30722744,0.950723465,6.3068103,6.30652912,6.30611193
32.904668,6.08276253,6.30679621,-0.473321958,6.30637861,6.30609627,6.30567863
32.91516,6.8556546,6.30635969,0.741144328,6.30594164,6.30565813,6.30524004
32.925651,5.91607978,6.30591794,-0.624370208,6.30549944,6.30521475,6.3047962
32.936143,5.74456265,6.3054709,-0.748938081,6.30505195,6.30476606,6.30434706
32.946634,6.08276253,6.30501866,-0.47144048,6.30459925,6.30431216,6.30389271
32.957126,6.32455532,6.30456115,0.141400752,6.30414129,6.30385298,6.30343307
32.967618,6.08276253,6.30409843,-0.470463492,6.30367812,6.30338857,6.30296821
32.978109,6.08276253,6.30363055,-0.469965982,6.30320979,6.302919,6.30249818
32.988601,6.08276253,6.30315745,-0.469462378,6.30273623,6.30244418,6.30202291
32.999092,7.14142843,6.30267923,0.915832516,6.30225755,6.30196423,6.3015425
33.009584,5.83095189,6.30219581,-0.686472077,6.30177366,6.30147907,6.30105688
33.020076,6.32455532,6.30170724,0.151155807,6.30128464,6.30098875,6.3005661
33.030567,6.244998,6.3012136,-0.237098291,6.30079053,6.30049334,6.30007022
33.041059,6.92820323,6.30071479,0.792141677,6.30029126,6.29999275,6.29956917
33.05155,6.4807407,6.30021094,0.424887937,6.29978694,6.2994871,6.29906305
33.062042,6.08276253,6.29970195,-0.465767562,6.29927749,6.2989763,6.29855179
33.072534,6.78232998,6.29918789,0.695084232,6.29876296,6.29846041,6.29803543
33.083025,6.40312424,6.29866883,0.323195621,6.29824343,6.29793951,6.29751406
33.093517,6.4807407,6.29814467,0.427312565,6.2977188,6.29741349,6.29698757
33.104008,6.40312424,6.29761553,0.324821034,6.29718919,6.29688248,6.29645609
33.1145,6.164414,6.29708133,-0.364235265,6.29665452,6.29634638,6.29591952
33.124992,6.08276253,6.29654213,-0.462363057,6.29611484,6.29580527,6.29537794
33.135483,6.55743852,6.29599799,0.511312563,6.29557023,6.29525921,6.2948314
33.145975,7.07106781,6.29544882,0.880692336,6.29502059,6.2947081,6.29427982
33.156466,6.63324958,6.29489475,0.58168276,6.29446604,6.29415207,6.29372331
33.166958,6.08276253,6.29433567,-0.459970808,6.29390649,6.29359102,6.29316179
33.17745,6.55743852,6.29377167,0.513485011,6.293342,6.29302503,6.29259531
33.187941,6.63324958,6.2932028,0.583135305,6.29277265,6.29245414,6.29202395
33.198433,6.164414,6.29262897,-0.35807117,6.29219834,6.29187828,6.29144761
33.208924,6.63324958,6.2920503,0.584122661,6.29161919,6.29129757,6.29086641
33.219416,6.164414,6.29146669,-0.356444515,6.29103511,6.2907119,6.29028026
33.229908,6.70820393,6.29087823,0.646007512,6.29044615,6.29012135,6.28968922
33.240399,6.08276253,6.29028496,-0.455546303,6.2898524,6.28952598,6.28909337
33.250891,7,6.28968681,0.842800803,6.28925376,6.2889257,6.2884926
33.261382,5.91607978,6.28908388,-0.610740615,6.28865035,6.28832063,6.28788704
33.271874,6.63324958,6.28847609,0.587174158,6.28804207,6.28771067,6.28727659
33.282366,6.8556546,6.2878635,0.753519146,6.28742898,6.28709589,6.28666132
33.292857,6.55743852,6.28724618,0.519800293,6.28681117,6.28647637,6.28604131
33.303349,6.08276253,6.28662403,-0.451510246,6.28618853,6.28585199,6.28541644
33.31384,6.55743852,6.28599719,0.521000324,6.2855612,6.2852229,6.28478685
33.324332,5.91607978,6.28536554,-0.607688863,6.28492905,6.28458897,6.28415243
33.334824,6.244998,6.28472916,-0.199326761,6.28429217,6.2839503,6.28351326
33.345315,6.92820323,6.28408812,0.802567824,6.28365064,6.28330694,6.2828694
33.355807,6.92820323,6.28344231,0.802970059,6.28300433,6.28265879,6.28222076
33.366298,6,6.28279188,-0.531781798,6.2823534,6.28200599,6.28156746
33.37679,6.63324958,6.28213671,0.592547782,6.28169773,6.28134843,6.28090939
33.387282,7.14142843,6.28147687,0.927335733,6.28103738,6.28068617,6.28024664
33.397773,5.38516481,6.28081244,-0.946386619,6.28037245,6.28001931,6.27957926
33.408265,7.21110255,6.28014331,0.964862292,6.27970282,6.27934771,6.27890716
33.418756,5.74456265,6.27946962,-0.731373345,6.27902862,6.27867152,6.27823047
33.429248,5.65685425,6.27879125,-0.788629824,6.27834974,6.27799064,6.27754908
33.43974,6.164414,6.27810828,-0.337185819,6.27766627,6.27730512,6.27686305
33.450231,6.92820323,6.27742079,0.806710878,6.27697827,6.27661506,6.27617248
33.460723,7.07106781,6.27672866,0.891257062,6.27628563,6.27592033,6.27547724
33.471214,6.8556546,6.27603204,0.761329469,6.2755885,6.27522108,6.27477747
33.481706,6.8556546,6.2753308,0.761789864,6.27488675,6.27451718,6.27407306
33.492198,6.78232998,6.27462503,0.712534175,6.27418046,6.27380872,6.27336409
33.502689,5.91607978,6.27391481,-0.598193134,6.27346972,6.27309578,6.27265063
33.513181,6.55743852,6.27320001,0.533140241,6.2727544,6.27237822,6.27193256
33.523672,6.164414,6.27248078,-0.328735117,6.27203466,6.27165621,6.27121003
33.534164,6.40312424,6.271757,0.362446183,6.27131036,6.27092962,6.27048292
33.544656,6.78232998,6.27102875,0.715053305,6.27058159,6.27019852,6.2697513
33.555147,6.8556546,6.27029612,0.765087238,6.26984843,6.26946301,6.26901526
33.565639,6.4807407,6.26955897,0.459545132,6.26911076,6.26872294,6.26827468
33.57613,6.70820393,6.26881746,0.662862332,6.26836873,6.26797848,6.26752969
33.586622,6.70820393,6.26807146,0.663424803,6.2676222,6.2672295,6.26678018
33.597114,5.38516481,6.26732106,-0.939231736,6.26687127,6.26647608,6.26602623
33.607605,6.4807407,6.26656634,0.462789758,6.26611602,6.26571829,6.26526792
33.618097,6.8556546,6.26580716,0.768015258,6.26535632,6.26495602,6.26450512
33.628588,5.29150262,6.2650437,-0.98668185,6.26459232,6.26418942,6.26373798
33.63908,6.70820393,6.2642758,0.666279319,6.2638239,6.26341835,6.26296638
33.649572,7.41619849,6.26350357,1.07363631,6.26305113,6.2626429,6.2621904
33.660063,6.4807407,6.26272708,0.466919287,6.2622741,6.26186315,6.26141012
33.670555,6.8556546,6.2619462,0.770524757,6.26149269,6.26107898,6.2606254
33.681046,6.78232998,6.26116109,0.721920279,6.26070705,6.26029053,6.25983642
33.691538,6.32455532,6.26037162,0.253345014,6.25991704,6.25949767,6.25904302
33.70203,6,6.25957788,-0.509487858,6.25912275,6.2587005,6.25824531
33.712521,6.32455532,6.25878051,0.256465997,6.25832485,6.25789909,6.25744336
33.723013,7.07106781,6.25797825,0.901714788,6.25752204,6.2570933,6.25663703
33.733504,6.63324958,6.25717183,0.613251784,6.25671508,6.25628331,6.25582649
33.743996,5.74456265,6.25636111,-0.715400909,6.25590381,6.25546897,6.2550116
33.754488,6.244998,6.25554617,-0.102704295,6.25508833,6.25465036,6.25419245
33.764979,5.65685425,6.25472711,-0.773222389,6.25426872,6.25382758,6.25336912
33.775471,6.32455532,6.25390379,0.265803555,6.25344485,6.25300048,6.25254148
33.785962,5.65685425,6.25307637,-0.77215421,6.25261688,6.25216924,6.25170968
33.796454,6.40312424,6.25224472,0.388432132,6.25178467,6.2513337,6.25087359
33.806946,7.34846923,6.25140891,1.04740647,6.25094832,6.25049396,6.25003329
33.817437,6.40312424,6.25056905,0.390583137,6.2501079,6.2496501,6.24918888
33.827929,5.56776436,6.24972499,-0.825809073,6.24926328,6.24880198,6.24834021
33.83842,5.74456265,6.2488769,-0.710150864,6.24841463,6.24794978,6.24748745
33.848912,6.70820393,6.24802463,0.67836517,6.24756181,6.24709333,6.24663044
33.859404,7.21110255,6.24716828,0.981801545,6.2467049,6.24623274,6.24576929
33.869895,6.244998,6.24630794,-0.0361930715,6.245844,6.2453681,6.24490409
33.880387,7.07106781,6.24544346,0.908638737,6.24497896,6.24449925,6.24403468
33.890878,6.4807407,6.24457502,0.485968807,6.24410995,6.24362637,6.24316123
33.90137,6,6.24370246,-0.493662295,6.24323683,6.24274931,6.2422836
33.911862,5.91607978,6.24282589,-0.571617097,6.24235969,6.24186815,6.24140189
33.922353,5,6.24194539,-1.11442604,6.24147863,6.24098301,6.24051617
33.932845,6.92820323,6.24106082,0.828940532,6.24059349,6.24009371,6.2396263
33.943336,7.07106781,6.24017236,0.911534668,6.23970446,6.23920044,6.23873247
33.953828,7.21110255,6.23927985,0.985810684,6.23881137,6.23830304,6.2378345
33.96432,6.164414,6.23838338,-0.271973119,6.23791433,6.23740161,6.23693249
33.974811,7.21110255,6.23748306,0.986721587,6.23701344,6.23649625,6.23602655
33.985303,6.32455532,6.23657873,0.296608479,6.23610853,6.23558679,6.23511651
33.995794,6.63324958,6.23567057,0.630538664,6.2351998,6.23467341,6.23420256
34.006286,6.32455532,6.23475843,0.299661288,6.23428708,6.23375596,6.23328453
34.016778,6.164414,6.23384241,-0.263492701,6.23337047,6.23283453,6.23236252
34.027269,6.4807407,6.2329226,0.497813321,6.23245008,6.23190922,6.23143663
34.037761,6.244998,6.23199884,0.114013849,6.23152575,6.23097987,6.2305067
34.048252,6.55743852,6.23107133,0.571285563,6.23059765,6.23004667,6.22957291
34.058744,6.164414,6.2301399,-0.256370623,6.22966563,6.22910944,6.2286351
34.069236,6.40312424,6.22920465,0.417036671,6.2287298,6.22816829,6.22769336
34.079727,5.83095189,6.22826569,-0.630328326,6.22779025,6.22722332,6.2267478
34.090219,6,6.22732286,-0.476783866,6.22684683,6.22627436,6.22579825
34.10071,7.21110255,6.22637633,0.992333723,6.22589971,6.2253216,6.2248449
34.111202,6.4807407,6.22542596,0.505286787,6.22494875,6.22436487,6.22388757
34.121694,6.55743852,6.22447184,0.577032652,6.22399404,6.22340427,6.22292638
34.132185,7,6.22351408,0.881184382,6.22303568,6.22243991,6.22196143
34.142677,5.74456265,6.22255252,-0.691368116,6.22207352,6.22147161,6.22099253
34.153168,6,6.22158734,-0.470730646,6.22110775,6.22049956,6.22001989
34.16366,5.91607978,6.22061839,-0.551850163,6.22013819,6.2195236,6.21904333
34.174152,6.40312424,6.21964576,0.428343882,6.21916496,6.21854383,6.21806295
34.184643,7.14142843,6.21866956,0.960603386,6.21818817,6.21756035,6.21707886
34.195135,6.63324958,6.21768963,0.644639393,6.21720763,6.21657298,6.21609089
34.205626,6.63324958,6.21670617,0.645401743,6.21622357,6.21558192,6.21509923
34.216118,5.56776436,6.215719,-0.804956298,6.21523579,6.214587,6.2141037
34.22661,6.92820323,6.21472824,0.844674488,6.21424442,6.21358831,6.21310441
34.237101,5.65685425,6.21373399,-0.746243755,6.21324956,6.21258598,6.21210146
34.247593,6.40312424,6.21273608,0.43633491,6.21225105,6.2115798,6.21109468
34.258084,6.40312424,6.21173472,0.437480872,6.21124907,6.21057,6.21008426
34.268576,6.92820323,6.21072974,0.84703807,6.21024347,6.20955638,6.20907003
34.279068,6.92820323,6.20972124,0.847633172,6.20923436,6.20853905,6.20805208
34.289559,6.4807407,6.20870933,0.521566261,6.20822184,6.20751813,6.20703054
34.300051,6.4807407,6.20769385,0.522538844,6.20720574,6.20649342,6.20600521
34.310542,6.164414,6.20667501,-0.205574819,6.20618628,6.20546513,6.2049763
34.321034,6.70820393,6.20565262,0.708908535,6.20516327,6.20443307,6.20394363
34.331526,6.164414,6.20462681,-0.200531301,6.20413683,6.20339737,6.20290729
34.342017,5.56776436,6.20359768,-0.79739157,6.20310708,6.20235811,6.20186742
34.352509,6.32455532,6.20256506,0.349271035,6.20207384,6.20131512,6.2008238
34.363,6.4807407,6.20152918,0.528404694,6.20103733,6.20026861,6.19977666
34.373492,6.32455532,6.20048984,0.352229302,6.19999736,6.19921838,6.1987258
34.383984,6.78232998,6.19944717,0.763467625,6.19895406,6.19816455,6.19767134
34.394475,6.40312424,6.19840129,0.452463205,6.19790755,6.19710723,6.19661339
34.404967,6.70820393,6.19735201,0.714739058,6.19685764,6.19604622,6.19555174
34.415458,6.63324958,6.19629957,0.661021946,6.19580456,6.19498174,6.19448663
34.42595,7.07106781,6.19524377,0.93585471,6.19474813,6.1939136,6.19341785
34.436442,6.92820323,6.19418475,0.856748782,6.19368848,6.1928419,6.19234551
34.446933,6.55743852,6.19312263,0.603585862,6.19262572,6.19176676,6.19126974
34.457425,5.83095189,6.19205723,-0.600920404,6.19155967,6.19068799,6.19019032
34.467916,5.91607978,6.19098877,-0.524317636,6.19049057,6.1896058,6.18910749
34.478408,6.32455532,6.18991707,0.36693085,6.18941823,6.18851999,6.18802104
34.4889,6.244998,6.18884227,0.236972,6.18834279,6.18743068,6.18693108
34.499391,6.92820323,6.18776449,0.860487502,6.18726436,6.18633799,6.18583774
34.509883,6.63324958,6.18668355,0.668255961,6.18618277,6.1852417,6.18474081
34.520374,6.4807407,6.18559969,0.543268818,6.18509826,6.18414205,6.18364051
34.530866,6.244998,6.18451273,0.245937535,6.18401065,6.18303883,6.18253664
34.541358,7.28010989,6.18342279,1.04722829,6.18292007,6.18193216,6.18142931
34.551849,6.40312424,6.18233003,0.469887443,6.18182665,6.18082216,6.18031865
34.562341,5.56776436,6.18123425,-0.783243185,6.18073021,6.17970861,6.17920445
34.572832,7,6.1801357,0.905463581,6.17963101,6.17859175,6.17808693
34.583324,5.83095189,6.17903421,-0.589985013,6.17852886,6.17747137,6.17696589
34.593816,6.70820393,6.17792991,0.728199162,6.1774239,6.17634759,6.17584145
34.604307,6.40312424,6.17682295,0.475711347,6.17631628,6.17522052,6.17471372
34.614799,6.164414,6.17571316,-0.106297472,6.17520582,6.17408997,6.1735825
34.62529,7.21110255,6.17460077,1.01808731,6.17409278,6.17295614,6.17244801
34.635782,6.40312424,6.17348564,0.479206217,6.17297697,6.17181885,6.17131005
34.646274,6,6.1723679,-0.41517213,6.17185857,6.1706782,6.17016873
34.656765,6.70820393,6.1712477,0.732772973,6.1707377,6.16953431,6.16902417
34.667257,6.40312424,6.17012489,0.482700062,6.16961422,6.16838699,6.16787617
34.677748,6.78232998,6.16899972,0.78315405,6.16848838,6.16723645,6.16672496
34.68824,6.63324958,6.16787203,0.682185863,6.16736001,6.16608248,6.16557032
34.698732,6,6.16674199,-0.408340526,6.1662293,6.16492521,6.16441237
34.709223,6.63324958,6.16560975,0.683841963,6.16509639,6.16376475,6.16325123
34.719715,5.91607978,6.16447517,-0.498392804,6.16396113,6.1626009,6.1620867
34.730206,7.41619849,6.16333853,1.11931227,6.1628238,6.16143388,6.160919
34.740698,6.08276253,6.16219967,-0.281845945,6.16168426,6.16026348,6.15974792
34.75119,6.32455532,6.16105877,0.404347062,6.16054269,6.15908983,6.15857358
34.761681,7.28010989,6.15991603,1.05839211,6.15939926,6.15791304,6.1573961
34.772173,7.28010989,6.1587713,1.05893276,6.15825385,6.1567329,6.15621527
34.782664,6.244998,6.15762489,0.29558943,6.15710675,6.15554964,6.15503133
34.793156,6.55743852,6.15647666,0.633215495,6.15595783,6.15436306,6.15384405
34.803648,6.63324958,6.15532683,0.691319573,6.15480731,6.15317326,6.15265356
34.814139,6.08276253,6.1541756,-0.267232242,6.15365539,6.15198037,6.15145998
34.824631,7.34846923,6.15302287,1.0933647,6.15250197,6.15078418,6.15026309
34.835122,6.164414,6.15186897,0.112004615,6.15134737,6.14958493,6.14906314
34.845614,5.91607978,6.15071381,-0.484390361,6.15019151,6.14838239,6.14785989
34.856106,7,6.14955762,0.922194328,6.14903463,6.14717668,6.14665349
34.866597,6.244998,6.14840067,0.310801105,6.14787698,6.14596794,6.14544404
34.877089,7.28010989,6.14724289,1.06436225,6.1467185,6.14475593,6.14423133
34.88758,6.63324958,6.14608466,0.697972007,6.14555957,6.14354091,6.1430156
34.898072,5.83095189,6.14492594,-0.560333869,6.14440014,6.14232265,6.14179663
34.908564,6.4807407,6.14376703,0.580494327,6.14324053,6.14110127,6.14057454
34.919055,6.78232998,6.14260826,0.799826057,6.14208106,6.1398769,6.13934946
34.929547,6.55743852,6.14144962,0.644972015,6.14092171,6.13864931,6.13812116
34.940038,7.07106781,6.14029159,0.964767446,6.13976297,6.13741876,6.13688989
34.95053,6.164414,6.1391342,0.158996249,6.13860486,6.13618501,6.13565542
34.961022,6.70820393,6.13797785,0.755133157,6.1374478,6.13494818,6.13441788
34.971513,7.48331477,6.13682296,1.16038434,6.13629221,6.13370842,6.13317739
34.982005,6.63324958,6.13566967,0.705393443,6.1351382,6.13246548,6.13193373
34.992496,6.63324958,6.13451856,0.706208908,6.13398637,6.13121962,6.13068715
35.002988,5.47722558,6.13336982,-0.810027312,6.13283692,6.12997061,6.12943741
35.01348,6.40312424,6.13222401,0.520480762,6.13169039,6.12871857,6.12818465
35.023971,6.244998,6.13108174,0.337514823,6.1305474,6.12746364,6.12692899
35.034463,6.08276253,6.12994333,-0.217211425,6.12940828,6.12620558,6.1256702
35.044954,6.63324958,6.1288096,0.71023938,6.12827382,6.12494465,6.12440853
35.055446,5.83095189,6.127681,-0.544728473,6.1271445,6.1236806,6.12314375
35.065938,6.4807407,6.12655838,0.595132186,6.12602116,6.12241358,6.12187599
35.076429,7.28010989,6.12544266,1.07455444,6.12490471,6.1211437,6.12060538
35.086921,6.32455532,6.12433453,0.447460376,6.12379586,6.11987075,6.11933168
35.097412,6.32455532,6.12323524,0.448687061,6.12269584,6.11859496,6.11805515
35.107904,6,6.12214572,-0.349493514,6.12160559,6.11731611,6.11677556
35.118396,5.65685425,6.12106734,-0.681331853,6.12052649,6.11603432,6.11549302
35.128887,6.70820393,6.12000167,0.766943457,6.11946009,6.11474973,6.11420769
35.139379,6.55743852,6.11895011,0.662184575,6.11840781,6.1134621,6.11291931
35.14987,7.34846923,6.11791473,1.10930361,6.1173717,6.11217168,6.11162814
35.160362,6,6.11689741,-0.341902638,6.11635366,6.11087824,6.11033395
35.170854,7,6.11590066,0.940265569,6.11535618,6.10958191,6.10903687
35.181345,6.40312424,6.11492729,0.536839777,6.11438208,6.10828283,6.10773702
35.191837,6.08276253,6.11398027,-0.176685415,6.11343433,6.10698074,6.10643418
35.202328,6.78232998,6.11306338,0.818087161,6.11251672,6.10567592,6.1051286
35.21282,6.4807407,6.11218065,0.607091466,6.11163327,6.10436812,6.10382004
35.223312,6.92820323,6.11133703,0.903806504,6.11078893,6.10305747,6.10250862
35.233803,6.32455532,6.11053828,0.462619756,6.10998946,6.1017441,6.1011945
35.244295,6.08276253,6.10979091,-0.164403113,6.10924138,6.10042779,6.09987741
35.254786,6.55743852,6.10910292,0.669578673,6.10855268,6.09910878,6.09855763
35.265278,6.63324958,6.1084835,0.724407399,6.10793255,6.09778683,6.09723491
35.27577,6.78232998,6.10794381,0.821210189,6.10739216,6.09646207,6.09590938
35.286261,6.70820393,6.10749719,0.775052736,6.10694485,6.09513465,6.09458119
35.296753,6.55743852,6.10715962,0.671028242,6.1066066,6.09380432,6.09325008
35.307244,5.91607978,6.10695068,-0.436887735,6.10639698,6.09247133,6.09191632
35.317736,6.55743852,6.10689421,0.671225982,6.10633984,6.09113545,6.09057965
35.328228,6.40312424,6.10701974,0.544154846,6.10646473,6.08979681,6.08924023
35.338719,6.4807407,6.10736441,0.611045242,6.10680878,6.08845554,6.08789818
35.349211,6.4807407,6.10797441,0.610545892,6.10741817,6.08711141,6.08655326
35.359702,6.40312424,6.10891065,0.542414588,6.10835384,6.08576466,6.08520573
35.370194,5.74456265,6.11025495,-0.60472498,6.10969759,6.08441507,6.08385534
35.380686,7.07106781,6.11212195,0.979257813,6.1115641,6.08306275,6.08250224
35.391177,6.70820393,6.1146808,0.770404524,6.11412252,6.08170785,6.08114655
35.401669,6.78232998,6.11819262,0.814946231,6.117634,6.08035013,6.07978803
35.41216,6.164414,6.12306428,0.203346312,6.12250543,6.07898984,6.07842694
35.422652,5.91607978,6.12992728,-0.462436475,6.12936839,6.07762674,6.07706304
35.433144,6.4807407,6.13971708,0.58397228,6.13915841,6.07626096,6.07569646
35.443635,6.63324958,6.15373132,0.692472571,6.15317326,6.07489264,6.07432734
35.454127,6.63324958,6.17361868,0.677960842,6.17306175,6.07352154,6.07295543
35.464618,5.56776436,6.20121596,-0.795896724,6.20066085,6.07214791,6.071581
35.47511,5.91607978,6.23823974,-0.567591364,6.23768726,6.07077151,6.07020379
35.485602,6.55743852,6.28573421,0.521252637,6.28518525,6.06939248,6.06882395
35.496093,6.78232998,6.34325359,0.662628399,6.34270895,6.06801095,6.06744161
35.506585,6.4807407,6.40753479,0.270565905,6.40699497,6.06662668,6.06605652
35.517076,5.91607978,6.47044962,-0.744560165,6.46991441,6.06523993,6.06466895
35.527568,7.34846923,6.51783934,0.911388987,6.51730738,6.06385044,6.06327865
35.53806,7.34846923,6.53357897,0.902712724,6.53304765,6.06245836,6.06188575
35.548551,6.70820393,6.51064867,0.444471896,6.51011483,6.06106383,6.0604904
35.559043,5.65685425,6.45761922,-0.894854721,6.45708036,6.05966659,6.05909233
35.569534,6.70820393,6.39100498,0.563204185,6.39045984,6.05826692,6.05769183
35.580026,5.91607978,6.32439907,-0.638998657,6.32384752,6.05686455,6.05628864
35.590518,6.63324958,6.26522054,0.606653971,6.26466311,6.05545963,6.05488289
35.601009,6.70820393,6.21627321,0.701377732,6.21571071,6.0540523,6.05347473
35.611501,6.08276253,6.17772987,-0.308167719,6.17716318,6.05264231,6.0520639
35.621992,6.63324958,6.14842588,0.696292829,6.14785579,6.05122991,6.05065067
35.632484,6.40312424,6.12660263,0.525853215,6.12602982,6.04981487,6.04923478
35.642976,6.08276253,6.11042954,-0.166334022,6.10985451,6.04839731,6.04781639
35.653467,5.74456265,6.09829801,-0.594756561,6.09772114,6.04697739,6.04639562
35.663959,5.83095189,6.08895217,-0.507937279,6.08837371,6.04555483,6.04497222
35.67445,6.55743852,6.08150022,0.689882822,6.08092034,6.04412993,6.04354647
35.684942,6.164414,6.07534362,0.298446623,6.07476245,6.0427024,6.0421181
35.695434,6.55743852,6.07009855,0.698097396,6.06951617,6.04127241,6.04068725
35.705925,6.63324958,6.06551975,0.753478485,6.06493622,6.03984009,6.03925408
35.716417,6.164414,6.06144607,0.320886163,6.06086144,6.03840518,6.03781832
35.726908,5.65685425,6.05776904,-0.633178322,6.05718333,6.03696796,6.03638024
35.7374,5.74456265,6.05440974,-0.556639108,6.053823,6.03552816,6.03493958
35.747892,6.63324958,6.05130999,0.762849648,6.05072223,6.03408593,6.03349649
35.758383,6.78232998,6.04842478,0.856682675,6.04783601,6.03264142,6.03205111
35.768875,6.40312424,6.04571778,0.597834804,6.04512803,6.03119435,6.03060318
35.779366,5.91607978,6.04316082,-0.356484279,6.0425701,6.02974501,6.02915298
35.789858,5.91607978,6.04073016,-0.3530586,6.04013847,6.02829314,6.02770023
35.80035,5.83095189,6.03840701,-0.455472405,6.03781437,6.02683887,6.02624509
35.810841,6.4807407,6.0361759,0.666756924,6.03558231,6.02538236,6.02478771
35.821333,6.32455532,6.03402343,0.539010101,6.0334289,6.02392333,6.0233278
35.831824,6.70820393,6.03193915,0.822353198,6.03134368,6.02246207,6.02186567
35.842316,6.70820393,6.02991356,0.823583858,6.02931716,6.02099832,6.02040103
35.852808,6,6.02793917,-0.167150148,6.02734184,6.01953221,6.01893404
35.863299,6.70820393,6.02600964,0.82595054,6.02541137,6.01806389,6.01746484
35.873791,6.08276253,6.02411903,0.242164201,6.02351984,6.0165931,6.01599316
35.884282,6.78232998,6.02226294,0.871818241,6.02166282,6.01512012,6.01451929
35.894774,6.32455532,6.02043691,0.551469322,6.01983587,6.01364467,6.01304295
35.905266,5.56776436,6.01863757,-0.671470927,6.0180356,6.01216691,6.0115643
35.915757,6.244998,6.01686201,0.47763583,6.01625912,6.01068699,6.01008348
35.926249,6.70820393,6.01510722,0.832524299,6.01450341,6.00920462,6.00860022
35.93674,6.244998,6.01337119,0.481276225,6.01276646,6.00772011,6.0071148
35.947232,6.78232998,6.01165154,0.877882932,6.01104588,6.00623317,6.00562696
35.957724,5.56776436,6.00994662,-0.664967864,6.00934004,6.00474395,6.00413684
35.968215,7.34846923,6.00825501,1.15767622,6.0076475,6.00325261,6.00264459
35.978707,5.83095189,6.00657496,-0.419074063,6.00596653,6.00175887,6.00114994
35.989198,6.4807407,6.00490556,0.689808044,6.00429619,6.00026301,5.99965317
35.99969,6.63324958,6.00324536,0.793728049,6.00263507,5.99876477,5.99815402
36.010182,5.74456265,6.00159354,-0.506982147,6.00098232,5.99726429,5.99665262
36.020673,5.29150262,5.99994937,-0.841692784,5.99933721,5.99576172,5.99514913
36.031165,6.244998,5.99831172,0.496675222,5.99769863,5.99425678,5.99364328
36.041656,6.32455532,5.99668021,0.572603798,5.99606619,5.99274978,5.99213535
36.052148,5.74456265,5.99505388,-0.500490991,5.99443892,5.99124042,5.99062507
36.06264,5.83095189,5.9934323,-0.403088583,5.99281641,5.98972886,5.98911258
36.073131,6.70820393,5.99181511,0.846397558,5.99119827,5.98821525,5.98759805
36.083623,6.164414,5.99020151,0.417387696,5.98958374,5.98669931,5.98608118
36.094114,6.32455532,5.9885914,0.579623945,5.98797269,5.98518134,5.98456227
36.104606,5.09901951,5.98698407,-0.942318714,5.98636441,5.98366106,5.98304105
36.115098,5.83095189,5.98537932,-0.392972555,5.98475872,5.98213861,5.98151766
36.125589,5.74456265,5.98377698,-0.489095428,5.98315543,5.98061415,5.97999226
36.136081,5.47722558,5.98217645,-0.710598958,5.98155395,5.97908739,5.97846457
36.146572,6,5.98057777,0.139363666,5.97995431,5.97755864,5.97693487
36.157064,7.54983444,5.97898038,1.25333717,5.97835597,5.97602761,5.9754029
36.167556,6.92820323,5.9773842,0.975099496,5.97675884,5.97449446,5.97386879
36.178047,6.78232998,5.97578919,0.898076161,5.97516287,5.97295933,5.97233271
36.188539,6,5.97419485,0.160639808,5.97356757,5.97142195,5.97079437
36.19903,6.40312424,5.97260131,0.65614246,5.97197306,5.9698826,5.96925407
36.209522,6.244998,5.9710081,0.523440443,5.97037889,5.96834102,5.96771153
36.220014,6.70820393,5.96941523,0.859528187,5.96878505,5.96679734,5.96616689
36.230505,6.244998,5.96782271,0.526474397,5.96719156,5.96525173,5.96462031
36.240997,5.74456265,5.96623011,-0.470815741,5.96559799,5.96370389,5.96307151
36.251488,6.244998,5.96463762,0.52949068,5.96400453,5.96215414,5.96152079
36.26198,5.83095189,5.96304483,-0.363445912,5.96241076,5.96060218,5.95996785
36.272472,6.92820323,5.96145178,0.983235195,5.96081674,5.95904816,5.95841286
36.282963,5.91607978,5.95985855,-0.209233753,5.95922253,5.95749225,5.95685597
36.293455,6.55743852,5.95826473,0.774063172,5.95762773,5.95593414,5.95529689
36.303946,6.4807407,5.95667056,0.723926889,5.95603257,5.95437416,5.95373593
36.314438,6.244998,5.95507565,0.538444376,5.95443668,5.952812,5.95217279
36.32493,6.63324958,5.9534801,0.824481343,5.95284014,5.95124782,5.95060762
36.335421,6.78232998,5.95188398,0.911288102,5.95124303,5.94968179,5.9490406
36.345913,5.91607978,5.95028694,-0.184951757,5.94964499,5.9481136,5.94747142
36.356404,6.63324958,5.94868922,0.827381631,5.94804628,5.94654356,5.94590039
36.366896,6.244998,5.94709047,0.545809059,5.94644653,5.94497139,5.94432722
36.377388,6.08276253,5.94549079,0.370502005,5.94484586,5.94339723,5.94275206
36.387879,5.65685425,5.9438903,-0.535757458,5.94324436,5.94182125,5.94117508
36.398371,5.65685425,5.94228865,-0.534260609,5.9416417,5.94024315,5.93959598
36.408862,5.56776436,5.9406861,-0.610673181,5.94003814,5.93866324,5.93801506
36.419354,6.55743852,5.93908231,0.786356291,5.93843334,5.93708122,5.93643204
36.429846,5.47722558,5.9374774,-0.678418622,5.93682743,5.93549726,5.93484707
36.440337,6.55743852,5.9358715,0.788395221,5.93522051,5.93391151,5.9332603
36.450829,6.164414,5.93426427,0.479739236,5.93361226,5.93232368,5.93167145
36.46132,6.40312424,5.93265599,0.685906882,5.93200296,5.93073407,5.93008083
36.471812,6.55743852,5.93104632,0.791449431,5.93039227,5.92914239,5.92848813
36.482304,5.65685425,5.92943541,-0.522093054,5.92878033,5.9275488,5.92689351
36.492795,6.40312424,5.92782337,0.689420674,5.92716727,5.92595346,5.92529715
36.503287,6.32455532,5.92620989,0.631146124,5.92555276,5.92435606,5.92369872
36.513778,5.74456265,5.92459525,-0.424302491,5.92393709,5.92275693,5.92209856
36.52427,5.56776436,5.92297913,-0.595998964,5.92231993,5.92115576,5.92049636
36.534762,6.164414,5.92136166,0.493003389,5.92070142,5.91955272,5.91889228
36.545253,5.83095189,5.91974299,-0.297978345,5.91908171,5.91794796,5.91728648
36.555745,5.91607978,5.91812279,-0.0451996247,5.91746047,5.91634118,5.91567866
36.566236,6.244998,5.91650136,0.573146264,5.91583799,5.91473269,5.91406913
36.576728,7.61577311,5.91487837,1.30418355,5.91421396,5.91312221,5.9124576
36.58722,6.32455532,5.91325398,0.641327792,5.91258852,5.91150988,5.91084422
36.597711,5,5.91162833,-0.954792296,5.91096181,5.90989587,5.90922916
36.608203,6.8556546,5.91000109,0.972447176,5.90933352,5.90827988,5.90761211
36.618694,5.74456265,5.90837257,-0.404734389,5.90770394,5.90666222,5.9059934
36.629186,6.32455532,5.90674246,0.646384456,5.90607277,5.90504259,5.9043727
36.639678,6.78232998,5.90511089,0.936599752,5.90444014,5.90342115,5.9027502
36.650169,5.29150262,5.90347802,-0.782288564,5.9028062,5.90179806,5.90112605
36.660661,5.56776436,5.90184353,-0.577995821,5.90117065,5.90017302,5.89949994
36.671152,6.63324958,5.90020773,0.85617863,5.89953378,5.89854635,5.8978722
36.681644,6.92820323,5.89857031,1.0147083,5.89789527,5.89691774,5.89624252
36.692136,6.244998,5.8969314,0.589971691,5.89625529,5.89528736,5.89461106
36.702627,5.91607978,5.89529117,0.144182557,5.89461399,5.89365536,5.89297799
36.713119,5.56776436,5.8936493,-0.570863331,5.89297104,5.89202145,5.891343
36.72361,5.83095189,5.89200611,-0.247091505,5.89132675,5.89038594,5.8897064
36.734102,6.32455532,5.89036126,0.658934031,5.88968082,5.88874852,5.8880679
36.744594,6.40312424,5.88871493,0.717223333,5.8880334,5.88710937,5.88642765
36.755085,6.32455532,5.88706726,0.661428804,5.88638463,5.88546863,5.88478582
36.765577,5.29150262,5.88541794,-0.770659013,5.88473422,5.88382601,5.8831421
36.776068,6.55743852,5.88376728,0.820774785,5.88308246,5.88218182,5.88149682
36.78656,5.74456265,5.88211496,-0.370880463,5.88142904,5.88053577,5.87984966
36.797052,5.56776436,5.88046116,-0.559192984,5.87977413,5.878888,5.87820079
36.807543,6.55743852,5.87880601,0.823791548,5.87811788,5.87723869,5.87655037
36.818035,5.19615242,5.87714921,-0.825225294,5.87645997,5.87558752,5.8748981
36.828526,5.74456265,5.87549107,-0.361840328,5.87480072,5.87393483,5.87324429
36.839018,6.08276253,5.87383128,0.457089983,5.87313981,5.87228029,5.87158864
36.84951,5.74456265,5.87216999,-0.357221703,5.87147741,5.87062408,5.86993132
36.860001,6.164414,5.87050737,0.542131564,5.86981366,5.86896636,5.86827247
36.870493,5.65685425,5.8688431,-0.460422469,5.86814827,5.86730682,5.86661181
36.880984,5.91607978,5.8671775,0.221138615,5.86648154,5.86564578,5.86494964
36.891476,6.92820323,5.86551024,1.03087001,5.86481316,5.86398293,5.86328566
36.901968,6.4807407,5.86384151,0.785429304,5.86314329,5.86231844,5.86162004
36.912459,6.40312424,5.86217144,0.735494932,5.86147209,5.86065247,5.85995294
36.922951,6.08276253,5.86049974,0.471447552,5.85979925,5.85898471,5.85828404
36.933442,7,5.85882671,1.06825713,5.85812508,5.85731549,5.85661368
36.943934,6.164414,5.85715204,0.55431215,5.85644927,5.85564449,5.85494154
36.954426,7.34846923,5.8554759,1.22188106,5.85477198,5.85397188,5.85326778
36.964917,5.38516481,5.85379845,-0.684568215,5.85309338,5.85229783,5.85159258
36.975409,5.83095189,5.85211936,-0.145490441,5.85141314,5.85062201,5.84991561
36.9859,6.40312424,5.85043897,0.74342805,5.84973159,5.84894477,5.84823721
36.996392,6.40312424,5.84875696,0.744558448,5.84804842,5.84726578,5.84655706
37.006884,6.78232998,5.84707348,0.967086607,5.84636378,5.84558521,5.84487533
37.017375,6.32455532,5.8453887,0.692218619,5.84467784,5.84390323,5.84319219
37.027867,6,5.84370231,0.395345021,5.84299028,5.84221953,5.84150732
37.038358,5.56776436,5.84201464,-0.523689099,5.84130144,5.84053442,5.83982104
37.04885,6.164414,5.84032535,0.569287849,5.83961097,5.8388476,5.83813305
37.059342,6.40312424,5.83863462,0.751325244,5.83791907,5.83715923,5.8364435
37.069833,6.8556546,5.83694261,1.00931263,5.83622588,5.83546949,5.83475258
37.080325,6.4807407,5.835249,0.803424982,5.83453109,5.83377804,5.83305995
37.090816,6.164414,5.83355412,0.575204211,5.83283502,5.83208523,5.83136596
37.101308,6.70820393,5.83185765,0.936133689,5.83113736,5.83039074,5.82967028
37.1118,6.164414,5.83015976,0.578147254,5.82943828,5.82869473,5.82797307
37.122291,5.47722558,5.8284606,-0.592650849,5.82773793,5.82699738,5.82627452
37.132783,6.4807407,5.82675987,0.808690809,5.82603601,5.82529836,5.82457431
37.143274,5.65685425,5.82505789,-0.410126376,5.82433282,5.823598,5.82287275
37.153766,6.32455532,5.82335434,0.707955491,5.82262807,5.82189599,5.82116954
37.164258,5.83095189,5.82164939,0.0964494964,5.82092191,5.8201925,5.81946484
37.174749,5,5.8199432,-0.90550715,5.81921451,5.81848769,5.81775882
37.185241,5.09901951,5.81823545,-0.848065998,5.81750555,5.81678124,5.81605116
37.195732,6.08276253,5.81653203,0.515975289,5.81580091,5.8150735,5.8143422
37.206224,6.08276253,5.81482151,0.517630197,5.81408917,5.81336413,5.81263161
37.216716,4.89897949,5.81310961,-0.956101523,5.81237605,5.8116533,5.81091956
37.227207,5.47722558,5.81139649,-0.578075182,5.81066171,5.8099412,5.80920623
37.237699,4.12310563,5.80968184,-1.29868249,5.80894583,5.80822748,5.80749128
37.24819,5.74456265,5.80796598,-0.251800194,5.80722874,5.8065125,5.80577507
37.258682,5.65685425,5.8062486,-0.386515657,5.80551012,5.80479592,5.80405726
37.269174,5.74456265,5.80452986,-0.244882045,5.80379014,5.80307792,5.80233802
37.279665,5.38516481,5.80280993,-0.646254691,5.80206897,5.80135867,5.80061752
37.290157,6,5.80108849,0.445994965,5.80034628,5.79963784,5.79889545
37.300648,5.74456265,5.79936587,-0.234100883,5.79862242,5.79791578,5.79717214
37.31114,6.244998,5.79764175,0.668846958,5.79689704,5.79619215,5.79544725
37.321632,5.83095189,5.79591629,0.187178012,5.79517033,5.79446712,5.79372097
37.332123,5.91607978,5.79418966,0.349127655,5.79344244,5.79274088,5.79199347
37.342615,4.47213595,5.79246155,-1.14905422,5.79171307,5.79101309,5.79026442
37.353106,4.79583152,5.79073228,-0.997447122,5.78998254,5.78928409,5.78853415
37.363598,5.91607978,5.78900154,0.356480356,5.78825053,5.78755355,5.78680235
37.37409,5.83095189,5.78726948,0.209003377,5.7865172,5.78582166,5.78506919
37.384581,5.29150262,5.78553629,-0.702875285,5.78478273,5.78408857,5.78333482
37.395073,5.83095189,5.78380163,0.217141118,5.78304679,5.78235397,5.78159894
37.405564,6.32455532,5.78206584,0.736538851,5.78130973,5.78061818,5.77986188
37.416056,6.63324958,5.7803286,0.923537212,5.7795712,5.7788809,5.77812331
37.426548,5.91607978,5.77859007,0.37079605,5.77783138,5.77714228,5.7763834
37.437039,5.47722558,5.77685043,-0.547379993,5.77609045,5.7754025,5.77464233
37.447531,6.40312424,5.77510935,0.792473902,5.77434808,5.77366123,5.77289977
37.458022,5.83095189,5.77336717,0.239968177,5.7726046,5.77191882,5.77115606
37.468514,5.09901951,5.77162356,-0.820124407,5.77085968,5.77017493,5.76941086
37.479006,6.164414,5.76987868,0.628120465,5.76911351,5.76842973,5.76766436
37.489497,5.74456265,5.76813273,-0.153525501,5.76736624,5.76668341,5.76591673
37.499989,6.164414,5.76638535,0.630895118,5.76561755,5.76493563,5.76416764
37.51048,5.91607978,5.7646369,0.389156627,5.76386779,5.76318673,5.76241742
37.520972,5.65685425,5.76288705,-0.325626778,5.76211662,5.76143638,5.76066576
37.531464,5.56776436,5.76113596,-0.439740375,5.76036421,5.75968476,5.75891281
37.541955,5.47722558,5.75938381,-0.53118569,5.75861073,5.75793204,5.75715877
37.552447,5.74456265,5.75763027,-0.114313727,5.75685587,5.75617789,5.75540329
37.562938,6,5.75587569,0.494089377,5.75509995,5.75442265,5.75364672
37.57343,6.55743852,5.75411972,0.896280539,5.75334264,5.752666,5.75188872
37.583922,5.29150262,5.75236255,-0.678866647,5.75158413,5.7509081,5.75012948
37.594413,5.09901951,5.75060434,-0.807208044,5.74982458,5.74914912,5.74836917
37.604905,5.29150262,5.74884477,-0.676270763,5.74806366,5.74738875,5.74660745
37.615396,6,5.74708417,0.502907374,5.74630172,5.74562732,5.74484466
37.625888,6.70820393,5.74532222,0.981265361,5.74453842,5.7438645,5.74308049
37.63638,5.83095189,5.7435591,0.295622731,5.74277393,5.74210046,5.74131509
37.646871,5.19615242,5.74179496,-0.738676206,5.74100843,5.74033538,5.73954865
37.657363,5.19615242,5.74002948,-0.737480211,5.73924159,5.73856893,5.73778084
37.667854,5.29150262,5.73826301,-0.66840137,5.73747375,5.73680145,5.73601199
37.678346,5.09901951,5.73649522,-0.798420755,5.73570458,5.7350326,5.73424177
37.688838,6.244998,5.73472626,0.714333071,5.73393425,5.73326257,5.73247036
37.699329,6.63324958,5.73295633,0.948837843,5.73216294,5.73149153,5.73069794
37.709821,5.56776436,5.73118508,-0.404253287,5.73039031,5.72971915,5.72892417
37.720312,5.83095189,5.72941287,0.31865189,5.72861671,5.72794576,5.7271494
37.730804,5.38516481,5.72763935,-0.585213246,5.7268418,5.72617104,5.72537329
37.741296,5.74456265,5.7258647,0.136740417,5.72506576,5.72439516,5.72359601
37.751787,5.65685425,5.72408911,-0.25929685,5.72328877,5.72261829,5.72181775
37.762279,5.19615242,5.72231222,-0.725368732,5.72151048,5.72084011,5.72003817
37.77277,5.83095189,5.72053439,0.332291291,5.71973125,5.71906096,5.71825761
37.783262,6.164414,5.71875529,0.667576748,5.71795073,5.7172805,5.71647574
37.793754,5.47722558,5.71697508,-0.489642223,5.71616912,5.71549891,5.71469274
37.804245,5.56776436,5.71519395,-0.383965606,5.71438657,5.71371637,5.71290878
37.814737,5.91607978,5.71341156,0.45018688,5.71260275,5.71193254,5.71112352
37.825228,6.164414,5.71162825,0.67289357,5.71081802,5.71014776,5.70933732
37.83572,5.91607978,5.70984369,0.454132245,5.70903203,5.7083617,5.70754984
37.846212,6,5.70805805,0.540316525,5.70724497,5.70657455,5.70576125
37.856703,5,5.70627152,-0.840399618,5.705457,5.70478646,5.70397173
37.867195,6.4807407,5.70448375,0.881054453,5.70366779,5.70299711,5.70218094
37.877686,5.19615242,5.70269509,-0.71171811,5.70187769,5.70120685,5.70038923
37.888178,6.8556546,5.70090521,1.07459266,5.70008636,5.69941534,5.69859627
37.89867,6,5.69911428,0.548530514,5.69829397,5.69762275,5.69680223
37.909161,5.56776436,5.69732247,-0.359941812,5.69650071,5.69582927,5.69500729
37.919653,5.56776436,5.69552946,-0.357442435,5.69470624,5.69403454,5.69321111
37.930144,6.244998,5.69373558,0.742470483,5.6929109,5.69223894,5.69141404
37.940636,5.09901951,5.69194051,-0.770013631,5.69111436,5.6904421,5.68961574
37.951128,5.29150262,5.69014441,-0.631380857,5.68931679,5.68864422,5.68781639
37.961619,5.38516481,5.68834746,-0.550620248,5.68751837,5.68684547,5.68601616
37.972111,5.74456265,5.68654934,0.240859521,5.68571877,5.68504551,5.68421472
37.982602,5.38516481,5.68475037,-0.547344104,5.68391832,5.6832447,5.68241242
37.993094,5.19615242,5.68295024,-0.697708977,5.6821167,5.68144268,5.68060892
38.003586,5.56776436,5.68114911,-0.336726512,5.68031408,5.67963964,5.67880439
38.014077,5.65685425,5.67934716,-0.14997635,5.67851063,5.67783577,5.67699902
38.024569,5.56776436,5.67754405,-0.331330172,5.67670602,5.6760307,5.67519246
38.03506,5.56776436,5.67574013,-0.328596659,5.6749006,5.67422481,5.67338506
38.045552,5.91607978,5.67393506,0.492082027,5.67309403,5.67241775,5.67157649
38.056044,5.56776436,5.67212903,-0.3230552,5.67128648,5.67060969,5.66976692
38.066535,6.244998,5.6703222,0.758073745,5.66947813,5.66880082,5.66795653
38.077027,5.56776436,5.66851423,-0.317411203,5.66766865,5.66699079,5.66614499
38.087518,5.91607978,5.66670549,0.4993739,5.66585839,5.66517996,5.66433263
38.09801,5.56776436,5.66489563,-0.311658888,5.66404699,5.66336799,5.66251913
38.108502,5.65685425,5.66308482,-0.0789339313,5.66223465,5.66155505,5.66070465
38.118993,6.4807407,5.66127324,0.90524442,5.66042154,5.65974131,5.65888938
38.129485,6.40312424,5.65946055,0.86235937,5.65860731,5.65792646,5.65707298
38.139976,5,5.65764712,-0.810954447,5.65679233,5.65611082,5.6552558
38.150468,5.56776436,5.65583258,-0.296762897,5.65497625,5.65429406,5.6534375
38.16096,5.47722558,5.65401713,-0.420465873,5.65315924,5.65247637,5.65161825
38.171451,6.08276253,5.65220093,0.656171929,5.65134149,5.65065791,5.64979823
38.181943,6.32455532,5.65038365,0.821079574,5.64952265,5.64883835,5.64797711
38.192434,5.19615242,5.64856565,-0.6726167,5.64770308,5.64701804,5.64615523
38.202926,6.40312424,5.64674657,0.869699756,5.64588243,5.64519664,5.64433226
38.213418,5.74456265,5.6449266,0.315651778,5.64406089,5.64337432,5.64250837
38.223909,5.56776436,5.64310592,-0.274484161,5.64223862,5.64155127,5.64068374
38.234401,5.38516481,5.64128418,-0.506082375,5.6404153,5.63972715,5.63885803
38.244892,6.08276253,5.63946173,0.665808378,5.63859127,5.6379023,5.63703159
38.255384,5.19615242,5.63763824,-0.664443994,5.63676619,5.63607638,5.63520408
38.265876,5.65685425,5.63581389,0.145052964,5.63494023,5.63424957,5.63337568
38.276367,5.19615242,5.63398884,-0.661692088,5.63311359,5.63242206,5.63154656
38.286859,6.40312424,5.63216277,0.878044117,5.63128591,5.63059349,5.62971639
38.29735,5.83095189,5.63033601,0.447901644,5.62945754,5.62876423,5.62788552
38.307842,5.65685425,5.62850824,0.168362738,5.62762816,5.62693393,5.6260536
38.318334,5.29150262,5.62667962,-0.578944729,5.62579792,5.62510276,5.62422081
38.328825,5.38516481,5.62485034,-0.489576895,5.62396702,5.62327091,5.62238734
38.339317,5.65685425,5.62302006,0.183940727,5.62213511,5.62143804,5.62055284
38.349808,5.19615242,5.62118912,-0.651948387,5.62030254,5.6196045,5.61871766
38.3603,6.164414,5.61935719,0.738279631,5.61846897,5.61776994,5.61688147
38.370792,5.47722558,5.61752444,-0.374564902,5.61663458,5.61593454,5.61504443
38.381283,5.65685425,5.61569106,0.202887146,5.61479955,5.61409849,5.61320673
38.391775,6,5.61385669,0.621404306,5.61296353,5.61226144,5.61136803
38.402266,5.91607978,5.6120217,0.551414623,5.61112689,5.61042374,5.60952867
38.412758,4.69041576,5.61018573,-0.959046387,5.60928926,5.60858505,5.60768832
38.42325,4.58257569,5.60834898,-1.01280466,5.60745084,5.60674555,5.60584716
38.433741,5.47722558,5.60651161,-0.359563675,5.60561181,5.60490542,5.60400536
38.444233,6.164414,5.60467329,0.748158215,5.60377181,5.60306432,5.60216258
38.454724,6.40312424,5.60283437,0.89458922,5.60193121,5.60122259,5.60031918
38.465216,5.91607978,5.6009945,0.561324583,5.60008966,5.5993799,5.5984748
38.475708,5.74456265,5.59915386,0.381325041,5.59824734,5.59753643,5.59662964
38.486199,5.74456265,5.59731264,0.383731688,5.59640442,5.59569235,5.59478387
38.496691,5.47722558,5.59547049,-0.343867576,5.59456057,5.59384732,5.59293714
38.507182,5,5.59362776,-0.770472424,5.59271614,5.59200169,5.59108981
38.517674,5.47722558,5.59178411,-0.338464962,5.59087079,5.59015513,5.58924154
38.528166,6.32455532,5.58993971,0.857097198,5.58902468,5.5883078,5.5873925
38.538657,6,5.58809476,0.641798441,5.58717801,5.5864599,5.58554288
38.549149,6.244998,5.5862489,0.811633598,5.58533043,5.58461106,5.58369233
38.55964,6,5.58440249,0.644668526,5.5834823,5.58276166,5.5818412
38.570132,5.91607978,5.58255518,0.577515887,5.58163326,5.58091135,5.57998915
38.580624,4.89897949,5.58070716,-0.825668017,5.5797835,5.5790603,5.57813636
38.591115,5.74456265,5.5788586,0.40706762,5.5779332,5.57720869,5.57628302
38.601607,5.74456265,5.57700916,0.409332981,5.57608201,5.57535618,5.57442876
38.612098,4.58257569,5.57515919,-0.996284846,5.57423029,5.57350313,5.57257396
38.62259,5.74456265,5.57330835,0.413828828,5.5723777,5.57164919,5.57071826
38.633082,5.56776436,5.57145681,-0.0607655474,5.5705244,5.56979454,5.56886185
38.643573,5.91607978,5.56960477,0.588621281,5.5686706,5.56793935,5.5670049
38.654065,5,5.56775187,-0.753493111,5.56681592,5.56608329,5.56514707
38.664556,5.74456265,5.56589846,0.42268686,5.56496075,5.56422672,5.56328871
38.675048,6.08276253,5.56404421,0.72022102,5.56310471,5.56236927,5.56142949
38.68554,5.19615242,5.56218929,-0.60500981,5.56124801,5.56051114,5.55956957
38.696031,6.70820393,5.56033389,1.07138697,5.55939081,5.5586525,5.55770914
38.706523,5.19615242,5.55847765,-0.601934568,5.55753278,5.55679301,5.55584785
38.717014,4.69041576,5.55662093,-0.93070144,5.55567426,5.55493302,5.55398607
38.727506,5.19615242,5.55476339,-0.598841352,5.55381491,5.5530722,5.55212343
38.737998,5.47722558,5.5529052,-0.275099306,5.55195492,5.5512107,5.55026013
38.748489,5.47722558,5.55104656,-0.271700168,5.55009445,5.54934873,5.54839634
38.758981,4.69041576,5.5491871,-0.926699163,5.54823318,5.54748593,5.54653172
38.769472,5.38516481,5.54732719,-0.402693908,5.54637144,5.54562267,5.54466662
38.779964,5.47722558,5.54546648,-0.261229603,5.5445089,5.54375858,5.5428007
38.790456,6.32455532,5.54360515,0.88371385,5.54264573,5.54189385,5.54093413
38.800947,5,5.54174338,-0.73603219,5.54078212,5.54002867,5.53906711
38.811439,5.29150262,5.53988083,-0.49837557,5.53891772,5.53816268,5.53719927
38.82193,5.83095189,5.53801785,0.541233817,5.53705289,5.53629624,5.53533098
38.832422,5.83095189,5.53615409,0.542952856,5.53518727,5.53442901,5.53346189
38.842914,5.65685425,5.53428974,0.350092148,5.53332106,5.53256117,5.53159219
38.853405,5.29150262,5.53242497,-0.490838414,5.53145442,5.53069289,5.52972204
38.863897,6.164414,5.53055944,0.796149836,5.52958702,5.52882383,5.52785111
38.874388,5.47722558,5.52869351,-0.22686545,5.52771921,5.52695436,5.52597975
38.88488,6.244998,5.52682682,0.847449809,5.52585063,5.5250841,5.52410761
38.895372,5.56776436,5.52495956,0.206893214,5.52398148,5.52321326,5.52223487
38.905863,7,5.52309191,1.21528107,5.52211194,5.52134201,5.52036173
38.916355,6.164414,5.52122353,0.80199157,5.52024165,5.51947,5.51848782
38.926846,6.32455532,5.51935476,0.897329684,5.51837098,5.51759759,5.5166135
38.937338,4.58257569,5.51748526,-0.966907216,5.51649957,5.51572444,5.51473843
38.94783,5.47722558,5.51561521,-0.19593274,5.5146276,5.51385071,5.51286279
38.958321,4.79583152,5.5137448,-0.847297633,5.51275527,5.51197661,5.51098676
38.968813,5.47722558,5.51187368,-0.186140001,5.51088221,5.51010176,5.50910998
38.979304,5.09901951,5.51000219,-0.641079307,5.5090088,5.50822655,5.50723283
38.989796,6.4807407,5.50813,0.98621027,5.50713467,5.5063506,5.50535495
39.000288,6.244998,5.50625729,0.859500269,5.50526001,5.50447412,5.50347651
39.010779,5.38516481,5.50438423,-0.345281657,5.503385,5.50259727,5.50159771
39.021271,5.65685425,5.50251048,0.392866097,5.50150929,5.50071971,5.4997182
39.031762,6.4807407,5.5006364,0.990002172,5.49963325,5.4988418,5.49783832
39.042254,5.09901951,5.49876163,-0.632251625,5.49775651,5.49696319,5.49595774
39.052746,4.47213595,5.49688636,-1.01229956,5.49587927,5.49508405,5.49407663
39.063237,5.19615242,5.49501078,-0.546679389,5.4940017,5.49320458,5.49219517
39.073729,5.19615242,5.49313452,-0.544960639,5.49212346,5.49132442,5.49031303
39.08422,5.83095189,5.49125796,0.582832685,5.49024491,5.48944393,5.48843054
39.094712,5.09901951,5.48938073,-0.624788937,5.48836568,5.48756276,5.48654738
39.105204,5.29150262,5.48750303,-0.442719328,5.48648598,5.48568109,5.4846637
39.115695,5.38516481,5.48562503,-0.316954602,5.48460597,5.48379911,5.48277971
39.126187,5.47722558,5.48374638,-0.0807515028,5.48272531,5.48191646,5.48089505
39.136678,5.38516481,5.48186745,-0.310970483,5.48084435,5.48003351,5.47901007
39.14717,5.47722558,5.47998788,-0.0525576145,5.47896276,5.4781499,5.47712443
39.157662,5.91607978,5.47810785,0.661794478,5.4770807,5.47626581,5.47523831
39.168153,4.69041576,5.47622756,-0.886460262,5.47519836,5.47438144,5.4733519
39.178645,5.83095189,5.47434663,0.597164351,5.4733154,5.47249641,5.47146483
39.189136,5.47722558,5.47246545,0.0689936671,5.47143216,5.47061111,5.46957747
39.199628,4.89897949,5.47058365,-0.75604508,5.4695483,5.46872517,5.46768948
39.21012,5,5.46870142,-0.684617715,5.46766401,5.46683878,5.46580102
39.220611,4.35889894,5.46681894,-1.05257778,5.46577946,5.46495212,5.46391229
39.231103,5.56776436,5.46493585,0.32066885,5.4638943,5.46306484,5.46202293
39.241594,5.56776436,5.46305253,0.323592079,5.4620089,5.4611773,5.46013331
39.252086,5.56776436,5.46116861,0.326490046,5.46012289,5.45928914,5.45824306
39.262578,6.08276253,5.45928429,0.789606385,5.45823647,5.45740056,5.45635238
39.273069,6.164414,5.45739974,0.840841404,5.45634982,5.45551173,5.45446145
39.283561,5.83095189,5.4555146,0.612729378,5.45446259,5.4536223,5.45256991
39.294052,5.74456265,5.45362926,0.539382416,5.45257513,5.45173263,5.45067813
39.304544,5.38516481,5.45174334,-0.258028157,5.45068709,5.44984237,5.44878575
39.315036,5.74456265,5.44985703,0.542867954,5.44879866,5.4479517,5.44689296
39.325527,6.70820393,5.44797052,1.12260118,5.44691002,5.44606082,5.44499994
39.336019,6.4807407,5.44608345,1.01718103,5.44502081,5.44416935,5.44310633
39.34651,5.19615242,5.44419619,-0.498039929,5.44313141,5.44227766,5.4412125
39.357002,5,5.44230838,-0.665062692,5.44124145,5.44038541,5.4393181
39.367494,5.09901951,5.44042021,-0.584295042,5.43935112,5.43849277,5.4374233
39.377985,4.79583152,5.43853185,-0.80168593,5.4374606,5.43659994,5.4355283
39.388477,5.47722558,5.43664296,0.201451263,5.43556954,5.43470654,5.43363273
39.398968,6,5.4347539,0.751828503,5.4336783,5.43281295,5.43173697
39.40946,5.47722558,5.43286431,0.210621135,5.43178653,5.43091882,5.42984065
39.419952,5.38516481,5.43097438,-0.214031713,5.42989441,5.42902432,5.42794395
39.430443,4.79583152,5.42908429,-0.795771807,5.42800212,5.42712964,5.42604708
39.440935,5.19615242,5.42719369,-0.480667521,5.42610932,5.42523442,5.42414966
39.451426,5.91607978,5.42530294,0.700554671,5.42421636,5.42333904,5.42225207
39.461918,4.58257569,5.42341168,-0.916971092,5.42232288,5.42144313,5.42035394
39.47241,4.79583152,5.4215201,-0.79100479,5.42042908,5.41954687,5.41845546
39.482901,5.29150262,5.41962839,-0.357946595,5.41853514,5.41765046,5.41655682
39.493393,5.19615242,5.41773618,-0.470726841,5.4166407,5.41575354,5.41465766
39.503884,5.38516481,5.41584385,-0.175154337,5.41474613,5.41385647,5.41275834
39.514376,6.08276253,5.41395103,0.817808961,5.41285106,5.41195889,5.41085851
39.524868,6.08276253,5.41205792,0.818965574,5.41095569,5.41006099,5.40895836
39.535359,6.164414,5.41016469,0.86847528,5.4090602,5.40816296,5.40705806
39.545851,4.79583152,5.40827099,-0.782585119,5.40716423,5.40626443,5.40515726
39.556342,5.29150262,5.40637719,-0.338931508,5.40526815,5.40436578,5.40325633
39.566834,5.56776436,5.40448292,0.40408098,5.4033716,5.40246664,5.4013549
39.577326,5.38516481,5.40258838,-0.131998393,5.40147477,5.4005672,5.39945317
39.587817,4.35889894,5.40069375,-1.0206835,5.39957784,5.39866765,5.39755132
39.598309,5,5.39879867,-0.631505081,5.39768045,5.39676763,5.39564899
39.6088,5.19615242,5.3969035,-0.448052541,5.39578298,5.3948675,5.39374655
39.619292,6,5.3950079,0.777812383,5.39388505,5.39296691,5.39184364
39.629784,5.56776436,5.39311204,0.417914258,5.39198687,5.39106604,5.38994045
39.640275,4.79583152,5.39121611,-0.771611678,5.3900886,5.38916508,5.38803715
39.650767,4.47213595,5.38931975,-0.95769713,5.38818991,5.38726367,5.38613339
39.661258,4.69041576,5.38742333,-0.834869791,5.38629114,5.38536217,5.38422955
39.67175,6.164414,5.38552649,0.88254604,5.38439195,5.38346023,5.38232525
39.682242,5.19615242,5.38362942,-0.432986137,5.38249251,5.38155803,5.38042069
39.692733,4.89897949,5.3817323,-0.694804154,5.38059303,5.37965577,5.37851605
39.703225,4.79583152,5.37983477,-0.764201052,5.37869312,5.37775307,5.37661098
39.713716,4.79583152,5.37793721,-0.762958506,5.37679317,5.37585031,5.37470583
39.724208,5.09901951,5.37603924,-0.526326636,5.37489282,5.37394712,5.37280026
39.7347,5,5.37414107,-0.611670717,5.37299225,5.37204371,5.37089444
39.745191,5.74456265,5.37229046,0.610141122,5.37113924,5.37014024,5.36898856
39.755683,5.38516481,5.37039192,0.121543761,5.36923829,5.36823636,5.36708227
39.766174,5.83095189,5.36849337,0.680043035,5.36733732,5.36633244,5.36517592
39.776666,4.89897949,5.36659443,-0.68382377,5.36543596,5.36442811,5.36326917
39.787158,5.38516481,5.36469531,0.143071646,5.3635344,5.36252358,5.3613622
39.797649,5.19615242,5.36279618,-0.408220234,5.36163283,5.36061901,5.35945518
39.808141,6,5.36089669,0.799439372,5.35973089,5.35871405,5.35754777
39.818632,6.40312424,5.3589972,1.02182535,5.35782894,5.35680907,5.35564034
39.829124,5.09901951,5.35709736,-0.508013624,5.35592663,5.35490371,5.35373251
39.839616,6.164414,5.35519734,0.899564707,5.35402414,5.35299816,5.35182448
39.850107,5.47722558,5.35329734,0.35203442,5.35212166,5.35109259,5.34991643
39.860599,4.35889894,5.351397,-0.996241967,5.35021883,5.34918666,5.34800801
39.87109,5.74456265,5.34949668,0.628542731,5.34831602,5.34728073,5.34609958
39.881582,3.74165739,5.34759603,-1.26725634,5.34641286,5.34537443,5.34419078
39.892074,5.29150262,5.34569523,-0.232793053,5.34450955,5.34346797,5.34228179
39.902565,5.29150262,5.34379446,-0.228674092,5.34260626,5.34156151,5.34037281
39.913057,5.09901951,5.34189338,-0.492822343,5.34070265,5.3396547,5.33846348
39.923548,5.29150262,5.33999233,-0.220203793,5.33879907,5.33774791,5.33655415
39.93404,4.47213595,5.33809098,-0.930567043,5.33689517,5.33584079,5.33464448
39.944532,5.29150262,5.33618949,-0.211392692,5.33499114,5.3339335,5.33273464
39.955023,5.38516481,5.33428807,0.225558732,5.33308715,5.33202625,5.33082483
39.965515,5.29150262,5.33238634,-0.202197218,5.33118286,5.33011867,5.32891468
39.976006,5.47722558,5.33048467,0.383067749,5.32927862,5.32821113,5.32700456
39.986498,4.79583152,5.32858272,-0.729898072,5.32737408,5.32630327,5.32509412
39.99699,5.19615242,5.32668066,-0.361286912,5.32546942,5.32439528,5.32318353
40.007481,5.38516481,5.32477867,0.245735909,5.32356484,5.32248733,5.32127298
40.017973,5.56776436,5.3228764,0.494861555,5.32165997,5.32057908,5.31936212
40.028464,5.38516481,5.32097422,0.253358605,5.31975517,5.31867089,5.31745131
40.038956,5.65685425,5.31907177,0.581190569,5.31785009,5.31676239,5.31554018
40.049448,5.74456265,5.31716923,0.653753328,5.31594492,5.31485379,5.31362894
40.059939,5.38516481,5.31526679,0.264382327,5.31403984,5.31294525,5.31171776
40.070431,6,5.31336409,0.828634967,5.31213449,5.31103642,5.30980628
40.080922,5.09901951,5.3114615,-0.460914291,5.31022924,5.30912767,5.30789487
40.091414,5.09901951,5.30955865,-0.45884544,5.30832372,5.30721865,5.30598317
40.101906,5,5.30765574,-0.554667232,5.30641814,5.30530952,5.30407137
40.112397,6.164414,5.30575294,0.926639659,5.30451266,5.30340049,5.30215965
40.122889,5.91607978,5.30384991,0.782451195,5.30260693,5.30149119,5.30024766
40.13338,5.09901951,5.301947,-0.45047474,5.30070133,5.29958198,5.29833575
40.143872,5.91607978,5.30004387,0.784879556,5.29879548,5.29767252,5.29642357
40.154364,5.47722558,5.29814068,0.423184231,5.29688958,5.29576298,5.29451131
40.164855,5.38516481,5.29623764,0.29820659,5.29498381,5.29385355,5.29259915
40.175347,5,5.29433437,-0.542525918,5.29307781,5.29194387,5.29068674
40.185838,4.79583152,5.29243125,-0.704698326,5.29117195,5.29003431,5.28877443
40.19633,5.74456265,5.29052793,0.673820986,5.28926586,5.2881245,5.28686187
40.206822,5.29150262,5.28862457,0.0536474787,5.28735975,5.28621464,5.28494924
40.217313,5.91607978,5.28672137,0.793321126,5.28545378,5.28430491,5.28303674
40.227805,4.89897949,5.28481798,-0.621158992,5.28354761,5.28239495,5.281124
40.238296,5.29150262,5.28291475,0.0926707635,5.28164159,5.28048513,5.27921138
40.248788,4.79583152,5.28101133,-0.696548497,5.27973538,5.27857508,5.27729853
40.25928,5,5.27910791,-0.528306642,5.27782915,5.276665,5.27538564
40.269771,5.09901951,5.27720466,-0.422119827,5.27592309,5.27475506,5.27347289
40.280263,5.56776436,5.27530124,0.5407986,5.27401684,5.27284491,5.27155991
40.290754,5.29150262,5.273398,0.134553419,5.27211077,5.27093492,5.26964709
40.301246,5.09901951,5.27149459,-0.415301188,5.27020451,5.26902473,5.26773405
40.311738,4.79583152,5.2695912,-0.688302021,5.26829827,5.26711452,5.26582098
40.322229,5,5.267688,-0.517385736,5.26639221,5.26520448,5.26390807
40.332721,5.09901951,5.26578464,-0.408368867,5.26448599,5.26329424,5.26199497
40.343212,5,5.2638815,-0.513693972,5.26257996,5.26138418,5.26008202
40.353704,6,5.2619782,0.859081953,5.26067377,5.25947393,5.25816888
40.364196,5.19615242,5.26007493,-0.252829013,5.25876761,5.25756369,5.25625574
40.374687,6,5.25817189,0.861294441,5.25686165,5.25565363,5.25434277
40.385179,4.89897949,5.2562687,-0.597736744,5.25495555,5.2537434,5.25242962
40.39567,4.89897949,5.25436574,-0.596142815,5.25304967,5.25183336,5.25051665
40.406162,5.65685425,5.25246265,0.635917918,5.25114364,5.24992316,5.24860351
40.416654,5,5.25055961,-0.500559302,5.24923766,5.24801297,5.24669037
40.427145,5.65685425,5.24865682,0.638903305,5.2473319,5.246103,5.24477744
40.437637,5.65685425,5.2467539,0.64039078,5.24542602,5.24419286,5.24286433
40.448128,5.56776436,5.24485123,0.568254464,5.24352037,5.24228294,5.24095144
40.45862,5.47722558,5.24294844,0.484021829,5.24161461,5.24037287,5.23903838
40.469112,5.19615242,5.24104573,-0.211880418,5.2397089,5.23846285,5.23712535
40.479603,5.19615242,5.23914328,-0.207342374,5.23780345,5.23655304,5.23521254
40.490095,5.47722558,5.23724073,0.48988248,5.23589788,5.2346431,5.23329958
40.500586,5,5.23533845,-0.48511694,5.23399257,5.23273339,5.23138684
40.511078,5.65685425,5.23343607,0.65070591,5.23208716,5.23082355,5.22947397
40.52157,5.09901951,5.23153378,-0.364025094,5.23018183,5.22891377,5.22756114
40.532061,5.74456265,5.22963178,0.717586839,5.22827677,5.22700423,5.22564854
40.542553,5.19615242,5.22772969,-0.177699929,5.22637162,5.22509457,5.22373581
40.553044,4.89897949,5.22582789,-0.571706568,5.22446674,5.22318516,5.22182333
40.563536,4.79583152,5.22392601,-0.654289299,5.22256178,5.22127564,5.21991072
40.574028,5.09901951,5.22202425,-0.350720308,5.22065692,5.2193662,5.21799818
40.584519,5.56776436,5.22012278,0.589611381,5.21875235,5.21745701,5.21608588
40.595011,5.09901951,5.21822126,-0.345256053,5.21684771,5.21554773,5.21417348
40.605502,5.74456265,5.21632003,0.726803008,5.21494337,5.21363872,5.21226134
40.615994,5.19615242,5.21441876,-0.135153011,5.21303895,5.21172961,5.21034909
40.626486,4.58257569,5.21251762,-0.793688806,5.21113466,5.20982059,5.20843693
40.636977,3.87298335,5.21061679,-1.15656104,5.20923068,5.20791186,5.20652503
40.647469,4.58257569,5.20871592,-0.791290228,5.20732664,5.20600304,5.20461304
40.65796,4.79583152,5.20681538,-0.641080223,5.20542292,5.20409451,5.20270133
40.668452,5.47722558,5.2049148,0.521834052,5.20351915,5.2021859,5.20078953
40.678944,5.19615242,5.20301437,-0.0828368716,5.20161553,5.20027741,5.19887783
40.689435,4.79583152,5.20111428,-0.636618218,5.19971223,5.19836921,5.19696642
40.699927,5.47722558,5.19921416,0.527267874,5.19780889,5.19646095,5.19505493
40.710418,4.69041576,5.19731439,-0.711968141,5.19590589,5.194553,5.19314374
40.72091,5.29150262,5.19541461,0.309980668,5.19400286,5.19264498,5.19123248
40.731402,5.19615242,5.19351499,0.0513559228,5.19209999,5.1907371,5.18932134
40.741893,4.24264069,5.19161573,-0.974153501,5.19019747,5.18882953,5.1874105
40.752385,5.19615242,5.18971647,0.0802244068,5.18829493,5.18692191,5.18549961
40.762876,5.19615242,5.18781757,0.0912954373,5.18639274,5.18501462,5.18358902
40.773368,5.19615242,5.18591867,0.101162018,5.18449054,5.18310729,5.18167839
40.78386,5,5.18401996,-0.428975478,5.18258853,5.1812001,5.17976789
40.794351,5.38516481,5.18212163,0.450603129,5.18068687,5.17929325,5.17785771
40.804843,5.47722558,5.18022331,0.544979143,5.17878522,5.17738636,5.17594749
40.815334,4.69041576,5.17832537,-0.69850527,5.17688395,5.17547982,5.1740376
40.825826,4.79583152,5.17642746,-0.616924579,5.17498268,5.17357326,5.17212768
40.836318,5.56776436,5.17452975,0.627084212,5.17308161,5.17166686,5.17021791
40.846809,5.19615242,5.17263244,0.153362252,5.17118092,5.16976081,5.16830848
40.857301,4.69041576,5.17073517,-0.693050796,5.16928026,5.16785475,5.16639903
40.867792,5.09901951,5.16883829,-0.264232427,5.16737998,5.16594905,5.16448992
40.878284,4.79583152,5.16694145,-0.609187928,5.16547973,5.16404334,5.1625808
40.888776,4.89897949,5.16504485,-0.515815241,5.1635797,5.16213782,5.16067185
40.899267,5,5.16314865,-0.403916641,5.16168007,5.16023266,5.15876325
40.909759,5.47722558,5.16125251,0.562114813,5.15978049,5.15832751,5.15685465
40.92025,5.47722558,5.15935679,0.563798532,5.15788131,5.15642273,5.15494641
40.930742,5,5.15746113,-0.396813722,5.15598218,5.15451797,5.15303817
40.941234,4.47213595,5.15556572,-0.826698107,5.15408328,5.1526134,5.15113012
40.951725,4.47213595,5.15367073,-0.825551196,5.1521848,5.15070923,5.14922244
40.962217,5.09901951,5.15177582,-0.229687414,5.15028639,5.14880507,5.14731477
40.972708,5,5.14988135,-0.387145127,5.1483884,5.14690131,5.14540749
40.9832,4.79583152,5.14798696,-0.593426856,5.14649047,5.14499757,5.14350022
40.993692,4.89897949,5.14609283,-0.497104964,5.1445928,5.14309406,5.14159316
41.004183,4.24264069,5.14419915,-0.949504326,5.14269557,5.14119094,5.13968648
41.014675,4.89897949,5.14230557,-0.493280935,5.14079842,5.13928787,5.13777983
41.025166,5.56776436,5.14041244,0.653721596,5.13890171,5.1373852,5.13587358
41.035658,4.24264069,5.13851941,-0.946508701,5.13700509,5.13548258,5.13396737
41.04615,5.19615242,5.13662666,0.243979016,5.13510874,5.1335802,5.13206138
41.056641,5,5.13473438,-0.367061827,5.13321284,5.13167824,5.13015579
41.067133,4,5.13284222,-1.06435061,5.13131705,5.12977633,5.12825025
41.077624,6,5.13095053,0.932228231,5.12942171,5.12787485,5.12634512
41.088116,4.47213595,5.12905895,-0.810507864,5.12752649,5.12597343,5.12444004
41.098608,5.19615242,5.12716768,0.262649463,5.12563155,5.12407226,5.1225352
41.109099,4.79583152,5.1252769,-0.573973322,5.12373708,5.12217153,5.12063078
41.119591,4.79583152,5.12338624,-0.572323964,5.12184274,5.12027087,5.11872643
41.130082,4.47213595,5.12149608,-0.805828845,5.11994887,5.11837066,5.1168225
41.140574,4.35889894,5.11960606,-0.872185253,5.11805513,5.11647053,5.11491865
41.151066,4.69041576,5.11771636,-0.653682337,5.11616169,5.11457066,5.11301504
41.161557,4.69041576,5.11582716,-0.652235694,5.11426875,5.11267125,5.11111188
41.172049,5,5.11393811,-0.337547201,5.11237595,5.11077193,5.10920879
41.18254,4.79583152,5.11204958,-0.562332689,5.11048364,5.10887306,5.10730615
41.193032,5.47722558,5.1101612,0.605858381,5.10859147,5.1069743,5.1054036
41.203524,5,5.10827316,-0.329048868,5.10669964,5.10507582,5.10350131
41.214015,4.79583152,5.10638564,-0.557273827,5.10480831,5.1031778,5.10159948
41.224507,4.12310563,5.10449829,-0.990652647,5.10291714,5.1012799,5.09969775
41.234998,5.65685425,5.10261148,0.744474831,5.10102648,5.09938247,5.09779647
41.24549,5.09901951,5.10072483,-0.0412955096,5.09913598,5.09748516,5.0958953
41.255982,5,5.09883855,-0.314385987,5.09724583,5.09558815,5.09399441
41.266473,5.65685425,5.09695293,0.74826554,5.09535634,5.09369162,5.092094
41.276965,4.79583152,5.09506738,-0.547024544,5.09346689,5.09179521,5.0901937
41.287456,5.29150262,5.09318237,0.445331621,5.09157798,5.0898993,5.08829387
41.297948,4.35889894,5.09129756,-0.855802906,5.08968924,5.08800352,5.08639416
41.30844,4.58257569,5.08941312,-0.711925156,5.08780087,5.08610805,5.08449476
41.318931,4.79583152,5.08752925,-0.540090478,5.08591305,5.08421309,5.08259584
41.329423,5.19615242,5.08564558,0.332425698,5.08402542,5.08231827,5.08069705
41.339914,4.47213595,5.08376248,-0.782065548,5.08213834,5.08042395,5.07879875
41.350406,5.09901951,5.08187959,0.130919538,5.08025146,5.07852979,5.07690058
41.360898,5.47722558,5.0799971,0.630260644,5.07836496,5.07663596,5.07500274
41.371389,4.89897949,5.07811518,-0.423244251,5.07647902,5.07474264,5.07310539
41.381881,4.89897949,5.07623359,-0.421015568,5.0745934,5.07284948,5.07120819
41.392372,4.12310563,5.07435249,-0.975318853,5.07270825,5.07095684,5.0693115
41.402864,5.38516481,5.07247162,0.559189761,5.07082331,5.06906437,5.06741496
41.413356,6,5.07059116,0.964058524,5.06893878,5.06717225,5.06551875
41.423847,5.65685425,5.0687113,0.766904784,5.06705482,5.06528066,5.06362306
41.434339,5.29150262,5.06683168,0.47399466,5.0651711,5.06338925,5.06172753
41.44483,4.35889894,5.06495267,-0.840270033,5.06328796,5.06149837,5.05983253
41.455322,5,5.06307391,-0.251145199,5.06140506,5.05960767,5.05793769
41.465814,5.19615242,5.06119558,0.367364724,5.05952258,5.05771734,5.05604319
41.476305,5.38516481,5.05931787,0.570830043,5.0576407,5.05582756,5.05414924
41.486797,5.19615242,5.05744042,0.372440605,5.05575907,5.05393797,5.05225545
41.497288,5.29150262,5.05556359,0.485735557,5.05387804,5.05204893,5.05036221
41.50778,4.89897949,5.05368703,-0.393328803,5.05199727,5.05016009,5.04846915
41.518272,4.79583152,5.05181093,-0.505944071,5.05011694,5.04827163,5.04657645
41.528763,5.19615242,5.04993545,0.382383274,5.04823722,5.04638374,5.04468431
41.539255,5.74456265,5.04806026,0.834567183,5.04635777,5.04449605,5.04279235
41.549746,4.47213595,5.04618571,-0.757660715,5.04447894,5.04260893,5.04090095
41.560238,3.74165739,5.04431145,-1.14133872,5.04260039,5.04072202,5.03900974
41.57073,5.91607978,5.04243766,0.934688248,5.04072229,5.03883551,5.03711892
41.581221,5,5.04056452,-0.201406365,5.03884483,5.03694958,5.03522866
41.591713,5.19615242,5.03869169,0.396813227,5.03696766,5.03506387,5.0333386
41.602204,5.29150262,5.03681951,0.504661385,5.03509113,5.03317875,5.03144912
41.612696,4.69041576,5.03494764,-0.586968379,5.03321488,5.03129385,5.02955984
41.623188,4.47213595,5.03307626,-0.748959479,5.03133912,5.02940937,5.02767097
41.633679,4.35889894,5.03120555,-0.819943049,5.029464,5.02752548,5.02578267
41.644171,3.74165739,5.02933516,-1.1347589,5.02758919,5.02564183,5.02389459
41.654662,5.19615242,5.02746544,0.410715204,5.02571505,5.02375879,5.0220071
41.665154,4.24264069,5.02559606,-0.884847654,5.02384121,5.02187598,5.02011983
41.675646,5.74456265,5.02372718,0.849020297,5.02196786,5.0199936,5.01823298
41.686137,5.74456265,5.02185899,0.850119787,5.02009519,5.01811184,5.01634672
41.696629,4.79583152,5.01999114,-0.473454983,5.01822284,5.01623032,5.01446069
41.70712,4,5.01812399,-1.0090213,5.01635117,5.01434943,5.01257527
41.717612,5.65685425,5.01625719,0.800373078,5.01447983,5.01246879,5.01069009
41.728104,5.56776436,5.01439091,0.743890756,5.012609,5.01058859,5.00880533
41.738595,5.19615242,5.01252534,0.428517312,5.01073886,5.00870902,5.00692118
41.749087,4.24264069,5.01066012,-0.876367181,5.00886906,5.00682972,5.00503729
41.759578,5.09901951,5.00879563,0.300372915,5.00699996,5.00495105,5.00315401
41.77007,5.29150262,5.00693149,0.533452087,5.00513121,5.00307266,5.00127098
41.780562,5,5.00506791,-0.0711892339,5.00326298,5.00119472,4.9993884
41.791053,4.79583152,5.00320505,-0.455382834,5.00139547,4.99931743,4.99750644
41.801545,4.89897949,5.00134257,-0.319942308,4.99952831,4.99744041,4.99562474
41.812036,4.35889894,4.99948082,-0.80036359,4.99766188,4.99556405,4.99374368
41.822528,4.58257569,4.99761946,-0.644238903,4.99579581,4.99368797,4.99186288
41.83302,3.87298335,4.99575866,-1.05961093,4.99393028,4.99181237,4.98998255
41.843511,4.58257569,4.99389861,-0.641344616,4.99206549,4.98993742,4.98810285
41.854003,5.19615242,4.99203896,0.451789184,4.99020107,4.98806277,4.98622343
41.864494,3.87298335,4.99018005,-1.05697526,4.98833739,4.98618879,4.98434465
41.874986,4.58257569,4.98832156,-0.636981838,4.9864741,4.98431511,4.98246616
41.885478,5,4.98646364,0.116345847,4.98461137,4.98244191,4.98058814
41.895969,5,4.9846065,0.124070559,4.98274939,4.98056939,4.97871077
41.906461,5.47722558,4.98274976,0.70318974,4.9808878,4.97869718,4.9768337
41.916952,4.24264069,4.98089381,-0.859216573,4.97902697,4.97682565,4.97495729
41.927444,5.29150262,4.97903827,0.558985109,4.97716655,4.97495443,4.97308117
41.937936,4.69041576,4.97718334,-0.535506843,4.97530671,4.97308372,4.97120554
41.948427,4.79583152,4.97532919,-0.423671652,4.97344763,4.9712137,4.96933058
41.958919,4.58257569,4.97347548,-0.62521979,4.97158898,4.969344,4.96745593
41.96941,5.56776436,4.97162256,0.772102196,4.96973109,4.967475,4.96558195
41.979902,4.89897949,4.96977009,-0.266065029,4.96787363,4.96560633,4.96370828
41.990394,5,4.96791823,0.179113838,4.96601678,4.96373817,4.96183512
42.000885,4.47213595,4.96606719,-0.702802412,4.96416071,4.96187072,4.95996263
42.011377,4.79583152,4.96421659,-0.410347498,4.96230507,4.96000361,4.95809047
42.021868,5.19615242,4.96236681,0.483513818,4.96045023,4.95813721,4.95621899
42.03236,5.47722558,4.96051749,0.718824097,4.95859583,4.95627115,4.95434784
42.042852,4.69041576,4.95866882,-0.517931519,4.95674206,4.95440563,4.95247721
42.053343,4.79583152,4.95682097,-0.4012349,4.95488909,4.95254082,4.95060727
42.063835,4.69041576,4.95497359,-0.514351857,4.95303657,4.95067637,4.94873767
42.074326,5.29150262,4.95312705,0.581700587,4.95118487,4.94881264,4.94686877
42.084818,3.87298335,4.95128099,-1.03841111,4.94933363,4.94694928,4.94500021
42.09531,5.47722558,4.94943559,0.726491558,4.94748303,4.94508646,4.94313218
42.105801,4.89897949,4.94759104,-0.220480278,4.94563326,4.94322437,4.94126486
42.116293,4.24264069,4.94574698,-0.838514337,4.94378396,4.94136265,4.93939789
42.126784,4.69041576,4.94390377,-0.503475933,4.94193549,4.93950167,4.93753163
42.137276,4.24264069,4.94206107,-0.836313569,4.94008751,4.93764106,4.93566573
42.147768,5.56776436,4.94021905,0.792177574,4.93824019,4.93578102,4.93380037
42.158259,4.58257569,4.9383779,-0.59649158,4.93639371,4.93392172,4.93193574
42.168751,4.79583152,4.93653726,-0.375107635,4.93454773,4.93206281,4.93007147
42.179242,5.09901951,4.93469749,0.405366524,4.9327026,4.93020464,4.92820792
42.189734,5.38516481,4.93285825,0.6725374,4.93085797,4.92834687,4.92634475
42.200226,4,4.93101972,-0.964893629,4.92901402,4.92648967,4.92448214
42.210717,4.69041576,4.92918206,-0.488637189,4.92717094,4.92463323,4.92262026
42.221209,5.38516481,4.92734495,0.67662387,4.92532838,4.9227772,4.92075876
42.2317,4.58257569,4.92550872,-0.585604839,4.92348668,4.92092192,4.91889799
42.242192,4.47213595,4.92367304,-0.671965096,4.92164551,4.91906705,4.91703762
42.252684,5,4.92183809,0.279574512,4.91980504,4.91721277,4.91517781
42.263175,5.19615242,4.92000404,0.525498219,4.91796546,4.91535927,4.91331876
42.273667,5.09901951,4.91817056,0.425263398,4.91612641,4.91350618,4.91146009
42.284158,4.89897949,4.91633798,-0.131751638,4.91428826,4.91165386,4.90960218
42.29465,5.19615242,4.91450597,0.530703732,4.91245065,4.90980197,4.90774467
42.305142,4.47213595,4.91267471,-0.663730936,4.91061376,4.90795068,4.90588774
42.315633,4.35889894,4.91084437,-0.7429303,4.90877778,4.90610017,4.90403157
42.326125,4.79583152,4.90901462,-0.336426954,4.90694235,4.9042501,4.90217581
42.336616,4.79583152,4.9071858,-0.333697878,4.90510784,4.90240081,4.90032082
42.347108,4.35889894,4.90535757,-0.739228396,4.90327389,4.90055196,4.89846624
42.3576,5.38516481,4.9035301,0.693999067,4.90144069,4.89870373,4.89661225
42.368091,4.79583152,4.90170359,-0.325379875,4.89960841,4.89685629,4.89475904
42.378583,5.38516481,4.89987767,0.696625533,4.89777671,4.89500931,4.89290625
42.389074,4.47213595,4.89805272,-0.652622985,4.89594595,4.89316312,4.89105424
42.399566,4.79583152,4.89622837,-0.316854615,4.89411577,4.89131738,4.88920266
42.410058,5.29150262,4.89440482,0.630156969,4.89228636,4.88947228,4.88735169
42.420549,5.19615242,4.89258223,0.550972043,4.8904579,4.88762799,4.8855015
42.431041,5.09901951,4.89076027,0.456354296,4.88863003,4.88578415,4.88365175
42.441532,5.09901951,4.88893929,0.458345095,4.88680312,4.88394114,4.88180279
42.452024,4.89897949,4.88711894,0.108906128,4.88497683,4.88209858,4.87995427
42.462516,4.24264069,4.88529941,-0.801659978,4.88315132,4.88025668,4.87810637
42.473007,4.79583152,4.88348086,-0.296056314,4.88132678,4.87841559,4.87625927
42.483499,4.79583152,4.88166297,-0.292970046,4.87950286,4.87657498,4.87441262
42.49399,4.47213595,4.87984608,-0.638521827,4.87767992,4.8747352,4.87256677
42.504482,4.69041576,4.87802984,-0.433144415,4.87585761,4.8728959,4.87072138
42.514974,5,4.87621445,0.351831712,4.87403612,4.87105726,4.86887662
42.525465,4.69041576,4.87440006,-0.428933914,4.87221561,4.86921945,4.86703268
42.535957,4.24264069,4.87258635,-0.793691165,4.87039576,4.86738213,4.86518919
42.546448,5.19615242,4.87077367,0.570419808,4.8685769,4.86554566,4.86334653
42.55694,4.35889894,4.86896166,-0.714186753,4.86675869,4.86370968,4.86150433
42.567432,3.87298335,4.86715052,-0.997079321,4.86494133,4.86187437,4.85966278
42.577923,4.24264069,4.86534041,-0.789113253,4.86312497,4.8600399,4.85782205
42.588415,5.91607978,4.86353101,1.025938,4.86130929,4.85820595,4.85598179
42.598906,5,4.86172265,0.371856631,4.85949463,4.85637284,4.85414237
42.609398,4,4.85991499,-0.927316016,4.85768065,4.85454025,4.85230343
42.61989,4.24264069,4.85810823,-0.784517393,4.85586753,4.85270833,4.85046514
42.630381,4.47213595,4.85630252,-0.619811719,4.85405545,4.85087729,4.8486277
42.640873,4.89897949,4.85449754,0.210907433,4.85224406,4.84904675,4.84679074
42.651364,5.38516481,4.85269363,0.729706226,4.85043372,4.84721709,4.84495462
42.661856,5.38516481,4.85089045,0.730940731,4.84862408,4.84538795,4.843119
42.672348,4.79583152,4.84908819,-0.230774059,4.84681533,4.8435595,4.84128405
42.682839,4.79583152,4.84728701,-0.226838023,4.84500764,4.84173193,4.83944994
42.693331,5.09901951,4.84548658,0.503520536,4.84320067,4.83990489,4.83761634
42.703822,5.38516481,4.84368725,0.735851585,4.84139477,4.83807873,4.8357836
42.714314,5.29150262,4.84188868,0.670532579,4.83958961,4.83625311,4.83395135
42.724806,4.47213595,4.84009105,-0.606593021,4.83778535,4.8344282,4.8321198
42.735297,4.79583152,4.83829453,-0.206065536,4.83598218,4.83260417,4.8302891
42.745789,5.56776436,4.83649879,0.855140677,4.83417976,4.83078069,4.82845892
42.75628,4.35889894,4.83470417,-0.68978636,4.83237843,4.8289581,4.8266296
42.766772,5.47722558,4.83291033,0.802692495,4.83057787,4.82713606,4.8248008
42.777264,4.69041576,4.83111747,-0.375102262,4.82877823,4.82531475,4.8229727
42.787755,5.74456265,4.82932574,0.956680148,4.82697972,4.82349434,4.82114547
42.798247,4.89897949,4.82753482,0.267291352,4.82518197,4.82167448,4.81931877
42.808738,4.58257569,4.82574505,-0.493122047,4.82338535,4.81985553,4.81749295
42.81923,5.29150262,4.82395609,0.68377374,4.82158952,4.81803714,4.81566766
42.829722,5.09901951,4.82216813,0.526166684,4.81979465,4.81621949,4.81384307
42.840213,4.35889894,4.82038134,-0.679324958,4.81800092,4.81440275,4.81201937
42.850705,4.89897949,4.81859538,0.283520901,4.816208,4.81258658,4.81019621
42.861196,4.69041576,4.81681061,-0.35552053,4.81441622,4.81077133,4.80837394
42.871688,4.47213595,4.81502668,-0.585568716,4.81262527,4.80895666,4.80655221
42.88218,5.38516481,4.81324377,0.756254613,4.8108353,4.80714273,4.80473121
42.892671,4.89897949,4.81146206,0.295833447,4.8090465,4.80532974,4.8029111
42.903163,4.69041576,4.80968121,-0.345348306,4.80725854,4.80351732,4.80109154
42.913654,4.69041576,4.80790158,-0.342762042,4.80547176,4.80170584,4.79927288
42.924146,5.74456265,4.80612282,0.968731039,4.80368582,4.79989494,4.79745478
42.934638,5.38516481,4.80434512,0.762115274,4.80190091,4.79808481,4.79563741
42.945129,4.79583152,4.80256864,-0.0820799548,4.80011719,4.79627562,4.79382095
42.955621,4.79583152,4.80079307,-0.0704382123,4.79833434,4.79446702,4.79200506
42.966112,3.31662479,4.79901873,-1.21753601,4.7965527,4.79265937,4.79019007
42.976604,5,4.79724531,0.450282905,4.79477194,4.79085232,4.78837565
42.987096,5.47722558,4.79547297,0.825683116,4.79299224,4.78904604,4.78656198
42.997587,4.58257569,4.79370189,-0.459484706,4.79121376,4.78724072,4.78474923
43.008079,4.35889894,4.79193219,-0.658052615,4.78943663,4.785436,4.78293705
43.01857,4.79583152,4.79016332,0.0752874886,4.7876603,4.78363224,4.7811258
43.029062,5.38516481,4.78839539,0.772508521,4.78588487,4.7818291,4.77931513
43.039554,4.47213595,4.78662859,-0.560796427,4.78411054,4.78002674,4.77750521
43.050045,4.47213595,4.78486308,-0.559220103,4.78233747,4.77822535,4.77569623
43.060537,4.89897949,4.78309854,0.340412909,4.78056533,4.77642458,4.77388783
43.071028,4.69041576,4.7813353,-0.30152868,4.77879447,4.77462477,4.77208037
43.08152,4.24264069,4.77957305,-0.73275669,4.77702456,4.7728256,4.7702735
43.092012,3.87298335,4.77781196,-0.951224797,4.77525577,4.77102722,4.7684674
43.102503,4.79583152,4.7760522,0.140638982,4.77348828,4.76922982,4.76666223
43.112995,4.79583152,4.77429344,0.146758578,4.77172176,4.76743306,4.76485767
43.123486,4.89897949,4.77253603,0.35558888,4.76995655,4.76563727,4.76305406
43.133978,4.35889894,4.77077964,-0.641779324,4.76819233,4.76384213,4.76125105
43.14447,5,4.76902445,0.480599157,4.76642927,4.7620478,4.75944882
43.154961,4.58257569,4.76727063,-0.429761483,4.76466755,4.76025446,4.75764754
43.165453,4.89897949,4.76551785,0.365324016,4.76290683,4.75846176,4.75584687
43.175944,4.24264069,4.76376646,-0.721890414,4.76114747,4.75667006,4.75404716
43.186436,4.35889894,4.76201613,-0.634915099,4.75938913,4.75487901,4.75224807
43.196928,5.19615242,4.76026703,0.66021617,4.75763199,4.75308879,4.75044976
43.207419,4.89897949,4.75851935,0.374780117,4.75587623,4.75129956,4.74865242
43.217911,4.89897949,4.75677275,0.377103078,4.75412152,4.749511,4.74685571
43.228402,3.31662479,4.75502759,-1.19933431,4.7523682,4.74772344,4.74505996
43.238894,5,4.75328353,0.496705621,4.75061595,4.74593654,4.74326484
43.249386,4.89897949,4.75154074,0.383977526,4.74886494,4.74415049,4.74147052
43.259877,4.69041576,4.74979942,-0.243687627,4.74711536,4.74236544,4.73967717
43.270369,4.35889894,4.74805923,-0.623827126,4.74536686,4.74058107,4.73788446
43.28086,4.35889894,4.74632051,-0.622431975,4.74361981,4.73879772,4.73609273
43.291352,5,4.74458294,0.505388028,4.74187387,4.73701504,4.73430164
43.301844,5.38516481,4.7428467,0.801447507,4.74012922,4.73523321,4.73251136
43.312335,4.58257569,4.74111196,-0.398166133,4.73838603,4.73345241,4.73072206
43.322827,5.19615242,4.73937841,0.675850585,4.73664399,4.73167229,4.72893341
43.333318,5.09901951,4.73764638,0.601143192,4.73490343,4.7298932,4.72714575
43.34381,4.47213595,4.73591555,-0.513594773,4.73316403,4.7281148,4.72535874
43.354302,4.24264069,4.73418609,-0.701102993,4.73142597,4.72633726,4.72357256
43.364793,4.79583152,4.73245819,0.251740599,4.72968943,4.72456076,4.72178737
43.375285,4.79583152,4.73073153,0.255147004,4.72795408,4.72278496,4.72000283
43.385776,5.29150262,4.72900644,0.749997455,4.72622027,4.72101019,4.7182193
43.396268,4.24264069,4.72728261,-0.696162279,4.72448767,4.71923613,4.71643643
43.40676,3.74165739,4.72556021,-0.991918756,4.72275647,4.71746295,4.71465439
43.417251,5.29150262,4.72383941,0.753434277,4.72102683,4.71569081,4.71287336
43.427743,4.24264069,4.72211991,-0.692444384,4.71929845,4.71391938,4.711093
43.438234,4.89897949,4.72040204,0.422584244,4.71757165,4.712149,4.70931365
43.448726,5.09901951,4.71868549,0.616712271,4.71584613,4.71037933,4.70753497
43.459218,4.47213595,4.71697043,-0.494807509,4.71412206,4.70861056,4.70575713
43.469709,4.89897949,4.71525703,0.428628574,4.71239962,4.70684284,4.70398031
43.480201,4.79583152,4.71354499,0.286856294,4.71067848,4.70507584,4.70220418
43.490692,5.47722558,4.71183464,0.874866238,4.708959,4.70330991,4.70042906
43.501184,4.58257569,4.71012567,-0.357141398,4.70724086,4.70154471,4.69865462
43.511676,4.58257569,4.70841826,-0.354742957,4.70552423,4.6997804,4.69688104
43.522167,4,4.70671258,-0.840661989,4.70380928,4.69801716,4.69510849
43.532659,4.12310563,4.70500832,-0.762825469,4.70209572,4.69625466,4.69333663
43.54315,4.58257569,4.70330582,-0.347462412,4.70038387,4.69449323,4.6915658
43.553642,5.09901951,4.70160477,0.630408391,4.69867343,4.69273255,4.68979566
43.564134,5,4.69990535,0.547808953,4.69696457,4.69097277,4.68802639
43.574625,3.87298335,4.69820773,-0.908418618,4.69525748,4.68921407,4.68625816
43.585117,4.47213595,4.69651161,-0.473683072,4.69355183,4.68745613,4.68449062
43.595608,4.35889894,4.69481732,-0.579584657,4.69184797,4.68569926,4.68272413
43.6061,5.09901951,4.69312455,0.637098862,4.69014559,4.68394315,4.68095834
43.616592,4.47213595,4.69143349,-0.468292151,4.68844487,4.68218796,4.67919343
43.627083,4.35889894,4.68974432,-0.575191595,4.68674599,4.68043387,4.67742957
43.637575,3.74165739,4.68805671,-0.972830574,4.68504863,4.67868053,4.67566642
43.648066,4.47213595,4.68637102,-0.462855344,4.68335315,4.67692829,4.67390431
43.658558,4.35889894,4.68468695,-0.57077842,4.68165923,4.67517681,4.67214293
43.66905,4.58257569,4.68300466,-0.316905294,4.67996705,4.67342627,4.67038243
43.679541,4.89897949,4.68132434,0.466535256,4.67827679,4.67167683,4.66862299
43.690033,4.79583152,4.67964569,0.340860437,4.67658815,4.66992817,4.66686427
43.700524,4.47213595,4.67796904,-0.453688308,4.67490147,4.66818061,4.66510661
43.711016,5,4.67629409,0.568951589,4.67321644,4.66643382,4.66334967
43.721508,4.89897949,4.67462103,0.473664922,4.67153325,4.66468799,4.66159363
43.731999,4.12310563,4.67295003,-0.741514937,4.66985208,4.66294327,4.65983866
43.742491,5.29150262,4.67128079,0.787541637,4.66817262,4.66119933,4.65808442
43.752982,3.60555128,4.66961366,-1.031534,4.66649521,4.65945651,4.65633126
43.763474,4.58257569,4.66794834,-0.292185975,4.66481956,4.65771448,4.65457882
43.773966,4.35889894,4.666285,-0.55442408,4.66314585,4.65597341,4.6528273
43.784457,4.24264069,4.66462384,-0.649602303,4.66147427,4.65423346,4.65107685
43.794949,4.58257569,4.66296455,-0.283529282,4.6598045,4.65249431,4.64932714
43.80544,4.89897949,4.66130747,0.487516166,4.6581369,4.65075629,4.64757852
43.815932,4.47213595,4.65965232,-0.4330316,4.65647117,4.64901906,4.64583064
43.826424,4.58257569,4.65799927,-0.274633537,4.6548075,4.64728281,4.64408367
43.836915,5.19615242,4.65634852,0.734713486,4.65314606,4.6455477,4.64233779
43.847407,3.60555128,4.65469976,-1.02427949,4.65148657,4.64381339,4.64059267
43.857898,3.60555128,4.65305333,-1.02347548,4.64982937,4.64208022,4.63884863
43.86839,4.58257569,4.65140897,-0.262360957,4.64817417,4.64034787,4.63710535
43.878882,5.19615242,4.64976696,0.73917891,4.64652127,4.6386165,4.635363
43.889373,4.79583152,4.64812725,0.384323135,4.64487062,4.63688627,4.63362174
43.899865,4.24264069,4.64648968,-0.635491142,4.64322205,4.63515687,4.63188125
43.910356,4.69041576,4.64485458,0.213450639,4.64157591,4.63342861,4.63014185
43.920848,3.87298335,4.64322169,-0.877632236,4.63993191,4.63170118,4.62840322
43.93134,4,4.64159118,-0.800993868,4.63829025,4.62997475,4.62666553
43.941831,4.47213595,4.63996324,-0.409667283,4.63665109,4.62824947,4.62492894
43.952323,4.35889894,4.63833759,-0.528619569,4.63501418,4.62652502,4.62319312
43.962814,5.29150262,4.63671458,0.809189742,4.63337985,4.62480174,4.62145841
43.973306,4.69041576,4.63509394,0.235205916,4.63174783,4.62307929,4.61972448
43.983798,4.35889894,4.63347584,-0.524000858,4.6301183,4.62135785,4.61799149
43.994289,5,4.63186049,0.606745012,4.62849145,4.61963757,4.61625962
44.004781,4.24264069,4.63024761,-0.622580857,4.62686702,4.61791814,4.61452853
44.015272,4.24264069,4.62863755,-0.621286455,4.62524536,4.61619989,4.61279855
44.025764,4,4.62703003,-0.791852279,4.62362618,4.61448248,4.61106936
44.036256,5.19615242,4.62542526,0.755464866,4.62200968,4.61276609,4.60934113
44.046747,5.09901951,4.62382342,0.689344682,4.62039607,4.61105087,4.60761402
44.057239,4.24264069,4.62222426,-0.616103541,4.61878507,4.60933652,4.6058877
44.06773,4,4.62062812,-0.787799543,4.61717703,4.60762334,4.60416251
44.078222,4.89897949,4.61903474,0.529098048,4.61557169,4.60591103,4.60243811
44.088714,4.12310563,4.61744432,-0.703092239,4.61396926,4.60419974,4.60071468
44.099205,4,4.61585706,-0.78476561,4.61236992,4.60248965,4.59899237
44.109697,5.38516481,4.61427271,0.878004612,4.61077343,4.60078042,4.59727087
44.120188,4.24264069,4.61269161,-0.60831811,4.60918014,4.59907239,4.59555051
44.13068,4.12310563,4.61111352,-0.698575618,4.60758979,4.59736523,4.59383095
44.141172,4.35889894,4.60953864,-0.500639287,4.60600258,4.5956591,4.59211236
44.151663,4,4.60796717,-0.779722497,4.60441873,4.59395418,4.59039491
44.162155,4.12310563,4.60639888,-0.695192961,4.60283799,4.59225014,4.58867828
44.172646,3.74165739,4.60483411,-0.929073046,4.60126072,4.59054731,4.58696279
44.183138,3.87298335,4.60327263,-0.85456965,4.59968667,4.58884536,4.58524811
44.19363,4.89897949,4.60171466,0.545219983,4.59811606,4.58714445,4.58353441
44.204121,4.58257569,4.60016039,-0.132607287,4.59654909,4.58544476,4.58182187
44.214613,5.09901951,4.5986096,0.707396575,4.59498554,4.58374596,4.58011014
44.225104,3.74165739,4.59706265,-0.924881218,4.59342576,4.58204838,4.57839957
44.235596,5.38516481,4.59551932,0.888619988,4.59186954,4.5803517,4.57668982
44.246088,3.87298335,4.59397983,-0.849115118,4.59031709,4.57865607,4.57498106
44.256579,4.35889894,4.59244439,-0.4832654,4.58876862,4.57696167,4.57327346
44.267071,5,4.59091279,0.639599258,4.58722393,4.57526817,4.57156668
44.277562,4.12310563,4.5893854,-0.682846814,4.58568338,4.57357589,4.56986107
44.288054,4.24264069,4.58786209,-0.587555444,4.58414685,4.57188453,4.56815629
44.298546,3.87298335,4.58634292,-0.844606165,4.58261439,4.57019424,4.56645252
44.309037,4.12310563,4.58482821,-0.679501719,4.58108632,4.56850518,4.5647499
44.319529,4.47213595,4.58331776,-0.33343936,4.57956244,4.56681703,4.56304813
44.33002,4.89897949,4.58181195,0.563176292,4.57804313,4.56513013,4.56134752
44.340512,4,4.58031058,-0.761781192,4.5765282,4.56344414,4.55964776
44.351004,5,4.57881391,0.648988514,4.57501789,4.56175924,4.55794901
44.361495,5.19615242,4.57732216,0.78665765,4.57351244,4.56007558,4.55625143
44.371987,4.89897949,4.57583517,0.568457837,4.57201167,4.55839284,4.5545547
44.382478,4.58257569,4.57435333,0.0906772675,4.57051598,4.55671136,4.55285914
44.39297,4.47213595,4.57287646,-0.317396446,4.56902519,4.55503081,4.55116444
44.403462,4.24264069,4.57140482,-0.573379575,4.56753956,4.55335135,4.54947075
44.413953,4.24264069,4.56993868,-0.572099639,4.56605936,4.55167315,4.54777825
44.424445,5.19615242,4.56847788,0.792259136,4.56458443,4.54999588,4.5460866
44.434936,3.60555128,4.56702283,-0.98054656,4.56311517,4.54831988,4.54439613
44.445428,4.58257569,4.56557339,0.130392906,4.56165144,4.54664482,4.54270653
44.45592,4.69041576,4.56412982,0.355367327,4.56019353,4.54497086,4.54101796
44.466411,4.89897949,4.56269242,0.57990263,4.55874171,4.54329817,4.53933057
44.476903,4.12310563,4.56126107,-0.661933111,4.55729585,4.54162643,4.53764405
44.487394,4.58257569,4.55983618,0.150796265,4.55585638,4.53995596,4.53595872
44.497886,4.79583152,4.55841765,0.487251341,4.55442321,4.53828644,4.53427426
44.508378,4.58257569,4.55700579,0.159905929,4.55299661,4.53661804,4.53259084
44.518869,4.79583152,4.55560089,0.490133276,4.55157692,4.53495092,4.53090861
44.529361,4.24264069,4.55420288,-0.558177568,4.55016403,4.53328476,4.52922725
44.539852,4.58257569,4.55281221,0.172520962,4.5487584,4.53161989,4.5275471
44.550344,4.79583152,4.55142881,0.494371028,4.54735997,4.52995597,4.52586783
44.560836,4.35889894,4.55005301,-0.437211697,4.54596906,4.52829319,4.5241896
44.571327,5.38516481,4.54868516,0.914592613,4.54458602,4.52663169,4.52251257
44.581819,4.89897949,4.54732521,0.593004446,4.54321081,4.52497117,4.52083642
44.59231,4.89897949,4.54597366,0.594142934,4.54184391,4.52331194,4.51916149
44.602802,3.87298335,4.54463048,-0.819540808,4.54048531,4.52165369,4.51748744
44.613294,4.69041576,4.54329606,0.383561864,4.53913539,4.51999658,4.51581444
44.623785,5.19615242,4.54197077,0.80881497,4.53779452,4.51834077,4.51414265
44.634277,4.24264069,4.54065463,-0.545906536,4.53646272,4.51668594,4.51247176
44.644768,5,4.53934819,0.678713352,4.53514054,4.51503241,4.51080208
44.65526,4.89897949,4.53805147,0.60077285,4.533828,4.51337988,4.5091333
44.665752,4.69041576,4.53676491,0.39198322,4.53252554,4.51172849,4.50746558
44.676243,4.69041576,4.53548896,0.393607413,4.53123361,4.51007842,4.50579907
44.686735,5,4.53422371,0.682478053,4.52995229,4.50842934,4.50413347
44.697226,3.31662479,4.53296974,-1.1028803,4.52868218,4.50678158,4.50246908
44.707718,5.09901951,4.53172717,0.753188116,4.52742339,4.50513482,4.50080561
44.71821,5.47722558,4.53049653,0.973000025,4.52617643,4.50348922,4.49914319
44.728701,4.69041576,4.5292783,0.401419303,4.52494182,4.50184494,4.49748201
44.739193,5.09901951,4.52807269,0.755610231,4.52371974,4.50020168,4.49582173
44.749684,3.74165739,4.52688036,-0.88612808,4.52251085,4.49855973,4.49416269
44.760176,4.58257569,4.52570154,0.23848303,4.52131539,4.4969188,4.49250456
44.770668,4.58257569,4.52453682,0.240912584,4.52013396,4.49527905,4.4908475
44.781159,5.19615242,4.52339196,0.820219768,4.5189723,4.49364062,4.48919167
44.791651,4.35889894,4.52225698,-0.404175753,4.51782044,4.49200322,4.48753676
44.802142,5.09901951,4.5211378,0.760185312,4.51668429,4.49036715,4.48588309
44.812634,4.12310563,4.52003479,-0.630023146,4.51556423,4.48873211,4.48423034
44.823126,4.58257569,4.51894866,0.252244003,4.51446096,4.48709826,4.48257868
44.833617,5.29150262,4.51788015,0.879558112,4.51337524,4.48546574,4.48092825
44.844109,5.74456265,4.51682974,1.1080311,4.51230753,4.48383426,4.47927875
44.8546,4.47213595,4.51579833,-0.208955441,4.51125874,4.48220413,4.47763049
44.865092,5.09901951,4.5147865,0.76435137,4.51022945,4.48057504,4.47598316
44.875584,4,4.51379511,-0.716795024,4.50922051,4.47894714,4.47433692
44.886075,5.65685425,4.51282508,1.06959299,4.50823286,4.4773206,4.47269193
44.896567,4.12310563,4.51187711,-0.623515427,4.50726719,4.4756951,4.47104787
44.907058,4.58257569,4.5109523,0.26762547,4.50632459,4.47407096,4.46940506
44.91755,4.47213595,4.51009015,-0.194818361,4.5054446,4.47244787,4.46776319
44.928042,4.47213595,4.50921439,-0.192557618,4.5045509,4.47082599,4.46612242
44.938533,5,4.50836487,0.701166975,4.50368335,4.46920548,4.4644829
44.949025,4.35889894,4.50754258,-0.385543298,4.50284295,4.46758602,4.46284432
44.959516,4.35889894,4.50674888,-0.384512598,4.50203107,4.46596793,4.461207
44.970008,4.24264069,4.50598492,-0.513170759,4.50124884,4.46435091,4.45957062
44.9805,4.89897949,4.50525212,0.627476983,4.50049771,4.46273511,4.45793535
44.990991,4.69041576,4.50455201,0.43111918,4.49977919,4.46112068,4.45630134
45.001483,4.47213595,4.50388598,-0.178185379,4.49909467,4.45950732,4.45466828
45.011974,4,4.50325579,-0.70940524,4.49844592,4.45789535,4.45303648
45.022466,4.79583152,4.50266305,0.541450344,4.49783455,4.45628445,4.45140564
45.032958,4.69041576,4.50210965,0.433942523,4.49726244,4.45467478,4.4497759
45.043449,4.69041576,4.5015976,0.434532121,4.49673163,4.4530665,4.44814744
45.053941,4.79583152,4.50112888,0.542865221,4.49624407,4.4514593,4.44651993
45.064432,4.47213595,4.5007058,-0.169026159,4.4958021,4.44985349,4.44489369
45.074924,4.89897949,4.50033064,0.631386444,4.49540798,4.44824878,4.44326842
45.085416,4.69041576,4.50000598,0.436359686,4.4950643,4.44664531,4.44164426
45.095907,3.60555128,4.49973454,-0.945612641,4.49477379,4.44504323,4.44002137
45.106399,5.29150262,4.49951915,0.889934534,4.49453926,4.44344226,4.43839945
45.11689,4.89897949,4.49936293,0.63215232,4.49436386,4.44184268,4.43677881
45.127382,4.79583152,4.49926916,0.544575396,4.49425087,4.44024421,4.43515913
45.137874,4,4.49924141,-0.706570172,4.49420384,4.438647,4.43354058
45.148365,4.79583152,4.49928347,0.54456226,4.4942266,4.43705119,4.43192331
45.158857,4.47213595,4.49939943,-0.165116549,4.49432321,4.4354565,4.43030701
45.169348,4.89897949,4.49959367,0.63196979,4.49449808,4.43386322,4.428692
45.17984,5.19615242,4.49987095,0.834434823,4.49475596,4.43227105,4.42707796
45.190332,4.69041576,4.50023635,0.436095644,4.49510195,4.43068015,4.42546506
45.200823,5,4.50069532,0.706614941,4.4955415,4.42909068,4.42385343
45.211315,4,4.50125389,-0.707992861,4.49608063,4.42750233,4.42224279
45.221806,4.69041576,4.50191837,0.434162864,4.49672568,4.4259154,4.42063344
45.232298,4.12310563,4.50269582,-0.616108914,4.49748372,4.42432961,4.41902508
45.24279,4.79583152,4.50359373,0.540590231,4.49836223,4.42274509,4.41741785
45.253281,5,4.50462016,0.703832254,4.4993693,4.42116201,4.41581191
45.263773,4.47213595,4.50578418,-0.183434534,4.500514,4.41958007,4.41420696
45.274264,4.47213595,4.50709525,-0.186974056,4.5018058,4.41799956,4.4126033
45.284756,4.35889894,4.50856413,-0.386865853,4.50325547,4.4164202,4.41100064
45.295248,4,4.5102022,-0.714284397,4.50487441,4.41484213,4.40939912
45.305739,4.79583152,4.51202184,0.532737913,4.50667503,4.4132655,4.4077989
45.316231,4.12310563,4.51403712,-0.62524515,4.5086714,4.41169003,4.40619967
45.326722,4.58257569,4.51626275,0.257513001,4.51087825,4.41011601,4.40460175
45.337214,4.79583152,4.51871566,0.526417951,4.51331254,4.40854314,4.40300482
45.347706,4.69041576,4.52141387,0.411098392,4.5159923,4.40697158,4.40140905
45.358197,5.38516481,4.52437714,0.927786436,4.51893733,4.40540148,4.39981457
45.368689,4,4.52762813,-0.726380155,4.52217031,4.40383254,4.3982211
45.37918,4.79583152,4.53119073,0.5144325,4.52571516,4.40226507,4.39662894
45.389672,4.89897949,4.53509269,0.603230297,4.52959968,4.40069876,4.39503778
45.400164,5.09901951,4.53936383,0.748101385,4.5338537,4.39913378,4.39344778
45.410655,4.69041576,4.54403719,0.38259452,4.53851033,4.39757027,4.39185909
45.421147,4.24264069,4.54915098,-0.55363372,4.54360782,4.39600793,4.39027141
45.431638,4.89897949,4.554746,0.586714142,4.54918701,4.39444707,4.38868504
45.44213,4.12310563,4.56087003,-0.661637666,4.55529575,4.3928874,4.38709968
45.452622,4.69041576,4.56757507,0.350486355,4.56198611,4.39132906,4.38551549
45.463113,4.24264069,4.57491954,-0.576436343,4.56931658,4.3897722,4.38393261
45.473605,5,4.58297148,0.645777454,4.57735527,4.38821654,4.38235075
45.484096,3.87298335,4.59180488,-0.847833438,4.58617629,4.38666236,4.3807702
45.494588,3,4.60150704,-1.26550663,4.59586703,4.38510939,4.37919068
45.50508,4.89897949,4.6121747,0.535541583,4.60652434,4.38355776,4.37761232
45.515571,4.47213595,4.62391807,-0.389592247,4.61825858,4.38200763,4.37603529
45.526063,4.35889894,4.63686683,-0.5272266,4.63119958,4.3804587,4.37445927
45.536554,5.65685425,4.65116513,1.00284053,4.64549165,4.37891128,4.37288459
45.547046,5.19615242,4.66698457,0.727439242,4.6613066,4.37736507,4.37131092
45.557538,4.69041576,4.68451955,0.0767867634,4.67883904,4.37582023,4.36973843
45.568029,4.35889894,4.70399562,-0.587449297,4.69831478,4.37427689,4.36816727
45.578521,4.79583152,4.72568193,0.264857685,4.72000327,4.37273478,4.36659714
45.589012,4.58257569,4.74988674,-0.409036729,4.74421309,4.37119418,4.36502834
45.599504,4.89897949,4.77698467,0.34927756,4.77131926,4.36965482,4.36346057
45.609996,4.79583152,4.80741837,-0.107642211,4.80176487,4.36811682,4.36189398
45.620487,4.35889894,4.84172894,-0.694859693,4.83609156,4.36658036,4.36032872
45.630979,5.09901951,4.88060696,0.467346287,4.87499059,4.36504513,4.3587645
45.64147,6.164414,4.92493589,1.11331851,4.91934624,4.36351143,4.35720161
45.651962,4.69041576,4.97592733,-0.534332829,4.97037121,4.36197898,4.35563976
45.662454,5.38516481,5.03526156,0.591526205,5.02974728,4.36044791,4.3540791
45.672945,5.38516481,5.10534158,0.528983198,5.09987956,4.35891839,4.35251977
45.683437,5.29150262,5.18964418,0.319152691,5.18424768,4.35739012,4.35096149
45.693928,5.19615242,5.29305895,-0.311298125,5.28774498,4.3558634,4.34940455
45.70442,7.28010989,5.4223041,1.3630135,5.41709431,4.35433793,4.34784865
45.714912,6,5.58602743,0.643407004,5.58094838,4.35281387,4.34629394
45.725403,5.29150262,5.79455298,-0.709260432,5.78963543,4.35129137,4.34474058
45.735895,6.70820393,6.05903564,0.805709807,6.05431226,4.34977014,4.34318826
45.746386,5.83095189,6.38970707,-0.747499284,6.38520859,4.34825046,4.34163729
45.756878,7,6.79395922,0.453917148,6.78970991,4.34673207,4.34008737
45.76737,6.70820393,7.27406917,-0.752240143,7.27008292,4.34521509,4.33853865
45.777861,7.54983444,7.82566622,-0.525196905,7.82194466,4.34369969,4.33699128
45.788353,8.60232527,8.43695357,0.406659196,8.4334864,4.34218557,4.33544496
45.798844,9.2736185,9.08755979,0.431345231,9.08432659,4.34067303,4.33389999
45.809336,9.64365076,9.74738581,-0.322079262,9.74435808,4.33916178,4.33235607
45.819828,9.38083152,10.3732716,-0.996212863,10.3704138,4.33765197,4.33081336
45.830319,10.9544512,10.9066381,0.218661862,10.903908,4.33614374,4.32927201
45.840811,12,11.2776751,0.849897006,11.2750229,4.33463682,4.32773171
45.851302,11.7898261,11.4230617,0.605610818,11.4204314,4.33313149,4.32619277
45.861794,11.4891253,11.3143121,0.418106685,11.3116445,4.33162747,4.32465489
45.872286,10.5830052,10.973226,-0.624676519,10.970463,4.33012491,4.32311822
45.882777,10.7703296,10.4595142,0.557508255,10.4566022,4.32862395,4.32158291
45.893269,10.198039,9.84302784,0.595828148,9.83991935,4.32712431,4.32004866
45.90376,9.21954446,9.18430297,0.18772715,9.18095621,4.32562628,4.31851577
45.914252,8.77496439,8.52846641,0.49648563,8.52484563,4.32412958,4.31698395
45.924744,8.36660027,7.90757295,0.677515543,7.90364978,4.32263435,4.31545335
45.935235,7.14142843,7.34338348,-0.449394097,7.33913924,4.32114075,4.31392411
45.945727,6.4807407,6.84895735,-0.606808579,6.84438548,4.31964848,4.31239594
45.956218,6.55743852,6.42990374,0.357120128,6.4250111,4.31815784,4.31086913
45.96671,5.65685425,6.08485916,-0.654220839,6.07966481,4.31666854,4.3093434
45.977202,6.08276253,5.80728504,0.524859491,5.80181681,4.31518074,4.30781889
45.987693,6.164414,5.58732651,0.759662751,5.58161622,4.31369457,4.30629574
45.998185,5.47722558,5.41389234,0.251660949,5.4079713,4.31220976,4.30477367
46.008676,5.74456265,5.27651752,0.68413824,5.27041359,4.3107266,4.30325297
46.019168,4.79583152,5.16623712,-0.608609562,5.15997336,4.3092448,4.30173335
46.02966,5.29150262,5.07606194,0.464155886,5.06965662,4.30776452,4.30021496
46.040151,4.58257569,5.00082402,-0.646721208,4.9942914,4.30628589,4.29869793
46.050643,4.79583152,4.93683227,-0.375500665,4.93018342,4.30480864,4.29718199
46.061134,4.89897949,4.88153865,0.132063743,4.87478234,4.30333305,4.29566742
46.071626,5.09901951,4.83314483,0.515630374,4.82628816,4.30185885,4.29415394
46.082118,4.69041576,4.79038532,-0.316179634,4.78343421,4.30038618,4.29264169
46.092609,3.87298335,4.75232911,-0.93773438,4.7452886,4.29891518,4.29113081
46.103101,4.58257569,4.71825519,-0.368346981,4.71112959,4.29744559,4.28962102
46.113592,4.69041576,4.68760628,0.0530045312,4.68039936,4.29597768,4.28811261
46.124084,3.87298335,4.65991732,-0.887092992,4.65263239,4.29451117,4.28660528
46.134576,5,4.63481049,0.60430912,4.62745044,4.29304622,4.2850992
46.145067,3.74165739,4.61196716,-0.932903949,4.60453457,4.29158296,4.28359449
46.155559,5.38516481,4.59111027,0.891097378,4.58360738,4.29012112,4.28209088
46.16605,3.87298335,4.57201081,-0.836078623,4.56443961,4.28866099,4.28058865
46.176542,4.47213595,4.55446454,-0.286929577,4.54682678,4.28720228,4.27908751
46.187034,4.24264069,4.5383003,-0.543745905,4.53059752,4.28574515,4.27758761
46.197525,5.29150262,4.52336944,0.876432076,4.51560301,4.28428974,4.2760891
46.208017,4.24264069,4.50953849,-0.516621524,4.50170959,4.28283577,4.27459169
46.218508,4.89897949,4.49669625,0.634258019,4.48880595,4.28138352,4.27309566
46.229,4.35889894,4.48474045,-0.354741464,4.47678965,4.27993273,4.27160073
46.239492,4.35889894,4.47358477,-0.338652959,4.46557428,4.27848353,4.27010705
46.249983,4,4.46315301,-0.68055346,4.45508352,4.27703607,4.26861475
46.260475,4.58257569,4.45337495,0.359445047,4.44524707,4.27559008,4.26712356
46.270966,4,4.44419212,-0.666477395,4.43600636,4.27414583,4.26563376
46.281458,4.69041576,4.43554907,0.504843229,4.42730587,4.27270306,4.26414507
46.29195,4.12310563,4.42739898,-0.551627916,4.41909871,4.27126192,4.26265762
46.302441,3.60555128,4.41969994,-0.902301872,4.41134291,4.26982253,4.26117157
46.312933,4.58257569,4.41241232,0.412508636,4.40399877,4.26838464,4.25968662
46.323424,5.09901951,4.40550334,0.832776183,4.39703348,4.26694851,4.25820307
46.333916,4.12310563,4.39894094,-0.525200259,4.39041491,4.26551389,4.25672062
46.344408,5.19615242,4.39272476,0.896341263,4.38414272,4.26408092,4.25523944
46.354899,5.09901951,4.38677719,0.843944504,4.37813916,4.26264973,4.25375964
46.365391,4,4.38110108,-0.617333846,4.37240708,4.26122006,4.25228097
46.375882,5.09901951,4.37567709,0.850495398,4.36692713,4.25979218,4.25080368
46.386374,4.79583152,4.37048563,0.652185473,4.36167965,4.25836584,4.24932752
46.396866,4.89897949,4.36551038,0.730389698,4.35664832,4.25694116,4.24785261
46.407357,3.74165739,4.36073642,-0.786815757,4.35181819,4.2555183,4.2463791
46.417849,2.82842712,4.35614885,-1.23601041,4.34717432,4.25409698,4.24490671
46.42834,5.09901951,4.35173576,0.864455758,4.3427048,4.25267749,4.24343572
46.438832,4.89897949,4.34748459,0.74262702,4.33839703,4.25125955,4.24196585
46.449324,4.35889894,4.34338508,0.124554656,4.33424072,4.24984332,4.24049724
46.459815,4.35889894,4.33942776,0.139539185,4.3302264,4.24842892,4.23903004
46.470307,2.64575131,4.33563727,-1.29995614,4.32637875,4.24701609,4.23756396
46.480798,5.29150262,4.33193721,0.979574099,4.32262122,4.24560512,4.23609928
46.49129,4.89897949,4.32835361,0.755397829,4.31897989,4.24419574,4.23463573
46.501782,4.24264069,4.32487976,-0.286773564,4.31544803,4.24278808,4.23317344
46.512273,4.24264069,4.32150948,-0.280835891,4.31201945,4.24138229,4.23171256
46.522765,4.79583152,4.31823609,0.691082795,4.30868744,4.23997811,4.23025281
46.533256,4.79583152,4.31505465,0.693380759,4.30544706,4.2385758,4.22879447
46.543748,4.35889894,4.31195936,0.216655442,4.30229251,4.23717512,4.22733725
46.55424,5.09901951,4.30894576,0.888860928,4.29921929,4.23577619,4.22588131
46.564731,4.58257569,4.30600968,0.525895442,4.29622323,4.23437917,4.22442678
46.575223,3.87298335,4.30314938,-0.655870443,4.29330258,4.23298378,4.22297337
46.585714,4.47213595,4.30035564,0.414463888,4.2904481,4.2315903,4.22152138
46.596206,5.19615242,4.2976273,0.94790565,4.28765863,4.23019848,4.22007052
46.606698,2.82842712,4.2949613,-1.21100544,4.28493108,4.22880845,4.21862094
46.617189,4.79583152,4.29235478,0.70956095,4.2822626,4.22742035,4.21717277
46.627681,4.58257569,4.28980433,0.54108351,4.27964975,4.22603392,4.21572574
46.638172,4.89897949,4.28730773,0.78209447,4.27709032,4.22464944,4.21428012
46.648664,4.58257569,4.28486195,0.545631507,4.27458126,4.22326665,4.21283564
46.659156,3.46410162,4.28246488,-0.904634327,4.27212043,4.22188568,4.21139243
46.669647,4.58257569,4.28011451,0.549964712,4.26970585,4.22050668,4.20995065
46.680139,4.35889894,4.27780831,0.284764178,4.26733494,4.21912939,4.20851
46.69063,5.38516481,4.27554476,1.05338504,4.26500621,4.21775408,4.20707077
46.701122,4.89897949,4.27332165,0.790985355,4.26271741,4.21638049,4.20563268
46.711614,4.79583152,4.2711374,0.724357734,4.26046695,4.21500878,4.20419588
46.722105,4.69041576,4.26899062,0.649172657,4.25825346,4.21363906,4.20276049
46.732597,4.79583152,4.2668794,0.727290948,4.25607499,4.21227109,4.20132625
46.743088,4,4.26480271,-0.51458985,4.25393052,4.21090515,4.19989343
46.75358,3.46410162,4.26275882,-0.893676231,4.25181829,4.20954096,4.19846176
46.764072,4.89897949,4.26074666,0.798894753,4.24973723,4.20817869,4.19703137
46.774563,3.31662479,4.25876523,-0.97063919,4.24768634,4.20681845,4.1956024
46.785055,4,4.25681303,-0.506767235,4.2456641,4.20546001,4.19417458
46.795546,4.47213595,4.25488938,0.466097168,4.24366984,4.20410363,4.19274819
46.806038,4.79583152,4.25299293,0.73677581,4.24170216,4.20274905,4.19132294
46.81653,4.69041576,4.25112291,0.662791708,4.23976032,4.20139643,4.18989899
46.827021,4.58257569,4.24927863,0.577318862,4.2378436,4.20004589,4.18847646
46.837513,4.47213595,4.24745889,0.474001129,4.2359508,4.19869718,4.18705508
46.848004,4,4.24566325,-0.495644279,4.23408148,4.19735058,4.18563513
46.858496,2.64575131,4.24389064,-1.26417536,4.23223453,4.19600583,4.18421633
46.868988,4.79583152,4.24214053,0.744104156,4.23040942,4.19466308,4.18279882
46.879479,4.24264069,4.24041242,0.0472045552,4.22860567,4.19332246,4.18138275
46.889971,4.35889894,4.23870536,0.346689469,4.22682228,4.19198372,4.17996782
46.900462,4.47213595,4.23701908,0.484888515,4.22505901,4.19064713,4.17855433
46.910954,4,4.23535272,-0.485131657,4.22331495,4.18931245,4.177142
46.921446,5.29150262,4.23370592,1.02849244,4.22158975,4.18797981,4.17573096
46.931937,3.74165739,4.23207834,-0.700300614,4.21988306,4.18664935,4.17432135
46.942429,4.79583152,4.2304692,0.751905797,4.21819408,4.18532082,4.1729129
46.95292,4.47213595,4.22887837,0.493211501,4.2165227,4.1839945,4.17150588
46.963412,4.89897949,4.22730515,0.819557404,4.21486816,4.18267013,4.17010003
46.973904,4.69041576,4.22574929,0.681664481,4.21323025,4.18134786,4.16869547
46.984395,4.24264069,4.2242106,0.135757475,4.21160873,4.18002782,4.16729234
46.994887,4.35889894,4.22268842,0.369067105,4.21000295,4.17870977,4.16589038
47.005378,4.24264069,4.22118273,0.146485354,4.20841288,4.17739397,4.16448986
47.01587,4.47213595,4.21969295,0.502437068,4.20683791,4.1760802,4.1630905
47.026362,4,4.21821894,-0.4671391,4.20527791,4.17476857,4.16169244
47.036853,4.47213595,4.21676058,0.505346785,4.20373275,4.17345923,4.16029581
47.047345,4.47213595,4.21531736,0.506772729,4.20220188,4.17215195,4.15890035
47.057836,4.47213595,4.21388931,0.508179735,4.20068536,4.17084698,4.15750633
47.068328,4.24264069,4.21247597,0.173679932,4.19918268,4.16954408,4.15611348
47.07882,4.47213595,4.21107727,0.510939021,4.19769378,4.1682434,4.15472193
47.089311,3.60555128,4.20969318,-0.777265657,4.19621861,4.16694507,4.15333182
47.099803,4.47213595,4.20832326,0.513627002,4.19475672,4.16564885,4.15194288
47.110294,5.19615242,4.20696763,0.994577696,4.19330823,4.16435501,4.15055538
47.120786,4.35889894,4.2056259,0.391501013,4.19187271,4.16306332,4.14916905
47.131278,4.24264069,4.20429808,0.19581268,4.19045017,4.1617739,4.14778403
47.141769,4.47213595,4.20298419,0.518798383,4.18904064,4.16048691,4.14640044
47.152261,4.89897949,4.20168389,0.835042272,4.18764372,4.15920209,4.14501803
47.162752,4.24264069,4.20039734,0.205531859,4.18625961,4.15791973,4.14363706
47.173244,4.12310563,4.19912424,-0.275714728,4.18488794,4.15663958,4.14225727
47.183736,3.74165739,4.19786464,-0.675431163,4.1835288,4.15536178,4.14087879
47.194227,4.79583152,4.19661863,0.774088425,4.18218224,4.15408647,4.13950175
47.204719,4.47213595,4.19538594,0.526070348,4.18084797,4.15281342,4.13812588
47.21521,4.12310563,4.19416679,-0.266572996,4.17952621,4.15154289,4.13675146
47.225702,3.46410162,4.19296093,-0.853732576,4.17821668,4.15027466,4.13537822
47.236194,4.47213595,4.19176848,0.52949738,4.1769195,4.14900886,4.13400629
47.246685,5,4.19058958,0.899672398,4.17563479,4.14774562,4.1326358
47.257177,4.89897949,4.18942402,0.842351155,4.17436233,4.14648473,4.1312665
47.267668,4.58257569,4.18827207,0.627936008,4.17310237,4.14522644,4.12989863
47.27816,5.09901951,4.18713355,0.954927203,4.17185471,4.14397053,4.12853195
47.288652,4.47213595,4.18600864,0.534908695,4.17061952,4.14271713,4.12716659
47.299143,3.31662479,4.18489752,-0.931811534,4.16939697,4.14146639,4.12580267
47.309635,3.87298335,4.18380007,-0.55750939,4.16818689,4.14021808,4.12443993
47.320126,4.24264069,4.18271657,0.244794022,4.16698961,4.13897246,4.12307864
47.330618,4.89897949,4.18164695,0.84695486,4.16580497,4.13772932,4.12171854
47.34111,4.58257569,4.18059142,0.6340223,4.1646332,4.13648878,4.12035975
47.351601,3.74165739,4.17955021,-0.661734708,4.16347452,4.13525098,4.11900241
47.362093,4.24264069,4.17852327,0.253214166,4.16232884,4.13401572,4.11764625
47.372584,5.09901951,4.17751096,0.959952371,4.16119653,4.13278325,4.11629155
47.383076,4.35889894,4.17651325,0.427066383,4.1600775,4.13155335,4.11493803
47.393568,4,4.17553042,-0.418963505,4.15897205,4.13032615,4.11358583
47.404059,3.74165739,4.17456276,-0.657955449,4.15788045,4.12910181,4.11223508
47.414551,4.47213595,4.1736103,0.546375013,4.15680268,4.1278801,4.11088551
47.425042,4,4.17267345,-0.415539944,4.15573916,4.12666129,4.1095374
47.435534,4.69041576,4.17175226,0.720182965,4.1546899,4.12544516,4.10819048
47.446026,3.74165739,4.17084708,-0.655125708,4.15365525,4.12423185,4.10684488
47.456517,5,4.16995827,0.91106626,4.15263554,4.1230215,4.10550073
47.467009,5.09901951,4.16908594,0.964330633,4.15163086,4.1218139,4.10415777
47.4775,4.35889894,4.16823057,0.436655895,4.15064167,4.12060932,4.10281626
47.487992,4.24264069,4.16739231,0.274314372,4.14966809,4.11940753,4.10147595
47.498484,4.35889894,4.16657159,0.438551431,4.14871053,4.11820869,4.10013696
47.508975,4.58257569,4.16576883,0.645605816,4.14776941,4.11701293,4.09879942
47.519467,4.24264069,4.16498425,0.278669038,4.14684492,4.11582006,4.09746308
47.529958,4.58257569,4.16421842,0.646805438,4.14593759,4.11463032,4.09612819
47.54045,4.47213595,4.1634716,0.555575701,4.14504766,4.11344352,4.09479449
47.550942,4.35889894,4.16274429,0.442893497,4.14417563,4.11225979,4.09346212
47.561433,4.35889894,4.16203704,0.443691221,4.14332201,4.11107928,4.0921312
47.571925,4.12310563,4.1613502,-0.195562196,4.14248711,4.1099018,4.09080148
47.582416,3.87298335,4.1606844,-0.536377716,4.14167158,4.10872759,4.08947322
47.592908,4.47213595,4.16004006,0.558655434,4.14087577,4.10755646,4.08814615
47.6034,4.35889894,4.15941781,0.446633108,4.14010031,4.10638856,4.08682041
47.613891,5.38516481,4.1588183,1.1074053,4.13934583,4.10522402,4.08549612
47.624383,4,4.15824204,-0.397796483,4.1386128,4.10406266,4.08417303
47.634874,5.09901951,4.1576898,0.970221476,4.13790198,4.10290474,4.0828514
47.645366,4.79583152,4.15716216,0.799167918,4.13721389,4.10175005,4.08153097
47.655858,4.12310563,4.15665991,-0.18317828,4.13654932,4.10059876,4.08021187
47.666349,5.83095189,4.15618384,1.2941283,4.13590906,4.09945099,4.07889422
47.676841,4.89897949,4.15573468,0.862116467,4.13529376,4.09830658,4.07757778
47.687332,4.69041576,4.15531335,0.731506943,4.13470435,4.09716576,4.07626279
47.697824,4.24264069,4.15492066,0.296175666,4.13414158,4.09602837,4.074949
47.708316,5.65685425,4.15455759,1.22568212,4.13360643,4.09489455,4.07363654
47.718807,4.58257569,4.15422514,0.654484954,4.13309988,4.09376444,4.07232554
47.729299,4.69041576,4.15392429,0.732455779,4.13262284,4.09263786,4.07101575
47.73979,4.47213595,4.15365619,0.564340114,4.13217648,4.09151508,4.06970741
47.750282,4.58257569,4.15342193,0.655098284,4.13176183,4.09039592,4.06840028
47.760774,4,4.15322276,-0.391436784,4.1313801,4.08928052,4.06709447
47.771265,4.47213595,4.15305995,0.564868133,4.13103258,4.08816904,4.06579013
47.781757,3.87298335,4.15293482,-0.529104408,4.13072051,4.08706131,4.06448699
47.792248,5.09901951,4.15284882,0.972713059,4.13044535,4.08595758,4.06318531
47.80274,4.24264069,4.15280342,0.299728649,4.13020851,4.08485769,4.06188484
47.813232,4.35889894,4.15280023,0.453980967,4.13001157,4.08376179,4.0605857
47.823723,5.38516481,4.15284089,1.11010086,4.12985618,4.08267003,4.05928802
47.834215,4.69041576,4.15292719,0.733136121,4.12974405,4.08158225,4.05799154
47.844706,3.74165739,4.15306097,-0.641407504,4.12967704,4.08049871,4.05669653
47.855198,5,4.15324425,0.920193323,4.12965708,4.07941925,4.05540272
47.86569,4.24264069,4.15347909,0.298599388,4.12968625,4.07834403,4.05411025
47.876181,3.16227766,4.15376769,-0.995735926,4.12976672,4.0772732,4.05281924
47.886673,4.89897949,4.15411246,0.863056793,4.12990082,4.07620661,4.05152944
47.897164,4.24264069,4.15451581,0.296858343,4.13009101,4.07514452,4.0502411
47.907656,4.69041576,4.15498048,0.731734436,4.13033992,4.07408678,4.04895397
47.918148,4.35889894,4.15550922,0.450987493,4.13065033,4.07303356,4.04766817
47.928639,4.69041576,4.15610499,0.730965645,4.13102516,4.07198501,4.04638383
47.939131,4.58257569,4.15677105,0.652537084,4.13146763,4.07094099,4.04510071
47.949622,4.79583152,4.15751067,0.798949846,4.13198101,4.06990177,4.04381905
47.960114,3.87298335,4.15832758,-0.534176221,4.13256897,4.0688672,4.04253859
47.970606,4.89897949,4.15922556,0.860089485,4.13323528,4.06783746,4.04125948
47.981097,5.74456265,4.16020861,1.25871126,4.13398395,4.0668127,4.03998182
47.991589,4.69041576,4.16128128,0.727416305,4.13481946,4.0657928,4.03870538
48.00208,3.74165739,4.16244804,-0.648683784,4.13574631,4.06477803,4.0374304
48.012572,4.47213595,4.16371411,0.555357406,4.13676965,4.06376825,4.03615664
48.023064,5,4.16508472,0.913736984,4.13789474,4.06276365,4.03488421
48.033555,4.35889894,4.16656547,0.438558401,4.13912717,4.06176439,4.03361324
48.044047,5.56776436,4.16816278,1.18304758,4.1404733,4.06077035,4.03234349
48.054538,4.69041576,4.16988294,0.721479607,4.14193948,4.0597818,4.0310752
48.06503,3.60555128,4.17173336,-0.752450717,4.14353307,4.05879864,4.02980812
48.075522,5,4.1737215,0.908998623,4.14526155,4.05782105,4.02854239
48.086013,4.12310563,4.17585537,-0.229673129,4.14713295,4.05684919,4.02727811
48.096505,4.69041576,4.17814422,0.715731473,4.1491565,4.05588297,4.02601505
48.106996,4.24264069,4.18059714,0.249085412,4.15134136,4.05492266,4.02475345
48.117488,4.79583152,4.18322493,0.782691886,4.15369828,4.05396817,4.02349307
48.12798,5.09901951,4.18603851,0.955500394,4.15623825,4.05301969,4.02223403
48.138471,4.69041576,4.18904965,0.708072106,4.15897312,4.05207739,4.02097645
48.148963,4.47213595,4.19227203,0.52902167,4.16191654,4.0511412,4.01972009
48.159454,4.24264069,4.19571923,0.216613618,4.16508222,4.0502114,4.01846519
48.169946,5.83095189,4.19940736,1.27731928,4.16848628,4.04928791,4.01721151
48.180438,5,4.20335293,0.892550877,4.17214534,4.04837092,4.01595916
48.190929,5.83095189,4.20757384,1.27411854,4.17607742,4.04746064,4.01470828
48.201421,5.83095189,4.21209091,1.27234468,4.18030339,4.04655699,4.01345862
48.211912,4.79583152,4.21692514,0.760858978,4.18484445,4.04566027,4.01221042
48.222404,4.89897949,4.2221014,0.822726007,4.18972556,4.04477041,4.01096344
48.232896,5,4.22764551,0.878837009,4.19497274,4.04388763,4.00971781
48.243387,5.09901951,4.23358572,0.930286942,4.20061445,4.04301214,4.00847363
48.253879,6.08276253,4.2399549,1.35750051,4.20668374,4.04214388,4.00723067
48.26437,4.69041576,4.24678681,0.666054766,4.21321467,4.04128316,4.00598917
48.274862,6.08276253,4.25412137,1.35227259,4.22024741,4.04042995,4.0047489
48.285354,4.47213595,4.26200067,0.458405157,4.2278244,4.03958446,4.00350997
48.295845,6.164414,4.27047121,1.37620594,4.23599255,4.03874692,4.0022725
48.306337,5.56776436,4.27958722,1.13497892,4.24480643,4.03791731,4.00103625
48.316828,5.74456265,4.28940543,1.20629897,4.25432334,4.03709594,3.99980146
48.32732,4.89897949,4.29999299,0.773942176,4.2646109,4.0362828,3.99856789
48.337812,4.79583152,4.31142193,0.695995399,4.27574178,4.03547813,3.99733567
48.348303,4.89897949,4.3237727,0.758423885,4.28779716,4.03468217,3.9961049
48.358795,5.09901951,4.3371394,0.87285744,4.3008719,4.03389493,3.99487536
48.369286,5.29150262,4.3516227,0.969474042,4.31506758,4.03311673,3.99364728
48.379778,5.38516481,4.36734189,1.0088721,4.33050446,4.0323476,3.99242043
48.39027,5.09901951,4.38442744,0.845335479,4.34731418,4.0315878,3.99119491
48.400761,4.35889894,4.40302702,-0.210066843,4.36564575,4.03083758,3.98997086
48.411253,4.89897949,4.42331433,0.689684821,4.38567426,4.030097,3.98874803
48.421744,4.79583152,4.44547956,0.591905366,4.40759163,4.02936638,3.98752666
48.432236,4.89897949,4.46974925,0.65515665,4.43162623,4.0286458,3.98630651
48.442728,5.47722558,4.49637684,0.990378078,4.45803366,4.02793552,3.98508771
48.453219,5,4.5256544,0.688727523,4.48710845,4.02723585,3.98387037
48.463711,5.38516481,4.55793051,0.909524217,4.5192019,4.02654685,3.98265425
48.474202,4.89897949,4.59360112,0.552610504,4.55471317,4.0258689,3.98143959
48.484694,5.47722558,4.63315146,0.918735063,4.59413113,4.0252021,3.98022616
48.495186,5.29150262,4.67715834,0.783801173,4.63803694,4.02454675,3.97901407
48.505677,5.19615242,4.72633914,0.685429271,4.6871532,4.02390317,3.97780344
48.516169,5.29150262,4.78163286,0.714051651,4.74242548,4.02327149,3.97659404
48.52666,4.89897949,4.84426695,0.233907114,4.80508969,4.0226521,3.97538609
48.537152,5.19615242,4.91595454,0.529337209,4.87687026,4.02204516,3.97417937
48.547644,6.164414,4.99907296,1.07950963,4.96015975,4.021451,3.972974
48.558135,5.65685425,5.0969641,0.748258078,5.05832039,4.02086997,3.97177008
48.568627,5.83095189,5.21430129,0.785271042,5.17605186,4.02030227,3.97056739
48.579118,5.83095189,5.35732932,0.688202425,5.31963049,4.01974832,3.96936615
48.58961,5.56776436,5.53412728,0.183404139,5.49716944,4.01920832,3.96816615
48.600102,6.40312424,5.75436574,0.80545546,5.71836915,4.01868266,3.96696748
48.610593,6.164414,6.02868431,0.368415109,5.99388557,4.01817174,3.96577028
48.621085,6.244998,6.36757278,-0.350106818,6.33420189,4.01767581,3.9645743
48.631576,6.92820323,6.77948587,0.3856389,6.74773663,4.01719532,3.96337978
48.642068,7.21110255,7.26930824,-0.241258559,7.23931209,4.01673057,3.96218648
48.65256,7.34846923,7.83657205,-0.698643559,7.80838128,4.01628199,3.96099453
48.663051,8.66025404,8.47460002,0.430875869,8.44818573,4.01585003,3.95980404
48.673543,9.32737905,9.17028434,0.396351757,9.14554686,4.01543501,3.95861477
48.684034,9.69535971,9.90325393,-0.455954181,9.88003749,4.01503746,3.95742696
48.694526,9.69535971,10.6454238,-0.974712315,10.6235309,4.01465774,3.95624038
48.705018,11.8321596,11.3585276,0.688209281,11.3377261,4.01429634,3.95505514
48.715509,12.4096736,11.9922847,0.646056451,11.9723083,4.01395379,3.95387136
48.726001,13.4164079,12.4858071,0.964676515,12.4663506,4.01363051,3.9526888
48.736492,13.892444,12.7768273,1.05622759,12.7575442,4.01332707,3.9515077
48.746984,14.6969385,12.8210448,1.36963267,12.801553,4.01304395,3.95032783
48.757476,13.2287566,12.6108291,0.786083617,12.5907257,4.01278172,3.94914931
48.767967,12.2065556,12.1792656,0.165196754,12.1581459,4.01254098,3.94797223
48.778459,11.1355287,11.585025,-0.670444819,11.5624943,4.01232227,3.94679639
48.78895,10.4880885,10.8916704,-0.635280937,10.8673483,4.01212625,3.945622
48.799442,10.7238053,10.1536661,0.755075632,10.1271833,4.01195351,3.94444883
48.809934,9.16515139,9.41324217,-0.498087121,9.38424129,4.01180473,3.94327701
48.820425,8.36660027,8.70177517,-0.578942917,8.6699201,4.01168061,3.94210665
48.830917,8.06225775,8.04188429,0.142735614,8.00687846,4.01158183,3.94093751
48.841408,8.30662386,7.44922019,0.925960948,7.4108341,4.01150914,3.93976982
48.8519,7.34846923,6.93248938,0.644964996,6.89058544,4.01146329,3.93860337
48.862392,7.41619849,6.49419515,0.96021005,6.44874397,4.0114451,3.93743825
48.872883,6.8556546,6.13118309,0.851158921,6.08226024,4.01145537,3.93627459
48.883375,6.8556546,5.83591274,1.00982269,5.78367472,4.01149498,3.93511216
48.893866,6.40312424,5.59842986,0.897047591,5.54308007,4.01156479,3.93395118
48.904358,5.29150262,5.40792109,-0.341201512,5.34967259,4.01166576,3.93279143
48.91485,5.83095189,5.25428148,0.759388186,5.19333054,4.01179884,3.93163302
48.925341,6.08276253,5.12887461,0.976671861,5.06538582,4.01196501,3.93047606
48.935833,5.29150262,5.02481335,0.516419671,4.95891485,4.01216536,3.92932032
48.946324,5.74456265,4.93695211,0.898671538,4.8687394,4.01240093,3.92816604
48.956816,5.29150262,4.86152624,0.655725841,4.79106717,4.0126729,3.92701299
48.967308,4.58257569,4.79587505,-0.461843432,4.72321674,4.01298243,3.92586128
48.977799,5.65685425,4.73810559,0.958513778,4.66327973,4.0133307,3.92471102
48.988291,5,4.68683742,0.559609314,4.60986364,4.01371908,3.92356199
48.998782,5.38516481,4.64106392,0.862612825,4.56195335,4.01414881,3.9224144
49.009274,5.09901951,4.59999627,0.706415771,4.51875248,4.01462139,3.92126805
49.019766,6,4.56301908,1.19874139,4.47963981,4.01513821,3.92012304
49.030257,5,4.52962848,0.685836364,4.4441064,4.01570075,3.91897947
49.040749,4.35889894,4.49939479,-0.374827755,4.4117173,4.01631071,3.91783713
49.05124,5.38516481,4.4719644,0.955615198,4.38211481,4.01696961,3.91669624
49.061732,5.56776436,4.4470242,1.05865016,4.35498111,4.01767932,3.91555658
49.072224,4.35889894,4.42431097,-0.255757757,4.33004909,4.01844159,3.91441826
49.082715,5.74456265,4.4035959,1.15800118,4.30708618,4.01925823,3.91328138
49.093207,4.69041576,4.38467422,0.552938999,4.28588334,4.02013138,3.91214573
49.103698,4.79583152,4.367374,0.654566669,4.2662653,4.02106295,3.91101153
49.11419,5.29150262,4.35153825,0.969517599,4.24807095,4.02205528,3.90987856
49.124682,5.47722558,4.33703361,1.06779772,4.23116348,4.02311056,3.90874692
49.135173,5,4.32374241,0.822348823,4.21542183,4.02423108,3.90761673
49.145665,4.89897949,4.31155731,0.766434715,4.20073454,4.02541955,3.90648777
49.156156,4,4.30038794,-0.548076582,4.18700807,4.02667835,3.90536025
49.166648,4.47213595,4.29015016,0.426597931,4.17415414,4.02801048,3.90423396
49.17714,5.65685425,4.28077232,1.17306519,4.16209759,4.02941872,3.90310901
49.187631,4.69041576,4.27219061,0.646703295,4.15077109,4.03090595,3.9019855
49.198123,3.60555128,4.26434602,-0.811661717,4.14011122,4.03247565,3.90086322
49.208614,4,4.25718898,-0.507138031,4.13006499,4.03413086,3.89974238
49.219106,4.79583152,4.25067274,0.738348688,4.12058098,4.03587544,3.89862276
49.229598,4.47213595,4.24475756,0.476842106,4.11161553,4.03771293,3.89750449
49.240089,4.47213595,4.23940796,0.482418896,4.10312908,4.03964706,3.89638765
49.250581,4.47213595,4.23459097,0.487385865,4.09508354,4.0416823,3.89527204
49.261072,3.60555128,4.23027911,-0.790397267,4.08744732,4.04382262,3.89415788
49.271564,4.58257569,4.22644643,0.59676567,4.08018893,4.04607298,3.89304494
49.282056,4,4.22307112,-0.472304059,4.07328176,4.04843803,3.89193333
49.292547,5,4.22013389,0.883100281,4.0667015,4.0509226,3.89082316
49.303039,4.69041576,4.21761707,0.687603588,4.06042415,4.05353255,3.88971422
49.31353,4.69041576,4.21550622,0.689136811,4.05443012,4.05627308,3.88860672
49.324022,3.60555128,4.21378812,-0.779895403,4.04869924,4.05915071,3.88750045
49.334514,3.87298335,4.21245205,-0.582639433,4.04321463,4.06217156,3.88639551
49.345005,4.58257569,4.21148896,0.609168891,4.03796077,4.06534205,3.885292
49.355497,4.47213595,4.21089117,0.511121102,4.03292194,4.06866992,3.88418972
49.365988,4.89897949,4.21065292,0.829654488,4.02808553,4.0721621,3.88308888
49.37648,4.79583152,4.21076975,0.764893306,4.02343815,4.07582728,3.88198927
49.386972,4.79583152,4.21123877,0.764586658,4.01896872,4.07967366,3.88089098
49.397463,3.74165739,4.21205829,-0.685857787,4.014667,4.08370988,3.87979413
49.407955,4.47213595,4.21322827,0.508829718,4.01052233,4.08794633,3.87869851
49.418446,5,4.21474959,0.886143559,4.00652637,4.09239243,3.87760432
49.428938,4.69041576,4.21662496,0.688324633,4.00266992,4.09705991,3.87651135
49.43943,4.69041576,4.21885796,0.686700665,3.9989455,4.10195994,3.87541972
49.449921,4.12310563,4.22145334,-0.313604393,3.99534618,4.10710439,3.87432952
49.460413,3.46410162,4.22441795,-0.871961199,3.99186448,4.11250741,3.87324054
49.470904,4,4.2277589,-0.477240919,3.98849478,4.11818206,3.872153
49.481396,4.89897949,4.23148588,0.817002819,3.98523055,4.12414444,3.87106668
49.491888,4.47213595,4.23560908,0.486340286,3.98206665,4.13041011,3.86998168
49.502379,5.29150262,4.24014001,1.02535975,3.97899825,4.13699564,3.86889812
49.512871,4.79583152,4.24509302,0.742117578,3.97601999,4.1439207,3.86781578
49.523362,5,4.2504823,0.865746903,3.97312798,4.15120374,3.86673488
49.533854,4.47213595,4.25632569,0.464553834,3.97031749,4.15886733,3.86565519
49.544346,4.24264069,4.26264135,-0.141423691,3.96758489,4.16693359,3.86457683
49.554837,5.09901951,4.26944917,0.910807522,3.96492677,4.17542614,3.8634999
49.565329,4.47213595,4.2767731,0.441998705,3.96233919,4.18437295,3.8624242
49.57582,4.35889894,4.28463659,0.272511206,3.95981942,4.19380066,3.86134992
49.586312,5.74456265,4.29306837,1.20477976,3.95736396,4.20374166,3.86027686
49.596804,4.58257569,4.30209756,0.529601869,3.9549702,4.21422808,3.85920513
49.607295,3,4.31175581,-1.14531909,3.95263569,4.22529449,3.85813482
49.617787,4.79583152,4.32208061,0.688295656,3.95035747,4.23698156,3.85706573
49.628278,3.87298335,4.33310896,-0.678325595,3.94813362,4.24932881,3.85599807
49.63877,4.35889894,4.34488551,0.118378354,3.94596147,4.26238385,3.85493163
49.649262,4.58257569,4.35745576,0.474468053,3.94383914,4.27619465,3.85386652
49.659753,4.24264069,4.37086925,-0.358090154,3.94176485,4.29081314,3.85280282
49.670245,4.12310563,4.38518411,-0.511936016,3.93973633,4.30630016,3.85174035
49.680736,4.47213595,4.40045846,0.267726537,3.9377522,4.32271596,3.8506793
49.691228,4.79583152,4.4167618,0.615686383,3.93581042,4.34013262,3.84961947
49.70172,4.47213595,4.43416058,0.194872719,3.9339038,4.35862391,3.84856096
49.712211,4.12310563,4.45274338,-0.574140881,3.93204266,4.37827022,3.84750387
49.722703,4.24264069,4.47259646,-0.479537039,3.93021941,4.39916545,3.846448
49.733194,4.69041576,4.49381266,0.443399487,3.92843308,4.42140444,3.84539355
49.743686,4.47213595,4.51650233,-0.210633265,3.92668207,4.44509996,3.84434032
49.754178,4.35889894,4.54078072,-0.426475997,3.92496536,4.47036936,3.84328841
49.764669,4.79583152,4.56677461,0.478598902,3.92328198,4.49734156,3.84223791
49.775161,5.19615242,4.59463195,0.775577508,3.92163054,4.5261669,3.84118864
49.785652,6.244998,4.62450586,1.27298552,3.92001035,4.5570006,3.84014078
49.796144,5.09901951,4.65657807,0.665162718,3.91842014,4.59002688,3.83909413
49.806636,5,4.69104223,0.555839698,3.91685916,4.62544162,3.83804881
49.817127,4.79583152,4.72811483,0.260224311,3.91532669,4.66346366,3.8370049
49.827619,4.47213595,4.76805152,-0.543981218,3.91382164,4.70435134,3.8359622
49.83811,4.58257569,4.81112823,-0.47807168,3.9123435,4.74838305,3.83492092
49.848602,4.89897949,4.85768099,0.203220303,3.91089128,4.79589788,3.83388086
49.859094,5.47722558,4.90809167,0.754409642,3.90946441,4.84728073,3.83284211
49.869585,5.65685425,4.96281843,0.833088122,3.90806237,4.90299328,3.83180477
49.880077,4.58257569,5.02244203,-0.663224196,3.90668427,4.96362069,3.83076865
49.890568,6.164414,5.08766956,1.03766297,3.90532978,5.02987503,3.82973393
49.90106,5.09901951,5.15943778,-0.24580127,3.90399809,5.10269969,3.82870044
49.911552,4.24264069,5.23894871,-0.998152306,3.90268879,5.18330474,3.82766825
49.922043,4.79583152,5.3277848,-0.729351274,3.9014015,5.27328281,3.82663748
49.932535,4.12310563,5.42805892,-1.14234552,3.90013551,5.37475977,3.82560791
49.943026,5,5.54248866,-0.736538293,3.89889059,5.49046838,3.82457976
49.953518,5.56776436,5.67460952,-0.326871772,3.89766609,5.62396198,3.82355282
49.96401,5.38516481,5.82881114,-0.666067818,3.89646173,5.77964873,3.82252719
49.974501,5.65685425,6.01040398,-0.59460048,3.89527724,5.96285637,3.82150296
49.984993,5.38516481,6.2256127,-0.916759454,3.89411202,6.17982298,3.82047995
49.995484,6.63324958,6.48122501,0.389903289,3.89296598,6.43734071,3.81945834
50.005976,6.244998,6.78435583,-0.73440985,3.89183856,6.7425177,3.81843794
50.016468,7,7.1417174,-0.376453718,3.89072957,7.1020446,3.81741885
50.026959,7.81024968,7.5589887,0.501259388,3.88963884,7.52156484,3.81640116
50.037451,8.06225775,8.0402618,0.148310313,3.8885659,8.00512494,3.81538468
50.047942,9.21954446,8.58714482,0.795235585,3.8875107,8.55428152,3.81436961
50.058434,9.05538514,9.19869812,-0.378567011,3.8864728,9.1680455,3.81335574
50.068926,10.0995049,9.87086413,0.478163999,3.88545209,9.84231585,3.81234318
50.079417,10.2956301,10.5965636,-0.548574058,3.88444846,10.5699798,3.81133202
50.089909,11.9163753,11.3660123,0.741864523,3.88346154,11.3412308,3.81032206
50.1004,12.0415946,12.1663225,-0.353168352,3.88249133,12.1431682,3.80931351
50.110892,12.8840987,12.9820689,-0.313001842,3.88153749,12.9603617,3.80830616
50.121384,13.6381817,13.79452,-0.395396359,3.88059997,13.7740793,3.80730011
50.131875,14.8660687,14.5813562,0.53358465,3.87967872,14.5620028,3.80629547
50.142367,15.132746,15.3162535,-0.42837785,3.87877343,15.2978099,3.80529202
50.152858,15.1986842,15.9680915,-0.877158655,3.87788419,15.9503787,3.80428998
50.16335,15.2643375,16.5024841,-1.11272035,3.8770107,16.4853201,3.80328913
50.173842,16.643317,16.88457,-0.49117518,3.87615298,16.8677666,3.80228959
50.184333,16.1864141,17.0850103,-0.947943166,3.87531102,17.068373,3.80129144
50.194825,17.0587221,17.0867317,-0.167360605,3.87448461,17.0700617,3.8002945
50.205316,18.4390889,16.8895538,1.24480324,3.87367383,16.872651,3.79929894
50.215808,17.4928557,16.5102423,0.991268592,3.87287851,16.4929085,3.79830459
50.2263,17.2916165,15.9779552,1.14615064,3.87209867,15.9599962,3.79731154
50.236791,17.3493516,15.3275045,1.42191668,3.87133437,15.3087298,3.79631988
50.247283,15.6204994,14.5933141,1.01350148,3.87058544,14.5735346,3.79532941
50.257774,15.0665192,13.8065776,1.12247121,3.86985203,13.7856029,3.79434034
50.268266,14.2828569,12.9936927,1.13541364,3.86913401,12.971329,3.79335247
50.278758,12.2474487,12.1770407,0.265345122,3.86843146,12.15309,3.79236589
50.289249,11.4891253,11.3754027,0.337227775,3.86774446,11.3496655,3.7913807
50.299741,11.4017543,10.6042479,0.893032129,3.86707293,10.5765272,3.79039671
50.310232,7.61577311,9.87650822,-1.50357411,3.86641703,9.84661836,3.7894141
50.320724,9.48683298,9.20201779,0.533680796,3.8657767,9.16979412,3.7884327
50.331216,7.61577311,8.58791301,-0.985971555,3.86515206,8.55322434,3.78745258
50.341707,7.61577311,8.03831583,-0.650032864,3.86454323,8.00107563,3.78647385
50.352199,7.61577311,7.55423397,0.248070831,3.86395019,7.51440763,3.78549631
50.36269,6.70820393,7.13412648,-0.652627419,3.86337314,7.09173472,3.78452016
50.373182,7.48331477,6.77396067,0.842231621,3.86281207,6.72907425,3.7835452
50.383674,5.65685425,6.46810442,-0.900694273,3.86226715,6.42083442,3.78257153
50.394165,5.91607978,6.20987624,-0.542029939,3.86173853,6.16035966,3.78159924
50.404657,6.164414,5.99217488,0.41501702,3.86122626,5.94055895,3.78062814
50.415148,5.83095189,5.80821269,0.150795242,3.86073056,5.75464264,3.77965842
50.42564,5.91607978,5.65175407,0.514126161,3.8602515,5.59636309,3.7786899
50.436132,5.09901951,5.51747217,-0.646879166,3.85978927,5.46037676,3.77772266
50.446623,5.65685425,5.40095875,0.505861142,3.85934409,5.34225707,3.7767568
50.457115,5,5.29865985,-0.546497807,3.85891604,5.23843196,3.77579213
50.467606,4.58257569,5.20784224,-0.790737976,3.85850541,5.14615289,3.77482883
50.478098,5,5.12637969,-0.355499209,3.8581123,5.06328039,3.77386673
50.48859,4.35889894,5.05267983,-0.832935106,3.85773697,4.9882119,3.7729059
50.499081,4.69041576,4.98553337,-0.543247285,3.85737966,4.91973019,3.77194645
50.509573,4.69041576,4.92399788,-0.483303337,3.85704055,4.85688637,3.77098819
50.520064,5.19615242,4.8673629,0.573401714,3.85671994,4.7989654,3.7700313
50.530556,5.83095189,4.81504481,1.00792216,3.85641801,4.7453796,3.7690756
50.541048,5.19615242,4.76658388,0.655414785,3.85613507,4.69566624,3.76812118
50.551539,4.69041576,4.72159722,-0.176582719,3.85587141,4.64943992,3.76716812
50.562031,5.47722558,4.67974752,0.893016269,3.85562728,4.60636082,3.76621625
50.572522,4.47213595,4.64075849,-0.410636743,3.85540302,4.5661508,3.76526575
50.583014,5.09901951,4.6043735,0.703310752,3.8551989,4.5285511,3.76431644
50.593506,4.47213595,4.57037562,-0.313432079,3.85501526,4.49334312,3.7633684
50.603997,5,4.5385708,0.679285798,3.85485247,4.46033122,3.76242173
50.614489,4.12310563,4.50877632,-0.621023911,3.85471085,4.42933084,3.76147624
50.62498,4.79583152,4.48083875,0.561242169,3.85459079,4.40018721,3.76053211
50.635472,4.35889894,4.45460908,-0.309370556,3.85449265,4.37274962,3.75958917
50.645964,4.58257569,4.42995997,0.390660625,3.85441684,4.34688937,3.75864749
50.656455,4,4.40677555,-0.637789579,3.85436377,4.32248932,3.75770718
50.666947,5.29150262,4.38494422,0.952133603,3.85433387,4.2994363,3.75676805
50.677438,4.24264069,4.36437263,-0.348901048,3.85432758,4.27763585,3.75583028
50.68793,5.09901951,4.34496796,0.868361421,3.85434537,4.25699365,3.75489369
50.698422,4.24264069,4.32665111,-0.289845509,3.85438772,4.23742948,3.75395837
50.708913,4.69041576,4.30934956,0.617305594,3.85445511,4.21886971,3.75302441
50.719405,4.24264069,4.29299224,-0.224391522,3.85454808,4.20124184,3.75209162
50.729896,4.79583152,4.27752016,0.719938446,3.85466714,4.18448595,3.75116019
50.740388,5.38516481,4.26287342,1.05938255,3.85481287,4.16854076,3.75022993
50.75088,4.47213595,4.24900125,0.47237136,3.85498584,4.15335447,3.74930095
50.761371,4.24264069,4.23585682,0.0823642553,3.85518663,4.13887926,3.74837331
50.771863,4.35889894,4.22339341,0.368110768,3.85541588,4.12506705,3.74744685
50.782354,5.09901951,4.21157268,0.942043965,3.85567421,4.11187865,3.74652174
50.792846,3.60555128,4.20035487,-0.771235111,3.85596232,4.09927293,3.74559781
50.803338,4.89897949,4.1897065,0.842183461,3.85628089,4.08721545,3.74467513
50.813829,4.12310563,4.17959654,-0.237678171,3.85663059,4.07567421,3.74375381
50.824321,5.09901951,4.16999352,0.963859947,3.85701224,4.06461638,3.74283366
50.834812,4,4.16087194,-0.401088444,3.85742654,4.05401561,3.74191485
50.845304,4.24264069,4.1522048,0.300725607,3.85787436,4.04384351,3.74099722
50.855796,4.79583152,4.14396956,0.80737969,3.85835649,4.03407655,3.74008084
50.866287,4.69041576,4.13614526,0.74449345,3.85887375,4.02469278,3.73916581
50.876779,4.69041576,4.12871031,0.74947011,3.85942714,4.01566914,3.73825195
50.88727,4.12310563,4.12164748,0.0381856601,3.86001746,4.00698754,3.73733943
50.897762,4,4.11493813,-0.339025265,3.8606458,3.99862784,3.73642808
50.908254,4.35889894,4.1085669,0.500331935,3.8613131,3.9905736,3.73551798
50.918745,4.58257569,4.10251945,0.692860913,3.86202034,3.98280941,3.73460923
50.929237,3,4.09678082,-1.04727304,3.86276871,3.97531871,3.73370163
50.939728,4.35889894,4.09133926,0.517261717,3.8635592,3.96808878,3.73279538
50.95022,4.79583152,4.08618184,0.842407074,3.86439313,3.96110502,3.7318903
50.960712,4.24264069,4.08129806,0.40167478,3.86527162,3.95435572,3.73098646
50.971203,4.24264069,4.07667809,0.407385078,3.86619583,3.94782983,3.73008396
50.981695,4.35889894,4.07231156,0.535338564,3.86716726,3.94151517,3.72918262
50.992186,4.69041576,4.06819054,0.788812539,3.86818707,3.93540269,3.72828262
51.002678,5.38516481,4.0643061,1.14928617,3.86925686,3.92948154,3.72738378
51.01317,3.46410162,4.06065114,-0.772366186,3.87037801,3.92374323,3.72648618
51.023661,5,4.05721905,0.970969079,3.87155193,3.91817972,3.72558992
51.034153,4.12310563,4.0540028,0.262874163,3.87278042,3.91278187,3.72469481
51.044644,4.58257569,4.05099714,0.729094336,3.8740649,3.90754312,3.72380104
51.055136,4.89897949,4.04819615,0.922379174,3.87540733,3.90245527,3.72290842
51.065628,5.09901951,4.0455952,1.02636461,3.8768094,3.89751207,3.72201705
51.076119,4.35889894,4.04319006,0.561879775,3.87827281,3.89270755,3.721127
51.086611,3.31662479,4.04097625,-0.851088397,3.87979979,3.88803476,3.72023811
51.097102,4.89897949,4.03895055,0.927377452,3.88139206,3.88348885,3.71935055
51.107594,5.19615242,4.03710933,1.07658864,3.88305205,3.87906355,3.71846414
51.118086,4.12310563,4.03544994,0.296067032,3.88478181,3.87475417,3.71757897
51.128577,4.12310563,4.03396998,0.298555931,3.88658344,3.87055623,3.71669512
51.139069,4.24264069,4.03266703,0.45822883,3.8884597,3.86646434,3.71581242
51.14956,4.24264069,4.03153949,0.459457502,3.89041271,3.86247489,3.71493105
51.160052,4.24264069,4.03058567,0.460494315,3.89244546,3.85858299,3.71405082
51.170544,4.35889894,4.02980451,0.573667529,3.89456049,3.85478509,3.71317183
51.181035,4.58257569,4.02919519,0.743895492,3.89676042,3.85107778,3.71229416
51.191527,4.12310563,4.02875706,0.307162119,3.89904866,3.84745681,3.71141764
51.202018,4.35889894,4.02848994,0.574812143,3.90142786,3.84391949,3.71054243
51.21251,4.47213595,4.02839387,0.666139691,3.90390174,3.84046192,3.70966838
51.223002,4.12310563,4.02846922,0.307630312,3.90647348,3.8370814,3.70879555
51.233493,4.79583152,4.02871662,0.875850958,3.90914635,3.8337753,3.70792404
51.243985,3.74165739,4.0291371,-0.536171349,3.91192461,3.83054024,3.70705367
51.254476,4.47213595,4.02973184,0.665134663,3.91481162,3.82737417,3.70618461
51.264968,4.35889894,4.03050252,0.573058832,3.91781201,3.82427397,3.7053167
51.27546,4.58257569,4.03145098,0.742377743,3.92092981,3.82123754,3.70445001
51.285951,4.24264069,4.0325793,0.458324541,3.92416917,3.81826286,3.70358463
51.296443,4.58257569,4.03389022,0.740733063,3.92753544,3.81534717,3.7027204
51.306934,4.12310563,4.03538633,0.296174428,3.93103291,3.81248893,3.70185747
51.317426,4.79583152,4.03707111,0.871068546,3.93466744,3.80968559,3.70099568
51.327918,4.69041576,4.03894795,0.80713556,3.93844416,3.80693552,3.70013511
51.338409,4.89897949,4.04102052,0.926260744,3.94236839,3.80423713,3.69927585
51.348901,3.74165739,4.04329349,-0.549214078,3.94644693,3.80158817,3.69841773
51.359392,5.19615242,4.04577106,1.07255833,3.9506853,3.79898746,3.69756091
51.369884,4.58257569,4.04845874,0.730833055,3.95509101,3.7964329,3.69670522
51.380376,4.47213595,4.05136177,0.64867109,3.95967065,3.79392322,3.69585075
51.390867,4.89897949,4.05448573,0.918963415,3.96443114,3.79145716,3.69499758
51.401359,4.12310563,4.05783756,0.255476152,3.9693812,3.78903285,3.69414555
51.41185,4.24264069,4.06142345,0.425696183,3.97452807,3.78664939,3.69329481
51.422342,4.47213595,4.06525141,0.637875022,3.97988141,3.78430504,3.69244521
51.432834,4.69041576,4.06932898,0.788090594,3.98544986,3.78199879,3.69159682
51.443325,4.89897949,4.07366412,0.908468692,3.99124251,3.77972964,3.69074972
51.453817,3.74165739,4.0782667,-0.580180415,3.99727067,3.77749603,3.68990376
51.464308,4.35889894,4.08314545,0.525122362,4.00354396,3.77529727,3.68905908
51.4748,4.69041576,4.08831161,0.775953703,4.01007499,3.77313189,3.68821554
51.485292,4.69041576,4.09377572,0.772424777,4.01687524,3.77099909,3.68737321
51.495783,4,4.09954896,-0.315513804,4.02395679,3.76889809,3.68653216
51.506275,4.47213595,4.10564499,0.605384973,4.03133456,3.76682754,3.68569224
51.516766,4.24264069,4.11207602,0.361337335,4.03902149,3.76478694,3.68485361
51.527258,4,4.1188576,-0.3447573,4.0470343,3.76277503,3.6840161
51.53775,5,4.12600439,0.934877324,4.05538844,3.76079117,3.6831798
51.548241,4,4.13353196,-0.365420245,4.06410026,3.75883474,3.68234478
51.558733,4.58257569,4.14145918,0.66416603,4.07318971,3.75690459,3.68151089
51.569224,3.87298335,4.14980313,-0.526136658,4.08267449,3.75500035,3.68067827
51.579716,4.24264069,4.15858532,0.289923036,4.09257713,3.75312092,3.67984678
51.590208,4.79583152,4.16782623,0.792467848,4.10291881,3.7512658,3.67901649
51.600699,4.47213595,4.17754765,0.542759895,4.11372197,3.74943449,3.67818748
51.611191,3.74165739,4.18777581,-0.667920973,4.12501383,3.74762601,3.67735958
51.621682,4.35889894,4.19853479,0.400454929,4.13681898,3.74584006,3.67653297
51.632174,4,4.20985462,-0.458098915,4.14916838,3.74407572,3.67570747
51.642666,4.12310563,4.2217642,-0.314099624,4.16209155,3.74233258,3.67488316
51.653157,4.69041576,4.23429441,0.675367565,4.17561996,3.74061023,3.67406013
51.663649,4.69041576,4.24748216,0.665532568,4.1897914,3.73890782,3.67323822
51.67414,3.60555128,4.26136191,-0.809821357,4.20464081,3.73722514,3.67241757
51.684632,4.24264069,4.27597615,-0.182580021,4.22021154,3.73556138,3.67159804
51.695124,5.19615242,4.29136641,0.951202404,4.23654566,3.7339162,3.6707797
51.705615,4.58257569,4.30757717,0.524403014,4.25368822,3.73228929,3.66996263
51.716107,5.09901951,4.32466129,0.879976261,4.27169289,3.73067989,3.66914667
51.726598,4.24264069,4.34266903,-0.316272582,4.29061039,3.72908787,3.66833198
51.73709,4.35889894,4.36166177,-0.0525626379,4.3105029,3.72751249,3.66751839
51.747582,4.89897949,4.38170035,0.719221198,4.33143179,3.72595351,3.66670599
51.758073,4.69041576,4.40285031,0.53625129,4.35346313,3.72441066,3.66589486
51.768565,4.69041576,4.42518905,0.515001657,4.37667512,3.72288327,3.66508483
51.779056,5.09901951,4.44879164,0.806367087,4.40114327,3.72137126,3.66427606
51.789548,3.87298335,4.47374889,-0.775090665,4.42695916,3.71987398,3.6634684
51.80004,5.09901951,4.50015225,0.773865143,4.45421478,3.71839123,3.66266192
51.810531,4.47213595,4.52810086,-0.236569025,4.48300979,3.7169228,3.6618567
51.821023,4.47213595,4.55771119,-0.292532451,4.51346143,3.7154681,3.66105258
51.831514,4.79583152,4.58909853,0.454678995,4.54568545,3.71402708,3.66024971
51.842006,4.79583152,4.6224013,0.416449546,4.57982102,3.71259915,3.65944795
51.852498,4.69041576,4.65776117,0.180705823,4.61601036,3.71118417,3.65864736
51.862989,5.09901951,4.69533278,0.635363462,4.65440864,3.70978197,3.65784802
51.873481,4.79583152,4.73529732,0.246036994,4.69519782,3.70839201,3.65704979
51.883972,5.65685425,4.77783784,0.937558751,4.73856139,3.70701428,3.6562528
51.894464,5.09901951,4.82317279,0.52521112,4.78471859,3.70564826,3.65545691
51.904956,4.58257569,4.87152973,-0.537544454,4.8338975,3.70429381,3.65466219
51.915447,5.47722558,4.92315912,0.744356401,4.8863491,3.70295083,3.65386872
51.925939,5.56776436,4.97835395,0.767730692,4.94236714,3.70161881,3.65307634
51.93643,4.69041576,5.03741676,-0.589067906,5.00225461,3.70029778,3.65228521
51.946922,5.38516481,5.1007072,0.533345678,5.0663719,3.69898725,3.65149517
51.957414,5.47722558,5.16860698,0.555534516,5.13510121,3.69768713,3.65070629
51.967905,5.74456265,5.24154065,0.709240437,5.20886757,3.69639733,3.64991866
51.978397,5.83095189,5.32000581,0.714804931,5.28816928,3.69511741,3.64913212
51.988888,5.38516481,5.40452911,-0.139155673,5.37353337,3.69384739,3.64834681
51.99938,6.63324958,5.49573872,1.06654154,5.46558866,3.69258684,3.6475626
52.009872,6.70820393,5.59432061,1.05540671,5.56502155,3.6913357,3.64677954
52.020363,6.32455532,5.70105922,0.789617696,5.67261692,3.69009389,3.64599773
52.030855,5.65685425,5.81690088,-0.400058287,5.78932184,3.688861,3.64521699
52.041346,6,5.94292068,0.238912777,5.91621194,3.68763708,3.64443749
52.051838,6.164414,6.08048369,0.289707286,6.05465343,3.68642174,3.64365908
52.06233,6.4807407,6.23126631,0.499474111,6.20632409,3.68521493,3.64288182
52.072821,7.54983444,6.39745052,1.07349146,6.37340799,3.6840166,3.64210579
52.083313,7.61577311,6.58201816,1.0167374,6.55889041,3.68282636,3.64133084
52.093804,7.41619849,6.78895638,0.791986182,6.7667629,3.68164428,3.64055712
52.104296,7.28010989,7.02382617,0.506244719,7.00259279,3.68047001,3.63978448
52.114788,7.61577311,7.29409295,0.567168544,7.27385271,3.67930349,3.63901299
52.125279,8.54400375,7.6096114,0.966639717,7.59040495,3.67814471,3.63824272
52.135771,10.7238053,7.98299428,1.65553949,7.9648686,3.6769933,3.63747354
52.146262,9.69535971,8.42922015,1.12522867,8.41222392,3.67584935,3.63670557
52.156754,10.2469508,8.96520376,1.13214266,8.94938079,3.67471251,3.63593868
52.167246,10.8627805,9.60802083,1.12016055,9.59340066,3.67358277,3.63517293
52.177737,11.3578167,10.3729227,0.992418242,10.3595119,3.6724601,3.6344084
52.188229,11.61895,11.2712818,0.589634011,11.2590586,3.67134418,3.63364495
52.19872,13.1529464,12.3078378,0.919297897,12.2967509,3.6702351,3.63288271
52.209212,13.96424,13.4799061,0.695941049,13.4698791,3.66913253,3.63212154
52.219704,14.4222051,14.7758572,-0.594686559,14.7667956,3.66803648,3.63136151
52.230195,15.6843871,16.1752087,-0.7005866,16.1670082,3.66694692,3.6306027
52.240687,16.673332,17.6490883,-0.987803786,17.6416421,3.66586356,3.62984495
52.251178,18.627936,19.1587241,-0.728552063,19.1519276,3.66478649,3.62908841
52.26167,19.3907194,20.6549193,-1.12436641,20.6486726,3.66371541,3.62833294
52.272162,22.0227155,22.07389,-0.226217704,22.0680978,3.66265033,3.62757861
52.282653,22.7156334,23.3345542,-0.786715216,23.3291241,3.66159124,3.62682548
52.293145,24.0624188,24.339823,-0.5266917,24.3346636,3.66053785,3.62607341
52.303636,24.5764115,24.9878234,-0.641414041,24.9828424,3.65949028,3.62532255
52.314128,24.1867732,25.1983392,-1.00576636,25.1934433,3.65844823,3.62457275
52.32462,25.4361947,24.9421016,0.702917559,24.9371986,3.65741171,3.62382408
52.335111,24.63737,24.2539449,0.619213314,24.2489465,3.65638075,3.62307661
52.345603,22.4944438,23.2174886,-0.850320405,23.212312,3.65535506,3.6223302
52.356094,22,21.9354727,0.254022204,21.9300406,3.65433476,3.62158499
52.366586,20,20.5039467,-0.709892001,20.4981846,3.65331957,3.62084084
52.377078,19.0262976,19.0023529,0.154740575,18.9961881,3.65230951,3.62009781
52.387569,16.9115345,17.4929036,-0.762475599,17.4862628,3.6513046,3.61935597
52.398061,15.8745079,16.0235751,-0.386092261,16.0163857,3.65030459,3.61861519
52.408552,14.832397,14.6321033,0.447541864,14.6242952,3.64930958,3.6178756
52.419044,13,13.3465016,-0.588643847,13.3380115,3.64831931,3.61713706
52.429536,11.3137085,12.1863556,-0.934155836,12.1771329,3.64733383,3.61639964
52.440027,10.6301458,11.1623974,-0.729555722,11.1524099,3.64635314,3.61566341
52.450519,10.0498756,10.2765159,-0.47606755,10.2657544,3.645377,3.61492823
52.46101,10.3440804,9.52320781,0.906020214,9.5116873,3.64440553,3.61419424
52.471502,8.71779789,8.89059406,-0.41568759,8.87835127,3.64343849,3.61346129
52.481994,7.93725393,8.36309558,-0.652565432,8.3501827,3.64247589,3.61272946
52.492485,7.48331477,7.9235488,-0.663501336,7.91002586,3.64151779,3.61199881
52.502977,6.63324958,7.55516299,-0.960163222,7.5410906,3.64056392,3.61126921
52.513468,5.47722558,7.24316468,-1.32888642,7.22859918,3.63961443,3.61054078
52.52396,5.91607978,6.97521987,-1.02914532,6.96021066,3.63866907,3.6098134
52.534452,5.91607978,6.74172955,-0.908652723,6.72631869,3.63772788,3.60908712
52.544943,5,6.53545287,-1.23913392,6.51967582,3.63679089,3.60836203
52.555435,4.47213595,6.35101439,-1.37072187,6.33490119,3.63585787,3.60763797
52.565926,6.244998,6.18455727,0.245846953,6.16813397,3.63492895,3.60691509
52.576418,4.58257569,6.03319985,-1.2044186,6.01648949,3.6340039,3.60619324
52.58691,5.38516481,5.89482588,-0.713905504,5.87784941,3.63308277,3.6054725
52.597401,5.29150262,5.76780493,-0.690146587,5.75058176,3.63216558,3.60475292
52.607893,4,5.65080697,-1.28483733,5.63335524,3.63125213,3.60403439
52.618384,4.35889894,5.54277878,-1.08806242,5.52511567,3.63034253,3.60331702
52.628876,4.69041576,5.44279333,-0.86739701,5.42493513,3.62943657,3.60260068
52.639368,4.79583152,5.35007923,-0.744478147,5.3320414,3.62853429,3.60188544
52.649859,4.58257569,5.26396133,-0.825460863,5.24575858,3.62763573,3.60117136
52.660351,4.89897949,5.1838219,-0.5337063,5.16546819,3.62674068,3.60045832
52.670842,4.47213595,5.10914147,-0.798126256,5.09065006,3.62584928,3.59974643
52.681334,4.12310563,5.03943021,-0.957248443,5.02081362,3.6249613,3.59903557
52.691826,5.38516481,4.97426928,0.641011332,4.95553942,3.62407679,3.59832581
52.702317,4.79583152,4.91328217,-0.342710736,4.89445026,3.62319581,3.5976172
52.712809,4,4.85611444,-0.925264524,4.83719109,3.62231813,3.59690962
52.7233,4.79583152,4.80246736,-0.0814606302,4.78346258,3.6214439,3.5962032
52.733792,3.60555128,4.75205195,-1.07074772,4.73297517,3.62057291,3.59549779
52.744284,5,4.70462089,0.543487914,4.68548099,3.6197052,3.59479347
52.754775,3.46410162,4.65994949,-1.0935483,4.64075484,3.61884083,3.59409031
52.765267,4.35889894,4.617822,-0.508844825,4.59858046,3.61797959,3.59338816
52.775758,3.46410162,4.57805756,-1.05544112,4.55877652,3.61712161,3.59268717
52.78625,3.46410162,4.54047707,-1.03748516,4.52116347,3.61626671,3.59198719
52.796742,3.60555128,4.50492764,-0.948354557,4.48558799,3.61541492,3.59128829
52.807233,4.69041576,4.47126922,0.468130898,4.45190963,3.61456629,3.59059054
52.817725,4.58257569,4.43936473,0.378432252,4.41999092,3.61372064,3.5898938
52.828216,4.24264069,4.40910021,-0.407994512,4.38971756,3.61287809,3.5891982
52.838708,3.60555128,4.38036013,-0.880232272,4.36097366,3.61203846,3.58850362
52.8492,4.24264069,4.35304639,-0.332273529,4.33366079,3.61120179,3.58781011
52.859691,4,4.32706848,-0.571899009,4.30768816,3.61036813,3.58711774
52.870183,3.87298335,4.3023361,-0.655250147,4.28296517,3.6095373,3.58642638
52.880674,3.31662479,4.27877507,-0.980892591,4.25941735,3.60870942,3.58573616
52.891166,2.64575131,4.25630828,-1.26907721,4.23696737,3.60788432,3.58504694
52.901658,5,4.2348708,0.874716638,4.21555004,3.60706204,3.5843588
52.912149,4.12310563,4.21440237,-0.302153517,4.19510487,3.60624264,3.58367179
52.922641,3.87298335,4.19484186,-0.567325759,4.17557052,3.60542593,3.58298578
52.933132,3.74165739,4.17614008,-0.659153011,4.1568976,3.60461204,3.5823009
52.943624,4.89897949,4.15824331,0.860660313,4.13903222,3.6038008,3.58161702
52.954116,3.31662479,4.14110757,-0.908010341,4.12193019,3.60299226,3.58093421
52.964607,3.46410162,4.12469181,-0.812767001,4.10555031,3.60218646,3.58025252
52.975099,4.35889894,4.10895324,0.499945704,4.08984962,3.60138324,3.57957183
52.98559,4.47213595,4.09385808,0.615042989,4.07479421,3.60058272,3.57889227
52.996082,3.74165739,4.0793691,-0.581129687,4.06034671,3.59978473,3.5782137
53.006574,4.12310563,4.06545588,0.240103623,4.04647656,3.59898932,3.57753619
53.017065,3.87298335,4.05208993,-0.423209862,4.03315516,3.59819654,3.5768598
53.027557,3.87298335,4.03924096,-0.407746993,4.02035208,3.59740623,3.57618441
53.038048,3.87298335,4.02688562,-0.392303804,4.00804389,3.59661851,3.57551013
53.04854,3.16227766,4.01499746,-0.923428286,3.99620402,3.59583321,3.57483684
53.059032,5.09901951,4.00355528,1.04664427,3.9848112,3.59505038,3.57416461
53.069523,3.60555128,3.99253927,-0.622083593,3.9738455,3.59427009,3.57349349
53.080015,4.24264069,3.98192789,0.510600431,3.96328532,3.59349215,3.57282335
53.090506,4.58257569,3.97170517,0.781582066,3.95311462,3.59271671,3.57215433
53.100998,4.35889894,3.96185244,0.630116264,3.94331464,3.59194359,3.5714863
53.11149,3.46410162,3.95235527,-0.698751497,3.9338709,3.59117285,3.57081931
53.121981,3.74165739,3.94320033,-0.448935347,3.92477,3.59040454,3.57015343
53.132473,3.87298335,3.93437285,-0.247769043,3.91599712,3.5896385,3.56948853
53.142964,4,3.9258627,0.272281647,3.90754209,3.58887486,3.56882473
53.153456,4,3.91765765,0.286953575,3.89939261,3.58811346,3.56816192
53.163948,4.12310563,3.90974913,0.461905291,3.8915401,3.58735434,3.56750014
53.174439,3.87298335,3.90212982,-0.170723371,3.88397718,3.58659757,3.56683947
53.184931,4,3.89479164,0.324358385,3.87669578,3.58584299,3.56617977
53.195422,4,3.88773113,0.335065464,3.86969239,3.58509072,3.56552118
53.205914,3.87298335,3.88094417,-0.089223473,3.8629629,3.5843406,3.56486355
53.216406,4,3.87443145,0.354356526,3.85650798,3.58359269,3.56420696
53.226897,3.74165739,3.86819731,-0.35572451,3.85033202,3.58284704,3.56355147
53.237389,4.12310563,3.86224954,0.51074072,3.84444284,3.5821035,3.56289695
53.24788,4.24264069,3.85660562,0.621317205,3.83885798,3.5813622,3.56224352
53.258372,3.87298335,3.85129097,0.14728331,3.83360303,3.58062297,3.56159106
53.268864,2.64575131,3.84634651,-1.09571675,3.82871906,3.57988588,3.56093963
53.279355,4.12310563,3.84183108,0.530353223,3.82426518,3.57915098,3.56028928
53.289847,4.24264069,3.83782484,0.636251403,3.82032192,3.57841811,3.5596399
53.300338,4.12310563,3.83443613,0.537279719,3.81699811,3.57768741,3.55899161
53.31083,3.60555128,3.83180086,-0.475657002,3.81443026,3.57695871,3.55834428
53.321322,3,3.83008417,-0.911089554,3.81278425,3.57623208,3.55769798
53.331813,4.24264069,3.82947378,0.642780606,3.81224859,3.57550758,3.55705275
53.342305,3.87298335,3.830169,0.20691627,3.81302345,3.57478504,3.55640849
53.352796,3.74165739,3.83236295,-0.301173639,3.81530273,3.5740646,3.5557653
53.363288,3.60555128,3.83621899,-0.480278792,3.81925043,3.5733461,3.55512307
53.37378,4.24264069,3.84183976,0.633088405,3.82496951,3.57262961,3.55448186
53.384271,3.74165739,3.84923276,-0.327986852,3.83246733,3.57191517,3.55384173
53.394763,4.12310563,3.85827428,0.51461767,3.8416195,3.57120265,3.55320255
53.405254,4.47213595,3.86865721,0.776838943,3.8521174,3.57049216,3.55256444
53.415746,4.69041576,3.87984025,0.90031967,3.86341729,3.56978356,3.55192728
53.426238,3.87298335,3.89097643,-0.134138283,3.87466855,3.5690769,3.55129113
53.436729,4,3.90087598,0.314839679,3.88467649,3.56837224,3.55065606
53.447221,4,3.90806857,0.303201955,3.89196486,3.56766943,3.55002193
53.457712,3.31662479,3.91104991,-0.770989704,3.89502346,3.56696861,3.54938887
53.468204,4.35889894,3.90872866,0.670947304,3.89275677,3.56626962,3.54875675
53.478696,3.46410162,3.90085238,-0.660871216,3.88491152,3.56557251,3.54812564
53.489187,3.60555128,3.88812102,-0.5315729,3.87219053,3.56487736,3.54749559
53.499679,3.46410162,3.87188226,-0.638577046,3.8559469,3.564184,3.54686648
53.51017,4.12310563,3.85366464,0.51907705,3.83771532,3.56349258,3.54623844
53.520662,4.12310563,3.83480365,0.536937593,3.81883673,3.56280293,3.54561133
53.531154,3.87298335,3.81630849,0.238064825,3.80032452,3.56211513,3.54498522
53.541645,4.12310563,3.79886121,0.569424633,3.78286366,3.56142922,3.54436017
53.552137,4.47213595,3.78287145,0.830219555,3.76686556,3.56074507,3.54373606
53.562628,4,3.76854937,0.481093166,3.75254139,3.5600628,3.543113
53.57312,3.46410162,3.75594446,-0.540224812,3.73994094,3.55938227,3.54249087
53.583612,4,3.74499652,0.504978688,3.72900381,3.55870352,3.54186974
53.594103,3.87298335,3.73556686,0.370697292,3.71959075,3.55802663,3.54124965
53.604595,3.60555128,3.72746829,-0.349166171,3.71151381,3.55735146,3.5406305
53.615086,3.87298335,3.72049811,0.390493575,3.70456944,3.55667811,3.54001239
53.625578,4.12310563,3.71445341,0.639259112,3.69855386,3.55600646,3.53939521
53.63607,3.87298335,3.70915055,0.404762643,3.69328264,3.55533656,3.53877902
53.646561,3.31662479,3.70443129,-0.622741118,3.68859686,3.55466848,3.53816387
53.657053,3.16227766,3.70016479,-0.733407891,3.68436512,3.55400206,3.53754964
53.667544,3.60555128,3.69624968,-0.301161764,3.68048561,3.55333743,3.53693646
53.678036,4.47213595,3.69260751,0.88290908,3.67687955,3.55267446,3.5363242
53.688528,4.12310563,3.68918107,0.658729503,3.67348948,3.5520132,3.53571292
53.699019,3.16227766,3.68592871,-0.723637371,3.67027357,3.55135372,3.53510267
53.709511,4.12310563,3.68281949,0.663540608,3.66720077,3.55069586,3.53449334
53.720002,4.24264069,3.67983202,0.750205751,3.66424957,3.55003976,3.53388505
53.730494,4.35889894,3.67694956,0.825802266,3.66140319,3.54938528,3.53327768
53.740986,3.74165739,3.67416023,0.259802141,3.65864969,3.54873248,3.53267127
53.751477,4.24264069,3.67145486,0.755768369,3.65597985,3.54808141,3.5320659
53.761969,3.87298335,3.66882538,0.45183843,3.65338559,3.54743193,3.53146144
53.77246,4,3.66626608,0.577697079,3.65086117,3.54678418,3.53085801
53.782952,3.16227766,3.66377125,-0.708162122,3.64840085,3.54613801,3.53025549
53.793444,3.16227766,3.66133662,-0.706441053,3.64600037,3.54549349,3.52965394
53.803935,3,3.65895849,-0.811762585,3.64365599,3.54485066,3.5290534
53.814427,3,3.65663295,-0.810328914,3.6413638,3.54420941,3.52845378
53.824918,4.69041576,3.65435735,1.01786954,3.63912114,3.54356983,3.52785518
53.83541,3.16227766,3.65212851,-0.699893454,3.63692481,3.54293182,3.52725748
53.845902,3.74165739,3.64994416,0.302841922,3.63477256,3.54229541,3.52666074
53.856393,3.16227766,3.64780226,-0.696795951,3.63266232,3.54166068,3.52606502
53.866885,4,3.64570036,0.595230745,3.63059164,3.54102748,3.5254702
53.877376,4,3.64363701,0.596961465,3.62855906,3.54039594,3.5248764
53.887868,3.31662479,3.6416101,-0.570074832,3.62656249,3.53976592,3.52428349
53.89836,3.60555128,3.63961828,-0.184572497,3.62460055,3.53913749,3.52369154
53.908851,4,3.63766028,0.601946606,3.62267197,3.5385107,3.5231006
53.919343,3.31662479,3.6357344,-0.564897876,3.62077506,3.53788542,3.52251055
53.929834,3.60555128,3.63383976,-0.168191813,3.61890892,3.53726176,3.52192151
53.940326,5.09901951,3.63197485,1.21121619,3.61707206,3.53663961,3.52133336
53.950818,3.74165739,3.63013878,0.333944018,3.61526357,3.53601901,3.52074617
53.961309,4.47213595,3.62833071,0.918588725,3.61348261,3.53540003,3.52015997
53.971801,3.60555128,3.62654935,-0.144907126,3.61172791,3.53478253,3.51957466
53.982292,4.35889894,3.62479416,0.856799151,3.6099989,3.53416664,3.51899036
53.992784,3.46410162,3.62306396,-0.398700826,3.60829442,3.53355222,3.51840694
54.003276,3.31662479,3.62135814,-0.552026588,3.60661385,3.53293933,3.51782446
54.013767,3.87298335,3.61967612,0.503296364,3.60495659,3.53232804,3.51724298
54.024259,2.44948974,3.61801685,-1.08098432,3.60332164,3.5317182,3.51666239
54.03475,4.12310563,3.61638,0.711846632,3.60170862,3.53110995,3.51608278
54.045242,4.12310563,3.61476461,0.712980378,3.60011659,3.53050315,3.51550406
54.055734,3.31662479,3.61317023,-0.544559857,3.59854511,3.52989786,3.51492627
54.066225,3,3.61159644,-0.782046314,3.59699374,3.52929413,3.51434948
54.076717,3.87298335,3.61004238,0.512777698,3.59546164,3.52869185,3.51377356
54.087208,3.31662479,3.60850783,-0.540262008,3.59394857,3.52809113,3.51319862
54.0977,4.24264069,3.60699198,0.797275801,3.59245374,3.52749184,3.51262456
54.108192,3.74165739,3.60549452,0.369002535,3.59097681,3.52689404,3.51205143
54.118683,3.87298335,3.6040151,0.518621484,3.58951746,3.52629778,3.51147929
54.129175,3.87298335,3.60255302,0.520029162,3.58807497,3.52570295,3.51090801
54.139666,4.35889894,3.60110811,0.870511821,3.58664919,3.52510966,3.51033772
54.150158,4.24264069,3.59967971,0.801848477,3.58523944,3.52451778,3.50976829
54.16065,4.24264069,3.59826755,0.80272856,3.58384547,3.52392738,3.50919979
54.171141,3.74165739,3.59687138,0.380507562,3.58246702,3.5233385,3.50863226
54.181633,3.31662479,3.59549058,-0.528077451,3.58110346,3.52275102,3.5080656
54.192124,3.87298335,3.59412507,0.528070336,3.57975472,3.52216507,3.50749991
54.202616,4.24264069,3.59277423,0.806142952,3.57842018,3.52158052,3.50693508
54.213108,3.74165739,3.59143788,0.387581619,3.57709966,3.52099742,3.50637117
54.223599,3.60555128,3.59011582,0.124239524,3.57579296,3.52041583,3.50580823
54.234091,4,3.58880749,0.641242939,3.57449954,3.51983563,3.50524615
54.244582,4,3.58751286,0.642251615,3.57321933,3.51925693,3.50468503
54.255074,4,3.58623139,0.64324848,3.57195181,3.51867962,3.50412477
54.265566,3.31662479,3.58496293,-0.51801365,3.57069684,3.51810375,3.50356542
54.276057,4,3.58370733,0.645207462,3.56945425,3.51752937,3.50300704
54.286549,3.31662479,3.58246409,-0.515596065,3.56822356,3.51695637,3.5024495
54.29704,3.31662479,3.5812332,-0.514401024,3.56700475,3.51638486,3.50189293
54.307532,3.46410162,3.58001419,-0.340459356,3.56579734,3.51581472,3.5013372
54.318024,3,3.57880693,-0.760793616,3.56460122,3.51524601,3.50078238
54.328515,3.16227766,3.57761131,-0.644463844,3.56341626,3.51467877,3.50022852
54.339007,4.47213595,3.57642688,0.946419082,3.56224203,3.51411291,3.4996755
54.349498,3.87298335,3.57525365,0.545646128,3.56107854,3.51354851,3.49912343
54.35999,3.60555128,3.57409119,0.177369904,3.55992534,3.51298548,3.49857221
54.370482,4.24264069,3.57293942,0.818352779,3.55878235,3.51242386,3.49802189
54.380973,4.12310563,3.57179823,0.742500771,3.55764949,3.51186371,3.49747251
54.391465,4.24264069,3.57066723,0.819739872,3.55652634,3.51130491,3.49692398
54.401956,3.46410162,3.56954644,-0.324722691,3.55541293,3.51074758,3.49637639
54.412448,2.64575131,3.56843547,-0.960564501,3.55430887,3.5101916,3.49582964
54.42294,4.12310563,3.56733425,0.745500752,3.55321409,3.50963702,3.49528378
54.433431,4.35889894,3.56624272,0.890312429,3.55212852,3.5090839,3.49473886
54.443923,3.74165739,3.5651605,0.420115326,3.5510518,3.50853212,3.49419478
54.454414,3.87298335,3.56408763,0.555783873,3.54998395,3.5079818,3.49365163
54.464906,2.64575131,3.56302376,-0.957743415,3.54892463,3.50743282,3.49310932
54.475398,3.60555128,3.56196883,0.208764091,3.54787378,3.50688524,3.49256789
54.485889,3.60555128,3.5609228,0.211254539,3.54683135,3.5063391,3.49202739
54.496381,3,3.55988531,-0.748254843,3.54579699,3.5057943,3.49148773
54.506872,2.82842712,3.55885643,-0.854651572,3.54477077,3.50525094,3.49094899
54.517364,3.16227766,3.55783583,-0.628934154,3.54375234,3.50470893,3.49041108
54.527856,4.47213595,3.55682347,0.956719651,3.54274168,3.5041683,3.48987405
54.538347,3.46410162,3.5558193,-0.302849285,3.54173874,3.50362911,3.48933795
54.548839,3.46410162,3.55482303,-0.301199956,3.54074322,3.50309125,3.48880267
54.55933,3.87298335,3.55383471,0.564932422,3.53975516,3.50255483,3.48826831
54.569822,3.74165739,3.55285402,0.434515089,3.53877427,3.50201974,3.48773477
54.580314,3.16227766,3.55188096,-0.624182108,3.53780052,3.50148603,3.48720211
54.590805,4.47213595,3.5509155,0.959802299,3.53683388,3.50095376,3.48667036
54.601297,3.31662479,3.54995734,-0.483045082,3.53587407,3.50042282,3.48613944
54.611788,4.47213595,3.54900656,0.960796231,3.53492114,3.4998933,3.48560943
54.62228,3,3.54806286,-0.740312679,3.53397482,3.49936512,3.48508023
54.632772,3.31662479,3.54712624,-0.480105669,3.5330351,3.49883831,3.4845519
54.643263,3.87298335,3.54619669,0.571652566,3.53210195,3.49831293,3.48402448
54.653755,4.12310563,3.54527393,0.760152419,3.5311751,3.49778888,3.48349787
54.664246,3.87298335,3.54435803,0.573258506,3.53025463,3.49726625,3.48297217
54.674738,3.16227766,3.54344874,-0.61739054,3.52934027,3.49674495,3.48244728
54.68523,3.87298335,3.54254604,0.574836761,3.52843202,3.49622503,3.48192325
54.695721,3.87298335,3.54164995,0.575615671,3.52752987,3.49570653,3.48140012
54.706213,3.31662479,3.54076018,-0.473429397,3.52663356,3.49518936,3.4808778
54.716704,3.60555128,3.53987685,0.256270225,3.52574318,3.49467361,3.48035638
54.727196,3.16227766,3.53899968,-0.61377685,3.52485847,3.49415919,3.47983577
54.737688,3.16227766,3.5381287,-0.613066909,3.52397944,3.49364615,3.479316
54.748179,4.12310563,3.53726389,0.765402989,3.52310609,3.49313452,3.47879713
54.758671,3.46410162,3.53640503,-0.268892934,3.52223818,3.49262423,3.47827907
54.769162,4.69041576,3.53555219,1.07464579,3.52137579,3.49211535,3.4777619
54.779654,3.31662479,3.53470515,-0.466990752,3.52051869,3.49160781,3.47724552
54.790146,3.46410162,3.53386392,-0.264125552,3.51966689,3.49110164,3.47672999
54.800637,4,3.53302851,0.683353122,3.51882039,3.49059689,3.47621535
54.811129,4.35889894,3.53219869,0.909230583,3.51797898,3.49009347,3.4757015
54.82162,3.46410162,3.53137456,-0.259370277,3.51714273,3.48959148,3.47518855
54.832112,3.87298335,3.53055589,0.585173016,3.51631143,3.48909081,3.47467638
54.842604,4.47213595,3.5297427,0.970769413,3.5154851,3.48859153,3.47416505
54.853095,4.47213595,3.52893502,0.971185327,3.51466374,3.48809367,3.4736546
54.863587,3.46410162,3.52813262,-0.25304348,3.51384714,3.48759714,3.47314494
54.874078,3.16227766,3.5273356,-0.604200252,3.5130354,3.48710205,3.47263617
54.88457,4.24264069,3.52654377,0.846225099,3.51222831,3.48660828,3.47212817
54.895062,3.16227766,3.52575713,-0.602892589,3.51142589,3.4861159,3.47162101
54.905553,3.87298335,3.52497572,0.58992171,3.51062815,3.48562495,3.47111473
54.916045,4.47213595,3.52419934,0.973620367,3.5098349,3.48513533,3.47060922
54.926536,3.74165739,3.52342807,0.467150206,3.50904624,3.48464715,3.47010459
54.937028,3.31662479,3.52266174,-0.453912929,3.50826196,3.48416031,3.46960074
54.94752,4,3.52190036,0.691447495,3.50748209,3.48367486,3.46909772
54.958011,3.31662479,3.52114397,-0.45223797,3.50670666,3.48319084,3.46859556
54.968503,3.60555128,3.52039238,0.29181997,3.50593547,3.48270817,3.46809418
54.978994,1.73205081,3.51964569,-1.33700968,3.50516863,3.48222694,3.46759366
54.989486,4.35889894,3.51890372,0.916512533,3.50440596,3.48174705,3.46709392
54.999978,3.31662479,3.5181665,-0.448933974,3.50364747,3.48126857,3.46659499
55.010469,3.74165739,3.51743407,0.473522243,3.5028932,3.48079152,3.46609693
55.020961,4.12310563,3.51670625,0.778716491,3.50214297,3.48031584,3.46559964
55.031452,3.46410162,3.51598315,-0.227775186,3.50139689,3.4798416,3.46510321
55.041944,4.12310563,3.51526459,0.779641604,3.50065478,3.47936872,3.46460754
55.052436,4.12310563,3.51455063,0.780099353,3.49991668,3.47889724,3.46411268
55.062927,3.60555128,3.51384128,0.302836582,3.49918262,3.47842722,3.46361868
55.073419,2.82842712,3.5131364,-0.827471614,3.49845243,3.47795857,3.46312544
55.08391,4.12310563,3.51243608,0.78145348,3.49772622,3.47749137,3.46263306
55.094402,4.47213595,3.51174019,0.979997841,3.49700383,3.47702555,3.46214143
55.104894,4.12310563,3.51104874,0.782340643,3.4962853,3.47656114,3.46165061
55.115385,3.60555128,3.51036181,0.308527907,3.49557067,3.4760982,3.46116064
55.125877,4.24264069,3.50967922,0.856131688,3.49485978,3.47563664,3.46067143
55.136368,3.16227766,3.5090011,-0.588832268,3.49415275,3.47517656,3.46018306
55.14686,3.46410162,3.5083273,-0.210299039,3.49344942,3.47471786,3.45969544
55.157352,3.46410162,3.50765787,-0.208701365,3.49274984,3.47426059,3.45920862
55.167843,3,3.50699287,-0.71203432,3.49205406,3.4738048,3.45872265
55.178335,3.87298335,3.50633216,0.605517289,3.49136194,3.47335041,3.45823742
55.188826,3.31662479,3.50567585,-0.434800025,3.49067359,3.47289751,3.45775303
55.199318,4.12310563,3.50502382,0.786181788,3.48998888,3.47244601,3.45726939
55.20981,4.35889894,3.50437613,0.924404033,3.48930785,3.47199596,3.45678654
55.220301,4.35889894,3.50373283,0.924751919,3.48863058,3.47154741,3.45630453
55.230793,4.47213595,3.50309381,0.984399383,3.48795693,3.47110027,3.45582326
55.241284,4,3.50245919,0.705365726,3.48728702,3.47065464,3.45534282
55.251776,4.24264069,3.50182886,0.86070426,3.48662073,3.47021043,3.45486312
55.262268,3.46410162,3.5012029,-0.192616928,3.48595813,3.4697677,3.45438421
55.272759,3.46410162,3.50058136,-0.190996714,3.48529929,3.46932648,3.45390612
55.283251,3.60555128,3.49996415,0.32494172,3.4846441,3.46888669,3.45342877
55.293742,4.24264069,3.49935142,0.862142256,3.48399269,3.46844843,3.45295225
55.304234,4,3.49874305,0.707995019,3.48334495,3.46801162,3.45247646
55.314726,3.16227766,3.49813915,-0.579535583,3.48270098,3.46757631,3.45200145
55.325217,3.74165739,3.4975398,0.494082572,3.48206085,3.46714253,3.45152726
55.335709,3.31662479,3.49694492,-0.424641174,3.48142448,3.46671021,3.4510538
55.3462,3.74165739,3.49635466,0.495280451,3.48079202,3.46627944,3.45058116
55.356692,3,3.49576896,-0.704108631,3.48016339,3.46585015,3.45010925
55.367184,3.16227766,3.49518793,-0.576983772,3.4795387,3.46542237,3.4496381
55.377675,3.60555128,3.49461168,0.333075958,3.47891805,3.46499616,3.44916778
55.388167,2.64575131,3.49404016,-0.921025978,3.47830138,3.46457144,3.44869817
55.398658,4.35889894,3.49347356,0.930282423,3.47768888,3.46414829,3.44822938
55.40915,3.74165739,3.49291183,0.498743975,3.47708051,3.46372665,3.44776131
55.419642,4.12310563,3.49235513,0.794198018,3.47647639,3.46330655,3.44729401
55.430133,2.64575131,3.49180361,-0.919811011,3.47587667,3.46288805,3.44682751
55.440625,2.82842712,3.49125725,-0.814143799,3.47528134,3.46247107,3.44636173
55.451116,3.46410162,3.49071629,-0.163140034,3.47469063,3.4620557,3.44589675
55.461608,4.35889894,3.49018074,0.932050538,3.47410453,3.46164186,3.44543249
55.4721,4.35889894,3.4896508,0.932334782,3.47352324,3.4612296,3.44496899
55.482591,4,3.48912667,0.714754034,3.47294695,3.46081897,3.44450628
55.493083,3.60555128,3.48860843,0.341969075,3.47237573,3.46040989,3.44404429
55.503574,3.16227766,3.48809635,-0.570805302,3.47180986,3.46000246,3.4435831
55.514066,3.46410162,3.48759056,-0.153261022,3.47124943,3.4595966,3.44312261
55.524558,3.60555128,3.48709131,0.34418013,3.47069472,3.45919235,3.44266288
55.535049,2.64575131,3.48659892,-0.916977433,3.47014601,3.45878977,3.44220394
55.545541,3.87298335,3.48611357,0.621988568,3.46960348,3.45838879,3.44174571
55.556032,3.16227766,3.48563565,-0.568645747,3.46906753,3.45798948,3.44128826
55.566524,2.82842712,3.4851654,-0.810393904,3.46853838,3.45759179,3.44083152
55.577016,3,3.48470327,-0.696206338,3.46801645,3.45719575,3.44037552
55.587507,3.74165739,3.48424969,0.507353624,3.46750221,3.45680142,3.43992031
55.597999,3.74165739,3.48380505,0.507791632,3.466996,3.45640873,3.4394658
55.60849,4.69041576,3.48336994,1.09865637,3.46649843,3.45601777,3.43901207
55.618982,4,3.48294486,0.719065464,3.46600997,3.45562846,3.43855904
55.629474,3.74165739,3.48253049,0.509045087,3.4655313,3.45524086,3.43810675
55.639965,3.31662479,3.48212758,-0.406820336,3.46506318,3.45485501,3.43765523
55.650457,2.82842712,3.48173685,-0.808275776,3.46460631,3.45447084,3.43720441
55.660948,4.58257569,3.4813593,1.04938858,3.46416167,3.45408845,3.43675436
55.67144,3.46410162,3.48099585,-0.129977829,3.4637302,3.45370777,3.43630501
55.681932,3,3.4806477,-0.693287602,3.46331307,3.45332884,3.43585638
55.692423,4,3.48031617,0.720890997,3.46291161,3.45295172,3.43540853
55.702915,3,3.48000268,-0.692822258,3.46252724,3.45257634,3.43496137
55.713406,3.74165739,3.47970897,0.511808963,3.46216168,3.45220279,3.43451497
55.723898,2.64575131,3.47943692,-0.913063857,3.46181682,3.451831,3.43406926
55.73439,3,3.47918877,-0.692234622,3.4614949,3.45146103,3.43362427
55.744881,3.87298335,3.47896713,0.627707107,3.46119853,3.45109291,3.43318005
55.755373,4,3.478775,0.72195914,3.4609307,3.4507266,3.43273651
55.765864,4.24264069,3.47861602,0.874085043,3.46069509,3.45036218,3.43229373
55.776356,3.60555128,3.47849457,0.356450137,3.46049605,3.44999959,3.43185162
55.786848,3,3.47841614,-0.691676328,3.46033911,3.44963887,3.43141024
55.797339,4.47213595,3.47838772,0.996869218,3.46023129,3.44928008,3.43096961
55.807831,3.46410162,3.47841846,-0.119653019,3.46018176,3.44892316,3.43052966
55.818322,3.74165739,3.47852066,0.51296854,3.46020289,3.44856819,3.43009047
55.828814,3.74165739,3.47871114,0.512782848,3.46031156,3.44821512,3.42965194
55.839306,3.60555128,3.479013,0.355722195,3.460531,3.447864,3.42921413
55.849797,2.64575131,3.47945801,-0.913075408,3.46089315,3.44751488,3.42877706
55.860289,3.31662479,3.48008971,-0.40430795,3.46144175,3.4471677,3.42834067
55.87078,3.31662479,3.48096627,-0.405390527,3.46223531,3.44682255,3.42790502
55.881272,4.35889894,3.48216437,0.936341055,3.4633509,3.44647938,3.42747004
55.891764,4,3.48378143,0.718483521,3.4648865,3.44613823,3.42703576
55.902255,2.44948974,3.48593712,-1.0180606,3.46696244,3.44579917,3.42660223
55.912747,2.82842712,3.48877338,-0.812616917,3.46972144,3.44546213,3.42616936
55.923238,3.74165739,3.49244858,0.499208182,3.47332279,3.4451272,3.42573723
55.93373,3.46410162,3.49713152,-0.181741323,3.47793623,3.44479434,3.42530576
55.944222,3.87298335,3.50298614,0.608273953,3.48372662,3.44446359,3.42487498
55.954713,4.12310563,3.5101546,0.782911886,3.49083695,3.44413501,3.42444495
55.965205,2.23606798,3.51873864,-1.13255051,3.4993695,3.44380855,3.42401557
55.975696,4.12310563,3.5287701,0.770931595,3.50935632,3.44348429,3.42358692
55.986188,3.31662479,3.54019108,-0.472827966,3.52073913,3.44316219,3.42315893
55.99668,3.31662479,3.55281743,-0.485996548,3.53333275,3.44284231,3.42273163
56.007171,3.87298335,3.56630587,0.553784685,3.54679195,3.44252469,3.42230506
56.017663,3.74165739,3.58011627,0.401921778,3.56057361,3.4422093,3.42187913
56.028154,3.46410162,3.59346199,-0.359667039,3.57388676,3.44189622,3.42145394
56.038646,3.31662479,3.60531003,-0.53729437,3.58569274,3.4415854,3.42102939
56.049138,3,3.61444818,-0.783867452,3.59477274,3.44127691,3.42060552
56.059629,4.24264069,3.61970453,0.78926305,3.59994839,3.44097079,3.42018238
56.070121,4.24264069,3.62027491,0.788901627,3.6004109,3.44066701,3.41975988
56.080612,3.60555128,3.61601015,-0.102268639,3.59600983,3.44036565,3.41933811
56.091104,4,3.60747637,0.626517064,3.58731379,3.44006668,3.41891697
56.101596,3.60555128,3.59574341,0.0990346796,3.57539792,3.43977016,3.41849651
56.112087,4.24264069,3.58204564,0.812769985,3.56150301,3.43947613,3.41807677
56.122579,4.35889894,3.56750387,0.889603888,3.54675587,3.43918457,3.41765766
56.13307,3.60555128,3.55300691,0.229225589,3.53205033,3.43889556,3.41723927
56.143562,3.31662479,3.53918537,-0.471763264,3.51802073,3.43860908,3.41682151
56.154054,3.60555128,3.52645592,0.281238962,3.50508638,3.43832518,3.41640442
56.164545,3.60555128,3.51506044,0.300816953,3.49349084,3.43804391,3.41598804
56.175037,3.16227766,3.50510145,-0.585511562,3.48333753,3.43776525,3.41557229
56.185528,4,3.4965809,0.709520328,3.47462868,3.43748928,3.41515725
56.19602,4.69041576,3.48942037,1.09589935,3.46728559,3.43721599,3.41474284
56.206512,4.58257569,3.48349194,1.04837196,3.46117975,3.43694544,3.41432909
56.217003,4,3.47863788,0.722054096,3.45615261,3.43667767,3.41391604
56.227495,4.35889894,3.47468893,0.940324418,3.45203391,3.43641267,3.41350362
56.237986,4.24264069,3.47148199,0.878156418,3.44865961,3.43615052,3.4130919
56.248478,3.74165739,3.46886734,0.522293063,3.44587904,3.43589122,3.41268079
56.25897,3.87298335,3.46671659,0.637390584,3.44356301,3.43563482,3.41227035
56.269461,3.60555128,3.46492363,0.375003529,3.44160476,3.43538138,3.4118606
56.279953,4.47213595,3.46340367,1.00435665,3.43991888,3.43513089,3.41145147
56.290444,3.74165739,3.46209195,0.528739476,3.43844021,3.43488344,3.41104304
56.300936,4.24264069,3.4609394,0.884138726,3.43711928,3.43463901,3.41063522
56.311428,4.79583152,3.45991018,1.15582064,3.43592002,3.43439768,3.41022805
56.321919,4.35889894,3.45897822,0.948641517,3.43481615,3.4341595,3.40982156
56.332411,5.38516481,3.45812436,1.38817882,3.43378832,3.43392447,3.40941569
56.342902,4,3.45733496,0.736658021,3.43282279,3.43369268,3.40901051
56.353394,4.58257569,3.45659965,1.06112018,3.43190905,3.43346413,3.40860594
56.363886,5,3.45591082,1.24261385,3.43103939,3.43323888,3.40820201
56.374377,4.24264069,3.45526256,0.887343297,3.43020786,3.433017,3.40779876
56.384869,4.12310563,3.45465002,0.817591347,3.42940949,3.43279851,3.40739612
56.39536,4.69041576,3.45406945,1.11191111,3.42864049,3.43258347,3.40699415
56.405852,3.60555128,3.45351755,0.389915019,3.42789746,3.43237192,3.40659279
56.416344,4.69041576,3.45299167,1.11239565,3.42717768,3.43216391,3.40619207
56.426835,3.60555128,3.45248955,0.391231039,3.42647885,3.43195951,3.40579202
56.437327,3.46410162,3.45200909,0.109966027,3.42579878,3.43175875,3.40539258
56.447818,4.12310563,3.45154865,0.819485799,3.42513578,3.43156171,3.4049938
56.45831,3.87298335,3.45110664,0.649520364,3.42448818,3.43136841,3.40459562
56.468802,3.87298335,3.45068179,0.649847334,3.42385463,3.43117892,3.40419807
56.479293,3.46410162,3.45027297,0.117595271,3.42323398,3.43099333,3.4038012
56.489785,3.60555128,3.44987908,0.394553153,3.42262502,3.43081166,3.40340491
56.500276,3.60555128,3.44949932,0.395034121,3.42202691,3.430634,3.40300929
56.510768,4.35889894,3.44913281,0.953816615,3.42143866,3.43046038,3.40261426
56.52126,3.74165739,3.44877889,0.541182498,3.42085958,3.43029088,3.40221985
56.531751,3.74165739,3.44843698,0.541498294,3.42028902,3.43012559,3.40182611
56.542243,3.46410162,3.44810648,0.126471886,3.41972626,3.42996454,3.40143296
56.552734,4.35889894,3.44778695,0.954521865,3.41917085,3.42980783,3.40104046
56.563226,3,3.44747792,-0.668937907,3.41862219,3.4296555,3.40064854
56.573718,2.23606798,3.44717905,-1.10050492,3.41807988,3.42950764,3.40025725
56.584209,3.87298335,3.44689002,0.652758248,3.41754355,3.42936435,3.39986661
56.594701,3.60555128,3.44661049,0.398673787,3.41701274,3.42922565,3.39947655
56.605192,3.31662479,3.44634026,-0.360160335,3.41648721,3.42909168,3.39908714
56.615684,3.60555128,3.44607905,0.399339736,3.41596654,3.42896247,3.39869831
56.626176,4,3.4458267,0.74442817,3.41545052,3.42883812,3.39831009
56.636667,4,3.44558306,0.744591795,3.41493893,3.42871874,3.39792252
56.647159,3.31662479,3.44534794,-0.358780079,3.41443144,3.42860438,3.39753553
56.65765,2.82842712,3.44512125,-0.785298751,3.41392794,3.42849516,3.39714918
56.668142,4.12310563,3.44490286,0.823530668,3.41342812,3.42839114,3.3967634
56.678634,3.16227766,3.44469271,-0.531427367,3.41293186,3.42829244,3.39637823
56.689125,3.31662479,3.44449073,-0.357583472,3.41243903,3.42819916,3.3959937
56.699617,3.60555128,3.44429684,0.401564978,3.41194939,3.42811137,3.39560973
56.710108,2.82842712,3.44411105,-0.784655288,3.41146288,3.42802921,3.39522641
56.7206,3.16227766,3.44393328,-0.530712368,3.41097929,3.42795276,3.39484365
56.731092,3.87298335,3.44376354,0.655148688,3.41049853,3.42788213,3.39446149
56.741583,2.44948974,3.44360186,-0.997051711,3.41002054,3.42781744,3.39407996
56.752075,2.82842712,3.4434482,-0.784232793,3.40954513,3.4277588,3.393699
56.762566,3.46410162,3.44330262,0.144218574,3.40907228,3.42770633,3.39331867
56.773058,3.87298335,3.44316512,0.655605237,3.40860181,3.42766015,3.39293889
56.78355,3.31662479,3.44303576,-0.355543198,3.40813368,3.42762038,3.39255971
56.794041,3,3.44291459,-0.665518286,3.40766786,3.42758715,3.39218116
56.804533,3.60555128,3.44280165,0.403422386,3.40720419,3.42756059,3.39180317
56.815024,3.74165739,3.44269704,0.546772666,3.40674267,3.42754084,3.3914258
56.825516,3.16227766,3.4426008,-0.529455511,3.40628317,3.42752803,3.39104898
56.836008,4.24264069,3.44251303,0.894498553,3.40582566,3.4275223,3.39067275
56.846499,3.87298335,3.44243382,0.656162729,3.40537014,3.42752382,3.39029714
56.856991,4.12310563,3.44236326,0.825071127,3.40491644,3.42753271,3.38992208
56.867482,4.79583152,3.44230147,1.1634131,3.40446463,3.42754915,3.38954763
56.877974,3.74165739,3.44224855,0.547182632,3.40401455,3.42757329,3.38917374
56.888466,3.16227766,3.44220463,-0.529081253,3.40356621,3.4276053,3.38880042
56.898957,4.24264069,3.44216984,0.894690363,3.40311961,3.42764534,3.38842772
56.909449,4.47213595,3.44214431,1.01488504,3.40267462,3.42769359,3.38805556
56.91994,2.23606798,3.44212818,-1.09820772,3.40223129,3.42775023,3.38768402
56.930432,3,3.44212161,-0.664922256,3.4017895,3.42781545,3.38731301
56.940924,3.46410162,3.44212475,0.148245973,3.40134926,3.42788944,3.38694258
56.951415,3.31662479,3.44213777,-0.354278104,3.40091057,3.42797239,3.38657276
56.961907,4.69041576,3.44216084,1.11725329,3.40047333,3.42806452,3.38620347
56.972398,4.24264069,3.44219414,0.894676783,3.40003758,3.42816601,3.38583479
56.98289,3.60555128,3.44223787,0.404120532,3.39960322,3.4282771,3.38546664
56.993382,3.31662479,3.44229222,-0.354496026,3.39917026,3.42839802,3.38509906
57.003873,3.60555128,3.44235739,0.403972625,3.39873871,3.42852897,3.38473209
57.014365,3.46410162,3.44243361,0.147200556,3.39830848,3.42867021,3.38436564
57.024856,3.74165739,3.44252108,0.546933545,3.39787962,3.42882197,3.38399979
57.035348,3.74165739,3.44262006,0.546843056,3.39745202,3.42898453,3.38363447
57.04584,3.16227766,3.44273077,-0.529578236,3.39702571,3.42915812,3.38326971
57.056331,3.46410162,3.44285345,0.145767497,3.3966007,3.42934301,3.38290555
57.066823,3.46410162,3.44298839,0.145303901,3.39617691,3.42953951,3.38254191
57.077314,3.60555128,3.44313583,0.403007996,3.39575438,3.42974787,3.38217886
57.087806,3.31662479,3.44329608,-0.355909099,3.39533302,3.42996841,3.38181634
57.098298,4.12310563,3.44346941,0.82440052,3.39491286,3.43020144,3.38145437
57.108789,3.46410162,3.44365611,0.14298779,3.39449391,3.43044724,3.38109299
57.119281,3,3.44385652,-0.666225578,3.39407609,3.43070618,3.38073212
57.129772,3.60555128,3.44407094,0.401846165,3.39365946,3.43097856,3.38037184
57.140264,4.47213595,3.44429973,1.01382258,3.39324392,3.43126478,3.38001208
57.150756,3.87298335,3.44454323,0.654553373,3.3928295,3.43156518,3.37965287
57.161247,3.87298335,3.44480177,0.654355847,3.39241622,3.43188009,3.37929424
57.171739,3.60555128,3.44507578,0.400593924,3.39200401,3.43220997,3.37893612
57.18223,3.74165739,3.4453656,0.544326912,3.39159291,3.43255515,3.37857858
57.192722,3.16227766,3.44567168,-0.53234765,3.39118284,3.43291612,3.37822155
57.203214,3.31662479,3.44599442,-0.359679896,3.39077383,3.43329327,3.37786506
57.213705,3.87298335,3.44633421,0.653183844,3.39036591,3.43368702,3.37750915
57.224197,4,3.44669158,0.743847041,3.38995899,3.43409789,3.37715374
57.234688,3.31662479,3.44706692,-0.361167732,3.38955313,3.43452629,3.37679891
57.24518,4.35889894,3.44746079,0.954692699,3.38914824,3.43497279,3.37644458
57.255672,4.35889894,3.44787367,0.954476442,3.38874437,3.43543788,3.37609078
57.266163,4.79583152,3.44830602,1.16082966,3.38834153,3.43592202,3.37573756
57.276655,3.74165739,3.44875848,0.541201355,3.38793964,3.43642588,3.37538483
57.287146,4.12310563,3.44923153,0.820898349,3.38753876,3.43694993,3.37503267
57.297638,3.16227766,3.44972584,-0.536141936,3.38713882,3.43749486,3.37468101
57.30813,3.31662479,3.45024197,-0.365536843,3.38673984,3.43806124,3.37432988
57.318621,3.16227766,3.45078052,-0.537124622,3.38634186,3.43864965,3.37397931
57.329113,4.12310563,3.45134224,0.819611731,3.38594478,3.43926088,3.37362924
57.339604,2.82842712,3.4519277,-0.789620525,3.38554868,3.43989551,3.37327972
57.350096,3.74165739,3.45253773,0.53769848,3.38515347,3.44055436,3.3729307
57.360588,3.46410162,3.45317302,0.104539919,3.38475918,3.44123813,3.3725822
57.371079,3.87298335,3.45383427,0.647417235,3.38436585,3.44194753,3.37223426
57.381571,3.46410162,3.45452241,0.0978734141,3.3839734,3.44268351,3.3718868
57.392062,3.46410162,3.45523814,0.0941460271,3.38358188,3.44344675,3.3715399
57.402554,4.12310563,3.45598247,0.816776075,3.38319123,3.4442383,3.37119348
57.413046,3,3.45675623,-0.67583743,3.38280146,3.44505897,3.37084758
57.423537,3.87298335,3.45756029,0.644533206,3.38241262,3.44590965,3.37050223
57.434029,3.46410162,3.45839579,0.0755369296,3.38202462,3.44679149,3.37015736
57.44452,3.46410162,3.45926358,0.069555983,3.38163753,3.44770534,3.36981304
57.455012,3.60555128,3.4601649,0.381295647,3.38125127,3.44865245,3.3694692
57.465504,3.16227766,3.46110079,-0.546647173,3.38086587,3.44963386,3.36912587
57.475995,3.87298335,3.46207231,0.641023429,3.38048136,3.45065065,3.36878308
57.486487,4.35889894,3.46308085,0.946476671,3.38009767,3.45170421,3.36844077
57.496978,3.74165739,3.4641275,0.526811055,3.37971486,3.45279563,3.368099
57.50747,4.12310563,3.46521377,0.811105332,3.37933286,3.45392644,3.3677577
57.517962,3.74165739,3.46634094,0.52470606,3.37895169,3.45509792,3.36741691
57.528453,3.74165739,3.46751034,0.523590531,3.37857139,3.45631141,3.36707665
57.538945,4.12310563,3.46872371,0.808938757,3.37819188,3.45756865,3.36673687
57.549436,3.74165739,3.4699824,0.521224511,3.37781322,3.45887099,3.36639762
57.559928,4,3.47128828,0.727125656,3.37743535,3.46022034,3.36605883
57.57042,5,3.47264298,1.23586287,3.37705829,3.46161831,3.36572055
57.580911,3.60555128,3.47404816,0.362633587,3.37668208,3.46306657,3.36538279
57.591403,4.24264069,3.47550598,0.875862262,3.37630664,3.4645673,3.3650455
57.601894,2.64575131,3.47701816,-0.911738369,3.37593203,3.4661222,3.36470874
57.612386,3.74165739,3.47858707,0.512903812,3.37555818,3.46773367,3.36437244
57.622878,4.12310563,3.48021473,0.801804772,3.37518513,3.46940375,3.36403663
57.633369,4,3.48190329,0.719789355,3.3748129,3.47113456,3.36370135
57.643861,4.47213595,3.48365545,0.994223568,3.37444142,3.47292884,3.36336652
57.654352,3,3.48547342,-0.696759225,3.37407076,3.47478879,3.36303222
57.664844,3.60555128,3.48736018,0.343789314,3.37370084,3.47671742,3.36269837
57.675336,4,3.48931836,0.714619926,3.37333169,3.47871734,3.362365
57.685827,3.46410162,3.49135068,-0.165072911,3.37296336,3.48079129,3.36203216
57.696319,3.60555128,3.49346061,0.334799434,3.37259575,3.48294276,3.36169977
57.70681,4,3.495651,0.710175332,3.37222895,3.48517459,3.36136789
57.717302,3.46410162,3.49792566,-0.183913153,3.37186287,3.48749063,3.36103646
57.727794,3.74165739,3.500288,0.491293583,3.37149755,3.48989426,3.36070552
57.738285,3.60555128,3.50274156,0.320639537,3.37113302,3.49238906,3.36037508
57.748777,3.31662479,3.50529081,-0.434357024,3.37076921,3.4949795,3.3600451
57.759268,2.64575131,3.50793948,-0.928540883,3.37040618,3.49766931,3.35971562
57.76976,3.46410162,3.51069253,-0.215849281,3.37004387,3.50046347,3.35938658
57.780252,4,3.5135544,0.697456522,3.3696823,3.50336645,3.35905802
57.790743,4.12310563,3.51652978,0.778829795,3.36932151,3.50638292,3.35872996
57.801235,3.31662479,3.51962448,-0.450554871,3.36896142,3.50951874,3.35840235
57.811726,4.12310563,3.52284348,0.774765866,3.36860211,3.51277886,3.35807524
57.822218,3.46410162,3.52619327,-0.249181967,3.3682435,3.51616981,3.35774856
57.83271,4.35889894,3.52967978,0.910614719,3.36788562,3.51969753,3.35742236
57.843201,3.74165739,3.53330925,0.456451677,3.3675285,3.52336827,3.35709665
57.853693,3.16227766,3.5370894,-0.612218703,3.36717208,3.52718977,3.35677138
57.864184,3.74165739,3.54102692,0.447917925,3.36681642,3.53116873,3.3564466
57.874676,3.46410162,3.54513046,-0.28465566,3.36646145,3.53531383,3.35612226
57.885168,3.31662479,3.54940804,-0.48247616,3.36610721,3.53963309,3.35579838
57.895659,3.60555128,3.55386812,0.227339292,3.36575371,3.54413501,3.35547499
57.906151,3,3.55852106,-0.747342667,3.36540091,3.54882995,3.35515203
57.916642,4,3.56337606,0.660775259,3.36504886,3.55372713,3.35482956
57.927134,2.64575131,3.5684448,-0.960569356,3.36469748,3.55883827,3.35450752
57.937626,3.74165739,3.5737383,0.409779313,3.36434683,3.5641744,3.35418593
57.948117,3.87298335,3.57926826,0.541954877,3.36399692,3.56974723,3.35386484
57.958609,3.31662479,3.5850488,-0.518096524,3.36364769,3.57557094,3.35354416
57.9691,4.12310563,3.59109277,0.729392112,3.36329921,3.58165837,3.35322397
57.979592,3.60555128,3.59741627,0.0901942538,3.3629514,3.58802567,3.3529042
57.990084,3.87298335,3.60403472,0.518602569,3.36260431,3.59468829,3.35258488
58.000575,3.87298335,3.61096457,0.511877695,3.36225795,3.6016627,3.35226604
58.011067,3.31662479,3.61822547,-0.549181829,3.36191228,3.60896858,3.35194761
58.021558,4.35889894,3.62583573,0.856191106,3.36156734,3.61662429,3.35162967
58.03205,2,3.63381798,-1.2782089,3.36122308,3.62465248,3.35131214
58.042542,3.60555128,3.64219426,-0.191423567,3.36087952,3.63307524,3.35099506
58.053033,4.24264069,3.6509882,0.769189503,3.3605367,3.64191624,3.35067845
58.063525,3.31662479,3.66022792,-0.586176704,3.36019456,3.65120365,3.35036225
58.074016,3.74165739,3.66994019,0.267800659,3.35985316,3.66096428,3.35004652
58.084508,4.89897949,3.68015781,1.10400257,3.35951243,3.67123097,3.3497312
58.095,4.58257569,3.69091345,0.944278693,3.35917242,3.68203645,3.34941632
58.105491,3.60555128,3.70224255,-0.310952212,3.35883314,3.69341624,3.34910191
58.115983,4,3.71418737,0.534614464,3.35849454,3.70541263,3.34878791
58.126474,3.87298335,3.72678967,0.382352814,3.35815668,3.71806745,3.34847437
58.136966,4.35889894,3.74010073,0.786637283,3.3578195,3.73143208,3.34816123
58.147458,4.35889894,3.75417395,0.777640657,3.35748303,3.74555998,3.34784853
58.157949,4.24264069,3.76906947,0.68816511,3.3571473,3.76051138,3.34753629
58.168441,3.74165739,3.78486047,-0.207853517,3.35681226,3.77635959,3.34722445
58.178932,3.87298335,3.80162514,0.267129561,3.35647797,3.79318289,3.34691307
58.189424,4.47213595,3.81946185,0.807882482,3.35614437,3.81107981,3.34660209
58.199916,4.69041576,3.83848184,0.923002668,3.35581149,3.83016176,3.34629154
58.210407,4.69041576,3.85881849,0.911919552,3.35547936,3.85056232,3.34598144
58.220899,3.74165739,3.88064008,-0.372803821,3.35514793,3.87245001,3.34567173
58.23139,4.47213595,3.90414338,0.753652818,3.35481726,3.89602193,3.34536248
58.241882,4.12310563,3.92958045,0.439914965,3.35448729,3.92153047,3.34505362
58.252374,4.79583152,3.95725459,0.915738464,3.35415806,3.94927942,3.34474519
58.262865,3.31662479,3.98753988,-0.819094069,3.3538296,3.97964339,3.3444372
58.273357,4.89897949,4.02090654,0.937055464,3.35350185,4.01309327,3.3441296
58.283848,4.47213595,4.05791633,0.643598965,3.35317488,4.05019156,3.34382245
58.29434,4.79583152,4.09926651,0.834604704,3.35284864,4.09163648,3.34351569
58.304832,5.65685425,4.14578237,1.22925664,3.35252316,4.1382543,3.34320934
58.315323,3.46410162,4.19844031,-0.856935643,3.35219847,4.19102253,3.34290344
58.325815,5.38516481,4.25839559,1.06149386,3.35187452,4.25109762,3.34259792
58.336306,4,4.32694633,-0.571792204,3.35155138,4.31977884,3.34229284
58.346798,4.89897949,4.4055731,0.70242892,3.351229,4.39854786,3.34198814
58.35729,5.47722558,4.49587155,0.990633141,3.35090741,4.48900118,3.34168385
58.367781,4.89897949,4.59952964,0.547220104,3.35058665,4.59282728,3.34138
58.378273,5.38516481,4.71830896,0.816612422,3.35026667,4.71178789,3.34107653
58.388764,5.19615242,4.85389845,0.585024761,3.34994754,4.84757148,3.3407735
58.399256,4.79583152,5.00792626,-0.460537447,3.34962921,5.00180518,3.34047084
58.409748,6.08276253,5.18177944,0.949201291,3.34931171,5.17587436,3.34016858
58.420239,5.74456265,5.3765451,0.606644501,3.3489951,5.37086389,3.33986676
58.430731,6.32455532,5.59299396,0.855313602,3.34867933,5.58754192,3.33956531
58.441222,6,5.83137138,0.410644152,3.34836446,5.82615084,3.33926428
58.451714,7.41619849,6.09151843,1.15094746,3.34805045,6.08652882,3.33896363
58.462206,6.78232998,6.37268378,0.640036096,3.34773735,6.36792167,3.33866338
58.472697,7.34846923,6.67357685,0.821518338,3.3474252,6.66903619,3.33836355
58.483189,7.41619849,6.99247454,0.650940819,3.34711396,6.98814712,3.33806409
58.49368,7.21110255,7.32703281,-0.340485334,3.3468037,7.3229086,3.33776506
58.504172,8.18535277,7.67456429,0.714694679,3.3464944,7.67063192,3.33746638
58.514664,8.66025404,8.03184264,0.792724033,3.34618609,8.0280898,3.33716811
58.525155,8.77496439,8.39522023,0.616233847,3.34587884,8.39163397,3.33687025
58.535647,8.83176087,8.76074844,0.266481565,3.3455726,8.75731551,3.33657275
58.546138,8.77496439,9.12392523,-0.590729077,3.34526746,9.12063225,3.33627567
58.55663,9.8488578,9.47995108,0.607376923,3.3449634,9.47678468,3.33597895
58.567122,9.48683298,9.82344647,-0.580184018,3.34466046,9.82039335,3.33568262
58.577613,9.2736185,10.1485283,-0.935366136,3.34435871,10.1455752,3.3353867
58.588105,9.05538514,10.4488936,-1.18046961,3.34405814,10.4460273,3.33509114
58.598596,9.38083152,10.7176847,-1.15622369,3.34375882,10.7148919,3.33479599
58.609088,9.8488578,10.9479116,-1.04835768,3.34346075,10.9451787,3.33450119
58.61958,10.7703296,11.1326366,-0.601919386,3.343164,11.12995,3.33420678
58.630071,10.198039,11.2656042,-1.03323045,3.34286864,11.26295,3.33391277
58.640563,10.5830052,11.3418943,-0.871142361,3.34257466,11.3392582,3.33361912
58.651054,11.045361,11.3584695,-0.559560964,3.34228218,11.3558373,3.33332587
58.661546,10.1488916,11.3146437,-1.07970003,3.3419912,11.312001,3.33303297
58.672038,11.045361,11.2121697,-0.40842213,3.34170181,11.209502,3.33274044
58.682529,10.9544512,11.0550112,-0.317112068,3.3414141,11.0523046,3.33244832
58.693021,11.2249722,10.8487432,0.613375054,3.34112809,10.8459836,3.33215654
58.703512,10.3923048,10.6000298,-0.455768527,3.34084393,10.5972034,3.33186517
58.714004,10.4880885,10.3158534,0.415012134,3.34056163,10.3129465,3.33157413
58.724496,10.7703296,10.0032109,0.875853111,3.34028133,10.00021,3.33128347
58.734987,10.4403065,9.66876091,0.878376685,3.34000314,9.66565219,3.33099321
58.745479,8.94427191,9.31857822,-0.611805777,3.33972714,9.31534793,3.33070328
58.75597,9.48683298,8.95834938,0.726968779,3.33945349,8.95498351,3.33041375
58.766462,9.11043358,8.59312979,0.719238338,3.33918228,8.58961413,3.33012456
58.776954,9.59166305,8.22762007,1.1679225,3.33891368,8.22394027,3.32983573
58.787445,8.71779789,7.86609635,0.922876773,3.33864787,7.86223806,3.32954729
58.797937,7.21110255,7.51232546,-0.548837782,3.33838497,7.50827453,3.32925919
58.808428,7.74596669,7.1697984,0.759057503,3.33812524,7.16554116,3.32897148
58.81892,7.07106781,6.84145021,0.479184309,3.33786882,6.83697378,3.32868409
58.829412,6.40312424,6.52985888,-0.355998088,3.33761599,6.52515161,3.32839707
58.839903,5.83095189,6.23711249,-0.637307298,3.33736701,6.23216437,3.32811044
58.850395,5.56776436,5.96470864,-0.63003514,3.33712212,5.9595116,3.32782413
58.860886,5.47722558,5.71372157,-0.486308542,3.33688169,5.7082699,3.32753821
58.871378,6.4807407,5.48460016,0.998068405,3.33664603,5.47889059,3.32725261
58.88187,5.29150262,5.27735122,0.118959671,3.33641553,5.27138304,3.32696737
58.892361,5.65685425,5.09149949,0.751900767,3.33619065,5.08527437,3.32668251
58.902853,5.38516481,4.92610459,0.677539829,3.33597184,4.91962618,3.32639797
58.913344,5.19615242,4.77995086,0.645136854,3.33575968,4.77322435,3.32611381
58.923836,4.79583152,4.65151334,0.379892336,3.33555473,4.64454476,3.32582997
58.934328,5,4.53914642,0.678861977,3.33535769,4.53194204,3.32554648
58.944819,4.24264069,4.44112526,-0.445516074,3.33516936,4.43369094,3.32526337
58.955311,4.69041576,4.35570374,0.57854301,3.33499057,4.34804425,3.32498057
58.965802,4,4.28123781,-0.530318596,3.33482236,4.27335638,3.32469815
58.976294,4.24264069,4.21616993,0.162698364,3.33466584,4.2080678,3.32441604
58.986786,4.58257569,4.15910975,0.650742609,3.33452234,4.15078587,3.32413428
58.997277,4.47213595,4.10882628,0.60275175,3.33439344,4.10027704,3.32385288
59.007769,4.47213595,4.0642407,0.638666779,3.33428096,4.05545958,3.3235718
59.01826,4.69041576,4.02445142,0.816066381,3.33418717,4.01542884,3.32329108
59.028752,4.58257569,3.9886889,0.770640506,3.33411485,3.97941168,3.32301068
59.039244,4.24264069,3.95632668,0.535083179,3.33406757,3.94677754,3.32273061
59.049735,3.74165739,3.92685183,-0.430342243,3.33404994,3.9170086,3.32245091
59.060227,3.87298335,3.8998412,-0.163883665,3.3340681,3.88967542,3.32217151
59.070718,4.24264069,3.87496409,0.606363422,3.3341303,3.86443935,3.32189248
59.08121,4.24264069,3.85194812,0.625054053,3.33424773,3.84101735,3.32161375
59.091702,4.69041576,3.83058413,0.927271069,3.3344355,3.8191862,3.32133536
59.102193,2.23606798,3.81070893,-1.25484699,3.33471387,3.79876397,3.32105732
59.112685,3.87298335,3.79219296,0.284236497,3.33510974,3.77959622,3.32077959
59.123176,4.24264069,3.77494711,0.683881259,3.33565787,3.7615618,3.32050221
59.133668,4,3.75890456,0.491014706,3.33640253,3.74455292,3.32022513
59.14416,2.82842712,3.74402881,-0.956870779,3.33739799,3.72848276,3.31994838
59.154651,3.31662479,3.73030524,-0.643179949,3.33870875,3.71327661,3.31967199
59.165143,4.24264069,3.7177343,0.724504237,3.34040897,3.6988654,3.31939589
59.175634,3.31662479,3.70633612,-0.624268632,3.34257902,3.68519354,3.31912014
59.186126,3.87298335,3.69613573,0.420532544,3.34530245,3.67220654,3.31884469
59.196618,2.64575131,3.68716407,-1.02049633,3.34865859,3.65985907,3.31856955
59.207109,3.60555128,3.67944609,-0.271836013,3.35271491,3.64810998,3.31829477
59.217601,3.31662479,3.67298967,-0.596963045,3.35751913,3.63691861,3.31802028
59.228092,3.74165739,3.66777995,0.271804035,3.36308592,3.62625182,3.31774613
59.238584,4.35889894,3.66376339,0.833747896,3.36938931,3.61607524,3.31747228
59.249076,3.46410162,3.66083912,-0.443551014,3.37634682,3.60636003,3.31719874
59.259567,3.46410162,3.65884308,-0.441295217,3.38380664,3.59707942,3.31692554
59.270059,4.35889894,3.65753163,0.837476755,3.39153346,3.58820611,3.31665263
59.28055,3.60555128,3.65656533,-0.225862921,3.39918604,3.57971801,3.31638006
59.291042,3,3.6554969,-0.809627631,3.40631217,3.57159149,3.31610778
59.301534,3,3.65378286,-0.808568402,3.41235654,3.56380683,3.3158358
59.312025,3.46410162,3.65083843,-0.432130551,3.41672256,3.55634558,3.31556417
59.322517,2.64575131,3.64614461,-1.00019663,3.41888832,3.54918858,3.31529281
59.333008,3.31662479,3.63938482,-0.568119736,3.41854602,3.5423205,3.31502179
59.3435,3.74165739,3.63053772,0.333346173,3.41570356,3.53572451,3.31475105
59.353992,3.46410162,3.61988065,-0.394688527,3.41068128,3.52938677,3.31448062
59.364483,3.60555128,3.60789234,-0.0483845677,3.40400885,3.52329423,3.31421052
59.374975,3.60555128,3.59511551,0.102155607,3.39628079,3.51743305,3.3139407
59.385466,3.87298335,3.58205844,0.539374553,3.38804864,3.51179241,3.3136712
59.395958,4.12310563,3.56913134,0.744294488,3.37975892,3.50636006,3.31340198
59.40645,2.23606798,3.55664329,-1.14916287,3.37174708,3.50112608,3.31313306
59.416941,2.64575131,3.54480822,-0.948186113,3.36424634,3.49608107,3.31286447
59.427433,2.64575131,3.53375762,-0.942340864,3.35740303,3.49121484,3.31259615
59.437924,3,3.52356332,-0.723576755,3.35129785,3.48651961,3.31232816
59.448416,3.31662479,3.51424207,-0.444541649,3.34595473,3.4819863,3.31206043
59.458908,3.60555128,3.50577383,0.315875678,3.34135721,3.47760766,3.311793
59.469399,3.31662479,3.49810902,-0.426009655,3.3374577,3.47337682,3.31152589
59.479891,3.46410162,3.49117638,-0.164544113,3.33418697,3.46928614,3.31125905
59.490382,4.35889894,3.48489673,0.934880857,3.33146593,3.46532993,3.31099253
59.500874,2.82842712,3.47918506,-0.80669569,3.32921095,3.46150135,3.31072627
59.511366,3.16227766,3.47396071,-0.558285818,3.3273419,3.45779502,3.31046031
59.521857,2.44948974,3.4691494,-1.00978198,3.32578536,3.45420584,3.31019466
59.532349,4.24264069,3.46468443,0.882018284,3.32447686,3.45072798,3.30992927
59.54284,3.31662479,3.46051081,-0.379323108,3.32336279,3.44735723,3.30966419
59.553332,4,3.45658168,0.737169125,3.32239922,3.44408836,3.30939938
59.563824,4,3.45286036,0.739688884,3.32155177,3.44091731,3.30913485
59.574315,3.60555128,3.4493178,0.395263802,3.32079397,3.43784025,3.30887064
59.584807,3.60555128,3.44593038,0.39952584,3.32010565,3.43485266,3.30860668
59.595298,2.82842712,3.44268081,-0.78374338,3.31947201,3.43195139,3.30834303
59.60579,3.16227766,3.43955446,-0.52657079,3.31888188,3.42913236,3.30807963
59.616282,3.74165739,3.43654053,0.552373838,3.31832719,3.4263925,3.30781652
59.626773,2.64575131,3.43363035,-0.887625506,3.31780191,3.42372887,3.30755371
59.637265,2.44948974,3.430816,-0.990619127,3.31730137,3.42113793,3.30729115
59.647756,3.16227766,3.42809179,-0.515571654,3.31682215,3.41861731,3.3070289
59.658248,2.64575131,3.42545185,-0.883006535,3.31636138,3.41616377,3.3067669
59.66874,3,3.42289172,-0.650301256,3.31591687,3.41377496,3.30650517
59.679231,3.31662479,3.42040741,-0.322153102,3.31548684,3.4114486,3.30624374
59.689723,3.16227766,3.41799462,-0.505684645,3.31506964,3.4091819,3.30598256
59.700214,3.60555128,3.4156503,0.435776285,3.31466405,3.40697301,3.30572168
59.710706,3.60555128,3.41337079,0.438383944,3.31426883,3.40481939,3.30546105
59.721198,4.12310563,3.41115332,0.843772662,3.31388304,3.40271917,3.30520069
59.731689,3.31662479,3.4089953,-0.303925177,3.31350584,3.4006706,3.30494062
59.742181,3.87298335,3.40689374,0.682707556,3.31313638,3.39867142,3.3046808
59.752672,4,3.4048466,0.771461862,3.31277406,3.39672023,3.30442127
59.763164,3.31662479,3.40285121,-0.293643347,3.31241819,3.39481493,3.30416198
59.773656,3.31662479,3.40090562,-0.290311613,3.31206827,3.3929541,3.30390295
59.784147,3,3.39900801,-0.631670807,3.31172385,3.39113634,3.30364422
59.794639,3.31662479,3.3971561,-0.283780395,3.31138443,3.38935982,3.30338572
59.80513,3.74165739,3.39534846,0.588480184,3.31104969,3.38762343,3.30312752
59.815622,2.82842712,3.39358304,-0.751768526,3.3107192,3.38592549,3.30286955
59.826114,3.16227766,3.39185841,-0.479145857,3.3103927,3.38426486,3.30261184
59.836605,4.35889894,3.39017321,0.984238658,3.31006991,3.38264043,3.30235441
59.847097,2.82842712,3.38852566,-0.748397311,3.30975052,3.38105068,3.30209722
59.857588,3.74165739,3.38691471,0.595602785,3.30943435,3.37949478,3.30184032
59.86808,3,3.38533874,-0.62075659,3.30912114,3.37797132,3.30158364
59.878572,3,3.38379668,-0.619513257,3.30881072,3.37647938,3.30132722
59.889063,3.87298335,3.38228746,0.700496884,3.30850293,3.37501809,3.30107108
59.899555,2.64575131,3.38080969,-0.857355455,3.30819757,3.37358619,3.30081518
59.910046,3.46410162,3.37936255,0.291099745,3.30789453,3.37218302,3.30055954
59.920538,2.82842712,3.37794476,-0.741294568,3.30759363,3.37080741,3.30030414
59.93103,3.46410162,3.37655546,0.29588199,3.30729476,3.36945863,3.30004899
59.941521,3.60555128,3.37519385,0.47995565,3.30699785,3.36813597,3.29979411
59.952013,3.60555128,3.37385876,0.481344485,3.30670273,3.36683838,3.29953946
59.962504,3.31662479,3.3725496,-0.23648426,3.30640936,3.36556533,3.29928508
59.972996,3.74165739,3.37126528,0.60859848,3.30611759,3.36431585,3.29903092
59.983488,3.31662479,3.37000514,-0.231041881,3.30582737,3.36308933,3.29877701
59.993979,3.31662479,3.36876855,-0.228350077,3.30553864,3.36188522,3.29852337
60.004471,3.31662479,3.36755454,-0.225676197,3.30525129,3.36070262,3.29826995
60.014962,2,3.36636264,-1.16891515,3.30496531,3.35954113,3.2980168
60.025454,3.74165739,3.36519196,0.613567784,3.30468056,3.35839989,3.29776387
60.035946,3,3.36404197,-0.60335891,3.30439704,3.35727845,3.29751118
60.046437,3.16227766,3.36291217,-0.447922433,3.3041147,3.35617633,3.29725875
60.056929,3,3.36180173,-0.601499565,3.30383345,3.35509277,3.29700655
60.06742,3.16227766,3.3607103,-0.445457784,3.3035533,3.35402746,3.2967546
60.077912,4,3.35963712,0.800226767,3.30327414,3.35297967,3.29650287
60.088404,2.82842712,3.35858177,-0.728117193,3.30299596,3.35194903,3.29625137
60.098895,3.31662479,3.35754384,-0.202284566,3.30271876,3.35093514,3.29600014
60.109387,3.87298335,3.35652263,0.718652014,3.30244244,3.34993735,3.29574911
60.119878,3.31662479,3.35551787,-0.197213282,3.30216703,3.34895542,3.29549835
60.13037,2,3.35452891,-1.1638423,3.30189244,3.34798873,3.29524779
60.140862,3.74165739,3.35355541,0.622978312,3.30161866,3.34703696,3.29499747
60.151353,3.87298335,3.35259703,0.721378067,3.3013457,3.3460998,3.2947474
60.161845,4.12310563,3.35165319,0.878323653,3.30107347,3.34517668,3.29449754
60.172336,3.87298335,3.35072366,0.72267537,3.30080201,3.34426741,3.29424793
60.182828,3.60555128,3.34980788,0.505710778,3.30053125,3.34337145,3.29399853
60.19332,3.31662479,3.34890559,-0.179668589,3.30026117,3.34248854,3.29374936
60.203811,3.31662479,3.34801651,-0.177177075,3.2999918,3.34161843,3.29350043
60.214303,3.87298335,3.34714011,0.725150489,3.29972306,3.34076062,3.29325171
60.224794,3.16227766,3.34627625,-0.428950569,3.29945498,3.33991496,3.29300324
60.235286,2.44948974,3.34542443,-0.946538265,3.29918749,3.33908098,3.29275497
60.245778,3.46410162,3.34458442,0.345712583,3.2989206,3.33825847,3.29250692
60.256269,4.24264069,3.34375601,0.948095288,3.29865433,3.33744722,3.29225912
60.266761,2.64575131,3.34293874,-0.834977503,3.29838861,3.3366468,3.29201151
60.277252,3.60555128,3.34213249,0.513243398,3.29812347,3.33585708,3.29176415
60.287744,2.23606798,3.34133683,-1.05131768,3.29785884,3.33507765,3.29151699
60.298236,3.60555128,3.34055158,0.514781213,3.29759476,3.33430835,3.29127005
60.308727,4.24264069,3.33977655,0.950191633,3.29733121,3.333549,3.29102334
60.319219,3.60555128,3.33901135,0.516275051,3.29706815,3.3327992,3.29077683
60.32971,4,3.33825588,0.813476564,3.29680561,3.33205889,3.29053056
60.340202,2.82842712,3.33750977,-0.713500279,3.29654354,3.33132769,3.29028448
60.350694,4.12310563,3.33677287,0.886754056,3.29628194,3.33060545,3.29003862
60.361185,3.46410162,3.33604502,0.357849958,3.29602084,3.32989203,3.28979299
60.371677,3.31662479,3.33532588,-0.136751935,3.29576017,3.3291871,3.28954755
60.382168,3,3.33461538,-0.578459487,3.29549997,3.32849059,3.28930235
60.39266,4,3.33391318,0.816141423,3.29524019,3.32780217,3.28905733
60.403152,2.44948974,3.33321915,-0.940068833,3.29498084,3.32712173,3.28881253
60.413643,3,3.33253319,-0.576656904,3.29472195,3.32644914,3.28856796
60.424135,3.87298335,3.33185496,0.735614292,3.29446345,3.32578411,3.28832357
60.434626,3.46410162,3.33118443,0.364578097,3.29420538,3.32512658,3.28807941
60.445118,4.24264069,3.33052129,0.955049422,3.2939477,3.32447627,3.28783543
60.45561,4.12310563,3.32986544,0.890640321,3.29369041,3.32383307,3.28759166
60.466101,3.31662479,3.32921679,-0.112214088,3.29343354,3.3231969,3.28734812
60.476593,4,3.32857505,0.819405242,3.29317703,3.32256747,3.28710476
60.487084,3.31662479,3.32794019,-0.106373859,3.29292093,3.32194476,3.28686162
60.497576,2.82842712,3.32731194,-0.706317784,3.29266517,3.32132851,3.28661867
60.508068,3.46410162,3.32669021,0.37069044,3.29240979,3.32071863,3.28637591
60.518559,3,3.32607493,-0.571029713,3.29215479,3.32011504,3.28613338
60.529051,3.46410162,3.32546584,0.372338247,3.29190013,3.3195175,3.28589102
60.539542,3.60555128,3.32486293,0.529800288,3.29164584,3.318926,3.28564889
60.550034,3.46410162,3.32426595,0.373946079,3.29139188,3.31834028,3.28540693
60.560526,4,3.32367482,0.822389918,3.29113827,3.3177603,3.28516516
60.571017,3.60555128,3.32308949,0.531471337,3.29088502,3.31718597,3.28492362
60.581509,3.87298335,3.32250973,0.741939092,3.29063208,3.31661708,3.28468225
60.592,3.46410162,3.32193552,0.377049189,3.2903795,3.31605363,3.28444109
60.602492,3.16227766,3.32136666,-0.398859619,3.29012722,3.31549539,3.28420011
60.612984,3.46410162,3.32080307,0.378547945,3.28987527,3.31494231,3.28395931
60.623475,3.87298335,3.32024471,0.743463945,3.28962366,3.31439434,3.28371873
60.633967,2.64575131,3.31969137,-0.820938521,3.28937234,3.31385127,3.28347832
60.644458,3.46410162,3.31914304,0.380734253,3.28912137,3.31331311,3.28323813
60.65495,3.46410162,3.31859954,0.381447344,3.28887068,3.31277966,3.28299809
60.665442,4.24264069,3.31806081,0.961550768,3.28862029,3.31225087,3.28275825
60.675933,3.46410162,3.31752681,0.382850897,3.28837023,3.31172671,3.28251862
60.686425,4,3.31699734,0.826439749,3.28812045,3.31120698,3.28227915
60.696916,3,3.31647242,-0.562558818,3.28787099,3.31069169,3.28203988
60.707408,3.60555128,3.31595187,0.53814441,3.2876218,3.31018067,3.28180078
60.7179,3.16227766,3.31543564,-0.391354035,3.2873729,3.30967388,3.28156187
60.728391,3,3.3149237,-0.561180635,3.28712432,3.30917128,3.28132316
60.738883,2.64575131,3.31441588,-0.817719128,3.286876,3.3086727,3.28108461
60.749374,3.16227766,3.31391219,-0.389402791,3.28662798,3.30817816,3.28084626
60.759866,3.31662479,3.31341246,0.0566773936,3.28638022,3.30768749,3.28060807
60.770358,3.16227766,3.31291667,-0.388122411,3.28613274,3.30720066,3.28037006
60.780849,3.87298335,3.31242477,0.748704596,3.28588556,3.30671765,3.28013225
60.791341,3.46410162,3.31193662,0.390083313,3.28563862,3.30623829,3.2798946
60.801832,3.46410162,3.31145224,0.390703694,3.28539199,3.30576261,3.27965715
60.812324,3.87298335,3.31097146,0.749674522,3.28514559,3.30529045,3.27941985
60.822816,3.74165739,3.31049426,0.65663013,3.28489947,3.30482179,3.27918272
60.833307,4.24264069,3.31002062,0.96572256,3.28465363,3.30435662,3.2789458
60.843799,3.46410162,3.3095504,0.393130021,3.28440803,3.30389477,3.27870902
60.85429,3.87298335,3.30908362,0.750932574,3.28416271,3.30343628,3.27847244
60.864782,3,3.30862012,-0.555535885,3.28391762,3.302981,3.27823601
60.875274,3.46410162,3.3081599,0.394894565,3.28367279,3.30252892,3.27799975
60.885765,3.60555128,3.30770294,0.545754835,3.28342824,3.30208003,3.27776369
60.896257,3.74165739,3.30724909,0.659096576,3.28318392,3.30163417,3.27752777
60.906748,3,3.30679839,-0.553893846,3.28293987,3.30119139,3.27729204
60.91724,3.16227766,3.3063507,-0.37956955,3.28269604,3.30075154,3.27705646
60.927732,3,3.30590601,-0.553087708,3.28245246,3.30031462,3.27682105
60.938223,3.74165739,3.30546431,0.660449147,3.28220914,3.29988062,3.27658582
60.948715,3.16227766,3.30502546,-0.377819804,3.28196605,3.2994494,3.27635074
60.959206,3.16227766,3.30458951,-0.377242424,3.28172322,3.299021,3.27611585
60.969698,2.64575131,3.30415631,-0.81142159,3.2814806,3.29859529,3.27588109
60.98019,3.46410162,3.30372586,0.400469418,3.28123822,3.29817227,3.2756465
60.990681,2.64575131,3.30329816,-0.810892625,3.2809961,3.29775192,3.2754121
61.001173,2.82842712,3.30287308,-0.688800375,3.28075419,3.29733413,3.27517783
61.011664,3,3.30245066,-0.549955143,3.28051254,3.29691893,3.27494375
61.022156,3.31662479,3.30203077,0.120805709,3.28027109,3.2965062,3.2747098
61.032648,4.35889894,3.30161342,1.02824391,3.28002987,3.29609593,3.27447602
61.043139,3.31662479,3.30119859,0.124202258,3.2797889,3.29568813,3.27424241
61.053631,4.24264069,3.30078617,0.970491892,3.27954813,3.29528268,3.27400894
61.064122,2.82842712,3.30037621,-0.686985506,3.27930761,3.29487962,3.27377565
61.074614,3.31662479,3.29996858,0.129058951,3.27906729,3.29447883,3.27354249
61.085106,2.82842712,3.29956328,-0.686393586,3.2788272,3.29408031,3.27330949
61.095597,3.16227766,3.29916032,-0.369976563,3.27858734,3.29368407,3.27307667
61.106089,3.46410162,3.29875958,0.406622722,3.27834768,3.29328998,3.27284397
61.11658,4.47213595,3.2983611,1.08340891,3.27810826,3.2928981,3.27261145
61.127072,4.12310563,3.29796477,0.908372639,3.27786903,3.29250832,3.27237907
61.137564,3.46410162,3.29757061,0.408082111,3.27763002,3.29212063,3.27214683
61.148055,4,3.2971786,0.838344442,3.27739124,3.29173504,3.27191476
61.158547,3.31662479,3.29678864,0.140840871,3.27715265,3.29135145,3.27168282
61.169038,4,3.29640078,0.838808216,3.27691429,3.29096989,3.27145106
61.17953,2.64575131,3.2960149,-0.806389232,3.27667612,3.29059027,3.27121942
61.190022,3,3.29563103,-0.543719622,3.27643816,3.29021259,3.27098792
61.200513,3.60555128,3.29524915,0.557047686,3.27620042,3.28983685,3.2707566
61.211005,3.31662479,3.29486917,0.147497853,3.27596287,3.28946296,3.2705254
61.221496,2,3.29449114,-1.13775706,3.27572554,3.28909095,3.27029437
61.231988,2.82842712,3.29411495,-0.682413234,3.2754884,3.28872073,3.27006345
61.24248,2.44948974,3.2937406,-0.918831247,3.27525145,3.28835231,3.26983269
61.252971,4,3.29336812,0.840613991,3.27501473,3.28798569,3.26960208
61.263463,3.87298335,3.29299739,0.761568087,3.27477818,3.28762077,3.2693716
61.273954,3.31662479,3.29262847,0.154907443,3.27454186,3.28725761,3.26914128
61.284446,3.16227766,3.29226126,-0.360532388,3.2743057,3.28689611,3.26891108
61.294938,3,3.29189577,-0.540273792,3.27406975,3.28653627,3.26868102
61.305429,2.82842712,3.29153201,-0.680518097,3.27383401,3.2861781,3.26845111
61.315921,2.64575131,3.29116987,-0.803379464,3.27359844,3.28582152,3.26822133
61.326412,3.87298335,3.29080942,0.763003226,3.27336308,3.28546657,3.2679917
61.336904,3.16227766,3.29045056,-0.35801243,3.2731279,3.28511315,3.26776219
61.347396,3.60555128,3.2900933,0.561656461,3.2728929,3.28476128,3.26753282
61.357887,3.74165739,3.28973764,0.672249765,3.27265811,3.28441097,3.2673036
61.368379,3.74165739,3.2893835,0.672513109,3.27242349,3.28406213,3.26707449
61.37887,2.44948974,3.28903094,-0.916264805,3.27218908,3.28371481,3.26684554
61.389362,3.31662479,3.28867984,0.167167423,3.27195483,3.28336891,3.2666167
61.399854,4.12310563,3.28833024,0.913660432,3.27172076,3.28302445,3.266388
61.410345,2.64575131,3.28798214,-0.801393055,3.2714869,3.28268145,3.26615944
61.420837,4.12310563,3.28763546,0.914040573,3.2712532,3.28233981,3.265931
61.431328,3.16227766,3.28729023,-0.353571172,3.27101971,3.28199959,3.26570271
61.44182,3.31662479,3.28694639,0.172274207,3.27078637,3.2816607,3.26547452
61.452312,3.60555128,3.28660393,0.564754232,3.27055321,3.28132314,3.26524646
61.462803,3.60555128,3.28626288,0.565056098,3.27032025,3.28098695,3.26501855
61.473295,3.31662479,3.28592315,0.175218833,3.27008745,3.28065202,3.26479075
61.483786,3.46410162,3.28558479,0.422512517,3.26985484,3.28031842,3.2645631
61.494278,3,3.28524771,-0.534085864,3.26962239,3.27998605,3.26433554
61.50477,3.46410162,3.28491193,0.423308025,3.26939011,3.27965494,3.26410812
61.515261,3.16227766,3.28457747,-0.349713893,3.26915803,3.27932509,3.26388084
61.525753,4.24264069,3.28424424,0.978977247,3.26892609,3.27899643,3.26365366
61.536244,3.31662479,3.28391229,0.180865982,3.26869435,3.27866901,3.26342662
61.546736,2.82842712,3.28358154,-0.674651327,3.26846276,3.27834274,3.26319969
61.557228,4.47213595,3.28325201,1.09035955,3.26823134,3.27801764,3.26297287
61.567719,4,3.28292371,0.846803574,3.26800011,3.27769372,3.2627462
61.578211,3,3.28259656,-0.531598119,3.26776902,3.27737092,3.26251963
61.588702,3.87298335,3.28227062,0.768578383,3.26753812,3.27704927,3.26229319
61.599194,3.31662479,3.2819458,0.186222971,3.26730737,3.27672869,3.26206686
61.609686,3.31662479,3.28162212,0.187090019,3.26707678,3.27640922,3.26184064
61.620177,3.31662479,3.28129959,0.18794999,3.26684638,3.27609085,3.26161456
61.630669,3.31662479,3.28097815,0.188803181,3.26661612,3.27577352,3.26138857
61.64116,2.44948974,3.28065784,-0.911684206,3.26638604,3.27545728,3.26116272
61.651652,3.60555128,3.28033857,0.570274233,3.2661561,3.27514204,3.26093696
61.662144,4,3.28002038,0.848516126,3.26592632,3.27482783,3.26071132
61.672635,2.23606798,3.27970328,-1.0215847,3.26569672,3.27451466,3.26048581
61.683127,3.74165739,3.27938719,0.679904548,3.26546726,3.27420246,3.2602604
61.693618,3.31662479,3.27907216,0.193785,3.26523798,3.27389128,3.26003511
61.70411,2.82842712,3.27875812,-0.671067061,3.26500884,3.27358104,3.25980992
61.714602,2.23606798,3.27844509,-1.02096871,3.26477985,3.27327176,3.25958483
61.725093,3.16227766,3.27813308,-0.340375411,3.26455104,3.27296347,3.25935988
61.735585,2.64575131,3.27782202,-0.795028749,3.26432236,3.27265608,3.25913502
61.746076,2.44948974,3.27751196,-0.909957263,3.26409385,3.27234965,3.25891028
61.756568,3.16227766,3.27720283,-0.339006156,3.26386548,3.2720441,3.25868563
61.76706,3.31662479,3.27689465,0.199324208,3.26363726,3.27173946,3.25846109
61.777551,3.60555128,3.27658743,0.573553698,3.26340921,3.27143573,3.25823667
61.788043,3.16227766,3.27628111,-0.337643965,3.26318129,3.27113286,3.25801234
61.798534,3.31662479,3.27597573,0.201616132,3.26295354,3.27083089,3.25778814
61.809026,2.82842712,3.27567122,-0.668763106,3.26272592,3.27052975,3.25756402
61.819518,3.74165739,3.2753676,0.682854147,3.26249845,3.27022945,3.25734
61.830009,3.46410162,3.27506489,0.434783534,3.26227114,3.26993003,3.25711611
61.840501,3.46410162,3.27476303,0.435130538,3.26204396,3.2696314,3.25689229
61.850992,3.60555128,3.27446206,0.575403527,3.26181695,3.26933362,3.2566686
61.861484,4.24264069,3.2741619,0.984113196,3.26159006,3.26903662,3.25644499
61.871976,3.87298335,3.27386259,0.774028909,3.26136331,3.26874042,3.25622148
61.882467,2.64575131,3.27356414,-0.792346409,3.26113673,3.26844504,3.25599809
61.892959,3.87298335,3.27326649,0.774413882,3.26091027,3.2681504,3.25577478
61.90345,3,3.27296967,-0.522464993,3.26068398,3.26785657,3.25555158
61.913942,3.31662479,3.27267363,0.209645328,3.2604578,3.26756347,3.25532846
61.924434,3.60555128,3.27237838,0.57721131,3.26023176,3.26727112,3.25510544
61.934925,4.12310563,3.27208394,0.922508363,3.26000589,3.26697954,3.25488254
61.945417,2.82842712,3.27179026,-0.66585519,3.25978013,3.26668866,3.25465971
61.955908,3.60555128,3.27149737,0.577973967,3.25955453,3.26639855,3.25443699
61.9664,3,3.27120521,-0.520773664,3.25932904,3.26610911,3.25421435
61.976892,3.74165739,3.2709138,0.686107562,3.2591037,3.26582039,3.2539918
61.987383,4,3.27062316,0.854035619,3.25887851,3.2655324,3.25376937
61.997875,2.82842712,3.27033323,-0.664760186,3.25865343,3.26524507,3.25354701
62.008366,2.64575131,3.27004405,-0.790121978,3.25842851,3.26495845,3.25332476
62.018858,3,3.26975556,-0.519379979,3.2582037,3.26467248,3.25310258
62.02935,3.16227766,3.26946778,-0.327399029,3.25797903,3.26438718,3.25288048
62.039841,4.24264069,3.26918074,0.986640741,3.25775451,3.26410257,3.2526585
62.050333,3.60555128,3.26889436,0.580221441,3.2575301,3.26381858,3.25243659
62.060824,4.24264069,3.26860869,0.986930594,3.25730584,3.26353527,3.25221479
62.071316,3.87298335,3.26832368,0.777598657,3.25708169,3.26325257,3.25199305
62.081808,2.64575131,3.26803933,-0.788852346,3.25685767,3.26297049,3.2517714
62.092299,4.35889894,3.26775569,1.04457803,3.2566338,3.26268907,3.25154985
62.102791,3.46410162,3.26747267,0.443428626,3.25641003,3.26240824,3.25132837
62.113282,2.23606798,3.26719033,-1.01544195,3.25618642,3.26212804,3.251107
62.123774,4.12310563,3.26690861,0.925309147,3.25596291,3.26184842,3.25088569
62.134266,4.24264069,3.26662752,0.987933784,3.25573953,3.2615694,3.25066446
62.144757,4,3.2663471,0.856535406,3.25551629,3.26129099,3.25044334
62.155249,4.35889894,3.26606727,1.0453859,3.25529316,3.26101314,3.25022228
62.16574,2.82842712,3.26578809,-0.661332716,3.25507017,3.26073589,3.25000132
62.176232,3.87298335,3.26550949,0.779406094,3.25484729,3.26045919,3.24978042
62.186724,3.31662479,3.26523149,0.2267009,3.25462452,3.26018305,3.2495596
62.197215,2.44948974,3.26495412,-0.903030664,3.25440191,3.25990749,3.24933888
62.207707,3.31662479,3.26467732,0.227919877,3.25417939,3.25963245,3.24911822
62.218198,4.12310563,3.26440113,0.926663097,3.25395701,3.25935799,3.24889766
62.22869,3,3.26412549,-0.513931409,3.25373473,3.25908404,3.24867716
62.239182,3.16227766,3.26385043,-0.318704835,3.25351258,3.25881062,3.24845673
62.249673,3,3.26357597,-0.513396499,3.25329056,3.25853776,3.2482364
62.260165,2,3.26330204,-1.1239671,3.25306864,3.25826539,3.24801613
62.270656,3.16227766,3.26302869,-0.317413026,3.25284686,3.25799357,3.24779595
62.281148,3.60555128,3.26275587,0.585487325,3.25262517,3.25772222,3.24757583
62.29164,3.46410162,3.26248359,0.449018955,3.2524036,3.25745138,3.24735577
62.302131,3.60555128,3.26221189,0.585951696,3.25218217,3.25718107,3.24713582
62.312623,3.31662479,3.26194069,0.233846326,3.25196084,3.25691122,3.24691592
62.323114,3.74165739,3.26167004,0.692811189,3.25173963,3.25664189,3.2466961
62.333606,3.46410162,3.2613999,0.450224073,3.25151853,3.25637302,3.24647634
62.344098,4.24264069,3.26113027,0.990712073,3.25129753,3.25610462,3.24625666
62.354589,3.74165739,3.26086119,0.69339469,3.25107667,3.25583672,3.24603706
62.365081,3.16227766,3.26059259,-0.313552116,3.2508559,3.25556927,3.24581751
62.375572,3.31662479,3.26032452,0.237276783,3.25063527,3.2553023,3.24559805
62.386064,3.31662479,3.26005692,0.237840006,3.25041472,3.25503576,3.24537864
62.396556,3.74165739,3.25978982,0.694166815,3.25019428,3.25476968,3.2451593
62.407047,2.44948974,3.25952323,-0.900018605,3.24997398,3.25450406,3.24494004
62.417539,3.60555128,3.25925711,0.588467646,3.24975376,3.25423887,3.24472083
62.42803,3.31662479,3.25899148,0.240069378,3.24953368,3.25397414,3.24450171
62.438522,3,3.25872631,-0.508651465,3.24931368,3.25370982,3.24428263
62.449014,2.64575131,3.25846161,-0.782758138,3.24909379,3.25344593,3.24406362
62.459505,3.60555128,3.25819741,0.589367347,3.24887403,3.25318249,3.24384469
62.469997,5,3.25793364,1.31987362,3.24865435,3.25291944,3.24362581
62.480488,3.31662479,3.25767035,0.242805358,3.2484348,3.25265683,3.24340701
62.49098,3.16227766,3.25740749,-0.30843124,3.24821534,3.25239461,3.24318825
62.501472,3.46410162,3.25714508,0.454924757,3.24799598,3.2521328,3.24296956
62.511963,2.64575131,3.25688314,-0.781749212,3.24777674,3.25187141,3.24275094
62.522455,3.74165739,3.25662162,0.696445094,3.24755759,3.2516104,3.24253237
62.532946,2.82842712,3.25636056,-0.654166212,3.24733856,3.25134981,3.24231387
62.543438,3.16227766,3.2560999,-0.306304169,3.24711962,3.25108958,3.24209542
62.55393,3,3.25583968,-0.505805971,3.24690078,3.25082974,3.24187703
62.564421,4,3.25557991,0.862797829,3.24668206,3.25057031,3.24165871
62.574913,3.87298335,3.25532053,0.785915275,3.24646342,3.25031123,3.24144043
62.585404,3.16227766,3.25506159,-0.304604548,3.2462449,3.25005254,3.24122223
62.595896,3.16227766,3.25480304,-0.304179853,3.24602647,3.24979421,3.24100407
62.606388,3.60555128,3.2545449,0.592457906,3.24580813,3.24953624,3.24078596
62.616879,3.60555128,3.2542872,0.592675357,3.24558991,3.24927865,3.24056793
62.627371,3.46410162,3.25402987,0.458335846,3.24537177,3.24902141,3.24034993
62.637862,3.31662479,3.25377296,0.250702673,3.24515375,3.24876454,3.24013201
62.648354,3.74165739,3.25351642,0.698670855,3.24493581,3.24850799,3.23991412
62.658846,4.24264069,3.25326028,0.994676032,3.24471796,3.2482518,3.23969628
62.669337,2.44948974,3.25300455,-0.896389872,3.24450024,3.24799598,3.23947852
62.679829,3.46410162,3.25274917,0.459730837,3.24428258,3.24774047,3.23926079
62.69032,4.24264069,3.25249421,0.995061044,3.24406505,3.24748532,3.23904313
62.700812,3.31662479,3.25223959,0.253742387,3.24384759,3.24723048,3.2388255
62.711304,1.73205081,3.25198535,-1.23285625,3.24363022,3.24697597,3.23860792
62.721795,3.74165739,3.25173151,0.699947055,3.24341297,3.24672182,3.23839041
62.732287,2.82842712,3.25147801,-0.650423618,3.2431958,3.24646796,3.23817294
62.742778,2.82842712,3.2512249,-0.650229014,3.24297873,3.24621445,3.23795553
62.75327,3.74165739,3.25097212,0.700489305,3.24276174,3.24596123,3.23773815
62.763762,2.44948974,3.2507197,-0.895114496,3.24254485,3.24570833,3.23752081
62.774253,3.60555128,3.25046767,0.595888923,3.24232806,3.24545575,3.23730355
62.784745,3.31662479,3.25021596,0.257699112,3.24211135,3.24520347,3.23708631
62.795236,3.60555128,3.24996462,0.596310869,3.24189475,3.24495151,3.23686914
62.805728,3.60555128,3.24971361,0.596521305,3.24167822,3.24469983,3.23665199
62.81622,3.60555128,3.24946294,0.596731378,3.24146178,3.24444844,3.23643488
62.826711,3,3.24921263,-0.499212011,3.24124545,3.24419738,3.23621785
62.837203,4.35889894,3.24896264,1.05353515,3.24102919,3.24394658,3.23600083
62.847694,3.16227766,3.248713,-0.293998884,3.24081304,3.2436961,3.23578388
62.858186,3.60555128,3.24846368,0.59756807,3.24059695,3.24344588,3.23556695
62.868678,3.31662479,3.24821468,0.261553265,3.24038096,3.24319594,3.23535007
62.879169,2.82842712,3.24796603,-0.647718231,3.24016508,3.24294631,3.23513324
62.889661,3.31662479,3.24771768,0.262501632,3.23994926,3.24269693,3.23491644
62.900152,2.23606798,3.24746968,-1.00568469,3.23973355,3.24244784,3.2346997
62.910644,3.31662479,3.24722197,0.26344415,3.2395179,3.24219901,3.23448298
62.921136,3.87298335,3.24697458,0.79120716,3.23930234,3.24195045,3.2342663
62.931627,2.23606798,3.24672752,-1.00531564,3.23908689,3.24170217,3.23404967
62.942119,2.82842712,3.24648075,-0.646570664,3.23887151,3.24145414,3.23383307
62.95261,3.16227766,3.24623431,-0.289752737,3.23865623,3.24120639,3.23361652
62.963102,2.64575131,3.24598815,-0.774749534,3.23844101,3.24095887,3.23339999
62.973594,3.46410162,3.2457423,0.467289331,3.23822588,3.24071161,3.2331835
62.984085,3,3.24549677,-0.495476301,3.23801085,3.24046463,3.23296707
62.994577,4,3.24525151,0.868762621,3.23779589,3.24021788,3.23275065
63.005068,3.31662479,3.24500657,0.267615805,3.23758103,3.23997139,3.23253428
63.01556,3.87298335,3.2447619,0.792604216,3.23736623,3.23972513,3.23231793
63.026052,2.82842712,3.24451753,-0.645050697,3.23715152,3.23947911,3.23210162
63.036543,3.60555128,3.24427346,0.601063902,3.2369369,3.23923336,3.23188536
63.047035,4,3.24402966,0.869465549,3.23672235,3.23898782,3.23166911
63.057526,4.12310563,3.24378616,0.937720354,3.2365079,3.23874254,3.23145292
63.068018,3.60555128,3.24354293,0.601671296,3.23629352,3.23849747,3.23123674
63.07851,2.64575131,3.24329997,-0.773012716,3.23607921,3.23825263,3.23102059
63.089001,4.24264069,3.24305731,0.999791665,3.235865,3.23800804,3.23080449
63.099493,3.60555128,3.24281491,0.602275988,3.23565086,3.23776365,3.2305884
63.109984,3.46410162,3.2425728,0.470668475,3.23543681,3.23751952,3.23037236
63.120476,3.46410162,3.24233094,0.470925337,3.23522282,3.23727558,3.23015634
63.130968,3.31662479,3.24208935,0.273011794,3.23500892,3.23703186,3.22994034
63.141459,3.31662479,3.24184805,0.273453361,3.23479511,3.23678838,3.22972439
63.151951,3.46410162,3.24160699,0.471693359,3.23458136,3.23654509,3.22950845
63.162442,3.46410162,3.24136622,0.471948512,3.23436771,3.23630204,3.22929255
63.172934,3,3.24112568,-0.491045498,3.23415411,3.23605917,3.22907667
63.183426,3.74165739,3.2408854,0.707652445,3.2339406,3.23581652,3.22886081
63.193917,2.64575131,3.24064541,-0.771293781,3.23372718,3.23557409,3.228645
63.204409,3.46410162,3.24040564,0.472965085,3.23351382,3.23533185,3.22842919
63.2149,2.44948974,3.24016615,-0.889199872,3.23330055,3.23508983,3.22821343
63.225392,3.87298335,3.23992689,0.795648447,3.23308735,3.23484798,3.22799767
63.235884,2.44948974,3.23968788,-0.888930898,3.23287421,3.23460634,3.22778194
63.246375,3.74165739,3.23944914,0.708666525,3.23266118,3.23436491,3.22756625
63.256867,2.82842712,3.23921063,-0.640923944,3.2324482,3.23412366,3.22735057
63.267358,3.74165739,3.23897238,0.709002828,3.23223531,3.23388262,3.22713493
63.27785,3.46410162,3.23873435,0.474728627,3.23202248,3.23364174,3.22691929
63.288342,3.60555128,3.23849656,0.605850411,3.23180973,3.23340106,3.22670367
63.298833,3.87298335,3.23825903,0.796695876,3.23159707,3.23316058,3.2264881
63.309325,3.60555128,3.23802171,0.606242165,3.23138446,3.23292027,3.22627252
63.319816,3,3.23778466,-0.487631681,3.23117195,3.23268016,3.22605699
63.330308,3.46410162,3.23754781,0.475976684,3.2309595,3.2324402,3.22584145
63.3408,3.60555128,3.2373112,0.60682788,3.23074711,3.23220043,3.22562594
63.351291,2.82842712,3.23707484,-0.639255594,3.23053482,3.23196085,3.22541047
63.361783,3.31662479,3.23683869,0.282464341,3.23032258,3.23172143,3.22519499
63.372274,3.74165739,3.23660278,0.710671938,3.23011044,3.2314822,3.22497955
63.382766,4.35889894,3.23636708,1.05949604,3.22989835,3.23124313,3.22476411
63.393258,3.60555128,3.23613161,0.607799035,3.22968633,3.23100422,3.22454869
63.403749,3.16227766,3.23589638,-0.271327694,3.2294744,3.2307655,3.2243333
63.414241,3,3.23566135,-0.485449633,3.22926253,3.23052692,3.22411791
63.424732,3,3.23542656,-0.485207747,3.22905075,3.23028853,3.22390256
63.435224,3.46410162,3.23519196,0.478445034,3.22883902,3.23005028,3.2236872
63.445716,3.60555128,3.23495759,0.608764066,3.22862736,3.22981219,3.22347186
63.456207,3.46410162,3.23472345,0.478934407,3.22841579,3.22957429,3.22325655
63.466699,3.87298335,3.2344895,0.799058098,3.22820427,3.22933652,3.22304124
63.47719,3.31662479,3.23425579,0.286999999,3.22799285,3.22909892,3.22282596
63.487682,3.74165739,3.23402227,0.712485171,3.22778147,3.22886146,3.22261067
63.498174,2.82842712,3.23378896,-0.63668032,3.22757017,3.22862415,3.22239539
63.508665,3.46410162,3.23355587,0.480151791,3.22735896,3.22838701,3.22218015
63.519157,3.16227766,3.23332298,-0.266543272,3.22714779,3.22815,3.2219649
63.529648,3,3.23309031,-0.48279427,3.22693672,3.22791316,3.22174968
63.54014,4.58257569,3.23285782,1.16177359,3.2267257,3.22767644,3.22153445
63.550632,3,3.23262554,-0.482312697,3.22651474,3.22743987,3.22131924
63.561123,4.35889894,3.23239348,1.06136962,3.22630388,3.22720346,3.22110405
63.571615,3.60555128,3.2321616,0.611056197,3.22609307,3.22696717,3.22088885
63.582106,3.31662479,3.23192994,0.291023794,3.22588234,3.22673104,3.22067368
63.592598,3.46410162,3.23169846,0.482082104,3.22567167,3.22649503,3.2204585
63.60309,3.16227766,3.23146718,-0.263039001,3.22546106,3.22625916,3.22024333
63.613581,3,3.23123611,-0.480870159,3.22525055,3.22602344,3.22002819
63.624073,3.87298335,3.23100522,0.801235377,3.22504008,3.22578784,3.21981303
63.634564,3.16227766,3.23077454,-0.261719086,3.2248297,3.22555239,3.2195979
63.645056,3.16227766,3.23054403,-0.261278345,3.22461937,3.22531704,3.21938276
63.655548,4.12310563,3.23019356,0.944940244,3.22428873,3.22508183,3.21916762
63.666039,4.12310563,3.22996359,0.945061921,3.22407869,3.22484677,3.21895251
63.676531,3.87298335,3.22973379,0.802028402,3.2238687,3.22461181,3.21873739
63.687022,4.47213595,3.2295042,1.11473394,3.2236588,3.224377,3.21852229
63.697514,3.60555128,3.22927477,0.613413812,3.22344895,3.22414229,3.21830717
63.708006,3.46410162,3.22904553,0.48482583,3.22323916,3.2239077,3.21809206
63.718497,3,3.2288165,-0.478347673,3.22302946,3.22367325,3.21787697
63.728989,3.60555128,3.22858762,0.613973656,3.22281981,3.22343891,3.21766187
63.73948,3.16227766,3.22835896,-0.25706283,3.22261025,3.2232047,3.21744678
63.749972,2.64575131,3.22813045,-0.763137695,3.22240074,3.22297059,3.21723168
63.760464,3.74165739,3.22790213,0.716767228,3.22219129,3.22273659,3.21701659
63.770955,3.60555128,3.22767401,0.614717228,3.22198194,3.22250273,3.21680151
63.781447,3.46410162,3.22744604,0.486472584,3.22177263,3.22226896,3.21658642
63.791938,2.64575131,3.22721828,-0.762539811,3.2215634,3.22203533,3.21637134
63.80243,3.16227766,3.22699067,-0.254387511,3.22135423,3.22180178,3.21615625
63.812922,3.31662479,3.22676323,0.299769173,3.22114512,3.22156834,3.21594115
63.823413,3.74165739,3.226536,0.717719575,3.2209361,3.22133503,3.21572608
63.833905,3.46410162,3.22630892,0.487639927,3.22072713,3.22110181,3.21551098
63.844396,3.87298335,3.22608203,0.804301756,3.22051825,3.22086871,3.21529591
63.854888,3,3.2258553,-0.475242356,3.22030941,3.2206357,3.21508081
63.86538,2.64575131,3.22562874,-0.761496831,3.22010064,3.22040278,3.21486571
63.875871,3.46410162,3.22540237,0.48856857,3.21989196,3.22017,3.21465062
63.886363,2.82842712,3.22517615,-0.629880166,3.21968333,3.21993729,3.21443552
63.896854,2.82842712,3.22495012,-0.62970072,3.21947479,3.2197047,3.21422043
63.907346,3.60555128,3.22472424,0.617111849,3.21926629,3.21947219,3.21400532
63.917838,3.31662479,3.22449853,0.303523079,3.21905786,3.21923977,3.2137902
63.928329,4,3.22427301,0.880753649,3.21884952,3.21900747,3.2135751
63.938821,3.60555128,3.22404763,0.61765981,3.21864123,3.21877525,3.21335997
63.949312,2.82842712,3.22382245,-0.628804678,3.21843303,3.21854314,3.21314486
63.959804,3.46410162,3.2235974,0.490412286,3.21822487,3.2183111,3.21292972
63.970296,3,3.22337253,-0.472623029,3.21801679,3.21807915,3.21271458
63.980787,3.31662479,3.22314784,0.305740011,3.21780879,3.21784731,3.21249945
63.991279,3.46410162,3.22292329,0.491099102,3.21760084,3.21761554,3.2122843
64.00177,2.82842712,3.22269892,-0.627910661,3.21739298,3.21738388,3.21206915
64.012262,2.64575131,3.2224747,-0.759423063,3.21718516,3.21715228,3.21185398
64.022754,3.46410162,3.22225064,0.491783464,3.21697742,3.21692077,3.2116388
64.033245,3.16227766,3.22202676,-0.244436294,3.21676977,3.21668937,3.21142364
64.043737,3.74165739,3.22180302,0.721009267,3.21656216,3.21645803,3.21120844
64.054228,4,3.22157947,0.882281436,3.21635464,3.21622679,3.21099325
64.06472,3.46410162,3.22135605,0.49269216,3.21614718,3.21599561,3.21077804
64.075212,3,3.22113279,-0.470247586,3.21593978,3.21576451,3.21056282
64.085703,3.74165739,3.22090971,0.721628487,3.21573247,3.21553351,3.2103476
64.096195,2.82842712,3.22068677,-0.626306354,3.21552522,3.21530257,3.21013236
64.106686,2.82842712,3.22046401,-0.626128491,3.21531805,3.21507173,3.20991712
64.117178,2.64575131,3.22024139,-0.757951236,3.21511093,3.21484094,3.20970185
64.12767,4.79583152,3.22001892,1.25531375,3.21490389,3.21461023,3.20948658
64.138161,3,3.21979663,-0.46882473,3.21469693,3.21437961,3.20927131
64.148653,3,3.21957447,-0.468587742,3.21449003,3.21414904,3.209056
64.159144,3.16227766,3.21935249,-0.238903397,3.21428321,3.21391857,3.20884071
64.169636,3.74165739,3.21913065,0.72286011,3.21407645,3.21368815,3.20862538
64.180128,3.16227766,3.21890896,-0.237973316,3.21386976,3.21345779,3.20841004
64.190619,2.44948974,3.21868745,-0.877039168,3.21366317,3.21322753,3.2081947
64.201111,3.87298335,3.21846606,0.809022423,3.21345662,3.21299732,3.20797933
64.211602,3.16227766,3.21824486,-0.236573876,3.21325017,3.21276719,3.20776397
64.222094,3.74165739,3.21802379,0.723625318,3.21304376,3.21253711,3.20754857
64.232586,4,3.21780287,0.884419094,3.21283744,3.21230709,3.20733315
64.243077,3.16227766,3.21758212,-0.235169003,3.2126312,3.21207716,3.20711774
64.253569,4,3.21736151,0.884668579,3.21242502,3.21184727,3.2069023
64.26406,3.74165739,3.21714106,0.724234991,3.21221893,3.21161746,3.20668685
64.274552,3.16227766,3.21692076,-0.233758626,3.2120129,3.2113877,3.20647137
64.285044,3.60555128,3.2167006,0.623578927,3.21180694,3.21115799,3.20625588
64.295535,4.35889894,3.21648061,1.06883971,3.21160108,3.21092837,3.20604038
64.306027,3.74165739,3.21626076,0.724842486,3.21139527,3.21069878,3.20582485
64.316518,2.44948974,3.21604108,-0.875529173,3.21118956,3.21046928,3.20560933
64.32701,4.69041576,3.21582152,1.21432872,3.2109839,3.21023981,3.20539376
64.337502,3.87298335,3.21560212,0.810790494,3.21077832,3.21001039,3.20517817
64.347993,3.31662479,3.21538289,0.318185321,3.21057283,3.20978106,3.20496259
64.358485,3.60555128,3.21516379,0.624809958,3.2103674,3.20955175,3.20474696
64.368976,2.82842712,3.21494486,-0.621705508,3.21016207,3.20932252,3.20453134
64.379468,2.82842712,3.21472606,-0.621529516,3.2099568,3.20909332,3.20431568
64.38996,3.16227766,3.21450742,-0.228538302,3.20975161,3.20886418,3.20409999
64.400451,3.31662479,3.21428894,0.319899754,3.20954651,3.2086351,3.20388431
64.410943,3.74165739,3.21407059,0.726351703,3.20934147,3.20840606,3.20366858
64.421434,3.60555128,3.21385241,0.625858501,3.20913654,3.20817709,3.20345286
64.431926,2.82842712,3.21363436,-0.620650658,3.20893166,3.20794814,3.20323709
64.442418,4.24264069,3.21341647,1.01450689,3.20872686,3.20771924,3.2030213
64.452909,4,3.21319874,0.887018186,3.20852217,3.20749041,3.2028055
64.463401,2.44948974,3.21298114,-0.873779948,3.20831753,3.2072616,3.20258967
64.473892,2.82842712,3.21276371,-0.619948859,3.208113,3.20703287,3.20237383
64.484384,3.16227766,3.21254641,-0.224206945,3.20790853,3.20680415,3.20215795
64.494876,3.46410162,3.21232927,0.501769219,3.20770414,3.20657548,3.20194204
64.505367,2.64575131,3.21211229,-0.752569584,3.20749986,3.20634687,3.20172614
64.515859,3.16227766,3.21189544,-0.222750492,3.20729564,3.20611829,3.20151018
64.52635,3.16227766,3.21167877,-0.222263594,3.20709152,3.20588976,3.20129423
64.536842,2.44948974,3.21146222,-0.872910348,3.20688747,3.20566126,3.20107822
64.547334,3,3.21124582,-0.459614864,3.20668351,3.20543279,3.2008622
64.557825,3,3.2110296,-0.45937958,3.20647965,3.20520439,3.20064616
64.568317,2.64575131,3.2108135,-0.751706188,3.20627586,3.204976,3.20043008
64.578808,2.82842712,3.21059758,-0.618199367,3.20607218,3.20474768,3.200214
64.5893,3.31662479,3.21038179,0.325949383,3.20586856,3.20451937,3.19999787
64.599792,3.46410162,3.21016615,0.503920098,3.20566504,3.20429109,3.19978171
64.610283,3.46410162,3.20995068,0.504133844,3.20546162,3.20406287,3.19956555
64.620775,3.46410162,3.20973535,0.50434737,3.20525827,3.20383467,3.19934934
64.631266,3,3.20952018,-0.457733746,3.20505503,3.20360652,3.19913312
64.641758,3,3.20930515,-0.457498798,3.20485187,3.20337838,3.19891685
64.65225,3.46410162,3.20909027,0.504986479,3.2046488,3.20315028,3.19870055
64.662741,3.60555128,3.20887557,0.629821966,3.20444584,3.20292222,3.19848425
64.673233,3.87298335,3.20866099,0.815059723,3.20424295,3.20269418,3.1982679
64.683724,2.82842712,3.2084466,-0.616457194,3.20404018,3.20246619,3.19805154
64.694216,3.46410162,3.20823233,0.505835233,3.20383748,3.20223821,3.19783513
64.704708,3.46410162,3.20801822,0.506046828,3.20363488,3.20201026,3.19761869
64.715199,3.46410162,3.20780429,0.506258162,3.2034324,3.20178236,3.19740224
64.725691,2.23606798,3.20759049,-0.985658415,3.20322999,3.20155446,3.19718574
64.736182,3.87298335,3.20737687,0.815847094,3.20302771,3.20132662,3.19696922
64.746674,2.44948974,3.20716338,-0.870444505,3.2028255,3.20109877,3.19675266
64.757166,4.35889894,3.20695005,1.07328882,3.20262339,3.20087096,3.19653607
64.767657,2.44948974,3.2067369,-0.870199491,3.2024214,3.20064319,3.19631947
64.778149,3.31662479,3.20652388,0.331814571,3.2022195,3.20041542,3.19610281
64.78864,3.60555128,3.20631104,0.631854597,3.20201771,3.2001877,3.19588614
64.799132,2.64575131,3.20609835,-0.748563314,3.20181601,3.19995998,3.19566942
64.809624,2.64575131,3.20588581,-0.748421336,3.20161442,3.19973228,3.19545267
64.820115,3.16227766,3.20567345,-0.208316558,3.20141295,3.19950463,3.19523591
64.830607,4.35889894,3.20546123,1.07398218,3.20121157,3.19927698,3.19501909
64.841098,2.44948974,3.20524919,-0.869344265,3.20101031,3.19904937,3.19480226
64.85159,3.60555128,3.2050373,0.632861736,3.20080915,3.19882175,3.19458537
64.862082,3.46410162,3.20482557,0.509191565,3.20060809,3.19859416,3.19436846
64.872573,3.16227766,3.20461402,-0.205758004,3.20040716,3.19836661,3.19415152
64.883065,2.23606798,3.20440261,-0.984039955,3.20020633,3.19813905,3.19393454
64.893556,4.12310563,3.20419139,0.958600144,3.20000562,3.19791153,3.19371754
64.904048,3,3.20398031,-0.451641799,3.19980501,3.19768401,3.19350048
64.91454,3.16227766,3.20376941,-0.203695225,3.19960452,3.19745651,3.19328339
64.925031,4,3.20355868,0.89243561,3.19940416,3.19722904,3.19306628
64.935523,3,3.20334811,-0.450941358,3.1992039,3.19700157,3.19284912
64.946014,3.46410162,3.20313772,0.510846252,3.19900377,3.19677413,3.19263194
64.956506,3.16227766,3.20292749,-0.201618018,3.19880375,3.19654668,3.19241471
64.966998,3,3.20271742,-0.450241512,3.19860385,3.19631925,3.19219743
64.977489,3.74165739,3.20250754,0.734268236,3.19840409,3.19609185,3.19198015
64.987981,1.73205081,3.20229782,-1.21253743,3.19820443,3.19586445,3.1917628
64.998472,3.74165739,3.20208829,0.734553671,3.19800491,3.19563707,3.19154544
65.008964,4.24264069,3.20187892,1.02017732,3.1978055,3.19540969,3.19132802
65.019456,2.82842712,3.20166971,-0.610935831,3.19760622,3.19518232,3.19111057
65.029947,3.46410162,3.20146071,0.512485029,3.19740709,3.19495498,3.19089309
65.040439,3.60555128,3.20125186,0.635845432,3.19720807,3.19472762,3.19067556
65.05093,3.74165739,3.20104321,0.735264696,3.19700919,3.1945003,3.19045801
65.061422,3.46410162,3.20083472,0.513095402,3.19681043,3.19427297,3.1902404
65.071914,3.16227766,3.20062641,-0.195828377,3.1966118,3.19404564,3.19002275
65.082405,3.46410162,3.20041831,0.513501032,3.19641333,3.19381834,3.18980508
65.092897,3.60555128,3.20021036,0.636663895,3.19621498,3.19359103,3.18958735
65.103388,4,3.20000262,0.894425727,3.19601678,3.19336374,3.1893696
65.11388,3.60555128,3.19979504,0.636989979,3.1958187,3.19313644,3.1891518
65.124372,3.60555128,3.19958765,0.637152748,3.19562076,3.19290914,3.18893395
65.134863,3.16227766,3.19938047,-0.192620894,3.19542299,3.19268187,3.18871608
65.145355,3,3.19917346,-0.446288534,3.19522534,3.19245459,3.18849815
65.155846,4.35889894,3.19896665,1.07700153,3.19502786,3.19222733,3.1882802
65.166338,2.82842712,3.19876002,-0.60854983,3.1948305,3.19200005,3.18806219
65.17683,2.44948974,3.19855358,-0.865484742,3.19463329,3.19177277,3.18784414
65.187321,3.87298335,3.19834736,0.821362276,3.19443626,3.19154552,3.18762607
65.197813,3.74165739,3.19814131,0.737235429,3.19423935,3.19131824,3.18740793
65.208304,3.16227766,3.19793548,-0.188832777,3.19404262,3.19109099,3.18718978
65.218796,3,3.19772983,-0.44466822,3.19384603,3.19086372,3.18697156
65.229288,3.46410162,3.19752437,0.516311187,3.19364959,3.19063645,3.1867533
65.239779,3.16227766,3.19731914,-0.187193705,3.19345334,3.1904092,3.18653501
65.250271,3.31662479,3.1971141,0.345703187,3.19325722,3.19018193,3.18631666
65.260762,3.46410162,3.19690928,0.51690651,3.19306129,3.18995468,3.18609829
65.271254,3.60555128,3.19670464,0.639411162,3.19286551,3.1897274,3.18587986
65.281746,3.31662479,3.19650021,0.346589924,3.19266989,3.18950013,3.18566138
65.292237,2.44948974,3.19629602,-0.864179539,3.19247446,3.18927287,3.18544288
65.302729,3.60555128,3.19609201,0.639890038,3.19227918,3.18904559,3.18522432
65.31322,2.64575131,3.19588824,-0.741712163,3.19208409,3.18881832,3.18500573
65.323712,3.60555128,3.19568467,0.640208252,3.19188916,3.18859103,3.18478707
65.334204,3.46410162,3.19548131,0.518285927,3.19169441,3.18836374,3.18456838
65.344695,3.16227766,3.19527819,-0.181660493,3.19149986,3.18813646,3.18434965
65.355187,2.64575131,3.19507528,-0.741163928,3.19130547,3.18790916,3.18413086
65.365678,3.31662479,3.1948726,0.348930058,3.19111128,3.18768187,3.18391205
65.37617,3.16227766,3.19467014,-0.179979101,3.19091726,3.18745455,3.18369317
65.386662,4,3.1944679,0.897514403,3.19072343,3.18722723,3.18347425
65.397153,3.31662479,3.1942659,0.34979835,3.19052981,3.18699992,3.1832553
65.407645,3.16227766,3.19406412,-0.178287589,3.19033636,3.18677258,3.18303628
65.418136,4.12310563,3.1938626,0.963972524,3.19014313,3.18654526,3.18281724
65.428628,3.16227766,3.19366129,-0.177154247,3.18995007,3.18631791,3.18259813
65.43912,3.87298335,3.19346022,0.82433193,3.18975722,3.18609054,3.18237897
65.449611,3.46410162,3.1932594,0.520425031,3.18956459,3.18586319,3.18215979
65.460103,3.87298335,3.19305881,0.824575365,3.18937214,3.18563581,3.18194054
65.470594,4.12310563,3.19285849,0.964493202,3.18917992,3.18540844,3.18172126
65.481086,2.64575131,3.19265839,-0.739531663,3.18898789,3.18518104,3.18150192
65.491578,3.16227766,3.19245854,-0.173726465,3.18879608,3.18495363,3.18128252
65.502069,3.46410162,3.19225897,0.521385314,3.1886045,3.18472623,3.1810631
65.512561,3,3.19205963,-0.438246084,3.18841312,3.18449879,3.18084362
65.523052,3.31662479,3.19186057,0.353219795,3.18822198,3.18427136,3.1806241
65.533544,3.16227766,3.19166174,-0.171417865,3.18803105,3.1840439,3.18040451
65.544036,2.82842712,3.19146319,-0.602524739,3.18784035,3.18381643,3.18018488
65.554527,2.64575131,3.19126491,-0.738588925,3.18764989,3.18358897,3.17996522
65.565019,3.16227766,3.19106689,-0.169673879,3.18745965,3.18336147,3.17974549
65.57551,3.46410162,3.19086915,0.522716429,3.18726966,3.18313397,3.17952573
65.586002,3.31662479,3.19067167,0.354898747,3.18707989,3.18290644,3.17930589
65.596494,2.44948974,3.19047447,-0.860804695,3.18689037,3.1826789,3.17908601
65.606985,4.12310563,3.19027756,0.965830246,3.18670111,3.18245136,3.17886611
65.617477,3.60555128,3.19008092,0.644569899,3.18651208,3.18222379,3.17864613
65.627968,3.16227766,3.18988459,-0.166153318,3.18632332,3.18199622,3.17842612
65.63846,3.31662479,3.18968852,0.356281168,3.1861348,3.18176862,3.17820604
65.648952,3.74165739,3.18949275,0.743077816,3.18594653,3.18154099,3.17798591
65.659443,2.82842712,3.18929729,-0.600724698,3.18575855,3.18131337,3.17776575
65.669935,3.31662479,3.18910211,0.35710318,3.18557082,3.18108572,3.17754552
65.680426,3,3.18890725,-0.434634618,3.18538337,3.18085806,3.17732525
65.690918,3.46410162,3.18871268,0.524775128,3.18519618,3.18063037,3.17710492
65.70141,3.87298335,3.18851842,0.827323955,3.18500926,3.18040266,3.17688453
65.711901,3.60555128,3.18832449,0.645930946,3.18482264,3.18017495,3.17666412
65.722393,3.31662479,3.18813086,0.358460506,3.18463629,3.1799472,3.17644363
65.732884,2,3.18793756,-1.08992548,3.18445024,3.17971945,3.17622311
65.743376,3,3.18774457,-0.433295018,3.18426447,3.17949166,3.17600252
65.753868,3.31662479,3.18755191,0.359267142,3.184079,3.17926385,3.17578187
65.764359,2.82842712,3.1873596,-0.599109735,3.18389384,3.17903605,3.1755612
65.774851,3.46410162,3.1871676,0.5262452,3.18370897,3.17880819,3.17534045
65.785342,3.16227766,3.18697597,-0.15715695,3.18352442,3.17858034,3.17511967
65.795834,3.60555128,3.18678465,0.647121797,3.18334017,3.17835245,3.17489882
65.806326,3.16227766,3.18659369,-0.15593598,3.18315623,3.17812454,3.17467791
65.816817,3,3.1864031,-0.431744247,3.18297264,3.17789662,3.17445697
65.827309,2.64575131,3.18621284,-0.735160885,3.18278935,3.17766866,3.17423595
65.8378,3.87298335,3.18602296,0.828830734,3.18260641,3.1774407,3.17401491
65.848292,3.74165739,3.18583343,0.745536021,3.18242379,3.17721269,3.17379379
65.858784,3.31662479,3.18564427,0.361912316,3.1822415,3.17698466,3.17357261
65.869275,3,3.1854555,-0.43064544,3.18205958,3.17675663,3.17335141
65.879767,4.12310563,3.18526709,0.968420642,3.18187799,3.17652855,3.17313013
65.890258,3.46410162,3.18507908,0.52822584,3.18169677,3.17630047,3.17290881
65.90075,2.82842712,3.18489144,-0.597046325,3.1815159,3.17607235,3.17268742
65.911242,3.60555128,3.18470419,0.648727278,3.18133538,3.17584419,3.17246597
65.921733,3.31662479,3.18451737,0.363465851,3.18115526,3.17561604,3.1722445
65.932225,3,3.18433092,-0.429337772,3.18097549,3.17538783,3.17202294
65.942716,3.46410162,3.18414491,0.529109355,3.18079612,3.17515963,3.17180135
65.953208,3.16227766,3.18395928,-0.147246814,3.18061712,3.17493137,3.17157969
65.9637,2.23606798,3.18377408,-0.97350198,3.1804385,3.17470309,3.17135797
65.974191,3.31662479,3.18358932,0.364740273,3.1802603,3.1744748,3.17113622
65.984683,2.64575131,3.18340498,-0.733248707,3.18008249,3.17424647,3.17091439
65.995174,3.31662479,3.18322108,0.365244721,3.1799051,3.17401813,3.17069252
66.005666,3.60555128,3.18303762,0.650010508,3.17972811,3.17378974,3.17047058
66.016158,4.12310563,3.18285459,0.969665422,3.17955154,3.17356132,3.17024858
66.026649,3.60555128,3.18267204,0.650291651,3.17937542,3.17333289,3.17002655
66.037141,2.23606798,3.18248994,-0.972842207,3.17919971,3.17310442,3.16980444
66.047632,3.31662479,3.18230831,0.366492125,3.17902445,3.17287593,3.1695823
66.058124,2.64575131,3.18212714,-0.732376837,3.17884962,3.1726474,3.16936008
66.068616,3.87298335,3.18194645,0.831286289,3.17867525,3.17241884,3.1691378
66.079107,3.60555128,3.18176626,0.650987719,3.17850135,3.17219027,3.16891549
66.089599,2.44948974,3.18158655,-0.855626559,3.1783279,3.17196165,3.1686931
66.10009,3,3.18140735,-0.425919423,3.17815494,3.17173302,3.16847067
66.110582,2.44948974,3.18122865,-0.855417385,3.17798244,3.17150433,3.16824816
66.121074,3,3.18105045,-0.425500236,3.17781043,3.17127562,3.1680256
66.131565,2.82842712,3.18087279,-0.593671346,3.17763893,3.1710469,3.167803
66.142057,3.74165739,3.18069564,0.748973794,3.17746791,3.17081812,3.16758033
66.152548,3.16227766,3.18051905,-0.135060676,3.17729742,3.17058934,3.16735761
66.16304,3,3.18034297,-0.424668076,3.17712743,3.1703605,3.16713482
66.173532,3.31662479,3.18016745,0.369401322,3.17695797,3.17013163,3.16691197
66.184023,3.31662479,3.17999251,0.369638044,3.17678906,3.16990274,3.16668909
66.194515,2.82842712,3.17981811,-0.592782409,3.17662066,3.16967381,3.16646612
66.205006,4,3.1796443,0.905734894,3.17645284,3.16944486,3.16624312
66.215498,3,3.17947106,-0.42364025,3.17628556,3.16921586,3.16602004
66.22599,2.82842712,3.17929841,-0.592343892,3.17611884,3.16898683,3.1657969
66.236481,2.82842712,3.17912638,-0.592198659,3.17595271,3.16875778,3.16557372
66.246973,2.82842712,3.17895493,-0.592053891,3.17578715,3.16852868,3.16535046
66.257464,3.74165739,3.17878413,0.7502488,3.1756222,3.16829957,3.16512717
66.267956,2.82842712,3.17861393,-0.591765833,3.17545784,3.1680704,3.1649038
66.278448,3.46410162,3.17844436,0.534469131,3.17529409,3.16784119,3.16468036
66.288939,3.87298335,3.17827546,0.833491383,3.17513097,3.16761198,3.16445689
66.299431,3.46410162,3.1781072,0.534784459,3.17496848,3.1673827,3.16423334
66.309922,3.46410162,3.17793961,0.534941119,3.17480663,3.16715342,3.16400976
66.320414,1.73205081,3.17777269,-1.20238175,3.17464543,3.16692407,3.16378609
66.330906,3.31662479,3.17760645,0.372851633,3.17448488,3.1666947,3.16356236
66.341397,2.64575131,3.17744092,-0.729170495,3.17432502,3.1664653,3.16333859
66.351889,3.74165739,3.17727608,0.751253155,3.17416583,3.16623585,3.16311475
66.36238,3.16227766,3.17711198,-0.121796211,3.17400735,3.16600639,3.16289086
66.372872,4.35889894,3.17694858,1.0871754,3.17384956,3.16577686,3.1626669
66.383364,3.31662479,3.17678593,0.373950348,3.17369249,3.1655473,3.16244287
66.393855,4.12310563,3.17662404,0.972872853,3.17353615,3.16531773,3.16221881
66.404347,3.46410162,3.1764629,0.536319606,3.17338055,3.1650881,3.16199466
66.414838,4,3.17630254,0.907577797,3.17322571,3.16485845,3.16177048
66.42533,3.31662479,3.17614296,0.37480906,3.17307161,3.16462874,3.16154621
66.435822,2.44948974,3.17598417,-0.852346427,3.1729183,3.164399,3.16132189
66.446313,3.31662479,3.17582622,0.375231361,3.17276579,3.16416923,3.16109752
66.456805,2.82842712,3.17566907,-0.589272383,3.17261406,3.16393941,3.16087307
66.467296,3.46410162,3.17551277,0.537204659,3.17246317,3.16370958,3.16064859
66.477788,3.31662479,3.17535731,0.375855668,3.17231309,3.16347968,3.16042402
66.48828,2.44948974,3.17520271,-0.851887884,3.17216385,3.16324974,3.16019939
66.498771,3.74165739,3.175049,0.752733938,3.17201549,3.16301979,3.15997473
66.509263,3.31662479,3.17489618,0.376468608,3.17186798,3.16278978,3.15974998
66.519754,3.46410162,3.17474427,0.537919458,3.17172137,3.16255975,3.15952519
66.530246,3.87298335,3.17459327,0.835697358,3.17157565,3.16232965,3.15930032
66.540738,3.87298335,3.17444321,0.835787135,3.17143084,3.16209952,3.15907538
66.551229,2.82842712,3.17429411,-0.588104574,3.17128698,3.16186937,3.15885041
66.561721,3.46410162,3.17414597,0.538475294,3.17114405,3.16163916,3.15862536
66.572212,3.87298335,3.17399883,0.836052939,3.1710021,3.16140893,3.15840026
66.582704,3.31662479,3.17385267,0.377851981,3.17086112,3.16117864,3.15817508
66.593196,2.44948974,3.17370753,-0.851009863,3.17072113,3.16094831,3.15794985
66.603687,4,3.17356344,0.909085564,3.17058217,3.16071796,3.15772457
66.614179,3.87298335,3.17342038,0.836398807,3.17044423,3.16048755,3.15749921
66.62467,3.74165739,3.17327841,0.753909131,3.17030735,3.16025711,3.1572738
66.635162,3.46410162,3.17313751,0.539410886,3.17017153,3.16002662,3.15704832
66.645654,3,3.17299772,-0.415929944,3.17003679,3.15979608,3.15682277
66.656145,3.74165739,3.17285906,0.754187193,3.16990317,3.15956553,3.15659719
66.666637,2.82842712,3.17272154,-0.586766066,3.16977066,3.15933491,3.15637152
66.677128,3.60555128,3.1725852,0.658001581,3.16963931,3.15910427,3.1561458
66.68762,3.60555128,3.17245002,0.658104289,3.16950911,3.15887357,3.15592001
66.698112,3.60555128,3.17231605,0.658206065,3.1693801,3.15864282,3.15569415
66.708603,2.64575131,3.17218332,-0.725556344,3.16925231,3.15841206,3.15546826
66.719095,2.82842712,3.17205182,-0.586195103,3.16912573,3.15818123,3.15524228
66.729586,2.82842712,3.17192161,-0.586084025,3.16900042,3.15795038,3.15501626
66.740078,2.44948974,3.17179267,-0.849884069,3.16887637,3.15771947,3.15479015
66.75057,3.31662479,3.17166505,0.380735784,3.16875361,3.15748851,3.15456398
66.761061,2.44948974,3.17153878,-0.849734688,3.16863219,3.15725753,3.15433778
66.771553,2.82842712,3.17141386,-0.585650697,3.16851209,3.15702649,3.15411148
66.782044,3.74165739,3.17129034,0.755226485,3.16839338,3.15679543,3.15388515
66.792536,4,3.17116822,0.910401987,3.16827605,3.1565643,3.15365874
66.803028,3.31662479,3.17104754,0.381545871,3.16816014,3.15633313,3.15343226
66.813519,3,3.17092833,-0.413434796,3.16804569,3.15610193,3.15320574
66.824011,3.60555128,3.1708106,0.659348674,3.1679327,3.15587067,3.15297913
66.834502,2.82842712,3.1706944,-0.585036133,3.16782122,3.15563939,3.15275248
66.844994,3.31662479,3.17057974,0.382158415,3.16771125,3.15540804,3.15252575
66.855486,3.87298335,3.17046665,0.838162693,3.16760285,3.15517665,3.15229896
66.865977,3.31662479,3.17035517,0.382452116,3.16749604,3.15494524,3.15207213
66.876469,4.12310563,3.17024532,0.976145639,3.16739083,3.15471376,3.15184521
66.88696,3.16227766,3.17013714,-0.0886536984,3.16728729,3.15448225,3.15161825
66.897452,2,3.17003065,-1.08167955,3.16718541,3.15425068,3.1513912
66.907944,3.31662479,3.16992588,0.383012935,3.16708525,3.15401907,3.1511641
66.918435,3.60555128,3.16982289,0.660097256,3.16698684,3.15378743,3.15093695
66.928927,3.60555128,3.16972168,0.660173913,3.16689019,3.15355573,3.15070971
66.939418,2.23606798,3.16962231,-0.966206154,3.16679537,3.153324,3.15048244
66.94991,3.31662479,3.16952479,0.383536172,3.16670239,3.15309221,3.15025508
66.960402,3.16227766,3.16942918,-0.0845666607,3.16661129,3.15286037,3.15002766
66.970893,3.60555128,3.16933551,0.660466323,3.16652212,3.1526285,3.14980019
66.981385,3.60555128,3.16924381,0.660535741,3.16643491,3.15239657,3.14957264
66.991876,3.74165739,3.16915413,0.756639449,3.16634969,3.15216462,3.14934505
67.002368,3.60555128,3.1690665,0.660669946,3.16626651,3.15193259,3.14911738
67.01286,3.16227766,3.16898096,-0.0818736758,3.16618541,3.15170053,3.14888964
67.023351,3.31662479,3.16889756,0.384352997,3.16610644,3.15146843,3.14866186
67.033843,2.82842712,3.16881634,-0.583428844,3.16602962,3.15123627,3.14843399
67.044334,3.87298335,3.16873735,0.83919366,3.16595501,3.15100409,3.14820608
67.054826,2.23606798,3.16866061,-0.96570836,3.16588265,3.15077184,3.14797809
67.065318,2.64575131,3.16858619,-0.723073222,3.16581259,3.15053954,3.14775003
67.075809,3,3.16851414,-0.410504742,3.16574488,3.15030721,3.14752193
67.086301,3.31662479,3.16844449,0.384941939,3.16567956,3.15007482,3.14729375
67.096792,3.31662479,3.16837731,0.385029194,3.16561669,3.1498424,3.14706553
67.107284,3.74165739,3.16831263,0.757195323,3.16555631,3.14960992,3.14683722
67.117776,2.64575131,3.16825051,-0.722841061,3.16549848,3.14937738,3.14660884
67.128267,2.64575131,3.16819101,-0.722799904,3.16544325,3.14914483,3.14638043
67.138759,4.47213595,3.16813418,1.14192897,3.16539067,3.1489122,3.14615193
67.14925,3.31662479,3.16808008,0.38541499,3.16534081,3.14867955,3.14592338
67.159742,3.31662479,3.16802875,0.385481566,3.16529371,3.14844682,3.14569476
67.170234,3.46410162,3.16798027,0.544170324,3.16524944,3.14821406,3.14546606
67.180725,3.16227766,3.1679347,-0.0752133124,3.16520807,3.14798126,3.14523733
67.191217,3.46410162,3.16789209,0.54425134,3.16516964,3.1477484,3.14500851
67.201708,4.12310563,3.16785252,0.977370506,3.16513424,3.14751551,3.14477965
67.2122,3,3.16781604,-0.40965356,3.16510192,3.14728255,3.1445507
67.222692,3.16227766,3.16778272,-0.0741961105,3.16507274,3.14704954,3.14432169
67.233183,3.60555128,3.16775264,0.661663534,3.16504679,3.14681651,3.14409264
67.243675,3.87298335,3.16772587,0.839796094,3.16502413,3.14658341,3.14386351
67.254166,3.16227766,3.16770247,-0.0736533034,3.16500484,3.14635028,3.14363433
67.264658,3.31662479,3.16768252,0.38593039,3.16498898,3.14611708,3.14340506
67.27515,3.31662479,3.16766611,0.385951655,3.16497665,3.14588384,3.14317573
67.285641,2.64575131,3.16765331,-0.722427849,3.16496791,3.14565056,3.14294636
67.296133,2.64575131,3.1676442,-0.722421544,3.16496285,3.14541722,3.14271691
67.306624,3.74165739,3.16763886,0.757640101,3.16496155,3.14518385,3.14248741
67.317116,3.60555128,3.16763739,0.661750619,3.16496411,3.14495041,3.14225783
67.327608,2.23606798,3.16763987,-0.965179723,3.16497061,3.14471693,3.14202818
67.338099,3,3.1676464,-0.409446454,3.16498113,3.14448341,3.14179849
67.348591,3.31662479,3.16765706,0.385963378,3.16499578,3.14424983,3.14156872
67.359082,2.23606798,3.16767196,-0.965196342,3.16501466,3.14401622,3.14133891
67.369574,3.16227766,3.16769119,-0.0735766706,3.16503785,3.14378253,3.141109
67.380066,2.23606798,3.16771485,-0.965218564,3.16506547,3.1435488,3.14087904
67.390557,3.16227766,3.16774306,-0.0739283462,3.16509762,3.14331505,3.14064903
67.401049,3,3.16777592,-0.409604591,3.16513442,3.14308122,3.14041894
67.41154,3,3.16781354,-0.409650509,3.16517596,3.14284736,3.14018881
67.422032,3.16227766,3.16785604,-0.0746885557,3.16522237,3.14261344,3.13995859
67.432524,3,3.16790354,-0.409760342,3.16527376,3.14237946,3.13972831
67.443015,3.87298335,3.16795615,0.839658976,3.16533026,3.14214546,3.13949798
67.453507,3.16227766,3.16801401,-0.0757387049,3.165392,3.14191139,3.13926757
67.463998,2.82842712,3.16807724,-0.582795091,3.1654591,3.14167729,3.13903712
67.47449,3.31662479,3.16814599,0.385329472,3.1655317,3.14144312,3.13880658
67.484982,3.46410162,3.16822038,0.543949661,3.16560994,3.14120889,3.13857598
67.495473,3.60555128,3.16830056,0.661249363,3.16569395,3.14097465,3.13834534
67.505965,4.12310563,3.16838667,0.977097206,3.16578389,3.14074033,3.13811462
67.516456,2.64575131,3.16847887,-0.722999005,3.16587991,3.14050598,3.13788385
67.526948,3,3.16857732,-0.410581689,3.16598216,3.14027156,3.13765299
67.53744,3.46410162,3.16868218,0.543525009,3.16609082,3.1400371,3.13742208
67.547931,2.23606798,3.1687936,-0.965777211,3.16620602,3.1398026,3.13719112
67.558423,3.31662479,3.16891177,0.384334515,3.16632798,3.13956804,3.13696007
67.568914,3,3.16903685,-0.411140916,3.16645683,3.13933344,3.13672899
67.579406,3.46410162,3.16916905,0.543076941,3.16659279,3.13909878,3.13649782
67.589898,4.12310563,3.16930855,0.976625353,3.16673604,3.13886406,3.13626658
67.600389,3.60555128,3.16945551,0.66037547,3.16688675,3.13862932,3.13603531
67.610881,3.16227766,3.16961019,-0.0856301924,3.16704516,3.13839451,3.13580395
67.621372,3,3.16977275,-0.412034891,3.16721145,3.13815967,3.13557255
67.631864,3.16227766,3.16994345,-0.087554471,3.16738587,3.13792476,3.13534106
67.642356,3.74165739,3.17012248,0.755999276,3.16756862,3.13768979,3.13510951
67.652847,3.46410162,3.17031007,0.542025409,3.16775991,3.1374548,3.13487792
67.663339,3.16227766,3.17050649,-0.0907128971,3.16796003,3.13721974,3.13464624
67.67383,3.60555128,3.17071195,0.659423481,3.16816918,3.13698465,3.13441453
67.684322,3.31662479,3.17092674,0.381704138,3.16838766,3.13674949,3.13418273
67.694814,3.74165739,3.17115111,0.755318656,3.16861572,3.13651428,3.13395086
67.705305,2.82842712,3.17138532,-0.585626329,3.1688536,3.13627904,3.13371896
67.715797,3.87298335,3.17162969,0.8374686,3.16910164,3.13604373,3.13348697
67.726288,3,3.17188447,-0.414589518,3.16936008,3.13580839,3.13325494
67.73678,3.16227766,3.17215001,-0.0993597052,3.16962928,3.13557298,3.13302282
67.747272,4,3.17226816,0.909797694,3.16975095,3.13533752,3.13279064
67.757763,3,3.1725563,-0.415398967,3.17004274,3.13510204,3.13255842
67.768255,2.44948974,3.1728562,-0.850509529,3.17034628,3.13486648,3.13232612
67.778746,3.60555128,3.17316815,0.657558458,3.17066187,3.13463089,3.13209377
67.789238,3,3.17349257,-0.416524397,3.17098993,3.13439523,3.13186135
67.79973,2.64575131,3.17382982,-0.726690107,3.17133081,3.13415952,3.13162885
67.810221,3.46410162,3.17418026,0.538443456,3.17168488,3.13392378,3.13139632
67.820713,3.31662479,3.17454436,0.376935576,3.17205261,3.13368797,3.13116371
67.831204,3.16227766,3.17492248,-0.112449206,3.17243435,3.13345214,3.13093105
67.841696,3.31662479,3.17531514,0.375911756,3.17283063,3.13321623,3.13069831
67.852188,3.16227766,3.17572276,-0.115953011,3.17324187,3.13298027,3.13046551
67.862679,3.60555128,3.17614578,0.655290392,3.1736685,3.13274429,3.13023266
67.873171,3.16227766,3.17658477,-0.119612334,3.17411111,3.13250823,3.12999974
67.883662,3,3.17704017,-0.420761421,3.17457013,3.13227214,3.12976677
67.894154,3,3.17751261,-0.421322456,3.17504618,3.13203598,3.12953372
67.904646,3.16227766,3.1780026,-0.125399135,3.17553979,3.13179978,3.1293006
67.915137,3.87298335,3.17851068,0.833350264,3.17605149,3.13156354,3.12906745
67.925629,2.82842712,3.17903756,-0.592123662,3.17658198,3.13132724,3.12883421
67.93612,4,3.17958375,0.905768318,3.17713179,3.1310909,3.12860094
67.946612,2.82842712,3.18015004,-0.593062323,3.1777017,3.13085449,3.12836758
67.957104,3.16227766,3.18073706,-0.135865378,3.17829234,3.13061804,3.12813415
67.967595,3,3.18134547,-0.425846763,3.17890438,3.13038155,3.12790069
67.978087,3.31662479,3.18197612,0.366945047,3.17953866,3.130145,3.12766715
67.988578,4.69041576,3.18262969,1.22791941,3.18019587,3.12990842,3.12743356
67.99907,3.74165739,3.18330712,0.74722839,3.18087693,3.12967176,3.12719989
68.009562,3.31662479,3.18400919,0.364164245,3.18158265,3.12943506,3.12696616
68.020053,4,3.18473673,0.902919302,3.18231384,3.12919832,3.12673239
68.030545,3,3.18549081,-0.430686442,3.18307157,3.12896152,3.12649854
68.041036,4,3.18627226,0.902068591,3.18385668,3.12872469,3.12626465
68.051528,3.74165739,3.18708224,0.744698025,3.18467034,3.12848779,3.12603068
68.06202,3.16227766,3.18792175,-0.160137713,3.18551353,3.12825083,3.12579664
68.072511,3.16227766,3.18879182,-0.162831682,3.18638729,3.12801385,3.12556257
68.083003,3.87298335,3.18969378,0.826613311,3.18729295,3.1277768,3.12532841
68.093494,3.31662479,3.19062869,0.354959291,3.18823158,3.12753972,3.12509422
68.103986,4,3.19159801,0.899111777,3.18920462,3.12730257,3.12485994
68.114478,3.60555128,3.192603,0.642610516,3.19021335,3.12706537,3.1246256
68.124969,3.31662479,3.19364497,0.350684791,3.19125906,3.12682815,3.12439122
68.135461,3.16227766,3.1947256,-0.180133104,3.19234346,3.12659085,3.12415676
68.145952,3,3.19584623,-0.442545176,3.19346788,3.12635352,3.12392226
68.156444,3.87298335,3.19700873,0.822176755,3.19463417,3.12611613,3.12368768
68.166936,3.31662479,3.1982147,0.344107676,3.19584396,3.12587868,3.12345304
68.177427,3.74165739,3.19946583,0.736336582,3.19709892,3.12564121,3.12321836
68.187919,3.46410162,3.20076425,0.513164073,3.19840121,3.12540366,3.1229836
68.19841,2.64575131,3.20211173,-0.745895713,3.19975256,3.12516609,3.1227488
68.208902,3.87298335,3.20351061,0.818213133,3.20115536,3.12492845,3.12251392
68.219394,3.87298335,3.20496301,0.817325108,3.20261168,3.12469076,3.12227898
68.229885,3.31662479,3.20647112,0.331894071,3.20412374,3.12445304,3.122044
68.240377,2.82842712,3.20803768,-0.616125435,3.20569428,3.12421525,3.12180894
68.250868,2.82842712,3.209665,-0.617444636,3.20732562,3.12397744,3.12157384
68.26136,3.31662479,3.21135615,0.324451284,3.20902082,3.12373955,3.12133866
68.271852,3.16227766,3.21311389,-0.225468904,3.21078263,3.12350162,3.12110342
68.282343,3.87298335,3.21494109,0.811198035,3.21261395,3.12326365,3.12086815
68.292835,2.82842712,3.21684137,-0.62322889,3.21451838,3.12302562,3.12063279
68.303326,3.46410162,3.2188178,0.495261356,3.216499,3.12278756,3.1203974
68.313818,4,3.2208744,0.882680915,3.21855983,3.12254943,3.12016192
68.32431,3.16227766,3.22301484,-0.246449147,3.22070454,3.12231125,3.11992638
68.334801,3.31662479,3.225243,0.302294206,3.22293703,3.12207305,3.11969081
68.345293,3.46410162,3.22756365,0.486351689,3.22526205,3.12183477,3.11945516
68.355784,3.16227766,3.22998095,-0.260198562,3.22768377,3.12159647,3.11921947
68.366276,2.64575131,3.23250027,-0.765995401,3.23020757,3.1213581,3.1189837
68.376768,3.31662479,3.23512658,0.285478922,3.23283842,3.12111968,3.11874788
68.387259,3.60555128,3.23786516,0.60637127,3.2355816,3.12088123,3.11851201
68.397751,3.31662479,3.24072243,0.275503823,3.23844354,3.12064272,3.11827607
68.408242,2.82842712,3.24370414,-0.64441991,3.24142998,3.12040418,3.11804009
68.418734,2.82842712,3.24681756,-0.646831072,3.24454821,3.12016556,3.11780403
68.429226,3.60555128,3.25006956,0.596222874,3.24780509,3.1199269,3.11756791
68.439717,2.82842712,3.25346745,-0.651951169,3.25120795,3.11968822,3.11733175
68.450209,3.31662479,3.25702005,0.244140825,3.2547656,3.11944946,3.11709552
68.4607,4,3.26073541,0.859804973,3.25848611,3.11921068,3.11685925
68.471192,3.46410162,3.26462359,0.446629628,3.26237953,3.11897183,3.1166229
68.481684,3.31662479,3.26869427,0.218930398,3.26645556,3.11873293,3.11638649
68.492175,2.82842712,3.27295778,-0.666731325,3.27072453,3.11849401,3.11615005
68.502667,3.31662479,3.27742648,0.19798564,3.27519879,3.11825502,3.11591353
68.513158,2.23606798,3.28211189,-1.02276288,3.2798899,3.118016,3.11567697
68.52365,2.82842712,3.28702826,-0.677200953,3.28481208,3.11777691,3.11544034
68.534142,3.60555128,3.29218948,0.559787279,3.28997926,3.11753777,3.11520365
68.544633,3.60555128,3.2976105,0.554924117,3.29540639,3.11729862,3.11496692
68.555125,3.31662479,3.30330902,0.11539396,3.30111117,3.11705939,3.11473011
68.565616,3.74165739,3.30930198,0.657537382,3.30711055,3.11682013,3.11449327
68.576108,3.46410162,3.31560996,0.38534615,3.31342513,3.11658081,3.11425635
68.5866,3.60555128,3.32225348,0.532257269,3.32007543,3.11634144,3.11401938
68.597091,2.64575131,3.32925466,-0.826742612,3.3270836,3.11610205,3.11378237
68.607583,3,3.33663958,-0.580206499,3.33447571,3.11586258,3.11354528
68.618074,4.12310563,3.3444337,0.882423895,3.34227724,3.1156231,3.11330816
68.628566,3.87298335,3.35266767,0.721329102,3.35051888,3.11538354,3.11307096
68.639058,3.74165739,3.36137258,0.616672365,3.35923169,3.11514394,3.11283371
68.649549,3.74165739,3.37058217,0.609159432,3.36844946,3.11490431,3.11259642
68.660041,2.82842712,3.38033602,-0.742905708,3.37821177,3.11466462,3.11235905
68.670532,4,3.39067362,0.780593605,3.38855815,3.1144249,3.11212165
68.681024,3.31662479,3.4016423,-0.291577629,3.39953593,3.11418511,3.11188418
68.691516,3.60555128,3.41329094,0.438475008,3.41119403,3.11394528,3.11164664
68.702007,3.60555128,3.42567329,0.424120246,3.4235862,3.11370542,3.11140908
68.712499,3.87298335,3.43885257,0.658886011,3.43677571,3.1134655,3.11117144
68.72299,3.60555128,3.45289409,0.390713686,3.45082789,3.11322555,3.11093376
68.733482,3.60555128,3.46787664,0.371045334,3.46582156,3.11298554,3.11069601
68.743974,2.64575131,3.48388521,-0.915496529,3.48184175,3.11274548,3.1104582
68.754465,3.74165739,3.50101711,0.490550996,3.49898581,3.11250539,3.11022037
68.764957,3.87298335,3.51939077,0.594636506,3.51737222,3.11226524,3.10998245
68.775448,3.60555128,3.53913898,0.257705829,3.53713381,3.11202507,3.10974451
68.78594,4.12310563,3.56042953,0.75011739,3.55843845,3.11178483,3.10950648
68.796432,4.35889894,3.5834616,0.880589203,3.58148539,3.11154454,3.10926841
68.806923,4.12310563,3.60848286,0.717372122,3.60652242,3.11130423,3.1090303
68.817415,3.60555128,3.63581332,-0.173959888,3.63386964,3.11106386,3.10879211
68.827906,3.74165739,3.66584865,0.275333867,3.66392291,3.11082346,3.1085539
68.838398,4.47213595,3.69910636,0.879221018,3.69719991,3.11058299,3.10831561
68.84889,3.46410162,3.73623669,-0.521665674,3.73435115,3.11034248,3.10807726
68.859381,4.35889894,3.77806357,0.762125564,3.77620083,3.11010195,3.10783889
68.869873,4.47213595,3.82563403,0.804053431,3.82379636,3.10986135,3.10760044
68.880364,4.58257569,3.88022371,0.838064427,3.87841376,3.10962073,3.10736196
68.890856,4.89897949,3.94340042,0.977537246,3.94162129,3.10938005,3.1071234
68.901348,3.87298335,4.017003,-0.379499209,4.01525826,3.10913932,3.10688479
68.911839,4.24264069,4.1031423,0.373494828,4.10143594,3.10889857,3.10664616
68.922331,5.38516481,4.20418815,1.0867275,4.2025245,3.10865775,3.10640744
68.932822,4.12310563,4.32262896,-0.446680347,4.32101254,3.10841691,3.1061687
68.943314,4.89897949,4.46102704,0.661779759,4.45946236,3.10817601,3.10592988
68.953806,5.56776436,4.62178648,0.972613945,4.62027776,3.10793506,3.10569102
68.964297,5.09901951,4.80699344,0.540394372,4.80554432,3.10769409,3.10545212
68.974789,5.19615242,5.01828762,0.421740208,5.01690092,3.10745306,3.10521315
68.98528,5.47722558,5.25655967,0.469750899,5.25523715,3.107212,3.10497415
68.995772,6.63324958,5.52197035,1.0541723,5.52071267,3.10697088,3.10473507
69.006264,5.56776436,5.8137079,-0.495926948,5.81251452,3.10672972,3.10449594
69.016755,6.78232998,6.13000323,0.807667476,6.12887255,3.10648854,3.10425679
69.027247,6.4807407,6.46823492,0.111829227,6.46716443,3.10624729,3.10401756
69.037738,7.28010989,6.82474951,0.674803953,6.82373595,3.10600603,3.10377831
69.04823,6.78232998,7.19515933,-0.642517976,7.19419889,3.10576469,3.10353898
69.058722,7.61577311,7.57414068,0.204040246,7.57322919,3.10552332,3.1032996
69.069213,6.92820323,7.95552497,-1.01356881,7.95465802,3.10528193,3.10306019
69.079705,8.1240384,8.33235324,-0.456415205,8.33152631,3.10504047,3.10282071
69.090196,8.83176087,8.69651814,0.367753628,8.6957266,3.10479899,3.10258121
69.100688,8.36660027,9.03893472,-0.819960033,9.0381739,3.10455745,3.10234163
69.11118,9.32737905,9.34926967,-0.147954779,9.34853481,3.10431587,3.102102
69.121671,10.7703296,9.61627784,1.07426802,9.61556407,3.10407427,3.10186235
69.132163,10.1488916,9.82850135,0.566030225,9.82780366,3.1038326,3.10162262
69.142654,10.9087121,9.97524345,0.96616182,9.97455668,3.10359092,3.10138287
69.153146,11.1355287,10.0482462,1.04272838,10.0475651,3.10334917,3.10114304
69.163638,10.3440804,10.0430591,0.548654078,10.0423783,3.10310738,3.10090317
69.174129,9.64365076,9.96001555,-0.562463147,9.95932968,3.10286558,3.10066327
69.184621,9.53939201,9.80410681,-0.514504414,9.80341068,3.10262371,3.10042329
69.195112,10.4403065,9.58404245,0.925345373,9.58333101,3.10238182,3.1001833
69.205604,10.3440804,9.31061978,1.01659267,9.30988812,3.10213987,3.09994323
69.216096,8.94427191,8.99537199,-0.22605327,8.9946154,3.10189788,3.09970311
69.226587,8.48528137,8.64945075,-0.405178205,8.64866463,3.10165587,3.09946297
69.237079,8.18535277,8.28293739,-0.312385375,8.28211724,3.10141381,3.09922276
69.24757,8.18535277,7.90490145,0.52957655,7.90404286,3.10117172,3.09898253
69.258062,8,7.5231673,0.690530739,7.52226597,3.10092957,3.09874222
69.268554,6.08276253,7.14467905,-1.03049334,7.14373084,3.10068738,3.09850187
69.279045,7.54983444,6.77549118,0.87996776,6.77449221,3.10044518,3.09826149
69.289537,7.07106781,6.42071464,0.806444776,6.41966142,3.10020291,3.09802104
69.300028,6.92820323,6.08476179,0.918390678,6.08365142,3.09996063,3.09778057
69.31052,5.29150262,5.77104358,-0.692488958,5.7698739,3.09971828,3.09754003
69.321012,6.244998,5.48215585,0.873408354,5.48092563,3.0994759,3.09729944
69.331503,5.91607978,5.21974073,0.834469326,5.21844981,3.0992335,3.09705883
69.341995,5.38516481,4.98442258,0.633042041,4.98307191,3.09899104,3.09681816
69.352486,4.47213595,4.77602493,-0.551261259,4.77461657,3.09874856,3.09657745
69.362978,5.47722558,4.59348785,0.940073257,4.59202481,3.09850603,3.09633668
69.37347,5,4.4351591,0.751558979,4.43364516,3.09826345,3.09609587
69.383961,4.79583152,4.29890123,0.70493283,4.29734067,3.09802086,3.09585503
69.394453,4,4.18225269,-0.426910638,4.18065001,3.09777821,3.09561412
69.404944,4.24264069,4.08269575,0.39993117,4.08105541,3.09753555,3.09537319
69.415436,4.12310563,3.99771997,0.354098376,3.99604622,3.09729282,3.0951322
69.425928,4,3.92500962,0.27384372,3.92330635,3.09705006,3.09489116
69.436419,3.74165739,3.86248499,-0.347602651,3.86075564,3.09680729,3.0946501
69.446911,3.31662479,3.80832717,-0.701214929,3.80657474,3.09656445,3.09440897
69.457402,4,3.76102465,0.488851053,3.75925171,3.0963216,3.09416782
69.467894,4,3.71931609,0.529796098,3.71752481,3.09607869,3.0939266
69.478386,4.47213595,3.68219529,0.888786064,3.6803875,3.09583575,3.09368534
69.488877,3.60555128,3.64886079,-0.208109392,3.64703805,3.09559279,3.09344405
69.499369,3.60555128,3.61867254,-0.114548084,3.61683615,3.09534977,3.09320271
69.50986,3,3.59113972,-0.768856114,3.58929083,3.09510674,3.09296134
69.520352,4,3.56586801,0.658886936,3.56400758,3.09486365,3.0927199
69.530844,3.74165739,3.54255388,0.446210165,3.54068279,3.09462052,3.09247843
69.541335,3.87298335,3.52095604,0.593318891,3.51907506,3.09437739,3.09223693
69.551827,4,3.50087456,0.706488101,3.49898438,3.09413419,3.09199537
69.562318,3,3.48215314,-0.694372478,3.48025438,3.09389098,3.09175379
69.57281,3.74165739,3.46465487,0.526310281,3.46274812,3.09364772,3.09151214
69.583302,2.23606798,3.4482687,-1.10099987,3.44635447,3.09340442,3.09127045
69.593793,2.82842712,3.43289883,-0.777477785,3.43097762,3.09316111,3.09102875
69.604285,4,3.41845747,0.762589362,3.41652974,3.09291774,3.09078697
69.614776,3,3.4048724,-0.636295845,3.40293857,3.09267436,3.09054518
69.625268,2.82842712,3.39207419,-0.750764321,3.39013466,3.09243092,3.09030333
69.63576,2.44948974,3.3800041,-0.964631721,3.37805923,3.09218745,3.09006144
69.646251,3.16227766,3.36860893,-0.454237018,3.36665907,3.09194396,3.08981952
69.656743,3.87298335,3.35783727,0.717736771,3.35588275,3.09170042,3.08957755
69.667234,3.16227766,3.34764639,-0.430544686,3.3456875,3.09145688,3.08933555
69.677726,3.16227766,3.33799343,-0.419184648,3.33603047,3.09121327,3.0890935
69.688218,3.16227766,3.328842,-0.408122945,3.32687522,3.09096963,3.0888514
69.698709,4.24264069,3.32015863,0.960459294,3.31818829,3.09072598,3.08860929
69.709201,3.60555128,3.31191023,0.541886565,3.30993656,3.09048228,3.08836711
69.719692,3.46410162,3.30406947,0.400040176,3.3020927,3.09023857,3.08812492
69.730184,4.12310563,3.2966083,0.909118986,3.29462862,3.0899948,3.08788266
69.740676,2.64575131,3.28950296,-0.802341355,3.28752058,3.089751,3.08764037
69.751167,3.87298335,3.28273151,0.768278487,3.28074661,3.08950719,3.08739806
69.761659,3.60555128,3.2762718,0.573828785,3.27428455,3.08926332,3.08715569
69.77215,3.31662479,3.27010578,0.215682652,3.26811634,3.08901945,3.0869133
69.782642,2.44948974,3.26421444,-0.902621018,3.26222297,3.08877552,3.08667085
69.793134,2.23606798,3.25858186,-1.01119428,3.25658849,3.08853156,3.08642837
69.803625,2.23606798,3.25319319,-1.00852626,3.25119807,3.08828759,3.08618587
69.814117,2.64575131,3.24803321,-0.776068231,3.24603646,3.08804357,3.08594331
69.824608,3.74165739,3.24308967,0.706093278,3.24109142,3.08779954,3.08570073
69.8351,2.64575131,3.23834934,-0.769803889,3.2363497,3.08755546,3.0854581
69.845592,3.31662479,3.23380126,0.28779078,3.23180034,3.08731135,3.08521542
69.856083,4,3.22943517,0.877818221,3.22743307,3.08706723,3.08497274
69.866575,4.12310563,3.2252403,0.947557557,3.22323712,3.08682306,3.08472999
69.877066,3.31662479,3.22120817,0.3088958,3.219204,3.08657888,3.08448723
69.887558,3.46410162,3.21732935,0.496761779,3.21532428,3.08633465,3.08424441
69.89805,3.31662479,3.21359611,0.320980806,3.21159022,3.08609039,3.08400156
69.908541,3.16227766,3.21000121,-0.218457215,3.20799458,3.08584612,3.08375869
69.919033,3.31662479,3.20653687,0.331795001,3.20452956,3.0856018,3.08351577
69.929524,3.60555128,3.20319708,0.63431396,3.20118917,3.08535748,3.08327283
69.940016,3.31662479,3.19997496,0.341540382,3.19796652,3.0851131,3.08302983
69.950508,3.46410162,3.19686498,0.516949357,3.19485607,3.08486869,3.0827868
69.960999,2.82842712,3.19386191,-0.604512022,3.19185259,3.08462428,3.08254376
69.971491,3.16227766,3.19096001,-0.169358635,3.18895033,3.08437982,3.08230066
69.981982,2.64575131,3.18815496,-0.73648058,3.18614498,3.08413536,3.08205755
69.992474,3.74165739,3.18544164,0.745798732,3.18343142,3.08389084,3.08181438
70.002966,2.82842712,3.18281601,-0.595305707,3.18080559,3.0836463,3.08157118
70.013457,2.82842712,3.18027424,-0.593167021,3.17826366,3.08340175,3.08132796
70.023949,3,3.17781201,-0.421677608,3.17580132,3.08315715,3.08108469
70.03444,2.64575131,3.17542616,-0.727787637,3.1734154,3.08291255,3.08084142
70.044932,2.44948974,3.17311281,-0.850660374,3.17110203,3.0826679,3.08059808
70.055424,3.46410162,3.17086898,0.541509589,3.16885821,3.08242322,3.08035471
70.065915,3.46410162,3.1686918,0.543516158,3.16668107,3.08217854,3.08011133
70.076407,3.31662479,3.16657797,0.387358772,3.16456732,3.08193381,3.0798679
70.086898,2,3.16452516,-1.07913167,3.16251462,3.08168907,3.07962446
70.09739,3,3.16253037,-0.40315056,3.16051998,3.08144429,3.07938096
70.107882,2.82842712,3.16059136,-0.576336915,3.15858114,3.08119949,3.07913743
70.118373,2.82842712,3.15870597,-0.574698921,3.15669595,3.08095468,3.07889389
70.128865,3,3.15687163,-0.39607024,3.15486184,3.08070982,3.0786503
70.139356,4,3.1550866,0.919191711,3.15307705,3.08046496,3.0784067
70.149848,3.46410162,3.15334853,0.557452315,3.15133926,3.08022005,3.07816305
70.16034,3.16227766,3.15165572,0.103062821,3.14964674,3.07997512,3.07791937
70.170831,3.46410162,3.1500065,0.56044189,3.14799785,3.07973019,3.07767567
70.181323,3.74165739,3.14839887,0.770232768,3.14639056,3.07948521,3.07743193
70.191814,3.31662479,3.14683149,0.412059821,3.14482354,3.07924023,3.07718818
70.202306,3,3.14530253,-0.381185684,3.14329496,3.07899521,3.07694437
70.212798,2.23606798,3.14381064,-0.9527553,3.14180347,3.07875016,3.07670054
70.223289,3.46410162,3.14235456,0.567227513,3.14034781,3.07850511,3.0764567
70.233781,2.82842712,3.14093268,-0.559021965,3.13892635,3.07826001,3.07621281
70.244272,3.87298335,3.13954398,0.856410743,3.1375381,3.07801492,3.07596891
70.254764,3.46410162,3.13818699,0.570889331,3.13618157,3.07776978,3.07572496
70.265256,2.82842712,3.13686066,-0.555367925,3.13485571,3.07752461,3.07548099
70.275747,4,3.135564,0.929750502,3.13355955,3.07727945,3.07523701
70.286239,2.82842712,3.13429572,-0.55305388,3.13229176,3.07703425,3.07499297
70.29673,3.31662479,3.13305503,0.42845042,3.13105158,3.07678904,3.07474893
70.307222,2.64575131,3.13184072,-0.697201127,3.1298378,3.07654379,3.07450485
70.317714,3.74165739,3.13065199,0.781668339,3.12864961,3.07629852,3.07426073
70.328205,3.16227766,3.12948806,0.181078979,3.12748622,3.07605325,3.07401661
70.338697,3.46410162,3.12834786,0.579442626,3.12634657,3.07580794,3.07377244
70.349188,3,3.12723078,-0.35669424,3.12523005,3.07556263,3.07352827
70.35968,3.74165739,3.12613584,0.784551813,3.12413568,3.07531728,3.07328405
70.370172,3.74165739,3.12506239,0.78523563,3.12306282,3.07507191,3.0730398
70.380663,2.82842712,3.12400982,-0.543675178,3.12201084,3.07482654,3.07279555
70.391155,2.82842712,3.12297725,-0.54272472,3.12097885,3.07458112,3.07255125
70.401646,3.31662479,3.1219642,0.441203574,3.1199664,3.07433572,3.07230695
70.412138,2.23606798,3.12096985,-0.94069223,3.11897267,3.07409026,3.0720626
70.42263,3.46410162,3.1199937,0.586607124,3.11799713,3.07384479,3.07181823
70.433121,3.46410162,3.11903525,0.587423501,3.1170393,3.07359933,3.07157386
70.443613,1.41421356,3.11809375,-1.30532762,3.11609843,3.07335382,3.07132943
70.454104,3.60555128,3.11716886,0.698843626,3.11517417,3.07310832,3.07108501
70.464596,4,3.11625988,0.94007453,3.11426582,3.07286278,3.07084054
70.475088,3.87298335,3.1153664,0.870411943,3.11337298,3.07261722,3.07059604
70.485579,3.87298335,3.11448802,0.870916373,3.11249524,3.07237166,3.07035155
70.496071,4,3.11362412,0.941475375,3.11163199,3.07212607,3.07010701
70.506562,3.16227766,3.11277442,0.222493233,3.11078294,3.07188048,3.06986247
70.517054,2.44948974,3.11193834,-0.813909451,3.10994751,3.07163485,3.06961788
70.527546,3.31662479,3.11111554,0.453331281,3.10912537,3.0713892,3.06937327
70.538037,3.60555128,3.11030571,0.703736857,3.1083162,3.07114356,3.06912867
70.548529,2.23606798,3.10950832,-0.9345803,3.10751947,3.07089788,3.06888402
70.55902,2.82842712,3.10872314,-0.529429896,3.10673496,3.07065221,3.06863936
70.569512,2.23606798,3.10794968,-0.93374606,3.10596217,3.0704065,3.06839467
70.580004,4.12310563,3.10718768,1.00792755,3.10520083,3.07016077,3.06814995
70.590495,3,3.10643687,-0.326246632,3.10445069,3.06991506,3.06790524
70.600987,2.82842712,3.10569679,-0.526564019,3.10371129,3.0696693,3.06766048
70.611478,3,3.10496729,-0.323986557,3.10298246,3.06942355,3.06741572
70.62197,2,3.10424793,-1.05083202,3.10226377,3.06917777,3.06717093
70.632462,3.31662479,3.10353849,0.461612721,3.10155501,3.06893197,3.06692611
70.642953,3.46410162,3.10283876,0.601051456,3.10085596,3.06868618,3.06668129
70.653445,3.16227766,3.10214836,0.245212771,3.10016623,3.06844035,3.06643643
70.663936,3.16227766,3.10146714,0.246597883,3.09948569,3.06819453,3.06619158
70.674428,3.31662479,3.10079475,0.46457512,3.09881398,3.06794868,3.06594668
70.68492,2.82842712,3.10013099,-0.521252212,3.0981509,3.06770281,3.06570177
70.695411,3,3.09947571,-0.315397706,3.09749629,3.06745695,3.06545686
70.705903,3.87298335,3.09882856,0.879860665,3.09684982,3.06721106,3.06521191
70.716394,2.64575131,3.09818943,-0.672635207,3.09621137,3.06696518,3.06496696
70.726886,3.31662479,3.09755801,0.468045702,3.09558062,3.06671926,3.06472198
70.737378,3.31662479,3.09693415,0.468711681,3.09495744,3.06647333,3.06447697
70.747869,3.74165739,3.09631771,0.803330364,3.09434168,3.06622742,3.06423198
70.758361,2.64575131,3.09570839,-0.670788403,3.09373303,3.06598146,3.06398694
70.768852,3.87298335,3.09510612,0.881973483,3.09313143,3.06573552,3.06374191
70.779344,1.73205081,3.09451061,-1.16724453,3.09253659,3.06548955,3.06349684
70.789836,2.44948974,3.09392174,-0.802765218,3.0919484,3.06524357,3.06325175
70.800327,3.74165739,3.0933394,0.805181959,3.09136673,3.06499759,3.06300667
70.810819,3.74165739,3.09276332,0.805539611,3.09079132,3.06475159,3.06276155
70.82131,2.82842712,3.09219346,-0.513581866,3.09022212,3.0645056,3.06251644
70.831802,3.60555128,3.09162955,0.716883344,3.08965888,3.06425957,3.06227129
70.842294,3.31662479,3.0910715,0.474924513,3.08910149,3.06401354,3.06202613
70.852785,3.87298335,3.09051922,0.884570024,3.08854988,3.06376752,3.06178097
70.863277,3.46410162,3.08997247,0.611660974,3.08800379,3.06352147,3.06153578
70.873768,3.46410162,3.08943122,0.612103258,3.0874632,3.06327543,3.0612906
70.88426,3,3.08889523,-0.298153031,3.08692787,3.06302936,3.06104538
70.894752,3.60555128,3.08836443,0.719157035,3.08639773,3.06278329,3.06080014
70.905243,2.64575131,3.08783876,-0.664896569,3.08587271,3.06253722,3.06055492
70.915735,3.46410162,3.08731798,0.613827038,3.08535258,3.06229113,3.06030966
70.926226,3.46410162,3.08680209,0.614247121,3.08483734,3.06204506,3.06006441
70.936718,3.60555128,3.08629087,0.720597255,3.08432677,3.06179895,3.05981913
70.94721,3.74165739,3.08578427,0.809859938,3.08382081,3.06155283,3.05957383
70.957701,3.31662479,3.08528222,0.480980841,3.08331941,3.06130674,3.05932854
70.968193,2.64575131,3.08478453,-0.662595821,3.08282236,3.06106061,3.05908322
70.978684,3,3.0842912,-0.290329467,3.08232966,3.0608145,3.05883791
70.989176,2.23606798,3.08380203,-0.920724743,3.08184113,3.06056836,3.05859257
70.999668,3.74165739,3.08331698,0.811381791,3.08135671,3.06032222,3.05834721
71.010159,3.46410162,3.08283599,0.617467102,3.08087636,3.06007609,3.05810187
71.020651,2.44948974,3.0823589,-0.79553074,3.08039989,3.05982994,3.0578565
71.031142,2.64575131,3.0818857,-0.660404718,3.07992732,3.0595838,3.05761114
71.041634,3.74165739,3.08141623,0.812552251,3.07945847,3.05933764,3.05736574
71.052126,3.74165739,3.08095043,0.812838823,3.07899329,3.05909147,3.05712034
71.062617,4.89897949,3.08048829,1.34851444,3.07853177,3.05884532,3.05687495
71.073109,2.23606798,3.08002963,-0.918673857,3.07807372,3.05859915,3.05662952
71.0836,3.16227766,3.07957447,0.287581624,3.07761917,3.05835299,3.05638412
71.094092,2,3.07912264,-1.03880828,3.07716795,3.05810681,3.05613868
71.104584,4.12310563,3.07867412,1.02197432,3.07672003,3.05786063,3.05589323
71.115075,3.16227766,3.07822889,0.289911666,3.0762754,3.05761446,3.0556478
71.125567,3.46410162,3.07778678,0.621542306,3.07583389,3.05736827,3.05540233
71.136058,3.16227766,3.07734782,0.291427252,3.07539552,3.0571221,3.05515689
71.14655,4.24264069,3.07691186,1.07968923,3.07496015,3.05687591,3.05491141
71.157042,3.74165739,3.07647887,0.815584767,3.07452776,3.05662971,3.05466592
71.167533,4.69041576,3.07604885,1.27057739,3.07409833,3.05638354,3.05442046
71.178025,2.23606798,3.07562165,-0.916271616,3.07367171,3.05613734,3.05417496
71.188516,3.46410162,3.07519729,0.623621939,3.07324793,3.05589117,3.05392948
71.199008,3.60555128,3.07477564,0.728543503,3.07282685,3.05564497,3.05368397
71.2095,3.46410162,3.07435668,0.624295553,3.07240846,3.05539877,3.05343846
71.219991,4.12310563,3.07394039,1.02428767,3.07199275,3.05515259,3.05319296
71.230483,2.82842712,3.07352666,-0.49507528,3.07157957,3.05490639,3.05294744
71.240974,2,3.0731155,-1.03591288,3.07116898,3.05466022,3.05270193
71.251466,3.60555128,3.07270678,0.729961981,3.07076082,3.05441402,3.0524564
71.261958,3.87298335,3.07230051,0.894808829,3.0703551,3.05416782,3.05221086
71.272449,4.47213595,3.07189666,1.18331707,3.06995181,3.05392165,3.05196534
71.282941,4,3.07149512,0.963589579,3.06955082,3.05367546,3.0517198
71.293432,2.64575131,3.07109593,-0.652184495,3.06915216,3.05342929,3.05147427
71.303924,3,3.07069895,-0.265892738,3.06875573,3.0531831,3.05122872
71.314416,3.87298335,3.07030419,0.895923635,3.0683615,3.05293691,3.05098317
71.324907,3.87298335,3.06991164,0.896142684,3.06796949,3.05269075,3.05073764
71.335399,3.31662479,3.06952118,0.497095171,3.06757956,3.05244457,3.05049208
71.34589,4.69041576,3.06913286,1.27329608,3.06719177,3.05219842,3.05024655
71.356382,2.82842712,3.06874656,-0.490223858,3.06680599,3.05195224,3.05000099
71.366874,3.16227766,3.06836227,0.306456177,3.06642222,3.05170607,3.04975542
71.377365,4,3.06798001,0.965411826,3.06604047,3.05145993,3.04950988
71.387857,3.60555128,3.06759965,0.733451856,3.06566063,3.05121376,3.04926432
71.398348,3.46410162,3.06722124,0.629984423,3.06528273,3.05096763,3.04901878
71.40884,3.87298335,3.06684468,0.897852255,3.06490666,3.05072148,3.04877322
71.419332,2.23606798,3.06646995,-0.911263944,3.06453244,3.05047533,3.04852765
71.429823,3,3.06609708,-0.257093521,3.06416006,3.05022921,3.04828212
71.440315,3,3.06572595,-0.256370725,3.06378943,3.04998308,3.04803655
71.450806,3,3.0653566,-0.255649377,3.06342057,3.04973697,3.04779102
71.461298,3.31662479,3.06498894,0.50163318,3.0630534,3.04949085,3.04754546
71.47179,3,3.06462297,-0.254210488,3.06268791,3.04924473,3.0472999
71.482281,3.46410162,3.0642587,0.632331335,3.06232411,3.04899864,3.04705437
71.492773,4,3.06389602,0.967524666,3.06196191,3.04875254,3.04680881
71.503264,3,3.06353499,-0.252061471,3.06160134,3.04850647,3.04656329
71.513756,3,3.06317549,-0.251347357,3.06124231,3.04826038,3.04631774
71.524248,3.46410162,3.06281756,0.633469857,3.06088484,3.0480143,3.04607219
71.534739,3.60555128,3.06246118,0.736946468,3.06052892,3.04776826,3.04582667
71.545231,3.46410162,3.06210627,0.634031029,3.06017446,3.04752219,3.04558114
71.555722,3.46410162,3.06175287,0.634309658,3.05982152,3.04727616,3.04533563
71.566214,3.31662479,3.0614009,0.505196886,3.05946999,3.04703012,3.0450901
71.576706,3,3.06105035,-0.247083695,3.05911988,3.04678409,3.04484457
71.587197,3.87298335,3.06070125,0.90126694,3.05877122,3.04653808,3.04459907
71.597689,4.12310563,3.0603535,1.0308987,3.0584239,3.04629207,3.04435356
71.60818,2.82842712,3.06000715,-0.481227622,3.05807798,3.04604609,3.04410807
71.618672,4.12310563,3.05966211,1.03123398,3.05773337,3.0458001,3.04386257
71.629164,3.87298335,3.05931839,0.902033788,3.05739007,3.04555411,3.04361707
71.639655,3.87298335,3.05897601,0.902223551,3.05704811,3.04530816,3.0433716
71.650147,3.74165739,3.05863488,0.826451757,3.05670739,3.0450622,3.04312612
71.660638,3.60555128,3.05829505,0.739767686,3.05636797,3.04481628,3.04288067
71.67113,4,3.05795643,0.970589292,3.05602975,3.04457034,3.04263519
71.681622,3.60555128,3.05761903,0.740224453,3.05569276,3.04432442,3.04238973
71.692113,3.60555128,3.05728288,0.740451478,3.05535701,3.04407853,3.0421443
71.702605,4.24264069,3.0569479,1.08889522,3.05502242,3.04383263,3.04189885
71.713096,3.16227766,3.05661411,0.325059297,3.05468902,3.04358677,3.04165344
71.723588,3.60555128,3.05628146,0.741127395,3.05435675,3.0433409,3.04140801
71.73408,3.31662479,3.05594995,0.51056326,3.05402562,3.04309504,3.04116259
71.744571,3.87298335,3.0556196,0.904081716,3.05369565,3.04284923,3.0409172
71.755063,3.87298335,3.05529033,0.9042638,3.05336675,3.0426034,3.0406718
71.765554,3.16227766,3.05496218,0.327590409,3.05303898,3.04235761,3.04042643
71.776046,3.31662479,3.05463509,0.511849291,3.05271225,3.04211181,3.04018105
71.786538,4.12310563,3.05430907,1.03382617,3.05238659,3.04186602,3.03993568
71.797029,4,3.05398414,0.972633467,3.05206202,3.04162028,3.03969034
71.807521,3.60555128,3.05366022,0.742893706,3.05173845,3.04137453,3.03944499
71.818012,3.87298335,3.05333735,0.905343024,3.05141593,3.04112882,3.03919967
71.828504,3,3.05301548,-0.230250902,3.0510944,3.0408831,3.03895435
71.838996,2.23606798,3.05269461,-0.903673962,3.05077387,3.04063739,3.03870903
71.849487,3.60555128,3.05237476,0.743758373,3.05045436,3.04039173,3.03846376
71.859979,3.60555128,3.05205586,0.743972724,3.05013579,3.04014606,3.03821847
71.87047,3.87298335,3.05173797,0.906225899,3.04981822,3.03990044,3.03797321
71.880962,4.69041576,3.051421,1.28023231,3.04950158,3.0396548,3.03772795
71.891454,2.82842712,3.05110498,-0.471887548,3.04918588,3.03940919,3.0374827
71.901945,2.44948974,3.05078994,-0.775435487,3.04887115,3.03916362,3.03723749
71.912437,2.82842712,3.05047579,-0.4712204,3.04855732,3.03891804,3.03699227
71.922928,3.60555128,3.05016259,0.745244041,3.04824443,3.03867251,3.03674709
71.93342,3.74165739,3.04985028,0.831749424,3.04793242,3.03842697,3.03650189
71.943912,3.74165739,3.04953887,0.831936605,3.04762131,3.03818145,3.03625672
71.954403,3,3.04922839,-0.221874714,3.04731112,3.03793598,3.03601158
71.964895,3.46410162,3.04891876,0.644346841,3.04700178,3.0376905,3.03576643
71.975386,2.64575131,3.04861005,-0.634711538,3.04669335,3.03744507,3.03552133
71.985878,3.60555128,3.04830218,0.746491191,3.04638576,3.03719963,3.03527621
71.99637,2.82842712,3.04799517,-0.468580889,3.04607904,3.03695422,3.03503111
72.006861,3.74165739,3.04768906,0.833047613,3.0457732,3.03670885,3.03478606
72.017353,3.60555128,3.04738378,0.747106083,3.04546818,3.03646348,3.03454099
72.027844,4.24264069,3.04707937,1.09341727,3.04516404,3.03621816,3.03429597
72.038336,3.87298335,3.04677578,0.908959607,3.04486071,3.03597283,3.03405095
72.048828,4.24264069,3.04647303,1.0936945,3.04455822,3.03572753,3.03380594
72.059319,2.82842712,3.04617115,-0.466630498,3.04425659,3.03548227,3.03356097
72.069811,2.82842712,3.04587007,-0.466307778,3.04395576,3.03523702,3.033316
72.080302,1.73205081,3.04556985,-1.14608858,3.04365578,3.03499181,3.03307107
72.090794,3.46410162,3.04527043,0.64717168,3.04335661,3.0347466,3.03282613
72.101286,3.60555128,3.04497184,0.74871853,3.04305825,3.03450142,3.03258122
72.111777,3,3.0446741,-0.211362484,3.04276074,3.03425628,3.03233635
72.122269,3.60555128,3.04437716,0.749115558,3.04246403,3.03401115,3.03209147
72.13276,3.60555128,3.04408106,0.749313159,3.04216816,3.03376606,3.03184664
72.143252,3,3.04378577,-0.209250494,3.04187308,3.03352098,3.03160181
72.153744,2.82842712,3.0434913,-0.46375012,3.04157883,3.03327592,3.031357
72.164235,3.60555128,3.04319768,0.749902389,3.04128542,3.03303091,3.03111224
72.174727,2.44948974,3.04290487,-0.770334424,3.04099281,3.03278591,3.03086747
72.185218,3.74165739,3.04261291,0.836088795,3.04070106,3.03254095,3.03062275
72.19571,3.46410162,3.04232177,0.649445801,3.04041011,3.032296,3.03037802
72.206202,4.12310563,3.04203146,1.03974716,3.04012,3.03205108,3.03013332
72.216693,3.16227766,3.04174203,0.347182418,3.03983076,3.03180621,3.02988867
72.227185,3.87298335,3.04145342,0.911882626,3.03954234,3.03156134,3.02964402
72.237676,3.46410162,3.0411657,0.650335231,3.0392548,3.03131653,3.02939941
72.248168,3.46410162,3.04087882,0.650555756,3.0389681,3.03107172,3.02915481
72.25866,3.60555128,3.04059282,0.751637181,3.03868227,3.03082694,3.02891023
72.269151,3.46410162,3.04030774,0.650994528,3.03839736,3.03058221,3.02866569
72.279643,2,3.04002353,-1.01981544,3.03811331,3.03033749,3.02842116
72.290134,3.46410162,3.03974026,0.651430237,3.03783021,3.03009282,3.02817668
72.300626,4.47213595,3.0394579,1.1969453,3.037548,3.02984816,3.0279322
72.311118,3,3.03917648,-0.197930483,3.03726673,3.02960353,3.02768775
72.321609,3.46410162,3.03889605,0.652077885,3.03698645,3.02935895,3.02744334
72.332101,3.16227766,3.03861657,0.351654782,3.03670712,3.02911439,3.02719894
72.342592,3.87298335,3.03833814,0.913589192,3.03642883,3.02886987,3.02695459
72.353084,2.64575131,3.0380607,-0.626346061,3.03615153,3.02862537,3.02671024
72.363576,3.74165739,3.03778432,0.838971434,3.03587528,3.0283809,3.02646593
72.374067,2.82842712,3.03750905,-0.457254771,3.03560014,3.02813648,3.02622166
72.384559,3.87298335,3.03723487,0.914192799,3.03532609,3.02789207,3.02597739
72.39505,3,3.03696187,-0.192254706,3.03505321,3.02764772,3.02573318
72.405542,3,3.03669003,-0.191546428,3.03478149,3.02740338,3.02548898
72.416034,4.12310563,3.03641943,1.04244242,3.03451099,3.02715908,3.0252448
72.426525,3.16227766,3.03615012,0.355144394,3.0342418,3.02691483,3.02500068
72.437017,2.82842712,3.03588211,-0.455472268,3.03397389,3.02667059,3.02475656
72.447508,3.74165739,3.03561551,0.840262983,3.03370739,3.02642641,3.0245125
72.458,2.64575131,3.03535031,-0.624178663,3.0334423,3.02618224,3.02426844
72.468492,2.82842712,3.03508662,-0.454598172,3.0331787,3.02593811,3.02402442
72.478983,3,3.03482453,-0.186613311,3.0329167,3.02569404,3.02378044
72.489475,3.87298335,3.03456406,0.915652384,3.03265631,3.02544997,3.02353648
72.499966,3.16227766,3.03430535,0.357732182,3.03239769,3.02520597,3.02329257
72.510458,2.82842712,3.03404844,-0.453454862,3.03214086,3.02496199,3.02304867
72.52095,3.16227766,3.03379346,0.358446932,3.03188596,3.02471804,3.02280481
72.531441,3.16227766,3.03354054,0.358799548,3.03163312,3.02447415,3.022561
72.541933,3.74165739,3.03328977,0.841645776,3.03138242,3.02423027,3.0223172
72.552424,3.74165739,3.03304133,0.841793355,3.03113404,3.02398646,3.02207345
72.562916,3,3.03279533,-0.181094808,3.0308881,3.02374266,3.02182972
72.573408,2.82842712,3.03255196,-0.451801762,3.03064479,3.0234989,3.02158602
72.583899,3,3.03231143,-0.179753816,3.03040433,3.0232552,3.02134238
72.594391,3,3.03207394,-0.179091975,3.03016689,3.02301151,3.02109875
72.604882,3,3.03183976,-0.17843699,3.02993276,3.0227679,3.02085517
72.615374,3,3.03160916,-0.177789641,3.02970221,3.02252429,3.02061161
72.625866,3.46410162,3.0313825,0.657813894,3.0294756,3.02228073,3.02036809
72.636357,3.87298335,3.03116021,0.917509201,3.02925336,3.02203723,3.02012462
72.646849,3.87298335,3.03094277,0.91762769,3.02903597,3.02179375,3.01988117
72.65734,3,3.03073082,-0.175302095,3.02882407,3.02155033,3.01963778
72.667832,3.46410162,3.03052511,0.658465266,3.02861839,3.02130694,3.0193944
72.678324,3.31662479,3.03032661,0.535068386,3.02841994,3.02106358,3.01915106
72.688815,4.35889894,3.03013658,1.15271955,3.02822995,3.02082029,3.01890778
72.699307,3.74165739,3.02995653,0.843623647,3.02804995,3.02057702,3.01866451
72.709798,3.31662479,3.02978848,0.535571016,3.02788194,3.02033381,3.01842131
72.72029,3.16227766,3.0296349,0.36420154,3.02772842,3.02009063,3.01817812
72.730782,2.44948974,3.02949897,-0.761583368,3.02759255,3.01984748,3.01793497
72.741273,3.46410162,3.02938464,0.659330702,3.02747829,3.01960441,3.01769188
72.751765,2,3.02929677,-1.01454264,3.0273905,3.01936136,3.01744881
72.762256,3.74165739,3.02924132,0.844047431,3.02733515,3.01911837,3.0172058
72.772748,3.31662479,3.02922544,0.5360964,3.02731938,3.01887541,3.01696281
72.78324,2.82842712,3.0292576,-0.448141137,3.02735169,3.01863249,3.01671986
72.793731,2.64575131,3.02934764,-0.619351536,3.0274419,3.01838964,3.01647697
72.804223,3.31662479,3.02950675,0.535833964,3.02760123,3.01814681,3.01623411
72.814714,3.60555128,3.02974738,0.758817431,3.02784212,3.01790405,3.0159913
72.825206,3,3.03008308,-0.173444751,3.02817813,3.01766131,3.01574852
72.835698,4,3.03052806,0.984617662,3.02862349,3.01741863,3.01550578
72.846189,3.16227766,3.03109672,0.362189101,3.0291926,3.01717601,3.0152631
72.856681,4,3.03180324,0.9839699,3.02989965,3.01693341,3.01502044
72.867172,3.60555128,3.03266041,0.756895547,3.03075745,3.01669089,3.01477785
72.877664,2.82842712,3.0336793,-0.453047654,3.03177706,3.01644839,3.01453528
72.888156,3.46410162,3.03486777,0.655159408,3.03296635,3.01620594,3.01429276
72.898647,2.64575131,3.03622956,-0.624882591,3.03432907,3.01596357,3.0140503
72.909139,3.16227766,3.03709922,0.353805649,3.03519934,3.01572122,3.01380786
72.91963,2.82842712,3.03879938,-0.458663558,3.03690063,3.01547894,3.01356549
72.930122,3.31662479,3.0406503,0.52533274,3.03875276,3.01523669,3.01332314
72.940614,3.31662479,3.04262904,0.523446037,3.04073279,3.01499448,3.01308084
72.951105,3.16227766,3.04470312,0.342891444,3.04280821,3.01475236,3.01283861
72.961597,3.74165739,3.04682995,0.833563097,3.04493641,3.01451026,3.0125964
72.972088,2.82842712,3.04895418,-0.469603086,3.047062,3.01426823,3.01235426
72.98258,3.60555128,3.05100846,0.744676314,3.04911759,3.01402623,3.01211215
72.993072,2.44948974,3.05291219,-0.776802711,3.05102253,3.01378429,3.01187008
73.003563,3.60555128,3.05457448,0.742278111,3.05268588,3.01354242,3.01162808
73.014055,3,3.0559,-0.23643181,3.05401224,3.01330058,3.01138611
73.024546,4.12310563,3.05679728,1.03262208,3.05491008,3.01305881,3.0111442
73.035038,1.41421356,3.05719182,-1.28178713,3.05530488,3.01281707,3.01090233
73.04553,2.82842712,3.05703789,-0.478132584,3.05515087,3.01257539,3.0106605
73.056021,4,3.05632764,0.971427998,3.05444018,3.01233379,3.01041875
73.066513,2.82842712,3.05509222,-0.476093579,3.053204,3.01209222,3.01017702
73.077004,3.46410162,3.05339635,0.64086291,3.05150707,3.01185072,3.00993536
73.087496,2.64575131,3.05132592,-0.636847396,3.04943534,3.01160926,3.00969373
73.097988,3.31662479,3.04897633,0.517347524,3.04708428,3.01136785,3.00945216
73.108479,2.44948974,3.0464414,-0.772626467,3.04454776,3.01112652,3.00921065
73.118971,2.82842712,3.04380555,-0.464088809,3.04191024,3.01088522,3.00896918
73.129462,2.44948974,3.04114211,-0.76918942,3.03924511,3.010644,3.00872778
73.139954,3.46410162,3.0385105,0.652373451,3.03661182,3.01040282,3.0084864
73.150446,3.60555128,3.03595855,0.754713674,3.03405824,3.01016169,3.00824509
73.160937,3,3.03352284,-0.183092434,3.03162096,3.00992064,3.00800384
73.171429,3.74165739,3.03122932,0.842868951,3.02932596,3.00967963,3.00776263
73.18192,3.16227766,3.02909607,0.364940536,3.02719131,3.0094387,3.00752149
73.192412,3.46410162,3.02713271,0.661036238,3.02522666,3.0091978,3.00728038
73.202904,2.23606798,3.02534294,-0.888411481,3.0234357,3.00895696,3.00703933
73.213395,3.46410162,3.02372489,0.663608863,3.02181657,3.0087162,3.00679835
73.223887,2.44948974,3.02227184,-0.756823688,3.02036252,3.00847548,3.00655741
73.234378,2.82842712,3.02097422,-0.438801882,3.01906401,3.00823485,3.00631654
73.24487,2.44948974,3.01981956,-0.755201837,3.01790854,3.00799425,3.00607571
73.255362,1.73205081,3.01879427,-1.13434715,3.01688252,3.00775371,3.00583493
73.265853,3.31662479,3.01788404,0.546571812,3.01597163,3.00751325,3.00559423
73.276345,3,3.01707431,-0.130668722,3.01516129,3.00727283,3.00535357
73.286836,3.46410162,3.01635138,0.669141413,3.0144378,3.0070325,3.00511298
73.297328,3.16227766,3.0157022,0.382851749,3.0137881,3.0067922,3.00487243
73.30782,3.74165739,3.0151151,0.852374497,3.01320053,3.00655197,3.00463194
73.318311,3.60555128,3.01457975,0.768746721,3.01266473,3.00631182,3.00439152
73.328803,3.31662479,3.01408704,0.550034322,3.01217158,3.00607171,3.00415114
73.339294,3.16227766,3.01362936,0.385549342,3.01171349,3.00583169,3.00391085
73.349786,4.35889894,3.01320024,1.16004255,3.01128397,3.00559171,3.00367058
73.360278,3,3.0127944,-0.113112352,3.01087775,3.00535179,3.00343038
73.370769,2.23606798,3.0124076,-0.881101369,3.01049056,3.00511196,3.00319026
73.381261,2.82842712,3.01203629,-0.428496406,3.01011888,3.00487217,3.00295018
73.391752,3.60555128,3.0116778,0.770631866,3.00976001,3.00463247,3.00271018
73.402244,3.31662479,3.01132988,0.552534988,3.00941172,3.00439281,3.00247021
73.412736,3.74165739,3.01099084,0.854790355,3.00907231,3.00415321,3.00223031
73.423227,3.46410162,3.01065936,0.673381213,3.00874046,3.00391371,3.00199049
73.433719,2.82842712,3.01033431,-0.426505787,3.00841504,3.00367424,3.00175072
73.44421,3.31662479,3.01001491,0.553723648,3.00809527,3.00343487,3.00151102
73.454702,3.60555128,3.00970042,0.771913761,3.00778041,3.00319554,3.00127137
73.465194,2.64575131,3.00939032,-0.603024883,3.00746993,3.00295628,3.00103177
73.475685,3,3.00908419,-0.0953109946,3.00716342,3.00271711,3.00079227
73.486177,3.31662479,3.00878158,0.554836198,3.00686044,3.00247798,3.0005528
73.496668,3,3.00848225,-0.0920991466,3.00656072,3.00223895,3.00031342
73.50716,2.82842712,3.00818586,-0.423979644,3.00626395,3.00199996,3.00007408
73.517652,3.31662479,3.00789221,0.555637098,3.0059699,3.00176103,2.9998348
73.528143,3.46410162,3.0076011,0.675648219,3.00567841,3.00152221,2.99959562
73.538635,2.64575131,3.0073123,-0.60129942,3.00538921,3.00128342,2.99935647
73.549126,3.74165739,3.00702571,0.857106575,3.00510222,3.00104473,2.99911741
73.559618,3.31662479,3.0067411,0.556671974,3.00481722,3.00080609,2.9988784
73.57011,2.44948974,3.00645839,-0.74630332,3.0045341,3.00056752,2.99863945
73.580601,3.31662479,3.00617747,0.557178001,3.00425276,3.00032904,2.99840059
73.591093,3.16227766,3.00589817,0.395448468,3.00397306,3.00009061,2.99816177
73.601584,3.31662479,3.00562045,0.557677631,3.00369492,2.99985228,2.99792305
73.612076,3.16227766,3.00534416,0.396148328,3.00341821,2.99961399,2.99768436
73.622568,3.16227766,3.00506925,0.396495161,3.00314287,2.99937578,2.99744575
73.633059,3.31662479,3.00479565,0.558416635,3.00286885,2.99913766,2.99720723
73.643551,2.44948974,3.00452325,-0.745005711,3.00259602,2.9988996,2.99696875
73.654042,3.60555128,3.00425203,0.775434873,3.00232437,2.99866163,2.99673036
73.664534,3.46410162,3.00398188,0.678321261,3.00205378,2.99842371,2.99649202
73.675026,3.46410162,3.00371277,0.6785196,3.00178422,2.99818586,2.99625375
73.685517,3.46410162,3.00344466,0.678717137,3.00151566,2.99794811,2.99601557
73.696009,3.60555128,3.00317747,0.776127442,3.00124802,2.99771041,2.99577744
73.7065,3.16227766,3.00291119,0.3992073,3.00098128,2.99747282,2.99553941
73.716992,3.31662479,3.00264574,0.560338337,3.00071537,2.99723527,2.99530142
73.727484,3,3.00238109,-0.0487964629,3.00045026,2.9969978,2.9950635
73.737975,3.74165739,3.00211725,0.859965194,3.00018595,2.99676043,2.99482567
73.748467,2.64575131,3.00185412,-0.596743506,2.99992235,2.99652311,2.9945879
73.758958,3,3.00159173,-0.0398964854,2.99965948,2.99628589,2.99435022
73.76945,3.46410162,3.00132999,0.680273198,2.99939726,2.99604873,2.99411259
73.779942,3.16227766,3.00106891,0.401508099,2.99913569,2.99581165,2.99387503
73.790433,3.87298335,3.00080847,0.933903031,2.99887476,2.99557466,2.99363757
73.800925,3,3.00054862,-0.0234226636,2.99861441,2.99533773,2.99340016
73.811416,3,3.00028937,-0.0170110073,2.99835467,2.9951009,2.99316284
73.821908,3,3.00003066,-0.0055374783,2.99809545,2.99486413,2.99292558
73.8324,3.46410162,2.99977249,0.681416995,2.99783677,2.99462744,2.99268839
73.842891,3.16227766,2.99951487,0.403438704,2.99757864,2.99439085,2.9924513
73.853383,3.16227766,2.99925773,0.403757265,2.99732098,2.99415432,2.99221426
73.863874,3,2.9990011,0.0316053163,2.99706383,2.99391789,2.99197732
73.874366,2.44948974,2.99874493,-0.741117524,2.99680712,2.99368152,2.99174043
73.884858,3.74165739,2.99848921,0.862072026,2.99655088,2.99344523,2.99150362
73.895349,2.82842712,2.99823396,-0.412076251,2.99629509,2.99320904,2.99126691
73.905841,3.16227766,2.99797912,0.405337559,2.99603971,2.99297291,2.99103026
73.916332,3.31662479,2.99772473,0.564712369,2.99578478,2.99273689,2.9907937
73.926824,2,2.99747072,-0.998734562,2.99553022,2.99250093,2.9905572
73.937316,3.87298335,2.99721712,0.935823824,2.99527606,2.99226505,2.99032078
73.947807,2.82842712,2.99696392,-0.410532335,2.9950223,2.99202928,2.99008445
73.958299,2.82842712,2.99671108,-0.41022428,2.9947689,2.99179356,2.98984819
73.96879,2.64575131,2.99645864,-0.592205479,2.99451589,2.99155796,2.98961202
73.979282,3,2.99620653,0.0615911193,2.99426321,2.99132241,2.98937591
73.989774,2,2.99595478,-0.997975341,2.99401088,2.99108695,2.98913989
74.000265,2.44948974,2.9957034,-0.739062687,2.99375891,2.9908516,2.98890396
74.010757,2.82842712,2.99545233,-0.408687173,2.99350726,2.99061631,2.98866809
74.021248,3.31662479,2.99520162,0.566941948,2.99325595,2.99038113,2.98843233
74.03174,3.46410162,2.99495121,0.684945552,2.99300495,2.99014601,2.98819662
74.042232,3,2.99470111,0.0727934536,2.99275425,2.98991098,2.987961
74.052723,2.64575131,2.99445136,-0.590508294,2.99250389,2.98967606,2.98772548
74.063215,3.46410162,2.99420188,0.685492328,2.9922538,2.9894412,2.98749002
74.073706,3.16227766,2.99395274,0.410274207,2.99200404,2.98920646,2.98725467
74.084198,3.31662479,2.99370386,0.568261322,2.99175455,2.98897178,2.98701937
74.09469,3.16227766,2.99345528,0.410880011,2.99150534,2.98873718,2.98678416
74.105181,3.16227766,2.993207,0.411182024,2.99125643,2.9885027,2.98654906
74.115673,3.31662479,2.99295899,0.56891634,2.99100778,2.98826828,2.98631401
74.126164,2.64575131,2.99271128,-0.589033076,2.99075943,2.98803398,2.98607908
74.136656,3.60555128,2.99246381,0.782999018,2.99051132,2.98779974,2.9858442
74.147148,3.31662479,2.99221662,0.569568406,2.99026348,2.98756559,2.98560941
74.157639,3.74165739,2.99196972,0.86584506,2.99001593,2.98733156,2.98537473
74.168131,3.74165739,2.99172306,0.865987489,2.98976861,2.98709759,2.98514011
74.178622,3.31662479,2.99147668,0.570217602,2.98952156,2.98686374,2.9849056
74.189114,3.31662479,2.99123053,0.570433398,2.98927475,2.98662996,2.98467116
74.199606,3,2.99098464,0.0949492735,2.98902818,2.98639626,2.9844368
74.210097,3.60555128,2.99073902,0.784099649,2.98878188,2.98616269,2.98420255
74.220589,2.82842712,2.99049362,-0.402574831,2.9885358,2.98592918,2.98396837
74.23108,2.44948974,2.99024849,-0.735363004,2.98828999,2.98569579,2.98373429
74.241572,3,2.99000358,0.0999820902,2.98804438,2.98546246,2.98350028
74.252064,2.82842712,2.98975891,-0.401661284,2.98779902,2.98522924,2.98326636
74.262555,2.82842712,2.9895145,-0.401356921,2.9875539,2.98499612,2.98303255
74.273047,3.31662479,2.98927031,0.572149006,2.987309,2.98476308,2.98279881
74.283538,3,2.98902636,0.104755123,2.98706434,2.98453016,2.98256518
74.29403,3.74165739,2.98878263,0.867683558,2.98681989,2.98429731,2.98233162
74.304522,3.16227766,2.98853913,0.416819547,2.98657567,2.98406455,2.98209815
74.315013,3.31662479,2.98829587,0.57299993,2.98633168,2.98383192,2.98186479
74.325505,2.64575131,2.98805282,-0.585065386,2.9860879,2.98359935,2.9816315
74.335996,3.46410162,2.98781001,0.69013883,2.98584435,2.98336691,2.98139832
74.346488,2.64575131,2.9875674,-0.5846504,2.985601,2.98313454,2.98116521
74.35698,2.64575131,2.98732501,-0.58444307,2.98535787,2.98290226,2.9809322
74.367471,1.73205081,2.98708287,-1.12028213,2.98511497,2.98267011,2.9806993
74.377963,2.64575131,2.98684091,-0.584028768,2.98487226,2.98243803,2.98046647
74.388454,3.31662479,2.9865992,0.574478539,2.98462978,2.98220607,2.98023375
74.398946,2.82842712,2.98635768,-0.397404769,2.98438749,2.98197419,2.98000111
74.409438,3.31662479,2.98611636,0.574898622,2.98414541,2.98174241,2.97976856
74.419929,3.46410162,2.98587529,0.6915391,2.98390356,2.98151075,2.97953612
74.430421,2.64575131,2.9856344,-0.582994931,2.98366188,2.98127916,2.97930376
74.440912,3.46410162,2.98539374,0.691887181,2.98342044,2.9810477,2.97907152
74.451404,2,2.98515327,-0.992548877,2.98317918,2.98081632,2.97883935
74.461896,3.16227766,2.98491301,0.421146828,2.98293812,2.98058503,2.97860727
74.472387,3,2.98467297,0.123802366,2.98269728,2.98035387,2.97837531
74.482879,3.87298335,2.98443312,0.94262942,2.98245662,2.98012279,2.97814343
74.49337,2.82842712,2.9841935,-0.394672487,2.98221618,2.97989183,2.97791166
74.503862,3.31662479,2.98395405,0.576776159,2.98197592,2.97966096,2.97767997
74.514354,3.46410162,2.98371481,0.693099419,2.98173585,2.97943018,2.97744838
74.524845,3.46410162,2.98347579,0.693271824,2.98149601,2.97919953,2.97721691
74.535337,3,2.98323695,0.129472179,2.98125634,2.97896896,2.97698551
74.545828,3.16227766,2.98299834,0.423413888,2.98101688,2.97873852,2.97675423
74.55632,2.64575131,2.9827599,-0.58052441,2.9807776,2.97850816,2.97652303
74.566812,3.46410162,2.98252166,0.693959619,2.98053852,2.9782779,2.97629193
74.577303,3.74165739,2.98228365,0.871420531,2.98029965,2.97804777,2.97606095
74.587795,3.31662479,2.9820458,0.578428031,2.98006094,2.97781772,2.97583004
74.598286,2.82842712,2.98180683,-0.391637206,2.9798211,2.9775878,2.97559926
74.608778,3.16227766,2.98156938,0.425097965,2.97958279,2.97735797,2.97536856
74.61927,2.64575131,2.98133213,-0.57929338,2.97934466,2.97712824,2.97513796
74.629761,2.82842712,2.9810951,-0.390727497,2.97910676,2.97689863,2.97490748
74.640253,3,2.98085825,0.138353727,2.97886901,2.97666912,2.97467708
74.650744,3.60555128,2.98062161,0.790524931,2.97863149,2.97643973,2.97444681
74.661236,3.16227766,2.98038514,0.426488588,2.97839413,2.97621042,2.97421661
74.671728,2.82842712,2.98014888,-0.389514764,2.97815696,2.97598123,2.97398652
74.682219,3.16227766,2.97991283,0.427041959,2.97792,2.97575216,2.97375655
74.692711,3.46410162,2.97967695,0.696006227,2.97768321,2.97552318,2.97352667
74.703202,3.31662479,2.97944129,0.580675041,2.97744664,2.97529434,2.9732969
74.713694,3.60555128,2.9792058,0.791419911,2.97721023,2.97506557,2.97306723
74.724186,3.16227766,2.97897051,0.428143845,2.97697401,2.97483692,2.97283765
74.734677,2.82842712,2.97873543,-0.387696157,2.97673801,2.9746084,2.9726082
74.745169,3.46410162,2.97850053,0.696850831,2.97650217,2.97437997,2.97237884
74.75566,2.44948974,2.97826585,-0.727169932,2.97626654,2.97415168,2.9721496
74.766152,3.46410162,2.97803134,0.6971874,2.97603109,2.97392347,2.97192045
74.776644,3.46410162,2.97779703,0.69735542,2.97579582,2.97369537,2.9716914
74.787135,2.23606798,2.97756294,-0.861101019,2.97556078,2.9734674,2.97146248
74.797627,4,2.97732903,1.01127196,2.9753259,2.97323953,2.97123364
74.808118,3,2.97709533,0.151342879,2.97509123,2.97301179,2.97100494
74.81861,3,2.97686182,0.152112401,2.97485674,2.97278414,2.97077632
74.829102,2.64575131,2.9766285,-0.575219256,2.97462245,2.97255661,2.9705478
74.839593,2.82842712,2.97639542,-0.384666467,2.97438838,2.97232921,2.97031942
74.850085,2.44948974,2.97616251,-0.725722239,2.97415448,2.9721019,2.97009112
74.860576,2.82842712,2.97592984,-0.38406082,2.97392081,2.97187473,2.96986296
74.871068,3.16227766,2.97569735,0.431949425,2.97368733,2.97164765,2.96963488
74.88156,2.82842712,2.97546509,-0.383455295,2.97345405,2.97142068,2.96940691
74.892051,2.64575131,2.97523307,-0.574005013,2.97322102,2.97119385,2.96917907
74.902543,3,2.97500125,0.158109925,2.97298819,2.97096712,2.96895132
74.913034,3.31662479,2.9747697,0.584683754,2.97275561,2.97074053,2.96872371
74.923526,2.82842712,2.97453837,-0.382245013,2.97252326,2.97051403,2.96849618
74.934018,3.16227766,2.97430732,0.433555469,2.97229117,2.97028764,2.96826876
74.944509,2.44948974,2.97407656,-0.724283659,2.97205938,2.9700614,2.96804148
74.955001,3.16227766,2.97384609,0.434087054,2.97182786,2.96983525,2.96781429
74.965492,3,2.97361597,0.162431613,2.97159669,2.96960924,2.96758723
74.975984,2.82842712,2.97338619,-0.380734903,2.97136586,2.96938332,2.96736026
74.986476,3.16227766,2.97315681,0.434880273,2.97113541,2.96915753,2.96713341
74.996967,4,2.97292788,1.01344567,2.97090542,2.96893187,2.96690669
75.007459,2.64575131,2.97269942,-0.571793765,2.97067589,2.96870632,2.96668006
75.01795,3.60555128,2.97247151,0.795663096,2.9704469,2.9684809,2.96645357
75.028442,2.44948974,2.97224417,-0.723017583,2.97021848,2.96825558,2.96622717
75.038934,3.31662479,2.97201747,0.587032643,2.96999069,2.96803039,2.96600088
75.049425,3.31662479,2.97151252,0.587462568,2.96976361,2.967526,2.96577474
75.059917,3.46410162,2.97128748,0.702007218,2.96953726,2.96730126,2.96554868
75.070408,2.82842712,2.97106326,-0.377671994,2.96931172,2.96707666,2.96532276
75.0809,2.82842712,2.97083986,-0.377376113,2.96908699,2.96685216,2.96509694
75.091392,3.46410162,2.97061732,0.702484375,2.96886313,2.96662779,2.96487124
75.101883,2,2.97039568,-0.985086636,2.96864016,2.96640355,2.96464567
75.112375,2.64575131,2.9701749,-0.56958194,2.96841804,2.96617942,2.9644202
75.122866,2.23606798,2.96995498,-0.85667205,2.96819678,2.96595544,2.96419486
75.133358,3,2.96973583,0.173965999,2.96797629,2.96573155,2.96396963
75.14385,3.16227766,2.96951739,0.439044727,2.96775649,2.96550779,2.96374451
75.154341,3.31662479,2.96929955,0.589343058,2.9675373,2.96528417,2.96351953
75.164833,3.87298335,2.96908212,0.950737203,2.9673185,2.96506066,2.96329465
75.175324,3.16227766,2.96886493,0.439787142,2.96709995,2.96483729,2.96306991
75.185816,2.23606798,2.9686477,-0.85590871,2.96688134,2.96461403,2.96284527
75.196308,3.16227766,2.96843014,0.440281178,2.96666241,2.96439089,2.96262075
75.206799,2,2.96821196,-0.983977619,2.96644283,2.9641679,2.96239637
75.217291,2.44948974,2.96799272,-0.720071511,2.96622221,2.96394502,2.96217209
75.227782,3.31662479,2.96777213,0.590637503,2.96600022,2.96372228,2.96194795
75.238274,3.16227766,2.96754981,0.441279785,2.9657765,2.96349965,2.96172391
75.248766,3.46410162,2.96732555,0.704823426,2.96555083,2.96327714,2.96149999
75.259257,2.44948974,2.96709927,-0.719450851,2.96532312,2.96305479,2.96127622
75.269749,3.31662479,2.96687095,0.591399897,2.96509338,2.96283254,2.96105254
75.28024,2.64575131,2.96664082,-0.5664711,2.96486182,2.96261044,2.96082902
75.290732,3.16227766,2.96640911,0.442570393,2.96462867,2.96238845,2.96060559
75.301224,3,2.96617619,0.183912519,2.9643943,2.96216659,2.96038229
75.311715,3,2.96594244,0.184546897,2.9641591,2.96194487,2.96015913
75.322207,3.46410162,2.96570819,0.705969848,2.96392339,2.96172327,2.95993607
75.332698,2.64575131,2.96547378,-0.565440071,2.96368753,2.96150182,2.95971316
75.34319,2.44948974,2.96523946,-0.718157168,2.96345173,2.96128047,2.95949035
75.353682,3,2.96500546,0.187068265,2.96321626,2.96105926,2.95926767
75.364173,3.16227766,2.964772,0.44441609,2.96298132,2.9608382,2.95904514
75.374665,3.16227766,2.96453916,0.444677972,2.96274699,2.96061725,2.95882271
75.385156,2,2.9643071,-0.981991394,2.96251344,2.96039646,2.95860043
75.395648,3.74165739,2.96407584,0.881805846,2.96228068,2.96017577,2.95837825
75.40614,3.46410162,2.96384544,0.7072879,2.96204878,2.95995522,2.9581562
75.416631,3.46410162,2.96361595,0.707450113,2.96181779,2.95973482,2.9579343
75.427123,3.46410162,2.96338732,0.707611682,2.96158764,2.95951453,2.9577125
75.437614,2.82842712,2.96315957,-0.36705919,2.96135838,2.9592944,2.95749085
75.448106,2.82842712,2.96293263,-0.366749922,2.96112991,2.95907438,2.95726931
75.458598,4.12310563,2.96270647,1.07721825,2.96090222,2.9588545,2.9570479
75.469089,3.60555128,2.96248106,0.801916588,2.96067528,2.95863477,2.95682664
75.479581,3.46410162,2.96225631,0.708410407,2.96044899,2.95841516,2.95660549
75.490072,2,2.9620322,-0.980832403,2.96022334,2.9581957,2.95638449
75.500564,2.82842712,2.96180864,-0.365214344,2.95999822,2.95797636,2.95616359
75.511056,3.16227766,2.9615856,0.447986676,2.95977362,2.95775715,2.95594283
75.521547,3,2.96136305,0.196562852,2.95954951,2.9575381,2.95572222
75.532039,3,2.9611409,0.197127123,2.95932579,2.95731917,2.95550172
75.54253,2.64575131,2.96091916,-0.561398119,2.95910248,2.9571004,2.95528137
75.553022,3,2.96069775,0.198247939,2.95887949,2.95688174,2.95506113
75.563514,3.87298335,2.96047668,0.955252149,2.95865683,2.95666322,2.95484102
75.574005,3.87298335,2.96025593,0.955367688,2.95843449,2.95644486,2.95462107
75.584497,2.44948974,2.96003544,-0.714524804,2.9582124,2.95622662,2.95440123
75.594988,2.44948974,2.95981524,-0.7143707,2.9579906,2.95600853,2.95418154
75.60548,2.64575131,2.95959528,-0.560217784,2.95776903,2.95579057,2.95396197
75.615972,3,2.95937556,0.201555055,2.9575477,2.95557274,2.95374253
75.626463,2,2.9591561,-0.979365152,2.95732662,2.95535508,2.95352324
75.636955,4.35889894,2.95893685,1.18319994,2.95710574,2.95513754,2.95330407
75.647446,3.16227766,2.95871785,0.451176026,2.95688511,2.95492016,2.95308505
75.657938,2.82842712,2.95849906,-0.360654865,2.95666467,2.95470289,2.95286615
75.66843,3.60555128,2.95828048,0.804531414,2.95644445,2.95448577,2.95264738
75.678921,2.23606798,2.95806214,-0.849702397,2.95622446,2.95426882,2.95242877
75.689413,3.87298335,2.957844,0.95662916,2.95600465,2.95405198,2.95221027
75.699904,3.46410162,2.95762609,0.711670939,2.95578508,2.95383531,2.95199194
75.710396,2.44948974,2.95740837,-0.712684104,2.9555657,2.95361876,2.95177371
75.720888,2.44948974,2.95719087,-0.712531494,2.95534652,2.95340235,2.95155563
75.731379,2.64575131,2.9569736,-0.557873008,2.95512757,2.95318611,2.9513377
75.741871,3.46410162,2.95675653,0.712281607,2.9549088,2.95296999,2.95111989
75.752362,2.64575131,2.95653968,-0.557483965,2.95469026,2.95275404,2.95090224
75.762854,3.60555128,2.95632303,0.805747012,2.9544719,2.95253821,2.95068471
75.773346,4.58257569,2.95610659,1.27533098,2.95425375,2.95232252,2.95046731
75.783837,2.44948974,2.95589038,-0.71161832,2.95403583,2.952107,2.95025008
75.794329,4,2.95567436,1.02192252,2.95381809,2.95189161,2.95003296
75.80482,3.60555128,2.95545857,0.806283267,2.95360058,2.95167638,2.94981601
75.815312,3,2.95524297,0.211558566,2.95338325,2.95146128,2.94959917
75.825804,3.31662479,2.95502759,0.601329528,2.95316612,2.95124633,2.94938248
75.836295,3,2.95481244,0.212573663,2.95294923,2.95103155,2.94916595
75.846787,1.73205081,2.95459748,-1.10568832,2.95273251,2.95081689,2.94894953
75.857278,4.12310563,2.95438275,1.08107487,2.95251603,2.9506024,2.94873328
75.86777,3.31662479,2.95416822,0.602043663,2.95229973,2.95038804,2.94851715
75.878262,3,2.9539539,0.214583553,2.95208364,2.95017382,2.94830117
75.888753,2.44948974,2.95373981,-0.710105676,2.95186778,2.94995978,2.94808534
75.899245,3.74165739,2.95352592,0.887767686,2.9516521,2.94974586,2.94786964
75.909736,3.46410162,2.95331227,0.714695284,2.95143666,2.94953212,2.9476541
75.920228,3.31662479,2.95309881,0.602931161,2.9512214,2.9493185,2.94743869
75.93072,2.64575131,2.95288556,-0.554196941,2.95100635,2.94910504,2.94722342
75.941211,3,2.95267255,0.217548722,2.95079153,2.94889175,2.94700831
75.951703,3.16227766,2.95245974,0.458058858,2.9505769,2.94867858,2.94679333
75.962194,2.23606798,2.95224717,-0.84627371,2.95036251,2.94846559,2.94657851
75.972686,3.60555128,2.9520348,0.808403661,2.9501483,2.94825273,2.94636382
75.983178,3,2.95182264,0.219493413,2.94993431,2.94804003,2.94614927
75.993669,4.12310563,2.95161073,1.08235618,2.94972055,2.94782749,2.94593489
76.004161,3.31662479,2.95139901,0.604339125,2.94950699,2.94761509,2.94572064
76.014652,3,2.95118754,0.220935419,2.94929366,2.94740286,2.94550655
76.025144,3.16227766,2.95097627,0.459675309,2.94908053,2.94719077,2.94529259
76.035636,3.87298335,2.95076522,0.960321885,2.94886761,2.94697883,2.94507878
76.046127,2.64575131,2.95055442,-0.552089765,2.94865493,2.94676707,2.94486513
76.056619,3.87298335,2.95034382,0.960541267,2.94844245,2.94655543,2.94465162
76.06711,2.64575131,2.95013347,-0.551708399,2.94823021,2.94634398,2.94443827
76.077602,3,2.94992332,0.223778188,2.94801816,2.94613266,2.94422505
76.088094,3.74165739,2.9497134,0.889912346,2.94780634,2.94592149,2.94401198
76.098585,3,2.94950373,0.224713743,2.94759476,2.94571051,2.94379907
76.109077,3.31662479,2.94929427,0.60607798,2.94738338,2.94549965,2.9435863
76.119568,2.64575131,2.94908506,-0.550757434,2.94717225,2.94528898,2.9433737
76.13006,3.16227766,2.94887606,0.461954107,2.94696132,2.94507844,2.94316122
76.140552,2.44948974,2.9486673,-0.706524985,2.94675061,2.94486806,2.9429489
76.151043,2.64575131,2.94845878,-0.55018858,2.94654016,2.94465786,2.94273675
76.161535,2.82842712,2.94825049,-0.346155112,2.94632991,2.94444779,2.94252473
76.172026,3.46410162,2.94804244,0.718372585,2.94611991,2.94423791,2.94231288
76.182518,3.46410162,2.94783462,0.71851722,2.94591012,2.94402816,2.94210117
76.19301,3.31662479,2.94762703,0.607451856,2.94570056,2.94381857,2.9418896
76.203501,2.23606798,2.94741971,-0.843416699,2.94549125,2.94360917,2.94167821
76.213993,3.31662479,2.9472126,0.607792886,2.94528216,2.9433999,2.94146696
76.224484,2.44948974,2.94700575,-0.705348149,2.94507332,2.94319081,2.94125587
76.234976,3.31662479,2.94679913,0.608132928,2.9448647,2.94298187,2.94104492
76.245468,2.82842712,2.94659276,-0.343752282,2.94465631,2.94277308,2.94083412
76.255959,3.60555128,2.94638665,0.811889543,2.94444819,2.94256448,2.9406235
76.266451,3.16227766,2.94618076,0.464862235,2.94424028,2.94235601,2.94041301
76.276942,3.16227766,2.94597515,0.465083338,2.94403264,2.94214773,2.9402027
76.287434,3,2.94576977,0.23287386,2.94382522,2.9419396,2.93999252
76.297926,3.74165739,2.94556463,0.8922403,2.94361805,2.94173162,2.9397825
76.308417,2.64575131,2.94535978,-0.54736502,2.94341114,2.94152383,2.93957265
76.318909,1,2.94515515,-1.39468819,2.94320446,2.94131618,2.93936294
76.3294,3.31662479,2.94495081,0.609650705,2.94299805,2.94110872,2.9391534
76.339892,3.74165739,2.9447467,0.892698541,2.94279187,2.9409014,2.93894401
76.350384,3,2.94454286,0.235493407,2.94258594,2.94069424,2.93873477
76.360875,3.16227766,2.94433929,0.466838698,2.94238029,2.94048727,2.93852571
76.371367,3,2.94413597,0.236355727,2.94217488,2.94028045,2.93831678
76.381858,2.82842712,2.94393294,-0.339861458,2.94196974,2.94007381,2.93810803
76.39235,3.46410162,2.94373015,0.721367774,2.94176485,2.93986732,2.93789943
76.402842,3.60555128,2.94352763,0.813648353,2.94156021,2.93966099,2.93769098
76.413333,3,2.94332541,0.23806426,2.94135586,2.93945485,2.93748271
76.423825,3.16227766,2.94312344,0.468139106,2.94115176,2.93924885,2.93727458
76.434316,3.46410162,2.94292176,0.721927872,2.94094795,2.93904305,2.93706663
76.444808,2.82842712,2.94272035,-0.338072806,2.94074439,2.93883739,2.93685882
76.4553,3.31662479,2.94251921,0.611641707,2.9405411,2.9386319,2.93665117
76.465791,3.46410162,2.94231838,0.722345648,2.94033811,2.9384266,2.9364437
76.476283,3.31662479,2.94211781,0.611969752,2.94013537,2.93822145,2.93623637
76.486774,3.16227766,2.94191755,0.469425293,2.93993294,2.93801648,2.93602923
76.497266,3,2.94171757,0.241417548,2.93973077,2.93781167,2.93582222
76.507758,3.46410162,2.94151787,0.722899538,2.93952888,2.93760702,2.93561538
76.518249,2.44948974,2.94131849,-0.701305035,2.9393273,2.93740257,2.93540872
76.528741,3.31662479,2.9411194,0.61278495,2.939126,2.93719827,2.93520221
76.539232,3.31662479,2.94092062,0.612947121,2.93892501,2.93699415,2.93499587
76.549724,2.64575131,2.94072212,-0.543112156,2.93872429,2.93679019,2.93478968
76.560216,3.31662479,2.94052394,0.613270617,2.93852388,2.9365864,2.93458366
76.570707,3.74165739,2.94032609,0.895171102,2.93832379,2.9363828,2.93437781
76.581199,2.23606798,2.94012853,-0.83908316,2.93812398,2.93617936,2.93417212
76.59169,3.60555128,2.9399313,0.815855362,2.93792451,2.9359761,2.9339666
76.602182,4.12310563,2.93973438,1.08782868,2.93772533,2.935773,2.93376123
76.612674,2,2.93953779,-0.969297575,2.93752646,2.93557008,2.93355603
76.623165,3.74165739,2.93934154,0.895720852,2.93732794,2.93536734,2.93335101
76.633657,3.16227766,2.93914561,0.472368556,2.93712972,2.93516476,2.93314614
76.644148,3.74165739,2.93895003,0.895939372,2.93693185,2.93496238,2.93294146
76.65464,2.82842712,2.93875477,-0.332156058,2.9367343,2.93476015,2.93273692
76.665132,3.16227766,2.93855986,0.472988161,2.93653708,2.93455809,2.93253255
76.675623,3.16227766,2.93836531,0.473193771,2.93634022,2.93435623,2.93232837
76.686115,3.46410162,2.93817111,0.725210665,2.93614368,2.93415453,2.93212433
76.696606,2.82842712,2.93797727,-0.330983609,2.93594752,2.93395302,2.93192048
76.707098,2.82842712,2.93778379,-0.330691189,2.93575169,2.93375167,2.93171678
76.71759,3.31662479,2.93759067,0.615657471,2.93555623,2.93355049,2.93151325
76.728081,2.82842712,2.93739794,-0.330107281,2.93536115,2.93334952,2.93130991
76.738573,3.74165739,2.93720558,0.896912376,2.93516642,2.9331487,2.93110672
76.749064,3,2.93701361,0.250970887,2.93497208,2.93294807,2.93090371
76.759556,2.82842712,2.93682202,-0.329233806,2.93477811,2.93274761,2.93070086
76.770048,3.60555128,2.93663083,0.817875568,2.93458453,2.93254732,2.93049817
76.780539,3.31662479,2.93644006,0.61659122,2.93439136,2.93234724,2.93029568
76.791031,3,2.93624968,0.252488263,2.93419858,2.93214731,2.93009334
76.801522,2.82842712,2.93605973,-0.328074086,2.93400622,2.93194758,2.92989119
76.812014,3.74165739,2.93587019,0.897656503,2.93381426,2.93174801,2.92968919
76.822506,3.60555128,2.93568108,0.818455983,2.93362272,2.93154862,2.92948736
76.832997,3.16227766,2.93549242,0.476219734,2.93343163,2.93134944,2.92928572
76.843489,3,2.9353042,0.254353693,2.93324096,2.93115041,2.92908424
76.85398,3.60555128,2.93511644,0.818800849,2.93305075,2.93095158,2.92888295
76.864472,2.44948974,2.93492914,-0.696734809,2.93286098,2.93075292,2.92868181
76.874964,3.16227766,2.9347423,0.477006667,2.93267167,2.93055444,2.92848085
76.885455,3.46410162,2.93455596,0.727698875,2.93248285,2.93035616,2.92828008
76.895947,3.46410162,2.9343701,0.727826571,2.9322945,2.93015804,2.92807946
76.906438,3.31662479,2.93418475,0.618417366,2.93210666,2.92996013,2.92787904
76.91693,2.64575131,2.9339999,-0.536887873,2.9319193,2.92976238,2.92767877
76.927422,2.23606798,2.93381557,-0.835312871,2.93173246,2.92956481,2.92747868
76.937913,3.46410162,2.93363179,0.728333594,2.93154616,2.92936745,2.92727878
76.948405,3.16227766,2.93344854,0.478360866,2.93136038,2.92917025,2.92707904
76.958896,2.64575131,2.93326587,-0.536203839,2.93117517,2.92897325,2.92687949
76.969388,3.31662479,2.93308375,0.619306905,2.9309905,2.92877643,2.9266801
76.97988,4,2.93290221,1.03300425,2.93080641,2.92857978,2.92648089
76.990371,3.46410162,2.93272129,0.728958381,2.93062293,2.92838334,2.92628187
77.000863,2,2.93254097,-0.96568161,2.93044004,2.92818707,2.92608301
77.011354,2.64575131,2.9323613,-0.53535968,2.93025778,2.92799101,2.92588435
77.021846,2,2.93218225,-0.965495859,2.93007615,2.92779511,2.92568584
77.032338,3,2.93200387,0.260760673,2.92989517,2.9275994,2.92548752
77.042829,3.46410162,2.93182619,0.729572085,2.92971488,2.92740389,2.92528939
77.053321,3.46410162,2.93164919,0.729693379,2.92953526,2.92720856,2.92509142
77.063812,2.64575131,2.93147292,-0.534529338,2.92935637,2.92701343,2.92489365
77.074304,3,2.93129739,0.262111836,2.9291782,2.92681847,2.92469604
77.084796,3,2.93112261,0.262445026,2.92900078,2.9266237,2.92449861
77.095287,2.23606798,2.93094863,-0.83359502,2.92882416,2.92642913,2.92430137
77.105779,2,2.93077545,-0.964767046,2.92864832,2.92623474,2.9241043
77.11627,2.44948974,2.93060312,-0.69362337,2.92847332,2.92604056,2.92390743
77.126762,2.23606798,2.93043164,-0.833284862,2.92829916,2.92584654,2.92371072
77.137254,2.23606798,2.93026104,-0.833182492,2.92812588,2.92565272,2.92351419
77.147745,2.82842712,2.93009138,-0.318848333,2.92795353,2.92545911,2.92331786
77.158237,2.82842712,2.92992266,-0.318583638,2.9277821,2.92526567,2.9231217
77.168728,3,2.92975493,0.265037857,2.92761166,2.92507244,2.92292573
77.17922,3,2.92958821,0.265352196,2.92744222,2.92487938,2.92272993
77.189712,3.74165739,2.92942254,0.901240724,2.92727382,2.92468652,2.92253431
77.200203,3.31662479,2.92925799,0.622387984,2.92710652,2.92449387,2.9223389
77.210695,2.64575131,2.92909455,-0.532299951,2.92694034,2.92430139,2.92214365
77.221186,3.16227766,2.92893231,0.483058335,2.92677534,2.92410912,2.9219486
77.231678,2.64575131,2.92877127,-0.531996202,2.92661154,2.92391703,2.92175371
77.24217,3.46410162,2.92861151,0.731771895,2.92644901,2.92372513,2.92155901
77.252661,2,2.92845309,-0.963562706,2.9262878,2.92353345,2.92136451
77.263153,2.82842712,2.92829603,-0.316020422,2.92612795,2.92334194,2.92117018
77.273644,3.16227766,2.92814043,0.48387729,2.92596955,2.92315064,2.92097605
77.284136,3.16227766,2.92798631,0.484036517,2.92581262,2.92295952,2.92078209
77.294628,4,2.92783376,1.03545461,2.92565726,2.9227686,2.92058832
77.305119,2.82842712,2.92768286,-0.315048779,2.92550353,2.92257789,2.92039475
77.315611,3.31662479,2.92753365,0.623771703,2.92535149,2.92238735,2.92020134
77.326102,3.31662479,2.92738625,0.623889844,2.92520125,2.92219704,2.92000815
77.336594,3.87298335,2.92724071,0.972492999,2.92505285,2.9220069,2.91981512
77.347086,3.31662479,2.92709714,0.624121503,2.92490642,2.92181696,2.91962228
77.357577,3.16227766,2.92695564,0.485100009,2.92476205,2.92162723,2.91942964
77.368069,2.82842712,2.9268163,-0.313670483,2.92461983,2.92143769,2.91923717
77.37856,2.44948974,2.92667924,-0.69078904,2.92447989,2.92124836,2.91904491
77.389052,3.31662479,2.92654457,0.624564026,2.92434232,2.92105921,2.91885282
77.399544,2.64575131,2.92641242,-0.52977458,2.92420727,2.92087026,2.91866092
77.410035,3,2.92628294,0.271508863,2.92407488,2.92068153,2.91846923
77.420527,3.60555128,2.92615625,0.824254223,2.92394527,2.92049298,2.9182777
77.431018,3,2.92603254,0.271969593,2.92381863,2.92030464,2.91808639
77.44151,4,2.92591195,1.03638219,2.92369511,2.92011649,2.91789524
77.452002,2.64575131,2.92579468,-0.529191238,2.92357489,2.91992854,2.91770429
77.462493,2.64575131,2.92568093,-0.529083753,2.92345819,2.91974081,2.91751355
77.472985,2.64575131,2.9255709,-0.528979758,2.9233452,2.91955326,2.91732297
77.483476,3.60555128,2.92546483,0.824673539,2.92323617,2.91936593,2.91713261
77.493968,4,2.92536296,1.03664702,2.92313132,2.91917879,2.91694242
77.50446,3.31662479,2.92526557,0.6255871,2.92303095,2.91899185,2.91675242
77.514951,3,2.92517296,0.273545313,2.92293536,2.91880513,2.91656264
77.525443,2.44948974,2.92508544,-0.689634466,2.92284484,2.91861859,2.91637302
77.535934,3.46410162,2.92500337,0.734233101,2.92275977,2.91843227,2.91618362
77.546426,3.31662479,2.92492712,0.625857546,2.92268052,2.91824614,2.91599439
77.556918,3.31662479,2.92485713,0.625913461,2.92260751,2.91806022,2.91580535
77.567409,2.82842712,2.92479387,-0.310429935,2.92254123,2.91787451,2.91561653
77.577901,3.31662479,2.92473785,0.626008737,2.92248219,2.917689,2.91542788
77.588392,2.64575131,2.92468968,-0.528146158,2.92243099,2.9175037,2.91523945
77.598884,3.31662479,2.92465,0.626078901,2.92238828,2.91731859,2.91505119
77.609376,3.31662479,2.9246196,0.626103183,2.92235484,2.91713369,2.91486312
77.619867,3.31662479,2.92459935,0.62611935,2.92233156,2.91694902,2.91467527
77.630359,3.16227766,2.9245903,0.487531904,2.92231947,2.91676453,2.91448759
77.64085,4.35889894,2.92459369,1.19762484,2.92231982,2.91658026,2.91430013
77.651342,2.82842712,2.92461102,-0.31013528,2.9223341,2.91639619,2.91411285
77.661834,2.64575131,2.92464409,-0.528102996,2.92236413,2.91621232,2.91392576
77.672325,3.16227766,2.92469512,0.48742439,2.92241213,2.91602867,2.91373889
77.682817,3,2.9247669,0.274286531,2.92248087,2.91584522,2.91355219
77.693308,3.60555128,2.92486282,0.825038455,2.92257377,2.91566199,2.91336571
77.7038,3,2.92498718,0.273884689,2.92269511,2.91547896,2.91317941
77.714292,3.16227766,2.92514526,0.486962418,2.9228502,2.91529613,2.91299331
77.724783,3.60555128,2.92534365,0.824747007,2.92304561,2.91511353,2.91280742
77.735275,3.60555128,2.92559051,0.824597337,2.92328952,2.91493112,2.91262171
77.745766,2.44948974,2.92589577,-0.690221725,2.92359187,2.91474894,2.91243622
77.756258,3.46410162,2.92627164,0.733368923,2.92396487,2.91456695,2.91225091
77.76675,3.31662479,2.9267327,0.624413394,2.92442312,2.91438517,2.9120658
77.777241,2.64575131,2.92729631,-0.530608145,2.92498399,2.91420362,2.9118809
77.787733,3.87298335,2.92798303,0.972111269,2.92566805,2.91402227,2.91169619
77.798224,3.46410162,2.9288164,0.731631883,2.92649888,2.91384114,2.9115117
77.808716,3.31662479,2.92982361,0.62193342,2.92750366,2.91366021,2.91132738
77.819208,3.46410162,2.93103486,0.730114206,2.92871265,2.91347949,2.91114327
77.829699,2.23606798,2.9324833,-0.83451502,2.93015899,2.913299,2.91095937
77.840191,3,2.93420498,0.256505402,2.93187879,2.9131187,2.91077566
77.850682,3.60555128,2.93623717,0.818116194,2.93390934,2.91293864,2.91059217
77.861174,3.31662479,2.93861856,0.614822112,2.93628935,2.91275877,2.91040886
77.871666,2.82842712,2.94138673,-0.336094644,2.93905644,2.91257912,2.91022576
77.882157,3.87298335,2.94457696,0.963538473,2.94224591,2.91239969,2.91004287
77.892649,3.31662479,2.94822137,0.606962453,2.94588991,2.91222047,2.90986017
77.90314,3,2.9523448,0.218300719,2.9500133,2.91204147,2.90967768
77.913632,3,2.95696526,0.207448174,2.9546341,2.91186268,2.90949539
77.924124,3.46410162,2.96208918,0.708528356,2.95975875,2.9116841,2.90931329
77.934615,3.31662479,2.96771014,0.59068998,2.96538081,2.91150575,2.90913142
77.945107,3.16227766,2.9738084,0.434130463,2.97148053,2.9113276,2.90894973
77.955598,3.46410162,2.98034512,0.695526057,2.97801903,2.91114969,2.90876827
77.96609,3.46410162,2.98726476,0.690533744,2.98494074,2.91097197,2.90858699
77.976582,3.46410162,2.99448888,0.685282961,2.99216713,2.91079448,2.90840592
77.987073,3.46410162,3.00191563,0.679842615,2.9995963,2.91061721,2.90822506
77.997565,3.31662479,3.00941991,0.554260659,3.00710302,2.91044015,2.9080444
78.008056,3.16227766,3.01684648,0.381354397,3.01453196,2.91026332,2.90786396
78.018548,2,3.02401476,-1.01193615,3.02170238,2.9100867,2.90768371
78.02904,2.82842712,3.03071515,-0.449764408,3.02840452,2.90991029,2.90750366
78.039531,3,3.03671671,-0.191616037,3.03440729,2.90973412,2.90732384
78.050023,3,3.04178,-0.204401557,3.03947106,2.90955815,2.9071442
78.060514,3,3.04567123,-0.213708272,3.04336187,2.90938242,2.90696479
78.071006,4.24264069,3.04819007,1.09290924,3.04587925,2.90920689,2.90678557
78.081498,3.16227766,3.04919228,0.3362817,3.04687881,2.90903158,2.90660656
78.091989,3.16227766,3.04861263,0.337142448,3.04629532,2.90885651,2.90642777
78.102481,2.82842712,3.04647463,-0.466955572,3.04415227,2.90868164,2.90624917
78.112972,3,3.0428871,-0.207091997,3.04055856,2.90850701,2.9060708
78.123464,3,3.03802609,-0.1950028,3.03569037,2.90833259,2.90589262
78.133956,3.60555128,3.03211242,0.757257455,3.02976866,2.90815838,2.90571464
78.144447,3.16227766,3.02538589,0.369988875,3.02303342,2.90798442,2.9055369
78.154939,4.12310563,3.01808193,1.05120107,3.01572025,2.90781066,2.90535934
78.16543,3.31662479,3.01042172,0.553356189,3.00805048,2.90763715,2.90518202
78.175922,2.23606798,3.00259886,-0.875517494,3.00021788,2.90746384,2.90500488
78.186414,2.64575131,2.99478133,-0.590787624,2.99239054,2.90729075,2.90482795
78.196905,3.16227766,2.98710929,0.418531208,2.98470875,2.9071179,2.90465126
78.207397,3.46410162,2.97969438,0.695993704,2.97728424,2.90694526,2.90447475
78.217888,3.16227766,2.97262687,0.435489136,2.97020734,2.90677286,2.90429847
78.22838,3.60555128,2.96597215,0.79973691,2.96354352,2.90660067,2.90412239
78.238872,3.16227766,2.95977765,0.450000009,2.95734024,2.90642871,2.90394652
78.249363,3,2.95407269,0.214306574,2.95162686,2.90625699,2.90377088
78.259855,3.60555128,2.94886906,0.810359313,2.94641517,2.90608547,2.90359543
78.270346,3.60555128,2.94416692,0.813255408,2.94170535,2.9059142,2.90342021
78.280838,2.82842712,2.93995295,-0.333954819,2.93748408,2.90574314,2.90324519
78.29133,2.82842712,2.93620591,-0.328296795,2.9337301,2.90557231,2.90307038
78.301821,3.46410162,2.93289729,0.728837653,2.93041488,2.90540172,2.90289579
78.312313,3.60555128,2.92999262,0.821923753,2.92750392,2.90523134,2.90272141
78.322804,3.87298335,2.92745561,0.972382505,2.92496091,2.90506121,2.90254726
78.333296,3.60555128,2.92524758,0.824805249,2.92274713,2.90489128,2.9023733
78.343788,3,2.92333074,0.276892153,2.92082477,2.90472159,2.90219955
78.354279,2.64575131,2.92166849,-0.525278194,2.9191572,2.90455214,2.90202604
78.364771,3.74165739,2.92022596,0.906328542,2.91770952,2.9043829,2.90185273
78.375262,3.16227766,2.91897167,0.493260572,2.91645022,2.90421391,2.90167964
78.385754,3,2.91787676,0.286571521,2.91535043,2.90404514,2.90150676
78.396246,2.82842712,2.91691608,-0.29747093,2.91438495,2.90387659,2.90133409
78.406737,3,2.91606769,0.289710732,2.91353186,2.90370829,2.90116165
78.417229,3.31662479,2.91531258,0.633492074,2.9127721,2.9035402,2.90098941
78.42772,3.46410162,2.91463496,0.741260177,2.91208989,2.90337236,2.90081741
78.438212,2.64575131,2.91402018,-0.517946782,2.91147055,2.90320474,2.9006456
78.448704,2.44948974,2.91345975,-0.681153437,2.91090559,2.90303735,2.90047401
78.459195,3.16227766,2.91294349,0.499333721,2.91038483,2.9028702,2.90030265
78.469687,2.44948974,2.91246401,-0.680422128,2.90990086,2.90270328,2.9001315
78.480178,2.44948974,2.9120155,-0.680092463,2.90944787,2.9025366,2.89996058
78.49067,3.31662479,2.91159312,0.636420987,2.90902102,2.90237013,2.89978986
78.501162,3.46410162,2.9111931,0.743578185,2.90861653,2.9022039,2.89961935
78.511653,3,2.91081241,0.298642908,2.90823138,2.90203793,2.89944908
78.522145,2.44948974,2.91044852,-0.678939449,2.90786302,2.90187216,2.89927902
78.532636,3,2.91009948,0.299834156,2.90750951,2.90170665,2.89910919
78.543128,3.16227766,2.90976359,0.502507783,2.90716914,2.90154136,2.89893956
78.55362,2.44948974,2.90943953,-0.678195976,2.9068406,2.9013763,2.89877015
78.564111,2.44948974,2.90912619,-0.67796493,2.90652277,2.9012115,2.89860097
78.574603,3,2.90882256,0.301956022,2.90621465,2.90104691,2.898432
78.585094,3.74165739,2.90852788,0.912759283,2.90591546,2.90088257,2.89826327
78.595586,3.60555128,2.90824137,0.835050838,2.90562444,2.90071846,2.89809474
78.606078,4.24264069,2.90796245,1.15528275,2.905341,2.90055458,2.89792642
78.616569,2.82842712,2.90769058,-0.281537661,2.90506459,2.90039095,2.89775835
78.627061,3.16227766,2.90742522,0.504829123,2.90479468,2.90022755,2.89759048
78.637552,3.16227766,2.90716597,0.505085827,2.90453088,2.9000644,2.89742285
78.648044,3,2.90691238,0.30510264,2.90427272,2.89990147,2.89725542
78.658536,3.16227766,2.90666411,0.505582386,2.90401987,2.89973878,2.89708822
78.669027,3,2.90642085,0.305907092,2.90377202,2.89957634,2.89692125
78.679519,3.16227766,2.90618225,0.506058705,2.90352881,2.89941412,2.89675449
78.69001,3.87298335,2.90594806,0.983379522,2.90329001,2.89925216,2.89658797
78.700502,3.31662479,2.90571799,0.641020123,2.90305531,2.89909043,2.89642165
78.710994,2.44948974,2.90549182,-0.675279261,2.90282449,2.89892893,2.89625556
78.721485,3.16227766,2.90526935,0.506959867,2.90259736,2.89876769,2.8960897
78.731977,3.31662479,2.90505034,0.641540688,2.90237367,2.89860667,2.89592406
78.742468,3.31662479,2.90483463,0.641708785,2.90215328,2.89844591,2.89575865
78.75296,2.82842712,2.90462201,-0.276034203,2.90193595,2.89828538,2.89559345
78.763452,3.74165739,2.90441233,0.915010958,2.90172156,2.89812509,2.89542847
78.773943,3.31662479,2.90420548,0.642198811,2.90150997,2.89796505,2.89526374
78.784435,2.82842712,2.90400126,-0.274907502,2.90130101,2.89780524,2.89509921
78.794926,3.16227766,2.90379959,0.508407391,2.90109457,2.89764569,2.89493492
78.805418,2.64575131,2.9036003,-0.507788327,2.9008905,2.89748636,2.89477085
78.81591,3.16227766,2.9034033,0.508796976,2.90068871,2.89732728,2.89460699
78.826401,2.64575131,2.9032085,-0.507402395,2.9004891,2.89716846,2.89444338
78.836893,3.46410162,2.90301577,0.749056636,2.90029155,2.89700986,2.89427998
78.847384,3.31662479,2.90282505,0.643272677,2.90009599,2.89685152,2.89411682
78.857876,3.31662479,2.90263622,0.643419434,2.8999023,2.89669342,2.89395388
78.868368,2.44948974,2.90244922,-0.67302264,2.89971042,2.89653555,2.89379115
78.878859,3.16227766,2.90226398,0.509915368,2.89952028,2.89637795,2.89362867
78.889351,2.44948974,2.9020804,-0.672748583,2.89933179,2.89622058,2.89346641
78.899842,2.44948974,2.90189845,-0.672613339,2.89914492,2.89606346,2.89330438
78.910334,3.74165739,2.90171803,0.916482057,2.89895955,2.89590658,2.89314257
78.920826,2.64575131,2.90153909,-0.505754666,2.89877566,2.89574994,2.89298098
78.931317,3.87298335,2.90136161,0.985708747,2.8985932,2.89559357,2.89281964
78.941809,2.44948974,2.90118549,-0.672083143,2.89841209,2.89543743,2.89265851
78.9523,4.12310563,2.90101072,1.10548401,2.8982323,2.89528155,2.89249762
78.962792,3.46410162,2.90083722,0.750509422,2.89805377,2.8951259,2.89233695
78.973284,3,2.90066496,0.315174613,2.89787646,2.89497049,2.8921765
78.983775,3.31662479,2.90049392,0.645082064,2.89770035,2.89481536,2.8920163
78.994267,3.60555128,2.90032402,0.839778097,2.89752537,2.89466045,2.89185632
79.004758,3.87298335,2.90015527,0.986320475,2.89735151,2.89450581,2.89169658
79.01525,3.60555128,2.89998759,0.839978387,2.89717871,2.8943514,2.89153705
79.025742,3.16227766,2.89982096,0.51230528,2.89700694,2.89419724,2.89137775
79.036233,3.16227766,2.89965538,0.512466861,2.8968362,2.89404335,2.8912187
79.046725,3.31662479,2.89949077,0.64585913,2.89666642,2.89388969,2.89105986
79.057216,3.16227766,2.89932716,0.512786996,2.89649761,2.8937363,2.89090127
79.067708,3.31662479,2.89916447,0.646111696,2.8963297,2.89358314,2.8907429
79.0782,2.64575131,2.89900269,-0.503240879,2.89616269,2.89343023,2.89058475
79.088691,3.16227766,2.89884183,0.513260002,2.89599658,2.89327759,2.89042686
79.099183,3.74165739,2.89868182,0.918137007,2.8958313,2.89312518,2.89026918
79.109674,3.74165739,2.89852268,0.918223669,2.89566686,2.89297304,2.89011174
79.120166,3.31662479,2.89836435,0.646730574,2.89550322,2.89282114,2.88995452
79.130658,1.73205081,2.89820684,-1.07988705,2.89534038,2.89266949,2.88979754
79.141149,3.60555128,2.89805013,0.841130873,2.89517832,2.89251811,2.8896408
79.151641,2.82842712,2.89789418,-0.263566039,2.895017,2.89236697,2.88948428
79.162132,3.31662479,2.89773901,0.647213862,2.89485643,2.89221609,2.88932801
79.172624,3,2.89758456,0.320024123,2.89469658,2.89206546,2.88917196
79.183116,3.16227766,2.89743084,0.514632702,2.89453743,2.89191508,2.88901613
79.193607,2.82842712,2.89727785,-0.262394223,2.89437899,2.89176496,2.88886056
79.204099,3,2.89712555,0.320740472,2.89422121,2.89161509,2.88870521
79.21459,1.73205081,2.89697395,-1.07931605,2.89406412,2.89146549,2.8885501
79.225082,3.16227766,2.89682301,0.515222915,2.89390766,2.89131612,2.88839522
79.235574,3.74165739,2.89667273,0.919230469,2.89375185,2.89116702,2.88824057
79.246065,2.23606798,2.89652312,-0.812683914,2.89359669,2.89101818,2.88808617
79.256557,3.60555128,2.89637414,0.842126555,2.89344213,2.89086958,2.88793199
79.267048,3.46410162,2.89622581,0.753575351,2.8932882,2.89072126,2.88777806
79.27754,2.82842712,2.89607808,-0.260097969,2.89313486,2.89057318,2.88762434
79.288032,4,2.89593096,1.05074689,2.8929821,2.89042535,2.88747087
79.298523,2.64575131,2.89578447,-0.500033157,2.89282995,2.8902778,2.88731764
79.309015,3.31662479,2.89563856,0.64883452,2.89267836,2.89013049,2.88716464
79.319506,2.64575131,2.89549324,-0.499741867,2.89252734,2.88998345,2.88701189
79.329998,3.46410162,2.8953485,0.754157221,2.89237687,2.88983666,2.88685936
79.34049,4.24264069,2.89520433,1.16079126,2.89222695,2.88969013,2.88670706
79.350981,3.31662479,2.89506074,0.64927964,2.8920776,2.88954386,2.88655502
79.361473,3,2.8949177,0.324164009,2.89192876,2.88939785,2.8864032
79.371964,2.82842712,2.89477522,-0.257581236,2.89178047,2.88925211,2.88625163
79.382456,3.31662479,2.89463327,0.64960874,2.89163269,2.88910661,2.88610028
79.392948,3.46410162,2.89449187,0.754724944,2.89148543,2.88896138,2.88594918
79.403439,3.74165739,2.89435102,0.920492458,2.8913387,2.88881642,2.88579832
79.413931,1.41421356,2.89421069,-1.21655133,2.89119247,2.8886717,2.88564769
79.424422,3.16227766,2.89407089,0.517886827,2.89104675,2.88852726,2.88549731
79.434914,2.44948974,2.89393161,-0.666664733,2.89090151,2.88838307,2.88534715
79.445406,3.31662479,2.89379284,0.650255296,2.89075677,2.88823915,2.88519724
79.455897,2.82842712,2.8936546,-0.255396696,2.89061254,2.88809549,2.88504757
79.466389,4.12310563,2.89351685,1.10886824,2.89046877,2.88795209,2.88489813
79.47688,3,2.89337962,0.326527763,2.8903255,2.88780896,2.88474895
79.487372,2.64575131,2.89324288,-0.497485242,2.8901827,2.88766609,2.88459999
79.497864,2.64575131,2.89310663,-0.49734829,2.89004036,2.88752347,2.88445127
79.508355,4,2.89297089,1.05215451,2.88989852,2.88738114,2.8843028
79.518847,3.60555128,2.89283563,0.844224876,2.88975712,2.88723905,2.88415456
79.529338,3.74165739,2.89270087,0.921388361,2.8896162,2.88709724,2.88400658
79.53983,2.64575131,2.89256659,-0.496805068,2.88947573,2.88695569,2.88385882
79.550322,2,2.89243278,-0.944686604,2.88933572,2.8868144,2.8837113
79.560813,2.23606798,2.89229947,-0.810081161,2.88919617,2.88667338,2.88356404
79.571305,3.16227766,2.89216662,0.519722084,2.88905706,2.88653263,2.883417
79.581796,3.74165739,2.89203425,0.921750039,2.88891842,2.88639215,2.88327022
79.592288,3.87298335,2.89190235,0.99049533,2.88878021,2.88625192,2.88312367
79.60278,2.23606798,2.89177091,-0.809754861,2.88864245,2.88611196,2.88297735
79.613271,4,2.89163996,1.0527868,2.88850514,2.88597228,2.8828313
79.623763,3.60555128,2.89150946,0.845009951,2.88836826,2.88583286,2.88268547
79.634254,3.31662479,2.89137943,0.652108393,2.88823183,2.88569371,2.8825399
79.644746,3.74165739,2.89124986,0.922175432,2.88809583,2.88555482,2.88239456
79.655238,2.44948974,2.89112075,-0.664553236,2.88796026,2.8854162,2.88224946
79.665729,2.64575131,2.8909921,-0.495217925,2.88782513,2.88527786,2.88210461
79.676221,4.35889894,2.89086391,1.21162496,2.88769043,2.88513978,2.88196
79.686712,2.82842712,2.89073618,-0.249617819,2.88755617,2.88500198,2.88181564
79.697204,1.41421356,2.8906089,-1.21507009,2.88742233,2.88486444,2.88167152
79.707696,2.64575131,2.89048206,-0.494702691,2.88728891,2.88472716,2.88152763
79.718187,3.46410162,2.8903557,0.757460175,2.88715593,2.88459017,2.88138401
79.728679,2,2.89022977,-0.943519884,2.88702337,2.88445344,2.88124061
79.73917,2.23606798,2.89010431,-0.808725126,2.88689124,2.88431699,2.88109747
79.749662,3,2.88997928,0.331693711,2.88675953,2.8841808,2.88095457
79.760154,3,2.88985471,0.331881447,2.88662823,2.88404488,2.88081191
79.770645,1.73205081,2.88973059,-1.07595529,2.88649737,2.88390925,2.8806695
79.781137,2.82842712,2.88960691,-0.247345475,2.88636692,2.88377388,2.88052733
79.791628,2.64575131,2.88948369,-0.493692593,2.8862369,2.88363879,2.88038542
79.80212,3.46410162,2.8893609,0.758116558,2.88610729,2.88350396,2.88024374
79.812612,3.16227766,2.88923856,0.522531435,2.8859781,2.88336941,2.8801023
79.823103,3,2.88911668,0.332991477,2.88584933,2.88323514,2.87996113
79.833595,2.82842712,2.88899523,-0.246105876,2.88572098,2.88310113,2.87982018
79.844086,2,2.88887423,-0.942801269,2.88559305,2.88296741,2.8796795
79.854578,2.64575131,2.88875367,-0.492952698,2.88546552,2.88283396,2.87953905
79.86507,3.74165739,2.88863356,0.923592891,2.88533842,2.88270078,2.87939884
79.875561,2.44948974,2.8885139,-0.662588979,2.88521174,2.88256788,2.8792589
79.886053,3.16227766,2.88839467,0.523338312,2.88508546,2.88243525,2.87911919
79.896544,3.16227766,2.8882759,0.523451775,2.88495961,2.88230291,2.87897974
79.907036,2.82842712,2.88815756,-0.244398109,2.88483417,2.88217083,2.87884052
79.917528,2.44948974,2.88803967,-0.662231019,2.88470913,2.88203903,2.87870155
79.928019,3.31662479,2.88792223,0.654753819,2.88458453,2.88190751,2.87856285
79.938511,3.31662479,2.88780522,0.654843164,2.88446033,2.88177627,2.87842437
79.949002,3,2.88768867,0.335128826,2.88433656,2.88164531,2.87828616
79.959494,3.31662479,2.88757255,0.655020791,2.88421319,2.88151462,2.87814818
79.969986,3.74165739,2.88745688,0.924229682,2.88409023,2.8813842,2.87801045
79.980477,3,2.88734167,0.335646144,2.88396771,2.88125408,2.87787299
79.990969,2.44948974,2.88722688,-0.661617066,2.88384558,2.88112423,2.87773576
80.00146,3.87298335,2.88711256,0.992910261,2.88372389,2.88099466,2.87759879
80.011952,3.60555128,2.88699867,0.847674822,2.8836026,2.88086537,2.87746205
80.022444,3.60555128,2.88688523,0.847741733,2.88348172,2.88073635,2.87732557
80.032935,2.82842712,2.88677225,-0.241547348,2.88336127,2.88060763,2.87718935
80.043427,3.31662479,2.8866597,0.655717234,2.88324123,2.88047917,2.87705336
80.053918,3,2.88654761,0.336826941,2.88312162,2.88035101,2.87691764
80.06441,2.82842712,2.88643596,-0.240850239,2.88300241,2.88022312,2.87678216
80.074902,3,2.88632476,0.337157585,2.88288363,2.88009551,2.87664692
80.085393,3.16227766,2.88621402,0.525417583,2.88276527,2.87996819,2.87651195
80.095885,2.82842712,2.88610373,-0.240159531,2.88264732,2.87984115,2.87637721
80.106376,3.46410162,2.88599389,0.760333957,2.8825298,2.87971439,2.87624274
80.116868,4,2.88588449,1.0555167,2.88241269,2.87958792,2.87610851
80.12736,2.23606798,2.88577555,-0.806044401,2.882296,2.87946172,2.87597453
80.137851,3.31662479,2.88566708,0.656473696,2.88217975,2.87933582,2.87584081
80.148343,3,2.88555904,0.338291229,2.8820639,2.87921019,2.87570733
80.158834,3.16227766,2.88545148,0.526142739,2.88194849,2.87908486,2.87557412
80.169326,4.12310563,2.88534436,1.1125472,2.8818335,2.8789598,2.87544114
80.179818,3.16227766,2.8852377,0.526345859,2.88171892,2.87883503,2.87530842
80.190309,2.82842712,2.8851315,-0.238126813,2.88160479,2.87871055,2.87517596
80.200801,3,2.88502576,0.339078515,2.88149107,2.87858635,2.87504374
80.211292,2.82842712,2.88492049,-0.237683326,2.88137778,2.87846245,2.87491178
80.221784,3.16227766,2.88481567,0.526746612,2.88126492,2.87833882,2.87478007
80.232276,2.44948974,2.88471131,-0.659713246,2.88115248,2.87821547,2.87464861
80.242767,2.82842712,2.88460743,-0.237023841,2.88104049,2.87809243,2.87451741
80.253259,2.64575131,2.884504,-0.488623256,2.88092891,2.87796967,2.87438645
80.26375,3.31662479,2.88440105,0.657437255,2.88081778,2.8778472,2.87425576
80.274242,3,2.88429855,0.340149156,2.88070707,2.87772501,2.87412531
80.284734,3.31662479,2.88419653,0.657592779,2.88059679,2.87760311,2.87399512
80.295225,3.74165739,2.88409498,0.926046654,2.88048696,2.87748151,2.87386519
80.305717,3.60555128,2.8839939,0.849445335,2.88037756,2.87736018,2.8737355
80.316208,3.31662479,2.8838933,0.657823299,2.8802686,2.87723916,2.87360607
80.3267,2.64575131,2.88379316,-0.487895328,2.88016008,2.87711842,2.87347689
80.337192,3.46410162,2.8836935,0.761845203,2.88005199,2.87699797,2.87334797
80.347683,3,2.88359433,0.341182753,2.87994435,2.87687782,2.87321931
80.358175,3.74165739,2.88349562,0.926370208,2.87983715,2.87675795,2.87309089
80.368666,3.16227766,2.88339741,0.528091138,2.8797304,2.87663838,2.87296274
80.379158,2.82842712,2.88329967,-0.234248892,2.87962408,2.8765191,2.87283483
80.38965,2.82842712,2.88320241,-0.234041203,2.87951821,2.8764001,2.87270718
80.400141,2.64575131,2.88310564,-0.487190244,2.8794128,2.87628141,2.87257979
80.410633,3.16227766,2.88300936,0.528458421,2.87930783,2.876163,2.87245265
80.421124,2,2.88291357,-0.939634805,2.87920332,2.8760449,2.87232578
80.431616,2.82842712,2.88281826,-0.233219068,2.87909925,2.87592708,2.87219915
80.442108,3,2.88272344,0.342456653,2.87899563,2.87580955,2.87207277
80.452599,3.16227766,2.88262913,0.528818055,2.87889248,2.87569233,2.87194667
80.463091,2.44948974,2.8825353,-0.658061968,2.87878978,2.8755754,2.8718208
80.473582,2,2.88244197,-0.939383826,2.87868754,2.87545877,2.87169521
80.484074,3.46410162,2.88234914,0.762726999,2.87858576,2.87534242,2.87156986
80.494566,2.44948974,2.88225681,-0.657850336,2.87848444,2.87522637,2.87144476
80.505057,2.44948974,2.88216499,-0.657780543,2.87838359,2.87511063,2.87131994
80.515549,3.16227766,2.88207366,0.529342989,2.87828319,2.87499517,2.87119536
80.52604,2.82842712,2.88198285,-0.231421099,2.87818327,2.87488003,2.87107105
80.536532,3.46410162,2.88189254,0.763026262,2.87808381,2.87476516,2.87094698
80.547024,4.12310563,2.88180274,1.11413773,2.87798483,2.8746506,2.87082318
80.557515,4.12310563,2.88171346,1.1141778,2.87788632,2.87453635,2.87069964
80.568007,4,2.88162469,1.05753265,2.87778828,2.87442238,2.87057634
80.578498,2.82842712,2.88153644,-0.230454588,2.87769072,2.87430872,2.87045332
80.58899,3.46410162,2.88144871,0.763317044,2.87759363,2.87419536,2.87033054
80.599482,3.46410162,2.88136149,0.763374171,2.87749703,2.87408229,2.87020802
80.609973,2.82842712,2.88127481,-0.229886239,2.87740091,2.87396953,2.87008577
80.620465,3.87298335,2.88118864,0.995888901,2.87730527,2.87385706,2.86996377
80.630956,2.44948974,2.88110301,-0.656972808,2.87721012,2.87374491,2.86984204
80.641448,2.44948974,2.88101791,-0.656908034,2.87711546,2.87363304,2.86972055
80.65194,2.64575131,2.88093333,-0.484955692,2.87702128,2.87352148,2.86959932
80.662431,3.16227766,2.8808493,0.530498215,2.87692761,2.87341023,2.86947837
80.672923,3.60555128,2.8807658,0.851343333,2.87683442,2.87329927,2.86935766
80.683414,4,2.88068285,1.05797786,2.87674174,2.87318863,2.86923722
80.693906,3.46410162,2.88060044,0.763872488,2.87664955,2.87307828,2.86911703
80.704398,2.44948974,2.88051857,-0.656527855,2.87655786,2.87296823,2.8689971
80.714889,3.31662479,2.88043725,0.660444954,2.87646668,2.8728585,2.86887744
80.725381,3.46410162,2.88035648,0.764032154,2.87637601,2.87274906,2.86875803
80.735872,3.46410162,2.88027627,0.764084643,2.87628585,2.87263993,2.86863889
80.746364,4.24264069,2.88019661,1.1672378,2.87619619,2.87253111,2.86851999
80.756856,2.23606798,2.88011751,-0.802526968,2.87610705,2.87242258,2.86840136
80.767347,3.74165739,2.88003898,0.928234026,2.87601844,2.87231438,2.868283
80.777839,3.46410162,2.87996101,0.764290918,2.87593033,2.87220647,2.86816489
80.78833,1.73205081,2.87988361,-1.07136959,2.87584276,2.87209887,2.86804705
80.798822,2.23606798,2.87980678,-0.802333346,2.8757557,2.87199158,2.86792946
80.809314,3.31662479,2.87973052,0.660979783,2.87566917,2.87188459,2.86781213
80.819805,2.44948974,2.87965484,-0.655869728,2.87558318,2.87177792,2.86769508
80.830297,3.74165739,2.87957974,0.928481365,2.87549772,2.87167155,2.86757827
80.840788,1.73205081,2.87950523,-1.07119299,2.8754128,2.8715655,2.86746173
80.85128,3.31662479,2.8794313,0.661206087,2.87532841,2.87145974,2.86734545
80.861772,2.44948974,2.87935796,-0.655643363,2.87524457,2.8713543,2.86722943
80.872263,3.31662479,2.87928522,0.661316541,2.87516128,2.87124918,2.86711367
80.882755,3.31662479,2.87921308,0.661371087,2.87507853,2.87114436,2.86699817
80.893246,2.82842712,2.87914154,-0.225198603,2.87499634,2.87103986,2.86688295
80.903738,2.82842712,2.87907059,-0.225041037,2.8749147,2.87093566,2.86676797
80.91423,3.16227766,2.87900026,0.532238106,2.87483362,2.87083177,2.86665326
80.924721,2.44948974,2.87893054,-0.655317328,2.8747531,2.87072821,2.86653881
80.935213,3.16227766,2.87886144,0.532368504,2.87467315,2.87062495,2.86642462
80.945704,3.60555128,2.87879296,0.852501214,2.87459377,2.87052201,2.86631071
80.956196,3.16227766,2.87872509,0.532496543,2.87451496,2.87041937,2.86619704
80.966688,3.31662479,2.87865785,0.661790704,2.87443673,2.87031705,2.86608364
80.977179,2.64575131,2.87859126,-0.482534916,2.87435908,2.87021506,2.86597051
80.987671,3,2.87852529,0.348532227,2.87428201,2.87011337,2.86585764
80.998162,3.16227766,2.87845996,0.532745434,2.87420554,2.870012,2.86574503
81.008654,2.23606798,2.87839528,-0.801453243,2.87412965,2.86991094,2.86563268
81.019146,4.12310563,2.87833124,1.11569458,2.87405436,2.8698102,2.86552059
81.029637,2.64575131,2.87826786,-0.4821997,2.87397967,2.86970978,2.86540878
81.040129,3.74165739,2.87820513,0.929221315,2.87390558,2.86960967,2.86529722
81.05062,2.44948974,2.87814308,-0.654716223,2.87383211,2.86950989,2.86518594
81.061112,3.46410162,2.87808168,0.765519391,2.87375924,2.86941042,2.8650749
81.071604,2.82842712,2.87802095,-0.222696712,2.873687,2.86931126,2.86496413
81.082095,2.64575131,2.87796091,-0.481881307,2.87361538,2.86921244,2.86485364
81.092587,2.64575131,2.87790154,-0.481819702,2.87354438,2.86911392,2.8647434
81.103078,3.31662479,2.87784286,0.662406168,2.87347402,2.86901573,2.86463343
81.11357,2.82842712,2.87778487,-0.222166027,2.87340429,2.86891786,2.86452372
81.124062,2.82842712,2.87772757,-0.222037045,2.8733352,2.8688203,2.86441427
81.134553,2.64575131,2.87767099,-0.481580395,2.87326676,2.86872308,2.8643051
81.145045,3.46410162,2.8776151,0.765824073,2.87319897,2.86862617,2.86419618
81.155536,3,2.87755994,0.349914362,2.87313184,2.86852959,2.86408753
81.166028,2.82842712,2.87750549,-0.221536371,2.87306537,2.86843332,2.86397914
81.17652,3.16227766,2.87745176,0.533690826,2.87299957,2.86833738,2.86387102
81.187011,3,2.87739877,0.35014458,2.87293444,2.86824177,2.86376317
81.197503,2.64575131,2.87734652,-0.481243395,2.87287,2.86814648,2.86365557
81.207994,3.16227766,2.87729501,0.533837664,2.87280624,2.86805151,2.86354825
81.218486,1.41421356,2.87724425,-1.20955805,2.87274316,2.86795687,2.86344119
81.228978,3.16227766,2.87719424,0.533932037,2.87268079,2.86786255,2.86333439
81.239469,2.23606798,2.877145,-0.800672857,2.87261912,2.86776857,2.86322787
81.249961,3.60555128,2.87709653,0.853495604,2.87255817,2.8676749,2.8631216
81.260452,3.74165739,2.87704884,0.929843291,2.87249793,2.86758157,2.86301561
81.270944,2.64575131,2.87700193,-0.480885246,2.87243841,2.86748856,2.86290987
81.281436,3,2.87695581,0.350776547,2.87237963,2.86739587,2.8628044
81.291927,3.31662479,2.8769105,0.66310956,2.87232158,2.86730353,2.86269921
81.302419,2.82842712,2.87686599,-0.220088319,2.87226428,2.8672115,2.86259427
81.31291,2.64575131,2.8768223,-0.480698443,2.87220774,2.86711981,2.86248961
81.323402,3.74165739,2.87677944,0.929988146,2.87215196,2.86702845,2.86238521
81.333894,2.44948974,2.8767374,-0.653641841,2.87209694,2.86693741,2.86228107
81.344385,3.16227766,2.87669621,0.534398214,2.87204271,2.86684672,2.86217721
81.354877,3.31662479,2.87665587,0.663301534,2.87198926,2.86675635,2.8620736
81.365368,3,2.87661639,0.351260038,2.87193661,2.86666631,2.86197027
81.37586,2.44948974,2.87657777,-0.653519723,2.87188477,2.86657661,2.8618672
81.386352,2.82842712,2.87654004,-0.219346556,2.87183373,2.86648723,2.86176439
81.396843,3.16227766,2.87650319,0.534578774,2.87178353,2.8663982,2.86166187
81.407335,3.60555128,2.87646725,0.853864174,2.87173415,2.86630949,2.8615596
81.417826,3.46410162,2.87643222,0.766595982,2.87168562,2.86622113,2.8614576
81.428318,2.23606798,2.8763981,-0.800206302,2.87163795,2.8661331,2.86135587
81.43881,2,2.87636492,-0.936143644,2.87159114,2.8660454,2.8612544
81.449301,3,2.87633269,0.351663632,2.87154521,2.86595804,2.86115321
81.459793,2.82842712,2.87630141,-0.218801936,2.87150017,2.86587102,2.86105227
81.470284,4.12310563,2.87627111,1.11661745,2.87145604,2.86578434,2.86095162
81.480776,2.44948974,2.87624178,-0.653262612,2.87141281,2.86569799,2.86085122
81.491268,3.46410162,2.87621346,0.766738652,2.87137052,2.86561197,2.86075109
81.501759,2.64575131,2.87618614,-0.48003628,2.87132916,2.86552631,2.86065124
81.512251,3.60555128,2.87615985,0.854044159,2.87128877,2.86544098,2.86055164
81.522742,3.16227766,2.8761346,0.534923412,2.87124934,2.86535599,2.86045232
81.533234,3,2.87611041,0.35197953,2.8712109,2.86527134,2.86035327
81.543726,2.82842712,2.87608729,-0.218312086,2.87117346,2.86518703,2.86025448
81.554217,3.31662479,2.87606527,0.663746582,2.87113704,2.86510308,2.86015596
81.564709,3.16227766,2.87604435,0.535007771,2.87110166,2.86501945,2.86005771
81.5752,2.64575131,2.87602455,-0.479867944,2.87106733,2.86493618,2.85995974
[truncated: 423,125 more chars]
