# Supplementary material for: Phase Stability of Iron Nitride Fe4N at High Pressure—Pressure-Dependent Evolution of Phase Equilibria in the Fe–N System
Source: Materials (Basel). 2021 Jul 15;14(14):3963. doi: 10.3390/ma14143963 (PMC8307547; doi:10.3390/ma14143963)
Supplement: Supplementary file 1 [file materials-14-03963-s001.zip › xrd_data/2-550b_riet.txt]

'y-axis saved as Sqrt(y)
'x,Yobs,Ycalc,Diff,fe4n,epsilon,Bkg
20,6.92820323,0,0,0,0,0
20.010492,7.28010989,0,0,0,0,0
20.020983,7.21110255,0,0,0,0,0
20.031475,7.21110255,0,0,0,0,0
20.041966,7.41619849,0,0,0,0,0
20.052458,7.93725393,0,0,0,0,0
20.06295,8,0,0,0,0,0
20.073441,7.14142843,0,0,0,0,0
20.083933,6.8556546,0,0,0,0,0
20.094424,7.34846923,0,0,0,0,0
20.104916,7.61577311,0,0,0,0,0
20.115408,6.78232998,0,0,0,0,0
20.125899,7.54983444,0,0,0,0,0
20.136391,7.28010989,0,0,0,0,0
20.146882,7.61577311,0,0,0,0,0
20.157374,7.21110255,0,0,0,0,0
20.167866,7.74596669,0,0,0,0,0
20.178357,7.81024968,0,0,0,0,0
20.188849,7.07106781,0,0,0,0,0
20.19934,7.93725393,0,0,0,0,0
20.209832,8.30662386,0,0,0,0,0
20.220324,8.24621125,0,0,0,0,0
20.230815,7.41619849,0,0,0,0,0
20.241307,7.61577311,0,0,0,0,0
20.251798,8.18535277,0,0,0,0,0
20.26229,7.48331477,0,0,0,0,0
20.272782,6.8556546,0,0,0,0,0
20.283273,7.48331477,0,0,0,0,0
20.293765,6.92820323,0,0,0,0,0
20.304256,7.87400787,0,0,0,0,0
20.314748,7.21110255,0,0,0,0,0
20.32524,7.34846923,0,0,0,0,0
20.335731,7.54983444,0,0,0,0,0
20.346223,7.81024968,0,0,0,0,0
20.356714,7.41619849,0,0,0,0,0
20.367206,7.74596669,0,0,0,0,0
20.377698,7.14142843,0,0,0,0,0
20.388189,7.14142843,0,0,0,0,0
20.398681,6.92820323,0,0,0,0,0
20.409172,7.28010989,0,0,0,0,0
20.419664,6.78232998,0,0,0,0,0
20.430156,7.41619849,0,0,0,0,0
20.440647,7.48331477,0,0,0,0,0
20.451139,7.07106781,0,0,0,0,0
20.46163,7.41619849,0,0,0,0,0
20.472122,7.68114575,0,0,0,0,0
20.482614,7.93725393,0,0,0,0,0
20.493105,6.08276253,0,0,0,0,0
20.503597,7.14142843,0,0,0,0,0
20.514088,7.07106781,0,0,0,0,0
20.52458,8.36660027,0,0,0,0,0
20.535072,7,0,0,0,0,0
20.545563,7.41619849,0,0,0,0,0
20.556055,8.1240384,0,0,0,0,0
20.566546,7.74596669,0,0,0,0,0
20.577038,7.28010989,0,0,0,0,0
20.58753,7.41619849,0,0,0,0,0
20.598021,7.68114575,0,0,0,0,0
20.608513,7.28010989,0,0,0,0,0
20.619004,7.68114575,0,0,0,0,0
20.629496,6.70820393,0,0,0,0,0
20.639988,7.74596669,0,0,0,0,0
20.650479,7.54983444,0,0,0,0,0
20.660971,6.55743852,0,0,0,0,0
20.671462,6.08276253,0,0,0,0,0
20.681954,6.55743852,0,0,0,0,0
20.692446,7.68114575,0,0,0,0,0
20.702937,7,0,0,0,0,0
20.713429,6.78232998,0,0,0,0,0
20.72392,8.60232527,0,0,0,0,0
20.734412,7.61577311,0,0,0,0,0
20.744904,6.55743852,0,0,0,0,0
20.755395,7.34846923,0,0,0,0,0
20.765887,7.07106781,0,0,0,0,0
20.776378,8.36660027,0,0,0,0,0
20.78687,7,0,0,0,0,0
20.797362,7.81024968,0,0,0,0,0
20.807853,7.14142843,0,0,0,0,0
20.818345,8.1240384,0,0,0,0,0
20.828836,6.78232998,0,0,0,0,0
20.839328,6.70820393,0,0,0,0,0
20.84982,7.07106781,0,0,0,0,0
20.860311,7.54983444,0,0,0,0,0
20.870803,7.41619849,0,0,0,0,0
20.881294,7.87400787,0,0,0,0,0
20.891786,7.14142843,0,0,0,0,0
20.902278,7.14142843,0,0,0,0,0
20.912769,7.41619849,0,0,0,0,0
20.923261,6.8556546,0,0,0,0,0
20.933752,7.54983444,0,0,0,0,0
20.944244,7.74596669,0,0,0,0,0
20.954736,7.28010989,0,0,0,0,0
20.965227,6.70820393,0,0,0,0,0
20.975719,7.07106781,0,0,0,0,0
20.98621,7.34846923,0,0,0,0,0
20.996702,7,0,0,0,0,0
21.007194,7.21110255,0,0,0,0,0
21.017685,6.92820323,0,0,0,0,0
21.028177,7.48331477,0,0,0,0,0
21.038668,7.34846923,0,0,0,0,0
21.04916,6.92820323,0,0,0,0,0
21.059652,7.74596669,0,0,0,0,0
21.070143,6.164414,0,0,0,0,0
21.080635,7.07106781,0,0,0,0,0
21.091126,7.07106781,0,0,0,0,0
21.101618,7.74596669,0,0,0,0,0
21.11211,6.78232998,0,0,0,0,0
21.122601,7.68114575,0,0,0,0,0
21.133093,8,0,0,0,0,0
21.143584,7.28010989,0,0,0,0,0
21.154076,6.63324958,0,0,0,0,0
21.164568,7.61577311,0,0,0,0,0
21.175059,6.4807407,0,0,0,0,0
21.185551,6.78232998,0,0,0,0,0
21.196042,7.93725393,0,0,0,0,0
21.206534,7.14142843,0,0,0,0,0
21.217026,7.21110255,0,0,0,0,0
21.227517,7.54983444,0,0,0,0,0
21.238009,8.06225775,0,0,0,0,0
21.2485,7,0,0,0,0,0
21.258992,6.92820323,0,0,0,0,0
21.269484,7.07106781,0,0,0,0,0
21.279975,5.83095189,0,0,0,0,0
21.290467,7.28010989,0,0,0,0,0
21.300958,7,0,0,0,0,0
21.31145,5.09901951,0,0,0,0,0
21.321942,7.81024968,0,0,0,0,0
21.332433,6.55743852,0,0,0,0,0
21.342925,7.07106781,0,0,0,0,0
21.353416,7.93725393,0,0,0,0,0
21.363908,5.65685425,0,0,0,0,0
21.3744,7,0,0,0,0,0
21.384891,7.28010989,0,0,0,0,0
21.395383,6.32455532,0,0,0,0,0
21.405874,6.92820323,0,0,0,0,0
21.416366,7.74596669,0,0,0,0,0
21.426858,6.8556546,0,0,0,0,0
21.437349,7.93725393,0,0,0,0,0
21.447841,7.07106781,0,0,0,0,0
21.458332,7.81024968,0,0,0,0,0
21.468824,6.8556546,0,0,0,0,0
21.479316,7.07106781,0,0,0,0,0
21.489807,6.63324958,0,0,0,0,0
21.500299,7.34846923,0,0,0,0,0
21.51079,6.63324958,0,0,0,0,0
21.521282,7.48331477,0,0,0,0,0
21.531774,6.8556546,0,0,0,0,0
21.542265,7.21110255,0,0,0,0,0
21.552757,7.14142843,0,0,0,0,0
21.563248,7.34846923,0,0,0,0,0
21.57374,7.28010989,0,0,0,0,0
21.584232,6.92820323,0,0,0,0,0
21.594723,7.81024968,0,0,0,0,0
21.605215,6.78232998,0,0,0,0,0
21.615706,6.70820393,0,0,0,0,0
21.626198,7.48331477,0,0,0,0,0
21.63669,7.14142843,0,0,0,0,0
21.647181,5.65685425,0,0,0,0,0
21.657673,6.55743852,0,0,0,0,0
21.668164,7.41619849,0,0,0,0,0
21.678656,6.55743852,0,0,0,0,0
21.689148,7.28010989,0,0,0,0,0
21.699639,7.14142843,0,0,0,0,0
21.710131,7,0,0,0,0,0
21.720622,7.34846923,0,0,0,0,0
21.731114,7.14142843,0,0,0,0,0
21.741606,6.78232998,0,0,0,0,0
21.752097,7.48331477,0,0,0,0,0
21.762589,7.81024968,0,0,0,0,0
21.77308,6.4807407,0,0,0,0,0
21.783572,6.164414,0,0,0,0,0
21.794064,7.74596669,0,0,0,0,0
21.804555,6.32455532,0,0,0,0,0
21.815047,6.63324958,0,0,0,0,0
21.825538,7.07106781,0,0,0,0,0
21.83603,7.14142843,0,0,0,0,0
21.846522,7.74596669,0,0,0,0,0
21.857013,6.78232998,0,0,0,0,0
21.867505,7.21110255,0,0,0,0,0
21.877996,6.8556546,0,0,0,0,0
21.888488,6.55743852,0,0,0,0,0
21.89898,6,0,0,0,0,0
21.909471,7.07106781,0,0,0,0,0
21.919963,7.54983444,0,0,0,0,0
21.930454,6.92820323,0,0,0,0,0
21.940946,6.32455532,0,0,0,0,0
21.951438,6.78232998,0,0,0,0,0
21.961929,6.40312424,0,0,0,0,0
21.972421,7.48331477,0,0,0,0,0
21.982912,7.61577311,0,0,0,0,0
21.993404,7.54983444,0,0,0,0,0
22.003896,6.55743852,0,0,0,0,0
22.014387,7.28010989,0,0,0,0,0
22.024879,7.87400787,0,0,0,0,0
22.03537,7.21110255,0,0,0,0,0
22.045862,7.41619849,0,0,0,0,0
22.056354,7.34846923,0,0,0,0,0
22.066845,7.07106781,0,0,0,0,0
22.077337,7.07106781,0,0,0,0,0
22.087828,7.14142843,0,0,0,0,0
22.09832,7.28010989,0,0,0,0,0
22.108812,6.8556546,0,0,0,0,0
22.119303,6.164414,0,0,0,0,0
22.129795,7,0,0,0,0,0
22.140286,6.78232998,0,0,0,0,0
22.150778,6.244998,0,0,0,0,0
22.16127,7.28010989,0,0,0,0,0
22.171761,7.61577311,0,0,0,0,0
22.182253,6.63324958,0,0,0,0,0
22.192744,7.14142843,0,0,0,0,0
22.203236,7.07106781,0,0,0,0,0
22.213728,7.81024968,0,0,0,0,0
22.224219,6.08276253,0,0,0,0,0
22.234711,6.78232998,0,0,0,0,0
22.245202,7.21110255,0,0,0,0,0
22.255694,7.48331477,0,0,0,0,0
22.266186,6.4807407,0,0,0,0,0
22.276677,7.21110255,0,0,0,0,0
22.287169,6.63324958,0,0,0,0,0
22.29766,7.74596669,0,0,0,0,0
22.308152,6.92820323,0,0,0,0,0
22.318644,7,0,0,0,0,0
22.329135,5.91607978,0,0,0,0,0
22.339627,6.63324958,0,0,0,0,0
22.350118,6.164414,0,0,0,0,0
22.36061,7.41619849,0,0,0,0,0
22.371102,7.14142843,0,0,0,0,0
22.381593,6.8556546,0,0,0,0,0
22.392085,6.4807407,0,0,0,0,0
22.402576,7.61577311,0,0,0,0,0
22.413068,6.08276253,0,0,0,0,0
22.42356,6.70820393,0,0,0,0,0
22.434051,7.21110255,0,0,0,0,0
22.444543,6.63324958,0,0,0,0,0
22.455034,7.14142843,0,0,0,0,0
22.465526,6.92820323,0,0,0,0,0
22.476018,8.06225775,0,0,0,0,0
22.486509,6.32455532,0,0,0,0,0
22.497001,6.63324958,0,0,0,0,0
22.507492,6.92820323,0,0,0,0,0
22.517984,7.14142843,0,0,0,0,0
22.528476,6.78232998,0,0,0,0,0
22.538967,7,0,0,0,0,0
22.549459,7.21110255,0,0,0,0,0
22.55995,6.55743852,0,0,0,0,0
22.570442,7.54983444,0,0,0,0,0
22.580934,6.92820323,0,0,0,0,0
22.591425,6.63324958,0,0,0,0,0
22.601917,7.07106781,0,0,0,0,0
22.612408,7.34846923,0,0,0,0,0
22.6229,6.70820393,0,0,0,0,0
22.633392,7.28010989,0,0,0,0,0
22.643883,7,0,0,0,0,0
22.654375,6.8556546,0,0,0,0,0
22.664866,6.92820323,0,0,0,0,0
22.675358,7.21110255,0,0,0,0,0
22.68585,6.164414,0,0,0,0,0
22.696341,6.244998,0,0,0,0,0
22.706833,7.48331477,0,0,0,0,0
22.717324,7.28010989,0,0,0,0,0
22.727816,7.68114575,0,0,0,0,0
22.738308,6.70820393,0,0,0,0,0
22.748799,6.78232998,0,0,0,0,0
22.759291,6.8556546,0,0,0,0,0
22.769782,6.4807407,0,0,0,0,0
22.780274,7.34846923,0,0,0,0,0
22.790766,7.48331477,0,0,0,0,0
22.801257,6.40312424,0,0,0,0,0
22.811749,7.48331477,0,0,0,0,0
22.82224,6.4807407,0,0,0,0,0
22.832732,7.21110255,0,0,0,0,0
22.843224,6.78232998,0,0,0,0,0
22.853715,6.4807407,0,0,0,0,0
22.864207,6.08276253,0,0,0,0,0
22.874698,6.4807407,0,0,0,0,0
22.88519,6.4807407,0,0,0,0,0
22.895682,6.63324958,0,0,0,0,0
22.906173,7.28010989,0,0,0,0,0
22.916665,7.48331477,0,0,0,0,0
22.927156,7.54983444,0,0,0,0,0
22.937648,6.32455532,0,0,0,0,0
22.94814,6.78232998,0,0,0,0,0
22.958631,6.70820393,0,0,0,0,0
22.969123,6.70820393,0,0,0,0,0
22.979614,7.34846923,0,0,0,0,0
22.990106,7.34846923,0,0,0,0,0
23.000598,6.40312424,0,0,0,0,0
23.011089,6.70820393,0,0,0,0,0
23.021581,7.74596669,0,0,0,0,0
23.032072,6.78232998,0,0,0,0,0
23.042564,6.8556546,0,0,0,0,0
23.053056,6.164414,0,0,0,0,0
23.063547,7.21110255,0,0,0,0,0
23.074039,7.61577311,0,0,0,0,0
23.08453,6.92820323,0,0,0,0,0
23.095022,6.92820323,0,0,0,0,0
23.105514,7,0,0,0,0,0
23.116005,6.55743852,0,0,0,0,0
23.126497,6.63324958,0,0,0,0,0
23.136988,6.63324958,0,0,0,0,0
23.14748,7.54983444,0,0,0,0,0
23.157972,7.87400787,0,0,0,0,0
23.168463,5.91607978,0,0,0,0,0
23.178955,7,0,0,0,0,0
23.189446,7.87400787,0,0,0,0,0
23.199938,6.164414,0,0,0,0,0
23.21043,6.8556546,0,0,0,0,0
23.220921,6.55743852,0,0,0,0,0
23.231413,6.8556546,0,0,0,0,0
23.241904,5.91607978,0,0,0,0,0
23.252396,6.4807407,0,0,0,0,0
23.262888,6.4807407,0,0,0,0,0
23.273379,7.14142843,0,0,0,0,0
23.283871,6.78232998,0,0,0,0,0
23.294362,6.92820323,0,0,0,0,0
23.304854,7.81024968,0,0,0,0,0
23.315346,6.4807407,0,0,0,0,0
23.325837,6.4807407,0,0,0,0,0
23.336329,6.08276253,0,0,0,0,0
23.34682,6.92820323,0,0,0,0,0
23.357312,6.78232998,0,0,0,0,0
23.367804,6.63324958,0,0,0,0,0
23.378295,6.40312424,0,0,0,0,0
23.388787,6.78232998,0,0,0,0,0
23.399278,6.55743852,0,0,0,0,0
23.40977,6.70820393,0,0,0,0,0
23.420262,6.08276253,0,0,0,0,0
23.430753,6.4807407,0,0,0,0,0
23.441245,6.92820323,0,0,0,0,0
23.451736,6.55743852,0,0,0,0,0
23.462228,6.92820323,0,0,0,0,0
23.47272,7.14142843,0,0,0,0,0
23.483211,6.8556546,0,0,0,0,0
23.493703,6.63324958,0,0,0,0,0
23.504194,7.34846923,0,0,0,0,0
23.514686,6.8556546,0,0,0,0,0
23.525178,6.63324958,0,0,0,0,0
23.535669,7.21110255,0,0,0,0,0
23.546161,7.61577311,0,0,0,0,0
23.556652,6.92820323,0,0,0,0,0
23.567144,5.65685425,0,0,0,0,0
23.577636,6.92820323,0,0,0,0,0
23.588127,5.74456265,0,0,0,0,0
23.598619,6.55743852,0,0,0,0,0
23.60911,6.40312424,0,0,0,0,0
23.619602,7.14142843,0,0,0,0,0
23.630094,5.91607978,0,0,0,0,0
23.640585,7.34846923,0,0,0,0,0
23.651077,5.91607978,0,0,0,0,0
23.661568,7.68114575,0,0,0,0,0
23.67206,5.56776436,0,0,0,0,0
23.682552,6.40312424,0,0,0,0,0
23.693043,6.70820393,0,0,0,0,0
23.703535,6.70820393,0,0,0,0,0
23.714026,6.70820393,0,0,0,0,0
23.724518,6.92820323,0,0,0,0,0
23.73501,6.55743852,0,0,0,0,0
23.745501,6.63324958,0,0,0,0,0
23.755993,6.8556546,0,0,0,0,0
23.766484,6.70820393,0,0,0,0,0
23.776976,6.40312424,0,0,0,0,0
23.787468,6.164414,0,0,0,0,0
23.797959,7,0,0,0,0,0
23.808451,6.78232998,0,0,0,0,0
23.818942,5.47722558,0,0,0,0,0
23.829434,6.92820323,0,0,0,0,0
23.839926,6.4807407,0,0,0,0,0
23.850417,6.55743852,0,0,0,0,0
23.860909,6.164414,0,0,0,0,0
23.8714,6.55743852,0,0,0,0,0
23.881892,6.78232998,0,0,0,0,0
23.892384,6.78232998,0,0,0,0,0
23.902875,7.28010989,0,0,0,0,0
23.913367,6.55743852,0,0,0,0,0
23.923858,5.83095189,0,0,0,0,0
23.93435,6.70820393,0,0,0,0,0
23.944842,6.244998,0,0,0,0,0
23.955333,6.8556546,0,0,0,0,0
23.965825,6.4807407,0,0,0,0,0
23.976316,7.07106781,0,0,0,0,0
23.986808,7.14142843,0,0,0,0,0
23.9973,6.8556546,0,0,0,0,0
24.007791,5.65685425,0,0,0,0,0
24.018283,6.8556546,0,0,0,0,0
24.028774,7.14142843,0,0,0,0,0
24.039266,5.83095189,0,0,0,0,0
24.049758,7.41619849,0,0,0,0,0
24.060249,6.4807407,0,0,0,0,0
24.070741,5,0,0,0,0,0
24.081232,6.32455532,0,0,0,0,0
24.091724,6.55743852,0,0,0,0,0
24.102216,6.63324958,0,0,0,0,0
24.112707,7.28010989,0,0,0,0,0
24.123199,6.164414,0,0,0,0,0
24.13369,6.78232998,0,0,0,0,0
24.144182,6.40312424,0,0,0,0,0
24.154674,5.74456265,0,0,0,0,0
24.165165,6.164414,0,0,0,0,0
24.175657,6.70820393,0,0,0,0,0
24.186148,6.244998,0,0,0,0,0
24.19664,7.21110255,0,0,0,0,0
24.207132,5.74456265,0,0,0,0,0
24.217623,6.78232998,0,0,0,0,0
24.228115,6.55743852,0,0,0,0,0
24.238606,5.65685425,0,0,0,0,0
24.249098,7.21110255,0,0,0,0,0
24.25959,7.81024968,0,0,0,0,0
24.270081,5.56776436,0,0,0,0,0
24.280573,6.8556546,0,0,0,0,0
24.291064,6.78232998,0,0,0,0,0
24.301556,6.78232998,0,0,0,0,0
24.312048,6.63324958,0,0,0,0,0
24.322539,6.8556546,0,0,0,0,0
24.333031,6.78232998,0,0,0,0,0
24.343522,6.40312424,0,0,0,0,0
24.354014,7.07106781,0,0,0,0,0
24.364506,7.54983444,0,0,0,0,0
24.374997,6.4807407,0,0,0,0,0
24.385489,6.08276253,0,0,0,0,0
24.39598,6.55743852,0,0,0,0,0
24.406472,6.63324958,0,0,0,0,0
24.416964,7.07106781,0,0,0,0,0
24.427455,6.244998,0,0,0,0,0
24.437947,7.48331477,0,0,0,0,0
24.448438,7,0,0,0,0,0
24.45893,5.83095189,0,0,0,0,0
24.469422,5.65685425,0,0,0,0,0
24.479913,5.83095189,0,0,0,0,0
24.490405,6.55743852,0,0,0,0,0
24.500896,6.55743852,0,0,0,0,0
24.511388,5.83095189,0,0,0,0,0
24.52188,5.91607978,0,0,0,0,0
24.532371,7.28010989,0,0,0,0,0
24.542863,6.70820393,0,0,0,0,0
24.553354,5.65685425,0,0,0,0,0
24.563846,6.55743852,0,0,0,0,0
24.574338,6.4807407,0,0,0,0,0
24.584829,6.244998,0,0,0,0,0
24.595321,6.92820323,0,0,0,0,0
24.605812,5.83095189,0,0,0,0,0
24.616304,6,0,0,0,0,0
24.626796,5.47722558,0,0,0,0,0
24.637287,5.91607978,0,0,0,0,0
24.647779,6.4807407,0,0,0,0,0
24.65827,7.54983444,0,0,0,0,0
24.668762,6.244998,0,0,0,0,0
24.679254,6.55743852,0,0,0,0,0
24.689745,5.91607978,0,0,0,0,0
24.700237,7.14142843,0,0,0,0,0
24.710728,6.40312424,0,0,0,0,0
24.72122,7,0,0,0,0,0
24.731712,5.91607978,0,0,0,0,0
24.742203,7.14142843,0,0,0,0,0
24.752695,7.41619849,0,0,0,0,0
24.763186,6.63324958,0,0,0,0,0
24.773678,6.40312424,0,0,0,0,0
24.78417,6.92820323,0,0,0,0,0
24.794661,5.38516481,0,0,0,0,0
24.805153,6.63324958,0,0,0,0,0
24.815644,5.74456265,0,0,0,0,0
24.826136,5.91607978,0,0,0,0,0
24.836628,6.164414,0,0,0,0,0
24.847119,5.47722558,0,0,0,0,0
24.857611,6.244998,0,0,0,0,0
24.868102,6.32455532,0,0,0,0,0
24.878594,6.4807407,0,0,0,0,0
24.889086,6.244998,0,0,0,0,0
24.899577,6.40312424,0,0,0,0,0
24.910069,7.21110255,0,0,0,0,0
24.92056,6.70820393,0,0,0,0,0
24.931052,6.32455532,0,0,0,0,0
24.941544,6.63324958,0,0,0,0,0
24.952035,6,0,0,0,0,0
24.962527,5.74456265,0,0,0,0,0
24.973018,6.08276253,0,0,0,0,0
24.98351,7.14142843,0,0,0,0,0
24.994002,6,0,0,0,0,0
25.004493,6.4807407,0,0,0,0,0
25.014985,6.78232998,0,0,0,0,0
25.025476,6.4807407,0,0,0,0,0
25.035968,5.91607978,0,0,0,0,0
25.04646,6,0,0,0,0,0
25.056951,6.40312424,0,0,0,0,0
25.067443,6.63324958,0,0,0,0,0
25.077934,5.65685425,0,0,0,0,0
25.088426,6.08276253,0,0,0,0,0
25.098918,5.74456265,0,0,0,0,0
25.109409,6.78232998,0,0,0,0,0
25.119901,7.34846923,0,0,0,0,0
25.130392,5.83095189,0,0,0,0,0
25.140884,6.244998,0,0,0,0,0
25.151376,6,0,0,0,0,0
25.161867,6.164414,0,0,0,0,0
25.172359,6.55743852,0,0,0,0,0
25.18285,6.63324958,0,0,0,0,0
25.193342,7.07106781,0,0,0,0,0
25.203834,6.08276253,0,0,0,0,0
25.214325,5.65685425,0,0,0,0,0
25.224817,6,0,0,0,0,0
25.235308,6.78232998,0,0,0,0,0
25.2458,6.78232998,0,0,0,0,0
25.256292,6.164414,0,0,0,0,0
25.266783,5.74456265,0,0,0,0,0
25.277275,6.70820393,0,0,0,0,0
25.287766,6,0,0,0,0,0
25.298258,6.78232998,0,0,0,0,0
25.30875,6.244998,0,0,0,0,0
25.319241,6.164414,0,0,0,0,0
25.329733,6.08276253,0,0,0,0,0
25.340224,6.32455532,0,0,0,0,0
25.350716,6.08276253,0,0,0,0,0
25.361208,7.07106781,0,0,0,0,0
25.371699,6.92820323,0,0,0,0,0
25.382191,7.14142843,0,0,0,0,0
25.392682,6.32455532,0,0,0,0,0
25.403174,6.40312424,0,0,0,0,0
25.413666,6.164414,0,0,0,0,0
25.424157,6.164414,0,0,0,0,0
25.434649,6.40312424,0,0,0,0,0
25.44514,6.164414,0,0,0,0,0
25.455632,6.70820393,0,0,0,0,0
25.466124,5.83095189,0,0,0,0,0
25.476615,6.40312424,0,0,0,0,0
25.487107,7.28010989,0,0,0,0,0
25.497598,7,0,0,0,0,0
25.50809,6.244998,0,0,0,0,0
25.518582,5.83095189,0,0,0,0,0
25.529073,6.63324958,0,0,0,0,0
25.539565,5.83095189,0,0,0,0,0
25.550056,6.32455532,0,0,0,0,0
25.560548,6.40312424,0,0,0,0,0
25.57104,7.14142843,0,0,0,0,0
25.581531,6.70820393,0,0,0,0,0
25.592023,6.40312424,0,0,0,0,0
25.602514,5.56776436,0,0,0,0,0
25.613006,6.32455532,0,0,0,0,0
25.623498,6.164414,0,0,0,0,0
25.633989,6.244998,0,0,0,0,0
25.644481,6.8556546,0,0,0,0,0
25.654972,5.74456265,0,0,0,0,0
25.665464,5.47722558,0,0,0,0,0
25.675956,5.74456265,0,0,0,0,0
25.686447,6.78232998,0,0,0,0,0
25.696939,5.29150262,0,0,0,0,0
25.70743,6.244998,0,0,0,0,0
25.717922,5.91607978,0,0,0,0,0
25.728414,6.92820323,0,0,0,0,0
25.738905,5.83095189,0,0,0,0,0
25.749397,6.70820393,0,0,0,0,0
25.759888,5.65685425,0,0,0,0,0
25.77038,6.4807407,0,0,0,0,0
25.780872,6.32455532,0,0,0,0,0
25.791363,5.38516481,0,0,0,0,0
25.801855,5.91607978,0,0,0,0,0
25.812346,6.32455532,0,0,0,0,0
25.822838,6.70820393,0,0,0,0,0
25.83333,5.47722558,0,0,0,0,0
25.843821,6.8556546,0,0,0,0,0
25.854313,5.65685425,0,0,0,0,0
25.864804,6.4807407,0,0,0,0,0
25.875296,6.78232998,0,0,0,0,0
25.885788,5.38516481,0,0,0,0,0
25.896279,7.07106781,0,0,0,0,0
25.906771,6.244998,0,0,0,0,0
25.917262,6.164414,0,0,0,0,0
25.927754,5.29150262,0,0,0,0,0
25.938246,6.4807407,0,0,0,0,0
25.948737,6.63324958,0,0,0,0,0
25.959229,6.63324958,0,0,0,0,0
25.96972,6,0,0,0,0,0
25.980212,6.92820323,0,0,0,0,0
25.990704,6.4807407,0,0,0,0,0
26.001195,6.55743852,0,0,0,0,0
26.011687,5.65685425,0,0,0,0,0
26.022178,6.70820393,0,0,0,0,0
26.03267,6.4807407,0,0,0,0,0
26.043162,6.8556546,0,0,0,0,0
26.053653,6.55743852,0,0,0,0,0
26.064145,5.83095189,0,0,0,0,0
26.074636,6.244998,0,0,0,0,0
26.085128,6.55743852,0,0,0,0,0
26.09562,5.65685425,0,0,0,0,0
26.106111,5.47722558,0,0,0,0,0
26.116603,5.09901951,0,0,0,0,0
26.127094,6.8556546,0,0,0,0,0
26.137586,6.08276253,0,0,0,0,0
26.148078,7,0,0,0,0,0
26.158569,6,0,0,0,0,0
26.169061,6,0,0,0,0,0
26.179552,5.91607978,0,0,0,0,0
26.190044,5.56776436,0,0,0,0,0
26.200536,6.78232998,0,0,0,0,0
26.211027,6.32455532,0,0,0,0,0
26.221519,5.83095189,0,0,0,0,0
26.23201,6.40312424,0,0,0,0,0
26.242502,5.56776436,0,0,0,0,0
26.252994,6.08276253,0,0,0,0,0
26.263485,6.32455532,0,0,0,0,0
26.273977,6,0,0,0,0,0
26.284468,6.244998,0,0,0,0,0
26.29496,6.4807407,0,0,0,0,0
26.305452,7.41619849,0,0,0,0,0
26.315943,5.19615242,0,0,0,0,0
26.326435,6,0,0,0,0,0
26.336926,6.4807407,0,0,0,0,0
26.347418,5.19615242,0,0,0,0,0
26.35791,6.55743852,0,0,0,0,0
26.368401,6.32455532,0,0,0,0,0
26.378893,5.19615242,0,0,0,0,0
26.389384,6.08276253,0,0,0,0,0
26.399876,6.8556546,0,0,0,0,0
26.410368,6.63324958,0,0,0,0,0
26.420859,6.40312424,0,0,0,0,0
26.431351,5.38516481,0,0,0,0,0
26.441842,6.08276253,0,0,0,0,0
26.452334,5.47722558,0,0,0,0,0
26.462826,6,0,0,0,0,0
26.473317,6.164414,0,0,0,0,0
26.483809,6.70820393,0,0,0,0,0
26.4943,5.29150262,0,0,0,0,0
26.504792,5.38516481,0,0,0,0,0
26.515284,6.4807407,0,0,0,0,0
26.525775,6.08276253,0,0,0,0,0
26.536267,5.83095189,0,0,0,0,0
26.546758,6.4807407,0,0,0,0,0
26.55725,6.164414,0,0,0,0,0
26.567742,6.78232998,0,0,0,0,0
26.578233,6.63324958,0,0,0,0,0
26.588725,5.91607978,0,0,0,0,0
26.599216,5.91607978,0,0,0,0,0
26.609708,6.244998,0,0,0,0,0
26.6202,5.29150262,0,0,0,0,0
26.630691,7.28010989,0,0,0,0,0
26.641183,6.63324958,0,0,0,0,0
26.651674,5.47722558,0,0,0,0,0
26.662166,6.32455532,0,0,0,0,0
26.672658,6.244998,0,0,0,0,0
26.683149,6.244998,0,0,0,0,0
26.693641,5.74456265,0,0,0,0,0
26.704132,5.91607978,0,0,0,0,0
26.714624,6.32455532,0,0,0,0,0
26.725116,6.4807407,0,0,0,0,0
26.735607,5.83095189,0,0,0,0,0
26.746099,6.08276253,0,0,0,0,0
26.75659,6.08276253,0,0,0,0,0
26.767082,5.09901951,0,0,0,0,0
26.777574,5.83095189,0,0,0,0,0
26.788065,6.08276253,0,0,0,0,0
26.798557,6.63324958,0,0,0,0,0
26.809048,5.29150262,0,0,0,0,0
26.81954,6.40312424,0,0,0,0,0
26.830032,6.70820393,0,0,0,0,0
26.840523,6.32455532,0,0,0,0,0
26.851015,6.164414,0,0,0,0,0
26.861506,6.4807407,0,0,0,0,0
26.871998,5.91607978,0,0,0,0,0
26.88249,6.70820393,0,0,0,0,0
26.892981,5.91607978,0,0,0,0,0
26.903473,5.65685425,0,0,0,0,0
26.913964,5.83095189,0,0,0,0,0
26.924456,6.8556546,0,0,0,0,0
26.934948,6.244998,0,0,0,0,0
26.945439,5.65685425,0,0,0,0,0
26.955931,5.47722558,0,0,0,0,0
26.966422,5.91607978,0,0,0,0,0
26.976914,5.38516481,0,0,0,0,0
26.987406,6.244998,0,0,0,0,0
26.997897,5.91607978,0,0,0,0,0
27.008389,6.32455532,0,0,0,0,0
27.01888,6.164414,0,0,0,0,0
27.029372,6.08276253,0,0,0,0,0
27.039864,6.244998,0,0,0,0,0
27.050355,6.4807407,0,0,0,0,0
27.060847,5.83095189,0,0,0,0,0
27.071338,5.91607978,0,0,0,0,0
27.08183,5.74456265,0,0,0,0,0
27.092322,5.65685425,0,0,0,0,0
27.102813,5.47722558,0,0,0,0,0
27.113305,6.164414,0,0,0,0,0
27.123796,4.79583152,0,0,0,0,0
27.134288,6.08276253,0,0,0,0,0
27.14478,7.07106781,0,0,0,0,0
27.155271,5.74456265,0,0,0,0,0
27.165763,6.4807407,0,0,0,0,0
27.176254,6.4807407,0,0,0,0,0
27.186746,5.74456265,0,0,0,0,0
27.197238,7.48331477,0,0,0,0,0
27.207729,5.91607978,0,0,0,0,0
27.218221,6.78232998,0,0,0,0,0
27.228712,5.19615242,0,0,0,0,0
27.239204,6.4807407,0,0,0,0,0
27.249696,5.09901951,0,0,0,0,0
27.260187,6.164414,0,0,0,0,0
27.270679,6.63324958,0,0,0,0,0
27.28117,5.91607978,0,0,0,0,0
27.291662,5.47722558,0,0,0,0,0
27.302154,6.164414,0,0,0,0,0
27.312645,6,0,0,0,0,0
27.323137,6.40312424,0,0,0,0,0
27.333628,5.91607978,0,0,0,0,0
27.34412,6.08276253,0,0,0,0,0
27.354612,6.08276253,0,0,0,0,0
27.365103,7.07106781,0,0,0,0,0
27.375595,5.83095189,0,0,0,0,0
27.386086,6.32455532,0,0,0,0,0
27.396578,5.29150262,0,0,0,0,0
27.40707,5.91607978,0,0,0,0,0
27.417561,6.40312424,0,0,0,0,0
27.428053,6.32455532,0,0,0,0,0
27.438544,6.63324958,0,0,0,0,0
27.449036,6.08276253,0,0,0,0,0
27.459528,6.244998,0,0,0,0,0
27.470019,6.164414,0,0,0,0,0
27.480511,6.08276253,0,0,0,0,0
27.491002,6,0,0,0,0,0
27.501494,5.83095189,0,0,0,0,0
27.511986,6.32455532,0,0,0,0,0
27.522477,5.47722558,0,0,0,0,0
27.532969,6.55743852,0,0,0,0,0
27.54346,6.40312424,0,0,0,0,0
27.553952,6,0,0,0,0,0
27.564444,6.78232998,0,0,0,0,0
27.574935,6.164414,0,0,0,0,0
27.585427,6.164414,0,0,0,0,0
27.595918,5.65685425,0,0,0,0,0
27.60641,6.40312424,0,0,0,0,0
27.616902,5.91607978,0,0,0,0,0
27.627393,5.83095189,0,0,0,0,0
27.637885,5.29150262,0,0,0,0,0
27.648376,6.78232998,0,0,0,0,0
27.658868,6.164414,0,0,0,0,0
27.66936,6.55743852,0,0,0,0,0
27.679851,5.83095189,0,0,0,0,0
27.690343,5.38516481,0,0,0,0,0
27.700834,6.78232998,0,0,0,0,0
27.711326,6.32455532,0,0,0,0,0
27.721818,5.91607978,0,0,0,0,0
27.732309,6.08276253,0,0,0,0,0
27.742801,5.29150262,0,0,0,0,0
27.753292,5.83095189,0,0,0,0,0
27.763784,5.47722558,0,0,0,0,0
27.774276,6.8556546,0,0,0,0,0
27.784767,6.164414,0,0,0,0,0
27.795259,6.55743852,0,0,0,0,0
27.80575,6.40312424,0,0,0,0,0
27.816242,5.56776436,0,0,0,0,0
27.826734,5.65685425,0,0,0,0,0
27.837225,6.4807407,0,0,0,0,0
27.847717,5.56776436,0,0,0,0,0
27.858208,6.08276253,0,0,0,0,0
27.8687,5.91607978,0,0,0,0,0
27.879192,5.83095189,0,0,0,0,0
27.889683,6.63324958,0,0,0,0,0
27.900175,5.91607978,0,0,0,0,0
27.910666,6.244998,0,0,0,0,0
27.921158,5.83095189,0,0,0,0,0
27.93165,6.63324958,0,0,0,0,0
27.942141,6.244998,0,0,0,0,0
27.952633,6,0,0,0,0,0
27.963124,5.47722558,0,0,0,0,0
27.973616,5.19615242,0,0,0,0,0
27.984108,6.40312424,0,0,0,0,0
27.994599,5.65685425,0,0,0,0,0
28.005091,5.47722558,0,0,0,0,0
28.015582,5.47722558,0,0,0,0,0
28.026074,6,0,0,0,0,0
28.036566,7.74596669,0,0,0,0,0
28.047057,5.91607978,0,0,0,0,0
28.057549,6.55743852,0,0,0,0,0
28.06804,5.56776436,0,0,0,0,0
28.078532,6.92820323,0,0,0,0,0
28.089024,6.40312424,0,0,0,0,0
28.099515,5.47722558,0,0,0,0,0
28.110007,5.38516481,0,0,0,0,0
28.120498,5.65685425,0,0,0,0,0
28.13099,6.244998,0,0,0,0,0
28.141482,6.63324958,0,0,0,0,0
28.151973,5.65685425,0,0,0,0,0
28.162465,6.55743852,0,0,0,0,0
28.172956,6.63324958,0,0,0,0,0
28.183448,5.47722558,0,0,0,0,0
28.19394,6.32455532,0,0,0,0,0
28.204431,5.74456265,0,0,0,0,0
28.214923,6.164414,0,0,0,0,0
28.225414,6,0,0,0,0,0
28.235906,6.55743852,0,0,0,0,0
28.246398,5.83095189,0,0,0,0,0
28.256889,5.83095189,0,0,0,0,0
28.267381,5.91607978,0,0,0,0,0
28.277872,5,0,0,0,0,0
28.288364,6.08276253,0,0,0,0,0
28.298856,5.74456265,0,0,0,0,0
28.309347,5.83095189,0,0,0,0,0
28.319839,6.08276253,0,0,0,0,0
28.33033,6.244998,0,0,0,0,0
28.340822,5.74456265,0,0,0,0,0
28.351314,5.74456265,0,0,0,0,0
28.361805,5.38516481,0,0,0,0,0
28.372297,5.74456265,0,0,0,0,0
28.382788,6.55743852,0,0,0,0,0
28.39328,5.19615242,0,0,0,0,0
28.403772,6.40312424,0,0,0,0,0
28.414263,6.32455532,0,0,0,0,0
28.424755,6.244998,0,0,0,0,0
28.435246,5.83095189,0,0,0,0,0
28.445738,5.56776436,0,0,0,0,0
28.45623,5.74456265,0,0,0,0,0
28.466721,5.91607978,0,0,0,0,0
28.477213,6.164414,0,0,0,0,0
28.487704,5.74456265,0,0,0,0,0
28.498196,6.244998,0,0,0,0,0
28.508688,6,0,0,0,0,0
28.519179,6,0,0,0,0,0
28.529671,6,0,0,0,0,0
28.540162,5.74456265,0,0,0,0,0
28.550654,5.38516481,0,0,0,0,0
28.561146,7.14142843,0,0,0,0,0
28.571637,5.29150262,0,0,0,0,0
28.582129,5.74456265,0,0,0,0,0
28.59262,5.83095189,0,0,0,0,0
28.603112,6.244998,0,0,0,0,0
28.613604,6.63324958,0,0,0,0,0
28.624095,6.63324958,0,0,0,0,0
28.634587,5.47722558,0,0,0,0,0
28.645078,5.56776436,0,0,0,0,0
28.65557,5.56776436,0,0,0,0,0
28.666062,6,0,0,0,0,0
28.676553,6.08276253,0,0,0,0,0
28.687045,6.78232998,0,0,0,0,0
28.697536,6.40312424,0,0,0,0,0
28.708028,6.08276253,0,0,0,0,0
28.71852,6.244998,0,0,0,0,0
28.729011,5.47722558,0,0,0,0,0
28.739503,5.47722558,0,0,0,0,0
28.749994,5.83095189,0,0,0,0,0
28.760486,6.164414,0,0,0,0,0
28.770978,5.91607978,0,0,0,0,0
28.781469,5.65685425,0,0,0,0,0
28.791961,6.164414,0,0,0,0,0
28.802452,6.244998,0,0,0,0,0
28.812944,6.8556546,0,0,0,0,0
28.823436,5.38516481,0,0,0,0,0
28.833927,5.47722558,0,0,0,0,0
28.844419,6.40312424,0,0,0,0,0
28.85491,4.89897949,0,0,0,0,0
28.865402,6.4807407,0,0,0,0,0
28.875894,5.91607978,0,0,0,0,0
28.886385,6,0,0,0,0,0
28.896877,6,0,0,0,0,0
28.907368,6.92820323,0,0,0,0,0
28.91786,5.47722558,0,0,0,0,0
28.928352,6.92820323,0,0,0,0,0
28.938843,6.4807407,0,0,0,0,0
28.949335,6.55743852,0,0,0,0,0
28.959826,7,0,0,0,0,0
28.970318,5.91607978,0,0,0,0,0
28.98081,5.83095189,0,0,0,0,0
28.991301,5.65685425,0,0,0,0,0
29.001793,5.74456265,0,0,0,0,0
29.012284,6.32455532,0,0,0,0,0
29.022776,6.92820323,0,0,0,0,0
29.033268,5.91607978,0,0,0,0,0
29.043759,5.74456265,0,0,0,0,0
29.054251,4.79583152,0,0,0,0,0
29.064742,4.89897949,0,0,0,0,0
29.075234,6.63324958,0,0,0,0,0
29.085726,5.74456265,0,0,0,0,0
29.096217,6.32455532,0,0,0,0,0
29.106709,6.70820393,0,0,0,0,0
29.1172,5.65685425,0,0,0,0,0
29.127692,6.244998,0,0,0,0,0
29.138184,5.29150262,0,0,0,0,0
29.148675,5.56776436,0,0,0,0,0
29.159167,6.8556546,0,0,0,0,0
29.169658,6.164414,0,0,0,0,0
29.18015,6.08276253,0,0,0,0,0
29.190642,5.56776436,0,0,0,0,0
29.201133,6.55743852,0,0,0,0,0
29.211625,6.78232998,0,0,0,0,0
29.222116,5.91607978,0,0,0,0,0
29.232608,6.08276253,0,0,0,0,0
29.2431,6.08276253,0,0,0,0,0
29.253591,6,0,0,0,0,0
29.264083,6.4807407,0,0,0,0,0
29.274574,6.55743852,0,0,0,0,0
29.285066,6.164414,0,0,0,0,0
29.295558,6.244998,0,0,0,0,0
29.306049,5.56776436,0,0,0,0,0
29.316541,6.164414,0,0,0,0,0
29.327032,6.78232998,0,0,0,0,0
29.337524,6.4807407,0,0,0,0,0
29.348016,6.4807407,0,0,0,0,0
29.358507,6.08276253,0,0,0,0,0
29.368999,6.164414,0,0,0,0,0
29.37949,5.74456265,0,0,0,0,0
29.389982,6.55743852,0,0,0,0,0
29.400474,5.91607978,0,0,0,0,0
29.410965,5.29150262,0,0,0,0,0
29.421457,6.164414,0,0,0,0,0
29.431948,6.08276253,0,0,0,0,0
29.44244,7.14142843,0,0,0,0,0
29.452932,5.56776436,0,0,0,0,0
29.463423,5.29150262,0,0,0,0,0
29.473915,6.244998,0,0,0,0,0
29.484406,6.63324958,0,0,0,0,0
29.494898,6.164414,0,0,0,0,0
29.50539,6.08276253,0,0,0,0,0
29.515881,6.08276253,0,0,0,0,0
29.526373,5.91607978,0,0,0,0,0
29.536864,5.56776436,0,0,0,0,0
29.547356,6,0,0,0,0,0
29.557848,5.56776436,0,0,0,0,0
29.568339,6.40312424,0,0,0,0,0
29.578831,5.83095189,0,0,0,0,0
29.589322,5.38516481,0,0,0,0,0
29.599814,5.91607978,0,0,0,0,0
29.610306,6.4807407,0,0,0,0,0
29.620797,5.91607978,0,0,0,0,0
29.631289,6.164414,0,0,0,0,0
29.64178,5.29150262,0,0,0,0,0
29.652272,6.55743852,0,0,0,0,0
29.662764,6.40312424,0,0,0,0,0
29.673255,5.29150262,0,0,0,0,0
29.683747,5.91607978,0,0,0,0,0
29.694238,6.70820393,0,0,0,0,0
29.70473,6.78232998,0,0,0,0,0
29.715222,6,0,0,0,0,0
29.725713,6.92820323,0,0,0,0,0
29.736205,6.08276253,0,0,0,0,0
29.746696,6.8556546,0,0,0,0,0
29.757188,6.164414,0,0,0,0,0
29.76768,6.63324958,0,0,0,0,0
29.778171,6.244998,0,0,0,0,0
29.788663,5.65685425,0,0,0,0,0
29.799154,6,0,0,0,0,0
29.809646,5.74456265,0,0,0,0,0
29.820138,6.78232998,0,0,0,0,0
29.830629,5.38516481,0,0,0,0,0
29.841121,6.164414,0,0,0,0,0
29.851612,5.91607978,0,0,0,0,0
29.862104,5.09901951,0,0,0,0,0
29.872596,5.74456265,0,0,0,0,0
29.883087,5.74456265,0,0,0,0,0
29.893579,6.8556546,0,0,0,0,0
29.90407,6.78232998,0,0,0,0,0
29.914562,5.29150262,0,0,0,0,0
29.925054,6.164414,0,0,0,0,0
29.935545,7,0,0,0,0,0
29.946037,6.40312424,0,0,0,0,0
29.956528,6.4807407,0,0,0,0,0
29.96702,5.91607978,0,0,0,0,0
29.977512,5.65685425,0,0,0,0,0
29.988003,6.32455532,0,0,0,0,0
29.998495,6.164414,6.04445775,0.346347015,6.04444519,6.04445137,6.04443881
30.008986,7,6.0471062,0.976162793,6.0470936,6.04709981,6.04708721
30.019478,5.74456265,6.04973614,-0.552425101,6.04972349,6.04972974,6.04971709
30.02997,6,6.05234738,-0.228795499,6.05233469,6.05234097,6.05232828
30.040461,5.65685425,6.05493976,-0.630940178,6.05492702,6.05493333,6.0549206
30.050953,6.63324958,6.05751384,0.758772521,6.05750106,6.0575074,6.05749462
30.061444,6.244998,6.06006922,0.430033467,6.06005639,6.06006276,6.06004994
30.071936,5.83095189,6.06260644,-0.481305046,6.06259357,6.06259998,6.06258711
30.082428,5.83095189,6.06512535,-0.483914721,6.06511243,6.06511888,6.06510596
30.092919,5.74456265,6.06762578,-0.56838643,6.06761281,6.06761929,6.06760633
30.103411,6.8556546,6.07010828,0.88631051,6.07009527,6.07010178,6.07008876
30.113902,6.63324958,6.07257245,0.748783769,6.07255939,6.07256593,6.07255287
30.124394,5.56776436,6.07501883,-0.712217992,6.07500572,6.0750123,6.07499919
30.134886,6.32455532,6.07744726,0.497099646,6.07743411,6.07744072,6.07742757
30.145377,6.40312424,6.07985759,0.568565432,6.07984438,6.07985103,6.07983783
30.155869,6.70820393,6.08225034,0.791172293,6.08223708,6.08224377,6.08223052
30.16636,6.70820393,6.08462512,0.789670062,6.08461182,6.08461855,6.08460524
30.176852,6.70820393,6.08698248,0.788176031,6.08696912,6.08697589,6.08696253
30.187344,5.83095189,6.08932224,-0.508301428,6.08930883,6.08931563,6.08930223
30.197835,6.78232998,6.09164425,0.831075045,6.0916308,6.09163763,6.09162418
30.208327,6.92820323,6.09394904,0.913375164,6.09393554,6.09394241,6.0939289
30.218818,6.244998,6.09623623,0.385696478,6.09622267,6.09622958,6.09621603
30.22931,6.164414,6.09850632,0.256724925,6.09849271,6.09849966,6.09848605
30.239802,6.32455532,6.10075916,0.473070987,6.10074551,6.10075249,6.10073883
30.250293,5.56776436,6.10299462,-0.731594325,6.10298091,6.10298793,6.10297423
30.260785,6.40312424,6.10521318,0.545812289,6.10519942,6.10520648,6.10519272
30.271276,6.63324958,6.1074145,0.725144872,6.10740068,6.10740778,6.10739397
30.281768,6.8556546,6.10959905,0.863745074,6.10958518,6.10959232,6.10957845
30.29226,6.244998,6.11176669,0.365008639,6.11175277,6.11175995,6.11174603
30.302751,6.40312424,6.11391729,0.537779642,6.11390332,6.11391054,6.11389657
30.313243,6.08276253,6.11605133,-0.182452183,6.1160373,6.11604456,6.11603053
30.323734,5.91607978,6.11816846,-0.449542739,6.11815438,6.11816167,6.11814759
30.334226,6.08276253,6.12026915,-0.193666249,6.12025501,6.12026235,6.12024821
30.344718,5.56776436,6.12235326,-0.744707256,6.12233907,6.12234645,6.12233226
30.355209,5.83095189,6.12442067,-0.541727582,6.12440642,6.12441384,6.1243996
30.365701,6,6.12647183,-0.355628778,6.12645753,6.12646499,6.12645069
30.376192,5.74456265,6.12850641,-0.619631961,6.12849206,6.12849956,6.1284852
30.386684,6,6.13052488,-0.361282268,6.13051046,6.13051801,6.13050359
30.397176,6.8556546,6.13252709,0.850369045,6.13251262,6.1325202,6.13250573
30.407667,6.32455532,6.13451292,0.435938529,6.13449839,6.13450602,6.13449149
30.418159,6.32455532,6.13648282,0.43367327,6.13646823,6.1364759,6.13646132
30.42865,6.244998,6.13843646,0.326437646,6.13842182,6.13842953,6.13841489
30.439142,6.32455532,6.14037429,0.42916317,6.14035959,6.14036735,6.14035265
30.449634,5.83095189,6.14229619,-0.557982341,6.14228142,6.14228923,6.14227447
30.460125,5.83095189,6.14420202,-0.559687527,6.1441872,6.14419505,6.14418023
30.470617,6.55743852,6.14609223,0.641362845,6.14607734,6.14608524,6.14607036
30.481108,6.70820393,6.1479665,0.748490105,6.14795155,6.14795949,6.14794455
30.4916,6.55743852,6.14982525,0.638445982,6.14981025,6.14981823,6.14980323
30.502092,5.19615242,6.15166838,-0.977504964,6.15165331,6.15166134,6.15164628
30.512583,6.63324958,6.15349576,0.692642638,6.15348063,6.15348871,6.15347358
30.523075,5.91607978,6.1553078,-0.48910941,6.15529261,6.15530073,6.15528555
30.533566,6.164414,6.15710422,0.0854972814,6.15708897,6.15709714,6.15708189
30.544058,6.40312424,6.15888542,0.494205241,6.1588701,6.15887832,6.15886301
30.55455,6.4807407,6.16065128,0.565764452,6.16063591,6.16064417,6.1606288
30.565041,5.56776436,6.16240171,-0.771127321,6.16238627,6.16239458,6.16237914
30.575533,6.4807407,6.16413709,0.562675406,6.16412158,6.16412994,6.16411444
30.586024,5.56776436,6.16585714,-0.773364584,6.16584157,6.16584998,6.16583441
30.596516,6.55743852,6.16756227,0.624400719,6.16754663,6.16755509,6.16753946
30.607008,5.74456265,6.16937091,-0.651773169,6.16935521,6.16924516,6.16922946
30.617499,6,6.17104596,-0.413577029,6.17103019,6.17092008,6.17090431
30.627991,6.70820393,6.17270624,0.731777078,6.17269041,6.17258024,6.1725644
30.638482,6,6.1743515,-0.417554187,6.1743356,6.17422537,6.17420947
30.648974,6.8556546,6.1759821,0.824422524,6.17596614,6.17585584,6.17583988
30.659466,6.244998,6.17759795,0.259615193,6.17758191,6.17747156,6.17745553
30.669957,5.38516481,6.17919895,-0.891085933,6.17918284,6.17907243,6.17905633
30.680449,6.63324958,6.18078545,0.672654538,6.18076928,6.18065881,6.18064264
30.69094,6.08276253,6.18235722,-0.315586267,6.18234098,6.18223045,6.18221421
30.701432,5.65685425,6.18391461,-0.725989229,6.1838983,6.18378771,6.1837714
30.711924,5.65685425,6.18545752,-0.727051079,6.18544114,6.18533049,6.18531411
30.722415,6.63324958,6.18698586,0.668029727,6.18696941,6.1868587,6.18684225
30.732907,6.4807407,6.18849999,0.540592926,6.18848346,6.18837269,6.18835617
30.743398,5.09901951,6.18999965,-1.04449995,6.18998306,6.18987223,6.18985563
30.75389,5.91607978,6.19148521,-0.524790838,6.19146854,6.19135765,6.19134098
30.764382,6.8556546,6.19295655,0.81406268,6.19293981,6.19282886,6.19281212
30.774873,5.47722558,6.19441361,-0.846869551,6.19439679,6.19428579,6.19426897
30.785365,5.65685425,6.19585671,-0.734167869,6.19583982,6.19572875,6.19571186
30.795856,6.164414,6.19728563,-0.181305338,6.19726866,6.19715753,6.19714057
30.806348,5.74456265,6.19870069,-0.673897652,6.19868365,6.19857246,6.19855542
30.81684,6.40312424,6.20010182,0.450580093,6.2000847,6.19997345,6.19995633
30.827331,5.47722558,6.20148892,-0.851036632,6.20147173,6.20136042,6.20134323
30.837823,6.08276253,6.20286233,-0.346554179,6.20284506,6.20273369,6.20271642
30.848314,5.83095189,6.20422182,-0.610958205,6.20420447,6.20409305,6.2040757
30.858806,5.91607978,6.20556772,-0.538040828,6.20555029,6.2054388,6.20542137
30.869298,6.32455532,6.20689993,0.343009315,6.20688242,6.20677088,6.20675337
30.879789,6.40312424,6.20821839,0.441481422,6.2082008,6.2080892,6.20807161
30.890281,6.164414,6.2095234,-0.212389733,6.20950574,6.20939407,6.2093764
30.900772,5.91607978,6.21081476,-0.542895,6.21079702,6.21068529,6.21066754
30.911264,5.29150262,6.21209277,-0.959473893,6.21207495,6.21196316,6.21194533
30.921756,5.91607978,6.21335736,-0.545231672,6.21333945,6.2132276,6.21320969
30.932247,7,6.21460845,0.886223193,6.21459046,6.21447855,6.21446056
30.942739,5.83095189,6.21584634,-0.620398617,6.21582826,6.2157163,6.21569822
30.95323,6,6.21707083,-0.465908611,6.21705267,6.21694065,6.21692249
30.963722,4.89897949,6.21828222,-1.14860904,6.21826398,6.21815189,6.21813365
30.974214,6.244998,6.21948043,0.159742191,6.2194621,6.21934996,6.21933163
30.984705,6.70820393,6.2206654,0.698239595,6.22064699,6.22053478,6.22051637
30.995197,6.40312424,6.22183741,0.425777913,6.22181891,6.22170664,6.22168814
31.005688,5.83095189,6.22299627,-0.626134472,6.22297768,6.22286536,6.22284677
31.01618,6.164414,6.22414227,-0.244393666,6.22412359,6.22401121,6.22399253
31.026672,6.40312424,6.22527533,0.421721364,6.22525656,6.22514413,6.22512536
31.037163,5.38516481,6.2263954,-0.917186236,6.22637655,6.22626405,6.22624519
31.047655,5.38516481,6.22750274,-0.917789699,6.22748379,6.22737124,6.22735229
31.058146,7.14142843,6.22859718,0.955422025,6.22857815,6.22846553,6.2284465
31.068638,5.91607978,6.22967899,-0.559999293,6.22965987,6.22954719,6.22952807
31.07913,6.32455532,6.2307481,0.306279638,6.23072889,6.23061616,6.23059694
31.089621,6.70820393,6.23180447,0.69021697,6.23178516,6.23167237,6.23165306
31.100113,4.89897949,6.23284833,-1.1549324,6.23282893,6.23271608,6.23269668
31.110604,5.47722558,6.23387954,-0.869858589,6.23386004,6.23374714,6.23372764
31.121096,5.83095189,6.23489834,-0.635567814,6.23487875,6.23476579,6.23474619
31.131588,6.164414,6.23590468,-0.267377401,6.23588499,6.23577197,6.23575228
31.142079,5.83095189,6.2368985,-0.637139395,6.23687872,6.23676564,6.23674586
31.152571,6.63324958,6.23788005,0.628784165,6.23786017,6.23774704,6.23772716
31.163062,6.4807407,6.23884919,0.491824675,6.23882921,6.23871602,6.23869604
31.173554,6.55743852,6.23980613,0.563588849,6.23978606,6.23967281,6.23965273
31.184046,5.19615242,6.24075084,-1.02205598,6.24073067,6.24061736,6.24059719
31.194537,6.164414,6.24168328,-0.277973514,6.241663,6.24154964,6.24152936
31.205029,6.40312424,6.24260365,0.4006502,6.24258328,6.24246986,6.24244948
31.21552,7.54983444,6.24351185,1.1429447,6.24349137,6.24337789,6.24335741
31.226012,6.70820393,6.24440807,0.681025598,6.24438749,6.24427395,6.24425337
31.236504,6.164414,6.24529228,-0.284391058,6.24527159,6.24515801,6.24513732
31.246995,6.4807407,6.24616444,0.484330736,6.24614365,6.24603001,6.24600922
31.257487,6.08276253,6.24702476,-0.405292765,6.24700386,6.24689016,6.24686927
31.267978,6.78232998,6.24787311,0.731065571,6.24785211,6.24773836,6.24771736
31.27847,6.08276253,6.24870972,-0.40736616,6.24868861,6.2485748,6.2485537
31.288962,6.32455532,6.24953453,0.273899236,6.24951331,6.24939945,6.24937824
31.299453,6.244998,6.25034751,-0.0731403688,6.25032619,6.25021227,6.25019095
31.309945,6.244998,6.25114887,-0.0784274673,6.25112743,6.25101346,6.25099203
31.320436,6.78232998,6.25193848,0.728279824,6.25191694,6.25180292,6.25178137
31.330928,5.91607978,6.25271655,-0.580204074,6.25269489,6.25258082,6.25255916
31.34142,6.244998,6.25348304,-0.092114284,6.25346127,6.25334715,6.25332538
31.351911,6.32455532,6.25423792,0.265174281,6.25421604,6.25410186,6.25407998
31.362403,6.164414,6.25498138,-0.300944142,6.25495938,6.25484515,6.25482316
31.372894,5.19615242,6.25571332,-1.02934974,6.25569121,6.25557692,6.25555481
31.383386,6.8556546,6.25643391,0.774093462,6.25641169,6.25629735,6.25627513
31.393878,6.55743852,6.25714314,0.547992141,6.25712079,6.25700641,6.25698407
31.404369,6.40312424,6.25784097,0.381160423,6.25781851,6.25770407,6.25768161
31.414861,5.38516481,6.25852758,-0.934538803,6.258505,6.25839052,6.25836794
31.425352,5.83095189,6.25920288,-0.654408885,6.25918018,6.25906565,6.25904295
31.435844,6.63324958,6.25986705,0.611050354,6.25984422,6.25972964,6.25970682
31.446336,6.70820393,6.26052004,0.669091839,6.2604971,6.26038247,6.26035952
31.456827,7.07106781,6.26116186,0.899947751,6.26113879,6.26102411,6.26100104
31.467319,6.244998,6.26179265,-0.129594178,6.26176946,6.26165473,6.26163154
31.47781,7.14142843,6.26241234,0.937558579,6.26238902,6.26227425,6.26225093
31.488302,5.83095189,6.26302109,-0.657319704,6.26299765,6.26288282,6.26285938
31.498794,6.32455532,6.26361887,0.24685309,6.2635953,6.26348043,6.26345686
31.509285,6.55743852,6.26420568,0.541509784,6.26418198,6.26406706,6.26404336
31.519777,6.08276253,6.26478166,-0.426636997,6.26475783,6.26464287,6.26461904
31.530268,5.29150262,6.26534674,-0.986835406,6.26532278,6.26520777,6.26518381
31.54076,6,6.26590107,-0.515655962,6.26587698,6.26576193,6.26573784
31.551252,5.56776436,6.26644464,-0.835870968,6.26642042,6.26630532,6.26628109
31.561743,7,6.26697743,0.856167374,6.26695307,6.26683793,6.26681357
31.572235,6.70820393,6.26749958,0.663855671,6.26747509,6.2673599,6.26733541
31.582726,5.65685425,6.26801104,-0.781765174,6.26798641,6.26787118,6.26784655
31.593218,7.34846923,6.26851193,1.03920994,6.26848717,6.2683719,6.26834713
31.60371,5.83095189,6.26900226,-0.661853731,6.26897735,6.26886204,6.26883713
31.614201,6.8556546,6.269482,0.765619096,6.26945696,6.2693416,6.26931656
31.624693,5.47722558,6.26995129,-0.890351459,6.26992611,6.26981072,6.26978553
31.635184,6,6.27041009,-0.520009701,6.27038476,6.27026933,6.270244
31.645676,5.74456265,6.27085851,-0.725462516,6.27083304,6.27071756,6.27069209
31.656168,7,6.27129654,0.853641292,6.27127093,6.27115542,6.2711298
31.666659,6.244998,6.2717242,-0.163481491,6.27169843,6.27158288,6.27155712
31.677151,6.78232998,6.27214158,0.714274738,6.27211567,6.27200008,6.27197417
31.687642,6.78232998,6.27254866,0.713989722,6.2725226,6.27240698,6.27238092
31.698134,5.91607978,6.27294554,-0.597382424,6.27291933,6.27280367,6.27277746
31.708626,6.55743852,6.27333223,0.533016222,6.27330587,6.27319018,6.27316381
31.719117,5.29150262,6.27370872,-0.991063117,6.27368221,6.27356648,6.27353997
31.729609,6.164414,6.27407513,-0.331151218,6.27404846,6.2739327,6.27390603
31.7401,6.63324958,6.27443142,0.599014324,6.27440459,6.2742888,6.27426197
31.750592,6.63324958,6.27477769,0.598725219,6.27475071,6.27463488,6.2746079
31.761084,7.21110255,6.27511395,0.967465038,6.27508681,6.27497095,6.27494381
31.771575,5.74456265,6.2754402,-0.728613448,6.2754129,6.27529701,6.27526971
31.782067,6.70820393,6.27575654,0.65760732,6.27572908,6.27561316,6.2755857
31.792558,6.244998,6.27606295,-0.176252529,6.27603533,6.27591938,6.27589175
31.80305,6.244998,6.27635952,-0.177091845,6.27633173,6.27621575,6.27618796
31.813542,6.32455532,6.27664625,0.218881399,6.2766183,6.27650229,6.27647434
31.824033,7.14142843,6.27692316,0.929787753,6.27689504,6.27677901,6.27675088
31.834525,6.63324958,6.27719033,0.596707002,6.27716204,6.27704599,6.27701769
31.845016,6.164414,6.27744775,-0.336204924,6.27741929,6.27730321,6.27727474
31.855508,7.41619849,6.27769551,1.06700655,6.27766687,6.27755077,6.27752213
31.866,6.78232998,6.2779336,0.710208691,6.27790479,6.27778866,6.27775985
31.876491,6,6.27816205,-0.5274107,6.27813306,6.27801691,6.27798793
31.886983,6.63324958,6.27838093,0.59570853,6.27835176,6.2782356,6.27820643
31.897474,6.55743852,6.27859024,0.528060876,6.27856089,6.27844471,6.27841536
31.907966,5.56776436,6.27879004,-0.843223387,6.27876052,6.27864432,6.27861479
31.918458,5.65685425,6.27898037,-0.788749717,6.27895066,6.27883444,6.27880473
31.928949,5.74456265,6.27916122,-0.731162481,6.27913133,6.27901509,6.2789852
31.939441,7.48331477,6.27933267,1.09726118,6.2793026,6.27918634,6.27915626
31.949932,6.55743852,6.27949473,0.527203751,6.27946446,6.2793482,6.27931793
31.960424,6.70820393,6.27964745,0.654642256,6.27961699,6.27950071,6.27947026
31.970916,6.08276253,6.27979085,-0.443878727,6.27976021,6.27964392,6.27961327
31.981407,6.08276253,6.27992496,-0.444029766,6.27989412,6.27977782,6.27974698
31.991899,6.70820393,6.28004984,0.65433485,6.2800188,6.27990249,6.27987145
32.00239,6.4807407,6.28016548,0.447856244,6.28013425,6.28001793,6.2799867
32.012882,6.32455532,6.28027196,0.210436124,6.28024053,6.2801242,6.28009277
32.023374,5.65685425,6.28036928,-0.789629681,6.28033765,6.28022132,6.28018968
32.033865,6.92820323,6.28045748,0.804826533,6.28042565,6.28030931,6.28027747
32.044357,6.244998,6.28053661,-0.188516864,6.28050457,6.28038822,6.28035618
32.054848,5.65685425,6.28060667,-0.789779984,6.28057442,6.28045808,6.28042583
32.06534,7.07106781,6.28066773,0.889044479,6.28063527,6.28051893,6.28048647
32.075832,6,6.28071979,-0.529829967,6.28068713,6.28057078,6.28053811
32.086323,7.14142843,6.2807629,0.927720607,6.28073002,6.28061368,6.2805808
32.096815,6.55743852,6.28079709,0.525967137,6.280764,6.28064766,6.28061456
32.107306,6.4807407,6.28082239,0.447122248,6.28078908,6.28067275,6.28063943
32.117798,7.34846923,6.28083884,1.03326201,6.2808053,6.28068898,6.28065544
32.12829,6,6.28084646,-0.529949484,6.2808127,6.28069638,6.28066263
32.138781,6.32455532,6.28084528,0.209069464,6.2808113,6.28069499,6.28066101
32.149273,6.08276253,6.28083534,-0.445053716,6.28080113,6.28068484,6.28065063
32.159764,5.74456265,6.28081667,-0.732293675,6.28078224,6.28066595,6.28063152
32.170256,5.65685425,6.2807893,-0.789895597,6.28075463,6.28063837,6.2806037
32.180748,6.8556546,6.28075326,0.758222484,6.28071836,6.28060211,6.28056721
32.191239,7.61577311,6.28070859,1.15544992,6.28067345,6.28055722,6.28052208
32.201731,6.244998,6.28065531,-0.188831441,6.28061993,6.28050372,6.28046834
32.212222,6.55743852,6.28059346,0.526160682,6.28055784,6.28044165,6.28040603
32.222714,6.55743852,6.28052306,0.526227579,6.2804872,6.28037103,6.28033517
32.233206,6.63324958,6.28044414,0.593974273,6.28040804,6.28029189,6.28025578
32.243697,6.244998,6.28035675,-0.188039241,6.2803204,6.28020428,6.28016792
32.254189,5,6.2802609,-1.13148615,6.2802243,6.28010821,6.2800716
32.26468,6.40312424,6.28015664,0.350667358,6.28011978,6.28000372,6.27996686
32.275172,5.74456265,6.28004398,-0.731765899,6.28000686,6.27989083,6.27985371
32.285664,6.55743852,6.27992295,0.526797469,6.27988557,6.27976958,6.2797322
32.296155,7.34846923,6.27979361,1.03376768,6.27975596,6.27964001,6.27960237
32.306647,5.91607978,6.27965595,-0.602972772,6.27961804,6.27950213,6.27946422
32.317138,6.32455532,6.27951003,0.212238759,6.27947186,6.27935598,6.27931781
32.32763,5.38516481,6.27935586,-0.945616757,6.27931741,6.27920158,6.27916314
32.338122,5.74456265,6.27919347,-0.731184536,6.27915475,6.27903897,6.27900025
32.348613,6.63324958,6.27902292,0.595169437,6.27898393,6.27886819,6.27882919
32.359105,5.91607978,6.2788442,-0.602299276,6.27880493,6.27868924,6.27864996
32.369596,6.40312424,6.27865738,0.352798614,6.27861782,6.27850218,6.27846262
32.380088,6.244998,6.27846244,-0.18293288,6.27842259,6.27830701,6.27826717
32.39058,6.55743852,6.27825943,0.528374007,6.2782193,6.27810378,6.27806364
32.401071,6.55743852,6.27804841,0.528573657,6.27800799,6.27789252,6.2778521
32.411563,6.244998,6.27782937,-0.181194282,6.27778865,6.27767324,6.27763252
32.422054,6.70820393,6.27760236,0.656202385,6.27756134,6.277446,6.27740498
32.432546,6.70820393,6.27736739,0.656381402,6.27732607,6.27721079,6.27716947
32.443038,5,6.27712449,-1.13009933,6.27708286,6.27696766,6.27692603
32.453529,6.55743852,6.27694009,0.529621032,6.27683179,6.27678302,6.27667472
32.464021,7,6.27668154,0.850481308,6.27657283,6.27652424,6.27641552
32.474512,7.48331477,6.27641519,1.09858981,6.27630605,6.27625765,6.2761485
32.485004,6.55743852,6.27614101,0.530374882,6.27603143,6.27598323,6.27587365
32.495496,6.8556546,6.27585905,0.761443073,6.27574904,6.27570102,6.27559101
32.505987,7.14142843,6.27556936,0.930515485,6.27545891,6.2754111,6.27530065
32.516479,6.55743852,6.27527193,0.53119356,6.27516104,6.27511342,6.27500253
32.52697,5.91607978,6.27496682,-0.599071817,6.27485549,6.27480808,6.27469674
32.537462,6.70820393,6.27465403,0.658445065,6.27454224,6.27449504,6.27438325
32.547954,5.47722558,6.27433359,-0.89280906,6.27422135,6.27417436,6.27406211
32.558445,6.164414,6.27400558,-0.33104618,6.27389288,6.2738461,6.27373339
32.568937,6.63324958,6.27366995,0.599649594,6.27355678,6.27351022,6.27339705
32.579428,6.244998,6.27332679,-0.168311594,6.27321316,6.27316682,6.27305318
32.58992,5.91607978,6.27297608,-0.597407978,6.27286197,6.27281586,6.27270175
32.600412,5.74456265,6.27261786,-0.726674074,6.27250327,6.27245739,6.2723428
32.610903,6.4807407,6.2722522,0.456605409,6.27213713,6.27209148,6.27197641
32.621395,6.164414,6.27187906,-0.327818633,6.27176351,6.27171809,6.27160254
32.631886,6.70820393,6.27149854,0.660836892,6.27138249,6.27133732,6.27122127
32.642378,6.63324958,6.27111058,0.60177986,6.27099404,6.27094911,6.27083257
32.65287,6.08276253,6.27071526,-0.433535154,6.27059822,6.27055354,6.27043649
32.663361,6.8556546,6.27031264,0.765076442,6.27019509,6.27015066,6.27003311
32.673853,6,6.26990266,-0.519521572,6.2697846,6.26974044,6.26962237
32.684344,6.70820393,6.26948544,0.662358279,6.26936686,6.26932296,6.26920438
32.694836,6.55743852,6.26906092,0.537008009,6.26894182,6.26889818,6.26877908
32.705328,5.47722558,6.26862917,-0.889608673,6.26850954,6.26846617,6.26834654
32.715819,5.91607978,6.26819025,-0.593388964,6.26807008,6.26802699,6.26790683
32.726311,6.78232998,6.2677441,0.717346416,6.2676234,6.26758059,6.26745989
32.736802,6.63324958,6.26729085,0.604945233,6.2671696,6.26712708,6.26700583
32.747294,5.83095189,6.26683042,-0.660210969,6.26670862,6.26666639,6.26654459
32.757786,6.40312424,6.26636289,0.36981259,6.26624053,6.26619859,6.26607624
32.768277,6.8556546,6.26588832,0.76796242,6.26576541,6.26572377,6.26560085
32.778769,6.40312424,6.26540666,0.371103188,6.26528318,6.26524185,6.26511836
32.78926,6.92820323,6.26491802,0.814423237,6.26479397,6.26475294,6.26462888
32.799752,6.32455532,6.26442234,0.245220279,6.2642977,6.26425699,6.26413235
32.810244,6.70820393,6.26391967,0.666546517,6.26379445,6.26375407,6.26362884
32.820735,6.55743852,6.26341011,0.542243868,6.2632843,6.26324424,6.26311842
32.831227,6.92820323,6.26289358,0.81566516,6.26276716,6.26272744,6.26260102
32.841718,6.244998,6.26237019,-0.131803628,6.26224318,6.26220379,6.26207676
32.85221,6.78232998,6.26183989,0.721449994,6.26171226,6.26167321,6.26154558
32.862702,7.07106781,6.26130273,0.899869478,6.26117448,6.26113579,6.26100753
32.873193,5.74456265,6.26075881,-0.718467927,6.26062993,6.26059159,6.26046271
32.883685,6.32455532,6.26020803,0.253667669,6.26007853,6.26004054,6.25991103
32.894176,6.70820393,6.25965054,0.669741288,6.25952039,6.25948278,6.25935262
32.904668,6,6.25908624,-0.50900515,6.25895545,6.25891821,6.25878741
32.91516,6.92820323,6.25851522,0.818344675,6.25838377,6.25834691,6.25821546
32.925651,6.63324958,6.25793756,0.612627148,6.25780544,6.25776897,6.25763686
32.936143,6.32455532,6.25735317,0.259233784,6.25722038,6.25718431,6.25705152
32.946634,7.54983444,6.25676218,1.13713335,6.25662872,6.25659304,6.25645958
32.957126,5.65685425,6.25616451,-0.774151317,6.25603036,6.2559951,6.25586095
32.967618,6.244998,6.25556024,-0.102772776,6.2554254,6.25539055,6.2552557
32.978109,6.78232998,6.25494945,0.7262097,6.25481391,6.25477948,6.25464393
32.988601,6.8556546,6.25433206,0.775449898,6.2541958,6.2541618,6.25402555
32.999092,6.92820323,6.25370819,0.82127647,6.25357122,6.25353766,6.25340068
33.009584,6.08276253,6.25307776,-0.412692658,6.25294006,6.25290694,6.25276924
33.020076,6.55743852,6.25244085,0.552265946,6.25230241,6.25226975,6.25213131
33.030567,6.78232998,6.25179754,0.728376578,6.25165836,6.25162616,6.25148698
33.041059,5.47722558,6.25114775,-0.879728464,6.25100781,6.25097608,6.25083614
33.05155,6.40312424,6.2504916,0.390682271,6.2503509,6.25031964,6.25017894
33.062042,5.56776436,6.24982901,-0.825872052,6.24968754,6.24965677,6.24951529
33.072534,5.74456265,6.24916006,-0.710350202,6.2490178,6.24898752,6.24884527
33.083025,6.164414,6.24848483,-0.289949696,6.24834178,6.24831201,6.24816896
33.093517,5.65685425,6.24780322,-0.768732057,6.24765938,6.24763011,6.24748626
33.104008,6.08276253,6.24711539,-0.405404569,6.24697073,6.24694199,6.24679733
33.1145,7.48331477,6.24642123,1.11215716,6.24627575,6.24624754,6.24610205
33.124992,6.92820323,6.24572083,0.826124933,6.24557451,6.24554684,6.24540052
33.135483,6.164414,6.24501427,-0.283901854,6.24486711,6.24483999,6.24469282
33.145975,6.70820393,6.24430144,0.681103877,6.24415343,6.24412687,6.24397885
33.156466,7,6.24358251,0.869722651,6.24343363,6.24340764,6.24325875
33.166958,6.8556546,6.24285736,0.782813669,6.2427076,6.24268219,6.24253243
33.17745,6.92820323,6.24212608,0.828297742,6.24197543,6.24195061,6.24179996
33.187941,7.41619849,6.24138877,1.0838864,6.24123722,6.241213,6.24106145
33.198433,7.07106781,6.2406453,0.911275212,6.24049284,6.24046923,6.24031677
33.208924,5.65685425,6.23989584,-0.763571604,6.23974246,6.23971948,6.23956609
33.219416,6.08276253,6.23914028,-0.395446266,6.23898596,6.23896361,6.23880928
33.229908,6,6.2383787,-0.488240412,6.23822343,6.23820173,6.23804645
33.240399,5.29150262,6.2376112,-0.97268113,6.23745497,6.23743393,6.23727769
33.250891,6,6.23683766,-0.486659698,6.23668045,6.23666008,6.23650286
33.261382,6.08276253,6.23605825,-0.391529971,6.23590005,6.23588036,6.23572215
33.271874,5.83095189,6.23527284,-0.63586236,6.23511363,6.23509464,6.23493543
33.282366,7.14142843,6.23448152,0.952337601,6.2343213,6.23430302,6.23414279
33.292857,6.70820393,6.2336844,0.68885378,6.23352315,6.23350559,6.23334433
33.303349,5.65685425,6.23288135,-0.758964492,6.23271905,6.23270223,6.23253992
33.31384,5.74456265,6.23207254,-0.698219086,6.23190917,6.23189311,6.23172974
33.324332,6.70820393,6.23125784,0.69061284,6.23109339,6.23107809,6.23091365
33.334824,5.19615242,6.23043734,-1.01699799,6.23027181,6.23025729,6.23009175
33.345315,6.63324958,6.22961116,0.635325446,6.22944452,6.22943079,6.22926414
33.355807,6.78232998,6.22877915,0.74400997,6.22861138,6.22859846,6.22843069
33.366298,6.4807407,6.22794149,0.502791415,6.22777258,6.22776049,6.22759157
33.37679,6.40312424,6.22709805,0.419554749,6.22692798,6.22691673,6.22674665
33.387282,6,6.22624893,-0.475656312,6.22607768,6.22606729,6.22589604
33.397773,6.244998,6.22539422,0.140013478,6.22522179,6.22521226,6.22503982
33.408265,6,6.2245338,-0.473849978,6.22436015,6.22435152,6.22417786
33.418756,6,6.22366784,-0.472935348,6.22349296,6.22348524,6.22331035
33.429248,6.32455532,6.22279621,0.318997042,6.22262008,6.22261328,6.22243715
33.43974,6.08276253,6.221919,-0.373036816,6.2217416,6.22173574,6.22155834
33.450231,6.70820393,6.22103632,0.697973936,6.22085763,6.22085274,6.22067405
33.460723,6.40312424,6.22014802,0.427757193,6.21996803,6.21996412,6.21978412
33.471214,6.08276253,6.2192543,-0.369447926,6.21907298,6.21907007,6.21888874
33.481706,5.91607978,6.21835501,-0.549795618,6.21817233,6.21817045,6.21798777
33.492198,5.83095189,6.21745024,-0.621689912,6.2172662,6.21726535,6.2170813
33.502689,6.55743852,6.21654012,0.583865057,6.21635468,6.2163549,6.21616945
33.513181,6.63324958,6.21562448,0.646239195,6.21543763,6.21543893,6.21525207
33.523672,6.55743852,6.21470353,0.585435729,6.21451524,6.21451765,6.21432935
33.534164,6,6.21377711,-0.462360366,6.21358735,6.21359089,6.21340112
33.544656,6.40312424,6.21284532,0.436209715,6.21265408,6.21265877,6.21246751
33.555147,6.92820323,6.21190828,0.846342098,6.21171553,6.21172139,6.21152863
33.565639,6.32455532,6.21096584,0.337030391,6.21077154,6.2107786,6.2105843
33.57613,6.55743852,6.21001818,0.589423741,6.20982232,6.20983061,6.20963474
33.586622,5.83095189,6.20906515,-0.614909144,6.2088677,6.20887724,6.20867978
33.597114,6.244998,6.20810686,0.192070648,6.2079078,6.20791861,6.20771954
33.607605,6.8556546,6.20714343,0.805301911,6.20694272,6.20695484,6.20675412
33.618097,5.91607978,6.20617469,-0.538604595,6.2059723,6.20598575,6.20578336
33.628588,6.70820393,6.20520085,0.709227103,6.20499676,6.20501157,6.20480747
33.63908,6.55743852,6.20422174,0.594320441,6.20401591,6.20403211,6.20382627
33.649572,6.92820323,6.20323747,0.851449212,6.20302988,6.20304749,6.2028399
33.660063,6,6.20224816,-0.449720094,6.20203878,6.20205784,6.20184844
33.670555,6.55743852,6.20125365,0.596812263,6.20104243,6.20106297,6.20085175
33.681046,7.07106781,6.20025413,0.933173981,6.20004105,6.2000631,6.19985002
33.691538,6.32455532,6.19924945,0.353985692,6.19903447,6.19905807,6.19884309
33.70203,6.92820323,6.19823971,0.854379024,6.19802281,6.19804798,6.19783107
33.712521,6.55743852,6.19722504,0.600177874,6.19700617,6.19703295,6.19681407
33.723013,6,6.19620526,-0.442950633,6.19598438,6.19601282,6.19579193
33.733504,4.69041576,6.19518059,-1.22668856,6.19495767,6.19498779,6.19476486
33.743996,6,6.19415085,-0.440625518,6.19392584,6.19395769,6.19373268
33.754488,6.244998,6.19311615,0.227775867,6.19288903,6.19292263,6.1926955
33.764979,6.244998,6.19207663,0.230046455,6.19184734,6.19188274,6.19165345
33.775471,6.4807407,6.19103209,0.538245861,6.1908006,6.19083785,6.19060635
33.785962,6.244998,6.18998277,0.234553263,6.18974903,6.18978816,6.18955441
33.796454,6.40312424,6.18892847,0.462812887,6.18869244,6.1887335,6.18849746
33.806946,6.244998,6.18786932,0.239016057,6.18763095,6.18767398,6.1874356
33.817437,6.78232998,6.18680545,0.771702362,6.18656469,6.18660974,6.18636898
33.827929,5.47722558,6.18573666,-0.841731007,6.18549347,6.18554059,6.18529739
33.83842,6.70820393,6.18466319,0.723561153,6.18441751,6.18446674,6.18422106
33.848912,6,6.18358485,-0.428468021,6.18333664,6.18338803,6.18313981
33.859404,6.8556546,6.18250175,0.820458926,6.18225095,6.18230456,6.18205375
33.869895,6.244998,6.18141403,0.252158613,6.18116059,6.18121647,6.18096302
33.880387,6.08276253,6.1803215,-0.312344314,6.18006536,6.18012356,6.17986741
33.890878,6.244998,6.17922439,0.256463668,6.17896549,6.17902607,6.17876716
33.90137,6.8556546,6.1781225,0.823123383,6.17786079,6.1779238,6.17766208
33.911862,5.47722558,6.17701596,-0.836534748,6.17675137,6.17681688,6.17655229
33.922353,6.244998,6.1759049,0.262855662,6.17563738,6.17570544,6.17543791
33.932845,5.74456265,6.17478913,-0.655916519,6.1745186,6.17458929,6.17431875
33.943336,6.32455532,6.17366887,0.388441049,6.17339527,6.17346865,6.17319504
33.953828,5.74456265,6.17254394,-0.654202795,6.17226721,6.17234333,6.17206659
33.96432,6.4807407,6.17141447,0.556171044,6.17113452,6.17121347,6.17093351
33.974811,7.28010989,6.17028057,1.05348437,6.16999734,6.17007919,6.16979595
33.985303,6.8556546,6.16914206,0.82856052,6.16885547,6.16894029,6.16865369
33.995794,7.14142843,6.16799918,0.986625182,6.16770915,6.16779701,6.16750697
34.006286,6.164414,6.16685172,-0.0493732205,6.16655817,6.16664916,6.1663556
34.016778,6.32455532,6.16569981,0.398566818,6.16540266,6.16549686,6.1651997
34.027269,6,6.16454359,-0.405639732,6.16424275,6.16434025,6.1640394
34.037761,6,6.16338286,-0.404206454,6.16307824,6.16317912,6.16287449
34.048252,5.91607978,6.16221785,-0.496123037,6.16190937,6.16201371,6.16170522
34.058744,5.19615242,6.16104837,-0.982291173,6.16073592,6.16084383,6.16053137
34.069236,6.244998,6.15987455,0.291759232,6.15955804,6.15966961,6.15935309
34.079727,6.08276253,6.15869652,-0.275561225,6.15837585,6.15849118,6.15817049
34.090219,6.08276253,6.15751408,-0.273407291,6.15718913,6.15730833,6.15698338
34.10071,6.164414,6.15632747,0.0899251552,6.15599815,6.15612132,6.15579199
34.111202,6.08276253,6.15513649,-0.269024091,6.15480268,6.15492993,6.15459611
34.121694,6.8556546,6.15394128,0.837683307,6.15360286,6.15373431,6.15339588
34.132185,7.28010989,6.15274196,1.06177584,6.15239882,6.15253458,6.15219143
34.142677,5.74456265,6.15153834,-0.637946468,6.15119035,6.15133055,6.15098254
34.153168,6.63324958,6.15033067,0.694923676,6.14997769,6.15012246,6.14976947
34.16366,6.244998,6.14911872,0.309643785,6.14876063,6.14891011,6.148552
34.174152,5.74456265,6.14790266,-0.635090553,6.1475393,6.14769362,6.14733026
34.184643,6.70820393,6.1466826,0.749347271,6.14631385,6.14647315,6.14610438
34.195135,6.164414,6.14545835,0.137679546,6.14508404,6.14524847,6.14487415
34.205626,6.92820323,6.14423015,0.885422544,6.14385013,6.14401986,6.14363983
34.216118,5.47722558,6.1429978,-0.815948665,6.14261191,6.14278708,6.14240118
34.22661,5.74456265,6.14176143,-0.630237089,6.14136951,6.1415503,6.14115836
34.237101,6.164414,6.1405212,0.15457297,6.14012306,6.14030964,6.13991148
34.247593,6,6.13927688,-0.373198179,6.13887234,6.13906489,6.13866034
34.258084,6.8556546,6.13802874,0.847128007,6.13761762,6.13781632,6.13740518
34.268576,7.07106781,6.13677656,0.966587425,6.13635865,6.13656371,6.13614579
34.279068,6.70820393,6.13552049,0.75675851,6.13509559,6.13530721,6.13488229
34.289559,5.65685425,6.13426067,-0.690946035,6.13382857,6.13404695,6.13361484
34.300051,6.32455532,6.13299689,0.437673883,6.13255737,6.13278274,6.1323432
34.310542,6.4807407,6.13172942,0.590771768,6.13128223,6.13151483,6.13106762
34.321034,5.74456265,6.13045803,-0.621204785,6.13000294,6.130243,6.1297879
34.331526,6.55743852,6.12918288,0.65441244,6.12871964,6.12896741,6.12850415
34.342017,5.65685425,6.12790412,-0.686330731,6.12743246,6.12768821,6.12721653
34.352509,6.164414,6.12662153,0.194402861,6.12614117,6.12640517,6.1259248
34.363,6.08276253,6.12533538,-0.206331902,6.12484604,6.12511858,6.12462922
34.373492,5.74456265,6.12404547,-0.616021769,6.12354684,6.12382822,6.12332957
34.383984,6.4807407,6.12275193,0.598321627,6.1222437,6.12253423,6.12202599
34.394475,6.164414,6.12145493,0.207265715,6.12093677,6.12123678,6.1207186
34.404967,6.244998,6.12015424,0.353332357,6.11962581,6.11993564,6.11940719
34.415458,6.164414,6.11885016,0.213456884,6.11831109,6.1186311,6.11809202
34.42595,5.65685425,6.11754246,-0.678740167,6.11699238,6.11732295,6.11677285
34.436442,6.164414,6.11623131,0.219505566,6.11566981,6.11601134,6.11544982
34.446933,5.74456265,6.11491686,-0.608567345,6.11434353,6.11469643,6.11412308
34.457425,6.92820323,6.1135989,0.902554336,6.1130133,6.11337801,6.11279238
34.467916,5.91607978,6.11227772,-0.442942364,6.11167939,6.11205636,6.11145801
34.478408,5.19615242,6.11095311,-0.956452135,6.11034156,6.11073129,6.11011971
34.4889,7,6.10962523,0.94359672,6.10899995,6.10940294,6.10877764
34.499391,6.55743852,6.10829426,0.670182266,6.10765472,6.1080715,6.10743194
34.509883,6.40312424,6.10695997,0.54420976,6.10630561,6.10673675,6.10608236
34.520374,6.244998,6.10562269,0.37333003,6.1049529,6.10539899,6.10472918
34.530866,6.92820323,6.10428219,0.907700965,6.10359636,6.10405801,6.10337215
34.541358,7.07106781,6.10293865,0.983935546,6.10223611,6.102714,6.10201143
34.551849,6.8556546,6.10159227,0.868367626,6.10087231,6.10136714,6.10064715
34.562341,5.65685425,6.10024282,-0.665874293,6.09950472,6.10001721,6.09927908
34.572832,6.164414,6.09894605,0.255867068,6.09818901,6.09866455,6.09790748
34.583324,6.164414,6.09759099,0.258501467,6.0968142,6.09730895,6.09653211
34.593816,5.38516481,6.0962332,-0.843248714,6.09543576,6.0959506,6.09515312
34.604307,5.74456265,6.09487286,-0.5918701,6.09405385,6.09458971,6.09377066
34.614799,6.55743852,6.09350979,0.681123139,6.09266822,6.09322608,6.09238447
34.62529,5.47722558,6.09214433,-0.784167556,6.09127914,6.09186006,6.09099483
34.635782,5.38516481,6.09077629,-0.840006838,6.08988637,6.09049147,6.0896015
34.646274,6.55743852,6.0894059,0.684129097,6.08849006,6.08912051,6.08820463
34.656765,6.92820323,6.08803338,0.916607795,6.08709035,6.08774742,6.08680435
34.667257,5.83095189,6.08665856,-0.505674469,6.085687,6.08637204,6.08540043
34.677748,6.40312424,6.08528182,0.563775147,6.08428028,6.08499473,6.08399314
34.68824,6,6.08390301,-0.289660156,6.08286994,6.08361534,6.08258222
34.698732,6,6.08252237,-0.287267072,6.08145613,6.08223413,6.08116784
34.709223,6.4807407,6.08114018,0.632139635,6.08003899,6.08085137,6.07975013
34.719715,6.244998,6.07975631,0.406499304,6.07861829,6.07946693,6.07832884
34.730206,6.40312424,6.07837119,0.569871078,6.07719429,6.07808122,6.07690427
34.740698,5.91607978,6.07698472,-0.401129572,6.07576675,6.07669417,6.07547614
34.75119,6.32455532,6.0755972,0.498957029,6.07433581,6.07530607,6.07404461
34.761681,5.83095189,6.07420898,-0.493210998,6.07290162,6.07391726,6.07260984
34.772173,5.83095189,6.07282001,-0.491800891,6.07146393,6.0725277,6.07117156
34.782664,6.4807407,6.07143079,0.639773328,6.07002303,6.07113789,6.06973006
34.793156,5.38516481,6.07004131,-0.827572656,6.06857865,6.06974782,6.06828509
34.803648,6.32455532,6.068652,0.505868881,6.06713095,6.06835791,6.06683678
34.814139,6.164414,6.0672633,0.311690079,6.06568007,6.06696861,6.06538531
34.824631,6.8556546,6.0658753,0.88869528,6.06422576,6.06558001,6.0639304
34.835122,6.32455532,6.06448865,0.50996732,6.06276832,6.06419277,6.06247234
34.845614,6.32455532,6.06310353,0.511323571,6.06130746,6.06280703,6.06101088
34.856106,5.74456265,6.06172053,-0.563167723,6.05984335,6.06142343,6.05954616
34.866597,6.63324958,6.06034034,0.756907686,6.05837615,6.06004263,6.05807835
34.877089,6.70820393,6.05896328,0.80575471,6.05690558,6.05866496,6.05660716
34.88758,6.32455532,6.0575903,0.516686578,6.05543195,6.05729137,6.05513291
34.898072,6.63324958,6.0562219,0.759623382,6.05395497,6.05592235,6.05365532
34.908564,6.244998,6.05485907,0.436049228,6.05247482,6.05455891,6.05217454
34.919055,6.92820323,6.05350292,0.935254142,6.05099164,6.05320214,6.05069073
34.929547,5.65685425,6.05215431,-0.628728923,6.04950516,6.05185291,6.04920363
34.940038,6.164414,6.05081477,0.337044858,6.04801569,6.05051274,6.04771353
34.95053,6.244998,6.0494855,0.442167948,6.04652295,6.04918285,6.04622015
34.961022,6.08276253,6.04816834,0.185995142,6.0450271,6.04786506,6.04472366
34.971513,6.40312424,6.04686534,0.596874269,6.04352829,6.04656144,6.04322422
34.982005,5.65685425,6.04557855,-0.623477587,6.04202626,6.04527401,6.04172154
34.992496,4.89897949,6.04431086,-1.07020156,6.0405213,6.04400569,6.04021594
35.002988,5.29150262,6.04306514,-0.866927052,6.03901314,6.04275933,6.03870713
35.01348,6.4807407,6.0418452,0.662491888,6.03750194,6.04153876,6.03719528
35.023971,6.164414,6.04065552,0.351793233,6.03598785,6.04034845,6.03568054
35.034463,5.83095189,6.03950111,-0.456671894,6.0344706,6.03919341,6.03416264
35.044954,6.32455532,6.03838847,0.534945654,6.0329505,6.03808012,6.03264188
35.055446,6.08276253,6.03732498,0.213160859,6.03142726,6.037016,6.03111798
35.065938,6.70820393,6.03632003,0.819685243,6.02990105,6.03601042,6.0295911
35.076429,7,6.03538513,0.982148089,6.02837202,6.03507488,6.02806141
35.086921,6.164414,6.03453424,0.360388354,6.0268399,6.03422335,6.02652861
35.097412,5.65685425,6.03378523,-0.61394705,6.02530499,6.03347371,6.02499303
35.107904,6.164414,6.03316036,0.362289448,6.02376701,6.03284821,6.02345438
35.118396,5.56776436,6.03268834,-0.681853338,6.02222612,6.03237557,6.02191281
35.128887,6.08276253,6.03240623,0.224402089,6.02068249,6.03209285,6.0203685
35.139379,6.92820323,6.03236257,0.946488595,6.01913583,6.03204858,6.01882115
35.14987,6.4807407,6.03262222,0.669416519,6.01758644,6.03230764,6.01727108
35.160362,6.08276253,6.0332746,0.222458836,6.01603406,6.03295945,6.015718
35.170854,7.07106781,6.03445207,1.01814328,6.01447883,6.03413637,6.01416208
35.181345,5.65685425,6.03638295,-0.616059004,6.01292092,6.03606674,6.01260348
35.191837,6.08276253,6.03955548,0.207863062,6.01136005,6.03923882,6.01104191
35.202328,6.8556546,6.04517296,0.90026754,6.00979652,6.04485598,6.00947768
35.21282,5.74456265,6.05621365,-0.558257117,6.00823006,6.05589663,6.00791051
35.223312,5.19615242,6.07927908,-0.939748189,6.00666082,6.07896265,6.00634056
35.233803,6.08276253,6.12655614,-0.209269224,6.00508896,6.12624153,6.00476799
35.244295,6.32455532,6.21541597,0.330362448,6.00351421,6.21510525,6.00319252
35.254786,6.63324958,6.36191712,0.520895821,6.00193686,6.36161296,6.00161445
35.265278,6,6.56778788,-0.753517008,6.00035664,6.56749267,6.00003351
35.27577,6.8556546,6.80737778,0.219719857,5.99877371,6.8070924,5.99844985
35.286261,5.83095189,7.024482,-1.09248804,5.99718823,7.02420489,5.99686364
35.296753,7.21110255,7.14584123,0.255462955,5.99559991,7.14556828,5.99527459
35.307244,7.07106781,7.12015035,-0.221545783,5.99400907,7.11987586,5.99368302
35.317736,6.55743852,6.95897241,-0.633667013,5.99241541,6.95869101,5.99208862
35.328228,7.34846923,6.72524883,0.789443093,5.99081911,6.72495707,5.99049157
35.338719,7.34846923,6.48896334,0.927095405,5.98922032,6.48866034,5.98889204
35.349211,5.91607978,6.29715382,-0.617311941,5.98761876,6.29684096,5.98728973
35.359702,6.244998,6.16616737,0.280767925,5.98601474,6.16584722,5.98568495
35.370194,5.83095189,6.0884705,-0.507462909,5.98440796,6.08814561,5.98407742
35.380686,5.19615242,6.04670188,-0.922252381,5.9827986,6.04637408,5.9824673
35.391177,6.92820323,6.02487193,0.950437423,5.98118682,6.02454228,5.98085475
35.401669,6.55743852,6.01264564,0.738100861,5.97957232,6.01231464,5.97923949
35.41216,6,6.00472671,-0.0687510973,5.97795543,6.0043946,5.97762183
35.422652,6,5.99879989,0.0346426322,5.97633585,5.99846676,5.97600147
35.433144,5.38516481,5.99393576,-0.780237755,5.97471374,5.99360168,5.97437858
35.443635,6.40312424,5.98974598,0.642944986,5.97308928,5.98941098,5.97275333
35.454127,5.47722558,5.98603698,-0.713310176,5.97146216,5.98570107,5.97112543
35.464618,6.08276253,5.98269232,0.31633876,5.9698327,5.98235553,5.96949518
35.47511,6,5.97963029,0.14272251,5.96820062,5.97929262,5.96786231
35.485602,6.08276253,5.97679175,0.325531534,5.96656607,5.97645322,5.96622696
35.496093,7,5.97413217,1.01285134,5.96492923,5.97379278,5.96458932
35.506585,6,5.97161673,0.168473348,5.96328979,5.97127649,5.96294907
35.517076,5.56776436,5.96921932,-0.633604736,5.96164808,5.96887823,5.96130655
35.527568,5.91607978,5.96691861,-0.22547467,5.9600038,5.96657666,5.95966146
35.53806,5.65685425,5.96469826,-0.554836926,5.95835711,5.96435547,5.95801395
35.548551,6,5.96254523,0.193532355,5.95670819,5.96220158,5.95636421
35.559043,5.56776436,5.96044837,-0.626645041,5.95505674,5.96010387,5.95471193
35.569534,5.74456265,5.95839936,-0.462424821,5.95340307,5.95805401,5.95305743
35.580026,6.164414,5.95639064,0.456095787,5.95174689,5.95604443,5.95140041
35.590518,6.244998,5.95441646,0.539056156,5.95008837,5.95406939,5.94974105
35.601009,6.40312424,5.95247207,0.671306311,5.94842767,5.95212415,5.94807951
35.611501,5.91607978,5.95055297,-0.185669564,5.94676449,5.95020418,5.94641548
35.621992,6.08276253,5.94865603,0.366205548,5.94509916,5.94830637,5.9447493
35.632484,5.91607978,5.94677793,-0.175208855,5.94343138,5.9464274,5.94308066
35.642976,7,5.94491633,1.02717266,5.94176131,5.94456494,5.94140973
35.653467,6.4807407,5.94306927,0.733260821,5.94008913,5.942717,5.93973668
35.663959,5.56776436,5.94123452,-0.611122052,5.93841452,5.94088137,5.9380612
35.67445,6.164414,5.93941086,0.474344963,5.93673782,5.93905683,5.93638363
35.684942,6.244998,5.93759654,0.55443797,5.93505873,5.93724161,5.93470366
35.695434,5,5.93579053,-0.967362665,5.93337741,5.93543471,5.93302145
35.705925,6.4807407,5.93399195,0.739424609,5.93169403,5.93363524,5.93133718
35.716417,5.83095189,5.93219953,-0.31819434,5.93000828,5.93184192,5.92965054
35.726908,6.40312424,5.93041282,0.687540121,5.92832051,5.9300543,5.92796186
35.7374,6.78232998,5.92863075,0.923958458,5.92663039,5.92827133,5.92627084
35.747892,5.47722558,5.92685287,-0.670542536,5.9249381,5.92649253,5.92457764
35.758383,6.164414,5.92507878,0.489218993,5.92324381,5.92471752,5.92288244
35.768875,5.83095189,5.92330765,-0.303900903,5.92154721,5.92294547,5.92118492
35.779366,5.65685425,5.92153938,-0.514475591,5.91984864,5.92117627,5.91948542
35.789858,5.65685425,5.91977324,-0.512756267,5.91814778,5.9194092,5.91778363
35.80035,6.08276253,5.91800903,0.405898381,5.9164448,5.91764405,5.91607972
35.810841,6.244998,5.91624662,0.573368446,5.91473989,5.9158807,5.91437387
35.821333,6.4807407,5.91448539,0.752499376,5.91303272,5.91411851,5.91266575
35.831824,5.74456265,5.9127254,-0.410076526,5.91132363,5.91235758,5.91095572
35.842316,5.83095189,5.91096611,-0.282867838,5.90961231,5.91059732,5.90924344
35.852808,5.83095189,5.90920746,-0.279741966,5.90789893,5.90883771,5.9075291
35.863299,5.83095189,5.90744945,-0.276581906,5.90618367,5.90707873,5.90581287
35.873791,5.83095189,5.90569155,-0.273385548,5.9044662,5.90531986,5.90409443
35.884282,6.70820393,5.90393397,0.896810999,5.90274688,5.90356129,5.90237413
35.894774,5.29150262,5.90217621,-0.781456069,5.90102538,5.90180255,5.90065164
35.905266,5.29150262,5.90041832,-0.780330509,5.89930187,5.90004367,5.89892714
35.915757,5.91607978,5.89866037,0.131982642,5.89757653,5.89828471,5.89720081
35.926249,6.164414,5.89690189,0.517215731,5.89584905,5.89652524,5.89547233
35.93674,5.65685425,5.89514314,-0.488148431,5.89411976,5.89476548,5.89374203
35.947232,6.70820393,5.89338369,0.902673939,5.89238835,5.89300501,5.89200961
35.957724,6.40312424,5.89162363,0.715192703,5.89065499,5.89124393,5.89027522
35.968215,6.164414,5.88986306,0.523976086,5.88891985,5.88948233,5.88853906
35.978707,7.34846923,5.88810158,1.20845672,5.88718262,5.88771981,5.8868008
35.989198,5.74456265,5.88633945,-0.376532609,5.88544364,5.88595665,5.88506078
35.99969,7,5.8845763,1.05613621,5.88370258,5.88419244,5.88331868
36.010182,5.56776436,5.88281223,-0.561291247,5.88195963,5.88242732,5.88157467
36.020673,7.34846923,5.88104737,1.21137189,5.88021496,5.8806614,5.87982895
36.031165,6.08276253,5.87928134,0.451088896,5.87846825,5.87889431,5.87808117
36.041656,6.244998,5.87751444,0.606204223,5.87671985,5.87712634,5.87633169
36.052148,6,5.8757463,0.352496387,5.87496942,5.87535711,5.87458018
36.06264,5.83095189,5.87397705,-0.207425059,5.87321715,5.87358678,5.87282683
36.073131,5.74456265,5.87220684,-0.357273271,5.87146321,5.87181547,5.8710718
36.083623,6,5.87043529,0.359950977,5.86970728,5.87004283,5.86931477
36.094114,6.4807407,5.86866273,0.782354117,5.86794971,5.86826916,5.86755609
36.104606,5.91607978,5.8668888,0.221790405,5.86619017,5.86649411,5.86579544
36.115098,5.38516481,5.86511364,-0.692783393,5.86442884,5.86471783,5.86403299
36.125589,5.47722558,5.8633374,-0.62137897,5.8626659,5.86294046,5.86226892
36.136081,5.74456265,5.86155973,-0.342048366,5.86090102,5.86116166,5.8605029
36.146572,6.40312424,5.85978096,0.737118227,5.85913454,5.85938174,5.85873528
36.157064,6.70820393,5.85800072,0.922064644,5.85736615,5.85760036,5.85696574
36.167556,6.244998,5.85621919,0.623521297,5.85559602,5.85581766,5.85519445
36.178047,6.40312424,5.85443652,0.740734582,5.85382433,5.85403382,5.85342159
36.188539,6.244998,5.85265235,0.626375005,5.85205075,5.85224848,5.85164684
36.19903,6.32455532,5.85086703,0.688250166,5.85027563,5.85046198,5.84987054
36.209522,5.38516481,5.8490802,-0.681113348,5.84849865,5.84867396,5.84809236
36.220014,5.74456265,5.84729203,-0.320514248,5.84671997,5.84688459,5.84631249
36.230505,6.4807407,5.84550268,0.797018203,5.84493979,5.84509403,5.8445311
36.240997,6.4807407,5.84371181,0.798140893,5.84315777,5.84330195,5.84274786
36.251488,6.32455532,5.84191976,0.694719771,5.84137426,5.84150867,5.84096313
36.26198,5.65685425,5.84012618,-0.428102706,5.83958893,5.83971385,5.83917656
36.272472,6.32455532,5.83833123,0.697297704,5.83780196,5.83791766,5.83738836
36.282963,6.244998,5.8365351,0.639111024,5.83601354,5.83612028,5.83559868
36.293455,5.91607978,5.83473743,0.285205813,5.83422333,5.83432135,5.83380721
36.303946,5.91607978,5.83293857,0.288342189,5.83243168,5.83252122,5.83201429
36.314438,6.32455532,5.83113817,0.702436583,5.83063826,5.83071954,5.83021959
36.32493,5.65685425,5.82933641,-0.415309711,5.82884325,5.82891649,5.8284233
36.335421,6.08276253,5.82753345,0.505202016,5.82704683,5.82711224,5.82662558
36.345913,6.244998,5.82572897,0.647509869,5.82524868,5.82530645,5.82482612
36.356404,5.83095189,5.82392329,0.0838367505,5.82344913,5.82349946,5.82302526
36.366896,5.91607978,5.82211609,0.306534977,5.82164787,5.82169093,5.82122267
36.377388,5.83095189,5.82030753,0.103171519,5.81984507,5.81988103,5.81941853
36.387879,6.08276253,5.81849779,0.514066859,5.8180409,5.81806994,5.81761302
36.398371,5.83095189,5.81668653,0.119437686,5.81623505,5.81625733,5.81580581
36.408862,6.08276253,5.8148741,0.517579394,5.81442786,5.81444353,5.81399725
36.419354,6.40312424,5.81306015,0.76815629,5.812619,5.8126282,5.81218701
36.429846,6.63324958,5.81124487,0.906644757,5.81080864,5.81081152,5.81037527
36.440337,5.19615242,5.80942842,-0.7831194,5.80899698,5.80899367,5.8085622
36.450829,5.91607978,5.80761047,0.329346804,5.80718367,5.80717431,5.80674749
36.46132,5.56776436,5.80579136,-0.487880108,5.80536907,5.80535379,5.80493147
36.471812,5.19615242,5.80397076,-0.779627053,5.80355285,5.80353175,5.80311381
36.482304,6.78232998,5.80214885,0.990040975,5.80173519,5.8017084,5.8012947
36.492795,5.56776436,5.8003258,-0.482246243,5.79991626,5.79988389,5.79947432
36.503287,5.91607978,5.79850127,0.342897229,5.79809574,5.79805789,5.79765233
36.513778,5.74456265,5.79667562,-0.228282659,5.79627398,5.79623075,5.79582908
36.52427,5.19615242,5.7948485,-0.773754531,5.79445064,5.79440214,5.79400425
36.534762,6.244998,5.79302009,0.672293026,5.7926259,5.79257222,5.792178
36.545253,5.19615242,5.79119057,-0.771387156,5.79079995,5.79074118,5.79035054
36.555745,5.38516481,5.7893596,-0.635763156,5.78897245,5.78890868,5.7885215
36.566236,6.55743852,5.78752753,0.87744572,5.78714376,5.78707507,5.78669127
36.576728,6.32455532,5.78569403,0.734071721,5.78531353,5.78524001,5.78485948
36.58722,6.244998,5.78385927,0.679071964,5.78348196,5.78340368,5.78302634
36.597711,6.164414,5.78202343,0.618377372,5.78164922,5.78156625,5.78119202
36.608203,5.91607978,5.78018617,0.368637507,5.77981498,5.7797274,5.77935617
36.618694,6.164414,5.77834785,0.621342218,5.77797959,5.77788746,5.77751917
36.629186,6.63324958,5.77650813,0.925603293,5.77614271,5.77604611,5.77568067
36.639678,6.32455532,5.77466717,0.741544433,5.77430454,5.77420352,5.77384085
36.650169,5.91607978,5.77282518,0.378489896,5.77246524,5.77235987,5.7719999
36.660661,5.83095189,5.7709818,0.244887918,5.77062449,5.77051482,5.77015747
36.671152,6.55743852,5.7691374,0.887863237,5.76878264,5.76866872,5.76831394
36.681644,5.47722558,5.76729162,-0.538577796,5.76693934,5.76682124,5.76646894
36.692136,6.32455532,5.76544465,0.747737034,5.76509479,5.76497255,5.76462267
36.702627,6.08276253,5.76359667,0.564947658,5.76324917,5.76312284,5.76277532
36.713119,6.8556546,5.76174735,1.04590021,5.76140214,5.76127177,5.76092653
36.72361,5.19615242,5.75989703,-0.750829282,5.75955405,5.75941968,5.75907668
36.734102,5.29150262,5.75804538,-0.683039353,5.75770457,5.75756625,5.75722541
36.744594,5.74456265,5.75619257,-0.107842145,5.75585388,5.75571164,5.75537291
36.755085,5.29150262,5.7543388,-0.680320644,5.75400216,5.75385605,5.75351937
36.765577,6.32455532,5.75248371,0.756354155,5.75214907,5.75199912,5.75166445
36.776068,5.74456265,5.75062767,-0.0778782614,5.75029497,5.75014122,5.7498085
36.78656,5.83095189,5.74877033,0.286673274,5.74843953,5.74828201,5.74795118
36.797052,6,5.74691187,0.50307865,5.74658292,5.74642166,5.74609268
36.807543,5.38516481,5.74505248,-0.599906391,5.74472533,5.74456036,5.74423317
36.818035,6.40312424,5.74319182,0.812362245,5.74286641,5.74269777,5.74237233
36.828526,6.164414,5.74133024,0.650448892,5.74100653,5.74083424,5.7405105
36.839018,5.38516481,5.7394674,-0.595233227,5.73914535,5.73896943,5.73864734
36.84951,6.40312424,5.73760348,0.815794553,5.73728304,5.73710352,5.73678305
36.860001,5,5.73573868,-0.857752107,5.7354198,5.7352367,5.7349178
36.870493,5.47722558,5.73387263,-0.506603449,5.73355528,5.73336862,5.73305124
36.880984,5,5.73200571,-0.855573321,5.73168985,5.73149964,5.73118375
36.891476,5.74456265,5.73013756,0.120104476,5.72982315,5.72962942,5.72931498
36.901968,5.91607978,5.72826838,0.433372132,5.72795537,5.72775813,5.7274451
36.912459,5.83095189,5.72639834,0.323347416,5.72608671,5.72588598,5.72557431
36.922951,5.65685425,5.72452711,-0.260140077,5.7242168,5.7240126,5.72370226
36.933442,6.32455532,5.72265504,0.775822326,5.72234603,5.72213836,5.72182932
36.943934,6.08276253,5.72078178,0.601648357,5.72047404,5.72026291,5.71995513
36.954426,6,5.71890753,0.530181542,5.71860101,5.71838644,5.71807989
36.964917,5.91607978,5.71703247,0.446147189,5.71672714,5.71650913,5.71620377
36.975409,5.91607978,5.71515624,0.448244953,5.71485207,5.71463064,5.71432644
36.9859,5.83095189,5.71327923,0.343034501,5.71297618,5.71275133,5.71244825
36.996392,5.09901951,5.71140106,-0.782548112,5.71109911,5.71087084,5.71056886
37.006884,5.56776436,5.70952194,-0.376507075,5.70922106,5.70898937,5.70868846
37.017375,5.74456265,5.70764205,0.192147337,5.7073422,5.7071071,5.70680722
37.027867,5.65685425,5.70576103,-0.221148783,5.70546219,5.70522368,5.70492481
37.038358,6.40312424,5.70387927,0.836208689,5.7035814,5.70333948,5.70304159
37.04885,5.38516481,5.70199639,-0.56287795,5.70169948,5.70145414,5.7011572
37.059342,5.91607978,5.7001126,0.464722692,5.69981661,5.69956786,5.69927183
37.069833,5.29150262,5.69822808,-0.637750312,5.69793298,5.69768081,5.69738568
37.080325,6.55743852,5.69634248,0.927952608,5.69604825,5.69579266,5.6954984
37.090816,5.56776436,5.69445617,-0.355937922,5.69416278,5.69390376,5.69361034
37.101308,7.21110255,5.69256879,1.23228802,5.69227622,5.69201376,5.69172115
37.1118,5.74456265,5.69068053,0.232125212,5.69038875,5.69012285,5.68983104
37.122291,5.47722558,5.68879159,-0.459963056,5.68850058,5.68823121,5.68794017
37.132783,6.08276253,5.6869016,0.629174799,5.68661134,5.68633851,5.68604821
37.143274,5.19615242,5.68501095,-0.699184184,5.6847214,5.68444509,5.68415552
37.153766,5.29150262,5.68311926,-0.625792811,5.68283042,5.68255061,5.68226174
37.164258,4.69041576,5.68122675,-0.995394891,5.68093858,5.68065527,5.68036707
37.174749,5.83095189,5.67933358,0.38938196,5.67904607,5.67875923,5.67847169
37.185241,6.08276253,5.67743942,0.636649911,5.67715254,5.67686216,5.67657525
37.195732,5.83095189,5.67554463,0.394217285,5.67525836,5.67496442,5.67467812
37.206224,6,5.67364885,0.571271521,5.67336317,5.67306565,5.67277994
37.216716,7.21110255,5.67175228,1.24070555,5.67146717,5.67116605,5.67088091
37.227207,5.91607978,5.6698551,0.49621032,5.66957054,5.6692658,5.66898121
37.237699,5.83095189,5.66795697,0.403726303,5.66767294,5.66736454,5.66708049
37.24819,6.92820323,5.66605824,1.12345226,5.66577473,5.66546266,5.66517912
37.258682,5.38516481,5.66415858,-0.52819861,5.66387556,5.66355979,5.66327674
37.269174,5.47722558,5.66232425,-0.43023096,5.66197562,5.66172222,5.66137354
37.279665,6.40312424,5.66042342,0.861800915,5.6600751,5.65981808,5.65946972
37.290157,5.56776436,5.65852167,-0.301259534,5.65817364,5.65791298,5.65756491
37.300648,5.74456265,5.65661937,0.29655231,5.65627162,5.65600728,5.65565949
37.31114,5.65685425,5.65471618,0.0462392759,5.65436868,5.65410063,5.6537531
37.321632,4.89897949,5.65281227,-0.868235445,5.65246502,5.65219323,5.65184593
37.332123,4.89897949,5.65090785,-0.867138031,5.65056082,5.65028524,5.64993817
37.342615,5.38516481,5.64900255,-0.513651385,5.64865573,5.64837633,5.64802947
37.353106,4.79583152,5.64709675,-0.922640358,5.64675012,5.64646686,5.64612018
37.363598,6.63324958,5.6451901,0.994011813,5.64484363,5.64455647,5.64420997
37.37409,5.65685425,5.64328277,0.116496676,5.64293647,5.64264536,5.64229902
37.384581,5.56776436,5.64137498,-0.271312758,5.64102881,5.64073372,5.64038751
37.395073,4.69041576,5.63946635,-0.974192274,5.63912031,5.63882117,5.6384751
37.405564,6.78232998,5.63755726,1.06994052,5.63721133,5.63690811,5.63656215
37.416056,5.29150262,5.63564736,-0.586638506,5.63530153,5.63499417,5.6346483
37.426548,6.32455532,5.63373684,0.83115491,5.63339109,5.63307953,5.63273375
37.437039,5.91607978,5.6322346,0.532771234,5.6314802,5.63157316,5.63081868
37.447531,5.74456265,5.63032359,0.337992691,5.62956852,5.6296579,5.62890274
37.458022,6.244998,5.62841217,0.785229794,5.6276564,5.62774216,5.6269863
37.468514,5,5.62649998,-0.791517519,5.6257435,5.62582557,5.625069
37.479006,5.74456265,5.62458722,0.346374689,5.62383002,5.62390833,5.62315104
37.489497,5.65685425,5.62267408,0.184878805,5.62191613,5.62199063,5.62123259
37.499989,4.79583152,5.62076019,-0.90825584,5.62000149,5.62007211,5.61931331
37.51048,5.74456265,5.61884594,0.354565511,5.61808647,5.61815314,5.61739357
37.520972,5.56776436,5.61693098,-0.221735457,5.61617071,5.61623336,5.615473
37.531464,5.47722558,5.61501548,-0.371200624,5.61425441,5.61431297,5.6135518
37.541955,6.55743852,5.61309964,0.971771002,5.61233776,5.61239214,5.61163016
37.552447,5.38516481,5.61118312,-0.475413832,5.6104204,5.61047053,5.60970772
37.562938,5,5.60926628,-0.780555108,5.60850272,5.60854851,5.60778485
37.57343,6.08276253,5.60734876,0.689502552,5.60658434,5.60662571,5.6058612
37.583922,5.56776436,5.60543077,-0.194078344,5.60466547,5.60470233,5.60393694
37.594413,5.74456265,5.60351248,0.375566455,5.60274631,5.60277856,5.60201228
37.604905,4.79583152,5.60159356,-0.897642488,5.60082648,5.60085404,5.60008686
37.615396,5.38516481,5.59967437,-0.46315177,5.59890637,5.59892914,5.59816104
37.625888,5.74456265,5.59775456,0.38315544,5.59698563,5.5970035,5.59623447
37.63638,5.74456265,5.59583431,0.385653125,5.59506445,5.59507731,5.59430734
37.646871,4.89897949,5.59391384,-0.833627225,5.59314302,5.59315076,5.59237984
37.657363,5.19615242,5.59199277,-0.629158443,5.59122099,5.5912235,5.59045161
37.667854,6.244998,5.59007149,0.8092753,5.58929872,5.58929589,5.58852302
37.678346,5.91607978,5.58814964,0.572651853,5.58737588,5.58736758,5.58659371
37.688838,6.164414,5.58622741,0.760385816,5.58545265,5.58543875,5.58466388
37.699329,5.09901951,5.58430501,-0.696624358,5.58352923,5.5835096,5.58273371
37.709821,5.38516481,5.58238207,-0.444091504,5.58160526,5.58157976,5.58080284
37.720312,5.65685425,5.58045898,0.27639695,5.57968112,5.57964962,5.57887165
37.730804,5.56776436,5.578536,-0.10378651,5.57775646,5.57771944,5.57693978
37.741296,5.74456265,5.57661208,0.409817723,5.57583147,5.57578814,5.57500741
37.751787,6.08276253,5.57468804,0.712793442,5.57390635,5.57385656,5.57307475
37.762279,5.65685425,5.57276352,0.289984012,5.57198074,5.57192432,5.57114142
37.77277,5.19615242,5.57083891,-0.612116401,5.57005502,5.5699918,5.5692078
37.783262,5.47722558,5.56891385,-0.302800719,5.56812885,5.56805865,5.56727353
37.793754,5.29150262,5.56698854,-0.524867523,5.5662024,5.56612505,5.5653388
37.804245,7.21110255,5.56506317,1.28298066,5.5642759,5.5641912,5.5634038
37.814737,6.4807407,5.5631374,0.957916125,5.56234897,5.56225673,5.56146818
37.825228,5.91607978,5.56121159,0.59570814,5.56042201,5.56032201,5.5595323
37.83572,5.74456265,5.55928541,0.430438419,5.55849465,5.55838669,5.5575958
37.846212,4.79583152,5.55735905,-0.872655447,5.55656711,5.55645095,5.55565887
37.856703,5.56776436,5.55543271,0.111047984,5.55463956,5.55451499,5.55372172
37.867195,5.83095189,5.55350603,0.526731301,5.55271168,5.55257844,5.55178396
37.877686,5.47722558,5.5515794,-0.272678984,5.55078383,5.55064169,5.54984598
37.888178,5.38516481,5.54965248,-0.405570793,5.54885567,5.54870436,5.54790742
37.89867,5.74456265,5.54772545,0.443663385,5.54692741,5.54676665,5.54596847
37.909161,6.244998,5.54579852,0.836181486,5.54499923,5.54482874,5.54402931
37.919653,4.79583152,5.54387135,-0.864892954,5.54307079,5.54289029,5.54208959
37.930144,5.56776436,5.54194431,0.160686198,5.54114248,5.54095165,5.54014968
37.940636,5.19615242,5.54001706,-0.586399726,5.53921395,5.53901248,5.53820922
37.951128,5.09901951,5.53808981,-0.662623796,5.5372854,5.53707295,5.5362684
37.961619,5,5.53616275,-0.732231352,5.53535704,5.53513327,5.5343274
37.972111,6.164414,5.53423555,0.793837801,5.53342852,5.53319306,5.53238588
37.982602,4.24264069,5.53230859,-1.13563546,5.53150023,5.53125271,5.5304442
37.993094,5.91607978,5.53038152,0.621046102,5.52957182,5.52931185,5.52850199
38.003586,5.47722558,5.52845456,-0.226338214,5.52764352,5.52737067,5.52655946
38.014077,6.32455532,5.52652792,0.893323796,5.52571551,5.52542936,5.5246168
38.024569,5.47722558,5.52460124,-0.217659517,5.52378747,5.52348756,5.52267363
38.03506,6.32455532,5.52267493,0.895477743,5.52185978,5.52154565,5.52073033
38.045552,5.38516481,5.52074865,-0.368217114,5.51993211,5.51960326,5.51878655
38.056044,5.56776436,5.51882261,0.221227834,5.51800467,5.51766058,5.51684247
38.066535,5.65685425,5.51689702,0.374108578,5.51607767,5.51571781,5.51489828
38.077027,6.40312424,5.51497155,0.942418529,5.51415078,5.51377457,5.51295362
38.087518,6.32455532,5.51304661,0.900837785,5.5122244,5.51183126,5.51100887
38.09801,5.29150262,5.51112185,-0.468635492,5.5102982,5.50988749,5.50906366
38.108502,5.65685425,5.5091975,0.384261308,5.5083724,5.50794347,5.50711819
38.118993,5.56776436,5.50727378,0.245948336,5.50644723,5.50599938,5.50517264
38.129485,6.32455532,5.50535037,0.905099416,5.50452234,5.50405487,5.50322665
38.139976,5.29150262,5.50342767,-0.460353178,5.50259817,5.5021103,5.5012806
38.150468,5.74456265,5.50150537,0.493008394,5.50067437,5.50016532,5.49933412
38.16096,6,5.4995837,0.707401092,5.4987512,5.4982201,5.4973874
38.171451,6,5.49766288,0.708757447,5.49682888,5.49627486,5.49544064
38.181943,6,5.49574262,0.710110825,5.49490709,5.49432921,5.49349347
38.192434,5.19615242,5.49382332,-0.545592248,5.49298627,5.49238355,5.49154627
38.202926,5.65685425,5.4919047,0.406139818,5.4910661,5.49043749,5.48959867
38.213418,5.19615242,5.48998699,-0.542065091,5.48914684,5.48849124,5.48765087
38.223909,5.19615242,5.48807044,-0.54029438,5.48722874,5.48654499,5.48570305
38.234401,5.47722558,5.48615477,-0.0944944001,5.48531149,5.48459836,5.48375485
38.244892,5.74456265,5.48424041,0.510217832,5.48339556,5.48265174,5.48180665
38.255384,5.83095189,5.48232709,0.590444582,5.48148065,5.48070477,5.47985808
38.265876,5.19615242,5.48041508,-0.533162877,5.47956704,5.47875763,5.47790934
38.276367,5.56776436,5.47850465,0.298763646,5.477655,5.47681051,5.47596061
38.286859,5.65685425,5.47659554,0.424568852,5.47574428,5.47486306,5.47401153
38.29735,5.29150262,5.47468823,-0.428001877,5.47383534,5.47291564,5.47206248
38.307842,6.244998,5.47278247,0.878757947,5.47192795,5.47096789,5.47011309
38.318334,5.74456265,5.47087857,0.523148237,5.4700224,5.46902001,5.46816355
38.328825,5.91607978,5.46897685,0.668657563,5.46811902,5.46707218,5.46621406
38.339317,5.47722558,5.46707709,0.100739693,5.4662176,5.46512404,5.46426424
38.349808,4.79583152,5.46517982,-0.818137088,5.46431866,5.46317596,5.46231449
38.3603,5.19615242,5.46328484,-0.516848548,5.462422,5.46122759,5.46036442
38.370792,5.47722558,5.46139254,0.125829393,5.460528,5.45927911,5.45841424
38.381283,5.56776436,5.45950328,0.329030512,5.45863705,5.45733071,5.45646413
38.391775,5.29150262,5.45761695,-0.407571249,5.456749,5.45538203,5.45451372
38.402266,5.38516481,5.45573412,-0.265648857,5.45486446,5.45343344,5.4525634
38.412758,5.47722558,5.45385472,0.152875284,5.45298333,5.45148458,5.45061281
38.42325,5.47722558,5.45197922,0.158891032,5.45110608,5.44953564,5.44866212
38.433741,5,5.4501081,-0.670900959,5.44923322,5.44758682,5.44671153
38.444233,5.91607978,5.44824136,0.683987153,5.44736472,5.44563774,5.44476068
38.454724,5.47722558,5.44637974,0.175629822,5.44550134,5.44368878,5.44280994
38.465216,5.47722558,5.44452331,0.180837669,5.44364314,5.44173958,5.44085895
38.475708,5.09901951,5.44267272,-0.586219417,5.44179076,5.43979033,5.4389079
38.486199,6,5.44082865,0.747777605,5.4399449,5.43784121,5.43695698
38.496691,5.56776436,5.43899134,0.358849585,5.43810579,5.43589188,5.43500582
38.507182,5.83095189,5.43716176,0.627526997,5.43627441,5.43394269,5.43305481
38.517674,5.91607978,5.43534029,0.6933538,5.43445112,5.43199329,5.43110356
38.528166,5.19615242,5.43352789,-0.487211936,5.43263689,5.43004386,5.42915229
38.538657,6,5.43172563,0.75383975,5.4308328,5.4280946,5.42720117
38.549149,4.47213595,5.42993417,-0.978671656,5.42903949,5.42614514,5.42524984
38.55964,5.74456265,5.42815496,0.562501274,5.42725844,5.42419586,5.42329869
38.570132,5.47722558,5.42638896,0.225469764,5.42549058,5.42224639,5.42134733
38.580624,5.47722558,5.42463777,0.229320305,5.42373753,5.42029693,5.41939597
38.591115,5.09901951,5.42290321,-0.569107803,5.42200109,5.41834766,5.41744479
38.601607,5.09901951,5.4211868,-0.567597822,5.42028281,5.41639822,5.41549343
38.612098,5.65685425,5.41949103,0.487199363,5.41858516,5.41444898,5.41354227
38.62259,5.74456265,5.41781803,0.571615793,5.41691027,5.41249958,5.41159093
38.633082,5.47722558,5.41617081,0.247092632,5.41526115,5.41055022,5.40963962
38.643573,5.29150262,5.41455279,-0.350785081,5.41364124,5.40860107,5.40768851
38.654065,5.47722558,5.41296751,0.253491744,5.41205405,5.40665178,5.40573726
38.664556,6.32455532,5.41141972,0.95558129,5.41050435,5.40470272,5.40378622
38.675048,5.83095189,5.40991436,0.648874051,5.40899709,5.40275353,5.40183504
38.68554,5.09901951,5.40845776,-0.556271741,5.40753858,5.4008044,5.39988391
38.696031,5.74456265,5.40705738,0.580952034,5.40613628,5.39885551,5.39793301
38.706523,6.32455532,5.40572167,0.958558108,5.40479867,5.3969065,5.39598199
38.717014,4.79583152,5.40446137,-0.780147323,5.40353646,5.39495776,5.39403121
38.727506,5.74456265,5.40328886,0.584186427,5.40236205,5.3930089,5.39208032
38.737998,5.47722558,5.40221966,0.27387207,5.40129096,5.39106013,5.3901295
38.748489,5.83095189,5.40127272,0.655499176,5.40034214,5.38911163,5.38817894
38.758981,5.74456265,5.40047132,0.586592982,5.39953887,5.38716304,5.38622828
38.769472,5.29150262,5.39984523,-0.329154377,5.39891093,5.38521473,5.3842779
38.779964,5.74456265,5.39943269,0.587477621,5.39849658,5.38326634,5.38232742
38.790456,6.244998,5.39928512,0.919626489,5.39834723,5.38131806,5.38037704
38.800947,5.29150262,5.39947393,-0.328589874,5.39853431,5.37937008,5.37842695
38.811439,5.65685425,5.40010259,0.506706681,5.39916131,5.37742204,5.37647679
38.82193,5.29150262,5.40132495,-0.331394523,5.40038211,5.3754743,5.37452692
38.832422,6,5.40337267,0.772416555,5.40242839,5.37352651,5.37257699
38.842914,5.74456265,5.40658855,0.581355392,5.40564305,5.37157885,5.37062718
38.853405,5.65685425,5.41146216,0.495370659,5.4105157,5.36963151,5.36867768
38.863897,4.58257569,5.41865673,-0.914374666,5.41770972,5.36768414,5.36672814
38.874388,5.38516481,5.42900064,-0.209370091,5.42805362,5.3657371,5.36477891
38.88488,5.47722558,5.44343858,0.183812388,5.44249226,5.36379003,5.36282965
38.895372,6.164414,5.46290112,0.837563656,5.46195635,5.36184312,5.36088054
38.905863,5.29150262,5.48809592,-0.443388422,5.48715366,5.35989656,5.35893176
38.916355,5.38516481,5.51918389,-0.366086174,5.51824513,5.35794998,5.35698296
38.926846,5.74456265,5.5552081,0.435148875,5.55427361,5.35600376,5.3550345
38.937338,5.38516481,5.59323897,-0.456151473,5.59230902,5.35405754,5.35308603
38.94783,5.56776436,5.62741661,-0.244238094,5.6264905,5.3521115,5.35113774
38.958321,6.40312424,5.64933289,0.86821158,5.64840856,5.35016583,5.34918981
38.968813,5.29150262,5.65148499,-0.599985304,5.65055919,5.34822017,5.34724187
38.979304,5.56776436,5.63236052,-0.254157747,5.63142975,5.3462749,5.34529431
38.989796,5.83095189,5.59771964,0.482941251,5.59678125,5.34432965,5.34334676
39.000288,6.08276253,5.55631346,0.725568105,5.55536619,5.3423846,5.3413994
39.010779,5.65685425,5.51517732,0.37639996,5.51422109,5.34043995,5.33945243
39.021271,5.38516481,5.47821844,-0.305046931,5.47725384,5.33849534,5.33750549
39.031762,5.83095189,5.44698132,0.619653591,5.44600925,5.33655113,5.33555894
39.042254,5,5.42161856,-0.649321617,5.42063998,5.33460697,5.33361242
39.052746,5.47722558,5.40157569,0.275045247,5.40059149,5.33266304,5.33166612
39.063237,4.89897949,5.38597391,-0.697849858,5.38498487,5.33071953,5.32972024
39.073729,5.29150262,5.37385386,-0.286969062,5.37286059,5.32877608,5.3277744
39.08422,4.89897949,5.36433725,-0.682171358,5.36334019,5.32683306,5.32582898
39.094712,5,5.35669624,-0.597240519,5.35569573,5.32489011,5.32388362
39.105204,4.12310563,5.35038094,-1.10782459,5.34937721,5.32294741,5.3219385
39.115695,5.19615242,5.34499964,-0.385807231,5.34399284,5.32100516,5.31999382
39.126187,5.47722558,5.3402841,0.370056046,5.33927434,5.31906299,5.31804921
39.136678,5.19615242,5.33605709,-0.374038327,5.33504446,5.31712128,5.31610504
39.14717,5,5.33219899,-0.57636706,5.33118353,5.31517965,5.31416095
39.157662,5.29150262,5.32862908,-0.192682278,5.32761085,5.31323831,5.31221712
39.168153,4.79583152,5.32529024,-0.727639141,5.32426926,5.31129743,5.31027376
39.178645,5.56776436,5.32213948,0.495605569,5.32111577,5.30935666,5.30833049
39.189136,5.29150262,5.31914502,-0.166260024,5.3181186,5.30741637,5.30638768
39.199628,5.47722558,5.31628084,0.401179181,5.31525172,5.30547619,5.30444498
39.21012,4.47213595,5.31352686,-0.917273625,5.31249505,5.30353631,5.30250256
39.220611,5.29150262,5.31086678,-0.139155156,5.30983229,5.30159693,5.30056063
39.231103,5.47722558,5.30828654,0.411021941,5.30724937,5.29965767,5.29861881
39.241594,5.74456265,5.30577542,0.662410164,5.30473558,5.29771891,5.29667749
39.252086,4.47213595,5.30332363,-0.911694946,5.3022811,5.29578029,5.29473628
39.262578,5.29150262,5.3009236,-0.0970617102,5.29987839,5.293842,5.29279539
39.273069,5.19615242,5.29856898,-0.320025869,5.29752109,5.29190422,5.290855
39.283561,5.47722558,5.29625377,0.425407814,5.29520318,5.28996659,5.28891475
39.294052,5.29150262,5.29397367,-0.0497096362,5.29292039,5.28802948,5.28697501
39.304544,5.65685425,5.29172421,0.604259909,5.29066823,5.28609253,5.28503542
39.315036,4.89897949,5.28950214,-0.624918119,5.28844345,5.28415593,5.28309616
39.325527,5.56776436,5.28730467,0.529584453,5.28624326,5.28221987,5.28115743
39.336019,4.79583152,5.28512879,-0.699497868,5.28406465,5.28028397,5.27921886
39.34651,4.69041576,5.28297266,-0.769777178,5.28190579,5.27834863,5.27728082
39.357002,6.164414,5.28083392,0.939989408,5.2797643,5.27641346,5.27534295
39.367494,5.56776436,5.27871103,0.537636799,5.27763866,5.27447867,5.27340543
39.377985,6.164414,5.27660271,0.942237388,5.27552757,5.27254443,5.27146847
39.388477,5.83095189,5.27450721,0.745952203,5.2734293,5.27061039,5.26953168
39.398968,6.32455532,5.27242375,1.02573465,5.27134306,5.26867691,5.26759545
39.40946,5.19615242,5.27035091,-0.272393989,5.26926742,5.26674364,5.26565941
39.419952,5.47722558,5.26828795,0.457096956,5.26720165,5.26481076,5.26372374
39.430443,4.69041576,5.26623424,-0.758827044,5.26514513,5.26287845,5.26178865
39.440935,5.38516481,5.26418867,0.347816247,5.26309672,5.26094637,5.25985375
39.451426,4.89897949,5.26215095,-0.602637089,5.26105617,5.25901487,5.25791944
39.461918,4.89897949,5.26012011,-0.600949767,5.25902247,5.2570836,5.25598533
39.47241,5.38516481,5.25809581,0.356467384,5.25699531,5.25515274,5.25405162
39.482901,4,5.25607777,-1.12074875,5.2549744,5.25322248,5.25211851
39.493393,5.09901951,5.25406517,-0.393758375,5.25295891,5.25129246,5.25018561
39.503884,4.24264069,5.252058,-1.00469762,5.25094884,5.24936305,5.24825331
39.514376,5.29150262,5.25005553,0.203585589,5.24894345,5.24743388,5.24632125
39.524868,5.83095189,5.24805762,0.763475128,5.24694262,5.24550515,5.2443896
39.535359,5.19615242,5.24606418,-0.223409392,5.24494624,5.24357704,5.24245857
39.545851,5.09901951,5.24407455,-0.380860917,5.24295366,5.24164919,5.24052777
39.556342,5,5.24208941,-0.492025823,5.24096555,5.23972197,5.2385976
39.566834,6.08276253,5.24010709,0.917962657,5.23898025,5.23779501,5.23666768
39.577326,5.91607978,5.23812811,0.823378207,5.23699828,5.23586851,5.2347382
39.587817,5,5.23615247,-0.485955217,5.23501964,5.23394266,5.23280934
39.598309,4.79583152,5.23417963,-0.662078626,5.23304378,5.23201708,5.23088076
39.6088,5.29150262,5.2322098,0.243501172,5.23107092,5.23009215,5.22895281
39.619292,4.89897949,5.23024247,-0.5755545,5.22910054,5.22816751,5.22702513
39.629784,4.47213595,5.22827769,-0.869564104,5.2271327,5.22624335,5.22509791
39.640275,5.83095189,5.22631552,0.777583678,5.22516746,5.22431984,5.22317134
39.650767,4.35889894,5.22435548,-0.930299165,5.22320433,5.22239664,5.22124506
39.661258,5.29150262,5.22239784,0.262877887,5.22124359,5.22047411,5.21931944
39.67175,5.29150262,5.22044213,0.266571745,5.21928476,5.21855189,5.2173941
39.682242,4.69041576,5.21848844,-0.726686096,5.21732795,5.21663016,5.21546925
39.692733,5.29150262,5.21653689,0.273798713,5.21537325,5.21470911,5.21354507
39.703225,5,5.21458701,-0.463235376,5.21342022,5.21278839,5.21162119
39.713716,4.47213595,5.21263912,-0.860524938,5.21146916,5.21086835,5.20969799
39.724208,5.19615242,5.21069278,-0.120583396,5.20951962,5.20894865,5.2077751
39.7347,5.29150262,5.2087481,0.287670852,5.20757175,5.20702946,5.20585271
39.745191,4.69041576,5.20680523,-0.71860244,5.20562565,5.20511097,5.20393101
39.755683,6.40312424,5.20486372,1.09465086,5.20368092,5.20319282,5.20200963
39.766174,5,5.20292392,-0.450470775,5.20173787,5.20127538,5.20008895
39.776666,5.65685425,5.20098539,0.67518061,5.19979608,5.19935829,5.1981686
39.787158,5.38516481,5.19904829,0.431412235,5.1978557,5.19744173,5.19624877
39.797649,6.08276253,5.19711276,0.941089674,5.19591687,5.19552589,5.19432964
39.808141,5.65685425,5.19517838,0.679467342,5.19397919,5.19361042,5.19241086
39.818632,5.29150262,5.1932455,0.313459919,5.19204299,5.19169567,5.1904928
39.829124,4.79583152,5.19131372,-0.62887375,5.19010786,5.18978129,5.18857508
39.839616,4.69041576,5.18938318,-0.706376259,5.18817397,5.18786747,5.18665791
39.850107,5.74456265,5.18745405,0.746397079,5.18624147,5.18595438,5.18474145
39.860599,5.74456265,5.18552592,0.747687584,5.18430996,5.18404168,5.18282536
39.87109,5.47722558,5.18359915,0.541873069,5.18237979,5.18212972,5.18091001
39.881582,4.79583152,5.18167334,-0.62116167,5.18045056,5.18021815,5.17899502
39.892074,4.69041576,5.17974866,-0.699523337,5.17852244,5.17830715,5.17708059
39.902565,5.91607978,5.17782526,0.859217389,5.17659559,5.17639691,5.1751669
39.913057,5.56776436,5.17590277,0.625988496,5.17466963,5.17448707,5.1732536
39.923548,4.12310563,5.17398152,-1.02512238,5.1727449,5.172578,5.17134104
39.93404,5.38516481,5.17206114,0.461631525,5.17082102,5.17066933,5.16942887
39.944532,5.09901951,5.1701418,-0.266687619,5.16889816,5.16876125,5.16751728
39.955023,5.09901951,5.16822366,-0.263066811,5.16697649,5.16685395,5.16560645
39.965515,4.89897949,5.16630635,-0.517036614,5.16505563,5.16494707,5.16369602
39.976006,6,5.16439021,0.914116947,5.16313592,5.16304097,5.16178635
39.986498,4.79583152,5.16247487,-0.605510814,5.161217,5.1611353,5.1598771
39.99699,5.19615242,5.1605605,0.188658208,5.15929903,5.15923023,5.15796843
40.007481,5.09901951,5.15864728,-0.244187974,5.15738219,5.15732596,5.15606055
40.017973,5.29150262,5.15673483,0.367107335,5.1554661,5.15542213,5.15415308
40.028464,5.91607978,5.1548235,0.872500021,5.15355112,5.1535191,5.1522464
40.038956,4.12310563,5.15291292,-1.01479421,5.15163687,5.15161652,5.15034014
40.049448,6,5.15100327,0.921410187,5.14972353,5.14971456,5.1484345
40.059939,4.35889894,5.14909472,-0.888929566,5.14781127,5.14781341,5.14652964
40.070431,5.65685425,5.1471869,0.713909906,5.14589972,5.14591272,5.14462523
40.080922,4.79583152,5.14528016,-0.591141809,5.14398924,5.14401285,5.14272161
40.091414,4.35889894,5.14337415,-0.885706047,5.14207947,5.14211344,5.14081844
40.101906,4.79583152,5.14146902,-0.587909432,5.14017056,5.14021468,5.1389159
40.112397,5.29150262,5.13956497,0.389791804,5.13826272,5.13831674,5.13701417
40.122889,5.65685425,5.13766162,0.720550225,5.13635555,5.13641928,5.13511289
40.13338,5.09901951,5.13575934,-0.191676347,5.13444943,5.13452266,5.13321244
40.143872,4.58257569,5.13385774,-0.742483702,5.13254398,5.13262652,5.13131244
40.154364,5.83095189,5.13195702,0.836059132,5.13063939,5.13073104,5.12941308
40.164855,4.89897949,5.13005735,-0.480705592,5.12873582,5.1288364,5.12751456
40.175347,4.79583152,5.12815837,-0.576477963,5.12683293,5.12694226,5.12561651
40.185838,4.69041576,5.12626042,-0.660185325,5.12493105,5.12504897,5.12371929
40.19633,5.83095189,5.12436316,0.840588326,5.12302984,5.12315618,5.12182255
40.206822,5.19615242,5.12246676,0.27145104,5.12112947,5.12126407,5.11992647
40.217313,5.09901951,5.12057139,-0.146805565,5.11923011,5.11937282,5.11803123
40.227805,5,5.11867669,-0.344494837,5.1173314,5.11748209,5.11613648
40.238296,5.56776436,5.11678303,0.671551437,5.11543371,5.11559222,5.11424259
40.248788,4.47213595,5.11489004,-0.801719455,5.11353667,5.11370287,5.11234919
40.25928,5.29150262,5.1129979,0.422498195,5.11164046,5.11181421,5.11045646
40.269771,4.89897949,5.11110678,-0.460572794,5.10974526,5.10992644,5.1085646
40.280263,5.65685425,5.10921634,0.740025615,5.1078507,5.10803919,5.10667324
40.290754,4.47213595,5.10732692,-0.796988685,5.10595715,5.10615283,5.10478275
40.301246,4.58257569,5.10543817,-0.723092298,5.10406425,5.10426701,5.10289277
40.311738,5,5.10355026,-0.321792261,5.10217217,5.10238189,5.10100349
40.322229,4.79583152,5.10166338,-0.553020663,5.10028109,5.10049768,5.09911508
40.332721,5.09901951,5.09977716,-0.0275253895,5.09839066,5.098614,5.09722719
40.343212,4.69041576,5.09789197,-0.638338632,5.09650124,5.09673123,5.09534018
40.353704,5.29150262,5.09600744,0.442148369,5.09461245,5.09484901,5.09345371
40.364196,5.38516481,5.09412376,0.539482202,5.09272449,5.09296752,5.09156794
40.374687,5.47722558,5.0922411,0.620471168,5.09083753,5.09108695,5.08968306
40.385179,5.09901951,5.09035911,0.0930612649,5.08895122,5.08920693,5.08779872
40.39567,4.58257569,5.08847815,-0.711268202,5.08706591,5.08732784,5.08591528
40.406162,5,5.08659785,-0.294275132,5.08518125,5.0854493,5.08403238
40.416654,5,5.0847184,-0.291064262,5.08329741,5.08357152,5.08215021
40.427145,5.38516481,5.08283998,0.549840727,5.08141458,5.08169467,5.08026894
40.437637,5.38516481,5.08096223,0.551545625,5.07953239,5.07981839,5.07838823
40.448128,4.69041576,5.07908551,-0.623433836,5.07765121,5.07794305,5.07650843
40.45862,4.89897949,5.07720946,-0.422172916,5.07577068,5.07606829,5.07462919
40.469112,3.87298335,5.07533426,-1.09651763,5.07389098,5.07419429,5.07275068
40.479603,5.29150262,5.07346009,0.466950246,5.07201228,5.07232124,5.07087311
40.490095,4.79583152,5.0715866,-0.525123866,5.07013424,5.07044878,5.0689961
40.500586,5.29150262,5.06971414,0.470944245,5.06825721,5.06857727,5.06712001
40.511078,4.47213595,5.06784236,-0.77182019,5.06638083,5.06670636,5.0652445
40.52157,4.79583152,5.06597144,-0.519749859,5.06450529,5.06483623,5.06336975
40.532061,4.35889894,5.06410156,-0.839763426,5.06263076,5.06296706,5.06149594
40.542553,6,5.06223235,0.968384038,5.06075688,5.0610985,5.0596227
40.553044,4.24264069,5.06036419,-0.904280657,5.05888403,5.05923091,5.05775041
40.563536,4.35889894,5.05849672,-0.836419616,5.05701183,5.05736393,5.05587871
40.574028,5.09901951,5.05663011,0.205886874,5.05514048,5.05549774,5.05400778
40.584519,5.38516481,5.05476454,0.574804543,5.05327015,5.05363253,5.0521378
40.595011,4.79583152,5.05289967,-0.507018882,5.05140048,5.05176795,5.05026842
40.605502,5.38516481,5.05103584,0.578038894,5.04953183,5.04990434,5.04839999
40.615994,5.29150262,5.04917271,0.492270158,5.04766385,5.04804137,5.04653217
40.626486,4.47213595,5.04731046,-0.758402599,5.04579673,5.04617921,5.04466514
40.636977,6.244998,5.04544925,1.09523913,5.04393062,5.04431804,5.04279907
40.647469,5.09901951,5.04358875,0.23543739,5.0420652,5.0424575,5.04093361
40.65796,5.47722558,5.0417293,0.659921414,5.0402008,5.04059797,5.03906912
40.668452,5.09901951,5.03987056,0.24320558,5.03833708,5.03873908,5.03720525
40.678944,4.69041576,5.0380127,-0.589573524,5.03647422,5.03688101,5.03534218
40.689435,5.19615242,5.0361559,0.39999565,5.03461239,5.03502395,5.03348009
40.699927,5,5.03429982,-0.185202094,5.03275124,5.03316755,5.03161863
40.710418,4.89897949,5.03244479,-0.365329042,5.03089114,5.03131216,5.02975815
40.72091,5.19615242,5.03059049,0.406893026,5.02903172,5.02945742,5.0278983
40.731402,4.79583152,5.02873707,-0.482602892,5.02717316,5.02760353,5.02603927
40.741893,4.79583152,5.02688473,-0.480679946,5.02531565,5.02575066,5.02418123
40.752385,5.38516481,5.02503311,0.600109735,5.02345884,5.02389846,5.02232383
40.762876,5.09901951,5.02318257,0.275385085,5.02160307,5.02204729,5.02046743
40.773368,4.35889894,5.02133275,-0.813900366,5.01974799,5.02019679,5.01861167
40.78386,5.19615242,5.01948383,0.420319627,5.01789379,5.01834714,5.01675674
40.794351,5.47722558,5.017636,0.677930361,5.01604065,5.01649853,5.01490282
40.804843,4.35889894,5.0157889,-0.81048748,5.01418821,5.01465061,5.01304956
40.815334,3.87298335,5.01394288,-1.06815708,5.01233682,5.01280373,5.0111973
40.825826,4.79583152,5.01209761,-0.465044173,5.01048614,5.01095753,5.0093457
40.836318,6.08276253,5.01025324,1.03562024,5.00863635,5.00911221,5.00749495
40.846809,5.65685425,5.00840997,0.805260379,5.00678762,5.00726794,5.00564521
40.857301,4.35889894,5.00656744,-0.804778541,5.0049396,5.00542436,5.00379614
40.867792,4.69041576,5.00472601,-0.560633797,5.00309264,5.00358184,5.0019481
40.878284,5.09901951,5.00288533,0.310055128,5.00124641,5.00174003,5.00010073
40.888776,4.12310563,5.00104558,-0.936984498,4.99940107,4.9998991,4.99825421
40.899267,5.09901951,4.99920692,0.315931307,4.9975568,4.99805923,4.99640873
40.909759,4.79583152,4.99736903,-0.448929284,4.99571325,4.99622007,4.99456392
40.92025,5.91607978,4.99553224,0.959451691,4.99387079,4.99438199,4.99272015
40.930742,5,4.99369621,0.0793964272,4.99202905,4.99254462,4.99087708
40.941234,5.74456265,4.99186112,0.867583731,4.99018821,4.99070815,4.98903486
40.951725,5.09901951,4.99002714,0.330139932,4.98834846,4.98887276,4.98719369
40.962217,3.74165739,4.98819393,-1.11648401,4.98650944,4.9870381,4.98535322
40.972708,4.47213595,4.98636184,-0.71709545,4.9846715,4.98520452,4.98351379
40.9832,4.89897949,4.98453052,-0.292491087,4.98283431,4.98337168,4.98167507
40.993692,5.38516481,4.98270015,0.63440102,4.98099803,4.98153974,4.97983722
41.004183,4.24264069,4.98087091,-0.859203249,4.97916284,4.9797089,4.97800043
41.014675,5.19615242,4.97904245,0.465950615,4.9773284,4.9778788,4.97616435
41.025166,4.89897949,4.97721512,-0.279706327,4.97549505,4.97604979,4.97432933
41.035658,5.47722558,4.97538857,0.708404551,4.97366245,4.97422154,4.97249502
41.04615,4.79583152,4.97356298,-0.421582088,4.97183078,4.9723942,4.9706616
41.056641,4.79583152,4.97173853,-0.419412694,4.97000021,4.97056798,4.96882925
41.067133,4.69041576,4.96991487,-0.528676758,4.9681704,4.96874251,4.96699762
41.077624,5.74456265,4.96809236,0.881175515,4.96634169,4.96691814,4.96516707
41.088116,4.35889894,4.96627064,-0.779340553,4.96451375,4.96509455,4.96333724
41.098608,4.69041576,4.9644499,-0.523482699,4.96268674,4.96327189,4.96150831
41.109099,4.69041576,4.9626303,-0.521741833,4.96086084,4.96145034,4.95968046
41.119591,5.38516481,4.96081151,0.651424054,4.95903571,4.95962957,4.95785335
41.130082,5.19615242,4.95899387,0.486989273,4.95721169,4.95780992,4.95602732
41.140574,5.56776436,4.95717704,0.78140087,4.95538845,4.95599105,4.95420203
41.151066,4.35889894,4.9553612,-0.772309689,4.95356615,4.95417312,4.95237765
41.161557,4.35889894,4.95354652,-0.771133953,4.95174498,4.95235633,4.95055436
41.172049,4.69041576,4.95173265,-0.51119164,4.94992458,4.95054033,4.94873182
41.18254,4.89897949,4.94991995,-0.225699948,4.94810531,4.94872545,4.94691038
41.193032,4,4.94810807,-0.973708413,4.94628683,4.94691137,4.94508968
41.203524,5.47722558,4.94629719,0.728648325,4.94446929,4.94509826,4.94326991
41.214015,3.87298335,4.94448749,-1.03513484,4.9426529,4.94328628,4.94145125
41.224507,4.47213595,4.94267861,-0.685961116,4.94083729,4.94147511,4.93963334
41.234998,4,4.94087091,-0.969985003,4.93902281,4.93966508,4.93781654
41.24549,4.24264069,4.93906404,-0.834519833,4.93720913,4.93785586,4.93600049
41.255982,5.29150262,4.93725818,0.595184374,4.93539642,4.93604761,4.93418539
41.266473,6,4.93545351,1.03176862,4.93358485,4.93424052,4.9323714
41.276965,5.47722558,4.93364968,0.737275997,4.93177408,4.93243425,4.93055818
41.287456,4.79583152,4.93184704,-0.368802812,4.92996445,4.93062913,4.92874608
41.297948,5,4.93004524,0.264489616,4.92815563,4.92882483,4.92693475
41.30844,4.12310563,4.92824447,-0.897295294,4.92634779,4.92702152,4.92512437
41.318931,5.38516481,4.92644489,0.677288648,4.9245411,4.92521938,4.92331511
41.329423,4.12310563,4.92464617,-0.895287969,4.92273522,4.92341807,4.92150663
41.339914,5.19615242,4.92284865,0.522784632,4.92093049,4.92161792,4.91969929
41.350406,4.79583152,4.92105199,-0.353865041,4.91912658,4.91981861,4.91789272
41.360898,4.24264069,4.91925636,-0.822566518,4.91732366,4.91802031,4.91608712
41.371389,4.69041576,4.91746194,-0.476493636,4.9155219,4.91622318,4.91428265
41.381881,4.79583152,4.91566839,-0.346174624,4.91372096,4.91442689,4.91247897
41.392372,6.08276253,4.91387605,1.08115053,4.91192119,4.91263179,4.91067643
41.402864,5.38516481,4.91208459,0.687808272,4.91012224,4.91083753,4.90887469
41.413356,6,4.91029417,1.04388976,4.90832429,4.90904429,4.90707391
41.423847,4.79583152,4.90850497,-0.335668654,4.90652752,4.90725224,4.90527428
41.434339,5,4.90671665,0.305423232,4.90473157,4.90546105,4.90347546
41.44483,5.19615242,4.90492955,0.539650692,4.9029368,4.90367105,4.90167778
41.455322,4.89897949,4.90314334,-0.0645279658,4.90114286,4.9018819,4.89988091
41.465814,4.79583152,4.90135819,-0.324848687,4.89934994,4.90009379,4.89808502
41.476305,4.79583152,4.89957427,-0.322091214,4.89755819,4.89830689,4.89629028
41.486797,4.89897949,4.89779125,0.0344708389,4.89576729,4.89652084,4.89449636
41.497288,5.19615242,4.89600946,0.547853052,4.89397757,4.89473601,4.89270359
41.50778,4.12310563,4.89422856,-0.878136059,4.8921887,4.89295205,4.89091165
41.518272,4.89897949,4.89244874,0.0808130047,4.89040084,4.89116913,4.88912069
41.528763,5.09901951,4.89067017,0.456453007,4.88861418,4.88938743,4.8873309
41.539255,5.47722558,4.88889249,0.767028735,4.88682837,4.8876066,4.88554193
41.549746,5.29150262,4.88711607,0.63591395,4.88504375,4.885827,4.88375413
41.560238,5,4.88534056,0.338614001,4.88325999,4.88404828,4.88196716
41.57073,5.29150262,4.88356613,0.638699062,4.88147726,4.88227061,4.88018119
41.581221,4,4.88179296,-0.939038314,4.87969572,4.88049418,4.87839639
41.591713,5.29150262,4.8800207,0.641468566,4.87791505,4.87871863,4.87661242
41.602204,4.69041576,4.87824971,-0.433398138,4.87613559,4.87694432,4.87482964
41.612696,4.47213595,4.87647963,-0.63588024,4.87435699,4.87517091,4.87304769
41.623188,5.83095189,4.87471066,0.977875879,4.87257942,4.87339856,4.87126675
41.633679,5,4.87294295,0.356450625,4.87080307,4.87162745,4.86948699
41.644171,4.24264069,4.87117618,-0.792802301,4.86902759,4.86985725,4.86770808
41.654662,5.09901951,4.86941067,0.479175169,4.86725332,4.86808829,4.86593036
41.665154,4.24264069,4.8676461,-0.790572841,4.86547993,4.86632024,4.86415348
41.675646,5.29150262,4.86588264,0.652395569,4.86370759,4.86455328,4.86237762
41.686137,5.65685425,4.86412046,0.890355988,4.86193646,4.86278756,4.86060296
41.696629,4.47213595,4.86235923,-0.624678536,4.86016622,4.86102276,4.85882915
41.70712,6.164414,4.86059928,1.14184707,4.85839719,4.85925922,4.85705653
41.717612,4.35889894,4.85884027,-0.707065295,4.85662906,4.8574966,4.85528478
41.728104,5,4.85708239,0.37804445,4.85486198,4.85573508,4.85351405
41.738595,4.69041576,4.8553258,-0.406091177,4.85309613,4.85397482,4.85174452
41.749087,4.79583152,4.85357017,-0.240288677,4.85133117,4.85221549,4.84997585
41.759578,4.58257569,4.85181584,-0.518883552,4.84956744,4.85045742,4.84820839
41.77007,4.58257569,4.85006246,-0.517191229,4.8478046,4.84870029,4.8464418
41.780562,5.19615242,4.84831022,0.589781486,4.84604284,4.84694427,4.84467625
41.791053,5.38516481,4.84655928,0.733897488,4.8442823,4.84518953,4.8429119
41.801545,5.29150262,4.84480932,0.668351183,4.84252267,4.84343572,4.84114843
41.812036,5.47722558,4.84306066,0.796344721,4.84076428,4.8416832,4.83938617
41.822528,4.47213595,4.84131298,-0.607599394,4.8390068,4.83993163,4.83762479
41.83302,5.47722558,4.83956644,0.798535618,4.83725039,4.83818117,4.83586445
41.843511,4.58257569,4.83782122,-0.505218296,4.83549522,4.836432,4.83410533
41.854003,4.89897949,4.83607698,0.25080371,4.83374096,4.83468379,4.83234709
41.864494,5.38516481,4.83433407,0.742179722,4.83198796,4.83293687,4.83059008
41.874986,5.09901951,4.83259214,0.516166032,4.83023586,4.83119091,4.82883395
41.885478,5.65685425,4.83085137,0.908847004,4.82848486,4.82944608,4.82707887
41.895969,5.09901951,4.82911193,0.519526306,4.8267351,4.82770255,4.82532502
41.906461,5.38516481,4.82737349,0.746854282,4.82498627,4.82595999,4.82357207
41.916952,4.24264069,4.82563638,-0.763541544,4.82323869,4.82421873,4.82182034
41.927444,5,4.82390027,0.419642385,4.82149203,4.82247845,4.8200695
41.937936,4.47213595,4.82216533,-0.591632806,4.81974647,4.82073931,4.81831973
41.948427,4.69041576,4.82043173,-0.36057728,4.81800217,4.81900149,4.8165712
41.958919,5.29150262,4.81869915,0.687607063,4.8162588,4.81726464,4.81482356
41.96941,5.29150262,4.81696791,0.688864801,4.81451669,4.81552911,4.81307716
41.979902,5.29150262,4.81523768,0.69011951,4.81277552,4.81379457,4.81133166
41.990394,5,4.81350864,0.43184645,4.81103544,4.81206118,4.80958724
42.000885,5.74456265,4.81178096,0.965806239,4.80929664,4.81032912,4.80784406
42.011377,5,4.81005429,0.435827611,4.80755877,4.80859806,4.80610178
42.021868,6.40312424,4.80832899,1.26285203,4.80582218,4.80686832,4.80436075
42.03236,4.47213595,4.80660471,-0.578332739,4.80408653,4.80513958,4.80262063
42.042852,4.89897949,4.80488163,0.30675373,4.80235199,4.80341201,4.80088159
42.053343,5.29150262,4.80315992,0.698815212,4.80061873,4.80168578,4.7991438
42.063835,5,4.80143925,0.445601561,4.79888641,4.79996055,4.79740693
42.074326,4.47213595,4.79971994,-0.572349534,4.79715538,4.79823667,4.79567131
42.084818,4.69041576,4.79800169,-0.328002935,4.79542529,4.7965138,4.7939366
42.09531,4.35889894,4.7962853,-0.661351919,4.79369633,4.79479277,4.79220299
42.105801,4.79583152,4.79456964,0.0355230602,4.79196865,4.79307243,4.79047063
42.116293,5.38516481,4.79285502,0.76961665,4.79024192,4.79135312,4.7887392
42.126784,4.69041576,4.79114179,-0.317373638,4.78851648,4.78963515,4.78700902
42.137276,5.56776436,4.78942961,0.882232822,4.78679201,4.78791821,4.78527978
42.147768,4.24264069,4.78771866,-0.738293962,4.78506866,4.78620247,4.78355163
42.158259,5,4.7860091,0.462591502,4.7833466,4.78448809,4.78182474
42.168751,4.89897949,4.78430061,0.338642694,4.78162551,4.78277474,4.78009879
42.179242,4.69041576,4.78259352,-0.303607899,4.77990571,4.78106276,4.7783741
42.189734,4.35889894,4.78088749,-0.649606458,4.77818688,4.77935182,4.77665034
42.200226,4,4.77918271,-0.882713267,4.77646919,4.77764209,4.77492769
42.210717,5,4.77747933,0.471720964,4.77475279,4.77593374,4.77320631
42.221209,5.47722558,4.77577704,0.837525247,4.77303737,4.77422643,4.77148587
42.2317,4.24264069,4.77407615,-0.728996201,4.77132325,4.7725205,4.7697667
42.242192,4.47213595,4.77237635,-0.547941963,4.76961011,4.77081562,4.76804848
42.252684,4.69041576,4.7706778,-0.283305568,4.76789811,4.76911197,4.76633136
42.263175,4.58257569,4.76898068,-0.431746433,4.76618742,4.76740971,4.76461553
42.273667,5,4.76728465,0.482405796,4.76447771,4.7657085,4.76290064
42.284158,5.91607978,4.76559004,1.07260885,4.76276931,4.76400869,4.76118702
42.29465,5,4.76389654,0.485904787,4.76106189,4.76230995,4.75947437
42.305142,5.19615242,4.7622043,0.658747386,4.75935563,4.76061245,4.75776282
42.315633,4.79583152,4.7605135,0.187930898,4.75765068,4.75891634,4.75605256
42.326125,5.38516481,4.75882381,0.791417081,4.75594672,4.75722132,4.75434326
42.336616,4.47213595,4.75713556,-0.533853542,4.75424408,4.7555277,4.75263524
42.347108,5.38516481,4.75544843,0.79354671,4.75254243,4.75383516,4.75092818
42.3576,4.12310563,4.75376258,-0.794139126,4.75084194,4.75214388,4.74922224
42.368091,5.19615242,4.75207817,0.666388961,4.74914277,4.750454,4.74751759
42.378583,4.89897949,4.7503949,0.38546671,4.7474446,4.74876522,4.74581391
42.389074,4.47213595,4.74871308,-0.525906004,4.74574775,4.74707786,4.74411151
42.399566,4.47213595,4.74703239,-0.524305674,4.7440519,4.7453916,4.74241008
42.410058,3.60555128,4.74535301,-1.06761497,4.74235722,4.74370661,4.74070978
42.420549,5.19615242,4.74367508,0.672664359,4.74066387,4.74202304,4.73901078
42.431041,5.09901951,4.7419983,0.597512518,4.73897152,4.74034058,4.73731274
42.441532,5,4.74032299,0.509585132,4.73728051,4.73865956,4.73561601
42.452024,4.79583152,4.73864883,0.239129022,4.7355905,4.73697965,4.73392024
42.462516,5.47722558,4.73697599,0.860377583,4.73390167,4.73530102,4.73222561
42.473007,5.09901951,4.73530462,0.603087796,4.73221417,4.73362384,4.73053229
42.483499,5.47722558,4.73363442,0.862317316,4.73052769,4.73194778,4.72883993
42.49399,5,4.7319657,0.51772029,4.72884254,4.73027316,4.72714889
42.504482,5.38516481,4.73029815,0.809238318,4.72715841,4.72859968,4.72545882
42.514974,3.87298335,4.72863193,-0.92501275,4.72547546,4.7269275,4.72376989
42.525465,4.89897949,4.72696721,0.414743625,4.72379386,4.72525677,4.72208227
42.535957,4.89897949,4.72530367,0.416744307,4.72211327,4.72358719,4.72039563
42.546448,5.09901951,4.72364163,0.612680902,4.72043403,4.72191907,4.7187103
42.55694,4.12310563,4.72198077,-0.773870239,4.71875581,4.7202521,4.71702596
42.567432,4.79583152,4.72032127,0.274791295,4.71707879,4.71858644,4.71534277
42.577923,5.19615242,4.71866327,0.691005896,4.7154031,4.71692226,4.71366088
42.588415,3.31662479,4.71700648,-1.18337724,4.71372845,4.71525923,4.71197999
42.598906,3.60555128,4.7153512,-1.05347042,4.71205515,4.71359769,4.71030041
42.609398,5.38516481,4.71369714,0.81943131,4.71038288,4.71193731,4.70862182
42.61989,3.74165739,4.71204444,-0.985082255,4.70871181,4.71027826,4.70694439
42.630381,4.79583152,4.71039326,0.292298236,4.70704209,4.70862071,4.70526827
42.640873,4.12310563,4.70874331,-0.765269682,4.70537341,4.70696433,4.70359315
42.651364,4.69041576,4.7070949,-0.129147733,4.70370608,4.70530945,4.70191935
42.661856,4.69041576,4.70544771,-0.122604845,4.7020398,4.70365575,4.70024654
42.672348,4,4.70380191,-0.838929024,4.70037471,4.70200341,4.6985749
42.682839,4.47213595,4.70215765,-0.479605775,4.69871099,4.70035257,4.69690458
42.693331,4.58257569,4.70051464,-0.343422402,4.69704831,4.69870293,4.69523526
42.703822,5,4.69887318,0.548750231,4.69538699,4.6970548,4.69356726
42.714314,4.24264069,4.69723298,-0.674234594,4.69372672,4.69540788,4.69190026
42.724806,4.35889894,4.69559417,-0.580254454,4.69206766,4.69376233,4.69023444
42.735297,4.79583152,4.69395735,0.319177335,4.69040997,4.69211871,4.68856994
42.745789,4.58257569,4.69232138,-0.331278866,4.68875332,4.69047591,4.68690644
42.75628,5.09901951,4.69068699,0.639009018,4.68709805,4.68883463,4.68524428
42.766772,4.89897949,4.68905387,0.458176407,4.68544383,4.68719459,4.68358312
42.777264,4.69041576,4.68742217,0.0547136774,4.68379083,4.68555593,4.68192314
42.787755,3.87298335,4.68579207,-0.901559052,4.6821392,4.68391882,4.68026448
42.798247,4.58257569,4.68416325,-0.318728031,4.68048862,4.68228295,4.67860685
42.808738,4.58257569,4.68253603,-0.316165049,4.67883943,4.68064864,4.67695054
42.81923,4.89897949,4.68091011,0.466978991,4.67719129,4.67901557,4.67529525
42.829722,3.60555128,4.67928564,-1.03621154,4.67554438,4.67738391,4.67364113
42.840213,4.47213595,4.67766278,-0.453350661,4.67389884,4.67575382,4.67198835
42.850705,4.69041576,4.67604123,0.11989384,4.67225437,4.674125,4.67033659
42.861196,4.12310563,4.6744213,-0.742506346,4.67061128,4.67249775,4.66868616
42.871688,4.58257569,4.67280269,-0.300378088,4.66896926,4.67087178,4.66703676
42.88218,4.47213595,4.67118556,-0.446149757,4.66732847,4.66924723,4.66538854
42.892671,4.35889894,4.66957007,-0.557378799,4.66568906,4.66762428,4.66374165
42.903163,3.87298335,4.66795591,-0.89161234,4.66405073,4.66600262,4.6620958
42.913654,4.58257569,4.6663434,-0.289426514,4.66241378,4.66438255,4.66045128
42.924146,4.79583152,4.66473224,0.362076352,4.66077791,4.66276379,4.65880779
42.934638,4.47213595,4.66312258,-0.437020167,4.65914327,4.66114648,4.65716548
42.945129,3.74165739,4.66151459,-0.959091862,4.65751002,4.65953079,4.65552452
42.955621,4.58257569,4.65990796,-0.278086788,4.65587786,4.65791641,4.65388459
42.966112,4.35889894,4.658303,-0.547178269,4.65424708,4.65630366,4.652246
42.976604,4.89897949,4.65669942,0.492219529,4.65261739,4.65469224,4.65060844
42.987096,4.79583152,4.65509738,0.375145503,4.65098894,4.6530823,4.64897208
42.997587,4.58257569,4.65349702,-0.266310584,4.64936188,4.651474,4.64733706
43.008079,4.35889894,4.65189806,-0.54129393,4.64773591,4.64986704,4.64570307
43.01857,4.58257569,4.65030081,-0.26024049,4.64611134,4.64826174,4.64407044
43.029062,4.58257569,4.64870496,-0.257156109,4.64448786,4.6466578,4.64243884
43.039554,4.35889894,4.64711068,-0.536853549,4.64286563,4.64505537,4.64080844
43.050045,4.47213595,4.64551812,-0.416391838,4.64124479,4.64345461,4.63917938
43.060537,3.74165739,4.64392699,-0.949878729,4.63962505,4.64185522,4.63755137
43.071028,4.12310563,4.64233759,-0.720577522,4.63800672,4.64025752,4.63592471
43.08152,4.12310563,4.64074964,-0.719474816,4.63638948,4.63866121,4.63429909
43.092012,5,4.63916328,0.600696861,4.63477349,4.63706644,4.63267466
43.102503,4.58257569,4.63757868,-0.23452716,4.63315891,4.63547338,4.6310516
43.112995,3.74165739,4.63599555,-0.94569454,4.63154543,4.63388172,4.62942957
43.123486,5,4.63441419,0.604636927,4.62993337,4.63229178,4.62780891
43.133978,4.24264069,4.6328343,-0.624654796,4.6283224,4.63070327,4.62618928
43.14447,5.29150262,4.63125605,0.812555579,4.62671269,4.62911633,4.62457087
43.154961,5.38516481,4.6296796,0.86918652,4.6251044,4.62753113,4.6229538
43.165453,4.24264069,4.62810465,-0.620857441,4.62349721,4.62594738,4.62133779
43.175944,4.69041576,4.62653151,0.252753343,4.62189144,4.62436539,4.61972314
43.186436,4.89897949,4.62495989,0.523468815,4.62028677,4.62278485,4.61810953
43.196928,4.47213595,4.62338994,-0.388913853,4.61868337,4.62120593,4.61649714
43.207419,5.47722558,4.62182183,0.924880395,4.61708139,4.61962879,4.6148861
43.217911,4.89897949,4.62025527,0.527943387,4.61548053,4.61805314,4.61327612
43.228402,4.69041576,4.61869055,0.267815619,4.61388108,4.61647928,4.6116675
43.238894,5.83095189,4.61712741,1.10173703,4.61228275,4.61490692,4.61005993
43.249386,4.69041576,4.61556598,0.273586879,4.61068569,4.61333623,4.60845358
43.259877,5,4.61400643,0.621283805,4.60909005,4.61176735,4.60684858
43.270369,4.47213595,4.61244848,-0.374583136,4.60749554,4.61020001,4.60524465
43.28086,4.47213595,4.61089243,-0.372500298,4.60590245,4.6086345,4.60364208
43.291352,4,4.60933799,-0.780601042,4.60431048,4.60707055,4.60204057
43.301844,5.19615242,4.60778532,0.767050915,4.60271979,4.6055083,4.60044027
43.312335,4.69041576,4.60623458,0.290139934,4.60113053,4.60394792,4.59884134
43.322827,5.38516481,4.60468548,0.883447408,4.59954239,4.60238912,4.59724347
43.333318,4.12310563,4.60313834,-0.692843934,4.59795569,4.60083222,4.59564696
43.34381,4,4.60159287,-0.77562418,4.59637012,4.59927691,4.59405152
43.354302,4.58257569,4.60004922,-0.132187465,4.59478583,4.59772336,4.5924573
43.364793,5.29150262,4.59850756,0.83246325,4.59320297,4.59617174,4.59086445
43.375285,4.47213595,4.5969676,-0.353315222,4.59162124,4.59462175,4.58927266
43.385776,5.74456265,4.59542965,1.07197621,4.59004096,4.5930737,4.58768224
43.396268,4.47213595,4.59389343,-0.348937642,4.58846181,4.59152732,4.58609289
43.40676,4.35889894,4.5923591,-0.48317715,4.58688394,4.58998275,4.58450476
43.417251,4.69041576,4.59082682,0.315577157,4.58530752,4.58844017,4.582918
43.427743,4.89897949,4.5892963,0.556491853,4.58373224,4.58689928,4.58133231
43.438234,4.35889894,4.58776786,-0.478402466,4.5821584,4.5853604,4.57974799
43.448726,4.69041576,4.58624122,0.322760809,4.5805857,4.58382325,4.57816474
43.459218,5.56776436,4.58471653,0.991487685,4.57901429,4.58228798,4.57658271
43.469709,4.69041576,4.58319397,0.327447391,4.57744433,4.58075476,4.57500206
43.480201,4.12310563,4.58167324,-0.677176206,4.57587552,4.57922331,4.57342248
43.490692,4.58257569,4.58015466,0.049204005,4.57430816,4.57769393,4.57184428
43.501184,4.58257569,4.57863796,0.0627514049,4.57274194,4.57616635,4.57026715
43.511676,5.38516481,4.57712329,0.898911297,4.57117702,4.57464074,4.56869124
43.522167,5.38516481,4.57561081,0.899752185,4.56961356,4.57311724,4.56711672
43.532659,3.87298335,4.57410026,-0.837327246,4.56805125,4.5715956,4.56554326
43.54315,5,4.57259194,0.653764526,4.56649039,4.57007611,4.56397119
43.553642,5.09901951,4.57108559,0.726590619,4.56493068,4.5685585,4.56240019
43.564134,4.35889894,4.56958135,-0.459001533,4.56337229,4.56704294,4.56083042
43.574625,4.89897949,4.5680794,0.575239155,4.56181534,4.56552959,4.55926203
43.585117,4.58257569,4.56657947,0.126476191,4.56025956,4.56401817,4.55769471
43.595608,4.89897949,4.56508186,0.577838754,4.55870524,4.562509,4.55612878
43.6061,4.79583152,4.56358631,0.481918264,4.55715208,4.56100181,4.55456393
43.616592,4,4.56209298,-0.749728606,4.55560023,4.55949676,4.5530003
43.627083,5.29150262,4.56060204,0.854927237,4.55404984,4.55799402,4.55143806
43.637575,4.58257569,4.55911323,0.153174636,4.55250062,4.55649332,4.5498769
43.648066,4.12310563,4.55762684,-0.659182232,4.55095286,4.55499496,4.54831712
43.658558,4.35889894,4.55614263,-0.444121247,4.54940627,4.5534987,4.54675842
43.66905,4.47213595,4.55466075,-0.287271288,4.547861,4.55200468,4.54520096
43.679541,4.12310563,4.55318137,-0.655801606,4.54631719,4.55051309,4.54364488
43.690033,5.09901951,4.55170424,0.739807591,4.54477456,4.54902365,4.54208988
43.700524,4.12310563,4.55022967,-0.653547275,4.5432334,4.54753668,4.54053627
43.711016,4.79583152,4.54875739,0.497065523,4.54169342,4.54605192,4.53898374
43.721508,4.47213595,4.54728758,-0.274137965,4.54015476,4.54456954,4.53743245
43.731999,4.47213595,4.5458204,-0.271448798,4.53861757,4.54308971,4.53588254
43.742491,5.09901951,4.54435562,0.74475761,4.53708156,4.54161217,4.53433371
43.752982,4.47213595,4.54289352,-0.266002944,4.53554702,4.54013724,4.53278628
43.763474,4.47213595,4.54143387,-0.263244979,4.53401367,4.53866466,4.53123993
43.773966,4.69041576,4.53997684,0.387864558,4.53248165,4.53719461,4.52969482
43.784457,4.24264069,4.5385226,-0.54395029,4.53095111,4.53572726,4.52815109
43.794949,4.69041576,4.53707091,0.391592708,4.52942175,4.53426236,4.52660845
43.80544,4.12310563,4.53562208,-0.642274435,4.52789388,4.53280022,4.5250672
43.815932,4.12310563,4.53417586,-0.64114759,4.52636719,4.5313406,4.52352704
43.826424,4.89897949,4.53273243,0.605183487,4.52484184,4.52988368,4.52198812
43.836915,5.47722558,4.53129198,0.972591177,4.52331798,4.52842963,4.52045059
43.847407,4.89897949,4.52985425,0.607556772,4.52179531,4.52697822,4.51891415
43.857898,3.87298335,4.52841958,-0.809590164,4.52027412,4.52552976,4.51737909
43.86839,4,4.52698772,-0.725939199,4.51875414,4.52408401,4.51584513
43.878882,4.24264069,4.52555886,-0.531900529,4.51723549,4.52264116,4.51431241
43.889373,4.79583152,4.52413318,0.521246916,4.51571834,4.52120138,4.51278108
43.899865,5.19615242,4.52271044,0.820635108,4.51420238,4.51976445,4.51125084
43.910356,4.35889894,4.52129098,-0.402978954,4.51268792,4.51833069,4.50972199
43.920848,4.58257569,4.51987457,0.250401929,4.51117467,4.51689988,4.50819423
43.93134,4.35889894,4.51846139,-0.399452686,4.50966276,4.51547219,4.50666772
43.941831,3.74165739,4.51705164,-0.880564734,4.50815235,4.51404782,4.5051426
43.952323,4.24264069,4.51564509,-0.522498234,4.50664315,4.51262655,4.50361857
43.962814,4.58257569,4.51424208,0.261406993,4.50513544,4.51120871,4.50209593
43.973306,4.24264069,4.51284239,-0.519809294,4.50362895,4.50979407,4.50057439
43.983798,4.58257569,4.51144622,0.266701104,4.50212381,4.50838285,4.4990541
43.994289,5.47722558,4.51005376,0.983448941,4.50062018,4.50697523,4.49753519
44.004781,4.89897949,4.50866481,0.624751693,4.49911776,4.505571,4.49601739
44.015272,4.89897949,4.5072797,0.625859237,4.49761685,4.5041705,4.49450097
44.025764,4.47213595,4.50589824,-0.183745173,4.49611716,4.50277354,4.49298565
44.036256,4.69041576,4.50452064,0.431155566,4.49461883,4.50138031,4.49147158
44.046747,4.35889894,4.50314709,-0.379800138,4.49312201,4.49999102,4.4899589
44.057239,5.19615242,4.50177741,0.833291672,4.49162641,4.49860549,4.48844731
44.06773,4.58257569,4.50041195,0.286642194,4.49013233,4.49722405,4.48693712
44.078222,4.79583152,4.49905052,0.544776105,4.48863947,4.49584652,4.48542803
44.088714,4.89897949,4.49769334,0.633471502,4.48714798,4.49447313,4.48392019
44.099205,5.29150262,4.49634063,0.891718559,4.48565801,4.49310408,4.48241374
44.109697,5.47722558,4.49499223,0.991076861,4.48416927,4.49173921,4.48090839
44.120188,3.60555128,4.49364848,-0.942389096,4.48268204,4.49037887,4.47940443
44.13068,5,4.49230924,0.712524219,4.48119606,4.48902291,4.47790158
44.141172,4.24264069,4.49097472,-0.498331252,4.47971145,4.48767155,4.47639997
44.151663,4,4.48964518,-0.699746509,4.47822836,4.48632503,4.47489975
44.162155,4.69041576,4.48832046,0.449550112,4.47674652,4.48498321,4.47340064
44.172646,4.69041576,4.48700093,0.451015333,4.4752662,4.48364645,4.47190292
44.183138,4.58257569,4.48568647,0.311270346,4.47378712,4.48231462,4.4704063
44.19363,4.58257569,4.48437732,0.313366199,4.47230943,4.48098797,4.46891093
44.204121,4.24264069,4.48307374,-0.490339737,4.47083327,4.47966677,4.46741696
44.214613,3.87298335,4.48177563,-0.780251423,4.46935836,4.47835088,4.46592408
44.225104,5.19615242,4.48048336,0.845972257,4.46788498,4.4770407,4.46443261
44.235596,5.09901951,4.47919685,0.787288172,4.46641285,4.47573614,4.46294223
44.246088,4.69041576,4.47791636,0.460976569,4.46494212,4.47443747,4.46145311
44.256579,4.47213595,4.47664219,-0.0671284959,4.46347292,4.47314497,4.45996538
44.267071,5.19615242,4.47537425,0.848986554,4.46200499,4.47185856,4.45847875
44.277562,5,4.47411297,0.725180685,4.46053859,4.47057867,4.45699352
44.288054,3.87298335,4.47285829,-0.774515943,4.45907345,4.46930522,4.45550939
44.298546,4.79583152,4.47161052,0.569404078,4.45760972,4.46803854,4.45402651
44.309037,4.47213595,4.47036997,0.0420235676,4.45614753,4.46677894,4.45254503
44.319529,5.83095189,4.46913663,1.16696841,4.45468661,4.46552639,4.45106465
44.33002,4.12310563,4.46791094,-0.587201258,4.45322724,4.46428135,4.44958567
44.340512,3.87298335,4.4666929,-0.770525507,4.45176914,4.4630438,4.44810779
44.351004,5.09901951,4.46548287,0.79595015,4.45031245,4.4618141,4.44663117
44.361495,4.12310563,4.46428121,-0.584102376,4.44885732,4.46059263,4.44515593
44.371987,4,4.46308796,-0.680505662,4.44740346,4.45937939,4.44368181
44.382478,3.46410162,4.46190361,-0.998900392,4.44595116,4.45817492,4.44220907
44.39297,4.24264069,4.46072823,-0.466998444,4.44450014,4.45697925,4.44073745
44.403462,4.35889894,4.45956224,-0.317274804,4.44305054,4.4557928,4.43926708
44.413953,5,4.45840607,0.735930655,4.4416025,4.45461601,4.4377981
44.424445,3.87298335,4.45725982,-0.7643798,4.44015575,4.45344899,4.43633022
44.434936,4.47213595,4.45612408,0.126538056,4.43871057,4.45229229,4.43486374
44.445428,4.58257569,4.45499897,0.357178835,4.43726668,4.45114608,4.43339837
44.45592,4,4.45388502,-0.673709892,4.43582422,4.45001084,4.43193426
44.466411,4.35889894,4.45278272,-0.306404595,4.43438333,4.44888709,4.43047153
44.476903,4.12310563,4.4516923,-0.573224799,4.43294374,4.44777505,4.42900991
44.487394,5.09901951,4.45061441,0.805236057,4.43150573,4.44667536,4.42754969
44.497886,4,4.44954932,-0.670484394,4.43006902,4.44558831,4.42609057
44.508378,4.47213595,4.44849765,0.15374754,4.42863375,4.44451449,4.42463271
44.518869,4.35889894,4.44746001,-0.29759212,4.42720006,4.44345453,4.42317623
44.529361,4.89897949,4.44643678,0.672712947,4.42576768,4.4424088,4.42172087
44.539852,4.35889894,4.4454231,-0.294149889,4.42433689,4.44137244,4.4202669
44.550344,4.12310563,4.44443067,-0.566855404,4.42290741,4.44035715,4.41881404
44.560836,4.12310563,4.44345462,-0.565993811,4.42147939,4.43935805,4.41736244
44.571327,4,4.44249573,-0.665203522,4.42005295,4.43837593,4.41591222
44.581819,4.47213595,4.44155455,0.174875409,4.41862784,4.43741133,4.41446311
44.59231,5,4.44063205,0.747909055,4.41720433,4.43646523,4.4130154
44.602802,4.12310563,4.43972888,-0.562692857,4.41578214,4.43553828,4.41156879
44.613294,4.35889894,4.43884601,-0.282749121,4.41436142,4.43463143,4.41012344
44.623785,3.87298335,4.43798446,-0.751665559,4.4129423,4.43374571,4.40867948
44.634277,5.29150262,4.43714506,0.924314647,4.41152452,4.43288195,4.40723663
44.644768,4.47213595,4.43632901,0.189227218,4.41010834,4.43204136,4.40579517
44.65526,4.69041576,4.4355373,0.504854885,4.4086935,4.4312249,4.40435482
44.665752,4.79583152,4.4347712,0.600882952,4.40728015,4.43043386,4.40291572
44.676243,4.58257569,4.43403205,0.385413605,4.4058684,4.42966957,4.40147801
44.686735,4.24264069,4.43332107,-0.436669646,4.40445801,4.42893325,4.40004141
44.697226,3.46410162,4.43263984,-0.984143398,4.40304924,4.4282265,4.39860621
44.707718,4.24264069,4.4319898,-0.435142636,4.40164182,4.42755073,4.39717211
44.71821,4.58257569,4.43137266,0.388848339,4.40023589,4.42690767,4.39573927
44.728701,4.35889894,4.43079026,-0.26812557,4.39883159,4.42629915,4.39430781
44.739193,3.87298335,4.43024439,-0.746499194,4.39742865,4.42572695,4.39287746
44.749684,5.56776436,4.4297372,1.06678356,4.39602735,4.42519323,4.39144851
44.760176,4.47213595,4.42927076,0.207039103,4.39462742,4.42470008,4.39002066
44.770668,5,4.42884751,0.755746316,4.39322899,4.4242499,4.38859407
44.781159,4.24264069,4.42846998,-0.431079223,4.3918322,4.42384526,4.38716886
44.791651,4.24264069,4.42814085,-0.430697302,4.3904368,4.42348882,4.38574477
44.802142,4.24264069,4.42786312,-0.430374753,4.38904304,4.42318357,4.38432206
44.812634,4.58257569,4.42763989,0.393618858,4.38765066,4.42293264,4.38290046
44.823126,4.35889894,4.42747463,-0.261869599,4.38625981,4.42273948,4.38148012
44.833617,3.74165739,4.42737105,-0.828078298,4.38487062,4.42260781,4.38006116
44.844109,4.79583152,4.42733315,0.607040666,4.38348282,4.42254163,4.37864331
44.8546,4.58257569,4.42736529,0.393967519,4.38209668,4.4225453,4.37722685
44.865092,4.69041576,4.42747219,0.512780231,4.38071195,4.42262356,4.3758115
44.875584,5,4.42765901,0.756532212,4.37932875,4.42278155,4.3743974
44.886075,4.79583152,4.42793131,0.606547783,4.37794723,4.42302484,4.37298468
44.896567,4.69041576,4.42829524,0.511977069,4.37656712,4.4233596,4.37157308
44.907058,4.89897949,4.4287574,0.685727412,4.3751887,4.42379242,4.37016286
44.91755,4.35889894,4.42932517,-0.265379402,4.37381169,4.4243307,4.36875375
44.928042,4.58257569,4.43000649,0.390601076,4.37243624,4.42498238,4.36734589
44.938533,4.12310563,4.43081005,-0.554711122,4.37106248,4.42575615,4.36593942
44.949025,4.24264069,4.43174564,-0.434861991,4.36969015,4.42666182,4.36453405
44.959516,4.35889894,4.43282367,-0.271891022,4.36831952,4.42770982,4.36313007
44.970008,3.87298335,4.43405606,-0.749047872,4.36695034,4.42891207,4.3617272
44.9805,4.89897949,4.43545565,0.680825852,4.36558272,4.43028142,4.36032558
44.990991,4.89897949,4.43703659,0.679663812,4.36421682,4.43183205,4.35892534
45.001483,5.09901951,4.43881509,0.812529647,4.36285237,4.43358018,4.35752621
45.011974,3.87298335,4.44080847,-0.753541722,4.36148964,4.43554316,4.35612846
45.022466,3.74165739,4.44303683,-0.837483996,4.36012837,4.4377411,4.35473182
45.032958,4.89897949,4.44552199,0.673392525,4.3587687,4.44019586,4.35333643
45.043449,4,4.44828833,-0.669543377,4.35741076,4.44293185,4.35194242
45.053941,4.58257569,4.45136405,0.362231479,4.3560543,4.44597728,4.35054952
45.064432,4.47213595,4.45477971,0.13174312,4.35469957,4.44936278,4.349158
45.074924,4.12310563,4.45857111,-0.579193821,4.35334633,4.45312419,4.34776759
45.085416,3.60555128,4.46277775,-0.925865257,4.35199471,4.45730106,4.34637843
45.095907,3.16227766,4.46744435,-1.14243892,4.35064485,4.46193816,4.34499064
45.106399,4.12310563,4.47262326,-0.591200168,4.34929648,4.46708791,4.34360397
45.11689,4.24264069,4.47837229,-0.485521992,4.34794988,4.4728082,4.34221867
45.127382,4,4.48475994,-0.696247041,4.34660478,4.47916763,4.34083448
45.137874,4.35889894,4.49186328,-0.36464275,4.34526133,4.48624334,4.33945154
45.148365,4.12310563,4.49977154,-0.61373114,4.34392011,4.49412428,4.33806997
45.158857,4.89897949,4.50858927,0.624812147,4.34257996,4.50291599,4.33668952
45.169348,4.47213595,4.51843618,-0.215174867,4.34124161,4.5127379,4.33531043
45.17984,4.12310563,4.52945564,-0.637455892,4.33990479,4.52373357,4.33393246
45.190332,5.09901951,4.54181302,0.746462655,4.33856965,4.53606857,4.33255573
45.200823,4.58257569,4.55570319,0.163928353,4.3372363,4.54993805,4.33118038
45.211315,4.69041576,4.5713617,0.345042113,4.33590452,4.56557783,4.32980613
45.221806,4.12310563,4.58906339,-0.682610989,4.33457455,4.58326311,4.32843326
45.232298,4.79583152,4.609145,0.432072357,4.33324615,4.60333104,4.3270615
45.24279,4.58257569,4.63200744,-0.222332504,4.33191944,4.62618301,4.32569098
45.253281,4.58257569,4.65813728,-0.274884671,4.33059458,4.65230618,4.32432182
45.263773,4.35889894,4.68813945,-0.573794827,4.3292713,4.68230616,4.32295378
45.274264,3.87298335,4.72275412,-0.92183012,4.32794986,4.71692396,4.32158711
45.284756,6,4.76293937,1.11223227,4.32663003,4.7571187,4.32022155
45.295248,4.89897949,4.80996633,0.29835073,4.32531193,4.80416284,4.31885723
45.305739,4.58257569,4.8656812,-0.532076597,4.32399569,4.85990449,4.31749428
45.316231,5.09901951,4.93308853,0.40734627,4.32268108,4.92735121,4.31613243
45.326722,5.09901951,5.01748938,0.285534826,4.32136834,5.01180929,4.31477195
45.337214,5,5.12873226,-0.358792785,4.32005724,5.12313656,4.31341258
45.347706,4.89897949,5.28459671,-0.620980856,4.31874791,5.279128,4.31205445
45.358197,5.56776436,5.51473767,0.23027526,4.31744048,5.50946039,4.31069769
45.368689,5.56776436,5.8624467,-0.542846517,4.31613471,5.85744751,4.30934203
45.37918,6.8556546,6.37915004,0.690293097,4.31483085,6.37452338,4.30798774
45.389672,7.48331477,7.10950863,0.611396878,4.31352867,7.1053279,4.30663456
45.400164,7.41619849,8.07086099,-0.809112169,4.3122283,8.06715207,4.30528261
45.410655,9.38083152,9.23882397,0.376838894,4.31092986,9.23556078,4.30393203
45.421147,10.6770783,10.5453842,0.362896694,4.30963313,10.5425048,4.30258255
45.431638,11.5758369,11.8844586,-0.555537289,4.30833835,11.8818851,4.30123444
45.44213,11.1803399,13.1205308,-1.39290735,4.30704529,13.1181828,4.29988743
45.452622,13.453624,14.0947284,-0.80068991,4.30575408,14.0925268,4.29854165
45.463113,14.5602198,14.6452378,-0.291578496,4.30446485,14.6431034,4.29719724
45.473605,14.832397,14.6596245,0.415659046,4.30317736,14.6574765,4.29585393
45.484096,15.0332964,14.1343127,0.94814748,4.30189188,14.1320684,4.29451199
45.494588,14.6628783,13.1770842,1.21893155,4.30060815,13.1746588,4.29317115
45.50508,12.2474487,11.9490022,0.546302619,4.29932633,11.9463075,4.29183154
45.515571,9.94987437,10.6098972,-0.812417879,4.29804653,10.6068396,4.29049329
45.526063,8.77496439,9.29662638,-0.722261722,4.29676853,9.29311049,4.28915614
45.536554,8.83176087,8.11697547,0.84544982,4.29549258,8.11291795,4.28782035
45.547046,7,7.14116008,-0.375712764,4.29421844,7.13651278,4.28648567
45.557538,6.244998,6.39600849,-0.388600681,4.29294625,6.3907798,4.28515221
45.568029,6.164414,5.86621947,0.546071914,4.29167615,5.86047451,4.28382011
45.578521,5.74456265,5.50813925,0.486233887,4.29040789,5.50197339,4.28248912
45.589012,4.58257569,5.27027113,-0.829274039,4.28914173,5.26377692,4.28115947
45.599504,5,5.10866094,-0.329637583,4.28787745,5.10190909,4.27983094
45.609996,6.164414,4.99292287,1.08235444,4.28661517,4.98596053,4.27850362
45.620487,5.29150262,4.90473406,0.621907199,4.28535503,4.89759096,4.27717767
45.630979,4.47213595,4.83391853,-0.601483648,4.2840968,4.82661375,4.27585281
45.64147,4.35889894,4.77500369,-0.645061814,4.28284073,4.76755034,4.27452931
45.651962,5.09901951,4.72490051,0.611652679,4.2815866,4.71730837,4.2732069
45.662454,4.12310563,4.68172245,-0.747406732,4.28033453,4.67399925,4.27188572
45.672945,3.60555128,4.64417749,-1.01913013,4.27908467,4.63632958,4.2705659
45.683437,4,4.61129442,-0.781853195,4.27783679,4.60332706,4.26924717
45.693928,4.58257569,4.58232491,0.0158361373,4.27659113,4.57424252,4.26792979
45.70442,4.47213595,4.556657,-0.290725038,4.27534748,4.54846324,4.26661351
45.714912,4.47213595,4.53379919,-0.248320841,4.27410596,4.52549713,4.26529846
45.725403,4.47213595,4.51334666,-0.203004208,4.27286672,4.50493884,4.26398475
45.735895,4.12310563,4.49495873,-0.609797597,4.27162953,4.48644725,4.26267214
45.746386,4,4.47835824,-0.691634473,4.27039465,4.4697448,4.26136087
45.756878,4.24264069,4.4633068,-0.469751115,4.26916184,4.45459277,4.2600507
45.76737,4,4.4496078,-0.670528002,4.26793126,4.44079427,4.25874176
45.777861,4.24264069,4.43709448,-0.440969156,4.26670302,4.42818229,4.25743416
45.788353,3.46410162,4.42562158,-0.980571245,4.26547692,4.41661133,4.25612765
45.798844,4.79583152,4.41506912,0.617059482,4.2642532,4.40596124,4.25482249
45.809336,5.38516481,4.40533018,0.989865966,4.26303165,4.3961249,4.25351842
45.819828,4.47213595,4.39631532,0.275355464,4.2618124,4.38701274,4.25221557
45.830319,4.69041576,4.38794699,0.549971606,4.2605956,4.37854706,4.25091407
45.840811,3.87298335,4.38015553,-0.712160225,4.25938102,4.37065808,4.24961365
45.851302,4.12310563,4.37288307,-0.499777391,4.25816891,4.36328782,4.24831458
45.861794,3.74165739,4.36607626,-0.790201795,4.25695908,4.35638283,4.2470166
45.872286,3.87298335,4.35969022,-0.697643801,4.25575164,4.34989813,4.24571984
45.882777,4.24264069,4.35368531,-0.333233592,4.25454674,4.34379402,4.24442441
45.893269,3.60555128,4.34802492,-0.861669102,4.25334417,4.33803377,4.24313008
45.90376,4.79583152,4.34267867,0.673166289,4.25214418,4.33258696,4.24183709
45.914252,5.19615242,4.33761763,0.926571525,4.25094656,4.32742458,4.24054518
45.924744,4.47213595,4.33281745,0.373253945,4.24975145,4.32252221,4.23925449
45.935235,4.47213595,4.32825633,0.379314677,4.24855899,4.31785802,4.23796513
45.945727,4,4.32391354,-0.569134027,4.24736897,4.31341118,4.23667687
45.956218,4.58257569,4.31977207,0.512643756,4.24618165,4.30916466,4.23538994
45.96671,3.87298335,4.31581511,-0.66545606,4.24499682,4.30510157,4.23410409
45.977202,4,4.31202862,-0.558595222,4.24381462,4.30120784,4.23281946
45.987693,3.31662479,4.3083999,-0.995879062,4.2426352,4.29747071,4.23153616
45.998185,4.35889894,4.30491646,0.232341317,4.24145835,4.29387765,4.23025395
46.008676,4.79583152,4.30156828,0.703038581,4.24028432,4.29041859,4.22897306
46.019168,4.89897949,4.29834502,0.775006106,4.23911292,4.28708315,4.22769327
46.02966,4.24264069,4.29523819,-0.229341451,4.23794429,4.28386278,4.22641468
46.040151,4.79583152,4.29224002,0.709641812,4.23677858,4.28074969,4.22513742
46.050643,4.24264069,4.28934262,-0.216106294,4.23561558,4.27773592,4.22386125
46.061134,5.65685425,4.28653983,1.1706043,4.23445555,4.27481529,4.2225864
46.071626,5,4.28382498,0.846271245,4.23329831,4.27198107,4.22131264
46.082118,3.60555128,4.28119273,-0.821974121,4.23214399,4.26922789,4.22004008
46.092609,3.74165739,4.27863816,-0.732789719,4.23099274,4.26655078,4.21876885
46.103101,4.12310563,4.27615604,-0.391216579,4.22984437,4.26394446,4.2174987
46.113592,4.69041576,4.27374248,0.645502348,4.22869914,4.26140502,4.21622987
46.124084,4.47213595,4.271393,0.44804347,4.22755686,4.25892791,4.21496213
46.134576,4.79583152,4.26910414,0.725759865,4.22641769,4.25650963,4.21369559
46.145067,4.24264069,4.26687268,-0.155666279,4.22528176,4.25414693,4.21243037
46.155559,4.24264069,4.26469503,-0.148507032,4.2241489,4.25183616,4.21116623
46.16605,3.87298335,4.26256867,-0.624167707,4.22301936,4.24957478,4.20990341
46.176542,4.47213595,4.26049051,0.460049399,4.22189298,4.24735961,4.20864167
46.187034,3.87298335,4.25845821,-0.620866223,4.2207699,4.24518831,4.20738113
46.197525,4.58257569,4.25646965,0.571056952,4.21965026,4.24305869,4.2061219
46.208017,3.60555128,4.25452228,-0.805587366,4.21853391,4.24096813,4.20486376
46.218508,4.58257569,4.25261445,0.574422531,4.2174211,4.23891498,4.20360693
46.229,4.24264069,4.25074393,-0.0900180294,4.21631165,4.23689691,4.20235118
46.239492,4.35889894,4.24890917,0.331647069,4.21520574,4.23491234,4.20109662
46.249983,4.24264069,4.2471087,-0.0668431622,4.21410351,4.23295976,4.19984338
46.260475,4.47213595,4.24534067,0.476230289,4.21300479,4.23103724,4.19859121
46.270966,4.89897949,4.24360401,0.809552641,4.21190987,4.22914369,4.19734036
46.281458,4.47213595,4.24189707,0.479832145,4.21081856,4.22727737,4.19609058
46.29195,4.58257569,4.24021879,0.585112731,4.20973105,4.22543717,4.194842
46.302441,4.12310563,4.23856817,-0.339797803,4.20864748,4.22362205,4.19359472
46.312933,4.12310563,4.23694384,-0.337399191,4.2075677,4.22183055,4.19234852
46.323424,4.69041576,4.2353451,0.674589256,4.20649199,4.22006194,4.19110362
46.333916,4.47213595,4.2337707,0.488226644,4.20542019,4.21831489,4.1898598
46.344408,5,4.23221993,0.876230604,4.20435248,4.21658861,4.18861717
46.354899,4.47213595,4.23069211,0.491369358,4.20328902,4.2148824,4.18737584
46.365391,4.12310563,4.22918618,-0.325700106,4.20222966,4.21319508,4.18613559
46.375882,4.35889894,4.22770173,0.362211563,4.20117469,4.2115262,4.18489663
46.386374,3.60555128,4.22623779,-0.787836601,4.20012398,4.2098747,4.18365875
46.396866,4.79583152,4.22479388,0.75567033,4.19907768,4.20824003,4.18242206
46.407357,4.69041576,4.22336955,0.683407793,4.19803599,4.2066217,4.18118666
46.417849,4.24264069,4.22196399,0.143793946,4.19699877,4.20501877,4.17995234
46.42834,4.79583152,4.22057695,0.758455385,4.1959663,4.20343095,4.17871931
46.438832,3.74165739,4.2192077,-0.691050155,4.19493846,4.20185739,4.17748735
46.449324,5.19615242,4.21785593,0.989088718,4.19391545,4.20029771,4.17625658
46.459815,4.89897949,4.21652135,0.826110245,4.19289744,4.19875156,4.1750271
46.470307,4.69041576,4.21520332,0.68935654,4.19188432,4.19721817,4.17379869
46.480798,4.58257569,4.21390174,0.60718527,4.19087638,4.19569739,4.17257157
46.49129,4.69041576,4.21261604,0.691230586,4.18987352,4.1941885,4.17134552
46.501782,3.87298335,4.21134602,-0.581689504,4.18887594,4.19269125,4.17012065
46.512273,4.47213595,4.21009154,0.511902737,4.18788383,4.19120539,4.16889707
46.522765,3.74165739,4.2088521,-0.683516429,4.1868971,4.18973028,4.16767455
46.533256,4.79583152,4.20762768,0.766944485,4.18591605,4.18826585,4.16645333
46.543748,5.38516481,4.20641785,1.08570114,4.1849406,4.18681151,4.16523316
46.55424,4.89897949,4.20522252,0.832920741,4.18397095,4.18536708,4.16401418
46.564731,4.69041576,4.20404164,0.697405278,4.18300732,4.1839324,4.16279648
46.575223,4.58257569,4.20287481,0.61619874,4.18204965,4.18250692,4.16157984
46.585714,4.69041576,4.20172211,0.699066267,4.18109822,4.18109065,4.16036449
46.596206,3.87298335,4.20058321,-0.572363405,4.18015301,4.17968306,4.1591502
46.606698,5.09901951,4.19945811,0.94845211,4.17921422,4.17828405,4.15793708
46.617189,4.47213595,4.19834681,0.523248641,4.17828209,4.17689353,4.15672524
46.627681,4.79583152,4.19724904,0.773681123,4.17735657,4.175511,4.15551446
46.638172,4.24264069,4.19616494,0.215582338,4.17643799,4.17413652,4.15430497
46.648664,4.69041576,4.19509426,0.703790806,4.17552633,4.17276965,4.15309653
46.659156,5.56776436,4.19403707,1.17206113,4.17462183,4.17141031,4.15188926
46.669647,4,4.19299346,-0.439310208,4.17372473,4.17005847,4.15068327
46.680139,4.69041576,4.19196322,0.706011715,4.17283503,4.16871369,4.14947834
46.69063,4.12310563,4.19094656,-0.260462919,4.17195308,4.16737608,4.14827468
46.701122,4.12310563,4.18994331,-0.258529855,4.17107888,4.16604522,4.14707207
46.711614,4.69041576,4.18895361,0.708139919,4.1702127,4.16472109,4.14587063
46.722105,4.12310563,4.18797761,-0.254699799,4.16935481,4.16340369,4.14467047
46.732597,4,4.18701519,-0.432452526,4.16850525,4.16209263,4.14347136
46.743088,4.89897949,4.1860666,0.844341687,4.16766439,4.16078803,4.14227352
46.75358,4.89897949,4.18513177,0.844895094,4.16683227,4.15948954,4.14107673
46.764072,4.47213595,4.18421088,0.536586502,4.1660092,4.15819716,4.1398811
46.774563,4.35889894,4.18330415,0.41904032,4.16519548,4.1569109,4.13868675
46.785055,4.89897949,4.18241155,0.84650336,4.1643912,4.15563043,4.13749344
46.795546,4.47213595,4.18153338,0.53907567,4.16359674,4.15435589,4.1363014
46.806038,4.69041576,4.18066964,0.713965067,4.16281221,4.15308695,4.13511041
46.81653,4.24264069,4.1798206,0.250639347,4.16203796,4.15182365,4.13392058
46.827021,4.47213595,4.17898653,0.541432748,4.16127432,4.15056603,4.13273201
46.837513,4.12310563,4.17816748,-0.234652625,4.16052144,4.14931376,4.13154449
46.848004,4.58257569,4.17736382,0.636562546,4.15977975,4.14806703,4.13035823
46.858496,4.89897949,4.17657564,0.849943436,4.15904941,4.14682552,4.12917302
46.868988,5,4.17580327,0.907852812,4.15833082,4.14558929,4.12798896
46.879479,4.24264069,4.17504706,0.25998775,4.15762436,4.14435841,4.12680616
46.889971,4.12310563,4.17430714,-0.226277513,4.15693026,4.14313258,4.1256244
46.900462,3,4.17358396,-1.0833208,4.15624899,4.141912,4.12444391
46.910954,4,4.17287771,-0.415785659,4.1555808,4.14069637,4.12326445
46.921446,4.47213595,4.17218881,0.54767431,4.15492613,4.13948577,4.12208614
46.931937,4.35889894,4.17151766,0.432875599,4.15428545,4.13828029,4.12090909
46.942429,4,4.17086453,-0.413357628,4.15365905,4.13707966,4.11973308
46.95292,4.47213595,4.17022994,0.54945975,4.15304749,4.13588407,4.11855833
46.963412,3.16227766,4.16961419,-1.00366156,4.1524511,4.13469327,4.11738461
46.973904,4.79583152,4.16901779,0.791715688,4.15187041,4.13350735,4.11621204
46.984395,5.09901951,4.16844127,0.964664837,4.15130597,4.1323264,4.11504072
46.994887,4.35889894,4.16788499,0.43705143,4.15075817,4.13115018,4.11387043
47.005378,4.24264069,4.16734959,0.274392227,4.15022767,4.12997891,4.1127014
47.01587,4,4.16683551,-0.408455031,4.1497149,4.12881234,4.1115334
47.026362,4.47213595,4.16634337,0.552985155,4.14922051,4.12765058,4.11036654
47.036853,4.35889894,4.16587382,0.439346249,4.14874515,4.12649375,4.10920093
47.047345,5.38516481,4.16542739,1.10441723,4.14828936,4.12534161,4.10803635
47.057836,3.16227766,4.16500482,-1.00136265,4.14785388,4.12419439,4.10687302
47.068328,4.58257569,4.16460675,0.646505179,4.14743933,4.12305189,4.10571072
47.07882,5.47722558,4.16423393,1.14585848,4.14704647,4.12191421,4.10454955
47.089311,3,4.16388715,-1.07883602,4.1466761,4.12078149,4.10338963
47.099803,4.58257569,4.16356717,0.647308677,4.14632893,4.11965351,4.10223074
47.110294,4.89897949,4.16327488,0.857732245,4.14600585,4.11853053,4.10107309
47.120786,3.87298335,4.16301112,-0.538542264,4.14570768,4.11741234,4.09991646
47.131278,4.89897949,4.16277683,0.858022524,4.14543535,4.11629908,4.09876097
47.141769,4.47213595,4.16257303,0.556383794,4.14518985,4.1151909,4.09760672
47.152261,4.35889894,4.16240069,0.443281233,4.14497211,4.11408761,4.09645348
47.162752,4.35889894,4.16226093,0.443438846,4.14478324,4.11298946,4.09530149
47.173244,4.58257569,4.16215486,0.648398667,4.14462429,4.1118963,4.09415052
47.183736,4.12310563,4.16208369,-0.197428632,4.14449643,4.11080826,4.09300068
47.194227,3,4.16204867,-1.07798361,4.1444009,4.1097255,4.09185208
47.204719,4.12310563,4.16205111,-0.197346115,4.14433894,4.10864789,4.09070449
47.21521,3.74165739,4.16209242,-0.648409616,4.14431191,4.10757567,4.08955814
47.225702,4.58257569,4.16217405,0.648383874,4.14432121,4.10650871,4.0884128
47.236194,4.79583152,4.16229755,0.795948477,4.14436833,4.10544718,4.08726859
47.246685,4,4.16246452,-0.403068875,4.14445482,4.10439126,4.08612561
47.257177,4.35889894,4.16267671,0.442969789,4.14458235,4.10334082,4.08498364
47.267668,5.38516481,4.16293588,1.10554463,4.14475263,4.10229615,4.08384291
47.27816,3.60555128,4.163244,-0.746788274,4.14496752,4.10125715,4.08270319
47.288652,5,4.16360305,0.914547404,4.14522894,4.100224,4.08156458
47.299143,4.89897949,4.1640151,0.857300638,4.14553889,4.09919691,4.08042721
47.309635,3.46410162,4.1644825,-0.836887615,4.1458996,4.09817578,4.07929084
47.320126,4.58257569,4.16500751,0.646195163,4.14631327,4.09716094,4.0781557
47.330618,4.24264069,4.16559275,0.277575102,4.14678239,4.0961523,4.07702157
47.34111,4.12310563,4.16624083,-0.207690173,4.14730948,4.09515009,4.07588856
47.351601,4.47213595,4.1669545,0.552432309,4.14789719,4.09415454,4.07475676
47.362093,4.24264069,4.16773687,0.273685621,4.14854848,4.09316561,4.07362598
47.372584,3.60555128,4.16859095,-0.750359695,4.14926628,4.09218363,4.07249641
47.383076,4.58257569,4.16952026,0.642693889,4.15005394,4.09120858,4.07136785
47.393568,4.24264069,4.17052828,0.268537525,4.15091483,4.09024073,4.0702404
47.404059,4.47213595,4.1716187,0.548194545,4.15185248,4.08928033,4.06911417
47.414551,5,4.17279573,0.90950771,4.15287097,4.0883274,4.06798894
47.425042,4.89897949,4.17406342,0.851420026,4.15397419,4.08738232,4.06686492
47.435534,4.12310563,4.17542659,-0.228737767,4.15516676,4.08644512,4.06574191
47.446026,4.47213595,4.17688996,0.543365433,4.15645326,4.0855161,4.06462
47.456517,4.24264069,4.17845855,0.25334194,4.15783853,4.0845956,4.06349931
47.467009,5.29150262,4.18013818,1.05421271,4.15932818,4.08368369,4.06237961
47.4775,5.38516481,4.18193442,1.09691859,4.1609276,4.08278079,4.06126113
47.487992,4.58257569,4.18385392,0.631444197,4.16264319,4.08188702,4.06014364
47.498484,4.24264069,4.18590325,0.238196207,4.16448134,4.08100275,4.05902726
47.508975,4.24264069,4.18808942,0.233562137,4.16644882,4.08012838,4.05791208
47.519467,4.35889894,4.19042056,0.41046118,4.16855351,4.07926406,4.05679789
47.529958,4.12310563,4.19290454,-0.264194835,4.17080304,4.0784103,4.05568492
47.54045,3.60555128,4.19555073,-0.768114216,4.17320648,4.07756731,4.05457293
47.550942,4.24264069,4.19836847,0.210409652,4.17577293,4.07673555,4.05346204
47.561433,4.47213595,4.20136775,0.52035392,4.1785121,4.07591552,4.05235236
47.571925,4,4.20456026,-0.452283384,4.18143531,4.07510748,4.05124366
47.582416,3.74165739,4.20795732,-0.682861573,4.18455364,4.07431204,4.05013617
47.592908,3.87298335,4.21157248,-0.581884127,4.18788025,4.07352955,4.04902967
47.6034,3.87298335,4.21541938,-0.585180345,4.19142845,4.0727606,4.04792425
47.613891,4.79583152,4.21951268,0.759156664,4.19521256,4.0720058,4.04682004
47.624383,3.74165739,4.22386951,-0.694414952,4.19924929,4.0712656,4.04571681
47.634874,5,4.22850673,0.878346896,4.20355515,4.07054074,4.04461478
47.645366,4,4.23344447,-0.483160914,4.20814981,4.06983176,4.04351373
47.655858,4.79583152,4.2387032,0.746410292,4.21305334,4.06913941,4.04241377
47.666349,4.24264069,4.24430512,-0.0407974575,4.21828752,4.0684645,4.04131501
47.676841,3,4.25027614,-1.11815747,4.22387772,4.06780769,4.04021722
47.687332,4,4.25664218,-0.506598635,4.22984947,4.06716996,4.03912063
47.697824,5.09901951,4.26343411,0.914103609,4.23623306,4.06655208,4.03802501
47.708316,4.24264069,4.27068377,-0.167460686,4.24305985,4.06595508,4.03693048
47.718807,4.79583152,4.27842597,0.719309079,4.25036416,4.06538003,4.03583714
47.729299,3.74165739,4.28670133,-0.738270912,4.25818596,4.06482791,4.03474478
47.73979,4.79583152,4.29555124,0.707304943,4.2665662,4.06430002,4.0336536
47.750282,5,4.30502488,0.833651676,4.27555338,4.06379749,4.0325634
47.760774,4.35889894,4.31517382,0.209105527,4.28519852,4.06332174,4.03147427
47.771265,4.79583152,4.32605494,0.685402495,4.29555796,4.06287424,4.03038633
47.781757,4.35889894,4.33773467,0.145479476,4.30669744,4.06245647,4.02929936
47.792248,4.79583152,4.35028212,0.667494872,4.31868558,4.06207016,4.02821358
47.80274,4,4.36377928,-0.603141181,4.33160368,4.06171704,4.02712876
47.813232,4,4.3783137,-0.615072112,4.34553874,4.06139907,4.02604502
47.823723,4.89897949,4.393983,0.710631044,4.36058792,4.06111837,4.02496246
47.834215,3.87298335,4.41090147,-0.733429017,4.37686486,4.06087712,4.02388086
47.844706,4.58257569,4.42919071,0.391643957,4.39449081,4.06067781,4.02280044
47.855198,5.19615242,4.44899505,0.864382656,4.41360958,4.06052301,4.02172099
47.86569,4.58257569,4.47047172,0.334819323,4.43437814,4.0604156,4.02064261
47.876181,4.12310563,4.49379831,-0.608845367,4.45697395,4.06035866,4.0195654
47.886673,4.35889894,4.51918378,-0.400355889,4.48160575,4.06035553,4.01848915
47.897164,4.69041576,4.54685585,0.378893011,4.50850149,4.06040986,4.01741408
47.907656,4.35889894,4.57708582,-0.467104785,4.53793268,4.06052563,4.01633997
47.918148,4.69041576,4.61017576,0.283266658,4.57020202,4.06070714,4.01526692
47.928639,3.87298335,4.64647217,-0.879482136,4.60565702,4.06095911,4.01419504
47.939131,4.89897949,4.6863864,0.461078174,4.64471019,4.06128674,4.01312412
47.949622,4.69041576,4.73037872,-0.199907379,4.68782377,4.06169563,4.01205437
47.960114,4.69041576,4.7790031,-0.297636251,4.73555398,4.06219206,4.01098557
47.970606,4.89897949,4.83289456,0.257069878,4.78853909,4.06278282,4.00991784
47.981097,4.47213595,4.89280328,-0.648588719,4.84753344,4.06347536,4.00885126
47.991589,5.29150262,4.95964931,0.576067111,4.91346219,4.06427809,4.00778564
48.00208,4.69041576,5.03453226,-0.586614439,4.98743207,4.0652,4.00672119
48.012572,4.58257569,5.11887072,-0.732321668,5.07087075,4.06625144,4.00565768
48.023064,5.38516481,5.21448834,0.413130088,5.16561464,4.06744355,4.00459523
48.033555,5,5.32384294,-0.569072,5.27413937,4.06878872,4.00353394
48.044047,5.83095189,5.4503749,0.616909224,5.39991019,4.07030115,4.0024736
48.054538,5.47722558,5.59883668,-0.348727844,5.54771458,4.07199612,4.00141441
48.06503,5.56776436,5.77587296,-0.456189207,5.72424377,4.07389142,4.00035618
48.075522,5.09901951,5.99033763,-0.944096455,5.93840961,4.07600645,3.99929899
48.086013,6,6.25346494,-0.503453021,6.20150994,4.07836304,3.99824296
48.096505,7.07106781,6.57855393,0.70179333,6.52690063,4.08098651,3.99718787
48.106996,6.63324958,6.9795367,-0.588461654,6.92854551,4.0839045,3.99613393
48.117488,7.54983444,7.46921632,0.283933286,7.41923665,4.08714958,3.99508094
48.12798,7.93725393,8.05645455,-0.345254419,8.00777294,4.09075788,3.99402899
48.138471,8.48528137,8.74381042,-0.508457511,8.6966056,4.09477062,3.99297819
48.148963,9.2736185,9.52590829,-0.502284573,9.48022585,4.09923631,3.99192833
48.159454,9.64365076,10.3874799,-0.86245531,10.3432262,4.10420898,3.99087962
48.169946,10.5356538,11.3021197,-0.875480397,11.2590673,4.1097531,3.98983184
48.180438,12.328828,12.2279954,0.317541497,12.1857827,4.11594183,3.98878511
48.190929,12.7671453,13.1022146,-0.578851645,13.060326,4.12286022,3.98773951
48.201421,12.1655251,13.8367414,-1.29275532,13.794463,4.13061003,3.98669486
48.211912,13.114877,14.3259635,-1.10049372,14.282324,4.13930773,3.98565134
48.222404,13.892444,14.4786677,-0.765652492,14.4323921,4.14909456,3.98460876
48.232896,13.3416641,14.2623217,-0.959509085,14.2118226,4.1601354,3.98356722
48.243387,13.453624,13.7232059,-0.519212696,13.6666047,4.17262693,3.98252681
48.253879,12.8452326,12.9596474,-0.338252617,12.8947791,4.18680957,3.98148733
48.26437,12.5299641,12.0771104,0.672944034,12.0014844,4.20296819,3.98044899
48.274862,10.9544512,11.1598354,-0.45319341,11.0705442,4.2214564,3.97941158
48.285354,10.0498756,10.2668112,-0.465763461,10.1604309,4.24270272,3.9783752
48.295845,9.79795897,9.43708986,0.60072382,9.30959615,4.2672377,3.97733995
48.306337,8.18535277,8.69533401,-0.714129708,8.54204089,4.29573945,3.97630562
48.316828,7.68114575,8.05558394,-0.611913546,7.87110208,4.32908484,3.97527243
48.32732,7,7.52249383,-0.722837345,7.30057477,4.36853595,3.97424016
48.337812,6.78232998,7.09352161,-0.557845521,6.82657594,4.41614073,3.97320892
48.348303,6.4807407,6.76163143,-0.529991258,6.43931834,4.47582879,3.9721788
48.358795,7.93725393,6.51994234,1.19050896,6.125555,4.55601288,3.97114961
48.369286,6.4807407,6.36900531,0.334268434,5.87129319,4.67482727,3.97012154
48.379778,7,6.32675275,0.820516454,5.66349448,4.86891579,3.96909439
48.39027,7.21110255,6.44020573,0.878007302,5.49131253,5.20262456,3.96806827
48.400761,7.34846923,6.79030863,0.747101462,5.34630756,5.76738407,3.96704326
48.411253,7.41619849,7.47493139,-0.242348718,5.22220365,6.65826527,3.96601917
48.421744,9.43398113,8.56395863,0.932749968,5.11452741,7.93121628,3.9649962
48.432236,10.4880885,10.0546233,0.658380754,5.02004513,9.57119046,3.96397414
48.442728,11.7473401,11.8563361,-0.330145349,4.93643689,11.4851771,3.96295311
48.453219,13.453624,13.8057902,-0.593435926,4.8619717,13.5151023,3.96193318
48.463711,15.4272486,15.6923355,-0.514865884,4.79529518,15.4577935,3.96091417
48.474202,17.7482393,17.279875,0.684371504,4.7353496,17.0836566,3.95989627
48.484694,18.5741756,18.3310663,0.493061196,4.68124718,18.1600287,3.95887929
48.495186,19.4679223,18.650134,0.904316477,4.63226078,18.4941705,3.95786332
48.505677,19.2873015,18.1641576,1.05978484,4.58777383,18.0151493,3.95684845
48.516169,18.2756669,16.9682965,1.14340298,4.54724825,16.8194603,3.95583449
48.52666,15.5241747,15.268517,0.505626083,4.51023605,15.1137684,3.95482164
48.537152,13.7840488,13.300157,0.695623287,4.4763372,13.1335141,3.9538097
48.547644,11.6619038,11.2901365,0.609727218,4.44521426,11.1054883,3.95279877
48.558135,9.2736185,9.43570973,-0.402605551,4.41657317,9.22730379,3.95178893
48.568627,8.36660027,7.88274224,0.695599039,4.39014983,7.64675567,3.95078
48.579118,7.61577311,6.70678219,0.953410153,4.36572251,6.443764,3.94977218
48.58961,6.55743852,5.90260665,0.809216827,4.34308773,5.61881671,3.94876525
48.600102,5.47722558,5.399368,0.279029695,4.32207261,5.10467109,3.94775933
48.610593,6.08276253,5.09956644,0.991562449,4.30252416,4.80320048,3.9467545
48.621085,5,4.91836857,0.285712144,4.28430178,4.62645169,3.94575058
48.631576,5,4.80003315,0.447176529,4.26728728,4.51570729,3.94474775
48.642068,5.09901951,4.71415433,0.620375038,4.25136931,4.43872065,3.94374582
48.65256,3.31662479,4.64605847,-1.1530107,4.23645299,4.3799044,3.94274488
48.663051,4.79583152,4.58900432,0.454782588,4.2224533,4.33211296,3.94174504
48.673543,3.87298335,4.53976641,-0.816567855,4.20929035,4.29194985,3.94074609
48.684034,4.47213595,4.49660979,-0.156441166,4.19689717,4.25760142,3.93974823
48.694526,4.47213595,4.45840915,0.117161447,4.18520902,4.22790719,3.93875126
48.705018,4.89897949,4.42435488,0.688930044,4.17417075,4.20203895,3.93775529
48.715509,4.58257569,4.393815,0.434465985,4.16373247,4.17935697,3.9367604
48.726001,4.47213595,4.36627312,0.325365689,4.15384618,4.15934612,3.93576641
48.736492,5.09901951,4.34131655,0.870461348,4.144472,4.14159676,3.93477349
48.746984,4.58257569,4.31859568,0.513789855,4.13557028,4.12576826,3.93378147
48.757476,4.12310563,4.29782554,-0.417995118,4.12710743,4.11158476,3.93279043
48.767967,4.79583152,4.27876686,0.719072088,4.11905275,4.09881754,3.93180047
48.778459,4.79583152,4.26121268,0.731176339,4.11137605,4.08727278,3.9308114
48.78895,5,4.24499346,0.868911125,4.10405256,4.07679213,3.92982341
48.799442,4.24264069,4.2299585,0.112615223,4.09705689,4.06723843,3.9288363
48.809934,5.19615242,4.21598244,0.990035342,4.09036775,4.05849808,3.92785017
48.820425,5.19615242,4.20295683,0.996591987,4.08396551,4.05047424,3.92686512
48.830917,5.47722558,4.19078412,1.13421403,4.0778304,4.04308199,3.92588095
48.841408,5,4.17938359,0.905878808,4.07194647,4.03625101,3.92489785
48.8519,4.79583152,4.16868047,0.791928693,4.06629685,4.02991819,3.92391563
48.862392,4.47213595,4.15861195,0.559932139,4.06086757,4.02403059,3.92293439
48.872883,4.89897949,4.14912249,0.865942836,4.05564566,4.01854209,3.92195421
48.883375,5,4.14016034,0.927275397,4.05061772,4.01341102,3.92097492
48.893866,4.79583152,4.13168274,0.814953242,4.04577315,4.00860273,3.91999668
48.904358,5.56776436,4.12364848,1.20171373,4.0411004,4.00408502,3.91901933
48.91485,5.38516481,4.11602291,1.12656198,4.03659,3.99983078,3.91804295
48.925341,4.89897949,4.10877486,0.888934543,4.03223314,3.995816,3.91706762
48.935833,4.79583152,4.10187436,0.833040912,4.02802046,3.99201831,3.91609317
48.946324,5,4.09529686,0.951158841,4.02394476,3.98841922,3.91511979
48.956816,4.58257569,4.08901776,0.702536784,4.01999785,3.98500092,3.91414727
48.967308,6.08276253,4.08301651,1.41412376,4.01617319,3.98174847,3.91317572
48.977799,4.69041576,4.07727437,0.783033452,4.01246465,3.97864845,3.91220522
48.988291,5.83095189,4.07177275,1.32634051,4.00886548,3.97568796,3.91123559
48.998782,5.83095189,4.06649667,1.32832798,4.0053707,3.97285652,3.91026702
49.009274,4.69041576,4.06143051,0.7930859,4.00197436,3.97014359,3.90929932
49.019766,4.47213595,4.05656139,0.644650734,3.99867184,3.96754046,3.90833257
49.030257,4.58257569,4.05187742,0.728490411,3.99545877,3.96503918,3.90736687
49.040749,5,4.04736642,0.9760295,3.99233019,3.96263189,3.90640204
49.05124,4.12310563,4.04301882,0.282996118,3.98928259,3.96031232,3.90543826
49.061732,4.35889894,4.03882422,0.56575147,3.98631153,3.95807392,3.90447534
49.072224,4.47213595,4.03477414,0.661333358,3.98341369,3.95591133,3.90351338
49.082715,4.12310563,4.03086076,0.303718402,3.98058591,3.95381966,3.90255246
49.093207,4.69041576,4.02707572,0.814456897,3.97782446,3.95179386,3.90159239
49.103698,4,4.0234127,-0.153012098,3.97512681,3.94983004,3.90063338
49.11419,5.47722558,4.01986446,1.20721213,3.97248961,3.94792393,3.89967522
49.124682,5,4.01642525,0.99175337,3.96991041,3.94607212,3.898718
49.135173,4.89897949,4.01308973,0.941217169,3.96738692,3.94427148,3.89776183
49.145665,4.79583152,4.00985197,0.886554882,3.96491623,3.94251862,3.89680651
49.156156,4.79583152,4.00670765,0.888326444,3.96249654,3.94081108,3.89585223
49.166648,4.35889894,4.00365159,0.596026304,3.96012525,3.93914594,3.89489881
49.17714,3.74165739,4.00067977,-0.508942415,3.95780055,3.93752097,3.89394632
49.187631,4.35889894,3.99778843,0.600924714,3.95552071,3.93593411,3.89299487
49.198123,4.12310563,3.99497326,0.35795582,3.95328348,3.93438302,3.89204427
49.208614,5,3.99223123,1.00387687,3.95108754,3.93286607,3.89109471
49.219106,4.58257569,3.98955853,0.77007608,3.94893083,3.93138123,3.89014599
49.229598,5.29150262,3.98695227,1.14216914,3.94681199,3.92992699,3.8891982
49.240089,5.09901951,3.98440977,1.0557508,3.94472974,3.92850198,3.88825145
49.250581,3.74165739,3.98192779,-0.49017385,3.94268227,3.9271045,3.88730554
49.261072,4.47213595,3.97950419,0.701877313,3.94066863,3.9257335,3.88636066
49.271564,4.24264069,3.97713608,0.515271396,3.93868715,3.92438749,3.88541662
49.282056,4.24264069,3.97482136,0.517512636,3.93673682,3.92306545,3.88447351
49.292547,5.09901951,3.97255808,1.06134888,3.93481665,3.92176643,3.88353143
49.303039,4.12310563,3.97034374,0.390847648,3.93292518,3.92048919,3.88259018
49.31353,5.19615242,3.96817683,1.1081406,3.93106171,3.91923304,3.88164996
49.324022,4.79583152,3.9660551,0.910920648,3.9292249,3.91799685,3.88071058
49.334514,4.24264069,3.96397701,0.527886047,3.92741396,3.91677993,3.87977212
49.345005,5.56776436,3.96194111,1.26721082,3.92562814,3.91558163,3.87883468
49.355497,3.60555128,3.95994546,-0.595310157,3.92386625,3.914401,3.87789807
49.365988,4.58257569,3.95798896,0.790308002,3.92212777,3.91323759,3.87696248
49.37648,4.12310563,3.95606984,0.408700121,3.92041159,3.91209055,3.87602773
49.386972,4.69041576,3.95418696,0.858037764,3.9187171,3.9109594,3.87509389
49.397463,4.47213595,3.95233923,0.720969296,3.91704375,3.90984369,3.87416107
49.407955,3.60555128,3.95052511,-0.587344734,3.91539051,3.90874268,3.87322908
49.418446,3.60555128,3.94874381,-0.585826372,3.91375703,3.90765609,3.87229809
49.428938,4.58257569,3.94699392,0.797233828,3.91214237,3.90658326,3.87136794
49.43943,4.89897949,3.94527457,0.976578165,3.91054608,3.90552385,3.8704387
49.449921,4.58257569,3.94358498,0.799368951,3.90896772,3.90447757,3.86951047
49.460413,3.60555128,3.94192386,-0.579976366,3.90740643,3.90344382,3.86858306
49.470904,4.79583152,3.94029067,0.924954515,3.90586195,3.90242245,3.86765666
49.481396,4.58257569,3.93868425,0.80242847,3.90433349,3.90141293,3.86673108
49.491888,5,3.93710395,1.0309685,3.90282069,3.90041503,3.86580641
49.502379,3.46410162,3.93554918,-0.686620394,3.90132322,3.89942856,3.86488274
49.512871,3.60555128,3.93401891,-0.573120956,3.89984034,3.89845304,3.8639599
49.523362,4.47213595,3.93251273,0.734590514,3.8983719,3.89748841,3.86303805
49.533854,3.31662479,3.93102972,-0.783839859,3.89691718,3.89653422,3.86211702
49.544346,4.35889894,3.92956952,0.655232346,3.89547608,3.89559035,3.86119689
49.554837,4.24264069,3.9281314,0.560811278,3.89404804,3.89465666,3.86027776
49.565329,3.16227766,3.92671466,-0.874320877,3.89263258,3.89373278,3.85935945
49.57582,3.31662479,3.92531902,-0.780188587,3.89122959,3.89281869,3.85844213
49.586312,3.60555128,3.92394371,-0.564262738,3.88983847,3.89191404,3.85752562
49.596804,4.24264069,3.92258837,0.565731662,3.88845901,3.89101875,3.85661002
49.607295,4.69041576,3.92125266,0.877019439,3.88709102,3.89013276,3.8556954
49.617787,4.35889894,3.91993588,0.662542876,3.88573393,3.88925574,3.85478159
49.628278,4.89897949,3.91863786,0.990122028,3.88438771,3.88838775,3.85386877
49.63877,4.12310563,3.91735794,0.453594191,3.88305181,3.88752848,3.85295676
49.649262,4.35889894,3.91609586,0.665434508,3.88172607,3.88667791,3.85204565
49.659753,4.35889894,3.91485138,0.666368939,3.88041037,3.88583601,3.85113552
49.670245,4,3.91362391,0.293898087,3.87910418,3.88500252,3.85022619
49.680736,4.12310563,3.91241336,0.459012268,3.87780752,3.88417752,3.84931784
49.691228,4.24264069,3.91121918,0.575692197,3.87651989,3.88336077,3.8484103
49.70172,4,3.91004119,0.299931347,3.87524119,3.88255228,3.84750366
49.712211,3.31662479,3.90887921,-0.769580676,3.87397131,3.88175205,3.84659798
49.722703,3.87298335,3.90773275,-0.186411919,3.8727098,3.88095988,3.84569311
49.733194,4,3.90660178,0.305611224,3.87145668,3.88017586,3.84478921
49.743686,4.47213595,3.90548584,0.752761658,3.87021152,3.87939981,3.84388612
49.754178,3.87298335,3.90438481,-0.177204594,3.86897425,3.87863176,3.84298391
49.764669,4.24264069,3.90329858,0.582530774,3.86774479,3.87787175,3.84208267
49.775161,4.12310563,3.90222674,0.469977536,3.86652272,3.87711961,3.84118222
49.785652,4.47213595,3.9011693,0.755623357,3.86530811,3.87637546,3.84028275
49.796144,4.24264069,3.90012587,0.585247653,3.86410054,3.87563915,3.83938407
49.806636,3.60555128,3.8990964,-0.541798044,3.86289998,3.87491075,3.83848627
49.817127,4.24264069,3.89808081,0.58699223,3.86170638,3.87419031,3.83758944
49.827619,3.87298335,3.89707877,-0.155227002,3.86051935,3.8734777,3.8366934
49.83811,4.35889894,3.89609033,0.680300386,3.85933897,3.87277308,3.83579832
49.848602,4.58257569,3.89511517,0.829132392,3.85816487,3.87207631,3.83490403
49.859094,4.47213595,3.89415328,0.76025172,3.85699703,3.87138749,3.83401062
49.869585,4.69041576,3.89320463,0.892866807,3.85583542,3.8707067,3.83311817
49.880077,4,3.89226894,0.328224107,3.85467969,3.87003384,3.8322265
49.890568,4.24264069,3.8913463,0.592700928,3.85352992,3.86936908,3.83133579
49.90106,3.60555128,3.89043645,-0.53374636,3.85238578,3.86871234,3.83044587
49.911552,4,3.88953942,0.332356108,3.85124726,3.86806371,3.82955682
49.922043,4.79583152,3.88865521,0.952458036,3.85011435,3.86742331,3.82866872
49.932535,3.87298335,3.88778361,-0.12165635,3.84898671,3.86679107,3.8277814
49.943026,3.74165739,3.88692474,-0.381139545,3.84786447,3.86616717,3.82689504
49.953518,4.58257569,3.88607839,0.834564142,3.84674728,3.86555157,3.82600945
49.96401,4.35889894,3.88524461,0.688225496,3.84563517,3.86494438,3.82512473
49.974501,3.16227766,3.88442346,-0.849791622,3.84452813,3.86434574,3.82424096
49.984993,4.47213595,3.88361477,0.767151344,3.84342586,3.86375562,3.82335797
49.995484,4.12310563,3.88281868,0.49019072,3.84232848,3.86317421,3.82247592
50.005976,4.89897949,3.88203505,1.00843663,3.84123567,3.8626015,3.82159465
50.016468,4.79583152,3.88126396,0.956330258,3.84014747,3.86203763,3.82071424
50.026959,4.24264069,3.8805055,0.601776696,3.83906388,3.86148276,3.81983477
50.037451,4,3.87975954,0.346757063,3.83798461,3.8609369,3.81895607
50.047942,3.74165739,3.87902626,-0.370633077,3.83690979,3.86040024,3.81807832
50.058434,4.69041576,3.87830557,0.901171564,3.83583914,3.85987282,3.81720133
50.068926,4.12310563,3.87759758,0.495487684,3.83477268,3.85935481,3.8163252
50.079417,3.87298335,3.87690241,-0.0626024379,3.83371043,3.85884638,3.81545001
50.089909,5.29150262,3.87621999,1.18965652,3.83265213,3.85834757,3.81457558
50.1004,4.58257569,3.87555053,0.840847883,3.83159789,3.85785862,3.81370209
50.110892,4.35889894,3.87489398,0.695704655,3.83054746,3.85737958,3.81282936
50.121384,4.35889894,3.87425048,0.696166981,3.82950087,3.85691065,3.81195749
50.131875,5,3.87362019,1.06131042,3.82845814,3.85645203,3.81108654
50.142367,5.19615242,3.87300311,1.15028228,3.82741902,3.85600381,3.81021636
50.152858,4.35889894,3.87239945,0.69749516,3.82638365,3.85556624,3.80934711
50.16335,4.24264069,3.87180922,0.608959334,3.82535176,3.85513941,3.80847861
50.173842,4.69041576,3.87123261,0.905087372,3.82432339,3.85472357,3.80761097
50.184333,4.69041576,3.87066981,0.905398226,3.82329859,3.85431893,3.80674424
50.194825,4.79583152,3.87012087,0.962138585,3.82227711,3.85392562,3.80587828
50.205316,4.24264069,3.86958603,0.610782002,3.82125909,3.85354393,3.80501324
50.215808,4.89897949,3.86906537,1.01484684,3.82024427,3.853174,3.80414896
50.2263,4.24264069,3.86855912,0.61162208,3.8192327,3.8528161,3.80328551
50.236791,4,3.86806749,0.363225145,3.81822444,3.85247048,3.80242299
50.247283,4.35889894,3.8675906,0.700933906,3.81721924,3.85213734,3.80156122
50.257774,3.74165739,3.86712874,-0.35421936,3.81621724,3.85181697,3.80070036
50.268266,4.35889894,3.86668204,0.701581719,3.8152182,3.85150958,3.79984026
50.278758,3.87298335,3.86625076,0.0820523593,3.81422218,3.85121548,3.79898099
50.289249,3.46410162,3.86583518,-0.633824553,3.81322923,3.85093496,3.79812264
50.299741,3.60555128,3.86543547,-0.509788385,3.81223911,3.85066827,3.79726503
50.310232,3.74165739,3.86505197,-0.351275654,3.81125197,3.85041575,3.79640834
50.320724,5.09901951,3.86468488,1.11100614,3.81026758,3.85017768,3.79555239
50.331216,4.58257569,3.86433451,0.847491113,3.80928599,3.84995439,3.79469727
50.341707,3,3.86400119,-0.929516645,3.80830727,3.84974625,3.79384306
50.352199,5.19615242,3.86368532,1.15432539,3.80733118,3.84955369,3.7929896
50.36269,4.58257569,3.86338699,0.848049942,3.80635787,3.84937685,3.79213704
50.373182,4,3.86310662,0.369991049,3.80538713,3.84921618,3.79128522
50.383674,3.46410162,3.8628446,-0.631460993,3.804419,3.84907211,3.79043423
50.394165,3.31662479,3.86260131,-0.738902241,3.80345355,3.84894504,3.78958414
50.404657,5,3.86237709,1.06659407,3.80249056,3.84883537,3.78873479
50.415148,4.35889894,3.86217239,0.704788307,3.80153017,3.84874353,3.78788634
50.42564,4.47213595,3.86198757,0.781119958,3.80057218,3.84866998,3.78703863
50.436132,4.47213595,3.86182308,0.781225236,3.79961664,3.84861517,3.78619173
50.446623,4.35889894,3.86167941,0.705137957,3.79866362,3.84857959,3.78534573
50.457115,4,3.86155697,0.372079331,3.79771289,3.84856374,3.78450047
50.467606,4.89897949,3.86145629,1.01858882,3.79676462,3.84856812,3.7836561
50.478098,3.60555128,3.86137786,-0.505793023,3.79581859,3.84859329,3.78281247
50.48859,4.24264069,3.86132221,0.617509902,3.79487487,3.8486398,3.78196965
50.499081,4.58257569,3.86128989,0.849285464,3.79393351,3.84870822,3.78112772
50.509573,4.35889894,3.86128149,0.705420056,3.79299431,3.84879916,3.78028651
50.520064,4.69041576,3.86129759,0.910559265,3.79205743,3.84891323,3.7794462
50.530556,3.74165739,3.86133881,-0.345950033,3.79112266,3.8490511,3.77860662
50.541048,3.31662479,3.86140582,-0.73809283,3.79019006,3.84921344,3.77776785
50.551539,4.58257569,3.86149926,0.849162195,3.7892597,3.84940091,3.77692996
50.562031,4.69041576,3.86161987,0.910382277,3.78833137,3.8496143,3.77609279
50.572522,4.24264069,3.86176835,0.617148557,3.78740523,3.8498543,3.77525651
50.583014,4,3.86194549,0.371556879,3.78648108,3.85012175,3.77442096
50.593506,4,3.86215207,0.37127878,3.78555899,3.85041745,3.7735862
50.603997,4.69041576,3.8623889,0.909959815,3.78463902,3.85074222,3.77275233
50.614489,4.35889894,3.86265688,0.704444509,3.78372097,3.851097,3.77191918
50.62498,4.79583152,3.86295686,0.965854369,3.782805,3.85148264,3.7710869
50.635472,3.74165739,3.86328984,-0.348758448,3.78189091,3.85190018,3.77025535
50.645964,3.74165739,3.86365677,-0.349284101,3.78097876,3.85235058,3.76942459
50.656455,4.58257569,3.86405863,0.84765386,3.78006864,3.85283483,3.76859471
50.666947,3.60555128,3.86449658,-0.508866682,3.77916033,3.85335414,3.76776554
50.677438,4.24264069,3.86497162,0.614547856,3.778254,3.85390951,3.76693725
50.68793,4.79583152,3.865485,0.964544721,3.77734946,3.85450222,3.76610967
50.698422,5.19615242,3.8660379,1.15330591,3.77644677,3.85513346,3.76528288
50.708913,4.89897949,3.86663151,1.01604526,3.775546,3.85580443,3.76445696
50.719405,4.58257569,3.86726726,0.845759087,3.77464697,3.8565166,3.76363175
50.729896,4.35889894,3.86794642,0.700680045,3.77374981,3.85727124,3.76280741
50.740388,4,3.86867055,0.36239406,3.77285436,3.85806995,3.76198378
50.75088,5,3.86944109,1.06327744,3.77196067,3.85891418,3.76116094
50.761371,4.24264069,3.87025954,0.610230404,3.77106882,3.85980543,3.76033896
50.771863,3.60555128,3.8711277,-0.51534108,3.77017861,3.86074554,3.75951768
50.782354,4.58257569,3.87204714,0.842928558,3.76929021,3.86173608,3.75869727
50.792846,4.69041576,3.87301983,0.904099516,3.76840343,3.86277904,3.75787757
50.803338,4.12310563,3.87404756,0.499057173,3.76751834,3.86387626,3.75705864
50.813829,4.47213595,3.87513223,0.77266016,3.766635,3.8650296,3.75624058
50.824321,3.74165739,3.87627611,-0.36690424,3.76575324,3.86624139,3.75542321
50.834812,4.58257569,3.87748115,0.83969908,3.76487321,3.86751358,3.7546067
50.845304,3.74165739,3.87874986,-0.370260013,3.76399472,3.86884871,3.7537909
50.855796,4.89897949,3.88008453,1.00940327,3.76311785,3.87024907,3.75297586
50.866287,5.09901951,3.88148754,1.10341832,3.76224267,3.87171705,3.75216169
50.876779,4.12310563,3.88296177,0.490044751,3.761369,3.87325557,3.75134821
50.88727,4.12310563,3.88450972,0.488462794,3.76049698,3.87486714,3.75053558
50.897762,4.58257569,3.8861346,0.834530461,3.75962645,3.87655498,3.74972364
50.908254,3.46410162,3.88783933,-0.650951391,3.75875747,3.87832202,3.74891248
50.918745,4.58257569,3.88962694,0.832435433,3.75789011,3.88017132,3.74810216
50.929237,3.60555128,3.89150117,-0.534742833,3.7570242,3.88210664,3.74729254
50.939728,4,3.89346523,0.326396644,3.75615989,3.88413118,3.74648377
50.95022,3.87298335,3.89552324,-0.150132923,3.755297,3.8862491,3.74567568
50.960712,4.69041576,3.89767898,0.890357668,3.7544356,3.88846419,3.74486836
50.971203,4.58257569,3.89993642,0.826219871,3.75357577,3.89078043,3.74406188
50.981695,4,3.90230037,0.312569396,3.75271733,3.89320267,3.74325609
50.992186,4.69041576,3.90477505,0.886363756,3.75186043,3.89573512,3.74245114
51.002678,4.58257569,3.90736583,0.821711546,3.7510049,3.89838317,3.74164688
51.01317,4.79583152,3.91007767,0.94114497,3.75015081,3.90115182,3.74084338
51.023661,4.12310563,3.91291579,0.458464654,3.74929823,3.90404627,3.74004072
51.034153,5,3.91588651,1.04120771,3.74844699,3.90707291,3.73923873
51.044644,4.69041576,3.91899544,0.878305367,3.74759724,3.91023731,3.73843759
51.055136,3.74165739,3.92224966,-0.424961495,3.7467488,3.91354661,3.73763712
51.065628,4,3.92565578,0.272661364,3.74590176,3.91700742,3.73683741
51.076119,4.35889894,3.92922078,0.655498407,3.74505618,3.92062675,3.73603854
51.086611,4.47213595,3.93295309,0.734290721,3.7442119,3.92441304,3.73524034
51.097102,5,3.93686026,1.03108668,3.74336905,3.92837386,3.73444297
51.107594,5,3.94095178,1.02910069,3.74252748,3.93251872,3.73364628
51.118086,4.58257569,3.94523661,0.798335196,3.74168726,3.93685662,3.73285034
51.128577,4.69041576,3.94972424,0.860634369,3.74084845,3.94139704,3.73205522
51.139069,4.24264069,3.95442608,0.53685623,3.74001089,3.94615143,3.73126078
51.14956,4.12310563,3.95935249,0.404664227,3.73917474,3.95113018,3.73046717
51.160052,3.60555128,3.96451641,-0.599136989,3.73833981,3.95634625,3.72967422
51.170544,4.89897949,3.9699302,0.963872028,3.73750619,3.96181202,3.72888203
51.181035,4.24264069,3.97560702,0.516753006,3.73667394,3.96754066,3.72809065
51.191527,4.69041576,3.98156256,0.8419342,3.73584291,3.97354792,3.72729994
51.202018,4.12310563,3.98781139,0.36782365,3.73501323,3.97984837,3.72651006
51.21251,4.89897949,3.99437144,0.95110885,3.73418475,3.98645998,3.72572084
51.223002,4.12310563,4.00126014,0.349063724,3.73335754,3.99340022,3.72493236
51.233493,4.12310563,4.00849611,0.338540278,3.73253166,4.00068771,3.72414469
51.243985,3.31662479,4.01610141,-0.83634719,3.73170696,4.00834458,3.7233577
51.254476,4,4.02409693,-0.155231858,3.73088358,4.01639173,3.72257151
51.264968,4.89897949,4.03250813,0.930844431,3.73006136,4.02485466,3.72178599
51.27546,4.58257569,4.04136013,0.735673548,3.72924037,4.03375854,3.72100121
51.285951,4.24264069,4.05067989,0.438133311,3.72842068,4.04313035,3.72021723
51.296443,4.47213595,4.06049923,0.64158922,3.72760214,4.05300197,3.71943392
51.306934,4.69041576,4.07084881,0.787125751,3.72678488,4.06340409,3.71865141
51.317426,3.74165739,4.08176573,-0.583188086,3.72596875,4.07437387,3.71786956
51.327918,3.46410162,4.09328714,-0.793212154,3.72515382,4.0859485,3.71708845
51.338409,3.74165739,4.10545318,-0.603154864,3.72434016,4.09816817,3.71630814
51.348901,4.47213595,4.11831096,0.594831903,3.72352761,4.11108005,3.71552848
51.359392,3.74165739,4.13190686,-0.624699505,3.72271632,4.12473057,3.71474963
51.369884,4.69041576,4.14629647,0.737644418,3.72190613,4.1391754,3.71397144
51.380376,4.79583152,4.16153644,0.796426443,3.72109711,4.15447124,3.71319396
51.390867,4.79583152,4.17775615,0.786177695,3.72028933,4.17074765,3.71241729
51.401359,3.60555128,4.19489195,-0.767685273,3.71948262,4.18794084,3.71164127
51.41185,4.24264069,4.21308418,0.171920057,3.71867715,4.20619132,3.71086605
51.422342,4.47213595,4.2324191,0.48960888,3.71787275,4.22558546,3.71009148
51.432834,5.83095189,4.25298611,1.25617108,3.71706949,4.24621273,3.70931763
51.443325,4.79583152,4.27488326,0.721767455,3.71626745,4.26817128,3.70854458
51.453817,5.47722558,4.29822495,1.08581795,3.71546646,4.29157561,3.70777217
51.464308,3.74165739,4.32312862,-0.762542613,3.71466667,4.31654326,3.70700055
51.4748,3.87298335,4.34973356,-0.690471011,3.71386793,4.34321365,3.70622958
51.485292,4.58257569,4.37818675,0.452093952,3.7130703,4.37173387,3.70545933
51.495783,4.58257569,4.40865092,0.417042888,3.71227386,4.40226677,3.70468986
51.506275,4.89897949,4.44131592,0.676508366,3.71147846,4.43500235,3.70392104
51.516766,4.47213595,4.47638102,-0.0651541793,3.71068423,4.47014002,3.70315301
51.527258,4.69041576,4.51408208,0.419921038,3.70989102,4.5079158,3.70238561
51.53775,3.87298335,4.55467282,-0.825644881,3.70909891,4.54858357,3.70161893
51.548241,4.58257569,4.5984373,-0.125942849,3.70830796,4.59242755,3.70085303
51.558733,3.74165739,4.64570783,-0.950815674,3.70751802,4.63978027,3.70008777
51.569224,4,4.69684147,-0.834770312,3.70672924,4.69099894,3.6993233
51.579716,4.24264069,4.75226129,-0.713877159,3.70594145,4.74650685,3.69855946
51.590208,4.24264069,4.81243202,-0.754845234,3.70515474,4.80676896,3.69779632
51.600699,4.58257569,4.87788124,-0.543420231,3.70436917,4.87231307,3.69703397
51.611191,4,4.94923004,-0.974284375,3.70358459,4.94376048,3.69627225
51.621682,5.09901951,5.02716265,0.268061309,3.70280114,5.02179567,3.6955113
51.632174,5,5.11249441,-0.335401864,3.70201868,5.10723425,3.69475099
51.642666,4.79583152,5.20614229,-0.640555047,3.70123726,5.20099342,3.69399138
51.653157,5.65685425,5.30916596,0.58965099,3.70045697,5.30413311,3.69323255
51.663649,6.55743852,5.42282807,1.06518095,3.69967765,5.41791624,3.69247434
51.67414,5.56776436,5.54856439,0.138563958,3.69889944,5.54377881,3.69171691
51.684632,4.79583152,5.68812172,-0.944611135,3.6981222,5.6834679,3.6909601
51.695124,5.83095189,5.8435724,-0.112341033,3.69734598,5.83905614,3.69020399
51.705615,5.38516481,6.01751734,-0.795205969,3.69657088,6.01314477,3.68944865
51.716107,6.4807407,6.21350437,0.516949062,3.69579672,6.20928225,3.68869394
51.726598,7.34846923,6.4366819,0.954875555,3.69502366,6.43261809,3.68793999
51.73709,7.68114575,6.69547976,0.992807125,3.69425154,6.69158429,3.68718666
51.747582,7.34846923,7.00428812,0.586669505,3.69348045,7.00057499,3.68643403
51.758073,8.54400375,7.38797207,1.07518913,3.69271043,7.38446166,3.68568216
51.768565,9.16515139,7.88769975,1.13024406,3.69194136,7.88442086,3.68493092
51.779056,10.3440804,8.56524709,1.33372911,3.69117336,8.56223583,3.68418043
51.789548,10.198039,9.50184865,0.834380233,3.6904063,9.49914154,3.68343056
51.80004,11.2694277,10.7853206,0.695778042,3.68964023,10.782942,3.68268139
51.810531,13.7477271,12.4873276,1.12267517,3.68887523,12.4852785,3.68193297
51.821023,15.4919334,14.6397602,0.923132246,3.68811116,14.6380169,3.68118516
51.831514,17.0587221,17.2180512,-0.39916052,3.68734815,17.2165727,3.68043812
51.842006,19.8997487,20.1384365,-0.488556793,3.68658605,20.1371755,3.67969168
51.852498,23.6220236,23.2608157,0.601005756,3.68582495,23.2597267,3.67894593
51.862989,25.8263431,26.3973994,-0.755682677,3.68506489,26.3964421,3.67820094
51.873481,28.1247222,29.3210122,-1.09375041,3.68430575,29.3201523,3.67745656
51.883972,30.6757233,31.767657,-1.04495631,3.68354765,31.7668652,3.67671293
51.894464,33.2415403,33.4520424,-0.458805097,3.68279046,33.4512922,3.6759699
51.904956,34.1174442,34.1208139,-0.0580489316,3.68203424,34.12008,3.67522756
51.915447,34.3656806,33.6571046,0.84176956,3.68127906,33.6563622,3.67448597
51.925939,32.5422802,32.1458258,0.629646277,3.68052478,32.1450502,3.67374498
51.93643,30.4795013,29.8229186,0.8102979,3.67977153,29.8220844,3.67300474
51.946922,26.7020598,26.9715131,-0.519088872,3.67901917,26.9705927,3.67226511
51.957414,23.8117618,23.8600117,-0.219658658,3.67826778,23.8589734,3.67152615
51.967905,20.1246118,20.7230676,-0.773599237,3.67751741,20.7218744,3.67078794
51.978397,17.2336879,17.7551203,-0.722102747,3.67676793,17.7537304,3.67005033
51.988888,14.0712473,15.1057257,-1.01709311,3.67601947,15.1040951,3.66931346
51.99938,12.2882057,12.869076,-0.76214845,3.67527189,12.8671656,3.66857719
52.009872,10.5830052,11.0809355,-0.705641734,3.67452527,11.0787209,3.66784159
52.020363,8.71779789,9.71991858,-1.00105979,3.67377965,9.71739842,3.66710673
52.030855,8.18535277,8.72051915,-0.73155067,3.67303492,8.71771506,3.66637247
52.041346,8,7.99691557,0.055537603,3.67229119,7.99386296,3.66563895
52.051838,6.63324958,7.4656452,-0.912357175,3.67154834,7.46238079,3.66490602
52.06233,6.08276253,7.06100138,-0.989059579,3.67080642,7.05755553,3.66417376
52.072821,6.08276253,6.73813402,-0.809550177,3.67006552,6.7345288,3.66344223
52.083313,5.19615242,6.46930549,-1.12834085,3.66932547,6.4655563,3.6627113
52.093804,6,6.23843755,-0.488300676,3.66858643,6.2345555,3.6619811
52.104296,5.83095189,6.0361228,-0.452957948,3.66784825,6.03211655,3.66125149
52.114788,5.29150262,5.85669058,-0.751789837,3.667111,5.85256754,3.66052255
52.125279,4.69041576,5.69637296,-1.00297418,3.66637475,5.69213981,3.65979433
52.135771,4.35889894,5.55237514,-1.09246336,3.66563936,5.54803812,3.6590667
52.146262,5.09901951,5.42255541,-0.56880216,3.66490496,5.41812043,3.65833981
52.156754,5,5.30510368,-0.552361913,3.66417141,5.30057633,3.65761349
52.167246,4.79583152,5.19853182,-0.634586711,3.66343878,5.19391741,3.65688784
52.177737,4.58257569,5.10156896,-0.720411869,3.66270714,5.09687251,3.65616291
52.188229,4,5.01309684,-1.00652712,3.66197635,5.00832309,3.65543857
52.19872,3.31662479,4.93218483,-1.27104683,3.66124655,4.92733825,3.65471495
52.209212,5.09901951,4.85799503,0.490942447,3.6605176,4.85307979,3.65399191
52.219704,4.58257569,4.78982091,-0.455241933,3.65978955,4.78484096,3.65326953
52.230195,3.87298335,4.72704441,-0.924154241,3.65906249,4.72200343,3.65254786
52.240687,4,4.66910664,-0.81798939,3.65833627,4.66400808,3.65182678
52.251178,4.12310563,4.61553903,-0.701735997,3.65761104,4.61038612,3.65110641
52.26167,4.24264069,4.56590799,-0.568566002,3.65688664,4.56070372,3.65038663
52.272162,3,4.51984512,-1.23281999,3.65616314,4.51459231,3.64966749
52.282653,3.87298335,4.47702321,-0.777200015,3.65544063,4.47172449,3.64894907
52.293145,4.69041576,4.43713954,0.503265558,3.65471895,4.43179735,3.64823122
52.303636,4.58257569,4.39993985,0.427359148,3.65399824,4.39455648,3.64751409
52.314128,4.12310563,4.36518284,-0.492013427,3.65327836,4.35976039,3.64679754
52.32462,4.47213595,4.33266284,0.37346099,3.65255939,4.3272033,3.64608162
52.335111,3.74165739,4.30219494,-0.748690558,3.65184139,4.29670014,3.64536642
52.345603,4.24264069,4.27360438,-0.175965024,3.65112422,4.26807603,3.64465179
52.356094,4.69041576,4.24674477,0.666086321,3.65040802,4.24118447,3.64393787
52.366586,4.24264069,4.22147372,0.145488706,3.64969265,4.21588293,3.64322452
52.377078,3.87298335,4.19766994,-0.569812771,3.64897817,4.19205004,3.64251181
52.387569,4.47213595,4.17522325,0.54489697,3.64826466,4.16957551,3.64179981
52.398061,3.46410162,4.15402739,-0.830617704,3.64755198,4.148353,3.64108838
52.408552,4.24264069,4.13399392,0.329616095,3.64684026,4.12829398,3.64037764
52.419044,4.69041576,4.11503466,0.758538794,3.64612937,4.10931019,3.63966748
52.429536,3.87298335,4.09707477,-0.473382959,3.64541937,4.09132672,3.63895795
52.440027,4.35889894,4.08004571,0.528065555,3.64471033,4.07427495,3.63824912
52.450519,4.24264069,4.06388001,0.422800987,3.64400212,4.05808734,3.63754086
52.46101,3.74165739,4.04852208,-0.553953693,3.64329486,4.04270825,3.6368333
52.471502,3.60555128,4.03391507,-0.654495067,3.64258843,4.02808078,3.6361263
52.481994,4,4.02001105,-0.141460421,3.64188289,4.01415694,3.63541993
52.492485,3.60555128,4.00676582,-0.633414987,3.64117831,4.00089247,3.63471426
52.502977,4.24264069,3.99413497,0.498503477,3.64047455,3.98824293,3.63400914
52.513468,4.24264069,3.98208241,0.510449094,3.63977175,3.97617217,3.63330473
52.52396,3.87298335,3.97057025,-0.312389019,3.63906977,3.96464227,3.63260087
52.534452,3.60555128,3.95956685,-0.594992077,3.63836868,3.95362155,3.63189763
52.544943,3.46410162,3.94904288,-0.69637724,3.63766854,3.94308065,3.63119509
52.555435,4.69041576,3.93896823,0.86686073,3.63696923,3.93298942,3.63049311
52.565926,3.46410162,3.92931891,-0.682068394,3.63627087,3.92332383,3.62979182
52.576418,4.12310563,3.92006898,0.450595878,3.63557334,3.91405792,3.62909108
52.58691,3.31662479,3.91119711,-0.771085158,3.63487669,3.90517033,3.62839096
52.597401,3.74165739,3.90268344,-0.401280522,3.63418099,3.89664117,3.62769153
52.607893,4.12310563,3.89450717,0.478119707,3.63348612,3.88844962,3.62699266
52.618384,3.31662479,3.88665211,-0.755001538,3.6327922,3.88057947,3.62629446
52.628876,3.16227766,3.87910028,-0.846653779,3.63209911,3.87301271,3.62559682
52.639368,3.74165739,3.87183719,-0.36080439,3.6314069,3.86573483,3.6248998
52.649859,3.74165739,3.86484939,-0.350987191,3.63071564,3.85873237,3.62420346
52.660351,4,3.85812249,0.376666314,3.63002521,3.85199091,3.62350767
52.670842,2.82842712,3.85164575,-1.0115427,3.62933573,3.8454997,3.62281256
52.681334,3.16227766,3.84540689,-0.826516319,3.62864708,3.83924645,3.622118
52.691826,4,3.83939643,0.400753753,3.62795932,3.83322166,3.62142405
52.702317,3.87298335,3.83360576,0.198437873,3.62727251,3.82741671,3.62073078
52.712809,4.12310563,3.82802549,0.543212786,3.62658652,3.8218222,3.62003805
52.7233,4.58257569,3.8226494,0.871737517,3.62590149,3.81643188,3.61934601
52.733792,4,3.81747005,0.42723524,3.62521729,3.81123833,3.6186545
52.744284,4.12310563,3.81248261,0.557335639,3.62453397,3.80623669,3.6179636
52.754775,4,3.80768324,0.43853935,3.62385162,3.80142313,3.61727338
52.765267,3.74165739,3.80306789,-0.247811434,3.62317009,3.79679359,3.6165837
52.775758,4.69041576,3.79863572,0.944341062,3.62248952,3.79234721,3.61589469
52.78625,3.74165739,3.79438573,-0.229626528,3.62180978,3.78808302,3.61520622
52.796742,5.19615242,3.79032034,1.1856779,3.62113093,3.78400343,3.61451835
52.807233,3.16227766,3.78644487,-0.79004254,3.62045304,3.78011378,3.61383115
52.817725,4.79583152,3.78276829,1.00651042,3.61977599,3.77642303,3.61314449
52.828216,3.60555128,3.77930928,-0.416842906,3.61909989,3.77294991,3.6124585
52.838708,3.87298335,3.7761002,0.311260584,3.61842463,3.76972683,3.61177305
52.8492,4.12310563,3.77320177,0.591526715,3.61775027,3.76681464,3.61108819
52.859691,3.46410162,3.7707225,-0.553733591,3.61707687,3.764322,3.610404
52.870183,3.16227766,3.76884858,-0.778826632,3.61640431,3.76243544,3.60972034
52.880674,3.46410162,3.76788478,-0.551165283,3.61573271,3.76146026,3.60903735
52.891166,3.31662479,3.76829285,-0.67206254,3.61506196,3.76185898,3.60835488
52.901658,4.69041576,3.77071517,0.959010214,3.61439211,3.76427512,3.60767302
52.912149,4.47213595,3.77595151,0.83437668,3.61372322,3.76950981,3.60699181
52.922641,3.46410162,3.78486435,-0.566359192,3.61305519,3.77842697,3.60631114
52.933132,4.24264069,3.79818733,0.666673348,3.61238812,3.79176145,3.60563112
52.943624,3.87298335,3.81626499,0.238156149,3.6117219,3.80985823,3.60495163
52.954116,4,3.83875139,0.401557735,3.61105659,3.8323706,3.60427273
52.964607,3.87298335,3.86435715,0.0928773366,3.61039226,3.85800689,3.60359449
52.975099,3,3.89069762,-0.94376778,3.60972877,3.88437839,3.60291678
52.98559,3.74165739,3.91426112,-0.415456055,3.60906627,3.90796773,3.60223972
52.996082,3.60555128,3.93075323,-0.570264814,3.60840462,3.92447377,3.60156318
53.006574,4.12310563,3.93615947,0.432372705,3.6077439,3.92987585,3.60088723
53.017065,4.35889894,3.92854236,0.656015689,3.60708415,3.92223342,3.60021194
53.027557,4,3.90915271,0.301408839,3.60642527,3.90279893,3.59953716
53.038048,3.16227766,3.88165694,-0.848162294,3.60576738,3.87524417,3.59886304
53.04854,4.12310563,3.8503675,0.522243356,3.60511035,3.8438882,3.59818943
53.059032,3.60555128,3.81900747,-0.462013195,3.60445424,3.8124601,3.59751641
53.069523,3.46410162,3.79023883,-0.571084245,3.60379914,3.78362646,3.59684404
53.080015,3.87298335,3.76560179,0.327691255,3.6031449,3.75893044,3.59617219
53.090506,4.79583152,3.74565951,1.024779,3.60249167,3.73893652,3.59550098
53.100998,4.24264069,3.73021108,0.715841885,3.60183931,3.72344372,3.59483029
53.11149,3,3.71859635,-0.847700626,3.60118789,3.71179095,3.59416018
53.121981,3.31662479,3.70996584,-0.627169077,3.60053747,3.70312732,3.59349071
53.132473,4.12310563,3.70348902,0.64777821,3.59988794,3.69662087,3.59282176
53.142964,4.58257569,3.6984786,0.940264377,3.59923943,3.69158311,3.59215345
53.153456,3.60555128,3.69442316,-0.298113887,3.5985918,3.6875017,3.59148565
53.163948,3.31662479,3.69097758,-0.611843764,3.59794512,3.68403086,3.59081843
53.174439,4,3.68792397,0.558637657,3.59729946,3.68095233,3.59015184
53.184931,3.46410162,3.68513095,-0.470137571,3.59665471,3.67813447,3.58948577
53.195422,4.47213595,3.68252279,0.888601805,3.59601097,3.6755014,3.58882034
53.205914,3.31662479,3.68005425,-0.602851106,3.59536814,3.67300782,3.58815541
53.216406,3.16227766,3.67769828,-0.717928005,3.59472628,3.6706266,3.58749106
53.226897,3.74165739,3.67543722,0.257332801,3.59408546,3.66834006,3.58682734
53.237389,3.60555128,3.67325792,-0.260205002,3.59344555,3.66613502,3.58616413
53.24788,3.87298335,3.67115116,0.449257375,3.59280668,3.66400223,3.58550155
53.258372,3.16227766,3.66910883,-0.711920758,3.59216873,3.66193357,3.58483948
53.268864,3.87298335,3.6671248,0.453716377,3.59153177,3.65992289,3.58417797
53.279355,3.31662479,3.66519395,-0.590397456,3.59089586,3.65796506,3.5835171
53.289847,3.74165739,3.66331141,0.279903517,3.59026088,3.6560552,3.58285673
53.300338,3.46410162,3.66147369,-0.44426577,3.58962696,3.6541898,3.58219699
53.31083,3.16227766,3.65967711,-0.705265521,3.58899399,3.65236518,3.58153775
53.321322,4.47213595,3.65791897,0.902339728,3.58836202,3.65057861,3.58087908
53.331813,4.12310563,3.65619689,0.683307205,3.58773112,3.64882772,3.58022103
53.342305,3.46410162,3.65450831,-0.436356159,3.58710117,3.64710994,3.57956348
53.352796,2,3.65285159,-1.28563276,3.5864723,3.64542361,3.57890656
53.363288,4.69041576,3.65122463,1.01940724,3.5858444,3.64376663,3.57825013
53.37378,4.24264069,3.64962603,0.770074448,3.58521753,3.64213759,3.57759427
53.384271,3.87298335,3.64805451,0.474266632,3.58459175,3.6405352,3.57693903
53.394763,4.35889894,3.64650847,0.84403227,3.58396694,3.63895785,3.57628429
53.405254,4,3.64498704,0.595829638,3.58334324,3.63740468,3.57563016
53.415746,3.87298335,3.64348886,0.479055827,3.58272053,3.63587429,3.57497653
53.426238,4.12310563,3.64201309,0.693608346,3.58209887,3.63436586,3.57432346
53.436729,3.87298335,3.64055896,0.482104125,3.58147833,3.6328786,3.57367101
53.447221,4.58257569,3.63912536,0.971313719,3.5808588,3.6314114,3.57301905
53.457712,3.74165739,3.63771178,0.322405971,3.58024039,3.62996374,3.5723677
53.468204,4.24264069,3.63631723,0.778667744,3.579623,3.62853461,3.57171685
53.478696,3.46410162,3.63494118,-0.413327432,3.57900669,3.62712349,3.57106655
53.489187,3.31662479,3.63358313,-0.56299053,3.57839153,3.62572986,3.57041687
53.499679,3.16227766,3.63224222,-0.68553961,3.5777774,3.62435286,3.56976767
53.51017,4.58257569,3.63091815,0.975529365,3.57716443,3.62299218,3.56911909
53.520662,3.87298335,3.62961016,0.493328679,3.5765525,3.62164705,3.56847099
53.531154,3.46410162,3.62831787,-0.405236052,3.57594169,3.62031708,3.56782345
53.541645,2.64575131,3.62704095,-0.990600644,3.57533206,3.61900193,3.56717651
53.552137,3.74165739,3.6257787,0.340409594,3.5747235,3.6177009,3.56653006
53.562628,4,3.62453094,0.612755301,3.57411612,3.6164138,3.56588422
53.57312,4.89897949,3.62329705,1.12946113,3.57350983,3.61513999,3.56523887
53.583612,3.46410162,3.62207676,-0.397460874,3.57290469,3.61387921,3.56459406
53.594103,3.74165739,3.62086983,0.347545041,3.57230076,3.6126312,3.56394985
53.604595,4.24264069,3.61967568,0.78928132,3.57169794,3.61139537,3.56330613
53.615086,4.89897949,3.61849422,1.13158529,3.57109634,3.61017162,3.56266302
53.625578,4.12310563,3.61732491,0.71118262,3.57049587,3.6089594,3.56202038
53.63607,3.74165739,3.61616858,0.354243998,3.56989658,3.60775954,3.56137829
53.646561,3.87298335,3.615023,0.507897967,3.56929855,3.6065698,3.5607368
53.657053,4.47213595,3.61388871,0.926416343,3.56870166,3.6053907,3.56009578
53.667544,3.60555128,3.61276567,-0.084937573,3.56810604,3.60422219,3.55945537
53.678036,3.87298335,3.61165339,0.511204414,3.56751159,3.60306378,3.55881544
53.688528,3.87298335,3.61055176,0.51228077,3.56691838,3.60191533,3.55817604
53.699019,4,3.60946063,0.624931489,3.56632645,3.60077672,3.55753725
53.709511,4.12310563,3.60837959,0.717444102,3.56573573,3.59964747,3.55689893
53.720002,3.60555128,3.60730861,-0.0419205239,3.56514632,3.5985276,3.5562612
53.730494,3.74165739,3.60624728,0.36798112,3.56455812,3.59741665,3.55562395
53.740986,4.58257569,3.60519552,0.988625398,3.56397121,3.59631453,3.55498724
53.751477,3.31662479,3.60415322,-0.536216775,3.56338564,3.59522114,3.55435112
53.761969,4.12310563,3.60312001,0.721100285,3.56280133,3.59413608,3.55371547
53.77246,3.74165739,3.60209589,0.373579302,3.56221838,3.59305935,3.55308042
53.782952,3.46410162,3.60108051,-0.370106604,3.5616367,3.59199058,3.55244583
53.793444,3.60555128,3.6000738,0.0740099556,3.56105635,3.59092968,3.55181178
53.803935,3.46410162,3.59907569,-0.367388184,3.56047741,3.58987658,3.55117832
53.814427,4.35889894,3.59808584,0.87224601,3.55989978,3.58883092,3.55054533
53.824918,3.74165739,3.59710429,0.38020139,3.55932358,3.58779273,3.54991292
53.83541,3.60555128,3.59613071,0.0970596214,3.5587487,3.58676166,3.54928099
53.845902,3.31662479,3.59516505,-0.52776913,3.55817523,3.58573766,3.54864958
53.856393,4.24264069,3.59420727,0.805253637,3.55760322,3.58472067,3.54801876
53.866885,3.87298335,3.59325706,0.528891565,3.55703259,3.58371036,3.5473884
53.877376,4,3.59231448,0.638502562,3.55646345,3.58270677,3.54675863
53.887868,3.60555128,3.59137923,0.119046416,3.55589571,3.5817096,3.54612933
53.89836,3.31662479,3.59045128,-0.523284327,3.55532944,3.58071879,3.54550054
53.908851,3.60555128,3.58953061,0.126572775,3.55476471,3.57973432,3.54487235
53.919343,4,3.58861693,0.641391507,3.55420142,3.57875587,3.54424461
53.929834,3.87298335,3.58771033,0.534109556,3.55363971,3.57778352,3.54361746
53.940326,3.74165739,3.58681052,0.393505871,3.55307947,3.57681695,3.54299076
53.950818,4,3.58591749,0.643492433,3.55252078,3.57585616,3.54236459
53.961309,4.35889894,3.58503124,0.879697508,3.55196371,3.57490111,3.541739
53.971801,3.31662479,3.58415151,-0.517229847,3.55140817,3.57395152,3.54111387
53.982292,3.46410162,3.58327837,-0.345219868,3.55085428,3.57300747,3.54048931
53.992784,3.46410162,3.58241159,-0.34396217,3.55030195,3.57206867,3.53986521
54.003276,3.31662479,3.58155116,-0.514709987,3.54975127,3.57113511,3.53924163
54.013767,4.35889894,3.58069709,0.882157499,3.54920229,3.5702068,3.53861863
54.024259,2.82842712,3.57984914,-0.866846018,3.54865494,3.56928344,3.53799608
54.03475,4,3.57900741,0.648839419,3.54810933,3.56836514,3.53737411
54.045242,4.35889894,3.57817166,0.883587734,3.54756539,3.56745163,3.53675259
54.055734,2.82842712,3.57734191,-0.865398628,3.54702318,3.5665429,3.53613158
54.066225,3.46410162,3.57651818,-0.335285791,3.54648279,3.56563896,3.53551115
54.076717,3.74165739,3.57570024,0.407378379,3.54594412,3.56473955,3.53489117
54.087208,3.31662479,3.57488821,-0.508196239,3.54540731,3.56384477,3.53427176
54.0977,3.31662479,3.57408186,-0.507402277,3.54487228,3.56295436,3.5336528
54.108192,3.87298335,3.57328123,0.547450562,3.54433909,3.56206834,3.53303435
54.118683,4,3.57248634,0.65384529,3.54380783,3.56118671,3.53241647
54.129175,4.12310563,3.57169699,0.742568945,3.54327842,3.56030924,3.53179904
54.139666,3.46410162,3.57091329,-0.326820547,3.54275099,3.55943601,3.53118218
54.150158,3.60555128,3.57013504,0.18819202,3.54222545,3.5585668,3.53056577
54.16065,3.87298335,3.56936228,0.551018205,3.5417019,3.55770161,3.52994986
54.171141,3.60555128,3.56859507,0.192239959,3.5411804,3.55684049,3.52933452
54.181633,3.74165739,3.56783319,0.416922293,3.54066089,3.55598317,3.52871962
54.192124,4.79583152,3.56707676,1.10849211,3.54014349,3.55512976,3.52810529
54.202616,4.47213595,3.56632561,0.951740691,3.53962813,3.55428005,3.5274914
54.213108,2.44948974,3.56557605,-1.05644986,3.53911113,3.55343405,3.52687802
54.223599,3.60555128,3.5648356,0.201781252,3.53860011,3.55259178,3.5262652
54.234091,3.87298335,3.56410036,0.555772427,3.53809123,3.55175303,3.52565282
54.244582,3.31662479,3.56337043,-0.49673498,3.53758461,3.55091791,3.525041
54.255074,3.74165739,3.56264567,0.423097766,3.53708021,3.55008619,3.52442963
54.265566,3.16227766,3.56192612,-0.632177552,3.53657809,3.54925791,3.52381875
54.276057,3.60555128,3.56121183,0.210569327,3.53607834,3.54843308,3.52320843
54.286549,3.87298335,3.56050267,0.558999714,3.53558091,3.54761151,3.52259856
54.29704,3.74165739,3.55979874,0.426448881,3.53508593,3.5467933,3.52198924
54.307532,3.60555128,3.55909991,0.215525794,3.53459334,3.54597824,3.52138035
54.318024,3.46410162,3.55840623,-0.307090569,3.53410323,3.54516637,3.52077197
54.328515,3.46410162,3.55771777,-0.30596758,3.53361568,3.54435771,3.52016414
54.339007,2.82842712,3.5570344,-0.853584955,3.53313065,3.54355206,3.51955675
54.349498,3.31662479,3.55635624,-0.48962378,3.53264827,3.54274954,3.51894991
54.35999,3.60555128,3.55568316,0.223311706,3.53216849,3.54194995,3.51834351
54.370482,3.31662479,3.55501523,-0.488252436,3.53169141,3.54115332,3.5177376
54.380973,3.46410162,3.55435253,-0.300417895,3.53121712,3.54035969,3.51713224
54.391465,3.31662479,3.55369493,-0.486898486,3.53074557,3.53956886,3.51652731
54.401956,3.60555128,3.55304256,0.229147795,3.5302769,3.53878095,3.51592294
54.412448,3.31662479,3.55239533,-0.485562085,3.52981108,3.53799576,3.515319
54.42294,3.87298335,3.5517533,0.566771602,3.52934821,3.53721333,3.51471555
54.433431,3.74165739,3.55111655,0.436509837,3.52888837,3.5364337,3.51411265
54.443923,3.60555128,3.55048498,0.234662086,3.52843154,3.53565669,3.51351018
54.454414,3.87298335,3.54985873,0.568440508,3.52797787,3.5348824,3.51290825
54.464906,2.82842712,3.54923772,-0.849005649,3.52752732,3.53411065,3.51230676
54.475398,4.12310563,3.54862201,0.757946972,3.52708,3.53334149,3.51170575
54.485889,2.82842712,3.54801171,-0.848283317,3.52663602,3.53257496,3.51110529
54.496381,3.46410162,3.54740672,-0.288626245,3.52619534,3.53181087,3.51050525
54.506872,3.74165739,3.54680721,0.441418374,3.52575813,3.53104933,3.50990576
54.517364,3,3.54621308,-0.739062296,3.52532437,3.53029018,3.50930669
54.527856,4.12310563,3.54562444,0.759921832,3.52489417,3.52953345,3.50870811
54.538347,3,3.54504138,-0.738269178,3.52446764,3.52877919,3.50811008
54.548839,3.74165739,3.54446384,0.444064798,3.52404477,3.52802722,3.50751246
54.55933,3.16227766,3.54389198,-0.617749401,3.52362573,3.52727765,3.50691539
54.569822,3.74165739,3.54332574,0.445344411,3.52321051,3.52653032,3.50631874
54.580314,3.87298335,3.54276523,0.574646077,3.52279923,3.52578528,3.50572257
54.590805,2.44948974,3.54221056,-1.04533287,3.52239202,3.52504255,3.50512694
54.601297,3.60555128,3.54166169,0.252763901,3.52198888,3.52430199,3.50453173
54.611788,4,3.54111877,0.677407726,3.52158998,3.52356369,3.50393706
54.62228,3.16227766,3.54058179,-0.615064327,3.52119534,3.5228275,3.50334281
54.632772,2.64575131,3.54005085,-0.945674119,3.52080509,3.52209346,3.50274904
54.643263,3.74165739,3.53952609,0.449590144,3.52041937,3.52136162,3.5021558
54.653755,3.46410162,3.53900748,-0.273689359,3.52003819,3.52063182,3.50156298
54.664246,3.31662479,3.5384952,-0.471031224,3.51966175,3.51990416,3.5009707
54.674738,3.16227766,3.53798925,-0.612953171,3.51929007,3.5191785,3.50037883
54.68523,4.35889894,3.53748976,0.906316273,3.51892331,3.51845487,3.49978744
54.695721,3.60555128,3.53699686,0.261828974,3.51856161,3.51773333,3.49919658
54.706213,3.60555128,3.53651058,0.262755965,3.51820502,3.51701371,3.49860614
54.716704,3.16227766,3.53603109,-0.611353772,3.51785373,3.51629614,3.49801623
54.727196,3.31662479,3.53555843,-0.46790345,3.51750781,3.51558046,3.49742673
54.737688,3.74165739,3.53509274,0.454493836,3.51716741,3.51486671,3.4968377
54.748179,4.12310563,3.53463419,0.76711892,3.51683271,3.51415495,3.49624921
54.758671,2.64575131,3.53418281,-0.942566442,3.51650379,3.51344502,3.49566112
54.769162,4.12310563,3.53373882,0.767702292,3.51618084,3.51273704,3.49507357
54.779654,3.16227766,3.53330226,-0.609117887,3.51586397,3.51203086,3.49448642
54.790146,3.16227766,3.53287332,-0.608765687,3.51555335,3.51132653,3.49389975
54.800637,4,3.53245218,0.683774682,3.51524917,3.5106241,3.4933136
54.811129,3,3.53203892,-0.729409982,3.51495156,3.50992342,3.49272786
54.82162,3.46410162,3.53163377,-0.259869495,3.51466072,3.50922461,3.49214265
54.832112,3.60555128,3.53123682,0.272606787,3.51437679,3.50852753,3.49155785
54.842604,3.60555128,3.53084827,0.273318507,3.51409999,3.50783221,3.49097351
54.853095,4,3.53046835,0.685223798,3.51383052,3.50713873,3.49038969
54.863587,3.16227766,3.53009716,-0.606481245,3.51356853,3.50644692,3.48980629
54.874078,3.31662479,3.52973498,-0.461638589,3.51331429,3.50575692,3.4892234
54.88457,3.87298335,3.52938193,0.586175243,3.51306796,3.50506858,3.48864092
54.895062,4,3.52903827,0.686266518,3.51282979,3.50438196,3.4880589
54.905553,3.60555128,3.52870424,0.277212985,3.51260002,3.5036971,3.48747741
54.916045,3.87298335,3.52838001,0.587029249,3.51237885,3.50301387,3.48689631
54.926536,3.16227766,3.52806588,-0.604804281,3.51216658,3.5023324,3.48631574
54.937028,3.74165739,3.52776204,0.46248821,3.51196341,3.50165254,3.48573557
54.94752,3.74165739,3.52746879,0.46280514,3.51176965,3.50097435,3.48515586
54.958011,3.60555128,3.52718642,0.279937243,3.51158558,3.50029788,3.48457667
54.968503,3.46410162,3.52691515,-0.250626291,3.51141146,3.49962302,3.48399788
54.978994,3.74165739,3.52665535,0.463683123,3.51124763,3.49894987,3.4834196
54.989486,4,3.52640726,0.688180746,3.51109436,3.4982783,3.48284173
54.999978,4.47213595,3.52617124,0.972607174,3.510952,3.49760839,3.48226432
55.010469,3.31662479,3.52594764,-0.457518142,3.5108209,3.49694018,3.48168741
55.020961,3.16227766,3.52573677,-0.602875702,3.51070138,3.49627355,3.48111091
55.031452,3,3.52553904,-0.724940717,3.51059385,3.49560863,3.48053492
55.041944,2.44948974,3.5253548,-1.03723915,3.51049865,3.4949453,3.47995933
55.052436,4,3.52518446,0.689068602,3.5104162,3.49428361,3.47938419
55.062927,3.60555128,3.52502846,0.283765418,3.51034692,3.49362364,3.47880956
55.073419,2.82842712,3.52488721,-0.834541843,3.51029123,3.49296527,3.47823533
55.08391,2.82842712,3.5247612,-0.83446634,3.5102496,3.49230862,3.47766161
55.094402,3.46410162,3.52465087,-0.246067585,3.51022249,3.49165359,3.47708829
55.104894,4.24264069,3.52455675,0.847398333,3.51021039,3.49100026,3.47651542
55.115385,3.87298335,3.52447937,0.590342251,3.51021381,3.49034868,3.47594305
55.125877,4.35889894,3.52441927,0.913498589,3.51023331,3.48969876,3.47537108
55.136368,3.46410162,3.52437703,-0.245510528,3.51026943,3.48905064,3.47479961
55.14686,4.12310563,3.52435326,0.773790903,3.51032276,3.48840422,3.47422854
55.157352,3,3.5243486,-0.724119191,3.51039393,3.48775958,3.47365792
55.167843,3.46410162,3.52436371,-0.245483395,3.51048355,3.48711682,3.47308781
55.178335,3.16227766,3.5243993,-0.601765437,3.51059233,3.48647584,3.47251808
55.188826,3.60555128,3.5244561,0.28477215,3.51072093,3.4858368,3.47194886
55.199318,3.60555128,3.52453489,0.284633772,3.51087013,3.48519962,3.47138003
55.20981,3.16227766,3.52463649,-0.601962483,3.51104069,3.48456441,3.47081165
55.220301,4,3.52476174,0.689375265,3.51123339,3.48393129,3.47024376
55.230793,3.16227766,3.52491158,-0.602190931,3.51144912,3.48330018,3.46967627
55.241284,4.12310563,3.52508692,0.773316693,3.51168872,3.48267128,3.46910928
55.251776,3.46410162,3.52528881,-0.247360448,3.51195319,3.48204455,3.46854267
55.262268,4,3.52551829,0.688826329,3.51224348,3.48142012,3.46797651
55.272759,3.31662479,3.52577646,-0.457331028,3.51256058,3.48079816,3.46741085
55.283251,3.87298335,3.52606456,0.588998121,3.51290565,3.48017865,3.46684558
55.293742,3.31662479,3.52638379,-0.457994539,3.51327976,3.47956183,3.4662808
55.304234,4.12310563,3.52673554,0.772250015,3.51368418,3.47894772,3.46571641
55.314726,3.60555128,3.5271212,0.280053703,3.51412014,3.47833655,3.46515246
55.325217,3.74165739,3.52754222,0.462725797,3.51458893,3.47772854,3.46458901
55.335709,3.87298335,3.52800029,0.58735258,3.51509203,3.47712378,3.46402594
55.3462,3.46410162,3.52849702,-0.253762494,3.51563082,3.47652263,3.46346336
55.356692,3.31662479,3.52903431,-0.460879075,3.51620698,3.47592522,3.46290117
55.367184,4.47213595,3.52961406,0.970835666,3.5168221,3.47533193,3.46233942
55.377675,4,3.53023829,0.685391647,3.51747785,3.47474316,3.46177816
55.388167,4.24264069,3.53090934,0.84364172,3.5181762,3.47415919,3.46121729
55.398658,3.46410162,3.53162946,-0.259861211,3.51891895,3.47358061,3.4606569
55.40915,3.46410162,3.5324014,-0.261342268,3.51970832,3.47300785,3.4600969
55.419642,3.16227766,3.53322785,-0.609056805,3.5205464,3.4724416,3.45953733
55.430133,4.35889894,3.53411177,0.908177943,3.52143541,3.47188266,3.45897825
55.440625,2.82842712,3.5350566,-0.840612561,3.52237797,3.47133179,3.45841955
55.451116,2.64575131,3.53606577,-0.94356476,3.52337651,3.47079014,3.45786134
55.461608,3.74165739,3.5371434,0.452232224,3.52443395,3.47025883,3.45730352
55.4721,3.87298335,3.53829376,0.578523628,3.52555314,3.4697394,3.45674612
55.482591,3.74165739,3.53952153,0.449595209,3.52673707,3.46923366,3.45618921
55.493083,4.12310563,3.54083236,0.763068324,3.52798929,3.46874366,3.45563268
55.503574,3.87298335,3.54223204,0.575109819,3.52931306,3.46827215,3.45507663
55.514066,4,3.5437278,0.675479236,3.5307124,3.46782234,3.45452097
55.524558,3.31662479,3.54532764,-0.478228865,3.53219119,3.46739855,3.45396573
55.535049,3.16227766,3.54704137,-0.620293247,3.53375355,3.46700674,3.45341097
55.545541,3.87298335,3.54888269,0.569298391,3.53540434,3.46665591,3.4528566
55.556032,3.87298335,3.55087133,0.567549131,3.53714812,3.46636183,3.4523027
55.566524,3.31662479,3.55304193,-0.486227458,3.53899044,3.46615436,3.45174918
55.577016,3.46410162,3.55545765,-0.302251601,3.54093673,3.46609299,3.45119609
55.587507,3.60555128,3.55823802,0.217516104,3.54299277,3.46629492,3.45064348
55.597999,3.31662479,3.5616045,-0.494954253,3.54516539,3.4669812,3.45009125
55.60849,3,3.56594039,-0.752290096,3.54746104,3.46854057,3.44953949
55.618982,3.16227766,3.57186167,-0.63998751,3.54988761,3.47160089,3.44898811
55.629474,3.31662479,3.58025794,-0.51345219,3.55245284,3.47707413,3.44843715
55.639965,3.60555128,3.5922601,0.115287361,3.55516505,3.48612343,3.44788667
55.650457,5.29150262,3.60907814,1.29708307,3.55803403,3.49999546,3.44733656
55.660948,3.87298335,3.63165959,0.49124714,3.56106922,3.5196701,3.44678693
55.67144,3.46410162,3.66024421,-0.442879883,3.564282,3.54539639,3.44623767
55.681932,4.12310563,3.69389344,0.655142874,3.56768377,3.57620649,3.44568884
55.692423,4.24264069,3.73021663,0.715838009,3.57128682,3.60962872,3.44514048
55.702915,4,3.76541922,0.484335396,3.57510556,3.64173304,3.44459249
55.713406,3.31662479,3.79470729,-0.691435103,3.57915415,3.66754751,3.44404497
55.723898,3.16227766,3.81328952,-0.806853058,3.58344956,3.68208412,3.44349782
55.73439,4.47213595,3.81797921,0.808799572,3.58800903,3.68199249,3.4429511
55.744881,3.87298335,3.80873217,0.253478153,3.59285126,3.66715308,3.44240485
55.755373,3.87298335,3.78868759,0.290337309,3.59799818,3.64073562,3.44185896
55.765864,3.74165739,3.7626847,-0.145007989,3.60347167,3.60768998,3.44131355
55.776356,2.64575131,3.73558515,-1.04395107,3.60929789,3.57301735,3.4407685
55.786848,3.31662479,3.71127924,-0.628215289,3.61550381,3.54074371,3.44022387
55.797339,3.16227766,3.69223839,-0.727984017,3.62211895,3.51344207,3.43967971
55.807831,4.79583152,3.67947123,1.05657952,3.62917804,3.49216712,3.43913592
55.818322,3.31662479,3.67281018,-0.596812688,3.63671623,3.47674397,3.43859259
55.828814,2.64575131,3.6713593,-1.01272306,3.64477518,3.4662196,3.43804963
55.839306,4,3.67396283,0.570996642,3.65339883,3.4593547,3.43750709
55.849797,4.12310563,3.67953877,0.666008148,3.66263572,3.45497232,3.43696502
55.860289,2.82842712,3.68725324,-0.926728716,3.67254237,3.45214051,3.4364233
55.87078,3,3.6965516,-0.834596668,3.68317792,3.45021444,3.43588206
55.881272,4.12310563,3.70712184,0.644968047,3.6946122,3.44879138,3.43534117
55.891764,4,3.7188217,0.530262486,3.70692008,3.44764183,3.43480071
55.902255,4.35889894,3.73161928,0.79200989,3.72018507,3.44664359,3.4342607
55.912747,3.74165739,3.74555336,-0.062417761,3.73450464,3.44573438,3.43372106
55.923238,4.47213595,3.76069866,0.843467424,3.74998296,3.44488317,3.43318188
55.93373,3.74165739,3.7771627,-0.188428536,3.7667432,3.44407347,3.43264306
55.944222,4.12310563,3.79507107,0.572743013,3.78491999,3.44329601,3.43210465
55.954713,4.24264069,3.8145701,0.654271034,3.80466563,3.44254478,3.43156671
55.965205,4.12310563,3.83583454,0.535976755,3.82615932,3.44181527,3.43102913
55.975696,4,3.85905818,0.375422194,3.84959828,3.44110425,3.430492
55.986188,3.31662479,3.88447473,-0.753558187,3.87521915,3.4404089,3.42995524
55.99668,3.60555128,3.91235132,-0.553895342,3.90329146,3.4397271,3.42941888
56.007171,4,3.94300538,0.23873546,3.93413475,3.4390571,3.42888299
56.017663,3.74165739,3.97683142,-0.484947452,3.96814549,3.43839726,3.42834745
56.028154,4.24264069,4.01430725,0.477842479,4.00580324,3.43774646,3.42781237
56.038646,4.24264069,4.05605813,0.431952033,4.04773505,3.43710352,3.42727765
56.049138,3.74165739,4.10289128,-0.601027366,4.09474996,3.43646759,3.42674333
56.059629,3.16227766,4.15588446,-0.996798276,4.14792773,3.43583797,3.42620947
56.070121,4.69041576,4.21650862,0.688409139,4.20874165,3.4352139,3.42567597
56.080612,3.87298335,4.28672391,-0.643226685,4.27915455,3.43459492,3.42514292
56.091104,4.35889894,4.36916797,-0.101336224,4.36180723,3.43398045,3.42461023
56.101596,4.24264069,4.46724782,-0.473927349,4.46011015,3.43337011,3.42407794
56.112087,5.19615242,4.58523225,0.781613824,4.5783356,3.4327636,3.42354611
56.122579,5.38516481,4.72825721,0.810498365,4.72162258,3.43216049,3.42301463
56.13307,2.64575131,4.9020454,-1.50209657,4.89569556,3.43156061,3.42248361
56.143562,4.69041576,5.11258853,-0.649748239,5.10654602,3.4309636,3.42195294
56.154054,5.29150262,5.36542208,-0.271881324,5.35970649,3.4303693,3.42142267
56.164545,5.65685425,5.66489015,-0.0896431845,5.65951536,3.42977757,3.42089285
56.175037,6.164414,6.01347031,0.388514733,6.00844235,3.42918814,3.42036339
56.185528,7,6.41095005,0.767495897,6.40626592,3.42860096,3.41983438
56.19602,6.92820323,6.85426144,0.271922392,6.84990943,3.42801579,3.41930571
56.206512,8.18535277,7.33705132,0.921032816,7.33301217,3.42743256,3.41877745
56.217003,8.24621125,7.84964375,0.629736058,7.84589245,3.42685121,3.41824964
56.227495,8.60232527,8.37891716,0.472660664,8.37542483,3.42627154,3.41772218
56.237986,7.68114575,8.90731118,-1.10732354,8.9040462,3.42569357,3.41719517
56.248478,9.64365076,9.41211692,0.481179631,9.40904573,3.4251171,3.4166685
56.25897,11.4891253,9.86415198,1.27474441,9.86123893,3.42454213,3.41614224
56.269461,11.0905365,10.2285291,0.92844356,10.2257362,3.42396864,3.41561642
56.279953,10.9087121,10.4690552,0.663066318,10.4663422,3.42339645,3.41509095
56.290444,11.8743421,10.5567431,1.14786714,10.554068,3.42282564,3.41456593
56.300936,10.3440804,10.4799641,-0.368624079,10.4772845,3.42225602,3.41404125
56.311428,11.6619038,10.2489902,1.18866043,10.2462653,3.42168762,3.41351697
56.321919,10.3440804,9.89189678,0.672446019,9.88908889,3.42112045,3.41299314
56.332411,9,9.44462671,-0.66680335,9.44170168,3.42055435,3.41246965
56.342902,8.88819442,8.94230151,-0.232609313,8.93922863,3.4199894,3.41194661
56.353394,7.07106781,8.41434865,-1.15899993,8.41110015,3.41942547,3.41142391
56.363886,7.21110255,7.88401492,-0.820312358,7.88056595,3.41886257,3.41090161
56.374377,6.4807407,7.36914647,-0.942552797,7.36547554,3.41830072,3.41037974
56.384869,6.244998,6.88312422,-0.798828027,6.87921411,3.4177398,3.40985823
56.39536,6.32455532,6.43591399,-0.333704466,6.43175328,3.4171799,3.40933715
56.405852,5.19615242,6.03397899,-0.915328666,6.02956331,3.41662087,3.40881642
56.416344,4.79583152,5.68073752,-0.940694422,5.6760705,3.41606275,3.40829609
56.426835,4.24264069,5.37659232,-1.06487165,5.37168551,3.41550557,3.40777619
56.437327,4.58257569,5.11924414,-0.732576578,5.11411577,3.41494922,3.40725663
56.447818,4.24264069,4.90451824,-0.813558575,4.89919125,3.41439377,3.40673752
56.45831,5.56776436,4.72690455,0.916984086,4.72140395,3.41383911,3.40621875
56.468802,3.74165739,4.58049272,-0.915879543,4.5748434,3.41328528,3.40570036
56.479293,3.60555128,4.45952779,-0.924108495,4.45375275,3.41273231,3.40518242
56.489785,4,4.35882133,-0.599016971,4.35294073,3.41218008,3.40466482
56.500276,4.24264069,4.27405453,-0.177239519,4.26808541,3.41162869,3.40414765
56.510768,3.60555128,4.20173505,-0.772129376,4.19569147,3.41107803,3.40363082
56.52126,4.35889894,4.13919106,0.46873008,4.13308457,3.41052812,3.40311439
56.531751,3.87298335,4.08441029,-0.45981186,4.0782504,3.40997901,3.40259839
56.542243,4.69041576,4.03588427,0.809031208,4.02967885,3.4094306,3.40208272
56.552734,4.89897949,3.99251352,0.952085062,3.98626925,3.40888297,3.4015675
56.563226,3,3.95345953,-0.976452524,3.94718213,3.40833601,3.40105261
56.573718,4,3.91809441,0.28619152,3.91178888,3.40778976,3.40053811
56.584209,3.16227766,3.885927,-0.850675812,3.87959774,3.40724427,3.40002404
56.594701,3.60555128,3.85655417,-0.501001895,3.85020512,3.40669943,3.39951031
56.605192,2.64575131,3.82965529,-1.08807352,3.82328998,3.40615533,3.39899701
56.615684,3.60555128,3.80495044,-0.446541337,3.79857205,3.40561186,3.39848405
56.626176,2.64575131,3.78220776,-1.06604711,3.77581916,3.40506906,3.39797148
56.636667,3,3.76122626,-0.872482816,3.75483008,3.40452699,3.39745933
56.647159,3.46410162,3.74182476,-0.526994448,3.73542334,3.40398553,3.39694753
56.65765,3.46410162,3.72385171,-0.509656845,3.7174472,3.40344479,3.39643615
56.668142,3.31662479,3.70716656,-0.624933408,3.7007609,3.40290464,3.39592511
56.678634,3.87298335,3.69164988,0.425832668,3.68524485,3.40236514,3.39541445
56.689125,3.31662479,3.67719548,-0.600475385,3.67079267,3.40182633,3.39490422
56.699617,3.87298335,3.66370476,0.457469768,3.65730564,3.40128811,3.39439432
56.710108,3.60555128,3.65109501,-0.213409791,3.64470091,3.40075058,3.39388486
56.7206,3.16227766,3.63928744,-0.690658949,3.63289957,3.40021361,3.39337572
56.731092,3.60555128,3.62821495,-0.150544595,3.6218344,3.39967728,3.39286697
56.741583,4.12310563,3.61781714,0.710836467,3.61144492,3.39914161,3.39235865
56.752075,4.24264069,3.60803678,0.796620305,3.60167379,3.39860651,3.39185066
56.762566,4.58257569,3.59882602,0.991841557,3.59247309,3.39807207,3.39134309
56.773058,3.31662479,3.59013815,-0.522985045,3.58379604,3.39753818,3.39083586
56.78355,2,3.58193345,-1.25774936,3.57560284,3.3970049,3.390329
56.794041,3.60555128,3.57417583,0.177131163,3.56785735,3.39647227,3.38982257
56.804533,3.16227766,3.56683034,-0.636044562,3.56052456,3.39594018,3.38931648
56.815024,3.16227766,3.55986805,-0.630547687,3.55357547,3.39540874,3.3888108
56.825516,3.31662479,3.55325989,-0.48645154,3.546981,3.39487784,3.38830546
56.836008,4.12310563,3.54698133,0.759028523,3.54071654,3.39434753,3.3878005
56.846499,3.31662479,3.54100985,-0.473693006,3.53475955,3.39381785,3.38729595
56.856991,2.23606798,3.53532321,-1.13984877,3.52908774,3.39328869,3.38679174
56.867482,4.24264069,3.52990316,0.84423784,3.52368285,3.39276017,3.38628795
56.877974,3.60555128,3.52473091,0.284289223,3.51852604,3.39223217,3.38578449
56.888466,3.46410162,3.51979072,-0.235985383,3.51360154,3.39170475,3.3852814
56.898957,2.64575131,3.51506802,-0.932371551,3.50889476,3.39117794,3.38477874
56.909449,3.46410162,3.5105481,-0.215514456,3.50439097,3.39065166,3.3842764
56.91994,4,3.50621909,0.702695462,3.50007827,3.39012598,3.38377449
56.930432,3.46410162,3.50206839,-0.194850655,3.49594405,3.38960082,3.3832729
56.940924,3,3.49808557,-0.705751775,3.49197784,3.38907622,3.38277168
56.951415,3.74165739,3.49426091,0.497389663,3.48816993,3.38855223,3.38227089
56.961907,3.46410162,3.49058436,-0.162735186,3.48451023,3.38802875,3.38177042
56.972398,2.82842712,3.48704797,-0.811554585,3.48099079,3.38750586,3.38127037
56.98289,2.64575131,3.48364303,-0.915364257,3.47760288,3.38698348,3.38077065
56.993382,3.87298335,3.48036253,0.626594619,3.47433948,3.38646165,3.38027129
57.003873,3.31662479,3.47719962,-0.400717892,3.47119372,3.38594042,3.37977236
57.014365,3.46410162,3.47414732,-0.100228253,3.46815862,3.38541968,3.37927375
57.024856,2.82842712,3.47120019,-0.80173129,3.46522872,3.38489954,3.37877555
57.035348,3.46410162,3.46835203,-0.0651951731,3.46239782,3.38437989,3.37827768
57.04584,4,3.46559787,0.73102813,3.45966094,3.38386078,3.37778018
57.056331,3.60555128,3.46301558,0.377538995,3.45701341,3.38342672,3.3772831
57.066823,3.74165739,3.46043514,0.53030392,3.45445012,3.38290876,3.37678634
57.077314,3.60555128,3.45793512,0.384208473,3.45196726,3.38239139,3.37629
57.087806,4.12310563,3.45551103,0.817064624,3.44956029,3.38187451,3.37579397
57.098298,3.46410162,3.4531593,0.104605511,3.44722569,3.38135815,3.37529832
57.108789,4.24264069,3.45087662,0.889811252,3.4449601,3.38084238,3.37480308
57.119281,4.47213595,3.44865921,1.01167027,3.44275974,3.38032709,3.37430816
57.129772,3.16227766,3.44650436,-0.533129158,3.44062191,3.37981238,3.37381365
57.140264,3.60555128,3.4444087,0.401425674,3.43854324,3.37929814,3.37331947
57.150756,3.74165739,3.44236968,0.54707194,3.43652115,3.37878444,3.37282565
57.161247,3.31662479,3.44038486,-0.35179549,3.43455321,3.3782713,3.37233225
57.171739,3.87298335,3.43845139,0.659190378,3.43263658,3.37775864,3.37183916
57.18223,3.31662479,3.43656733,-0.346327212,3.43076928,3.37724655,3.37134649
57.192722,3.31662479,3.43473011,-0.343664543,3.42894877,3.37673494,3.37085413
57.203214,3.74165739,3.43293784,0.555625363,3.42717315,3.37622384,3.37036214
57.213705,3.74165739,3.43118874,0.557197137,3.42544061,3.37571332,3.36987057
57.224197,3.46410162,3.4294806,0.186067227,3.42374898,3.37520326,3.36937931
57.234688,2.44948974,3.42781201,-0.989101748,3.42209681,3.37469377,3.36888846
57.24518,4.12310563,3.42618098,0.834820125,3.42048213,3.37418475,3.36839792
57.255672,3.60555128,3.42458611,0.425400007,3.41890352,3.37367624,3.36790776
57.266163,3.16227766,3.42302604,-0.510635274,3.41735964,3.3731683,3.367418
57.276655,3.60555128,3.42149907,0.429013058,3.41584876,3.37266082,3.36692855
57.287146,3.87298335,3.42000415,0.673037295,3.41436984,3.37215391,3.36643952
57.297638,3.31662479,3.41853971,-0.319241155,3.41292132,3.37164746,3.3659508
57.30813,3.31662479,3.41710468,-0.316985635,3.41150212,3.37114152,3.36546244
57.318621,3.31662479,3.41569806,-0.314759072,3.41011123,3.37063614,3.3649745
57.329113,3.74165739,3.41431848,0.572135391,3.40874728,3.37013123,3.36448686
57.339604,3.31662479,3.41296516,-0.310387453,3.4074095,3.36962687,3.36399963
57.350096,3.74165739,3.41163685,0.574474137,3.40609662,3.36912298,3.36351272
57.360588,2.82842712,3.41033274,-0.762827384,3.40480784,3.3686196,3.36302617
57.371079,3.46410162,3.40905206,0.234626425,3.40354238,3.36811677,3.36254002
57.381571,3.16227766,3.40779369,-0.49549574,3.40229913,3.36761441,3.36205419
57.392062,4.12310563,3.40655707,0.846491913,3.40107752,3.36711261,3.36156877
57.402554,4.12310563,3.40534117,0.847209805,3.39987653,3.36661126,3.36108365
57.413046,2.82842712,3.40414538,-0.758761001,3.39869553,3.36611043,3.3605989
57.423537,3.74165739,3.4029691,0.58196932,3.39753392,3.36561015,3.36011455
57.434029,3.60555128,3.40181142,0.45137552,3.3963908,3.36511034,3.35963051
57.44452,3,3.40067191,-0.6329865,3.39526574,3.36461108,3.35914687
57.455012,4.47213595,3.39954974,1.03565738,3.3941579,3.36411228,3.35866355
57.465504,3.16227766,3.39844443,-0.485969929,3.3930668,3.36361399,3.35818058
57.475995,2.82842712,3.39735551,-0.754273418,3.39199196,3.36311626,3.35769802
57.486487,3.46410162,3.39628224,0.260421534,3.39093265,3.362619,3.35721577
57.496978,3.16227766,3.39522429,-0.482645453,3.38988854,3.36212229,3.35673392
57.50747,4.12310563,3.39418098,0.853770841,3.38885893,3.36162605,3.35625238
57.517962,3.60555128,3.39315192,0.46086805,3.38784345,3.36113031,3.3557712
57.528453,3.46410162,3.39213675,0.26826268,3.38684174,3.36063514,3.35529041
57.538945,3.87298335,3.39113485,0.69415308,3.38585315,3.36014043,3.35480994
57.549436,3.31662479,3.39014598,-0.271147912,3.38487746,3.35964629,3.35432987
57.559928,4,3.38916956,0.781556422,3.38391409,3.35915261,3.3538501
57.57042,2.82842712,3.38820529,-0.748183243,3.38296273,3.35865945,3.35337069
57.580911,4.12310563,3.38725289,0.857818589,3.38202309,3.35816685,3.35289168
57.591403,3.74165739,3.38631183,0.596108675,3.38109466,3.35767473,3.35241298
57.601894,3.16227766,3.38538195,-0.472339167,3.38017725,3.35718317,3.35193468
57.612386,3.87298335,3.38446273,0.698942498,3.37927036,3.35669208,3.35145668
57.622878,3.74165739,3.38355396,0.598417439,3.37837376,3.35620152,3.35097904
57.633369,2.44948974,3.3826554,-0.966005001,3.37748724,3.35571153,3.3505018
57.643861,3.46410162,3.38176661,0.286940763,3.37661032,3.35522201,3.35002486
57.654352,4.47213595,3.38088747,1.04462839,3.37574289,3.35473308,3.34954832
57.664844,3.74165739,3.38001755,0.601364978,3.37488452,3.35424462,3.34907209
57.675336,2.82842712,3.37915666,-0.742111541,3.37403502,3.3537567,3.3485962
57.685827,3.46410162,3.37830465,0.292911193,3.37319422,3.35326936,3.34812072
57.696319,4,3.3774611,0.789011343,3.37236172,3.35278251,3.34764554
57.70681,3.31662479,3.37662595,-0.244951343,3.37153745,3.35229624,3.34717075
57.717302,2.64575131,3.37579882,-0.854428175,3.37072101,3.35181047,3.34669627
57.727794,3.87298335,3.37497957,0.705693829,3.36991228,3.35132525,3.34622214
57.738285,4,3.37416807,0.7910954,3.36911111,3.35084062,3.34574841
57.748777,4.12310563,3.37336397,0.865876235,3.36831716,3.3503565,3.34527498
57.759268,4.12310563,3.37256723,0.866336188,3.36753037,3.34987298,3.34480194
57.76976,3,3.37177752,-0.609735619,3.36675041,3.34938998,3.34432921
57.780252,3.60555128,3.37099474,0.484310371,3.36597718,3.34890753,3.34385683
57.790743,3.74165739,3.37021878,0.609457631,3.36521056,3.34842571,3.34338484
57.801235,3.16227766,3.36944934,-0.455161158,3.36445024,3.34794441,3.34291315
57.811726,3.87298335,3.3686864,0.71013868,3.36369621,3.34746373,3.34244186
57.822218,3.46410162,3.36792967,0.310116024,3.36294816,3.34698359,3.34197087
57.83271,3.16227766,3.36717906,-0.452660362,3.36220601,3.34650404,3.34150022
57.843201,3.31662479,3.36643452,-0.223180935,3.36146969,3.34602513,3.34102997
57.853693,3.74165739,3.36569576,0.6131571,3.3607389,3.34554678,3.34056002
57.864184,4,3.36496279,0.796892222,3.36001365,3.34506908,3.34009046
57.874676,3.16227766,3.36423534,-0.449397018,3.35929366,3.34459195,3.33962121
57.885168,3.87298335,3.36351337,0.713771658,3.35857889,3.34411544,3.33915229
57.895659,3.16227766,3.36279682,-0.447793653,3.35786926,3.34363961,3.33868377
57.906151,3.31662479,3.36208544,-0.213215034,3.35716452,3.34316437,3.33821555
57.916642,3,3.36137927,-0.601148291,3.35646469,3.34268982,3.33774772
57.927134,3.46410162,3.36067806,0.32159533,3.35576952,3.34221589,3.33728019
57.937626,3,3.35998178,-0.599984818,3.35507896,3.34174263,3.33681301
57.948117,3.60555128,3.35929041,0.496246784,3.35439299,3.34127008,3.33634621
57.958609,2.64575131,3.35860371,-0.844305866,3.35371135,3.34079819,3.33587972
57.9691,3.87298335,3.35792173,0.717677933,3.35303408,3.34032704,3.33541361
57.979592,2.64575131,3.35724426,-0.843500414,3.35236096,3.33985656,3.3349478
57.990084,4.35889894,3.35657128,1.00116315,3.35169195,3.33938681,3.33448233
58.000575,3.46410162,3.35590279,0.328935905,3.35102702,3.33891786,3.33401726
58.011067,3,3.35523857,-0.596018932,3.35036597,3.33844961,3.33355248
58.021558,3.60555128,3.35457869,0.500971645,3.34970883,3.33798219,3.33308808
58.03205,2.82842712,3.35392295,-0.72491091,3.34905538,3.33751552,3.33262399
58.042542,2.82842712,3.35327136,-0.724461345,3.34840562,3.33704966,3.33216024
58.053033,3.31662479,3.35262393,-0.189734391,3.34775953,3.33658469,3.33169687
58.063525,3.16227766,3.35198047,-0.435548859,3.3471169,3.33612053,3.3312338
58.074016,2.44948974,3.35134105,-0.949658523,3.34647779,3.33565729,3.33077112
58.084508,3.46410162,3.35070552,0.336743372,3.34584199,3.33519491,3.33030873
58.095,3.16227766,3.35007388,-0.433354608,3.34520951,3.33473347,3.32984669
58.105491,3.16227766,3.34944615,-0.432629741,3.34458032,3.33427303,3.32938503
58.115983,3.60555128,3.34882219,0.506684401,3.34395426,3.33381354,3.32892366
58.126474,3,3.34820208,-0.590086506,3.34333137,3.33335513,3.32846268
58.136966,3,3.34758568,-0.589563977,3.34271146,3.33289773,3.328002
58.147458,3,3.34697303,-0.589044162,3.34209455,3.33244144,3.32754166
58.157949,3.16227766,3.34636415,-0.429053019,3.34148062,3.33198633,3.32708169
58.168441,3.46410162,3.34575894,0.344009704,3.34086951,3.33153236,3.32662203
58.178932,3.31662479,3.34515749,-0.16891625,3.34026128,3.33107968,3.32616275
58.189424,2.64575131,3.34455969,-0.835947593,3.33965575,3.33062824,3.32570376
58.199916,3.60555128,3.3439656,0.51145447,3.33905292,3.33017815,3.32524511
58.210407,3.46410162,3.34337529,0.347456941,3.33845282,3.32972952,3.32478684
58.220899,3.31662479,3.34278866,-0.161752493,3.33785526,3.32928231,3.32432887
58.23139,3.87298335,3.34220585,0.728544782,3.33726032,3.32883669,3.32387127
58.241882,3.74165739,3.34162677,0.632479735,3.33666784,3.32839266,3.32341398
58.252374,4.12310563,3.34105153,0.884338225,3.33607782,3.32795034,3.32295702
58.262865,3.60555128,3.34048022,0.514850515,3.33549028,3.32750986,3.32250044
58.273357,3,3.3399128,-0.583020412,3.33490505,3.32707125,3.32204415
58.283848,3.31662479,3.33934944,-0.150746976,3.33432222,3.3266347,3.32158824
58.29434,3.31662479,3.33879012,-0.14888024,3.33374163,3.32620025,3.32113263
58.304832,4,3.33823497,0.813489414,3.33316329,3.32576808,3.32067735
58.315323,3.46410162,3.33768417,0.355552307,3.33258721,3.32533836,3.32022245
58.325815,3.60555128,3.33713773,0.518086427,3.33201326,3.32491119,3.31976785
58.336306,3.31662479,3.33659589,-0.141319149,3.33144149,3.32448682,3.31931362
58.346798,3.60555128,3.33605871,0.519126729,3.33087178,3.32406537,3.31885968
58.35729,4,3.33552643,0.815152482,3.33030412,3.32364709,3.31840608
58.367781,3.60555128,3.3349993,0.520146113,3.32973855,3.32323226,3.31795286
58.378273,3.60555128,3.33447744,0.520647512,3.32917492,3.32282108,3.31749993
58.388764,3.16227766,3.33396124,-0.414347169,3.32861331,3.32241392,3.31704738
58.399256,3.46410162,3.33345088,0.361456414,3.32805358,3.32201103,3.31659511
58.409748,3.87298335,3.33294675,0.734871823,3.32749574,3.32161282,3.31614318
58.420239,3.74165739,3.33244929,0.639693753,3.32693983,3.32121975,3.31569163
58.430731,3.16227766,3.33195884,-0.411923751,3.3263857,3.32083221,3.31524037
58.441222,3.74165739,3.33147598,0.640454062,3.32583343,3.3204508,3.31478949
58.451714,3.87298335,3.33100119,0.736194371,3.32528289,3.32007604,3.31433889
58.462206,3,3.33053517,-0.574921879,3.32473411,3.31970864,3.31388863
58.472697,3.60555128,3.33007868,0.524854834,3.3241871,3.3193494,3.31343874
58.483189,3,3.32963248,-0.574136295,3.32364174,3.31899912,3.31298914
58.49368,2.64575131,3.32907271,-0.826632569,3.3230981,3.31853354,3.31253992
58.504172,3.74165739,3.32865044,0.642656168,3.32255606,3.31820458,3.31209099
58.514664,3.74165739,3.32824187,0.642973961,3.32201564,3.31788808,3.31164238
58.525155,3.46410162,3.32784855,0.369124724,3.32147688,3.31758558,3.31119416
58.535647,2.64575131,3.32747215,-0.825663875,3.32093963,3.3172988,3.31074622
58.546138,3,3.32711475,-0.571939467,3.32040399,3.31702986,3.31029865
58.55663,3.60555128,3.32677869,0.527989187,3.31986983,3.3167811,3.30985137
58.567122,4,3.32646681,0.820690676,3.31933718,3.31655542,3.30940443
58.577613,2.64575131,3.32618248,-0.82488252,3.31880606,3.31635618,3.30895785
58.588105,3.31662479,3.32592964,-0.0964616481,3.31827635,3.31618739,3.30851157
58.598596,3.74165739,3.32571319,0.644937358,3.31774815,3.31605396,3.30806565
58.609088,3.16227766,3.32553913,-0.404056266,3.31722131,3.31596193,3.30762003
58.61958,3.16227766,3.32541523,-0.403902921,3.31669588,3.31591912,3.30717473
58.630071,3.87298335,3.32535203,0.74002116,3.31617188,3.31593609,3.3067298
58.640563,4,3.32536471,0.821361851,3.3156492,3.31602811,3.30628517
58.651054,5.09901951,3.32547667,1.33174429,3.31512792,3.31621863,3.3058409
58.661546,4,3.32572569,0.821142075,3.31460792,3.31654557,3.30539692
58.672038,4,3.32617412,0.820868977,3.31408923,3.31707144,3.30495327
58.682529,3.60555128,3.32692431,0.527851273,3.31357189,3.31789888,3.30450999
58.693021,3.46410162,3.32814033,0.368729289,3.31305577,3.3191924,3.30406699
58.703512,3.87298335,3.33007315,0.736824402,3.31254097,3.32120362,3.30362436
58.714004,3.31662479,3.33308664,-0.128303759,3.31202736,3.32429735,3.30318202
58.724496,4.24264069,3.33767078,0.951299065,3.31151498,3.32896476,3.30274001
58.734987,3.46410162,3.34443042,0.345935249,3.31100386,3.33581216,3.30229837
58.745479,3,3.35403571,-0.595008999,3.31049389,3.34551124,3.30185701
58.75597,3.60555128,3.36711248,0.488301954,3.30998516,3.3586891,3.30141602
58.766462,3.46410162,3.38409498,0.282854439,3.30947755,3.37578069,3.30097532
58.776954,2.82842712,3.40503319,-0.759345814,3.30897109,3.39683562,3.30053494
58.787445,3.31662479,3.42941498,-0.335842502,3.30846582,3.42134002,3.30009493
58.797937,4,3.45603648,0.737538827,3.30796163,3.44808678,3.29965521
58.808428,4.12310563,3.4829141,0.800119695,3.30745861,3.47508754,3.29921585
58.81892,3.31662479,3.50733173,-0.436700056,3.30695663,3.49962025,3.29877678
58.829412,3,3.52605608,-0.725297234,3.30645575,3.51844506,3.29833803
58.839903,3.16227766,3.53597882,-0.611311015,3.30595599,3.52844772,3.29789965
58.850395,4.24264069,3.53521542,0.841085769,3.30552841,3.52767383,3.29746155
58.860886,3.87298335,3.52370146,0.59100075,3.30503083,3.51619244,3.29702382
58.871378,4,3.50355443,0.704588937,3.30453425,3.49605904,3.29658637
58.88187,3.16227766,3.47791135,-0.561812859,3.30403869,3.4704172,3.29614925
58.892361,3.31662479,3.44998295,-0.365182371,3.3035442,3.44248442,3.2957125
58.902853,4.47213595,3.42244248,1.0245455,3.30305066,3.41493966,3.29527602
58.913344,3.16227766,3.3972277,-0.484716454,3.30255817,3.38972501,3.29483991
58.923836,4.24264069,3.37549944,0.931204189,3.30206662,3.36800399,3.29440409
58.934328,3,3.35773402,-0.5981087,3.30157603,3.35025409,3.29396859
58.944819,2.64575131,3.34385541,-0.835526238,3.30108646,3.33639922,3.29353345
58.955311,3.74165739,3.33341393,0.638939325,3.30059779,3.32598872,3.29309859
58.965802,3.31662479,3.32577859,-0.0956754844,3.30011011,3.31839017,3.2926641
58.976294,3.60555128,3.32028097,0.534107017,3.29962332,3.31293364,3.29222989
58.986786,2.44948974,3.31632232,-0.931038441,3.29913745,3.309019,3.29179601
58.997277,3.31662479,3.31342022,0.0566089543,3.29865255,3.30616272,3.29136248
59.007769,4.24264069,3.3112176,0.965102632,3.2981685,3.30400693,3.29092924
59.01826,3,3.30946935,-0.556299694,3.29768539,3.30230598,3.29049636
59.028752,3.31662479,3.30801531,0.0927873013,3.29720312,3.30089933,3.29006377
59.039244,3.16227766,3.30675594,-0.38010299,3.29672174,3.29968726,3.28963149
59.049735,3,3.30563071,-0.552838773,3.29624127,3.29860906,3.28919958
59.060227,4,3.30460261,0.833904906,3.29576161,3.29762769,3.28876794
59.070718,3.87298335,3.30364899,0.75454248,3.29528285,3.29672044,3.28833667
59.08121,3.74165739,3.30275478,0.662497248,3.29480489,3.29587221,3.28790568
59.091702,3.60555128,3.30190971,0.551036806,3.29432777,3.29507272,3.28747502
59.102193,3.31662479,3.30110619,0.124573693,3.29385153,3.29431436,3.28704471
59.112685,2.64575131,3.30033806,-0.809065355,3.29337606,3.29359097,3.28661468
59.123176,3.74165739,3.29960065,0.664873472,3.29290145,3.29289788,3.28618502
59.133668,3.74165739,3.29888984,0.665407807,3.2924276,3.29223096,3.28575563
59.14416,3.16227766,3.29820235,-0.368679653,3.29195456,3.29158693,3.28532656
59.154651,3.46410162,3.29753543,0.408125213,3.29148235,3.29096304,3.28489786
59.165143,3.74165739,3.29688655,0.666911416,3.29101088,3.29035678,3.28446943
59.175634,3.46410162,3.2962538,0.409692343,3.29054023,3.28976622,3.28404136
59.186126,3.60555128,3.29563529,0.556700981,3.29007031,3.28918948,3.28361357
59.196618,2.82842712,3.29502958,-0.683083049,3.28960116,3.28862511,3.2831861
59.207109,4.47213595,3.29443539,1.08521913,3.28913281,3.28807185,3.282759
59.217601,2.82842712,3.29385149,-0.682220175,3.28866517,3.28752847,3.28233216
59.228092,3,3.29327698,-0.541550538,3.28819832,3.28699408,3.28190569
59.238584,3.74165739,3.29271089,0.670034696,3.28773217,3.28646769,3.2814795
59.249076,3.46410162,3.29215251,0.414667468,3.28726675,3.28594862,3.28105362
59.259567,3,3.2916012,-0.540001112,3.2868021,3.28543622,3.28062811
59.270059,3.87298335,3.29105628,0.762841444,3.28633814,3.28492982,3.28020287
59.28055,2.23606798,3.29051731,-1.02686383,3.28587493,3.28442899,3.27977799
59.291042,3.60555128,3.28998372,0.561753996,3.28541239,3.28393315,3.27935338
59.301534,3.87298335,3.28945515,0.763890171,3.28495055,3.28344196,3.2789291
59.312025,3.46410162,3.28893127,0.418533562,3.28448946,3.28295508,3.27850517
59.322517,3.74165739,3.28841165,0.673235278,3.28402902,3.28247209,3.27808152
59.333008,2.82842712,3.28789607,-0.677841389,3.28356931,3.28199278,3.27765823
59.3435,3.74165739,3.28738418,0.673997927,3.28311025,3.2815168,3.27723521
59.353992,3.31662479,3.28687577,0.172479032,3.28265186,3.28104394,3.27681251
59.364483,3.31662479,3.28637068,0.17393709,3.28219419,3.28057405,3.27639017
59.374975,3.60555128,3.2858686,0.565404879,3.28173714,3.28010682,3.2759681
59.385466,3.31662479,3.28536945,0.176791813,3.28128081,3.27964218,3.27554639
59.395958,3.74165739,3.28487296,0.67585829,3.28082508,3.27917986,3.27512495
59.40645,3.60555128,3.28437903,0.566720603,3.28037002,3.27871978,3.27470383
59.416941,2.82842712,3.28388758,-0.674878103,3.27991565,3.27826183,3.27428307
59.427433,4.12310563,3.28339837,0.916355418,3.27946188,3.2778058,3.27386258
59.437924,2.64575131,3.2829114,-0.79822308,3.27900879,3.27735168,3.27344245
59.448416,4.47213595,3.28242645,1.09073806,3.2785563,3.27689928,3.27302259
59.458908,2.44948974,3.28194347,-0.912389023,3.27810444,3.27644853,3.27260305
59.469399,3.74165739,3.28146243,0.678376708,3.27765325,3.2759994,3.27218386
59.479891,2,3.28098314,-1.13180526,3.27720264,3.27555173,3.27176495
59.490382,3,3.28050562,-0.529627817,3.27675269,3.27510552,3.2713464
59.500874,3,3.28002972,-0.52917834,3.27630332,3.27466062,3.27092811
59.511366,4.12310563,3.27955539,0.918449907,3.27585456,3.27421702,3.27051014
59.521857,3.87298335,3.27908264,0.770649534,3.27540645,3.27377469,3.27009253
59.532349,3.16227766,3.27861132,-0.341077199,3.2749589,3.2733335,3.26967519
59.54284,4.35889894,3.27814145,1.03959487,3.274512,3.27289348,3.2692582
59.553332,3.16227766,3.2776729,-0.339698755,3.27406565,3.27245451,3.26884149
59.563824,4,3.27720568,0.850173112,3.27361989,3.27201658,3.26842509
59.574315,2.64575131,3.27673978,-0.794347824,3.27317476,3.2715797,3.26800905
59.584807,2.23606798,3.27627506,-1.01990543,3.27273017,3.27114373,3.26759328
59.595298,3.31662479,3.2758116,0.202022756,3.27228621,3.27070875,3.26717786
59.60579,4,3.27534925,0.851264208,3.27184279,3.27027462,3.26676271
59.616282,3.60555128,3.27488803,0.575033257,3.27139994,3.26984136,3.26634788
59.626773,2.44948974,3.27442795,-0.908261091,3.2709577,3.26940898,3.2659334
59.637265,2.44948974,3.2739689,-0.908008348,3.270516,3.26897738,3.26551919
59.647756,3.16227766,3.27351094,-0.333516533,3.27007489,3.26854661,3.26510534
59.658248,4.47213595,3.27305395,1.09502603,3.26963431,3.26811656,3.26469176
59.66874,4,3.27259794,0.852878688,3.26919429,3.26768726,3.26427849
59.679231,3.60555128,3.27214295,0.577415207,3.26875486,3.26725873,3.26386557
59.689723,3.16227766,3.27168887,-0.330773649,3.26831595,3.26683086,3.26345292
59.700214,3.74165739,3.27123575,0.685872903,3.26787762,3.26640372,3.26304063
59.710706,2.44948974,3.27078349,-0.906252586,3.2674398,3.26597722,3.2626286
59.721198,4.24264069,3.27033212,0.98605708,3.26700253,3.26555136,3.26221689
59.731689,3.87298335,3.26976747,0.776669736,3.26656584,3.26501183,3.26180553
59.742181,3.16227766,3.26931802,-0.327170225,3.26612964,3.26458744,3.26139444
59.752672,2.64575131,3.26886944,-0.789378321,3.26569402,3.26416371,3.2609837
59.763164,3.46410162,3.26842165,0.442357282,3.26525889,3.26374054,3.26057324
59.773656,2.82842712,3.26797466,-0.662983813,3.26482429,3.26331795,3.26016308
59.784147,3.46410162,3.26752851,0.443365658,3.26439026,3.26289598,3.25975327
59.794639,4.12310563,3.26708309,0.925214859,3.26395671,3.26247454,3.25934374
59.80513,3.16227766,3.26663848,-0.323049258,3.26352372,3.2620537,3.25893455
59.815622,3.60555128,3.26619459,0.582543293,3.26309121,3.26163336,3.25852564
59.826114,2.64575131,3.26575143,-0.787400866,3.26265922,3.26121355,3.25811703
59.836605,4.24264069,3.26530906,0.988600845,3.26222778,3.26079432,3.25770878
59.847097,2.82842712,3.26486736,-0.660636233,3.26179681,3.26037557,3.25730079
59.857588,3.31662479,3.26442641,0.228469646,3.2613664,3.25995737,3.25689316
59.86808,4,3.26398613,0.85791251,3.26093645,3.25953963,3.25648579
59.878572,3.87298335,3.26354653,0.780664341,3.260507,3.2591224,3.25607873
59.889063,3,3.26310766,-0.512940216,3.26007809,3.25870569,3.25567203
59.899555,2.44948974,3.26266943,-0.901764763,3.25964965,3.25828943,3.25526559
59.910046,3.16227766,3.2622319,-0.316155412,3.25922174,3.25787369,3.2548595
59.920538,3.31662479,3.261795,0.234157627,3.25879429,3.25745838,3.25445368
59.93103,2.82842712,3.26135874,-0.657975391,3.25836733,3.25704354,3.25404817
59.941521,3.46410162,3.26092317,0.4507532,3.2579409,3.25662921,3.253643
59.952013,2.64575131,3.26048819,-0.784051581,3.25751492,3.25621529,3.25323811
59.962504,3.60555128,3.26005389,0.587790258,3.25708946,3.25580186,3.25283356
59.972996,3.74165739,3.25962017,0.694289003,3.25666445,3.25538884,3.25242928
59.983488,3.16227766,3.25918706,-0.31130275,3.25623993,3.25497626,3.25202531
59.993979,3.87298335,3.25875461,0.783727462,3.25581592,3.25456417,3.25162169
60.004471,3.46410162,3.25832272,0.453628584,3.25539235,3.25415247,3.25121834
60.014962,3.87298335,3.25789148,0.784277929,3.2549693,3.25374124,3.25081533
60.025454,3.16227766,3.25746078,-0.308517621,3.25454668,3.2533304,3.25041259
60.035946,3.46410162,3.25703068,0.455050478,3.25412453,3.25291998,3.25001016
60.046437,3.16227766,3.2566012,-0.307121373,3.2537029,3.25251002,3.24960807
60.056929,3.87298335,3.25617226,0.785373218,3.25328169,3.25210044,3.24920626
60.06742,2.23606798,3.25574393,-1.00979005,3.25286099,3.25169132,3.24880478
60.077912,3.87298335,3.25531613,0.785918073,3.25244072,3.25128256,3.24840358
60.088404,3.46410162,3.25488889,0.457397772,3.2520209,3.25087422,3.24800268
60.098895,2.82842712,3.25446226,-0.652713669,3.25160159,3.25046632,3.24760213
60.109387,3.46410162,3.25403614,0.458329003,3.2511827,3.25005878,3.24720185
60.119878,3.46410162,3.25361061,0.458792984,3.25076431,3.24965169,3.24680191
60.13037,3.74165739,3.25318559,0.698907571,3.25034633,3.24924495,3.24640224
60.140862,4,3.25276112,0.864429802,3.24992881,3.24883861,3.24600288
60.151353,3.31662479,3.25233722,0.253549932,3.24951178,3.2484327,3.24560386
60.161845,3.74165739,3.25191382,0.699816808,3.24909517,3.24802714,3.24520511
60.172336,3.74165739,3.251491,0.700118841,3.24867904,3.24762201,3.2448067
60.182828,4,3.25106866,0.865408195,3.24826332,3.24721723,3.24440856
60.19332,2.44948974,3.25064684,-0.895073796,3.24784805,3.24681283,3.24401072
60.203811,3.31662479,3.25022559,0.257680417,3.24743326,3.24640885,3.24361323
60.214303,3.60555128,3.24980482,0.596444846,3.24701887,3.24600522,3.24321601
60.224794,3.46410162,3.24938461,0.463375668,3.24660497,3.24560201,3.24281913
60.235286,3.60555128,3.24896486,0.597148569,3.24619147,3.24519913,3.24242251
60.245778,3.46410162,3.24854563,0.464280073,3.2457784,3.24479663,3.2420262
60.256269,3,3.24812694,-0.49812342,3.24536582,3.24439454,3.24163024
60.266761,3.16227766,3.24770872,-0.292285919,3.24495363,3.24399279,3.24123454
60.277252,3.46410162,3.24729104,0.465629229,3.24454191,3.24359145,3.24083918
60.287744,2.23606798,3.24687381,-1.0053884,3.24413059,3.24319044,3.24044409
60.298236,4.24264069,3.24645709,0.998089977,3.2437197,3.24278979,3.24004931
60.308727,3.31662479,3.24604089,0.265676308,3.24330928,3.24238955,3.23965486
60.319219,2.44948974,3.24562515,-0.8922642,3.24289925,3.24198964,3.23926069
60.32971,3.60555128,3.24520993,0.600284389,3.24248968,3.24159014,3.23886685
60.340202,3.60555128,3.24479516,0.600629768,3.24208051,3.24119095,3.23847328
60.350694,3,3.24438087,-0.494348935,3.24167176,3.24079213,3.23808001
60.361185,3.16227766,3.2439671,-0.285813649,3.24126347,3.24039371,3.23768709
60.371677,3.74165739,3.24355377,0.705764559,3.24085556,3.23999561,3.23729443
60.382168,3.16227766,3.24314096,-0.284364732,3.24044812,3.2395979,3.23690212
60.39266,3.31662479,3.24272858,0.271838569,3.24004106,3.23920052,3.23651006
60.403152,2.82842712,3.24231668,-0.643342484,3.23963441,3.23880349,3.23611832
60.413643,3.46410162,3.24190528,0.471377063,3.23922823,3.23840686,3.23572691
60.424135,2.64575131,3.24149431,-0.771843896,3.23882242,3.23801054,3.23533577
60.434626,3.60555128,3.24108385,0.603711378,3.23841706,3.23761461,3.23494496
60.445118,3.60555128,3.24067381,0.60405088,3.23801208,3.237219,3.23455443
60.45561,3.60555128,3.24026423,0.60438981,3.23760752,3.23682374,3.23416419
60.466101,2.82842712,3.23985515,-0.641426559,3.2372034,3.23642886,3.2337743
60.476593,3.46410162,3.2394465,0.473977973,3.23679966,3.2360343,3.23338467
60.487084,3.60555128,3.23903833,0.605403124,3.23639636,3.23564013,3.23299538
60.497576,2.64575131,3.23863059,-0.769986542,3.23599344,3.23524627,3.23260636
60.508068,3,3.23822329,-0.488081234,3.23559092,3.23485275,3.23221764
60.518559,3,3.23781649,-0.487664317,3.23518885,3.23445962,3.23182925
60.529051,3,3.23741009,-0.487247464,3.23478714,3.2340668,3.23144114
60.539542,3.46410162,3.23700418,0.476547407,3.23438588,3.23367436,3.23105336
60.550034,3.46410162,3.23659868,0.476972674,3.23398499,3.23328222,3.23066584
60.560526,3,3.23619363,-0.485997559,3.23358449,3.23289043,3.23027863
60.571017,3.31662479,3.23578905,0.284316262,3.23318444,3.23249903,3.22989176
60.581509,3.46410162,3.23538488,0.478243383,3.23278474,3.23210792,3.22950515
60.592,3,3.23498119,-0.484748584,3.23238549,3.2317172,3.22911887
60.602492,3,3.2345779,-0.484332424,3.2319866,3.23132678,3.22873287
60.612984,3,3.23417504,-0.483916357,3.2315881,3.2309367,3.22834716
60.623475,3,3.23377266,-0.483500423,3.23119004,3.23054699,3.22796179
60.633967,3.46410162,3.23337067,0.480344608,3.23079233,3.23015759,3.22757669
60.644458,3.16227766,3.23296916,-0.265878728,3.23039506,3.22976857,3.22719192
60.65495,2.64575131,3.23256804,-0.766039637,3.22999815,3.22937984,3.22680742
60.665442,2.44948974,3.23216735,-0.884690682,3.22960163,3.22899146,3.22642322
60.675933,3.60555128,3.23176712,0.611378896,3.22920554,3.22860345,3.22603935
60.686425,2.64575131,3.23136729,-0.765255496,3.2288098,3.22821573,3.22565575
60.696916,4.12310563,3.23096791,0.944530418,3.22841449,3.22782839,3.22527248
60.707408,3.16227766,3.23056893,-0.261325986,3.22801953,3.22744135,3.22488948
60.7179,3.87298335,3.23017037,0.801756182,3.22762496,3.22705465,3.22450678
60.728391,2.82842712,3.22977227,-0.633518072,3.22723082,3.22666831,3.22412442
60.738883,3.60555128,3.22937456,0.61333247,3.22683703,3.22628228,3.22374231
60.749374,2.82842712,3.2289773,-0.632890334,3.22644366,3.22589661,3.22336055
60.759866,3.16227766,3.22858042,-0.257493229,3.22605064,3.22551124,3.22297905
60.770358,3,3.22818396,-0.477686053,3.225658,3.22512621,3.22259784
60.780849,3.46410162,3.22778796,0.486121028,3.22526579,3.22474154,3.22221698
60.791341,2.82842712,3.22739234,-0.63163693,3.22487392,3.22435717,3.22183637
60.801832,3.16227766,3.22699716,-0.254400282,3.22448247,3.22397316,3.2214561
60.812324,2.82842712,3.22660237,-0.631011285,3.22409136,3.22358945,3.2210761
60.822816,3.16227766,3.22620798,-0.252844464,3.22370064,3.22320607,3.22069639
60.833307,3.16227766,3.22581405,-0.252064255,3.22331034,3.22282306,3.22031702
60.843799,3.60555128,3.22542049,0.616547474,3.22292037,3.22244034,3.21993791
60.85429,3.16227766,3.22502737,-0.250498929,3.22253083,3.22205799,3.21955914
60.864782,3,3.22463463,-0.47395636,3.22214162,3.22167593,3.21918063
60.875274,2.64575131,3.2242423,-0.760585948,3.22175279,3.2212942,3.21880242
60.885765,3.46410162,3.22385041,0.490154271,3.22136438,3.22091283,3.21842454
60.896257,3.31662479,3.22345888,0.305230907,3.22097631,3.22053176,3.21804692
60.906748,3,3.2230678,-0.472300544,3.22058865,3.22015105,3.21766964
60.91724,3.46410162,3.22267709,0.491349696,3.22020132,3.21977063,3.21729262
60.927732,3.87298335,3.22228678,0.80665765,3.21981437,3.21939053,3.2169159
60.938223,3.74165739,3.22189691,0.720944154,3.21942784,3.2190108,3.21653951
60.948715,3.31662479,3.22150741,0.30841106,3.21904163,3.21863136,3.21616339
60.959206,3.46410162,3.22111834,0.492933336,3.21865584,3.21825229,3.21578759
60.969698,3.87298335,3.22072964,0.807622256,3.21827038,3.2178735,3.21541206
60.98019,3.46410162,3.22034133,0.493720855,3.2178853,3.21749504,3.21503683
60.990681,3.16227766,3.21995346,-0.240157872,3.21750062,3.21711694,3.21466193
61.001173,2.82842712,3.21956596,-0.625410929,3.21711628,3.21673913,3.21428729
61.011664,3.87298335,3.21917905,0.808581658,3.21673234,3.21636185,3.21391299
61.022156,2.82842712,3.21879233,-0.624792132,3.21634873,3.21598468,3.21353895
61.032648,2.82842712,3.21840601,-0.624482897,3.2159655,3.21560784,3.2131652
61.043139,3.16227766,3.21802013,-0.236098423,3.21558266,3.21523137,3.21279179
61.053631,3,3.21763459,-0.466513231,3.21520016,3.21485518,3.21241864
61.064122,3.46410162,3.21724949,0.496842149,3.21481806,3.21447934,3.21204582
61.074614,3.16227766,3.21686475,-0.2336388,3.2144363,3.2141038,3.21167326
61.085106,3.60555128,3.2164804,0.623755464,3.21405489,3.21372858,3.211301
61.095597,3.16227766,3.21609647,-0.231988817,3.21367389,3.21335371,3.21092907
61.106089,3.16227766,3.2157129,-0.231160638,3.21329322,3.21297914,3.2105574
61.11658,3.16227766,3.21532976,-0.230330407,3.21291295,3.21260492,3.21018606
61.127072,3.74165739,3.21494697,0.72574818,3.21253301,3.21223098,3.20981499
61.137564,3.87298335,3.21456456,0.811430085,3.21215343,3.21185737,3.20944421
61.148055,1.73205081,3.21418259,-1.21742835,3.21177425,3.21148412,3.20907376
61.158547,3.60555128,3.21380096,0.625899606,3.2113954,3.21111115,3.20870357
61.169038,4.12310563,3.21341976,0.953774538,3.21101694,3.21073853,3.20833371
61.17953,3.16227766,3.2130389,-0.225302559,3.21063882,3.21036621,3.20796412
61.190022,3.46410162,3.21265844,0.501441102,3.21026105,3.2099942,3.20759482
61.200513,3.16227766,3.21227839,-0.223608433,3.20988368,3.20962255,3.20722585
61.211005,2.82842712,3.21189869,-0.619250814,3.20950663,3.20925118,3.20685714
61.221496,4.24264069,3.21151942,1.01544142,3.20912998,3.20888017,3.20648876
61.231988,3.74165739,3.21114049,0.728365908,3.20875366,3.20850944,3.20612065
61.24248,3.31662479,3.21076195,0.325365708,3.20837769,3.20813903,3.20575282
61.252971,3.87298335,3.21038382,0.814002166,3.20800212,3.20776897,3.20538533
61.263463,3.31662479,3.21000604,0.326525265,3.20762687,3.2073992,3.2050181
61.273954,3.46410162,3.20962868,0.504453105,3.20725202,3.20702978,3.2046512
61.284446,3.46410162,3.20925166,0.504826654,3.20687749,3.20666065,3.20428456
61.294938,3.16227766,3.20887503,-0.215864239,3.20650332,3.20629183,3.20391821
61.305429,4.47213595,3.20849881,1.12411616,3.20612954,3.20592337,3.20355219
61.315921,3,3.20812294,-0.45620493,3.20575608,3.20555519,3.20318643
61.326412,4.12310563,3.20774748,0.956743511,3.20538301,3.20518737,3.20282101
61.336904,2.64575131,3.20737237,-0.749413808,3.20501027,3.20481982,3.20245584
61.347396,2.64575131,3.20699763,-0.749163747,3.20463788,3.20445259,3.20209096
61.357887,3.46410162,3.20662331,0.507423201,3.20426588,3.20408572,3.20172642
61.368379,3.46410162,3.20624933,0.507791574,3.2038942,3.20371913,3.20136213
61.37887,3.16227766,3.20587577,-0.2088016,3.20352292,3.20335288,3.20099818
61.389362,4.12310563,3.20550255,0.957916009,3.20315195,3.20298693,3.20063448
61.399854,3.46410162,3.2051297,0.508892831,3.20278134,3.20262128,3.20027108
61.410345,3.46410162,3.20475727,0.509258624,3.20241112,3.20225599,3.199908
61.420837,2.23606798,3.20438518,-0.984031097,3.20204121,3.20189098,3.19954519
61.431328,3.31662479,3.2040135,0.335576059,3.2016717,3.20152632,3.1991827
61.44182,3.31662479,3.20364216,0.336128888,3.20130251,3.20116194,3.19882048
61.452312,2.64575131,3.2032712,-0.746672544,3.20093367,3.20079788,3.19845854
61.462803,3.74165739,3.20290065,0.734000504,3.20056522,3.20043417,3.19809694
61.473295,4.47213595,3.20253044,1.12676773,3.20019708,3.20007074,3.19773559
61.483786,3,3.20216064,-0.44962277,3.19982934,3.19970765,3.19737457
61.494278,4,3.20179117,0.893425333,3.19946191,3.19934485,3.19701381
61.50477,3.16227766,3.20142209,-0.197849509,3.19909484,3.19898237,3.19665334
61.515261,4.35889894,3.20105341,1.07603231,3.19872816,3.19862023,3.1962932
61.525753,4,3.20068507,0.89404414,3.19836179,3.19825837,3.19593332
61.536244,4,3.20031715,0.894249883,3.19799581,3.19789686,3.19557377
61.546736,3.46410162,3.19994956,0.513957252,3.19763015,3.19753564,3.19521448
61.557228,3,3.19958234,-0.446746398,3.19726484,3.19717472,3.19485547
61.567719,3,3.19921554,-0.446335678,3.19689992,3.19681416,3.1944968
61.578211,3.31662479,3.19884907,0.343184673,3.19653532,3.19645387,3.19413838
61.588702,4.12310563,3.19848301,0.961572989,3.1961711,3.19609393,3.19378029
61.599194,3.16227766,3.198132,-0.189352413,3.19582192,3.19573428,3.19342246
61.609686,3.16227766,3.19776666,-0.188385238,3.19545838,3.19537493,3.19306492
61.620177,3.60555128,3.19740173,0.638865829,3.19509523,3.19501593,3.19270771
61.630669,2,3.19703714,-1.09409192,3.19473239,3.19465722,3.19235075
61.64116,4.12310563,3.19667295,0.962513726,3.19436995,3.19429885,3.19199413
61.651652,2.64575131,3.19630911,-0.74199582,3.19400782,3.19394075,3.19163776
61.662144,3.16227766,3.19594564,-0.183488356,3.19364604,3.19358298,3.19128168
61.672635,3.60555128,3.19558257,0.640287984,3.19328465,3.19322554,3.19092593
61.683127,3,3.19521985,-0.441836903,3.19292358,3.19286839,3.19057043
61.693618,3.74165739,3.19485753,0.739459163,3.1925629,3.19251158,3.19021526
61.70411,2.82842712,3.19449556,-0.605035892,3.19220253,3.19215506,3.18986035
61.714602,3.60555128,3.19413395,0.641418213,3.19184252,3.19179884,3.18950573
61.725093,3.46410162,3.19377276,0.519931591,3.19148289,3.19144297,3.18915144
61.735585,3.74165739,3.1934119,0.740436012,3.19112359,3.19108738,3.1887974
61.746076,3.60555128,3.19305145,0.642261492,3.19076467,3.19073213,3.18844369
61.756568,3.16227766,3.19269134,-0.174395191,3.19040607,3.19037717,3.18809024
61.76706,3.74165739,3.19233161,0.741165149,3.19004783,3.19002251,3.18773707
61.777551,2.82842712,3.19197228,-0.602947062,3.18968997,3.1896682,3.18738424
61.788043,3.46410162,3.1916133,0.522004134,3.18933243,3.18931417,3.18703166
61.798534,3.31662479,3.19125472,0.354076357,3.18897528,3.18896048,3.1866794
61.809026,3,3.19089649,-0.436917028,3.18861845,3.18860707,3.1863274
61.819518,3.60555128,3.19053863,0.64421475,3.18826198,3.18825398,3.18597569
61.830009,4.47213595,3.19018118,1.13223442,3.1879059,3.18790122,3.18562431
61.840501,3.16227766,3.18982408,-0.165971127,3.18755014,3.18754875,3.18527318
61.850992,3,3.18946738,-0.435278507,3.18719477,3.18719662,3.18492238
61.861484,2.64575131,3.18911103,-0.737129374,3.18683972,3.18684476,3.18457184
61.871976,3.16227766,3.18875505,-0.162718742,3.18648503,3.18649322,3.18422158
61.882467,4.24264069,3.18839948,1.02676249,3.18613073,3.18614202,3.18387165
61.892959,4.35889894,3.18804426,1.08206039,3.18577675,3.1857911,3.18352198
61.90345,3.74165739,3.18768946,0.744290219,3.18542316,3.18544052,3.18317263
61.913942,3.16227766,3.18733499,-0.158295084,3.1850699,3.18509022,3.18282353
61.924434,4,3.18698091,0.901675712,3.18471701,3.18474023,3.18247473
61.934925,2.44948974,3.18662724,-0.85856712,3.1843645,3.18439058,3.18212625
61.945417,2.44948974,3.18627392,-0.858361332,3.18401232,3.18404121,3.18177803
61.955908,3.31662479,3.18592101,0.361529774,3.18366054,3.18369219,3.18143013
61.9664,3.60555128,3.18556845,0.648060816,3.18330908,3.18334344,3.18108248
61.976892,3.74165739,3.18521628,0.745949803,3.18295799,3.182995,3.18073513
61.987383,3.60555128,3.18486452,0.648603697,3.18260729,3.1826469,3.1803881
61.997875,3.60555128,3.18451311,0.648874536,3.18225692,3.18229908,3.18004132
62.008366,2.23606798,3.18416212,-0.973701261,3.18190695,3.18195161,3.17969487
62.018858,3,3.18381149,-0.428732418,3.18155732,3.1816044,3.17934867
62.02935,3,3.18346124,-0.428323751,3.18120805,3.18125751,3.17900277
62.039841,2.82842712,3.18311141,-0.595553761,3.18085918,3.18091097,3.17865718
62.050333,3,3.18276193,-0.427506647,3.18051065,3.18056469,3.17831185
62.060824,2.64575131,3.18241288,-0.732571888,3.18016252,3.18021876,3.17796685
62.071316,2.82842712,3.18206419,-0.594673914,3.17981473,3.17987311,3.1776221
62.081808,2.82842712,3.18171589,-0.594380991,3.1794673,3.17952777,3.17727764
62.092299,3.60555128,3.18136801,0.651293532,3.17912029,3.17918276,3.1769335
62.102791,3.46410162,3.1810205,0.53205368,3.17877361,3.17883804,3.17658961
62.113282,3,3.18067341,-0.425056949,3.17842735,3.17849365,3.17624605
62.123774,2.44948974,3.18032669,-0.854890019,3.17808142,3.17814955,3.17590274
62.134266,4.24264069,3.17998036,1.03085417,3.17773588,3.17780575,3.17555973
62.144757,3.46410162,3.17963447,0.533354614,3.17739075,3.17746229,3.17521703
62.155249,2.44948974,3.17928895,-0.854282859,3.17704596,3.17711911,3.17487459
62.16574,4.24264069,3.17894386,1.03135679,3.17670159,3.17677627,3.17453247
62.176232,3.31662479,3.17859914,0.371518035,3.17635757,3.1764337,3.17419061
62.186724,4.24264069,3.17825483,1.03169078,3.17601394,3.17609145,3.17384903
62.197215,2.64575131,3.17791096,-0.729492731,3.17567072,3.17574953,3.17350777
62.207707,2.23606798,3.17756746,-0.970308963,3.17532786,3.1754079,3.17316677
62.218198,3.31662479,3.17722441,0.373363604,3.17498543,3.1750666,3.1728261
62.22869,3.31662479,3.17688174,0.37382222,3.17464336,3.17472558,3.17248567
62.239182,3,3.17653948,-0.420166018,3.17430168,3.17438486,3.17214554
62.249673,4.24264069,3.17619768,1.03268728,3.17396043,3.17404449,3.17180572
62.260165,2,3.17585626,-1.08436906,3.17361954,3.17370439,3.17146616
62.270656,2.23606798,3.17551529,-0.969250905,3.17327909,3.17336464,3.17112692
62.281148,2.23606798,3.17517472,-0.969075201,3.17293902,3.17302516,3.17078793
62.29164,2.82842712,3.17483458,-0.58856389,3.17259935,3.17268598,3.17044924
62.302131,3,3.17449489,-0.41772586,3.17226012,3.17234715,3.17011086
62.312623,2.64575131,3.17415561,-0.726914231,3.17192127,3.17200859,3.16977274
62.323114,2.64575131,3.17381679,-0.726681143,3.17158286,3.17167038,3.16943493
62.333606,3.16227766,3.17347839,-0.105833478,3.17124485,3.17133244,3.16909738
62.344098,3.74165739,3.17314042,0.754000643,3.17090725,3.1709948,3.16876012
62.354589,3.60555128,3.17280293,0.657836112,3.17057011,3.17065751,3.16842318
62.365081,3,3.17246585,-0.415290079,3.17023336,3.17032049,3.16808649
62.375572,2,3.17212926,-1.08264919,3.16989708,3.16998381,3.16775013
62.386064,3.46410162,3.17179309,0.540655644,3.1695612,3.16964741,3.16741401
62.396556,3,3.17145738,-0.414074125,3.16922576,3.16931132,3.16707819
62.407047,3.87298335,3.17112217,0.837771555,3.16889079,3.16897556,3.16674268
62.417539,2.82842712,3.17078739,-0.5851156,3.16855624,3.16864008,3.16640742
62.42803,4.24264069,3.17045312,1.03546491,3.16822217,3.16830494,3.16607249
62.438522,3.16227766,3.17011929,-0.088552958,3.16788853,3.16797008,3.16573781
62.449014,3.16227766,3.16978594,-0.086650325,3.16755535,3.16763552,3.16540341
62.459505,2.82842712,3.16945311,-0.583974302,3.16722266,3.16730131,3.16506934
62.469997,4.12310563,3.16912074,0.976721498,3.16689041,3.16696736,3.16473552
62.480488,3.31662479,3.1687889,0.384494329,3.16655867,3.16663376,3.16440201
62.49098,4.24264069,3.16845753,1.03642807,3.16622739,3.16630043,3.16406877
62.501472,2.64575131,3.16812667,-0.722755396,3.16589659,3.16596741,3.1637358
62.511963,3.46410162,3.16779636,0.544339281,3.16556631,3.16563473,3.16340316
62.522455,3.31662479,3.16746654,0.386210109,3.16523651,3.16530233,3.16307077
62.532946,3,3.16713728,-0.408824268,3.16490724,3.16497026,3.16273869
62.543438,3.16227766,3.16680853,-0.0673117189,3.16457846,3.16463847,3.16240687
62.55393,2.82842712,3.16648032,-0.58142342,3.1642502,3.16430699,3.16207534
62.564421,2.82842712,3.16615269,-0.581141606,3.16392251,3.16397584,3.16174412
62.574913,3,3.16582559,-0.407216889,3.16359532,3.16364497,3.16141316
62.585404,3.60555128,3.1654991,0.663364286,3.16326871,3.16331444,3.16108252
62.595896,3.74165739,3.16517315,0.75926559,3.16294263,3.16298419,3.16075212
62.606388,3.46410162,3.16484779,0.54704097,3.16261712,3.16265424,3.16042202
62.616879,2.44948974,3.16452306,-0.845596429,3.16229221,3.16232463,3.16009223
62.627371,3.60555128,3.16419891,0.664343557,3.16196787,3.1619953,3.15976269
62.637862,3.16227766,3.16387542,-0.0399719473,3.16164415,3.1616663,3.15943347
62.648354,3,3.16355252,-0.404416273,3.16132101,3.16133758,3.15910451
62.658846,3.16227766,3.16323027,-0.0308644251,3.1609985,3.16100917,3.15877583
62.669337,3.31662479,3.16290871,0.392066418,3.16067666,3.1606811,3.15844746
62.679829,3.87298335,3.1625878,0.84284966,3.16035543,3.1603533,3.15811935
62.69032,3.74165739,3.1622676,0.761176581,3.1600349,3.16002584,3.15779156
62.700812,3.60555128,3.16194807,0.666035435,3.15971503,3.15969866,3.15746402
62.711304,2.82842712,3.16162927,-0.577236645,3.15939585,3.15937178,3.15713676
62.721795,3,3.16131123,-0.401635695,3.15907742,3.15904524,3.15680982
62.732287,3,3.16099392,-0.401240476,3.15875969,3.15871898,3.15648313
62.742778,2.44948974,3.16067741,-0.843319435,3.15844274,3.15839305,3.15615676
62.75327,3,3.16036167,-0.400451833,3.15812653,3.1580674,3.15583064
62.763762,4.24264069,3.16004675,1.04047775,3.15781113,3.15774206,3.15550481
62.774253,3,3.15973269,-0.399665725,3.15749656,3.15741706,3.15517929
62.784745,3.87298335,3.15941947,0.844727101,3.15718281,3.15709233,3.15485402
62.795236,2.64575131,3.15910717,-0.716488562,3.15686996,3.15676794,3.15452907
62.805728,3.31662479,3.15879579,0.397276981,3.15655797,3.15644386,3.15420437
62.81622,3,3.15848533,-0.398102154,3.15624691,3.15612005,3.15387996
62.826711,2.82842712,3.15817587,-0.574237531,3.15593683,3.15579658,3.15355586
62.837203,3.46410162,3.15786739,0.553384339,3.15562771,3.15547339,3.15323202
62.847694,3.46410162,3.15755999,0.553662017,3.15531964,3.15515054,3.15290848
62.858186,4.12310563,3.15725364,0.982777691,3.1550126,3.15482796,3.1525852
62.868678,3.46410162,3.15694841,0.554214045,3.15470666,3.15450569,3.15226221
62.879169,3.60555128,3.15664437,0.670005151,3.1544019,3.15418376,3.15193953
62.889661,3.87298335,3.15634152,0.846547002,3.15409828,3.1538621,3.1516171
62.900152,3.31662479,3.15603995,0.400730382,3.15379593,3.15354078,3.15129499
62.910644,3.46410162,3.15573966,0.555303477,3.15349484,3.15321974,3.15097312
62.921136,4,3.15544074,0.918999053,3.15319509,3.15289901,3.15065155
62.931627,3.46410162,3.15514327,0.555840216,3.15289677,3.15257861,3.15033028
62.942119,3.60555128,3.15484726,0.671344933,3.15259989,3.15225849,3.15000927
62.95261,3.60555128,3.15455283,0.671564181,3.15230456,3.15193871,3.14968857
62.963102,3.31662479,3.15425999,0.402945152,3.15201081,3.1516192,3.14936812
62.973594,4.24264069,3.15396887,1.04339437,3.15171874,3.1513,3.14904796
62.984085,3.87298335,3.15367956,0.84811779,3.15142846,3.15098114,3.14872811
62.994577,2.82842712,3.15339211,-0.570056998,3.15114001,3.15066256,3.14840851
63.005068,1.73205081,3.15310666,-1.19208047,3.15085355,3.15034431,3.14808923
63.01556,3,3.15282327,-0.390926163,3.15056912,3.15002634,3.1477702
63.026052,3.16227766,3.15254207,0.0986690814,3.15028687,3.14970868,3.14745145
63.036543,3.16227766,3.15226323,0.10007213,3.15000694,3.14939136,3.14713301
63.047035,3.87298335,3.15198682,0.849115146,3.14972942,3.14907431,3.14681483
63.057526,3,3.15171303,-0.389503568,3.1494545,3.14875761,3.14649695
63.068018,3.87298335,3.15144198,0.849435912,3.14918229,3.14844117,3.14617933
63.07851,2.82842712,3.15117386,-0.568108028,3.14891299,3.14812505,3.14586199
63.089001,3,3.15090888,-0.38846992,3.14864681,3.14780927,3.14554497
63.099493,3,3.1506472,-0.388132965,3.1483839,3.14749376,3.14522819
63.109984,3,3.15038909,-0.38780032,3.14812454,3.14717859,3.14491173
63.120476,3.46410162,3.15013474,0.56032747,3.14786892,3.1468637,3.14459552
63.130968,3.87298335,3.14988445,0.850352219,3.14761733,3.14654911,3.14427959
63.141459,3.74165739,3.14963853,0.769427615,3.1473701,3.14623487,3.14396398
63.151951,3.16227766,3.14939726,0.113491853,3.14712748,3.1459209,3.14364861
63.162442,3.46410162,3.14916103,0.56119567,3.14688989,3.14560727,3.14333356
63.172934,3.60555128,3.1489302,0.675737428,3.14665767,3.14529392,3.14301876
63.183426,3.74165739,3.14870522,0.770033873,3.14643127,3.14498088,3.14270424
63.193917,3,3.14848658,-0.38533957,3.1462112,3.14466817,3.14239003
63.204409,2.64575131,3.14827478,-0.7088889,3.14599795,3.14435575,3.14207607
63.2149,3.16227766,3.14807045,0.119194004,3.14579214,3.14404366,3.14176242
63.225392,3.46410162,3.1478742,0.562341014,3.14559439,3.14373185,3.14144903
63.235884,3,3.14768679,-0.384300386,3.14540545,3.14342035,3.14113591
63.246375,2.64575131,3.14750905,-0.708348599,3.14522617,3.14310918,3.14082311
63.256867,2.64575131,3.14734187,-0.708230585,3.14505744,3.1427983,3.14051056
63.267358,3.60555128,3.14718633,0.67702655,3.14490031,3.14248775,3.14019832
63.27785,3,3.14704355,-0.383462578,3.14475593,3.14217749,3.13988633
63.288342,3.87298335,3.14691488,0.852096511,3.14462565,3.14186753,3.13957462
63.298833,3.60555128,3.14680184,0.677310441,3.14451098,3.14155791,3.13926322
63.309325,2.82842712,3.14670613,-0.564162219,3.14441362,3.14124857,3.13895207
63.319816,2.64575131,3.14662977,-0.70772767,3.14433559,3.14093957,3.13864123
63.330308,2.23606798,3.14657504,-0.954204938,3.14427919,3.14063085,3.13833064
63.3408,3.16227766,3.1465447,0.125431081,3.14424716,3.14032244,3.13802034
63.351291,3.74165739,3.14654204,0.771437197,3.1442428,3.14001436,3.13771034
63.361783,3.46410162,3.14657105,0.563498502,3.14427011,3.13970657,3.13740059
63.372274,3.16227766,3.14663676,0.125063578,3.14433412,3.13939911,3.13709116
63.382766,3,3.14674558,-0.383073853,3.14444123,3.13909194,3.13678197
63.393258,4,3.14690583,0.92363097,3.14459979,3.13878508,3.13647307
63.403749,3.16227766,3.14712852,0.123081841,3.1448208,3.13847855,3.13616447
63.414241,3.16227766,3.14742838,0.121857611,3.14511902,3.13817231,3.13585612
63.424732,3.74165739,3.14782501,0.770605201,3.14551404,3.1378664,3.13554809
63.435224,4.24264069,3.14834463,1.04608607,3.14603211,3.13756077,3.1352403
63.445716,3.46410162,3.14902162,0.561319866,3.14670764,3.13725546,3.13493279
63.456207,3.46410162,3.14990045,0.560536495,3.14758513,3.13695048,3.13462559
63.466699,3.60555128,3.15103767,0.674176244,3.14872116,3.13664579,3.13431865
63.47719,3.31662479,3.15250253,0.405120053,3.15018505,3.13634144,3.13401201
63.487682,3.31662479,3.15437825,0.402798381,3.15206008,3.13603736,3.13370562
63.498174,3.60555128,3.15676009,0.669918788,3.15444156,3.1357336,3.13339951
63.508665,2.82842712,3.1597527,-0.57560887,3.15743422,3.13543018,3.13309371
63.519157,3.16227766,3.1634661,-0.0344738008,3.16114819,3.13512704,3.13278815
63.529648,2.82842712,3.16800619,-0.582734131,3.16568941,3.13482424,3.13248291
63.54014,3.46410162,3.17346778,0.539104662,3.17115276,3.13452172,3.13217792
63.550632,4,3.17992007,0.905582648,3.1776075,3.13421951,3.1318732
63.561123,3.16227766,3.18739397,-0.158481264,3.18508456,3.13391765,3.1315688
63.571615,4,3.19586927,0.896733368,3.19356368,3.13361606,3.13126464
63.582106,3.46410162,3.20525143,0.508773214,3.20295028,3.13331482,3.13096079
63.592598,3.60555128,3.21535587,0.624656229,3.2130596,3.13301386,3.13065719
63.60309,3.87298335,3.22587436,0.804430848,3.2235832,3.13271321,3.13035387
63.613581,4.24264069,3.23634711,1.00314185,3.23406097,3.1324129,3.13005086
63.624073,3.74165739,3.24614493,0.70392646,3.24386327,3.13211288,3.12974809
63.634564,3,3.25447796,-0.504458083,3.2521997,3.1318132,3.12944564
63.645056,3.46410162,3.26049106,0.451232265,3.25821452,3.1315138,3.12914343
63.655548,3.16227766,3.26343282,-0.318048996,3.26115583,3.13121471,3.1288415
63.666039,3.31662479,3.26287372,0.231842768,3.2605938,3.13091597,3.12853988
63.676531,4,3.25885071,0.860900281,3.25656538,3.13061751,3.12823851
63.687022,3.46410162,3.25185429,0.46070308,3.24956143,3.13031939,3.12793744
63.697514,4,3.24266176,0.870251824,3.24035974,3.13002155,3.12763662
63.708006,4.35889894,3.23212758,1.06149487,3.22981535,3.12972403,3.12733608
63.718497,3.31662479,3.22101978,0.309200604,3.21869681,3.12942685,3.12703585
63.728989,3.46410162,3.2099411,0.504143343,3.20760733,3.12912996,3.12673587
63.73948,3.74165739,3.19932839,0.7364299,3.19698403,3.12883341,3.12643619
63.749972,3,3.18946767,-0.435278845,3.18711318,3.12853714,3.12613676
63.760464,3.46410162,3.18053162,0.532512908,3.17816758,3.12824119,3.12583761
63.770955,3.87298335,3.17260268,0.836887486,3.17022977,3.12794559,3.12553876
63.781447,3.31662479,3.1656926,0.388499929,3.16331148,3.12765026,3.12524017
63.791938,3.16227766,3.15976496,0.0501267978,3.15737633,3.12735529,3.12494188
63.80243,3,3.15474502,-0.393376432,3.15234948,3.12706059,3.12464384
63.812922,3.74165739,3.15053711,0.768843467,3.14813524,3.12676622,3.12434607
63.823413,3.60555128,3.14703416,0.677138922,3.14462643,3.12647218,3.12404861
63.833905,2.82842712,3.14412637,-0.561871199,3.1417132,3.12617844,3.1237514
63.844396,3.31662479,3.14171057,0.41822747,3.13929228,3.12588504,3.12345449
63.854888,3,3.13969264,-0.373754791,3.1372695,3.12559192,3.12315784
63.86538,3.87298335,3.13799183,0.857316464,3.13556402,3.12529912,3.12286145
63.875871,3.46410162,3.1365407,0.572329377,3.13410839,3.12500667,3.12256538
63.886363,3.31662479,3.13528439,0.425840822,3.13284768,3.12471451,3.12226955
63.896854,3.60555128,3.13418014,0.686564734,3.13173911,3.12442269,3.12197403
63.907346,2.64575131,3.13319463,-0.698171409,3.13074932,3.12413115,3.12167875
63.917838,3.31662479,3.13230282,0.429327341,3.12985328,3.12383994,3.12138375
63.928329,3.87298335,3.13148594,0.861102434,3.12903217,3.12354907,3.12108906
63.938821,3.46410162,3.13072972,0.577383663,3.12827172,3.12325849,3.12079461
63.949312,3.31662479,3.13002372,0.431973466,3.12756149,3.12296826,3.12050047
63.959804,2.82842712,3.12935977,-0.548573278,3.1268933,3.12267832,3.12020658
63.970296,3.16227766,3.12873176,0.183155386,3.12626105,3.1223887,3.11991296
63.980787,3.46410162,3.12813491,0.579626349,3.12565992,3.12209942,3.11961964
63.991279,3,3.12756519,-0.357162699,3.12508591,3.12181043,3.11932658
64.00177,3.31662479,3.12701953,0.435436866,3.12453592,3.12152179,3.11903381
64.012262,3.31662479,3.12649513,0.436038596,3.12400718,3.12123344,3.1187413
64.022754,2,3.1259898,-1.06112667,3.12349747,3.12094542,3.11844906
64.033245,2.82842712,3.12550162,-0.545045408,3.12300489,3.12065774,3.11815712
64.043737,3.31662479,3.12502881,0.437716777,3.12252763,3.12037035,3.11786543
64.054228,3.31662479,3.12456998,0.43824058,3.12206433,3.12008331,3.11757404
64.06472,3.60555128,3.12412375,0.693849788,3.12161358,3.11979656,3.11728291
64.075212,4.12310563,3.12368899,0.999708273,3.12117427,3.11951013,3.11699204
64.085703,3.16227766,3.12326475,0.197516865,3.12074544,3.11922406,3.11670148
64.096195,3.16227766,3.12285002,0.198563944,3.12032608,3.11893827,3.11641117
64.106686,2.44948974,3.12244408,-0.820337942,3.11991547,3.11865284,3.11612116
64.117178,3.60555128,3.12204613,0.69534534,3.11951281,3.1183677,3.11583139
64.12767,4.58257569,3.12165557,1.20868529,3.11911749,3.11808289,3.1155419
64.138161,3,3.12127184,-0.348241062,3.11872897,3.11779842,3.11525272
64.148653,3.16227766,3.12089435,0.20342889,3.11834664,3.11751425,3.11496378
64.159144,3.74165739,3.1205227,0.788120986,3.1179701,3.11723043,3.11467514
64.169636,3.16227766,3.12015639,0.205234667,3.11759887,3.11694691,3.11438675
64.180128,3.60555128,3.11979508,0.69696212,3.11723258,3.11666371,3.11409863
64.190619,2.44948974,3.11943844,-0.818503941,3.11687092,3.11638086,3.11381081
64.201111,3.60555128,3.1190861,0.697470555,3.11651351,3.11609831,3.11352325
64.211602,3.60555128,3.11873783,0.69772018,3.11616011,3.11581611,3.11323598
64.222094,2.82842712,3.11839329,-0.538485065,3.11581041,3.11553421,3.11294896
64.232586,2,3.11805229,-1.05737992,3.11546419,3.11525264,3.11266221
64.243077,3.74165739,3.11771463,0.789900473,3.11512127,3.11497142,3.11237577
64.253569,2.64575131,3.11738005,-0.686752312,3.11478137,3.11469049,3.11208957
64.26406,2.44948974,3.11704843,-0.817042644,3.11444438,3.11440993,3.11180367
64.274552,2.64575131,3.11671953,-0.68627124,3.11411006,3.11412966,3.11151802
64.285044,3.31662479,3.11639323,0.447472416,3.11377829,3.11384972,3.11123264
64.295535,3.46410162,3.11606942,0.589942539,3.11344895,3.11357013,3.11094756
64.306027,4.47213595,3.1157479,1.16464074,3.11312185,3.11329085,3.11066273
64.316518,3.46410162,3.11542861,0.590485398,3.11279693,3.11301192,3.1103782
64.32701,3.87298335,3.11511138,0.870558421,3.11247402,3.11273329,3.11009391
64.337502,3.87298335,3.11479614,0.870739461,3.11215303,3.112455,3.1098099
64.347993,1.73205081,3.11448281,-1.17576869,3.1118339,3.11217706,3.10952619
64.358485,2.82842712,3.11417125,-0.534550395,3.11151649,3.11189942,3.10924272
64.368976,3.60555128,3.11386143,0.701205992,3.11120076,3.11162214,3.10895956
64.379468,2.44948974,3.11355322,-0.814900902,3.11088659,3.11134517,3.10867664
64.38996,3.16227766,3.11324658,0.221429631,3.11057391,3.11106853,3.10839399
64.400451,2.82842712,3.11294146,-0.533398852,3.11026271,3.11079224,3.10811164
64.410943,3,3.11263775,-0.335615477,3.10995285,3.11051626,3.10782954
64.421434,4,3.11233544,0.942159518,3.10964435,3.11024065,3.10754773
64.431926,3.60555128,3.11203443,0.702507542,3.10933707,3.10996533,3.10726618
64.442418,3,3.11173469,-0.33426739,3.109031,3.10969036,3.10698489
64.452909,3.87298335,3.1114362,0.872666687,3.10872613,3.10941574,3.1067039
64.463401,3.74165739,3.11113886,0.794051966,3.10842234,3.10914143,3.10642316
64.473892,3.31662479,3.11084269,0.453632119,3.10811966,3.10886748,3.10614272
64.484384,3.60555128,3.11054759,0.703564983,3.10781798,3.10859385,3.10586252
64.494876,2.23606798,3.11025355,-0.934978917,3.10751731,3.10832055,3.1055826
64.505367,2.82842712,3.10996057,-0.530597254,3.10721762,3.10804761,3.10530297
64.515859,4,3.10966856,0.943573762,3.10691884,3.10777498,3.10502359
64.52635,2.44948974,3.10937753,-0.812334778,3.10662098,3.10750272,3.1047445
64.536842,3.16227766,3.10908742,0.230630088,3.10632397,3.10723077,3.10446566
64.547334,3,3.10879822,-0.329845753,3.1060278,3.10695916,3.1041871
64.557825,3.74165739,3.10850993,0.795705634,3.10573248,3.10668791,3.10390883
64.568317,2.64575131,3.10822247,-0.680052324,3.10543792,3.10641698,3.1036308
64.578808,3.60555128,3.10793588,0.705418593,3.10514415,3.10614641,3.10335307
64.5893,2,3.10770059,-1.05247356,3.10490166,3.10587616,3.10307559
64.599792,3.16227766,3.10741562,0.234226469,3.10460938,3.10560625,3.10279838
64.610283,2.82842712,3.10713146,-0.527924551,3.10431783,3.10533671,3.10252146
64.620775,2,3.10684803,-1.05206845,3.10402694,3.10506749,3.10224479
64.631266,2.44948974,3.10656536,-0.810602012,3.10373675,3.10479864,3.10196842
64.641758,3.74165739,3.10628341,0.797103495,3.10344719,3.1045301,3.10169229
64.65225,2,3.10600216,-1.05166637,3.10315827,3.10426191,3.10141643
64.662741,3,3.10572164,-0.325148641,3.10287,3.10399409,3.10114087
64.673233,2.82842712,3.10544178,-0.526321814,3.10258231,3.1037266,3.10086555
64.683724,2.82842712,3.10516261,-0.526056545,3.10229524,3.10345947,3.10059053
64.694216,3.46410162,3.10488408,0.599347587,3.10200874,3.10319267,3.10031575
64.704708,3.16227766,3.1046062,0.240148819,3.1017228,3.10292621,3.10004124
64.715199,2.44948974,3.10432899,-0.809221383,3.10143745,3.10266013,3.09976703
64.725691,3.31662479,3.10405238,0.461055761,3.10115262,3.10239437,3.09949306
64.736182,3,3.10377641,-0.322143457,3.10086835,3.10212899,3.09921939
64.746674,3.46410162,3.10350102,0.600500287,3.10058459,3.10186393,3.09894596
64.757166,2.82842712,3.10322624,-0.524212848,3.10030134,3.10159923,3.0986728
64.767657,3.16227766,3.10295207,0.243568456,3.10001864,3.1013349,3.09839994
64.778149,2.82842712,3.10267846,-0.523690112,3.0997364,3.1010709,3.09812732
64.78864,4.12310563,3.10240545,1.01029707,3.09945469,3.10080728,3.09785499
64.799132,2.64575131,3.10213299,-0.675560268,3.09917343,3.10054399,3.09758291
64.809624,3.46410162,3.10186109,0.601864211,3.09889265,3.10028106,3.0973111
64.820115,3.74165739,3.10158977,0.80004226,3.09861236,3.1000185,3.09703958
64.830607,3,3.10131898,-0.318306417,3.09833251,3.09975628,3.09676831
64.841098,3.31662479,3.10104875,0.464301667,3.09805314,3.09949444,3.09649733
64.85159,3.31662479,3.10077904,0.464592022,3.0977742,3.09923294,3.09622659
64.862082,3.74165739,3.10050987,0.800716878,3.0974957,3.09897179,3.09595613
64.872573,3.60555128,3.10024887,0.71084626,3.09721766,3.09871866,3.09568595
64.883065,3.74165739,3.09998075,0.80104721,3.09694003,3.09845824,3.09541602
64.893556,2.82842712,3.09971318,-0.520851282,3.09666285,3.09819821,3.09514639
64.904048,3.87298335,3.0994461,0.879509661,3.09638607,3.09793852,3.09487699
64.91454,3.87298335,3.09917954,0.879661191,3.0961097,3.09767919,3.09460787
64.925031,3.16227766,3.0989135,0.251722384,3.09583377,3.09742025,3.09433903
64.935523,3.31662479,3.09864795,0.466879902,3.09555822,3.09716166,3.09407045
64.946014,4.12310563,3.09838292,1.01228588,3.0952831,3.09690345,3.09380215
64.956506,3.87298335,3.09811837,0.880264154,3.09500836,3.09664559,3.0935341
64.966998,3.46410162,3.09785431,0.605183698,3.094734,3.09638809,3.09326631
64.977489,3.31662479,3.09759077,0.468010709,3.09446007,3.09613099,3.09299882
64.987981,3.46410162,3.09732769,0.60561863,3.09418649,3.09587424,3.09273157
64.998472,3.31662479,3.09706513,0.46857194,3.09391333,3.09561789,3.09246461
65.008964,2.82842712,3.09680302,-0.518050094,3.09364051,3.09536188,3.09219789
65.019456,3.74165739,3.0965414,0.803191124,3.09336808,3.09510624,3.09193145
65.029947,2.82842712,3.09628029,-0.517545328,3.09309604,3.09485101,3.09166529
65.040439,2.82842712,3.09601963,-0.517293444,3.09282435,3.09459613,3.09139938
65.05093,3.46410162,3.09575957,0.606911895,3.09255305,3.09434174,3.09113375
65.061422,3,3.09549986,-0.309030518,3.09228209,3.09408762,3.09086837
65.071914,3.46410162,3.09524063,0.607339268,3.09201149,3.09383387,3.09060326
65.082405,4.12310563,3.09498189,1.01396436,3.09174127,3.09358053,3.09033844
65.092897,4.24264069,3.09472361,1.07140892,3.09147139,3.09332755,3.09007386
65.103388,2.44948974,3.09446581,-0.803104023,3.09120188,3.09307497,3.08980957
65.11388,2.23606798,3.09420847,-0.926358725,3.0909327,3.09282276,3.08954552
65.124372,3.31662479,3.09395159,0.471882617,3.09066387,3.09257093,3.08928174
65.134863,4,3.0936952,0.952000421,3.09039541,3.09231951,3.08901825
65.145355,2.64575131,3.09343925,-0.669094866,3.09012727,3.09206845,3.088755
65.155846,3.60555128,3.0931838,0.715798491,3.0898595,3.09181781,3.08849205
65.166338,3.46410162,3.09292878,0.609239554,3.08959204,3.09156754,3.08822933
65.17683,3.16227766,3.09267423,0.26382462,3.08932492,3.09131766,3.08796688
65.187321,3.31662479,3.09242017,0.473502505,3.08905816,3.0910682,3.08770472
65.197813,2.64575131,3.09216655,-0.668143125,3.08879171,3.0908191,3.0874428
65.208304,3.60555128,3.09191341,0.716685331,3.08852562,3.09057043,3.08718117
65.218796,3.46410162,3.09166072,0.610279361,3.08825984,3.09032214,3.08691978
65.229288,3.16227766,3.09140849,0.26621265,3.08799438,3.09007424,3.08665866
65.239779,3.87298335,3.09115674,0.884209593,3.08772928,3.08982677,3.08639783
65.250271,3.16227766,3.09090544,0.267155805,3.08746448,3.08957967,3.08613723
65.260762,3.74165739,3.09065462,0.806847426,3.08720002,3.08933301,3.08587693
65.271254,3.60555128,3.09040424,0.717737442,3.08693587,3.08908672,3.08561687
65.281746,3.87298335,3.09015433,0.884776254,3.08667203,3.08884084,3.08535707
65.292237,3.60555128,3.0899049,0.718085215,3.08640855,3.0885954,3.08509756
65.302729,3,3.08965591,-0.299425975,3.08614535,3.08835034,3.08483829
65.31322,2.82842712,3.08940742,-0.510862303,3.0858825,3.08810572,3.08457931
65.323712,3.16227766,3.08915936,0.270403953,3.08561994,3.08786149,3.08432057
65.334204,2.23606798,3.08891177,-0.923495423,3.08535769,3.08761767,3.0840621
65.344695,3.16227766,3.08866468,0.27131713,3.08509578,3.0873743,3.08380391
65.355187,3.16227766,3.08841802,0.2717713,3.08483416,3.08713132,3.08354597
65.365678,3.16227766,3.08817186,0.27222381,3.08457288,3.08688879,3.08328831
65.37617,3.74165739,3.08792614,0.808536484,3.08431188,3.08664665,3.08303089
65.386662,3.60555128,3.08768089,0.719632116,3.08405119,3.08640494,3.08277373
65.397153,4,3.08743614,0.955282084,3.08379083,3.08616368,3.08251687
65.407645,3.60555128,3.08719184,0.719971833,3.08353076,3.08592282,3.08226024
65.418136,4,3.08694803,0.955537531,3.08327101,3.08568242,3.0820039
65.428628,2.44948974,3.08670467,-0.798257431,3.08301155,3.08544243,3.0817478
65.43912,3.31662479,3.08646179,0.479753064,3.08275239,3.08520288,3.08149196
65.449611,3.60555128,3.08621941,0.720646841,3.08249355,3.08496378,3.08123641
65.460103,4,3.08597748,0.956045251,3.082235,3.0847251,3.0809811
65.470594,2.82842712,3.08573605,-0.507256275,3.08197677,3.08448688,3.08072607
65.481086,3.60555128,3.08549509,0.721149215,3.08171882,3.08424908,3.08047129
65.491578,2.82842712,3.0852546,-0.506781487,3.08146116,3.08401173,3.08021677
65.502069,3.31662479,3.08501462,0.481258941,3.08120383,3.08377485,3.07996253
65.512561,3.16227766,3.08477511,0.278392806,3.08094678,3.0835384,3.07970853
65.523052,4,3.0845361,0.956798777,3.08069004,3.08330242,3.07945482
65.533544,3.60555128,3.08429756,0.721979027,3.08043358,3.08306688,3.07920135
65.544036,3.74165739,3.08405951,0.810924088,3.08017741,3.08283179,3.07894814
65.554527,2.64575131,3.08382198,-0.661869069,3.07992156,3.08259718,3.07869521
65.565019,4.12310563,3.08358491,1.01956889,3.07966598,3.08236301,3.07844253
65.57551,3.31662479,3.08334837,0.482986978,3.07941072,3.08212934,3.07819013
65.586002,2.44948974,3.0831123,-0.79600412,3.07915573,3.0818961,3.07793796
65.596494,3.16227766,3.08287673,0.281781699,3.07890103,3.08166334,3.07768606
65.606985,3.74165739,3.08264169,0.811797816,3.07864664,3.08143107,3.07743445
65.617477,3.60555128,3.08240713,0.723287041,3.07839252,3.08119925,3.07718307
65.627968,3.31662479,3.0821731,0.484202115,3.07813872,3.08096794,3.07693197
65.63846,3,3.08193956,-0.286250867,3.07788518,3.08073708,3.07668112
65.648952,2.44948974,3.08170653,-0.79512061,3.07763193,3.08050671,3.07643053
65.659443,3.16227766,3.08147403,0.284259788,3.07737899,3.08027685,3.07618022
65.669935,3.31662479,3.08124203,0.485162609,3.07712632,3.08004746,3.07593014
65.680426,3.31662479,3.08101058,0.485401087,3.07687396,3.07981858,3.07568036
65.690918,4,3.08077962,0.958759815,3.07662186,3.07959017,3.0754308
65.70141,3,3.08054918,-0.283811882,3.07637004,3.07936227,3.07518151
65.711901,4,3.0803193,0.958999843,3.07611854,3.07913489,3.07493251
65.722393,2.44948974,3.08008993,-0.794103384,3.0758673,3.07890799,3.07468374
65.732884,4.12310563,3.07986111,1.02139342,3.07561636,3.07868163,3.07443525
65.743376,3.31662479,3.0796328,0.486818227,3.07536569,3.07845575,3.074187
65.753868,3.31662479,3.07940504,0.487052103,3.0751153,3.0782304,3.07393902
65.764359,2.23606798,3.07917784,-0.918210141,3.07486521,3.07800558,3.07369131
65.774851,3.74165739,3.07895117,0.814067701,3.07461539,3.07778127,3.07344384
65.785342,3.46410162,3.07872506,0.620787043,3.07436587,3.0775575,3.07319665
65.795834,2.82842712,3.07849949,-0.50007236,3.07411661,3.07733425,3.0729497
65.806326,3.60555128,3.07827447,0.72613828,3.07386763,3.07711153,3.07270301
65.816817,3.87298335,3.07805004,0.891590324,3.07361895,3.07688937,3.07245661
65.827309,3,3.07782615,-0.278973383,3.07337053,3.07666773,3.07221043
65.8378,2.82842712,3.07760285,-0.49917504,3.07312242,3.07644666,3.07196455
65.848292,4,3.07714274,0.960654602,3.07263685,3.07622612,3.07171889
65.858784,4.12310563,3.07692082,1.02283176,3.07238954,3.07600613,3.0714735
65.869275,3.46410162,3.07669951,0.622416343,3.07214252,3.07578673,3.07122838
65.879767,2.82842712,3.07647876,-0.498047824,3.07189576,3.07556787,3.07098351
65.890258,3,3.07625862,-0.276149628,3.0716493,3.07534959,3.07073891
65.90075,3.60555128,3.07603904,0.727675911,3.07140309,3.07513187,3.07049455
65.911242,3.16227766,3.07582007,0.29403672,3.07115716,3.07491473,3.07025045
65.921733,3.31662479,3.07560171,0.490941013,3.07091153,3.07469819,3.07000663
65.932225,3.74165739,3.07538394,0.816255748,3.07066616,3.07448221,3.06976304
65.942716,2.44948974,3.0751668,-0.790997507,3.07042108,3.07426685,3.06951974
65.953208,3.31662479,3.07495025,0.491604049,3.07017625,3.07405207,3.06927667
65.9637,3,3.07473432,-0.273375786,3.0699317,3.07383788,3.06903386
65.974191,4,3.07451904,0.962019212,3.06968744,3.07362433,3.06879133
65.984683,3.60555128,3.07430436,0.728866871,3.06944344,3.07341136,3.06854903
65.995174,2.44948974,3.07409034,-0.790316769,3.06919973,3.07319904,3.06830701
66.005666,4,3.07387694,0.962352879,3.06895628,3.07298732,3.06806523
66.016158,3,3.07366418,-0.271411458,3.06871309,3.07277622,3.0678237
66.026649,2.64575131,3.07345209,-0.653988366,3.06847021,3.07256579,3.06758246
66.037141,2.82842712,3.07324064,-0.494786336,3.06822757,3.07235597,3.06734145
66.047632,4,3.07302988,0.962792877,3.06798523,3.07214682,3.06710072
66.058124,3.31662479,3.07281976,0.493766174,3.06774313,3.0719383,3.06686022
66.068616,2.23606798,3.07261031,-0.914626882,3.06750131,3.07173045,3.06661998
66.079107,3.74165739,3.07240156,0.818080572,3.06725978,3.07152327,3.06638002
66.089599,4.24264069,3.07219349,1.08187208,3.0670185,3.07131675,3.06614029
66.10009,3.31662479,3.07198612,0.494609614,3.06677751,3.07111093,3.06590084
66.110582,2.64575131,3.07177943,-0.652708299,3.06653677,3.07090578,3.06566162
66.121074,3.16227766,3.07157345,0.301171389,3.0662963,3.07070132,3.06542266
66.131565,3,3.07136821,-0.267148289,3.06605613,3.07049757,3.06518398
66.142057,3.16227766,3.07116366,0.301850953,3.0658162,3.07029452,3.06494553
66.152548,3.31662479,3.07095986,0.495645969,3.06557656,3.07009219,3.06470736
66.16304,4,3.07075678,0.963972623,3.06533717,3.06989057,3.06446943
66.173532,2.64575131,3.07055444,-0.651769231,3.06509804,3.06968968,3.06423174
66.184023,3.74165739,3.07035287,0.81933175,3.06485921,3.06948955,3.06399434
66.194515,3.16227766,3.07015204,0.303522028,3.06462062,3.06929014,3.06375717
66.205006,3.16227766,3.06995199,0.303851391,3.06438233,3.0690915,3.06352027
66.215498,2.44948974,3.0697527,-0.787567748,3.06414427,3.06889361,3.06328361
66.22599,4.24264069,3.06955419,1.08309118,3.06390649,3.06869649,3.06304721
66.236481,4,3.0693565,0.96469866,3.063669,3.06850017,3.06281108
66.246973,2.64575131,3.06915958,-0.650698293,3.06343174,3.06830461,3.06257518
66.257464,3.74165739,3.06896349,0.820179185,3.06319478,3.06810987,3.06233956
66.267956,3,3.0687682,-0.262236923,3.06295806,3.06791592,3.06210417
66.278448,4.12310563,3.06857374,1.02690403,3.06272161,3.06772279,3.06186903
66.288939,2.82842712,3.06838014,-0.489849993,3.06248545,3.0675305,3.06163417
66.299431,3.16227766,3.06818737,0.306741414,3.06224953,3.06733903,3.06139955
66.309922,2.64575131,3.06799547,-0.649803167,3.06201389,3.06714842,3.06116519
66.320414,3,3.06780442,-0.260392815,3.0617785,3.06695865,3.06093107
66.330906,3.74165739,3.06761425,0.821001303,3.06154338,3.06676975,3.06069721
66.341397,3.16227766,3.06742498,0.307981615,3.06130854,3.06658175,3.06046362
66.351889,3.60555128,3.0672366,0.733699305,3.06107394,3.06639461,3.06023026
66.36238,3.16227766,3.06704915,0.308591163,3.06083963,3.0662084,3.05999717
66.372872,2.82842712,3.06686261,-0.488298561,3.06060556,3.06602308,3.05976432
66.383364,3.16227766,3.06592718,0.310403743,3.06037176,3.06508866,3.05953172
66.393855,2.64575131,3.06574357,-0.648068099,3.06013824,3.06490626,3.05929939
66.404347,3.16227766,3.06556091,0.310993169,3.05990496,3.06472479,3.0590673
66.414838,3.46410162,3.06537923,0.631444678,3.05967197,3.0645443,3.05883548
66.42533,2.64575131,3.06519852,-0.647647446,3.05943921,3.06436477,3.05860388
66.435822,2.64575131,3.06501881,-0.647508689,3.05920672,3.06418622,3.05837255
66.446313,3.16227766,3.06484013,0.312149853,3.05897452,3.06400869,3.05814148
66.456805,3.31662479,3.06466245,0.501958501,3.05874255,3.06383216,3.05791065
66.467296,2.44948974,3.06448583,-0.784216865,3.05851087,3.06365667,3.05768009
66.477788,3,3.06431025,-0.25359466,3.05827942,3.06348222,3.05744976
66.48828,3.16227766,3.06413574,0.313276111,3.05804824,3.06330882,3.05721968
66.498771,3.87298335,3.06396233,0.899455958,3.05781734,3.06313651,3.05698987
66.509263,3.31662479,3.06379,0.502826802,3.05758668,3.06296528,3.05676029
66.519754,3.60555128,3.0636188,0.73616063,3.05735631,3.06279517,3.05653099
66.530246,3,3.06344872,-0.251890303,3.05712617,3.06262617,3.05630192
66.540738,3.16227766,3.0632798,0.314639259,3.05689629,3.06245831,3.05607309
66.551229,2.64575131,3.06311205,-0.646034629,3.0566667,3.06229163,3.05584454
66.561721,2,3.06294548,-1.03099247,3.05643734,3.06212611,3.05561622
66.572212,3.60555128,3.06278013,0.736730039,3.05620826,3.06196179,3.05538817
66.582704,2.44948974,3.06261598,-0.783023778,3.05597943,3.06179868,3.05516035
66.593196,3.31662479,3.06245308,0.504154456,3.05575085,3.0616368,3.05493278
66.603687,2.64575131,3.06229145,-0.645399208,3.05552255,3.06147619,3.05470548
66.614179,2.44948974,3.06213109,-0.782714091,3.05529449,3.06131683,3.05447841
66.62467,3.60555128,3.06197205,0.737278255,3.05506671,3.06115879,3.05425161
66.635162,3.16227766,3.06181432,0.316959524,3.05483916,3.06100205,3.05402504
66.645654,3.74165739,3.06165794,0.824620791,3.05461188,3.06084665,3.05379872
66.656145,3.87298335,3.06150294,0.900822073,3.05438487,3.06069262,3.05357267
66.666637,3.31662479,3.06134932,0.50524793,3.05415811,3.06053996,3.05334684
66.677128,3,3.06119713,-0.247380537,3.05393162,3.06038873,3.05312129
66.68762,3.87298335,3.06104637,0.901075457,3.05370536,3.06023891,3.05289597
66.698112,3.46410162,3.06089707,0.634983892,3.05347937,3.06009056,3.05267089
66.708603,3.16227766,3.06074928,0.318635181,3.05325365,3.0599437,3.05244609
66.719095,3.16227766,3.06060302,0.318864612,3.05302817,3.05979836,3.05222151
66.729586,2.64575131,3.06045829,-0.64397747,3.05280296,3.05965455,3.0519972
66.740078,2.82842712,3.06031513,-0.481547509,3.052578,3.05951229,3.05177312
66.75057,3.46410162,3.06017356,0.635553342,3.05235328,3.05937162,3.05154929
66.761061,3.16227766,3.06009357,0.319662462,3.05212885,3.05929254,3.05132572
66.771553,3,3.05995534,-0.244857788,3.05190465,3.05915518,3.05110239
66.782044,2.23606798,3.05981911,-0.907607368,3.05168103,3.05901953,3.05087932
66.792536,2.23606798,3.0596843,-0.907533096,3.05145735,3.05888558,3.05065648
66.803028,4.24264069,3.05955124,1.08769915,3.05123391,3.05875339,3.05043388
66.813519,3.60555128,3.05941999,0.739006958,3.05101076,3.05862299,3.05021156
66.824011,3,3.05929056,-0.243496523,3.05078784,3.0584944,3.04998946
66.834502,3.87298335,3.059163,0.902119919,3.05056519,3.05836768,3.04976763
66.844994,3.16227766,3.05903733,0.32131034,3.05034278,3.05824283,3.04954602
66.855486,3.46410162,3.05891359,0.63654381,3.05012062,3.05811992,3.04932466
66.865977,3.31662479,3.05879185,0.507772528,3.04989874,3.057999,3.04910357
66.876469,2.82842712,3.05867211,-0.479838503,3.04967709,3.05788007,3.04888271
66.88696,3.60555128,3.05855445,0.739592339,3.04945572,3.0577632,3.04866211
66.897452,3.60555128,3.05843887,0.739670469,3.04923458,3.05764842,3.04844174
66.907944,3,3.05832545,-0.241506616,3.04901369,3.05753578,3.04822161
66.918435,3.31662479,3.05821422,0.508340998,3.04879308,3.05742533,3.04800176
66.928927,3.87298335,3.05810522,0.902706001,3.0485727,3.0573171,3.04778212
66.939418,3.46410162,3.05799852,0.637262186,3.0483526,3.05721117,3.04756275
66.94991,3,3.05789415,-0.240612027,3.04813273,3.05710755,3.04734361
66.960402,3.16227766,3.05779216,0.323242168,3.04791311,3.05700632,3.04712471
66.970893,3.31662479,3.05769262,0.508853776,3.04769376,3.05690752,3.04690608
66.981385,3.60555128,3.05759557,0.7402403,3.04747465,3.05681121,3.04668768
66.991876,3.46410162,3.05750108,0.63765236,3.04725581,3.05671745,3.04646953
67.002368,3.60555128,3.05740919,0.740366182,3.0470372,3.05662628,3.04625162
67.01286,3.60555128,3.05731997,0.740426435,3.04681884,3.05653777,3.04603395
67.023351,2.64575131,3.05723349,-0.641468764,3.04660075,3.056452,3.04581654
67.033843,4,3.05714979,0.971004743,3.0463829,3.056369,3.04559936
67.044334,4.35889894,3.05706896,1.14097764,3.04616532,3.05628887,3.04538244
67.054826,3.74165739,3.05699105,0.82744567,3.04594797,3.05621165,3.04516574
67.065318,3.16227766,3.05691614,0.324594396,3.04573087,3.05613742,3.04494929
67.075809,3.60555128,3.0568443,0.740747576,3.04551404,3.05606627,3.04473311
67.086301,3.60555128,3.05677561,0.740793943,3.04529744,3.05599824,3.04451714
67.096792,3.74165739,3.05671014,0.827615396,3.04508112,3.05593344,3.04430144
67.107284,2.44948974,3.05664797,-0.779203587,3.04486502,3.05587192,3.04408597
67.117776,3.31662479,3.05658919,0.50993686,3.04464917,3.05581379,3.04387073
67.128267,4,3.05653388,0.971321841,3.0444336,3.05575913,3.04365577
67.138759,3,3.05648213,-0.237659688,3.04421825,3.05570801,3.04344102
67.14925,3.46410162,3.05643403,0.638488516,3.04400318,3.05566055,3.04322654
67.159742,2.64575131,3.05638967,-0.640810707,3.04378833,3.05561681,3.04301227
67.170234,3.46410162,3.05634916,0.638554974,3.04357374,3.05557692,3.04279826
67.180725,2.44948974,3.0563126,-0.778988353,3.04335941,3.05554097,3.0425845
67.191217,3.46410162,3.05628008,0.638609062,3.04314531,3.05550906,3.04237097
67.201708,3.31662479,3.05625173,0.510267638,3.04293149,3.05548131,3.04215769
67.2122,3.46410162,3.05622764,0.638650116,3.04271789,3.05545782,3.04194464
67.222692,4.35889894,3.05620795,1.14135489,3.04250454,3.05543872,3.04173184
67.233183,2.23606798,3.05619277,-0.905607416,3.04229146,3.05542412,3.04151929
67.243675,3.31662479,3.05618222,0.51033574,3.0420786,3.05541415,3.04130696
67.254166,3.46410162,3.05617644,0.638690199,3.04186602,3.05540894,3.0410949
67.264658,2.82842712,3.05617557,-0.477229969,3.04165366,3.05540863,3.04088306
67.27515,2.64575131,3.05617973,-0.640646879,3.04144155,3.05541335,3.04067146
67.285641,2.64575131,3.05618909,-0.64065418,3.04122971,3.05542326,3.04046012
67.296133,2.64575131,3.05620378,-0.640665649,3.0410181,3.0554385,3.040249
67.306624,3.74165739,3.05629347,0.82786709,3.04080676,3.05552874,3.04003814
67.317116,3.16227766,3.05631936,0.325512364,3.04059564,3.05555517,3.0398275
67.327608,3,3.05635109,-0.237383836,3.04038477,3.05558743,3.0396171
67.338099,3.87298335,3.05638881,0.903656203,3.04017417,3.05562568,3.03940696
67.348591,3.60555128,3.05643273,0.741025331,3.03996379,3.05567012,3.03919705
67.359082,2.64575131,3.05648303,-0.640883547,3.03975368,3.05572093,3.03898739
67.369574,3.46410162,3.05653991,0.638405593,3.0395438,3.05577832,3.03877795
67.380066,3,3.05660358,-0.237915075,3.03933417,3.05584249,3.03856875
67.390557,3.16227766,3.05667425,0.324966789,3.0391248,3.05591365,3.03835981
67.401049,3.31662479,3.05675218,0.509777018,3.03891565,3.05599208,3.03815109
67.41154,3.16227766,3.05683753,0.324715462,3.03870678,3.05607791,3.03794263
67.422032,2.82842712,3.05693059,-0.478020357,3.03849813,3.05617145,3.03773439
67.432524,2.23606798,3.0570316,-0.906070429,3.03828972,3.05627294,3.03752638
67.443015,3,3.05714082,-0.23904147,3.03808158,3.05638263,3.03731864
67.453507,3.60555128,3.05725856,0.740467906,3.03787367,3.05650083,3.03711111
67.463998,2.82842712,3.05738506,-0.478495489,3.03766602,3.05662779,3.03690384
67.47449,4,3.05752066,0.970813753,3.0374586,3.05676385,3.03669679
67.484982,3,3.05766566,-0.240136745,3.03725142,3.0569093,3.03648998
67.495473,3,3.05782037,-0.24045866,3.03704451,3.05706445,3.03628342
67.505965,3.31662479,3.05798516,0.508566248,3.03683782,3.05722969,3.03607709
67.516456,2.64575131,3.05816037,-0.642190826,3.0366314,3.05740533,3.03587101
67.526948,3.46410162,3.05834639,0.636989185,3.0364252,3.05759179,3.03566515
67.53744,3.31662479,3.05854361,0.508016906,3.03621925,3.05778944,3.03545952
67.547931,3.16227766,3.05875242,0.321753385,3.03601356,3.05799866,3.03525415
67.558423,3.16227766,3.05897328,0.321409986,3.03580809,3.05821994,3.035049
67.568914,3,3.0592066,-0.243324074,3.03560289,3.05845368,3.03484411
67.579406,3,3.05945291,-0.243829673,3.03539791,3.05870039,3.03463943
67.589898,3,3.05971267,-0.244361755,3.03519318,3.05896056,3.03443499
67.600389,3.46410162,3.05998637,0.635700594,3.03498871,3.05923466,3.03423081
67.610881,3,3.06027462,-0.245508895,3.03478446,3.0595233,3.03402684
67.621372,3.16227766,3.06057792,0.318903961,3.03458048,3.059827,3.03382313
67.631864,3.16227766,3.06089695,0.318403376,3.03437672,3.06014642,3.03361963
67.642356,2.82842712,3.0612323,-0.482498886,3.0341732,3.06048216,3.03341637
67.652847,3,3.0615846,-0.24816245,3.03396995,3.06083484,3.03321336
67.663339,3.31662479,3.06195462,0.504648558,3.03376692,3.06120524,3.03301057
67.67383,3.87298335,3.06234303,0.900355662,3.03356415,3.06159402,3.03280804
67.684322,2.82842712,3.06275067,-0.484069769,3.0333616,3.06200203,3.03260572
67.694814,2.82842712,3.06317832,-0.484511294,3.0331593,3.06243005,3.03240363
67.705305,2.44948974,3.0636268,-0.783668972,3.03295726,3.0628789,3.0322018
67.715797,3.60555128,3.06409711,0.735835695,3.03275544,3.06334957,3.03200018
67.726288,3.74165739,3.0645901,0.822840983,3.03255389,3.06384293,3.03179882
67.73678,2.82842712,3.0651069,-0.486497456,3.03235255,3.06436009,3.03159767
67.747272,3.46410162,3.06564852,0.631231414,3.03215146,3.06490206,3.03139676
67.757763,4,3.06621603,0.966324981,3.03195063,3.06546993,3.0311961
67.768255,3.60555128,3.06681075,0.733989461,3.03175002,3.066065,3.03099565
67.778746,3,3.06743382,-0.259680217,3.03154967,3.06668843,3.03079546
67.789238,3.60555128,3.0680867,0.733119756,3.03134955,3.06734166,3.03059548
67.79973,3.31662479,3.06877076,0.497849405,3.03114966,3.06802608,3.03039573
67.810221,3.60555128,3.06948744,0.732163806,3.03095004,3.06874311,3.03019624
67.820713,4.12310563,3.07023847,1.02609315,3.03075064,3.06949449,3.02999696
67.831204,2.82842712,3.07102541,-0.492542673,3.03055149,3.07028178,3.02979793
67.841696,3.46410162,3.07185022,0.626299765,3.03035257,3.07110694,3.02959912
67.852188,4.24264069,3.07271475,1.08163115,3.03015389,3.07197182,3.02940053
67.862679,2,3.07362095,-1.03615682,3.02995547,3.07287838,3.0292022
67.873171,3.60555128,3.07457118,0.728683812,3.02975728,3.07382897,3.02900408
67.883662,2.64575131,3.07556758,-0.655603743,3.02955934,3.07482573,3.02880622
67.894154,2.82842712,3.07661282,-0.498182396,3.02936162,3.07587134,3.02860856
67.904646,2.64575131,3.07770947,-0.657235238,3.02916414,3.07696835,3.02841114
67.915137,3.31662479,3.07886023,0.487611077,3.02896692,3.07811948,3.02821397
67.925629,2.64575131,3.08006836,-0.659027348,3.02876993,3.07932798,3.02801701
67.93612,2.82842712,3.08139469,-0.502958809,3.02857319,3.08065471,3.0278203
67.946612,2.64575131,3.08272731,-0.661041605,3.02837667,3.08198772,3.0276238
67.957104,3,3.08412765,-0.290047662,3.02818039,3.08338844,3.02742753
67.967595,3.60555128,3.08559954,0.721076788,3.02798437,3.08486074,3.02723151
67.978087,2.82842712,3.08714759,-0.508645715,3.02778858,3.0864092,3.02703571
67.988578,3.16227766,3.08877611,0.271111685,3.02759304,3.08803814,3.02684015
67.99907,3.16227766,3.09049042,0.2679314,3.02739772,3.08975288,3.0266448
68.009562,3.60555128,3.09229574,0.716418547,3.02720264,3.09155864,3.02644968
68.020053,3,3.09419768,-0.306916398,3.02700781,3.09346103,3.02625482
68.030545,2.64575131,3.09620287,-0.671156882,3.02681321,3.0954667,3.02606016
68.041036,2.82842712,3.09831772,-0.519509956,3.02661887,3.09758203,3.02586575
68.051528,2.64575131,3.10054998,-0.674387627,3.02642474,3.0998148,3.02567155
68.06202,3.87298335,3.10290743,0.877539694,3.02623086,3.10217277,3.02547758
68.072511,2.23606798,3.10539847,-0.932378942,3.02603723,3.10466435,3.02528386
68.083003,3.31662479,3.10803299,0.456718508,3.02584382,3.10729945,3.02509035
68.093494,3.16227766,3.11082074,0.226841182,3.02565067,3.11008778,3.02489708
68.103986,3.87298335,3.11377342,0.871326533,3.02545774,3.11304108,3.02470403
68.114478,3.46410162,3.11690297,0.589235645,3.02526505,3.11617128,3.0245112
68.124969,3.74165739,3.1202224,0.788311479,3.02507262,3.1194914,3.02431862
68.135461,3.87298335,3.12374697,0.865584414,3.0248804,3.12301669,3.02412625
68.145952,3,3.12749243,-0.357060824,3.02468845,3.12676291,3.02393412
68.156444,3.74165739,3.1314763,0.781140891,3.02449671,3.13074757,3.0237422
68.166936,4.12310563,3.13571801,0.9936738,3.02430521,3.13499013,3.02355052
68.177427,3,3.14023847,-0.374484278,3.02411397,3.1395115,3.02335907
68.187919,3.31662479,3.1450622,0.414201153,3.02392295,3.14433618,3.02316784
68.19841,3.16227766,3.15021433,0.109833171,3.02373218,3.14948934,3.02297685
68.208902,2.64575131,3.15572487,-0.714124327,3.02354163,3.15500096,3.02278607
68.219394,4.47213595,3.16162547,1.1447753,3.02335132,3.16090272,3.02259551
68.229885,3.60555128,3.16795133,0.661513373,3.02316127,3.16722983,3.0224052
68.240377,3.31662479,3.17474365,0.376671134,3.02297144,3.17402347,3.0222151
68.250868,3.31662479,3.18204575,0.366850159,3.02278186,3.18132701,3.02202524
68.26136,3.31662479,3.18990916,0.355971394,3.02259251,3.18919195,3.02183559
68.271852,3.46410162,3.19838942,0.515472784,3.02240339,3.19767387,3.02164616
68.282343,3.87298335,3.20754896,0.815741616,3.02221453,3.2068352,3.02145698
68.292835,3.87298335,3.21746,0.80964396,3.02202589,3.21674817,3.02126801
68.303326,4.58257569,3.22820408,1.16377473,3.0218375,3.22749433,3.02107928
68.313818,3.31662479,3.23987344,0.277040334,3.02164933,3.23916597,3.02089075
68.32431,3.87298335,3.2525721,0.787661885,3.0214614,3.25186709,3.02070245
68.334801,3.60555128,3.2664181,0.582351416,3.02127373,3.26571577,3.02051439
68.345293,4.12310563,3.28155122,0.917362743,3.02108628,3.2808518,3.02032654
68.355784,3.16227766,3.29812618,-0.368576336,3.02089908,3.29742993,3.02013893
68.366276,2.82842712,3.31632908,-0.698499789,3.02071211,3.31563632,3.01995153
68.376768,3.87298335,3.33637238,0.732537351,3.02052537,3.33568342,3.01976435
68.387259,3.31662479,3.35850857,-0.204655277,3.02033889,3.35782379,3.01957741
68.397751,4,3.38305436,0.785458873,3.02015262,3.38237417,3.01939068
68.408242,3.74165739,3.41040486,0.575545419,3.01996662,3.40972974,3.01920419
68.418734,3.60555128,3.44111088,0.405512512,3.01978083,3.44044138,3.0190179
68.429226,3.87298335,3.47596709,0.630092263,3.01959528,3.4753039,3.01883184
68.439717,4.12310563,3.51621072,0.779034599,3.01940999,3.51555471,3.01864602
68.450209,4.79583152,3.56386588,1.10993948,3.01922492,3.56321822,3.0184604
68.4607,4.35889894,3.62223868,0.858289148,3.0190401,3.62160103,3.01827502
68.471192,4.24264069,3.69672626,0.738860221,3.01885551,3.69610103,3.01808985
68.481684,4.89897949,3.79575124,1.05034673,3.01867115,3.79514189,3.0179049
68.492175,4,3.93174549,0.261255644,3.01848705,3.93115678,3.01772019
68.502667,4.35889894,4.12171929,0.487010935,3.01830318,4.1211573,3.01753568
68.513158,5.19615242,4.38646479,0.899826448,3.01811955,4.3859363,3.01735141
68.52365,6.40312424,4.74829981,1.28639979,3.01793615,4.74781121,3.01716735
68.534142,5.65685425,5.22681164,0.655776343,3.01775299,5.2263674,3.0169835
68.544633,5.65685425,5.83439065,-0.421350689,3.01757009,5.83399235,3.0167999
68.555125,8.36660027,6.57310758,1.33921346,3.0173874,6.57275373,3.0166165
68.565616,8.18535277,7.43277948,0.867509821,3.01720498,7.43246628,3.01643333
68.576108,9.16515139,8.39191435,0.879338979,3.01702277,8.39163669,3.01625037
68.5866,9.21954446,9.41845195,-0.445990466,3.01684081,9.41820432,3.01606763
68.597091,10.5356538,10.4718642,0.252565985,3.0166591,10.4716412,3.01588513
68.607583,11.2249722,11.5054465,-0.529598241,3.01647762,11.5052433,3.01570283
68.618074,12.4498996,12.4673712,-0.132180217,3.01629639,12.4671836,3.01552076
68.628566,13.7477271,13.3029574,0.666910551,3.01611539,13.3027814,3.0153389
68.639058,13.7113092,13.9559759,-0.494637968,3.01593462,13.955808,3.01515726
68.649549,16.1554944,14.3736427,1.3348602,3.01575412,14.3734794,3.01497585
68.660041,14.832397,14.5161345,0.562372188,3.01557384,14.5159726,3.01479465
68.670532,16.4924225,14.3683899,1.45740614,3.01539382,14.3682262,3.01461368
68.681024,15.9059737,13.945843,1.4000467,3.01521402,13.9456741,3.01443292
68.691516,13.96424,13.2886977,0.821913832,3.01503446,13.2885203,3.01425237
68.702007,14,12.4499649,1.24500406,3.01485516,12.4497753,3.01407205
68.712499,10.9544512,11.4856442,-0.728829899,3.01467609,11.4854384,3.01389194
68.72299,11.3137085,10.4507556,0.928952566,3.01449728,10.4505292,3.01371206
68.733482,10.2956301,9.39670201,0.948118205,3.01431869,9.3964498,3.01353239
68.743974,8.30662386,8.37043364,-0.252605975,3.01414035,8.37015013,3.01335293
68.754465,7.93725393,7.41235758,0.724497313,3.01396227,7.41203697,3.0131737
68.764957,7,6.55414862,0.667721038,3.01378442,6.55378551,3.01299468
68.775448,6.70820393,5.81744998,0.943797621,3.01360682,5.81704029,3.01281589
68.78594,5.65685425,5.21195126,0.667010485,3.01342946,5.21149329,3.01263729
68.796432,4.58257569,4.73563795,-0.391231709,3.01325234,4.73513314,3.01245892
68.806923,4.47213595,4.37578054,0.310411681,3.01307548,4.37523337,3.01228078
68.817415,4.12310563,4.11251201,0.102925294,3.01289885,4.11192887,3.01210283
68.827906,3.74165739,3.92360755,-0.426556172,3.01272248,3.92299534,3.01192512
68.838398,4.35889894,3.78823176,0.755425165,3.01254706,3.78759604,3.01174761
68.84889,4.58257569,3.68951553,0.945018607,3.01237117,3.68886168,3.01157032
68.859381,3,3.61510894,-0.784288809,3.01219555,3.61444047,3.01139325
68.869873,3.31662479,3.55664609,-0.489919684,3.01202016,3.55596542,3.01121639
68.880364,3.87298335,3.50881324,0.603465083,3.01184504,3.50812204,3.01103976
68.890856,3.16227766,3.46832188,-0.553212631,3.01167014,3.4676213,3.01086332
68.901348,3.60555128,3.43318552,0.415169552,3.0114955,3.43247643,3.0106871
68.911839,3.74165739,3.40217959,0.582647233,3.01132113,3.40146265,3.01051111
68.922331,3.46410162,3.37450876,0.299320663,3.01114699,3.3737845,3.01033532
68.932822,3.16227766,3.3496381,-0.432851524,3.01097312,3.34890699,3.01015976
68.943314,3.74165739,3.32716522,0.643810658,3.01079949,3.32642765,3.0099844
68.953806,2.64575131,3.30678217,-0.813038044,3.01062611,3.30603848,3.00980925
68.964297,3,3.28823699,-0.53687707,3.010453,3.28748749,3.00963433
68.974789,4.12310563,3.27131276,0.922926253,3.01028013,3.27055772,3.0094596
68.98528,4.12310563,3.25583068,0.931275975,3.01010754,3.25507034,3.00928511
68.995772,4,3.24163041,0.870844182,3.00993518,3.24086498,3.00911081
69.006264,2.64575131,3.22857692,-0.76343016,3.00976308,3.22780658,3.00893673
69.016755,2.64575131,3.2165522,-0.755513656,3.00959126,3.21577712,3.00876287
69.027247,3.31662479,3.20544945,0.333429667,3.00941968,3.20466978,3.00858921
69.037738,3.60555128,3.19517921,0.640602888,3.00924838,3.19439508,3.00841578
69.04823,3,3.18565869,-0.430881299,3.00907733,3.1848702,3.00824255
69.058722,3.46410162,3.17681758,0.535988838,3.00890653,3.17602482,3.00806952
69.069213,3.87298335,3.16859345,0.839279392,3.00873602,3.16779651,3.00789673
69.079705,2.64575131,3.16092854,-0.717758476,3.00856576,3.16012749,3.00772413
69.090196,4.24264069,3.15377441,1.04348756,3.00839578,3.1529693,3.00755175
69.100688,3.16227766,3.14708504,0.123258329,3.00822605,3.14627593,3.00737957
69.11118,3.31662479,3.14082129,0.419289277,3.00805659,3.1400082,3.00720761
69.121671,2.82842712,3.13494796,-0.553643234,3.00788742,3.13413092,3.00703587
69.132163,2.82842712,3.12943176,-0.548638891,3.0077185,3.1286108,3.00686432
69.142654,3.16227766,3.12424487,0.195019962,3.00754988,3.12342001,3.006693
69.153146,3.74165739,3.11936021,0.788858149,3.00738151,3.11853143,3.00652187
69.163638,3.60555128,3.11475471,0.700568744,3.00721342,3.11392203,3.00635095
69.174129,3.16227766,3.11040745,0.227750316,3.00704563,3.10957085,3.00618026
69.184621,3.60555128,3.10629823,0.706578407,3.0068781,3.10545769,3.00600977
69.195112,3,3.10241026,-0.320016026,3.00671087,3.10156577,3.00583949
69.205604,2.44948974,3.09872676,-0.805752457,3.00654391,3.09787829,3.00566941
69.216096,2.82842712,3.09523355,-0.516533082,3.00637723,3.09438106,3.00549954
69.226587,3.46410162,3.0919176,0.610068863,3.00621086,3.09106106,3.0053299
69.237079,3.46410162,3.08876608,0.612646341,3.00604476,3.08790545,3.00516044
69.24757,3,3.08576844,-0.292862489,3.00587898,3.08490367,3.00499122
69.258062,2.64575131,3.08291386,-0.66118269,3.00571347,3.0820449,3.00482218
69.268554,3.31662479,3.08019324,0.486242272,3.00554826,3.07932003,3.00465335
69.279045,3.31662479,3.07759818,0.488903475,3.00538337,3.07672065,3.00448474
69.289537,3.87298335,3.07512021,0.893231849,3.00521876,3.0742383,3.00431633
69.300028,4.89897949,3.07275247,1.35137967,3.00505448,3.0718661,3.00414814
69.31052,4.12310563,3.07048771,1.02597169,3.00489049,3.06959682,3.00398014
69.321012,3.31662479,3.06831991,0.498301995,3.00472681,3.06742441,3.00381235
69.331503,2.44948974,3.06624347,-0.785336697,3.00456346,3.06534327,3.00364478
69.341995,2,3.06425261,-1.0316262,3.00440042,3.06334762,3.0034774
69.352486,3,3.06234273,-0.249685269,3.00423771,3.06143286,3.00331024
69.362978,2.82842712,3.06050885,-0.481748609,3.00407532,3.05959399,3.00314327
69.37347,3.46410162,3.05874684,0.63667478,3.00391325,3.05782689,3.00297651
69.383961,3.87298335,3.05705287,0.9032887,3.00375154,3.05612772,3.00280997
69.394453,3,3.05542289,-0.235420666,3.00359015,3.05449242,3.00264362
69.404944,2.82842712,3.05385374,-0.474791128,3.00342911,3.05291783,3.00247749
69.415436,3.60555128,3.05234188,0.743780477,3.00326841,3.05140041,3.00231155
69.425928,2.64575131,3.05088443,-0.636500685,3.00310806,3.04993726,3.00214581
69.436419,4.24264069,3.04947871,1.09231954,3.00294808,3.0485257,3.0019803
69.446911,3.31662479,3.0481218,0.518172745,3.00278845,3.0471628,3.00181497
69.457402,3.60555128,3.04681148,0.747488996,3.00262921,3.04584634,3.00164987
69.467894,3.74165739,3.04554517,0.834333394,3.00247032,3.04457375,3.00148495
69.478386,2.64575131,3.04432085,-0.631323638,3.00231181,3.04334296,3.00132024
69.488877,3.46410162,3.04313656,0.648818196,3.00215371,3.04215205,3.00115574
69.499369,3.31662479,3.04199018,0.524055924,3.00199598,3.04099885,3.00099144
69.50986,3.31662479,3.04088011,0.525113966,3.00183866,3.03988179,3.00082735
69.520352,3.60555128,3.03980446,0.752161431,3.00168175,3.03879894,3.00066345
69.530844,3.87298335,3.03876172,0.913357335,3.00152524,3.03774881,3.00049975
69.541335,3.87298335,3.03775051,0.913910737,3.00136918,3.03672998,3.00033627
69.551827,3.46410162,3.03676921,0.653706667,3.00121353,3.03574085,3.00017298
69.562318,3.31662479,3.03581667,0.529913314,3.00105834,3.03478025,3.00000991
69.57281,3.74165739,3.03489146,0.84069372,3.00090358,3.03384673,2.99984702
69.583302,2.44948974,3.03399247,-0.764527781,3.00074929,3.03293919,2.99968433
69.593793,4,3.03311868,0.983301238,3.00059548,3.03205658,2.99952186
69.604285,3,3.03226884,-0.179635311,3.00044214,3.03119765,2.99935958
69.614776,2.44948974,3.03144214,-0.762858045,3.00028931,3.03036157,2.99919752
69.625268,3,3.03063745,-0.175035576,3.00013698,3.0295472,2.99903564
69.63576,3.31662479,3.02985397,0.53550987,2.99998516,3.02875373,2.99887396
69.646251,3,3.02909092,-0.170560591,2.99983389,3.02798035,2.99871249
69.656743,3,3.02834734,-0.168366679,2.99968316,3.02722611,2.99855121
69.667234,2.44948974,3.02762262,-0.760350498,2.999533,3.02649038,2.99839015
69.677726,3.87298335,3.02691591,0.919819242,2.99938341,3.02577227,2.99822927
69.688218,2.82842712,3.02622658,-0.44474651,2.99923442,3.02507116,2.99806859
69.698709,3.31662479,3.02555406,0.539509711,2.99908606,3.02438644,2.99790813
69.709201,3.60555128,3.0248976,0.762006346,2.99893833,3.02371735,2.99774785
69.719692,2.82842712,3.02425675,-0.442526416,2.99879126,3.02306342,2.99758779
69.730184,3,3.02363084,-0.153723242,2.99864486,3.02242394,2.99742791
69.740676,2.64575131,3.02301939,-0.614221522,2.99849916,3.02179844,2.99726822
69.751167,3.60555128,3.02242198,0.763629033,2.9983542,3.02118646,2.99710876
69.761659,2.82842712,3.02183801,-0.439785046,2.99820998,3.02058737,2.99694947
69.77215,3,3.02126716,-0.145832651,2.99806655,3.02000082,2.9967904
69.782642,1.73205081,3.0207089,-1.13519077,2.99792392,3.01942624,2.99663151
69.793134,3.16227766,3.02016287,0.37698115,2.99778213,3.01886327,2.99647282
69.803625,3.74165739,3.01962876,0.849722675,2.99764123,3.01831153,2.99631434
69.814117,3.31662479,3.01910611,0.545452734,2.99750124,3.01777054,2.99615604
69.824608,3.16227766,3.01859467,0.379055398,2.9973622,3.01724002,2.99599796
69.8351,2.82842712,3.01809403,-0.435507637,2.99722415,3.01671951,2.99584006
69.845592,3.31662479,3.01760394,0.546827992,2.99708713,3.01620872,2.99568235
69.856083,3,3.01712416,-0.130859331,2.9969512,3.01570736,2.99552486
69.866575,3.31662479,3.01665435,0.547695573,2.9968164,3.01521502,2.99536754
69.877066,2.64575131,3.01619434,-0.608640308,2.9966828,3.01473151,2.99521044
69.887558,3.74165739,3.0157438,0.852005623,2.99655044,3.01425642,2.99505352
69.89805,2.82842712,3.01530259,-0.432290947,2.99641938,3.01378954,2.9948968
69.908541,3,3.01487053,-0.121944766,2.99628972,3.01333065,2.99474028
69.919033,3.74165739,3.01444736,0.852766106,2.99616149,3.01287939,2.99458395
69.929524,3,3.01403299,-0.118460936,2.9960348,3.01243562,2.99442782
69.940016,3.87298335,3.01362721,0.927014637,2.99590971,3.01199901,2.99427188
69.950508,3,3.01325165,-0.115115811,2.99578633,3.01159114,2.99411613
69.960999,3.60555128,3.01286276,0.769862657,2.99566476,3.01116832,2.99396059
69.971491,4.12310563,3.01248211,1.05386124,2.9955451,3.01075203,2.99380523
69.981982,4.12310563,3.01210967,1.05403793,2.99542747,3.01034213,2.99365008
69.992474,3.16227766,3.01174531,0.387984981,2.99531198,3.00993836,2.99349511
70.002966,3.46410162,3.01138903,0.672839198,2.99519878,3.00954057,2.99334033
70.013457,1.73205081,3.01104082,-1.13092441,2.99508803,3.00914862,2.99318575
70.023949,3.74165739,3.01070061,0.854960104,2.99497988,3.00876227,2.99303136
70.03444,3.16227766,3.01036848,0.389755286,2.99487452,3.00838143,2.99287718
70.044932,3.60555128,3.0100444,0.771690921,2.99477212,3.00800585,2.99272317
70.055424,3.74165739,3.00972846,0.855528448,2.9946729,3.00763544,2.99256936
70.065915,2.64575131,3.00942079,-0.603050144,2.99457712,3.00727008,2.99241575
70.076407,3.16227766,3.00912143,0.391351803,2.99448501,3.00690955,2.99226232
70.086898,3.16227766,3.00883059,0.391723212,2.99439687,3.00655379,2.9921091
70.09739,3.31662479,3.00854839,0.555046308,2.99431299,3.00620261,2.99195605
70.107882,3.16227766,3.00827507,0.392431631,2.99423373,3.0058559,2.99180319
70.118373,2.82842712,3.00801093,-0.423773298,2.99415947,3.00551358,2.99165055
70.128865,3,3.00775621,-0.0880693601,2.99409062,3.00517546,2.99149807
70.139356,2.64575131,3.00751132,-0.601464882,2.99402766,3.0048415,2.99134581
70.149848,4,3.00727661,0.996355054,2.9939711,3.00451152,2.99119372
70.16034,3.74165739,3.00705258,0.857090895,2.99392153,3.00418545,2.99104182
70.170831,0,3.00683982,-1.73402417,2.99387961,3.00386322,2.99089012
70.181323,2.82842712,3.00663889,-0.42215135,2.99384605,3.00354467,2.9907386
70.191814,2.64575131,3.00645056,-0.600582428,2.99382169,3.00322976,2.99058728
70.202306,3.31662479,3.00627564,0.557089893,2.99380745,3.00291834,2.99043614
70.212798,3.87298335,3.0061151,0.931057595,2.99380438,3.00261034,2.99028519
70.223289,4.35889894,3.00597007,1.16315471,2.99381368,3.00230573,2.99013444
70.233781,3.16227766,3.00584182,0.395519708,2.99383676,3.00200434,2.98998387
70.244272,2,3.00573191,-1.00286186,2.9938752,3.00170617,2.9898335
70.254764,2.23606798,3.00564213,-0.877253753,2.99393094,3.00141107,2.9896833
70.265256,3.87298335,3.00557469,0.931347766,2.99400623,3.001119,2.9895333
70.275747,2.23606798,3.00553229,-0.877191148,2.99410385,3.0008299,2.98938349
70.286239,3.74165739,3.0055183,0.857985482,2.99422728,3.00054367,2.98923386
70.29673,3.16227766,3.00553701,0.395904846,2.99438086,3.00026028,2.98908443
70.307222,3.16227766,3.00559398,0.395832894,2.99457026,2.9999796,2.98893517
70.317714,3.46410162,3.00569645,0.677056251,2.99480279,2.99970162,2.98878611
70.328205,3.87298335,3.00585393,0.931197841,2.99508804,2.99942628,2.98863724
70.338697,3.87298335,3.00607897,0.931076995,2.9954387,2.99915348,2.98848854
70.349188,2.44948974,3.00638794,-0.746256121,2.9958712,2.9988832,2.98834005
70.35968,2.82842712,3.0068021,-0.422344622,2.99640696,2.99861535,2.98819173
70.370172,3.60555128,3.00734849,0.7734357,2.99707314,2.99834989,2.98804359
70.380663,4,3.00806085,0.995961419,2.99790362,2.99808679,2.98789565
70.391155,3.87298335,3.00898058,0.929517492,2.99894,2.99782596,2.98774789
70.401646,3,3.01015647,-0.100779322,3.00023124,2.99756738,2.98760032
70.412138,4.35889894,3.01164502,1.16071268,3.00183405,2.99731097,2.98745293
70.42263,3.31662479,3.01350838,0.550560088,3.00381081,2.9970567,2.98730572
70.433121,2.44948974,3.01581216,-0.752543967,3.00622732,2.99680455,2.98715871
70.443613,3,3.01862266,-0.136464862,3.0091501,2.99655442,2.98701187
70.454104,2.64575131,3.0220004,-0.613391465,3.01263983,2.99630633,2.98686523
70.464596,3.31662479,3.02599642,0.539099595,3.01674771,2.99606017,2.98671876
70.475088,3.16227766,3.03064321,0.362814627,3.02150629,2.99581594,2.98657248
70.485579,2.44948974,3.03594747,-0.765805278,3.02692225,2.99557362,2.98642639
70.496071,2.23606798,3.04188261,-0.897671787,3.03296891,2.99533312,2.98628047
70.506562,2.64575131,3.04837386,-0.63452545,3.03957121,2.99509445,2.98613475
70.517054,3.31662479,3.05528844,0.511210668,3.04659603,2.99485753,2.9859892
70.527546,3.74165739,3.06241407,0.82416219,3.05383043,2.99462235,2.98584383
70.538037,3.74165739,3.06944269,0.819887002,3.06096555,2.99438889,2.98569866
70.548529,3.46410162,3.07596272,0.623007944,3.06758873,2.99415708,2.98555365
70.55902,3.46410162,3.08146909,0.618572976,3.07319366,2.99392692,2.98540884
70.569512,2.64575131,3.08542608,-0.663079759,3.07724335,2.99369835,2.9852642
70.580004,3.31662479,3.08736915,0.478806474,3.07927222,2.99347136,2.98511975
70.590495,2.82842712,3.08703187,-0.508531956,3.07901336,2.99324592,2.98497548
70.600987,3.46410162,3.08442914,0.616175682,3.07648191,2.99302199,2.98483139
70.611478,3.60555128,3.07985261,0.7250508,3.07197043,2.99279956,2.98468749
70.62197,3.16227766,3.07377773,0.297489381,3.06595572,2.99257856,2.98454376
70.632462,3,3.06674163,-0.258344008,3.05897636,2.992359,2.98440021
70.642953,2.64575131,3.05924096,-0.643031607,3.0515303,2.99214087,2.98425685
70.653445,3.46410162,3.05167646,0.642203363,3.04401934,2.99192409,2.98411366
70.663936,4,3.04434666,0.977575237,3.03674275,2.9917087,2.98397066
70.674428,2.82842712,3.03745343,-0.457193945,3.02990294,2.99149461,2.98382783
70.68492,3.87298335,3.03112499,0.917528398,3.02362844,2.99128183,2.98368518
70.695411,2.82842712,3.0254306,-0.443850736,3.01798867,2.99107035,2.98354272
70.705903,3,3.02039306,-0.142804275,3.01300649,2.99086012,2.98340043
70.716394,2.64575131,3.01600336,-0.608483398,3.00867283,2.99065115,2.98325833
70.726886,2.64575131,3.01222591,-0.605371458,3.00495204,2.99044338,2.98311639
70.737378,3.16227766,3.00900953,0.391494744,3.00179278,2.9902368,2.98297464
70.747869,3.16227766,3.00629268,0.394949339,2.99913335,2.99003143,2.98283307
70.758361,3.60555128,3.00400882,0.77559168,2.99690707,2.98982719,2.98269167
70.768852,3.74165739,3.00209275,0.859979442,2.99504855,2.98962412,2.98255047
70.779344,2.64575131,3.0004823,-0.595592969,2.99349549,2.98942214,2.98240942
70.789836,3.87298335,2.99912201,0.934805508,2.9921923,2.98922127,2.98226856
70.800327,3.16227766,2.99796369,0.4053566,2.99109068,2.9890215,2.98212788
70.810819,3.87298335,2.99696651,0.93595771,2.99014971,2.98882278,2.98198737
70.82131,2,2.99609747,-0.998046829,2.98933633,2.98862513,2.98184705
70.831802,2.64575131,2.99532988,-0.591251697,2.98862379,2.9884285,2.98170689
70.842294,2.23606798,2.99464303,-0.87096214,2.98799135,2.98823288,2.9815669
70.852785,3.31662479,2.99402091,0.56798229,2.98742297,2.98803829,2.98142711
70.863277,2.23606798,2.99345112,-0.870277623,2.98690625,2.98784466,2.98128748
70.873768,3.31662479,2.9929244,0.568946735,2.9864319,2.98765203,2.98114804
70.88426,2.64575131,2.99243352,-0.588797256,2.98599269,2.98746033,2.98100876
70.894752,4.47213595,2.99197303,1.21661947,2.98558319,2.98726958,2.98086966
70.905243,2,2.99153869,-0.995760357,2.98519914,2.98707978,2.98073074
70.915735,3.46410162,2.99112703,0.687731475,2.98483709,2.98689087,2.98059199
70.926226,3.16227766,2.99073541,0.41417659,2.98449439,2.98670288,2.98045342
70.936718,3.74165739,2.9903615,0.86677326,2.98416874,2.98651577,2.98031502
70.94721,2.64575131,2.99000346,-0.586730052,2.98385829,2.98632954,2.98017679
70.957701,2.64575131,2.98965973,-0.586437055,2.98356148,2.98614418,2.98003874
70.968193,2.82842712,2.98932886,-0.401125583,2.98327689,2.98595967,2.97990086
70.978684,3.87298335,2.98900971,0.94019872,2.98300339,2.98577601,2.97976316
70.989176,3.60555128,2.98870119,0.785398044,2.98273987,2.98559316,2.97962563
70.999668,3.60555128,2.98840238,0.785588246,2.98248545,2.98541114,2.97948827
71.010159,2,2.98811261,-0.994038533,2.98223934,2.98523004,2.97935109
71.020651,2.44948974,2.98783087,-0.733717335,2.98200077,2.98504962,2.97921407
71.031142,2.82842712,2.98755668,-0.398910457,2.98176913,2.98487,2.97907724
71.041634,2.23606798,2.98728939,-0.8667303,2.98154382,2.98469115,2.97894057
71.052126,4,2.98702851,1.00646485,2.98132433,2.98451306,2.97880406
71.062617,2.82842712,2.98677359,-0.39792771,2.98111023,2.98433574,2.97866775
71.073109,3.74165739,2.98652415,0.868984027,2.98090104,2.98415916,2.97853159
71.0836,3.31662479,2.98627986,0.574756414,2.98069644,2.98398334,2.97839562
71.094092,3,2.98604031,0.118151119,2.98049604,2.98380823,2.9782598
71.104584,3.46410162,2.98580523,0.691589753,2.98029956,2.98363384,2.97812416
71.115075,3,2.98557433,0.120106891,2.98010674,2.98346018,2.9779887
71.125567,3.16227766,2.98534733,0.420630876,2.97991727,2.9832872,2.97785339
71.136058,3.16227766,2.98512401,0.42089625,2.97973097,2.98311495,2.97771827
71.14655,2.82842712,2.98490412,-0.395571726,2.97954759,2.98294336,2.97758331
71.157042,3.16227766,2.98468747,0.421414508,2.97936695,2.98277246,2.97744852
71.167533,3.74165739,2.98447392,0.870162899,2.97918889,2.98260225,2.9773139
71.178025,2.64575131,2.98426324,-0.581817776,2.97901322,2.98243269,2.97717945
71.188516,3.46410162,2.98405532,0.692853735,2.97883983,2.98226381,2.97704518
71.199008,3.16227766,2.98384998,0.422407011,2.97866853,2.98209556,2.97691106
71.2095,2.82842712,2.9836471,-0.393979669,2.97849923,2.98192796,2.97677711
71.219991,3.31662479,2.9834466,0.577215899,2.97833182,2.98176102,2.97664334
71.230483,2.64575131,2.9832483,-0.580944912,2.97816616,2.9815947,2.97650973
71.240974,3.46410162,2.98305215,0.693577292,2.97800219,2.98142902,2.9763763
71.251466,3.31662479,2.98285802,0.577725514,2.97783978,2.98126395,2.97624302
71.261958,4.12310563,2.98266583,1.06791376,2.97767887,2.9810995,2.97610992
71.272449,3,2.98247552,0.132380075,2.9775194,2.98093567,2.97597699
71.282941,4.24264069,2.98228697,1.12265477,2.97736125,2.98077244,2.97584421
71.293432,2.82842712,2.98210014,-0.392011502,2.97720439,2.98060982,2.97571162
71.303924,4,2.98191494,1.00900201,2.97704873,2.98044779,2.97557918
71.314416,3.60555128,2.98173133,0.789822733,2.97689423,2.98028635,2.9754469
71.324907,4,2.98154925,1.00918321,2.97674084,2.98012551,2.97531481
71.335399,3.74165739,2.98136862,0.871945394,2.97658849,2.97996524,2.97518287
71.34589,3.46410162,2.98118942,0.694918842,2.97643716,2.97980557,2.9750511
71.356382,4.12310563,2.98101157,1.06868801,2.97628677,2.97964646,2.97491949
71.366874,3.60555128,2.98083505,0.790389921,2.97613729,2.97948793,2.97478804
71.377365,3.16227766,2.98065982,0.426166442,2.97598871,2.97932998,2.97465678
71.387857,2.82842712,2.98048582,-0.389947048,2.97584096,2.97917258,2.97452566
71.398348,2.82842712,2.98031305,-0.389725446,2.97569402,2.97901576,2.97439472
71.40884,3.31662479,2.98014143,0.580071861,2.97554785,2.97885949,2.97426393
71.419332,3,2.97997094,0.141524045,2.97540243,2.97870378,2.97413331
71.429823,2.64575131,2.97980159,-0.577970827,2.97525773,2.97854864,2.97400286
71.440315,2.82842712,2.9796333,-0.388852379,2.97511371,2.97839404,2.97387257
71.450806,2,2.97946608,-0.989679785,2.97497037,2.97824001,2.97374245
71.461298,3,2.97929987,0.143875392,2.97482766,2.97808652,2.97361248
71.47179,4.24264069,2.97913467,1.12405783,2.97468557,2.97793358,2.97348268
71.482281,3.16227766,2.97897048,0.42814388,2.97454409,2.9777812,2.97335305
71.492773,3.16227766,2.97880723,0.42833448,2.97440318,2.97762937,2.97322357
71.503264,4,2.97864495,1.01062112,2.97426283,2.9774781,2.97309426
71.513756,3.60555128,2.97848359,0.791876057,2.97412302,2.97732736,2.9729651
71.524248,3.31662479,2.97832313,0.581637048,2.97398374,2.97717718,2.97283611
71.534739,2.64575131,2.9781636,-0.576552069,2.97384497,2.97702757,2.97270729
71.545231,3.31662479,2.97800494,0.58191052,2.97370669,2.9768785,2.97257862
71.555722,3.87298335,2.97784716,0.946116368,2.9735689,2.97672999,2.97245012
71.566214,4,2.97769024,1.01109335,2.97343156,2.97658204,2.97232177
71.576706,2,2.97753418,-0.98870328,2.97329468,2.97643465,2.97219359
71.587197,3.31662479,2.97737897,0.582448127,2.97315826,2.97628783,2.97206557
71.597689,2.82842712,2.97722459,-0.385742744,2.97302225,2.97614158,2.9719377
71.60818,4,2.97707106,1.0113995,2.97288667,2.97599591,2.97181001
71.618672,4.12310563,2.97691834,1.07060137,2.97275149,2.97585081,2.97168246
71.629164,3.74165739,2.97676644,0.874580438,2.97261671,2.97570629,2.97155507
71.639655,3.46410162,2.97661539,0.69820214,2.97248233,2.97556239,2.97142786
71.650147,4.24264069,2.97646514,1.12524466,2.97234831,2.97541906,2.97130079
71.660638,3.74165739,2.97631572,0.874838079,2.97221468,2.97527637,2.97117389
71.67113,3.60555128,2.97616712,0.793337355,2.97208141,2.97513427,2.97104714
71.681622,3.16227766,2.97601934,0.431576557,2.97194848,2.97499281,2.97092055
71.692113,3.16227766,2.9758724,0.431746756,2.97181592,2.974852,2.97079413
71.702605,3.60555128,2.97572628,0.793615141,2.97168369,2.97471183,2.97066785
71.713096,4,2.97558102,1.01213585,2.9715518,2.97457234,2.97054174
71.723588,3,2.9754366,0.156727137,2.97142023,2.97443351,2.97041578
71.73408,4.12310563,2.97529305,1.07136015,2.97128898,2.97429539,2.97028998
71.744571,4.12310563,2.97515038,1.07142673,2.97115806,2.974158,2.97016435
71.755063,3.31662479,2.97500859,0.584479427,2.97102743,2.97402134,2.97003886
71.765554,2.44948974,2.97486772,-0.724829621,2.97089712,2.97388545,2.96991354
71.776046,3.60555128,2.97472777,0.794243984,2.9707671,2.97375033,2.96978836
71.786538,4,2.97458877,1.01262591,2.97063737,2.97361603,2.96966334
71.797029,3.31662479,2.97445076,0.584956438,2.97050794,2.97348258,2.96953849
71.807521,3.16227766,2.97431374,0.433548065,2.97037879,2.97335,2.96941378
71.818012,3.16227766,2.97417777,0.433704846,2.97024993,2.97321835,2.96928924
71.828504,3.87298335,2.97404286,0.948124722,2.97012133,2.97308764,2.96916484
71.838996,3.46410162,2.97390906,0.700137522,2.969993,2.97295792,2.9690406
71.849487,3.16227766,2.97377644,0.434167267,2.96986495,2.97282927,2.96891652
71.859979,3.60555128,2.97364502,0.794925313,2.96973715,2.97270171,2.96879259
71.87047,3.31662479,2.97351488,0.585755846,2.96960962,2.97257532,2.96866883
71.880962,3.31662479,2.97338605,0.5858658,2.96948234,2.97245014,2.9685452
71.891454,2.82842712,2.97325863,-0.380567349,2.96935532,2.97232627,2.96842173
71.901945,3.87298335,2.9731327,0.948604577,2.96922855,2.9722038,2.96829843
71.912437,3,2.97300833,0.164291412,2.96910202,2.9720828,2.96817527
71.922928,4.12310563,2.97288564,1.07248309,2.96897574,2.97196338,2.96805227
71.93342,3.74165739,2.97276472,0.876865249,2.9688497,2.97184565,2.96792941
71.943912,3.31662479,2.97264571,0.586497299,2.96872389,2.97172974,2.96780671
71.954403,3.31662479,2.97252875,0.586596996,2.96859833,2.97161581,2.96768417
71.964895,3.74165739,2.972414,0.877065214,2.96847299,2.97150399,2.96756177
71.975386,2.23606798,2.97230164,-0.858040593,2.96834789,2.9713945,2.96743954
71.985878,3.31662479,2.97219186,0.586884087,2.968223,2.97128751,2.96731744
71.99637,3.16227766,2.9720849,0.436110946,2.96809834,2.97118327,2.9671955
72.006861,3.31662479,2.97198104,0.587063664,2.96797392,2.97108206,2.96707372
72.017353,2.64575131,2.97188056,-0.571077275,2.96784971,2.97098416,2.96695208
72.027844,2.64575131,2.97178383,-0.570992573,2.96772572,2.97088994,2.9668306
72.038336,3.31662479,2.97169122,0.587310454,2.96760194,2.97079977,2.96670927
72.048828,2.64575131,2.97160322,-0.570834394,2.96747838,2.97071416,2.96658808
72.059319,2.64575131,2.97152038,-0.570761834,2.96735503,2.97063365,2.96646705
72.069811,3.16227766,2.97144337,0.43684584,2.96723189,2.9705589,2.96634617
72.080302,3.46410162,2.97137304,0.701946275,2.96710897,2.97049078,2.96622544
72.090794,2.23606798,2.97131046,-0.857462817,2.96698624,2.97043036,2.96610486
72.101286,2.44948974,2.97125708,-0.722334646,2.96686372,2.97037908,2.96598442
72.111777,4.12310563,2.97121493,1.07326171,2.96674142,2.97033897,2.96586414
72.122269,3.31662479,2.97118686,0.587739676,2.9666193,2.97031291,2.965744
72.13276,2.44948974,2.97117709,-0.722279273,2.9664974,2.97030509,2.96562402
72.143252,3.31662479,2.97119175,0.587735517,2.96637568,2.97032167,2.96550418
72.153744,4.12310563,2.9712398,1.07325012,2.96625416,2.97037159,2.96538449
72.164235,3.60555128,2.97133408,0.796377545,2.96613285,2.9704677,2.96526495
72.174727,3.46410162,2.97149262,0.701861097,2.96601172,2.97062805,2.96514555
72.185218,2.82842712,2.97173988,-0.37856671,2.9658908,2.9708771,2.96502632
72.19571,3,2.97210807,0.167008764,2.96577005,2.97124707,2.96490721
72.206202,3.87298335,2.97263764,0.948865483,2.9656495,2.97177843,2.96478826
72.216693,3.31662479,2.97337698,0.585873547,2.96552915,2.97251956,2.96466946
72.227185,3.60555128,2.97438096,0.79446228,2.96540897,2.97352538,2.9645508
72.237676,2.82842712,2.97570687,-0.383770439,2.96528899,2.97485318,2.9644323
72.248168,3.31662479,2.97740954,0.582421887,2.96516919,2.97655779,2.96431393
72.25866,3,2.97953295,0.143063106,2.96504957,2.97868323,2.9641957
72.269151,3.16227766,2.98210144,0.424471697,2.96493014,2.98125384,2.96407764
72.279643,2.82842712,2.98511092,-0.395833035,2.96481089,2.98426552,2.96395971
72.290134,3,2.98851786,0.107154771,2.96469183,2.98767473,2.96384193
72.300626,3.31662479,2.99223363,0.569553475,2.96457294,2.99139283,2.96372429
72.311118,3.87298335,2.99611642,0.936411728,2.96445423,2.99527795,2.96360679
72.321609,3.60555128,2.99996886,0.778191757,2.9643357,2.99913267,2.96348945
72.332101,2,3.00354094,-1.00176891,2.96421735,3.00270691,2.96337225
72.342592,3.31662479,3.00653989,0.556852677,2.96409918,3.00570782,2.9632552
72.353084,3,3.00866497,-0.0930858161,2.96398117,3.0078346,2.96313828
72.363576,3.16227766,3.00966167,0.390660967,2.96386334,3.00883264,2.9630215
72.374067,2.82842712,3.00939015,-0.425397495,2.9637457,3.0085621,2.96290488
72.384559,3.31662479,3.0078693,0.555657708,2.96362821,3.00704184,2.9627884
72.39505,3.60555128,3.00527043,0.77477793,2.96351091,3.00444324,2.96267206
72.405542,3,3.00186329,-0.0431658196,2.96339377,3.00103612,2.96255586
72.416034,3.74165739,2.99795079,0.862384252,2.9632768,2.99712347,2.9624398
72.426525,2,2.99381773,-0.996904071,2.96316001,2.99299018,2.9623239
72.437017,2.64575131,2.98970246,-0.586473482,2.96304338,2.98887465,2.96220812
72.447508,4.12310563,2.98579026,1.06644989,2.96292693,2.98496222,2.9620925
72.458,3.60555128,2.9822099,0.789519715,2.96281063,2.9813817,2.96197701
72.468492,2,2.97904021,-0.989464606,2.9626945,2.97821194,2.96186166
72.478983,3.31662479,2.97631518,0.583360615,2.96257855,2.97548694,2.96174646
72.489475,3.16227766,2.97403163,0.433873289,2.96246275,2.97320351,2.9616314
72.499966,3.60555128,2.97216031,0.795858635,2.96234712,2.97133241,2.96151648
72.510458,3.16227766,2.97065376,0.437748674,2.96223165,2.96982616,2.9614017
72.52095,3.16227766,2.96945643,0.439114139,2.96211634,2.96862919,2.96128705
72.531441,2.82842712,2.96851118,-0.374278048,2.96200121,2.96768435,2.96117256
72.541933,3,2.96776427,0.179543119,2.96188623,2.96693787,2.96105819
72.552424,3.31662479,2.96716908,0.591147786,2.96177142,2.96634315,2.96094398
72.562916,3.16227766,2.96668692,0.442256418,2.96165676,2.96586146,2.96082989
72.573408,3.87298335,2.96628745,0.952205803,2.96154225,2.96546247,2.96071595
72.583899,3.16227766,2.96594775,0.44309131,2.96142792,2.96512324,2.96060215
72.594391,3,2.96565098,0.185334893,2.96131374,2.96482693,2.96048848
72.604882,2.44948974,2.9653853,-0.718258696,2.96119973,2.9645617,2.96037496
72.615374,2.82842712,2.9651424,-0.369750286,2.96108586,2.96431924,2.96026157
72.625866,3.16227766,2.96491665,0.444253318,2.96097215,2.96409391,2.96014832
72.636357,3,2.9647042,0.18787176,2.96085861,2.96388188,2.96003521
72.646849,3.31662479,2.96450235,0.593399056,2.96074521,2.96368042,2.95992224
72.65734,3.16227766,2.96430926,0.4449364,2.96063198,2.96348771,2.95980941
72.667832,2.64575131,2.96412353,-0.564244824,2.96051889,2.96330234,2.9596967
72.678324,2.64575131,2.96394416,-0.564085853,2.96040596,2.96312332,2.95958414
72.688815,3,2.96377036,0.190340856,2.9602932,2.96294985,2.95947172
72.699307,3,2.96360144,0.190784058,2.96018057,2.96278125,2.95935943
72.709798,3.46410162,2.96343691,0.707576644,2.96006811,2.96261701,2.95924728
72.72029,3.60555128,2.96327626,0.801420622,2.95995579,2.96245665,2.95913526
72.730782,2.82842712,2.96311913,-0.367004094,2.95984362,2.96229979,2.95902338
72.741273,2.64575131,2.96296518,-0.56321743,2.95973162,2.9621461,2.95891164
72.751765,3.31662479,2.9628141,0.594819882,2.95961976,2.96199525,2.95880003
72.762256,3.46410162,2.96266564,0.708121443,2.95950805,2.96184702,2.95868856
72.772748,3.87298335,2.96251954,0.954182268,2.95939649,2.96170114,2.95857722
72.78324,4.12310563,2.96237563,1.0773718,2.95928508,2.96155742,2.95846601
72.793731,3.31662479,2.96223372,0.595307539,2.95917382,2.9614157,2.95835495
72.804223,3.16227766,2.96209364,0.447419287,2.95906271,2.96127578,2.95824401
72.814714,3.87298335,2.96195526,0.954477911,2.95895175,2.96113756,2.95813321
72.825206,3.31662479,2.96181844,0.595656238,2.95884093,2.96100087,2.95802254
72.835698,3.16227766,2.96168306,0.447877888,2.95873026,2.96086562,2.95791201
72.846189,2.64575131,2.96154904,-0.561958829,2.95861974,2.96073171,2.95780161
72.856681,4,2.96141626,1.01910929,2.95850937,2.96059903,2.95769134
72.867172,3,2.96128466,0.196762152,2.95839915,2.96046752,2.95758121
72.877664,2.82842712,2.96115414,-0.364317184,2.95828906,2.96033708,2.95747121
72.888156,2.64575131,2.96102464,-0.561492055,2.95817912,2.96020764,2.95736134
72.898647,4.35889894,2.96089612,1.1823717,2.95806934,2.96007917,2.95725161
72.909139,2.82842712,2.96076849,-0.363787522,2.95795969,2.95995158,2.957142
72.91963,2.23606798,2.96064172,-0.851218975,2.95785019,2.95982483,2.95703253
72.930122,3,2.96051575,0.198706443,2.95774083,2.95969888,2.95692319
72.940614,3.31662479,2.96039054,0.596853625,2.95763161,2.95957367,2.95681398
72.951105,3.16227766,2.96026607,0.449456997,2.95752254,2.95944918,2.9567049
72.961597,3.16227766,2.96014227,0.449594696,2.95741361,2.95932536,2.95659595
72.972088,3.16227766,2.96001914,0.449731612,2.95730483,2.9592022,2.95648714
72.98258,3,2.95989662,0.200258292,2.95719619,2.95907963,2.95637845
72.993072,3.74165739,2.95977469,0.884241311,2.95708768,2.95895765,2.95626989
73.003563,2.44948974,2.95965335,-0.714257379,2.95697932,2.95883623,2.95616147
73.014055,3.16227766,2.95953253,0.450272279,2.9568711,2.95871534,2.95605317
73.024546,3.46410162,2.95941226,0.710414919,2.95676303,2.95859498,2.95594501
73.035038,3.60555128,2.95929247,0.803902235,2.95665509,2.95847509,2.95583697
73.04553,3.46410162,2.95917317,0.710583173,2.95654728,2.95835568,2.95572906
73.056021,3.16227766,2.95905434,0.45080297,2.95643963,2.95823673,2.95562129
73.066513,3.60555128,2.95893595,0.804123947,2.95633211,2.95811821,2.95551364
73.077004,4.12310563,2.95881801,1.0790216,2.95622473,2.95800012,2.95540612
73.087496,2.82842712,2.95870047,-0.360933996,2.95611748,2.95788243,2.95529872
73.097988,4,2.95858334,1.02049824,2.95601038,2.95776514,2.95519146
73.108479,3.16227766,2.95846662,0.451454362,2.95590342,2.95764824,2.95508432
73.118971,2.44948974,2.95835026,-0.713344602,2.95579658,2.9575317,2.95497731
73.129462,2.64575131,2.95823429,-0.559001771,2.9556899,2.95741553,2.95487044
73.139954,3.31662479,2.95811867,0.598753808,2.95558334,2.95729971,2.95476368
73.150446,3.31662479,2.95800339,0.598850061,2.95547692,2.95718422,2.95465704
73.160937,2.64575131,2.95788847,-0.558692369,2.95537064,2.95706908,2.95455055
73.171429,2.82842712,2.95777388,-0.359648095,2.95526449,2.95695425,2.95444417
73.18192,4.35889894,2.95765962,1.18373955,2.95515849,2.95683975,2.95433793
73.192412,3,2.95754566,0.206044509,2.95505261,2.95672554,2.9542318
73.202904,3,2.95743202,0.2063201,2.95494687,2.95661164,2.9541258
73.213395,3,2.95731869,0.206594562,2.95484127,2.95649804,2.95401994
73.223887,3.31662479,2.95720564,0.59951576,2.9547358,2.95638472,2.95391419
73.234378,3,2.9570929,0.207140281,2.95463047,2.9562717,2.95380857
73.24487,2.44948974,2.95698044,-0.712383812,2.95452526,2.95615894,2.95370307
73.255362,3,2.95686825,0.207681838,2.95442019,2.95604645,2.9535977
73.265853,2.82842712,2.95675636,-0.358230695,2.95431526,2.95593424,2.95349246
73.276345,3.74165739,2.95664472,0.886009407,2.95421045,2.95582228,2.95338733
73.286836,3,2.95653336,0.208486558,2.95410579,2.95571058,2.95328234
73.297328,3.16227766,2.95642224,0.453712922,2.95400125,2.95559914,2.95317746
73.30782,3,2.95631139,0.209018202,2.95389684,2.95548794,2.95307271
73.318311,2.44948974,2.9562008,-0.711836399,2.95379257,2.95537699,2.95296809
73.328803,2.44948974,2.95609045,-0.711758884,2.95368842,2.95526628,2.95286358
73.339294,3,2.95598036,0.209808582,2.95358442,2.95515581,2.95275921
73.349786,3.46410162,2.9558705,0.712903301,2.95348054,2.95504557,2.95265494
73.360278,3,2.95576088,0.210330984,2.95337678,2.95493556,2.9525508
73.370769,2.82842712,2.9556515,-0.356685265,2.95327317,2.95482579,2.9524468
73.381261,3,2.95554235,0.210849823,2.95316968,2.95471624,2.9523429
73.391752,3.74165739,2.95543344,0.8866927,2.95306633,2.95460692,2.95223914
73.402244,3,2.95532475,0.211365206,2.95296309,2.9544978,2.95213549
73.412736,3.46410162,2.95521628,0.713361992,2.95285999,2.95438891,2.95203196
73.423227,2.23606798,2.95510805,-0.847962306,2.95275702,2.95428024,2.95192856
73.433719,2.82842712,2.95500003,-0.355770855,2.95265418,2.95417178,2.95182527
73.44421,2.64575131,2.95489223,-0.556004425,2.95255147,2.95406353,2.95172211
73.454702,3.31662479,2.95478464,0.601531502,2.95244888,2.95395548,2.95161906
73.465194,3.31662479,2.95467727,0.601620747,2.95234642,2.95384764,2.95151614
73.475685,2.23606798,2.95457011,-0.847645054,2.95224409,2.95374002,2.95141334
73.486177,2.64575131,2.95446316,-0.55561844,2.95214189,2.95363258,2.95131066
73.496668,3,2.95435643,0.213643563,2.95203982,2.95352536,2.9512081
73.50716,2.64575131,2.95424989,-0.555426484,2.95193787,2.95341833,2.95110565
73.517652,2.44948974,2.95414356,-0.710389903,2.95183604,2.95331149,2.95100332
73.528143,2.44948974,2.95403744,-0.710315208,2.95173435,2.95320486,2.95090112
73.538635,3.46410162,2.95393151,0.714261931,2.95163278,2.95309841,2.95079903
73.549126,2.64575131,2.95382579,-0.555044575,2.95153134,2.95299217,2.95069707
73.559618,2.82842712,2.95372026,-0.353967707,2.95143002,2.95288611,2.95059522
73.57011,4,2.95361493,1.02292965,2.95132882,2.95278024,2.95049348
73.580601,4.35889894,2.9535098,1.1854911,2.95122776,2.95267457,2.95039187
73.591093,3.31662479,2.95340486,0.6026773,2.95112681,2.95256907,2.95029038
73.601584,2.44948974,2.95330013,-0.709796015,2.951026,2.95246377,2.950189
73.612076,3,2.95319557,0.216343316,2.9509253,2.95235865,2.95008774
73.622568,2.23606798,2.95309121,-0.846772241,2.95082473,2.95225371,2.94998659
73.633059,3.16227766,2.95298704,0.457482917,2.95072429,2.95214897,2.94988557
73.643551,3,2.95288306,0.217064377,2.95062396,2.95204439,2.94978465
73.654042,3.16227766,2.95277927,0.457709942,2.95052376,2.95194001,2.94968387
73.664534,2.23606798,2.95267566,-0.846526835,2.95042368,2.9518358,2.94958318
73.675026,3.87298335,2.95257224,0.959380586,2.95032373,2.95173177,2.94948262
73.685517,3.74165739,2.95246901,0.888362751,2.9502239,2.95162793,2.94938218
73.696009,2.64575131,2.95236596,-0.553727952,2.95012419,2.95152425,2.94928184
73.7065,2.23606798,2.9522631,-0.84628312,2.95002461,2.95142076,2.94918163
73.716992,3,2.95216041,0.218722632,2.94992514,2.95131744,2.94908153
73.727484,2.44948974,2.95205791,-0.708920422,2.94982579,2.95121429,2.94898154
73.737975,3.16227766,2.9519556,0.458608836,2.94972657,2.95111133,2.94888167
73.748467,3.16227766,2.95185346,0.458720182,2.94962747,2.95100854,2.94878191
73.758958,2.64575131,2.95175151,-0.553172843,2.94952849,2.95090593,2.94868228
73.76945,3,2.95164973,0.219886956,2.94942963,2.95080348,2.94858275
73.779942,3.16227766,2.95154813,0.459052865,2.94933089,2.9507012,2.94848333
73.790433,3.16227766,2.95144672,0.459163307,2.94923227,2.95059911,2.94838403
73.800925,2.82842712,2.95134548,-0.350597136,2.94913377,2.95049718,2.94828484
73.811416,3.46410162,2.95124442,0.716140483,2.9490354,2.95039543,2.94818577
73.821908,3.60555128,2.95114354,0.808954717,2.94893713,2.95029385,2.94808681
73.8324,2.82842712,2.95104284,-0.350165262,2.94883899,2.95019244,2.94798795
73.842891,3,2.95094232,0.221489688,2.94874097,2.9500912,2.94788922
73.853383,3.31662479,2.95084197,0.604799819,2.94864307,2.94999013,2.9477906
73.863874,3.16227766,2.95074181,0.459930269,2.94854529,2.94988925,2.94769209
73.874366,3.16227766,2.95064181,0.460038961,2.94844762,2.94978852,2.94759369
73.884858,3,2.950542,0.222391548,2.94835006,2.94968796,2.94749539
73.895349,3.31662479,2.95044237,0.605130084,2.94825264,2.94958759,2.94739722
73.905841,2.82842712,2.95034291,-0.349164415,2.94815532,2.94948738,2.94729915
73.916332,2.64575131,2.95024364,-0.551808238,2.94805813,2.94938735,2.9472012
73.926824,2.64575131,2.95014454,-0.551718434,2.94796105,2.94928748,2.94710336
73.937316,3.31662479,2.95004562,0.605457819,2.94786408,2.94918779,2.94700562
73.947807,2.82842712,2.94994689,-0.348596849,2.94776725,2.94908828,2.946908
73.958299,3.46410162,2.94984833,0.717114557,2.94767051,2.94898893,2.94681048
73.96879,2.23606798,2.94974996,-0.844797005,2.94757391,2.94888977,2.94671309
73.979282,3.16227766,2.94965176,0.461113761,2.94747741,2.94879078,2.94661579
73.989774,3.16227766,2.94955375,0.461220029,2.94738102,2.94869196,2.9465186
74.000265,2.82842712,2.94945592,-0.347891937,2.94728476,2.94859333,2.94642153
74.010757,2.64575131,2.94935828,-0.551005416,2.94718861,2.94849487,2.94632456
74.021248,3,2.94926083,0.225253565,2.94709258,2.9483966,2.94622771
74.03174,2.64575131,2.94916356,-0.550828695,2.94699666,2.9482985,2.94613096
74.042232,3,2.94906648,0.225684553,2.94690085,2.94820059,2.94603432
74.052723,2.82842712,2.9489696,-0.34719228,2.94680516,2.94810287,2.94593779
74.063215,1.73205081,2.94887291,-1.1030966,2.94670958,2.94800533,2.94584137
74.073706,3,2.94877642,0.226326263,2.94661413,2.94790799,2.94574506
74.084198,3.74165739,2.94868012,0.890492708,2.94651877,2.94781083,2.94564885
74.09469,4,2.94858403,1.02538577,2.94642353,2.94771387,2.94555274
74.105181,3.16227766,2.94848815,0.462373781,2.94632842,2.94761712,2.94545675
74.115673,2.64575131,2.94839246,-0.550128306,2.94623341,2.94752056,2.94536086
74.126164,3,2.948297,0.22738293,2.94613852,2.94742422,2.94526509
74.136656,4.24264069,2.94820175,1.13773412,2.94604373,2.94732807,2.94516941
74.147148,2.82842712,2.94810672,-0.345947387,2.94594906,2.94723215,2.94507384
74.157639,3.46410162,2.94801192,0.718393827,2.9458545,2.94713645,2.94497839
74.168131,2.82842712,2.94791735,-0.345673587,2.94576005,2.94704097,2.94488303
74.178622,2.82842712,2.94782303,-0.345537127,2.94566572,2.94694574,2.94478779
74.189114,3.87298335,2.94772895,0.96190145,2.9455715,2.94685073,2.94469264
74.199606,2.82842712,2.94763512,-0.345265104,2.94547738,2.94675598,2.9445976
74.210097,3.46410162,2.94754156,0.718721124,2.94538339,2.94666149,2.94450267
74.220589,3.46410162,2.94744827,0.718786022,2.9452895,2.94656726,2.94440784
74.23108,3.87298335,2.94735527,0.962095667,2.94519572,2.94647332,2.94431312
74.241572,3.46410162,2.94726257,0.718915188,2.94510205,2.94637966,2.9442185
74.252064,2.64575131,2.94717017,-0.549016268,2.94500849,2.94628631,2.94412398
74.262555,3,2.94707812,0.230047566,2.94491505,2.94619329,2.94402957
74.273047,3.60555128,2.9469864,0.811520102,2.94482171,2.9461006,2.94393526
74.283538,3.16227766,2.94689506,0.464093313,2.94472849,2.94600829,2.94384106
74.29403,2.23606798,2.9468041,-0.843051671,2.94463537,2.94591635,2.94374696
74.304522,3,2.94671355,0.230838573,2.94454235,2.94582482,2.94365296
74.315013,3.31662479,2.94662347,0.608277342,2.94444946,2.94573373,2.94355907
74.325505,4,2.94653385,1.02638499,2.94435667,2.94564312,2.94346528
74.335996,2.64575131,2.94644476,-0.548355224,2.94426399,2.94555303,2.94337159
74.346488,3.16227766,2.94635623,0.464673462,2.94417141,2.94546349,2.943278
74.35698,2.64575131,2.94626832,-0.54819432,2.94407894,2.94537456,2.94318452
74.367471,3.16227766,2.9461811,0.464861867,2.94398659,2.94528632,2.94309114
74.377963,3.60555128,2.94609464,0.812069357,2.94389434,2.94519882,2.94299786
74.388454,3.46410162,2.94600903,0.719786486,2.9438022,2.94511218,2.94290468
74.398946,2.82842712,2.9459244,-0.34277875,2.94371017,2.94502651,2.9428116
74.409438,2.64575131,2.94584091,-0.547804347,2.94361824,2.94494198,2.94271862
74.419929,2.82842712,2.94575884,-0.342537166,2.94352642,2.94485885,2.94262575
74.430421,2.23606798,2.94567851,-0.842383837,2.94343471,2.94477746,2.94253297
74.440912,3.31662479,2.94560049,0.609117642,2.94334311,2.94469838,2.94244031
74.451404,3.31662479,2.9455256,0.609179108,2.94325161,2.94462243,2.94234773
74.461896,2.23606798,2.94545513,-0.84225124,2.94316021,2.94455088,2.94225525
74.472387,3.87298335,2.94539096,0.963115978,2.94306893,2.94448563,2.94216288
74.482879,2.44948974,2.94533583,-0.704163395,2.94297774,2.94442942,2.9420706
74.49337,3.31662479,2.94529362,0.609369486,2.94288667,2.94438612,2.94197843
74.503862,3.31662479,2.94526956,0.609389227,2.9427957,2.94436098,2.94188636
74.514354,3,2.94527044,0.23394349,2.94270483,2.94436078,2.94179438
74.524845,4.58257569,2.94530462,1.27955894,2.94261408,2.94439388,2.9417025
74.535337,3,2.9453818,0.23370538,2.94252342,2.94446998,2.94161072
74.545828,3.87298335,2.94551237,0.963052948,2.94243288,2.94459949,2.94151905
74.55632,3,2.94570651,0.233009631,2.94234243,2.94479259,2.94142746
74.566812,3.31662479,2.94597268,0.608812049,2.94225208,2.94505773,2.94133597
74.577303,3.16227766,2.94631585,0.464716917,2.94216185,2.94539988,2.94124459
74.587795,2.64575131,2.94673577,-0.548620502,2.94207172,2.9458188,2.9411533
74.598286,3.16227766,2.94722495,0.463737765,2.94198169,2.946307,2.94106211
74.608778,2.64575131,2.94776754,-0.549560033,2.94189176,2.94684863,2.94097102
74.61927,3,2.94833819,0.227292344,2.94180194,2.94741831,2.94088002
74.629761,3.16227766,2.94890198,0.461926051,2.94171223,2.94798113,2.94078912
74.640253,2.64575131,2.9494155,-0.551057337,2.94162261,2.94849365,2.94069831
74.650744,2.64575131,2.94982911,-0.551432497,2.9415331,2.94890623,2.94060761
74.661236,3.74165739,2.95009316,0.889698954,2.94144369,2.94916919,2.940517
74.671728,3,2.95016714,0.223232744,2.94135437,2.94924202,2.94042648
74.682219,3.16227766,2.95003069,0.460702688,2.94126517,2.94910435,2.94033607
74.692711,3,2.94968996,0.224299006,2.94117607,2.94876232,2.94024574
74.703202,3.31662479,2.94917557,0.6061759,2.94108707,2.94824657,2.94015552
74.713694,3.60555128,2.94853328,0.810566467,2.94099817,2.94760288,2.94006538
74.724186,3.16227766,2.94781359,0.463102653,2.94090937,2.94688176,2.93997534
74.734677,3.31662479,2.94706386,0.607915235,2.94082067,2.94613057,2.9398854
74.745169,3.46410162,2.94632376,0.719567823,2.94073207,2.94538902,2.93979555
74.75566,4.35889894,2.9456241,1.18881237,2.94064358,2.94468791,2.9397058
74.766152,3.16227766,2.94498582,0.466145725,2.94055519,2.94404819,2.93961614
74.776644,3.60555128,2.94442102,0.813099165,2.94046689,2.94348197,2.93952657
74.787135,3.16227766,2.94393382,0.46727277,2.9403787,2.94299336,2.93943711
74.797627,2.82842712,2.94352185,-0.339256134,2.9402906,2.94258,2.93934772
74.808118,3.31662479,2.94317845,0.611102563,2.94020262,2.94223523,2.93925844
74.81861,2.64575131,2.94289416,-0.545108109,2.94011472,2.94194959,2.93916925
74.829102,3.60555128,2.94265862,0.814182199,2.94002692,2.9417127,2.93908015
74.839593,3.87298335,2.94246167,0.964635517,2.93993923,2.94151439,2.93899115
74.850085,3,2.94229412,0.240220491,2.93985163,2.9413455,2.93890223
74.860576,3.60555128,2.94214834,0.814495512,2.93976414,2.94119838,2.93881342
74.871068,3.31662479,2.94201821,0.612051122,2.93967674,2.94106691,2.93872469
74.88156,2.44948974,2.94189916,-0.701718899,2.93958944,2.94094651,2.93863605
74.892051,2.44948974,2.94178783,-0.701639572,2.93950225,2.94083383,2.93854751
74.902543,2.44948974,2.94168188,-0.701564063,2.93941514,2.94072652,2.93845905
74.913034,3.16227766,2.94157972,0.469784994,2.93932814,2.940623,2.93837069
74.923526,2.64575131,2.94148028,-0.543809683,2.93924124,2.9405222,2.93828242
74.934018,4,2.94138288,1.02889121,2.93915443,2.94042342,2.93819424
74.944509,2,2.94128706,-0.970199492,2.93906772,2.94032622,2.93810616
74.955001,2.82842712,2.9411925,-0.335805555,2.93898111,2.94023027,2.93801816
74.965492,3.46410162,2.94109901,0.723189193,2.9388946,2.94013539,2.93793025
74.975984,2.82842712,2.94100642,-0.335528384,2.93880817,2.9400414,2.93784243
74.986476,2,2.94091464,-0.970007545,2.93872185,2.93994821,2.93775471
74.996967,3.46410162,2.94082358,0.723379594,2.93863563,2.93985574,2.93766707
75.007459,3,2.94073315,0.243447833,2.9385495,2.9397639,2.93757952
75.01795,3.16227766,2.94064332,0.470780564,2.93846347,2.93967264,2.93749207
75.028442,2.44948974,2.94055402,-0.700759783,2.93837754,2.9395819,2.9374047
75.038934,3,2.9404652,0.243997534,2.9382917,2.93949165,2.93731742
75.049425,2.44948974,2.94037685,-0.700633364,2.93820596,2.93940185,2.93723023
75.059917,2.44948974,2.94028892,-0.700570607,2.93812031,2.93931246,2.93714313
75.070408,3.31662479,2.94020139,0.61353354,2.93803476,2.93922347,2.93705612
75.0809,2.64575131,2.94011421,-0.54255221,2.9379493,2.93913483,2.93696919
75.091392,3.87298335,2.94002739,0.965896455,2.93786394,2.93904652,2.93688235
75.101883,2.44948974,2.93994089,-0.700322176,2.93777868,2.93895855,2.93679561
75.112375,2.82842712,2.9398547,-0.333807696,2.9376935,2.93887087,2.93670895
75.122866,3.74165739,2.93976881,0.895482313,2.93760843,2.93878349,2.93662238
75.133358,2.82842712,2.9396832,-0.333550704,2.93752345,2.93869636,2.93653589
75.14385,3.46410162,2.93959785,0.724226323,2.93743856,2.9386095,2.93644949
75.154341,3.60555128,2.93951276,0.816111826,2.93735377,2.9385229,2.93636318
75.164833,3.31662479,2.93942792,0.614163556,2.93726907,2.93843653,2.93627696
75.175324,3,2.93934332,0.246285777,2.93718447,2.9383504,2.93619082
75.185816,4,2.93925894,1.02992284,2.93709996,2.93826448,2.93610477
75.196308,3.60555128,2.93917478,0.816318869,2.93701554,2.93817878,2.9360188
75.206799,4.24264069,2.93909085,1.14173107,2.93693122,2.93809329,2.93593293
75.217291,3.60555128,2.93900712,0.816421557,2.93684698,2.938008,2.93584713
75.227782,2.82842712,2.9389236,-0.332410098,2.93676285,2.93792291,2.93576143
75.238274,2.44948974,2.93884027,-0.699535938,2.9366788,2.93783801,2.9356758
75.248766,3.87298335,2.93875714,0.966553778,2.93659485,2.93775329,2.93559026
75.259257,3.60555128,2.93867421,0.816625414,2.93651099,2.93766877,2.93550481
75.269749,4.12310563,2.93859146,1.08835388,2.93642722,2.93758442,2.93541944
75.28024,3,2.9385089,0.247973996,2.93634355,2.93750026,2.93533417
75.290732,3.31662479,2.93842651,0.614978275,2.93625997,2.93741626,2.93524897
75.301224,3.31662479,2.9383443,0.615045109,2.93617647,2.93733243,2.93516385
75.311715,2.82842712,2.93826228,-0.331413876,2.93609308,2.93724878,2.93507883
75.322207,3,2.93818043,0.248635424,2.93600977,2.93716529,2.93499388
75.332698,2.82842712,2.93809875,-0.331167065,2.93592656,2.93708197,2.93490902
75.34319,3.31662479,2.93801724,0.615310941,2.93584343,2.9369988,2.93482424
75.353682,3,2.93793589,0.249126691,2.93576039,2.9369158,2.93473954
75.364173,4,2.93785472,1.03060433,2.93567745,2.93683296,2.93465494
75.374665,3,2.93777371,0.249451977,2.9355946,2.93675028,2.93457041
75.385156,3.60555128,2.93769287,0.817226041,2.93551184,2.93666776,2.93448597
75.395648,2.23606798,2.93761219,-0.837582362,2.93542917,2.93658538,2.9344016
75.40614,3.31662479,2.93753167,0.615705384,2.93534659,2.93650317,2.93431732
75.416631,2.23606798,2.93745132,-0.837486324,2.9352641,2.93642111,2.93423312
75.427123,2,2.93737112,-0.968179283,2.9351817,2.9363392,2.93414901
75.437614,2.44948974,2.9372911,-0.698427773,2.93509939,2.93625745,2.93406498
75.448106,4.12310563,2.93721122,1.08898779,2.93501717,2.93617585,2.93398102
75.458598,3.31662479,2.93713151,0.616030262,2.93493504,2.93609439,2.93389715
75.469089,3,2.93705196,0.250894482,2.934853,2.9360131,2.93381336
75.479581,3.46410162,2.93697256,0.726036536,2.93477105,2.93593195,2.93372965
75.490072,3.46410162,2.93689333,0.726091098,2.93468919,2.93585096,2.93364603
75.500564,2.64575131,2.93681426,-0.539502497,2.93460741,2.93577011,2.93356248
75.511056,3.31662479,2.93673534,0.61635173,2.93452572,2.93568941,2.93347901
75.521547,3.74165739,2.93665658,0.89721837,2.93444413,2.93560887,2.93339563
75.532039,3,2.93657798,0.251837285,2.93436262,2.93552848,2.93331233
75.54253,2.82842712,2.93649955,-0.328743704,2.93428121,2.93544824,2.93322911
75.553022,3.31662479,2.93642127,0.616606459,2.93419987,2.93536815,2.93314596
75.563514,2.64575131,2.93634324,-0.539065791,2.93411863,2.9352883,2.93306289
75.574005,3.46410162,2.93626528,0.726523456,2.93403748,2.93520852,2.93297991
75.584497,2.23606798,2.93618748,-0.836731441,2.93395641,2.93512888,2.932897
75.594988,2.82842712,2.93610985,-0.328150458,2.93387543,2.9350494,2.93281418
75.60548,2.44948974,2.93603128,-0.697525295,2.93379454,2.93496898,2.93273143
75.615972,3.60555128,2.93595396,0.81828926,2.93371373,2.9348898,2.93264876
75.626463,3.60555128,2.93587682,0.818336397,2.93363302,2.93481079,2.93256617
75.636955,3,2.93579983,0.253377531,2.93355239,2.93473192,2.93248366
75.647446,2.44948974,2.93572301,-0.697304284,2.93347185,2.93465321,2.93240123
75.657938,3.31662479,2.93564635,0.617234513,2.93339139,2.93457465,2.93231887
75.66843,3,2.93556985,0.253830946,2.93331102,2.93449625,2.93223659
75.678921,3.31662479,2.93549353,0.617358292,2.93323074,2.93441802,2.9321544
75.689413,3.87298335,2.93541737,0.968279907,2.93315054,2.93433994,2.93207227
75.699904,2.44948974,2.93534138,-0.697030587,2.93307043,2.93426202,2.93199023
75.710396,3.74165739,2.93526556,0.897993222,2.9329904,2.93418426,2.93190826
75.720888,3.74165739,2.93518991,0.898035344,2.93291046,2.93410666,2.93182637
75.731379,2.64575131,2.93511443,-0.537924831,2.93283061,2.93402922,2.93174456
75.741871,3.60555128,2.93503913,0.818848062,2.93275084,2.93395195,2.93166282
75.752362,3.46410162,2.934964,0.727418458,2.93267117,2.93387485,2.93158116
75.762854,3.16227766,2.93488905,0.476852822,2.93259157,2.93379791,2.93149958
75.773346,2.82842712,2.9348146,-0.326170927,2.93251206,2.93372147,2.93141807
75.783837,2.64575131,2.93474001,-0.537576687,2.93243263,2.93364487,2.93133664
75.794329,3.31662479,2.93466559,0.618028482,2.93235329,2.93356844,2.93125528
75.80482,4.12310563,2.93459136,1.09019002,2.93227404,2.93349219,2.93117401
75.815312,3,2.9345173,0.255895871,2.93219487,2.93341611,2.9310928
75.825804,2.82842712,2.93444344,-0.325601461,2.93211578,2.9333402,2.93101167
75.836295,3.60555128,2.93436976,0.819256683,2.93203678,2.93326448,2.93093062
75.846787,2.82842712,2.93429627,-0.325375396,2.93195786,2.93318893,2.93084963
75.857278,3.16227766,2.93422298,0.477550708,2.93187903,2.93311357,2.93076873
75.86777,3.16227766,2.93414988,0.477627243,2.93180028,2.93303839,2.9306879
75.878262,2.82842712,2.93407697,-0.325038219,2.93172161,2.93296339,2.93060714
75.888753,3.74165739,2.93400426,0.898695233,2.93164303,2.93288859,2.93052646
75.899245,2.82842712,2.93393176,-0.324814764,2.93156453,2.93281398,2.93044585
75.909736,3.60555128,2.93385946,0.819568069,2.93148612,2.93273956,2.93036533
75.920228,3.46410162,2.93378736,0.728226791,2.93140779,2.93266534,2.93028486
75.93072,3.16227766,2.93371546,0.478081788,2.93132954,2.93259131,2.93020447
75.941211,3.16227766,2.93364379,0.478156742,2.93125138,2.93251749,2.93012417
75.951703,3.31662479,2.93357232,0.618912325,2.9311733,2.93244387,2.93004392
75.962194,2.64575131,2.93350108,-0.536423128,2.9310953,2.93237047,2.92996376
75.972686,2.82842712,2.93343006,-0.324041557,2.93101739,2.93229727,2.92988366
75.983178,2.44948974,2.93335925,-0.695607295,2.93093955,2.93222428,2.92980364
75.993669,2.64575131,2.93328868,-0.536225113,2.93086181,2.93215152,2.9297237
76.004161,2.64575131,2.93321834,-0.536159516,2.93078414,2.93207897,2.92964382
76.014652,3.16227766,2.93314823,0.478674655,2.93070655,2.93200665,2.92956402
76.025144,3.46410162,2.93307836,0.728713422,2.93062905,2.93193456,2.92948428
76.035636,4,2.93300874,1.03295269,2.93055163,2.93186269,2.92940462
76.046127,3.74165739,2.93294986,0.899281673,2.93047429,2.93180158,2.92932504
76.056619,2.23606798,2.93288074,-0.834753113,2.93039703,2.9317302,2.92924552
76.06711,3.31662479,2.93281188,0.619526362,2.93031986,2.93165907,2.92916608
76.077602,3.46410162,2.93274327,0.728943306,2.93024276,2.93158819,2.9290867
76.088094,3.46410162,2.93267493,0.72899018,2.93016575,2.93151757,2.92900739
76.098585,3.16227766,2.93260687,0.479239804,2.93008882,2.93144721,2.92892817
76.109077,3.31662479,2.93253908,0.619746489,2.93001197,2.93137711,2.928849
76.119568,3.31662479,2.93247158,0.619800946,2.92993521,2.93130729,2.92876992
76.13006,3.16227766,2.93240436,0.479451044,2.92985852,2.93123774,2.92869089
76.140552,3.60555128,2.93233743,0.820496096,2.92978191,2.93116848,2.92861194
76.151043,2.64575131,2.93227081,-0.535275165,2.92970539,2.93109951,2.92853306
76.161535,3.31662479,2.9322045,0.620016366,2.92962894,2.93103084,2.92845425
76.172026,2.82842712,2.9321385,-0.322042506,2.92955258,2.93096247,2.92837551
76.182518,2.82842712,2.93207282,-0.321940517,2.92947629,2.93089441,2.92829684
76.19301,3.46410162,2.93200747,0.729447835,2.92940009,2.93082667,2.92821823
76.203501,2.23606798,2.93194247,-0.834190919,2.92932397,2.93075926,2.9281397
76.213993,3,2.9318778,0.261002296,2.92924793,2.93069218,2.92806124
76.224484,3.16227766,2.9318135,0.480066831,2.92917197,2.93062545,2.92798285
76.234976,3.74165739,2.93174955,0.899948795,2.92909608,2.93055907,2.92790452
76.245468,1.41421356,2.93168598,-1.23185731,2.92902028,2.93049305,2.92782626
76.255959,3.74165739,2.9316228,0.900019214,2.92894456,2.93042741,2.92774807
76.266451,2.82842712,2.93156001,-0.321143092,2.92886891,2.93036215,2.92766995
76.276942,2.64575131,2.93149763,-0.534552448,2.92879335,2.93029729,2.9275919
76.287434,3.31662479,2.93143566,0.620636066,2.92871787,2.93023283,2.92751391
76.297926,2.82842712,2.93137413,-0.320853551,2.92864246,2.93016878,2.92743599
76.308417,3.74165739,2.93131304,0.900191285,2.92856714,2.93010518,2.92735814
76.318909,3.87298335,2.9312524,0.970428229,2.92849189,2.93004201,2.92728036
76.3294,3.16227766,2.93119224,0.480713454,2.92841672,2.92997931,2.92720265
76.339892,3.60555128,2.93113255,0.821230006,2.92834163,2.92991708,2.927125
76.350384,3.31662479,2.93107337,0.62092787,2.92826662,2.92985533,2.92704741
76.360875,3.87298335,2.93101471,0.970550686,2.92819169,2.9297941,2.9269699
76.371367,3.31662479,2.93095658,0.621021907,2.92811684,2.92973338,2.92689245
76.381858,4,2.93089901,1.0339734,2.92804207,2.92967321,2.92681508
76.39235,3.16227766,2.930842,0.4810776,2.92796737,2.9296136,2.92673776
76.402842,2.82842712,2.93078559,-0.319935095,2.92789275,2.92955456,2.92666051
76.413333,3,2.93072979,0.263192335,2.92781822,2.92949613,2.92658333
76.423825,3.74165739,2.93067463,0.90054581,2.92774375,2.92943832,2.92650621
76.434316,3.87298335,2.93062013,0.970753942,2.92766938,2.92938116,2.92642916
76.444808,3.31662479,2.93056631,0.621336044,2.92759507,2.92932467,2.92635217
76.4553,3.46410162,2.9305132,0.730471364,2.92752084,2.92926888,2.92627525
76.465791,2.82842712,2.93046084,-0.319427161,2.92744669,2.92921382,2.9261984
76.476283,3.31662479,2.93040923,0.621462434,2.92737262,2.92915951,2.9261216
76.486774,2.23606798,2.93035844,-0.833240937,2.92729863,2.92910599,2.92604488
76.497266,3.46410162,2.93030847,0.730611489,2.92722471,2.92905329,2.92596822
76.507758,3.31662479,2.93025937,0.621582999,2.92715087,2.92900145,2.92589162
76.518249,3.46410162,2.93021117,0.73067807,2.92707712,2.9289505,2.92581509
76.528741,3.16227766,2.93016392,0.481781836,2.92700343,2.92890048,2.92573862
76.539232,3.16227766,2.93011766,0.481829844,2.92692983,2.92885143,2.92566222
76.549724,2.64575131,2.93007243,-0.533217702,2.9268563,2.92880341,2.92558588
76.560216,3.46410162,2.93002827,0.730803217,2.92678284,2.92875644,2.9255096
76.570707,3.31662479,2.92998525,0.621803456,2.92670947,2.9287106,2.92543339
76.581199,3.46410162,2.92994341,0.730861276,2.92663617,2.92866592,2.92535724
76.59169,2.23606798,2.92990281,-0.832967487,2.92656295,2.92862248,2.92528116
76.602182,4,2.92986351,1.03447402,2.92648981,2.92858032,2.92520513
76.612674,3.31662479,2.92982558,0.62193184,2.92641674,2.92853951,2.92512917
76.623165,2.64575131,2.92978908,-0.53295194,2.92634375,2.92850013,2.92505328
76.633657,2.64575131,2.92975409,-0.532919116,2.92627083,2.92846225,2.92497744
76.644148,3.31662479,2.9297207,0.622016148,2.926198,2.92842594,2.92490168
76.65464,3.31662479,2.92968898,0.622041645,2.92612523,2.9283913,2.92482597
76.665132,3.60555128,2.92965903,0.82212666,2.92605254,2.92835841,2.92475032
76.675623,3.60555128,2.92963095,0.82214374,2.92597994,2.92832737,2.92467474
76.686115,2.44948974,2.92960483,-0.692903378,2.9259074,2.92829829,2.92459921
76.696606,2.82842712,2.92958081,-0.318046669,2.92583495,2.92827129,2.92452376
76.707098,2.44948974,2.92955899,-0.692870295,2.92576257,2.92824648,2.92444835
76.71759,3,2.92953951,0.265443949,2.92569026,2.928224,2.92437301
76.728081,2.82842712,2.92952251,-0.317955013,2.92561803,2.92820398,2.92429774
76.738573,2,2.92950815,-0.964110032,2.92554588,2.92818659,2.92422253
76.749064,2.23606798,2.9294966,-0.832723616,2.9254738,2.92817199,2.92414738
76.759556,2.64575131,2.92948802,-0.532669421,2.9254018,2.92816036,2.92407228
76.770048,2.23606798,2.92948263,-0.832715227,2.92532987,2.92815189,2.92399725
76.780539,3.31662479,2.92948062,0.622209105,2.92525802,2.9281468,2.92392228
76.791031,2.23606798,2.92948223,-0.832714991,2.92518625,2.92814532,2.92384737
76.801522,3.16227766,2.92948772,0.482483102,2.92511455,2.92814769,2.92377252
76.812014,3.16227766,2.92949734,0.482473124,2.92504292,2.9281542,2.92369773
76.822506,3.60555128,2.92951141,0.822216432,2.92497137,2.92816513,2.923623
76.832997,4,2.92953025,1.03463508,2.9248999,2.92818081,2.92354833
76.843489,2.82842712,2.92955421,-0.318004852,2.9248285,2.92820161,2.92347372
76.85398,4,2.92958368,1.03460926,2.92475718,2.92822791,2.92339917
76.864472,2.64575131,2.92961911,-0.532792449,2.92468593,2.92826014,2.92332468
76.874964,3,2.92966094,0.265215114,2.92461476,2.92829878,2.92325024
76.885455,3,2.92970971,0.265123152,2.92454366,2.92834434,2.92317587
76.895947,3.74165739,2.929766,0.901050157,2.92447264,2.9283974,2.92310156
76.906438,2.82842712,2.92983043,-0.318438856,2.92440169,2.92845859,2.92302731
76.91693,3.31662479,2.92990372,0.621869018,2.92433082,2.92852863,2.92295311
76.927422,3.31662479,2.92998663,0.621802344,2.92426001,2.92860829,2.92287897
76.937913,4,2.93008005,1.03436935,2.9241893,2.92869843,2.92280489
76.948405,1.41421356,2.93018494,-1.2312479,2.92411864,2.92880004,2.92273087
76.958896,3.87298335,2.93030238,0.970917588,2.92404807,2.92891419,2.92265691
76.969388,3.46410162,2.93043361,0.730525843,2.92397757,2.92904212,2.92258301
76.97988,3.46410162,2.93057997,0.730425661,2.92390714,2.92918517,2.92250916
76.990371,3.74165739,2.93074299,0.900507855,2.9238368,2.92934487,2.92243537
77.000863,3,2.93092444,0.262822295,2.92376652,2.92952299,2.92236164
77.011354,3.60555128,2.93112627,0.821233831,2.92369632,2.92972149,2.92228797
77.021846,2.64575131,2.93135079,-0.534415076,2.92362619,2.92994267,2.92221435
77.032338,2.64575131,2.9316006,-0.534648748,2.92355614,2.93018913,2.92214079
77.042829,3.31662479,2.93187876,0.620278997,2.92348616,2.93046395,2.92206729
77.053321,3.60555128,2.93218902,0.820586533,2.92341626,2.93077086,2.92199384
77.063812,2.82842712,2.93253585,-0.322658831,2.92334643,2.93111435,2.92192046
77.074304,2.64575131,2.93292505,-0.535885937,2.92327667,2.93150021,2.92184713
77.084796,3.46410162,2.93336409,0.728517344,2.92320699,2.93193592,2.92177385
77.095287,2.64575131,2.93386306,-0.536760425,2.92313739,2.93243157,2.92170064
77.105779,2.82842712,2.93443611,-0.325590212,2.92306785,2.93300131,2.92162747
77.11627,3.16227766,2.93510298,0.476628455,2.9229984,2.9336649,2.92155437
77.126762,3.46410162,2.93589209,0.726780244,2.92292901,2.93445079,2.92148132
77.137254,3.46410162,2.9368437,0.726125276,2.9228597,2.93539923,2.92140832
77.147745,2.64575131,2.93801451,-0.540613728,2.92279047,2.93656698,2.92133539
77.158237,2.44948974,2.93948364,-0.699995639,2.9227213,2.93803316,2.9212625
77.168728,4.12310563,2.94135774,1.08708228,2.92265222,2.93990451,2.92118968
77.17922,2.64575131,2.94377838,-0.545918559,2.9225832,2.94232264,2.9211169
77.189712,3.87298335,2.94692571,0.962318886,2.92251426,2.94546781,2.92104418
77.200203,3.46410162,2.95102101,0.71629645,2.9224454,2.94956141,2.92097153
77.210695,2,2.95632612,-0.97791928,2.92237661,2.9548654,2.92089892
77.221186,2.64575131,2.96313149,-0.563365046,2.92230789,2.96167038,2.92082637
77.231678,2.82842712,2.97174378,-0.378571867,2.92223925,2.97028316,2.92075387
77.24217,3.87298335,2.98245558,0.943677789,2.92217068,2.98099644,2.92068142
77.252661,2.44948974,2.99551205,-0.738933219,2.92210218,2.99405551,2.92060904
77.263153,2.82842712,3.01107502,-0.427373254,2.92203376,3.00962226,2.9205367
77.273644,2.64575131,3.02916993,-0.619208057,2.92196542,3.02772208,2.92046443
77.284136,3.46410162,3.04965697,0.643773755,2.92189714,3.0482151,2.9203922
77.294628,3.16227766,3.07218486,0.300154629,2.92182894,3.07074983,2.92032002
77.305119,2.64575131,3.09617101,-0.671133144,2.92176082,3.09474336,2.92024791
77.315611,3.16227766,3.1207962,0.20366997,2.92169276,3.1193761,2.92017584
77.326102,3.60555128,3.14498807,0.678648074,2.92162479,3.14357518,2.92010383
77.336594,4,3.16745882,0.912436945,2.92155688,3.16605226,2.92003187
77.347086,3.74165739,3.18674726,0.744922902,2.92148905,3.18534551,2.91995996
77.357577,4.58257569,3.20135449,1.17525368,2.9214213,3.19995543,2.91988812
77.368069,3.74165739,3.20996281,0.729173898,2.92135361,3.2085638,2.91981632
77.37856,2.44948974,3.21170195,-0.873047652,2.92128601,3.21029996,2.91974457
77.389052,3.87298335,3.20637993,0.816457845,2.92121847,3.20497186,2.91967288
77.399544,4.24264069,3.19453786,1.02376893,2.92115101,3.19312078,2.91960124
77.410035,2.82842712,3.17730367,-0.590657723,2.92108363,3.17587507,2.91952965
77.420527,2.82842712,3.15611714,-0.572442154,2.92101631,3.15467507,2.91945811
77.431018,2.64575131,3.13248565,-0.697663488,2.92094908,3.13102877,2.91938663
77.44151,2.82842712,3.10779412,-0.528551791,2.92088191,3.10632168,2.9193152
77.452002,3.16227766,3.08323131,0.281151835,2.92081482,3.0817431,2.91924382
77.462493,3.46410162,3.0597477,0.635888289,2.92074781,3.05824398,2.91917249
77.472985,2.82842712,3.03804137,-0.457836486,2.92068087,3.03652278,2.91910122
77.483476,3.46410162,3.01858008,0.667473996,2.920614,3.01704751,2.91902999
77.493968,2.44948974,3.00160405,-0.743043949,2.92054721,3.00005858,2.91895882
77.50446,2.44948974,2.98716859,-0.73326588,2.92048048,2.98561138,2.9188877
77.514951,3.74165739,2.97517582,0.875489329,2.92041384,2.97360802,2.91881663
77.525443,2.44948974,2.96541537,-0.718279633,2.92034727,2.96383807,2.91874561
77.535934,3,2.9576142,0.205878112,2.92028078,2.95602835,2.91867464
77.546426,1.73205081,2.95146752,-1.10427203,2.92021435,2.94987395,2.91860372
77.556918,2.64575131,2.94667452,-0.548564682,2.920148,2.94507392,2.91853285
77.567409,3,2.94295719,0.238836357,2.92008173,2.9413501,2.91846204
77.577901,3.74165739,2.94007248,0.895312742,2.92001553,2.93845931,2.91839127
77.588392,3.60555128,2.93781964,0.817148476,2.91994941,2.93620071,2.91832056
77.598884,2,2.93603783,-0.967490481,2.91988336,2.93441336,2.9182499
77.609376,2.64575131,2.93460377,-0.537449961,2.91981738,2.93297392,2.91817928
77.619867,3,2.93342535,0.258020636,2.91975149,2.93179024,2.91810872
77.630359,3,2.93243522,0.259932264,2.91968566,2.93079493,2.9180382
77.64085,2.64575131,2.93158563,-0.534634751,2.91961991,2.9299402,2.91796774
77.651342,3.74165739,2.93084265,0.900452516,2.91955423,2.92919213,2.91789732
77.661834,3.46410162,2.9301827,0.730697552,2.91948863,2.92852709,2.91782695
77.672325,3.16227766,2.92958918,0.482377948,2.91942311,2.9279285,2.91775664
77.682817,2.44948974,2.92905008,-0.692502952,2.91935765,2.92738433,2.91768637
77.693308,3.60555128,2.92855685,0.822796709,2.91929228,2.92688603,2.91761616
77.7038,2.64575131,2.92810287,-0.531367629,2.91922697,2.92642698,2.91754599
77.714292,2.64575131,2.92768311,-0.530972503,2.91916175,2.92600214,2.91747586
77.724783,3,2.92729354,0.269641356,2.9190966,2.92560747,2.9174058
77.735275,2.44948974,2.92693072,-0.690971039,2.91903152,2.92523955,2.91733577
77.745766,2.82842712,2.92659188,-0.313312551,2.91896652,2.92489559,2.9172658
77.756258,2,2.92627452,-0.962431565,2.9189016,2.9245731,2.91719587
77.76675,3.46410162,2.92597655,0.733570082,2.91883674,2.92426998,2.917126
77.777241,2.23606798,2.92569614,-0.830438539,2.91877197,2.92398441,2.91705617
77.787733,2.82842712,2.92543161,-0.311455436,2.91870727,2.92371469,2.91698639
77.798224,2.82842712,2.92518156,-0.311053748,2.91864265,2.92345943,2.91691666
77.808716,3.31662479,2.92494465,0.625843546,2.9185781,2.92321729,2.91684697
77.819208,3.16227766,2.92471975,0.487399125,2.91851363,2.92298715,2.91677733
77.829699,4,2.92450587,1.03706033,2.91844924,2.922768,2.91670775
77.840191,4.35889894,2.92430205,1.19774659,2.91838491,2.92255888,2.91663821
77.850682,3.16227766,2.92410749,0.48802681,2.91832067,2.922359,2.91656872
77.861174,2.82842712,2.92392143,-0.309021524,2.9182565,2.9221676,2.91649927
77.871666,2.44948974,2.9237432,-0.688660627,2.91819241,2.921984,2.91642987
77.882157,3.31662479,2.92357223,0.626939041,2.9181284,2.92180764,2.91636052
77.892649,2.64575131,2.92340793,-0.526931323,2.91806446,2.92163792,2.91629121
77.90314,3.46410162,2.92324984,0.735426253,2.9180006,2.92147439,2.91622196
77.913632,3.60555128,2.92309748,0.826107617,2.91793682,2.92131656,2.91615274
77.924124,2.82842712,2.92295045,-0.307446466,2.91787311,2.92116404,2.91608358
77.934615,3.60555128,2.9228084,0.826282562,2.91780948,2.92101646,2.91601446
77.945107,2.64575131,2.92267096,-0.526231554,2.91774592,2.92087346,2.91594539
77.955598,4,2.92253784,1.03800875,2.91768245,2.92073476,2.91587637
77.96609,3.16227766,2.92240873,0.489764158,2.91761905,2.92060004,2.91580739
77.976582,3.16227766,2.92228338,0.489892108,2.91755572,2.92046906,2.91573845
77.987073,3.31662479,2.92216157,0.628063069,2.91749248,2.92034158,2.91566957
77.997565,2.64575131,2.92204305,-0.525634606,2.91742931,2.92021736,2.91560073
78.008056,2.23606798,2.92192764,-0.828166446,2.91736623,2.92009622,2.91553194
78.018548,2.82842712,2.92169958,-0.305405396,2.91718748,2.91997795,2.91546319
78.02904,3.16227766,2.92158992,0.49059937,2.91712466,2.91986239,2.91539448
78.039531,3.31662479,2.92148285,0.628603169,2.91706191,2.91974939,2.91532583
78.050023,3.16227766,2.9213782,0.490815102,2.91699924,2.91963878,2.91525722
78.060514,3.74165739,2.92127585,0.905749157,2.91693666,2.91953045,2.91518865
78.071006,2.82842712,2.92117567,-0.304546451,2.91687414,2.91942424,2.91512013
78.081498,2.44948974,2.92107753,-0.686722497,2.91681171,2.91932005,2.91505165
78.091989,2.23606798,2.92098135,-0.82759493,2.91674936,2.91921777,2.91498323
78.102481,2.64575131,2.92088699,-0.524533776,2.91668708,2.9191173,2.91491484
78.112972,4,2.92079439,1.03884821,2.91662489,2.91901855,2.9148465
78.123464,3.16227766,2.92070344,0.491502001,2.91656277,2.91892141,2.9147782
78.133956,3.87298335,2.92061407,0.975894092,2.91650073,2.91882581,2.91470995
78.144447,2.44948974,2.9205262,-0.686320956,2.91643877,2.91873169,2.91464174
78.154939,3.87298335,2.92043975,0.975983402,2.91637689,2.91863894,2.91457358
78.16543,3.31662479,2.92035466,0.629499904,2.9163151,2.91854753,2.91450547
78.175922,3.31662479,2.92027087,0.629566458,2.91625338,2.91845738,2.91443739
78.186414,2.82842712,2.92018831,-0.302921083,2.91619173,2.91836843,2.91436936
78.196905,3.31662479,2.92010694,0.629696634,2.91613018,2.91828063,2.91430138
78.207397,3,2.92002669,0.28279552,2.9160687,2.91819392,2.91423343
78.217888,2.44948974,2.91994754,-0.685899261,2.9160073,2.91810826,2.91416554
78.22838,3.60555128,2.91986941,0.828059094,2.91594599,2.91802359,2.91409768
78.238872,2.23606798,2.91979228,-0.826876232,2.91588475,2.91793989,2.91402987
78.249363,2.23606798,2.91971611,-0.826830171,2.9158236,2.9178571,2.9139621
78.259855,3.16227766,2.91964085,0.492581784,2.91576252,2.91777519,2.91389438
78.270346,2.64575131,2.91956647,-0.523273503,2.91570153,2.91769412,2.9138267
78.280838,3.31662479,2.91949293,0.630183987,2.91564062,2.91761386,2.91375906
78.29133,3.31662479,2.91942021,0.630241684,2.91557979,2.91753437,2.91369147
78.301821,3,2.91934828,0.283992466,2.91551905,2.91745564,2.91362392
78.312313,3.60555128,2.9192771,0.828416669,2.91545838,2.91737761,2.91355641
78.322804,3.16227766,2.91920665,0.493022321,2.91539781,2.91730029,2.91348895
78.333296,2.64575131,2.9191369,-0.52286288,2.91533731,2.91722362,2.91342153
78.343788,4,2.91906783,1.03967888,2.91527689,2.91714759,2.91335415
78.354279,3.16227766,2.91899943,0.49323243,2.91521656,2.91707218,2.91328681
78.364771,3.31662479,2.91893166,0.630629158,2.91515631,2.91699737,2.91321952
78.375262,2.64575131,2.9188645,-0.522602328,2.91509615,2.91692313,2.91315227
78.385754,3,2.91879794,0.284959747,2.91503607,2.91684945,2.91308506
78.396246,3.16227766,2.91873196,0.493503496,2.91497607,2.9167763,2.91301789
78.406737,3.74165739,2.91866654,0.907188427,2.91491616,2.91670368,2.91295077
78.417229,3,2.91860167,0.285303929,2.91485633,2.91663155,2.91288368
78.42772,3.31662479,2.91853733,0.630941727,2.9147966,2.91655992,2.91281665
78.438212,3.16227766,2.9184735,0.493765293,2.91473694,2.91648875,2.91274965
78.448704,3.16227766,2.91841016,0.49382942,2.91467736,2.91641804,2.91268269
78.459195,3.46410162,2.91834733,0.738751845,2.91461788,2.91634778,2.91261578
78.469687,2.82842712,2.91828496,-0.299762962,2.91455848,2.91627795,2.9125489
78.480178,3.31662479,2.91822306,0.631190725,2.91449917,2.91620854,2.91248207
78.49067,3.31662479,2.9181616,0.631239404,2.91443994,2.91613953,2.91241528
78.501162,3,2.91810059,0.286180727,2.9143808,2.91607091,2.91234853
78.511653,3.46410162,2.91804001,0.73895981,2.91432175,2.91600269,2.91228183
78.522145,3.31662479,2.91797985,0.631383353,2.91426278,2.91593483,2.91221516
78.532636,3.16227766,2.91792011,0.494325352,2.91420391,2.91586735,2.91214853
78.543128,2.44948974,2.91786076,-0.68437637,2.91414512,2.91580022,2.91208195
78.55362,3.46410162,2.9178018,0.739120972,2.91408641,2.91573343,2.9120154
78.564111,2.82842712,2.91774324,-0.298858019,2.91402781,2.91566699,2.9119489
78.574603,2.23606798,2.91768505,-0.825601037,2.91396928,2.91560087,2.91188244
78.585094,3.31662479,2.91762724,0.631662533,2.91391085,2.91553508,2.91181602
78.595586,3,2.91756978,0.287106636,2.9138525,2.9154696,2.91174964
78.606078,3,2.91751268,0.287206056,2.91379424,2.91540443,2.9116833
78.616569,3,2.91745594,0.287304822,2.91373608,2.91533957,2.911617
78.627061,2.64575131,2.91739954,-0.521198835,2.913678,2.91527499,2.91155074
78.637552,2.82842712,2.91734348,-0.298188455,2.91362002,2.91521071,2.91148453
78.648044,3.16227766,2.91728775,0.494964554,2.91356213,2.91514671,2.91141835
78.658536,3.87298335,2.91723235,0.977625182,2.91350432,2.91508299,2.91135221
78.669027,3.31662479,2.91717728,0.632018601,2.91344661,2.91501954,2.91128611
78.679519,3.31662479,2.91712252,0.632061919,2.91338899,2.91495636,2.91122005
78.69001,2.64575131,2.91706808,-0.520880766,2.91333147,2.91489344,2.91115404
78.700502,2.64575131,2.91701395,-0.520828801,2.91327404,2.91483077,2.91108805
78.710994,3.74165739,2.91696012,0.908128439,2.9132167,2.91476836,2.91102211
78.721485,3.60555128,2.91690661,0.829846172,2.91315945,2.9147062,2.91095622
78.731977,2.64575131,2.91686059,-0.520681548,2.9131023,2.91465149,2.91089036
78.742468,3.31662479,2.91680766,0.632310941,2.91304525,2.91458983,2.91082454
78.75296,3.74165739,2.91675503,0.908241354,2.91298828,2.91452839,2.91075876
78.763452,2.64575131,2.91670268,-0.520529895,2.91293141,2.91446718,2.91069301
78.773943,2.44948974,2.91665063,-0.683491686,2.91287464,2.91440621,2.91062731
78.784435,3,2.91659885,0.288792573,2.91281796,2.91434546,2.91056165
78.794926,3,2.91654736,0.288881711,2.91276139,2.91428494,2.91049603
78.805418,2.64575131,2.91649614,-0.520331458,2.9127049,2.91422464,2.91043044
78.81591,2.82842712,2.91644519,-0.296678393,2.91264851,2.91416455,2.91036489
78.826401,3.16227766,2.91639453,0.495866043,2.91259223,2.91410468,2.91029939
78.836893,2.23606798,2.91634413,-0.824788548,2.91253604,2.91404502,2.91023392
78.847384,3.74165739,2.916294,0.908495122,2.91247995,2.91398557,2.91016849
78.857876,3.31662479,2.91624414,0.632756394,2.91242395,2.91392633,2.9101031
78.868368,4,2.91619454,1.04105978,2.91236806,2.91386729,2.91003775
78.878859,3.46410162,2.9161452,0.740240779,2.91231227,2.91380845,2.90997244
78.889351,3,2.91609613,0.289661646,2.91225657,2.91374982,2.90990716
78.899842,3.60555128,2.91604732,0.830363748,2.91220098,2.91369138,2.90984193
78.910334,2,2.91599877,-0.957078245,2.91214549,2.91363314,2.90977673
78.920826,3.46410162,2.91595047,0.740372302,2.91209009,2.91357509,2.90971156
78.931317,3.16227766,2.91590243,0.496361993,2.91203481,2.91351724,2.90964644
78.941809,3,2.91585465,0.290078185,2.91197962,2.91345957,2.90958136
78.9523,3,2.91580712,0.290160095,2.91192454,2.9134021,2.90951632
78.962792,2.23606798,2.91575984,-0.824434269,2.91186956,2.91334481,2.90945131
78.973284,3.46410162,2.91571282,0.740532781,2.91181469,2.91328771,2.90938633
78.983775,3.60555128,2.91566605,0.8305933,2.91175992,2.9132308,2.9093214
78.994267,3.16227766,2.91561952,0.496646895,2.91170525,2.91317406,2.90925651
79.004758,2.23606798,2.91557325,-0.824321099,2.9116507,2.91311752,2.90919165
79.01525,2.64575131,2.91552723,-0.519399574,2.91159624,2.91306115,2.90912683
79.025742,1.41421356,2.91548145,-1.22526238,2.9115419,2.91300496,2.90906205
79.036233,3,2.91543593,0.290799016,2.91148766,2.91294895,2.90899731
79.046725,3.16227766,2.91539065,0.496877255,2.91143353,2.91289312,2.9089326
79.057216,4,2.91534563,1.04146741,2.91137951,2.91283747,2.90886793
79.067708,2.82842712,2.91530085,-0.294743484,2.9113256,2.91278199,2.9088033
79.0782,2.82842712,2.91525631,-0.294667925,2.91127179,2.91272668,2.9087387
79.088691,3.16227766,2.91521203,0.497056971,2.9112181,2.91267156,2.90867415
79.099183,3.31662479,2.91516799,0.633606189,2.91116452,2.9126166,2.90860962
79.109674,3,2.9151242,0.291334519,2.91111105,2.91256182,2.90854514
79.120166,2.82842712,2.91508065,-0.294369712,2.91105769,2.91250721,2.90848069
79.130658,2.23606798,2.91503735,-0.823995981,2.91100445,2.91245277,2.90841628
79.141149,2.44948974,2.91499431,-0.682278948,2.91095132,2.91239851,2.90835191
79.151641,2.23606798,2.9149515,-0.823943885,2.9108983,2.91234441,2.90828757
79.162132,2.64575131,2.91490895,-0.518804047,2.9108454,2.91229049,2.90822328
79.172624,3,2.91486664,0.291776211,2.91079261,2.91223673,2.90815901
79.183116,3.31662479,2.91482458,0.633877123,2.91073994,2.91218314,2.90809478
79.193607,3.31662479,2.91478278,0.633910099,2.91068739,2.91212972,2.9080306
79.204099,2.82842712,2.91474122,-0.293792598,2.91063495,2.91207647,2.90796644
79.21459,2.82842712,2.91469991,-0.293722289,2.91058263,2.91202339,2.90790233
79.225082,2.23606798,2.91465885,-0.823766271,2.91053043,2.91197048,2.90783824
79.235574,3.16227766,2.91461804,0.497654121,2.91047834,2.91191773,2.9077742
79.246065,3.31662479,2.91457748,0.634072007,2.91042639,2.91186516,2.90771019
79.256557,3.16227766,2.91453717,0.497735358,2.91037455,2.91181275,2.90764622
79.267048,2,2.91449712,-0.956293429,2.91032283,2.91176051,2.90758229
79.27754,2.44948974,2.91445732,-0.681885312,2.91027123,2.91170843,2.90751838
79.288032,2,2.91441778,-0.956251941,2.91021976,2.91165652,2.90745452
79.298523,2.82842712,2.91437849,-0.293174628,2.91016841,2.91160478,2.90739069
79.309015,3.31662479,2.91433945,0.634259678,2.91011719,2.91155321,2.9073269
79.319506,3.74165739,2.91430068,0.909591507,2.91006609,2.91150181,2.90726315
79.329998,2.64575131,2.91426216,-0.51818032,2.91001512,2.91145057,2.90719942
79.34049,3,2.91422389,0.292875584,2.90996427,2.91139949,2.90713574
79.350981,3,2.91418589,0.292940449,2.90991356,2.91134859,2.90707209
79.361473,3.16227766,2.91414815,0.498125997,2.90986297,2.91129786,2.90700847
79.371964,2.44948974,2.91411067,-0.681631082,2.90981251,2.91124729,2.9069449
79.382456,3.46410162,2.91407346,0.741638833,2.90976218,2.91119689,2.90688135
79.392948,3,2.9140365,0.293195321,2.90971199,2.91114666,2.90681784
79.403439,3.74165739,2.91399982,0.909756872,2.90966193,2.9110966,2.90675438
79.413931,2.64575131,2.9139634,-0.517891965,2.90961199,2.91104671,2.90669094
79.424422,3.16227766,2.91392725,0.498347681,2.9095622,2.91099699,2.90662754
79.434914,3.16227766,2.91389136,0.498383683,2.90951254,2.91094744,2.90656417
79.445406,3.60555128,2.91385575,0.831682346,2.90946301,2.91089805,2.90650084
79.455897,4.12310563,2.91382041,1.09967505,2.90941362,2.91084884,2.90643755
79.466389,4.24264069,2.91378534,1.15275988,2.90936437,2.9107998,2.90637428
79.47688,3.46410162,2.91375055,0.741856496,2.90931526,2.91075093,2.90631106
79.487372,2.82842712,2.91371604,-0.292042656,2.90926629,2.91070223,2.90624787
79.497864,3.31662479,2.9136818,0.634777907,2.90921746,2.91065371,2.90618471
79.508355,2.82842712,2.91364784,-0.291925877,2.90916877,2.91060536,2.9061216
79.518847,3.16227766,2.91361416,0.498661705,2.90912022,2.91055717,2.90605851
79.529338,2.82842712,2.91358077,-0.291810978,2.90907182,2.91050917,2.90599546
79.53983,3.16227766,2.91354766,0.498728383,2.90902357,2.91046134,2.90593244
79.550322,2.64575131,2.91351484,-0.517458717,2.90897545,2.91041368,2.90586946
79.560813,2.64575131,2.9134823,-0.51742728,2.90892749,2.91036621,2.90580651
79.571305,3,2.91345005,0.294193723,2.90887967,2.9103189,2.9057436
79.581796,2.44948974,2.9134181,-0.681122866,2.90883201,2.91027178,2.90568073
79.592288,3,2.91338644,0.29430182,2.90878449,2.91022483,2.90561788
79.60278,3.87298335,2.91335507,0.979606183,2.90873713,2.91017806,2.90555507
79.613271,3.60555128,2.91332401,0.832001965,2.90868992,2.91013148,2.9054923
79.623763,3,2.91329323,0.294460125,2.90864286,2.91008507,2.90542956
79.634254,3.46410162,2.91326277,0.742185183,2.90859596,2.91003884,2.90536685
79.644746,1.41421356,2.9132326,-1.22434433,2.90854921,2.9099928,2.90530418
79.655238,2.44948974,2.91320274,-0.680964758,2.90850262,2.90994693,2.90524154
79.665729,3,2.91317319,0.294663886,2.90845619,2.90990126,2.90517894
79.676221,2.44948974,2.91314395,-0.680921588,2.90840992,2.90985576,2.90511637
79.686712,2,2.91311503,-0.955570523,2.90836381,2.90981046,2.90505384
79.697204,1.41421356,2.91308641,-1.22428463,2.90831787,2.90976533,2.90499134
79.707696,4.24264069,2.91305811,1.15307527,2.90827208,2.9097204,2.90492887
79.718187,2.23606798,2.91303013,-0.8227771,2.90822647,2.90967565,2.90486644
79.728679,2.44948974,2.91300248,-0.680817694,2.90818101,2.90963109,2.90480404
79.73917,2.64575131,2.91297514,-0.516936972,2.90813573,2.90958673,2.90474168
79.749662,3.16227766,2.91294814,0.499329074,2.90809062,2.90954255,2.90467934
79.760154,4.12310563,2.91292146,1.10008371,2.90804568,2.90949857,2.90461704
79.770645,3,2.91289511,0.295135372,2.90800091,2.90945479,2.90455478
79.781137,3.46410162,2.9128691,0.742450346,2.90795631,2.90941119,2.90449255
79.791628,3,2.91284343,0.295222924,2.90791189,2.9093678,2.90443036
79.80212,2.82842712,2.91281809,-0.290501228,2.90786764,2.90932459,2.9043682
79.812612,2.44948974,2.91279309,-0.680663904,2.90782358,2.90928159,2.90430607
79.823103,1.73205081,2.91276845,-1.08660832,2.90777969,2.90923879,2.90424397
79.833595,3.60555128,2.91274414,0.832350366,2.90773598,2.90919619,2.90418191
79.844086,3.60555128,2.9127202,0.832364752,2.90769246,2.90915379,2.90411989
79.854578,3.16227766,2.9126966,0.499580887,2.90764912,2.9091116,2.90405789
79.86507,1.73205081,2.91267336,-1.08656456,2.90760597,2.90906961,2.90399593
79.875561,2.64575131,2.91265048,-0.516622847,2.907563,2.90902782,2.903934
79.886053,4,2.91262796,1.04277133,2.90752023,2.90898625,2.90387211
79.896544,3,2.91260581,0.295625086,2.90747764,2.90894488,2.90381025
79.907036,3.46410162,2.91258403,0.742642303,2.90743525,2.90890372,2.90374842
79.917528,3.74165739,2.91256261,0.910546415,2.90739305,2.90886278,2.90368663
79.928019,2.44948974,2.91254158,-0.680479123,2.90735105,2.90882205,2.90362487
79.938511,2.44948974,2.91252092,-0.680463945,2.90730924,2.90878153,2.90356314
79.949002,2.44948974,2.91250065,-0.680449048,2.90726764,2.90874123,2.90350145
79.959494,3,2.91248076,0.295836507,2.90722623,2.90870115,2.90343979
79.969986,3.16227766,2.91246126,0.499816365,2.90718503,2.90866129,2.90337816
79.980477,3.31662479,2.91244216,0.635753596,2.90714404,2.90862165,2.90331656
79.990969,2.82842712,2.91242345,-0.289821187,2.90710325,2.90858223,2.903255
80.00146,2.44948974,2.91240514,-0.68037886,2.90706268,2.90854304,2.90319348
80.011952,2.64575131,2.91238723,-0.516368006,2.90702231,2.90850408,2.90313198
80.022444,2.23606798,2.91236973,-0.822375675,2.90698215,2.90846534,2.90307051
80.032935,3.16227766,2.91235264,0.499925013,2.90694221,2.90842683,2.90300909
80.043427,4,2.91233597,1.04291132,2.90690249,2.90838855,2.90294769
80.053918,3.31662479,2.91231972,0.635849884,2.90686299,2.90835051,2.90288633
80.06441,3,2.91230388,0.296135299,2.90682371,2.9083127,2.90282499
80.074902,2.82842712,2.91228848,-0.289588253,2.90678465,2.90827513,2.90276369
80.085393,3,2.91227351,0.29618658,2.90674582,2.90823781,2.90270243
80.095885,2.82842712,2.91225897,-0.2895373,2.90670722,2.90820072,2.9026412
80.106376,2.23606798,2.91224488,-0.822299763,2.90666885,2.90816387,2.90258
80.116868,2.82842712,2.91223122,-0.289489377,2.9066307,2.90812727,2.90251883
80.12736,2.23606798,2.91221802,-0.822283432,2.9065928,2.90809092,2.9024577
80.137851,3.46410162,2.91220527,0.742897265,2.90655513,2.90805482,2.9023966
80.148343,3.31662479,2.91219298,0.635949538,2.9065177,2.90801897,2.90233553
80.158834,3.16227766,2.91218115,0.500096506,2.90648051,2.90798337,2.9022745
80.169326,2.64575131,2.91216978,-0.516157407,2.90644357,2.90794803,2.90221349
80.179818,3.16227766,2.91215889,0.500118759,2.90640687,2.90791294,2.90215252
80.190309,2.23606798,2.91214847,-0.822241141,2.90637043,2.90787812,2.90209158
80.200801,3.16227766,2.91213854,0.500139104,2.90633424,2.90784356,2.90203067
80.211292,3,2.91212909,0.296430281,2.9062983,2.90780927,2.9019698
80.221784,3.31662479,2.91212013,0.636006807,2.90626262,2.90777525,2.90190896
80.232276,3.31662479,2.91211167,0.636013459,2.90622719,2.90774149,2.90184815
80.242767,3,2.91210371,0.29647308,2.90619204,2.90770801,2.90178738
80.253259,2.82842712,2.91209626,-0.289256178,2.90615714,2.9076748,2.90172663
80.26375,2.23606798,2.91208932,-0.822205172,2.90612252,2.90764187,2.90166593
80.274242,3.46410162,2.9120829,0.742979618,2.90608817,2.90760922,2.90160525
80.284734,4.58257569,2.912077,1.29247773,2.90605409,2.90757686,2.9015446
80.295225,3.31662479,2.91207164,0.63604493,2.90602029,2.90754478,2.90148399
80.305717,3.31662479,2.9120668,0.636048729,2.90598677,2.90751298,2.9014234
80.316208,3.46410162,2.91206251,0.742993339,2.90595353,2.90748149,2.90136286
80.3267,1.73205081,2.91205877,-1.08628171,2.90592058,2.90745028,2.90130234
80.337192,3.60555128,2.91205558,0.832763891,2.90588792,2.90741937,2.90124185
80.347683,3,2.91205294,0.296558689,2.90585555,2.90738876,2.90118141
80.358175,3,2.91205088,0.296562175,2.90582347,2.90735846,2.90112098
80.368666,2.64575131,2.91204938,-0.516040763,2.9057917,2.90732846,2.9010606
80.379158,3.31662479,2.91204846,0.636063147,2.90576023,2.90729877,2.90100024
80.38965,2.44948974,2.91204813,-0.680116451,2.90572907,2.90726939,2.90093992
80.400141,2.82842712,2.91204839,-0.289173414,2.90569821,2.90724033,2.90087963
80.410633,2.23606798,2.91204924,-0.822180799,2.90566767,2.90721159,2.90081937
80.421124,3,2.91205071,0.296562463,2.90563745,2.90718317,2.90075915
80.431616,2.82842712,2.91205278,-0.289181006,2.90560754,2.90715507,2.90069895
80.442108,2.23606798,2.91205547,-0.822184586,2.90557796,2.9071273,2.90063879
80.452599,2.82842712,2.91205879,-0.2891914,2.90554871,2.90709987,2.90057866
80.463091,2.64575131,2.91206274,-0.51605371,2.90551979,2.90707277,2.90051856
80.473582,2.82842712,2.91206734,-0.289206175,2.9054912,2.90704602,2.9004585
80.484074,3.60555128,2.91207258,0.832753683,2.90546295,2.9070196,2.90039846
80.494566,2.82842712,2.91207848,-0.289225438,2.90543505,2.90699353,2.90033846
80.505057,2.64575131,2.91208504,-0.516075316,2.9054075,2.90696782,2.90027849
80.515549,3.16227766,2.91209228,0.500185347,2.90538029,2.90694246,2.90021855
80.52604,2.44948974,2.9121002,-0.680154727,2.90535345,2.90691746,2.90015865
80.536532,3.87298335,2.9121088,0.980242085,2.90532696,2.90689282,2.90009878
80.547024,3.31662479,2.91211811,0.6360084,2.90530084,2.90686854,2.90003893
80.557515,2.23606798,2.91212811,-0.822228762,2.90527508,2.90684464,2.89997913
80.568007,2,2.91213884,-0.955059599,2.9052497,2.90682112,2.89991935
80.578498,3.60555128,2.91215029,0.832707025,2.9052247,2.90679797,2.89985961
80.58899,3,2.91216247,0.296373977,2.90520008,2.90677521,2.89979989
80.599482,2.64575131,2.91217539,-0.51616284,2.90517585,2.90675284,2.89974021
80.609973,2.44948974,2.91218906,-0.680220052,2.90515201,2.90673086,2.89968057
80.620465,3.16227766,2.9122035,0.500074158,2.90512857,2.90670928,2.89962095
80.630956,2.82842712,2.9122187,-0.289467747,2.90510553,2.9066881,2.89956137
80.641448,2.82842712,2.91223469,-0.289495359,2.9050829,2.90666733,2.89950181
80.65194,2.44948974,2.91225146,-0.68026592,2.90506068,2.90664697,2.89944229
80.662431,4,2.91226904,1.04294341,2.90503888,2.90662704,2.8993828
80.672923,2.44948974,2.91228743,-0.680292354,2.9050175,2.90660752,2.89932334
80.683414,3.31662479,2.91230664,0.635860166,2.90499655,2.90658843,2.89926392
80.693906,3.31662479,2.91232668,0.635844404,2.90497603,2.90656978,2.89920453
80.704398,3.16227766,2.91234757,0.499930082,2.90495595,2.90655156,2.89914517
80.714889,3.31662479,2.91236932,0.63581088,2.90493632,2.90653379,2.89908584
80.725381,1.73205081,2.91239193,-1.08643505,2.90491714,2.90651647,2.89902654
80.735872,2.44948974,2.91241541,-0.680386413,2.90489842,2.90649961,2.89896728
80.746364,3.16227766,2.91243979,0.499837839,2.90488016,2.90648321,2.89890804
80.756856,2.64575131,2.91246508,-0.516443382,2.90486237,2.90646728,2.89884884
80.767347,2.82842712,2.91249127,-0.289938183,2.90484506,2.90645182,2.89878968
80.777839,1.73205081,2.9125184,-1.08649326,2.90482823,2.90643685,2.89873054
80.78833,3.60555128,2.91254647,0.832469104,2.90481188,2.90642236,2.89867144
80.798822,2.64575131,2.91257549,-0.516550266,2.90479604,2.90640837,2.89861236
80.809314,2.44948974,2.91260548,-0.680526073,2.90478069,2.90639487,2.89855332
80.819805,3.31662479,2.91263645,0.635600773,2.90476585,2.90638189,2.89849431
80.830297,2.64575131,2.91266841,-0.516640207,2.90475153,2.90636942,2.89843533
80.840788,3.16227766,2.91270139,0.499576091,2.90473773,2.90635748,2.89837639
80.85128,3.74165739,2.91273539,0.910451534,2.90472446,2.90634607,2.89831748
80.861772,3.46410162,2.91277043,0.742516789,2.90471173,2.90633519,2.89825859
80.872263,2.23606798,2.91280653,-0.822641204,2.90469954,2.90632486,2.89819975
80.882755,3.31662479,2.9128437,0.635437719,2.90468791,2.90631509,2.89814093
80.893246,3.16227766,2.91288195,0.499395348,2.90467684,2.90630587,2.89808214
80.903738,4,2.9129213,1.04263066,2.90466633,2.90629723,2.89802339
80.91423,3.60555128,2.91296178,0.832219618,2.9046564,2.90628917,2.89796467
80.924721,3.31662479,2.9130034,0.635312045,2.90464706,2.9062817,2.89790598
80.935213,2.82842712,2.91304617,-0.290893522,2.90463831,2.90627483,2.89784732
80.945704,2.64575131,2.91309011,-0.517048155,2.90463016,2.90626856,2.8977887
80.956196,2.23606798,2.91313524,-0.822840971,2.90462262,2.90626292,2.8977301
80.966688,3.31662479,2.91318159,0.635171792,2.9046157,2.9062579,2.89767154
80.977179,3.16227766,2.91322916,0.499047597,2.90460941,2.90625352,2.89761301
80.987671,3.31662479,2.91327798,0.635095906,2.90460375,2.90624978,2.89755452
80.998162,3.31662479,2.91332807,0.63505647,2.90459874,2.90624671,2.89749605
81.008654,3.87298335,2.91337946,0.979593738,2.90459439,2.90624431,2.89743762
81.019146,3.16227766,2.91343215,0.498844171,2.90459071,2.9062426,2.89737922
81.029637,2.44948974,2.91348618,-0.681172839,2.9045877,2.90624158,2.89732085
81.040129,3.16227766,2.91354157,0.49873449,2.90458538,2.90624127,2.89726251
81.05062,3,2.91359833,0.293941606,2.90458376,2.90624168,2.89720421
81.061112,2.82842712,2.91365651,-0.291940716,2.90458284,2.90624282,2.89714594
81.071604,3.74165739,2.91371611,0.909912786,2.90458264,2.90624472,2.89708769
81.082095,2.82842712,2.91377716,-0.292147284,2.90458317,2.90624738,2.89702949
81.092587,3.46410162,2.9138397,0.741796412,2.90458444,2.90625081,2.89697131
81.103078,3.31662479,2.91390374,0.634603067,2.90458646,2.90625504,2.89691317
81.11357,1.41421356,2.91396932,-1.22464516,2.90458925,2.90626009,2.89685506
81.124062,3.60555128,2.91403647,0.831573695,2.90459281,2.90626596,2.89679697
81.134553,2.44948974,2.9141052,-0.681627065,2.90459716,2.90627267,2.89673893
81.145045,2,2.91417556,-0.956125286,2.90460231,2.90628026,2.89668091
81.155536,3.46410162,2.91424758,0.741521434,2.90460828,2.90628872,2.89662293
81.166028,2.64575131,2.91432129,-0.518237377,2.90461507,2.90629809,2.89656498
81.17652,3.74165739,2.91439673,0.909538708,2.90462269,2.90630838,2.89650706
81.187011,3,2.91447391,0.292448435,2.90463117,2.90631962,2.89644918
81.197503,2.82842712,2.9145529,-0.29347194,2.90464052,2.90633184,2.89639132
81.207994,2.44948974,2.91463372,-0.682014648,2.90465075,2.90634505,2.8963335
81.218486,2.44948974,2.91471642,-0.682075276,2.90466187,2.90635928,2.89627571
81.228978,3.16227766,2.91480104,0.497470217,2.9046739,2.90637456,2.89621795
81.239469,2.82842712,2.91488761,-0.294041644,2.90468686,2.90639091,2.89616023
81.249961,2.23606798,2.9149762,-0.82395887,2.90470076,2.90640838,2.89610254
81.260452,2,2.91506683,-0.956591253,2.90471561,2.90642698,2.89604488
81.270944,3.31662479,2.91515957,0.633612834,2.90473143,2.90644676,2.89598725
81.281436,2.64575131,2.91525446,-0.519136932,2.90474824,2.90646775,2.89592965
81.291927,2.64575131,2.91535156,-0.519230443,2.90476605,2.90649,2.89587209
81.302419,3.60555128,2.91545094,0.830722778,2.90478489,2.90651353,2.89581456
81.31291,2.64575131,2.91555264,-0.519424037,2.90480477,2.9065384,2.89575707
81.323402,3,2.91565675,0.290419099,2.9048257,2.90656466,2.8956996
81.333894,2.64575131,2.91576332,-0.519626795,2.9048477,2.90659235,2.89564217
81.344385,2.44948974,2.91587242,-0.682922157,2.9048708,2.90662153,2.89558477
81.354877,2,2.91598414,-0.957070604,2.90489502,2.90665226,2.8955274
81.365368,4.12310563,2.91609855,1.09863874,2.90492036,2.90668461,2.89547007
81.37586,2.64575131,2.91621577,-0.520061973,2.90494685,2.90671864,2.89541276
81.386352,3.31662479,2.91633586,0.632683907,2.90497452,2.90675443,2.89535549
81.396843,3.87298335,2.91645894,0.97802066,2.90500338,2.90679206,2.89529826
81.407335,2.82842712,2.91658512,-0.296914115,2.90503346,2.90683163,2.89524105
81.417826,2.64575131,2.9167145,-0.520541248,2.90506476,2.90687322,2.89518388
81.428318,3.16227766,2.91684725,0.495409339,2.90509733,2.90691696,2.89512674
81.43881,3.16227766,2.91698348,0.495271825,2.90513118,2.90696295,2.89506963
81.449301,3.60555128,2.91712334,0.829715574,2.90516633,2.90701134,2.89501256
81.459793,3.87298335,2.91726703,0.977607447,2.90520281,2.90706226,2.89495552
81.470284,3.16227766,2.91741469,0.494836302,2.90524064,2.90711588,2.89489852
81.480776,2.44948974,2.91756658,-0.684161409,2.90527986,2.90717238,2.89484154
81.491268,4.47213595,2.91772289,1.24676103,2.90532047,2.90723196,2.89478459
81.501759,3,2.91788386,0.286559135,2.90536251,2.90729484,2.89472769
81.512251,2.64575131,2.91804982,-0.521822292,2.90540601,2.9073613,2.89467081
81.522742,3.46410162,2.91822104,0.738837316,2.90545099,2.90743162,2.89461397
81.533234,3.31662479,2.91839792,0.631052191,2.90549748,2.90750614,2.89455716
81.543726,2.82842712,2.91858089,-0.300256165,2.90554552,2.90758527,2.89450038
81.554217,2.44948974,2.91877044,-0.685040651,2.90559512,2.90766949,2.89444364
81.564709,3.87298335,2.91896724,0.976737479,2.90564632,2.90775943,2.89438692
81.5752,2.44948974,2.91917212,-0.68533377,2.90569915,2.90785589,2.89433025
81.585692,3.87298335,2.91938627,0.976522954,2.90575365,2.90796004,2.8942736
81.596184,3.31662479,2.91961135,0.630090028,2.90580984,2.90807351,2.89421699
[truncated: 422,548 more chars]
