# Supplementary material for: Phase Stability of Iron Nitride Fe4N at High Pressure—Pressure-Dependent Evolution of Phase Equilibria in the Fe–N System
Source: Materials (Basel). 2021 Jul 15;14(14):3963. doi: 10.3390/ma14143963 (PMC8307547; doi:10.3390/ma14143963)
Supplement: Supplementary file 1 [file materials-14-03963-s001.zip › xrd_data/2-600_riet.txt]

'y-axis saved as Sqrt(y)
'x,Yobs,Ycalc,Diff,epsilon,Bkg
20,7.34846923,0,0,0,0
20.010492,7.48331477,0,0,0,0
20.020983,7.41619849,0,0,0,0
20.031475,7.07106781,0,0,0,0
20.041966,7.68114575,0,0,0,0
20.052458,7.07106781,0,0,0,0
20.06295,6.8556546,0,0,0,0
20.073441,7.14142843,0,0,0,0
20.083933,7.14142843,0,0,0,0
20.094424,7.41619849,0,0,0,0
20.104916,7.28010989,0,0,0,0
20.115408,6.8556546,0,0,0,0
20.125899,7.34846923,0,0,0,0
20.136391,7.21110255,0,0,0,0
20.146882,6.63324958,0,0,0,0
20.157374,7.54983444,0,0,0,0
20.167866,5.38516481,0,0,0,0
20.178357,7.87400787,0,0,0,0
20.188849,7.48331477,0,0,0,0
20.19934,7.07106781,0,0,0,0
20.209832,6.78232998,0,0,0,0
20.220324,6.63324958,0,0,0,0
20.230815,7.74596669,0,0,0,0
20.241307,7.68114575,0,0,0,0
20.251798,7.14142843,0,0,0,0
20.26229,7.14142843,0,0,0,0
20.272782,6.8556546,0,0,0,0
20.283273,7.54983444,0,0,0,0
20.293765,7.41619849,0,0,0,0
20.304256,6.40312424,0,0,0,0
20.314748,6.164414,0,0,0,0
20.32524,8,0,0,0,0
20.335731,7.48331477,0,0,0,0
20.346223,7.28010989,0,0,0,0
20.356714,7.21110255,0,0,0,0
20.367206,7.81024968,0,0,0,0
20.377698,7.14142843,0,0,0,0
20.388189,7,0,0,0,0
20.398681,8.24621125,0,0,0,0
20.409172,7.28010989,0,0,0,0
20.419664,6.92820323,0,0,0,0
20.430156,7.41619849,0,0,0,0
20.440647,7.48331477,0,0,0,0
20.451139,7.41619849,0,0,0,0
20.46163,7.48331477,0,0,0,0
20.472122,6.92820323,0,0,0,0
20.482614,5.83095189,0,0,0,0
20.493105,6.78232998,0,0,0,0
20.503597,6.78232998,0,0,0,0
20.514088,6.92820323,0,0,0,0
20.52458,7.74596669,0,0,0,0
20.535072,7.07106781,0,0,0,0
20.545563,6.55743852,0,0,0,0
20.556055,7.48331477,0,0,0,0
20.566546,7.21110255,0,0,0,0
20.577038,6.70820393,0,0,0,0
20.58753,6.78232998,0,0,0,0
20.598021,7.14142843,0,0,0,0
20.608513,7,0,0,0,0
20.619004,7.54983444,0,0,0,0
20.629496,6.92820323,0,0,0,0
20.639988,7.28010989,0,0,0,0
20.650479,7,0,0,0,0
20.660971,6.55743852,0,0,0,0
20.671462,6.78232998,0,0,0,0
20.681954,7,0,0,0,0
20.692446,6.8556546,0,0,0,0
20.702937,7.68114575,0,0,0,0
20.713429,7.28010989,0,0,0,0
20.72392,8.06225775,0,0,0,0
20.734412,6.92820323,0,0,0,0
20.744904,7.68114575,0,0,0,0
20.755395,7.21110255,0,0,0,0
20.765887,7.61577311,0,0,0,0
20.776378,7.74596669,0,0,0,0
20.78687,6.78232998,0,0,0,0
20.797362,6.78232998,0,0,0,0
20.807853,7.61577311,0,0,0,0
20.818345,7.14142843,0,0,0,0
20.828836,6.92820323,0,0,0,0
20.839328,7.14142843,0,0,0,0
20.84982,6.55743852,0,0,0,0
20.860311,7.41619849,0,0,0,0
20.870803,6.32455532,0,0,0,0
20.881294,6.63324958,0,0,0,0
20.891786,6.78232998,0,0,0,0
20.902278,6.70820393,0,0,0,0
20.912769,7.14142843,0,0,0,0
20.923261,7.28010989,0,0,0,0
20.933752,7.21110255,0,0,0,0
20.944244,7.34846923,0,0,0,0
20.954736,6.55743852,0,0,0,0
20.965227,8.06225775,0,0,0,0
20.975719,8,0,0,0,0
20.98621,7.28010989,0,0,0,0
20.996702,6.92820323,0,0,0,0
21.007194,5.83095189,0,0,0,0
21.017685,7.34846923,0,0,0,0
21.028177,7.34846923,0,0,0,0
21.038668,7,0,0,0,0
21.04916,7.21110255,0,0,0,0
21.059652,8,0,0,0,0
21.070143,7.54983444,0,0,0,0
21.080635,7.34846923,0,0,0,0
21.091126,7.87400787,0,0,0,0
21.101618,6.08276253,0,0,0,0
21.11211,7.61577311,0,0,0,0
21.122601,6.92820323,0,0,0,0
21.133093,6.92820323,0,0,0,0
21.143584,6.70820393,0,0,0,0
21.154076,7.41619849,0,0,0,0
21.164568,7.14142843,0,0,0,0
21.175059,7.21110255,0,0,0,0
21.185551,7.28010989,0,0,0,0
21.196042,6.4807407,0,0,0,0
21.206534,7.54983444,0,0,0,0
21.217026,6.4807407,0,0,0,0
21.227517,6.63324958,0,0,0,0
21.238009,7.21110255,0,0,0,0
21.2485,6.55743852,0,0,0,0
21.258992,7.21110255,0,0,0,0
21.269484,7,0,0,0,0
21.279975,7.14142843,0,0,0,0
21.290467,6.92820323,0,0,0,0
21.300958,7,0,0,0,0
21.31145,6.78232998,0,0,0,0
21.321942,6.4807407,0,0,0,0
21.332433,5.91607978,0,0,0,0
21.342925,7.87400787,0,0,0,0
21.353416,6.40312424,0,0,0,0
21.363908,7.07106781,0,0,0,0
21.3744,6.63324958,0,0,0,0
21.384891,6.8556546,0,0,0,0
21.395383,6.63324958,0,0,0,0
21.405874,7.61577311,0,0,0,0
21.416366,7.07106781,0,0,0,0
21.426858,6.92820323,0,0,0,0
21.437349,7.54983444,0,0,0,0
21.447841,6.244998,0,0,0,0
21.458332,7.34846923,0,0,0,0
21.468824,7.07106781,0,0,0,0
21.479316,6.63324958,0,0,0,0
21.489807,6.244998,0,0,0,0
21.500299,5.91607978,0,0,0,0
21.51079,7.34846923,0,0,0,0
21.521282,5.83095189,0,0,0,0
21.531774,7.07106781,0,0,0,0
21.542265,7.28010989,0,0,0,0
21.552757,6.55743852,0,0,0,0
21.563248,6.70820393,0,0,0,0
21.57374,6.92820323,0,0,0,0
21.584232,7.34846923,0,0,0,0
21.594723,6.92820323,0,0,0,0
21.605215,6.8556546,0,0,0,0
21.615706,7.34846923,0,0,0,0
21.626198,6.8556546,0,0,0,0
21.63669,6.164414,0,0,0,0
21.647181,6.8556546,0,0,0,0
21.657673,6.244998,0,0,0,0
21.668164,6.55743852,0,0,0,0
21.678656,6.55743852,0,0,0,0
21.689148,6.70820393,0,0,0,0
21.699639,6.8556546,0,0,0,0
21.710131,5.83095189,0,0,0,0
21.720622,7.07106781,0,0,0,0
21.731114,6.244998,0,0,0,0
21.741606,6.40312424,0,0,0,0
21.752097,6.8556546,0,0,0,0
21.762589,7.61577311,0,0,0,0
21.77308,7.21110255,0,0,0,0
21.783572,7.48331477,0,0,0,0
21.794064,6.32455532,0,0,0,0
21.804555,8.1240384,0,0,0,0
21.815047,7.21110255,0,0,0,0
21.825538,7.41619849,0,0,0,0
21.83603,7.87400787,0,0,0,0
21.846522,6,0,0,0,0
21.857013,7.14142843,0,0,0,0
21.867505,7,0,0,0,0
21.877996,6.244998,0,0,0,0
21.888488,7.07106781,0,0,0,0
21.89898,7.68114575,0,0,0,0
21.909471,6.55743852,0,0,0,0
21.919963,6.4807407,0,0,0,0
21.930454,6.4807407,0,0,0,0
21.940946,7.21110255,0,0,0,0
21.951438,6.70820393,0,0,0,0
21.961929,5.47722558,0,0,0,0
21.972421,6.92820323,0,0,0,0
21.982912,6.40312424,0,0,0,0
21.993404,6.55743852,0,0,0,0
22.003896,6.40312424,0,0,0,0
22.014387,7.48331477,0,0,0,0
22.024879,6.32455532,0,0,0,0
22.03537,6.40312424,0,0,0,0
22.045862,5.83095189,0,0,0,0
22.056354,6.8556546,0,0,0,0
22.066845,6.63324958,0,0,0,0
22.077337,7.48331477,0,0,0,0
22.087828,7.61577311,0,0,0,0
22.09832,7.28010989,0,0,0,0
22.108812,7.14142843,0,0,0,0
22.119303,6.70820393,0,0,0,0
22.129795,6.70820393,0,0,0,0
22.140286,6.4807407,0,0,0,0
22.150778,7.48331477,0,0,0,0
22.16127,6.78232998,0,0,0,0
22.171761,6.244998,0,0,0,0
22.182253,6.32455532,0,0,0,0
22.192744,6.8556546,0,0,0,0
22.203236,7.34846923,0,0,0,0
22.213728,6.40312424,0,0,0,0
22.224219,6.40312424,0,0,0,0
22.234711,6.70820393,0,0,0,0
22.245202,6.78232998,0,0,0,0
22.255694,7.14142843,0,0,0,0
22.266186,7.34846923,0,0,0,0
22.276677,6.92820323,0,0,0,0
22.287169,6.4807407,0,0,0,0
22.29766,6.32455532,0,0,0,0
22.308152,6.55743852,0,0,0,0
22.318644,6.78232998,0,0,0,0
22.329135,6.32455532,0,0,0,0
22.339627,7,0,0,0,0
22.350118,7,0,0,0,0
22.36061,6.70820393,0,0,0,0
22.371102,6.40312424,0,0,0,0
22.381593,6.92820323,0,0,0,0
22.392085,6.55743852,0,0,0,0
22.402576,7.07106781,0,0,0,0
22.413068,6.4807407,0,0,0,0
22.42356,6.63324958,0,0,0,0
22.434051,6.32455532,0,0,0,0
22.444543,6.63324958,0,0,0,0
22.455034,7.61577311,0,0,0,0
22.465526,6,0,0,0,0
22.476018,7.14142843,0,0,0,0
22.486509,5.65685425,0,0,0,0
22.497001,7.48331477,0,0,0,0
22.507492,6.4807407,0,0,0,0
22.517984,6.4807407,0,0,0,0
22.528476,6.40312424,0,0,0,0
22.538967,7.61577311,0,0,0,0
22.549459,6.244998,0,0,0,0
22.55995,7.74596669,0,0,0,0
22.570442,7.34846923,0,0,0,0
22.580934,7,0,0,0,0
22.591425,6.55743852,0,0,0,0
22.601917,6.63324958,0,0,0,0
22.612408,7.34846923,0,0,0,0
22.6229,6.78232998,0,0,0,0
22.633392,6.08276253,0,0,0,0
22.643883,6.4807407,0,0,0,0
22.654375,7.34846923,0,0,0,0
22.664866,6.8556546,0,0,0,0
22.675358,6.32455532,0,0,0,0
22.68585,7.07106781,0,0,0,0
22.696341,6.78232998,0,0,0,0
22.706833,8.30662386,0,0,0,0
22.717324,7.61577311,0,0,0,0
22.727816,6.63324958,0,0,0,0
22.738308,6.70820393,0,0,0,0
22.748799,7.48331477,0,0,0,0
22.759291,6.63324958,0,0,0,0
22.769782,6.92820323,0,0,0,0
22.780274,6.55743852,0,0,0,0
22.790766,6.92820323,0,0,0,0
22.801257,6.8556546,0,0,0,0
22.811749,6.4807407,0,0,0,0
22.82224,6.8556546,0,0,0,0
22.832732,5.29150262,0,0,0,0
22.843224,7,0,0,0,0
22.853715,6.4807407,0,0,0,0
22.864207,7.54983444,0,0,0,0
22.874698,7.28010989,0,0,0,0
22.88519,6.92820323,0,0,0,0
22.895682,7.14142843,0,0,0,0
22.906173,5.83095189,0,0,0,0
22.916665,7.21110255,0,0,0,0
22.927156,6.244998,0,0,0,0
22.937648,5.56776436,0,0,0,0
22.94814,7.07106781,0,0,0,0
22.958631,5.91607978,0,0,0,0
22.969123,6.55743852,0,0,0,0
22.979614,7.54983444,0,0,0,0
22.990106,7.07106781,0,0,0,0
23.000598,6.92820323,0,0,0,0
23.011089,7.28010989,0,0,0,0
23.021581,7.61577311,0,0,0,0
23.032072,6.244998,0,0,0,0
23.042564,7.48331477,0,0,0,0
23.053056,6.4807407,0,0,0,0
23.063547,7.41619849,0,0,0,0
23.074039,6.55743852,0,0,0,0
23.08453,7,0,0,0,0
23.095022,7.21110255,0,0,0,0
23.105514,7.07106781,0,0,0,0
23.116005,5.83095189,0,0,0,0
23.126497,6.92820323,0,0,0,0
23.136988,6.63324958,0,0,0,0
23.14748,7.68114575,0,0,0,0
23.157972,7,0,0,0,0
23.168463,6.70820393,0,0,0,0
23.178955,7.21110255,0,0,0,0
23.189446,6.70820393,0,0,0,0
23.199938,6.78232998,0,0,0,0
23.21043,6.92820323,0,0,0,0
23.220921,7.34846923,0,0,0,0
23.231413,6.4807407,0,0,0,0
23.241904,6.63324958,0,0,0,0
23.252396,6.78232998,0,0,0,0
23.262888,6.78232998,0,0,0,0
23.273379,6,0,0,0,0
23.283871,7.14142843,0,0,0,0
23.294362,6.40312424,0,0,0,0
23.304854,7.07106781,0,0,0,0
23.315346,6.92820323,0,0,0,0
23.325837,6.08276253,0,0,0,0
23.336329,6.55743852,0,0,0,0
23.34682,6.63324958,0,0,0,0
23.357312,6.8556546,0,0,0,0
23.367804,6.63324958,0,0,0,0
23.378295,6.4807407,0,0,0,0
23.388787,7.14142843,0,0,0,0
23.399278,6.4807407,0,0,0,0
23.40977,5.47722558,0,0,0,0
23.420262,7.07106781,0,0,0,0
23.430753,6.55743852,0,0,0,0
23.441245,6.92820323,0,0,0,0
23.451736,6.08276253,0,0,0,0
23.462228,6.70820393,0,0,0,0
23.47272,6.40312424,0,0,0,0
23.483211,6,0,0,0,0
23.493703,6.55743852,0,0,0,0
23.504194,7.21110255,0,0,0,0
23.514686,7.07106781,0,0,0,0
23.525178,7.07106781,0,0,0,0
23.535669,6.8556546,0,0,0,0
23.546161,7.48331477,0,0,0,0
23.556652,6.8556546,0,0,0,0
23.567144,6.164414,0,0,0,0
23.577636,5.74456265,0,0,0,0
23.588127,6.55743852,0,0,0,0
23.598619,6.63324958,0,0,0,0
23.60911,6.92820323,0,0,0,0
23.619602,6.8556546,0,0,0,0
23.630094,6.78232998,0,0,0,0
23.640585,5.91607978,0,0,0,0
23.651077,6.63324958,0,0,0,0
23.661568,6.08276253,0,0,0,0
23.67206,6.4807407,0,0,0,0
23.682552,5.65685425,0,0,0,0
23.693043,7.14142843,0,0,0,0
23.703535,6.4807407,0,0,0,0
23.714026,6.63324958,0,0,0,0
23.724518,6.70820393,0,0,0,0
23.73501,7.07106781,0,0,0,0
23.745501,7,0,0,0,0
23.755993,6.4807407,0,0,0,0
23.766484,6.244998,0,0,0,0
23.776976,7.14142843,0,0,0,0
23.787468,7,0,0,0,0
23.797959,5.56776436,0,0,0,0
23.808451,7.48331477,0,0,0,0
23.818942,6.78232998,0,0,0,0
23.829434,6.92820323,0,0,0,0
23.839926,6.92820323,0,0,0,0
23.850417,6.164414,0,0,0,0
23.860909,6.40312424,0,0,0,0
23.8714,6.40312424,0,0,0,0
23.881892,7.41619849,0,0,0,0
23.892384,6.164414,0,0,0,0
23.902875,7.14142843,0,0,0,0
23.913367,6.08276253,0,0,0,0
23.923858,6.70820393,0,0,0,0
23.93435,6.70820393,0,0,0,0
23.944842,6.55743852,0,0,0,0
23.955333,6.55743852,0,0,0,0
23.965825,6,0,0,0,0
23.976316,6,0,0,0,0
23.986808,6,0,0,0,0
23.9973,6.164414,0,0,0,0
24.007791,7.07106781,0,0,0,0
24.018283,6.4807407,0,0,0,0
24.028774,6.32455532,0,0,0,0
24.039266,6,0,0,0,0
24.049758,5.91607978,0,0,0,0
24.060249,7.28010989,0,0,0,0
24.070741,7.07106781,0,0,0,0
24.081232,7.74596669,0,0,0,0
24.091724,6.78232998,0,0,0,0
24.102216,6.55743852,0,0,0,0
24.112707,7.28010989,0,0,0,0
24.123199,6.32455532,0,0,0,0
24.13369,5.65685425,0,0,0,0
24.144182,6.244998,0,0,0,0
24.154674,6.8556546,0,0,0,0
24.165165,6.32455532,0,0,0,0
24.175657,6.8556546,0,0,0,0
24.186148,5.38516481,0,0,0,0
24.19664,6.08276253,0,0,0,0
24.207132,6.4807407,0,0,0,0
24.217623,7.07106781,0,0,0,0
24.228115,5.74456265,0,0,0,0
24.238606,6.55743852,0,0,0,0
24.249098,7.07106781,0,0,0,0
24.25959,6.40312424,0,0,0,0
24.270081,7.28010989,0,0,0,0
24.280573,6.63324958,0,0,0,0
24.291064,6.164414,0,0,0,0
24.301556,6.32455532,0,0,0,0
24.312048,5.83095189,0,0,0,0
24.322539,6.244998,0,0,0,0
24.333031,7.41619849,0,0,0,0
24.343522,6.78232998,0,0,0,0
24.354014,6.70820393,0,0,0,0
24.364506,5.47722558,0,0,0,0
24.374997,7.48331477,0,0,0,0
24.385489,7.54983444,0,0,0,0
24.39598,6.32455532,0,0,0,0
24.406472,6.78232998,0,0,0,0
24.416964,7,0,0,0,0
24.427455,6.164414,0,0,0,0
24.437947,6.55743852,0,0,0,0
24.448438,6.78232998,0,0,0,0
24.45893,6.40312424,0,0,0,0
24.469422,6.4807407,0,0,0,0
24.479913,6.70820393,0,0,0,0
24.490405,6.32455532,0,0,0,0
24.500896,6.92820323,0,0,0,0
24.511388,5.74456265,0,0,0,0
24.52188,6.4807407,0,0,0,0
24.532371,6,0,0,0,0
24.542863,7.41619849,0,0,0,0
24.553354,6.32455532,0,0,0,0
24.563846,6.78232998,0,0,0,0
24.574338,6.63324958,0,0,0,0
24.584829,6.8556546,0,0,0,0
24.595321,6.63324958,0,0,0,0
24.605812,6.40312424,0,0,0,0
24.616304,6.164414,0,0,0,0
24.626796,6.164414,0,0,0,0
24.637287,5.47722558,0,0,0,0
24.647779,6.8556546,0,0,0,0
24.65827,6.40312424,0,0,0,0
24.668762,6,0,0,0,0
24.679254,5.83095189,0,0,0,0
24.689745,6.32455532,0,0,0,0
24.700237,7.54983444,0,0,0,0
24.710728,5.29150262,0,0,0,0
24.72122,5.91607978,0,0,0,0
24.731712,5.74456265,0,0,0,0
24.742203,6.63324958,0,0,0,0
24.752695,6.63324958,0,0,0,0
24.763186,6.164414,0,0,0,0
24.773678,5.19615242,0,0,0,0
24.78417,6.40312424,0,0,0,0
24.794661,6.244998,0,0,0,0
24.805153,7.07106781,0,0,0,0
24.815644,5.91607978,0,0,0,0
24.826136,6,0,0,0,0
24.836628,5.56776436,0,0,0,0
24.847119,6.40312424,0,0,0,0
24.857611,6.92820323,0,0,0,0
24.868102,7.28010989,0,0,0,0
24.878594,5.83095189,0,0,0,0
24.889086,6.63324958,0,0,0,0
24.899577,7.14142843,0,0,0,0
24.910069,6.8556546,0,0,0,0
24.92056,7,0,0,0,0
24.931052,6.4807407,0,0,0,0
24.941544,6.78232998,0,0,0,0
24.952035,6.63324958,0,0,0,0
24.962527,6.40312424,0,0,0,0
24.973018,6.63324958,0,0,0,0
24.98351,6.78232998,0,0,0,0
24.994002,5.83095189,0,0,0,0
25.004493,7.41619849,0,0,0,0
25.014985,6.32455532,0,0,0,0
25.025476,6.32455532,0,0,0,0
25.035968,6.32455532,0,0,0,0
25.04646,6,0,0,0,0
25.056951,7.87400787,0,0,0,0
25.067443,6.164414,0,0,0,0
25.077934,6.63324958,0,0,0,0
25.088426,6.92820323,0,0,0,0
25.098918,6.8556546,0,0,0,0
25.109409,6.08276253,0,0,0,0
25.119901,5.83095189,0,0,0,0
25.130392,5.83095189,0,0,0,0
25.140884,5.65685425,0,0,0,0
25.151376,6,0,0,0,0
25.161867,5.83095189,0,0,0,0
25.172359,6.32455532,0,0,0,0
25.18285,6.244998,0,0,0,0
25.193342,6.164414,0,0,0,0
25.203834,6.63324958,0,0,0,0
25.214325,5.83095189,0,0,0,0
25.224817,6.244998,0,0,0,0
25.235308,6.164414,0,0,0,0
25.2458,6.63324958,0,0,0,0
25.256292,5.74456265,0,0,0,0
25.266783,6.78232998,0,0,0,0
25.277275,6.40312424,0,0,0,0
25.287766,6,0,0,0,0
25.298258,6.4807407,0,0,0,0
25.30875,5.09901951,0,0,0,0
25.319241,5.91607978,0,0,0,0
25.329733,4.69041576,0,0,0,0
25.340224,6,0,0,0,0
25.350716,6.32455532,0,0,0,0
25.361208,5.91607978,0,0,0,0
25.371699,6,0,0,0,0
25.382191,5.91607978,0,0,0,0
25.392682,6.244998,0,0,0,0
25.403174,6.32455532,0,0,0,0
25.413666,6.4807407,0,0,0,0
25.424157,6.164414,0,0,0,0
25.434649,5.74456265,0,0,0,0
25.44514,6.8556546,0,0,0,0
25.455632,5.74456265,0,0,0,0
25.466124,6.08276253,0,0,0,0
25.476615,6.164414,0,0,0,0
25.487107,6.164414,0,0,0,0
25.497598,6.78232998,0,0,0,0
25.50809,6.55743852,0,0,0,0
25.518582,7.07106781,0,0,0,0
25.529073,5.83095189,0,0,0,0
25.539565,5.91607978,0,0,0,0
25.550056,5.74456265,0,0,0,0
25.560548,5.19615242,0,0,0,0
25.57104,4.89897949,0,0,0,0
25.581531,5.74456265,0,0,0,0
25.592023,6.55743852,0,0,0,0
25.602514,5.47722558,0,0,0,0
25.613006,6,0,0,0,0
25.623498,6,0,0,0,0
25.633989,6.92820323,0,0,0,0
25.644481,6.164414,0,0,0,0
25.654972,6.70820393,0,0,0,0
25.665464,6.55743852,0,0,0,0
25.675956,5.83095189,0,0,0,0
25.686447,6,0,0,0,0
25.696939,6.4807407,0,0,0,0
25.70743,6.40312424,0,0,0,0
25.717922,6.244998,0,0,0,0
25.728414,7.07106781,0,0,0,0
25.738905,6.244998,0,0,0,0
25.749397,6.08276253,0,0,0,0
25.759888,6.70820393,0,0,0,0
25.77038,5.47722558,0,0,0,0
25.780872,6.78232998,0,0,0,0
25.791363,5.65685425,0,0,0,0
25.801855,5.38516481,0,0,0,0
25.812346,5.47722558,0,0,0,0
25.822838,6.40312424,0,0,0,0
25.83333,6.8556546,0,0,0,0
25.843821,6.4807407,0,0,0,0
25.854313,5.47722558,0,0,0,0
25.864804,5.83095189,0,0,0,0
25.875296,6.63324958,0,0,0,0
25.885788,5.65685425,0,0,0,0
25.896279,5,0,0,0,0
25.906771,5.56776436,0,0,0,0
25.917262,6.164414,0,0,0,0
25.927754,6.55743852,0,0,0,0
25.938246,6.244998,0,0,0,0
25.948737,6,0,0,0,0
25.959229,6.55743852,0,0,0,0
25.96972,5.65685425,0,0,0,0
25.980212,5.74456265,0,0,0,0
25.990704,6.4807407,0,0,0,0
26.001195,6.32455532,0,0,0,0
26.011687,5.56776436,0,0,0,0
26.022178,6.63324958,0,0,0,0
26.03267,6.164414,0,0,0,0
26.043162,5.74456265,0,0,0,0
26.053653,6.92820323,0,0,0,0
26.064145,6.164414,0,0,0,0
26.074636,6.164414,0,0,0,0
26.085128,6.08276253,0,0,0,0
26.09562,6.4807407,0,0,0,0
26.106111,6.164414,0,0,0,0
26.116603,5.56776436,0,0,0,0
26.127094,6.40312424,0,0,0,0
26.137586,7,0,0,0,0
26.148078,6.40312424,0,0,0,0
26.158569,6.08276253,0,0,0,0
26.169061,6.40312424,0,0,0,0
26.179552,6.40312424,0,0,0,0
26.190044,5.83095189,0,0,0,0
26.200536,6.08276253,0,0,0,0
26.211027,5.91607978,0,0,0,0
26.221519,4.89897949,0,0,0,0
26.23201,6.32455532,0,0,0,0
26.242502,6,0,0,0,0
26.252994,5.56776436,0,0,0,0
26.263485,5.65685425,0,0,0,0
26.273977,7.07106781,0,0,0,0
26.284468,6.08276253,0,0,0,0
26.29496,6.55743852,0,0,0,0
26.305452,5.83095189,0,0,0,0
26.315943,5.09901951,0,0,0,0
26.326435,5.65685425,0,0,0,0
26.336926,5.74456265,0,0,0,0
26.347418,5.65685425,0,0,0,0
26.35791,6.244998,0,0,0,0
26.368401,6,0,0,0,0
26.378893,6.164414,0,0,0,0
26.389384,7,0,0,0,0
26.399876,5.74456265,0,0,0,0
26.410368,6,0,0,0,0
26.420859,5,0,0,0,0
26.431351,6.4807407,0,0,0,0
26.441842,6.70820393,0,0,0,0
26.452334,5.65685425,0,0,0,0
26.462826,6.63324958,0,0,0,0
26.473317,5.83095189,0,0,0,0
26.483809,5.47722558,0,0,0,0
26.4943,5.38516481,0,0,0,0
26.504792,5.83095189,0,0,0,0
26.515284,6.32455532,0,0,0,0
26.525775,6.32455532,0,0,0,0
26.536267,7.07106781,0,0,0,0
26.546758,5.65685425,0,0,0,0
26.55725,5,0,0,0,0
26.567742,5.83095189,0,0,0,0
26.578233,6.63324958,0,0,0,0
26.588725,5.91607978,0,0,0,0
26.599216,6.244998,0,0,0,0
26.609708,5.91607978,0,0,0,0
26.6202,5.74456265,0,0,0,0
26.630691,6.164414,0,0,0,0
26.641183,6.164414,0,0,0,0
26.651674,6.4807407,0,0,0,0
26.662166,6.70820393,0,0,0,0
26.672658,5.56776436,0,0,0,0
26.683149,4.89897949,0,0,0,0
26.693641,6.08276253,0,0,0,0
26.704132,5.91607978,0,0,0,0
26.714624,6.164414,0,0,0,0
26.725116,5.83095189,0,0,0,0
26.735607,6.4807407,0,0,0,0
26.746099,6.164414,0,0,0,0
26.75659,5.65685425,0,0,0,0
26.767082,5.65685425,0,0,0,0
26.777574,5.65685425,0,0,0,0
26.788065,5.65685425,0,0,0,0
26.798557,5.74456265,0,0,0,0
26.809048,5.74456265,0,0,0,0
26.81954,6,0,0,0,0
26.830032,5.38516481,0,0,0,0
26.840523,5.91607978,0,0,0,0
26.851015,6.40312424,0,0,0,0
26.861506,5.65685425,0,0,0,0
26.871998,6.32455532,0,0,0,0
26.88249,6.40312424,0,0,0,0
26.892981,5.09901951,0,0,0,0
26.903473,6,0,0,0,0
26.913964,6.78232998,0,0,0,0
26.924456,6.08276253,0,0,0,0
26.934948,6.63324958,0,0,0,0
26.945439,6.40312424,0,0,0,0
26.955931,6.08276253,0,0,0,0
26.966422,7.14142843,0,0,0,0
26.976914,4.69041576,0,0,0,0
26.987406,6,0,0,0,0
26.997897,6.164414,0,0,0,0
27.008389,6.244998,0,0,0,0
27.01888,6.244998,0,0,0,0
27.029372,6.164414,0,0,0,0
27.039864,6.70820393,0,0,0,0
27.050355,5.38516481,0,0,0,0
27.060847,6,0,0,0,0
27.071338,5.47722558,0,0,0,0
27.08183,6.78232998,0,0,0,0
27.092322,6.244998,0,0,0,0
27.102813,5.47722558,0,0,0,0
27.113305,6,0,0,0,0
27.123796,5.83095189,0,0,0,0
27.134288,5.47722558,0,0,0,0
27.14478,5.91607978,0,0,0,0
27.155271,5.29150262,0,0,0,0
27.165763,5.83095189,0,0,0,0
27.176254,6.70820393,0,0,0,0
27.186746,6.78232998,0,0,0,0
27.197238,5.91607978,0,0,0,0
27.207729,5.38516481,0,0,0,0
27.218221,5.83095189,0,0,0,0
27.228712,5.56776436,0,0,0,0
27.239204,5.56776436,0,0,0,0
27.249696,6,0,0,0,0
27.260187,5.38516481,0,0,0,0
27.270679,5.56776436,0,0,0,0
27.28117,6,0,0,0,0
27.291662,6.244998,0,0,0,0
27.302154,6.32455532,0,0,0,0
27.312645,6.244998,0,0,0,0
27.323137,6.8556546,0,0,0,0
27.333628,6.08276253,0,0,0,0
27.34412,5.19615242,0,0,0,0
27.354612,6.244998,0,0,0,0
27.365103,5.83095189,0,0,0,0
27.375595,6.08276253,0,0,0,0
27.386086,6.40312424,0,0,0,0
27.396578,5.38516481,0,0,0,0
27.40707,5.83095189,0,0,0,0
27.417561,4.89897949,0,0,0,0
27.428053,6,0,0,0,0
27.438544,6.164414,0,0,0,0
27.449036,5.83095189,0,0,0,0
27.459528,6,0,0,0,0
27.470019,5.74456265,0,0,0,0
27.480511,6.244998,0,0,0,0
27.491002,6.164414,0,0,0,0
27.501494,5,0,0,0,0
27.511986,6.08276253,0,0,0,0
27.522477,5.83095189,0,0,0,0
27.532969,5.83095189,0,0,0,0
27.54346,6.4807407,0,0,0,0
27.553952,5.65685425,0,0,0,0
27.564444,5.38516481,0,0,0,0
27.574935,6.164414,0,0,0,0
27.585427,5.83095189,0,0,0,0
27.595918,6.4807407,0,0,0,0
27.60641,6.244998,0,0,0,0
27.616902,6.244998,0,0,0,0
27.627393,5.29150262,0,0,0,0
27.637885,5.47722558,0,0,0,0
27.648376,6.244998,0,0,0,0
27.658868,5.65685425,0,0,0,0
27.66936,4.89897949,0,0,0,0
27.679851,5.19615242,0,0,0,0
27.690343,5.38516481,0,0,0,0
27.700834,6.08276253,0,0,0,0
27.711326,5.91607978,0,0,0,0
27.721818,5.65685425,0,0,0,0
27.732309,5.65685425,0,0,0,0
27.742801,5.65685425,0,0,0,0
27.753292,5.56776436,0,0,0,0
27.763784,5.65685425,0,0,0,0
27.774276,5.74456265,0,0,0,0
27.784767,7.14142843,0,0,0,0
27.795259,7.14142843,0,0,0,0
27.80575,5.56776436,0,0,0,0
27.816242,6,0,0,0,0
27.826734,5.65685425,0,0,0,0
27.837225,6,0,0,0,0
27.847717,6.32455532,0,0,0,0
27.858208,5.91607978,0,0,0,0
27.8687,5.91607978,0,0,0,0
27.879192,5.91607978,0,0,0,0
27.889683,5.65685425,0,0,0,0
27.900175,6.32455532,0,0,0,0
27.910666,5.56776436,0,0,0,0
27.921158,6.32455532,0,0,0,0
27.93165,6.92820323,0,0,0,0
27.942141,5.91607978,0,0,0,0
27.952633,6.08276253,0,0,0,0
27.963124,5.74456265,0,0,0,0
27.973616,5.56776436,0,0,0,0
27.984108,5.38516481,0,0,0,0
27.994599,5.65685425,0,0,0,0
28.005091,5.09901951,0,0,0,0
28.015582,5.38516481,0,0,0,0
28.026074,6,0,0,0,0
28.036566,6.40312424,0,0,0,0
28.047057,5.47722558,0,0,0,0
28.057549,5.65685425,0,0,0,0
28.06804,6.164414,0,0,0,0
28.078532,5.29150262,0,0,0,0
28.089024,6,0,0,0,0
28.099515,5.29150262,0,0,0,0
28.110007,5.91607978,0,0,0,0
28.120498,6.164414,0,0,0,0
28.13099,6.32455532,0,0,0,0
28.141482,5.09901951,0,0,0,0
28.151973,6.32455532,0,0,0,0
28.162465,5.74456265,0,0,0,0
28.172956,6.55743852,0,0,0,0
28.183448,6.164414,0,0,0,0
28.19394,6.32455532,0,0,0,0
28.204431,6,0,0,0,0
28.214923,5.29150262,0,0,0,0
28.225414,6.78232998,0,0,0,0
28.235906,5.74456265,0,0,0,0
28.246398,5.91607978,0,0,0,0
28.256889,6.4807407,0,0,0,0
28.267381,5.56776436,0,0,0,0
28.277872,7,0,0,0,0
28.288364,6.164414,0,0,0,0
28.298856,5.47722558,0,0,0,0
28.309347,6,0,0,0,0
28.319839,7.07106781,0,0,0,0
28.33033,6.08276253,0,0,0,0
28.340822,6.40312424,0,0,0,0
28.351314,5.29150262,0,0,0,0
28.361805,6.08276253,0,0,0,0
28.372297,5.47722558,0,0,0,0
28.382788,6.8556546,0,0,0,0
28.39328,6,0,0,0,0
28.403772,6.164414,0,0,0,0
28.414263,5.65685425,0,0,0,0
28.424755,5.47722558,0,0,0,0
28.435246,6.55743852,0,0,0,0
28.445738,5.47722558,0,0,0,0
28.45623,6,0,0,0,0
28.466721,5.09901951,0,0,0,0
28.477213,5.83095189,0,0,0,0
28.487704,6.244998,0,0,0,0
28.498196,5.56776436,0,0,0,0
28.508688,5.91607978,0,0,0,0
28.519179,6.32455532,0,0,0,0
28.529671,5.74456265,0,0,0,0
28.540162,5.47722558,0,0,0,0
28.550654,5.47722558,0,0,0,0
28.561146,5.65685425,0,0,0,0
28.571637,5.83095189,0,0,0,0
28.582129,6.63324958,0,0,0,0
28.59262,6.244998,0,0,0,0
28.603112,6,0,0,0,0
28.613604,5.65685425,0,0,0,0
28.624095,5.74456265,0,0,0,0
28.634587,5,0,0,0,0
28.645078,6.164414,0,0,0,0
28.65557,6.164414,0,0,0,0
28.666062,5.19615242,0,0,0,0
28.676553,6.32455532,0,0,0,0
28.687045,6.08276253,0,0,0,0
28.697536,5.65685425,0,0,0,0
28.708028,5.09901951,0,0,0,0
28.71852,5.56776436,0,0,0,0
28.729011,5.83095189,0,0,0,0
28.739503,6,0,0,0,0
28.749994,6.55743852,0,0,0,0
28.760486,6.55743852,0,0,0,0
28.770978,5.56776436,0,0,0,0
28.781469,6.40312424,0,0,0,0
28.791961,6.08276253,0,0,0,0
28.802452,6.08276253,0,0,0,0
28.812944,6.244998,0,0,0,0
28.823436,6.164414,0,0,0,0
28.833927,5.47722558,0,0,0,0
28.844419,5.83095189,0,0,0,0
28.85491,6.55743852,0,0,0,0
28.865402,5.47722558,0,0,0,0
28.875894,4.12310563,0,0,0,0
28.886385,5.74456265,0,0,0,0
28.896877,5.74456265,0,0,0,0
28.907368,6.40312424,0,0,0,0
28.91786,6.08276253,0,0,0,0
28.928352,5.74456265,0,0,0,0
28.938843,5.74456265,0,0,0,0
28.949335,6.70820393,0,0,0,0
28.959826,6.164414,0,0,0,0
28.970318,6.92820323,0,0,0,0
28.98081,5.19615242,0,0,0,0
28.991301,6.40312424,0,0,0,0
29.001793,6.164414,0,0,0,0
29.012284,5.65685425,0,0,0,0
29.022776,5,0,0,0,0
29.033268,6.40312424,0,0,0,0
29.043759,6.32455532,0,0,0,0
29.054251,6.164414,0,0,0,0
29.064742,7.21110255,0,0,0,0
29.075234,6.08276253,0,0,0,0
29.085726,5.83095189,0,0,0,0
29.096217,5.56776436,0,0,0,0
29.106709,5.56776436,0,0,0,0
29.1172,6.164414,0,0,0,0
29.127692,5.74456265,0,0,0,0
29.138184,5,0,0,0,0
29.148675,6.244998,0,0,0,0
29.159167,6,0,0,0,0
29.169658,5.83095189,0,0,0,0
29.18015,6.92820323,0,0,0,0
29.190642,6.08276253,0,0,0,0
29.201133,5.56776436,0,0,0,0
29.211625,6.244998,0,0,0,0
29.222116,5.29150262,0,0,0,0
29.232608,6.08276253,0,0,0,0
29.2431,6.4807407,0,0,0,0
29.253591,6.55743852,0,0,0,0
29.264083,5.74456265,0,0,0,0
29.274574,6.244998,0,0,0,0
29.285066,6.4807407,0,0,0,0
29.295558,5.74456265,0,0,0,0
29.306049,5.74456265,0,0,0,0
29.316541,6.32455532,0,0,0,0
29.327032,6.63324958,0,0,0,0
29.337524,6.55743852,0,0,0,0
29.348016,5.56776436,0,0,0,0
29.358507,5.56776436,0,0,0,0
29.368999,6.164414,0,0,0,0
29.37949,5.56776436,0,0,0,0
29.389982,5.91607978,0,0,0,0
29.400474,5.65685425,0,0,0,0
29.410965,6,0,0,0,0
29.421457,5.56776436,0,0,0,0
29.431948,6.244998,0,0,0,0
29.44244,6.4807407,0,0,0,0
29.452932,6.08276253,0,0,0,0
29.463423,6.78232998,0,0,0,0
29.473915,6.244998,0,0,0,0
29.484406,6.244998,0,0,0,0
29.494898,6.08276253,0,0,0,0
29.50539,5.56776436,0,0,0,0
29.515881,6.70820393,0,0,0,0
29.526373,5.56776436,0,0,0,0
29.536864,5.91607978,0,0,0,0
29.547356,6.40312424,0,0,0,0
29.557848,5.83095189,0,0,0,0
29.568339,6.4807407,0,0,0,0
29.578831,5.74456265,0,0,0,0
29.589322,5.56776436,0,0,0,0
29.599814,6.4807407,0,0,0,0
29.610306,6.32455532,0,0,0,0
29.620797,5.56776436,0,0,0,0
29.631289,5.65685425,0,0,0,0
29.64178,6.244998,0,0,0,0
29.652272,5.65685425,0,0,0,0
29.662764,5.74456265,0,0,0,0
29.673255,5.19615242,0,0,0,0
29.683747,5.65685425,0,0,0,0
29.694238,6.55743852,0,0,0,0
29.70473,7.07106781,0,0,0,0
29.715222,6.164414,0,0,0,0
29.725713,5.83095189,0,0,0,0
29.736205,6.08276253,0,0,0,0
29.746696,6.244998,0,0,0,0
29.757188,5.65685425,0,0,0,0
29.76768,6.164414,0,0,0,0
29.778171,6.40312424,0,0,0,0
29.788663,6.08276253,0,0,0,0
29.799154,6,0,0,0,0
29.809646,6.08276253,0,0,0,0
29.820138,6.92820323,0,0,0,0
29.830629,4.89897949,0,0,0,0
29.841121,6.08276253,0,0,0,0
29.851612,6.08276253,0,0,0,0
29.862104,6,0,0,0,0
29.872596,6.78232998,0,0,0,0
29.883087,5.74456265,0,0,0,0
29.893579,6,0,0,0,0
29.90407,6.32455532,0,0,0,0
29.914562,6.32455532,0,0,0,0
29.925054,6.55743852,0,0,0,0
29.935545,6.244998,0,0,0,0
29.946037,6.70820393,0,0,0,0
29.956528,5.65685425,0,0,0,0
29.96702,5.47722558,0,0,0,0
29.977512,6,0,0,0,0
29.988003,6.244998,0,0,0,0
29.998495,5.38516481,6.1130234,-0.853146289,6.1130234,6.11300883
30.008986,5.83095189,6.11376122,-0.531798202,6.11376122,6.1137466
30.019478,5.74456265,6.11449192,-0.608218115,6.11449192,6.11447724
30.02997,5.91607978,6.11521544,-0.446246188,6.11521544,6.11520071
30.040461,6.244998,6.11593174,0.359257931,6.11593174,6.11591695
30.050953,5.19615242,6.11664096,-0.959420938,6.11664096,6.11662611
30.061444,6.63324958,6.11734299,0.718266379,6.11734299,6.11732808
30.071936,4.89897949,6.11803798,-1.10410982,6.11803798,6.11802302
30.082428,5.65685425,6.11872589,-0.679611389,6.11872589,6.11871087
30.092919,6.164414,6.11940666,0.212149336,6.11940666,6.11939158
30.103411,6.40312424,6.12008045,0.532018597,6.12008045,6.12006531
30.113902,5.65685425,6.12074714,-0.68109683,6.12074714,6.12073194
30.124394,6,6.12140688,-0.348434902,6.12140688,6.12139162
30.134886,7.54983444,6.12205962,1.19489531,6.12205962,6.1220443
30.145377,6.40312424,6.12270533,0.529545947,6.12270533,6.12268994
30.155869,6.164414,6.12334413,0.202657033,6.12334413,6.12332869
30.16636,6.70820393,6.12397593,0.76434809,6.12397593,6.12396042
30.176852,7.34846923,6.12460086,1.10628584,6.12460086,6.1245853
30.187344,6.08276253,6.12521889,-0.206049407,6.12521889,6.12520326
30.197835,6,6.12582996,-0.354725196,6.12582996,6.12581427
30.208327,6,6.12643423,-0.355575907,6.12643423,6.12641847
30.218818,6.63324958,6.12703157,0.711489991,6.12703157,6.12701575
30.22931,5.29150262,6.12762214,-0.914395712,6.12762214,6.12760626
30.239802,5.65685425,6.12820589,-0.686550535,6.12820589,6.12818994
30.250293,6.4807407,6.12878277,0.593260419,6.12878277,6.12876676
30.260785,6.40312424,6.12935293,0.523231602,6.12935293,6.12933685
30.271276,6.63324958,6.12991626,0.709459879,6.12991626,6.12990012
30.281768,5.38516481,6.13047289,-0.863312276,6.13047289,6.13045668
30.29226,6.08276253,6.13102279,-0.219682182,6.13102279,6.13100651
30.302751,7,6.13156592,0.931898107,6.13156592,6.13154958
30.313243,6.92820323,6.1321024,0.892244828,6.1321024,6.13208599
30.323734,5.09901951,6.13263214,-1.01666741,6.13263214,6.13261566
30.334226,6.08276253,6.13315527,-0.224483266,6.13315527,6.13313872
30.344718,6.08276253,6.13367174,-0.225630698,6.13367174,6.13365513
30.355209,5.56776436,6.13418154,-0.752606918,6.13418154,6.13416485
30.365701,6,6.13468476,-0.366994223,6.13468476,6.13466801
30.376192,5.74456265,6.13518134,-0.624994952,6.13518134,6.13516451
30.386684,5.56776436,6.13567138,-0.753596054,6.13567138,6.13565448
30.397176,6.92820323,6.13615485,0.889971001,6.13615485,6.13613788
30.407667,6.164414,6.13663172,0.166680169,6.13663172,6.13661469
30.418159,5.47722558,6.13710211,-0.81232785,6.13710211,6.137085
30.42865,6.164414,6.13756594,0.163853796,6.13756594,6.13754875
30.439142,6.78232998,6.1380233,0.802687161,6.1380233,6.13800605
30.449634,6.92820323,6.13847419,0.888667004,6.13847419,6.13845686
30.460125,5.91607978,6.13891856,-0.47205802,6.13891856,6.13890116
30.470617,7.28010989,6.13935652,1.06806057,6.13935652,6.13933904
30.481108,6.244998,6.139788,0.324360906,6.139788,6.13977045
30.4916,5.74456265,6.14021311,-0.629007519,6.14021311,6.14019548
30.502092,5.83095189,6.1406318,-0.556488912,6.1406318,6.1406141
30.512583,5.47722558,6.14104408,-0.814750576,6.14104408,6.1410263
30.523075,5.83095189,6.14145002,-0.557223582,6.14145002,6.14143216
30.533566,6,6.14184956,-0.376629207,6.14184956,6.14183163
30.544058,6.70820393,6.1422428,0.752303882,6.1422428,6.14222479
30.55455,5.74456265,6.14262972,-0.630925569,6.14262972,6.14261163
30.565041,5.65685425,6.14301029,-0.69724891,6.14301029,6.14299212
30.575533,5.74456265,6.14338461,-0.631523524,6.14338461,6.14336636
30.586024,6.78232998,6.14375261,0.799110362,6.14375261,6.14373428
30.596516,6.8556546,6.14411439,0.843528429,6.14411439,6.14409598
30.607008,6.4807407,6.14446992,0.57988859,6.14446992,6.14445143
30.617499,6.4807407,6.14481919,0.579587361,6.14481919,6.14480062
30.627991,6.55743852,6.14516228,0.642087415,6.14516228,6.14514362
30.638482,6.32455532,6.14549913,0.423150316,6.14549913,6.14548039
30.648974,6.164414,6.14582983,0.136323763,6.14582983,6.14581101
30.659466,6,6.14615437,-0.382301412,6.14615437,6.14613546
30.669957,6.164414,6.14647272,0.133945069,6.14647272,6.14645373
30.680449,5.09901951,6.14678497,-1.02360415,6.14678497,6.14676589
30.69094,6,6.14709106,-0.383524523,6.14709106,6.1470719
30.701432,5.83095189,6.14739108,-0.562529271,6.14739108,6.14737183
30.711924,5.65685425,6.147685,-0.700593141,6.147685,6.14766566
30.722415,5.91607978,6.14797282,-0.481552733,6.14797282,6.14795339
30.732907,5,6.1482546,-1.07156642,6.1482546,6.14823509
30.743398,6.32455532,6.14853032,0.41955334,6.14853032,6.14851071
30.75389,5.56776436,6.14880002,-0.762256951,6.14880002,6.14878033
30.764382,4.89897949,6.14906371,-1.11807166,6.14906371,6.14904393
30.774873,5.29150262,6.14932138,-0.926185055,6.14932138,6.14930151
30.785365,5.56776436,6.14957308,-0.762763868,6.14957308,6.14955312
30.795856,5.74456265,6.14981879,-0.636597315,6.14981879,6.14979873
30.806348,5.19615242,6.15005856,-0.976681187,6.15005856,6.15003841
30.81684,5.83095189,6.15029239,-0.565102203,6.15029239,6.15027215
30.827331,5.83095189,6.15052028,-0.565303797,6.15052028,6.15049994
30.837823,6.40312424,6.15074227,0.502376321,6.15074227,6.15072184
30.848314,6.55743852,6.15095834,0.637557983,6.15095834,6.15093781
30.858806,6.40312424,6.15116855,0.501951874,6.15116855,6.15114793
30.869298,6.55743852,6.1513729,0.63723279,6.1513729,6.15135217
30.879789,6.08276253,6.15157136,-0.262314381,6.15157136,6.15155054
30.890281,5.91607978,6.15176401,-0.485473202,6.15176401,6.15174309
30.900772,5.83095189,6.15195082,-0.566567668,6.15195082,6.1519298
30.911264,6,6.15213183,-0.390040805,6.15213183,6.15211071
30.921756,5.65685425,6.15230705,-0.703884078,6.15230705,6.15228583
30.932247,5.83095189,6.15247646,-0.567031364,6.15247646,6.15245514
30.942739,6.244998,6.15264013,0.303904376,6.15264013,6.15261871
30.95323,6.08276253,6.15279803,-0.264642203,6.15279803,6.1527765
30.963722,6.78232998,6.1529502,0.793334598,6.1529502,6.15292857
30.974214,6.164414,6.15309665,0.106383061,6.15309665,6.15307491
30.984705,6,6.15323737,-0.391455452,6.15323737,6.15321553
30.995197,6.164414,6.15337241,0.105078977,6.15337241,6.15335047
31.005688,6.40312424,6.15350176,0.499622338,6.15350176,6.15347971
31.01618,5.47722558,6.15362545,-0.82243533,6.15362545,6.15360329
31.026672,6,6.15374348,-0.392101366,6.15374348,6.15372121
31.037163,5.74456265,6.15385586,-0.639760281,6.15385586,6.15383349
31.047655,7.28010989,6.15396263,1.06120086,6.15396263,6.15394015
31.058146,6.08276253,6.15406378,-0.267022932,6.15406378,6.15404118
31.068638,5.47722558,6.15415933,-0.822759842,6.15415933,6.15413662
31.07913,6.244998,6.1542493,0.301245242,6.1542493,6.15422648
31.089621,6,6.15433369,-0.392853272,6.15433369,6.15431076
31.100113,6.244998,6.15441254,0.30097419,6.15441254,6.15438949
31.110604,6.8556546,6.15448583,0.837358212,6.15448583,6.15446266
31.121096,5.83095189,6.15455359,-0.568859999,6.15455359,6.15453031
31.131588,6.244998,6.15461584,0.300636249,6.15461584,6.15459245
31.142079,6.08276253,6.15467259,-0.268160505,6.15467259,6.15464907
31.152571,6.32455532,6.15472385,0.412106145,6.15472385,6.15470021
31.163062,6.92820323,6.15476962,0.879450741,6.15476962,6.15474587
31.173554,6,6.15480994,-0.393458949,6.15480994,6.15478607
31.184046,6.164414,6.15484482,0.0978222206,6.15484482,6.15482082
31.194537,6.08276253,6.15487425,-0.268536253,6.15487425,6.15485013
31.205029,6.40312424,6.15489826,0.498222815,6.15489826,6.15487402
31.21552,6.8556546,6.15491687,0.83710079,6.15491687,6.1548925
31.226012,6,6.15493008,-0.393611582,6.15493008,6.15490558
31.236504,6.63324958,6.15493791,0.691600806,6.15493791,6.15491329
31.246995,6.4807407,6.15494036,0.57078922,6.15494036,6.15491562
31.257487,6,6.15493747,-0.39362097,6.15493747,6.15491259
31.267978,6.55743852,6.15492923,0.634436202,6.15492923,6.15490422
31.27847,5.56776436,6.15491566,-0.766257985,6.15491566,6.15489053
31.288962,6.32455532,6.15489678,0.411896276,6.15489678,6.15487151
31.299453,5.83095189,6.15487259,-0.569140315,6.15487259,6.15484719
31.309945,6.55743852,6.15484312,0.634504065,6.15484312,6.15481758
31.320436,6.78232998,6.15480837,0.792162621,6.15480837,6.1547827
31.330928,6.164414,6.15476835,0.0982122971,6.15476835,6.15474254
31.34142,5.83095189,6.15472308,-0.569008949,6.15472308,6.15469714
31.351911,6.55743852,6.15467258,0.634638439,6.15467258,6.15464649
31.362403,6.55743852,6.15461684,0.634682346,6.15461684,6.15459062
31.372894,5.65685425,6.1545559,-0.705479734,6.1545559,6.15452954
31.383386,5.91607978,6.15448976,-0.488272442,6.15448976,6.15446326
31.393878,6.78232998,6.15441843,0.792408704,6.15441843,6.15439178
31.404369,6.55743852,6.15434193,0.634898884,6.15434193,6.15431514
31.414861,6.40312424,6.15426027,0.498862678,6.15426027,6.15423333
31.425352,6.32455532,6.15417346,0.412773378,6.15417346,6.15414638
31.435844,6.4807407,6.15408151,0.571541066,6.15408151,6.15405428
31.446336,4.58257569,6.15398443,-1.25355843,6.15398443,6.15395706
31.456827,6.78232998,6.15388226,0.792746948,6.15388226,6.15385473
31.467319,5.47722558,6.15377498,-0.822526231,6.15377498,6.1537473
31.47781,5.47722558,6.15366262,-0.822457928,6.15366262,6.15363479
31.488302,6.8556546,6.15354518,0.8379197,6.15354518,6.15351719
31.498794,6.92820323,6.15342267,0.880216198,6.15342267,6.15339453
31.509285,7.54983444,6.15329514,1.18175264,6.15329514,6.15326684
31.519777,5.47722558,6.15316255,-0.822153864,6.15316255,6.15313409
31.530268,5.74456265,6.15302495,-0.63911056,6.15302495,6.15299634
31.54076,6.63324958,6.15288233,0.69308531,6.15288233,6.15285356
31.551252,7.14142843,6.15273471,0.994330787,6.15273471,6.15270578
31.561743,6.40312424,6.15258212,0.500541821,6.15258212,6.15255302
31.572235,6.08276253,6.15242454,-0.263935623,6.15242454,6.15239528
31.582726,6.164414,6.15226202,0.110236047,6.15226202,6.15223259
31.593218,5.91607978,6.15209453,-0.485813485,6.15209453,6.15206493
31.60371,7.14142843,6.1519221,0.994739329,6.1519221,6.15189233
31.614201,6.92820323,6.15174476,0.88116881,6.15174476,6.15171482
31.624693,6.92820323,6.15156249,0.881272228,6.15156249,6.15153238
31.635184,5.56776436,6.15137534,-0.763944354,6.15137534,6.15134506
31.645676,5.74456265,6.15118328,-0.637668123,6.15118328,6.15115282
31.656168,6.244998,6.15098635,0.306613198,6.15098635,6.15095571
31.666659,6.70820393,6.15078456,0.74660523,6.15078456,6.15075375
31.677151,5,6.15057791,-1.07264995,6.15057791,6.15054692
31.687642,7.14142843,6.15036643,0.995520966,6.15036643,6.15033526
31.698134,5.56776436,6.15015011,-0.763142023,6.15015011,6.15011875
31.708626,6.32455532,6.14992897,0.417883181,6.14992897,6.14989743
31.719117,6.32455532,6.14970304,0.418153416,6.14970304,6.14967131
31.729609,6.164414,6.1494723,0.122236264,6.1494723,6.14944038
31.7401,6.244998,6.1492368,0.309453068,6.1492368,6.14920469
31.750592,5.56776436,6.1489965,-0.762385821,6.1489965,6.14896421
31.761084,5.91607978,6.14875145,-0.482360515,6.14875145,6.14871896
31.771575,6.63324958,6.14850167,0.696238398,6.14850167,6.14846899
31.782067,6.40312424,6.14824714,0.504853542,6.14824714,6.14821426
31.792558,7.14142843,6.1479879,0.996714866,6.1479879,6.14795482
31.80305,6.164414,6.14772393,0.12919005,6.14772393,6.14769065
31.813542,5.91607978,6.14745526,-0.481015051,6.14745526,6.14742178
31.824033,5.56776436,6.14718193,-0.761194828,6.14718193,6.14714824
31.834525,5.74456265,6.14690389,-0.634303748,6.14690389,6.14687
31.845016,6.78232998,6.14662122,0.797313469,6.14662122,6.14658712
31.855508,6.55743852,6.14633386,0.641174442,6.14633386,6.14629955
31.866,5.83095189,6.14604186,-0.561328748,6.14604186,6.14600734
31.876491,6.164414,6.14574526,0.136633626,6.14574526,6.14571052
31.886983,6.4807407,6.145444,0.579048094,6.145444,6.14540905
31.897474,6.4807407,6.14513817,0.579312114,6.14513817,6.14510301
31.907966,6.32455532,6.14482772,0.423942926,6.14482772,6.14479233
31.918458,6.40312424,6.14451267,0.508538657,6.14451267,6.14447706
31.928949,5.56776436,6.14419308,-0.759229031,6.14419308,6.14415725
31.939441,6,6.1438689,-0.379300545,6.1438689,6.14383285
31.949932,6.4807407,6.1435402,0.580689674,6.1435402,6.14350392
31.960424,6.32455532,6.14320693,0.425850201,6.14320693,6.14317041
31.970916,5.83095189,6.14286912,-0.558495503,6.14286912,6.14283237
31.981407,5.91607978,6.14252683,-0.475864528,6.14252683,6.14248985
31.991899,6.55743852,6.14218,0.644405558,6.14218,6.14214278
32.00239,5.29150262,6.14182871,-0.922131274,6.14182871,6.14179125
32.012882,6.40312424,6.1414729,0.511518662,6.1414729,6.1414352
32.023374,7.14142843,6.14111261,1.0001579,6.14111261,6.14107467
32.033865,6.164414,6.1407479,0.153837927,6.1407479,6.1407097
32.044357,7.41619849,6.14037869,1.12952193,6.14037869,6.14034025
32.054848,6.78232998,6.14000509,0.801451743,6.14000509,6.1399664
32.06534,6.55743852,6.13962701,0.646383408,6.13962701,6.13958807
32.075832,5.74456265,6.13924452,-0.628237117,6.13924452,6.13920532
32.086323,6,6.13885766,-0.372636093,6.13885766,6.1388182
32.096815,5.83095189,6.13846636,-0.554539868,6.13846636,6.13842664
32.107306,6.70820393,6.13807071,0.755071665,6.13807071,6.13803073
32.117798,6.8556546,6.13767065,0.847339335,6.13767065,6.1376304
32.12829,6.40312424,6.13726623,0.515614208,6.13726623,6.13722571
32.138781,5.74456265,6.13685749,-0.626334447,6.13685749,6.13681669
32.149273,5.74456265,6.13644436,-0.626004565,6.13644436,6.13640329
32.159764,5.65685425,6.13602695,-0.692223011,6.13602695,6.1359856
32.170256,6.244998,6.13560517,0.330745869,6.13560517,6.13556354
32.180748,6.164414,6.13517908,0.170982233,6.13517908,6.13513717
32.191239,6.08276253,6.13474873,-0.228004824,6.13474873,6.13470654
32.201731,6.63324958,6.13431405,0.706353687,6.13431405,6.13427157
32.212222,6.164414,6.13387513,0.174753742,6.13387513,6.13383236
32.222714,5.83095189,6.1334319,-0.549981827,6.1334319,6.13338883
32.233206,6,6.13298442,-0.364670287,6.13298442,6.13294105
32.243697,6.164414,6.13253273,0.178553285,6.13253273,6.13248906
32.254189,5.74456265,6.13207676,-0.622506313,6.13207676,6.13203278
32.26468,6.40312424,6.1316166,0.521063945,6.1316166,6.13157232
32.275172,6.40312424,6.13115219,0.521509395,6.13115219,6.13110759
32.285664,6.40312424,6.13068357,0.521958494,6.13068357,6.13063866
32.296155,5.38516481,6.1302108,-0.863160467,6.1302108,6.13016557
32.306647,6.244998,6.1297338,0.339505817,6.1297338,6.12968825
32.317138,5.65685425,6.12925267,-0.687312462,6.12925267,6.1292068
32.32763,6.08276253,6.12876733,-0.214487298,6.12876733,6.12872113
32.338122,5.65685425,6.12827784,-0.686602934,6.12827784,6.12823131
32.348613,6.78232998,6.12778425,0.809040007,6.12778425,6.12773738
32.359105,6.244998,6.12728648,0.343091121,6.12728648,6.12723928
32.369596,6.40312424,6.12678464,0.525680131,6.12678464,6.12673709
32.380088,6.244998,6.12627863,0.344556768,6.12627863,6.12623074
32.39058,6.92820323,6.12576853,0.895787199,6.12576853,6.12572028
32.401071,4.12310563,6.12525437,-1.41497306,6.12525437,6.12520578
32.411563,6.244998,6.12473609,0.346787983,6.12473609,6.12468714
32.422054,6.244998,6.12421379,0.347540226,6.12421379,6.12416447
32.432546,6,6.12368737,-0.351692159,6.12368737,6.12363769
32.443038,6.70820393,6.12315691,0.764883667,6.12315691,6.12310686
32.453529,6.4807407,6.12262245,0.598429819,6.12262245,6.12257203
32.464021,6.244998,6.12208391,0.350591054,6.12208391,6.12203311
32.474512,6.08276253,6.1215414,-0.196923517,6.1215414,6.12149022
32.485004,6.40312424,6.12099483,0.531158553,6.12099483,6.12094326
32.495496,6.164414,6.12044426,0.209689646,6.12044426,6.12039229
32.505987,5.47722558,6.11988974,-0.801663376,6.11988974,6.11983739
32.516479,6.63324958,6.1193312,0.716881011,6.1193312,6.11927844
32.52697,6.164414,6.11876873,0.213647538,6.11876873,6.11871557
32.537462,6.244998,6.11820225,0.356083902,6.11820225,6.11814868
32.547954,6.244998,6.11763182,0.356883982,6.11763182,6.11757784
32.558445,5.83095189,6.1170575,-0.534888408,6.1170575,6.1170031
32.568937,6.70820393,6.1164792,0.769236461,6.1164792,6.11642437
32.579428,6.244998,6.11589703,0.359306235,6.11589703,6.11584177
32.58992,6.164414,6.11531089,0.221592224,6.11531089,6.1152552
32.600412,6.164414,6.11472085,0.222919615,6.11472085,6.11466472
32.610903,5.65685425,6.11412697,-0.676219433,6.11412697,6.1140704
32.621395,5.38516481,6.11352915,-0.853442645,6.11352915,6.11347213
32.631886,6.08276253,6.11292752,-0.173680719,6.11292752,6.11287004
32.642378,5.83095189,6.11232197,-0.530443282,6.11232197,6.11226403
32.65287,5.83095189,6.11171256,-0.529868539,6.11171256,6.11165416
32.663361,5.09901951,6.11109937,-1.0060218,6.11109937,6.1110405
32.673853,6.164414,6.11048229,0.232232031,6.11048229,6.11042293
32.684344,6.244998,6.10986144,0.367609251,6.10986144,6.1098016
32.694836,6.164414,6.10923671,0.234898468,6.10923671,6.10917639
32.705328,5.74456265,6.10860818,-0.603361862,6.10860818,6.10854736
32.715819,6.40312424,6.10797592,0.543275546,6.10797592,6.1079146
32.726311,7,6.10733981,0.944806961,6.10733981,6.10727798
32.736802,7.48331477,6.10669998,1.17329229,6.10669998,6.10663764
32.747294,6.55743852,6.10605632,0.671849834,6.10605632,6.10599346
32.757786,6.08276253,6.10540891,-0.150487149,6.10540891,6.10534553
32.768277,6.4807407,6.10475781,0.613174433,6.10475781,6.10469389
32.778769,6.08276253,6.10410291,-0.146083483,6.10410291,6.10403845
32.78926,5.91607978,6.10344435,-0.432856288,6.10344435,6.10337934
32.799752,6.92820323,6.102782,0.908526956,6.102782,6.10271644
32.810244,6.92820323,6.10211594,0.908893441,6.10211594,6.10204982
32.820735,6.244998,6.10144625,0.378882238,6.10144625,6.10137956
32.831227,7,6.1007728,0.948275911,6.1007728,6.10070553
32.841718,6.55743852,6.10009573,0.676271243,6.10009573,6.10002788
32.85221,6.08276253,6.09941492,-0.129044157,6.09941492,6.09934649
32.862702,6.8556546,6.09873046,0.870013876,6.09873046,6.09866142
32.873193,6.4807407,6.0980424,0.618626138,6.0980424,6.09797276
32.883685,6.63324958,6.09735063,0.732051192,6.09735063,6.09728038
32.894176,6.40312424,6.0966553,0.55359637,6.0966553,6.09658442
32.904668,6.92820323,6.09595627,0.912275705,6.09595627,6.09588476
32.91516,6.63324958,6.09525362,0.733482077,6.09525362,6.09518148
32.925651,7.14142843,6.09454744,1.02317202,6.09454744,6.09447465
32.936143,5.91607978,6.09383759,-0.421613334,6.09383759,6.09376414
32.946634,6,6.09312421,-0.305162604,6.09312421,6.0930501
32.957126,6.8556546,6.09240719,0.873640318,6.09240719,6.09233241
32.967618,6.08276253,6.0916866,-0.0944673134,6.0916866,6.09161114
32.978109,5.83095189,6.09096252,-0.50991237,6.09096252,6.09088636
32.988601,6.244998,6.09023482,0.393399521,6.09023482,6.09015795
32.999092,5.83095189,6.08950364,-0.508479834,6.08950364,6.08942606
33.009584,6.63324958,6.08876885,0.737889373,6.08876885,6.08869056
33.020076,6.55743852,6.08803055,0.685133547,6.08803055,6.08795152
33.030567,5.47722558,6.08728879,-0.781065438,6.08728879,6.08720903
33.041059,6.4807407,6.08654346,0.627851284,6.08654346,6.08646295
33.05155,5.56776436,6.08579471,-0.719743249,6.08579471,6.08571343
33.062042,6.70820393,6.08504239,0.789405816,6.08504239,6.08496034
33.072534,5.83095189,6.08428659,-0.503323652,6.08428659,6.08420375
33.083025,6.08276253,6.0835274,-0.027656258,6.0835274,6.08344376
33.093517,5.65685425,6.08276467,-0.652618128,6.08276467,6.08268023
33.104008,5.65685425,6.08199856,-0.652030913,6.08199856,6.0819133
33.1145,6.08276253,6.08122894,0.0391611326,6.08122894,6.08114284
33.124992,6.164414,6.08045588,0.289755288,6.08045588,6.08036894
33.135483,5,6.07967946,-1.03907626,6.07967946,6.07959167
33.145975,5.74456265,6.07889956,-0.578218743,6.07889956,6.0788109
33.156466,6.32455532,6.07811633,0.496426223,6.07811633,6.07802679
33.166958,5.65685425,6.07732962,-0.648440719,6.07732962,6.07723918
33.17745,6.40312424,6.07653952,0.571475915,6.07653952,6.07644817
33.187941,5.29150262,6.07574611,-0.88557523,6.07574611,6.07565385
33.198433,6.63324958,6.07494926,0.74719497,6.07494926,6.07485606
33.208924,5.91607978,6.07414912,-0.397579343,6.07414912,6.07405497
33.219416,6.244998,6.07334555,0.414309609,6.07334555,6.07325044
33.229908,6.40312424,6.07253863,0.574965745,6.07253863,6.07244254
33.240399,6.08276253,6.07172845,0.105043217,6.07172845,6.07163137
33.250891,6,6.07091487,-0.266298463,6.07091487,6.07081678
33.261382,7.14142843,6.07009805,1.03505091,6.07009805,6.06999893
33.271874,6.08276253,6.06927784,0.116123611,6.06927784,6.06917768
33.282366,6.70820393,6.06845432,0.79984349,6.06845432,6.06835311
33.292857,6.55743852,6.0676276,0.699864934,6.0676276,6.06752531
33.303349,5.47722558,6.06679751,-0.767835877,6.06679751,6.06669413
33.31384,6.244998,6.06596422,0.423123829,6.06596422,6.06585973
33.324332,5.91607978,6.06512759,-0.386067105,6.06512759,6.06502198
33.334824,5.19615242,6.0642877,-0.931737775,6.0642877,6.06418094
33.345315,6.55743852,6.06344465,0.70284698,6.06344465,6.06333672
33.355807,6.244998,6.06259827,0.427082813,6.06259827,6.06248916
33.366298,5.83095189,6.06174874,-0.480413204,6.06174874,6.06163843
33.37679,5.29150262,6.06089591,-0.877150664,6.06089591,6.06078438
33.387282,5.74456265,6.06003986,-0.561673587,6.06003986,6.05992709
33.397773,5.74456265,6.0591807,-0.560908236,6.0591807,6.05906666
33.408265,6.8556546,6.05831825,0.892936925,6.05831825,6.05820293
33.418756,5.56776436,6.0574527,-0.699777346,6.0574527,6.05733607
33.429248,5.47722558,6.05658388,-0.761155903,6.05658388,6.05646593
33.43974,5.83095189,6.0557119,-0.474088604,6.0557119,6.0555926
33.450231,6.32455532,6.05483684,0.519344282,6.05483684,6.05471616
33.460723,6.32455532,6.05395854,0.520189178,6.05395854,6.05383647
33.471214,6.32455532,6.05307718,0.521035641,6.05307718,6.05295369
33.481706,6.32455532,6.0521926,0.521883816,6.0521926,6.05206766
33.492198,6.164414,6.0513049,0.336316969,6.0513049,6.05117849
33.502689,6.40312424,6.05041416,0.593893994,6.05041416,6.05028625
33.513181,5.91607978,6.04952023,-0.365295014,6.04952023,6.0493908
33.523672,6.40312424,6.04862328,0.595399827,6.04862328,6.0484923
33.534164,6,6.04772316,-0.218456312,6.04772316,6.0475906
33.544656,6.32455532,6.04681995,0.527006041,6.04681995,6.04668578
33.555147,5.47722558,6.04591376,-0.754114171,6.04591376,6.04577795
33.565639,6.164414,6.04500441,0.345556929,6.04500441,6.04486694
33.57613,6.78232998,6.0440921,0.85920771,6.0440921,6.04395292
33.586622,5.74456265,6.04317664,-0.546455851,6.04317664,6.04303574
33.597114,5.74456265,6.04225815,-0.545614796,6.04225815,6.04211549
33.607605,6.08276253,6.04133672,0.203533319,6.04133672,6.04119226
33.618097,6.164414,6.04041217,0.352138933,6.04041217,6.04026589
33.628588,5.91607978,6.03948471,-0.351290369,6.03948471,6.03933656
33.63908,4.47213595,6.03855415,-1.25156629,6.03855415,6.0384041
33.649572,6.164414,6.03762059,0.356080628,6.03762059,6.0374686
33.660063,6.244998,6.03668414,0.456414135,6.03668414,6.03653018
33.670555,6.55743852,6.03574461,0.722283815,6.03574461,6.03558864
33.681046,5.56776436,6.03480222,-0.683401677,6.03480222,6.03464419
33.691538,6,6.03385677,-0.184002079,6.03385677,6.03369665
33.70203,5.91607978,6.03290836,-0.341801962,6.03290836,6.03274612
33.712521,6.92820323,6.03195711,0.946702762,6.03195711,6.03179269
33.723013,6.70820393,6.03100283,0.822922291,6.03100283,6.0308362
33.733504,6.164414,6.03004573,0.366562789,6.03004573,6.02987682
33.743996,6.244998,6.02908561,0.464663738,6.02908561,6.02891439
33.754488,6.244998,6.02812259,0.465698844,6.02812259,6.02794901
33.764979,6.55743852,6.02715676,0.728204482,6.02715676,6.02698078
33.775471,6.8556546,6.02618795,0.910750598,6.02618795,6.02600951
33.785962,6.08276253,6.02521635,0.239887843,6.02521635,6.02503541
33.796454,6.164414,6.02424179,0.374395791,6.02424179,6.02405829
33.806946,5.74456265,6.02326438,-0.527922086,6.02326438,6.02307826
33.817437,6.32455532,6.0222842,0.54979189,6.0222842,6.02209541
33.827929,5.91607978,6.02130108,-0.324378331,6.02130108,6.02110957
33.83842,6.08276253,6.02031523,0.249894575,6.02031523,6.02012092
33.848912,6,6.01932646,-0.139019643,6.01932646,6.0191293
33.859404,6.08276253,6.01833488,0.253826032,6.01833488,6.01813481
33.869895,6.40312424,6.01734058,0.62111485,6.01734058,6.01713754
33.880387,7,6.01634339,0.991794639,6.01634339,6.01613731
33.890878,5.65685425,6.01534352,-0.598739733,6.01534352,6.01513432
33.90137,7.28010989,6.01434077,1.12506405,6.01434077,6.01412839
33.911862,5.83095189,6.01333525,-0.427063647,6.01333525,6.01311962
33.922353,5.47722558,6.01232708,-0.731506324,6.01232708,6.01210811
33.932845,6.8556546,6.01131606,0.91887896,6.01131606,6.01109368
33.943336,6.8556546,6.0103024,0.91943037,6.0103024,6.01007654
33.953828,5.09901951,6.00928591,-0.954078821,6.00928591,6.00905648
33.96432,5.83095189,6.00826671,-0.421087655,6.00826671,6.00803363
33.974811,5.74456265,6.0072449,-0.512525364,6.0072449,6.00700807
33.985303,5.83095189,6.00622029,-0.418650683,6.00622029,6.00597963
33.995794,5.74456265,6.00519309,-0.510519781,6.00519309,6.00494852
34.006286,6.08276253,6.00416312,0.280355858,6.00416312,6.00391452
34.016778,7,6.00313049,0.99843353,6.00313049,6.00287777
34.027269,6.32455532,6.00209529,0.567855638,6.00209529,6.00183835
34.037761,6.4807407,6.00105736,0.692591755,6.00105736,6.00079609
34.048252,6.8556546,6.00001689,0.925006871,6.00001689,5.99975118
34.058744,6.244998,5.9989737,0.496008367,5.9989737,5.99870344
34.069236,6,5.9979279,0.0455203775,5.9979279,5.99765297
34.079727,6.08276253,5.99687959,0.293057909,5.99687959,5.99659987
34.090219,6.164414,5.9958286,0.410591526,5.9958286,5.99554397
34.10071,5.83095189,5.99477513,-0.404750836,5.99477513,5.99448545
34.111202,6.244998,5.993719,0.501277365,5.993719,5.99342414
34.121694,5.91607978,5.99266032,-0.276731878,5.99266032,5.99236014
34.132185,6.63324958,5.99159919,0.80103083,5.99159919,5.99129355
34.142677,5.74456265,5.99053544,-0.495956439,5.99053544,5.99022418
34.153168,6,5.98946927,0.102619353,5.98946927,5.98915224
34.16366,5.65685425,5.9884005,-0.575800527,5.9884005,5.98807754
34.174152,6.55743852,5.98732923,0.755055819,5.98732923,5.98700018
34.184643,7,5.9862556,1.00684875,5.9862556,5.98592028
34.195135,5.74456265,5.9851794,-0.490527016,5.9851794,5.98483763
34.205626,6.164414,5.98410086,0.424632956,5.98410086,5.98375245
34.216118,5,5.98301977,-0.991473537,5.98301977,5.98266453
34.22661,6.40312424,5.98193627,0.648989956,5.98193627,5.981574
34.237101,6,5.98085047,0.138381811,5.98085047,5.98048096
34.247593,5.29150262,5.97976218,-0.829614103,5.97976218,5.97938521
34.258084,7.14142843,5.97867162,1.07831202,5.97867162,5.97828696
34.268576,5.91607978,5.9775786,-0.247989552,5.9775786,5.97718602
34.279068,5.91607978,5.97648324,-0.245771149,5.97648324,5.97608249
34.289559,6.4807407,5.97538566,0.710883278,5.97538566,5.97497648
34.300051,5.91607978,5.97428568,-0.241258977,5.97428568,5.9738678
34.310542,5.74456265,5.97318351,-0.478143141,5.97318351,5.97275667
34.321034,6.4807407,5.97207897,0.713205249,5.97207897,5.97164286
34.331526,6.78232998,5.97097218,0.900754017,5.97097218,5.97052651
34.342017,6,5.96986328,0.173599319,5.96986328,5.96940772
34.352509,5.91607978,5.96875206,-0.22950441,5.96875206,5.96828629
34.363,5.83095189,5.96763876,-0.369711867,5.96763876,5.96716244
34.373492,5.65685425,5.96652319,-0.556479061,5.96652319,5.96603596
34.383984,6,5.96540549,0.185995991,5.96540549,5.96490696
34.394475,6.40312424,5.96428578,0.662448833,5.96428578,5.96377556
34.404967,6.32455532,5.96316388,0.601158418,5.96316388,5.96264155
34.415458,5.47722558,5.96204002,-0.696286179,5.96204002,5.96150515
34.42595,5.83095189,5.96091402,-0.360502598,5.96091402,5.96036615
34.436442,5.83095189,5.95978601,-0.3589347,5.95978601,5.95922468
34.446933,6.08276253,5.95865614,0.352287365,5.95865614,5.95808084
34.457425,5.83095189,5.95752422,-0.355770048,5.95752422,5.95693442
34.467916,6.164414,5.9563905,0.456095936,5.9563905,5.95578565
34.478408,5.91607978,5.9552548,-0.197926787,5.9552548,5.95463432
34.4889,6.08276253,5.95411726,0.358671542,5.95411726,5.95348054
34.499391,6,5.95297803,0.216845508,5.95297803,5.95232443
34.509883,6.70820393,5.95183693,0.869693626,5.95183693,5.95116578
34.520374,6.244998,5.95069423,0.542497713,5.95069423,5.9500048
34.530866,6.40312424,5.94954975,0.673479387,5.94954975,5.9488413
34.541358,5.83095189,5.94840366,-0.342712361,5.94840366,5.94767539
34.551849,6.78232998,5.9472561,0.913823768,5.9472561,5.94650718
34.562341,6.244998,5.94610693,0.546709312,5.94610693,5.94533645
34.572832,5.19615242,5.94495641,-0.865334607,5.94495641,5.94416345
34.583324,6.40312424,5.94380438,0.677731404,5.94380438,5.94298794
34.593816,5.74456265,5.94265103,-0.445071212,5.94265103,5.94181006
34.604307,5.56776436,5.94149653,-0.61133638,5.94149653,5.94062991
34.614799,6.244998,5.94034074,0.551957656,5.94034074,5.93944729
34.62529,6.08276253,5.93918397,0.378917623,5.93918397,5.93826242
34.635782,6.08276253,5.93802606,0.380442463,5.93802606,5.93707508
34.646274,5.74456265,5.93686724,-0.438525476,5.93686724,5.93588539
34.656765,6.08276253,5.93570771,0.383477279,5.93570771,5.93469348
34.667257,5.38516481,5.93454735,-0.741203442,5.93454735,5.93349912
34.677748,5.83095189,5.93338651,-0.320054079,5.93338651,5.93230254
34.68824,6.40312424,5.93222509,0.686220921,5.93222509,5.93110353
34.698732,5.38516481,5.93106333,-0.738849458,5.93106333,5.92990221
34.709223,6.4807407,5.9299015,0.742185423,5.9299015,5.92869869
34.719715,6.244998,5.92873953,0.562368625,5.92873953,5.92749276
34.730206,6.63324958,5.92757782,0.840042713,5.92757782,5.92628464
34.740698,6.244998,5.92641634,0.564430382,5.92641634,5.92507413
34.75119,5.74456265,5.92525541,-0.425079717,5.92525541,5.92386133
34.761681,5.65685425,5.92409537,-0.516953693,5.92409537,5.92264637
34.772173,5.91607978,5.92293625,-0.0828037577,5.92293625,5.92142902
34.782664,6.70820393,5.92177853,0.886806292,5.92177853,5.92020953
34.793156,5.91607978,5.92062232,-0.0673983105,5.92062232,5.91898767
34.803648,6.78232998,5.91946804,0.928903625,5.91946804,5.91776356
34.814139,6.55743852,5.91831618,0.799451277,5.91831618,5.91653732
34.824631,5.65685425,5.91716693,-0.51020847,5.91716693,5.91530873
34.835122,5.65685425,5.91602097,-0.509084197,5.91602097,5.91407802
34.845614,5.74456265,5.91487858,-0.412693511,5.91487858,5.91284497
34.856106,5.09901951,5.91374044,-0.902618929,5.91374044,5.91160971
34.866597,7,5.9126073,1.04278123,5.9126073,5.91037235
34.877089,6.32455532,5.91147965,0.64270963,5.91147965,5.90913266
34.88758,6,5.91035851,0.29940188,5.91035851,5.9078909
34.898072,5.91607978,5.90924458,0.0826752791,5.90924458,5.90664683
34.908564,6.63324958,5.90813899,0.851534256,5.90813899,5.90540057
34.919055,6.08276253,5.90704302,0.419189113,5.90704302,5.90415225
34.929547,6.164414,5.90595779,0.508385891,5.90595779,5.90290163
34.940038,5.91607978,5.90488504,0.105805209,5.90488504,5.90164897
34.95053,6.40312424,5.90382633,0.706610154,5.90382633,5.90039403
34.961022,7,5.90278378,1.04748089,5.90278378,5.89913693
34.971513,5.83095189,5.90175986,-0.266097656,5.90175986,5.8978778
34.982005,6.32455532,5.9007571,0.650997867,5.9007571,5.89661642
34.992496,6.8556546,5.8997789,0.977688958,5.8997789,5.89535301
35.002988,6.92820323,5.89882886,1.01458089,5.89882886,5.89408736
35.01348,5.56776436,5.89791152,-0.574584332,5.89791152,5.89281958
35.023971,6.63324958,5.89703228,0.858031062,5.89703228,5.8915498
35.034463,5.29150262,5.89619732,-0.777621177,5.89619732,5.89027779
35.044954,6,5.89541445,0.323396893,5.89541445,5.8890038
35.055446,6.55743852,5.89469281,0.814091957,5.89469281,5.88772759
35.065938,6.40312424,5.89404383,0.713498709,5.89404383,5.88644928
35.076429,6,5.89348156,0.326371632,5.89348156,5.88516901
35.086921,6.55743852,5.8930233,0.815116694,5.8930233,5.88388654
35.097412,5.74456265,5.89269101,-0.38487448,5.89269101,5.88260211
35.107904,5.91607978,5.8925124,0.15351672,5.8925124,5.88131549
35.118396,7.21110255,5.89252317,1.14829412,5.89252317,5.88002681
35.128887,5.74456265,5.89276968,-0.38497667,5.89276968,5.8787362
35.139379,6.63324958,5.89331318,0.860195558,5.89331318,5.87744341
35.14987,6.55743852,5.89423555,0.814372747,5.89423555,5.87614871
35.160362,6.08276253,5.89564872,0.432566539,5.89564872,5.87485184
35.170854,6.70820393,5.89770793,0.900275512,5.89770793,5.87355294
35.181345,6.32455532,5.90063378,0.651092576,5.90063378,5.87225213
35.191837,6,5.90475192,0.308622884,5.90475192,5.87094918
35.202328,6.164414,5.91057659,0.503822801,5.91057659,5.86964434
35.21282,5.83095189,5.91907697,-0.296858674,5.91907697,5.86833737
35.223312,6.244998,5.93263439,0.558894986,5.93263439,5.8670284
35.233803,5.74456265,5.95831909,-0.462338017,5.95831909,5.86571756
35.244295,6,6.01648762,-0.128404145,6.01648762,5.8644046
35.254786,6.40312424,6.15354025,0.499583813,6.15354025,5.86308978
35.265278,6.63324958,6.43707533,0.442915629,6.43707533,5.86177285
35.27577,6.70820393,6.89486784,-0.432046182,6.89486784,5.86045396
35.286261,7.14142843,7.42265854,-0.530311339,7.42265854,5.85913322
35.296753,7.81024968,7.7771327,0.181980698,7.7771327,5.8578104
35.307244,7.14142843,7.74142649,-0.774595418,7.74142649,5.85648574
35.317736,7,7.34088787,-0.583856037,7.34088787,5.85515902
35.328228,6.55743852,6.81056379,-0.503115564,6.81056379,5.85383035
35.338719,6.164414,6.3755027,-0.4594439,6.3755027,5.85249987
35.349211,6.40312424,6.11517462,0.536609368,6.11517462,5.85116733
35.359702,6.08276253,5.99067891,0.303452827,5.99067891,5.84983299
35.370194,6.70820393,5.93633119,0.878562883,5.93633119,5.8484966
35.380686,6,5.91036897,0.299384425,5.91036897,5.84715831
35.391177,6.08276253,5.89509154,0.433210099,5.89509154,5.84581823
35.401669,5.83095189,5.88439828,-0.231184745,5.88439828,5.84447612
35.41216,5.83095189,5.87620267,-0.212722296,5.87620267,5.84313224
35.422652,6.55743852,5.86962433,0.829345641,5.86962433,5.84178634
35.433144,6.164414,5.86418384,0.547932629,5.86418384,5.84043856
35.443635,5.56776436,5.8595746,-0.540194631,5.8595746,5.83908903
35.454127,5.56776436,5.85558602,-0.536490127,5.85558602,5.8377375
35.464618,6.08276253,5.85207087,0.480303718,5.85207087,5.83638423
35.47511,6.08276253,5.84892166,0.483570962,5.84892166,5.83502896
35.485602,6.4807407,5.84606015,0.796668406,5.84606015,5.83367184
35.496093,6,5.84342779,0.395692062,5.84342779,5.832313
35.506585,6.4807407,5.84097942,0.799850787,5.84097942,5.83095219
35.517076,6.244998,5.83868109,0.637429924,5.83868109,5.82958966
35.527568,6,5.83650554,0.404344485,5.83650554,5.82822517
35.53806,7.28010989,5.83443181,1.20236354,5.83443181,5.82685886
35.548551,6.8556546,5.83244322,1.01153912,5.83244322,5.82549085
35.559043,6.164414,5.83052579,0.577830608,5.83052579,5.8241209
35.569534,5.29150262,5.82866887,-0.732916261,5.82866887,5.82274926
35.580026,6.08276253,5.82686306,0.505865073,5.82686306,5.82137569
35.590518,6.08276253,5.82510109,0.507603623,5.82510109,5.82000032
35.601009,6.55743852,5.82337694,0.856773938,5.82337694,5.81862329
35.611501,6.244998,5.82168511,0.650625001,5.82168511,5.81724434
35.621992,5.56776436,5.82002155,-0.502252119,5.82002155,5.81586373
35.632484,5.65685425,5.81838228,-0.401905503,5.81838228,5.81448122
35.642976,6.4807407,5.81676432,0.814847455,5.81676432,5.81309694
35.653467,5.47722558,5.81516515,-0.581325703,5.81516515,5.81171102
35.663959,5.56776436,5.81358215,-0.495800152,5.81358215,5.81032321
35.67445,5.91607978,5.81201366,0.322592815,5.81201366,5.80893378
35.684942,5.56776436,5.81045765,-0.492639103,5.81045765,5.80754247
35.695434,6.164414,5.80891278,0.596239234,5.80891278,5.80614941
35.705925,6.8556546,5.80737789,1.02385385,5.80737789,5.80475474
35.716417,6.63324958,5.80585155,0.909614219,5.80585155,5.80335821
35.726908,5.47722558,5.80433305,-0.571933106,5.80433305,5.80196009
35.7374,6,5.80282122,0.444048178,5.80282122,5.80056011
35.747892,6,5.80131541,0.4457405,5.80131541,5.79915842
35.758383,7.07106781,5.79981507,1.12749844,5.79981507,5.79775515
35.768875,5.83095189,5.79831932,0.180644894,5.79831932,5.79635004
35.779366,6,5.79682787,0.450746191,5.79682787,5.79494336
35.789858,4.58257569,5.79533996,-1.10125577,5.79533996,5.79353486
35.80035,6.8556546,5.79385529,1.03043646,5.79385529,5.79212466
35.810841,5.38516481,5.79237361,-0.638129143,5.79237361,5.79071292
35.821333,6,5.79089428,0.457280792,5.79089428,5.78929936
35.831824,5.83095189,5.78941726,0.203800487,5.78941726,5.78788427
35.842316,6.4807407,5.78794198,0.832345314,5.78794198,5.78646737
35.852808,4.58257569,5.78646832,-1.09722041,5.78646832,5.78504882
35.863299,6.4807407,5.78499619,0.834113007,5.78499619,5.78362874
35.873791,6,5.78352509,0.465268642,5.78352509,5.78220687
35.884282,6.78232998,5.78205511,1.00013743,5.78205511,5.78078349
35.894774,6.08276253,5.78058578,0.549706057,5.78058578,5.77935834
35.905266,6.08276253,5.77911709,0.551040324,5.77911709,5.77793156
35.915757,6.40312424,5.77764903,0.790869905,5.77764903,5.77650328
35.926249,7.54983444,5.77618118,1.33178574,5.77618118,5.77507323
35.93674,7.21110255,5.77471371,1.19849441,5.77471371,5.77364171
35.947232,6.78232998,5.7732462,1.00453162,5.7732462,5.77220844
35.957724,7.21110255,5.77177872,1.19971823,5.77177872,5.77077355
35.968215,7.68114575,5.77031128,1.38232936,5.77031128,5.7693372
35.978707,7.48331477,5.76884354,1.30937819,5.76884354,5.76789912
35.989198,8.1240384,5.76737569,1.53514257,5.76737569,5.76645958
35.99969,7.41619849,5.76590736,1.28463657,5.76590736,5.76501832
36.010182,7.21110255,5.76443865,1.20277342,5.76443865,5.76357547
36.020673,7.61577311,5.76296962,1.36117724,5.76296962,5.76213119
36.031165,6.70820393,5.76149992,0.972987157,5.76149992,5.76068519
36.041656,7.68114575,5.7600298,1.38604327,5.7600298,5.75923777
36.052148,6.70820393,5.75855892,0.974497311,5.75855892,5.75778865
36.06264,6.92820323,5.75708738,1.08218106,5.75708738,5.75633797
36.073131,5.74456265,5.75561526,-0.105131408,5.75561526,5.75488588
36.083623,5.91607978,5.75414225,0.402414623,5.75414225,5.75343211
36.094114,5.29150262,5.7526686,-0.679092028,5.7526686,5.75197693
36.104606,5.74456265,5.751194,-0.0814330955,5.751194,5.75052008
36.115098,6.55743852,5.74971854,0.898732434,5.74971854,5.7490617
36.125589,6.40312424,5.74824234,0.809247737,5.74824234,5.74760193
36.136081,5.83095189,5.74676509,0.290149622,5.74676509,5.74614051
36.146572,6,5.74528706,0.50469094,5.74528706,5.74467771
36.157064,6.164414,5.74380792,0.648541502,5.74380792,5.74321326
36.167556,6.40312424,5.74232782,0.812893857,5.74232782,5.74174731
36.178047,5.65685425,5.74084685,-0.289814773,5.74084685,5.74028
36.188539,6.92820323,5.73936473,1.09033871,5.73936473,5.73881105
36.19903,6,5.73788172,0.511974878,5.73788172,5.73734076
36.209522,6.244998,5.73639753,0.713162305,5.73639753,5.73586884
36.220014,6.40312424,5.73491227,0.817442336,5.73491227,5.73439544
36.230505,5.29150262,5.73342607,-0.664773231,5.73342607,5.73292071
36.240997,5.65685425,5.73193865,-0.274015322,5.73193865,5.73144438
36.251488,6,5.73045026,0.519181795,5.73045026,5.72996671
36.26198,5.47722558,5.72896063,-0.501732054,5.72896063,5.72848745
36.272472,5.29150262,5.72746987,-0.660278162,5.72746987,5.72700674
36.282963,6,5.72597813,0.523470983,5.72597813,5.72552472
36.293455,6.08276253,5.72448511,0.598562798,5.72448511,5.72404111
36.303946,5.74456265,5.72299108,0.146872615,5.72299108,5.72255621
36.314438,4.24264069,5.72149576,-1.21608185,5.72149576,5.72106973
36.32493,5.65685425,5.71999928,-0.251286751,5.71999928,5.71958183
36.335421,5.74456265,5.71850178,0.161433788,5.71850178,5.71809264
36.345913,5.91607978,5.71700296,0.446180254,5.71700296,5.71660189
36.356404,6.32455532,5.71550312,0.780417967,5.71550312,5.71510987
36.366896,6.63324958,5.71400195,0.958774026,5.71400195,5.7136163
36.377388,7.07106781,5.7124996,1.16557635,5.7124996,5.71212133
36.387879,5.47722558,5.7109962,-0.48349832,5.7109962,5.7106251
36.398371,6.08276253,5.70949147,0.61095913,5.70949147,5.70912734
36.408862,5.83095189,5.70798569,0.350665369,5.70798569,5.70762833
36.419354,5.29150262,5.70647858,-0.644186274,5.70647858,5.70612779
36.429846,6.244998,5.70497027,0.734865792,5.70497027,5.70462588
36.440337,5.56776436,5.7034609,-0.368370106,5.7034609,5.70312273
36.450829,5.29150262,5.70195019,-0.640661818,5.70195019,5.70161807
36.46132,6,5.70043842,0.547322192,5.70043842,5.7001122
36.471812,6.63324958,5.6989253,0.966604509,5.6989253,5.69860482
36.482304,5.65685425,5.69741099,-0.201387033,5.69741099,5.69709608
36.492795,5.38516481,5.69589561,-0.557432331,5.69589561,5.69558614
36.503287,5.83095189,5.69437889,0.369557855,5.69437889,5.69407471
36.513778,6.32455532,5.6928611,0.794791933,5.6928611,5.69256209
36.52427,5.74456265,5.69134197,0.230696061,5.69134197,5.69104799
36.534762,5.38516481,5.68982164,-0.551957276,5.68982164,5.68953256
36.545253,5.74456265,5.68830025,0.237196955,5.68830025,5.68801594
36.555745,5.47722558,5.68677751,-0.457768435,5.68677751,5.68649787
36.566236,4.69041576,5.68525372,-0.997415642,5.68525372,5.68497862
36.576728,5.19615242,5.68372859,-0.698266542,5.68372859,5.68345791
36.58722,6,5.68220225,0.56373553,5.68220225,5.68193591
36.597711,7.21110255,5.68067487,1.23710456,5.68067487,5.68041274
36.608203,5.83095189,5.67914614,0.38962258,5.67914614,5.67888813
36.618694,6.40312424,5.67761637,0.851767499,5.67761637,5.67736238
36.629186,6.164414,5.67608525,0.69880523,5.67608525,5.6758352
36.639678,6.40312424,5.67455295,0.853563874,5.67455295,5.67430673
36.650169,5.38516481,5.67301961,-0.536521014,5.67301961,5.67277714
36.660661,5.38516481,5.67148493,-0.535088891,5.67148493,5.67124612
36.671152,5.74456265,5.66994921,0.273154596,5.66994921,5.66971399
36.681644,6.32455532,5.66841217,0.810026635,5.66841217,5.66818044
36.692136,5.74456265,5.66687395,0.278726926,5.66687395,5.66664564
36.702627,5.29150262,5.66533469,-0.611418083,5.66533469,5.66510973
36.713119,6,5.66379412,0.579832632,5.66379412,5.66357242
36.72361,5.74456265,5.66225252,0.286897416,5.66225252,5.66203402
36.734102,5.56776436,5.6607096,-0.304869218,5.6607096,5.66049423
36.744594,6,5.65916552,0.583810312,5.65916552,5.65895321
36.755085,5.38516481,5.65762042,-0.521972807,5.65762042,5.65741111
36.765577,6.164414,5.65607401,0.712979658,5.65607401,5.65586763
36.776068,5.65685425,5.65452659,0.0482458231,5.65452659,5.65432308
36.78656,5.65685425,5.65297787,0.0622606004,5.65297787,5.65277716
36.797052,5.19615242,5.65142799,-0.674741113,5.65142799,5.65123004
36.807543,5.19615242,5.64987711,-0.673590893,5.64987711,5.64968185
36.818035,5.83095189,5.64832494,0.427348747,5.64832494,5.64813232
36.828526,6.244998,5.64677178,0.773450853,5.64677178,5.64658174
36.839018,5.74456265,5.64521732,0.315190935,5.64521732,5.64502982
36.84951,6.08276253,5.64366173,0.662646815,5.64366173,5.64347671
36.860001,6,5.64210515,0.598243135,5.64210515,5.64192256
36.870493,6,5.6405473,0.599543747,5.6405473,5.64036709
36.880984,6,5.63898846,0.600842358,5.63898846,5.63881059
36.891476,5.74456265,5.63742835,0.327313752,5.63742835,5.63725277
36.901968,6.164414,5.63586713,0.727012294,5.63586713,5.63569379
36.912459,6.08276253,5.63430493,0.669669768,5.63430493,5.6341338
36.922951,5.83095189,5.63274147,0.445208289,5.63274147,5.6325725
36.933442,6.244998,5.63117706,0.783467257,5.63117706,5.6310102
36.943934,6.63324958,5.62961138,1.00181745,5.62961138,5.6294466
36.954426,5.65685425,5.6280446,0.169734044,5.6280446,5.62788186
36.964917,5.91607978,5.62647688,0.538147662,5.62647688,5.62631614
36.975409,6.08276253,5.6249079,0.676649559,5.6249079,5.62474913
36.9859,4.58257569,5.62333799,-1.02017758,5.62333799,5.62318114
36.996392,5.47722558,5.62176684,-0.380185824,5.62176684,5.62161188
37.006884,6.244998,5.6201946,0.790445065,5.6201946,5.6200415
37.017375,5.65685425,5.61862143,0.195532149,5.61862143,5.61847015
37.027867,6.70820393,5.61704703,1.04458456,5.61704703,5.61689755
37.038358,6.32455532,5.61547171,0.842071024,5.61547171,5.61532398
37.04885,6.08276253,5.61389517,0.6847389,5.61389517,5.61374917
37.059342,6.4807407,5.61231756,0.931892235,5.61231756,5.61217326
37.069833,5.91607978,5.61073904,0.552576457,5.61073904,5.6105964
37.080325,5.65685425,5.60915931,0.218391705,5.60915931,5.60901831
37.090816,6.244998,5.60757868,0.798385446,5.60757868,5.60743929
37.101308,6,5.60599684,0.627696708,5.60599684,5.60585903
37.1118,5.47722558,5.60441396,-0.356634805,5.60441396,5.6042777
37.122291,5.65685425,5.60283018,0.232430778,5.60283018,5.60269545
37.132783,5.74456265,5.60124522,0.378572887,5.60124522,5.60111199
37.143274,5.38516481,5.59965936,-0.46313557,5.59965936,5.59952761
37.153766,5.65685425,5.59807233,0.242449833,5.59807233,5.59794203
37.164258,5.74456265,5.59648426,0.384809541,5.59648426,5.59635539
37.174749,5.09901951,5.59489533,-0.704184502,5.59489533,5.59476786
37.185241,5.65685425,5.59330522,0.252089334,5.59330522,5.59317913
37.195732,5.74456265,5.59171424,0.390958314,5.59171424,5.59158951
37.206224,5.83095189,5.5901221,0.49074412,5.5901221,5.5899987
37.216716,5.56776436,5.58852896,-0.144099246,5.58852896,5.58840687
37.227207,5.19615242,5.58693495,-0.625126012,5.58693495,5.58681416
37.237699,5.29150262,5.5853398,-0.542067502,5.5853398,5.58522028
37.24819,5,5.5837438,-0.764031282,5.5837438,5.58362553
37.258682,5.19615242,5.58214665,-0.62128434,5.58214665,5.58202961
37.269174,5.38516481,5.58054852,-0.442022298,5.58054852,5.58043269
37.279665,6,5.57894955,0.648884003,5.57894955,5.57883491
37.290157,5.74456265,5.57734945,0.408917104,5.57734945,5.57723598
37.300648,6.32455532,5.57574852,0.865336235,5.57574852,5.57563621
37.31114,5.47722558,5.57414647,-0.311321204,5.57414647,5.57403529
37.321632,5.47722558,5.57254344,-0.308735919,5.57254344,5.57243339
37.332123,5.83095189,5.57093961,0.509914001,5.57093961,5.57083066
37.342615,6.40312424,5.56933465,0.913120793,5.56933465,5.56922679
37.353106,5.19615242,5.5677289,-0.60957073,5.5677289,5.5676221
37.363598,5.38516481,5.56612203,-0.425390674,5.56612203,5.56601629
37.37409,5.29150262,5.56451422,-0.522505116,5.56451422,5.56440951
37.384581,5.74456265,5.56290561,0.42621243,5.56290561,5.56280193
37.395073,5.19615242,5.56129591,-0.604271037,5.56129591,5.56119323
37.405564,5.65685425,5.55968542,0.31171915,5.55968542,5.55958374
37.416056,6.08276253,5.55807385,0.724353978,5.55807385,5.55797314
37.426548,5.74456265,5.55646134,0.433706476,5.55646134,5.55636159
37.437039,5.65685425,5.55484806,0.319384078,5.55484806,5.55474926
37.447531,5.56776436,5.55323371,0.120543178,5.55323371,5.55313584
37.458022,6,5.55161859,0.669612884,5.55161859,5.55152165
37.468514,6.32455532,5.5500024,0.880086884,5.5500024,5.54990637
37.479006,5.29150262,5.5483853,-0.506835945,5.5483853,5.54829016
37.489497,5.38516481,5.54676745,-0.401998307,5.54676745,5.54667319
37.499989,5.83095189,5.54514854,0.534605796,5.54514854,5.54505515
37.51048,7,5.54352888,1.20684345,5.54352888,5.54343636
37.520972,5.47722558,5.54190818,-0.254327755,5.54190818,5.5418165
37.531464,5.29150262,5.54028659,-0.498782484,5.54028659,5.54019574
37.541955,5.56776436,5.53866426,0.170587515,5.53866426,5.53857424
37.552447,5.65685425,5.5370409,0.346140651,5.5370409,5.53695169
37.562938,5.83095189,5.53541681,0.543631386,5.53541681,5.5353284
37.57343,5.47722558,5.53379169,-0.237836327,5.53379169,5.53370407
37.583922,5.91607978,5.5321657,0.619608004,5.5321657,5.53207886
37.594413,5.91607978,5.530539,0.620919302,5.530539,5.53045292
37.604905,5.65685425,5.52891128,0.35769116,5.52891128,5.52882596
37.615396,6.244998,5.52728286,0.8471807,5.52728286,5.52719828
37.625888,5.09901951,5.52565342,-0.653172191,5.52565342,5.52556959
37.63638,6.55743852,5.52402314,1.0165704,5.52402314,5.52394003
37.646871,5.83095189,5.52239216,0.555481534,5.52239216,5.52230977
37.657363,6.4807407,5.52076018,0.979785954,5.52076018,5.5206785
37.667854,5.38516481,5.51912752,-0.366009171,5.51912752,5.51904653
37.678346,5,5.51749387,-0.719370466,5.51749387,5.51741357
37.688838,6,5.51585938,0.69580214,5.51585938,5.51577976
37.699329,6.08276253,5.51422422,0.754014791,5.51422422,5.51414528
37.709821,6.8556546,5.51258809,1.15890747,5.51258809,5.5125098
37.720312,5.91607978,5.51095129,0.636497052,5.51095129,5.51087366
37.730804,6.32455532,5.50931351,0.90290742,5.50931351,5.50923653
37.741296,5.56776436,5.50767492,0.245131471,5.50767492,5.50759858
37.751787,5.38516481,5.50603569,-0.347664894,5.50603569,5.50595997
37.762279,6.63324958,5.50439549,1.06247546,5.50439549,5.50432039
37.77277,6,5.50275464,0.705156265,5.50275464,5.50268016
37.783262,5,5.50111284,-0.707893244,5.50111284,5.50103897
37.793754,4.79583152,5.49947025,-0.838831766,5.49947025,5.49939698
37.804245,6.78232998,5.49782703,1.13335914,5.49782703,5.49775435
37.814737,5.74456265,5.49618287,0.498377146,5.49618287,5.49611077
37.825228,6.164414,5.49453808,0.818459483,5.49453808,5.49446655
37.83572,5.65685425,5.49289235,0.404922085,5.49289235,5.4928214
37.846212,5.47722558,5.49124586,-0.118407273,5.49124586,5.49117547
37.856703,5.91607978,5.48959875,0.653055155,5.48959875,5.48952891
37.867195,3.60555128,5.48795072,-1.37200563,5.48795072,5.48788143
37.877686,6.164414,5.48630208,0.823475516,5.48630208,5.48623333
37.888178,5.91607978,5.48465252,0.656831225,5.48465252,5.48458432
37.89867,6.78232998,5.48300222,1.13988059,5.48300222,5.48293454
37.909161,5.65685425,5.48135132,0.418930701,5.48135132,5.48128416
37.919653,5.09901951,5.47969951,-0.616992706,5.47969951,5.47963287
37.930144,5.19615242,5.47804712,-0.530937567,5.47804712,5.477981
37.940636,6.32455532,5.47639384,0.92095683,5.47639384,5.47632821
37.951128,5.47722558,5.47473982,0.0498573882,5.47473982,5.47467469
37.961619,5.09901951,5.47308522,-0.611609113,5.47308522,5.47302059
37.972111,5.56776436,5.47142974,0.310378192,5.47142974,5.4713656
37.982602,5,5.4697737,-0.68540039,5.4697737,5.46971003
37.993094,5.29150262,5.46811677,-0.420254862,5.46811677,5.46805359
38.003586,5.91607978,5.46645913,0.670537584,5.46645913,5.46639642
38.014077,5.91607978,5.46480094,0.671772912,5.46480094,5.46473869
38.024569,4.69041576,5.46314188,-0.879048416,5.46314188,5.46308009
38.03506,5.56776436,5.46148227,0.326009344,5.46148227,5.46142094
38.045552,5.74456265,5.4598218,0.533611134,5.4598218,5.45976092
38.056044,6.08276253,5.45816064,0.790317588,5.45816064,5.4581002
38.066535,5.91607978,5.45649894,0.677923919,5.45649894,5.45643894
38.077027,5.29150262,5.4548364,-0.404145735,5.4548364,5.45477683
38.087518,5.91607978,5.45317332,0.680372295,5.45317332,5.45311419
38.09801,5.74456265,5.45150941,0.541343917,5.45150941,5.4514507
38.108502,5.47722558,5.44984482,0.165471318,5.44984482,5.44978653
38.118993,4.47213595,5.44817971,-0.987949267,5.44817971,5.44812183
38.129485,5.29150262,5.44651377,-0.393714555,5.44651377,5.44645631
38.139976,5.91607978,5.44484733,0.686463732,5.44484733,5.44479027
38.150468,6.164414,5.44318006,0.849254934,5.44318006,5.4431234
38.16096,5.19615242,5.44151213,-0.495337975,5.44151213,5.44145587
38.171451,4.89897949,5.43984371,-0.735434717,5.43984371,5.43978784
38.181943,5.47722558,5.43817447,0.197613514,5.43817447,5.438119
38.192434,5.19615242,5.43650475,-0.490257409,5.43650475,5.43644966
38.202926,5.74456265,5.43483422,0.556532501,5.43483422,5.43477951
38.213418,5.74456265,5.43316305,0.558031892,5.43316305,5.43310872
38.223909,5.38516481,5.43149141,-0.215236149,5.43149141,5.43143745
38.234401,4.79583152,5.42981897,-0.796233285,5.42981897,5.42976538
38.244892,5.56776436,5.42814606,0.373655329,5.42814606,5.42809283
38.255384,5.65685425,5.42647236,0.479981131,5.42647236,5.4264195
38.265876,5.47722558,5.42479805,0.228970586,5.42479805,5.42474554
38.276367,5.09901951,5.42312327,-0.569301112,5.42312327,5.42307111
38.286859,5.74456265,5.42144772,0.568431991,5.42144772,5.42139591
38.29735,5.29150262,5.41977172,-0.358146748,5.41977172,5.41972026
38.307842,5.91607978,5.41809495,0.705680408,5.41809495,5.41804383
38.318334,5.65685425,5.41641757,0.490343429,5.41641757,5.41636679
38.328825,5.29150262,5.41473976,-0.35105147,5.41473976,5.41468931
38.339317,5.38516481,5.41306119,-0.16702209,5.41306119,5.41301108
38.349808,5.74456265,5.41138218,0.577217866,5.41138218,5.4113324
38.3603,6.164414,5.40970243,0.868741374,5.40970243,5.40965297
38.370792,5.83095189,5.40802209,0.650330536,5.40802209,5.40797296
38.381283,5.38516481,5.40634133,-0.145521548,5.40634133,5.40629251
38.391775,5.47722558,5.40465983,0.269380301,5.40465983,5.40461133
38.402266,5.56776436,5.40297791,0.405938971,5.40297791,5.40292973
38.412758,4.47213595,5.40129527,-0.963929102,5.40129527,5.40124739
38.42325,5.38516481,5.39961206,-0.120196707,5.39961206,5.39956449
38.433741,6.92820323,5.39792844,1.23704276,5.39792844,5.39788117
38.444233,5.09901951,5.3962441,-0.545183077,5.3962441,5.39619714
38.454724,5.65685425,5.39455937,0.512147324,5.39455937,5.3945127
38.465216,5.56776436,5.39287392,0.418199046,5.39287392,5.39282755
38.475708,5.83095189,5.39118792,0.663147021,5.39118792,5.39114184
38.486199,5.56776436,5.38950154,0.42221182,5.38950154,5.38945575
38.496691,5.09901951,5.38781446,-0.537396449,5.38781446,5.38776895
38.507182,5.47722558,5.38612699,0.301825415,5.38612699,5.38608177
38.517674,5.29150262,5.38443883,-0.304854412,5.38443883,5.38439389
38.528166,4.79583152,5.38275014,-0.766106142,5.38275014,5.38270548
38.538657,6,5.38106109,0.786726708,5.38106109,5.38101669
38.549149,4.79583152,5.37937134,-0.763897781,5.37937134,5.37932722
38.55964,4.69041576,5.37768124,-0.829014765,5.37768124,5.37763739
38.570132,6.244998,5.37599046,0.932205739,5.37599046,5.37594688
38.580624,5.83095189,5.37429916,0.675760854,5.37429916,5.37425585
38.591115,5.38516481,5.37260752,0.112059308,5.37260752,5.37256446
38.601607,5.74456265,5.37091521,0.611267078,5.37091521,5.37087241
38.612098,5.38516481,5.36922255,0.126262644,5.36922255,5.36918001
38.62259,5.09901951,5.36752924,-0.518179238,5.36752924,5.36748695
38.633082,6,5.36583542,0.796344508,5.36583542,5.36579339
38.643573,5.91607978,5.36414128,0.742925636,5.36414128,5.3640995
38.654065,5.56776436,5.36244649,0.453120154,5.36244649,5.36240496
38.664556,5.74456265,5.36075137,0.61952504,5.36075137,5.36071008
38.675048,4.47213595,5.35905561,-0.941764119,5.35905561,5.35901457
38.68554,6.08276253,5.35735937,0.851706029,5.35735937,5.35731857
38.696031,5.38516481,5.35566282,0.171761433,5.35566282,5.35562225
38.706523,5.56776436,5.35396563,0.46238375,5.35396563,5.3539253
38.717014,5.19615242,5.35226814,-0.395114812,5.35226814,5.35222805
38.727506,5.56776436,5.35057002,0.46604114,5.35057002,5.35053016
38.737998,5.19615242,5.34887144,-0.390792803,5.34887144,5.34883181
38.748489,6.164414,5.34717256,0.904014072,5.34717256,5.34713316
38.758981,4.79583152,5.34547307,-0.741378139,5.34547307,5.34543389
38.769472,5.47722558,5.34377329,0.365311221,5.34377329,5.34373434
38.779964,5.83095189,5.3420729,0.699198826,5.3420729,5.34203417
38.790456,5.47722558,5.34037206,0.369937176,5.34037206,5.34033355
38.800947,5.29150262,5.33867095,-0.217182701,5.33867095,5.33863266
38.811439,4.89897949,5.33696924,-0.66180794,5.33696924,5.33693116
38.82193,5.38516481,5.33526725,0.223377607,5.33526725,5.33522939
38.832422,5.29150262,5.33356468,-0.205090354,5.33356468,5.33352703
38.842914,5.65685425,5.33186167,0.570081202,5.33186167,5.33182424
38.853405,5.74456265,5.33015841,0.643742369,5.33015841,5.33012118
38.863897,5.38516481,5.32845456,0.238139129,5.32845456,5.32841754
38.874388,6.164414,5.32675046,0.915239608,5.32675046,5.32671365
38.88488,5.56776436,5.32504579,0.492664771,5.32504579,5.32500918
38.895372,5.29150262,5.3233407,-0.17843228,5.3233407,5.32330429
38.905863,6.244998,5.32163537,0.960917596,5.32163537,5.32159916
38.916355,5.38516481,5.31992948,0.25541208,5.31992948,5.31989347
38.926846,5.38516481,5.31822334,0.258730482,5.31822334,5.31818753
38.937338,6,5.31651665,0.826730516,5.31651665,5.31648104
38.94783,5.74456265,5.31480957,0.655555547,5.31480957,5.31477415
38.958321,4.47213595,5.31310226,-0.917042151,5.31310226,5.31306703
38.968813,6.08276253,5.3113944,0.878275656,5.3113944,5.31135936
38.979304,5.38516481,5.30968632,0.274733477,5.30968632,5.30965147
38.989796,5.74456265,5.3079777,0.660745748,5.3079777,5.30794303
39.000288,5.56776436,5.30626871,0.51136646,5.30626871,5.30623422
39.010779,5.91607978,5.3045595,0.781997624,5.3045595,5.3045252
39.021271,5.83095189,5.30284976,0.72670636,5.30284976,5.30281564
39.031762,5.83095189,5.30113982,0.727881911,5.30113982,5.30110588
39.042254,5.91607978,5.2996037,0.785159908,5.2996037,5.29939559
39.052746,4.69041576,5.2978935,-0.779408585,5.2978935,5.29768495
39.063237,5.47722558,5.29618311,0.42549085,5.29618311,5.2959741
39.073729,5.29150262,5.29447221,-0.054493921,5.29447221,5.29426274
39.08422,5.83095189,5.29276112,0.733614865,5.29276112,5.29255119
39.094712,5.19615242,5.29104953,-0.308053746,5.29104953,5.29083914
39.105204,4.89897949,5.2893376,-0.624786457,5.2893376,5.28912673
39.115695,5.65685425,5.2876255,0.607641959,5.2876255,5.28741415
39.126187,5.56776436,5.2859129,0.530896848,5.2859129,5.28570107
39.136678,5.38516481,5.28420013,0.317749388,5.28420013,5.28398782
39.14717,4.89897949,5.28248688,-0.619279737,5.28248688,5.28227407
39.157662,4.89897949,5.2807733,-0.617894663,5.2807733,5.28056
39.168153,5.19615242,5.27905957,-0.287936006,5.27905957,5.27884576
39.178645,5.38516481,5.27734535,0.328358729,5.27734535,5.27713104
39.189136,4.69041576,5.27563099,-0.764993614,5.27563099,5.27541617
39.199628,6.164414,5.27391615,0.943661937,5.27391615,5.27370082
39.21012,5.19615242,5.27220101,-0.275769082,5.27220101,5.27198516
39.220611,5.09901951,5.27048573,-0.41408479,5.27048573,5.27026935
39.231103,4.69041576,5.26876998,-0.760496036,5.26876998,5.26855307
39.241594,6,5.2670541,0.856122596,5.2670541,5.26683666
39.252086,5,5.26533777,-0.515109469,5.26533777,5.26511979
39.262578,5,5.26362114,-0.513440492,5.26362114,5.26340262
39.273069,5,5.26190439,-0.511765952,5.26190439,5.26168532
39.283561,5.83095189,5.26018719,0.75548971,5.26018719,5.25996757
39.294052,5.09901951,5.25846988,-0.399312367,5.25846988,5.2582497
39.304544,5.56776436,5.25675213,0.557684711,5.25675213,5.25653138
39.315036,4.79583152,5.2550341,-0.677644873,5.2550341,5.25481278
39.325527,5.47722558,5.25331596,0.473190884,5.25331596,5.25309407
39.336019,5.56776436,5.2515974,0.562287263,5.2515974,5.25137493
39.34651,4.35889894,5.24987873,-0.943917256,5.24987873,5.24965568
39.357002,5.38516481,5.24815964,0.370142093,5.24815964,5.247936
39.367494,4.47213595,5.24644029,-0.879945643,5.24644029,5.24621606
39.377985,4.24264069,5.24472085,-1.00103954,5.24472085,5.24449602
39.388477,5.65685425,5.24300099,0.643314274,5.24300099,5.24277556
39.398968,5.83095189,5.24128105,0.76790028,5.24128105,5.24105501
39.40946,4.79583152,5.23956071,-0.666130005,5.23956071,5.23933405
39.419952,4.12310563,5.23784012,-1.05580987,5.23784012,5.23761284
39.430443,5.19615242,5.23611945,-0.199917555,5.23611945,5.23589156
39.440935,5.29150262,5.23439839,0.238964924,5.23439839,5.23416986
39.451426,4.89897949,5.23267725,-0.577665794,5.23267725,5.2324481
39.461918,4.58257569,5.23095573,-0.805220488,5.23095573,5.23072593
39.47241,5.83095189,5.22923398,0.775704787,5.22923398,5.22900354
39.482901,5.74456265,5.22751217,0.719062222,5.22751217,5.22728108
39.493393,3.60555128,5.22578997,-1.27288597,5.22578997,5.22555823
39.503884,5.29150262,5.22406773,0.259682296,5.22406773,5.22383532
39.514376,5.47722558,5.2223451,0.504856882,5.2223451,5.22211203
39.524868,4.79583152,5.22062227,-0.651759731,5.22062227,5.22038853
39.535359,5.47722558,5.21889939,0.508257988,5.21889939,5.21866498
39.545851,5,5.21717615,-0.466021618,5.21717615,5.21694105
39.556342,4.69041576,5.21545287,-0.724594443,5.21545287,5.21521709
39.566834,4.89897949,5.21372922,-0.561025613,5.21372922,5.21349275
39.577326,5,5.21200539,-0.460440427,5.21200539,5.21176822
39.587817,5.38516481,5.21028152,0.418190489,5.21028152,5.21004365
39.598309,5.19615242,5.2085573,-0.111377206,5.2085573,5.20831872
39.6088,4.69041576,5.20683307,-0.718621811,5.20683307,5.20659377
39.619292,4.89897949,5.20510848,-0.553289252,5.20510848,5.20486847
39.629784,5.56776436,5.20338372,0.603639498,5.20338372,5.20314298
39.640275,5.09901951,5.20165894,-0.320373892,5.20165894,5.20141748
39.650767,6.78232998,5.19993383,1.25793329,5.19993383,5.19969163
39.661258,5.29150262,5.19820871,0.305440514,5.19820871,5.19796577
39.67175,4.24264069,5.19648327,-0.976648647,5.19648327,5.19623958
39.682242,5.83095189,5.19475765,0.797617853,5.19475765,5.19451321
39.692733,5.09901951,5.19303205,-0.306614634,5.19303205,5.19278685
39.703225,4.79583152,5.19130612,-0.628867708,5.19130612,5.19106015
39.713716,5.47722558,5.1895802,0.536325812,5.1895802,5.18933346
39.724208,4.35889894,5.18785396,-0.91046967,5.18785396,5.18760645
39.7347,5.56776436,5.18612758,0.61776758,5.18612758,5.18587929
39.745191,5,5.18440122,-0.429419627,5.18440122,5.18415214
39.755683,5.09901951,5.18267455,-0.289231797,5.18267455,5.18242468
39.766174,5.56776436,5.1809479,0.621945706,5.1809479,5.18069723
39.776666,4.79583152,5.17922096,-0.61918449,5.17922096,5.17896948
39.787158,4.89897949,5.17749388,-0.527744628,5.17749388,5.17724159
39.797649,5.65685425,5.17576683,0.693604654,5.17576683,5.17551373
39.808141,4.24264069,5.1740395,-0.965090054,5.1740395,5.17378558
39.818632,5.29150262,5.1723122,0.345239652,5.1723122,5.17205745
39.829124,5.29150262,5.17058463,0.347732652,5.17058463,5.17032904
39.839616,4.69041576,5.16885693,-0.691694418,5.16885693,5.1686005
39.850107,5.38516481,5.16712928,0.466942745,5.16712928,5.16687201
39.860599,5,5.16540136,-0.406695655,5.16540136,5.16514323
39.87109,4.47213595,5.16367349,-0.831587357,5.16367349,5.1634145
39.881582,5.47722558,5.16194535,0.561498197,5.16194535,5.1616855
39.892074,5.19615242,5.16021711,0.189566122,5.16021711,5.15995638
39.902565,4.69041576,5.15848893,-0.684158733,5.15848893,5.15822733
39.913057,5.29150262,5.15676049,0.367072375,5.15676049,5.156498
39.923548,5,5.15503213,-0.393741193,5.15503213,5.15476875
39.93404,5.19615242,5.1533035,0.206999802,5.1533035,5.15303923
39.944532,5.29150262,5.15157479,0.374069282,5.15157479,5.15130961
39.955023,4.79583152,5.14984616,-0.594991294,5.14984616,5.14958007
39.965515,5.09901951,5.14811729,-0.221580173,5.14811729,5.14785028
39.976006,4.79583152,5.1463885,-0.592078519,5.1463885,5.14612056
39.986498,5.74456265,5.14465946,0.774534172,5.14465946,5.1443906
39.99699,5.38516481,5.14293036,0.49217319,5.14293036,5.14266056
40.007481,4.35889894,5.14120135,-0.884478606,5.14120135,5.1409306
40.017973,5.38516481,5.13947211,0.495673987,5.13947211,5.13920041
40.028464,5,5.13774296,-0.371137393,5.13774296,5.13747031
40.038956,5.09901951,5.1360136,-0.192338461,5.1360136,5.13573998
40.049448,5.19615242,5.13428417,0.248733294,5.13428417,5.13400958
40.059939,4.58257569,5.13255486,-0.741605798,5.13255486,5.13227929
40.070431,3.74165739,5.13082532,-1.17862969,5.13082532,5.13054877
40.080922,4.58257569,5.1290959,-0.739270051,5.1290959,5.12881836
40.091414,4.89897949,5.12736627,-0.477898303,5.12736627,5.12708773
40.101906,6,5.1256366,0.935074008,5.1256366,5.12535705
40.112397,6.164414,5.12390705,1.02005243,5.12390705,5.12362648
40.122889,4.69041576,5.1221773,-0.657085641,5.1221773,5.12189571
40.13338,5.47722558,5.12044768,0.597308879,5.12044768,5.12016506
40.143872,4.89897949,5.11871786,-0.468762598,5.11871786,5.11843421
40.154364,5.38516481,5.11698801,0.517857892,5.11698801,5.11670331
40.164855,5.56776436,5.1152583,0.672685708,5.1152583,5.11497255
40.175347,5.09901951,5.1135284,-0.120452857,5.1135284,5.1132416
40.185838,5.09901951,5.11179865,-0.113044849,5.11179865,5.11151078
40.19633,5.38516481,5.11006872,0.524496035,5.11006872,5.10977977
40.206822,5.56776436,5.10833877,0.67780941,5.10833877,5.10804874
40.217313,4.24264069,5.10660897,-0.929498941,5.10660897,5.10631786
40.227805,5.56776436,5.104879,0.680356792,5.104879,5.10458679
40.238296,5.29150262,5.10314919,0.433997046,5.10314919,5.10285587
40.248788,4.47213595,5.10141921,-0.793273756,5.10141921,5.10112478
40.25928,3.87298335,5.09968923,-1.10756755,5.09968923,5.09939368
40.269771,4.89897949,5.09795941,-0.446071662,5.09795941,5.09766274
40.280263,6.40312424,5.09622944,1.143195,5.09622944,5.09593163
40.290754,4.47213595,5.09449964,-0.788900302,5.09449964,5.09420069
40.301246,4.79583152,5.09276969,-0.544920329,5.09276969,5.09246958
40.311738,5,5.09103975,-0.301727939,5.09103975,5.09073848
40.322229,5,5.08930999,-0.298847773,5.08930999,5.08900755
40.332721,5.56776436,5.08758009,0.692953299,5.08758009,5.08727647
40.343212,5.19615242,5.08585037,0.332117524,5.08585037,5.08554557
40.353704,5.09901951,5.08412052,0.122061441,5.08412052,5.08381452
40.364196,3.87298335,5.08239069,-1.09973058,5.08239069,5.08208349
40.374687,5.29150262,5.08066106,0.459174871,5.08066106,5.08035265
40.385179,5.47722558,5.0789313,0.631105599,5.0789313,5.07862167
40.39567,4.12310563,5.07720174,-0.976778435,5.07720174,5.07689088
40.406162,5.09901951,5.07547205,0.153451827,5.07547205,5.07515996
40.416654,4.79583152,5.07374241,-0.527172536,5.07374241,5.07342907
40.427145,4.58257569,5.07201297,-0.699597939,5.07201297,5.07169838
40.437637,5.09901951,5.07028342,0.169517236,5.07028342,5.06996756
40.448128,5.09901951,5.06855408,0.174543488,5.06855408,5.06823695
40.45862,4.35889894,5.06682464,-0.841383202,5.06682464,5.06650622
40.469112,5,5.06509525,-0.255137699,5.06509525,5.06477554
40.479603,5.09901951,5.06336608,0.188821174,5.06336608,5.06304507
40.490095,4.58257569,5.06163681,-0.692142407,5.06163681,5.06131449
40.500586,3.60555128,5.05990777,-1.20596704,5.05990777,5.05958413
40.511078,5.09901951,5.05817863,0.202091283,5.05817863,5.05785366
40.52157,5,5.05644956,-0.237591158,5.05644956,5.05612325
40.532061,4.69041576,5.05472073,-0.603576811,5.05472073,5.05439307
40.542553,4.89897949,5.05299181,-0.392444036,5.05299181,5.0526628
40.553044,3.87298335,5.05126313,-1.08548597,5.05126313,5.05093275
40.563536,4.35889894,5.04953437,-0.831044779,5.04953437,5.04920261
40.574028,4.89897949,5.04780569,-0.385779997,5.04780569,5.04747255
40.584519,4.47213595,5.04607727,-0.757589144,5.04607727,5.04574273
40.595011,4.69041576,5.04434877,-0.594922689,5.04434877,5.04401282
40.605502,4,5.04262052,-1.02108791,5.04262052,5.04228315
40.615994,4.24264069,5.04089221,-0.893449227,5.04089221,5.04055341
40.626486,4.47213595,5.03916399,-0.75301264,5.03916399,5.03882376
40.636977,4.35889894,5.03743604,-0.823733632,5.03743604,5.03709436
40.647469,4.12310563,5.03570803,-0.955302257,5.03570803,5.03536489
40.65796,5.29150262,5.03398029,0.507466587,5.03398029,5.03363567
40.668452,5.65685425,5.03225249,0.790317507,5.03225249,5.03190639
40.678944,4.58257569,5.0305248,-0.669290001,5.0305248,5.03017721
40.689435,4,5.02879739,-1.0142965,5.02879739,5.0284483
40.699927,5.29150262,5.02706994,0.514230189,5.02706994,5.02671933
40.710418,4.69041576,5.02534276,-0.578728782,5.02534276,5.02499064
40.72091,4.69041576,5.02361555,-0.577234604,5.02361555,5.02326189
40.731402,5.09901951,5.02188846,0.277724783,5.02188846,5.02153325
40.741893,5,5.02016166,-0.141991763,5.02016166,5.01980489
40.752385,4.79583152,5.01843483,-0.471808548,5.01843483,5.01807649
40.762876,5.19615242,5.01670829,0.423608461,5.01670829,5.01634838
40.773368,5.38516481,5.01498173,0.608426722,5.01498173,5.01462022
40.78386,5.56776436,5.01325531,0.744653649,5.01325531,5.01289219
40.794351,4.58257569,5.01152919,-0.654945412,5.01152919,5.01116445
40.804843,5.19615242,5.00980305,0.431682031,5.00980305,5.00943668
40.815334,4.24264069,5.00807722,-0.874892297,5.00807722,5.00770921
40.825826,5.56776436,5.00635137,0.749274976,5.00635137,5.00598172
40.836318,5.38516481,5.00462568,0.616878535,5.00462568,5.00425436
40.846809,4.69041576,5.00288403,-0.558988617,5.00288403,5.00252731
40.857301,5.38516481,5.00115871,0.619682256,5.00115871,5.00080024
40.867792,5.09901951,4.99943371,0.315572188,4.99943371,4.99907348
40.878284,4.58257569,4.9977087,-0.644308163,4.9977087,4.9973467
40.888776,5.09901951,4.99598387,0.320991663,4.99598387,4.99562008
40.899267,5.09901951,4.99425936,0.323666734,4.99425936,4.99389378
40.909759,5.19615242,4.99253486,0.45124003,4.99253486,4.99216747
40.92025,4.79583152,4.99081069,-0.441564459,4.99081069,4.99044148
40.930742,4.69041576,4.98908654,-0.546507806,4.98908654,4.9887155
40.941234,5,4.98736257,0.112416333,4.98736257,4.98698968
40.951725,5.19615242,4.98563894,0.458817484,4.98563894,4.98526419
40.962217,5.19615242,4.98391533,0.460691973,4.98391533,4.9835387
40.972708,5.19615242,4.98219207,0.462558486,4.98219207,4.98181356
40.9832,4.35889894,4.98046883,-0.788397039,4.98046883,4.98008842
40.993692,4.89897949,4.97874579,-0.282429293,4.97874579,4.97836346
41.004183,5.09901951,4.97702311,0.349279841,4.97702311,4.97663885
41.014675,5.09901951,4.97530045,0.351737204,4.97530045,4.97491425
41.025166,5.09901951,4.97357816,0.354177003,4.97357816,4.97319
41.035658,4.12310563,4.97185591,-0.921276444,4.97185591,4.97146578
41.04615,4.79583152,4.97013387,-0.41749532,4.97013387,4.96974175
41.056641,4.79583152,4.96841219,-0.415428294,4.96841219,4.96801807
41.067133,4.69041576,4.96669056,-0.525618494,4.96669056,4.96629443
41.077624,4.58257569,4.96496931,-0.618379829,4.96496931,4.96457115
41.088116,4.89897949,4.96324811,-0.253512564,4.96324811,4.9628479
41.098608,5.09901951,4.96152712,0.370799666,4.96152712,4.96112485
41.109099,4.69041576,4.95980652,-0.519028671,4.95980652,4.95940218
41.119591,4.58257569,4.95808598,-0.61278894,4.95808598,4.95767955
41.130082,5.09901951,4.95636583,0.377695227,4.95636583,4.95595729
41.140574,3,4.95464574,-1.39808646,4.95464574,4.95423508
41.151066,4.24264069,4.95292589,-0.842784194,4.95292589,4.95251309
41.161557,4.35889894,4.95120643,-0.769615152,4.95120643,4.95079147
41.172049,4,4.94948704,-0.974416256,4.94948704,4.94906992
41.18254,4.89897949,4.94776805,-0.220881347,4.94776805,4.94734875
41.193032,4.47213595,4.94604915,-0.688413533,4.94604915,4.94562764
41.203524,4.89897949,4.94433048,-0.21295774,4.94433048,4.94390675
41.214015,4.89897949,4.94261223,-0.208884528,4.94261223,4.94218626
41.224507,5.09901951,4.94089406,0.397649909,4.94089406,4.94046584
41.234998,3.87298335,4.93917631,-1.0325662,4.93917631,4.93874582
41.24549,4.69041576,4.93745865,-0.497034093,4.93745865,4.93702587
41.255982,4.47213595,4.93574124,-0.680885665,4.93574124,4.93530616
41.266473,5.38516481,4.93402426,0.671669968,4.93402426,4.93358685
41.276965,4.79583152,4.93230738,-0.369426386,4.93230738,4.93186763
41.287456,5.19615242,4.93059092,0.515326596,4.93059092,4.93014881
41.297948,5.29150262,4.92887457,0.602186061,4.92887457,4.92843008
41.30844,4.47213595,4.92715849,-0.67455358,4.92715849,4.9267116
41.318931,5.56776436,4.92544284,0.801449638,4.92544284,4.92499354
41.329423,5.29150262,4.92372731,0.606444818,4.92372731,4.92327557
41.339914,3.87298335,4.92201221,-1.0242211,4.92201221,4.92155803
41.350406,5.56776436,4.92029723,0.804653422,4.92029723,4.91984058
41.360898,5.56776436,4.91858254,0.805718204,4.91858254,4.91812339
41.371389,5.56776436,4.91686829,0.806781303,4.91686829,4.91640663
41.381881,5.09901951,4.91515417,0.428795224,4.91515417,4.91468998
41.392372,4.79583152,4.9134405,-0.342941653,4.9134405,4.91297376
41.402864,4.47213595,4.91172696,-0.663016596,4.91172696,4.91125765
41.413356,5.09901951,4.91001372,0.434747968,4.91001372,4.90954182
41.423847,5.38516481,4.90830094,0.690553308,4.90830094,4.90782642
41.434339,4.79583152,4.90658829,-0.332801394,4.90658829,4.90611114
41.44483,4.24264069,4.90487611,-0.813778487,4.90487611,4.90439631
41.455322,4.89897949,4.90316408,-0.064688413,4.90316408,4.9026816
41.465814,5.38516481,4.90145235,0.695494399,4.90145235,4.90096718
41.476305,5.74456265,4.89974109,0.919141747,4.89974109,4.8992532
41.486797,4.35889894,4.89802999,-0.734255438,4.89802999,4.89753936
41.497288,4.69041576,4.89631937,-0.453766027,4.89631937,4.89582597
41.50778,3,4.8946089,-1.37644793,4.8946089,4.89411272
41.518272,5.09901951,4.89289875,0.454005246,4.89289875,4.89239976
41.528763,5.38516481,4.89118909,0.702834061,4.89118909,4.89068727
41.539255,4.58257569,4.88947959,-0.553989076,4.88947959,4.88897492
41.549746,4.79583152,4.88777059,-0.303214547,4.88777059,4.88726303
41.560238,4.89897949,4.88606175,0.113656229,4.88606175,4.88555129
41.57073,4,4.88435324,-0.940400576,4.88435324,4.88383986
41.581221,5,4.88264524,0.342570812,4.88264524,4.88212891
41.591713,4.35889894,4.88093741,-0.722522295,4.88093741,4.88041811
41.602204,5.65685425,4.87923009,0.881830008,4.87923009,4.87870778
41.612696,4.69041576,4.87752294,-0.432558879,4.87752294,4.87699762
41.623188,4.35889894,4.87581615,-0.718969543,4.87581615,4.87528777
41.633679,4,4.87410986,-0.934938428,4.87410986,4.87357841
41.644171,4.58257569,4.87240377,-0.538356827,4.87240377,4.87186922
41.654662,4.79583152,4.87069819,-0.273617739,4.87069819,4.87016051
41.665154,4.89897949,4.86899281,0.173166622,4.86899281,4.86845197
41.675646,4.69041576,4.86728778,-0.420561556,4.86728778,4.86674377
41.686137,5,4.86558328,0.366628855,4.86558328,4.86503606
41.696629,4.12310563,4.86387898,-0.860681915,4.86387898,4.86332853
41.70712,4.89897949,4.86217522,0.191844387,4.86217522,4.8616215
41.717612,5.38516481,4.86047166,0.724357061,4.86047166,4.85991465
41.728104,3.60555128,4.85876847,-1.11947184,4.85876847,4.85820814
41.738595,4.69041576,4.85706582,-0.408227946,4.85706582,4.85650214
41.749087,5.65685425,4.85536338,0.895260225,4.85536338,4.85479633
41.759578,5.29150262,4.85366149,0.661695653,4.85366149,4.85309103
41.77007,5,4.85195981,0.38475991,4.85195981,4.85138592
41.780562,5.09901951,4.85025852,0.498759452,4.85025852,4.84968117
41.791053,5,4.84855778,0.389155774,4.84855778,4.84797693
41.801545,4.69041576,4.84685727,-0.395526881,4.84685727,4.8462729
41.812036,4.58257569,4.84515732,-0.512427187,4.84515732,4.84456938
41.822528,4.47213595,4.84345759,-0.609361665,4.84345759,4.84286607
41.83302,4.89897949,4.84175827,0.239209565,4.84175827,4.84116313
41.843511,4.69041576,4.84005951,-0.386838141,4.84005951,4.83946071
41.854003,4.47213595,4.83836099,-0.605165292,4.83836099,4.8377585
41.864494,5.09901951,4.83666303,0.51220746,4.83666303,4.83605683
41.874986,4.24264069,4.83496532,-0.769626297,4.83496532,4.83435537
41.885478,4.47213595,4.83326803,-0.600942654,4.83326803,4.83265429
41.895969,4.79583152,4.83157131,-0.189049684,4.83157131,4.83095375
41.906461,4.79583152,4.82987484,-0.184508309,4.82987484,4.82925343
41.916952,4.58257569,4.82817895,-0.495583754,4.82817895,4.82755366
41.927444,5,4.82648332,0.416553328,4.82648332,4.82585411
41.937936,4.12310563,4.82478812,-0.837664906,4.82478812,4.82415494
41.948427,5.47722558,4.82309351,0.808784316,4.82309351,4.82245633
41.958919,4.79583152,4.82139916,-0.159898822,4.82139916,4.82075795
41.96941,5,4.8197054,0.424611115,4.8197054,4.81906013
41.979902,5,4.81801192,0.426600611,4.81801192,4.81736254
41.990394,4.35889894,4.81631887,-0.67632827,4.81631887,4.81566535
42.000885,4.69041576,4.81462643,-0.352435337,4.81462643,4.81396872
42.011377,4.69041576,4.81293426,-0.350026431,4.81293426,4.81227233
42.021868,4.69041576,4.8112427,-0.347601702,4.8112427,4.81057651
42.03236,4.24264069,4.80955143,-0.752934754,4.80955143,4.80888094
42.042852,4.79583152,4.80786061,-0.109677179,4.80786061,4.80718578
42.053343,5.29150262,4.8061704,0.696657896,4.8061704,4.80549119
42.063835,4.24264069,4.80448048,-0.749559734,4.80448048,4.80379685
42.074326,4.89897949,4.80279118,0.310142388,4.80279118,4.80210309
42.084818,5.09901951,4.80110219,0.545818034,4.80110219,4.80040958
42.09531,3.60555128,4.79941365,-1.0926401,4.79941365,4.7987165
42.105801,5.38516481,4.79772574,0.766445733,4.79772574,4.797024
42.116293,4.89897949,4.79603814,0.320844731,4.79603814,4.79533176
42.126784,5,4.79435118,0.453485197,4.79435118,4.79364011
42.137276,5.74456265,4.79266452,0.975652667,4.79266452,4.79194872
42.147768,4.58257569,4.79097834,-0.456511386,4.79097834,4.79025777
42.158259,4.12310563,4.7892928,-0.8162029,4.7892928,4.78856741
42.168751,4.58257569,4.78800543,-0.45324357,4.78800543,4.78687733
42.179242,4,4.78632232,-0.886748171,4.78632232,4.78518784
42.189734,5,4.78463954,0.464069453,4.78463954,4.78349863
42.200226,6,4.78295726,1.1031966,4.78295726,4.78180986
42.210717,4.47213595,4.78127565,-0.55600332,4.78127565,4.7801217
42.221209,4,4.77959437,-0.882946415,4.77959437,4.77843382
42.2317,4.69041576,4.77791376,-0.295800612,4.77791376,4.77674655
42.242192,4.69041576,4.7762335,-0.292946652,4.7762335,4.77505956
42.252684,4.35889894,4.77455375,-0.644712965,4.77455375,4.77337303
42.263175,5,4.77287468,0.476576672,4.77287468,4.77168711
42.273667,5.56776436,4.77119596,0.89250681,4.77119596,4.77000149
42.284158,4.69041576,4.76951792,-0.281251058,4.76951792,4.76831649
42.29465,4.69041576,4.76784024,-0.278252549,4.76784024,4.76663178
42.305142,5.38516481,4.76616309,0.786766622,4.76616309,4.76494754
42.315633,4.79583152,4.76448663,0.177044902,4.76448663,4.76326392
42.326125,5.56776436,4.76281053,0.897192192,4.76281053,4.7615806
42.336616,4,4.76113514,-0.872430591,4.76113514,4.75989792
42.347108,5.29150262,4.75946011,0.729412441,4.75946011,4.75821554
42.3576,4,4.75778563,-0.870508835,4.75778563,4.75653363
42.368091,4.69041576,4.75611185,-0.256312489,4.75611185,4.75485236
42.378583,4.58257569,4.75443846,-0.41456334,4.75443846,4.75317141
42.389074,4.24264069,4.75276577,-0.714230414,4.75276577,4.75149109
42.399566,4.24264069,4.75109348,-0.713058756,4.75109348,4.74981109
42.410058,3.31662479,4.74942174,-1.19699497,4.74942174,4.74813158
42.420549,4.24264069,4.74775071,-0.71071093,4.74775071,4.7464527
42.431041,4.47213595,4.74608009,-0.523396728,4.74608009,4.74477416
42.441532,4.89897949,4.74441019,0.393153019,4.74441019,4.74309626
42.452024,4,4.7427407,-0.861824051,4.7427407,4.74141869
42.462516,3.87298335,4.74107177,-0.931712629,4.74107177,4.73974161
42.473007,5.38516481,4.73940358,0.803592702,4.73940358,4.73806519
42.483499,5.09901951,4.7377358,0.601068811,4.7377358,4.7363891
42.49399,4.79583152,4.73606876,0.244464243,4.73606876,4.73471367
42.504482,4.89897949,4.73440214,0.405681337,4.73440214,4.73303858
42.514974,4.47213595,4.7327361,-0.510490107,4.7327361,4.73136399
42.525465,4.47213595,4.73107082,-0.508856424,4.73107082,4.72969007
42.535957,5,4.72940596,0.520186545,4.72940596,4.72801649
42.546448,4.79583152,4.72774185,0.260939972,4.72774185,4.72634358
42.55694,4.79583152,4.72607819,0.264108568,4.72607819,4.72467101
42.567432,4.47213595,4.72441512,-0.502273994,4.72441512,4.72299896
42.577923,4.47213595,4.72275282,-0.50061648,4.72275282,4.72132759
42.588415,3.31662479,4.72109096,-1.18510175,4.72109096,4.71965657
42.598906,4.69041576,4.71942987,-0.170335279,4.71942987,4.71798622
42.609398,4.35889894,4.71776923,-0.599057833,4.71776923,4.71631624
42.61989,4.58257569,4.71610921,-0.365422381,4.71610921,4.71464677
42.630381,4.47213595,4.71444997,-0.492254013,4.71444997,4.71297799
42.640873,4.35889894,4.71279119,-0.594888432,4.71279119,4.71130957
42.651364,4.69041576,4.71113319,-0.143935524,4.71113319,4.70964185
42.661856,4.12310563,4.70947567,-0.76574803,4.70947567,4.70797449
42.672348,5.47722558,4.70781878,0.877158364,4.70781878,4.70630766
42.682839,5.19615242,4.70616268,0.699992673,4.70616268,4.70464152
42.693331,4.69041576,4.70450706,-0.1187068,4.70450706,4.70297576
42.703822,4.47213595,4.70285225,-0.480329358,4.70285225,4.70131069
42.714314,4.69041576,4.70119792,-0.103837176,4.70119792,4.69964601
42.724806,4.79583152,4.69954424,0.310301923,4.69954424,4.69798186
42.735297,4.35889894,4.69789137,-0.582230563,4.69789137,4.69631841
42.745789,3.31662479,4.696239,-1.1745698,4.696239,4.69465536
42.75628,4,4.69458745,-0.833419132,4.69458745,4.692993
42.766772,4.12310563,4.6929364,-0.754871365,4.6929364,4.69133103
42.777264,4.58257569,4.69128602,-0.329712495,4.69128602,4.68966962
42.787755,4.69041576,4.68963647,0.0279157028,4.68963647,4.68800891
42.798247,4.24264069,4.68798744,-0.667343055,4.68798744,4.6863486
42.808738,4.35889894,4.68633924,-0.572223992,4.68633924,4.68468901
42.81923,4.35889894,4.68469157,-0.570782466,4.68469157,4.68302981
42.829722,4.24264069,4.68304458,-0.663629333,4.68304458,4.68137117
42.840213,5,4.68139844,0.564448016,4.68139844,4.67971325
42.850705,5.19615242,4.67975283,0.718609484,4.67975283,4.67805573
42.861196,4.47213595,4.67810808,-0.45384152,4.67810808,4.67639894
42.871688,4.69041576,4.67646387,0.118118105,4.67646387,4.67474256
42.88218,4.69041576,4.67482037,0.1248815,4.67482037,4.67308674
42.892671,5,4.67317773,0.571683712,4.67317773,4.67143166
42.903163,5.47722558,4.67153565,0.897602318,4.67153565,4.66977698
42.913654,4.35889894,4.66989445,-0.557669707,4.66989445,4.66812304
42.924146,3.87298335,4.6682538,-0.891779377,4.6682538,4.66646952
42.934638,4.79583152,4.66661389,0.359468548,4.66661389,4.66481657
42.945129,4.69041576,4.66497485,0.159502054,4.66497485,4.66316437
42.955621,4.12310563,4.6633364,-0.735003928,4.6633364,4.66151258
42.966112,4.35889894,4.66169884,-0.550272566,4.66169884,4.65986154
42.976604,5.91607978,4.66006187,1.12072205,4.66006187,4.65821092
42.987096,4.89897949,4.65842564,0.490462891,4.65842564,4.65656089
42.997587,4.47213595,4.65679032,-0.42971428,4.65679032,4.65491161
43.008079,5.09901951,4.6551556,0.666231129,4.6551556,4.65326276
43.01857,4.35889894,4.65352179,-0.542791716,4.65352179,4.65161465
43.029062,4.12310563,4.65188859,-0.727174648,4.65188859,4.64996699
43.039554,4.35889894,4.65025617,-0.53977516,4.65025617,4.64831992
43.050045,4.47213595,4.64862467,-0.420105598,4.64862467,4.6466736
43.060537,4.24264069,4.64699379,-0.635887652,4.64699379,4.64502773
43.071028,4.24264069,4.64536386,-0.634604735,4.64536386,4.64338262
43.08152,4,4.64373455,-0.802330701,4.64373455,4.64173795
43.092012,4.35889894,4.64210604,-0.532172059,4.64210604,4.64009388
43.102503,4.79583152,4.64047849,0.394148495,4.64047849,4.63845058
43.112995,3.60555128,4.63885158,-1.0165138,4.63885158,4.63680773
43.123486,4.58257569,4.63722563,-0.233773262,4.63722563,4.63516565
43.133978,3.31662479,4.63560035,-1.14846661,4.63560035,4.63352402
43.14447,4.24264069,4.63397588,-0.625567895,4.63397588,4.63188301
43.154961,4.24264069,4.63235239,-0.624268935,4.63235239,4.63024277
43.165453,4.47213595,4.63072958,-0.398238146,4.63072958,4.62860299
43.175944,4.69041576,4.62910775,0.24760454,4.62910775,4.62696398
43.186436,4.89897949,4.62748661,0.521049779,4.62748661,4.62532544
43.196928,4.79583152,4.62586632,0.412268361,4.62586632,4.62368752
43.207419,4.79583152,4.62424704,0.414227579,4.62424704,4.62205037
43.217911,4.58257569,4.62262845,-0.200131857,4.62262845,4.6204137
43.228402,4.35889894,4.62101089,-0.511968698,4.62101089,4.61877782
43.238894,4.24264069,4.61939404,-0.613802376,4.61939404,4.6171424
43.249386,3.87298335,4.61777807,-0.863014905,4.61777807,4.61550762
43.259877,4.47213595,4.61616314,-0.379509133,4.61616314,4.61387362
43.270369,4,4.61454894,-0.783931717,4.61454894,4.61224011
43.28086,4.35889894,4.61293578,-0.504020675,4.61293578,4.61060738
43.291352,4.69041576,4.61132338,0.281233673,4.61132338,4.60897514
43.301844,4,4.60971189,-0.780840499,4.60971189,4.60734354
43.312335,4.35889894,4.60810146,-0.499201878,4.60810146,4.60571273
43.322827,4.24264069,4.6064918,-0.603200723,4.6064918,4.60408241
43.333318,5.09901951,4.60488322,0.702948284,4.60488322,4.60245289
43.34381,5.19615242,4.60327543,0.76998506,4.60327543,4.60082387
43.354302,4.47213595,4.60166858,-0.359906411,4.60166858,4.59919549
43.364793,4.24264069,4.60006283,-0.597847929,4.60006283,4.59756791
43.375285,4.58257569,4.59845789,-0.12602459,4.59845789,4.59594083
43.385776,4.35889894,4.59685407,-0.487806444,4.59685407,4.59431456
43.396268,4.47213595,4.59525107,-0.350877633,4.59525107,4.59268879
43.40676,5,4.59364905,0.637456627,4.59364905,4.59106368
43.417251,4,4.59204817,-0.769446666,4.59204817,4.58943938
43.427743,4.35889894,4.59044814,-0.481195591,4.59044814,4.58781558
43.438234,4.58257569,4.58884927,-0.0792058923,4.58884927,4.5861926
43.448726,4.47213595,4.58725126,-0.339286463,4.58725126,4.58457013
43.459218,4.58257569,4.58565427,-0.0554849399,4.58565427,4.58294832
43.469709,4.58257569,4.58405847,-0.0385068622,4.58405847,4.58132733
43.480201,4.12310563,4.58246356,-0.677759498,4.58246356,4.57970686
43.490692,4.12310563,4.58086986,-0.67658276,4.58086986,4.57808721
43.501184,4.12310563,4.57927706,-0.675404645,4.57927706,4.57646808
43.511676,4.69041576,4.57768533,0.33575352,4.57768533,4.57484962
43.522167,3.87298335,4.57609484,-0.838517438,4.57609484,4.57323199
43.532659,5.29150262,4.57450529,0.846756952,4.57450529,4.57161488
43.54315,4,4.57291699,-0.756912799,4.57291699,4.5699986
43.553642,4.35889894,4.57132965,-0.460902052,4.57132965,4.56838285
43.564134,4.24264069,4.56974343,-0.571928965,4.56974343,4.56676778
43.574625,5.47722558,4.5681585,0.953450092,4.5681585,4.56515355
43.585117,4.47213595,4.56657456,-0.307308648,4.56657456,4.56353985
43.595608,4.24264069,4.56499193,-0.567759848,4.56499193,4.56192698
43.6061,4.79583152,4.56341032,0.48210082,4.56341032,4.56031466
43.616592,4.12310563,4.56182989,-0.662362641,4.56182989,4.55870302
43.627083,3.31662479,4.56025081,-1.11517982,4.56025081,4.55709222
43.637575,4.12310563,4.55867278,-0.65997512,4.55867278,4.55548197
43.648066,4,4.55709613,-0.746388725,4.55709613,4.55387256
43.658558,4.58257569,4.55552056,0.164484463,4.55552056,4.55226369
43.66905,4.58257569,4.55394623,0.169202432,4.55394623,4.55065552
43.679541,4.69041576,4.55237332,0.371540631,4.55237332,4.5490482
43.690033,4.35889894,4.55080153,-0.438066878,4.55080153,4.54744143
43.700524,5,4.54923119,0.671393187,4.54923119,4.54583552
43.711016,4.47213595,4.547662,-0.274820023,4.547662,4.54423015
43.721508,4.35889894,4.54609413,-0.432660595,4.54609413,4.54262549
43.731999,4.69041576,4.54452776,0.381952881,4.54452776,4.54102169
43.742491,4.79583152,4.54296259,0.502860754,4.54296259,4.53941845
43.752982,4.58257569,4.54139893,0.202920575,4.54139893,4.53781607
43.763474,4.69041576,4.53983653,0.388045402,4.53983653,4.53621424
43.773966,4.24264069,4.53827552,-0.543723125,4.53827552,4.53461313
43.784457,5,4.5367161,0.680649618,4.5367161,4.53301289
43.794949,3.87298335,4.53515797,-0.813741127,4.53515797,4.53141321
43.80544,3.74165739,4.53360145,-0.889912392,4.53360145,4.5298144
43.815932,4.79583152,4.53204627,0.513600284,4.53204627,4.52821616
43.826424,4.47213595,4.5304926,-0.241571197,4.5304926,4.52661864
43.836915,5,4.5289406,0.686337672,4.5289406,4.52502199
43.847407,5,4.52739,0.687466361,4.52739,4.52342591
43.857898,4.79583152,4.52584112,0.519606004,4.52584112,4.52183071
43.86839,4.12310563,4.52429369,-0.633394086,4.52429369,4.52023609
43.878882,4.69041576,4.52274788,0.409472682,4.52274788,4.51864219
43.889373,4.69041576,4.52120386,0.411353738,4.52120386,4.51704918
43.899865,4.69041576,4.51966136,0.413224389,4.51966136,4.51545674
43.910356,5.56776436,4.51812071,1.02452118,4.51812071,4.5138652
43.920848,4.58257569,4.51658163,0.2568931,4.51658163,4.51227423
43.93134,4.12310563,4.5150443,-0.626050059,4.5150443,4.510684
43.941831,4.69041576,4.5135089,0.420602972,4.5135089,4.50909466
43.952323,5,4.51197516,0.698587746,4.51197516,4.5075059
43.962814,3.87298335,4.51044341,-0.798410961,4.51044341,4.50591804
43.973306,4.35889894,4.50891338,-0.387316976,4.50891338,4.50433077
43.983798,3.87298335,4.50738526,-0.796493513,4.50738526,4.50274424
43.994289,4.58257569,4.50585923,0.276977377,4.50585923,4.50115861
44.004781,4,4.50433502,-0.710165488,4.50433502,4.49957357
44.015272,4.69041576,4.50281297,0.433131376,4.50281297,4.49798943
44.025764,4.35889894,4.50129282,-0.377351137,4.50129282,4.49640589
44.036256,4.24264069,4.49977476,-0.507083896,4.49977476,4.4948231
44.046747,4.35889894,4.49825898,-0.373309569,4.49825898,4.49324122
44.057239,4.35889894,4.49674522,-0.371276544,4.49674522,4.49165993
44.06773,5.56776436,4.49523381,1.03563051,4.49523381,4.49007956
44.078222,3.46410162,4.49372452,-1.01470336,4.49372452,4.48849978
44.088714,5.19615242,4.49221753,0.839008278,4.49221753,4.48692077
44.099205,3.46410162,4.49071304,-1.01321835,4.49071304,4.48534267
44.109697,4.35889894,4.48921081,-0.360987348,4.48921081,4.48376518
44.120188,4.69041576,4.48771117,0.450227261,4.48771117,4.4821886
44.13068,3.87298335,4.4862139,-0.783090389,4.4862139,4.48061263
44.141172,5.38516481,4.4847192,0.948918127,4.4847192,4.47903743
44.151663,4.47213595,4.48322725,-0.105315233,4.48322725,4.47746315
44.162155,4.58257569,4.48173785,0.317549752,4.48173785,4.47588949
44.172646,4.89897949,4.48025133,0.647092074,4.48025133,4.47431674
44.183138,4.12310563,4.47876748,-0.596373925,4.47876748,4.47274462
44.19363,5,4.47728651,0.722989273,4.47728651,4.47117327
44.204121,4,4.47580863,-0.689788829,4.47580863,4.46960284
44.214613,5.29150262,4.47433362,0.903974003,4.47433362,4.46803304
44.225104,4.47213595,4.47286186,-0.0269425991,4.47286186,4.46646417
44.235596,4.58257569,4.47139313,0.333440499,4.47139313,4.46489592
44.246088,4,4.46992766,-0.685512697,4.46992766,4.46332845
44.256579,3.87298335,4.46846567,-0.771675014,4.46846567,4.46176192
44.267071,4.24264069,4.46700698,-0.473673196,4.46700698,4.46019602
44.277562,4,4.46555196,-0.682313683,4.46555196,4.45863105
44.288054,5.09901951,4.46410043,0.7968181,4.46410043,4.45706671
44.298546,4.24264069,4.46265263,-0.469054303,4.46265263,4.45550317
44.309037,4.35889894,4.4612088,-0.319859115,4.4612088,4.45394056
44.319529,4.79583152,4.45976878,0.579709191,4.45976878,4.45237859
44.33002,4.35889894,4.45833296,-0.315331595,4.45833296,4.45081756
44.340512,4,4.45690119,-0.675944664,4.45690119,4.44925717
44.351004,4.35889894,4.45547373,-0.310764845,4.45547373,4.44769758
44.361495,5.29150262,4.45405086,0.915123906,4.45405086,4.44613893
44.371987,5.38516481,4.45263244,0.965677157,4.45263244,4.44458093
44.382478,4.47213595,4.45121888,0.144627368,4.45121888,4.44302388
44.39297,4.47213595,4.44981007,0.149418473,4.44981007,4.44146748
44.403462,5.74456265,4.44840632,1.13848862,4.44840632,4.43991187
44.413953,5.38516481,4.44700791,0.968584998,4.44700791,4.43835722
44.424445,5,4.44561476,0.744570508,4.44561476,4.43680322
44.434936,4.58257569,4.44422732,0.371952115,4.44422732,4.43525018
44.445428,4.79583152,4.44284552,0.594126252,4.44284552,4.43369779
44.45592,4.69041576,4.4414697,0.498944946,4.4414697,4.43214621
44.466411,4.89897949,4.44010021,0.677406289,4.44010021,4.43059559
44.476903,4.89897949,4.438737,0.678411737,4.438737,4.42904563
44.487394,4.89897949,4.43738059,0.6794107,4.43738059,4.42749662
44.497886,4.69041576,4.43603095,0.504365746,4.43603095,4.42594829
44.508378,4.47213595,4.4346885,0.193513449,4.4346885,4.42440076
44.518869,4.24264069,4.43335363,-0.436706931,4.43335363,4.4228542
44.529361,4.47213595,4.43202639,0.200273735,4.43202639,4.42130831
44.539852,4.89897949,4.43070733,0.684304138,4.43070733,4.41976338
44.550344,4.35889894,4.42939655,-0.265513844,4.42939655,4.41821913
44.560836,4.89897949,4.4280945,0.686210598,4.4280945,4.4166757
44.571327,4.47213595,4.42680169,0.212918447,4.42680169,4.41513323
44.581819,4.35889894,4.42551826,-0.258107171,4.42551826,4.41359144
44.59231,4.69041576,4.42424486,0.515917537,4.42424486,4.41205063
44.602802,4.24264069,4.42298168,-0.424665747,4.42298168,4.41051049
44.613294,5.19615242,4.42172933,0.880013122,4.42172933,4.40897118
44.623785,3.60555128,4.4204884,-0.902738679,4.4204884,4.40743284
44.634277,4.12310563,4.41925918,-0.54419992,4.41925918,4.40589519
44.644768,4.69041576,4.41804246,0.521893951,4.41804246,4.40435851
44.65526,4.79583152,4.41683861,0.615624002,4.41683861,4.40282252
44.665752,4.69041576,4.41564837,0.524182595,4.41564837,4.40128737
44.676243,4.24264069,4.41447252,-0.414526029,4.41447252,4.39975319
44.686735,4.79583152,4.41331155,0.618481993,4.41331155,4.39821971
44.697226,4.35889894,4.41216645,-0.23079754,4.41216645,4.3966872
44.707718,4.12310563,4.41103781,-0.536593132,4.41103781,4.39515539
44.71821,3.74165739,4.40992663,-0.817477365,4.40992663,4.39362443
44.728701,4.58257569,4.40883393,0.416823421,4.40883393,4.39209444
44.739193,4.24264069,4.40776051,-0.406349382,4.40776051,4.39056516
44.749684,4.58257569,4.40670764,0.419366256,4.40670764,4.38903686
44.760176,5.19615242,4.40567627,0.889087257,4.40567627,4.38750926
44.770668,4.24264069,4.40466775,-0.402525848,4.40466775,4.38598251
44.781159,4.12310563,4.40368348,-0.529696002,4.40368348,4.38445676
44.791651,4.47213595,4.40272472,0.263460121,4.40272472,4.3829317
44.802142,4.69041576,4.40179319,0.537236048,4.40179319,4.38140764
44.812634,4.89897949,4.40089037,0.705754288,4.40089037,4.37988429
44.823126,4.58257569,4.40001815,0.427267528,4.40001815,4.37836179
44.833617,4.12310563,4.39917856,-0.525426433,4.39917856,4.37684029
44.844109,4.24264069,4.39837354,-0.394630014,4.39837354,4.37531949
44.8546,4.58257569,4.39760551,0.430081602,4.39760551,4.3737997
44.865092,5,4.39687682,0.776610059,4.39687682,4.37228062
44.875584,4.89897949,4.39619022,0.709076347,4.39619022,4.3707624
44.886075,4.24264069,4.39554871,-0.391034558,4.39554871,4.36924519
44.896567,5,4.39495537,0.777846151,4.39495537,4.36772869
44.907058,3.87298335,4.39441378,-0.722101403,4.39441378,4.36621319
44.91755,4,4.39392767,-0.627636577,4.39392767,4.36469842
44.928042,4.89897949,4.39350127,0.710969911,4.39350127,4.36318451
44.938533,4.69041576,4.3931392,0.545230744,4.3931392,4.36167161
44.949025,5,4.39284641,0.779200609,4.39284641,4.36015943
44.959516,5.09901951,4.39262853,0.840470693,4.39262853,4.35864827
44.970008,5.47722558,4.39249162,1.04150562,4.39249162,4.35713783
44.9805,4.47213595,4.39244247,0.282300344,4.39244247,4.35562826
44.990991,4,4.39248857,-0.626489085,4.39248857,4.35411971
45.001483,4.69041576,4.39263824,0.545689946,4.39263824,4.35261189
45.011974,4.12310563,4.3929007,-0.519418014,4.3929007,4.35110508
45.022466,4.58257569,4.39328629,0.435074021,4.39328629,4.34959901
45.032958,4.12310563,4.39380652,-0.520289241,4.39380652,4.34809381
45.043449,4.35889894,4.39447422,-0.188614084,4.39447422,4.34658963
45.053941,4,4.39530398,-0.628732045,4.39530398,4.34508619
45.064432,4.24264069,4.39631198,-0.392009307,4.39631198,4.34358377
45.074924,3.74165739,4.39751681,-0.809851485,4.39751681,4.34208209
45.085416,3.87298335,4.39893925,-0.725228175,4.39893925,4.34058129
45.095907,4.69041576,4.40060283,0.538342761,4.40060283,4.33908152
45.106399,5.19615242,4.40253486,0.890852153,4.40253486,4.33758249
45.11689,3.60555128,4.40476588,-0.893988034,4.40476588,4.33608449
45.127382,3.87298335,4.40733174,-0.730991378,4.40733174,4.33458723
45.137874,4.12310563,4.41173691,-0.537244158,4.41173691,4.33309086
45.148365,4.24264069,4.41510411,-0.415287162,4.41510411,4.33159552
45.158857,4,4.41894909,-0.647262767,4.41894909,4.33010093
45.169348,5.09901951,4.42333513,0.822000233,4.42333513,4.32860738
45.17984,4.47213595,4.42833808,0.209279424,4.42833808,4.32711457
45.190332,4.79583152,4.43404596,0.601486128,4.43404596,4.32562266
45.200823,5.19615242,4.44056285,0.869246557,4.44056285,4.32413178
45.211315,3.87298335,4.44801464,-0.758308177,4.44801464,4.32264166
45.221806,3.74165739,4.45654937,-0.84551285,4.45654937,4.32115258
45.232298,4.35889894,4.46634879,-0.327795434,4.46634879,4.31966425
45.24279,4.58257569,4.47763096,0.323951749,4.47763096,4.31817682
45.253281,4.47213595,4.49066216,-0.13611102,4.49066216,4.31669044
45.263773,5.74456265,4.50577458,1.11300857,4.50577458,4.31520481
45.274264,4.47213595,4.52337527,-0.226361017,4.52337527,4.31372023
45.284756,4.12310563,4.54398148,-0.648749452,4.54398148,4.31223641
45.295248,4.58257569,4.56824264,0.119720724,4.56824264,4.3107535
45.305739,4.47213595,4.59698878,-0.353345188,4.59698878,4.30927163
45.316231,4,4.63130329,-0.794545965,4.63130329,4.30779053
45.326722,4.89897949,4.672597,0.475796689,4.672597,4.30631047
45.337214,4.12310563,4.7227896,-0.774392649,4.7227896,4.30483119
45.347706,5.47722558,4.78461001,0.832235281,4.78461001,4.30335281
45.358197,5.19615242,4.86245369,0.577666626,4.86245369,4.30187549
45.368689,5.74456265,4.96484469,0.883016397,4.96484469,4.30039894
45.37918,5.47722558,5.11095683,0.60520141,5.11095683,4.29892344
45.389672,6.08276253,5.34558088,0.858592832,5.34558088,4.29744872
45.400164,6,5.76276811,0.487064568,5.76276811,4.29597491
45.410655,7.74596669,6.51756437,1.10833313,6.51756437,4.29450216
45.421147,7.61577311,7.77654322,-0.400961485,7.77654322,4.29303018
45.431638,9.64365076,9.59830912,0.212935773,9.59830912,4.29155927
45.44213,10.8627805,11.8401258,-0.988607757,11.8401258,4.29008913
45.452622,13.6381817,14.1556944,-0.719383557,14.1556944,4.28861992
45.463113,15.5884573,16.0550435,-0.683071171,16.0550435,4.28715176
45.473605,16.583124,17.0119993,-0.654885718,17.0119993,4.28568439
45.484096,17.8044938,16.7053103,1.04841954,16.7053103,4.28421809
45.494588,16.2788206,15.2534861,1.01258804,15.2534861,4.28275257
45.50508,13.2287566,13.1057564,0.350713753,13.1057564,4.28128797
45.515571,11.0905365,10.7817216,0.555711209,10.7817216,4.27982444
45.526063,8.30662386,8.70807288,-0.633600048,8.70807288,4.2783617
45.536554,6.92820323,7.13908177,-0.459215133,7.13908177,4.27690003
45.547046,5.65685425,6.12015477,-0.680661828,6.12015477,4.27543915
45.557538,6,5.53242302,0.683796008,5.53242302,4.2739792
45.568029,5.56776436,5.20662845,0.60094585,5.20662845,4.27252032
45.578521,5.29150262,5.01491407,0.525916866,5.01491407,4.27106223
45.589012,4.69041576,4.88810888,-0.444626942,4.88810888,4.26960522
45.599504,5.29150262,4.79489262,0.704705616,4.79489262,4.268149
45.609996,3.74165739,4.72181125,-0.990027201,4.72181125,4.26669372
45.620487,4.35889894,4.66255619,-0.551051034,4.66255619,4.26523952
45.630979,4.89897949,4.61358733,0.534221076,4.61358733,4.26378611
45.64147,5.09901951,4.57259799,0.725549117,4.57259799,4.26233379
45.651962,4.58257569,4.53791236,0.211337013,4.53791236,4.26088226
45.662454,4.89897949,4.50828275,0.625057385,4.50828275,4.25943168
45.672945,4.35889894,4.48275195,-0.351927559,4.48275195,4.25798217
45.683437,5.09901951,4.46056968,0.799030556,4.46056968,4.25653347
45.693928,3.87298335,4.44115503,-0.753771638,4.44115503,4.25508585
45.70442,4.12310563,4.42403977,-0.548574648,4.42403977,4.25363904
45.714912,4,4.408854,-0.639416919,4.408854,4.25219318
45.725403,4.58257569,4.3952985,0.432755349,4.3952985,4.2507484
45.735895,4.35889894,4.38312599,-0.155650397,4.38312599,4.24930443
45.746386,4.89897949,4.3721381,0.725838404,4.3721381,4.24786154
45.756878,3.60555128,4.36216679,-0.869836485,4.36216679,4.24641947
45.76737,4.79583152,4.35307517,0.665399393,4.35307517,4.24497835
45.777861,4.47213595,4.3447485,0.356913788,4.3447485,4.24353832
45.788353,4,4.33708792,-0.580592728,4.33708792,4.2420991
45.798844,4.58257569,4.33001258,0.502556579,4.33001258,4.24066097
45.809336,4.12310563,4.32345108,-0.447599653,4.32345108,4.23922366
45.819828,5,4.31734421,0.826229863,4.31734421,4.23778731
45.830319,4.69041576,4.31164107,0.615446737,4.31164107,4.23635205
45.840811,3.16227766,4.30629617,-1.06958801,4.30629617,4.23491761
45.851302,4.79583152,4.30127209,0.703249196,4.30127209,4.23348426
45.861794,4.24264069,4.29653443,-0.232150266,4.29653443,4.23205174
45.872286,4,4.29205451,-0.540420678,4.29205451,4.23062018
45.882777,4.47213595,4.28780715,0.429335301,4.28780715,4.22918971
45.893269,3,4.28376909,-1.13303534,4.28376909,4.22776008
45.90376,4.35889894,4.27992128,0.281029647,4.27992128,4.22633153
45.914252,5.19615242,4.27624549,0.959117791,4.27624549,4.22490382
45.924744,4.79583152,4.27272655,0.723259964,4.27272655,4.22347707
45.935235,4,4.26935097,-0.518990339,4.26935097,4.22205143
45.945727,3.31662479,4.2661058,-0.974413159,4.2661058,4.22062661
45.956218,4.58257569,4.26298064,0.565327391,4.26298064,4.2192029
45.96671,4.47213595,4.25996503,0.460620153,4.25996503,4.21778001
45.977202,4.35889894,4.25705042,0.319137147,4.25705042,4.2163581
45.987693,4.58257569,4.25422911,0.573015342,4.25422911,4.2149373
45.998185,4.58257569,4.25149336,0.575397544,4.25149336,4.21351733
46.008676,4.24264069,4.2488372,-0.0787179103,4.2488372,4.21209846
46.019168,4.69041576,4.24625422,0.666454453,4.24625422,4.21068043
46.02966,3.16227766,4.24373935,-1.0399335,4.24373935,4.20926338
46.040151,4,4.24128797,-0.491210717,4.24128797,4.20784744
46.050643,4.47213595,4.23889518,0.482950079,4.23889518,4.20643233
46.061134,3.74165739,4.2365574,-0.703491306,4.2365574,4.20501834
46.071626,3.31662479,4.23427288,-0.957939501,4.23427288,4.20360519
46.082118,3.87298335,4.23203375,-0.599208145,4.23203375,4.20219302
46.092609,4.69041576,4.22983948,0.678657706,4.22983948,4.20078196
46.103101,3.31662479,4.22768682,-0.954495692,4.22768682,4.19937175
46.113592,3.74165739,4.22557357,-0.695640844,4.22557357,4.19796265
46.124084,3.16227766,4.22349694,-1.03015498,4.22349694,4.1965544
46.134576,4.79583152,4.22145491,0.757876381,4.22145491,4.19514712
46.145067,4.35889894,4.21944565,0.373434455,4.21944565,4.19374097
46.155559,4.24264069,4.21746688,0.158662548,4.21746688,4.19233567
46.16605,4.24264069,4.21551725,0.164691959,4.21551725,4.19093148
46.176542,4.79583152,4.21359476,0.763044408,4.21359476,4.18952815
46.187034,4.58257569,4.2116981,0.6089972,4.2116981,4.1881258
46.197525,3.87298335,4.20982609,-0.580381546,4.20982609,4.18672458
46.208017,4.89897949,4.20797705,0.831265561,4.20797705,4.1853242
46.218508,4.69041576,4.20615016,0.695891945,4.20615016,4.18392495
46.229,4.35889894,4.20434395,0.393134833,4.20434395,4.18252656
46.239492,4,4.20255755,-0.450063938,4.20255755,4.18112916
46.249983,4.12310563,4.20079017,-0.278719465,4.20079017,4.17973288
46.260475,5.56776436,4.19904056,1.1699247,4.19904056,4.17833746
46.270966,3.87298335,4.19730822,-0.569495277,4.19730822,4.17694317
46.281458,3.60555128,4.19559202,-0.768141098,4.19559202,4.17554973
46.29195,4.35889894,4.1938914,0.406211204,4.1938914,4.17415729
46.302441,4.35889894,4.19220583,0.408280685,4.19220583,4.17276598
46.312933,4.12310563,4.19053433,-0.25967037,4.19053433,4.17137553
46.323424,4.58257569,4.18887662,0.627454443,4.18887662,4.16998622
46.333916,4.12310563,4.18723181,-0.253231489,4.18723181,4.16859776
46.344408,4.12310563,4.18559954,-0.249987823,4.18559954,4.16721031
46.354899,3.74165739,4.18397944,-0.665072971,4.18397944,4.16582398
46.365391,4.69041576,4.18237075,0.71277276,4.18237075,4.16443853
46.375882,4.12310563,4.18077333,-0.240141005,4.18077333,4.16305421
46.386374,3.74165739,4.17918645,-0.661459796,4.17918645,4.16167075
46.396866,4,4.17760987,-0.421437864,4.17760987,4.1602883
46.407357,5.19615242,4.17604338,1.01000447,4.17604338,4.15890699
46.417849,4.35889894,4.17448634,0.429432891,4.17448634,4.15752654
46.42834,4.24264069,4.17293869,0.26401135,4.17293869,4.15614723
46.438832,4.47213595,4.17139986,0.548394108,4.17139986,4.1547688
46.449324,3.60555128,4.16986968,-0.751211293,4.16986968,4.15339137
46.459815,2.82842712,4.16834804,-1.15754953,4.16834804,4.15201508
46.470307,3.87298335,4.16683438,-0.542080281,4.16683438,4.15063967
46.480798,4.58257569,4.16532874,0.645946556,4.16532874,4.14926539
46.49129,4.35889894,4.16383062,0.441665403,4.16383062,4.14789199
46.501782,4.79583152,4.16233992,0.795921855,4.16233992,4.14651961
46.512273,3.87298335,4.1608566,-0.536538215,4.1608566,4.14514836
46.522765,4.89897949,4.15938017,0.859999599,4.15938017,4.143778
46.533256,4.35889894,4.15791074,0.44831708,4.15791074,4.14240878
46.543748,4.24264069,4.15644784,0.293586178,4.15644784,4.14104044
46.55424,4.89897949,4.15499146,0.862547403,4.15499146,4.13967311
46.564731,5,4.15354159,0.920031746,4.15354159,4.13830693
46.575223,4.24264069,4.15209779,0.300903474,4.15209779,4.13694163
46.585714,4.47213595,4.15066021,0.566988315,4.15066021,4.13557748
46.596206,3.31662479,4.14922844,-0.912471177,4.14922844,4.13421421
46.606698,4.35889894,4.14780251,0.459452324,4.14780251,4.13285196
46.617189,4.24264069,4.14638242,0.31025516,4.14638242,4.13149086
46.627681,4.12310563,4.14496782,-0.147858681,4.14496782,4.13013065
46.638172,4.35889894,4.14355885,0.464047512,4.14355885,4.12877159
46.648664,5.38516481,4.14215517,1.11490342,4.14215517,4.12741341
46.659156,4.35889894,4.14075681,0.467056887,4.14075681,4.12605626
46.669647,4.69041576,4.13936382,0.742328724,4.13936382,4.12470026
46.680139,3.60555128,4.13797587,-0.72967431,4.13797587,4.12334515
46.69063,4.35889894,4.13659315,0.471493154,4.13659315,4.12199119
46.701122,3.60555128,4.13521532,-0.727780217,4.13521532,4.12063813
46.711614,5.09901951,4.13384245,0.982434253,4.13384245,4.11928609
46.722105,3.46410162,4.13247462,-0.81754083,4.13247462,4.1179352
46.732597,4.35889894,4.13111152,0.47727081,4.13111152,4.11658521
46.743088,5.47722558,4.12975334,1.16080672,4.12975334,4.11523638
46.75358,3.60555128,4.1283998,-0.723082656,4.1283998,4.11388844
46.764072,4.12310563,4.12705098,-0.062812072,4.12705098,4.11254153
46.774563,3.46410162,4.12570697,-0.81339127,4.12570697,4.11119578
46.785055,3.74165739,4.12436749,-0.618635676,4.12436749,4.10985093
46.795546,4.58257569,4.12303275,0.677895969,4.12303275,4.10850723
46.806038,4.69041576,4.12170248,0.754130808,4.12170248,4.10716444
46.81653,4.79583152,4.1203768,0.821860528,4.1203768,4.10582267
46.827021,4.24264069,4.11905579,0.351546435,4.11905579,4.10448207
46.837513,4.24264069,4.11773921,0.353414037,4.11773921,4.10314237
46.848004,4.89897949,4.11642728,0.884619809,4.11642728,4.10180383
46.858496,4.69041576,4.11511975,0.758482699,4.11511975,4.1004662
46.868988,3.87298335,4.11381675,-0.490747803,4.11381675,4.0991296
46.879479,4.47213595,4.1125184,0.599681214,4.1125184,4.09779416
46.889971,4.35889894,4.11122444,0.497669068,4.11122444,4.09645963
46.900462,3.74165739,4.10993514,-0.606858925,4.10993514,4.09512626
46.910954,4.35889894,4.10865026,0.500248624,4.10865026,4.0937938
46.921446,4,4.10736993,-0.327673506,4.10736993,4.09246238
46.931937,4.12310563,4.10609429,0.130427526,4.10609429,4.09113212
46.942429,3.74165739,4.10482311,-0.60263233,4.10482311,4.08980277
46.95292,4.35889894,4.10355667,0.505314037,4.10355667,4.08847459
46.963412,4.12310563,4.10229474,0.144259786,4.10229474,4.08714733
46.973904,4.12310563,4.10103748,0.148553522,4.10103748,4.0858211
46.984395,3.74165739,4.09978503,-0.598437669,4.09978503,4.08449604
46.994887,4.12310563,4.0985372,0.156743187,4.0985372,4.08317189
47.005378,4.24264069,4.09729426,0.381243266,4.09729426,4.08184891
47.01587,3.60555128,4.09605602,-0.700360437,4.09605602,4.08052685
47.026362,4.79583152,4.09482264,0.837262734,4.09482264,4.07920583
47.036853,4.12310563,4.09359429,0.171788643,4.09359429,4.07788598
47.047345,3.74165739,4.09237079,-0.592210606,4.09237079,4.07656705
47.057836,4.12310563,4.09115243,0.178754566,4.09115243,4.07524929
47.068328,5.19615242,4.08993904,1.05176679,4.08993904,4.07393245
47.07882,5.19615242,4.08873081,1.05234102,4.08873081,4.07261665
47.089311,4.69041576,4.08752791,0.776458529,4.08752791,4.07130203
47.099803,4.47213595,4.0863302,0.62113264,4.0863302,4.06998833
47.110294,4,4.08513797,-0.291784123,4.08513797,4.0686758
47.120786,4.12310563,4.0839511,0.197875036,4.0839511,4.06736419
47.131278,4.24264069,4.08276976,0.39983862,4.08276976,4.06605364
47.141769,4.58257569,4.08159419,0.707800473,4.08159419,4.06474425
47.152261,4.47213595,4.08042423,0.625868774,4.08042423,4.0634358
47.162752,3.60555128,4.07926023,-0.688265179,4.07926023,4.06212851
47.173244,4.69041576,4.07810207,0.782504754,4.07810207,4.06082216
47.183736,4.69041576,4.07694997,0.783240569,4.07694997,4.05951685
47.194227,3.60555128,4.07580417,-0.685749875,4.07580417,4.05821272
47.204719,4.35889894,4.07466456,0.533136363,4.07466456,4.05690952
47.21521,4,4.07353151,-0.271166938,4.07353151,4.0556075
47.225702,4.24264069,4.07240493,0.412596363,4.07240493,4.0543064
47.236194,3.87298335,4.07128508,-0.445310823,4.07128508,4.05300636
47.246685,3.87298335,4.07017221,-0.444059526,4.07017221,4.0517075
47.257177,4.12310563,4.06906628,0.232463647,4.06906628,4.05040957
47.267668,5,4.06796766,0.965418219,4.06796766,4.04911282
47.27816,3.60555128,4.06687633,-0.679209138,4.06687633,4.04781701
47.288652,4.58257569,4.06579257,0.718876295,4.06579257,4.04652224
47.299143,3.87298335,4.06471668,-0.437873647,4.06471668,4.04522866
47.309635,4.69041576,4.06364865,0.791686241,4.06364865,4.04393602
47.320126,3.74165739,4.06258892,-0.566508193,4.06258892,4.04264455
47.330618,3.31662479,4.06153749,-0.863083254,4.06153749,4.04135403
47.34111,3.60555128,4.06049471,-0.674494951,4.06049471,4.04006456
47.351601,4.58257569,4.05946093,0.723266733,4.05946093,4.03877627
47.362093,3.31662479,4.0584362,-0.861284741,4.0584362,4.03748892
47.372584,5.09901951,4.05742099,1.02058734,4.05742099,4.03620275
47.383076,4.24264069,4.0564154,0.431538286,4.0564154,4.03491753
47.393568,4.47213595,4.05541982,0.645535543,4.05541982,4.03363336
47.404059,4.12310563,4.05443466,0.262051451,4.05443466,4.03235038
47.414551,4.47213595,4.05346008,0.647051682,4.05346008,4.03106834
47.425042,3.74165739,4.05249659,-0.557529556,4.05249659,4.02978749
47.435534,4.69041576,4.0515444,0.799294291,4.0515444,4.02850757
47.446026,4.79583152,4.05060396,0.863265637,4.05060396,4.02722873
47.456517,4.89897949,4.04967579,0.921576744,4.04967579,4.02595106
47.467009,3.74165739,4.04876013,-0.554168514,4.04876013,4.02467434
47.4775,5.09901951,4.0478576,1.02526188,4.0478576,4.02339881
47.487992,4,4.04696851,-0.216722199,4.04696851,4.02212422
47.498484,3.87298335,4.04609345,-0.41606502,4.04609345,4.0208507
47.508975,3.87298335,4.04523302,-0.415029722,4.04523302,4.01957837
47.519467,4.12310563,4.04438761,0.280567306,4.04438761,4.01830698
47.529958,3.31662479,4.04355798,-0.852603772,4.04355798,4.01703679
47.54045,4,4.04274459,-0.206747649,4.04274459,4.01576754
47.550942,4.35889894,4.04194817,0.562983812,4.04194817,4.01449935
47.561433,3.60555128,4.04116949,-0.660013798,4.04116949,4.01323236
47.571925,4.58257569,4.04040913,0.736319607,4.04040913,4.01196632
47.582416,5.29150262,4.03966802,1.11885415,4.03966802,4.01070147
47.592908,5,4.03894682,0.980333196,4.03894682,4.00943757
47.6034,4.24264069,4.0382465,0.452099756,4.0382465,4.00817473
47.613891,3.46410162,4.03756802,-0.757275648,4.03756802,4.00691309
47.624383,4.24264069,4.03691225,0.453572971,4.03691225,4.00565241
47.634874,4.47213595,4.03628034,0.660193622,4.03628034,4.00439291
47.645366,4.24264069,4.03567327,0.454936713,4.03567327,4.00313437
47.655858,4.58257569,4.03509229,0.739921213,4.03509229,4.0018769
47.666349,4.12310563,4.03453869,0.297601968,4.03453869,4.00062062
47.676841,4.12310563,4.0340137,0.298482705,4.0340137,3.9993653
47.687332,4.35889894,4.03351883,0.570421,4.03351883,3.99811117
47.697824,4.35889894,4.03305549,0.570826993,4.03305549,3.99685799
47.708316,4.89897949,4.03262534,0.930781469,4.03262534,3.9956059
47.718807,4.69041576,4.03223015,0.811286394,4.03223015,3.99435499
47.729299,4,4.03187167,-0.178526371,4.03187167,3.99310504
47.73979,4.47213595,4.03155193,0.663765038,4.03155193,3.99185629
47.750282,3.31662479,4.03127299,-0.845368674,4.03127299,3.9906085
47.760774,4.47213595,4.03103712,0.664152718,4.03103712,3.98936178
47.771265,3.74165739,4.03084677,-0.537763319,4.03084677,3.98811626
47.781757,4.12310563,4.03070451,0.303975525,4.03070451,3.9868717
47.792248,4.47213595,4.03061314,0.664471835,4.03061314,3.98562833
47.80274,3.60555128,4.03057565,-0.651938937,4.03057565,3.98438593
47.813232,3.31662479,4.0305953,-0.844967759,4.0305953,3.9831446
47.823723,4.24264069,4.03067557,0.460396696,4.03067557,3.98190447
47.834215,4.35889894,4.03082023,0.572781556,4.03082023,3.9806653
47.844706,4.47213595,4.03103334,0.664155569,4.03103334,3.97942733
47.855198,4.47213595,4.03131932,0.663940232,4.03131932,3.97819033
47.86569,4.35889894,4.03168295,0.572027962,4.03168295,3.9769544
47.876181,4.24264069,4.03212936,0.458815139,4.03212936,3.97571967
47.886673,4.47213595,4.03266424,0.662926632,4.03266424,3.97448591
47.897164,4.24264069,4.03329361,0.45754462,4.03329361,3.97325334
47.907656,4.69041576,4.03402425,0.810179924,4.03402425,3.97202174
47.918148,4.58257569,4.03486338,0.740075888,4.03486338,3.97079123
47.928639,4,4.03581882,-0.189258601,4.03581882,3.96956191
47.939131,4.89897949,4.03689944,0.928482655,4.03689944,3.96833356
47.949622,4.24264069,4.03811456,0.45224565,4.03811456,3.96710641
47.960114,4,4.03947484,-0.198682753,4.03947484,3.96588022
47.970606,3.46410162,4.04099165,-0.759532774,4.04099165,3.96465513
47.981097,4.24264069,4.04267748,0.447172463,4.04267748,3.96343123
47.991589,4.35889894,4.04454659,0.560671338,4.04454659,3.9622083
48.00208,4.12310563,4.04661408,0.276571056,4.04661408,3.96098657
48.012572,4.35889894,4.04889741,0.55677781,4.04889741,3.95976581
48.023064,5.19615242,4.0514154,1.06992384,4.0514154,3.95854613
48.033555,4.47213595,4.05418888,0.646488267,4.05418888,3.95732766
48.044047,5.38516481,4.05724192,1.15235537,4.05724192,3.95611016
48.054538,4.24264069,4.06060027,0.426661952,4.06060027,3.95489386
48.06503,4.58257569,4.06429405,0.719917804,4.06429405,3.95367853
48.075522,4.79583152,4.0683561,0.852921698,4.0683561,3.95246429
48.086013,4.35889894,4.07282329,0.534860406,4.07282329,3.95125126
48.096505,4.24264069,4.07773862,0.406081352,4.07773862,3.95003919
48.106996,6.08276253,4.0831489,1.41407695,4.0831489,3.94882833
48.117488,4.79583152,4.08910943,0.84066765,4.08910943,3.94761844
48.12798,5.47722558,4.09568155,1.17539101,4.09568155,3.94640964
48.138471,4.69041576,4.10293531,0.766472736,4.10293531,3.94520205
48.148963,5.56776436,4.11095328,1.20698429,4.11095328,3.94399543
48.159454,5.09901951,4.11982747,0.989541329,4.11982747,3.94279001
48.169946,5.09901951,4.1296678,0.984556607,4.1296678,3.94158557
48.180438,4.69041576,4.14059914,0.741496201,4.14059914,3.94038222
48.190929,5.83095189,4.15276687,1.29544781,4.15276687,3.93918007
48.201421,5.38516481,4.16634509,1.10400168,4.16634509,3.9379789
48.211912,6,4.18153346,1.3485053,4.18153346,3.93677894
48.222404,4.89897949,4.19857431,0.836902133,4.19857431,3.93557995
48.232896,5.09901951,4.21775117,0.938758935,4.21775117,3.93438205
48.243387,4.79583152,4.23940291,0.745941427,4.23940291,3.93318536
48.253879,5.19615242,4.26394436,0.965509223,4.26394436,3.93198965
48.26437,5.29150262,4.29186859,0.999816998,4.29186859,3.93079514
48.274862,5.65685425,4.32378864,1.1545846,4.32378864,3.92960162
48.285354,5.47722558,4.36044933,1.05677634,4.36044933,3.92840918
48.295845,5.38516481,4.4027726,0.991157003,4.4027726,3.92721795
48.306337,4.69041576,4.45192437,0.488355803,4.45192437,3.9260277
48.316828,4.89897949,4.50935536,0.624198786,4.50935536,3.92483866
48.32732,5.83095189,4.57693691,1.11982811,4.57693691,3.9236506
48.337812,4.24264069,4.65706131,-0.643755096,4.65706131,3.92246363
48.348303,5.65685425,4.75286064,0.950785788,4.75286064,3.92127787
48.358795,5.38516481,4.86861707,0.718712556,4.86861707,3.92009309
48.369286,5.09901951,5.01058836,0.297373763,5.01058836,3.91890952
48.379778,6.08276253,5.18964517,0.945048866,5.18964517,3.91772693
48.39027,6.70820393,5.42840947,1.13128001,5.42840947,3.91654544
48.400761,6.40312424,5.77898998,0.790021682,5.77898998,3.91536515
48.411253,7.07106781,6.35510853,0.846143773,6.35510853,3.91418585
48.421744,7.93725393,7.35773768,0.76125965,7.35773768,3.91300775
48.432236,9.53939201,9.0308938,0.713090607,9.0308938,3.91183064
48.442728,11.9582607,11.513756,0.666711858,11.513756,3.91065462
48.453219,13.3790882,14.6940553,-1.14672018,14.6940553,3.90947982
48.463711,17.5214155,18.1663338,-0.803068072,18.1663338,3.90830599
48.474202,20.6155281,21.2750627,-0.812117317,21.2750627,3.90713338
48.484694,23.2594067,23.2336812,0.160391628,23.2336812,3.90596175
48.495186,23.2594067,23.4095021,-0.387421437,23.4095021,3.90479122
48.505677,21.9089023,21.7312846,0.421447097,21.7312846,3.90362189
48.516169,19.4422221,18.7576095,0.827413171,18.7576095,3.90245355
48.52666,15.2643375,15.2854009,-0.145132222,15.2854009,3.90128642
48.537152,12,12.0075982,-0.0871678619,12.0075982,3.90012028
48.547644,9.38083152,9.38218471,-0.0367857282,9.38218471,3.89895524
48.558135,7.14142843,7.57287854,-0.656848622,7.57287854,3.8977914
48.568627,7.28010989,6.47277345,0.898519026,6.47277345,3.89662855
48.579118,5.91607978,5.84092218,0.274148869,5.84092218,3.89546692
48.58961,5,5.46142843,-0.679285237,5.46142843,3.89430626
48.600102,6.32455532,5.20686904,1.05720683,5.20686904,3.89314671
48.610593,5.09901951,5.01764525,0.285261746,5.01764525,3.89198837
48.621085,4.58257569,4.86798345,-0.534235674,4.86798345,3.89083102
48.631576,4,4.74589729,-0.863653457,4.74589729,3.88967487
48.642068,4.47213595,4.64460912,-0.415298885,4.64460912,3.88851972
48.65256,5.74456265,4.55962874,1.08854669,4.55962874,3.88736566
48.663051,5.47722558,4.4876706,0.994763777,4.4876706,3.88621282
48.673543,4.35889894,4.42621836,-0.259459862,4.42621836,3.88506096
48.684034,3.60555128,4.37334526,-0.876238545,4.37334526,3.88391031
48.694526,4.47213595,4.32752198,0.380281437,4.32752198,3.88276066
48.705018,4.58257569,4.28755081,0.543161932,4.28755081,3.8816121
48.715509,4.47213595,4.25247362,0.468681481,4.25247362,3.88046476
48.726001,4.24264069,4.22150932,0.145366334,4.22150932,3.8793184
48.736492,4.12310563,4.19403462,-0.266324974,4.19403462,3.87817326
48.746984,4,4.16952945,-0.411739543,4.16952945,3.87702911
48.757476,4,4.14757213,-0.384151185,4.14757213,3.87588605
48.767967,4.89897949,4.12781232,0.878161241,4.12781232,3.87474421
48.778459,4.89897949,4.10995237,0.88827198,4.10995237,3.87360336
48.78895,4.47213595,4.0937489,0.615131741,4.0937489,3.87246372
48.799442,4,4.07899046,-0.281052421,4.07899046,3.87132508
48.809934,4.24264069,4.06550182,0.420878684,4.06550182,3.87018753
48.820425,5.19615242,4.05313326,1.06912074,4.05313326,3.86905119
48.830917,3.87298335,4.04175322,-0.410816103,4.04175322,3.86791585
48.841408,4.12310563,4.03125265,0.30307255,4.03125265,3.86678172
48.8519,4.47213595,4.02153349,0.671269293,4.02153349,3.86564858
48.862392,4.89897949,4.01251338,0.941523291,4.01251338,3.86451655
48.872883,4.12310563,4.00412047,0.344942246,4.00412047,3.86338572
48.883375,4.69041576,3.99628974,0.833142256,3.99628974,3.86225589
48.893866,4.89897949,3.98896703,0.953945729,3.98896703,3.86112726
48.904358,4.58257569,3.98210202,0.774902368,3.98210202,3.85999964
48.91485,4.12310563,3.97565221,0.383996634,3.97565221,3.85887311
48.925341,4.89897949,3.96958271,0.964052268,3.96958271,3.8577478
48.935833,5.09901951,3.96385292,1.06544197,3.96385292,3.85662348
48.946324,5.56776436,3.95843649,1.26859287,3.95843649,3.85550037
48.956816,4.69041576,3.95330546,0.858551282,3.95330546,3.85437825
48.967308,5.29150262,3.94843625,1.15890741,3.94843625,3.85325724
48.977799,5.29150262,3.94380769,1.16090264,3.94380769,3.85213744
48.988291,5.29150262,3.9393995,1.16279969,3.9393995,3.85101863
48.998782,5.38516481,3.93519504,1.2041469,3.93519504,3.84990104
49.009274,6.164414,3.93117773,1.49440164,3.93117773,3.84878444
49.019766,6,3.92733372,1.43967575,3.92733372,3.84766894
49.030257,5.47722558,3.92365044,1.24642494,3.92365044,3.84655465
49.040749,4.79583152,3.92011545,0.935797026,3.92011545,3.84544136
49.05124,5.38516481,3.91671876,1.21179455,3.91671876,3.84432928
49.061732,5.47722558,3.91345003,1.25051011,3.91345003,3.8432182
49.072224,4.79583152,3.91030071,0.941026469,3.91030071,3.84210822
49.082715,5.65685425,3.90726299,1.32272116,3.90726299,3.84099944
49.093207,4.89897949,3.90432888,0.997321716,3.90432888,3.83989167
49.103698,4.47213595,3.90149215,0.755409693,3.90149215,3.83878511
49.11419,3.60555128,3.89874602,-0.541474605,3.89874602,3.83767954
49.124682,4.89897949,3.89608504,1.00144618,3.89608504,3.83657508
49.135173,4.47213595,3.89350417,0.760678503,3.89350417,3.83547182
49.145665,4.89897949,3.89099806,1.00398278,3.89099806,3.83436957
49.156156,4.24264069,3.88856269,0.595044533,3.88856269,3.83326852
49.166648,4.24264069,3.88619346,0.597032013,3.88619346,3.83216847
49.17714,4.24264069,3.88388677,0.598960695,3.88388677,3.83106952
49.187631,4,3.88163928,0.344035926,3.88163928,3.82997179
49.198123,4.79583152,3.87944727,0.957279613,3.87944727,3.82887505
49.208614,4.69041576,3.87730809,0.90172483,3.87730809,3.82777952
49.219106,4.47213595,3.87521851,0.772604328,3.87521851,3.82668499
49.229598,4.69041576,3.87317608,0.904013095,3.87317608,3.82559156
49.240089,4.12310563,3.87117855,0.50192338,3.87117855,3.82449934
49.250581,4.47213595,3.86922323,0.77647455,3.86922323,3.82340812
49.261072,3.46410162,3.86730836,-0.634985629,3.86730836,3.82231811
49.271564,4.79583152,3.8654316,0.964572406,3.8654316,3.8212291
49.282056,4.24264069,3.86359125,0.615669912,3.86359125,3.82014119
49.292547,4.47213595,3.86178574,0.781249135,3.86178574,3.81905448
49.303039,4.79583152,3.86001311,0.967377077,3.86001311,3.81796878
49.31353,3.87298335,3.85827217,0.121289647,3.85827217,3.81688429
49.324022,3.74165739,3.85656115,-0.33897457,3.85656115,3.81580079
49.334514,4,3.85487887,0.38094767,3.85487887,3.8147184
49.345005,4.89897949,3.85322425,1.02262175,3.85322425,3.81363722
49.355497,3.87298335,3.85159577,0.146244922,3.85159577,3.81255703
49.365988,4.24264069,3.84999264,0.626616347,3.84999264,3.81147805
49.37648,3.74165739,3.84841351,-0.326735558,3.84841351,3.81040008
49.386972,3.46410162,3.84685755,-0.618672722,3.84685755,3.8093232
49.397463,4,3.84532398,0.39328872,3.84532398,3.80824754
49.407955,4.69041576,3.84381164,0.920110928,3.84381164,3.80717287
49.418446,3.60555128,3.84231999,-0.486588856,3.84231999,3.80609941
49.428938,4,3.84084798,0.398938621,3.84084798,3.80502694
49.43943,4.24264069,3.83939501,0.635016281,3.83939501,3.80395559
49.449921,4.35889894,3.83796054,0.721760628,3.83796054,3.80288543
49.460413,4.12310563,3.83654364,0.535314849,3.83654364,3.80181628
49.470904,4,3.83514396,0.406024675,3.83514396,3.80074834
49.481396,4.47213595,3.83376067,0.79898391,3.83376067,3.79968139
49.491888,4.12310563,3.83239334,0.53917742,3.83239334,3.79861555
49.502379,3.87298335,3.83104158,0.204796896,3.83104158,3.79755091
49.512871,4.69041576,3.82970465,0.927745178,3.82970465,3.79648727
49.523362,3.74165739,3.82838233,-0.294490988,3.82838233,3.79542484
49.533854,3.74165739,3.82707394,-0.292261101,3.82707394,3.7943634
49.544346,4,3.82577918,0.417397671,3.82577918,3.79330307
49.554837,3.60555128,3.82449779,-0.467917214,3.82449779,3.79224395
49.565329,3.87298335,3.82322915,0.223056477,3.82322915,3.79118582
49.57582,4.12310563,3.82197315,0.548755386,3.82197315,3.7901289
49.586312,4,3.82072922,0.423403808,3.82072922,3.78907298
49.596804,3,3.81949715,-0.905260818,3.81949715,3.78801816
49.607295,3.74165739,3.81827677,-0.276802066,3.81827677,3.78696455
49.617787,3.87298335,3.81706756,0.236465183,3.81706756,3.78591193
49.628278,4.69041576,3.81586949,0.935171785,3.81586949,3.78486052
49.63877,3.60555128,3.81468207,-0.457308209,3.81468207,3.78381011
49.649262,4.24264069,3.81350518,0.655084348,3.81350518,3.7827608
49.659753,4,3.81233871,0.433198904,3.81233871,3.78171269
49.670245,4.24264069,3.81118221,0.656854988,3.81118221,3.78066558
49.680736,2.44948974,3.81003571,-1.16642444,3.81003571,3.77961968
49.691228,4.35889894,3.80889879,0.741619949,3.80889879,3.77857477
49.70172,2.82842712,3.8077714,-0.989618245,3.8077714,3.77753097
49.712211,4.35889894,3.80665345,0.743132217,3.80665345,3.77648837
49.722703,4.47213595,3.80554459,0.816450468,3.80554459,3.77544677
49.733194,4.12310563,3.80444487,0.564500451,3.80444487,3.77440636
49.743686,4.47213595,3.80335394,0.817790939,3.80335394,3.77336696
49.754178,3.46410162,3.80227177,-0.581523993,3.80227177,3.77232867
49.764669,4.58257569,3.80119835,0.883955513,3.80119835,3.77129157
49.775161,3.60555128,3.80013335,-0.441114577,3.80013335,3.77025547
49.785652,3.16227766,3.79907686,-0.797996993,3.79907686,3.76922057
49.796144,3.87298335,3.79802859,0.27377866,3.79802859,3.76818667
49.806636,4.12310563,3.79698854,0.571066617,3.79698854,3.76715387
49.817127,4,3.79595673,0.451711488,3.79595673,3.76612227
49.827619,4.12310563,3.79493288,0.572863639,3.79493288,3.76509167
49.83811,4.47213595,3.7939171,0.823540438,3.7939171,3.76406226
49.848602,4.12310563,3.79290915,0.574627252,3.79290915,3.76303386
49.859094,3.87298335,3.79190905,0.284735489,3.79190905,3.76200656
49.869585,4.24264069,3.79091684,0.672104042,3.79091684,3.76098046
49.880077,4.24264069,3.7899323,0.672836079,3.7899323,3.75995535
49.890568,3.60555128,3.78895555,-0.428257259,3.78895555,3.75893144
49.90106,4.24264069,3.78798639,0.674280577,3.78798639,3.75790853
49.911552,4.58257569,3.78702487,0.891936561,3.78702487,3.75688673
49.922043,4,3.78607105,0.462524543,3.78607105,3.75586611
49.932535,3.46410162,3.78512473,-0.566589016,3.78512473,3.7548465
49.943026,4.24264069,3.78418607,0.677092765,3.78418607,3.75382808
49.953518,4,3.7832549,0.465558916,3.7832549,3.75281066
49.96401,4.24264069,3.78233128,0.678461062,3.78233128,3.75179434
49.974501,4.24264069,3.7814153,0.679135766,3.7814153,3.75077921
49.984993,4.24264069,3.7805068,0.679804304,3.7805068,3.74976509
49.995484,4.12310563,3.77960595,0.586088456,3.77960595,3.74875216
50.005976,4.35889894,3.7787126,0.761699644,3.7787126,3.74774022
50.016468,4.12310563,3.77782684,0.587604273,3.77782684,3.74672939
50.026959,4.47213595,3.7769488,0.833778841,3.7769488,3.74571974
50.037451,5.65685425,3.77607832,1.37141384,3.77607832,3.7447111
50.047942,4.79583152,3.77521561,1.01025537,3.77521561,3.74370365
50.058434,4.89897949,3.77436053,1.06048053,3.77436053,3.7426972
50.068926,3.74165739,3.77351322,-0.17848203,3.77351322,3.74169184
50.079417,4.24264069,3.7726738,0.685541312,3.7726738,3.74068768
50.089909,4.12310563,3.77184215,0.592674847,3.77184215,3.73968451
50.1004,2.82842712,3.7710185,-0.970871452,3.7710185,3.73868253
50.110892,3.16227766,3.77020275,-0.779695509,3.77020275,3.73768156
50.121384,4.12310563,3.76939504,0.59473573,3.76939504,3.73668168
50.131875,4.58257569,3.76859552,0.9022085,3.76859552,3.73568299
50.142367,3.87298335,3.76780411,0.324313485,3.76780411,3.73468529
50.152858,4.89897949,3.76702105,1.06393535,3.76702105,3.73368879
50.16335,3.16227766,3.76624627,-0.777154171,3.76624627,3.73269328
50.173842,4,3.76547993,0.48427272,3.76547993,3.73169887
50.184333,3.46410162,3.76472222,-0.548288794,3.76472222,3.73070565
50.194825,4.35889894,3.76397307,0.771314377,3.76397307,3.72971342
50.205316,4.89897949,3.76323276,1.06571419,3.76323276,3.72872238
50.215808,4.35889894,3.76250124,0.772267898,3.76250124,3.72773234
50.2263,3.46410162,3.7617787,-0.545597919,3.7617787,3.72674339
50.236791,4.12310563,3.76106535,0.601697826,3.76106535,3.72575563
50.247283,3.87298335,3.76036117,0.335592272,3.76036117,3.72476886
50.257774,5.47722558,3.75966644,1.3105568,3.75966644,3.72378328
50.268266,3.16227766,3.75898117,-0.772465862,3.75898117,3.7227987
50.278758,4.24264069,3.75830557,0.695941893,3.75830557,3.72181521
50.289249,4.35889894,3.75763986,0.775408976,3.75763986,3.7208329
50.299741,4.24264069,3.75698409,0.696890662,3.75698409,3.7198516
50.310232,4.47213595,3.75633855,0.846048112,3.75633855,3.71887147
50.320724,4.35889894,3.75570329,0.776656717,3.75570329,3.71789234
50.331216,4.47213595,3.75507856,0.846792417,3.75507856,3.7169143
50.341707,4.69041576,3.75446461,0.967445682,3.75446461,3.71593744
50.352199,3.46410162,3.75386154,-0.538293526,3.75386154,3.71496158
50.36269,4.12310563,3.75326965,0.608141409,3.75326965,3.7139869
50.373182,4,3.75268907,0.49730366,3.75268907,3.71301322
50.383674,4.12310563,3.75212007,0.609085834,3.75212007,3.71204063
50.394165,4,3.75156295,0.498434599,3.75156295,3.71106921
50.404657,4.58257569,3.75101784,0.911897939,3.75101784,3.7100988
50.415148,3.74165739,3.75048511,-0.0939559831,3.75048511,3.70912956
50.42564,4,3.74996493,0.500035073,3.74996493,3.70816131
50.436132,3.46410162,3.74945761,-0.534187228,3.74945761,3.70719416
50.446623,4.35889894,3.7489635,0.780983637,3.7489635,3.70622818
50.457115,4.69041576,3.74848281,0.970532304,3.74848281,3.7052632
50.467606,3.31662479,3.74801593,-0.656803731,3.74801593,3.70429939
50.478098,3.46410162,3.74756311,-0.532411021,3.74756311,3.70333658
50.48859,3.60555128,3.74712473,-0.376262478,3.74712473,3.70237486
50.499081,4.58257569,3.74670117,0.914261735,3.74670117,3.70141431
50.509573,4.12310563,3.74629274,0.613850867,3.74629274,3.70045475
50.520064,3.74165739,3.74589988,-0.0651343939,3.74589988,3.69949638
50.530556,3.87298335,3.74552291,0.357016017,3.74552291,3.69853899
50.541048,3.74165739,3.74516229,-0.0592022287,3.74516229,3.69758269
50.551539,3.46410162,3.74481848,-0.529827202,3.74481848,3.69662756
50.562031,4.35889894,3.74449186,0.783841238,3.74449186,3.69567343
50.572522,3.60555128,3.74418295,-0.372332748,3.74418295,3.69472047
50.583014,4.79583152,3.74389219,1.02564094,3.74389219,3.6937685
50.593506,4.58257569,3.7436201,0.915945192,3.7436201,3.69281761
50.603997,3.16227766,3.74336724,-0.762292317,3.74336724,3.6918679
50.614489,3.74165739,3.7431341,-0.0384279947,3.7431341,3.69091918
50.62498,3.31662479,3.7429213,-0.652913858,3.7429213,3.68997163
50.635472,3.87298335,3.74272939,0.360907135,3.74272939,3.68902507
50.645964,4.58257569,3.74255901,0.916524242,3.74255901,3.68807959
50.656455,3.74165739,3.74241082,-0.0274487611,3.74241082,3.68713529
50.666947,4.89897949,3.74228547,1.0754971,3.74228547,3.68619197
50.677438,4.58257569,3.74218368,0.916728975,3.74218368,3.68524982
50.68793,4.35889894,3.74210617,0.785361558,3.74210617,3.68430867
50.698422,4,3.74205371,0.507884135,3.74205371,3.68336859
50.708913,4,3.74202709,0.507910332,3.74202709,3.68242968
50.719405,4.12310563,3.74202717,0.617315528,3.74202717,3.68149176
50.729896,3.31662479,3.74205479,-0.65224995,3.74205479,3.68055501
50.740388,4.35889894,3.74211088,0.785358559,3.74211088,3.67961924
50.75088,3.31662479,3.74219639,-0.652358488,3.74219639,3.67868456
50.761371,4.12310563,3.7423123,0.617084539,3.7423123,3.67775103
50.771863,3.74165739,3.74245967,-0.0283246701,3.74245967,3.6768185
50.782354,4.47213595,3.74263958,0.854105602,3.74263958,3.67588714
50.792846,4.58257569,3.74285318,0.916363746,3.74285318,3.67495676
50.803338,3.74165739,3.74310167,-0.0380036689,3.74310167,3.67402745
50.813829,3.60555128,3.74338625,-0.371261334,3.74338625,3.67309931
50.824321,2.82842712,3.74370831,-0.95670329,3.74370831,3.67217216
50.834812,4.35889894,3.74406915,0.784110831,3.74406915,3.67124617
50.845304,4,3.74447028,0.505499475,3.74447028,3.67032116
50.855796,4.69041576,3.74491319,0.972369566,3.74491319,3.66939723
50.866287,3.60555128,3.74539941,-0.373962738,3.74539941,3.66847446
50.876779,3.74165739,3.7459307,-0.0653705732,3.7459307,3.66755268
50.88727,3.87298335,3.74650872,0.355632718,3.74650872,3.66663205
50.897762,3,3.74713541,-0.864369951,3.74713541,3.66571241
50.908254,4.12310563,3.74781267,0.612611586,3.74781267,3.66479385
50.918745,4.69041576,3.74854246,0.970501574,3.74854246,3.66387644
50.929237,3.16227766,3.74932705,-0.766191486,3.74932705,3.66296002
50.939728,3.74165739,3.75016857,-0.0922560867,3.75016857,3.66204475
50.95022,4.47213595,3.75106956,0.849156287,3.75106956,3.66113047
50.960712,4.12310563,3.75203243,0.609157773,3.75203243,3.66021726
50.971203,3.74165739,3.75305975,-0.106781861,3.75305975,3.6593052
50.981695,4.69041576,3.7541545,0.96760594,3.7541545,3.65839413
50.992186,4.58257569,3.75531943,0.909536292,3.75531943,3.65748421
51.002678,4.35889894,3.75655786,0.776106358,3.75655786,3.65657527
51.01317,3.87298335,3.757873,0.339279157,3.757873,3.6556674
51.023661,4.12310563,3.75926818,0.603189392,3.75926818,3.65476069
51.034153,3.60555128,3.76074737,-0.393949358,3.76074737,3.65385496
51.044644,4.79583152,3.76231419,1.01662055,3.76231419,3.65295038
51.055136,3.74165739,3.76397308,-0.149384368,3.76397308,3.65204678
51.065628,3.74165739,3.76572828,-0.155147971,3.76572828,3.65114424
51.076119,3.87298335,3.76758428,0.32465223,3.76758428,3.65024286
51.086611,3.31662479,3.76954637,-0.672994488,3.76954637,3.64934246
51.097102,3.87298335,3.77161945,0.318376979,3.77161945,3.64844321
51.107594,4.58257569,3.77380949,0.899314297,3.77380949,3.64754493
51.118086,4.12310563,3.77612226,0.589052936,3.77612226,3.64664772
51.128577,3.60555128,3.77856386,-0.415947817,3.77856386,3.64575166
51.139069,3.16227766,3.78114151,-0.786679,3.78114151,3.64485658
51.14956,4.24264069,3.78386191,0.6773321,3.78386191,3.64396264
51.160052,3.31662479,3.78673329,-0.685644588,3.78673329,3.64306968
51.170544,4.58257569,3.7897636,0.890399961,3.7897636,3.64217779
51.181035,3.87298335,3.79296132,0.282881639,3.79296132,3.64128704
51.191527,3.31662479,3.79633647,-0.692612215,3.79633647,3.64039726
51.202018,3.74165739,3.79989846,-0.241331883,3.79989846,3.63950863
51.21251,4,3.80365879,0.443104059,3.80365879,3.63862098
51.223002,4.69041576,3.80762871,0.939567479,3.80762871,3.63773438
51.233493,3.60555128,3.81182026,-0.454168454,3.81182026,3.63684893
51.243985,3.46410162,3.81624763,-0.593418921,3.81624763,3.63596446
51.254476,3.60555128,3.82092438,-0.464083078,3.82092438,3.63508112
51.264968,4.24264069,3.82586693,0.645580169,3.82586693,3.63419876
51.27546,3.31662479,3.8310916,-0.717263419,3.8310916,3.63331746
51.285951,3.74165739,3.83661593,-0.308153436,3.83661593,3.63243729
51.296443,4.35889894,3.84246052,0.7186365,3.84246052,3.6315581
51.306934,4.35889894,3.84864542,0.71432032,3.84864542,3.63068005
51.317426,3.87298335,3.85519475,0.133373885,3.85519475,3.62980297
51.327918,2.64575131,3.86213281,-1.10289687,3.86213281,3.62892695
51.338409,4.35889894,3.86948591,0.699580613,3.86948591,3.62805206
51.348901,3.87298335,3.87728486,-0.0655859571,3.87728486,3.62717815
51.359392,4,3.8855602,0.338289523,3.8855602,3.62630537
51.369884,4,3.89434845,0.325040839,3.89434845,3.62543356
51.380376,3,3.90368703,-0.950624545,3.90368703,3.6245628
51.390867,3.46410162,3.91361669,-0.670458854,3.91361669,3.62369318
51.401359,4.58257569,3.92418513,0.8114127,3.92418513,3.62282453
51.41185,2.64575131,3.93544051,-1.13564484,3.93544051,3.62195701
51.422342,3.31662479,3.94744022,-0.794238898,3.94744022,3.62109046
51.432834,3.46410162,3.96024401,-0.704373759,3.96024401,3.62022496
51.443325,3.46410162,3.97391758,-0.714013984,3.97391758,3.61936059
51.453817,4.24264069,3.98853772,0.504086269,3.98853772,3.61849719
51.464308,3.87298335,4.00418365,-0.362215825,4.00418365,3.61763492
51.4748,4.35889894,4.02094947,0.581334218,4.02094947,3.61677361
51.485292,3.74165739,4.03893497,-0.545231675,4.03893497,3.61591335
51.495783,3.60555128,4.058251,-0.672829639,4.058251,3.61505423
51.506275,4.35889894,4.07902726,0.529028998,4.07902726,3.61419606
51.516766,3.46410162,4.10140067,-0.798310123,4.10140067,3.61333903
51.527258,4.12310563,4.12553369,-0.0492754077,4.12553369,3.61248296
51.53775,4.69041576,4.15160211,0.73403927,4.15160211,3.61162793
51.548241,4.35889894,4.17980364,0.423196535,4.17980364,3.61077403
51.558733,3.87298335,4.21037052,-0.580850389,4.21037052,3.60992109
51.569224,4.24264069,4.24355392,-0.0302197043,4.24355392,3.60906928
51.579716,3.60555128,4.27965275,-0.821036827,4.27965275,3.60821843
51.590208,4.69041576,4.3189976,0.609440855,4.3189976,3.60736862
51.600699,3.74165739,4.36196609,-0.787596789,4.36196609,3.60651994
51.611191,4.69041576,4.40900533,0.530481321,4.40900533,3.60567221
51.621682,4.58257569,4.46061189,0.34923317,4.46061189,3.60482561
51.632174,5,4.51738128,0.694707652,4.51738128,3.60397997
51.642666,4.12310563,4.57999164,-0.675933443,4.57999164,3.60313537
51.653157,4.12310563,4.6492248,-0.725340731,4.6492248,3.60229188
51.663649,4.35889894,4.72602803,-0.605911782,4.72602803,3.60144936
51.67414,4.58257569,4.81148331,-0.478442902,4.81148331,3.60060795
51.684632,4.69041576,4.90690714,-0.465286342,4.90690714,3.59976751
51.695124,6.164414,5.01384006,1.0726481,5.01384006,3.5989281
51.705615,4.89897949,5.13412536,-0.484918416,5.13412536,3.5980898
51.716107,6,5.27002558,0.854385407,5.27002558,3.59725246
51.726598,4.24264069,5.42423398,-1.08701117,5.42423398,3.59641624
51.73709,5.19615242,5.60011548,-0.635580882,5.60011548,3.59558098
51.747582,6.164414,5.80179382,0.602179527,5.80179382,3.59474674
51.758073,6.08276253,6.03450359,0.219679166,6.03450359,3.59391363
51.768565,6.08276253,6.3053496,-0.471791339,6.3053496,3.59308146
51.779056,6.4807407,6.62487248,-0.379646911,6.62487248,3.59225041
51.789548,7.81024968,7.01190388,0.893501986,7.01190388,3.59142031
51.80004,7.68114575,7.50471092,0.420041465,7.50471092,3.59059124
51.810531,8.48528137,8.1842852,0.548631186,8.1842852,3.58976329
51.821023,10.1488916,9.20876103,0.969603287,9.20876103,3.58893628
51.831514,11.9582607,10.8319484,1.06127863,10.8319484,3.58811039
51.842006,14.4568323,13.3547927,1.04978074,13.3547927,3.58728544
51.852498,18.6010752,16.9910877,1.26885283,16.9910877,3.58646153
51.862989,21.5174348,21.7272893,-0.458098752,21.7272893,3.58563872
51.873481,26.8141754,27.2514382,-0.661258517,27.2514382,3.58481686
51.883972,31.5277655,32.9488576,-1.19209566,32.9488576,3.5839961
51.894464,37,37.9599445,-0.979767579,37.9599445,3.5831763
51.904956,40.2616443,41.288249,-1.01321505,41.288249,3.58235752
51.915447,42.3083916,42.0725705,0.485614151,42.0725705,3.58153984
51.925939,40.2243707,40.0597063,0.405788595,40.0597063,3.58072311
51.93643,35.9583092,35.8226185,0.368362112,35.8226185,3.57990749
51.946922,29.866369,30.3522917,-0.697081529,30.3522917,3.57909281
51.957414,23.9374184,24.614717,-0.822981555,24.614717,3.57827915
51.967905,18.627936,19.3745054,-0.864042494,19.3745054,3.5774666
51.978397,14.2126704,15.1161878,-0.950535308,15.1161878,3.57665498
51.988888,11.3578167,12.0121984,-0.808938625,12.0121984,3.57584447
51.99938,9.74679434,9.95108422,-0.451984373,9.95108422,3.5750349
52.009872,8.83176087,8.65235373,0.423564797,8.65235373,3.57422635
52.020363,7.74596669,7.82047711,-0.272965957,7.82047711,3.5734189
52.030855,6.55743852,7.24475046,-0.829042781,7.24475046,3.57261239
52.041346,6.32455532,6.80854372,-0.695692749,6.80854372,3.57180698
52.051838,6.63324958,6.45550177,0.421601485,6.45550177,3.5710025
52.06233,4.89897949,6.15915583,-1.12257576,6.15915583,3.57019905
52.072821,6.32455532,5.90574251,0.647157486,5.90574251,3.56939668
52.083313,5.74456265,5.68672187,0.240501093,5.68672187,3.56859526
52.093804,4.58257569,5.49608529,-0.95577696,5.49608529,3.56779493
52.104296,4.24264069,5.32913478,-1.04235028,5.32913478,3.56699554
52.114788,4,5.18216518,-1.0872742,5.18216518,3.56619716
52.125279,4.58257569,5.05216606,-0.685266636,5.05216606,3.56539987
52.135771,4.12310563,4.93663767,-0.901960113,4.93663767,3.56460352
52.146262,3.87298335,4.83355664,-0.980088411,4.83355664,3.56380826
52.156754,4.24264069,4.74120377,-0.706089996,4.74120377,3.56301393
52.167246,3.16227766,4.65816615,-1.2230652,4.65816615,3.56222061
52.177737,3.74165739,4.58325267,-0.917385027,4.58325267,3.56142838
52.188229,3.31662479,4.515436,-1.09490237,4.515436,3.56063709
52.19872,4.35889894,4.45386654,-0.308168122,4.45386654,3.55984688
52.209212,4.24264069,4.39779597,-0.393897557,4.39779597,3.5590576
52.219704,3.46410162,4.34659747,-0.939412506,4.34659747,3.55826933
52.230195,4.24264069,4.29972957,-0.238932803,4.29972957,3.55748215
52.240687,4.79583152,4.25671129,0.734248073,4.25671129,3.55669589
52.251178,3.31662479,4.21714024,-0.948954924,4.21714024,3.55591072
52.26167,4.69041576,4.18065116,0.713978014,4.18065116,3.55512648
52.272162,4.24264069,4.14693465,0.30936393,4.14693465,3.55434324
52.282653,4.58257569,4.11571854,0.683269462,4.11571854,3.55356108
52.293145,3.60555128,4.08675491,-0.693688426,4.08675491,3.55277985
52.303636,4.69041576,4.05983534,0.794090936,4.05983534,3.5519997
52.314128,4.12310563,4.03476546,0.297220738,4.03476546,3.55122048
52.32462,3.87298335,4.01137966,-0.372016554,4.01137966,3.55044226
52.335111,3.16227766,3.98953019,-0.90953424,3.98953019,3.54966511
52.345603,4.35889894,3.96907935,0.62435534,3.96907935,3.54888889
52.356094,3.87298335,3.94991143,-0.277359126,3.94991143,3.54811374
52.366586,4.69041576,3.93191567,0.870919107,3.93191567,3.54733952
52.377078,5.09901951,3.9149976,1.08812771,3.9149976,3.5465663
52.387569,3.74165739,3.89907194,-0.396755033,3.89907194,3.54579415
52.398061,4,3.88405748,0.34050333,3.88405748,3.54502292
52.408552,4.35889894,3.86988631,0.699294385,3.86988631,3.54425276
52.419044,3.60555128,3.85649171,-0.500939551,3.85649171,3.54348353
52.429536,4.89897949,3.84381693,1.02721106,3.84381693,3.54271529
52.440027,4,3.83181026,0.41010943,3.83181026,3.54194812
52.450519,4,3.82042134,0.42376722,3.82042134,3.54118187
52.46101,4,3.8096085,0.436338749,3.8096085,3.54041668
52.471502,3.31662479,3.79932965,-0.694769647,3.79932965,3.53965242
52.481994,3.46410162,3.78954924,-0.570480168,3.78954924,3.53888914
52.492485,4.35889894,3.78023457,0.760699923,3.78023457,3.53812693
52.502977,4.24264069,3.77135315,0.686503847,3.77135315,3.53736564
52.513468,4,3.76287843,0.486951306,3.76287843,3.53660541
52.52396,3.16227766,3.75478283,-0.769743576,3.75478283,3.5358461
52.534452,4.12310563,3.74704329,0.613239212,3.74704329,3.53508777
52.544943,3.60555128,3.73963848,-0.366179192,3.73963848,3.53433051
52.555435,4,3.73254668,0.517158894,3.73254668,3.53357416
52.565926,3.74165739,3.72575049,0.126122559,3.72575049,3.53281887
52.576418,3.60555128,3.7192313,-0.337164688,3.7192313,3.53206449
52.58691,4.47213595,3.71297376,0.871299145,3.71297376,3.5313111
52.597401,4,3.70696358,0.541328384,3.70696358,3.53055877
52.607893,3.74165739,3.70118593,0.201175201,3.70118593,3.52980734
52.618384,3.87298335,3.69562918,0.421134384,3.69562918,3.52905697
52.628876,4.35889894,3.69028053,0.817690906,3.69028053,3.52830752
52.639368,3.60555128,3.68512962,-0.282096331,3.68512962,3.52755904
52.649859,4.69041576,3.68016683,1.0051114,3.68016683,3.52681162
52.660351,3.46410162,3.67538192,-0.459652371,3.67538192,3.5260651
52.670842,4.47213595,3.67076719,0.895192026,3.67076719,3.52531964
52.681334,5.19615242,3.66631387,1.23686642,3.66631387,3.52457508
52.691826,3.74165739,3.66201514,0.282209583,3.66201514,3.5238315
52.702317,3.87298335,3.65786475,0.463808791,3.65786475,3.52308897
52.712809,4,3.65385592,0.588340105,3.65385592,3.52234735
52.7233,3.74165739,3.64998401,0.302776111,3.64998401,3.52160677
52.733792,3.16227766,3.64624353,-0.695676554,3.64624353,3.5208671
52.744284,3.74165739,3.64263071,0.314685046,3.64263071,3.5201284
52.754775,4.47213595,3.63914243,0.912684788,3.63914243,3.51939074
52.765267,4.12310563,3.63577533,0.698090465,3.63577533,3.51865399
52.775758,4.24264069,3.63252813,0.781097019,3.63252813,3.51791829
52.78625,4.58257569,3.62939926,0.976307549,3.62939926,3.51718348
52.796742,2.82842712,3.62638915,-0.893287203,3.62638915,3.51644964
52.807233,4.24264069,3.62349949,0.786855259,3.62349949,3.51571685
52.817725,3.87298335,3.62073276,0.502245547,3.62073276,3.51498495
52.828216,3.60555128,3.61809454,-0.111996717,3.61809454,3.5142541
52.838708,3.46410162,3.61559201,-0.389217671,3.61559201,3.51352414
52.8492,2.82842712,3.6132366,-0.885894732,3.6132366,3.51279515
52.859691,4.35889894,3.61104466,0.864785689,3.61104466,3.51206719
52.870183,3.60555128,3.60903975,-0.0590633466,3.60903975,3.51134013
52.880674,3.60555128,3.60726101,-0.0413489776,3.60726101,3.51061411
52.891166,4.47213595,3.60577927,0.930782836,3.60577927,3.50988898
52.901658,4,3.60474325,0.628694483,3.60474325,3.50916482
52.912149,3.16227766,3.60448309,-0.664985284,3.60448309,3.50844169
52.922641,3.87298335,3.60572068,0.516974534,3.60572068,3.50771945
52.933132,4.35889894,3.60991604,0.865437985,3.60991604,3.50699824
52.943624,4.24264069,3.61966961,0.789285167,3.61966961,3.50627792
52.954116,3.46410162,3.63884184,-0.418019409,3.63884184,3.50555857
52.964607,3.46410162,3.67177056,-0.455707085,3.67177056,3.50484024
52.975099,4,3.72109006,0.52811925,3.72109006,3.5041228
52.98559,3.87298335,3.78452356,0.297421895,3.78452356,3.50340639
52.996082,4,3.8523954,0.384193447,3.8523954,3.50269086
53.006574,4.47213595,3.90767263,0.751307746,3.90767263,3.5019763
53.017065,3.60555128,3.93084695,-0.570346975,3.93084695,3.50126276
53.027557,4.24264069,3.91154872,0.575405913,3.91154872,3.5005501
53.038048,3.46410162,3.85727629,-0.627036425,3.85727629,3.49983847
53.04854,3.74165739,3.7866322,-0.212072656,3.7866322,3.49912772
53.059032,3.87298335,3.71751824,0.39429064,3.71751824,3.49841792
53.069523,4.69041576,3.66112176,1.01454127,3.66112176,3.49770915
53.080015,3.46410162,3.62101932,-0.396128395,3.62101932,3.49700125
53.090506,3.74165739,3.59533955,0.382515149,3.59533955,3.49629438
53.100998,4.69041576,3.57990693,1.05380683,3.57990693,3.49558839
53.11149,3.16227766,3.57069945,-0.639078864,3.57069945,3.49488334
53.121981,3.60555128,3.56486623,0.201705341,3.56486623,3.49417932
53.132473,4.35889894,3.56074214,0.893396219,3.56074214,3.49347617
53.142964,4.12310563,3.55748021,0.752080724,3.55748021,3.49277403
53.153456,3.74165739,3.55468335,0.432404945,3.55468335,3.49207278
53.163948,4.35889894,3.55217138,0.898180138,3.55217138,3.49137247
53.174439,3.60555128,3.54985778,0.235994702,3.54985778,3.49067317
53.184931,4,3.54769468,0.672536486,3.54769468,3.48997475
53.195422,4,3.54565247,0.674053063,3.54565247,3.48927733
53.205914,2.82842712,3.54370954,-0.845743703,3.54370954,3.48858079
53.216406,2.82842712,3.54185015,-0.844643728,3.54185015,3.4878852
53.226897,3.87298335,3.54006215,0.576993235,3.54006215,3.48719061
53.237389,3,3.53833547,-0.733713477,3.53833547,3.48649689
53.24788,3.16227766,3.53666264,-0.611870069,3.53666264,3.48580418
53.258372,3.60555128,3.53503706,0.265545125,3.53503706,3.48511234
53.268864,3.87298335,3.53345373,0.582691696,3.53345373,3.48442144
53.279355,3.60555128,3.53190854,0.271371956,3.53190854,3.48373154
53.289847,4.12310563,3.53039762,0.769875321,3.53039762,3.48304251
53.300338,3.16227766,3.52891825,-0.605508542,3.52891825,3.48235448
53.31083,4.12310563,3.52746762,0.77177588,3.52746762,3.48166732
53.321322,3.16227766,3.52604365,-0.603130162,3.52604365,3.48098109
53.331813,3.46410162,3.5246446,-0.246054839,3.5246446,3.48029587
53.342305,3.87298335,3.52326854,0.591366897,3.52326854,3.4796115
53.352796,4.12310563,3.52191428,0.775365295,3.52191428,3.47892814
53.363288,3.46410162,3.5205803,-0.237652444,3.5205803,3.47824564
53.37378,3.46410162,3.51926557,-0.23487009,3.51926557,3.47756406
53.384271,4.47213595,3.51796921,0.976814588,3.51796921,3.47688349
53.394763,3.46410162,3.51669006,-0.229321705,3.51669006,3.47620377
53.405254,4.58257569,3.51542752,1.03302864,3.51542752,3.47552505
53.415746,3.16227766,3.51418062,-0.59321409,3.51418062,3.47484719
53.426238,3.46410162,3.51294877,-0.221013928,3.51294877,3.47417025
53.436729,4,3.51173148,0.698762137,3.51173148,3.4734943
53.447221,4.24264069,3.51052792,0.855635886,3.51052792,3.47281921
53.457712,3.31662479,3.50933779,-0.438990891,3.50933779,3.47214511
53.468204,3.87298335,3.50816038,0.604005768,3.50816038,3.47147187
53.478696,2.44948974,3.50699533,-1.0283509,3.50699533,3.47079955
53.489187,2.23606798,3.50584232,-1.12684264,3.50584232,3.47012821
53.499679,4,3.50470072,0.703775018,3.50470072,3.46945773
53.51017,3.16227766,3.50357039,-0.584202646,3.50357039,3.46878824
53.520662,4,3.50245075,0.705371712,3.50245075,3.46811959
53.531154,3.31662479,3.50134157,-0.429786896,3.50134157,3.46745187
53.541645,3.60555128,3.50024263,0.324512929,3.50024263,3.46678512
53.552137,4,3.49915344,0.707705134,3.49915344,3.46611923
53.562628,3.60555128,3.49807392,0.327837394,3.49807392,3.46545431
53.57312,3.87298335,3.49700358,0.613171887,3.49700358,3.46479025
53.583612,4,3.49594228,0.709970221,3.49594228,3.4641271
53.594103,3.87298335,3.49488988,0.614893053,3.49488988,3.46346492
53.604595,3.16227766,3.49384593,-0.575819653,3.49384593,3.4628036
53.615086,3.16227766,3.49281042,-0.574919788,3.49281042,3.46214324
53.625578,3,3.49178294,-0.701272371,3.49178294,3.46148374
53.63607,3.60555128,3.49076338,0.338803629,3.49076338,3.46082514
53.646561,3.46410162,3.48975164,-0.16015624,3.48975164,3.46016752
53.657053,3.16227766,3.48874734,-0.571375252,3.48874734,3.45951074
53.667544,3.16227766,3.4877505,-0.570502266,3.4877505,3.45885493
53.678036,4.69041576,3.48676074,1.09711213,3.48676074,3.45819996
53.688528,4,3.48577801,0.717092732,3.48577801,3.45754589
53.699019,3.16227766,3.48480224,-0.567912472,3.48480224,3.4568928
53.709511,3.87298335,3.48383307,0.623819103,3.48383307,3.45624054
53.720002,4.24264069,3.48287056,0.871647937,3.48287056,3.45558925
53.730494,4.69041576,3.48191437,1.0993186,3.48191437,3.4549388
53.740986,3.31662479,3.48096446,-0.405388298,3.48096446,3.45428925
53.751477,4.35889894,3.48002079,0.937485017,3.48002079,3.45364067
53.761969,4,3.47908304,0.721745776,3.47908304,3.45299292
53.77246,2.82842712,3.47815127,-0.806054676,3.47815127,3.45234613
53.782952,3,3.47722518,-0.690814864,3.47722518,3.45170017
53.793444,2.82842712,3.47630474,-0.804908454,3.47630474,3.45105511
53.803935,3.31662479,3.47538994,-0.398453446,3.47538994,3.45041101
53.814427,4,3.47448048,0.724927251,3.47448048,3.44976775
53.824918,4.35889894,3.47357644,0.940915782,3.47357644,3.44912544
53.83541,3.87298335,3.47267753,0.632697256,3.47267753,3.44848396
53.845902,3.16227766,3.47178375,-0.556332713,3.47178375,3.44784337
53.856393,2.64575131,3.47089508,-0.908374246,3.47089508,3.44720374
53.866885,4.24264069,3.47001127,0.878993414,3.47001127,3.44656493
53.877376,4.12310563,3.46913238,0.808686124,3.46913238,3.44592708
53.887868,3.16227766,3.46825817,-0.553155047,3.46825817,3.44529005
53.89836,4.12310563,3.46738863,0.809763546,3.46738863,3.44465392
53.908851,3.87298335,3.46652376,0.637541834,3.46652376,3.44401873
53.919343,4,3.46566331,0.73098337,3.46566331,3.44338437
53.929834,3.46410162,3.46480738,-0.026566247,3.46480738,3.44275095
53.940326,3.60555128,3.46395572,0.376291847,3.46395572,3.44211836
53.950818,3.60555128,3.46310834,0.377416127,3.46310834,3.44148665
53.961309,4.24264069,3.46226525,0.883388609,3.46226525,3.44085588
53.971801,2.23606798,3.46142622,-1.10695901,3.46142622,3.44022594
53.982292,3.74165739,3.46059134,0.530156629,3.46059134,3.43959694
53.992784,3.46410162,3.45976038,0.0658880758,3.45976038,3.43896876
54.003276,3.16227766,3.45893336,-0.544661084,3.45893336,3.43834146
54.013767,3.31662479,3.45811029,-0.376145585,3.45811029,3.43771509
54.024259,3,3.45729096,-0.676232921,3.45729096,3.43708955
54.03475,4.47213595,3.45647547,1.00779983,3.45647547,3.43646494
54.045242,3.60555128,3.45566359,0.387153307,3.45566359,3.43584115
54.055734,3.16227766,3.45485536,-0.540904518,3.45485536,3.43521824
54.066225,4,3.45405079,0.738883762,3.45405079,3.43459625
54.076717,4.12310563,3.45324967,0.818447284,3.45324967,3.43397509
54.087208,4.24264069,3.45245211,0.888925519,3.45245211,3.43335485
54.0977,4.24264069,3.4516579,0.88937213,3.4516579,3.43273543
54.108192,4.47213595,3.45086707,1.01057849,3.45086707,3.43211688
54.118683,4.12310563,3.45007965,0.820381604,3.45007965,3.43149925
54.129175,3.87298335,3.44929543,0.650913137,3.44929543,3.43088244
54.139666,3,3.44851453,-0.669712274,3.44851453,3.43026656
54.150158,4.24264069,3.44773674,0.891573857,3.44773674,3.42965148
54.16065,3.31662479,3.44696211,-0.361022597,3.44696211,3.42903727
54.171141,3.31662479,3.44619065,-0.359952574,3.44619065,3.42842398
54.181633,3.46410162,3.44542218,0.136672746,3.44542218,3.4278115
54.192124,3.74165739,3.4446568,0.544977602,3.4446568,3.42719995
54.202616,3.74165739,3.44389433,0.545676692,3.44389433,3.42658919
54.213108,4,3.44313481,0.746234004,3.44313481,3.4259793
54.223599,3.87298335,3.44237827,0.656205059,3.44237827,3.42537033
54.234091,4,3.44162452,0.747245263,3.44162452,3.42476217
54.244582,3.87298335,3.44087367,0.657350496,3.44087367,3.42415492
54.255074,3.46410162,3.44012555,0.154842065,3.44012555,3.42354847
54.265566,4,3.43938019,0.74874549,3.43938019,3.42294287
54.276057,3.16227766,3.43863763,-0.525699505,3.43863763,3.4223382
54.286549,3.46410162,3.43789769,0.161876256,3.43789769,3.42173432
54.29704,2.44948974,3.43716049,-0.993816253,3.43716049,3.42113135
54.307532,3.16227766,3.43642584,-0.52359162,3.43642584,3.42052918
54.318024,3.74165739,3.4356938,0.553139752,3.4356938,3.41992786
54.328515,3.74165739,3.4349644,0.55379869,3.4349644,3.41932746
54.339007,3.16227766,3.43423746,-0.521497655,3.43423746,3.41872785
54.349498,4,3.43351311,0.752653232,3.43351311,3.41812914
54.35999,3.74165739,3.43279117,0.555757332,3.43279117,3.41753123
54.370482,4,3.43207169,0.753610182,3.43207169,3.41693417
54.380973,4,3.43135471,0.754085732,3.43135471,3.41633801
54.391465,3.60555128,3.43064006,0.418223882,3.43064006,3.41574264
54.401956,4.24264069,3.42992786,0.901505868,3.42992786,3.41514818
54.412448,3.74165739,3.42921794,0.558962834,3.42921794,3.4145545
54.42294,3.16227766,3.42851035,-0.515977407,3.42851035,3.41396167
54.433431,3.31662479,3.42780512,-0.333437152,3.42780512,3.41336973
54.443923,4.35889894,3.42710212,0.965296238,3.42710212,3.41277859
54.454414,3.46410162,3.42640143,0.194165344,3.42640143,3.41218834
54.464906,3.74165739,3.42570292,0.562098271,3.42570292,3.41159888
54.475398,3.87298335,3.42500662,0.669310635,3.42500662,3.41101025
54.485889,2.82842712,3.42431258,-0.771936171,3.42431258,3.41042253
54.496381,3.46410162,3.42362064,0.201198845,3.42362064,3.40983558
54.506872,3.31662479,3.42293092,-0.326046208,3.42293092,3.40924953
54.517364,3.74165739,3.42224327,0.565167339,3.42224327,3.40866425
54.527856,3.16227766,3.42155772,-0.509195505,3.42155772,3.40807982
54.538347,3.46410162,3.42087434,0.207911705,3.42087434,3.40749627
54.548839,3.16227766,3.42019296,-0.507853624,3.42019296,3.4069135
54.55933,4,3.41951371,0.761896509,3.41951371,3.40633162
54.569822,4.12310563,3.41883643,0.83920748,3.41883643,3.40575051
54.580314,2,3.41816117,-1.19086572,3.41816117,3.40517024
54.590805,2.44948974,3.41748799,-0.983869018,3.41748799,3.40459085
54.601297,3.46410162,3.41681673,0.217450887,3.41681673,3.40401223
54.611788,4.12310563,3.4161475,0.840808018,3.4161475,3.4034345
54.62228,3,3.41548017,-0.644577516,3.41548017,3.40285754
54.632772,2.82842712,3.41481479,-0.765759534,3.41481479,3.4022814
54.643263,3.46410162,3.4141514,0.223495459,3.4141514,3.40170615
54.653755,3.31662479,3.41348985,-0.311231527,3.41348985,3.40113167
54.664246,3.74165739,3.41283028,0.573434486,3.41283028,3.40055806
54.674738,2.64575131,3.41217253,-0.875454862,3.41217253,3.39998522
54.68523,4,3.41151665,0.767126683,3.41151665,3.3994132
54.695721,3.87298335,3.4108627,0.67979456,3.4108627,3.39884206
54.706213,3.16227766,3.41021054,-0.497928593,3.41021054,3.39827169
54.716704,3.60555128,3.40956029,0.442708695,3.40956029,3.39770218
54.727196,3.87298335,3.4089118,0.681227971,3.4089118,3.39713344
54.737688,3.74165739,3.40826513,0.577401299,3.40826513,3.39656552
54.748179,3.31662479,3.40762033,-0.301654666,3.40762033,3.39599847
54.758671,3.74165739,3.40697727,0.578515445,3.40697727,3.39543218
54.769162,3.16227766,3.40633606,-0.494022669,3.40633606,3.39486676
54.779654,3.31662479,3.40569657,-0.298448955,3.40569657,3.39430209
54.790146,3.87298335,3.40505885,0.684050065,3.40505885,3.39373824
54.800637,3.31662479,3.40442297,-0.296307573,3.40442297,3.39317525
54.811129,4.12310563,3.40378878,0.848125489,3.40378878,3.39261303
54.82162,4,3.40315641,0.772556531,3.40315641,3.39205166
54.832112,3.31662479,3.40196923,-0.29213771,3.40196923,3.39149105
54.842604,1.73205081,3.40134202,-1.29201053,3.40134202,3.39093125
54.853095,3.74165739,3.4007166,0.58390135,3.4007166,3.3903723
54.863587,3.46410162,3.40009284,0.252999547,3.40009284,3.38981411
54.874078,3.31662479,3.39947087,-0.287829949,3.39947087,3.38925678
54.88457,4.12310563,3.39885056,0.851031768,3.39885056,3.3887002
54.895062,2.44948974,3.39823196,-0.974033992,3.39823196,3.38814442
54.905553,2.23606798,3.39761514,-1.07775097,3.39761514,3.3875895
54.916045,2.23606798,3.39699998,-1.07746554,3.39699998,3.38703532
54.926536,3,3.39638659,-0.629592398,3.39638659,3.386482
54.937028,3.46410162,3.39577486,0.261393869,3.39577486,3.38592942
54.94752,3.87298335,3.39516485,0.691244162,3.39516485,3.38537765
54.958011,3.87298335,3.39455663,0.691683971,3.39455663,3.38482672
54.968503,3.87298335,3.39395008,0.692122292,3.39395008,3.38427654
54.978994,3.31662479,3.39334532,-0.27698471,3.39334532,3.3837272
54.989486,4,3.39274225,0.779267447,3.39274225,3.38317861
54.999978,3.46410162,3.39214092,0.268254903,3.39214092,3.38263081
55.010469,3.46410162,3.39154142,0.269370003,3.39154142,3.38208386
55.020961,3.87298335,3.39094363,0.694290804,3.39094363,3.38153764
55.031452,3.31662479,3.39034768,-0.27151959,3.39034768,3.38099227
55.041944,4,3.38975347,0.781182774,3.38975347,3.38044764
55.052436,3.87298335,3.38916109,0.695573332,3.38916109,3.37990379
55.062927,3.60555128,3.38857059,0.465811854,3.38857059,3.37936079
55.073419,3.46410162,3.3879819,0.275898015,3.3879819,3.37881852
55.08391,4.47213595,3.38739515,1.04150891,3.38739515,3.37827708
55.094402,3,3.38681025,-0.62194071,3.38681025,3.37773639
55.104894,3.46410162,3.38622729,0.279059722,3.38622729,3.37719647
55.115385,2.82842712,3.38564635,-0.746471185,3.38564635,3.37665739
55.125877,3.46410162,3.38506738,0.281130285,3.38506738,3.37611905
55.136368,4.58257569,3.38449051,1.09457078,3.38449051,3.37558153
55.14686,3.46410162,3.38391568,0.283171212,3.38391568,3.37504474
55.157352,3.74165739,3.383343,0.598593674,3.383343,3.37450874
55.167843,3.74165739,3.38277258,0.599069951,3.38277258,3.37397356
55.178335,3.60555128,3.38220437,0.472595917,3.38220437,3.37343911
55.188826,3.16227766,3.38163856,-0.468359797,3.38163856,3.37290549
55.199318,3.46410162,3.38107511,0.28814321,3.38107511,3.37237259
55.20981,3.74165739,3.38051415,0.60095194,3.38051415,3.37184046
55.220301,3.16227766,3.37995585,-0.466559952,3.37995585,3.37130917
55.230793,3.16227766,3.3794002,-0.465964092,3.3794002,3.37077859
55.241284,3.87298335,3.37884742,0.702948028,3.37884742,3.37024883
55.251776,4.24264069,3.37829754,0.929700568,3.37829754,3.3697198
55.262268,3.46410162,3.37775077,0.293855147,3.37775077,3.36919154
55.272759,3.87298335,3.37720732,0.704113648,3.37720732,3.36866409
55.283251,3.46410162,3.37666727,0.29569299,3.37666727,3.36813737
55.293742,2.64575131,3.37613094,-0.854622508,3.37613094,3.36761146
55.304234,3.16227766,3.37559847,-0.461866657,3.37559847,3.36708626
55.314726,3.46410162,3.37507017,0.298381382,3.37507017,3.36656183
55.325217,4.12310563,3.37454639,0.865193179,3.37454639,3.36603822
55.335709,3.46410162,3.37402738,0.300123696,3.37402738,3.36551532
55.3462,4.35889894,3.37351364,0.992665758,3.37351364,3.36499323
55.356692,4,3.3730055,0.791829841,3.3730055,3.36447185
55.367184,3.74165739,3.37250354,0.607580318,3.37250354,3.36395124
55.377675,3.60555128,3.3720084,0.483262741,3.3720084,3.36343143
55.388167,3.31662479,3.37152065,-0.234298661,3.37152065,3.36291233
55.398658,2.64575131,3.37104119,-0.851639525,3.37104119,3.36239404
55.40915,3.74165739,3.37057084,0.60916873,3.37057084,3.36187646
55.419642,3.74165739,3.37011073,0.60954627,3.37011073,3.36135963
55.430133,3.74165739,3.36966216,0.609914116,3.36966216,3.3608436
55.440625,4,3.36922653,0.794212484,3.36922653,3.36032828
55.451116,2.82842712,3.3688057,-0.735104464,3.3688057,3.35981376
55.461608,3.60555128,3.36840169,0.486980064,3.36840169,3.35929995
55.4721,3,3.36801709,-0.606644122,3.36801709,3.35878688
55.482591,3,3.36765499,-0.606345602,3.36765499,3.35827462
55.493083,3.87298335,3.36731905,0.711100765,3.36731905,3.35776305
55.503574,3.31662479,3.36701391,-0.224475205,3.36701391,3.35725228
55.514066,3.60555128,3.36674517,0.488677918,3.36674517,3.35674221
55.524558,2.82842712,3.36651992,-0.733548085,3.36651992,3.35623288
55.535049,3,3.36634707,-0.605266115,3.36634707,3.35572435
55.545541,2.82842712,3.36623792,-0.733355842,3.36623792,3.35521651
55.556032,3,3.36620708,-0.605150458,3.36620708,3.35470947
55.566524,3.46410162,3.36627371,0.312774536,3.36627371,3.35420312
55.577016,2.82842712,3.3664637,-0.733509768,3.3664637,3.35369751
55.587507,3.60555128,3.3668142,0.488607278,3.3668142,3.35319268
55.597999,3.16227766,3.36738487,-0.452887631,3.36738487,3.35268855
55.60849,3.60555128,3.36828676,0.48709806,3.36828676,3.35218521
55.618982,3.60555128,3.36975591,0.485587653,3.36975591,3.35168255
55.629474,3.46410162,3.37231699,0.302959782,3.37231699,3.35118063
55.639965,3.46410162,3.37709515,0.294968585,3.37709515,3.3506795
55.650457,2.82842712,3.38627874,-0.746894646,3.38627874,3.35017905
55.660948,3.46410162,3.40351756,0.246138281,3.40351756,3.34967938
55.67144,3.31662479,3.43370546,-0.342170534,3.43370546,3.3491804
55.681932,3.31662479,3.48132603,-0.405834007,3.48132603,3.34868214
55.692423,2.82842712,3.547153,-0.847777021,3.547153,3.34818467
55.702915,4.47213595,3.62456003,0.920638867,3.62456003,3.34768788
55.713406,3.60555128,3.69770956,-0.303575838,3.69770956,3.34719186
55.723898,3.74165739,3.74444919,-0.0528374717,3.74444919,3.34669652
55.73439,4.58257569,3.74652989,0.914355406,3.74652989,3.34620191
55.744881,4.58257569,3.702779,0.937974781,3.702779,3.34570808
55.755373,3.31662479,3.63017478,-0.559955347,3.63017478,3.34521492
55.765864,3.16227766,3.55120162,-0.623637685,3.55120162,3.34472253
55.776356,2.64575131,3.48260273,-0.914795833,3.48260273,3.34423081
55.786848,3.87298335,3.43196297,0.664093652,3.43196297,3.34373982
55.797339,3.60555128,3.39910742,0.454360935,3.39910742,3.3432496
55.807831,2.64575131,3.37973664,-0.856729439,3.37973664,3.34276005
55.818322,3.74165739,3.36888498,0.610550907,3.36888498,3.34227126
55.828814,3.60555128,3.36273557,0.492763335,3.36273557,3.34178315
55.839306,4,3.35896477,0.80064676,3.35896477,3.34129575
55.849797,3.31662479,3.35636287,-0.199344118,3.35636287,3.34080911
55.860289,3.46410162,3.35436226,0.331269308,3.35436226,3.34032315
55.87078,3,3.35270871,-0.593892844,3.35270871,3.33983794
55.881272,3.16227766,3.35128298,-0.434747423,3.35128298,3.3393534
55.891764,2.82842712,3.35002241,-0.722215538,3.35002241,3.33886957
55.902255,3.74165739,3.34888839,0.626712847,3.34888839,3.3383865
55.912747,2.64575131,3.34785397,-0.837915661,3.34785397,3.33790409
55.923238,3.60555128,3.3468996,0.508578094,3.3468996,3.33742244
55.93373,3.31662479,3.3460101,-0.171421431,3.3460101,3.33694145
55.944222,3.60555128,3.34517393,0.510271836,3.34517393,3.33646116
55.954713,3.46410162,3.34438204,0.346005165,3.34438204,3.33598163
55.965205,2.64575131,3.34362704,-0.83538957,3.34362704,3.33550276
55.975696,3.46410162,3.34290329,0.348135504,3.34290329,3.33502463
55.986188,3.60555128,3.34220594,0.513171837,3.34220594,3.33454717
55.99668,3.46410162,3.34153126,0.350100492,3.34153126,3.3340704
56.007171,3.16227766,3.34087617,-0.422609169,3.34087617,3.33359439
56.017663,4,3.34023795,0.81225738,3.34023795,3.33311902
56.028154,3.60555128,3.33961456,0.515690525,3.33961456,3.33264441
56.038646,3.60555128,3.33900407,0.516282102,3.33900407,3.33217044
56.049138,3.87298335,3.33840501,0.731148643,3.33840501,3.33169717
56.059629,2.64575131,3.33781614,-0.831904341,3.33781614,3.33122465
56.070121,2.82842712,3.33723626,-0.713308582,3.33723626,3.33075277
56.080612,3.31662479,3.33666452,-0.141561735,3.33666452,3.33028163
56.091104,4.12310563,3.33609999,0.887133378,3.33609999,3.32981114
56.101596,5,3.33554205,1.29013873,3.33554205,3.32934135
56.112087,4.12310563,3.33499012,0.887758698,3.33499012,3.32887229
56.122579,4.58257569,3.33444357,1.11719834,3.33444357,3.32840387
56.13307,3.31662479,3.33390204,-0.131442965,3.33390204,3.32793619
56.143562,3.60555128,3.33336503,0.52171472,3.33336503,3.32746915
56.154054,3.16227766,3.33283221,-0.412982507,3.33283221,3.3270028
56.164545,3.46410162,3.33230333,0.363040331,3.33230333,3.32653718
56.175037,3.87298335,3.33177801,0.735666593,3.33177801,3.32607221
56.185528,3.74165739,3.33125609,0.640625706,3.33125609,3.32560796
56.19602,3.46410162,3.33073726,0.365190853,3.33073726,3.32514435
56.206512,4,3.33022136,0.818400052,3.33022136,3.32468142
56.217003,4.89897949,3.32970826,1.25270556,3.32970826,3.32421922
56.227495,4.58257569,3.32919771,1.11954365,3.32919771,3.32375765
56.237986,4.89897949,3.32868966,1.25311206,3.32868966,3.32329681
56.248478,4.24264069,3.32818389,0.956272346,3.32818389,3.3228366
56.25897,3.74165739,3.32768032,0.643410498,3.32768032,3.32237707
56.269461,4.69041576,3.32717889,1.16757735,3.32717889,3.32191826
56.279953,4.35889894,3.32667942,1.01598205,3.32667942,3.32146008
56.290444,4.89897949,3.32618191,1.25411227,3.32618191,3.32100262
56.300936,3.87298335,3.32568618,0.739795354,3.32568618,3.32054579
56.311428,3.87298335,3.32519221,0.740129133,3.32519221,3.32008963
56.321919,4.58257569,3.32469998,1.12155058,3.32469998,3.31963418
56.332411,4.24264069,3.32420933,0.958348242,3.32420933,3.31917937
56.342902,3.74165739,3.32372031,0.646480534,3.32372031,3.31872527
56.353394,3.74165739,3.32323275,0.646857507,3.32323275,3.31827179
56.363886,3.87298335,3.32274667,0.741779398,3.32274667,3.31781898
56.374377,3,3.32226206,-0.567681306,3.32226206,3.31736688
56.384869,3.46410162,3.3217788,0.377256963,3.3217788,3.3169154
56.39536,3.31662479,3.32129693,-0.0683530433,3.32129693,3.31646463
56.405852,3.87298335,3.32081633,0.743079417,3.32081633,3.31601448
56.416344,4.47213595,3.32033701,1.07321897,3.32033701,3.31556499
56.426835,3.31662479,3.31985898,-0.056869935,3.31985898,3.31511621
56.437327,3.31662479,3.31938213,-0.0525103889,3.31938213,3.31466804
56.447818,3.60555128,3.31890652,0.535392148,3.31890652,3.31422058
56.45831,3.74165739,3.31843204,0.650557718,3.31843204,3.31377374
56.468802,3.60555128,3.31795871,0.536276578,3.31795871,3.31332755
56.479293,3.46410162,3.31748654,0.382903474,3.31748654,3.31288206
56.489785,3.87298335,3.31701544,0.745632553,3.31701544,3.31243718
56.500276,3.74165739,3.31654547,0.65200607,3.31654547,3.311993
56.510768,3.74165739,3.31607652,0.65236559,3.31607652,3.31154944
56.52126,2.82842712,3.31560863,-0.697983885,3.31560863,3.31110652
56.531751,3.74165739,3.31514181,0.653081598,3.31514181,3.3106643
56.542243,4.47213595,3.31467597,1.07585314,3.31467597,3.31022269
56.552734,4.35889894,3.31421119,1.02209968,3.31421119,3.30978177
56.563226,4.24264069,3.31374735,0.963791128,3.31374735,3.30934146
56.573718,3.87298335,3.31328449,0.74813024,3.31328449,3.30890179
56.584209,4.69041576,3.31282264,1.17370913,3.31282264,3.30846281
56.594701,3.46410162,3.31236171,0.389538066,3.31236171,3.30802444
56.605192,3.60555128,3.31190177,0.54189437,3.31190177,3.30758675
56.615684,2.64575131,3.31144272,-0.815899139,3.31144272,3.30714967
56.626176,4.24264069,3.31098459,0.96522334,3.31098459,3.30671323
56.636667,4.24264069,3.31052743,0.965460129,3.31052743,3.30627747
56.647159,3.46410162,3.31007113,0.392467182,3.31007113,3.30584231
56.65765,4.12310563,3.30961577,0.901936726,3.30961577,3.30540784
56.668142,3.46410162,3.30916126,0.393624641,3.30916126,3.30497396
56.678634,3.60555128,3.30870763,0.544833594,3.30870763,3.30454071
56.689125,3.46410162,3.30825492,0.39477423,3.30825492,3.30410815
56.699617,4.24264069,3.30780304,0.966870026,3.30780304,3.30367618
56.710108,3.31662479,3.30735206,0.096295004,3.30735206,3.30324489
56.7206,2.44948974,3.3069019,-0.925965526,3.3069019,3.30281419
56.731092,2.64575131,3.30645258,-0.812835328,3.30645258,3.30238412
56.741583,3.46410162,3.30600415,0.397614718,3.30600415,3.30195473
56.752075,3,3.30555652,-0.552771666,3.30555652,3.30152593
56.762566,2.64575131,3.30510975,-0.812008893,3.30510975,3.30109779
56.773058,3.31662479,3.30466378,0.109366426,3.30466378,3.30067025
56.78355,4.24264069,3.30421862,0.968721874,3.30421862,3.30024333
56.794041,2,3.30377432,-1.14182937,3.30377432,3.29981708
56.804533,4.24264069,3.30333079,0.969180013,3.30333079,3.29939142
56.815024,3.74165739,3.30288811,0.662396618,3.30288811,3.29896642
56.825516,2.82842712,3.30244619,-0.688490422,3.30244619,3.29854201
56.836008,3.16227766,3.30200506,-0.373801285,3.30200506,3.29811822
56.846499,3.87298335,3.30156477,0.755922334,3.30156477,3.29769509
56.856991,3.60555128,3.30112523,0.551748173,3.30112523,3.29727254
56.867482,2.44948974,3.30068651,-0.922603258,3.30068651,3.29685065
56.877974,3,3.30024854,-0.547949394,3.30024854,3.29642935
56.888466,3.60555128,3.29981134,0.552937551,3.29981134,3.29600866
56.898957,3.60555128,3.29937496,0.553332015,3.29937496,3.29558862
56.909449,3.74165739,3.2989393,0.665370637,3.2989393,3.29516916
56.91994,3.60555128,3.29850446,0.554118055,3.29850446,3.29475036
56.930432,3.16227766,3.29807033,-0.368500573,3.29807033,3.29433214
56.940924,3.31662479,3.29763697,0.137796303,3.29763697,3.29391452
56.951415,3.74165739,3.2972044,0.666673071,3.2972044,3.29349756
56.961907,3.87298335,3.29677255,0.759085499,3.29677255,3.29308117
56.972398,3.74165739,3.29634149,0.667319936,3.29634149,3.29266543
56.98289,4.58257569,3.29591114,1.13431237,3.29591114,3.29225026
56.993382,3.74165739,3.29548153,0.667963965,3.29548153,3.29183569
57.003873,2.44948974,3.2950527,-0.919544974,3.2950527,3.29142178
57.014365,2,3.29462458,-1.1378157,3.29462458,3.29100843
57.024856,2.64575131,3.29419723,-0.805261396,3.29419723,3.29059572
57.035348,4,3.29377057,0.840374576,3.29377057,3.29018358
57.04584,3.60555128,3.29334465,0.558754532,3.29334465,3.28977204
57.056331,3,3.2929195,-0.541220376,3.2929195,3.28936115
57.066823,3.16227766,3.29249503,-0.360856437,3.29249503,3.28895082
57.077314,2.44948974,3.29207133,-0.917922428,3.29207133,3.28854112
57.087806,4.35889894,3.29164831,1.03307823,3.29164831,3.28813199
57.098298,2.82842712,3.29122601,-0.680293232,3.29122601,3.28772346
57.108789,3.16227766,3.29080446,-0.358506351,3.29080446,3.28731556
57.119281,3.46410162,3.2903836,0.416794935,3.2903836,3.28690822
57.129772,3.60555128,3.28996348,0.56177201,3.28996348,3.28650151
57.140264,2.23606798,3.28954404,-1.02638982,3.28954404,3.28609536
57.150756,3.46410162,3.28912531,0.41830169,3.28912531,3.2856898
57.161247,3,3.28870733,-0.537314923,3.28870733,3.28528487
57.171739,3.16227766,3.28829001,-0.354982179,3.28829001,3.2848805
57.18223,3.74165739,3.28787343,0.673634882,3.28787343,3.28447676
57.192722,3.87298335,3.28745752,0.765196594,3.28745752,3.28407356
57.203214,2.64575131,3.28704231,-0.800806465,3.28704231,3.28367096
57.213705,3.87298335,3.28662783,0.765738543,3.28662783,3.28326898
57.224197,3.87298335,3.28621401,0.766008704,3.28621401,3.28286755
57.234688,3.74165739,3.28580093,0.675171429,3.28580093,3.28246674
57.24518,3.46410162,3.2853885,0.422744743,3.2853885,3.28206648
57.255672,3.60555128,3.28497676,0.566193003,3.28497676,3.2816668
57.266163,2.82842712,3.28456575,-0.675380356,3.28456575,3.28126775
57.276655,3.74165739,3.28415539,0.676388939,3.28415539,3.28086923
57.287146,3.46410162,3.28374576,0.424683245,3.28374576,3.28047134
57.297638,2.44948974,3.28333677,-0.913152247,3.28333677,3.28007399
57.30813,3.74165739,3.28292847,0.677295297,3.28292847,3.27967721
57.318621,4.35889894,3.28252089,1.03748641,3.28252089,3.27928106
57.329113,3.16227766,3.28211395,-0.346173783,3.28211395,3.27888544
57.339604,4.12310563,3.28170773,0.917277437,3.28170773,3.27849043
57.350096,3.46410162,3.28130215,0.42755054,3.28130215,3.27809596
57.360588,2.44948974,3.28089725,-0.911815501,3.28089725,3.27770207
57.371079,4.12310563,3.28049306,0.917939301,3.28049306,3.27730878
57.381571,2.82842712,3.28008952,-0.672058324,3.28008952,3.27691603
57.392062,4.89897949,3.27968668,1.27251436,3.27968668,3.27652389
57.402554,3.60555128,3.27928448,0.571197685,3.27928448,3.27613228
57.413046,4,3.27888295,0.849186109,3.27888295,3.27574124
57.423537,3.31662479,3.27848213,0.195301449,3.27848213,3.2753508
57.434029,3.74165739,3.27808195,0.680863744,3.27808195,3.2749609
57.44452,2.64575131,3.27768247,-0.794940979,3.27768247,3.2745716
57.455012,3.87298335,3.27728362,0.77181586,3.27728362,3.27418282
57.465504,3,3.27688545,-0.526199055,3.27688545,3.27379461
57.475995,2.82842712,3.27648797,-0.669373474,3.27648797,3.273407
57.486487,2.44948974,3.27609113,-0.909176213,3.27609113,3.27301991
57.496978,3.31662479,3.27569499,0.202311152,3.27569499,3.27263342
57.50747,2.44948974,3.27529948,-0.90874074,3.27529948,3.27224746
57.517962,3.31662479,3.27490463,0.204255138,3.27490463,3.27186205
57.528453,3.74165739,3.27451048,0.683481457,3.27451048,3.27147724
57.538945,3.74165739,3.27411697,0.683769274,3.27411697,3.27109295
57.549436,3.87298335,3.27372415,0.774118335,3.27372415,3.27070925
57.559928,3.16227766,3.27333196,-0.333248105,3.27333196,3.27032607
57.57042,3.60555128,3.27294043,0.576724234,3.27294043,3.26994345
57.580911,3,3.27254961,-0.522062839,3.27254961,3.26956141
57.591403,3.46410162,3.27215941,0.438112094,3.27215941,3.26917989
57.601894,4,3.27176991,0.853363985,3.27176991,3.26879896
57.612386,2.82842712,3.27138104,-0.665547828,3.27138104,3.26841854
57.622878,3.31662479,3.27099283,0.213616392,3.27099283,3.26803867
57.633369,3.46410162,3.27060532,0.439882139,3.27060532,3.26765939
57.643861,1.73205081,3.27021844,-1.24022886,3.27021844,3.26728061
57.654352,3.16227766,3.26983226,-0.327955179,3.26983226,3.26690242
57.664844,3.60555128,3.26944671,0.57974526,3.26944671,3.26652474
57.675336,3.31662479,3.26906182,0.218089353,3.26906182,3.2661476
57.685827,2.64575131,3.26867764,-0.789256822,3.26867764,3.26577105
57.696319,3.16227766,3.26829409,-0.325601646,3.26829409,3.265395
57.70681,4,3.26791125,0.855621852,3.26791125,3.26501952
57.717302,2.23606798,3.26752903,-1.01560871,3.26752903,3.26464455
57.727794,3.87298335,3.26714749,0.778354581,3.26714749,3.26427012
57.738285,2.23606798,3.26676666,-1.01523331,3.26676666,3.26389627
57.748777,2.82842712,3.26638646,-0.661784963,3.26638646,3.26352291
57.759268,3.16227766,3.26600698,-0.32207036,3.26600698,3.26315013
57.76976,4.12310563,3.26562813,0.926000806,3.26562813,3.26277785
57.780252,3.16227766,3.26524997,-0.320892985,3.26524997,3.2624061
57.790743,3.31662479,3.26487252,0.227491254,3.26487252,3.26203493
57.801235,4.47213595,3.26449572,1.09892686,3.26449572,3.26166425
57.811726,4.12310563,3.26411964,0.926814968,3.26411964,3.26129413
57.822218,3.46410162,3.26374421,0.447613004,3.26374421,3.26092452
57.83271,4.58257569,3.26336948,1.14856703,3.26336948,3.26055543
57.843201,3,3.26299547,-0.512830843,3.26299547,3.2601869
57.853693,3.46410162,3.26262213,0.448864661,3.26262213,3.25981887
57.864184,3.74165739,3.26224953,0.692392851,3.26224953,3.2594514
57.874676,3.46410162,3.26187759,0.449693255,3.26187759,3.25908443
57.885168,3,3.26150637,-0.511376932,3.26150637,3.25871797
57.895659,3.16227766,3.26113589,-0.314417289,3.26113589,3.25835208
57.906151,3.74165739,3.2607661,0.693463255,3.2607661,3.25798667
57.916642,3,3.26039707,-0.510291161,3.26039707,3.25762182
57.927134,3.74165739,3.26002873,0.693994708,3.26002873,3.25725746
57.937626,3.74165739,3.25966113,0.694259501,3.25966113,3.25689362
57.948117,3,3.25929431,-0.509209494,3.25929431,3.25653033
57.958609,3.16227766,3.2589282,-0.310886701,3.2589282,3.25616753
57.9691,2.82842712,3.25856288,-0.65584736,3.25856288,3.25580527
57.979592,3.16227766,3.2581983,-0.309710572,3.2581983,3.2554435
57.990084,3.31662479,3.25783449,0.242467121,3.25783449,3.25508224
58.000575,3.46410162,3.25747149,0.454565864,3.25747149,3.25472154
58.011067,3.87298335,3.25710925,0.784776461,3.25710925,3.25436131
58.021558,2.82842712,3.25674785,-0.654462166,3.25674785,3.25400163
58.03205,3.46410162,3.25638723,0.455756936,3.25638723,3.25364242
58.042542,2.64575131,3.25602744,-0.781201718,3.25602744,3.25328373
58.053033,3.60555128,3.25566851,0.591508885,3.25566851,3.25292558
58.063525,3.60555128,3.25531041,0.591811511,3.25531041,3.2525679
58.074016,3.16227766,3.25495321,-0.304426592,3.25495321,3.25221077
58.084508,3.60555128,3.25459686,0.592414058,3.25459686,3.25185411
58.095,1.73205081,3.25424141,-1.23377089,3.25424141,3.25149795
58.105491,2.82842712,3.25388691,-0.652272787,3.25388691,3.25114233
58.115983,3.74165739,3.25353332,0.698658761,3.25353332,3.25078719
58.126474,2.82842712,3.25318073,-0.651731234,3.25318073,3.25043257
58.136966,3.16227766,3.25282908,-0.300917631,3.25282908,3.25007843
58.147458,3.87298335,3.25247844,0.787721335,3.25247844,3.24972479
58.157949,3.46410162,3.25212888,0.460404971,3.25212888,3.24937168
58.168441,3.60555128,3.25178034,0.594786459,3.25178034,3.24901904
58.178932,3.16227766,3.25143294,-0.298588812,3.25143294,3.24866693
58.189424,3.46410162,3.25108663,0.461535463,3.25108663,3.24831528
58.199916,3.74165739,3.25074149,0.700653905,3.25074149,3.24796413
58.210407,3,3.25039759,-0.500397436,3.25039759,3.24761351
58.220899,3,3.25005491,-0.500054911,3.25005491,3.24726334
58.23139,3,3.24971356,-0.499713482,3.24971356,3.24691371
58.241882,2.44948974,3.24937353,-0.894362225,3.24937353,3.24656453
58.252374,3.16227766,3.24903491,-0.294545831,3.24903491,3.24621585
58.262865,2.82842712,3.24869778,-0.648282851,3.24869778,3.24586769
58.273357,3.46410162,3.24836215,0.464477622,3.24836215,3.24551998
58.283848,3.16227766,3.24802817,-0.292831873,3.24802817,3.2451728
58.29434,2.64575131,3.24769583,-0.775850837,3.24769583,3.24482607
58.304832,4,3.24736527,0.86754523,3.24736527,3.24447983
58.315323,3.46410162,3.24703662,0.46590235,3.24703662,3.2441341
58.325815,3.31662479,3.2467099,0.264414236,3.2467099,3.24378883
58.336306,3.87298335,3.24638531,0.791579455,3.24638531,3.24344407
58.346798,3.60555128,3.24606291,0.599573484,3.24606291,3.24309977
58.35729,2.64575131,3.24574288,-0.774591226,3.24574288,3.24275594
58.367781,2.82842712,3.2454254,-0.645754033,3.2454254,3.24241263
58.378273,4,3.24511058,0.868843726,3.24511058,3.24206977
58.388764,3.74165739,3.24479869,0.704882046,3.24479869,3.24172742
58.399256,3.87298335,3.24448988,0.792775801,3.24448988,3.24138551
58.409748,3.87298335,3.24418442,0.792968427,3.24418442,3.24104409
58.420239,3.74165739,3.24388262,0.705531549,3.24388262,3.24070317
58.430731,4.58257569,3.24358473,1.15714777,3.24358473,3.24036269
58.441222,3.60555128,3.24329114,0.601880498,3.24329114,3.24002272
58.451714,2.44948974,3.2430022,-0.890793162,3.2430022,3.23968319
58.462206,1.73205081,3.24271837,-1.22909217,3.24271837,3.23934413
58.472697,3.74165739,3.24244019,0.706553037,3.24244019,3.23900558
58.483189,3.60555128,3.24216818,0.602812656,3.24216818,3.23866746
58.49368,5,3.24190304,1.32593249,3.24190304,3.23832985
58.504172,3.87298335,3.24164547,0.794567726,3.24164547,3.23799267
58.514664,4.12310563,3.24139639,0.938993737,3.24139639,3.23765596
58.525155,3.60555128,3.2411568,0.603650951,3.2411568,3.23731975
58.535647,4.24264069,3.24092785,1.00085605,3.24092785,3.23698397
58.546138,3.60555128,3.24071094,0.604020147,3.24071094,3.23664869
58.55663,3.60555128,3.24050763,0.604188421,3.24050763,3.23631385
58.567122,3.46410162,3.24031983,0.473055793,3.24031983,3.23597946
58.577613,3.31662479,3.24014981,0.276541098,3.24014981,3.23564557
58.588105,3.87298335,3.24000021,0.795602376,3.24000021,3.23531211
58.598596,4,3.23987425,0.871851907,3.23987425,3.23497914
58.609088,4.24264069,3.2397758,1.00143142,3.2397758,3.23464659
58.61958,2.44948974,3.23970958,-0.888943101,3.23970958,3.23431451
58.630071,2.82842712,3.23968136,-0.641291068,3.23968136,3.23398292
58.640563,3.46410162,3.23969827,0.473712307,3.23969827,3.23365174
58.651054,3,3.23976918,-0.489662316,3.23976918,3.23332106
58.661546,3.87298335,3.23990532,0.795662005,3.23990532,3.2329908
58.672038,3.60555128,3.24012098,0.604508309,3.24012098,3.23266099
58.682529,2.23606798,3.24043486,-1.00218106,3.24043486,3.23233167
58.693021,3,3.24087274,-0.490787881,3.24087274,3.23200277
58.703512,3.87298335,3.23948945,0.795923301,3.23948945,3.23167435
58.714004,3.60555128,3.240324,0.604340362,3.240324,3.23134635
58.724496,3.31662479,3.24151181,0.274067473,3.24151181,3.2310188
58.734987,3.46410162,3.2433125,0.469882023,3.2433125,3.23069172
58.745479,4.12310563,3.24626576,0.93639728,3.24626576,3.23036506
58.75597,3,3.2514312,-0.501429158,3.2514312,3.23003888
58.766462,3.87298335,3.26070188,0.782484165,3.26070188,3.22971312
58.776954,4.35889894,3.27702858,1.04012997,3.27702858,3.2293878
58.787445,3.60555128,3.30422571,0.548931293,3.30422571,3.22906295
58.797937,2.82842712,3.34595482,-0.719393978,3.34595482,3.22873851
58.808428,2.44948974,3.40371494,-0.976844512,3.40371494,3.22841455
58.81892,3.74165739,3.47450003,0.516872666,3.47450003,3.228091
58.829412,3.46410162,3.54917254,-0.291669206,3.54917254,3.22776788
58.839903,3.74165739,3.61274983,0.359036986,3.61274983,3.22744524
58.850395,4,3.64788071,0.593396399,3.64788071,3.227123
58.860886,3.60555128,3.64284757,-0.193122495,3.64284757,3.22680123
58.871378,4.69041576,3.59941095,1.04451176,3.59941095,3.22647987
58.88187,3.87298335,3.53135913,0.58448628,3.53135913,3.22615894
58.892361,4.12310563,3.45593591,0.816804574,3.45593591,3.22583847
58.902853,3.74165739,3.38691289,0.595604316,3.38691289,3.22551841
58.913344,3.87298335,3.33201489,0.735505576,3.33201489,3.22519881
58.923836,3.31662479,3.29307199,0.153469202,3.29307199,3.22487962
58.934328,3.74165739,3.26792431,0.688282704,3.26792431,3.22456085
58.944819,3.31662479,3.25276454,0.252705866,3.25276454,3.22424254
58.955311,2.82842712,3.24392589,-0.644591934,3.24392589,3.22392463
58.965802,3.87298335,3.23870267,0.7964174,3.23870267,3.22360718
58.976294,2.82842712,3.23540958,-0.637951766,3.23540958,3.22329012
58.986786,2.64575131,3.23312326,-0.766401948,3.23312326,3.2229735
58.997277,4,3.2313798,0.876709872,3.2313798,3.22265732
59.007769,2.64575131,3.22995591,-0.764332782,3.22995591,3.22234154
59.01826,3.31662479,3.228743,0.296448634,3.228743,3.22202622
59.028752,3.46410162,3.22768287,0.486229111,3.22768287,3.22171128
59.039244,3.46410162,3.22674053,0.487197172,3.22674053,3.22139677
59.049735,3,3.22589211,-0.475281081,3.22589211,3.22108271
59.060227,3.60555128,3.22511977,0.616791301,3.22511977,3.22076903
59.070718,2.82842712,3.22441009,-0.629271777,3.22441009,3.22045581
59.08121,3.74165739,3.2237523,0.719656231,3.2237523,3.22014297
59.091702,3.74165739,3.22313796,0.720082929,3.22313796,3.21983055
59.102193,3.31662479,3.22256033,0.306699308,3.22256033,3.21951858
59.112685,3.31662479,3.22201374,0.307589087,3.22201374,3.21920699
59.123176,4,3.2214938,0.882329983,3.2214938,3.21889584
59.133668,2.64575131,3.22099667,-0.758449314,3.22099667,3.21858508
59.14416,3.46410162,3.22051932,0.493540572,3.22051932,3.21827473
59.154651,3.46410162,3.2200592,0.494006489,3.2200592,3.21796483
59.165143,3.31662479,3.21961407,0.311465436,3.21961407,3.2176553
59.175634,3,3.21918218,-0.468168966,3.21918218,3.21734621
59.186126,3.31662479,3.21876189,0.312830461,3.21876189,3.2170375
59.196618,2.64575131,3.21835192,-0.756703781,3.21835192,3.2167292
59.207109,3.31662479,3.21795118,0.314123567,3.21795118,3.21642133
59.217601,3.87298335,3.21755859,0.809583075,3.21755859,3.21611384
59.228092,3.74165739,3.2171734,0.724212669,3.2171734,3.21580679
59.238584,3.60555128,3.21679479,0.6235034,3.21679479,3.21550011
59.249076,2.82842712,3.21642215,-0.62289247,3.21642215,3.21519383
59.259567,3.60555128,3.21605497,0.624096389,3.21605497,3.21488799
59.270059,3.74165739,3.21569268,0.725234243,3.21569268,3.21458252
59.28055,3,3.21533491,-0.464041927,3.21533491,3.21427747
59.291042,2.64575131,3.21498121,-0.754473261,3.21498121,3.2139728
59.301534,3.16227766,3.21463128,-0.228809139,3.21463128,3.21366853
59.312025,3.16227766,3.21428485,-0.228050846,3.21428485,3.21336468
59.322517,3.60555128,3.21394158,0.625787263,3.21394158,3.2130612
59.333008,3.16227766,3.21360129,-0.226547193,3.21360129,3.21275815
59.3435,3.46410162,3.21326371,0.500837203,3.21326371,3.21245546
59.353992,3.31662479,3.21292868,0.322018808,3.21292868,3.21215317
59.364483,3.60555128,3.21259605,0.626861411,3.21259605,3.2118513
59.374975,3.16227766,3.2122656,-0.223579824,3.2122656,3.21154979
59.385466,3.74165739,3.21193725,0.727818751,3.21193725,3.2112487
59.395958,3.87298335,3.21161082,0.813248134,3.21161082,3.21094798
59.40645,2.82842712,3.21128621,-0.618756081,3.21128621,3.21064764
59.416941,3.60555128,3.21096336,0.628162334,3.21096336,3.21034772
59.427433,3.31662479,3.2106421,0.325549834,3.2106421,3.21004817
59.437924,2,3.2103224,-1.10014654,3.2103224,3.20974902
59.448416,3.60555128,3.21000413,0.62892539,3.21000413,3.20945024
59.458908,3.31662479,3.20968724,0.327013074,3.20968724,3.20915184
59.469399,3.74165739,3.20937169,0.72957912,3.20937169,3.20885385
59.479891,2.82842712,3.20905737,-0.616952384,3.20905737,3.20855622
59.490382,3,3.20874427,-0.4568854,3.20874427,3.208259
59.500874,3.87298335,3.20843228,0.815200016,3.20843228,3.20796214
59.511366,4.12310563,3.20812138,0.956548087,3.20812138,3.20766565
59.521857,3.60555128,3.20781156,0.630666085,3.20781156,3.20736958
59.532349,3.74165739,3.20750272,0.730858854,3.20750272,3.20707385
59.54284,2.44948974,3.20719488,-0.870462598,3.20719488,3.20677853
59.553332,2,3.20688793,-1.09858451,3.20688793,3.20648356
59.563824,2.82842712,3.20658189,-0.614942895,3.20658189,3.20618897
59.574315,2.82842712,3.20627674,-0.614694735,3.20627674,3.20589478
59.584807,3.46410162,3.2059724,0.50806418,3.2059724,3.20560094
59.595298,3.46410162,3.20566891,0.508362771,3.20566891,3.2053075
59.60579,3.46410162,3.20536617,0.508660442,3.20536617,3.2050144
59.616282,3.46410162,3.2050642,0.508957189,3.2050642,3.20472168
59.626773,2.82842712,3.20476299,-0.613462197,3.20476299,3.20442935
59.637265,3.46410162,3.20446248,0.509547971,3.20446248,3.20413737
59.647756,2.64575131,3.2041627,-0.747269288,3.2041627,3.20384579
59.658248,2.64575131,3.20386357,-0.747069116,3.20386357,3.20355454
59.66874,3.31662479,3.20356512,0.336243473,3.20356512,3.20326367
59.679231,3.60555128,3.20326734,0.634258572,3.20326734,3.20297319
59.689723,1.73205081,3.20297017,-1.21281464,3.20297017,3.20268305
59.700214,3.31662479,3.20267365,0.337566497,3.20267365,3.2023933
59.710706,2.64575131,3.20237771,-0.746073991,3.20237771,3.20210388
59.721198,3.16227766,3.20208237,-0.199511176,3.20208237,3.20181484
59.731689,3.31662479,3.20178764,0.338876306,3.20178764,3.20152618
59.742181,3.16227766,3.20149346,-0.198029783,3.20149346,3.20123785
59.752672,3.87298335,3.20119986,0.81962399,3.20119986,3.20094992
59.763164,2.44948974,3.20090679,-0.866843151,3.20090679,3.20066231
59.773656,4.24264069,3.20061427,1.02079695,3.20061427,3.20037507
59.784147,3.16227766,3.2003223,-0.195050355,3.2003223,3.20008821
59.794639,2.82842712,3.20003083,-0.609593069,3.20003083,3.19980168
59.80513,3.87298335,3.19973991,0.820514128,3.19973991,3.19951554
59.815622,3.16227766,3.19944947,-0.192799925,3.19944947,3.19922972
59.826114,2.23606798,3.19915953,-0.981372282,3.19915953,3.19894426
59.836605,2.64575131,3.19887012,-0.743719574,3.19887012,3.19865918
59.847097,3.87298335,3.19858116,0.821219937,3.19858116,3.19837443
59.857588,3.31662479,3.19829271,0.343994296,3.19829271,3.19809006
59.86808,3,3.19800472,-0.444977208,3.19800472,3.19780601
59.878572,3.60555128,3.19771719,0.638618891,3.19771719,3.19752231
59.889063,3.74165739,3.19743015,0.737717586,3.19743015,3.19723899
59.899555,3.16227766,3.19714354,-0.186724085,3.19714354,3.19695599
59.910046,2.82842712,3.19685742,-0.606984591,3.19685742,3.19667336
59.920538,2.82842712,3.19657171,-0.606749198,3.19657171,3.19639106
59.93103,3.31662479,3.19628645,0.346898164,3.19628645,3.1961091
59.941521,3.87298335,3.19600166,0.822788968,3.19600166,3.19582751
59.952013,3,3.19571727,-0.442399451,3.19571727,3.19554625
59.962504,4,3.19543335,0.896976396,3.19543335,3.19526535
59.972996,3.31662479,3.1951467,0.348537074,3.1951467,3.19498477
59.983488,3.74165739,3.1948636,0.73945506,3.1948636,3.19470453
59.993979,3,3.19458095,-0.441113307,3.19458095,3.19442466
60.004471,3.31662479,3.19429869,0.349751489,3.19429869,3.1941451
60.014962,2.44948974,3.19401686,-0.862859849,3.19401686,3.19386591
60.025454,3.46410162,3.19373542,0.519967497,3.19373542,3.19358703
60.035946,3.46410162,3.19345438,0.520237673,3.19345438,3.19330849
60.046437,3,3.19317377,-0.439515379,3.19317377,3.19303031
60.056929,3.46410162,3.19289353,0.520776425,3.19289353,3.19275244
60.06742,2.82842712,3.19261371,-0.60347874,3.19261371,3.19247494
60.077912,3,3.19233426,-0.438559306,3.19233426,3.19219774
60.088404,3.31662479,3.1920552,0.352944168,3.1920552,3.19192088
60.098895,3,3.19177656,-0.437923006,3.19177656,3.19164437
60.109387,3.31662479,3.19149827,0.35373227,3.19149827,3.19136817
60.119878,2.44948974,3.19122039,-0.861237859,3.19122039,3.19109233
60.13037,4.12310563,3.19094287,0.965485763,3.19094287,3.1908168
60.140862,3.16227766,3.19066572,-0.16848756,3.19066572,3.19054159
60.151353,3.46410162,3.19038897,0.523175539,3.19038897,3.19026674
60.161845,3,3.19011257,-0.436019001,3.19011257,3.18999218
60.172336,3,3.18983656,-0.435702381,3.18983656,3.18971799
60.182828,4.24264069,3.1895609,1.02619676,3.1895609,3.18944409
60.19332,2.44948974,3.1892856,-0.860113866,3.1892856,3.18917052
60.203811,3.16227766,3.1890107,-0.16350241,3.1890107,3.1888973
60.214303,3.60555128,3.18873613,0.645612227,3.18873613,3.18862437
60.224794,3.16227766,3.18846194,-0.16181558,3.18846194,3.1883518
60.235286,3.46410162,3.18818809,0.525274715,3.18818809,3.18807952
60.245778,4.35889894,3.18791459,1.0821203,3.18791459,3.18780756
60.256269,3,3.18764148,-0.433176033,3.18764148,3.18753595
60.266761,3.60555128,3.18736869,0.646670388,3.18736869,3.18726463
60.277252,3.16227766,3.18709627,-0.157539237,3.18709627,3.18699366
60.287744,3.74165739,3.18682418,0.744871268,3.18682418,3.18672298
60.298236,3,3.18655244,-0.431917164,3.18655244,3.18645261
60.308727,3,3.18628106,-0.431602901,3.18628106,3.18618259
60.319219,3.16227766,3.18601001,-0.154053076,3.18601001,3.18591286
60.32971,2.82842712,3.18573932,-0.59775597,3.18573932,3.18564347
60.340202,3,3.18546895,-0.430661065,3.18546895,3.18537437
60.350694,3.60555128,3.18519892,0.648345861,3.18519892,3.18510558
60.361185,3.46410162,3.18492925,0.528367641,3.18492925,3.18483713
60.371677,4.12310563,3.18465989,0.968734088,3.18465989,3.18456896
60.382168,3,3.18439089,-0.429407609,3.18439089,3.18430113
60.39266,3.16227766,3.1841222,-0.147798996,3.1841222,3.18403358
60.403152,3.16227766,3.18385384,-0.146888338,3.18385384,3.18376635
60.413643,2.23606798,3.18358584,-0.973405292,3.18358584,3.18349944
60.424135,3.31662479,3.18331814,0.365111832,3.18331814,3.18323282
60.434626,3,3.18305079,-0.427844356,3.18305079,3.18296653
60.445118,3.31662479,3.18278375,0.365842922,3.18278375,3.18270052
60.45561,3.87298335,3.18251703,0.830943031,3.18251703,3.18243482
60.466101,3.31662479,3.18225065,0.366570782,3.18225065,3.18216945
60.476593,3.16227766,3.18198458,-0.140381324,3.18198458,3.18190435
60.487084,3.31662479,3.18171885,0.367295445,3.18171885,3.18163958
60.497576,4.35889894,3.18145341,1.08510162,3.18145341,3.18137509
60.508068,3,3.18118829,-0.425662183,3.18118829,3.1811109
60.518559,3.46410162,3.18092352,0.532144807,3.18092352,3.18084703
60.529051,3.16227766,3.18065904,-0.135577931,3.18065904,3.18058344
60.539542,2.44948974,3.18039489,-0.854929909,3.18039489,3.18032017
60.550034,3.60555128,3.18013104,0.65224247,3.18013104,3.18005718
60.560526,3,3.17986749,-0.424107878,3.17986749,3.17979448
60.571017,3.87298335,3.17960429,0.832693858,3.17960429,3.1795321
60.581509,3,3.17934136,-0.423487146,3.17934136,3.17926999
60.592,2.23606798,3.17907877,-0.97108743,3.17907877,3.1790082
60.602492,3.87298335,3.17881647,0.833166776,3.17881647,3.17874669
60.612984,3.60555128,3.17855447,0.653449926,3.17855447,3.17848546
60.623475,3,3.1782928,-0.422247323,3.1782928,3.17822455
60.633967,3.60555128,3.17803141,0.653850031,3.17803141,3.17796391
60.644458,3.46410162,3.17777035,0.535099303,3.17777035,3.17770358
60.65495,3.60555128,3.17750957,0.654248965,3.17750957,3.17744352
60.665442,3.46410162,3.17724909,0.535586155,3.17724909,3.17718375
60.675933,3.31662479,3.17698893,0.373678823,3.17698893,3.17692429
60.686425,3,3.17672904,-0.420391537,3.17672904,3.17666509
60.696916,2.64575131,3.17646948,-0.728504065,3.17646948,3.1764062
60.707408,3.74165739,3.1762102,0.751962227,3.1762102,3.17614758
60.7179,3.87298335,3.1759512,0.834884509,3.1759512,3.17588924
60.728391,2.82842712,3.17569253,-0.589292291,3.17569253,3.1756312
60.738883,3,3.17543413,-0.418848571,3.17543413,3.17537343
60.749374,2.23606798,3.17517604,-0.96907588,3.17517604,3.17511597
60.759866,3,3.17491822,-0.418232256,3.17491822,3.17485876
60.770358,3.46410162,3.17466069,0.537997141,3.17466069,3.17460183
60.780849,3.87298335,3.17440348,0.835810905,3.17440348,3.17434521
60.791341,3.46410162,3.17414653,0.538474778,3.17414653,3.17408884
60.801832,3.16227766,3.17388989,-0.107760061,3.17388989,3.17383278
60.812324,3.46410162,3.17363352,0.538950924,3.17363352,3.17357697
60.822816,2.82842712,3.17337743,-0.587324699,3.17337743,3.17332144
60.833307,3.46410162,3.17312165,0.53942559,3.17312165,3.17306621
60.843799,3.74165739,3.17286613,0.75418251,3.17286613,3.17281123
60.85429,3.60555128,3.17261092,0.657982036,3.17261092,3.17255654
60.864782,3.16227766,3.17235596,-0.100390743,3.17235596,3.17230211
60.875274,3.87298335,3.17210129,0.837186991,3.17210129,3.17204795
60.885765,3.16227766,3.17184692,-0.0978225912,3.17184692,3.17179409
60.896257,3,3.17159281,-0.41423762,3.17159281,3.17154048
60.906748,3,3.171339,-0.413931148,3.171339,3.17128716
60.91724,3,3.17108544,-0.413624754,3.17108544,3.17103409
60.927732,3.31662479,3.17083216,0.381828016,3.17083216,3.17078129
60.938223,2.64575131,3.17057918,-0.724450043,3.17057918,3.17052878
60.948715,3.60555128,3.17032645,0.659715719,3.17032645,3.17027651
60.959206,3.46410162,3.17007401,0.542243121,3.17007401,3.17002454
60.969698,4.89897949,3.16982183,1.31497439,3.16982183,3.1697728
60.98019,2.23606798,3.16956992,-0.966179042,3.16956992,3.16952134
60.990681,2.44948974,3.1693183,-0.848427109,3.1693183,3.16927016
61.001173,3,3.16906693,-0.411177495,3.16906693,3.16901922
61.011664,3.46410162,3.16881586,0.543402024,3.16881586,3.16876857
61.022156,2.44948974,3.16856502,-0.847983067,3.16856502,3.16851816
61.032648,3.31662479,3.16831446,0.385110802,3.16831446,3.16826801
61.043139,3.16227766,3.16806419,-0.0760692263,3.16806419,3.16801814
61.053631,3.16227766,3.16781416,-0.0744076356,3.16781416,3.16776852
61.064122,4.69041576,3.16756441,1.23403863,3.16756441,3.16751917
61.074614,3.74165739,3.16731491,0.75785386,3.16731491,3.16727006
61.085106,3.16227766,3.16706567,-0.0691954817,3.16706567,3.16702121
61.095597,3,3.16681672,-0.40843203,3.16681672,3.16677264
61.106089,2.82842712,3.16656801,-0.581498826,3.16656801,3.1665243
61.11658,3.46410162,3.16631958,0.545694085,3.16631958,3.16627624
61.127072,3,3.16607139,-0.407518573,3.16607139,3.16602842
61.137564,3,3.16582345,-0.407214261,3.16582345,3.16578085
61.148055,3.46410162,3.1655758,0.546375157,3.1655758,3.16553355
61.158547,3.16227766,3.16532838,-0.0552333664,3.16532838,3.16528649
61.169038,3,3.16508125,-0.406301917,3.16508125,3.1650397
61.17953,4.12310563,3.16483434,0.978913317,3.16483434,3.16479313
61.190022,3.87298335,3.16458769,0.841662434,3.16458769,3.16454682
61.200513,2.64575131,3.16434132,-0.720131939,3.16434132,3.16430078
61.211005,3.74165739,3.16409518,0.759975137,3.16409518,3.16405497
61.221496,3.60555128,3.16384931,0.664606623,3.16384931,3.16380943
61.231988,4,3.16360367,0.91454706,3.16360367,3.16356412
61.24248,2.82842712,3.16335829,-0.578732376,3.16335829,3.16331905
61.252971,3.46410162,3.16311318,0.548624134,3.16311318,3.16307425
61.263463,3.60555128,3.16286829,0.665344262,3.16286829,3.16282967
61.273954,3.60555128,3.16262367,0.665528063,3.16262367,3.16258536
61.284446,3.60555128,3.16237928,0.665711644,3.16237928,3.16234127
61.294938,3.16227766,3.16213514,0.0119382545,3.16213514,3.16209742
61.305429,3.31662479,3.16189126,0.393361826,3.16189126,3.16185384
61.315921,3.60555128,3.16164761,0.666260958,3.16164761,3.16161048
61.326412,3.46410162,3.16190141,0.549727388,3.16190141,3.16136739
61.336904,3.16227766,3.16165971,0.0248585465,3.16165971,3.16112451
61.347396,3.60555128,3.16141826,0.666433053,3.16141826,3.16088187
61.357887,3.60555128,3.16117708,0.666613977,3.16117708,3.16063949
61.368379,3.46410162,3.16093613,0.550604658,3.16093613,3.16039732
61.37887,3.31662479,3.16069544,0.394878905,3.16069544,3.16015542
61.389362,3.16227766,3.16045498,0.0426928703,3.16045498,3.15991373
61.399854,2.64575131,3.16021476,-0.717261076,3.16021476,3.15967228
61.410345,3.46410162,3.15997481,0.551476927,3.15997481,3.15943108
61.420837,4,3.15973509,0.916659649,3.15973509,3.1591901
61.431328,2.64575131,3.15949563,-0.716759594,3.15949563,3.15894937
61.44182,4.35889894,3.15925639,1.09528195,3.15925639,3.15870886
61.452312,3.60555128,3.15901739,0.668231912,3.15901739,3.15846857
61.462803,4.47213595,3.15877865,1.14601802,3.15877865,3.15822854
61.473295,3.16227766,3.15854014,0.0611353017,3.15854014,3.15798872
61.483786,3.16227766,3.15830188,0.0630537843,3.15830188,3.15774915
61.494278,3,3.15806384,-0.397572436,3.15806384,3.15750979
61.50477,3.31662479,3.15782604,0.398495606,3.15782604,3.15727066
61.515261,3.16227766,3.1575885,0.068477422,3.1575885,3.15703178
61.525753,3.74165739,3.15735118,0.764399247,3.15735118,3.1567931
61.536244,3.16227766,3.15711411,0.0718578386,3.15711411,3.15655467
61.546736,2.44948974,3.15687726,-0.841063324,3.15687726,3.15631645
61.557228,3.31662479,3.15664064,0.399980189,3.15664064,3.15607845
61.567719,2.64575131,3.15640428,-0.714599864,3.15640428,3.15584069
61.578211,3.31662479,3.15616813,0.400570424,3.15616813,3.15560314
61.588702,3.31662479,3.15593223,0.400864766,3.15593223,3.15536584
61.599194,3.60555128,3.15569654,0.670712108,3.15569654,3.15512873
61.609686,3.46410162,3.15546109,0.555554252,3.15546109,3.15489185
61.620177,3.87298335,3.15522589,0.847205677,3.15522589,3.15465521
61.630669,4,3.15499089,0.91924377,3.15499089,3.15441876
61.64116,3.31662479,3.15475615,0.402329021,3.15475615,3.15418256
61.651652,3.46410162,3.15452161,0.55639914,3.15452161,3.15394656
61.662144,2.44948974,3.1542873,-0.839522222,3.1542873,3.15371077
61.672635,3.46410162,3.15405324,0.556819873,3.15405324,3.15347523
61.683127,3.74165739,3.15381939,0.766705939,3.15381939,3.15323987
61.693618,2.64575131,3.15358578,-0.712625056,3.15358578,3.15300476
61.70411,3,3.15335238,-0.391602321,3.15335238,3.15276984
61.714602,3.74165739,3.1531192,0.767162426,3.1531192,3.15253513
61.725093,4.12310563,3.15288626,0.984997138,3.15288626,3.15230066
61.735585,2,3.15265353,-1.07361703,3.15265353,3.15206639
61.746076,3.31662479,3.15242104,0.405220615,3.15242104,3.15183234
61.756568,2.82842712,3.15218876,-0.569000554,3.15218876,3.15159849
61.76706,3.74165739,3.15195669,0.767919722,3.15195669,3.15136484
61.777551,2.82842712,3.15172486,-0.56859277,3.15172486,3.15113144
61.788043,3.46410162,3.15149324,0.559113924,3.15149324,3.15089821
61.798534,3.16227766,3.15126185,0.104956233,3.15126185,3.15066522
61.809026,3.16227766,3.15103066,0.106051876,3.15103066,3.15043242
61.819518,2.64575131,3.15079969,-0.710667557,3.15079969,3.15019982
61.830009,3.74165739,3.15056896,0.768822757,3.15056896,3.14996745
61.840501,3.60555128,3.15033842,0.674694641,3.15033842,3.14973527
61.850992,2.82842712,3.15010812,-0.56716928,3.15010812,3.14950331
61.861484,3.16227766,3.14987801,0.11135372,3.14987801,3.14927154
61.871976,4,3.14964812,0.922145262,3.14964812,3.14903997
61.882467,3.31662479,3.14941846,0.408908707,3.14941846,3.14880863
61.892959,2.64575131,3.14918899,-0.709533426,3.14918899,3.14857747
61.90345,3.31662479,3.14895976,0.409469202,3.14895976,3.14834653
61.913942,2.64575131,3.14873072,-0.709210414,3.14873072,3.14811578
61.924434,2.64575131,3.14850189,-0.709049068,3.14850189,3.14788522
61.934925,3.74165739,3.1482733,0.770314281,3.1482733,3.14765489
61.945417,3.60555128,3.14804489,0.676392186,3.14804489,3.14742473
61.955908,4.12310563,3.14781671,0.987567171,3.14781671,3.1471948
61.9664,3.60555128,3.14758872,0.676729309,3.14758872,3.14696504
61.976892,3.16227766,3.14736093,0.122134047,3.14736093,3.14673548
61.987383,3.87298335,3.14713338,0.851968289,3.14713338,3.14650613
61.997875,1.41421356,3.14690601,-1.31631776,3.14690601,3.14627697
62.008366,4,3.14667887,0.923753824,3.14667887,3.14604802
62.018858,2.64575131,3.14645192,-0.707602011,3.14645192,3.14581924
62.02935,3.60555128,3.14622516,0.677736018,3.14622516,3.14559066
62.039841,2.44948974,3.14599864,-0.834571086,3.14599864,3.14536229
62.050333,3.31662479,3.1457723,0.413343071,3.1457723,3.14513409
62.060824,3.87298335,3.14554618,0.852899272,3.14554618,3.14490611
62.071316,3.46410162,3.14532024,0.564607275,3.14532024,3.1446783
62.081808,3.46410162,3.1450945,0.564807144,3.1450945,3.14445068
62.092299,3,3.14486899,-0.380616594,3.14486899,3.14422327
62.102791,2.44948974,3.14464366,-0.833758907,3.14464366,3.14399603
62.113282,3.46410162,3.14441855,0.565405225,3.14441855,3.143769
62.123774,3,3.14419361,-0.37972834,3.14419361,3.14354213
62.134266,3.74165739,3.14396888,0.773103169,3.14396888,3.14331546
62.144757,3.60555128,3.14374436,0.679563767,3.14374436,3.14308899
62.155249,3.16227766,3.14352002,0.136958526,3.14352002,3.14286269
62.16574,3.87298335,3.1432959,0.854217446,3.1432959,3.14263659
62.176232,3.16227766,3.14307196,0.138584647,3.14307196,3.14241066
62.186724,3.16227766,3.14284821,0.139389577,3.14284821,3.14218491
62.197215,3.87298335,3.14262467,0.854610247,3.14262467,3.14195937
62.207707,3.16227766,3.14240131,0.1409835,3.14240131,3.14173399
62.218198,3.46410162,3.14217817,0.567382981,3.14217817,3.14150882
62.22869,3.31662479,3.1419552,0.417934916,3.1419552,3.1412838
62.239182,2.82842712,3.14173242,-0.559736806,3.14173242,3.14105897
62.249673,2.44948974,3.14150985,-0.83187746,3.14150985,3.14083433
62.260165,3,3.14128746,-0.375882237,3.14128746,3.14060986
62.270656,2.64575131,3.14106527,-0.703785452,3.14106527,3.14038559
62.281148,2.82842712,3.14084326,-0.558941978,3.14084326,3.14016147
62.29164,2.82842712,3.14062144,-0.558743511,3.14062144,3.13993753
62.302131,3.16227766,3.14039982,0.147911585,3.14039982,3.13971379
62.312623,3.87298335,3.14017838,0.856040284,3.14017838,3.13949021
62.323114,3.46410162,3.13995714,0.569336871,3.13995714,3.13926683
62.333606,2.64575131,3.13973607,-0.702840495,3.13973607,3.13904359
62.344098,4,3.13951519,0.927623204,3.13951519,3.13882054
62.354589,2.82842712,3.13929452,-0.557554833,3.13929452,3.13859768
62.365081,3.46410162,3.13907401,0.570111926,3.13907401,3.13837497
62.375572,3.31662479,3.1388537,0.421629086,3.1388537,3.13815245
62.386064,4,3.13863357,0.928098289,3.13863357,3.13793009
62.396556,3.31662479,3.13841361,0.42215066,3.13841361,3.1377079
62.407047,3.16227766,3.13819386,0.155189561,3.13819386,3.1374859
62.417539,3,3.13797427,-0.371448883,3.13797427,3.13726405
62.42803,2.82842712,3.13775489,-0.556172423,3.13775489,3.13704239
62.438522,3.31662479,3.13753567,0.423189231,3.13753567,3.13682087
62.449014,3.46410162,3.13731662,0.57165111,3.13731662,3.13659953
62.459505,3,3.13709778,-0.37026718,3.13709778,3.13637838
62.469997,3,3.1368791,-0.369971761,3.1368791,3.13615737
62.480488,3.16227766,3.13666063,0.160053226,3.13666063,3.13593655
62.49098,3.16227766,3.1364423,0.160733804,3.1364423,3.13571588
62.501472,3.16227766,3.13622416,0.161410959,3.13622416,3.13549537
62.511963,4,3.13600622,0.929512657,3.13600622,3.13527504
62.522455,3,3.13578843,-0.368494822,3.13578843,3.13505486
62.532946,3,3.13557085,-0.368199465,3.13557085,3.13483487
62.543438,3.46410162,3.13535341,0.573365679,3.13535341,3.13461501
62.55393,3.46410162,3.13513268,0.573558137,3.13513268,3.13439532
62.564421,2.44948974,3.13491563,-0.827904516,3.13491563,3.13417581
62.574913,3.46410162,3.13469874,0.573936303,3.13469874,3.13395645
62.585404,3.16227766,3.13448204,0.166720199,3.13448204,3.13373726
62.595896,2.44948974,3.13426549,-0.82751178,3.13426549,3.13351821
62.606388,3.46410162,3.13404912,0.574501957,3.13404912,3.13329932
62.616879,2.64575131,3.13383294,-0.698628389,3.13383294,3.13308061
62.627371,3.87298335,3.13361691,0.859864197,3.13361691,3.13286204
62.637862,3.16227766,3.13340107,0.169931119,3.13340107,3.13264365
62.648354,2.44948974,3.13318539,-0.826858904,3.13318539,3.13242539
62.658846,2.44948974,3.13296988,-0.826728574,3.13296988,3.13220729
62.669337,3.60555128,3.13275456,0.687602153,3.13275456,3.13198937
62.679829,3.87298335,3.13253938,0.860490537,3.13253938,3.13177158
62.69032,3.46410162,3.1323244,0.576001056,3.1323244,3.13155396
62.700812,2.82842712,3.13210956,-0.551073897,3.13210956,3.13133648
62.711304,2.64575131,3.1318949,-0.697239978,3.1318949,3.13111915
62.721795,3.60555128,3.13168042,0.688382783,3.13168042,3.130902
62.732287,3,3.13146609,-0.362582527,3.13146609,3.13068498
62.742778,3.87298335,3.13125194,0.861238295,3.13125194,3.13046813
62.75327,3.60555128,3.13103795,0.688849279,3.13103795,3.13025141
62.763762,3.87298335,3.13082411,0.86148664,3.13082411,3.13003484
62.774253,3.60555128,3.13061047,0.689159493,3.13061047,3.12981844
62.784745,2.82842712,3.13039697,-0.549517826,3.13039697,3.12960217
62.795236,2.82842712,3.13018365,-0.549323697,3.13018365,3.12938606
62.805728,2,3.12997048,-1.06300069,3.12997048,3.12917009
62.81622,3.60555128,3.12975747,0.689778087,3.12975747,3.12895426
62.826711,3,3.12954464,-0.359923101,3.12954464,3.1287386
62.837203,2.64575131,3.12933195,-0.695399628,3.12933195,3.12852307
62.847694,3.60555128,3.12911945,0.69024041,3.12911945,3.1283077
62.858186,2.82842712,3.12890709,-0.548160529,3.12890709,3.12809246
62.868678,2.64575131,3.12869489,-0.694941422,3.12869489,3.12787736
62.879169,2.82842712,3.12848287,-0.547773445,3.12848287,3.12766242
62.889661,3,3.12827099,-0.358149399,3.12827099,3.12744761
62.900152,3.31662479,3.12805929,0.43424129,3.12805929,3.12723296
62.910644,2.23606798,3.12784773,-0.94434091,3.12784773,3.12701844
62.921136,3.87298335,3.12763633,0.863334823,3.12763633,3.12680405
62.931627,3.16227766,3.12742511,0.186688385,3.12742511,3.12658983
62.942119,3.46410162,3.12721402,0.580420187,3.12721402,3.12637572
62.95261,2.64575131,3.12700311,-0.693723145,3.12700311,3.12616178
62.963102,3,3.12679234,-0.356079123,3.12679234,3.12594796
62.973594,2.64575131,3.12658173,-0.693419365,3.12658173,3.12573427
62.984085,3.74165739,3.12637129,0.784401746,3.12637129,3.12552074
62.994577,2.44948974,3.12616099,-0.822600293,3.12616099,3.12530733
63.005068,2,3.12595086,-1.06110832,3.12595086,3.12509408
63.01556,3.31662479,3.12574086,0.436902651,3.12574086,3.12488094
63.026052,2.64575131,3.12553102,-0.692661327,3.12553102,3.12466794
63.036543,2.64575131,3.12532136,-0.692509962,3.12532136,3.1244551
63.047035,3.46410162,3.12511183,0.582228295,3.12511183,3.12424237
63.057526,3.16227766,3.12490247,0.193326646,3.12490247,3.12402979
63.068018,3.31662479,3.12469324,0.43809993,3.12469324,3.12381733
63.07851,3.60555128,3.12448417,0.693590014,3.12448417,3.123605
63.089001,3.74165739,3.12427526,0.785736675,3.12427526,3.12339282
63.099493,2.44948974,3.12406649,-0.821326214,3.12406649,3.12318076
63.109984,2.23606798,3.12385789,-0.942226042,3.12385789,3.12296884
63.120476,2.82842712,3.12364942,-0.543343628,3.12364942,3.12275704
63.130968,2.44948974,3.1234411,-0.820945406,3.1234411,3.12254537
63.141459,2.44948974,3.12323295,-0.820818621,3.12323295,3.12233385
63.151951,3.16227766,3.12302493,0.198123017,3.12302493,3.12212243
63.162442,3.60555128,3.12281708,0.694790758,3.12281708,3.12191117
63.172934,3.16227766,3.12260935,0.19916904,3.12260935,3.12170001
63.183426,3.74165739,3.12240178,0.786927957,3.12240178,3.12148898
63.193917,4.12310563,3.12219437,1.00045552,3.12219437,3.1212781
63.204409,2.82842712,3.12198709,-0.541811741,3.12198709,3.12106732
63.2149,3,3.12177997,-0.348969874,3.12177997,3.12085669
63.225392,3.74165739,3.12157298,0.787454381,3.12157298,3.12064617
63.235884,3.31662479,3.12136614,0.441880807,3.12136614,3.12043577
63.246375,4,3.12115947,0.937464951,3.12115947,3.12022551
63.256867,3.74165739,3.12095291,0.787848001,3.12095291,3.12001536
63.267358,3.16227766,3.12074653,0.203791885,3.12074653,3.11980535
63.27785,2.82842712,3.12054027,-0.540474922,3.12054027,3.11959544
63.288342,3.16227766,3.12033415,0.204801152,3.12033415,3.11938566
63.298833,4,3.12012819,0.938014822,3.12012819,3.11917602
63.309325,3.16227766,3.11992236,0.205804025,3.11992236,3.11896647
63.319816,3.31662479,3.1197167,0.443743276,3.1197167,3.11875707
63.330308,2.44948974,3.11951115,-0.818548354,3.11951115,3.11854777
63.3408,2,3.11930575,-1.05797247,3.11930575,3.11833859
63.351291,3.46410162,3.11910051,0.58736795,3.11910051,3.11812955
63.361783,3,3.11889539,-0.344812105,3.11889539,3.1179206
63.372274,3.74165739,3.11869043,0.789282559,3.11869043,3.11771179
63.382766,3.60555128,3.11848559,0.697900912,3.11848559,3.11750309
63.393258,3.46410162,3.1182809,0.588065234,3.1182809,3.11729449
63.403749,3.46410162,3.11807636,0.588239115,3.11807636,3.11708604
63.414241,2.64575131,3.11787194,-0.687110349,3.11787194,3.11687767
63.424732,2.82842712,3.11766769,-0.537810897,3.11766769,3.11666945
63.435224,3.60555128,3.11746355,0.698632756,3.11746355,3.11646132
63.445716,3.87298335,3.11725955,0.869323759,3.11725955,3.1162533
63.456207,2.23606798,3.11705571,-0.938609466,3.11705571,3.11604542
63.466699,2.64575131,3.11685199,-0.68636774,3.11685199,3.11583762
63.47719,2,3.11664842,-1.05671587,3.11664842,3.11562997
63.487682,2.82842712,3.11644497,-0.536672944,3.11644497,3.1154224
63.498174,4.12310563,3.11624166,1.00342611,3.11624166,3.11521495
63.508665,3.46410162,3.11603851,0.589968731,3.11603851,3.11500762
63.519157,3.74165739,3.11583548,0.791089067,3.11583548,3.11480039
63.529648,3.31662479,3.11563259,0.448321532,3.11563259,3.11459329
63.54014,2.82842712,3.11542983,-0.535726335,3.11542983,3.11438627
63.550632,3.60555128,3.1152272,0.700231442,3.1152272,3.11417937
63.561123,3.60555128,3.11502473,0.700376003,3.11502473,3.11397259
63.571615,2.64575131,3.11482237,-0.684887627,3.11482237,3.1137659
63.582106,2.82842712,3.11462017,-0.534970134,3.11462017,3.11355934
63.592598,3.74165739,3.11441808,0.79198441,3.11441808,3.11335287
63.60309,2.64575131,3.11421613,-0.684444896,3.11421613,3.1131465
63.613581,3.16227766,3.11401433,0.219689175,3.11401433,3.11294026
63.624073,2.64575131,3.11381264,-0.684150078,3.11381264,3.1127341
63.634564,2.82842712,3.11361111,-0.5340262,3.11361111,3.11252807
63.645056,3.87298335,3.11340969,0.871535231,3.11340969,3.11232212
63.655548,4,3.1132084,0.941696129,3.1132084,3.11211628
63.666039,2.64575131,3.11300727,-0.68356123,3.11300727,3.11191055
63.676531,4.35889894,3.11280624,1.11628522,3.11280624,3.11170492
63.687022,3.60555128,3.11260537,0.702101062,3.11260537,3.1114994
63.697514,4,3.11240462,0.942122807,3.11240462,3.11129397
63.708006,2.44948974,3.11220399,-0.81407263,3.11220399,3.11108864
63.718497,2.23606798,3.11200351,-0.935914279,3.11200351,3.11088342
63.728989,3.46410162,3.11180315,0.593547356,3.11180315,3.11067829
63.73948,2.82842712,3.11160294,-0.532142662,3.11160294,3.11047328
63.749972,3.31662479,3.11140284,0.453014298,3.11140284,3.11026835
63.760464,4.12310563,3.11120286,1.00593378,3.11120286,3.11006352
63.770955,3.31662479,3.11100304,0.453455343,3.11100304,3.1098588
63.781447,3.74165739,3.11080333,0.794263216,3.11080333,3.10965417
63.791938,3.60555128,3.11060377,0.703525058,3.11060377,3.10944965
63.80243,4,3.11040432,0.943183801,3.11040432,3.1092452
63.812922,3.87298335,3.11020499,0.873371829,3.11020499,3.10904086
63.823413,3.46410162,3.11000582,0.595059489,3.11000582,3.10883663
63.833905,2,3.10980676,-1.05347366,3.10980676,3.10863247
63.844396,2.23606798,3.10960784,-0.934633544,3.10960784,3.10842843
63.854888,2.44948974,3.10940903,-0.812354165,3.10940903,3.10822447
63.86538,2,3.10921035,-1.05319056,3.10921035,3.1080206
63.875871,3,3.10901182,-0.330169383,3.10901182,3.10781684
63.886363,2.44948974,3.1088134,-0.811987473,3.1088134,3.10761315
63.896854,3.16227766,3.10861512,0.231651757,3.10861512,3.10740958
63.907346,3.31662479,3.10841696,0.456297966,3.10841696,3.10720608
63.917838,4,3.10821892,0.944341613,3.10821892,3.10700267
63.928329,3.16227766,3.10802102,0.232930539,3.10802102,3.10679938
63.938821,3.46410162,3.10782324,0.596890589,3.10782324,3.10659615
63.949312,3.16227766,3.1076256,0.233777799,3.1076256,3.10639303
63.959804,2.82842712,3.10742807,-0.528205401,3.10742807,3.10618999
63.970296,2.44948974,3.10723067,-0.811012283,3.10723067,3.10598703
63.980787,3.31662479,3.10703341,0.457811515,3.10703341,3.10578418
63.991279,3,3.10683626,-0.32685816,3.10683626,3.1055814
64.00177,2.82842712,3.10663925,-0.527458175,3.10663925,3.10537872
64.012262,2.82842712,3.10644235,-0.527271493,3.10644235,3.10517612
64.022754,4,3.10624558,0.945385858,3.10624558,3.1049736
64.033245,3.60555128,3.10604895,0.706754782,3.10604895,3.10477119
64.043737,3.74165739,3.10585243,0.797373786,3.10585243,3.10456884
64.054228,2.44948974,3.10565606,-0.810040934,3.10565606,3.1043666
64.06472,4,3.10545979,0.945801359,3.10545979,3.10416443
64.075212,2.64575131,3.10526365,-0.677873391,3.10526365,3.10396233
64.085703,3.46410162,3.10506765,0.599194433,3.10506765,3.10376035
64.096195,3.46410162,3.10487175,0.599357873,3.10487175,3.10355842
64.106686,3.31662479,3.10467601,0.460378956,3.10467601,3.1033566
64.117178,3.31662479,3.10448037,0.460591386,3.10448037,3.10315485
64.12767,3.74165739,3.10428485,0.798356147,3.10428485,3.10295317
64.138161,3.60555128,3.10408948,0.708139674,3.10408948,3.1027516
64.148653,3.31662479,3.10389485,0.461226565,3.10389485,3.10255008
64.159144,3.60555128,3.10369973,0.708414815,3.10369973,3.10234867
64.169636,3.46410162,3.10350471,0.600497213,3.10350471,3.10214732
64.180128,3.60555128,3.10330982,0.708689955,3.10330982,3.10194605
64.190619,3,3.10311508,-0.321115365,3.10311508,3.10174488
64.201111,3.46410162,3.10292044,0.600983507,3.10292044,3.10154377
64.211602,3.16227766,3.10272594,0.244032204,3.10272594,3.10134275
64.222094,2.64575131,3.10253155,-0.675855194,3.10253155,3.1011418
64.232586,2.82842712,3.10233729,-0.523364276,3.10233729,3.10094092
64.243077,3.31662479,3.10214317,0.463121604,3.10214317,3.10074014
64.253569,4,3.10194916,0.947655446,3.10194916,3.10053942
64.26406,3.46410162,3.10175528,0.6019521,3.10175528,3.10033879
64.274552,2.64575131,3.10156152,-0.675137178,3.10156152,3.10013822
64.285044,3.74165739,3.10136788,0.80018092,3.10136788,3.09993772
64.295535,3.31662479,3.10117439,0.464166355,3.10117439,3.09973732
64.306027,2.23606798,3.100981,-0.930006999,3.100981,3.09953698
64.316518,4.12310563,3.10078775,1.01109736,3.10078775,3.09933673
64.32701,3.74165739,3.10059461,0.800663959,3.10059461,3.09913653
64.337502,3.16227766,3.1004016,0.248748993,3.1004016,3.09893641
64.347993,2.44948974,3.10020873,-0.806671548,3.10020873,3.09873637
64.358485,3.31662479,3.10001597,0.465412531,3.10001597,3.0985364
64.368976,3.46410162,3.09982335,0.603554694,3.09982335,3.09833651
64.379468,3.74165739,3.09963084,0.801265594,3.09963084,3.09813667
64.38996,3.60555128,3.09943845,0.711416071,3.09943845,3.09793691
64.400451,3.31662479,3.09924621,0.466238762,3.09924621,3.09773724
64.410943,1.41421356,3.09905407,-1.29801406,3.09905407,3.09753761
64.421434,3.74165739,3.09886208,0.801745162,3.09886208,3.09733808
64.431926,3.16227766,3.0986702,0.252205194,3.0986702,3.0971386
64.442418,3.87298335,3.09847844,0.880059601,3.09847844,3.09693918
64.452909,3.60555128,3.09828683,0.712224994,3.09828683,3.09673986
64.463401,2.64575131,3.09809533,-0.672565252,3.09809533,3.09654058
64.473892,4,3.09790397,0.94978736,3.09790397,3.09634139
64.484384,4.12310563,3.09771272,1.01261686,3.09771272,3.09614225
64.494876,4.12310563,3.0975216,1.01271123,3.0975216,3.09594317
64.505367,3.87298335,3.09733062,0.880711487,3.09733062,3.09574418
64.515859,3.46410162,3.09713976,0.605773769,3.09713976,3.09554524
64.52635,3.16227766,3.09694903,0.255594653,3.09694903,3.09534638
64.536842,3,3.09675842,-0.311060157,3.09675842,3.09514757
64.547334,3.74165739,3.09656794,0.803174607,3.09656794,3.09494883
64.557825,3.46410162,3.0963776,0.606402519,3.0963776,3.09475016
64.568317,3.60555128,3.09618737,0.713697346,3.09618737,3.09455155
64.578808,4.12310563,3.09599729,1.01346353,3.09599729,3.09435301
64.5893,4,3.09580732,0.950890465,3.09580732,3.09415452
64.599792,4.35889894,3.09561748,1.12395794,3.09561748,3.09395609
64.610283,4,3.09542779,0.95109001,3.09542779,3.09375774
64.620775,4.69041576,3.09523821,1.26300338,3.09523821,3.09355944
64.631266,4.69041576,3.09504878,1.26307837,3.09504878,3.09336122
64.641758,5.29150262,3.09485946,1.48210768,3.09485946,3.09316304
64.65225,3.60555128,3.09467027,0.714759402,3.09467027,3.09296492
64.662741,5.19615242,3.09448123,1.44971418,3.09448123,3.09276687
64.673233,4.24264069,3.09429231,1.07161018,3.09429231,3.09256887
64.683724,4.24264069,3.09410353,1.07169826,3.09410353,3.09237095
64.694216,3,3.09391487,-0.30645533,3.09391487,3.09217307
64.704708,4.79583152,3.09372634,1.30464753,3.09372634,3.09197525
64.715199,5.38516481,3.09353796,1.51381202,3.09353796,3.0917775
64.725691,5.29150262,3.0933497,1.48261692,3.0933497,3.0915798
64.736182,4.24264069,3.09316159,1.07213763,3.09316159,3.09138217
64.746674,5.47722558,3.09297359,1.54410232,3.09297359,3.09118458
64.757166,4.35889894,3.09278573,1.12521696,3.09278573,3.09098704
64.767657,3.46410162,3.09259803,0.609510942,3.09259803,3.09078958
64.778149,3.46410162,3.09241044,0.609664807,3.09241044,3.09059216
64.78864,3.87298335,3.092223,0.883606442,3.092223,3.09039481
64.799132,4.47213595,3.09203569,1.17477669,3.09203569,3.0901975
64.809624,3.87298335,3.09184851,0.88381833,3.09184851,3.09000025
64.820115,3.60555128,3.09166148,0.71686107,3.09166148,3.08980306
64.830607,4,3.09147458,0.953165999,3.09147458,3.08960592
64.841098,3.16227766,3.09128783,0.266439167,3.09128783,3.08940884
64.85159,3.31662479,3.0911012,0.474893237,3.0911012,3.0892118
64.862082,3.60555128,3.09091472,0.717381738,3.09091472,3.08901481
64.872573,3.87298335,3.09072839,0.884451783,3.09072839,3.0888179
64.883065,3.46410162,3.09054218,0.611195085,3.09054218,3.08862101
64.893556,4,3.09035614,0.953752516,3.09035614,3.0884242
64.904048,4.35889894,3.09017022,1.12637859,3.09017022,3.08822742
64.91454,3,3.08998444,-0.29997406,3.08998444,3.08803069
64.925031,4.47213595,3.08979882,1.17572834,3.08979882,3.08783403
64.935523,3.31662479,3.08961333,0.4764572,3.08961333,3.0876374
64.946014,3.31662479,3.089428,0.476651647,3.089428,3.08744084
64.956506,3.46410162,3.0892428,0.612257151,3.0892428,3.08724431
64.966998,3.16227766,3.08905774,0.270591794,3.08905774,3.08704783
64.977489,3.31662479,3.08887285,0.477233633,3.08887285,3.08685142
64.987981,3.16227766,3.08868809,0.271273977,3.08868809,3.08665504
64.998472,3.31662479,3.08850349,0.477620451,3.08850349,3.08645872
65.008964,3.16227766,3.08831903,0.271953357,3.08831903,3.08626244
65.019456,3.16227766,3.08813472,0.272292015,3.08813472,3.0860662
65.029947,3.31662479,3.08795057,0.47819893,3.08795057,3.08587002
65.040439,3.31662479,3.08776656,0.478391291,3.08776656,3.08567388
65.05093,4.24264069,3.08758272,1.07473623,3.08758272,3.0854778
65.061422,3.16227766,3.08739902,0.273639621,3.08739902,3.08528174
65.071914,3.46410162,3.08721547,0.613910537,3.08721547,3.08508573
65.082405,3.74165739,3.08703209,0.809089177,3.08703209,3.08488979
65.092897,3.16227766,3.08684885,0.274643059,3.08684885,3.08469387
65.103388,3.31662479,3.08666579,0.47954041,3.08666579,3.08449801
65.11388,3.31662479,3.08648286,0.4797311,3.08648286,3.08430218
65.124372,2.82842712,3.0863001,-0.507811946,3.0863001,3.08410639
65.134863,3.46410162,3.08611751,0.61480412,3.08611751,3.08391067
65.145355,3.31662479,3.08593507,0.480301702,3.08593507,3.08371497
65.155846,3.16227766,3.0857528,0.276631269,3.0857528,3.08351933
65.166338,2.44948974,3.08557068,-0.797546826,3.08557068,3.08332371
65.17683,3,3.08538873,-0.292213499,3.08538873,3.08312814
65.187321,3,3.08520696,-0.291902308,3.08520696,3.08293262
65.197813,4,3.08502534,0.95654308,3.08502534,3.08273713
65.208304,3.46410162,3.0848439,0.615839035,3.0848439,3.0825417
65.218796,3.31662479,3.08466261,0.481624519,3.08466261,3.08234629
65.229288,4,3.0844815,0.95682731,3.0844815,3.08215092
65.239779,2,3.08430057,-1.04129754,3.08430057,3.08195561
65.250271,3.74165739,3.0841198,0.810886913,3.0841198,3.08176032
65.260762,2.82842712,3.08393922,-0.505482044,3.08393922,3.08156509
65.271254,2.44948974,3.0837588,-0.796410107,3.0837588,3.08136987
65.281746,3.87298335,3.08357856,0.888484547,3.08357856,3.0811747
65.292237,3.31662479,3.08339851,0.482935072,3.08339851,3.08097958
65.302729,3.46410162,3.08321862,0.617157189,3.08321862,3.08078448
65.31322,3.16227766,3.08303893,0.281493747,3.08303893,3.08058944
65.323712,3.16227766,3.08285941,0.281812443,3.08285941,3.08039441
65.334204,3,3.08268007,-0.287541418,3.08268007,3.08019943
65.344695,2.64575131,3.08250093,-0.66087035,3.08250093,3.08000449
65.355187,3.31662479,3.08232196,0.484048373,3.08232196,3.07980958
65.365678,3.31662479,3.0821432,0.484232991,3.0821432,3.07961472
65.37617,2.64575131,3.08196461,-0.660464459,3.08196461,3.07941987
65.386662,3.87298335,3.08178622,0.889492625,3.08178622,3.07922506
65.397153,2.82842712,3.08160803,-0.503170851,3.08160803,3.07903031
65.407645,2.64575131,3.08143002,-0.660059627,3.08143002,3.07883556
65.418136,2.82842712,3.08125223,-0.502817167,3.08125223,3.07864088
65.428628,2.64575131,3.08107462,-0.659790349,3.08107462,3.0784462
65.43912,2.82842712,3.0808972,-0.502464008,3.0808972,3.07825156
65.449611,3,3.08072001,-0.284112675,3.08072001,3.07805698
65.460103,3,3.08054301,-0.283801,3.08054301,3.0778624
65.470594,4.35889894,3.08036623,1.13072221,3.08036623,3.07766788
65.481086,4,3.08018964,0.959067445,3.08018964,3.07747337
65.491578,2,3.08001326,-1.03923686,3.08001326,3.07727889
65.502069,3.46410162,3.07983711,0.619890724,3.07983711,3.07708447
65.512561,3.31662479,3.07966115,0.486789111,3.07966115,3.07689005
65.523052,3.60555128,3.07948543,0.725303966,3.07948543,3.07669568
65.533544,3,3.07930991,-0.28162016,3.07930991,3.07650133
65.544036,3,3.07913462,-0.281308759,3.07913462,3.07630701
65.554527,3.60555128,3.07895956,0.725666393,3.07895956,3.07611273
65.565019,3.46410162,3.07878471,0.620738997,3.07878471,3.07591847
65.57551,3.16227766,3.07861011,0.289253437,3.07861011,3.07572425
65.586002,3.16227766,3.07843572,0.289554729,3.07843572,3.07553004
65.596494,3,3.07826156,-0.27975268,3.07826156,3.07533587
65.606985,2.44948974,3.07808766,-0.79284167,3.07808766,3.07514173
65.617477,2.82842712,3.07791397,-0.499486584,3.07791397,3.07494761
65.627968,3,3.07774054,-0.278819914,3.07774054,3.07475354
65.63846,3.16227766,3.07756734,0.291050368,3.07756734,3.07455947
65.648952,2.82842712,3.07739439,-0.498966194,3.07739439,3.07436543
65.659443,3,3.0772217,-0.277887922,3.0772217,3.07417144
65.669935,3,3.07704924,-0.277577451,3.07704924,3.07397745
65.680426,2.44948974,3.07687706,-0.792077846,3.07687706,3.07378351
65.690918,3.16227766,3.07670511,0.29252786,3.07670511,3.07358957
65.70141,3.87298335,3.07653343,0.892440429,3.07653343,3.07339566
65.711901,2.82842712,3.07636202,-0.497930614,3.07636202,3.0732018
65.722393,2.23606798,3.07619087,-0.916582178,3.07619087,3.07300794
65.732884,3.87298335,3.07602,0.892728038,3.07602,3.07281412
65.743376,3.87298335,3.07584938,0.892823591,3.07584938,3.07262031
65.753868,2.64575131,3.07567904,-0.655688747,3.07567904,3.07242652
65.764359,2.44948974,3.075509,-0.791213788,3.075509,3.07223278
65.774851,3.87298335,3.07533922,0.893109244,3.07533922,3.07203904
65.785342,3,3.07516975,-0.274171024,3.07516975,3.07184534
65.795834,3,3.07500055,-0.273862282,3.07500055,3.07165165
65.806326,2.44948974,3.07483164,-0.790785621,3.07483164,3.07145798
65.816817,3.16227766,3.07466305,0.295997658,3.07466305,3.07126435
65.827309,3,3.07449474,-0.27293724,3.07449474,3.07107072
65.8378,2.44948974,3.07432675,-0.790466321,3.07432675,3.07087713
65.848292,3,3.07415905,-0.272321593,3.07415905,3.07068355
65.858784,2.44948974,3.07399167,-0.79025434,3.07399167,3.07048998
65.869275,2.82842712,3.07382461,-0.495376108,3.07382461,3.07029646
65.879767,3.16227766,3.07365787,0.297690769,3.07365787,3.07010294
65.890258,3.16227766,3.07349146,0.297970134,3.07349146,3.06990945
65.90075,3.16227766,3.07332537,0.298248711,3.07332537,3.06971597
65.911242,3.31662479,3.07315961,0.493421912,3.07315961,3.06952251
65.921733,3.74165739,3.0729942,0.81771828,3.0729942,3.06932908
65.932225,2.64575131,3.07282912,-0.653511907,3.07282912,3.06913566
65.942716,2.82842712,3.07266441,-0.494203688,3.07266441,3.06894227
65.953208,3.31662479,3.07250003,0.494089829,3.07250003,3.06874889
65.9637,3.16227766,3.07233601,0.299902732,3.07233601,3.06855552
65.974191,3.46410162,3.07217237,0.626042528,3.07217237,3.06836219
65.984683,2.82842712,3.07200908,-0.493540225,3.07200908,3.06816885
65.995174,2.23606798,3.07184618,-0.914209056,3.07184618,3.06797556
66.005666,2.64575131,3.07168364,-0.65263491,3.07168364,3.06778226
66.016158,4,3.07152148,0.963575902,3.07152148,3.06758897
66.026649,2.64575131,3.07135973,-0.652386709,3.07135973,3.06739573
66.037141,3.16227766,3.07119836,0.301793478,3.07119836,3.06720248
66.047632,3.87298335,3.0710374,0.895514347,3.0710374,3.06700926
66.058124,2.82842712,3.07087684,-0.492391826,3.07087684,3.06681605
66.068616,3.16227766,3.07071285,0.30259678,3.07071285,3.06662284
66.079107,3.60555128,3.07055314,0.731435666,3.07055314,3.06642968
66.089599,2.82842712,3.07039384,-0.491901127,3.07039384,3.0662365
66.10009,3,3.07023499,-0.265018854,3.07023499,3.06604337
66.110582,3.16227766,3.07007656,0.303646333,3.07007656,3.06585022
66.121074,3.16227766,3.06991858,0.303906365,3.06991858,3.06565709
66.131565,3.74165739,3.06976106,0.819692822,3.06976106,3.065464
66.142057,3.31662479,3.06960399,0.497011869,3.06960399,3.0652709
66.152548,3.31662479,3.0694474,0.497169378,3.0694474,3.06507783
66.16304,2.44948974,3.06929127,-0.787274745,3.06929127,3.06488475
66.173532,2.64575131,3.06913574,-0.650679971,3.06913574,3.06469169
66.184023,3.31662479,3.06898059,0.497638628,3.06898059,3.06449866
66.194515,3.31662479,3.06882592,0.497794005,3.06882592,3.06430562
66.205006,3.16227766,3.06867177,0.305950798,3.06867177,3.06411261
66.215498,3.46410162,3.06851812,0.628954288,3.06851812,3.0639196
66.22599,3,3.06836499,-0.261466992,3.06836499,3.0637266
66.236481,2.82842712,3.0682124,-0.489678748,3.0682124,3.06353363
66.246973,3.16227766,3.06806034,0.306948402,3.06806034,3.06334065
66.257464,3,3.06790884,-0.260593241,3.06790884,3.0631477
66.267956,3.74165739,3.06775788,0.820913826,3.06775788,3.06295474
66.278448,3.31662479,3.06760748,0.499016339,3.06760748,3.06276179
66.288939,2.44948974,3.06745768,-0.786109366,3.06745768,3.06256887
66.299431,4.12310563,3.06730844,1.02751992,3.06730844,3.06237594
66.309922,2.44948974,3.06715982,-0.785919892,3.06715982,3.06218304
66.320414,3.16227766,3.06701179,0.308651704,3.06701179,3.06199013
66.330906,3.16227766,3.06686437,0.308890421,3.06686437,3.06179723
66.341397,2.64575131,3.06671759,-0.648819142,3.06671759,3.06160436
66.351889,2.82842712,3.06657144,-0.488000318,3.06657144,3.06141147
66.36238,3.60555128,3.06642594,0.734251545,3.06642594,3.06121862
66.372872,3.46410162,3.0662811,0.630730146,3.0662811,3.06102575
66.383364,3.60555128,3.06613692,0.734448332,3.06613692,3.06083289
66.393855,3.46410162,3.06599345,0.630958135,3.06599345,3.06064006
66.404347,3.60555128,3.06585065,0.734643194,3.06585065,3.06044721
66.414838,2.82842712,3.06570858,-0.487115445,3.06570858,3.06025439
66.42533,3.31662479,3.06556722,0.501056456,3.06556722,3.06006156
66.435822,2.23606798,3.06542659,-0.910691283,3.06542659,3.05986874
66.446313,3.46410162,3.06528672,0.631517926,3.06528672,3.05967594
66.456805,2.23606798,3.06514761,-0.910538099,3.06514761,3.05948313
66.467296,3.16227766,3.06500928,0.311878793,3.06500928,3.05929034
66.477788,2.82842712,3.06487173,-0.486255699,3.06487173,3.05909754
66.48828,4.35889894,3.06473499,1.13761327,3.06473499,3.05890475
66.498771,2.44948974,3.06459908,-0.784289063,3.06459908,3.05871198
66.509263,3,3.06446399,-0.253897602,3.06446399,3.05851919
66.519754,3.74165739,3.06432977,0.822999158,3.06432977,3.05832643
66.530246,2.64575131,3.06419641,-0.646873326,3.06419641,3.05813366
66.540738,2.82842712,3.06406394,-0.485424361,3.06406394,3.05794089
66.551229,3.60555128,3.06393238,0.73594762,3.06393238,3.05774814
66.561721,3.16227766,3.06380173,0.313808755,3.06380173,3.05755538
66.572212,3.16227766,3.06367203,0.314015339,3.06367203,3.05736264
66.582704,2.44948974,3.06354327,-0.783615679,3.06354327,3.05716988
66.593196,3.74165739,3.0634155,0.823554422,3.0634155,3.05697713
66.603687,3.16227766,3.06328873,0.314625056,3.06328873,3.0567844
66.614179,3.31662479,3.06316297,0.503449914,3.06316297,3.05659165
66.62467,3.60555128,3.06303826,0.736554826,3.06303826,3.05639893
66.635162,3.31662479,3.0629146,0.503696526,3.0629146,3.05620618
66.645654,2.23606798,3.06279202,-0.909243664,3.06279202,3.05601344
66.656145,3.87298335,3.06267055,0.900173759,3.06267055,3.05582072
66.666637,3.16227766,3.0625502,0.315796555,3.0625502,3.05562799
66.677128,3,3.062431,-0.24986197,3.062431,3.05543527
66.68762,3.46410162,3.06231297,0.633868,3.06231297,3.05524254
66.698112,3,3.06219614,-0.249391545,3.06219614,3.0550498
66.708603,3.74165739,3.06208055,0.824364507,3.06208055,3.05485709
66.719095,3.46410162,3.06196619,0.634141487,3.06196619,3.05466436
66.729586,2,3.06185312,-1.03046258,3.06185312,3.05447165
66.740078,3,3.06174135,-0.248478059,3.06174135,3.05427892
66.75057,3,3.0616309,-0.248255724,3.0616309,3.05408619
66.761061,3.16227766,3.06152184,0.31742058,3.06152184,3.05389347
66.771553,3.87298335,3.06141415,0.900871355,3.06141415,3.05370074
66.782044,2.64575131,3.06130789,-0.644636784,3.06130789,3.05350803
66.792536,3.46410162,3.06120309,0.634742884,3.06120309,3.05331529
66.803028,2.82842712,3.06109976,-0.482361524,3.06109976,3.05312256
66.813519,3.74165739,3.06099797,0.825020856,3.06099797,3.05292984
66.824011,3.16227766,3.06089773,0.318402152,3.06089773,3.05273711
66.834502,2,3.06079909,-1.02995101,3.06079909,3.05254439
66.844994,2.64575131,3.06070206,-0.644166709,3.06070206,3.05235165
66.855486,2.64575131,3.0606067,-0.644092686,3.0606067,3.0521589
66.865977,2.64575131,3.06051305,-0.644019984,3.06051305,3.05196618
66.876469,3.16227766,3.06042114,0.319149686,3.06042114,3.05177343
66.88696,2.44948974,3.06033102,-0.781563354,3.06033102,3.0515807
66.897452,2.23606798,3.06024272,-0.907840702,3.06024272,3.05138794
66.907944,3.87298335,3.06015629,0.901569221,3.06015629,3.05119519
66.918435,3,3.06007178,-0.245095448,3.06007178,3.05100245
66.928927,3,3.05998922,-0.244926977,3.05998922,3.05080968
66.939418,2.64575131,3.05990869,-0.643550601,3.05990869,3.05061694
66.94991,2.82842712,3.0598302,-0.481043734,3.0598302,3.05042417
66.960402,3,3.05975382,-0.244445946,3.05975382,3.05023139
66.970893,2.64575131,3.05967961,-0.643372597,3.05967961,3.05003863
66.981385,3,3.05960761,-0.24414669,3.05960761,3.04984585
66.991876,4.12310563,3.05953788,1.03129421,3.05953788,3.04965308
67.002368,3.16227766,3.05947047,0.320635599,3.05947047,3.04946029
67.01286,3.60555128,3.05940545,0.739016795,3.05940545,3.04926749
67.023351,2.82842712,3.05934289,-0.48053695,3.05934289,3.04907471
67.033843,3.31662479,3.05928282,0.507288842,3.05928282,3.0488819
67.044334,3.16227766,3.05922534,0.321017635,3.05922534,3.0486891
67.054826,3.60555128,3.05917049,0.739175746,3.05917049,3.04849628
67.065318,2.44948974,3.05911836,-0.780787175,3.05911836,3.04830346
67.075809,4.24264069,3.05906901,1.08792081,3.05906901,3.04811065
67.086301,3.74165739,3.05902251,0.82621721,3.05902251,3.04791781
67.096792,3.31662479,3.05897895,0.507588259,3.05897895,3.04772499
67.107284,3,3.0589384,-0.242772314,3.0589384,3.04753213
67.117776,3.87298335,3.05890094,0.902265155,3.05890094,3.04733928
67.128267,3,3.05886666,-0.242624522,3.05886666,3.04714643
67.138759,2.82842712,3.05883564,-0.480008872,3.05883564,3.04695356
67.14925,3.31662479,3.05880798,0.507756642,3.05880798,3.0467607
67.159742,2.82842712,3.05878377,-0.479954836,3.05878377,3.04656782
67.170234,3.87298335,3.0587631,0.902341534,3.0587631,3.04637492
67.180725,2.82842712,3.05874608,-0.479915573,3.05874608,3.04618204
67.191217,3.46410162,3.05873281,0.636685798,3.05873281,3.04598913
67.201708,3.46410162,3.05872339,0.636693192,3.05872339,3.04579623
67.2122,3.60555128,3.05871795,0.739481798,3.05871795,3.0456033
67.222692,2.23606798,3.05871658,-0.906999782,3.05871658,3.04541037
67.233183,3.60555128,3.05871942,0.739480801,3.05871942,3.04521745
67.243675,3.31662479,3.05872659,0.507836789,3.05872659,3.04502449
67.254166,2.44948974,3.05873821,-0.780543697,3.05873821,3.04483155
67.264658,3.31662479,3.05875442,0.507809388,3.05875442,3.04463858
67.27515,2.82842712,3.05877535,-0.479946068,3.05877535,3.0444456
67.285641,3.16227766,3.05880116,0.321677636,3.05880116,3.04425263
67.296133,3.46410162,3.05883199,0.636607907,3.05883199,3.04405963
67.306624,3.46410162,3.05886799,0.636579632,3.05886799,3.04386664
67.317116,3.31662479,3.05890933,0.507656837,3.05890933,3.04367363
67.327608,3.60555128,3.05895617,0.739320706,3.05895617,3.0434806
67.338099,3.60555128,3.05900868,0.73928519,3.05900868,3.04328758
67.348591,4,3.05906706,0.970016979,3.05906706,3.04309453
67.359082,3,3.05913148,-0.243169648,3.05913148,3.04290149
67.369574,2.82842712,3.05920214,-0.480390484,3.05920214,3.04270842
67.380066,4.12310563,3.05927925,1.03141959,3.05927925,3.04251533
67.390557,2.23606798,3.05936301,-0.907356066,3.05936301,3.04232226
67.401049,3.60555128,3.05945365,0.738984185,3.05945365,3.04212916
67.41154,3.74165739,3.05955139,0.825897086,3.05955139,3.04193606
67.422032,3.31662479,3.05965649,0.506920412,3.05965649,3.04174293
67.432524,3.46410162,3.05976918,0.6358714,3.05976918,3.04154979
67.443015,3,3.05988971,-0.244723752,3.05988971,3.04135666
67.453507,3,3.06001839,-0.244986512,3.06001839,3.0411635
67.463998,3.60555128,3.06015546,0.738509181,3.06015546,3.04097035
67.47449,2.44948974,3.06030126,-0.781544315,3.06030126,3.04077716
67.484982,3.31662479,3.06045607,0.506131131,3.06045607,3.04058396
67.495473,4,3.0606202,0.969216074,3.0606202,3.04039077
67.505965,3.46410162,3.06079402,0.635065029,3.06079402,3.04019754
67.516456,2.64575131,3.06097786,-0.644380747,3.06097786,3.04000432
67.526948,2.82842712,3.06117211,-0.482436505,3.06117211,3.03981107
67.53744,3.31662479,3.06137714,0.505220401,3.06137714,3.03961781
67.547931,3.31662479,3.06159333,0.505006394,3.06159333,3.03942455
67.558423,3,3.06182116,-0.248638607,3.06182116,3.03923126
67.568914,3.31662479,3.06206101,0.50454314,3.06206101,3.03903798
67.579406,3.60555128,3.0623134,0.737046725,3.0623134,3.03884466
67.589898,3.74165739,3.06257879,0.82406225,3.06257879,3.03865133
67.600389,3.60555128,3.06285767,0.736677407,3.06285767,3.038458
67.610881,2.64575131,3.06315063,-0.646064483,3.06315063,3.03826464
67.621372,3.16227766,3.06345816,0.314355687,3.06345816,3.03807129
67.631864,3,3.06378093,-0.252548861,3.06378093,3.0378779
67.642356,3.16227766,3.06411951,0.313302005,3.06411951,3.0376845
67.652847,2.64575131,3.06447454,-0.647088271,3.06447454,3.0374911
67.663339,3.74165739,3.06484676,0.822685009,3.06484676,3.03729767
67.67383,2.64575131,3.06523683,-0.647677019,3.06523683,3.03710424
67.684322,2.82842712,3.06564558,-0.487050774,3.06564558,3.03691078
67.694814,3.60555128,3.06607378,0.734491319,3.06607378,3.0367173
67.705305,3,3.06652222,-0.257919023,3.06652222,3.03652383
67.715797,2.64575131,3.06699189,-0.649030493,3.06699189,3.03633032
67.726288,3.74165739,3.06748364,0.821080841,3.06748364,3.03613682
67.73678,3.31662479,3.06799855,0.498624349,3.06799855,3.03594328
67.747272,2.64575131,3.06853763,-0.650220205,3.06853763,3.03574972
67.757763,3.31662479,3.06910193,0.497516697,3.06910193,3.03555617
67.768255,2,3.06969273,-1.03425951,3.06969273,3.03536259
67.778746,3.16227766,3.07031117,0.30325978,3.07031117,3.035169
67.789238,3.60555128,3.07095867,0.731158399,3.07095867,3.03497538
67.79973,2,3.07163658,-1.03519881,3.07163658,3.03478175
67.810221,3.31662479,3.07234631,0.494245369,3.07234631,3.03458812
67.820713,3.16227766,3.07308955,0.298643782,3.07308955,3.03439445
67.831204,3.16227766,3.07386785,0.297337879,3.07386785,3.03420078
67.841696,3.16227766,3.07468311,0.295963767,3.07468311,3.03400708
67.852188,3.16227766,3.07553715,0.294517412,3.07553715,3.03381336
67.862679,3,3.0764319,-0.276463201,3.0764319,3.03361964
67.873171,3,3.07736966,-0.278154023,3.07736966,3.03342589
67.883662,2.44948974,3.07835253,-0.793008694,3.07835253,3.03323214
67.894154,4,3.07938313,0.959487814,3.07938313,3.03303835
67.904646,2.82842712,3.08046398,-0.502032719,3.08046398,3.03284454
67.915137,3,3.08159772,-0.28565315,3.08159772,3.03265074
67.925629,3.46410162,3.08278756,0.617506321,3.08278756,3.0324569
67.93612,3.16227766,3.08403644,0.279716322,3.08403644,3.03226305
67.946612,3.46410162,3.08534801,0.61542961,3.08534801,3.03206918
67.957104,3.31662479,3.08672581,0.479477819,3.08672581,3.03187528
67.967595,3.74165739,3.08817363,0.808383423,3.08817363,3.03168139
67.978087,3.31662479,3.08969595,0.476370482,3.08969595,3.03148746
67.988578,3.46410162,3.09129704,0.610577246,3.09129704,3.03129352
67.99907,4,3.09298208,0.952374882,3.09298208,3.03109956
68.009562,3.31662479,3.09475621,0.471029281,3.09475621,3.03090557
68.020053,3.31662479,3.09662492,0.46904144,3.09662492,3.03071158
68.030545,2.64575131,3.09859473,-0.672936414,3.09859473,3.03051756
68.041036,3.16227766,3.10067642,0.248195975,3.10067642,3.03032353
68.051528,3.74165739,3.1028686,0.799242636,3.1028686,3.03012947
68.06202,3.60555128,3.10518339,0.707366871,3.10518339,3.02993538
68.072511,2.64575131,3.10762904,-0.679615872,3.10762904,3.0297413
68.083003,3.74165739,3.11021528,0.794633318,3.11021528,3.02954718
68.093494,3.87298335,3.11295165,0.871797967,3.11295165,3.02935306
68.103986,3.74165739,3.11584966,0.7910801,3.11584966,3.0291589
68.114478,3.87298335,3.11892104,0.868367609,3.11892104,3.02896472
68.124969,3.87298335,3.12217859,0.866489908,3.12217859,3.02877054
68.135461,3.16227766,3.12563728,0.191416776,3.12563728,3.02857632
68.145952,2.64575131,3.12931222,-0.695385441,3.12931222,3.0283821
68.156444,2.23606798,3.13322145,-0.947181859,3.13322145,3.02818784
68.166936,3.16227766,3.13738371,0.157778167,3.13738371,3.02799356
68.177427,2.82842712,3.14181961,-0.559814692,3.14181961,3.02779928
68.187919,4.12310563,3.14655328,0.988206631,3.14655328,3.02760496
68.19841,4.24264069,3.15160957,1.04452435,3.15160957,3.02741064
68.208902,3.31662479,3.15701804,0.399508132,3.15701804,3.02721628
68.219394,3,3.16281003,-0.403497247,3.16281003,3.0270219
68.229885,2.64575131,3.16902035,-0.723373373,3.16902035,3.02682752
68.240377,3.46410162,3.17568976,0.5370399,3.17568976,3.02663309
68.250868,3.74165739,3.18286129,0.74752665,3.18286129,3.02643867
68.26136,2.82842712,3.19058604,-0.601796408,3.19058604,3.0262442
68.271852,3.60555128,3.19891929,0.637677022,3.19891929,3.02604972
68.282343,2.44948974,3.20792326,-0.870880888,3.20792326,3.02585523
68.292835,3.46410162,3.21767108,0.496417702,3.21767108,3.0256607
68.303326,3.16227766,3.22824186,-0.256834975,3.22824186,3.02546617
68.313818,3.74165739,3.23972981,0.70846847,3.23972981,3.0252716
68.32431,3.60555128,3.25223918,0.594400616,3.25223918,3.02507701
68.334801,3.74165739,3.26588912,0.689759571,3.26588912,3.02488242
68.345293,3.16227766,3.28082072,-0.344300833,3.28082072,3.02468779
68.355784,2.44948974,3.29719084,-0.920706844,3.29719084,3.02449315
68.366276,3,3.3151875,-0.561415625,3.3151875,3.02429847
68.376768,3.74165739,3.33502417,0.63767799,3.33502417,3.02410377
68.387259,2.23606798,3.35694947,-1.05871691,3.35694947,3.02390907
68.397751,3.74165739,3.38126161,0.600329723,3.38126161,3.02371433
68.408242,3.74165739,3.40830209,0.577369291,3.40830209,3.02351958
68.418734,2.44948974,3.43848569,-0.994482753,3.43848569,3.02332479
68.429226,4.58257569,3.47229708,1.05369759,3.47229708,3.02312998
68.439717,2.82842712,3.5103149,-0.825764961,3.5103149,3.02293517
68.450209,4,3.5532478,0.668395244,3.5532478,3.02274032
68.4607,3.16227766,3.60194047,-0.663070739,3.60194047,3.02254546
68.471192,3.16227766,3.65745924,-0.703691396,3.65745924,3.02235056
68.481684,4,3.72115994,0.528053087,3.72115994,3.02215564
68.492175,4.12310563,3.79491553,0.572878781,3.79491553,3.02196071
68.502667,4.58257569,3.88164283,0.837217335,3.88164283,3.02176575
68.513158,4.47213595,3.9863712,0.696968257,3.9863712,3.02157078
68.52365,5.19615242,4.11859788,1.03805325,4.11859788,3.02137577
68.534142,4.58257569,4.29623876,0.535104605,4.29623876,3.02118073
68.544633,5,4.55117173,0.669946472,4.55117173,3.02098569
68.555125,5.65685425,4.93376877,0.850344331,4.93376877,3.02079061
68.565616,6.164414,5.51000955,0.808952688,5.51000955,3.02059553
68.576108,7.93725393,6.34648557,1.26125666,6.34648557,3.0204004
68.5866,7.68114575,7.48579212,0.441988269,7.48579212,3.02020525
68.597091,8.88819442,8.92641365,-0.195497395,8.92641365,3.0200101
68.607583,11.045361,10.6159409,0.65530158,10.6159409,3.0198149
68.618074,12.9614814,12.4534528,0.712761221,12.4534528,3.0196197
68.628566,14.525839,14.299069,0.476203777,14.299069,3.01942446
68.639058,16.5227116,15.9810271,0.735992194,15.9810271,3.01922919
68.649549,17.6635217,17.3038142,0.599756227,17.3038142,3.01903392
68.660041,18.0831413,18.0692613,0.117813636,18.0692613,3.01883861
68.670532,19.1572441,18.1340627,1.01152429,18.1340627,3.01864329
68.681024,19.6214169,17.483816,1.46205364,17.483816,3.01844793
68.691516,16.8226038,16.2430534,0.761282113,16.2430534,3.01825255
68.702007,15.3297097,14.6073356,0.849925966,14.6073356,3.01805716
68.712499,13.5277493,12.7752519,0.867466045,12.7752519,3.01786172
68.72299,11.4891253,10.9236239,0.751998263,10.9236239,3.01766629
68.733482,8.66025404,9.19850628,-0.733656757,9.19850628,3.01747081
68.743974,7.48331477,7.708457,-0.474491544,7.708457,3.01727531
68.754465,7,6.5151755,0.696293402,6.5151755,3.0170798
68.764957,5.65685425,5.62848522,0.168431088,5.62848522,3.01688425
68.775448,6.08276253,5.01213913,1.03470933,5.01213913,3.01668869
68.78594,5.38516481,4.6015491,0.885220708,4.6015491,3.01649309
68.796432,4.79583152,4.3289662,0.683275434,4.3289662,3.01629747
68.806923,4.12310563,4.14080143,-0.133025577,4.14080143,3.01610184
68.817415,3.31662479,4.00218684,-0.827986742,4.00218684,3.01590617
68.827906,4,3.89329568,0.32665627,3.89329568,3.01571049
68.838398,4.12310563,3.80356724,0.56527726,3.80356724,3.01551477
68.84889,3.60555128,3.72744068,-0.349126633,3.72744068,3.01531902
68.859381,3.16227766,3.66177177,-0.706748973,3.66177177,3.01512327
68.869873,3.60555128,3.60454786,0.0316766962,3.60454786,3.01492748
68.880364,3.31662479,3.5543546,-0.487575443,3.5543546,3.01473168
68.890856,3.74165739,3.51008431,0.481220403,3.51008431,3.01453583
68.901348,1.41421356,3.47085925,-1.434101,3.47085925,3.01433997
68.911839,3.87298335,3.43595829,0.661078709,3.43595829,3.01414409
68.922331,3.74165739,3.40477417,0.58041642,3.40477417,3.01394818
68.932822,3,3.37681101,-0.613849335,3.37681101,3.01375225
68.943314,3.74165739,3.3516419,0.624512197,3.3516419,3.01355629
68.953806,3.46410162,3.32891352,0.367679341,3.32891352,3.0133603
68.964297,2.44948974,3.30832549,-0.926733913,3.30832549,3.0131643
68.974789,3,3.28961632,-0.538160125,3.28961632,3.01296826
68.98528,3.60555128,3.27256897,0.577046189,3.27256897,3.01277221
68.995772,3.60555128,3.25699056,0.590390307,3.25699056,3.01257612
69.006264,2.23606798,3.24271902,-1.00332001,3.24271902,3.01238001
69.016755,2.44948974,3.22961365,-0.883246235,3.22961365,3.01218389
69.027247,2.23606798,3.21754859,-0.990697035,3.21754859,3.01198772
69.037738,3.16227766,3.20641845,-0.210097087,3.20641845,3.01179155
69.04823,3.60555128,3.19612683,0.639862833,3.19612683,3.01159533
69.058722,2.44948974,3.18659202,-0.858546605,3.18659202,3.01139909
69.069213,3.16227766,3.17774184,-0.124355055,3.17774184,3.01120285
69.079705,3.31662479,3.16951016,0.38355525,3.16951016,3.01100656
69.090196,3.31662479,3.16184142,0.393425181,3.16184142,3.01081026
69.100688,3,3.15468341,-0.393298118,3.15468341,3.01061392
69.11118,2.82842712,3.14799168,-0.565300412,3.14799168,3.01041756
69.121671,3.46410162,3.14172644,0.567780922,3.14172644,3.01022118
69.132163,3.16227766,3.13585038,0.162564709,3.13585038,3.01002477
69.142654,3,3.1303322,-0.361015509,3.1303322,3.00982834
69.153146,3.31662479,3.12514173,0.437587774,3.12514173,3.00963188
69.163638,3.16227766,3.12025326,0.204998533,3.12025326,3.00943539
69.174129,3.74165739,3.11564352,0.791210381,3.11564352,3.00923889
69.184621,3.60555128,3.1112902,0.703037037,3.1112902,3.00904234
69.195112,3.16227766,3.10717471,0.234740182,3.10717471,3.0088458
69.205604,3,3.10327863,-0.321369928,3.10327863,3.0086492
69.216096,1.73205081,3.09958633,-1.16941675,3.09958633,3.00845258
69.226587,3.31662479,3.09608353,0.469618209,3.09608353,3.00825596
69.237079,3.46410162,3.09275622,0.609381157,3.09275622,3.00805929
69.24757,2.82842712,3.08959286,-0.511043771,3.08959286,3.00786261
69.258062,2.64575131,3.0865817,-0.663950589,3.0865817,3.00766589
69.268554,3.74165739,3.08371281,0.81113783,3.08371281,3.00746915
69.279045,3.60555128,3.08097707,0.724274954,3.08097707,3.0072724
69.289537,4,3.07836532,0.960018061,3.07836532,3.0070756
69.300028,3.31662479,3.07587013,0.490667564,3.07587013,3.0068788
69.31052,4.24264069,3.0734837,1.08127563,3.0734837,3.00668195
69.321012,3.87298335,3.07119951,0.89542383,3.07119951,3.00648508
69.331503,3.16227766,3.06901152,0.30539505,3.06901152,3.0062882
69.341995,3.46410162,3.06691355,0.630228583,3.06691355,3.00609128
69.352486,2.82842712,3.06490063,-0.486285417,3.06490063,3.00589435
69.362978,3.16227766,3.06296743,0.315135252,3.06296743,3.00569737
69.37347,3.16227766,3.06110954,0.318069364,3.06110954,3.00550037
69.383961,3.31662479,3.05932284,0.507249398,3.05932284,3.00530336
69.394453,3.16227766,3.05760301,0.323534619,3.05760301,3.00510631
69.404944,3.46410162,3.05594667,0.63887005,3.05594667,3.00490926
69.415436,2.82842712,3.05435006,-0.475313513,3.05435006,3.00471215
69.425928,3.16227766,3.05281011,0.330858814,3.05281011,3.00451503
69.436419,3,3.05132394,-0.226547867,3.05132394,3.00431789
69.446911,3.31662479,3.04988846,0.516465229,3.04988846,3.00412071
69.457402,2.64575131,3.04850131,-0.634625873,3.04850131,3.00392353
69.467894,4.47213595,3.04715977,1.19372367,3.04715977,3.0037263
69.478386,2.82842712,3.04586165,-0.466298748,3.04586165,3.00352904
69.488877,3.60555128,3.04460491,0.74896353,3.04460491,3.00333178
69.499369,3,3.04338727,-0.208296116,3.04338727,3.00313448
69.50986,3.60555128,3.04220706,0.750562597,3.04220706,3.00293716
69.520352,3.60555128,3.04106226,0.751324838,3.04106226,3.00273981
69.530844,3,3.0399513,-0.199878202,3.0399513,3.00254242
69.541335,3.46410162,3.03887267,0.65209581,3.03887267,3.00234503
69.551827,2.82842712,3.03782468,-0.457599781,3.03782468,3.0021476
69.562318,3.60555128,3.03680612,0.754151942,3.03680612,3.00195016
69.57281,1.73205081,3.03581547,-1.14182514,3.03581547,3.00175268
69.583302,3.87298335,3.03485155,0.915495385,3.03485155,3.00155517
69.593793,2.23606798,3.03391327,-0.893221859,3.03391327,3.00135765
69.604285,3.31662479,3.03299933,0.532564985,3.03299933,3.00116009
69.614776,2.44948974,3.03210884,-0.763294894,3.03210884,3.00096252
69.625268,3.16227766,3.03124062,0.361990383,3.03124062,3.00076491
69.63576,3.74165739,3.03039382,0.843364434,3.03039382,3.00056727
69.646251,3.16227766,3.0295676,0.364293925,3.0295676,3.00036963
69.656743,2.44948974,3.02876095,-0.761098683,3.02876095,3.00017194
69.667234,3.31662479,3.02797321,0.537263043,3.02797321,2.99997425
69.677726,2.44948974,3.02720347,-0.76007482,3.02720347,2.99977651
69.688218,3.60555128,3.02645107,0.760986334,3.02645107,2.99957875
69.698709,3.74165739,3.02571539,0.846133558,3.02571539,2.99938098
69.709201,3,3.02499562,-0.158100022,3.02499562,2.99918316
69.719692,3.16227766,3.02429127,0.371465197,3.02429127,2.99898534
69.730184,3.31662479,3.02360161,0.541316155,3.02360161,2.99878748
69.740676,3.74165739,3.02292614,0.847780186,3.02292614,2.99858959
69.751167,2.82842712,3.02226439,-0.440269533,3.02226439,2.99839169
69.761659,3,3.0216157,-0.147022784,3.0216157,2.99819375
69.77215,3.74165739,3.02097971,0.848927368,3.02097971,2.99799581
69.782642,4,3.02035583,0.989769754,3.02035583,2.99779782
69.793134,3.74165739,3.01974368,0.849655053,3.01974368,2.9975998
69.803625,3.60555128,3.01914288,0.765773073,3.01914288,2.99740178
69.814117,3.87298335,3.0185529,0.924354069,3.0185529,2.99720371
69.824608,3,3.01797348,-0.134065209,3.01797348,2.99700564
69.8351,2.44948974,3.01740413,-0.753600945,3.01740413,2.99680753
69.845592,3.16227766,3.01684454,0.381356943,3.01684454,2.99660939
69.856083,3.60555128,3.01629444,0.767630666,3.01629444,2.99641124
69.866575,2.64575131,3.01575338,-0.608277952,3.01575338,2.99621305
69.877066,3.46410162,3.01522116,0.669985416,3.01522116,2.99601485
69.887558,1,3.01469738,-1.41940036,3.01469738,2.99581661
69.89805,3,3.0141818,-0.119087356,3.0141818,2.99561835
69.908541,3.87298335,3.0136742,0.926989293,3.0136742,2.99542008
69.919033,2.82842712,3.01317421,-0.429822156,3.01317421,2.99522176
69.929524,3.60555128,3.01268168,0.769980254,3.01268168,2.99502344
69.940016,3.46410162,3.01219628,0.672239046,3.01219628,2.99482508
69.950508,3.16227766,3.01171782,0.388020417,3.01171782,2.99462669
69.960999,2.44948974,3.01124611,-0.749504081,3.01124611,2.99442829
69.971491,3.31662479,3.01078086,0.553031581,3.01078086,2.99422986
69.981982,3.74165739,3.01032195,0.855181523,3.01032195,2.99403141
69.992474,2,3.00986909,-1.00492243,3.00986909,2.99383293
70.002966,2.82842712,3.00942214,-0.425435092,3.00942214,2.99363441
70.013457,2.44948974,3.00898096,-0.747991454,3.00898096,2.9934359
70.023949,4.24264069,3.00854528,1.11089847,3.00854528,2.99323734
70.03444,2.23606798,3.00811502,-0.878662078,3.00811502,2.99303877
70.044932,2.82842712,3.00768994,-0.423394402,3.00768994,2.99284016
70.055424,3.74165739,3.00726992,0.856964097,3.00726992,2.99264153
70.065915,3.16227766,3.00685485,0.394236994,3.00685485,2.99244289
70.076407,3.31662479,3.00644451,0.556938313,3.00644451,2.99224421
70.086898,3.31662479,3.00603882,0.557302403,3.00603882,2.99204552
70.09739,2,3.00563759,-1.00281483,3.00563759,2.99184679
70.107882,2.23606798,3.00524071,-0.877024935,3.00524071,2.99164803
70.118373,2.64575131,3.00484811,-0.599246861,3.00484811,2.99144927
70.128865,3.87298335,3.00445958,0.931946223,3.00445958,2.99125047
70.139356,3,3.00407509,-0.0638364319,3.00407509,2.99105166
70.149848,3.60555128,3.00369444,0.775794324,3.00369444,2.99085281
70.16034,2.64575131,3.00331757,-0.597968444,3.00331757,2.99065394
70.170831,3.16227766,3.0029444,0.399165699,3.0029444,2.99045506
70.181323,3.74165739,3.00257477,0.859699142,3.00257477,2.99025614
70.191814,3.31662479,3.00220865,0.560728227,3.00220865,2.99005721
70.202306,3.46410162,3.00184586,0.679893929,3.00184586,2.98985824
70.212798,2.82842712,3.00148636,-0.416003889,3.00148636,2.98965925
70.223289,3.60555128,3.00113009,0.777445293,3.00113009,2.98946025
70.233781,3.16227766,3.0007769,0.401871571,3.0007769,2.98926121
70.244272,3.46410162,3.00042677,0.68093674,3.00042677,2.98906216
70.254764,3.74165739,3.00007956,0.861149132,3.00007956,2.98886308
70.265256,3.16227766,2.99973522,0.403165528,2.99973522,2.98866397
70.275747,3.74165739,2.99939371,0.86154726,2.99939371,2.98846485
70.286239,2.82842712,2.99905489,-0.413071135,2.99905489,2.98826569
70.29673,3.16227766,2.99871875,0.404424165,2.99871875,2.98806653
70.307222,2.64575131,2.99838518,-0.59382983,2.99838518,2.98786733
70.317714,3,2.99805412,0.0441121072,2.99805412,2.9876681
70.328205,3.60555128,2.99772556,0.779631785,2.99772556,2.98746887
70.338697,2.82842712,2.99739935,-0.411062317,2.99739935,2.9872696
70.349188,3,2.99707552,0.0540784725,2.99707552,2.98707032
70.35968,3.16227766,2.99675393,0.406846074,2.99675393,2.986871
70.370172,3.16227766,2.99643457,0.407238373,2.99643457,2.98667166
70.380663,3.46410162,2.9961174,0.684093717,2.9961174,2.98647232
70.391155,3.87298335,2.99580232,0.936579429,2.99580232,2.98627293
70.401646,3.46410162,2.99548933,0.684552614,2.99548933,2.98607354
70.412138,3,2.99517833,0.0694382411,2.99517833,2.98587411
70.42263,4,2.99486929,1.00256207,2.99486929,2.98567465
70.433121,3.16227766,2.99456221,0.409530771,2.99456221,2.98547519
70.443613,2.82842712,2.99425697,-0.407222102,2.99425697,2.98527569
70.454104,4.12310563,2.99395358,1.06261566,2.99395358,2.98507619
70.464596,3.60555128,2.99365196,0.782239936,2.99365196,2.98487664
70.475088,3,2.99335208,0.0815347849,2.99335208,2.98467708
70.485579,2.82842712,2.99305393,-0.405742294,2.99305393,2.98447751
70.496071,3,2.99275743,0.085103304,2.99275743,2.9842779
70.506562,3.31662479,2.99246258,0.56935245,2.99246258,2.98407828
70.517054,2.82842712,2.99216929,-0.404650671,2.99216929,2.98387863
70.527546,3.74165739,2.99187756,0.865898278,2.99187756,2.98367895
70.538037,3.74165739,2.99158738,0.866065824,2.99158738,2.98347927
70.548529,3.46410162,2.99129865,0.687606692,2.99129865,2.98327955
70.55902,3.31662479,2.99101141,0.570625431,2.99101141,2.98307983
70.569512,2,2.99072556,-0.995351977,2.99072556,2.98288007
70.580004,3.16227766,2.9904411,0.414531736,2.9904411,2.98268028
70.590495,2.44948974,2.99015803,-0.735301492,2.99015803,2.98248049
70.600987,3.60555128,2.98987626,0.784649615,2.98987626,2.98228066
70.611478,3.16227766,2.98959582,0.415550049,2.98959582,2.98208083
70.62197,3.31662479,2.98931662,0.572108528,2.98931662,2.98188096
70.632462,3,2.98903867,0.10469635,2.98903867,2.98168107
70.642953,3,2.98876197,0.106009564,2.98876197,2.98148118
70.653445,4.58257569,2.98848644,1.26257248,2.98848644,2.98128124
70.663936,2.82842712,2.9882121,-0.399731127,2.9882121,2.98108131
70.674428,3,2.98793888,0.109823145,2.98793888,2.98088133
70.68492,3,2.98766678,0.111055049,2.98766678,2.98068134
70.695411,2.64575131,2.9873958,-0.584503625,2.9873958,2.98048134
70.705903,3.16227766,2.98712587,0.418511399,2.98712587,2.9802813
70.716394,3.31662479,2.98685702,0.574254101,2.98685702,2.98008126
70.726886,3.16227766,2.98658917,0.419152105,2.98658917,2.97988118
70.737378,3,2.98632234,0.116951538,2.98632234,2.97968108
70.747869,2.82842712,2.98605652,-0.397025683,2.98605652,2.97948098
70.758361,3,2.98579164,0.119198816,2.98579164,2.97928084
70.768852,3.87298335,2.98552774,0.942048621,2.98552774,2.9790807
70.779344,3,2.98526475,0.121388839,2.98526475,2.97888052
70.789836,2.82842712,2.98500267,-0.395696279,2.98500267,2.97868032
70.800327,3,2.98474151,0.123525259,2.98474151,2.97848012
70.810819,2.82842712,2.9844812,-0.395036807,2.9844812,2.97827988
70.82131,3.46410162,2.98422178,0.692733594,2.98422178,2.97807964
70.831802,3.16227766,2.98396318,0.422272991,2.98396318,2.97787936
70.842294,2.64575131,2.98370541,-0.581338194,2.98370541,2.97767906
70.852785,3,2.98344847,0.12865275,2.98344847,2.97747876
70.863277,3.46410162,2.9831923,0.693476251,2.9831923,2.97727842
70.873768,2.82842712,2.98293695,-0.393077372,2.98293695,2.97707808
70.88426,3.16227766,2.98268233,0.423786894,2.98268233,2.97687771
70.894752,3.60555128,2.98242846,0.789381284,2.98242846,2.97667731
70.905243,2.82842712,2.98217536,-0.392107431,2.98217536,2.97647692
70.915735,3.16227766,2.98192296,0.42468188,2.98192296,2.97627648
70.926226,2.82842712,2.98167129,-0.391464136,2.98167129,2.97607605
70.936718,3.31662479,2.9814203,0.578968468,2.9814203,2.97587558
70.94721,3.60555128,2.98117,0.790178004,2.98117,2.97567509
70.957701,3,2.98092039,0.138128967,2.98092039,2.9754746
70.968193,2.82842712,2.98067142,-0.390184946,2.98067142,2.97527407
70.978684,2.44948974,2.98042312,-0.728651752,2.98042312,2.97507354
70.989176,3.16227766,2.98017543,0.426734374,2.98017543,2.97487298
70.999668,3.31662479,2.97992838,0.580255473,2.97992838,2.9746724
71.010159,2.82842712,2.97968196,-0.388914942,2.97968196,2.97447182
71.020651,4.12310563,2.97943612,1.06942485,2.97943612,2.9742712
71.031142,2.82842712,2.9791909,-0.388283111,2.9791909,2.97407058
71.041634,4.12310563,2.97894624,1.06965386,2.97894624,2.97386993
71.052126,3.16227766,2.97870215,0.428457122,2.97870215,2.97366925
71.062617,3,2.97845866,0.146769696,2.97845866,2.97346858
71.073109,3.74165739,2.97821569,0.873751507,2.97821569,2.97326788
71.0836,3.60555128,2.97797329,0.792198197,2.97797329,2.97306717
71.094092,3.31662479,2.97773141,0.5821455,2.97773141,2.97286643
71.104584,2.82842712,2.97749005,-0.386086682,2.97749005,2.97266567
71.115075,3,2.97724924,0.150833566,2.97724924,2.97246491
71.125567,3.60555128,2.97700891,0.79280664,2.97700891,2.97226412
71.136058,3.16227766,2.9767691,0.430707041,2.9767691,2.97206333
71.14655,3.46410162,2.97652977,0.698263447,2.97652977,2.9718625
71.157042,3.16227766,2.97629093,0.43126179,2.97629093,2.97166165
71.167533,4.24264069,2.97605258,1.12542796,2.97605258,2.97146081
71.178025,2.82842712,2.97581469,-0.383910881,2.97581469,2.97125993
71.188516,1.41421356,2.97557728,-1.2495454,2.97557728,2.97105906
71.199008,2.82842712,2.97534031,-0.383292553,2.97534031,2.97085815
71.2095,3.46410162,2.97510378,0.6992838,2.97510378,2.97065722
71.219991,2.64575131,2.97486772,-0.573686685,2.97486772,2.9704563
71.230483,3,2.97463208,0.159273103,2.97463208,2.97025534
71.240974,3,2.97439689,0.160009728,2.97439689,2.97005438
71.251466,4.12310563,2.9741621,1.07188783,2.9741621,2.96985339
71.261958,3.74165739,2.97392772,0.876201839,2.97392772,2.96965239
71.272449,2.82842712,2.97369379,-0.381138639,2.97369379,2.96945138
71.282941,3,2.97346023,0.162910301,2.97346023,2.96925035
71.293432,3.16227766,2.9732271,0.434799444,2.9732271,2.96904931
71.303924,2.23606798,2.97299435,-0.858444156,2.97299435,2.96884824
71.314416,4,2.97276198,1.01352751,2.97276198,2.96864716
71.324907,3.16227766,2.97253002,0.43560032,2.97253002,2.96844608
71.335399,3.46410162,2.97229842,0.701286813,2.97229842,2.96824497
71.34589,3.74165739,2.97206722,0.877262885,2.97206722,2.96804386
71.356382,2.82842712,2.97183636,-0.378694123,2.97183636,2.96784272
71.366874,3.16227766,2.97160588,0.436659803,2.97160588,2.96764156
71.377365,2.64575131,2.97137577,-0.570635139,2.97137577,2.96744041
71.387857,3,2.97114601,0.169864631,2.97114601,2.96723922
71.398348,3.46410162,2.97091662,0.702271314,2.97091662,2.96703804
71.40884,3.46410162,2.97068756,0.702434381,2.97068756,2.96683682
71.419332,2,2.97045884,-0.985118694,2.97045884,2.96663559
71.429823,2.64575131,2.97023049,-0.569630742,2.97023049,2.96643437
71.440315,2.82842712,2.97000246,-0.376264984,2.97000246,2.96623311
71.450806,2.64575131,2.96977479,-0.569230604,2.96977479,2.96603186
71.461298,4.24264069,2.96954743,1.12831434,2.96954743,2.96583058
71.47179,3.46410162,2.96932041,0.703406858,2.96932041,2.96562928
71.482281,3.74165739,2.96909373,0.878956002,2.96909373,2.96542799
71.492773,3.31662479,2.96886736,0.589709613,2.96886736,2.96522667
71.503264,3,2.96864134,0.177083767,2.96864134,2.96502535
71.513756,3.74165739,2.96841562,0.879341668,2.96841562,2.964824
71.524248,2.64575131,2.96819022,-0.567837042,2.96819022,2.96462263
71.534739,2.64575131,2.96796516,-0.567638835,2.96796516,2.96442128
71.545231,2.64575131,2.9677404,-0.56744082,2.9677404,2.96421989
71.555722,3.60555128,2.96751597,0.798771121,2.96751597,2.96401851
71.566214,3.31662479,2.96729184,0.591043945,2.96729184,2.96381709
71.576706,3,2.96706803,0.181471668,2.96706803,2.96361567
71.587197,2.64575131,2.96684456,-0.566650906,2.96684456,2.96341425
71.597689,2.82842712,2.96662138,-0.371744882,2.96662138,2.9632128
71.60818,3.46410162,2.96639854,0.70548074,2.96639854,2.96301136
71.618672,3,2.966176,0.183913031,2.966176,2.96280988
71.629164,2.64575131,2.96595377,-0.565864348,2.96595377,2.9626084
71.639655,3.74165739,2.96573189,0.880866334,2.96573189,2.96240692
71.650147,3.87298335,2.9655103,0.952613795,2.9655103,2.96220541
71.660638,2.82842712,2.96528907,-0.369948567,2.96528907,2.96200391
71.67113,3,2.96506814,0.186900682,2.96506814,2.96180238
71.681622,3.74165739,2.96484753,0.881368171,2.96484753,2.96160084
71.692113,3.60555128,2.96462729,0.800577284,2.96462729,2.96139931
71.702605,3.87298335,2.96440736,0.953192523,2.96440736,2.96119774
71.713096,4,2.9641878,1.0177486,2.9641878,2.96099619
71.723588,3.74165739,2.96396856,0.881866671,2.96396856,2.96079461
71.73408,3.60555128,2.96374968,0.801125204,2.96374968,2.96059301
71.744571,3.60555128,2.96353119,0.801261561,2.96353119,2.96039143
71.755063,3.60555128,2.96331304,0.801397675,2.96331304,2.96018981
71.765554,3.87298335,2.9630953,0.953880521,2.9630953,2.95998821
71.776046,4.35889894,2.96287792,1.18153333,2.96287792,2.95978657
71.786538,4.79583152,2.96266095,1.3539463,2.96266095,2.95958493
71.797029,4.12310563,2.96244441,1.07733988,2.96244441,2.95938329
71.807521,4.12310563,2.96222829,1.07744018,2.96222829,2.95918163
71.818012,4.79583152,2.96201262,1.3541857,2.96201262,2.95897998
71.828504,4,2.9617974,1.01892228,2.9617974,2.95877829
71.838996,3.46410162,2.96158265,0.70888572,2.96158265,2.9585766
71.849487,4.58257569,2.96136843,1.27326638,2.96136843,2.95837492
71.859979,3.87298335,2.96115471,0.954897185,2.96115471,2.95817321
71.87047,3.46410162,2.96094157,0.709337753,2.96094157,2.95797152
71.880962,3.31662479,2.96072898,0.596570035,2.96072898,2.95776979
71.891454,3.60555128,2.96051701,0.803140251,2.96051701,2.95756806
71.901945,3.74165739,2.96030571,0.88394099,2.96030571,2.95736633
71.912437,4.35889894,2.96009508,1.18271039,2.96009508,2.95716458
71.922928,3.74165739,2.95988521,0.884178815,2.95988521,2.95696284
71.93342,3.60555128,2.95967741,0.803662781,2.95967741,2.95676108
71.943912,4,2.95946915,1.02006414,2.95946915,2.9565593
71.954403,3.46410162,2.95926182,0.710520789,2.95926182,2.95635754
71.964895,3.60555128,2.95905546,0.804049636,2.95905546,2.95615575
71.975386,4.12310563,2.95885018,1.0790067,2.95885018,2.95595398
71.985878,3.87298335,2.95864603,0.956209869,2.95864603,2.95575217
71.99637,3.87298335,2.95844315,0.956315949,2.95844315,2.95555036
72.006861,4.58257569,2.95824167,1.27449363,2.95824167,2.95534857
72.017353,3.16227766,2.95804169,0.451924734,2.95804169,2.95514674
72.027844,2.23606798,2.95784341,-0.849573679,2.95784341,2.95494493
72.038336,3.16227766,2.95764697,0.452361239,2.95764697,2.9547431
72.048828,3,2.95745259,0.206270229,2.95745259,2.95454125
72.059319,3.74165739,2.95726054,0.885661813,2.95726054,2.95433942
72.069811,4.35889894,2.95707106,1.18398813,2.95707106,2.95413757
72.080302,2.82842712,2.9568845,-0.358409515,2.9568845,2.95393573
72.090794,3,2.95670123,0.208083562,2.95670123,2.95373386
72.101286,2.82842712,2.95652171,-0.357903033,2.95652171,2.95353199
72.111777,4.12310563,2.95634648,1.08016626,2.95634648,2.95333013
72.122269,4.12310563,2.95617615,1.0802451,2.95617615,2.95312825
72.13276,2.82842712,2.95601152,-0.357189577,2.95601152,2.95292638
72.143252,3,2.95585347,0.210110764,2.95585347,2.95272449
72.153744,2.82842712,2.95570313,-0.356757633,2.95570313,2.9525226
72.164235,3,2.95556192,0.21080341,2.95556192,2.95232071
72.174727,3.31662479,2.95543159,0.600993514,2.95543159,2.95211881
72.185218,3.60555128,2.95531455,0.806372571,2.95531455,2.95191692
72.19571,3,2.95521429,0.211626336,2.95521429,2.951715
72.206202,3,2.95513643,0.211810227,2.95513643,2.95151308
72.216693,2.64575131,2.95509069,-0.556182866,2.95509069,2.95131118
72.227185,3,2.95509479,0.211908495,2.95509479,2.95110925
72.237676,3.31662479,2.95518114,0.601201839,2.95518114,2.95090734
72.248168,2.64575131,2.9554074,-0.556467512,2.9554074,2.95070541
72.25866,3.60555128,2.95587085,0.80602756,2.95587085,2.95050348
72.269151,3.74165739,2.95672423,0.885964534,2.95672423,2.95030156
72.279643,2.64575131,2.95818764,-0.558960044,2.95818764,2.95009961
72.290134,3.46410162,2.96054483,0.709617349,2.96054483,2.94989769
72.300626,3.31662479,2.96411405,0.59372615,2.96411405,2.94969574
72.311118,3.16227766,2.96918048,0.439428243,2.96918048,2.94949379
72.321609,3,2.97589558,0.15525597,2.97589558,2.94929186
72.332101,2.64575131,2.98416324,-0.581731834,2.98416324,2.9490899
72.342592,2.44948974,2.99353525,-0.737594405,2.99353525,2.94888797
72.353084,3.16227766,3.00316252,0.398892395,3.00316252,2.94868601
72.363576,3.31662479,3.01180184,0.552107734,3.01180184,2.94848405
72.374067,2,3.01795212,-1.00893613,3.01795212,2.9482821
72.384559,3.31662479,3.02024128,0.544411157,3.02024128,2.94808014
72.39505,3.16227766,3.01804778,0.379776094,3.01804778,2.9478782
72.405542,3,3.01187485,-0.108971802,3.01187485,2.94767623
72.416034,3.74165739,3.00303761,0.859429914,3.00303761,2.94747427
72.426525,3,2.99304224,0.0834132153,2.99304224,2.94727232
72.437017,3.31662479,2.98316745,0.577457651,2.98316745,2.94707035
72.447508,2.64575131,2.97431433,-0.573204166,2.97431433,2.9468684
72.458,3.16227766,2.96697468,0.441930969,2.96697468,2.94666643
72.468492,2.44948974,2.9612847,-0.715398458,2.9612847,2.94646447
72.478983,3.16227766,2.95711759,0.452945994,2.95711759,2.94626252
72.489475,2.82842712,2.95419858,-0.354642715,2.95419858,2.94606055
72.499966,3.31662479,2.95221129,0.603666717,2.95221129,2.9458586
72.510458,3.46410162,2.95086565,0.716404889,2.95086565,2.94565663
72.52095,3.16227766,2.94993396,0.460807658,2.94993396,2.94545467
72.531441,2.82842712,2.94925575,-0.347604116,2.94925575,2.94525272
72.541933,3.31662479,2.94872751,0.606545366,2.94872751,2.94505076
72.552424,3.46410162,2.94828751,0.718201992,2.94828751,2.94484881
72.562916,3,2.94790063,0.228252869,2.94790063,2.94464685
72.573408,2.23606798,2.94754767,-0.843492557,2.94754767,2.94444489
72.583899,3.46410162,2.94721813,0.718946093,2.94721813,2.94424295
72.594391,2.44948974,2.94690592,-0.705277373,2.94690592,2.944041
72.604882,3.16227766,2.94660737,0.464403153,2.94660737,2.94383906
72.615374,2.23606798,2.94631992,-0.842764466,2.94631992,2.94363711
72.625866,3.31662479,2.94604175,0.60875532,2.94604175,2.94343516
72.636357,2.44948974,2.94577144,-0.70447264,2.94577144,2.94323323
72.646849,2.82842712,2.9455078,-0.342170528,2.9455078,2.94303129
72.65734,3.46410162,2.94524991,0.720313613,2.94524991,2.94282936
72.667832,3.87298335,2.94499697,0.963320496,2.94499697,2.94262743
72.678324,3.46410162,2.94474833,0.720661699,2.94474833,2.94242549
72.688815,2.64575131,2.94450348,-0.546582258,2.94450348,2.94222358
72.699307,3.60555128,2.9442619,0.813197012,2.9442619,2.94202165
72.709798,3.16227766,2.94402324,0.467177075,2.94402324,2.94181974
72.72029,2.64575131,2.94378713,-0.545926571,2.94378713,2.94161782
72.730782,3.31662479,2.9435533,0.610795782,2.9435533,2.94141591
72.741273,2.64575131,2.94332153,-0.545499971,2.94332153,2.94121401
72.751765,3,2.94309155,0.238554919,2.94309155,2.94101211
72.762256,2.44948974,2.94286323,-0.702405498,2.94286323,2.94081022
72.772748,3.31662479,2.94263635,0.611545943,2.94263635,2.94060832
72.78324,3.87298335,2.9424108,0.964661881,2.9424108,2.94040643
72.793731,3.31662479,2.94218648,0.611913647,2.94218648,2.94020456
72.804223,3.16227766,2.94196323,0.469376642,2.94196323,2.94000268
72.814714,2.23606798,2.941741,-0.840043462,2.941741,2.93980082
72.825206,2.64575131,2.94151965,-0.54384588,2.94151965,2.93959895
72.835698,3.16227766,2.94129915,0.470083519,2.94129915,2.93939708
72.846189,3.16227766,2.94107943,0.470317164,2.94107943,2.93919524
72.856681,3.46410162,2.94086039,0.723354148,2.94086039,2.93899339
72.867172,2.23606798,2.94064203,-0.839389095,2.94064203,2.93879156
72.877664,2.82842712,2.94042425,-0.334659718,2.94042425,2.93858972
72.888156,3.16227766,2.94020703,0.471243703,2.94020703,2.93838788
72.898647,3,2.93999035,0.244968663,2.93999035,2.93818608
72.909139,3.46410162,2.93977414,0.724104603,2.93977414,2.93798426
72.91963,3.16227766,2.9395584,0.471931418,2.9395584,2.93778246
72.930122,3.74165739,2.93934306,0.895720007,2.93934306,2.93758066
72.940614,2.64575131,2.93912811,-0.541642688,2.93912811,2.93737886
72.951105,2.64575131,2.93891356,-0.541444594,2.93891356,2.93717709
72.961597,2.64575131,2.93869934,-0.541246732,2.93869934,2.93697531
72.972088,2.82842712,2.93848546,-0.331750415,2.93848546,2.93677355
72.98258,2.64575131,2.93827188,-0.540851706,2.93827188,2.93657179
72.993072,4,2.93805859,1.03050542,2.93805859,2.93637003
73.003563,3.87298335,2.9378456,0.967025205,2.9378456,2.9361683
73.014055,3.16227766,2.93763285,0.473967098,2.93763285,2.93596656
73.024546,3.46410162,2.93742037,0.725728077,2.93742037,2.93576485
73.035038,4.24264069,2.93720811,1.14255528,2.93720811,2.93556313
73.04553,2.44948974,2.93699608,-0.698216542,2.93699608,2.93536142
73.056021,3.74165739,2.93678429,0.897147201,2.93678429,2.93515973
73.066513,3.74165739,2.93657268,0.897265127,2.93657268,2.93495804
73.077004,3.16227766,2.93663917,0.475014195,2.93663917,2.93475638
73.087496,3.46410162,2.93642851,0.726411116,2.93642851,2.93455471
73.097988,3.31662479,2.93621802,0.616771246,2.93621802,2.93435304
73.108479,3.16227766,2.93600773,0.475678387,2.93600773,2.93415141
73.118971,3.74165739,2.93579759,0.897696938,2.93579759,2.93394977
73.129462,3.31662479,2.93558764,0.617282068,2.93558764,2.93374816
73.139954,2.82842712,2.93537782,-0.327033174,2.93537782,2.93354654
73.150446,3,2.93516816,0.254620979,2.93516816,2.93334494
73.160937,2.23606798,2.93495866,-0.83599682,2.93495866,2.93314336
73.171429,3.60555128,2.93474929,0.819025024,2.93474929,2.93294177
73.18192,3.60555128,2.93454007,0.819152736,2.93454007,2.93274022
73.192412,3.46410162,2.93433097,0.727853451,2.93433097,2.93253866
73.202904,3.31662479,2.934122,0.618468102,2.934122,2.93233711
73.213395,3.60555128,2.93391317,0.819535297,2.93391317,2.9321356
73.223887,3.16227766,2.93370445,0.478093306,2.93370445,2.93193407
73.234378,3.16227766,2.93349587,0.478311396,2.93349587,2.93173258
73.24487,3.16227766,2.93328738,0.478529284,2.93328738,2.93153109
73.255362,2.64575131,2.93307901,-0.536029572,2.93307901,2.9313296
73.265853,3.87298335,2.93287077,0.969594024,2.93287077,2.93112815
73.276345,2.82842712,2.93266262,-0.322855229,2.93266262,2.93092669
73.286836,3.46410162,2.9324546,0.729141287,2.9324546,2.93072527
73.297328,3,2.93224666,0.260294718,2.93224666,2.93052384
73.30782,2.82842712,2.93203882,-0.321887709,2.93203882,2.93032243
73.318311,3.16227766,2.9318311,0.480048494,2.9318311,2.93012105
73.328803,2.82842712,2.93162346,-0.321241871,2.93162346,2.92991966
73.339294,3.74165739,2.93141594,0.900134127,2.93141594,2.92971831
73.349786,3.16227766,2.93120849,0.480696545,2.93120849,2.92951695
73.360278,1.41421356,2.93100114,-1.2315793,2.93100114,2.92931561
73.370769,3.87298335,2.93079389,0.970664439,2.93079389,2.9291143
73.381261,3.16227766,2.93058672,0.481342853,2.93058672,2.92891299
73.391752,3.16227766,2.93037965,0.481557896,2.93037965,2.92871172
73.402244,3,2.93017266,0.264248642,2.93017266,2.92851044
73.412736,2.82842712,2.92996574,-0.31865125,2.92996574,2.92830917
73.423227,3.31662479,2.92975894,0.621985413,2.92975894,2.92810795
73.433719,3.74165739,2.92955219,0.901168792,2.92955219,2.92790672
73.44421,3.16227766,2.92934555,0.482630402,2.92934555,2.92770552
73.454702,2.44948974,2.92913898,-0.692567134,2.92913898,2.92750432
73.465194,1,2.92893248,-1.38886014,2.92893248,2.92730315
73.475685,3.46410162,2.92872608,0.731693604,2.92872608,2.927102
73.486177,3,2.92851975,0.267357911,2.92851975,2.92690086
73.496668,2.44948974,2.92831351,-0.691970929,2.92831351,2.92669975
73.50716,3,2.92810733,0.268128087,2.92810733,2.92649864
73.517652,2.82842712,2.92790123,-0.315395151,2.92790123,2.92629755
73.528143,3.16227766,2.92769522,0.484337115,2.92769522,2.92609649
73.538635,3,2.92748927,0.269278167,2.92748927,2.92589544
73.549126,2.64575131,2.92728341,-0.530595988,2.92728341,2.92569442
73.559618,2.23606798,2.92707761,-0.831269893,2.92707761,2.92549341
73.57011,3.60555128,2.92687189,0.823819997,2.92687189,2.92529241
73.580601,3.60555128,2.92666626,0.823944792,2.92666626,2.92509145
73.591093,3.60555128,2.92646068,0.824069535,2.92646068,2.92489049
73.601584,3.60555128,2.92625519,0.824194203,2.92625519,2.92468957
73.612076,3,2.92604976,0.271937936,2.92604976,2.92448865
73.622568,3.31662479,2.9258444,0.625124301,2.9258444,2.92428775
73.633059,2.64575131,2.92563913,-0.529044252,2.92563913,2.92408689
73.643551,2.64575131,2.92543392,-0.528850266,2.92543392,2.92388603
73.654042,2,2.92522879,-0.961888138,2.92522879,2.92368521
73.664534,2.44948974,2.92502372,-0.689589715,2.92502372,2.92348439
73.675026,3.16227766,2.92481872,0.487297592,2.92481872,2.9232836
73.685517,3,2.92461381,0.274565463,2.92461381,2.92308284
73.696009,2.64575131,2.92440895,-0.527880324,2.92440895,2.92288209
73.7065,2.64575131,2.92420418,-0.527686335,2.92420418,2.92268138
73.716992,2.82842712,2.92399946,-0.309147759,2.92399946,2.92248067
73.727484,2.82842712,2.92379482,-0.308816597,2.92379482,2.92227998
73.737975,2.82842712,2.92359026,-0.308485227,2.92359026,2.92207933
73.748467,2,2.92338576,-0.960929631,2.92338576,2.92187869
73.758958,3,2.92318134,0.27716179,2.92318134,2.92167809
73.76945,3.16227766,2.92297698,0.489183688,2.92297698,2.92147749
73.779942,2.44948974,2.92277269,-0.687955628,2.92277269,2.92127692
73.790433,3,2.92256849,0.27826518,2.92256849,2.92107638
73.800925,3.16227766,2.92236434,0.489809471,2.92236434,2.92087586
73.811416,3,2.92216029,0.278997696,2.92216029,2.92067537
73.821908,1.73205081,2.92195628,-1.09082789,2.92195628,2.92047489
73.8324,3.31662479,2.92175235,0.628388764,2.92175235,2.92027444
73.842891,2.44948974,2.92154851,-0.687065332,2.92154851,2.92007402
73.853383,3.60555128,2.92134473,0.827167786,2.92134473,2.91987362
73.863874,3.60555128,2.92114104,0.827290902,2.92114104,2.91967326
73.874366,2.23606798,2.9209374,-0.827568381,2.9209374,2.9194729
73.884858,2.44948974,2.92073384,-0.686472212,2.92073384,2.91927257
73.895349,3,2.92053037,0.281903575,2.92053037,2.91907228
73.905841,3.16227766,2.92032697,0.491884839,2.92032697,2.918872
73.916332,2,2.92012365,-0.959230761,2.92012365,2.91867176
73.926824,3.31662479,2.9199204,0.629844737,2.9199204,2.91847154
73.937316,2.64575131,2.91971722,-0.52341753,2.91971722,2.91827133
73.947807,2.82842712,2.91951415,-0.301806263,2.91951415,2.91807118
73.958299,3,2.91931113,0.284057864,2.91931113,2.91787103
73.96879,2.82842712,2.91910822,-0.301133012,2.91910822,2.91767092
73.979282,3,2.91890537,0.284771197,2.91890537,2.91747083
73.989774,3.31662479,2.9187026,0.630810741,2.9187026,2.91727076
74.000265,3.31662479,2.91849994,0.630971356,2.91849994,2.91707074
74.010757,3.16227766,2.91829735,0.493943635,2.91829735,2.91687073
74.021248,2,2.91809486,-0.958172668,2.91809486,2.91667076
74.03174,2.64575131,2.91789245,-0.521671485,2.91789245,2.91647081
74.042232,3,2.91769013,0.286896967,2.91769013,2.91627088
74.052723,2.82842712,2.91748793,-0.298430563,2.91748793,2.916071
74.063215,3,2.9172858,0.287600766,2.9172858,2.91587113
74.073706,4.35889894,2.91708379,1.20075607,2.91708379,2.9156713
74.084198,2.44948974,2.91688187,-0.683660827,2.91688187,2.91547149
74.09469,3.31662479,2.91668005,0.632411841,2.91668005,2.91527171
74.105181,4,2.91647837,1.04092345,2.91647837,2.91507198
74.115673,2.44948974,2.91627677,-0.683218142,2.91627677,2.91487225
74.126164,4.12310563,2.91607531,1.09864931,2.91607531,2.91467258
74.136656,3.16227766,2.91587396,0.496390673,2.91587396,2.91447292
74.147148,3.16227766,2.91567273,0.496593322,2.91567273,2.91427328
74.157639,2.44948974,2.91547166,-0.682628679,2.91547166,2.9140737
74.168131,2.23606798,2.9152707,-0.824137562,2.9152707,2.91387413
74.178622,2.44948974,2.9150699,-0.682334347,2.9150699,2.91367461
74.189114,1.41421356,2.91486924,-1.22501252,2.91486924,2.9134751
74.199606,3,2.91466874,0.292115149,2.91466874,2.91327563
74.210097,3.46410162,2.91446842,0.741372504,2.91446842,2.9130762
74.220589,2.82842712,2.91426827,-0.292986594,2.91426827,2.91287679
74.23108,4.58257569,2.91406832,1.29170715,2.91406832,2.91267743
74.241572,2.82842712,2.91386856,-0.292303664,2.91386856,2.91247808
74.252064,2.82842712,2.91366901,-0.291962124,2.91366901,2.91227876
74.262555,2.64575131,2.91346971,-0.517415109,2.91346971,2.9120795
74.273047,2,2.91327063,-0.955651942,2.91327063,2.91188025
74.283538,3.31662479,2.91307185,0.63525817,2.91307185,2.91168106
74.29403,2.82842712,2.91287333,-0.290596297,2.91287333,2.91148187
74.304522,3.31662479,2.91267513,0.635570341,2.91267513,2.91128273
74.315013,3,2.91247729,0.29584237,2.91247729,2.91108363
74.325505,3.31662479,2.91227981,0.635881263,2.91227981,2.91088455
74.335996,2.64575131,2.91208276,-0.516073103,2.91208276,2.91068552
74.346488,2.82842712,2.91188614,-0.288892748,2.91188614,2.91048651
74.35698,2.44948974,2.91169004,-0.679853141,2.91169004,2.91028754
74.367471,4.12310563,2.91149451,1.10073208,2.91149451,2.91008862
74.377963,3,2.9112996,0.297826132,2.9112996,2.90988971
74.388454,3,2.91110541,0.29815196,2.91110541,2.90969086
74.398946,3.31662479,2.91091201,0.636955874,2.91091201,2.90949203
74.409438,3.60555128,2.91071951,0.833565691,2.91071951,2.90929323
74.419929,2.64575131,2.91052808,-0.514564642,2.91052808,2.90909449
74.430421,3.16227766,2.91033783,0.501936082,2.91033783,2.90889576
74.440912,2.82842712,2.91014898,-0.285870349,2.91014898,2.90869709
74.451404,3.46410162,2.90996173,0.744405727,2.90996173,2.90849844
74.461896,3.46410162,2.90977637,0.744530216,2.90977637,2.90829983
74.472387,2.23606798,2.90959329,-0.82068588,2.90959329,2.90810127
74.482879,2.64575131,2.90941292,-0.513479906,2.90941292,2.90790273
74.49337,2.64575131,2.90923599,-0.513307589,2.90923599,2.90770425
74.503862,4.12310563,2.90906353,1.10183579,2.90906353,2.90750578
74.514354,3.46410162,2.90889736,0.745120298,2.90889736,2.90730736
74.524845,2.82842712,2.90874076,-0.283396604,2.90874076,2.90710899
74.535337,3.46410162,2.90859966,0.745320038,2.90859966,2.90691064
74.545828,3,2.90848471,0.302514946,2.90848471,2.90671235
74.55632,3,2.90841403,0.302631745,2.90841403,2.90651408
74.566812,2.82842712,2.90841659,-0.282824097,2.90841659,2.90631585
74.577303,3.46410162,2.90853497,0.745363434,2.90853497,2.90611768
74.587795,3.16227766,2.9088256,0.50344022,2.9088256,2.90591953
74.598286,2.44948974,2.90935399,-0.678132912,2.90935399,2.90572144
74.608778,4.12310563,2.91018261,1.10132784,2.91018261,2.90552336
74.61927,3.46410162,2.9113508,0.743472137,2.9113508,2.90532533
74.629761,3,2.91284994,0.295211885,2.91284994,2.90512736
74.640253,2.44948974,2.91460064,-0.681990391,2.91460064,2.90492942
74.650744,3,2.91643637,0.289073748,2.91643637,2.90473153
74.661236,2.82842712,2.91810347,-0.299460095,2.91810347,2.90453366
74.671728,2.23606798,2.91928506,-0.826569465,2.91928506,2.90433584
74.682219,3.46410162,2.91968106,0.737848597,2.91968106,2.90413807
74.692711,3,2.91914235,0.284354802,2.91914235,2.90394033
74.703202,4,2.91775814,1.04030854,2.91775814,2.90374265
74.713694,2.64575131,2.91579945,-0.519661566,2.91579945,2.903545
74.724186,3.16227766,2.91358705,0.498688893,2.91358705,2.90334739
74.734677,3,2.91139594,0.297664339,2.91139594,2.90314984
74.745169,2.82842712,2.9094171,-0.284587376,2.9094171,2.90295231
74.75566,3.46410162,2.90775396,0.745887157,2.90775396,2.90275485
74.766152,3,2.90643278,0.305887589,2.90643278,2.90255741
74.776644,2.64575131,2.90542562,-0.50958248,2.90542562,2.90236001
74.787135,2.82842712,2.90467469,-0.27612961,2.90467469,2.90216268
74.797627,3.46410162,2.90411393,0.74832325,2.90411393,2.90196537
74.808118,3,2.90368389,0.310348366,2.90368389,2.90176813
74.81861,1.41421356,2.90333794,-1.22029684,2.90333794,2.90157091
74.829102,3.46410162,2.90304351,0.749038119,2.90304351,2.90137374
74.839593,3.60555128,2.90277972,0.838314712,2.90277972,2.90117663
74.850085,2.44948974,2.902534,-0.673085625,2.902534,2.90097955
74.860576,3,2.90229931,0.312571093,2.90229931,2.90078254
74.871068,3,2.9020717,0.312934982,2.9020717,2.90058555
74.88156,3.31662479,2.90184902,0.644030876,2.90184902,2.9003886
74.892051,3.31662479,2.90163006,0.644200847,2.90163006,2.90019173
74.902543,3.46410162,2.901414,0.750125069,2.901414,2.89999488
74.913034,2.44948974,2.90120034,-0.672094191,2.90120034,2.89979809
74.923526,2.64575131,2.90098868,-0.505210218,2.90098868,2.89960134
74.934018,2.82842712,2.90077871,-0.268982494,2.90077871,2.89940463
74.944509,3.16227766,2.90057022,0.511573498,2.90057022,2.89920799
74.955001,3,2.90036297,0.315653346,2.90036297,2.89901137
74.965492,3.16227766,2.90015683,0.511977373,2.90015683,2.89881483
74.975984,3.16227766,2.89995163,0.51217773,2.89995163,2.89861831
74.986476,2.82842712,2.89974728,-0.267058337,2.89974728,2.89842184
74.996967,3.16227766,2.89954369,0.512575815,2.89954369,2.89822544
75.007459,2,2.89934075,-0.948335781,2.89934075,2.89802907
75.01795,2.23606798,2.89913843,-0.814291379,2.89913843,2.89783277
75.028442,2.64575131,2.89893662,-0.503175225,2.89893662,2.8976365
75.038934,3.16227766,2.89873529,0.513363778,2.89873529,2.89744028
75.049425,3,2.89853442,0.318536617,2.89853442,2.89724413
75.059917,2.44948974,2.89833394,-0.669958353,2.89833394,2.89704801
75.070408,2.82842712,2.89813384,-0.264020287,2.89813384,2.89685196
75.0809,2.23606798,2.89793405,-0.813551521,2.89793405,2.89665594
75.091392,3,2.89773459,0.319789641,2.89773459,2.89645997
75.101883,2.23606798,2.89753542,-0.81330649,2.89753542,2.89626407
75.112375,2.44948974,2.89733652,-0.669213548,2.89733652,2.8960682
75.122866,2.44948974,2.89713788,-0.66906512,2.89713788,2.89587241
75.133358,3.16227766,2.89693946,0.515109894,2.89693946,2.89567664
75.14385,3.16227766,2.89674126,0.515302241,2.89674126,2.89548093
75.154341,3.74165739,2.89654329,0.919300872,2.89654329,2.89528529
75.164833,2.44948974,2.89634551,-0.668472711,2.89634551,2.89508969
75.175324,1.73205081,2.89614793,-1.07893333,2.89614793,2.89489415
75.185816,3.31662479,2.89595052,0.648594072,2.89595052,2.89469865
75.196308,3,2.89575328,0.322872605,2.89575328,2.89450321
75.206799,2.23606798,2.89555623,-0.812088819,2.89555623,2.89430783
75.217291,3.46410162,2.89535932,0.75415005,2.89535932,2.89411249
75.227782,2.82842712,2.89516258,-0.258332065,2.89516258,2.89391723
75.238274,2.44948974,2.89496598,-0.667440059,2.89496598,2.89372199
75.248766,3.31662479,2.89476952,0.649503868,2.89476952,2.89352682
75.259257,3,2.89457322,0.324694908,2.89457322,2.89333171
75.269749,3.31662479,2.89437704,0.649805936,2.89437704,2.89313665
75.28024,3.16227766,2.89418101,0.517780504,2.89418101,2.89294165
75.290732,3.46410162,2.8939851,0.755060607,2.8939851,2.8927467
75.301224,3,2.89378931,0.325899816,2.89378931,2.8925518
75.311715,2.44948974,2.89359367,-0.66641123,2.89359367,2.89235697
75.322207,3.46410162,2.89339813,0.755449191,2.89339813,2.89216218
75.332698,3.87298335,2.89320274,0.989838676,2.89320274,2.89196747
75.34319,3.87298335,2.89300745,0.98993732,2.89300745,2.89177279
75.353682,2.44948974,2.89281228,-0.665824701,2.89281228,2.89157818
75.364173,2.82842712,2.89261724,-0.253357678,2.89261724,2.89138363
75.374665,3,2.8924223,0.3279904,2.8924223,2.89118913
75.385156,3.46410162,2.89222749,0.756223594,2.89222749,2.8909947
75.395648,3,2.89203278,0.328583657,2.89203278,2.89080031
75.40614,3.31662479,2.89183818,0.651756556,2.89183818,2.89060598
75.416631,3.16227766,2.89164372,0.520224898,2.89164372,2.89041173
75.427123,2.23606798,2.89144934,-0.809556276,2.89144934,2.89021751
75.437614,2.82842712,2.8912551,-0.250655087,2.8912551,2.89002338
75.448106,1.73205081,2.89106095,-1.07657333,2.89106095,2.88982928
75.458598,3.87298335,2.8908669,0.991017882,2.8908669,2.88963524
75.469089,3,2.89067299,0.330646352,2.89067299,2.88944129
75.479581,2.82842712,2.89047917,-0.249102475,2.89047917,2.88924737
75.490072,2.82842712,2.89028547,-0.248713387,2.89028547,2.88905353
75.500564,3.46410162,2.89009187,0.757634308,2.89009187,2.88885973
75.511056,3.46410162,2.88989838,0.757761993,2.88989838,2.88866599
75.521547,2.64575131,2.88970501,-0.493916693,2.88970501,2.88847234
75.532039,2.82842712,2.88951174,-0.247153012,2.88951174,2.88827872
75.54253,2.82842712,2.88931859,-0.246761959,2.88931859,2.88808519
75.553022,3,2.88912553,0.332978177,2.88912553,2.88789169
75.563514,3.46410162,2.88893259,0.758398989,2.88893259,2.88769826
75.574005,3,2.88873977,0.333556935,2.88873977,2.88750491
75.584497,3.31662479,2.88854705,0.654276504,2.88854705,2.88731161
75.594988,3.74165739,2.88835445,0.923743977,2.88835445,2.88711838
75.60548,2.64575131,2.88816195,-0.492352148,2.88816195,2.8869252
75.615972,3.16227766,2.88796956,0.523744309,2.88796956,2.88673208
75.626463,2.82842712,2.8877773,-0.243618912,2.8877773,2.88653904
75.636955,2.64575131,2.88758513,-0.491766024,2.88758513,2.88634605
75.647446,3,2.8873931,0.335569516,2.8873931,2.88615314
75.657938,3.16227766,2.88720116,0.524477357,2.88720116,2.88596027
75.66843,3.46410162,2.88700934,0.759665897,2.88700934,2.88576747
75.678921,3.16227766,2.88681765,0.524842843,2.88681765,2.88557476
75.689413,3,2.88662606,0.336710471,2.88662606,2.88538208
75.699904,2.64575131,2.8864346,-0.490594834,2.8864346,2.8851895
75.710396,3.16227766,2.88624325,0.525389774,2.88624325,2.88499695
75.720888,2.82842712,2.88605201,-0.240051832,2.88605201,2.88480448
75.731379,3.16227766,2.88586091,0.525753511,2.88586091,2.88461209
75.741871,3.46410162,2.88566991,0.760546979,2.88566991,2.88441974
75.752362,2.44948974,2.88547905,-0.660294863,2.88547905,2.88422748
75.762854,2.82842712,2.88528829,-0.238455801,2.88528829,2.88403527
75.773346,2.64575131,2.88509766,-0.489230366,2.88509766,2.88384312
75.783837,2.82842712,2.88490717,-0.237655314,2.88490717,2.88365106
75.794329,2.44948974,2.88471679,-0.659717401,2.88471679,2.88345905
75.80482,2.64575131,2.88452655,-0.488646338,2.88452655,2.88326712
75.815312,3.31662479,2.88433643,0.657486397,2.88433643,2.88307524
75.825804,3.16227766,2.88414643,0.527381484,2.88414643,2.88288343
75.836295,2.64575131,2.88395658,-0.488062773,2.88395658,2.88269171
75.846787,3,2.88376685,0.340929836,2.88376685,2.88250004
75.857278,3.16227766,2.88357726,0.527920825,2.88357726,2.88230845
75.86777,3,2.8833878,0.341485291,2.8833878,2.88211691
75.878262,3,2.88319847,0.341762395,2.88319847,2.88192545
75.888753,3.46410162,2.88300929,0.762294119,2.88300929,2.88173407
75.899245,3.16227766,2.88282024,0.528637326,2.88282024,2.88154274
75.909736,3.46410162,2.88263134,0.76254198,2.88263134,2.8813515
75.920228,3,2.88244257,0.342866484,2.88244257,2.88116031
75.93072,3.16227766,2.88225395,0.529172666,2.88225395,2.88096919
75.941211,2.82842712,2.88206549,-0.23159958,2.88206549,2.88077816
75.951703,2.64575131,2.88187716,-0.485927824,2.88187716,2.88058718
75.962194,2.82842712,2.881689,-0.230785345,2.881689,2.88039629
75.972686,3,2.88150097,0.344236875,2.88150097,2.88020546
75.983178,2.23606798,2.8813131,-0.803271514,2.8813131,2.88001469
75.993669,2.82842712,2.88112541,-0.229561062,2.88112541,2.87982402
76.004161,3.87298335,2.88093785,0.996014807,2.88093785,2.8796334
76.014652,3.31662479,2.88075048,0.660207782,2.88075048,2.87944287
76.025144,3.74165739,2.88002033,0.92824407,2.88002033,2.87925239
76.035636,2.23606798,2.87983478,-0.802350798,2.87983478,2.87906199
76.046127,3,2.87964941,0.346915826,2.87964941,2.87887168
76.056619,3.31662479,2.87946419,0.661181219,2.87946419,2.87868142
76.06711,3.31662479,2.87927915,0.661321134,2.87927915,2.87849126
76.077602,3.16227766,2.87909427,0.532149786,2.87909427,2.87830115
76.088094,2.64575131,2.87890956,-0.482864625,2.87890956,2.87811111
76.098585,3.16227766,2.87872505,0.532496587,2.87872505,2.87792117
76.109077,4,2.8785407,1.05898976,2.8785407,2.87773128
76.119568,2.82842712,2.87835655,-0.223448935,2.87835655,2.87754149
76.13006,4.12310563,2.87817258,1.11576568,2.87817258,2.87735175
76.140552,2.23606798,2.8779888,-0.801199612,2.8779888,2.87716209
76.151043,4,2.87780523,1.05933695,2.87780523,2.87697252
76.161535,3,2.87762184,0.349825894,2.87762184,2.876783
76.172026,2.82842712,2.87743868,-0.22138554,2.87743868,2.87659359
76.182518,2.64575131,2.87725571,-0.481149043,2.87725571,2.87640423
76.19301,3.87298335,2.87707296,0.9979531,2.87707296,2.87621494
76.203501,2.23606798,2.87689044,-0.800513872,2.87689044,2.87602576
76.213993,3.60555128,2.87670812,0.853723112,2.87670812,2.87583663
76.224484,3.16227766,2.87652606,0.534557389,2.87652606,2.87564759
76.234976,4,2.87634421,1.06002632,2.87634421,2.87545862
76.245468,3.46410162,2.8761626,0.766771814,2.8761626,2.87526972
76.255959,3.87298335,2.87598126,0.99849992,2.87598126,2.87508092
76.266451,3.16227766,2.87580015,0.535235942,2.87580015,2.87489218
76.276942,3.60555128,2.87561931,0.854360557,2.87561931,2.87470353
76.287434,4.35889894,2.87543873,1.21797381,2.87543873,2.87451495
76.297926,3.60555128,2.87525842,0.854571738,2.87525842,2.87432644
76.308417,3.46410162,2.87507841,0.767478474,2.87507841,2.87413803
76.318909,3.87298335,2.87489867,0.999041881,2.87489867,2.87394969
76.3294,4,2.87471924,1.06079252,2.87471924,2.87376144
76.339892,3.74165739,2.8745401,0.931191326,2.8745401,2.87357325
76.350384,3.74165739,2.87436128,0.93128734,2.87436128,2.87338514
76.360875,2.82842712,2.87418279,-0.213905748,2.87418279,2.87319713
76.371367,2.64575131,2.87400463,-0.477758638,2.87400463,2.87300918
76.381858,3.46410162,2.87382682,0.768293429,2.87382682,2.87282134
76.39235,3.60555128,2.87364936,0.855512664,2.87364936,2.87263355
76.402842,4.47213595,2.87347226,1.26438273,2.87347226,2.87244585
76.413333,3.74165739,2.87329555,0.931859342,2.87329555,2.87225825
76.423825,2.82842712,2.87311923,-0.211405064,2.87311923,2.87207071
76.434316,3.31662479,2.87294332,0.66609419,2.87294332,2.87188327
76.444808,3,2.87276782,0.356696205,2.87276782,2.87169589
76.4553,3.46410162,2.87259275,0.769096135,2.87259275,2.8715086
76.465791,3.87298335,2.87241815,1.00028256,2.87241815,2.87132141
76.476283,4.69041576,2.872244,1.348396,2.872244,2.87113428
76.486774,3.16227766,2.87207035,0.538708928,2.87207035,2.87094725
76.497266,3.31662479,2.87189719,0.666878999,2.87189719,2.87076029
76.507758,2.82842712,2.87172455,-0.208080342,2.87172455,2.87057342
76.518249,2.64575131,2.87155248,-0.475185402,2.87155248,2.87038664
76.528741,3.16227766,2.87138095,0.539348411,2.87138095,2.87019993
76.539232,3.46410162,2.87121003,0.769994534,2.87121003,2.87001333
76.549724,3.16227766,2.87103971,0.539664661,2.87103971,2.86982679
76.560216,3.46410162,2.87087004,0.770215281,2.87087004,2.86964034
76.570707,3,2.87070104,0.359581639,2.87070104,2.86945399
76.581199,2.23606798,2.87053274,-0.796532963,2.87053274,2.86926771
76.59169,3,2.87036518,0.360048358,2.87036518,2.86908153
76.602182,2.82842712,2.87019837,-0.204380153,2.87019837,2.86889542
76.612674,3.87298335,2.87003237,1.0014744,2.87003237,2.86870939
76.623165,2.64575131,2.86986722,-0.473408818,2.86986722,2.86852347
76.633657,2.82842712,2.86970294,-0.203164502,2.86970294,2.86833762
76.644148,3,2.8695396,0.361193019,2.8695396,2.86815188
76.65464,4,2.86937723,1.06330747,2.86937723,2.8679662
76.665132,2.23606798,2.86921587,-0.795705911,2.86921587,2.86778061
76.675623,3.31662479,2.86905562,0.669006107,2.86905562,2.86759513
76.686115,3.31662479,2.86889649,0.669125028,2.86889649,2.86740972
76.696606,3.16227766,2.86873857,0.541792477,2.86873857,2.86722441
76.707098,3,2.86858191,0.362516328,2.86858191,2.86703917
76.71759,3,2.86842659,0.362730487,2.86842659,2.86685403
76.728081,2.82842712,2.86827271,-0.199613595,2.86827271,2.86666899
76.738573,2.64575131,2.86812032,-0.471560187,2.86812032,2.86648402
76.749064,2.23606798,2.86796954,-0.794922364,2.86796954,2.86629916
76.759556,3.31662479,2.86782045,0.669928612,2.86782045,2.86611437
76.770048,3.46410162,2.86767315,0.772287811,2.86767315,2.86592967
76.780539,3.31662479,2.86752779,0.670146996,2.86752779,2.86574508
76.791031,4,2.86738447,1.06424411,2.86738447,2.86556056
76.801522,3.31662479,2.86724334,0.670359192,2.86724334,2.86537615
76.812014,2.23606798,2.86710454,-0.794378097,2.86710454,2.86519181
76.822506,2.64575131,2.86696823,-0.470337029,2.86696823,2.86500757
76.832997,2.64575131,2.86683461,-0.470194963,2.86683461,2.86482343
76.843489,2.44948974,2.86670386,-0.645921137,2.86670386,2.86463937
76.85398,3.16227766,2.8665762,0.543784388,2.8665762,2.86445542
76.864472,3.16227766,2.86645185,0.543898711,2.86645185,2.86427154
76.874964,3.31662479,2.86633109,0.671039272,2.86633109,2.86408776
76.885455,2,2.8662142,-0.93070629,2.8662142,2.86390408
76.895947,2.64575131,2.86610148,-0.469414707,2.86610148,2.86372049
76.906438,3,2.8659933,0.366069256,2.8659933,2.863537
76.91693,3.46410162,2.86589003,0.773441394,2.86589003,2.86335359
76.927422,3.60555128,2.8657921,0.860092542,2.8657921,2.86317027
76.937913,2.23606798,2.86569999,-0.793493552,2.86569999,2.86298706
76.948405,2.44948974,2.86561424,-0.645077124,2.86561424,2.86280393
76.958896,2.82842712,2.86553544,-0.192635185,2.86553544,2.86262091
76.969388,4.24264069,2.86546425,1.17353161,2.86546425,2.86243797
76.97988,2.44948974,2.86540142,-0.644912148,2.86540142,2.86225513
76.990371,3.74165739,2.86534781,0.936114082,2.86534781,2.8620724
77.000863,2.64575131,2.86530436,-0.468564887,2.86530436,2.86188974
77.011354,3.74165739,2.86527217,0.936154484,2.86527217,2.8617072
77.021846,2.44948974,2.86525245,-0.64479664,2.86525245,2.86152474
77.032338,1.41421356,2.86524662,-1.20458833,2.86524662,2.86134237
77.042829,3,2.86525628,0.367074549,2.86525628,2.86116012
77.053321,2.82842712,2.86528327,-0.191979556,2.86528327,2.86097795
77.063812,2.64575131,2.86532974,-0.468591962,2.86532974,2.86079589
77.074304,3,2.86539814,0.366881264,2.86539814,2.86061391
77.084796,3,2.86549134,0.366754226,2.86549134,2.86043203
77.095287,3.16227766,2.86561267,0.544669618,2.86561267,2.86025027
77.105779,3.31662479,2.86576607,0.671460138,2.86576607,2.86006858
77.11627,2.64575131,2.86595615,-0.469259887,2.86595615,2.85988701
77.126762,3.16227766,2.86618843,0.544140814,2.86618843,2.85970552
77.137254,2.82842712,2.86646948,-0.195044498,2.86646948,2.85952414
77.147745,3.16227766,2.86680725,0.543571901,2.86680725,2.85934286
77.158237,3.74165739,2.86721172,0.935117995,2.86721172,2.85916167
77.168728,3.60555128,2.86769561,0.858985251,2.86769561,2.8589806
77.17922,2.64575131,2.86827646,-0.471725709,2.86827646,2.85879961
77.189712,2.23606798,2.86897976,-0.79555753,2.86897976,2.85861872
77.200203,3.16227766,2.86984582,0.540769678,2.86984582,2.85843794
77.210695,3.31662479,2.8709424,0.667594481,2.8709424,2.85825725
77.221186,3.16227766,2.87238599,0.538415885,2.87238599,2.85807668
77.231678,3.74165739,2.8743783,0.9312782,2.8743783,2.85789619
77.24217,3.46410162,2.87725865,0.766056763,2.87725865,2.8577158
77.252661,3.60555128,2.88157477,0.85086809,2.88157477,2.85753554
77.263153,3,2.8881634,0.334419789,2.8881634,2.85735535
77.273644,3.16227766,2.89821032,0.513874834,2.89821032,2.85717529
77.284136,3.31662479,2.91326025,0.635109868,2.91326025,2.85699531
77.294628,3.74165739,2.93510126,0.8980847,2.93510126,2.85681543
77.305119,3.60555128,2.96548941,0.800038662,2.96548941,2.85663567
77.315611,3.74165739,3.00571021,0.857873637,3.00571021,2.856456
77.326102,2.82842712,3.05599733,-0.477043185,3.05599733,2.85627645
77.336594,3.31662479,3.11503437,0.448988215,3.11503437,2.85609699
77.347086,3,3.17959019,-0.423780823,3.17959019,2.85591763
77.357577,2.82842712,3.24449226,-0.645031114,3.24449226,2.85573839
77.368069,3.31662479,3.30293525,0.117002298,3.30293525,2.85555924
77.37856,3.60555128,3.34717316,0.508309077,3.34717316,2.85538021
77.389052,3.87298335,3.37008176,0.709155548,3.37008176,2.85520126
77.399544,4,3.3674264,0.795344953,3.3674264,2.85502243
77.410035,2.82842712,3.33970549,-0.715037316,3.33970549,2.85484371
77.420527,3.16227766,3.29188173,-0.360005653,3.29188173,2.85466508
77.431018,3.60555128,3.23134806,0.611721516,3.23134806,2.85448658
77.44151,3.74165739,3.16572266,0.758903635,3.16572266,2.85430816
77.452002,3.60555128,3.10154885,0.709931279,3.10154885,2.85412986
77.462493,3.60555128,3.04364251,0.749605739,3.04364251,2.85395167
77.472985,3.46410162,2.99484893,0.685020205,2.99484893,2.85377358
77.483476,3.60555128,2.9561772,0.805837502,2.9561772,2.8535956
77.493968,3.60555128,2.92714348,0.823655143,2.92714348,2.85341772
77.50446,2.64575131,2.90634564,-0.510484402,2.90634564,2.85323995
77.514951,2.82842712,2.89199471,-0.252126125,2.89199471,2.8530623
77.525443,3.74165739,2.88233279,0.926997626,2.88233279,2.85288474
77.535934,3,2.87588315,0.352302207,2.87588315,2.85270731
77.546426,3.46410162,2.87152649,0.769789014,2.87152649,2.85252997
77.556918,3.46410162,2.86848685,0.771760823,2.86848685,2.85235274
77.567409,2.44948974,2.86626064,-0.645577957,2.86626064,2.85217563
77.577901,3,2.86453808,0.368051517,2.86453808,2.85199862
77.588392,3.16227766,2.86313687,0.546937649,2.86313687,2.85182173
77.598884,3,2.86195105,0.371549384,2.86195105,2.85164494
77.609376,2.82842712,2.86091932,-0.180255924,2.86091932,2.85146825
77.619867,3,2.86000473,0.374159417,2.86000473,2.85129169
77.630359,2,2.85918336,-0.926921444,2.85918336,2.85111523
77.64085,2.64575131,2.85843897,-0.46118072,2.85843897,2.85093889
77.651342,3.60555128,2.85775922,0.864749706,2.85775922,2.85076265
77.661834,2.64575131,2.85713468,-0.45976447,2.85713468,2.85058652
77.672325,1.73205081,2.85655769,-1.06042769,2.85655769,2.85041052
77.682817,3.31662479,2.85602179,0.678677388,2.85602179,2.85023461
77.693308,2.44948974,2.85552176,-0.63720642,2.85552176,2.85005883
77.7038,3.46410162,2.85505302,0.780415655,2.85505302,2.84988315
77.714292,2.64575131,2.8546118,-0.457012574,2.8546118,2.84970758
77.724783,3.74165739,2.8541949,0.942052272,2.8541949,2.84953213
77.735275,3,2.85379945,0.382361801,2.85379945,2.84935679
77.745766,2.64575131,2.85342313,-0.455710236,2.85342313,2.84918157
77.756258,2.44948974,2.85306379,-0.63527478,2.85306379,2.84900646
77.76675,3,2.85271967,0.3837712,2.85271967,2.84883145
77.777241,2.44948974,2.85238922,-0.634743634,2.85238922,2.84865658
77.787733,2.64575131,2.85207103,-0.454224304,2.85207103,2.8484818
77.798224,2.82842712,2.85176394,-0.152763921,2.85176394,2.84830715
77.808716,3.46410162,2.85146684,0.782709892,2.85146684,2.84813261
77.819208,4,2.85117883,1.07183076,2.85117883,2.84795817
77.829699,2.82842712,2.8508991,-0.149906539,2.8508991,2.84778387
77.840191,3,2.85062686,0.386488212,2.85062686,2.84760967
77.850682,2.64575131,2.85036153,-0.452338606,2.85036153,2.8474356
77.861174,2.44948974,2.85010245,-0.632939735,2.85010245,2.84726163
77.871666,2.44948974,2.84984914,-0.632739599,2.84984914,2.84708778
77.882157,2.44948974,2.84960116,-0.632543608,2.84960116,2.84691406
77.892649,2.82842712,2.84935803,-0.144675168,2.84935803,2.84674044
77.90314,3.87298335,2.84911942,1.01186161,2.84911942,2.84656695
77.913632,3.74165739,2.84888495,0.944866358,2.84888495,2.84639356
77.924124,3.16227766,2.84865433,0.560020827,2.84865433,2.84622029
77.934615,2.82842712,2.84842731,-0.141421998,2.84842731,2.84604716
77.945107,3.31662479,2.84820357,0.684413045,2.84820357,2.84587412
77.955598,3.46410162,2.84798295,0.784932269,2.84798295,2.84570122
77.96609,3.60555128,2.84776518,0.870509103,2.84776518,2.84552842
77.976582,3.16227766,2.84755009,0.561005856,2.84755009,2.84535575
77.987073,3,2.84733753,0.390720449,2.84733753,2.8451832
77.997565,2.64575131,2.8471273,-0.448749359,2.8471273,2.84501076
78.008056,3.46410162,2.84691929,0.785609527,2.84691929,2.84483846
78.018548,2,2.84671332,-0.920170267,2.84671332,2.84466625
78.02904,3.46410162,2.8465093,0.785870422,2.8465093,2.84449417
78.039531,3.31662479,2.84630712,0.685797109,2.84630712,2.84432223
78.050023,4,2.84610664,1.07419428,2.84610664,2.84415038
78.060514,2.64575131,2.84590781,-0.447388527,2.84590781,2.84397868
78.071006,3.31662479,2.84571049,0.68623196,2.84571049,2.84380708
78.081498,3.60555128,2.84551462,0.871800812,2.84551462,2.8436356
78.091989,3.46410162,2.84532015,0.786626639,2.84532015,2.84346426
78.102481,3.46410162,2.84512696,0.786749426,2.84512696,2.84329302
78.112972,3,2.84493502,0.393782907,2.84493502,2.84312192
78.123464,3.16227766,2.84474424,0.563501034,2.84474424,2.84295093
78.133956,2.82842712,2.84455458,-0.126993938,2.84455458,2.84278006
78.144447,3.74165739,2.84436601,0.947254653,2.84436601,2.84260933
78.154939,3,2.84417843,0.394742411,2.84417843,2.8424387
78.16543,2.82842712,2.84399184,-0.124758611,2.84399184,2.84226822
78.175922,2.64575131,2.84380615,-0.445033526,2.84380615,2.84209784
78.186414,3.31662479,2.84362135,0.687752455,2.84362135,2.84192759
78.196905,4.35889894,2.84343742,1.23104083,2.84343742,2.84175747
78.207397,3,2.84325428,0.395911259,2.84325428,2.84158746
78.217888,2.82842712,2.84307193,-0.121015728,2.84307193,2.8414176
78.22838,3.46410162,2.84289032,0.788169587,2.84289032,2.84124784
78.238872,3.16227766,2.84270942,0.565303668,2.84270942,2.8410782
78.249363,2.64575131,2.84252924,-0.44359658,2.84252924,2.84090871
78.259855,2.64575131,2.8423497,-0.443394168,2.8423497,2.84073933
78.270346,3,2.84217082,0.397277207,2.84217082,2.84057008
78.280838,2.82842712,2.84199254,-0.116470678,2.84199254,2.84040095
78.29133,2.82842712,2.84181486,-0.115705399,2.84181486,2.84023194
78.301821,3,2.84163778,0.39794751,2.84163778,2.84006308
78.312313,3.31662479,2.84146124,0.689321083,2.84146124,2.83989433
78.322804,2.64575131,2.84128525,-0.442192196,2.84128525,2.83972571
78.333296,3.46410162,2.84110977,0.789298325,2.84110977,2.83955721
78.343788,3.74165739,2.8409348,0.949064059,2.8409348,2.83938884
78.354279,2.23606798,2.84076034,-0.777619674,2.84076034,2.83922061
78.364771,3,2.84058633,0.399266409,2.84058633,2.83905249
78.375262,2.64575131,2.84041282,-0.441204606,2.84041282,2.83888452
78.385754,2.82842712,2.84023973,-0.108685817,2.84023973,2.83871665
78.396246,2.64575131,2.84006709,-0.440812633,2.84006709,2.83854892
78.406737,4,2.83989489,1.07708176,2.83989489,2.83838133
78.417229,3.16227766,2.83972309,0.567938876,2.83972309,2.83821385
78.42772,3.16227766,2.83955172,0.568089729,2.83955172,2.83804652
78.438212,2.44948974,2.83938073,-0.624412513,2.83938073,2.8378793
78.448704,2.64575131,2.83921013,-0.439839533,2.83921013,2.83771221
78.459195,2.82842712,2.83903992,-0.10301842,2.83903992,2.83754527
78.469687,2.82842712,2.83887007,-0.102190723,2.83887007,2.83737844
78.480178,3.31662479,2.8387006,0.691320615,2.8387006,2.83721176
78.49067,3.87298335,2.83853147,1.01708008,2.83853147,2.83704519
78.501162,2.82842712,2.83836268,-0.0996772793,2.83836268,2.83687875
78.511653,3,2.83819426,0.40225084,2.83819426,2.83671246
78.522145,2,2.83802616,-0.915437687,2.83802616,2.83654628
78.532636,3.16227766,2.8378584,0.569578142,2.8378584,2.83638026
78.543128,3,2.83769095,0.402875973,2.83769095,2.83621434
78.55362,2.44948974,2.83752382,-0.622923813,2.83752382,2.83604856
78.564111,3.16227766,2.83735702,0.570018107,2.83735702,2.83588293
78.574603,2.64575131,2.83719051,-0.437537652,2.83719051,2.83571741
78.585094,2.64575131,2.83702432,-0.437347695,2.83702432,2.83555205
78.595586,3.16227766,2.83685841,0.570455301,2.83685841,2.8353868
78.606078,3.31662479,2.8366928,0.692771242,2.8366928,2.83522168
78.616569,2.64575131,2.83652749,-0.436779325,2.83652749,2.83505671
78.627061,3.60555128,2.83636245,0.877034105,2.83636245,2.83489186
78.637552,3.46410162,2.83619772,0.792403874,2.83619772,2.83472716
78.648044,2.44948974,2.83603324,-0.621726225,2.83603324,2.83456258
78.658536,3,2.83586904,0.40513079,2.83586904,2.83439813
78.669027,2.82842712,2.83570513,-0.0853112382,2.83570513,2.83423383
78.679519,1.73205081,2.83554148,-1.05047164,2.83554148,2.83406965
78.69001,2.23606798,2.8353781,-0.774151227,2.8353781,2.83390562
78.700502,3.74165739,2.83521497,0.952072693,2.83521497,2.83374171
78.710994,3.46410162,2.83505211,0.793126413,2.83505211,2.83357794
78.721485,2.64575131,2.83488952,-0.434900224,2.83488952,2.83341432
78.731977,2.64575131,2.83472716,-0.43471353,2.83472716,2.83325082
78.742468,2.82842712,2.83456508,-0.0783451138,2.83456508,2.83308747
78.75296,3.16227766,2.83440324,0.5726032,2.83440324,2.83292424
78.763452,3.46410162,2.83424164,0.793637182,2.83424164,2.83276115
78.773943,3.31662479,2.8340803,0.694654221,2.8340803,2.83259821
78.784435,2.44948974,2.8339192,-0.620023754,2.8339192,2.83243539
78.794926,3.31662479,2.83375835,0.694885917,2.83375835,2.83227272
78.805418,3.16227766,2.83359773,0.573306137,2.83359773,2.83211018
78.81591,4,2.83343735,1.0800753,2.83343735,2.83194777
78.826401,3.46410162,2.83327723,0.794244538,2.83327723,2.83178552
78.836893,2.82842712,2.83311733,-0.0684850424,2.83311733,2.83162339
78.847384,3.46410162,2.83295767,0.794445682,2.83295767,2.83146142
78.857876,3.16227766,2.83279824,0.574002979,2.83279824,2.83129956
78.868368,3.46410162,2.83263904,0.794646195,2.83263904,2.83113785
78.878859,2.64575131,2.83248009,-0.432121251,2.83248009,2.83097629
78.889351,3.46410162,2.83232135,0.794846065,2.83232135,2.83081486
78.899842,2,2.83216286,-0.912229607,2.83216286,2.83065358
78.910334,2.23606798,2.83200458,-0.771969299,2.83200458,2.83049242
78.920826,3.31662479,2.83184652,0.6962602,2.83184652,2.83033141
78.931317,3.31662479,2.83168871,0.696373518,2.83168871,2.83017055
78.941809,3.60555128,2.83153111,0.879784156,2.83153111,2.83000982
78.9523,3.16227766,2.83137375,0.575242476,2.83137375,2.82984924
78.962792,1.73205081,2.8312166,-1.04841108,2.8312166,2.82968879
78.973284,2.82842712,2.83105968,-0.0513083974,2.83105968,2.82952848
78.983775,3.46410162,2.83090299,0.795737789,2.83090299,2.82936833
78.994267,3.31662479,2.8307465,0.697049701,2.8307465,2.8292083
79.004758,2.23606798,2.83059026,-0.77105271,2.83059026,2.82904843
79.01525,3,2.83043422,0.411783658,2.83043422,2.82888869
79.025742,2.64575131,2.8302784,-0.429566164,2.8302784,2.82872909
79.036233,3.87298335,2.83012282,1.02120543,2.83012282,2.82856964
79.046725,3.31662479,2.82996744,0.69760831,2.82996744,2.82841033
79.057216,2.64575131,2.82981229,-0.429023285,2.82981229,2.82825117
79.067708,2.64575131,2.82965735,-0.428842671,2.82965735,2.82809215
79.0782,3.16227766,2.82950262,0.576866567,2.82950262,2.82793326
79.088691,1.41421356,2.82934813,-1.18959429,2.82934813,2.82777454
79.099183,3.31662479,2.82919384,0.698162549,2.82919384,2.82761594
79.109674,3.16227766,2.82903979,0.577267591,2.82903979,2.8274575
79.120166,3.16227766,2.82888594,0.577400835,2.82888594,2.8272992
79.130658,2.64575131,2.8287323,-0.427762771,2.8287323,2.82714103
79.141149,3,2.82857889,0.414030319,2.82857889,2.82698303
79.151641,4.12310563,2.82842569,1.13784003,2.82842569,2.82682516
79.162132,3.46410162,2.82827272,0.797388797,2.82827272,2.82666745
79.172624,3.60555128,2.82811995,0.881720661,2.82811995,2.82650986
79.183116,3.87298335,2.8279674,1.02226022,2.8279674,2.82635243
79.193607,3,2.82781508,0.414951713,2.82781508,2.82619515
79.204099,3,2.82766296,0.415134971,2.82766296,2.82603801
79.21459,2.82842712,2.82751107,0.0302664586,2.82751107,2.82588103
79.225082,4,2.82735938,1.08288532,2.82735938,2.82572418
79.235574,2.64575131,2.82720791,-0.425977225,2.82720791,2.82556748
79.246065,3.16227766,2.82705667,0.578982723,2.82705667,2.82541094
79.256557,2.23606798,2.82690563,-0.768659646,2.82690563,2.82525453
79.267048,3.31662479,2.82675482,0.699907114,2.82675482,2.82509829
79.27754,2.82842712,2.82660422,0.0426955248,2.82660422,2.82494217
79.288032,2.64575131,2.82645383,-0.425091188,2.82645383,2.82478621
79.298523,2.82842712,2.82630367,0.0460809314,2.82630367,2.82463041
79.309015,2,2.82615383,-0.908930048,2.82615383,2.82447474
79.319506,3.16227766,2.82600411,0.579890981,2.82600411,2.82431924
79.329998,2,2.82585459,-0.908765422,2.82585459,2.82416387
79.34049,2.64575131,2.82570529,-0.424209831,2.82570529,2.82400865
79.350981,4.24264069,2.82555622,1.19041357,2.82555622,2.8238536
79.361473,2.82842712,2.82540736,0.0549523886,2.82540736,2.82369868
79.371964,4,2.82525873,1.08385482,2.82525873,2.82354392
79.382456,3.46410162,2.8251103,0.799369322,2.8251103,2.8233893
79.392948,2.82842712,2.82496209,0.0588645043,2.82496209,2.82323483
79.403439,3.46410162,2.82481412,0.79955456,2.82481412,2.82308053
79.413931,2.23606798,2.82466635,-0.767201653,2.82466635,2.82292636
79.424422,3,2.82451882,0.418904738,2.82451882,2.82277236
79.434914,2.23606798,2.82437149,-0.767009463,2.82437149,2.82261849
79.445406,2.44948974,2.82422439,-0.612155736,2.82422439,2.82246478
79.455897,2.64575131,2.82407752,-0.422286876,2.82407752,2.82231123
79.466389,3.16227766,2.82393085,0.58167586,2.82393085,2.82215782
79.47688,3.31662479,2.82378443,0.702025899,2.82378443,2.82200458
79.487372,4.24264069,2.82363821,1.1912189,2.82363821,2.82185147
79.497864,3.60555128,2.82349222,0.884341031,2.82349222,2.82169852
79.508355,2.64575131,2.82334646,-0.421420393,2.82334646,2.82154574
79.518847,3,2.82320091,0.420474837,2.82320091,2.82139309
79.529338,3.16227766,2.8230556,0.582427727,2.8230556,2.82124061
79.53983,3.31662479,2.82291051,0.702648051,2.82291051,2.82108827
79.550322,2.82842712,2.82276563,0.0752428743,2.82276563,2.82093609
79.560813,1.41421356,2.822621,-1.18676343,2.822621,2.82078407
79.571305,3.16227766,2.82247658,0.582924589,2.82247658,2.82063219
79.581796,3.31662479,2.82233241,0.703059303,2.82233241,2.82048048
79.592288,3.31662479,2.82218844,0.70316168,2.82218844,2.82032891
79.60278,3.60555128,2.82204471,0.885159064,2.82204471,2.8201775
79.613271,2.23606798,2.82190121,-0.765397438,2.82190121,2.82002625
79.623763,3,2.82175794,0.422187235,2.82175794,2.81987515
79.634254,3.16227766,2.82161491,0.58366322,2.82161491,2.81972422
79.644746,3.31662479,2.82147209,0.703670875,2.82147209,2.81957342
79.655238,3.74165739,2.82132951,0.959337209,2.82132951,2.81942279
79.665729,3.16227766,2.82118717,0.58402953,2.82118717,2.81927232
79.676221,2.44948974,2.82104505,-0.609553366,2.82104505,2.819122
79.686712,2,2.82090318,-0.906037073,2.82090318,2.81897185
79.697204,2.82842712,2.82076153,0.0875534007,2.82076153,2.81882184
79.707696,3.74165739,2.82062011,0.95970687,2.82062011,2.81867198
79.718187,2.82842712,2.82047894,0.0891525693,2.82047894,2.8185223
79.728679,3.31662479,2.820338,0.704476252,2.820338,2.81837276
79.73917,2.44948974,2.82019731,-0.60885759,2.82019731,2.8182234
79.749662,2.44948974,2.82005684,-0.608742225,2.82005684,2.81807417
79.760154,3.31662479,2.81991661,0.70477527,2.81991661,2.81792511
79.770645,3,2.81977663,0.424527228,2.81977663,2.81777622
79.781137,2.64575131,2.81963688,-0.416995889,2.81963688,2.81762747
79.791628,3.74165739,2.81949739,0.960291622,2.81949739,2.8174789
79.80212,2.82842712,2.81935812,0.0952313157,2.81935812,2.81733047
79.812612,3.16227766,2.8192191,0.585712013,2.8192191,2.8171822
79.823103,3,2.81908033,0.425346528,2.81908033,2.8170341
79.833595,1.41421356,2.8189418,-1.18521232,2.8189418,2.81688615
79.844086,2.82842712,2.81880352,0.0980999736,2.81880352,2.81673837
79.854578,2.82842712,2.81866548,0.098801052,2.81866548,2.81659074
79.86507,3.46410162,2.81852768,0.803476156,2.81852768,2.81644327
79.875561,1.73205081,2.81839015,-1.04227604,2.81839015,2.81629597
79.886053,2.64575131,2.81825285,-0.415333044,2.81825285,2.81614882
79.896544,2.82842712,2.81811581,0.101544624,2.81811581,2.81600184
79.907036,2.64575131,2.81797902,-0.415003261,2.81797902,2.81585502
79.917528,2.23606798,2.81784247,-0.762741434,2.81784247,2.81570835
79.928019,2.82842712,2.81770619,0.103541923,2.81770619,2.81556186
79.938511,3.60555128,2.81757016,0.887683005,2.81757016,2.81541552
79.949002,3,2.81743439,0.427276972,2.81743439,2.81526935
79.959494,2.82842712,2.81729886,0.105490571,2.81729886,2.81512333
79.969986,3.60555128,2.8171636,0.887911977,2.8171636,2.81497747
79.980477,3.31662479,2.8170286,0.706821187,2.8170286,2.81483179
79.990969,2.82842712,2.81689385,0.107393084,2.81689385,2.81468626
80.00146,3,2.81675937,0.428066147,2.81675937,2.81454091
80.011952,2.82842712,2.81662515,0.108636907,2.81662515,2.8143957
80.022444,3.60555128,2.81649118,0.888290545,2.81649118,2.81425066
80.032935,3.60555128,2.8163575,0.888365791,2.8163575,2.8141058
80.043427,3.46410162,2.81622406,0.804908413,2.81622406,2.81396108
80.053918,3.31662479,2.81609091,0.707484193,2.81609091,2.81381655
80.06441,3.16227766,2.81595801,0.588489297,2.81595801,2.81367216
80.074902,3,2.81582538,0.429155709,2.81582538,2.81352794
80.085393,3.31662479,2.81569303,0.707765329,2.81569303,2.8133839
80.095885,3.60555128,2.81556094,0.888814004,2.81556094,2.81324001
80.106376,3.31662479,2.81542914,0.70795173,2.81542914,2.81309629
80.116868,4.12310563,2.8152976,1.14359435,2.8152976,2.81295273
80.12736,2.44948974,2.81516633,-0.604711989,2.81516633,2.81280934
80.137851,2.23606798,2.81503536,-0.76089906,2.81503536,2.81266612
80.148343,2.82842712,2.81490465,0.116286186,2.81490465,2.81252306
80.158834,3.60555128,2.81477423,0.889256456,2.81477423,2.81238017
80.169326,2.82842712,2.81464408,0.117401203,2.81464408,2.81223744
80.179818,2.64575131,2.81451422,-0.410807626,2.81451422,2.81209488
80.190309,2.64575131,2.81438465,-0.410649896,2.81438465,2.81195249
80.200801,3.16227766,2.81425535,0.589934155,2.81425535,2.81181026
80.211292,3,2.81412636,0.431130656,2.81412636,2.81166821
80.221784,3,2.81399764,0.431279911,2.81399764,2.81152632
80.232276,2.82842712,2.81386921,0.120656186,2.81386921,2.81138459
80.242767,3.60555128,2.81374109,0.88983717,2.81374109,2.81124304
80.253259,3.16227766,2.81361324,0.590478126,2.81361324,2.81110165
80.26375,3.74165739,2.81348571,0.963416669,2.81348571,2.81096044
80.274242,3.31662479,2.81335846,0.709412667,2.81335846,2.81081938
80.284734,2.44948974,2.81323151,-0.603110076,2.81323151,2.8106785
80.295225,3.46410162,2.81310487,0.806843694,2.81310487,2.81053779
80.305717,3.31662479,2.81297852,0.7096804,2.81297852,2.81039724
80.316208,2.82842712,2.81285249,0.12479838,2.81285249,2.81025687
80.3267,2.82842712,2.81272675,0.125301131,2.81272675,2.81011666
80.337192,2.23606798,2.81260132,-0.759297929,2.81260132,2.80997662
80.347683,2.23606798,2.81247621,-0.75921554,2.81247621,2.80983676
80.358175,3.87298335,2.81235141,1.02986987,2.81235141,2.80969706
80.368666,3.87298335,2.81222692,1.0299303,2.81222692,2.80955755
80.379158,3.16227766,2.81210275,0.59175579,2.81210275,2.80941818
80.38965,2.44948974,2.81197889,-0.602070712,2.81197889,2.80927899
80.400141,2.64575131,2.81185536,-0.407558641,2.81185536,2.80913999
80.410633,3,2.81173214,0.433898446,2.81173214,2.80900114
80.421124,3.46410162,2.81160926,0.807769991,2.81160926,2.80886248
80.431616,2.23606798,2.81148669,-0.758563585,2.81148669,2.80872397
80.442108,2.44948974,2.81136445,-0.601560228,2.81136445,2.80858564
80.452599,3.46410162,2.81124256,0.807996943,2.81124256,2.80844749
80.463091,2.64575131,2.81112098,-0.406656698,2.81112098,2.8083095
80.473582,3,2.81099975,0.434741584,2.81099975,2.8081717
80.484074,3,2.81087886,0.43488061,2.81087886,2.80803405
80.494566,2.44948974,2.8107583,-0.601056199,2.8107583,2.80789658
80.505057,3.31662479,2.81063809,0.71132742,2.81063809,2.80775929
80.515549,2.82842712,2.81051822,0.133824145,2.81051822,2.80762216
80.52604,2.82842712,2.81039871,0.134269919,2.81039871,2.80748522
80.536532,3.16227766,2.81027954,0.593294291,2.81027954,2.80734844
80.547024,3.74165739,2.81016073,0.965140745,2.81016073,2.80721184
80.557515,2.82842712,2.81004228,0.135590719,2.81004228,2.80707542
80.568007,3.31662479,2.81024082,0.711606615,2.81024082,2.80693916
80.578498,2.44948974,2.81012363,-0.600528004,2.81012363,2.80680309
80.58899,2.44948974,2.81000679,-0.60043072,2.81000679,2.80666718
80.599482,3.16227766,2.80989033,0.593622213,2.80989033,2.80653144
80.609973,2.82842712,2.80977425,0.136575529,2.80977425,2.8063959
80.620465,3.31662479,2.80965854,0.712015628,2.80965854,2.80626051
80.630956,3.46410162,2.80954251,0.809048269,2.80954251,2.80612531
80.641448,2.23606798,2.80942757,-0.757205116,2.80942757,2.80599028
80.65194,2.64575131,2.809313,-0.404427611,2.809313,2.80585542
80.662431,2.64575131,2.80919884,-0.404286448,2.80919884,2.80572075
80.672923,2.82842712,2.80908507,0.13907573,2.80908507,2.80558624
80.683414,3.60555128,2.8089717,0.892513069,2.8089717,2.80545192
80.693906,3,2.80885872,0.437197072,2.80885872,2.80531777
80.704398,3.74165739,2.80874615,0.965873303,2.80874615,2.80518379
80.714889,3.16227766,2.808634,0.594679462,2.808634,2.80505
80.725381,2.82842712,2.80852225,0.14108464,2.80852225,2.80491637
80.735872,3.31662479,2.80841093,0.712891198,2.80841093,2.80478294
80.746364,2,2.80830002,-0.899055072,2.80830002,2.80464967
80.756856,2.82842712,2.80818954,0.142258855,2.80818954,2.80451657
80.767347,2.64575131,2.80807951,-0.402899732,2.80807951,2.80438367
80.777839,3.46410162,2.80796989,0.810019581,2.80796989,2.80425093
80.78833,2.23606798,2.80786073,-0.756169794,2.80786073,2.80411839
80.798822,3.46410162,2.80775201,0.810154061,2.80775201,2.803986
80.809314,3.87298335,2.80764374,1.0321529,2.80764374,2.8038538
80.819805,2,2.80753594,-0.898630034,2.80753594,2.80372179
80.830297,2.82842712,2.80742859,0.14490872,2.80742859,2.80358994
80.840788,3.16227766,2.80732172,0.595781792,2.80732172,2.80345829
80.85128,1.73205081,2.80721531,-1.03690139,2.80721531,2.8033268
80.861772,1,2.80710938,-1.34428769,2.80710938,2.80319549
80.872263,2.64575131,2.80700396,-0.401562753,2.80700396,2.80306438
80.882755,2.23606798,2.80689901,-0.755533609,2.80689901,2.80293343
80.893246,3.16227766,2.80679458,0.59622402,2.80679458,2.80280267
80.903738,2.23606798,2.80669064,-0.755395701,2.80669064,2.80267208
80.91423,3,2.80658722,0.439787195,2.80658722,2.80254168
80.924721,2.44948974,2.80648434,-0.597490246,2.80648434,2.80241146
80.935213,3.31662479,2.80638197,0.71431283,2.80638197,2.80228141
80.945704,2.82842712,2.80628015,0.148818583,2.80628015,2.80215156
80.956196,2.44948974,2.80617888,-0.597234571,2.80617888,2.80202187
80.966688,3,2.80607815,0.440365582,2.80607815,2.80189237
80.977179,3,2.80597801,0.440479275,2.80597801,2.80176306
80.987671,3,2.80587843,0.440592296,2.80587843,2.80163392
80.998162,2.82842712,2.80577944,0.150491462,2.80577944,2.80150497
81.008654,2.82842712,2.80568105,0.150818026,2.80568105,2.80137619
81.019146,2.23606798,2.80558326,-0.754662363,2.80558326,2.8012476
81.029637,3.16227766,2.8054861,0.597320317,2.8054861,2.8011192
81.040129,2.44948974,2.80538956,-0.596573397,2.80538956,2.80099097
81.05062,2.23606798,2.80529368,-0.754470476,2.80529368,2.80086293
81.061112,3,2.80519844,0.441363297,2.80519844,2.80073507
81.071604,3,2.80510388,0.441470412,2.80510388,2.80060738
81.082095,3,2.80501001,0.441576713,2.80501001,2.8004799
81.092587,2.44948974,2.80491683,-0.596177061,2.80491683,2.80035258
81.103078,2.82842712,2.80482438,0.153631841,2.80482438,2.80022546
81.11357,2.64575131,2.80473266,-0.398724654,2.80473266,2.80009851
81.124062,2.82842712,2.80464169,0.154225264,2.80464169,2.79997175
81.134553,2.44948974,2.80455151,-0.595870593,2.80455151,2.79984518
81.145045,3.60555128,2.80446211,0.895035848,2.80446211,2.79971879
81.155536,2.82842712,2.80437353,0.155092217,2.80437353,2.79959259
81.166028,2.44948974,2.80428578,-0.59564758,2.80428578,2.79946656
81.17652,3.16227766,2.8041989,0.598396827,2.8041989,2.79934072
81.187011,3.46410162,2.80411291,0.812396889,2.80411291,2.79921507
81.197503,2.64575131,2.80402783,-0.397839818,2.80402783,2.7990896
81.207994,2.44948974,2.80394371,-0.595360365,2.80394371,2.79896433
81.218486,2.44948974,2.80386055,-0.595290525,2.80386055,2.79883923
81.228978,3.46410162,2.80377841,0.812602736,2.80377841,2.79871431
81.239469,3.16227766,2.80369732,0.598815781,2.80369732,2.7985896
81.249961,3.46410162,2.80361731,0.812701854,2.80361731,2.79846505
81.260452,2.64575131,2.80353844,-0.397224279,2.80353844,2.79834071
81.270944,2.44948974,2.80346073,-0.594954611,2.80346073,2.79821654
81.281436,3,2.80338425,0.443413748,2.80338425,2.79809255
81.291927,2.64575131,2.80330905,-0.396935428,2.80330905,2.79796877
81.302419,2.44948974,2.80323517,-0.594765016,2.80323517,2.79784516
81.31291,2,2.80316269,-0.896193444,2.80316269,2.79772175
81.323402,2.44948974,2.80309167,-0.594644366,2.80309167,2.79759851
81.333894,3,2.80302217,0.443821841,2.80302217,2.79747546
81.344385,3.74165739,2.8029543,0.968866908,2.8029543,2.79735261
81.354877,3.87298335,2.80288812,1.03445407,2.80288812,2.79722994
81.365368,2.64575131,2.80282375,-0.396323648,2.80282375,2.79710747
81.37586,3.31662479,2.80276126,0.716842751,2.80276126,2.79698517
81.386352,2.82842712,2.80270079,0.160394311,2.80270079,2.79686306
81.396843,3.16227766,2.80264247,0.599695918,2.80264247,2.79674115
81.407335,3,2.80258642,0.444312484,2.80258642,2.79661942
81.417826,3,2.80253281,0.444372807,2.80253281,2.79649789
81.428318,3.16227766,2.8024818,0.599829857,2.8024818,2.79637654
81.43881,3.46410162,2.8024336,0.813429787,2.8024336,2.79625537
81.449301,3.74165739,2.80238841,0.969158903,2.80238841,2.79613441
81.459793,3.16227766,2.80234647,0.599942658,2.80234647,2.79601362
81.470284,2,2.80230805,-0.895716502,2.80230805,2.79589304
81.480776,3.16227766,2.80227346,0.600003503,2.80227346,2.79577263
81.491268,3.31662479,2.80224303,0.71720413,2.80224303,2.79565242
81.501759,2.44948974,2.80221715,-0.593908587,2.80221715,2.7955324
81.512251,2.64575131,2.80219627,-0.395531236,2.80219627,2.79541257
81.522742,3.31662479,2.80218088,0.717247451,2.80218088,2.79529293
81.533234,3.46410162,2.80217157,0.813590835,2.80217157,2.79517348
81.543726,2.64575131,2.80216898,-0.395496742,2.80216898,2.79505421
81.554217,2.44948974,2.8021739,-0.59387217,2.8021739,2.79493515
81.564709,3.74165739,2.80218719,0.969262708,2.80218719,2.79481627
81.5752,3.46410162,2.80220989,0.813567282,2.80220989,2.79469759
81.585692,3.60555128,2.80224321,0.896274546,2.80224321,2.79457909
81.596184,3.60555128,2.80228857,0.896249242,2.80228857,2.79446079
81.606675,1.73205081,2.80234764,-1.03455151,2.80234764,2.79434268
81.617167,2.44948974,2.80242243,-0.59408138,2.80242243,2.79422476
81.627658,2.44948974,2.80251536,-0.594159592,2.80251536,2.79410704
81.63815,3.74165739,2.80262947,0.96903453,2.80262947,2.7939895
81.648642,3,2.80276859,0.444107436,2.80276859,2.79387215
81.659133,3.46410162,2.80293791,0.813119738,2.80293791,2.79375501
81.669625,3.16227766,2.80314497,0.599276804,2.80314497,2.79363805
81.680116,2.64575131,2.80340137,-0.397051709,2.80340137,2.79352129
81.690608,3.31662479,2.80372621,0.716169377,2.80372621,2.79340472
81.7011,3.60555128,2.80415178,0.895209193,2.80415178,2.79328833
81.711591,2.23606798,2.80473297,-0.754098798,2.80473297,2.79317216
81.722083,3.16227766,2.80556187,0.597256884,2.80556187,2.79305616
81.732574,3.16227766,2.80678666,0.596230657,2.80678666,2.79294037
81.743066,3.46410162,2.80863534,0.809608717,2.80863534,2.79282476
81.753558,4,2.81143615,1.09021275,2.81143615,2.79270935
81.764049,3.31662479,2.81562675,0.707812148,2.81562675,2.79259414
81.774541,3.46410162,2.8217384,0.801475646,2.8217384,2.79247912
81.785032,3.31662479,2.83033223,0.6973468,2.83033223,2.7923643
81.795524,3.31662479,2.84189146,0.689008945,2.84189146,2.79224966
81.806016,2.23606798,2.85665599,-0.787774089,2.85665599,2.79213522
81.816507,2.82842712,2.87444351,-0.214514301,2.87444351,2.79202099
81.826999,3.16227766,2.89449975,0.51747262,2.89449975,2.79190694
81.83749,3.60555128,2.91539823,0.830754502,2.91539823,2.79179309
81.847982,3.87298335,2.93507242,0.968458017,2.93507242,2.79167943
81.858474,2.44948974,2.95097827,-0.708158543,2.95097827,2.79156597
81.868965,3.60555128,2.96054894,0.803120372,2.96054894,2.79145271
81.879457,2.23606798,2.96196427,-0.851995478,2.96196427,2.79133964
81.889948,3.60555128,2.95491908,0.806617751,2.95491908,2.79122677
81.90044,3.46410162,2.94078029,0.723409512,2.94078029,2.79111409
81.910932,2.82842712,2.92197044,-0.305848515,2.92197044,2.79100161
81.921423,3.87298335,2.90111962,0.985831488,2.90111962,2.79088933
81.931915,3.31662479,2.88048796,0.660406568,2.88048796,2.79077724
81.942406,2.82842712,2.86172912,-0.182488344,2.86172912,2.79066536
81.952898,2.82842712,2.84581572,-0.131865827,2.84581572,2.79055366
81.96339,2.82842712,2.83310861,-0.0684213476,2.83310861,2.79044216
81.973881,2.82842712,2.82348807,0.0702784193,2.82348807,2.79033087
81.984373,2.44948974,2.81653034,-0.605838758,2.81653034,2.79021976
81.994864,3.87298335,2.81168444,1.03019362,2.81168444,2.79010887
82.005356,2.82842712,2.80839776,0.141525138,2.80839776,2.78999816
82.015848,3.74165739,2.80619716,0.967191928,2.80619716,2.78988765
82.026339,3,2.80471741,0.441907897,2.80471741,2.78977734
82.036831,2.23606798,2.80369896,-0.753412889,2.80369896,2.78966723
82.047322,3.31662479,2.80296998,0.716697153,2.80296998,2.78955732
82.057814,3.46410162,2.80242226,0.813436754,2.80242226,2.7894476
82.068306,3,2.80199068,0.444982377,2.80199068,2.78933808
82.078797,2.64575131,2.80163691,-0.394823501,2.80163691,2.78922877
82.089289,2,2.80133836,-0.895175045,2.80133836,2.78911965
82.09978,3.31662479,2.80108158,0.718013376,2.80108158,2.78901073
82.110272,3.60555128,2.80085799,0.89704698,2.80085799,2.78890201
82.120764,3.74165739,2.80066185,0.970049246,2.80066185,2.78879348
82.131255,3.31662479,2.80048899,0.718425917,2.80048899,2.78868517
82.141747,2.82842712,2.80033619,0.16760349,2.80033619,2.78857704
82.152238,3.46410162,2.80020093,0.814801008,2.80020093,2.78846913
82.16273,3.74165739,2.8000811,0.970348541,2.8000811,2.7883614
82.173222,2.64575131,2.79997497,-0.392713197,2.79997497,2.78825387
82.183713,3.46410162,2.7998811,0.814997246,2.7998811,2.78814656
82.194205,2.82842712,2.79979827,0.169200635,2.79979827,2.78803943
82.204696,2.82842712,2.79972545,0.169415696,2.79972545,2.78793252
82.215188,3.31662479,2.79966174,0.719001424,2.79966174,2.78782579
82.22568,3.31662479,2.79960642,0.719039897,2.79960642,2.78771927
82.236171,3.46410162,2.79955884,0.815194934,2.79955884,2.78761296
82.246663,3.16227766,2.79951844,0.60229496,2.79951844,2.78750683
82.257154,2.82842712,2.79948477,0.170124519,2.79948477,2.78740092
82.267646,2.82842712,2.79945742,0.170204882,2.79945742,2.7872952
82.278138,3.60555128,2.79943605,0.897839199,2.79943605,2.78718969
82.288629,2.44948974,2.79942036,-0.591549334,2.79942036,2.78708438
82.299121,3.31662479,2.79941009,0.719176404,2.79941009,2.78697927
82.309612,3.31662479,2.79940503,0.719179919,2.79940503,2.78687436
82.320104,3.60555128,2.799405,0.897856487,2.799405,2.78676965
82.330596,3.31662479,2.79940984,0.719176575,2.79940984,2.78666514
82.341087,3,2.79941942,0.447862229,2.79941942,2.78656085
82.351579,2.82842712,2.79943363,0.170274751,2.79943363,2.78645674
82.36207,2.44948974,2.79945238,-0.591576403,2.79945238,2.78635285
82.372562,3.46410162,2.7994756,0.815245982,2.7994756,2.78624915
82.383054,3.74165739,2.79950324,0.970646254,2.79950324,2.78614566
82.393545,3.60555128,2.79953524,0.897783959,2.79953524,2.78604238
82.404037,3,2.79957159,0.447692321,2.79957159,2.78593929
82.414528,4,2.79961225,1.09562208,2.79961225,2.78583641
82.42502,3,2.79965724,0.447596645,2.79965724,2.78573373
82.435512,2,2.79970656,-0.894263135,2.79970656,2.78563125
82.446003,2.23606798,2.7997602,-0.750794392,2.7997602,2.78552898
82.456495,3.74165739,2.7998182,0.970483996,2.7998182,2.78542691
82.466986,3.60555128,2.79988058,0.897591606,2.79988058,2.78532505
82.477478,2.44948974,2.7999474,-0.59199464,2.7999474,2.78522339
82.48797,4,2.80001868,1.09543659,2.80001868,2.78512193
82.498461,2.23606798,2.80009447,-0.751016972,2.80009447,2.78502068
82.508953,3.74165739,2.80017485,0.970300231,2.80017485,2.78491963
82.519444,3,2.80025986,0.446922967,2.80025986,2.78481879
82.529936,3.31662479,2.8003496,0.718522925,2.8003496,2.78471815
82.540428,3.46410162,2.80044412,0.814651761,2.80044412,2.78461771
82.550919,2.82842712,2.80054352,0.166983853,2.80054352,2.78451749
82.561411,3,2.80064789,0.446488649,2.80064789,2.78441746
82.571902,2.44948974,2.80075731,-0.592678296,2.80075731,2.78431765
82.582394,3.46410162,2.8008719,0.814389168,2.8008719,2.78421803
82.592886,4.24264069,2.80099176,1.20068685,2.80099176,2.78411862
82.603377,3.16227766,2.801117,0.600966436,2.801117,2.78401943
82.613869,3.74165739,2.80124776,0.969747198,2.80124776,2.78392043
82.62436,3.46410162,2.80138413,0.814074616,2.80138413,2.78382164
82.634852,2.82842712,2.80152629,0.16401474,2.80152629,2.78372305
82.645344,3.31662479,2.80167435,0.717600474,2.80167435,2.78362467
82.655835,3.16227766,2.80182845,0.600374227,2.80182845,2.7835265
82.666327,2.64575131,2.80198876,-0.395268837,2.80198876,2.78342853
82.676818,3,2.80215543,0.444797223,2.80215543,2.78333078
82.68731,3.60555128,2.80232864,0.896226886,2.80232864,2.78323322
82.697802,2.64575131,2.80250857,-0.395925822,2.80250857,2.78313587
82.708293,3.46410162,2.80269536,0.813268869,2.80269536,2.78303874
82.718785,3.31662479,2.80288926,0.716753468,2.80288926,2.7829418
82.729276,3,2.80309041,0.443744958,2.80309041,2.78284508
82.739768,3.46410162,2.80329908,0.812897619,2.80329908,2.78274856
82.75026,2.23606798,2.80351545,-0.753291091,2.80351545,2.78265225
82.760751,3.31662479,2.80373973,0.716159944,2.80373973,2.78255615
82.771243,2,2.80397219,-0.896644965,2.80397219,2.78246025
82.781734,3.46410162,2.80421305,0.812335252,2.80421305,2.78236457
82.792226,3.46410162,2.80446261,0.812181634,2.80446261,2.78226908
82.802718,2.82842712,2.8047211,0.153967602,2.8047211,2.78217381
82.813209,3.16227766,2.80498879,0.597736456,2.80498879,2.78207875
82.823701,3.31662479,2.80526601,0.715093544,2.80526601,2.78198389
82.834192,3,2.80555303,0.44096142,2.80555303,2.78188925
82.844684,3.46410162,2.8058502,0.811326947,2.8058502,2.7817948
82.855176,2.44948974,2.80615784,-0.59721696,2.80615784,2.78170057
82.865667,3.31662479,2.80647626,0.714246825,2.80647626,2.78160655
82.876159,2.44948974,2.80680589,-0.597759274,2.80680589,2.78151273
82.88665,3.31662479,2.80714704,0.713777099,2.80714704,2.78141913
82.897142,3,2.80750018,0.438748019,2.80750018,2.78132573
82.907634,3.31662479,2.80786567,0.713273521,2.80786567,2.78123254
82.918125,3,2.80824393,0.43789961,2.80824393,2.78113957
82.928617,2.82842712,2.80863548,0.140682797,2.80863548,2.7810468
82.939108,3.16227766,2.8090407,0.59433741,2.8090407,2.78095424
82.9496,2.82842712,2.80946019,0.137720499,2.80946019,2.78086189
82.960092,2.82842712,2.80989441,0.136134899,2.80989441,2.78076975
82.970583,3.60555128,2.81034388,0.89174402,2.81034388,2.78067782
82.981075,3.16227766,2.81080924,0.592847722,2.81080924,2.7805861
82.991566,2.82842712,2.811291,0.130905012,2.811291,2.78049459
83.002058,3.31662479,2.81178989,0.710517346,2.81178989,2.78040329
83.01255,3,2.81230652,0.433236061,2.81230652,2.78031219
83.023041,2,2.81284151,-0.901577237,2.81284151,2.78022132
83.033533,2.82842712,2.81339572,0.122602646,2.81339572,2.78013064
83.044024,2.44948974,2.81396978,-0.603721817,2.81396978,2.78004019
83.054516,3.46410162,2.8145646,0.80593859,2.8145646,2.77994994
83.065008,3.87298335,2.81518099,1.02849519,2.81518099,2.7798599
83.075499,1.73205081,2.81581976,-1.04104224,2.81581976,2.77977008
83.085991,3.46410162,2.81648196,0.804748195,2.81648196,2.77968046
83.096482,3,2.81716845,0.42758806,2.81716845,2.77959106
83.106974,3.16227766,2.8178804,0.586853694,2.8178804,2.77950186
83.117466,3.74165739,2.81861884,0.960748952,2.81861884,2.77941287
83.127957,2.23606798,2.81938483,-0.763751828,2.81938483,2.77932411
83.138449,3.46410162,2.82017975,0.802447422,2.82017975,2.77923554
83.14894,3.74165739,2.82100472,0.959506471,2.82100472,2.7791472
83.159432,3.31662479,2.82186126,0.703394296,2.82186126,2.77905906
83.169924,3.16227766,2.82275071,0.58268941,2.82275071,2.77897113
83.180415,3.31662479,2.82367451,0.702104178,2.82367451,2.77888342
83.190907,3,2.82463444,0.41876671,2.82463444,2.77879592
83.201398,2.23606798,2.82563188,-0.767830649,2.82563188,2.77870864
83.21189,2.82842712,2.82666909,0.041928918,2.82666909,2.77862156
83.222382,3.31662479,2.82774775,0.699197426,2.82774775,2.77853469
83.232873,3.31662479,2.82886978,0.698394597,2.82886978,2.77844804
83.243365,3.31662479,2.83003754,0.69755806,2.83003754,2.7783616
83.253856,2.44948974,2.83125311,-0.617870023,2.83125311,2.77827538
83.264348,3.31662479,2.83251914,0.695777012,2.83251914,2.77818936
83.27484,3,2.83383811,0.407629593,2.83383811,2.77810356
83.285331,3.16227766,2.83521265,0.571895974,2.83521265,2.77801797
83.295823,2.23606798,2.83664597,-0.774969669,2.83664597,2.77793259
83.306314,3.46410162,2.83814091,0.791176787,2.83814091,2.77784744
83.316806,2.64575131,2.83970112,-0.440397325,2.83970112,2.77776248
83.327298,3.74165739,2.84133003,0.948855815,2.84133003,2.77767775
83.337789,3.31662479,2.84303131,0.688181286,2.84303131,2.77759323
83.348281,3.31662479,2.84480938,0.686888212,2.84480938,2.77750892
83.358772,4.47213595,2.84666828,1.2749383,2.84666828,2.77742483
83.369264,2,2.84861308,-0.921201976,2.84861308,2.77734094
83.379756,3.74165739,2.85064866,0.943932586,2.85064866,2.77725727
83.390247,2.23606798,2.85278023,-0.785310293,2.85278023,2.77717382
83.400739,4.12310563,2.85501405,1.12609572,2.85501405,2.77709058
83.41123,3.16227766,2.85735597,0.552197151,2.85735597,2.77700756
83.421722,2,2.85981321,-0.927261131,2.85981321,2.77692474
83.432214,3.74165739,2.86239286,0.937691063,2.86239286,2.77684214
83.442705,1.41421356,2.86510254,-1.20452853,2.86510254,2.77675976
83.453197,3.74165739,2.86795133,0.934722448,2.86795133,2.77667759
83.463688,2.64575131,2.87094791,-0.474548836,2.87094791,2.77659564
83.47418,3,2.87410287,0.354819854,2.87410287,2.7765139
83.484672,3.31662479,2.87742681,0.662720136,2.87742681,2.77643237
83.495163,3.31662479,2.8809312,0.6600709,2.8809312,2.77635106
83.505655,3.87298335,2.88462956,0.994159837,2.88462956,2.77626997
83.516146,3.60555128,2.8885352,0.846768015,2.8885352,2.77618909
83.526638,3.16227766,2.89266416,0.519243199,2.89266416,2.77610842
83.53713,2.23606798,2.89703277,-0.812997414,2.89703277,2.77602797
83.547621,3.16227766,2.90165886,0.510508375,2.90165886,2.77594774
83.558113,3.46410162,2.90656336,0.746684844,2.90656336,2.77586772
83.568604,3.16227766,2.91176731,0.500510088,2.91176731,2.77578792
83.579096,3.74165739,2.91729592,0.907943537,2.91729592,2.77570832
83.589588,3.31662479,2.92317534,0.62725549,2.92317534,2.77562895
83.600079,4.58257569,2.92943435,1.28574544,2.92943435,2.77554979
83.610571,3.60555128,2.93610666,0.818195954,2.93610666,2.77547085
83.621062,4.35889894,2.94322696,1.18982015,2.94322696,2.77539213
83.631554,3.74165739,2.95083658,0.889281063,2.95083658,2.77531362
83.642046,3.60555128,2.95897925,0.804097024,2.95897925,2.77523532
83.652537,3,2.96770358,0.179712051,2.96770358,2.77515725
83.663029,3.31662479,2.9770665,0.582716305,2.9770665,2.77507938
83.67352,3.16227766,2.98712798,0.418508872,2.98712798,2.77500174
83.684012,4.58257569,2.99795933,1.25881546,2.99795933,2.77492431
83.694504,2.44948974,3.00963752,-0.748430211,3.00963752,2.77484709
83.704995,2.44948974,3.02224912,-0.75680868,3.02224912,2.7747701
83.715487,3.87298335,3.03589583,0.914924871,3.03589583,2.77469332
83.725978,3.87298335,3.05068739,0.906805356,3.05068739,2.77461676
83.73647,3.16227766,3.06675442,0.309068339,3.06675442,2.77454041
83.746962,4.47213595,3.08424114,1.17808948,3.08424114,2.77446428
83.757453,3.60555128,3.10331219,0.708688287,3.10331219,2.77438837
83.767945,2.23606798,3.12416295,-0.942387909,3.12416295,2.77431267
83.778436,3.31662479,3.14701142,0.411841444,3.14701142,2.7742372
83.788928,3.31662479,3.17212275,0.38013424,3.17212275,2.77416193
83.79942,3.87298335,3.19980689,0.820473311,3.19980689,2.77408689
83.809911,3.60555128,3.23044613,0.612458285,3.23044613,2.77401207
83.820403,3.31662479,3.26454445,0.228211171,3.26454445,2.77393745
83.830894,4.35889894,3.30277555,1.02767864,3.30277555,2.77386307
83.841386,3.74165739,3.34613384,0.628906625,3.34613384,2.77378889
83.851878,4,3.39611971,0.77709735,3.39611971,2.77371493
83.862369,4.12310563,3.45508889,0.817322905,3.45508889,2.77364119
83.872861,3.74165739,3.52678997,0.463537938,3.52678997,2.77356767
83.883352,3.31662479,3.61702831,-0.5480908,3.61702831,2.77349437
83.893844,4.12310563,3.73457333,0.623323588,3.73457333,2.77342128
83.904336,4.69041576,3.89186459,0.893616906,3.89186459,2.77334841
83.914827,5.09901951,4.10528126,0.996864209,4.10528126,2.77327577
83.925319,5.29150262,4.39441619,0.947146469,4.39441619,2.77320333
83.93581,4.69041576,4.77960143,-0.298639698,4.77960143,2.77313112
83.946302,5.65685425,5.27861498,0.615011597,5.27861498,2.77305913
83.956794,7.54983444,5.90256484,1.28346001,5.90256484,2.77298735
83.967285,7.68114575,6.65296944,1.01399029,6.65296944,2.77291579
83.977777,8.18535277,7.52054178,0.815359425,7.52054178,2.77284445
83.988268,9.05538514,8.48448025,0.755582485,8.48448025,2.77277333
83.99876,9.79795897,9.51398688,0.532890317,9.51398688,2.77270243
84.009252,11.0905365,10.5689635,0.722200101,10.5689635,2.77263174
84.019743,11.8743421,11.6019205,0.521940224,11.6019205,2.77256128
84.030235,11.8321596,12.5598944,-0.853073734,12.5598944,2.77249103
84.040726,14.2126704,13.3854375,0.909523472,13.3854375,2.77242101
84.051218,15.2315462,14.0200142,1.10069613,14.0200142,2.7723512
84.06171,15.2643375,14.4094267,0.924613902,14.4094267,2.7722816
84.072201,16.0312195,14.5148902,1.23139327,14.5148902,2.77221224
84.082693,15.4596248,14.3247954,1.06528374,14.3247954,2.77214308
84.093184,13.7477271,13.8592169,-0.333900926,13.8592169,2.77207416
84.103676,15.3297097,13.162607,1.47210824,13.162607,2.77200544
84.114168,12.9614814,12.2915856,0.818471605,12.2915856,2.77193694
84.124659,12.3693169,11.3051401,1.03158946,11.3051401,2.77186867
84.135151,10.2956301,10.2594605,0.190183161,10.2594605,2.77180062
84.145642,8.71779789,9.20644871,-0.69903564,9.20644871,2.77173278
84.156134,7.93725393,8.19139889,-0.50412792,8.19139889,2.77166517
84.166626,8.1240384,7.25203325,0.93381216,7.25203325,2.77159777
84.177117,6.40312424,6.41658841,-0.116035208,6.41658841,2.7715306
84.187609,4.69041576,5.70237404,-1.00596137,5.70237404,2.77146364
84.1981,5.74456265,5.11565568,0.793036547,5.11565568,2.7713969
84.208592,6.08276253,4.65166167,1.19628628,4.65166167,2.77133038
84.219084,4.35889894,4.29693024,0.248935144,4.29693024,2.77126409
84.229575,4.58257569,4.03248649,0.74167999,4.03248649,2.77119801
84.240067,3,3.83773588,-0.915279125,3.83773588,2.77113215
84.250558,3.74165739,3.69387286,0.218596732,3.69387286,2.77106652
84.26105,4,3.5855889,0.643747698,3.5855889,2.7710011
84.271542,3.31662479,3.50160047,-0.430087989,3.50160047,2.7709359
84.282033,4.12310563,3.43412634,0.830047763,3.43412634,2.77087093
84.292525,3.31662479,3.37804693,-0.247834895,3.37804693,2.77080617
84.303016,3,3.33011988,-0.5745606,3.33011988,2.77074164
84.313508,2.44948974,3.28828298,-0.915856557,3.28828298,2.77067732
84.324,2,3.2512253,-1.11858183,3.2512253,2.77061323
84.334491,3.60555128,3.21807509,0.622475854,3.21807509,2.77054936
84.344983,3.74165739,3.18821234,0.743938874,3.18821234,2.7704857
84.355474,3,3.161185,-0.401478521,3.161185,2.77042227
84.365966,3.31662479,3.13662833,0.424259897,3.13662833,2.77035906
84.376458,3.60555128,3.11425026,0.700928681,3.11425026,2.77029607
84.386949,3.46410162,3.09380461,0.608520343,3.09380461,2.7702333
84.397441,4.12310563,3.07507533,1.02373351,3.07507533,2.77017075
84.407932,2.82842712,3.05788224,-0.47901473,3.05788224,2.77010842
84.418424,3.16227766,3.04206219,0.346721031,3.04206219,2.77004631
84.428916,2.64575131,3.02747683,-0.617839397,3.02747683,2.76998443
84.439407,2.23606798,3.01400444,-0.882007067,3.01400444,2.76992276
84.449899,3.46410162,3.00153421,0.680123084,3.00153421,2.76986132
84.46039,3.46410162,2.98997275,0.688570157,2.98997275,2.7698001
84.470882,3.16227766,2.9792332,0.427836955,2.9792332,2.7697391
84.481374,2.64575131,2.96924139,-0.568761879,2.96924139,2.76967831
84.491865,2.82842712,2.95993115,-0.362634831,2.95993115,2.76961776
84.502357,4,2.95124098,1.02408936,2.95124098,2.76955742
84.512848,3,2.94311904,0.238497289,2.94311904,2.7694973
84.52334,3.60555128,2.93551593,0.81855687,2.93551593,2.76943741
84.533832,2.82842712,2.92838937,-0.316168068,2.92838937,2.76937773
84.544323,2.82842712,2.92170126,-0.305408142,2.92170126,2.76931828
84.554815,3.46410162,2.91541542,0.740733551,2.91541542,2.76925905
84.565306,2.82842712,2.90950148,-0.284735596,2.90950148,2.76920005
84.575798,3,2.90392979,0.309951944,2.90392979,2.76914126
84.58629,3.16227766,2.89867502,0.513422481,2.89867502,2.76908269
84.596781,2.64575131,2.89371408,-0.497958603,2.89371408,2.76902435
84.607273,3.31662479,2.88902467,0.653911404,2.88902467,2.76896623
84.617764,3.31662479,2.88458814,0.657294949,2.88458814,2.76890833
84.628256,2.82842712,2.88038588,-0.227944625,2.88038588,2.76885065
84.638748,3.16227766,2.87640202,0.534673392,2.87640202,2.76879319
84.649239,3,2.87262203,0.356900511,2.87262203,2.76873596
84.659731,3.46410162,2.86903151,0.77140787,2.86903151,2.76867895
84.670222,3.16227766,2.86561862,0.544664154,2.86561862,2.76862216
84.680714,3.87298335,2.86237117,1.00529208,2.86237117,2.76856559
84.691206,3.16227766,2.85927889,0.550453245,2.85927889,2.76850925
84.701697,3.60555128,2.85633224,0.865574396,2.85633224,2.76845313
84.712189,3,2.85352166,0.382724892,2.85352166,2.76839722
84.72268,3.31662479,2.85083932,0.682484779,2.85083932,2.76834155
84.733172,3.31662479,2.84827759,0.684358972,2.84827759,2.76828609
84.743664,2.64575131,2.8458284,-0.447299778,2.8458284,2.76823085
84.754155,1.41421356,2.84348593,-1.1955218,2.84348593,2.76817585
84.764647,3.46410162,2.84124359,0.789213549,2.84124359,2.76812105
84.775138,2,2.83909608,-0.916021875,2.83909608,2.76806649
84.78563,2.44948974,2.83703767,-0.622533478,2.83703767,2.76801214
84.796122,2.64575131,2.83506364,-0.435100364,2.83506364,2.76795802
84.806613,3,2.83316953,0.408448859,2.83316953,2.76790412
84.817105,3.16227766,2.83135069,0.575262522,2.83135069,2.76785045
84.827596,3,2.82960345,0.412791175,2.82960345,2.76779699
84.838088,2.44948974,2.82792371,-0.615169871,2.82792371,2.76774376
84.84858,1,2.82630815,-1.35140969,2.82630815,2.76769075
84.859071,3.31662479,2.82475361,0.701335285,2.82475361,2.76763797
84.869563,3.31662479,2.82325672,0.702401645,2.82325672,2.7675854
84.880054,2.82842712,2.82181488,0.0813157232,2.82181488,2.76753306
84.890546,2.82842712,2.8204251,0.0894540209,2.8204251,2.76748094
84.901038,3.31662479,2.81908499,0.705365014,2.81908499,2.76742905
84.911529,3.16227766,2.81779226,0.586928787,2.81779226,2.76737738
84.922021,3.31662479,2.81654443,0.707163604,2.81654443,2.76732593
84.932512,2.64575131,2.81533961,-0.411810997,2.81533961,2.7672747
84.943004,2.23606798,2.81417558,-0.760333877,2.81417558,2.7672237
84.953496,2.82842712,2.81305059,0.124002174,2.81305059,2.76717291
84.963987,2.23606798,2.81196295,-0.758877439,2.81196295,2.76712236
84.974479,3.16227766,2.81091079,0.592762072,2.81091079,2.76707202
84.98497,3,2.80989272,0.436012931,2.80989272,2.76702191
84.995462,4.47213595,2.80890708,1.28966231,2.80890708,2.76697202
85.005954,2.82842712,2.80795253,0.143089467,2.80795253,2.76692235
85.016445,2,2.80702783,-0.898347278,2.80702783,2.76687292
85.026937,2.82842712,2.80613155,0.149317042,2.80613155,2.76682369
85.037428,3.16227766,2.80526264,0.597507336,2.80526264,2.7667747
85.04792,3,2.80441982,0.442244474,2.80441982,2.76672593
85.058412,3.31662479,2.8036021,0.716256024,2.8036021,2.76667737
85.068903,2.64575131,2.80280851,-0.396304433,2.80280851,2.76662905
85.079395,4.35889894,2.80203796,1.24774236,2.80203796,2.76658094
85.089886,3.46410162,2.80128965,0.814132649,2.80128965,2.76653307
85.100378,2.64575131,2.80056257,-0.393460617,2.80056257,2.76648541
85.11087,3.74165739,2.79985596,0.97046454,2.79985596,2.76643797
85.121361,3.60555128,2.7991691,0.897987846,2.7991691,2.76639077
85.131853,2.64575131,2.79850111,-0.390832181,2.79850111,2.76634378
85.142344,2.44948974,2.79785138,-0.590221682,2.79785138,2.76629702
85.152836,4.35889894,2.79721911,1.24967189,2.79721911,2.76625047
85.163328,2.23606798,2.79660373,-0.748689354,2.79660373,2.76620415
85.173819,2.23606798,2.79600465,-0.748289163,2.79600465,2.76615806
85.184311,2.44948974,2.79542118,-0.588159361,2.79542118,2.76611219
85.194802,3.74165739,2.79485285,0.973038813,2.79485285,2.76606655
85.205294,3.60555128,2.79429904,0.90069542,2.79429904,2.76602112
85.215786,2,2.79375926,-0.89093168,2.79375926,2.76597592
85.226277,2.82842712,2.79323308,0.18760076,2.79323308,2.76593095
85.236769,2.44948974,2.79271993,-0.585858503,2.79271993,2.76588619
85.24726,1.41421356,2.79221945,-1.17388496,2.79221945,2.76584167
85.257752,2.44948974,2.79173113,-0.585014003,2.79173113,2.76579736
85.268244,3.74165739,2.79125459,0.974886045,2.79125459,2.76575328
85.278735,2.82842712,2.79078948,0.194004242,2.79078948,2.76570942
85.289227,2.23606798,2.79033534,-0.744491345,2.79033534,2.76566578
85.299718,2.82842712,2.78989189,0.196303927,2.78989189,2.76562237
85.31021,2.82842712,2.78945871,0.197404198,2.78945871,2.76557918
85.320702,3.46410162,2.78903549,0.821624077,2.78903549,2.76553622
85.331193,3.31662479,2.78862197,0.726638028,2.78862197,2.76549348
85.341685,3.31662479,2.78821775,0.726916119,2.78821775,2.76545096
85.352176,3,2.78782262,0.460627165,2.78782262,2.76540867
85.362668,2.44948974,2.78743622,-0.581331637,2.78743622,2.7653666
85.37316,2,2.78705831,-0.88716307,2.78705831,2.76532475
85.383651,2.64575131,2.78668868,-0.375416266,2.78668868,2.76528313
85.394143,3,2.78632701,0.462247762,2.78632701,2.76524173
85.404634,3,2.78597311,0.462630404,2.78597311,2.76520056
85.415126,2.44948974,2.78562669,-0.579773189,2.78562669,2.7651596
85.425618,3,2.78528757,0.463370724,2.78528757,2.76511887
85.436109,3.87298335,2.78495556,1.0430857,2.78495556,2.76507837
85.446601,2.82842712,2.78463039,0.209276692,2.78463039,2.76503809
85.457092,3.16227766,2.78431193,0.614789179,2.78431193,2.76499803
85.467584,2.23606798,2.78399991,-0.740224248,2.78399991,2.7649582
85.478076,2.23606798,2.7836942,-0.74001772,2.7836942,2.76491859
85.488567,2.82842712,2.78339464,0.21220858,2.78339464,2.7648792
85.499059,2.82842712,2.78310101,0.212899314,2.78310101,2.76484004
85.50955,3.46410162,2.78281318,0.825401981,2.78281318,2.7648011
85.520042,3.16227766,2.78253096,0.61623591,2.78253096,2.76476239
85.530534,2.82842712,2.78225422,0.21487882,2.78225422,2.76472389
85.541025,3.60555128,2.78198282,0.907506722,2.78198282,2.76468563
85.551517,2.64575131,2.78171659,-0.368734701,2.78171659,2.76464758
85.562008,2.64575131,2.78145543,-0.368380398,2.78145543,2.76460976
85.5725,2.44948974,2.78119916,-0.575942197,2.78119916,2.76457217
85.582992,2.82842712,2.78094767,0.217897807,2.78094767,2.76453479
85.593483,2.64575131,2.78070087,-0.367354812,2.78070087,2.76449764
85.603975,2.64575131,2.78045859,-0.367024898,2.78045859,2.76446072
85.614466,2.23606798,2.78022075,-0.737667117,2.78022075,2.76442402
85.624958,3.60555128,2.77998721,0.90860556,2.77998721,2.76438754
85.63545,2.82842712,2.77975788,0.22061108,2.77975788,2.76435128
85.645941,3.46410162,2.77953266,0.827386821,2.77953266,2.76431525
85.656433,2.44948974,2.77931143,-0.574301043,2.77931143,2.76427945
85.666924,2,2.77909412,-0.882663084,2.77909412,2.76424386
85.677416,3.46410162,2.77890106,0.827768417,2.77890106,2.7642085
85.687908,3.16227766,2.77869128,0.619343504,2.77869128,2.76417336
85.698399,2.82842712,2.77848515,0.223477007,2.77848515,2.76413845
85.708891,2.82842712,2.77828254,0.223929861,2.77828254,2.76410376
85.719382,3,2.77808341,0.471080239,2.77808341,2.7640693
85.729874,3.16227766,2.77788763,0.619991957,2.77788763,2.76403506
85.740366,3.46410162,2.77769516,0.828496505,2.77769516,2.76400104
85.750857,3.46410162,2.77750592,0.828610701,2.77750592,2.76396725
85.761349,2.82842712,2.77731982,0.226069251,2.77731982,2.76393367
85.77184,3,2.77713681,0.472083879,2.77713681,2.76390033
85.782332,2.64575131,2.7769568,-0.362222976,2.7769568,2.7638672
85.792824,3.31662479,2.77677972,0.734741497,2.77677972,2.7638343
85.803315,2.82842712,2.77660554,0.227643537,2.77660554,2.76380163
85.813807,3,2.77643416,0.47282749,2.77643416,2.76376917
85.824298,3,2.77626555,0.473005757,2.77626555,2.76373694
85.83479,2.82842712,2.77609962,0.228752056,2.77609962,2.76370494
85.845282,3.46410162,2.77593633,0.829557285,2.77593633,2.76367315
85.855773,3,2.77577563,0.473523362,2.77577563,2.7636416
85.866265,3,2.77561744,0.473690366,2.77561744,2.76361026
85.876756,2.64575131,2.77546174,-0.360153336,2.77546174,2.76357915
85.887248,2.23606798,2.77530844,-0.734329944,2.77530844,2.76354826
85.89774,2.44948974,2.77515752,-0.570673095,2.77515752,2.76351759
85.908231,2.64575131,2.77500894,-0.359524173,2.77500894,2.76348715
85.918723,3.31662479,2.77486262,0.736044949,2.77486262,2.76345693
85.929214,2,2.77471855,-0.880180976,2.77471855,2.76342694
85.939706,3.16227766,2.77457665,0.622656414,2.77457665,2.76339716
85.950198,3.16227766,2.77443689,0.622768629,2.77443689,2.76336761
85.960689,3.46410162,2.77429925,0.830543413,2.77429925,2.76333829
85.971181,3.31662479,2.77416366,0.736519605,2.77416366,2.76330919
85.981672,3.16227766,2.7740301,0.623095143,2.7740301,2.76328031
85.992164,3.16227766,2.77389851,0.623200727,2.77389851,2.76325165
86.002656,3,2.77376887,0.475637602,2.77376887,2.76322322
86.013147,3.31662479,2.77364115,0.736874236,2.77364115,2.76319501
86.023639,3.46410162,2.77351529,0.831015238,2.77351529,2.76316703
86.03413,4.47213595,2.77339128,1.303359,2.77339128,2.76313927
86.044622,3,2.77326906,0.476162723,2.77326906,2.76311173
86.055114,2.82842712,2.77314861,0.235113824,2.77314861,2.76308441
86.065605,2.82842712,2.77302992,0.235366109,2.77302992,2.76305732
86.076097,3.16227766,2.77291292,0.623990977,2.77291292,2.76303044
86.086588,3,2.77279761,0.476657517,2.77279761,2.7630038
86.09708,2.82842712,2.77268394,0.236099948,2.77268394,2.76297737
86.107572,2.82842712,2.77257189,0.236337128,2.77257189,2.76295117
86.118063,2.82842712,2.77246144,0.236570685,2.77246144,2.7629252
86.128555,1.73205081,2.77235254,-1.01995183,2.77235254,2.76289944
86.139046,2.82842712,2.77224519,0.237027289,2.77224519,2.76287391
86.149538,2.44948974,2.77213934,-0.568022533,2.77213934,2.7628486
86.16003,3.60555128,2.77203498,0.912971138,2.77203498,2.76282351
86.170521,3.87298335,2.77193209,1.0493099,2.77193209,2.76279865
86.181013,3.16227766,2.77183062,0.624857615,2.77183062,2.76277401
86.191504,3,2.77173058,0.477775492,2.77173058,2.76274959
86.201996,2.23606798,2.77163192,-0.731822343,2.77163192,2.76272539
86.212488,2.44948974,2.77153463,-0.567489985,2.77153463,2.76270142
86.222979,3.74165739,2.77143869,0.984996801,2.77143869,2.76267767
86.233471,2.44948974,2.77134407,-0.567322064,2.77134407,2.76265414
86.243962,4,2.77125076,1.10848962,2.77125076,2.76263084
86.254454,2.82842712,2.77115872,0.239308171,2.77115872,2.76260776
86.264946,2.64575131,2.77106795,-0.354000908,2.77106795,2.7625849
86.275437,2,2.77097844,-0.878053778,2.77097844,2.76256226
86.285929,2.82842712,2.77089014,0.23986869,2.77089014,2.76253985
86.29642,2,2.77080305,-0.877953901,2.77080305,2.76251765
86.306912,2.44948974,2.77071715,-0.566769269,2.77071715,2.76249568
86.317404,3.60555128,2.77063241,0.913738946,2.77063241,2.76247394
86.327895,2,2.77054884,-0.877809116,2.77054884,2.76245241
86.338387,3.16227766,2.7704664,0.625948286,2.7704664,2.76243111
86.348878,2.44948974,2.77038509,-0.566476255,2.77038509,2.76241003
86.35937,3,2.77030487,0.479265193,2.77030487,2.76238917
86.369862,2,2.77022575,-0.877625062,2.77022575,2.76236854
86.380353,2.82842712,2.7701477,0.241411311,2.7701477,2.76234812
86.390845,2.44948974,2.77007071,-0.5661987,2.77007071,2.76232793
86.401336,2.82842712,2.76999477,0.241727857,2.76999477,2.76230796
86.411828,2,2.76991985,-0.877450767,2.76991985,2.76228821
86.42232,3.46410162,2.76984594,0.833220061,2.76984594,2.76226869
86.432811,3.74165739,2.76977305,0.985841943,2.76977305,2.76224939
86.443303,3.74165739,2.76970114,0.985878415,2.76970114,2.7622303
86.453794,3.16227766,2.76963021,0.626615874,2.76963021,2.76221145
86.464286,2.82842712,2.76956023,0.242625003,2.76956023,2.76219281
86.474778,3.87298335,2.76949121,1.05047234,2.76949121,2.76217439
86.485269,2.82842712,2.76942313,0.242907381,2.76942313,2.7621562
86.495761,2.23606798,2.76935597,-0.730265699,2.76935597,2.76213823
86.506252,3.31662479,2.76928973,0.739820965,2.76928973,2.76212048
86.516744,3.74165739,2.76922439,0.986120175,2.76922439,2.76210295
86.527236,2.64575131,2.76915994,-0.351295637,2.76915994,2.76208564
86.537727,2.44948974,2.76909637,-0.565337624,2.76909637,2.76206855
86.548219,3.16227766,2.76903367,0.627091692,2.76903367,2.76205169
86.55871,3.46410162,2.76897183,0.833744433,2.76897183,2.76203505
86.569202,3.31662479,2.76891084,0.740076988,2.76891084,2.76201863
86.579694,3,2.76885069,0.480779899,2.76885069,2.76200243
86.590185,3.16227766,2.76879137,0.627284856,2.76879137,2.76198645
86.600677,3.16227766,2.76873286,0.627331489,2.76873286,2.76197069
86.611168,3.16227766,2.76867517,0.627377468,2.76867517,2.76195516
86.62166,3.16227766,2.76861828,0.62742281,2.76861828,2.76193984
86.632152,3,2.76856217,0.481079855,2.76856217,2.76192475
86.642643,2.44948974,2.76850686,-0.564816,2.76850686,2.76190987
86.653135,3,2.76845231,0.481194026,2.76845231,2.76189522
86.663626,3.31662479,2.76839853,0.740423027,2.76839853,2.76188079
86.674118,2.82842712,2.76834551,0.245115523,2.76834551,2.76186658
86.68461,2.23606798,2.76829323,-0.729537696,2.76829323,2.76185259
86.695101,1.41421356,2.7682417,-1.16362715,2.7682417,2.76183883
86.705593,3.31662479,2.76819089,0.740563231,2.76819089,2.76182528
86.716084,3.74165739,2.76814082,0.986669433,2.76814082,2.76181195
86.726576,3,2.76809145,0.481568838,2.76809145,2.76179885
86.737068,3.31662479,2.7680428,0.740663208,2.7680428,2.76178596
86.747559,2.23606798,2.76799486,-0.729333174,2.76799486,2.7617733
86.758051,3.46410162,2.76794257,0.834361459,2.76794257,2.76176085
86.768542,2.23606798,2.76789602,-0.729265413,2.76789602,2.76174863
86.779034,2,2.76785015,-0.87627059,2.76785015,2.76173663
86.789526,3.31662479,2.76780495,0.740823759,2.76780495,2.76172484
86.800017,4,2.76776042,1.11006287,2.76776042,2.76171328
86.810509,2.64575131,2.76771655,-0.349235226,2.76771655,2.76170194
86.821,2.44948974,2.76767335,-0.564077657,2.76767335,2.76169082
86.831492,3.46410162,2.76763078,0.834548281,2.76763078,2.76167992
86.841984,2.82842712,2.76758886,0.246654138,2.76758886,2.76166923
86.852475,2,2.76754758,-0.876097929,2.76754758,2.76165877
86.862967,3.46410162,2.76750693,0.834622482,2.76750693,2.76164853
86.873458,3.74165739,2.76746691,0.987010882,2.76746691,2.76163851
86.88395,2.23606798,2.7674275,-0.728944113,2.7674275,2.76162871
86.894442,2.82842712,2.7673887,0.247059548,2.7673887,2.76161912
86.904933,3.74165739,2.76735052,0.987069837,2.76735052,2.76160976
86.915425,4.12310563,2.76731294,1.16438511,2.76731294,2.76160062
86.925916,3,2.76727596,0.482414797,2.76727596,2.76159169
86.936408,3.31662479,2.76723957,0.741205246,2.76723957,2.76158299
86.9469,3.16227766,2.76720377,0.628549034,2.76720377,2.76157451
86.957391,3.31662479,2.76716856,0.741253151,2.76716856,2.76156624
86.967883,3.74165739,2.76713392,0.987179553,2.76713392,2.7615582
86.978374,3.31662479,2.76709985,0.741299492,2.76709985,2.76155037
86.988866,3.74165739,2.76706635,0.987213772,2.76706635,2.76154276
86.999358,2.82842712,2.76703342,0.247777531,2.76703342,2.76153537
87.009849,3,2.76700105,0.482699649,2.76700105,2.7615282
87.020341,3,2.76696923,0.482732608,2.76696923,2.76152125
87.030832,3.46410162,2.76693796,0.834963264,2.76693796,2.76151452
87.041324,3.31662479,2.76690724,0.741429396,2.76690724,2.76150801
87.051816,3.16227766,2.76687706,0.628808874,2.76687706,2.76150172
87.062307,4.24264069,2.76684742,1.21482232,2.76684742,2.76149564
87.072799,2,2.76681831,-0.875681628,2.76681831,2.76148979
87.08329,3,2.76678974,0.482918483,2.76678974,2.76148415
87.093782,3.46410162,2.76676169,0.835068816,2.76676169,2.76147873
87.104274,3,2.76673416,0.482976026,2.76673416,2.76147353
87.114765,3.31662479,2.76670715,0.741564319,2.76670715,2.76146855
87.125257,3.31662479,2.76668066,0.741582184,2.76668066,2.76146379
87.135748,3.31662479,2.76665467,0.741599701,2.76665467,2.76145924
87.14624,3.74165739,2.7666292,0.987435157,2.7666292,2.76145491
87.156732,3.16227766,2.76660422,0.629025783,2.76660422,2.7614508
87.167223,3.31662479,2.76657976,0.741650211,2.76657976,2.76144691
87.177715,2,2.76655578,-0.875531713,2.76655578,2.76144324
87.188206,2.64575131,2.7665323,-0.347535598,2.7665323,2.76143979
87.198698,2.82842712,2.76650931,0.248832898,2.76650931,2.76143655
87.20919,4.12310563,2.76648681,1.16473981,2.76648681,2.76143353
87.219681,4.35889894,2.7664648,1.26191685,2.7664648,2.76143073
87.230173,2.64575131,2.76644326,-0.347407468,2.76644326,2.76142814
87.240664,3.60555128,2.7664222,0.916039885,2.7664222,2.76142578
87.251156,4.24264069,2.76640162,1.21500579,2.76640162,2.76142363
87.261648,3.46410162,2.76638151,0.835296417,2.76638151,2.7614217
87.272139,3.16227766,2.76636187,0.629218396,2.76636187,2.76141998
87.282631,2.64575131,2.7663427,-0.347262703,2.7663427,2.76141848
87.293122,3.74165739,2.76632399,0.987589692,2.76632399,2.7614172
87.303614,3.60555128,2.76630574,0.916103454,2.76630574,2.76141614
87.314106,3,2.76628794,0.483437747,2.76628794,2.76141529
87.324597,3.31662479,2.76627061,0.741858599,2.76627061,2.76141467
87.335089,3.87298335,2.76625373,1.05201218,2.76625373,2.76141425
87.34558,3.74165739,2.7662373,0.987633581,2.7662373,2.76141406
87.356072,3.31662479,2.76622131,0.741891825,2.76622131,2.76141408
87.366564,2.64575131,2.76620577,-0.347065498,2.76620577,2.76141432
87.377055,3.16227766,2.76619068,0.629354418,2.76619068,2.76141477
87.387547,2.64575131,2.76617602,-0.347022635,2.76617602,2.76141544
87.398038,3.16227766,2.7661618,0.629377356,2.7661618,2.76141633
87.40853,3,2.76614802,0.483582442,2.76614802,2.76141743
87.419022,3.31662479,2.76613467,0.741950211,2.76613467,2.76141875
87.429513,3.60555128,2.76612176,0.916203862,2.76612176,2.76142029
87.440005,4,2.76610927,1.11080634,2.76610927,2.76142204
87.450496,2.44948974,2.76609721,-0.562678833,2.76609721,2.761424
87.460988,3.16227766,2.76608558,0.629437911,2.76608558,2.76142619
87.47148,2.64575131,2.76607436,-0.346876134,2.76607436,2.76142859
87.481971,3.16227766,2.76606357,0.62945539,2.76606357,2.7614312
87.492463,3.46410162,2.7660532,0.835492918,2.7660532,2.76143403
87.502954,3,2.76604324,0.483690765,2.76604324,2.76143708
87.513446,3.16227766,2.7660337,0.629479116,2.7660337,2.76144034
87.523938,3,2.76602457,0.483710064,2.76602457,2.76144381
87.534429,3.31662479,2.76622803,0.741887297,2.76622803,2.76144751
87.544921,2.44948974,2.76622,-0.562787932,2.76622,2.76145141
87.555412,2.23606798,2.76621238,-0.728110157,2.76621238,2.76145553
87.565904,2.82842712,2.76620516,0.249443304,2.76620516,2.76145987
87.576396,3.74165739,2.76619835,0.987653297,2.76619835,2.76146442
87.586887,2.64575131,2.76619194,-0.347045577,2.76619194,2.76146919
87.597379,2.44948974,2.76618594,-0.562757668,2.76618594,2.76147417
87.60787,3,2.76618033,0.483549039,2.76618033,2.76147937
87.618362,3.74165739,2.76617512,0.98766506,2.76617512,2.76148478
87.628854,3.31662479,2.7661703,0.741926202,2.7661703,2.7614904
87.639345,3.31662479,2.76616588,0.741929181,2.76616588,2.76149624
87.649837,2.44948974,2.76616185,-0.56273627,2.76616185,2.76150229
87.660328,3,2.76615822,0.483571902,2.76615822,2.76150856
87.67082,3,2.76615497,0.48357526,2.76615497,2.76151504
87.681312,2.82842712,2.76615211,0.249549626,2.76615211,2.76152174
87.691803,2.82842712,2.76614964,0.249554579,2.76614964,2.76152865
87.702295,3.31662479,2.76614755,0.741941534,2.76614755,2.76153577
87.712786,3.60555128,2.76614585,0.916190716,2.76614585,2.76154311
87.723278,3,2.76614453,0.483586056,2.76614453,2.76155066
87.73377,3.31662479,2.76614359,0.741944205,2.76614359,2.76155842
87.744261,3.16227766,2.76614303,0.629392272,2.76614303,2.7615664
87.754753,2.82842712,2.76614285,0.249568182,2.76614285,2.76157459
87.765244,3.74165739,2.76614304,0.987681296,2.76614304,2.76158299
87.775736,3,2.76614362,0.483586997,2.76614362,2.76159161
87.786228,2.82842712,2.76614456,0.249564744,2.76614456,2.76160044
87.796719,3,2.76614588,0.483584653,2.76614588,2.76160948
87.807211,3,2.76614758,0.483582902,2.76614758,2.76161874
87.817702,3.46410162,2.76614964,0.835435201,2.76614964,2.76162821
87.828194,3.46410162,2.76615207,0.835433744,2.76615207,2.76163789
87.838686,3.16227766,2.76615488,0.629382858,2.76615488,2.76164778
87.849177,2.82842712,2.76615805,0.249537726,2.76615805,2.76165789
87.859669,3.31662479,2.76616159,0.741932076,2.76616159,2.7616682
87.87016,3.87298335,2.76616549,1.05205411,2.76616549,2.76167873
87.880652,3.46410162,2.76616976,0.835423162,2.76616976,2.76168948
87.891144,3.16227766,2.76617439,0.62936736,2.76617439,2.76170043
87.901635,3.31662479,2.76617938,0.741920084,2.76617938,2.7617116
87.912127,3.16227766,2.76618473,0.629359139,2.76618473,2.76172297
87.922618,2.44948974,2.76619045,-0.562761678,2.76619045,2.76173456
87.93311,2.23606798,2.76619652,-0.728099269,2.76619652,2.76174636
87.943602,3.16227766,2.76620296,0.629344662,2.76620296,2.76175838
87.954093,4,2.76620975,1.11076111,2.76620975,2.7617706
87.964585,2.82842712,2.7662169,0.249419786,2.7662169,2.76178304
87.975076,2.64575131,2.7662244,-0.347092332,2.7662244,2.76179568
87.985568,3.60555128,2.76623226,0.916143558,2.76623226,2.76180854
87.99606,3.16227766,2.76624047,0.629314858,2.76624047,2.76182161
88.006551,2.82842712,2.76624903,0.249355349,2.76624903,2.76183489
88.017043,3.60555128,2.76625795,0.916129533,2.76625795,2.76184838
88.027534,3,2.76626722,0.483459178,2.76626722,2.76186207
88.038026,3.31662479,2.76627684,0.741854397,2.76627684,2.76187599
88.048518,2.82842712,2.76628682,0.249279581,2.76628682,2.76189011
88.059009,3.31662479,2.76629713,0.741840721,2.76629713,2.76190444
88.069501,2.23606798,2.7663078,-0.728175684,2.7663078,2.76191898
88.079992,3.46410162,2.76631882,0.835333942,2.76631882,2.76193373
88.090484,2.44948974,2.76633018,-0.562885816,2.76633018,2.76194869
88.100976,3.46410162,2.7663419,0.83532013,2.7663419,2.76196387
88.111467,3,2.76635395,0.483369475,2.76635395,2.76197925
88.121959,2.82842712,2.76636635,0.249119995,2.76636635,2.76199484
88.13245,2.23606798,2.7663791,-0.728224636,2.7663791,2.76201064
88.142942,2.64575131,2.76639219,-0.347333956,2.76639219,2.76202665
88.153434,3.60555128,2.76640562,0.916048936,2.76640562,2.76204287
88.163925,2.23606798,2.7664194,-0.728252305,2.7664194,2.76205929
88.174417,3.46410162,2.76643352,0.835265287,2.76643352,2.76207593
88.184908,3.60555128,2.76644797,0.916025819,2.76644797,2.76209278
88.1954,3.16227766,2.76646277,0.629138208,2.76646277,2.76210983
88.205892,2.64575131,2.76647792,-0.347457343,2.76647792,2.7621271
88.216383,2.64575131,2.7664934,-0.347479618,2.7664934,2.76214457
88.226875,2.23606798,2.76650922,-0.72831397,2.76650922,2.76216225
88.237366,2.64575131,2.76652538,-0.347525631,2.76652538,2.76218014
88.247858,3.16227766,2.76654187,0.629075343,2.76654187,2.76219823
88.25835,3.16227766,2.76655871,0.629061961,2.76655871,2.76221654
88.268841,2,2.76657588,-0.875543192,2.76657588,2.76223505
88.279333,3.74165739,2.76659339,0.987453287,2.76659339,2.76225377
88.289824,3,2.76661124,0.483103263,2.76661124,2.7622727
88.300316,2,2.76662942,-0.875573767,2.76662942,2.76229184
88.310808,1.41421356,2.76664794,-1.16294212,2.76664794,2.76231118
88.321299,3.16227766,2.76666679,0.628976047,2.76666679,2.76233073
88.331791,2,2.76668598,-0.875606066,2.76668598,2.76235049
88.342282,2.44948974,2.76670551,-0.563219107,2.76670551,2.76237046
88.352774,3.16227766,2.76672536,0.628929484,2.76672536,2.76239063
88.363266,2.23606798,2.76674556,-0.728476204,2.76674556,2.76241101
88.373757,2.64575131,2.76676608,-0.347871772,2.76676608,2.7624316
88.384249,3.46410162,2.76678694,0.835053696,2.76678694,2.76245239
88.39474,3.16227766,2.76680813,0.628863681,2.76680813,2.76247339
88.405232,2.44948974,2.76682966,-0.563329312,2.76682966,2.7624946
88.415724,2.82842712,2.76685152,0.248144332,2.76685152,2.76251601
88.426215,3.60555128,2.7668737,0.915793411,2.7668737,2.76253763
88.436707,2.64575131,2.76689623,-0.34805878,2.76689623,2.76255945
88.447198,2.44948974,2.76691908,-0.563408674,2.76691908,2.76258148
88.45769,2.64575131,2.76694226,-0.348124908,2.76694226,2.76260372
88.468182,3.31662479,2.76696578,0.741389918,2.76696578,2.76262616
88.478673,3,2.76698963,0.482711482,2.76698963,2.76264881
88.489165,3,2.7670138,0.482686436,2.7670138,2.76267166
88.499656,3.31662479,2.76703831,0.741341,2.76703831,2.76269472
88.510148,2,2.76706315,-0.875821415,2.76706315,2.76271798
88.52064,3.46410162,2.76708832,0.83487322,2.76708832,2.76274145
88.531131,2.44948974,2.76711382,-0.563581474,2.76711382,2.76276512
88.541623,3.16227766,2.76713965,0.628600038,2.76713965,2.762789
88.552114,3.74165739,2.76716581,0.987163399,2.76716581,2.76281308
88.562606,2.82842712,2.7671923,0.247456708,2.7671923,2.76283737
88.573098,3,2.76721912,0.482473706,2.76721912,2.76286186
88.583589,3,2.76724627,0.48244557,2.76724627,2.76288656
88.594081,3.31662479,2.76727375,0.741182189,2.76727375,2.76291146
88.604572,3,2.76730156,0.482388266,2.76730156,2.76293656
88.615064,3.16227766,2.7673297,0.628448852,2.7673297,2.76296187
88.625556,1.73205081,2.76735817,-1.01750055,2.76735817,2.76298738
88.636047,3.46410162,2.76738697,0.834694344,2.76738697,2.76301309
88.646539,3,2.7674161,0.482269534,2.7674161,2.76303901
88.65703,2.64575131,2.76744555,-0.348847017,2.76744555,2.76306513
88.667522,2.44948974,2.76747534,-0.563902117,2.76747534,2.76309146
88.678014,2,2.76750546,-0.876073889,2.76750546,2.76311799
88.688505,3.31662479,2.7675359,0.741005321,2.7675359,2.76314472
88.698997,3.74165739,2.76756668,0.986960336,2.76756668,2.76317165
88.709488,2.44948974,2.76759779,-0.564010677,2.76759779,2.76319879
88.71998,3.74165739,2.76762922,0.986928651,2.76762922,2.76322613
88.730472,3.46410162,2.76766099,0.834530181,2.76766099,2.76325367
88.740963,3.60555128,2.76769309,0.915345939,2.76769309,2.76328141
88.751455,3.46410162,2.76772552,0.834491522,2.76772552,2.76330936
88.761946,3.74165739,2.76775827,0.986863271,2.76775827,2.7633375
88.772438,3.31662479,2.76779136,0.74083293,2.76779136,2.76336585
88.78293,3.16227766,2.76782478,0.628054838,2.76782478,2.76339441
88.793421,2.44948974,2.76785853,-0.56424178,2.76785853,2.76342316
88.803913,1.41421356,2.76789261,-1.16347714,2.76789261,2.76345211
88.814404,2.44948974,2.76792702,-0.564302471,2.76792702,2.76348126
88.824896,3,2.76796177,0.48170347,2.76796177,2.76351062
88.835388,3.60555128,2.76799684,0.91518,2.76799684,2.76354018
88.845879,2.44948974,2.76803225,-0.5643957,2.76803225,2.76356994
88.856371,2.44948974,2.76806799,-0.564427363,2.76806799,2.7635999
88.866862,2.64575131,2.76810406,-0.34978958,2.76810406,2.76363005
88.877354,3.16227766,2.76814047,0.627803466,2.76814047,2.76366041
88.887846,2.23606798,2.76817721,-0.729458176,2.76817721,2.76369097
88.898337,2.82842712,2.76821428,0.245383061,2.76821428,2.76372173
88.908829,3.16227766,2.76825169,0.627714883,2.76825169,2.76375269
88.91932,2.82842712,2.76828942,0.245229895,2.76828942,2.76378385
88.929812,2.44948974,2.7683275,-0.564657203,2.7683275,2.76381521
88.940304,3.87298335,2.76836591,1.05100782,2.76836591,2.76384677
88.950795,2.64575131,2.76840465,-0.35021899,2.76840465,2.76387853
88.961287,3.31662479,2.76844373,0.740392502,2.76844373,2.76391049
88.971778,3,2.76848315,0.481161982,2.76848315,2.76394264
88.98227,3.31662479,2.7685229,0.740339037,2.7685229,2.763975
88.992762,3,2.76856299,0.481079004,2.76856299,2.76400756
89.003253,2.82842712,2.76860342,0.244588856,2.76860342,2.76404031
89.013745,2.23606798,2.76864418,-0.729778189,2.76864418,2.76407326
89.024236,2.64575131,2.76868528,-0.350619411,2.76868528,2.76410641
89.034728,2.64575131,2.76872673,-0.350678506,2.76872673,2.76413976
89.04522,3,2.76876851,0.480865358,2.76876851,2.76417331
89.055711,2.64575131,2.76881063,-0.350798111,2.76881063,2.76420705
89.066203,3.16227766,2.76885309,0.627235659,2.76885309,2.76424099
89.076694,3.31662479,2.76889589,0.740087092,2.76889589,2.76427513
89.087186,3,2.76893903,0.480688016,2.76893903,2.76430947
89.097678,3.60555128,2.76898252,0.914641327,2.76898252,2.76434401
89.108169,3.31662479,2.76902634,0.739998951,2.76902634,2.76437874
89.118661,3.16227766,2.76907052,0.627062313,2.76907052,2.76441367
89.129152,1.73205081,2.76928079,-1.01844488,2.76928079,2.76444879
89.139644,2.23606798,2.76932585,-0.730245075,2.76932585,2.76448411
89.150136,3.16227766,2.76937125,0.626822468,2.76937125,2.76451963
89.160627,2.44948974,2.769417,-0.565621128,2.769417,2.76455535
89.171119,2,2.7694631,-0.87719046,2.7694631,2.76459126
89.18161,3,2.76950955,0.480094213,2.76950955,2.76462737
89.192102,2.64575131,2.76955634,-0.351859392,2.76955634,2.76466367
89.202594,2.44948974,2.76960349,-0.565785954,2.76960349,2.76470017
89.213085,3,2.76965098,0.479946894,2.76965098,2.76473687
89.223577,3.16227766,2.76969883,0.626561118,2.76969883,2.76477376
89.234068,3,2.76974702,0.479846832,2.76974702,2.76481084
89.24456,3,2.76979557,0.47979624,2.76979557,2.76484812
89.255052,3.87298335,2.76984447,1.05030418,2.76984447,2.7648856
89.265543,3,2.76989372,0.47969394,2.76989372,2.76492327
89.276035,2,2.76994334,-0.877464151,2.76994334,2.76496114
89.286526,2.82842712,2.7699933,0.241730896,2.7699933,2.7649992
89.297018,3.46410162,2.77004362,0.833101429,2.77004362,2.76503745
89.30751,2.44948974,2.77009431,-0.566219536,2.77009431,2.7650759
89.318001,2,2.77014534,-0.877579251,2.77014534,2.76511454
89.328493,2,2.77019674,-0.877608536,2.77019674,2.76515338
89.338984,3.87298335,2.7702485,1.05011183,2.7702485,2.76519241
89.349476,3,2.77030062,0.47926963,2.77030062,2.76523164
89.359968,3.46410162,2.77035311,0.832915667,2.77035311,2.76527106
89.370459,3,2.77040595,0.479159732,2.77040595,2.76531067
89.380951,3.31662479,2.77045917,0.739030192,2.77045917,2.76535047
89.391442,2.64575131,2.77051274,-0.35321584,2.77051274,2.76539047
89.401934,2.23606798,2.77056669,-0.731094187,2.77056669,2.76543066
89.412426,3,2.770621,0.478935274,2.770621,2.76547104
89.422917,2.82842712,2.77067568,0.240315297,2.77067568,2.76551162
89.433409,3.16227766,2.77073074,0.625737103,2.77073074,2.76555239
89.4439,3.16227766,2.77078616,0.625692816,2.77078616,2.76559334
89.454392,3,2.77084196,0.478704543,2.77084196,2.7656345
89.464884,3.74165739,2.77089813,0.985271157,2.77089813,2.76567584
89.475375,3.60555128,2.77095468,0.913562585,2.77095468,2.76571737
89.485867,3.16227766,2.77101161,0.625512633,2.77101161,2.7657591
89.496358,2.64575131,2.77106891,-0.354002253,2.77106891,2.76580102
89.50685,3.31662479,2.77112659,0.738578499,2.77112659,2.76584313
89.517342,3.16227766,2.77118466,0.62537429,2.77118466,2.76588543
89.527833,3.46410162,2.7712431,0.832381232,2.7712431,2.76592792
89.538325,2.64575131,2.77130193,-0.35433123,2.77130193,2.7659706
89.548816,3.31662479,2.77136114,0.738419696,2.77136114,2.76601347
89.559308,2,2.77142075,-0.878305612,2.77142075,2.76605654
89.5698,3.16227766,2.77148074,0.625137521,2.77148074,2.76609979
89.580291,2.82842712,2.77154112,0.238507877,2.77154112,2.76614323
89.590783,3.16227766,2.77160189,0.625040614,2.77160189,2.76618686
89.601274,3.60555128,2.77166305,0.913174804,2.77166305,2.76623068
89.611766,3.16227766,2.77172461,0.624942434,2.77172461,2.7662747
89.622258,2,2.77178657,-0.878513843,2.77178657,2.7663189
89.632749,2.44948974,2.77184892,-0.567766836,2.77184892,2.76636329
89.643241,2.64575131,2.77191168,-0.355190608,2.77191168,2.76640787
89.653732,2.64575131,2.7719749,-0.355279599,2.7719749,2.76645263
89.664224,2,2.77203847,-0.878657195,2.77203847,2.76649759
89.674716,2.64575131,2.77210243,-0.355459029,2.77210243,2.76654274
89.685207,2.23606798,2.7721668,-0.732187696,2.7721668,2.76658807
89.695699,3.60555128,2.77223158,0.912863458,2.77223158,2.76663359
89.70619,2.64575131,2.77229677,-0.355732284,2.77229677,2.7666793
89.716682,2,2.77236237,-0.878841496,2.77236237,2.7667252
89.727174,3,2.7724284,0.477044657,2.7724284,2.76677128
89.737665,2.23606798,2.77249483,-0.732411667,2.77249483,2.76681755
89.748157,2.44948974,2.77256168,-0.568394177,2.77256168,2.76686402
89.758648,2.64575131,2.77262895,-0.356198882,2.77262895,2.76691066
89.76914,2.64575131,2.77269666,-0.356293901,2.77269666,2.76695749
89.779632,3.31662479,2.77276478,0.73746865,2.77276478,2.76700452
89.790123,3.31662479,2.77283333,0.737422174,2.77283333,2.76705172
89.800615,4,2.77290231,1.10774441,2.77290231,2.76709912
89.811106,2.82842712,2.77297172,0.235489712,2.77297172,2.76714669
89.821598,3,2.77304157,0.476401543,2.77304157,2.76719446
89.83209,3,2.77311186,0.476327769,2.77311186,2.76724241
89.842581,3.31662479,2.77318258,0.737185333,2.77318258,2.76729055
89.853073,2.82842712,2.77325374,0.234890148,2.77325374,2.76733887
89.863564,3.74165739,2.77332535,0.984038637,2.77332535,2.76738738
89.874056,2.64575131,2.77339741,-0.357275937,2.77339741,2.76743607
89.884548,2.23606798,2.77346991,-0.733077033,2.77346991,2.76748495
89.895039,2.82842712,2.77354287,0.234273897,2.77354287,2.76753401
89.905531,3,2.77361628,0.475797982,2.77361628,2.76758326
89.916022,3.16227766,2.77369014,0.623367882,2.77369014,2.76763269
89.926514,3,2.77376448,0.475642223,2.77376448,2.76768231
89.937006,2.23606798,2.77383927,-0.733328912,2.77383927,2.76773211
89.947497,3,2.77391452,0.475484465,2.77391452,2.76778209
89.957989,3,2.77399025,0.475404825,2.77399025,2.76783226
89.96848,2.82842712,2.77406645,0.233153766,2.77406645,2.76788261
89.978972,2.82842712,2.77414312,0.232989277,2.77414312,2.76793314
89.989464,2.64575131,2.77422027,-0.358425674,2.77422027,2.76798386
89.999955,3.74165739,2.7742979,0.983544348,2.7742979,2.76803476
90.010447,2.23606798,2.77437602,-0.733694789,2.77437602,2.76808585
90.020938,3.31662479,2.77445462,0.736322057,2.77445462,2.76813711
90.03143,2.23606798,2.77453372,-0.733802247,2.77453372,2.76818856
90.041922,2.44948974,2.77461331,-0.570196075,2.77461331,2.76824019
90.052413,3.31662479,2.77469339,0.736159903,2.77469339,2.768292
90.062905,3,2.77477398,0.474579839,2.77477398,2.768344
90.073396,3,2.77485506,0.474494402,2.77485506,2.76839617
90.083888,3,2.77493667,0.474408405,2.77493667,2.76844853
90.09438,2.82842712,2.77501878,0.231102457,2.77501878,2.76850108
90.104871,3.60555128,2.7751014,0.911290225,2.7751014,2.76855379
90.115363,3.46410162,2.77518455,0.83001028,2.77518455,2.7686067
90.125854,3.16227766,2.77526821,0.622100832,2.77526821,2.76865978
90.136346,3,2.77535241,0.473970026,2.77535241,2.76871304
90.146838,3,2.77543715,0.473880633,2.77543715,2.76876649
90.157329,2.64575131,2.7755224,-0.36023755,2.7755224,2.76882011
90.167821,2.44948974,2.77560821,-0.57106783,2.77560821,2.76887391
90.178312,3,2.77569455,0.473608962,2.77569455,2.76892789
90.188804,2.82842712,2.77578145,0.229446455,2.77578145,2.76898206
90.199296,4,2.7758689,1.10640458,2.7758689,2.7690364
90.209787,2.82842712,2.7759569,0.229063804,2.7759569,2.76909092
90.220279,2.82842712,2.77604547,0.228870394,2.77604547,2.76914562
90.23077,3,2.77613459,0.47314417,2.77613459,2.7692005
90.241262,2,2.7762243,-0.881035925,2.7762243,2.76925556
90.251754,2.82842712,2.77631458,0.228281717,2.77631458,2.7693108
90.262245,3.46410162,2.77640544,0.82927449,2.77640544,2.76936621
90.272737,2.44948974,2.77649688,-0.571845383,2.77649688,2.76942181
90.283228,2.64575131,2.77658891,-0.36171481,2.77658891,2.76947758
90.29372,2.44948974,2.77668155,-0.572006824,2.77668155,2.76953353
90.304212,2.23606798,2.77677479,-0.735327687,2.77677479,2.76958966
90.314703,3,2.77686862,0.472367845,2.77686862,2.76964596
90.325195,2.82842712,2.77696307,0.226856895,2.77696307,2.76970244
90.335686,2,2.77705814,-0.881509011,2.77705814,2.7697591
90.346178,2.44948974,2.77715383,-0.572419505,2.77715383,2.76981593
90.35667,2.44948974,2.77725016,-0.572503637,2.77725016,2.76987295
90.367161,3.46410162,2.77734711,0.828706527,2.77734711,2.76993013
90.377653,2.44948974,2.77744471,-0.572673524,2.77744471,2.7699875
90.388144,2.82842712,2.77754295,0.225575216,2.77754295,2.77004503
90.398636,3,2.77764185,0.471548674,2.77764185,2.77010275
90.409128,3.16227766,2.77774141,0.620109871,2.77774141,2.77016065
90.419619,2.44948974,2.77784163,-0.573019967,2.77784163,2.77021871
90.430111,3.60555128,2.77794253,0.909730042,2.77794253,2.77027695
90.440602,2.82842712,2.7780441,0.224461644,2.7780441,2.77033537
90.451094,3,2.77814636,0.471013417,2.77814636,2.77039396
90.461586,3,2.77824932,0.47090411,2.77824932,2.77045273
90.472077,3.46410162,2.77835297,0.828099418,2.77835297,2.77051167
90.482569,2.82842712,2.77845734,0.223539233,2.77845734,2.77057079
90.49306,2.82842712,2.77856241,0.22330409,2.77856241,2.77063007
90.503552,2.82842712,2.77866821,0.223067057,2.77866821,2.77068954
90.514044,1.41421356,2.77877475,-1.16814433,2.77877475,2.77074918
90.524535,2.23606798,2.77888201,-0.736759142,2.77888201,2.77080899
90.535027,2.82842712,2.77899003,0.222344539,2.77899003,2.77086897
90.545518,3,2.77909879,0.470001283,2.77909879,2.77092913
90.55601,3.16227766,2.77920833,0.618925948,2.77920833,2.77098946
90.566502,3,2.77931864,0.469767349,2.77931864,2.77104996
90.576993,2.64575131,2.77942971,-0.365620574,2.77942971,2.77111063
90.587485,3,2.77954159,0.469529987,2.77954159,2.77117148
90.597976,2.44948974,2.77965425,-0.574599435,2.77965425,2.7712325
90.608468,2,2.77976773,-0.883044582,2.77976773,2.77129369
90.61896,3.31662479,2.77988203,0.732627299,2.77988203,2.77135506
90.629451,2.82842712,2.77999714,0.220068133,2.77999714,2.77141659
90.639943,3.16227766,2.7801131,0.618194598,2.7801131,2.7714783
90.650434,1.73205081,2.78022989,-1.02380617,2.78022989,2.77154017
90.660926,3.31662479,2.78034755,0.732309526,2.78034755,2.77160222
90.671418,3.31662479,2.78046607,0.732228596,2.78046607,2.77166444
90.681909,2.82842712,2.78058546,0.21872737,2.78058546,2.77172682
90.692401,3,2.78070575,0.468288639,2.78070575,2.77178939
90.702892,3.31662479,2.78082692,0.731982148,2.78082692,2.77185211
90.713384,4,2.78094902,1.10410642,2.78094902,2.77191501
90.723876,3.46410162,2.78107204,0.826456035,2.78107204,2.77197808
90.734367,2.23606798,2.78119597,-0.738327838,2.78119597,2.77204132
90.744859,2.64575131,2.78132087,-0.368197714,2.78132087,2.77210472
90.75535,2.23606798,2.78144671,-0.738497616,2.78144671,2.7721683
90.765842,2.82842712,2.78157353,0.216456922,2.78157353,2.77223204
[truncated: 305,304 more chars]
