# Supplementary material for: Phase Stability of Iron Nitride Fe4N at High Pressure—Pressure-Dependent Evolution of Phase Equilibria in the Fe–N System
Source: Materials (Basel). 2021 Jul 15;14(14):3963. doi: 10.3390/ma14143963 (PMC8307547; doi:10.3390/ma14143963)
Supplement: Supplementary file 1 [file materials-14-03963-s001.zip › xrd_data/2-800_riet.txt]

'y-axis saved as Sqrt(y)
'x,Yobs,Ycalc,Diff,epsilon,gamma,Bkg
20,7.68114575,0,0,0,0,0
20.010492,7.81024968,0,0,0,0,0
20.020983,7.54983444,0,0,0,0,0
20.031475,7.54983444,0,0,0,0,0
20.041966,7.68114575,0,0,0,0,0
20.052458,8.30662386,0,0,0,0,0
20.06295,7.87400787,0,0,0,0,0
20.073441,8.36660027,0,0,0,0,0
20.083933,7.54983444,0,0,0,0,0
20.094424,8.06225775,0,0,0,0,0
20.104916,7.41619849,0,0,0,0,0
20.115408,8.42614977,0,0,0,0,0
20.125899,8,0,0,0,0,0
20.136391,7.81024968,0,0,0,0,0
20.146882,7.54983444,0,0,0,0,0
20.157374,7.87400787,0,0,0,0,0
20.167866,8,0,0,0,0,0
20.178357,8.06225775,0,0,0,0,0
20.188849,7.81024968,0,0,0,0,0
20.19934,7.93725393,0,0,0,0,0
20.209832,7.34846923,0,0,0,0,0
20.220324,8,0,0,0,0,0
20.230815,8.30662386,0,0,0,0,0
20.241307,7.61577311,0,0,0,0,0
20.251798,8.48528137,0,0,0,0,0
20.26229,7.74596669,0,0,0,0,0
20.272782,6.63324958,0,0,0,0,0
20.283273,7.48331477,0,0,0,0,0
20.293765,7.61577311,0,0,0,0,0
20.304256,7.28010989,0,0,0,0,0
20.314748,7.07106781,0,0,0,0,0
20.32524,8.48528137,0,0,0,0,0
20.335731,8.36660027,0,0,0,0,0
20.346223,7.41619849,0,0,0,0,0
20.356714,8,0,0,0,0,0
20.367206,7.93725393,0,0,0,0,0
20.377698,7.48331477,0,0,0,0,0
20.388189,8.36660027,0,0,0,0,0
20.398681,8.48528137,0,0,0,0,0
20.409172,6.78232998,0,0,0,0,0
20.419664,7.93725393,0,0,0,0,0
20.430156,7.74596669,0,0,0,0,0
20.440647,7.34846923,0,0,0,0,0
20.451139,7.34846923,0,0,0,0,0
20.46163,7.87400787,0,0,0,0,0
20.472122,7.07106781,0,0,0,0,0
20.482614,7.14142843,0,0,0,0,0
20.493105,7.41619849,0,0,0,0,0
20.503597,8.24621125,0,0,0,0,0
20.514088,7.68114575,0,0,0,0,0
20.52458,8.18535277,0,0,0,0,0
20.535072,7.68114575,0,0,0,0,0
20.545563,8,0,0,0,0,0
20.556055,8.1240384,0,0,0,0,0
20.566546,8.71779789,0,0,0,0,0
20.577038,8.30662386,0,0,0,0,0
20.58753,8.18535277,0,0,0,0,0
20.598021,6.63324958,0,0,0,0,0
20.608513,6.70820393,0,0,0,0,0
20.619004,9.05538514,0,0,0,0,0
20.629496,7.61577311,0,0,0,0,0
20.639988,7.81024968,0,0,0,0,0
20.650479,7.48331477,0,0,0,0,0
20.660971,7.28010989,0,0,0,0,0
20.671462,7.68114575,0,0,0,0,0
20.681954,6.92820323,0,0,0,0,0
20.692446,7.21110255,0,0,0,0,0
20.702937,7,0,0,0,0,0
20.713429,7.87400787,0,0,0,0,0
20.72392,7,0,0,0,0,0
20.734412,7.87400787,0,0,0,0,0
20.744904,8.30662386,0,0,0,0,0
20.755395,6.8556546,0,0,0,0,0
20.765887,8,0,0,0,0,0
20.776378,8.60232527,0,0,0,0,0
20.78687,8.30662386,0,0,0,0,0
20.797362,8.36660027,0,0,0,0,0
20.807853,7.61577311,0,0,0,0,0
20.818345,7.68114575,0,0,0,0,0
20.828836,7.28010989,0,0,0,0,0
20.839328,8.1240384,0,0,0,0,0
20.84982,8.1240384,0,0,0,0,0
20.860311,7.34846923,0,0,0,0,0
20.870803,8.1240384,0,0,0,0,0
20.881294,7.93725393,0,0,0,0,0
20.891786,7.41619849,0,0,0,0,0
20.902278,7.54983444,0,0,0,0,0
20.912769,7.74596669,0,0,0,0,0
20.923261,7.41619849,0,0,0,0,0
20.933752,7.87400787,0,0,0,0,0
20.944244,7.81024968,0,0,0,0,0
20.954736,7.54983444,0,0,0,0,0
20.965227,7.93725393,0,0,0,0,0
20.975719,8.06225775,0,0,0,0,0
20.98621,8.71779789,0,0,0,0,0
20.996702,8.18535277,0,0,0,0,0
21.007194,8.60232527,0,0,0,0,0
21.017685,8.06225775,0,0,0,0,0
21.028177,7.93725393,0,0,0,0,0
21.038668,7.54983444,0,0,0,0,0
21.04916,7.68114575,0,0,0,0,0
21.059652,7.81024968,0,0,0,0,0
21.070143,7.81024968,0,0,0,0,0
21.080635,8.36660027,0,0,0,0,0
21.091126,8.30662386,0,0,0,0,0
21.101618,8.1240384,0,0,0,0,0
21.11211,8.06225775,0,0,0,0,0
21.122601,7.61577311,0,0,0,0,0
21.133093,8.1240384,0,0,0,0,0
21.143584,7.68114575,0,0,0,0,0
21.154076,7.74596669,0,0,0,0,0
21.164568,7.34846923,0,0,0,0,0
21.175059,7.21110255,0,0,0,0,0
21.185551,7.28010989,0,0,0,0,0
21.196042,7.34846923,0,0,0,0,0
21.206534,8.06225775,0,0,0,0,0
21.217026,8,0,0,0,0,0
21.227517,7.34846923,0,0,0,0,0
21.238009,7.54983444,0,0,0,0,0
21.2485,7.68114575,0,0,0,0,0
21.258992,7.74596669,0,0,0,0,0
21.269484,8,0,0,0,0,0
21.279975,7.81024968,0,0,0,0,0
21.290467,7.28010989,0,0,0,0,0
21.300958,7.14142843,0,0,0,0,0
21.31145,8.36660027,0,0,0,0,0
21.321942,8.1240384,0,0,0,0,0
21.332433,8.66025404,0,0,0,0,0
21.342925,7.54983444,0,0,0,0,0
21.353416,8.24621125,0,0,0,0,0
21.363908,7.81024968,0,0,0,0,0
21.3744,6.78232998,0,0,0,0,0
21.384891,7.61577311,0,0,0,0,0
21.395383,8.06225775,0,0,0,0,0
21.405874,7.14142843,0,0,0,0,0
21.416366,8.18535277,0,0,0,0,0
21.426858,6.55743852,0,0,0,0,0
21.437349,7.28010989,0,0,0,0,0
21.447841,7.54983444,0,0,0,0,0
21.458332,7.68114575,0,0,0,0,0
21.468824,7.34846923,0,0,0,0,0
21.479316,7.87400787,0,0,0,0,0
21.489807,7.14142843,0,0,0,0,0
21.500299,7.41619849,0,0,0,0,0
21.51079,7.81024968,0,0,0,0,0
21.521282,7.87400787,0,0,0,0,0
21.531774,7.61577311,0,0,0,0,0
21.542265,7.68114575,0,0,0,0,0
21.552757,7.68114575,0,0,0,0,0
21.563248,7.93725393,0,0,0,0,0
21.57374,6.8556546,0,0,0,0,0
21.584232,6.92820323,0,0,0,0,0
21.594723,7.07106781,0,0,0,0,0
21.605215,7.68114575,0,0,0,0,0
21.615706,7.21110255,0,0,0,0,0
21.626198,7.87400787,0,0,0,0,0
21.63669,7.54983444,0,0,0,0,0
21.647181,7.93725393,0,0,0,0,0
21.657673,8.1240384,0,0,0,0,0
21.668164,6.8556546,0,0,0,0,0
21.678656,7.28010989,0,0,0,0,0
21.689148,7.61577311,0,0,0,0,0
21.699639,7.81024968,0,0,0,0,0
21.710131,8,0,0,0,0,0
21.720622,6.8556546,0,0,0,0,0
21.731114,7.93725393,0,0,0,0,0
21.741606,7.28010989,0,0,0,0,0
21.752097,6.78232998,0,0,0,0,0
21.762589,7.68114575,0,0,0,0,0
21.77308,7.68114575,0,0,0,0,0
21.783572,7.74596669,0,0,0,0,0
21.794064,7.74596669,0,0,0,0,0
21.804555,6.8556546,0,0,0,0,0
21.815047,7.21110255,0,0,0,0,0
21.825538,7.48331477,0,0,0,0,0
21.83603,8,0,0,0,0,0
21.846522,7.21110255,0,0,0,0,0
21.857013,7.28010989,0,0,0,0,0
21.867505,7.21110255,0,0,0,0,0
21.877996,7.41619849,0,0,0,0,0
21.888488,7.41619849,0,0,0,0,0
21.89898,7.68114575,0,0,0,0,0
21.909471,7.28010989,0,0,0,0,0
21.919963,6.70820393,0,0,0,0,0
21.930454,7.21110255,0,0,0,0,0
21.940946,8.24621125,0,0,0,0,0
21.951438,7.41619849,0,0,0,0,0
21.961929,7.87400787,0,0,0,0,0
21.972421,7.21110255,0,0,0,0,0
21.982912,7.28010989,0,0,0,0,0
21.993404,8.06225775,0,0,0,0,0
22.003896,6.8556546,0,0,0,0,0
22.014387,7.68114575,0,0,0,0,0
22.024879,7.87400787,0,0,0,0,0
22.03537,7.48331477,0,0,0,0,0
22.045862,7.41619849,0,0,0,0,0
22.056354,8.48528137,0,0,0,0,0
22.066845,7.74596669,0,0,0,0,0
22.077337,7.81024968,0,0,0,0,0
22.087828,7.87400787,0,0,0,0,0
22.09832,6.4807407,0,0,0,0,0
22.108812,7.81024968,0,0,0,0,0
22.119303,8,0,0,0,0,0
22.129795,7.54983444,0,0,0,0,0
22.140286,7.68114575,0,0,0,0,0
22.150778,7.61577311,0,0,0,0,0
22.16127,7.14142843,0,0,0,0,0
22.171761,6.92820323,0,0,0,0,0
22.182253,8.54400375,0,0,0,0,0
22.192744,7.54983444,0,0,0,0,0
22.203236,7.34846923,0,0,0,0,0
22.213728,7.54983444,0,0,0,0,0
22.224219,8.66025404,0,0,0,0,0
22.234711,7.81024968,0,0,0,0,0
22.245202,6.40312424,0,0,0,0,0
22.255694,7.21110255,0,0,0,0,0
22.266186,7.07106781,0,0,0,0,0
22.276677,6.70820393,0,0,0,0,0
22.287169,7.21110255,0,0,0,0,0
22.29766,7.54983444,0,0,0,0,0
22.308152,7.21110255,0,0,0,0,0
22.318644,6.55743852,0,0,0,0,0
22.329135,7.41619849,0,0,0,0,0
22.339627,7.74596669,0,0,0,0,0
22.350118,6.32455532,0,0,0,0,0
22.36061,7.54983444,0,0,0,0,0
22.371102,7.41619849,0,0,0,0,0
22.381593,7.34846923,0,0,0,0,0
22.392085,7.34846923,0,0,0,0,0
22.402576,7.93725393,0,0,0,0,0
22.413068,7.68114575,0,0,0,0,0
22.42356,7.54983444,0,0,0,0,0
22.434051,7.14142843,0,0,0,0,0
22.444543,7.48331477,0,0,0,0,0
22.455034,7.41619849,0,0,0,0,0
22.465526,5.91607978,0,0,0,0,0
22.476018,6.70820393,0,0,0,0,0
22.486509,7.21110255,0,0,0,0,0
22.497001,7.74596669,0,0,0,0,0
22.507492,6,0,0,0,0,0
22.517984,7,0,0,0,0,0
22.528476,8.42614977,0,0,0,0,0
22.538967,7.74596669,0,0,0,0,0
22.549459,6.92820323,0,0,0,0,0
22.55995,7.14142843,0,0,0,0,0
22.570442,7.14142843,0,0,0,0,0
22.580934,7.34846923,0,0,0,0,0
22.591425,8,0,0,0,0,0
22.601917,7.54983444,0,0,0,0,0
22.612408,7.48331477,0,0,0,0,0
22.6229,7.68114575,0,0,0,0,0
22.633392,8.06225775,0,0,0,0,0
22.643883,7.14142843,0,0,0,0,0
22.654375,6.8556546,0,0,0,0,0
22.664866,6.92820323,0,0,0,0,0
22.675358,7.07106781,0,0,0,0,0
22.68585,6.63324958,0,0,0,0,0
22.696341,6.32455532,0,0,0,0,0
22.706833,7.93725393,0,0,0,0,0
22.717324,7.41619849,0,0,0,0,0
22.727816,6.8556546,0,0,0,0,0
22.738308,6.70820393,0,0,0,0,0
22.748799,7.93725393,0,0,0,0,0
22.759291,6.40312424,0,0,0,0,0
22.769782,7.28010989,0,0,0,0,0
22.780274,6.164414,0,0,0,0,0
22.790766,7.21110255,0,0,0,0,0
22.801257,7.61577311,0,0,0,0,0
22.811749,7.48331477,0,0,0,0,0
22.82224,7.87400787,0,0,0,0,0
22.832732,8.06225775,0,0,0,0,0
22.843224,6.70820393,0,0,0,0,0
22.853715,7.28010989,0,0,0,0,0
22.864207,7.34846923,0,0,0,0,0
22.874698,7,0,0,0,0,0
22.88519,7.48331477,0,0,0,0,0
22.895682,7.28010989,0,0,0,0,0
22.906173,6.63324958,0,0,0,0,0
22.916665,6.40312424,0,0,0,0,0
22.927156,7.41619849,0,0,0,0,0
22.937648,8.06225775,0,0,0,0,0
22.94814,7.81024968,0,0,0,0,0
22.958631,7.28010989,0,0,0,0,0
22.969123,7.74596669,0,0,0,0,0
22.979614,6.63324958,0,0,0,0,0
22.990106,7.93725393,0,0,0,0,0
23.000598,6.4807407,0,0,0,0,0
23.011089,7.87400787,0,0,0,0,0
23.021581,6.70820393,0,0,0,0,0
23.032072,7.14142843,0,0,0,0,0
23.042564,6.40312424,0,0,0,0,0
23.053056,8.18535277,0,0,0,0,0
23.063547,6.8556546,0,0,0,0,0
23.074039,7.14142843,0,0,0,0,0
23.08453,7.54983444,0,0,0,0,0
23.095022,7,0,0,0,0,0
23.105514,7.34846923,0,0,0,0,0
23.116005,7.41619849,0,0,0,0,0
23.126497,6.78232998,0,0,0,0,0
23.136988,6.63324958,0,0,0,0,0
23.14748,7.21110255,0,0,0,0,0
23.157972,7.34846923,0,0,0,0,0
23.168463,7.54983444,0,0,0,0,0
23.178955,7.34846923,0,0,0,0,0
23.189446,7.34846923,0,0,0,0,0
23.199938,7.14142843,0,0,0,0,0
23.21043,6.92820323,0,0,0,0,0
23.220921,6.92820323,0,0,0,0,0
23.231413,7,0,0,0,0,0
23.241904,8.06225775,0,0,0,0,0
23.252396,7.14142843,0,0,0,0,0
23.262888,6.92820323,0,0,0,0,0
23.273379,7.07106781,0,0,0,0,0
23.283871,7.34846923,0,0,0,0,0
23.294362,7.21110255,0,0,0,0,0
23.304854,8.1240384,0,0,0,0,0
23.315346,7.48331477,0,0,0,0,0
23.325837,7.14142843,0,0,0,0,0
23.336329,7.87400787,0,0,0,0,0
23.34682,7.14142843,0,0,0,0,0
23.357312,6.78232998,0,0,0,0,0
23.367804,6.55743852,0,0,0,0,0
23.378295,7.68114575,0,0,0,0,0
23.388787,6.4807407,0,0,0,0,0
23.399278,7,0,0,0,0,0
23.40977,6,0,0,0,0,0
23.420262,7.61577311,0,0,0,0,0
23.430753,6.40312424,0,0,0,0,0
23.441245,7,0,0,0,0,0
23.451736,7.61577311,0,0,0,0,0
23.462228,6.32455532,0,0,0,0,0
23.47272,6,0,0,0,0,0
23.483211,7.28010989,0,0,0,0,0
23.493703,6.40312424,0,0,0,0,0
23.504194,7.41619849,0,0,0,0,0
23.514686,6.63324958,0,0,0,0,0
23.525178,6.08276253,0,0,0,0,0
23.535669,7.48331477,0,0,0,0,0
23.546161,6.55743852,0,0,0,0,0
23.556652,7.21110255,0,0,0,0,0
23.567144,6.92820323,0,0,0,0,0
23.577636,6.8556546,0,0,0,0,0
23.588127,6.63324958,0,0,0,0,0
23.598619,8.1240384,0,0,0,0,0
23.60911,7.68114575,0,0,0,0,0
23.619602,7.48331477,0,0,0,0,0
23.630094,6.4807407,0,0,0,0,0
23.640585,7.68114575,0,0,0,0,0
23.651077,6.92820323,0,0,0,0,0
23.661568,6.78232998,0,0,0,0,0
23.67206,6.40312424,0,0,0,0,0
23.682552,6.63324958,0,0,0,0,0
23.693043,7.41619849,0,0,0,0,0
23.703535,7.34846923,0,0,0,0,0
23.714026,6.164414,0,0,0,0,0
23.724518,6.55743852,0,0,0,0,0
23.73501,6.4807407,0,0,0,0,0
23.745501,7.07106781,0,0,0,0,0
23.755993,6.55743852,0,0,0,0,0
23.766484,7.34846923,0,0,0,0,0
23.776976,7.87400787,0,0,0,0,0
23.787468,7.68114575,0,0,0,0,0
23.797959,6.78232998,0,0,0,0,0
23.808451,6.92820323,0,0,0,0,0
23.818942,7.81024968,0,0,0,0,0
23.829434,7.34846923,0,0,0,0,0
23.839926,7.14142843,0,0,0,0,0
23.850417,6.92820323,0,0,0,0,0
23.860909,7,0,0,0,0,0
23.8714,7.48331477,0,0,0,0,0
23.881892,8,0,0,0,0,0
23.892384,7.34846923,0,0,0,0,0
23.902875,6,0,0,0,0,0
23.913367,7.14142843,0,0,0,0,0
23.923858,7.28010989,0,0,0,0,0
23.93435,6.164414,0,0,0,0,0
23.944842,6.164414,0,0,0,0,0
23.955333,6.08276253,0,0,0,0,0
23.965825,6.78232998,0,0,0,0,0
23.976316,7.41619849,0,0,0,0,0
23.986808,7,0,0,0,0,0
23.9973,6.78232998,0,0,0,0,0
24.007791,7,0,0,0,0,0
24.018283,7.21110255,0,0,0,0,0
24.028774,6.55743852,0,0,0,0,0
24.039266,6.08276253,0,0,0,0,0
24.049758,7.34846923,0,0,0,0,0
24.060249,7.87400787,0,0,0,0,0
24.070741,7.61577311,0,0,0,0,0
24.081232,7.07106781,0,0,0,0,0
24.091724,6.40312424,0,0,0,0,0
24.102216,7.07106781,0,0,0,0,0
24.112707,7.74596669,0,0,0,0,0
24.123199,6.92820323,0,0,0,0,0
24.13369,7,0,0,0,0,0
24.144182,7,0,0,0,0,0
24.154674,7.54983444,0,0,0,0,0
24.165165,7.68114575,0,0,0,0,0
24.175657,7.87400787,0,0,0,0,0
24.186148,7.21110255,0,0,0,0,0
24.19664,5.09901951,0,0,0,0,0
24.207132,6.244998,0,0,0,0,0
24.217623,5.91607978,0,0,0,0,0
24.228115,7.61577311,0,0,0,0,0
24.238606,7,0,0,0,0,0
24.249098,7.81024968,0,0,0,0,0
24.25959,7,0,0,0,0,0
24.270081,6.55743852,0,0,0,0,0
24.280573,6.4807407,0,0,0,0,0
24.291064,6.92820323,0,0,0,0,0
24.301556,7.81024968,0,0,0,0,0
24.312048,7.14142843,0,0,0,0,0
24.322539,6.8556546,0,0,0,0,0
24.333031,7.21110255,0,0,0,0,0
24.343522,7,0,0,0,0,0
24.354014,7,0,0,0,0,0
24.364506,7.07106781,0,0,0,0,0
24.374997,7,0,0,0,0,0
24.385489,6.70820393,0,0,0,0,0
24.39598,7.54983444,0,0,0,0,0
24.406472,6.70820393,0,0,0,0,0
24.416964,7.81024968,0,0,0,0,0
24.427455,7.28010989,0,0,0,0,0
24.437947,6.78232998,0,0,0,0,0
24.448438,6.40312424,0,0,0,0,0
24.45893,6.78232998,0,0,0,0,0
24.469422,7,0,0,0,0,0
24.479913,7.48331477,0,0,0,0,0
24.490405,7.14142843,0,0,0,0,0
24.500896,6.32455532,0,0,0,0,0
24.511388,6.92820323,0,0,0,0,0
24.52188,6.244998,0,0,0,0,0
24.532371,6.8556546,0,0,0,0,0
24.542863,7.34846923,0,0,0,0,0
24.553354,6.32455532,0,0,0,0,0
24.563846,6.55743852,0,0,0,0,0
24.574338,7,0,0,0,0,0
24.584829,7.07106781,0,0,0,0,0
24.595321,6.8556546,0,0,0,0,0
24.605812,6.55743852,0,0,0,0,0
24.616304,6.55743852,0,0,0,0,0
24.626796,6.63324958,0,0,0,0,0
24.637287,7.14142843,0,0,0,0,0
24.647779,7,0,0,0,0,0
24.65827,6.8556546,0,0,0,0,0
24.668762,5.74456265,0,0,0,0,0
24.679254,6.32455532,0,0,0,0,0
24.689745,7.41619849,0,0,0,0,0
24.700237,6.40312424,0,0,0,0,0
24.710728,6.4807407,0,0,0,0,0
24.72122,6.8556546,0,0,0,0,0
24.731712,6.40312424,0,0,0,0,0
24.742203,7.21110255,0,0,0,0,0
24.752695,7.07106781,0,0,0,0,0
24.763186,6.8556546,0,0,0,0,0
24.773678,6.32455532,0,0,0,0,0
24.78417,7.07106781,0,0,0,0,0
24.794661,5.65685425,0,0,0,0,0
24.805153,6.70820393,0,0,0,0,0
24.815644,7.41619849,0,0,0,0,0
24.826136,7,0,0,0,0,0
24.836628,6.40312424,0,0,0,0,0
24.847119,6.55743852,0,0,0,0,0
24.857611,7.07106781,0,0,0,0,0
24.868102,6.4807407,0,0,0,0,0
24.878594,7.34846923,0,0,0,0,0
24.889086,6.55743852,0,0,0,0,0
24.899577,6.32455532,0,0,0,0,0
24.910069,7,0,0,0,0,0
24.92056,6.55743852,0,0,0,0,0
24.931052,6.40312424,0,0,0,0,0
24.941544,7.48331477,0,0,0,0,0
24.952035,5.91607978,0,0,0,0,0
24.962527,6.8556546,0,0,0,0,0
24.973018,6.40312424,0,0,0,0,0
24.98351,6.08276253,0,0,0,0,0
24.994002,6.78232998,0,0,0,0,0
25.004493,6.92820323,0,0,0,0,0
25.014985,6.8556546,0,0,0,0,0
25.025476,6.8556546,0,0,0,0,0
25.035968,7,0,0,0,0,0
25.04646,6.92820323,0,0,0,0,0
25.056951,6.40312424,0,0,0,0,0
25.067443,7.28010989,0,0,0,0,0
25.077934,5.91607978,0,0,0,0,0
25.088426,7.81024968,0,0,0,0,0
25.098918,6.4807407,0,0,0,0,0
25.109409,7.14142843,0,0,0,0,0
25.119901,6.70820393,0,0,0,0,0
25.130392,7.34846923,0,0,0,0,0
25.140884,6.78232998,0,0,0,0,0
25.151376,7.21110255,0,0,0,0,0
25.161867,7.21110255,0,0,0,0,0
25.172359,7.21110255,0,0,0,0,0
25.18285,7,0,0,0,0,0
25.193342,6.92820323,0,0,0,0,0
25.203834,6.32455532,0,0,0,0,0
25.214325,7.21110255,0,0,0,0,0
25.224817,6.70820393,0,0,0,0,0
25.235308,7.21110255,0,0,0,0,0
25.2458,6.55743852,0,0,0,0,0
25.256292,6.55743852,0,0,0,0,0
25.266783,7.41619849,0,0,0,0,0
25.277275,6.63324958,0,0,0,0,0
25.287766,6.63324958,0,0,0,0,0
25.298258,7.54983444,0,0,0,0,0
25.30875,7.21110255,0,0,0,0,0
25.319241,6.92820323,0,0,0,0,0
25.329733,6.8556546,0,0,0,0,0
25.340224,5.47722558,0,0,0,0,0
25.350716,6.92820323,0,0,0,0,0
25.361208,6.40312424,0,0,0,0,0
25.371699,7.07106781,0,0,0,0,0
25.382191,6.08276253,0,0,0,0,0
25.392682,7.54983444,0,0,0,0,0
25.403174,7.74596669,0,0,0,0,0
25.413666,6.92820323,0,0,0,0,0
25.424157,6.92820323,0,0,0,0,0
25.434649,6.70820393,0,0,0,0,0
25.44514,6.70820393,0,0,0,0,0
25.455632,7.28010989,0,0,0,0,0
25.466124,7.28010989,0,0,0,0,0
25.476615,6,0,0,0,0,0
25.487107,7.07106781,0,0,0,0,0
25.497598,6.244998,0,0,0,0,0
25.50809,7.28010989,0,0,0,0,0
25.518582,7.07106781,0,0,0,0,0
25.529073,6.08276253,0,0,0,0,0
25.539565,7.28010989,0,0,0,0,0
25.550056,7.21110255,0,0,0,0,0
25.560548,6.4807407,0,0,0,0,0
25.57104,6.55743852,0,0,0,0,0
25.581531,6.55743852,0,0,0,0,0
25.592023,7.21110255,0,0,0,0,0
25.602514,7.14142843,0,0,0,0,0
25.613006,6.63324958,0,0,0,0,0
25.623498,7,0,0,0,0,0
25.633989,7.14142843,0,0,0,0,0
25.644481,7,0,0,0,0,0
25.654972,6.55743852,0,0,0,0,0
25.665464,6.40312424,0,0,0,0,0
25.675956,6.78232998,0,0,0,0,0
25.686447,7.07106781,0,0,0,0,0
25.696939,6.08276253,0,0,0,0,0
25.70743,6.63324958,0,0,0,0,0
25.717922,7.14142843,0,0,0,0,0
25.728414,5.83095189,0,0,0,0,0
25.738905,6.55743852,0,0,0,0,0
25.749397,6.78232998,0,0,0,0,0
25.759888,7,0,0,0,0,0
25.77038,7,0,0,0,0,0
25.780872,7.14142843,0,0,0,0,0
25.791363,6.32455532,0,0,0,0,0
25.801855,6.63324958,0,0,0,0,0
25.812346,7.14142843,0,0,0,0,0
25.822838,6.70820393,0,0,0,0,0
25.83333,6.4807407,0,0,0,0,0
25.843821,6.4807407,0,0,0,0,0
25.854313,6.164414,0,0,0,0,0
25.864804,6.8556546,0,0,0,0,0
25.875296,6.8556546,0,0,0,0,0
25.885788,6.8556546,0,0,0,0,0
25.896279,7.07106781,0,0,0,0,0
25.906771,5.91607978,0,0,0,0,0
25.917262,6.32455532,0,0,0,0,0
25.927754,6.55743852,0,0,0,0,0
25.938246,7,0,0,0,0,0
25.948737,6.78232998,0,0,0,0,0
25.959229,6.40312424,0,0,0,0,0
25.96972,6.4807407,0,0,0,0,0
25.980212,6.92820323,0,0,0,0,0
25.990704,6.4807407,0,0,0,0,0
26.001195,6.63324958,0,0,0,0,0
26.011687,6.32455532,0,0,0,0,0
26.022178,6.78232998,0,0,0,0,0
26.03267,6.78232998,0,0,0,0,0
26.043162,6.32455532,0,0,0,0,0
26.053653,5.74456265,0,0,0,0,0
26.064145,6.8556546,0,0,0,0,0
26.074636,7.07106781,0,0,0,0,0
26.085128,6.164414,0,0,0,0,0
26.09562,6.92820323,0,0,0,0,0
26.106111,6,0,0,0,0,0
26.116603,6.08276253,0,0,0,0,0
26.127094,6.55743852,0,0,0,0,0
26.137586,6,0,0,0,0,0
26.148078,6.32455532,0,0,0,0,0
26.158569,6,0,0,0,0,0
26.169061,7.21110255,0,0,0,0,0
26.179552,6.32455532,0,0,0,0,0
26.190044,6.92820323,0,0,0,0,0
26.200536,7,0,0,0,0,0
26.211027,5.47722558,0,0,0,0,0
26.221519,6.32455532,0,0,0,0,0
26.23201,7.07106781,0,0,0,0,0
26.242502,6.32455532,0,0,0,0,0
26.252994,6.55743852,0,0,0,0,0
26.263485,6.40312424,0,0,0,0,0
26.273977,6.40312424,0,0,0,0,0
26.284468,7.41619849,0,0,0,0,0
26.29496,7.61577311,0,0,0,0,0
26.305452,6.244998,0,0,0,0,0
26.315943,6.55743852,0,0,0,0,0
26.326435,6.4807407,0,0,0,0,0
26.336926,6.164414,0,0,0,0,0
26.347418,6.164414,0,0,0,0,0
26.35791,6.244998,0,0,0,0,0
26.368401,6.78232998,0,0,0,0,0
26.378893,7.41619849,0,0,0,0,0
26.389384,6.164414,0,0,0,0,0
26.399876,7.68114575,0,0,0,0,0
26.410368,6.63324958,0,0,0,0,0
26.420859,6.70820393,0,0,0,0,0
26.431351,6.78232998,0,0,0,0,0
26.441842,6.8556546,0,0,0,0,0
26.452334,7,0,0,0,0,0
26.462826,7,0,0,0,0,0
26.473317,6.244998,0,0,0,0,0
26.483809,6.78232998,0,0,0,0,0
26.4943,6.55743852,0,0,0,0,0
26.504792,6.4807407,0,0,0,0,0
26.515284,6.164414,0,0,0,0,0
26.525775,6.40312424,0,0,0,0,0
26.536267,7.07106781,0,0,0,0,0
26.546758,6.70820393,0,0,0,0,0
26.55725,6.78232998,0,0,0,0,0
26.567742,6.55743852,0,0,0,0,0
26.578233,6.92820323,0,0,0,0,0
26.588725,5.83095189,0,0,0,0,0
26.599216,6.40312424,0,0,0,0,0
26.609708,7.48331477,0,0,0,0,0
26.6202,6.40312424,0,0,0,0,0
26.630691,6.4807407,0,0,0,0,0
26.641183,6.92820323,0,0,0,0,0
26.651674,5.65685425,0,0,0,0,0
26.662166,6.55743852,0,0,0,0,0
26.672658,6.40312424,0,0,0,0,0
26.683149,7.14142843,0,0,0,0,0
26.693641,6.4807407,0,0,0,0,0
26.704132,6.70820393,0,0,0,0,0
26.714624,6.78232998,0,0,0,0,0
26.725116,7.14142843,0,0,0,0,0
26.735607,6.40312424,0,0,0,0,0
26.746099,6.63324958,0,0,0,0,0
26.75659,5.91607978,0,0,0,0,0
26.767082,5.38516481,0,0,0,0,0
26.777574,6,0,0,0,0,0
26.788065,6.40312424,0,0,0,0,0
26.798557,6.4807407,0,0,0,0,0
26.809048,5.91607978,0,0,0,0,0
26.81954,6.40312424,0,0,0,0,0
26.830032,5.74456265,0,0,0,0,0
26.840523,6.92820323,0,0,0,0,0
26.851015,6.92820323,0,0,0,0,0
26.861506,6.40312424,0,0,0,0,0
26.871998,6.08276253,0,0,0,0,0
26.88249,6.55743852,0,0,0,0,0
26.892981,5.83095189,0,0,0,0,0
26.903473,6.32455532,0,0,0,0,0
26.913964,6.4807407,0,0,0,0,0
26.924456,6.70820393,0,0,0,0,0
26.934948,7.07106781,0,0,0,0,0
26.945439,6.8556546,0,0,0,0,0
26.955931,6.63324958,0,0,0,0,0
26.966422,6.78232998,0,0,0,0,0
26.976914,6.4807407,0,0,0,0,0
26.987406,6,0,0,0,0,0
26.997897,6.8556546,0,0,0,0,0
27.008389,6.92820323,0,0,0,0,0
27.01888,6.32455532,0,0,0,0,0
27.029372,7.28010989,0,0,0,0,0
27.039864,6.164414,0,0,0,0,0
27.050355,6.63324958,0,0,0,0,0
27.060847,6.244998,0,0,0,0,0
27.071338,6.244998,0,0,0,0,0
27.08183,6.70820393,0,0,0,0,0
27.092322,5.74456265,0,0,0,0,0
27.102813,5.83095189,0,0,0,0,0
27.113305,6.92820323,0,0,0,0,0
27.123796,6.40312424,0,0,0,0,0
27.134288,6.164414,0,0,0,0,0
27.14478,6.8556546,0,0,0,0,0
27.155271,6.55743852,0,0,0,0,0
27.165763,6.32455532,0,0,0,0,0
27.176254,5.56776436,0,0,0,0,0
27.186746,6.78232998,0,0,0,0,0
27.197238,6.244998,0,0,0,0,0
27.207729,6.164414,0,0,0,0,0
27.218221,6.08276253,0,0,0,0,0
27.228712,6.63324958,0,0,0,0,0
27.239204,7.54983444,0,0,0,0,0
27.249696,6.78232998,0,0,0,0,0
27.260187,6.63324958,0,0,0,0,0
27.270679,6.40312424,0,0,0,0,0
27.28117,6.164414,0,0,0,0,0
27.291662,7.14142843,0,0,0,0,0
27.302154,6.244998,0,0,0,0,0
27.312645,6.32455532,0,0,0,0,0
27.323137,6.244998,0,0,0,0,0
27.333628,6.164414,0,0,0,0,0
27.34412,5.74456265,0,0,0,0,0
27.354612,6.244998,0,0,0,0,0
27.365103,6.32455532,0,0,0,0,0
27.375595,6.40312424,0,0,0,0,0
27.386086,6.4807407,0,0,0,0,0
27.396578,5.91607978,0,0,0,0,0
27.40707,6.32455532,0,0,0,0,0
27.417561,5.74456265,0,0,0,0,0
27.428053,6.32455532,0,0,0,0,0
27.438544,6.63324958,0,0,0,0,0
27.449036,6.32455532,0,0,0,0,0
27.459528,6.32455532,0,0,0,0,0
27.470019,6.164414,0,0,0,0,0
27.480511,5.65685425,0,0,0,0,0
27.491002,6.244998,0,0,0,0,0
27.501494,6.08276253,0,0,0,0,0
27.511986,7.28010989,0,0,0,0,0
27.522477,6.70820393,0,0,0,0,0
27.532969,6.4807407,0,0,0,0,0
27.54346,6.08276253,0,0,0,0,0
27.553952,6.55743852,0,0,0,0,0
27.564444,6.70820393,0,0,0,0,0
27.574935,6.70820393,0,0,0,0,0
27.585427,6.55743852,0,0,0,0,0
27.595918,6.40312424,0,0,0,0,0
27.60641,6.4807407,0,0,0,0,0
27.616902,6,0,0,0,0,0
27.627393,6,0,0,0,0,0
27.637885,6.8556546,0,0,0,0,0
27.648376,6.55743852,0,0,0,0,0
27.658868,6.32455532,0,0,0,0,0
27.66936,6.244998,0,0,0,0,0
27.679851,7.28010989,0,0,0,0,0
27.690343,6.164414,0,0,0,0,0
27.700834,6.244998,0,0,0,0,0
27.711326,6.78232998,0,0,0,0,0
27.721818,7.61577311,0,0,0,0,0
27.732309,6.244998,0,0,0,0,0
27.742801,7.07106781,0,0,0,0,0
27.753292,6.4807407,0,0,0,0,0
27.763784,6.244998,0,0,0,0,0
27.774276,7.48331477,0,0,0,0,0
27.784767,7.14142843,0,0,0,0,0
27.795259,6.164414,0,0,0,0,0
27.80575,6.164414,0,0,0,0,0
27.816242,6.4807407,0,0,0,0,0
27.826734,6.4807407,0,0,0,0,0
27.837225,6.92820323,0,0,0,0,0
27.847717,6.78232998,0,0,0,0,0
27.858208,6.70820393,0,0,0,0,0
27.8687,5.56776436,0,0,0,0,0
27.879192,5.91607978,0,0,0,0,0
27.889683,6.78232998,0,0,0,0,0
27.900175,6.55743852,0,0,0,0,0
27.910666,6.70820393,0,0,0,0,0
27.921158,6,0,0,0,0,0
27.93165,7.14142843,0,0,0,0,0
27.942141,6.70820393,0,0,0,0,0
27.952633,6.70820393,0,0,0,0,0
27.963124,6.32455532,0,0,0,0,0
27.973616,6.32455532,0,0,0,0,0
27.984108,7.14142843,0,0,0,0,0
27.994599,7.21110255,0,0,0,0,0
28.005091,5.65685425,0,0,0,0,0
28.015582,6.40312424,0,0,0,0,0
28.026074,6.244998,0,0,0,0,0
28.036566,6.08276253,0,0,0,0,0
28.047057,7.14142843,0,0,0,0,0
28.057549,6.40312424,0,0,0,0,0
28.06804,6,0,0,0,0,0
28.078532,7.28010989,0,0,0,0,0
28.089024,5.38516481,0,0,0,0,0
28.099515,7,0,0,0,0,0
28.110007,7.07106781,0,0,0,0,0
28.120498,7.14142843,0,0,0,0,0
28.13099,6.63324958,0,0,0,0,0
28.141482,6.78232998,0,0,0,0,0
28.151973,6.78232998,0,0,0,0,0
28.162465,6.164414,0,0,0,0,0
28.172956,5.09901951,0,0,0,0,0
28.183448,6.63324958,0,0,0,0,0
28.19394,6.63324958,0,0,0,0,0
28.204431,6,0,0,0,0,0
28.214923,6.70820393,0,0,0,0,0
28.225414,6.55743852,0,0,0,0,0
28.235906,5.38516481,0,0,0,0,0
28.246398,5.65685425,0,0,0,0,0
28.256889,6.63324958,0,0,0,0,0
28.267381,6.40312424,0,0,0,0,0
28.277872,6.164414,0,0,0,0,0
28.288364,5.47722558,0,0,0,0,0
28.298856,6.32455532,0,0,0,0,0
28.309347,6.78232998,0,0,0,0,0
28.319839,6.164414,0,0,0,0,0
28.33033,5.83095189,0,0,0,0,0
28.340822,6.32455532,0,0,0,0,0
28.351314,6.70820393,0,0,0,0,0
28.361805,7.07106781,0,0,0,0,0
28.372297,5.91607978,0,0,0,0,0
28.382788,6.08276253,0,0,0,0,0
28.39328,5.09901951,0,0,0,0,0
28.403772,6.164414,0,0,0,0,0
28.414263,6.32455532,0,0,0,0,0
28.424755,6.164414,0,0,0,0,0
28.435246,6.164414,0,0,0,0,0
28.445738,6.70820393,0,0,0,0,0
28.45623,5.91607978,0,0,0,0,0
28.466721,6,0,0,0,0,0
28.477213,5.83095189,0,0,0,0,0
28.487704,5.19615242,0,0,0,0,0
28.498196,5.83095189,0,0,0,0,0
28.508688,5.91607978,0,0,0,0,0
28.519179,6.32455532,0,0,0,0,0
28.529671,7.14142843,0,0,0,0,0
28.540162,5.91607978,0,0,0,0,0
28.550654,6.4807407,0,0,0,0,0
28.561146,6.40312424,0,0,0,0,0
28.571637,6.40312424,0,0,0,0,0
28.582129,5.56776436,0,0,0,0,0
28.59262,6.92820323,0,0,0,0,0
28.603112,6.40312424,0,0,0,0,0
28.613604,6.92820323,0,0,0,0,0
28.624095,6.55743852,0,0,0,0,0
28.634587,6.32455532,0,0,0,0,0
28.645078,6.78232998,0,0,0,0,0
28.65557,6.40312424,0,0,0,0,0
28.666062,6.4807407,0,0,0,0,0
28.676553,6.70820393,0,0,0,0,0
28.687045,5.83095189,0,0,0,0,0
28.697536,6.40312424,0,0,0,0,0
28.708028,6.78232998,0,0,0,0,0
28.71852,6.8556546,0,0,0,0,0
28.729011,5.91607978,0,0,0,0,0
28.739503,6.40312424,0,0,0,0,0
28.749994,5.56776436,0,0,0,0,0
28.760486,6.244998,0,0,0,0,0
28.770978,7,0,0,0,0,0
28.781469,6.08276253,0,0,0,0,0
28.791961,7.14142843,0,0,0,0,0
28.802452,6,0,0,0,0,0
28.812944,6.63324958,0,0,0,0,0
28.823436,6.164414,0,0,0,0,0
28.833927,6.4807407,0,0,0,0,0
28.844419,6.08276253,0,0,0,0,0
28.85491,6.32455532,0,0,0,0,0
28.865402,7.41619849,0,0,0,0,0
28.875894,6.40312424,0,0,0,0,0
28.886385,5.65685425,0,0,0,0,0
28.896877,7.81024968,0,0,0,0,0
28.907368,6.63324958,0,0,0,0,0
28.91786,6.244998,0,0,0,0,0
28.928352,7.41619849,0,0,0,0,0
28.938843,5.91607978,0,0,0,0,0
28.949335,6.32455532,0,0,0,0,0
28.959826,7,0,0,0,0,0
28.970318,6.63324958,0,0,0,0,0
28.98081,5.38516481,0,0,0,0,0
28.991301,6.63324958,0,0,0,0,0
29.001793,6.08276253,0,0,0,0,0
29.012284,6,0,0,0,0,0
29.022776,6.8556546,0,0,0,0,0
29.033268,6.70820393,0,0,0,0,0
29.043759,6.70820393,0,0,0,0,0
29.054251,5.47722558,0,0,0,0,0
29.064742,6.164414,0,0,0,0,0
29.075234,6.40312424,0,0,0,0,0
29.085726,6.40312424,0,0,0,0,0
29.096217,6.55743852,0,0,0,0,0
29.106709,6.78232998,0,0,0,0,0
29.1172,5.91607978,0,0,0,0,0
29.127692,6.92820323,0,0,0,0,0
29.138184,6.164414,0,0,0,0,0
29.148675,6.244998,0,0,0,0,0
29.159167,6.08276253,0,0,0,0,0
29.169658,6.40312424,0,0,0,0,0
29.18015,5.91607978,0,0,0,0,0
29.190642,6,0,0,0,0,0
29.201133,6.08276253,0,0,0,0,0
29.211625,6,0,0,0,0,0
29.222116,5.74456265,0,0,0,0,0
29.232608,6.55743852,0,0,0,0,0
29.2431,6,0,0,0,0,0
29.253591,6.92820323,0,0,0,0,0
29.264083,6.70820393,0,0,0,0,0
29.274574,5.56776436,0,0,0,0,0
29.285066,5.56776436,0,0,0,0,0
29.295558,5.74456265,0,0,0,0,0
29.306049,6.78232998,0,0,0,0,0
29.316541,6.70820393,0,0,0,0,0
29.327032,6.92820323,0,0,0,0,0
29.337524,5.83095189,0,0,0,0,0
29.348016,6.08276253,0,0,0,0,0
29.358507,6.40312424,0,0,0,0,0
29.368999,6.78232998,0,0,0,0,0
29.37949,6.32455532,0,0,0,0,0
29.389982,6.63324958,0,0,0,0,0
29.400474,6.8556546,0,0,0,0,0
29.410965,6.55743852,0,0,0,0,0
29.421457,6.40312424,0,0,0,0,0
29.431948,6.55743852,0,0,0,0,0
29.44244,6.32455532,0,0,0,0,0
29.452932,6.70820393,0,0,0,0,0
29.463423,6.244998,0,0,0,0,0
29.473915,5.65685425,0,0,0,0,0
29.484406,6.4807407,0,0,0,0,0
29.494898,6.244998,0,0,0,0,0
29.50539,5.74456265,0,0,0,0,0
29.515881,7.07106781,0,0,0,0,0
29.526373,6.164414,0,0,0,0,0
29.536864,6.78232998,0,0,0,0,0
29.547356,6.4807407,0,0,0,0,0
29.557848,6.164414,0,0,0,0,0
29.568339,6,0,0,0,0,0
29.578831,7,0,0,0,0,0
29.589322,6.32455532,0,0,0,0,0
29.599814,5.56776436,0,0,0,0,0
29.610306,6,0,0,0,0,0
29.620797,7.14142843,0,0,0,0,0
29.631289,6.70820393,0,0,0,0,0
29.64178,6,0,0,0,0,0
29.652272,6.63324958,0,0,0,0,0
29.662764,5.19615242,0,0,0,0,0
29.673255,5.83095189,0,0,0,0,0
29.683747,6.78232998,0,0,0,0,0
29.694238,7,0,0,0,0,0
29.70473,5.91607978,0,0,0,0,0
29.715222,6.164414,0,0,0,0,0
29.725713,6.78232998,0,0,0,0,0
29.736205,6.63324958,0,0,0,0,0
29.746696,6.78232998,0,0,0,0,0
29.757188,5.65685425,0,0,0,0,0
29.76768,7.21110255,0,0,0,0,0
29.778171,6.70820393,0,0,0,0,0
29.788663,6.55743852,0,0,0,0,0
29.799154,6,0,0,0,0,0
29.809646,6.164414,0,0,0,0,0
29.820138,6.4807407,0,0,0,0,0
29.830629,6,0,0,0,0,0
29.841121,6.78232998,0,0,0,0,0
29.851612,6.55743852,0,0,0,0,0
29.862104,6.70820393,0,0,0,0,0
29.872596,6.63324958,0,0,0,0,0
29.883087,6.70820393,0,0,0,0,0
29.893579,6.78232998,0,0,0,0,0
29.90407,5.38516481,0,0,0,0,0
29.914562,6.32455532,0,0,0,0,0
29.925054,6.08276253,0,0,0,0,0
29.935545,5.74456265,0,0,0,0,0
29.946037,7.14142843,0,0,0,0,0
29.956528,6.4807407,0,0,0,0,0
29.96702,6.55743852,0,0,0,0,0
29.977512,5.83095189,0,0,0,0,0
29.988003,6.78232998,0,0,0,0,0
29.998495,5.38516481,6.36091001,-0.987798161,6.36079138,6.36090355,6.36078492
30.008986,7.14142843,6.36433958,0.881526429,6.36422091,6.3643331,6.36421443
30.019478,6.244998,6.36774509,-0.35035281,6.36762637,6.36773859,6.36761987
30.02997,6.55743852,6.37112632,0.431638979,6.37100756,6.37111979,6.37100103
30.040461,7.07106781,6.37448305,0.834616534,6.37436425,6.37447651,6.37435771
30.050953,5,6.37781605,-1.17380409,6.3776972,6.37780948,6.37769063
30.061444,6.32455532,6.38112477,-0.237843329,6.38100588,6.38111818,6.38099929
30.071936,5.91607978,6.38440996,-0.684346532,6.38429102,6.38440335,6.38428442
30.082428,7.34846923,6.38767141,0.98020295,6.38755242,6.38766478,6.3875458
30.092919,6.4807407,6.39090891,0.299719521,6.39078988,6.39090226,6.39078323
30.103411,6.78232998,6.39412318,0.623062435,6.39400411,6.39411652,6.39399744
30.113902,6.244998,6.39731373,-0.390276481,6.39719461,6.39730704,6.39718792
30.124394,6.4807407,6.40048125,0.283300977,6.40036208,6.40047454,6.40035537
30.134886,6.55743852,6.40362556,0.392189964,6.40350634,6.40361882,6.4034996
30.145377,6.4807407,6.40674644,0.272018853,6.40662717,6.40673969,6.40662042
30.155869,7.54983444,6.40984461,1.06770306,6.40972529,6.40983783,6.40971851
30.16636,6.55743852,6.41291956,0.380156497,6.41280019,6.41291276,6.41279339
30.176852,7.07106781,6.41597199,0.809379897,6.41585257,6.41596517,6.41584575
30.187344,6.78232998,6.41900171,0.602767181,6.41888224,6.41899487,6.41887539
30.197835,6.63324958,6.42200852,0.459609684,6.421889,6.42200165,6.42188213
30.208327,7.07106781,6.4249931,0.803787729,6.42487352,6.42498621,6.42486664
30.218818,6.78232998,6.42795498,0.595294052,6.42783535,6.42794807,6.42782844
30.22931,7.14142843,6.43089481,0.842931561,6.43077513,6.43088788,6.4307682
30.239802,7,6.43381242,0.75245437,6.43369269,6.43380547,6.43368573
30.250293,6.8556546,6.43670763,0.647261133,6.43658784,6.43670065,6.43658086
30.260785,5.47722558,6.43958107,-0.980997196,6.43946123,6.43957407,6.43945423
30.271276,5.91607978,6.44243231,-0.725501569,6.44231241,6.44242528,6.44230538
30.281768,6.92820323,6.44526198,0.694939749,6.44514202,6.44525493,6.44513497
30.29226,7.21110255,6.44806989,0.873517406,6.44794988,6.44806282,6.44794281
30.302751,6.55743852,6.45085589,0.326469964,6.45073582,6.45084879,6.45072872
30.313243,6.92820323,6.45362059,0.68889959,6.45350046,6.45361346,6.45349334
30.323734,5.47722558,6.45636355,-0.989514011,6.45624337,6.45635641,6.45623622
30.334226,6.63324958,6.45908541,0.417329816,6.45896516,6.45907824,6.45895799
30.344718,7.28010989,6.46178597,0.90461258,6.46166567,6.46177878,6.46165847
30.355209,6.70820393,6.46446508,0.493699147,6.46434472,6.46445787,6.4643375
30.365701,6.92820323,6.46712335,0.679028629,6.46700293,6.46711611,6.46699569
30.376192,6,6.46976035,-0.685390656,6.46963987,6.46975308,6.4696326
30.386684,6.244998,6.47237668,-0.476842407,6.47225614,6.47236939,6.47224884
30.397176,6.63324958,6.47497217,0.397840935,6.47485157,6.47496485,6.47484425
30.407667,6.32455532,6.47754667,-0.391141087,6.477426,6.47753933,6.47741866
30.418159,6.244998,6.48010076,-0.484873961,6.47998003,6.48009339,6.47997266
30.42865,6,6.48263403,-0.694718669,6.48251324,6.48262663,6.48250584
30.439142,6.40312424,6.48514706,-0.286396268,6.4850262,6.48513964,6.48501878
30.449634,6.08276253,6.48763969,-0.636299585,6.48751877,6.48763224,6.48751132
30.460125,5.91607978,6.49011178,-0.757648992,6.48999079,6.4901043,6.48998332
30.470617,6.55743852,6.49256387,0.254705028,6.49244282,6.49255637,6.49243532
30.481108,6.40312424,6.4949956,-0.303102886,6.49487448,6.49498807,6.49486695
30.4916,6.244998,6.4974075,-0.50240372,6.49728631,6.49739994,6.49727876
30.502092,6.55743852,6.49979942,0.240081445,6.49967818,6.49979184,6.49967059
30.512583,6.4807407,6.50217124,-0.146391734,6.50204992,6.50216363,6.50204231
30.523075,6.78232998,6.50452347,0.527073532,6.50440209,6.50451584,6.50439446
30.533566,5.91607978,6.50685577,-0.768619532,6.50673432,6.5068481,6.50672665
30.544058,6.164414,6.50916864,-0.587158106,6.50904713,6.50916095,6.50903943
30.55455,6.63324958,6.51146196,0.348980825,6.51134038,6.51145424,6.51133266
30.565041,6.4807407,6.51373559,-0.181644967,6.51361394,6.51372784,6.51360619
30.575533,7,6.51599004,0.695708241,6.51586832,6.51598227,6.51586054
30.586024,6.08276253,6.51822497,-0.659895779,6.51810317,6.51821716,6.51809537
30.596516,6.63324958,6.52044088,0.335870072,6.52031901,6.52043304,6.52031117
30.607008,6.244998,6.52263763,-0.526915202,6.52251569,6.52262977,6.52250783
30.617499,6.8556546,6.5248151,0.575186492,6.52469309,6.52480721,6.5246852
30.627991,6.32455532,6.52697379,-0.449909397,6.5268517,6.52696586,6.52684378
30.638482,6.4807407,6.52911335,-0.219937842,6.5289912,6.5291054,6.52898325
30.648974,6.78232998,6.53123429,0.501094499,6.53111206,6.53122631,6.53110408
30.659466,6.55743852,6.53333646,0.155248395,6.53321416,6.53332845,6.53320615
30.669957,6.164414,6.53541975,-0.609102414,6.53529738,6.53541171,6.53528934
30.680449,7.61577311,6.53748464,1.0384067,6.53736219,6.53747657,6.53735412
30.69094,5.65685425,6.53953081,-0.939508678,6.53940828,6.5395227,6.53940018
30.701432,6.55743852,6.54155871,0.12601512,6.54143611,6.54155058,6.54142798
30.711924,6.63324958,6.54356825,0.299468422,6.54344557,6.54356008,6.5434374
30.722415,6.40312424,6.54555929,-0.377405682,6.54543653,6.54555109,6.54542834
30.732907,7.74596669,6.54753229,1.09473029,6.54740946,6.54752407,6.54740123
30.743398,6.63324958,6.54948696,0.289417725,6.54936405,6.5494787,6.54935579
30.75389,6.08276253,6.55142374,-0.684588351,6.55130075,6.55141545,6.55129246
30.764382,6.92820323,6.55334252,0.612258698,6.55321945,6.5533342,6.55321113
30.774873,7.21110255,6.55524318,0.809851448,6.55512004,6.55523483,6.55511169
30.785365,6.32455532,6.55712618,-0.482256007,6.55700295,6.55711779,6.55699457
30.795856,6.4807407,6.55899121,-0.279732926,6.55886791,6.55898279,6.55885949
30.806348,6.70820393,6.56083871,0.383881784,6.56071533,6.56083026,6.56070687
30.81684,6.8556546,6.56266857,0.54128184,6.56254511,6.56266008,6.56253662
30.827331,6.164414,6.56448069,-0.632508252,6.56435715,6.56447217,6.56434863
30.837823,6.32455532,6.56627549,-0.491650458,6.56615187,6.56626694,6.56614331
30.848314,6.40312424,6.5680527,-0.406113854,6.56792899,6.56804411,6.56792041
30.858806,6.244998,6.56981272,-0.569925193,6.56968893,6.5698041,6.56968031
30.869298,6.78232998,6.57155546,0.459101861,6.57143159,6.57154681,6.57142294
30.879789,5.91607978,6.57328083,-0.810679373,6.57315687,6.57327214,6.57314818
30.890281,6.70820393,6.57498921,0.364985916,6.57486517,6.57498049,6.57485645
30.900772,7,6.57668036,0.650630184,6.57655624,6.57667161,6.57654748
30.911264,6.70820393,6.57835467,0.360346031,6.57823046,6.57834588,6.57822167
30.921756,6.78232998,6.58001204,0.449797668,6.57988775,6.58000321,6.57987892
30.932247,6.70820393,6.58165239,0.355740841,6.58152801,6.58164352,6.58151914
30.942739,7,6.58327609,0.645541564,6.58315162,6.58326719,6.58314272
30.95323,6.08276253,6.58488291,-0.708604528,6.58475835,6.58487397,6.58474942
30.963722,7.07106781,6.58647321,0.696128292,6.58634857,6.58646424,6.5863396
30.974214,6.8556546,6.58804692,0.517308109,6.58792219,6.58803791,6.58791318
30.984705,6.63324958,6.58960395,0.208915369,6.58947913,6.5895949,6.58947009
30.995197,7.14142843,6.59114466,0.74181114,6.59101976,6.59113558,6.59101067
31.005688,6.32455532,6.59266883,-0.517796783,6.59254384,6.59265971,6.59253471
31.01618,6.40312424,6.59417681,-0.43709561,6.59405173,6.59416765,6.59404257
31.026672,6.32455532,6.59566852,-0.520685319,6.59554335,6.59565932,6.59553415
31.037163,7.07106781,6.59714389,0.688421325,6.59701863,6.59713465,6.59700939
31.047655,7,6.59860326,0.633558787,6.59847791,6.59859399,6.59846864
31.058146,6.08276253,6.60004643,-0.719224509,6.59992098,6.60003711,6.59991167
31.068638,7.48331477,6.60147372,0.939063927,6.60134818,6.60146436,6.60133883
31.07913,6.244998,6.60288506,-0.598236627,6.60275943,6.60287567,6.60275004
31.089621,6.92820323,6.60428039,0.569142197,6.60415467,6.60427096,6.60414524
31.100113,7.28010989,6.60566003,0.82124896,6.60553422,6.60565056,6.60552475
31.110604,6.8556546,6.60702379,0.498628926,6.60689789,6.60701428,6.60688838
31.121096,6.70820393,6.60837199,0.31596193,6.60824599,6.60836244,6.60823644
31.131588,7.68114575,6.60970456,1.03510443,6.60957846,6.60969496,6.60956887
31.142079,6.164414,6.61102143,-0.668286935,6.61089524,6.61101179,6.61088561
31.152571,6.4807407,6.61232292,-0.362742642,6.61219664,6.61231324,6.61218696
31.163062,6.4807407,6.61360885,-0.364510836,6.61348247,6.61359913,6.61347275
31.173554,5.65685425,6.61487951,-0.978787649,6.61475304,6.61486975,6.61474328
31.184046,6.32455532,6.61613485,-0.539981048,6.61600828,6.61612505,6.61599848
31.194537,6.8556546,6.61737481,0.488139106,6.61724815,6.61736497,6.6172383
31.205029,6.4807407,6.61859969,-0.371293675,6.61847293,6.6185898,6.61846304
31.21552,5.83095189,6.61980931,-0.888176457,6.61968245,6.61979938,6.61967252
31.226012,5.65685425,6.62100397,-0.981911258,6.62087701,6.62099399,6.62086703
31.236504,6.92820323,6.6221836,0.553190409,6.62205654,6.62217358,6.62204652
31.246995,7.28010989,6.62334816,0.810408371,6.623221,6.6233381,6.62321094
31.257487,6.40312424,6.62449793,-0.470503657,6.62437067,6.62448782,6.62436056
31.267978,6.4807407,6.62563274,-0.380646877,6.62550539,6.62562259,6.62549523
31.27847,5.65685425,6.62675288,-0.984834316,6.62662542,6.62674268,6.62661522
31.288962,6.4807407,6.62785829,-0.383559108,6.62773073,6.62784804,6.62772048
31.299453,6.92820323,6.62894892,0.547041413,6.62882126,6.62893863,6.62881097
31.309945,6.244998,6.63002505,-0.62050548,6.62989729,6.63001471,6.62988695
31.320436,6.92820323,6.63108652,0.545084132,6.63095866,6.63107613,6.63094827
31.330928,6.32455532,6.63213359,-0.554597397,6.63200563,6.63212316,6.6319952
31.34142,6.08276253,6.63316623,-0.741891971,6.63303816,6.63315575,6.63302768
31.351911,7.28010989,6.63418438,0.803694911,6.63405621,6.63417385,6.63404568
31.362403,8.06225775,6.6351883,1.19460012,6.63506003,6.63517773,6.63504945
31.372894,6,6.63617786,-0.797607584,6.63604948,6.63616723,6.63603886
31.383386,6.40312424,6.63715329,-0.483765498,6.63702481,6.63714262,6.63701414
31.393878,6.4807407,6.63811457,-0.396703758,6.63798598,6.63810385,6.63797526
31.404369,6.70820393,6.63906165,0.262949197,6.63893296,6.63905088,6.63892219
31.414861,6.55743852,6.63999478,-0.287326037,6.63986598,6.63998395,6.63985515
31.425352,7.41619849,6.64091382,0.880502509,6.64078491,6.64090295,6.64077404
31.435844,6.40312424,6.64181901,-0.488563989,6.64169,6.64180809,6.64167907
31.446336,6.55743852,6.64271031,-0.292013339,6.64258119,6.64269934,6.64257022
31.456827,7.14142843,6.64358771,0.705578289,6.64345848,6.64357668,6.64344745
31.467319,6.244998,6.64445141,-0.632023265,6.64432207,6.64444033,6.64431099
31.47781,6.08276253,6.6453013,-0.750025847,6.64517186,6.64529017,6.64516073
31.488302,6.78232998,6.64613761,0.369042508,6.64600806,6.64612643,6.64599688
31.498794,6.55743852,6.6469603,-0.299201902,6.64683064,6.64694907,6.64681941
31.509285,6.244998,6.64776936,-0.6346427,6.64763958,6.64775807,6.64762829
31.519777,6.92820323,6.64856498,0.528808334,6.64843509,6.64855363,6.64842375
31.530268,6.70820393,6.64934706,0.242604344,6.64921707,6.64933567,6.64920567
31.54076,7.07106781,6.65011582,0.648808129,6.64998572,6.65010437,6.64997427
31.551252,6.244998,6.65087123,-0.63708181,6.65074101,6.65085972,6.65072951
31.561743,6.92820323,6.65161327,0.525918211,6.65148294,6.6516017,6.65147138
31.572235,5.83095189,6.65234212,-0.906305814,6.65221168,6.65233051,6.65220007
31.582726,6.63324958,6.65305772,-0.140741378,6.65292716,6.65304604,6.65291549
31.593218,7.48331477,6.65376023,0.910798848,6.65362956,6.6537485,6.65361783
31.60371,6.78232998,6.65444965,0.357603596,6.65431887,6.65443786,6.65430708
31.614201,6.32455532,6.65512596,-0.574952731,6.65499507,6.65511412,6.65498322
31.624693,6.8556546,6.65578935,0.447062919,6.65565834,6.65577744,6.65564643
31.635184,6.70820393,6.65643973,0.227517486,6.6563086,6.65642776,6.65629664
31.645676,7.14142843,6.65707727,0.695953413,6.65694603,6.65706525,6.65693401
31.656168,5.29150262,6.65770198,-1.16884531,6.65757062,6.6576899,6.65755854
31.666659,6.32455532,6.65831384,-0.577718371,6.65818236,6.65830169,6.65817022
31.677151,6.70820393,6.65891301,0.222015598,6.65878142,6.65890081,6.65876922
31.687642,6.32455532,6.65949943,-0.57874356,6.65936772,6.65948717,6.65935546
31.698134,6.78232998,6.66007326,0.349652286,6.65994144,6.66006094,6.65992911
31.708626,6.63324958,6.6606345,-0.165483893,6.66050256,6.66062211,6.66049017
31.719117,7.54983444,6.66118314,0.942683031,6.66105108,6.66117069,6.66103863
31.729609,6.92820323,6.66171933,0.516220784,6.66158715,6.66170682,6.66157464
31.7401,6.08276253,6.66224303,-0.761236163,6.66211073,6.66223045,6.66209815
31.750592,6,6.66275437,-0.814097273,6.66262195,6.66274173,6.66260931
31.761084,6.70820393,6.66325336,0.212015504,6.66312082,6.66324065,6.66310812
31.771575,7.48331477,6.66374,0.905303693,6.66360734,6.66372723,6.66359457
31.782067,6.8556546,6.66421442,0.437538773,6.66408164,6.66420159,6.66406881
31.792558,6.78232998,6.66467659,0.343006397,6.66454369,6.66466369,6.66453079
31.80305,7.41619849,6.66512665,0.86664401,6.66499362,6.66511368,6.66498066
31.813542,7.14142843,6.66556458,0.689828852,6.66543144,6.66555155,6.6654184
31.824033,6,6.66599041,-0.816082355,6.66585714,6.66597731,6.66584404
31.834525,6,6.66640425,-0.816335871,6.66627086,6.66639108,6.66625769
31.845016,6.40312424,6.66680608,-0.513499608,6.66667257,6.66679284,6.66665933
31.855508,6.164414,6.66719602,-0.709071238,6.66706238,6.66718271,6.66704907
31.866,6.70820393,6.66757408,0.201568488,6.66744031,6.6675607,6.66742693
31.876491,6.92820323,6.66794026,0.510159751,6.66780637,6.66792681,6.66779292
31.886983,6.32455532,6.66829468,-0.586292898,6.66816067,6.66828116,6.66814715
31.897474,6,6.66863733,-0.817702469,6.66850319,6.66862373,6.66848959
31.907966,5.83095189,6.6689683,-0.915432362,6.66883404,6.66895464,6.66882037
31.918458,6.4807407,6.66928762,-0.434219904,6.66915323,6.66927389,6.66913949
31.928949,6.78232998,6.6695953,0.335759855,6.66946078,6.66958149,6.66944697
31.939441,6.08276253,6.66989145,-0.766243378,6.6697568,6.66987756,6.66974291
31.949932,6.63324958,6.67017604,-0.192162583,6.67004126,6.67016208,6.6700273
31.960424,5.91607978,6.67044918,-0.868544414,6.67031428,6.67043515,6.67030024
31.970916,7.21110255,6.67071089,0.735113365,6.67057586,6.67069678,6.67056174
31.981407,6.70820393,6.67096119,0.192983789,6.67082603,6.670947,6.67081184
31.991899,6.4807407,6.67120017,-0.436416621,6.67106487,6.6711859,6.6710506
32.00239,6.70820393,6.67142782,0.191770992,6.6712924,6.67141347,6.67127805
32.012882,8.1240384,6.67172734,1.20511869,6.67159178,6.67162981,6.67149426
32.023374,7.21110255,6.67193266,0.734281888,6.67179698,6.67183494,6.67169925
32.033865,7.07106781,6.67212679,0.631617778,6.67199098,6.67202887,6.67189305
32.044357,6.78232998,6.67230982,0.331692875,6.67217387,6.67221169,6.67207574
32.054848,6.8556546,6.67248174,0.427986981,6.67234566,6.67238341,6.67224733
32.06534,6,6.67264264,-0.82014794,6.67250643,6.67254411,6.67240789
32.075832,6.08276253,6.67279254,-0.768134111,6.6726562,6.6726938,6.67255745
32.086323,6.32455532,6.67293147,-0.590233981,6.67279499,6.67283253,6.67269604
32.096815,7.21110255,6.6730595,0.733514179,6.67292289,6.67296035,6.67282373
32.107306,6.164414,6.67317665,-0.713275993,6.6730399,6.67307728,6.67294053
32.117798,6.08276253,6.67328297,-0.768453278,6.67314609,6.6731834,6.67304651
32.12829,6.78232998,6.67337851,0.330077986,6.67324149,6.67327872,6.6731417
32.138781,7.21110255,6.67346329,0.733238886,6.67332613,6.67336329,6.67322613
32.149273,6.4807407,6.67353737,-0.439086178,6.67340008,6.67343716,6.67329987
32.159764,6.4807407,6.67360078,-0.439158381,6.67346335,6.67350036,6.67336293
32.170256,5.29150262,6.67365358,-1.17564916,6.67351601,6.67355294,6.67341537
32.180748,6.78232998,6.67369579,0.329597016,6.67355809,6.67359493,6.67345723
32.191239,6.164414,6.67372746,-0.713662003,6.67358962,6.67362638,6.67348854
32.201731,6.63324958,6.67374863,-0.20124375,6.67361065,6.67364733,6.67350935
32.212222,7.61577311,6.67375934,0.970573938,6.67362122,6.67365782,6.6735197
32.222714,6.63324958,6.67375963,-0.201271072,6.67362137,6.67365789,6.67351963
32.233206,7.21110255,6.67374953,0.733043666,6.67361114,6.67364757,6.67350917
32.243697,6.92820323,6.67372911,0.504454284,6.67359057,6.67362692,6.67348838
32.254189,6.70820393,6.67369837,0.185756717,6.6735597,6.67359596,6.67345728
32.26468,7.41619849,6.67365739,0.861708245,6.67351857,6.67355475,6.67341592
32.275172,6.78232998,6.67360618,0.329732933,6.67346721,6.67350331,6.67336434
32.285664,6.4807407,6.67354478,-0.439094619,6.67340568,6.67344168,6.67330258
32.296155,6.08276253,6.67347325,-0.768577077,6.67333401,6.67336992,6.67323068
32.306647,6.32455532,6.67339162,-0.59062365,6.67325223,6.67328805,6.67314866
32.317138,6.63324958,6.67329992,-0.200125816,6.67316039,6.67319613,6.67305659
32.32763,7,6.6731982,0.571665815,6.67305852,6.67309416,6.67295449
32.338122,6.92820323,6.67308648,0.505090831,6.67294666,6.67298221,6.67284239
32.348613,7.34846923,6.67296483,0.821890744,6.67282487,6.67286033,6.67272036
32.359105,6.55743852,6.67283326,-0.339698012,6.67269315,6.67272852,6.6725884
32.369596,7.21110255,6.67269184,0.733764755,6.67255158,6.67258685,6.67244659
32.380088,6.244998,6.67254056,-0.65386739,6.67240016,6.67243533,6.67229493
32.39058,6.70820393,6.67237949,0.189273453,6.67223894,6.67227402,6.67213347
32.401071,7.41619849,6.67220868,0.862548436,6.67206799,6.67210296,6.67196226
32.411563,6.63324958,6.67202814,-0.196922717,6.67188729,6.67192217,6.67178132
32.422054,6.08276253,6.67183793,-0.767512474,6.67169694,6.67173171,6.67159072
32.432546,7.07106781,6.67163806,0.632004553,6.67149692,6.67153159,6.67139045
32.443038,6.55743852,6.67142858,-0.337624131,6.67128729,6.67132186,6.67118057
32.453529,6.55743852,6.67120955,-0.337299608,6.67106811,6.67110258,6.67096114
32.464021,6.08276253,6.67098097,-0.766954,6.67083938,6.67087374,6.67073215
32.474512,6.70820393,6.67074291,0.193548491,6.67060118,6.67063543,6.67049369
32.485004,6.78232998,6.67049538,0.334416813,6.67035349,6.67038764,6.67024575
32.495496,7,6.67023842,0.57424871,6.67009638,6.67013042,6.66998838
32.505987,5.83095189,6.6699721,-0.915980461,6.66982991,6.66986384,6.66972165
32.516479,6.63324958,6.6696964,-0.190910511,6.66955406,6.66958788,6.66944554
32.52697,6.8556546,6.66941142,0.431559008,6.66926893,6.66930264,6.66916014
32.537462,6.55743852,6.66911714,-0.334183502,6.66897449,6.66900809,6.66886544
32.547954,6.40312424,6.66881361,-0.51545065,6.66867081,6.66870429,6.66856149
32.558445,6.70820393,6.66850091,0.19925618,6.66835795,6.66839132,6.66824836
32.568937,7.34846923,6.668179,0.82479708,6.6680359,6.66806915,6.66792603
32.579428,6.70820393,6.667848,0.200887863,6.66770474,6.66773787,6.6675946
32.58992,6.8556546,6.66750786,0.433758847,6.66736444,6.66739746,6.66725404
32.600412,7.34846923,6.66715866,0.825415389,6.66701509,6.66704798,6.6669044
32.610903,6.4807407,6.66680047,-0.431346464,6.66665674,6.66668951,6.66654578
32.621395,7,6.66643325,0.577552379,6.66628936,6.66632201,6.66617812
32.631886,6.70820393,6.66605711,0.205296923,6.66591306,6.66594558,6.66580154
32.642378,6.70820393,6.665672,0.206232707,6.6655278,6.6655602,6.66541599
32.65287,7.07106781,6.66527801,0.637016327,6.66513365,6.66516592,6.66502156
32.663361,6.4807407,6.6648752,-0.429108967,6.66473069,6.66476283,6.66461831
32.673853,7,6.66446354,0.579255092,6.66431886,6.66435087,6.66420619
32.684344,7.34846923,6.66404313,0.82730049,6.66389829,6.66393017,6.66378533
32.694836,6.32455532,6.66361393,-0.58228739,6.66346893,6.66350067,6.66335568
32.705328,6.40312424,6.66317601,-0.509952712,6.66303085,6.66306246,6.6629173
32.715819,6.40312424,6.66272945,-0.509514679,6.66258413,6.6626156,6.66247028
32.726311,6.63324958,6.66227419,-0.170366114,6.66212872,6.66216005,6.66201457
32.736802,6.8556546,6.66181037,0.440277447,6.66166473,6.66169593,6.66155028
32.747294,7.41619849,6.66133792,0.868827121,6.66119212,6.66122317,6.66107737
32.757786,6.63324958,6.66085692,-0.166154572,6.66071096,6.66074187,6.6605959
32.768277,6.32455532,6.66036746,-0.579492999,6.66022133,6.6602521,6.66010597
32.778769,6.63324958,6.65986946,-0.163155999,6.65972317,6.65975379,6.6596075
32.78926,6.70820393,6.65936307,0.220999699,6.65921661,6.65924708,6.65910063
32.799752,7.14142843,6.65884821,0.694679942,6.65870159,6.65873191,6.65858529
32.810244,6.55743852,6.65832496,-0.317626257,6.65817818,6.65820835,6.65806157
32.820735,5.83095189,6.65779342,-0.909308268,6.65764647,6.65767649,6.65752954
32.831227,7.07106781,6.65725351,0.643283996,6.6571064,6.65713626,6.65698915
32.841718,7.14142843,6.65670537,0.696220553,6.65655809,6.6565878,6.65644051
32.85221,6,6.65614892,-0.810030199,6.65600148,6.65603103,6.65588358
32.862702,6.4807407,6.65558426,-0.418142989,6.65543664,6.65546603,6.65531842
32.873193,6.55743852,6.65501146,-0.312366665,6.65486368,6.6548929,6.65474512
32.883685,6.40312424,6.65443045,-0.501304509,6.6542825,6.65431156,6.65416361
32.894176,6.55743852,6.65384137,-0.310488078,6.65369325,6.65372215,6.65357403
32.904668,7.34846923,6.65324415,0.833801584,6.65309586,6.65312459,6.6529763
32.91516,6,6.65263886,-0.807860669,6.6524904,6.65251896,6.6523705
32.925651,6.32455532,6.65202561,-0.572250196,6.65187698,6.65190536,6.65175674
32.936143,6.32455532,6.6514043,-0.571707072,6.6512555,6.65128371,6.65113491
32.946634,7,6.65077508,0.590952551,6.65062611,6.65065415,6.65050518
32.957126,6.55743852,6.65013787,-0.304465679,6.64998873,6.65001659,6.64986745
32.967618,6.32455532,6.64949276,-0.570032844,6.64934345,6.64937113,6.64922181
32.978109,6.92820323,6.64883984,0.528548377,6.64869036,6.64871785,6.64856837
32.988601,6.70820393,6.64817902,0.244999821,6.64802936,6.64805667,6.64790701
32.999092,6.8556546,6.64751045,0.456228176,6.64736062,6.64738774,6.64723791
33.009584,5.74456265,6.64683404,-0.949879674,6.64668404,6.64671097,6.64656096
33.020076,5.91607978,6.64614988,-0.854441397,6.64599971,6.64602644,6.64587626
33.030567,7.41619849,6.64545807,0.877918227,6.64530772,6.64533427,6.64518391
33.041059,5.83095189,6.64475851,-0.902112308,6.64460798,6.64463433,6.6444838
33.05155,6.40312424,6.64405136,-0.490843278,6.64390066,6.64392681,6.6437761
33.062042,6.08276253,6.64333652,-0.74871489,6.64318564,6.64321158,6.6430607
33.072534,7.41619849,6.64261408,0.879536475,6.64246302,6.64248876,6.6423377
33.083025,7.68114575,6.64188414,1.01944181,6.64173291,6.64175844,6.64160721
33.093517,7.34846923,6.6411466,0.841024749,6.64099519,6.64102051,6.6408691
33.104008,6.92820323,6.64040162,0.536471441,6.64025003,6.64027515,6.64012356
33.1145,6.78232998,6.6396491,0.37773123,6.63949733,6.63952223,6.63937046
33.124992,5.29150262,6.63888913,-1.16076979,6.63873718,6.63876187,6.63860992
33.135483,6.40312424,6.63812182,-0.484765492,6.63796969,6.63799415,6.63784202
33.145975,6.55743852,6.63734705,-0.282680956,6.63719474,6.63721898,6.63706667
33.156466,7.61577311,6.63656499,0.98954945,6.6364125,6.63643652,6.63628403
33.166958,6.63324958,6.63577553,-0.0502588632,6.63562286,6.63564665,6.63549398
33.17745,7.28010989,6.63497878,0.803200543,6.63482593,6.63484948,6.63469663
33.187941,7.28010989,6.63417483,0.803700854,6.63402179,6.63404511,6.63389208
33.198433,7,6.63336356,0.605505113,6.63321034,6.63323342,6.6330802
33.208924,6.4807407,6.63254516,-0.389620916,6.63239176,6.6324146,6.6322612
33.219416,6.8556546,6.63171949,0.473217822,6.63156591,6.63158851,6.63143492
33.229908,7.07106781,6.63088668,0.66346148,6.63073291,6.63075526,6.63060149
33.240399,6.70820393,6.63004681,0.279565948,6.62989286,6.62991496,6.62976101
33.250891,7,6.62919977,0.60893368,6.62904564,6.62906748,6.62891334
33.261382,6.78232998,6.62834575,0.392408253,6.62819142,6.62821301,6.62805869
33.271874,7.14142843,6.6274846,0.71689876,6.62733009,6.62735142,6.62719691
33.282366,7.14142843,6.62661644,0.717504002,6.62646174,6.62648281,6.62632811
33.292857,6.32455532,6.62574137,-0.548804204,6.62558649,6.62560729,6.6254524
33.303349,7,6.62485927,0.612487327,6.6247042,6.62472473,6.62456966
33.31384,6.70820393,6.62397033,0.290230257,6.62381507,6.62383532,6.62368006
33.324332,7.07106781,6.6230744,0.669323098,6.62291896,6.62293893,6.62278348
33.334824,7.21110255,6.6221716,0.767418366,6.62201597,6.62203566,6.62188002
33.345315,7.54983444,6.62126204,0.963624611,6.62110622,6.62112562,6.6209698
33.355807,6.244998,6.62034558,-0.612656172,6.62018957,6.62020868,6.62005267
33.366298,7.28010989,6.61942242,0.812826837,6.61926622,6.61928504,6.61912883
33.37679,7.41619849,6.61849241,0.893143928,6.61833601,6.61835454,6.61819814
33.387282,4.89897949,6.61755567,-1.31094477,6.61739908,6.6174173,6.61726071
33.397773,8.18535277,6.6166123,1.2524937,6.61645552,6.61647344,6.61631665
33.408265,6.4807407,6.61566217,-0.367316583,6.6155052,6.6155228,6.61536583
33.418756,7.21110255,6.61470548,0.772267489,6.61454831,6.6145656,6.61440843
33.429248,6.40312424,6.61374207,-0.458931182,6.61358471,6.61360168,6.61344432
33.43974,6.70820393,6.61277206,0.308920498,6.61261451,6.61263115,6.61247359
33.450231,6.55743852,6.61179557,-0.233145977,6.61163782,6.61165414,6.61149639
33.460723,6.92820323,6.61081245,0.563374462,6.6106545,6.61067049,6.61051254
33.471214,6.40312424,6.6098229,-0.454641242,6.60966476,6.6096804,6.60952226
33.481706,7.14142843,6.60882676,0.729795634,6.60866843,6.60868373,6.60852539
33.492198,6.164414,6.60782416,-0.6658905,6.60766563,6.60768059,6.60752205
33.502689,6.32455532,6.60681522,-0.531281374,6.60665649,6.60667109,6.60651236
33.513181,7.21110255,6.60579977,0.778012072,6.60564084,6.60565509,6.60549616
33.523672,7.07106781,6.60477803,0.682854146,6.6046189,6.60463279,6.60447366
33.534164,7.81024968,6.60374983,1.09840787,6.60359051,6.60360402,6.6034447
33.544656,7.28010989,6.6027153,0.823039847,6.60255578,6.60256892,6.60240939
33.555147,6.63324958,6.60167456,0.177693613,6.60151484,6.6015276,6.60136788
33.565639,6.4807407,6.60062744,-0.346246649,6.60046752,6.6004799,6.60031997
33.57613,7.07106781,6.59957417,0.68665395,6.59941404,6.59942603,6.5992659
33.586622,6.70820393,6.59851456,0.33119386,6.59835423,6.59836583,6.5982055
33.597114,6.70820393,6.59744875,0.332799014,6.59728822,6.59729941,6.59713888
33.607605,6.32455532,6.59637686,-0.521365075,6.59621613,6.59622692,6.59606618
33.618097,7.14142843,6.59529872,0.739005892,6.59513779,6.59514816,6.59498722
33.628588,6.4807407,6.59421455,-0.336858805,6.59405342,6.59406337,6.59390223
33.63908,6.55743852,6.59312418,-0.188906476,6.59296284,6.59297237,6.59281102
33.649572,6.70820393,6.59202773,0.340846301,6.59186619,6.59187528,6.59171373
33.660063,7.07106781,6.59092534,0.692923139,6.59076359,6.59077224,6.59061049
33.670555,7,6.58981681,0.640455456,6.58965485,6.58966306,6.5895011
33.681046,6.92820323,6.58870239,0.58266701,6.58854022,6.58854798,6.58838581
33.691538,6.8556546,6.58758188,0.517757395,6.58741951,6.58742681,6.58726443
33.70203,6.164414,6.58645542,-0.649647151,6.58629285,6.58629967,6.58613709
33.712521,6.70820393,6.58532315,0.350543556,6.58516036,6.58516672,6.58500393
33.723013,7,6.58418486,0.644837295,6.58402187,6.58402774,6.58386474
33.733504,6.164414,6.58304081,-0.64701376,6.58287761,6.58288299,6.58271978
33.743996,6.78232998,6.58189079,0.447704355,6.58172738,6.58173227,6.58156885
33.754488,6.08276253,6.58073495,-0.705671609,6.58057133,6.58057571,6.58041208
33.764979,6.78232998,6.57957341,0.450284986,6.57940958,6.57941345,6.57924961
33.775471,6.78232998,6.57840599,0.451579444,6.57824195,6.57824529,6.57808125
33.785962,7.81024968,6.57723292,1.11041288,6.57706867,6.57707148,6.57690722
33.796454,6.8556546,6.57605401,0.528772721,6.57588954,6.57589182,6.57572735
33.806946,6.08276253,6.57486939,-0.701503288,6.57470471,6.57470644,6.57454176
33.817437,5.83095189,6.57367921,-0.861816287,6.57351432,6.57351549,6.57335059
33.827929,7.21110255,6.57248325,0.799136597,6.57231815,6.57231875,6.57215364
33.83842,5.83095189,6.57128177,-0.860424244,6.57111645,6.57111649,6.57095116
33.848912,7.14142843,6.57007457,0.755879524,6.56990904,6.56990849,6.56974295
33.859404,6.164414,6.56886179,-0.635962092,6.56869604,6.56869489,6.56852914
33.869895,6.32455532,6.56764355,-0.493039788,6.56747759,6.56747584,6.56730987
33.880387,6.4807407,6.56641966,-0.292709695,6.56625348,6.56625112,6.56608493
33.890878,6.32455532,6.56519038,-0.490545673,6.56502398,6.56502099,6.56485459
33.90137,6.92820323,6.56395548,0.603529409,6.56378887,6.56378524,6.56361862
33.911862,6.40312424,6.56271512,-0.399488276,6.56254828,6.56254402,6.56237718
33.922353,6.78232998,6.56146943,0.469958031,6.56130238,6.56129745,6.5611304
33.932845,6.63324958,6.5602182,0.270243182,6.56005093,6.56004534,6.55987806
33.943336,7.07106781,6.5589617,0.715615899,6.5587942,6.55878793,6.55862044
33.953828,8.1240384,6.5576997,1.25153454,6.55753198,6.55752502,6.5573573
33.96432,6.70820393,6.55643234,0.389578731,6.55626441,6.55625674,6.5560888
33.974811,6.40312424,6.55515979,-0.389917361,6.55499163,6.55498325,6.55481509
33.985303,6.8556546,6.5538818,0.549338511,6.55371342,6.55370431,6.55353593
33.995794,7.07106781,6.55259866,0.720048023,6.55243005,6.5524202,6.5522516
34.006286,6.4807407,6.55131013,-0.265649076,6.55114131,6.5511307,6.55096187
34.016778,6.8556546,6.55001637,0.552845578,6.54984732,6.54983594,6.54966689
34.027269,6.40312424,6.54871752,-0.381566872,6.54854824,6.54853609,6.54836681
34.037761,8,6.54741335,1.20523303,6.54724385,6.5472309,6.54706139
34.048252,6.78232998,6.54610414,0.486030703,6.54593442,6.54592065,6.54575092
34.058744,6.08276253,6.54478966,-0.679725775,6.54461971,6.54460512,6.54443517
34.069236,7,6.54347006,0.675669996,6.54329988,6.54328445,6.54311427
34.079727,7.07106781,6.54214548,0.727270467,6.54197508,6.54195879,6.54178838
34.090219,7.61577311,6.5408157,1.03680153,6.54064507,6.54062791,6.54045727
34.10071,7,6.53948099,0.678615509,6.53931013,6.53929208,6.53912122
34.111202,7,6.53814112,0.679601999,6.53797003,6.53795108,6.53777998
34.121694,5.91607978,6.53679624,-0.787855609,6.53662493,6.53660505,6.53643372
34.132185,5.74456265,6.5354465,-0.889316512,6.53527496,6.53525414,6.53508258
34.142677,6.70820393,6.53409167,0.417267614,6.53391989,6.53389811,6.53372633
34.153168,6.63324958,6.53273202,0.317045041,6.53256001,6.53253726,6.53236524
34.16366,6.244998,6.53136732,-0.535134866,6.53119508,6.53117133,6.53099908
34.174152,7.14142843,6.52999772,0.781940346,6.52982525,6.52980048,6.529628
34.184643,7.34846923,6.52862338,0.905453395,6.52845067,6.52842487,6.52825215
34.195135,5.91607978,6.52724404,-0.781769954,6.5270711,6.52704424,6.5268713
34.205626,6.70820393,6.52586001,0.427017474,6.52568683,6.5256589,6.52548571
34.216118,6.70820393,6.52447103,0.428640761,6.52429762,6.52426858,6.52409517
34.22661,6.78232998,6.52307726,0.509168658,6.52290362,6.52287346,6.5226998
34.237101,6.40312424,6.52167886,-0.344317614,6.52150497,6.52147367,6.52129978
34.247593,6.4807407,6.52027557,-0.198833783,6.52010145,6.52006898,6.51989486
34.258084,6.4807407,6.5188677,-0.195261357,6.51869334,6.51865968,6.51848532
34.268576,7.07106781,6.51745498,0.744051631,6.51728039,6.51724551,6.51707091
34.279068,6.164414,6.51603759,-0.59297857,6.51586276,6.51582663,6.5156518
34.289559,5.91607978,6.51461567,-0.773651009,6.5144406,6.51440321,6.51422813
34.300051,6.63324958,6.51318897,0.346497631,6.51301366,6.51297498,6.51279966
34.310542,7.14142843,6.5117578,0.793517884,6.51158225,6.51154224,6.51136668
34.321034,7.68114575,6.51032189,1.08204614,6.5101461,6.51010474,6.50992894
34.331526,6.70820393,6.50888141,0.446455514,6.50870537,6.50866264,6.5084866
34.342017,6.08276253,6.50743651,-0.651670145,6.50726023,6.50721609,6.50703981
34.352509,6.70820393,6.50598694,0.449685437,6.50581042,6.50576484,6.50558831
34.363,6.4807407,6.504533,-0.154247538,6.50435624,6.50430918,6.50413242
34.373492,6.92820323,6.50307443,0.652019015,6.50289743,6.50284887,6.50267186
34.383984,7.28010989,6.5016114,0.882325615,6.50143415,6.50138405,6.5012068
34.394475,7.07106781,6.50014406,0.755594968,6.49996656,6.49991489,6.49973739
34.404967,6.78232998,6.49867215,0.532595376,6.49849441,6.49844113,6.49826338
34.415458,6.4807407,6.49719598,-0.128278132,6.49701799,6.49696307,6.49678507
34.42595,6.8556546,6.49571528,0.599949429,6.49553705,6.49548044,6.4953022
34.436442,6.92820323,6.49423023,0.658766275,6.49405174,6.49399342,6.49381493
34.446933,6.78232998,6.49274097,0.538134755,6.49256224,6.49250215,6.49232341
34.457425,6.8556546,6.49124725,0.603661618,6.49106827,6.49100638,6.4908274
34.467916,6.70820393,6.48974938,0.467391223,6.48957015,6.48950641,6.48932718
34.478408,6.4807407,6.48824708,-0.0866393926,6.48806761,6.48800198,6.48782249
34.4889,6.164414,6.48674053,-0.567738081,6.4865608,6.48649324,6.48631351
34.499391,6.8556546,6.48522989,0.608625263,6.48504991,6.48498036,6.48480038
34.509883,5.91607978,6.48371489,-0.753415626,6.48353466,6.48346308,6.48328284
34.520374,6.08276253,6.48219584,-0.632007365,6.48201536,6.4819417,6.48176121
34.530866,6.55743852,6.48067247,0.277066871,6.48049174,6.48041595,6.48023521
34.541358,6.55743852,6.47914496,0.279809878,6.47896397,6.47888599,6.478705
34.551849,6.4807407,6.47761346,0.0559217604,6.47743221,6.477352,6.47717075
34.562341,6.32455532,6.4760777,-0.389258756,6.4758962,6.47581369,6.47563218
34.572832,6.32455532,6.474538,-0.387275977,6.47435625,6.47427138,6.47408962
34.583324,6.8556546,6.47299409,0.618595593,6.47281208,6.4727248,6.47254278
34.593816,6.70820393,6.47144614,0.486577636,6.47126387,6.47117411,6.47099183
34.604307,7.61577311,6.46989431,1.07045729,6.46971178,6.46961947,6.46943694
34.614799,6.40312424,6.46833832,-0.255370488,6.46815554,6.46806062,6.46787783
34.62529,7.28010989,6.46677851,0.901848868,6.46659547,6.46649786,6.46631481
34.635782,6.32455532,6.46521459,-0.375045684,6.46503128,6.46493093,6.46474762
34.646274,6.4807407,6.46364672,0.130743929,6.46346316,6.46335998,6.46317641
34.656765,5.91607978,6.46207509,-0.738914955,6.46189127,6.46178518,6.46160135
34.667257,6.8556546,6.46049942,0.628613698,6.46031533,6.46020626,6.46002216
34.677748,6.32455532,6.45892002,-0.36655791,6.45873567,6.45862353,6.45843917
34.68824,6.40312424,6.45733662,-0.232835529,6.45715201,6.45703671,6.45685209
34.698732,5.74456265,6.45574939,-0.843318886,6.45556452,6.45544597,6.45526108
34.709223,6.63324958,6.4541585,0.423191539,6.45397337,6.45385147,6.45366633
34.719715,6.78232998,6.45256368,0.574252825,6.45237827,6.45225295,6.45206754
34.730206,6.63324958,6.45096524,0.426947704,6.45077957,6.45065071,6.45046503
34.740698,6.63324958,6.44936291,0.428820095,6.44917697,6.44904447,6.44885853
34.75119,6.4807407,6.44775686,0.181614544,6.44757066,6.4474344,6.44724819
34.761681,7.34846923,6.44614726,0.949906294,6.44596079,6.44582068,6.4456342
34.772173,6.78232998,6.44453384,0.581202327,6.4443471,6.444203,6.44401626
34.782664,6.4807407,6.44291692,0.194483367,6.44272991,6.44258171,6.4423947
34.793156,6.164414,6.44129622,-0.526195984,6.44110894,6.44095651,6.44076923
34.803648,6.32455532,6.43967191,-0.339288356,6.43948437,6.43932757,6.43914002
34.814139,6.244998,6.43804418,-0.439370205,6.43785636,6.43769507,6.43750724
34.824631,6.32455532,6.43641273,-0.334450907,6.43622464,6.43605871,6.43587061
34.835122,6.78232998,6.43477791,0.589535476,6.43458955,6.43441882,6.43423045
34.845614,5.56776436,6.43313942,-0.930255371,6.43295079,6.4327751,6.43258646
34.856106,6.78232998,6.43149744,0.592311185,6.43130854,6.43112774,6.43093883
34.866597,6.08276253,6.42985217,-0.589143138,6.42966299,6.42947691,6.42928772
34.877089,6.55743852,6.4282033,0.35949301,6.42801385,6.4278223,6.42763284
34.88758,5.65685425,6.42655118,-0.877323733,6.42636145,6.42616425,6.42597452
34.898072,6.92820323,6.42489552,0.709441828,6.42470552,6.42450247,6.42431246
34.908564,6.92820323,6.42323651,0.710610105,6.42304623,6.42283713,6.42264684
34.919055,7.14142843,6.42157432,0.848442164,6.42138377,6.42116841,6.42097784
34.929547,7.48331477,6.41990868,1.03121583,6.41971784,6.419496,6.41930515
34.940038,6.4807407,6.41823992,0.250001557,6.41804881,6.41782024,6.41762911
34.95053,6.92820323,6.41656776,0.715286987,6.41637636,6.41614082,6.41594942
34.961022,6.8556546,6.41489238,0.663899256,6.41470071,6.41445794,6.41426625
34.971513,6.78232998,6.41321398,0.607549181,6.41302202,6.41277176,6.41257979
34.982005,6.40312424,6.41153226,-0.0916952586,6.41134002,6.41108198,6.41088973
34.992496,6.4807407,6.40984758,0.26625762,6.40965506,6.40938893,6.4091964
35.002988,6.70820393,6.40815965,0.547762982,6.40796685,6.40769232,6.40749951
35.01348,6.8556546,6.40646866,0.670213354,6.40627558,6.40599232,6.40579923
35.023971,6.4807407,6.40477481,0.275619097,6.40458144,6.40428912,6.40409573
35.034463,6.164414,6.40307782,-0.488532305,6.40288416,6.40258239,6.40238872
35.044954,5.91607978,6.40137803,-0.696633511,6.40118409,6.40087249,6.40067854
35.055446,6.63324958,6.39967517,0.483295361,6.39948095,6.39915911,6.39896486
35.065938,7.34846923,6.39796945,0.974935784,6.39777493,6.39744242,6.39724789
35.076429,7.54983444,6.39626105,1.07404534,6.39606625,6.3957226,6.39552779
35.086921,7.07106781,6.3945497,0.82250721,6.39435461,6.39399936,6.39380425
35.097412,6.63324958,6.39283577,0.490320106,6.3926404,6.39227302,6.39207762
35.107904,6.4807407,6.39111899,0.299368852,6.39092332,6.39054328,6.39034759
35.118396,6.55743852,6.38939956,0.409925565,6.3892036,6.38881032,6.38861434
35.128887,6.78232998,6.38767769,0.628213572,6.38748144,6.38707432,6.38687805
35.139379,6.92820323,6.38595312,0.736376336,6.38575658,6.38533496,6.3851384
35.14987,5.91607978,6.38422623,-0.684212285,6.3840294,6.3835926,6.38339575
35.160362,7.07106781,6.38249676,0.829801817,6.38229963,6.38184692,6.38164977
35.170854,6.40312424,6.38076492,0.149530325,6.3805675,6.3800981,6.37990065
35.181345,6.8556546,6.37903096,0.690379349,6.37883324,6.37834632,6.37814858
35.191837,6.63324958,6.37729461,0.505919929,6.37709659,6.37659127,6.37639323
35.202328,6.164414,6.37555628,-0.459502204,6.37535797,6.37483329,6.37463496
35.21282,6.63324958,6.37381572,0.5093465,6.37361712,6.37307207,6.37287344
35.223312,6.244998,6.37207319,-0.35647608,6.37187429,6.37130779,6.37110887
35.233803,6,6.37032895,-0.608546589,6.37012975,6.36954064,6.36934141
35.244295,6.78232998,6.36858276,0.643231857,6.36838326,6.36777029,6.36757077
35.254786,6.164414,6.36683507,-0.449912286,6.36663527,6.3659971,6.36579728
35.265278,7.34846923,6.36508566,0.991656983,6.36488556,6.36422075,6.36402062
35.27577,6.63324958,6.36333482,0.519533216,6.36313442,6.36244141,6.36224098
35.286261,6,6.36158286,-0.601317603,6.36138216,6.36065929,6.36045855
35.296753,6.55743852,6.3598296,0.444532257,6.35962859,6.35887404,6.35867301
35.307244,6.55743852,6.35807553,0.446500835,6.35787422,6.35708603,6.35688469
35.317736,6.63324958,6.3563205,0.526240517,6.35611889,6.35529494,6.35509329
35.328228,5.38516481,6.35456487,-0.984581163,6.35436296,6.35350094,6.35329899
35.338719,6,6.35280904,-0.593977302,6.35260681,6.35170423,6.35150198
35.349211,7.48331477,6.35105289,1.06407795,6.35085036,6.34990448,6.34970192
35.359702,6.40312424,6.34929703,0.232006909,6.3490942,6.34810205,6.34789918
35.370194,6.40312424,6.34754142,0.235760079,6.34733828,6.3462966,6.34609342
35.380686,5.83095189,6.34578655,-0.717519797,6.34558311,6.34448833,6.34428484
35.391177,6,6.34403296,-0.586543226,6.3438292,6.34267743,6.34247363
35.401669,6.63324958,6.3422807,0.539415313,6.34207663,6.34086356,6.34065945
35.41216,6.244998,6.34053058,-0.30908345,6.3403262,6.33904708,6.33884266
35.422652,5.65685425,6.33878277,-0.825789632,6.33857808,6.33722767,6.33702293
35.433144,6.164414,6.33703801,-0.415480453,6.33683301,6.33540551,6.33520046
35.443635,6.70820393,6.33529713,0.610660952,6.33509183,6.33358079,6.33337543
35.454127,6.244998,6.33356055,-0.297594615,6.33335493,6.33175318,6.3315475
35.464618,6.40312424,6.33182945,0.267010838,6.33162352,6.32992305,6.32971705
35.47511,6.63324958,6.33010447,0.550586152,6.32989822,6.32809004,6.32788373
35.485602,7.07106781,6.3283869,0.861789365,6.32818034,6.32625437,6.32604774
35.496093,6.55743852,6.32667821,0.480375184,6.32647133,6.32441622,6.32420927
35.506585,6.78232998,6.32497956,0.676276881,6.32477238,6.32257524,6.32236798
35.517076,6.164414,6.32329305,-0.398596347,6.32308555,6.32073182,6.32052423
35.527568,5.91607978,6.32162041,-0.636820715,6.32141259,6.3188856,6.31867769
35.53806,6.08276253,6.31996422,-0.487033564,6.31975609,6.31703679,6.31682856
35.548551,6.244998,6.31832756,-0.27079432,6.31811912,6.31518556,6.31497701
35.559043,6.92820323,6.31671364,0.781977998,6.31650488,6.3133316,6.31312272
35.569534,6.92820323,6.31512717,0.782991735,6.3149181,6.31147525,6.31126605
35.580026,6.40312424,6.3135736,0.299250123,6.31336421,6.30961619,6.30940667
35.590518,5.83095189,6.31206101,-0.693620294,6.3118513,6.3077546,6.30754475
35.601009,7.07106781,6.31060123,0.872047353,6.31039121,6.30589067,6.3056805
35.611501,6.70820393,6.30921232,0.631657826,6.309002,6.30402408,6.30381358
35.621992,5.09901951,6.30792456,-1.09950218,6.30771393,6.30215517,6.30194435
35.632484,6.4807407,6.30678752,0.417076942,6.30657659,6.30028362,6.30007247
35.642976,6.63324958,6.30588344,0.572159196,6.3056722,6.29840962,6.29819814
35.653467,6.244998,6.30534396,-0.245654158,6.30513245,6.29653336,6.29632154
35.663959,7.48331477,6.30537134,1.08533103,6.30515955,6.29465449,6.29444234
35.67445,5.83095189,6.30626052,-0.689426301,6.3060485,6.29277339,6.29256091
35.684942,6.70820393,6.30841494,0.632288697,6.30820272,6.29088971,6.2906769
35.695434,7.07106781,6.31234534,0.871046767,6.31213299,6.28900365,6.28879051
35.705925,6.63324958,6.31863938,0.56090124,6.31842697,6.2871154,6.28690192
35.716417,6.244998,6.32789444,-0.287917416,6.32768207,6.28522462,6.28501081
35.726908,6.92820323,6.34060112,0.76655209,6.34038891,6.28333167,6.28311752
35.7374,5.91607978,6.35700478,-0.664021833,6.35679284,6.28143622,6.28122173
35.747892,5.83095189,6.37708355,-0.739007211,6.37687201,6.27953845,6.27932363
35.758383,6.92820323,6.39985312,0.726876956,6.39964207,6.27763857,6.27742341
35.768875,5.91607978,6.42412683,-0.712774191,6.42391631,6.27573622,6.27552072
35.779366,5.38516481,6.44790368,-1.03089227,6.44769367,6.27383178,6.27361593
35.789858,7.28010989,6.46857862,0.900850303,6.46836901,6.27192489,6.27170871
35.80035,6.40312424,6.48318219,-0.282945139,6.48297278,6.27001577,6.26979924
35.810841,6.55743852,6.48903476,0.261541134,6.48882528,6.26810459,6.26788773
35.821333,6.32455532,6.48470884,-0.400191854,6.48449895,6.26619102,6.26597381
35.831824,6.164414,6.47068213,-0.553414969,6.47047152,6.26427542,6.26405787
35.842316,7,6.44909029,0.74223292,6.4488787,6.26235746,6.26213956
35.852808,6.55743852,6.42283646,0.366881538,6.42262373,6.26043731,6.26021906
35.863299,7,6.39475889,0.777972433,6.39454496,6.25851519,6.25829659
35.873791,6.78232998,6.36718421,0.644318068,6.36696907,6.25659073,6.25637179
35.884282,5.83095189,6.34180322,-0.714738643,6.34158695,6.25466432,6.25444503
35.894774,6.32455532,6.31964208,0.0700945121,6.31942477,6.2527356,6.25251596
35.905266,6.78232998,6.30114074,0.693678052,6.30092251,6.25080477,6.25058478
35.915757,7,6.28625744,0.844832858,6.28603841,6.24887203,6.24865169
35.926249,6.164414,6.27461358,-0.331963222,6.27439386,6.24693703,6.24671633
35.93674,6.78232998,6.26565715,0.718799577,6.26543683,6.24500013,6.24477909
35.947232,6.164414,6.25878455,-0.307197889,6.2585637,6.243061,6.2428396
35.957724,6.164414,6.25343996,-0.298372178,6.25321864,6.24111982,6.24089807
35.968215,6.55743852,6.24916203,0.555226526,6.24894027,6.2391768,6.23895469
35.978707,6.55743852,6.2455983,0.558426565,6.24537613,6.23723157,6.2370091
35.989198,7.07106781,6.2424999,0.910257059,6.24227733,6.23528453,6.2350617
35.99969,5.65685425,6.23969918,-0.763442815,6.23947622,6.2333353,6.23311212
36.010182,6.08276253,6.2370899,-0.392845228,6.23686656,6.2313841,6.23116056
36.020673,7.07106781,6.23460671,0.914582474,6.23438299,6.22943112,6.22920722
36.031165,6.70820393,6.23220954,0.689923472,6.23198544,6.227476,6.22725173
36.041656,7.48331477,6.2298749,1.11957129,6.22965043,6.22551912,6.2252945
36.052148,6.08276253,6.22758749,-0.380558751,6.22736265,6.22356014,6.22333514
36.06264,6,6.22533781,-0.474697596,6.22511259,6.22159923,6.22137388
36.073131,6.70820393,6.22311927,0.696480192,6.22289368,6.21963661,6.21941089
36.083623,6.78232998,6.22092643,0.74926868,6.22070046,6.21767192,6.21744583
36.094114,6.164414,6.21875574,-0.233113145,6.2185294,6.21570553,6.21547908
36.104606,6.244998,6.2166036,0.168506362,6.21637689,6.2137371,6.21351028
36.115098,7.54983444,6.21446757,1.15558075,6.21424049,6.21176681,6.21153962
36.125589,5.56776436,6.21234563,-0.802858185,6.21211816,6.20979487,6.20956731
36.136081,5.29150262,6.21023547,-0.958505528,6.21000763,6.20782092,6.20759299
36.146572,6.63324958,6.2081359,0.652007428,6.20790768,6.20584534,6.20561704
36.157064,6.8556546,6.20604512,0.805983548,6.20581653,6.20386777,6.2036391
36.167556,5.83095189,6.20396216,-0.610745662,6.20373319,6.20188841,6.20165937
36.178047,7.48331477,6.20188618,1.13200203,6.20165683,6.19990747,6.19967805
36.188539,6.164414,6.19981589,-0.188153898,6.19958617,6.19792457,6.19769477
36.19903,7,6.19775092,0.895683584,6.19752082,6.1959401,6.19570993
36.209522,5.83095189,6.19569018,-0.603935667,6.1954597,6.19395371,6.19372316
36.220014,7,6.19363329,0.897979235,6.19340243,6.19196559,6.19173467
36.230505,5.91607978,6.19157992,-0.524881068,6.19134868,6.18997594,6.18974464
36.240997,5.74456265,6.18952921,-0.667058141,6.18929759,6.1879844,6.18775272
36.251488,6.40312424,6.18748115,0.464373866,6.18724914,6.18599136,6.1857593
36.26198,6.55743852,6.18543499,0.609920924,6.1852026,6.18399645,6.183764
36.272472,6.63324958,6.18339061,0.67071527,6.18315783,6.18199987,6.18176704
36.282963,6.32455532,6.18134791,0.378427549,6.18111475,6.18000183,6.17976862
36.293455,5.83095189,6.17930626,-0.590215523,6.17907271,6.17800195,6.17776835
36.303946,5.47722558,6.17726581,-0.836684073,6.17703188,6.17600063,6.17576665
36.314438,6.78232998,6.17522599,0.779168786,6.17499167,6.1739975,6.17376314
36.32493,6.40312424,6.17318679,0.479517932,6.17295208,6.17199276,6.17175801
36.335421,6.40312424,6.17114826,0.481638848,6.17091316,6.16998662,6.16975148
36.345913,6.164414,6.16910985,-0.0685262758,6.16887436,6.16797871,6.16774317
36.356404,5.47722558,6.16707184,-0.830569841,6.16683596,6.16596941,6.16573349
36.366896,6.08276253,6.1650337,-0.28682951,6.16479743,6.16395836,6.16372205
36.377388,6.63324958,6.16299553,0.685750722,6.16275886,6.16194576,6.16170905
36.387879,5.38516481,6.16095742,-0.880790904,6.16072036,6.15993181,6.15969472
36.398371,6.32455532,6.15891891,0.406984531,6.15868146,6.15791615,6.15767866
36.408862,5.38516481,6.1568803,-0.878473388,6.15664245,6.15589917,6.15566128
36.419354,6.32455532,6.15484113,0.411963819,6.15460288,6.15388049,6.1536422
36.429846,5.74456265,6.15280154,-0.638935748,6.15256289,6.15186032,6.15162164
36.440337,6.164414,6.15076165,0.116843288,6.1505226,6.14983886,6.14959978
36.450829,6.70820393,6.14872103,0.747985897,6.14848159,6.14781574,6.14757626
36.46132,6.32455532,6.14668002,0.421752651,6.14644018,6.14579136,6.14555148
36.471812,5.74456265,6.14463819,-0.632515252,6.14439794,6.14376534,6.14352506
36.482304,6.8556546,6.14259569,0.844428154,6.14235504,6.14173789,6.14149721
36.492795,7.14142843,6.14055269,1.00043777,6.14031164,6.13970921,6.13946812
36.503287,6.08276253,6.13850876,-0.236106392,6.1382673,6.13767892,6.13743743
36.513778,5.91607978,6.13646426,-0.469451253,6.1362224,6.13564742,6.13540553
36.52427,6.08276253,6.13441878,-0.22728012,6.13417651,6.13361435,6.13337204
36.534762,6.55743852,6.1323725,0.65197088,6.13212982,6.13157989,6.13133718
36.545253,6.70820393,6.13032557,0.76018311,6.13008248,6.12954427,6.12930115
36.555745,6,6.12827761,-0.358158632,6.12803411,6.12750709,6.12726356
36.566236,6,6.12622897,-0.355287165,6.12598506,6.12546876,6.12522482
36.576728,6.244998,6.12417926,0.347589903,6.12393494,6.12342891,6.12318456
36.58722,5.47722558,6.12212865,-0.803058577,6.12188392,6.12138773,6.12114297
36.597711,6.40312424,6.12007734,0.532021519,6.11983219,6.11934544,6.11910026
36.608203,6.92820323,6.11802492,0.900099057,6.11777935,6.11730166,6.11705606
36.618694,6,6.11597177,-0.340546281,6.11572579,6.11525677,6.11501076
36.629186,5.47722558,6.11391749,-0.797929771,6.1136711,6.11321042,6.11296399
36.639678,6.40312424,6.11186228,0.539686905,6.11161547,6.1111628,6.11091595
36.650169,6.40312424,6.10980632,0.541588325,6.10955909,6.10911411,6.10886685
36.660661,6.78232998,6.10774922,0.821328655,6.10750157,6.10706399,6.10681631
36.671152,5.47722558,6.10569137,-0.792758346,6.10544329,6.10501282,6.10476472
36.681644,6.4807407,6.10363237,0.614091468,6.10338387,6.10296024,6.10271171
36.692136,6.244998,6.10157241,0.378715708,6.10132349,6.10090644,6.10065749
36.702627,6.40312424,6.09951169,0.551010474,6.09926235,6.09885164,6.09860226
36.713119,7.28010989,6.09744983,1.08750175,6.09720005,6.09679545,6.09654565
36.72361,6.70820393,6.0953872,0.78282612,6.095137,6.09473827,6.09448804
36.734102,6.40312424,6.09332342,0.556597538,6.09307279,6.09267972,6.09242907
36.744594,6.164414,6.09125868,0.270472401,6.09100763,6.09062002,6.09036893
36.755085,6.55743852,6.08919319,0.68428454,6.08894171,6.08855936,6.08830785
36.765577,6.244998,6.08712655,0.397330396,6.08687464,6.08649736,6.08624542
36.776068,5.56776436,6.08505917,-0.719232092,6.08480682,6.08443444,6.08418206
36.78656,6.08276253,6.08299063,-0.0151031014,6.08273785,6.08237019,6.08211739
36.797052,5.38516481,6.08092116,-0.834120107,6.08066794,6.08030484,6.0800516
36.807543,6.244998,6.07885095,0.407611399,6.07859729,6.07823859,6.07798492
36.818035,6.4807407,6.0767796,0.635579341,6.07652551,6.07617106,6.07591694
36.828526,6.63324958,6.07470752,0.747356716,6.07445299,6.07410264,6.07384809
36.839018,6.63324958,6.07263432,0.748742455,6.07237935,6.07203296,6.07177797
36.84951,6.244998,6.07056019,0.417657521,6.07030479,6.06996223,6.0697068
36.860001,6.40312424,6.06848535,0.578479805,6.06822951,6.06789064,6.06763477
36.870493,6.164414,6.0664094,0.313056866,6.06615311,6.06581783,6.06556151
36.880984,6.32455532,6.06433274,0.510120159,6.06407601,6.06374418,6.06348743
36.891476,6.32455532,6.06225499,0.512152645,6.06199781,6.06166932,6.06141212
36.901968,6,6.06017634,-0.245308661,6.05991872,6.05959346,6.05933581
36.912459,6.55743852,6.058097,0.706641015,6.05783893,6.0575168,6.0572587
36.922951,5.74456265,6.05601658,-0.558080581,6.05575806,6.05543895,6.05518041
36.933442,6.08276253,6.05393549,0.16978529,6.05367652,6.05336033,6.05310134
36.943934,6.32455532,6.05185332,0.522208769,6.05159391,6.05128054,6.0510211
36.954426,6.63324958,6.0497703,0.763858157,6.04951043,6.0491998,6.04893991
36.964917,6.244998,6.04768661,0.444197461,6.04742629,6.04711831,6.04685797
36.975409,6.08276253,6.04560188,0.192770968,6.04534111,6.04503569,6.04477489
36.9859,6.55743852,6.04351651,0.716883542,6.04325528,6.04295234,6.04269109
36.996392,6.8556546,6.0414301,0.90234389,6.04116842,6.04086788,6.04060617
37.006884,6.63324958,6.03934287,0.770653431,6.03908073,6.03878251,6.03852034
37.017375,6.8556546,6.03725501,0.904654402,6.03699241,6.03669644,6.03643381
37.027867,6,6.03516615,-0.187526387,6.03490309,6.03460928,6.0343462
37.038358,5.47722558,6.03307667,-0.745554221,6.03281315,6.03252145,6.03225791
37.04885,6.08276253,6.0309862,0.227544131,6.03072222,6.03043256,6.03016855
37.059342,4.89897949,6.02889494,-1.06297481,6.02863049,6.0283428,6.02807833
37.069833,6.32455532,6.02680309,0.545666778,6.02653818,6.0262524,6.02598747
37.080325,6.55743852,6.02471027,0.729882359,6.02444489,6.02416096,6.02389556
37.090816,6.4807407,6.02261688,0.676848449,6.02235103,6.02206889,6.02180303
37.101308,5.83095189,6.02052253,-0.435397095,6.02025622,6.0199758,6.01970947
37.1118,6.32455532,6.01842742,0.553288259,6.01816064,6.01788191,6.01761511
37.122291,5.65685425,6.01633177,-0.599564446,6.01606453,6.01578741,6.01552014
37.132783,6.164414,6.01423519,0.387529112,6.01396747,6.01369192,6.01342418
37.143274,6,6.01213808,-0.110172942,6.01186988,6.01159586,6.01132764
37.153766,6.164414,6.01004004,0.392904517,6.00977138,6.00949882,6.00923013
37.164258,6.70820393,6.0079413,0.836816967,6.00767215,6.00740102,6.00713185
37.174749,5.65685425,6.00584204,-0.590751889,6.00557243,6.00530266,6.00503302
37.185241,6.92820323,6.0037419,0.961489124,6.0034718,6.00320336,6.00293324
37.195732,5.74456265,6.00164126,-0.507029202,6.00137068,6.00110353,6.00083293
37.206224,7,5.99953974,1.0002301,5.99926868,5.99900277,5.9987317
37.216716,6,5.99743755,0.0506206736,5.99716601,5.9969013,5.99662974
37.227207,6.32455532,5.99533489,0.573777334,5.99506287,5.99479932,5.99452728
37.237699,6,5.99323138,0.0822716313,5.99295888,5.99269645,5.99242392
37.24819,5.91607978,5.99112742,-0.273948234,5.99085443,5.99059309,5.99032007
37.258682,6.55743852,5.98902262,0.753933623,5.98874914,5.98848884,5.98821534
37.269174,5.74456265,5.98691718,-0.492295171,5.98664322,5.98638393,5.98610995
37.279665,6.4807407,5.98481133,0.704222531,5.98453687,5.98427856,5.98400408
37.290157,6,5.98270465,0.131511782,5.98242971,5.98217234,5.98189737
37.300648,6.08276253,5.98059757,0.319632539,5.98032214,5.98006567,5.97979021
37.31114,6.4807407,5.97848969,0.708696697,5.97821376,5.97795817,5.97768222
37.321632,6.164414,5.97638122,0.433627474,5.9761048,5.97585005,5.9755736
37.332123,5.83095189,5.97427236,-0.378576897,5.97399545,5.97374151,5.97346457
37.342615,5.83095189,5.97216273,-0.375780303,5.97188532,5.97163216,5.97135472
37.353106,7.34846923,5.97005273,1.17405983,5.96977482,5.96952242,5.96924448
37.363598,5.65685425,5.96794198,-0.55775239,5.96766357,5.96741189,5.96713345
37.37409,5.56776436,5.96583067,-0.630924963,5.96555176,5.96530077,5.96502184
37.384581,6.55743852,5.96371902,0.77053196,5.96343961,5.96318929,5.96290985
37.395073,5.91607978,5.96160664,-0.213370234,5.96132672,5.96107704,5.9607971
37.405564,5.29150262,5.95949393,-0.817307353,5.95921351,5.95896445,5.958684
37.416056,5.38516481,5.9573805,-0.756449402,5.95709958,5.9568511,5.95657015
37.426548,6.08276253,5.95526657,0.357065769,5.95498513,5.95473722,5.95445576
37.437039,6.4807407,5.95315233,0.726352785,5.95287039,5.95262301,5.95234105
37.447531,6,5.9510374,0.221274948,5.95075495,5.95050809,5.95022561
37.458022,5.29150262,5.94892218,-0.810814134,5.94863922,5.94839285,5.94810987
37.468514,6.63324958,5.94680629,0.828518735,5.94652281,5.94627691,5.94599341
37.479006,6.164414,5.94468992,0.468747353,5.94440593,5.94416048,5.94387647
37.489497,6.164414,5.9425733,0.470999686,5.94228879,5.94204377,5.94175924
37.499989,6.4807407,5.94045602,0.735040596,5.940171,5.93992638,5.93964133
37.51048,5.56776436,5.9383385,-0.608748007,5.93805296,5.93780872,5.93752316
37.520972,6.40312424,5.93622034,0.683303664,5.93593428,5.93569041,5.93540432
37.531464,5.83095189,5.93410175,-0.321169513,5.93381517,5.93357164,5.93328504
37.541955,7.21110255,5.93198294,1.1309817,5.93169584,5.93145263,5.93116551
37.552447,5.65685425,5.92986352,-0.522502892,5.9295759,5.92933299,5.92904534
37.562938,6.08276253,5.9277439,0.393724058,5.92745575,5.92721313,5.92692495
37.57343,6.4807407,5.92562367,0.74506176,5.925335,5.92509264,5.92480394
37.583922,4.47213595,5.92350306,-1.20472698,5.92321386,5.92297175,5.92268252
37.594413,5.74456265,5.92138227,-0.420499254,5.92109254,5.92085066,5.9205609
37.604905,6,5.9192609,0.284146259,5.91897064,5.91872898,5.91843869
37.615396,6.55743852,5.91713937,0.800186947,5.91684858,5.91660711,5.91631629
37.625888,5.29150262,5.91501729,-0.789629448,5.91472596,5.91448467,5.91419332
37.63638,6,5.91289485,0.295135816,5.91260299,5.91236186,5.91206997
37.646871,6.164414,5.91077227,0.503628562,5.91047988,5.91023889,5.90994647
37.657363,5.83095189,5.90864916,-0.278742297,5.90835623,5.90811538,5.90782241
37.667854,5.83095189,5.90652593,-0.274907318,5.90623245,5.90599172,5.90569822
37.678346,6.40312424,5.90440217,0.706202565,5.90410816,5.90386752,5.90357348
37.688838,5.19615242,5.90227811,-0.840312851,5.90198355,5.901743,5.90144841
37.699329,6.08276253,5.90015395,0.427327256,5.89985885,5.89961836,5.89932323
37.709821,6.164414,5.89802929,0.51612471,5.89773364,5.89749321,5.89719754
37.720312,4.79583152,5.89590454,-1.04884366,5.89560835,5.89536796,5.89507174
37.730804,5.38516481,5.89377932,-0.713172146,5.89348258,5.89324221,5.89294545
37.741296,6.55743852,5.89165382,0.815956312,5.89135653,5.89111618,5.89081886
37.751787,5.74456265,5.88952826,-0.380743506,5.88923043,5.88899007,5.8886922
37.762279,5.38516481,5.88740225,-0.708687126,5.88710386,5.88686349,5.88656507
37.77277,6.40312424,5.88527619,0.719616598,5.88497725,5.88473684,5.88443787
37.783262,6.32455532,5.88314969,0.664383649,5.88285019,5.88260975,5.88231022
37.793754,5.47722558,5.88102295,-0.63545053,5.8807229,5.8804824,5.88018232
37.804245,5.74456265,5.87889619,-0.366515413,5.87859558,5.87835502,5.87805438
37.814737,6,5.87676902,0.351042708,5.87646785,5.8762272,5.875926
37.825228,5.65685425,5.87464183,-0.466677173,5.8743401,5.87409936,5.8737976
37.83572,5.74456265,5.87251424,-0.357703226,5.87221195,5.87197111,5.87166878
37.846212,5.65685425,5.87038646,-0.462095458,5.8700836,5.86984264,5.86953976
37.856703,5.65685425,5.86825869,-0.459787391,5.86795527,5.86771418,5.86741073
37.867195,5.65685425,5.86613054,-0.457467261,5.86582655,5.86558533,5.86528131
37.877686,6.244998,5.86400243,0.617248388,5.86369787,5.86345649,5.8631519
37.888178,5.74456265,5.86187394,-0.342507362,5.86156881,5.86132727,5.86102211
37.89867,5.65685425,5.8597453,-0.450434287,5.8594396,5.85919788,5.85889215
37.909161,4.89897949,5.85761671,-0.97910021,5.85731043,5.85706853,5.85676223
37.919653,6.70820393,5.85548777,0.923426316,5.85518092,5.85493883,5.85463195
37.930144,6.08276253,5.85335891,0.478960985,5.85305148,5.85280918,5.85250172
37.940636,5.47722558,5.85122971,-0.611558774,5.85092171,5.85067919,5.85037115
37.951128,5.91607978,5.84910039,0.25880377,5.84879181,5.84854906,5.84824045
37.961619,6.78232998,5.84697117,0.967139503,5.846662,5.84641902,5.84610982
37.972111,5,5.84484163,-0.91915267,5.84453189,5.84428865,5.84397888
37.982602,6.08276253,5.8427122,0.489949313,5.84240187,5.84215838,5.84184802
37.993094,6.63324958,5.84058248,0.89031854,5.84027156,5.8400278,5.83971686
38.003586,4.47213595,5.83845267,-1.16889551,5.83814117,5.83789713,5.8375856
38.014077,5.91607978,5.83632299,0.282412452,5.8360109,5.83576657,5.83545445
38.024569,6.244998,5.83419304,0.640940684,5.83388036,5.83363573,5.83332302
38.03506,5.74456265,5.83206323,-0.29580497,5.83174995,5.83150502,5.83119171
38.045552,5.74456265,5.82993316,-0.292182326,5.82961929,5.82937404,5.82906014
38.056044,5.91607978,5.82780304,0.29711402,5.82748858,5.827243,5.82692851
38.066535,5.29150262,5.82567309,-0.730869665,5.82535803,5.82511211,5.82479702
38.077027,5,5.8235429,-0.907492644,5.82322724,5.82298098,5.82266529
38.087518,5.38516481,5.82141289,-0.660490787,5.82109663,5.82085001,5.82053372
38.09801,7.07106781,5.81928265,1.11883205,5.81896579,5.81871881,5.81840192
38.108502,6,5.81715241,0.427606823,5.81683494,5.81658759,5.8162701
38.118993,6.40312424,5.81502236,0.766878009,5.81470429,5.81445655,5.81413846
38.129485,5.65685425,5.81289211,-0.395016275,5.81257343,5.81232531,5.8120066
38.139976,6.32455532,5.81076207,0.716793729,5.81044279,5.81019426,5.80987495
38.150468,6,5.80863185,0.43745646,5.80831195,5.80806302,5.8077431
38.16096,6.244998,5.80650164,0.662190572,5.80618114,5.80593179,5.80561126
38.171451,5.29150262,5.80437168,-0.716148765,5.80405056,5.80380078,5.80347964
38.181943,6,5.80224154,0.444700414,5.80191981,5.8016696,5.80134784
38.192434,6.4807407,5.80011165,0.825002451,5.79978931,5.79953865,5.79921627
38.202926,5.91607978,5.79798162,0.34365414,5.79765865,5.79740755,5.79708455
38.213418,5.56776436,5.79585163,-0.47758483,5.79552805,5.79527648,5.79495287
38.223909,6.40312424,5.79372192,0.780642248,5.79339771,5.79314568,5.79282144
38.234401,5.47722558,5.79159207,-0.560683954,5.79126724,5.79101474,5.79068987
38.244892,5.19615242,5.78946251,-0.770266242,5.78913705,5.78888406,5.78855857
38.255384,5.47722558,5.78733282,-0.556872739,5.78700674,5.78675326,5.78642714
38.265876,5.83095189,5.78520323,0.213889374,5.78487652,5.78462254,5.7842958
38.276367,4.89897949,5.78307394,-0.940262971,5.7827466,5.78249211,5.78216474
38.286859,5.91607978,5.78094455,0.367607443,5.78061658,5.78036157,5.78003357
38.29735,5.47722558,5.77881548,-0.549172015,5.77848687,5.77823134,5.7779027
38.307842,6.244998,5.77668632,0.684333018,5.77635708,5.77610102,5.77577174
38.318334,5.74456265,5.77455728,-0.173189602,5.7742274,5.77397081,5.77364089
38.328825,6.244998,5.77242859,0.687436843,5.77209807,5.77184092,5.77151037
38.339317,6.40312424,5.77029982,0.795502618,5.76996866,5.76971096,5.76937977
38.349808,6.164414,5.76817141,0.629478035,5.7678396,5.76758134,5.76724951
38.3603,6.32455532,5.76604294,0.747336859,5.76571049,5.76545166,5.76511918
38.370792,5.47722558,5.76391463,-0.535433521,5.76358154,5.76332213,5.762989
38.381283,6.40312424,5.76178669,0.800835532,5.76145295,5.76119295,5.76085918
38.391775,6.70820393,5.75965871,0.973932861,5.75932432,5.75906374,5.75872931
38.402266,5.65685425,5.75753112,-0.31729619,5.75719608,5.75693489,5.75659982
38.412758,4.69041576,5.75540351,-1.03198244,5.75506781,5.75480602,5.75447029
38.42325,6,5.75327609,0.496713108,5.75293974,5.75267733,5.75234094
38.433741,6.78232998,5.75114907,1.01547079,5.75081206,5.75054903,5.75021199
38.444233,6.55743852,5.74902205,0.899119835,5.74868438,5.74842072,5.74808302
38.454724,5.91607978,5.74689544,0.411320247,5.74655711,5.74629281,5.74595445
38.465216,6.164414,5.74476884,0.647800247,5.74442985,5.74416491,5.74382589
38.475708,5.83095189,5.74264247,0.297169017,5.74230282,5.74203722,5.74169753
38.486199,5.09901951,5.74051653,-0.800935088,5.74017621,5.73990996,5.7395696
38.496691,6.32455532,5.73839062,0.765613936,5.73804963,5.73778271,5.73744169
38.507182,5.19615242,5.73626516,-0.734923625,5.7359235,5.7356559,5.73531421
38.517674,5.74456265,5.73413974,0.102092649,5.73379741,5.73352913,5.73318677
38.528166,5.83095189,5.73201457,0.314543038,5.73167157,5.73140261,5.73105957
38.538657,6.40312424,5.72988987,0.820508603,5.72954619,5.72927653,5.72893282
38.549149,5.74456265,5.72776523,0.129604842,5.72742088,5.72715051,5.72680612
38.55964,6.244998,5.72564107,0.720664229,5.72529603,5.72502496,5.72467989
38.570132,5.65685425,5.72351698,-0.258191269,5.72317127,5.72289948,5.72255372
38.580624,5.91607978,5.72139318,0.441233049,5.72104678,5.72077427,5.72042783
38.591115,5.91607978,5.71926987,0.443632632,5.71892279,5.71864954,5.71830242
38.601607,5.38516481,5.71714666,-0.576178662,5.71679889,5.7165249,5.7161771
38.612098,6,5.71502395,0.533831481,5.71467549,5.71440076,5.71405227
38.62259,5.74456265,5.71290135,0.177936218,5.7125522,5.71227672,5.71192753
38.633082,6,5.71077906,0.537792652,5.71042922,5.71015298,5.7098031
38.643573,6.164414,5.7086573,0.675097549,5.70830677,5.70802976,5.70767918
38.654065,5.83095189,5.70653567,0.352726847,5.70618443,5.70590665,5.70555538
38.664556,5.29150262,5.70441457,-0.642582247,5.70406263,5.70378407,5.7034321
38.675048,5.74456265,5.7022936,0.205594367,5.70194097,5.70166162,5.70130895
38.68554,6.164414,5.70017299,0.681352345,5.69981965,5.6995395,5.69918613
38.696031,5.47722558,5.69805292,-0.469922703,5.69769888,5.69741793,5.69706386
38.706523,5.38516481,5.69593301,-0.557465879,5.69557827,5.69529651,5.69494173
38.717014,5.65685425,5.69381367,-0.19224833,5.69345822,5.69317564,5.69282015
38.727506,5,5.69169449,-0.831681726,5.69133833,5.69105493,5.69069873
38.737998,5.83095189,5.68957569,0.376000268,5.68921882,5.68893459,5.68857767
38.748489,6.32455532,5.68745748,0.798184092,5.68709988,5.68681482,5.68645719
38.758981,6.8556546,5.68533944,1.08181105,5.68498113,5.68469523,5.68433688
38.769472,5.83095189,5.683222,0.384356465,5.68286298,5.68257622,5.68221715
38.779964,5.74456265,5.68110476,0.251908487,5.68074501,5.6804574,5.68009761
38.790456,6,5.67898792,0.566579277,5.67862745,5.67833897,5.67797846
38.800947,4.79583152,5.6768717,-0.938637402,5.6765105,5.67622115,5.67585991
38.811439,5.56776436,5.67475568,-0.327095277,5.67439376,5.67410353,5.67374156
38.82193,6.164414,5.67264029,0.701265791,5.67227764,5.67198652,5.67162383
38.832422,6.4807407,5.67052513,0.900119753,5.67016175,5.66986973,5.66950631
38.842914,5.29150262,5.6684104,-0.613928152,5.66804628,5.66775337,5.66738921
38.853405,5.38516481,5.66629631,-0.53021835,5.66593146,5.66563763,5.66527274
38.863897,5.09901951,5.66418246,-0.751773199,5.66381687,5.66352213,5.6631565
38.874388,5,5.66206926,-0.813676384,5.66170293,5.66140727,5.6610409
38.88488,4.47213595,5.65995631,-1.08987172,5.65958925,5.65929266,5.65892555
38.895372,6,5.65784383,0.584941167,5.65747602,5.65717849,5.65681064
38.905863,5.74456265,5.65573201,0.298044681,5.65536346,5.65506499,5.65469639
38.916355,5.09901951,5.65362047,-0.744715352,5.65325117,5.65295174,5.6525824
38.926846,5.83095189,5.6515096,0.423606293,5.65113955,5.65083917,5.65046907
38.937338,5.83095189,5.64939902,0.426090221,5.64902821,5.64872687,5.64835602
38.94783,6,5.64728892,0.593894838,5.64691736,5.64661505,5.64624344
38.958321,6.4807407,5.64517952,0.914090355,5.6448072,5.64450391,5.64413155
38.968813,5.29150262,5.64307042,-0.592931527,5.64269734,5.64239306,5.64201994
38.979304,4.24264069,5.64096202,-1.18250638,5.64058818,5.64028291,5.63990903
38.989796,7.07106781,5.63885393,1.19675139,5.63847933,5.63817306,5.63779841
39.000288,5.09901951,5.63674636,-0.733298607,5.636371,5.63606371,5.6356883
39.010779,6.244998,5.63463951,0.781254432,5.63426338,5.63395508,5.6335789
39.021271,5.29150262,5.63253299,-0.58397805,5.63215608,5.63184676,5.63146982
39.031762,5.38516481,5.63042719,-0.495239726,5.63004952,5.62973917,5.62936145
39.042254,5.83095189,5.62832174,0.450144597,5.62794329,5.6276319,5.62725341
39.052746,5.83095189,5.62621682,0.452476598,5.6258376,5.62552517,5.6251459
39.063237,5.09901951,5.62411266,-0.72463311,5.62373266,5.62341917,5.62303912
39.073729,6.32455532,5.62200884,0.838180455,5.62162806,5.62131352,5.62093269
39.08422,5.65685425,5.61990579,0.192219819,5.61952423,5.61920861,5.618827
39.094712,6,5.6178031,0.618220754,5.61742075,5.61710406,5.61672167
39.105204,6.164414,5.61570098,0.740751663,5.61531784,5.61500007,5.61461689
39.115695,4.35889894,5.61359963,-1.12013423,5.6132157,5.61289684,5.61251287
39.126187,5.65685425,5.61149866,0.212968522,5.61111394,5.61079399,5.61040922
39.136678,6.08276253,5.60939847,0.688014577,5.60901296,5.6086919,5.60830634
39.14717,6.32455532,5.60729868,0.846910057,5.60691236,5.6065902,5.60620384
39.157662,6,5.60519947,0.628331541,5.60481236,5.60448908,5.60410192
39.168153,5.47722558,5.60310107,-0.35478937,5.60271316,5.60238875,5.60200079
39.178645,5.38516481,5.60175734,-0.465395032,5.60136868,5.60028881,5.59990005
39.189136,4.89897949,5.59966161,-0.837067572,5.59927214,5.59818968,5.5978001
39.199628,5.65685425,5.59756629,0.243491193,5.59717601,5.59609094,5.59570056
39.21012,5.65685425,5.59547159,0.247755232,5.59508051,5.59399282,5.59360163
39.220611,7.21110255,5.59337773,1.27189812,5.59298583,5.59189552,5.59150351
39.231103,5.83095189,5.5912843,0.489558575,5.59089158,5.58979863,5.58940581
39.241594,5.29150262,5.5891917,-0.545608908,5.58879817,5.58770257,5.58730893
39.252086,5.91607978,5.58709955,0.573567982,5.5867052,5.58560694,5.58521248
39.262578,6.244998,5.58500805,0.812397653,5.58461287,5.58351194,5.58311665
39.273069,6.63324958,5.5829174,1.02485715,5.5825214,5.58141778,5.58102167
39.283561,5.56776436,5.58082721,-0.114292835,5.58043038,5.57932407,5.57892713
39.294052,5.56776436,5.57873789,-0.104754597,5.57834023,5.5772312,5.57683343
39.304544,5.74456265,5.57664903,0.409772639,5.57625054,5.57513879,5.57474019
39.315036,5.65685425,5.57456085,0.286868268,5.57416152,5.57304704,5.5726476
39.325527,5.56776436,5.57247354,-0.0686234379,5.57207337,5.57095615,5.57055588
39.336019,5.47722558,5.57038672,-0.305223099,5.56998571,5.56886573,5.56846462
39.34651,5.38516481,5.56830078,-0.427943888,5.56789893,5.56677618,5.56637423
39.357002,5.91607978,5.56621533,0.591493405,5.56581264,5.56468711,5.56428431
39.367494,6.32455532,5.56413059,0.872023355,5.56372705,5.56259873,5.56219508
39.377985,6.164414,5.56204674,0.776123225,5.56164236,5.56051123,5.56010673
39.388477,5,5.55996341,-0.748307026,5.55955817,5.55842422,5.55801887
39.398968,5.65685425,5.55788098,0.314600177,5.55747488,5.55633811,5.5559319
39.40946,6.08276253,5.55579907,0.72592249,5.55539212,5.5542525,5.55384544
39.419952,5.29150262,5.55371788,-0.512069583,5.55331007,5.5521676,5.55175967
39.430443,5.29150262,5.55163762,-0.510034306,5.55122894,5.55008361,5.54967482
39.440935,5.38516481,5.54955788,-0.405454159,5.54914834,5.54800013,5.54759048
39.451426,5.56776436,5.54747908,0.142426402,5.54706868,5.54591758,5.54550705
39.461918,6.63324958,5.54540082,1.04299988,5.54498955,5.54383554,5.54342415
39.47241,6,5.54332331,0.67577858,5.54291116,5.54175424,5.54134197
39.482901,5.09901951,5.54124674,-0.665001677,5.54083372,5.53967387,5.53926073
39.493393,5.56776436,5.53917073,0.169096513,5.53875683,5.53759404,5.53718002
39.503884,6.08276253,5.53709568,0.738692666,5.53668089,5.53551515,5.53510025
39.514376,5.47722558,5.53502118,-0.240407175,5.53460552,5.53343681,5.53302102
39.524868,5.09901951,5.53294746,-0.658732075,5.53253091,5.53135922,5.53094255
39.535359,4.89897949,5.53087471,-0.794918373,5.53045726,5.52928259,5.52886503
39.545851,5.91607978,5.52880253,0.62231604,5.5283842,5.52720651,5.52678806
39.556342,5.74456265,5.52673133,0.466724025,5.5263121,5.52513141,5.52471206
39.566834,5.19615242,5.52466072,-0.573156434,5.5242406,5.52305687,5.52263662
39.577326,5.91607978,5.5225909,0.627286923,5.52216988,5.5209831,5.52056196
39.587817,6.164414,5.52052207,0.802428771,5.52010014,5.51891031,5.51848827
39.598309,4.24264069,5.51845384,-1.12951899,5.51803101,5.51683811,5.51641516
39.6088,5.29150262,5.51638661,-0.474219348,5.51596288,5.51476689,5.51434303
39.619292,6.164414,5.51431999,0.806284075,5.51389535,5.51269627,5.51227149
39.629784,5.38516481,5.51225419,-0.356495973,5.51182863,5.51062644,5.51020075
39.640275,5.91607978,5.51018939,0.637095276,5.50976292,5.5085576,5.508131
39.650767,5.65685425,5.50812522,0.385654027,5.50769783,5.50648938,5.50606185
39.661258,5,5.50606207,-0.711380398,5.50563376,5.50442215,5.50399371
39.67175,5.56776436,5.50399955,0.252516948,5.50357031,5.50235555,5.50192618
39.682242,4.69041576,5.50193787,-0.90084522,5.5015077,5.50028976,5.49985946
39.692733,5.91607978,5.49987722,0.645137632,5.49944612,5.49822499,5.49779376
39.703225,5.09901951,5.49781721,-0.631504316,5.49738519,5.49616085,5.49572869
39.713716,5.29150262,5.49575825,-0.45194649,5.49532529,5.49409773,5.49366463
39.724208,5.09901951,5.49369994,-0.628235966,5.49326604,5.49203525,5.49160121
39.7347,5.56776436,5.49164249,0.275901928,5.49120765,5.48997361,5.48953863
39.745191,5.74456265,5.48958609,0.504952035,5.4891503,5.487913,5.48747708
39.755683,5.19615242,5.48753036,-0.539794344,5.48709362,5.48585305,5.48541618
39.766174,5.09901951,5.48547569,-0.621655992,5.485038,5.48379414,5.48335632
39.776666,5.09901951,5.48342169,-0.620001757,5.48298306,5.48173589,5.48129711
39.787158,4.89897949,5.48136857,-0.763144211,5.48092898,5.47967849,5.47923876
39.797649,5.09901951,5.47931653,-0.616682264,5.47887598,5.47762216,5.47718147
39.808141,4.69041576,5.47726517,-0.887045327,5.47682366,5.47556649,5.47512484
39.818632,4.89897949,5.4752149,-0.759101714,5.47477242,5.47351189,5.47306928
39.829124,6.40312424,5.47316532,0.964343775,5.47272188,5.47145797,5.47101439
39.839616,5.47722558,5.47111664,0.0781596766,5.47067223,5.46940493,5.46896037
39.850107,5.38516481,5.46906905,-0.289662297,5.46862367,5.46735296,5.46690744
39.860599,5.74456265,5.46702218,0.526821099,5.46657581,5.46530169,5.46485518
39.87109,6,5.4649764,0.731453074,5.46452906,5.4632515,5.46280401
39.881582,6.08276253,5.46293134,0.787293584,5.46248302,5.46120201,5.46075354
39.892074,5.83095189,5.4608872,0.608329429,5.46043789,5.45915341,5.45870396
39.902565,6.08276253,5.45884417,0.789885028,5.45839387,5.45710591,5.45665547
39.913057,5.91607978,5.45680187,0.677700457,5.45635058,5.45505913,5.45460769
39.923548,6.164414,5.4547607,0.842409227,5.45430841,5.45301344,5.45256102
39.93404,5.91607978,5.45272026,0.680705167,5.45226698,5.45096848,5.45051505
39.944532,5.38516481,5.45068075,-0.255960831,5.45022647,5.44892443,5.44847
39.955023,5.09901951,5.44864238,-0.59128916,5.4481871,5.4468815,5.44642607
39.965515,6.164414,5.44660476,0.847236236,5.44614847,5.4448393,5.44438286
39.976006,5.83095189,5.44456828,0.621597629,5.44411098,5.44279822,5.44234077
39.986498,5.38516481,5.44253256,-0.239515662,5.44207424,5.44075788,5.44029941
39.99699,5.74456265,5.44049779,0.551420761,5.44003846,5.43871847,5.43825899
40.007481,4.47213595,5.43846418,-0.983019949,5.43800382,5.4366802,5.43621969
40.017973,5.29150262,5.43643133,-0.38069503,5.43596995,5.43464267,5.43418115
40.028464,5.09901951,5.43439964,-0.579120132,5.43393724,5.43260629,5.43214374
40.038956,4.89897949,5.43236873,-0.730335022,5.4319053,5.43057066,5.43010708
40.049448,5.74456265,5.43033879,0.560556736,5.42987433,5.42853599,5.42807137
40.059939,5.47722558,5.42831003,0.221168599,5.42784453,5.42650247,5.42603682
40.070431,5.65685425,5.42628205,0.480179344,5.42581551,5.42446972,5.42400302
40.080922,5.83095189,5.42425525,0.637727723,5.42378767,5.42243812,5.42197039
40.091414,5.56776436,5.42222924,0.381490657,5.42176062,5.4204073,5.41993852
40.101906,5.91607978,5.42020423,0.704184318,5.41973456,5.41837745,5.41790762
40.112397,5.83095189,5.41818041,0.642472949,5.41770968,5.41634878,5.41587789
40.122889,5.29150262,5.41615739,-0.353064818,5.41568561,5.41432088,5.41384895
40.13338,6.55743852,5.41413557,1.06925346,5.41366273,5.41229417,5.41182117
40.143872,5.19615242,5.41211456,-0.464717266,5.41164066,5.41026825,5.40979418
40.154364,4.89897949,5.41009456,-0.714923128,5.4096196,5.40824331,5.40776819
40.164855,5.38516481,5.40807577,-0.151363692,5.40759974,5.40621957,5.40574337
40.175347,6.32455532,5.40605781,0.958382758,5.4055807,5.40419662,5.40371935
40.185838,5.29150262,5.40404106,-0.33546749,5.40356288,5.40217487,5.40169653
40.19633,4.89897949,5.40202514,-0.709257115,5.40154588,5.40015394,5.39967451
40.206822,5.83095189,5.40001025,0.656461457,5.39952991,5.398134,5.3976535
40.217313,5.38516481,5.39799658,-0.113277437,5.39751516,5.39611528,5.39563368
40.227805,5.29150262,5.39598376,-0.323235426,5.39550125,5.39409737,5.39361468
40.238296,5.47722558,5.39397217,0.28853666,5.39348856,5.39208067,5.39159689
40.248788,6,5.39196143,0.77976828,5.39147672,5.3900648,5.38957993
40.25928,4.47213595,5.38995173,-0.958027024,5.38946593,5.38804996,5.38756398
40.269771,4.24264069,5.38794328,-1.07018811,5.38745637,5.38603633,5.38554925
40.280263,5.47722558,5.38593569,0.302142166,5.38544767,5.38402355,5.38353536
40.290754,5.74456265,5.38392934,0.600527523,5.38344022,5.38201199,5.38152269
40.301246,4.35889894,5.38192386,-1.01144694,5.38143363,5.38000127,5.37951086
40.311738,5.56776436,5.37991945,0.43341079,5.37942809,5.3779916,5.37750007
40.322229,5.65685425,5.37791629,0.528145772,5.37742382,5.37598316,5.37549051
40.332721,4.69041576,5.37591402,-0.82794822,5.37542041,5.37397558,5.3734818
40.343212,5.65685425,5.373913,0.53192222,5.37341827,5.37196923,5.37147433
40.353704,4.47213595,5.37191287,-0.948565716,5.37141701,5.36996376,5.36946772
40.364196,5.09901951,5.36991382,-0.520475082,5.36941683,5.36795933,5.36746216
40.374687,4.69041576,5.36791605,-0.823104058,5.36741792,5.36595616,5.36545785
40.385179,5.29150262,5.36591917,-0.272793968,5.36541989,5.36395386,5.3634544
40.39567,4.79583152,5.36392357,-0.753718813,5.36342315,5.36195282,5.36145221
40.406162,4.58257569,5.36192888,-0.882809822,5.3614273,5.35995266,5.3594509
40.416654,5.29150262,5.35993528,-0.26159636,5.35943255,5.35795357,5.35745065
40.427145,4.58257569,5.35794297,-0.880549415,5.35743908,5.35595574,5.35545167
40.437637,5,5.35595157,-0.59661677,5.35544653,5.35395881,5.35345357
40.448128,5.47722558,5.35396147,0.351089883,5.35345526,5.35196314,5.35145674
40.45862,4.89897949,5.35197229,-0.6730474,5.35146491,5.34996837,5.3494608
40.469112,4.79583152,5.34998422,-0.74441433,5.34947567,5.34797469,5.34746595
40.479603,5.65685425,5.34799745,0.55574886,5.34748773,5.34598229,5.34547237
40.490095,6.08276253,5.34601162,0.858341954,5.34550071,5.3439908,5.3434797
40.500586,5.65685425,5.3440271,0.559309532,5.343515,5.34200059,5.3414883
40.511078,4.24264069,5.34204351,-1.04852412,5.34153023,5.34001129,5.33949781
40.52157,4.58257569,5.34006105,-0.870336346,5.33954658,5.33802309,5.33750843
40.532061,5.19615242,5.33807991,-0.376732648,5.33756424,5.33603619,5.33552033
40.542553,5.56776436,5.33609972,0.481315536,5.33558285,5.33405021,5.33353315
40.553044,5.47722558,5.33412085,0.378291851,5.33360278,5.33206554,5.33154727
40.563536,6,5.33214294,0.817225223,5.33162366,5.33008178,5.3295623
40.574028,5.38516481,5.33016616,0.234517894,5.32964567,5.32809915,5.32757846
40.584519,4.79583152,5.32819073,-0.729629499,5.32766902,5.32611782,5.32559591
40.595011,5.56776436,5.32621625,0.49147544,5.32569333,5.32413743,5.3236143
40.605502,5,5.32424312,-0.569423499,5.32371897,5.32215836,5.321634
40.615994,5.38516481,5.32227096,0.250786466,5.32174558,5.32018022,5.31965464
40.626486,5.38516481,5.32029995,0.254685803,5.31977334,5.31820322,5.3176764
40.636977,5.38516481,5.31833029,0.258523722,5.31780245,5.31622754,5.31569949
40.647469,5.65685425,5.31636161,0.583517469,5.31583253,5.31425281,5.31372352
40.65796,6.164414,5.31439429,0.921965137,5.31386396,5.31227941,5.31174887
40.668452,4.58257569,5.31242795,-0.854313908,5.31189637,5.31030697,5.30977518
40.678944,5.91607978,5.31046278,0.778213982,5.30992996,5.30833567,5.30780263
40.689435,4.12310563,5.30849898,-1.08875771,5.3079649,5.30636571,5.30583141
40.699927,5.91607978,5.30653617,0.780732743,5.30600083,5.30439671,5.30386115
40.710418,6.244998,5.30457473,0.969754233,5.30403812,5.30242905,5.30189223
40.72091,5.09901951,5.30261428,-0.451214772,5.30207641,5.30046237,5.29992427
40.731402,5.47722558,5.30065503,0.420202981,5.30011588,5.29849684,5.29795747
40.741893,5.09901951,5.29869715,-0.446853041,5.29815673,5.29653266,5.29599202
40.752385,4.79583152,5.29674029,-0.707749081,5.29619858,5.29456947,5.29402754
40.762876,5.38516481,5.2947848,0.300632679,5.29424181,5.29260762,5.29206441
40.773368,6.244998,5.29283033,0.975790792,5.29228605,5.29064676,5.29010226
40.78386,5.83095189,5.29087706,0.734897841,5.29033148,5.28868708,5.28814128
40.794351,5.47722558,5.28892518,0.433935933,5.28837831,5.28672876,5.28618165
40.804843,6.08276253,5.28697433,0.892069619,5.28642615,5.28477142,5.28422302
40.815334,5.47722558,5.28502487,0.438407012,5.28447538,5.28281546,5.28226575
40.825826,4.79583152,5.28307644,-0.698029306,5.28252564,5.28086049,5.28030947
40.836318,5.74456265,5.28112922,0.680759447,5.28057711,5.27890672,5.27835437
40.846809,5.47722558,5.27918341,0.445019283,5.27862998,5.27695431,5.27640064
40.857301,4.47213595,5.27723864,-0.897275145,5.27668388,5.27500291,5.27444792
40.867792,4.69041576,5.27529528,-0.764774161,5.27473919,5.27305289,5.27249657
40.878284,5.47722558,5.27335296,0.451522555,5.27279553,5.27110388,5.27054622
40.888776,4.79583152,5.27141187,-0.689623335,5.27085311,5.26915607,5.26859707
40.899267,4.89897949,5.2694722,-0.608681123,5.26891209,5.26720965,5.26664931
40.909759,5.19615242,5.26753357,-0.267172512,5.26697212,5.26526425,5.26470255
40.92025,4.89897949,5.26559638,-0.605488968,5.26503357,5.26332023,5.26275719
40.930742,5.56776436,5.26366023,0.551456371,5.26309607,5.26137725,5.26081284
40.941234,4.69041576,5.26172534,-0.755850234,5.26115981,5.25943547,5.2588697
40.951725,4,5.25979187,-1.1224045,5.25922498,5.25749509,5.25692795
40.962217,5.09901951,5.25785946,-0.398547301,5.2572912,5.25555574,5.25498723
40.972708,5.38516481,5.2559285,0.35949452,5.25535886,5.2536178,5.25304791
40.9832,5.09901951,5.2539986,-0.393673832,5.25342758,5.25168089,5.25110962
40.993692,3.87298335,5.25206996,-1.17434518,5.25149756,5.24974521,5.24917255
41.004183,5.09901951,5.25014276,-0.388745737,5.24956897,5.24781093,5.24723689
41.014675,5.47722558,5.24821664,0.478548778,5.24764146,5.2458777,5.24530226
41.025166,5.83095189,5.24629197,0.76463058,5.24571539,5.24394589,5.24336905
41.035658,5.47722558,5.24436838,0.482552787,5.2437904,5.24201512,5.24143688
41.04615,4.79583152,5.24244606,-0.668292257,5.24186667,5.24008559,5.23950593
41.056641,5.47722558,5.2405252,0.486518626,5.23994439,5.23815748,5.23757641
41.067133,5.74456265,5.23860543,0.711306696,5.2380232,5.23623043,5.23564793
41.077624,5,5.23668712,-0.486505004,5.23610347,5.2343048,5.23372088
41.088116,4.79583152,5.2347699,-0.662524249,5.23418482,5.23238023,5.23179488
41.098608,5.38516481,5.23285397,0.390270208,5.23226746,5.23045691,5.22987013
41.109099,5.38516481,5.23093951,0.392715292,5.23035156,5.22853502,5.2279468
41.119591,5.38516481,5.22902615,0.395143849,5.22843675,5.2266142,5.22602453
41.130082,5.09901951,5.22711426,-0.35790326,5.22652341,5.22469481,5.2241037
41.140574,5.29150262,5.22520348,0.257486202,5.22461118,5.2227765,5.22218393
41.151066,5.29150262,5.22329399,0.261167817,5.22270024,5.22085944,5.22026541
41.161557,4.89897949,5.22138599,-0.567808508,5.22079077,5.21894383,5.21834833
41.172049,4.58257569,5.2194791,-0.798062281,5.21888241,5.2170293,5.21643233
41.18254,5.56776436,5.21757369,0.591769101,5.21697554,5.21511621,5.21451777
41.193032,4.79583152,5.21566941,-0.647948986,5.21506977,5.21320421,5.21260428
41.203524,5.47722558,5.21376644,0.513282709,5.21316531,5.21129347,5.21069206
41.214015,4.24264069,5.21186495,-0.984491881,5.21126234,5.20938419,5.20878129
41.224507,4.69041576,5.20996459,-0.720797361,5.20936049,5.207476,5.2068716
41.234998,4.79583152,5.20806573,-0.642054679,5.20746013,5.20556926,5.20496337
41.24549,5.65685425,5.20616801,0.671331693,5.2055609,5.20366362,5.20305622
41.255982,5.56776436,5.2042716,0.60290361,5.20366298,5.20175926,5.20115034
41.266473,5.74456265,5.20237669,0.736332773,5.20176656,5.19985636,5.19924593
41.276965,5.47722558,5.20048293,0.526063347,5.19987128,5.19795456,5.19734261
41.287456,4.79583152,5.19859067,-0.634633082,5.19797749,5.19605423,5.19544075
41.297948,5,5.19669956,-0.443508242,5.19608485,5.194155,5.19353999
41.30844,5,5.19480978,-0.441372609,5.19419353,5.19225706,5.19164051
41.318931,5.56776436,5.19292151,0.612244112,5.19230372,5.1903606,5.1897425
41.329423,4.89897949,5.1910344,-0.54042105,5.19041506,5.18846525,5.1878456
41.339914,5.56776436,5.1891488,0.61531745,5.18852791,5.18657137,5.18595017
41.350406,4.58257569,5.18726436,-0.7776173,5.18664191,5.18467861,5.18405585
41.360898,5.65685425,5.18538126,0.686638906,5.18475725,5.18278714,5.18216282
41.371389,4.58257569,5.18349969,-0.775192875,5.1828741,5.18089716,5.18027126
41.381881,6.244998,5.18161928,1.03120256,5.18099212,5.1790083,5.17838083
41.392372,5.29150262,5.1797404,0.334308574,5.17911166,5.17712093,5.17649187
41.402864,5.09901951,5.17786269,-0.280790271,5.17723236,5.17523468,5.17460403
41.413356,5.47722558,5.17598633,0.54885266,5.17535441,5.17334974,5.1727175
41.423847,5.29150262,5.17411151,0.342623867,5.17347799,5.17146629,5.17083245
41.434339,5,5.17223786,-0.415015496,5.17160274,5.16958397,5.16894852
41.44483,4.69041576,5.17036575,-0.692784233,5.16972902,5.16770314,5.16706609
41.455322,5.19615242,5.16849483,0.166305728,5.16785648,5.16582346,5.16518478
41.465814,5,5.16662526,-0.408197581,5.1659853,5.16394509,5.16330479
41.476305,4.47213595,5.16475725,-0.832238722,5.16411565,5.16206821,5.16142629
41.486797,5.83095189,5.16289042,0.817350279,5.16224719,5.16019248,5.15954892
41.497288,5,5.16102513,-0.401279372,5.16038027,5.15831825,5.15767305
41.50778,5.56776436,5.15916105,0.639220867,5.15851454,5.15644517,5.15579832
41.518272,4.89897949,5.15729833,-0.508250772,5.15665017,5.15457342,5.15392491
41.528763,5.09901951,5.15543717,-0.237524017,5.15478736,5.15270317,5.15205301
41.539255,5.09901951,5.15357721,-0.233575896,5.15292573,5.15083407,5.15018224
41.549746,5.09901951,5.15171881,-0.229563275,5.15106566,5.14896648,5.14831299
41.560238,4.47213595,5.14986161,-0.823240948,5.14920679,5.14710005,5.14644488
41.57073,4.69041576,5.1480058,-0.676454021,5.1473493,5.14523495,5.1445781
41.581221,5.09901951,5.14615155,-0.217099147,5.14549337,5.14337137,5.14271283
41.591713,5,5.14429852,-0.379866445,5.14363864,5.14150895,5.14084871
41.602204,5.56776436,5.14244705,0.652163566,5.14178547,5.13964805,5.13898611
41.612696,5.38516481,5.14059679,0.494538183,5.13993351,5.13778831,5.13712466
41.623188,5.83095189,5.13874793,0.831987957,5.13808294,5.13592991,5.13526455
41.633679,5.74456265,5.13690065,0.779526778,5.13623393,5.13407304,5.13340596
41.644171,4.69041576,5.13505459,-0.666812437,5.13438615,5.13221733,5.13154853
41.654662,6.32455532,5.1332101,1.09148762,5.13253993,5.13036315,5.12969261
41.665154,4.79583152,5.13136684,-0.579254105,5.13069494,5.12851015,5.12783787
41.675646,5.47722558,5.12952499,0.589661418,5.12885134,5.1266585,5.12598447
41.686137,4.47213595,5.12768472,-0.809659658,5.12700932,5.12480837,5.1241326
41.696629,4.79583152,5.12584568,-0.574468585,5.12516853,5.12295943,5.12228189
41.70712,5.38516481,5.12400823,0.511034814,5.12332931,5.12111201,5.12043271
41.717612,5.38516481,5.12217201,0.512828231,5.12149133,5.11926578,5.11858471
41.728104,5,5.12033721,-0.346896546,5.11965475,5.11742091,5.11673806
41.738595,5.19615242,5.11850401,0.278654654,5.11781976,5.11557758,5.11489294
41.749087,5.09901951,5.11667204,-0.132862823,5.11598601,5.11373543,5.113049
41.759578,4.79583152,5.11484168,-0.564809837,5.11415385,5.11189482,5.1112066
41.77007,5.83095189,5.11301256,0.847313011,5.11232293,5.1100554,5.10936537
41.780562,5.47722558,5.11118486,0.605012986,5.11049343,5.10821735,5.10752551
41.791053,5.56776436,5.10935877,0.677056567,5.10866552,5.10638084,5.10568719
41.801545,4.12310563,5.10753393,-0.992183603,5.10683886,5.10454553,5.10385005
41.812036,5.19615242,5.10571069,0.300735314,5.10501379,5.10271176,5.10201445
41.822528,5,5.10388872,-0.322317727,5.10318998,5.10087919,5.10018004
41.83302,5.29150262,5.10206818,0.435240677,5.1013676,5.099048,5.098347
41.843511,5.38516481,5.10024924,0.533774825,5.09954681,5.09721835,5.09651551
41.854003,5.19615242,5.09843158,0.312603337,5.09772729,5.09538991,5.09468521
41.864494,4.24264069,5.09661552,-0.924107589,5.09590937,5.09356302,5.09285645
41.874986,4.69041576,5.09480074,-0.635912713,5.09409272,5.09173734,5.0910289
41.885478,4.47213595,5.0929874,-0.787941268,5.0922775,5.08991304,5.08920271
41.895969,4.47213595,5.09117568,-0.786790773,5.09046389,5.08809029,5.08737808
41.906461,4.35889894,5.08936523,-0.854673203,5.08865155,5.08626876,5.08555465
41.916952,4.89897949,5.0875564,-0.434254438,5.08684083,5.08444878,5.08373277
41.927444,4,5.08574886,-1.04199273,5.08503138,5.08263002,5.0819121
41.937936,4.35889894,5.08394276,-0.85149505,5.08322337,5.08081265,5.08009281
41.948427,5.56776436,5.0821383,0.696868756,5.08141699,5.07899683,5.07827508
41.958919,4.58257569,5.08033512,-0.705520676,5.07961188,5.07718224,5.07645855
41.96941,4.47213595,5.07853357,-0.778715362,5.0778084,5.07536921,5.07464358
41.979902,4.79583152,5.07673331,-0.530001685,5.07600619,5.0735574,5.07282983
41.990394,4.58257569,5.07493451,-0.701682847,5.07420545,5.07174698,5.07101746
42.000885,5.29150262,5.07313735,0.4672957,5.07240633,5.06993814,5.06920665
42.011377,5.38516481,5.07134148,0.56019936,5.0706085,5.06813051,5.06739706
42.021868,5.47722558,5.06954726,0.638496921,5.0688123,5.06632446,5.06558903
42.03236,5.56776436,5.06775433,0.707113876,5.06701739,5.06451964,5.06378223
42.042852,5.83095189,5.06596287,0.874636508,5.06522394,5.06271621,5.06197681
42.053343,5,5.06417306,-0.253324024,5.06343214,5.06091436,5.06017296
42.063835,5.19615242,5.06238455,0.365742899,5.06164163,5.05911374,5.05837034
42.074326,4.47213595,5.0605977,-0.7671126,5.05985276,5.0573147,5.05656928
42.084818,4.89897949,5.05881215,-0.39979077,5.05806519,5.05551689,5.05476945
42.09531,5.47722558,5.05702808,0.648226425,5.0562791,5.05372049,5.05297102
42.105801,5.19615242,5.05524566,0.375375495,5.05449465,5.05192567,5.05117416
42.116293,5.56776436,5.05346456,0.717146989,5.0527115,5.05013208,5.04937853
42.126784,5,5.05168511,-0.227343605,5.05093001,5.04834008,5.04758447
42.137276,4.89897949,5.04990699,-0.38849389,5.04914983,5.04654931,5.04579164
42.147768,4.79583152,5.04813035,-0.502293569,5.04737112,5.04475996,5.04400022
42.158259,5.19615242,5.04635538,0.387036232,5.04559408,5.04297219,5.04221038
42.168751,5,5.04458173,-0.211143854,5.04381834,5.04118567,5.04042177
42.179242,5.19615242,5.04280974,0.39158994,5.04204427,5.03940073,5.03863474
42.189734,5.29150262,5.04103908,0.500463323,5.04027151,5.03761704,5.03684895
42.200226,4.79583152,5.03926993,-0.493394774,5.03850025,5.03583477,5.03506456
42.210717,4.24264069,5.03750244,-0.891550196,5.03673065,5.03405408,5.03328176
42.221209,5.83095189,5.03573628,0.891748625,5.03496237,5.03227465,5.0315002
42.2317,4.47213595,5.0339718,-0.749557101,5.03319576,5.0304968,5.02972022
42.242192,5.56776436,5.03220866,0.731816714,5.03143048,5.02872021,5.02794149
42.252684,4.79583152,5.03044703,-0.484371245,5.02966669,5.02694504,5.02616417
42.263175,4.79583152,5.02868707,-0.482551081,5.02790458,5.02517147,5.02438843
42.273667,5,5.02693014,-0.16410404,5.02614548,5.02339915,5.02261394
42.284158,5.38516481,5.02517321,0.599992999,5.02438638,5.02162842,5.02084104
42.29465,5.19615242,5.02341763,0.415613756,5.02262862,5.01985895,5.01906939
42.305142,5.38516481,5.02166357,0.602910641,5.02087237,5.01809092,5.01729916
42.315633,5.65685425,5.01991119,0.798087125,5.01911779,5.01632448,5.01553051
42.326125,4.89897949,5.01816017,-0.345225553,5.01736456,5.0145593,5.01376312
42.336616,4.69041576,5.01641084,-0.570959784,5.01561301,5.01279571,5.01199732
42.347108,4.58257569,5.01466286,-0.657333374,5.01386281,5.0110334,5.01023277
42.3576,4,5.01291641,-1.00643749,5.01211413,5.00927251,5.00846965
42.368091,4.89897949,5.01117166,-0.334950999,5.01036713,5.00751323,5.00670812
42.378583,5.09901951,5.00942827,0.299317969,5.00862149,5.00575521,5.00494785
42.389074,5.19615242,5.00768657,0.434126535,5.00687754,5.0039988,5.00318917
42.399566,4.89897949,5.00594625,-0.327057738,5.00513494,5.00224366,5.00143175
42.410058,5.74456265,5.00420746,0.86043895,5.00339387,5.00048995,4.99967576
42.420549,4.69041576,5.00247037,-0.558618487,5.0016545,4.99873785,4.99792136
42.431041,4.69041576,5.00073466,-0.557062745,4.99991649,4.99698702,4.99616823
42.441532,5.29150262,4.99900065,0.54083451,4.99818018,4.99523779,4.9944167
42.452024,4.79583152,4.99726803,-0.44881678,4.99644523,4.99348984,4.99266643
42.462516,5.91607978,4.99553694,0.959449239,4.99471182,4.99174334,4.99091759
42.473007,5.19615242,4.99380757,0.449827583,4.99298011,4.98999844,4.98917035
42.483499,5.74456265,4.99207958,0.867457819,4.99124978,4.98825481,4.98742438
42.49399,4.69041576,4.9903533,-0.547665541,4.98952115,4.9865128,4.98568
42.504482,5.91607978,4.98862842,0.963042764,4.9877939,4.98477207,4.9839369
42.514974,5.29150262,4.98690508,0.551903559,4.98606819,4.98303278,4.98219523
42.525465,4.58257569,4.98518347,-0.634513811,4.9843442,4.9812951,4.98045517
42.535957,4.47213595,4.98346325,-0.715071532,4.98262158,4.9795587,4.97871638
42.546448,4.89897949,4.98174475,-0.287689536,4.98090069,4.97782392,4.97697919
42.55694,5.29150262,4.98002766,0.558099423,4.97918118,4.97609042,4.97524327
42.567432,5.38516481,4.97831212,0.63785005,4.97746322,4.97435837,4.97350879
42.577923,3.60555128,4.97659831,-1.17091718,4.97574698,4.97262794,4.97177592
42.588415,5.56776436,4.97488591,0.769986007,4.97403214,4.97089879,4.97004433
42.598906,4.12310563,4.97317524,-0.9219922,4.97231901,4.96917125,4.96831434
42.609398,4.69041576,4.97146598,-0.530141697,4.97060729,4.96744501,4.96658562
42.61989,5.19615242,4.96975829,0.475808925,4.96889713,4.96572022,4.96485835
42.630381,5.65685425,4.96805234,0.829940909,4.96718869,4.96399704,4.96313269
42.640873,5.09901951,4.9663478,0.364241285,4.96548166,4.96227516,4.96140831
42.651364,5.38516481,4.964645,0.648474983,4.96377636,4.96055489,4.95968553
42.661856,5.38516481,4.96294363,0.649785489,4.96207247,4.95883591,4.95796404
42.672348,5.19615242,4.96124383,0.484673697,4.96037015,4.9571184,4.95624399
42.682839,5.09901951,4.95954578,0.373461821,4.95866957,4.9554025,4.95452555
42.693331,4.47213595,4.95784916,-0.696931276,4.9569704,4.95368789,4.9528084
42.703822,5.38516481,4.95615428,0.654988948,4.95527297,4.95197491,4.95109286
42.714314,5.29150262,4.95446084,0.580552996,4.95357696,4.95026322,4.9493786
42.724806,4.58257569,4.95276899,-0.608435119,4.95188254,4.94855299,4.94766579
42.735297,4.89897949,4.95107889,-0.228252948,4.95018985,4.94684439,4.94595459
42.745789,5.65685425,4.94939023,0.841108801,4.9484986,4.94513708,4.94424468
42.75628,4.24264069,4.94770333,-0.839680087,4.94680909,4.9434314,4.94253638
42.766772,5.65685425,4.94601788,0.843111128,4.94512101,4.94172701,4.94082937
42.777264,4.79583152,4.94433402,-0.385360216,4.94343452,4.94002409,4.93912381
42.787755,3.74165739,4.94265193,-1.09589897,4.94174979,4.93832279,4.93741986
42.798247,5.38516481,4.94097129,0.666478448,4.94006649,4.9366228,4.9357172
42.808738,5.29150262,4.93929241,0.593473007,4.93838495,4.93492442,4.93401616
42.81923,5.47722558,4.93761499,0.734581912,4.93670486,4.93322736,4.93231641
42.829722,4.89897949,4.93593918,-0.192249047,4.93502636,4.93153175,4.93061812
42.840213,5.38516481,4.93426515,0.671490624,4.93334963,4.92983778,4.92892143
42.850705,4.24264069,4.93259258,-0.830633426,4.93167435,4.9281451,4.92722605
42.861196,4.12310563,4.93092178,-0.898785934,4.93000083,4.92645406,4.92553227
42.871688,4.79583152,4.92925245,-0.365268295,4.92832877,4.92476432,4.92383979
42.88218,4.35889894,4.92758474,-0.754112592,4.92665832,4.92307605,4.92214877
42.892671,5.38516481,4.92591883,0.677676901,4.92498964,4.92138941,4.92045937
42.903163,5.56776436,4.92425438,0.802190742,4.92332242,4.91970407,4.91877126
42.913654,4.47213595,4.92259172,-0.671160013,4.92165698,4.91802037,4.91708477
42.924146,4.89897949,4.92093054,-0.148158868,4.91999301,4.91633797,4.91539957
42.934638,4.35889894,4.91927099,-0.74858002,4.91833066,4.91465704,4.91371583
42.945129,5.09901951,4.91761324,0.425918153,4.9166701,4.91297775,4.91203371
42.955621,5,4.91595697,0.289901751,4.915011,4.91129976,4.91035289
42.966112,4.69041576,4.91430251,-0.473166726,4.9133537,4.90962341,4.90867369
42.976604,5.29150262,4.91264953,0.615510428,4.91169787,4.90794836,4.90699578
42.987096,4.12310563,4.91099821,-0.887633135,4.91004368,4.90627479,4.90531934
42.997587,4.47213595,4.90934869,-0.661220639,4.90839128,4.90460285,4.90364451
43.008079,4.89897949,4.90770067,-0.0933872645,4.90674037,4.90293222,4.90197099
43.01857,5.09901951,4.90605446,0.43927788,4.90509126,4.90126323,4.90029909
43.029062,4.79583152,4.90440975,-0.329512105,4.90344363,4.89959555,4.89862848
43.039554,4.69041576,4.9027667,-0.460815521,4.90179766,4.89792934,4.89695934
43.050045,4.35889894,4.90112548,-0.73636033,4.9001535,4.89626477,4.89529182
43.060537,4.89897949,4.89948576,-0.0225006311,4.89851083,4.89460151,4.8936256
43.071028,4.89897949,4.89784787,0.033639431,4.89686997,4.89293988,4.891961
43.08152,5.47722558,4.8962115,0.762242792,4.89523062,4.89127957,4.8902977
43.092012,4.12310563,4.8945768,-0.878334319,4.89359293,4.88962074,4.88863587
43.102503,4.69041576,4.89294394,-0.450031306,4.89195706,4.88796354,4.88697566
43.112995,4.69041576,4.89131259,-0.448215166,4.8903227,4.88630766,4.88531675
43.123486,4.35889894,4.88968309,-0.728549345,4.88869016,4.88465341,4.88365946
43.133978,4.12310563,4.88805512,-0.874613912,4.88705914,4.88300049,4.88200348
43.14447,5.74456265,4.88642884,0.92635512,4.8854298,4.88134903,4.88034896
43.154961,5,4.8848044,0.33940477,4.88380229,4.87969922,4.87869606
43.165453,5,4.88318151,0.341787206,4.88217631,4.87805072,4.87704447
43.175944,4.58257569,4.88156046,-0.546794996,4.88055217,4.87640386,4.8753945
43.186436,3.74165739,4.87994097,-1.06690373,4.87892956,4.87475832,4.87374584
43.196928,4.58257569,4.87832317,-0.543826698,4.87730864,4.87311426,4.87209864
43.207419,5.09901951,4.87670724,0.471500024,4.87568957,4.87147183,4.87045306
43.217911,5,4.87509287,0.353422034,4.87407204,4.86983072,4.86880879
43.228402,5.09901951,4.87348036,0.474909628,4.87245636,4.86819125,4.86716614
43.238894,4.69041576,4.87186941,-0.425973771,4.87084223,4.86655311,4.8655248
43.249386,5.65685425,4.87026019,0.886901381,4.86922981,4.86491644,4.86388493
43.259877,5.09901951,4.86865284,0.479965282,4.86761925,4.86328141,4.86224667
43.270369,4.12310563,4.86704707,-0.862520401,4.86601025,4.8616477,4.86060973
43.28086,5,4.86544318,0.366819878,4.86440312,4.86001563,4.8589744
43.291352,5.29150262,4.86384087,0.653958527,4.86279755,4.85838488,4.85734039
43.301844,4,4.8622403,-0.92856895,4.86119371,4.85675561,4.85570784
43.312335,5,4.86064162,0.373307358,4.85959174,4.85512798,4.85407691
43.322827,6.08276253,4.85904453,1.10621788,4.85799136,4.85350167,4.8524473
43.333318,4.12310563,4.85744934,-0.856938573,4.85639286,4.851877,4.8508193
43.34381,4.35889894,4.85585576,-0.70495164,4.85479594,4.85025366,4.84919261
43.354302,4.24264069,4.85426393,-0.782063451,4.85320077,4.84863179,4.84756739
43.364793,3.87298335,4.85267401,-0.989793243,4.85160749,4.84701157,4.8459438
43.375285,4.35889894,4.8510857,-0.701560233,4.8500158,4.84539267,4.84432151
43.385776,3.74165739,4.84949932,-1.0525407,4.84842603,4.8437754,4.84270084
43.396268,3.60555128,4.84791455,-1.11461351,4.84683785,4.84215946,4.84108149
43.40676,4.58257569,4.84633156,-0.513571676,4.84525144,4.84054501,4.8394636
43.417251,4.47213595,4.8447505,-0.610421614,4.84366694,4.83893219,4.83784733
43.427743,4.47213595,4.84317108,-0.609126524,4.84208406,4.8373207,4.83623237
43.438234,5.09901951,4.84159359,0.507371583,4.84050311,4.83571084,4.83461903
43.448726,4,4.84001775,-0.916524821,4.83892378,4.83410231,4.833007
43.459218,5.56776436,4.8384437,0.854002729,4.83734623,4.83249527,4.83139644
43.469709,4.89897949,4.83687161,0.249214521,4.83577062,4.83088986,4.8297875
43.480201,4.35889894,4.83530117,-0.690218971,4.83419665,4.82928578,4.82817988
43.490692,4.69041576,4.8337327,-0.378572235,4.83262462,4.82768333,4.82657387
43.501184,4.69041576,4.83216589,-0.376497183,4.83105425,4.82608222,4.82496917
43.511676,4.58257569,4.8306009,-0.498021291,4.82948567,4.82448258,4.82336594
43.522167,5.65685425,4.82903789,0.90984414,4.82791906,4.82288458,4.82176433
43.532659,4.58257569,4.82747656,-0.494874596,4.82635411,4.82128792,4.82016403
43.54315,5,4.82591722,0.41723229,4.82479114,4.81969288,4.81856535
43.553642,5.19615242,4.82435956,0.609748192,4.82322983,4.81809918,4.81696798
43.564134,4.69041576,4.82280376,-0.363851619,4.82167036,4.81650696,4.81537208
43.574625,4.79583152,4.82124996,-0.159431595,4.82011287,4.81491637,4.81377779
43.585117,3.74165739,4.81969786,-1.03828728,4.81855707,4.81332712,4.81218482
43.595608,4.79583152,4.81814778,-0.149386269,4.81700327,4.8117395,4.81059346
43.6061,5.56776436,4.81659942,0.866697723,4.81545117,4.81015321,4.80900342
43.616592,5,4.81505293,0.430054725,4.81390093,4.8085684,4.80741484
43.627083,5.29150262,4.81350848,0.691371207,4.8123527,4.80698523,4.80582788
43.637575,4.89897949,4.81196576,0.294980892,4.81080619,4.80540338,4.80424223
43.648066,4.58257569,4.81042508,-0.477335717,4.8092617,4.80382318,4.80265819
43.658558,4.35889894,4.80888616,-0.670810862,4.80771895,4.8022443,4.80107547
43.66905,4.35889894,4.80734914,-0.66966424,4.80617808,4.8006669,4.79949422
43.679541,4.24264069,4.80581418,-0.75044886,4.80463926,4.79909114,4.79791457
43.690033,5.38516481,4.80428099,0.762157343,4.80310219,4.79751671,4.79633624
43.700524,5.29150262,4.80274988,0.699108537,4.80156717,4.79594391,4.79475953
43.711016,4.89897949,4.80122055,0.312664257,4.80003392,4.79437245,4.79318413
43.721508,5.09901951,4.79969316,0.54710726,4.7985026,4.79280246,4.79161019
43.731999,4.89897949,4.79816786,0.317508458,4.79697334,4.79123411,4.79003786
43.742491,5.65685425,4.79664438,0.927474998,4.79544588,4.78966709,4.78846684
43.752982,4.79583152,4.795123,0.0266181201,4.7939205,4.7881017,4.78689744
43.763474,5.47722558,4.79360344,0.826814448,4.79239693,4.78653764,4.78532935
43.773966,5.29150262,4.79208587,0.706694244,4.79087532,4.78497507,4.78376272
43.784457,5.29150262,4.79057042,0.70776564,4.78935582,4.78341412,4.7821977
43.794949,5.29150262,4.78905682,0.708834113,4.78783815,4.78185451,4.780634
43.80544,6.08276253,4.78754537,1.13807608,4.7863226,4.78029653,4.7790719
43.815932,5,4.78603579,0.462562661,4.7848089,4.77873987,4.77751112
43.826424,4.35889894,4.78452822,-0.652402694,4.7832972,4.7771847,4.7759518
43.836915,4.58257569,4.78302282,-0.447713222,4.78178765,4.77563116,4.77439408
43.847407,3.60555128,4.78151932,-1.0844206,4.78027998,4.77407896,4.77283768
43.857898,4.47213595,4.78001801,-0.554871206,4.77877447,4.77252838,4.77128288
43.86839,4.24264069,4.77851861,-0.732036832,4.77727086,4.77097913,4.7697294
43.878882,4.58257569,4.77702128,-0.440959841,4.77576928,4.76943136,4.76817738
43.889373,4.89897949,4.77552616,0.351359254,4.77426991,4.76788522,4.76662696
43.899865,4.58257569,4.77403299,-0.437558329,4.77277246,4.76634041,4.76507785
43.910356,4.47213595,4.77254205,-0.548093145,4.77127722,4.76479723,4.76353035
43.920848,4.12310563,4.77105308,-0.804951833,4.76978393,4.76325538,4.76198416
43.93134,4.89897949,4.76956622,0.359740549,4.76829273,4.76171501,4.76043942
43.941831,4.35889894,4.76808164,-0.639673897,4.76680379,4.76017627,4.75889629
43.952323,3.46410162,4.76659905,-1.1412701,4.76531681,4.75863886,4.75735447
43.962814,4.47213595,4.76511875,-0.541278854,4.76383211,4.75710307,4.75581426
43.973306,4.12310563,4.76364048,-0.800334213,4.7623494,4.75556861,4.75427535
43.983798,4.69041576,4.76216438,-0.267859324,4.76086885,4.75403564,4.7527379
43.994289,5.38516481,4.7606906,0.790236802,4.75939061,4.75250428,4.75120205
44.004781,4.79583152,4.75921889,0.191344281,4.7579144,4.75097426,4.7496675
44.015272,4.47213595,4.75774953,-0.534428267,4.75644052,4.74944587,4.74813456
44.025764,5.29150262,4.75628225,0.731587569,4.7549687,4.7479188,4.74660293
44.036256,5.09901951,4.75481721,0.586687566,4.7534991,4.74639321,4.74507275
44.046747,4.58257569,4.75335457,-0.413254007,4.75203186,4.74486924,4.74354417
44.057239,5.56776436,4.75189405,0.903255396,4.75056674,4.74334661,4.7420169
44.06773,5.38516481,4.75043596,0.796698721,4.74910401,4.74182559,4.74049122
44.078222,4.24264069,4.74898002,-0.711575245,4.74764341,4.74030591,4.73896685
44.088714,4.35889894,4.74752639,-0.623399909,4.7461851,4.7387877,4.73744394
44.099205,4.69041576,4.74607523,-0.235922592,4.74472924,4.73727111,4.73592262
44.109697,5.91607978,4.74462627,1.08233706,4.74327556,4.73575585,4.7344026
44.120188,4,4.74317982,-0.862078776,4.74182435,4.73424221,4.73288418
44.13068,4.79583152,4.7417356,0.232585312,4.74037535,4.7327299,4.73136707
44.141172,4.79583152,4.74029377,0.235664491,4.73892872,4.73121907,4.7298514
44.151663,4.47213595,4.73885449,-0.516448003,4.73748462,4.72970985,4.72833733
44.162155,4.12310563,4.73741751,-0.783780509,4.73604279,4.72820197,4.72682456
44.172646,5.91607978,4.73598311,1.08632254,4.73460351,4.7266957,4.72531339
44.183138,4.24264069,4.73455105,-0.701363214,4.73316655,4.72519076,4.72380351
44.19363,5.09901951,4.73312146,0.604895072,4.73173204,4.72368729,4.72229509
44.204121,4.47213595,4.73169453,-0.509468912,4.73030015,4.72218544,4.72078825
44.214613,5.09901951,4.73026998,0.607247504,4.72887063,4.72068491,4.71928272
44.225104,5,4.72884812,0.520722459,4.72744377,4.719186,4.71777877
44.235596,5.38516481,4.72742869,0.811009317,4.72601931,4.71768842,4.71627613
44.246088,5,4.72601186,0.523438763,4.72459742,4.71619232,4.71477493
44.256579,5.74456265,4.72459778,1.0099331,4.72317826,4.71469782,4.71327532
44.267071,5.09901951,4.7231862,0.613052455,4.72176158,4.71320465,4.71177701
44.277562,4.69041576,4.72177742,-0.177092236,4.72034766,4.7117131,4.71028028
44.288054,5.38516481,4.72037119,0.815348768,4.71893627,4.71022287,4.70878486
44.298546,5,4.71896768,0.530124816,4.71752757,4.70873411,4.70729087
44.309037,4.35889894,4.71756704,-0.598889052,4.71612172,4.70724696,4.70579847
44.319529,6,4.71616903,1.13306265,4.71471847,4.70576114,4.70430737
44.33002,5.74456265,4.71477395,1.01478505,4.71331812,4.70427693,4.70281785
44.340512,4.79583152,4.71338156,0.287141011,4.71192043,4.70279405,4.70132963
44.351004,4.79583152,4.71199202,0.289550511,4.71052557,4.70131263,4.69984284
44.361495,4.89897949,4.7106055,0.43402072,4.70913369,4.69983282,4.69835764
44.371987,4.58257569,4.70922176,-0.35587366,4.70774456,4.69835434,4.69687373
44.382478,4.12310563,4.70784109,-0.764679974,4.70635849,4.69687746,4.6953914
44.39297,5.09901951,4.70646327,0.626543093,4.70497523,4.69540191,4.69391036
44.403462,3.87298335,4.70508846,-0.912197955,4.70359495,4.69392783,4.69243077
44.413953,4.24264069,4.70371682,-0.67902587,4.70221781,4.69245535,4.69095274
44.424445,3.74165739,4.70234813,-0.980148329,4.7008436,4.69098419,4.68947601
44.434936,4.24264069,4.7009827,-0.677009608,4.69947261,4.68951464,4.68800086
44.445428,5.47722558,4.69962028,0.881819308,4.69810461,4.68804641,4.686527
44.45592,5.56776436,4.69826107,0.932471607,4.69673978,4.68657965,4.68505457
44.466411,4.89897949,4.69690521,0.449526724,4.69537828,4.68511449,4.68358371
44.476903,3,4.6955525,-1.30213383,4.69401989,4.68365065,4.68211415
44.487394,3.87298335,4.69420324,-0.906211836,4.69266492,4.68218842,4.68064615
44.497886,4.58257569,4.69285721,-0.332086606,4.69131315,4.6807275,4.67917945
44.508378,5.09901951,4.69151459,0.638361126,4.68996476,4.67926805,4.67771417
44.518869,4,4.69017554,-0.830768045,4.68861992,4.6778102,4.67625047
44.529361,4.24264069,4.68883988,-0.667981429,4.68727842,4.67635367,4.67478805
44.539852,4.47213595,4.68750789,-0.464081816,4.68594057,4.67489874,4.6733272
44.550344,5,4.68617937,0.560196956,4.68460616,4.67344513,4.67186763
44.560836,4.89897949,4.68485451,0.4627364,4.68327538,4.67199298,4.6704095
44.571327,4.47213595,4.68353348,-0.45977987,4.68194839,4.67054242,4.66895292
44.581819,4.89897949,4.6822161,0.465578553,4.68062501,4.66909319,4.66749764
44.59231,4.35889894,4.68090266,-0.567453711,4.67930555,4.66764555,4.66604391
44.602802,5.56776436,4.67959298,0.942428452,4.67798981,4.66619923,4.66459147
44.613294,4.69041576,4.67828724,0.11012957,4.67667799,4.66475437,4.66314045
44.623785,4.24264069,4.67698563,-0.659048515,4.67537026,4.66331111,4.661691
44.634277,5.65685425,4.67568798,0.990538375,4.67406645,4.66186916,4.66024282
44.644768,5.19615242,4.67439459,0.722328067,4.67276687,4.6604288,4.6587962
44.65526,4.47213595,4.67310528,-0.448296029,4.67147134,4.65898976,4.65735087
44.665752,4.24264069,4.67182027,-0.655117991,4.67018007,4.65755218,4.65590695
44.676243,4.79583152,4.67053974,0.3539658,4.66889324,4.65611619,4.65446459
44.686735,4.12310563,4.66926352,-0.739024961,4.6676107,4.65468151,4.65302351
44.697226,4.69041576,4.66799194,0.149745847,4.66633276,4.65324843,4.65158399
44.707718,4.79583152,4.66672484,0.359314178,4.66505927,4.65181666,4.65014574
44.71821,3.46410162,4.66546244,-1.09606607,4.66379043,4.65038634,4.64870891
44.728701,5.56776436,4.66420493,0.950557435,4.66252645,4.64895761,4.64727363
44.739193,5,4.66295217,0.580558209,4.66126718,4.6475302,4.64583962
44.749684,4.58257569,4.66170449,-0.28129841,4.66001297,4.64610437,4.64440717
44.760176,5,4.66046176,0.582699098,4.65876366,4.64467986,4.64297599
44.770668,4.79583152,4.6592242,0.36960428,4.65751949,4.6432568,4.64154622
44.781159,4.89897949,4.65799203,0.490904731,4.65628067,4.64183532,4.640118
44.791651,4.35889894,4.65676513,-0.545771183,4.65504708,4.64041515,4.63869105
44.802142,4,4.65554384,-0.80965662,4.65381907,4.63899657,4.63726565
44.812634,4.35889894,4.65432806,-0.543533913,4.65259652,4.6375793,4.63584151
44.823126,4.47213595,4.65311802,-0.425419865,4.65137968,4.63616348,4.63441879
44.833617,4.89897949,4.65191396,0.497056865,4.65016879,4.63474924,4.63299761
44.844109,3.87298335,4.65071579,-0.881891401,4.64896374,4.63333632,4.6315777
44.8546,4,4.64952388,-0.805930441,4.64776491,4.63192497,4.63015932
44.865092,5,4.64833813,0.593010851,4.64657222,4.63051493,4.62874222
44.875584,4.35889894,4.64715882,-0.536898386,4.64538591,4.62910634,4.62732652
44.886075,4.47213595,4.64598621,-0.416953541,4.64420627,4.62769933,4.62591235
44.896567,4.24264069,4.64482024,-0.634176278,4.64303323,4.62629362,4.62449946
44.907058,3.87298335,4.64366129,-0.87788265,4.64186718,4.6248895,4.6230881
44.91755,4.24264069,4.64250933,-0.632351676,4.64070806,4.62348668,4.621678
44.928042,4.69041576,4.64136464,0.22147488,4.63955618,4.62208531,4.6202693
44.938533,4.69041576,4.64022752,0.224027328,4.63841183,4.6206855,4.61886213
44.949025,5.09901951,4.63909794,0.678175176,4.63727498,4.61928701,4.61745623
44.959516,4.47213595,4.63797634,-0.407235052,4.63614607,4.61789009,4.61605186
44.970008,4.58257569,4.63686271,-0.232995742,4.63502509,4.61649448,4.61464875
44.9805,4.69041576,4.63575738,0.23379132,4.63391236,4.61510031,4.61324703
44.990991,4.47213595,4.63466068,-0.403143556,4.63280823,4.61370771,4.61184684
45.001483,5.19615242,4.63357265,0.750053177,4.63171272,4.61231642,4.61044791
45.011974,5.29150262,4.63249375,0.811793611,4.6306263,4.61092669,4.6090505
45.022466,5.29150262,4.63142404,0.812452201,4.62954903,4.60953828,4.60765435
45.032958,5.29150262,4.6303639,0.813104376,4.62848128,4.60815129,4.6062596
45.043449,4.24264069,4.6293137,-0.621830374,4.62742344,4.60676588,4.60486636
45.053941,5.29150262,4.62827356,0.814388765,4.6263756,4.60538177,4.60347438
45.064432,3.60555128,4.62724399,-1.01078816,4.6253383,4.60399923,4.60208392
45.074924,4.12310563,4.62622511,-0.70930916,4.62431164,4.60261799,4.60069471
45.085416,5,4.62521738,0.612194924,4.62329609,4.60123819,4.59930689
45.095907,4.89897949,4.62422124,0.524173873,4.62229209,4.59985995,4.59792058
45.106399,5.09901951,4.62323688,0.689769986,4.62129982,4.59848302,4.59653553
45.11689,4.69041576,4.62226489,0.261057217,4.62031988,4.59710764,4.59515199
45.127382,5.19615242,4.62130549,0.758186606,4.61935249,4.59573357,4.5937697
45.137874,5.09901951,4.62035922,0.691852798,4.61839818,4.59436093,4.59238879
45.148365,4.35889894,4.61942661,-0.510419109,4.61745748,4.59298985,4.59100939
45.158857,4.47213595,4.61850797,-0.382585955,4.61653071,4.59162008,4.58963124
45.169348,5.29150262,4.61760397,0.820913305,4.61561854,4.59025186,4.58825459
45.17984,4.47213595,4.61671497,-0.380235468,4.61472132,4.58888494,4.5868792
45.190332,4.35889894,4.6158416,-0.506895117,4.61383969,4.58751945,4.58550518
45.200823,4.79583152,4.61498454,0.425261074,4.61297432,4.58615552,4.58413266
45.211315,4.47213595,4.61414423,-0.376839859,4.61212566,4.58479289,4.58276139
45.221806,3.74165739,4.61332148,-0.933629529,4.61129451,4.58343182,4.58139162
45.232298,4.12310563,4.61251681,-0.699579294,4.6104814,4.58207204,4.58002309
45.24279,5.09901951,4.61173102,0.698060522,4.60968711,4.58071369,4.57865594
45.253281,5.19615242,4.61096493,0.764975484,4.60891249,4.5793569,4.57729028
45.263773,4.35889894,4.6102192,-0.501318513,4.60815817,4.5780014,4.57592586
45.274264,4.12310563,4.6094948,-0.697416066,4.60742515,4.57664745,4.57456294
45.284756,5,4.60879248,0.625465841,4.60671416,4.57529481,4.57320126
45.295248,5.09901951,4.60811326,0.700647023,4.60602623,4.57394358,4.57184094
45.305739,4.58257569,4.60745819,-0.157741871,4.60536239,4.57259391,4.57048212
45.316231,5.09901951,4.6068282,0.701563481,4.60472359,4.57124553,4.56912453
45.326722,5.09901951,4.6062245,0.701993598,4.60411105,4.5698987,4.56776844
45.337214,4.79583152,4.60564818,0.436100158,4.60352582,4.56855317,4.56641357
45.347706,4.58257569,4.60510052,-0.150082737,4.60296923,4.56720905,4.56506007
45.358197,4.69041576,4.60458292,0.292972429,4.60244264,4.56586649,4.56370806
45.368689,3.16227766,4.60409666,-1.20075768,4.60194736,4.56452522,4.56235728
45.37918,4.89897949,4.60364334,0.54344838,4.60148497,4.5631855,4.56100798
45.389672,5.38516481,4.60322447,0.884273906,4.60105698,4.56184706,4.55965991
45.400164,4.58257569,4.60284176,-0.142358938,4.60066512,4.56051005,4.55831319
45.410655,4.58257569,4.60249706,-0.141143064,4.60031122,4.55917458,4.55696796
45.421147,4.79583152,4.60219221,0.440044673,4.59999713,4.55784041,4.55562396
45.431638,5.56776436,4.60192931,0.982769073,4.59972495,4.55650778,4.55428143
45.44213,4.69041576,4.6017105,0.297834285,4.59949682,4.55517643,4.55294013
45.452622,4.79583152,4.60153813,0.440787248,4.59931509,4.55384651,4.55160018
45.463113,5.38516481,4.60141469,0.885296625,4.59918226,4.55251813,4.5502617
45.473605,4.35889894,4.60134284,-0.492385923,4.59910097,4.55119103,4.54892445
45.484096,3.87298335,4.60132544,-0.853429605,4.5990741,4.54986548,4.54758867
45.494588,4.58257569,4.60136554,-0.137076048,4.5991047,4.54854122,4.54625411
45.50508,5.19615242,4.60146643,0.771158863,4.59919606,4.54721837,4.54492089
45.515571,4.79583152,4.60163162,0.440681176,4.59935168,4.54589706,4.54358915
45.526063,4.47213595,4.60186494,-0.360179104,4.5995754,4.54457704,4.54225862
45.536554,4.47213595,4.60217042,-0.360602916,4.59987125,4.54325855,4.54092956
45.547046,5.19615242,4.60255251,0.770454355,4.60024369,4.54194135,4.53960171
45.557538,4.12310563,4.60301593,-0.692755591,4.60069744,4.54062557,4.5382752
45.568029,3.74165739,4.60356576,-0.928390205,4.60123757,4.53931132,4.53695016
45.578521,4.58257569,4.60420763,-0.147077982,4.60186973,4.53799836,4.53562633
45.589012,5.29150262,4.60494741,0.828586273,4.60259978,4.53668693,4.53430396
45.599504,5.09901951,4.60579175,0.702301762,4.60343438,4.53537679,4.5329828
45.609996,4.47213595,4.60674763,-0.366894636,4.60438051,4.53406806,4.53166297
45.620487,5.19615242,4.6078226,0.767026609,4.60544573,4.53276086,4.5303446
45.630979,4.69041576,4.60902522,0.285290273,4.60663859,4.53145494,4.52902744
45.64147,4.58257569,4.61036433,-0.166699239,4.60796796,4.53015056,4.52771173
45.651962,5.38516481,4.61185011,0.879383134,4.609444,4.52884746,4.52639723
45.662454,4.12310563,4.61349327,-0.700276836,4.61107744,4.52754577,4.52508406
45.672945,3.87298335,4.6153055,-0.861581194,4.61287997,4.52624562,4.52377234
45.683437,5.29150262,4.61730015,0.821098335,4.61486495,4.52494674,4.52246182
45.693928,4.89897949,4.61949111,0.528666603,4.61704628,4.52364939,4.52115274
45.70442,5.09901951,4.62189452,0.69074235,4.61944011,4.52235333,4.51984487
45.714912,4,4.6245275,-0.790270521,4.62206356,4.52105867,4.51853832
45.725403,5,4.62740887,0.610402432,4.62493548,4.51976555,4.51723322
45.735895,4.35889894,4.63056034,-0.521211473,4.62807758,4.5184737,4.51592931
45.746386,5.09901951,4.63400475,0.681919911,4.6315127,4.51718338,4.51462684
45.756878,4.69041576,4.63776879,0.229449284,4.63526756,4.51589434,4.51332557
45.76737,5.19615242,4.64188112,0.744493989,4.63937084,4.51460671,4.51202562
45.777861,4.47213595,4.64637364,-0.417417883,4.64385445,4.5133206,4.5107271
45.788353,4.24264069,4.65128336,-0.639251654,4.64875543,4.51203578,4.50942978
45.798844,3.87298335,4.65664986,-0.885249408,4.65411337,4.51075247,4.50813389
45.809336,4.58257569,4.6625197,-0.282743701,4.65997486,4.50947045,4.50683919
45.819828,4.35889894,4.66894369,-0.556816614,4.66639074,4.50818983,4.5055458
45.830319,4.89897949,4.67597908,0.472229184,4.67341831,4.50691074,4.50425385
45.840811,5,4.6836929,0.562411856,4.68112461,4.50563293,4.50296308
45.851302,5,4.69215827,0.554834869,4.68958281,4.50435663,4.50167374
45.861794,4.69041576,4.70146185,-0.10510038,4.69887963,4.50308162,4.50038558
45.872286,4.47213595,4.71170014,-0.489452942,4.70911161,4.50180801,4.49909873
45.882777,4.47213595,4.72298359,-0.500846922,4.72038928,4.50053592,4.4978133
45.893269,5.47722558,4.7354429,0.861268065,4.73284338,4.49926511,4.49652906
45.90376,5.19615242,4.74922415,0.668526946,4.74662009,4.49799583,4.49524624
45.914252,5.74456265,4.76450233,0.98997996,4.76189449,4.49672782,4.49396459
45.924744,5.38516481,4.78147696,0.77697352,4.7788662,4.49546121,4.49268425
45.935235,5.09901951,4.80038103,0.546478253,4.79776834,4.49419612,4.49140532
45.945727,5.29150262,4.82149426,0.685571561,4.81888076,4.49293231,4.49012757
45.956218,5.09901951,4.8451385,0.503866069,4.84252547,4.49167002,4.48885124
45.96671,4.89897949,4.87170524,0.165149176,4.86909416,4.49040901,4.48757608
45.977202,4.12310563,4.90165433,-0.882354071,4.89904689,4.48914939,4.48630221
45.987693,5.47722558,4.93553816,0.735994167,4.9329363,4.4878913,4.48502975
45.998185,5.19615242,4.97403957,0.471288498,4.97144553,4.48663448,4.48375846
46.008676,5.09901951,5.01798975,0.28465727,5.01540613,4.48537919,4.48248859
46.019168,4.69041576,5.06847188,-0.614862688,5.06590173,4.48412517,4.48121988
46.02966,5.74456265,5.12693265,0.785894394,5.12437958,4.48287255,4.47995245
46.040151,6.4807407,5.19546392,1.13370048,5.19293239,4.48162144,4.47868644
46.050643,6.164414,5.27734195,0.941845028,5.27483765,4.48037162,4.47742158
46.061134,5.74456265,5.37788391,0.605540035,5.37541453,4.47912331,4.47615813
46.071626,6.40312424,5.50593381,0.947201368,5.50351014,4.47787628,4.47489584
46.082118,6.244998,5.67565615,0.754547447,5.67329352,4.47663065,4.47363483
46.092609,6.78232998,5.90827001,0.934911746,5.90598934,4.47538653,4.47237522
46.103101,6.08276253,6.23240459,-0.386835963,6.23023197,4.4741437,4.47111677
46.113592,6.8556546,6.68091902,0.41801385,6.67888233,4.47290238,4.46985972
46.124084,7.21110255,7.28394691,-0.269896945,7.28206967,4.47166234,4.46860382
46.134576,7.14142843,8.05876615,-0.957777493,8.05706105,4.47042369,4.46734919
46.145067,8.77496439,9.00135495,-0.475805176,8.99982086,4.46918657,4.46609596
46.155559,9.38083152,10.0829028,-0.837896932,10.0815265,4.46795072,4.46484388
46.16605,9.89949494,11.2497797,-1.16201752,11.2485399,4.46671639,4.46359318
46.176542,11.7898261,12.4260899,-0.79766142,12.4249619,4.46548334,4.46234364
46.187034,12.3693169,13.5120117,-1.06896903,13.5109692,4.46425168,4.46109537
46.197525,13.6014705,14.3826761,-0.883858357,14.3816918,4.46302155,4.45984848
46.208017,15.4272486,14.9012725,0.72524214,14.9003176,4.46179269,4.45860274
46.218508,16.2172747,14.9633888,1.11977051,14.9624331,4.46056535,4.45735838
46.229,16.0623784,14.5541159,1.22811339,14.5531284,4.45933929,4.45611516
46.239492,14.5945195,13.7585612,0.91430757,13.7575112,4.45811462,4.45487321
46.249983,13.1529464,12.7121563,0.663920283,12.7110141,4.45689148,4.45363263
46.260475,10.2956301,11.545802,-1.11811084,11.544538,4.45566961,4.45239319
46.270966,10.0995049,10.3659735,-0.516205973,10.3645584,4.45444927,4.45115513
46.281458,8.42614977,9.25425778,-0.910004397,9.25266447,4.4532302,4.44991821
46.29195,7.81024968,8.2700607,-0.67809367,8.26826855,4.45201254,4.44868254
46.302441,6.164414,7.44888949,-1.13334703,7.44688943,4.45079639,4.44744825
46.312933,6.92820323,6.80078911,0.35695114,6.79858702,4.44958152,4.44621508
46.323424,5.38516481,6.3133085,-0.963402147,6.31092397,4.44836817,4.44498329
46.333916,5.91607978,5.95854689,-0.206075498,5.95600714,4.44715611,4.44375263
46.344408,5.29150262,5.70345579,-0.641835777,5.7007885,4.44594545,4.44252322
46.354899,5.19615242,5.51785673,-0.567189838,5.51508521,4.4447363,4.44129517
46.365391,5,5.37851806,-0.615238216,5.37565973,4.44352844,4.44006825
46.375882,5.47722558,5.26963696,0.455618941,5.26670413,4.4423221,4.43884269
46.386374,5.47722558,5.18121193,0.544071358,5.17821322,4.44111705,4.43761825
46.396866,4.58257569,5.10720622,-0.724313828,5.10414787,4.4399134,4.43639506
46.407357,5.09901951,5.04395489,0.234658516,5.04084168,4.43871127,4.43517323
46.417849,5,4.98912285,0.104293563,4.98595858,4.43751043,4.43395252
46.42834,4.35889894,4.94114437,-0.76305008,4.93793223,4.43631111,4.43273316
46.438832,4.79583152,4.89886083,-0.320981787,4.89560353,4.43511308,4.43151492
46.449324,4.79583152,4.86138906,-0.256042055,4.85808893,4.43391646,4.43029792
46.459815,3.31662479,4.82802036,-1.22938829,4.82467945,4.43272135,4.42908227
46.470307,5.09901951,4.79816571,0.548501419,4.79478576,4.43152754,4.42786773
46.480798,5.09901951,4.77134734,0.572426563,4.76792989,4.43033525,4.42665454
46.49129,4.89897949,4.74715596,0.389645384,4.74370234,4.42914426,4.42544247
46.501782,4.79583152,4.72525397,0.26566437,4.72176533,4.42795468,4.42423162
46.512273,4,4.70535531,-0.839854339,4.70183268,4.42676662,4.42302211
46.522765,4.58257569,4.6872116,-0.323474739,4.68365585,4.42557985,4.42181372
46.533256,4.58257569,4.67061735,-0.29671814,4.66702925,4.42439462,4.42060667
46.543748,4.89897949,4.65539026,0.493547589,4.65177047,4.42321068,4.41940072
46.55424,5.56776436,4.64137766,0.962489846,4.63772675,4.42202815,4.41819599
46.564731,4.12310563,4.62844731,-0.710873886,4.62476579,4.42084715,4.4169926
46.575223,4.89897949,4.61648101,0.531505854,4.6127693,4.41966746,4.41579032
46.585714,4.89897949,4.60538023,0.541848002,4.60163869,4.41848929,4.41458936
46.596206,4.35889894,4.59505476,-0.485958661,4.59128372,4.41731243,4.41338951
46.606698,3.74165739,4.58542846,-0.918570122,4.58162816,4.41613699,4.41219087
46.617189,4.47213595,4.57643419,-0.322952368,4.57260486,4.41496307,4.41099356
46.627681,4.89897949,4.56801033,0.575299185,4.56415214,4.41379047,4.40979735
46.638172,5.09901951,4.56010547,0.73410765,4.55621857,4.4126194,4.40860247
46.648664,4.79583152,4.55267108,0.493113012,4.54875558,4.41144964,4.40740867
46.659156,4,4.54566609,-0.73869215,4.54172207,4.4102813,4.40621609
46.669647,4.12310563,4.53905381,-0.644940448,4.53508131,4.4091145,4.40502483
46.680139,5,4.53279963,0.68352057,4.5287987,4.40794901,4.40383466
46.69063,4.24264069,4.52687487,-0.533136179,4.52284551,4.40678507,4.4026458
46.701122,5,4.52125158,0.691916482,4.51719378,4.40562244,4.40145804
46.711614,4.79583152,4.51590619,0.529079704,4.51181991,4.40446124,4.40027147
46.722105,4.69041576,4.51081739,0.423790478,4.5067026,4.40330158,4.39908622
46.732597,3.74165739,4.50596455,-0.874246624,4.50182116,4.40214325,4.39790206
46.743088,4.69041576,4.50133077,0.434839043,4.49715872,4.40098646,4.3967192
46.75358,4.12310563,4.49689902,-0.611386451,4.49269821,4.399831,4.39553743
46.764072,4,4.49265507,-0.701893915,4.4884254,4.39867697,4.39435685
46.774563,4.58257569,4.48858593,0.306577502,4.48432728,4.3975245,4.39317758
46.785055,4.24264069,4.48467865,-0.491973542,4.48039089,4.39637335,4.39199938
46.795546,4.79583152,4.48092285,0.56116724,4.47660584,4.39522376,4.39082249
46.806038,5.47722558,4.47730764,0.999958966,4.47296122,4.39407551,4.38964667
46.81653,4.12310563,4.47382406,-0.592214858,4.46944808,4.3929287,4.38847205
46.827021,5,4.47046388,0.727692324,4.46605816,4.39178344,4.38729872
46.837513,4,4.4672186,-0.683533908,4.46278297,4.39063953,4.38612646
46.848004,4.69041576,4.46408162,0.475745874,4.4596159,4.38949718,4.38495549
46.858496,3.74165739,4.46104569,-0.848167617,4.45654967,4.38835618,4.3837856
46.868988,4.35889894,4.45810498,-0.314969899,4.45357846,4.38721663,4.38261689
46.879479,4,4.45525408,-0.674725192,4.45069686,4.38607864,4.38144947
46.889971,4.79583152,4.45248723,0.585955881,4.44789907,4.38494202,4.38028311
46.900462,4.47213595,4.44980009,0.149451873,4.44518079,4.38380696,4.37911804
46.910954,4.69041576,4.44718768,0.493181594,4.44253699,4.38267326,4.37795404
46.921446,4.24264069,4.44464607,-0.44945009,4.43996376,4.38154102,4.3767912
46.931937,3.74165739,4.44217164,-0.836967297,4.43745747,4.38041037,4.37562965
46.942429,4.12310563,4.43976033,-0.562720807,4.43501404,4.37928107,4.37446916
46.95292,4.79583152,4.43740925,0.598683785,4.43263058,4.37815337,4.37330995
46.963412,4.69041576,4.43511484,0.505273116,4.43030353,4.37702703,4.3721518
46.973904,4.12310563,4.43287442,-0.556568771,4.42803021,4.37590217,4.37099481
46.984395,5.09901951,4.4306855,0.81751698,4.4258081,4.3747789,4.3698391
46.994887,5.38516481,4.42854513,0.978069361,4.42363426,4.37365701,4.36868444
47.005378,5.29150262,4.42645136,0.93008132,4.42150674,4.37253672,4.36753106
47.01587,5.47722558,4.42440158,1.02607212,4.41942291,4.37141781,4.36637872
47.026362,3.87298335,4.42239394,-0.741222362,4.41738091,4.3703004,4.36522754
47.036853,4.47213595,4.42042667,0.227396761,4.41537898,4.36918459,4.36407763
47.047345,4,4.41849759,-0.646913898,4.41341494,4.36807017,4.36292877
47.057836,4.12310563,4.41660538,-0.541756172,4.41148743,4.36695737,4.36178117
47.068328,4.12310563,4.41474806,-0.540039293,4.40959451,4.36584596,4.36063462
47.07882,5,4.41292434,0.766208628,4.40773484,4.36473607,4.35948921
47.089311,4.12310563,4.41113296,-0.536681785,4.40590719,4.3636278,4.35834507
47.099803,4.47213595,4.40937228,0.250526803,4.40410989,4.36252094,4.35720197
47.110294,4,4.40764136,-0.638467982,4.40234201,4.36141571,4.35606012
47.120786,5,4.40593873,0.770753703,4.40060206,4.3603119,4.35491931
47.131278,5.74456265,4.40426344,1.15771292,4.39888909,4.35920961,4.35377965
47.141769,5.19615242,4.4026146,0.8908074,4.39720221,4.35810897,4.35264124
47.152261,5,4.40099093,0.773956764,4.39554012,4.35700976,4.35150386
47.162752,4.35889894,4.39939181,-0.201228396,4.39390222,4.35591219,4.35036773
47.173244,5.09901951,4.39781607,0.837378911,4.3922873,4.35481606,4.34923263
47.183736,5.29150262,4.39626305,0.946171007,4.39069471,4.35372149,4.34809867
47.194227,5.19615242,4.39473211,0.89522082,4.38912381,4.35262857,4.34696595
47.204719,4.24264069,4.39322223,-0.388048371,4.38757356,4.35153711,4.34583426
47.21521,4.47213595,4.39173301,0.283554138,4.38604357,4.35044731,4.34470381
47.225702,5.29150262,4.39026351,0.949336142,4.38453289,4.34935898,4.34357439
47.236194,4,4.38881327,-0.623548934,4.38304104,4.34827222,4.3424461
47.246685,4.58257569,4.38738184,0.441807481,4.38156757,4.34718714,4.34131904
47.257177,5.09901951,4.38596841,0.844423536,4.38011165,4.34610355,4.340193
47.267668,4.69041576,4.38457271,0.553030787,4.37867304,4.34502164,4.3390682
47.27816,4.24264069,4.383194,-0.374904405,4.37725096,4.34394122,4.33794441
47.288652,4.35889894,4.38183195,-0.151436485,4.37584509,4.34286241,4.33682175
47.299143,4.89897949,4.38048626,0.720064738,4.37445511,4.3417853,4.33570031
47.309635,5.29150262,4.37915625,0.955168242,4.37308034,4.34070969,4.33457989
47.320126,4.47213595,4.3778418,0.307073535,4.37172066,4.33963581,4.3334607
47.330618,4.35889894,4.37654229,-0.132828241,4.37037542,4.33856344,4.33234251
47.34111,4.79583152,4.37525749,0.648516793,4.3690444,4.3374927,4.33122544
47.351601,5.19615242,4.37398722,0.90673326,4.36772742,4.3364237,4.3301096
47.362093,3.87298335,4.37273091,-0.706928263,4.36642388,4.33535624,4.32899476
47.372584,4.89897949,4.37148854,0.726285721,4.36513377,4.33429052,4.32788113
47.383076,4.58257569,4.37025958,0.460777728,4.36385654,4.33322636,4.32676851
47.393568,5.38516481,4.36904391,1.00802822,4.36259206,4.33216386,4.325657
47.404059,4.24264069,4.36784141,-0.353837138,4.36134022,4.33110312,4.32454671
47.414551,4.69041576,4.36665162,0.569002759,4.36010054,4.33004396,4.32343741
47.425042,4.79583152,4.36547457,0.656015969,4.35887304,4.32898658,4.32232932
47.435534,4.69041576,4.36430985,0.571056839,4.35765729,4.32793079,4.32122223
47.446026,5.29150262,4.36315738,0.963506743,4.35645323,4.3268767,4.32011625
47.456517,5.65685425,4.36201711,1.13790911,4.35526078,4.32582441,4.31901146
47.467009,4.12310563,4.36088868,-0.487630038,4.35407957,4.32477373,4.31790768
47.4775,4.69041576,4.35977216,0.575016178,4.35290967,4.32372488,4.31680509
47.487992,4.69041576,4.3586672,0.575976179,4.35175072,4.32267765,4.31570349
47.498484,4.47213595,4.35757381,0.338470306,4.35060271,4.32163216,4.31460299
47.508975,4.35889894,4.35649197,0.0490608937,4.34946563,4.32058852,4.31350369
47.519467,4.69041576,4.3554214,0.578786975,4.34833915,4.31954653,4.31240537
47.529958,4.24264069,4.3543622,-0.334247689,4.34722342,4.3185064,4.31130824
47.54045,4.24264069,4.35331412,-0.332676168,4.34611812,4.31746795,4.3102121
47.550942,4.35889894,4.35227718,0.081374196,4.34502329,4.31643129,4.30911705
47.561433,3.74165739,4.35125144,-0.780765044,4.34393898,4.31539651,4.30802319
47.571925,6.08276253,4.35023666,1.31625449,4.34286492,4.31436344,4.3069303
47.582416,4.35889894,4.34923299,0.0983155774,4.34180128,4.31333228,4.30583861
47.592908,5,4.34824023,0.807316399,4.34074782,4.31230285,4.30474789
47.6034,4.35889894,4.34725846,0.10789106,4.33970462,4.31127525,4.30365825
47.613891,5.29150262,4.34628777,0.972221605,4.33867176,4.31024959,4.30256979
47.624383,4.89897949,4.34532799,0.744077617,4.33764904,4.3092257,4.3014823
47.634874,4.79583152,4.3443793,0.671901946,4.33663666,4.30820376,4.30039599
47.645366,5,4.34344156,0.810282939,4.33563444,4.30718362,4.29931066
47.655858,4.12310563,4.34251489,-0.468411425,4.3346425,4.30616536,4.29822639
47.666349,4.47213595,4.34159942,0.361298397,4.33366096,4.30514911,4.2971433
47.676841,5,4.34069504,0.81197596,4.33268967,4.30413467,4.29606118
47.687332,5.09901951,4.33980198,0.8713309,4.33172888,4.30312226,4.29498022
47.697824,3.74165739,4.33892013,-0.77282776,4.33077846,4.3021117,4.29390023
47.708316,4.79583152,4.33804968,0.676595773,4.32983856,4.3011031,4.29282131
47.718807,4.47213595,4.3371908,0.367348825,4.32890936,4.30009656,4.29174355
47.729299,4.24264069,4.33634341,-0.306109011,4.32799077,4.29909191,4.29066675
47.73979,4.79583152,4.33550781,0.678471601,4.32708305,4.29808936,4.28959111
47.750282,5.74456265,4.33468395,1.18738313,4.32618615,4.29708873,4.28851643
47.760774,4.79583152,4.33387204,0.67967601,4.32530027,4.29609012,4.28744281
47.771265,4.79583152,4.33307232,0.680264071,4.32442562,4.29509366,4.28637034
47.781757,4.89897949,4.33228477,0.752791282,4.32356217,4.29409916,4.28529883
47.792248,4.89897949,4.33150972,0.75330589,4.32271024,4.29310684,4.28422848
47.80274,4.24264069,4.3307472,-0.296827418,4.32186983,4.29211651,4.28315907
47.813232,5.29150262,4.32999748,0.980563687,4.32104119,4.2911283,4.28209071
47.823723,5.29150262,4.32926082,0.980939245,4.32022459,4.2901423,4.2810235
47.834215,5.38516481,4.3285373,1.02792388,4.31942006,4.28915837,4.27995724
47.844706,4.69041576,4.32782729,0.602153191,4.31862798,4.28817669,4.27889213
47.855198,4.69041576,4.3271309,0.602731165,4.31784841,4.2871971,4.27782796
47.86569,4.79583152,4.32644845,0.685115371,4.31708167,4.28621972,4.27676483
47.876181,4.24264069,4.32578027,-0.288339362,4.31632807,4.28524465,4.27570284
47.886673,4.69041576,4.32512653,0.604391618,4.31558776,4.28427174,4.2746418
47.897164,4.79583152,4.32448765,0.686544881,4.31486113,4.28330118,4.27358189
47.907656,5.65685425,4.32386382,1.15455205,4.31414836,4.28233282,4.27252292
47.918148,5.09901951,4.32325545,0.880774694,4.31344983,4.28136677,4.27146498
47.928639,5.19615242,4.32266294,0.934606591,4.31276593,4.28040313,4.27040818
47.939131,3.46410162,4.32208656,-0.926274765,4.31209688,4.27944176,4.26935231
47.949622,4.24264069,4.32152679,-0.280866701,4.31144318,4.27848286,4.26829757
47.960114,4.69041576,4.32098395,0.607809021,4.3108051,4.27752628,4.26724376
47.970606,5.09901951,4.32045853,0.882361027,4.3101831,4.27657211,4.26619098
47.981097,5.19615242,4.31995103,0.9360563,4.30957767,4.27562049,4.26513933
47.991589,4.47213595,4.31946182,0.39073538,4.30898916,4.27467126,4.2640886
48.00208,4.58257569,4.3189915,0.51340451,4.30841814,4.27372462,4.26303899
48.012572,5.09901951,4.31854053,0.883447219,4.30786502,4.27278043,4.26199031
48.023064,3.87298335,4.31810948,-0.667177738,4.30733038,4.2718388,4.26094264
48.033555,5,4.31769899,0.826015137,4.30681483,4.27089984,4.2598961
48.044047,4.47213595,4.3173096,0.393479804,4.30631884,4.26996342,4.25885048
48.054538,4.47213595,4.31694202,0.393946618,4.30584314,4.26902973,4.25780597
48.06503,4.12310563,4.31659686,-0.439876384,4.30538829,4.26809864,4.25676237
48.075522,4.12310563,4.31627487,-0.439510235,4.30495502,4.26717025,4.25571979
48.086013,4.35889894,4.31597684,0.207176513,4.30454408,4.26624471,4.25467832
48.096505,5.29150262,4.31570349,0.987825458,4.30415616,4.26532185,4.25363776
48.106996,4.24264069,4.3154557,-0.26984258,4.30379214,4.2644019,4.25259831
48.117488,4.79583152,4.31523432,0.693251181,4.30345278,4.26348471,4.25155977
48.12798,4.47213595,4.31504029,0.396352958,4.30313902,4.26257041,4.25052223
48.138471,5.38516481,4.31487458,1.03454832,4.30285182,4.26165911,4.2494858
48.148963,4.24264069,4.31473821,-0.268509818,4.30259212,4.2607507,4.24845027
48.159454,5,4.31463227,0.827869394,4.30236102,4.25984537,4.24741584
48.169946,4,4.31455788,-0.560854595,4.30215957,4.258943,4.24638231
48.180438,4.89897949,4.31451625,0.76450195,4.30198896,4.25804371,4.24534978
48.190929,4.24264069,4.31450867,-0.268082036,4.30185045,4.25714764,4.24431835
48.201421,4.58257569,4.31453645,0.517725064,4.3017453,4.25625465,4.24328781
48.211912,4.35889894,4.31460103,0.210470704,4.30167492,4.25536496,4.24225837
48.222404,3.74165739,4.3147039,-0.756998357,4.30164075,4.25447846,4.24122982
48.232896,4.12310563,4.31484665,-0.43788243,4.30164435,4.25359527,4.24020226
48.243387,5.09901951,4.31503093,0.885431297,4.30168735,4.25271552,4.23917579
48.253879,6.08276253,4.31525856,1.32947507,4.30177149,4.2518391,4.23815021
48.26437,4.69041576,4.31553138,0.612278024,4.3018986,4.25096622,4.23712571
48.274862,5.83095189,4.31585143,1.23089417,4.30207066,4.25009678,4.23610211
48.285354,4.58257569,4.31622081,0.51609581,4.30228973,4.24923092,4.23507948
48.295845,5.19615242,4.31664172,0.937822321,4.30255798,4.24836876,4.23405794
48.306337,4.47213595,4.31711663,0.39372494,4.30287782,4.24751021,4.23303728
48.316828,4.12310563,4.31764798,-0.441069558,4.30325167,4.24665549,4.23201769
48.32732,4.79583152,4.31823859,0.691080992,4.30368227,4.2458045,4.23099899
48.337812,4.69041576,4.31889127,0.60952809,4.30417241,4.24495738,4.22998126
48.348303,4.35889894,4.31960901,0.198216878,4.30472504,4.24411428,4.22896461
48.358795,5.74456265,4.32039523,1.19338486,4.3053435,4.24327511,4.22794883
48.369286,4.24264069,4.32125325,-0.280379323,4.3060311,4.24244009,4.22693412
48.379778,5.09901951,4.32218697,0.881381046,4.30679165,4.24160914,4.22592029
48.39027,4.58257569,4.32320027,0.509289137,4.30762903,4.24078241,4.22490742
48.400761,4.47213595,4.32429731,0.384497914,4.30854734,4.23996006,4.22389562
48.411253,3.74165739,4.32548286,-0.764084727,4.30955127,4.239142,4.22288469
48.421744,4.69041576,4.32676156,0.603037475,4.31064547,4.23832847,4.22187482
48.432236,4.69041576,4.32813892,0.601894375,4.31183534,4.23751941,4.22086581
48.442728,5.19615242,4.32962044,0.930876998,4.31312636,4.23671497,4.21985777
48.453219,5.29150262,4.331212,0.979944195,4.31452439,4.23591532,4.21885079
48.463711,4.47213595,4.33292043,0.373115971,4.31603617,4.2351204,4.21784466
48.474202,4.89897949,4.3347524,0.751150508,4.31766836,4.23433046,4.21683959
48.484694,4.12310563,4.33671584,-0.462179849,4.31942882,4.23354543,4.21583538
48.495186,4.47213595,4.33881874,0.365126307,4.32132551,4.2327655,4.21483213
48.505677,5,4.34106969,0.811745227,4.323367,4.23199084,4.21382992
48.516169,4.69041576,4.34347869,0.589013645,4.32556321,4.23122141,4.21282857
48.52666,5.74456265,4.34605561,1.1825849,4.32792402,4.23045747,4.21182827
48.537152,5.47722558,4.34881219,1.06226804,4.3304611,4.22969898,4.21082882
48.547644,5.09901951,4.35176038,0.864441513,4.33318639,4.22894614,4.20983031
48.558135,4.79583152,4.35491315,0.664016851,4.33611283,4.22819914,4.20883285
48.568627,4.79583152,4.35828555,0.661472579,4.33925546,4.22745796,4.20783624
48.579118,4.69041576,4.36189271,0.573169302,4.3426294,4.22672287,4.20684066
48.58961,4.24264069,4.36575257,-0.350873032,4.34625256,4.22599387,4.20584593
48.600102,4.89897949,4.36988366,0.727389736,4.35014348,4.22527116,4.20485214
48.610593,4.47213595,4.3743062,0.312777492,4.35432243,4.22455496,4.20385939
48.621085,5,4.37904376,0.788007765,4.35881295,4.22384527,4.20286747
48.631576,4.79583152,4.38412039,0.641647202,4.36363917,4.22314239,4.20187659
48.642068,4.79583152,4.3895646,0.637390714,4.3688296,4.22244634,4.20088654
48.65256,5.65685425,4.39540628,1.12314201,4.37441422,4.22175734,4.19989743
48.663051,4.58257569,4.40167839,0.425320236,4.3804261,4.22107564,4.19890935
48.673543,4.69041576,4.4084194,0.531033298,4.38690375,4.22040128,4.1979221
48.684034,5.38516481,4.4156693,0.984629629,4.39388737,4.21973457,4.19693587
48.694526,4.89897949,4.42347555,0.689567934,4.4014245,4.21907557,4.19595047
48.705018,4.12310563,4.43188877,-0.555682598,4.40956599,4.21842454,4.194966
48.715509,5.56776436,4.44096542,1.06150786,4.41836855,4.21778175,4.19398255
48.726001,3.87298335,4.45077157,-0.76012382,4.42789847,4.21714727,4.19299993
48.736492,4.79583152,4.4613775,0.578319999,4.43822641,4.21652145,4.19201832
48.746984,5.74456265,4.47286668,1.12769498,4.44943615,4.2159044,4.19103753
48.757476,5.09901951,4.48532998,0.783383387,4.46161906,4.2152964,4.19005767
48.767967,4.47213595,4.49887009,-0.163505779,4.47487835,4.21469776,4.18907881
48.778459,5.38516481,4.51360793,0.933572106,4.48933551,4.21410861,4.18810078
48.78895,4.89897949,4.52967526,0.607704065,4.50512307,4.21352933,4.18712375
48.799442,5.56776436,4.54722927,1.01021537,4.52239899,4.21296008,4.18614755
48.809934,4.89897949,4.56644508,0.576657961,4.54133941,4.2124012,4.18517225
48.820425,5.19615242,4.58752381,0.780146531,4.56214658,4.21185302,4.18419796
48.830917,6.164414,4.61070454,1.24647883,4.58506085,4.21131576,4.18322448
48.841408,5.74456265,4.63625494,1.05276194,4.61035148,4.21078982,4.182252
48.8519,5.09901951,4.66449725,0.659183026,4.63834244,4.21027544,4.18128033
48.862392,5.47722558,4.69579986,0.883982873,4.6694042,4.20977301,4.18030957
48.872883,5,4.73059451,0.519042863,4.70397096,4.20928293,4.1793398
48.883375,6.244998,4.76940194,1.21474115,4.74256621,4.20880548,4.17837084
48.893866,6.63324958,4.81282324,1.34923176,4.78579432,4.20834114,4.17740288
48.904358,6.55743852,4.86159298,1.30224635,4.8343936,4.20789021,4.17643571
48.91485,4.79583152,4.91657701,-0.347484513,4.88923434,4.20745316,4.17546945
48.925341,6.08276253,4.97881903,1.05068716,4.95136532,4.20703048,4.17450417
48.935833,6.78232998,5.04961355,1.31632687,5.02208697,4.20662252,4.17353969
48.946324,6.78232998,5.13053883,1.28522028,5.10298455,4.20622984,4.1725762
48.956816,6.32455532,5.22365727,1.04923689,5.19612896,4.20585287,4.1716135
48.967308,5.47722558,5.33173576,0.381431266,5.30429803,4.20549215,4.1706517
48.977799,7.48331477,5.45881414,1.42284948,5.43154691,4.20514826,4.16969087
48.988291,6.92820323,5.61130695,1.14756102,5.58431348,4.20482169,4.16873084
48.998782,7.21110255,5.79972118,1.18801573,5.773141,4.2045131,4.16777179
49.009274,8,6.04145137,1.39948156,6.01547823,4.20422303,4.16681353
49.019766,9.69535971,6.36352308,1.82533192,6.33842013,4.20395216,4.16585615
49.030257,8,6.80379792,1.09371024,6.77989324,4.20370119,4.16489974
49.040749,9.79795897,7.407643,1.54606467,7.3852853,4.20347076,4.16394412
49.05124,8.42614977,8.21724444,0.457061633,8.19671757,4.20326166,4.16298947
49.061732,10.5356538,9.25737715,1.13060895,9.2388168,4.20307461,4.1620356
49.072224,11.2694277,10.5218985,0.864597666,10.5052606,4.20291045,4.16108261
49.082715,12.5299641,11.9681846,0.749519473,11.953278,4.20277003,4.16013059
49.093207,14,13.5180809,0.694203903,13.5046282,4.20265421,4.15917934
49.103698,15.3622915,15.0554126,0.553966479,15.0430973,4.20256393,4.15822906
49.11419,15.3622915,16.4183526,-1.02764835,16.406836,4.20250017,4.15727956
49.124682,16.8522995,17.3912388,-0.734124801,17.3801487,4.20246394,4.15633092
49.135173,17.9722008,17.75114,0.470170935,17.7400548,4.20245632,4.15538324
49.145665,19.3649167,17.3958696,1.40322738,17.3843262,4.20247844,4.15443634
49.156156,18,16.4269855,1.25419875,16.4145077,4.20253149,4.15349039
49.166648,17.5499288,15.0667613,1.57580694,15.0528715,4.20261672,4.15254521
49.17714,15.1657509,13.5307382,1.27867614,13.5149429,4.20273543,4.15160089
49.187631,13.3790882,11.9813603,1.18225542,11.9631382,4.20288901,4.15065752
49.198123,10.8627805,10.5342042,0.573215755,10.5130262,4.20307892,4.14971493
49.208614,10.2469508,9.26842944,0.98920237,9.24382588,4.20330668,4.14877327
49.219106,8.60232527,8.22654132,0.613012191,8.19819869,4.20357394,4.14783238
49.229598,7.74596669,7.41508294,0.575224955,7.38292246,4.20388239,4.14689235
49.240089,7.21110255,6.80979944,0.633484893,6.77397336,4.20423379,4.14595326
49.250581,6.244998,6.36836589,-0.351237658,6.32916411,4.20463013,4.14501493
49.261072,6.4807407,6.04563944,0.659622059,6.00337348,4.20507333,4.14407754
49.271564,5.29150262,5.80355791,-0.715580384,5.75848234,4.2055656,4.1431409
49.282056,6,5.61502766,0.620461395,5.56731933,4.20610917,4.14220512
49.292547,5.09901951,5.46263048,-0.603001634,5.41239993,4.20670634,4.14127027
49.303039,5.19615242,5.33574009,-0.373614328,5.28305117,4.20735977,4.14033617
49.31353,5.29150262,5.2279666,0.252063533,5.17285434,4.208072,4.13940301
49.324022,4.79583152,5.13521826,-0.582569087,5.07769837,4.20884601,4.13847059
49.334514,5.19615242,5.0547259,0.376067172,4.99480105,4.20968474,4.13753902
49.345005,4.69041576,4.9844481,-0.542247488,4.92211056,4.21059132,4.13660838
49.355497,5.29150262,4.92277762,0.607227308,4.85800986,4.21156932,4.13567848
49.365988,5.19615242,4.86844694,0.572455658,4.80122313,4.21262217,4.13474951
49.37648,5.09901951,4.82039699,0.527847062,4.75068241,4.21375393,4.13382128
49.386972,4.69041576,4.77776663,-0.295551812,4.70551862,4.21496861,4.13289389
49.397463,5.09901951,4.7398372,0.599318207,4.66500533,4.21627046,4.13196741
49.407955,5,4.70599607,0.542221294,4.62852151,4.2176644,4.13104168
49.418446,4.58257569,4.67574094,-0.305229831,4.59555747,4.21915516,4.13011686
49.428938,4.79583152,4.6486353,0.3836616,4.56566826,4.22074835,4.12919279
49.43943,4.79583152,4.624317,0.41414312,4.538484,4.22244953,4.12826954
49.449921,5,4.6024769,0.630494328,4.51368771,4.22426465,4.1273472
49.460413,5.09901951,4.58284469,0.718453079,4.49100014,4.22620058,4.1264256
49.470904,4.58257569,4.56519639,0.131830599,4.47018931,4.22826398,4.1255049
49.481396,4.24264069,4.54933265,-0.553797763,4.4510463,4.23046278,4.12458494
49.491888,5,4.53508675,0.681845476,4.43339534,4.23280488,4.1236658
49.502379,5.65685425,4.52231456,1.06514773,4.41708286,4.23529876,4.12274757
49.512871,4.35889894,4.5108882,-0.389857997,4.40196991,4.23795426,4.12183006
49.523362,5.09901951,4.50070182,0.773509981,4.38794044,4.24078098,4.12091345
49.533854,4.24264069,4.49166022,-0.499018565,4.37488683,4.24379037,4.11999757
49.544346,4.69041576,4.48368432,0.454677287,4.36271797,4.24699396,4.11908251
49.554837,5.09901951,4.47670615,0.788868406,4.35135301,4.25040414,4.11816834
49.565329,4.69041576,4.47066583,0.468774927,4.34071698,4.25403537,4.11725489
49.57582,5.38516481,4.46551517,0.958983646,4.33074724,4.25790188,4.11634234
49.586312,5.65685425,4.46121195,1.0934543,4.32138407,4.26202065,4.11543051
49.596804,4.35889894,4.45772292,-0.314362814,4.31257683,4.26640894,4.11451948
49.607295,5.38516481,4.4550214,0.964439427,4.30428001,4.27108547,4.11360935
49.617787,5.47722558,4.45308625,1.01199769,4.29645038,4.27607202,4.11269993
49.628278,5.29150262,4.45190327,0.916296542,4.28905202,4.28139042,4.1117914
49.63877,5,4.45146334,0.74063261,4.28204971,4.28706659,4.11088358
49.649262,4,4.45176325,-0.672133359,4.27541365,4.29312724,4.10997656
49.659753,5,4.45280495,0.739726332,4.26911677,4.29960157,4.10907042
49.670245,5.09901951,4.4545961,0.802759872,4.26313276,4.30652356,4.10816499
49.680736,4.58257569,4.4571493,0.354155898,4.25743998,4.3139278,4.10726045
49.691228,4.79583152,4.46048355,0.57909237,4.25201655,4.32185531,4.10635661
49.70172,4.12310563,4.46462302,-0.584394893,4.24684412,4.33034902,4.10545356
49.712211,4.89897949,4.46959765,0.655272339,4.24190584,4.3394562,4.10455139
49.722703,5.09901951,4.47544539,0.789667097,4.23718495,4.34923187,4.10364992
49.733194,5.83095189,4.48220912,1.16135386,4.23266785,4.35973319,4.10274933
49.743686,4.69041576,4.48994176,0.447743227,4.22834038,4.37102773,4.10184943
49.754178,4.58257569,4.49870272,0.289608321,4.22419077,4.38318743,4.10095033
49.764669,4.35889894,4.50856021,-0.386860785,4.22020815,4.39629224,4.10005209
49.775161,4.47213595,4.51959571,-0.217852588,4.2163814,4.41043549,4.09915454
49.785652,4.79583152,4.53189818,0.51374443,4.2127017,4.42571611,4.09825787
49.796144,4.58257569,4.54557428,0.192357514,4.20915952,4.44225124,4.09736189
49.806636,4.79583152,4.56074212,0.484860192,4.20574708,4.4601681,4.09646668
49.817127,4.79583152,4.5775365,0.467220534,4.20245713,4.47961016,4.09557234
49.827619,5,4.5961173,0.635517665,4.19928205,4.50074639,4.09467869
49.83811,3.60555128,4.61666118,-1.00553961,4.19621596,4.52376116,4.0937859
49.848602,4.47213595,4.63938057,-0.408955514,4.19325224,4.54887539,4.0928938
49.859094,4.69041576,4.66451589,0.160934372,4.19038559,4.5763371,4.09200246
49.869585,5.19615242,4.69234767,0.709792046,4.18761106,4.60643437,4.09111199
49.880077,3.60555128,4.72321486,-1.05719609,4.18492327,4.63951435,4.09022219
49.890568,5.29150262,4.75750625,0.730750556,4.1823182,4.67597333,4.08933325
49.90106,4.58257569,4.79569842,-0.461652171,4.17979114,4.71629642,4.088445
49.911552,5,4.83834911,0.402058321,4.17733839,4.76104951,4.0875575
49.922043,4.12310563,4.88612319,-0.873508765,4.17495649,4.81090603,4.08667086
49.932535,4.79583152,4.93982779,-0.379468398,4.17264154,4.86668258,4.08578489
49.943026,5.65685425,5.00039654,0.810220777,4.17039076,4.92932172,4.08489977
49.953518,4.69041576,5.06894781,-0.615249585,4.16820068,4.99995162,4.08401532
49.96401,4.79583152,5.14675445,-0.592387483,4.1660687,5.07985403,4.08313164
49.974501,4.79583152,5.23525748,-0.662892112,4.16399234,5.1704781,4.08224879
49.984993,4.58257569,5.3360827,-0.868047811,4.16196872,5.27345697,4.08136662
49.995484,4.58257569,5.45094566,-0.931863708,4.15999587,5.39051047,4.08048528
50.005976,5.47722558,5.58168068,-0.323195144,4.15807121,5.52347507,4.07960461
50.016468,6,5.7300909,0.519527767,4.15619285,5.67415173,4.0787247
50.026959,5.29150262,5.89787516,-0.77869926,4.15435903,5.84423283,4.07784562
50.037451,5.91607978,6.0865558,-0.412887411,4.15256753,6.0352304,4.0769672
50.047942,4.89897949,6.29718713,-1.18245831,4.15081698,6.248183,4.07608962
50.058434,6.32455532,6.53027239,-0.45356044,4.1491054,6.48357467,4.0752127
50.068926,6.63324958,6.78529567,-0.389930875,4.14743142,6.74086553,4.07433653
50.079417,7,7.06030604,-0.245572874,4.14579373,7.01807678,4.07346118
50.089909,8.30662386,7.35135758,0.977377246,4.14419066,7.31123128,4.07258649
50.1004,7.14142843,7.65149224,-0.71418752,4.14262121,7.6133348,4.07171263
50.110892,8.60232527,7.95008726,0.807612536,4.14108384,7.91372514,4.07083942
50.121384,8.18535277,8.23207089,-0.216143748,4.13957756,8.19728734,4.06996696
50.131875,9.21954446,8.47833137,0.860937331,4.13810141,8.44486567,4.06909531
50.142367,9.11043358,8.66767062,0.665404357,4.13665405,8.63522185,4.06822432
50.152858,8.36660027,8.78040649,-0.643277716,4.13523479,8.74864224,4.06735414
50.16335,8.83176087,8.80329442,0.168720016,4.13384243,8.7718662,4.06648462
50.173842,8.42614977,8.73335156,-0.554257868,4.13247622,8.70191369,4.06561583
50.184333,8.66025404,8.57888464,0.285253209,4.13113545,8.54711394,4.06474785
50.194825,7.93725393,8.35685527,-0.647766422,4.12981907,8.32446691,4.06388052
50.205316,8.1240384,8.0883608,0.188885173,4.12852659,8.05511833,4.063014
50.215808,8.60232527,7.79394534,0.89909951,4.12725705,7.75966369,4.06214813
50.2263,7.28010989,7.49088018,-0.459097256,4.1260099,7.45542404,4.06128298
50.236791,6.164414,7.19204482,-1.01372127,4.12478462,7.1553239,4.06041864
50.247283,7.34846923,6.90607364,0.665128253,4.12358037,6.86803643,4.05955494
50.257774,7.14142843,6.63835123,0.709279353,4.1223968,6.59897968,4.05869205
50.268266,7.14142843,6.39168922,0.865874821,4.12123314,6.35099293,4.05782979
50.278758,6.8556546,6.16725161,0.829700541,4.12008899,6.12526331,4.05696826
50.289249,6.55743852,5.96502738,0.769682498,4.11896398,5.92179834,4.05610752
50.299741,6.70820393,5.78417536,0.961264051,4.11785741,5.7397706,4.05524742
50.310232,6.164414,5.62342274,0.735521085,4.11676907,5.57791706,4.05438812
50.320724,6.8556546,5.48112827,1.17240195,4.11569833,5.43460168,4.05352945
50.331216,6.164414,5.35553707,0.899375857,4.11464489,5.30807131,4.0526715
50.341707,6.08276253,5.24484237,0.915379789,4.11360849,5.19651769,4.05181434
50.352199,5.19615242,5.14724795,0.221143563,4.11258858,5.09814042,4.0509578
50.36269,5.56776436,5.06109843,0.711804703,4.111585,5.01127856,4.05010206
50.373182,5.38516481,4.98484796,0.632705969,4.11059727,4.93437941,4.04924695
50.383674,4.79583152,4.91714035,-0.34829417,4.10962517,4.86607978,4.04839254
50.394165,4.24264069,4.85678845,-0.783675802,4.10866851,4.80518558,4.04753893
50.404657,5.09901951,4.80275595,0.544300991,4.10772685,4.75065383,4.04668593
50.415148,5.29150262,4.75418195,0.733021607,4.10680011,4.70161773,4.04583372
50.42564,5.19615242,4.71032343,0.697014345,4.10588789,4.65732883,4.04498213
50.436132,4.58257569,4.67056898,-0.296636618,4.10499005,4.61717108,4.04413124
50.446623,5.09901951,4.63440504,0.681626344,4.10410647,4.58062687,4.04328113
50.457115,5.47722558,4.6013905,0.935860607,4.10323678,4.54725148,4.04243164
50.467606,5.09901951,4.57116462,0.726536231,4.10238098,4.51668118,4.04158293
50.478098,5.74456265,4.54340994,1.09597112,4.10153872,4.48859578,4.04073483
50.48859,4.69041576,4.51786246,0.415395348,4.10070994,4.46272896,4.03988743
50.499081,5.56776436,4.49429415,1.03608408,4.09989455,4.43885066,4.03904081
50.509573,5.29150262,4.47250082,0.904987181,4.09909229,4.41675483,4.03819479
50.520064,4.79583152,4.45231204,0.586105348,4.09830316,4.39626945,4.03734955
50.530556,5,4.43357073,0.752614952,4.09752692,4.37723595,4.03650491
50.541048,3.87298335,4.41614353,-0.736994022,4.09676352,4.35951968,4.03566097
50.551539,4.24264069,4.39991201,-0.396574483,4.09601296,4.34300105,4.03481779
50.562031,4.47213595,4.38476652,0.295583208,4.09527499,4.32756932,4.03397522
50.572522,5.09901951,4.37061486,0.853466258,4.09454969,4.31313136,4.03313341
50.583014,4.12310563,4.35736938,-0.484008015,4.09383686,4.29959861,4.03229221
50.593506,3.87298335,4.34495529,-0.687002145,4.09313651,4.28689547,4.03145169
50.603997,5.56776436,4.33330524,1.11106216,4.09244864,4.27495391,4.03061193
50.614489,5.19615242,4.32235548,0.934771064,4.09177311,4.26370946,4.02977277
50.62498,4.47213595,4.31205259,0.400104195,4.09110999,4.25310813,4.02893437
50.635472,5.19615242,4.30234451,0.945414151,4.09045915,4.24309724,4.02809657
50.645964,4.58257569,4.29318687,0.537948716,4.08982063,4.23363194,4.02725945
50.656455,4.69041576,4.28453938,0.637084284,4.08919449,4.22467146,4.02642308
50.666947,4.12310563,4.27636308,-0.391481099,4.08858061,4.21617634,4.02558731
50.677438,5,4.26862559,0.855204309,4.08797911,4.20811385,4.02475228
50.68793,5.29150262,4.26129457,1.01499165,4.0873899,4.20045118,4.02391786
50.698422,3.87298335,4.2543426,-0.617542918,4.08681307,4.19316057,4.0230841
50.708913,5.09901951,4.24774454,0.922645636,4.08624869,4.18621657,4.02225109
50.719405,4.69041576,4.24147564,0.670029942,4.0856967,4.17959402,4.02141867
50.729896,4.69041576,4.23551551,0.674462932,4.08515726,4.17327229,4.02058699
50.740388,4.12310563,4.2298433,-0.32670732,4.08463031,4.16723014,4.0197559
50.75088,4.69041576,4.22444143,0.682623127,4.08411598,4.16144975,4.01892548
50.761371,3.74165739,4.2192937,-0.691112372,4.08361438,4.15591467,4.0180958
50.771863,4.89897949,4.2143838,0.827402975,4.0831255,4.15060824,4.0172667
50.782354,3.87298335,4.20969853,-0.580271648,4.08264951,4.14551706,4.01643835
50.792846,4.89897949,4.20522397,0.832919874,4.08218642,4.14062688,4.01561057
50.803338,3.31662479,4.20094853,-0.94038489,4.08173637,4.13592589,4.01478346
50.813829,4.79583152,4.19686147,0.773931555,4.08129952,4.13140313,4.01395708
50.824321,4.69041576,4.19295174,0.705311296,4.08087591,4.12704721,4.01313127
50.834812,4.58257569,4.18921053,0.627188297,4.08046573,4.12284919,4.01230621
50.845304,4.24264069,4.18562834,0.238772583,4.08006904,4.11879919,4.01148171
50.855796,4.12310563,4.18219733,-0.243087853,4.07968602,4.11488919,4.01065787
50.866287,5,4.17891021,0.90614005,4.07931687,4.11111168,4.00983476
50.876779,5.38516481,4.17575931,1.09972974,4.07896166,4.10745865,4.00901223
50.88727,4.35889894,4.17273866,0.431462957,4.07862063,4.10392399,4.00819042
50.897762,4,4.16984161,-0.412118439,4.0782939,4.10050066,4.00736918
50.908254,5,4.16706277,0.91265395,4.07798167,4.09718308,4.00654859
50.918745,5,4.1643971,0.914113174,4.07768417,4.093966,4.00572872
50.929237,4.69041576,4.1618392,0.727032708,4.07740155,4.09084363,4.00490942
50.939728,4.24264069,4.15938496,0.288540689,4.07713406,4.0878117,4.00409084
50.95022,4.35889894,4.15702965,0.449298673,4.07688189,4.08486509,4.00327283
50.960712,4.58257569,4.15476952,0.654068938,4.07664529,4.08199983,4.00245545
50.971203,4.58257569,4.15260107,0.655724504,4.07642451,4.07921217,4.0016388
50.981695,6.244998,4.15052043,1.447231,4.07621978,4.07649782,4.00082271
50.992186,4.12310563,4.14852476,-0.159433794,4.07603138,4.07385376,4.00000733
51.002678,5.09901951,4.14661068,0.975914356,4.07585956,4.07127618,3.99919251
51.01317,3.74165739,4.14477559,-0.6349159,4.07570462,4.06876219,3.99837833
51.023661,4.69041576,4.14301702,0.739864003,4.07556686,4.06630908,3.99756486
51.034153,4.35889894,4.14133221,0.466440493,4.07544657,4.06391361,3.99675195
51.044644,4.89897949,4.13971922,0.871355421,4.07534409,4.06157361,3.99593974
51.055136,4.79583152,4.13817562,0.810959863,4.07525972,4.05928616,3.99512809
51.065628,4.69041576,4.13669963,0.744121047,4.07519383,4.05704916,3.99431707
51.076119,4.24264069,4.13528954,0.327644854,4.07514677,4.05486061,3.99350676
51.086611,5,4.1339434,0.930621621,4.07511891,4.052718,3.992697
51.097102,4.89897949,4.1326599,0.875396815,4.07511063,4.05061976,3.99188794
51.107594,4.58257569,4.13143736,0.671668322,4.07512234,4.04856364,3.99107943
51.118086,4.35889894,4.13027457,0.478146816,4.07515444,4.04654806,3.99027154
51.128577,4.79583152,4.12917039,0.816493191,4.07520737,4.04457153,3.98946436
51.139069,3.60555128,4.12812351,-0.722891578,4.07528157,4.04263209,3.98865772
51.14956,5,4.1271331,0.934273461,4.07537752,4.04072858,3.98785177
51.160052,4.47213595,4.12619803,0.58816488,4.07549569,4.03885923,3.98704638
51.170544,4.12310563,4.12531755,-0.0470310583,4.07563656,4.03702285,3.9862416
51.181035,4.58257569,4.12449097,0.676819569,4.07580066,4.03521832,3.98543751
51.191527,6,4.12371745,1.36977463,4.07598852,4.03344407,3.98463397
51.202018,5,4.12299655,0.936484623,4.07620069,4.03169925,3.98383112
51.21251,4.58257569,4.1223276,0.678415872,4.07643776,4.02998244,3.9830288
51.223002,4.69041576,4.12171022,0.754125678,4.07670032,4.02829273,3.9822271
51.233493,4.47213595,4.12114409,0.592445665,4.07698896,4.02662928,3.98142609
51.243985,4.35889894,4.12062878,0.488129244,4.07730437,4.0249908,3.98062561
51.254476,4.58257569,4.12016417,0.680008478,4.07764716,4.02337669,3.97982582
51.264968,4.69041576,4.11974997,0.755424246,4.07801808,4.02178577,3.97902657
51.27546,4.12310563,4.11938613,0.0609876653,4.07841781,4.02021736,3.97822792
51.285951,4.89897949,4.11907264,0.883123349,4.07884707,4.0186708,3.97742995
51.296443,4.47213595,4.11880944,0.594412746,4.0793067,4.01714504,3.97663252
51.306934,5,4.11859668,0.938830826,4.07979741,4.01563964,3.97583576
51.317426,4.47213595,4.11843445,0.594728091,4.08032012,4.01415363,3.97503954
51.327918,5.09901951,4.11832299,0.99030123,4.08087566,4.01268647,3.97424391
51.338409,4.89897949,4.11826255,0.883581877,4.08146487,4.01123767,3.97344896
51.348901,4.89897949,4.11825346,0.88358702,4.08208877,4.00980635,3.97265454
51.359392,4,4.11829611,-0.343942021,4.08274823,4.00839219,3.9718608
51.369884,4.24264069,4.11839096,0.35249075,4.08344436,4.00699437,3.97106757
51.380376,4.79583152,4.11853851,0.822978136,4.08417815,4.00561249,3.97027494
51.390867,4.12310563,4.11873932,0.0660779927,4.08495061,4.00424616,3.96948299
51.401359,4.24264069,4.11899408,0.3516342,4.08576301,4.00289464,3.96869156
51.41185,5,4.11930342,0.938454355,4.08661637,4.0015577,3.96790079
51.422342,3.87298335,4.11966819,-0.496673781,4.08751206,4.00023465,3.96711054
51.432834,4.69041576,4.12008919,0.755199689,4.08845128,3.99892516,3.96632089
51.443325,4.79583152,4.12056728,0.821744636,4.08943524,3.99762896,3.9655319
51.453817,3.31662479,4.12110352,-0.89692738,4.09046551,3.9963454,3.96474342
51.464308,4.79583152,4.12169885,0.821055827,4.09154331,3.99507432,3.96395561
51.4748,4,4.12235452,-0.349792104,4.09267035,3.99381513,3.96316832
51.485292,4.89897949,4.12307165,0.880856308,4.09384805,3.99256759,3.96238161
51.495783,4.69041576,4.12385145,0.752704663,4.09507793,3.99133147,3.96159556
51.506275,4.35889894,4.12469542,0.483945788,4.09636189,3.9901062,3.96081002
51.516766,4.24264069,4.12560483,0.342105036,4.09770145,3.98889172,3.96002514
51.527258,3.87298335,4.12658138,-0.503585184,4.09909868,3.98768747,3.95924076
51.53775,4.47213595,4.12762661,0.586949187,4.10055536,3.98649329,3.95845697
51.548241,5.09901951,4.1287421,0.985026606,4.10207334,3.985309,3.95767383
51.558733,4,4.12992987,-0.360457865,4.10365497,3.98413411,3.9568912
51.569224,4.12310563,4.13119161,-0.0899220936,4.10530214,3.98296857,3.95610923
51.579716,3.87298335,4.13252955,-0.509456775,4.1070174,3.98181192,3.95532775
51.590208,5.19615242,4.13394571,1.03063413,4.10880297,3.98066402,3.95454685
51.600699,4.69041576,4.13544217,0.744965498,4.11066115,3.97952474,3.9537666
51.611191,5.38516481,4.13702156,1.11720331,4.11259486,3.97839365,3.95298686
51.621682,4.35889894,4.13868608,0.469268436,4.11460644,3.97727073,3.95220775
51.632174,4.35889894,4.14043864,0.467397373,4.11669909,3.97615557,3.95142915
51.642666,4.47213595,4.14228184,0.574329271,4.11887559,3.97504806,3.95065112
51.653157,4.47213595,4.1442184,0.572640858,4.12113881,3.97394811,3.94987374
51.663649,4.12310563,4.14625173,-0.15213843,4.12349242,3.97285533,3.94909685
51.67414,5.38516481,4.14838465,1.11210618,4.12593939,3.97176974,3.9483206
51.684632,4.35889894,4.15062094,0.456374849,4.12848371,3.97069096,3.94754484
51.695124,2.82842712,4.15296397,-1.15088525,4.13112892,3.96961891,3.94676965
51.705615,4.89897949,4.15541725,0.862300546,4.13387865,3.96855354,3.94599511
51.716107,5.38516481,4.15798519,1.10778139,4.13673755,3.96749448,3.94522105
51.726598,4,4.16067146,-0.400838449,4.13970938,3.96644177,3.94444763
51.73709,4.35889894,4.16348094,0.442061081,4.14279924,3.96539508,3.94367469
51.747582,5,4.16641801,0.913007114,4.14601163,3.96435434,3.94290232
51.758073,4.12310563,4.16948723,-0.215363881,4.14935123,3.96331952,3.94213059
51.768565,3.87298335,4.1726943,-0.547458632,4.15282395,3.96229029,3.94135934
51.779056,3.74165739,4.17604404,-0.659080154,4.15643468,3.96126672,3.94058872
51.789548,4.24264069,4.17954277,0.251192994,4.16018994,3.96024847,3.93981858
51.80004,4.79583152,4.18319621,0.782710237,4.16409554,3.95923552,3.93904901
51.810531,4.58257569,4.18701035,0.628939855,4.1681576,3.95822785,3.93828006
51.821023,4.89897949,4.19099263,0.841419548,4.17238371,3.95722516,3.93751159
51.831514,4.58257569,4.19514939,0.622435787,4.17678029,3.95622751,3.93674375
51.842006,4.47213595,4.1994889,0.522156161,4.18135579,3.95523462,3.93597639
51.852498,4.69041576,4.20401872,0.69742171,4.18611786,3.95424647,3.93520958
51.862989,4.69041576,4.20874679,0.694023756,4.19107452,3.95326305,3.93444339
51.873481,3.16227766,4.21368287,-1.02538052,4.1962357,3.95228407,3.93367769
51.883972,4.12310563,4.21883545,-0.309402365,4.20160996,3.95130963,3.9329126
51.894464,4.47213595,4.22421546,0.497916152,4.20720838,3.95033944,3.93214799
51.904956,5.09901951,4.229833,0.932301727,4.21304114,3.94937352,3.93138392
51.915447,4.58257569,4.23569873,0.588962618,4.21911897,3.94841185,3.93062048
51.925939,4.12310563,4.24182564,-0.344557711,4.22545504,3.94745418,3.9298575
51.93643,4,4.24822523,-0.498222073,4.23206089,3.94650059,3.92909514
51.946922,4.47213595,4.25506785,0.46590568,4.23910759,3.94555084,3.92833326
51.957414,4.12310563,4.26205571,-0.372760086,4.24629626,3.94460493,3.92757191
51.967905,4.58257569,4.26935908,0.559657585,4.25379785,3.94366288,3.92681118
51.978397,4.58257569,4.27699554,0.552793051,4.26163006,3.94272442,3.92605092
51.988888,5,4.2849809,0.84558802,4.26980877,3.94178968,3.92529127
51.99938,4.69041576,4.29333507,0.630143389,4.27835403,3.9408584,3.92453208
52.009872,4.58257569,4.30207696,0.529621316,4.28728481,3.93993059,3.92377344
52.020363,4.69041576,4.31122667,0.615783315,4.2966213,3.9390063,3.9230154
52.030855,4,4.32080834,-0.566399452,4.30638777,3.93808526,3.92225782
52.041346,4.69041576,4.33084416,0.59964289,4.31660647,3.9371676,3.92150085
52.051838,4.58257569,4.3413617,0.491135414,4.32730509,3.93625308,3.92074434
52.06233,4.24264069,4.35238755,-0.331280646,4.33851031,3.93534173,3.91998837
52.072821,4.69041576,4.36395014,0.571371703,4.35025063,3.93443357,3.919233
52.083313,5.19615242,4.37608329,0.905576684,4.36256002,3.93352839,3.91847809
52.093804,4.69041576,4.38881879,0.549178447,4.37547032,3.93262628,3.91772378
52.104296,5.65685425,4.40219563,1.12011545,4.38902064,3.93172704,3.91696993
52.114788,4.79583152,4.41625205,0.616100212,4.40324933,3.9308307,3.9162166
52.125279,4.58257569,4.43102913,0.389289822,4.41819754,3.92993728,3.91546388
52.135771,5.65685425,4.44657543,1.10012673,4.43391397,3.92904657,3.91471161
52.146262,4.79583152,4.46293753,0.576969667,4.45044526,3.9281587,3.91395994
52.156754,5.29150262,4.48017195,0.900738958,4.46784808,3.92727344,3.91320872
52.167246,4.47213595,4.49833511,-0.161861534,4.48617895,3.92639084,3.91245802
52.177737,5.38516481,4.5174879,0.931491764,4.50549883,3.92551092,3.91170792
52.188229,5.29150262,4.53770193,0.868216964,4.5258795,3.9246335,3.91095827
52.19872,4.89897949,4.55904733,0.583037013,4.54739116,3.92375868,3.91020921
52.209212,4.79583152,4.58160845,0.462842386,4.57011833,3.92288626,3.9094606
52.219704,5.56776436,4.6054709,0.980965577,4.5941467,3.92201629,3.90871251
52.230195,4.79583152,4.63072772,0.40632967,4.61956944,3.9211488,3.907965
52.240687,5.56776436,4.65748784,0.954084127,4.64649562,3.9202836,3.90721795
52.251178,5.47722558,4.68585916,0.889587777,4.67503327,3.91942081,3.90647148
52.26167,4.58257569,4.715974,-0.365237327,4.70531485,3.91856023,3.90572546
52.272162,5.56776436,4.74796564,0.905427368,4.73747379,3.91770191,3.90497995
52.282653,6.55743852,4.78198132,1.33246283,4.77165744,3.91684589,3.90423503
52.293145,4.69041576,4.81819292,-0.357459308,4.80803788,3.91599198,3.90349055
52.303636,5.19615242,4.85677626,0.582560007,4.84679104,3.91514031,3.90274665
52.314128,5.91607978,4.89794011,1.00902907,4.88812589,3.91429068,3.90200319
52.32462,5.83095189,4.94190412,0.942893301,4.93226221,3.91344315,3.90126024
52.335111,5.47722558,4.98891114,0.698794986,4.97944303,3.91259776,3.90051788
52.345603,5,5.03924463,-0.198102583,5.029952,3.91175431,3.89977595
52.356094,5.74456265,5.09320115,0.807069697,5.08408582,3.91091296,3.8990346
52.366586,6,5.15113194,0.921340362,5.14219595,3.91007349,3.89829368
52.377078,6.92820323,5.21341388,1.30949966,5.20465944,3.90923598,3.89755327
52.387569,6.164414,5.28046847,0.940183778,5.27189796,3.90840046,3.89681344
52.398061,6.08276253,5.35278889,0.854384949,5.34440492,3.90756675,3.89607404
52.408552,7.41619849,5.43090364,1.40900491,5.42270896,3.90673499,3.89533522
52.419044,6.32455532,5.51543935,0.899508738,5.50743696,3.90590499,3.89459683
52.429536,6.08276253,5.6070831,0.689695174,5.59927615,3.90507681,3.89385894
52.440027,5.29150262,5.70661432,-0.644291626,5.69900614,3.9042505,3.89312162
52.450519,6.92820323,5.81495098,1.0551077,5.80754511,3.90342588,3.89238473
52.46101,7.07106781,5.9331029,1.06675438,5.92590301,3.90260308,3.89164841
52.471502,7.28010989,6.06227459,1.10355575,6.05528458,3.90178192,3.89091252
52.481994,8.24621125,6.20382034,1.42912243,6.19704419,3.90096246,3.89017712
52.492485,8.94427191,6.35930712,1.60778257,6.35274895,3.90014476,3.8894423
52.502977,7.74596669,6.53060831,1.10243294,6.52427238,3.89932864,3.88870789
52.513468,8.18535277,6.71986575,1.21057301,6.71375639,3.89851423,3.88797406
52.52396,8.24621125,6.92971412,1.14738709,6.92383577,3.89770135,3.88724065
52.534452,8.83176087,7.16333366,1.29167612,7.15769092,3.89689007,3.88650773
52.544943,8.83176087,7.42480161,1.18615313,7.41939933,3.89608044,3.88577537
52.555435,9.2736185,7.71975558,1.24654038,7.7145993,3.8952723,3.88504344
52.565926,9.53939201,8.05629782,1.21782355,8.05139437,3.89446576,3.88431207
52.576418,10.3923048,8.44707294,1.39471571,8.44243152,3.89366067,3.88358111
52.58691,11.045361,8.91196679,1.46061433,8.90760041,3.89285708,3.88285065
52.597401,12.4498996,9.48196591,1.72276919,9.47789251,3.89205505,3.88212075
52.607893,11.8743421,10.202917,1.29283608,10.1991594,3.89125441,3.88139126
52.618384,14,11.1359287,1.69235674,11.1325112,3.89045529,3.88066233
52.628876,13.0766968,12.3523215,0.851102425,12.349263,3.88965753,3.87993382
52.639368,15.7480157,13.9192673,1.35231226,13.9165728,3.88886119,3.87920579
52.649859,17.4928557,15.8803604,1.26984066,15.8780156,3.88806632,3.87847831
52.660351,19,18.2378055,0.873037514,18.2357784,3.88727276,3.87775125
52.670842,20.7605395,20.9399388,-0.423555518,20.9381858,3.88648065,3.87702475
52.681334,23.3023604,23.8798763,-0.759944655,23.87835,3.88568981,3.87629865
52.691826,24.2899156,26.8955232,-1.61418944,26.8941775,3.88490032,3.87557304
52.702317,27.2396769,29.7704252,-1.59083257,29.7692179,3.88411223,3.87484797
52.712809,30.3644529,32.2324092,-1.36673199,32.2313019,3.88332537,3.87412332
52.7233,32.249031,33.9650664,-1.30997535,33.9640227,3.88253989,3.87339922
52.733792,33.7786915,34.6782457,-0.948448312,34.6772305,3.88175561,3.87267552
52.744284,34.8137904,34.232482,0.762435802,34.2314606,3.88097261,3.8719523
52.754775,34.0440891,32.7199446,1.15071478,32.7188831,3.88019094,3.87122963
52.765267,31.6227766,30.4066494,1.10278156,30.4055148,3.87941043,3.87050736
52.775758,29.4108823,27.6087138,1.34244873,27.6074725,3.87863124,3.86978564
52.78625,24.979992,24.6093417,0.608810575,24.6079583,3.87785319,3.86906432
52.796742,20.5426386,21.6378398,-1.0465186,21.6362767,3.87707635,3.86834348
52.807233,17.8044938,18.8690173,-1.0317575,18.8672366,3.87630078,3.86762318
52.817725,16.4012195,16.4226608,-0.146428557,16.420628,3.87552632,3.86690328
52.828216,12.9614814,14.3638749,-1.18422696,14.3615657,3.87475311,3.86618392
52.838708,11,12.7026029,-1.30483826,12.7000083,3.87398099,3.86546496
52.8492,10.0995049,11.4043895,-1.14231543,11.4015178,3.87321001,3.86474648
52.859691,9.43398113,10.4064669,-0.986146924,10.4033397,3.87244026,3.86402853
52.870183,8.06225775,9.63732193,-1.25501561,9.63396622,3.87167155,3.86331098
52.880674,7.61577311,9.03293923,-1.19044787,9.02938121,3.87090405,3.86259396
52.891166,7.34846923,8.54364142,-1.09323931,8.53990284,3.87013757,3.86187735
52.901658,6.40312424,8.13511251,-1.31605026,8.13121025,3.8693722,3.8611612
52.912149,6.55743852,7.7850462,-1.10797458,7.7809933,3.86860799,3.86044558
52.922641,5.47722558,7.4792298,-1.41492199,7.4750367,3.86784478,3.85973036
52.933132,5.74456265,7.20864301,-1.20999189,7.20431865,3.86708272,3.85901567
52.943624,5.56776436,6.96710519,-1.18293737,6.96265762,3.86632165,3.85830138
52.954116,4.35889894,6.75023058,-1.5463931,6.74566733,3.86556163,3.85758755
52.964607,5,6.55464861,-1.24685549,6.54997688,3.86480273,3.85687424
52.975099,4.89897949,6.37759123,-1.2159818,6.3728179,3.86404478,3.85616134
52.98559,5.29150262,6.21682762,-0.961938149,6.21195932,3.86328794,3.85544895
52.996082,4.89897949,6.07040858,-1.08232578,6.06545164,3.86253204,3.85473696
53.006574,5.47722558,5.93671104,-0.677853574,5.93167154,3.86177715,3.85402543
53.017065,5.56776436,5.81433417,-0.496557963,5.80921792,3.86102333,3.85331443
53.027557,4.47213595,5.70203086,-1.10900627,5.69684336,3.86027043,3.85260381
53.038048,4.47213595,5.59876011,-1.06142553,5.59350661,3.85951859,3.85189372
53.04854,3.74165739,5.50357332,-1.32737181,5.4982588,3.85876766,3.85118401
53.059032,4.89897949,5.41566798,-0.718810474,5.41029714,3.85801769,3.85047476
53.069523,4.35889894,5.33433713,-0.987642742,5.32891442,3.85726875,3.84976604
53.080015,4.79583152,5.2589347,-0.680516848,5.25346432,3.8565207,3.84905769
53.090506,5.29150262,5.18891848,0.320287595,5.18340439,3.85577367,3.84834987
53.100998,4,5.12378063,-1.0600852,5.11822656,3.85502751,3.84764244
53.11149,4.47213595,5.06308893,-0.768734658,5.05749839,3.85428228,3.84693545
53.121981,4.24264069,5.00645706,-0.87396589,5.00083336,3.85353804,3.84622898
53.132473,3.87298335,4.95352393,-1.03949054,4.94787015,3.85279466,3.8455229
53.142964,4.79583152,4.9039864,-0.328869083,4.89830545,3.85205225,3.84481733
53.153456,3.46410162,4.8575533,-1.18044555,4.85184792,3.85131069,3.84411214
53.163948,4.12310563,4.81397638,-0.831186352,4.80824911,3.85057002,3.8434074
53.174439,4.35889894,4.77303116,-0.643531052,4.76728442,3.84983032,3.84270318
53.184931,4.24264069,4.7345034,-0.701329244,4.72873941,3.84909143,3.84199933
53.195422,5.19615242,4.69821396,0.705647549,4.69243484,3.84835349,3.841296
53.205914,3.74165739,4.66398651,-0.960379678,4.65819423,3.84761636,3.84059305
53.216406,4.24264069,4.63167096,-0.62372291,4.62586734,3.8468801,3.83989054
53.226897,4,4.60113029,-0.775325925,4.59531707,3.84614477,3.83918854
53.237389,4.58257569,4.5722311,0.101708377,4.56640988,3.84541023,3.83848691
53.24788,3.74165739,4.54486268,-0.896217215,4.53903497,3.84467661,3.8377858
53.258372,3.87298335,4.51891336,-0.803697712,4.51308055,3.84394376,3.83708506
53.268864,3.60555128,4.49428849,-0.942728603,4.4884519,3.84321176,3.83638476
53.279355,2.82842712,4.47090104,-1.28159039,4.46506189,3.84248066,3.83568497
53.289847,4.47213595,4.44866453,0.153203866,4.44282396,3.84175032,3.83498555
53.300338,3.60555128,4.42750797,-0.906618275,4.42166705,3.84102088,3.83428664
53.31083,3.74165739,4.40735795,-0.815904753,4.40151767,3.84029218,3.8335881
53.321322,3.60555128,4.3881527,-0.884647629,4.38231398,3.8395643,3.83289
53.331813,4.12310563,4.36983504,-0.496718642,4.36399873,3.8388373,3.8321924
53.342305,3,4.35234698,-1.16290455,4.3465139,3.83811104,3.83149517
53.352796,3.87298335,4.33564163,-0.680189889,4.32981252,3.83738564,3.83079844
53.363288,5.19615242,4.31966918,0.936206838,4.31384473,3.83666097,3.83010208
53.37378,4.47213595,4.30438814,0.409570277,4.29856899,3.8359371,3.82940616
53.384271,3.46410162,4.2897599,-0.908657408,4.28394665,3.83521407,3.82871073
53.394763,3.60555128,4.2757445,-0.818653296,4.2699377,3.83449176,3.82801567
53.405254,4.24264069,4.26231016,-0.140247887,4.25651032,3.8337703,3.82732112
53.415746,4.12310563,4.24942223,-0.355410471,4.24362983,3.83304953,3.82662692
53.426238,3.87298335,4.23705221,-0.603381195,4.23126769,3.83232954,3.82593316
53.436729,3.74165739,4.22517348,-0.695353211,4.21939724,3.83161038,3.82523989
53.447221,3.60555128,4.21375787,-0.779876012,4.20799029,3.83089191,3.82454699
53.457712,4.47213595,4.20278352,0.51899175,4.19702493,3.83017427,3.82385459
53.468204,3.74165739,4.19222586,-0.671243974,4.18647659,3.82945731,3.82316254
53.478696,4.47213595,4.18206505,0.538582309,4.17632539,3.82874109,3.82247093
53.489187,3.60555128,4.17228252,-0.752815546,4.16655273,3.82802569,3.8217798
53.499679,4.24264069,4.16285822,0.282457906,4.15713854,3.82731096,3.82108904
53.51017,2.82842712,4.15377705,-1.15123843,4.1480677,3.82659704,3.82039877
53.520662,4,4.14502153,-0.380816921,4.13932272,3.82588378,3.81970886
53.531154,3.46410162,4.13657793,-0.820046533,4.13088985,3.82517125,3.81901938
53.541645,4,4.12843349,-0.358376181,4.12275629,3.82445951,3.81833038
53.552137,4.24264069,4.12057411,0.349380277,4.11490795,3.82374842,3.81764174
53.562628,3.60555128,4.11298979,-0.71234719,4.10733481,3.82303813,3.8169536
53.57312,4.35889894,4.10566855,0.503220029,4.10002487,3.82232848,3.8162658
53.583612,4.12310563,4.09860154,0.156537806,4.09296928,3.82161954,3.81557843
53.594103,5,4.09178084,0.953005328,4.08616009,3.82091137,3.81489155
53.604595,3.87298335,4.08519757,-0.460667154,4.07958843,3.82020385,3.81420502
53.615086,3.31662479,4.07884648,-0.873053085,4.07324902,3.81949709,3.81351898
53.625578,3.87298335,4.07272096,-0.446920146,4.06713527,3.81879096,3.81283329
53.63607,3.87298335,4.0668175,-0.440266001,4.06124365,3.81808553,3.81214802
53.646561,3.87298335,4.06113386,-0.433763204,4.05557192,3.81738086,3.81146323
53.657053,3.87298335,4.0556678,-0.427416018,4.05011784,3.81667681,3.8107788
53.667544,3.74165739,4.05042105,-0.555665068,4.04488314,3.81597351,3.81009484
53.678036,3.74165739,4.04539557,-0.551124471,4.03986978,3.81527083,3.80941124
53.688528,4.24264069,4.04059756,0.449492077,4.03508398,3.81456883,3.80872806
53.699019,4.12310563,4.03603661,0.295074596,4.03053533,3.81386757,3.80804535
53.709511,3.74165739,4.03172542,-0.538579647,4.02623657,3.81316692,3.807363
53.720002,4.47213595,4.02768418,0.666672164,4.02220789,3.81246701,3.80668112
53.730494,3.46410162,4.02393923,-0.748222974,4.01847569,3.8117677,3.80599959
53.740986,3.74165739,4.02052896,-0.528082919,4.01507838,3.81106906,3.80531848
53.751477,3.87298335,4.01750777,-0.380163674,4.01207047,3.81037115,3.80463784
53.761969,4.47213595,4.0149556,0.676151137,4.00953199,3.80967383,3.80395755
53.77246,4.35889894,4.0130002,0.588131571,4.00759086,3.80897724,3.80327773
53.782952,3.87298335,4.01185557,-0.372655641,4.00646137,3.80828123,3.80259826
53.793444,3.16227766,4.01189515,-0.921746979,4.00651745,3.80758588,3.8019192
53.803935,4,4.01375912,-0.117299269,4.00840012,3.80689125,3.80124062
53.814427,4.69041576,4.01847933,0.819717286,4.01314258,3.8061972,3.80056238
53.824918,4.24264069,4.0275457,0.463783336,4.02223666,3.80550386,3.79988461
53.83541,4,4.04280903,-0.206903423,4.03753545,3.8048111,3.79920718
53.845902,4.69041576,4.0660763,0.790151542,4.06084802,3.80411899,3.79853017
53.856393,4.12310563,4.09834004,0.157370859,4.09316771,3.80342757,3.79785362
53.866885,3.74165739,4.13848569,-0.629943095,4.13337798,3.80273673,3.79717741
53.877376,3.74165739,4.18109675,-0.662902228,4.17605517,3.80204659,3.79650168
53.887868,3.87298335,4.21422982,-0.584163052,4.20924162,3.80135701,3.79582628
53.89836,5.09901951,4.22237628,0.936292281,4.21741117,3.80066807,3.79515129
53.908851,4.12310563,4.19916523,-0.27578906,4.19418597,3.79997982,3.79447677
53.919343,3.46410162,4.15488732,-0.831135191,4.14986819,3.79929213,3.79380259
53.929834,4,4.10534736,-0.324572588,4.1002808,3.79860513,3.79312887
53.940326,3.87298335,4.06058896,-0.433134639,4.05547963,3.79791869,3.7924555
53.950818,4.47213595,4.02440178,0.669129414,4.0192595,3.79723287,3.79178252
53.961309,3.46410162,3.99705415,-0.730035981,3.99188956,3.79654773,3.79111001
53.971801,4.24264069,3.97718256,0.515226286,3.97200492,3.79586315,3.79043783
53.982292,3.74165739,3.96289857,-0.470362825,3.95771486,3.79517924,3.78976612
53.992784,3.74165739,3.9524225,-0.459091616,3.94723747,3.79449589,3.78909475
54.003276,4,3.94439386,0.23580955,3.93921051,3.79381314,3.78842377
54.013767,4,3.93790552,0.249187641,3.93272569,3.79313107,3.78775326
54.024259,3.60555128,3.93240571,-0.571711848,3.92723051,3.79244954,3.78708308
54.03475,3.74165739,3.92757643,-0.431183303,3.92240654,3.79176868,3.78641336
54.045242,3.87298335,3.92323043,-0.224158607,3.9180663,3.79108836,3.78574398
54.055734,3.31662479,3.91925316,-0.776291421,3.91409508,3.79040865,3.78507499
54.066225,3,3.91556838,-0.956853376,3.91041655,3.7897296,3.78440646
54.076717,3.60555128,3.9121209,-0.553687299,3.90697544,3.78905108,3.78373827
54.087208,5.47722558,3.90887076,1.25233974,3.90373174,3.78837323,3.78307053
54.0977,3.74165739,3.9057862,-0.405128143,3.90065365,3.78769591,3.78240312
54.108192,4.24264069,3.90284322,0.582921493,3.89771713,3.78701919,3.78173611
54.118683,4.12310563,3.9000228,0.472316445,3.89490315,3.78634312,3.78106955
54.129175,3.87298335,3.89730894,-0.15596665,3.89219568,3.78566758,3.78040332
54.139666,4,3.8946896,0.324515633,3.88958267,3.7849927,3.77973755
54.150158,2.44948974,3.89215399,-1.20110959,3.88705331,3.78431834,3.77907211
54.16065,4,3.88969383,0.332123725,3.8845993,3.78364457,3.77840706
54.171141,3.60555128,3.88730221,-0.530802157,3.88221374,3.78297145,3.77774246
54.181633,3.46410162,3.88497264,-0.64874573,3.87989013,3.78229885,3.77707819
54.192124,4.35889894,3.88270044,0.690071373,3.87762378,3.7816269,3.77641437
54.202616,2.82842712,3.88048079,-1.02569667,3.87540986,3.78095547,3.77575088
54.213108,4,3.87831008,0.348840821,3.87324476,3.78028462,3.77508778
54.223599,4.24264069,3.87618521,0.605355663,3.87112537,3.77961442,3.77442513
54.234091,4.47213595,3.87410285,0.773326002,3.86904837,3.77894473,3.7737628
54.244582,4.24264069,3.87206083,0.608752705,3.86701158,3.77827568,3.77310093
54.255074,5,3.87005648,1.06298802,3.86501232,3.77760715,3.77243938
54.265566,4.12310563,3.86808794,0.504992756,3.86304874,3.77693919,3.77177821
54.276057,3.46410162,3.86615357,-0.634075669,3.86111918,3.77627187,3.7711175
54.286549,3.74165739,3.86425133,-0.350134177,3.85922162,3.77560507,3.7704571
54.29704,5.29150262,3.86238008,1.19545914,3.8573549,3.77493889,3.76979716
54.307532,3.31662479,3.86053808,-0.73750477,3.85551729,3.77427323,3.76913754
54.318024,2.64575131,3.85872425,-1.10135051,3.85370771,3.77360814,3.7684783
54.328515,4.12310563,3.8569376,0.515914744,3.85192517,3.77294368,3.7678195
54.339007,4.58257569,3.85517672,0.85287688,3.85016824,3.77227972,3.76716103
54.349498,4,3.85344095,0.382830311,3.84843628,3.7716164,3.76650301
54.35999,3.46410162,3.85172904,-0.62259732,3.84672802,3.77095359,3.7658453
54.370482,3.31662479,3.85004028,-0.730352991,3.84504277,3.77029133,3.76518797
54.380973,4.12310563,3.84837404,0.524148442,3.84337988,3.76962971,3.76453109
54.391465,4,3.84672923,0.391498114,3.84173827,3.76896859,3.76387453
54.401956,4,3.84510546,0.393566441,3.84011755,3.7683081,3.76321841
54.412448,3.31662479,3.84350174,-0.725862903,3.83851674,3.76764811,3.76256261
54.42294,3.60555128,3.84191761,-0.486175214,3.83693535,3.76698868,3.76190718
54.433431,3,3.84035261,-0.916707485,3.83537294,3.76632987,3.7612522
54.443923,3,3.83880588,-0.91586346,3.83382864,3.76567157,3.76059754
54.454414,3.46410162,3.83727716,-0.610880957,3.8323022,3.76501389,3.75994331
54.464906,3.16227766,3.83576565,-0.820663143,3.83079282,3.7643567,3.7592894
54.475398,3.46410162,3.83427102,-0.608415488,3.82930015,3.76370008,3.75863587
54.485889,3.46410162,3.83279293,-0.60719957,3.82782386,3.76304407,3.75798278
54.496381,3.87298335,3.83133066,0.204089897,3.82636324,3.76238857,3.75733
54.506872,4,3.82988406,0.412451139,3.82491813,3.76173368,3.75667766
54.517364,3.74165739,3.82845244,-0.294610001,3.82348784,3.76107929,3.75602563
54.527856,3.60555128,3.82703555,-0.470621161,3.82207212,3.76042545,3.75537398
54.538347,4,3.82563316,0.417572561,3.82067073,3.75977224,3.75472277
54.548839,3.87298335,3.82424462,0.220768491,3.81928305,3.75911951,3.75407187
54.55933,5,3.82286986,1.08495628,3.81790897,3.75846741,3.7534214
54.569822,4.12310563,3.82150829,0.549178785,3.81654792,3.7578158,3.75277125
54.580314,4.12310563,3.82015999,0.550404977,3.81519998,3.75716474,3.75212146
54.590805,3.60555128,3.81882422,-0.461814835,3.81386441,3.7565143,3.75147212
54.601297,3.31662479,3.8175007,-0.707725875,3.81254093,3.75586436,3.75082308
54.611788,3.74165739,3.81618941,-0.273005542,3.81122951,3.75521503,3.75017448
54.62228,3,3.81488982,-0.902712476,3.80992961,3.75456619,3.74952618
54.632772,4.12310563,3.81360177,0.556330709,3.8086411,3.7539179,3.74887826
54.643263,4.24264069,3.81232513,0.655984415,3.80736384,3.75327023,3.74823077
54.653755,3.46410162,3.81105942,-0.589031241,3.80609733,3.75262305,3.74758359
54.664246,4,3.80980462,0.436113955,3.80484156,3.75197649,3.74693684
54.674738,4.35889894,3.80856026,0.741848153,3.80359607,3.75133042,3.7462904
54.68523,3.60555128,3.80732624,-0.449193682,3.80236075,3.7506849,3.74564432
54.695721,3.16227766,3.80610245,-0.802386932,3.80113549,3.75004,3.74499868
54.706213,4,3.80488844,0.441714339,3.79991984,3.74939558,3.74435334
54.716704,3.60555128,3.80368425,-0.445121298,3.79871383,3.74875178,3.74370844
54.727196,3.16227766,3.80248943,-0.800132343,3.79751703,3.74810848,3.74306384
54.737688,3.87298335,3.80130391,0.267730161,3.79632935,3.74746572,3.7424196
54.748179,3.31662479,3.80012761,-0.69534367,3.79515072,3.74682358,3.7417758
54.758671,4,3.79896013,0.448374701,3.79398074,3.74618193,3.74113229
54.769162,3.74165739,3.7978015,-0.236947498,3.79281943,3.7455409,3.74048922
54.779654,4.24264069,3.79665135,0.667824334,3.79166642,3.74490036,3.73984645
54.790146,3.74165739,3.7955096,-0.232060788,3.79052164,3.74426037,3.73920405
54.800637,2.82842712,3.7943762,-0.982827083,3.78938503,3.74362099,3.73856207
54.811129,3.31662479,3.79325078,-0.690381047,3.78825623,3.74298211,3.73792039
54.82162,2.64575131,3.7921334,-1.07069234,3.78713528,3.74234384,3.73727914
54.832112,3.31662479,3.7910237,-0.688766221,3.78602184,3.74170607,3.73663819
54.842604,3.46410162,3.78992163,-0.57080646,3.78491584,3.74106885,3.73599761
54.853095,4.12310563,3.78882716,0.578168197,3.78381727,3.74043225,3.73535744
54.863587,4.47213595,3.78773995,0.827282303,3.78272576,3.73979614,3.73471758
54.874078,3.87298335,3.78666006,0.293808252,3.7816414,3.73916064,3.73407815
54.88457,4.12310563,3.78558716,0.580963398,3.78056384,3.73852564,3.73343901
54.895062,3.46410162,3.78452122,-0.566056186,3.77949307,3.7378912,3.73280024
54.905553,4.24264069,3.78346223,0.67762708,3.77842904,3.73725738,3.73216189
54.916045,3,3.78240985,-0.884539345,3.77737145,3.73662405,3.73152383
54.926536,3.87298335,3.78136418,0.302686577,3.77632038,3.73599134,3.7308862
54.937028,3.60555128,3.7803249,-0.418059355,3.7752755,3.73535913,3.73024887
54.94752,3.87298335,3.779292,0.306090429,3.77423681,3.73472748,3.72961189
54.958011,3.46410162,3.77826579,-0.560503497,3.77320463,3.73409645,3.72897534
54.968503,3.60555128,3.77724531,-0.414359793,3.77217799,3.73346592,3.72833909
54.978994,3.46410162,3.776231,-0.558685407,3.77115731,3.732836,3.72770325
54.989486,3.46410162,3.77522255,-0.557782154,3.7701423,3.73220659,3.72706771
54.999978,3.74165739,3.77421996,-0.180451018,3.76913295,3.73157775,3.72643253
55.010469,3.16227766,3.77322323,-0.781630071,3.76812927,3.73094952,3.72579777
55.020961,4.69041576,3.77223208,0.958219015,3.76713097,3.7303218,3.7251633
55.031452,4.58257569,3.77124661,0.900738081,3.76613815,3.7296947,3.72452926
55.041944,3.16227766,3.77026653,-0.779736412,3.76515052,3.72906811,3.7238955
55.052436,4.47213595,3.76929187,0.83835797,3.7641681,3.72844209,3.72326211
55.062927,3.87298335,3.76832262,0.323513098,3.76319089,3.72781669,3.72262913
55.073419,3.60555128,3.76735853,-0.402252719,3.76221863,3.7271918,3.72199644
55.08391,3.87298335,3.76639968,0.326471536,3.76125142,3.72656754,3.72136417
55.094402,4.12310563,3.76544583,0.598046647,3.76028899,3.72594379,3.7207322
55.104894,4.12310563,3.76449699,0.598839405,3.75933135,3.72532062,3.72010058
55.115385,3.74165739,3.76355318,-0.147972265,3.75837854,3.72469807,3.71946937
55.125877,4.69041576,3.76261414,0.963224597,3.75743028,3.72407604,3.71883846
55.136368,2.82842712,3.76167998,-0.966050128,3.75648668,3.72345464,3.71820796
55.14686,3.60555128,3.76075045,-0.393953263,3.75554751,3.72283376,3.71757775
55.157352,4,3.75982558,0.490075933,3.75461278,3.72221345,3.7169479
55.167843,4.24264069,3.75890539,0.695510817,3.7536825,3.72159379,3.71631846
55.178335,3.46410162,3.75798964,-0.542114404,3.75275645,3.72097464,3.71568931
55.188826,4.12310563,3.75707845,0.6050018,3.75183472,3.72035614,3.71506058
55.199318,3.60555128,3.75617157,-0.388098306,3.75091709,3.71973815,3.71443213
55.20981,4,3.75526904,0.494702899,3.75000358,3.71912075,3.71380404
55.220301,3.31662479,3.75437089,-0.661623834,3.74909421,3.718504,3.71317636
55.230793,3.60555128,3.75347688,-0.384610983,3.74818877,3.71788777,3.71254897
55.241284,3.31662479,3.75258714,-0.660274453,3.74728736,3.71727219,3.71192198
55.251776,3.74165739,3.75170144,-0.100220049,3.74638975,3.71665715,3.71129529
55.262268,3.31662479,3.75081982,-0.658934771,3.74549598,3.71604269,3.71066895
55.272759,3.87298335,3.74994231,0.35077206,3.74460608,3.71542888,3.71004302
55.283251,4.47213595,3.74906869,0.850333621,3.74371984,3.71481562,3.70941738
55.293742,3.60555128,3.74819908,-0.377687441,3.74283737,3.714203,3.70879214
55.304234,3.74165739,3.74733327,-0.0753384524,3.74195844,3.71359093,3.7081672
55.314726,4.47213595,3.7464713,0.851859529,3.74108312,3.71297946,3.7075426
55.325217,4.35889894,3.7456132,0.783125622,3.74021141,3.71236865,3.70691841
55.335709,4.12310563,3.74475878,0.615099053,3.73934313,3.71175838,3.70629451
55.3462,3.87298335,3.74390815,0.359270367,3.73847839,3.71114878,3.70567102
55.356692,4,3.74306111,0.506891399,3.73761698,3.71053973,3.70504781
55.367184,4.24264069,3.7422177,0.707405814,3.73675894,3.70993129,3.70442495
55.377675,3.87298335,3.74137797,0.362774551,3.73590432,3.70932352,3.7038025
55.388167,2.64575131,3.74054172,-1.04632233,3.73505292,3.7087163,3.70318033
55.398658,3,3.73970907,-0.860063413,3.73420485,3.70810977,3.70255857
55.40915,4.35889894,3.73887984,0.787412919,3.73335993,3.70750379,3.70193709
55.419642,2.64575131,3.73805406,-1.04513289,3.73251819,3.70689843,3.70131597
55.430133,2.64575131,3.7372318,-1.04473943,3.73167969,3.70629376,3.70069524
55.440625,4.24264069,3.73641285,0.711496902,3.73084423,3.70568966,3.7000748
55.451116,3.46410162,3.73559734,-0.52105252,3.73001194,3.70508624,3.69945477
55.461608,4.24264069,3.73478511,0.712639868,3.72918262,3.7044834,3.69883502
55.4721,4,3.73397618,0.515774968,3.72835634,3.70388119,3.69821561
55.482591,3.74165739,3.73317063,0.0921236162,3.72753313,3.70327967,3.69759661
55.493083,5.19615242,3.73236826,1.20986948,3.72671283,3.70267874,3.69697789
55.503574,3.74165739,3.73156921,0.100439901,3.72589554,3.70207851,3.69635957
55.514066,4.47213595,3.73077331,0.861024182,3.72508111,3.70147886,3.69574154
55.524558,3.60555128,3.72998062,-0.352745432,3.72426958,3.70087987,3.69512385
55.535049,4,3.72919118,0.520392951,3.723461,3.70028158,3.69450656
55.545541,3.31662479,3.72840483,-0.641700895,3.7226552,3.69968389,3.69388956
55.556032,4.35889894,3.72762171,0.79452957,3.72185232,3.69908691,3.69327295
55.566524,3.16227766,3.72684164,-0.75137473,3.72105219,3.69849054,3.69265663
55.577016,4.58257569,3.72606471,0.925478789,3.72025485,3.69789483,3.69204065
55.587507,3.87298335,3.72529095,0.384307682,3.71946039,3.69729985,3.69142507
55.597999,4,3.72452023,0.524861672,3.71866862,3.69670548,3.69080978
55.60849,4.24264069,3.72375266,0.720338825,3.71787969,3.69611184,3.69019488
55.618982,2.82842712,3.72298812,-0.945812344,3.71709344,3.69551883,3.68958026
55.629474,4,3.72222665,0.527042079,3.71630993,3.69492649,3.68896599
55.639965,4.12310563,3.72146833,0.633748608,3.71552923,3.6943349,3.68835211
55.650457,4.35889894,3.72071301,0.798865404,3.71475119,3.69374394,3.68773852
55.660948,3.31662479,3.71996084,-0.635087436,3.71397594,3.69315373,3.68712532
55.67144,4,3.71921168,0.529894633,3.71320335,3.69256416,3.6865124
55.681932,3.60555128,3.7184656,-0.336027263,3.71243348,3.69197529,3.68589983
55.692423,3.16227766,3.71772268,-0.745281836,3.71166641,3.69138719,3.68528765
55.702915,3.31662479,3.71698278,-0.632738486,3.71090201,3.69079973,3.68467575
55.713406,3.31662479,3.71624607,-0.632156054,3.71014041,3.69021305,3.68406424
55.723898,3.74165739,3.71551241,0.161694096,3.70938148,3.68962703,3.68345302
55.73439,3.87298335,3.71478189,0.397745473,3.70862532,3.68904173,3.68284214
55.744881,3.74165739,3.71405459,0.166140882,3.70787201,3.68845721,3.68223165
55.755373,3.74165739,3.71333042,0.16830618,3.70712141,3.68787337,3.68162144
55.765864,4.69041576,3.71260952,0.988840858,3.7063737,3.68729033,3.68101162
55.776356,4.47213595,3.71189179,0.871919816,3.70562876,3.68670797,3.68040209
55.786848,4.24264069,3.71117733,0.729015332,3.70488669,3.68612635,3.67979289
55.797339,3.74165739,3.71046626,0.176610107,3.70414759,3.68554555,3.67918408
55.807831,4,3.70975847,0.538740692,3.70341136,3.68496544,3.67857556
55.818322,4.24264069,3.70905414,0.730470084,3.70267817,3.68438616,3.67796743
55.828814,4.35889894,3.70835321,0.806564156,3.70194795,3.68380758,3.67735957
55.839306,3.74165739,3.70765578,0.184395246,3.7012208,3.68322978,3.67675206
55.849797,4,3.706962,0.541329848,3.70049686,3.68265282,3.67614493
55.860289,3.60555128,3.70627179,-0.317364955,3.69977605,3.68207658,3.67553809
55.87078,4.12310563,3.70558537,0.64615807,3.69905859,3.68150119,3.67493163
55.881272,3.74165739,3.7049027,0.191715111,3.69834441,3.68092655,3.67432545
55.891764,4.12310563,3.70422394,0.6472107,3.69763367,3.6803527,3.67371961
55.902255,3.60555128,3.70354924,-0.313046267,3.69692654,3.67977972,3.67311416
55.912747,3,3.7028786,-0.838378556,3.69622299,3.6792075,3.67250899
55.923238,3.87298335,3.70221228,0.413244562,3.69552327,3.67863616,3.67190421
55.93373,3.74165739,3.70155028,0.2002676,3.69482739,3.67806559,3.67129971
55.944222,4.47213595,3.70089281,0.8782045,3.69413555,3.67749586,3.67069553
55.954713,3.31662479,3.70024011,-0.619366874,3.69344798,3.67692703,3.67009175
55.965205,3.60555128,3.69959225,-0.306661003,3.69276473,3.67635899,3.66948825
55.975696,3.60555128,3.69894953,-0.305611286,3.69208612,3.67579187,3.66888514
55.986188,4,3.69831208,0.549261251,3.69141225,3.67522555,3.6682823
55.99668,4,3.69768019,0.549836167,3.69074341,3.67466011,3.66767979
56.007171,4,3.6970542,0.550405122,3.69007994,3.67409561,3.66707768
56.017663,4.24264069,3.6964343,0.73905777,3.68942201,3.67353193,3.66647584
56.028154,4.35889894,3.69582094,0.814296017,3.68877007,3.67296921,3.66587439
56.038646,3.87298335,3.69521438,0.421626572,3.68812437,3.67240734,3.66527321
56.049138,4.69041576,3.6946151,0.997898123,3.68748538,3.67184638,3.66467237
56.059629,4.35889894,3.69402361,0.815398881,3.68685361,3.6712864,3.66407191
56.070121,3.46410162,3.69344033,-0.478893215,3.68622947,3.6707273,3.66347173
56.080612,3.31662479,3.69286594,-0.613384997,3.68561363,3.67016919,3.66287194
56.091104,3.60555128,3.69230101,-0.294533071,3.68500664,3.66961198,3.66227242
56.101596,2.64575131,3.6917463,-1.02273897,3.68440928,3.66905572,3.66167324
56.112087,4.79583152,3.69120271,1.05101323,3.68382243,3.66850049,3.66107444
56.122579,3.74165739,3.69067108,0.225801478,3.6832469,3.66794618,3.66047591
56.13307,3.31662479,3.69015256,-0.611169185,3.68268387,3.66739291,3.65987777
56.143562,3.46410162,3.68964828,-0.474917532,3.68213442,3.6668406,3.65927991
56.154054,3.60555128,3.68915966,-0.289151142,3.6816,3.66628929,3.65868237
56.164545,3.60555128,3.68868833,-0.288334975,3.68108223,3.66573905,3.65808523
56.175037,2.64575131,3.68823603,-1.02102141,3.68058282,3.66518979,3.65748835
56.185528,4.12310563,3.68780495,0.659773199,3.68010397,3.66464163,3.65689186
56.19602,3.46410162,3.68739744,-0.472541872,3.67964801,3.66409447,3.65629565
56.206512,4.24264069,3.68701637,0.74540212,3.67921782,3.66354837,3.65569976
56.217003,3.60555128,3.68666509,-0.28480487,3.67881675,3.66300341,3.65510426
56.227495,4,3.68634743,0.560046934,3.67844861,3.66245948,3.65450903
56.237986,4,3.68606805,0.560296306,3.67811808,3.66191671,3.65391419
56.248478,3.60555128,3.68583235,-0.283339154,3.67783053,3.66137501,3.65331962
56.25897,3.87298335,3.68564689,0.432823819,3.67759255,3.66083443,3.65272538
56.269461,3.60555128,3.68551951,-0.282786553,3.67741198,3.66029505,3.65213152
56.279953,3.16227766,3.68545968,-0.723313227,3.6772983,3.65975677,3.65153794
56.290444,4,3.68547899,0.560821724,3.67726311,3.65921972,3.65094474
56.300936,3.16227766,3.68559166,-0.723404453,3.67732064,3.6586838,3.65035181
56.311428,3.87298335,3.68581532,0.432629201,3.67748857,3.65814908,3.64975921
56.321919,4.12310563,3.68617198,0.661009566,3.67778894,3.65761562,3.64916699
56.332411,4.24264069,3.68668956,0.745621303,3.67824974,3.65708335,3.64857504
56.342902,3.60555128,3.68740354,-0.286098346,3.6789065,3.65655238,3.64798348
56.353394,5.19615242,3.68836003,1.22792198,3.67980544,3.65602261,3.64739219
56.363886,2.64575131,3.68961915,-1.02169851,3.68100683,3.65549413,3.64680122
56.374377,4,3.69126067,0.555643169,3.68259061,3.654967,3.64621064
56.384869,3.87298335,3.69339277,0.423781287,3.68466522,3.65444113,3.64562033
56.39536,4.35889894,3.6961637,0.814085526,3.68737928,3.65391664,3.64503041
56.405852,3,3.69978493,-0.836531487,3.69094475,3.65339345,3.64444075
56.416344,4,3.70456887,0.543535764,3.69567484,3.65287164,3.64385142
56.426835,3,3.71100572,-0.843211552,3.70206094,3.65235126,3.64326247
56.437327,3.74165739,3.71991084,0.14746709,3.71092042,3.65183224,3.64267379
56.447818,3.74165739,3.73266275,0.0948400575,3.72363518,3.6513147,3.6420855
56.45831,3.16227766,3.75152873,-0.767626906,3.74247799,3.65079856,3.64149747
56.468802,4.69041576,3.7799051,0.954206821,3.77085323,3.65028389,3.64090977
56.479293,3.60555128,3.82217575,-0.465429342,3.81315465,3.64977076,3.64032245
56.489785,4.12310563,3.88262321,0.490390066,3.8736733,3.6492591,3.6397354
56.500276,4.69041576,3.96186642,0.85355102,3.95302663,3.64874903,3.63914874
56.510768,4.47213595,4.04805708,0.651213384,4.03933702,3.64824046,3.63856234
56.52126,4.12310563,4.10754345,0.124748452,4.09888093,3.64773349,3.63797626
56.531751,3.74165739,4.10381917,-0.601798789,4.09507859,3.64722817,3.63739057
56.542243,3.46410162,4.03934342,-0.758446972,4.03039054,3.64672444,3.63680515
56.552734,3.87298335,3.95186673,-0.280861852,3.9426399,3.64622241,3.63622011
56.563226,3.74165739,3.8729313,-0.362317424,3.86343785,3.64572203,3.63563533
56.573718,4.35889894,3.81294639,0.738886021,3.80322255,3.64522336,3.63505089
56.584209,4.24264069,3.77080981,0.686899468,3.76089411,3.64472648,3.63446682
56.594701,4,3.74217417,0.507765528,3.73209744,3.64423133,3.63388302
56.605192,4.12310563,3.72272718,0.63275465,3.71251085,3.64373802,3.6332996
56.615684,3.74165739,3.70916836,0.180247138,3.69882598,3.6432465,3.63271645
56.626176,4.24264069,3.69932013,0.737102816,3.6888598,3.64275684,3.63213362
56.636667,3.87298335,3.69185982,0.425586093,3.68128626,3.64226913,3.63155117
56.647159,4,3.68600506,0.560352516,3.67532089,3.64178329,3.63096899
56.65765,4,3.68128434,0.564549072,3.67049096,3.64129946,3.6303872
56.668142,3,3.6773943,-0.823039669,3.66649224,3.64081758,3.62980566
56.678634,4.69041576,3.6741305,1.00810975,3.66311976,3.64033772,3.62922446
56.689125,4.12310563,3.67134841,0.672128871,3.66022854,3.63985999,3.62864363
56.699617,4.12310563,3.66894223,0.67391646,3.65771248,3.63938431,3.62806307
56.710108,3.31662479,3.66683437,-0.591785075,3.65549373,3.63891081,3.62748288
56.7206,4.12310563,3.66496554,0.67686046,3.65351281,3.63843946,3.62690297
56.731092,3.74165739,3.66329097,0.279940028,3.65172478,3.63797033,3.62632338
56.741583,4.35889894,3.66177592,0.834938936,3.65009477,3.63750351,3.62574417
56.752075,3,3.66039279,-0.812645551,3.64859507,3.63703895,3.62516522
56.762566,3.87298335,3.65912023,0.462453363,3.64720421,3.63657679,3.62458665
56.773058,2.64575131,3.6579407,-1.00607624,3.64590456,3.63611698,3.62400835
56.78355,3.60555128,3.65684037,-0.226470959,3.64468221,3.63565961,3.62343038
56.794041,2.82842712,3.65580798,-0.909604778,3.64352582,3.63520478,3.62285278
56.804533,3.74165739,3.65483402,0.294658056,3.64242581,3.63475245,3.62227545
56.815024,4,3.65391099,0.588293305,3.6413746,3.63430275,3.62169849
56.825516,2.64575131,3.65303232,-1.0036339,3.64036555,3.63385566,3.62112181
56.836008,3.60555128,3.65219277,-0.215966428,3.63939335,3.63341126,3.62054544
56.846499,4,3.65138792,0.590433806,3.63845353,3.63296966,3.61996945
56.856991,3.31662479,3.65061381,-0.577917834,3.63754203,3.63253083,3.61939373
56.867482,3.87298335,3.64986738,0.472351532,3.63665574,3.63209491,3.61881839
56.877974,4.12310563,3.64914572,0.688447462,3.63579168,3.63166188,3.61824332
56.888466,3.16227766,3.64844655,-0.697258126,3.63494751,3.63123184,3.61766856
56.898957,3.31662479,3.64776793,-0.575450376,3.63412121,3.6308049,3.61709418
56.909449,4.69041576,3.64710796,1.0214244,3.6333108,3.63038105,3.61652007
56.91994,4.24264069,3.64646527,0.772123965,3.63251486,3.62996042,3.61594634
56.930432,3.74165739,3.64583843,0.309546378,3.63173186,3.62954302,3.61537287
56.940924,3.87298335,3.64522636,0.477238923,3.63096065,3.62912895,3.61479973
56.951415,3.87298335,3.64462813,0.477865275,3.63020025,3.62871834,3.61422696
56.961907,2.82842712,3.64404276,-0.903114407,3.62944957,3.62831117,3.61365445
56.972398,3.87298335,3.64346961,0.479075921,3.62870791,3.62790761,3.61308233
56.98289,3.87298335,3.64290792,0.479661788,3.62797439,3.62750766,3.61251047
56.993382,3.60555128,3.64235716,-0.191848593,3.62724842,3.62711144,3.61193893
57.003873,4.24264069,3.64181689,0.775128247,3.62652948,3.62671909,3.61136776
57.014365,4.24264069,3.64128656,0.775470259,3.6258169,3.6263306,3.61079687
57.024856,3.46410162,3.64076591,-0.420314519,3.62511035,3.62594617,3.61022635
57.035348,4.12310563,3.6402545,0.694874902,3.62440927,3.6255658,3.60965609
57.04584,4.24264069,3.63975209,0.776459013,3.62371334,3.62518963,3.60908616
57.056331,4.58257569,3.63925849,0.971245182,3.62302227,3.6248178,3.6085166
57.066823,4.47213595,3.6387734,0.912886933,3.62233562,3.62445035,3.60794731
57.077314,3.31662479,3.63829674,-0.567161307,3.62165323,3.62408746,3.60737839
57.087806,2.44948974,3.63782826,-1.09010941,3.62097472,3.62372916,3.60680974
57.098298,3.60555128,3.63736791,-0.178372169,3.62029991,3.62337563,3.60624141
57.108789,3.31662479,3.63691561,-0.565942421,3.61962866,3.623027,3.60567346
57.119281,4.12310563,3.63647123,0.697591854,3.61896063,3.62268334,3.60510577
57.129772,2.82842712,3.63603479,-0.898669943,3.61829577,3.62234485,3.60453846
57.140264,3.74165739,3.63560618,0.325655042,3.61763379,3.62201159,3.60397141
57.150756,3.87298335,3.63518543,0.487645278,3.6169746,3.62168374,3.60340468
57.161247,4.12310563,3.63477258,0.698808304,3.61631813,3.62136147,3.60283833
57.171739,3.31662479,3.63436758,-0.56368678,3.61566411,3.62104488,3.60227224
57.18223,4,3.63397053,0.605003693,3.61501256,3.62073417,3.60170653
57.192722,3.31662479,3.63358142,-0.562989014,3.61436324,3.62042945,3.60114109
57.203214,3.74165739,3.63320034,0.329328167,3.61371611,3.62013092,3.60057596
57.213705,4.12310563,3.63282742,0.70019869,3.61307113,3.61983878,3.60001121
57.224197,3,3.63246267,-0.795275215,3.6124281,3.61955315,3.59944672
57.234688,3.60555128,3.63210626,-0.162957003,3.61178706,3.61927426,3.59888261
57.24518,3.87298335,3.63175825,0.491146718,3.6111478,3.61900227,3.59831877
57.255672,3.31662479,3.63141879,-0.561065062,3.61051033,3.61873741,3.59775524
57.266163,3.31662479,3.63108807,-0.560770259,3.60987463,3.61847989,3.59719209
57.276655,4.12310563,3.63076618,0.701669045,3.60924052,3.61822989,3.59662921
57.287146,5.19615242,3.63045333,1.25127898,3.60860807,3.61798769,3.5960667
57.297638,2.64575131,3.63014966,-0.992168509,3.6079771,3.61775346,3.59550445
57.30813,3.74165739,3.62985538,0.334368064,3.60734762,3.61752748,3.59494253
57.318621,4,3.62957073,0.608629005,3.60671964,3.61731002,3.59438098
57.329113,2.64575131,3.62929587,-0.991738153,3.606093,3.6171013,3.59381969
57.339604,3.31662479,3.62903109,-0.558933179,3.60546778,3.61690163,3.59325878
57.350096,3.74165739,3.62877657,0.335977405,3.60484381,3.61671126,3.59269813
57.360588,4,3.6285326,0.609481252,3.60422113,3.61653051,3.59213781
57.371079,3.16227766,3.62829948,-0.682657911,3.60359976,3.61635969,3.59157786
57.381571,3.46410162,3.62807745,-0.404939303,3.60297954,3.61619911,3.59101817
57.392062,3.87298335,3.62786686,0.495092401,3.60236056,3.61604911,3.59045886
57.402554,3.60555128,3.62766798,-0.148716861,3.60174267,3.61591003,3.58989981
57.413046,3.60555128,3.62748117,-0.148087456,3.60112592,3.61578223,3.58934108
57.423537,3.74165739,3.6273068,0.338157638,3.60051032,3.61566612,3.58878273
57.434029,3.31662479,3.6271452,-0.557243584,3.59989574,3.61556207,3.58822464
57.44452,3.46410162,3.6269968,-0.403602758,3.59928227,3.6154705,3.58766693
57.455012,3.60555128,3.62686197,-0.145981845,3.59866977,3.61539183,3.58710948
57.465504,3.16227766,3.62674117,-0.681515595,3.59805828,3.61532652,3.58655235
57.475995,4.58257569,3.62663483,0.977722282,3.59744783,3.61527505,3.58599559
57.486487,4,3.62654343,0.611110929,3.5968383,3.6152379,3.5854391
57.496978,4,3.62646747,0.611173076,3.59622978,3.61521559,3.58488298
57.50747,3.16227766,3.62640746,-0.681270722,3.59562213,3.61520865,3.58432713
57.517962,3.87298335,3.62636394,0.496607896,3.5950154,3.61521765,3.5837716
57.528453,4,3.62633751,0.611279391,3.59440963,3.61524318,3.58321644
57.538945,3.74165739,3.62632874,0.339600718,3.59380469,3.61528585,3.58266155
57.549436,4.24264069,3.62633828,0.785049304,3.59320068,3.61534632,3.58210703
57.559928,3.46410162,3.62636678,-0.40282151,3.59259746,3.61542526,3.58155278
57.57042,2.44948974,3.62641496,-1.08486184,3.5919951,3.61552339,3.58099885
57.580911,3.74165739,3.62648352,0.339372748,3.59139363,3.61564144,3.58044529
57.591403,4,3.62657327,0.61108652,3.59079291,3.61578021,3.57989199
57.601894,3.16227766,3.62668497,-0.681474367,3.59019307,3.61594051,3.57933907
57.612386,4.24264069,3.62681952,0.784742739,3.58959397,3.61612322,3.57878641
57.622878,3.16227766,3.62697779,-0.681689177,3.58899565,3.61632925,3.57823408
57.633369,3.60555128,3.62716072,-0.147001509,3.58839817,3.61655952,3.57768211
57.643861,4,3.62736932,0.610434826,3.58780141,3.61681508,3.57713042
57.654352,3.60555128,3.62760461,-0.148503661,3.58720545,3.61709694,3.57657909
57.664844,3.31662479,3.62786774,-0.557891518,3.58661019,3.61740627,3.57602803
57.675336,4.24264069,3.62815984,0.783888291,3.58601567,3.61774422,3.5754773
57.685827,4.35889894,3.6284821,0.854644276,3.58542194,3.618112,3.57492693
57.696319,3,3.6288359,-0.792991741,3.58482888,3.61851096,3.57437683
57.70681,3.46410162,3.62922252,-0.406350721,3.5842366,3.61894243,3.5738271
57.717302,3,3.62964349,-0.793500782,3.58364496,3.61940793,3.57327764
57.727794,3.60555128,3.63010029,-0.156681264,3.58305403,3.61990896,3.5727285
57.738285,4.12310563,3.6305945,0.701791369,3.58246385,3.6204471,3.57217973
57.748777,3,3.63112791,-0.794435593,3.5818743,3.62102417,3.57163123
57.759268,3.87298335,3.63170224,0.491203735,3.5812855,3.62164188,3.5710831
57.76976,4.12310563,3.6323195,0.700561293,3.58069731,3.62230226,3.57053524
57.780252,3.74165739,3.63298168,0.329659982,3.58010979,3.62300731,3.5699877
57.790743,3.87298335,3.63369087,0.489175302,3.57952299,3.62375912,3.56944053
57.801235,3,3.63444948,-0.796523373,3.5789368,3.62456014,3.56889363
57.811726,3.60555128,3.63525981,-0.172361635,3.57835131,3.62541263,3.56834709
57.822218,4.12310563,3.63612458,0.697840272,3.57776642,3.62631937,3.56780083
57.83271,3.60555128,3.63704647,-0.177468855,3.57718217,3.62728303,3.56725489
57.843201,4.12310563,3.6380283,0.696474925,3.57659861,3.62830645,3.56670932
57.853693,3.87298335,3.63907338,0.483642396,3.57601563,3.62939293,3.56616401
57.864184,3.16227766,3.64018481,-0.69130829,3.57543334,3.6305456,3.56561908
57.874676,3.31662479,3.64136635,-0.569861002,3.57485161,3.63176823,3.56507441
57.885168,4.47213595,3.64262167,0.910776749,3.5742705,3.63306449,3.56453007
57.895659,3.60555128,3.64395466,-0.195967824,3.57369007,3.6344383,3.5639861
57.906151,3.46410162,3.6453699,-0.425756132,3.57311019,3.63589424,3.56344239
57.916642,4.12310563,3.64687172,0.690097029,3.57253097,3.63743666,3.56289906
57.927134,3.16227766,3.64846533,-0.697271592,3.5719523,3.63907079,3.56235599
57.937626,3.74165739,3.6501559,0.30249212,3.57137424,3.64080181,3.56181325
57.948117,3.60555128,3.65194893,-0.215401144,3.57079682,3.64263521,3.56127087
57.958609,3.46410162,3.65385083,-0.435602132,3.57021994,3.64457746,3.56072877
57.9691,3.31662479,3.6558678,-0.582445713,3.5696437,3.64663474,3.56018703
57.979592,2.23606798,3.65800725,-1.19245095,3.569068,3.64881449,3.55964557
57.990084,4.89897949,3.66027657,1.11297031,3.56849288,3.65112414,3.55910442
58.000575,3.87298335,3.6626837,0.458584393,3.56791839,3.65357161,3.55856365
58.011067,3.60555128,3.66523791,-0.244308475,3.56734442,3.65616621,3.55802315
58.021558,3.87298335,3.66794822,0.452808042,3.56677109,3.65891699,3.55748301
58.03205,3,3.67082546,-0.819039354,3.56619826,3.6618348,3.55694315
58.042542,3.60555128,3.67388054,-0.261398669,3.56562601,3.66493056,3.5564036
58.053033,3,3.67712525,-0.822876208,3.56505437,3.66821609,3.55586443
58.063525,3.87298335,3.6805734,0.438645585,3.56448325,3.67170523,3.55532553
58.074016,4,3.68423869,0.56192643,3.56391273,3.67541172,3.554787
58.084508,4.35889894,3.68813754,0.819000247,3.56334272,3.67935201,3.55424873
58.095,4.69041576,3.69228687,0.999064008,3.56277326,3.68354305,3.55371079
58.105491,4.47213595,3.69670526,0.880585428,3.56220441,3.68800345,3.55317322
58.115983,4.12310563,3.70141461,0.649377404,3.56163606,3.69275516,3.55263592
58.126474,3.87298335,3.7064375,0.408100291,3.56106831,3.6978208,3.55209899
58.136966,3.31662479,3.71180118,-0.628630567,3.56050105,3.70322769,3.55156233
58.147458,2.82842712,3.71753493,-0.942925131,3.55993433,3.70900514,3.55102599
58.157949,4.24264069,3.723672,0.720394817,3.5593682,3.71518648,3.55049003
58.168441,3.31662479,3.73025241,-0.643138883,3.55880257,3.72181181,3.54995433
58.178932,4.58257569,3.73731994,0.919377916,3.55823752,3.72892496,3.549419
58.189424,4.69041576,3.74492845,0.972361717,3.55767295,3.73657993,3.54888395
58.199916,3.87298335,3.75313906,0.346185332,3.55710892,3.74483793,3.54834921
58.210407,3.46410162,3.76202396,-0.545822629,3.55654547,3.75377128,3.54781485
58.220899,2.64575131,3.7716716,-1.06109391,3.5559825,3.76346861,3.54728076
58.23139,4.12310563,3.78218357,0.583885309,3.55542011,3.77403166,3.54674704
58.241882,3.31662479,3.79368513,-0.690695549,3.55485819,3.78558594,3.54621359
58.252374,3,3.80632218,-0.897954443,3.55429679,3.7982776,3.54568046
58.262865,4.12310563,3.82026767,0.550307149,3.55373598,3.81227988,3.5451477
58.273357,3.74165739,3.83573008,-0.306712718,3.55317563,3.82780161,3.54461521
58.283848,3.60555128,3.85294787,-0.49738978,3.55261585,3.84508165,3.5440831
58.29434,3.87298335,3.8722048,0.0279024722,3.55205654,3.8644042,3.54355125
58.304832,3,3.8938218,-0.945421495,3.55149775,3.88609068,3.54301973
58.315323,4,3.91816241,0.286072709,3.55093952,3.91050514,3.54248858
58.325815,3.87298335,3.94564033,-0.269549594,3.55038176,3.93806187,3.5419577
58.336306,4.24264069,3.97670014,0.515694234,3.54982456,3.96920599,3.54142719
58.346798,4.69041576,4.01183263,0.823761573,3.54926782,4.00442882,3.54089695
58.35729,3.60555128,4.05154639,-0.66782866,3.5487116,4.04423948,3.54036704
58.367781,4.24264069,4.09636229,0.382463594,3.54815593,4.0891592,3.5398375
58.378273,3.87298335,4.14681196,-0.523286357,3.54760072,4.13971995,3.53930823
58.388764,3.87298335,4.2033877,-0.574808098,3.54704607,4.19641411,3.53877933
58.399256,3.60555128,4.26655853,-0.813023524,3.54649188,4.25971067,3.5382507
58.409748,3.74165739,4.33671049,-0.771396851,3.54593819,4.32999537,3.53772239
58.420239,4.35889894,4.41413505,-0.235023634,3.54538506,4.40755915,3.53719446
58.430731,4.79583152,4.49902981,0.544795108,3.54483238,4.49259888,3.5366668
58.441222,4.12310563,4.59142282,-0.684337051,3.54428026,4.58514162,3.53613951
58.451714,4.24264069,4.69121568,-0.669757416,3.54372858,4.68508783,3.53561249
58.462206,4.79583152,4.79810481,-0.0476789954,3.54317741,4.79213264,3.5350858
58.472697,4.24264069,4.91158566,-0.817890562,3.54262679,4.90577005,3.53455948
58.483189,5.29150262,5.0309677,0.510426219,3.54207662,5.02530809,3.53403343
58.49368,5.65685425,5.15527356,0.708223618,3.541527,5.14976785,3.53350775
58.504172,5.65685425,5.28329834,0.611192204,3.54097783,5.27794293,3.53298234
58.514664,5.38516481,5.41348952,-0.168299467,3.54042916,5.40827925,3.53245726
58.525155,6.63324958,5.54393591,1.04370191,3.53988104,5.53886407,3.53193255
58.535647,5.83095189,5.67236019,0.398235741,3.53933336,5.66741853,3.53140812
58.546138,6.32455532,5.79600007,0.727018051,3.53878624,5.79117872,3.53088405
58.55663,6.32455532,5.91170873,0.64253139,3.53823956,5.90699624,3.53036026
58.567122,6.08276253,6.01593918,0.258502125,3.53769338,6.01132245,3.5298368
58.577613,6.32455532,6.10494655,0.468624336,3.53714775,6.10041092,3.5293137
58.588105,6.70820393,6.17507895,0.73015408,3.53660256,6.17060835,3.52879088
58.598596,6,6.22308281,-0.472316426,3.53605792,6.21865999,3.52826843
58.609088,6.78232998,6.24655216,0.73196846,3.53551373,6.24215909,3.52774626
58.61958,6.40312424,6.24423044,0.398614843,3.53497004,6.23984877,3.5272244
58.630071,6.164414,6.21622628,-0.227623098,3.5344269,6.21183783,3.52670293
58.640563,5.83095189,6.16397781,-0.577083972,3.5338842,6.15956511,3.52618172
58.651054,5.29150262,6.09005643,-0.893618379,3.53334205,6.08560317,3.52566089
58.661546,6.40312424,5.9977741,0.636671141,3.53280035,5.9932654,3.52514033
58.672038,6.92820323,5.89083149,1.01851448,3.53225915,5.88625414,3.5246201
58.682529,6.55743852,5.77295469,0.885710922,3.5317185,5.76829721,3.52410024
58.693021,5.29150262,5.64760245,-0.596741006,3.5311783,5.64285511,3.52358065
58.703512,5.74456265,5.51790085,0.476090115,3.53063866,5.51305563,3.52306144
58.714004,5.47722558,5.38649271,0.301218961,3.53009946,5.3815432,3.5225425
58.724496,4.58257569,5.25562676,-0.820396895,3.52956077,5.25056813,3.52202389
58.734987,4.79583152,5.12715578,-0.575607732,3.52902264,5.12198474,3.52150565
58.745479,4.58257569,5.00254623,-0.648051335,3.52848507,4.99726086,3.52098768
58.75597,4.69041576,4.8830076,-0.438852869,3.52794795,4.87760763,3.52047009
58.766462,5.65685425,4.76943542,0.942029101,3.52741128,4.76392185,3.51995277
58.776954,4.69041576,4.66252176,0.16701496,3.52687513,4.65689695,3.51943578
58.787445,5.09901951,4.5627415,0.732310053,3.52633954,4.55700906,3.51891916
58.797937,4.58257569,4.47034623,0.335006664,3.52580441,4.46451084,3.51840282
58.808428,4.47213595,4.38544821,0.294427819,3.52526985,4.37951555,3.51788685
58.81892,5,4.30796897,0.831884022,3.52473576,4.30194542,3.51737116
58.829412,5.83095189,4.23771914,1.26223324,3.52420219,4.23161165,3.51685579
58.839903,4.35889894,4.17439382,0.429540595,3.52366919,4.16820967,3.5163408
58.850395,4.89897949,4.11758164,0.883967109,3.52313666,4.1113282,3.51582608
58.860886,4.69041576,4.06683015,0.789674367,3.52260472,4.06051476,3.51531173
58.871378,4.12310563,4.02162571,0.318559118,3.52207325,4.01525541,3.51479767
58.88187,3.87298335,3.98145066,-0.329343762,3.52154233,3.97503214,3.51428392
58.892361,3.31662479,3.94578546,-0.793196488,3.52101199,3.93932494,3.51377056
58.902853,4.58257569,3.91411615,0.817593753,3.52048214,3.90761932,3.51325747
58.913344,3.87298335,3.88596924,-0.113955678,3.51995289,3.87944123,3.51274475
58.923836,4,3.86089558,0.372967051,3.51942415,3.85434095,3.51223231
58.934328,3.60555128,3.83849517,-0.482642615,3.51889595,3.83191795,3.5117202
58.944819,5,3.81841022,1.08700956,3.51836837,3.81181393,3.51120846
58.955311,3.46410162,3.80032052,-0.579843865,3.51784131,3.79370821,3.51069699
58.965802,4.35889894,3.78395474,0.758250755,3.51731487,3.77732904,3.51018591
58.976294,4,3.76907348,0.48054814,3.51678896,3.76243666,3.5096751
58.986786,4,3.75547712,0.494492551,3.51626363,3.74883111,3.50916461
58.997277,4.12310563,3.74299645,0.616529947,3.51573895,3.73634293,3.50865451
59.007769,3.60555128,3.7314857,-0.35487241,3.51521482,3.72482609,3.50814467
59.01826,4.58257569,3.72082671,0.92830436,3.51469135,3.71416222,3.50763522
59.028752,4.47213595,3.71091648,0.872478928,3.51416844,3.70424814,3.50712604
59.039244,3.46410162,3.70167129,-0.487411193,3.51364617,3.69500001,3.50661719
59.049735,3.16227766,3.69302056,-0.728521036,3.51312458,3.68634709,3.50610872
59.060227,4.79583152,3.68490226,1.05400629,3.51260359,3.67822725,3.50560052
59.070718,3.46410162,3.67726652,-0.461697855,3.51208331,3.67059052,3.5050927
59.08121,3.46410162,3.67006782,-0.453834995,3.51156365,3.66339127,3.50458515
59.091702,3.87298335,3.66326877,0.457946038,3.51104468,3.65659207,3.50407794
59.102193,4,3.65683676,0.585801369,3.51052646,3.6501602,3.5035711
59.112685,4.35889894,3.65074133,0.841521009,3.51000891,3.64406516,3.50306454
59.123176,2.82842712,3.6449578,-0.903620867,3.50949215,3.63828218,3.50255835
59.133668,3.46410162,3.63946194,-0.418760464,3.50897608,3.632787,3.50205245
59.14416,3.46410162,3.63423359,-0.412470575,3.5084608,3.62755939,3.50154687
59.154651,3.16227766,3.62925446,-0.68335701,3.50794635,3.622581,3.50104167
59.165143,3.46410162,3.6245066,-0.400505912,3.50743268,3.61783383,3.50053674
59.175634,3.31662479,3.6199754,-0.550772741,3.5069199,3.61330322,3.5000322
59.186126,3.31662479,3.61564583,-0.54682816,3.50640794,3.60897407,3.49952793
59.196618,3.31662479,3.61150531,-0.543029021,3.50589688,3.60483378,3.49902399
59.207109,3.60555128,3.60754226,-0.0446204616,3.5053868,3.60087069,3.49852043
59.217601,3.60555128,3.60374492,0.0425012886,3.50487765,3.59707299,3.49801715
59.228092,3.46410162,3.60010384,-0.368784792,3.50436955,3.59343117,3.49751425
59.238584,3,3.59660894,-0.772404649,3.50386245,3.58993511,3.49701162
59.249076,2.64575131,3.5932519,-0.973396418,3.50335645,3.5865764,3.49650933
59.259567,3.60555128,3.59002496,0.124604636,3.50285164,3.58334723,3.49600741
59.270059,4,3.58692006,0.642712957,3.50234798,3.58023947,3.49550577
59.28055,2.82842712,3.58393085,-0.869197175,3.50184564,3.57724671,3.49500451
59.291042,3.31662479,3.58105036,-0.514223271,3.50134457,3.57436187,3.49450353
59.301534,4,3.5782729,0.649405189,3.5008449,3.57157921,3.49400288
59.312025,3.60555128,3.57559317,0.173084112,3.50034677,3.56889331,3.4935026
59.322517,3.31662479,3.57300548,-0.50634049,3.49985015,3.56629841,3.49300261
59.333008,2.64575131,3.57050554,-0.961641424,3.49935526,3.56379008,3.492503
59.3435,3.46410162,3.56808839,-0.322469801,3.4988621,3.56136327,3.49200366
59.353992,3,3.56575011,-0.752163619,3.49837084,3.55901393,3.49150466
59.364483,3.31662479,3.56348704,-0.496852343,3.49788166,3.55673824,3.49100604
59.374975,4.47213595,3.56129515,0.954379801,3.49739463,3.55453202,3.49050769
59.385466,3.60555128,3.5591715,0.215359636,3.49691,3.55239217,3.49000973
59.395958,2.64575131,3.55711258,-0.954652436,3.49642788,3.55031496,3.48951205
59.40645,3.31662479,3.55511572,-0.488355327,3.49594853,3.5482975,3.48901469
59.416941,4.69041576,3.55317841,1.06641331,3.49547223,3.54633706,3.48851772
59.427433,3.46410162,3.55129783,-0.29529005,3.49499917,3.54443053,3.48802103
59.437924,3.31662479,3.54947207,-0.482542517,3.49452975,3.54257568,3.48752471
59.448416,3,3.54769872,-0.740066698,3.49406423,3.54076975,3.48702868
59.458908,4,3.54597606,0.673812984,3.49360306,3.53901061,3.48653298
59.469399,3,3.54430257,-0.737768644,3.49314676,3.53729629,3.48603766
59.479891,2.23606798,3.54267643,-1.14306975,3.49269576,3.53562441,3.48554262
59.490382,2.64575131,3.54109663,-0.946226888,3.49225078,3.53399338,3.48504797
59.500874,4.12310563,3.5395618,0.763900406,3.49181243,3.53240108,3.48455359
59.511366,4.12310563,3.53807118,0.764875446,3.4913816,3.53084594,3.48405955
59.521857,3.46410162,3.53662426,-0.269300294,3.4909593,3.52932651,3.48356588
59.532349,4.35889894,3.53522038,0.907567388,3.49054659,3.52784094,3.4830725
59.54284,3.16227766,3.53385968,-0.609575282,3.49014488,3.52638808,3.4825795
59.553332,2.64575131,3.53254213,-0.941695716,3.48975572,3.52496628,3.48208678
59.563824,4.12310563,3.53126846,0.769309539,3.48938104,3.52357438,3.4815944
59.574315,4.35889894,3.53003983,0.910416997,3.48902321,3.52221126,3.48110239
59.584807,2.64575131,3.52885766,-0.939737382,3.48868495,3.5208755,3.48061067
59.595298,4.12310563,3.52772454,0.771609414,3.48836987,3.51956625,3.48011933
59.60579,4.12310563,3.52664367,0.772309497,3.48808241,3.51828219,3.47962827
59.616282,2.82842712,3.5256201,-0.834980822,3.48782859,3.51702245,3.47913755
59.626773,3.74165739,3.52466124,0.465828456,3.48761676,3.51578619,3.4786472
59.637265,3.46410162,3.52377805,-0.2442876,3.48745904,3.51457228,3.47815714
59.647756,3.16227766,3.5229881,-0.60059174,3.48737389,3.51338007,3.47766747
59.658248,3,3.52231867,-0.722716174,3.48738977,3.51220853,3.47717807
59.66874,4.35889894,3.52181284,0.9149241,3.48755087,3.51105697,3.47668901
59.679231,3.60555128,3.52153645,0.289853114,3.48792428,3.50992478,3.47620033
59.689723,3.74165739,3.5215863,0.469117352,3.48860844,3.50881101,3.47571194
59.700214,3.16227766,3.52209738,-0.599849746,3.48974001,3.5077152,3.47522393
59.710706,3.16227766,3.52324494,-0.600805528,3.49149639,3.5066365,3.4747362
59.721198,3.87298335,3.52523626,0.589700847,3.49408694,3.5055744,3.47424881
59.731689,3.60555128,3.52828652,0.277965383,3.4977289,3.5045284,3.4737618
59.742181,3.74165739,3.5325771,0.457252979,3.50260535,3.50349774,3.47327507
59.752672,3.16227766,3.53819259,-0.613119015,3.50880144,3.50248209,3.47278873
59.763164,4.12310563,3.54504909,0.760300296,3.51623258,3.50148072,3.47230267
59.773656,3.74165739,3.55280765,0.434568444,3.52455701,3.50049326,3.47181695
59.784147,4,3.56078761,0.662731012,3.53308874,3.49951931,3.4713316
59.794639,4.47213595,3.56790741,0.950909328,3.54073851,3.49855825,3.47084655
59.80513,2.82842712,3.57275926,-0.862746857,3.54608881,3.49760982,3.47036188
59.815622,4,3.5740179,0.652673043,3.54780618,3.49667343,3.46987749
59.826114,2,3.57110084,-1.25343561,3.5453057,3.49574878,3.46939344
59.836605,3.31662479,3.56453974,-0.497910579,3.53912459,3.49483557,3.46890977
59.847097,3.74165739,3.55563498,0.431303151,3.53057391,3.49393326,3.46842639
59.857588,4.47213595,3.54579735,0.962464861,3.52107512,3.49304168,3.46794339
59.86808,4,3.53612529,0.681083485,3.51173488,3.49216033,3.46746069
59.878572,3.16227766,3.52731889,-0.604186417,3.50325827,3.49128896,3.46697831
59.889063,3.60555128,3.51973363,0.292946484,3.49600322,3.49042735,3.46649632
59.899555,3.60555128,3.51346475,0.303457614,3.49006561,3.48957504,3.46601462
59.910046,4,3.50843588,0.70111634,3.48536842,3.4887319,3.46553329
59.920538,3.31662479,3.50446878,-0.433409719,3.48173226,3.48789751,3.46505226
59.93103,2.82842712,3.50134911,-0.820318222,3.47894134,3.48707168,3.46457157
59.941521,3.46410162,3.49886827,-0.186458191,3.47678571,3.48625423,3.46409125
59.952013,3.87298335,3.49684782,0.613298886,3.47508594,3.48544476,3.46361123
59.962504,3.46410162,3.49515015,-0.176205955,3.47370361,3.4846432,3.46313159
59.972996,3.60555128,3.49367513,0.334478921,3.47253818,3.48384917,3.46265224
59.983488,3.46410162,3.49235456,-0.168086109,3.47152118,3.48306252,3.46217323
59.993979,4,3.4911434,0.713341851,3.47060744,3.48228312,3.46169459
60.004471,3.74165739,3.49001219,0.5016425,3.46976754,3.48151063,3.46121625
60.014962,3.16227766,3.48894218,-0.571545725,3.46898276,3.48074498,3.4607383
60.025454,2.44948974,3.4879206,-1.01903428,3.46824049,3.47998587,3.46026063
60.035946,3.60555128,3.48693892,0.344401448,3.46753228,3.47923316,3.4597833
60.046437,3.74165739,3.48599099,0.505634644,3.4668521,3.47848677,3.45930636
60.056929,3.74165739,3.48507193,0.506542655,3.46619523,3.47774638,3.4588297
60.06742,3.87298335,3.48417819,0.623542427,3.46555823,3.47701197,3.45835343
60.077912,3.60555128,3.48343889,0.349445824,3.46507111,3.47628324,3.45787745
60.088404,3.46410162,3.48258724,-0.135961837,3.46446575,3.47556012,3.45740181
60.098895,4.24264069,3.48175337,0.872288551,3.46387314,3.47484253,3.45692655
60.109387,3.46410162,3.48093539,-0.12974503,3.46329152,3.47413019,3.45645159
60.119878,2.82842712,3.48013196,-0.807282374,3.46271967,3.4734231,3.455977
60.13037,3.46410162,3.47934165,-0.123450521,3.4621563,3.47272099,3.45550272
60.140862,4.12310563,3.47856343,0.802833852,3.4616005,3.47202381,3.45502877
60.151353,3,3.47779643,-0.691228205,3.46105147,3.4713315,3.4545552
60.161845,3.60555128,3.47703966,0.358485165,3.4605084,3.4706438,3.45408193
60.172336,4.12310563,3.47629254,0.804246909,3.45997076,3.46996074,3.45360904
60.182828,4.35889894,3.47555426,0.939864182,3.4594379,3.46928207,3.45313644
60.19332,2.64575131,3.47482434,-0.910534476,3.45890942,3.46860776,3.45266418
60.203811,3.60555128,3.47410234,0.362558877,3.45838496,3.46793776,3.45219231
60.214303,3.74165739,3.47338765,0.517947623,3.45786404,3.46727184,3.45172073
60.224794,2.64575131,3.47268,-0.909356195,3.45734647,3.46661004,3.45124954
60.235286,3.60555128,3.47197889,0.365475554,3.45683186,3.46595213,3.45077864
60.245778,4.12310563,3.47128406,0.80735467,3.45632002,3.46529808,3.45030808
60.256269,3.74165739,3.47059526,0.520636268,3.45581078,3.46464788,3.44983791
60.266761,3.87298335,3.46991209,0.634878931,3.45530384,3.4640013,3.44936802
60.277252,2.64575131,3.46923442,-0.9074597,3.45479914,3.4633584,3.44889853
60.287744,3.31662479,3.46856189,-0.389791092,3.45429643,3.46271896,3.44842933
60.298236,3.74165739,3.46789434,0.523223704,3.4537956,3.46208297,3.44796047
60.308727,3.74165739,3.46723165,0.523856595,3.4532966,3.46145042,3.44749199
60.319219,3.16227766,3.46657351,-0.551630175,3.4527992,3.46082111,3.44702382
60.32971,4,3.46591986,0.730807865,3.45230341,3.46019509,3.44655602
60.340202,3.31662479,3.46527043,-0.385545903,3.45180904,3.45957218,3.44608852
60.350694,3.31662479,3.46462513,-0.384708126,3.45131606,3.45895236,3.44562137
60.361185,3.74165739,3.46398388,0.526947344,3.45082443,3.45833562,3.4451546
60.371677,2.82842712,3.46334643,-0.79681824,3.450334,3.4577218,3.44468812
60.382168,3.74165739,3.46271278,0.528152067,3.4498448,3.45711094,3.44422203
60.39266,3.60555128,3.46208269,0.37877247,3.44935668,3.45650287,3.44375624
60.403152,3.74165739,3.46145612,0.529340411,3.44886963,3.45589759,3.44329079
60.413643,3.60555128,3.46083301,0.380418538,3.44838365,3.45529511,3.44282572
60.424135,4.12310563,3.46005311,0.814280367,3.44773799,3.45469524,3.44236096
60.434626,3.87298335,3.45943675,0.643075888,3.44725416,3.45409806,3.44189658
60.445118,2.23606798,3.45882346,-1.10578275,3.4467712,3.45350339,3.44143249
60.45561,4.24264069,3.45821323,0.885679093,3.4462891,3.45291125,3.44096875
60.466101,2.82842712,3.45760603,-0.793207983,3.4458079,3.45232164,3.44050539
60.476593,3.74165739,3.45700167,0.533531368,3.44532747,3.45173441,3.44004234
60.487084,3.16227766,3.45640019,-0.542330643,3.44484788,3.45114961,3.43957967
60.497576,3.74165739,3.45580141,0.534655012,3.444369,3.4505671,3.43911729
60.508068,4,3.45520531,0.738102083,3.44389087,3.44998688,3.43865526
60.518559,2.44948974,3.45461191,-1.00255781,3.4434135,3.44940897,3.43819362
60.529051,3.16227766,3.45402101,-0.540132719,3.4429368,3.44883322,3.43773228
60.539542,3,3.45343269,-0.673374105,3.44246082,3.4482597,3.43727132
60.550034,4.47213595,3.45284676,1.00959853,3.44198547,3.44768825,3.43681066
60.560526,4.35889894,3.45226323,0.952174206,3.44151077,3.4471189,3.43635035
60.571017,4,3.4516821,0.740484908,3.44103676,3.44655166,3.43589042
60.581509,2.82842712,3.45110322,-0.789098281,3.44056332,3.44598639,3.4354308
60.592,4,3.45052665,0.741264697,3.44009054,3.44542317,3.43497156
60.602492,3.46410162,3.44995223,0.118951193,3.43961832,3.44486184,3.43451262
60.612984,3.74165739,3.44937997,0.540626873,3.43914669,3.44430243,3.43405402
60.623475,4.12310563,3.44880989,0.821155124,3.43867568,3.44374497,3.43359581
60.633967,3.87298335,3.44824183,0.651721962,3.4382052,3.44318931,3.4331379
60.644458,3.60555128,3.44767586,0.397335388,3.43773532,3.44263552,3.43268038
60.65495,3.46410162,3.44711185,0.130344807,3.43726595,3.44208348,3.43222317
60.665442,3.31662479,3.44654979,-0.360451108,3.43679713,3.44153321,3.43176629
60.675933,3.87298335,3.44598972,0.653447495,3.43632888,3.44098473,3.4313098
60.686425,2.82842712,3.44543148,-0.78549625,3.43586112,3.44043791,3.43085362
60.696916,3.46410162,3.44487516,0.138659489,3.43539393,3.43989282,3.43039782
60.707408,2.44948974,3.44432061,-0.997412086,3.43492721,3.43934934,3.42994233
60.7179,3.16227766,3.44376786,-0.530556499,3.434461,3.43880749,3.42948718
60.728391,3.74165739,3.44321692,0.546297048,3.43399534,3.4382673,3.42903242
60.738883,3.60555128,3.44266767,0.403588414,3.43353014,3.43772865,3.42857796
60.749374,3.46410162,3.44212017,0.148261408,3.43306548,3.4371916,3.42812389
60.759866,3.31662479,3.4415743,-0.353481977,3.43260126,3.43665603,3.42767012
60.770358,3,3.44103008,-0.664100954,3.43213752,3.43612198,3.42721669
60.780849,3.16227766,3.44048753,-0.527456037,3.43167432,3.43558947,3.42676366
60.791341,3.46410162,3.43994653,0.155419057,3.43121154,3.43505838,3.42631093
60.801832,3.87298335,3.43940716,0.658465025,3.43074929,3.43452879,3.42585859
60.812324,3.60555128,3.43886928,0.408267063,3.43028746,3.43400057,3.42540655
60.822816,3.16227766,3.43833293,-0.52540962,3.4298261,3.43347376,3.42495486
60.833307,4.24264069,3.43779813,0.897130178,3.42936524,3.43294839,3.42450355
60.843799,3.60555128,3.43726476,0.410227392,3.4289048,3.43242434,3.42405256
60.85429,3.60555128,3.4367329,0.41087513,3.42844486,3.43190168,3.42360195
60.864782,3.74165739,3.43620243,0.552679796,3.42798534,3.43138031,3.42315164
60.875274,4.24264069,3.43567337,0.898313594,3.42752626,3.43086025,3.42270168
60.885765,3.16227766,3.43514576,-0.522367787,3.42706768,3.43034154,3.42225211
60.896257,4.24264069,3.43461948,0.898899997,3.4266095,3.42982405,3.42180285
60.906748,3,3.43409461,-0.658858564,3.42615181,3.42930788,3.42135397
60.91724,3,3.43357102,-0.658461102,3.42569453,3.4287929,3.4209054
60.927732,2.64575131,3.43304876,-0.887297835,3.42523768,3.42827916,3.42045718
60.938223,3,3.43252785,-0.657668495,3.42478131,3.42776667,3.42000935
60.948715,3.60555128,3.43200818,0.416585045,3.42432534,3.42725534,3.41956182
60.959206,3.16227766,3.43148982,-0.518856591,3.42386984,3.42674524,3.41911469
60.969698,3.16227766,3.43097267,-0.518357996,3.42341474,3.42623626,3.41866786
60.98019,3.60555128,3.43045676,0.418442966,3.42296006,3.42572844,3.41822137
60.990681,3.46410162,3.42994212,0.184822881,3.42250587,3.42522181,3.41777528
61.001173,3.60555128,3.42942863,0.419669682,3.42205205,3.42471625,3.4173295
61.011664,3.74165739,3.42891639,0.559232507,3.42159871,3.42421186,3.4168841
61.022156,3.31662479,3.42840528,-0.334335887,3.42114575,3.42370852,3.41643901
61.032648,3.31662479,3.42789532,-0.333572381,3.42069321,3.42320627,3.41599427
61.043139,3.74165739,3.42738657,0.560598624,3.42024114,3.42270514,3.41554992
61.053631,4,3.4268789,0.757047618,3.41978945,3.42220504,3.41510588
61.064122,3.16227766,3.42637241,-0.513901496,3.41933823,3.42170602,3.41466223
61.074614,3.60555128,3.42586697,0.423891852,3.41888738,3.42120801,3.41421889
61.085106,4,3.42536264,0.758048391,3.41843695,3.42071102,3.41377589
61.095597,3.31662479,3.42485943,-0.328990337,3.41798698,3.42021509,3.41333329
61.106089,3.46410162,3.42435725,0.199359881,3.41753738,3.41972013,3.41289099
61.11658,3.31662479,3.42385618,-0.327462047,3.41708824,3.41922621,3.41244909
61.127072,3.31662479,3.42335611,-0.326697602,3.41663948,3.41873323,3.41200749
61.137564,3.46410162,3.42285708,0.203087499,3.41619113,3.41824122,3.41156625
61.148055,3.74165739,3.42235913,0.565064828,3.41574324,3.41775022,3.41112539
61.158547,3.31662479,3.42186214,-0.324403067,3.41529571,3.41726013,3.41068484
61.169038,3.74165739,3.42136621,0.565942736,3.41484864,3.41677104,3.41024469
61.17953,3.46410162,3.42087122,0.207919199,3.41440194,3.41628283,3.40980485
61.190022,3.46410162,3.42037722,0.209103785,3.41395565,3.41579555,3.40936535
61.200513,3.87298335,3.41988425,0.673126363,3.41350981,3.41530923,3.40892625
61.211005,4.12310563,3.41939219,0.838876295,3.41306434,3.41482378,3.40848745
61.221496,2.64575131,3.41890113,-0.879289385,3.41261932,3.41433927,3.40804905
61.231988,2.23606798,3.41841098,-1.08735597,3.41217467,3.41385561,3.40761096
61.24248,2.82842712,3.41792176,-0.767785542,3.41173042,3.41337283,3.40717322
61.252971,3.16227766,3.41743352,-0.505129551,3.41128662,3.41289097,3.40673587
61.263463,3,3.41694616,-0.645713682,3.41084319,3.41240993,3.40629883
61.273954,3.46410162,3.41645975,0.218270162,3.4104002,3.4119298,3.40586219
61.284446,4.24264069,3.4159742,0.909212013,3.40995758,3.41145047,3.40542585
61.294938,3.87298335,3.41548955,0.676382878,3.40951536,3.41097198,3.40498987
61.305429,3,3.41500583,-0.644209461,3.40907359,3.41049438,3.40455428
61.315921,3.87298335,3.41452294,0.677097041,3.40863218,3.41001755,3.40411899
61.326412,3.60555128,3.41404098,0.437618898,3.40819122,3.4095416,3.40368411
61.336904,2,3.41355983,-1.18893222,3.40775061,3.40906641,3.40324953
61.347396,3.60555128,3.41307953,0.438716014,3.40731041,3.40859204,3.40281531
61.357887,3.60555128,3.41260014,0.439262036,3.40687066,3.4081185,3.40238148
61.368379,2.82842712,3.41212154,-0.763998963,3.40643126,3.40764572,3.40194796
61.37887,4.12310563,3.41164382,0.843481951,3.40599231,3.40717377,3.40151483
61.389362,3.31662479,3.41116689,-0.307476991,3.40555372,3.40670256,3.40108202
61.399854,3.87298335,3.41069078,0.679921,3.40511553,3.40623212,3.40064955
61.410345,4,3.41021553,0.767974263,3.40467778,3.40576249,3.40021749
61.420837,3.31662479,3.40974105,-0.305149563,3.40424039,3.40529358,3.39978573
61.431328,3,3.40926741,-0.639740111,3.40380344,3.40482548,3.39935437
61.44182,3,3.40879453,-0.639370414,3.40336685,3.40435808,3.39892332
61.452312,3.87298335,3.40832243,0.681660409,3.40293066,3.40389142,3.39849262
61.462803,3.60555128,3.40785117,0.4446348,3.40249491,3.40342556,3.39806232
61.473295,4.24264069,3.40738064,0.913925624,3.40205952,3.40296038,3.39763233
61.483786,4.47213595,3.40691093,1.03209739,3.40162457,3.40249597,3.39720273
61.494278,3,3.40644194,-0.637527995,3.40118997,3.40203224,3.39677345
61.50477,3.46410162,3.40597372,0.241097272,3.40075578,3.40156923,3.39634452
61.515261,3.60555128,3.4055063,0.447263879,3.40032202,3.40110698,3.39591599
61.525753,3.16227766,3.40503958,-0.492708761,3.39988862,3.40064539,3.39548777
61.536244,2.44948974,3.40457366,-0.977283949,3.39945566,3.40018456,3.39505994
61.546736,3.16227766,3.40410843,-0.491762923,3.39902306,3.39972437,3.39463243
61.557228,3.60555128,3.40364394,0.449340999,3.39859085,3.39926488,3.39420527
61.567719,2.64575131,3.40318023,-0.870303922,3.39815909,3.39880612,3.39377851
61.578211,3.60555128,3.4027172,0.450371046,3.39772768,3.39834801,3.39335206
61.588702,4.35889894,3.40225493,0.978081803,3.3972967,3.39789061,3.39292601
61.599194,4.24264069,3.40179334,0.916977289,3.39686609,3.39743385,3.39250027
61.609686,4.89897949,3.40133246,1.2237839,3.39643587,3.39697776,3.39207489
61.620177,3.74165739,3.40087233,0.583767981,3.39600608,3.39652239,3.3916499
61.630669,4.12310563,3.40041286,0.850113381,3.39557666,3.39606763,3.39122522
61.64116,4.47213595,3.39995414,1.03546213,3.39514767,3.39561357,3.39080094
61.651652,3,3.39949607,-0.632057014,3.39471903,3.39516013,3.39037698
61.662144,3.31662479,3.39903869,-0.287078209,3.39429079,3.39470733,3.38995337
61.672635,3.16227766,3.39858204,-0.486111488,3.39386299,3.39425523,3.38953016
61.683127,3,3.39812603,-0.630972288,3.39343555,3.39380372,3.38910726
61.693618,3.87298335,3.39767074,0.689429188,3.39300854,3.3933529,3.38868476
61.70411,3.74165739,3.39721608,0.586891219,3.39258188,3.39290268,3.38826257
61.714602,4,3.3967621,0.776683913,3.39215562,3.39245308,3.38784074
61.725093,4,3.39630883,0.776975658,3.3917298,3.39200416,3.38741931
61.735585,3.74165739,3.39585617,0.588048649,3.39130433,3.39155581,3.38699819
61.746076,4.12310563,3.39540422,0.853054161,3.3908793,3.39110814,3.38657747
61.756568,4.24264069,3.39495289,0.920699624,3.39045462,3.39066103,3.38615707
61.76706,3.31662479,3.39450221,-0.279065254,3.39003034,3.39021455,3.38573702
61.777551,3.46410162,3.39405222,0.264668468,3.3896065,3.38976871,3.38531737
61.788043,2.82842712,3.39360283,-0.751781688,3.389183,3.38932344,3.38489803
61.798534,3.87298335,3.39315413,0.692697058,3.38875995,3.38887882,3.38447909
61.809026,3.60555128,3.39270603,0.461351543,3.38833725,3.38843476,3.38406047
61.819518,3.74165739,3.39225856,0.591099673,3.38791494,3.3879913,3.3836422
61.830009,3.31662479,3.39181177,-0.274202449,3.38749307,3.38754848,3.38322433
61.840501,3.60555128,3.39136557,0.462802013,3.38707155,3.38710621,3.38280678
61.850992,3.87298335,3.39092004,0.694307789,3.38665047,3.38666457,3.38238963
61.861484,4.35889894,3.39047509,0.984085288,3.38622974,3.38622348,3.38197279
61.871976,3.31662479,3.39003076,-0.270935364,3.38580941,3.38578297,3.38155631
61.882467,3.60555128,3.38958709,0.464719465,3.38538952,3.38534308,3.38114023
61.892959,3.74165739,3.389144,0.593728378,3.38496997,3.38490373,3.38072447
61.90345,3.31662479,3.38870156,-0.268471174,3.38455086,3.384465,3.3803091
61.913942,5,3.38825969,1.26954335,3.38413211,3.3840268,3.37989405
61.924434,3.16227766,3.38781843,-0.474911325,3.38371375,3.38358917,3.37947936
61.934925,4,3.38737781,0.782701852,3.38329583,3.38315215,3.37906507
61.945417,3.16227766,3.38693775,-0.473983221,3.38287826,3.38271566,3.37865109
61.955908,2.82842712,3.38649834,-0.747041642,3.38246113,3.38227977,3.37823752
61.9664,4,3.38605948,0.783543567,3.38204435,3.3818444,3.37782426
61.976892,3.46410162,3.38562121,0.280143536,3.38162796,3.38140959,3.37741136
61.987383,3.31662479,3.38518358,-0.26183734,3.38121201,3.38097538,3.37699886
61.997875,3.87298335,3.3847465,0.69873947,3.38079641,3.38054168,3.37658667
62.008366,4.24264069,3.38431005,0.926461355,3.38038125,3.38010857,3.37617489
62.018858,3.60555128,3.38387413,0.47082602,3.37996644,3.37967597,3.37576342
62.02935,4,3.38343881,0.785214107,3.37955203,3.37924392,3.37535231
62.039841,2.82842712,3.3830041,-0.744699251,3.37913805,3.37881245,3.37494161
62.050333,3.31662479,3.38256993,-0.256797857,3.37872443,3.37838149,3.37453122
62.060824,4,3.38213638,0.786043016,3.37831124,3.37795111,3.37412123
62.071316,3.31662479,3.38170336,-0.255105012,3.37789841,3.37752122,3.37371155
62.081808,3,3.38127091,-0.617471384,3.37748597,3.37709188,3.37330224
62.092299,3,3.38083907,-0.617121603,3.37707396,3.3766631,3.37289333
62.102791,3.46410162,3.38040776,0.2892989,3.37666231,3.37623482,3.37248474
62.113282,4.58257569,3.37997706,1.09663058,3.37625109,3.37580711,3.37207654
62.123774,3.46410162,3.37954688,0.290782977,3.37584023,3.37537989,3.37166867
62.134266,4.47213595,3.37911726,1.04547535,3.37542977,3.3749532,3.37126115
62.144757,3.60555128,3.37868824,0.476301416,3.37501973,3.37452707,3.37085404
62.155249,4,3.37825973,0.788505083,3.37461006,3.37410142,3.37044724
62.16574,3.31662479,3.37783183,-0.247400561,3.37420082,3.37367634,3.37004085
62.176232,3.60555128,3.37740444,0.477647192,3.37379193,3.37325173,3.36963477
62.186724,3.87298335,3.3769776,0.704276757,3.37338344,3.37282764,3.36922906
62.197215,4.12310563,3.37655135,0.864033726,3.37297538,3.37240411,3.36882374
62.207707,3.46410162,3.3761256,0.296607502,3.37256768,3.37198106,3.36841875
62.218198,3.31662479,3.37570045,-0.243054852,3.37216041,3.37155855,3.36801415
62.22869,4.12310563,3.3752758,0.864771544,3.37175349,3.37113652,3.36760988
62.239182,3,3.3748517,-0.612251335,3.37134698,3.37071499,3.36720597
62.249673,3.74165739,3.37442818,0.605994399,3.37094089,3.37029402,3.36680245
62.260165,3,3.37400515,-0.611559607,3.37053517,3.36987351,3.36639926
62.270656,2.23606798,3.37358271,-1.06654336,3.37012987,3.36945354,3.36599647
62.281148,2,3.37316076,-1.17181942,3.36972494,3.36903404,3.365594
62.29164,3,3.37273935,-0.610523833,3.36932039,3.36861504,3.36519189
62.302131,3.31662479,3.37231851,-0.235995177,3.36891629,3.36819658,3.36479018
62.312623,4.24264069,3.37189817,0.933135852,3.36851253,3.36777858,3.3643888
62.323114,2.82842712,3.3714784,-0.736920126,3.36810922,3.36736111,3.36398781
62.333606,3.46410162,3.37105911,0.305028691,3.36770626,3.3669441,3.36358714
62.344098,3.16227766,3.37064036,-0.45646763,3.36730369,3.36652759,3.36318684
62.354589,3.16227766,3.37022217,-0.45600933,3.36690156,3.3661116,3.36278694
62.365081,4.24264069,3.36980447,0.934257042,3.36649979,3.36569607,3.36238736
62.375572,3.74165739,3.36938733,0.610139377,3.36609845,3.36528107,3.36198818
62.386064,2.82842712,3.36897067,-0.735216666,3.36569746,3.36486652,3.36158932
62.396556,2.64575131,3.36855454,-0.850178349,3.36529688,3.36445246,3.36119082
62.407047,4,3.36813896,0.794896873,3.36489672,3.36403892,3.36079273
62.417539,3.87298335,3.36772386,0.710816067,3.36449693,3.36362583,3.36039496
62.42803,3.87298335,3.36730933,0.711107601,3.36409757,3.36321326,3.35999758
62.438522,2.64575131,3.36689526,-0.849201951,3.36369856,3.36280113,3.35960054
62.449014,3.74165739,3.36648172,0.612515853,3.36329996,3.36238949,3.35920385
62.459505,2.23606798,3.36606872,-1.06301493,3.36290178,3.36197836,3.35880756
62.469997,4.35889894,3.3656562,0.996615644,3.36250397,3.36156768,3.3584116
62.480488,3.74165739,3.36524423,0.613525186,3.36210658,3.36115751,3.35801604
62.49098,2.82842712,3.36483273,-0.732397166,3.36170956,3.36074777,3.3576208
62.501472,3.60555128,3.36442174,0.491049419,3.36131294,3.36033852,3.35722593
62.511963,3.31662479,3.3640113,-0.21768443,3.36091674,3.35992977,3.35683145
62.522455,3.46410162,3.36360133,0.317017805,3.36052091,3.35952147,3.3564373
62.532946,3.74165739,3.36292604,0.615411522,3.35985942,3.35911367,3.35604355
62.543438,3,3.36251746,-0.602094232,3.35946476,3.3587063,3.35565013
62.55393,3.31662479,3.36210939,-0.21327118,3.3590705,3.35829941,3.35525707
62.564421,3.60555128,3.36170185,0.493811124,3.35867667,3.35789302,3.35486441
62.574913,3.60555128,3.36129477,0.494223129,3.35828321,3.35748706,3.35447207
62.585404,3.16227766,3.36088824,-0.445657467,3.35789017,3.35708161,3.35408014
62.595896,3.87298335,3.36048216,0.715891881,3.3574975,3.35667658,3.35368853
62.606388,3.16227766,3.36007658,-0.444745908,3.35710522,3.35627202,3.35329728
62.616879,3.60555128,3.35967154,0.495862618,3.35671337,3.35586796,3.35290643
62.627371,3.46410162,3.35926695,0.323781812,3.35632188,3.35546432,3.35251591
62.637862,3.46410162,3.3588629,0.32440517,3.35593083,3.35506119,3.35212579
62.648354,4,3.3584593,0.800962356,3.35554014,3.35465848,3.351736
62.658846,3.87298335,3.3580562,0.717584243,3.35514984,3.35425623,3.35134657
62.669337,3.16227766,3.35765363,-0.442013536,3.35475998,3.35385447,3.35095754
62.679829,3.60555128,3.35725151,0.498296869,3.35437047,3.35345314,3.35056884
62.69032,4,3.35684991,0.801966387,3.3539814,3.3530523,3.35018053
62.700812,3.74165739,3.35644877,0.620651764,3.35359269,3.35265188,3.34979256
62.711304,3.46410162,3.35604812,0.328714911,3.35320438,3.35225191,3.34940494
62.721795,3,3.355648,-0.596362304,3.3528165,3.35185244,3.34901773
62.732287,2.64575131,3.35524832,-0.842316455,3.35242898,3.35145338,3.34863085
62.742778,3.60555128,3.35484917,0.500701615,3.3520419,3.35105482,3.34824436
62.75327,4.12310563,3.35445046,0.876729811,3.35165517,3.35065667,3.34785821
62.763762,3.74165739,3.35405224,0.622579427,3.35126885,3.35025897,3.34747241
62.774253,3.74165739,3.35365455,0.62289874,3.35088295,3.34986176,3.34708702
62.784745,3.46410162,3.35325729,0.332932909,3.35049742,3.34946496,3.34670196
62.795236,3.60555128,3.35286056,0.502683514,3.35011233,3.34906864,3.34631729
62.805728,3.74165739,3.35246427,0.62385344,3.34972759,3.34867274,3.34593296
62.81622,4.58257569,3.35206846,1.1092823,3.34934325,3.34827729,3.34554898
62.826711,3.60555128,3.35167317,0.503863176,3.34895935,3.34788231,3.34516541
62.837203,3.46410162,3.35127833,0.33589178,3.34857581,3.34748775,3.34478217
62.847694,4,3.350884,0.805677357,3.3481927,3.34709367,3.34439933
62.858186,3.46410162,3.35049011,0.337063065,3.34780995,3.3467,3.34401681
62.868678,3.60555128,3.35009669,0.505425151,3.34742761,3.34630677,3.34363466
62.879169,3.31662479,3.34970379,-0.181876341,3.3470457,3.34591402,3.34325291
62.889661,4.24264069,3.34931133,0.94516102,3.34666415,3.34552168,3.34287149
62.900152,3.74165739,3.34891939,0.62668812,3.34628303,3.34512982,3.34249047
62.910644,3.60555128,3.34852788,0.506974751,3.34590228,3.34473835,3.34210978
62.921136,4,3.34813684,0.807380429,3.34552193,3.34434733,3.34172945
62.931627,3.31662479,3.34774632,-0.176412946,3.34514201,3.34395679,3.34134953
62.942119,3.16227766,3.34735623,-0.430207589,3.34476246,3.34356665,3.34096993
62.95261,3.31662479,3.34696665,-0.174189152,3.34438334,3.34317698,3.34059074
62.963102,2.82842712,3.34657751,-0.719826634,3.34400458,3.34278772,3.34021187
62.973594,3,3.34618883,-0.588378139,3.34362622,3.34239889,3.33983337
62.984085,3.46410162,3.34580067,0.343949044,3.3432483,3.34201053,3.33945527
62.994577,2.64575131,3.34541294,-0.836457786,3.34287075,3.34162257,3.33907749
63.005068,4,3.34502571,0.809304817,3.34249362,3.34123509,3.33870012
63.01556,3.74165739,3.34463892,0.630094013,3.34211687,3.340848,3.33832308
63.026052,3.74165739,3.3442526,0.630400499,3.34174051,3.34046135,3.33794641
63.036543,3.87298335,3.34386678,0.727403992,3.34136459,3.34007516,3.33757013
63.047035,4,3.34348139,0.81025836,3.34098903,3.33968938,3.33719419
63.057526,3.46410162,3.34309651,0.347857887,3.34061391,3.33930406,3.33681864
63.068018,2.82842712,3.34271205,-0.717136616,3.34023915,3.33891914,3.33644343
63.07851,4.24264069,3.34232806,0.948848052,3.3398648,3.33853464,3.33606858
63.089001,3.60555128,3.34194458,0.513426431,3.33949088,3.33815062,3.33569413
63.099493,3.46410162,3.34156152,0.350057277,3.33911732,3.33776698,3.33532001
63.109984,4.12310563,3.34117896,0.884266173,3.33874421,3.33738382,3.33494629
63.120476,3.16227766,3.34079683,-0.422515292,3.33837145,3.33700104,3.33457291
63.130968,3.74165739,3.34041517,0.633436832,3.3379991,3.3366187,3.33419988
63.141459,3.60555128,3.340034,0.515283683,3.33762719,3.33623682,3.33382726
63.151951,2.64575131,3.33965326,-0.833007774,3.33725564,3.33585533,3.33345497
63.162442,2.82842712,3.33927302,-0.714734844,3.33688453,3.3354743,3.33308308
63.172934,3.31662479,3.33889321,-0.14922606,3.33651378,3.33509366,3.33271153
63.183426,3,3.33851385,-0.581819435,3.33614344,3.33471345,3.33234033
63.193917,3,3.338135,-0.581493765,3.33577354,3.3343337,3.33196954
63.204409,4,3.33775657,0.813783406,3.335404,3.33395433,3.33159908
63.2149,3.74165739,3.33737863,0.635829186,3.3350349,3.33357543,3.33122902
63.225392,3.31662479,3.33700112,-0.14274569,3.33466616,3.33319692,3.33085929
63.235884,4,3.33662407,0.814478931,3.33429783,3.33281883,3.33048993
63.246375,3.74165739,3.33624752,0.636718047,3.33392993,3.33244119,3.33012096
63.256867,3.60555128,3.33587138,0.519307128,3.33356241,3.33206395,3.32975233
63.267358,3.31662479,3.33549574,-0.13737159,3.33319532,3.33168716,3.3293841
63.27785,3.60555128,3.33512053,0.520029564,3.3328286,3.33131076,3.3290162
63.288342,2.64575131,3.33474577,-0.830056901,3.33246228,3.33093477,3.32864867
63.298833,3,3.3343715,-0.578248653,3.3320964,3.33055925,3.32828154
63.309325,3.60555128,3.33399766,0.521108064,3.33173089,3.33018411,3.32791474
63.319816,2.82842712,3.33362431,-0.710772245,3.33136582,3.32980942,3.32754834
63.330308,4.35889894,3.33325138,1.0127426,3.33100111,3.32943512,3.32718227
63.3408,3.31662479,3.3328789,-0.127491624,3.33063681,3.32906123,3.32681657
63.351291,3.87298335,3.33250692,0.735171017,3.33027295,3.3286878,3.32645127
63.361783,3,3.33213536,-0.576311859,3.32990946,3.32831475,3.3260863
63.372274,3.46410162,3.33176429,0.363781979,3.32954641,3.32794216,3.32572173
63.382766,3.87298335,3.33139363,0.73592779,3.32918372,3.32756994,3.32535749
63.393258,3.46410162,3.33102344,0.36479882,3.32882145,3.32719815,3.32499362
63.403749,2.23606798,3.33065373,-1.04622452,3.32845961,3.3268268,3.32463015
63.414241,4.58257569,3.33028444,1.1190582,3.32809814,3.32645583,3.32426701
63.424732,3.87298335,3.32991564,0.736931278,3.32773711,3.32608532,3.32390428
63.435224,3.60555128,3.32954726,0.525360847,3.32737645,3.32571518,3.32354187
63.445716,4.12310563,3.32917933,0.891025419,3.32701619,3.32534546,3.32317983
63.456207,2.82842712,3.32881189,-0.707378797,3.32665638,3.32497619,3.3228182
63.466699,3.31662479,3.32844486,-0.108720164,3.32629694,3.3246073,3.32245689
63.47719,3,3.32807833,-0.572781223,3.32593793,3.32423886,3.32209599
63.487682,3.31662479,3.32771221,-0.105296824,3.3255793,3.32387079,3.32173541
63.498174,4.35889894,3.32734655,1.01565368,3.32522108,3.32350314,3.32137521
63.508665,3.16227766,3.32698137,-0.405837045,3.32486329,3.32313593,3.3210154
63.519157,3.46410162,3.3266166,0.370789712,3.32450588,3.3227691,3.32065593
63.529648,3.74165739,3.32625233,0.644519245,3.32414891,3.32240272,3.32029686
63.54014,3.74165739,3.32588847,0.644801456,3.32379231,3.32203671,3.31993812
63.550632,4.24264069,3.32552506,0.95766154,3.32343612,3.32167111,3.31957974
63.561123,3.74165739,3.32516214,0.645364431,3.32308037,3.32130596,3.31922177
63.571615,4,3.32479963,0.821705768,3.32272499,3.32094119,3.31886413
63.582106,3.74165739,3.32443761,0.64592552,3.32237005,3.32057686,3.31850689
63.592598,3.74165739,3.324076,0.646205372,3.32201549,3.3202129,3.31814999
63.60309,3.16227766,3.32371485,-0.401792468,3.32166133,3.31984936,3.31779345
63.613581,2.44948974,3.32335418,-0.934807164,3.32130762,3.31948625,3.31743731
63.624073,3.16227766,3.32299392,-0.400894324,3.32095428,3.31912352,3.3170815
63.634564,3.46410162,3.32263415,0.376121613,3.32060138,3.31876124,3.31672609
63.645056,3.60555128,3.32227479,0.532237246,3.32024886,3.31839932,3.31637102
63.655548,3.31662479,3.32191588,-0.0727398874,3.31989674,3.31803782,3.31601632
63.666039,3.74165739,3.32155746,0.648151163,3.31954507,3.31767675,3.31566201
63.676531,3.60555128,3.32119945,0.533246499,3.31919377,3.31731606,3.31530804
63.687022,3.31662479,3.32084192,-0.0649394277,3.31884292,3.31695581,3.31495446
63.697514,3.46410162,3.32048481,0.378968083,3.31849244,3.31659593,3.31460122
63.708006,3.16227766,3.32012814,-0.397304018,3.31814237,3.31623645,3.31424835
63.718497,3.87298335,3.31977196,0.743781812,3.31779275,3.31587742,3.31389588
63.728989,3.16227766,3.31941619,-0.396407031,3.3174435,3.31551876,3.31354374
63.73948,2.44948974,3.31906091,-0.932507998,3.31709469,3.31516053,3.313192
63.749972,3.31662479,3.31870604,-0.0456206972,3.31674626,3.31480268,3.31284059
63.760464,3.31662479,3.31835162,-0.0415550847,3.31639824,3.31444523,3.31248955
63.770955,2.23606798,3.31799767,-1.0401585,3.31605067,3.31408822,3.31213891
63.781447,3.46410162,3.31764415,0.38269762,3.31570347,3.31373158,3.31178861
63.791938,3.16227766,3.3172911,-0.393717463,3.31535672,3.31337537,3.3114387
63.80243,2.64575131,3.31693847,-0.819260128,3.31501034,3.31301954,3.31108913
63.812922,2.23606798,3.31658628,-1.03947983,3.31466438,3.3126641,3.31073992
63.823413,4,3.31623458,0.826901094,3.31431886,3.31230911,3.31039111
63.833905,3,3.31588329,-0.562034955,3.31397372,3.31195448,3.31004264
63.844396,3,3.31553248,-0.56172278,3.31362902,3.31160029,3.30969457
63.854888,3,3.31518209,-0.5614108,3.31328471,3.31124646,3.30934683
63.86538,4,3.31483214,0.827748671,3.3129408,3.31089304,3.30899946
63.875871,3.87298335,3.31448267,0.747329028,3.31259734,3.31054005,3.30865248
63.886363,2.82842712,3.31413362,-0.69692646,3.31225427,3.31018743,3.30830584
63.896854,3.74165739,3.31378504,0.654119519,3.31191163,3.30983525,3.3079596
63.907346,2.82842712,3.31343688,-0.696426419,3.31156938,3.30948343,3.3076137
63.917838,3.46410162,3.31308917,0.388603199,3.31122754,3.30913201,3.30726816
63.928329,3.31662479,3.31274194,0.0623125601,3.31088615,3.30878102,3.30692301
63.938821,3.46410162,3.31239512,0.389495186,3.31054514,3.3084304,3.30657821
63.949312,3.16227766,3.31204878,-0.387002733,3.31020458,3.30808021,3.3062338
63.959804,3.16227766,3.31170285,-0.386555545,3.30986439,3.30773039,3.30588973
63.970296,2.82842712,3.31135737,-0.694931828,3.30952463,3.30738097,3.30554602
63.980787,3.31662479,3.31101237,0.0749160853,3.3091853,3.30703198,3.30520271
63.991279,3.16227766,3.31066778,-0.385214388,3.30884637,3.30668335,3.30485974
64.00177,3.60555128,3.31032368,0.543348504,3.30850788,3.30633516,3.30451716
64.012262,3.16227766,3.30997999,-0.384320603,3.30816977,3.30598732,3.30417492
64.022754,3.87298335,3.30963674,0.750564192,3.30783208,3.30563989,3.30383305
64.033245,3.60555128,3.30929397,0.544295234,3.30749484,3.30529289,3.30349157
64.043737,4,3.30895162,0.831293196,3.30715798,3.30494625,3.30315043
64.054228,3.31662479,3.30860975,0.089526766,3.30682157,3.30460004,3.30280968
64.06472,3.31662479,3.30826829,0.091413897,3.30648554,3.30425419,3.30246927
64.075212,4.24264069,3.30792728,0.966805776,3.30614993,3.30390874,3.30212923
64.085703,3,3.30758675,-0.554605035,3.30581477,3.30356372,3.30178959
64.096195,3.87298335,3.30724663,0.752154718,3.30548,3.30321906,3.30145028
64.106686,3.74165739,3.30690699,0.659356049,3.30514567,3.30287483,3.30111136
64.117178,4,3.30656776,0.832725787,3.30481173,3.30253096,3.30077279
64.12767,3,3.30622899,-0.553379604,3.30447821,3.30218749,3.30043457
64.138161,3.31662479,3.30589069,0.103605513,3.30414514,3.30184444,3.30009676
64.148653,5.09901951,3.3055528,1.33920376,3.30381246,3.30150176,3.29975928
64.159144,3.74165739,3.3052154,0.66063756,3.30348023,3.3011595,3.2994222
64.169636,3.31662479,3.30487841,0.10838071,3.30314839,3.30081761,3.29908545
64.180128,4.24264069,3.30454187,0.968555015,3.30281696,3.3004761,3.29874907
64.190619,3.60555128,3.30420581,0.548949421,3.30248599,3.30013503,3.29841309
64.201111,3.46410162,3.30387016,0.400289213,3.3021554,3.29979431,3.29807744
64.211602,3.31662479,3.30353499,0.114410647,3.30182527,3.29945402,3.29774218
64.222094,3.60555128,3.30320024,0.549864559,3.30149553,3.2991141,3.29740727
64.232586,3,3.30286594,-0.550332571,3.3011662,3.29877456,3.29707272
64.243077,2.82842712,3.30253211,-0.688552823,3.30083733,3.29843545,3.29673856
64.253569,3.87298335,3.30219871,0.755502905,3.30050885,3.2980967,3.29640474
64.26406,1.73205081,3.30186578,-1.25292257,3.30018083,3.29775837,3.29607132
64.274552,3.16227766,3.30153327,-0.373169674,3.29985319,3.2974204,3.29573823
64.285044,4,3.3012012,0.835941863,3.29952598,3.29708282,3.29540551
64.295535,4,3.30086962,0.836140169,3.29919922,3.29674567,3.29507318
64.306027,4.24264069,3.30053845,0.970619512,3.29887285,3.29640888,3.29474119
64.316518,2,3.30020776,-1.14026653,3.29854694,3.2960725,3.2944096
64.32701,3.16227766,3.29987749,-0.370944516,3.29822142,3.29573649,3.29407834
64.337502,3.16227766,3.29954767,-0.370499681,3.29789632,3.29540087,3.29374744
64.347993,3.31662479,3.29921833,0.131933533,3.29757168,3.29506567,3.29341694
64.358485,3.74165739,3.29888941,0.665408127,3.29724744,3.29473083,3.29308678
64.368976,4,3.29856097,0.837519571,3.29692365,3.29439641,3.29275701
64.379468,2.64575131,3.29823295,-0.807763353,3.29660025,3.29406234,3.29242758
64.38996,3,3.29790585,-0.545807516,3.29627775,3.29372867,3.29209851
64.400451,3.46410162,3.29757875,0.408072129,3.29595524,3.29339542,3.29176984
64.410943,3.74165739,3.29725208,0.666637314,3.29563312,3.29306252,3.2914415
64.421434,3.46410162,3.29692589,0.408871287,3.29531146,3.29273005,3.29111356
64.431926,4.12310563,3.29660011,0.909123486,3.29499019,3.29239793,3.29078595
64.442418,3.16227766,3.29627479,-0.366056183,3.29466936,3.2920662,3.29045871
64.452909,3.60555128,3.29594995,0.556418302,3.29434898,3.29173489,3.29013186
64.463401,3.74165739,3.29562553,0.667856167,3.294029,3.29140393,3.28980535
64.473892,3.60555128,3.29530159,0.557000617,3.29370947,3.2910734,3.28947924
64.484384,3.46410162,3.29497807,0.411246333,3.29339035,3.29074322,3.28915345
64.494876,3.16227766,3.294655,-0.363836971,3.29307165,3.29041343,3.28882804
64.505367,4.47213595,3.29433242,1.08526657,3.29275342,3.29008405,3.28850301
64.515859,4,3.29401025,0.84023196,3.29243558,3.28975504,3.28817833
64.52635,3.16227766,3.29368857,-0.362506431,3.29211821,3.28942643,3.28785403
64.536842,2.64575131,3.29336731,-0.804745924,3.29180123,3.28909819,3.28753007
64.547334,3.16227766,3.29304651,-0.361619756,3.29148469,3.28877033,3.28720648
64.557825,2.64575131,3.29272619,-0.804347483,3.29116861,3.28844289,3.28688328
64.568317,2.82842712,3.29240629,-0.681160158,3.29085293,3.2881158,3.28656042
64.578808,3.87298335,3.29208687,0.762165649,3.29053771,3.28778913,3.28623795
64.5893,3.60555128,3.29176788,0.560163725,3.29022289,3.28746282,3.28591581
64.599792,3,3.29144934,-0.539860479,3.28990851,3.28713688,3.28559404
64.610283,4.24264069,3.29113128,0.975453435,3.28959459,3.28681137,3.28527266
64.620775,3,3.29081365,-0.539271409,3.28928108,3.28648621,3.28495161
64.631266,3.16227766,3.29049651,-0.358076594,3.28896803,3.28616146,3.28463096
64.641758,3.46410162,3.29017979,0.41703936,3.28865538,3.28583707,3.28431065
64.65225,3.74165739,3.28986352,0.672156131,3.28834317,3.28551306,3.2839907
64.662741,3.46410162,3.28954774,0.417796448,3.28803142,3.28518947,3.28367114
64.673233,3.87298335,3.28923239,0.764035965,3.28772008,3.28486623,3.28335191
64.683724,3.31662479,3.28891752,0.166455,3.28740921,3.2845434,3.28303308
64.694216,3.31662479,3.28860308,0.167396855,3.28709875,3.28422093,3.28271458
64.704708,4.47213595,3.2882891,1.08804727,3.28678872,3.28389884,3.28239645
64.715199,3.60555128,3.2879756,0.563538527,3.28647916,3.28357716,3.28207871
64.725691,3.46410162,3.28766254,0.420046521,3.28617,3.28325584,3.28176131
64.736182,3.16227766,3.28734995,-0.353655616,3.28586132,3.28293493,3.28144429
64.746674,2.23606798,3.2870378,-1.02516819,3.28555305,3.28261437,3.28112761
64.757166,3.46410162,3.28672611,0.421159715,3.28524521,3.28229419,3.2808113
64.767657,3.74165739,3.2864149,0.674716594,3.28493785,3.28197443,3.28049537
64.778149,3.46410162,3.28610413,0.421897482,3.28463089,3.28165502,3.28017978
64.78864,3.16227766,3.28579384,-0.351448693,3.28432441,3.28133601,3.27986458
64.799132,2.82842712,3.28548399,-0.676059808,3.28401834,3.28101736,3.27954972
64.809624,4.12310563,3.28517459,0.915385728,3.28371271,3.2806991,3.27923522
64.820115,3.87298335,3.28486569,0.766888294,3.28340756,3.28038124,3.27892111
64.830607,2.82842712,3.28455722,-0.67537404,3.28310282,3.28006373,3.27860733
64.841098,3.60555128,3.28424924,0.566835106,3.28279855,3.27974663,3.27829395
64.85159,3.16227766,3.28394169,-0.348803712,3.28249469,3.27942989,3.2779809
64.862082,3.46410162,3.2836346,0.42481409,3.28219128,3.27911352,3.27766821
64.872573,2.82842712,3.28332801,-0.674463406,3.28188835,3.27879757,3.27735592
64.883065,3.87298335,3.28302185,0.768089509,3.28158583,3.27848196,3.27704395
64.893556,3.31662479,3.28271619,0.184142891,3.28128379,3.27816677,3.27673238
64.904048,3.87298335,3.28241096,0.768487079,3.28098217,3.27785192,3.27642114
64.91454,4.12310563,3.28210619,0.917060214,3.28068099,3.27753745,3.27611027
64.925031,3.31662479,3.28180192,0.186608875,3.28038029,3.2772234,3.27579978
64.935523,3,3.28149808,-0.53056393,3.28008001,3.27690969,3.27548963
64.946014,3.46410162,3.28119474,0.427676129,3.27978021,3.27659639,3.27517987
64.956506,3.74165739,3.28089184,0.67879713,3.27948083,3.27628343,3.27487044
64.966998,3.16227766,3.28058941,-0.343964748,3.2791819,3.27597086,3.27456137
64.977489,3.60555128,3.28028747,0.570319038,3.27888346,3.2756587,3.2742527
64.987981,3.16227766,3.27998597,-0.34308645,3.27858543,3.27534688,3.27394435
64.998472,3.46410162,3.27968497,0.42943759,3.27828789,3.27503547,3.2736364
65.008964,3.16227766,3.27938441,-0.342208638,3.27799077,3.27472441,3.27332878
65.019456,3.16227766,3.27908432,-0.341769896,3.2776941,3.27441372,3.27302152
65.029947,4,3.27878473,0.84924394,3.27739792,3.27410344,3.27271465
65.040439,4.24264069,3.27861868,0.981846225,3.27723531,3.27379351,3.27240811
65.05093,4.47213595,3.27832014,1.09261879,3.27694015,3.27348399,3.27210196
65.061422,4,3.27802204,0.849692864,3.27664541,3.27317481,3.27179614
65.071914,3.46410162,3.27772441,0.431714263,3.27635113,3.27286601,3.27149069
65.082405,3.74165739,3.27742729,0.681344334,3.27605733,3.27255762,3.27118562
65.092897,3.46410162,3.27713061,0.432401444,3.27576397,3.27224957,3.27088089
65.103388,3.74165739,3.27683443,0.681779258,3.27547109,3.27194193,3.27057654
65.11388,3.60555128,3.2765387,0.573596177,3.27517864,3.27163463,3.27027253
65.124372,3.74165739,3.27624345,0.682212531,3.27488666,3.27132771,3.26996888
65.134863,3,3.2759487,-0.525308196,3.27459516,3.27102119,3.26966561
65.145355,3.46410162,3.2756544,0.434105072,3.2743041,3.27071502,3.26936268
65.155846,3.87298335,3.27536061,0.77306063,3.27401353,3.27040925,3.26906014
65.166338,3,3.27506727,-0.524468555,3.2737234,3.27010383,3.26875793
65.17683,4.12310563,3.2747744,0.92104898,3.27343373,3.26979879,3.26845607
65.187321,3.31662479,3.27448205,0.20528698,3.27314455,3.26949414,3.26815461
65.197813,3.74165739,3.27419014,0.683715762,3.27285582,3.26918984,3.26785347
65.208304,3,3.27389875,-0.523353369,3.27256757,3.26888595,3.26755273
65.218796,3.46410162,3.27360781,0.436455961,3.27227977,3.2685824,3.26725231
65.229288,2.64575131,3.27331735,-0.79219066,3.27199243,3.26827922,3.26695226
65.239779,3.31662479,3.27302741,0.208799864,3.2717056,3.26797645,3.26665259
65.250271,2.82842712,3.27273792,-0.666566421,3.2714192,3.26767401,3.26635325
65.260762,2.44948974,3.27244894,-0.907170987,3.27113331,3.26737199,3.2660543
65.271254,3.31662479,3.27216042,0.210865754,3.27084785,3.2670703,3.26575568
65.281746,2.64575131,3.27187239,-0.791278132,3.27056287,3.26676899,3.26545742
65.292237,4.24264069,3.27158488,0.985421641,3.2702784,3.26646808,3.26515955
65.302729,3.87298335,3.27129782,0.775683908,3.26999437,3.26616751,3.26486201
65.31322,3,3.27101128,-0.520587439,3.26971084,3.26586734,3.26456485
65.323712,3.16227766,3.2707252,-0.329313748,3.26942776,3.26556752,3.26426802
65.334204,3.46410162,3.27043962,0.440070445,3.26914516,3.26526807,3.26397156
65.344695,3.16227766,3.27015455,-0.328446178,3.26886306,3.26496902,3.26367547
65.355187,3.31662479,3.26986995,0.216228675,3.26858142,3.26467031,3.26337972
65.365678,3.46410162,3.26958587,0.441039393,3.26830028,3.264372,3.26308435
65.37617,2.82842712,3.26930226,-0.663984285,3.2680196,3.26407403,3.26278932
65.386662,3.74165739,3.26901914,0.687486909,3.2677394,3.26377643,3.26249464
65.397153,3.74165739,3.26873654,0.687692406,3.26745971,3.26347923,3.26220034
65.407645,4.24264069,3.26845442,0.987008749,3.26718048,3.26318238,3.26190638
65.418136,3.16227766,3.26817282,-0.325415358,3.26690176,3.26288592,3.2616128
65.428628,3.46410162,3.26789169,0.442955899,3.26662349,3.2625898,3.26131955
65.43912,4,3.26761106,0.855797255,3.26634572,3.26229406,3.26102666
65.449611,2.44948974,3.26733096,-0.904345739,3.26606846,3.26199871,3.26073415
65.460103,3.31662479,3.26705133,0.222650977,3.26579167,3.2617037,3.26044197
65.470594,3.74165739,3.26677224,0.689119111,3.26551539,3.26140909,3.26015017
65.481086,2.82842712,3.26649362,-0.661865919,3.26523958,3.26111482,3.25985871
65.491578,2.64575131,3.26621551,-0.787695497,3.26496426,3.26082092,3.2595676
65.502069,4.24264069,3.26593793,0.988282733,3.26468946,3.26052742,3.25927687
65.512561,3.31662479,3.26566083,0.225751994,3.26441513,3.26023425,3.25898648
65.523052,4,3.26538168,0.857098781,3.26413873,3.25994148,3.25869646
65.533544,4.12310563,3.2651056,0.926282906,3.2638654,3.25964906,3.25840678
65.544036,3.16227766,3.26483004,-0.320238,3.26359257,3.25935699,3.25811745
65.554527,4.12310563,3.26455501,0.926580065,3.26332026,3.25906533,3.2578285
65.565019,2.82842712,3.26428047,-0.660191899,3.26304843,3.258774,3.25753988
65.57551,3.31662479,3.26400647,0.229386841,3.26277712,3.25848307,3.25725165
65.586002,3,3.26373296,-0.513549371,3.2625063,3.25819248,3.25696374
65.596494,2.44948974,3.26345996,-0.902202981,3.26223598,3.25790226,3.25667618
65.606985,2.64575131,3.26318751,-0.785771086,3.26196619,3.25761243,3.25638901
65.617477,2.64575131,3.26291555,-0.785598016,3.26169688,3.25732293,3.25610217
65.627968,3,3.26264414,-0.512488187,3.26142811,3.25703384,3.25581571
65.63846,4.35889894,3.26237323,1.04715124,3.26115982,3.25674508,3.25552958
65.648952,3,3.26210283,-0.511959798,3.26089205,3.25645668,3.2552438
65.659443,3.60555128,3.26183299,0.586274921,3.26062481,3.25616868,3.2549584
65.669935,3.87298335,3.26156365,0.781933306,3.26035807,3.25588102,3.25467333
65.680426,4.12310563,3.26129486,0.928337635,3.26009186,3.25559375,3.25438864
65.690918,3.60555128,3.26102658,0.586962264,3.25982615,3.25530681,3.25410428
65.70141,2.82842712,3.26075882,-0.657519349,3.25956095,3.25502025,3.25382027
65.711901,2.82842712,3.26049162,-0.657316131,3.2592963,3.25473407,3.25353664
65.722393,3.31662479,3.26022493,0.237486551,3.25903215,3.25444823,3.25325334
65.732884,3.87298335,3.2599588,0.782958843,3.25876855,3.25416278,3.25297041
65.743376,3.87298335,3.25969318,0.783128451,3.25850545,3.25387767,3.25268782
65.753868,3.31662479,3.25942809,0.239158314,3.25824287,3.25359292,3.25240558
65.764359,3.16227766,3.25916357,-0.311265018,3.25798085,3.25330857,3.25212371
65.774851,3.46410162,3.25889957,0.452992327,3.25771933,3.25302454,3.25184218
65.785342,3.60555128,3.25863613,0.58899503,3.25745837,3.25274091,3.25156102
65.795834,4,3.25837321,0.861177559,3.25719792,3.25245762,3.25128019
65.806326,3.31662479,3.25811084,0.241896573,3.256938,3.25217469,3.25099971
65.816817,3.16227766,3.25784904,-0.309146207,3.25667864,3.25189214,3.2507196
65.827309,3.16227766,3.25758776,-0.308723339,3.2564198,3.25160994,3.25043983
65.8378,3.46410162,3.25732706,0.454724704,3.25616153,3.25132812,3.25016043
65.848292,4.24264069,3.25706688,0.992760698,3.25590377,3.25104663,3.24988136
65.858784,4.12310563,3.25680726,0.930751504,3.25564655,3.25076551,3.24960264
65.869275,3.31662479,3.25654822,0.245105215,3.25538991,3.25048478,3.2493243
65.879767,3.31662479,3.25628972,0.245631987,3.25513378,3.25020438,3.24904628
65.890258,3.16227766,3.25603179,-0.30619297,3.25487824,3.24992437,3.24876864
65.90075,4,3.25577441,0.862685105,3.25462322,3.24964469,3.24849132
65.911242,3.60555128,3.25551759,0.59163645,3.25436875,3.24936537,3.24821436
65.921733,4.35889894,3.25526135,1.05054157,3.25411486,3.24908644,3.24793777
65.932225,3.46410162,3.25500566,0.457270107,3.25386151,3.24880785,3.24766151
65.942716,4,3.25475057,0.863278305,3.25360874,3.24852964,3.24738562
65.953208,3,3.25449602,-0.504475984,3.25335651,3.24825176,3.24711006
65.9637,4.12310563,3.25424204,0.932128523,3.25310484,3.24797424,3.24683484
65.974191,4.12310563,3.25398867,0.932264426,3.25285376,3.24769711,3.24656
65.984683,2.23606798,3.25373584,-1.00879525,3.25260322,3.24742031,3.24628549
65.995174,3.74165739,3.25348362,0.698694327,3.25235328,3.2471439,3.24601135
66.005666,3.31662479,3.25323196,0.251779323,3.25210389,3.24686782,3.24573754
66.016158,3.16227766,3.25298089,-0.301169762,3.25185508,3.2465921,3.24546407
66.026649,3.74165739,3.25273042,0.699233129,3.25160686,3.24631676,3.24519098
66.037141,3.16227766,3.25248052,-0.300337904,3.2513592,3.24604175,3.24491821
66.047632,3.31662479,3.25223123,0.253758864,3.25111215,3.24576713,3.24464582
66.058124,3,3.25198251,-0.501978597,3.25086565,3.24549284,3.24437375
66.068616,3.46410162,3.25173439,0.460833186,3.25061975,3.24521891,3.24410203
66.079107,3.60555128,3.25148689,0.595033096,3.25037445,3.24494536,3.24383068
66.089599,3,3.25123997,-0.501238433,3.25012973,3.24467214,3.24355965
66.10009,3.46410162,3.25099367,0.46163616,3.24988562,3.2443993,3.243289
66.110582,2.23606798,3.25074796,-1.00731325,3.24964208,3.2441268,3.24301867
66.121074,3.60555128,3.25050285,0.5958594,3.24939915,3.24385465,3.24274868
66.131565,3.60555128,3.25025838,0.596064506,3.24915684,3.24358288,3.24247907
66.142057,4.35889894,3.2500145,1.05303582,3.24891511,3.24331145,3.24220978
66.152548,3.46410162,3.24977126,0.462958267,3.24867401,3.24304039,3.24194087
66.16304,3.31662479,3.24952861,0.259029299,3.2484335,3.24276966,3.24167227
66.173532,3.16227766,3.24928659,-0.29497276,3.24819361,3.24249929,3.24140402
66.184023,3.46410162,3.24904521,0.46374174,3.24795435,3.2422293,3.24113615
66.194515,3.31662479,3.24880444,0.2604234,3.24771569,3.24195964,3.24086859
66.205006,3.60555128,3.24856433,0.597483849,3.24747768,3.24169036,3.24060141
66.215498,3.60555128,3.24832482,0.597684245,3.24724026,3.24142141,3.24033454
66.22599,3,3.24808595,-0.498082272,3.24700348,3.24115281,3.24006803
66.236481,4,3.24784774,0.86726712,3.24676735,3.24088459,3.23980188
66.246973,2.64575131,3.24761016,-0.77579562,3.24653183,3.2406167,3.23953605
66.257464,3.74165739,3.24737324,0.703053448,3.24629697,3.24034919,3.2392706
66.267956,3.31662479,3.24713694,0.263605473,3.24606273,3.24008201,3.23900546
66.278448,3.16227766,3.24690131,-0.290901436,3.24582914,3.23981518,3.23874067
66.288939,4,3.24666634,0.867947956,3.24559621,3.23954873,3.23847625
66.299431,4.47213595,3.24643202,1.10711514,3.24536392,3.2392826,3.23821214
66.309922,3.60555128,3.24490015,0.600542361,3.24383364,3.23901686,3.23794841
66.320414,3.46410162,3.24466907,0.468436282,3.24360457,3.23875144,3.23768499
66.330906,3.46410162,3.24443865,0.46868216,3.24337616,3.23848637,3.23742192
66.341397,2.64575131,3.24420892,-0.773600421,3.24314843,3.23822168,3.23715922
66.351889,3.60555128,3.24397985,0.601308098,3.24292135,3.23795731,3.23689684
66.36238,3.60555128,3.24375147,0.601497968,3.24269495,3.23769332,3.23663482
66.372872,3,3.24352375,-0.493481259,3.24246921,3.23742966,3.23637313
66.383364,3.16227766,3.24329672,-0.284638472,3.24224414,3.23716635,3.23611177
66.393855,3.60555128,3.2430704,0.602063849,3.24201978,3.23690341,3.23585079
66.404347,2.44948974,3.24284474,-0.890704778,3.24179608,3.2366408,3.23559012
66.414838,3.31662479,3.24261981,0.272038563,3.24157309,3.23637856,3.23532982
66.42533,2.64575131,3.24239556,-0.772427501,3.24135077,3.23611665,3.23506984
66.435822,3.87298335,3.24217201,0.794236326,3.24112915,3.23585509,3.23481019
66.446313,2.82842712,3.24194919,-0.64305681,3.24090825,3.2355939,3.23455092
66.456805,3,3.24172706,-0.49165746,3.24068804,3.23533304,3.23429196
66.467296,4.12310563,3.24150567,0.938935544,3.24046856,3.23507255,3.23403337
66.477788,3.16227766,3.24128498,-0.281082411,3.24024977,3.23481238,3.23377509
66.48828,3.74165739,3.24106502,0.707525523,3.2400317,3.23455256,3.23351716
66.498771,4,3.24084581,0.871294546,3.23981438,3.23429312,3.23325959
66.509263,3,3.24062732,-0.490537788,3.23959776,3.234034,3.23300234
66.519754,2.44948974,3.24040959,-0.889336746,3.2393819,3.23377525,3.23274545
66.530246,3.31662479,3.24019259,0.27646375,3.23916676,3.23351682,3.23248888
66.540738,3.46410162,3.23997633,0.47341872,3.23895236,3.23325874,3.23223264
66.551229,4,3.23976085,0.871916938,3.23873873,3.23300104,3.23197678
66.561721,4.12310563,3.23954612,0.939978462,3.23852584,3.23274365,3.23172122
66.572212,2.64575131,3.23933217,-0.770441986,3.23831372,3.23248664,3.23146603
66.582704,3.60555128,3.23911897,0.605336526,3.23810235,3.23222994,3.23121116
66.593196,3.46410162,3.23890654,0.474547227,3.23789175,3.2319736,3.23095663
66.603687,4.24264069,3.23869493,1.00197094,3.23768194,3.23171762,3.23070245
66.614179,4,3.23848407,0.872648799,3.2374729,3.23146197,3.2304486
66.62467,2.64575131,3.23827404,-0.769754978,3.23726466,3.23120668,3.2301951
66.635162,3,3.23806478,-0.487918824,3.2370572,3.23095172,3.22994192
66.645654,3.87298335,3.23785633,0.796948567,3.23685053,3.2306971,3.22968908
66.656145,2.82842712,3.23764871,-0.639704293,3.23664469,3.23044285,3.2294366
66.666637,3.16227766,3.23744188,-0.274160946,3.23643964,3.23018892,3.22918443
66.677128,4,3.23723591,0.873363667,3.23623543,3.22993536,3.22893262
66.68762,3.31662479,3.23703074,0.282124181,3.23603202,3.22968211,3.22868113
66.698112,3.74165739,3.23682641,0.710514589,3.23582945,3.22942922,3.22842997
66.708603,4,3.23662294,0.873714521,3.23562772,3.22917669,3.22817918
66.719095,3.87298335,3.23641536,0.79785211,3.23542188,3.22892447,3.22792869
66.729586,2.64575131,3.2362136,-0.768415443,3.23522186,3.22867263,3.22767857
66.740078,3.16227766,3.2360127,-0.271541959,3.23502268,3.2284211,3.22742876
66.75057,3.16227766,3.23581266,-0.271173372,3.23482437,3.22816992,3.22717928
66.761061,3.60555128,3.23561352,0.608225089,3.23462694,3.2279191,3.22693017
66.771553,2.44948974,3.23541524,-0.886524393,3.23443037,3.2276686,3.22668137
66.782044,3.87298335,3.23521788,0.798602197,3.23423471,3.22741847,3.22643292
66.792536,3.74165739,3.2350214,0.711783669,3.23403992,3.22716865,3.22618479
66.803028,3.31662479,3.23482582,0.286005192,3.23384604,3.22691917,3.22593699
66.813519,3.60555128,3.23463118,0.609032097,3.23365308,3.22667006,3.22568955
66.824011,3.74165739,3.23443744,0.712193753,3.23346102,3.22642127,3.22544242
66.834502,2.82842712,3.23424466,-0.637038095,3.23326991,3.22617284,3.22519565
66.844994,3.60555128,3.23405279,0.609506752,3.23307971,3.22592472,3.22494918
66.855486,3.31662479,3.23386188,0.287685438,3.23289045,3.22567695,3.22470306
66.865977,3.16227766,3.23367194,-0.267197078,3.23270216,3.22542954,3.22445728
66.876469,3.60555128,3.23348295,0.60997404,3.23251481,3.22518245,3.22421182
66.88696,3.74165739,3.23329495,0.712995401,3.23232845,3.22493571,3.22396672
66.897452,3,3.23310791,-0.482812501,3.23214305,3.2246893,3.22372192
66.907944,3.16227766,3.23292187,-0.265789784,3.23195864,3.22444322,3.22347746
66.918435,3.16227766,3.23273685,-0.265441497,3.23177524,3.2241975,3.22323335
66.928927,3.74165739,3.23255282,0.713515638,3.23159283,3.2239521,3.22298955
66.939418,3.31662479,3.23236983,0.290267044,3.23141145,3.22370706,3.22274611
66.94991,3.60555128,3.23218786,0.611034709,3.23123109,3.22346234,3.22250297
66.960402,3.60555128,3.23200693,0.611182744,3.23105175,3.22321795,3.22226017
66.970893,3.60555128,3.23182707,0.611329869,3.23087348,3.22297392,3.22201772
66.981385,2.64575131,3.23164825,-0.765439051,3.23069626,3.22273021,3.22177558
66.991876,3.60555128,3.23147053,0.61162141,3.23052011,3.22248685,3.22153379
67.002368,4,3.23129387,0.876758879,3.23034503,3.22224381,3.22129231
67.01286,3,3.23111831,-0.480747654,3.23017104,3.22200111,3.22105116
67.023351,3,3.23094387,-0.480566196,3.22999817,3.22175876,3.22081036
67.033843,3.16227766,3.23077053,-0.261711431,3.22982639,3.22151673,3.22056987
67.044334,4.58257569,3.23059835,1.16274561,3.22965575,3.22127505,3.22032973
67.054826,4.12310563,3.23042728,0.944816565,3.22948624,3.22103369,3.2200899
67.065318,3.74165739,3.23025738,0.715122374,3.22931788,3.22079266,3.2198504
67.075809,2.64575131,3.23008865,-0.764419612,3.22915069,3.22055199,3.21961124
67.086301,3.74165739,3.2299211,0.715357456,3.22898467,3.22031163,3.2193724
67.096792,3,3.22975475,-0.479327392,3.22881984,3.22007162,3.2191339
67.107284,3.31662479,3.22958959,0.295017285,3.22865621,3.21983193,3.21889572
67.117776,3.74165739,3.22942566,0.715703661,3.22849379,3.21959257,3.21865785
67.128267,3.87298335,3.22926297,0.802321865,3.22833261,3.21935357,3.21842034
67.138759,2.82842712,3.22910152,-0.632988463,3.22817266,3.21911487,3.21818314
67.14925,2.44948974,3.22894135,-0.882865563,3.22801399,3.21887654,3.21794628
67.159742,3.46410162,3.22878244,0.485097083,3.22785657,3.21863851,3.21770973
67.170234,3.60555128,3.22862482,0.613943366,3.22770044,3.21840081,3.2174735
67.180725,3.46410162,3.22846853,0.485420529,3.22754564,3.21816347,3.21723763
67.191217,2,3.22831354,-1.10829308,3.22739213,3.21792644,3.21700205
67.201708,3.31662479,3.22815991,0.297430458,3.22723997,3.21768976,3.21676683
67.2122,3.46410162,3.22800763,0.485895038,3.22708916,3.21745339,3.21653191
67.222692,2.64575131,3.22785671,-0.762958324,3.22693971,3.21721735,3.21629731
67.233183,4.24264069,3.22770721,1.00743907,3.22679166,3.21698166,3.21606306
67.243675,3.60555128,3.22755909,0.614810688,3.226645,3.21674628,3.21582911
67.254166,4.12310563,3.22741242,0.946410696,3.22649977,3.21651126,3.21559552
67.264658,3.87298335,3.22726718,0.803564664,3.22635597,3.21627654,3.21536222
67.27515,3.31662479,3.2271234,0.299167834,3.22621363,3.21604215,3.21512925
67.285641,3.46410162,3.22698111,0.486950205,3.22607278,3.21580811,3.21489662
67.296133,2.82842712,3.22684032,-0.631199803,3.22593341,3.21557438,3.21466429
67.306624,3.74165739,3.22670105,0.71760458,3.22579557,3.215341,3.21443231
67.317116,3.74165739,3.22656332,0.717700542,3.22565925,3.21510792,3.21420063
67.327608,3.87298335,3.22642715,0.804087184,3.22552449,3.21487517,3.21396928
67.338099,3.31662479,3.22629257,0.300553189,3.22539133,3.21464278,3.21373827
67.348591,3.31662479,3.22615959,0.30077434,3.22525975,3.21441069,3.21350756
67.359082,3.16227766,3.22602824,-0.252488775,3.2251298,3.21417894,3.21327719
67.369574,4.24264069,3.22589853,1.00833633,3.22500149,3.2139475,3.21304712
67.380066,3.60555128,3.2257705,0.616263561,3.22487484,3.21371639,3.21281738
67.390557,3.87298335,3.22564417,0.804573908,3.2247499,3.21348563,3.21258797
67.401049,3.74165739,3.22551955,0.718427332,3.22462666,3.21325517,3.21235887
67.41154,3.74165739,3.22539669,0.718512835,3.22450518,3.21302506,3.21213011
67.422032,3.46410162,3.22527559,0.488698296,3.22438545,3.21279525,3.21190165
67.432524,3.74165739,3.22515628,0.718680111,3.22426751,3.21256577,3.21167351
67.443015,3.46410162,3.22503881,0.48894049,3.2241514,3.21233663,3.21144571
67.453507,3.46410162,3.22492318,0.489058726,3.22403712,3.2121078,3.21121821
67.463998,3,3.22480943,-0.47414073,3.22392473,3.21187931,3.21099105
67.47449,3,3.22469758,-0.474022764,3.22381423,3.21165113,3.21076418
67.484982,3,3.22458766,-0.47390681,3.22370565,3.21142327,3.21053764
67.495473,2.64575131,3.22447972,-0.760742014,3.22359905,3.21119575,3.21031144
67.505965,3.46410162,3.22437377,0.489620107,3.22349443,3.21096854,3.21008553
67.516456,3.46410162,3.22426984,0.489726221,3.22339184,3.21074167,3.20985996
67.526948,3.60555128,3.22416797,0.61756239,3.22329129,3.2105151,3.20963469
67.53744,3.74165739,3.22406819,0.719436725,3.22319283,3.21028885,3.20940974
67.547931,3.60555128,3.22397053,0.617722221,3.2230965,3.21006295,3.20918513
67.558423,3.74165739,3.22387503,0.719570954,3.22300231,3.20983735,3.20896081
67.568914,3.60555128,3.22378173,0.617875026,3.22291031,3.20961209,3.20873683
67.579406,4.12310563,3.22369064,0.948374916,3.22282054,3.20938713,3.20851314
67.589898,3.31662479,3.22360183,0.304996663,3.22273302,3.20916249,3.20828977
67.600389,3.74165739,3.22351532,0.719820858,3.22264781,3.20893819,3.20806674
67.610881,3.31662479,3.22343114,0.305276345,3.22256493,3.2087142,3.20784401
67.621372,3.16227766,3.22334936,-0.247126884,3.22248443,3.20849054,3.20762161
67.631864,3.60555128,3.22326998,0.618289004,3.22240634,3.20826718,3.2073995
67.642356,2.64575131,3.22319307,-0.759895888,3.22233071,3.20804414,3.20717771
67.652847,3.74165739,3.22311867,0.720096323,3.22225759,3.20782144,3.20695625
67.663339,3.31662479,3.22304681,0.305905176,3.222187,3.20759904,3.20673509
67.67383,3.74165739,3.22297755,0.720194302,3.22211901,3.20737698,3.20651426
67.684322,4.69041576,3.22291093,1.21140614,3.22205365,3.20715522,3.20629373
67.694814,2.64575131,3.22284699,-0.759668135,3.22199097,3.20693377,3.20607351
67.705305,3.74165739,3.22278579,0.720327426,3.22193103,3.20671266,3.20585362
67.715797,3.16227766,3.22272736,-0.24586521,3.22187386,3.20649185,3.20563403
67.726288,3.31662479,3.22267178,0.306517559,3.22181952,3.20627138,3.20541477
67.73678,4.12310563,3.22261907,0.948939699,3.22176807,3.2060512,3.2051958
67.747272,3,3.22256931,-0.471772517,3.22171954,3.20583134,3.20497714
67.757763,3.46410162,3.22252254,0.491506942,3.22167402,3.20561182,3.20475881
67.768255,3.60555128,3.22247882,0.618928473,3.22163153,3.20539259,3.20454078
67.778746,2.23606798,3.22243821,-0.993161737,3.22159215,3.2051737,3.20432308
67.789238,3.87298335,3.22240077,0.806586994,3.22155594,3.2049551,3.20410567
67.79973,3.60555128,3.22236655,0.619019163,3.22152294,3.20473682,3.20388857
67.810221,3.87298335,3.22233563,0.806627372,3.22149324,3.20451887,3.2036718
67.820713,3.74165739,3.22230806,0.720658955,3.22146689,3.20430121,3.20345532
67.831204,3.87298335,3.22228391,0.80665943,3.22144395,3.20408389,3.20323917
67.841696,3.46410162,3.22226325,0.491770644,3.2214245,3.20386687,3.20302331
67.852188,3.46410162,3.22224615,0.491788032,3.22140861,3.20365016,3.20280775
67.862679,3.60555128,3.22223268,0.619127289,3.22139634,3.20343378,3.20259253
67.873171,3.74165739,3.22222291,0.720718031,3.22138777,3.20321769,3.2023776
67.883662,2.44948974,3.22221692,-0.879049017,3.22138298,3.20300194,3.20216299
67.894154,3.87298335,3.22221479,0.806702275,3.22138204,3.20278647,3.20194868
67.904646,3.87298335,3.22221659,0.806701157,3.22138504,3.20257132,3.20173467
67.915137,4.35889894,3.22222241,1.06615033,3.22139205,3.20235651,3.20152098
67.925629,3,3.22223234,-0.471415254,3.22140316,3.20214198,3.20130759
67.93612,2.82842712,3.22224646,-0.627550265,3.22141846,3.20192778,3.20109452
67.946612,3.87298335,3.22226486,0.806671238,3.22143803,3.20171388,3.20088174
67.957104,3.60555128,3.22228763,0.619082904,3.22146198,3.20150028,3.20066927
67.967595,2.82842712,3.22231487,-0.62760477,3.22149039,3.20128702,3.20045712
67.978087,3.31662479,3.22234668,0.307047409,3.22152337,3.20107404,3.20024526
67.988578,3.46410162,3.22238315,0.491648722,3.221561,3.2008614,3.20003372
67.99907,3.87298335,3.22242439,0.806572349,3.22160341,3.20064904,3.19982247
68.009562,3.46410162,3.22247051,0.491559866,3.22165069,3.20043699,3.19961152
68.020053,3,3.22252162,-0.471721968,3.22170295,3.20022527,3.1994009
68.030545,3.16227766,3.22257782,-0.245560915,3.22176031,3.20001384,3.19919056
68.041036,3.31662479,3.22263924,0.306570626,3.22182288,3.19980274,3.19898055
68.051528,4.35889894,3.222706,1.06592352,3.22189079,3.19959192,3.19877082
68.06202,3.46410162,3.22277823,0.491246769,3.22196416,3.19938141,3.19856139
68.072511,2.82842712,3.22285603,-0.628035754,3.22204311,3.19917123,3.19835228
68.083003,2.44948974,3.22293957,-0.879459962,3.22212778,3.19896134,3.19814346
68.093494,3.46410162,3.22302895,0.49099151,3.2222183,3.19875177,3.19793496
68.103986,3.60555128,3.22312434,0.618406769,3.22231483,3.19854249,3.19772675
68.114478,3.46410162,3.22322588,0.49079093,3.2224175,3.19833351,3.19751883
68.124969,2.23606798,3.22333369,-0.993612458,3.22252644,3.19812486,3.19731124
68.135461,3.87298335,3.22344804,0.805937533,3.22264192,3.19791649,3.19710393
68.145952,2.82842712,3.22356891,-0.628603042,3.22276391,3.19770845,3.19689694
68.156444,3.74165739,3.22369656,0.719694953,3.22289269,3.19750069,3.19669023
68.166936,3.46410162,3.22383116,0.490173906,3.2230284,3.19729324,3.19648382
68.177427,4,3.22397286,0.880924028,3.22317122,3.19708611,3.19627773
68.187919,3.46410162,3.22412187,0.489877277,3.22332135,3.19687926,3.19607192
68.19841,3.74165739,3.22427835,0.719290647,3.22347895,3.19667274,3.19586643
68.208902,3.46410162,3.22444253,0.489549878,3.22364424,3.1964665,3.19566122
68.219394,3.87298335,3.22461459,0.805213482,3.22381741,3.19626056,3.19545631
68.229885,3.46410162,3.22479473,0.489190031,3.22399866,3.19605494,3.19525171
68.240377,3.16227766,3.22498318,-0.250410711,3.22418822,3.19584961,3.1950474
68.250868,3.31662479,3.22518015,0.302398153,3.22438629,3.1956446,3.1948434
68.26136,3.74165739,3.22538589,0.718520355,3.22459313,3.19543986,3.19463968
68.271852,3.87298335,3.22560062,0.804600974,3.22480897,3.19523543,3.19443625
68.282343,3.60555128,3.22582457,0.616219688,3.22503402,3.19503132,3.19423315
68.292835,3.46410162,3.22605804,0.487897093,3.22526859,3.19482749,3.19403032
68.303326,3.60555128,3.22630125,0.61583279,3.22551289,3.19462398,3.19382781
68.313818,3.87298335,3.22655452,0.804007979,3.22576725,3.19442075,3.19362557
68.32431,2.44948974,3.2268181,-0.881662271,3.22603193,3.19421782,3.19342363
68.334801,2.64575131,3.22709228,-0.762457188,3.2263072,3.19401521,3.193222
68.345293,4.79583152,3.22737739,1.25237939,3.22659341,3.19381288,3.19302065
68.355784,3.16227766,3.22767372,-0.255726533,3.22689083,3.19361086,3.19281962
68.366276,3,3.22798164,-0.477474228,3.22719984,3.19340912,3.19261885
68.376768,3.46410162,3.22830146,0.485592577,3.22752075,3.19320768,3.19241839
68.387259,3.31662479,3.22863352,0.29663323,3.22785389,3.19300656,3.19221823
68.397751,4.35889894,3.22897823,1.06297729,3.22819969,3.19280571,3.19201835
68.408242,4,3.22933592,0.877874753,3.22855847,3.19260518,3.19181879
68.418734,3.74165739,3.22970705,0.71550705,3.22893068,3.19240493,3.19161949
68.429226,3,3.230092,-0.479679056,3.22931672,3.19220497,3.19142049
68.439717,2.64575131,3.23049115,-0.764682839,3.22971696,3.19200533,3.1912218
68.450209,3.60555128,3.23090505,0.612083516,3.23013194,3.19180596,3.19102338
68.4607,3.16227766,3.23133405,-0.262785829,3.23056203,3.19160691,3.19082528
68.471192,3.74165739,3.23177874,0.714057873,3.2310078,3.19140813,3.19062744
68.481684,3.74165739,3.23223957,0.713735115,3.23146972,3.19120965,3.1904299
68.492175,3,3.23271702,-0.482407529,3.23194826,3.19101148,3.19023267
68.502667,3.74165739,3.23321173,0.713053753,3.23244405,3.19081359,3.1900357
68.513158,2.82842712,3.23372417,-0.636629439,3.23295757,3.190616,3.18983905
68.52365,3.31662479,3.23425502,0.287001336,3.23348952,3.1904187,3.18964267
68.534142,3,3.23480487,-0.484566679,3.23404045,3.19022168,3.18944657
68.544633,4,3.23537428,0.874428795,3.23461095,3.19002497,3.18925079
68.555125,4.58257569,3.23596406,1.16043597,3.23520181,3.18982854,3.18905527
68.565616,3.31662479,3.23657477,0.282931122,3.23581362,3.18963242,3.18886006
68.576108,3,3.23720728,-0.487039296,3.23644722,3.18943657,3.18866512
68.5866,3.46410162,3.23786228,0.475646231,3.23710331,3.18924101,3.18847047
68.597091,3,3.23854051,-0.488406089,3.23778264,3.18904576,3.18827613
68.607583,3.31662479,3.23924293,0.278175951,3.23848616,3.18885078,3.18808205
68.618074,4.12310563,3.23997028,0.93975281,3.23921461,3.18865612,3.18788828
68.628566,2.64575131,3.24072361,-0.771344478,3.23996904,3.18846172,3.18769477
68.639058,3,3.24150381,-0.491430376,3.24075034,3.18826761,3.18750155
68.649549,4,3.2423118,0.87045287,3.24155944,3.18807381,3.18730864
68.660041,2,3.24314878,-1.11496582,3.24239752,3.18788027,3.18711599
68.670532,4,3.24401568,0.869473591,3.24326553,3.18768705,3.18692365
68.681024,3.74165739,3.24491381,0.704800378,3.24416479,3.18749409,3.18673157
68.691516,3.46410162,3.24584431,0.467180158,3.24509641,3.18730142,3.18653978
68.702007,3.31662479,3.24680835,0.264228012,3.24606157,3.18710906,3.18634829
68.712499,3.31662479,3.24780743,0.262330639,3.24706177,3.18691697,3.18615706
68.72299,3.16227766,3.24884275,-0.294219457,3.24809823,3.18672518,3.18596614
68.733482,3.46410162,3.24991598,0.462801939,3.2491726,3.18653365,3.18577548
68.743974,3.87298335,3.25102856,0.7886411,3.25028632,3.18634242,3.1855851
68.754465,3,3.25218199,-0.502177253,3.2514409,3.18615148,3.18539503
68.764957,3.16227766,3.2533782,-0.301828667,3.25263826,3.18596082,3.18520521
68.775448,3.60555128,3.25461875,0.59239558,3.25387997,3.18577045,3.1850157
68.78594,4.24264069,3.25590576,0.99334532,3.25516815,3.18558036,3.18482645
68.796432,3.87298335,3.25724111,0.784692448,3.25650466,3.18539054,3.18463748
68.806923,4.24264069,3.25862675,0.991974768,3.25789148,3.18520103,3.18444881
68.817415,3.46410162,3.26006516,0.451703948,3.25933108,3.18501179,3.18426041
68.827906,2.44948974,3.2615584,-0.901148519,3.26082552,3.18482284,3.1840723
68.838398,3.16227766,3.26310921,-0.317539847,3.26237754,3.18463416,3.18388445
68.84889,2.64575131,3.26472007,-0.786745679,3.26398961,3.18444576,3.18369688
68.859381,3,3.26639356,-0.516133281,3.26566433,3.18425766,3.18350961
68.869873,3,3.26813292,-0.517815526,3.26740492,3.18406983,3.1833226
68.880364,4,3.26994089,0.854434968,3.26921413,3.18388229,3.18313589
68.890856,3.46410162,3.27182108,0.438498044,3.27109558,3.18369502,3.18294943
68.901348,4,3.27377679,0.852187307,3.27305256,3.18350803,3.18276326
68.911839,4.79583152,3.27581149,1.23289092,3.27508855,3.18332133,3.18257737
68.922331,2.64575131,3.27792947,-0.795096322,3.27720782,3.1831349,3.18239175
68.932822,2.64575131,3.28013446,-0.796481729,3.27941412,3.18294876,3.18220642
68.943314,3.46410162,3.28243127,0.42622804,3.28171226,3.18276289,3.18202135
68.953806,3.74165739,3.28482439,0.675894219,3.28410672,3.18257729,3.18183656
68.964297,2.44948974,3.28731854,-0.915329886,3.28660223,3.18239199,3.18165206
68.974789,3.74165739,3.28991952,0.672114476,3.28920458,3.18220696,3.18146782
68.98528,3.31662479,3.29263246,0.154894565,3.29191893,3.18202221,3.18128387
68.995772,3.74165739,3.29546394,0.667977129,3.29475182,3.18183773,3.18110017
69.006264,4.24264069,3.29842013,0.971710118,3.29770945,3.18165352,3.18091675
69.016755,4.12310563,3.30150762,0.906420436,3.3007984,3.18146961,3.18073362
69.027247,4.12310563,3.30473436,0.90463875,3.30402663,3.18128595,3.18055075
69.037738,3.16227766,3.30810761,-0.381876873,3.30740139,3.18110259,3.18036817
69.04823,3.74165739,3.31163646,0.655759808,3.31093178,3.18091949,3.18018584
69.058722,4.12310563,3.31532966,0.898763576,3.31462655,3.18073666,3.18000379
69.069213,3.74165739,3.31919654,0.649969882,3.31849502,3.18055412,3.17982202
69.079705,4.24264069,3.3232483,0.958849515,3.32254841,3.18037184,3.17964051
69.090196,2.44948974,3.32749537,-0.937019546,3.32679715,3.18018986,3.17945929
69.100688,3.31662479,3.33195069,-0.123797822,3.33125417,3.18000813,3.17927832
69.11118,4.12310563,3.33662688,0.886836367,3.33593211,3.17982667,3.17909762
69.121671,3.74165739,3.34153753,0.632550283,3.34084453,3.1796455,3.17891721
69.132163,2.64575131,3.34669876,-0.837226046,3.34600759,3.17946459,3.17873706
69.142654,4.69041576,3.35212601,1.15684474,3.35143672,3.17928396,3.17855718
69.153146,3.60555128,3.35783812,0.497707905,3.35715074,3.1791036,3.17837757
69.163638,3.60555128,3.36385383,0.491627342,3.36316843,3.1789235,3.17819822
69.174129,3,3.37019345,-0.608435243,3.36951007,3.17874369,3.17801915
69.184621,4,3.37688092,0.789378922,3.37619964,3.17856414,3.17784034
69.195112,3.46410162,3.38393967,0.283128845,3.38326054,3.17838487,3.17766181
69.205604,3.46410162,3.39139803,0.269636032,3.39072112,3.17820585,3.17748353
69.216096,3.60555128,3.3992847,0.454165798,3.39861009,3.17802711,3.17730552
69.226587,3.60555128,3.40763098,0.444882337,3.40695874,3.17784865,3.17712779
69.237079,3.31662479,3.41647363,-0.315988666,3.41580384,3.17767045,3.17695032
69.24757,3.87298335,3.42584941,0.668680743,3.42518217,3.17749252,3.17677312
69.258062,3.60555128,3.43580242,0.412005893,3.43513782,3.17731486,3.17659617
69.268554,4,3.44637822,0.744057643,3.44571636,3.17713745,3.17641949
69.279045,3.60555128,3.45762684,0.384609457,3.45696783,3.17696034,3.17624309
69.289537,2.64575131,3.4696069,-0.907664908,3.46895085,3.17678347,3.17606694
69.300028,4.12310563,3.48237837,0.800454404,3.48172542,3.17660689,3.17589107
69.31052,3.74165739,3.49601279,0.49562546,3.49536307,3.17643055,3.17571545
69.321012,3.87298335,3.51058548,0.601994902,3.50993914,3.17625448,3.17554009
69.331503,3.74165739,3.52617993,0.46419549,3.52553712,3.1760787,3.17536501
69.341995,3.74165739,3.54289392,0.445828971,3.5422548,3.17590316,3.17519017
69.352486,3.46410162,3.56082981,-0.311011574,3.56019457,3.17572791,3.17501562
69.362978,3.87298335,3.58010934,0.541178348,3.57947818,3.1755529,3.17484131
69.37347,3.87298335,3.60086326,0.521651305,3.60023638,3.17537815,3.17466726
69.383961,4,3.62323809,0.613809344,3.62261572,3.17520369,3.17449349
69.394453,3.87298335,3.64740579,0.474950056,3.64678818,3.17502948,3.17431996
69.404944,4,3.67355071,0.57135741,3.67293813,3.17485554,3.17414671
69.415436,4.12310563,3.70189209,0.649009661,3.70128482,3.17468185,3.17397371
69.425928,4.35889894,3.73267039,0.791346037,3.73206875,3.17450842,3.17380096
69.436419,3.74165739,3.76615862,-0.156528713,3.76556293,3.17433527,3.1736285
69.446911,3.87298335,3.80269047,0.265128038,3.8021011,3.17416236,3.17345627
69.457402,3.87298335,3.84259685,0.17431723,3.84201419,3.17398974,3.17328432
69.467894,3.87298335,3.88631267,-0.115452672,3.88573714,3.17381736,3.17311261
69.478386,4.58257569,3.93431395,0.805147036,3.93374602,3.17364523,3.17294116
69.488877,5.19615242,3.98715316,1.09954502,3.98659333,3.17347339,3.17276998
69.499369,4.35889894,4.04549652,0.559823562,4.04494531,3.17330178,3.17259904
69.50986,5.09901951,4.11011496,0.994436802,4.10957296,3.17313046,3.17242838
69.520352,5.29150262,4.18197852,1.0533395,4.18144637,3.17295937,3.17225795
69.530844,5.09901951,4.26229061,0.91472887,4.261769,3.17278855,3.17208779
69.541335,5.74456265,4.35263208,1.17980107,4.3521218,3.172618,3.17191789
69.551827,5.19615242,4.45519839,0.860786867,4.45470036,3.17244769,3.17174824
69.562318,6.164414,4.57304188,1.26149599,4.57255716,3.17227765,3.17157885
69.57281,5.09901951,4.71058544,0.623244792,4.71011534,3.17210785,3.1714097
69.583302,7.07106781,4.874062,1.48223001,4.87360811,3.17193831,3.17124081
69.593793,6.08276253,5.07204376,1.0053451,5.07160802,3.17176905,3.17107219
69.604285,6.55743852,5.31579503,1.11429058,5.31537967,3.17160002,3.17090381
69.614776,7.21110255,5.61884586,1.26184654,5.61845329,3.17143127,3.17073569
69.625268,5.83095189,5.99609748,-0.406381086,5.99572997,3.17126275,3.17056781
69.63576,8.30662386,6.46156572,1.35832917,6.46122501,3.17109449,3.17040019
69.646251,7.68114575,7.02576382,0.809556622,7.02545078,3.1709265,3.17023283
69.656743,8.48528137,7.69328045,0.889944337,7.69299484,3.17075875,3.17006571
69.667234,9.11043358,8.46039582,0.806249193,8.46013636,3.17059126,3.16989885
69.677726,11.045361,9.31468668,1.31555096,9.31445124,3.17042402,3.16973223
69.688218,9.94987437,10.2341453,-0.53317065,10.2339312,3.17025702,3.16956586
69.698709,11.1355287,11.1867206,-0.226256308,11.186525,3.1700903,3.16939976
69.709201,11.5758369,12.1284383,-0.743371629,12.128258,3.16992381,3.16923389
69.719692,12.922848,12.9987765,-0.275551338,12.9986085,3.16975759,3.16906828
69.730184,13.9283883,13.7185864,0.458041389,13.7184273,3.1695916,3.16890291
69.740676,13.453624,14.1963523,-0.861816851,14.1961987,3.16942587,3.16873779
69.751167,13.7840488,14.3536581,-0.754724714,14.3535064,3.1692604,3.16857293
69.761659,15.0996689,14.1606671,0.969021033,14.1605134,3.16909517,3.16840831
69.77215,13.96424,13.6530727,0.557823766,13.6529134,3.1689302,3.16824394
69.782642,13.6747943,12.9123172,0.873199389,12.9121489,3.16876547,3.16807981
69.793134,11.9582607,12.0299197,-0.267691872,12.0297393,3.16860098,3.16791593
69.803625,13.0766968,11.0836712,1.41174559,11.0834756,3.16843676,3.16775231
69.814117,11.5325626,10.1319184,1.18348815,10.1317046,3.16827277,3.16758891
69.824608,10,9.21751704,0.884580667,9.21728223,3.16810904,3.16742578
69.8351,8.1240384,8.37110661,-0.49705956,8.37084829,3.16794555,3.16726288
69.845592,7.68114575,7.61369044,0.25972159,7.61340668,3.16778231,3.16710023
69.856083,6.92820323,6.95692875,-0.169486052,6.95661848,3.16761932,3.16693783
69.866575,5.74456265,6.40336343,-0.81166544,6.40302665,3.16745657,3.16677566
69.877066,4.47213595,5.94783637,-1.2147841,5.94747412,3.16729408,3.16661375
69.887558,5,5.57915233,-0.761020581,5.57876648,3.16713181,3.16645207
69.89805,5.09901951,5.28306208,-0.429001823,5.28265498,3.1669698,3.16629064
69.908541,5.29150262,5.04476472,0.496727191,5.04433877,3.16680804,3.16612946
69.919033,4.58257569,4.85083107,-0.517933753,4.85038849,3.16664651,3.1659685
69.929524,4.24264069,4.69034649,-0.669108217,4.68988918,3.16648525,3.16580781
69.940016,4.24264069,4.55496176,-0.558856936,4.55449127,3.16632421,3.16564734
69.950508,4.47213595,4.43867857,0.182913591,4.43819619,3.16616341,3.16548711
69.960999,3.46410162,4.33728087,-0.934440608,4.33678764,3.16600287,3.16532714
69.971491,3.31662479,4.24779931,-0.964973842,4.24729613,3.16584256,3.16516739
69.981982,3.16227766,4.16815494,-1.00293433,4.1676426,3.16568251,3.1650079
69.992474,3.31662479,4.09679658,-0.883273335,4.09627577,3.16552268,3.16484863
70.002966,5,4.0325574,0.983586601,4.03202876,3.16536309,3.1646896
70.013457,3.46410162,3.974509,-0.714428012,3.97397311,3.16520376,3.16453083
70.023949,4,3.92187492,0.279508636,3.92133232,3.16504466,3.16437228
70.03444,2.82842712,3.87402167,-1.02254318,3.87347284,3.16488581,3.16421398
70.044932,4.12310563,3.83039238,0.541029797,3.82983778,3.16472718,3.1640559
70.055424,4.35889894,3.79051973,0.753909286,3.78995978,3.1645688,3.16389807
70.065915,3.74165739,3.75399811,-0.111088827,3.7534332,3.16441067,3.16374048
70.076407,4.47213595,3.72046509,0.86698954,3.71989558,3.16425276,3.16358311
70.086898,3.74165739,3.689616,0.228125815,3.68904221,3.1640951,3.163426
70.09739,3.31662479,3.6611728,-0.586982116,3.66059505,3.16393767,3.16326911
70.107882,3.46410162,3.63489892,-0.413276306,3.63431749,3.16378047,3.16311245
70.118373,3.87298335,3.61058542,0.512247915,3.61000057,3.16362353,3.16295604
70.128865,4,3.58804127,0.641840113,3.58745325,3.16346681,3.16279985
70.139356,3.87298335,3.5671053,0.553062424,3.56651433,3.16331034,3.16264391
70.149848,4.58257569,3.54762681,1.01732437,3.54703309,3.16315409,3.16248819
70.16034,3,3.52947702,-0.727651713,3.52888074,3.16299807,3.1623327
70.170831,3.16227766,3.5125407,-0.591830245,3.51194205,3.16284231,3.16217746
70.181323,3.60555128,3.49671034,0.32991049,3.49610949,3.16268677,3.16202244
70.191814,2.82842712,3.4818953,-0.808373782,3.48129239,3.16253147,3.16186766
70.202306,2.44948974,3.46800875,-1.00921703,3.46740393,3.16237639,3.16171311
70.212798,3.60555128,3.45497645,0.388039716,3.45436985,3.16222155,3.16155878
70.223289,2.64575131,3.44273125,-0.892737327,3.44212299,3.16206695,3.1614047
70.233781,4.12310563,3.4312092,0.831803115,3.43059941,3.16191258,3.16125083
70.244272,3.46410162,3.42035665,0.209152973,3.41974542,3.16175845,3.16109721
70.254764,3.16227766,3.41012096,-0.497838624,3.40950839,3.16160453,3.16094381
70.265256,3.46410162,3.40045718,0.252278494,3.39984337,3.16145085,3.16079063
70.275747,3.60555128,3.3913243,0.462846602,3.39070934,3.16129741,3.1606377
70.286239,3.87298335,3.3826825,0.700214855,3.38206647,3.16114419,3.16048498
70.29673,2.44948974,3.3744986,-0.961773807,3.37388157,3.16099122,3.16033251
70.307222,3.31662479,3.36673926,-0.223862603,3.36612131,3.16083846,3.16018025
70.317714,4.12310563,3.35937613,0.873916183,3.35875732,3.16068593,3.16002821
70.328205,3.74165739,3.35238316,0.623918449,3.35176355,3.16053364,3.15987642
70.338697,3.74165739,3.34573452,0.629224018,3.34511419,3.16038156,3.15972484
70.349188,3.60555128,3.33940894,0.515889851,3.33878792,3.16022973,3.1595735
70.35968,4.12310563,3.33338449,0.888662557,3.33276284,3.16007812,3.15942237
70.370172,4.24264069,3.32764265,0.956555296,3.32702043,3.15992673,3.15927147
70.380663,3.60555128,3.3221663,0.532339153,3.32154354,3.15977558,3.1591208
70.391155,3.31662479,3.31693811,-0.0177009409,3.31631486,3.15962464,3.15897035
70.401646,3.16227766,3.31194399,-0.386867334,3.31132029,3.15947395,3.15882014
70.412138,3,3.30716906,-0.554228344,3.30654494,3.15932346,3.15867013
70.42263,3.60555128,3.30260084,0.550409335,3.30197634,3.1591732,3.15852035
70.433121,4,3.29822773,0.837718489,3.29760289,3.15902318,3.15837081
70.443613,3.31662479,3.29403777,0.150289792,3.29341262,3.15887337,3.15822147
70.454104,4,3.29002136,0.842602303,3.28939593,3.1587238,3.15807237
70.464596,3.16227766,3.28616816,-0.351980824,3.28554248,3.15857444,3.15792348
70.475088,3.87298335,3.28246955,0.768448955,3.28184364,3.15842531,3.15777481
70.485579,3.46410162,3.27891742,0.430330337,3.27829131,3.15827641,3.15762638
70.496071,3.74165739,3.27550324,0.682754825,3.27487695,3.15812771,3.15747815
70.506562,4.12310563,3.27222036,0.922434422,3.27159393,3.15797926,3.15733016
70.517054,3.87298335,3.26906131,0.777124206,3.26843475,3.15783101,3.15718237
70.527546,3.74165739,3.26602002,0.689664679,3.26539334,3.15768298,3.1570348
70.538037,3.31662479,3.26309075,0.231374237,3.26246398,3.15753519,3.15688747
70.548529,4,3.26026733,0.86007713,3.25964049,3.15738761,3.15674034
70.55902,3.74165739,3.25766741,0.69569388,3.25704054,3.15724026,3.15659344
70.569512,2.82842712,3.25504092,-0.65315679,3.254414,3.15709311,3.15644674
70.580004,3.74165739,3.25250567,0.699393818,3.25187874,3.15694619,3.15630027
70.590495,4.47213595,3.25005754,1.10547656,3.24943059,3.1567995,3.15615402
70.600987,3.87298335,3.24769192,0.790753706,3.24706498,3.15665301,3.15600798
70.611478,3.31662479,3.24540541,0.266869602,3.24477848,3.15650675,3.15586217
70.62197,2.44948974,3.24319389,-0.890900753,3.242567,3.1563607,3.15571656
70.632462,3.16227766,3.24105417,-0.280671529,3.24042732,3.15621487,3.15557117
70.642953,4,3.23898317,0.872362783,3.23835638,3.15606926,3.155426
70.653445,3,3.23697744,-0.48680329,3.23635072,3.15592386,3.15528104
70.663936,4.24264069,3.23503447,1.00379591,3.23440782,3.15577869,3.1551363
70.674428,2.82842712,3.23315112,-0.63617922,3.23252456,3.15563372,3.15499176
70.68492,2.82842712,3.23132502,-0.634742383,3.23069855,3.15548897,3.15484744
70.695411,2.82842712,3.22955386,-0.633345668,3.2289275,3.15534444,3.15470335
70.705903,3.87298335,3.22783499,0.80321128,3.22720874,3.15520012,3.15455945
70.716394,2.64575131,3.22616653,-0.761849864,3.2255404,3.15505603,3.15441578
70.726886,2.64575131,3.22454607,-0.76078562,3.22392007,3.15491213,3.15427231
70.737378,3.46410162,3.2229718,0.491049706,3.22234594,3.15476845,3.15412905
70.747869,3.46410162,3.22144199,0.492604943,3.22081626,3.15462499,3.15398601
70.758361,2.82842712,3.21995454,-0.625721517,3.21932897,3.15448173,3.15384317
70.768852,2.82842712,3.21850806,-0.624564598,3.21788264,3.1543387,3.15370056
70.779344,4.24264069,3.21710066,1.0126895,3.2164754,3.15419587,3.15355814
70.789836,3.87298335,3.21573093,0.810711057,3.21510584,3.15405325,3.15341593
70.800327,3.60555128,3.21439755,0.625422837,3.21377263,3.15391085,3.15327394
70.810819,3.60555128,3.21309888,0.626460214,3.21247413,3.15376865,3.15313215
70.82131,2.64575131,3.21183383,-0.752384555,3.21120927,3.15362667,3.15299058
70.831802,3.31662479,3.21060091,0.325613083,3.20997654,3.15348489,3.15284921
70.842294,3.60555128,3.20939904,0.629406258,3.20877486,3.15334332,3.15270804
70.852785,3,3.20822718,-0.456319163,3.20760319,3.15320197,3.1525671
70.863277,3.16227766,3.20708401,-0.211675109,3.20646023,3.15306082,3.15242634
70.873768,3,3.20596872,-0.453837764,3.20534513,3.15291989,3.15228581
70.88426,2.23606798,3.20488008,-0.984282531,3.2042567,3.15277915,3.15214547
70.894752,3.46410162,3.20381725,0.510180714,3.20319409,3.15263862,3.15200533
70.905243,4,3.20277943,0.892872088,3.20215648,3.15249831,3.15186542
70.915735,3,3.20176555,-0.449183199,3.20114281,3.15235819,3.15172569
70.926226,2.64575131,3.20077495,-0.74499909,3.20015244,3.15221829,3.15158618
70.936718,3,3.19980667,-0.446997396,3.19918438,3.15207858,3.15144686
70.94721,3.46410162,3.19886003,0.5150161,3.19823796,3.15193908,3.15130775
70.957701,3.46410162,3.19793439,0.515913968,3.19731255,3.1517998,3.15116885
70.968193,3.16227766,3.19702888,-0.186416781,3.19640726,3.15166071,3.15103014
70.978684,3.31662479,3.19614299,0.347104887,3.19552161,3.15152183,3.15089165
70.989176,3,3.19527591,-0.441900344,3.19465476,3.15138315,3.15075335
70.999668,3,3.19442712,-0.440938912,3.19380621,3.15124467,3.15061524
71.010159,3.87298335,3.19359611,0.824249501,3.19297543,3.1511064,3.15047736
71.020651,2.64575131,3.19278214,-0.739615322,3.1921617,3.15096833,3.15033965
71.031142,2.64575131,3.19198482,-0.73907612,3.19136462,3.15083047,3.15020217
71.041634,3.16227766,3.19120349,-0.170075953,3.19058353,3.15069279,3.15006487
71.052126,4.35889894,3.19043771,1.08095385,3.189818,3.15055532,3.14992776
71.062617,3,3.18968709,-0.435530809,3.18906762,3.15041806,3.14979087
71.073109,2.44948974,3.18895099,-0.859919329,3.18833177,3.15028099,3.14965417
71.0836,4.12310563,3.18822914,0.966890112,3.18761016,3.15014414,3.14951768
71.094092,4,3.18752095,0.9013762,3.18690222,3.15000747,3.14938137
71.104584,2.82842712,3.18682608,-0.598664307,3.1862076,3.14987099,3.14924526
71.115075,3.16227766,3.1861442,-0.154487995,3.18552597,3.14973473,3.14910936
71.125567,3.16227766,3.1854748,-0.15230608,3.18485683,3.14959866,3.14897364
71.136058,2.64575131,3.18481764,-0.734211367,3.18419992,3.14946279,3.14883813
71.14655,3.46410162,3.18417224,0.529083522,3.18355477,3.14932712,3.14870281
71.157042,2.44948974,3.18353832,-0.85676635,3.1829211,3.14919163,3.14856768
71.167533,3.46410162,3.18291561,0.530269746,3.18229865,3.14905636,3.14843276
71.178025,3.60555128,3.18230368,0.650574823,3.18168696,3.14892127,3.14829802
71.188516,3,3.18170233,-0.426265558,3.18108587,3.14878639,3.14816348
71.199008,3.60555128,3.18111115,0.651490694,3.18049495,3.14865169,3.14802913
71.2095,3.87298335,3.18052993,0.832137861,3.17991398,3.14851719,3.14789497
71.219991,3,3.17995843,-0.424215076,3.17934274,3.14838289,3.14776102
71.230483,3.46410162,3.17939629,0.533577854,3.17878085,3.14824877,3.14762725
71.240974,3.87298335,3.17884335,0.833150642,3.17822817,3.14811487,3.14749368
71.251466,3.31662479,3.17829927,0.371921387,3.17768435,3.14798114,3.14736029
71.261958,3.31662479,3.17776386,0.372640486,3.17714919,3.1478476,3.14722709
71.272449,2.23606798,3.17723693,-0.970138627,3.17662252,3.14771427,3.1470941
71.282941,3.46410162,3.17671817,0.536081564,3.17610401,3.14758112,3.14696128
71.293432,4,3.17620746,0.907630178,3.17559356,3.14744818,3.14682866
71.303924,3,3.17570449,-0.419171193,3.17509084,3.14731541,3.14669623
71.314416,3.46410162,3.17520911,0.537487215,3.17459572,3.14718283,3.14656398
71.324907,2.44948974,3.17472117,-0.851605206,3.17410804,3.14705046,3.14643193
71.335399,4.24264069,3.17424039,1.03363451,3.17362751,3.14691826,3.14630006
71.34589,2.64575131,3.17376668,-0.726646664,3.17315406,3.14678627,3.14616839
71.356382,3.60555128,3.17329978,0.65745836,3.17268741,3.14665445,3.1460369
71.366874,3.74165739,3.17283955,0.754200128,3.17222744,3.14652282,3.14590559
71.377365,3,3.17238588,-0.415193789,3.17177402,3.1463914,3.14577448
71.387857,2.64575131,3.17193852,-0.725387627,3.17132691,3.14626014,3.14564354
71.398348,2.82842712,3.1714974,-0.58572201,3.17088604,3.14612909,3.14551281
71.40884,3.60555128,3.17106228,0.659157793,3.17045118,3.14599822,3.14538225
71.419332,3.46410162,3.17063306,0.541727378,3.17002222,3.14586752,3.14525187
71.429823,3.74165739,3.17020965,0.755941624,3.16959905,3.14573703,3.14512169
71.440315,3.16227766,3.16979182,-0.086684226,3.16918147,3.14560671,3.14499168
71.450806,3.16227766,3.16937951,-0.0842724916,3.16876942,3.14547659,3.14486186
71.461298,3.46410162,3.16897253,0.543257841,3.16836269,3.14534665,3.14473222
71.47179,2.44948974,3.16857079,-0.847986467,3.1679612,3.14521688,3.14460276
71.482281,3.31662479,3.1681742,0.385292857,3.16756486,3.14508732,3.1444735
71.492773,3.46410162,3.16778258,0.544351942,3.16717349,3.14495792,3.14434441
71.503264,2.64575131,3.16739587,-0.722249654,3.16678703,3.14482872,3.14421551
71.513756,3.31662479,3.16701391,0.38679566,3.16640531,3.14469969,3.14408678
71.524248,2.64575131,3.16663661,-0.721723837,3.16602826,3.14457085,3.14395823
71.534739,3.31662479,3.16626391,0.387763953,3.1656558,3.1444422,3.14382987
71.545231,3.60555128,3.16589563,0.663065339,3.16528777,3.14431372,3.14370168
71.555722,3.46410162,3.16553176,0.546415465,3.16492414,3.14418543,3.14357369
71.566214,3.46410162,3.16517211,0.54674446,3.16456474,3.14405731,3.14344586
71.576706,3.87298335,3.16481664,0.841526414,3.16420952,3.14392937,3.14331821
71.587197,3.31662479,3.16446529,0.390076274,3.16385841,3.14380162,3.14319075
71.597689,3.74165739,3.1641179,0.759960186,3.16351126,3.14367404,3.14306346
71.60818,3.87298335,3.16377446,0.842145407,3.16316806,3.14354666,3.14293635
71.618672,2.44948974,3.16343481,-0.844952703,3.16282865,3.14341944,3.14280942
71.629164,3.31662479,3.16309891,0.391823783,3.16249299,3.14329239,3.14268266
71.639655,2.82842712,3.16276672,-0.578221058,3.16216103,3.14316554,3.14255608
71.650147,4.35889894,3.16243808,1.09382853,3.16183264,3.14303886,3.14242968
71.660638,3.31662479,3.162113,0.393079883,3.16150779,3.14291236,3.14230345
71.67113,3.60555128,3.16179133,0.666153097,3.16118636,3.14278603,3.1421774
71.681622,3.16227766,3.16147304,0.0283658944,3.1608683,3.14265987,3.14205152
71.692113,2.64575131,3.16115808,-0.717918361,3.16055358,3.1425339,3.14192582
71.702605,3,3.16084634,-0.401056534,3.16024208,3.1424081,3.14180029
71.713096,3.31662479,3.16053781,0.395078448,3.15993378,3.14228248,3.14167494
71.723588,3.46410162,3.16023236,0.55124337,3.15962856,3.14215703,3.14154975
71.73408,3.74165739,3.15992997,0.762710573,3.15932639,3.14203175,3.14142474
71.744571,3.46410162,3.1596306,0.551788927,3.15902725,3.14190666,3.14129991
71.755063,3.46410162,3.15933413,0.552057503,3.15873101,3.14178172,3.14117524
71.765554,4.24264069,3.15904057,1.04096115,3.15843768,3.14165698,3.14105075
71.776046,2.23606798,3.1587498,-0.960563286,3.15814714,3.14153239,3.14092643
71.786538,2.82842712,3.15846181,-0.574486453,3.15785938,3.14140798,3.14080227
71.797029,2.82842712,3.15817656,-0.574238134,3.15757435,3.14128375,3.1406783
71.807521,3.74165739,3.15789395,0.764044135,3.15729196,3.14115968,3.14055448
71.818012,2.64575131,3.15761398,-0.715445781,3.15701221,3.14103579,3.14043085
71.828504,3.16227766,3.15733655,0.0702930446,3.15673501,3.14091206,3.14030737
71.838996,2.44948974,3.15706164,-0.841172929,3.15646032,3.1407885,3.14018406
71.849487,3.74165739,3.15678923,0.764766733,3.15618813,3.14066512,3.14006094
71.859979,3.16227766,3.15651922,0.0758843599,3.15591834,3.14054191,3.13993797
71.87047,3.60555128,3.15625163,0.670298178,3.15565096,3.14041887,3.13981517
71.880962,3.87298335,3.15598635,0.846756752,3.1553859,3.14029599,3.13969254
71.891454,3.16227766,3.15572337,0.0809585671,3.15512314,3.14017327,3.13957007
71.901945,2.82842712,3.15546268,-0.571870223,3.15486266,3.14005074,3.13944777
71.912437,2.64575131,3.15520418,-0.71375967,3.15460437,3.13992836,3.13932564
71.922928,3.87298335,3.15494788,0.847369732,3.15434829,3.13980616,3.13920368
71.93342,3.31662479,3.15469371,0.402406613,3.15409433,3.13968412,3.13908187
71.943912,2.82842712,3.15444164,-0.570976808,3.15384247,3.13956224,3.13896023
71.954403,3.60555128,3.15419167,0.671833023,3.1535927,3.13944054,3.13883876
71.964895,3.16227766,3.1539437,0.091290516,3.15334495,3.13931899,3.13871745
71.975386,3.46410162,3.15369776,0.557138988,3.15309921,3.13919762,3.13859631
71.985878,3.60555128,3.15356076,0.672302397,3.15296244,3.1390764,3.13847532
71.99637,4.12310563,3.15331877,0.984777566,3.15272065,3.13895535,3.13835449
72.006861,3.87298335,3.15307871,0.848471944,3.15248079,3.13883447,3.13823384
72.017353,3.31662479,3.15284049,0.404702732,3.15224278,3.13871375,3.13811334
72.027844,3.87298335,3.15260414,0.84875156,3.15200662,3.13859319,3.13799301
72.038336,3.60555128,3.15236957,0.673187718,3.15177226,3.13847279,3.13787283
72.048828,3.74165739,3.15213679,0.767802447,3.15153967,3.13835255,3.13775282
72.059319,3,3.15190578,-0.389750924,3.15130887,3.13823249,3.13763297
72.069811,2.82842712,3.15167648,-0.568550223,3.15107976,3.13811257,3.13751327
72.080302,3,3.1514489,-0.38916436,3.15085237,3.13799283,3.13739374
72.090794,3.60555128,3.15122297,0.674038801,3.15062664,3.13787323,3.13727436
72.101286,4.12310563,3.15099869,0.985954836,3.15040255,3.1377538,3.13715514
72.111777,3.87298335,3.15077605,0.849827805,3.1501801,3.13763453,3.13703609
72.122269,4.79583152,3.15055498,1.28268334,3.14995923,3.13751542,3.13691718
72.13276,3.46410162,3.15033552,0.560148283,3.14973995,3.13739647,3.13679845
72.143252,4,3.15011758,0.921890678,3.1495222,3.13727767,3.13667986
72.153744,2.44948974,3.14990116,-0.836905862,3.14930597,3.13715903,3.13656142
72.164235,3.74165739,3.14968628,0.769396587,3.14909127,3.13704056,3.13644315
72.174727,3.87298335,3.14947285,0.850594199,3.14887803,3.13692223,3.13632503
72.185218,3.46410162,3.14926091,0.561106677,3.14866628,3.13680407,3.13620708
72.19571,3,3.14905039,-0.386070449,3.14845594,3.13668606,3.13608926
72.206202,3.46410162,3.14884129,0.561480475,3.14824702,3.1365682,3.1359716
72.216693,3.31662479,3.14863361,0.409867269,3.14803952,3.13645051,3.13585411
72.227185,3.16227766,3.14842729,0.117687575,3.14783338,3.13633297,3.13573676
72.237676,3.87298335,3.14822236,0.851328953,3.14762862,3.13621558,3.13561957
72.248168,3.31662479,3.14801875,0.410616658,3.14742519,3.13609835,3.13550253
72.25866,3.31662479,3.14781647,0.410862901,3.14722308,3.13598126,3.13538564
72.269151,3.87298335,3.14761551,0.85168529,3.1470223,3.13586434,3.13526891
72.279643,2.64575131,3.14741583,-0.708282796,3.14682279,3.13574757,3.13515232
72.290134,3,3.14721744,-0.383689253,3.14662458,3.13563095,3.13503589
72.300626,3.87298335,3.1470203,0.852034653,3.1464276,3.13551448,3.13491961
72.311118,3.87298335,3.14682439,0.852149607,3.14623186,3.13539816,3.13480347
72.321609,4.12310563,3.14662974,0.988167946,3.14603738,3.135282,3.1346875
72.332101,2.23606798,3.14643627,-0.954132222,3.14584408,3.13516598,3.13457166
72.342592,3.74165739,3.14624403,0.771630324,3.145652,3.13505013,3.13445598
72.353084,3.16227766,3.14605295,0.127376251,3.14546109,3.13493441,3.13434044
72.363576,4.24264069,3.14586304,1.04727152,3.14527134,3.13481884,3.13422505
72.374067,3.87298335,3.14567431,0.852824153,3.14508277,3.13470343,3.13410982
72.384559,2.82842712,3.1454867,-0.563080438,3.14489533,3.13458816,3.13399473
72.39505,3.87298335,3.14530025,0.853043433,3.14470903,3.13447305,3.13387979
72.405542,3.31662479,3.14511489,0.414137533,3.14452383,3.13435808,3.13376499
72.416034,3.60555128,3.14493065,0.678690377,3.14433974,3.13424326,3.13365034
72.426525,3.16227766,3.14474751,0.132401457,3.14415676,3.13412859,3.13353584
72.437017,3.60555128,3.14456545,0.67895937,3.14397485,3.13401406,3.13342148
72.447508,3,3.14438448,-0.379979573,3.14379403,3.13389969,3.13330727
72.458,3.31662479,3.14420467,0.415235021,3.14361438,3.13378545,3.1331932
72.468492,2.82842712,3.1440258,-0.561781693,3.14343566,3.13367136,3.13307927
72.478983,3,3.14384799,-0.379272969,3.14325799,3.13355742,3.13296549
72.489475,3.16227766,3.14367119,0.136405523,3.14308135,3.13344362,3.13285185
72.499966,3.60555128,3.14349545,0.679746887,3.14290575,3.13332997,3.13273836
72.510458,2.23606798,3.1433207,-0.952498147,3.14273115,3.13321646,3.13262501
72.52095,3.16227766,3.14314696,0.13831377,3.14255756,3.13310309,3.13251179
72.531441,2.64575131,3.14297424,-0.705140364,3.14238498,3.13298987,3.13239873
72.541933,2.64575131,3.1428025,-0.705018577,3.14221338,3.13287679,3.1322858
72.552424,3.16227766,3.14263177,0.140163796,3.14204279,3.13276386,3.13217303
72.562916,3.60555128,3.142462,0.68050663,3.14187316,3.13265106,3.13206038
72.573408,2.23606798,3.14229321,-0.951958629,3.14170451,3.13253841,3.13194787
72.583899,4,3.1421254,0.9262152,3.14153684,3.1324259,3.13183551
72.594391,3.87298335,3.14195855,0.854999883,3.14137012,3.13231353,3.13172328
72.604882,3.60555128,3.14179267,0.680998245,3.14120437,3.1322013,3.1316112
72.615374,2.23606798,3.14162772,-0.951609031,3.14103956,3.13208921,3.13149925
72.625866,3.46410162,3.14146374,0.568012217,3.14087571,3.13197725,3.13138744
72.636357,3.74165739,3.14130071,0.774826867,3.14071281,3.13186545,3.13127578
72.646849,3.74165739,3.14113862,0.774931459,3.14055085,3.13175377,3.13116424
72.65734,3,3.14097749,-0.375469689,3.14038985,3.13164224,3.13105285
72.667832,3.87298335,3.14081728,0.855667029,3.14022977,3.13153084,3.13094159
72.678324,2.82842712,3.14065802,-0.558776244,3.14007063,3.13141958,3.13083046
72.688815,3.46410162,3.14049971,0.568860185,3.13991244,3.13130847,3.13071948
72.699307,3.16227766,3.14034232,0.148105841,3.13975518,3.13119748,3.13060862
72.709798,3.16227766,3.14018589,0.148633002,3.13959887,3.13108664,3.13049791
72.72029,2.64575131,3.14003039,-0.70304984,3.13944349,3.13097592,3.13038732
72.730782,4.24264069,3.13987583,1.05012611,3.13928905,3.13086534,3.13027687
72.741273,3.87298335,3.13972223,0.85630667,3.13913557,3.13075491,3.13016656
72.751765,2.82842712,3.13956957,-0.55780144,3.13898303,3.1306446,3.13005638
72.762256,4.47213595,3.13941788,1.15443409,3.13883145,3.13053443,3.12994634
72.772748,3,3.13926713,-0.373185114,3.13868081,3.13042439,3.12983642
72.78324,3.87298335,3.13911735,0.856659793,3.13853114,3.13031448,3.12972663
72.793731,3.60555128,3.13896855,0.683068612,3.13838246,3.13020472,3.12961699
72.804223,3,3.13882071,-0.372586519,3.13823474,3.13009507,3.12950746
72.814714,2.23606798,3.13867388,-0.950055738,3.13808801,3.12998557,3.12939808
72.825206,3.31662479,3.13852804,0.422015111,3.13794228,3.1298762,3.12928882
72.835698,2.23606798,3.1383832,-0.949902743,3.13779755,3.12976695,3.12917969
72.846189,3.16227766,3.1382394,0.155042781,3.13765385,3.12965785,3.12907069
72.856681,3.31662479,3.13809662,0.422525946,3.13751117,3.12954886,3.12896182
72.867172,3.16227766,3.1379549,0.155957565,3.13736956,3.12944002,3.12885309
72.877664,2.82842712,3.13781423,-0.556225772,3.137229,3.1293313,3.12874447
72.888156,3.46410162,3.13767466,0.571337868,3.13708952,3.1292227,3.12863599
72.898647,2.82842712,3.1375362,-0.555975783,3.13695116,3.12911425,3.12852764
72.909139,3.31662479,3.13739885,0.423350848,3.13681391,3.12900591,3.12841941
72.91963,3,3.13726267,-0.370489767,3.13667783,3.12889772,3.12831131
72.930122,4,3.13712765,0.928909226,3.13654291,3.12878964,3.12820334
72.940614,3.74165739,3.13699384,0.77760115,3.13640919,3.12868169,3.12809548
72.951105,3.74165739,3.13686128,0.777686383,3.13627672,3.12857387,3.12798777
72.961597,3.74165739,3.13672997,0.777770798,3.13614551,3.12846617,3.12788017
72.972088,3.46410162,3.13659999,0.572277577,3.13601562,3.12835861,3.1277727
72.98258,2.23606798,3.13647134,-0.948895866,3.13588706,3.12825117,3.12766535
72.993072,2.64575131,3.13634409,-0.700423283,3.1357599,3.12814385,3.12755813
73.003563,3.46410162,3.13621828,0.572610978,3.13563418,3.12803667,3.12745104
73.014055,3.74165739,3.13609396,0.778179561,3.13550994,3.1279296,3.12734406
73.024546,3.46410162,3.13597119,0.572826694,3.13538726,3.12782266,3.12723721
73.035038,3.16227766,3.13585003,0.162565779,3.13526618,3.12771584,3.12713048
73.04553,2.64575131,3.13573054,-0.699985162,3.13514678,3.12760915,3.12702387
73.056021,2.82842712,3.13561281,-0.554243346,3.13502913,3.12750258,3.12691739
73.066513,3.16227766,3.1354969,0.163648274,3.13491331,3.12739613,3.12681102
73.077004,3,3.13538292,-0.367944185,3.13479941,3.12728981,3.12670479
73.087496,3.46410162,3.13527095,0.573437589,3.13468751,3.12718361,3.12659866
73.097988,3.16227766,3.13516109,0.164671104,3.13457773,3.12707752,3.12649266
73.108479,3,3.13505347,-0.367496221,3.13447019,3.12697157,3.12638678
73.118971,3,3.13494821,-0.367352971,3.134365,3.12686573,3.12628102
73.129462,3.46410162,3.13484544,0.573808479,3.13426232,3.12676002,3.12617538
73.139954,2.64575131,3.13474532,-0.699281067,3.13416227,3.12665442,3.12606985
73.150446,3.16227766,3.13464802,0.166221672,3.13406504,3.12654894,3.12596444
73.160937,3.16227766,3.13455372,0.16650508,3.13397081,3.12644358,3.12585916
73.171429,3.46410162,3.13446262,0.574141968,3.13387978,3.12633834,3.12575399
73.18192,3.46410162,3.13437495,0.574218309,3.13379219,3.12623323,3.12564894
73.192412,3.46410162,3.13429095,0.574291445,3.13370826,3.12612822,3.125544
73.202904,2.23606798,3.13421091,-0.947704031,3.13362829,3.12602333,3.12543918
73.213395,2.82842712,3.13413513,-0.552908681,3.13355258,3.12591857,3.12533448
73.223887,4.12310563,3.13406396,0.994505741,3.13348147,3.12581392,3.12522989
73.234378,4.58257569,3.13399777,1.20356883,3.13341535,3.12570939,3.12512543
73.24487,3,3.13393699,-0.365974035,3.13335465,3.12560497,3.12502107
73.255362,3.16227766,3.13388211,0.16850979,3.13329983,3.12550066,3.12491682
73.265853,3.16227766,3.13383367,0.168653476,3.13325145,3.12539648,3.1248127
73.276345,3.60555128,3.13379225,0.68684716,3.13321011,3.12529241,3.12470868
73.286836,3.87298335,3.13375857,0.859781817,3.13317649,3.12518846,3.12460478
73.297328,3,3.13373339,-0.365695763,3.13315138,3.12508461,3.12450099
73.30782,3,3.13371759,-0.365674165,3.13313565,3.12498088,3.12439731
73.318311,3.16227766,3.13371219,0.169013224,3.13313032,3.12487727,3.12429375
73.328803,3.16227766,3.13371832,0.168995076,3.13313652,3.12477376,3.12419029
73.339294,3.60555128,3.13373732,0.686887152,3.13315558,3.12467038,3.12408696
73.349786,3.46410162,3.13377068,0.574744231,3.13318902,3.1245671,3.12398372
73.360278,3.16227766,3.13382018,0.168693443,3.13323859,3.12446393,3.1238806
73.370769,3.60555128,3.13388784,0.68677757,3.13330633,3.12436089,3.1237776
73.381261,3.31662479,3.13397607,0.427374221,3.13339463,3.12425794,3.12367469
73.391752,3.87298335,3.13408765,0.859590426,3.13350629,3.12415512,3.12357191
73.402244,3.31662479,3.13422597,0.427081754,3.13364469,3.12405239,3.12346922
73.412736,3.16227766,3.13439511,0.166980698,3.13381392,3.12394978,3.12336665
73.423227,3.74165739,3.13460013,0.779138789,3.13401904,3.12384728,3.12326419
73.433719,2.44948974,3.1348476,-0.827863426,3.1342666,3.12374489,3.12316183
73.44421,3.46410162,3.13514605,0.573546477,3.13456517,3.12364261,3.12305959
73.454702,2.64575131,3.13550731,-0.699825691,3.13492654,3.12354043,3.12295744
73.465194,3.16227766,3.13594779,0.162264826,3.13536715,3.12343836,3.1228554
73.475685,3.46410162,3.1365291,0.572339509,3.13594862,3.12333641,3.12275348
73.486177,3.74165739,3.13720816,0.777463331,3.13662785,3.12323455,3.12265165
73.496668,2.44948974,3.13807025,-0.829807513,3.13749015,3.12313282,3.12254994
73.50716,2.82842712,3.13918086,-0.557452897,3.138601,3.12303118,3.12244832
73.517652,3,3.14062772,-0.375003621,3.14004817,3.12292964,3.12234681
73.528143,3,3.14252348,-0.377522822,3.14194433,3.12282822,3.12224542
73.538635,2.64575131,3.14500983,-0.706582283,3.14443118,3.1227269,3.12214411
73.549126,2.44948974,3.14824855,-0.835917944,3.14767053,3.12262569,3.12204292
73.559618,3.60555128,3.15241679,0.67315265,3.15183957,3.12252457,3.12194183
73.57011,3.46410162,3.15768856,0.553545892,3.15711234,3.12242356,3.12184084
73.580601,3.31662479,3.16421237,0.39040034,3.16363737,3.12232267,3.12173996
73.591093,2.44948974,3.17208466,-0.850055831,3.17151112,3.12222187,3.12163917
73.601584,3.60555128,3.18131202,0.651336518,3.18074017,3.12212118,3.12153849
73.612076,3.60555128,3.19177766,0.643252377,3.19120772,3.12202058,3.12143791
73.622568,2.82842712,3.20318754,-0.612176787,3.20261966,3.12192009,3.12133742
73.633059,3.31662479,3.21501024,0.318770378,3.21444447,3.1218197,3.12123705
73.643551,3.46410162,3.22641295,0.487533242,3.22584921,3.12171941,3.12113677
73.654042,3,3.23622989,-0.486034861,3.23566788,3.12161923,3.12103659
73.664534,3.31662479,3.2430968,0.271160459,3.242536,3.12151915,3.12093651
73.675026,2.44948974,3.2458087,-0.892367053,3.2452484,3.12141916,3.12083652
73.685517,3,3.24381649,-0.493777775,3.24325586,3.12131928,3.12073665
73.696009,3.46410162,3.23749496,0.476032199,3.23693326,3.12121949,3.12063686
73.7065,3.16227766,3.22795198,-0.256270021,3.22738864,3.12111981,3.12053718
73.716992,3.31662479,3.21654934,0.316347039,3.21598401,3.12102022,3.12043759
73.727484,3.60555128,3.20450589,0.63328144,3.20393845,3.12092073,3.12033809
73.737975,3.87298335,3.19272433,0.824778161,3.19215481,3.12082135,3.12023871
73.748467,3.31662479,3.18179208,0.367195739,3.18122061,3.12072206,3.1201394
73.758958,3.60555128,3.17204963,0.658408421,3.17147641,3.12062287,3.12004021
73.76945,3.74165739,3.16364668,0.760270154,3.16307195,3.12052377,3.1199411
73.779942,3.16227766,3.15660009,0.0753496232,3.15602409,3.12042477,3.11984209
73.790433,3.31662479,3.15083106,0.407177762,3.15025401,3.12032587,3.11974318
73.800925,2.82842712,3.14619851,-0.563712146,3.14562061,3.12022706,3.11964435
73.811416,3,3.14253277,-0.377535119,3.1419542,3.12012835,3.11954563
73.821908,2.82842712,3.13965574,-0.557878678,3.13907665,3.12002973,3.11944699
73.8324,3,3.13740132,-0.370676847,3.13682181,3.11993121,3.11934845
73.842891,3.31662479,3.13565128,0.425409818,3.13507144,3.11983279,3.11925001
73.853383,3.16227766,3.13423272,0.16746625,3.13365262,3.11973445,3.11915165
73.863874,3.16227766,3.13307962,0.17087434,3.1324993,3.11963622,3.1190534
73.874366,3,3.13212198,-0.363485877,3.13154148,3.11953807,3.11895523
73.884858,3.31662479,3.13130924,0.430482928,3.13072858,3.11944001,3.11885715
73.895349,2.82842712,3.13060544,-0.549707485,3.13002465,3.11934206,3.11875917
73.905841,3.87298335,3.12998517,0.861973418,3.12940425,3.11924419,3.11866127
73.916332,3.60555128,3.12943079,0.690014843,3.12884976,3.11914642,3.11856347
73.926824,3.16227766,3.12892955,0.18261464,3.12834841,3.11904873,3.11846575
73.937316,3.46410162,3.12847231,0.579335225,3.12789108,3.11895113,3.11836812
73.947807,3.46410162,3.1280522,0.579697697,3.12747087,3.11885364,3.11827059
73.958299,3.46410162,3.12766376,0.580032635,3.12708234,3.11875622,3.11817314
73.96879,2.44948974,3.12730279,-0.823294022,3.12672129,3.11865891,3.11807579
73.979282,3.87298335,3.12696571,0.863723123,3.12638413,3.11856167,3.11797852
73.989774,4.24264069,3.12664963,1.05640478,3.12606797,3.11846453,3.11788133
74.000265,3.60555128,3.12635211,0.692242131,3.12577036,3.11836748,3.11778424
74.010757,2.64575131,3.12607096,-0.693050971,3.12548914,3.11827051,3.11768723
74.021248,2.64575131,3.12580443,-0.692858658,3.12522254,3.11817364,3.11759032
74.03174,4.24264069,3.1255509,1.05692468,3.12496893,3.11807685,3.11749348
74.042232,3.60555128,3.12530903,0.692995129,3.12472699,3.11798014,3.11739673
74.052723,3.31662479,3.12507765,0.437660993,3.12449553,3.11788353,3.11730008
74.063215,2.82842712,3.12485567,-0.544452521,3.12427349,3.117787,3.1172035
74.073706,3.31662479,3.12464224,0.438158138,3.12405998,3.11769057,3.11710701
74.084198,3.46410162,3.12443649,0.582807962,3.12385416,3.11759421,3.1170106
74.09469,2.82842712,3.12423776,-0.543884759,3.12365535,3.11749794,3.11691428
74.105181,2.82842712,3.12404541,-0.543707905,3.12346294,3.11740176,3.11681805
74.115673,3.16227766,3.12385886,0.196007132,3.12327632,3.11730566,3.11672189
74.126164,3.16227766,3.12367766,0.19646884,3.12309503,3.11720965,3.11662582
74.136656,3.31662479,3.1235013,0.439458173,3.12291861,3.11711372,3.11652983
74.147148,3.16227766,3.12332943,0.197353052,3.12274666,3.11701787,3.11643392
74.157639,3.46410162,3.1231617,0.583900603,3.12257886,3.11692211,3.1163381
74.168131,3.31662479,3.12299776,0.440030721,3.12241484,3.11682643,3.11624236
74.178622,3,3.12283734,-0.350481582,3.12225434,3.11673084,3.1161467
74.189114,3.31662479,3.12268016,0.440391449,3.12209709,3.11663532,3.11605112
74.199606,3,3.122526,-0.350037146,3.12194285,3.11653989,3.11595562
74.210097,3.31662479,3.12237466,0.44073816,3.12179143,3.11644455,3.1158602
74.220589,3.87298335,3.12222592,0.866462592,3.12164261,3.11634927,3.11576486
74.23108,3.46410162,3.12207963,0.584826458,3.12149624,3.11625409,3.11566961
74.241572,2.44948974,3.1219356,-0.820027959,3.12135212,3.11615898,3.11557443
74.252064,2.64575131,3.12179369,-0.689958246,3.12121013,3.11606395,3.11547932
74.262555,3.31662479,3.12165379,0.441555202,3.12107015,3.11596901,3.11538431
74.273047,3.74165739,3.12151575,0.787490719,3.12093203,3.11587414,3.11528936
74.283538,4,3.12137949,0.937347595,3.12079567,3.11577936,3.1151945
74.29403,3,3.12124486,-0.348202325,3.12066096,3.11568465,3.11509971
74.304522,2.82842712,3.12111179,-0.54100339,3.1205278,3.11559002,3.11500499
74.315013,2.64575131,3.12098021,-0.689368479,3.12039613,3.11549547,3.11491036
74.325505,3.60555128,3.12085001,0.696204902,3.12026584,3.11540099,3.1148158
74.335996,2.23606798,3.12072114,-0.940560025,3.12013687,3.1153066,3.11472132
74.346488,3.87298335,3.1205935,0.867404084,3.12000914,3.11521228,3.11462691
74.35698,3.16227766,3.12046705,0.20447643,3.1198826,3.11511804,3.11453258
74.367471,3.16227766,3.12034174,0.204782628,3.11975718,3.11502388,3.11443833
74.377963,3.60555128,3.12021748,0.696659024,3.11963283,3.11492978,3.11434414
74.388454,3.16227766,3.12009426,0.205385986,3.11950951,3.11483578,3.11425004
74.398946,3.46410162,3.11997199,0.586625623,3.11938715,3.11474183,3.114156
74.409438,4,3.11985066,0.938162747,3.11926571,3.11464797,3.11406204
74.419929,3,3.11973022,-0.346020555,3.11914517,3.11455418,3.11396816
74.430421,2.44948974,3.11961063,-0.818609116,3.11902547,3.11446047,3.11387434
74.440912,2.64575131,3.11949185,-0.688288125,3.11890659,3.11436683,3.11378061
74.451404,3.31662479,3.11937385,0.444129417,3.11878848,3.11427326,3.11368694
74.461896,3.74165739,3.1192566,0.788923818,3.11867112,3.11417977,3.11359333
74.472387,4.12310563,3.11914007,1.00198081,3.11855449,3.11408635,3.11349981
74.482879,3.16227766,3.11902423,0.207974586,3.11843853,3.113993,3.11340636
74.49337,3.87298335,3.11890907,0.868374503,3.11832326,3.11389973,3.11331298
74.503862,4.47213595,3.11879454,1.16333203,3.11820861,3.11380652,3.11321966
74.514354,3.31662479,3.11868063,0.444909162,3.11809459,3.11371339,3.11312642
74.524845,3.16227766,3.11856733,0.20907016,3.11798117,3.11362033,3.11303325
74.535337,3.74165739,3.1184546,0.78943194,3.11786833,3.11352734,3.11294014
74.545828,2.82842712,3.11834244,-0.538437848,3.11775605,3.11343443,3.11284711
74.55632,3.31662479,3.11823082,0.445414385,3.1176443,3.11334158,3.11275414
74.566812,3.60555128,3.11811972,0.698162986,3.11753309,3.11324879,3.11266124
74.577303,3.60555128,3.11800915,0.698242171,3.11742239,3.11315609,3.11256842
74.587795,3.46410162,3.11789906,0.588389799,3.11731218,3.11306345,3.11247565
74.598286,3.16227766,3.11778947,0.210922241,3.11720246,3.11297088,3.11238296
74.608778,4.12310563,3.11768034,1.00270897,3.1170932,3.11287837,3.11229033
74.61927,3.87298335,3.11757167,0.869144222,3.1169844,3.11278594,3.11219777
74.629761,4.58257569,3.11746345,1.21041821,3.11687606,3.11269358,3.11210528
74.640253,3,3.11735567,-0.342572138,3.11676814,3.11260127,3.11201285
74.650744,3.46410162,3.11724832,0.588942521,3.11666066,3.11250905,3.11192049
74.661236,2.64575131,3.11714138,-0.686578526,3.11655359,3.11241688,3.11182819
74.671728,3.46410162,3.11703485,0.589123724,3.11644692,3.11232478,3.11173596
74.682219,3.60555128,3.11692873,0.699015408,3.11634067,3.11223275,3.11164379
74.692711,3.74165739,3.116823,0.790464666,3.11623479,3.11214078,3.11155169
74.703202,3.74165739,3.11671766,0.790531294,3.11612931,3.11204888,3.11145965
74.713694,3.16227766,3.11661269,0.213693634,3.1160242,3.11195704,3.11136767
74.724186,2.82842712,3.11650809,-0.536731749,3.11591946,3.11186527,3.11127576
74.734677,2.23606798,3.11640388,-0.938262169,3.1158151,3.11177357,3.11118391
74.745169,3.31662479,3.11630001,0.447576565,3.11571108,3.11168192,3.11109212
74.75566,3.31662479,3.11619651,0.447692172,3.11560744,3.11159035,3.1110004
74.766152,2.82842712,3.11609335,-0.53634525,3.11550413,3.11149883,3.11090874
74.776644,2.64575131,3.11599054,-0.685739916,3.11540117,3.11140737,3.11081713
74.787135,4,3.11588809,0.940272254,3.11529856,3.11131599,3.1107256
74.797627,2.64575131,3.11578597,-0.685590734,3.11519629,3.11122466,3.11063412
74.808118,2.44948974,3.11568419,-0.816207356,3.11509436,3.1111334,3.1105427
74.81861,2.44948974,3.11558274,-0.816145206,3.11499275,3.11104219,3.11045134
74.829102,3.16227766,3.11548162,0.216323918,3.11489147,3.11095105,3.11036004
74.839593,3.46410162,3.11538085,0.590525842,3.11479054,3.11085998,3.11026881
74.850085,4.24264069,3.11528039,1.06177224,3.11468992,3.11076895,3.11017763
74.860576,3.16227766,3.11518027,0.217019336,3.11458964,3.110678,3.11008651
74.871068,3,3.11508047,-0.339235118,3.11448967,3.1105871,3.10999545
74.88156,3.46410162,3.11498099,0.590864305,3.11439003,3.11049625,3.10990444
74.892051,3.46410162,3.11488185,0.590948194,3.11429072,3.11040548,3.1098135
74.902543,3,3.11478302,-0.338796431,3.11419172,3.11031476,3.10972261
74.913034,3.31662479,3.11468453,0.449377634,3.11409306,3.1102241,3.10963178
74.923526,3.16227766,3.11458636,0.218383377,3.11399472,3.1101335,3.10954101
74.934018,3.74165739,3.11448867,0.791939844,3.11389686,3.11004295,3.10945029
74.944509,3.31662479,3.11439117,0.449703929,3.11379918,3.10995247,3.10935963
74.955001,2,3.11429398,-1.05560124,3.11370182,3.10986203,3.10926903
74.965492,2.44948974,3.11419715,-0.815295899,3.1136048,3.10977167,3.10917848
74.975984,2.44948974,3.11410063,-0.815236709,3.11350811,3.10968135,3.10908799
74.986476,3.87298335,3.11400446,0.871193941,3.11341176,3.10959109,3.10899755
74.996967,3.46410162,3.11390865,0.591771045,3.11331576,3.10950089,3.10890717
75.007459,3.46410162,3.11381317,0.591851712,3.1132201,3.10941074,3.10881683
75.01795,3,3.11371805,-0.337221066,3.1131248,3.10932066,3.10872657
75.028442,2.82842712,3.11362328,-0.534037595,3.11302984,3.10923062,3.10863634
75.038934,3.46410162,3.11352887,0.592091837,3.11293524,3.10914064,3.10854617
75.049425,3.60555128,3.11343484,0.701510108,3.11284103,3.10905072,3.10845606
75.059917,3.46410162,3.11334118,0.592250311,3.11274717,3.10896084,3.108366
75.070408,2.23606798,3.11324792,-0.936578848,3.11265371,3.10887103,3.10827599
75.0809,3.74165739,3.11315503,0.792781404,3.11256064,3.10878126,3.10818603
75.091392,3.46410162,3.11306255,0.592485498,3.11246796,3.10869155,3.10809612
75.101883,2.64575131,3.11297049,-0.683534327,3.1123757,3.1086019,3.10800627
75.112375,2.82842712,3.11287884,-0.533340147,3.11228385,3.10851229,3.10791647
75.122866,3.31662479,3.11278763,0.451483289,3.11219244,3.10842275,3.10782672
75.133358,2.82842712,3.11269686,-0.533169517,3.11210147,3.10833324,3.10773702
75.14385,4.12310563,3.11260655,1.00523583,3.11201095,3.10824379,3.10764736
75.154341,3.60555128,3.11251672,0.702164195,3.11192092,3.1081544,3.10755777
75.164833,3.31662479,3.11242737,0.451882087,3.11183136,3.10806505,3.10746821
75.175324,3.31662479,3.11233854,0.451980368,3.11174232,3.10797577,3.10737871
75.185816,3.74165739,3.11225022,0.793351855,3.1116538,3.10788652,3.10728926
75.196308,3.31662479,3.11216245,0.45217512,3.11156581,3.10779732,3.10719985
75.206799,3.31662479,3.11207526,0.452271528,3.11147841,3.10770819,3.1071105
75.217291,2.82842712,3.11198864,-0.532504946,3.11139158,3.10761909,3.10702119
75.227782,2.44948974,3.11190265,-0.81388753,3.11130537,3.10753005,3.10693193
75.238274,3.46410162,3.1118173,0.593535437,3.1112198,3.10744105,3.10684272
75.248766,2.82842712,3.11173262,-0.532264496,3.1111349,3.1073521,3.10675355
75.259257,3.74165739,3.11164865,0.793730896,3.11105072,3.10726321,3.10666443
75.269749,3.31662479,3.11156542,0.452834819,3.11096726,3.10717436,3.10657536
75.28024,4.24264069,3.11148297,1.06355899,3.11088459,3.10708556,3.10648633
75.290732,2.82842712,3.11140133,-0.531953201,3.11080273,3.10699681,3.10639735
75.301224,3,3.11132056,-0.333647361,3.11072173,3.1069081,3.10630841
75.311715,3.46410162,3.11124071,0.594020962,3.11064165,3.10681944,3.10621953
75.322207,3.31662479,3.11116182,0.453280232,3.11056253,3.10673082,3.10613068
75.332698,3.31662479,3.11108396,0.453366105,3.11048444,3.10664226,3.10604188
75.34319,3.74165739,3.11100719,0.794134873,3.11040744,3.10655374,3.10595313
75.353682,3.16227766,3.11093157,0.226596749,3.11033159,3.10646526,3.10586441
75.364173,4,3.1108572,0.942943689,3.11025698,3.10637683,3.10577575
75.374665,4.12310563,3.11078414,1.00614188,3.11018368,3.10628845,3.10568712
75.385156,3.74165739,3.11071249,0.794320398,3.1101118,3.10620011,3.10559854
75.395648,2.82842712,3.11064235,-0.531239331,3.11004142,3.10611181,3.10551
75.40614,3.31662479,3.11057383,0.45392836,3.10997266,3.10602356,3.1054215
75.416631,2.82842712,3.11050707,-0.531111989,3.10990565,3.10593536,3.10533305
75.427123,2.64575131,3.11044218,-0.681682382,3.10984052,3.10584719,3.10524464
75.437614,3.46410162,3.11037933,0.594745564,3.10977742,3.10575907,3.10515627
75.448106,2.82842712,3.11031867,-0.530934597,3.10971652,3.10567099,3.10506794
75.458598,2.64575131,3.1102604,-0.681549034,3.109658,3.10558295,3.10497965
75.469089,2.44948974,3.11020472,-0.81284376,3.10960207,3.10549497,3.1048914
75.479581,3.31662479,3.11015186,0.454392924,3.10954896,3.10540701,3.10480319
75.490072,3,3.11010209,-0.331816346,3.10949894,3.10531911,3.10471503
75.500564,2.23606798,3.11005568,-0.934873094,3.10945228,3.10523124,3.1046269
75.511056,3.16227766,3.11001297,0.228614721,3.10940932,3.10514341,3.10453881
75.521547,3.31662479,3.10997433,0.454588235,3.10937042,3.10505563,3.10445077
75.532039,4.12310563,3.10994016,1.00656121,3.109336,3.10496788,3.10436275
75.54253,3.31662479,3.10991095,0.45465794,3.10930653,3.10488018,3.10427479
75.553022,3,3.10988722,-0.331492411,3.10928255,3.10479252,3.10418685
75.563514,3.31662479,3.10986959,0.454703423,3.10926466,3.10470489,3.10409895
75.574005,3.74165739,3.10985875,0.794857617,3.10925357,3.10461731,3.1040111
75.584497,2,3.10985552,-1.05349681,3.10925008,3.10452976,3.10392328
75.594988,4.12310563,3.10986082,1.00660062,3.10925512,3.10444226,3.1038355
75.60548,3,3.10987574,-0.331475091,3.10926978,3.10435479,3.10374775
75.615972,2.82842712,3.10990154,-0.530541622,3.10929532,3.10426736,3.10366004
75.626463,4.12310563,3.10993974,1.00656142,3.10933326,3.10417997,3.10357237
75.636955,4.12310563,3.10999217,1.00653537,3.10938545,3.10409261,3.10348473
75.647446,3.87298335,3.1100611,0.873454201,3.10945413,3.1040053,3.10339714
75.657938,3.87298335,3.11014944,0.873403633,3.10954221,3.10391802,3.10330957
75.66843,4.24264069,3.11026096,1.06413332,3.10965348,3.10383077,3.10322203
75.678921,4.69041576,3.11040076,1.25698648,3.10979303,3.10374357,3.10313454
75.689413,2.82842712,3.1105759,-0.53117678,3.10996793,3.1036564,3.10304708
75.699904,2.64575131,3.11079619,-0.681941991,3.11018799,3.10356927,3.10295966
75.710396,2.82842712,3.11107548,-0.531646834,3.11046706,3.10348217,3.10287226
75.720888,2.64575131,3.11143297,-0.682408718,3.11082434,3.10339511,3.1027849
75.731379,2.82842712,3.11189492,-0.532416937,3.1112861,3.10330808,3.10269758
75.741871,3.16227766,3.11249655,0.223116818,3.11188756,3.10322109,3.10261028
75.752362,3.87298335,3.11328313,0.871607832,3.11267402,3.10313414,3.10252303
75.762854,2.44948974,3.11431123,-0.815365858,3.11370203,3.10304721,3.1024358
75.773346,3,3.11564757,-0.340069953,3.11503835,3.10296032,3.1023486
75.783837,3.74165739,3.11736677,0.790120633,3.11675759,3.10287347,3.10226144
75.794329,3.46410162,3.11954706,0.586987699,3.11893801,3.10278664,3.10217431
75.80482,3,3.12226173,-0.349659443,3.12165292,3.10269986,3.10208721
75.815312,3.46410162,3.12557102,0.581833824,3.12496256,3.1026131,3.10200014
75.825804,3.16227766,3.1295086,0.181022264,3.12890061,3.10252638,3.1019131
75.836295,3,3.13406839,-0.366153504,3.13346099,3.10243969,3.1018261
75.846787,2,3.1391901,-1.06732849,3.1385834,3.10235303,3.10173912
75.857278,2.64575131,3.14473645,-0.706388804,3.14413052,3.10226641,3.10165218
75.86777,2.44948974,3.15047239,-0.837247062,3.14986725,3.10217981,3.10156526
75.878262,3.31662479,3.15603596,0.400735365,3.15543159,3.10209324,3.10147837
75.888753,3.46410162,3.16093126,0.55060908,3.16032752,3.10200672,3.10139151
75.899245,3.74165739,3.16457361,0.759660303,3.16397027,3.10192021,3.10130468
75.909736,4.35889894,3.16641451,1.09200936,3.16581121,3.10183375,3.10121788
75.920228,3.16227766,3.16612992,-0.0620665376,3.16552625,3.1017473,3.10113111
75.93072,3.16227766,3.16375482,-0.0384338785,3.1631504,3.10166089,3.10104436
75.941211,3.46410162,3.15966822,0.551754835,3.1590627,3.10157451,3.10095765
75.951703,3.46410162,3.15443585,0.556476203,3.15382901,3.10148816,3.10087096
75.962194,3.60555128,3.1486334,0.67595701,3.14802512,3.10140184,3.1007843
75.972686,2.64575131,3.1427315,-0.704968218,3.14212176,3.10131555,3.10069766
75.983178,3.87298335,3.13706811,0.857855018,3.13645695,3.10122928,3.10061105
75.993669,2.82842712,3.13186027,-0.550847658,3.13124777,3.10114305,3.10052448
76.004161,3,3.12722848,-0.356691012,3.12661474,3.10105684,3.10043792
76.014652,2.44948974,3.12322378,-0.820813034,3.12260893,3.10097066,3.10035139
76.025144,3.60555128,3.11984306,0.6969277,3.11922721,3.1008845,3.10026489
76.035636,3,3.1170474,-0.34212191,3.11643066,3.10079838,3.10017841
76.046127,2.82842712,3.11477407,-0.535113958,3.11415655,3.10071228,3.10009196
76.056619,4.24264069,3.1129476,1.06287021,3.11232938,3.10062621,3.10000553
76.06711,4.24264069,3.11149059,1.0635554,3.11087174,3.10054017,3.09991913
76.077602,4.12310563,3.11032917,1.00636795,3.10970975,3.10045415,3.09983275
76.088094,2.64575131,3.10939845,-0.680916393,3.10877849,3.10036815,3.09974639
76.098585,3.31662479,3.10864404,0.456049066,3.10802359,3.10028219,3.09966006
76.109077,4,3.10802231,0.944445703,3.10740139,3.10019624,3.09957375
76.119568,3.46410162,3.10749994,0.597161348,3.10687856,3.10011033,3.09948747
76.13006,3.46410162,3.10705188,0.597536391,3.10643006,3.10002444,3.09940121
76.140552,3.46410162,3.10666003,0.597864188,3.10603778,3.09993857,3.09931497
76.151043,3.46410162,3.10631141,0.598155672,3.10568873,3.09985273,3.09922876
76.161535,3.16227766,3.10599667,0.237236157,3.10537357,3.09976691,3.09914256
76.172026,3.46410162,3.10570921,0.598658836,3.1050857,3.09968112,3.09905639
76.182518,2.44948974,3.10544415,-0.809910123,3.10482022,3.09959535,3.09897024
76.19301,2.64575131,3.1051979,-0.677824895,3.10457355,3.0995096,3.09888411
76.203501,2.82842712,3.10496771,-0.525871267,3.10434296,3.09942388,3.09879801
76.213993,2.44948974,3.10475136,-0.809482316,3.10412619,3.09933818,3.09871192
76.224484,3.46410162,3.10454712,0.599628634,3.10392154,3.09925251,3.09862586
76.234976,3,3.10435347,-0.323037872,3.10372747,3.09916685,3.09853981
76.245468,3.60555128,3.1041692,0.708083384,3.10354279,3.09908121,3.09845378
76.255959,3,3.10399327,-0.322479874,3.10336645,3.09899561,3.09836778
76.266451,3.16227766,3.10382474,0.241770386,3.10319751,3.09891001,3.09828179
76.276942,2.82842712,3.10366286,-0.524629139,3.10303522,3.09882445,3.09819583
76.287434,3.60555128,3.10350691,0.708550894,3.10287885,3.0987389,3.09810988
76.297926,3.46410162,3.1033563,0.600620773,3.10272783,3.09865337,3.09802395
76.308417,2,3.10321053,-1.0503383,3.10258165,3.09856787,3.09793805
76.318909,3.87298335,3.10306911,0.877447567,3.10243981,3.09848239,3.09785216
76.3294,2.82842712,3.10293166,-0.523931803,3.10230194,3.09839693,3.09776629
76.339892,2.82842712,3.10279778,-0.523804025,3.10216764,3.09831148,3.09768043
76.350384,3.74165739,3.10266718,0.799368633,3.10203662,3.09822605,3.09759459
76.360875,3.31662479,3.10253957,0.462693444,3.10190859,3.09814065,3.09750878
76.371367,2.23606798,3.10241468,-0.93077747,3.10178327,3.09805527,3.09742297
76.381858,3,3.1022923,-0.319831675,3.10166047,3.09796991,3.09733719
76.39235,3.87298335,3.10217221,0.877958505,3.10153995,3.09788455,3.09725142
76.402842,2.44948974,3.10205424,-0.80781464,3.10142155,3.09779922,3.09716567
76.413333,2.82842712,3.10193822,-0.522982882,3.1013051,3.09771392,3.09707994
76.423825,3.60555128,3.10182399,0.709737474,3.10119044,3.09762862,3.09699421
76.434316,2.82842712,3.10171144,-0.522766026,3.10107746,3.09754335,3.09690852
76.444808,4,3.10160042,0.947839426,3.100966,3.09745809,3.09682282
76.4553,3.74165739,3.10149084,0.800104088,3.10085598,3.09737285,3.09673715
76.465791,3.16227766,3.10138259,0.246769266,3.10074729,3.09728763,3.0966515
76.476283,3,3.10127557,-0.318238231,3.10063983,3.09720242,3.09656585
76.486774,2.64575131,3.10116972,-0.674846951,3.10053354,3.09711724,3.09648023
76.497266,3.87298335,3.10106493,0.878588875,3.10042831,3.09703207,3.09639461
76.507758,3.60555128,3.10096116,0.710345069,3.10032408,3.09694691,3.09630901
76.518249,3.16227766,3.10085834,0.247829225,3.10022081,3.09686177,3.09622342
76.528741,3.46410162,3.10075639,0.602781243,3.10011841,3.09677664,3.09613785
76.539232,3.60555128,3.10065528,0.710560339,3.10001685,3.09669154,3.09605229
76.549724,3,3.10055494,-0.317103996,3.09991606,3.09660644,3.09596675
76.560216,3,3.10045534,-0.316946908,3.099816,3.09652136,3.09588121
76.570707,3,3.10035644,-0.31679085,3.09971664,3.0964363,3.09579569
76.581199,3.46410162,3.10025819,0.603194354,3.09961792,3.09635125,3.09571018
76.59169,3.16227766,3.10016056,0.249233032,3.09951983,3.09626622,3.09562469
76.602182,3.87298335,3.1000635,0.879158602,3.09942231,3.0961812,3.0955392
76.612674,3.74165739,3.09996699,0.801055799,3.09932533,3.09609619,3.09545373
76.623165,2.82842712,3.09987102,-0.521002779,3.09922889,3.0960112,3.09536827
76.633657,3.16227766,3.09977553,0.250004254,3.09913293,3.09592622,3.09528282
76.644148,3,3.09968053,-0.315722229,3.09903745,3.09584126,3.09519739
76.65464,3.46410162,3.09958596,0.603751321,3.09894241,3.0957563,3.09511196
76.665132,3.46410162,3.09949181,0.603829282,3.09884778,3.09567136,3.09502654
76.675623,3.46410162,3.09939808,0.603906889,3.09875358,3.09558644,3.09494113
76.686115,4.24264069,3.09930473,1.06926889,3.09865974,3.09550152,3.09485573
76.696606,3.87298335,3.09921176,0.879642875,3.09856628,3.09541662,3.09477035
76.707098,3.31662479,3.09911913,0.466375023,3.09847316,3.09533173,3.09468497
76.71759,3.46410162,3.099027,0.604214045,3.09838055,3.09524685,3.0945996
76.728081,3.31662479,3.09893504,0.466572343,3.09828809,3.09516198,3.09451425
76.738573,3.60555128,3.09884337,0.711834181,3.09819594,3.09507712,3.0944289
76.749064,3.46410162,3.09875201,0.604441562,3.09810408,3.09499228,3.09434356
76.759556,3.31662479,3.09866093,0.466866001,3.09801249,3.09490745,3.09425823
76.770048,2.82842712,3.09857011,-0.519752816,3.09792118,3.09482262,3.0941729
76.780539,2.82842712,3.09847957,-0.519665706,3.09783013,3.09473781,3.09408759
76.791031,3.74165739,3.09838927,0.802039973,3.09773933,3.09465301,3.09400228
76.801522,3.60555128,3.09829922,0.712216299,3.09764877,3.09456822,3.09391698
76.812014,3.16227766,3.09820939,0.253117104,3.09755843,3.09448343,3.09383169
76.822506,2.82842712,3.09811979,-0.519319425,3.09746832,3.09439865,3.0937464
76.832997,2.44948974,3.09803041,-0.805320229,3.09737843,3.0943139,3.09366113
76.843489,3.60555128,3.09794124,0.71246757,3.09728874,3.09422914,3.09357585
76.85398,3.74165739,3.09785227,0.802374673,3.09719925,3.0941444,3.09349059
76.864472,3.60555128,3.09776349,0.712592298,3.09710995,3.09405966,3.09340533
76.874964,2.44948974,3.0976749,-0.805099472,3.09702084,3.09397493,3.09332008
76.885455,2.64575131,3.0975865,-0.672186874,3.09693191,3.09389021,3.09323484
76.895947,3.46410162,3.09749828,0.605477778,3.09684316,3.09380549,3.09314959
76.906438,2.64575131,3.09741023,-0.672055738,3.09675458,3.0937208,3.09306436
76.91693,2.64575131,3.09732234,-0.671990346,3.09666615,3.0936361,3.09297913
76.927422,2.44948974,3.09723461,-0.804825984,3.09657789,3.0935514,3.0928939
76.937913,2.64575131,3.09714705,-0.671859907,3.09648979,3.09346673,3.09280869
76.948405,2.23606798,3.09705963,-0.927896358,3.09640183,3.09338205,3.09272347
76.958896,3.46410162,3.09697237,0.605911914,3.09631403,3.09329739,3.09263827
76.969388,3.60555128,3.09688524,0.713208266,3.09622636,3.09321272,3.09255306
76.97988,3.87298335,3.09679826,0.881013668,3.09613883,3.09312807,3.09246785
76.990371,2.23606798,3.09671143,-0.92770871,3.09605145,3.09304342,3.09238266
77.000863,3,3.09662472,-0.310845168,3.09596419,3.09295878,3.09229746
77.011354,2.44948974,3.0965383,-0.804393287,3.09587722,3.09287415,3.09221228
77.021846,3.60555128,3.09645185,0.713512033,3.09579021,3.09278952,3.09212709
77.032338,4,3.09636553,0.950596901,3.09570333,3.09270489,3.0920419
77.042829,3.46410162,3.09627934,0.606483533,3.09561657,3.09262027,3.09195672
77.053321,4,3.09619326,0.950687509,3.09552993,3.09253566,3.09187154
77.063812,3.31662479,3.09610731,0.469592892,3.09544341,3.09245105,3.09178637
77.074304,2.23606798,3.09602146,-0.927336769,3.09535699,3.09236645,3.09170119
77.084796,1.73205081,3.09593573,-1.16785484,3.09527069,3.09228184,3.09161602
77.095287,3.31662479,3.09585011,0.469866657,3.0951845,3.09219725,3.09153085
77.105779,2.64575131,3.0957646,-0.670830301,3.09509841,3.09211266,3.09144568
77.11627,3.60555128,3.09567921,0.714053267,3.09501244,3.09202808,3.09136052
77.126762,3.74165739,3.09559391,0.803780739,3.09492656,3.09194349,3.09127535
77.137254,2.64575131,3.09550872,-0.670639549,3.09484078,3.09185891,3.09119018
77.147745,3.46410162,3.09542363,0.607188588,3.09475511,3.09177434,3.09110502
77.158237,3.31662479,3.09533864,0.470410615,3.09466953,3.09168976,3.09101986
77.168728,2,3.09525376,-1.04654372,3.09458405,3.0916052,3.0909347
77.17922,3.16227766,3.09516897,0.259053447,3.09449867,3.09152063,3.09084954
77.189712,2.82842712,3.09508428,-0.516388568,3.09441338,3.09143606,3.09076437
77.200203,3,3.09499969,-0.308220196,3.09432819,3.09135151,3.09067921
77.210695,4.24264069,3.09491519,1.07131951,3.09424308,3.09126694,3.09059405
77.221186,3,3.09483079,-0.307946079,3.09415808,3.09118239,3.09050889
77.231678,3,3.09474647,-0.307809151,3.09407316,3.09109783,3.09042372
77.24217,3.46410162,3.09466225,0.607815238,3.09398832,3.09101328,3.09033855
77.252661,2.82842712,3.09457813,-0.515898251,3.09390359,3.09092873,3.09025339
77.263153,3.31662479,3.09449409,0.471307436,3.09381893,3.09084418,3.09016822
77.273644,3,3.09441015,-0.30726235,3.09373438,3.09075963,3.09008306
77.284136,3.46410162,3.09432629,0.608091541,3.0936499,3.09067508,3.08999789
77.294628,3.31662479,3.09424252,0.471574242,3.0935655,3.09059053,3.08991271
77.305119,3.31662479,3.09415885,0.471662949,3.0934812,3.09050599,3.08982754
77.315611,3.46410162,3.09407526,0.608297914,3.09339698,3.09042145,3.08974237
77.326102,3.74165739,3.09399177,0.804776751,3.09331286,3.09033691,3.08965719
77.336594,3.60555128,3.09381792,0.715355408,3.09322881,3.09016181,3.08957201
77.347086,3.74165739,3.09373466,0.804936476,3.09314485,3.09007733,3.08948682
77.357577,3.60555128,3.09365149,0.71547172,3.09306097,3.08999286,3.08940164
77.368069,3.31662479,3.09356841,0.472288449,3.09297718,3.08990838,3.08931645
77.37856,3.87298335,3.09348542,0.882891795,3.09289348,3.0898239,3.08923126
77.389052,3.74165739,3.09340252,0.805142764,3.09280986,3.08973942,3.08914606
77.399544,3.74165739,3.0933197,0.805194193,3.09272632,3.08965494,3.08906086
77.410035,4,3.09323698,0.952241054,3.09264288,3.08957046,3.08897566
77.420527,3.31662479,3.09315433,0.47272662,3.09255951,3.08948598,3.08889045
77.431018,3.16227766,3.09307179,0.263070088,3.09247624,3.0894015,3.08880524
77.44151,3.31662479,3.09298933,0.472901115,3.09239305,3.08931701,3.08872003
77.452002,3.87298335,3.09290695,0.883219335,3.09230994,3.08923252,3.0886348
77.462493,3.16227766,3.09282468,0.263539338,3.09222693,3.08914804,3.08854958
77.472985,4,3.09274249,0.952500663,3.092144,3.08906354,3.08846435
77.483476,2.44948974,3.09266039,-0.801979209,3.09206117,3.08897906,3.08837912
77.493968,3.60555128,3.09257839,0.716221256,3.09197842,3.08889456,3.08829388
77.50446,3.31662479,3.09249647,0.473421921,3.09189576,3.08881006,3.08820863
77.514951,2,3.09241466,-1.04518643,3.09181321,3.08872556,3.08812338
77.525443,3,3.09233294,-0.30386336,3.09173073,3.08864105,3.08803812
77.535934,3,3.09225132,-0.303729029,3.09164836,3.08855655,3.08795287
77.546426,3.74165739,3.0921698,0.80590793,3.09156607,3.08847204,3.08786759
77.556918,2.44948974,3.09208837,-0.801622494,3.09148388,3.08838752,3.08778232
77.567409,3.16227766,3.09200705,0.26508605,3.0914018,3.08830301,3.08769704
77.577901,2.82842712,3.09192582,-0.51332124,3.09131981,3.08821849,3.08761175
77.588392,3.87298335,3.09184471,0.883820479,3.09123793,3.08813397,3.08752646
77.598884,3.16227766,3.09176369,0.265544667,3.09115614,3.08804944,3.08744116
77.609376,3.74165739,3.09168278,0.806210026,3.09107446,3.08796491,3.08735585
77.619867,3.87298335,3.09160199,0.88395778,3.09099289,3.08788037,3.08727054
77.630359,3.74165739,3.0915213,0.806310167,3.09091142,3.08779583,3.08718521
77.64085,3,3.09144073,-0.302391691,3.09083007,3.08771129,3.08709989
77.651342,3.31662479,3.09136028,0.474620389,3.09074882,3.08762674,3.08701455
77.661834,3.74165739,3.09127994,0.806459826,3.0906677,3.08754218,3.0869292
77.672325,3.31662479,3.09119973,0.474789496,3.09058669,3.08745763,3.08684385
77.682817,3,3.09111963,-0.301860283,3.0905058,3.08737306,3.08675849
77.693308,2.64575131,3.09103967,-0.667299302,3.09042504,3.08728849,3.08667312
77.7038,3.31662479,3.09095983,0.47504206,3.0903444,3.08720392,3.08658774
77.714292,3.46410162,3.09088013,0.610918561,3.0902639,3.08711933,3.08650235
77.724783,3.60555128,3.09080057,0.717461294,3.09018353,3.08703475,3.08641696
77.735275,3,3.09072114,-0.301199501,3.09010329,3.08695016,3.08633155
77.745766,3.31662479,3.09064186,0.475376615,3.0900232,3.08686556,3.08624614
77.756258,2.82842712,3.09056273,-0.511991801,3.08994325,3.08678096,3.08616072
77.76675,2.82842712,3.09048375,-0.511914664,3.08986345,3.08669634,3.08607528
77.777241,3.46410162,3.09040493,0.611307356,3.08978381,3.08661173,3.08598985
77.787733,3.31662479,3.09032627,0.475708441,3.08970433,3.0865271,3.08590439
77.798224,2.44948974,3.09024778,-0.800473635,3.08962501,3.08644248,3.08581894
77.808716,3.87298335,3.09016946,0.8847677,3.08954586,3.08635784,3.08573346
77.819208,4,3.09009132,0.953891335,3.08946688,3.08627319,3.08564798
77.829699,2.64575131,3.09001337,-0.666529864,3.0893881,3.08618854,3.08556249
77.840191,3.16227766,3.08993561,0.268964783,3.08930949,3.08610388,3.08547699
77.850682,4.12310563,3.08985805,1.01648786,3.08923109,3.08601922,3.08539148
77.861174,3,3.08978069,-0.299634253,3.08915288,3.08593454,3.08530596
77.871666,2,3.08970354,-1.04388866,3.08907488,3.08584986,3.08522042
77.882157,2.44948974,3.08962662,-0.800085543,3.08899711,3.08576518,3.08513488
77.892649,3.31662479,3.08954992,0.476523731,3.08891956,3.08568048,3.08504932
77.90314,2.64575131,3.08947348,-0.666124736,3.08884225,3.08559578,3.08496376
77.913632,3.46410162,3.08939727,0.612130987,3.08876518,3.08551106,3.08487818
77.924124,2.44948974,3.08932132,-0.799894731,3.08868837,3.08542634,3.08479258
77.934615,3.60555128,3.08924566,0.718544098,3.08861183,3.08534161,3.08470699
77.945107,3.31662479,3.08917026,0.47692193,3.08853556,3.08525687,3.08462137
77.955598,2.23606798,3.08909517,-0.923594714,3.0884596,3.08517213,3.08453575
77.96609,2.44948974,3.08902038,-0.799706597,3.08838393,3.08508737,3.08445011
77.976582,3.31662479,3.08894592,0.477157072,3.08830858,3.0850026,3.08436445
77.987073,3.16227766,3.0888718,0.27093516,3.08823358,3.08491784,3.0842788
77.997565,1.73205081,3.08879803,-1.16479493,3.08815892,3.08483305,3.08419312
78.008056,3,3.08872463,-0.297866803,3.08808463,3.08474826,3.08410744
78.018548,3.46410162,3.08865162,0.612739744,3.08801072,3.08466346,3.08402173
78.02904,3.16227766,3.08857902,0.271474935,3.08793722,3.08457865,3.08393602
78.039531,3.16227766,3.08850686,0.271607811,3.08786416,3.08449383,3.08385029
78.050023,3.87298335,3.08843514,0.885747258,3.08779154,3.084409,3.08376455
78.060514,2.64575131,3.08836391,-0.665291363,3.0877194,3.08432416,3.0836788
78.071006,3,3.08829318,-0.297141675,3.08764775,3.08423931,3.08359303
78.081498,4,3.08822297,0.954870162,3.08757663,3.08415444,3.08350725
78.091989,3.16227766,3.08815334,0.272257819,3.08750608,3.08406958,3.08342146
78.102481,3.60555128,3.08808429,0.719351778,3.08743611,3.0839847,3.08333565
78.112972,3.31662479,3.08801589,0.478130636,3.08736678,3.08389981,3.08324984
78.123464,2.82842712,3.08794814,-0.509432048,3.0872981,3.0838149,3.083164
78.133956,3.31662479,3.08788109,0.478271571,3.08723013,3.08372999,3.08307814
78.144447,3,3.08781481,-0.296335638,3.08716291,3.08364507,3.08299229
78.154939,3.16227766,3.08774932,0.272998794,3.08709648,3.08356013,3.0829064
78.16543,3.16227766,3.08768468,0.273117149,3.0870309,3.08347519,3.08282052
78.175922,2.23606798,3.08762095,-0.922796277,3.08696622,3.08339023,3.0827346
78.186414,2.44948974,3.08755818,-0.798791859,3.0869025,3.08330526,3.08264868
78.196905,2.23606798,3.08749644,-0.922728815,3.08683981,3.08322029,3.08256275
78.207397,3.31662479,3.08743581,0.478736861,3.08677822,3.0831353,3.08247679
78.217888,3.87298335,3.08737636,0.886344734,3.08671781,3.0830503,3.08239083
78.22838,3.46410162,3.08731817,0.613826886,3.08665866,3.08296528,3.08230484
78.238872,3.31662479,3.08726134,0.478919046,3.08660086,3.08288026,3.08221884
78.249363,2.82842712,3.08720597,-0.508703102,3.08654452,3.08279522,3.08213283
78.259855,4,3.08715217,0.955430704,3.08648975,3.08271017,3.0820468
78.270346,2.64575131,3.08710007,-0.664340844,3.08643667,3.08262512,3.08196076
78.280838,4,3.08704979,0.955484282,3.08638541,3.08254004,3.08187469
78.29133,3.60555128,3.08700148,0.720104015,3.08633612,3.08245495,3.08178861
78.301821,2.82842712,3.08695532,-0.508456681,3.08628898,3.08236986,3.08170252
78.312313,3.60555128,3.08691147,0.72016651,3.08624414,3.08228474,3.08161641
78.322804,3.74165739,3.08687015,0.809189247,3.08620182,3.08219963,3.08153029
78.333296,4,3.08683156,0.955598472,3.08616224,3.08211449,3.08144414
78.343788,4.35889894,3.08679596,1.12787543,3.08612564,3.08202934,3.08135798
78.354279,3.87298335,3.08676362,0.88669032,3.0860923,3.08194418,3.08127181
78.364771,3.31662479,3.08673485,0.47946839,3.08606252,3.08185901,3.08118561
78.375262,3.46410162,3.08671,0.614322077,3.08603666,3.08177382,3.08109941
78.385754,3.87298335,3.08668945,0.886732146,3.0860151,3.08168862,3.08101318
78.396246,3.16227766,3.08667364,0.274961856,3.08599827,3.0816034,3.08092693
78.406737,3.16227766,3.08666307,0.274981067,3.08598669,3.08151818,3.08084067
78.417229,3.87298335,3.08665833,0.886749693,3.08598093,3.08143294,3.08075439
78.42772,3.87298335,3.08666008,0.886748707,3.08598166,3.08134769,3.0806681
78.438212,3.60555128,3.08666911,0.720334757,3.08598967,3.08126242,3.08058178
78.448704,3,3.08668639,-0.294425531,3.08600592,3.08117714,3.08049545
78.459195,2.64575131,3.08671309,-0.664049531,3.08603159,3.08109185,3.08040911
78.469687,3,3.08675069,-0.294534699,3.08606816,3.08100654,3.08032274
78.480178,3.16227766,3.08680109,0.274730002,3.08611753,3.08092122,3.08023636
78.49067,3.60555128,3.08686679,0.720197531,3.0861822,3.08083588,3.08014995
78.501162,2.82842712,3.08695113,-0.508452562,3.08626551,3.08075053,3.08006353
78.511653,3.16227766,3.08705857,0.274260981,3.08637192,3.08066517,3.07997709
78.522145,3.60555128,3.08719517,0.719969515,3.08650749,3.08057979,3.07989063
78.532636,3.31662479,3.087369,0.478806628,3.0866803,3.0804944,3.07980416
78.543128,3.31662479,3.08759088,0.478574876,3.08690116,3.08040899,3.07971766
78.55362,3,3.08787491,-0.29643703,3.08718419,3.08032357,3.07963115
78.564111,3.31662479,3.08823924,0.47789701,3.08754752,3.08023814,3.07954462
78.574603,3.46410162,3.08870675,0.612694756,3.08801406,3.08015268,3.07945807
78.585094,3.16227766,3.08930526,0.270134048,3.08861162,3.08006722,3.0793715
78.595586,3.31662479,3.09006789,0.475979932,3.08937334,3.07998174,3.07928491
78.606078,3.46410162,3.09103229,0.610794012,3.09033686,3.07989624,3.0791983
78.616569,4,3.09223943,0.952764698,3.09154318,3.07981074,3.07911168
78.627061,3.87298335,3.09373203,0.882752127,3.09303502,3.07972521,3.07902503
78.637552,3.16227766,3.09555064,0.258315734,3.09485294,3.07963968,3.07893837
78.648044,3.16227766,3.09773091,0.254060523,3.0970326,3.07955412,3.07885168
78.658536,2.82842712,3.10029773,-0.521412125,3.09959888,3.07946855,3.07876498
78.669027,2.82842712,3.10326039,-0.524245421,3.1025611,3.07938297,3.07867826
78.679519,2.23606798,3.10660813,-0.933027415,3.10590849,3.07929736,3.07859151
78.69001,4.58257569,3.11030275,1.21337255,3.10960282,3.07921175,3.07850475
78.700502,2.44948974,3.11427595,-0.815344228,3.11357579,3.07912612,3.07841796
78.710994,3.46410162,3.11842239,0.587944919,3.11772203,3.07904047,3.07833116
78.721485,3.87298335,3.1225969,0.866248491,3.12189636,3.07895481,3.07824434
78.731977,2.82842712,3.1266144,-0.546065268,3.12591363,3.07886913,3.07815749
78.742468,2.82842712,3.13025098,-0.54938498,3.12954989,3.07878344,3.07807064
78.75296,3,3.13326051,-0.365048642,3.13255896,3.07869773,3.07798375
78.763452,2.44948974,3.13539964,-0.828196777,3.13469744,3.078612,3.07789684
78.773943,4.12310563,3.13646956,0.993295557,3.13576645,3.07852627,3.07780992
78.784435,3,3.13635873,-0.369267831,3.13565445,3.07844051,3.07772297
78.794926,2.64575131,3.1350703,-0.699513395,3.13436458,3.07835474,3.07763601
78.805418,2.64575131,3.13272118,-0.697832268,3.13201377,3.07826895,3.07754902
78.81591,3.74165739,3.12951354,0.782396223,3.12880424,3.07818314,3.07746201
78.826401,2.82842712,3.1256917,-0.545219752,3.12498037,3.07809733,3.07737499
78.836893,3,3.12150099,-0.348569919,3.12078752,3.07801149,3.07728794
78.847384,2.64575131,3.11716357,-0.686594686,3.11644793,3.07792564,3.07720087
78.857876,2,3.1128624,-1.05492294,3.11214458,3.07783977,3.07711378
78.868368,3,3.10874054,-0.329758306,3.10802058,3.07775388,3.07702666
78.878859,3.74165739,3.10490145,0.797969886,3.10417939,3.07766798,3.07693953
78.889351,3.16227766,3.10141168,0.246710318,3.10068761,3.07758206,3.07685238
78.899842,3.60555128,3.09830806,0.712210094,3.09758205,3.07749613,3.0767652
78.910334,3.46410162,3.09560014,0.607043227,3.09487227,3.07741017,3.076678
78.920826,3.16227766,3.09327775,0.262678335,3.09254812,3.0773242,3.07659078
78.931317,2,3.09131541,-1.04466043,3.09058408,3.07723822,3.07650355
78.941809,3.16227766,3.08967707,0.269444964,3.08894412,3.07715222,3.07641628
78.9523,2.82842712,3.08832205,-0.50979891,3.08758754,3.0770662,3.076329
78.962792,3.16227766,3.08720763,0.273989105,3.08647161,3.07698016,3.07624169
78.973284,3,3.08629297,-0.293756656,3.08555548,3.07689411,3.07615436
78.983775,3.74165739,3.08554069,0.810010307,3.08480176,3.07680805,3.07606702
78.994267,2.82842712,3.08491787,-0.506449151,3.08417753,3.07672196,3.07597965
79.004758,3.87298335,3.08439699,0.888023848,3.08365526,3.07663586,3.07589226
79.01525,4.12310563,3.08395538,1.01938719,3.08321228,3.07654974,3.07580484
79.025742,2.82842712,3.08357515,-0.505121791,3.08283067,3.0764636,3.0757174
79.036233,3.46410162,3.08324237,0.617137948,3.08249653,3.07637745,3.07562995
79.046725,3.60555128,3.08294635,0.722914189,3.08219915,3.07629127,3.07554246
79.057216,3.31662479,3.08267917,0.483679256,3.08193061,3.07620509,3.07545496
79.067708,3.16227766,3.08243482,0.282564751,3.08168491,3.07611888,3.07536743
79.0782,2.64575131,3.08220893,-0.660649389,3.08145766,3.07603266,3.07527988
79.088691,3,3.08199822,-0.286353313,3.08124559,3.07594642,3.07519231
79.099183,2.64575131,3.0818002,-0.660339977,3.08104621,3.07586016,3.07510472
79.109674,3,3.08161301,-0.285679914,3.08085766,3.0757739,3.07501711
79.120166,3.46410162,3.08143517,0.61860039,3.08067845,3.0756876,3.07492947
79.130658,3.31662479,3.08126553,0.485138392,3.08050744,3.07560129,3.0748418
79.141149,2.64575131,3.08110315,-0.659811976,3.08034369,3.07551497,3.07475412
79.151641,2.23606798,3.08094723,-0.919173133,3.08018638,3.07542862,3.07466641
79.162132,3,3.08079711,-0.284248322,3.08003488,3.07534227,3.07457869
79.172624,2.44948974,3.0806522,-0.794457336,3.07988858,3.07525589,3.07449093
79.183116,2.82842712,3.08051202,-0.502080567,3.07974701,3.07516949,3.07440315
79.193607,2.23606798,3.08037614,-0.918862429,3.07960974,3.07508308,3.07431536
79.204099,3.46410162,3.08024415,0.619562316,3.07947635,3.07499665,3.07422753
79.21459,3.60555128,3.08011574,0.724869326,3.07934653,3.07491021,3.07413969
79.225082,3.31662479,3.07999056,0.486450645,3.07921994,3.07482374,3.07405182
79.235574,4.24264069,3.07986837,1.07831921,3.07909633,3.07473725,3.07396393
79.246065,3,3.07974892,-0.282398515,3.07897547,3.07465076,3.07387602
79.256557,3.16227766,3.07963198,0.287481618,3.0788571,3.07456424,3.07378808
79.267048,3.74165739,3.07951737,0.813719867,3.07874106,3.0744777,3.07370012
79.27754,3.60555128,3.07940488,0.725359495,3.07862714,3.07439115,3.07361214
79.288032,3,3.07929437,-0.281592552,3.07851518,3.07430457,3.07352413
79.298523,3.16227766,3.07918569,0.288256776,3.07840506,3.07421799,3.0734361
79.309015,2.64575131,3.0790787,-0.658276075,3.07829662,3.07413138,3.07334804
79.319506,3.46410162,3.07897329,0.620587077,3.07818976,3.07404476,3.07325997
79.329998,3.16227766,3.07886934,0.288804986,3.07808434,3.07395812,3.07317187
79.34049,3.16227766,3.07876675,0.288982548,3.07798028,3.07387146,3.07308374
79.350981,2,3.07866543,-1.03858819,3.0778775,3.07378479,3.0729956
79.361473,3.87298335,3.07856529,0.891301325,3.07777588,3.07369809,3.07290742
79.371964,3.16227766,3.07846627,0.289501965,3.07767537,3.07361138,3.07281923
79.382456,3.16227766,3.07836828,0.289671163,3.07757589,3.07352465,3.07273101
79.392948,3.60555128,3.07827125,0.726140497,3.07747737,3.0734379,3.07264276
79.403439,3.31662479,3.07817515,0.488313055,3.07737976,3.07335114,3.0725545
79.413931,3,3.07807989,-0.279427799,3.077283,3.07326435,3.07246621
79.424422,3.46410162,3.07798545,0.621382461,3.07718704,3.07317756,3.0723779
79.434914,3.87298335,3.07789176,0.891679083,3.07709183,3.07309074,3.07228956
79.445406,3.46410162,3.07779878,0.62153265,3.07699733,3.0730039,3.07220119
79.455897,2.82842712,3.07770648,-0.49927884,3.0769035,3.07291705,3.07211281
79.466389,3.60555128,3.07761482,0.726592361,3.07681029,3.07283017,3.0720244
79.47688,2,3.07752376,-1.03803842,3.07671769,3.07274329,3.07193597
79.487372,3.16227766,3.07743326,0.291280612,3.07662565,3.07265638,3.07184751
79.497864,2.82842712,3.07734331,-0.498915008,3.07653414,3.07256945,3.07175902
79.508355,2.82842712,3.07725388,-0.498825371,3.07644314,3.07248252,3.07167052
79.518847,3,3.07716492,-0.277785745,3.07635261,3.07239555,3.07158199
79.529338,3,3.07707643,-0.27762643,3.07626255,3.07230858,3.07149344
79.53983,3.31662479,3.07698838,0.489526719,3.07617292,3.07222158,3.07140486
79.550322,3.60555128,3.07690075,0.727083577,3.0760837,3.07213457,3.07131625
79.560813,2.44948974,3.07681352,-0.792037738,3.07599488,3.07204754,3.07122763
79.571305,3,3.07672667,-0.276995789,3.07590642,3.07196049,3.07113897
79.581796,2.82842712,3.07664019,-0.498209857,3.07581834,3.07187343,3.0710503
79.592288,3.46410162,3.07655404,0.622533188,3.07573058,3.07178634,3.0709616
79.60278,3.16227766,3.07646824,0.292932457,3.07564315,3.07169924,3.07087288
79.613271,2.82842712,3.07638275,-0.497951433,3.07555604,3.07161213,3.07078413
79.623763,3,3.07629757,-0.276220149,3.07546923,3.07152499,3.07069536
79.634254,3.16227766,3.07621269,0.293368321,3.0753827,3.07143784,3.07060657
79.644746,3.87298335,3.07612808,0.892667501,3.07529645,3.07135067,3.07051774
79.655238,2.82842712,3.07604374,-0.497610908,3.07521046,3.07126348,3.07042889
79.665729,3.87298335,3.07595967,0.892761824,3.07512473,3.07117628,3.07034003
79.676221,2.64575131,3.07587584,-0.655838801,3.07503923,3.07108905,3.07025113
79.686712,2.64575131,3.07579227,-0.65577508,3.07495398,3.07100181,3.07016222
79.697204,3.16227766,3.07570891,0.294225673,3.07486895,3.07091455,3.07007328
79.707696,3.31662479,3.07562579,0.490916494,3.07478413,3.07082727,3.06998431
79.718187,3.60555128,3.07554288,0.728016752,3.07469954,3.07073999,3.06989532
79.728679,3.16227766,3.07546018,0.294648056,3.07461513,3.07065267,3.0698063
79.73917,3.31662479,3.07537769,0.491169111,3.07453094,3.07056535,3.06971727
79.749662,2.82842712,3.07529539,-0.4968584,3.07444692,3.070478,3.0696282
79.760154,4.12310563,3.07521329,1.02366613,3.07436309,3.07039064,3.06953911
79.770645,3.74165739,3.07513137,0.816410447,3.07427944,3.07030327,3.06945
79.781137,3,3.07504962,-0.273951866,3.07419596,3.07021587,3.06936086
79.791628,3.16227766,3.07496806,0.295481974,3.07411265,3.07012846,3.0692717
79.80212,2.44948974,3.07488666,-0.79082041,3.0740295,3.07004103,3.06918251
79.812612,3.60555128,3.07480543,0.728523058,3.07394651,3.06995358,3.0690933
79.823103,3.46410162,3.07472436,0.624001002,3.07386368,3.06986612,3.06900407
79.833595,3.16227766,3.07464345,0.296030761,3.07378099,3.06977863,3.0689148
79.844086,2.23606798,3.07456269,-0.915693571,3.07369845,3.06969114,3.06882553
79.854578,2.64575131,3.07448208,-0.654775358,3.07361605,3.06960362,3.06873621
79.86507,3.60555128,3.07440161,0.728800153,3.07353379,3.06951609,3.06864688
79.875561,3.31662479,3.0743213,0.492243328,3.07345166,3.06942854,3.06855753
79.886053,3,3.07424111,-0.272472222,3.07336967,3.06934097,3.06846814
79.896544,2.64575131,3.07416107,-0.654530183,3.07328781,3.0692534,3.06837874
79.907036,2.44948974,3.07408116,-0.790310961,3.07320607,3.0691658,3.06828931
79.917528,3.46410162,3.07400138,0.62458005,3.07312445,3.06907818,3.06819985
79.928019,3.87298335,3.07392173,0.893902464,3.07304297,3.06899055,3.06811037
79.938511,3.46410162,3.07384221,0.624707459,3.07296159,3.0689029,3.06802087
79.949002,3.46410162,3.07376281,0.624771001,3.07288034,3.06881524,3.06793134
79.959494,4.35889894,3.07368353,1.13367341,3.07279919,3.06872755,3.06784179
79.969986,3,3.07360438,-0.271301263,3.07271816,3.06863985,3.06775221
79.980477,3,3.07352534,-0.271155571,3.07263725,3.06855214,3.06766261
79.990969,3,3.07344642,-0.271010002,3.07255644,3.06846441,3.06757298
80.00146,2.82842712,3.07336762,-0.494914636,3.07247574,3.06837667,3.06748334
80.011952,3.31662479,3.07328893,0.493290849,3.07239514,3.0682889,3.06739366
80.022444,3.31662479,3.07321035,0.493370492,3.07231465,3.06820112,3.06730396
80.032935,2.82842712,3.07313189,-0.494676421,3.07223426,3.06811333,3.06721424
80.043427,4.12310563,3.07305353,1.0247205,3.07215397,3.06802552,3.06712449
80.053918,2.82842712,3.07297528,-0.494518107,3.07207379,3.0679377,3.06703472
80.06441,3.87298335,3.07289714,0.894475381,3.0719937,3.06784985,3.06694492
80.074902,3.16227766,3.0728191,0.299096236,3.07191371,3.06776199,3.0668551
80.085393,2.44948974,3.07274118,-0.789462751,3.07183382,3.06767412,3.06676526
80.095885,3.31662479,3.07266335,0.493924529,3.07175402,3.06758623,3.06667539
80.106376,2.82842712,3.07258563,-0.494123982,3.07167432,3.06749833,3.0665855
80.116868,2.44948974,3.07250801,-0.789315064,3.07159471,3.0674104,3.06649558
80.12736,2.82842712,3.0724305,-0.493966973,3.07151519,3.06732246,3.06640564
80.137851,2.44948974,3.07235309,-0.789216917,3.07143578,3.06723452,3.06631568
80.148343,2.64575131,3.07227577,-0.6530884,3.07135645,3.06714654,3.06622568
80.158834,3.31662479,3.07219856,0.494394812,3.07127721,3.06705857,3.06613568
80.169326,2.82842712,3.07212144,-0.493654049,3.07119807,3.06697057,3.06604564
80.179818,2.82842712,3.07204443,-0.493576036,3.07111901,3.06688255,3.06595557
80.190309,2.82842712,3.07196752,-0.493498118,3.07104005,3.06679453,3.06586549
80.200801,2.23606798,3.0718907,-0.914233406,3.07096117,3.06670648,3.06577538
80.211292,2.64575131,3.07181398,-0.652734765,3.07088239,3.06661843,3.06568525
80.221784,3.16227766,3.07173736,0.300899152,3.07080368,3.06653035,3.06559509
80.232276,2,3.07166083,-1.03521053,3.07072507,3.06644226,3.06550491
80.242767,3.60555128,3.07158441,0.730730362,3.07064656,3.06635416,3.06541471
80.253259,3.16227766,3.07150808,0.301279899,3.07056812,3.06626604,3.06532447
80.26375,2,3.07143186,-1.03509993,3.07048978,3.06617792,3.06523423
80.274242,3.60555128,3.07135572,0.730886829,3.07041152,3.06608977,3.06514395
80.284734,2.82842712,3.07127968,-0.492800725,3.07033335,3.06600161,3.06505364
80.295225,3.31662479,3.07120374,0.495399886,3.07025527,3.06591344,3.06496332
80.305717,2.44948974,3.0711279,-0.78844033,3.07017727,3.06582525,3.06487297
80.316208,3.46410162,3.07105215,0.626936568,3.07009937,3.06573705,3.06478261
80.3267,3.16227766,3.0709765,0.302160815,3.07002154,3.06564883,3.06469221
80.337192,3.74165739,3.07090095,0.818997216,3.06994381,3.0655606,3.06460179
80.347683,3.60555128,3.0708255,0.731249465,3.06986617,3.06547236,3.06451135
80.358175,3.31662479,3.07075013,0.495857495,3.06978861,3.0653841,3.06442088
80.368666,3.16227766,3.07067488,0.302659514,3.06971114,3.06529583,3.0643304
80.379158,3.31662479,3.07059971,0.496009151,3.06963376,3.06520754,3.06423988
80.38965,3.16227766,3.07052464,0.302907602,3.06955646,3.06511924,3.06414935
80.400141,3.31662479,3.07044968,0.496160365,3.06947926,3.06503093,3.06405879
80.410633,3.46410162,3.07037481,0.627476537,3.06940214,3.0649426,3.06396821
80.421124,2.82842712,3.07030005,-0.491805775,3.06932511,3.06485427,3.06387761
80.431616,4.24264069,3.07022537,1.08278129,3.06924817,3.06476592,3.06378697
80.442108,3.46410162,3.0701508,0.627655015,3.06917132,3.06467755,3.06369632
80.452599,3.31662479,3.07007633,0.496536465,3.06909456,3.06458918,3.06360565
80.463091,3,3.07000196,-0.264578826,3.06901788,3.06450079,3.06351495
80.473582,2.82842712,3.06992769,-0.491427069,3.06894131,3.06441239,3.06342423
80.484074,3.16227766,3.06985352,0.304013396,3.06886481,3.06432397,3.06333348
80.494566,4.24264069,3.06977944,1.08298719,3.06878841,3.06423554,3.06324271
80.505057,1.73205081,3.06970548,-1.15657022,3.06871211,3.06414711,3.06315193
80.515549,2.82842712,3.06963161,-0.491125737,3.06863589,3.06405865,3.06306111
80.52604,3.16227766,3.06955786,0.304499267,3.06855977,3.06397019,3.06297028
80.536532,4,3.0694842,0.964632471,3.06848373,3.06388171,3.06287942
80.547024,2.82842712,3.06941064,-0.490900717,3.06840779,3.06379322,3.06278854
80.557515,2.82842712,3.06933719,-0.490825904,3.06833195,3.06370473,3.06269764
80.568007,3.31662479,3.06926385,0.497353943,3.0682562,3.06361621,3.06260671
80.578498,3.46410162,3.06919061,0.628419449,3.06818055,3.0635277,3.06251576
80.58899,3.46410162,3.06911748,0.628477636,3.06810498,3.06343916,3.06242479
80.599482,3.16227766,3.06904445,0.30534114,3.06802952,3.06335061,3.06233379
80.609973,3.31662479,3.06897153,0.497647722,3.06795415,3.06326206,3.06224278
80.620465,2.82842712,3.06889872,-0.490379035,3.06787888,3.06317349,3.06215174
80.630956,3.31662479,3.06882603,0.497793897,3.06780371,3.06308492,3.06206068
80.641448,3.46410162,3.06875343,0.628767192,3.06772863,3.06299632,3.0619696
80.65194,3.16227766,3.06868095,0.305935792,3.06765366,3.06290772,3.06187849
80.662431,3.31662479,3.06860859,0.498012252,3.06757879,3.06281912,3.06178737
80.672923,3.31662479,3.06853633,0.498084794,3.06750401,3.06273049,3.06169622
80.683414,3,3.06846419,-0.261656624,3.06742934,3.06264187,3.06160505
80.693906,2.23606798,3.06839216,-0.912318025,3.06735476,3.06255322,3.06151385
80.704398,3.87298335,3.06832024,0.89703016,3.06728029,3.06246457,3.06142264
80.714889,3.16227766,3.06824844,0.306641839,3.06720593,3.06237591,3.0613314
80.725381,3.31662479,3.0681768,0.498445574,3.06713171,3.06228724,3.06124014
80.735872,3.31662479,3.06810524,0.498517354,3.06705756,3.06219857,3.06114887
80.746364,2.82842712,3.06803379,-0.489496335,3.06698351,3.06210987,3.06105756
80.756856,3,3.06796245,-0.260696095,3.06690956,3.06202117,3.06096624
80.767347,2.64575131,3.06789125,-0.64972297,3.06683573,3.06193247,3.0608749
80.777839,2.82842712,3.06782016,-0.489278073,3.066762,3.06184375,3.06078353
80.78833,2.82842712,3.06774919,-0.489205549,3.06668839,3.06175503,3.06069215
80.798822,2.23606798,3.06767835,-0.911926735,3.06661488,3.06166629,3.06060073
80.809314,3.87298335,3.06760762,0.89742728,3.06654148,3.06157754,3.0605093
80.819805,3.46410162,3.06753703,0.62973374,3.0664682,3.06148879,3.06041786
80.830297,3.46410162,3.06746656,0.629789692,3.06639503,3.06140003,3.06032638
80.840788,2.23606798,3.06739622,-0.911772034,3.06632198,3.06131127,3.06023489
80.85128,4.12310563,3.067326,1.02751137,3.06624904,3.06122249,3.06014338
80.861772,3.46410162,3.06725591,0.629956905,3.06617621,3.0611337,3.06005184
80.872263,3.46410162,3.06718596,0.630012424,3.06610351,3.06104491,3.05996029
80.882755,3.74165739,3.06711613,0.821304605,3.06603091,3.06095611,3.05986871
80.893246,3.31662479,3.06704644,0.499578168,3.06595845,3.06086731,3.05977712
80.903738,3.74165739,3.06697688,0.821389374,3.0658861,3.06077849,3.0596855
80.91423,4.35889894,3.06690746,1.13665803,3.06581387,3.06068967,3.05959386
80.924721,3.16227766,3.06683817,0.308932823,3.06574176,3.06060084,3.0595022
80.935213,3,3.06676902,-0.258397014,3.06566978,3.06051201,3.05941052
80.945704,2.44948974,3.06670001,-0.785627307,3.06559793,3.06042317,3.05931883
80.956196,3.16227766,3.06663113,0.309267729,3.06552619,3.06033432,3.05922711
80.966688,4,3.0665624,0.966145747,3.06545459,3.06024546,3.05913536
80.977179,4,3.06649381,0.966181241,3.06538312,3.06015661,3.05904361
80.987671,3.46410162,3.06642536,0.630615774,3.06531177,3.06006774,3.05895183
80.998162,3.16227766,3.06635706,0.309710508,3.06524056,3.05997887,3.05886004
81.008654,3.31662479,3.0662889,0.500335775,3.06516947,3.05988999,3.05876821
81.019146,2.64575131,3.06622089,-0.648436258,3.06509852,3.0598011,3.05867637
81.029637,2.44948974,3.06615304,-0.785279117,3.06502771,3.05971222,3.05858452
81.040129,3.74165739,3.06608532,0.82193191,3.06495702,3.05962332,3.05849264
81.05062,3.60555128,3.06601777,0.734529446,3.06488649,3.05953443,3.05840075
81.061112,4.89897949,3.06595036,1.35389406,3.06481608,3.05944552,3.05830883
81.071604,3.87298335,3.06588311,0.898387577,3.06474582,3.05935661,3.05821689
81.082095,3.60555128,3.06581602,0.734666767,3.0646757,3.05926771,3.05812495
81.092587,3.74165739,3.06574908,0.82213643,3.06460572,3.05917879,3.05803297
81.103078,3.16227766,3.0656823,0.310797937,3.06453589,3.05908987,3.05794098
81.11357,3.60555128,3.06561568,0.734803098,3.06446619,3.05900094,3.05784897
81.124062,3.31662479,3.06554922,0.501074412,3.06439665,3.05891201,3.05775694
81.134553,3.46410162,3.06548294,0.631362558,3.06432726,3.05882309,3.05766489
81.145045,3.31662479,3.06541681,0.501206528,3.06425801,3.05873415,3.05757282
81.155536,3.46410162,3.06535085,0.631467152,3.06418893,3.05864522,3.05748074
81.166028,3.31662479,3.06528506,0.501337943,3.06411998,3.05855627,3.05738864
81.17652,2.82842712,3.06521943,-0.486613099,3.0640512,3.05846733,3.05729651
81.187011,3.46410162,3.06515399,0.63162301,3.06398257,3.05837839,3.05720438
81.197503,3.74165739,3.06508871,0.822537949,3.0639141,3.05828944,3.05711222
81.207994,3.46410162,3.06502361,0.631726208,3.06384579,3.05820049,3.05702005
81.218486,4.24264069,3.06495869,1.08521058,3.06377764,3.05811154,3.05692785
81.228978,3,3.06489394,-0.254742892,3.06370965,3.05802258,3.05683563
81.239469,3.31662479,3.06482938,0.501792197,3.06364184,3.05793363,3.05674341
81.249961,3.16227766,3.064765,0.312270176,3.06357418,3.05784467,3.05665116
81.260452,2.64575131,3.0647008,-0.647263079,3.0635067,3.05775572,3.0565589
81.270944,2.64575131,3.06463679,-0.647213628,3.06343938,3.05766676,3.05646661
81.281436,2.64575131,3.06457297,-0.647164319,3.06337223,3.0575778,3.05637431
81.291927,2.44948974,3.06450934,-0.78423185,3.06330526,3.05748884,3.056282
81.302419,3.87298335,3.06444589,0.899187106,3.06323846,3.05739988,3.05618966
81.31291,2,3.06438265,-1.03168922,3.06317184,3.05731093,3.05609732
81.323402,3.31662479,3.0643196,0.502299902,3.0631054,3.05722197,3.05600495
81.333894,3.31662479,3.06425674,0.502362465,3.06303914,3.057133,3.05591256
81.344385,3.87298335,3.0641941,0.89932711,3.06297306,3.05704405,3.05582016
81.354877,3.16227766,3.06413164,0.313282648,3.06290717,3.05695509,3.05572774
81.365368,3.46410162,3.0640694,0.632481,3.06284147,3.05686614,3.05563531
81.37586,2.64575131,3.06400736,-0.646727181,3.06277595,3.05677718,3.05554286
81.386352,3.60555128,3.06394552,0.735938687,3.06271062,3.05668823,3.05545039
81.396843,2.44948974,3.06388391,-0.783832996,3.06264549,3.05659928,3.05535791
81.407335,3.16227766,3.0638225,0.313775655,3.06258055,3.05651033,3.05526541
81.417826,3.60555128,3.06376131,0.736063833,3.06251582,3.05642139,3.0551729
81.428318,3.46410162,3.06370033,0.632772694,3.06245127,3.05633244,3.05508037
81.43881,2.82842712,3.06363958,-0.484987063,3.06238693,3.05624349,3.05498782
81.449301,2.23606798,3.06357905,-0.909676355,3.0623228,3.05615456,3.05489526
81.459793,3.60555128,3.06351874,0.736228591,3.06225887,3.05606562,3.05480268
81.470284,3.16227766,3.06345866,0.314354895,3.06219515,3.0559767,3.05471009
81.480776,3.31662479,3.06339881,0.503215643,3.06213164,3.05588776,3.05461748
81.491268,2.23606798,3.06333919,-0.909544506,3.06206834,3.05579884,3.05452486
81.501759,3,3.0632798,-0.251554774,3.06200527,3.05570992,3.05443222
81.512251,2.64575131,3.06322065,-0.646118676,3.0619424,3.055621,3.05433957
81.522742,2.82842712,3.06316175,-0.484494195,3.06187976,3.0555321,3.05424691
81.533234,3.46410162,3.06310308,0.63324445,3.06181734,3.05544319,3.05415422
81.543726,3,3.06304466,-0.251086954,3.06175514,3.05535428,3.05406152
81.554217,3,3.06298649,-0.250971091,3.06169318,3.05526539,3.05396881
81.564709,2.64575131,3.06292856,-0.645892601,3.06163144,3.0551765,3.05387608
81.5752,2.64575131,3.0628709,-0.645847959,3.06156995,3.05508762,3.05378335
[truncated: 423,158 more chars]
