# Supplementary material for: Phase Stability of Iron Nitride Fe4N at High Pressure—Pressure-Dependent Evolution of Phase Equilibria in the Fe–N System
Source: Materials (Basel). 2021 Jul 15;14(14):3963. doi: 10.3390/ma14143963 (PMC8307547; doi:10.3390/ma14143963)
Supplement: Supplementary file 1 [file materials-14-03963-s001.zip › xrd_data/2-1000_pawley.txt]

'y-axis saved as Sqrt(y)
'x,Yobs,Ycalc,Diff,epsilon_pawley,Bkg
20,10.9544512,0,0,0,0
20.010492,11,0,0,0,0
20.020983,10.5830052,0,0,0,0
20.031475,11.3137085,0,0,0,0
20.041966,11.6619038,0,0,0,0
20.052458,10.7238053,0,0,0,0
20.06295,11.7046999,0,0,0,0
20.073441,11.3137085,0,0,0,0
20.083933,11.1355287,0,0,0,0
20.094424,10.6770783,0,0,0,0
20.104916,11.0905365,0,0,0,0
20.115408,11.1803399,0,0,0,0
20.125899,10.8166538,0,0,0,0
20.136391,11.6619038,0,0,0,0
20.146882,11.2694277,0,0,0,0
20.157374,11.3578167,0,0,0,0
20.167866,11.1355287,0,0,0,0
20.178357,11.4891253,0,0,0,0
20.188849,10.8627805,0,0,0,0
20.19934,11.045361,0,0,0,0
20.209832,10.4403065,0,0,0,0
20.220324,10.9544512,0,0,0,0
20.230815,10.7238053,0,0,0,0
20.241307,11.1803399,0,0,0,0
20.251798,11.7046999,0,0,0,0
20.26229,11.8743421,0,0,0,0
20.272782,12.083046,0,0,0,0
20.283273,11.4017543,0,0,0,0
20.293765,12.0415946,0,0,0,0
20.304256,11.4017543,0,0,0,0
20.314748,11.4891253,0,0,0,0
20.32524,11.045361,0,0,0,0
20.335731,11.2249722,0,0,0,0
20.346223,10.9087121,0,0,0,0
20.356714,11.2249722,0,0,0,0
20.367206,11.5758369,0,0,0,0
20.377698,11.7898261,0,0,0,0
20.388189,12.1655251,0,0,0,0
20.398681,11.7473401,0,0,0,0
20.409172,11.4017543,0,0,0,0
20.419664,11.7046999,0,0,0,0
20.430156,11.9163753,0,0,0,0
20.440647,11.4017543,0,0,0,0
20.451139,11.5758369,0,0,0,0
20.46163,11.2694277,0,0,0,0
20.472122,10.7238053,0,0,0,0
20.482614,11.2249722,0,0,0,0
20.493105,11.9163753,0,0,0,0
20.503597,11.3137085,0,0,0,0
20.514088,10.9087121,0,0,0,0
20.52458,12.2065556,0,0,0,0
20.535072,11.5325626,0,0,0,0
20.545563,11.4017543,0,0,0,0
20.556055,11.2694277,0,0,0,0
20.566546,11.3578167,0,0,0,0
20.577038,10.9087121,0,0,0,0
20.58753,10.9544512,0,0,0,0
20.598021,11.1355287,0,0,0,0
20.608513,11.5325626,0,0,0,0
20.619004,10.4880885,0,0,0,0
20.629496,11.2694277,0,0,0,0
20.639988,10.7703296,0,0,0,0
20.650479,12.083046,0,0,0,0
20.660971,10.7703296,0,0,0,0
20.671462,11.045361,0,0,0,0
20.681954,10.9544512,0,0,0,0
20.692446,12.0415946,0,0,0,0
20.702937,10.7238053,0,0,0,0
20.713429,11.2694277,0,0,0,0
20.72392,11.2694277,0,0,0,0
20.734412,11.2694277,0,0,0,0
20.744904,11.2249722,0,0,0,0
20.755395,11.2249722,0,0,0,0
20.765887,11.2694277,0,0,0,0
20.776378,10.7703296,0,0,0,0
20.78687,11.9163753,0,0,0,0
20.797362,11.3137085,0,0,0,0
20.807853,10.6301458,0,0,0,0
20.818345,11.61895,0,0,0,0
20.828836,11.1803399,0,0,0,0
20.839328,11.5758369,0,0,0,0
20.84982,11.8321596,0,0,0,0
20.860311,11.4891253,0,0,0,0
20.870803,10.5356538,0,0,0,0
20.881294,10.1488916,0,0,0,0
20.891786,11.6619038,0,0,0,0
20.902278,10.6301458,0,0,0,0
20.912769,11.2694277,0,0,0,0
20.923261,11.7046999,0,0,0,0
20.933752,11.7473401,0,0,0,0
20.944244,11.9163753,0,0,0,0
20.954736,11.4455231,0,0,0,0
20.965227,12.4096736,0,0,0,0
20.975719,11.3578167,0,0,0,0
20.98621,11.6619038,0,0,0,0
20.996702,10.3923048,0,0,0,0
21.007194,11.6619038,0,0,0,0
21.017685,11.1803399,0,0,0,0
21.028177,11.7898261,0,0,0,0
21.038668,11.1355287,0,0,0,0
21.04916,10.6301458,0,0,0,0
21.059652,11.5758369,0,0,0,0
21.070143,10.6770783,0,0,0,0
21.080635,10.9087121,0,0,0,0
21.091126,12.2065556,0,0,0,0
21.101618,11.7898261,0,0,0,0
21.11211,11.2249722,0,0,0,0
21.122601,11.4891253,0,0,0,0
21.133093,11.61895,0,0,0,0
21.143584,10.8166538,0,0,0,0
21.154076,11.9163753,0,0,0,0
21.164568,10.8166538,0,0,0,0
21.175059,11.3137085,0,0,0,0
21.185551,11.4891253,0,0,0,0
21.196042,10.8627805,0,0,0,0
21.206534,11.61895,0,0,0,0
21.217026,11.2249722,0,0,0,0
21.227517,11.2694277,0,0,0,0
21.238009,11.4455231,0,0,0,0
21.2485,11.61895,0,0,0,0
21.258992,11.61895,0,0,0,0
21.269484,12.0415946,0,0,0,0
21.279975,10.5356538,0,0,0,0
21.290467,11.4891253,0,0,0,0
21.300958,11,0,0,0,0
21.31145,12.2474487,0,0,0,0
21.321942,11.4455231,0,0,0,0
21.332433,11.1803399,0,0,0,0
21.342925,11.4455231,0,0,0,0
21.353416,10.9087121,0,0,0,0
21.363908,11.7046999,0,0,0,0
21.3744,11.4455231,0,0,0,0
21.384891,11.9163753,0,0,0,0
21.395383,11.0905365,0,0,0,0
21.405874,11.7046999,0,0,0,0
21.416366,10.9087121,0,0,0,0
21.426858,11.4455231,0,0,0,0
21.437349,11.7046999,0,0,0,0
21.447841,10.9544512,0,0,0,0
21.458332,11.5758369,0,0,0,0
21.468824,12.4498996,0,0,0,0
21.479316,11.3578167,0,0,0,0
21.489807,11.5758369,0,0,0,0
21.500299,11,0,0,0,0
21.51079,11.3137085,0,0,0,0
21.521282,10.4880885,0,0,0,0
21.531774,11.5325626,0,0,0,0
21.542265,12.2065556,0,0,0,0
21.552757,11.0905365,0,0,0,0
21.563248,11.8321596,0,0,0,0
21.57374,11.4891253,0,0,0,0
21.584232,12.083046,0,0,0,0
21.594723,11.3578167,0,0,0,0
21.605215,11.9582607,0,0,0,0
21.615706,10.7703296,0,0,0,0
21.626198,11.8321596,0,0,0,0
21.63669,12.2065556,0,0,0,0
21.647181,11.61895,0,0,0,0
21.657673,10.6770783,0,0,0,0
21.668164,10.9087121,0,0,0,0
21.678656,11.8743421,0,0,0,0
21.689148,11.7473401,0,0,0,0
21.699639,12.3693169,0,0,0,0
21.710131,11.8743421,0,0,0,0
21.720622,11.5758369,0,0,0,0
21.731114,11.1355287,0,0,0,0
21.741606,11.61895,0,0,0,0
21.752097,11.2249722,0,0,0,0
21.762589,11.1355287,0,0,0,0
21.77308,11.5758369,0,0,0,0
21.783572,11.2249722,0,0,0,0
21.794064,11.4455231,0,0,0,0
21.804555,10.9087121,0,0,0,0
21.815047,11.61895,0,0,0,0
21.825538,11.7046999,0,0,0,0
21.83603,10.4403065,0,0,0,0
21.846522,12.9614814,0,0,0,0
21.857013,12.0415946,0,0,0,0
21.867505,11.4455231,0,0,0,0
21.877996,11.4891253,0,0,0,0
21.888488,11.4891253,0,0,0,0
21.89898,10.6770783,0,0,0,0
21.909471,11.61895,0,0,0,0
21.919963,11.7473401,0,0,0,0
21.930454,11.8321596,0,0,0,0
21.940946,11.1355287,0,0,0,0
21.951438,12.6491106,0,0,0,0
21.961929,11.4455231,0,0,0,0
21.972421,10.8627805,0,0,0,0
21.982912,11.7046999,0,0,0,0
21.993404,11.4891253,0,0,0,0
22.003896,11.4455231,0,0,0,0
22.014387,11.7898261,0,0,0,0
22.024879,12.2474487,0,0,0,0
22.03537,11.5758369,0,0,0,0
22.045862,10.8627805,0,0,0,0
22.056354,12.5299641,0,0,0,0
22.066845,11.2249722,0,0,0,0
22.077337,12.3693169,0,0,0,0
22.087828,12.1243557,0,0,0,0
22.09832,11.61895,0,0,0,0
22.108812,11.2694277,0,0,0,0
22.119303,11.6619038,0,0,0,0
22.129795,11.7473401,0,0,0,0
22.140286,11.8743421,0,0,0,0
22.150778,11.3137085,0,0,0,0
22.16127,10.8627805,0,0,0,0
22.171761,11.3137085,0,0,0,0
22.182253,11.4891253,0,0,0,0
22.192744,12.083046,0,0,0,0
22.203236,11.9163753,0,0,0,0
22.213728,12.2882057,0,0,0,0
22.224219,12.4498996,0,0,0,0
22.234711,11.9582607,0,0,0,0
22.245202,12.0415946,0,0,0,0
22.255694,11.4891253,0,0,0,0
22.266186,11.4455231,0,0,0,0
22.276677,11.1355287,0,0,0,0
22.287169,11.4891253,0,0,0,0
22.29766,11.4891253,0,0,0,0
22.308152,11.9163753,0,0,0,0
22.318644,11.9582607,0,0,0,0
22.329135,10.8166538,0,0,0,0
22.339627,11.6619038,0,0,0,0
22.350118,10.9544512,0,0,0,0
22.36061,11.3578167,0,0,0,0
22.371102,11.4455231,0,0,0,0
22.381593,10.6770783,0,0,0,0
22.392085,11.4891253,0,0,0,0
22.402576,11.2249722,0,0,0,0
22.413068,10.9544512,0,0,0,0
22.42356,11.045361,0,0,0,0
22.434051,10.5356538,0,0,0,0
22.444543,10.3923048,0,0,0,0
22.455034,12,0,0,0,0
22.465526,11.2694277,0,0,0,0
22.476018,11.6619038,0,0,0,0
22.486509,11.1803399,0,0,0,0
22.497001,11.4891253,0,0,0,0
22.507492,11.8321596,0,0,0,0
22.517984,11.5325626,0,0,0,0
22.528476,11.045361,0,0,0,0
22.538967,11.5758369,0,0,0,0
22.549459,11.7473401,0,0,0,0
22.55995,11.2249722,0,0,0,0
22.570442,11,0,0,0,0
22.580934,10.6770783,0,0,0,0
22.591425,11.1355287,0,0,0,0
22.601917,10.6770783,0,0,0,0
22.612408,11.7898261,0,0,0,0
22.6229,11.9163753,0,0,0,0
22.633392,11.0905365,0,0,0,0
22.643883,11.2249722,0,0,0,0
22.654375,11.7046999,0,0,0,0
22.664866,12.083046,0,0,0,0
22.675358,11.3578167,0,0,0,0
22.68585,10.8627805,0,0,0,0
22.696341,12,0,0,0,0
22.706833,11.7898261,0,0,0,0
22.717324,10.9087121,0,0,0,0
22.727816,11.3578167,0,0,0,0
22.738308,11.3137085,0,0,0,0
22.748799,11.61895,0,0,0,0
22.759291,11.1355287,0,0,0,0
22.769782,11.5325626,0,0,0,0
22.780274,10.5830052,0,0,0,0
22.790766,11.0905365,0,0,0,0
22.801257,11.5325626,0,0,0,0
22.811749,11.7046999,0,0,0,0
22.82224,11.4017543,0,0,0,0
22.832732,11.3578167,0,0,0,0
22.843224,11,0,0,0,0
22.853715,11.4455231,0,0,0,0
22.864207,11.2249722,0,0,0,0
22.874698,10.9544512,0,0,0,0
22.88519,11.4455231,0,0,0,0
22.895682,10.6770783,0,0,0,0
22.906173,11.1355287,0,0,0,0
22.916665,10.5356538,0,0,0,0
22.927156,11.8743421,0,0,0,0
22.937648,11.4455231,0,0,0,0
22.94814,11.8743421,0,0,0,0
22.958631,11.3137085,0,0,0,0
22.969123,11.4017543,0,0,0,0
22.979614,11.5325626,0,0,0,0
22.990106,11.2249722,0,0,0,0
23.000598,10.8166538,0,0,0,0
23.011089,11.4455231,0,0,0,0
23.021581,11.7046999,0,0,0,0
23.032072,11.2249722,0,0,0,0
23.042564,12,0,0,0,0
23.053056,11,0,0,0,0
23.063547,11.9582607,0,0,0,0
23.074039,11.1355287,0,0,0,0
23.08453,11.0905365,0,0,0,0
23.095022,12.3693169,0,0,0,0
23.105514,12.1243557,0,0,0,0
23.116005,12.2474487,0,0,0,0
23.126497,11.5325626,0,0,0,0
23.136988,11.7046999,0,0,0,0
23.14748,11.2249722,0,0,0,0
23.157972,11.7898261,0,0,0,0
23.168463,10.7238053,0,0,0,0
23.178955,11.3137085,0,0,0,0
23.189446,10.9087121,0,0,0,0
23.199938,10.8627805,0,0,0,0
23.21043,11.045361,0,0,0,0
23.220921,11.3578167,0,0,0,0
23.231413,10.7238053,0,0,0,0
23.241904,11.4455231,0,0,0,0
23.252396,10.5356538,0,0,0,0
23.262888,11.0905365,0,0,0,0
23.273379,11.1803399,0,0,0,0
23.283871,11.1355287,0,0,0,0
23.294362,11.8743421,0,0,0,0
23.304854,11.3578167,0,0,0,0
23.315346,11.61895,0,0,0,0
23.325837,11.1803399,0,0,0,0
23.336329,11.045361,0,0,0,0
23.34682,10.2469508,0,0,0,0
23.357312,11.4455231,0,0,0,0
23.367804,10.0498756,0,0,0,0
23.378295,11.1355287,0,0,0,0
23.388787,10.8166538,0,0,0,0
23.399278,11.4891253,0,0,0,0
23.40977,10.7238053,0,0,0,0
23.420262,11.61895,0,0,0,0
23.430753,10.3923048,0,0,0,0
23.441245,11.8321596,0,0,0,0
23.451736,10.7238053,0,0,0,0
23.462228,11.61895,0,0,0,0
23.47272,11.2249722,0,0,0,0
23.483211,10.8166538,0,0,0,0
23.493703,11.5758369,0,0,0,0
23.504194,10.8166538,0,0,0,0
23.514686,10.7238053,0,0,0,0
23.525178,11.9582607,0,0,0,0
23.535669,11.1803399,0,0,0,0
23.546161,12,0,0,0,0
23.556652,11.4891253,0,0,0,0
23.567144,11.1355287,0,0,0,0
23.577636,10.8627805,0,0,0,0
23.588127,11.5325626,0,0,0,0
23.598619,11.1803399,0,0,0,0
23.60911,10.5356538,0,0,0,0
23.619602,11.5758369,0,0,0,0
23.630094,10.3923048,0,0,0,0
23.640585,11.1355287,0,0,0,0
23.651077,11.1803399,0,0,0,0
23.661568,10.2956301,0,0,0,0
23.67206,10.3440804,0,0,0,0
23.682552,10.6770783,0,0,0,0
23.693043,10.7703296,0,0,0,0
23.703535,10.3923048,0,0,0,0
23.714026,10.3440804,0,0,0,0
23.724518,10.6770783,0,0,0,0
23.73501,10.4880885,0,0,0,0
23.745501,10.3923048,0,0,0,0
23.755993,10.5830052,0,0,0,0
23.766484,10.1488916,0,0,0,0
23.776976,11.045361,0,0,0,0
23.787468,11.0905365,0,0,0,0
23.797959,10.7703296,0,0,0,0
23.808451,10.3923048,0,0,0,0
23.818942,10.3440804,0,0,0,0
23.829434,11.3578167,0,0,0,0
23.839926,11.5325626,0,0,0,0
23.850417,9.59166305,0,0,0,0
23.860909,10.7703296,0,0,0,0
23.8714,10.7703296,0,0,0,0
23.881892,10.2956301,0,0,0,0
23.892384,10.2469508,0,0,0,0
23.902875,10.7238053,0,0,0,0
23.913367,11.045361,0,0,0,0
23.923858,10.4403065,0,0,0,0
23.93435,11.7473401,0,0,0,0
23.944842,10.7238053,0,0,0,0
23.955333,11.045361,0,0,0,0
23.965825,11.0905365,0,0,0,0
23.976316,10.8627805,0,0,0,0
23.986808,11,0,0,0,0
23.9973,11.2694277,0,0,0,0
24.007791,11.7046999,0,0,0,0
24.018283,10.0498756,0,0,0,0
24.028774,9.32737905,0,0,0,0
24.039266,11,0,0,0,0
24.049758,10.9544512,0,0,0,0
24.060249,9.8488578,0,0,0,0
24.070741,11,0,0,0,0
24.081232,11.61895,0,0,0,0
24.091724,10.2956301,0,0,0,0
24.102216,11.2249722,0,0,0,0
24.112707,11.3137085,0,0,0,0
24.123199,10.6301458,0,0,0,0
24.13369,10.7703296,0,0,0,0
24.144182,10.9544512,0,0,0,0
24.154674,11.7046999,0,0,0,0
24.165165,10.4880885,0,0,0,0
24.175657,10,0,0,0,0
24.186148,10.8166538,0,0,0,0
24.19664,10.5830052,0,0,0,0
24.207132,11.2249722,0,0,0,0
24.217623,10.8627805,0,0,0,0
24.228115,11.3137085,0,0,0,0
24.238606,10.3440804,0,0,0,0
24.249098,9.89949494,0,0,0,0
24.25959,10.4880885,0,0,0,0
24.270081,10.6770783,0,0,0,0
24.280573,11,0,0,0,0
24.291064,10.4880885,0,0,0,0
24.301556,10.7238053,0,0,0,0
24.312048,10.9544512,0,0,0,0
24.322539,9.38083152,0,0,0,0
24.333031,10.8166538,0,0,0,0
24.343522,10.198039,0,0,0,0
24.354014,10.1488916,0,0,0,0
24.364506,11,0,0,0,0
24.374997,10.6770783,0,0,0,0
24.385489,9.8488578,0,0,0,0
24.39598,10.0995049,0,0,0,0
24.406472,11.1355287,0,0,0,0
24.416964,9.69535971,0,0,0,0
24.427455,10.4880885,0,0,0,0
24.437947,11.3578167,0,0,0,0
24.448438,9.79795897,0,0,0,0
24.45893,10.9087121,0,0,0,0
24.469422,10.8627805,0,0,0,0
24.479913,11.3578167,0,0,0,0
24.490405,10.5356538,0,0,0,0
24.500896,10.0995049,0,0,0,0
24.511388,11.3137085,0,0,0,0
24.52188,10.8627805,0,0,0,0
24.532371,11.045361,0,0,0,0
24.542863,11.0905365,0,0,0,0
24.553354,10.8166538,0,0,0,0
24.563846,11.3578167,0,0,0,0
24.574338,10.1488916,0,0,0,0
24.584829,10.2956301,0,0,0,0
24.595321,11,0,0,0,0
24.605812,10.1488916,0,0,0,0
24.616304,10.8166538,0,0,0,0
24.626796,10.6301458,0,0,0,0
24.637287,10.9544512,0,0,0,0
24.647779,10.5830052,0,0,0,0
24.65827,9.79795897,0,0,0,0
24.668762,10.4403065,0,0,0,0
24.679254,10.7703296,0,0,0,0
24.689745,10.4403065,0,0,0,0
24.700237,10.3440804,0,0,0,0
24.710728,10.3440804,0,0,0,0
24.72122,10.3440804,0,0,0,0
24.731712,11.0905365,0,0,0,0
24.742203,10.4880885,0,0,0,0
24.752695,10.8627805,0,0,0,0
24.763186,10.2469508,0,0,0,0
24.773678,9.89949494,0,0,0,0
24.78417,11.045361,0,0,0,0
24.794661,10.9087121,0,0,0,0
24.805153,11.1355287,0,0,0,0
24.815644,9.8488578,0,0,0,0
24.826136,10.2469508,0,0,0,0
24.836628,10.5830052,0,0,0,0
24.847119,9.74679434,0,0,0,0
24.857611,10.6301458,0,0,0,0
24.868102,10.0498756,0,0,0,0
24.878594,10.198039,0,0,0,0
24.889086,10.4403065,0,0,0,0
24.899577,10.3923048,0,0,0,0
24.910069,10.6770783,0,0,0,0
24.92056,9,0,0,0,0
24.931052,10.6770783,0,0,0,0
24.941544,10.3440804,0,0,0,0
24.952035,10.2956301,0,0,0,0
24.962527,9.59166305,0,0,0,0
24.973018,10.5830052,0,0,0,0
24.98351,9.89949494,0,0,0,0
24.994002,10.3923048,0,0,0,0
25.004493,10.4403065,0,0,0,0
25.014985,10.198039,0,0,0,0
25.025476,10.4880885,0,0,0,0
25.035968,9.79795897,0,0,0,0
25.04646,10.5356538,0,0,0,0
25.056951,10.4403065,0,0,0,0
25.067443,10.7703296,0,0,0,0
25.077934,9.2736185,0,0,0,0
25.088426,10.3440804,0,0,0,0
25.098918,10.5830052,0,0,0,0
25.109409,10.2956301,0,0,0,0
25.119901,9.8488578,0,0,0,0
25.130392,10.3923048,0,0,0,0
25.140884,10.7238053,0,0,0,0
25.151376,10.4403065,0,0,0,0
25.161867,9.89949494,0,0,0,0
25.172359,10.5830052,0,0,0,0
25.18285,9.79795897,0,0,0,0
25.193342,10.0498756,0,0,0,0
25.203834,9.21954446,0,0,0,0
25.214325,11.045361,0,0,0,0
25.224817,10.3923048,0,0,0,0
25.235308,9.2736185,0,0,0,0
25.2458,10.2956301,0,0,0,0
25.256292,10.8166538,0,0,0,0
25.266783,8.42614977,0,0,0,0
25.277275,10.198039,0,0,0,0
25.287766,10.0995049,0,0,0,0
25.298258,10.2956301,0,0,0,0
25.30875,10.0995049,0,0,0,0
25.319241,9.16515139,0,0,0,0
25.329733,10.1488916,0,0,0,0
25.340224,10.0995049,0,0,0,0
25.350716,9.79795897,0,0,0,0
25.361208,10.4403065,0,0,0,0
25.371699,10.2956301,0,0,0,0
25.382191,11.1803399,0,0,0,0
25.392682,9.2736185,0,0,0,0
25.403174,10.7703296,0,0,0,0
25.413666,10,0,0,0,0
25.424157,10.5830052,0,0,0,0
25.434649,10.2469508,0,0,0,0
25.44514,9.79795897,0,0,0,0
25.455632,10.2469508,0,0,0,0
25.466124,9.8488578,0,0,0,0
25.476615,10.3440804,0,0,0,0
25.487107,10.198039,0,0,0,0
25.497598,8.83176087,0,0,0,0
25.50809,11.0905365,0,0,0,0
25.518582,8.71779789,0,0,0,0
25.529073,9.8488578,0,0,0,0
25.539565,9.64365076,0,0,0,0
25.550056,9.94987437,0,0,0,0
25.560548,9.8488578,0,0,0,0
25.57104,9.69535971,0,0,0,0
25.581531,10.4403065,0,0,0,0
25.592023,10.1488916,0,0,0,0
25.602514,10,0,0,0,0
25.613006,10.5830052,0,0,0,0
25.623498,9.48683298,0,0,0,0
25.633989,9.43398113,0,0,0,0
25.644481,10.2469508,0,0,0,0
25.654972,9.74679434,0,0,0,0
25.665464,10.7703296,0,0,0,0
25.675956,9.48683298,0,0,0,0
25.686447,9.94987437,0,0,0,0
25.696939,9.89949494,0,0,0,0
25.70743,9.79795897,0,0,0,0
25.717922,9.48683298,0,0,0,0
25.728414,9.79795897,0,0,0,0
25.738905,10,0,0,0,0
25.749397,10.5356538,0,0,0,0
25.759888,10.6770783,0,0,0,0
25.77038,9.38083152,0,0,0,0
25.780872,9.05538514,0,0,0,0
25.791363,9.64365076,0,0,0,0
25.801855,10,0,0,0,0
25.812346,10.3440804,0,0,0,0
25.822838,9,0,0,0,0
25.83333,9.53939201,0,0,0,0
25.843821,10.3440804,0,0,0,0
25.854313,9.79795897,0,0,0,0
25.864804,10.9087121,0,0,0,0
25.875296,9.74679434,0,0,0,0
25.885788,9.79795897,0,0,0,0
25.896279,10.0498756,0,0,0,0
25.906771,9.74679434,0,0,0,0
25.917262,9.59166305,0,0,0,0
25.927754,9.2736185,0,0,0,0
25.938246,10.198039,0,0,0,0
25.948737,10.198039,0,0,0,0
25.959229,9.21954446,0,0,0,0
25.96972,10.4403065,0,0,0,0
25.980212,9.79795897,0,0,0,0
25.990704,9.21954446,0,0,0,0
26.001195,9.38083152,0,0,0,0
26.011687,9.74679434,0,0,0,0
26.022178,9,0,0,0,0
26.03267,10.8627805,0,0,0,0
26.043162,8.54400375,0,0,0,0
26.053653,8.54400375,0,0,0,0
26.064145,8.71779789,0,0,0,0
26.074636,10,0,0,0,0
26.085128,10.2956301,0,0,0,0
26.09562,9.53939201,0,0,0,0
26.106111,10.5830052,0,0,0,0
26.116603,10.4403065,0,0,0,0
26.127094,9.48683298,0,0,0,0
26.137586,10.3923048,0,0,0,0
26.148078,9.2736185,0,0,0,0
26.158569,10.0498756,0,0,0,0
26.169061,9.32737905,0,0,0,0
26.179552,9.89949494,0,0,0,0
26.190044,9.79795897,0,0,0,0
26.200536,10,0,0,0,0
26.211027,9.38083152,0,0,0,0
26.221519,9.79795897,0,0,0,0
26.23201,9.11043358,0,0,0,0
26.242502,9.94987437,0,0,0,0
26.252994,10.0995049,0,0,0,0
26.263485,10,0,0,0,0
26.273977,9.32737905,0,0,0,0
26.284468,9.48683298,0,0,0,0
26.29496,9.48683298,0,0,0,0
26.305452,9.8488578,0,0,0,0
26.315943,9.38083152,0,0,0,0
26.326435,9.59166305,0,0,0,0
26.336926,9,0,0,0,0
26.347418,8.77496439,0,0,0,0
26.35791,9.74679434,0,0,0,0
26.368401,9.89949494,0,0,0,0
26.378893,10.4403065,0,0,0,0
26.389384,10.2469508,0,0,0,0
26.399876,8.88819442,0,0,0,0
26.410368,9.64365076,0,0,0,0
26.420859,8.36660027,0,0,0,0
26.431351,9.32737905,0,0,0,0
26.441842,10.3923048,0,0,0,0
26.452334,9.16515139,0,0,0,0
26.462826,8.54400375,0,0,0,0
26.473317,10.0995049,0,0,0,0
26.483809,10.0498756,0,0,0,0
26.4943,10.0995049,0,0,0,0
26.504792,9.43398113,0,0,0,0
26.515284,9.53939201,0,0,0,0
26.525775,9.11043358,0,0,0,0
26.536267,9.32737905,0,0,0,0
26.546758,9.69535971,0,0,0,0
26.55725,9.32737905,0,0,0,0
26.567742,9.05538514,0,0,0,0
26.578233,10.0995049,0,0,0,0
26.588725,9.64365076,0,0,0,0
26.599216,9.21954446,0,0,0,0
26.609708,9.11043358,0,0,0,0
26.6202,9.38083152,0,0,0,0
26.630691,10.4880885,0,0,0,0
26.641183,9.53939201,0,0,0,0
26.651674,9.79795897,0,0,0,0
26.662166,10.2956301,0,0,0,0
26.672658,8.71779789,0,0,0,0
26.683149,9.11043358,0,0,0,0
26.693641,9.2736185,0,0,0,0
26.704132,9.43398113,0,0,0,0
26.714624,9.59166305,0,0,0,0
26.725116,8.94427191,0,0,0,0
26.735607,9.21954446,0,0,0,0
26.746099,10,0,0,0,0
26.75659,9.38083152,0,0,0,0
26.767082,8.48528137,0,0,0,0
26.777574,8.71779789,0,0,0,0
26.788065,9.64365076,0,0,0,0
26.798557,9.69535971,0,0,0,0
26.809048,8.30662386,0,0,0,0
26.81954,8.54400375,0,0,0,0
26.830032,9.38083152,0,0,0,0
26.840523,8.77496439,0,0,0,0
26.851015,9.16515139,0,0,0,0
26.861506,9.89949494,0,0,0,0
26.871998,8.48528137,0,0,0,0
26.88249,9.94987437,0,0,0,0
26.892981,7.54983444,0,0,0,0
26.903473,9.38083152,0,0,0,0
26.913964,9.48683298,0,0,0,0
26.924456,8.94427191,0,0,0,0
26.934948,8.94427191,0,0,0,0
26.945439,9,0,0,0,0
26.955931,9,0,0,0,0
26.966422,7.87400787,0,0,0,0
26.976914,9,0,0,0,0
26.987406,7.87400787,0,0,0,0
26.997897,9.05538514,0,0,0,0
27.008389,8.30662386,0,0,0,0
27.01888,9.32737905,0,0,0,0
27.029372,8.71779789,0,0,0,0
27.039864,9.38083152,0,0,0,0
27.050355,7.74596669,0,0,0,0
27.060847,8.30662386,0,0,0,0
27.071338,8.71779789,0,0,0,0
27.08183,9.59166305,0,0,0,0
27.092322,9.48683298,0,0,0,0
27.102813,9.53939201,0,0,0,0
27.113305,8.83176087,0,0,0,0
27.123796,9.38083152,0,0,0,0
27.134288,8.36660027,0,0,0,0
27.14478,9.2736185,0,0,0,0
27.155271,9.64365076,0,0,0,0
27.165763,8,0,0,0,0
27.176254,8.71779789,0,0,0,0
27.186746,9.32737905,0,0,0,0
27.197238,9.21954446,0,0,0,0
27.207729,9.16515139,0,0,0,0
27.218221,9.69535971,0,0,0,0
27.228712,8.94427191,0,0,0,0
27.239204,8.77496439,0,0,0,0
27.249696,8.66025404,0,0,0,0
27.260187,8.94427191,0,0,0,0
27.270679,8.30662386,0,0,0,0
27.28117,9.59166305,0,0,0,0
27.291662,8.94427191,0,0,0,0
27.302154,8.36660027,0,0,0,0
27.312645,8.77496439,0,0,0,0
27.323137,8.77496439,0,0,0,0
27.333628,8.54400375,0,0,0,0
27.34412,9.43398113,0,0,0,0
27.354612,9.21954446,0,0,0,0
27.365103,10,0,0,0,0
27.375595,9.05538514,0,0,0,0
27.386086,8.83176087,0,0,0,0
27.396578,9.2736185,0,0,0,0
27.40707,9.16515139,0,0,0,0
27.417561,9.11043358,0,0,0,0
27.428053,9.53939201,0,0,0,0
27.438544,9.2736185,0,0,0,0
27.449036,9.43398113,0,0,0,0
27.459528,9.21954446,0,0,0,0
27.470019,9.38083152,0,0,0,0
27.480511,8.42614977,0,0,0,0
27.491002,8.66025404,0,0,0,0
27.501494,8.77496439,0,0,0,0
27.511986,8.94427191,0,0,0,0
27.522477,8.36660027,0,0,0,0
27.532969,8.83176087,0,0,0,0
27.54346,9.48683298,0,0,0,0
27.553952,9.59166305,0,0,0,0
27.564444,8.88819442,0,0,0,0
27.574935,9.38083152,0,0,0,0
27.585427,8.66025404,0,0,0,0
27.595918,9.11043358,0,0,0,0
27.60641,8.24621125,0,0,0,0
27.616902,8.94427191,0,0,0,0
27.627393,8.88819442,0,0,0,0
27.637885,8.88819442,0,0,0,0
27.648376,8.30662386,0,0,0,0
27.658868,9.64365076,0,0,0,0
27.66936,8.36660027,0,0,0,0
27.679851,8.88819442,0,0,0,0
27.690343,9,0,0,0,0
27.700834,9.38083152,0,0,0,0
27.711326,8.71779789,0,0,0,0
27.721818,9.11043358,0,0,0,0
27.732309,9,0,0,0,0
27.742801,8.24621125,0,0,0,0
27.753292,8.88819442,0,0,0,0
27.763784,7.93725393,0,0,0,0
27.774276,8,0,0,0,0
27.784767,8.66025404,0,0,0,0
27.795259,9.16515139,0,0,0,0
27.80575,8.06225775,0,0,0,0
27.816242,8.71779789,0,0,0,0
27.826734,8.94427191,0,0,0,0
27.837225,8.60232527,0,0,0,0
27.847717,8.54400375,0,0,0,0
27.858208,9.32737905,0,0,0,0
27.8687,8.94427191,0,0,0,0
27.879192,8.24621125,0,0,0,0
27.889683,8.30662386,0,0,0,0
27.900175,8.77496439,0,0,0,0
27.910666,7.68114575,0,0,0,0
27.921158,8.36660027,0,0,0,0
27.93165,8,0,0,0,0
27.942141,8.88819442,0,0,0,0
27.952633,8,0,0,0,0
27.963124,8.48528137,0,0,0,0
27.973616,8.71779789,0,0,0,0
27.984108,7.81024968,0,0,0,0
27.994599,8,0,0,0,0
28.005091,8.30662386,0,0,0,0
28.015582,8.30662386,0,0,0,0
28.026074,8.66025404,0,0,0,0
28.036566,8.66025404,0,0,0,0
28.047057,8.42614977,0,0,0,0
28.057549,8.30662386,0,0,0,0
28.06804,8.24621125,0,0,0,0
28.078532,8.83176087,0,0,0,0
28.089024,8.24621125,0,0,0,0
28.099515,8.66025404,0,0,0,0
28.110007,8.77496439,0,0,0,0
28.120498,8.30662386,0,0,0,0
28.13099,7.93725393,0,0,0,0
28.141482,8.60232527,0,0,0,0
28.151973,8.71779789,0,0,0,0
28.162465,8.36660027,0,0,0,0
28.172956,9.38083152,0,0,0,0
28.183448,9,0,0,0,0
28.19394,8.71779789,0,0,0,0
28.204431,7.68114575,0,0,0,0
28.214923,7.93725393,0,0,0,0
28.225414,7.61577311,0,0,0,0
28.235906,9,0,0,0,0
28.246398,8.83176087,0,0,0,0
28.256889,8.54400375,0,0,0,0
28.267381,8.83176087,0,0,0,0
28.277872,8.36660027,0,0,0,0
28.288364,8.06225775,0,0,0,0
28.298856,7.48331477,0,0,0,0
28.309347,9.05538514,0,0,0,0
28.319839,8.48528137,0,0,0,0
28.33033,8.1240384,0,0,0,0
28.340822,9.05538514,0,0,0,0
28.351314,7.48331477,0,0,0,0
28.361805,8.42614977,0,0,0,0
28.372297,8,0,0,0,0
28.382788,7.54983444,0,0,0,0
28.39328,8.36660027,0,0,0,0
28.403772,7.87400787,0,0,0,0
28.414263,7.87400787,0,0,0,0
28.424755,7.81024968,0,0,0,0
28.435246,7.74596669,0,0,0,0
28.445738,7.48331477,0,0,0,0
28.45623,8.30662386,0,0,0,0
28.466721,7.48331477,0,0,0,0
28.477213,7.74596669,0,0,0,0
28.487704,8.71779789,0,0,0,0
28.498196,8.1240384,0,0,0,0
28.508688,7.81024968,0,0,0,0
28.519179,8.71779789,0,0,0,0
28.529671,8.30662386,0,0,0,0
28.540162,7.68114575,0,0,0,0
28.550654,8.18535277,0,0,0,0
28.561146,8.66025404,0,0,0,0
28.571637,7,0,0,0,0
28.582129,8.06225775,0,0,0,0
28.59262,8.06225775,0,0,0,0
28.603112,8.36660027,0,0,0,0
28.613604,8.36660027,0,0,0,0
28.624095,8.88819442,0,0,0,0
28.634587,7.87400787,0,0,0,0
28.645078,8.42614977,0,0,0,0
28.65557,7.68114575,0,0,0,0
28.666062,8.1240384,0,0,0,0
28.676553,8.30662386,0,0,0,0
28.687045,8.48528137,0,0,0,0
28.697536,7.07106781,0,0,0,0
28.708028,8.1240384,0,0,0,0
28.71852,7.61577311,0,0,0,0
28.729011,7.87400787,0,0,0,0
28.739503,8.1240384,0,0,0,0
28.749994,8.24621125,0,0,0,0
28.760486,8.88819442,0,0,0,0
28.770978,7.93725393,0,0,0,0
28.781469,7.81024968,0,0,0,0
28.791961,7.41619849,0,0,0,0
28.802452,7.68114575,0,0,0,0
28.812944,8.18535277,0,0,0,0
28.823436,8.77496439,0,0,0,0
28.833927,7.81024968,0,0,0,0
28.844419,7.54983444,0,0,0,0
28.85491,7.93725393,0,0,0,0
28.865402,6.8556546,0,0,0,0
28.875894,8.18535277,0,0,0,0
28.886385,8.30662386,0,0,0,0
28.896877,7.74596669,0,0,0,0
28.907368,7.68114575,0,0,0,0
28.91786,8.48528137,0,0,0,0
28.928352,7.54983444,0,0,0,0
28.938843,8.18535277,0,0,0,0
28.949335,7.87400787,0,0,0,0
28.959826,8.24621125,0,0,0,0
28.970318,6.8556546,0,0,0,0
28.98081,7.87400787,0,0,0,0
28.991301,6.92820323,0,0,0,0
29.001793,7.68114575,0,0,0,0
29.012284,7.28010989,0,0,0,0
29.022776,8.48528137,0,0,0,0
29.033268,6.70820393,0,0,0,0
29.043759,7.68114575,0,0,0,0
29.054251,8.1240384,0,0,0,0
29.064742,7.07106781,0,0,0,0
29.075234,7.87400787,0,0,0,0
29.085726,8.30662386,0,0,0,0
29.096217,7.81024968,0,0,0,0
29.106709,6.63324958,0,0,0,0
29.1172,7.74596669,0,0,0,0
29.127692,8.48528137,0,0,0,0
29.138184,8,0,0,0,0
29.148675,8.30662386,0,0,0,0
29.159167,8.1240384,0,0,0,0
29.169658,7.48331477,0,0,0,0
29.18015,8.24621125,0,0,0,0
29.190642,7.81024968,0,0,0,0
29.201133,7.81024968,0,0,0,0
29.211625,7.54983444,0,0,0,0
29.222116,7.21110255,0,0,0,0
29.232608,7.68114575,0,0,0,0
29.2431,7.81024968,0,0,0,0
29.253591,7.28010989,0,0,0,0
29.264083,8.24621125,0,0,0,0
29.274574,7.14142843,0,0,0,0
29.285066,7.34846923,0,0,0,0
29.295558,7.68114575,0,0,0,0
29.306049,7.68114575,0,0,0,0
29.316541,7.93725393,0,0,0,0
29.327032,7.21110255,0,0,0,0
29.337524,8.30662386,0,0,0,0
29.348016,7.28010989,0,0,0,0
29.358507,8.1240384,0,0,0,0
29.368999,7.48331477,0,0,0,0
29.37949,6.70820393,0,0,0,0
29.389982,8.30662386,0,0,0,0
29.400474,7.68114575,0,0,0,0
29.410965,7.48331477,0,0,0,0
29.421457,7.21110255,0,0,0,0
29.431948,7.81024968,0,0,0,0
29.44244,7.61577311,0,0,0,0
29.452932,7.81024968,0,0,0,0
29.463423,7.81024968,0,0,0,0
29.473915,6.78232998,0,0,0,0
29.484406,7.34846923,0,0,0,0
29.494898,7.14142843,0,0,0,0
29.50539,7.21110255,0,0,0,0
29.515881,7.28010989,0,0,0,0
29.526373,7.21110255,0,0,0,0
29.536864,7.81024968,0,0,0,0
29.547356,7.28010989,0,0,0,0
29.557848,8.54400375,0,0,0,0
29.568339,7.28010989,0,0,0,0
29.578831,6.78232998,0,0,0,0
29.589322,7.68114575,0,0,0,0
29.599814,8.06225775,0,0,0,0
29.610306,8.06225775,0,0,0,0
29.620797,7.28010989,0,0,0,0
29.631289,7.61577311,0,0,0,0
29.64178,7.14142843,0,0,0,0
29.652272,6.78232998,0,0,0,0
29.662764,8.54400375,0,0,0,0
29.673255,7.34846923,0,0,0,0
29.683747,6.70820393,0,0,0,0
29.694238,7.07106781,0,0,0,0
29.70473,7.74596669,0,0,0,0
29.715222,7.93725393,0,0,0,0
29.725713,8.1240384,0,0,0,0
29.736205,8.06225775,0,0,0,0
29.746696,7.41619849,0,0,0,0
29.757188,7.41619849,0,0,0,0
29.76768,7.81024968,0,0,0,0
29.778171,7.28010989,0,0,0,0
29.788663,8,0,0,0,0
29.799154,6.92820323,0,0,0,0
29.809646,7.21110255,0,0,0,0
29.820138,8,0,0,0,0
29.830629,7.87400787,0,0,0,0
29.841121,7.41619849,0,0,0,0
29.851612,6.63324958,0,0,0,0
29.862104,7.28010989,0,0,0,0
29.872596,7.41619849,0,0,0,0
29.883087,7.54983444,0,0,0,0
29.893579,7.48331477,0,0,0,0
29.90407,7.81024968,0,0,0,0
29.914562,7,0,0,0,0
29.925054,7.14142843,0,0,0,0
29.935545,6.55743852,0,0,0,0
29.946037,8.1240384,0,0,0,0
29.956528,6.63324958,0,0,0,0
29.96702,7.14142843,0,0,0,0
29.977512,6.55743852,0,0,0,0
29.988003,7.68114575,0,0,0,0
29.998495,6.63324958,7.2388395,-0.77819658,7.2388395,7.238838
30.008986,6.78232998,7.23451525,-0.672447224,7.23451525,7.23451375
30.019478,8.36660027,7.23019399,1.06602358,7.23019399,7.23019248
30.02997,7.41619849,7.22587613,0.436259511,7.22587613,7.22587461
30.040461,6.8556546,7.22156208,-0.604902868,7.22156208,7.22156056
30.050953,6.55743852,7.21725103,-0.812288439,7.21725103,7.2172495
30.061444,7.07106781,7.21294381,-0.376664305,7.21294381,7.21294227
30.071936,7.28010989,7.2086396,0.267339284,7.2086396,7.20863805
30.082428,6.164414,7.20433881,-1.01976703,7.20433881,7.20433726
30.092919,7.93725393,7.20004185,0.858610551,7.20004185,7.2000403
30.103411,7.81024968,7.19574793,0.78390162,7.19574793,7.19574636
30.113902,7.87400787,7.19145784,0.826165861,7.19145784,7.19145628
30.124394,6.92820323,7.1871708,-0.50888856,7.1871708,7.18716922
30.134886,6.8556546,7.1828872,-0.572042477,7.1828872,7.18288561
30.145377,8.71779789,7.17860745,1.24064114,7.17860745,7.17860587
30.155869,7,7.17433076,-0.417529353,7.17433076,7.17432917
30.16636,7.21110255,7.17005793,0.20259471,7.17005793,7.17005633
30.176852,7.41619849,7.16578817,0.500410152,7.16578817,7.16578656
30.187344,6.55743852,7.16152187,-0.777227988,7.16152187,7.16152025
30.197835,7.41619849,7.15725945,0.508860527,7.15725945,7.15725783
30.208327,7.41619849,7.15300011,0.513028635,7.15300011,7.15299848
30.218818,7.34846923,7.14874465,0.446905559,7.14874465,7.14874301
30.22931,7.34846923,7.14449228,0.451638077,7.14449228,7.14449063
30.239802,6.92820323,7.14024339,-0.46047819,7.14024339,7.14024174
30.250293,6.8556546,7.13599841,-0.529475035,7.13599841,7.13599675
30.260785,6.78232998,7.13175653,-0.591123121,7.13175653,7.13175486
30.271276,7.61577311,7.12751855,0.69875214,7.12751855,7.12751688
30.281768,8.1240384,7.12328368,1.00037729,7.12328368,7.123282
30.29226,7.61577311,7.11905233,0.704784207,7.11905233,7.11905064
30.302751,7.28010989,7.11482489,0.406552575,7.11482489,7.1148232
30.313243,7.68114575,7.11060058,0.755344405,7.11060058,7.11059888
30.323734,6.92820323,7.10638019,-0.422110132,7.10638019,7.10637848
30.334226,7.28010989,7.10216294,0.421837589,7.10216294,7.10216122
30.344718,7.68114575,7.09794922,0.763673052,7.09794922,7.09794749
30.355209,8.1240384,7.09373944,1.01503644,7.09373944,7.09373771
30.365701,6.4807407,7.0895328,-0.780251308,7.0895328,7.08953106
30.376192,7.21110255,7.08533012,0.354644096,7.08533012,7.08532837
30.386684,7.21110255,7.08113058,0.360516255,7.08113058,7.08112883
30.397176,7.48331477,7.0769346,0.637479545,7.0769346,7.07693284
30.407667,7.28010989,7.07274259,0.455376001,7.07274259,7.07274082
30.418159,7,7.06855374,-0.261827683,7.06855374,7.06855196
30.42865,8.06225775,7.06436885,0.99894389,7.06436885,7.06436707
30.439142,7.21110255,7.06018715,0.388478321,7.06018715,7.06018535
30.449634,6.08276253,7.05600902,-0.986532557,7.05600902,7.05600721
30.460125,7.81024968,7.05183487,0.870870145,7.05183487,7.05183306
30.470617,7.41619849,7.0476639,0.607070493,7.0476639,7.04766209
30.481108,7.61577311,7.04349693,0.756489376,7.04349693,7.0434951
30.4916,7.61577311,7.03933315,0.759236428,7.03933315,7.03933132
30.502092,6.63324958,7.03517297,-0.633974284,7.03517297,7.03517113
30.512583,6.244998,7.03101679,-0.886577011,7.03101679,7.03101494
30.523075,7.41619849,7.02686382,0.623966876,7.02686382,7.02686196
30.533566,6.92820323,7.02271486,-0.307427439,7.02271486,7.02271299
30.544058,6.4807407,7.01856912,-0.73336786,7.01856912,7.01856724
30.55455,7.41619849,7.01442699,0.633854476,7.01442699,7.0144251
30.565041,7.48331477,7.01028888,0.687768778,7.01028888,7.01028699
30.575533,6.92820323,7.006154,-0.279196659,7.006154,7.0061521
30.586024,6.70820393,7.00202315,-0.542050938,7.00202315,7.00202124
30.596516,6.70820393,6.99789554,-0.538230069,6.99789554,6.99789362
30.607008,6.40312424,6.99377157,-0.768535835,6.99377157,6.99376964
30.617499,6.55743852,6.98965163,-0.657429163,6.98965163,6.98964969
30.627991,6.244998,6.98553494,-0.860544563,6.98553494,6.985533
30.638482,6.63324958,6.9814223,-0.590061624,6.9814223,6.98142034
30.648974,6.92820323,6.97731292,-0.22160706,6.97731292,6.97731095
30.659466,7.68114575,6.9732072,0.841390844,6.9732072,6.97320522
30.669957,7,6.96910553,0.17576824,6.96910553,6.96910354
30.680449,7.34846923,6.96500713,0.619243166,6.96500713,6.96500514
30.69094,6.164414,6.96091279,-0.892467809,6.96091279,6.96091079
30.701432,6.8556546,6.95682174,-0.318067822,6.95682174,6.95681973
30.711924,6.40312424,6.95273436,-0.741356949,6.95273436,6.95273234
30.722415,7,6.94865106,0.226603054,6.94865106,6.94864903
30.732907,7,6.94457104,0.235433548,6.94457104,6.94456901
30.743398,6.32455532,6.94049511,-0.784818316,6.94049511,6.94049306
30.75389,7.07106781,6.93642248,0.366940505,6.93642248,6.93642042
30.764382,6.8556546,6.93235354,-0.276945736,6.93235354,6.93235147
30.774873,6.70820393,6.92828869,-0.469131921,6.92828869,6.92828661
30.785365,5.65685425,6.92422716,-1.12577658,6.92422716,6.92422507
30.795856,6.32455532,6.92016972,-0.771760583,6.92016972,6.92016762
30.806348,6.70820393,6.9161156,-0.455973319,6.9161156,6.91611349
30.81684,7.54983444,6.9120652,0.798604557,6.9120652,6.91206308
30.827331,6.78232998,6.9080189,-0.354526323,6.9080189,6.90801677
30.837823,6.70820393,6.90397593,-0.442461298,6.90397593,6.90397379
30.848314,6.70820393,6.89993708,-0.437873435,6.89993708,6.89993493
30.858806,6.8556546,6.89590157,-0.200616463,6.89590157,6.89589941
30.869298,7.28010989,6.89186979,0.623089162,6.89186979,6.89186762
30.879789,6.63324958,6.88784213,-0.504571645,6.88784213,6.88783995
30.890281,5.74456265,6.88381782,-1.06735897,6.88381782,6.88381563
30.900772,6.8556546,6.87979764,-0.155380307,6.87979764,6.87979544
30.911264,7.81024968,6.87578082,0.966679292,6.87578082,6.87577861
30.921756,7.07106781,6.87176776,0.446430349,6.87176776,6.87176553
30.932247,6.8556546,6.86775882,-0.110019193,6.86775882,6.86775659
30.942739,7,6.86375326,0.369116154,6.86375326,6.86375102
30.95323,6.164414,6.85975185,-0.833869201,6.85975185,6.85974959
30.963722,7,6.85575381,0.379797561,6.85575381,6.85575155
30.974214,7.21110255,6.85175954,0.599452256,6.85175954,6.85175727
30.984705,7.48331477,6.84776943,0.797210981,6.84776943,6.84776714
30.995197,6.244998,6.8437827,-0.7738118,6.8437827,6.8437804
31.005688,6.63324958,6.83980013,-0.454478328,6.83980013,6.83979782
31.01618,7.74596669,6.83582096,0.954015581,6.83582096,6.83581864
31.026672,6.8556546,6.83184558,0.154301722,6.83184558,6.83184325
31.037163,6.40312424,6.82787436,-0.651728565,6.82787436,6.82787202
31.047655,6.70820393,6.82390655,-0.340150878,6.82390655,6.8239042
31.058146,6.4807407,6.81994292,-0.582410695,6.81994292,6.81994055
31.068638,8.06225775,6.8159827,1.1163669,6.8159827,6.81598032
31.07913,6,6.81202628,-0.901125008,6.81202628,6.81202389
31.089621,6.70820393,6.80807404,-0.316022326,6.80807404,6.80807164
31.100113,7.34846923,6.80412524,0.737796715,6.80412524,6.80412282
31.110604,7.34846923,6.80018061,0.740465134,6.80018061,6.80017819
31.121096,6.40312424,6.79623943,-0.626988988,6.79623943,6.79623699
31.131588,7.93725393,6.79230206,1.07002424,6.79230206,6.79229961
31.142079,7.14142843,6.78836888,0.594188139,6.78836888,6.78836642
31.152571,6.32455532,6.78443916,-0.678147356,6.78443916,6.78443668
31.163062,6.8556546,6.78051363,0.274118535,6.78051363,6.78051114
31.173554,6.70820393,6.77659156,-0.261510274,6.77659156,6.77658906
31.184046,7.68114575,6.77267331,0.953138202,6.77267331,6.7726708
31.194537,6.8556546,6.76875928,0.294780119,6.76875928,6.76875676
31.205029,7.21110255,6.76484871,0.668022333,6.76484871,6.76484617
31.21552,7.07106781,6.76094236,0.556889085,6.76094236,6.76093981
31.226012,6.08276253,6.75703948,-0.821143682,6.75703948,6.75703691
31.236504,7.41619849,6.75314044,0.814283763,6.75314044,6.75313786
31.246995,6.70820393,6.74924563,-0.202587497,6.74924563,6.74924304
31.257487,6.32455532,6.74535429,-0.648690199,6.74535429,6.74535169
31.267978,6.55743852,6.74146719,-0.428985623,6.74146719,6.74146457
31.27847,5.91607978,6.73758357,-0.906368462,6.73758357,6.73758094
31.288962,7.54983444,6.73370382,0.903399478,6.73370382,6.73370117
31.299453,6.32455532,6.7298283,-0.636610539,6.7298283,6.72982564
31.309945,5.09901951,6.72595628,-1.27551431,6.72595628,6.7259536
31.320436,7.61577311,6.7220885,0.945348936,6.7220885,6.72208581
31.330928,6.8556546,6.71822422,0.370716038,6.71822422,6.71822152
31.34142,6.32455532,6.71436382,-0.624346459,6.71436382,6.71436111
31.351911,5.65685425,6.71050767,-1.02647621,6.71050767,6.71050494
31.362403,6.70820393,6.70665503,0.0393560693,6.70665503,6.70665229
31.372894,7.48331477,6.70280665,0.883463709,6.70280665,6.70280389
31.383386,6.92820323,6.69896178,0.478791651,6.69896178,6.69895901
31.393878,7,6.69512081,0.552158661,6.69512081,6.69511803
31.404369,6.63324958,6.6912841,-0.240903549,6.6912841,6.6912813
31.414861,6.8556546,6.68745092,0.41012642,6.68745092,6.6874481
31.425352,7,6.683622,0.562474886,6.683622,6.68361917
31.435844,6.164414,6.67979662,-0.71790154,6.67979662,6.67979378
31.446336,6.08276253,6.67597515,-0.770202973,6.67597515,6.67597229
31.456827,7.07106781,6.67215795,0.631593117,6.67215795,6.67215507
31.467319,6.164414,6.66834429,-0.709880474,6.66834429,6.6683414
31.47781,6.55743852,6.66453491,-0.327255843,6.66453491,6.664532
31.488302,7.68114575,6.66072908,1.01015675,6.66072908,6.66072616
31.498794,7.34846923,6.65692718,0.831590075,6.65692718,6.65692424
31.509285,6.32455532,6.65312955,-0.573213948,6.65312955,6.6531266
31.519777,7.28010989,6.64933549,0.794213071,6.64933549,6.64933252
31.530268,5.83095189,6.64554571,-0.902548512,6.64554571,6.64554272
31.54076,7.21110255,6.6417595,0.754548241,6.6417595,6.6417565
31.551252,6.70820393,6.63797723,0.265003217,6.63797723,6.63797421
31.561743,6.32455532,6.63419925,-0.55645658,6.63419925,6.63419621
31.572235,6.08276253,6.63042484,-0.740042101,6.63042484,6.63042179
31.582726,6.92820323,6.62665473,0.549134315,6.62665473,6.62665167
31.593218,6.244998,6.62288821,-0.614727755,6.62288821,6.62288513
31.60371,6.63324958,6.61912563,0.118844219,6.61912563,6.61912253
31.614201,7.34846923,6.61536736,0.856213682,6.61536736,6.61536424
31.624693,7.81024968,6.61161268,1.09482282,6.61161268,6.61160954
31.635184,6.40312424,6.6078623,-0.452479907,6.6078623,6.60785915
31.645676,6.8556546,6.60411553,0.501536712,6.60411553,6.60411235
31.656168,6.08276253,6.60037271,-0.719451303,6.60037271,6.60036952
31.666659,6.32455532,6.5966342,-0.521611814,6.5966342,6.596631
31.677151,7,6.59289931,0.638044429,6.59289931,6.59289608
31.687642,7.68114575,6.58916873,1.04497704,6.58916873,6.58916549
31.698134,6.70820393,6.58544176,0.35037433,6.58544176,6.5854385
31.708626,6.70820393,6.58171876,0.355647535,6.58171876,6.58171548
31.719117,7.14142843,6.57800009,0.750618636,6.57800009,6.57799679
31.729609,7,6.57428504,0.652468361,6.57428504,6.57428172
31.7401,7.28010989,6.57057431,0.842339347,6.57057431,6.57057098
31.750592,6,6.56686722,-0.752905848,6.56686722,6.56686386
31.761084,6.78232998,6.5631641,0.468151563,6.5631641,6.56316072
31.771575,7.28010989,6.55946531,0.848907872,6.55946531,6.55946192
31.782067,5.83095189,6.55577016,-0.851362596,6.55577016,6.55576675
31.792558,6.55743852,6.55207935,0.073206358,6.55207935,6.55207592
31.80305,7.48331477,6.54839218,0.966913953,6.54839218,6.54838873
31.813542,7,6.544709,0.674752548,6.544709,6.54470553
31.824033,7.14142843,6.54103016,0.774853706,6.54103016,6.54102667
31.834525,6.32455532,6.53735497,-0.461302127,6.53735497,6.53735146
31.845016,6.244998,6.53368413,-0.5372952,6.53368413,6.5336806
31.855508,6.55743852,6.53001694,0.165594641,6.53001694,6.53001339
31.866,6.92820323,6.52635375,0.633915988,6.52635375,6.52635018
31.876491,6.08276253,6.52269492,-0.66327399,6.52269492,6.52269132
31.886983,6.70820393,6.51903974,0.434930101,6.51903974,6.51903612
31.897474,6.164414,6.51538892,-0.592431361,6.51538892,6.51538528
31.907966,6.92820323,6.51174176,0.645338256,6.51174176,6.51173811
31.918458,7.21110255,6.50809862,0.838453295,6.50809862,6.50809494
31.928949,6.4807407,6.50445984,-0.154010209,6.50445984,6.50445614
31.939441,7,6.50082473,0.706523366,6.50082473,6.50082101
31.949932,6.244998,6.49719399,-0.50219119,6.49719399,6.49719024
31.960424,6.4807407,6.49356692,-0.113252918,6.49356692,6.49356315
31.970916,6.244998,6.48994388,-0.494920073,6.48994388,6.48994009
31.981407,6.92820323,6.4863252,0.664739067,6.4863252,6.48632139
31.991899,6.244998,6.48271021,-0.487557395,6.48271021,6.48270638
32.00239,5.65685425,6.47909959,-0.906777451,6.47909959,6.47909574
32.012882,6.55743852,6.47549266,0.286261873,6.47549266,6.47548878
32.023374,6.4807407,6.47188977,0.094079387,6.47188977,6.47188586
32.033865,7,6.46829125,0.72918362,6.46829125,6.46828732
32.044357,6.63324958,6.46469642,0.410552257,6.46469642,6.46469247
32.054848,5.83095189,6.46110598,-0.793822453,6.46110598,6.46110201
32.06534,6.63324958,6.45751924,0.419202032,6.45751924,6.45751524
32.075832,5.29150262,6.45393654,-1.07816229,6.45393654,6.45393251
32.086323,5.83095189,6.45035822,-0.787023714,6.45035822,6.45035417
32.096815,6.63324958,6.44678361,0.431817056,6.44678361,6.44677954
32.107306,6.70820393,6.44321339,0.514772322,6.44321339,6.44320929
32.117798,6.63324958,6.43964688,0.440003071,6.43964688,6.43964275
32.12829,6.164414,6.43608442,-0.521220122,6.43608442,6.43608027
32.138781,6.8556546,6.43252635,0.650483089,6.43252635,6.43252218
32.149273,6.70820393,6.428972,0.528424007,6.428972,6.4289678
32.159764,7.21110255,6.42542205,0.886386205,6.42542205,6.42541782
32.170256,5.47722558,6.42187581,-0.97193119,6.42187581,6.42187156
32.180748,6.4807407,6.41833364,0.24981405,6.41833364,6.41832936
32.191239,6.244998,6.41479586,-0.412065366,6.41479586,6.41479156
32.201731,6.08276253,6.41126182,-0.573148573,6.41126182,6.41125748
32.212222,7.14142843,6.40773217,0.856560714,6.40773217,6.40772781
32.222714,6.8556546,6.40420626,0.671899057,6.40420626,6.40420187
32.233206,7.34846923,6.40068441,0.973542406,6.40068441,6.40067999
32.243697,7.68114575,6.39716697,1.13312787,6.39716697,6.39716253
32.254189,5.83095189,6.39365327,-0.750134239,6.39365327,6.3936488
32.26468,6.244998,6.39014398,-0.380980286,6.39014398,6.39013947
32.275172,7,6.38663842,0.78317404,6.38663842,6.38663389
32.285664,5.83095189,6.38313695,-0.74309155,6.38313695,6.38313239
32.296155,7.07106781,6.37963988,0.831521455,6.37963988,6.37963529
32.306647,6.4807407,6.37614656,0.323410165,6.37614656,6.37614194
32.317138,5.56776436,6.37265766,-0.897158457,6.37265766,6.37265301
32.32763,6.92820323,6.36917251,0.747683572,6.36917251,6.36916783
32.338122,6.70820393,6.36569144,0.585245671,6.36569144,6.36568673
32.348613,5.65685425,6.36221479,-0.83985745,6.36221479,6.36221005
32.359105,7,6.35874189,0.800785932,6.35874189,6.35873712
32.369596,6.55743852,6.35527341,0.449627746,6.35527341,6.35526861
32.380088,6.78232998,6.3518087,0.656141208,6.3518087,6.35180386
32.39058,5.83095189,6.34834807,-0.719302564,6.34834807,6.34834321
32.401071,6.70820393,6.34489187,0.602753732,6.34489187,6.34488697
32.411563,5.56776436,6.34143943,-0.879588012,6.34143943,6.3414345
32.422054,6.70820393,6.33799142,0.608450911,6.33799142,6.33798646
32.432546,6.164414,6.33454718,-0.412472029,6.33454718,6.33454218
32.443038,6.40312424,6.33110703,0.268360216,6.33110703,6.331102
32.453529,6.4807407,6.32767131,0.391240826,6.32767131,6.32766625
32.464021,6.244998,6.32423937,-0.281498439,6.32423937,6.32423427
32.474512,6.164414,6.32081185,-0.395471682,6.32081185,6.32080672
32.485004,6,6.31738812,-0.563372094,6.31738812,6.31738295
32.495496,5.91607978,6.31396848,-0.630784195,6.31396848,6.31396328
32.505987,7.48331477,6.31055328,1.08294113,6.31055328,6.31054804
32.516479,6.70820393,6.30714186,0.633294615,6.30714186,6.30713659
32.52697,5.65685425,6.30373488,-0.804288896,6.30373488,6.30372957
32.537462,6.32455532,6.30033168,0.155639468,6.30033168,6.30032633
32.547954,6.55743852,6.29693259,0.510397823,6.29693259,6.2969272
32.558445,7.14142843,6.29353793,0.920809696,6.29353793,6.29353251
32.568937,5.91607978,6.29014707,-0.611610404,6.29014707,6.29014161
32.579428,5.65685425,6.28676064,-0.793666425,6.28676064,6.28675515
32.58992,6.32455532,6.28337801,0.202921933,6.28337801,6.28337248
32.600412,5.74456265,6.27999949,-0.731735503,6.27999949,6.27999392
32.610903,6.4807407,6.27662542,0.451791194,6.27662542,6.2766198
32.621395,7.14142843,6.27325514,0.931758173,6.27325514,6.27324949
32.631886,6.08276253,6.2698893,-0.432581515,6.2698893,6.26988361
32.642378,5.29150262,6.26652726,-0.987433358,6.26652726,6.26652153
32.65287,6,6.26316934,-0.513000334,6.26316934,6.26316357
32.663361,7,6.25981587,0.860339544,6.25981587,6.25981006
32.673853,5.56776436,6.2564662,-0.829880617,6.2564662,6.25646035
32.684344,6.244998,6.25312098,-0.0901275652,6.25312098,6.25311508
32.694836,5.47722558,6.24977956,-0.878950501,6.24977956,6.24977362
32.705328,6,6.24644227,-0.496429521,6.24644227,6.24643629
32.715819,6.08276253,6.24310942,-0.400433383,6.24310942,6.2431034
32.726311,6.08276253,6.23978039,-0.396254794,6.23978039,6.23977433
32.736802,6.8556546,6.23645581,0.786891857,6.23645581,6.2364497
32.747294,6.63324958,6.23313503,0.632546083,6.23313503,6.23312888
32.757786,6.8556546,6.22981839,0.791098102,6.22981839,6.22981219
32.768277,6,6.2265062,-0.475926677,6.2265062,6.22649996
32.778769,6.63324958,6.22319783,0.640352834,6.22319783,6.22319154
32.78926,6.55743852,6.2198939,0.580985904,6.2198939,6.21988757
32.799752,5.74456265,6.2165938,-0.687045233,6.2165938,6.21658741
32.810244,6.40312424,6.21329783,0.435690723,6.21329783,6.2132914
32.820735,7.21110255,6.21000631,1.00054797,6.21000631,6.20999983
32.831227,6.63324958,6.20671862,0.653093379,6.20671862,6.20671209
32.841718,6.08276253,6.20343538,-0.347379975,6.20343538,6.2034288
32.85221,6.32455532,6.20015596,0.352702934,6.20015596,6.20014933
32.862702,5.74456265,6.19688068,-0.672545937,6.19688068,6.19687401
32.873193,6,6.19360986,-0.440011205,6.19360986,6.19360313
32.883685,6.164414,6.19034287,-0.161024419,6.19034287,6.19033609
32.894176,5.56776436,6.18708033,-0.786966303,6.18708033,6.1870735
32.904668,6.164414,6.18382162,-0.139311208,6.18382162,6.18381473
32.91516,6.164414,6.18056705,-0.127094636,6.18056705,6.18056012
32.925651,6.32455532,6.17731694,0.38371654,6.17731694,6.17730995
32.936143,6.32455532,6.17407066,0.387923524,6.17407066,6.17406362
32.946634,6.164414,6.17082884,-0.0800926603,6.17082884,6.17082174
32.957126,5.29150262,6.16759085,-0.935995849,6.16759085,6.1675837
32.967618,6.70820393,6.16435701,0.737459776,6.16435701,6.16434981
32.978109,6.4807407,6.16112763,0.565343321,6.16112763,6.16112036
32.988601,6.164414,6.15790208,0.0806964688,6.15790208,6.15789476
32.999092,7,6.15468099,0.919412316,6.15468099,6.15467362
33.009584,5.56776436,6.15146375,-0.764002214,6.15146375,6.15145631
33.020076,6.08276253,6.14825065,-0.255906463,6.14825065,6.14824315
33.030567,5.91607978,6.14504201,-0.478499971,6.14504201,6.14503445
33.041059,6.244998,6.14183721,0.321186536,6.14183721,6.14182959
33.05155,6.55743852,6.13863687,0.647148869,6.13863687,6.13862919
33.062042,6.32455532,6.13544037,0.434873488,6.13544037,6.13543263
33.072534,7.28010989,6.13224803,1.07138315,6.13224803,6.13224023
33.083025,6.164414,6.12906014,0.188026237,6.12906014,6.12905228
33.093517,6.164414,6.1258761,0.196310736,6.1258761,6.12586817
33.104008,6.40312424,6.12269651,0.529554268,6.12269651,6.12268852
33.1145,6.164414,6.11952078,0.211880206,6.11952078,6.11951273
33.124992,6.244998,6.1163492,0.358676451,6.1163492,6.11634108
33.135483,6.40312424,6.11318208,0.538462774,6.11318208,6.11317389
33.145975,5.29150262,6.11001881,-0.904718844,6.11001881,6.11001055
33.156466,6.4807407,6.10685999,0.611457852,6.10685999,6.10685167
33.166958,6.40312424,6.10370503,0.54719211,6.10370503,6.10369664
33.17745,7.41619849,6.10055423,1.14701537,6.10055423,6.10054576
33.187941,7.28010989,6.09740788,1.08752104,6.09740788,6.09739934
33.198433,5.74456265,6.09426538,-0.591356693,6.09426538,6.09425678
33.208924,6.4807407,6.09112735,0.624190157,6.09112735,6.09111867
33.219416,6,6.08799317,-0.29663642,6.08799317,6.08798441
33.229908,5.91607978,6.08486314,-0.410832519,6.08486314,6.08485432
33.240399,5.65685425,6.08173757,-0.651830747,6.08173757,6.08172867
33.250891,5.91607978,6.07861586,-0.403157636,6.07861586,6.07860689
33.261382,6.32455532,6.07549861,0.499055822,6.07549861,6.07548955
33.271874,5.74456265,6.07238521,-0.572557915,6.07238521,6.07237608
33.282366,4.89897949,6.06927597,-1.08180243,6.06927597,6.06926676
33.292857,6.55743852,6.06617119,0.700904653,6.06617119,6.0661619
33.303349,6.55743852,6.06307027,0.703113259,6.06307027,6.0630609
33.31384,5.65685425,6.0599738,-0.634916965,6.0599738,6.05996435
33.324332,6.4807407,6.0568812,0.651044931,6.0568812,6.05687166
33.334824,6.78232998,6.05379275,0.853543926,6.05379275,6.05378313
33.345315,6.40312424,6.05070876,0.593645923,6.05070876,6.05069905
33.355807,6.164414,6.04762862,0.341738757,6.04762862,6.04761883
33.366298,5.83095189,6.04455295,-0.462169938,6.04455295,6.04454307
33.37679,6.08276253,6.04148113,0.20317824,6.04148113,6.04147116
33.387282,6.63324958,6.03841348,0.771256185,6.03841348,6.03840342
33.397773,6.63324958,6.03535027,0.773239488,6.03535027,6.03534012
33.408265,6.55743852,6.03229094,0.724670675,6.03229094,6.0322807
33.418756,6.08276253,6.02923605,0.231357909,6.02923605,6.02922571
33.429248,6.70820393,6.02618503,0.825844359,6.02618503,6.0261746
33.43974,6.32455532,6.02313817,0.549014713,6.02313817,6.02312764
33.450231,6,6.02009575,-0.141759483,6.02009575,6.02008513
33.460723,5.65685425,6.01705721,-0.600169106,6.01705721,6.01704649
33.471214,6.40312424,6.01402311,0.623779713,6.01402311,6.01401229
33.481706,6.164414,6.01099288,0.39169009,6.01099288,6.01098196
33.492198,5.74456265,6.0079668,-0.513229148,6.0079668,6.00795578
33.502689,6.08276253,6.00494518,0.278957616,6.00494518,6.00493405
33.513181,5.47722558,6.00192742,-0.724363063,6.00192742,6.00191619
33.523672,6.164414,5.99891411,0.40681678,5.99891411,5.99890277
33.534164,5.91607978,5.99590467,-0.282532981,5.99590467,5.99589322
33.544656,6.08276253,5.99289938,0.299771825,5.99289938,5.99288783
33.555147,6,5.98989854,0.100506013,5.98989854,5.98988687
33.565639,6.32455532,5.98690157,0.581079814,5.98690157,5.98688979
33.57613,6.8556546,5.98390904,0.933673155,5.98390904,5.98389715
33.586622,5.09901951,5.98092038,-0.939095771,5.98092038,5.98090837
33.597114,5.29150262,5.97793588,-0.828512677,5.97793588,5.97792375
33.607605,6.40312424,5.97495581,0.654345798,5.97495581,5.97494357
33.618097,6.55743852,5.97197962,0.765152862,5.97197962,5.97196726
33.628588,6.08276253,5.96900787,0.33727535,5.96900787,5.96899538
33.63908,6.4807407,5.96603999,0.717426451,5.96603999,5.96602737
33.649572,5.29150262,5.96307626,-0.819495964,5.96307626,5.96306352
33.660063,6.164414,5.96011697,0.451992298,5.96011697,5.9601041
33.670555,5.29150262,5.95716154,-0.815879233,5.95716154,5.95714855
33.681046,6.63324958,5.95421056,0.824038241,5.95421056,5.95419743
33.691538,6,5.95126344,0.220763576,5.95126344,5.95125018
33.70203,5.83095189,5.94832048,-0.34259099,5.94832048,5.94830708
33.712521,5.74456265,5.94538195,-0.44812867,5.94538195,5.94536842
33.723013,6.70820393,5.94244729,0.87507522,5.94244729,5.94243362
33.733504,5.74456265,5.93951706,-0.441536429,5.93951706,5.93950325
33.743996,6.244998,5.93659071,0.555344299,5.93659071,5.93657675
33.754488,6.4807407,5.9336685,0.739643291,5.9336685,5.93365439
33.764979,6.32455532,5.93075072,0.627538523,5.93075072,5.93073647
33.775471,6.32455532,5.92783681,0.629855941,5.92783681,5.92782241
33.785962,6.244998,5.92492733,0.565747882,5.92492733,5.92491278
33.796454,5,5.92202172,-0.960219622,5.92202172,5.92200701
33.806946,6.40312424,5.91912026,0.695703945,5.91912026,5.91910539
33.817437,5.19615242,5.91622322,-0.848569854,5.91622322,5.91620819
33.827929,5.19615242,5.91333005,-0.846863405,5.91333005,5.91331486
33.83842,4.35889894,5.9104413,-1.24560923,5.9104413,5.91042594
33.848912,5.91607978,5.90755642,0.0923220446,5.90755642,5.9075409
33.859404,6.32455532,5.90467569,0.647981196,5.90467569,5.90465999
33.869895,6.4807407,5.90179937,0.760881938,5.90179937,5.90178351
33.880387,5.56776436,5.89892693,-0.575467259,5.89892693,5.89891088
33.890878,5.38516481,5.8960589,-0.714768559,5.8960589,5.89604268
33.90137,6.40312424,5.89319474,0.71409348,5.89319474,5.89317833
33.911862,6.164414,5.89033472,0.523525819,5.89033472,5.89031813
33.922353,6,5.88747911,0.33544133,5.88747911,5.88746234
33.932845,5.74456265,5.88462738,-0.374252227,5.88462738,5.88461041
33.943336,6,5.88178005,0.343831283,5.88178005,5.88176289
33.953828,6.32455532,5.87893659,0.667546801,5.87893659,5.87891923
33.96432,5.74456265,5.87609727,-0.36267702,5.87609727,5.87607971
33.974811,6.70820393,5.87326235,0.913751377,5.87326235,5.87324459
33.985303,5.74456265,5.8704313,-0.354779732,5.8704313,5.87041333
33.995794,5.19615242,5.86760466,-0.819421893,5.86760466,5.86758648
34.006286,5.83095189,5.86478188,-0.183929307,5.86478188,5.86476349
34.016778,6,5.86196324,0.371532984,5.86196324,5.86194463
34.027269,6,5.859149,0.375301212,5.859149,5.85913016
34.037761,6.08276253,5.85633862,0.475840212,5.85633862,5.85631956
34.048252,6,5.85353265,0.382710536,5.85353265,5.85351335
34.058744,5.91607978,5.85073053,0.255634998,5.85073053,5.850711
34.069236,6.55743852,5.84793255,0.842321778,5.84793255,5.84791278
34.079727,5.29150262,5.84513896,-0.744067427,5.84513896,5.84511895
34.090219,5.91607978,5.84234923,0.271533704,5.84234923,5.84232898
34.10071,5.65685425,5.8395639,-0.42744549,5.8395639,5.83954339
34.111202,5.47722558,5.83678242,-0.599630594,5.83678242,5.83676166
34.121694,6.32455532,5.83400508,0.700392921,5.83400508,5.83398405
34.132185,5.83095189,5.83123212,-0.0167398827,5.83123212,5.83121083
34.142677,5,5.82846302,-0.91019944,5.82846302,5.82844146
34.153168,5.65685425,5.82569831,-0.410906386,5.82569831,5.82567647
34.16366,6.164414,5.82293745,0.584359949,5.82293745,5.82291534
34.174152,5.65685425,5.82018072,-0.404136698,5.82018072,5.82015832
34.184643,6.244998,5.81742837,0.653888086,5.81742837,5.81740568
34.195135,4.89897949,5.81467988,-0.956922353,5.81467988,5.81465689
34.205626,6.4807407,5.81193576,0.81780495,5.81193576,5.81191247
34.216118,7.14142843,5.8091955,1.15422395,5.8091955,5.8091719
34.22661,6.244998,5.80645936,0.6622225,5.80645936,5.80643545
34.237101,6,5.80372759,0.443026419,5.80372759,5.80370336
34.247593,6.164414,5.80099968,0.602838556,5.80099968,5.80097512
34.258084,5.47722558,5.79827614,-0.566613238,5.79827614,5.79825124
34.268576,6.08276253,5.79555645,0.535916116,5.79555645,5.79553121
34.279068,5.56776436,5.79284087,-0.474422287,5.79284087,5.79281529
34.289559,6.244998,5.79012966,0.674439278,5.79012966,5.79010373
34.300051,6.164414,5.7874223,0.613996501,5.7874223,5.78739601
34.310542,5.19615242,5.7847193,-0.767181127,5.7847193,5.78469264
34.321034,6.164414,5.78202016,0.618380016,5.78202016,5.78199312
34.331526,6.32455532,5.77932512,0.738397048,5.77932512,5.7792977
34.342017,6.55743852,5.77663444,0.883631192,5.77663444,5.77660663
34.352509,5.19615242,5.77394761,-0.7601284,5.77394761,5.77391939
34.363,6.63324958,5.77126513,0.928431175,5.77126513,5.77123651
34.373492,6.55743852,5.7685865,0.888173418,5.7685865,5.76855746
34.383984,6.164414,5.76591197,0.631270171,5.76591197,5.76588251
34.394475,5.38516481,5.7632418,-0.614879656,5.7632418,5.7632119
34.404967,5.83095189,5.76057547,0.265285561,5.76057547,5.76054512
34.415458,6.63324958,5.75791348,0.935593981,5.75791348,5.75788268
34.42595,5.56776436,5.75525534,-0.433002287,5.75525534,5.75522408
34.436442,5.91607978,5.7526013,0.404324729,5.7526013,5.75256956
34.446933,4.79583152,5.7499516,-0.976790701,5.7499516,5.74991937
34.457425,6,5.74730573,0.502687045,5.74730573,5.74727301
34.467916,7,5.74466422,1.12041768,5.74466422,5.74463099
34.478408,5.29150262,5.74202654,-0.671210782,5.74202654,5.74199278
34.4889,5.74456265,5.73939294,0.0719006482,5.73939294,5.73935866
34.499391,5,5.73676369,-0.858349398,5.73676369,5.73672886
34.509883,6.08276253,5.73413827,0.590444121,5.73413827,5.73410289
34.520374,5.47722558,5.73151719,-0.504273351,5.73151719,5.73148123
34.530866,4.89897949,5.72889994,-0.910999699,5.72889994,5.7288634
34.541358,5.29150262,5.72628677,-0.659381642,5.72628677,5.72624964
34.551849,5.83095189,5.72367794,0.327527036,5.72367794,5.72364019
34.562341,4.89897949,5.72107293,-0.906693689,5.72107293,5.72103456
34.572832,5.56776436,5.71847225,-0.388211143,5.71847225,5.71843324
34.583324,5.09901951,5.71587541,-0.785401741,5.71587541,5.71583573
34.593816,4.69041576,5.71328264,-1.01136881,5.71328264,5.71324229
34.604307,6.244998,5.71069419,0.730960878,5.71069419,5.71065315
34.614799,5.91607978,5.70810957,0.456037508,5.70810957,5.70806782
34.62529,6.78232998,5.70552928,1.03769008,5.70552928,5.7054868
34.635782,5.47722558,5.70295281,-0.475107598,5.70295281,5.70290958
34.646274,5.91607978,5.70038041,0.46443447,5.70038041,5.70033641
34.656765,6.32455532,5.69781232,0.791671017,5.69781232,5.69776754
34.667257,5.09901951,5.69524806,-0.772158371,5.69524806,5.69520247
34.677748,6.08276253,5.69268812,0.624559375,5.69268812,5.6926417
34.68824,6.08276253,5.69013199,0.626602375,5.69013199,5.69008473
34.698732,6.244998,5.68757994,0.746604353,5.68757994,5.68753179
34.709223,6.78232998,5.68503219,1.04751983,5.68503219,5.68498315
34.719715,5.65685425,5.68248827,-0.16010627,5.68248827,5.6824383
34.730206,5.65685425,5.67994865,-0.151968414,5.67994865,5.67989773
34.740698,6.32455532,5.67741285,0.804451658,5.67741285,5.67736096
34.75119,5.56776436,5.67488112,-0.327286958,5.67488112,5.67482822
34.761681,5.74456265,5.67235368,0.268717256,5.67235368,5.67229975
34.772173,5.56776436,5.66983007,-0.31947724,5.66983007,5.66977508
34.782664,5.47722558,5.66731076,-0.435987594,5.66731076,5.66725467
34.793156,6.08276253,5.66479526,0.64650388,5.66479526,5.66473805
34.803648,5.56776436,5.66228383,-0.307440183,5.66228383,5.66222545
34.814139,6,5.65977669,0.583286643,5.65977669,5.65971712
34.824631,5.38516481,5.65727337,-0.521640265,5.65727337,5.65721257
34.835122,5.47722558,5.65477435,-0.42136537,5.65477435,5.65471228
34.845614,5.47722558,5.65227915,-0.418394037,5.65227915,5.65221576
34.856106,5.91607978,5.649788,0.516034675,5.649788,5.64972326
34.866597,5.74456265,5.64730114,0.311867766,5.64730114,5.64723501
34.877089,5.65685425,5.64481811,0.109709352,5.64481811,5.64475054
34.88758,6,5.64233936,0.598047352,5.64233936,5.64227031
34.898072,5.83095189,5.63986444,0.43713551,5.63986444,5.63979385
34.908564,6.55743852,5.63739357,0.959189736,5.63739357,5.6373214
34.919055,6.08276253,5.634927,0.669205149,5.634927,5.63485318
34.929547,6.40312424,5.63246424,0.877872424,5.63246424,5.63238873
34.940038,5.09901951,5.63000578,-0.728688046,5.63000578,5.62992852
34.95053,6.244998,5.62755114,0.785777866,5.62755114,5.62747207
34.961022,5.65685425,5.62510056,0.178195641,5.62510056,5.62501961
34.971513,6.32455532,5.62265428,0.837795348,5.62265428,5.62257138
34.982005,5.09901951,5.62021181,-0.721936494,5.62021181,5.6201269
34.992496,5.09901951,5.61777365,-0.720245885,5.61777365,5.61768665
35.002988,5.29150262,5.61533931,-0.569066508,5.61533931,5.61525015
35.01348,5.91607978,5.61290904,0.550609427,5.61290904,5.61281763
35.023971,5.65685425,5.61048307,0.215339687,5.61048307,5.61038933
35.034463,6,5.60806093,0.626050371,5.60806093,5.60796477
35.044954,5.09901951,5.6056431,-0.711774954,5.6056431,5.60554443
35.055446,5.91607978,5.60322911,0.55933056,5.60322911,5.60312783
35.065938,6,5.60081919,0.63180757,5.60081919,5.6007152
35.076429,6.164414,5.59841359,0.75232999,5.59841359,5.59830677
35.086921,5.91607978,5.59601184,0.565745476,5.59601184,5.59590208
35.097412,5.56776436,5.59361441,-0.160779483,5.59361441,5.59350159
35.107904,5.91607978,5.59122083,0.569963989,5.59122083,5.59110483
35.118396,5.91607978,5.58883136,0.57205631,5.58883136,5.58871203
35.128887,5.38516481,5.58644622,-0.448643969,5.58644622,5.58632342
35.139379,5.56776436,5.58406496,-0.127673776,5.58406496,5.58393854
35.14987,5.29150262,5.58168804,-0.538688605,5.58168804,5.58155784
35.160362,5.91607978,5.57931501,0.580314373,5.57931501,5.57918086
35.170854,6.32455532,5.57694612,0.864643975,5.57694612,5.57680784
35.181345,4.69041576,5.57458159,-0.940300924,5.57458159,5.57443899
35.191837,6.08276253,5.57222098,0.714521902,5.57222098,5.57207385
35.202328,6,5.56986476,0.655846965,5.56986476,5.56971289
35.21282,5.65685425,5.56751248,0.298900931,5.56751248,5.56735564
35.223312,6.164414,5.56516439,0.774112145,5.56516439,5.56500233
35.233803,6.08276253,5.56282072,0.721069907,5.56282072,5.56265318
35.244295,4.89897949,5.56048104,-0.813327457,5.56048104,5.56030774
35.254786,5.56776436,5.55814581,0.0980742336,5.55814581,5.55796645
35.265278,5.19615242,5.5558146,-0.599718418,5.5558146,5.55562886
35.27577,5,5.55348767,-0.743967518,5.55348767,5.5532952
35.286261,6.08276253,5.55116525,0.729107183,5.55116525,5.55096569
35.296753,5.65685425,5.54884692,0.32864469,5.54884692,5.54863988
35.307244,6.08276253,5.54653315,0.732276845,5.54653315,5.5463182
35.317736,5.56776436,5.54422354,0.153430188,5.54422354,5.54400022
35.328228,5.83095189,5.54191833,0.537618415,5.54191833,5.54168615
35.338719,5.29150262,5.53961779,-0.498111604,5.53961779,5.53937621
35.349211,5.56776436,5.53732152,0.174478788,5.53732152,5.53706996
35.359702,5.38516481,5.53502999,-0.387124243,5.53502999,5.53476784
35.370194,6.164414,5.53274282,0.794777443,5.53274282,5.5324694
35.380686,5.47722558,5.53046029,-0.230726491,5.53046029,5.53017485
35.391177,5.19615242,5.52818267,-0.576220663,5.52818267,5.52788443
35.401669,5.38516481,5.52590961,-0.375159707,5.52590961,5.52559768
35.41216,6.32455532,5.52364161,0.894937822,5.52364161,5.52331504
35.422652,5.91607978,5.52137834,0.628252693,5.52137834,5.52103607
35.433144,5.09901951,5.51912009,-0.648151664,5.51912009,5.51876099
35.443635,5.56776436,5.51686721,0.225603971,5.51686721,5.51649
35.454127,6.244998,5.51461939,0.854621911,5.51461939,5.51422269
35.464618,5.56776436,5.51237719,0.235344791,5.51237719,5.51195947
35.47511,5.47722558,5.51014036,-0.181424327,5.51014036,5.5096999
35.485602,5.91607978,5.50790929,0.638882218,5.50790929,5.50744421
35.496093,5.29150262,5.50568441,-0.462797787,5.50568441,5.50519261
35.506585,6,5.50346554,0.704652014,5.50346554,5.50294466
35.517076,5.65685425,5.50125337,0.394462769,5.50125337,5.50070079
35.527568,6.32455532,5.49904782,0.908574435,5.49904782,5.49846056
35.53806,5.56776436,5.49684945,0.266298534,5.49684945,5.4962242
35.548551,5.83095189,5.49465893,0.57990772,5.49465893,5.49399191
35.559043,5.38516481,5.49247634,-0.327584395,5.49247634,5.49176325
35.569534,5.29150262,5.4903027,-0.445870029,5.4903027,5.48953866
35.580026,4.58257569,5.48813831,-0.951610538,5.48813831,5.4873177
35.590518,4.58257569,5.48598422,-0.950478049,5.48598422,5.48510059
35.601009,5.38516481,5.48384163,-0.314128673,5.48384163,5.48288754
35.611501,6.55743852,5.48171136,1.03717268,5.48171136,5.48067811
35.621992,5.47722558,5.47959527,-0.0486795589,5.47959527,5.47847273
35.632484,5.83095189,5.47749477,0.594522605,5.47749477,5.47627097
35.642976,5.91607978,5.47541224,0.663827948,5.47541224,5.47407304
35.653467,6.08276253,5.47335061,0.780648395,5.47335061,5.47187915
35.663959,6.164414,5.47131291,0.832526934,5.47131291,5.46968888
35.67445,5.19615242,5.46930382,-0.522638875,5.46930382,5.46750263
35.684942,5,5.46732847,-0.68361427,5.46732847,5.46532
35.695434,5.47722558,5.46539427,0.108771783,5.46539427,5.46314118
35.705925,5.19615242,5.46351125,-0.517067528,5.46351125,5.46096638
35.716417,5.83095189,5.46169374,0.607666151,5.46169374,5.45879519
35.726908,4.79583152,5.45996759,-0.81494544,5.45996759,5.45662801
35.7374,5.83095189,5.45838438,0.610383087,5.45838438,5.45446442
35.747892,5.38516481,5.45706025,-0.268133262,5.45706025,5.45230464
35.758383,6.244998,5.45625367,0.888112789,5.45625367,5.45014886
35.768875,5.74456265,5.45649965,0.536715002,5.45649965,5.44799667
35.779366,5.91607978,5.45878324,0.676237048,5.45878324,5.44584847
35.789858,5.19615242,5.46465727,-0.518174531,5.46465727,5.44370387
35.80035,6.32455532,5.47611375,0.921108881,5.47611375,5.44156304
35.810841,5.29150262,5.49499993,-0.451106757,5.49499993,5.4394262
35.821333,5.19615242,5.52196265,-0.570797884,5.52196265,5.43729294
35.831824,5.38516481,5.55522963,-0.412389159,5.55522963,5.43516366
35.842316,5.38516481,5.58985449,-0.452426439,5.58985449,5.43303795
35.852808,6,5.61784913,0.618183523,5.61784913,5.430916
35.863299,5.65685425,5.63014071,0.163442784,5.63014071,5.42879803
35.873791,5.38516481,5.62144982,-0.486091573,5.62144982,5.42668362
35.884282,6.244998,5.59439357,0.806600539,5.59439357,5.42457317
35.894774,5.19615242,5.55718262,-0.600857881,5.55718262,5.42246627
35.905266,5.56776436,5.51849684,0.221962876,5.51849684,5.42036313
35.915757,6.244998,5.48453265,0.872046646,5.48453265,5.41826395
35.926249,4.69041576,5.45824036,-0.876256015,5.45824036,5.4161683
35.93674,5.74456265,5.43980141,0.552051843,5.43980141,5.41407661
35.947232,5.56776436,5.42770974,0.37423872,5.42770974,5.41198845
35.957724,5.19615242,5.41995462,-0.473077368,5.41995462,5.40990403
35.968215,5.91607978,5.41478808,0.708019568,5.41478808,5.40782355
35.978707,4.79583152,5.41101013,-0.784333221,5.41101013,5.4057466
35.989198,4.69041576,5.40792813,-0.847061021,5.40792813,5.40367358
35.99969,4.58257569,5.40518965,-0.906980682,5.40518965,5.40160408
36.010182,5.65685425,5.40263228,0.504204292,5.40263228,5.3995383
36.020673,5.29150262,5.40018364,-0.329668047,5.40018364,5.39747644
36.031165,6.40312424,5.39780926,1.00265397,5.39780926,5.3954181
36.041656,5.65685425,5.39549133,0.511236653,5.39549133,5.39336366
36.052148,5.47722558,5.39321792,0.289840737,5.39321792,5.39131274
36.06264,5.83095189,5.39098109,0.66330295,5.39098109,5.38926552
36.073131,4.58257569,5.38877491,-0.897885969,5.38877491,5.3872222
36.083623,5.65685425,5.38659419,0.519865428,5.38659419,5.38518238
36.094114,6.32455532,5.38443559,0.969597716,5.38443559,5.38314645
36.104606,4.69041576,5.38229571,-0.831793216,5.38229571,5.38111402
36.115098,4.69041576,5.38017236,-0.830515862,5.38017236,5.37908528
36.125589,5.47722558,5.37806376,0.314899687,5.37806376,5.37706041
36.136081,5.19615242,5.37596793,-0.424046586,5.37596793,5.37503903
36.146572,5.91607978,5.37388394,0.736339489,5.37388394,5.37302152
36.157064,4.69041576,5.3718103,-0.825466255,5.3718103,5.3710075
36.167556,5.19615242,5.36974629,-0.416645975,5.36974629,5.36899714
36.178047,6.244998,5.36769134,0.936646495,5.36769134,5.36699064
36.188539,5.91607978,5.36564441,0.741913319,5.36564441,5.36498762
36.19903,4.89897949,5.36360533,-0.681634686,5.36360533,5.36298845
36.209522,5.65685425,5.36157324,0.543397651,5.36157324,5.36099274
36.220014,5.83095189,5.35954793,0.686588641,5.35954793,5.35900068
36.230505,5.91607978,5.35752925,0.747362387,5.35752925,5.35701247
36.240997,6.55743852,5.35551649,1.09632205,5.35551649,5.35502771
36.251488,5.65685425,5.35350978,0.550767162,5.35350978,5.35304678
36.26198,4.69041576,5.35150851,-0.813076107,5.35150851,5.35106931
36.272472,5.19615242,5.34951267,-0.391612372,5.34951267,5.34909547
36.282963,5.65685425,5.34752227,0.556176215,5.34752227,5.34712545
36.293455,5.56776436,5.34553676,0.471410225,5.34553676,5.34515887
36.303946,5.65685425,5.3435564,0.559730161,5.3435564,5.3431961
36.314438,5.47722558,5.34158067,0.368300026,5.34158067,5.34123676
36.32493,5.19615242,5.33960965,-0.378757479,5.33960965,5.33928105
36.335421,5,5.33764344,-0.581070941,5.33764344,5.33732913
36.345913,5.65685425,5.33568156,0.566720994,5.33568156,5.33538064
36.356404,4.58257569,5.33372432,-0.866688311,5.33372432,5.33343594
36.366896,5.83095189,5.33177127,0.706527158,5.33177127,5.33149466
36.377388,5.56776436,5.32982252,0.487792824,5.32982252,5.32955697
36.387879,5.91607978,5.32787821,0.766943004,5.32787821,5.32762307
36.398371,5.19615242,5.32593791,-0.360257528,5.32593791,5.32569257
36.408862,5.65685425,5.32400194,0.576933543,5.32400194,5.32376585
36.419354,5.56776436,5.32206988,0.495675785,5.32206988,5.32184253
36.429846,5.65685425,5.32014188,0.580269221,5.32014188,5.31992279
36.440337,5.47722558,5.31821809,0.39875743,5.31821809,5.3180068
36.450829,5.47722558,5.3162981,0.401157674,5.3162981,5.31609421
36.46132,6.164414,5.31438224,0.921971671,5.31438224,5.31418537
36.471812,5.19615242,5.31247013,-0.341053814,5.31247013,5.31227992
36.482304,6.32455532,5.31056191,1.0069724,5.31056191,5.31037802
36.492795,5.38516481,5.30865774,0.276599104,5.30865774,5.30847987
36.503287,4.79583152,5.30675724,-0.714790681,5.30675724,5.30658509
36.513778,5.47722558,5.30486075,0.415168436,5.30486075,5.30469404
36.52427,5.83095189,5.30296787,0.726625092,5.30296787,5.30280636
36.534762,5.74456265,5.30107878,0.665945843,5.30107878,5.30092222
36.545253,5.74456265,5.29919363,0.667359732,5.29919363,5.2990418
36.555745,5.47722558,5.29731206,0.424162137,5.29731206,5.29716474
36.566236,5.91607978,5.29543439,0.787810506,5.29543439,5.29529138
36.576728,5.83095189,5.29356026,0.733070008,5.29356026,5.29342138
36.58722,5.74456265,5.29168983,0.672958258,5.29168983,5.2915549
36.597711,4.69041576,5.28982327,-0.774214121,5.28982327,5.28969212
36.608203,4.35889894,5.2879602,-0.963878236,5.2879602,5.28783267
36.618694,4.79583152,5.28610097,-0.700192434,5.28610097,5.28597692
36.629186,5.09901951,5.28424521,-0.430378553,5.28424521,5.2841245
36.639678,5.29150262,5.28239309,0.0954438483,5.28239309,5.28227558
36.650169,5.56776436,5.28054478,0.535928711,5.28054478,5.28043034
36.660661,5.56776436,5.27869991,0.53764715,5.27869991,5.27858842
36.671152,5.91607978,5.27685881,0.799512958,5.27685881,5.27675017
36.681644,5.65685425,5.27502114,0.617926458,5.27502114,5.27491523
36.692136,6,5.27318706,0.852533249,5.27318706,5.27308377
36.702627,6.4807407,5.27135673,1.09971995,5.27135673,5.27125598
36.713119,5.74456265,5.2695298,0.68922627,5.2695298,5.26943148
36.72361,5,5.2677066,-0.517403707,5.2677066,5.26761063
36.734102,5.09901951,5.26588678,-0.408493895,5.26588678,5.26579308
36.744594,6,5.2640705,0.857863333,5.2640705,5.26397899
36.755085,5.83095189,5.26225794,0.754118,5.26225794,5.26216854
36.765577,5.56776436,5.26044873,0.554360562,5.26044873,5.26036137
36.776068,5,5.25864322,-0.508569776,5.25864322,5.25855783
36.78656,5.65685425,5.25684105,0.632465969,5.25684105,5.25675756
36.797052,5.56776436,5.25504239,0.5592155,5.25504239,5.25496074
36.807543,5.19615242,5.2532474,-0.238945553,5.2532474,5.25316753
36.818035,5.47722558,5.25145574,0.475152437,5.25145574,5.25137758
36.828526,5.74456265,5.24966773,0.703487679,5.24966773,5.24959124
36.839018,6.40312424,5.24788304,1.07482147,5.24788304,5.24780816
36.84951,5.47722558,5.24610182,0.480753319,5.24610182,5.24602851
36.860001,5.56776436,5.24432424,0.568717962,5.24432424,5.24425244
36.870493,5.38516481,5.24254996,0.377643813,5.24254996,5.24247962
36.880984,5.56776436,5.2407793,0.571826078,5.2407793,5.24071038
36.891476,5.29150262,5.23901781,0.229095636,5.23901781,5.23894438
36.901968,5.09901951,5.2372539,-0.371798848,5.2372539,5.23718179
36.912459,5.56776436,5.23549359,0.57642933,5.23549359,5.23542276
36.922951,4.58257569,5.23373655,-0.806945385,5.23373655,5.23366697
36.933442,5.74456265,5.2319831,0.715946606,5.2319831,5.23191473
36.943934,4.79583152,5.23023292,-0.659091338,5.23023292,5.23016571
36.954426,5.09901951,5.22848614,-0.359814717,5.22848614,5.22842008
36.964917,5.47722558,5.22674295,0.500482392,5.22674295,5.22667799
36.975409,5.38516481,5.225003,0.40020221,5.225003,5.22493911
36.9859,5.83095189,5.22326661,0.779541713,5.22326661,5.22320377
36.996392,5.19615242,5.22153346,-0.159314264,5.22153346,5.22147162
37.006884,5.74456265,5.21980369,0.72440248,5.21980369,5.21974285
37.017375,4.69041576,5.21807748,-0.726403276,5.21807748,5.21801759
37.027867,5.91607978,5.21635448,0.836495847,5.21635448,5.21629553
37.038358,6.55743852,5.21463502,1.15879399,5.21463502,5.21457698
37.04885,5.83095189,5.21291877,0.786150828,5.21291877,5.21286161
37.059342,5.19615242,5.21120588,-0.122692543,5.21120588,5.21114958
37.069833,5.38516481,5.20949652,0.41912801,5.20949652,5.20944105
37.080325,4.58257569,5.20779035,-0.790705161,5.20779035,5.20773569
37.090816,6.78232998,5.20608769,1.25548489,5.20608769,5.20603383
37.101308,5.74456265,5.20438821,0.734965603,5.20438821,5.20433513
37.1118,5.29150262,5.20269207,0.298010989,5.20269207,5.20263974
37.122291,5.56776436,5.20099943,0.605611204,5.20099943,5.20094784
37.132783,5,5.19930996,-0.446441442,5.19930996,5.19925908
37.143274,5.47722558,5.19762398,0.528773674,5.19762398,5.1975738
37.153766,4.47213595,5.19594115,-0.850767416,5.19594115,5.19589165
37.164258,5,5.19426164,-0.440751224,5.19426164,5.19421281
37.174749,4.58257569,5.1925856,-0.78103131,5.1925856,5.19253742
37.185241,5.29150262,5.19091271,0.317159128,5.19091271,5.19086516
37.195732,5.47722558,5.18924328,0.536639821,5.18924328,5.18919634
37.206224,5.74456265,5.18757698,0.746314722,5.18757698,5.18753065
37.216716,5.29150262,5.18591398,0.324944062,5.18591398,5.18586823
37.227207,5.38516481,5.18425442,0.448230284,5.18425442,5.18420925
37.237699,4.89897949,5.18259799,-0.532558447,5.18259799,5.18255338
37.24819,5,5.18094499,-0.425376287,5.18094499,5.18090092
37.258682,5.09901951,5.1792951,-0.283329466,5.1792951,5.17925157
37.269174,4.69041576,5.17764848,-0.698020575,5.17764848,5.17760548
37.279665,4.89897949,5.17600529,-0.526332404,5.17600529,5.17596279
37.290157,5.74456265,5.17436519,0.755114201,5.17436519,5.1743232
37.300648,5.29150262,5.1727285,0.344636213,5.1727285,5.172687
37.31114,6.08276253,5.17109491,0.954812872,5.17109491,5.17105388
37.321632,5.47722558,5.16946456,0.554762125,5.16946456,5.169424
37.332123,5.29150262,5.1678376,0.351660373,5.1678376,5.1677975
37.342615,5,5.16621373,-0.40769318,5.16621373,5.16617407
37.353106,5.19615242,5.16459324,0.177649051,5.16459324,5.16455402
37.363598,5.09901951,5.16297582,-0.252895835,5.16297582,5.16293702
37.37409,5.47722558,5.16136162,0.562017756,5.16136162,5.16132324
37.384581,5.29150262,5.15975079,0.362976357,5.15975079,5.15971282
37.395073,5.56776436,5.15814301,0.640016679,5.15814301,5.15810545
37.405564,5.74456265,5.1565386,0.766827261,5.1565386,5.15650142
37.416056,4.69041576,5.15493723,-0.681558122,5.15493723,5.15490044
37.426548,5.56776436,5.15333907,0.643758726,5.15333907,5.15330265
37.437039,4.79583152,5.15174424,-0.596584209,5.15174424,5.15170819
37.447531,5,5.15015245,-0.387495101,5.15015245,5.15011677
37.458022,5.56776436,5.148564,0.647456843,5.148564,5.14852866
37.468514,5.38516481,5.14697857,0.488043271,5.14697857,5.14694358
37.479006,5.56776436,5.14539632,0.649898488,5.14539632,5.14536167
37.489497,5.65685425,5.14381738,0.716265918,5.14381738,5.14378306
37.499989,4.79583152,5.14224146,-0.588566003,5.14224146,5.14220747
37.51048,5.56776436,5.14066885,0.653525448,5.14066885,5.14063517
37.520972,5.56776436,5.13909924,0.654725223,5.13909924,5.13906588
37.531464,5.29150262,5.13753279,0.392389901,5.13753279,5.13749973
37.541955,5,5.13596963,-0.368740594,5.13596963,5.13593686
37.552447,5.47722558,5.13440945,0.585505013,5.13440945,5.13437699
37.562938,5.38516481,5.13285257,0.502306918,5.13285257,5.13282039
37.57343,5.47722558,5.13129866,0.588155516,5.13129866,5.13126677
37.583922,5,5.12974789,-0.360205339,5.12974789,5.12971627
37.594413,5.65685425,5.12820038,0.727085876,5.12820038,5.12816903
37.604905,4.47213595,5.12665584,-0.809024032,5.12665584,5.12662476
37.615396,5,5.12511456,-0.353715365,5.12511456,5.12508374
37.625888,4.89897949,5.12357624,-0.473916401,5.12357624,5.12354567
37.63638,5.74456265,5.12204102,0.789000394,5.12204102,5.12201071
37.646871,5.19615242,5.12050905,0.275033398,5.12050905,5.12047898
37.657363,5.29150262,5.11898003,0.415358392,5.11898003,5.1189502
37.667854,5.83095189,5.11745424,0.844687905,5.11745424,5.11742465
37.678346,4.69041576,5.11593139,-0.652315588,5.11593139,5.11590203
37.688838,5.29150262,5.11441161,0.420821826,5.11441161,5.11438248
37.699329,5.74456265,5.11289506,0.79477518,5.11289506,5.11286615
37.709821,4.89897949,5.11138143,-0.460870855,5.11138143,5.11135274
37.720312,5.47722558,5.10987101,0.606097817,5.10987101,5.10984254
37.730804,5.29150262,5.10836351,0.42794756,5.10836351,5.10833525
37.741296,4.24264069,5.10685906,-0.929633462,5.10685906,5.10683101
37.751787,5.47722558,5.10535781,0.609809617,5.10535781,5.10532996
37.762279,4.79583152,5.10385946,-0.555002642,5.10385946,5.10383181
37.77277,4.69041576,5.10236429,-0.641832165,5.10236429,5.10233684
37.783262,4.79583152,5.10087202,-0.552304709,5.10087202,5.10084476
37.793754,5,5.09938277,-0.315250335,5.09938277,5.09935571
37.804245,5.47722558,5.0978967,0.615896805,5.0978967,5.09786982
37.814737,5.91607978,5.09641351,0.905354226,5.09641351,5.09638681
37.825228,5.19615242,5.09493347,0.318149255,5.09493347,5.09490695
37.83572,4.47213595,5.09345631,-0.788238769,5.09345631,5.09342997
37.846212,5.74456265,5.09198216,0.807824541,5.09198216,5.09195599
37.856703,4.47213595,5.09051115,-0.786368356,5.09051115,5.09048514
37.867195,5.65685425,5.08904299,0.753532519,5.08904299,5.08901716
37.877686,5,5.08757797,-0.295935757,5.08757797,5.0875523
37.888178,5.29150262,5.0861158,0.453196228,5.0861158,5.08609029
37.89867,5.09901951,5.08465661,0.119845315,5.08465661,5.08463126
37.909161,5.47722558,5.08320054,0.627714131,5.08320054,5.08317535
37.919653,5.19615242,5.08174731,0.338238247,5.08174731,5.08172227
37.930144,4.58257569,5.08029718,-0.705493792,5.08029718,5.08027229
37.940636,5.09901951,5.07884989,0.142019817,5.07884989,5.07882514
37.951128,5.19615242,5.07740555,0.344596688,5.07740555,5.07738094
37.961619,4.47213595,5.0759643,-0.777063925,5.0759643,5.07593984
37.972111,5.65685425,5.07452586,0.76310444,5.07452586,5.07450154
37.982602,5.56776436,5.07309051,0.703330543,5.07309051,5.07306633
37.993094,5.38516481,5.07165796,0.55991682,5.07165796,5.07163391
38.003586,4.47213595,5.07022835,-0.773364334,5.07022835,5.07020443
38.014077,4.12310563,5.0688018,-0.972469114,5.0688018,5.06877802
38.024569,5.09901951,5.06737805,0.177880485,5.06737805,5.06735439
38.03506,4.89897949,5.06595735,-0.408629247,5.06595735,5.06593382
38.045552,4.47213595,5.06453943,-0.769677513,5.06453943,5.06451602
38.056044,5.19615242,5.06312442,0.364730039,5.06312442,5.06310113
38.066535,5.38516481,5.06171246,0.568728715,5.06171246,5.06168929
38.077027,5,5.06030326,-0.245567215,5.06030326,5.06028021
38.087518,4.89897949,5.05889709,-0.399896992,5.05889709,5.05887415
38.09801,4.58257569,5.05749368,-0.689142935,5.05749368,5.05747086
38.108502,4.58257569,5.05609316,-0.688126051,5.05609316,5.05607045
38.118993,4.47213595,5.05469565,-0.763255983,5.05469565,5.05467305
38.129485,4.79583152,5.05330089,-0.507414391,5.05330089,5.05327839
38.139976,5.09901951,5.05190913,0.217049265,5.05190913,5.05188674
38.150468,5.29150262,5.05052011,0.490899699,5.05052011,5.05049782
38.16096,4.69041576,5.04913395,-0.598930871,5.04913395,5.04911176
38.171451,5.74456265,5.04775078,0.834752579,5.04775078,5.04772869
38.181943,5.56776436,5.04637033,0.722076196,5.04637033,5.04634834
38.192434,5,5.04499286,-0.212115206,5.04499286,5.04497097
38.202926,5.38516481,5.0436181,0.584419972,5.0436181,5.04359631
38.213418,5.38516481,5.04224618,0.58559254,5.04224618,5.04222448
38.223909,4.47213595,5.04087723,-0.754149371,5.04087723,5.04085562
38.234401,4.35889894,5.03951097,-0.824992139,5.03951097,5.03948945
38.244892,3.87298335,5.03814767,-1.07942778,5.03814767,5.03812624
38.255384,4.89897949,5.03678705,-0.371224418,5.03678705,5.03676571
38.265876,5,5.03542925,-0.188226602,5.03542925,5.035408
38.276367,4.89897949,5.03407439,-0.367552588,5.03407439,5.03405322
38.286859,5.09901951,5.0327222,0.257482642,5.0327222,5.03270111
38.29735,5.38516481,5.03137294,0.594804056,5.03137294,5.03135193
38.307842,4.69041576,5.03002635,-0.582761175,5.03002635,5.03000542
38.318334,5.29150262,5.02868254,0.51265981,5.02868254,5.02866169
38.328825,5.19615242,5.02734165,0.410865884,5.02734165,5.02732087
38.339317,4.79583152,5.02600341,-0.479762318,5.02600341,5.0259827
38.349808,5.65685425,5.02466806,0.795101368,5.02466806,5.02464744
38.3603,5.09901951,5.02333537,0.27510752,5.02333537,5.02331481
38.370792,5.74456265,5.02200543,0.850033655,5.02200543,5.02198495
38.381283,4.79583152,5.02067838,-0.474180198,5.02067838,5.02065797
38.391775,5.29150262,5.01935396,0.521678693,5.01935396,5.01933362
38.402266,5.56776436,5.01803242,0.741439103,5.01803242,5.01801214
38.412758,6.4807407,5.01671349,1.20996992,5.01671349,5.01669328
38.42325,4.79583152,5.01539731,-0.468578471,5.01539731,5.01537716
38.433741,6.244998,5.01408398,1.10946565,5.01408398,5.0140639
38.444233,5.56776436,5.01277326,0.744977251,5.01277326,5.01275324
38.454724,6.08276253,5.01146539,1.03503485,5.01146539,5.01144543
38.465216,4.69041576,5.01016011,-0.565459414,5.01016011,5.01014021
38.475708,4.89897949,5.00885755,-0.331478598,5.00885755,5.00883771
38.486199,5.19615242,5.00755782,0.434274803,5.00755782,5.00753804
38.496691,4.89897949,5.00626067,-0.327538066,5.00626067,5.00624095
38.507182,5.19615242,5.00496635,0.437248302,5.00496635,5.00494668
38.517674,5.09901951,5.00367459,0.308779729,5.00367459,5.00365498
38.528166,5.38516481,5.00238553,0.618691585,5.00238553,5.00236597
38.538657,5.74456265,5.00109927,0.862243221,5.00109927,5.00107977
38.549149,4.69041576,4.99981558,-0.556237193,4.99981558,4.99979612
38.55964,5.19615242,4.99853467,0.444542179,4.99853467,4.99851527
38.570132,5,4.99725632,0.0523801466,4.99725632,4.99723697
38.580624,4.89897949,4.99598063,-0.31145007,4.99598063,4.99596133
38.591115,5.19615242,4.99470772,0.448825911,4.99470772,4.99468847
38.601607,5.56776436,4.99343735,0.75784366,4.99343735,4.99341814
38.612098,4.69041576,4.99216975,-0.549321388,4.99216975,4.99215058
38.62259,4.79583152,4.99090467,-0.441670856,4.99090467,4.99088555
38.633082,4.24264069,4.98964223,-0.864292509,4.98964223,4.98962316
38.643573,4.47213595,4.98838254,-0.71850302,4.98838254,4.98836351
38.654065,5.91607978,4.98712537,0.963822812,4.98712537,4.98710638
38.664556,3.87298335,4.98587094,-1.05493488,4.98587094,4.98585199
38.675048,4.69041576,4.98461901,-0.542405061,4.98461901,4.9846001
38.68554,5.83095189,4.98336969,0.920642276,4.98336969,4.98335083
38.696031,4.79583152,4.98212311,-0.431615089,4.98212311,4.98210428
38.706523,4.58257569,4.98087901,-0.631112757,4.98087901,4.98086022
38.717014,5.56776436,4.97963762,0.766894216,4.97963762,4.97961887
38.727506,4.79583152,4.97839872,-0.427278826,4.97839872,4.97838
38.737998,4,4.9771624,-0.988515251,4.9771624,4.97714372
38.748489,6.08276253,4.97592879,1.05206166,4.97592879,4.97591014
38.758981,5.19615242,4.97469763,0.47058983,4.97469763,4.97467902
38.769472,6.08276253,4.97346917,1.05322996,4.97346917,4.97345059
38.779964,4.12310563,4.97224316,-0.921486592,4.97224316,4.97222462
38.790456,6.164414,4.97101972,1.09242587,4.97101972,4.9710012
38.800947,5.38516481,4.96979895,0.644488833,4.96979895,4.96978047
38.811439,4.69041576,4.96858062,-0.527413368,4.96858062,4.96856217
38.82193,4.24264069,4.96736496,-0.851307387,4.96736496,4.96734653
38.832422,4.58257569,4.96615172,-0.619335146,4.96615172,4.96613332
38.842914,4.58257569,4.96494102,-0.618356956,4.96494102,4.96492265
38.853405,4.58257569,4.96373297,-0.617379362,4.96373297,4.96371463
38.863897,5.74456265,4.96252734,0.884327604,4.96252734,4.96250902
38.874388,4.89897949,4.96132434,-0.249689516,4.96132434,4.96130605
38.88488,5.29150262,4.96012375,0.57565517,4.96012375,4.96010548
38.895372,4.89897949,4.95892567,-0.244839099,4.95892567,4.95890743
38.905863,4.58257569,4.95773021,-0.612498587,4.95773021,4.957712
38.916355,4.89897949,4.95653715,-0.239911782,4.95653715,4.95651895
38.926846,4.12310563,4.9553467,-0.912272476,4.9553467,4.95532852
38.937338,5.38516481,4.95415862,0.656510613,4.95415862,4.95414047
38.94783,4.89897949,4.95297304,-0.232365126,4.95297304,4.95295491
38.958321,6,4.95179005,1.02382125,4.95179005,4.95177194
38.968813,5.47722558,4.95060943,0.725683229,4.95060943,4.95059133
38.979304,4.58257569,4.94943139,-0.605686134,4.94943139,4.94941332
38.989796,4.35889894,4.94825571,-0.767695749,4.94825571,4.94823765
39.000288,5.29150262,4.94708249,0.586873183,4.94708249,4.94706445
39.010779,5.19615242,4.94591184,0.500240524,4.94591184,4.94589382
39.021271,6.4807407,4.94474353,1.23935353,4.94474353,4.94472553
39.031762,4.89897949,4.94357779,-0.211183095,4.94357779,4.9435598
39.042254,4.89897949,4.94241437,-0.208410373,4.94241437,4.9423964
39.052746,4.58257569,4.94125339,-0.598897066,4.94125339,4.94123543
39.063237,5.56776436,4.94009496,0.792255898,4.94009496,4.94007701
39.073729,4.79583152,4.93893884,-0.378295273,4.93893884,4.93892091
39.08422,5.09901951,4.93778525,0.401539864,4.93778525,4.93776733
39.094712,5.65685425,4.93663397,0.848657927,4.93663397,4.93661607
39.105204,5,4.93548511,0.25399782,4.93548511,4.93546721
39.115695,4.58257569,4.93433876,-0.593096167,4.93433876,4.93432087
39.126187,5.74456265,4.9331947,0.900759649,4.9331947,4.93317683
39.136678,4.79583152,4.93205315,-0.369082143,4.93205315,4.93203529
39.14717,4.47213595,4.93091388,-0.677331476,4.93091388,4.93089603
39.157662,5.38516481,4.929777,0.674824276,4.929777,4.92975916
39.168153,5.38516481,4.92864261,0.675664261,4.92864261,4.92862477
39.178645,4.35889894,4.92751049,-0.754063358,4.92751049,4.92749266
39.189136,4.35889894,4.92638085,-0.753313949,4.92638085,4.92636302
39.199628,4.89897949,4.92525347,-0.162092503,4.92525347,4.92523565
39.21012,5.19615242,4.92412844,0.521559181,4.92412844,4.92411063
39.220611,4.79583152,4.92300588,-0.356615144,4.92300588,4.92298808
39.231103,5.47722558,4.92188557,0.745211383,4.92188557,4.92186777
39.241594,4.35889894,4.92076771,-0.749579058,4.92076771,4.92074991
39.252086,5.09901951,4.91965208,0.423517925,4.91965208,4.91963429
39.262578,5.09901951,4.91853879,0.42483023,4.91853879,4.918521
39.273069,4.79583152,4.91742793,-0.34870677,4.91742793,4.91741015
39.283561,5.09901951,4.9163193,0.427434455,4.9163193,4.91630152
39.294052,4.69041576,4.91521309,-0.474127969,4.91521309,4.91519531
39.304544,4.79583152,4.91410909,-0.343915061,4.91410909,4.91409131
39.315036,5.65685425,4.9130074,0.862465561,4.9130074,4.91298962
39.325527,5,4.91190813,0.296802751,4.91190813,4.91189035
39.336019,5,4.91081104,0.298645199,4.91081104,4.91079326
39.34651,6.08276253,4.90971636,1.08307256,4.90971636,4.90969858
39.357002,5.09901951,4.90862386,0.436343498,4.90862386,4.90860608
39.367494,4.69041576,4.90753365,-0.465959111,4.90753365,4.90751587
39.377985,5.56776436,4.90644582,0.81321494,4.90644582,4.90642804
39.388477,4.89897949,4.90536017,-0.079879169,4.90536017,4.90534238
39.398968,4.79583152,4.90427688,-0.32931043,4.90427688,4.90425909
39.40946,5.29150262,4.90319576,0.62314273,4.90319576,4.90317796
39.419952,5.38516481,4.9021169,0.695016483,4.9021169,4.9020991
39.430443,4.69041576,4.90104039,-0.45893859,4.90104039,4.90102258
39.440935,5.65685425,4.89996603,0.86999323,4.89996603,4.89994822
39.451426,4.79583152,4.89889402,-0.321033476,4.89889402,4.8988762
39.461918,4.12310563,4.89782414,-0.880180955,4.89782414,4.89780632
39.47241,4.89897949,4.8967565,0.0471485839,4.8967565,4.89673867
39.482901,4.89897949,4.89569118,0.0573437112,4.89569118,4.89567335
39.493393,5.74456265,4.89462799,0.921919005,4.89462799,4.89461015
39.503884,4.89897949,4.89356712,0.0735687534,4.89356712,4.89354927
39.514376,4.79583152,4.89250837,-0.310929,4.89250837,4.89249051
39.524868,5.29150262,4.89145182,0.632495696,4.89145182,4.89143395
39.535359,5.38516481,4.89039757,0.703396926,4.89039757,4.8903797
39.545851,4.35889894,4.88934542,-0.728317568,4.88934542,4.88932754
39.556342,3.74165739,4.88829557,-1.07081193,4.88829557,4.88827767
39.566834,5.19615242,4.8872478,0.555791885,4.8872478,4.8872299
39.577326,5.56776436,4.88620222,0.82556777,4.88620222,4.8861843
39.587817,5.09901951,4.88515891,0.462450646,4.88515891,4.88514099
39.598309,5.09901951,4.88411768,0.463575056,4.88411768,4.88409974
39.6088,4.89897949,4.88307872,0.126098256,4.88307872,4.88306076
39.619292,5.83095189,4.88204181,0.974120158,4.88204181,4.88202385
39.629784,4.79583152,4.88100707,-0.291848497,4.88100707,4.88098909
39.640275,5,4.87997457,0.346446858,4.87997457,4.87995658
39.650767,4.69041576,4.87894413,-0.434198537,4.87894413,4.87892612
39.661258,4.58257569,4.87791592,-0.543452141,4.87791592,4.8778979
39.67175,4.69041576,4.87688976,-0.431826353,4.87688976,4.87687172
39.682242,4.79583152,4.87586573,-0.282903167,4.87586573,4.87584767
39.692733,5.47722558,4.87484392,0.776132501,4.87484392,4.87482585
39.703225,4.47213595,4.87382413,-0.633788747,4.87382413,4.87380605
39.713716,4.89897949,4.87280656,0.161780486,4.87280656,4.87278846
39.724208,4.58257569,4.871791,-0.537787419,4.871791,4.87177289
39.7347,5.19615242,4.87077755,0.5704164,4.87077755,4.87075942
39.745191,5.19615242,4.8697663,0.571302128,4.8697663,4.86974815
39.755683,5.19615242,4.86875705,0.572184737,4.86875705,4.86873888
39.766174,5.74456265,4.86774999,0.936382754,4.86774999,4.8677318
39.776666,5.19615242,4.86674491,0.573940338,4.86674491,4.8667267
39.787158,3.87298335,4.86574192,-0.996372707,4.86574192,4.86572369
39.797649,4.89897949,4.8647411,0.185036183,4.8647411,4.86472285
39.808141,4.47213595,4.86374225,-0.625784544,4.86374225,4.86372398
39.818632,3.87298335,4.86274557,-0.994867941,4.86274557,4.86272728
39.829124,4.24264069,4.86175085,-0.786835535,4.86175085,4.86173254
39.839616,6,4.86075818,1.06735271,4.86075818,4.86073985
39.850107,5.29150262,4.85976766,0.657065414,4.85976766,4.85974931
39.860599,5.74456265,4.8587791,0.941160746,4.8587791,4.85876072
39.87109,4.69041576,4.85779266,-0.409117226,4.85779266,4.85777426
39.881582,4.69041576,4.85680817,-0.407912262,4.85680817,4.85678975
39.892074,4.24264069,4.85582571,-0.783061317,4.85582571,4.85580727
39.902565,4.79583152,4.85484537,-0.242927659,4.85484537,4.8548269
39.913057,4.58257569,4.85386696,-0.520856277,4.85386696,4.85384846
39.923548,4.89897949,4.85289065,0.214683108,4.85289065,4.85287213
39.93404,5.19615242,4.85191626,0.586716425,4.85191626,4.85189771
39.944532,5.74456265,4.85094387,0.945314113,4.85094387,4.8509253
39.955023,5.47722558,4.84997358,0.79199242,4.84997358,4.84995498
39.965515,4,4.84900519,-0.921414777,4.84900519,4.84898657
39.976006,5.47722558,4.84803888,0.793212891,4.84803888,4.84802023
39.986498,4.79583152,4.84707447,-0.226369048,4.84707447,4.84705579
39.99699,4.79583152,4.84611203,-0.224233161,4.84611203,4.84609333
40.007481,5.19615242,4.84515166,0.59245317,4.84515166,4.84513293
40.017973,3.87298335,4.84419317,-0.985499786,4.84419317,4.84417441
40.028464,4.12310563,4.84324982,-0.848613098,4.84324982,4.84321794
40.038956,4.79583152,4.84229528,-0.215554535,4.84229528,4.84226335
40.049448,5,4.8413427,0.398318088,4.8413427,4.8413107
40.059939,4.47213595,4.84039216,-0.606841171,4.84039216,4.8403601
40.070431,4.79583152,4.83944348,-0.208834749,4.83944348,4.83941135
40.080922,5.29150262,4.83849682,0.673057057,4.83849682,4.83846463
40.091414,4.79583152,4.83755201,-0.204255929,4.83755201,4.83751976
40.101906,4.47213595,4.83660913,-0.603716134,4.83660913,4.83657681
40.112397,5,4.83566826,0.405378519,4.83566826,4.83563587
40.122889,4.89897949,4.83472922,0.253476365,4.83472922,4.83469677
40.13338,4.24264069,4.83379218,-0.768863769,4.83379218,4.83375967
40.143872,4.69041576,4.83285697,-0.377413841,4.83285697,4.83282438
40.154364,5.65685425,4.83192366,0.908256898,4.83192366,4.831891
40.164855,5.09901951,4.83099233,0.517713416,4.83099233,4.83095961
40.175347,5.29150262,4.83006281,0.679293609,4.83006281,4.83003003
40.185838,5,4.82913527,0.413357866,4.82913527,4.82910242
40.19633,4.47213595,4.82820953,-0.596719008,4.82820953,4.8281766
40.206822,5.65685425,4.82728566,0.910806558,4.82728566,4.82725266
40.217313,4.89897949,4.82636376,0.26947305,4.82636376,4.82633069
40.227805,3.87298335,4.82544364,-0.975940722,4.82544364,4.82541049
40.238296,5.09901951,4.82452547,0.523921794,4.82452547,4.82449225
40.248788,4.58257569,4.82360907,-0.490951497,4.82360907,4.82357578
40.25928,5.09901951,4.82269452,0.525666236,4.82269452,4.82266116
40.269771,4.89897949,4.82178191,0.277844512,4.82178191,4.82174848
40.280263,4.69041576,4.82087106,-0.361185964,4.82087106,4.82083755
40.290754,4,4.81996213,-0.905517605,4.81996213,4.81992855
40.301246,4.58257569,4.81905495,-0.486291331,4.81905495,4.81902129
40.311738,4.69041576,4.8181496,-0.357398718,4.8181496,4.81811587
40.322229,4.79583152,4.81724616,-0.146337417,4.81724616,4.81721235
40.332721,4,4.81634446,-0.903517822,4.81634446,4.81631056
40.343212,4.58257569,4.81544465,-0.482564972,4.81544465,4.81541068
40.353704,4.47213595,4.81454656,-0.585158618,4.81454656,4.81451252
40.364196,4.89897949,4.81365028,0.292111628,4.81365028,4.81361616
40.374687,4.79583152,4.81275589,-0.13009367,4.81275589,4.81272168
40.385179,4.47213595,4.8118632,-0.582861256,4.8118632,4.81182891
40.39567,4.79583152,4.81097239,-0.12304821,4.81097239,4.81093802
40.406162,5.38516481,4.81008327,0.758341306,4.81008327,4.81004882
40.416654,5.09901951,4.80919594,0.538352652,4.80919594,4.80916141
40.427145,4.89897949,4.80831046,0.301112979,4.80831046,4.80827585
40.437637,5.47722558,4.80742667,0.818412431,4.80742667,4.80739197
40.448128,4.12310563,4.80654472,-0.826703755,4.80654472,4.80650995
40.45862,5.91607978,4.80566446,1.05376246,4.80566446,4.80562959
40.469112,3.46410162,4.80478594,-1.15787924,4.80478594,4.80475099
40.479603,4,4.80390926,-0.896609871,4.80390926,4.80387423
40.490095,4.24264069,4.80303424,-0.748594385,4.80303424,4.80299912
40.500586,4.89897949,4.80216104,0.311156622,4.80216104,4.80212584
40.511078,5.56776436,4.8012895,0.875485504,4.8012895,4.8012542
40.52157,5.09901951,4.80041968,0.546442893,4.80041968,4.8003843
40.532061,5,4.79955167,0.447714564,4.79955167,4.7995162
40.542553,5.09901951,4.7986853,0.54802757,4.7986853,4.79864974
40.553044,4.69041576,4.79782072,-0.32772696,4.79782072,4.79778507
40.563536,4.47213595,4.79695777,-0.569931414,4.79695777,4.79692204
40.574028,5.83095189,4.79609653,1.01727841,4.79609653,4.7960607
40.584519,4.79583152,4.79523707,0.0243814801,4.79523707,4.79520115
40.595011,3.87298335,4.79437922,-0.959893677,4.79437922,4.79434321
40.605502,5.09901951,4.79352314,0.552717263,4.79352314,4.79348704
40.615994,4.69041576,4.79266867,-0.319770086,4.79266867,4.79263247
40.626486,5.38516481,4.79181587,0.77029146,4.79181587,4.79177959
40.636977,4.24264069,4.79096484,-0.740489129,4.79096484,4.79092845
40.647469,6.08276253,4.79011539,1.13694641,4.79011539,4.79007891
40.65796,5,4.78926769,0.459055892,4.78926769,4.78923111
40.668452,5.09901951,4.78842157,0.55731315,4.78842157,4.7883849
40.678944,4.69041576,4.7875771,-0.31170714,4.7875771,4.78754033
40.689435,4.89897949,4.78673437,0.335030028,4.78673437,4.7866975
40.699927,4.35889894,4.7858932,-0.653447973,4.7858932,4.78585623
40.710418,4.58257569,4.78505375,-0.449975614,4.78505375,4.78501669
40.72091,4.69041576,4.78421586,-0.306268013,4.78421586,4.7841787
40.731402,4,4.78337959,-0.885087337,4.78337959,4.78334233
40.741893,4.89897949,4.78254504,0.34122492,4.78254504,4.78250768
40.752385,4.24264069,4.78171203,-0.734214777,4.78171203,4.78167456
40.762876,5.09901951,4.78088071,0.564037947,4.78088071,4.78084314
40.773368,5.19615242,4.78005092,0.645059299,4.78005092,4.78001326
40.78386,4.89897949,4.77922274,0.346058869,4.77922274,4.77918497
40.794351,4.35889894,4.77839625,-0.647686115,4.77839625,4.77835837
40.804843,4.69041576,4.77757127,-0.295221117,4.77757127,4.77753329
40.815334,4.79583152,4.77674796,0.138143274,4.77674796,4.77670987
40.825826,4.89897949,4.77592616,0.350789576,4.77592616,4.77588797
40.836318,5.19615242,4.77510594,0.648880945,4.77510594,4.77506765
40.846809,4.47213595,4.77428738,-0.549683023,4.77428738,4.77424898
40.857301,4.79583152,4.77347031,0.14953665,4.77347031,4.7734318
40.867792,5.38516481,4.77265489,0.782630126,4.77265489,4.77261627
40.878284,3.87298335,4.77184096,-0.948081015,4.77184096,4.77180223
40.888776,5.29150262,4.77102858,0.72143887,4.77102858,4.77098974
40.899267,4.47213595,4.77021783,-0.545968751,4.77021783,4.77017888
40.909759,5.65685425,4.76940856,0.94204336,4.76940856,4.76936949
40.92025,4,4.7686009,-0.876698866,4.7686009,4.76856173
40.930742,4,4.76779471,-0.876238957,4.76779471,4.76775542
40.941234,3,4.76699005,-1.32928178,4.76699005,4.76695065
40.951725,4.47213595,4.766187,-0.542264736,4.766187,4.76614748
40.962217,3.16227766,4.76538539,-1.26613891,4.76538539,4.76534576
40.972708,4.79583152,4.76458539,0.17676577,4.76458539,4.76454564
40.9832,4.24264069,4.76378682,-0.721904515,4.76378682,4.76374695
40.993692,4.79583152,4.76298976,0.181222976,4.76298976,4.76294977
41.004183,5.19615242,4.76219428,0.658754996,4.76219428,4.76215418
41.014675,4.79583152,4.76140022,0.185556728,4.76140022,4.76136001
41.025166,5.38516481,4.76060774,0.790289229,4.76060774,4.7605674
41.035658,4.89897949,4.75981667,0.373045321,4.75981667,4.75977622
41.04615,4.47213595,4.75902709,-0.535622198,4.75902709,4.75898651
41.056641,4.89897949,4.75823907,0.375153857,4.75823907,4.75819837
41.067133,3.31662479,4.75745245,-1.20034481,4.75745245,4.75741162
41.077624,4.79583152,4.75666737,0.197899351,4.75666737,4.75662642
41.088116,5.47722558,4.75588369,0.849318485,4.75588369,4.75584261
41.098608,5.09901951,4.75510147,0.586445265,4.75510147,4.75506027
41.109099,5.09901951,4.75432078,0.587110499,4.75432078,4.75427945
41.119591,4.69041576,4.75354146,-0.251248293,4.75354146,4.75350002
41.130082,4.69041576,4.75276368,-0.249695647,4.75276368,4.7527221
41.140574,5.19615242,4.75198726,0.666457175,4.75198726,4.75194555
41.151066,4.24264069,4.75121228,-0.713142054,4.75121228,4.75117044
41.161557,4.47213595,4.7504388,-0.527544167,4.7504388,4.75039684
41.172049,5,4.74966668,0.500333204,4.74966668,4.74962459
41.18254,4.79583152,4.74889606,0.216645929,4.74889606,4.74885384
41.193032,5.56776436,4.74812679,0.905338374,4.74812679,4.74808443
41.203524,4.89897949,4.74735893,0.389384839,4.74735893,4.74731644
41.214015,4.47213595,4.74659256,-0.523886059,4.74659256,4.74654993
41.224507,4.69041576,4.74582751,-0.235397015,4.74582751,4.74578475
41.234998,4.47213595,4.74506395,-0.522425105,4.74506395,4.74502105
41.24549,4.47213595,4.7443017,-0.521695069,4.7443017,4.74425867
41.255982,4.89897949,4.74354085,0.394257074,4.74354085,4.74349768
41.266473,5.38516481,4.74278145,0.801488214,4.74278145,4.74273814
41.276965,4.47213595,4.74202336,-0.519506891,4.74202336,4.74197992
41.287456,5,4.74126673,0.508658305,4.74126673,4.74122314
41.297948,4.47213595,4.74051139,-0.518049649,4.74051139,4.74046766
41.30844,4.47213595,4.73975743,-0.517321439,4.73975743,4.73971356
41.318931,4.47213595,4.73900489,-0.516593592,4.73900489,4.73896088
41.329423,4.69041576,4.73825365,-0.218718745,4.73825365,4.73820949
41.339914,4,4.73750383,-0.858780432,4.73750383,4.73745953
41.350406,4.79583152,4.73675529,0.243056034,4.73675529,4.73671084
41.360898,4.58257569,4.73600809,-0.391704475,4.73600809,4.7359635
41.371389,4.69041576,4.73526231,-0.211770029,4.73526231,4.73521756
41.381881,4.58257569,4.73451778,-0.389797497,4.73451778,4.73447289
41.392372,5.38516481,4.73377466,0.807087445,4.73377466,4.73372963
41.402864,4.79583152,4.7330328,0.250596736,4.7330328,4.73298761
41.413356,4,4.73229226,-0.855740765,4.73229226,4.73224692
41.423847,5.38516481,4.7315531,0.808462557,4.7315531,4.73150761
41.434339,4.58257569,4.73081519,-0.38501882,4.73081519,4.73076954
41.44483,5.83095189,4.73007865,1.04922507,4.73007865,4.73003285
41.455322,4.79583152,4.72934335,0.257853011,4.72934335,4.72929739
41.465814,4.69041576,4.72860934,-0.195431787,4.72860934,4.72856323
41.476305,4.89897949,4.7278767,0.413645722,4.7278767,4.72783044
41.486797,5,4.72714528,0.522354974,4.72714528,4.72709886
41.497288,4.58257569,4.72641521,-0.379261807,4.72641521,4.72636863
41.50778,4.89897949,4.72568636,0.416284913,4.72568636,4.72563961
41.518272,4.69041576,4.72495878,-0.185857514,4.72495878,4.72491187
41.528763,5.47722558,4.72423253,0.867751716,4.72423253,4.72418547
41.539255,4.35889894,4.72350749,-0.603828243,4.72350749,4.72346026
41.549746,5.29150262,4.72278378,0.754134501,4.72278378,4.72273638
41.560238,5.09901951,4.72206125,0.613969268,4.72206125,4.72201369
41.57073,4.12310563,4.72133998,-0.77345611,4.72133998,4.72129225
41.581221,5.09901951,4.72062002,0.615141846,4.72062002,4.72057213
41.591713,3.87298335,4.71990124,-0.920281422,4.71990124,4.71985318
41.602204,4.47213595,4.71918377,-0.497039046,4.71918377,4.71913554
41.612696,5.74456265,4.71846746,1.01296357,4.71846746,4.71841906
41.623188,4.79583152,4.71775238,0.279426448,4.71775238,4.71770381
41.633679,4.79583152,4.7170386,0.280700773,4.7170386,4.71698985
41.644171,4.47213595,4.71632597,-0.494155859,4.71632597,4.71627705
41.654662,4.79583152,4.71561462,0.283225886,4.71561462,4.71556552
41.665154,4,4.71490442,-0.845520205,4.71490442,4.71485514
41.675646,4.79583152,4.71419542,0.285720321,4.71419542,4.71414597
41.686137,5.09901951,4.7134877,0.620912086,4.7134877,4.71343807
41.696629,5.19615242,4.7127811,0.695249108,4.7127811,4.71273129
41.70712,4.35889894,4.71207577,-0.594286819,4.71207577,4.71202578
41.717612,5,4.71137155,0.537241515,4.71137155,4.71132138
41.728104,5,4.71066853,0.53789541,4.71066853,4.71061817
41.738595,5.56776436,4.70996675,0.926173642,4.70996675,4.70991621
41.749087,3.87298335,4.70926608,-0.914484954,4.70926608,4.70921535
41.759578,4.69041576,4.70856664,-0.134725218,4.70856664,4.70851573
41.77007,4.58257569,4.70786831,-0.353966971,4.70786831,4.70781721
41.780562,4.24264069,4.70717114,-0.68156471,4.70717114,4.70711985
41.791053,4.58257569,4.7064752,-0.351993609,4.7064752,4.70642371
41.801545,4.47213595,4.70578034,-0.48336775,4.70578034,4.70572866
41.812036,5.19615242,4.70508669,0.700760822,4.70508669,4.70503483
41.822528,4.35889894,4.70439413,-0.587788385,4.70439413,4.70434207
41.83302,4.12310563,4.7037027,-0.761969211,4.7037027,4.70365045
41.843511,5.09901951,4.70301248,0.629290896,4.70301248,4.70296003
41.854003,5,4.70232332,0.545597541,4.70232332,4.70227067
41.864494,5.65685425,4.70163536,0.977353002,4.70163536,4.70158251
41.874986,4.89897949,4.70094845,0.445006781,4.70094845,4.7008954
41.885478,4.69041576,4.70026266,-0.0992315534,4.70026266,4.7002094
41.895969,5,4.69957805,0.548107608,4.69957805,4.69952459
41.906461,4.35889894,4.69889448,-0.583091365,4.69889448,4.69884082
41.916952,5.91607978,4.69821209,1.10357043,4.69821209,4.69815821
41.927444,4.35889894,4.69753073,-0.581920769,4.69753073,4.69747665
41.937936,4.47213595,4.69685046,-0.474040615,4.69685046,4.69679617
41.948427,4.24264069,4.69617135,-0.673446853,4.69617135,4.69611685
41.958919,5.29150262,4.69549327,0.772016423,4.69549327,4.69543855
41.96941,5,4.69481633,0.552434316,4.69481633,4.6947614
41.979902,4.79583152,4.6941404,0.318890452,4.6941404,4.69408526
41.990394,4.12310563,4.69346555,-0.755221773,4.69346555,4.69341019
42.000885,4.58257569,4.69279184,-0.331988166,4.69279184,4.69273626
42.011377,4.58257569,4.69211912,-0.330973455,4.69211912,4.69206333
42.021868,5.19615242,4.69144753,0.71042585,4.69144753,4.69139152
42.03236,4.79583152,4.69077694,0.324121251,4.69077694,4.6907207
42.042852,4.69041576,4.69010739,0.0175603404,4.69010739,4.69005093
42.053343,4.24264069,4.68943896,-0.668429709,4.68943896,4.68938227
42.063835,4.89897949,4.68877151,0.458484431,4.68877151,4.68871459
42.074326,4.12310563,4.68810516,-0.751664512,4.68810516,4.68804802
42.084818,4.58257569,4.68743979,-0.323827258,4.68743979,4.68738241
42.09531,4.35889894,4.68677544,-0.572605012,4.68677544,4.68671783
42.105801,4.47213595,4.68611219,-0.462575651,4.68611219,4.68605434
42.116293,4.79583152,4.68544989,0.332237311,4.68544989,4.68539181
42.126784,4.79583152,4.68478868,0.333230919,4.68478868,4.68473036
42.137276,5.91607978,4.68412841,1.10993305,4.68412841,4.68406986
42.147768,4.12310563,4.68346916,-0.748574335,4.68346916,4.68341036
42.158259,5.09901951,4.68281097,0.645142263,4.68281097,4.68275194
42.168751,4.89897949,4.68215373,0.465645529,4.68215373,4.68209445
42.179242,4.47213595,4.68149754,-0.45756047,4.68149754,4.68143801
42.189734,4.58257569,4.68084228,-0.313475017,4.68084228,4.68078251
42.200226,5.19615242,4.68018801,0.718306627,4.68018801,4.68012799
42.210717,5,4.67953479,0.566096468,4.67953479,4.67947451
42.221209,5,4.67888248,0.566672319,4.67888248,4.67882196
42.2317,4.79583152,4.67823122,0.342929013,4.67823122,4.67817043
42.242192,4.79583152,4.67758086,0.343875946,4.67758086,4.67751982
42.252684,5.09901951,4.67693147,0.649683036,4.67693147,4.67687017
42.263175,4.47213595,4.6762831,-0.451826455,4.6762831,4.67622154
42.273667,3.60555128,4.67563563,-1.03444882,4.67563563,4.67557381
42.284158,5.09901951,4.67498918,0.651176117,4.67498918,4.6749271
42.29465,4.35889894,4.67434361,-0.561644612,4.67434361,4.67428127
42.305142,4.79583152,4.673699,0.349474645,4.673699,4.67363638
42.315633,5.38516481,4.67305538,0.843865763,4.67305538,4.6729925
42.326125,4.24264069,4.67241264,-0.655569948,4.67241264,4.67234949
42.336616,5.56776436,4.6717709,0.946569312,4.6717709,4.67170747
42.347108,5,4.67113003,0.573471859,4.67113003,4.67106632
42.3576,4.89897949,4.67049008,0.478005657,4.67049008,4.67042609
42.368091,4.35889894,4.66985111,-0.557630852,4.66985111,4.66978685
42.378583,4,4.669213,-0.818054399,4.669213,4.66914845
42.389074,4.79583152,4.66857586,0.356729114,4.66857586,4.66851103
42.399566,5.09901951,4.66793957,0.656566782,4.66793957,4.66787446
42.410058,5.56776436,4.66730419,0.9489258,4.66730419,4.66723879
42.420549,4.89897949,4.66666977,0.481985185,4.66666977,4.66660407
42.431041,4.89897949,4.66603618,0.482642006,4.66603618,4.66597019
42.441532,4.24264069,4.66540355,-0.650202167,4.66540355,4.66533727
42.452024,4.58257569,4.66477174,-0.286698524,4.66477174,4.66470516
42.462516,4.79583152,4.66414082,0.362892142,4.66414082,4.66407394
42.473007,4.12310563,4.66351083,-0.735122581,4.66351083,4.66344366
42.483499,3.60555128,4.66288167,-1.02826572,4.66288167,4.66281419
42.49399,4.24264069,4.66225343,-0.647775229,4.66225343,4.66218565
42.504482,4.47213595,4.66162601,-0.435304552,4.66162601,4.66155791
42.514974,4.35889894,4.66099945,-0.5496367,4.66099945,4.66093104
42.525465,5,4.6603738,0.582774569,4.6603738,4.66030508
42.535957,5.65685425,4.65974895,0.998551598,4.65974895,4.65967992
42.546448,5.19615242,4.65912502,0.732821536,4.65912502,4.65905567
42.55694,4.58257569,4.65850187,-0.275547049,4.65850187,4.6584322
42.567432,5.56776436,4.65787957,0.953878816,4.65787957,4.65780957
42.577923,4.89897949,4.65725816,0.491651629,4.65725816,4.65718784
42.588415,3.46410162,4.65663753,-1.09203293,4.65663753,4.65656688
42.598906,5.56776436,4.65601779,0.954854214,4.65601779,4.65594682
42.609398,4.47213595,4.65539882,-0.428092125,4.65539882,4.65532751
42.61989,5,4.65478068,0.587553678,4.65478068,4.65470903
42.630381,4.58257569,4.65416341,-0.267558801,4.65416341,4.65409142
42.640873,4.79583152,4.65354689,0.377206347,4.65354689,4.65347457
42.651364,3.87298335,4.65293125,-0.883146594,4.65293125,4.65285859
42.661856,4.58257569,4.65231636,-0.264084579,4.65231636,4.65224335
42.672348,4.69041576,4.65170227,0.196757438,4.65170227,4.65162891
42.682839,5.19615242,4.65108904,0.738284081,4.65108904,4.65101532
42.693331,5.19615242,4.65047654,0.738698773,4.65047654,4.65040248
42.703822,4.35889894,4.6498649,-0.539412604,4.6498649,4.64979047
42.714314,4.79583152,4.64925399,0.38285446,4.64925399,4.6491792
42.724806,3.74165739,4.64864385,-0.952358371,4.64864385,4.6485687
42.735297,5.09901951,4.64803456,0.671554132,4.64803456,4.64795905
42.745789,4.89897949,4.64742599,0.501551094,4.64742599,4.6473501
42.75628,4.79583152,4.64681824,0.386022387,4.64681824,4.64674198
42.766772,5.09901951,4.6462112,0.672910327,4.6462112,4.64613457
42.777264,4.24264069,4.64560493,-0.634794649,4.64560493,4.64552792
42.787755,4.79583152,4.64499948,0.388371012,4.64499948,4.64492209
42.798247,4.47213595,4.64439473,-0.415040686,4.64439473,4.64431695
42.808738,4.35889894,4.64379078,-0.5337526,4.64379078,4.64371262
42.81923,4.69041576,4.64318753,0.217320573,4.64318753,4.64310897
42.829722,5.19615242,4.64258502,0.744021104,4.64258502,4.64250607
42.840213,4.12310563,4.64198331,-0.720331648,4.64198331,4.64190396
42.850705,3.60555128,4.64138228,-1.01775783,4.64138228,4.64130253
42.861196,4.69041576,4.64078204,0.222786271,4.64078204,4.64070189
42.871688,5.56776436,4.64018247,0.96311053,4.64018247,4.64010191
42.88218,5.65685425,4.63958363,1.00859835,4.63958363,4.63950266
42.892671,5.09901951,4.63898556,0.678258028,4.63898556,4.63890418
42.903163,4.24264069,4.63838816,-0.629084629,4.63838816,4.63830636
42.913654,5.09901951,4.63779152,0.67913768,4.63779152,4.6377093
42.924146,4.47213595,4.63719555,-0.406275264,4.63719555,4.6371129
42.934638,4.89897949,4.63660027,0.512229649,4.63660027,4.6365172
42.945129,3.60555128,4.63600576,-1.01511304,4.63600576,4.63592225
42.955621,3.87298335,4.63541189,-0.873171541,4.63541189,4.63532794
42.966112,4.79583152,4.63481877,0.40126395,4.63481877,4.63473438
42.976604,4.35889894,4.63422628,-0.524716434,4.63422628,4.63414145
42.987096,5.19615242,4.63363448,0.750011961,4.63363448,4.63354921
42.997587,5.19615242,4.63304342,0.75040589,4.63304342,4.6329577
43.008079,4.89897949,4.63245299,0.516262044,4.63245299,4.63236681
43.01857,4.12310563,4.63186328,-0.7132725,4.63186328,4.63177665
43.029062,5.19615242,4.6312742,0.751583811,4.6312742,4.6311871
43.039554,4,4.63068578,-0.794157277,4.63068578,4.63059821
43.050045,4.89897949,4.63009808,0.518537754,4.63009808,4.63001004
43.060537,5.19615242,4.62951099,0.752755891,4.62951099,4.62942248
43.071028,4.24264069,4.62892461,-0.621517437,4.62892461,4.62883562
43.08152,4.12310563,4.62833883,-0.710797584,4.62833883,4.62824935
43.092012,4.79583152,4.6277537,0.409972954,4.6277537,4.62766373
43.102503,5.38516481,4.62716927,0.870629391,4.62716927,4.62707881
43.112995,5,4.62658543,0.611076567,4.62658543,4.62649447
43.123486,5.19615242,4.62600228,0.75508287,4.62600228,4.62591082
43.133978,5.65685425,4.62541971,1.01559566,4.62541971,4.62532775
43.14447,4.47213595,4.62483778,-0.390770806,4.62483778,4.6247453
43.154961,5.09901951,4.62425653,0.68903047,4.62425653,4.62416353
43.165453,4.47213595,4.62367584,-0.389281243,4.62367584,4.62358233
43.175944,5.29150262,4.62309583,0.817561489,4.62309583,4.6230018
43.186436,5,4.62251639,0.614396951,4.62251639,4.62242182
43.196928,4,4.62193755,-0.788630175,4.62193755,4.62184245
43.207419,3.46410162,4.62135939,-1.07575916,4.62135939,4.62126374
43.217911,5.47722558,4.62078177,0.925442493,4.62078177,4.62068558
43.228402,4.35889894,4.62020481,-0.511180853,4.62020481,4.62010807
43.238894,4.58257569,4.61962839,-0.192490772,4.61962839,4.6195311
43.249386,5,4.61905257,0.617209388,4.61905257,4.61895472
43.259877,5.19615242,4.6184774,0.760049357,4.6184774,4.61837898
43.270369,4.79583152,4.61790276,0.421816034,4.61790276,4.61780377
43.28086,4.47213595,4.61732875,-0.38104173,4.61732875,4.61722919
43.291352,4.58257569,4.61675528,-0.184877214,4.61675528,4.61665513
43.301844,4.89897949,4.61618238,0.531786709,4.61618238,4.61608165
43.312335,4.79583152,4.61561011,0.424524925,4.61561011,4.61550878
43.322827,4.69041576,4.61503836,0.274549453,4.61503836,4.61493643
43.333318,4.79583152,4.61446722,0.425868875,4.61446722,4.61436469
43.34381,4.69041576,4.6138966,0.276620966,4.6138966,4.61379346
43.354302,4.35889894,4.61332654,-0.504408161,4.61332654,4.61322278
43.364793,4.12310563,4.61275708,-0.699750997,4.61275708,4.6126527
43.375285,4.79583152,4.61218813,0.428536341,4.61218813,4.61208311
43.385776,4.12310563,4.61161978,-0.698937873,4.61161978,4.61151413
43.396268,4.47213595,4.61105192,-0.372714314,4.61105192,4.61094563
43.40676,4.79583152,4.6104846,0.430519368,4.6104846,4.61037766
43.417251,4.69041576,4.60991787,0.283721498,4.60991787,4.60981028
43.427743,4.12310563,4.60935163,-0.697313417,4.60935163,4.60924337
43.438234,5,4.60878597,0.625471048,4.60878597,4.60867705
43.448726,4.79583152,4.60822078,0.433140553,4.60822078,4.60811119
43.459218,4,4.60765613,-0.779523011,4.60765613,4.60754585
43.469709,5.19615242,4.60709204,0.767502692,4.60709204,4.60698108
43.480201,4.89897949,4.60652842,0.540787448,4.60652842,4.60641676
43.490692,4,4.60596537,-0.778437775,4.60596537,4.60585301
43.501184,3.60555128,4.60540278,-0.999925748,4.60540278,4.6052897
43.511676,4.89897949,4.60484069,0.542345642,4.60484069,4.6047269
43.522167,4.79583152,4.60427916,0.437666953,4.60427916,4.60416465
43.532659,5.47722558,4.60371808,0.934616228,4.60371808,4.60360283
43.54315,4.24264069,4.60315755,-0.600430566,4.60315755,4.60304156
43.553642,5.09901951,4.60259746,0.704572247,4.60259746,4.60248073
43.564134,4.12310563,4.60203787,-0.692049304,4.60203787,4.60192038
43.574625,4.58257569,4.60147881,-0.137488593,4.60147881,4.60136055
43.585117,4.24264069,4.60092018,-0.598564529,4.60092018,4.60080116
43.595608,3.31662479,4.60036209,-1.13302131,4.60036209,4.60024228
43.6061,4.12310563,4.59980442,-0.690433774,4.59980442,4.59968383
43.616592,5.19615242,4.59924723,0.772596398,4.59924723,4.59912584
43.627083,5,4.59869056,0.63348989,4.59869056,4.59856836
43.637575,4.24264069,4.59813431,-0.596232855,4.59813431,4.59801129
43.648066,4.58257569,4.59757857,-0.122486214,4.59757857,4.59745473
43.658558,4.24264069,4.59702324,-0.595300387,4.59702324,4.59689857
43.66905,4.79583152,4.59646837,0.446501015,4.59646837,4.59634286
43.679541,5.29150262,4.595914,0.834019556,4.595914,4.59578764
43.690033,4.89897949,4.59536004,0.551016741,4.59536004,4.59523282
43.700524,4.69041576,4.59480657,0.309207355,4.59480657,4.59467848
43.711016,4.58257569,4.5942535,-0.108063885,4.5942535,4.59412453
43.721508,5.09901951,4.59370087,0.710857684,4.59370087,4.59357101
43.731999,3.87298335,4.59314873,-0.848625583,4.59314873,4.59301797
43.742491,4.58257569,4.59259697,-0.100106309,4.59259697,4.5924653
43.752982,4.69041576,4.59204569,0.313640025,4.59204569,4.59191311
43.763474,4.24264069,4.5914948,-0.59063873,4.5914948,4.59136128
43.773966,5,4.59094433,0.639574605,4.59094433,4.59080987
43.784457,5.83095189,4.59039433,1.1138032,4.59039433,4.59025892
43.794949,4.89897949,4.5898447,0.55599891,4.5898447,4.58970832
43.80544,4.24264069,4.58929554,-0.588774022,4.58929554,4.58915819
43.815932,4.35889894,4.58874673,-0.479424438,4.58874673,4.5886084
43.826424,4.12310563,4.58819834,-0.681977066,4.58819834,4.58805901
43.836915,5,4.58765041,0.642144523,4.58765041,4.58751007
43.847407,4.47213595,4.58710283,-0.339067655,4.58710283,4.58696146
43.857898,4.47213595,4.58684842,-0.338692286,4.58684842,4.5864133
43.86839,5.29150262,4.58630236,0.839762028,4.58630236,4.58586547
43.878882,5,4.58575669,0.64361736,4.58575669,4.58531803
43.889373,4,4.58521147,-0.76499116,4.58521147,4.58477101
43.899865,4.24264069,4.58466659,-0.58482981,4.58466659,4.58422431
43.910356,4.89897949,4.58412215,0.561121495,4.58412215,4.58367804
43.920848,4.89897949,4.58357805,0.561606125,4.58357805,4.58313209
43.93134,4.24264069,4.58303432,-0.583432629,4.58303432,4.5825865
43.941831,4.24264069,4.58249102,-0.582966841,4.58249102,4.58204133
43.952323,5.09901951,4.58194805,0.719076811,4.58194805,4.58149646
43.962814,4.79583152,4.58140551,0.463061569,4.58140551,4.580952
43.973306,4.58257569,4.58086328,0.0413813677,4.58086328,4.58040784
43.983798,4.69041576,4.58032142,0.331804678,4.58032142,4.57986403
43.994289,4.58257569,4.57977997,0.0528746246,4.57977997,4.57932062
44.004781,3.87298335,4.57923883,-0.84039008,4.57923883,4.5787775
44.015272,4.47213595,4.5786981,-0.326438585,4.5786981,4.57823477
44.025764,4.79583152,4.57815768,0.466555294,4.57815768,4.57769233
44.036256,5.19615242,4.57761761,0.786469842,4.57761761,4.57715021
44.046747,4.12310563,4.57707794,-0.673774676,4.57707794,4.57660848
44.057239,4.35889894,4.57653856,-0.466518617,4.57653856,4.57606703
44.06773,3.60555128,4.57599958,-0.985113348,4.57599958,4.57552595
44.078222,5,4.57546089,0.651566656,4.57546089,4.57498514
44.088714,4.89897949,4.57492254,0.569259998,4.57492254,4.57444465
44.099205,4.89897949,4.57438457,0.569732315,4.57438457,4.57390452
44.109697,4.89897949,4.57384689,0.570203995,4.57384689,4.57336465
44.120188,5.56776436,4.57330959,0.997223534,4.57330959,4.57282514
44.13068,5.19615242,4.57277256,0.789544087,4.57277256,4.57228589
44.141172,4.79583152,4.57223585,0.472859037,4.57223585,4.57174694
44.151663,5.83095189,4.57169952,1.12216415,4.57169952,4.57120833
44.162155,4.47213595,4.57116346,-0.314686359,4.57116346,4.57066997
44.172646,4.47213595,4.57062776,-0.313834045,4.57062776,4.57013196
44.183138,4.58257569,4.57009233,0.111728985,4.57009233,4.56959418
44.19363,3.87298335,4.56955721,-0.834610004,4.56955721,4.56905669
44.204121,4.35889894,4.56902244,-0.458392297,4.56902244,4.56851953
44.214613,5,4.56848793,0.656895782,4.56848793,4.5679826
44.225104,4.69041576,4.56795378,0.349945688,4.56795378,4.56744601
44.235596,4.69041576,4.56741987,0.3507077,4.56741987,4.56690963
44.246088,4.89897949,4.56688626,0.576275304,4.56688626,4.56637352
44.256579,4.24264069,4.566353,-0.568957213,4.566353,4.56583773
44.267071,4.24264069,4.56581998,-0.5684886,4.56581998,4.56530216
44.277562,4,4.5652873,-0.751855901,4.5652873,4.5647669
44.288054,5.29150262,4.56475485,0.852495027,4.56475485,4.56423185
44.298546,3.31662479,4.56422269,-1.11695922,4.56422269,4.56369705
44.309037,4.89897949,4.56369087,0.579041119,4.56369087,4.56316256
44.319529,4.35889894,4.56315927,-0.451951688,4.56315927,4.56262826
44.33002,4,4.562628,-0.750085331,4.562628,4.56209426
44.340512,3.46410162,4.56209696,-1.04785273,4.56209696,4.56156046
44.351004,4.35889894,4.56156619,-0.450185793,4.56156619,4.56102689
44.361495,4.24264069,4.56103574,-0.564265058,4.56103574,4.56049362
44.371987,4.47213595,4.56050551,-0.297270176,4.56050551,4.55996053
44.382478,5,4.5599756,0.663343351,4.5599756,4.55942772
44.39297,4.47213595,4.5594459,-0.295482558,4.5594459,4.55889508
44.403462,4,4.55891646,-0.747607154,4.55891646,4.55836268
44.413953,3.31662479,4.55838733,-1.11434399,4.55838733,4.55783055
44.424445,4.69041576,4.5578584,0.364084271,4.5578584,4.55729858
44.434936,4.35889894,4.55732979,-0.445455769,4.55732979,4.55676689
44.445428,4.58257569,4.55680137,0.160543842,4.55680137,4.55623536
44.45592,4.69041576,4.5562732,0.366254769,4.5562732,4.55570403
44.466411,4.58257569,4.55574534,0.163799748,4.55574534,4.55517297
44.476903,4.24264069,4.55521767,-0.559085843,4.55521767,4.55464206
44.487394,4.69041576,4.55469029,0.368409376,4.55469029,4.55411141
44.497886,5,4.55416311,0.667710186,4.55416311,4.5535809
44.508378,4.58257569,4.55363616,0.170116227,4.55363616,4.55305059
44.518869,4.12310563,4.55310951,-0.655746814,4.55310951,4.55252053
44.529361,4.79583152,4.55258304,0.493202273,4.55258304,4.5519906
44.539852,4.69041576,4.55205686,0.371966264,4.55205686,4.55146092
44.550344,4.69041576,4.55153086,0.372672648,4.55153086,4.55093136
44.560836,4.79583152,4.55100509,0.494799389,4.55100509,4.55040199
44.571327,5.19615242,4.5504796,0.803537694,4.5504796,4.54987285
44.581819,4.24264069,4.54995428,-0.554358727,4.54995428,4.54934384
44.59231,4.58257569,4.54942925,0.182061656,4.54942925,4.54881505
44.602802,5.65685425,4.54890439,1.05259197,4.54890439,4.54828638
44.613294,5.19615242,4.54837975,0.804843262,4.54837975,4.54775788
44.623785,4,4.54785538,-0.740172533,4.54785538,4.54722959
44.634277,4.12310563,4.54733118,-0.651325997,4.54733118,4.54670141
44.644768,4.79583152,4.54680725,0.49902332,4.54680725,4.54617345
44.65526,4.35889894,4.54628349,-0.432879362,4.54628349,4.54564559
44.665752,4.69041576,4.54575994,0.380336459,4.54575994,4.54511788
44.676243,5.19615242,4.54523665,0.806793511,4.54523665,4.54459038
44.686735,4.12310563,4.54471353,-0.649313412,4.54471353,4.54406297
44.697226,4.58257569,4.54419067,0.195920957,4.54419067,4.54353576
44.707718,4.47213595,4.54366798,-0.267454707,4.54366798,4.54300865
44.71821,4.35889894,4.54314549,-0.429239494,4.54314549,4.54248167
44.728701,4.12310563,4.54262326,-0.647701807,4.54262326,4.54195488
44.739193,4.58257569,4.54210118,0.20118278,4.54210118,4.54142817
44.749684,4.47213595,4.54157937,-0.263521182,4.54157937,4.54090165
44.760176,4.58257569,4.54105771,0.203759629,4.54105771,4.5403752
44.770668,3.60555128,4.54053625,-0.966946213,4.54053625,4.53984888
44.781159,4.47213595,4.54001505,-0.260536177,4.54001505,4.53932274
44.791651,4.79583152,4.53949401,0.506297851,4.53949401,4.53879666
44.802142,4.69041576,4.53897322,0.389156193,4.53897322,4.53827075
44.812634,4.24264069,4.53845258,-0.543885918,4.53845258,4.53774491
44.823126,4,4.53793214,-0.733438575,4.53793214,4.53721918
44.833617,3.74165739,4.53741196,-0.892050768,4.53741196,4.53669361
44.844109,4.58257569,4.53689193,0.213737611,4.53689193,4.5361681
44.8546,5.19615242,4.53637215,0.812268596,4.53637215,4.53564274
44.865092,4.47213595,4.53585252,-0.252421413,4.53585252,4.53511744
44.875584,4.12310563,4.5353331,-0.642049435,4.5353331,4.53459223
44.886075,4.35889894,4.53481393,-0.419422208,4.53481393,4.53406717
44.896567,4.12310563,4.53429492,-0.641240431,4.53429492,4.53354215
44.907058,5.19615242,4.53377615,0.813865019,4.53377615,4.53301728
44.91755,4.58257569,4.53325755,0.222076898,4.53325755,4.53249244
44.928042,4.12310563,4.53273914,-0.640026186,4.53273914,4.53196769
44.938533,4.12310563,4.532221,-0.639621273,4.532221,4.53144307
44.949025,3.46410162,4.53170301,-1.03324798,4.53170301,4.53091849
44.959516,4.58257569,4.53118528,0.226694539,4.53118528,4.53039403
44.970008,4.35889894,4.53066771,-0.414449959,4.53066771,4.5298696
44.9805,3.60555128,4.53015035,-0.961560752,4.53015035,4.52934523
44.990991,5.56776436,4.52963326,1.01888719,4.52963326,4.52882099
45.001483,4.47213595,4.52911633,-0.238705627,4.52911633,4.52829677
45.011974,5.09901951,4.52859967,0.755261441,4.52859967,4.52777266
45.022466,3.87298335,4.52808318,-0.809382377,4.52808318,4.52724857
45.032958,4.12310563,4.52756691,-0.635972706,4.52756691,4.52672453
45.043449,4.69041576,4.52705091,0.404184174,4.52705091,4.5262006
45.053941,5,4.5265351,0.68808786,4.5265351,4.52567668
45.064432,5.09901951,4.52601956,0.756967604,4.52601956,4.52515286
45.074924,3.87298335,4.52550421,-0.807787635,4.52550421,4.52462904
45.085416,4.24264069,4.5249891,-0.531364668,4.5249891,4.52410526
45.095907,5.38516481,4.52447428,0.927734084,4.52447428,4.52358158
45.106399,4.35889894,4.52395965,-0.406276642,4.52395965,4.52305789
45.11689,3.60555128,4.52344533,-0.958067876,4.52344533,4.52253429
45.127382,4.35889894,4.52293121,-0.405008976,4.52293121,4.52201068
45.137874,4,4.52241736,-0.722784449,4.52241736,4.5214871
45.148365,4.89897949,4.52190382,0.61406487,4.52190382,4.52096361
45.158857,3.46410162,4.52139051,-1.02824554,4.52139051,4.52044009
45.169348,5.19615242,4.52087752,0.821751119,4.52087752,4.51991665
45.17984,3.60555128,4.52036477,-0.956458832,4.52036477,4.51939319
45.190332,5.47722558,4.51985232,0.978454525,4.51985232,4.51886974
45.200823,4.58257569,4.51934021,0.25146666,4.51934021,4.51834637
45.211315,4.12310563,4.51882837,-0.629064977,4.51882837,4.51782296
45.221806,3.87298335,4.5183169,-0.803326552,4.5183169,4.51729962
45.232298,4,4.5178057,-0.719587173,4.5178057,4.51677624
45.24279,4,4.51729484,-0.719232119,4.51729484,4.51625287
45.253281,3.60555128,4.51678438,-0.954585305,4.51678438,4.51572956
45.263773,4.58257569,4.51627423,0.257490707,4.51627423,4.5152062
45.274264,4,4.5157645,-0.718167461,4.5157645,4.51468289
45.284756,5.19615242,4.51525511,0.825165022,4.51525511,4.51415954
45.295248,5,4.51474612,0.696601668,4.51474612,4.51363618
45.305739,4.47213595,4.51423758,-0.205186814,4.51423758,4.51311286
45.316231,4.58257569,4.51372943,0.262385716,4.51372943,4.51258949
45.326722,4.35889894,4.51322177,-0.392839443,4.51322177,4.51206616
45.337214,4.35889894,4.51271453,-0.392193298,4.51271453,4.51154277
45.347706,5.38516481,4.51220776,0.934321704,4.51220776,4.51101936
45.358197,4.69041576,4.51170154,0.422746041,4.51170154,4.51049599
45.368689,5.38516481,4.5111958,0.934863095,4.5111958,4.50997254
45.37918,4.79583152,4.51069065,0.533985837,4.51069065,4.50944913
45.389672,4.69041576,4.51018602,0.424534737,4.51018602,4.50892564
45.400164,4.35889894,4.50968198,-0.38830791,4.50968198,4.50840212
45.410655,4.79583152,4.5091786,0.535399775,4.5091786,4.50787863
45.421147,4.12310563,4.50867583,-0.620942998,4.50867583,4.50735505
45.431638,4.89897949,4.50817379,0.625144542,4.50817379,4.50683149
45.44213,4.47213595,4.50767241,-0.188511143,4.50767241,4.50630784
45.452622,5,4.50717177,0.702017257,4.50717177,4.50578416
45.463113,4,4.50667197,-0.711808941,4.50667197,4.50526049
45.473605,4.24264069,4.50617294,-0.513353926,4.50617294,4.50473672
45.484096,3.74165739,4.50567483,-0.874080912,4.50567483,4.50421296
45.494588,4.58257569,4.50517758,0.27820517,4.50517758,4.5036891
45.50508,4.47213595,4.50468129,-0.180403257,4.50468129,4.50316519
45.515571,4.35889894,4.50418606,-0.381165474,4.50418606,4.50264128
45.526063,5.09901951,4.50369186,0.771574791,4.50369186,4.50211727
45.536554,4.47213595,4.50319883,-0.176246619,4.50319883,4.50159324
45.547046,4.69041576,4.50270694,0.433253757,4.50270694,4.50106911
45.557538,4.89897949,4.50221632,0.629891391,4.50221632,4.50054492
45.568029,5.56776436,4.50172708,1.03249081,4.50172708,4.50002072
45.578521,5.47722558,4.50123922,0.987920217,4.50123922,4.4994964
45.589012,5.65685425,4.5007529,1.07522153,4.5007529,4.49897206
45.599504,4.47213595,4.50026814,-0.167726519,4.50026814,4.4984476
45.609996,4.12310563,4.49978507,-0.613742168,4.49978507,4.49792307
45.620487,4.47213595,4.49930386,-0.164826895,4.49930386,4.49739852
45.630979,4.79583152,4.49882452,0.544983484,4.49882452,4.49687384
45.64147,4.12310563,4.49834729,-0.612569719,4.49834729,4.49634912
45.651962,4,4.49787219,-0.705600589,4.49787219,4.49582428
45.662454,5.29150262,4.49739944,0.891124675,4.49739944,4.49529936
45.672945,4.79583152,4.49692923,0.546719577,4.49692923,4.4947744
45.683437,4.69041576,4.49646165,0.440402211,4.49646165,4.4942493
45.693928,4.58257569,4.49599699,0.294242591,4.49599699,4.49372416
45.70442,4.35889894,4.49553537,-0.369643648,4.49553537,4.49319888
45.714912,4.24264069,4.49507706,-0.502430466,4.49507706,4.49267351
45.725403,3.31662479,4.49462236,-1.08535596,4.49462236,4.49214809
45.735895,5,4.49417145,0.71121625,4.49417145,4.49162252
45.746386,4.58257569,4.49372472,0.298078807,4.49372472,4.49109689
45.756878,4.24264069,4.49328242,-0.500641325,4.49328242,4.49057112
45.76737,4.35889894,4.49284497,-0.36598637,4.49284497,4.49004524
45.777861,4.89897949,4.49241279,0.637625824,4.49241279,4.48951931
45.788353,4.79583152,4.49198627,0.551221602,4.49198627,4.48899321
45.798844,4.69041576,4.49156597,0.445925771,4.49156597,4.48846706
45.809336,3.74165739,4.49115236,-0.865733776,4.49115236,4.48794074
45.819828,4.69041576,4.49074609,0.446844122,4.49074609,4.4874143
45.830319,4.35889894,4.49034788,-0.362558879,4.49034788,4.4868878
45.840811,4.58257569,4.48995842,0.304330859,4.48995842,4.48636112
45.851302,4.58257569,4.48957863,0.304954198,4.48957863,4.48583438
45.861794,4.69041576,4.48920939,0.448560325,4.48920939,4.48530746
45.872286,4.35889894,4.48885182,-0.360489779,4.48885182,4.48478041
45.882777,5.09901951,4.48850717,0.781352894,4.48850717,4.48425329
45.893269,4.58257569,4.48817674,0.307244132,4.48817674,4.48372598
45.90376,5.38516481,4.48786216,0.947260602,4.48786216,4.4831986
45.914252,4.12310563,4.48756515,-0.603704836,4.48756515,4.48267102
45.924744,4.89897949,4.48728779,0.641632055,4.48728779,4.48214332
45.935235,4.69041576,4.48703243,0.450980406,4.48703243,4.48161552
45.945727,3.87298335,4.48680173,-0.783465621,4.48680173,4.48108753
45.956218,4.47213595,4.48659883,-0.120261694,4.48659883,4.48055945
45.96671,4.58257569,4.48642733,0.310078,4.48642733,4.48003118
45.977202,4,4.48629147,-0.697346018,4.48629147,4.47950276
45.987693,4.24264069,4.48619621,-0.493513451,4.48619621,4.47897424
45.998185,5,4.48614739,0.716835137,4.48614739,4.47844552
46.008676,5,4.48615192,0.716831977,4.48615192,4.4779167
46.019168,5.38516481,4.48621806,0.948128025,4.48621806,4.47738767
46.02966,5,4.4863557,0.71668982,4.4863557,4.47685848
46.040151,5.19615242,4.48657677,0.842363134,4.48657677,4.47632919
46.050643,4.58257569,4.48689584,0.309321602,4.48689584,4.47579969
46.061134,4.69041576,4.48733063,0.450649671,4.48733063,4.47527007
46.071626,4.24264069,4.48790322,-0.495239877,4.48790322,4.47474024
46.082118,5.09901951,4.48864097,0.781267266,4.48864097,4.47421024
46.092609,4.58257569,4.48957826,0.304954803,4.48957826,4.47368012
46.103101,4.12310563,4.49075913,-0.606344377,4.49075913,4.47314979
46.113592,4.58257569,4.49223972,0.300559429,4.49223972,4.47261933
46.124084,4.12310563,4.49409385,-0.609088027,4.49409385,4.47208864
46.134576,4.35889894,4.49641882,-0.370836729,4.49641882,4.47155778
46.145067,4,4.49934735,-0.70664514,4.49934735,4.4710268
46.155559,5.09901951,4.50307343,0.771975442,4.50307343,4.47049558
46.16605,4.58257569,4.50791544,0.273240293,4.50791544,4.46996423
46.176542,4.24264069,4.51450484,-0.521405938,4.51450484,4.46943264
46.187034,4.79583152,4.52427257,0.521113188,4.52427257,4.46890087
46.197525,5.29150262,4.54054346,0.866579,4.54054346,4.46836896
46.208017,5.09901951,4.57044708,0.727029874,4.57044708,4.46783682
46.218508,5.29150262,4.62702315,0.815156103,4.62702315,4.46730453
46.229,4.79583152,4.72925948,0.258015586,4.72925948,4.46677199
46.239492,5.47722558,4.89624521,0.76222068,4.89624521,4.46623926
46.249983,4.89897949,5.13438719,-0.485188316,5.13438719,4.46570639
46.260475,5.56776436,5.42375274,0.379488636,5.42375274,4.46517326
46.270966,6.78232998,5.71218509,1.03447808,5.71218509,4.46463999
46.281458,5.29150262,5.92169515,-0.793846667,5.92169515,4.46410646
46.29195,5.56776436,5.97437172,-0.637657713,5.97437172,4.46357273
46.302441,5.74456265,5.84530189,-0.317394459,5.84530189,4.46303884
46.312933,5.47722558,5.58828518,-0.33325607,5.58828518,4.46250469
46.323424,5.38516481,5.28864789,0.310671715,5.28864789,4.46197038
46.333916,5.47722558,5.01532458,0.679632989,5.01532458,4.46143581
46.344408,5.47722558,4.80646295,0.819000995,4.80646295,4.46090103
46.354899,4.89897949,4.66905171,0.479507842,4.66905171,4.46036608
46.365391,4.12310563,4.58893246,-0.682515078,4.58893246,4.45983086
46.375882,4.69041576,4.54557392,0.380580923,4.54557392,4.45929548
46.386374,4.89897949,4.52216905,0.613848868,4.52216905,4.45875982
46.396866,4,4.50848388,-0.713080556,4.50848388,4.45822394
46.407357,4.35889894,4.49940198,-0.374837344,4.49940198,4.45768788
46.417849,4.58257569,4.4926665,0.299848615,4.4926665,4.45715155
46.42834,4.79583152,4.48732054,0.555437649,4.48732054,4.45661504
46.438832,4.35889894,4.48291898,-0.352164786,4.48291898,4.45607825
46.449324,5.19615242,4.47921622,0.846720856,4.47921622,4.45554123
46.459815,4.79583152,4.47605196,0.565490551,4.47605196,4.45500403
46.470307,4.69041576,4.47331087,0.465945156,4.47331087,4.45446654
46.480798,4.79583152,4.47090793,0.570020697,4.47090793,4.45392886
46.49129,5.19615242,4.46877758,0.852862734,4.46877758,4.4533909
46.501782,5.47722558,4.46686978,1.00516456,4.46686978,4.45285269
46.512273,4.47213595,4.46514535,0.0836098121,4.46514535,4.4523143
46.522765,4.89897949,4.46357293,0.659853434,4.46357293,4.45177561
46.533256,4.79583152,4.462128,0.577670774,4.462128,4.45123672
46.543748,4.79583152,4.46079031,0.578827448,4.46079031,4.45069754
46.55424,4.58257569,4.45954376,0.350759089,4.45954376,4.4501581
46.564731,4.58257569,4.45837514,0.352420985,4.45837514,4.44961847
46.575223,5,4.45727327,0.736699888,4.45727327,4.44907853
46.585714,4.69041576,4.45622923,0.483928224,4.45622923,4.44853839
46.596206,4.79583152,4.45523519,0.583606314,4.45523519,4.44799795
46.606698,4.58257569,4.45428484,0.358177131,4.45428484,4.44745724
46.617189,4.58257569,4.45337282,0.359448019,4.45337282,4.44691633
46.627681,4.24264069,4.45249434,-0.458097864,4.45249434,4.44637511
46.638172,4.69041576,4.45164562,0.488641112,4.45164562,4.44583368
46.648664,4.35889894,4.45082312,-0.303189994,4.45082312,4.44529193
46.659156,4.69041576,4.45002397,0.490297652,4.45002397,4.44474991
46.669647,5.29150262,4.44924573,0.917745549,4.44924573,4.44420768
46.680139,3.31662479,4.44848604,-1.06388968,4.44848604,4.44366513
46.69063,4.69041576,4.44774312,0.492618152,4.44774312,4.44312236
46.701122,5.56776436,4.44701514,1.05865444,4.44701514,4.44257926
46.711614,4.89897949,4.44630069,0.672814086,4.44630069,4.44203589
46.722105,4.47213595,4.44559854,0.162903093,4.44559854,4.4414923
46.732597,5.38516481,4.44490739,0.969668717,4.44490739,4.44094838
46.743088,3.87298335,4.44422634,-0.755806189,4.44422634,4.44040423
46.75358,3.60555128,4.44355436,-0.915425087,4.44355436,4.43985975
46.764072,3.74165739,4.44289071,-0.837396751,4.44289071,4.43931499
46.774563,5.09901951,4.4422347,0.810422615,4.4422347,4.43876999
46.785055,4.69041576,4.44158557,0.498828822,4.44158557,4.43822466
46.795546,4.58257569,4.44094285,0.376341398,4.44094285,4.4376791
46.806038,3.74165739,4.44030589,-0.835851962,4.44030589,4.43713319
46.81653,4.89897949,4.43967428,0.677720595,4.43967428,4.436587
46.827021,4.79583152,4.43904765,0.597313885,4.43904765,4.43604056
46.837513,5.56776436,4.43842548,1.06270357,4.43842548,4.43549378
46.848004,4.12310563,4.43780754,-0.56098299,4.43780754,4.43494676
46.858496,4.47213595,4.43719339,0.186929296,4.43719339,4.43439939
46.868988,4.12310563,4.4365828,-0.559890325,4.4365828,4.43385173
46.879479,4.47213595,4.43597555,0.190158883,4.43597555,4.43330381
46.889971,4,4.43537129,-0.659826713,4.43537129,4.43275555
46.900462,5.65685425,4.4347699,1.10547924,4.4347699,4.43220703
46.910954,4,4.43417107,-0.658916588,4.43417107,4.43165816
46.921446,6,4.43357466,1.25156915,4.43357466,4.43110898
46.931937,4.69041576,4.43298055,0.50738073,4.43298055,4.43055955
46.942429,4.47213595,4.43238848,0.199367685,4.43238848,4.43000976
46.95292,4.35889894,4.4317984,-0.269999003,4.4317984,4.42945971
46.963412,4.35889894,4.43121008,-0.268907296,4.43121008,4.42890929
46.973904,3.16227766,4.43062343,-1.12620858,4.43062343,4.42835857
46.984395,5.09901951,4.4300384,0.817912659,4.4300384,4.42780758
46.994887,4.89897949,4.42945476,0.685218742,4.42945476,4.42725623
47.005378,5,4.42887254,0.755729756,4.42887254,4.42670461
47.01587,5,4.42829151,0.75611407,4.42829151,4.42615262
47.026362,4.58257569,4.42771166,0.393527674,4.42771166,4.42560031
47.036853,4.35889894,4.42713296,-0.261216422,4.42713296,4.42504773
47.047345,5,4.42655522,0.757261366,4.42655522,4.42449477
47.057836,5,4.42597848,0.757642076,4.42597848,4.42394155
47.068328,4.47213595,4.42540257,0.216179052,4.42540257,4.42338794
47.07882,4.24264069,4.42482748,-0.426833449,4.42482748,4.42283401
47.089311,5.38516481,4.42425321,0.980260986,4.42425321,4.4222798
47.099803,4,4.42367959,-0.650906741,4.42367959,4.42172521
47.110294,5.19615242,4.42310668,0.8792302,4.42310668,4.42117035
47.120786,5.19615242,4.42253433,0.879555624,4.42253433,4.42061509
47.131278,4.58257569,4.42196255,0.400765704,4.42196255,4.4200595
47.141769,4.89897949,4.42139134,0.691077523,4.42139134,4.41950363
47.152261,5,4.42082057,0.761038387,4.42082057,4.41894737
47.162752,4.69041576,4.42025031,0.519774423,4.42025031,4.41839083
47.173244,3.31662479,4.41968041,-1.05026455,4.41968041,4.41783389
47.183736,4.24264069,4.41911089,-0.420083561,4.41911089,4.41727661
47.194227,3.87298335,4.41854177,-0.73861927,4.41854177,4.41671904
47.204719,4.47213595,4.41797293,0.232729511,4.41797293,4.41616107
47.21521,3.87298335,4.41740444,-0.737848962,4.41740444,4.41560282
47.225702,5.29150262,4.41683616,0.935236045,4.41683616,4.41504416
47.236194,4.89897949,4.41626813,0.694774317,4.41626813,4.41448515
47.246685,4.79583152,4.41570038,0.61654776,4.41570038,4.41392585
47.257177,4.12310563,4.41513278,-0.540395369,4.41513278,4.41336615
47.267668,4.47213595,4.41456541,0.239938618,4.41456541,4.41280614
47.27816,5.65685425,4.41399816,1.11483456,4.41399816,4.41224573
47.288652,4.24264069,4.41343104,-0.4132679,4.41343104,4.41168497
47.299143,4.58257569,4.41286411,0.411960657,4.41286411,4.4111239
47.309635,4.58257569,4.41229724,0.412648105,4.41229724,4.41056242
47.320126,4.89897949,4.41173051,0.698032216,4.41173051,4.41000064
47.330618,4.35889894,4.41116381,-0.228615108,4.41116381,4.40943844
47.34111,5.38516481,4.41059718,0.987201919,4.41059718,4.40887589
47.351601,4.58257569,4.41003065,0.415385414,4.41003065,4.40831302
47.362093,5.09901951,4.40946412,0.830394724,4.40946412,4.40774974
47.372584,4.79583152,4.40889766,0.622040081,4.40889766,4.40718614
47.383076,4.12310563,4.40833117,-0.534065113,4.40833117,4.40662213
47.393568,4.24264069,4.40776469,-0.406354527,4.40776469,4.40605774
47.404059,4.47213595,4.40719826,0.254828758,4.40719826,4.40549305
47.414551,3.74165739,4.40663176,-0.815459611,4.40663176,4.40492793
47.425042,4.79583152,4.4060653,0.6243126,4.4060653,4.40436249
47.435534,4.24264069,4.40549876,-0.403556774,4.40549876,4.40379662
47.446026,5.29150262,4.40493218,0.941578699,4.40493218,4.40323039
47.456517,4.24264069,4.4043656,-0.402150367,4.4043656,4.40266383
47.467009,4,4.40379893,-0.635451751,4.40379893,4.40209684
47.4775,4.24264069,4.40323225,-0.400738769,4.40323225,4.40152952
47.487992,4.35889894,4.40266545,-0.209204463,4.40266545,4.40096178
47.498484,4.35889894,4.40209858,-0.207845231,4.40209858,4.40039365
47.508975,3.60555128,4.4015317,-0.892177348,4.4015317,4.3998252
47.519467,4.24264069,4.40096467,-0.397899467,4.40096467,4.39925631
47.529958,4.58257569,4.40039762,0.426823236,4.40039762,4.39868709
47.54045,4.69041576,4.39983042,0.539059677,4.39983042,4.39811743
47.550942,4.69041576,4.39926314,0.539585605,4.39926314,4.39754739
47.561433,4.69041576,4.3986958,0.54011106,4.3986958,4.39697701
47.571925,4.79583152,4.39812832,0.630637143,4.39812832,4.39640619
47.582416,4.79583152,4.39756078,0.631086953,4.39756078,4.39583504
47.592908,4.12310563,4.39699309,-0.523342584,4.39699309,4.39526344
47.6034,5.29150262,4.39642528,0.946085271,4.39642528,4.39469145
47.613891,4.47213595,4.39585742,0.276185688,4.39585742,4.39411912
47.624383,4.12310563,4.39528939,-0.521712342,4.39528939,4.39354634
47.634874,4,4.39472131,-0.628268498,4.39472131,4.39297323
47.645366,4.89897949,4.39415305,0.710511392,4.39415305,4.39239966
47.655858,4,4.39358467,-0.627363271,4.39358467,4.39182569
47.666349,4,4.39301624,-0.62691007,4.39301624,4.39125138
47.676841,4.89897949,4.39244763,0.711710517,4.39244763,4.39067661
47.687332,4.69041576,4.39187895,0.54638522,4.39187895,4.3901015
47.697824,4.47213595,4.3913101,0.284298875,4.3913101,4.38952593
47.708316,4,4.39074114,-0.625092905,4.39074114,4.38894996
47.718807,4.24264069,4.39017211,-0.384098197,4.39017211,4.38837364
47.729299,3.74165739,4.38960291,-0.804950636,4.38960291,4.38779685
47.73979,3.74165739,4.38903365,-0.804596959,4.38903365,4.38721972
47.750282,4.12310563,4.38846423,-0.515129693,4.38846423,4.38664212
47.760774,4.58257569,4.3878957,0.441225557,4.3878957,4.38606412
47.771265,4.35889894,4.38732611,-0.168603574,4.38732611,4.38548576
47.781757,3.60555128,4.38675635,-0.883858064,4.38675635,4.38490693
47.792248,4.24264069,4.38618654,-0.378874461,4.38618654,4.38432775
47.80274,3.87298335,4.38561658,-0.715984101,4.38561658,4.3837481
47.813232,4.47213595,4.38504652,0.2951092,4.38504652,4.38316803
47.823723,4.79583152,4.38447641,0.641369717,4.38447641,4.38258761
47.834215,4.69041576,4.38390616,0.553633094,4.38390616,4.38200671
47.844706,3.87298335,4.38333587,-0.714389616,4.38333587,4.38142545
47.855198,5,4.38276545,0.785642765,4.38276545,4.38084372
47.86569,5.29150262,4.38219494,0.953576258,4.38219494,4.38026157
47.876181,5,4.38162442,0.786368603,4.38162442,4.37967905
47.886673,5,4.38105378,0.786731354,4.38105378,4.37909606
47.897164,5.09901951,4.38048312,0.847665258,4.38048312,4.3785127
47.907656,4.47213595,4.37991236,0.303683375,4.37991236,4.37792886
47.918148,4.12310563,4.37934155,-0.506197518,4.37934155,4.37734459
47.928639,4.24264069,4.37877075,-0.368958084,4.37877075,4.37675996
47.939131,4.69041576,4.37819987,0.558762822,4.37819987,4.37617484
47.949622,5.09901951,4.37762901,0.849347103,4.37762901,4.37558935
47.960114,5.56776436,4.37705808,1.09119489,4.37705808,4.37500338
47.970606,5.09901951,4.37648715,0.850019039,4.37648715,4.37441698
47.981097,4.24264069,4.37591627,-0.365069282,4.37591627,4.3738302
47.991589,4.24264069,4.37534535,-0.364286506,4.37534535,4.37324294
48.00208,4.69041576,4.3747745,0.561819597,4.3747745,4.3726553
48.012572,3.74165739,4.37420364,-0.795327762,4.37420364,4.37206717
48.023064,4.69041576,4.37363282,0.562834739,4.37363282,4.3714786
48.033555,4.24264069,4.37306211,-0.361139066,4.37306211,4.37088966
48.044047,5.09901951,4.37249142,0.85236617,4.37249142,4.37030022
48.054538,4.47213595,4.37192088,0.316567648,4.37192088,4.3697104
48.06503,3.60555128,4.37135038,-0.875099483,4.37135038,4.36912009
48.075522,4,4.37078,-0.608917072,4.37078,4.36852933
48.086013,4.12310563,4.37020981,-0.497095747,4.37020981,4.3679382
48.096505,4.69041576,4.36963971,0.566370945,4.36963971,4.36734656
48.106996,4.35889894,4.36906984,-0.10085087,4.36906984,4.36675455
48.117488,4.79583152,4.36850011,0.65370591,4.36850011,4.36616203
48.12798,5.29150262,4.36793058,0.961026556,4.36793058,4.36556906
48.138471,4,4.36736134,-0.606103407,4.36736134,4.36497571
48.148963,4.24264069,4.3667923,-0.352351549,4.3667923,4.36438186
48.159454,5.09901951,4.36622359,0.856034999,4.36622359,4.36378761
48.169946,5.65685425,4.36565514,1.13630943,4.36565514,4.36319287
48.180438,5.38516481,4.36508701,1.00998901,4.36508701,4.36259767
48.190929,4.35889894,4.3645193,-0.0749690236,4.3645193,4.36200208
48.201421,4.24264069,4.36395192,-0.348297621,4.36395192,4.36140598
48.211912,5.38516481,4.36338502,1.01083124,4.36338502,4.36080949
48.222404,3.87298335,4.36281851,-0.699882251,4.36281851,4.36021249
48.232896,3.60555128,4.3622525,-0.869885752,4.3622525,4.35961504
48.243387,5.09901951,4.36168706,0.858680645,4.36168706,4.35901719
48.253879,4.79583152,4.36112214,0.659324945,4.36112214,4.35841883
48.26437,5,4.36055788,0.79965125,4.36055788,4.35782007
48.274862,5.65685425,4.35999421,1.13879763,4.35999421,4.3572208
48.285354,4.35889894,4.35943125,-0.0230717482,4.35943125,4.35662107
48.295845,4.47213595,4.35886909,0.336551437,4.35886909,4.35602094
48.306337,4.24264069,4.35830767,-0.340098488,4.35830767,4.35542029
48.316828,4.58257569,4.35774716,0.474160873,4.35774716,4.35481924
48.32732,4.35889894,4.35718752,0.0413694029,4.35718752,4.35421767
48.337812,4.69041576,4.35662885,0.577742945,4.35662885,4.35361564
48.348303,3.87298335,4.35607128,-0.695045275,4.35607128,4.35301321
48.358795,4.69041576,4.35551478,0.578706302,4.35551478,4.35241025
48.369286,4.24264069,4.35495952,-0.335140012,4.35495952,4.35180689
48.379778,4.69041576,4.35440547,0.579663942,4.35440547,4.35120301
48.39027,4.58257569,4.35385279,0.478249834,4.35385279,4.35059866
48.400761,3.87298335,4.35330161,-0.693049973,4.35330161,4.3499939
48.411253,4.12310563,4.35275193,-0.479214252,4.35275193,4.34938862
48.421744,4.12310563,4.35220394,-0.478642161,4.35220394,4.34878292
48.432236,4,4.35165767,-0.593007313,4.35165767,4.3481767
48.442728,4.79583152,4.35111329,0.66687198,4.35111329,4.34757001
48.453219,4.89897949,4.35057096,0.7405461,4.35057096,4.34696291
48.463711,5.19615242,4.35003073,0.919848734,4.35003073,4.34635528
48.474202,4.24264069,4.34949284,-0.326882483,4.34949284,4.34574724
48.484694,4.69041576,4.34895736,0.584344419,4.34895736,4.34513866
48.495186,2.82842712,4.3484245,-1.23288173,4.3484245,4.34452961
48.505677,4.47213595,4.34789449,0.352479031,4.34789449,4.34392015
48.516169,4.69041576,4.34736743,0.58570328,4.34736743,4.34331015
48.52666,4.69041576,4.34684363,0.586150263,4.34684363,4.34269973
48.537152,5.19615242,4.34632322,0.921861813,4.34632322,4.34208878
48.547644,4.47213595,4.3458065,0.355428555,4.3458065,4.34147736
48.558135,5,4.34529378,0.809139186,4.34529378,4.34086551
48.568627,4.79583152,4.34478525,0.671599786,4.34478525,4.34025312
48.579118,4.79583152,4.34428133,0.671974847,4.34428133,4.33964032
48.58961,5,4.34378225,0.810072679,4.34378225,4.33902698
48.600102,4.47213595,4.34328845,0.35895335,4.34328845,4.33841315
48.610593,4.35889894,4.34280036,0.126880204,4.34280036,4.33779891
48.621085,4.47213595,4.34231833,0.360302131,4.34231833,4.33718412
48.631576,4.58257569,4.34184294,0.490645247,4.34184294,4.3365689
48.642068,5.91607978,4.34137461,1.25487257,4.34137461,4.33595315
48.65256,4.69041576,4.34091398,0.591186757,4.34091398,4.33533691
48.663051,4,4.34046171,-0.583490966,4.34046171,4.33472025
48.673543,4.47213595,4.34001841,0.363479775,4.34001841,4.33410304
48.684034,4.35889894,4.33958493,0.138974873,4.33958493,4.3334854
48.694526,4.24264069,4.33916203,-0.310678839,4.33916203,4.33286722
48.705018,3.60555128,4.33875068,-0.856270638,4.33875068,4.33224854
48.715509,4.35889894,4.33835196,0.143342202,4.33835196,4.33162944
48.726001,4.58257569,4.33796692,0.494579387,4.33796692,4.33100979
48.736492,5.19615242,4.33759693,0.926582694,4.33759693,4.33038972
48.746984,5,4.33724333,0.814098684,4.33724333,4.32976909
48.757476,5,4.33690775,0.814304768,4.33690775,4.32914797
48.767967,5.09901951,4.33659198,0.873170964,4.33659198,4.32852641
48.778459,5.19615242,4.33629798,0.927283366,4.33629798,4.32790431
48.78895,4.69041576,4.33602805,0.59530472,4.33602805,4.32728177
48.799442,4.79583152,4.33578468,0.67826753,4.33578468,4.32665868
48.809934,4.69041576,4.33557078,0.595688657,4.33557078,4.3260351
48.820425,3.60555128,4.33538965,-0.854305786,4.33538965,4.32541108
48.830917,5.19615242,4.33524498,0.927850979,4.33524498,4.3247865
48.841408,4.35889894,4.33514109,0.154135836,4.33514109,4.32416149
48.8519,3.60555128,4.33508285,-0.854126207,4.33508285,4.32353592
48.862392,4.35889894,4.33507596,0.154346963,4.33507596,4.32290985
48.872883,4.58257569,4.33512695,0.497442199,4.33512695,4.32228335
48.883375,4.24264069,4.33524348,-0.304307065,4.33524348,4.32165629
48.893866,5.29150262,4.33543441,0.977787404,4.33543441,4.32102878
48.904358,4.58257569,4.33571026,0.496855545,4.33571026,4.32040072
48.91485,4.47213595,4.33608335,0.368853089,4.33608335,4.31977216
48.925341,4.58257569,4.33656828,0.495991342,4.33656828,4.31914316
48.935833,4,4.33718263,-0.58067429,4.33718263,4.31851359
48.946324,4.47213595,4.33794728,0.36631773,4.33794728,4.31788359
48.956816,4.79583152,4.33888776,0.675976154,4.33888776,4.31725302
48.967308,3.74165739,4.34003496,-0.77354869,4.34003496,4.31662194
48.977799,5.56776436,4.34142671,1.1074013,4.34142671,4.31599043
48.988291,3.60555128,4.34311029,-0.858812563,4.34311029,4.31535835
48.998782,4.12310563,4.3451441,-0.471209591,4.3451441,4.31472582
49.009274,4.58257569,4.34760262,0.484740209,4.34760262,4.31409273
49.019766,4.89897949,4.35058015,0.740539892,4.35058015,4.31345913
49.030257,5.38516481,4.35419818,1.01536527,4.35419818,4.31282509
49.040749,5.29150262,4.35861667,0.965860212,4.35861667,4.31219048
49.05124,5.91607978,4.3640463,1.24580636,4.3640463,4.31155542
49.061732,5.29150262,4.37077652,0.959544735,4.37077652,4.31091979
49.072224,5.19615242,4.37922212,0.90384197,4.37922212,4.31028366
49.082715,4.79583152,4.39005334,0.637007205,4.39005334,4.30964707
49.093207,4.69041576,4.40457172,0.534643841,4.40457172,4.30900992
49.103698,5.38516481,4.42570884,0.979518231,4.42570884,4.30837231
49.11419,6.08276253,4.46033438,1.27374572,4.46033438,4.30773414
49.124682,4.58257569,4.52320328,0.243664563,4.52320328,4.30709545
49.135173,5.29150262,4.64090045,0.806599143,4.64090045,4.30645631
49.145665,6.164414,4.84994485,1.14650301,4.84994485,4.3058166
49.156156,6.78232998,5.18126252,1.26533295,5.18126252,4.30517643
49.166648,6.164414,5.63382347,0.728416455,5.63382347,4.3045357
49.17714,6.70820393,6.15461448,0.744035919,6.15461448,4.30389445
49.187631,6.244998,6.63806826,-0.62695316,6.63806826,4.30325274
49.198123,6.244998,6.94420846,-0.836188056,6.94420846,4.30261046
49.208614,7.07106781,6.9569335,0.337837698,6.9569335,4.30196773
49.219106,6.78232998,6.67001519,0.335133991,6.67001519,4.30132441
49.229598,6.08276253,6.19367436,-0.333034283,6.19367436,4.30068059
49.240089,4.89897949,5.66975706,-0.877939392,5.66975706,4.3000363
49.250581,4.58257569,5.20751659,-0.790532032,5.20751659,4.29939144
49.261072,5.91607978,4.86449572,1.02546773,4.86449572,4.29874613
49.271564,5.19615242,4.645379,0.742141106,4.645379,4.29810023
49.282056,4,4.52067385,-0.721577336,4.52067385,4.29745381
49.292547,5.56776436,4.4534518,1.05561004,4.4534518,4.29680694
49.303039,4.89897949,4.41606562,0.694920045,4.41606562,4.29615949
49.31353,4.69041576,4.39294817,0.545405894,4.39294817,4.29551158
49.324022,5.29150262,4.37678491,0.956408756,4.37678491,4.29486308
49.334514,3.74165739,4.36445089,-0.78917267,4.36445089,4.29421407
49.345005,5.47722558,4.35457365,1.0595527,4.35457365,4.2935646
49.355497,4.35889894,4.34645144,0.111568365,4.34645144,4.29291454
49.365988,4.89897949,4.3396576,0.747878254,4.3396576,4.29226402
49.37648,4.12310563,4.33389497,-0.459118011,4.33389497,4.29161292
49.386972,5.09901951,4.32894771,0.877537349,4.32894771,4.2909613
49.397463,3.60555128,4.3246534,-0.847998894,4.3246534,4.29030922
49.407955,4.47213595,4.32088678,0.388907672,4.32088678,4.28965655
49.418446,4.89897949,4.31755218,0.762513804,4.31755218,4.28900342
49.428938,4.47213595,4.31457345,0.396941436,4.31457345,4.2883497
49.43943,4.35889894,4.31189107,0.216812994,4.31189107,4.28769546
49.449921,4.35889894,4.30945739,0.222354577,4.30945739,4.28704075
49.460413,4.79583152,4.30723329,0.698998018,4.30723329,4.28638546
49.470904,4.12310563,4.30518776,-0.426710827,4.30518776,4.2857297
49.481396,5.09901951,4.30329456,0.892034164,4.30329456,4.28507336
49.491888,4.24264069,4.30153258,-0.242676524,4.30153258,4.28441648
49.502379,4.47213595,4.2998842,0.415032233,4.2998842,4.28375915
49.512871,4.24264069,4.29833424,-0.235994808,4.29833424,4.28310122
49.523362,3.31662479,4.29687046,-0.990073566,4.29687046,4.28244283
49.533854,4.89897949,4.29548197,0.776851024,4.29548197,4.28178385
49.544346,4.69041576,4.29415989,0.629488581,4.29415989,4.28112434
49.554837,4.24264069,4.29289659,-0.224178274,4.29289659,4.28046437
49.565329,4.12310563,4.29168518,-0.410584408,4.29168518,4.2798038
49.57582,4.24264069,4.29052017,-0.218813798,4.29052017,4.27914277
49.586312,4.69041576,4.28939634,0.633260942,4.28939634,4.27848114
49.596804,5.19615242,4.28830949,0.952807922,4.28830949,4.27781899
49.607295,3.87298335,4.28725592,-0.643640097,4.28725592,4.27715636
49.617787,3.74165739,4.28623213,-0.737953074,4.28623213,4.27649314
49.628278,4,4.28523538,-0.53407432,4.28523538,4.27582946
49.63877,4,4.28426292,-0.533163125,4.28426292,4.27516518
49.649262,5.09901951,4.28331256,0.903164964,4.28331256,4.27450037
49.659753,4.47213595,4.28238237,0.435607141,4.28238237,4.27383509
49.670245,4.58257569,4.28147038,0.54873064,4.28147038,4.27316922
49.680736,4.47213595,4.28057515,0.437676601,4.28057515,4.27250287
49.691228,4.24264069,4.27969507,-0.192495156,4.27969507,4.27183593
49.70172,4.47213595,4.27882895,0.439666923,4.27882895,4.27116846
49.712211,4.47213595,4.27797571,0.440636183,4.27797571,4.27050052
49.722703,5.09901951,4.27713414,0.906578939,4.27713414,4.26983198
49.733194,5.19615242,4.27630347,0.959087565,4.27630347,4.26916297
49.743686,5.29150262,4.27548268,1.00797815,4.27548268,4.26849336
49.754178,4.69041576,4.27467108,0.64478266,4.27467108,4.26782321
49.764669,5.19615242,4.27386806,0.960356375,4.27386806,4.2671526
49.775161,4.79583152,4.27307281,0.723020545,4.27307281,4.26648139
49.785652,4,4.27228493,-0.521809281,4.27228493,4.2658097
49.796144,3.87298335,4.27150371,-0.631284696,4.27150371,4.26513742
49.806636,4.35889894,4.27072877,0.296934632,4.27072877,4.2644646
49.817127,4.12310563,4.26995972,-0.383215469,4.26995972,4.26379131
49.827619,4.35889894,4.26919602,0.299504462,4.26919602,4.26311742
49.83811,5.65685425,4.26843744,1.178311,4.26843744,4.26244306
49.848602,4.69041576,4.2676835,0.65017864,4.2676835,4.26176809
49.859094,4.24264069,4.26693394,-0.155862937,4.26693394,4.26109259
49.869585,4.24264069,4.26618856,-0.153453168,4.26618856,4.26041661
49.880077,4,4.26544694,-0.515215435,4.26544694,4.25974004
49.890568,4.35889894,4.26470899,0.306903825,4.26470899,4.25906299
49.90106,4.58257569,4.26397432,0.564447853,4.26397432,4.25838534
49.911552,4.58257569,4.26324279,0.565095479,4.26324279,4.25770715
49.922043,4.35889894,4.26251429,0.310458773,4.26251429,4.25702848
49.932535,4.35889894,4.2617885,0.311625494,4.2617885,4.25634922
49.943026,3.16227766,4.26106537,-1.04823075,4.26106537,4.25566947
49.953518,4.24264069,4.26034462,-0.133056115,4.26034462,4.25498913
49.96401,4.89897949,4.25962617,0.799595723,4.25962617,4.25430825
49.974501,4.79583152,4.25890995,0.732749326,4.25890995,4.25362689
49.984993,4.12310563,4.2581957,-0.367546017,4.2581957,4.25294492
49.995484,4.69041576,4.25748344,0.657975925,4.25748344,4.25226249
50.005976,5.19615242,4.25677293,0.969215919,4.25677293,4.25157944
50.016468,5.09901951,4.25606412,0.918126023,4.25606412,4.25089586
50.026959,4.58257569,4.25535699,0.572030333,4.25535699,4.2502118
50.037451,4.24264069,4.25465132,-0.10959305,4.25465132,4.24952714
50.047942,5.38516481,4.25394716,1.06358716,4.25394716,4.248842
50.058434,4.24264069,4.2532443,-0.102973824,4.2532443,4.24815626
50.068926,3.60555128,4.25254272,-0.804357783,4.25254272,4.24746997
50.079417,5.56776436,4.25184243,1.14713641,4.25184243,4.24678321
50.089909,4.69041576,4.25114323,0.662776379,4.25114323,4.24609584
50.1004,4.89897949,4.2504452,0.805316266,4.2504452,4.245408
50.110892,5.56776436,4.24974814,1.14804888,4.24974814,4.24471955
50.121384,5.47722558,4.24905207,1.1082299,4.24905207,4.24403055
50.131875,5.47722558,4.248357,1.10854345,4.248357,4.24334109
50.142367,5,4.24766276,0.86737376,4.24766276,4.24265101
50.152858,4.35889894,4.24696944,0.334558675,4.24696944,4.24196046
50.16335,4.47213595,4.24627686,0.475246356,4.24627686,4.24126929
50.173842,4.24264069,4.24558505,-0.0542619624,4.24558505,4.24057759
50.184333,4.47213595,4.24489404,0.476698977,4.24489404,4.23988541
50.194825,4.58257569,4.24420367,0.581697538,4.24420367,4.23919262
50.205316,5.29150262,4.24351404,1.02371314,4.24351404,4.23849936
50.215808,5.38516481,4.24282498,1.06880299,4.24282498,4.23780548
50.2263,4.79583152,4.24213654,0.744106839,4.24213654,4.23711106
50.236791,3.87298335,4.24144875,-0.607013511,4.24144875,4.23641617
50.247283,4.79583152,4.24076146,0.745030243,4.24076146,4.23572067
50.257774,5.56776436,4.24007478,1.15225413,4.24007478,4.23502469
50.268266,3.74165739,4.23938856,-0.705500655,4.23938856,4.2343281
50.278758,4.79583152,4.23870284,0.746410531,4.23870284,4.23363096
50.289249,4.24264069,4.23801768,0.0679927257,4.23801768,4.23293335
50.299741,5.29150262,4.23733291,1.02672767,4.23733291,4.23223513
50.310232,4.12310563,4.23664867,-0.336961488,4.23664867,4.23153643
50.320724,5.09901951,4.2359648,0.92900738,4.2359648,4.23083712
50.331216,5.19615242,4.23528136,0.980240309,4.23528136,4.23013727
50.341707,3.16227766,4.2345984,-1.03552921,4.2345984,4.22943694
50.352199,4,4.23391578,-0.483648402,4.23391578,4.228736
50.36269,3.74165739,4.23323361,-0.701124973,4.23323361,4.22803458
50.373182,4.69041576,4.23255177,0.676656477,4.23255177,4.22733255
50.383674,4.58257569,4.23187031,0.592203839,4.23187031,4.22662998
50.394165,4.47213595,4.23118928,0.490863194,4.23118928,4.22592693
50.404657,4.12310563,4.23050855,-0.327723856,4.23050855,4.22522326
50.415148,3.74165739,4.22982825,-0.69869225,4.22982825,4.22451912
50.42564,4.24264069,4.22914823,0.11615703,4.22914823,4.22381437
50.436132,4.12310563,4.22846857,-0.324596583,4.22846857,4.22310908
50.446623,4.69041576,4.22778932,0.680166483,4.22778932,4.2224033
50.457115,4.79583152,4.22711034,0.754136048,4.22711034,4.22169692
50.467606,3.87298335,4.22643178,-0.594515295,4.22643178,4.22099006
50.478098,4.12310563,4.2257535,-0.320387065,4.2257535,4.22028258
50.48859,5.19615242,4.22507555,0.985432325,4.22507555,4.21957456
50.499081,4.47213595,4.22439802,0.497732794,4.22439802,4.21886607
50.509573,4.58257569,4.22372076,0.599045015,4.22372076,4.21815696
50.520064,5,4.22304392,0.881451122,4.22304392,4.21744737
50.530556,5.19615242,4.22236736,0.986805485,4.22236736,4.21673717
50.541048,4.58257569,4.22169115,0.600736672,4.22169115,4.21602643
50.551539,3.74165739,4.22101535,-0.69235682,4.22101535,4.21531521
50.562031,4.58257569,4.22033985,0.601860316,4.22033985,4.21460338
50.572522,4.69041576,4.21966478,0.686112948,4.21966478,4.21389107
50.583014,3.87298335,4.21899001,-0.588223315,4.21899001,4.21317815
50.593506,4.12310563,4.21831562,-0.308561169,4.21831562,4.21246468
50.603997,4,4.21764167,-0.466520815,4.21764167,4.21175074
50.614489,4.12310563,4.21696804,-0.306369741,4.21696804,4.21103618
50.62498,4.79583152,4.21629488,0.761273044,4.21629488,4.21032115
50.635472,4.89897949,4.21562205,0.826654365,4.21562205,4.2096055
50.645964,3.74165739,4.21494963,-0.687962384,4.21494963,4.20888931
50.656455,4.35889894,4.2142777,0.380291004,4.2142777,4.20817264
50.666947,4.89897949,4.21360613,0.82787279,4.21360613,4.20745536
50.677438,5.19615242,4.21293507,0.991573173,4.21293507,4.20673761
50.68793,4.58257569,4.21226439,0.60853209,4.21226439,4.20601924
50.698422,4.69041576,4.21159418,0.69196935,4.21159418,4.20530032
50.708913,4.47213595,4.21092451,0.511088494,4.21092451,4.20458093
50.719405,5.09901951,4.21025526,0.942742943,4.21025526,4.20386093
50.729896,3.60555128,4.20958657,-0.777197077,4.20958657,4.20314045
50.740388,5,4.20891834,0.889427716,4.20891834,4.20241936
50.75088,4.35889894,4.20825063,0.388134397,4.20825063,4.20169772
50.761371,4,4.20758354,-0.455613363,4.20758354,4.20097561
50.771863,4.69041576,4.20691694,0.695340797,4.20691694,4.20025289
50.782354,3.87298335,4.20625097,-0.577293364,4.20625097,4.19952969
50.792846,5,4.20558554,0.891299309,4.20558554,4.19880588
50.803338,4.79583152,4.20492072,0.768707228,4.20492072,4.19808152
50.813829,4.12310563,4.20425659,-0.284870087,4.20425659,4.19735669
50.824321,3.74165739,4.20359305,-0.679658488,4.20359305,4.19663124
50.834812,4.58257569,4.20293023,0.616153765,4.20293023,4.19590532
50.845304,4.12310563,4.20226804,-0.281358165,4.20226804,4.19517879
50.855796,4.24264069,4.20160656,0.202568817,4.20160656,4.19445171
50.866287,4.47213595,4.20094587,0.520759139,4.20094587,4.19372416
50.876779,3.46410162,4.20028588,-0.858011807,4.20028588,4.192996
50.88727,4.12310563,4.19962672,-0.276624459,4.19962672,4.19226736
50.897762,4.35889894,4.1989683,0.3999133,4.1989683,4.19153811
50.908254,4.69041576,4.1983107,0.701502003,4.1983107,4.19080832
50.918745,4.69041576,4.19765402,0.701969901,4.19765402,4.19007806
50.929237,5.09901951,4.19699815,0.949748052,4.19699815,4.18934718
50.939728,3.74165739,4.19634325,-0.674303985,4.19634325,4.18861582
50.95022,4.69041576,4.19568922,0.703367996,4.19568922,4.18788386
50.960712,4,4.19503616,-0.44162898,4.19503616,4.18715135
50.971203,4.69041576,4.19438415,0.704295119,4.19438415,4.18641837
50.981695,3.46410162,4.1937331,-0.854184689,4.1937331,4.18568478
50.992186,4.47213595,4.19308317,0.528254472,4.19308317,4.18495072
51.002678,4.58257569,4.19243427,0.624613023,4.19243427,4.18421604
51.01317,4.89897949,4.19178649,0.840947678,4.19178649,4.18348082
51.023661,5,4.19113993,0.899366481,4.19113993,4.18274513
51.034153,3.74165739,4.19049451,-0.669953078,4.19049451,4.18200883
51.044644,4.69041576,4.18985039,0.707506446,4.18985039,4.18127205
51.055136,4.47213595,4.18920748,0.531910217,4.18920748,4.18053467
51.065628,4.35889894,4.18856588,0.412714266,4.18856588,4.17979674
51.076119,5.19615242,4.1879257,1.00410494,4.1879257,4.17905834
51.086611,4.35889894,4.18728685,0.414260897,4.18728685,4.17831934
51.097102,4.47213595,4.18664951,0.534309313,4.18664951,4.17757986
51.107594,3.60555128,4.1860136,-0.761880782,4.1860136,4.17683977
51.118086,4.47213595,4.18537923,0.535496713,4.18537923,4.17609913
51.128577,5.29150262,4.1847465,1.05202477,4.1847465,4.17535803
51.139069,4.79583152,4.18411534,0.782122869,4.18411534,4.17461632
51.14956,3.87298335,4.18348593,-0.557227591,4.18348593,4.17387414
51.160052,4.35889894,4.18285821,0.419572084,4.18285821,4.17313135
51.170544,5.38516481,4.18223228,1.09678281,4.18223228,4.17238802
51.181035,4.58257569,4.18160827,0.633219886,4.18160827,4.17164422
51.191527,4.79583152,4.18098611,0.784120788,4.18098611,4.17089981
51.202018,4.47213595,4.18036599,0.54015735,4.18036599,4.17015493
51.21251,5.19615242,4.17974785,1.00816892,4.17974785,4.16940944
51.223002,4.12310563,4.17913182,-0.23669852,4.17913182,4.16866341
51.233493,4.24264069,4.17851801,0.253224556,4.17851801,4.16791692
51.243985,5.19615242,4.17790639,1.00908178,4.17790639,4.16716981
51.254476,4.35889894,4.17729715,0.426147621,4.17729715,4.16642224
51.264968,4.12310563,4.17669024,-0.231483502,4.17669024,4.16567406
51.27546,4.12310563,4.1760858,-0.230174217,4.1760858,4.16492534
51.285951,3.87298335,4.17548396,-0.550000559,4.17548396,4.16417616
51.296443,3.60555128,4.1748847,-0.754541866,4.1748847,4.16342636
51.306934,4.58257569,4.17428822,0.638973767,4.17428822,4.1626761
51.317426,4.35889894,4.17369449,0.43035387,4.17369449,4.16192524
51.327918,4.47213595,4.17310366,0.546838453,4.17310366,4.16117383
51.338409,3.46410162,4.17251589,-0.841673494,4.17251589,4.16042196
51.348901,4.12310563,4.17193115,-0.220964986,4.17193115,4.15966948
51.359392,4.79583152,4.17134967,0.790241642,4.17134967,4.15891654
51.369884,4,4.17077144,-0.413245013,4.17077144,4.15816299
51.380376,4.58257569,4.17019663,0.642167475,4.17019663,4.15740891
51.390867,4,4.1696254,-0.411856046,4.1696254,4.15665436
51.401359,4.24264069,4.16905777,0.271261708,4.16905777,4.1558992
51.41185,4.24264069,4.16849397,0.272298947,4.16849397,4.15514358
51.422342,5,4.16793402,0.912176509,4.16793402,4.15438736
51.432834,3.74165739,4.1673781,-0.652472768,4.1673781,4.1536306
51.443325,4.69041576,4.16682641,0.723594743,4.16682641,4.15287338
51.453817,3.74165739,4.16627898,-0.651629952,4.16627898,4.15211555
51.464308,4.79583152,4.16573607,0.793785519,4.16573607,4.15135726
51.4748,4.12310563,4.16519773,-0.205163612,4.16519773,4.15059836
51.485292,4.58257569,4.16466418,0.646460763,4.16466418,4.14983894
51.495783,3.87298335,4.16413562,-0.53958528,4.16413562,4.14907905
51.506275,4.47213595,4.16361214,0.555449203,4.16361214,4.14831855
51.516766,3.74165739,4.16309401,-0.649181503,4.16309401,4.1475576
51.527258,4.58257569,4.16258133,0.648069724,4.16258133,4.14679604
51.53775,4.69041576,4.16207433,0.726870982,4.16207433,4.14603395
51.548241,3.46410162,4.16157329,-0.835147694,4.16157329,4.1452714
51.558733,4.69041576,4.1610783,0.727555815,4.1610783,4.14450825
51.569224,5.09901951,4.16058968,0.96872588,4.16058968,4.14374464
51.579716,4.69041576,4.16010759,0.728222613,4.16010759,4.14298042
51.590208,4.24264069,4.15963229,0.288111776,4.15963229,4.14221568
51.600699,4.35889894,4.1591641,0.446917047,4.1591641,4.14145047
51.611191,4,4.15870317,-0.398375669,4.15870317,4.14068467
51.621682,5,4.15824989,0.917469408,4.15824989,4.13991841
51.632174,4.58257569,4.15780443,0.651744783,4.15780443,4.13915154
51.642666,3.60555128,4.15736716,-0.742843106,4.15736716,4.13838415
51.653157,5,4.15693841,0.918183854,4.15693841,4.1376163
51.663649,4,4.15651844,-0.395624114,4.15651844,4.13684785
51.67414,3.74165739,4.15610767,-0.643778129,4.15610767,4.13607894
51.684632,4.89897949,4.15570637,0.862132889,4.15570637,4.13530944
51.695124,4.35889894,4.15531496,0.451202818,4.15531496,4.1345394
51.705615,4.58257569,4.15493387,0.653943289,4.15493387,4.13376892
51.716107,4.12310563,4.15456343,-0.177363495,4.15456343,4.13299783
51.726598,4.12310563,4.15420416,-0.176347754,4.15420416,4.13222629
51.73709,4.24264069,4.15385641,0.297966898,4.15385641,4.13145415
51.747582,3.16227766,4.15352072,-0.995611902,4.15352072,4.13068148
51.758073,5.19615242,4.1531976,1.0212516,4.1531976,4.12990837
51.768565,3.31662479,4.15288751,-0.914474011,4.15288751,4.12913465
51.779056,4,4.15259105,-0.390629049,4.15259105,4.12836048
51.789548,4.24264069,4.15230876,0.300552707,4.15230876,4.12758572
51.80004,3.74165739,4.15204125,-0.640612101,4.15204125,4.12681043
51.810531,3.74165739,4.15178919,-0.64041534,4.15178919,4.12603469
51.821023,3.87298335,4.15155321,-0.527797179,4.15155321,4.12525835
51.831514,4.58257569,4.15133404,0.656689921,4.15133404,4.12448156
51.842006,4.35889894,4.1511324,0.455814158,4.1511324,4.12370418
51.852498,4.58257569,4.15094908,0.656982967,4.15094908,4.12292627
51.862989,4.58257569,4.15078492,0.657107886,4.15078492,4.12214792
51.873481,4.69041576,4.15064077,0.734693807,4.15064077,4.12136897
51.883972,4,4.15051757,-0.387965942,4.15051757,4.12058957
51.894464,4.58257569,4.15041627,0.657388334,4.15041627,4.11980958
51.904956,4.79583152,4.15033791,0.803426169,4.15033791,4.11902907
51.915447,4.69041576,4.15028359,0.73493685,4.15028359,4.11824811
51.925939,3.60555128,4.15025443,-0.738040075,4.15025443,4.11746656
51.93643,5,4.15025166,0.921817952,4.15025166,4.11668456
51.946922,3.60555128,4.15027658,-0.738055084,4.15027658,4.11590197
51.957414,3.46410162,4.15033056,-0.828389366,4.15033056,4.11511886
51.967905,4,4.15041503,-0.387833765,4.15041503,4.1143353
51.978397,4.58257569,4.15053156,0.657300644,4.15053156,4.11355116
51.988888,3.74165739,4.15068176,-0.639550137,4.15068176,4.11276657
51.99938,4.24264069,4.15086742,0.302941032,4.15086742,4.11198139
52.009872,4,4.15109036,-0.38870344,4.15109036,4.11119569
52.020363,3.87298335,4.15135256,-0.527607059,4.15135256,4.11040955
52.030855,4.58257569,4.15165615,0.656444627,4.15165615,4.10962282
52.041346,4.58257569,4.15200333,0.656180128,4.15200333,4.10883565
52.051838,4.24264069,4.15239658,0.300406563,4.15239658,4.10804788
52.06233,3.31662479,4.15283843,-0.914447179,4.15283843,4.10725961
52.072821,4.24264069,4.15333158,0.298846292,4.15333158,4.10647089
52.083313,3.87298335,4.15387906,-0.529995956,4.15387906,4.10568159
52.093804,4.58257569,4.15448392,0.654287228,4.15448392,4.10489184
52.104296,3.31662479,4.15514965,-0.915710032,4.15514965,4.10410151
52.114788,4.47213595,4.15587984,0.562366534,4.15587984,4.10331067
52.125279,4.79583152,4.1566783,0.79947059,4.1566783,4.10251938
52.135771,4.12310563,4.15754938,-0.185590294,4.15754938,4.10172752
52.146262,4.12310563,4.15849745,-0.188127151,4.15849745,4.10093521
52.156754,5.38516481,4.15952755,1.10708502,4.15952755,4.10014232
52.167246,4.12310563,4.16064488,-0.193750483,4.16064488,4.09934892
52.177737,4,4.16185499,-0.40231205,4.16185499,4.09855508
52.188229,4,4.16316427,-0.403935969,4.16316427,4.09776066
52.19872,4.35889894,4.16457915,0.440817192,4.16457915,4.0969658
52.209212,4.12310563,4.16610712,-0.207368027,4.16610712,4.09617036
52.219704,4.12310563,4.16775593,-0.211306194,4.16775593,4.09537441
52.230195,4.47213595,4.16953395,0.550092721,4.16953395,4.09457803
52.240687,4.24264069,4.17145083,0.266814278,4.17145083,4.09378106
52.251178,4.79583152,4.17351636,0.788869548,4.17351636,4.09298367
52.26167,3.16227766,4.17574203,-1.00670968,4.17574203,4.09218569
52.272162,3.87298335,4.1781398,-0.552409682,4.1781398,4.0913872
52.282653,4,4.18072274,-0.425114967,4.18072274,4.09058829
52.293145,4.35889894,4.18350592,0.418799503,4.18350592,4.08978879
52.303636,5.19615242,4.1865049,1.00481218,4.1865049,4.08898886
52.314128,4.58257569,4.18973795,0.6267677,4.18973795,4.08818836
52.32462,4.12310563,4.19322431,-0.264799331,4.19322431,4.08738735
52.335111,4.12310563,4.19698524,-0.271808049,4.19698524,4.08658591
52.345603,3.31662479,4.20104537,-0.940436377,4.20104537,4.08578389
52.356094,5.56776436,4.20543051,1.16719058,4.20543051,4.08498145
52.366586,4.47213595,4.21017106,0.511825066,4.21017106,4.08417843
52.377078,3.87298335,4.21529959,-0.585077981,4.21529959,4.08337491
52.387569,4.35889894,4.22085244,0.371546096,4.22085244,4.08257096
52.398061,4.35889894,4.22687195,0.363355186,4.22687195,4.08176643
52.408552,4.69041576,4.2334034,0.67602689,4.2334034,4.08096149
52.419044,4.12310563,4.24050028,-0.342629035,4.24050028,4.08015596
52.429536,4.12310563,4.24822105,-0.353716589,4.24822105,4.07934994
52.440027,5.09901951,4.25663179,0.917816824,4.25663179,4.07854349
52.450519,4.47213595,4.26581006,0.4542311,4.26581006,4.07773647
52.46101,3.74165739,4.27584079,-0.730878512,4.27584079,4.07692903
52.471502,5.09901951,4.2868249,0.901218403,4.2868249,4.07612101
52.481994,4.58257569,4.29887525,0.532635377,4.29887525,4.0753125
52.492485,4.69041576,4.31212155,0.615056266,4.31212155,4.07450356
52.502977,4.24264069,4.32671773,-0.289960424,4.32671773,4.07369406
52.513468,3.60555128,4.34283698,-0.858653425,4.34283698,4.07288414
52.52396,4.79583152,4.36068737,0.659654572,4.36068737,4.07207364
52.534452,4.69041576,4.38050777,0.556693801,4.38050777,4.07126265
52.544943,5,4.40257887,0.772930226,4.40257887,4.07045125
52.555435,4.47213595,4.42723926,0.211888394,4.42723926,4.06963927
52.565926,4.79583152,4.45488227,0.583908597,4.45488227,4.06882688
52.576418,3.74165739,4.4859889,-0.862746494,4.4859889,4.06801392
52.58691,3.60555128,4.52112949,-0.956858513,4.52112949,4.06720046
52.597401,5,4.56099379,0.662575434,4.56099379,4.0663866
52.607893,4.35889894,4.60643485,-0.497529802,4.60643485,4.06557216
52.618384,4.47213595,4.658483,-0.431679336,4.658483,4.06475731
52.628876,4.58257569,4.71843357,-0.368589033,4.71843357,4.0639419
52.639368,3.87298335,4.78788708,-0.956506002,4.78788708,4.06312599
52.649859,4.79583152,4.8688567,-0.270231716,4.8688567,4.06230968
52.660351,4.47213595,4.96392704,-0.701278181,4.96392704,4.0614928
52.670842,5.83095189,5.07638804,0.86865635,5.07638804,4.06067551
52.681334,5.83095189,5.21060289,0.787622374,5.21060289,4.05985766
52.691826,6.08276253,5.37254307,0.84274519,5.37254307,4.05903931
52.702317,7,5.57142805,1.19522883,5.57142805,4.05822057
52.712809,7.41619849,5.82461294,1.26158057,5.82461294,4.05740125
52.7233,6.4807407,6.17030469,0.55716785,6.17030469,4.05658153
52.733792,8.06225775,6.69371132,1.16984889,6.69371132,4.05576125
52.744284,9.11043358,7.55591986,1.24680139,7.55591986,4.05494049
52.754775,10.9544512,8.97822545,1.40578295,8.97822545,4.05411932
52.765267,12,11.1354229,0.929826362,11.1354229,4.05329759
52.775758,15.0332964,14.0177362,1.00775006,14.0177362,4.05247545
52.78625,16.8522995,17.377437,-0.724663669,17.377437,4.05165276
52.796742,17.6635217,20.7541698,-1.7580239,20.7541698,4.05082959
52.807233,23.9165215,23.5026135,0.643356781,23.5026135,4.05000601
52.817725,24.8193473,24.8496005,-0.173934493,24.8496005,4.04918188
52.828216,27.1293199,24.2950878,1.68351778,24.2950878,4.04835734
52.838708,22.7815715,22.0796215,0.837824573,22.0796215,4.04753225
52.8492,18.973666,18.9104267,0.251474089,18.9104267,4.04670668
52.859691,14.9666295,15.4922466,-0.724994534,15.4922466,4.04588071
52.870183,12.0415946,12.3649587,-0.568651185,12.3649587,4.04505418
52.880674,10.0995049,9.87298271,0.475943517,9.87298271,4.04422726
52.891166,7,8.1301703,-1.06309468,8.1301703,4.04339979
52.901658,6.63324958,7.03519616,-0.633992573,7.03519616,4.04257183
52.912149,5.56776436,6.3755307,-0.898758219,6.3755307,4.04174349
52.922641,5.29150262,5.95831632,-0.816586614,5.95831632,4.04091459
52.933132,6,5.66647771,0.577513885,5.66647771,4.04008529
52.943624,4.89897949,5.44349336,-0.737911837,5.44349336,4.03925545
52.954116,4.47213595,5.26424051,-0.890002559,5.26424051,4.03842513
52.964607,5.09901951,5.1164743,-0.132116575,5.1164743,4.03759442
52.975099,6.244998,4.99292828,1.11895921,4.99292828,4.03676316
52.98559,4.12310563,4.88862534,-0.874939833,4.88862534,4.03593151
52.996082,5.19615242,4.79980886,0.629558229,4.79980886,4.03509931
53.006574,6,4.72361175,1.12977354,4.72361175,4.03426664
53.017065,5,4.65778853,0.584988432,4.65778853,4.03343358
53.027557,2.64575131,4.6005461,-1.39813976,4.6005461,4.03259997
53.038048,3.16227766,4.55047544,-1.17821805,4.55047544,4.03176598
53.04854,3.74165739,4.50642322,-0.874508908,4.50642322,4.03093144
53.059032,3.46410162,4.46746688,-1.00168122,4.46746688,4.03009643
53.069523,4,4.43285114,-0.657914237,4.43285114,4.02926104
53.080015,3.74165739,4.40194479,-0.812580708,4.40194479,4.0284251
53.090506,3.87298335,4.37423652,-0.707992353,4.37423652,4.02758878
53.100998,4.47213595,4.34928939,0.350494738,4.34928939,4.02675191
53.11149,4.47213595,4.32674434,0.381302524,4.32674434,4.02591459
53.121981,4.47213595,4.306298,0.407232065,4.306298,4.02507688
53.132473,3.46410162,4.28768761,-0.907516386,4.28768761,4.02423863
53.142964,4.12310563,4.27069636,-0.38417539,4.27069636,4.02339999
53.153456,4.12310563,4.25513224,-0.363354666,4.25513224,4.02256082
53.163948,3.74165739,4.24083475,-0.706524851,4.24083475,4.02172119
53.174439,3.16227766,4.22766507,-1.03217606,4.22766507,4.02088117
53.184931,3.60555128,4.21549926,-0.780991665,4.21549926,4.02004062
53.195422,4.47213595,4.20423409,0.51759237,4.20423409,4.0191997
53.205914,4.12310563,4.1937752,-0.265837492,4.1937752,4.01835823
53.216406,4.47213595,4.18404293,0.536742979,4.18404293,4.01751631
53.226897,4.69041576,4.17496714,0.717947503,4.17496714,4.01667401
53.237389,4.12310563,4.16648349,-0.208273527,4.16648349,4.01583118
53.24788,4.12310563,4.15853827,-0.188235604,4.15853827,4.01498797
53.258372,3.60555128,4.15108087,-0.738599749,4.15108087,4.01414422
53.268864,4,4.14406843,-0.379563469,4.14406843,4.01330003
53.279355,4.24264069,4.13746266,0.324311613,4.13746266,4.01245546
53.289847,4.35889894,4.13122753,0.477149258,4.13122753,4.01161036
53.300338,4.47213595,4.12533308,0.588899718,4.12533308,4.01076489
53.31083,4.47213595,4.1197502,0.593620883,4.1197502,4.00991889
53.321322,4.69041576,4.11445432,0.758921236,4.11445432,4.00907243
53.331813,3,4.10942319,-1.0532916,4.10942319,4.00822561
53.342305,4.69041576,4.10463535,0.765362925,4.10463535,4.00737826
53.352796,4.69041576,4.10007315,0.768337562,4.10007315,4.00653054
53.363288,3.87298335,4.09571886,-0.471948637,4.09571886,4.0056823
53.37378,3.31662479,4.09155763,-0.880302698,4.09155763,4.0048336
53.384271,3.87298335,4.08757589,-0.463241347,4.08757589,4.00398455
53.394763,4.24264069,4.08376017,0.398598185,4.08376017,4.00313496
53.405254,4,4.08009961,-0.28301874,4.08009961,4.00228501
53.415746,3.74165739,4.07658287,-0.578727468,4.07658287,4.00143454
53.426238,4.24264069,4.07320059,0.41163102,4.07320059,4.00058362
53.436729,4.24264069,4.06994415,0.415567727,4.06994415,3.99973234
53.447221,4.24264069,4.06680472,0.419327989,4.06680472,3.99888054
53.457712,3.74165739,4.06377537,-0.567554387,4.06377537,3.99802838
53.468204,4.35889894,4.06084855,0.54593992,4.06084855,3.9971757
53.478696,4.12310563,4.05801814,0.25512249,4.05801814,3.99632258
53.489187,4.58257569,4.05527848,0.726152334,4.05527848,3.9954691
53.499679,4.12310563,4.05262357,0.26548457,4.05262357,3.9946151
53.51017,4.12310563,4.05004883,0.270290202,4.05004883,3.99376074
53.520662,4.24264069,4.04754908,0.44169176,4.04754908,3.99290586
53.531154,4.24264069,4.04512019,0.444432786,4.04512019,3.99205055
53.541645,4.24264069,4.04275833,0.447082048,4.04275833,3.99119489
53.552137,4.12310563,4.04045928,0.287482773,4.04045928,3.9903387
53.562628,5.09901951,4.03821997,1.02995123,4.03821997,3.98948217
53.57312,4.47213595,4.0360367,0.660378116,4.0360367,3.98862512
53.583612,4.35889894,4.03390663,0.570080973,4.03390663,3.98776763
53.594103,4.24264069,4.03182711,0.459144401,4.03182711,3.9869098
53.604595,4,4.02979507,-0.172612488,4.02979507,3.98605145
53.615086,4.89897949,4.02780842,0.93336545,4.02780842,3.98519276
53.625578,3.87298335,4.02586445,-0.391000127,4.02586445,3.98433355
53.63607,4.12310563,4.02396115,0.314872158,4.02396115,3.98347391
53.646561,3.87298335,4.02209666,-0.386151932,4.02209666,3.98261393
53.657053,5,4.0202687,0.98981377,4.0202687,3.98175344
53.667544,4.69041576,4.01847581,0.819719433,4.01847581,3.9808926
53.678036,4,4.01671595,-0.129290182,4.01671595,3.98003125
53.688528,3.74165739,4.0149877,-0.522810015,4.0149877,3.97916948
53.699019,4.58257569,4.01328971,0.754510427,4.01328971,3.97830736
53.709511,2.82842712,4.01162024,-1.08774681,4.01162024,3.97744474
53.720002,4.35889894,4.00997829,0.590695062,4.00997829,3.97658178
53.730494,4,4.00836226,-0.0914454126,4.00836226,3.97571831
53.740986,4.12310563,4.00677114,0.34107841,4.00677114,3.97485442
53.751477,4.12310563,4.00520395,0.343368129,4.00520395,3.97399019
53.761969,4.79583152,4.00365933,0.890040556,4.00365933,3.97312546
53.77246,3.87298335,4.00213657,-0.359378942,4.00213657,3.97226039
53.782952,4.12310563,4.00063443,0.349958851,4.00063443,3.97139482
53.793444,3,3.99915215,-0.999575986,3.99915215,3.97052883
53.803935,4.24264069,3.99768903,0.494925911,3.99768903,3.96966251
53.814427,4.79583152,3.99624397,0.894196595,3.99624397,3.96879569
53.824918,4.24264069,3.99481649,0.497819439,3.99481649,3.96792853
53.83541,4.12310563,3.99340559,0.360138913,3.99340559,3.96706088
53.845902,5.56776436,3.99201071,1.25529027,3.99201071,3.96619281
53.856393,4.24264069,3.99063132,0.502005342,3.99063132,3.96532441
53.866885,4.12310563,3.98926655,0.365840231,3.98926655,3.96445551
53.877376,3.46410162,3.98791606,-0.723750262,3.98791606,3.96358629
53.887868,3.60555128,3.98657902,-0.617274448,3.98657902,3.96271657
53.89836,3.87298335,3.98525503,-0.335069672,3.98525503,3.96184644
53.908851,4.12310563,3.98394371,0.373044126,3.98394371,3.96097598
53.919343,4.58257569,3.98264431,0.77455238,3.98264431,3.96010503
53.929834,3.60555128,3.98135661,-0.613029638,3.98135661,3.95923376
53.940326,3.60555128,3.98007994,-0.61198747,3.98007994,3.95836199
53.950818,4.12310563,3.97881399,0.379857393,3.97881399,3.95748982
53.961309,4.24264069,3.97755847,0.514861357,3.97755847,3.95661732
53.971801,2.82842712,3.97631276,-1.07139425,3.97631276,3.95574434
53.982292,3.46410162,3.97507674,-0.714825241,3.97507674,3.95487103
53.992784,4.24264069,3.97384981,0.518450459,3.97384981,3.95399724
54.003276,4.24264069,3.97263175,0.519623839,3.97263175,3.95312304
54.013767,4.89897949,3.97142237,0.963097669,3.97142237,3.95224853
54.024259,3.16227766,3.97022111,-0.898856746,3.97022111,3.95137353
54.03475,3.87298335,3.96902792,-0.309910587,3.96902792,3.95049821
54.045242,4.47213595,3.96784228,0.710136377,3.96784228,3.94962241
54.055734,3.74165739,3.96666404,-0.474348667,3.96666404,3.94874621
54.066225,4,3.96549306,0.185760441,3.96549306,3.9478697
54.076717,4,3.96432885,0.188868067,3.96432885,3.94699271
54.087208,4.12310563,3.96317141,0.399917759,3.96317141,3.9461154
54.0977,4.58257569,3.96202029,0.787753394,3.96202029,3.94523761
54.108192,4.12310563,3.96087537,0.402778176,3.96087537,3.94435943
54.118683,3.46410162,3.95973655,-0.704013449,3.95973655,3.94348093
54.129175,4.12310563,3.95860342,0.405588711,3.95860342,3.94260196
54.139666,3.31662479,3.957476,-0.800531831,3.957476,3.94172268
54.150158,4.12310563,3.95635389,0.408352466,3.95635389,3.94084293
54.16065,3,3.95523701,-0.977362272,3.95523701,3.93996278
54.171141,4.12310563,3.9541253,0.411072165,3.9541253,3.93908233
54.181633,4.69041576,3.95301838,0.85871845,3.95301838,3.9382014
54.192124,4.12310563,3.95191631,0.413750307,3.95191631,3.93732017
54.202616,5.09901951,3.95081871,1.07154132,3.95081871,3.93643847
54.213108,5,3.94972556,1.02482898,3.94972556,3.93555638
54.223599,4.69041576,3.9486368,0.861265905,3.9486368,3.93467398
54.234091,4.12310563,3.9475521,0.418991081,3.9475521,3.93379112
54.244582,3.74165739,3.94647153,-0.452563964,3.94647153,3.93290796
54.255074,4.35889894,3.94539475,0.643042914,3.94539475,3.93202433
54.265566,3.46410162,3.94432176,-0.69297918,3.94432176,3.93114031
54.276057,5.09901951,3.94325253,1.07506604,3.94325253,3.930256
54.286549,4.12310563,3.94218674,0.425345611,3.94218674,3.92937122
54.29704,4.24264069,3.94112449,0.549104909,3.94112449,3.92848615
54.307532,3.87298335,3.94006547,-0.259002162,3.94006547,3.92760061
54.318024,4.35889894,3.93900967,0.647988633,3.93900967,3.92671469
54.328515,3.87298335,3.93795711,-0.254899525,3.93795711,3.92582848
54.339007,3.46410162,3.93690749,-0.687608808,3.93690749,3.92494181
54.349498,4.24264069,3.93586091,0.553877045,3.93586091,3.92405484
54.35999,4.79583152,3.93481708,0.92790864,3.93481708,3.92316742
54.370482,3.87298335,3.93377602,-0.246561708,3.93377602,3.92227962
54.380973,4.69041576,3.93273775,0.870447018,3.93273775,3.92139153
54.391465,4.24264069,3.93170198,0.557618779,3.93170198,3.92050298
54.401956,4.35889894,3.93066885,0.654392922,3.93066885,3.91961415
54.412448,4.89897949,3.92963806,0.984551381,3.92963806,3.91872486
54.42294,4,3.92860966,0.267189701,3.92860966,3.9178352
54.433431,4.12310563,3.92758367,0.442178643,3.92758367,3.91694525
54.443923,3.60555128,3.92655983,-0.566576167,3.92655983,3.91605485
54.454414,3.87298335,3.92553826,-0.229248583,3.92553826,3.91516417
54.464906,4.79583152,3.92451871,0.933441383,3.92451871,3.91427303
54.475398,3.46410162,3.92350121,-0.677790229,3.92350121,3.91338153
54.485889,3.87298335,3.9224858,-0.222491476,3.9224858,3.91248975
54.496381,4.12310563,3.92147224,0.449036067,3.92147224,3.91159752
54.506872,4.47213595,3.92046065,0.742748483,3.92046065,3.91070501
54.517364,4.47213595,3.91945079,0.743427985,3.91945079,3.90981205
54.527856,3.87298335,3.9184427,-0.213211996,3.9184427,3.90891873
54.538347,3.74165739,3.91743644,-0.419260121,3.91743644,3.90802513
54.548839,3.60555128,3.91643175,-0.557566564,3.91643175,3.90713109
54.55933,4.58257569,3.91542878,0.816790616,3.91542878,3.90623677
54.569822,4.24264069,3.9144273,0.572899104,3.9144273,3.90534201
54.580314,4.35889894,3.91342736,0.667436576,3.91342736,3.90444689
54.590805,4.12310563,3.912429,0.458995231,3.912429,3.9035515
54.601297,4.35889894,3.911432,0.668929699,3.911432,3.90265567
54.611788,4.79583152,3.9104365,0.940954313,3.9104365,3.90175957
54.62228,4.58257569,3.90944228,0.820447082,3.90944228,3.90086303
54.632772,4,3.90844939,0.302573317,3.90844939,3.89996613
54.643263,3.74165739,3.90745788,-0.407186072,3.90745788,3.89906897
54.653755,4.24264069,3.90646754,0.579804403,3.90646754,3.89817137
54.664246,4,3.90547852,0.307443464,3.90547852,3.8972735
54.674738,4.47213595,3.90449058,0.753422439,3.90449058,3.8963752
54.68523,3.87298335,3.90350381,-0.174701059,3.90350381,3.89547655
54.695721,4.24264069,3.90251824,0.583200174,3.90251824,3.89457764
54.706213,3.16227766,3.90153368,-0.859799988,3.90153368,3.8936783
54.716704,4.89897949,3.90055027,0.9992143,3.90055027,3.89277869
54.727196,2.82842712,3.89956779,-1.03495926,3.89956779,3.89187865
54.737688,4.47213595,3.89858632,0.757330597,3.89858632,3.89097827
54.748179,3.87298335,3.89760592,-0.15691581,3.89760592,3.89007763
54.758671,3.74165739,3.89662637,-0.393660995,3.89662637,3.88917656
54.769162,4.79583152,3.89564783,0.948780109,3.89564783,3.88827523
54.779654,4.58257569,3.89467009,0.82940075,3.89467009,3.88737348
54.790146,4.58257569,3.89369322,0.82998944,3.89369322,3.88647139
54.800637,4.58257569,3.89271729,0.830577149,3.89271729,3.88556904
54.811129,3.46410162,3.89174209,-0.65394226,3.89174209,3.88466627
54.82162,3.87298335,3.89076779,-0.133358312,3.89076779,3.88376325
54.832112,4,3.88979416,0.331972649,3.88979416,3.8828598
54.842604,3,3.88882129,-0.942773191,3.88882129,3.88195602
54.853095,3.46410162,3.88784924,-0.650959007,3.88784924,3.88105199
54.863587,3.60555128,3.88687782,-0.530402248,3.88687782,3.88014754
54.874078,2.44948974,3.88590718,-1.19850634,3.88590718,3.87924284
54.88457,3.16227766,3.88493712,-0.850093796,3.88493712,3.87833772
54.895062,3.16227766,3.88396772,-0.849523429,3.88396772,3.87743228
54.905553,3.74165739,3.88299904,-0.375954325,3.88299904,3.87652659
54.916045,4.12310563,3.88203089,0.49099362,3.88203089,3.87562048
54.926536,4.47213595,3.88106343,0.768812411,3.88106343,3.87471413
54.937028,4.12310563,3.88009647,0.492959593,3.88009647,3.87380736
54.94752,4.58257569,3.87913006,0.838716657,3.87913006,3.87290027
54.958011,3.87298335,3.87816431,-0.0719788921,3.87816431,3.87199294
54.968503,4.47213595,3.87719899,0.771321569,3.87719899,3.8710852
54.978994,4.35889894,3.87623429,0.69474071,3.87623429,3.87017722
54.989486,4.35889894,3.87527,0.695434357,3.87527,3.86926883
54.999978,4.12310563,3.8743062,0.498797983,3.8743062,3.86836012
55.010469,3.31662479,3.87334297,-0.746135494,3.87334297,3.86745117
55.020961,3.46410162,3.8723801,-0.638966735,3.8723801,3.86654182
55.031452,4,3.87141778,0.358583628,3.87141778,3.86563223
55.041944,4.35889894,3.8704558,0.698887072,3.8704558,3.86472224
55.052436,4.47213595,3.86949425,0.776300009,3.86949425,3.86381193
55.062927,4,3.8685332,0.362583509,3.8685332,3.86290139
55.073419,4,3.86757245,0.363905957,3.86757245,3.86199045
55.08391,3.31662479,3.86661219,-0.741611352,3.86661219,3.86107928
55.094402,4.47213595,3.86565221,0.778770665,3.86565221,3.86016771
55.104894,3.87298335,3.86469259,0.0910535976,3.86469259,3.85925583
55.115385,4.35889894,3.86373342,0.703679989,3.86373342,3.85834372
55.125877,3.74165739,3.8627745,-0.348018834,3.8627745,3.85743121
55.136368,4.69041576,3.861816,0.910274553,3.861816,3.85651848
55.14686,3.31662479,3.86085773,-0.737721454,3.86085773,3.85560535
55.157352,4.47213595,3.85989978,0.782455221,3.85989978,3.85469191
55.167843,3.60555128,3.85894222,-0.503379528,3.85894222,3.85377826
55.178335,3.16227766,3.85798487,-0.834090649,3.85798487,3.85286421
55.188826,4,3.85702789,0.378116525,3.85702789,3.85194994
55.199318,3.87298335,3.8560711,0.130047084,3.8560711,3.85103528
55.20981,3.74165739,3.85511458,-0.336834072,3.85511458,3.85012032
55.220301,4.47213595,3.85415841,0.78611548,3.85415841,3.84920514
55.230793,5.09901951,3.8532024,1.11616178,3.8532024,3.84828957
55.241284,3.60555128,3.85224672,-0.496684451,3.85224672,3.84737378
55.251776,4.89897949,3.85129119,1.02356646,3.85129119,3.84645761
55.262268,4.24264069,3.85033589,0.626342397,3.85033589,3.84554115
55.272759,3.46410162,3.8493809,-0.620708696,3.8493809,3.84462447
55.283251,4,3.84842604,0.38932501,3.84842604,3.8437074
55.293742,3.46410162,3.84747147,-0.619168683,3.84747147,3.84279013
55.304234,3.74165739,3.84651702,-0.323820371,3.84651702,3.84187247
55.314726,4.12310563,3.84556276,0.526823371,3.84556276,3.84095452
55.325217,4.12310563,3.84460878,0.527728,3.84460878,3.84003637
55.335709,4.12310563,3.8436549,0.528630993,3.8436549,3.83911783
55.3462,3.87298335,3.84270128,0.174017423,3.84270128,3.83819909
55.356692,3.60555128,3.84174775,-0.486000486,3.84174775,3.83727997
55.367184,3.60555128,3.84079438,-0.485018663,3.84079438,3.83636057
55.377675,4,3.83984126,0.400198372,3.83984126,3.83544096
55.388167,3.31662479,3.83888821,-0.722677952,3.83888821,3.83452098
55.398658,4.35889894,3.8379354,0.72177804,3.8379354,3.83360079
55.40915,3,3.83698265,-0.91486756,3.83698265,3.83268024
55.419642,4.79583152,3.83603004,0.979694585,3.83603004,3.8317594
55.430133,3.31662479,3.83507766,-0.720036715,3.83507766,3.83083836
55.440625,2.82842712,3.83412532,-1.00284505,3.83412532,3.82991695
55.451116,4.12310563,3.83317321,0.53845373,3.83317321,3.82899535
55.461608,4.35889894,3.83222112,0.725725719,3.83222112,3.82807338
55.4721,4.12310563,3.83126917,0.5402189,3.83126917,3.82715113
55.482591,4,3.83031742,0.411925459,3.83031742,3.82622869
55.493083,4.24264069,3.82936569,0.642864679,3.82936569,3.82530588
55.503574,3.74165739,3.82841417,-0.294545044,3.82841417,3.82438288
55.514066,3.87298335,3.82746267,0.213355756,3.82746267,3.82345952
55.524558,4.12310563,3.82651127,0.544604768,3.82651127,3.82253589
55.535049,4.12310563,3.82556007,0.545477363,3.82556007,3.82161207
55.545541,3.74165739,3.82460888,-0.288013013,3.82460888,3.82068788
55.556032,4.12310563,3.82365788,0.547218185,3.82365788,3.81976352
55.566524,4,3.82270689,0.421061881,3.82270689,3.81883879
55.577016,4.89897949,3.821756,1.03789378,3.821756,3.8179138
55.587507,4.35889894,3.82080529,0.733548675,3.82080529,3.81698862
55.597999,4.12310563,3.81985458,0.550682348,3.81985458,3.81606308
55.60849,3.46410162,3.81890405,-0.595652949,3.81890405,3.81513737
55.618982,3.16227766,3.81795352,-0.809738145,3.81795352,3.8142113
55.629474,4.47213595,3.81700309,0.809402784,3.81700309,3.81328497
55.639965,3.60555128,3.81605283,-0.458804485,3.81605283,3.81235846
55.650457,3.87298335,3.81510257,0.240584234,3.81510257,3.8114316
55.660948,4.24264069,3.81415249,0.654590096,3.81415249,3.81050457
55.67144,3.74165739,3.81320241,-0.26747902,3.81320241,3.80957718
55.681932,3.74165739,3.81225242,-0.265697262,3.81225242,3.80864954
55.692423,4.12310563,3.81130261,0.558393244,3.81130261,3.80772172
55.702915,4.69041576,3.81034473,0.93812101,3.81034473,3.80679356
55.713406,3.16227766,3.80939512,-0.804436113,3.80939512,3.80586523
55.723898,3.87298335,3.80844551,0.254042978,3.80844551,3.80493655
55.73439,3.60555128,3.807496,-0.449382603,3.807496,3.80400762
55.744881,4.47213595,3.80654667,0.815836552,3.80654667,3.80307852
55.755373,4.12310563,3.80559736,0.563478717,3.80559736,3.80214908
55.765864,4.79583152,3.80464824,0.995581881,3.80464824,3.80121948
55.776356,3.87298335,3.80369914,0.263218938,3.80369914,3.80028953
55.786848,4.12310563,3.80275014,0.565999542,3.80275014,3.79935934
55.797339,4.35889894,3.80180136,0.746389702,3.80180136,3.79842898
55.807831,2.82842712,3.8008526,-0.986116359,3.8008526,3.79749829
55.818322,3.46410162,3.79990406,-0.579484633,3.79990406,3.79656744
55.828814,3.60555128,3.79895555,-0.439777532,3.79895555,3.79563625
55.839306,3,3.79800719,-0.89331248,3.79800719,3.79470482
55.849797,3.60555128,3.79705906,-0.437616021,3.79705906,3.79377323
55.860289,4.12310563,3.79611099,0.571834449,3.79611099,3.79284132
55.87078,4,3.79516317,0.452589028,3.79516317,3.79190924
55.881272,4,3.79421543,0.453634838,3.79421543,3.79097684
55.891764,3.60555128,3.79326788,-0.433262739,3.79326788,3.79004419
55.902255,3.60555128,3.7923206,-0.432168167,3.7923206,3.7891114
55.912747,3.74165739,3.79137344,-0.222970964,3.79137344,3.78817828
55.923238,4.47213595,3.79042658,0.825656934,3.79042658,3.78724501
55.93373,4.79583152,3.78947987,1.0031708,3.78947987,3.78631141
55.944222,4.35889894,3.7885334,0.755225492,3.7885334,3.78537758
55.954713,3.46410162,3.78758729,-0.568758008,3.78758729,3.7844436
55.965205,3.87298335,3.78664137,0.293840058,3.78664137,3.7835093
55.975696,3.87298335,3.78569584,0.295444591,3.78569584,3.78257486
55.986188,4.47213595,3.78475055,0.829087092,3.78475055,3.7816401
55.99668,3.31662479,3.78380561,-0.683506268,3.78380561,3.78070511
56.007171,3.31662479,3.78286114,-0.682815016,3.78286114,3.77976997
56.017663,4.47213595,3.78191698,0.830794183,3.78191698,3.77883452
56.028154,3.31662479,3.78097335,-0.68143126,3.78097335,3.77789893
56.038646,3.46410162,3.78003011,-0.562075168,3.78003011,3.77696303
56.049138,3.87298335,3.77908738,0.306424488,3.77908738,3.7760269
56.059629,3.31662479,3.77814529,-0.679353004,3.77814529,3.77509063
56.070121,3.87298335,3.77720372,0.309482835,3.77720372,3.77415406
56.080612,3,3.77626289,-0.881057825,3.77626289,3.77321735
56.091104,4.58257569,3.77532268,0.898472599,3.77532268,3.77228033
56.101596,4.69041576,3.77438325,0.957095873,3.77438325,3.77134308
56.112087,4,3.77344475,0.475978205,3.77344475,3.77040571
56.122579,3.87298335,3.77250708,0.316979916,3.77250708,3.76946804
56.13307,4,3.77157051,0.477942981,3.77157051,3.76853023
56.143562,3.74165739,3.77063495,-0.170227971,3.77063495,3.76759212
56.154054,3.46410162,3.7697006,-0.552810082,3.7697006,3.76665379
56.164545,4.12310563,3.76876767,0.595262926,3.76876767,3.76571534
56.175037,2.82842712,3.76783612,-0.969231138,3.76783612,3.76477659
56.185528,3.31662479,3.76690628,-0.67103017,3.76690628,3.76383772
56.19602,2.64575131,3.76597813,-1.05840768,3.76597813,3.76289854
56.206512,3.46410162,3.76505197,-0.548589421,3.76505197,3.76195915
56.217003,3.74165739,3.76412809,-0.149902318,3.76412809,3.76101965
56.227495,4.12310563,3.76320658,0.599915869,3.76320658,3.76007985
56.237986,2.64575131,3.76228788,-1.05666294,3.76228788,3.75913993
56.248478,4.12310563,3.76137216,0.601442822,3.76137216,3.75819971
56.25897,4.24264069,3.76045987,0.69439241,3.76045987,3.75725929
56.269461,3.46410162,3.75955153,-0.543553049,3.75955153,3.75631876
56.279953,4.35889894,3.75864747,0.774758975,3.75864747,3.75537793
56.290444,4.35889894,3.75774845,0.775338952,3.75774845,3.754437
56.300936,4.47213595,3.75685498,0.845742856,3.75685498,3.75349577
56.311428,3.46410162,3.75596793,-0.540246533,3.75596793,3.75255434
56.321919,3.31662479,3.75508835,-0.662165808,3.75508835,3.75161281
56.332411,3.87298335,3.75421718,0.344624672,3.75421718,3.75067098
56.342902,3,3.75335594,-0.867960794,3.75335594,3.74972905
56.353394,4,3.75250608,0.497487612,3.75250608,3.74878684
56.363886,3,3.75166962,-0.866988826,3.75166962,3.74784443
56.374377,4.24264069,3.75084905,0.701278574,3.75084905,3.74690192
56.384869,2.82842712,3.75004713,-0.960010418,3.75004713,3.74595912
56.39536,4.24264069,3.74926765,0.702405183,3.74926765,3.74501623
56.405852,4.12310563,3.74851501,0.612038081,3.74851501,3.74407305
56.416344,3.87298335,3.74779506,0.353819565,3.74779506,3.74312969
56.426835,4.24264069,3.74711522,0.703935701,3.74711522,3.74218623
56.437327,3.16227766,3.74648488,-0.764334493,3.74648488,3.74124249
56.447818,4.47213595,3.74591666,0.852185014,3.74591666,3.74029865
56.45831,4,3.74542708,0.504552196,3.74542708,3.73935454
56.468802,4.12310563,3.74503878,0.614871403,3.74503878,3.73841025
56.479293,3.60555128,3.74478342,-0.373138244,3.74478342,3.73746586
56.489785,3.31662479,3.74470846,-0.65428103,3.74470846,3.7365212
56.500276,3.60555128,3.74489573,-0.373288705,3.74489573,3.73557645
56.510768,3.16227766,3.74551488,-0.763699694,3.74551488,3.73463144
56.52126,5.29150262,3.7469625,1.24279529,3.7469625,3.73368624
56.531751,3.74165739,3.75015483,-0.0921815757,3.75015483,3.73274095
56.542243,3.31662479,3.75696781,-0.663583465,3.75696781,3.7317954
56.552734,3,3.77053275,-0.877799948,3.77053275,3.73084977
56.563226,4,3.79472539,0.453072412,3.79472539,3.72990387
56.573718,4.47213595,3.83216344,0.79998282,3.83216344,3.72895779
56.584209,4.35889894,3.8809728,0.691322029,3.8809728,3.72801164
56.594701,4.35889894,3.93159577,0.653684305,3.93159577,3.72706522
56.605192,4,3.96603009,0.184309269,3.96603009,3.72611872
56.615684,3.31662479,3.96656896,-0.806191148,3.96656896,3.72517197
56.626176,4.69041576,3.93227729,0.870711472,3.93227729,3.72422504
56.636667,4,3.88019658,0.346126306,3.88019658,3.72327804
56.647159,3.87298335,3.82885582,0.21006552,3.82885582,3.72233079
56.65765,3,3.78849868,-0.887974483,3.78849868,3.72138346
56.668142,3.16227766,3.7614586,-0.774067785,3.7614586,3.72043587
56.678634,4.12310563,3.74533033,0.614634276,3.74533033,3.71948812
56.689125,3.87298335,3.73623607,0.36979356,3.73623607,3.71854031
56.699617,3.60555128,3.73094666,-0.354112112,3.73094666,3.71759224
56.710108,4.24264069,3.72749866,0.717733951,3.72749866,3.7166441
56.7206,3.87298335,3.72492123,0.384788402,3.72492123,3.71569571
56.731092,3.87298335,3.72279345,0.387543408,3.72279345,3.71474717
56.741583,4.58257569,3.72093623,0.928245371,3.72093623,3.71379856
56.752075,4.35889894,3.71926372,0.799771984,3.71926372,3.7128497
56.762566,4.47213595,3.71772719,0.868567077,3.71772719,3.71190078
56.773058,3.60555128,3.71629387,-0.332780095,3.71629387,3.71095162
56.78355,4.12310563,3.7149408,0.63887779,3.7149408,3.71000231
56.794041,2.64575131,3.71365108,-1.03339236,3.71365108,3.70905293
56.804533,4.24264069,3.71241172,0.728168224,3.71241172,3.70810332
56.815024,4.24264069,3.71121323,0.728990711,3.71121323,3.70715364
56.825516,3.60555128,3.71004787,-0.323259325,3.71004787,3.70620373
56.836008,3.31662479,3.70890988,-0.626326662,3.70890988,3.70525368
56.846499,3.74165739,3.70779473,0.184018084,3.70779473,3.70430356
56.856991,4.47213595,3.70669851,0.874892818,3.70669851,3.70335322
56.867482,2.64575131,3.70561845,-1.02949849,3.70561845,3.70240282
56.877974,4.24264069,3.7045519,0.733545355,3.7045519,3.70145218
56.888466,3.87298335,3.70349699,0.411687208,3.70349699,3.70050141
56.898957,3.46410162,3.70245217,-0.488211592,3.70245217,3.69955059
56.909449,3.74165739,3.70141589,0.200602835,3.70141589,3.69859953
56.91994,3.46410162,3.70038719,-0.486092149,3.70038719,3.69764843
56.930432,3.31662479,3.69936493,-0.618659952,3.69936493,3.6966971
56.940924,2.44948974,3.69834838,-1.11752344,3.69834838,3.69574564
56.951415,4.12310563,3.69733695,0.652509522,3.69733695,3.69479413
56.961907,4,3.69632986,0.551062739,3.69632986,3.6938424
56.972398,4,3.69532679,0.551972113,3.69532679,3.69289063
56.98289,3.74165739,3.69432711,0.217555236,3.69432711,3.69193863
56.993382,4,3.69333053,0.553777453,3.69333053,3.69098651
57.003873,3.74165739,3.69233683,0.222082322,3.69233683,3.69003435
57.014365,3.60555128,3.69134552,-0.292906544,3.69134552,3.68908196
57.024856,4.35889894,3.69035654,0.817644425,3.69035654,3.68812954
57.035348,3.31662479,3.68936947,-0.610528201,3.68936947,3.68717691
57.04584,3.74165739,3.68838423,0.230809788,3.68838423,3.68622415
57.056331,4.12310563,3.68740072,0.66007947,3.68740072,3.68527135
57.066823,4.12310563,3.68641861,0.660822987,3.68641861,3.68431835
57.077314,4.35889894,3.68543794,0.820646699,3.68543794,3.68336531
57.087806,4.35889894,3.68445841,0.821243286,3.68445841,3.68241206
57.098298,4.24264069,3.68348,0.747770477,3.68348,3.68145869
57.108789,3.74165739,3.68250271,0.243217345,3.68250271,3.68050529
57.119281,4.35889894,3.68152626,0.823026537,3.68152626,3.67955169
57.129772,4.24264069,3.68055077,0.749726564,3.68055077,3.67859806
57.140264,4,3.67957596,0.5660601,3.67957596,3.67764423
57.150756,3.16227766,3.67860188,-0.718557041,3.67860188,3.67669028
57.161247,3.74165739,3.67762856,0.253039185,3.67762856,3.6757363
57.171739,3.31662479,3.67665575,-0.6000258,3.67665575,3.67478213
57.18223,3.60555128,3.6756836,-0.264825084,3.6756836,3.67382794
57.192722,3.46410162,3.67471188,-0.458922937,3.67471188,3.67287354
57.203214,3.87298335,3.67374063,0.446366121,3.67374063,3.67191904
57.213705,3.74165739,3.67276992,0.262464212,3.67276992,3.67096452
57.224197,4.24264069,3.67179953,0.755540306,3.67179953,3.67000981
57.234688,4,3.67082961,0.573733724,3.67082961,3.66905508
57.24518,4,3.66985995,0.574578145,3.66985995,3.66810015
57.255672,3.31662479,3.66889062,-0.593519866,3.66889062,3.66714512
57.266163,3,3.66792168,-0.817264757,3.66792168,3.66619008
57.276655,5.09901951,3.66695293,1.19668984,3.66695293,3.66523485
57.287146,4.24264069,3.66598454,0.759378791,3.66598454,3.66427961
57.297638,3.74165739,3.66501629,0.276841278,3.66501629,3.66332418
57.30813,3.46410162,3.66404827,-0.447153955,3.66404827,3.66236866
57.318621,3.46410162,3.66308056,-0.446070558,3.66308056,3.66141312
57.329113,3.16227766,3.66211295,-0.706990301,3.66211295,3.6604574
57.339604,3.16227766,3.66114561,-0.706305846,3.66114561,3.65950168
57.350096,3.46410162,3.66017835,-0.442805525,3.66017835,3.65854578
57.360588,4.58257569,3.65921125,0.960918544,3.65921125,3.65758978
57.371079,4.12310563,3.65824439,0.681807333,3.65824439,3.65663378
57.381571,4.12310563,3.65727757,0.682515973,3.65727757,3.6556776
57.392062,4.35889894,3.65631098,0.838205205,3.65631098,3.65472143
57.402554,4.69041576,3.65534441,1.01738456,3.65534441,3.65376507
57.413046,4.47213595,3.65437796,0.904299725,3.65437796,3.65280863
57.423537,3.60555128,3.65341171,-0.218770272,3.65341171,3.6518522
57.434029,4.35889894,3.65244546,0.840507873,3.65244546,3.65089559
57.44452,4.12310563,3.6514794,0.686750486,3.6514794,3.64993898
57.455012,4.12310563,3.65051333,0.687453489,3.65051333,3.64898221
57.465504,3.46410162,3.64954734,-0.430634094,3.64954734,3.64802535
57.475995,3.74165739,3.64858152,0.305083381,3.64858152,3.64706851
57.486487,4,3.64761568,0.59361968,3.64761568,3.64611149
57.496978,3.46410162,3.64664999,-0.427256804,3.64664999,3.64515449
57.50747,3.46410162,3.64568428,-0.426125174,3.64568428,3.64419732
57.517962,2.64575131,3.64471862,-0.999483523,3.64471862,3.64324008
57.528453,4.24264069,3.64375312,0.773878265,3.64375312,3.64228285
57.538945,2.44948974,3.64278757,-1.09238172,3.64278757,3.64132546
57.549436,3.60555128,3.64182216,-0.190449171,3.64182216,3.64036808
57.559928,4,3.64085671,0.599285651,3.64085671,3.63941055
57.57042,3.31662479,3.6398913,-0.568565306,3.6398913,3.63845294
57.580911,3.31662479,3.63892602,-0.5677158,3.63892602,3.63749536
57.591403,4.35889894,3.63796069,0.84908083,3.63796069,3.63653762
57.601894,4.47213595,3.63699548,0.913860204,3.63699548,3.6355799
57.612386,3.46410162,3.63603022,-0.414642745,3.63603022,3.63462203
57.622878,3.31662479,3.63506499,-0.56430506,3.63506499,3.63366409
57.633369,3.87298335,3.63409988,0.488757059,3.63409988,3.63270618
57.643861,3.31662479,3.63313471,-0.562592146,3.63313471,3.63174812
57.654352,3.74165739,3.63216966,0.330889294,3.63216966,3.63079009
57.664844,3.87298335,3.63120454,0.491710078,3.63120454,3.62983191
57.675336,3.74165739,3.63023945,0.33379325,3.63023945,3.62887366
57.685827,4.12310563,3.62927448,0.702731207,3.62927448,3.62791546
57.696319,4.12310563,3.62830943,0.703417511,3.62830943,3.6269571
57.70681,4,3.6273445,0.610455159,3.6273445,3.62599878
57.717302,4,3.6263795,0.611245044,3.6263795,3.62504032
57.727794,3.46410162,3.62541451,-0.40163777,3.62541451,3.6240818
57.738285,4.58257569,3.62444964,0.978839135,3.62444964,3.62312332
57.748777,3.60555128,3.6234847,-0.133915729,3.6234847,3.6221647
57.759268,3.74165739,3.62251986,0.345163038,3.62251986,3.62120612
57.76976,4.35889894,3.62155496,0.858687363,3.62155496,3.6202474
57.780252,4.12310563,3.62059007,0.708883319,3.62059007,3.61928863
57.790743,3.16227766,3.61962528,-0.676274814,3.61962528,3.61832991
57.801235,4.35889894,3.61866043,0.86037115,3.61866043,3.61737105
57.811726,3.87298335,3.61769568,0.505259999,3.61769568,3.61641224
57.822218,3.16227766,3.61673086,-0.674131438,3.61673086,3.61545329
57.83271,3,3.61576605,-0.784707619,3.61576605,3.6144943
57.843201,3.87298335,3.61480135,0.508116126,3.61480135,3.61353537
57.853693,3.74165739,3.61383657,0.357520368,3.61383657,3.6125763
57.864184,2.82842712,3.61287191,-0.885688874,3.61287191,3.61161728
57.874676,3.74165739,3.61190716,0.360208584,3.61190716,3.61065814
57.885168,4,3.61094244,0.623744791,3.61094244,3.60969896
57.895659,3.16227766,3.60997782,-0.669103995,3.60997782,3.60873983
57.906151,3.31662479,3.60901312,-0.540729444,3.60901312,3.60778058
57.916642,3.87298335,3.60804854,0.514718185,3.60804854,3.60682139
57.927134,4.47213595,3.60708388,0.93008176,3.60708388,3.60586208
57.937626,3.60555128,3.60611923,-0.023831822,3.60611923,3.60490273
57.948117,4.24264069,3.6051547,0.798427198,3.6051547,3.60394345
57.958609,4.24264069,3.60419009,0.799031038,3.60419009,3.60298404
57.9691,3.87298335,3.60322559,0.519382094,3.60322559,3.6020247
57.979592,4,3.60226101,0.630665511,3.60226101,3.60106525
57.990084,4,3.60129646,0.63142976,3.60129646,3.60010577
58.000575,4,3.60033201,0.632192997,3.60033201,3.59914635
58.011067,3.87298335,3.5993675,0.523083022,3.5993675,3.59818682
58.021558,2.44948974,3.59840309,-1.07187376,3.59840309,3.59722736
58.03205,3.60555128,3.59743862,0.0900703034,3.59743862,3.59626779
58.042542,3.60555128,3.59647416,0.0952738983,3.59647416,3.5953082
58.053033,3.16227766,3.59550982,-0.658203735,3.59550982,3.59434868
58.063525,3.74165739,3.5945454,0.3835518,3.5945454,3.59338906
58.074016,3.46410162,3.5935811,-0.359832584,3.5935811,3.59242951
58.084508,3.60555128,3.59261674,0.113730119,3.59261674,3.59146985
58.095,3.46410162,3.59165239,-0.357142514,3.59165239,3.59051018
58.105491,3.46410162,3.59068816,-0.35579003,3.59068816,3.58955059
58.115983,3.87298335,3.58972386,0.532221272,3.58972386,3.58859089
58.126474,4.24264069,3.58875968,0.808629089,3.58875968,3.58763128
58.136966,4.69041576,3.58779544,1.05005729,3.58779544,3.58667156
58.147458,3.46410162,3.58683122,-0.350327849,3.58683122,3.58571184
58.157949,4.24264069,3.58586712,0.810415678,3.58586712,3.5847522
58.168441,3.46410162,3.58490295,-0.347564865,3.58490295,3.58379247
58.178932,3.60555128,3.5839389,0.147011465,3.5839389,3.58283282
58.189424,3,3.5829748,-0.763527862,3.5829748,3.58187307
58.199916,3.60555128,3.58201072,0.153429327,3.58201072,3.58091333
58.210407,3.46410162,3.58104676,-0.341972433,3.58104676,3.57995367
58.220899,3.74165739,3.58008274,0.401963486,3.58008274,3.57899392
58.23139,3.87298335,3.57911885,0.542092702,3.57911885,3.57803426
58.241882,3.87298335,3.57815489,0.542981078,3.57815489,3.57707452
58.252374,4,3.57719097,0.650237669,3.57719097,3.57611478
58.262865,3.31662479,3.57622718,-0.509511913,3.57622718,3.57515513
58.273357,3.74165739,3.57526333,0.407914279,3.57526333,3.5741954
58.283848,3.60555128,3.5742996,0.176781426,3.5742996,3.57323576
58.29434,3.60555128,3.57333582,0.179486637,3.57333582,3.57227604
58.304832,2.64575131,3.57237208,-0.962611432,3.57237208,3.57131633
58.315323,3.31662479,3.57140847,-0.504761008,3.57140847,3.57035672
58.325815,3.87298335,3.5704448,0.550035042,3.5704448,3.56939703
58.336306,4.12310563,3.56948126,0.744059381,3.56948126,3.56843745
58.346798,3.60555128,3.56851768,0.192441161,3.56851768,3.56747778
58.35729,3.74165739,3.56755413,0.417256825,3.56755413,3.56651814
58.367781,3.74165739,3.56659072,0.418409693,3.56659072,3.56555859
58.378273,3.74165739,3.56562725,0.419559451,3.56562725,3.56459898
58.388764,4,3.5646462,0.659813461,3.5646462,3.56363947
58.399256,3.60555128,3.56368286,0.204617736,3.56368286,3.56267989
58.409748,3.74165739,3.56271956,0.423010429,3.56271956,3.56172033
58.420239,3.31662479,3.56175641,-0.495107682,3.56175641,3.56076088
58.430731,3.46410162,3.56079321,-0.310952716,3.56079321,3.55980136
58.441222,4.12310563,3.55983014,0.750516809,3.55983014,3.55884196
58.451714,3.16227766,3.55886704,-0.629753427,3.55886704,3.55788249
58.462206,3,3.55790398,-0.746929705,3.55790398,3.55692305
58.472697,2.44948974,3.55694107,-1.05235513,3.55694107,3.55596373
58.483189,3.60555128,3.55597812,0.222650309,3.55597812,3.55500434
58.49368,3.87298335,3.5550153,0.56388655,3.5550153,3.55404507
58.504172,3.60555128,3.55405246,0.226933515,3.55405246,3.55308574
58.514664,3.16227766,3.55308966,-0.625149581,3.55308966,3.55212645
58.525155,3.31662479,3.55212701,-0.485285709,3.55212701,3.55116727
58.535647,3.60555128,3.55116432,0.233210101,3.55116432,3.55020804
58.546138,4,3.55020179,0.670669973,3.55020179,3.54924894
58.55663,3.31662479,3.54923921,-0.482301176,3.54923921,3.54828978
58.567122,4.24264069,3.5482767,0.833285057,3.5482767,3.54733066
58.577613,4.47213595,3.54731434,0.961676461,3.54731434,3.54637166
58.588105,2.82842712,3.54635194,-0.847304444,3.54635194,3.54541262
58.598596,3.16227766,3.5453897,-0.618960454,3.5453897,3.5444537
58.609088,3.46410162,3.54442743,-0.283418096,3.54442743,3.54349474
58.61958,3.74165739,3.54346522,0.445187783,3.54346522,3.54253582
58.630071,3.74165739,3.54250317,0.446266977,3.54250317,3.54157704
58.640563,3.31662479,3.54154109,-0.474253415,3.54154109,3.5406182
58.651054,2.82842712,3.54057917,-0.843891015,3.54057917,3.53965951
58.661546,3,3.53961722,-0.73458643,3.53961722,3.53870077
58.672038,3.46410162,3.53865534,-0.273045288,3.53865534,3.53774208
58.682529,4,3.53769363,0.679931154,3.53769363,3.53678353
58.693021,3.31662479,3.53673188,-0.469155724,3.53673188,3.53582494
58.703512,3.74165739,3.53577031,0.453747817,3.53577031,3.5348665
58.714004,3.60555128,3.53480871,0.265974754,3.53480871,3.53390801
58.724496,3.46410162,3.53384718,-0.264093855,3.53384718,3.53294958
58.734987,3.60555128,3.53288582,0.269565313,3.53288582,3.5319913
58.745479,4.79583152,3.53192444,1.12423622,3.53192444,3.53103298
58.75597,3.74165739,3.53096323,0.459014335,3.53096323,3.53007481
58.766462,2.44948974,3.530002,-1.03947691,3.530002,3.52911661
58.776954,4.69041576,3.52904085,1.07767106,3.52904085,3.52815847
58.787445,2.82842712,3.52807987,-0.836452476,3.52807987,3.52720048
58.797937,3.74165739,3.52711888,0.46318302,3.52711888,3.52624246
58.808428,4.35889894,3.52615806,0.912546375,3.52615806,3.52528459
58.81892,3.60555128,3.52519723,0.2834679,3.52519723,3.5243267
58.829412,3.60555128,3.52423648,0.285157498,3.52423648,3.52336887
58.839903,4.24264069,3.5232759,0.848153751,3.5232759,3.5224112
58.850395,3.16227766,3.52231532,-0.600031383,3.52231532,3.52145351
58.860886,3.46410162,3.52135492,-0.239276621,3.52135492,3.52049598
58.871378,3.74165739,3.52039451,0.470385885,3.52039451,3.51953842
58.88187,3.87298335,3.51943418,0.594600002,3.51943418,3.51858094
58.892361,2.44948974,3.51847404,-1.03391697,3.51847404,3.51762362
58.902853,4.24264069,3.51751389,0.85154377,3.51751389,3.51666629
58.913344,4.12310563,3.51655393,0.778814288,3.51655393,3.51570911
58.923836,3.46410162,3.51559397,-0.226919261,3.51559397,3.51475193
58.934328,3.16227766,3.51463409,-0.593596188,3.51463409,3.51379482
58.944819,3.60555128,3.51367441,0.303111974,3.51367441,3.51283788
58.955311,3.16227766,3.51271472,-0.591977248,3.51271472,3.51188092
58.965802,3.60555128,3.51175522,0.30626141,3.51175522,3.51092414
58.976294,2.82842712,3.51079573,-0.826056055,3.51079573,3.50996735
58.986786,3.74165739,3.50983633,0.481477987,3.50983633,3.50901064
58.997277,4.35889894,3.50887713,0.921966277,3.50887713,3.50805411
59.007769,2.64575131,3.50791793,-0.928529277,3.50791793,3.50709757
59.01826,3.87298335,3.50695892,0.604999524,3.50695892,3.5061412
59.028752,3.46410162,3.50599993,-0.204690767,3.50599993,3.50518484
59.039244,4.24264069,3.50504103,0.858836222,3.50504103,3.50422856
59.049735,3.74165739,3.50408233,0.487416717,3.50408233,3.50327246
59.060227,3.46410162,3.50312364,-0.197539941,3.50312364,3.50231636
59.070718,3.31662479,3.50216515,-0.430743964,3.50216515,3.50136044
59.08121,3,3.50120668,-0.707959517,3.50120668,3.50040453
59.091702,3.87298335,3.50024831,0.6105203,3.50024831,3.49944871
59.102193,3.74165739,3.49929014,0.49230808,3.49929014,3.49849307
59.112685,3.74165739,3.49833199,0.49328024,3.49833199,3.49753744
59.123176,3.31662479,3.49737404,-0.425146155,3.49737404,3.496582
59.133668,3.16227766,3.49641612,-0.578047104,3.49641612,3.49562656
59.14416,3.46410162,3.4954583,-0.177078188,3.4954583,3.49467123
59.154651,3.60555128,3.49450069,0.333242534,3.49450069,3.49371608
59.165143,3.16227766,3.4935431,-0.575556637,3.4935431,3.49276095
59.175634,2.82842712,3.49258572,-0.814959261,3.49258572,3.49180601
59.186126,3.46410162,3.49162837,-0.165911879,3.49162837,3.49085108
59.196618,2.44948974,3.49067113,-1.02038296,3.49067113,3.48989626
59.207109,3.60555128,3.4897141,0.340348605,3.4897141,3.48894164
59.217601,3.74165739,3.4887571,0.502891919,3.4887571,3.48798703
59.228092,3.31662479,3.48780032,-0.413733643,3.48780032,3.48703263
59.238584,2.82842712,3.48684356,-0.81142864,3.48684356,3.48607824
59.249076,3.87298335,3.48588693,0.62217073,3.48588693,3.48512396
59.259567,3.31662479,3.48493051,-0.410250803,3.48493051,3.48416988
59.270059,2.64575131,3.48397413,-0.915545093,3.48397413,3.48321583
59.28055,3.46410162,3.48301796,-0.137536708,3.48301796,3.48226198
59.291042,3,3.48206183,-0.694306727,3.48206183,3.48130816
59.301534,3.46410162,3.48110583,-0.130400203,3.48110583,3.48035445
59.312025,3.74165739,3.48015005,0.511377885,3.48015005,3.47940095
59.322517,3.31662479,3.4791943,-0.403199098,3.4791943,3.47844748
59.333008,3.16227766,3.47823878,-0.562104191,3.47823878,3.47749422
59.3435,4.47213595,3.4772833,0.997423006,3.4772833,3.47654099
59.353992,4.47213595,3.47632796,0.997901798,3.47632796,3.47558789
59.364483,4.35889894,3.47537284,0.939960694,3.47537284,3.47463499
59.374975,3.46410162,3.47441776,-0.101568426,3.47441776,3.47368213
59.385466,4.12310563,3.47346291,0.806004165,3.47346291,3.47272949
59.395958,3.46410162,3.47250811,-0.0916869393,3.47250811,3.47177688
59.40645,3.46410162,3.47155345,-0.086323992,3.47155345,3.4708244
59.416941,3.31662479,3.47059901,-0.392395494,3.47059901,3.46987214
59.427433,2.82842712,3.46964463,-0.80076058,3.46964463,3.46891992
59.437924,3.16227766,3.46869048,-0.553545681,3.46869048,3.46796792
59.448416,3.87298335,3.46773638,0.636590106,3.46773638,3.46701597
59.458908,3.60555128,3.46678243,0.372516907,3.46678243,3.46606414
59.469399,3.16227766,3.46582871,-0.550954672,3.46582871,3.46511254
59.479891,3.60555128,3.46487505,0.375068298,3.46487505,3.46416099
59.490382,2.23606798,3.46392162,-1.10808558,3.46392162,3.46320966
59.500874,3.31662479,3.46296825,-0.382548643,3.46296825,3.46225839
59.511366,3.74165739,3.46201504,0.528812208,3.46201504,3.46130725
59.521857,3,3.46106206,-0.679015507,3.46106206,3.46035634
59.532349,3.16227766,3.46010914,-0.545739389,3.46010914,3.45940548
59.54284,3.31662479,3.45915647,-0.377533676,3.45915647,3.45845485
59.553332,3,3.45820386,-0.676907568,3.45820386,3.45750428
59.563824,3.31662479,3.4572514,-0.375002145,3.4572514,3.45655386
59.574315,3.74165739,3.45629919,0.534189291,3.45629919,3.45560366
59.584807,3,3.45534704,-0.674794075,3.45534704,3.45465353
59.595298,3.16227766,3.45439515,-0.540478943,3.45439515,3.45370363
59.60579,3.74165739,3.45344332,0.536855723,3.45344332,3.4527538
59.616282,3,3.45249165,-0.672674997,3.45249165,3.45180411
59.626773,3.74165739,3.45154023,0.538625243,3.45154023,3.45085467
59.637265,3.60555128,3.45058889,0.393652621,3.45058889,3.44990528
59.647756,4,3.4496378,0.741864006,3.4496378,3.44895615
59.658248,2.82842712,3.44868678,-0.787565651,3.44868678,3.44800707
59.66874,4,3.44773593,0.74314472,3.44773593,3.44705815
59.679231,2.44948974,3.44678533,-0.998646878,3.44678533,3.44610948
59.689723,3.46410162,3.44583481,0.135154749,3.44583481,3.44516088
59.700214,4.89897949,3.44488455,1.20585859,3.44488455,3.44421253
59.710706,2.82842712,3.44393437,-0.784542696,3.44393437,3.44326425
59.721198,2.82842712,3.44298435,-0.783937006,3.44298435,3.44231613
59.731689,3.46410162,3.4420346,0.148549691,3.4420346,3.44136826
59.742181,3.31662479,3.44108494,-0.352789096,3.44108494,3.44042046
59.752672,3.60555128,3.44013553,0.406713341,3.44013553,3.43947293
59.763164,3.46410162,3.43918621,0.15784613,3.43918621,3.43852546
59.773656,3.74165739,3.43823707,0.550836016,3.43823707,3.43757817
59.784147,3.46410162,3.43728819,0.16374804,3.43728819,3.43663113
59.794639,3,3.43633941,-0.660559919,3.43633941,3.43568417
59.80513,3,3.43539089,-0.659841562,3.43539089,3.43473748
59.815622,3.16227766,3.43444246,-0.52169416,3.43444246,3.43379086
59.826114,3.74165739,3.43349421,0.555124471,3.43349421,3.43284442
59.836605,3.16227766,3.43254623,-0.519873612,3.43254623,3.43189824
59.847097,3.31662479,3.43159835,-0.339077512,3.43159835,3.43095214
59.857588,4.12310563,3.43065074,0.832138741,3.43065074,3.43000632
59.86808,4,3.42970323,0.75517996,3.42970323,3.42906058
59.878572,3.60555128,3.4287559,0.420470421,3.4287559,3.42811502
59.889063,2.64575131,3.42780885,-0.884340173,3.42780885,3.42716972
59.899555,4.47213595,3.4268619,1.02238645,3.4268619,3.42622452
59.910046,3.46410162,3.42591523,0.195413369,3.42591523,3.42527959
59.920538,3.46410162,3.42496866,0.197820513,3.42496866,3.42433476
59.93103,3.31662479,3.42402228,-0.327715564,3.42402228,3.4233901
59.941521,3,3.42307619,-0.650443069,3.42307619,3.42244573
59.952013,3.46410162,3.42213019,0.204869278,3.42213019,3.42150145
59.962504,3.16227766,3.42118449,-0.508828878,3.42118449,3.42055744
59.972996,3.46410162,3.42023889,0.209434305,3.42023889,3.41961354
59.983488,3.87298335,3.41929348,0.67356504,3.41929348,3.41866982
59.993979,3.74165739,3.41834837,0.568602689,3.41834837,3.41772639
60.004471,2.82842712,3.41740336,-0.767447873,3.41740336,3.41678305
60.014962,3.74165739,3.41645865,0.570261992,3.41645865,3.41584
60.025454,3.31662479,3.41551404,-0.314466615,3.41551404,3.41489706
60.035946,1.73205081,3.41456964,-1.29711944,3.41456964,3.41395431
60.046437,4,3.41362553,0.765750917,3.41362553,3.41301184
60.056929,3.74165739,3.41268154,0.573564162,3.41268154,3.41206949
60.06742,4,3.41173784,0.766982502,3.41173784,3.41112742
60.077912,3,3.41079426,-0.640932337,3.41079426,3.41018546
60.088404,3.16227766,3.40985089,-0.497567309,3.40985089,3.4092437
60.098895,4.24264069,3.40890781,0.91308974,3.40890781,3.40830223
60.109387,3.60555128,3.40796486,0.444506936,3.40796486,3.40736088
60.119878,4.24264069,3.40702221,0.914121699,3.40702221,3.40641982
60.13037,3.31662479,3.40607967,-0.299090094,3.40607967,3.40547888
60.140862,3.60555128,3.40513736,0.447676131,3.40513736,3.40453814
60.151353,3.60555128,3.40419534,0.448727013,3.40419534,3.4035977
60.161845,3.16227766,3.40325345,-0.490892854,3.40325345,3.40265738
60.172336,3.60555128,3.40231187,0.45082081,3.40231187,3.40171736
60.182828,2.64575131,3.40137042,-0.869263543,3.40137042,3.40077746
60.19332,3.16227766,3.40042918,-0.488007707,3.40042918,3.39983777
60.203811,4.35889894,3.39948826,0.979495119,3.39948826,3.39889838
60.214303,3.74165739,3.39855822,0.585746678,3.39855822,3.39795912
60.224794,3.16227766,3.39761776,-0.485118643,3.39761776,3.39702016
60.235286,3.31662479,3.39667743,-0.282935758,3.39667743,3.39608133
60.245778,3,3.39573733,-0.629076571,3.39573733,3.39514272
60.256269,2.82842712,3.39479755,-0.752575858,3.39479755,3.39420442
60.266761,3.60555128,3.3938579,0.460101487,3.3938579,3.39326624
60.277252,4.24264069,3.39291856,0.921803733,3.39291856,3.39232838
60.287744,3.87298335,3.39197937,0.693544501,3.39197937,3.39139065
60.298236,3.16227766,3.39104041,-0.478291487,3.39104041,3.39045314
60.308727,2.82842712,3.39010176,-0.749449556,3.39010176,3.38951594
60.319219,3,3.38916326,-0.623829511,3.38916326,3.38857888
60.32971,2.44948974,3.38822508,-0.968883551,3.38822508,3.38764214
60.340202,3.46410162,3.38728704,0.277154422,3.38728704,3.38670553
60.350694,3.31662479,3.38634924,-0.264053875,3.38634924,3.38576915
60.361185,4,3.38541176,0.783956783,3.38541176,3.38483309
60.371677,3.16227766,3.38447443,-0.471377527,3.38447443,3.38389718
60.382168,3.60555128,3.38353743,0.471183451,3.38353743,3.38296158
60.39266,3.60555128,3.38260058,0.472176553,3.38260058,3.38202613
60.403152,3,3.38166397,-0.61778958,3.38166397,3.38109091
60.413643,3.31662479,3.38072768,-0.25318549,3.38072768,3.38015601
60.424135,4.24264069,3.37979155,0.928896729,3.37979155,3.37922127
60.434626,3.31662479,3.37885576,-0.249461351,3.37885576,3.37828685
60.445118,3.60555128,3.37792011,0.477107076,3.37792011,3.37735257
60.45561,3.31662479,3.37698472,-0.245682573,3.37698472,3.37641854
60.466101,3.46410162,3.37604966,0.296735504,3.37604966,3.37548484
60.476593,2.82842712,3.37511475,-0.739383276,3.37511475,3.37455129
60.487084,3.16227766,3.37418019,-0.460328717,3.37418019,3.37361807
60.497576,3.87298335,3.37324578,0.706921186,3.37324578,3.37268501
60.508068,3.87298335,3.37231163,0.707581598,3.37231163,3.37175219
60.518559,2.82842712,3.37137781,-0.736851878,3.37137781,3.3708197
60.529051,3.31662479,3.37044417,-0.231990032,3.37044417,3.36988738
60.539542,3.46410162,3.36951086,0.307556104,3.36951086,3.36895539
60.550034,3.74165739,3.36857772,0.61080248,3.36857772,3.36802356
60.560526,3.74165739,3.36764483,0.611565658,3.36764483,3.36709199
60.571017,3.31662479,3.36671229,-0.223802374,3.36671229,3.36616075
60.581509,3.46410162,3.36577992,0.3135629,3.36577992,3.36522968
60.592,4.47213595,3.3648479,1.05227756,3.3648479,3.36429895
60.602492,3.87298335,3.36391605,0.71348952,3.36391605,3.36336838
60.612984,2.23606798,3.36298446,-1.06156323,3.36298446,3.36243807
60.623475,3.74165739,3.36205322,0.616120251,3.36205322,3.36150811
60.633967,3.87298335,3.36112216,0.715444748,3.36112216,3.36057832
60.644458,3.31662479,3.36019145,-0.208726276,3.36019145,3.35964887
60.65495,3.16227766,3.35926092,-0.443827956,3.35926092,3.35871959
60.665442,4.47213595,3.35833065,1.05536975,3.35833065,3.35779058
60.675933,3.60555128,3.35740074,0.498147105,3.35740074,3.35686192
60.686425,2.82842712,3.35647101,-0.726666279,3.35647101,3.35593343
60.696916,2.82842712,3.35554163,-0.726026521,3.35554163,3.3550053
60.707408,3.16227766,3.35461244,-0.438559897,3.35461244,3.35407734
60.7179,2.44948974,3.35368353,-0.950891047,3.35368353,3.35314965
60.728391,2.82842712,3.35275497,-0.724104857,3.35275497,3.35222232
60.738883,3.60555128,3.3518266,0.503710908,3.3518266,3.35129516
60.749374,2.82842712,3.35089859,-0.722821876,3.35089859,3.35036837
60.759866,3.16227766,3.34997077,-0.433235627,3.34997077,3.34944176
60.770358,3.46410162,3.34904323,0.339202579,3.34904323,3.34851542
60.780849,4,3.34811605,0.807393306,3.34811605,3.34758944
60.791341,3,3.34718906,-0.589227514,3.34718906,3.34666365
60.801832,4.24264069,3.34626245,0.946772539,3.34626245,3.34573822
60.812324,3.60555128,3.34533602,0.510112981,3.34533602,3.34481298
60.822816,3,3.34440988,-0.586864448,3.34440988,3.34388801
60.833307,3.60555128,3.34348411,0.51192496,3.34348411,3.34296342
60.843799,4,3.34255854,0.810827641,3.34255854,3.34203901
60.85429,3.87298335,3.34163334,0.72893759,3.34163334,3.34111498
60.864782,3.16227766,3.34070834,-0.422410553,3.34070834,3.34019114
60.875274,3,3.33978362,-0.582909617,3.33978362,3.33926758
60.885765,3.87298335,3.33885928,0.730837917,3.33885928,3.33834439
60.896257,3.46410162,3.33793515,0.355199192,3.33793515,3.3374214
60.906748,4.12310563,3.33701139,0.886619553,3.33701139,3.33649879
60.91724,3,3.33608784,-0.579730835,3.33608784,3.33557637
60.927732,3.31662479,3.33516458,-0.1361609,3.33516458,3.33465424
60.938223,4.35889894,3.3342417,1.01225355,3.3342417,3.33373249
60.948715,2.44948974,3.33331903,-0.940121955,3.33331903,3.33281094
60.959206,2.82842712,3.33239675,-0.709908178,3.33239675,3.33188977
60.969698,2.44948974,3.33147467,-0.939140525,3.33147467,3.33096881
60.98019,2.64575131,3.33055289,-0.827527388,3.33055289,3.33004814
60.990681,3.31662479,3.3296315,-0.114046952,3.3296315,3.32912785
61.001173,3.16227766,3.32871032,-0.407961588,3.32871032,3.32820777
61.011664,3.87298335,3.32778953,0.738372412,3.32778953,3.32728808
61.022156,4,3.32686895,0.82044564,3.32686895,3.32636859
61.032648,4,3.32594868,0.821006286,3.32594868,3.32544941
61.043139,3.87298335,3.3250288,0.740239521,3.3250288,3.32453061
61.053631,4.12310563,3.32410914,0.893866036,3.32410914,3.32361202
61.064122,3.46410162,3.32318987,0.375382136,3.32318987,3.32269383
61.074614,3.46410162,3.32227082,0.376604297,3.32227082,3.32177585
61.085106,2.82842712,3.32135208,-0.702086144,3.32135208,3.32085818
61.095597,4.47213595,3.32043374,1.0731739,3.32043374,3.31994089
61.106089,3.74165739,3.31951562,0.64972438,3.31951562,3.31902383
61.11658,3.16227766,3.3185979,-0.39537354,3.3185979,3.31810716
61.127072,2.82842712,3.3176804,-0.699466423,3.3176804,3.31719072
61.137564,3.31662479,3.31676322,-0.0117656047,3.31676322,3.31627458
61.148055,2.82842712,3.31584644,-0.698154221,3.31584644,3.31535884
61.158547,3.74165739,3.31492989,0.653243826,3.31492989,3.31444333
61.169038,3.60555128,3.31401374,0.539942155,3.31401374,3.31352821
61.17953,3.74165739,3.31309783,0.654644604,3.31309783,3.31261333
61.190022,3.74165739,3.31218223,0.655343539,3.31218223,3.31169875
61.200513,4.35889894,3.31126704,1.02353891,3.31126704,3.31078458
61.211005,3.46410162,3.31035209,0.392109076,3.31035209,3.30987064
61.221496,4,3.30943754,0.831000877,3.30943754,3.30895711
61.231988,3.31662479,3.30852323,0.0900086586,3.30852323,3.30804381
61.24248,2.23606798,3.30760925,-1.03515278,3.30760925,3.30713082
61.252971,3.46410162,3.30669567,0.396744178,3.30669567,3.30621825
61.263463,4,3.30578234,0.833197253,3.30578234,3.30530591
61.273954,3.46410162,3.30486942,0.399039092,3.30486942,3.30439398
61.284446,3.31662479,3.30395674,0.112552438,3.30395674,3.30348229
61.294938,2,3.30304439,-1.1415097,3.30304439,3.30257093
61.305429,3.31662479,3.30213246,0.120384105,3.30213246,3.30165998
61.315921,3.74165739,3.30122077,0.663653989,3.30122077,3.30074926
61.326412,2.23606798,3.3003095,-1.03162082,3.3003095,3.29983897
61.336904,4.12310563,3.29939848,0.907583134,3.29939848,3.29892892
61.347396,3.87298335,3.29848779,0.757954849,3.29848779,3.29801919
61.357887,2.82842712,3.29757753,-0.684945548,3.29757753,3.29710989
61.368379,3.31662479,3.29666751,0.141270229,3.29666751,3.29620083
61.37887,3.60555128,3.29575792,0.556590831,3.29575792,3.29529219
61.389362,3.46410162,3.29484858,0.411403734,3.29484858,3.29438381
61.399854,3.87298335,3.29393958,0.760949251,3.29393958,3.29347575
61.410345,4,3.29303101,0.840814479,3.29303101,3.29256812
61.420837,3.60555128,3.29212269,0.559846926,3.29212269,3.29166075
61.431328,4.12310563,3.29121481,0.912080489,3.29121481,3.29075379
61.44182,2.64575131,3.29030718,-0.802842366,3.29030718,3.28984709
61.452312,2.64575131,3.28939989,-0.802277121,3.28939989,3.28894074
61.462803,3.60555128,3.28849304,0.563079247,3.28849304,3.28803481
61.473295,2.64575131,3.28758644,-0.801146137,3.28758644,3.28712913
61.483786,3.74165739,3.28668028,0.674519905,3.28668028,3.28622389
61.494278,3.60555128,3.28577439,0.565488185,3.28577439,3.28531891
61.50477,3.46410162,3.28486884,0.423358919,3.28486884,3.28441427
61.515261,3.87298335,3.28396373,0.767476133,3.28396373,3.28351007
61.525753,3.31662479,3.28305889,0.183209997,3.28305889,3.28260613
61.536244,4.24264069,3.28215448,0.980043981,3.28215448,3.28170262
61.546736,3.74165739,3.28125035,0.678533007,3.28125035,3.28079938
61.557228,2.82842712,3.28034656,-0.672249536,3.28034656,3.27989649
61.567719,2.82842712,3.27944322,-0.671577321,3.27944322,3.27899404
61.578211,2.44948974,3.27854015,-0.910522054,3.27854015,3.27809186
61.588702,4,3.27763753,0.849919098,3.27763753,3.27719011
61.599194,3.31662479,3.27673517,0.199723848,3.27673517,3.27628864
61.609686,3.16227766,3.27583318,-0.336980003,3.27583318,3.27538752
61.620177,3.31662479,3.27493164,0.204189014,3.27493164,3.27448685
61.630669,3.46410162,3.27403037,0.435971614,3.27403037,3.27358645
61.64116,2.82842712,3.27312955,-0.666860122,3.27312955,3.27268649
61.651652,1.73205081,3.272229,-1.24103916,3.272229,3.27178681
61.662144,3,3.27132883,-0.520892337,3.27132883,3.27088749
61.672635,3.31662479,3.2704291,0.214931825,3.2704291,3.26998862
61.683127,4.12310563,3.26952966,0.923891752,3.26952966,3.26909003
61.693618,3.46410162,3.26863067,0.442120967,3.26863067,3.26819189
61.70411,4.12310563,3.26773196,0.924864134,3.26773196,3.26729403
61.714602,2.82842712,3.26683362,-0.66212272,3.26683362,3.26639653
61.725093,3.46410162,3.26593574,0.445158258,3.26593574,3.26549949
61.735585,4.79583152,3.26503815,1.23725235,3.26503815,3.26460273
61.746076,2.64575131,3.26414101,-0.786377581,3.26414101,3.26370643
61.756568,2.82842712,3.26324416,-0.659406581,3.26324416,3.26281041
61.76706,3.60555128,3.26234769,0.585835799,3.26234769,3.26191477
61.777551,3,3.26145168,-0.51132346,3.26145168,3.26101958
61.788043,2.82842712,3.26014469,-0.657052179,3.26014469,3.26012468
61.798534,3.31662479,3.25925028,0.239529763,3.25925028,3.25923024
61.809026,3.46410162,3.25835617,0.45359172,3.25835617,3.2583361
61.819518,3.31662479,3.25746243,0.243233146,3.25746243,3.25744233
61.830009,3.74165739,3.25656915,0.69648276,3.25656915,3.25654902
61.840501,4,3.25567617,0.862742042,3.25567617,3.255656
61.850992,3.60555128,3.25478365,0.592256383,3.25478365,3.25476345
61.861484,3,3.25389143,-0.503876405,3.25389143,3.2538712
61.871976,3.60555128,3.25299959,0.593760627,3.25299959,3.25297933
61.882467,3.87298335,3.25210822,0.787956295,3.25210822,3.25208793
61.892959,3.74165739,3.25121715,0.700314382,3.25121715,3.25119682
61.90345,2.23606798,3.25032655,-1.00710405,3.25032655,3.25030619
61.913942,3.74165739,3.24943625,0.70158473,3.24943625,3.24941586
61.924434,2.82842712,3.24854634,-0.648166041,3.24854634,3.24852591
61.934925,3.46410162,3.2476569,0.465236191,3.2476569,3.24763644
61.945417,2.64575131,3.24676777,-0.775252511,3.24676777,3.24674727
61.955908,2.44948974,3.24587911,-0.892406502,3.24587911,3.24585857
61.9664,3,3.24499075,-0.494965408,3.24499075,3.24497018
61.976892,3.74165739,3.24410279,0.705375498,3.24410279,3.24408219
61.987383,3.31662479,3.24321531,0.270941837,3.24321531,3.24319467
61.997875,2.82842712,3.24232814,-0.643351392,3.24232814,3.24230746
62.008366,3.31662479,3.24144144,0.274195817,3.24144144,3.24142073
62.018858,3.74165739,3.24055506,0.707885813,3.24055506,3.24053431
62.02935,3.16227766,3.23966908,-0.27819313,3.23966908,3.23964829
62.039841,3.16227766,3.23878358,-0.276597027,3.23878358,3.23876275
62.050333,3.46410162,3.23789839,0.47560827,3.23789839,3.23787752
62.060824,3.74165739,3.23701369,0.710382785,3.23701369,3.23699278
62.071316,3,3.2361293,-0.485931373,3.2361293,3.23610836
62.081808,3.46410162,3.23524532,0.478389276,3.23524532,3.23522434
62.092299,4.47213595,3.23436182,1.11255298,3.23436182,3.2343408
62.102791,4.24264069,3.23347864,1.00457058,3.23347864,3.23345758
62.113282,3.31662479,3.23259596,0.289877276,3.23259596,3.23257486
62.123774,3,3.23171359,-0.481366378,3.23171359,3.23169245
62.134266,3.46410162,3.23083163,0.482980314,3.23083163,3.23081045
62.144757,3.46410162,3.22995017,0.483891982,3.22995017,3.22992895
62.155249,3.16227766,3.22906902,-0.258440252,3.22906902,3.22904777
62.16574,3.46410162,3.22818838,0.485709006,3.22818838,3.22816708
62.176232,3.87298335,3.22730806,0.803539227,3.22730806,3.22728672
62.186724,3.31662479,3.22642815,0.300327558,3.22642815,3.22640677
62.197215,2.64575131,3.22554874,-0.761444302,3.22554874,3.22552731
62.207707,3.31662479,3.22466965,0.303241052,3.22466965,3.22464819
62.218198,3.46410162,3.22379107,0.490214793,3.22379107,3.22376956
62.22869,3,3.22291282,-0.472136444,3.22291282,3.22289127
62.239182,3.74165739,3.22203499,0.720848389,3.22203499,3.22201339
62.249673,3.16227766,3.22115765,-0.242652003,3.22115765,3.22113602
62.260165,3,3.22028066,-0.469340662,3.22028066,3.22025898
62.270656,3.60555128,3.21940416,0.621407364,3.21940416,3.21938244
62.281148,2.64575131,3.21852801,-0.756820121,3.21852801,3.21850624
62.29164,3.74165739,3.21765227,0.723881976,3.21765227,3.21763046
62.302131,3.74165739,3.21677704,0.724486263,3.21677704,3.21675518
62.312623,2.44948974,3.21590215,-0.875449833,3.21590215,3.21588025
62.323114,3.31662479,3.21502777,0.318742873,3.21502777,3.21500582
62.333606,3.60555128,3.21415373,0.625617729,3.21415373,3.21413174
62.344098,3.60555128,3.21328012,0.62631554,3.21328012,3.21325808
62.354589,3.60555128,3.21240702,0.627012167,3.21240702,3.21238493
62.365081,2.44948974,3.21153426,-0.872951613,3.21153426,3.21151213
62.375572,3.46410162,3.21066202,0.503427848,3.21066202,3.21063984
62.386064,2.64575131,3.20979012,-0.751025172,3.20979012,3.20976789
62.396556,3.60555128,3.20891865,0.629787759,3.20891865,3.20889638
62.407047,3.16227766,3.2080477,-0.213939346,3.2080477,3.20802538
62.417539,4,3.2071771,0.890406029,3.2071771,3.20715473
62.42803,3.60555128,3.20630702,0.631857781,3.20630702,3.2062846
62.438522,2.44948974,3.20543729,-0.869452441,3.20543729,3.20541482
62.449014,2.64575131,3.20456799,-0.747540423,3.20456799,3.20454548
62.459505,3.46410162,3.20369922,0.51029638,3.20369922,3.20367665
62.469997,3,3.2028308,-0.450367405,3.2028308,3.20280818
62.480488,4.12310563,3.2019629,0.959761806,3.2019629,3.20194024
62.49098,4.12310563,3.20109536,0.960213656,3.20109536,3.20107264
62.501472,3.60555128,3.20022826,0.636649838,3.20022826,3.20020549
62.511963,3,3.19936168,-0.446499365,3.19936168,3.19933887
62.522455,2.64575131,3.19849547,-0.743467656,3.19849547,3.1984726
62.532946,2.64575131,3.19762978,-0.74288523,3.19762978,3.19760686
62.543438,3.60555128,3.19676445,0.639364393,3.19676445,3.19674148
62.55393,3.31662479,3.19589957,0.347455356,3.19589957,3.19587654
62.564421,3.31662479,3.19503521,0.348696972,3.19503521,3.19501213
62.574913,3.60555128,3.19417122,0.641389158,3.19417122,3.19414809
62.585404,3.87298335,3.19330777,0.824424393,3.19330777,3.19328458
62.595896,3.16227766,3.19244467,-0.173686541,3.19244467,3.19242144
62.606388,3.16227766,3.19158203,-0.171185202,3.19158203,3.19155874
62.616879,3,3.19071993,-0.436714925,3.19071993,3.19069658
62.627371,3.46410162,3.18985819,0.523682563,3.18985819,3.18983479
62.637862,3.16227766,3.18899699,-0.16346047,3.18899699,3.18897353
62.648354,2.82842712,3.18813615,-0.599757476,3.18813615,3.18811264
62.658846,2.64575131,3.18727578,-0.735883461,3.18727578,3.18725221
62.669337,2.64575131,3.18641594,-0.735299007,3.18641594,3.18639232
62.679829,3.16227766,3.18555648,-0.152573971,3.18555648,3.1855328
62.69032,3.31662479,3.18469755,0.363217893,3.18469755,3.18467382
62.700812,3.46410162,3.18383901,0.529398347,3.18383901,3.18381521
62.711304,2.64575131,3.18298092,-0.732959485,3.18298092,3.18295707
62.721795,3.46410162,3.18212337,0.531016236,3.18212337,3.18209946
62.732287,2.82842712,3.18126621,-0.594002593,3.18126621,3.18124224
62.742778,3.31662479,3.18040958,0.369073444,3.18040958,3.18038556
62.75327,3.31662479,3.17955334,0.370231614,3.17955334,3.17952926
62.763762,3,3.17869757,-0.422726349,3.17869757,3.17867342
62.774253,3.31662479,3.17784234,0.372535173,3.17784234,3.17781813
62.784745,2.64575131,3.17698749,-0.728859505,3.17698749,3.17696323
62.795236,3.31662479,3.17613319,0.374822089,3.17613319,3.17610887
62.805728,3.60555128,3.17527928,0.655951214,3.17527928,3.1752549
62.81622,3.16227766,3.17442584,-0.110218774,3.17442584,3.1744014
62.826711,3.46410162,3.17357295,0.539007114,3.17357295,3.17354844
62.837203,3.16227766,3.17272044,-0.102189941,3.17272044,3.17269588
62.847694,3.60555128,3.17186849,0.65854596,3.17186849,3.17184387
62.858186,3.31662479,3.17101694,0.381585973,3.17101694,3.17099224
62.868678,3.16227766,3.17016585,-0.0888154797,3.17016585,3.1701411
62.879169,3,3.16931532,-0.411479427,3.16931532,3.1692905
62.889661,3.16227766,3.16846518,-0.0786608059,3.16846518,3.1684403
62.900152,2.82842712,3.1676156,-0.582398899,3.1676156,3.16759066
62.910644,3.31662479,3.16676642,0.38711545,3.16676642,3.16674141
62.921136,3.87298335,3.16591771,0.840871948,3.16591771,3.16589264
62.931627,2,3.16506957,-1.07938388,3.16506957,3.16504443
62.942119,4.12310563,3.16422182,0.979226127,3.16422182,3.16419661
62.95261,3,3.16337463,-0.404196278,3.16337463,3.16334936
62.963102,2.64575131,3.16252785,-0.718871709,3.16252785,3.16250251
62.973594,3.87298335,3.16168154,0.843387103,3.16168154,3.16165614
62.984085,2.64575131,3.1608358,-0.717693869,3.1608358,3.16081033
62.994577,2.23606798,3.15999046,-0.961208867,3.15999046,3.15996493
63.005068,2.23606798,3.15914569,-0.960769335,3.15914569,3.15912009
63.01556,2.82842712,3.15830133,-0.57434676,3.15830133,3.15827565
63.026052,3.16227766,3.15745745,0.0694277618,3.15745745,3.15743171
63.036543,3.60555128,3.15661413,0.670027717,3.15661413,3.15658832
63.047035,3.31662479,3.15577123,0.40106553,3.15577123,3.15574535
63.057526,3.87298335,3.1549289,0.847380935,3.1549289,3.15490295
63.068018,2.64575131,3.15408697,-0.71297662,3.15408697,3.15406095
63.07851,3.16227766,3.15324554,0.0950374713,3.15324554,3.15321945
63.089001,3.60555128,3.15240468,0.673161643,3.15240468,3.15237852
63.099493,3.60555128,3.15156423,0.673785608,3.15156423,3.151538
63.109984,3.31662479,3.15072436,0.407308771,3.15072436,3.15069805
63.120476,3.46410162,3.1498849,0.560550372,3.1498849,3.14985852
63.130968,3.16227766,3.14904593,0.115029253,3.14904593,3.14901948
63.141459,2.64575131,3.14820754,-0.708841472,3.14820754,3.14818102
63.151951,2.82842712,3.14736957,-0.564749898,3.14736957,3.14734298
63.162442,3.74165739,3.14653218,0.771443587,3.14653218,3.14650551
63.172934,3.46410162,3.14569521,0.564275119,3.14569521,3.14566846
63.183426,2.82842712,3.14485873,-0.562522539,3.14485873,3.14483191
63.193917,3.31662479,3.14402284,0.415453912,3.14402284,3.14399594
63.204409,3.87298335,3.14318737,0.854280973,3.14318737,3.1431604
63.2149,2.64575131,3.14235248,-0.704699344,3.14235248,3.14232543
63.225392,3.31662479,3.14151801,0.41845762,3.14151801,3.14149089
63.235884,2.82842712,3.14068405,-0.558799538,3.14068405,3.14065685
63.246375,3.31662479,3.13985067,0.420445144,3.13985067,3.13982339
63.256867,3.31662479,3.13901772,0.421434538,3.13901772,3.13899037
63.267358,3,3.13818536,-0.37173291,3.13818536,3.13815792
63.27785,3.16227766,3.13735342,0.157874128,3.13735342,3.13732591
63.288342,4,3.13652199,0.929235174,3.13652199,3.1364944
63.298833,2.82842712,3.13569115,-0.554314016,3.13569115,3.13566348
63.309325,3,3.13486074,-0.36723391,3.13486074,3.13483299
63.319816,3.16227766,3.13403093,0.168067647,3.13403093,3.13400309
63.330308,2.82842712,3.13320154,-0.552063779,3.13320154,3.13317363
63.3408,3.31662479,3.13237267,0.429245993,3.13237267,3.13234467
63.351291,3.16227766,3.13154439,0.175309076,3.13154439,3.13151631
63.361783,4.24264069,3.13071654,1.05447814,3.13071654,3.13068838
63.372274,2.23606798,3.12988929,-0.945421237,3.12988929,3.12986105
63.382766,3.46410162,3.12906248,0.578825652,3.12906248,3.12903415
63.393258,3.16227766,3.12823618,0.184503323,3.12823618,3.12820777
63.403749,3.46410162,3.12741048,0.580250921,3.12741048,3.12738199
63.414241,3.31662479,3.12658522,0.435935277,3.12658522,3.12655665
63.424732,2.23606798,3.12576056,-0.94323517,3.12576056,3.1257319
63.435224,2.64575131,3.12493634,-0.692231921,3.12493634,3.12490759
63.445716,3.31662479,3.12411265,0.43876206,3.12411265,3.12408381
63.456207,3.31662479,3.12328955,0.439699037,3.12328955,3.12326062
63.466699,3.46410162,3.12246689,0.584495271,3.12246689,3.12243788
63.47719,3,3.12164484,-0.348776206,3.12164484,3.12161574
63.487682,3.74165739,3.12082324,0.787930295,3.12082324,3.12079405
63.498174,3.31662479,3.12000404,0.443419384,3.12000404,3.11997288
63.508665,3.31662479,3.11918357,0.444343585,3.11918357,3.11915232
63.519157,4.12310563,3.11836355,1.00236824,3.11836355,3.1183322
63.529648,2.64575131,3.11754413,-0.686871763,3.11754413,3.11751269
63.54014,3.16227766,3.11672516,0.213430307,3.11672516,3.11669363
63.550632,3,3.11590673,-0.340450771,3.11590673,3.11587509
63.561123,3.16227766,3.1150889,0.217229741,3.1150889,3.11505717
63.571615,3.46410162,3.11427152,0.591464361,3.11427152,3.1142397
63.582106,4,3.11345476,0.941565314,3.11345476,3.11342284
63.592598,3.74165739,3.11263845,0.793107141,3.11263845,3.11260643
63.60309,3.60555128,3.11182267,0.70265824,3.11182267,3.11179055
63.613581,2.82842712,3.11100751,-0.531582905,3.11100751,3.11097529
63.624073,3.46410162,3.1101928,0.594902355,3.1101928,3.11016048
63.634564,3,3.10937871,-0.330724523,3.10937871,3.10934629
63.645056,2.44948974,3.10856508,-0.811834548,3.10856508,3.10853255
63.655548,2.82842712,3.10775198,-0.528511926,3.10775198,3.10771936
63.666039,3.31662479,3.1069395,0.457914064,3.1069395,3.10690678
63.676531,2.44948974,3.10612748,-0.81033187,3.10612748,3.10609465
63.687022,2.23606798,3.10531608,-0.93233476,3.10531608,3.10528315
63.697514,3.60555128,3.10450514,0.707846121,3.10450514,3.10447211
63.708006,3,3.10369475,-0.322016692,3.10369475,3.10366161
63.718497,3.60555128,3.10288497,0.708989634,3.10288497,3.10285173
63.728989,2.64575131,3.10207566,-0.675517841,3.10207566,3.10204232
63.73948,3.31662479,3.10126698,0.464066605,3.10126698,3.10123352
63.749972,2.44948974,3.10045876,-0.806826508,3.10045876,3.10042519
63.760464,4,3.09965108,0.948867176,3.09965108,3.09961741
63.770955,3,3.09884403,-0.314394706,3.09884403,3.09881025
63.781447,3.74165739,3.09803745,0.80225927,3.09803745,3.09800356
63.791938,3.74165739,3.09723149,0.802761417,3.09723149,3.0971975
63.80243,2.82842712,3.09642601,-0.517686089,3.09642601,3.09639191
63.812922,2.82842712,3.09562108,-0.51690807,3.09562108,3.09558686
63.823413,2.82842712,3.09481677,-0.516129486,3.09481677,3.09478244
63.833905,3.16227766,3.09401294,0.261275183,3.09401294,3.0939785
63.844396,3.31662479,3.09320974,0.472668017,3.09320974,3.09317518
63.854888,3.16227766,3.09240701,0.264330573,3.09240701,3.09237234
63.86538,3,3.09160484,-0.302662907,3.09160484,3.09157006
63.875871,3.16227766,3.09080329,0.267346905,3.09080329,3.0907684
63.886363,3.46410162,3.09000223,0.611636646,3.09000223,3.08996722
63.896854,3.46410162,3.0892018,0.612290632,3.0892018,3.08916667
63.907346,3.31662479,3.08840185,0.477726851,3.08840185,3.08836661
63.917838,3.87298335,3.08760245,0.886217182,3.08760245,3.0875671
63.928329,3.16227766,3.08680369,0.274725255,3.08680369,3.08676822
63.938821,3.46410162,3.08600542,0.614895273,3.08600542,3.08596983
63.949312,3.46410162,3.08520778,0.615543529,3.08520778,3.08517207
63.959804,3.74165739,3.08441062,0.81070757,3.08441062,3.08437479
63.970296,2.64575131,3.08361403,-0.66171196,3.08361403,3.08357808
63.980787,2.64575131,3.08281807,-0.66111025,3.08281807,3.082782
63.991279,3.60555128,3.0820226,0.723552812,3.0820226,3.08198641
64.00177,4,3.08122778,0.958526069,3.08122778,3.08119146
64.012262,3.31662479,3.08043343,0.485995222,3.08043343,3.08039699
64.022754,3.31662479,3.07963966,0.486811186,3.07963966,3.07960309
64.033245,3,3.07884653,-0.280796235,3.07884653,3.07880983
64.043737,2.64575131,3.07805388,-0.657497203,3.07805388,3.07801707
64.054228,2.23606798,3.07726188,-0.917166237,3.07726188,3.07722494
64.06472,4,3.07647038,0.961004487,3.07647038,3.07643331
64.075212,3.16227766,3.07567944,0.294275757,3.07567944,3.07564224
64.085703,3.16227766,3.07488915,0.295615483,3.07488915,3.07485182
64.096195,3.60555128,3.07409935,0.729007494,3.07409935,3.07406189
64.106686,3.60555128,3.0733102,0.729548544,3.0733102,3.07327261
64.117178,3.31662479,3.07252154,0.494068058,3.07252154,3.07248383
64.12767,3.46410162,3.07173346,0.62639297,3.07173346,3.07169562
64.138161,3.74165739,3.07094603,0.818969692,3.07094603,3.07090805
64.148653,3.46410162,3.0701591,0.627648403,3.0701591,3.07012099
64.159144,4.12310563,3.06937281,1.02651489,3.06937281,3.06933457
64.169636,3.87298335,3.06858703,0.896881439,3.06858703,3.06854865
64.180128,2.64575131,3.06780182,-0.649654149,3.06780182,3.06776331
64.190619,3.31662479,3.06701727,0.499607365,3.06701727,3.06697862
64.201111,3.16227766,3.06623322,0.309910374,3.06623322,3.06619443
64.211602,3.16227766,3.06544982,0.311171717,3.06544982,3.0654109
64.222094,4.24264069,3.06466693,1.08534499,3.06466693,3.06462787
64.232586,3,3.06388462,-0.252754066,3.06388462,3.06384541
64.243077,4.35889894,3.06310296,1.13833035,3.06310296,3.06306362
64.253569,3.31662479,3.06232181,0.504284621,3.06232181,3.06228233
64.26406,3,3.06154132,-0.248075227,3.06154132,3.06150169
64.274552,3,3.06076133,-0.246498142,3.06076133,3.06072156
64.285044,2.64575131,3.05998193,-0.643607507,3.05998193,3.05994202
64.295535,2.23606798,3.05920319,-0.907267995,3.05920319,3.05916313
64.306027,3.74165739,3.05842496,0.826578747,3.05842496,3.05838476
64.316518,2.23606798,3.05764739,-0.90641018,3.05764739,3.05760704
64.32701,3,3.05687033,-0.238475017,3.05687033,3.05682984
64.337502,4,3.05609386,0.971548319,3.05609386,3.05605322
64.347993,4.12310563,3.05531806,1.03333807,3.05531806,3.05527726
64.358485,3,3.05454276,-0.233543919,3.05454276,3.05450182
64.368976,2.82842712,3.05376813,-0.474700967,3.05376813,3.05372704
64.379468,3.74165739,3.05299402,0.829857438,3.05299402,3.05295277
64.38996,3.31662479,3.0522205,0.51420258,3.0522205,3.0521791
64.400451,3.31662479,3.05144764,0.514953542,3.05144764,3.05140609
64.410943,3,3.0506753,-0.225111755,3.0506753,3.05063359
64.421434,2.64575131,3.04990363,-0.635729754,3.04990363,3.04986177
64.431926,2.82842712,3.04913248,-0.469792885,3.04913248,3.04909046
64.442418,3.60555128,3.04836192,0.746451172,3.04836192,3.04831975
64.452909,3.16227766,3.04759204,0.338652661,3.04759204,3.0475497
64.463401,3.16227766,3.04682267,0.339786683,3.04682267,3.04678018
64.473892,3.74165739,3.04605398,0.834028424,3.04605398,3.04601132
64.484384,2.64575131,3.0452858,-0.632087409,3.0452858,3.04524299
64.494876,3.31662479,3.04451823,0.521638342,3.04451823,3.04447525
64.505367,3.46410162,3.04375133,0.648344265,3.04375133,3.04370819
64.515859,2.44948974,3.04298495,-0.770386404,3.04298495,3.04294165
64.52635,3,3.04221925,-0.205473242,3.04221925,3.04217578
64.536842,3,3.04145408,-0.203602749,3.04145408,3.04141044
64.547334,3.60555128,3.04068951,0.751572863,3.04068951,3.0406457
64.557825,2.44948974,3.03992561,-0.768398247,3.03992561,3.03988164
64.568317,2.82842712,3.03916224,-0.459058948,3.03916224,3.0391181
64.578808,3.31662479,3.03839955,0.527470605,3.03839955,3.03835524
64.5893,2.64575131,3.03763739,-0.626008052,3.03763739,3.03759291
64.599792,3.74165739,3.03687584,0.839512686,3.03687584,3.03683118
64.610283,3.74165739,3.03611496,0.839965729,3.03611496,3.03607013
64.620775,3,3.03535462,-0.188028239,3.03535462,3.03530961
64.631266,3,3.03459496,-0.185997192,3.03459496,3.03454978
64.641758,2.82842712,3.03383583,-0.453220369,3.03383583,3.03379047
64.65225,3,3.03307731,-0.18187168,3.03307731,3.03303177
64.662741,3.31662479,3.03231947,0.533202889,3.03231947,3.03227376
64.673233,4.12310563,3.03156217,1.04476957,3.03156217,3.03151627
64.683724,2.44948974,3.03080555,-0.762440691,3.03080555,3.03075947
64.694216,3.16227766,3.03004947,0.363631943,3.03004947,3.03000321
64.704708,3.60555128,3.029294,0.759116113,3.029294,3.02924756
64.715199,3.60555128,3.02853922,0.759613097,3.02853922,3.02849259
64.725691,3.60555128,3.02778498,0.760109399,3.02778498,3.02773816
64.736182,3.60555128,3.02703142,0.760604928,3.02703142,3.02698442
64.746674,3,3.0262784,-0.162106153,3.0262784,3.02623122
64.757166,3.60555128,3.02552601,0.761593901,3.02552601,3.02547863
64.767657,3.46410162,3.02477429,0.662817714,3.02477429,3.02472672
64.778149,3.16227766,3.02402313,0.371825947,3.02402313,3.02397536
64.78864,3.31662479,3.02327265,0.541619926,3.02327265,3.02322469
64.799132,3.16227766,3.02252271,0.37383813,3.02252271,3.02247456
64.809624,2.82842712,3.0217734,-0.439711579,3.0217734,3.02172505
64.820115,3.60555128,3.02102477,0.764543329,3.02102477,3.02097623
64.830607,3,3.0202767,-0.142396266,3.0202767,3.02022796
64.841098,2.82842712,3.01952931,-0.437152361,3.01952931,3.01948037
64.85159,3.46410162,3.01878248,0.667322365,3.01878248,3.01873334
64.862082,2.23606798,3.01803626,-0.884289706,3.01803626,3.01798692
64.872573,3,3.01729074,-0.131494262,3.01729074,3.0172412
64.883065,3,3.01654577,-0.128630369,3.01654577,3.01649602
64.893556,2.64575131,3.0158015,-0.608317504,3.0158015,3.01575154
64.904048,3.87298335,3.01505778,0.926242717,3.01505778,3.01500761
64.91454,2.23606798,3.01431468,-0.882182918,3.01431468,3.01426431
64.925031,3.46410162,3.01357228,0.671214823,3.01357228,3.01352169
64.935523,3.46410162,3.01283043,0.67176721,3.01283043,3.01277964
64.946014,2.44948974,3.01208928,-0.750066357,3.01208928,3.01203828
64.956506,3.60555128,3.01134869,0.77084537,3.01134869,3.01129747
64.966998,3.16227766,3.01060873,0.389446959,3.01060873,3.01055729
64.977489,3.16227766,3.00986946,0.390394928,3.00986946,3.00981781
64.987981,2.82842712,3.00913075,-0.425092495,3.00913075,3.00907888
64.998472,3,3.00839275,-0.0916119366,3.00839275,3.00834065
65.008964,3.74165739,3.0076553,0.856739217,3.0076553,3.00760298
65.019456,4.12310563,3.00691848,1.05649758,3.00691848,3.00686595
65.029947,3.16227766,3.00618237,0.395088965,3.00618237,3.00612961
65.040439,2.82842712,3.00544682,-0.420737083,3.00544682,3.00539383
65.05093,2.44948974,3.00471197,-0.745132354,3.00471197,3.00465875
65.061422,2.82842712,3.00397768,-0.418987538,3.00397768,3.00392424
65.071914,2.64575131,3.00324403,-0.597906948,3.00324403,3.00319035
65.082405,3.31662479,3.00251108,0.56045848,3.00251108,3.00245717
65.092897,3.87298335,3.0017787,0.93338344,3.0017787,3.00172456
65.103388,3.16227766,3.00104702,0.40153535,3.00104702,3.00099264
65.11388,3.74165739,3.00031591,0.861011889,3.00031591,3.0002613
65.124372,3,2.99958544,0.020360749,2.99958544,2.99953059
65.134863,3,2.99885567,0.0338278877,2.99885567,2.99880058
65.145355,2.44948974,2.99812648,-0.740700165,2.99812648,2.99807114
65.155846,4.35889894,2.99739799,1.16683373,2.99739799,2.99734241
65.166338,3.60555128,2.99667007,0.780308405,2.99667007,2.99661424
65.17683,2.64575131,2.99594279,-0.591769785,2.99594279,2.99588672
65.187321,3.60555128,2.99521622,0.781239435,2.99521622,2.9951599
65.197813,2.44948974,2.99449022,-0.738241479,2.99449022,2.99443365
65.208304,2.64575131,2.99376494,-0.589926797,2.99376494,2.99370811
65.218796,3.31662479,2.99304022,0.56884494,2.99304022,2.99298315
65.229288,3.31662479,2.99231615,0.569481023,2.99231615,2.99225882
65.239779,2.23606798,2.9915928,-0.869209307,2.9915928,2.99153521
65.250271,2.64575131,2.99087001,-0.587468045,2.99087001,2.99081217
65.260762,3.16227766,2.99014795,0.414885182,2.99014795,2.99008984
65.271254,2.82842712,2.98942645,-0.401247216,2.98942645,2.98936808
65.281746,3.16227766,2.98870561,0.416619795,2.98870561,2.98864697
65.292237,2.64575131,2.98798548,-0.585007833,2.98798548,2.98792657
65.302729,3.31662479,2.98726592,0.573897959,2.98726592,2.98720675
65.31322,3.46410162,2.98654709,0.691053203,2.98654709,2.98648764
65.323712,2.64575131,2.98582883,-0.583161657,2.98582883,2.98576911
65.334204,3.74165739,2.98511122,0.869796624,2.98511122,2.98505123
65.344695,1.73205081,2.98439433,-1.11908155,2.98439433,2.98433407
65.355187,3.46410162,2.98367802,0.693125959,2.98367802,2.98361748
65.365678,2.44948974,2.98296243,-0.730392146,2.98296243,2.98290161
65.37617,3.74165739,2.98224742,0.871441314,2.98224742,2.98218632
65.386662,2.82842712,2.98153307,-0.391287544,2.98153307,2.98147168
65.397153,4,2.98081943,1.00954473,2.98081943,2.98075776
65.407645,3.74165739,2.98010638,0.872668899,2.98010638,2.98004442
65.418136,3.16227766,2.97939405,0.427648934,2.97939405,2.9793318
65.428628,3,2.97868231,0.146005803,2.97868231,2.97861976
65.43912,3.74165739,2.97797122,0.873891395,2.97797122,2.97790838
65.449611,3.74165739,2.97726085,0.87429774,2.97726085,2.97719771
65.460103,3.60555128,2.97655107,0.793095332,2.97655107,2.97648764
65.470594,4.12310563,2.97584052,1.07110462,2.97584052,2.97577828
65.481086,2.82842712,2.97513205,-0.383020794,2.97513205,2.97506951
65.491578,3.46410162,2.97442425,0.69976951,2.97442425,2.9743614
65.502069,2.44948974,2.97371717,-0.724035513,2.97371717,2.973654
65.512561,2.44948974,2.97301068,-0.723547464,2.97301068,2.9729472
65.523052,2.82842712,2.97230491,-0.379312255,2.97230491,2.97224112
65.533544,2.23606798,2.97159974,-0.857631484,2.97159974,2.97153563
65.544036,3.31662479,2.97089523,0.587987724,2.97089523,2.9708308
65.554527,3.60555128,2.97019144,0.79709462,2.97019144,2.97012669
65.565019,3.31662479,2.96948825,0.589182942,2.96948825,2.96942318
65.57551,2.44948974,2.96878579,-0.720621986,2.96878579,2.96872039
65.586002,3.60555128,2.96808392,0.798415527,2.96808392,2.96801819
65.596494,2.23606798,2.96738272,-0.855169421,2.96738272,2.96731665
65.606985,3.31662479,2.96668224,0.591559421,2.96668224,2.96661585
65.617477,3.16227766,2.96598236,0.443052251,2.96598236,2.96591563
65.627968,2.44948974,2.96528322,-0.718187631,2.96528322,2.96521614
65.63846,2.64575131,2.96458467,-0.564653305,2.96458467,2.96451725
65.648952,3,2.96388678,0.190034781,2.96388678,2.96381902
65.659443,3.46410162,2.96318963,0.707751358,2.96318963,2.96312153
65.669935,3.60555128,2.96249308,0.801909096,2.96249308,2.96242462
65.680426,2.64575131,2.96179726,-0.56217964,2.96179726,2.96172845
65.690918,2.82842712,2.96110204,-0.36424568,2.96110204,2.96103288
65.70141,3.46410162,2.96040749,0.709714115,2.96040749,2.96033797
65.711901,3.31662479,2.95971367,0.597420385,2.95971367,2.9596438
65.722393,3.31662479,2.95902046,0.598000276,2.95902046,2.95895022
65.732884,3.31662479,2.95832798,0.59857899,2.95832798,2.95825738
65.743376,3.31662479,2.95763611,0.599156642,2.95763611,2.95756513
65.753868,2.64575131,2.95694491,-0.557847286,2.95694491,2.95687356
65.764359,2.82842712,2.95625444,-0.357529458,2.95625444,2.95618272
65.774851,3.16227766,2.95556458,0.454657105,2.95556458,2.95549248
65.785342,2.82842712,2.95487545,-0.355595737,2.95487545,2.95480298
65.795834,3,2.95418694,0.214039866,2.95418694,2.95411408
65.806326,2.44948974,2.95349909,-0.709936158,2.95349909,2.95342585
65.816817,3.31662479,2.95281199,0.603168968,2.95281199,2.95273835
65.827309,3,2.95212549,0.218802447,2.95212549,2.95205147
65.8378,2,2.95143973,-0.975417722,2.95143973,2.95136531
65.848292,3.60555128,2.95075458,0.809195088,2.95075458,2.95067977
65.858784,2.64575131,2.95007011,-0.551650978,2.95007011,2.94999489
65.869275,2.64575131,2.94938638,-0.551030916,2.94938638,2.94931076
65.879767,2.64575131,2.94870326,-0.55041071,2.94870326,2.94862723
65.890258,3.74165739,2.94802088,0.890862786,2.94802088,2.94794444
65.90075,3.60555128,2.94733912,0.811302753,2.94733912,2.94726226
65.911242,3.74165739,2.94665803,0.891627364,2.94665803,2.94658076
65.921733,3.74165739,2.94597769,0.892008801,2.94597769,2.94589999
65.932225,2.82842712,2.94529795,-0.34186376,2.94529795,2.94521984
65.942716,3,2.94461897,0.235331748,2.94461897,2.94454043
65.953208,2.64575131,2.9439406,-0.546067107,2.9439406,2.94386162
65.9637,1.73205081,2.94326291,-1.10055082,2.94326291,2.9431835
65.974191,4.24264069,2.94258596,1.14019942,2.94258596,2.94250612
65.984683,3.16227766,2.94190963,0.469433733,2.94190963,2.94182935
65.995174,3,2.94123405,0.242416897,2.94123405,2.94115332
66.005666,2.23606798,2.94055908,-0.839339684,2.94055908,2.9404779
66.016158,3.46410162,2.9398848,0.724028187,2.9398848,2.93980317
66.026649,2.64575131,2.93921127,-0.541719442,2.93921127,2.93912918
66.037141,3.31662479,2.93853835,0.61488734,2.93853835,2.9384558
66.047632,3.31662479,2.93786618,0.615433675,2.93786618,2.93778317
66.058124,2.64575131,2.93719464,-0.53985491,2.93719464,2.93711116
66.068616,3,2.93652377,0.251944888,2.93652377,2.93643983
66.079107,3.60555128,2.93585366,0.818350545,2.93585366,2.93576924
66.089599,3.31662479,2.93518417,0.617608792,2.93518417,2.93509927
66.10009,2.64575131,2.93451543,-0.537367769,2.93451543,2.93443005
66.110582,3.74165739,2.93384731,0.898782551,2.93384731,2.93376144
66.121074,3.60555128,2.93317988,0.819982556,2.93317988,2.93309352
66.131565,3,2.93251321,0.259782207,2.93251321,2.93242635
66.142057,3.16227766,2.93184715,0.480031779,2.93184715,2.93175979
66.152548,3.46410162,2.93118185,0.730013538,2.93118185,2.93109399
66.16304,3.46410162,2.93051717,0.730468644,2.93051717,2.93042881
66.173532,3.31662479,2.92985319,0.621909641,2.92985319,2.92976431
66.184023,1.73205081,2.92918996,-1.09413854,2.92918996,2.92910056
66.194515,2.44948974,2.92852735,-0.692125428,2.92852735,2.92843743
66.205006,3.46410162,2.9278655,0.732281445,2.9278655,2.92777506
66.215498,2.44948974,2.92720428,-0.691168962,2.92720428,2.9271133
66.22599,2.82842712,2.92654375,-0.313235729,2.92654375,2.92645224
66.236481,3.16227766,2.92588397,0.486203341,2.92588397,2.92579192
66.246973,2.44948974,2.92522483,-0.689735517,2.92522483,2.92513223
66.257464,3,2.92456644,0.274651713,2.92456644,2.9244733
66.267956,3,2.92390868,0.275846555,2.92390868,2.92381498
66.278448,3.31662479,2.92325161,0.627194688,2.92325161,2.92315736
66.288939,3.16227766,2.92259531,0.489573644,2.92259531,2.92250049
66.299431,3.31662479,2.92193963,0.62823973,2.92193963,2.92184425
66.309922,2.64575131,2.92128472,-0.524912759,2.92128472,2.92118876
66.320414,1.41421356,2.92063043,-1.22736175,2.92063043,2.9205339
66.330906,2.82842712,2.91997685,-0.302571845,2.91997685,2.91987973
66.341397,3.16227766,2.91932402,0.492903278,2.91932402,2.91922631
66.351889,3,2.91867183,0.28518095,2.91867183,2.91857352
66.36238,2.44948974,2.91802039,-0.684492988,2.91802039,2.91792149
66.372872,3.16227766,2.9173696,0.494881868,2.9173696,2.91727009
66.383364,3.46410162,2.9167195,0.739852767,2.9167195,2.91661938
66.393855,2.82842712,2.91607016,-0.296045666,2.91607016,2.91596943
66.404347,2.82842712,2.91542146,-0.294948024,2.91542146,2.91532011
66.414838,3.60555128,2.91477352,0.831130406,2.91477352,2.91467154
66.42533,3.16227766,2.91412622,0.498148006,2.91412622,2.91402361
66.435822,4,2.91347963,1.04236288,2.91347963,2.91337637
66.446313,2.44948974,2.91283379,-0.680693798,2.91283379,2.91272989
66.456805,3.31662479,2.91218859,0.635952983,2.91218859,2.91208405
66.467296,3,2.91154416,0.297415263,2.91154416,2.91143896
66.477788,3,2.91090037,0.298495611,2.91090037,2.9107945
66.48828,3.60555128,2.91025728,0.833842907,2.91025728,2.91015075
66.498771,3.74165739,2.90961496,0.912163598,2.90961496,2.90950775
66.509263,2.44948974,2.90897328,-0.677852147,2.90897328,2.90886539
66.519754,3.16227766,2.90833236,0.503929856,2.90833236,2.90822378
66.530246,3.46410162,2.90769209,0.745928634,2.90769209,2.90758282
66.540738,2.64575131,2.90705252,-0.511176299,2.90705252,2.90694255
66.551229,3.46410162,2.90641372,0.74678504,2.90641372,2.90630304
66.561721,3.60555128,2.90577556,0.836525979,2.90577556,2.90566417
66.572212,2.82842712,2.90513817,-0.276967594,2.90513817,2.90502606
66.582704,2.64575131,2.90450143,-0.508674865,2.90450143,2.90438859
66.593196,3,2.90386539,0.310055812,2.90386539,2.90375182
66.603687,2.64575131,2.90323013,-0.507423703,2.90323013,2.90311581
66.614179,3,2.9025955,0.312096932,2.9025955,2.90248044
66.62467,3.16227766,2.90196165,0.510211728,2.90196165,2.90184583
66.635162,3.87298335,2.90132845,0.985725569,2.90132845,2.90121186
66.645654,2.64575131,2.90069596,-0.504920434,2.90069596,2.90057859
66.656145,3.46410162,2.90006423,0.751024223,2.90006423,2.89994609
66.666637,3.74165739,2.89943316,0.917727754,2.89943316,2.89931423
66.677128,4,2.89880285,1.04937941,2.89880285,2.89868313
66.68762,2.82842712,2.8981732,-0.264094821,2.8981732,2.89805268
66.698112,3.74165739,2.89754426,0.918756295,2.89754426,2.89742292
66.708603,3.74165739,2.89691609,0.91909809,2.89691609,2.89679394
66.719095,2.64575131,2.89628857,-0.50053697,2.89628857,2.89616559
66.729586,4.12310563,2.89566182,1.10790063,2.89566182,2.89553801
66.740078,2.82842712,2.89503573,-0.258086432,2.89503573,2.89491108
66.75057,2.23606798,2.89441035,-0.811383001,2.89441035,2.89428484
66.761061,3.87298335,2.89378575,0.989544137,2.89378575,2.89365938
66.771553,3,2.8931618,0.326861139,2.8931618,2.89303456
66.782044,2.64575131,2.89253862,-0.496776919,2.89253862,2.8924105
66.792536,3.16227766,2.8919161,0.51996304,2.8919161,2.8917871
66.803028,3.16227766,2.89129429,0.520560629,2.89129429,2.89116439
66.813519,2.44948974,2.89067326,-0.664216469,2.89067326,2.89054246
66.824011,2.23606798,2.89005289,-0.808693335,2.89005289,2.88992117
66.834502,3.74165739,2.88943329,0.923159844,2.88943329,2.88930065
66.844994,3.31662479,2.88881435,0.654072198,2.88881435,2.88868077
66.855486,2.82842712,2.88819613,-0.244477,2.88819613,2.88806161
66.865977,3.60555128,2.88757868,0.847332634,2.88757868,2.88744321
66.876469,3.31662479,2.8869619,0.65548676,2.8869619,2.88682546
66.88696,2.82842712,2.88634589,-0.240663176,2.88634589,2.88620848
66.897452,3.31662479,2.88573054,0.656425357,2.88573054,2.88559215
66.907944,2,2.88511591,-0.940805991,2.88511591,2.88497653
66.918435,2.82842712,2.88450206,-0.236801477,2.88450206,2.88436167
66.928927,3.16227766,2.88388888,0.527625609,2.88388888,2.88374747
66.939418,2.82842712,2.88327647,-0.234199368,2.88327647,2.88313403
66.94991,2.82842712,2.88266472,-0.232889672,2.88266472,2.88252125
66.960402,2.82842712,2.8820537,-0.231574126,2.8820537,2.88190918
66.970893,3.74165739,2.88144346,0.927477185,2.88144346,2.88129787
66.981385,3,2.88083388,0.345204462,2.88083388,2.88068722
66.991876,3.16227766,2.88022508,0.531086225,2.88022508,2.88007734
67.002368,3.31662479,2.87961695,0.661065685,2.87961695,2.87946811
67.01286,2.23606798,2.87900954,-0.80183637,2.87900954,2.8788596
67.023351,2,2.87840292,-0.937231517,2.87840292,2.87825185
67.033843,2.23606798,2.87779696,-0.801079884,2.87779696,2.87764476
67.044334,3.31662479,2.87719178,0.662897434,2.87719178,2.87703844
67.054826,2.23606798,2.87658727,-0.800324495,2.87658727,2.87643277
67.065318,3,2.87598349,0.352159776,2.87598349,2.87582782
67.075809,3.87298335,2.87538049,0.998800707,2.87538049,2.87522364
67.086301,3,2.87477817,0.353866972,2.87477817,2.87462011
67.096792,3.16227766,2.87417662,0.536750442,2.87417662,2.87401736
67.107284,2.23606798,2.87357575,-0.798440838,2.87357575,2.87341526
67.117776,4.24264069,2.8729756,1.17032691,2.8729756,2.87281388
67.128267,3.16227766,2.87237625,0.538424938,2.87237625,2.87221326
67.138759,2.44948974,2.87177756,-0.649836762,2.87177756,2.87161331
67.14925,3.16227766,2.87117966,0.539534986,2.87117966,2.87101413
67.159742,2.44948974,2.87058243,-0.648916551,2.87058243,2.8704156
67.170234,2.82842712,2.86998594,-0.203859783,2.86998594,2.86981779
67.180725,3.16227766,2.86939023,0.541190754,2.86939023,2.86922075
67.191217,3.31662479,2.86879519,0.669200715,2.86879519,2.86862438
67.201708,3.31662479,2.86820095,0.669644564,2.86820095,2.86802877
67.2122,3.74165739,2.86760738,0.934906417,2.86760738,2.86743383
67.222692,2,2.86701454,-0.931136157,2.86701454,2.8668396
67.233183,3.16227766,2.8664225,0.543925698,2.8664225,2.86624614
67.243675,3.46410162,2.86583113,0.773479469,2.86583113,2.86565335
67.254166,3.16227766,2.86524055,0.545011112,2.86524055,2.86506132
67.264658,3.31662479,2.86465065,0.672290222,2.86465065,2.86446996
67.27515,3.46410162,2.86406148,0.774622574,2.86406148,2.86387932
67.285641,3,2.86347311,0.369495454,2.86347311,2.86328945
67.296133,2.82842712,2.86288542,-0.185629449,2.86288542,2.86270024
67.306624,3,2.86229852,0.371081505,2.86229852,2.86211181
67.317116,3,2.8617123,0.371870544,2.8617123,2.86152404
67.327608,3.31662479,2.86112682,0.674905899,2.86112682,2.86093699
67.338099,2.82842712,2.86054213,-0.179206602,2.86054213,2.86035071
67.348591,3.16227766,2.85995813,0.549835914,2.85995813,2.85976509
67.359082,3.16227766,2.85937492,0.550366007,2.85937492,2.85918025
67.369574,2.82842712,2.85879239,-0.174256333,2.85879239,2.85859608
67.380066,3.74165739,2.85821061,0.939918494,2.85821061,2.85801262
67.390557,3.16227766,2.85762962,0.551949307,2.85762962,2.85742994
67.401049,2.23606798,2.85704932,-0.788023695,2.85704932,2.85684792
67.41154,3,2.85646982,0.378853774,2.85646982,2.85626668
67.422032,2.44948974,2.855891,-0.637496085,2.855891,2.8556861
67.432524,3.31662479,2.85531293,0.679199428,2.85531293,2.85510624
67.443015,3,2.85473565,0.381135602,2.85473565,2.85452716
67.453507,3.46410162,2.85415907,0.780988187,2.85415907,2.85394875
67.463998,3.46410162,2.85358328,0.781356726,2.85358328,2.85337111
67.47449,2.23606798,2.85300895,-0.785455898,2.85300895,2.85279414
67.484982,2.44948974,2.8524346,-0.634779375,2.8524346,2.85221788
67.495473,2.23606798,2.85186105,-0.78472484,2.85186105,2.85164241
67.505965,3.60555128,2.8512882,0.868483205,2.8512882,2.8510676
67.516456,3,2.85071615,0.386372685,2.85071615,2.85049357
67.526948,2.82842712,2.85014479,-0.147369151,2.85014479,2.8499202
67.53744,3.46410162,2.84957418,0.783918,2.84957418,2.84934756
67.547931,3.87298335,2.84900438,1.01191846,2.84900438,2.84877569
67.558423,2.64575131,2.84843527,-0.450204357,2.84843527,2.84820449
67.568914,3,2.84786697,0.390042341,2.84786697,2.84763407
67.579406,3,2.84729937,0.390769282,2.84729937,2.84706431
67.589898,4,2.84673252,1.07390292,2.84673252,2.84649528
67.600389,2.23606798,2.84616647,-0.78108802,2.84616647,2.84592703
67.610881,4,2.84560113,1.07442956,2.84560113,2.84535944
67.621372,2.44948974,2.84503659,-0.628925155,2.84503659,2.84479264
67.631864,2,2.84447276,-0.918951989,2.84447276,2.8442265
67.642356,3.46410162,2.84390968,0.787522656,2.84390968,2.84366108
67.652847,3.16227766,2.84334741,0.564739096,2.84334741,2.84309645
67.663339,2.64575131,2.84278585,-0.443885728,2.84278585,2.84253248
67.67383,4.12310563,2.8422251,1.13175992,2.8422251,2.84196929
67.684322,2.82842712,2.84166505,-0.115056197,2.84166505,2.84140677
67.694814,3.74165739,2.84110577,0.948973982,2.84110577,2.84084497
67.705305,2.82842712,2.8405473,-0.11009165,2.8405473,2.84028396
67.715797,2.23606798,2.83998953,-0.7771239,2.83998953,2.83972361
67.726288,2.64575131,2.83943259,-0.440092348,2.83943259,2.83916404
67.73678,3.16227766,2.83887635,0.568683841,2.83887635,2.83860514
67.747272,3.16227766,2.83832088,0.569172016,2.83832088,2.83804697
67.757763,2.44948974,2.83776622,-0.623118351,2.83776622,2.83748957
67.768255,3.74165739,2.83721228,0.951023189,2.83721228,2.83693285
67.778746,3.87298335,2.83665916,1.01800009,2.83665916,2.83637691
67.789238,4,2.83610675,1.07883884,2.83610675,2.83582163
67.79973,3.31662479,2.83555512,0.693591864,2.83555512,2.83526709
67.810221,2.82842712,2.8350043,-0.0810998009,2.8350043,2.83471332
67.820713,2.82842712,2.83445421,-0.0776342831,2.83445421,2.83416022
67.831204,3.16227766,2.83390494,0.573038153,2.83390494,2.8336079
67.841696,2.82842712,2.83335638,-0.0702086893,2.83335638,2.83305626
67.852188,2.23606798,2.83280861,-0.772489891,2.83280861,2.83250534
67.862679,1,2.83226166,-1.3536106,2.83226166,2.8319552
67.873171,3.16227766,2.83171544,0.57494541,2.83171544,2.83140573
67.883662,3.31662479,2.83117004,0.696745829,2.83117004,2.83085704
67.894154,3,2.83062537,0.411551488,2.83062537,2.83030903
67.904646,3.74165739,2.83008149,0.954764841,2.83008149,2.82976174
67.915137,3.31662479,2.82953843,0.697915725,2.82953843,2.82921523
67.925629,3,2.82899611,0.41352617,2.82899611,2.82866939
67.93612,3,2.82845462,0.414180373,2.82845462,2.82812433
67.946612,3.31662479,2.82791386,0.699078627,2.82791386,2.82757995
67.957104,3.31662479,2.8273739,0.69946472,2.8273739,2.82703629
67.967595,2.64575131,2.82683477,-0.425539019,2.82683477,2.82649342
67.978087,3.46410162,2.82629638,0.798627096,2.82629638,2.82595121
67.988578,2.44948974,2.82575883,-0.613407765,2.82575883,2.82540979
67.99907,3.31662479,2.82522202,0.701001262,2.82522202,2.82486904
68.009562,3,2.82468601,0.418705137,2.82468601,2.82432902
68.020053,3.46410162,2.82415084,0.799969233,2.82415084,2.82378978
68.030545,3.46410162,2.82361642,0.800303188,2.82361642,2.82325121
68.041036,4,2.82308285,1.08485812,2.82308285,2.82271342
68.051528,3.87298335,2.82255003,1.02490649,2.82255003,2.82217631
68.06202,3.16227766,2.82201801,0.583317793,2.82201801,2.82163992
68.072511,3.16227766,2.82148685,0.583772911,2.82148685,2.82110431
68.083003,3,2.82095644,0.423135391,2.82095644,2.82056938
68.093494,3,2.82042689,0.423760674,2.82042689,2.82003523
68.103986,2.23606798,2.8198981,-0.764087772,2.8198981,2.81950176
68.114478,4,2.81937012,1.08656793,2.81937012,2.81896901
68.124969,3.46410162,2.81884301,0.803279905,2.81884301,2.81843704
68.135461,2.64575131,2.81831666,-0.415409859,2.81831666,2.81790574
68.145952,2.64575131,2.81779118,-0.414776894,2.81779118,2.81737523
68.156444,3.87298335,2.81726647,1.02748084,2.81726647,2.81684539
68.166936,3.16227766,2.81674259,0.587822313,2.81674259,2.81631628
68.177427,3.16227766,2.81621958,0.588267016,2.81621958,2.81578795
68.187919,4,2.81569735,1.0882567,2.81569735,2.8152603
68.19841,2,2.81517599,-0.902870973,2.81517599,2.81473342
68.208902,2.82842712,2.81465543,0.11735288,2.81465543,2.81420723
68.219394,2.64575131,2.81413569,-0.410346662,2.81413569,2.81368176
68.229885,3.31662479,2.81361685,0.709230527,2.81361685,2.81315706
68.240377,2.82842712,2.8130988,0.123807623,2.8130988,2.81263305
68.250868,1.73205081,2.81258164,-1.03948585,2.81258164,2.81210981
68.26136,2.64575131,2.81206528,-0.407816095,2.81206528,2.81158726
68.271852,3.74165739,2.81154977,0.964420871,2.81154977,2.81106543
68.282343,2.64575131,2.81103516,-0.406551168,2.81103516,2.81054438
68.292835,3.74165739,2.81052137,0.964953896,2.81052137,2.810024
68.303326,3.31662479,2.81000848,0.711769845,2.81000848,2.80950441
68.313818,3,2.80949641,0.436467175,2.80949641,2.80898549
68.32431,3.16227766,2.8089852,0.5943841,2.8089852,2.8084673
68.334801,3.87298335,2.80847492,1.03175018,2.80847492,2.80794989
68.345293,3,2.80796546,0.438217454,2.80796546,2.80743316
68.355784,2.64575131,2.80745694,-0.402126379,2.80745694,2.8069172
68.366276,3.16227766,2.80694925,0.5960943,2.80694925,2.80640193
68.376768,3,2.80644244,0.439951766,2.80644244,2.80588738
68.387259,2.64575131,2.80593658,-0.400231523,2.80593658,2.80537361
68.397751,3.31662479,2.80543157,0.714977774,2.80543157,2.80486052
68.408242,3.46410162,2.80492751,0.811895375,2.80492751,2.8043482
68.418734,3,2.80442432,0.442239397,2.80442432,2.80383657
68.429226,2.44948974,2.80392203,-0.595342161,2.80392203,2.80332566
68.439717,2.44948974,2.80342071,-0.594920978,2.80342071,2.80281553
68.450209,3.16227766,2.80292027,0.599464251,2.80292027,2.80230608
68.4607,3.16227766,2.80242081,0.599880698,2.80242081,2.8017974
68.471192,2.23606798,2.80192223,-0.752232848,2.80192223,2.80128941
68.481684,2.82842712,2.8014246,0.164324438,2.8014246,2.80078214
68.492175,3.16227766,2.80092797,0.60112369,2.80092797,2.80027565
68.502667,3.74165739,2.80043224,0.970167585,2.80043224,2.79976984
68.513158,2.23606798,2.79993753,-0.75091248,2.79993753,2.79926481
68.52365,3.16227766,2.79944374,0.602356972,2.79944374,2.79876045
68.534142,2.82842712,2.79895093,0.171686338,2.79895093,2.79825682
68.544633,3.16227766,2.79845915,0.603173701,2.79845915,2.79775397
68.555125,3.16227766,2.79796832,0.603580438,2.79796832,2.7972518
68.565616,3,2.79747853,0.450023851,2.79747853,2.79675041
68.576108,3.16227766,2.79698972,0.604390555,2.79698972,2.79624969
68.5866,3,2.79650192,0.451107611,2.79650192,2.7957497
68.597091,3.31662479,2.79601521,0.721532802,2.79601521,2.79525049
68.607583,2.82842712,2.79552948,0.181377067,2.79552948,2.79475196
68.618074,3.46410162,2.79504486,0.817958895,2.79504486,2.7942542
68.628566,2.64575131,2.79456125,-0.385758917,2.79456125,2.79375713
68.639058,2.82842712,2.79407872,0.185333225,2.79407872,2.79326078
68.649549,3.60555128,2.79359732,0.901084877,2.79359732,2.7927652
68.660041,3.16227766,2.79311697,0.607585951,2.79311697,2.79227031
68.670532,3.60555128,2.79263778,0.901617155,2.79263778,2.79177619
68.681024,3.74165739,2.79215967,0.974421734,2.79215967,2.79128275
68.691516,3,2.7916827,0.4564179,2.7916827,2.79079003
68.702007,2.64575131,2.79120693,-0.381386442,2.79120693,2.7902981
68.712499,2.82842712,2.79073228,0.194151594,2.79073228,2.78980684
68.72299,4,2.79025887,1.09988233,2.79025887,2.78931635
68.733482,3.74165739,2.78978661,0.97563865,2.78978661,2.78882655
68.743974,3.60555128,2.78931558,0.903457636,2.78931558,2.78833747
68.754465,3.16227766,2.78884582,0.611090694,2.78884582,2.78784917
68.764957,3.31662479,2.78837729,0.726806372,2.78837729,2.78736154
68.775448,2.64575131,2.78791008,-0.377039473,2.78791008,2.78687469
68.78594,2.82842712,2.78744412,0.202442597,2.78744412,2.78638852
68.796432,2.82842712,2.78697949,0.203586927,2.78697949,2.78590308
68.806923,2.64575131,2.78651625,-0.375186536,2.78651625,2.78541841
68.817415,2.82842712,2.78605434,0.205846517,2.78605434,2.78493442
68.827906,3.31662479,2.78559387,0.728718686,2.78559387,2.7844512
68.838398,2.82842712,2.78513478,0.208068128,2.78513478,2.78396866
68.84889,3.46410162,2.78467715,0.824272084,2.78467715,2.78348685
68.859381,3.46410162,2.78422104,0.824548709,2.78422104,2.78300581
68.869873,2.23606798,2.78376641,-0.740066507,2.78376641,2.78252545
68.880364,3,2.78331338,0.465496105,2.78331338,2.78204586
68.890856,3.87298335,2.78286188,1.04408882,2.78286188,2.78156695
68.901348,3.87298335,2.78241201,1.04430423,2.78241201,2.78108877
68.911839,2.64575131,2.78196385,-0.369069832,2.78196385,2.78061136
68.922331,2.23606798,2.78151735,-0.738545445,2.78151735,2.78013462
68.932822,4.12310563,2.78107264,1.15846147,2.78107264,2.77965866
68.943314,3.16227766,2.78062969,0.617776635,2.78062969,2.77918338
68.953806,2.82842712,2.78018858,0.219632748,2.78018858,2.77870883
68.964297,2.64575131,2.77974941,-0.366057509,2.77974941,2.77823504
68.974789,3,2.77931215,0.469774252,2.77931215,2.77776193
68.98528,3,2.77887695,0.470237231,2.77887695,2.7772896
68.995772,3.46410162,2.77844377,0.828044589,2.77844377,2.77681794
69.006264,3,2.77801274,0.47115524,2.77801274,2.77634701
69.016755,4,2.77758396,1.10562925,2.77758396,2.77587685
69.027247,3.16227766,2.77715742,0.62058057,2.77715742,2.77540737
69.037738,2.44948974,2.77673328,-0.57205204,2.77673328,2.77493865
69.04823,2.64575131,2.77631155,-0.361331204,2.77631155,2.77447062
69.058722,2.23606798,2.77589236,-0.734727419,2.77589236,2.77400331
69.069213,3,2.77547584,0.473839805,2.77547584,2.77353676
69.079705,3.16227766,2.77506202,0.622266538,2.77506202,2.7730709
69.090196,3.87298335,2.77465107,1.04801349,2.77465107,2.77260581
69.100688,2.64575131,2.77424306,-0.358457452,2.77424306,2.77214139
69.11118,2.44948974,2.77383812,-0.569515917,2.77383812,2.7716777
69.121671,3.16227766,2.77343645,0.623571338,2.77343645,2.77121477
69.132163,4.12310563,2.77303809,1.16192406,2.77303809,2.77075253
69.142654,2.64575131,2.77264329,-0.356219009,2.77264329,2.77029105
69.153146,3.31662479,2.77225214,0.737816138,2.77225214,2.76983025
69.163638,2.82842712,2.77186484,0.237828275,2.77186484,2.76937017
69.174129,3.60555128,2.77148162,0.91327414,2.77148162,2.76891086
69.184621,3.31662479,2.77110262,0.738594725,2.77110262,2.76845223
69.195112,3,2.77072813,0.47882342,2.77072813,2.76799436
69.205604,2.44948974,2.77035832,-0.566452627,2.77035832,2.76753717
69.216096,2.64575131,2.76999348,-0.35248003,2.76999348,2.7670807
69.226587,3.60555128,2.76963393,0.914285156,2.76963393,2.766625
69.237079,3.31662479,2.7692799,0.739827612,2.7692799,2.76616998
69.24757,3.60555128,2.76893178,0.914669065,2.76893178,2.76571572
69.258062,2.82842712,2.76858987,0.244616553,2.76858987,2.76526214
69.268554,3.60555128,2.76825458,0.915039174,2.76825458,2.76480928
69.279045,2.44948974,2.76792639,-0.564301907,2.76792639,2.76435719
69.289537,2.44948974,2.76760567,-0.564017664,2.76760567,2.76390577
69.300028,3,2.767293,0.48239714,2.767293,2.76345511
69.31052,4.24264069,2.76698887,1.2147641,2.76698887,2.76300514
69.321012,3.16227766,2.76669392,0.628954483,2.76669392,2.76255588
69.331503,3.46410162,2.76640883,0.835280061,2.76640883,2.76210739
69.341995,3.16227766,2.7661343,0.629399209,2.7661343,2.76165957
69.352486,2.23606798,2.76587116,-0.727875801,2.76587116,2.76121252
69.362978,2.82842712,2.76562027,0.250612961,2.76562027,2.76076614
69.37347,2.64575131,2.76538263,-0.34587761,2.76538263,2.76032048
69.383961,3.16227766,2.76515936,0.630173228,2.76515936,2.75987559
69.394453,3.31662479,2.76495163,0.742747035,2.76495163,2.75943137
69.404944,3.87298335,2.76476083,1.05272148,2.76476083,2.75898791
69.415436,3.31662479,2.76458843,0.742991494,2.76458843,2.75854513
69.425928,3,2.76443614,0.485349217,2.76443614,2.75810306
69.436419,2.44948974,2.76430586,-0.561084767,2.76430586,2.75766176
69.446911,2.64575131,2.7641997,-0.344163314,2.7641997,2.75722113
69.457402,3.16227766,2.76412008,0.630997294,2.76412008,2.75678127
69.467894,3.16227766,2.7640697,0.631037213,2.7640697,2.75634208
69.478386,3,2.76405165,0.485745148,2.76405165,2.7559036
69.488877,4.24264069,2.76406945,1.21596515,2.76406945,2.75546589
69.499369,3.16227766,2.76412709,0.630991732,2.76412709,2.75502885
69.50986,2.64575131,2.76422918,-0.344206138,2.76422918,2.75459257
69.520352,3.60555128,2.764381,0.917153352,2.764381,2.75415696
69.530844,2.64575131,2.76458867,-0.344727956,2.76458867,2.75372207
69.541335,4,2.76485924,1.11136887,2.76485924,2.75328794
69.551827,3.46410162,2.76520102,0.836002751,2.76520102,2.75285448
69.562318,2.64575131,2.76562359,-0.346225758,2.76562359,2.75242178
69.57281,2.64575131,2.76613841,-0.346968442,2.76613841,2.75198976
69.583302,2.82842712,2.76675889,0.24833089,2.76675889,2.75155845
69.593793,2.23606798,2.76750094,-0.728994491,2.76750094,2.75112789
69.604285,3.16227766,2.76838385,0.6276096,2.76838385,2.75069801
69.614776,2.64575131,2.76943047,-0.351680476,2.76943047,2.75026889
69.625268,3.74165739,2.77066896,0.985387453,2.77066896,2.74984044
69.63576,2.64575131,2.77213335,-0.355502511,2.77213335,2.7494127
69.646251,2,2.77386548,-0.879696242,2.77386548,2.74898572
69.656743,3.74165739,2.7759179,0.982720453,2.7759179,2.74855941
69.667234,3.46410162,2.77835558,0.828097839,2.77835558,2.74813386
69.677726,2,2.78126185,-0.883890178,2.78126185,2.74770897
69.688218,3,2.78474243,0.463958591,2.78474243,2.74728481
69.698709,2.44948974,2.78893408,-0.582618514,2.78893408,2.74686139
69.709201,2.64575131,2.7940179,-0.385054002,2.7940179,2.74643865
69.719692,2.64575131,2.80023418,-0.393043089,2.80023418,2.74601666
69.730184,2.44948974,2.80791941,-0.598689959,2.80791941,2.74559534
69.740676,3.74165739,2.81757439,0.961292359,2.81757439,2.74517473
69.751167,3.16227766,2.83005288,0.576389431,2.83005288,2.74475488
69.761659,3.60555128,2.84705615,0.870916254,2.84705615,2.7443357
69.77215,3.46410162,2.87224977,0.769319077,2.87224977,2.74391726
69.782642,4.12310563,2.91335309,1.09988751,2.91335309,2.7434995
69.793134,3,2.98463865,0.123940924,2.98463865,2.74308245
69.803625,2.82842712,3.10732227,-0.528105245,3.10732227,2.74266615
69.814117,4.12310563,3.30351088,0.90531472,3.30351088,2.74225052
69.824608,3.60555128,3.58218631,0.152856044,3.58218631,2.74183564
69.8351,4.69041576,3.92517519,0.874780299,3.92517519,2.74142143
69.845592,3.60555128,4.28118458,-0.821969162,4.28118458,2.74100793
69.856083,4,4.56596595,-0.752307086,4.56596595,2.74059518
69.866575,4.24264069,4.67615953,-0.65842148,4.67615953,2.7401831
69.877066,4.79583152,4.55813772,0.487538519,4.55813772,2.73977176
69.887558,4.69041576,4.26807504,0.649877467,4.26807504,2.7393611
69.89805,5.29150262,3.9100621,1.17534698,3.9100621,2.73895114
69.908541,3,3.56755792,-0.753364403,3.56755792,2.73854193
69.919033,3.60555128,3.29065082,0.561159922,3.29065082,2.73813339
69.929524,4.12310563,3.09653761,1.01319693,3.09653761,2.73772559
69.940016,3.87298335,2.97537814,0.947420293,2.97537814,2.73731847
69.950508,3.60555128,2.90483877,0.837085721,2.90483877,2.73691204
69.960999,2.64575131,2.86380751,-0.466964875,2.86380751,2.73650637
69.971491,3.60555128,2.83825117,0.875956682,2.83825117,2.73610136
69.981982,3.74165739,2.82066366,0.959684181,2.82066366,2.7356971
69.992474,3.74165739,2.80749071,0.966522984,2.80749071,2.7352935
70.002966,2.64575131,2.79709243,-0.389025853,2.79709243,2.73489061
70.013457,2.82842712,2.78863871,0.199470341,2.78863871,2.73448846
70.023949,3.46410162,2.78163727,0.826114002,2.78163727,2.73408698
70.03444,3,2.77575929,0.473540606,2.77575929,2.73368624
70.044932,2.82842712,2.77076528,0.240128807,2.77076528,2.73328617
70.055424,2.64575131,2.76647748,-0.347456709,2.76647748,2.7328868
70.065915,2.23606798,2.7627603,-0.725735714,2.7627603,2.73248817
70.076407,2.82842712,2.75950812,0.262524301,2.75950812,2.73209021
70.086898,3.31662479,2.75663941,0.748321709,2.75663941,2.73169298
70.09739,2,2.75408879,-0.868382859,2.75408879,2.73129643
70.107882,3,2.75180473,0.498191999,2.75180473,2.73090057
70.118373,3.31662479,2.74974575,0.752913701,2.74974575,2.73050546
70.128865,2.64575131,2.74787756,-0.319571974,2.74787756,2.73011101
70.139356,1.73205081,2.74617266,-1.00703617,2.74617266,2.7297173
70.149848,2.64575131,2.74460783,-0.314414567,2.74460783,2.72932425
70.16034,2.44948974,2.74316422,-0.541917404,2.74316422,2.7289319
70.170831,4.69041576,2.74182604,1.39591895,2.74182604,2.72854029
70.181323,2.44948974,2.74057967,-0.539527505,2.74057967,2.72814934
70.191814,3.16227766,2.73941404,0.650279649,2.73941404,2.72775913
70.202306,3,2.7383193,0.511547363,2.7383193,2.72736959
70.212798,2.23606798,2.73728734,-0.707968477,2.73728734,2.72698074
70.223289,2.82842712,2.73631121,0.303506035,2.73631121,2.72659263
70.233781,3.16227766,2.73538463,0.653370515,2.73538463,2.72620518
70.244272,2.44948974,2.73450251,-0.53386587,2.73450251,2.72581846
70.254764,2.44948974,2.7336601,-0.533076312,2.7336601,2.72543241
70.265256,2.82842712,2.73285348,0.309149869,2.73285348,2.72504705
70.275747,2.82842712,2.73207924,0.310399556,2.73207924,2.72466243
70.286239,3.46410162,2.73133414,0.856018383,2.73133414,2.72427846
70.29673,2.64575131,2.73061562,-0.291314801,2.73061562,2.72389523
70.307222,3.46410162,2.72992115,0.856843316,2.72992115,2.72351266
70.317714,3,2.72924866,0.520337721,2.72924866,2.72313079
70.328205,2.64575131,2.72859632,-0.287828095,2.72859632,2.72274965
70.338697,3,2.72796234,0.5215723,2.72796234,2.72236917
70.349188,2.44948974,2.72734531,-0.52712007,2.72734531,2.72198941
70.35968,3.16227766,2.72674378,0.65994991,2.72674378,2.72161032
70.370172,3.16227766,2.72615658,0.660394638,2.72615658,2.72123192
70.380663,3.60555128,2.72558269,0.938066408,2.72558269,2.72085425
70.391155,3.16227766,2.725021,0.661253851,2.725021,2.72047724
70.401646,2.82842712,2.72447074,0.322422675,2.72447074,2.72010096
70.412138,3,2.72393099,0.525422693,2.72393099,2.71972533
70.42263,2.44948974,2.72340108,-0.523365394,2.72340108,2.7193504
70.433121,2.44948974,2.72288038,-0.522867705,2.72288038,2.71897619
70.443613,3,2.72236819,0.526907779,2.72236819,2.71860264
70.454104,3.74165739,2.72186406,1.00984817,2.72186406,2.71822982
70.464596,3,2.72136739,0.527856622,2.72136739,2.71785766
70.475088,3.16227766,2.72087775,0.664379341,2.72087775,2.71748618
70.485579,2.44948974,2.72039478,-0.520485386,2.72039478,2.71711543
70.496071,2.64575131,2.71991799,-0.272335597,2.71991799,2.71674533
70.506562,2.64575131,2.71944711,-0.271469703,2.71944711,2.71637596
70.517054,3,2.71898173,0.530111566,2.71898173,2.71600724
70.527546,2,2.71852158,-0.847656523,2.71852158,2.71563922
70.538037,2.44948974,2.71806643,-0.518243852,2.71806643,2.71527191
70.548529,3,2.71761594,0.531398215,2.71761594,2.71490526
70.55902,2.64575131,2.71716994,-0.267242641,2.71716994,2.71453933
70.569512,1.73205081,2.71672813,-0.992309089,2.71672813,2.71417406
70.580004,3.16227766,2.71629036,0.667822808,2.71629036,2.71380947
70.590495,3.16227766,2.71585646,0.668147591,2.71585646,2.7134456
70.600987,4.12310563,2.71542617,1.18645668,2.71542617,2.71308238
70.611478,3.16227766,2.71499942,0.668788634,2.71499942,2.71271988
70.62197,3.16227766,2.71457602,0.669105107,2.71457602,2.71235804
70.632462,2.64575131,2.71415576,-0.261542437,2.71415576,2.71199688
70.642953,2,2.7137386,-0.844830515,2.7137386,2.71163644
70.653445,3.60555128,2.71332434,0.944577651,2.71332434,2.71127665
70.663936,2.64575131,2.71291293,-0.259155586,2.71291293,2.71091757
70.674428,3.31662479,2.71250419,0.777251954,2.71250419,2.71055915
70.68492,2.44948974,2.71209806,-0.51245323,2.71209806,2.71020141
70.695411,2.64575131,2.71169447,-0.256793995,2.71169447,2.70984439
70.705903,3,2.71129326,0.53731438,2.71129326,2.70948801
70.716394,3,2.71089442,0.537685393,2.71089442,2.70913235
70.726886,3.46410162,2.71049779,0.868103578,2.71049779,2.70877734
70.737378,2.64575131,2.71010335,-0.253677028,2.71010335,2.70842301
70.747869,3.31662479,2.70971104,0.779046692,2.70971104,2.70806939
70.758361,2.82842712,2.70932074,0.34511793,2.70932074,2.70771642
70.768852,4.12310563,2.70893245,1.18919013,2.70893245,2.70736417
70.779344,3.46410162,2.70854604,0.869226997,2.70854604,2.70701256
70.789836,2.23606798,2.7081615,-0.687090619,2.7081615,2.70666163
70.800327,2.64575131,2.70777879,-0.249053174,2.70777879,2.70631141
70.810819,3.16227766,2.70739781,0.674447808,2.70739781,2.70596184
70.82131,3.46410162,2.70701858,0.870105185,2.70701858,2.70561297
70.831802,3.31662479,2.70664098,0.781014604,2.70664098,2.70526475
70.842294,2.82842712,2.706265,0.349516987,2.706265,2.70491721
70.852785,3.31662479,2.70589064,0.781494817,2.70589064,2.70457038
70.863277,3.87298335,2.70551779,1.0804932,2.70551779,2.70422419
70.873768,3.31662479,2.70514649,0.781970782,2.70514649,2.70387871
70.88426,3.46410162,2.70477662,0.871392561,2.70477662,2.70353388
70.894752,2,2.7044082,-0.839290293,2.7044082,2.70318972
70.905243,2.64575131,2.70404122,-0.241433029,2.70404122,2.70284626
70.915735,3.31662479,2.70367559,0.782910724,2.70367559,2.70250345
70.926226,3.60555128,2.70331135,0.949863111,2.70331135,2.70216134
70.936718,2,2.70294839,-0.838420178,2.70294839,2.70181987
70.94721,3.16227766,2.70258675,0.678005099,2.70258675,2.70147908
70.957701,3.16227766,2.70222641,0.678270781,2.70222641,2.70113899
70.968193,3,2.70186729,0.546015303,2.70186729,2.70079954
70.978684,2.82842712,2.70150944,0.356255088,2.70150944,2.7004608
70.989176,3,2.70115276,0.546669223,2.70115276,2.70012269
70.999668,3,2.70079728,0.546994264,2.70079728,2.69978526
71.010159,2.44948974,2.700443,-0.500952346,2.700443,2.69944852
71.020651,2.44948974,2.70008983,-0.500599732,2.70008983,2.69911243
71.031142,2.64575131,2.69973784,-0.232350018,2.69973784,2.69877703
71.041634,2.23606798,2.69938693,-0.680675369,2.69938693,2.69844227
71.052126,3.46410162,2.69903713,0.874679647,2.69903713,2.69810819
71.062617,3,2.69868845,0.548918532,2.69868845,2.6977748
71.073109,3,2.6983408,0.549235105,2.6983408,2.69744204
71.0836,2.44948974,2.69799425,-0.498502259,2.69799425,2.69710999
71.094092,3.16227766,2.6976487,0.681636969,2.6976487,2.69677857
71.104584,2.23606798,2.69730419,-0.679143735,2.69730419,2.69644782
71.115075,2.64575131,2.69696073,-0.226294984,2.69696073,2.69611776
71.125567,2.44948974,2.69661824,-0.497120209,2.69661824,2.69578834
71.136058,3,2.69627679,0.55111089,2.69627679,2.69545961
71.14655,2.44948974,2.69593628,-0.496433821,2.69593628,2.69513152
71.157042,2.64575131,2.69559675,-0.223260919,2.69559675,2.69480409
71.167533,3.46410162,2.69525821,0.876837159,2.69525821,2.69447736
71.178025,2.44948974,2.6949206,-0.495409784,2.6949206,2.69415125
71.188516,2.64575131,2.69458396,-0.220981102,2.69458396,2.69382585
71.199008,1,2.69424822,-1.30163291,2.69424822,2.69350107
71.2095,3.16227766,2.69391341,0.684371425,2.69391341,2.69317695
71.219991,3,2.69357955,0.55355257,2.69357955,2.69285353
71.230483,3.74165739,2.69324657,1.02391934,2.69324657,2.69253073
71.240974,2.82842712,2.69291452,0.368120365,2.69291452,2.69220863
71.251466,3.60555128,2.69258334,0.955493558,2.69258334,2.69188716
71.261958,3.31662479,2.69225304,0.790171977,2.69225304,2.69156634
71.272449,3,2.69192365,0.555046261,2.69192365,2.69124622
71.282941,3.60555128,2.6915951,0.956010551,2.6915951,2.69092672
71.293432,2.82842712,2.69126745,0.370350741,2.69126745,2.69060791
71.303924,2.64575131,2.69094063,-0.212577804,2.69094063,2.69028973
71.314416,3.16227766,2.69061467,0.686777251,2.69061467,2.6899722
71.324907,2.44948974,2.69028958,-0.490713601,2.69028958,2.68965536
71.335399,2.44948974,2.68996531,-0.490383078,2.68996531,2.68933915
71.34589,2.64575131,2.6896419,-0.209500804,2.6896419,2.68902362
71.356382,3,2.68931929,0.557387396,2.68931929,2.68870872
71.366874,3.16227766,2.68899751,0.687953596,2.68899751,2.68839447
71.377365,3.16227766,2.68867658,0.688186806,2.68867658,2.68808091
71.387857,3.46410162,2.68835644,0.880763974,2.68835644,2.68776797
71.398348,3.31662479,2.68803713,0.792835201,2.68803713,2.68745571
71.40884,3.16227766,2.68771861,0.688882465,2.68771861,2.68714408
71.419332,2.23606798,2.68740089,-0.671813151,2.68740089,2.68683309
71.429823,3.46410162,2.68708399,0.881486031,2.68708399,2.68652279
71.440315,3,2.68676786,0.559671455,2.68676786,2.68621311
71.450806,2.64575131,2.68645255,-0.201745487,2.68645255,2.68590411
71.461298,3.74165739,2.686138,1.02738473,2.686138,2.68559573
71.47179,3.46410162,2.68582423,0.882200311,2.68582423,2.685288
71.482281,3.31662479,2.68551126,0.79442654,2.68551126,2.68498095
71.492773,3.31662479,2.68519905,0.794623021,2.68519905,2.68467452
71.503264,2.44948974,2.68488763,-0.4851782,2.68488763,2.68436876
71.513756,3.46410162,2.68457695,0.882906941,2.68457695,2.68406362
71.524248,2.82842712,2.68426704,0.379684197,2.68426704,2.68375913
71.534739,3.31662479,2.68395791,0.795403594,2.68395791,2.68345532
71.545231,3.16227766,2.68364952,0.691829561,2.68364952,2.68315212
71.555722,2,2.68334191,-0.826644972,2.68334191,2.6828496
71.566214,3.87298335,2.68303502,1.09084752,2.68303502,2.68254769
71.576706,3,2.68272889,0.563268242,2.68272889,2.68224643
71.587197,2,2.68242353,-0.826089298,2.68242353,2.68194584
71.597689,2.23606798,2.68211888,-0.667870425,2.68211888,2.68164587
71.60818,3.31662479,2.68181501,0.796749511,2.68181501,2.68134656
71.618672,1.73205081,2.68151184,-0.974402912,2.68151184,2.68104787
71.629164,2.64575131,2.68120941,-0.18830322,2.68120941,2.68074983
71.639655,2.64575131,2.68090775,-0.187500498,2.68090775,2.68045245
71.650147,4,2.68060678,1.14864843,2.68060678,2.68015568
71.660638,2.82842712,2.68030658,0.384864321,2.68030658,2.67985959
71.67113,2.44948974,2.68000707,-0.480122202,2.68000707,2.6795641
71.681622,3.16227766,2.67970829,0.694672132,2.67970829,2.67926926
71.692113,3,2.67941026,0.566206448,2.67941026,2.67897508
71.702605,3.31662479,2.67911292,0.798443406,2.67911292,2.67868151
71.713096,3,2.67881633,0.566730689,2.67881633,2.67838861
71.723588,3.46410162,2.67852042,0.886330184,2.67852042,2.67809631
71.73408,3.46410162,2.67822523,0.886496692,2.67822523,2.67780465
71.744571,3,2.67793078,0.567511427,2.67793078,2.67751366
71.755063,2.82842712,2.67763701,0.388317024,2.67763701,2.67722328
71.765554,3.16227766,2.67734398,0.696371795,2.67734398,2.67693355
71.776046,2.44948974,2.67705163,-0.477034473,2.67705163,2.67664444
71.786538,3.16227766,2.67675999,0.696790983,2.67675999,2.67635596
71.797029,2.64575131,2.67646907,-0.175264828,2.67646907,2.67606813
71.807521,3.31662479,2.67617883,0.800278676,2.67617883,2.67578092
71.818012,2.64575131,2.67588932,-0.173603015,2.67588932,2.67549436
71.828504,3.16227766,2.67560048,0.697622522,2.67560048,2.67520841
71.838996,2.44948974,2.67531233,-0.475207943,2.67531233,2.67492309
71.849487,3.46410162,2.67502491,0.888299895,2.67502491,2.67463843
71.859979,2.44948974,2.67473816,-0.474603428,2.67473816,2.67435437
71.87047,3.16227766,2.67445212,0.698445085,2.67445212,2.67407097
71.880962,3.16227766,2.67416675,0.698649345,2.67416675,2.67378817
71.891454,3.31662479,2.67388207,0.801712366,2.67388207,2.673506
71.901945,2.64575131,2.67359811,-0.166873599,2.67359811,2.67322448
71.912437,2.64575131,2.67331481,-0.166022572,2.67331481,2.67294356
71.922928,2.64575131,2.67303221,-0.165169319,2.67303221,2.6726633
71.93342,2.64575131,2.67275028,-0.164313637,2.67275028,2.67238364
71.943912,2.82842712,2.67246903,0.394915296,2.67246903,2.6721046
71.954403,3.46410162,2.67218849,0.889895006,2.67218849,2.67182621
71.964895,3.31662479,2.67190861,0.802942203,2.67190861,2.67154843
71.975386,2.64575131,2.67162943,-0.160866776,2.67162943,2.67127129
71.985878,3,2.67135091,0.573279247,2.67135091,2.67099475
71.99637,3.31662479,2.67107306,0.803462341,2.67107306,2.67071883
72.006861,3.60555128,2.67079591,0.966827473,2.67079591,2.67044356
72.017353,3.46410162,2.67051942,0.890832305,2.67051942,2.67016889
72.027844,2.82842712,2.67024363,0.397722891,2.67024363,2.66989487
72.038336,3.31662479,2.66996848,0.804149432,2.66996848,2.66962144
72.048828,3.31662479,2.66969401,0.804320074,2.66969401,2.66934863
72.059319,2.82842712,2.66942024,0.398756678,2.66942024,2.66907646
72.069811,3.87298335,2.66914711,1.09719471,2.66914711,2.66880489
72.080302,2.82842712,2.66887468,0.399440168,2.66887468,2.66853396
72.090794,3.60555128,2.66860289,0.967960943,2.66860289,2.66826363
72.101286,3.16227766,2.66833177,0.702812841,2.66833177,2.66799391
72.111777,4,2.66806135,1.15409647,2.66806135,2.66772483
72.122269,3.74165739,2.66779156,1.03627498,2.66779156,2.66745635
72.13276,2.44948974,2.66752247,-0.466939749,2.66752247,2.6671885
72.143252,3.31662479,2.66725402,0.805835447,2.66725402,2.66692125
72.153744,3,2.66698624,0.577073446,2.66698624,2.66665461
72.164235,3.60555128,2.66671914,0.968933503,2.66671914,2.66638861
72.174727,3.46410162,2.66645269,0.893111935,2.66645269,2.6661232
72.185218,3.46410162,2.66618692,0.893260709,2.66618692,2.66585842
72.19571,3.46410162,2.66592179,0.893409102,2.66592179,2.66559423
72.206202,2.44948974,2.66565733,-0.464938258,2.66565733,2.66533066
72.216693,2.82842712,2.66539355,0.403774166,2.66539355,2.66506771
72.227185,3,2.66513041,0.578679181,2.66513041,2.66480536
72.237676,2,2.66486795,-0.815394352,2.66486795,2.66454364
72.248168,3.46410162,2.66460613,0.894145114,2.66460613,2.6642825
72.25866,3.87298335,2.66434497,1.09938091,2.66434497,2.66402197
72.269151,2.44948974,2.6640845,-0.463243729,2.6640845,2.66376208
72.279643,2.64575131,2.66382466,-0.134437142,2.66382466,2.66350277
72.290134,3.46410162,2.6635655,0.894726838,2.6635655,2.66324409
72.300626,2.64575131,2.66330698,-0.132497811,2.66330698,2.66298599
72.311118,3.31662479,2.66304912,0.80844027,2.66304912,2.66272849
72.321609,2.64575131,2.66279194,-0.13053977,2.66279194,2.66247163
72.332101,3.87298335,2.6625354,1.10020359,2.6625354,2.66221535
72.342592,2.64575131,2.66227954,-0.12856216,2.66227954,2.66195969
72.353084,3,2.66264021,0.580826818,2.66264021,2.66170461
72.363576,2.64575131,2.66238666,-0.128978093,2.66238666,2.66145014
72.374067,2.64575131,2.6621338,-0.127994087,2.6621338,2.66119629
72.384559,3,2.66188157,0.581479516,2.66188157,2.66094302
72.39505,2.82842712,2.66163003,0.408407997,2.66163003,2.66069037
72.405542,2.23606798,2.66137913,-0.652158841,2.66137913,2.6604383
72.416034,2.82842712,2.66112889,0.409021067,2.66112889,2.66018683
72.426525,2.44948974,2.66087934,-0.459771242,2.66087934,2.65993599
72.437017,2.82842712,2.66063042,0.409629958,2.66063042,2.65968571
72.447508,3.60555128,2.66038219,0.972198067,2.66038219,2.65943606
72.458,2.44948974,2.66013461,-0.458960633,2.66013461,2.65918698
72.468492,3.60555128,2.65988768,0.972452361,2.65988768,2.6589385
72.478983,3.31662479,2.65964144,0.810545093,2.65964144,2.65869064
72.489475,1.41421356,2.65939585,-1.11587736,2.65939585,2.65844335
72.499966,2.82842712,2.65915094,0.411431869,2.65915094,2.65819668
72.510458,3.31662479,2.65890668,0.810998219,2.65890668,2.65795058
72.52095,3.31662479,2.65866308,0.811148388,2.65866308,2.65770507
72.531441,2.44948974,2.65842018,-0.45708909,2.65842018,2.65746018
72.541933,2.44948974,2.65817792,-0.456824013,2.65817792,2.65721586
72.552424,3.16227766,2.65793636,0.710169911,2.65793636,2.65697215
72.562916,2.44948974,2.65769544,-0.456295626,2.65769544,2.65672901
72.573408,2.64575131,2.6574552,-0.108184505,2.6574552,2.65648647
72.583899,2.44948974,2.65721565,-0.455769579,2.65721565,2.65624453
72.594391,2.64575131,2.65697676,-0.105950215,2.65697676,2.65600316
72.604882,2,2.65673857,-0.810394081,2.65673857,2.6557624
72.615374,2.23606798,2.65650103,-0.64840809,2.65650103,2.65552221
72.625866,3.16227766,2.65626417,0.711346251,2.65626417,2.6552826
72.636357,2,2.65602802,-0.809955567,2.65602802,2.65504361
72.646849,2.44948974,2.65579253,-0.454205667,2.65579253,2.65480517
72.65734,2,2.65555775,-0.809665209,2.65555775,2.65456735
72.667832,3.16227766,2.65532364,0.712007039,2.65532364,2.65433009
72.678324,3.31662479,2.65509021,0.813347758,2.65509021,2.65409341
72.688815,2.64575131,2.65485751,-0.0954263958,2.65485751,2.65385734
72.699307,2.82842712,2.65462548,0.416895249,2.65462548,2.65362182
72.709798,2.82842712,2.65439417,0.417172576,2.65439417,2.65338692
72.72029,2.23606798,2.65416354,-0.646603093,2.65416354,2.65315257
72.730782,2.64575131,2.65393361,-0.0904560863,2.65393361,2.6529188
72.741273,3,2.65370442,0.588468841,2.65370442,2.65268564
72.751765,2.82842712,2.65347592,0.418271684,2.65347592,2.65245303
72.762256,2,2.65324816,-0.808237689,2.65324816,2.65222103
72.772748,2.82842712,2.6530211,0.418815022,2.6530211,2.65198958
72.78324,2.64575131,2.65279477,-0.0839252997,2.65279477,2.65175871
72.793731,2.44948974,2.65256918,-0.450643364,2.65256918,2.65152844
72.804223,2.64575131,2.65234432,-0.0811973229,2.65234432,2.65129872
72.814714,2.44948974,2.65212021,-0.450144941,2.65212021,2.6510696
72.825206,2.44948974,2.65189683,-0.449896752,2.65189683,2.65084103
72.835698,2.64575131,2.6516742,-0.0769603288,2.6516742,2.65061304
72.846189,3.31662479,2.65145236,0.815581041,2.65145236,2.65038565
72.856681,2,2.65123125,-0.806989005,2.65123125,2.65015881
72.867172,1.73205081,2.65101095,-0.958624087,2.65101095,2.64993256
72.877664,2.82842712,2.6507914,0.421468534,2.6507914,2.64970686
72.888156,2.64575131,2.65057264,-0.069435795,2.65057264,2.64948173
72.898647,3.74165739,2.6503547,1.04465434,2.6503547,2.6492572
72.909139,3.31662479,2.65013755,0.8163867,2.65013755,2.64903321
72.91963,2.44948974,2.64992123,-0.447695754,2.64992123,2.64880981
72.930122,1.41421356,2.64970572,-1.11152695,2.64970572,2.64858697
72.940614,3.31662479,2.64949105,0.816782554,2.64949105,2.64836469
72.951105,1.41421356,2.64927725,-1.11133419,2.64927725,2.648143
72.961597,3.16227766,2.64906429,0.716389118,2.64906429,2.64792185
72.972088,3.16227766,2.64885223,0.71653711,2.64885223,2.64770129
72.98258,2.64575131,2.64864104,-0.0537561865,2.64864104,2.64748128
72.993072,2.82842712,2.64843075,0.424259792,2.64843075,2.64726183
73.003563,3.16227766,2.64822141,0.71697716,2.64822141,2.64704297
73.014055,2,2.64801299,-0.80499254,2.64801299,2.64682465
73.024546,2.64575131,2.64780555,-0.0453236666,2.64780555,2.64660691
73.035038,2.44948974,2.64759906,-0.44509473,2.64759906,2.64638972
73.04553,3.16227766,2.64739358,0.717554237,2.64739358,2.64617308
73.056021,2.82842712,2.64718914,0.425720552,2.64718914,2.64595703
73.066513,3.16227766,2.64698572,0.717838377,2.64698572,2.64574152
73.077004,2.82842712,2.64678341,0.426196806,2.64678341,2.64552659
73.087496,2.64575131,2.64658217,-0.0288246821,2.64658217,2.6453122
73.097988,3.16227766,2.64638207,0.718258718,2.64638207,2.64509836
73.108479,2.44948974,2.64618316,-0.443501317,2.64618316,2.64488511
73.118971,2.64575131,2.64598543,-0.0153010127,2.64598543,2.64467239
73.129462,2.44948974,2.64578896,-0.443056679,2.64578896,2.64446024
73.139954,3.60555128,2.64559376,0.979774217,2.64559376,2.64424863
73.150446,3.31662479,2.64539988,0.819283167,2.64539988,2.64403758
73.160937,3.16227766,2.6452074,0.719075976,2.6452074,2.6438271
73.171429,2,2.64501633,-0.803129087,2.64501633,2.64361716
73.18192,3.60555128,2.64482676,0.980165553,2.64482676,2.64340779
73.192412,3,2.64463873,0.59612186,2.64463873,2.64319895
73.202904,2.82842712,2.64445231,0.428922857,2.64445231,2.64299066
73.213395,3.31662479,2.64426759,0.8199739,2.64426759,2.64278294
73.223887,2.64575131,2.64408463,0.0408249793,2.64408463,2.64257576
73.234378,2.82842712,2.64390354,0.42956208,2.64390354,2.64236914
73.24487,3.31662479,2.64372439,0.820305064,2.64372439,2.64216306
73.255362,3.60555128,2.6435473,0.980818015,2.6435473,2.64195752
73.265853,2,2.64337239,-0.802104974,2.64337239,2.64175254
73.276345,2,2.64319976,-0.801997359,2.64319976,2.6415481
73.286836,2.82842712,2.64302959,0.430578139,2.64302959,2.64134422
73.297328,2.82842712,2.64286199,0.430772716,2.64286199,2.64114087
73.30782,2.82842712,2.64269715,0.430964004,2.64269715,2.64093806
73.318311,3.46410162,2.64253527,0.906402968,2.64253527,2.64073582
73.328803,3.16227766,2.64237654,0.721041694,2.64237654,2.6405341
73.339294,3.16227766,2.6422212,0.721149405,2.6422212,2.64033294
73.349786,2.44948974,2.64206948,-0.438839083,2.64206948,2.64013231
73.360278,2.44948974,2.6419217,-0.43867067,2.6419217,2.63993222
73.370769,2.64575131,2.64177818,0.0630327783,2.64177818,2.63973268
73.381261,3.16227766,2.64163926,0.721552772,2.64163926,2.63953367
73.391752,2.44948974,2.64150536,-0.438195868,2.64150536,2.63933522
73.402244,3.46410162,2.64137693,0.907041723,2.64137693,2.63913729
73.412736,2.82842712,2.64125448,0.432634536,2.64125448,2.63893989
73.423227,1.41421356,2.64113863,-1.1076665,2.64113863,2.63874306
73.433719,2.44948974,2.64103001,-0.437653131,2.64103001,2.63854673
73.44421,3,2.6409294,0.599224998,2.6409294,2.63835097
73.454702,2.44948974,2.64083767,-0.437433344,2.64083767,2.63815572
73.465194,2.64575131,2.64075584,0.0706786811,2.64075584,2.63796101
73.475685,2.44948974,2.64068506,-0.437258864,2.64068506,2.63776685
73.486177,2.82842712,2.64062667,0.433359493,2.64062667,2.6375732
73.496668,3.16227766,2.64058227,0.722284841,2.64058227,2.6373801
73.50716,2.82842712,2.64055367,0.433443711,2.64055367,2.63718752
73.517652,2.64575131,2.64054306,0.0721682335,2.64054306,2.63699547
73.528143,3.31662479,2.64055297,0.822235864,2.64055297,2.63680397
73.538635,2.44948974,2.64058647,-0.437146122,2.64058647,2.63661298
73.549126,3,2.64064719,0.599460433,2.64064719,2.63642254
73.559618,2.64575131,2.64073952,0.0707940283,2.64073952,2.63623261
73.57011,3.46410162,2.64086877,0.907321799,2.64086877,2.6360432
73.580601,2.44948974,2.64104142,-0.437666166,2.64104142,2.63585434
73.591093,3.60555128,2.64126549,0.981980542,2.64126549,2.63566599
73.601584,3.31662479,2.64155086,0.821628825,2.64155086,2.63547818
73.612076,2.23606798,2.64191004,-0.637057345,2.64191004,2.63529088
73.622568,2.82842712,2.64235872,0.431356468,2.64235872,2.63510411
73.633059,3.16227766,2.642917,0.720666819,2.642917,2.63491788
73.643551,3,2.64361109,0.596983171,2.64361109,2.63473215
73.654042,3.16227766,2.64447534,0.719584825,2.64447534,2.63454696
73.664534,3.60555128,2.64555692,0.979793019,2.64555692,2.63436227
73.675026,2.23606798,2.64692397,-0.640980493,2.64692397,2.63417811
73.685517,3.31662479,2.64868697,0.817274627,2.64868697,2.63399448
73.696009,3.74165739,2.65105258,1.04432026,2.65105258,2.63381136
73.7065,3.31662479,2.65444463,0.813744533,2.65444463,2.63362877
73.716992,2.82842712,2.65974741,0.410706362,2.65974741,2.63344668
73.727484,3.60555128,2.66867338,0.96792453,2.66867338,2.63326511
73.737975,2.82842712,2.68412338,0.379873326,2.68412338,2.63308408
73.748467,4,2.71016168,1.13571049,2.71016168,2.63290354
73.758958,2.23606798,2.75097422,-0.717569674,2.75097422,2.63272354
73.76945,2.82842712,2.80870636,0.140430625,2.80870636,2.63254403
73.779942,2.23606798,2.88068816,-0.802882422,2.88068816,2.63236503
73.790433,3.31662479,2.95711257,0.599593383,2.95711257,2.63218657
73.800925,2.82842712,3.01964802,-0.437288118,3.01964802,2.6320086
73.811416,3.60555128,3.04468642,0.748909109,3.04468642,2.63183116
73.821908,3.87298335,3.01979342,0.923682805,3.01979342,2.63165422
73.8324,2.82842712,2.95723481,-0.358897869,2.95723481,2.63147778
73.842891,2.23606798,2.8805615,-0.802803536,2.8805615,2.63130188
73.853383,2.64575131,2.80815714,-0.402996071,2.80815714,2.63112646
73.863874,2.82842712,2.74991287,0.280203959,2.74991287,2.63095157
73.874366,3.31662479,2.70855326,0.779789417,2.70855326,2.63077717
73.884858,3,2.68199353,0.563920622,2.68199353,2.63060327
73.895349,3.31662479,2.66606372,0.806573659,2.66606372,2.6304299
73.905841,3.31662479,2.65670675,0.812353394,2.65670675,2.63025702
73.916332,2.44948974,2.65100813,-0.448907993,2.65100813,2.63008466
73.926824,3.31662479,2.64723947,0.818159713,2.64723947,2.62991279
73.937316,2,2.64450818,-0.802812666,2.64450818,2.62974142
73.947807,2.44948974,2.64238454,-0.439197902,2.64238454,2.62957057
73.958299,3.60555128,2.64065929,0.982289157,2.64065929,2.6294002
73.96879,2.82842712,2.639221,0.434978299,2.639221,2.62923035
73.979282,3,2.63800066,0.601663806,2.63800066,2.62906099
73.989774,3.31662479,2.63695118,0.824423201,2.63695118,2.62889212
74.000265,2.64575131,2.63603799,0.0985561902,2.63603799,2.62872377
74.010757,2.82842712,2.6352347,0.439536606,2.6352347,2.62855591
74.021248,2,2.63452125,-0.796568419,2.63452125,2.62838855
74.03174,2.44948974,2.6338817,-0.429408842,2.6338817,2.62822168
74.042232,2.64575131,2.63330364,0.111569132,2.63330364,2.6280553
74.052723,2,2.63277717,-0.79547292,2.63277717,2.62788944
74.063215,3,2.63229415,0.606387539,2.63229415,2.62772405
74.073706,2,2.63184818,-0.794888783,2.63184818,2.62755917
74.084198,2.23606798,2.63143382,-0.628781235,2.63143382,2.62739477
74.09469,2.44948974,2.63104672,-0.426095036,2.63104672,2.62723086
74.105181,3.31662479,2.63068327,0.828215866,2.63068327,2.62706747
74.115673,3,2.63034033,0.607996435,2.63034033,2.62690454
74.126164,2.64575131,2.63001542,0.125442794,2.63001542,2.62674212
74.136656,3.31662479,2.62970628,0.828805472,2.62970628,2.62658018
74.147148,3.74165739,2.62941111,1.05463087,2.62941111,2.62641872
74.157639,2.64575131,2.62912836,0.128930037,2.62912836,2.62625777
74.168131,3.46410162,2.62885661,0.913917395,2.62885661,2.62609729
74.178622,2.82842712,2.62859476,0.447026136,2.62859476,2.62593731
74.189114,2.23606798,2.62834174,-0.626317618,2.62834174,2.62577781
74.199606,2.23606798,2.62809669,-0.626121965,2.62809669,2.62561879
74.210097,2.44948974,2.62785888,-0.422337708,2.62785888,2.62546026
74.220589,2.44948974,2.62762759,-0.422063794,2.62762759,2.62530221
74.23108,2.64575131,2.62740227,0.13545865,2.62740227,2.62514466
74.241572,3,2.62718235,0.610587955,2.62718235,2.62498757
74.252064,2.64575131,2.6269674,0.137054404,2.6269674,2.62483096
74.262555,2.23606798,2.62675704,-0.625051244,2.62675704,2.62467485
74.273047,2.44948974,2.62655085,-0.420786293,2.62655085,2.62451921
74.283538,2.23606798,2.62634855,-0.624724399,2.62634855,2.62436406
74.29403,2.23606798,2.62614982,-0.624565326,2.62614982,2.62420937
74.304522,3,2.62595442,0.611592657,2.62595442,2.62405516
74.315013,3,2.62576213,0.611749842,2.62576213,2.62390145
74.325505,3,2.62557271,0.611904645,2.62557271,2.62374819
74.335996,3.16227766,2.62538599,0.732728918,2.62538599,2.62359543
74.346488,3.31662479,2.62520178,0.831518494,2.62520178,2.62344313
74.35698,3.46410162,2.62501995,0.916014012,2.62501995,2.6232913
74.367471,2.82842712,2.62484035,0.451205911,2.62484035,2.62313996
74.377963,3.16227766,2.62466284,0.733222219,2.62466284,2.62298907
74.388454,1.73205081,2.62448732,-0.944688582,2.62448732,2.62283868
74.398946,3,2.62431367,0.612932564,2.62431367,2.62268874
74.409438,3.16227766,2.6241418,0.733577442,2.6241418,2.62253927
74.419929,2,2.62397163,-0.789918748,2.62397163,2.62239029
74.430421,3.31662479,2.62380305,0.83235914,2.62380305,2.62224176
74.440912,2.64575131,2.62363603,0.148712089,2.62363603,2.62209372
74.451404,2.23606798,2.62347045,-0.622416636,2.62347045,2.62194612
74.461896,2.64575131,2.62330627,0.149816702,2.62330627,2.621799
74.472387,2.82842712,2.62314344,0.453082421,2.62314344,2.62165236
74.482879,2.23606798,2.62298189,-0.622024048,2.62298189,2.62150616
74.49337,3.31662479,2.6228216,0.832948495,2.6228216,2.62136045
74.503862,3.16227766,2.62266247,0.734585045,2.62266247,2.62121519
74.514354,3.16227766,2.6225045,0.734692565,2.6225045,2.62107039
74.524845,3.16227766,2.62234764,0.734799305,2.62234764,2.62092606
74.535337,2.64575131,2.62219184,0.153490941,2.62219184,2.62078219
74.545828,2.23606798,2.62203709,-0.621264127,2.62203709,2.62063879
74.55632,2.44948974,2.62188333,-0.415203069,2.62188333,2.62049584
74.566812,2.82842712,2.62173054,0.454638958,2.62173054,2.62035334
74.577303,2.82842712,2.62157871,0.454805905,2.62157871,2.62021132
74.587795,2,2.62142779,-0.788306912,2.62142779,2.62006974
74.598286,3.60555128,2.62127777,0.992105592,2.62127777,2.61992864
74.608778,3,2.62112861,0.615525298,2.62112861,2.61978798
74.61927,2.82842712,2.62098029,0.455463314,2.62098029,2.61964777
74.629761,2.64575131,2.62083282,0.157855907,2.62083282,2.61950804
74.640253,2.82842712,2.62068615,0.455786108,2.62068615,2.61936874
74.650744,3.31662479,2.62054028,0.834316793,2.62054028,2.61922991
74.661236,3,2.62039517,0.616120792,2.62039517,2.61909152
74.671728,2,2.62025082,-0.787560041,2.62025082,2.61895359
74.682219,3.31662479,2.62010723,0.834576279,2.62010723,2.61881612
74.692711,3.16227766,2.61996435,0.736419251,2.61996435,2.61867908
74.703202,2.64575131,2.6198222,0.16102519,2.6198222,2.61854251
74.713694,2.23606798,2.61968074,-0.619364806,2.61968074,2.61840638
74.724186,2.82842712,2.61953997,0.457041739,2.61953997,2.6182707
74.734677,2.64575131,2.6193999,0.162331178,2.6193999,2.61813547
74.745169,2,2.61926048,-0.786931053,2.61926048,2.61800068
74.75566,3.31662479,2.61912174,0.835166483,2.61912174,2.61786635
74.766152,2.44948974,2.61898363,-0.411696348,2.61898363,2.61773246
74.776644,2,2.61884616,-0.786667755,2.61884616,2.61759901
74.787135,2.23606798,2.61870933,-0.618580111,2.61870933,2.61746601
74.797627,2.23606798,2.61857312,-0.618469998,2.61857312,2.61733345
74.808118,2.64575131,2.61843753,0.165268821,2.61843753,2.61720134
74.81861,2.82842712,2.61830253,0.458393488,2.61830253,2.61706966
74.829102,3,2.61816814,0.617925447,2.61816814,2.61693842
74.839593,2.82842712,2.61803436,0.458685915,2.61803436,2.61680764
74.850085,2.82842712,2.61790114,0.458831104,2.61790114,2.61667728
74.860576,1.73205081,2.61776852,-0.941125771,2.61776852,2.61654738
74.871068,3.31662479,2.61763647,0.836055216,2.61763647,2.6164179
74.88156,3.74165739,2.61750498,1.06026054,2.61750498,2.61628885
74.892051,4.12310563,2.61737406,1.22708254,2.61737406,2.61616026
74.902543,2.64575131,2.6172437,0.168841981,2.6172437,2.61603209
74.913034,3.31662479,2.61711389,0.83636768,2.61711389,2.61590437
74.923526,2.23606798,2.61698463,-0.617184453,2.61698463,2.61577708
74.934018,2.82842712,2.6168559,0.459968718,2.6168559,2.61565021
74.944509,1.73205081,2.61672773,-0.940572657,2.61672773,2.61552379
74.955001,2.23606798,2.61660008,-0.616872842,2.61660008,2.61539779
74.965492,2.23606798,2.61647297,-0.616769807,2.61647297,2.61527224
74.975984,2.64575131,2.61634638,0.171478664,2.61634638,2.6151471
74.986476,2.44948974,2.61622031,-0.408326542,2.61622031,2.6150224
74.996967,3,2.61609477,0.619600866,2.61609477,2.61489813
75.007459,3.16227766,2.61596973,0.739126464,2.61596973,2.61477429
75.01795,3.16227766,2.61584522,0.73921069,2.61584522,2.61465088
75.028442,3,2.6157212,0.619902252,2.6157212,2.61452789
75.038934,2.44948974,2.61559769,-0.407563422,2.61559769,2.61440532
75.049425,3.31662479,2.61547469,0.837347062,2.61547469,2.61428319
75.059917,1.41421356,2.61535218,-1.0959647,2.61535218,2.61416148
75.070408,3.16227766,2.61523017,0.739626587,2.61523017,2.6140402
75.0809,2.44948974,2.61510865,-0.406963029,2.61510865,2.61391934
75.091392,3,2.61498762,0.62049366,2.61498762,2.61379889
75.101883,3.31662479,2.61486708,0.837709798,2.61486708,2.61367888
75.112375,3.74165739,2.61474703,1.06156034,2.61474703,2.61355928
75.122866,2.82842712,2.61462746,0.462384758,2.61462746,2.61344011
75.133358,3.46410162,2.61450836,0.921733829,2.61450836,2.61332135
75.14385,2.23606798,2.61438974,-0.615078667,2.61438974,2.61320301
75.154341,2,2.61427161,-0.783754817,2.61427161,2.6130851
75.164833,3.16227766,2.61415394,0.740353779,2.61415394,2.6129676
75.175324,3.60555128,2.61403675,0.995748222,2.61403675,2.61285052
75.185816,4.12310563,2.61392002,1.22848915,2.61392002,2.61273385
75.196308,3.60555128,2.61380376,0.99586521,2.61380376,2.6126176
75.206799,1,2.61368797,-1.27031019,2.61368797,2.61250177
75.217291,3,2.61357263,0.621632822,2.61357263,2.61238634
75.227782,3,2.61345777,0.621725205,2.61345777,2.61227134
75.238274,2.44948974,2.61334335,-0.404788352,2.61334335,2.61215673
75.248766,2.64575131,2.61322939,0.180338345,2.61322939,2.61204254
75.259257,3.16227766,2.6131159,0.741054493,2.6131159,2.61192878
75.269749,3.16227766,2.61300285,0.741130767,2.61300285,2.61181541
75.28024,3.74165739,2.61289026,1.06243453,2.61289026,2.61170246
75.290732,2.44948974,2.61277811,-0.404089551,2.61277811,2.61158991
75.301224,2.64575131,2.61266641,0.181892564,2.61266641,2.61147777
75.311715,2,2.61255516,-0.782659033,2.61255516,2.61136604
75.322207,2.23606798,2.61244435,-0.613495211,2.61244435,2.61125471
75.332698,2.23606798,2.612334,-0.613405264,2.612334,2.6111438
75.34319,2.23606798,2.61222407,-0.613315656,2.61222407,2.61103328
75.353682,2.44948974,2.61211459,-0.403267708,2.61211459,2.61092317
75.364173,2.82842712,2.61200555,0.46521132,2.61200555,2.61081347
75.374665,2.64575131,2.61189694,0.183995561,2.61189694,2.61070416
75.385156,3,2.61178878,0.623065981,2.61178878,2.61059527
75.395648,3,2.61168105,0.623152432,2.61168105,2.61048676
75.40614,2.64575131,2.61157374,0.184871763,2.61157374,2.61037866
75.416631,1.73205081,2.61146688,-0.937771866,2.61146688,2.61027097
75.427123,2.82842712,2.61136044,0.46590416,2.61136044,2.61016366
75.437614,3.46410162,2.61125444,0.923497254,2.61125444,2.61005677
75.448106,3.31662479,2.61114885,0.839926151,2.61114885,2.60995026
75.458598,3,2.61104369,0.623663616,2.61104369,2.60984414
75.469089,2.44948974,2.61093897,-0.401807452,2.61093897,2.60973844
75.479581,3.16227766,2.61083466,0.74259208,2.61083466,2.60963312
75.490072,3.16227766,2.61073079,0.742662018,2.61073079,2.6095282
75.500564,2.82842712,2.61062732,0.466690263,2.61062732,2.60942367
75.511056,2.82842712,2.61052428,0.466800648,2.61052428,2.60931953
75.521547,2.23606798,2.61042166,-0.611844496,2.61042166,2.6092158
75.532039,3,2.61031946,0.624243976,2.61031946,2.60911244
75.54253,2,2.61021768,-0.781164309,2.61021768,2.60900949
75.553022,2.64575131,2.61011639,0.188772138,2.61011639,2.60890691
75.563514,3.16227766,2.61001543,0.743143478,2.61001543,2.60880473
75.574005,2.82842712,2.6099149,0.467452916,2.6099149,2.60870294
75.584497,3.16227766,2.60981476,0.743278479,2.60981476,2.60860153
75.594988,3.60555128,2.60971505,0.997915941,2.60971505,2.60850052
75.60548,2.64575131,2.60961574,0.190093589,2.60961574,2.60839989
75.615972,3.31662479,2.60951684,0.840897113,2.60951684,2.60829964
75.626463,3,2.60941835,0.624965318,2.60941835,2.60819979
75.636955,2.64575131,2.60932026,0.19086919,2.60932026,2.60810031
75.647446,2.64575131,2.60922259,0.191124881,2.60922259,2.60800122
75.657938,2.82842712,2.60912531,0.468296712,2.60912531,2.60790251
75.66843,2.82842712,2.60902844,0.468400131,2.60902844,2.60780417
75.678921,3.60555128,2.60893198,0.998308216,2.60893198,2.60770623
75.689413,2.64575131,2.60883591,0.192133802,2.60883591,2.60760866
75.699904,2.64575131,2.60874026,0.192382576,2.60874026,2.60751148
75.710396,2.82842712,2.60864499,0.468809275,2.60864499,2.60741467
75.720888,3,2.60855012,0.625659556,2.60855012,2.60731824
75.731379,2.23606798,2.60845566,-0.610235759,2.60845566,2.60722219
75.741871,2.64575131,2.60836159,0.193364229,2.60836159,2.60712652
75.752362,2.44948974,2.60826792,-0.398469792,2.60826792,2.60703122
75.762854,3.16227766,2.60817464,0.744380967,2.60817464,2.60693629
75.773346,3.46410162,2.60808175,0.925213417,2.60808175,2.60684174
75.783837,2,2.60798926,-0.779736662,2.60798926,2.60674757
75.794329,2.44948974,2.60789716,-0.398004293,2.60789716,2.60665377
75.80482,1.41421356,2.60780546,-1.09251631,2.60780546,2.60656034
75.815312,2.23606798,2.60771414,-0.609627887,2.60771414,2.60646728
75.825804,2.64575131,2.60762321,0.195264191,2.60762321,2.60637459
75.836295,3.60555128,2.60753267,0.99900881,2.60753267,2.60628228
75.846787,2.82842712,2.60744252,0.470089998,2.60744252,2.60619033
75.857278,2.82842712,2.60735276,0.470185459,2.60735276,2.60609875
75.86777,2.23606798,2.60726338,-0.609258073,2.60726338,2.60600754
75.878262,3.31662479,2.60717438,0.842288792,2.60717438,2.60591669
75.888753,3.46410162,2.60708578,0.925751499,2.60708578,2.60582622
75.899245,3.16227766,2.60699755,0.745171197,2.60699755,2.6057361
75.909736,2.23606798,2.60690971,-0.608967759,2.60690971,2.60564636
75.920228,2,2.60682224,-0.778987961,2.60682224,2.60555697
75.93072,2.23606798,2.60673516,-0.608824426,2.60673516,2.60546795
75.941211,3,2.60664846,0.627177436,2.60664846,2.60537929
75.951703,2.64575131,2.60656214,0.197962556,2.60656214,2.605291
75.962194,3,2.6064762,0.627314755,2.6064762,2.60520307
75.972686,4.12310563,2.60639063,1.23154984,2.60639063,2.60511549
75.983178,2.82842712,2.60630543,0.471297878,2.60630543,2.60502827
75.993669,3.46410162,2.60622063,0.926218651,2.60622063,2.60494142
76.004161,3,2.60613618,0.627585706,2.60613618,2.60485492
76.014652,2.64575131,2.60605212,0.199246555,2.60605212,2.60476879
76.025144,2.23606798,2.60596843,-0.608194416,2.60596843,2.604683
76.035636,2.44948974,2.6058851,-0.395468531,2.6058851,2.60459757
76.046127,2.64575131,2.60580216,0.199872842,2.60580216,2.60451251
76.056619,2.82842712,2.60571958,0.471919006,2.60571958,2.60442779
76.06711,3.87298335,2.60563737,1.12576462,2.60563737,2.60434343
76.077602,3.46410162,2.60555553,0.926577619,2.60555553,2.60425942
76.088094,1.41421356,2.60547406,-1.09144881,2.60547406,2.60417576
76.098585,3.31662479,2.60539296,0.843345618,2.60539296,2.60409245
76.109077,3,2.60531222,0.628241816,2.60531222,2.6040095
76.119568,2.23606798,2.60523185,-0.607588575,2.60523185,2.6039269
76.13006,2.64575131,2.60515185,0.20149309,2.60515185,2.60384464
76.140552,2.82842712,2.6050722,0.472604404,2.6050722,2.60376273
76.151043,4,2.60499293,1.18110417,2.60499293,2.60368117
76.161535,2.44948974,2.60491401,-0.394238848,2.60491401,2.60359996
76.172026,2.23606798,2.60483546,-0.607262288,2.60483546,2.6035191
76.182518,1.41421356,2.60475727,-1.09112039,2.60475727,2.60343858
76.19301,2.44948974,2.60467944,-0.393941231,2.60467944,2.6033584
76.203501,3.31662479,2.60460197,0.843814447,2.60460197,2.60327857
76.213993,3,2.60452485,0.628868146,2.60452485,2.60319908
76.224484,3,2.60444811,0.628929165,2.60444811,2.60311994
76.234976,3.31662479,2.60437171,0.843950878,2.60437171,2.60304114
76.245468,2.44948974,2.60429566,-0.393453835,2.60429566,2.60296268
76.255959,3,2.60421998,0.629110496,2.60421998,2.60288456
76.266451,2.82842712,2.60414465,0.473584705,2.60414465,2.60280678
76.276942,3,2.60406968,0.62922994,2.60406968,2.60272934
76.287434,3.31662479,2.60399506,0.844173994,2.60399506,2.60265224
76.297926,2,2.60392079,-0.777123406,2.60392079,2.60257547
76.308417,2.44948974,2.60384688,-0.392883106,2.60384688,2.60249904
76.318909,2.82842712,2.60377331,0.473976596,2.60377331,2.60242295
76.3294,2.23606798,2.6037001,-0.606326747,2.6037001,2.6023472
76.339892,2.44948974,2.60362724,-0.392603481,2.60362724,2.60227177
76.350384,2.64575131,2.60355472,0.205418091,2.60355472,2.60219668
76.360875,2.23606798,2.60348256,-0.606147326,2.60348256,2.60212193
76.371367,2.82842712,2.60341074,0.474358922,2.60341074,2.60204751
76.381858,3,2.60333927,0.629810074,2.60333927,2.60197342
76.39235,1.41421356,2.60326814,-1.09043779,2.60326814,2.60189966
76.402842,2,2.60319736,-0.776657816,2.60319736,2.60182623
76.413333,2.82842712,2.60312693,0.474657973,2.60312693,2.60175314
76.423825,3,2.60305684,0.630034252,2.60305684,2.60168036
76.434316,3.60555128,2.6029871,1.00128127,2.6029871,2.60160792
76.444808,2.82842712,2.60291769,0.474878333,2.60291769,2.60153581
76.4553,3.46410162,2.60284863,0.928037168,2.60284863,2.60146402
76.465791,3,2.60277991,0.630253986,2.60277991,2.60139256
76.476283,2.23606798,2.60271153,-0.605510986,2.60271153,2.60132142
76.486774,2.64575131,2.6026435,0.207624214,2.6026435,2.60125061
76.497266,3.16227766,2.60257579,0.748132252,2.60257579,2.60118012
76.507758,3,2.60250843,0.630469325,2.60250843,2.60110995
76.518249,3.46410162,2.60244141,0.92825654,2.60244141,2.60104011
76.528741,2.44948974,2.60237472,-0.391005088,2.60237472,2.60097059
76.539232,2.82842712,2.60230838,0.475519452,2.60230838,2.60090139
76.549724,3.46410162,2.60224236,0.928363752,2.60224236,2.60083251
76.560216,3.16227766,2.60217668,0.748398946,2.60217668,2.60076395
76.570707,2.82842712,2.60211134,0.475726589,2.60211134,2.60069571
76.581199,3,2.60204632,0.630835696,2.60204632,2.60062778
76.59169,3.46410162,2.60198165,0.928504154,2.60198165,2.60056018
76.602182,2.82842712,2.6019173,0.47593048,2.6019173,2.60049289
76.612674,2.44948974,2.60185329,-0.39033773,2.60185329,2.60042591
76.623165,3.16227766,2.60178961,0.7486575,2.60178961,2.60035926
76.633657,3,2.60172625,0.631089333,2.60172625,2.60029291
76.644148,2.82842712,2.60166323,0.476197323,2.60166323,2.60022688
76.65464,3.16227766,2.60160054,0.748783761,2.60160054,2.60016116
76.665132,2.64575131,2.60153817,0.210269207,2.60153817,2.60009575
76.675623,2.82842712,2.60147614,0.476393731,2.60147614,2.60003066
76.686115,3.16227766,2.60141443,0.748908028,2.60141443,2.59996588
76.696606,2.44948974,2.60135305,-0.389696423,2.60135305,2.59990141
76.707098,2.44948974,2.60129198,-0.389618072,2.60129198,2.59983724
76.71759,2.23606798,2.60123125,-0.604287409,2.60123125,2.59977338
76.728081,2,2.60117084,-0.775352078,2.60117084,2.59970984
76.738573,2.82842712,2.60111076,0.476777062,2.60111076,2.59964659
76.749064,3.74165739,2.601051,1.06799175,2.601051,2.59958366
76.759556,1.73205081,2.60099156,-0.932169916,2.60099156,2.59952103
76.770048,2.64575131,2.60093244,0.211704679,2.60093244,2.59945871
76.780539,2.44948974,2.60087365,-0.389080846,2.60087365,2.59939669
76.791031,2.82842712,2.60081517,0.477086946,2.60081517,2.59933497
76.801522,2.82842712,2.60075702,0.477147887,2.60075702,2.59927356
76.812014,2.82842712,2.60069918,0.477208491,2.60069918,2.59921245
76.822506,3.46410162,2.60064166,0.929225459,2.60064166,2.59915164
76.832997,2.23606798,2.60058447,-0.60375201,2.60058447,2.59909113
76.843489,2.44948974,2.60052758,-0.388635872,2.60052758,2.59903092
76.85398,2.44948974,2.60047102,-0.388563096,2.60047102,2.59897102
76.864472,2.82842712,2.60041477,0.47750639,2.60041477,2.5989114
76.874964,2,2.60035884,-0.774828264,2.60035884,2.59885209
76.885455,2.82842712,2.60030322,0.477623178,2.60030322,2.59879308
76.895947,2.64575131,2.60024792,0.213315238,2.60024792,2.59873436
76.906438,2.82842712,2.60019293,0.477738621,2.60019293,2.59867594
76.91693,3.46410162,2.60013826,0.929496292,2.60013826,2.59861781
76.927422,1.73205081,2.60008389,-0.931682932,2.60008389,2.59855997
76.937913,3,2.60002985,0.632431937,2.60002985,2.59850243
76.948405,1.73205081,2.5999761,-0.931625084,2.5999761,2.59844518
76.958896,2.82842712,2.59992268,0.478021385,2.59992268,2.59838823
76.969388,3.16227766,2.59986956,0.749938731,2.59986956,2.59833156
76.97988,3.46410162,2.59981675,0.929669223,2.59981675,2.59827519
76.990371,3,2.59976426,0.632641877,2.59976426,2.59821911
77.000863,2.64575131,2.59971206,0.214567581,2.59971206,2.59816331
77.011354,3.16227766,2.59966019,0.750078312,2.59966019,2.59810781
77.021846,2.82842712,2.59960861,0.478349783,2.59960861,2.59805259
77.032338,3.16227766,2.59955734,0.750146865,2.59955734,2.59799766
77.042829,2.44948974,2.59950638,-0.387319818,2.59950638,2.59794302
77.053321,2.64575131,2.59945573,0.215164085,2.59945573,2.59788866
77.063812,3.31662479,2.59940538,0.846888073,2.59940538,2.59783459
77.074304,3,2.59935534,0.632964979,2.59935534,2.5977808
77.084796,2.82842712,2.59930559,0.478666408,2.59930559,2.59772729
77.095287,2.82842712,2.59925616,0.478718042,2.59925616,2.59767407
77.105779,2.44948974,2.59920703,-0.386933178,2.59920703,2.59762113
77.11627,3.46410162,2.5991582,0.930023341,2.5991582,2.59756848
77.126762,2.23606798,2.59910967,-0.602529413,2.59910967,2.5975161
77.137254,2.23606798,2.59906144,-0.602489391,2.59906144,2.597464
77.147745,2.23606798,2.59901352,-0.60244962,2.59901352,2.59741218
77.158237,2.44948974,2.5989659,-0.386621462,2.5989659,2.59736064
77.168728,3,2.59891858,0.633309895,2.59891858,2.59730939
77.17922,2.82842712,2.59887155,0.479119581,2.59887155,2.5972584
77.189712,2.82842712,2.59882483,0.47916834,2.59882483,2.59720769
77.200203,2.44948974,2.5987784,-0.38637891,2.5987784,2.59715727
77.210695,2.44948974,2.59873228,-0.386319212,2.59873228,2.59710711
77.221186,3.16227766,2.59868645,0.75072712,2.59868645,2.59705723
77.231678,3.16227766,2.59864092,0.750757445,2.59864092,2.59700762
77.24217,2.23606798,2.59859568,-0.602102737,2.59859568,2.59695829
77.252661,2.82842712,2.59855075,0.479454247,2.59855075,2.59690923
77.263153,2.64575131,2.59850611,0.217359618,2.59850611,2.59686044
77.273644,2.82842712,2.59846177,0.479547036,2.59846177,2.59681192
77.284136,2.23606798,2.59841771,-0.60195493,2.59841771,2.59676367
77.294628,2,2.59837396,-0.773546352,2.59837396,2.59671569
77.305119,2.82842712,2.5983305,0.479683877,2.5983305,2.59666798
77.315611,3.31662479,2.59828734,0.847547907,2.59828734,2.59662054
77.326102,2.23606798,2.59824447,-0.601811009,2.59824447,2.59657337
77.336594,1.73205081,2.59820189,-0.930672382,2.59820189,2.59652646
77.347086,2.23606798,2.5981596,-0.601740498,2.5981596,2.59647982
77.357577,2.64575131,2.59811762,0.21825145,2.59811762,2.59643345
77.368069,3.16227766,2.59807592,0.751133639,2.59807592,2.59638733
77.37856,2,2.59803451,-0.773326912,2.59803451,2.59634149
77.389052,2.82842712,2.5979934,0.480035131,2.5979934,2.59629591
77.399544,3.16227766,2.59795257,0.751215739,2.59795257,2.59625058
77.410035,2.44948974,2.59791298,-0.38525737,2.59791298,2.59620553
77.420527,2.23606798,2.59787274,-0.601502092,2.59787274,2.59616073
77.431018,3,2.5978328,0.63416654,2.5978328,2.5961162
77.44151,2.64575131,2.59779314,0.218993536,2.59779314,2.59607192
77.452002,2.64575131,2.59775378,0.219083399,2.59775378,2.5960279
77.462493,2,2.5977147,-0.773120108,2.5977147,2.59598415
77.472985,2.23606798,2.59767592,-0.601338456,2.59767592,2.59594064
77.483476,2.82842712,2.59763742,0.480405768,2.59763742,2.5958974
77.493968,3.46410162,2.59759922,0.930861106,2.59759922,2.59585442
77.50446,3,2.5975613,0.634380564,2.5975613,2.59581168
77.514951,2.82842712,2.59752368,0.48052414,2.59752368,2.59576921
77.525443,2.44948974,2.59748634,-0.384703257,2.59748634,2.59572699
77.535934,3.60555128,2.59744929,1.00404282,2.59744929,2.59568502
77.546426,3.46410162,2.59741254,0.930961374,2.59741254,2.59564331
77.556918,2.23606798,2.59737607,-0.601089086,2.59737607,2.59560185
77.567409,3.31662479,2.59733989,0.848106656,2.59733989,2.59556064
77.577901,3.46410162,2.597304,0.931019664,2.597304,2.59551968
77.588392,2,2.5972684,-0.77283142,2.5972684,2.59547897
77.598884,2.44948974,2.59723309,-0.384373971,2.59723309,2.59543851
77.609376,1.73205081,2.59719807,-0.930132928,2.59719807,2.5953983
77.619867,2.82842712,2.59716334,0.480898931,2.59716334,2.59535834
77.630359,2.64575131,2.5971289,0.220504895,2.5971289,2.59531863
77.64085,3.31662479,2.59709475,0.848251163,2.59709475,2.59527917
77.651342,2.82842712,2.59706089,0.481005437,2.59706089,2.59523994
77.661834,2.64575131,2.59702732,0.220735104,2.59702732,2.59520097
77.672325,2.23606798,2.59699405,-0.600771231,2.59699405,2.59516224
77.682817,2.64575131,2.59696106,0.220885147,2.59696106,2.59512376
77.693308,3.60555128,2.59692837,1.0043022,2.59692837,2.59508552
77.7038,3,2.59689597,0.634904742,2.59689597,2.59504752
77.714292,3,2.59686386,0.634930029,2.59686386,2.59500976
77.724783,2,2.59683205,-0.772549057,2.59683205,2.59497225
77.735275,3.16227766,2.59680052,0.751982139,2.59680052,2.59493497
77.745766,4,2.5967693,1.18458039,2.5967693,2.59489794
77.756258,2.64575131,2.59673836,0.221388677,2.59673836,2.59486115
77.76675,3.31662479,2.59670773,0.848479264,2.59670773,2.59482459
77.777241,3.60555128,2.59667739,1.00442714,2.59667739,2.59478827
77.787733,3.31662479,2.59664735,0.848514844,2.59664735,2.59475219
77.798224,2.44948974,2.59661761,-0.383572505,2.59661761,2.59471635
77.808716,2.64575131,2.59658817,0.221727637,2.59658817,2.59468075
77.819208,4,2.59655902,1.18466914,2.59655902,2.59464538
77.829699,2.23606798,2.59653019,-0.60038505,2.59653019,2.59461024
77.840191,2,2.59650165,-0.772335192,2.59650165,2.59457534
77.850682,2.82842712,2.59647342,0.481615724,2.59647342,2.59454067
77.861174,3,2.59644549,0.635259401,2.59644549,2.59450624
77.871666,3,2.59641788,0.635281138,2.59641788,2.59447204
77.882157,2.44948974,2.59639057,-0.383276436,2.59639057,2.59443807
77.892649,2.64575131,2.59636357,0.222233524,2.59636357,2.59440433
77.90314,2,2.59633689,-0.772228522,2.59633689,2.59437082
77.913632,3.46410162,2.59631052,0.931553055,2.59631052,2.59433754
77.924124,3,2.59628447,0.635386127,2.59628447,2.59430448
77.934615,2.82842712,2.59625874,0.481838546,2.59625874,2.59427166
77.945107,3.46410162,2.59623333,0.931594485,2.59623333,2.59423907
77.955598,2.44948974,2.59620825,-0.383038518,2.59620825,2.5942067
77.96609,3.31662479,2.59618349,0.848788135,2.59618349,2.59417456
77.976582,2.82842712,2.59615907,0.481941965,2.59615907,2.59414264
77.987073,2,2.59613498,-0.772097777,2.59613498,2.59411095
77.997565,2.44948974,2.59611122,-0.382911844,2.59611122,2.59407948
78.008056,2,2.59608781,-0.772067233,2.59608781,2.59404824
78.018548,3.74165739,2.59606475,1.07032362,2.59606475,2.59401722
78.02904,3.87298335,2.59604203,1.13001828,2.59604203,2.59398642
78.039531,2.82842712,2.59601967,0.482086568,2.59601967,2.59395584
78.050023,2.23606798,2.59599766,-0.599941399,2.59599766,2.59392549
78.060514,2,2.59597602,-0.771994832,2.59597602,2.59389535
78.071006,3.16227766,2.59595475,0.752544293,2.59595475,2.59386544
78.081498,3.16227766,2.59593385,0.752558177,2.59593385,2.59383574
78.091989,2.82842712,2.59591334,0.482196836,2.59591334,2.59380626
78.102481,3.46410162,2.59589899,0.931773912,2.59589899,2.593777
78.112972,2.44948974,2.59587927,-0.382608842,2.59587927,2.59374796
78.123464,2.64575131,2.59585995,0.22336375,2.59585995,2.59371914
78.133956,2.44948974,2.59584103,-0.382558874,2.59584103,2.59369052
78.144447,3.31662479,2.59582254,0.849000734,2.59582254,2.59366213
78.154939,3.31662479,2.59580448,0.849011371,2.59580448,2.59363395
78.16543,4,2.59578686,1.184995,2.59578686,2.59360598
78.175922,2.64575131,2.59576969,0.223565702,2.59576969,2.59357823
78.186414,3,2.59575298,0.635804233,2.59575298,2.59355069
78.196905,2.64575131,2.59573674,0.223639373,2.59573674,2.59352336
78.207397,2.64575131,2.59572099,0.223674579,2.59572099,2.59349624
78.217888,3,2.59570575,0.635841372,2.59570575,2.59346933
78.22838,3.31662479,2.59569102,0.849078187,2.59569102,2.59344263
78.238872,2.82842712,2.59567683,0.482442012,2.59567683,2.59341615
78.249363,2.64575131,2.59566319,0.223803751,2.59566319,2.59338987
78.259855,3,2.59565013,0.63588511,2.59565013,2.5933638
78.270346,2.82842712,2.59563766,0.482482608,2.59563766,2.59333793
78.280838,3.46410162,2.5956258,0.931920496,2.5956258,2.59331228
78.29133,3.60555128,2.5956146,1.00495606,2.5956146,2.59328682
78.301821,3.46410162,2.59560406,0.931932164,2.59560406,2.59326158
78.312313,2.44948974,2.59559422,-0.382236152,2.59559422,2.59323654
78.322804,3.31662479,2.59558511,0.849140552,2.59558511,2.5932117
78.333296,3.16227766,2.59557678,0.752795381,2.59557678,2.59318707
78.343788,2.82842712,2.59556924,0.482553501,2.59556924,2.59316264
78.354279,2.64575131,2.59556256,0.22402846,2.59556256,2.59313842
78.364771,2.82842712,2.59555677,0.482566424,2.59555677,2.59311439
78.375262,2,2.59555193,-0.77172011,2.59555193,2.59309057
78.385754,2.23606798,2.59554808,-0.599566599,2.59554808,2.59306694
78.396246,3.16227766,2.5955453,0.752816285,2.5955453,2.59304352
78.406737,3.16227766,2.59554365,0.752817383,2.59554365,2.59302029
78.417229,1.41421356,2.5955432,-1.08688989,2.5955432,2.59299727
78.42772,3.16227766,2.59554403,0.752817128,2.59554403,2.59297444
78.438212,2.82842712,2.59554624,0.482577333,2.59554624,2.59295181
78.448704,3.16227766,2.59554993,0.752813211,2.59554993,2.59292937
78.459195,3,2.59555521,0.635959743,2.59555521,2.59290713
78.469687,3,2.5955622,0.635954247,2.5955622,2.59288509
78.480178,3.46410162,2.59557104,0.931949878,2.59557104,2.59286324
78.49067,2.23606798,2.5955819,-0.599594797,2.5955819,2.59284159
78.501162,3.16227766,2.59559494,0.752783314,2.59559494,2.59282013
78.511653,2,2.59561037,-0.771757975,2.59561037,2.59279886
78.522145,1.41421356,2.59562841,-1.08692909,2.59562841,2.59277779
78.532636,2.64575131,2.59564932,0.223834743,2.59564932,2.5927569
78.543128,3.31662479,2.59567338,0.849088576,2.59567338,2.59273621
78.55362,2.44948974,2.59570092,-0.382375707,2.59570092,2.59271571
78.564111,3.60555128,2.59573233,1.00489748,2.59573233,2.5926954
78.574603,3,2.59576802,0.635792401,2.59576802,2.59267527
78.585094,2.64575131,2.59580851,0.223478864,2.59580851,2.59265534
78.595586,2.23606798,2.59585437,-0.599821964,2.59585437,2.59263559
78.606078,2.64575131,2.59590626,0.223260043,2.59590626,2.59261603
78.616569,2.44948974,2.59596498,-0.382720834,2.59596498,2.59259666
78.627061,2.64575131,2.59603144,0.222979528,2.59603144,2.59257747
78.637552,2,2.59610672,-0.772079478,2.59610672,2.59255847
78.648044,2.64575131,2.59619211,0.222618949,2.59619211,2.59253965
78.658536,3.16227766,2.59628915,0.75232208,2.59628915,2.59252102
78.669027,2.82842712,2.59639964,0.481692309,2.59639964,2.59250257
78.679519,3.16227766,2.59652584,0.752164756,2.59652584,2.59248431
78.69001,2.64575131,2.59667041,0.221542105,2.59667041,2.59246623
78.700502,3.31662479,2.59683667,0.848403277,2.59683667,2.59244832
78.710994,2.23606798,2.59702869,-0.600800061,2.59702869,2.5924306
78.721485,3.60555128,2.59725153,1.0041413,2.59725153,2.59241307
78.731977,2.82842712,2.5975116,0.480536704,2.5975116,2.59239571
78.742468,3.31662479,2.59781701,0.847825323,2.59781701,2.59237853
78.75296,2.64575131,2.59817842,0.218112106,2.59817842,2.59236152
78.763452,3.16227766,2.59861012,0.750777956,2.59861012,2.5923447
78.773943,2.82842712,2.59913278,0.478846889,2.59913278,2.59232806
78.784435,2.64575131,2.59977972,0.214409872,2.59977972,2.59231159
78.794926,2,2.60061038,-0.774990567,2.60061038,2.5922953
78.805418,2,2.60173985,-0.775718928,2.60173985,2.59227918
78.81591,2.44948974,2.60339154,-0.3923032,2.60339154,2.59226324
78.826401,2.82842712,2.60597774,0.471645402,2.60597774,2.59224747
78.836893,3.31662479,2.6101908,0.840496276,2.6101908,2.59223188
78.847384,3,2.61704463,0.618833881,2.61704463,2.59221646
78.857876,3,2.62778055,0.610097902,2.62778055,2.59220121
78.868368,3.16227766,2.64353583,0.720237342,2.64353583,2.59218613
78.878859,3,2.66478322,0.578979085,2.66478322,2.59217123
78.889351,2.64575131,2.69067095,-0.211942537,2.69067095,2.5921565
78.899842,3.16227766,2.71838952,0.666249306,2.71838952,2.59214194
78.910334,3.31662479,2.74278734,0.757520597,2.74278734,2.59212754
78.920826,2.82842712,2.75702662,0.267208722,2.75702662,2.59211332
78.931317,2.23606798,2.75591184,-0.721001983,2.75591184,2.59209927
78.941809,2.64575131,2.73991573,-0.306862212,2.73991573,2.59208538
78.9523,3,2.71472187,0.534114344,2.71472187,2.59207166
78.962792,2.44948974,2.68701655,-0.487367223,2.68701655,2.59205811
78.973284,3,2.66163476,0.581691701,2.66163476,2.59204472
78.983775,2.23606798,2.64109606,-0.636418169,2.64109606,2.5920315
78.994267,2.44948974,2.62604005,-0.420178903,2.62604005,2.59201844
79.004758,2.23606798,2.61587172,-0.616282192,2.61587172,2.59200555
79.01525,1.41421356,2.60941339,-1.09325195,2.60941339,2.59199282
79.025742,3.60555128,2.60544557,1.00005285,2.60544557,2.59198026
79.036233,2.64575131,2.60299637,0.206772674,2.60299637,2.59196786
79.046725,3.16227766,2.60141496,0.748907671,2.60141496,2.59195562
79.057216,3.60555128,2.60031902,1.00261271,2.60031902,2.59194354
79.067708,3.16227766,2.59950272,0.750183268,2.59950272,2.59193162
79.0782,3,2.59886054,0.633355711,2.59886054,2.59191987
79.088691,3.31662479,2.5983374,0.84751837,2.5983374,2.59190827
79.099183,3,2.59790206,0.634111929,2.59790206,2.59189683
79.109674,2.64575131,2.59753492,0.219582317,2.59753492,2.59188555
79.120166,2.82842712,2.59722215,0.480837784,2.59722215,2.59187443
79.130658,2.82842712,2.59695356,0.481116994,2.59695356,2.59186346
79.141149,2.44948974,2.59672129,-0.383707629,2.59672129,2.59185266
79.151641,3.16227766,2.59651908,0.752169248,2.59651908,2.591842
79.162132,2.82842712,2.59634206,0.481752082,2.59634206,2.59183151
79.172624,2.82842712,2.59618621,0.481913804,2.59618621,2.59182117
79.183116,4,2.59604835,1.18488466,2.59604835,2.59181098
79.193607,3,2.59592586,0.635668263,2.59592586,2.59180095
79.204099,2,2.59581655,-0.771891542,2.59581655,2.59179107
79.21459,3.16227766,2.59571866,0.752701137,2.59571866,2.59178135
79.225082,3.16227766,2.59563066,0.752759588,2.59563066,2.59177177
79.235574,2.23606798,2.59555132,-0.599569296,2.59555132,2.59176235
79.246065,2.82842712,2.59547957,0.482646407,2.59547957,2.59175308
79.256557,2.23606798,2.59541451,-0.599455193,2.59541451,2.59174396
79.267048,2.23606798,2.59535537,-0.599405866,2.59535537,2.59173499
79.27754,2.64575131,2.59530149,0.224610374,2.59530149,2.59172617
79.288032,2,2.59525231,-0.771525961,2.59525231,2.59171749
79.298523,3.16227766,2.59520734,0.753040718,2.59520734,2.59170897
79.309015,2.23606798,2.59516614,-0.599247999,2.59516614,2.59170059
79.319506,3,2.59512836,0.636295246,2.59512836,2.59169236
79.329998,2.23606798,2.59509366,-0.599187518,2.59509366,2.59168428
79.34049,1,2.59506176,-1.26295754,2.59506176,2.59167634
79.350981,4.47213595,2.59503241,1.37007428,2.59503241,2.59166855
79.361473,3,2.59500539,0.63639187,2.59500539,2.59166091
79.371964,3.16227766,2.5949805,0.753191319,2.5949805,2.5916534
79.382456,3.16227766,2.59495756,0.753206544,2.59495756,2.59164605
79.392948,3.60555128,2.59493643,1.00529341,2.59493643,2.59163883
79.403439,3,2.59491696,0.636461342,2.59491696,2.59163176
79.413931,3.31662479,2.59489903,0.849544444,2.59489903,2.59162483
79.424422,2.64575131,2.59488252,0.225541099,2.59488252,2.59161804
79.434914,2.44948974,2.59486735,-0.381284149,2.59486735,2.59161139
79.445406,3.16227766,2.5948534,0.753275685,2.5948534,2.59160488
79.455897,2,2.59484062,-0.771259111,2.59484062,2.59159851
79.466389,2.82842712,2.59482891,0.483319994,2.59482891,2.59159228
79.47688,2.82842712,2.59481821,0.483331056,2.59481821,2.59158619
79.487372,2.23606798,2.59480847,-0.598949493,2.59480847,2.59158024
79.497864,2.44948974,2.59479963,-0.381195336,2.59479963,2.59157443
79.508355,2.82842712,2.59479163,0.483358558,2.59479163,2.59156875
79.518847,3,2.59478443,0.636565449,2.59478443,2.59156321
79.529338,1.41421356,2.59476393,-1.08653135,2.59476393,2.5915578
79.53983,4.12310563,2.59475824,1.23626348,2.59475824,2.59155254
79.550322,3.74165739,2.59475323,1.07093611,2.59475323,2.5915474
79.560813,2.23606798,2.59474887,-0.598899736,2.59474887,2.5915424
79.571305,1.73205081,2.59474513,-0.928813396,2.59474513,2.59153753
79.581796,3,2.59474199,0.636598786,2.59474199,2.5915328
79.592288,2,2.5947394,-0.771193494,2.5947394,2.5915282
79.60278,2.44948974,2.59473737,-0.381113664,2.59473737,2.59152373
79.613271,2.44948974,2.59473585,-0.381111675,2.59473585,2.5915194
79.623763,2.82842712,2.59473484,0.483417303,2.59473484,2.59151519
79.634254,3.31662479,2.5947343,0.849641388,2.5947343,2.59151112
79.644746,2.64575131,2.59473423,0.225869604,2.59473423,2.59150717
79.655238,2.64575131,2.59473461,0.225868764,2.59473461,2.59150336
79.665729,3.31662479,2.59473542,0.849640728,2.59473542,2.59149967
79.676221,2.82842712,2.59473666,0.483415421,2.59473666,2.59149611
79.686712,2.44948974,2.59473829,-0.381114876,2.59473829,2.59149268
79.697204,3,2.59474032,0.636600093,2.59474032,2.59148938
79.707696,3.16227766,2.59474273,0.753349139,2.59474273,2.5914862
79.718187,2.44948974,2.59474552,-0.381124356,2.59474552,2.59148315
79.728679,2.64575131,2.59474866,0.22583766,2.59474866,2.59148023
79.73917,2.82842712,2.59475216,0.483399386,2.59475216,2.59147743
79.749662,3.31662479,2.594756,0.84962862,2.594756,2.59147475
79.760154,2.44948974,2.59476017,-0.381143582,2.59476017,2.5914722
79.770645,2.82842712,2.59476467,0.483386441,2.59476467,2.59146978
79.781137,3,2.59476949,0.63657718,2.59476949,2.59146747
79.791628,3.16227766,2.59477463,0.753327971,2.59477463,2.59146529
79.80212,3.46410162,2.59478007,0.932374146,2.59478007,2.59146323
79.812612,3.46410162,2.59478581,0.932371067,2.59478581,2.5914613
79.823103,2.44948974,2.59479184,-0.381185125,2.59479184,2.59145948
79.833595,3.16227766,2.59479817,0.753312348,2.59479817,2.59145778
79.844086,3,2.59480477,0.63654947,2.59480477,2.59145621
79.854578,3.16227766,2.59481166,0.753303392,2.59481166,2.59145475
79.86507,3.46410162,2.59481882,0.932353363,2.59481882,2.59145341
79.875561,3,2.59482625,0.636532598,2.59482625,2.59145219
79.886053,3.16227766,2.59483395,0.753288598,2.59483395,2.59145109
79.896544,2,2.59484191,-0.771259948,2.59484191,2.59145011
79.907036,2.82842712,2.59485013,0.483298043,2.59485013,2.59144924
79.917528,2.44948974,2.5948586,-0.38127268,2.5948586,2.59144849
79.928019,2.64575131,2.59486732,0.225574793,2.59486732,2.59144785
79.938511,3.16227766,2.5948763,0.753260488,2.5948763,2.59144733
79.949002,2.23606798,2.59488552,-0.599013805,2.59488552,2.59144693
79.959494,3.16227766,2.59489498,0.753248087,2.59489498,2.59144663
79.969986,3,2.59490468,0.636470988,2.59490468,2.59144646
79.980477,3.16227766,2.59491462,0.753235049,2.59491462,2.59144639
79.990969,3.16227766,2.5949248,0.753228294,2.5949248,2.59144644
80.00146,3,2.5949352,0.636447009,2.5949352,2.5914466
80.011952,2.23606798,2.59494584,-0.599064159,2.59494584,2.59144687
80.022444,3,2.59495671,0.636430112,2.59495671,2.59144726
80.032935,3,2.59496781,0.636421396,2.59496781,2.59144775
80.043427,3.31662479,2.59497913,0.8494973,2.59497913,2.59144835
80.053918,3,2.59499067,0.636403434,2.59499067,2.59144907
80.06441,2,2.59500243,-0.771364008,2.59500243,2.59144989
80.074902,3,2.59501442,0.636384775,2.59501442,2.59145082
80.085393,2.64575131,2.59502662,0.225221429,2.59502662,2.59145186
80.095885,3.31662479,2.59503904,0.849462037,2.59503904,2.59145301
80.106376,3,2.59505167,0.636355504,2.59505167,2.59145426
80.116868,2.82842712,2.59506452,0.483076188,2.59506452,2.59145562
80.12736,3,2.59507758,0.636335145,2.59507758,2.59145709
80.137851,3.74165739,2.59509085,1.07077847,2.59509085,2.59145866
80.148343,3.60555128,2.59510434,1.0052099,2.59510434,2.59146034
80.158834,3,2.59511803,0.636303363,2.59511803,2.59146212
80.169326,2.23606798,2.59513193,-0.599219454,2.59513193,2.59146401
80.179818,2.82842712,2.59514604,0.482991806,2.59514604,2.591466
80.190309,2.82842712,2.59516035,0.482976988,2.59516035,2.5914681
80.200801,1.73205081,2.59517487,-0.929044707,2.59517487,2.59147029
80.211292,2.44948974,2.5951896,-0.381706505,2.5951896,2.59147259
80.221784,1.73205081,2.59520453,-0.929060665,2.59520453,2.59147499
80.232276,3.74165739,2.59521966,1.07071832,2.59521966,2.59147749
80.242767,2.44948974,2.59523499,-0.381765963,2.59523499,2.59148009
80.253259,2.64575131,2.59525053,0.22472379,2.59525053,2.5914828
80.26375,2.64575131,2.59526627,0.224688776,2.59526627,2.5914856
80.274242,3,2.5952822,0.636174345,2.5952822,2.5914885
80.284734,3,2.59529834,0.636161661,2.59529834,2.5914915
80.295225,2,2.59531468,-0.771566378,2.59531468,2.5914946
80.305717,2.23606798,2.59533121,-0.599385714,2.59533121,2.59149779
80.316208,3.16227766,2.59534794,0.752947353,2.59534794,2.59150109
80.3267,3.16227766,2.59536488,0.752936109,2.59536488,2.59150448
80.337192,2.23606798,2.595382,-0.599428083,2.595382,2.59150796
80.347683,2.64575131,2.59539933,0.224392473,2.59539933,2.59151154
80.358175,2.23606798,2.59541685,-0.59945715,2.59541685,2.59151522
80.368666,3.74165739,2.59543457,1.07061796,2.59543457,2.59151899
80.379158,2.64575131,2.59545248,0.224273999,2.59545248,2.59152286
80.38965,2.82842712,2.5954706,0.482655705,2.5954706,2.59152682
80.400141,3.31662479,2.5954889,0.849197204,2.5954889,2.59153088
80.410633,2.44948974,2.5955074,-0.382122569,2.5955074,2.59153502
80.421124,3,2.5955261,0.635982629,2.5955261,2.59153926
80.431616,3,2.59554499,0.635967777,2.59554499,2.5915436
80.442108,2.82842712,2.59556407,0.48255886,2.59556407,2.59154802
80.452599,2.23606798,2.59558335,-0.599596007,2.59558335,2.59155253
80.463091,1.73205081,2.59560282,-0.929274995,2.59560282,2.59155714
80.473582,2.82842712,2.59562249,0.482498326,2.59562249,2.59156184
80.484074,2,2.59564235,-0.771778694,2.59564235,2.59156662
80.494566,3.31662479,2.59566241,0.849095037,2.59566241,2.5915715
80.505057,1.73205081,2.59568266,-0.929317948,2.59568266,2.59157646
80.515549,2.82842712,2.5957031,0.482414785,2.5957031,2.59158151
80.52604,3,2.59572374,0.635827229,2.59572374,2.59158665
80.536532,3.46410162,2.59574457,0.931856775,2.59574457,2.59159188
80.547024,1.73205081,2.59576559,-0.929362569,2.59576559,2.59159719
80.557515,2.23606798,2.59578681,-0.599765647,2.59578681,2.59160259
80.568007,2.23606798,2.59580822,-0.599783498,2.59580822,2.59160807
80.578498,3.46410162,2.59582983,0.931811026,2.59582983,2.59161365
80.58899,2.44948974,2.59585163,-0.382572718,2.59585163,2.5916193
80.599482,2.64575131,2.59587362,0.223333134,2.59587362,2.59162504
80.609973,3.46410162,2.59589581,0.93177562,2.59589581,2.59163087
80.620465,3,2.59591819,0.635674293,2.59591819,2.59163678
80.630956,2.44948974,2.59594077,-0.382689203,2.59594077,2.59164277
80.641448,2.82842712,2.59596354,0.482144774,2.59596354,2.59164884
80.65194,2.44948974,2.59598651,-0.38274896,2.59598651,2.591655
80.662431,2.64575131,2.59600967,0.223028342,2.59600967,2.59166124
80.672923,2.64575131,2.59603303,0.222975971,2.59603303,2.59166756
80.683414,2.64575131,2.59605658,0.222923154,2.59605658,2.59167396
80.693906,2.23606798,2.59608033,-0.600010291,2.59608033,2.59168045
80.704398,2.23606798,2.59610427,-0.600030245,2.59610427,2.59168701
80.714889,2.44948974,2.59612841,-0.382934287,2.59612841,2.59169365
80.725381,1,2.59615275,-1.26338939,2.59615275,2.59170037
80.735872,3.31662479,2.59617728,0.848791794,2.59617728,2.59170717
80.746364,3,2.59620201,0.635451011,2.59620201,2.59171405
80.756856,2.82842712,2.59622694,0.481871542,2.59622694,2.591721
80.767347,2.23606798,2.59625207,-0.600153387,2.59625207,2.59172804
80.777839,2.23606798,2.59627739,-0.600174486,2.59627739,2.59173515
80.78833,2.82842712,2.59630291,0.481792707,2.59630291,2.59174233
80.798822,1.73205081,2.59632863,-0.929665438,2.59632863,2.5917496
80.809314,2.64575131,2.59635456,0.222253808,2.59635456,2.59175693
80.819805,2.64575131,2.59638067,0.222195041,2.59638067,2.59176435
80.830297,2.82842712,2.596407,0.481684677,2.596407,2.59177183
80.840788,2,2.59643352,-0.772291082,2.59643352,2.5917794
80.85128,2,2.59646024,-0.772308384,2.59646024,2.59178703
80.861772,2.44948974,2.59648716,-0.383402427,2.59648716,2.59179474
80.872263,3.31662479,2.59651429,0.848593249,2.59651429,2.59180253
80.882755,2.82842712,2.59654162,0.481544917,2.59654162,2.59181038
80.893246,3.46410162,2.59656915,0.93141423,2.59656915,2.59181831
80.903738,2.64575131,2.59659688,0.221707978,2.59659688,2.59182631
80.91423,1.73205081,2.59662482,-0.929824723,2.59662482,2.59183438
80.924721,4.47213595,2.59665297,1.36948275,2.59665297,2.59184252
80.935213,2.64575131,2.59668132,0.221517483,2.59668132,2.59185073
80.945704,2,2.59670987,-0.77246998,2.59670987,2.59185901
80.956196,2.44948974,2.59673863,-0.38373023,2.59673863,2.59186736
80.966688,2.44948974,2.5967676,-0.383767975,2.5967676,2.59187578
80.977179,2.23606798,2.59679678,-0.600607025,2.59679678,2.59188427
80.987671,2.44948974,2.59682616,-0.383844265,2.59682616,2.59189283
80.998162,2,2.59685575,-0.772564402,2.59685575,2.59190145
81.008654,2.64575131,2.59688556,0.221055992,2.59688556,2.59191015
81.019146,3.74165739,2.59691557,1.06992608,2.59691557,2.59191891
81.029637,2,2.5969458,-0.772622675,2.5969458,2.59192773
81.040129,2.44948974,2.59697624,-0.384039704,2.59697624,2.59193662
81.05062,3.16227766,2.59700689,0.751844914,2.59700689,2.59194558
81.061112,2.23606798,2.59703775,-0.600807601,2.59703775,2.59195461
81.071604,3.60555128,2.59706883,1.00423227,2.59706883,2.59196369
81.082095,2,2.59710012,-0.772722538,2.59710012,2.59197285
81.092587,3,2.59713163,0.634719126,2.59713163,2.59198206
81.103078,2.44948974,2.59716336,-0.384283245,2.59716336,2.59199134
81.11357,2.82842712,2.5971953,0.480865704,2.5971953,2.59200069
81.124062,2.64575131,2.59722746,0.220281294,2.59722746,2.59201009
81.134553,3,2.59725984,0.63461812,2.59725984,2.59201956
81.145045,2.44948974,2.59729244,-0.38445117,2.59729244,2.59202909
81.155536,3.74165739,2.59732527,1.0697346,2.59732527,2.59203869
81.166028,2.82842712,2.59735831,0.480696175,2.59735831,2.59204834
81.17652,3,2.59739158,0.634514317,2.59739158,2.59205805
81.187011,3.31662479,2.59742507,0.848056436,2.59742507,2.59206783
81.197503,3.31662479,2.59745879,0.848036556,2.59745879,2.59207766
81.207994,3.16227766,2.59749273,0.751521742,2.59749273,2.59208756
81.218486,3.16227766,2.5975269,0.751499007,2.5975269,2.59209751
81.228978,2.82842712,2.5975613,0.480484986,2.5975613,2.59210752
81.239469,3.31662479,2.59759593,0.847955696,2.59759593,2.59211759
81.249961,3.31662479,2.59763079,0.84793514,2.59763079,2.59212772
81.260452,2.82842712,2.59766705,0.480374937,2.59766705,2.59213791
81.270944,2,2.59770237,-0.773112133,2.59770237,2.59214815
81.281436,2.82842712,2.59773793,0.480301151,2.59773793,2.59215845
81.291927,3,2.59777372,0.634213119,2.59777372,2.59216881
81.302419,2.64575131,2.59780975,0.218955616,2.59780975,2.59217922
81.31291,3.31662479,2.59784601,0.84780822,2.59784601,2.59218969
81.323402,3.16227766,2.59788252,0.751262365,2.59788252,2.59220021
81.333894,3.16227766,2.59791927,0.751237908,2.59791927,2.59221079
81.344385,3.16227766,2.59795625,0.751213293,2.59795625,2.59222142
81.354877,2.82842712,2.59799348,0.480035047,2.59799348,2.59223211
81.365368,3,2.59803095,0.634010293,2.59803095,2.59224285
81.37586,2.44948974,2.59806867,-0.385459367,2.59806867,2.59225364
81.386352,2.44948974,2.59810663,-0.38550861,2.59810663,2.59226449
81.396843,2.23606798,2.59814484,-0.60172823,2.59814484,2.59227539
81.407335,2.64575131,2.5981833,0.218100914,2.5981833,2.59228634
81.417826,2.64575131,2.59822201,0.218012154,2.59822201,2.59229734
81.428318,2.44948974,2.59826098,-0.385708742,2.59826098,2.59230839
81.43881,2.23606798,2.5983002,-0.601857307,2.5983002,2.5923195
81.449301,2.23606798,2.59833967,-0.601890097,2.59833967,2.59233065
81.459793,3.31662479,2.5983794,0.847493595,2.5983794,2.59234186
81.470284,3,2.59841938,0.633703888,2.59841938,2.59235311
81.480776,2.23606798,2.59845963,-0.601989746,2.59845963,2.59236442
81.491268,2.64575131,2.59850014,0.217373341,2.59850014,2.59237577
81.501759,2.64575131,2.59854091,0.217279542,2.59854091,2.59238717
81.512251,2.64575131,2.59858195,0.217185084,2.59858195,2.59239862
81.522742,2.64575131,2.59862325,0.21708998,2.59862325,2.59241012
81.533234,3.46410162,2.59866482,0.930288552,2.59866482,2.59242166
81.543726,2.23606798,2.59870667,-0.602194894,2.59870667,2.59243326
81.554217,2.82842712,2.59874878,0.479247687,2.59874878,2.59244489
81.564709,2.64575131,2.59879117,0.216702891,2.59879117,2.59245658
81.5752,2.64575131,2.59883383,0.216604439,2.59883383,2.59246831
81.585692,3.31662479,2.59887677,0.847200107,2.59887677,2.59248009
81.596184,2.82842712,2.59891999,0.479069029,2.59891999,2.59249191
81.606675,2.23606798,2.59896349,-0.602408092,2.59896349,2.59250378
81.617167,2.44948974,2.59900727,-0.386674966,2.59900727,2.59251569
81.627658,3.60555128,2.59905134,1.0032447,2.59905134,2.59252764
81.63815,2.23606798,2.59909569,-0.602517814,2.59909569,2.59253964
81.648642,2.23606798,2.59914034,-0.602554863,2.59914034,2.59255169
81.659133,2.44948974,2.59918527,-0.386905066,2.59918527,2.59256377
81.669625,2.44948974,2.5992305,-0.386963512,2.5992305,2.5925759
81.680116,3.46410162,2.59927602,0.929959994,2.59927602,2.59258807
81.690608,3,2.59932185,0.632991432,2.59932185,2.59260028
81.7011,3.46410162,2.59936797,0.929910558,2.59936797,2.59261254
81.711591,2.44948974,2.59941439,-0.387201043,2.59941439,2.59262483
81.722083,2.64575131,2.59946112,0.215151553,2.59946112,2.59263717
81.732574,2.64575131,2.59950815,0.215042227,2.59950815,2.59264954
81.743066,2.44948974,2.5995555,-0.387383213,2.5995555,2.59266196
81.753558,2.82842712,2.59960315,0.478355487,2.59960315,2.59267442
81.764049,3,2.59965112,0.632731287,2.59965112,2.59268691
81.774541,2.82842712,2.59969941,0.478254869,2.59969941,2.59269945
81.785032,3.74165739,2.59974801,1.0686016,2.59974801,2.59271202
81.795524,3,2.59979693,0.632616051,2.59979693,2.59272463
81.806016,3.60555128,2.59984618,1.00284849,2.59984618,2.59273729
81.816507,2.64575131,2.59989575,0.214139105,2.59989575,2.59274997
81.826999,3.31662479,2.59994566,0.846569034,2.59994566,2.5927627
81.83749,3.46410162,2.59999589,0.92957287,2.59999589,2.59277546
81.847982,2.82842712,2.60004647,0.477891889,2.60004647,2.59278826
81.858474,2.44948974,2.60009738,-0.388081995,2.60009738,2.59280109
81.868965,2.44948974,2.60014862,-0.388148013,2.60014862,2.59281396
81.879457,2.82842712,2.60020022,0.477731,2.60020022,2.59282687
81.889948,1.73205081,2.60025215,-0.931773225,2.60025215,2.59283981
81.90044,3,2.60030444,0.632214805,2.60030444,2.59285279
81.910932,2.44948974,2.60035708,-0.388416449,2.60035708,2.5928658
81.921423,2.44948974,2.60041007,-0.388484657,2.60041007,2.59287885
81.931915,2.44948974,2.60046343,-0.38855332,2.60046343,2.59289193
81.942406,2.82842712,2.60051714,0.477399192,2.60051714,2.59290504
81.952898,3.16227766,2.60057122,0.749470776,2.60057122,2.59291818
81.96339,3.16227766,2.60062566,0.749434451,2.60062566,2.59293136
81.973881,2.82842712,2.60068048,0.477228087,2.60068048,2.59294457
81.984373,3.46410162,2.60073567,0.929174873,2.60073567,2.59295782
81.994864,3,2.60079124,0.631829694,2.60079124,2.59297109
82.005356,2.82842712,2.60084719,0.477053387,2.60084719,2.5929844
82.015848,2.64575131,2.60090353,0.211772951,2.60090353,2.59299774
82.026339,3.16227766,2.60096025,0.749211192,2.60096025,2.59301111
82.036831,1.41421356,2.60101737,-1.08940525,2.60101737,2.5930245
82.047322,2.44948974,2.60107488,-0.389339356,2.60107488,2.59303793
82.057814,3,2.60113279,0.631559347,2.60113279,2.59305139
82.068306,1.73205081,2.60119111,-0.932276944,2.60119111,2.59306488
82.078797,2.64575131,2.60124983,0.210953747,2.60124983,2.5930784
82.089289,3.46410162,2.60130896,0.928866326,2.60130896,2.59309195
82.09978,2.82842712,2.60136851,0.476506679,2.60136851,2.59310552
82.110272,2.23606798,2.60142848,-0.604450579,2.60142848,2.59311913
82.120764,3.16227766,2.60148887,0.748858322,2.60148887,2.59313276
82.131255,1.73205081,2.60154969,-0.932469239,2.60154969,2.59314642
82.141747,3.87298335,2.60161094,1.12755151,2.60161094,2.5931601
82.152238,2.64575131,2.60167263,0.209949241,2.60167263,2.59317381
82.16273,2.64575131,2.60173476,0.209801224,2.60173476,2.59318755
82.173222,3.16227766,2.60179733,0.748652341,2.60179733,2.59320132
82.183713,2.82842712,2.60186035,0.475990307,2.60186035,2.59321511
82.194205,2.44948974,2.60192383,-0.390428084,2.60192383,2.59322893
82.204696,3.31662479,2.60198776,0.845362068,2.60198776,2.59324277
82.215188,3,2.60205217,0.630831066,2.60205217,2.59325664
82.22568,3,2.60211704,0.630779646,2.60211704,2.59327053
82.236171,2.82842712,2.60218238,0.47565192,2.60218238,2.59328445
82.246663,2.64575131,2.6022482,0.208573996,2.6022482,2.59329839
82.257154,3.60555128,2.6023145,1.00161708,2.6023145,2.59331236
82.267646,2.23606798,2.6023813,-0.605238233,2.6023813,2.59332634
82.278138,3.46410162,2.60244859,0.928252675,2.60244859,2.59334036
82.288629,2.82842712,2.60251637,0.4753007,2.60251637,2.59335439
82.299121,3,2.60258466,0.630408864,2.60258466,2.59336845
82.309612,2.82842712,2.60265346,0.475156461,2.60265346,2.59338252
82.320104,2,2.60272278,-0.776352229,2.60272278,2.59339663
82.330596,2.82842712,2.60279263,0.475009997,2.60279263,2.59341075
82.341087,3.46410162,2.60286299,0.92802943,2.60286299,2.59342489
82.351579,2.23606798,2.6029339,-0.605694577,2.6029339,2.59343906
82.36207,3.16227766,2.60300534,0.74784512,2.60300534,2.59345324
82.372562,2.82842712,2.60307733,0.474710224,2.60307733,2.59346745
82.383054,2.23606798,2.60314987,-0.605872837,2.60314987,2.59348167
82.393545,2.44948974,2.60322297,-0.392088287,2.60322297,2.59349592
82.404037,2.82842712,2.60329664,0.474479176,2.60329664,2.59351018
82.414528,2.64575131,2.60337087,0.205865107,2.60337087,2.59352447
82.42502,3,2.60344569,0.629725585,2.60344569,2.59353877
82.435512,3.16227766,2.60352109,0.747500213,2.60352109,2.59355309
82.446003,2.44948974,2.60359708,-0.392565076,2.60359708,2.59356743
82.456495,2.64575131,2.60367368,0.205128332,2.60367368,2.59358179
82.466986,2.64575131,2.60375088,0.204940079,2.60375088,2.59359617
82.477478,2.82842712,2.60382869,0.473918169,2.60382869,2.59361056
82.48797,2.64575131,2.60390713,0.204558493,2.60390713,2.59362497
82.498461,2,2.6039862,-0.777165489,2.6039862,2.5936394
82.508953,2.23606798,2.60406591,-0.606628327,2.60406591,2.59365384
82.519444,2.23606798,2.60414625,-0.606694548,2.60414625,2.5936683
82.529936,2.64575131,2.60422726,0.203774511,2.60422726,2.59368278
82.540428,2.64575131,2.60430893,0.203574018,2.60430893,2.59369727
82.550919,2.82842712,2.60439126,0.473324266,2.60439126,2.59371177
82.561411,3.31662479,2.60447429,0.843890102,2.60447429,2.5937263
82.571902,2.82842712,2.60455799,0.473148114,2.60455799,2.59374083
82.582394,2,2.6046424,-0.777587548,2.6046424,2.59375538
82.592886,3.31662479,2.60472751,0.843740054,2.60472751,2.59376995
82.603377,3.46410162,2.60481333,0.926978037,2.60481333,2.59378453
82.613869,3,2.60489989,0.62856989,2.60489989,2.59379912
82.62436,3.16227766,2.60498718,0.746518907,2.60498718,2.59381373
82.634852,3.87298335,2.60507522,1.12601426,2.60507522,2.59382835
82.645344,2.23606798,2.60516403,-0.607532754,2.60516403,2.59384298
82.655835,2.44948974,2.60525359,-0.394669284,2.60525359,2.59385763
82.666327,3.16227766,2.60534394,0.746279924,2.60534394,2.59387228
82.676818,2.64575131,2.60543507,0.200789053,2.60543507,2.59388695
82.68731,2.64575131,2.60552701,0.200559966,2.60552701,2.59390164
82.697802,2.64575131,2.60561977,0.200328583,2.60561977,2.59391633
82.708293,2.44948974,2.60571335,-0.395251319,2.60571335,2.59393103
82.718785,3.60555128,2.60580778,0.999871741,2.60580778,2.59394575
82.729276,3,2.60590305,0.627771416,2.60590305,2.59396047
82.739768,2.44948974,2.6059992,-0.395612761,2.6059992,2.59397521
82.75026,1.73205081,2.60609623,-0.934903966,2.60609623,2.59398996
82.760751,3.31662479,2.60619415,0.842870474,2.60619415,2.59400471
82.771243,2.64575131,2.606293,0.198641167,2.606293,2.59401948
82.781734,2.82842712,2.60639276,0.471205225,2.60639276,2.59403425
82.792226,3,2.60649348,0.62730098,2.60649348,2.59404903
82.802718,2.82842712,2.60659516,0.470990405,2.60659516,2.59406383
82.813209,3.16227766,2.60669782,0.745372284,2.60669782,2.59407863
82.823701,3.16227766,2.60680149,0.74530274,2.60680149,2.59409344
82.834192,2.64575131,2.60690617,0.19709172,2.60690617,2.59410826
82.844684,1.73205081,2.6070119,-0.935393549,2.6070119,2.59412308
82.855176,2.82842712,2.6071187,0.470434295,2.6071187,2.59413791
82.865667,3.16227766,2.60722658,0.745017503,2.60722658,2.59415275
82.876159,2.82842712,2.60733559,0.470203716,2.60733559,2.5941676
82.88665,2.82842712,2.60744573,0.470086577,2.60744573,2.59418245
82.897142,3,2.60755707,0.626452659,2.60755707,2.59419732
82.907634,3.46410162,2.60766961,0.925436119,2.60766961,2.59421218
82.918125,2.64575131,2.60778338,0.19485362,2.60778338,2.59422705
82.928617,2.23606798,2.60789844,-0.609779031,2.60789844,2.59424193
82.939108,2.64575131,2.60801482,0.194258815,2.60801482,2.59425681
82.9496,2.44948974,2.60813259,-0.398299942,2.60813259,2.5942717
82.960092,2,2.60825177,-0.779904978,2.60825177,2.5942866
82.970583,1.73205081,2.60837243,-0.936120518,2.60837243,2.5943015
82.981075,2.44948974,2.60849465,-0.398754194,2.60849465,2.5943164
82.991566,3.87298335,2.60861848,1.1244398,2.60861848,2.59433131
83.002058,3.16227766,2.60874402,0.743998411,2.60874402,2.59434622
83.01255,2.82842712,2.60887138,0.468567763,2.60887138,2.59436113
83.023041,2.64575131,2.60900063,0.191704664,2.60900063,2.59437605
83.033533,3.46410162,2.60913195,0.924645697,2.60913195,2.59439097
83.044024,3.16227766,2.60926546,0.7436479,2.60926546,2.59440589
83.054516,2.23606798,2.60940137,-0.611010143,2.60940137,2.59442082
83.065008,2.23606798,2.6095399,-0.611123488,2.6095399,2.59443575
83.075499,3.16227766,2.60968128,0.743368265,2.60968128,2.59445068
83.085991,3,2.60982589,0.624639183,2.60982589,2.59446562
83.096482,3,2.6099741,0.624520536,2.6099741,2.59448055
83.106974,2.44948974,2.61012646,-0.400795111,2.61012646,2.59449549
83.117466,1.73205081,2.61028366,-0.937140788,2.61028366,2.59451043
83.127957,3.31662479,2.61044668,0.84034404,2.61044668,2.59452537
83.138449,3.31662479,2.61061713,0.840242618,2.61061713,2.59454031
83.14894,2.44948974,2.6107977,-0.401631617,2.6107977,2.59455525
83.159432,2.82842712,2.61099339,0.466297903,2.61099339,2.59457019
83.169924,3,2.61121333,0.623527599,2.61121333,2.59458513
83.180415,2.64575131,2.61147366,0.185142256,2.61147366,2.59460007
83.190907,2,2.61180097,-0.78217707,2.61180097,2.59461501
83.201398,3,2.61223472,0.622708021,2.61223472,2.59462995
83.21189,3.60555128,2.61282671,0.996355644,2.61282671,2.59464489
83.222382,3.74165739,2.61363362,1.06208463,2.61363362,2.59465983
83.232873,4.24264069,2.61470166,1.27590714,2.61470166,2.59467477
83.243365,3,2.61604441,0.6196415,2.61604441,2.5946897
83.253856,2.23606798,2.61761669,-0.617696297,2.61761669,2.59470464
83.264348,1.73205081,2.61929204,-0.941934834,2.61929204,2.59471957
83.27484,2.82842712,2.62084498,0.45561184,2.62084498,2.5947345
83.285331,3.60555128,2.62196605,0.991758654,2.62196605,2.59474943
83.295823,2.23606798,2.62236532,-0.62152823,2.62236532,2.59476435
83.306314,3.60555128,2.62195595,0.991763743,2.62195595,2.59477927
83.316806,2.64575131,2.62092867,0.157552039,2.62092867,2.59479419
83.327298,2.44948974,2.61960665,-0.412452305,2.61960665,2.59480911
83.337789,3.16227766,2.61827271,0.737566915,2.61827271,2.59482402
83.348281,2.64575131,2.617109,0.169240398,2.617109,2.59483893
83.358772,3,2.61620456,0.61951226,2.61620456,2.59485383
83.369264,3.16227766,2.61557591,0.739392827,2.61557591,2.59486873
83.379756,3,2.61519232,0.620328688,2.61519232,2.59488363
83.390247,1.73205081,2.61500028,-0.939653913,2.61500028,2.59489852
83.400739,3,2.61494354,0.620529174,2.61494354,2.59491341
83.41123,2.64575131,2.61497506,0.175431601,2.61497506,2.59492829
83.421722,2,2.61506107,-0.784258292,2.61506107,2.59494317
83.432214,2,2.61517996,-0.784334089,2.61517996,2.59495804
83.442705,3.46410162,2.61531912,0.921293927,2.61531912,2.59497291
83.453197,2.64575131,2.61548105,0.173983501,2.61548105,2.59498777
83.463688,2.64575131,2.61564318,0.173516962,2.61564318,2.59500262
83.47418,1.41421356,2.61581289,-1.09617486,2.61581289,2.59501747
83.484672,3,2.61598899,0.619686221,2.61598899,2.59503231
83.495163,1.73205081,2.61617066,-0.940276479,2.61617066,2.59504714
83.505655,2.44948974,2.61635741,-0.408494395,2.61635741,2.59506197
83.516146,2.64575131,2.6165488,0.170887432,2.6165488,2.59507679
83.526638,3.60555128,2.61674454,0.994387616,2.61674454,2.5950916
83.53713,2.82842712,2.61694441,0.459872502,2.61694441,2.59510641
83.547621,2.82842712,2.61714818,0.459650892,2.61714818,2.59512121
83.558113,2.82842712,2.61735577,0.459425022,2.61735577,2.595136
83.568604,2.23606798,2.61756704,-0.617656104,2.61756704,2.59515078
83.579096,3,2.61778195,0.618237862,2.61778195,2.59516556
83.589588,2.82842712,2.61800042,0.45872291,2.61800042,2.59518032
83.600079,2.23606798,2.6182224,-0.618186396,2.6182224,2.59519508
83.610571,3.60555128,2.61844791,0.993530757,2.61844791,2.59520983
83.621062,2.44948974,2.61867691,-0.411323672,2.61867691,2.59522457
83.631554,2.82842712,2.61890943,0.457731029,2.61890943,2.5952393
83.642046,3.74165739,2.61914547,1.05948663,2.61914547,2.59525402
83.652537,3.46410162,2.61938504,0.919084641,2.61938504,2.59526873
83.663029,3,2.61962819,0.616742903,2.61962819,2.59528343
83.67352,2.44948974,2.61987492,-0.412777398,2.61987492,2.59529812
83.684012,3.46410162,2.62012532,0.918681825,2.62012532,2.5953128
83.694504,2.64575131,2.6203794,0.15928563,2.6203794,2.59532747
83.704995,2.64575131,2.62063719,0.158474362,2.62063719,2.59534213
83.715487,3,2.62089879,0.615711957,2.62089879,2.59535678
83.725978,3.16227766,2.6211642,0.735604147,2.6211642,2.59537142
83.73647,2.82842712,2.62143354,0.454965477,2.62143354,2.59538605
83.746962,3.16227766,2.62170684,0.735235212,2.62170684,2.59540066
83.757453,2,2.62198415,-0.788659718,2.62198415,2.59541527
83.767945,2.23606798,2.62226558,-0.621447992,2.62226558,2.59542986
83.778436,2.64575131,2.62255116,0.152315951,2.62255116,2.59544444
83.788928,1.73205081,2.62284101,-0.943816829,2.62284101,2.59545901
83.79942,2.82842712,2.62313519,0.453091526,2.62313519,2.59547357
83.809911,3,2.62343375,0.613649941,2.62343375,2.59548811
83.820403,3,2.62373683,0.613402945,2.62373683,2.59550264
83.830894,2.82842712,2.62404445,0.452087019,2.62404445,2.59551716
83.841386,2.44948974,2.62435677,-0.418171055,2.62435677,2.59553167
83.851878,2.64575131,2.62467386,0.145180763,2.62467386,2.59554616
83.862369,2.64575131,2.62499577,0.14406785,2.62499577,2.59556064
83.872861,2.82842712,2.62532266,0.450671127,2.62532266,2.59557511
83.883352,3.16227766,2.62565458,0.732545617,2.62565458,2.59558956
83.893844,3.16227766,2.62599169,0.732315484,2.62599169,2.595604
83.904336,2.44948974,2.62633407,-0.420528634,2.62633407,2.59561842
83.914827,2.82842712,2.6266818,0.449160684,2.6266818,2.59563283
83.925319,1.73205081,2.62703506,-0.946036076,2.62703506,2.59564723
83.93581,2.82842712,2.6273939,0.448367286,2.6273939,2.59566161
83.946302,2.64575131,2.62775851,0.134137253,2.62775851,2.59567598
83.956794,2,2.62812898,-0.792545882,2.62812898,2.59569033
83.967285,3.16227766,2.62850539,0.730597198,2.62850539,2.59570467
83.977777,3.46410162,2.62888797,0.913900238,2.62888797,2.59571899
83.988268,3.31662479,2.62927676,0.829064549,2.62927676,2.5957333
83.99876,2.64575131,2.62967199,0.126804246,2.62967199,2.59574759
84.009252,2.23606798,2.63007377,-0.627698804,2.63007377,2.59576186
84.019743,3,2.63048219,0.607879767,2.63048219,2.59577612
84.030235,3,2.63089749,0.60753807,2.63089749,2.59579037
84.040726,2.82842712,2.63131976,0.443967753,2.63131976,2.5958046
84.051218,4,2.63174923,1.16972252,2.63174923,2.59581881
84.06171,1.41421356,2.63218603,-1.1036179,2.63218603,2.595833
84.072201,3.46410162,2.63263029,0.911850497,2.63263029,2.59584718
84.082693,2.44948974,2.63308227,-0.428476983,2.63308227,2.59586135
84.093184,2.44948974,2.63354207,-0.429013198,2.63354207,2.59587549
84.103676,2.64575131,2.63400996,0.10835751,2.63400996,2.59588962
84.114168,2.44948974,2.6344861,-0.430112029,2.6344861,2.59590373
84.124659,2.23606798,2.63497064,-0.631587412,2.63497064,2.59591782
84.135151,3.46410162,2.63546164,0.910296639,2.63546164,2.5959319
84.145642,3,2.6359637,0.60335421,2.6359637,2.59594596
84.156134,2.64575131,2.63647488,0.0963142332,2.63647488,2.59596
84.166626,2,2.63699537,-0.798119897,2.63699537,2.59597402
84.177117,3.46410162,2.63752535,0.909162398,2.63752535,2.59598803
84.187609,2.82842712,2.63806516,0.436304898,2.63806516,2.59600201
84.1981,2.64575131,2.63861495,0.0844769962,2.63861495,2.59601598
84.208592,3.74165739,2.63917507,1.04999158,2.63917507,2.59602993
84.219084,3,2.63974575,0.600211841,2.63974575,2.59604386
84.229575,2.44948974,2.64032719,-0.436849451,2.64032719,2.59605777
84.240067,2.44948974,2.64091978,-0.437527188,2.64091978,2.59607166
84.250558,3,2.64152372,0.59872889,2.64152372,2.59608554
84.26105,3.46410162,2.6421394,0.906621318,2.6421394,2.59609939
84.271542,3,2.64276709,0.597689642,2.64276709,2.59611323
84.282033,2.82842712,2.64340705,0.430139605,2.64340705,2.59612704
84.292525,3.31662479,2.64405972,0.820100649,2.64405972,2.59614084
84.303016,3,2.64472532,0.596049224,2.64472532,2.59615461
84.313508,2.44948974,2.64540435,-0.442622417,2.64540435,2.59616837
84.324,3.46410162,2.64609709,0.904436026,2.64609709,2.59618211
84.334491,2,2.64680387,-0.804241174,2.64680387,2.59619582
84.344983,2.44948974,2.6475252,-0.445011749,2.6475252,2.59620952
84.355474,2.82842712,2.64826136,0.42445938,2.64826136,2.59622319
84.365966,2.23606798,2.64901291,-0.642607913,2.64901291,2.59623684
84.376458,2.64575131,2.64978021,-0.0634735988,2.64978021,2.59625048
84.386949,3,2.65056364,0.591131426,2.65056364,2.59626409
84.397441,3.16227766,2.65136381,0.714782379,2.65136381,2.59627768
84.407932,2.44948974,2.65218106,-0.450212524,2.65218106,2.59629125
84.418424,3.16227766,2.65301604,0.713625685,2.65301604,2.5963048
84.428916,2.23606798,2.6538692,-0.646375448,2.6538692,2.59631833
84.439407,2,2.65474098,-0.809160666,2.65474098,2.59633183
84.449899,2.44948974,2.65563213,-0.454029055,2.65563213,2.59634532
84.46039,1,2.65654303,-1.28706761,2.65654303,2.59635878
84.470882,1.73205081,2.65747448,-0.961989434,2.65747448,2.59637222
84.481374,3.46410162,2.658427,0.897593789,2.658427,2.59638564
84.491865,3.16227766,2.65940116,0.709137854,2.65940116,2.59639903
84.502357,3.87298335,2.66039782,1.10117461,2.66039782,2.5964124
84.512848,3,2.66141747,0.581878447,2.66141747,2.59642576
84.52334,3.46410162,2.66246105,0.895343824,2.66246105,2.59643908
84.533832,3,2.66352922,0.580061016,2.66352922,2.59645239
84.544323,1.73205081,2.66462265,-0.965697592,2.66462265,2.59646567
84.554815,3.16227766,2.66574237,0.704652605,2.66574237,2.59647893
84.565306,3.16227766,2.66688901,0.703838509,2.66688901,2.59649217
84.575798,3.60555128,2.66806369,0.968239425,2.66806369,2.59650538
84.58629,2.64575131,2.66926722,-0.153348964,2.66926722,2.59651857
84.596781,2.44948974,2.67050042,-0.470117732,2.67050042,2.59653174
84.607273,3,2.67176456,0.572918358,2.67176456,2.59654488
84.617764,2.64575131,2.67306667,-0.165273575,2.67306667,2.596558
84.628256,3.46410162,2.67439557,0.888654062,2.67439557,2.5965711
84.638748,3.87298335,2.67575855,1.09417768,2.67575855,2.59658417
84.649239,2.82842712,2.67715663,0.388935081,2.67715663,2.59659722
84.659731,2.44948974,2.67859132,-0.478645566,2.67859132,2.59661025
84.670222,2.82842712,2.68006364,0.385179815,2.68006364,2.59662324
84.680714,2.82842712,2.6815752,0.38321264,2.6815752,2.59663622
84.691206,2.64575131,2.68312727,-0.193328633,2.68312727,2.59664917
84.701697,2,2.68472117,-0.827478803,2.68472117,2.5966621
84.712189,2.82842712,2.68635873,0.376919613,2.68635873,2.596675
84.72268,3.60555128,2.68804124,0.957867441,2.68804124,2.59668788
84.733172,4,2.68977071,1.14465248,2.68977071,2.59670073
84.743664,3,2.69154872,0.555383905,2.69154872,2.59671356
84.754155,3.16227766,2.69337694,0.684763259,2.69337694,2.59672636
84.764647,2.23606798,2.69525765,-0.677635351,2.69525765,2.59673914
84.775138,2.82842712,2.69719249,0.362263206,2.69719249,2.59675189
84.78563,2.82842712,2.69918397,0.359504037,2.69918397,2.59676462
84.796122,2.64575131,2.70123411,-0.235547878,2.70123411,2.59677732
84.806613,2.44948974,2.70334504,-0.503840551,2.70334504,2.59678999
84.817105,3,2.70551961,0.542660475,2.70551961,2.59680264
84.827596,3.16227766,2.70775996,0.674179279,2.70775996,2.59681527
84.838088,2.64575131,2.71006922,-0.253609762,2.71006922,2.59682787
84.84858,2,2.71245002,-0.844067545,2.71245002,2.59684044
84.859071,3.16227766,2.7149051,0.66885915,2.7149051,2.59685298
84.869563,2.23606798,2.71743806,-0.693808391,2.71743806,2.5968655
84.880054,2.82842712,2.72005173,0.329204187,2.72005173,2.596878
84.890546,3.31662479,2.72275008,0.770632669,2.72275008,2.59689046
84.901038,2.23606798,2.72553654,-0.699620296,2.72553654,2.59690291
84.911529,3.60555128,2.72841468,0.936555707,2.72841468,2.59691532
84.922021,3,2.73138915,0.518276805,2.73138915,2.59692771
84.932512,2.64575131,2.73446368,-0.297846215,2.73446368,2.59694007
84.943004,3,2.7376434,0.512207575,2.7376434,2.5969524
84.953496,2.64575131,2.74093283,-0.308515027,2.74093283,2.59696471
84.963987,1.73205081,2.74433673,-1.00612421,2.74433673,2.59697699
84.974479,2.64575131,2.74786111,-0.319546245,2.74786111,2.59698925
84.98497,3.74165739,2.75151101,0.995060992,2.75151101,2.59700147
84.995462,1.73205081,2.75529314,-1.01155442,2.75529314,2.59701367
85.005954,3.31662479,2.75921357,0.746599772,2.75921357,2.59702584
85.016445,3.46410162,2.76327867,0.837151685,2.76327867,2.59703799
85.026937,3.46410162,2.76749643,0.834628772,2.76749643,2.5970501
85.037428,2.82842712,2.77187367,0.237809696,2.77187367,2.59706219
85.04792,3.16227766,2.77641938,0.62117492,2.77641938,2.59707425
85.058412,2.64575131,2.78114178,-0.367954436,2.78114178,2.59708629
85.068903,3,2.78604959,0.462547737,2.78604959,2.59709829
85.079395,4.12310563,2.79115357,1.15410227,2.79115357,2.59711027
85.089886,3.16227766,2.79646317,0.604825997,2.79646317,2.59712222
85.100378,2.82842712,2.80199058,0.162593173,2.80199058,2.59713414
85.11087,2.64575131,2.80774721,-0.402487136,2.80774721,2.59714604
85.121361,4,2.81374517,1.08915326,2.81374517,2.5971579
85.131853,3.46410162,2.81999925,0.802559884,2.81999925,2.59716974
85.142344,3.74165739,2.82652279,0.956626673,2.82652279,2.59718155
85.152836,2.64575131,2.83333268,-0.433106647,2.83333268,2.59719333
85.163328,3.16227766,2.84044503,0.567302944,2.84044503,2.59720508
85.173819,3,2.84787707,0.390029394,2.84787707,2.5972168
85.184311,3,2.85564955,0.379934799,2.85564955,2.5972285
85.194802,2,2.86378172,-0.929398579,2.86378172,2.59724016
85.205294,1,2.8722975,-1.36831922,2.8722975,2.5972518
85.215786,3.46410162,2.88122021,0.763466699,2.88122021,2.59726341
85.226277,3.74165739,2.89057492,0.922541309,2.89057492,2.59727499
85.236769,3.16227766,2.90039149,0.511748152,2.90039149,2.59728654
85.24726,2.64575131,2.91069836,-0.51473007,2.91069836,2.59729806
85.257752,3,2.92153036,0.280124334,2.92153036,2.59730955
85.268244,2.82842712,2.93292211,-0.323256846,2.93292211,2.59732101
85.278735,3.16227766,2.94491105,0.466225919,2.94491105,2.59733245
85.289227,3.31662479,2.95754145,0.599235629,2.95754145,2.59734385
85.299718,3.31662479,2.9708565,0.588020659,2.9708565,2.59735522
85.31021,2,2.98490848,-0.992425553,2.98490848,2.59736657
85.320702,3,2.99975037,0.0157995549,2.99975037,2.59737788
85.331193,3.16227766,3.01543986,0.38319421,3.01543986,2.59738917
85.341685,4,3.03204477,0.983847157,3.03204477,2.59740043
85.352176,3.46410162,3.04963288,0.643792463,3.04963288,2.59741165
85.362668,3,3.0682855,-0.261314951,3.0682855,2.59742285
85.37316,3.74165739,3.08808662,0.808437236,3.08808662,2.59743402
85.383651,2.82842712,3.10912842,-0.529812505,3.10912842,2.59744515
85.394143,2.82842712,3.13151896,-0.550537767,3.13151896,2.59745626
85.404634,3.87298335,3.15536878,0.847121342,3.15536878,2.59746733
85.415126,3.60555128,3.18080971,0.651721997,3.18080971,2.59747838
85.425618,3.60555128,3.20798062,0.630532042,3.20798062,2.5974894
85.436109,3.46410162,3.2370354,0.476514656,3.2370354,2.59750038
85.446601,3.46410162,3.26815439,0.442659261,3.26815439,2.59751134
85.457092,3.87298335,3.30152652,0.755947637,3.30152652,2.59752226
85.467584,3.16227766,3.33737648,-0.418448113,3.33737648,2.59753316
85.478076,4,3.37594593,0.789970929,3.37594593,2.59754403
85.488567,3.31662479,3.41750591,-0.317617882,3.41750591,2.59755486
85.499059,4.24264069,3.46237491,0.88332654,3.46237491,2.59756566
85.50955,3.46410162,3.51089505,-0.216317905,3.51089505,2.59757644
85.520042,4.47213595,3.56347385,0.953237696,3.56347385,2.59758718
85.530534,4,3.62055958,0.615987354,3.62055958,2.59759789
85.541025,4.35889894,3.68266274,0.822335823,3.68266274,2.59760857
85.551517,4.24264069,3.7503875,0.701607577,3.7503875,2.59761922
85.562008,3.87298335,3.82440096,0.220414117,3.82440096,2.59762984
85.5725,3.60555128,3.90550315,-0.547678626,3.90550315,2.59764043
85.582992,4.12310563,3.9945975,0.358480297,3.9945975,2.59765099
85.593483,4.12310563,4.09273415,0.174274128,4.09273415,2.59766152
85.603975,5.56776436,4.20117486,1.16901219,4.20117486,2.59767201
85.614466,5.09901951,4.32136687,0.881846158,4.32136687,2.59768248
85.624958,4.79583152,4.45509917,0.583722841,4.45509917,2.59769291
85.63545,5.74456265,4.60454681,1.06771524,4.60454681,2.59770331
85.645941,5.38516481,4.77255493,0.782693989,4.77255493,2.59771368
85.656433,5.65685425,4.96323254,0.832839544,4.96323254,2.59772402
85.666924,6.78232998,5.18292784,1.26467472,5.18292784,2.59773433
85.677416,6.4807407,5.44245893,1.01896112,5.44245893,2.59774461
85.687908,6.92820323,5.76040382,1.08064768,5.76040382,2.59775486
85.698399,7.28010989,6.16777747,1.05467171,6.16777747,2.59776507
85.708891,8.42614977,6.71237358,1.30911275,6.71237358,2.59777526
85.719382,9.05538514,7.45828325,1.26376496,7.45828325,2.59778541
85.729874,9.21954446,8.47744427,0.861452373,8.47744427,2.59779553
85.740366,10.5356538,9.83096949,0.839454738,9.83096949,2.59780562
85.750857,12.6095202,11.548542,1.03003799,11.548542,2.59781568
85.761349,13.7113092,13.6147215,0.310785669,13.6147215,2.5978257
85.77184,16.4924225,15.9630207,0.72760002,15.9630207,2.5978357
85.782332,17.5499288,18.4804866,-0.964654233,18.4804866,2.59784566
85.792824,19.8494332,21.0114482,-1.07796799,21.0114482,2.59785559
85.803315,21.725561,23.3604987,-1.27864685,23.3604987,2.59786549
85.813807,25.2388589,25.2909233,-0.228176167,25.2909233,2.59787536
85.824298,26.3438797,26.5352839,-0.437497592,26.5352839,2.59788519
85.83479,28.3019434,26.8641858,1.19906532,26.8641858,2.597895
85.845282,26.0192237,26.20395,-0.429798068,26.20395,2.59790477
85.855773,27.9463772,24.690171,1.8044961,24.690171,2.59791451
85.866265,21.2837967,22.5802329,-1.13861152,22.5802329,2.59792422
85.876756,21.725561,20.1384955,1.25978786,20.1384955,2.5979339
85.887248,16.4924225,17.5878599,-1.04663146,17.5878599,2.59794354
85.89774,15.5241747,15.109925,0.643622288,15.109925,2.59795316
85.908231,12.1243557,12.8465607,-0.849826478,12.8465607,2.59796274
85.918723,10.9544512,10.8953813,0.243042991,10.8953813,2.59797229
85.929214,9.43398113,9.30555568,0.35836497,9.30555568,2.5979818
85.939706,7.54983444,8.07549746,-0.725026224,8.07549746,2.59799129
85.950198,6.40312424,7.16186269,-0.871055943,7.16186269,2.59800074
85.960689,6.8556546,6.49668576,0.599140085,6.49668576,2.59801016
85.971181,6.164414,6.00853853,0.394810681,6.00853853,2.59801955
85.981672,5.56776436,5.6383646,-0.265707053,5.6383646,2.59802891
85.992164,4.35889894,5.34455427,-0.992801757,5.34455427,2.59803823
86.002656,5,5.10112936,-0.318008432,5.10112936,2.59804753
86.013147,4.47213595,4.89286188,-0.648633892,4.89286188,2.59805679
86.023639,4.35889894,4.71088908,-0.593287568,4.71088908,2.59806601
86.03413,3.16227766,4.54990138,-1.17797441,4.54990138,2.59807521
86.044622,3.31662479,4.40633876,-1.04389366,4.40633876,2.59808437
86.055114,3.60555128,4.27764795,-0.819815022,4.27764795,2.59809351
86.065605,3.87298335,4.16182711,-0.537441871,4.16182711,2.5981026
86.076097,3.31662479,4.05720765,-0.860571242,4.05720765,2.59811167
86.086588,3.31662479,3.96242727,-0.803618366,3.96242727,2.59812071
86.09708,4,3.87629545,0.351716581,3.87629545,2.59812971
86.107572,4.24264069,3.79781747,0.666950689,3.79781747,2.59813868
86.118063,3,3.72613615,-0.852136227,3.72613615,2.59814762
86.128555,3.74165739,3.66049219,0.284895062,3.66049219,2.59815652
86.139046,2.64575131,3.60025032,-0.976984651,3.60025032,2.5981654
86.149538,3.74165739,3.54483552,0.4436461,3.54483552,2.59817424
86.16003,3.31662479,3.49376058,-0.420875025,3.49376058,2.59818305
86.170521,3.16227766,3.44659721,-0.533216232,3.44659721,2.59819182
86.181013,3.16227766,3.40295619,-0.490589984,3.40295619,2.59820057
86.191504,2.64575131,3.36250973,-0.846615865,3.36250973,2.59820928
86.201996,2.82842712,3.324953,-0.704645922,3.324953,2.59821796
86.212488,2.64575131,3.29002589,-0.802667164,3.29002589,2.5982266
86.222979,2.64575131,3.25749634,-0.782141311,3.25749634,2.59823522
86.233471,3.31662479,3.2271487,0.299125543,3.2271487,2.5982438
86.243962,3.31662479,3.1988011,0.343254556,3.1988011,2.59825235
86.254454,3.60555128,3.17228018,0.65823331,3.17228018,2.59826087
86.264946,3.16227766,3.14743763,0.121819659,3.14743763,2.59826935
86.275437,2.23606798,3.12413955,-0.942375492,3.12413955,2.59827781
86.285929,3.31662479,3.10225892,0.462996617,3.10225892,2.59828623
86.29642,2,3.08168895,-1.04004277,3.08168895,2.59829461
86.306912,3,3.06232539,-0.249650527,3.06232539,2.59830297
86.317404,2.82842712,3.04407908,-0.464383411,3.04407908,2.59831129
86.327895,3.87298335,3.02686878,0.919844861,3.02686878,2.59831958
86.338387,3.60555128,3.0106159,0.771320537,3.0106159,2.59832784
86.348878,3.31662479,2.99525477,0.566895072,2.99525477,2.59833607
86.35937,3,2.98071974,0.138853376,2.98071974,2.59834426
86.369862,2.64575131,2.96695488,-0.566748245,2.96695488,2.59835242
86.380353,2.44948974,2.9539088,-0.710224656,2.9539088,2.59836055
86.390845,3,2.94153084,0.24180397,2.94153084,2.59836865
86.401336,3,2.92977901,0.264992426,2.92977901,2.59837671
86.411828,2.23606798,2.91861039,-0.826161254,2.91861039,2.59838475
86.42232,2.64575131,2.90798859,-0.512091086,2.90798859,2.59839275
86.432811,2.64575131,2.89787994,-0.502124112,2.89787994,2.59840071
86.443303,2.44948974,2.88825061,-0.662390265,2.88825061,2.59840865
86.453794,2.82842712,2.8790729,-0.225046162,2.8790729,2.59841655
86.464286,3.74165739,2.87031779,0.933455727,2.87031779,2.59842442
86.474778,3.31662479,2.86196087,0.674287713,2.86196087,2.59843226
86.485269,2.64575131,2.85397941,-0.456320168,2.85397941,2.59844007
86.495761,2.44948974,2.84635014,-0.629968565,2.84635014,2.59844784
86.506252,2.82842712,2.83905426,-0.103087985,2.83905426,2.59845558
86.516744,3.31662479,2.83207159,0.696098559,2.83207159,2.59846329
86.527236,2,2.8253853,-0.908507183,2.8253853,2.59847097
86.537727,2.44948974,2.81897966,-0.607856822,2.81897966,2.59847862
86.548219,2.64575131,2.81283823,-0.408762664,2.81283823,2.59848623
86.55871,3,2.80694794,0.4393769,2.80694794,2.59849381
86.569202,2,2.80129441,-0.895150493,2.80129441,2.59850136
86.579694,2.82842712,2.79586576,0.180447682,2.79586576,2.59850888
86.590185,2.44948974,2.79065085,-0.584089979,2.79065085,2.59851636
86.600677,2.64575131,2.78563817,-0.374014515,2.78563817,2.59852381
86.611168,2.82842712,2.7808177,0.218195843,2.7808177,2.59853123
86.62166,2.44948974,2.77617932,-0.571567651,2.77617932,2.59853862
86.632152,2.82842712,2.7717145,0.238144129,2.7717145,2.59854598
86.642643,2.44948974,2.76741517,-0.563848759,2.76741517,2.5985533
86.653135,2.23606798,2.76327256,-0.726088551,2.76327256,2.59856059
86.663626,3.74165739,2.75927998,0.991149537,2.75927998,2.59856785
86.674118,3,2.75542963,0.494540565,2.75542963,2.59857508
86.68461,2.82842712,2.75171524,0.276969098,2.75171524,2.59858228
86.695101,3,2.74813089,0.501865628,2.74813089,2.59858944
86.705593,3,2.74466999,0.505301898,2.74466999,2.59859658
86.716084,3.46410162,2.74132762,0.850161161,2.74132762,2.59860368
86.726576,3.16227766,2.73809787,0.651290868,2.73809787,2.59861075
86.737068,3,2.73497608,0.514804743,2.73497608,2.59861779
86.747559,1.73205081,2.73195782,-0.999953504,2.73195782,2.59862479
86.758051,2.82842712,2.72903806,0.315260318,2.72903806,2.59863177
86.768542,2.82842712,2.72621312,0.319709247,2.72621312,2.59863871
86.779034,3,2.72347848,0.525853135,2.72347848,2.59864562
86.789526,1.41421356,2.72083061,-1.14307351,2.72083061,2.5986525
86.800017,3.46410162,2.71826614,0.863617669,2.71826614,2.59865934
86.810509,3.16227766,2.71578118,0.668203923,2.71578118,2.59866616
86.821,3,2.71337295,0.535375616,2.71337295,2.59867294
86.831492,2.23606798,2.71103792,-0.689180631,2.71103792,2.5986797
86.841984,2.44948974,2.70877339,-0.509199025,2.70877339,2.59868642
86.852475,2.64575131,2.70657678,-0.246628194,2.70657678,2.59869311
86.862967,3.16227766,2.70444502,0.676633314,2.70444502,2.59869977
86.873458,2.64575131,2.70237599,-0.237959416,2.70237599,2.59870639
86.88395,3.16227766,2.70036691,0.67964016,2.70036691,2.59871299
86.894442,3.60555128,2.69841568,0.952436661,2.69841568,2.59871955
86.904933,2.82842712,2.6965203,0.363189797,2.6965203,2.59872609
86.915425,1.73205081,2.69467832,-0.981135827,2.69467832,2.59873259
86.925916,3.16227766,2.69288811,0.685120096,2.69288811,2.59873906
86.936408,2.23606798,2.69114745,-0.674595783,2.69114745,2.5987455
86.9469,2.44948974,2.68945468,-0.489862165,2.68945468,2.59875191
86.957391,2.44948974,2.68780825,-0.488178763,2.68780825,2.59875829
86.967883,2.64575131,2.68620618,-0.201133953,2.68620618,2.59876463
86.978374,1.73205081,2.6846472,-0.976010446,2.6846472,2.59877095
86.988866,3.16227766,2.68312951,0.692205282,2.68312951,2.59877723
86.999358,3,2.68165181,0.564223528,2.68165181,2.59878348
87.009849,2,2.68021286,-0.824750178,2.68021286,2.59878971
87.020341,2.44948974,2.67881105,-0.478875047,2.67881105,2.5987959
87.030832,3,2.6774454,0.567938907,2.6774454,2.59880206
87.041324,2.23606798,2.67611442,-0.663359964,2.67611442,2.59880819
87.051816,3.31662479,2.67481708,0.80112902,2.67481708,2.59881429
87.062307,3,2.67355239,0.571355937,2.67355239,2.59882036
87.072799,2.82842712,2.67231904,0.395105159,2.67231904,2.5988264
87.08329,3.74165739,2.67111623,1.03466959,2.67111623,2.5988324
87.093782,2.82842712,2.66994275,0.398100966,2.66994275,2.59883838
87.104274,2,2.66879776,-0.817800565,2.66879776,2.59884433
87.114765,3.46410162,2.66768048,0.892424304,2.66768048,2.59885024
87.125257,3.87298335,2.6665898,1.09835948,2.6665898,2.59885613
87.135748,2.44948974,2.6655251,-0.464796043,2.6655251,2.59886198
87.14624,2,2.66448538,-0.815159726,2.66448538,2.59886781
87.156732,2.44948974,2.66346995,-0.462579949,2.66346995,2.5988736
87.167223,3.46410162,2.66247817,0.895334265,2.66247817,2.59887937
87.177715,3.46410162,2.66150913,0.895875264,2.66150913,2.5988851
87.188206,3.31662479,2.66056232,0.809976835,2.66056232,2.59889081
87.198698,3.31662479,2.6596369,0.810547896,2.6596369,2.59889648
87.20919,2.44948974,2.65873232,-0.457430405,2.65873232,2.59890212
87.219681,2.64575131,2.65784804,-0.109985147,2.65784804,2.59890774
87.230173,2.82842712,2.65698331,0.414057738,2.65698331,2.59891332
87.240664,2.64575131,2.65613772,-0.101913738,2.65613772,2.59891888
87.251156,2.44948974,2.65531055,-0.453674784,2.65531055,2.5989244
87.261648,2.82842712,2.65450136,0.417044085,2.65450136,2.5989299
87.272139,2,2.65370969,-0.808523156,2.65370969,2.59893536
87.282631,2.44948974,2.65293492,-0.451048976,2.65293492,2.5989408
87.293122,2.64575131,2.65217671,-0.0801585614,2.65217671,2.5989462
87.303614,3,2.65143444,0.590394407,2.65143444,2.59895158
87.314106,3.16227766,2.65070776,0.715241146,2.65070776,2.59895693
87.324597,3.46410162,2.6499963,0.902277848,2.6499963,2.59896225
87.335089,2,2.6492995,-0.805791229,2.6492995,2.59896754
87.34558,3.46410162,2.64861711,0.903041809,2.64861711,2.59897279
87.356072,3.16227766,2.64794859,0.717167393,2.64794859,2.59897802
87.366564,3.31662479,2.64729365,0.818126607,2.64729365,2.59898323
87.377055,3,2.64665197,0.594430845,2.64665197,2.5989884
87.387547,3.46410162,2.64602309,0.904476932,2.64602309,2.59899354
87.398038,2.64575131,2.64540718,0.0185506897,2.64540718,2.59899865
87.40853,3,2.64480302,0.595984045,2.64480302,2.59900374
87.419022,3.16227766,2.64421073,0.719768665,2.64421073,2.59900879
87.429513,3,2.64363006,0.596967284,2.64363006,2.59901382
87.440005,3.16227766,2.64306061,0.720567172,2.64306061,2.59901882
87.450496,3,2.6425022,0.597911202,2.6425022,2.59902379
87.460988,3.31662479,2.64195443,0.821383199,2.64195443,2.59902873
87.47148,2.64575131,2.6414171,0.0658347169,2.6414171,2.59903364
87.481971,2,2.64088999,-0.800556053,2.64088999,2.59903853
87.492463,3.46410162,2.64037276,0.907595096,2.64037276,2.59904338
87.502954,3.60555128,2.63986604,0.982692849,2.63986604,2.59904821
87.513446,3,2.63936791,0.600526508,2.63936791,2.59905301
87.523938,2.64575131,2.63887899,0.0828994621,2.63887899,2.59905778
87.534429,3.46410162,2.63839909,0.908681749,2.63839909,2.59906252
87.544921,2.64575131,2.63792792,0.0884499608,2.63792792,2.59906724
87.555412,3.16227766,2.63746533,0.724439318,2.63746533,2.59907193
87.565904,3.46410162,2.63701106,0.909445192,2.63701106,2.59907658
87.576396,3.31662479,2.63656493,0.824657419,2.63656493,2.59908122
87.586887,2,2.63612681,-0.79757558,2.63612681,2.59908582
87.597379,3.74165739,2.63569641,1.05164679,2.63569641,2.59909039
87.60787,2.82842712,2.63527364,0.439492303,2.63527364,2.59909494
87.618362,2.64575131,2.63485825,0.104369846,2.63485825,2.59909946
87.628854,3.16227766,2.63445009,0.726517423,2.63445009,2.59910396
87.639345,2.44948974,2.63404906,-0.42960367,2.63404906,2.59910842
87.649837,3.31662479,2.63365489,0.826419927,2.63365489,2.59911286
87.660328,2.23606798,2.63326753,-0.630237692,2.63326753,2.59911727
87.67082,2.64575131,2.63288673,0.113422153,2.63288673,2.59912165
87.681312,3,2.63251238,0.606207569,2.63251238,2.59912601
87.691803,2.44948974,2.63214439,-0.427381146,2.63214439,2.59913034
87.702295,2,2.63178709,-0.794850356,2.63178709,2.59913464
87.712786,3.60555128,2.6314313,0.986975164,2.6314313,2.59913892
87.723278,2.23606798,2.63108138,-0.62850092,2.63108138,2.59914316
87.73377,3,2.63073724,0.607669943,2.63073724,2.59914739
87.744261,3.16227766,2.63039878,0.729300269,2.63039878,2.59915158
87.754753,2.64575131,2.63006581,0.125241778,2.63006581,2.59915575
87.765244,2.44948974,2.62973828,-0.424556868,2.62973828,2.59915989
87.775736,3.60555128,2.62941601,0.987995581,2.62941601,2.59916401
87.786228,3.60555128,2.62909892,0.98815604,2.62909892,2.5991681
87.796719,2.64575131,2.62878692,0.130247412,2.62878692,2.59917216
87.807211,4.12310563,2.62847986,1.22254888,2.62847986,2.5991762
87.817702,2.64575131,2.62817769,0.132565536,2.62817769,2.59918021
87.828194,2.64575131,2.62788025,0.133682707,2.62788025,2.59918419
87.838686,2.64575131,2.62758746,0.134773337,2.62758746,2.59918815
87.849177,2.44948974,2.62729926,-0.42167466,2.62729926,2.59919208
87.859669,3.46410162,2.62701551,0.914924101,2.62701551,2.59919599
87.87016,3,2.62673615,0.610953229,2.62673615,2.59919987
87.880652,2.64575131,2.62646106,0.138889344,2.62646106,2.59920372
87.891144,2.82842712,2.62619017,0.449707632,2.62619017,2.59920755
87.901635,2.23606798,2.62592342,-0.624384052,2.62592342,2.59921136
87.912127,3.46410162,2.62566068,0.915664203,2.62566068,2.59921514
87.922618,2.23606798,2.62540192,-0.623966299,2.62540192,2.59921889
87.93311,3,2.62514701,0.612252392,2.62514701,2.59922262
87.943602,2.23606798,2.6248959,-0.623560677,2.6248959,2.59922632
87.954093,2.82842712,2.62464853,0.451418426,2.62464853,2.59923
87.964585,3.31662479,2.62440479,0.831997596,2.62440479,2.59923366
87.975076,3.16227766,2.62416465,0.733561862,2.62416465,2.59923728
87.985568,2.64575131,2.62392801,0.14772713,2.62392801,2.59924089
87.99606,2.82842712,2.6236948,0.452473562,2.6236948,2.59924447
88.006551,3.87298335,2.62346499,1.11781857,2.62346499,2.59924802
88.017043,3,2.62323847,0.61380903,2.62323847,2.59925155
88.027534,2.82842712,2.62301523,0.453223893,2.62301523,2.59925506
88.038026,3.31662479,2.62279515,0.832964372,2.62279515,2.59925854
88.048518,3,2.62257819,0.614346651,2.62257819,2.59926199
88.059009,2.82842712,2.62236433,0.453941403,2.62236433,2.59926543
88.069501,2.23606798,2.62215345,-0.621357768,2.62215345,2.59926884
88.079992,2.44948974,2.62194555,-0.415277993,2.62194555,2.59927222
88.090484,3.31662479,2.62174054,0.833597178,2.62174054,2.59927558
88.100976,3.16227766,2.62153836,0.735349778,2.62153836,2.59927892
88.111467,3.74165739,2.62133901,1.05845093,2.62133901,2.59928223
88.121959,2.44948974,2.62114238,-0.414309827,2.62114238,2.59928552
88.13245,2.44948974,2.62094846,-0.414075733,2.62094846,2.59928879
88.142942,3,2.62075716,0.615826954,2.62075716,2.59929203
88.153434,3.16227766,2.62056847,0.736008962,2.62056847,2.59929525
88.163925,2.64575131,2.62038234,0.159276387,2.62038234,2.59929845
88.174417,3.16227766,2.62019871,0.736260113,2.62019871,2.59930162
88.184908,2,2.62001755,-0.787411929,2.62001755,2.59930477
88.1954,3.31662479,2.61983879,0.834737087,2.61983879,2.5993079
88.205892,3,2.6196624,0.616715168,2.6196624,2.599311
88.216383,2.44948974,2.61948836,-0.412308892,2.61948836,2.59931408
88.226875,2.44948974,2.6193166,-0.412100548,2.6193166,2.59931714
88.237366,3,2.61914711,0.617132796,2.61914711,2.59932018
88.247858,2.44948974,2.61897982,-0.411691721,2.61897982,2.59932319
88.25835,3.31662479,2.61881469,0.835350283,2.61881469,2.59932618
88.268841,2.82842712,2.61865173,0.458012443,2.61865173,2.59932915
88.279333,3,2.61849084,0.617664274,2.61849084,2.5993321
88.289824,2.44948974,2.61833204,-0.410904245,2.61833204,2.59933503
88.300316,3.31662479,2.61817525,0.835732934,2.61817525,2.59933793
88.310808,3.46410162,2.61802046,0.919826698,2.61802046,2.59934081
88.321299,2.44948974,2.61786765,-0.410338766,2.61786765,2.59934367
88.331791,3.31662479,2.61771674,0.836007205,2.61771674,2.59934651
88.342282,3,2.61756775,0.618411065,2.61756775,2.59934932
88.352774,2,2.61742061,-0.785761169,2.61742061,2.59935212
88.363266,2.23606798,2.61727531,-0.6174199,2.61727531,2.59935489
88.373757,3.16227766,2.61713182,0.73833992,2.61713182,2.59935764
88.384249,3.16227766,2.6169901,0.738435889,2.6169901,2.59936038
88.39474,2.82842712,2.61685013,0.459974994,2.61685013,2.59936309
88.405232,2.44948974,2.61671187,-0.408928017,2.61671187,2.59936578
88.415724,2.82842712,2.61657529,0.46027365,2.61657529,2.59936844
88.426215,2.82842712,2.61644039,0.46042017,2.61644039,2.59937109
88.436707,2.44948974,2.61630711,-0.408432823,2.61630711,2.59937372
88.447198,2.23606798,2.61617546,-0.616528572,2.61617546,2.59937633
88.45769,3.60555128,2.61604537,0.994739113,2.61604537,2.59937891
88.468182,2.44948974,2.61591684,-0.407954778,2.61591684,2.59938148
88.478673,3,2.61578986,0.619846867,2.61578986,2.59938402
88.489165,1.73205081,2.61566438,-0.940007217,2.61566438,2.59938655
88.499656,2.64575131,2.61554039,0.173812902,2.61554039,2.59938905
88.510148,1.41421356,2.61541785,-1.09599466,2.61541785,2.59939154
88.52064,4,2.61529675,1.17673415,2.61529675,2.59939401
88.531131,3,2.61517708,0.620340974,2.61517708,2.59939645
88.541623,3,2.61505879,0.620436308,2.61505879,2.59939888
88.552114,2.82842712,2.61494188,0.46204463,2.61494188,2.59940129
88.562606,3.31662479,2.61482632,0.837734128,2.61482632,2.59940367
88.573098,3.31662479,2.61471209,0.837802304,2.61471209,2.59940604
88.583589,2.64575131,2.61459918,0.176499659,2.61459918,2.59940839
88.594081,2.44948974,2.61448755,-0.406199224,2.61448755,2.59941072
88.604572,3,2.61437721,0.620985342,2.61437721,2.59941303
88.615064,2.44948974,2.6142681,-0.405929006,2.6142681,2.59941533
88.625556,2,2.61416023,-0.783683756,2.61416023,2.5994176
88.636047,2,2.61405358,-0.783615712,2.61405358,2.59941986
88.646539,2.44948974,2.61394813,-0.405534687,2.61394813,2.5994221
88.65703,3.16227766,2.61384386,0.740563167,2.61384386,2.59942431
88.667522,2.64575131,2.61374074,0.17891499,2.61374074,2.59942652
88.678014,2.82842712,2.61363876,0.463452652,2.61363876,2.5994287
88.688505,3.31662479,2.61353793,0.83850275,2.61353793,2.59943086
88.698997,3.74165739,2.61343819,1.06217663,2.61343819,2.59943301
88.709488,2.82842712,2.61333957,0.463775333,2.61333957,2.59943514
88.71998,2.82842712,2.61324201,0.4638805,2.61324201,2.59943725
88.730472,3.46410162,2.61314551,0.922472821,2.61314551,2.59943934
88.740963,2.44948974,2.61305007,-0.404425925,2.61305007,2.59944142
88.751455,2.82842712,2.61295566,0.464189043,2.61295566,2.59944348
88.761946,3.46410162,2.61286227,0.92262633,2.61286227,2.59944552
88.772438,2.82842712,2.61276988,0.464389112,2.61276988,2.59944755
88.78293,3,2.61267848,0.622351609,2.61267848,2.59944956
88.793421,3,2.61258806,0.622424247,2.61258806,2.59945155
88.803913,3.46410162,2.61249859,0.922823398,2.61249859,2.59945352
88.814404,1.73205081,2.61241008,-0.938274627,2.61241008,2.59945548
88.824896,3.31662479,2.6123225,0.839227197,2.6123225,2.59945742
88.835388,2.23606798,2.61223584,-0.613325252,2.61223584,2.59945935
88.845879,3.16227766,2.6121501,0.741705845,2.6121501,2.59946125
88.856371,3,2.61206525,0.622844085,2.61206525,2.59946315
88.866862,2.82842712,2.61198128,0.465237403,2.61198128,2.59946502
88.877354,2,2.61189819,-0.782239213,2.61189819,2.59946689
88.887846,2.44948974,2.61181595,-0.402897264,2.61181595,2.59946873
88.898337,2.23606798,2.61173457,-0.612916461,2.61173457,2.59947056
88.908829,3.31662479,2.61165401,0.839625379,2.61165401,2.59947237
88.91932,3,2.61157429,0.623238081,2.61157429,2.59947417
88.929812,3.74165739,2.61149538,1.06309078,2.61149538,2.59947596
88.940304,2.82842712,2.61141727,0.465843164,2.61141727,2.59947772
88.950795,2.44948974,2.61133996,-0.402306126,2.61133996,2.59947948
88.961287,3.46410162,2.61126343,0.923492387,2.61126343,2.59948122
88.971778,2.82842712,2.61118767,0.466089534,2.61118767,2.59948294
88.98227,2.82842712,2.61111267,0.466169986,2.61111267,2.59948465
88.992762,2.64575131,2.61103842,0.186313963,2.61103842,2.59948634
89.003253,2.44948974,2.61096492,-0.401839735,2.61096492,2.59948802
89.013745,2.82842712,2.61089214,0.466406461,2.61089214,2.59948969
89.024236,2.23606798,2.61082009,-0.612170002,2.61082009,2.59949134
89.034728,3.16227766,2.61074875,0.742649927,2.61074875,2.59949298
89.04522,3.46410162,2.61067811,0.923809238,2.61067811,2.5994946
89.055711,2.44948974,2.61060817,-0.401395598,2.61060817,2.59949621
89.066203,2.44948974,2.61053891,-0.401309315,2.61053891,2.59949781
89.076694,2.82842712,2.61047033,0.466858428,2.61047033,2.59949939
89.087186,3.16227766,2.61040242,0.742883061,2.61040242,2.59950096
89.097678,3.16227766,2.61033516,0.742928326,2.61033516,2.59950251
89.108169,2,2.61026856,-0.781196879,2.61026856,2.59950406
89.118661,3.16227766,2.6102026,0.743017535,2.6102026,2.59950559
89.129152,2.44948974,2.61013728,-0.400808607,2.61013728,2.5995071
89.139644,2.44948974,2.61007258,-0.400727887,2.61007258,2.59950861
89.150136,2.23606798,2.6100085,-0.611506765,2.6100085,2.5995101
89.160627,3,2.60994504,0.624543803,2.60994504,2.59951158
89.171119,3,2.60988217,0.624594131,2.60988217,2.59951304
89.18161,1.73205081,2.60981991,-0.936893324,2.60981991,2.5995145
89.192102,3.46410162,2.60975823,0.924306977,2.60975823,2.59951594
89.202594,3,2.60969713,0.624742244,2.60969713,2.59951737
89.213085,3.60555128,2.60963661,0.997955242,2.60963661,2.59951879
89.223577,3.16227766,2.60957665,0.743438637,2.60957665,2.59952019
89.234068,2,2.60951726,-0.780715865,2.60951726,2.59952159
89.24456,3,2.60945842,0.62493326,2.60945842,2.59952297
89.255052,2,2.60940013,-0.780640843,2.60940013,2.59952434
89.265543,2.64575131,2.60934238,0.190811254,2.60934238,2.59952571
89.276035,3.60555128,2.60928516,0.998131314,2.60928516,2.59952706
89.286526,2.82842712,2.60922847,0.46818656,2.60922847,2.59952839
89.297018,3.60555128,2.6091723,0.998187846,2.6091723,2.59952972
89.30751,3.16227766,2.60911664,0.743747951,2.60911664,2.59953104
89.318001,3.16227766,2.60906151,0.743785019,2.60906151,2.59953235
89.328493,3.31662479,2.60900686,0.841200289,2.60900686,2.59953364
89.338984,2.82842712,2.60895272,0.468480949,2.60895272,2.59953493
89.349476,3,2.60889907,0.625380626,2.60889907,2.5995362
89.359968,2.82842712,2.60884591,0.46859494,2.60884591,2.59953747
89.370459,2.44948974,2.60879323,-0.399128406,2.60879323,2.59953873
89.380951,2,2.60874102,-0.780218571,2.60874102,2.59953997
89.391442,2.64575131,2.60868928,0.192515007,2.60868928,2.59954121
89.401934,2.44948974,2.60863801,-0.398933911,2.60863801,2.59954243
89.412426,2.23606798,2.60858719,-0.610343522,2.60858719,2.59954365
89.422917,1.73205081,2.60853683,-0.936208325,2.60853683,2.59954486
89.433409,2.64575131,2.60848692,0.193039864,2.60848692,2.59954606
89.4439,3,2.60843746,0.625749584,2.60843746,2.59954725
89.454392,2.64575131,2.60838843,0.193294808,2.60838843,2.59954843
89.464884,3.16227766,2.60833983,0.744269996,2.60833983,2.5995496
89.475375,2,2.60829167,-0.779930556,2.60829167,2.59955077
89.485867,2.82842712,2.60824393,0.46923682,2.60824393,2.59955192
89.496358,2.82842712,2.60819662,0.469287235,2.60819662,2.59955307
89.50685,3,2.60814971,0.625979463,2.60814971,2.59955421
89.517342,3,2.60810322,0.626016598,2.60810322,2.59955534
89.527833,3,2.60805714,0.626053403,2.60805714,2.59955647
89.538325,2.64575131,2.60801145,0.194267489,2.60801145,2.59955758
89.548816,2.44948974,2.60796617,-0.398090983,2.60796617,2.59955869
89.559308,2.23606798,2.60792128,-0.609797758,2.60792128,2.59955979
89.5698,2.44948974,2.60787678,-0.397978693,2.60787678,2.59956089
89.580291,1.73205081,2.60783267,-0.935832178,2.60783267,2.59956197
89.590783,2.82842712,2.60778894,0.469721388,2.60778894,2.59956305
89.601274,3.46410162,2.60774559,0.925395063,2.60774559,2.59956412
89.611766,2.64575131,2.60770261,0.19506075,2.60770261,2.59956519
89.622258,3.16227766,2.60766001,0.744726563,2.60766001,2.59956625
89.632749,2.82842712,2.60761777,0.469903558,2.60761777,2.5995673
89.643241,2.44948974,2.60757589,-0.397600492,2.60757589,2.59956835
89.653732,2.82842712,2.60753438,0.46999228,2.60753438,2.59956939
89.664224,3.16227766,2.60749322,0.744838532,2.60749322,2.59957042
89.674716,2.82842712,2.60745241,0.470079472,2.60745241,2.59957145
89.685207,2.44948974,2.60741196,-0.397394287,2.60741196,2.59957247
89.695699,2,2.60737185,-0.779340652,2.60737185,2.59957349
89.70619,3.31662479,2.60733209,0.842195169,2.60733209,2.5995745
89.716682,3.46410162,2.60729266,0.925639754,2.60729266,2.59957551
89.727174,2.23606798,2.60725357,-0.609250026,2.60725357,2.59957651
89.737665,2.44948974,2.60721482,-0.397146166,2.60721482,2.5995775
89.748157,3.74165739,2.6071764,1.06512018,2.6071764,2.59957849
89.758648,3.31662479,2.6071383,0.842310209,2.6071383,2.59957948
89.76914,2.23606798,2.60710053,-0.609124416,2.60710053,2.59958046
89.779632,2.23606798,2.60706308,-0.609093676,2.60706308,2.59958144
89.790123,2.44948974,2.60702596,-0.396908323,2.60702596,2.59958241
89.800615,3,2.60698915,0.626905775,2.60698915,2.59958338
89.811106,2.82842712,2.60695266,0.470610739,2.60695266,2.59958434
89.821598,1.73205081,2.60691647,-0.935342539,2.60691647,2.5995853
89.83209,2.82842712,2.6068806,0.47068729,2.6068806,2.59958626
89.842581,2.64575131,2.60684504,0.197246732,2.60684504,2.59958721
89.853073,2.82842712,2.60680978,0.470762517,2.60680978,2.59958816
89.863564,2,2.60677482,-0.778957524,2.60677482,2.59958911
89.874056,2.82842712,2.60674017,0.470836444,2.60674017,2.59959005
89.884548,2.44948974,2.60670581,-0.396504815,2.60670581,2.59959099
89.895039,2.64575131,2.60667175,0.197685498,2.60667175,2.59959193
89.905531,3.46410162,2.60663799,0.925993318,2.60663799,2.59959286
89.916022,2.44948974,2.60660452,-0.396377068,2.60660452,2.59959379
89.926514,2.23606798,2.60657134,-0.608689877,2.60657134,2.59959472
89.937006,3.74165739,2.60653846,1.0654196,2.60653846,2.59959565
89.947497,2.64575131,2.60650586,0.198104649,2.60650586,2.59959657
89.957989,2.44948974,2.60647355,-0.396211817,2.60647355,2.59959749
89.96848,3.46410162,2.60644152,0.926099396,2.60644152,2.59959841
89.978972,2.44948974,2.60640978,-0.396131342,2.60640978,2.59959933
89.989464,2.64575131,2.60637833,0.198426272,2.60637833,2.59960025
89.999955,2.64575131,2.60634715,0.198504802,2.60634715,2.59960117
90.010447,2.82842712,2.60631626,0.471286391,2.60631626,2.59960208
90.020938,2.44948974,2.60628566,-0.395974636,2.60628566,2.59960299
90.03143,2.82842712,2.60625533,0.471351035,2.60625533,2.59960391
90.041922,2.23606798,2.60622528,-0.608405539,2.60622528,2.59960482
90.052413,2,2.60619551,-0.778585584,2.60619551,2.59960573
90.062905,2.44948974,2.60616602,-0.395823549,2.60616602,2.59960664
90.073396,2.23606798,2.60613682,-0.608332839,2.60613682,2.59960755
90.083888,2.82842712,2.60610789,0.471507402,2.60610789,2.59960846
90.09438,2.82842712,2.60607925,0.471537776,2.60607925,2.59960937
90.104871,2.44948974,2.60605089,-0.395678086,2.60605089,2.59961028
90.115363,2.64575131,2.60602281,0.199320092,2.60602281,2.59961118
90.125854,3,2.60599502,0.627698159,2.60599502,2.59961209
90.136346,2.23606798,2.60596751,-0.608193666,2.60596751,2.599613
90.146838,2.82842712,2.60594029,0.471685098,2.60594029,2.59961392
90.157329,2.64575131,2.60591337,0.199594449,2.60591337,2.59961483
90.167821,2.44948974,2.60588673,-0.395470591,2.60588673,2.59961574
90.178312,3,2.60586039,0.627805389,2.60586039,2.59961665
90.188804,2.23606798,2.60583435,-0.608084185,2.60583435,2.59961757
90.199296,2.23606798,2.60580862,-0.608063022,2.60580862,2.59961848
90.209787,3,2.60578319,0.627866873,2.60578319,2.5996194
90.220279,2.82842712,2.60575807,0.471878215,2.60575807,2.59962032
90.23077,2.23606798,2.60573328,-0.608001071,2.60573328,2.59962124
90.241262,3.16227766,2.60570881,0.746035422,2.60570881,2.59962217
90.251754,3,2.60568467,0.627945325,2.60568467,2.59962309
90.262245,2.64575131,2.60566087,0.200225967,2.60566087,2.59962402
90.272737,2.82842712,2.60563742,0.472006039,2.60563742,2.59962495
90.283228,3.16227766,2.60561434,0.746098735,2.60561434,2.59962588
90.29372,3,2.60559162,0.628019411,2.60559162,2.59962682
90.304212,3.16227766,2.60556929,0.746128927,2.60556929,2.59962776
90.314703,2.64575131,2.60554735,0.200509251,2.60554735,2.5996287
90.325195,2.82842712,2.60552583,0.472124236,2.60552583,2.59962964
90.335686,3.60555128,2.60550474,1.00002327,2.60550474,2.59963059
90.346178,2.64575131,2.60548411,0.200666899,2.60548411,2.59963154
90.35667,4.47213595,2.60546395,1.36626206,2.60546395,2.59963249
90.367161,2.23606798,2.60544429,-0.607763366,2.60544429,2.59963345
90.377653,3,2.60542516,0.628151927,2.60542516,2.59963442
90.388144,3,2.60540576,0.628167364,2.60540576,2.59963538
90.398636,3.16227766,2.6053878,0.746250538,2.6053878,2.59963635
90.409128,2.23606798,2.60537047,-0.607702635,2.60537047,2.59963733
90.419619,2.64575131,2.60535384,0.200991232,2.60535384,2.59963831
90.430111,2.82842712,2.60533794,0.472323174,2.60533794,2.59963929
90.440602,2,2.60532286,-0.778024973,2.60532286,2.59964028
90.451094,2,2.60530865,-0.778015842,2.60530865,2.59964128
90.461586,2.82842712,2.6052954,0.472368206,2.6052954,2.59964228
90.472077,3.16227766,2.60528321,0.746320607,2.60528321,2.59964328
90.482569,2.44948974,2.60527218,-0.394692843,2.60527218,2.59964429
90.49306,2.82842712,2.60526245,0.472403085,2.60526245,2.59964531
90.503552,2.44948974,2.60525416,-0.394670009,2.60525416,2.59964633
90.514044,3,2.60524749,0.628293334,2.60524749,2.59964736
90.524535,2.23606798,2.60524264,-0.607597451,2.60524264,2.59964839
90.535027,3,2.60523987,0.628299399,2.60523987,2.59964943
90.545518,3,2.60523945,0.628299726,2.60523945,2.59965048
90.55601,2.44948974,2.60524176,-0.3946543,2.60524176,2.59965153
90.566502,2.64575131,2.60524721,0.201256308,2.60524721,2.59965259
90.576993,3,2.60525634,0.628286291,2.60525634,2.59965366
90.587485,3.31662479,2.60526983,0.843418617,2.60526983,2.59965473
90.597976,3,2.6052886,0.628260618,2.6052886,2.59965581
90.608468,3.31662479,2.60531398,0.843392444,2.60531398,2.5996569
90.61896,2.23606798,2.60534801,-0.607684158,2.60534801,2.59965799
90.629451,2.82842712,2.60539405,0.472263775,2.60539405,2.5996591
90.639943,3.16227766,2.60545773,0.746203675,2.60545773,2.59966021
[truncated: 305,328 more chars]
