# Supplementary material for: Phase Stability of Iron Nitride Fe4N at High Pressure—Pressure-Dependent Evolution of Phase Equilibria in the Fe–N System
Source: Materials (Basel). 2021 Jul 15;14(14):3963. doi: 10.3390/ma14143963 (PMC8307547; doi:10.3390/ma14143963)
Supplement: Supplementary file 1 [file materials-14-03963-s001.zip › xrd_data/3-400_riet.txt]

'y-axis saved as Sqrt(y)
'x,Yobs,Ycalc,Diff,epsilon,fe4n,Bkg
30,10.6301458,10.7764158,-0.382452532,0,0,10.7764158
30.010492,10.9544512,10.7715891,0.427623705,0,0,10.7715891
30.020983,11.4017543,10.7668195,0.796827947,0,0,10.7668195
30.031475,10.3440804,10.7621057,-0.646548722,0,0,10.7621057
30.041966,9.89949494,10.7574484,-0.926257778,0,0,10.7574484
30.052458,11.045361,10.7528465,0.540846084,0,0,10.7528465
30.06295,10.8627805,10.7483003,0.338349269,0,0,10.7483003
30.073441,11.5758369,10.7438098,0.912155196,0,0,10.7438098
30.083933,10.5356538,10.7393741,-0.451353853,0,0,10.7393741
30.094424,10.4880885,10.7349936,-0.496895515,0,0,10.7349936
30.104916,10.0498756,10.7306675,-0.825101118,0,0,10.7306675
30.115408,10.3440804,10.7263958,-0.618316531,0,0,10.7263958
30.125899,10.7238053,10.7221787,0.0403314208,0,0,10.7221787
30.136391,10.4880885,10.7180152,-0.479506698,0,0,10.7180152
30.146882,10.4880885,10.7139058,-0.475202376,0,0,10.7139058
30.157374,10.6301458,10.7098495,-0.282318466,0,0,10.7098495
30.167866,10.5830052,10.7058466,-0.350487261,0,0,10.7058466
30.178357,9.89949494,10.701897,-0.895768994,0,0,10.701897
30.188849,11.5325626,10.6979999,0.913544011,0,0,10.6979999
30.19934,11.0905365,10.6941558,0.629587732,0,0,10.6941558
30.209832,10.4403065,10.6903636,-0.50005713,0,0,10.6903636
30.220324,11.1355287,10.6866236,0.670003813,0,0,10.6866236
30.230815,10.6301458,10.6829358,-0.229760789,0,0,10.6829358
30.241307,10,10.6792994,-0.824196189,0,0,10.6792994
30.251798,10.5356538,10.6757147,-0.37424711,0,0,10.6757147
30.26229,10.8166538,10.6721808,0.380096074,0,0,10.6721808
30.272782,11.6619038,10.6686979,0.996597146,0,0,10.6686979
30.283273,10.8627805,10.6652661,0.444425918,0,0,10.6652661
30.293765,9.8488578,10.6618844,-0.901679902,0,0,10.6618844
30.304256,11,10.6585534,0.584334333,0,0,10.6585534
30.314748,9.8488578,10.6552721,-0.898005707,0,0,10.6552721
30.32524,10.0995049,10.6520405,-0.743327377,0,0,10.6520405
30.335731,10.5830052,10.6488589,-0.256619646,0,0,10.6488589
30.346223,11.61895,10.6457263,0.986521033,0,0,10.6457263
30.356714,11.0905365,10.6426431,0.669248383,0,0,10.6426431
30.367206,9.74679434,10.6396085,-0.944888446,0,0,10.6396085
30.377698,9.64365076,10.6366226,-0.996479719,0,0,10.6366226
30.388189,10,10.6336854,-0.796043575,0,0,10.6336854
30.398681,10.6301458,10.6307961,-0.0255002561,0,0,10.6307961
30.409172,10.4880885,10.627955,-0.373987349,0,0,10.627955
30.419664,10.7703296,10.6251614,0.381009424,0,0,10.6251614
30.430156,11.045361,10.6224154,0.650342721,0,0,10.6224154
30.440647,11.4017543,10.6197168,0.884328795,0,0,10.6197168
30.451139,10.2956301,10.6170651,-0.566952345,0,0,10.6170651
30.46163,11.1803399,10.6144604,0.752249586,0,0,10.6144604
30.472122,10.3923048,10.6119021,-0.4686121,0,0,10.6119021
30.482614,10.8166538,10.6093902,0.455262131,0,0,10.6093902
30.493105,10.7703296,10.6069247,0.404233772,0,0,10.6069247
30.503597,10.8627805,10.6045048,0.508208306,0,0,10.6045048
30.514088,10.7238053,10.6021309,0.348818622,0,0,10.6021309
30.52458,10.2469508,10.5998022,-0.594012956,0,0,10.5998022
30.535072,11.1803399,10.5975187,0.763427269,0,0,10.5975187
30.545563,11.3137085,10.5952805,0.847601347,0,0,10.5952805
30.556055,10.8166538,10.5930868,0.472828758,0,0,10.5930868
30.566546,10.2956301,10.5909379,-0.543422262,0,0,10.5909379
30.577038,10.6301458,10.5888331,0.203255208,0,0,10.5888331
30.58753,11.045361,10.5867725,0.677191651,0,0,10.5867725
30.598021,10.8627805,10.5847559,0.527280354,0,0,10.5847559
30.608513,10.4880885,10.5827828,-0.307724461,0,0,10.5827828
30.619004,10.2469508,10.5808534,-0.577843051,0,0,10.5808534
30.629496,10.9087121,10.5789669,0.574234439,0,0,10.5789669
30.639988,10.198039,10.5771235,-0.615698352,0,0,10.5771235
30.650479,9.64365076,10.575323,-0.9652317,0,0,10.575323
30.660971,10.4880885,10.5735649,-0.292363474,0,0,10.5735649
30.671462,10.8166538,10.5718493,0.494777288,0,0,10.5718493
30.681954,12,10.5701756,1.19575266,0,0,10.5701756
30.692446,10.7703296,10.5685438,0.449205763,0,0,10.5685438
30.702937,11.2694277,10.5669538,0.838137127,0,0,10.5669538
30.713429,11.6619038,10.5654051,1.04713831,0,0,10.5654051
30.72392,11.3137085,10.5638978,0.86591608,0,0,10.5638978
30.734412,10.8166538,10.5624314,0.50420475,0,0,10.5624314
30.744904,10.3440804,10.5610057,-0.465752409,0,0,10.5610057
30.755395,11.6619038,10.5596208,1.04989666,0,0,10.5596208
30.765887,10.9544512,10.558276,0.629424423,0,0,10.558276
30.776378,10.198039,10.5569716,-0.599109787,0,0,10.5569716
30.78687,10,10.5557069,-0.745457493,0,0,10.5557069
30.797362,10.5830052,10.5544819,0.168888606,0,0,10.5544819
30.807853,10,10.5532965,-0.743839019,0,0,10.5532965
30.818345,10.8166538,10.5521502,0.514299119,0,0,10.5521502
30.828836,11.1803399,10.5510432,0.793282254,0,0,10.5510432
30.839328,10.7238053,10.5499748,0.416929852,0,0,10.5499748
30.84982,10.1488916,10.5489451,-0.632497818,0,0,10.5489451
30.860311,11.1355287,10.5479538,0.76653435,0,0,10.5479538
30.870803,10.9087121,10.5470007,0.601424509,0,0,10.5470007
30.881294,11.1803399,10.5460856,0.796400834,0,0,10.5460856
30.891786,11,10.5452082,0.674382531,0,0,10.5452082
30.902278,11.2249722,10.5443684,0.824987152,0,0,10.5443684
30.912769,10.3923048,10.5435659,-0.388922984,0,0,10.5435659
30.923261,10.8166538,10.5428006,0.523309913,0,0,10.5428006
30.933752,11.4891253,10.5420722,0.973166541,0,0,10.5420722
30.944244,11.0905365,10.5413804,0.741050656,0,0,10.5413804
30.954736,10.2469508,10.5407252,-0.542009613,0,0,10.5407252
30.965227,10.2469508,10.5401063,-0.541438383,0,0,10.5401063
30.975719,11.1355287,10.5395234,0.772013804,0,0,10.5395234
30.98621,10.5830052,10.5389765,0.209830372,0,0,10.5389765
30.996702,10.0995049,10.5384651,-0.6625407,0,0,10.5384651
31.007194,11.4017543,10.5379892,0.929389594,0,0,10.5379892
31.017685,10.5356538,10.5375486,-0.0435303144,0,0,10.5375486
31.028177,10.6770783,10.537143,0.37407914,0,0,10.537143
31.038668,9.74679434,10.5367723,-0.888807057,0,0,10.5367723
31.04916,10.5356538,10.5364362,-0.0279723848,0,0,10.5364362
31.059652,10.5830052,10.5361345,0.216496493,0,0,10.5361345
31.070143,10.7703296,10.5358671,0.484213328,0,0,10.5358671
31.080635,11.1355287,10.5356336,0.774528961,0,0,10.5356336
31.091126,9.53939201,10.535434,-0.998019029,0,0,10.535434
31.101618,10.2469508,10.535268,-0.536951774,0,0,10.535268
31.11211,8.71779789,10.5351354,-1.3480866,0,0,10.5351354
31.122601,9.38083152,10.535036,-1.07433908,0,0,10.535036
31.133093,10.8627805,10.5349696,0.572547736,0,0,10.5349696
31.143584,9.79795897,10.534936,-0.858473664,0,0,10.534936
31.154076,10.5356538,10.534935,0.026809036,0,0,10.534935
31.164568,11.3137085,10.5349665,0.882463616,0,0,10.5349665
31.175059,10.9544512,10.5350301,0.64762724,0,0,10.5350301
31.185551,10.8166538,10.5351258,0.530592176,0,0,10.5351258
31.196042,10.4403065,10.5352532,-0.308134264,0,0,10.5352532
31.206534,10.8166538,10.5354123,0.53032207,0,0,10.5354123
31.217026,10.7238053,10.5356028,0.43382306,0,0,10.5356028
31.227517,10.6301458,10.5358246,0.307117634,0,0,10.5358246
31.238009,10.4880885,10.5360773,-0.219063612,0,0,10.5360773
31.2485,10.5356538,10.5363609,-0.0265928735,0,0,10.5363609
31.258992,11.0905365,10.5366752,0.744218595,0,0,10.5366752
31.269484,10.9544512,10.5370199,0.6460892,0,0,10.5370199
31.279975,11.4455231,10.5373948,0.952957669,0,0,10.5373948
31.290467,10.9544512,10.5377999,0.645485321,0,0,10.5377999
31.300958,10.9087121,10.5382347,0.608668551,0,0,10.5382347
31.31145,10.6301458,10.5386993,0.302401258,0,0,10.5386993
31.321942,10.8627805,10.5391934,0.568847189,0,0,10.5391934
31.332433,11.5758369,10.5397167,1.0178999,0,0,10.5397167
31.342925,10.5356538,10.5402692,-0.0679369539,0,0,10.5402692
31.353416,10.4880885,10.5408505,-0.229699932,0,0,10.5408505
31.363908,10.4880885,10.5414607,-0.231024258,0,0,10.5414607
31.3744,10.5356538,10.5420994,-0.0802847187,0,0,10.5420994
31.384891,9.64365076,10.5427664,-0.948217077,0,0,10.5427664
31.395383,10.8166538,10.5434616,0.522677914,0,0,10.5434616
31.405874,10.8627805,10.5441848,0.564442829,0,0,10.5441848
31.416366,11.6619038,10.5449358,1.05686706,0,0,10.5449358
31.426858,10,10.5457145,-0.738724898,0,0,10.5457145
31.437349,10.1488916,10.5465205,-0.630578248,0,0,10.5465205
31.447841,10.7238053,10.5473538,0.420061248,0,0,10.5473538
31.458332,10.0995049,10.5482142,-0.66985763,0,0,10.5482142
31.468824,10.3440804,10.5491015,-0.452792518,0,0,10.5491015
31.479316,10,10.5500155,-0.741630314,0,0,10.5500155
31.489807,10.7238053,10.550956,0.415751496,0,0,10.550956
31.500299,10.9087121,10.5519229,0.597318359,0,0,10.5519229
31.51079,10.7238053,10.5529159,0.413387736,0,0,10.5529159
31.521282,9.69535971,10.5539349,-0.926593345,0,0,10.5539349
31.531774,10.8166538,10.5549798,0.51154081,0,0,10.5549798
31.542265,10.0498756,10.5560502,-0.711459503,0,0,10.5560502
31.552757,11.1803399,10.5571462,0.789426158,0,0,10.5571462
31.563248,10.9544512,10.5582674,0.629431301,0,0,10.5582674
31.57374,11.3137085,10.5594138,0.86850143,0,0,10.5594138
31.584232,10.5356538,10.5605851,-0.157896561,0,0,10.5605851
31.594723,10.5830052,10.561781,0.145685304,0,0,10.561781
31.605215,10.4403065,10.5630017,-0.35027873,0,0,10.5630017
31.615706,10.0995049,10.5642467,-0.681719676,0,0,10.5642467
31.626198,10.2469508,10.565516,-0.564415811,0,0,10.565516
31.63669,10.2469508,10.5668094,-0.56556043,0,0,10.5668094
31.647181,12,10.5681265,1.19660915,0,0,10.5681265
31.657673,11.1803399,10.5694676,0.781583221,0,0,10.5694676
31.668164,10.7238053,10.570832,0.391117993,0,0,10.570832
31.678656,10.4403065,10.57222,-0.363198952,0,0,10.57222
31.689148,10.8627805,10.5736312,0.537726046,0,0,10.5736312
31.699639,9.8488578,10.5750653,-0.852178099,0,0,10.5750653
31.710131,10.4403065,10.5765225,-0.369074456,0,0,10.5765225
31.720622,10.3923048,10.5780022,-0.430926154,0,0,10.5780022
31.731114,10.9087121,10.5795046,0.573766055,0,0,10.5795046
31.741606,10.4880885,10.5810295,-0.304862221,0,0,10.5810295
31.752097,10.8627805,10.5825764,0.529343109,0,0,10.5825764
31.762589,10.2469508,10.5841455,-0.5806847,0,0,10.5841455
31.77308,10.0995049,10.5857364,-0.697302963,0,0,10.5857364
31.783572,11.3137085,10.5873491,0.852267195,0,0,10.5873491
31.794064,10.3923048,10.5889835,-0.443484643,0,0,10.5889835
31.804555,11.3578167,10.5906391,0.875886757,0,0,10.5906391
31.815047,11.0905365,10.5923161,0.705847294,0,0,10.5923161
31.825538,10.0498756,10.5940141,-0.737657403,0,0,10.5940141
31.83603,10.3440804,10.5957331,-0.501649971,0,0,10.5957331
31.846522,11.0905365,10.597473,0.702184831,0,0,10.597473
31.857013,9.94987437,10.5992333,-0.805828083,0,0,10.5992333
31.867505,10.5830052,10.6010142,-0.134197466,0,0,10.6010142
31.877996,10.2469508,10.6028153,-0.596543805,0,0,10.6028153
31.888488,10.1488916,10.6046367,-0.675088966,0,0,10.6046367
31.89898,10.2469508,10.6064781,-0.599605964,0,0,10.6064781
31.909471,9.94987437,10.6083391,-0.811458425,0,0,10.6083391
31.919963,10,10.6102201,-0.78116585,0,0,10.6102201
31.930454,10.8166538,10.6121204,0.45225374,0,0,10.6121204
31.940946,11.2249722,10.6140402,0.781621338,0,0,10.6140402
31.951438,11.1355287,10.6159793,0.72079774,0,0,10.6159793
31.961929,10.9544512,10.6179373,0.580098104,0,0,10.6179373
31.972421,10.4403065,10.6199145,-0.423801778,0,0,10.6199145
31.982912,10.7703296,10.6219102,0.385252447,0,0,10.6219102
31.993404,10.0995049,10.6239247,-0.724168325,0,0,10.6239247
32.003896,10.8166538,10.6259577,0.43668765,0,0,10.6259577
32.014387,10.8627805,10.6280089,0.484532356,0,0,10.6280089
32.024879,10.6301458,10.6300784,0.00820819577,0,0,10.6300784
32.03537,10.7703296,10.6321658,0.371703886,0,0,10.6321658
32.045862,10.0498756,10.6342713,-0.764457788,0,0,10.6342713
32.056354,10.9544512,10.6363946,0.563965043,0,0,10.6363946
32.066845,11.2249722,10.6385352,0.765791698,0,0,10.6385352
32.077337,11.2249722,10.6406936,0.764381188,0,0,10.6406936
32.087828,10.9544512,10.642869,0.558195442,0,0,10.642869
32.09832,10.2469508,10.6450618,-0.630960426,0,0,10.6450618
32.108812,10.5830052,10.6472717,-0.253508275,0,0,10.6472717
32.119303,10.6301458,10.6494982,-0.139112997,0,0,10.6494982
32.129795,10.5830052,10.6517418,-0.262176489,0,0,10.6517418
32.140286,10.7238053,10.6540017,0.26420375,0,0,10.6540017
32.150778,10.5356538,10.6562783,-0.347310423,0,0,10.6562783
32.16127,11.4891253,10.6585712,0.911347389,0,0,10.6585712
32.171761,10.8166538,10.6608802,0.394681731,0,0,10.6608802
32.182253,10.8627805,10.6632054,0.446738316,0,0,10.6632054
32.192744,10.2469508,10.6655463,-0.646989578,0,0,10.6655463
32.203236,11.4891253,10.6679032,0.906213048,0,0,10.6679032
32.213728,10.7238053,10.6702758,0.231364452,0,0,10.6702758
32.224219,11.2249722,10.6726637,0.743174612,0,0,10.6726637
32.234711,10.3440804,10.6750671,-0.575314442,0,0,10.6750671
32.245202,10.7703296,10.6774856,0.304703085,0,0,10.6774856
32.255694,11.1355287,10.6799195,0.674988317,0,0,10.6799195
32.266186,11.045361,10.6823683,0.602488738,0,0,10.6823683
32.276677,9.69535971,10.6848318,-0.994722113,0,0,10.6848318
32.287169,10.2956301,10.6873102,-0.625843489,0,0,10.6873102
32.29766,11.045361,10.689803,0.596286869,0,0,10.689803
32.308152,10.2956301,10.6923105,-0.629825626,0,0,10.6923105
32.318644,11.2694277,10.6948323,0.758020713,0,0,10.6948323
32.329135,10.2956301,10.697368,-0.633827973,0,0,10.697368
32.339627,10.4880885,10.6999181,-0.460249551,0,0,10.6999181
32.350118,10.2469508,10.7024819,-0.674930487,0,0,10.7024819
32.36061,10.8166538,10.7050598,0.334056933,0,0,10.7050598
32.371102,10.7703296,10.7076514,0.250356266,0,0,10.7076514
32.381593,11.3578167,10.7102562,0.804711408,0,0,10.7102562
32.392085,10.5356538,10.7128748,-0.420976329,0,0,10.7128748
32.402576,10.6770783,10.7155065,-0.196031182,0,0,10.7155065
32.413068,10.5356538,10.7181516,-0.427197644,0,0,10.7181516
32.42356,11,10.7208098,0.528384556,0,0,10.7208098
32.434051,11.5325626,10.7234806,0.899489829,0,0,10.7234806
32.444543,11,10.7261646,0.523292834,0,0,10.7261646
32.455034,10.4403065,10.728861,-0.537172712,0,0,10.728861
32.465526,10.5356538,10.7315703,-0.442624613,0,0,10.7315703
32.476018,10.8627805,10.734292,0.358452855,0,0,10.734292
32.486509,10.4403065,10.7370259,-0.544719528,0,0,10.7370259
32.497001,10.0995049,10.7397722,-0.80016702,0,0,10.7397722
32.507492,10.7703296,10.7425304,0.166731038,0,0,10.7425304
32.517984,10.9087121,10.7453008,0.404241639,0,0,10.7453008
32.528476,10.5356538,10.7480831,-0.460900615,0,0,10.7480831
32.538967,11.5325626,10.7508769,0.884129883,0,0,10.7508769
32.549459,10.5356538,10.7536827,-0.466935673,0,0,10.7536827
32.55995,10.1488916,10.7564997,-0.779492209,0,0,10.7564997
32.570442,11.61895,10.7593284,0.927157855,0,0,10.7593284
32.580934,10.3440804,10.7621683,-0.646597174,0,0,10.7621683
32.591425,10.7238053,10.7650192,-0.203012192,0,0,10.7650192
32.601917,11.1803399,10.7678815,0.642229232,0,0,10.7678815
32.612408,10.7238053,10.7707545,-0.216677539,0,0,10.7707545
32.6229,10.9087121,10.7736385,0.367523585,0,0,10.7736385
32.633392,10.6301458,10.7765334,-0.382606245,0,0,10.7765334
32.643883,10.4880885,10.7794385,-0.539768514,0,0,10.7794385
32.654375,10.1488916,10.7823545,-0.795903854,0,0,10.7823545
32.664866,10.3440804,10.7852806,-0.664229021,0,0,10.7852806
32.675358,10.9087121,10.7882173,0.347123596,0,0,10.7882173
32.68585,10,10.7911642,-0.889474126,0,0,10.7911642
32.696341,10.9087121,10.7941209,0.338513201,0,0,10.7941209
32.706833,11.1355287,10.7970879,0.581756674,0,0,10.7970879
32.717324,10.6301458,10.8000645,-0.412211898,0,0,10.8000645
32.727816,11.0905365,10.8030511,0.536176675,0,0,10.8030511
32.738308,10.7703296,10.8060474,-0.1889914,0,0,10.8060474
32.748799,10.5356538,10.8090529,-0.522875864,0,0,10.8090529
32.759291,9.8488578,10.8120682,-0.981432841,0,0,10.8120682
32.769782,10.8627805,10.8150926,0.218375596,0,0,10.8150926
32.780274,10.6770783,10.8181265,-0.375563901,0,0,10.8181265
32.790766,11.1803399,10.8211695,0.599308217,0,0,10.8211695
32.801257,11.6619038,10.8242214,0.915249929,0,0,10.8242214
32.811749,11.8743421,10.8272824,1.02325934,0,0,10.8272824
32.82224,10.8627805,10.830352,0.180079138,0,0,10.830352
32.832732,10.0995049,10.8334306,-0.856694629,0,0,10.8334306
32.843224,10.9087121,10.8365179,0.268689809,0,0,10.8365179
32.853715,10.2956301,10.8396134,-0.737552225,0,0,10.8396134
32.864207,11.5758369,10.8427177,0.85622381,0,0,10.8427177
32.874698,11.7898261,10.84583,0.971594625,0,0,10.84583
32.88519,10.0995049,10.8489509,-0.865705454,0,0,10.8489509
32.895682,11.7046999,10.8520799,0.923374259,0,0,10.8520799
32.906173,10.8627805,10.8552167,0.086970265,0,0,10.8552167
32.916665,10.6770783,10.8583617,-0.42577394,0,0,10.8583617
32.927156,10.4880885,10.8615143,-0.61108577,0,0,10.8615143
32.937648,11.045361,10.864675,0.425071811,0,0,10.864675
32.94814,11.3137085,10.8678433,0.667731366,0,0,10.8678433
32.958631,10.6770783,10.871019,-0.440386987,0,0,10.871019
32.969123,10.1488916,10.8742024,-0.85165181,0,0,10.8742024
32.979614,10.2956301,10.8773929,-0.762733731,0,0,10.8773929
32.990106,11.61895,10.880591,0.859278204,0,0,10.880591
33.000598,11.1803399,10.8837963,0.544558119,0,0,10.8837963
33.011089,11.4891253,10.8870085,0.775961855,0,0,10.8870085
33.021581,11,10.890228,0.331318607,0,0,10.890228
33.032072,11.4455231,10.8934541,0.743013486,0,0,10.8934541
33.042564,11.3137085,10.8966874,0.645771723,0,0,10.8966874
33.053056,10.9087121,10.8999274,0.0937266848,0,0,10.8999274
33.063547,10.3923048,10.9031738,-0.714750994,0,0,10.9031738
33.074039,10.3923048,10.9064271,-0.71702321,0,0,10.9064271
33.08453,11.2694277,10.9096866,0.599784172,0,0,10.9096866
33.095022,11.1355287,10.9129528,0.471779504,0,0,10.9129528
33.105514,11.2249722,10.9162254,0.555649892,0,0,10.9162254
33.116005,10.4880885,10.9195038,-0.656822148,0,0,10.9195038
33.126497,11,10.9227887,0.277869144,0,0,10.9227887
33.136988,10.9544512,10.9260794,0.168439114,0,0,10.9260794
33.14748,10.7703296,10.9293764,-0.398806686,0,0,10.9293764
33.157972,11.0905365,10.9326793,0.397312533,0,0,10.9326793
33.168463,11.5758369,10.9359876,0.799905792,0,0,10.9359876
33.178955,10.4880885,10.939302,-0.67172432,0,0,10.939302
33.189446,10.5830052,10.9426218,-0.599680372,0,0,10.9426218
33.199938,10.4403065,10.9459474,-0.711084324,0,0,10.9459474
33.21043,11.4891253,10.9492785,0.734742643,0,0,10.9492785
33.220921,11.7046999,10.9526147,0.867228439,0,0,10.9526147
33.231413,10.9544512,10.9559566,-0.0387999747,0,0,10.9559566
33.241904,10.8166538,10.9593034,-0.377689725,0,0,10.9593034
33.252396,10.8627805,10.9626556,-0.31603024,0,0,10.9626556
33.262888,10.2469508,10.9660129,-0.847975336,0,0,10.9660129
33.273379,11.8321596,10.969375,0.928861999,0,0,10.969375
33.283871,10.5830052,10.9727422,-0.624289173,0,0,10.9727422
33.294362,11.4891253,10.976114,0.716248063,0,0,10.976114
33.304854,10.9087121,10.9794909,-0.266042801,0,0,10.9794909
33.315346,11.1355287,10.9828725,0.390712507,0,0,10.9828725
33.325837,10.6301458,10.9862583,-0.59675164,0,0,10.9862583
33.336329,11.7473401,10.9896491,0.870454512,0,0,10.9896491
33.34682,11.3578167,10.9930439,0.603964196,0,0,10.9930439
33.357312,10.9544512,10.9964435,-0.204920425,0,0,10.9964435
33.367804,10.8627805,10.9998474,-0.370225532,0,0,10.9998474
33.378295,10.6301458,11.0032553,-0.610826853,0,0,11.0032553
33.388787,10.8166538,11.0066676,-0.435905659,0,0,11.0066676
33.399278,11.6619038,11.0100837,0.807353788,0,0,11.0100837
33.40977,11,11.0135041,-0.116207052,0,0,11.0135041
33.420262,10.5830052,11.0169285,-0.658728481,0,0,11.0169285
33.430753,9.2736185,11.0203564,-1.32164212,0,0,11.0203564
33.441245,11.4891253,11.0237884,0.682156034,0,0,11.0237884
33.451736,10.198039,11.0272239,-0.91059589,0,0,11.0272239
33.462228,11.2694277,11.0306634,0.488635154,11.0306634,0,11.0306634
33.47272,11.1803399,11.0342091,0.382270579,11.0342091,0,11.0341064
33.483211,10.8627805,11.0376566,-0.41818196,11.0376566,0,11.0375526
33.493703,10.0995049,11.041108,-0.970362336,11.041108,0,11.0410027
33.504194,10.9544512,11.0445624,-0.300185427,11.0445624,0,11.0444557
33.514686,10.9544512,11.0480206,-0.305891159,11.0480206,0,11.0479125
33.525178,11.3137085,11.0514819,0.51208062,11.0514819,0,11.0513724
33.535669,11.5325626,11.0549462,0.691097962,11.0549462,0,11.0548352
33.546161,11.045361,11.0584139,-0.114249371,11.0584139,0,11.0583015
33.556652,10.198039,11.0618844,-0.929432831,11.0618844,0,11.0617705
33.567144,10.5830052,11.0653582,-0.694516371,11.0653582,0,11.0652428
33.577636,10.8627805,11.068835,-0.453932271,11.068835,0,11.068718
33.588127,10.2956301,11.0723143,-0.881296867,11.0723143,0,11.0721957
33.598619,10.2469508,11.0757968,-0.910409798,11.0757968,0,11.0756765
33.60911,10.4403065,11.0792816,-0.799359202,11.0792816,0,11.0791597
33.619602,10.3923048,11.0827695,-0.830942052,11.0827695,0,11.0826459
33.630094,10.2956301,11.0862601,-0.889173728,11.0862601,0,11.0861347
33.640585,11.0905365,11.0897528,0.0279946016,11.0897528,0,11.0896256
33.651077,11.045361,11.0932484,-0.218831837,11.0932484,0,11.0931194
33.661568,10.5356538,11.0967461,-0.749060961,11.0967461,0,11.0966152
33.67206,11.7473401,11.1002465,0.804421315,11.1002465,0,11.1001137
33.682552,11.9582607,11.1037492,0.924397945,11.1037492,0,11.1036145
33.693043,11.9582607,11.1072538,0.922500367,11.1072538,0,11.1071171
33.703535,10.5830052,11.110761,-0.726467985,11.110761,0,11.1106223
33.714026,11,11.1142699,-0.33803837,11.1142699,0,11.1141292
33.724518,11.6619038,11.1177813,0.73764658,11.1177813,0,11.1176384
33.73501,12.0415946,11.1212947,0.959322612,11.1212947,0,11.1211496
33.745501,10.5830052,11.1248097,-0.736073689,11.1248097,0,11.1246624
33.755993,11.045361,11.128327,-0.288038113,11.128327,0,11.1281774
33.766484,12.083046,11.1318457,0.975294951,11.1318457,0,11.1316938
33.776976,10.6770783,11.1353666,-0.676969988,11.1353666,0,11.1352123
33.787468,11.2249722,11.1388892,0.293398926,11.1388892,0,11.1387325
33.797959,11.5325626,11.1424132,0.624619413,11.1424132,0,11.142254
33.808451,10.7703296,11.1459391,-0.612869871,11.1459391,0,11.1457773
33.818942,11.2249722,11.1494662,0.274783427,11.1494662,0,11.1493018
33.829434,11.8743421,11.1529952,0.849321421,11.1529952,0,11.1528281
33.839926,11.5325626,11.1565256,0.613218515,11.1565256,0,11.1563558
33.850417,11.7898261,11.1600571,0.793579847,11.1600571,0,11.1598845
33.860909,11.6619038,11.1635903,0.705913206,11.1635903,0,11.1634148
33.8714,11.4017543,11.1671245,0.484385973,11.1671245,0,11.1669459
33.881892,10.6301458,11.1706602,-0.735196839,11.1706602,0,11.1704786
33.892384,11.2694277,11.1741971,0.308594475,11.1741971,0,11.1740124
33.902875,11.3578167,11.1777348,0.424360525,11.1777348,0,11.1775469
33.913367,12.2474487,11.181274,1.03255738,11.181274,0,11.1810827
33.923858,11.0905365,11.1848138,-0.307046114,11.1848138,0,11.1846192
33.93435,11.1355287,11.188355,-0.229839652,11.188355,0,11.1881569
33.944842,11.4455231,11.1918971,0.50361299,11.1918971,0,11.1916954
33.955333,10.7238053,11.1954398,-0.68675648,11.1954398,0,11.1952344
33.965825,11,11.1989836,-0.446075772,11.1989836,0,11.1987745
33.976316,11.3137085,11.2025279,0.333437568,11.2025279,0,11.2023149
33.986808,11.5758369,11.2060733,0.608081935,11.2060733,0,11.2058563
33.9973,11.2694277,11.2096193,0.244557422,11.2096193,0,11.2093982
34.007791,10.5356538,11.2131657,-0.823111154,11.2131657,0,11.2129404
34.018283,11.5325626,11.2167131,0.562004926,11.2167131,0,11.2164834
34.028774,10.4403065,11.2202606,-0.883150103,11.2202606,0,11.2200265
34.039266,12,11.223809,0.881017012,11.223809,0,11.2235703
34.049758,11.5758369,11.2273579,0.590321096,11.2273579,0,11.2271144
34.060249,10.5356538,11.2309069,-0.833818402,11.2309069,0,11.2306585
34.070741,11.7046999,11.2344566,0.685742906,11.2344566,0,11.2342031
34.081232,10.1488916,11.2380063,-1.04360659,11.2380063,0,11.2377476
34.091724,11.1803399,11.2415566,-0.247420159,11.2415566,0,11.2412926
34.102216,11.1355287,11.2451072,-0.331026435,11.2451072,0,11.2448377
34.112707,10.9087121,11.2486577,-0.583048538,11.2486577,0,11.2483825
34.123199,10.7238053,11.2522087,-0.726913629,11.2522087,0,11.2519276
34.13369,10.8166538,11.2557595,-0.662650513,11.2557595,0,11.2554723
34.144182,11.3578167,11.2593108,0.31385651,11.2593108,0,11.2590173
34.154674,11.045361,11.2628621,-0.466370117,11.2628621,0,11.2625621
34.165165,10.7703296,11.2664131,-0.704331954,11.2664131,0,11.2661064
34.175657,11.7473401,11.2699645,0.690923774,11.2699645,0,11.2696508
34.186148,11.3137085,11.2735154,0.200482086,11.2735154,0,11.2731945
34.19664,10.7703296,11.2770667,-0.711854657,11.2770667,0,11.2767383
34.207132,10.7238053,11.2806178,-0.746198701,11.2806178,0,11.2802817
34.217623,11.045361,11.2841684,-0.488679272,11.2841684,0,11.2838244
34.228115,10.8627805,11.2877193,-0.651873285,11.2877193,0,11.287367
34.238606,11.7046999,11.2912696,0.642985499,11.2912696,0,11.2909087
34.249098,11.7898261,11.29482,0.703566745,11.29482,0,11.2944501
34.25959,11.8321596,11.2983701,0.730608967,11.2983701,0,11.2979911
34.270081,11.1355287,11.3019196,-0.407910416,11.3019196,0,11.301531
34.280573,11.4017543,11.3054692,0.310298331,11.3054692,0,11.3050706
34.291064,11,11.3090181,-0.555893962,11.3090181,0,11.3086091
34.301556,11.4455231,11.312567,0.364631533,11.312567,0,11.3121473
34.312048,12.2065556,11.3161155,0.94363134,11.3161155,0,11.3156846
34.322539,11.4017543,11.3196633,0.286515166,11.3196633,0,11.3192207
34.333031,11.3137085,11.323211,-0.0974810217,11.323211,0,11.3227563
34.343522,11.4017543,11.326758,0.273854373,11.326758,0,11.3262906
34.354014,12.2474487,11.3303049,0.957676242,11.3303049,0,11.3298243
34.364506,11,11.3338514,-0.577798747,11.3338514,0,11.333357
34.374997,10.9544512,11.3373971,-0.618826246,11.3373971,0,11.3368884
34.385489,10.1488916,11.3409426,-1.09181092,11.3409426,0,11.3404189
34.39598,11.8321596,11.3444874,0.698335259,11.3444874,0,11.343948
34.406472,11,11.3480321,-0.589942465,11.3480321,0,11.3474763
34.416964,11.8743421,11.3515764,0.723025404,11.3515764,0,11.3510034
34.427455,11.1803399,11.3551198,-0.418066906,11.3551198,0,11.3545289
34.437947,11.7046999,11.3586632,0.588248835,11.3586632,0,11.3580534
34.448438,11.6619038,11.3622059,0.547446721,11.3622059,0,11.3615763
34.45893,10.5830052,11.3657485,-0.884727784,11.3657485,0,11.3650982
34.469422,10.7238053,11.3692908,-0.803421107,11.3692908,0,11.3686187
34.479913,11.045361,11.3728324,-0.572251146,11.3728324,0,11.3721374
34.490405,11.61895,11.3763741,0.49252001,11.3763741,0,11.375655
34.500896,10.6301458,11.3799152,-0.865892251,11.3799152,0,11.3791708
34.511388,11.8321596,11.3834565,0.66985302,11.3834565,0,11.3826853
34.52188,11.1803399,11.3869977,-0.454596303,11.3869977,0,11.3861983
34.532371,11.2694277,11.3905385,-0.348009824,11.3905385,0,11.3897093
34.542863,11.9582607,11.3940797,0.751119847,11.3940797,0,11.393219
34.553354,11.8321596,11.3976207,0.659195587,11.3976207,0,11.3967267
34.563846,11.045361,11.4011624,-0.596490863,11.4011624,0,11.400233
34.574338,11.4017543,11.4047044,-0.0543150436,11.4047044,0,11.4037375
34.584829,11.5758369,11.4082466,0.409377981,11.4082466,0,11.4072399
34.595321,10.8166538,11.4117898,-0.771450559,11.4117898,0,11.4107408
34.605812,11.1803399,11.4153335,-0.484761439,11.4153335,0,11.4142396
34.616304,10.6770783,11.4188787,-0.861278379,11.4188787,0,11.4177367
34.626796,11.1803399,11.4224252,-0.492021617,11.4224252,0,11.421232
34.637287,11.045361,11.4259728,-0.616937459,11.4259728,0,11.4247249
34.647779,11.4017543,11.4295227,-0.166638775,11.4295227,0,11.4282162
34.65827,11.0905365,11.4330745,-0.585267435,11.4330745,0,11.4317052
34.668762,11.5325626,11.4366291,0.309731265,11.4366291,0,11.4351924
34.679254,10.9544512,11.4401868,-0.696947388,11.4401868,0,11.4386775
34.689745,11.2694277,11.4437476,-0.417516442,11.4437476,0,11.4421601
34.700237,10.5830052,11.4473129,-0.929681477,11.4473129,0,11.445641
34.710728,11.4891253,11.4508825,0.195557632,11.4508825,0,11.4491193
34.72122,10.7238053,11.4544579,-0.854782199,11.4544579,0,11.4525957
34.731712,10.5830052,11.4580396,-0.935432706,11.4580396,0,11.4560699
34.742203,12.0415946,11.4616282,0.761555237,11.4616282,0,11.4595415
34.752695,12.5299641,11.4652255,1.03186169,11.4652255,0,11.463011
34.763186,11.1355287,11.4688322,-0.577324431,11.4688322,0,11.4664779
34.773678,11.1355287,11.4724505,-0.580449595,11.4724505,0,11.4699428
34.78417,11.3137085,11.4760817,-0.402955543,11.4760817,0,11.4734053
34.794661,12.2474487,11.4797276,0.876196971,11.4797276,0,11.476865
34.805153,10.9087121,11.4833913,-0.758075998,11.4833913,0,11.4803225
34.815644,11.2694277,11.4870751,-0.466527004,11.4870751,0,11.4837772
34.826136,12.1655251,11.4907831,0.821426806,11.4907831,0,11.4872298
34.836628,10.8166538,11.4945189,-0.823325642,11.4945189,0,11.4906798
34.847119,12.1243557,11.4982873,0.791244795,11.4982873,0,11.4941268
34.857611,10.5830052,11.5020949,-0.958691659,11.5020949,0,11.4975716
34.868102,11.4017543,11.5059484,-0.322791212,11.5059484,0,11.5010135
34.878594,10.4403065,11.5098576,-1.03419105,11.5098576,0,11.504453
34.889086,11.4891253,11.5138339,-0.157189669,11.5138339,0,11.5078897
34.899577,11.4455231,11.517892,-0.269014616,11.517892,0,11.5113235
34.910069,11.5758369,11.5220535,0.231912574,11.5220535,0,11.5147548
34.92056,12.1655251,11.5263467,0.799486339,11.5263467,0,11.518183
34.931052,10.9087121,11.5308149,-0.788734951,11.5308149,0,11.5216088
34.941544,11.4891253,11.535521,-0.215396605,11.535521,0,11.5250317
34.952035,12.2882057,11.5405577,0.864666438,11.5405577,0,11.5284514
34.962527,11.1355287,11.5460611,-0.640727976,11.5460611,0,11.5318685
34.973018,11.7898261,11.552218,0.487450603,11.552218,0,11.5352824
34.98351,11.9163753,11.5592767,0.597577251,11.5592767,0,11.5386938
34.994002,10,11.5675386,-1.25201381,11.5675386,0,11.5421021
35.004493,11.5325626,11.5773392,-0.211604833,11.5773392,0,11.5455071
35.014985,11.8321596,11.58901,0.493101946,11.58901,0,11.5489094
35.025476,10.8166538,11.6028062,-0.886652358,11.6028062,0,11.5523084
35.035968,11.9163753,11.618817,0.545488998,11.618817,0,11.5557046
35.04646,12,11.6368032,0.602658081,11.6368032,0,11.5590978
35.056951,12.5299641,11.6559496,0.934887431,11.6559496,0,11.5624875
35.067443,11.4891253,11.6745402,-0.430598341,11.6745402,0,11.5658743
35.077934,11.9582607,11.6898165,0.518116062,11.6898165,0,11.5692577
35.088426,12.6095202,11.6986951,0.954371606,11.6986951,0,11.5726382
35.098918,12.0415946,11.6994476,0.58493329,11.6994476,0,11.5760155
35.109409,11.1355287,11.69295,-0.746606501,11.69295,0,11.5793893
35.119901,12.2065556,11.6819966,0.724264472,11.6819966,0,11.5827601
35.130392,11.9163753,11.6695752,0.496789763,11.6695752,0,11.5861273
35.140884,12.0415946,11.657786,0.619522904,11.657786,0,11.5894915
35.151376,12.1243557,11.6477447,0.690370137,11.6477447,0,11.5928524
35.161867,11.7046999,11.6398743,0.254608717,11.6398743,0,11.5962096
35.172359,11.9582607,11.6341875,0.569274314,11.6341875,0,11.5995637
35.18285,11.4455231,11.6304786,-0.430064523,11.6304786,0,11.6029141
35.193342,11.5758369,11.6284351,-0.229343038,11.6284351,0,11.6062614
35.203834,11.4017543,11.6277176,-0.475356005,11.6277176,0,11.6096053
35.214325,11.4017543,11.6280079,-0.475661265,11.6280079,0,11.6129454
35.224817,11.6619038,11.6290375,0.181290529,11.6290375,0,11.6162823
35.235308,11.6619038,11.6305968,0.17693776,11.6305968,0,11.6196154
35.2458,12.4096736,11.6325323,0.881556222,11.6325323,0,11.6229453
35.256292,12.4498996,11.6347361,0.902864074,11.6347361,0,11.6262716
35.266783,11.2249722,11.6371346,-0.641998804,11.6371346,0,11.629594
35.277275,11.045361,11.639679,-0.770920207,11.639679,0,11.6329131
35.287766,12.1243557,11.642335,0.694277076,11.642335,0,11.6362284
35.298258,11.4455231,11.6450796,-0.446717428,11.6450796,0,11.6395402
35.30875,11.1803399,11.6478955,-0.683780348,11.6478955,0,11.6428485
35.319241,11.61895,11.6507694,-0.178379722,11.6507694,0,11.6461527
35.329733,11,11.6536918,-0.808512112,11.6536918,0,11.6494536
35.340224,11.2249722,11.6566543,-0.657025213,11.6566543,0,11.6527504
35.350716,11.5325626,11.6596508,-0.356494296,11.6596508,0,11.6560438
35.361208,11.3137085,11.6626757,-0.590734423,11.6626757,0,11.6593334
35.371699,11.045361,11.6657242,-0.787631371,11.6657242,0,11.6626189
35.382191,11.9163753,11.6687932,0.497576163,11.6687932,0,11.665901
35.392682,12.4096736,11.6718791,0.858949667,11.6718791,0,11.6691789
35.403174,11.9163753,11.6749797,0.491320214,11.6749797,0,11.6724533
35.413666,12,11.6780926,0.567368869,11.6780926,0,11.6757238
35.424157,12.1655251,11.6812154,0.695923611,11.6812154,0,11.6789902
35.434649,11.2694277,11.6843471,-0.644142435,11.6843471,0,11.682253
35.44514,11.4455231,11.6874858,-0.491897017,11.6874858,0,11.6855115
35.455632,11.045361,11.6906308,-0.803286843,11.6906308,0,11.6887665
35.466124,11.9163753,11.6937806,0.471799386,11.6937806,0,11.6920174
35.476615,11.4891253,11.6969342,-0.455860573,11.6969342,0,11.6952642
35.487107,11.4017543,11.7000911,-0.546202234,11.7000911,0,11.6985072
35.497598,12.2474487,11.7032502,0.737698096,11.7032502,0,11.7017459
35.50809,12.1243557,11.7064114,0.646486064,11.7064114,0,11.7049809
35.518582,11.9163753,11.7095738,0.45475428,11.7095738,0,11.7082119
35.529073,12.083046,11.7127367,0.608530453,11.7127367,0,11.7114385
35.539565,12,11.7159001,0.533010259,11.7159001,0,11.7146614
35.550056,12.2474487,11.719063,0.726901422,11.719063,0,11.7178798
35.560548,11.7473401,11.7222258,0.158474929,11.7222258,0,11.7210945
35.57104,11.8743421,11.7253878,0.38594597,11.7253878,0,11.724305
35.581531,11.4455231,11.7285484,-0.532001151,11.7285484,0,11.7275111
35.592023,11.4891253,11.7317079,-0.49252673,11.7317079,0,11.7307133
35.602514,12.083046,11.7348655,0.590068216,11.7348655,0,11.7339111
35.613006,10.6301458,11.7380216,-1.05255676,11.7380216,0,11.737105
35.623498,11.7898261,11.7411756,0.220568594,11.7411756,0,11.7402946
35.633989,11.4891253,11.7443272,-0.505175106,11.7443272,0,11.7434798
35.644481,12.2065556,11.7474767,0.677553641,11.7474767,0,11.746661
35.654972,11.7046999,11.7506234,-0.214297576,11.7506234,0,11.7498377
35.665464,11.61895,11.7537677,-0.367175231,11.7537677,0,11.7530104
35.675956,11.5758369,11.7569092,-0.425525945,11.7569092,0,11.7561788
35.686447,11.9163753,11.7600476,0.395382996,11.7600476,0,11.7593426
35.696939,11.2694277,11.7631832,-0.702677404,11.7631832,0,11.7625024
35.70743,11.3578167,11.7663154,-0.639139053,11.7663154,0,11.7656576
35.717922,11.4455231,11.7694447,-0.569141095,11.7694447,0,11.7688087
35.728414,12.1655251,11.7725707,0.626860687,11.7725707,0,11.7719555
35.738905,11.8743421,11.7756931,0.314084403,11.7756931,0,11.7750976
35.749397,12.4498996,11.7788123,0.819199209,11.7788123,0,11.7782356
35.759888,11.3137085,11.7819276,-0.684265379,11.7819276,0,11.7813689
35.77038,11.9163753,11.7850397,0.362402568,11.7850397,0,11.7844981
35.780872,11.9163753,11.7881481,0.358088286,11.7881481,0,11.7876229
35.791363,12.3693169,11.7912525,0.760305479,11.7912525,0,11.790743
35.801855,12.8062485,11.7943534,1.00592997,11.7943534,0,11.7938588
35.812346,12.2882057,11.7974502,0.700539484,11.7974502,0,11.7969699
35.822838,11.5758369,11.8005434,-0.474032137,11.8005434,0,11.8000769
35.83333,12.083046,11.8036327,0.528595607,11.8036327,0,11.8031793
35.843821,11.61895,11.8067177,-0.433321642,11.8067177,0,11.8062769
35.854313,11.0905365,11.809799,-0.848093443,11.809799,0,11.8093703
35.864804,12.489996,11.812876,0.822873039,11.812876,0,11.8124588
35.875296,10.8627805,11.8159491,-0.976303558,11.8159491,0,11.8155431
35.885788,12,11.8190182,0.425419592,11.8190182,0,11.8186229
35.896279,12.0415946,11.8220828,0.468520886,11.8220828,0,11.8216978
35.906771,12,11.8251434,0.418158531,11.8251434,0,11.8247683
35.917262,12.328828,11.8281996,0.707550986,11.8281996,0,11.827834
35.927754,11.3578167,11.8312518,-0.688066214,11.8312518,0,11.8308954
35.938246,11.2249722,11.8342997,-0.780594361,11.8342997,0,11.8339521
35.948737,12,11.837343,0.403307552,11.837343,0,11.8370039
35.959229,11.9163753,11.8403823,0.275668318,11.8403823,0,11.8400513
35.96972,12.6491106,11.8434169,0.897604471,11.8434169,0,11.8430938
35.980212,12.4498996,11.8464473,0.776821899,11.8464473,0,11.8461319
35.990704,11.8321596,11.8494734,-0.131582019,11.8494734,0,11.8491654
36.001195,11.6619038,11.8524947,-0.436567212,11.8524947,0,11.8521938
36.011687,12.8452326,11.8555119,0.994847079,11.8555119,0,11.8552178
36.022178,12.3693169,11.8585242,0.714697586,11.8585242,0,11.8582368
36.03267,11.9582607,11.8615324,0.311011833,11.8615324,0,11.8612514
36.043162,11.7046999,11.864536,-0.399795054,11.864536,0,11.8642612
36.053653,11.5325626,11.8675348,-0.578767808,11.8675348,0,11.867266
36.064145,12.328828,11.8705293,0.676977656,11.8705293,0,11.8702663
36.074636,11.5758369,11.8735189,-0.54560239,11.8735189,0,11.8732615
36.085128,11.5758369,11.8765042,-0.548331337,11.8765042,0,11.8762522
36.09562,11.7046999,11.8794848,-0.418072848,11.8794848,0,11.8792382
36.106111,12.5698051,11.8824605,0.829062448,11.8824605,0,11.882219
36.116603,12.4096736,11.8854319,0.724045405,11.8854319,0,11.8851953
36.127094,12,11.8883983,0.334068426,11.8883983,0,11.8881665
36.137586,11.6619038,11.8913603,-0.479016151,11.8913603,0,11.8911332
36.148078,12.1655251,11.8943175,0.520775895,11.8943175,0,11.894095
36.158569,12.0415946,11.8972698,0.379901034,11.8972698,0,11.8970516
36.169061,12.2882057,11.9002176,0.622886947,11.9002176,0,11.9000037
36.179552,11.7898261,11.9031603,-0.336651472,11.9031603,0,11.9029506
36.190044,12.0415946,11.9060986,0.368097781,11.9060986,0,11.9058929
36.200536,12.7671453,11.9090321,0.926344024,11.9090321,0,11.9088303
36.211027,12.6885775,11.9119605,0.88125879,11.9119605,0,11.9117625
36.221519,12.6885775,11.9148844,0.87959831,11.9148844,0,11.91469
36.23201,11.7898261,11.9178031,-0.357738724,11.9178031,0,11.9176124
36.242502,12.1243557,11.9207173,0.451263043,11.9207173,0,11.9205301
36.252994,12.083046,11.9236267,0.399273471,11.9236267,0,11.9234428
36.263485,12.3693169,11.9265309,0.665421671,11.9265309,0,11.9263504
36.273977,12.2474487,11.9294305,0.56393105,11.9294305,0,11.9292532
36.284468,12.8452326,11.9323249,0.95546201,11.9323249,0,11.9321508
36.29496,11.8743421,11.9352147,-0.246723849,11.9352147,0,11.9350436
36.305452,11.4017543,11.9380996,-0.73235606,11.9380996,0,11.9379315
36.315943,11.4891253,11.9409794,-0.672200909,11.9409794,0,11.9408141
36.326435,12.1655251,11.9438544,0.470819138,11.9438544,0,11.943692
36.336926,11.5758369,11.9467242,-0.609005191,11.9467242,0,11.9465646
36.347418,11.3137085,11.9495894,-0.797421387,11.9495894,0,11.9494324
36.35791,11.8321596,11.9524495,-0.346828451,11.9524495,0,11.9522952
36.368401,11.7898261,11.9553045,-0.406790291,11.9553045,0,11.9551527
36.378893,12.2882057,11.9581547,0.574500703,11.9581547,0,11.9580054
36.389384,12.1243557,11.9609996,0.404173287,11.9609996,0,11.9608528
36.399876,11.61895,11.9638398,-0.587273162,11.9638398,0,11.9636953
36.410368,12.5299641,11.966675,0.750525882,11.966675,0,11.9665328
36.420859,12.489996,11.9695049,0.721450711,11.9695049,0,11.969365
36.431351,12.5299641,11.97233,0.746749023,11.97233,0,11.9721923
36.441842,12.1243557,11.9751498,0.386271759,11.9751498,0,11.9750143
36.452334,12.3693169,11.9779648,0.625581397,11.9779648,0,11.9778314
36.462826,12.6095202,11.9807747,0.792934723,11.9807747,0,11.9806434
36.473317,12.2065556,11.9835793,0.472203637,11.9835793,0,11.98345
36.483809,12,11.9863791,0.116708487,11.9863791,0,11.9862518
36.4943,11.8321596,11.9891736,-0.396249912,11.9891736,0,11.9890481
36.504792,10.9087121,11.9919632,-1.04079347,11.9919632,0,11.9918396
36.515284,12.489996,11.9947476,0.70373884,11.9947476,0,11.9946259
36.525775,12.6885775,11.9975267,0.83129465,11.9975267,0,11.9974068
36.536267,12.489996,12.000301,0.699782114,12.000301,0,12.0001828
36.546758,12.1655251,12.0030698,0.403057345,12.0030698,0,12.0029534
36.55725,12.328828,12.0058338,0.568325786,12.0058338,0,12.005719
36.567742,12.1243557,12.0085926,0.340239659,12.0085926,0,12.0084795
36.578233,12.1243557,12.011346,0.336169042,12.011346,0,12.0112345
36.588725,12.7671453,12.0140945,0.867785001,12.0140945,0,12.0139846
36.599216,12.083046,12.0168376,0.257309892,12.0168376,0,12.0167292
36.609708,12.0415946,12.0195757,0.14838746,12.0195757,0,12.0194689
36.6202,13.114877,12.0223087,1.04525994,12.0223087,0,12.0222033
36.630691,11.7046999,12.0250362,-0.565982595,12.0250362,0,12.0249323
36.641183,12.1655251,12.0277588,0.371168812,12.0277588,0,12.0276563
36.651674,12,12.0304759,-0.174573402,12.0304759,0,12.0303748
36.662166,12.328828,12.033188,0.543727864,12.033188,0,12.0330883
36.672658,11.9163753,12.0358949,-0.345716139,12.0358949,0,12.0357965
36.683149,12.8452326,12.0385964,0.898129282,12.0385964,0,12.0384993
36.693641,11.61895,12.0412928,-0.649879059,12.0412928,0,12.041197
36.704132,12.5299641,12.0439838,0.697122871,12.0439838,0,12.0438892
36.714624,11.8321596,12.0466698,-0.463152448,12.0466698,0,12.0465764
36.725116,11.7898261,12.0492584,-0.509344919,12.0492584,0,12.0492584
36.735607,12.7279221,12.0519348,0.822184471,12.0519348,0,12.0519348
36.746099,12.083046,12.0546061,0.168641229,12.0546061,0,12.0546061
36.75659,13.0384048,12.0572719,0.990521528,12.0572719,0,12.0572719
36.767082,12.2882057,12.0599327,0.477779298,12.0599327,0,12.0599327
36.777574,12.2065556,12.0625881,0.379430487,12.0625881,0,12.0625881
36.788065,11.5758369,12.065238,-0.699572087,12.065238,0,12.065238
36.798557,11.8743421,12.0678828,-0.439932658,12.0678828,0,12.0678828
36.809048,12.7279221,12.0705221,0.81080206,12.0705221,0,12.0705221
36.81954,12.6095202,12.0731563,0.732368731,12.0731563,0,12.0731563
36.830032,12.6095202,12.0757851,0.730571774,12.0757851,0,12.0757851
36.840523,12.328828,12.0784084,0.500419479,12.0784084,0,12.0784084
36.851015,11.4891253,12.0810265,-0.769351169,12.0810265,0,12.0810265
36.861506,11.3578167,12.0836391,-0.851952105,12.0836391,0,12.0836391
36.871998,12.7279221,12.0862465,0.801046514,12.0862465,0,12.0862465
36.88249,12.1243557,12.0888487,0.188433018,12.0888487,0,12.0888487
36.892981,13.0384048,12.0914451,0.973118524,12.0914451,0,12.0914451
36.903473,12.1243557,12.0940365,0.174123878,12.0940365,0,12.0940365
36.913964,12.2882057,12.0966223,0.437702452,12.0966223,0,12.0966223
36.924456,12.2474487,12.0992029,0.385026999,12.0992029,0,12.0992029
36.934948,12.5299641,12.1017782,0.654359159,12.1017782,0,12.1017782
36.945439,11.5758369,12.1043478,-0.726987551,12.1043478,0,12.1043478
36.955931,11.9582607,12.1069123,-0.38555355,12.1069123,0,12.1069123
36.966422,12.4096736,12.1094711,0.5479074,12.1094711,0,12.1094711
36.976914,12.1655251,12.1120248,0.231301193,12.1120248,0,12.1120248
36.987406,12.083046,12.1145731,-0.177558819,12.1145731,0,12.1145731
36.997897,11.7046999,12.1171157,-0.642196106,12.1171157,0,12.1171157
37.008389,11.9163753,12.1196532,-0.450863545,12.1196532,0,12.1196532
37.01888,12.5698051,12.122185,0.669044129,12.122185,0,12.122185
37.029372,12.7671453,12.1247117,0.801519587,12.1247117,0,12.1247117
37.039864,12.2882057,12.1272329,0.401214183,12.1272329,0,12.1272329
37.050355,12.489996,12.1297485,0.600206243,12.1297485,0,12.1297485
37.060847,12.1655251,12.1322588,0.182390327,12.1322588,0,12.1322588
37.071338,11.1803399,12.1347635,-0.976946076,12.1347635,0,12.1347635
37.08183,13.3790882,12.137263,1.11437208,12.137263,0,12.137263
37.092322,12.922848,12.1397571,0.884924239,12.1397571,0,12.1397571
37.102813,11.9582607,12.1422454,-0.428934385,12.1422454,0,12.1422454
37.113305,12.4096736,12.1447286,0.514728116,12.1447286,0,12.1447286
37.123796,13.5277493,12.1472061,1.17496518,12.1472061,0,12.1472061
37.134288,12.5698051,12.1496783,0.648171847,12.1496783,0,12.1496783
37.14478,12.1243557,12.1521451,-0.166701806,12.1521451,0,12.1521451
37.155271,12.6491106,12.1546062,0.703210063,12.1546062,0,12.1546062
37.165763,11.9163753,12.1570621,-0.490598443,12.1570621,0,12.1570621
37.176254,11.9582607,12.1595123,-0.448610686,12.1595123,0,12.1595123
37.186746,12.3693169,12.1619572,0.455367602,12.1619572,0,12.1619572
37.197238,12.5698051,12.1643967,0.636716898,12.1643967,0,12.1643967
37.207729,11.8321596,12.1668304,-0.578507444,12.1668304,0,12.1668304
37.218221,11.3137085,12.1692589,-0.924959691,12.1692589,12.1692589,12.1692589
37.228712,12.4498996,12.1743257,0.524951364,12.1716817,12.1743257,12.1716817
37.239204,11.9582607,12.1767754,-0.467455532,12.1740992,12.1767754,12.1740992
37.249696,12.922848,12.1792203,0.862338508,12.1765113,12.1792203,12.1765113
37.260187,11.2694277,12.18166,-0.955108563,12.1789176,12.18166,12.1789176
37.270679,12.6095202,12.1840952,0.652246161,12.1813186,12.1840952,12.1813186
37.28117,11.7898261,12.1865252,-0.629840516,12.183714,12.1865252,12.183714
37.291662,12.6885775,12.1889506,0.706842917,12.186104,12.1889506,12.186104
37.302154,13.0766968,12.1913712,0.94091742,12.1884886,12.1913712,12.1884886
37.312645,13.1529464,12.1937868,0.979366952,12.1908674,12.1937868,12.1908674
37.323137,12.328828,12.1961978,0.364184277,12.1932409,12.1961978,12.1932409
37.333628,12.489996,12.1986038,0.539807538,12.1956087,12.1986038,12.1956087
37.34412,12.2474487,12.2010053,0.215507365,12.1979712,12.2010053,12.1979712
37.354612,12.0415946,12.203402,-0.402252953,12.2003282,12.203402,12.2003282
37.365103,12.5698051,12.2057938,0.603333488,12.2026794,12.2057938,12.2026794
37.375595,12.2882057,12.2081811,0.282886264,12.2050254,12.2081811,12.2050254
37.386086,11.8743421,12.2105635,-0.579846003,12.2073656,12.2105635,12.2073656
37.396578,12.489996,12.2129414,0.526359741,12.2097005,12.2129414,12.2097005
37.40707,13.1529464,12.2153147,0.968313852,12.2120298,12.2153147,12.2120298
37.417561,12.0415946,12.2176832,-0.419629118,12.2143534,12.2176832,12.2143534
37.428053,12.489996,12.2200473,0.519565915,12.2166717,12.2200473,12.2166717
37.438544,12.4096736,12.2224065,0.432743698,12.2189843,12.2224065,12.2189843
37.449036,12.328828,12.2247615,0.322593415,12.2212915,12.2247615,12.2212915
37.459528,12.2474487,12.2271119,0.142607109,12.2235932,12.2271119,12.2235932
37.470019,12,12.2294576,-0.479017367,12.2258891,12.2294576,12.2258891
37.480511,12.4498996,12.2317991,0.467012306,12.2281797,12.2317991,12.2281797
37.491002,12.7671453,12.2341359,0.730074946,12.2304645,12.2341359,12.2304645
37.501494,12.083046,12.2364685,-0.391691909,12.232744,12.2364685,12.232744
37.511986,13,12.2387968,0.872469619,12.235018,12.2387968,12.235018
37.522477,12.5698051,12.2411204,0.573310259,12.2372862,12.2411204,12.2372862
37.532969,11.8743421,12.24344,-0.607534307,12.239549,12.24344,12.239549
37.54346,12.2065556,12.2457551,-0.19798862,12.2418061,12.2457551,12.2418061
37.553952,11.8321596,12.2480662,-0.644908222,12.2440578,12.2480662,12.2440578
37.564444,12.6095202,12.2503731,0.599288879,12.246304,12.2503731,12.246304
37.574935,12.1655251,12.2526755,-0.29521261,12.2485444,12.2526755,12.2485444
37.585427,12.4498996,12.2549741,0.441503632,12.2507794,12.2549741,12.2507794
37.595918,12.0415946,12.2572684,-0.464407004,12.2530087,12.2572684,12.2530087
37.60641,11.61895,12.2595589,-0.800380472,12.2552326,12.2595589,12.2552326
37.616902,12.2065556,12.2618455,-0.235137906,12.257451,12.2618455,12.257451
37.627393,12.3693169,12.2641278,0.324328634,12.2596635,12.2641278,12.2596635
37.637885,12.6885775,12.2664065,0.649746893,12.2618708,12.2664065,12.2618708
37.648376,13.0384048,12.2686812,0.877338953,12.2640722,12.2686812,12.2640722
37.658868,12,12.2709523,-0.520530764,12.2662683,12.2709523,12.2662683
37.66936,12.083046,12.2732197,-0.436089089,12.2684587,12.2732197,12.2684587
37.679851,12.1655251,12.2754832,-0.331599352,12.2706435,12.2754832,12.2706435
37.690343,12.6095202,12.2777433,0.576000756,12.2728228,12.2777433,12.2728228
37.700834,12.2882057,12.2799998,0.0905868131,12.2749963,12.2799998,12.2749963
37.711326,13.0384048,12.2822529,0.869569938,12.2771645,12.2822529,12.2771645
37.721818,13.190906,12.2845027,0.952052115,12.2793271,12.2845027,12.2793271
37.732309,11.7046999,12.286749,-0.762921422,12.2814839,12.286749,12.2814839
37.742801,12.5299641,12.2889923,0.490888801,12.2836354,12.2889923,12.2836354
37.753292,12.6491106,12.2912322,0.598229439,12.285781,12.2912322,12.285781
37.763784,12.5698051,12.2934692,0.525676562,12.2879213,12.2934692,12.2879213
37.774276,13.190906,12.2957033,0.946151479,12.2900559,12.2957033,12.2900559
37.784767,12.2065556,12.2979343,-0.302289154,12.2921848,12.2979343,12.2921848
37.795259,12.489996,12.3001628,0.435698519,12.2943083,12.3001628,12.2943083
37.80575,12.328828,12.3023884,0.162602716,12.296426,12.3023884,12.296426
37.816242,12.8840987,12.3046116,0.761240533,12.2985383,12.3046116,12.2985383
37.826734,12.4096736,12.3068323,0.320688793,12.300645,12.3068323,12.300645
37.837225,12.2882057,12.3090506,-0.144377428,12.302746,12.3090506,12.302746
37.847717,12.328828,12.3112668,0.132518699,12.3048415,12.3112668,12.3048415
37.858208,12.2882057,12.3134807,-0.15898119,12.3069312,12.3134807,12.3069312
37.8687,13.4907376,12.315693,1.08399474,12.3090156,12.315693,12.3090156
37.879192,12.489996,12.3179034,0.414840454,12.3110943,12.3179034,12.3110943
37.889683,12.1655251,12.320112,-0.39317542,12.3131673,12.320112,12.3131673
37.900175,12.2882057,12.3223193,-0.184698537,12.3152348,12.3223193,12.3152348
37.910666,12.5698051,12.3245251,0.49525754,12.3172966,12.3245251,12.3172966
37.921158,12.2882057,12.3267299,-0.196275789,12.3193529,12.3267299,12.3193529
37.93165,11.3137085,12.3289338,-1.0075839,12.3214037,12.3289338,12.3214037
37.942141,12.3693169,12.3311368,0.195397354,12.3234486,12.3311368,12.3234486
37.952633,13.3041347,12.3333393,0.985289475,12.3254882,12.3333393,12.3254882
37.963124,12.1243557,12.3355414,-0.459549501,12.3275219,12.3355414,12.3275219
37.973616,12.0415946,12.3377436,-0.544195712,12.3295503,12.3377436,12.3295503
37.984108,13.3416641,12.3399458,1.00085874,12.331573,12.3399458,12.331573
37.994599,12.1243557,12.3421483,-0.466682617,12.3335899,12.3421483,12.3335899
38.005091,11.4017543,12.3443517,-0.97087456,12.3356015,12.3443517,12.3356015
38.015582,12.4498996,12.3465557,0.321471395,12.3376072,12.3465557,12.3376072
38.026074,12.0415946,12.3487613,-0.554226214,12.3396075,12.3487613,12.3396075
38.036566,12.2882057,12.3509684,-0.250524746,12.3416023,12.3509684,12.3416023
38.047057,13.190906,12.3531772,0.915275254,12.3435912,12.3531772,12.3435912
38.057549,12,12.3553884,-0.596144639,12.3455747,12.3553884,12.3455747
38.06804,12.5698051,12.3576021,0.460654936,12.3475524,12.3576021,12.3475524
38.078532,12.2065556,12.3598191,-0.391488758,12.3495247,12.3598191,12.3495247
38.089024,12.7279221,12.3620395,0.604882292,12.3514914,12.3620395,12.3514914
38.099515,11.9582607,12.3642636,-0.637183532,12.3534523,12.3642636,12.3534523
38.110007,13,12.3664923,0.795931947,12.3554077,12.3664923,12.3554077
38.120498,12.4096736,12.3687258,0.202355791,12.3573574,12.3687258,12.3573574
38.13099,11.9582607,12.3709649,-0.642420548,12.3593016,12.3709649,12.3593016
38.141482,11.9163753,12.3732101,-0.675895545,12.3612403,12.3732101,12.3612403
38.151973,12.083046,12.3754617,-0.540754778,12.3631731,12.3754617,12.3631731
38.162465,12.2065556,12.3777209,-0.413721241,12.3651006,12.3777209,12.3651006
38.172956,12.083046,12.3799879,-0.544923767,12.3670222,12.3799879,12.3670222
38.183448,12.2474487,12.3822639,-0.367171888,12.3689384,12.3822639,12.3689384
38.19394,12.922848,12.3845495,0.733688242,12.370849,12.3845495,12.370849
38.204431,13.4907376,12.3868455,1.0506627,12.3727538,12.3868455,12.3727538
38.214923,12.5299641,12.389153,0.375248047,12.3746532,12.389153,12.3746532
38.225414,12.4096736,12.3914727,0.13491079,12.3765468,12.3914727,12.3765468
38.235906,12.489996,12.3938062,0.310144839,12.378435,12.3938062,12.378435
38.246398,11.9582607,12.3961543,-0.661735246,12.3803175,12.3961543,12.3803175
38.256889,11.7046999,12.3985181,-0.832957467,12.3821943,12.3985181,12.3821943
38.267381,11.9163753,12.4008993,-0.696077585,12.3840656,12.4008993,12.3840656
38.277872,12.7671453,12.403299,0.60319677,12.3859311,12.403299,12.3859311
38.288364,13.8564065,12.4057192,1.2044448,12.3877913,12.4057192,12.3877913
38.298856,12,12.4081613,-0.638875033,12.3896458,12.4081613,12.3896458
38.309347,11.9582607,12.410627,-0.672581775,12.3914945,12.410627,12.3914945
38.319839,12.8840987,12.4131187,0.686279864,12.3933378,12.4131187,12.3933378
38.33033,13.0766968,12.4156381,0.813055213,12.3951753,12.4156381,12.3951753
38.340822,12.6095202,12.4181879,0.437415437,12.3970074,12.4181879,12.3970074
38.351314,14.2828569,12.4207707,1.36458278,12.3988338,12.4207707,12.3988338
38.361805,12.9614814,12.4233888,0.733547959,12.4006545,12.4233888,12.4006545
38.372297,12.6095202,12.4260458,0.428339118,12.4024698,12.4260458,12.4024698
38.382788,11.8743421,12.4287446,-0.744582089,12.4042792,12.4287446,12.4042792
38.39328,12.6885775,12.4314892,0.507038759,12.4060833,12.4314892,12.4060833
38.403772,12.6885775,12.4342835,0.504275712,12.4078817,12.4342835,12.4078817
38.414263,13.190906,12.4371316,0.868201781,12.4096744,12.4371316,12.4096744
38.424755,13.56466,12.4400389,1.06048154,12.4114616,12.4400389,12.4114616
38.435246,11.7473401,12.44301,-0.834068292,12.413243,12.44301,12.413243
38.445738,12.5299641,12.4460516,0.28967646,12.415019,12.4460516,12.415019
38.45623,11.9163753,12.4491699,-0.729927815,12.4167894,12.4491699,12.4167894
38.466721,12.3693169,12.4523718,-0.288192497,12.4185541,12.4523718,12.4185541
38.477213,13.0384048,12.455666,0.76337332,12.4203133,12.455666,12.4203133
38.487704,12.5299641,12.4590608,0.266276631,12.4220667,12.4590608,12.4220667
38.498196,12.2474487,12.4625671,-0.46380853,12.4238147,12.4625671,12.4238147
38.508688,13.4907376,12.4661956,1.01219661,12.425557,12.4661956,12.425557
38.519179,12.4096736,12.4699587,-0.245530127,12.4272937,12.4699587,12.4272937
38.529671,11.4891253,12.4738713,-0.992343697,12.4290248,12.4738713,12.4290248
38.540162,12.328828,12.4779487,-0.386161548,12.4307503,12.4779487,12.4307503
38.550654,12.7671453,12.48221,0.533793365,12.4324702,12.48221,12.4324702
38.561146,12.083046,12.4866753,-0.635318259,12.4341846,12.4866753,12.4341846
38.571637,12.7279221,12.4913677,0.486368587,12.4358932,12.4913677,12.4358932
38.582129,12.1243557,12.4963149,-0.609884659,12.4375964,12.4963149,12.4375964
38.59262,12.8452326,12.501547,0.586247022,12.4392938,12.501547,12.4392938
38.603112,12.922848,12.5071003,0.644784965,12.4409858,12.5071003,12.4409858
38.613604,12.4096736,12.5130154,-0.321468189,12.4426722,12.5130154,12.4426722
38.624095,12.328828,12.5193393,-0.436475981,12.4443528,12.5193393,12.4443528
38.634587,12.2882057,12.5261285,-0.487773305,12.446028,12.5261285,12.446028
38.645078,11.9582607,12.5334467,-0.758410154,12.4476975,12.5334467,12.4476975
38.65557,12.7279221,12.5413715,0.43191496,12.4493615,12.5413715,12.4493615
38.666062,12.922848,12.5499925,0.610618967,12.4510199,12.5499925,12.4510199
38.676553,13.0384048,12.5594156,0.692090449,12.4526725,12.5594156,12.4526725
38.687045,12,12.5697707,-0.754831588,12.4543197,12.5697707,12.4543197
38.697536,13.3790882,12.5812094,0.89324061,12.4559612,12.5812094,12.4559612
38.708028,12.6095202,12.5939195,0.124902822,12.4575973,12.5939195,12.4575973
38.71852,12.922848,12.608126,0.56100086,12.4592277,12.608126,12.4592277
38.729011,13.820275,12.6241042,1.0936959,12.4608524,12.6241042,12.4608524
38.739503,11.5758369,12.6421996,-1.0326484,12.4624717,12.6421996,12.4624717
38.749994,12.4096736,12.6628361,-0.503152499,12.4640852,12.6628361,12.4640852
38.760486,12.489996,12.6865594,-0.443354669,12.4656933,12.6865594,12.4656933
38.770978,13.190906,12.7140672,0.690535116,12.4672958,12.7140672,12.4672958
38.781469,12.7671453,12.7462834,0.144436696,12.4688926,12.7462834,12.4688926
38.791961,13.190906,12.78448,0.637515423,12.4704839,12.78448,12.4704839
38.802452,12.6885775,12.8304264,-0.376628257,12.4720695,12.8304264,12.4720695
38.812944,12.1243557,12.8866675,-0.873104729,12.4736497,12.8866675,12.4736497
38.823436,12.9614814,12.9568062,0.0683754225,12.4752243,12.9568062,12.4752243
38.833927,13.0384048,13.0458182,-0.0861007991,12.4767932,13.0458182,12.4767932
38.844419,13.190906,13.1602392,0.17511923,12.4783566,13.1602392,12.4783566
38.85491,12.9614814,13.3078549,-0.588535089,12.4799143,13.3078549,12.4799143
38.865402,13.190906,13.4968693,-0.55313954,12.4814666,13.4968693,12.4814666
38.875894,13.96424,13.733891,0.479946939,12.4830132,13.733891,12.4830132
38.886385,14.3874946,14.0207098,0.605627588,12.4845542,14.0207098,12.4845542
38.896877,13.6381817,14.349343,-0.843303831,12.4860898,14.349343,12.4860898
38.907368,13.5277493,14.694723,-1.08026558,12.4876196,14.694723,12.4876196
38.91786,14.3527001,15.0082394,-0.809653846,12.489144,15.0082394,12.489144
38.928352,15.3622915,15.2207936,0.37616204,12.4906628,15.2207936,12.4906628
38.938843,14.8660687,15.26918,-0.634910414,12.4921759,15.26918,12.4921759
38.949335,15.4272486,15.1366298,0.539090699,12.4936836,15.1366298,12.4936836
38.959826,14.8660687,14.8666299,-0.0236877388,12.4951855,14.8666299,12.4951855
38.970318,14.3874946,14.5311277,-0.37898959,12.4966821,14.5311277,12.4966821
38.98081,13.7113092,14.1916034,-0.693032618,12.498173,14.1916034,12.498173
38.991301,13.1529464,13.8845525,-0.855339719,12.4996583,13.8845525,12.4996583
39.001793,12.8452326,13.6252998,-0.883214126,12.5011381,13.6252998,12.5011381
39.012284,13,13.4160654,-0.645031335,12.5026122,13.4160654,12.5026122
39.022776,12.9614814,13.2519708,-0.538970718,12.504081,13.2519708,12.504081
39.033268,13.5277493,13.1252544,0.634424851,12.5055441,13.1252544,12.5055441
39.043759,12.8840987,13.0277184,-0.378971863,12.5070015,13.0277184,12.5070015
39.054251,13.5277493,12.9520947,0.75871904,12.5084536,12.9520947,12.5084536
39.064742,12.4096736,12.8926404,-0.694958069,12.5098999,12.8926404,12.5098999
39.075234,12.489996,12.845085,-0.595893433,12.5113408,12.845085,12.5113408
39.085726,12.6095202,12.8064108,-0.443723518,12.5127761,12.8064108,12.5127761
39.096217,12.8840987,12.7745066,0.331047085,12.5142058,12.7745066,12.5142058
39.106709,12.922848,12.7478771,0.418295249,12.51563,12.7478771,12.51563
39.1172,12.4498996,12.7254522,-0.524931091,12.5170486,12.7254522,12.5170486
39.127692,12.489996,12.7064283,-0.465222835,12.5184617,12.7064283,12.5184617
39.138184,13.114877,12.6901953,0.651676095,12.5198693,12.6901953,12.5198693
39.148675,13.6014705,12.6762755,0.961870592,12.5212712,12.6762755,12.5212712
39.159167,13.0766968,12.6642851,0.642192917,12.5226676,12.6642851,12.5226676
39.169658,12.6095202,12.6539195,-0.210711429,12.5240584,12.6539195,12.5240584
39.18015,12.328828,12.6449275,-0.562227241,12.5254438,12.6449275,12.5254438
39.190642,12.5299641,12.6371057,-0.327324973,12.5268237,12.6371057,12.5268237
39.201133,11.8743421,12.6302864,-0.86945059,12.5281978,12.6302864,12.5281978
39.211625,13.3041347,12.6243285,0.824503583,12.5295666,12.6243285,12.5295666
39.222116,12.8840987,12.6191165,0.514764227,12.5309296,12.6191165,12.5309296
39.232608,12.083046,12.6145514,-0.729044214,12.5322873,12.6145514,12.5322873
39.2431,12.6491106,12.6105511,0.196365767,12.5336394,12.6105511,12.5336394
39.253591,12.6095202,12.6070457,0.0497441866,12.5349859,12.6070457,12.5349859
39.264083,12.8062485,12.6039748,0.449748448,12.536327,12.6039748,12.536327
39.274574,12.6885775,12.6012877,0.295448491,12.5376623,12.6012877,12.5376623
39.285066,12.2474487,12.59894,-0.59286697,12.5389923,12.59894,12.5389923
39.295558,12.1243557,12.5968937,-0.687414042,12.5403168,12.5968937,12.5403168
39.306049,11.6619038,12.5951162,-0.966029187,12.5416356,12.5951162,12.5416356
39.316541,12.922848,12.5935783,0.573820239,12.5429489,12.5935783,12.5429489
39.327032,12.489996,12.5922553,-0.319780157,12.5442567,12.5922553,12.5442567
39.337524,12.489996,12.5911251,-0.318007959,12.545559,12.5911251,12.545559
39.348016,12.5698051,12.5901683,-0.142699617,12.5468558,12.5901683,12.5468558
39.358507,12.4096736,12.589368,-0.423903723,12.548147,12.589368,12.548147
39.368999,13.3416641,12.5887091,0.867729792,12.5494327,12.5887091,12.5494327
39.37949,12.7279221,12.5881782,0.373823291,12.5507128,12.5881782,12.5507128
39.389982,12.8840987,12.5877634,0.544366869,12.5519875,12.5877634,12.5519875
39.400474,12.6491106,12.5874542,0.248307119,12.5532567,12.5874542,12.5532567
39.410965,12.6095202,12.5872411,0.149261969,12.5545202,12.5872411,12.5545202
39.421457,12.5698051,12.5871155,-0.131569028,12.5557784,12.5871155,12.5557784
39.431948,12.4096736,12.5870699,-0.421184317,12.5570309,12.5870699,12.5570309
39.44244,12.0415946,12.5870973,-0.738581585,12.558278,12.5870973,12.558278
39.452932,12.2474487,12.5871917,-0.58287476,12.5595196,12.5871917,12.5595196
39.463423,13.2664992,12.5873473,0.824106675,12.5607556,12.5873473,12.5607556
39.473915,12.7671453,12.5875593,0.423775982,12.5619862,12.5875593,12.5619862
39.484406,12.3693169,12.5878228,-0.467446136,12.5632111,12.5878228,12.5632111
39.494898,11.5325626,12.5881338,-1.02740993,12.5644307,12.5881338,12.5644307
39.50539,13.2664992,12.5884884,0.823414071,12.5656448,12.5884884,12.5656448
39.515881,12.5698051,12.5888832,-0.138123665,12.5668532,12.5888832,12.5668532
39.526373,13,12.5893151,0.640847017,12.5680562,12.5893151,12.5680562
39.536864,12.8840987,12.589781,0.542510546,12.5692537,12.589781,12.5692537
39.547356,12.7671453,12.5902785,0.42055542,12.5704457,12.5902785,12.5704457
39.557848,12.8452326,12.5908049,0.504408213,12.5716323,12.5908049,12.5716323
39.568339,12.4498996,12.5913581,-0.376109719,12.5728132,12.5913581,12.5728132
39.578831,12.0415946,12.5919361,-0.741850049,12.5739888,12.5919361,12.5739888
39.589322,13.453624,12.5925368,0.927947877,12.5751587,12.5925368,12.5751587
39.599814,11.8321596,12.5931586,-0.872352595,12.5763233,12.5931586,12.5763233
39.610306,13.190906,12.5937999,0.772726386,12.5774823,12.5937999,12.5774823
39.620797,13.6014705,12.594459,1.00349961,12.5786358,12.594459,12.5786358
39.631289,12.2882057,12.5951348,-0.554011812,12.5797839,12.5951348,12.5797839
39.64178,11.8743421,12.5958258,-0.849401968,12.5809264,12.5958258,12.5809264
39.652272,12.7279221,12.5965309,0.362479181,12.5820635,12.5965309,12.5820635
39.662764,13.2664992,12.597249,0.818077121,12.5831951,12.597249,12.5831951
39.673255,13.5277493,12.5979789,0.964245989,12.5843211,12.5979789,12.5843211
39.683747,13.4164079,12.5987199,0.904260995,12.5854418,12.5987199,12.5854418
39.694238,12.7279221,12.5994709,0.358400822,12.5865569,12.5994709,12.5865569
39.70473,12.7279221,12.6002312,0.357338553,12.5876666,12.6002312,12.5876666
39.715222,12.4096736,12.601,-0.437408671,12.5887708,12.601,12.5887708
39.725713,12.3693169,12.6017764,-0.482140587,12.5898694,12.6017764,12.5898694
39.736205,13,12.60256,0.630428442,12.5909627,12.60256,12.5909627
39.746696,11.9163753,12.6033499,-0.828839302,12.5920504,12.6033499,12.5920504
39.757188,12.6885775,12.6041457,0.290571634,12.5931327,12.6041457,12.5931327
39.76768,12.489996,12.6049467,-0.339043824,12.5942095,12.6049467,12.5942095
39.778171,12.0415946,12.6057524,-0.751104407,12.5952808,12.6057524,12.5952808
39.788663,12.8452326,12.6065624,0.4885388,12.5963467,12.6065624,12.5963467
39.799154,12.7671453,12.6073761,0.399711409,12.5974071,12.6073761,12.5974071
39.809646,12.6095202,12.6081932,0.0364276342,12.5984621,12.6081932,12.5984621
39.820138,13.114877,12.6090133,0.711241006,12.5995116,12.6090133,12.5995116
39.830629,12.6491106,12.6098358,0.198178868,12.6005555,12.6098358,12.6005555
39.841121,13.0384048,12.6106605,0.654021626,12.6015941,12.6106605,12.6015941
39.851612,13.0766968,12.611487,0.68206291,12.6026272,12.611487,12.6026272
39.862104,12.4096736,12.6123151,-0.450157134,12.6036549,12.6123151,12.6036549
39.872596,12.9614814,12.6131444,0.590200844,12.6046771,12.6131444,12.6046771
39.883087,12.6095202,12.6139745,-0.0667401014,12.6056938,12.6139745,12.6056938
39.893579,12.3693169,12.6148053,-0.49546784,12.6067051,12.6148053,12.6067051
39.90407,13.0384048,12.6156364,0.650206474,12.6077108,12.6156364,12.6077108
39.914562,13.0384048,12.6164677,0.649566901,12.6087113,12.6164677,12.6087113
39.925054,12.0415946,12.6172988,-0.75875178,12.6097062,12.6172988,12.6097062
39.935545,12.2065556,12.6181296,-0.641540342,12.6106957,12.6181296,12.6106957
39.946037,13,12.61896,0.617284414,12.6116797,12.61896,12.6116797
39.956528,12.083046,12.6197895,-0.732627798,12.6126583,12.6197895,12.6126583
39.96702,12.7671453,12.6206181,0.382788721,12.6136315,12.6206181,12.6136315
39.977512,12.6095202,12.6214457,-0.109203846,12.6145992,12.6214457,12.6145992
39.988003,12.6491106,12.6222719,0.163825323,12.6155614,12.6222719,12.6155614
39.998495,13.1529464,12.6230968,0.72790774,12.6165183,12.6230968,12.6165183
40.008986,12.083046,12.6239199,-0.735441347,12.6174697,12.6239199,12.6174697
40.019478,12.8840987,12.6247415,0.509271288,12.6184157,12.6247415,12.6184157
40.02997,13,12.6255611,0.611914094,12.6193562,12.6255611,12.6193562
40.040461,12.6491106,12.6263787,0.1507711,12.6202913,12.6263787,12.6202913
40.050953,13.2287566,12.6271942,0.775604486,12.621221,12.6271942,12.621221
40.061444,13.7477271,12.6280074,1.05816807,12.6221452,12.6280074,12.6221452
40.071936,12.4498996,12.6288183,-0.422987858,12.6230641,12.6288183,12.6230641
40.082428,11.1355287,12.6296267,-1.22233302,12.6239775,12.6296267,12.6239775
40.092919,11.7046999,12.6304325,-0.962149989,12.6248854,12.6304325,12.6248854
40.103411,13.190906,12.6312357,0.748111147,12.625788,12.6312357,12.625788
40.113902,12.4498996,12.632036,-0.426774386,12.6266851,12.632036,12.6266851
40.124394,13,12.6328335,0.605942664,12.6275768,12.6328335,12.6275768
40.134886,12.1243557,12.633628,-0.713633234,12.6284632,12.633628,12.6284632
40.145377,13.1529464,12.6344195,0.720088154,12.629344,12.6344195,12.629344
40.155869,13.6381817,12.6352079,1.0014858,12.6302195,12.6352079,12.6302195
40.16636,12.7671453,12.635993,0.362149574,12.6310895,12.635993,12.6310895
40.176852,12.8840987,12.636775,0.497316566,12.6319542,12.636775,12.6319542
40.187344,12.7279221,12.6375536,0.300613539,12.6328135,12.6375536,12.6328135
40.197835,12.6491106,12.6383287,0.103836196,12.6336673,12.6383287,12.6336673
40.208327,12.5698051,12.6391004,-0.263240051,12.6345157,12.6391004,12.6345157
40.218818,12.1655251,12.6398685,-0.688725983,12.6353587,12.6398685,12.6353587
40.22931,13.7840488,12.6406332,1.06930613,12.6361963,12.6406332,12.6361963
40.239802,12.922848,12.6413941,0.530522257,12.6370286,12.6413941,12.6370286
40.250293,12.4498996,12.6421513,-0.438465181,12.6378554,12.6421513,12.6378554
40.260785,12.4498996,12.6429048,-0.439323606,12.6386768,12.6429048,12.6386768
40.271276,12.5299641,12.6436545,-0.337180049,12.6394928,12.6436545,12.6394928
40.281768,12.4096736,12.6444003,-0.484486008,12.6403034,12.6444003,12.6403034
40.29226,12.7279221,12.6451423,0.287714707,12.6411087,12.6451423,12.6411087
40.302751,12.2882057,12.6458803,-0.59805898,12.6419085,12.6458803,12.6419085
40.313243,12.5299641,12.6466143,-0.341540972,12.642703,12.6466143,12.642703
40.323734,12.8840987,12.6473443,0.486574194,12.643492,12.6473443,12.643492
40.334226,12.5299641,12.6480702,-0.34366577,12.6442757,12.6480702,12.6442757
40.344718,12.2065556,12.6487921,-0.665008646,12.6450541,12.6487921,12.6450541
40.355209,12.1655251,12.6495098,-0.695690103,12.6458269,12.6495098,12.6458269
40.365701,11.9582607,12.6502233,-0.831842893,12.6465945,12.6502233,12.6465945
40.376192,11.9163753,12.6509326,-0.85706321,12.6473566,12.6509326,12.6473566
40.386684,12.922848,12.6516378,0.520778482,12.6481134,12.6516378,12.6481134
40.397176,13.3041347,12.6523386,0.80733889,12.6488648,12.6523386,12.6488648
40.407667,12.8062485,12.6530351,0.391424796,12.6496108,12.6530351,12.6496108
40.418159,12.8062485,12.6537273,0.390539547,12.6503515,12.6537273,12.6503515
40.42865,12.6491106,12.6544152,-0.0728320722,12.6510867,12.6544152,12.6510867
40.439142,11.8321596,12.6550987,-0.9071599,12.6518166,12.6550987,12.6518166
40.449634,12.2474487,12.6557777,-0.639006284,12.6525412,12.6557777,12.6525412
40.460125,12.2474487,12.6564523,-0.639533915,12.6532603,12.6564523,12.6532603
40.470617,12.8840987,12.6571226,0.476420167,12.6539742,12.6571226,12.6539742
40.481108,13.2287566,12.6577882,0.755624468,12.6546826,12.6577882,12.6546826
40.4916,12.5698051,12.6584494,-0.297732026,12.6553857,12.6584494,12.6553857
40.502092,12.2474487,12.6591062,-0.641605365,12.6560834,12.6591062,12.6560834
40.512583,12.7279221,12.6597583,0.261081974,12.6567757,12.6597583,12.6567757
40.523075,12.8840987,12.6604059,0.472961792,12.6574627,12.6604059,12.6574627
40.533566,12.2474487,12.6610488,-0.643117501,12.6581443,12.6610488,12.6581443
40.544058,13.0384048,12.6616873,0.613773208,12.6588207,12.6616873,12.6588207
40.55455,11.8743421,12.6623211,-0.887681801,12.6594916,12.6623211,12.6594916
40.565041,11.8321596,12.6629502,-0.91147716,12.6601572,12.6629502,12.6601572
40.575533,12.6491106,12.6635747,-0.120266625,12.6608174,12.6635747,12.6608174
40.586024,12.6885775,12.6641945,0.156150707,12.6614723,12.6641945,12.6614723
40.596516,11.9163753,12.6648097,-0.865121021,12.6621218,12.6648097,12.6621218
40.607008,12.7671453,12.6654201,0.318943871,12.6627661,12.6654201,12.6627661
40.617499,12.8840987,12.6660258,0.466982742,12.6634049,12.6660258,12.6634049
40.627991,12.922848,12.6666269,0.506182875,12.6640384,12.6666269,12.6640384
40.638482,12.7279221,12.6672231,0.246371554,12.6646665,12.6672231,12.6646665
40.648974,12.328828,12.6652894,-0.580052924,12.6652894,12.6652894,12.6652894
40.659466,12.6491106,12.6659069,-0.129600465,12.6659069,12.6659069,12.6659069
40.669957,11.5758369,12.666519,-1.04435729,12.666519,12.666519,12.666519
40.680449,12.489996,12.6671259,-0.420868037,12.6671259,12.6671259,12.6671259
40.69094,12.4096736,12.6677274,-0.50798988,12.6677274,12.6677274,12.6677274
40.701432,13.4164079,12.6683236,0.864918672,12.6683236,12.6683236,12.6683236
40.711924,12.5698051,12.6689144,-0.314816339,12.6689144,12.6689144,12.6689144
40.722415,13.3041347,12.6694999,0.796639692,12.6694999,12.6694999,12.6694999
40.732907,12.2474487,12.6700801,-0.650101063,12.6700801,12.6700801,12.6700801
40.743398,13.114877,12.6706549,0.666499896,12.6706549,12.6706549,12.6706549
40.75389,12.922848,12.6712245,0.501620854,12.6712245,12.6712245,12.6712245
40.764382,13.0384048,12.6717887,0.605488286,12.6717887,12.6717887,12.6717887
40.774873,12.4096736,12.6723476,-0.512517289,12.6723476,12.6723476,12.6723476
40.785365,12.9614814,12.6729012,0.537196585,12.6729012,12.6729012,12.6729012
40.795856,12.5299641,12.6734495,-0.37879464,12.6734495,12.6734495,12.6734495
40.806348,13.6747943,12.6739924,1.00040086,12.6739924,12.6739924,12.6739924
40.81684,11.0905365,12.6745301,-1.25856808,12.6745301,12.6745301,12.6745301
40.827331,12.6491106,12.6750624,-0.161095546,12.6750624,12.6750624,12.6750624
40.837823,13.0766968,12.6755895,0.633330378,12.6755895,12.6755895,12.6755895
40.848314,13,12.6761112,0.569112333,12.6761112,12.6761112,12.6761112
40.858806,12.4498996,12.6766276,-0.476159625,12.6766276,12.6766276,12.6766276
40.869298,12.5299641,12.6771387,-0.383633457,12.6771387,12.6771387,12.6771387
40.879789,13,12.6776445,0.5677636,12.6776445,12.6776445,12.6776445
40.890281,12.922848,12.678145,0.494674603,12.678145,12.678145,12.678145
40.900772,12.8840987,12.6786402,0.453275331,12.6786402,12.6786402,12.6786402
40.911264,13,12.6791301,0.566453766,12.6791301,12.6791301,12.6791301
40.921756,13.114877,12.6796148,0.659744105,12.6796148,12.6796148,12.6796148
40.932247,12.8840987,12.6800941,0.45166876,12.6800941,12.6800941,12.6800941
40.942739,12.3693169,12.6805681,-0.557898941,12.6805681,12.6805681,12.6805681
40.95323,13.0384048,12.6810368,0.597802639,12.6810368,12.6810368,12.6810368
40.963722,12.5698051,12.6815003,-0.334208307,12.6815003,12.6815003,12.6815003
40.974214,12.6095202,12.6819585,-0.269143545,12.6819585,12.6819585,12.6819585
40.984705,13,12.6824113,0.563550078,12.6824113,12.6824113,12.6824113
40.995197,12.1243557,12.6828589,-0.74733076,12.6828589,12.6828589,12.6828589
41.005688,13.2287566,12.6833012,0.738549494,12.6833012,12.6833012,12.6833012
41.01618,12.8452326,12.6837382,0.401863577,12.6837382,12.6837382,12.6837382
41.026672,12.6095202,12.68417,-0.273221148,12.68417,12.68417,12.68417
41.037163,13.3790882,12.6845965,0.83336169,12.6845965,12.6845965,12.6845965
41.047655,12.6095202,12.6850177,-0.274767995,12.6850177,12.6850177,12.6850177
41.058146,12.8840987,12.6854336,0.445718709,12.6854336,12.6854336,12.6854336
41.068638,12.6885775,12.6858442,0.0522811523,12.6858442,12.6858442,12.6858442
41.07913,12.1655251,12.6862496,-0.721612466,12.6862496,12.6862496,12.6862496
41.089621,13.0384048,12.6866497,0.593089467,12.6866497,12.6866497,12.6866497
41.100113,12.9614814,12.6870445,0.523867206,12.6870445,12.6870445,12.6870445
41.110604,12.6885775,12.6874341,0.0338148539,12.6874341,12.6874341,12.6874341
41.121096,13.2287566,12.6878184,0.735484968,12.6878184,12.6878184,12.6878184
41.131588,12.4498996,12.6881975,-0.488157635,12.6881975,12.6881975,12.6881975
41.142079,12.8452326,12.6885712,0.395804678,12.6885712,12.6885712,12.6885712
41.152571,12.4096736,12.6889398,-0.528456361,12.6889398,12.6889398,12.6889398
41.163062,12.2474487,12.689303,-0.66472122,12.689303,12.689303,12.689303
41.173554,13.0766968,12.689661,0.62212201,12.689661,12.689661,12.689661
41.184046,12.5299641,12.6900138,-0.400062139,12.6900138,12.6900138,12.6900138
41.194537,12.5698051,12.6903613,-0.347212025,12.6903613,12.6903613,12.6903613
41.205029,12.083046,12.6907035,-0.779523936,12.6907035,12.6907035,12.6907035
41.21552,12.6095202,12.6910405,-0.28551761,12.6910405,12.6910405,12.6910405
41.226012,12.6885775,12.6913723,-0.0528652957,12.6913723,12.6913723,12.6913723
41.236504,12.922848,12.6916988,0.480779772,12.6916988,12.6916988,12.6916988
41.246995,13.4907376,12.69202,0.893709981,12.69202,12.69202,12.69202
41.257487,12.1655251,12.6923361,-0.725817468,12.6923361,12.6923361,12.6923361
41.267978,12.1243557,12.6926468,-0.753850886,12.6926468,12.6926468,12.6926468
41.27847,12.3693169,12.6929524,-0.568889688,12.6929524,12.6929524,12.6929524
41.288962,12.4096736,12.6932527,-0.532521373,12.6932527,12.6932527,12.6932527
41.299453,12.6491106,12.6935477,-0.210800987,12.6935477,12.6935477,12.6935477
41.309945,12.7671453,12.6938375,0.270754145,12.6938375,12.6938375,12.6938375
41.320436,12.8062485,12.6941221,0.334852769,12.6941221,12.6941221,12.6941221
41.330928,13.4164079,12.6944015,0.849709599,12.6944015,12.6944015,12.6944015
41.34142,13.6014705,12.6946756,0.952257797,12.6946756,12.6946756,12.6946756
41.351911,12.4498996,12.6949445,-0.495020078,12.6949445,12.6949445,12.6949445
41.362403,12.4498996,12.6952082,-0.495286337,12.6952082,12.6952082,12.6952082
41.372894,12.328828,12.6954666,-0.605506874,12.6954666,12.6954666,12.6954666
41.383386,12.2065556,12.6957198,-0.69940274,12.6957198,12.6957198,12.6957198
41.393878,13.2664992,12.6959678,0.755335256,12.6959678,12.6959678,12.6959678
41.404369,13.190906,12.6962106,0.70334585,12.6962106,12.6962106,12.6962106
41.414861,12.3693169,12.6964481,-0.571953898,12.6964481,12.6964481,12.6964481
41.425352,12.489996,12.6966805,-0.454625633,12.6966805,12.6966805,12.6966805
41.435844,12.4498996,12.6969076,-0.49699899,12.6969076,12.6969076,12.6969076
41.446336,12.8840987,12.6971295,0.432399372,12.6971295,12.6971295,12.6971295
41.456827,13.0384048,12.6973462,0.584002241,12.6973462,12.6973462,12.6973462
41.467319,13.6014705,12.6975577,0.950743301,12.6975577,12.6975577,12.6975577
41.47781,12.922848,12.6977639,0.474430221,12.6977639,12.6977639,12.6977639
41.488302,12.8840987,12.697965,0.431432154,12.697965,12.697965,12.697965
41.498794,13.1529464,12.6981609,0.674377896,12.6981609,12.6981609,12.6981609
41.509285,12.6491106,12.6983515,-0.2219029,12.6983515,12.6983515,12.6983515
41.519777,13.3416641,12.698537,0.801952034,12.698537,12.698537,12.698537
41.530268,12.2474487,12.6987172,-0.671765232,12.6987172,12.6987172,12.6987172
41.54076,13.3790882,12.6988923,0.824739874,12.6988923,12.6988923,12.6988923
41.551252,12.489996,12.6990622,-0.457237537,12.6990622,12.6990622,12.6990622
41.561743,12.922848,12.6992268,0.472886003,12.6992268,12.6992268,12.6992268
41.572235,12.2882057,12.6993863,-0.641233619,12.6993863,12.6993863,12.6993863
41.582726,12.8840987,12.6995405,0.429602355,12.6995405,12.6995405,12.6995405
41.593218,12.2474487,12.6996896,-0.672488598,12.6996896,12.6996896,12.6996896
41.60371,11.8321596,12.6998335,-0.931490181,12.6998335,12.6998335,12.6998335
41.614201,12.083046,12.6999722,-0.785446524,12.6999722,12.6999722,12.6999722
41.624693,12.2882057,12.7001057,-0.641794366,12.7001057,12.7001057,12.7001057
41.635184,13.114877,12.7002341,0.643927784,12.7002341,12.7002341,12.7002341
41.645676,12.8062485,12.7003572,0.325409382,12.7003572,12.7003572,12.7003572
41.656168,13.4164079,12.7004752,0.846128056,12.7004752,12.7004752,12.7004752
41.666659,12.6491106,12.700588,-0.226886128,12.700588,12.700588,12.700588
41.677151,13.3790882,12.7006956,0.823645916,12.7006956,12.7006956,12.7006956
41.687642,13.3416641,12.700798,0.800541114,12.700798,12.700798,12.700798
41.698134,13.114877,12.7008952,0.643414176,12.7008952,12.7008952,12.7008952
41.708626,11.8321596,12.7009873,-0.932109309,12.7009873,12.7009873,12.7009873
41.719117,12.922848,12.7010742,0.470928604,12.7010742,12.7010742,12.7010742
41.729609,13.7113092,12.701156,1.00506379,12.701156,12.701156,12.701156
41.7401,12.8062485,12.7012325,0.324061624,12.7012325,12.7012325,12.7012325
41.750592,13.0766968,12.7013039,0.612693143,12.7013039,12.7013039,12.7013039
41.761084,12.922848,12.7013702,0.47061428,12.7013702,12.7013702,12.7013702
41.771575,13.114877,12.7014313,0.642997509,12.7014313,12.7014313,12.7014313
41.782067,13.6014705,12.7014872,0.94867452,12.7014872,12.7014872,12.7014872
41.792558,12.6885775,12.7015379,-0.113843622,12.7015379,12.7015379,12.7015379
41.80305,12.5698051,12.7015835,-0.363012966,12.7015835,12.7015835,12.7015835
41.813542,12.6885775,12.7016239,-0.114220827,12.7016239,12.7016239,12.7016239
41.824033,12.4096736,12.7016592,-0.540356889,12.7016592,12.7016592,12.7016592
41.834525,12.922848,12.7016893,0.470275074,12.7016893,12.7016893,12.7016893
41.845016,13.1529464,12.7017143,0.671738141,12.7017143,12.7017143,12.7017143
41.855508,12.1243557,12.7017341,-0.759854246,12.7017341,12.7017341,12.7017341
41.866,12.9614814,12.7017488,0.509639674,12.7017488,12.7017488,12.7017488
41.876491,13.0384048,12.7017583,0.580212451,12.7017583,12.7017583,12.7017583
41.886983,13.114877,12.7017627,0.642739722,12.7017627,12.7017627,12.7017627
41.897474,13.2287566,12.7017619,0.725943954,12.7017619,12.7017619,12.7017619
41.907966,12.7279221,12.701756,0.161759204,12.701756,12.701756,12.701756
41.918458,12.5698051,12.701745,-0.363235295,12.701745,12.701745,12.701745
41.928949,12.4096736,12.7017288,-0.540421256,12.7017288,12.7017288,12.7017288
41.939441,12.8062485,12.7017075,0.323328045,12.7017075,12.7017075,12.7017075
41.949932,13.4907376,12.701681,0.888288566,12.701681,12.701681,12.701681
41.960424,13.56466,12.7016494,0.928983628,12.7016494,12.7016494,12.7016494
41.970916,12.328828,12.7016127,-0.610560927,12.7016127,12.7016127,12.7016127
41.981407,13.0384048,12.7015708,0.580374035,12.7015708,12.7015708,12.7015708
41.991899,12.6491106,12.7015238,-0.228939193,12.7015238,12.7015238,12.7015238
42.00239,13,12.7014717,0.546377456,12.7014717,12.7014717,12.7014717
42.012882,13.3416641,12.7014144,0.800156009,12.7014144,12.7014144,12.7014144
42.023374,12.5698051,12.701352,-0.36269403,12.701352,12.701352,12.701352
42.033865,12.6491106,12.7012846,-0.228416102,12.7012846,12.7012846,12.7012846
42.044357,12.1655251,12.7012119,-0.731906329,12.7012119,12.7012119,12.7012119
42.054848,12.9614814,12.7011342,0.510242291,12.7011342,12.7011342,12.7011342
42.06534,12.8840987,12.7010513,0.427840373,12.7010513,12.7010513,12.7010513
42.075832,12.4096736,12.7009634,-0.539712626,12.7009634,12.7009634,12.7009634
42.086323,12.2474487,12.7008703,-0.67336585,12.7008703,12.7008703,12.7008703
42.096815,12.2474487,12.7007721,-0.673292924,12.7007721,12.7007721,12.7007721
42.107306,12.3693169,12.7006688,-0.575631732,12.7006688,12.7006688,12.7006688
42.117798,12.328828,12.7005603,-0.609698559,12.7005603,12.7005603,12.7005603
42.12829,12.5698051,12.7004468,-0.361443926,12.7004468,12.7004468,12.7004468
42.138781,13.1529464,12.7003282,0.672769106,12.7003282,12.7003282,12.7003282
42.149273,12.8062485,12.7002044,0.325644064,12.7002044,12.7002044,12.7002044
42.159764,13,12.7000756,0.547653561,12.7000756,12.7000756,12.7000756
42.170256,13.7113092,12.6999416,1.00566773,12.6999416,12.6999416,12.6999416
42.180748,12.489996,12.6998026,-0.458046468,12.6998026,12.6998026,12.6998026
42.191239,12.7671453,12.6996584,0.259782435,12.6996584,12.6996584,12.6996584
42.201731,12.6885775,12.6995092,-0.104554423,12.6995092,12.6995092,12.6995092
42.212222,12.8452326,12.6993548,0.381939452,12.6993548,12.6993548,12.6993548
42.222714,12.6885775,12.6991954,-0.103042951,12.6991954,12.6991954,12.6991954
42.233206,12.6491106,12.6990309,-0.223428318,12.6990309,12.6990309,12.6990309
42.243697,14.1774469,12.6988612,1.21597107,12.6988612,12.6988612,12.6988612
42.254189,11.7898261,12.6986865,-0.953341704,12.6986865,12.6986865,12.6986865
42.26468,13.0766968,12.6985067,0.614971617,12.6985067,12.6985067,12.6985067
42.275172,13,12.6983219,0.549252354,12.6983219,12.6983219,12.6983219
42.285664,13.0384048,12.6981319,0.583329181,12.6981319,12.6981319,12.6981319
42.296155,12.6885775,12.6979368,-0.0967434658,12.6979368,12.6979368,12.6979368
42.306647,11.8321596,12.6977367,-0.93036398,12.6977367,12.6977367,12.6977367
42.317138,12.7671453,12.6975315,0.263844333,12.6975315,12.6975315,12.6975315
42.32763,12.9614814,12.6973212,0.513965163,12.6973212,12.6973212,12.6973212
42.338122,12.8840987,12.6971058,0.432426746,12.6971058,12.6971058,12.6971058
42.348613,13.0384048,12.6968854,0.584396611,12.6968854,12.6968854,12.6968854
42.359105,13.3790882,12.6966599,0.826092167,12.6966599,12.6966599,12.6966599
42.369596,12.7279221,12.6964293,0.177461932,12.6964293,12.6964293,12.6964293
42.380088,12.6095202,12.6961937,-0.294403552,12.6961937,12.6961937,12.6961937
42.39058,12.9614814,12.6959529,0.515294537,12.6959529,12.6959529,12.6959529
42.401071,13.3790882,12.6957072,0.826668612,12.6957072,12.6957072,12.6957072
42.411563,12.083046,12.6954563,-0.782566504,12.6954563,12.6954563,12.6954563
42.422054,13.0384048,12.6952004,0.585836497,12.6952004,12.6952004,12.6952004
42.432546,13.6381817,12.6949394,0.971206606,12.6949394,12.6949394,12.6949394
42.443038,13.56466,12.6946734,0.932730713,12.6946734,12.6946734,12.6946734
42.453529,13.2287566,12.6944023,0.730995382,12.6944023,12.6944023,12.6944023
42.464021,13.0384048,12.6941261,0.586752641,12.6941261,12.6941261,12.6941261
42.474512,12.7279221,12.693845,0.184599833,12.693845,12.693845,12.693845
42.485004,12.4498996,12.6935587,-0.493618374,12.6935587,12.6935587,12.6935587
42.495496,12.6491106,12.6932674,-0.210135049,12.6932674,12.6932674,12.6932674
42.505987,12.4096736,12.692971,-0.532256887,12.692971,12.692971,12.692971
42.516479,11.9163753,12.6926696,-0.88107567,12.6926696,12.6926696,12.6926696
42.52697,13.4164079,12.6923632,0.850908147,12.6923632,12.6923632,12.6923632
42.537462,12.2474487,12.6920517,-0.66678555,12.6920517,12.6920517,12.6920517
42.547954,13.3041347,12.6917351,0.782559623,12.6917351,12.6917351,12.6917351
42.558445,13.3416641,12.6914136,0.806381109,12.6914136,12.6914136,12.6914136
42.568937,12.328828,12.6910869,-0.6018795,12.6910869,12.6910869,12.6910869
42.579428,13.4164079,12.6907553,0.851852432,12.6907553,12.6907553,12.6907553
42.58992,12.2474487,12.6904186,-0.665559823,12.6904186,12.6904186,12.6904186
42.600412,12.7671453,12.6900768,0.277612114,12.6900768,12.6900768,12.6900768
42.610903,11.8743421,12.6897301,-0.902988382,12.6897301,12.6897301,12.6897301
42.621395,13.2664992,12.6893783,0.759684713,12.6893783,12.6893783,12.6893783
42.631886,12.6491106,12.6890215,-0.199777008,12.6890215,12.6890215,12.6890215
42.642378,12.3693169,12.6886596,-0.565104194,12.6886596,12.6886596,12.6886596
42.65287,12.2474487,12.6882927,-0.663960857,12.6882927,12.6882927,12.6882927
42.663361,12.1243557,12.6879209,-0.750709796,12.6879209,12.6879209,12.6879209
42.673853,12.4498996,12.6875439,-0.487487755,12.6875439,12.6875439,12.6875439
42.684344,12.1655251,12.687162,-0.722244364,12.687162,12.687162,12.687162
42.694836,12.8062485,12.686775,0.345649356,12.686775,12.686775,12.686775
42.705328,12.8062485,12.686383,0.346215943,12.686383,12.686383,12.686383
42.715819,11.6619038,12.685986,-1.01196948,12.685986,12.685986,12.685986
42.726311,12.5299641,12.685584,-0.394486874,12.685584,12.685584,12.685584
42.736802,12.8452326,12.685177,0.400069504,12.685177,12.685177,12.685177
42.747294,13.0384048,12.6847649,0.594676298,12.6847649,12.6847649,12.6847649
42.757786,13,12.6843478,0.561829297,12.6843478,12.6843478,12.6843478
42.768277,11.9582607,12.6839258,-0.851859765,12.6839258,12.6839258,12.6839258
42.778769,13.820275,12.6834987,1.06619709,12.6834987,12.6834987,12.6834987
42.78926,13.3041347,12.6830667,0.788078694,12.6830667,12.6830667,12.6830667
42.799752,12.8840987,12.6826296,0.448853152,12.6826296,12.6826296,12.6826296
42.810244,12.489996,12.6821875,-0.43839649,12.6821875,12.6821875,12.6821875
42.820735,12.1655251,12.6817404,-0.718481291,12.6817404,12.6817404,12.6817404
42.831227,13.0384048,12.6812883,0.597592235,12.6812883,12.6812883,12.6812883
42.841718,12.2882057,12.6808313,-0.626598401,12.6808313,12.6808313,12.6808313
42.85221,12.489996,12.6803692,-0.436317776,12.6803692,12.6803692,12.6803692
42.862702,12.4096736,12.6799021,-0.519835044,12.6799021,12.6799021,12.6799021
42.873193,13.190906,12.6794301,0.715175409,12.6794301,12.6794301,12.6794301
42.883685,13.453624,12.678953,0.880153973,12.678953,12.678953,12.678953
42.894176,12.922848,12.678471,0.494344977,12.678471,12.678471,12.678471
42.904668,13.190906,12.677984,0.716185707,12.677984,12.677984,12.677984
42.91516,12.6095202,12.677492,-0.260713937,12.677492,12.677492,12.677492
42.925651,12.922848,12.676995,0.495835629,12.676995,12.676995,12.676995
42.936143,12.1655251,12.676493,-0.714820233,12.676493,12.676493,12.676493
42.946634,12.489996,12.6759861,-0.431265709,12.6759861,12.6759861,12.6759861
42.957126,13.2287566,12.6754742,0.743829544,12.6754742,12.6754742,12.6754742
42.967618,12.1243557,12.6749572,-0.74202533,12.6749572,12.6749572,12.6749572
42.978109,12.2065556,12.6744354,-0.684017384,12.6744354,12.6744354,12.6744354
42.988601,12.7671453,12.6739085,0.305347026,12.6739085,12.6739085,12.6739085
42.999092,12.5698051,12.6733767,-0.321825495,12.6733767,12.6733767,12.6733767
43.009584,12.5698051,12.6728399,-0.320990404,12.6728399,12.6728399,12.6728399
43.020076,13.0766968,12.6722982,0.635923486,12.6722982,12.6722982,12.6722982
43.030567,13.2664992,12.6717515,0.771198874,12.6717515,12.6717515,12.6717515
43.041059,11.8743421,12.6711997,-0.892668843,12.6711997,12.6711997,12.6711997
43.05155,12.1655251,12.6743866,-0.713345344,12.6743866,12.6706431,12.6706431
43.062042,12.4096736,12.6738642,-0.513994733,12.6738642,12.6700815,12.6700815
43.072534,12.7671453,12.6733375,0.306280674,12.6733375,12.6695149,12.6695149
43.083025,12.1655251,12.6728065,-0.712236898,12.6728065,12.6689434,12.6689434
43.093517,12.5299641,12.6722711,-0.377235987,12.6722711,12.6683669,12.6683669
43.104008,12.0415946,12.6717314,-0.793811608,12.6717314,12.6677855,12.6677855
43.1145,12.489996,12.6711875,-0.425665941,12.6711875,12.6671991,12.6671991
43.124992,12.6885775,12.6706393,0.133933834,12.6706393,12.6666077,12.6666077
43.135483,12.8452326,12.6700869,0.418504151,12.6700869,12.6660115,12.6660115
43.145975,12.8840987,12.6695302,0.463215467,12.6695302,12.6654102,12.6654102
43.156466,12.4498996,12.6689693,-0.468048828,12.6689693,12.6648041,12.6648041
43.166958,12.0415946,12.6684042,-0.791713094,12.6684042,12.6641929,12.6641929
43.17745,12.1655251,12.6678349,-0.708738219,12.6678349,12.6635768,12.6635768
43.187941,12.3693169,12.6672615,-0.54584308,12.6672615,12.6629558,12.6629558
43.198433,13.0766968,12.666684,0.640322463,12.666684,12.6623299,12.6623299
43.208924,12,12.6661023,-0.81615093,12.6661023,12.661699,12.661699
43.219416,12.4096736,12.6655166,-0.505809162,12.6655166,12.6610632,12.6610632
43.229908,11.8321596,12.6649267,-0.912560752,12.6649267,12.6604224,12.6604224
43.240399,13.0766968,12.6643328,0.642155744,12.6643328,12.6597767,12.6597767
43.250891,12.6491106,12.6637349,-0.120930723,12.6637349,12.6591261,12.6591261
43.261382,13,12.663133,0.580402467,12.663133,12.6584706,12.6584706
43.271874,13.2664992,12.662527,0.77715644,12.662527,12.6578101,12.6578101
43.282366,12.083046,12.6619171,-0.760835818,12.6619171,12.6571447,12.6571447
43.292857,12.5299641,12.6613033,-0.362407557,12.6613033,12.6564744,12.6564744
43.303349,12.4096736,12.6606856,-0.50101089,12.6606856,12.6557991,12.6557991
43.31384,12.922848,12.660064,0.512624638,12.660064,12.655119,12.655119
43.324332,11.61895,12.6594384,-1.02004334,12.6594384,12.6544339,12.6544339
43.334824,11.9163753,12.6588091,-0.861645989,12.6588091,12.6537439,12.6537439
43.345315,11.8321596,12.658176,-0.908854463,12.658176,12.653049,12.653049
43.355807,11.5758369,12.6575391,-1.04004912,12.6575391,12.6523492,12.6523492
43.366298,12.2882057,12.6568984,-0.607200723,12.6568984,12.6516445,12.6516445
43.37679,11.9582607,12.656254,-0.835459934,12.656254,12.6509348,12.6509348
43.387282,12.4096736,12.655606,-0.495915631,12.655606,12.6502202,12.6502202
43.397773,13.4907376,12.6549543,0.914211837,12.6549543,12.6495008,12.6495008
43.408265,12.5299641,12.6542989,-0.35261145,12.6542989,12.6487764,12.6487764
43.418756,12.1243557,12.65364,-0.727519336,12.65364,12.6480472,12.6480472
43.429248,12.328828,12.6529775,-0.569341317,12.6529775,12.647313,12.647313
43.43974,12.328828,12.6523115,-0.568756119,12.6523115,12.646574,12.646574
43.450231,12.2474487,12.6516421,-0.635762056,12.6516421,12.64583,12.64583
43.460723,11.8743421,12.6509692,-0.881264485,12.6509692,12.6450812,12.6450812
43.471214,12.8062485,12.6502929,0.394912085,12.6502929,12.6443275,12.6443275
43.481706,12.2882057,12.6496132,-0.601171783,12.6496132,12.6435688,12.6435688
43.492198,11.7473401,12.6489302,-0.949520995,12.6489302,12.6428053,12.6428053
43.502689,12.8062485,12.648244,0.397497711,12.648244,12.6420369,12.6420369
43.513181,11.9582607,12.6475546,-0.830237202,12.6475546,12.6412636,12.6412636
43.523672,13.6747943,12.646862,1.01387,12.646862,12.6404854,12.6404854
43.534164,12.0415946,12.6461662,-0.777542008,12.6461662,12.6397023,12.6397023
43.544656,12.6885775,12.6454673,0.20763012,12.6454673,12.6389144,12.6389144
43.555147,13.0384048,12.6447654,0.627406868,12.6447654,12.6381216,12.6381216
43.565639,12.8062485,12.6440605,0.40272562,12.6440605,12.6373239,12.6373239
43.57613,12.1655251,12.6433528,-0.691250861,12.6433528,12.6365213,12.6365213
43.586622,12.6491106,12.6426421,0.0804269462,12.6426421,12.6357139,12.6357139
43.597114,12.6491106,12.6419287,0.084746474,12.6419287,12.6349015,12.6349015
43.607605,12,12.6412125,-0.800757472,12.6412125,12.6340844,12.6340844
43.618097,12.4096736,12.6404936,-0.480437289,12.6404936,12.6332623,12.6332623
43.628588,12.9614814,12.6397722,0.56719415,12.6397722,12.6324354,12.6324354
43.63908,12.2882057,12.6390481,-0.592319515,12.6390481,12.6316036,12.6316036
43.649572,12,12.6383216,-0.798950312,12.6383216,12.6307669,12.6307669
43.660063,11.4891253,12.6375927,-1.07166573,12.6375927,12.6299255,12.6299255
43.670555,12.083046,12.6368615,-0.744187804,12.6368615,12.6290791,12.6290791
43.681046,12.4096736,12.636128,-0.475872214,12.636128,12.6282279,12.6282279
43.691538,12.2882057,12.6353923,-0.589225416,12.6353923,12.6273718,12.6273718
43.70203,12.328828,12.6346545,-0.553015853,12.6346545,12.6265108,12.6265108
43.712521,12.2882057,12.6339148,-0.587970326,12.6339148,12.6256451,12.6256451
43.723013,12.5698051,12.6331731,-0.251730121,12.6331731,12.6247744,12.6247744
43.733504,12.2474487,12.6324297,-0.620468369,12.6324297,12.623899,12.623899
43.743996,13.3416641,12.6316845,0.842602857,12.6316845,12.6230186,12.6230186
43.754488,12.1655251,12.6309377,-0.682211543,12.6309377,12.6221334,12.6221334
43.764979,12.328828,12.6301894,-0.548963902,12.6301894,12.6212435,12.6212435
43.775471,12.328828,12.6294396,-0.548280596,12.6294396,12.6203486,12.6203486
43.785962,11.9582607,12.6286886,-0.81879662,12.6286886,12.6194489,12.6194489
43.796454,12.328828,12.6279364,-0.546908063,12.6279364,12.6185444,12.6185444
43.806946,11.9163753,12.6271832,-0.843094234,12.6271832,12.617635,12.617635
43.817437,12.3693169,12.6264291,-0.507062315,12.6264291,12.6167208,12.6167208
43.827929,12.2065556,12.6256741,-0.647393611,12.6256741,12.6158018,12.6158018
43.83842,12.922848,12.6249186,0.545829112,12.6249186,12.614878,12.614878
43.848912,13.3416641,12.6241625,0.84705467,12.6241625,12.6139493,12.6139493
43.859404,12.328828,12.623406,-0.542750385,12.623406,12.6130157,12.6130157
43.869895,13.0384048,12.6226494,0.644790981,12.6226494,12.6120775,12.6120775
43.880387,11.9163753,12.6218927,-0.839950848,12.6218927,12.6111343,12.6111343
43.890878,11.7898261,12.6211362,-0.911762097,12.6211362,12.6101864,12.6101864
43.90137,12.8840987,12.62038,0.513535495,12.62038,12.6092335,12.6092335
43.911862,13,12.6196243,0.61674605,12.6196243,12.6082759,12.6082759
43.922353,12.6491106,12.6188694,0.173900166,12.6188694,12.6073135,12.6073135
43.932845,12.1655251,12.6181153,-0.672748253,12.6181153,12.6063463,12.6063463
43.943336,12.5698051,12.6173624,-0.21807631,12.6173624,12.6053743,12.6053743
43.953828,12.9614814,12.6166107,0.587256896,12.6166107,12.6043974,12.6043974
43.96432,13.0766968,12.6158607,0.678849135,12.6158607,12.6034157,12.6034157
43.974811,11.7898261,12.6151125,-0.908452753,12.6151125,12.6024293,12.6024293
43.985303,12.8062485,12.6143664,0.438043484,12.6143664,12.601438,12.601438
43.995794,12.489996,12.6136227,-0.35160583,12.6136227,12.600442,12.600442
44.006286,12.9614814,12.6128815,0.590423495,12.6128815,12.5994411,12.5994411
44.016778,11.4455231,12.6121433,-1.0801019,12.6121433,12.5984354,12.5984354
44.027269,12.5299641,12.6114083,-0.285384387,12.6114083,12.597425,12.597425
44.037761,13.0766968,12.6106769,0.682656522,12.6106769,12.5964097,12.5964097
44.048252,13.7840488,12.6099495,1.08355863,12.6099495,12.5953897,12.5953897
44.058744,12.6491106,12.6092262,0.199710903,12.6092262,12.5943649,12.5943649
44.069236,12.8452326,12.6085076,0.486543925,12.6085076,12.5933352,12.5933352
44.079727,12.4498996,12.6077941,-0.397359401,12.6077941,12.5923009,12.5923009
44.090219,12.7671453,12.607086,0.400074172,12.607086,12.5912617,12.5912617
44.10071,12.7279221,12.6063839,0.348623288,12.6063839,12.5902178,12.5902178
44.111202,12.7279221,12.605688,0.349619821,12.605688,12.589169,12.589169
44.121694,12.328828,12.6049991,-0.525519815,12.6049991,12.5881154,12.5881154
44.132185,13.190906,12.6043176,0.765890587,12.6043176,12.5870572,12.5870572
44.142677,12.489996,12.6036439,-0.337117068,12.6036439,12.5859941,12.5859941
44.153168,11.8743421,12.6029788,-0.853602215,12.6029788,12.5849263,12.5849263
44.16366,12.5299641,12.6023228,-0.268995743,12.6023228,12.5838537,12.5838537
44.174152,12.6095202,12.6016765,0.0885646024,12.6016765,12.5827763,12.5827763
44.184643,12.7671453,12.6010408,0.407559294,12.6010408,12.5816942,12.5816942
44.195135,11.7046999,12.6004161,-0.946422836,12.6004161,12.5806072,12.5806072
44.205626,12.328828,12.5998034,-0.520552997,12.5998034,12.5795156,12.5795156
44.216118,12.0415946,12.5992034,-0.746732128,12.5992034,12.5784192,12.5784192
44.22661,12.6491106,12.5986171,0.224707716,12.5986171,12.577318,12.577318
44.237101,13.2664992,12.5980453,0.817590279,12.5980453,12.5762121,12.5762121
44.247593,12.922848,12.597489,0.570402513,12.597489,12.5751014,12.5751014
44.258084,12.5299641,12.5969492,-0.258814832,12.5969492,12.573986,12.573986
44.268576,11.8743421,12.596427,-0.849755818,12.596427,12.5728657,12.5728657
44.279068,13.0766968,12.5959237,0.693378068,12.5959237,12.5717408,12.5717408
44.289559,11.4891253,12.5954404,-1.05181517,12.5954404,12.5706111,12.5706111
44.300051,13.2287566,12.5949786,0.796101755,12.5949786,12.5694767,12.5694767
44.310542,12.7279221,12.5945395,0.36521574,12.5945395,12.5683376,12.5683376
44.321034,12.922848,12.5941248,0.573343857,12.5941248,12.5671936,12.5671936
44.331526,12.7671453,12.5937361,0.416424389,12.5937361,12.5660449,12.5660449
44.342017,11.7473401,12.5933751,-0.919801582,12.5933751,12.5648916,12.5648916
44.352509,12.1243557,12.5930436,-0.68460791,12.5930436,12.5637335,12.5637335
44.363,11.9582607,12.5927438,-0.796544469,12.5927438,12.5625707,12.5625707
44.373492,11.3578167,12.5924777,-1.11115303,12.5924777,12.5614031,12.5614031
44.383984,12.4498996,12.5922477,-0.377290502,12.5922477,12.5602307,12.5602307
44.394475,12.922848,12.5920563,0.575144956,12.5920563,12.5590538,12.5590538
44.404967,12.8062485,12.591906,0.462971335,12.591906,12.557872,12.557872
44.415458,12.489996,12.5917999,-0.319067244,12.5917999,12.5566856,12.5566856
44.42595,12.2065556,12.591741,-0.620633068,12.591741,12.5554943,12.5554943
44.436442,12,12.5917328,-0.769241673,12.5917328,12.5542984,12.5542984
44.446933,12.6095202,12.5917787,0.133197133,12.5917787,12.5530978,12.5530978
44.457425,12.7671453,12.5918829,0.418643519,12.5918829,12.5518924,12.5518924
44.467916,12.489996,12.5920496,-0.319458327,12.5920496,12.5506825,12.5506825
44.478408,12.0415946,12.5922835,-0.742084153,12.5922835,12.5494677,12.5494677
44.4889,12.7671453,12.5925895,0.417798754,12.5925895,12.5482482,12.5482482
44.499391,13.453624,12.5929733,0.927712648,12.5929733,12.5470241,12.5470241
44.509883,11.7046999,12.5934408,-0.942730561,12.5934408,12.5457952,12.5457952
44.520374,12.8452326,12.5939986,0.50123246,12.5939986,12.5445617,12.5445617
44.530866,13.0766968,12.5946539,0.694293098,12.5946539,12.5433234,12.5433234
44.541358,13.1529464,12.5954146,0.746680536,12.5954146,12.5420804,12.5420804
44.551849,12.6095202,12.5962892,0.115026084,12.5962892,12.5408328,12.5408328
44.562341,12.489996,12.5972874,-0.327553651,12.5972874,12.5395804,12.5395804
44.572832,11.9163753,12.5984194,-0.825859622,12.5984194,12.5383234,12.5383234
44.583324,12.0415946,12.599697,-0.747062537,12.599697,12.5370617,12.5370617
44.593816,12.4498996,12.6011329,-0.388887216,12.6011329,12.5357952,12.5357952
44.604307,11.4891253,12.6027409,-1.05527988,12.6027409,12.5345242,12.5345242
44.614799,13.190906,12.6045371,0.765747227,12.6045371,12.5332484,12.5332484
44.62529,12.083046,12.6065386,-0.723527921,12.6065386,12.531968,12.531968
44.635782,12.8840987,12.6087652,0.524722351,12.6087652,12.5306828,12.5306828
44.646274,11.9582607,12.6112383,-0.808070277,12.6112383,12.529393,12.529393
44.656765,13.0384048,12.613982,0.651477382,12.613982,12.5280986,12.5280986
44.667257,12.6491106,12.6170241,0.179127054,12.6170241,12.5267994,12.5267994
44.677748,11.0905365,12.6203947,-1.23687437,12.6203947,12.5254956,12.5254956
44.68824,12.083046,12.624129,-0.73558347,12.624129,12.5241871,12.5241871
44.698732,12.8840987,12.6282659,0.505799185,12.6282659,12.5228739,12.5228739
44.709223,12.4498996,12.6328494,-0.427726259,12.6328494,12.5215562,12.5215562
44.719715,13.190906,12.6379308,0.743622986,12.6379308,12.5202337,12.5202337
44.730206,12.489996,12.643567,-0.39188138,12.643567,12.5189066,12.5189066
44.740698,12.1655251,12.6498252,-0.695916769,12.6498252,12.5175748,12.5175748
44.75119,12.922848,12.6567809,0.515816897,12.6567809,12.5162383,12.5162383
44.761681,12.5698051,12.6645211,-0.307759633,12.6645211,12.5148973,12.5148973
44.772173,11.7046999,12.6731491,-0.984098136,12.6731491,12.5135516,12.5135516
44.782664,12.6491106,12.6827818,-0.183497003,12.6827818,12.5122013,12.5122013
44.793156,13.6014705,12.6935607,0.952843023,12.6935607,12.5108462,12.5108462
44.803648,12,12.7056503,-0.84002992,12.7056503,12.5094865,12.5094865
44.814139,13.0384048,12.719248,0.564939677,12.719248,12.5081223,12.5081223
44.824631,12.2474487,12.7345998,-0.697962104,12.7345998,12.5067533,12.5067533
44.835122,12.8062485,12.7520069,0.232898153,12.7520069,12.5053798,12.5053798
44.845614,12.1655251,12.7718633,-0.778677208,12.7718633,12.5040016,12.5040016
44.856106,12.6885775,12.7946816,-0.325736146,12.7946816,12.5026187,12.5026187
44.866597,12.4498996,12.8211526,-0.609305322,12.8211526,12.5012313,12.5012313
44.877089,12.1655251,12.8522318,-0.828677698,12.8522318,12.4998391,12.4998391
44.88758,12.5698051,12.8892218,-0.565169597,12.8892218,12.4984425,12.4984425
44.898072,12.5698051,12.9339238,-0.603422489,12.9339238,12.4970411,12.4970411
44.908564,13.3416641,12.9887506,0.594065238,12.9887506,12.4956351,12.4956351
44.919055,13.453624,13.0568596,0.629892442,13.0568596,12.4942246,12.4942246
44.929547,13.4907376,13.1422575,0.590322035,13.1422575,12.4928094,12.4928094
44.940038,13.892444,13.2497221,0.801699357,13.2497221,12.4913897,12.4913897
44.95053,13.2664992,13.3846985,-0.34380128,13.3846985,12.4899652,12.4899652
44.961022,13.3041347,13.5528445,-0.498708156,13.5528445,12.4885362,12.4885362
44.971513,13.5277493,13.7594539,-0.481357035,13.7594539,12.4871026,12.4871026
44.982005,13.1529464,14.0087477,-0.925095279,14.0087477,12.4856643,12.4856643
44.992496,13.892444,14.3027839,-0.640577796,14.3027839,12.4842216,12.4842216
45.002988,14.6287388,14.6406221,-0.109010388,14.6406221,12.4827741,12.4827741
45.01348,14.1774469,15.0168988,-0.916216075,15.0168988,12.481322,12.481322
45.023971,15.6843871,15.4203007,0.513893434,15.4203007,12.4798655,12.4798655
45.034463,15.8113883,15.8315488,-0.14198764,15.8315488,12.4784043,12.4784043
45.044954,15.2315462,16.2208707,-0.994647945,16.2208707,12.4769385,12.4769385
45.055446,15.9373775,16.5479338,-0.781381029,16.5479338,12.4754681,12.4754681
45.065938,16.583124,16.7668238,-0.428602159,16.7668238,12.4739931,12.4739931
45.076429,16.3707055,16.8393553,-0.684579974,16.8393553,12.4725136,12.4725136
45.086921,16.643317,16.7511472,-0.328375118,16.7511472,12.4710294,12.4710294
45.097412,16.2788206,16.5188847,-0.48996338,16.5188847,12.4695408,12.4695408
45.107904,15.4596248,16.1819946,-0.849923364,16.1819946,12.4680475,12.4680475
45.118396,15.8429795,15.7864378,0.237784953,15.7864378,12.4665496,12.4665496
45.128887,15.6204994,15.3719513,0.498545925,15.3719513,12.4650472,12.4650472
45.139379,15.0665192,14.96725,0.315070129,14.96725,12.4635402,12.4635402
45.14987,14.2126704,14.5909791,-0.615068053,14.5909791,12.4620287,12.4620287
45.160362,13.6747943,14.2537544,-0.760894229,14.2537544,12.4605125,12.4605125
45.170854,13.9283883,13.9605228,-0.179261143,13.9605228,12.4589918,12.4589918
45.181345,12.5698051,13.7120031,-1.06873664,13.7120031,12.4574666,12.4574666
45.191837,13,13.5058355,-0.71122116,13.5058355,12.4559368,12.4559368
45.202328,13.7113092,13.3377526,0.611192749,13.3377526,12.4544025,12.4544025
45.21282,13,13.2023522,-0.449835793,13.2023522,12.4528635,12.4528635
45.223312,13.5277493,13.0939817,0.65861033,13.0939817,12.45132,12.45132
45.233803,13,13.0072637,-0.0852273442,13.0072637,12.4497721,12.4497721
45.244295,12.8452326,12.9374477,-0.303669366,12.9374477,12.4482195,12.4482195
45.254786,12.6095202,12.8806227,-0.520675041,12.8806227,12.4466625,12.4466625
45.265278,13.2664992,12.8336802,0.657889755,12.8336802,12.4451008,12.4451008
45.27577,13.1529464,12.7942675,0.598898092,12.7942675,12.4435346,12.4435346
45.286261,13.2287566,12.7606406,0.684189998,12.7606406,12.441964,12.441964
45.296753,12.6885775,12.7315204,-0.207226541,12.7315204,12.4403887,12.4403887
45.307244,13.0766968,12.7059884,0.608858271,12.7059884,12.438809,12.438809
45.317736,12.8452326,12.6833654,0.402327192,12.6833654,12.4372247,12.4372247
45.328228,13.0384048,12.6631524,0.612578466,12.6631524,12.4356358,12.4356358
45.338719,12.8840987,12.6449697,0.489008187,12.6449697,12.4340425,12.4340425
45.349211,13.114877,12.6285161,0.697395859,12.6285161,12.4324446,12.4324446
45.359702,12.6491106,12.6135558,0.18856004,12.6135558,12.4308424,12.4308424
45.370194,12.5698051,12.5998905,-0.173451533,12.5998905,12.4292354,12.4292354
45.380686,12.6095202,12.5873589,0.148866815,12.5873589,12.4276239,12.4276239
45.391177,12.6885775,12.5758243,0.33578742,12.5758243,12.4260081,12.4260081
45.401669,11.3578167,12.5651677,-1.09879524,12.5651677,12.4243876,12.4243876
45.41216,12.7279221,12.5552903,0.415489793,12.5552903,12.4227628,12.4227628
45.422652,12.5698051,12.5461037,0.153952547,12.5461037,12.4211333,12.4211333
45.433144,13.2287566,12.5375337,0.831398149,12.5375337,12.4194993,12.4194993
45.443635,12.6885775,12.5295155,0.398825809,12.5295155,12.417861,12.417861
45.454127,12.6095202,12.5219906,0.295853981,12.5219906,12.416218,12.416218
45.464618,12.2882057,12.5149104,-0.476135133,12.5149104,12.4145707,12.4145707
45.47511,12.0415946,12.5082295,-0.683106806,12.5082295,12.4129188,12.4129188
45.485602,12.2882057,12.5019098,-0.462281393,12.5019098,12.4112623,12.4112623
45.496093,12.8840987,12.4959176,0.623041813,12.4959176,12.4096015,12.4096015
45.506585,11.8743421,12.4902214,-0.784779795,12.4902214,12.4079361,12.4079361
45.517076,12.922848,12.4847952,0.661855546,12.4847952,12.4062664,12.4062664
45.527568,12.7671453,12.4796139,0.536219532,12.4796139,12.404592,12.404592
45.53806,13,12.4746566,0.724805764,12.4746566,12.4029132,12.4029132
45.548551,12.5698051,12.4699044,0.316070776,12.4699044,12.40123,12.40123
45.559043,11.8321596,12.465339,-0.795725742,12.465339,12.3995422,12.3995422
45.569534,12.4498996,12.4609459,-0.105101446,12.4609459,12.3978501,12.3978501
45.580026,13.3790882,12.4567102,0.960405111,12.4567102,12.3961534,12.3961534
45.590518,12.6095202,12.4526196,0.396106827,12.4526196,12.3944522,12.3944522
45.601009,12.1655251,12.4486631,-0.532107127,12.4486631,12.3927467,12.3927467
45.611501,12.5299641,12.4448294,0.291778426,12.4448294,12.3910366,12.3910366
45.621992,12.2474487,12.44111,-0.440069668,12.44111,12.3893223,12.3893223
45.632484,12.5698051,12.4374955,0.363743789,12.4374955,12.3876033,12.3876033
45.642976,12.922848,12.4339785,0.699192004,12.4339785,12.3858798,12.3858798
45.653467,12.1655251,12.4305521,-0.514807811,12.4305521,12.3841521,12.3841521
45.663959,12.7671453,12.4272093,0.583040373,12.4272093,12.3824197,12.3824197
45.67445,12.5299641,12.4239445,0.325606452,12.4239445,12.3806831,12.3806831
45.684942,12.2882057,12.4207518,-0.36406877,12.4207518,12.3789419,12.3789419
45.695434,12.2065556,12.4176264,-0.459424363,12.4176264,12.3771962,12.3771962
45.705925,12.7671453,12.4145639,0.593785697,12.4145639,12.3754463,12.3754463
45.716417,12.328828,12.4115595,-0.287630836,12.4115595,12.3736918,12.3736918
45.726908,13.3790882,12.4086099,0.985128561,12.4086099,12.371933,12.371933
45.7374,12.8062485,12.4057108,0.632880451,12.4057108,12.3701697,12.3701697
45.747892,11.7473401,12.4028592,-0.809641344,12.4028592,12.3684019,12.3684019
45.758383,12.328828,12.4000523,-0.266878806,12.4000523,12.3666298,12.3666298
45.768875,12.4498996,12.3972866,0.229375203,12.3972866,12.3648532,12.3648532
45.779366,12.1243557,12.39456,-0.519811865,12.39456,12.3630723,12.3630723
45.789858,12.7671453,12.3918695,0.612597576,12.3918695,12.3612869,12.3612869
45.80035,12.6095202,12.3892131,0.469368818,12.3892131,12.359497,12.359497
45.810841,13.1529464,12.3865889,0.875418505,12.3865889,12.3577029,12.3577029
45.821333,12.083046,12.3839943,-0.548587582,12.3839943,12.3559043,12.3559043
45.831824,12.2882057,12.381428,-0.305323307,12.381428,12.3541014,12.3541014
45.842316,11.8321596,12.3788879,-0.739410785,12.3788879,12.3522939,12.3522939
45.852808,11.7898261,12.3763724,-0.765863101,12.3763724,12.350482,12.350482
45.863299,12.6491106,12.3738804,0.52462392,12.3738804,12.348666,12.348666
45.873791,12.7671453,12.3714099,0.629075069,12.3714099,12.3468453,12.3468453
45.884282,12.6885775,12.3689601,0.565347199,12.3689601,12.3450205,12.3450205
45.894774,12.6885775,12.3665292,0.56749299,12.3665292,12.3431911,12.3431911
45.905266,12.5299641,12.3641164,0.407243955,12.3641164,12.3413573,12.3413573
45.915757,12.489996,12.3617208,0.358155243,12.3617208,12.3395193,12.3395193
45.926249,12.1655251,12.3593409,-0.440245172,12.3593409,12.3376767,12.3376767
45.93674,12,12.3569761,-0.597474766,12.3569761,12.33583,12.33583
45.947232,12.9614814,12.3546251,0.779009801,12.3546251,12.3339787,12.3339787
45.957724,13.114877,12.3522873,0.873263829,12.3522873,12.332123,12.332123
45.968215,12.6491106,12.3499621,0.546944703,12.3499621,12.3302632,12.3302632
45.978707,12.328828,12.3476483,-0.137187131,12.3476483,12.3283988,12.3283988
45.989198,12.4498996,12.3453456,0.323348098,12.3453456,12.3265302,12.3265302
45.99969,12.4096736,12.3430529,0.258109977,12.3430529,12.3246571,12.3246571
46.010182,12.8062485,12.3407697,0.682260023,12.3407697,12.3227797,12.3227797
46.020673,12.328828,12.3384958,-0.0983247736,12.3384958,12.3208981,12.3208981
46.031165,12.7279221,12.33623,0.62585309,12.33623,12.3190119,12.3190119
46.041656,12.7671453,12.3339722,0.658158867,12.3339722,12.3171216,12.3171216
46.052148,13.0384048,12.3317216,0.840644503,12.3317216,12.3152268,12.3152268
46.06264,11.4455231,12.3294779,-0.940188665,12.3294779,12.3133276,12.3133276
46.073131,12.1655251,12.3272407,-0.402138841,12.3272407,12.3114243,12.3114243
46.083623,13.2664992,12.3250093,0.970304012,12.3250093,12.3095165,12.3095165
46.094114,12.8062485,12.3227836,0.695316376,12.3227836,12.3076045,12.3076045
46.104606,12.0415946,12.3205629,-0.528174488,12.3205629,12.305688,12.305688
46.115098,12.6095202,12.3183469,0.539604781,12.3183469,12.3037671,12.3037671
46.125589,12.922848,12.3161355,0.778917481,12.3161355,12.3018422,12.3018422
46.136081,12.7671453,12.3139281,0.673214142,12.3139281,12.2999127,12.2999127
46.146572,12.6491106,12.3117245,0.580849474,12.3117245,12.2979791,12.2979791
46.157064,12.1655251,12.3095242,-0.379472238,12.3095242,12.296041,12.296041
46.167556,12.3693169,12.3123572,0.238662361,12.3123572,12.2940986,12.2940986
46.178047,12.5698051,12.3102132,0.509501586,12.3102132,12.2921521,12.2921521
46.188539,11.4455231,12.3080724,-0.928735324,12.3080724,12.2902011,12.2902011
46.19903,13,12.305935,0.833105643,12.305935,12.288246,12.288246
46.209522,12.9614814,12.3038002,0.810975448,12.3038002,12.2862864,12.2862864
46.220014,13.2287566,12.3016681,0.962854312,12.3016681,12.2843225,12.2843225
46.230505,12.489996,12.2995387,0.436414113,12.2995387,12.2823545,12.2823545
46.240997,12.5299641,12.2974114,0.482237182,12.2974114,12.280382,12.280382
46.251488,12.4498996,12.2952864,0.393208903,12.2952864,12.2784054,12.2784054
46.26198,11.8321596,12.293163,-0.678972373,12.293163,12.2764244,12.2764244
46.272472,11.7046999,12.2910415,-0.765729451,12.2910415,12.274439,12.274439
46.282963,12.328828,12.2889218,0.19976547,12.2889218,12.2724496,12.2724496
46.293455,12,12.2868033,-0.535540171,12.2868033,12.2704557,12.2704557
46.303946,12.5299641,12.2846863,0.49525527,12.2846863,12.2684578,12.2684578
46.314438,11.7898261,12.2825703,-0.701957398,12.2825703,12.2664553,12.2664553
46.32493,12.489996,12.2804554,0.457756074,12.2804554,12.2644487,12.2644487
46.335421,12.4096736,12.2783416,0.362397675,12.2783416,12.2624379,12.2624379
46.345913,12.3693169,12.2762284,0.305104063,12.2762284,12.2604227,12.2604227
46.356404,12.6095202,12.2741161,0.579140824,12.2741161,12.2584034,12.2584034
46.366896,13.0384048,12.2720043,0.875443059,12.2720043,12.2563797,12.2563797
46.377388,13.7840488,12.2698929,1.2305104,12.2698929,12.2543517,12.2543517
46.387879,12.8452326,12.2677822,0.759901556,12.2677822,12.2523197,12.2523197
46.398371,12.6095202,12.2656716,0.586386037,12.2656716,12.2502833,12.2502833
46.408862,11.4891253,12.2635615,-0.880020581,12.2635615,12.2482428,12.2482428
46.419354,11.8321596,12.2614514,-0.655203647,12.2614514,12.2461978,12.2461978
46.429846,12,12.2593414,-0.509255702,12.2593414,12.2441486,12.2441486
46.440337,13.2664992,12.2572316,1.00462309,12.2572316,12.2420954,12.2420954
46.450829,12.5299641,12.2551216,0.524254194,12.2551216,12.2400378,12.2400378
46.46132,12.0415946,12.2530118,-0.45980126,12.2530118,12.2379762,12.2379762
46.471812,12.6885775,12.4328283,0.505716594,12.2509016,12.4180564,12.2359101
46.482304,12.922848,12.4329883,0.699899771,12.2487913,12.4182586,12.2338398
46.492795,12.489996,12.4331903,0.238339384,12.2466809,12.4184989,12.2317655
46.503287,11.8743421,12.4334354,-0.747725451,12.2445701,12.4187785,12.2296868
46.513778,12.6095202,12.4337246,0.419279878,12.2424591,12.4190983,12.227604
46.52427,12.2065556,12.434059,-0.476973098,12.2403477,12.4194595,12.2255169
46.534762,12.9614814,12.4344396,0.725976445,12.2382359,12.4198632,12.2234255
46.545253,12.328828,12.4348677,-0.325637292,12.2361239,12.4203107,12.2213302
46.555745,11.61895,12.4353444,-0.903545438,12.2340112,12.4208032,12.2192305
46.566236,12.3693169,12.435871,-0.257980835,12.2318984,12.4213419,12.2171267
46.576728,12.2882057,12.4364488,-0.385023485,12.2297849,12.4219282,12.2150186
46.58722,12.6491106,12.4370792,0.460468767,12.2276709,12.4225634,12.2129063
46.597711,12.4096736,12.4377633,-0.167599781,12.2255566,12.4232489,12.21079
46.608203,11.5325626,12.4385029,-0.951808967,12.2234417,12.4239862,12.2086693
46.618694,12.8062485,12.4392992,0.605763375,12.2213265,12.4247767,12.2065447
46.629186,12.6095202,12.4401539,0.411541347,12.2192105,12.4256221,12.2044157
46.639678,12.8840987,12.4410686,0.665605091,12.2170941,12.4265239,12.2022825
46.650169,12,12.4420447,-0.664864445,12.2149774,12.4274836,12.2001453
46.660661,11.9582607,12.4430842,-0.696292682,12.2128601,12.4285031,12.1980038
46.671152,12.2474487,12.4441887,-0.443553806,12.2107424,12.4295841,12.1958583
46.681644,11.3137085,12.4453601,-1.06379115,12.2086241,12.4307285,12.1937084
46.692136,12,12.4466003,-0.668281614,12.2065054,12.4319381,12.1915544
46.702627,13.6747943,12.4479111,1.10764761,12.2043864,12.4332148,12.1893965
46.713119,12.489996,12.4492948,0.201745379,12.2022669,12.4345607,12.1872342
46.72361,13.2664992,12.4507532,0.903186552,12.2001472,12.4359778,12.1850679
46.734102,11.4891253,12.4522888,-0.981408952,12.1980269,12.4374685,12.1828973
46.744594,13.453624,12.4539038,0.999860135,12.1959064,12.4390349,12.1807226
46.755085,12.3693169,12.4556002,-0.293740231,12.1937857,12.4406792,12.1785439
46.765577,12.7671453,12.4573809,0.55656484,12.1916647,12.442404,12.1763609
46.776068,12.4498996,12.4592481,-0.0966875779,12.1895436,12.4442116,12.174174
46.78656,12,12.4612047,-0.679120532,12.1874222,12.4461049,12.1719828
46.797052,12,12.4632533,-0.680627134,12.1853007,12.4480864,12.1697874
46.807543,12.5299641,12.4653965,0.254101524,12.1831794,12.4501586,12.1675881
46.818035,13,12.4676377,0.729631648,12.1810579,12.452325,12.1653845
46.828526,12.6491106,12.4699794,0.423239006,12.1789366,12.454588,12.163177
46.839018,14.0356688,12.4724253,1.25029739,12.1768153,12.4569513,12.1609652
46.84951,13.0384048,12.4749785,0.750617313,12.1746942,12.4594178,12.1587492
46.860001,12.4096736,12.477642,-0.260707491,12.1725736,12.4619906,12.1565294
46.870493,12.6491106,12.4804201,0.410719538,12.1704531,12.4646738,12.1543053
46.880984,13.3790882,12.4833158,0.946452511,12.1683333,12.4674705,12.1520773
46.891476,12.2474487,12.4863335,-0.488758461,12.1662138,12.4703849,12.1498449
46.901968,12.2474487,12.4894771,-0.491963765,12.1640948,12.4734208,12.1476085
46.912459,12.1243557,12.4927502,-0.606955132,12.1619768,12.476582,12.1453683
46.922951,12.1655251,12.4961579,-0.575006799,12.1598594,12.4798732,12.1431237
46.933442,12,12.499704,-0.706897449,12.157743,12.4832983,12.1408752
46.943934,12.083046,12.5033939,-0.64834247,12.1556275,12.4868625,12.1386225
46.954426,12.328828,12.5072322,-0.422379241,12.1535131,12.4905704,12.1363657
46.964917,12.5698051,12.5112236,0.242036114,12.1514001,12.4944266,12.1341051
46.975409,12.0415946,12.5153742,-0.688316478,12.1492883,12.498437,12.1318401
46.9859,12.922848,12.5196886,0.634948322,12.1471782,12.5026063,12.1295713
46.996392,12.5299641,12.5241736,0.0760952659,12.1450695,12.506941,12.1272983
47.006884,12.4096736,12.5288347,-0.345197186,12.1429626,12.5114467,12.1250212
47.017375,12.2882057,12.5336779,-0.495451466,12.1408578,12.5161289,12.1227403
47.027867,12.2474487,12.5387105,-0.539686768,12.1387549,12.5209952,12.1204551
47.038358,12.489996,12.5439386,-0.232255415,12.1366545,12.5260513,12.118166
47.04885,12.4498996,12.5493702,-0.315389644,12.1345562,12.5313052,12.1158727
47.059342,12.0415946,12.5550125,-0.716531867,12.1324606,12.5367639,12.1135754
47.069833,12.2474487,12.5608727,-0.559842796,12.1303679,12.5424344,12.1112743
47.080325,13.1529464,12.5669601,0.765497454,12.128278,12.548326,12.1089689
47.090816,12.8840987,12.5732822,0.557509234,12.1261915,12.5544459,12.1066597
47.101308,12.7671453,12.5798492,0.432777275,12.1241082,12.5608042,12.1043463
47.1118,12.5698051,12.5829424,-0.114618248,12.1181582,12.5674096,12.1020288
47.122291,13.0766968,12.5900662,0.697589133,12.1161215,12.574271,12.0997076
47.132783,13.6747943,12.5974641,1.03794518,12.1140881,12.5813999,12.0973821
47.143274,12.489996,12.6051456,-0.339336966,12.1120587,12.5888058,12.0950528
47.153766,12.6095202,12.6131235,-0.0600270355,12.1100332,12.5965011,12.0927193
47.164258,11.9163753,12.621409,-0.839662877,12.1080121,12.6044969,12.0903818
47.174749,12.4096736,12.630014,-0.469404302,12.1059958,12.6128048,12.0880406
47.185241,12.8452326,12.6389533,0.454179742,12.1039844,12.6214392,12.0856951
47.195732,13.3041347,12.6482391,0.809873815,12.1019785,12.6304123,12.0833458
47.206224,11.9163753,12.6578877,-0.861111147,12.0999781,12.63974,12.0809923
47.216716,12.3693169,12.6679136,-0.546440063,12.0979837,12.6494366,12.0786349
47.227207,13.190906,12.678332,0.715942688,12.095996,12.6595169,12.0762737
47.237699,12.328828,12.6891619,-0.600278205,12.094015,12.6699997,12.0739083
47.24819,12.0415946,12.7004192,-0.811680121,12.0920415,12.6809005,12.0715391
47.258682,11.8321596,12.7121249,-0.938064672,12.0900754,12.6922401,12.0691658
47.269174,12.2882057,12.7242979,-0.66037276,12.0881176,12.7040369,12.0667885
47.279665,12.2065556,12.7369581,-0.728287338,12.0861687,12.7163106,12.0644074
47.290157,12.489996,12.75013,-0.510033335,12.0842288,12.7290852,12.0620222
47.300648,12.5299641,12.7638347,-0.483601693,12.0822988,12.7423815,12.0596333
47.31114,12.328828,12.7780996,-0.670277221,12.0803789,12.7562265,12.0572401
47.321632,13.6747943,12.7929496,0.939065881,12.0784699,12.7706446,12.054843
47.332123,11.6619038,12.8084111,-1.07075082,12.0765727,12.7856619,12.0524423
47.342615,12.9614814,12.8245164,0.370087758,12.0746875,12.8013102,12.0500373
47.353106,12.7671453,12.8412938,-0.272302067,12.0728154,12.8176171,12.0476286
47.363598,13.4907376,12.8587793,0.79495803,12.0709567,12.8346185,12.0452158
47.37409,13.0384048,12.8770066,0.401743949,12.0691125,12.8523473,12.042799
47.384581,12.5299641,12.8960111,-0.605018204,12.0672836,12.8708385,12.0403786
47.395073,12.6885775,12.915836,-0.476716374,12.0654707,12.8901347,12.037954
47.405564,13,12.9365197,0.251952962,12.063675,12.9102737,12.0355257
47.416056,12.083046,12.9581109,-0.935449033,12.061897,12.9313035,12.0330932
47.426548,13.0384048,12.9806553,0.240311265,12.0601381,12.9532693,12.0306569
47.437039,12.8062485,13.0042016,-0.444919204,12.0583994,12.9762191,12.0282169
47.447531,12.3693169,13.0288084,-0.812090832,12.0566818,13.0002108,12.0257727
47.458022,13.0766968,13.0545289,0.148888854,12.0549868,13.025297,12.0233249
47.468514,13.3790882,13.0814299,0.545580619,12.0533153,13.0515434,12.020873
47.479006,12.922848,13.1095751,-0.43211935,12.0516689,13.0790132,12.0184171
47.489497,13.453624,13.1390323,0.560884804,12.0500492,13.1077733,12.0159576
47.499989,12.1655251,13.1698828,-1.00217651,12.0484575,13.1379041,12.013494
47.51048,13.114877,13.202202,-0.295507956,12.0468956,13.1694802,12.0110268
47.520972,13.892444,13.2360831,0.810161033,12.045365,13.2025937,12.0085554
47.531464,12.8452326,13.2716166,-0.652980875,12.0438677,13.2373343,12.0060802
47.541955,12.6491106,13.3088994,-0.812273829,12.0424059,13.2737978,12.0036013
47.552447,12.6095202,13.3480468,-0.859375709,12.0409813,13.3120984,12.0011184
47.562938,13.114877,13.3891678,-0.523727754,12.0395966,13.3523441,11.9986318
47.57343,13.4907376,13.4323958,0.241540302,12.0382537,13.3946671,11.9961411
47.583922,13.0384048,13.4778627,-0.66291617,12.0369556,13.4391979,11.9936466
47.594413,11.9163753,13.52571,-1.26859558,12.0357049,13.4860772,11.9911484
47.604905,12.8840987,13.5761055,-0.831869474,12.0345046,13.5354711,11.9886462
47.615396,13.96424,13.6292111,0.578816817,12.0333579,13.5875404,11.9861404
47.625888,13.3416641,13.685223,-0.586139009,12.032268,13.6424798,11.9836304
47.63638,13.0766968,13.7443382,-0.817093231,12.0312387,13.7004848,11.9811167
47.646871,14.3527001,13.8067701,0.738870775,12.0302742,13.7617676,11.9785994
47.657363,14.525839,13.8727696,0.808127125,12.0293783,13.8265773,11.976078
47.667854,13.6014705,13.9425845,-0.584049642,12.0285559,13.8951602,11.973553
47.678346,14.0712473,14.0165124,0.233954914,12.0278117,13.9678123,11.971024
47.688838,14.0712473,14.0948574,-0.153655942,12.0271512,14.0448361,11.9684911
47.699329,13.6381817,14.1779515,-0.734690284,12.0265801,14.1265619,11.9659547
47.709821,13.8564065,14.2661834,-0.640138188,12.0261047,14.2133766,11.9634143
47.720312,13.6014705,14.3599453,-0.870904606,12.0257319,14.3056709,11.9608702
47.730804,14.2126704,14.4597057,-0.497026422,12.0254688,14.4039112,11.9583222
47.741296,14.106736,14.5659517,-0.677654559,12.0253236,14.5085831,11.9557703
47.751787,14.7309199,14.6792197,0.227376785,12.025305,14.6202215,11.9532149
47.762279,14.0356688,14.8001367,-0.874338527,12.0254225,14.7394514,11.9506555
47.77277,15.2315462,14.9293502,0.549723615,12.0256865,14.8669188,11.9480925
47.783262,14.6287388,15.0676293,-0.662488081,12.0261084,15.0033913,11.9455256
47.793754,13.9283883,15.2157903,-1.1346374,12.0267006,15.1496837,11.9429548
47.804245,15.2643375,15.3747406,-0.332269596,12.0274768,15.3067024,11.9403805
47.814737,15.8745079,15.5455422,0.573555263,12.0284521,15.4755079,11.9378022
47.825228,15.3948043,15.7293174,-0.578371032,12.0296429,15.6572221,11.9352204
47.83572,15.8113883,15.9273983,-0.340602437,12.0310676,15.8531763,11.9326346
47.846212,15.0996689,16.141228,-1.02056806,12.0327463,16.0648135,11.930045
47.856703,16.8226038,16.3724312,0.670949061,12.0347012,16.2937589,11.927452
47.867195,16.583124,16.6229173,-0.199482752,12.0369574,16.5419225,11.9248549
47.877686,16.1245155,16.8947552,-0.877632985,12.039542,16.811375,11.9222543
47.888178,16.7630546,17.1904082,-0.653722904,12.0424862,17.1045817,11.9196498
47.89867,17.9164729,17.5126067,0.635504653,12.045824,17.4242761,11.9170415
47.909161,17.7763888,17.864474,-0.296791517,12.0495934,17.7735862,11.9144298
47.919653,18.3030052,18.249713,0.230850968,12.0538382,18.15622,11.911814
47.930144,18.5741756,18.6724478,-0.313483942,12.0586058,18.5763089,11.9091948
47.940636,19.1311265,19.13763,-0.0806445261,12.0639519,19.0388129,11.9065717
47.951128,18.6547581,19.6508937,-0.998065934,12.0699375,19.5493768,11.9039448
47.961619,19.5703858,20.2188183,-0.805253096,12.0766321,20.1145932,11.9013144
47.972111,20.5182845,20.8493153,-0.57535275,12.0841164,20.7423882,11.8986802
47.982602,22.2036033,21.55148,0.807541504,12.0924797,21.4418761,11.8960424
47.993094,22.3830293,22.3364066,0.215922801,12.1018277,22.2241717,11.8934007
48.003586,23.0217289,23.2171557,-0.442071017,12.1122791,23.1023608,11.8907553
48.014077,23.515952,24.2095022,-0.832796601,12.1239713,24.0922476,11.8881065
48.024569,25.4754784,25.3331084,0.377319566,12.1370676,25.2135277,11.8854538
48.03506,25.9036677,26.6120401,-0.841648601,12.1517552,26.4903077,11.8827976
48.045552,26.8886593,28.0773778,-1.09028366,12.1682627,27.9537152,11.8801375
48.056044,29.4618397,29.7685786,-0.553840075,12.1868624,29.6432629,11.8774737
48.066535,30.9354166,31.7359684,-0.894735591,12.2078899,31.6093363,11.8748065
48.077027,33.3016516,34.0425229,-0.860738809,12.2317764,33.9149615,11.8721354
48.087518,35.5668385,36.7604646,-1.09253199,12.2590696,36.6323774,11.8694609
48.09801,39.4208067,39.9655981,-0.738099864,12.2905043,39.8373325,11.8667825
48.108502,42.9185275,43.7201306,-0.895322929,12.327056,43.5918615,11.8641004
48.118993,46.7118829,48.047547,-1.15570937,12.3700397,47.9191199,11.861415
48.129485,50.9705797,52.8943197,-1.38698954,12.4212381,52.7650574,11.8587256
48.139976,56.4180822,58.0668963,-1.28406156,12.4829981,57.9353495,11.8560329
48.150468,60.9918027,63.1569212,-1.47143414,12.5583952,63.0205124,11.8533363
48.16096,66.1815684,67.4840262,-1.14125273,12.6512853,67.3385206,11.850636
48.171451,69.5341643,70.1888218,-0.809109124,12.7663336,70.0276013,11.8479324
48.181943,69.32532,70.5754352,-1.11808548,12.9089543,70.3886376,11.8452249
48.192434,69.3757883,68.536279,0.916247391,13.0849594,68.3099591,11.842514
48.202926,65.6353563,64.6382112,0.998571562,13.300217,64.3535812,11.8397993
48.213418,60.6217783,59.7573693,0.929735952,13.5599004,59.3901404,11.837081
48.223909,54.8999089,54.6603385,0.489459335,13.8677418,54.1801661,11.8343593
48.234401,49.8196748,49.8387662,-0.138171573,14.2252864,49.2090581,11.8316338
48.244892,44.3170396,45.5439253,-1.10764872,14.630772,44.7226188,11.8289049
48.255384,41.0609303,41.8637413,-0.895997199,15.0784217,40.8052985,11.8261722
48.265876,37.5632799,38.7910073,-1.10802861,15.5569548,37.4501942,11.8234359
48.276367,35.3553391,36.2648283,-0.953671459,16.0480804,34.6023951,11.8206963
48.286859,34.4093011,34.1970792,0.460675446,16.5248428,32.187479,11.8179528
48.29735,32.4807635,32.490144,-0.096852745,16.9504198,30.1312432,11.815206
48.307842,30.2489669,31.0451858,-0.892310954,17.2808804,28.3673903,11.8124554
48.318334,29.1719043,29.7714444,-0.774299752,17.472977,26.8421873,11.8097013
48.328825,29.3768616,28.5950642,0.884193082,17.4972246,25.5133054,11.8069438
48.339317,28.618176,27.4673619,1.07276005,17.3492227,24.3474674,11.8041825
48.349808,26.8700577,26.3677752,0.708718929,17.0516282,23.3189839,11.801418
48.3603,25.7293607,25.2966356,0.657818412,16.6449477,22.4069994,11.7986496
48.370792,25.9422435,24.2652164,1.29500083,16.1742541,21.5948364,11.7958777
48.381283,24.3104916,23.2864912,1.01192904,15.6790897,20.8687346,11.7931025
48.391775,22.181073,22.3703585,-0.435069497,15.1893312,20.2170444,11.7903235
48.402266,22.2934968,21.5231761,0.877679175,14.7257493,19.6302202,11.7875413
48.412758,20.976177,20.7475005,0.47820125,14.3013935,19.0999837,11.7847552
48.42325,20.1246118,20.043379,0.28501372,13.9236389,18.6194531,11.7819657
48.433741,19.4164878,19.408689,0.0883112522,13.5953637,18.1827447,11.7791729
48.444233,19.2873015,18.8394761,0.669197625,13.3159065,17.7846993,11.7763763
48.454724,18.1659021,18.3307969,-0.406072429,13.0821741,17.42102,11.7735765
48.465216,18.2208672,17.8767403,0.586623283,12.8892982,17.0878591,11.7707729
48.475708,17.175564,17.4712119,-0.543735082,12.7316023,16.7819715,11.7679658
48.486199,17.5499288,17.1081654,0.664652854,12.6032094,16.5005248,11.7651555
48.496691,16.2172747,16.781829,-0.751368253,12.4985363,16.2409683,11.7623414
48.507182,16.7928556,16.4871366,0.552918644,12.4126933,16.0011602,11.7595241
48.517674,16.8226038,16.2195798,0.77654624,12.3415544,15.7791277,11.7567031
48.528166,15.6204994,15.9754197,-0.595751942,12.2818303,15.5731931,11.7538786
48.538657,16.8226038,15.7515461,1.03491919,12.2309666,15.3818679,11.7510509
48.549149,15.1986842,15.5453417,-0.588776294,12.1870171,15.2037799,11.7482195
48.55964,15.6204994,15.3547308,0.515527444,12.1485465,15.0377738,11.7453849
48.570132,15.8113883,15.1779333,0.795898894,12.114478,14.8827578,11.7425465
48.580624,15.0996689,15.0135139,0.293521632,12.0840196,14.7377996,11.7397047
48.591115,15.7162336,14.8602597,0.925188612,12.0565745,14.6020617,11.7368597
48.601607,15.4272486,14.7170915,0.842708187,12.0316776,14.474755,11.734011
48.612098,15.4596248,14.5831258,0.936215274,12.0089721,14.3552166,11.7311592
48.62259,15.6524758,14.4575385,1.09313189,11.988163,14.2428043,11.7283036
48.633082,14.0356688,14.3396356,-0.55133184,11.9690138,14.1369696,11.7254446
48.643573,14.106736,14.2287971,-0.349372414,11.9513265,14.0372149,11.7225825
48.654065,14.7309199,14.124437,0.778770064,11.9349286,13.9430614,11.7197167
48.664556,14.8996644,14.026067,0.93466436,11.9196784,13.8541092,11.7168477
48.675048,13.5277493,13.9332092,-0.636757384,11.9054479,13.7699615,11.713975
48.68554,15,13.8454577,1.07449629,11.8921303,13.6902804,11.711099
48.696031,14.0712473,13.7624429,0.555701717,11.8796319,13.6147563,11.7082198
48.706523,14.6287388,13.683806,0.972076549,11.8678677,13.5430859,11.7053369
48.717014,14.0356688,13.6092495,0.653007927,11.856767,13.4750179,11.702451
48.727506,14.8660687,13.538474,1.15221298,11.8462636,13.4102965,11.6995613
48.737998,14.5945195,13.4712259,1.05985546,11.836302,13.3487053,11.6966683
48.748489,13.6014705,13.4072723,0.440679247,11.8268326,13.2900448,11.6937722
48.758981,14.8660687,13.3463821,1.23275572,11.8178091,13.2341151,11.6908724
48.769472,13.7477271,13.2883655,0.677762166,11.8091934,13.1807528,11.6879696
48.779964,14.6969385,13.2330267,1.20992222,11.8009483,13.1297873,11.6850631
48.790456,14.4913767,13.1802007,1.14506597,11.7930429,13.0810754,11.6821532
48.800947,14.2828569,13.1297349,1.07383514,11.7854494,13.0344841,11.6792403
48.811439,12.8840987,13.0814748,-0.444270249,11.7781407,12.9898776,11.6763237
48.82193,13.2664992,13.0352951,0.48083684,11.771095,12.9471466,11.6734041
48.832422,13.8564065,12.9910629,0.930238445,11.7642902,12.9061736,11.6704809
48.842914,13.892444,12.9486675,0.971481612,11.7577081,12.8668611,11.6675543
48.853405,14.106736,12.9080057,1.09486541,11.7513321,12.8291182,11.6646247
48.863897,13.6014705,12.8689707,0.855862032,11.7451456,12.7928499,11.6616915
48.874388,14.4568323,12.8314775,1.27489403,11.7391357,12.7579811,11.6587552
48.88488,13.114877,12.7954332,0.565193648,11.7332882,12.7244288,11.6558153
48.895372,13.2664992,12.7607613,0.711152487,11.7275922,12.6921251,11.6528722
48.905863,13.6014705,12.7273903,0.934922566,11.7220373,12.6610063,11.649926
48.916355,13.3416641,12.6952442,0.804002392,11.7166127,12.6310042,11.6469762
48.926846,13.7477271,12.664264,1.04089531,11.7113104,12.6020662,11.6440234
48.937338,13.2287566,12.634383,0.770956247,11.7061213,12.5741322,11.641067
48.94783,13.0766968,12.6055472,0.686403416,11.7010381,12.5471539,11.6381074
48.958321,14.0712473,12.5777057,1.22210538,11.6960545,12.5210856,11.6351447
48.968813,12.489996,12.5508034,-0.246591497,11.6911629,12.4958774,11.6321785
48.979304,13.56466,12.5247982,1.01973611,11.6863584,12.4714918,11.6292093
48.989796,13.1529464,12.4996413,0.808272923,11.6816347,12.4478842,11.6262366
49.000288,12.922848,12.4752937,0.668994971,11.676987,12.4250197,11.6232606
49.010779,13.2664992,12.4517186,0.902651938,11.6724111,12.402865,11.6202816
49.021271,12.8452326,12.428875,0.645257778,11.6679018,12.3813828,11.6172991
49.031762,13,12.4067325,0.770238581,11.6634558,12.3605457,11.6143136
49.042254,12.7671453,12.3852546,0.61797312,11.6590687,12.3403203,11.6113246
49.052746,13.2664992,12.3644125,0.949782424,11.6547373,12.3206808,11.6083323
49.063237,12.4096736,12.3441793,0.255918614,11.6504587,12.3016025,11.6053371
49.073729,13.0384048,12.3245238,0.844914805,11.6462292,12.283057,11.6023384
49.08422,12.1243557,12.3054238,-0.425521054,11.6420467,12.2650242,11.5993368
49.094712,11.61895,12.2868514,-0.81725231,11.6379077,12.2474785,11.5963317
49.105204,13,12.2687852,0.855111002,11.6338102,12.2304005,11.5933233
49.115695,12.8062485,12.251205,0.745012412,11.6297523,12.2137717,11.590312
49.126187,12.4498996,12.2340867,0.464556616,11.625731,12.1975701,11.5872973
49.136678,11.9163753,12.2174141,-0.548670028,11.621745,12.1817808,11.5842796
49.14717,12.2065556,12.2011652,0.0734193046,11.6177918,12.1663838,11.5812584
49.157662,12.1655251,12.1853241,-0.140709016,11.6138699,12.1513643,11.5782341
49.168153,12.6095202,12.1698754,0.663057198,11.6099779,12.1367085,11.5752069
49.178645,12.4096736,12.1548002,0.50484992,11.6061137,12.1223988,11.5721762
49.189136,13,12.1400863,0.927315301,11.6022764,12.1084243,11.5691426
49.199628,12.0415946,12.1257166,-0.29003793,11.5984639,12.0947689,11.5661055
49.21012,13.190906,12.1336794,1.02821522,11.6176552,12.0814214,11.5630653
49.220611,12.7671453,12.1201887,0.804336135,11.6141081,12.0683712,11.5600222
49.231103,12.328828,12.1070059,0.470979939,11.6105851,12.0556043,11.5569757
49.241594,12.5698051,12.0941217,0.689698018,11.6070859,12.0431122,11.5539264
49.252086,13.7113092,12.0815226,1.27663096,11.6036088,12.0308824,11.5508736
49.262578,13,12.069199,0.964780274,11.6001533,12.018906,11.5478176
49.273069,12.1243557,12.057142,0.259255907,11.5967188,12.0071747,11.5447588
49.283561,12.1655251,12.0453396,0.346677724,11.5933038,11.9956774,11.5416966
49.294052,11.4455231,12.0337848,-0.766982164,11.5899082,11.9844075,11.5386316
49.304544,12.5698051,12.0224665,0.739823346,11.5865307,11.9733548,11.5355632
49.315036,11.1355287,12.0113775,-0.935867908,11.5831709,11.9625124,11.5324916
49.325527,12,12.0005106,-0.0225971941,11.5798284,11.9518739,11.5294172
49.336019,12.2065556,11.9898562,0.465509792,11.5765021,11.9414301,11.5263395
49.34651,11.7898261,11.979409,-0.435411142,11.5731921,11.931176,11.5232589
49.357002,11.7046999,11.9691598,-0.514256661,11.569897,11.9211032,11.520175
49.367494,11.4455231,11.959103,-0.71664489,11.5666168,11.9112063,11.5170879
49.377985,11.6619038,11.9492331,-0.536031096,11.5633514,11.9014802,11.5139981
49.388477,12.2474487,11.939542,0.554893384,11.5600995,11.8919172,11.5109049
49.398968,12.3693169,11.9300257,0.662790414,11.5568615,11.8825137,11.507809
49.40946,12.1655251,11.9206768,0.49482148,11.5536364,11.8732626,11.5047097
49.419952,12.1655251,11.9114906,0.50401831,11.5504241,11.8641596,11.5016073
49.430443,11.6619038,11.9024629,-0.490468286,11.5472245,11.8552006,11.4985021
49.440935,11.9163753,11.8935871,0.150957715,11.5440367,11.8463794,11.4953936
49.451426,12.8452326,11.8848599,0.979986059,11.5408611,11.837693,11.4922824
49.461918,11.9582607,11.8762752,0.286331097,11.5376968,11.8291354,11.4891678
49.47241,11,11.8678295,-0.931573688,11.5345437,11.8207034,11.4860502
49.482901,11.3578167,11.8595193,-0.708309718,11.531402,11.8123937,11.4829299
49.493393,11.4891253,11.8513391,-0.601841989,11.5282709,11.8042009,11.4798062
49.503884,12.6095202,11.8432864,0.875347831,11.5251507,11.7961228,11.4766799
49.514376,12.2065556,11.835356,0.609261495,11.5220407,11.7881544,11.4735502
49.524868,11.4017543,11.8275453,-0.652526628,11.5189409,11.780293,11.4704175
49.535359,11.7046999,11.8198513,-0.339339632,11.5158516,11.772536,11.4672821
49.545851,11.7046999,11.8122694,-0.327977924,11.512772,11.7648788,11.4641434
49.556342,12.489996,11.8047979,0.827766917,11.5097025,11.7573198,11.461002
49.566834,12.7279221,11.7974323,0.964618954,11.5066425,11.7498545,11.4578573
49.577326,12.4498996,11.7901704,0.812237128,11.5035922,11.742481,11.4547097
49.587817,12.4096736,11.7830101,0.791620816,11.5005517,11.7351971,11.4515593
49.598309,11.2694277,11.7759473,-0.711701947,11.4975204,11.7279988,11.4484057
49.6088,12,11.7689808,0.480644565,11.4944988,11.7208849,11.4452495
49.619292,11.3578167,11.7621067,-0.63583806,11.4914863,11.7138516,11.4420899
49.629784,12.0415946,11.7553234,0.535043167,11.4884831,11.7068974,11.4389275
49.640275,11.9582607,11.7486291,0.457855473,11.4854895,11.7000204,11.4357623
49.650767,11.7473401,11.7420204,0.0729363656,11.4825049,11.6932172,11.432594
49.661258,11.1355287,11.7354964,-0.774575819,11.4795299,11.686487,11.4294229
49.67175,11.7898261,11.7290539,0.246520281,11.4765639,11.6798264,11.4262487
49.682242,11.5325626,11.7226914,-0.436037639,11.4736072,11.6732341,11.4230715
49.692733,11.2249722,11.7164078,-0.701024682,11.4706602,11.6667088,11.4198917
49.703225,11.8321596,11.7101999,0.349227219,11.4677222,11.6602473,11.4167087
49.713716,12.083046,11.7040673,0.61561243,11.4647939,11.6538492,11.4135231
49.724208,11.3137085,11.6980071,-0.619918232,11.4618748,11.6475115,11.4103343
49.7347,11.045361,11.6920183,-0.804150044,11.4589653,11.6412331,11.4071425
49.745191,10.7703296,11.6860999,-0.956958886,11.4560657,11.6350129,11.4039482
49.755683,11.045361,11.6802494,-0.796798805,11.4531755,11.6288483,11.4007507
49.766174,12.4498996,11.6744663,0.880586908,11.4502954,11.6227388,11.3975506
49.776666,12.6491106,11.6687483,0.990132487,11.447425,11.6166819,11.3943473
49.787158,12.1243557,11.6630946,0.679162011,11.4445646,11.6106767,11.3911412
49.797649,12.4498996,11.6575045,0.890165753,11.4417147,11.6047224,11.3879325
49.808141,11.3578167,11.6519758,-0.542364359,11.4388748,11.5988165,11.3847206
49.818632,11.1355287,11.6465083,-0.714828359,11.4360457,11.5929589,11.3815061
49.829124,12.922848,11.6411,1.13214311,11.4332269,11.5871472,11.3782885
49.839616,11.7046999,11.6357502,0.26258271,11.430419,11.5813807,11.3750681
49.850107,11.9163753,11.6304586,0.534711752,11.4276223,11.5756589,11.3718451
49.860599,11.4891253,11.6252232,-0.36891451,11.4248365,11.5699794,11.368619
49.87109,11.2694277,11.6200441,-0.5921287,11.4220625,11.5643423,11.3653904
49.881582,11.4017543,11.6149194,-0.46169808,11.4192997,11.5587453,11.3621586
49.892074,11.4455231,11.4165489,0.170218278,11.4165489,11.358924,11.358924
49.902565,11.1803399,11.4138104,-0.48318785,11.4138104,11.3556869,11.3556869
49.913057,11.9163753,11.411084,0.710838445,11.411084,11.3524467,11.3524467
49.923548,11.7046999,11.4083705,0.544361479,11.4083705,11.349204,11.349204
49.93404,12.2882057,11.4056696,0.939433915,11.4056696,11.3459582,11.3459582
49.944532,11.2249722,11.402982,-0.421912143,11.402982,11.3427096,11.3427096
49.955023,11.3578167,11.4003082,-0.206134603,11.4003082,11.3394586,11.3394586
49.965515,11.4017543,11.3976479,0.0640807242,11.3976479,11.3362044,11.3362044
49.976006,12.328828,11.3950021,0.96634668,11.3950021,11.3329478,11.3329478
49.986498,11.1803399,11.3923706,-0.460467912,11.3923706,11.3296881,11.3296881
49.99699,11.8321596,11.389754,0.665135757,11.389754,11.3264256,11.3264256
50.007481,11.3578167,11.387153,-0.171278308,11.387153,11.3231607,11.3231607
50.017973,12.1243557,11.3845674,0.860109457,11.3845674,11.3198927,11.3198927
50.028464,12.922848,11.3819982,1.24130971,11.3819982,11.3166223,11.3166223
50.038956,12.5299641,11.3794453,1.07262238,11.3794453,11.3133489,11.3133489
50.049448,12.6885775,11.3769095,1.14528078,11.3769095,11.3100727,11.3100727
50.059939,11.2249722,11.3743914,-0.386547864,11.3743914,11.3067941,11.3067941
50.070431,12.0415946,11.3718911,0.818354122,11.3718911,11.3035124,11.3035124
50.080922,11.9582607,11.3694096,0.767366384,11.3694096,11.3002284,11.3002284
50.091414,12.0415946,11.3669469,0.821369404,11.3669469,11.2969413,11.2969413
50.101906,11.4017543,11.3645038,0.193003695,11.3645038,11.2936515,11.2936515
50.112397,11.8321596,11.3620812,0.685622593,11.3620812,11.2903593,11.2903593
50.122889,11.7046999,11.3596792,0.587384606,11.3596792,11.2870642,11.2870642
50.13338,11.3137085,11.3572989,-0.208783257,11.3572989,11.2837666,11.2837666
50.143872,12.6885775,11.3549406,1.15483201,11.3549406,11.280466,11.280466
50.154364,11.7898261,11.352605,0.661226954,11.352605,11.2771628,11.2771628
50.164855,11.1355287,11.3502933,-0.463426962,11.3502933,11.2738572,11.2738572
50.175347,10.6301458,11.3480056,-0.847266066,11.3480056,11.2705487,11.2705487
50.185838,11.3578167,11.3457567,0.109817856,11.3457567,11.2672378,11.2672378
50.19633,11.61895,11.3435202,0.524814124,11.3435202,11.2639239,11.2639239
50.206822,11.1355287,11.3413104,-0.453631626,11.3413104,11.2606073,11.2606073
50.217313,11.5758369,11.3391284,0.486526945,11.3391284,11.2572885,11.2572885
50.227805,10.8166538,11.3369749,-0.721332814,11.3369749,11.2539667,11.2539667
50.238296,12.7279221,11.334851,1.18028431,11.334851,11.2506425,11.2506425
50.248788,12.1243557,11.3327575,0.889718015,11.3327575,11.2473155,11.2473155
50.25928,11.3137085,11.3306956,-0.130334557,11.3306956,11.2439858,11.2439858
50.269771,12,11.3286666,0.819349399,11.3286666,11.2406538,11.2406538
50.280263,11.7473401,11.3266712,0.648589977,11.3266712,11.2373189,11.2373189
50.290754,11.7046999,11.324711,0.616432424,11.324711,11.2339817,11.2339817
50.301246,11.4455231,11.3227869,0.350337365,11.3227869,11.2306416,11.2306416
50.311738,12.2882057,11.3209003,0.983516846,11.3209003,11.2272989,11.2272989
50.322229,11.7473401,11.3190529,0.654436558,11.3190529,11.2239539,11.2239539
50.332721,12.4096736,11.3172457,1.04519279,11.3172457,11.220606,11.220606
50.343212,10.8627805,11.3154804,-0.672829798,11.3154804,11.2172559,11.2172559
50.353704,10.6301458,11.3137584,-0.826808686,11.3137584,11.2139029,11.2139029
50.364196,11.2694277,11.3120814,-0.206527862,11.3120814,11.2105473,11.2105473
50.374687,12.083046,11.3104513,0.878973639,11.3104513,11.2071895,11.2071895
50.385179,11.045361,11.3088696,-0.513330828,11.3088696,11.2038288,11.2038288
50.39567,11.2249722,11.3073383,-0.286995039,11.3073383,11.2004659,11.2004659
50.406162,11.3137085,11.3058593,0.0885959803,11.3058593,11.1971002,11.1971002
50.416654,11.4891253,11.3044346,0.429756588,11.3044346,11.1937319,11.1937319
50.427145,10.7703296,11.3030665,-0.729888296,11.3030665,11.1903614,11.1903614
50.437637,12,11.3017572,0.835609264,11.3017572,11.186988,11.186988
50.448128,11.2694277,11.300509,-0.176299083,11.300509,11.1836125,11.1836125
50.45862,12.2065556,11.2993244,0.952486847,11.2993244,11.1802341,11.1802341
50.469112,11.4455231,11.298206,0.3838191,11.298206,11.1768533,11.1768533
50.479603,11.4891253,11.2971567,0.438142176,11.2971567,11.1734702,11.1734702
50.490095,11.4017543,11.2907339,0.333197163,11.2907339,11.1700844,11.1700844
50.500586,11.7898261,11.2898832,0.707066411,11.2898832,11.1666963,11.1666963
50.511078,10.7238053,11.2891098,-0.751867344,11.2891098,11.1633055,11.1633055
50.52157,11.9582607,11.2884171,0.818439756,11.2884171,11.1599122,11.1599122
50.532061,11.1355287,11.2878087,-0.390230719,11.2878087,11.1565168,11.1565168
50.542553,12.4498996,11.2872883,1.07824454,11.2872883,11.1531186,11.1531186
50.553044,11.2694277,11.2868599,-0.132031035,11.2868599,11.1497182,11.1497182
50.563536,11,11.2865275,-0.535282597,11.2865275,11.1463151,11.1463151
50.574028,11.4891253,11.2862955,0.450366262,11.2862955,11.1429095,11.1429095
50.584519,11.045361,11.2861687,-0.490721574,11.2861687,11.1395019,11.1395019
50.595011,11.4455231,11.2861518,0.399213406,11.2861518,11.1360914,11.1360914
50.605502,11.7046999,11.28625,0.64687702,11.28625,11.1326789,11.1326789
50.615994,11.7046999,11.2864689,0.646707851,11.2864689,11.1292636,11.1292636
50.626486,10.9544512,11.2868141,-0.576509252,11.2868141,11.1258459,11.1258459
50.636977,11.7046999,11.2872917,0.646071368,11.2872917,11.1224261,11.1224261
50.647469,11.2249722,11.2879083,-0.250870837,11.2879083,11.1190036,11.1190036
50.65796,11.2694277,11.2886707,-0.138719348,11.2886707,11.1155791,11.1155791
50.668452,11.4017543,11.2895863,0.334914822,11.2895863,11.1121518,11.1121518
50.678944,11.7473401,11.2906628,0.675779076,11.2906628,11.1087221,11.1087221
50.689435,11.61895,11.2919082,0.571875743,11.2919082,11.1052904,11.1052904
50.699927,12.083046,11.2933315,0.888658789,11.2933315,11.101856,11.101856
50.710418,11.2694277,11.2949419,-0.159731602,11.2949419,11.0984195,11.0984195
50.72091,10.7703296,11.2967494,-0.7255479,11.2967494,11.0949804,11.0949804
50.731402,11.4455231,11.2987645,0.383090929,11.2987645,11.0915389,11.0915389
50.741893,10.8627805,11.3009982,-0.661980157,11.3009982,11.0880954,11.0880954
50.752385,11.3137085,11.303463,0.101219868,11.303463,11.0846492,11.0846492
50.762876,11.4455231,11.3061713,0.373298621,11.3061713,11.081201,11.081201
50.773368,12.0415946,11.3091372,0.855837233,11.3091372,11.0777502,11.0777502
50.78386,11.3137085,11.3123752,0.0365137018,11.3123752,11.074297,11.074297
50.794351,10.9087121,11.3159008,-0.638113353,11.3159008,11.0708419,11.0708419
50.804843,11.4891253,11.3197313,0.411575004,11.3197313,11.0673841,11.0673841
50.815334,11.9163753,11.3238842,0.769734418,11.3238842,11.0639243,11.0639243
50.825826,11.2694277,11.3283797,-0.242800427,11.3283797,11.060462,11.060462
50.836318,11.4017543,11.3332383,0.261755491,11.3332383,11.0569973,11.0569973
50.846809,11.9582607,11.3384819,0.787260311,11.3384819,11.0535306,11.0535306
50.857301,10.7703296,11.3441359,-0.757499991,11.3441359,11.0500614,11.0500614
50.867792,11.0905365,11.350225,-0.509596425,11.350225,11.0465902,11.0465902
50.878284,11.7898261,11.3567788,0.658063282,11.3567788,11.0431165,11.0431165
50.888776,11.1355287,11.3638272,-0.477805887,11.3638272,11.0396404,11.0396404
50.899267,12.0415946,11.3714023,0.81865274,11.3714023,11.0361625,11.0361625
50.909759,11.4017543,11.3795413,0.149040215,11.3795413,11.0326819,11.0326819
50.92025,12.2065556,11.3882813,0.904585159,11.3882813,11.0291995,11.0291995
50.930742,11.8743421,11.3976662,0.690417214,11.3976662,11.0257145,11.0257145
50.941234,12.3693169,11.4077407,0.980599891,11.4077407,11.0222272,11.0222272
50.951725,11.4017543,11.4185537,-0.129612783,11.4185537,11.0187381,11.0187381
50.962217,10.6301458,11.4301615,-0.894435986,11.4301615,11.0152464,11.0152464
50.972708,11.7046999,11.4426212,0.511936248,11.4426212,11.0117529,11.0117529
50.9832,12.083046,11.4559999,0.791862408,11.4559999,11.0082568,11.0082568
50.993692,11.7473401,11.4703675,0.526281907,11.4703675,11.0047585,11.0047585
51.004183,11.6619038,11.4858002,0.419646987,11.4858002,11.0012583,11.0012583
51.014675,11.8743421,11.5023866,0.609881564,11.5023866,10.9977557,10.9977557
51.025166,13.0766968,11.5202174,1.24758946,11.5202174,10.9942512,10.9942512
51.035658,11.9163753,11.5393998,0.613983297,11.5393998,10.9907441,10.9907441
51.04615,11.3137085,11.5600466,-0.496324566,11.5600466,10.987235,10.987235
51.056641,12.3693169,11.582282,0.88714986,11.582282,10.983724,10.983724
51.067133,11.5758369,11.6062507,-0.174395401,11.6062507,10.9802105,10.9802105
51.077624,10.9544512,11.6321035,-0.823196393,11.6321035,10.9766952,10.9766952
51.088116,11.7473401,11.6600186,0.29550223,11.6600186,10.9731774,10.9731774
51.098608,11.9163753,11.6901865,0.475593124,11.6901865,10.9696575,10.9696575
51.109099,11.2249722,11.7228193,-0.705582815,11.7228193,10.9661358,10.9661358
51.119591,11,11.7581645,-0.870726419,11.7581645,10.9626116,10.9626116
51.130082,12.6491106,11.7964856,0.92337695,11.7964856,10.9590857,10.9590857
51.140574,11.5758369,11.8380945,-0.512110903,11.8380945,10.9555573,10.9555573
51.151066,12.8062485,11.8833305,0.960686186,11.8833305,10.9520268,10.9520268
51.161557,12.2882057,11.9325771,0.596346062,11.9325771,10.9484945,10.9484945
51.172049,12.083046,11.9862853,0.311063729,11.9862853,10.9449599,10.9449599
51.18254,12.489996,12.0449491,0.667118384,12.0449491,10.9414234,10.9414234
51.193032,12.6095202,12.1091609,0.707360827,12.1091609,10.9378846,10.9378846
51.203524,12.8452326,12.1795911,0.815868525,12.1795911,10.9343437,10.9343437
51.214015,12.4096736,12.2570285,0.390698229,12.2570285,10.9308011,10.9308011
51.224507,12.6491106,12.3424436,0.553775261,12.3424436,10.9272561,10.9272561
51.234998,12.7279221,12.4369872,0.539383815,12.4369872,10.9237093,10.9237093
51.24549,13.2664992,12.5421371,0.851094601,12.5421371,10.9201602,10.9201602
51.255982,11.6619038,12.6597451,-0.998920088,12.6597451,10.916609,10.916609
51.266473,13.2664992,12.7922087,0.688687521,12.7922087,10.9130562,10.9130562
51.276965,12.922848,12.9427114,-0.1409378,12.9427114,10.909501,10.909501
51.287456,13.7477271,13.1153621,0.795213773,13.1153621,10.9059441,10.9059441
51.297948,13.0766968,13.3155816,-0.488758359,13.3155816,10.9023848,10.9023848
51.30844,14,13.5502411,0.670640627,13.5502411,10.8988236,10.8988236
51.318931,14.7648231,13.8278845,0.967955888,13.8278845,10.8952607,10.8952607
51.329423,14.832397,14.1588599,0.820693071,14.1588599,10.8916955,10.8916955
51.339914,14.832397,14.5548815,0.526797363,14.5548815,10.8881286,10.8881286
51.350406,14.0712473,15.0287412,-0.978516195,15.0287412,10.8845594,10.8845594
51.360898,16.0934769,15.5930898,0.707380488,15.5930898,10.8809882,10.8809882
51.371389,16.673332,16.2592363,0.643502683,16.2592363,10.8774154,10.8774154
51.381881,16.8226038,17.035928,-0.461870291,17.035928,10.8738403,10.8738403
51.392372,18.0831413,17.9274004,0.394640252,17.9274004,10.8702636,10.8702636
51.402864,18.2208672,18.9328003,-0.843761318,18.9328003,10.8666845,10.8666845
51.413356,21.0713075,20.0446607,1.01323579,20.0446607,10.8631036,10.8631036
51.423847,21.6794834,21.2483972,0.656571543,21.2483972,10.8595211,10.8595211
51.434339,21.9544984,22.5218215,-0.753208542,22.5218215,10.8559363,10.8559363
51.44483,24.0831892,23.8327656,0.500423339,23.8327656,10.8523499,10.8523499
51.455322,24.6170673,25.1375985,-0.721478502,25.1375985,10.8487612,10.8487612
51.465814,26.2488095,26.3772902,-0.358441985,26.3772902,10.8451707,10.8451707
51.476305,27.4772633,27.4761582,0.0332439274,27.4761582,10.8415786,10.8415786
51.486797,28.2488938,28.3456769,-0.311099788,28.3456769,10.8379842,10.8379842
51.497288,28.7054002,28.8968588,-0.43755986,28.8968588,10.8343883,10.8343883
51.50778,29.240383,29.0630258,0.421138026,29.0630258,10.8307902,10.8307902
51.518272,28.3725219,28.82187,-0.67033433,28.82187,10.8271902,10.8271902
51.528763,29.1719043,28.2043307,0.983653189,28.2043307,10.8235887,10.8235887
51.539255,27.7488739,27.2826811,0.682783067,27.2826811,10.819985,10.819985
51.549746,25.6709953,26.1476012,-0.690366503,26.1476012,10.8163798,10.8163798
51.560238,25.4950976,24.8861558,0.780347225,24.8861558,10.8127724,10.8127724
51.57073,24.0624188,23.5712245,0.700852591,23.5712245,10.8091631,10.8091631
51.581221,22.7156334,22.2589148,0.675809558,22.2589148,10.8055524,10.8055524
51.591713,20,20.9904289,-0.995202964,20.9904289,10.8019394,10.8019394
51.602204,21,19.7959884,1.09727463,19.7959884,10.798325,10.798325
51.612696,17.3781472,18.6962533,-1.14808803,18.6962533,10.7947085,10.7947085
51.623188,17.7482393,17.7044727,0.209204871,17.7044727,10.7910901,10.7910901
51.633679,16.8522995,16.8269388,0.159250601,16.8269388,10.7874703,10.7874703
51.644171,15.6204994,16.0635352,-0.665609369,16.0635352,10.7838483,10.7838483
51.654662,15.0665192,15.4092069,-0.585395385,15.4092069,10.7802249,10.7802249
51.665154,14.6969385,14.8546786,-0.397165116,14.8546786,10.7765994,10.7765994
51.675646,14.6628783,14.3883349,0.523968903,14.3883349,10.7729721,10.7729721
51.686137,14.3178211,13.9974609,0.566003701,13.9974609,10.7693434,10.7693434
51.696629,13.190906,13.669405,-0.691736224,13.669405,10.7657125,10.7657125
51.70712,13.3041347,13.3926888,-0.297580458,13.3926888,10.7620803,10.7620803
51.717612,14.0356688,13.1572768,0.937225732,13.1572768,10.7584459,10.7584459
51.728104,12.9614814,12.9549327,0.0809238837,12.9549327,10.7548099,10.7548099
51.738595,13.0384048,12.7790707,0.509248596,12.7790707,10.7511724,10.7511724
51.749087,13.6747943,12.6245178,1.02483001,12.6245178,10.7475329,10.7475329
51.759578,12.8452326,12.4873599,0.598224597,12.4873599,10.7438919,10.7438919
51.77007,13.2287566,12.3645679,0.929617505,12.3645679,10.740249,10.740249
51.780562,11.8321596,12.2538579,-0.649383011,12.2538579,10.7366043,10.7366043
51.791053,11.2694277,12.1534629,-0.940231495,12.1534629,10.7329583,10.7329583
51.801545,11.5325626,12.0619677,-0.727602296,12.0619677,10.7293102,10.7293102
51.812036,11.7473401,11.9782666,-0.480548085,11.9782666,10.7256608,10.7256608
51.822528,12.328828,11.901423,0.653762175,11.901423,10.7220093,10.7220093
51.83302,11.5758369,11.8306739,-0.504813855,11.8306739,10.7183562,10.7183562
51.843511,11,11.7653692,-0.87485379,11.7653692,10.7147018,10.7147018
51.854003,12,11.7049316,0.543202006,11.7049316,10.7110453,10.7110453
51.864494,10.8166538,11.6488808,-0.912264754,11.6488808,10.7073876,10.7073876
51.874986,11.8743421,11.5967758,0.526845582,11.5967758,10.7037279,10.7037279
51.885478,11.2249722,11.5482426,-0.568568771,11.5482426,10.7000665,10.7000665
51.895969,10.1488916,11.5029497,-1.16364004,11.5029497,10.6964038,10.6964038
51.906461,12.0415946,11.4605911,0.762235831,11.4605911,10.6927392,10.6927392
51.916952,12.2882057,11.4209098,0.931287234,11.4209098,10.6890733,10.6890733
51.927444,11.7473401,11.3836622,0.603057143,11.3836622,10.6854054,10.6854054
51.937936,12,11.3486409,0.807068227,11.3486409,10.6817359,10.6817359
51.948427,11.1803399,11.3156595,-0.367858148,11.3156595,10.6780652,10.6780652
51.958919,11.2249722,11.2845421,-0.244069448,11.2845421,10.6743926,10.6743926
51.96941,11.3578167,11.2551415,0.320429759,11.2551415,10.6707187,10.6707187
51.979902,11.7046999,11.2273145,0.690930852,11.2273145,10.6670428,10.6670428
51.990394,11.61895,11.2009394,0.646537387,11.2009394,10.6633655,10.6633655
52.000885,10.7703296,11.1759061,-0.636848858,11.1759061,10.6596868,10.6596868
52.011377,10.0498756,11.1521077,-1.04987241,11.1521077,10.6560063,10.6560063
52.021868,11.6619038,11.1294561,0.729690115,11.1294561,10.6523246,10.6523246
52.03236,10.9544512,11.1078629,-0.391678149,11.1078629,10.648641,10.648641
52.042852,11.3137085,11.0872536,0.475872828,11.0872536,10.6449559,10.6449559
52.053343,11.045361,11.0675598,-0.148992702,11.0675598,10.6412696,10.6412696
52.063835,11.2249722,11.0487142,0.419830856,11.0487142,10.6375814,10.6375814
52.074326,10.9087121,11.0306617,-0.349212846,11.0306617,10.633892,10.633892
52.084818,10.5830052,11.0133455,-0.656003207,11.0133455,10.6302008,10.6302008
52.09531,11.1355287,10.996718,0.37257314,10.996718,10.6265081,10.6265081
52.105801,10.4880885,10.9807357,-0.701888292,10.9807357,10.6228142,10.6228142
52.116293,10.9087121,10.965354,-0.237995547,10.965354,10.6191185,10.6191185
52.126784,10.6301458,10.9505377,-0.566031685,10.9505377,10.6154217,10.6154217
52.137276,10.3440804,10.9362487,-0.769524722,10.9362487,10.6117231,10.6117231
52.147768,11.5758369,10.9224561,0.808319757,10.9224561,10.6080229,10.6080229
52.158259,10.5356538,10.9091309,-0.611127798,10.9091309,10.6043217,10.6043217
52.168751,11.2694277,10.8962431,0.610888347,10.8962431,10.6006187,10.6006187
52.179242,10.4880885,10.8837693,-0.629031674,10.8837693,10.5969146,10.5969146
52.189734,10.8627805,10.8716835,-0.0943560187,10.8716835,10.5932086,10.5932086
52.200226,10.4403065,10.859965,-0.647810512,10.859965,10.5895013,10.5895013
52.210717,11.045361,10.8485943,0.443583974,10.8485943,10.5857929,10.5857929
52.221209,10.6301458,10.8375505,-0.455417023,10.8375505,10.5820827,10.5820827
52.2317,11.5758369,10.8268182,0.865458667,10.8268182,10.5783715,10.5783715
52.242192,10.8166538,10.8163793,0.0165694214,10.8163793,10.5746585,10.5746585
52.252684,10.5830052,10.8062199,-0.472455945,10.8062199,10.5709441,10.5709441
52.263175,10.9087121,10.7963272,0.3352386,10.7963272,10.5672286,10.5672286
52.273667,10.2956301,10.7866869,-0.700754451,10.7866869,10.5635115,10.5635115
52.284158,9.74679434,10.7772897,-1.01513315,10.7772897,10.5597933,10.5597933
52.29465,11.8743421,10.7681236,1.0517692,10.7681236,10.5560734,10.5560734
52.305142,10.8166538,10.7591812,0.239734523,10.7591812,10.5523521,10.5523521
52.315633,9.89949494,10.7504561,-0.922475573,10.7504561,10.5486298,10.5486298
52.326125,10.6770783,10.7419416,-0.254682803,10.7419416,10.5449058,10.5449058
52.336616,10.2956301,10.733636,-0.661820111,10.733636,10.5411809,10.5411809
52.347108,11.7473401,10.725537,1.0108428,10.725537,10.5374542,10.5374542
52.3576,11.1803399,10.7176469,0.680215368,10.7176469,10.5337263,10.5337263
52.368091,10.0995049,10.709971,-0.781323304,10.709971,10.5299973,10.5299973
52.378583,10.7703296,10.7025149,0.260412669,10.7025149,10.5262667,10.5262667
52.389074,11.3137085,10.6952892,0.786396375,10.6952892,10.5225352,10.5225352
52.399566,11.045361,10.6883041,0.59754243,10.6883041,10.518802,10.518802
52.410058,11.5325626,10.6815721,0.922491473,10.6815721,10.5150675,10.5150675
52.420549,10.5830052,10.6751054,-0.303480055,10.6751054,10.511332,10.511332
52.431041,11.2249722,10.6689119,0.745694485,10.6689119,10.507595,10.507595
52.441532,10,10.6629973,-0.814246475,10.6629973,10.503857,10.503857
52.452024,9.74679434,10.6573577,-0.954234416,10.6573577,10.5001174,10.5001174
52.462516,10.7703296,10.6519795,0.344020498,10.6519795,10.4963766,10.4963766
52.473007,10.6770783,10.6468331,0.173911312,10.6468331,10.4926349,10.4926349
52.483499,10.3440804,10.641864,-0.545695527,10.641864,10.4888915,10.4888915
52.49399,10.4880885,10.6369884,-0.385875476,10.6369884,10.4851473,10.4851473
52.504482,10,10.6320825,-0.795036161,10.6320825,10.4814016,10.4814016
52.514974,10.9087121,10.6269897,0.530775263,10.6269897,10.4776545,10.4776545
52.525465,10.6301458,10.6215415,0.0927595051,10.6215415,10.4739067,10.4739067
52.535957,10.198039,10.6155997,-0.646189374,10.6155997,10.4701573,10.4701573
52.546448,10.2469508,10.609109,-0.601795848,10.609109,10.466407,10.466407
52.55694,10.6770783,10.6021142,0.273795661,10.6021142,10.4626552,10.4626552
52.567432,10.6770783,10.5947438,0.28693986,10.5947438,10.4589022,10.4589022
52.577923,10.7238053,10.5871604,0.369655054,10.5871604,10.4551484,10.4551484
52.588415,11.2249722,10.5795144,0.803403871,10.5795144,10.4513931,10.4513931
52.598906,10.3440804,10.571925,-0.477330623,10.571925,10.4476369,10.4476369
52.609398,10.198039,10.5644711,-0.605336292,10.5644711,10.4438793,10.4438793
52.61989,10.3923048,10.5572021,-0.406075377,10.5572021,10.4401205,10.4401205
52.630381,11.0905365,10.5501437,0.735114113,10.5501437,10.4363609,10.4363609
52.640873,10.4880885,10.5433033,-0.234978237,10.5433033,10.4325998,10.4325998
52.651364,10.3440804,10.5366789,-0.438860369,10.5366789,10.428838,10.428838
52.661856,10.7703296,10.5302584,0.48997059,10.5302584,10.4250747,10.4250747
52.672348,10.8627805,10.5240268,0.582025517,10.5240268,10.4213103,10.4213103
52.682839,10.3440804,10.5179659,-0.416995728,10.5179659,10.4175451,10.4175451
52.693331,10.7238053,10.5120549,0.460163415,10.5120549,10.4137785,10.4137785
52.703822,10.2469508,10.5062759,-0.509239773,10.5062759,10.4100111,10.4100111
52.714314,9.69535971,10.5006099,-0.897357353,10.5006099,10.4062423,10.4062423
52.724806,11,10.4950418,0.710604131,10.4950418,10.4024724,10.4024724
52.735297,10.2956301,10.4895584,-0.440372822,10.4895584,10.3987019,10.3987019
52.745789,10.7703296,10.4841474,0.534960032,10.4841474,10.3949299,10.3949299
52.75628,9.89949494,10.4788007,-0.76112136,10.4788007,10.3911572,10.3911572
52.766772,11.045361,10.4735098,0.756208436,10.4735098,10.3873831,10.3873831
52.777264,9.05538514,10.4682695,-1.18864812,10.4682695,10.383608,10.383608
52.787755,9.16515139,10.4630755,-1.13926474,10.4630755,10.3798322,10.3798322
52.798247,10.2469508,10.4579232,-0.459317375,10.4579232,10.376055,10.376055
52.808738,10.1488916,10.4528105,-0.551288421,10.4528105,10.3722771,10.3722771
52.81923,10.7703296,10.4477339,0.567975124,10.4477339,10.3684979,10.3684979
52.829722,11.4017543,10.4426917,0.979317367,10.4426917,10.3647177,10.3647177
52.840213,9.89949494,10.4376828,-0.733612855,10.4376828,10.3609369,10.3609369
52.850705,11,10.4327043,0.753190318,10.4327043,10.3571547,10.3571547
52.861196,9.69535971,10.427756,-0.855801557,10.427756,10.3533719,10.3533719
52.871688,10.2956301,10.4228355,-0.356658646,10.4228355,10.3495877,10.3495877
52.88218,11.6619038,10.4179422,1.11533028,10.4179422,10.3458026,10.3458026
52.892671,10.2469508,10.4130753,-0.407583728,10.4130753,10.3420169,10.3420169
52.903163,10.8627805,10.4082329,0.674201459,10.4082329,10.3382299,10.3382299
52.913654,9.21954446,10.403415,-1.08805815,10.403415,10.3344423,10.3344423
52.924146,10.3440804,10.3986198,-0.233536599,10.3986198,10.3306534,10.3306534
52.934638,9.94987437,10.3938468,-0.666312595,10.3938468,10.3268636,10.3268636
52.945129,10.3923048,10.3890959,0.0566478845,10.3890959,10.3230732,10.3230732
52.955621,10.3440804,10.3843652,-0.200710577,10.3843652,10.3192815,10.3192815
52.966112,10.3440804,10.379655,-0.188612098,10.379655,10.3154893,10.3154893
52.976604,10.6301458,10.3749637,0.50515558,10.3749637,10.3116959,10.3116959
52.987096,9.69535971,10.3703347,-0.821568608,10.3703347,10.3079015,10.3079015
52.997587,9.74679434,10.3656811,-0.78669353,10.3656811,10.3041066,10.3041066
53.008079,9.48683298,10.3610445,-0.934992794,10.3610445,10.3003105,10.3003105
53.01857,11.3578167,10.3564254,1.00069541,10.3564254,10.2965139,10.2965139
53.029062,10.5356538,10.3518223,0.428755748,10.3518223,10.292716,10.292716
53.039554,10.7703296,10.3472351,0.650457165,10.3472351,10.2889173,10.2889173
53.050045,9.79795897,10.3426638,-0.738041223,10.3426638,10.2851182,10.2851182
53.060537,10.7238053,10.3381071,0.621046043,10.3381071,10.2813178,10.2813178
53.071028,10.1488916,10.3335654,-0.429736916,10.3335654,10.2775169,10.2775169
53.08152,10.5830052,10.3290374,0.503952273,10.3290374,10.2737149,10.2737149
53.092012,10.8627805,10.324523,0.733660314,10.324523,10.269912,10.269912
53.102503,9.89949494,10.3200225,-0.648480945,10.3200225,10.2661087,10.2661087
53.112995,9.74679434,10.3155344,-0.754148578,10.3155344,10.2623042,10.2623042
53.123486,10.7238053,10.3110594,0.642453046,10.3110594,10.2584993,10.2584993
53.133978,9.89949494,10.3065961,-0.638044825,10.3065961,10.2546933,10.2546933
53.14447,9.74679434,10.3021448,-0.745218382,10.3021448,10.2508865,10.2508865
53.154961,10.4403065,10.2977054,0.377625599,10.2977054,10.2470792,10.2470792
53.165453,10.0995049,10.2932769,-0.440195339,10.2932769,10.2432708,10.2432708
53.175944,10.3923048,10.2888597,0.321628892,10.2888597,10.2394621,10.2394621
53.186436,11.1803399,10.2844528,0.946513142,10.2844528,10.2356522,10.2356522
53.196928,10.6301458,10.2800562,0.591683718,10.2800562,10.2318416,10.2318416
53.207419,10.198039,10.2756701,-0.278623599,10.2756701,10.2280306,10.2280306
53.217911,9.32737905,10.2712935,-0.971552596,10.2712935,10.2242185,10.2242185
53.228402,10.198039,10.2669269,-0.262464916,10.2669269,10.2204061,10.2204061
53.238894,10.6770783,10.2625691,0.643823824,10.2625691,10.2165925,10.2165925
53.249386,10.0995049,10.2582205,-0.398391227,10.2582205,10.2127783,10.2127783
53.259877,10.5830052,10.2538812,0.573693372,10.2538812,10.2089638,10.2089638
53.270369,10.4880885,10.24955,0.488403975,10.24955,10.2051482,10.2051482
53.28086,10.2956301,10.2452278,0.224504752,10.2452278,10.2013322,10.2013322
53.291352,11.0905365,10.2409133,0.921750089,10.2409133,10.1975153,10.1975153
53.301844,10.1488916,10.2366068,-0.296167613,10.2366068,10.1936976,10.1936976
53.312335,10.198039,10.2323086,-0.185120397,10.2323086,10.1898797,10.1898797
53.322827,9.74679434,10.2280176,-0.693702553,10.2280176,10.1860608,10.1860608
53.333318,9.11043358,10.2237344,-1.05513072,10.2237344,10.1822415,10.1822415
53.34381,10.8166538,10.2194581,0.772784384,10.2194581,10.1784213,10.1784213
53.354302,9.21954446,10.2151889,-0.997819854,10.2151889,10.1746004,10.1746004
53.364793,10.4880885,10.210927,0.526461236,10.210927,10.1707793,10.1707793
53.375285,11.045361,10.2066715,0.915799912,10.2066715,10.1669572,10.1669572
53.385776,10.6770783,10.202423,0.688952257,10.202423,10.1631349,10.1631349
53.396268,10.4880885,10.1981806,0.538430954,10.1981806,10.1593116,10.1593116
53.40676,9.94987437,10.1939444,-0.494034488,10.1939444,10.1554877,10.1554877
53.417251,9.48683298,10.1897149,-0.838380515,10.1897149,10.1516636,10.1516636
53.427743,9.11043358,10.1854909,-1.03684972,10.1854909,10.1478385,10.1478385
53.438234,10.9087121,10.1812732,0.852900272,10.1812732,10.1440132,10.1440132
53.448726,9.8488578,10.1770609,-0.57289015,10.1770609,10.140187,10.140187
53.459218,9.8488578,10.1728542,-0.569206847,10.1728542,10.1363603,10.1363603
53.469709,9.94987437,10.1686535,-0.467738261,10.1686535,10.1325334,10.1325334
53.480201,10.5356538,10.1644576,0.609258651,10.1644576,10.1287055,10.1287055
53.490692,10.4880885,10.1602675,0.572556521,10.1602675,10.1248775,10.1248775
53.501184,9,10.1560821,-1.0752126,10.1560821,10.1210486,10.1210486
53.511676,9.59166305,10.1519018,-0.748490973,10.1519018,10.1172192,10.1172192
53.522167,9.59166305,10.1477268,-0.745696805,10.1477268,10.1133897,10.1133897
53.532659,9.64365076,10.1435562,-0.707039908,10.1435562,10.1095593,10.1095593
53.54315,11.2694277,10.1393907,1.06303195,10.1393907,10.1057287,10.1057287
53.553642,10.3440804,10.1352295,0.457002098,10.1352295,10.1018973,10.1018973
53.564134,9.89949494,10.1310728,-0.481225404,10.1310728,10.0980655,10.0980655
53.574625,10.1488916,10.126921,0.1482248,10.126921,10.0942335,10.0942335
53.585117,9.69535971,10.1227731,-0.653768583,10.1227731,10.0904007,10.0904007
53.595608,9.79795897,10.1186298,-0.566278079,10.1186298,10.0865678,10.0865678
53.6061,11.0905365,10.1144904,0.987950471,10.1144904,10.0827341,10.0827341
53.616592,9.8488578,10.110355,-0.511367972,10.110355,10.0788999,10.0788999
53.627083,9.43398113,10.106224,-0.819904208,10.106224,10.0750657,10.0750657
53.637575,10.0498756,10.1020966,-0.228519141,10.1020966,10.0712307,10.0712307
53.648066,9.64365076,10.0979734,-0.674034631,10.0979734,10.0673956,10.0673956
53.658558,10,10.0938537,-0.306355445,10.0938537,10.0635598,10.0635598
53.66905,9.69535971,10.0897376,-0.627995117,10.0897376,10.0597235,10.0597235
53.679541,9.89949494,10.0856255,-0.431428556,10.0856255,10.0558873,10.0558873
53.690033,10.7238053,10.0815167,0.801429116,10.0815167,10.0520503,10.0520503
53.700524,9.38083152,10.0774117,-0.834613786,10.0774117,10.0482132,10.0482132
53.711016,10.4880885,10.0733098,0.644033165,10.0733098,10.0443754,10.0443754
53.721508,9.79795897,10.0692112,-0.520818816,10.0692112,10.0405373,10.0405373
53.731999,9.64365076,10.0651164,-0.64920382,10.0651164,10.0366992,10.0366992
53.742491,10.3923048,10.0610244,0.575569694,10.0610244,10.0328603,10.0328603
53.752982,9.59166305,10.056936,-0.682109173,10.056936,10.0290215,10.0290215
53.763474,9.59166305,10.0528503,-0.679107701,10.0528503,10.025182,10.025182
53.773966,10.3440804,10.0487677,0.543426801,10.0487677,10.0213422,10.0213422
53.784457,10.1488916,10.0446886,0.322804855,10.0446886,10.0175024,10.0175024
53.794949,10.8627805,10.040612,0.906735058,10.040612,10.0136619,10.0136619
53.80544,10.3923048,10.0365388,0.596461291,10.0365388,10.0098215,10.0098215
53.815932,9.59166305,10.0061341,-0.643794267,10.0061341,10.0059804,10.0059804
53.826424,9.43398113,10.0022933,-0.753864815,10.0022933,10.0021391,10.0021391
53.836915,9.32737905,9.99845261,-0.819190794,9.99845261,9.99829779,9.99829779
53.847407,10.1488916,9.99461134,0.392785219,9.99461134,9.99445588,9.99445588
53.857898,10.0498756,9.99077021,0.243116042,9.99077021,9.99061407,9.99061407
53.86839,10.4403065,9.98692851,0.673333498,9.98692851,9.98677165,9.98677165
53.878882,10.0995049,9.98308661,0.341201308,9.98308661,9.98292897,9.98292897
53.889373,9.48683298,9.97924487,-0.701720666,9.97924487,9.97908642,9.97908642
53.899865,10.9544512,9.97540259,0.989468828,9.97540259,9.97524326,9.97524326
53.910356,9.94987437,9.97156049,-0.147262081,9.97156049,9.97140025,9.97140025
53.920848,9.59166305,9.96771786,-0.613233081,9.96771786,9.96755666,9.96755666
53.93134,10.0498756,9.96387506,0.293258517,9.96387506,9.96371285,9.96371285
53.941831,9.43398113,9.96003248,-0.725293974,9.96003248,9.95986921,9.95986921
53.952323,9.79795897,9.95618939,-0.397781869,9.95618939,9.956025,9.956025
53.962814,8.54400375,9.95234652,-1.18673619,9.95234652,9.95218098,9.95218098
53.973306,10.198039,9.94850316,0.49953565,9.94850316,9.94833641,9.94833641
53.983798,9.89949494,9.94465968,-0.212519987,9.94465968,9.94449167,9.94449167
53.994289,8.88819442,9.94081646,-1.0259737,9.94081646,9.94064713,9.94064713
54.004781,9.94987437,9.93697276,0.113585258,9.93697276,9.93680207,9.93680207
54.015272,10.3923048,9.93312934,0.677624903,9.93312934,9.93295722,9.93295722
54.025764,9.38083152,9.92928546,-0.740576762,9.92928546,9.92911187,9.92911187
54.036256,9.11043358,9.92544151,-0.902777895,9.92544151,9.92526639,9.92526639
54.046747,9.32737905,9.92159785,-0.770855887,9.92159785,9.92142115,9.92142115
54.057239,9.64365076,9.91775377,-0.523548479,9.91775377,9.91757542,9.91757542
54.06773,9.69535971,9.91391,-0.467493626,9.91391,9.91372995,9.91372995
54.078222,9.48683298,9.91006583,-0.650563487,9.91006583,9.90988402,9.90988402
54.088714,10.2469508,9.90622162,0.583720088,9.90622162,9.90603798,9.90603798
54.099205,9,9.90237776,-0.949935662,9.90237776,9.90219223,9.90219223
54.109697,9.38083152,9.89853352,-0.719515112,9.89853352,9.89834603,9.89834603
54.120188,9.69535971,9.89468963,-0.446463793,9.89468963,9.89450013,9.89450013
54.13068,10.9087121,9.89084539,1.00889381,9.89084539,9.8906538,9.8906538
54.141172,8.60232527,9.88700116,-1.13343544,9.88700116,9.88680742,9.88680742
54.151663,9.64365076,9.88315731,-0.489394067,9.88315731,9.88296135,9.88296135
54.162155,10.9544512,9.87931314,1.03688862,9.87931314,9.87911488,9.87911488
54.172646,9.59166305,9.87546937,-0.53273476,9.87546937,9.87526874,9.87526874
54.183138,10.4403065,9.87162529,0.754109554,9.87162529,9.87142221,9.87142221
54.19363,10.4880885,9.86778127,0.787595842,9.86778127,9.86757566,9.86757566
54.204121,10.198039,9.86393769,0.578014997,9.86393769,9.86372947,9.86372947
54.214613,10.9087121,9.86009383,1.02402065,9.86009383,9.85988292,9.85988292
54.225104,9.21954446,9.85625042,-0.79793857,9.85625042,9.85603674,9.85603674
54.235596,9.21954446,9.85240675,-0.795526425,9.85240675,9.8521902,9.8521902
54.246088,9.69535971,9.84856319,-0.391412159,9.84856319,9.84834369,9.84834369
54.256579,10.8166538,9.84472013,0.985866979,9.84472013,9.84449758,9.84449758
54.267071,9.94987437,9.84087683,0.330147759,9.84087683,9.84065113,9.84065113
54.277562,9.74679434,9.83703404,-0.300399229,9.83703404,9.8368051,9.8368051
54.288054,10.0995049,9.83319104,0.516056095,9.83319104,9.83295876,9.83295876
54.298546,10.2469508,9.82934822,0.64622175,9.82934822,9.82911248,9.82911248
54.309037,10.3440804,9.82550593,0.720121171,9.82550593,9.82526663,9.82526663
54.319529,10.3923048,9.82166347,0.755408084,9.82166347,9.8214205,9.8214205
54.33002,10.2469508,9.81782158,0.655079527,9.81782158,9.81757481,9.81757481
54.340512,9.16515139,9.81397954,-0.805498694,9.81397954,9.81372886,9.81372886
54.351004,10.0498756,9.81013772,0.489630374,9.81013772,9.809883,9.809883
54.361495,10.7703296,9.8062965,0.981851878,9.8062965,9.80603762,9.80603762
54.371987,9.74679434,9.80245517,-0.235925476,9.80245517,9.80219199,9.80219199
54.382478,9,9.79861448,-0.893652324,9.79861448,9.79834684,9.79834684
54.39297,10.8627805,9.79477369,1.03344415,9.79477369,9.79450147,9.79450147
54.403462,10.2469508,9.79093319,0.675290736,9.79093319,9.79065623,9.79065623
54.413953,10.4403065,9.78709336,0.80821603,9.78709336,9.78681151,9.78681151
54.424445,8.94427191,9.78325348,-0.915959371,9.78325348,9.78296658,9.78296658
54.434936,9.8488578,9.7794143,0.263521352,9.7794143,9.77912217,9.77912217
54.445428,9.89949494,9.7755751,0.352022497,9.7755751,9.77527757,9.77527757
54.45592,10.4880885,9.77173626,0.846375935,9.77173626,9.77143315,9.77143315
54.466411,9.43398113,9.76789816,-0.577855542,9.76789816,9.76758928,9.76758928
54.476903,9.89949494,9.76406009,0.36801474,9.76406009,9.76374525,9.76374525
54.487394,10.0498756,9.76022279,0.538194047,9.76022279,9.75990178,9.75990178
54.497886,10.7238053,9.90176625,0.906663692,9.75638555,9.90144365,9.75605815
54.508378,10.4403065,9.8997443,0.735229355,9.75254875,9.89941526,9.75221474
54.518869,10.2469508,9.8977564,0.590926701,9.74871278,9.89742068,9.74837192
54.529361,9.11043358,9.89580299,-0.886210702,9.74487691,9.89546035,9.74452897
54.539852,9.74679434,9.8938853,-0.383524386,9.74104191,9.89353551,9.74068663
54.550344,10.198039,9.89200386,0.553204457,9.73720706,9.89164665,9.73684418
54.560836,10.1488916,9.89015975,0.508656869,9.73337274,9.88979486,9.73300198
54.571327,9.64365076,9.88835411,-0.494674995,9.72953935,9.88798126,9.72916041
54.581819,10,9.88658755,0.336767648,9.72570616,9.88620644,9.72531874
54.59231,10.4880885,9.88486142,0.776676938,9.72187394,9.88447173,9.72147773
54.602802,10.2469508,9.88317641,0.603137097,9.71804198,9.88277784,9.71763664
54.613294,9.59166305,9.88153377,-0.538396433,9.71421067,9.88112596,9.71379584
54.623785,9.43398113,9.87993474,-0.667797581,9.71038039,9.87951736,9.70995571
54.634277,10.5356538,9.87838017,0.810724112,9.70655044,9.87795282,9.70611553
54.644768,9.74679434,9.87687152,-0.360662128,9.70272159,9.87643383,9.70227604
54.65526,10.4403065,9.87540971,0.751596165,9.69889312,9.87496127,9.69843651
54.665752,9.59166305,9.87399616,-0.531350277,9.69506544,9.87353652,9.69459731
54.676243,9.89949494,9.87263229,0.163898282,9.69123893,9.87216101,9.69075883
54.686735,9.89949494,9.87131917,0.167856379,9.68741292,9.87083576,9.68692033
54.697226,10.4403065,9.87005845,0.755147707,9.68358815,9.86956241,9.68308255
54.707718,9.64365076,9.86885131,-0.474553002,9.67976393,9.86834211,9.67924478
54.71821,10.2469508,9.86769937,0.615833902,9.67594067,9.86717644,9.67540738
54.728701,9.32737905,9.86660426,-0.734319553,9.67211878,9.86606701,9.67157073
54.739193,10.9544512,9.86556736,1.04349595,9.66829757,9.86501517,9.66773411
54.749684,10.0995049,9.86459051,0.484679716,9.66447781,9.86402271,9.66389825
54.760176,9.79795897,9.86367523,-0.256351835,9.66065882,9.86309112,9.66006243
54.770668,10.5830052,9.86282339,0.848635289,9.65684102,9.86222222,9.65622703
54.781159,10.1488916,9.86203688,0.535588168,9.65302483,9.86141787,9.65239241
54.791651,10.0498756,9.86131745,0.434232856,9.64920957,9.86067975,9.64855786
54.802142,10.6770783,9.8606672,0.903554676,9.64539605,9.86000993,9.64472411
54.812634,10.6770783,9.86008805,0.903875106,9.64158359,9.85941026,9.64089045
54.823126,9.69535971,9.85958217,-0.405243698,9.63777264,9.85888286,9.63705723
54.833617,9.53939201,9.8591518,-0.565473067,9.63396363,9.8584299,9.63322485
54.844109,10.198039,9.85879915,0.582443028,9.63015592,9.8580535,9.62939257
54.8546,9.74679434,9.85852663,-0.334263795,9.62635032,9.85775603,9.62556113
54.865092,8.94427191,9.85833666,-0.956067336,9.62254621,9.85753979,9.62172981
54.875584,10.2469508,9.85823183,0.623473286,9.61874405,9.8574073,9.61789899
54.886075,8.88819442,9.85821479,-0.984896121,9.61494432,9.8573611,9.61406903
54.896567,9.53939201,9.85827289,-0.564695381,9.6111306,9.85740385,9.61023922
54.907058,9.74679434,9.85843995,-0.334134105,9.60733551,9.85753829,9.60641028
54.91755,9.64365076,9.85870344,-0.463737726,9.6035425,9.85776732,9.60258151
54.928042,9.79795897,9.85906648,-0.247199331,9.59975212,9.85809391,9.59875327
54.938533,10.2469508,9.85953227,0.622429513,9.59596488,9.8585211,9.59492594
54.949025,10.0498756,9.86010428,0.43562753,9.59218025,9.8590522,9.59109879
54.959516,10.198039,9.86078593,0.580734961,9.58839917,9.85969045,9.58727256
54.970008,8.94427191,9.86158105,-0.957762571,9.58462113,9.86043945,9.58344653
54.9805,10.0498756,9.86249343,0.432876649,9.58084674,9.86130277,9.57962108
54.990991,10.6770783,9.86352698,0.901970771,9.57707663,9.86228409,9.57579656
55.001483,10.6770783,9.86468611,0.901327988,9.5733104,9.86338752,9.57197227
55.011974,10.3440804,9.865975,0.691451686,9.56954908,9.86461693,9.56814895
55.022466,9.53939201,9.8673985,-0.572718504,9.56579235,9.86597684,9.56432586
55.032958,10.9544512,9.86896132,1.04186843,9.56204097,9.86747156,9.56050338
55.043449,9.21954446,9.87066837,-0.806922492,9.55829577,9.86910557,9.55668189
55.053941,9.8488578,9.87252526,-0.153842332,9.55455654,9.87088401,9.55286066
55.064432,9.89949494,9.87453725,0.157980012,9.55082458,9.8728116,9.54904043
55.074924,9.64365076,9.87671058,-0.482762698,9.54709984,9.87489395,9.54522048
55.085416,11,9.87905126,1.05874867,9.54338342,9.87713638,9.54140118
55.095907,9.74679434,9.88156557,-0.367112001,9.53967651,9.87954441,9.5375829
55.106399,8.94427191,9.88426087,-0.969530277,9.53597935,9.88212449,9.53376493
55.11689,9.53939201,9.88714395,-0.58970496,9.53229377,9.88488238,9.52994799
55.127382,9.74679434,9.89022313,-0.378719923,9.52862033,9.88782519,9.52613138
55.137874,9.16515139,9.89350638,-0.85343716,9.52496089,9.89095951,9.52231545
55.148365,9.74679434,9.89700221,-0.387566591,9.52131757,9.89429219,9.51850059
55.158857,9.48683298,9.90072081,-0.643341145,9.51769181,9.89783138,9.51468607
55.169348,10.3440804,9.90467182,0.662879035,9.51408695,9.90158429,9.51087262
55.17984,9.94987437,9.90886733,0.20250196,9.51050559,9.90555987,9.50705954
55.190332,9.53939201,9.91331956,-0.611496158,9.50695227,9.90976642,9.50324719
55.200823,10,9.91804223,0.286282667,9.50343274,9.91421257,9.49943593
55.211315,10.0498756,9.9230524,0.356122484,9.4999534,9.91890869,9.49562506
55.221806,10.7238053,9.92836779,0.891873033,9.49652414,9.92386387,9.49181531
55.232298,9.43398113,9.93401127,-0.707128091,9.49315639,9.92908952,9.48800596
55.24279,9.64365076,9.94000809,-0.54438711,9.48986609,9.93459623,9.48419737
55.253281,10.2469508,9.94638798,0.548236064,9.48667353,9.94039498,9.48038993
55.263773,10.2469508,9.9531879,0.541998957,9.48360317,9.94649908,9.47658291
55.274264,10.198039,9.96044814,0.487432958,9.48068628,9.95292016,9.47277704
55.284756,10.5830052,9.96821785,0.784083793,9.47795894,9.95967293,9.46897161
55.295248,10.5356538,9.97655002,0.747732392,9.4754637,9.966771,9.465167
55.305739,9.8488578,9.98550245,-0.369654775,9.47324775,9.97422862,9.46136356
55.316231,10.3440804,9.99513889,0.590712745,9.47136063,9.98206298,9.45756058
55.326722,11.1355287,10.0055203,1.06301853,9.46985289,9.99028923,9.4537588
55.337214,10.6770783,10.0167091,0.812631026,9.46877109,9.99892651,9.4499575
55.347706,10.198039,10.0287575,0.411438372,9.46815421,10.0079926,9.44615704
55.358197,9.89949494,10.0417055,-0.37710815,9.46802728,10.0175062,9.44235781
55.368689,11,10.0555779,0.971813802,9.46839449,10.0274897,9.43855907
55.37918,10.8627805,10.0703674,0.890175895,9.46922997,10.0379634,9.43476157
55.389672,10.5356538,10.0860333,0.670537412,9.4704657,10.0489522,9.43096459
55.400164,10.3923048,10.1024778,0.538355918,9.47197479,10.0604799,9.4271685
55.410655,10.3923048,10.1195313,0.522277292,9.47355222,10.0725713,9.42337366
55.421147,10.1488916,10.136944,0.109305063,9.47489913,10.0852563,9.41957937
55.431638,11.3137085,10.1543756,1.07672322,9.47562268,10.0985619,9.41578635
55.44213,10.2956301,10.1714453,0.352398683,9.47527501,10.1125216,9.41199389
55.452622,9.8488578,10.1878017,-0.58218888,9.47343962,10.1271673,9.40820235
55.463113,10.0498756,10.2032369,-0.391613643,9.46984906,10.1425326,9.40441211
55.473605,10,10.2177745,-0.46666318,9.46447489,10.1586581,9.40062246
55.484096,10.2956301,10.2316675,0.252908307,9.45754077,10.1755803,9.39683411
55.494588,10.2469508,10.2453346,0.0402014016,9.44944012,10.193345,9.39304636
55.50508,10.5356538,10.2592414,0.525749283,9.44062332,10.211996,9.38925958
55.515571,10.6301458,10.2738153,0.596934223,9.43149963,10.2315796,9.38547414
55.526063,11.9163753,10.2894061,1.27552703,9.42238644,10.2521513,9.38168932
55.536554,10.2469508,10.3062708,-0.243557096,9.41350865,10.2737623,9.37790584
55.547046,10.2469508,10.3246003,-0.278656696,9.40500612,10.2964758,9.37412301
55.557538,11.045361,10.3445267,0.837158456,9.39695902,10.3203531,9.37034118
55.568029,9.8488578,10.3661443,-0.719226288,9.38940214,10.3454596,9.36656073
55.578521,9.59166305,10.3895286,-0.893233184,9.38233586,10.3718728,9.36278094
55.589012,10.4403065,10.4147316,0.159921682,9.37574078,10.3996657,9.35900254
55.599504,11,10.4418066,0.747123406,9.36957969,10.4289277,9.35522481
55.609996,11.0905365,10.4707983,0.78723455,9.36380806,10.4597465,9.35144813
55.620487,10.6301458,10.5017537,0.358318442,9.35837679,10.4922163,9.34767287
55.630979,11.3137085,10.5347366,0.882593845,9.35323479,10.5264481,9.3438983
55.64147,10.7238053,10.5698093,0.392423183,9.34833534,10.5625487,9.34012517
55.651962,10.9544512,10.6070607,0.589398384,9.34363419,10.6006471,9.33635275
55.662454,10.3440804,10.6465848,-0.550003964,9.339094,10.6408725,9.33258141
55.672945,11.045361,10.6884914,0.597385632,9.33468322,10.6833638,9.32881153
55.683437,11.8743421,10.7329199,1.06837363,9.33037479,10.7282846,9.32504239
55.693928,10.5830052,10.7800111,-0.443853406,9.32614854,10.7757949,9.32127472
55.70442,11.6619038,10.8299423,0.912119242,9.32198716,10.8260869,9.3175078
55.714912,11.6619038,10.8828969,0.882613658,9.31787831,10.8793557,9.31374201
55.725403,11,10.939078,0.246823895,9.31381259,10.935813,9.30997771
55.735895,11.61895,10.9987265,0.787542743,9.30978176,10.9957069,9.30621419
55.746386,11.045361,11.062085,-0.129321201,9.30578088,11.0592849,9.30245218
55.756878,11.4891253,11.1294562,0.599724199,9.30181791,11.1268429,9.29869096
55.76737,11.2694277,11.2011199,0.261357477,9.2978636,11.1986857,9.29493091
55.777861,11.8743421,11.2774185,0.77260829,9.29392861,11.2751472,9.29117239
55.788353,11.7898261,11.3587396,0.656571766,9.29000999,11.3566171,9.28741469
55.798844,12.0415946,11.4454794,0.772084959,9.28610663,11.4434933,9.28365853
55.809336,11.045361,11.5381089,-0.701960054,9.28221627,11.5362482,9.27990321
55.819828,11.7473401,11.6371232,0.331989298,9.27833796,11.6353781,9.27614909
55.830319,11.6619038,11.7430692,-0.284895429,9.27447095,11.7414309,9.27239654
55.840811,13.3041347,11.8565857,1.2031413,9.27061353,11.8550465,9.26864485
55.851302,12.7671453,11.9783393,0.888147534,9.26676558,11.976892,9.26489474
55.861794,12.7671453,12.1091203,0.811187427,9.26292562,12.1077586,9.26114551
55.872286,13.2287566,12.2497746,0.989435168,9.25909336,12.2484928,9.25739752
55.882777,12.8840987,12.4012469,0.69487537,9.25526859,12.4000399,9.25365114
55.893269,13.6747943,12.5646433,1.05363706,9.25145004,12.5635062,9.24990566
55.90376,13.892444,12.7411444,1.0729863,9.247638,12.740073,9.2461618
55.914252,12.922848,12.9321515,-0.0964548141,9.24383133,12.9311419,9.24241886
55.924744,14,13.1391961,0.9277952,9.24003001,13.1382447,9.2386772
55.935235,14.3178211,13.364012,0.976631462,9.23623409,13.3631158,9.23493718
55.945727,15,13.6086415,1.17955859,9.23244254,13.6077973,9.2311981
55.956218,15.2315462,13.8753212,1.16457075,9.22865582,13.8745263,9.22746069
55.96671,16.0623784,14.1667189,1.3768295,9.22487297,14.1659709,9.22372423
55.977202,17,14.4858213,1.58561618,9.22109414,14.4851179,9.21998909
55.987693,17.175564,14.8360701,1.52954044,9.21731949,14.8354092,9.21625563
55.998185,16.0312195,15.2215624,0.899809499,9.21354813,15.220942,9.21252315
56.008676,17.2626765,15.6469168,1.27112535,9.2097806,15.6463352,9.20879237
56.019168,16.9410743,16.1177018,0.907398757,9.20601606,16.1171573,9.20506259
56.02966,18.5741756,16.6403256,1.39062938,9.20225473,16.6398165,9.20133416
56.040151,19.0262976,17.2223381,1.3431156,9.19849684,17.2218631,9.19760746
56.050643,19.3649167,17.872872,1.22149283,9.19474158,17.8724297,9.19388178
56.061134,20.7364414,18.6025513,1.46078405,9.19098956,18.6021404,9.19015783
56.071626,21.2602916,19.4243812,1.35495773,9.18723996,19.4240004,9.18643492
56.082118,21.7715411,20.3537631,1.19070483,9.18349308,20.3534113,9.18271341
56.092609,23.4093998,21.4092462,1.41426786,9.17974918,21.4089223,9.17899365
56.103101,23.9791576,22.613576,1.16858102,9.17600749,22.6132788,9.17527496
56.113592,25.7487864,23.9937324,1.32478449,9.17226866,23.9934608,9.17155804
56.124084,26.8328157,25.5826032,1.11812905,9.16853192,25.582356,9.1678422
56.134576,29.0344623,27.4185213,1.27119666,9.16479756,27.4182975,9.16412779
56.145067,32.1403174,29.5449972,1.61099973,9.1610659,29.5447955,9.16041518
56.155559,33.9116499,32.0085933,1.37951317,9.15733618,32.0084124,9.15670367
56.16605,36.2353419,34.8497795,1.17709913,9.15360908,34.8496179,9.15299397
56.176542,40.385641,38.0878758,1.51583814,9.14988384,38.087732,9.14928539
56.187034,43.760713,41.6862264,1.44030781,9.14616078,41.6860986,9.14557828
56.197525,46.5080638,45.4980262,1.00500629,9.14244023,45.4979122,9.14187301
56.208017,50.8625599,49.1998751,1.28945136,9.13872146,49.1997725,9.13816887
56.218508,52.5261839,52.2596251,0.516293409,9.13500513,52.2595309,9.13446659
56.229,54.7722558,54.0435318,0.853653288,9.13129053,54.0434431,9.13076546
56.239492,55.0363516,54.0896422,0.972989955,9.12757799,54.0895557,9.12706584
56.249983,52.9905652,52.3841799,0.778707482,9.12386783,52.3840928,9.1233681
56.260475,50.5667875,49.3703548,1.09381569,9.12015933,49.3702647,9.11967154
56.270966,47.0106371,45.6832019,1.15214375,9.11645319,45.6831068,9.11597687
56.281458,41.6533312,41.8637446,-0.458708427,9.11274867,41.8636433,9.11228338
56.29195,36.6196668,38.2470251,-1.27567951,9.10904613,38.2469168,9.10859146
56.302441,34.2490876,34.9868225,-0.85891497,9.1053459,34.9867068,9.10490144
56.312933,31.4324673,32.1226788,-0.830789691,9.10164726,32.1225557,9.10121264
56.323424,28.3019434,29.6380097,-1.15588335,9.09795092,29.6378792,9.09752577
56.333916,25.96151,27.4919318,-1.23710218,9.09425615,27.4917942,9.09384013
56.344408,24.1453929,25.6385373,-1.22194287,9.0905633,25.6383929,9.09015608
56.354899,23.0217289,24.034028,-1.00613077,9.08687271,24.0338772,9.08647398
56.365391,20.9523268,22.6393775,-1.29886513,9.08318368,22.6392208,9.08279313
56.375882,20.1990099,21.4219648,-1.1058729,9.0794969,21.4218026,9.07911426
56.386374,19.4164878,20.3541181,-0.968313084,9.07581167,20.3539509,9.07543665
56.396866,17.9443584,19.4132241,-1.21196769,9.07212833,19.4130523,9.07176067
56.407357,18.493242,18.5805475,-0.295475031,9.06844723,18.5803715,9.06808668
56.417849,17.4355958,17.8403432,-0.636197636,9.06476766,17.8401635,9.06441399
56.42834,17.0587221,17.17979,-0.347948091,9.06109033,17.1796069,9.06074329
56.438832,16.3707055,16.5879377,-0.466081692,9.05741454,16.5877517,9.05707391
56.449324,15.2970585,16.0557699,-0.87104037,9.05374062,16.0555813,9.0534062
56.459815,15.4919334,15.575674,-0.289379739,9.05006893,15.5754832,9.04974051
56.470307,14.8660687,15.141076,-0.524411345,9.04639877,15.1408833,9.04607616
56.480798,14.4222051,14.7465421,-0.569505965,9.04273085,14.7463478,9.04241384
56.49129,14.0712473,14.3872822,-0.562169829,9.03906445,14.3870864,9.03875288
56.501782,13.9283883,14.0592864,-0.36179845,9.03539993,14.0590895,9.03509362
56.512273,13.6014705,13.759091,-0.39701448,9.03173765,13.7588933,9.03143642
56.522765,13.3416641,13.4836173,-0.376766817,9.0280769,13.4834189,9.0277806
56.533256,13,13.2302917,-0.47988714,9.02441838,13.2300928,9.02412686
56.543748,12.8840987,12.9967755,-0.33567363,9.02076141,12.9965764,9.0204745
56.55424,13.190906,12.7810888,0.640169665,9.01710632,12.7808895,9.01682389
56.564731,12.4096736,12.5814888,-0.41450587,9.01345347,12.5812895,9.01317537
56.575223,11.5758369,12.3963865,-0.905841953,9.00980217,12.3961875,9.00952827
56.585714,12.4498996,12.2244467,0.474818759,9.00615312,12.224248,9.00588329
56.596206,12.7671453,12.0644222,0.838285852,9.00250562,12.0642238,9.00223973
56.606698,10.9544512,11.9152504,-0.980203665,8.99886002,11.9150525,8.99859796
56.617189,10.9087121,11.7759826,-0.93127357,8.99521668,11.7757852,8.99495832
56.627681,11.9582607,11.6457337,0.559041224,8.9915749,11.6455369,8.99132013
56.638172,12.2882057,11.5237597,0.874326056,8.98793539,11.5235637,8.98768409
56.648664,10.5356538,11.4093478,-0.934716004,8.98429745,11.4091525,8.98404952
56.659156,10.6301458,11.3018896,-0.819599766,8.98066144,11.3016952,8.98041678
56.669647,9.89949494,11.2008355,-1.14076317,8.9770277,11.200642,8.9767862
56.680139,10.198039,11.1056619,-0.952692421,8.97339555,11.1054692,8.97315712
56.69063,10.5356538,11.0159302,-0.693019821,8.96976568,11.0157385,8.96953022
56.701122,10.3923048,10.9312099,-0.734101517,8.96613741,10.9310191,8.96590483
56.711614,10.9087121,10.851134,0.239954407,8.96251109,10.8509442,8.9622813
56.722105,10.1488916,10.775368,-0.791502618,8.95888707,10.7751791,8.95865997
56.732597,9.89949494,10.7035862,-0.896711373,8.95526466,10.7033984,8.95504018
56.743088,10.3440804,10.6355185,-0.53985008,8.95164456,10.6353317,8.95142261
56.75358,10.9544512,10.5708926,0.619321079,8.94802608,10.5707068,8.94780659
56.764072,10.3923048,10.5094774,-0.342304811,8.94440958,10.5092926,8.94419246
56.774563,10.9544512,10.451061,0.709499956,8.94079541,10.4508772,8.94058058
56.785055,10.7703296,10.3954323,0.612288549,8.93718287,10.3952496,8.93697027
56.795546,10.8166538,10.3424186,0.688647366,8.93357267,10.3422368,8.93336221
56.806038,10.2469508,10.2918409,-0.211872812,8.92996413,10.29166,8.92975575
56.81653,10.3440804,10.2435485,0.317067639,8.92635758,10.2433687,8.92615121
56.827021,9.2736185,10.1974024,-0.961136789,8.92275339,10.1972235,8.92254896
56.837513,10.7703296,10.1532611,0.785537065,8.91915088,10.1530832,8.91894831
56.848004,8.36660027,10.1110105,-1.32076122,8.91555073,10.1108335,8.91534997
56.858496,10.5356538,10.0705289,0.682000605,8.91195226,10.0703528,8.91175324
56.868988,9.64365076,10.0317154,-0.622948345,8.90835583,10.0315402,8.90815848
56.879479,9.79795897,9.99447578,-0.443302164,8.90476178,9.99430139,8.90456605
56.889971,9.53939201,9.95871237,-0.647549499,8.90116943,9.95853882,8.90097526
56.900462,9.43398113,9.92434773,-0.700261806,8.89757948,9.92417499,8.8973868
56.910954,9.74679434,9.89129695,-0.380134978,8.89399125,9.89112499,8.89380001
56.921446,9.64365076,9.85949033,-0.464585373,8.89040508,9.85931913,8.89021522
56.931937,8.71779789,9.82886266,-1.05407057,8.88682133,9.82869219,8.88663279
56.942429,8.48528137,9.7993446,-1.14632597,8.88323932,9.79917483,8.88305204
56.95292,9.38083152,9.77088244,-0.624540568,8.87965974,9.77071334,8.87947366
56.963412,9.59166305,9.74341532,-0.389553942,8.8760819,9.74324686,8.87589698
56.973904,9.32737905,9.71689411,-0.624111411,8.87250617,9.71672625,8.87232234
56.984395,10,9.69127261,0.555632424,8.86893289,9.69110533,8.8687501
56.994887,9.69535971,9.66650044,0.169880177,8.86536138,9.66633371,8.86517958
57.005378,9.89949494,9.64253962,0.506907603,8.86179233,9.6423734,8.86161147
57.01587,9.53939201,9.61934553,-0.282760519,8.85822507,9.61917979,8.85804509
57.026362,9.64365076,9.59688284,0.216258928,8.85465994,9.59671754,8.85448079
57.036853,9.69535971,9.57511822,0.346758561,8.85109729,9.57495333,8.85091892
57.047345,10.6770783,9.55401425,1.05974714,8.84753646,9.55384974,8.84735881
57.057836,8.66025404,9.53354364,-0.934499655,8.84397812,9.53337947,8.84380115
57.068328,9.53939201,9.513673,0.160371482,8.8404216,9.51350913,8.84024525
57.07882,9.74679434,9.4943765,0.502412031,8.83686726,9.49421289,8.83669148
57.089311,8.30662386,9.47562966,-1.08120571,8.83331543,9.47546628,8.83314017
57.099803,10.5830052,9.45740417,1.06094348,8.82976545,9.45724098,8.82959066
57.110294,8.94427191,9.43968014,-0.70385242,8.826218,9.43951709,8.82604363
57.120786,8.83176087,9.4224321,-0.768551389,8.82267242,9.42226916,8.8224984
57.131278,8.1240384,9.40564089,-1.13207883,8.81912904,9.40547802,8.81895534
57.141769,8.60232527,9.38928828,-0.887109357,8.81558822,9.38912543,8.81541477
57.152261,9,9.37335246,-0.611025741,8.81204928,9.37318959,8.81187604
57.162752,9.43398113,9.35781875,0.275975337,8.80851291,9.35765581,8.80833982
57.173244,10,9.34266741,0.810760503,8.80497844,9.34250437,8.80480545
57.183736,8.30662386,9.32788402,-1.01057417,8.80144622,9.32772083,8.80127327
57.194227,8.1240384,9.31345484,-1.0906037,8.79791659,9.31329145,8.79774363
57.204719,9.43398113,9.29936279,0.36690373,8.79438889,9.29919915,8.79421586
57.21521,8.71779789,9.28559693,-0.753524417,8.79086379,9.28543301,8.79069065
57.225702,8.83176087,9.27214173,-0.663611984,8.78734064,9.27197747,8.78716731
57.236194,8.83176087,9.25898621,-0.653624772,8.78381977,9.25882155,8.78364621
57.246685,9.16515139,9.24611988,-0.284549627,8.78030154,9.24595478,8.78012767
57.257177,8.42614977,9.23352917,-0.898542932,8.77678527,9.23336357,8.77661105
57.267668,9.11043358,9.22120589,-0.332824749,8.77327165,9.22103974,8.77309701
57.27816,9.69535971,9.20913761,0.697296285,8.76976001,9.20897084,8.7695849
57.288652,9.53939201,9.19731588,0.584872749,8.7662507,9.19714846,8.76607505
57.299143,8.06225775,9.18573265,-1.05994099,8.76274407,9.1855645,8.7625678
57.309635,9.38083152,9.17437696,0.454372706,8.75923944,9.17420803,8.7590625
57.320126,9.32737905,9.16324265,0.405137511,8.75573751,9.16307287,8.75555983
57.330618,10.0498756,9.15231963,0.947394316,8.7522376,9.15214894,8.75205911
57.34111,9.21954446,9.14160138,0.27918288,8.74874007,9.14142971,8.74856069
57.351601,9,9.13108162,-0.362051954,8.74524525,9.13090891,8.74506492
57.362093,9.59166305,9.12075141,0.686230014,8.74175248,9.12057759,8.74157113
57.372584,9.43398113,9.1106061,0.568660734,8.73826246,9.11043109,8.73807999
57.383076,10,9.10063741,0.948347296,8.73477451,9.10046113,8.73459085
57.393568,9.64365076,9.09084023,0.743512293,8.73128897,9.09066262,8.73110405
57.404059,8.06225775,9.08120968,-1.00943149,8.7278062,9.08103064,8.72761992
57.414551,9.16515139,9.07173835,0.305635469,8.72432554,9.07155781,8.72413782
57.425042,8.1240384,9.06242273,-0.968702391,8.72084766,9.0622406,8.7206584
57.435534,8.66025404,9.05325593,-0.62689863,8.7173719,9.05307213,8.71718102
57.446026,8.42614977,9.04423396,-0.786183306,8.71389862,9.04404839,8.71370601
57.456517,8.36660027,9.03535298,-0.817773019,8.71042815,9.03516553,8.71023371
57.467009,8.83176087,9.02660678,-0.441413537,8.70695983,9.02641736,8.70676347
57.4775,9.32737905,9.01799272,0.556225076,8.70349436,9.01780123,8.70329595
57.487992,8.36660027,9.00950502,-0.801813416,8.70003106,9.00931135,8.6998305
57.498484,9.21954446,9.00114053,0.467337059,8.69657029,9.00094456,8.69636746
57.508975,8.66025404,8.99289621,-0.576751396,8.69311239,8.99269783,8.69290717
57.519467,9.05538514,8.98476683,0.265741061,8.68965671,8.98456591,8.68944897
57.529958,8.77496439,8.9767504,-0.44920598,8.68620393,8.97654681,8.68599353
57.54045,8.94427191,8.96884202,-0.156748554,8.68275339,8.96863563,8.68254019
57.550942,8.88819442,8.9610392,-0.26989772,8.67930544,8.96082986,8.6790893
57.561433,8.60232527,8.95333953,-0.592464565,8.67586042,8.95312709,8.67564119
57.571925,8.30662386,8.94573854,-0.79944648,8.67241769,8.94552285,8.67219521
57.582416,9.11043358,8.93823477,0.414968442,8.66897792,8.93801567,8.66875202
57.592908,8.83176087,8.93082402,-0.314742989,8.66554047,8.93060133,8.66531097
57.6034,8.18535277,8.9235043,-0.859157453,8.66210568,8.92327785,8.6618724
57.613891,8.36660027,8.91627373,-0.741399665,8.65867391,8.91604333,8.65843665
57.624383,8.88819442,8.90912843,-0.144685918,8.6552445,8.90889387,8.65500306
57.634874,8.88819442,8.90206737,-0.11778351,8.65181813,8.90182845,8.6515723
57.645366,8,8.8950869,-0.946090321,8.64839417,8.89484338,8.64814371
57.655858,8.88819442,8.88818545,0.00299451662,8.64497297,8.88793711,8.64471764
57.666349,8.24621125,8.88136154,-0.796963164,8.64155486,8.88110813,8.64129442
57.676841,8.30662386,8.87461178,-0.753649734,8.63813922,8.87435304,8.6378734
57.687332,7.93725393,8.86793548,-0.964718379,8.63472673,8.86767113,8.63445524
57.697824,8.1240384,8.86132944,-0.858656532,8.63131675,8.86105919,8.63103929
57.708316,9.43398113,8.85479244,0.761044472,8.62790964,8.85451597,8.62762589
57.718807,9.32737905,8.84832331,0.69213853,8.62450575,8.84804028,8.62421538
57.729299,8.30662386,8.84191908,-0.73163872,8.62110445,8.84162915,8.6208071
57.73979,8.06225775,8.83557931,-0.879387038,8.61770644,8.8352821,8.61740171
57.750282,7.54983444,8.82930119,-1.13113516,8.61431107,8.8289963,8.61399857
57.760774,9.11043358,8.82308377,0.536050194,8.61091873,8.82277077,8.61059802
57.771265,7.81024968,8.81692614,-1.00333268,8.60752977,8.81660458,8.60720038
57.781757,8.48528137,8.81082569,-0.570564908,8.60414357,8.81049508,8.60380502
57.792248,9.05538514,8.80478218,0.500602592,8.60076083,8.804442,8.60041257
57.80274,8.60232527,8.79879313,-0.443246958,8.59738094,8.79844282,8.59702242
57.813232,9.05538514,8.79285782,0.512374196,8.59400429,8.79249678,8.59363489
57.823723,8.24621125,8.78697556,-0.735366785,8.59063123,8.78660314,8.5902503
57.834215,8.94427191,8.78114403,0.40389093,8.58726119,8.78075954,8.58686801
57.844706,8,8.77536318,-0.88054709,8.58389486,8.77496587,8.58348869
57.855198,8.66025404,8.7696308,-0.330721573,8.58053168,8.76921987,8.58011169
57.86569,8.71779789,8.76394637,-0.214821975,8.57717203,8.76352094,8.57673734
57.876181,7.87400787,8.7583094,-0.940373077,8.57381632,8.75786854,8.57336597
57.886673,8.18535277,8.75271783,-0.753236387,8.57046399,8.7522605,8.56999694
57.897164,7.93725393,8.74717177,-0.899954355,8.56711578,8.74669688,8.56663091
57.907656,8.36660027,8.74166928,-0.612428782,8.56377115,8.74117562,8.56326723
57.918148,8.36660027,8.73621001,-0.607955381,8.56043054,8.73569626,8.55990624
57.928639,8.36660027,8.73079366,-0.603484379,8.55709439,8.73025839,8.55654826
57.939131,8.18535277,8.72536693,-0.734856554,8.55370969,8.72486006,8.55319265
57.949622,9.48683298,8.72003348,0.875670884,8.5503827,8.71950141,8.54984007
57.960114,8.66025404,8.71473973,-0.233421696,8.54706001,8.71418057,8.54648989
57.970606,8.71779789,8.70948552,0.0911721875,8.54374214,8.70889721,8.54314242
57.981097,8.42614977,8.54042962,-0.338053027,8.54042962,8.53979799,8.53979799
57.991589,8.36660027,8.53712208,-0.412942872,8.53712208,8.53645598,8.53645598
58.00208,8.1240384,8.53382043,-0.640142194,8.53382043,8.53311703,8.53311703
58.012572,9.64365076,8.53052438,1.05504805,8.53052438,8.5297805,8.5297805
58.023064,9.38083152,8.52723461,0.923903086,8.52723461,8.52644672,8.52644672
58.033555,9.38083152,8.52395189,0.925677931,8.52395189,8.52311602,8.52311602
58.044047,8.36660027,8.52067612,-0.392524972,8.52067612,8.51978777,8.51978777
58.054538,8.48528137,8.51740857,-0.179240607,8.51740857,8.5164626,8.5164626
58.06503,7.87400787,8.5141494,-0.800088452,8.5141494,8.5131399,8.5131399
58.075522,9.48683298,8.51089992,0.987893242,8.51089992,8.50981998,8.50981998
58.086013,8.36660027,8.50766168,-0.375581435,8.50766168,8.50650317,8.50650317
58.096505,7.74596669,8.50443566,-0.870901239,8.50443566,8.50318884,8.50318884
58.106996,9.32737905,8.50122455,0.90893042,8.50122455,8.49987763,8.49987763
58.117488,9.16515139,8.49803039,0.816774757,8.49803039,8.49656891,8.49656891
58.12798,8.88819442,8.49485692,0.627166244,8.49485692,8.49326301,8.49326301
58.138471,8.36660027,8.49170881,-0.353706866,8.49170881,8.48996025,8.48996025
58.148963,8.42614977,8.48859096,-0.249882337,8.48859096,8.48666001,8.48666001
58.159454,9.05538514,8.48551073,0.754900267,8.48551073,8.48336292,8.48336292
58.169946,8.48528137,8.48247573,0.0529683167,8.48247573,8.48006836,8.48006836
58.180438,8.88819442,8.47949593,0.639295305,8.47949593,8.47677664,8.47677664
58.190929,8.60232527,8.47658265,0.354602059,8.47658265,8.4734881,8.4734881
58.201421,7.87400787,8.47374754,-0.774428609,8.47374754,8.47020211,8.47020211
58.211912,8.60232527,8.47100414,0.362382566,8.47100414,8.4669193,8.4669193
58.222404,8.06225775,8.46836504,-0.637265484,8.46836504,8.46363905,8.46363905
58.232896,8.60232527,8.46584296,0.369435113,8.46584296,8.46036168,8.46036168
58.243387,8.77496439,8.46344885,0.558135774,8.46344885,8.45708752,8.45708752
58.253879,8.30662386,8.46118995,-0.393148942,8.46118995,8.45381594,8.45381594
58.26437,9.05538514,8.4590699,0.772214506,8.4590699,8.45054757,8.45054757
58.274862,7.48331477,8.45708496,-0.986797944,8.45708496,8.4472818,8.4472818
58.285354,8.77496439,8.45522301,0.565456789,8.45522301,8.44401894,8.44401894
58.295845,8.42614977,8.4534595,-0.165256537,8.4534595,8.44075931,8.44075931
58.306337,8,8.45175274,-0.672125539,8.45175274,8.4375023,8.4375023
58.316828,9.11043358,8.45004059,0.812645676,8.45004059,8.43424854,8.43424854
58.32732,8.1240384,8.44823623,-0.569383728,8.44823623,8.4309974,8.4309974
58.337812,8.18535277,8.4462319,-0.510763281,8.4462319,8.42774921,8.42774921
58.348303,8.30662386,8.44391053,-0.37052215,8.44391053,8.42450428,8.42450428
58.358795,8.06225775,8.44116797,-0.615556842,8.44116797,8.421262,8.421262
58.369286,7.81024968,8.43794241,-0.792270619,8.43794241,8.41802299,8.41802299
58.379778,7.93725393,8.43423189,-0.704966635,8.43423189,8.41478665,8.41478665
58.39027,9,8.4300968,0.754919331,8.4300968,8.41155328,8.41155328
58.400761,9.53939201,8.42563995,1.05534452,8.42563995,8.40832321,8.40832321
58.411253,8.60232527,8.42097745,0.425849527,8.42097745,8.40509582,8.40509582
58.421744,8.60232527,8.41621852,0.431400916,8.41621852,8.40187173,8.40187173
58.432236,8.42614977,8.41144951,0.121244653,8.41144951,8.39865034,8.39865034
58.442728,8.54400375,8.40673425,0.37049898,8.40673425,8.39543195,8.39543195
58.453219,8.60232527,8.40211537,0.447448205,8.40211537,8.39221689,8.39221689
58.463711,8.06225775,8.39761745,-0.579102495,8.39761745,8.38900454,8.38900454
58.474202,7.28010989,8.3932543,-1.05505659,8.3932543,8.38579552,8.38579552
58.484694,9.69535971,8.38902894,1.14294828,8.38902894,8.38258923,8.38258923
58.495186,7.74596669,8.38493902,-0.799357445,8.38493902,8.37938599,8.37938599
58.505677,7.81024968,8.38097752,-0.755465316,8.38097752,8.37618609,8.37618609
58.516169,8.30662386,8.37713321,-0.265535955,8.37713321,8.37298894,8.37298894
58.52666,8.1240384,8.37339452,-0.499355698,8.37339452,8.36979515,8.36979515
58.537152,8.30662386,8.3697477,-0.251244585,8.3697477,8.36660412,8.36660412
58.547644,8.18535277,8.36618018,-0.425238057,8.36618018,8.36341616,8.36341616
58.558135,8.24621125,8.36268004,-0.341275235,8.36268004,8.36023158,8.36023158
58.568627,8.48528137,8.35923553,0.355029355,8.35923553,8.35704978,8.35704978
58.579118,8.60232527,8.35583761,0.496475238,8.35583761,8.35387137,8.35387137
58.58961,7.61577311,8.35247736,-0.858314773,8.35247736,8.35069576,8.35069576
58.600102,8.1240384,8.34914827,-0.474457443,8.34914827,8.34752324,8.34752324
58.610593,8.66025404,8.34584512,0.560721786,8.34584512,8.34435413,8.34435413
58.621085,8.60232527,8.34256286,0.509668921,8.34256286,8.34118783,8.34118783
58.631576,8.06225775,8.33929866,-0.526346757,8.33929866,8.33802495,8.33802495
58.642068,8.71779789,8.3360492,0.617858142,8.3360492,8.3348649,8.3348649
58.65256,8.83176087,8.33281273,0.706362612,8.33281273,8.33170798,8.33170798
58.663051,8.48528137,8.32958792,0.394580094,8.32958792,8.32855449,8.32855449
58.673543,8.1240384,8.32637293,-0.449816097,8.32637293,8.32540384,8.32540384
58.684034,9.05538514,8.32316736,0.855697246,8.32316736,8.32225664,8.32225664
58.694526,8.36660027,8.31996983,0.215940805,8.31996983,8.3191123,8.3191123
58.705018,7.68114575,8.31678001,-0.797266746,8.31678001,8.31597112,8.31597112
58.715509,7.87400787,8.31359768,-0.663015687,8.31359768,8.3128334,8.3128334
58.726001,7.81024968,8.31042178,-0.707228466,8.31042178,8.30969855,8.30969855
58.736492,8.24621125,8.30725256,-0.247065387,8.30725256,8.30656719,8.30656719
58.746984,7.81024968,8.30408908,-0.702737084,8.30408908,8.3034387,8.3034387
58.757476,8.83176087,8.30093139,0.728580454,8.30093139,8.30031341,8.30031341
58.767967,9,8.29777953,0.837985962,8.29777953,8.29719161,8.29719161
58.778459,7.93725393,8.29463269,-0.597811639,8.29463269,8.29407271,8.29407271
58.78895,7.87400787,8.29149128,-0.646129561,8.29149128,8.29095731,8.29095731
58.799442,8.30662386,8.28835455,0.135164024,8.28835455,8.28784484,8.28784484
58.809934,8.88819442,8.28522264,0.776512576,8.28522264,8.28473558,8.28473558
58.820425,8.77496439,8.28209571,0.702046062,8.28209571,8.28162984,8.28162984
58.830917,7.61577311,8.27897307,-0.814370899,8.27897307,8.27852703,8.27852703
58.841408,6.8556546,8.27585519,-1.19172169,8.27585519,8.27542776,8.27542776
58.8519,8.83176087,8.27274138,0.747676054,8.27274138,8.27233143,8.27233143
58.862392,8.77496439,8.26963188,0.710867436,8.26963188,8.26923835,8.26923835
58.872883,8,8.26652688,-0.516262413,8.26652688,8.26614881,8.26614881
58.883375,7.61577311,8.26342574,-0.804768681,8.26342574,8.26306224,8.26306224
58.893866,7.87400787,8.26032898,-0.621547346,8.26032898,8.25997923,8.25997923
58.904358,7.74596669,8.25723596,-0.715030953,8.25723596,8.2568992,8.2568992
58.91485,8.54400375,8.25414692,0.538383531,8.25414692,8.25382244,8.25382244
58.925341,8.66025404,8.25106212,0.63968111,8.25106212,8.25074925,8.25074925
58.935833,7.41619849,8.24798092,-0.912021068,8.24798092,8.24767906,8.24767906
58.946324,9.11043358,8.24490387,0.93033849,8.24490387,8.24461245,8.24461245
58.956816,8.30662386,8.24183037,0.254545665,8.24183037,8.24154885,8.24154885
58.967308,8,8.23876066,-0.488631416,8.23876066,8.23848856,8.23848856
58.977799,9.2736185,8.23569502,1.01878529,8.23569502,8.23543186,8.23543186
58.988291,8.1240384,8.23263284,-0.329536692,8.23263284,8.23237818,8.23237818
58.998782,7.81024968,8.22957467,-0.647553082,8.22957467,8.22932812,8.22932812
59.009274,8.18535277,8.22651992,-0.202896888,8.22651992,8.22628109,8.22628109
59.019766,7.81024968,8.22346886,-0.642821267,8.22346886,8.2232374,8.2232374
59.030257,8.60232527,8.22042176,0.61798342,8.22042176,8.22019733,8.22019733
59.040749,8.54400375,8.21737803,0.571511781,8.21737803,8.21716031,8.21716031
59.05124,9.48683298,8.21433823,1.12804909,8.21433823,8.21412693,8.21412693
59.061732,8.1240384,8.21130178,-0.295403753,8.21130178,8.21109661,8.21109661
59.072224,7.68114575,8.20826895,-0.72603251,8.20826895,8.20806966,8.20806966
59.082715,8.18535277,8.20524003,-0.141022175,8.20524003,8.20504635,8.20504635
59.093207,8.24621125,8.20221441,0.209754229,8.20221441,8.20202613,8.20202613
59.103698,8.24621125,8.19919269,0.21683764,8.19919269,8.19900957,8.19900957
59.11419,8.30662386,8.19617427,0.332339581,8.19617427,8.1959961,8.1959961
59.124682,8.24621125,8.19315943,0.230329814,8.19315943,8.19298601,8.19298601
59.135173,7.68114575,8.19014846,-0.713444257,8.19014846,8.18997961,8.18997961
59.145665,8.94427191,8.18714077,0.870132827,8.18714077,8.18697631,8.18697631
59.156156,8.54400375,8.18413695,0.599888988,8.18413695,8.1839767,8.1839767
59.166648,8.42614977,8.1811364,0.494988253,8.1811364,8.18098022,8.18098022
59.17714,8.30662386,8.17813942,0.358447262,8.17813942,8.17798714,8.17798714
59.187631,8.66025404,8.17514629,0.696496766,8.17514629,8.17499777,8.17499777
59.198123,8.18535277,8.17215644,0.1148753,8.17215644,8.17201153,8.17201153
59.208614,7.61577311,8.16917043,-0.743906795,8.16917043,8.16902901,8.16902901
59.219106,8.94427191,8.16618769,0.882090824,8.16618769,8.16604964,8.16604964
59.229598,7.87400787,8.16320851,-0.537773777,8.16320851,8.1630737,8.1630737
59.240089,7.81024968,8.16023317,-0.591594029,8.16023317,8.16010149,8.16010149
59.250581,8.36660027,8.15726111,0.457535964,8.15726111,8.15713245,8.15713245
59.261072,8.24621125,8.15429288,0.303180421,8.15429288,8.15416715,8.15416715
59.271564,7.74596669,8.15132793,-0.636679858,8.15132793,8.15120502,8.15120502
59.282056,9,8.14836654,0.922839886,8.14836654,8.14824635,8.14824635
59.292547,7.87400787,8.145409,-0.520961729,8.145409,8.14529144,8.14529144
59.303039,7.48331477,8.14245473,-0.811874346,8.14245473,8.14233972,8.14233972
59.31353,7.87400787,8.1395043,-0.515263456,8.1395043,8.13939176,8.13939176
59.324022,7.68114575,8.13655716,-0.674841768,8.13655716,8.136447,8.136447
59.334514,8,8.13361358,-0.365531918,8.13361358,8.13350574,8.13350574
59.345005,8.94427191,8.13067385,0.901996705,8.13067385,8.13056825,8.13056825
59.355497,8.1240384,8.12773741,-0.0608194839,8.12773741,8.12763398,8.12763398
59.365988,7.14142843,8.12480483,-0.991653365,8.12480483,8.12470349,8.12470349
59.37648,7.87400787,8.12187553,-0.497863091,8.12187553,8.12177624,8.12177624
59.386972,8.36660027,8.11894981,0.497644905,8.11894981,8.1188525,8.1188525
59.397463,8.48528137,8.11602795,0.607662258,8.11602795,8.11593255,8.11593255
59.407955,8.42614977,8.1131094,0.559500112,8.1131094,8.11301586,8.11301586
59.418446,8.30662386,8.1101947,0.443203294,8.1101947,8.11010297,8.11010297
59.428938,8.30662386,8.10728332,0.446475693,8.10728332,8.10719334,8.10719334
59.43943,8.88819442,8.10437552,0.88533547,8.10437552,8.10428725,8.10428725
59.449921,7.81024968,8.1014716,-0.539649815,8.1014716,8.10138498,8.10138498
59.460413,8.54400375,8.09857099,0.667407486,8.09857099,8.09848598,8.09848598
59.470904,8.18535277,8.09567426,0.299463703,8.09567426,8.09559082,8.09559082
59.481396,7.74596669,8.09278086,-0.588909303,8.09278086,8.09269894,8.09269894
59.491888,8.06225775,8.08989106,-0.166232708,8.08989106,8.08981062,8.08981062
59.502379,7.61577311,8.08700515,-0.686463431,8.08700515,8.08692614,8.08692614
59.512871,7.87400787,8.08412257,-0.458382698,8.08412257,8.08404497,8.08404497
59.523362,8.18535277,8.08124389,0.322659086,8.08124389,8.08116765,8.08116765
59.533854,7.93725393,8.07836855,-0.375652249,8.07836855,8.07829363,8.07829363
59.544346,7.68114575,8.07549683,-0.627973789,8.07549683,8.07542321,8.07542321
59.554837,8.66025404,8.07262901,0.766567041,8.07262901,8.07255665,8.07255665
59.565329,8.18535277,8.06976455,0.339982682,8.06976455,8.06969341,8.06969341
59.57582,7.48331477,8.06690399,-0.763930114,8.06690399,8.06683405,8.06683405
59.586312,7.21110255,8.0640468,-0.92354981,8.0640468,8.06397803,8.06397803
59.596804,8.06225775,8.06119325,0.0326266032,8.06119325,8.06112561,8.06112561
59.607295,7.93725393,8.05834362,-0.347979434,8.05834362,8.05827709,8.05827709
59.617787,7.41619849,8.05549736,-0.799561678,8.05549736,8.05543191,8.05543191
59.628278,7.93725393,8.05265503,-0.339707369,8.05265503,8.05259063,8.05259063
59.63877,6.78232998,8.04981608,-1.12582685,8.04981608,8.04975271,8.04975271
59.649262,8.48528137,8.04698079,0.662042734,8.04698079,8.04691843,8.04691843
59.659753,8.36660027,8.04414944,0.56784754,8.04414944,8.04408805,8.04408805
59.670245,7.54983444,8.04132148,-0.701061369,8.04132148,8.04126105,8.04126105
59.680736,8.48528137,8.03849746,0.668418965,8.03849746,8.03843797,8.03843797
59.691228,8.94427191,8.03567685,0.953202529,8.03567685,8.03561827,8.03561827
59.70172,7.41619849,8.03285992,-0.785277931,8.03285992,8.03280223,8.03280223
59.712211,8.18535277,8.03004693,0.394088619,8.03004693,8.02999011,8.02999011
59.722703,7.74596669,8.02723737,-0.530349579,8.02723737,8.0271814,8.0271814
59.733194,8.24621125,8.02443176,0.470934698,8.02443176,8.02437663,8.02437663
59.743686,7.87400787,8.02162958,-0.384215705,8.02162958,8.02157526,8.02157526
59.754178,8.54400375,8.0188311,0.724687964,8.0188311,8.01877757,8.01877757
59.764669,8.48528137,8.01603659,0.685014443,8.01603659,8.01598384,8.01598384
59.775161,8.06225775,8.01324551,0.221387071,8.01324551,8.01319352,8.01319352
59.785652,7.74596669,8.01045841,-0.514287587,8.01045841,8.01040717,8.01040717
59.796144,8.18535277,8.00767476,0.421518692,8.00767476,8.00762425,8.00762425
59.806636,7.87400787,8.00489483,-0.361783025,8.00489483,8.00484503,8.00484503
59.817127,7.74596669,8.00211888,-0.506114801,8.00211888,8.00206978,8.00206978
59.827619,7.41619849,7.9993464,-0.763641219,7.9993464,7.99929797,7.99929797
59.83811,7.14142843,7.99657791,-0.924742925,7.99657791,7.99653015,7.99653015
59.848602,8.18535277,7.99381288,0.437652705,7.99381288,7.99376578,7.99376578
59.859094,9,7.99105159,1.00446424,7.99105159,7.99100513,7.99100513
59.869585,8.48528137,7.98829431,0.704973094,7.98829431,7.98824848,7.98824848
59.880077,6.78232998,7.98554051,-1.09690953,7.98554051,7.98549529,7.98549529
59.890568,7.54983444,7.98279072,-0.657994137,7.98279072,7.9827461,7.9827461
59.90106,8.30662386,7.98004442,0.571471297,7.98004442,7.98000039,7.98000039
59.911552,7.21110255,7.97730188,-0.875328124,7.97730188,7.97725842,7.97725842
59.922043,8.60232527,7.97456335,0.792314278,7.97456335,7.97452047,7.97452047
59.932535,7.81024968,7.97182833,-0.401968477,7.97182833,7.971786,7.971786
59.943026,8.30662386,7.96909734,0.580970328,7.96909734,7.96905556,7.96905556
59.953518,8.42614977,7.96636986,0.678070728,7.96636986,7.96632861,7.96632861
59.96401,7.87400787,7.96364616,-0.299396529,7.96364616,7.96360543,7.96360543
59.974501,8.24621125,7.96092649,0.53412055,7.96092649,7.96088628,7.96088628
59.984993,8.18535277,7.95821035,0.476594613,7.95821035,7.95817064,7.95817064
59.995484,7.87400787,7.95549825,-0.285465192,7.95549825,7.95545904,7.95545904
60.005976,8.06225775,7.95278968,0.330859583,7.95278968,7.95275096,7.95275096
60.016468,7.28010989,7.95008491,-0.818520021,7.95008491,7.95004666,7.95004666
60.026959,7.87400787,7.9473842,-0.270880648,7.9473842,7.94734641,7.94734641
60.037451,8.36660027,7.94468703,0.649548486,7.94468703,7.9446497,7.9446497
60.047942,8,7.94199392,0.240844512,7.94199392,7.94195704,7.94195704
60.058434,7.61577311,7.93930437,-0.568798084,7.93930437,7.93926793,7.93926793
60.068926,8.30662386,7.93661862,0.60828056,7.93661862,7.93658262,7.93658262
60.079417,8.1240384,7.93393695,0.436006251,7.93393695,7.93390138,7.93390138
60.089909,7.68114575,7.93125885,-0.500113089,7.93125885,7.93122369,7.93122369
60.1004,7.68114575,7.92858482,-0.497432483,7.92858482,7.92855008,7.92855008
60.110892,8.48528137,7.92591437,0.747908419,7.92591437,7.92588003,7.92588003
60.121384,8.60232527,7.92324775,0.824061598,7.92324775,7.9232138,7.9232138
60.131875,7.68114575,7.92058522,-0.489325525,7.92058522,7.92055166,7.92055166
60.142367,8.18535277,7.91792627,0.517132963,7.91792627,7.91789309,7.91789309
60.152858,7.28010989,7.91527142,-0.796970218,7.91527142,7.91523862,7.91523862
60.16335,8.66025404,7.91262016,0.864658244,7.91262016,7.91258773,7.91258773
60.173842,7.68114575,7.90997275,-0.478358655,7.90997275,7.90994068,7.90994068
60.184333,8.54400375,7.90732945,0.797918729,7.90732945,7.90729774,7.90729774
60.194825,8.1240384,7.90468975,0.468346728,7.90468975,7.90465839,7.90465839
60.205316,8.88819442,7.90205416,0.993045949,7.90205416,7.90202315,7.90202315
60.215808,8.06225775,7.89942218,0.403528889,7.89942218,7.89939151,7.89939151
60.2263,6.8556546,7.89679408,-1.02036242,7.89679408,7.89676374,7.89676374
60.236791,8.88819442,7.89417009,0.997007687,7.89417009,7.89414008,7.89414008
60.247283,8.24621125,7.89154973,0.595534654,7.89154973,7.89152004,7.89152004
60.257774,7.54983444,7.88893349,-0.582322124,7.88893349,7.88890412,7.88890412
60.268266,7.28010989,7.88632089,-0.77859553,7.88632089,7.88629183,7.88629183
60.278758,8,7.88371217,0.341010015,7.88371217,7.88368342,7.88368342
60.289249,8.71779789,7.88110759,0.914707767,7.88110759,7.88107914,7.88107914
60.299741,8.18535277,7.87850665,0.553936931,7.87850665,7.8784785,7.8784785
60.310232,8.54400375,7.87590985,0.817370108,7.87590985,7.87588199,7.87588199
60.320724,7.54983444,7.87331671,-0.568755018,7.87331671,7.87328914,7.87328914
60.331216,7.87400787,7.87072746,0.0572748883,7.87072746,7.87070018,7.87070018
60.341707,7.81024968,7.86814237,-0.240609003,7.86814237,7.86811536,7.86811536
60.352199,7.87400787,7.86556094,0.0919072165,7.86556094,7.86553421,7.86553421
60.36269,7,7.86298366,-0.928969141,7.86298366,7.8629572,7.8629572
60.373182,8.24621125,7.86041006,0.621128965,7.86041006,7.86038387,7.86038387
60.383674,8.42614977,7.85784037,0.753862984,7.85784037,7.85781444,7.85781444
60.394165,7.81024968,7.85527485,-0.212191371,7.85527485,7.85524918,7.85524918
60.404657,7.68114575,7.85271301,-0.414206792,7.85271301,7.8526876,7.8526876
60.415148,8,7.85015535,0.387097731,7.85015535,7.85013018,7.85013018
60.42564,7.74596669,7.84760137,-0.318801934,7.84760137,7.84757644,7.84757644
60.436132,8.18535277,7.84505132,0.583353625,7.84505132,7.84502664,7.84502664
60.446623,8.77496439,7.84250545,0.965639132,7.84250545,7.84248102,7.84248102
60.457115,7.48331477,7.83996329,-0.597200563,7.83996329,7.83993908,7.83993908
60.467606,8.06225775,7.8374253,0.474164997,7.8374253,7.83740134,7.83740134
60.478098,7.07106781,7.83489103,-0.873969802,7.83489103,7.83486729,7.83486729
60.48859,7.81024968,7.8323607,-0.148697763,7.8323607,7.83233719,7.83233719
60.499081,6.92820323,7.82983457,-0.949542699,7.82983457,7.82981128,7.82981128
60.509573,6.78232998,7.82731215,-1.02224369,7.82731215,7.82728908,7.82728908
60.520064,8.1240384,7.82479393,0.547032423,7.82479393,7.82477108,7.82477108
60.530556,7.48331477,7.82227944,-0.582206719,7.82227944,7.8222568,7.8222568
60.541048,7.21110255,7.81976891,-0.780170723,7.81976891,7.81974648,7.81974648
60.551539,7.68114575,7.81726259,-0.368940154,7.81726259,7.81724036,7.81724036
60.562031,7.68114575,7.81475999,-0.365532826,7.81475999,7.81473797,7.81473797
60.572522,8.1240384,7.81226162,0.558369759,7.81226162,7.8122398,7.8122398
60.583014,7.68114575,7.80976698,-0.358638022,7.80976698,7.80974536,7.80974536
60.593506,8.24621125,7.80727632,0.662521645,7.80727632,7.8072549,7.8072549
60.603997,8.06225775,7.80478988,0.507412914,7.80478988,7.80476865,7.80476865
60.614489,7.34846923,7.80230719,-0.67367497,7.80230719,7.80228615,7.80228615
60.62498,7.48331477,7.79982873,-0.562595731,7.79982873,7.79980788,7.79980788
60.635472,7.28010989,7.79735402,-0.719196866,7.79735402,7.79733335,7.79733335
60.645964,8,7.79488331,0.452898103,7.79488331,7.79486282,7.79486282
60.656455,7.68114575,7.79241683,-0.3335732,7.79241683,7.79239652,7.79239652
60.666947,7.81024968,7.78995411,0.1424625,7.78995411,7.78993399,7.78993399
60.677438,8.30662386,7.78749563,0.720505537,7.78749563,7.78747568,7.78747568
60.68793,8.36660027,7.78504093,0.762600379,7.78504093,7.78502115,7.78502115
60.698422,6.8556546,7.78259023,-0.962774962,7.78259023,7.78257062,7.78257062
60.708913,8,7.78014377,0.468888286,7.78014377,7.78012434,7.78012434
60.719405,6.78232998,7.7777011,-0.997682875,7.7777011,7.77768183,7.77768183
60.729896,7.28010989,7.77526268,-0.703670938,7.77526268,7.77524357,7.77524357
60.740388,7.68114575,7.77282804,-0.302790841,7.77282804,7.7728091,7.7728091
60.75088,6.8556546,7.77039743,-0.956421887,7.77039743,7.77037864,7.77037864
60.761371,7.07106781,7.76797107,-0.834807317,7.76797107,7.76795244,7.76795244
60.771863,7.81024968,7.76554851,0.211426514,7.76554851,7.76553003,7.76553003
60.782354,8,7.7631302,0.486692713,7.7631302,7.76311189,7.76311189
60.792846,7.34846923,7.7607157,-0.642064229,7.7607157,7.76069754,7.76069754
60.803338,7.68114575,7.75830524,-0.277775969,7.75830524,7.75828722,7.75828722
60.813829,7.28010989,7.75589904,-0.689774709,7.75589904,7.75588117,7.75588117
60.824321,7.34846923,7.75349665,-0.636417648,7.75349665,7.75347893,7.75347893
60.834812,8,7.75109853,0.498900256,7.75109853,7.75108096,7.75108096
60.845304,7.93725393,7.74870423,0.434223098,7.74870423,7.7486868,7.7486868
60.855796,7.81024968,7.74631398,0.252855086,7.74631398,7.74629669,7.74629669
60.866287,8.24621125,7.74392801,0.70871944,7.74392801,7.74391085,7.74391085
60.876779,8,7.74154586,0.508383855,7.74154586,7.74152884,7.74152884
60.88727,7.81024968,7.73916799,0.266611493,7.73916799,7.73915111,7.73915111
60.897762,7.74596669,7.73679395,0.0957744392,7.73679395,7.7367772,7.7367772
60.908254,7.93725393,7.73442397,0.450366476,7.73442397,7.73440736,7.73440736
60.918745,8.1240384,7.73205828,0.626083162,7.73205828,7.7320418,7.7320418
60.929237,8,7.72969643,0.519907274,7.72969643,7.72968007,7.72968007
60.939728,7.74596669,7.72733887,0.136483798,7.72733887,7.72732264,7.72732264
60.95022,7.68114575,7.72498515,-0.209378605,7.72498515,7.72496905,7.72496905
60.960712,7.28010989,7.7226355,-0.665225986,7.7226355,7.72261953,7.72261953
60.971203,8,7.72029015,0.528876023,7.72029015,7.7202743,7.7202743
60.981695,8.60232527,7.71793293,0.940421363,7.71793293,7.71793293,7.71793293
60.992186,7.54983444,7.71559585,-0.40713808,7.71559585,7.71559585,7.71559585
61.002678,8.18535277,7.71326263,0.687088161,7.71326263,7.71326263,7.71326263
61.01317,8.24621125,7.71093349,0.731626791,7.71093349,7.71093349,7.71093349
61.023661,7.34846923,7.70860866,-0.600116178,7.70860866,7.70860866,7.70860866
61.034153,8.30662386,7.70628768,0.774813642,7.70628768,7.70628768,7.70628768
61.044644,7.87400787,7.70397102,0.412355253,7.70397102,7.70397102,7.70397102
61.055136,7.54983444,7.70165822,-0.389645721,7.70165822,7.70165822,7.70165822
61.065628,8.18535277,7.69934952,0.697139335,7.69934952,7.69934952,7.69934952
61.076119,8,7.69704513,0.550413364,7.69704513,7.69704513,7.69704513
61.086611,8.83176087,7.69474461,1.06630964,7.69474461,7.69474461,7.69474461
61.097102,7.87400787,7.69244841,0.426097947,7.69244841,7.69244841,7.69244841
61.107594,7.14142843,7.6901561,-0.740761545,7.6901561,7.6901561,7.6901561
61.118086,7.07106781,7.68786788,-0.785366199,7.68786788,7.68786788,7.68786788
61.128577,7.54983444,7.68558398,-0.368442054,7.68558398,7.68558398,7.68558398
61.139069,8.77496439,7.68330397,1.04482554,7.68330397,7.68330397,7.68330397
61.14956,7.21110255,7.68102829,-0.685511298,7.68102829,7.68102829,7.68102829
61.160052,7.74596669,7.6787565,0.259249289,7.6787565,7.6787565,7.6787565
61.170544,7.28010989,7.67648882,-0.629586316,7.67648882,7.67648882,7.67648882
61.181035,7.07106781,7.67422547,-0.776632252,7.67422547,7.67422547,7.67422547
61.191527,7.93725393,7.67196601,0.515061083,7.67196601,7.67196601,7.67196601
61.202018,7.28010989,7.66971089,-0.624180265,7.66971089,7.66971089,7.66971089
61.21251,7.68114575,7.66745967,0.116987494,7.66745967,7.66745967,7.66745967
61.223002,7.41619849,7.66521258,-0.499013115,7.66521258,7.66521258,7.66521258
61.233493,7.74596669,7.66296981,0.288091787,7.66296981,7.66296981,7.66296981
61.243985,7.93725393,7.66073096,0.525854515,7.66073096,7.66073096,7.66073096
61.254476,7.74596669,7.65849645,0.295753688,7.65849645,7.65849645,7.65849645
61.264968,7.28010989,7.65626585,-0.613315546,7.65626585,7.65626585,7.65626585
61.27546,8.06225775,7.65403938,0.63891969,7.65403938,7.65403938,7.65403938
61.285951,7.87400787,7.65181725,0.471371006,7.65181725,7.65181725,7.65181725
61.296443,7.68114575,7.64959904,0.177613928,7.64959904,7.64959904,7.64959904
61.306934,7.87400787,7.64738518,0.47604905,7.64738518,7.64738518,7.64738518
61.317426,8.66025404,7.64517524,1.00751119,7.64517524,7.64517524,7.64517524
61.327918,7.48331477,7.64296943,-0.399568092,7.64296943,7.64296943,7.64296943
61.338409,8.1240384,7.64076798,0.695176543,7.64076798,7.64076798,7.64076798
61.348901,7.68114575,7.63857045,0.206337815,7.63857045,7.63857045,7.63857045
61.359392,7.81024968,7.63637728,0.416980091,7.63637728,7.63637728,7.63637728
61.369884,7.54983444,7.63418804,-0.290436918,7.63418804,7.63418804,7.63418804
61.380376,8.36660027,7.63200294,0.857086532,7.63200294,7.63200294,7.63200294
61.390867,8.88819442,7.6298222,1.12177191,7.6298222,7.6298222,7.6298222
61.401359,8.06225775,7.6276454,0.659251357,7.6276454,7.6276454,7.6276454
61.41185,7.07106781,7.62547295,-0.744583868,7.62547295,7.62547295,7.62547295
61.422342,7.41619849,7.62330444,-0.455088955,7.62330444,7.62330444,7.62330444
61.432834,9.05538514,7.62114009,1.1975997,7.62114009,7.62114009,7.62114009
61.443325,8.48528137,7.6189801,0.930753071,7.6189801,7.6189801,7.6189801
61.453817,7.68114575,7.61682405,0.253617231,7.61682405,7.61682405,7.61682405
61.464308,7.48331477,7.61467236,-0.362432873,7.61467236,7.61467236,7.61467236
61.4748,7.87400787,7.61252463,0.511354327,7.61252463,7.61252463,7.61252463
61.485292,7.87400787,7.61038105,0.51344603,7.61038105,7.61038105,7.61038105
61.495783,7.28010989,7.60824183,-0.572828024,7.60824183,7.60824183,7.60824183
61.506275,7.34846923,7.60610658,-0.507579893,7.60610658,7.60610658,7.60610658
61.516766,7.81024968,7.60397568,0.454173969,7.60397568,7.60397568,7.60397568
61.527258,7.93725393,7.60184875,0.579141767,7.60184875,7.60184875,7.60184875
61.53775,8.06225775,7.59972598,0.680096884,7.59972598,7.59972598,7.59972598
61.548241,8,7.59760757,0.634344092,7.59760757,7.59760757,7.59760757
61.558733,8.06225775,7.59549313,0.683201738,7.59549313,7.59549313,7.59549313
61.569224,7.07106781,7.59338306,-0.722713809,7.59338306,7.59338306,7.59338306
61.579716,8,7.59127696,0.63931451,7.59127696,7.59127696,7.59127696
61.590208,7,7.58917502,-0.767577371,7.58917502,7.58917502,7.58917502
61.600699,7.87400787,7.58707746,0.535658864,7.58707746,7.58707746,7.58707746
61.611191,7.07106781,7.58498386,-0.716879383,7.58498386,7.58498386,7.58498386
61.621682,7.54983444,7.58289464,-0.181824648,7.58289464,7.58289464,7.58289464
61.632174,7.74596669,7.58080939,0.406395502,7.58080939,7.58080939,7.58080939
61.642666,7.41619849,7.58026078,-0.405046035,7.57872831,7.58026078,7.57872831
61.653157,7.21110255,7.57820112,-0.605886599,7.57665161,7.57820112,7.57665161
61.663649,7.21110255,7.57614572,-0.604188028,7.57457889,7.57614572,7.57457889
61.67414,7.81024968,7.57409499,0.485957498,7.57251054,7.57409499,7.57251054
61.684632,7.68114575,7.57204852,0.33029869,7.57044617,7.57204852,7.57044617
61.695124,8.06225775,7.57000654,0.701606165,7.56838597,7.57000654,7.56838597
61.705615,7.93725393,7.56796923,0.607687996,7.56633016,7.56796923,7.56633016
61.716107,7.54983444,7.56593623,-0.126892829,7.56427832,7.56593623,7.56427832
61.726598,7.81024968,7.56390791,0.496328282,7.56223087,7.56390791,7.56223087
61.73709,8.06225775,7.56188391,0.707371072,7.5601874,7.56188391,7.5601874
61.747582,7.07106781,7.55986443,-0.699139916,7.55814811,7.55986443,7.55814811
61.758073,7.68114575,7.55784967,0.35113541,7.5561132,7.55784967,7.5561132
61.768565,7.68114575,7.55583925,0.353986578,7.55408227,7.55583925,7.55408227
61.779056,7.68114575,7.55383356,0.35680833,7.55205573,7.55383356,7.55205573
61.789548,7.28010989,7.55183224,-0.521269937,7.55003317,7.55183224,7.55003317
61.80004,8,7.54983547,0.670943015,7.54801481,7.54983547,7.54801481
61.810531,7.74596669,7.54784347,0.445110353,7.54600082,7.54784347,7.54600082
61.821023,7.14142843,7.54585585,-0.635946085,7.54399082,7.54585585,7.54399082
61.831514,7.28010989,7.54387302,-0.513578744,7.5419852,7.54387302,7.5419852
61.842006,7.48331477,7.54189459,-0.24203268,7.53998358,7.54189459,7.53998358
61.852498,7.48331477,7.53992078,-0.237920165,7.53798615,7.53992078,7.53798615
61.862989,7.07106781,7.53795177,-0.683289077,7.5359931,7.53795177,7.5359931
61.873481,7.93725393,7.53598722,0.633456168,7.53400404,7.53598722,7.53400404
61.883972,7,7.53402749,-0.730771844,7.53201937,7.53402749,7.53201937
61.894464,8.18535277,7.53207223,0.80825772,7.53003869,7.53207223,7.53003869
61.904956,7.54983444,7.53012164,0.140402265,7.52806221,7.53012164,7.52806221
61.915447,8,7.52817591,0.686894523,7.5260901,7.52817591,7.5260901
61.925939,7.74596669,7.5262347,0.468755795,7.524122,7.5262347,7.524122
61.93643,7.68114575,7.52429837,0.396039616,7.52215827,7.52429837,7.52215827
61.946922,9.11043358,7.52236658,1.2601853,7.52019855,7.52236658,7.52019855
61.957414,8.24621125,7.52043952,0.851922374,7.51824303,7.52043952,7.51824303
61.967905,7.61577311,7.51851739,0.311858482,7.51629188,7.51851739,7.51629188
61.978397,7.41619849,7.51659985,-0.316861734,7.51434473,7.51659985,7.51434473
61.988888,7.34846923,7.51468726,-0.407698454,7.51240197,7.51468726,7.51240197
61.99938,6.8556546,7.51277928,-0.810632272,7.51046321,7.51277928,7.51046321
62.009872,6.70820393,7.51087611,-0.895919741,7.50852865,7.51087611,7.50852865
62.020363,7.41619849,7.50897795,-0.304597222,7.50659846,7.50897795,7.50659846
62.030855,7.34846923,7.50708446,-0.398265275,7.50467228,7.50708446,7.50467228
62.041346,7.34846923,7.505196,-0.395887324,7.50275048,7.505196,7.50275048
62.051838,6.32455532,7.50331225,-1.08570573,7.50083269,7.50331225,7.50083269
62.06233,6.32455532,7.50143339,-1.08484011,7.4989191,7.50143339,7.4989191
62.072821,7.61577311,7.49955963,0.340900981,7.49700988,7.49955963,7.49700988
62.083313,7.41619849,7.49769063,-0.28546828,7.49510467,7.49769063,7.49510467
62.093804,7.14142843,7.49582676,-0.595313643,7.49320383,7.49582676,7.49320383
62.104296,7,7.4939677,-0.702828358,7.49130701,7.4939677,7.49130701
62.114788,6.63324958,7.49211364,-0.926749191,7.48941438,7.49211364,7.48941438
62.125279,7.81024968,7.49026479,0.565672066,7.48752613,7.49026479,7.48752613
62.135771,6.8556546,7.48842081,-0.795466033,7.48564189,7.48842081,7.48564189
62.146262,8.30662386,7.48658208,0.905561584,7.48376202,7.48658208,7.48376202
62.156754,8.30662386,7.48474828,0.906573541,7.48188617,7.48474828,7.48188617
62.167246,7.74596669,7.4829196,0.512881166,7.48001451,7.4829196,7.48001451
62.177737,7,7.48109626,-0.693611027,7.47814722,7.48109626,7.47814722
62.188229,6.55743852,7.47927792,-0.960124678,7.47628395,7.47927792,7.47628395
62.19872,7.54983444,7.47746497,0.269015729,7.47442504,7.47746497,7.47442504
62.209212,7.28010989,7.4756571,-0.442207199,7.47257015,7.4756571,7.47257015
62.219704,7.34846923,7.4738545,-0.354097823,7.47071946,7.4738545,7.47071946
62.230195,8.1240384,7.47205738,0.80745342,7.46887313,7.47205738,7.46887313
62.240687,7.81024968,7.47026543,0.583081677,7.46703082,7.47026543,7.46703082
62.251178,8.06225775,7.46847904,0.770570379,7.46519287,7.46847904,7.46519287
62.26167,7.41619849,7.46669789,-0.22472073,7.46335894,7.46669789,7.46335894
62.272162,8.18535277,7.4649222,0.848781814,7.4615292,7.4649222,7.4615292
62.282653,7,7.46315218,-0.680552849,7.45970383,7.46315218,7.45970383
62.293145,7.68114575,7.46138753,0.468783768,7.45788247,7.46138753,7.45788247
62.303636,7.21110255,7.45962862,-0.498523893,7.45606547,7.45962862,7.45606547
62.314128,7.34846923,7.45787518,-0.330765704,7.45425249,7.45787518,7.45425249
62.32462,8.24621125,7.45612741,0.888866604,7.4524437,7.45612741,7.4524437
62.335111,6.63324958,7.45438553,-0.906165522,7.45063926,7.45438553,7.45063926
62.345603,7.74596669,7.45264927,0.541587874,7.44883885,7.45264927,7.44883885
62.356094,8,7.45091899,0.741000004,7.44704279,7.45091899,7.44704279
62.366586,6.4807407,7.44919444,-0.984100474,7.44525075,7.44919444,7.44525075
62.377078,6.40312424,7.44747583,-1.02193522,7.44346289,7.44747583,7.44346289
62.387569,8.36660027,7.44576339,0.959602457,7.44167939,7.44576339,7.44167939
62.398061,7.41619849,7.44405685,-0.166908255,7.4398999,7.44405685,7.4398999
62.408552,7.68114575,7.44235661,0.488660553,7.43812477,7.44235661,7.43812477
62.419044,7,7.44066241,-0.663824082,7.43635365,7.44066241,7.43635365
62.429536,7.93725393,7.43897449,0.705889117,7.43458671,7.43897449,7.43458671
62.440027,7.41619849,7.43729308,-0.145239763,7.43282412,7.43729308,7.43282412
62.450519,6.70820393,7.43561793,-0.852885691,7.43106555,7.43561793,7.43106555
62.46101,6.70820393,7.43394946,-0.851906998,7.42931132,7.43394946,7.42931132
62.471502,7.28010989,7.43228744,-0.390099407,7.42756111,7.43228744,7.42756111
62.481994,7.61577311,7.4306321,0.430280148,7.42581508,7.4306321,7.42581508
62.492485,7.07106781,7.42898371,-0.598260725,7.42407339,7.42898371,7.42407339
62.502977,8,7.42734204,0.756741671,7.42233571,7.42734204,7.42233571
62.513468,8.1240384,7.42570753,0.83566194,7.42060237,7.42570753,7.42060237
62.52396,7.28010989,7.42407995,-0.379433875,7.41887305,7.42407995,7.41887305
62.534452,7.81024968,7.4224596,0.622727931,7.41714789,7.4224596,7.41714789
62.544943,7.61577311,7.42084674,0.441504667,7.41542708,7.42084674,7.41542708
62.555435,7.41619849,7.41924118,-0.0551606274,7.41371028,7.41924118,7.41371028
62.565926,6.92820323,7.41764338,-0.699599992,7.41199781,7.41764338,7.41199781
62.576418,7.87400787,7.41605316,0.67672351,7.41028935,7.41605316,7.41028935
62.58691,7.54983444,7.41447084,0.367917923,7.40858505,7.41447084,7.40858505
62.597401,8.24621125,7.4128967,0.91286064,7.40688509,7.4128967,7.40688509
62.607893,7.28010989,7.41133063,-0.362244031,7.40518914,7.41133063,7.40518914
62.618384,8.36660027,7.40977308,0.978175436,7.40349751,7.40977308,7.40349751
62.628876,6.92820323,7.40822395,-0.692835276,7.40180989,7.40822395,7.40180989
62.639368,7.68114575,7.40668358,0.523891374,7.40012643,7.40668358,7.40012643
62.649859,8.36660027,7.40515231,0.980534527,7.3984473,7.40515231,7.3984473
62.660351,7.34846923,7.40363007,-0.23486345,7.39677217,7.40363007,7.39677217
62.670842,6.78232998,7.40211738,-0.78726577,7.39510136,7.40211738,7.39510136
62.681334,7,7.40061418,-0.632940899,7.39343455,7.40061418,7.39343455
62.691826,7,7.39912088,-0.631760148,7.39177189,7.39912088,7.39177189
62.702317,7,7.3976379,-0.630585359,7.39011356,7.3976379,7.39011356
62.712809,6.78232998,7.39616522,-0.783476377,7.38845922,7.39616522,7.38845922
62.7233,8.60232527,7.39470343,1.09891848,7.3868092,7.39470343,7.3868092
62.733792,7.07106781,7.39325258,-0.567613224,7.38516317,7.39325258,7.38516317
62.744284,8,7.39181315,0.779863351,7.38352129,7.39181315,7.38352129
62.754775,8.24621125,7.39038564,0.925108433,7.38188372,7.39038564,7.38188372
62.765267,8.30662386,7.38897015,0.957942436,7.38025015,7.38897015,7.38025015
62.775758,5.56776436,7.38756738,-1.34900075,7.37862088,7.38756738,7.37862088
62.78625,7.28010989,7.38617748,-0.325680191,7.3769956,7.38617748,7.3769956
62.796742,7.74596669,7.38480106,0.600970579,7.37537446,7.38480106,7.37537446
62.807233,7.07106781,7.38343874,-0.558901536,7.37375763,7.38343874,7.37375763
62.817725,7.48331477,7.3820908,0.318157156,7.37214478,7.3820908,7.37214478
62.828216,7.54983444,7.38075805,0.411188985,7.37053623,7.38075805,7.37053623
62.838708,8.30662386,7.37944086,0.962903423,7.36893166,7.37944086,7.36893166
62.8492,7.14142843,7.37813999,-0.486530129,7.36733123,7.37813999,7.36733123
62.859691,7.54983444,7.37685627,0.415906437,7.36573509,7.37685627,7.36573509
62.870183,7.48331477,7.37559019,0.328214233,7.36414293,7.37559019,7.36414293
62.880674,7.41619849,7.37434279,0.204586637,7.36255506,7.37434279,7.36255506
62.891166,7.41619849,7.37311471,0.207566331,7.36097117,7.37311471,7.36097117
62.901658,7.68114575,7.37190697,0.556092422,7.35939141,7.37190697,7.35939141
62.912149,7.07106781,7.37072068,-0.547405582,7.35781593,7.37072068,7.35781593
62.922641,8.24621125,7.3695567,0.936298321,7.35624442,7.3695567,7.35624442
62.933132,7.21110255,7.36841641,-0.396628111,7.35467719,7.36841641,7.35467719
62.943624,6.78232998,7.36730083,-0.764833869,7.35311393,7.36730083,7.35311393
62.954116,6.8556546,7.36621143,-0.714532594,7.35155479,7.36621143,7.35155479
62.964607,7.07106781,7.36514977,-0.542293239,7.34999993,7.36514977,7.34999993
62.975099,6.92820323,7.36411724,-0.660237842,7.34844903,7.36411724,7.34844903
62.98559,7.61577311,7.36311575,0.502650327,7.34690239,7.36311575,7.34690239
62.996082,7.54983444,7.362147,0.433229077,7.34535973,7.362147,7.34535973
63.006574,7.48331477,7.36121312,0.349430474,7.34382117,7.36121312,7.34382117
63.017065,6.92820323,7.36031641,-0.65735316,7.34228688,7.36031641,7.34228688
63.027557,6.32455532,7.35945913,-1.01730222,7.34075654,7.35945913,7.34075654
63.038048,7.41619849,7.3586441,0.239904959,7.33923046,7.3586441,7.33923046
63.04854,7,7.35787407,-0.598225766,7.33770834,7.35787407,7.33770834
63.059032,7.34846923,7.3571523,-0.0931830251,7.33619032,7.3571523,7.33619032
63.069523,7.07106781,7.35648237,-0.534242044,7.33467654,7.35648237,7.33467654
63.080015,7.87400787,7.355868,0.719819332,7.33316673,7.355868,7.33316673
63.090506,7.87400787,7.35531356,0.720204356,7.33166115,7.35531356,7.33166115
63.100998,7.07106781,7.35482364,-0.53268736,7.33015952,7.35482364,7.33015952
63.11149,7.48331477,7.35440348,0.359042182,7.32866199,7.35440348,7.32866199
63.121981,7.07106781,7.3540589,-0.531969068,7.32716869,7.3540589,7.32716869
63.132473,7.81024968,7.35379623,0.675613385,7.32567934,7.35379623,7.32567934
63.142964,6.70820393,7.35362265,-0.803379563,7.32419421,7.35362265,7.32419421
63.153456,7,7.35354611,-0.594597438,7.32271303,7.35354611,7.32271303
63.163948,7.81024968,7.35357554,0.675776689,7.32123593,7.35357554,7.32123593
63.174439,7.87400787,7.35372093,0.721309189,7.31976305,7.35372093,7.31976305
63.184931,8.30662386,7.35399355,0.976027824,7.31829412,7.35399355,7.31829412
63.195422,7.41619849,7.35440604,0.248580876,7.31682939,7.35440604,7.31682939
63.205914,7.34846923,7.35497282,-0.0806448293,7.3153686,7.35497282,7.3153686
63.216406,7.81024968,7.35571013,0.674195479,7.31391188,7.35571013,7.31391188
63.226897,7.61577311,7.35663639,0.509054726,7.31245937,7.35663639,7.31245937
63.237389,6.244998,7.3577729,-1.05488146,7.31101079,7.3577729,7.31101079
63.24788,6.32455532,7.35914363,-1.01714714,7.30956641,7.35914363,7.30956641
63.258372,6.8556546,7.36077662,-0.710719368,7.30812596,7.36077662,7.30812596
63.268864,7.93725393,7.36270382,0.757990841,7.30668956,7.36270382,7.30668956
63.279355,7.68114575,7.36496208,0.562302114,7.30525736,7.36496208,7.30525736
63.289847,7.48331477,7.36759497,0.340176139,7.30382908,7.36759497,7.30382908
63.300338,7.61577311,7.37065228,0.495096781,7.30240499,7.37065228,7.30240499
63.31083,7.61577311,7.37419361,0.491507371,7.30098481,7.37419361,7.30098481
63.321322,6.92820323,7.37828814,-0.67088368,7.29956868,7.37828814,7.29956868
63.331813,7.21110255,7.38301758,-0.414626375,7.29815673,7.38301758,7.29815673
63.342305,8.1240384,7.38848059,0.857646672,7.29674868,7.38848059,7.29674868
63.352796,7.14142843,7.39479293,-0.503353259,7.29534482,7.39479293,7.29534482
63.363288,8,7.40209627,0.773242346,7.29394485,7.40209627,7.29394485
63.37378,6.70820393,7.41055985,-0.838066775,7.29254892,7.41055985,7.29254892
63.384271,8.60232527,7.4203892,1.08716883,7.29115716,7.4203892,7.29115716
63.394763,7.48331477,7.43183923,0.226882232,7.2897693,7.43183923,7.2897693
63.405254,7.28010989,7.44521985,-0.406337252,7.28838559,7.44521985,7.28838559
63.415746,7.07106781,7.46092232,-0.6243833,7.28700578,7.46092232,7.28700578
63.426238,7.41619849,7.47943389,-0.251466505,7.28562999,7.47943389,7.28562999
63.436729,7.48331477,7.5013724,-0.134378678,7.28425835,7.5013724,7.28425835
63.447221,7.74596669,7.52753675,0.467364896,7.2828906,7.52753675,7.2828906
63.457712,8.1240384,7.55894576,0.75172644,7.28152699,7.55894576,7.28152699
63.468204,7.28010989,7.59692468,-0.56286303,7.28016726,7.59692468,7.28016726
63.478696,7.81024968,7.64315166,0.408776245,7.27881154,7.64315166,7.27881154
63.489187,7.81024968,7.69971049,0.33247434,7.27745996,7.69971049,7.27745996
63.499679,8,7.76909825,0.480522368,7.27611225,7.76909825,7.27611225
63.51017,7.81024968,7.85404062,-0.209262864,7.27476867,7.85404062,7.27476867
63.520662,8,7.95716034,0.206977436,7.27342896,7.95716034,7.27342896
63.531154,7.87400787,8.0801057,-0.453979979,7.27209325,8.0801057,7.27209325
63.541645,8.77496439,8.22207193,0.743567388,7.27076165,8.22207193,7.27076165
63.552137,8.48528137,8.37750138,0.328298643,7.26943391,8.37750138,7.26943391
63.562628,8.1240384,8.53318607,-0.639646517,7.26811029,8.53318607,7.26811029
63.57312,9.11043358,8.66704212,0.665876461,7.26679053,8.66704212,7.26679053
63.583612,9.05538514,8.75169528,0.551080624,7.26547474,8.75169528,7.26547474
63.594103,9.79795897,8.76521995,1.01623768,7.26416306,8.76521995,7.26416306
63.604595,9.79795897,8.70333195,1.04624424,7.26285522,8.70333195,7.26285522
63.615086,9.05538514,8.5822512,0.687847319,7.26155149,8.5822512,7.26155149
63.625578,9.74679434,8.42898693,1.14795793,7.26025159,8.42898693,7.26025159
63.63607,8.42614977,8.26868787,0.396814702,7.25895567,8.26868787,7.25895567
63.646561,8.60232527,8.11801707,0.69592255,7.25766382,8.11801707,7.25766382
63.657053,8.06225775,7.98505354,0.277856461,7.25637582,7.98505354,7.25637582
63.667544,8.60232527,7.87205237,0.854560063,7.25509189,7.87205237,7.25509189
63.678036,7.87400787,7.77800679,0.309840416,7.25381179,7.77800679,7.25381179
63.688528,8.48528137,7.70053872,0.885857017,7.25253564,7.70053872,7.25253564
63.699019,8.36660027,7.63689579,0.854227414,7.25126356,7.63689579,7.25126356
63.709511,7.41619849,7.58445878,-0.410195427,7.24999531,7.58445878,7.24999531
63.720002,6.55743852,7.54099471,-0.991744013,7.24873111,7.54099471,7.24873111
63.730494,7.41619849,7.50466751,-0.297437432,7.24747073,7.50466751,7.24747073
63.740986,7.48331477,7.47403671,0.0963226838,7.24621428,7.47403671,7.24621428
63.751477,7.87400787,7.44798009,0.652708042,7.24496189,7.44798009,7.24496189
63.761969,7,7.42562114,-0.652396463,7.2437133,7.42562114,7.2437133
63.77246,7.68114575,7.40628565,0.524271014,7.24246875,7.40628565,7.24246875
63.782952,8.06225775,7.38943752,0.820256194,7.24122801,7.38943752,7.24122801
63.793444,7.87400787,7.37465647,0.706648009,7.23999119,7.37465647,7.23999119
63.803935,7.81024968,7.36160553,0.669809039,7.23875839,7.36160553,7.23875839
63.814427,6.32455532,7.35000913,-1.01264693,7.23752939,7.35000913,7.23752939
63.824918,7.54983444,7.33964698,0.458462054,7.23630441,7.33964698,7.23630441
63.83541,7.93725393,7.33033468,0.779050224,7.23508323,7.33033468,7.23508323
63.845902,8.66025404,7.32192262,1.15686275,7.23386594,7.32192262,7.23386594
63.856393,7.68114575,7.31428641,0.605689145,7.23265266,7.31428641,7.23265266
63.866885,8,7.30732018,0.832273885,7.23144316,7.30732018,7.23144316
63.877376,6.92820323,7.30093759,-0.610519747,7.23023767,7.30093759,7.23023767
63.887868,8.06225775,7.29506348,0.875896264,7.22903595,7.29506348,7.22903595
63.89836,7.34846923,7.28963576,0.242556118,7.22783812,7.28963576,7.22783812
63.908851,6.63324958,7.28460145,-0.807063735,7.22664427,7.28460145,7.22664427
63.919343,7.21110255,7.27991392,-0.262319209,7.22545419,7.27991392,7.22545419
63.929834,7.21110255,7.27553477,-0.25383502,7.2242681,7.27553477,7.2242681
63.940326,6.92820323,7.2714293,-0.585854989,7.22308576,7.2714293,7.22308576
63.950818,7.54983444,7.26756859,0.531286972,7.22190728,7.26756859,7.22190728
63.961309,7.93725393,7.26392746,0.820564728,7.22073278,7.26392746,7.22073278
63.971801,7.81024968,7.26048298,0.74146254,7.21956203,7.26048298,7.21956203
63.982292,6.40312424,7.25721631,-0.924171019,7.21839524,7.25721631,7.21839524
63.992784,7.54983444,7.25410974,0.543805756,7.2172322,7.25410974,7.2172322
64.003276,7.34846923,7.2511485,0.311962701,7.216073,7.2511485,7.216073
64.013767,6.08276253,7.24831956,-1.07960966,7.21491775,7.24831956,7.21491775
64.024259,7,7.24561057,-0.495591128,7.21376623,7.24561057,7.21376623
64.03475,6.244998,7.24301157,-0.999006291,7.21261866,7.24301157,7.21261866
64.045242,7.28010989,7.24051273,0.198990343,7.21147481,7.24051273,7.21147481
64.055734,8,7.23810598,0.87286541,7.21033479,7.23810598,7.21033479
64.066225,7.54983444,7.23578405,0.560401983,7.20919871,7.23578405,7.20919871
64.076717,7.74596669,7.23353983,0.715839972,7.20806633,7.23353983,7.20806633
64.087208,7.81024968,7.2313677,0.760842935,7.20693788,7.2313677,7.20693788
64.0977,7.54983444,7.22926185,0.566191299,7.20581314,7.22926185,7.20581314
64.108192,7,7.22721757,-0.476673441,7.20469221,7.22721757,7.20469221
64.118683,7.81024968,7.22523062,0.764865383,7.20357519,7.22523062,7.20357519
64.129175,7.07106781,7.22329661,-0.390165093,7.20246186,7.22329661,7.20246186
64.139666,7.61577311,7.22141226,0.627981568,7.20135244,7.22141226,7.20135244
64.150158,6.08276253,7.21957388,-1.06621356,7.2002467,7.21957388,7.2002467
64.16065,7.81024968,7.21777863,0.769721406,7.19914476,7.21777863,7.19914476
64.171141,8.18535277,7.21602392,0.984544995,7.1980467,7.21602392,7.1980467
64.181633,8,7.21430689,0.886393314,7.19695233,7.21430689,7.19695233
64.192124,7.87400787,7.21262555,0.813254155,7.19586183,7.21262555,7.19586183
64.202616,6.92820323,7.21097747,-0.531765207,7.19477501,7.21097747,7.19477501
64.213108,7.87400787,7.20936084,0.815258874,7.19369195,7.20936084,7.19369195
64.223599,6.244998,7.20777404,-0.981211517,7.19261277,7.20777404,7.19261277
64.234091,7.87400787,7.20621511,0.817185881,7.19153724,7.20621511,7.19153724
64.244582,7.34846923,7.20468282,0.379191779,7.19046558,7.20468282,7.19046558
64.255074,8.06225775,7.20317549,0.926866907,7.18939756,7.20317549,7.18939756
64.265566,7.34846923,7.20169194,0.383115237,7.18833329,7.20169194,7.18833329
64.276057,7.74596669,7.20023113,0.738739169,7.18727288,7.20023113,7.18727288
64.286549,7.41619849,7.19879166,0.466269051,7.1862161,7.19879166,7.1862161
64.29704,7.21110255,7.19737276,0.117174176,7.18516316,7.19737276,7.18516316
64.307532,7.21110255,7.19597321,0.123001367,7.18411385,7.19597321,7.18411385
64.318024,7.68114575,7.19459226,0.697533865,7.18306827,7.19459226,7.18306827
64.328515,7.74596669,7.19322918,0.743463187,7.18202651,7.19322918,7.18202651
64.339007,7.87400787,7.19188296,0.825908539,7.18098838,7.19188296,7.18098838
64.349498,7.54983444,7.19055312,0.599400795,7.17995405,7.19055312,7.17995405
64.35999,7.34846923,7.18923874,0.399036948,7.17892335,7.18923874,7.17892335
64.370482,6.32455532,7.18793932,-0.929184586,7.17789635,7.18793932,7.17789635
64.380973,8,7.18665437,0.901856766,7.17687315,7.18665437,7.17687315
64.391465,7.48331477,7.18538312,0.54583116,7.17585355,7.18538312,7.17585355
64.401956,6.70820393,7.18412527,-0.689870526,7.17483774,7.18412527,7.17483774
64.412448,7.54983444,7.18288012,0.605767544,7.17382553,7.18288012,7.17382553
64.42294,7.74596669,7.18164731,0.751211942,7.17281701,7.18164731,7.17281701
64.433431,8,7.18042654,0.905302965,7.17181226,7.18042654,7.17181226
64.443923,8.06225775,7.17921718,0.939702385,7.17081109,7.17921718,7.17081109
64.454414,7.14142843,7.17801906,-0.191286785,7.16981369,7.17801906,7.16981369
64.464906,7.07106781,7.17683162,-0.325213479,7.16881986,7.17683162,7.16881986
64.475398,7.81024968,7.17565462,0.796614747,7.1678297,7.17565462,7.1678297
64.485889,8.06225775,7.17448786,0.942215413,7.16684329,7.17448786,7.16684329
64.496381,7.14142843,7.17333082,-0.178612416,7.16586044,7.17333082,7.16586044
64.506872,7.68114575,7.17218344,0.713415944,7.16488133,7.17218344,7.16488133
64.517364,7.48331477,7.17104522,0.558810835,7.16390578,7.17104522,7.16390578
64.527856,7.61577311,7.16991603,0.667725296,7.16293387,7.16991603,7.16293387
64.538347,6.92820323,7.16879574,-0.490502302,7.16196569,7.16879574,7.16196569
64.548839,7.61577311,7.16768389,0.66939466,7.16100104,7.16768389,7.16100104
64.55933,6.70820393,7.1665805,-0.67703513,7.16004012,7.1665805,7.16004012
64.569822,7.21110255,7.16548514,0.213582326,7.15908273,7.16548514,7.15908273
64.580314,6.8556546,7.16439773,-0.555646586,7.15812896,7.16439773,7.15812896
64.590805,6.92820323,7.16331818,-0.484886535,7.15717889,7.16331818,7.15717889
64.601297,7.07106781,7.16224612,-0.301957464,7.15623234,7.16224612,7.15623234
64.611788,7.34846923,7.16118158,0.432767424,7.15528949,7.16118158,7.15528949
64.62228,7.54983444,7.16012421,0.624267751,7.15435014,7.16012421,7.15435014
64.632772,8.24621125,7.15907395,1.04265876,7.15341439,7.15907395,7.15341439
64.643263,6.4807407,7.15803076,-0.822976345,7.15248232,7.15803076,7.15248232
64.653755,7.61577311,7.15699431,0.677332118,7.15155375,7.15699431,7.15155375
64.664246,7.14142843,7.15596466,-0.120566278,7.15062885,7.15596466,7.15062885
64.674738,7.28010989,7.15494149,0.353791468,7.14970743,7.15494149,7.14970743
64.68523,7.74596669,7.15392478,0.7694426,7.14878959,7.15392478,7.14878959
64.695721,7.07106781,7.15291451,-0.286088628,7.1478754,7.15291451,7.1478754
64.706213,6.55743852,7.1519104,-0.77102002,7.14696469,7.1519104,7.14696469
64.716704,6.55743852,7.15091251,-0.770372627,7.14605762,7.15091251,7.14605762
64.727196,6.8556546,7.14992056,-0.542462868,7.14515401,7.14992056,7.14515401
64.737688,7.68114575,7.14893456,0.729528057,7.14425396,7.14893456,7.14425396
64.748179,7.48331477,7.14795451,0.579102985,7.14335753,7.14795451,7.14335753
64.758671,6.78232998,7.14698012,-0.603862683,7.14246456,7.14698012,7.14246456
64.769162,7.54983444,7.14601151,0.635470629,7.1415752,7.14601151,7.1415752
64.779654,6.92820323,7.14504842,-0.465666389,7.14068929,7.14504842,7.14068929
64.790146,8,7.14409084,0.925153586,7.1398069,7.14409084,7.1398069
64.800637,7.14142843,7.14313881,-0.0413567924,7.13892811,7.14313881,7.13892811
64.811129,7.21110255,7.14219207,0.262508052,7.13805276,7.14219207,7.13805276
64.82162,8.18535277,7.14125074,1.02181311,7.13718099,7.14125074,7.13718099
64.832112,6.8556546,7.14031456,-0.533535339,7.13631265,7.14031456,7.13631265
64.842604,6.55743852,7.13938357,-0.762853224,7.1354478,7.13938357,7.1354478
64.853095,7.34846923,7.13845779,0.458270053,7.13458653,7.13845779,7.13458653
64.863587,7.54983444,7.13753699,0.642103924,7.13372867,7.13753699,7.13372867
64.874078,7,7.13662128,-0.369623162,7.13287437,7.13662128,7.13287437
64.88457,7.34846923,7.13571045,0.461257824,7.13202347,7.13571045,7.13202347
64.895062,7.28010989,7.13480452,0.381189416,7.13117604,7.13480452,7.13117604
64.905553,7.28010989,7.13390353,0.382369404,7.13033217,7.13390353,7.13033217
64.916045,6,7.13300726,-1.06442814,7.12949167,7.13300726,7.12949167
64.926536,7.07106781,7.13211583,-0.247078975,7.12865472,7.13211583,7.12865472
64.937028,7.34846923,7.13122903,0.466090328,7.12782114,7.13122903,7.12782114
64.94752,7.41619849,7.13034691,0.534650896,7.126991,7.13034691,7.126991
64.958011,6.40312424,7.12946949,-0.852258912,7.12616439,7.12946949,7.12616439
64.968503,8.1240384,7.12859658,0.997718311,7.12534114,7.12859658,7.12534114
64.978994,6.70820393,7.12772829,-0.647707002,7.1245214,7.12772829,7.1245214
64.989486,6.55743852,7.12686444,-0.754603148,7.12370501,7.12686444,7.12370501
64.999978,6.78232998,7.12600505,-0.586238063,7.12289204,7.12600505,7.12289204
65.010469,7.48331477,7.12515018,0.598468539,7.12208257,7.12515018,7.12208257
65.020961,7.34846923,7.12429963,0.473465516,7.12127643,7.12429963,7.12127643
65.031452,6.92820323,7.12345353,-0.441871364,7.12047377,7.12345353,7.12047377
65.041944,8,7.12261169,0.936690084,7.11967444,7.12261169,7.11967444
65.052436,7.07106781,7.12177414,-0.225180663,7.11887851,7.12177414,7.11887851
65.062927,6.78232998,7.12094095,-0.581902885,7.11808605,7.12094095,7.11808605
65.073419,7.28010989,7.12011192,0.39999746,7.11729689,7.12011192,7.11729689
65.08391,7.21110255,7.11928718,0.303010507,7.11651119,7.11928718,7.11651119
65.094402,7.41619849,7.11846655,0.545648179,7.11572879,7.11846655,7.11572879
65.104894,6.8556546,7.12322716,-0.517274158,7.12052896,7.11765008,7.11494976
65.115385,6.92820323,7.12245334,-0.440738146,7.11979181,7.11683781,7.11417417
65.125877,7.61577311,7.12168395,0.702914754,7.11905834,7.11602957,7.11340187
65.136368,6.55743852,7.12091911,-0.750653442,7.1183287,7.11522548,7.11263299
65.14686,7.34846923,7.12015866,0.477818556,7.11760273,7.11442538,7.11186739
65.157352,6.63324958,7.11940264,-0.697246768,7.11688052,7.1136293,7.11110514
65.167843,7.14142843,7.11865111,0.150921569,7.11616213,7.1128373,7.11034629
65.178335,7.93725393,7.11790391,0.905179552,7.11544742,7.11204922,7.1095907
65.188826,7.07106781,7.11716117,-0.21469364,7.11473653,7.11126517,7.10883852
65.199318,6.92820323,7.11642273,-0.433842713,7.11402933,7.11048498,7.10808958
65.20981,7.93725393,7.11568864,0.906402388,7.11332588,7.10970871,7.10734396
65.220301,7.07106781,7.11495897,-0.209502164,7.11262626,7.10893641,7.10660172
65.230793,6.70820393,7.11423355,-0.637204533,7.11193032,7.10816792,7.10586272
65.241284,7.34846923,7.11351251,0.48472334,7.1112382,7.10740336,7.10512709
65.251776,6.78232998,7.1127957,-0.57486148,7.11054977,7.10664256,7.10439468
65.262268,7.21110255,7.11208319,0.314673427,7.10986511,7.10588558,7.10366556
65.272759,6.70820393,7.11137501,-0.634957539,7.10918426,7.10513247,7.1029398
65.283251,7.41619849,7.11067103,0.552745383,7.10850711,7.10438307,7.10221724
65.293742,7.21110255,7.10997137,0.318011293,7.10783379,7.10363751,7.10149802
65.304234,6.92820323,7.10927588,-0.425526326,7.10716417,7.10289562,7.10078201
65.314726,6.32455532,7.10858463,-0.885454297,7.10649831,7.10215746,7.10006925
65.325217,7.48331477,7.10789767,0.612712904,7.10583629,7.10142308,7.09935982
65.335709,7.07106781,7.10721486,-0.190123762,7.10517796,7.10069233,7.09865357
65.3462,8.54400375,7.10653631,1.1989443,7.10452348,7.09996533,7.09795063
65.356692,7.54983444,7.1058619,0.666312639,7.1038727,7.09924193,7.09725087
65.367184,7.48331477,7.10519168,0.614917142,7.1032257,7.09852217,7.09655434
65.377675,7.93725393,7.10452571,0.912539438,7.10258253,7.09780612,7.0958611
65.388167,7.07106781,7.10386385,-0.181096753,7.10194309,7.09709361,7.09517102
65.398658,7.41619849,7.10320622,0.559457122,7.10130749,7.09638478,7.09448423
65.40915,6.244998,7.10255269,-0.926042487,7.10067561,7.09567947,7.09380057
65.419642,8,7.10190331,0.947679632,7.10004752,7.09497773,7.09312013
65.430133,6.8556546,7.10125816,-0.495584056,7.09942329,7.09427962,7.09244295
65.440625,7,7.10061709,-0.317201963,7.09880279,7.09358499,7.09176889
65.451116,6.8556546,7.09998022,-0.494293048,7.09818614,7.09289396,7.09109809
65.461608,6.78232998,7.09934743,-0.563043022,7.09757324,7.09220638,7.09043041
65.4721,7.28010989,7.09871877,0.425900359,7.09696415,7.09152231,7.08976591
65.482591,7.07106781,7.09809431,-0.164397382,7.09635892,7.0908418,7.08910464
65.493083,7.41619849,7.09747392,0.564556967,7.09575745,7.09016471,7.08844647
65.503574,8.18535277,7.09685771,1.04330967,7.09515986,7.08949115,7.08779153
65.514066,7.34846923,7.09624557,0.502218738,7.09456603,7.08882098,7.08713968
65.524558,7.61577311,7.09563755,0.721204241,7.09397603,7.08815425,7.08649097
65.535049,7.61577311,7.09503371,0.721622754,7.09338991,7.08749102,7.08584547
65.545541,7.74596669,7.09280758,0.8081826,7.09280758,7.08520305,7.08520305
65.556032,7.68114575,7.09222914,0.767409021,7.09222914,7.08456382,7.08456382
65.566524,7.28010989,7.0916545,0.43411449,7.0916545,7.08392765,7.08392765
65.577016,7,7.09108371,-0.301800779,7.09108371,7.0832946,7.0832946
65.587507,7.14142843,7.09051683,0.225635977,7.09051683,7.08266472,7.08266472
65.597999,7.48331477,7.08995377,0.627184983,7.08995377,7.08203789,7.08203789
65.60849,7.41619849,7.08939463,0.571667609,7.08939463,7.08141423,7.08141423
65.618982,6.8556546,7.08883932,-0.482892035,7.08883932,7.0807936,7.0807936
65.629474,8,7.08828789,0.954836169,7.08828789,7.08017606,7.08017606
65.639965,7.21110255,7.08774041,0.351229476,7.08774041,7.07956166,7.07956166
65.650457,7.48331477,7.08719677,0.629379062,7.08719677,7.07895028,7.07895028
65.660948,7.14142843,7.08665709,0.234032765,7.08665709,7.07834203,7.07834203
65.67144,6.63324958,7.08612128,-0.672957428,7.08612128,7.0777368,7.0777368
65.681932,7.93725393,7.08558939,0.922856729,7.08558939,7.07713462,7.07713462
65.692423,6.244998,7.08506148,-0.916549772,7.08506148,7.07653555,7.07653555
65.702915,7.34846923,7.08453747,0.513742896,7.08453747,7.07593948,7.07593948
65.713406,7,7.08401745,-0.289857633,7.08401745,7.0753465,7.0753465
65.723898,7.41619849,7.08350134,0.576799054,7.08350134,7.07475651,7.07475651
65.73439,7.07106781,7.0829892,-0.1091851,7.0829892,7.07416954,7.07416954
65.744881,7.41619849,7.08248108,0.577682787,7.08248108,7.07358566,7.07358566
65.755373,7.41619849,7.08197691,0.578118998,7.08197691,7.07300474,7.07300474
65.765864,7.54983444,7.08147679,0.684366605,7.08147679,7.07242689,7.07242689
65.776356,7,7.08098062,-0.284570944,7.08098062,7.07185198,7.07185198
65.786848,8.06225775,7.08048848,0.990842706,7.08048848,7.07128008,7.07128008
65.797339,6.70820393,7.08000042,-0.609751167,7.08000042,7.07071123,7.07071123
65.807831,7.21110255,7.07951636,0.362748115,7.07951636,7.07014532,7.07014532
65.818322,7.48331477,7.0790364,0.63582889,7.0790364,7.06958244,7.06958244
65.828814,6.92820323,7.07856046,-0.387759245,7.07856046,7.06902248,7.06902248
65.839306,7,7.07808861,-0.279443397,7.07808861,7.0684655,7.0684655
65.849797,7,7.0776209,-0.278605284,7.0776209,7.06791153,7.06791153
65.860289,7.28010989,7.07715726,0.450502637,7.07715726,7.06736046,7.06736046
65.87078,6.08276253,7.07669779,-0.99696302,7.07669779,7.06681241,7.06681241
65.881272,7.81024968,7.07624242,0.856742234,7.07624242,7.06626724,7.06626724
65.891764,7.34846923,7.0757912,0.522185814,7.0757912,7.06572502,7.06572502
65.902255,7.54983444,7.0753442,0.688832514,7.0753442,7.06518578,7.06518578
65.912747,7.61577311,7.07490135,0.735439839,7.07490135,7.06464942,7.06464942
65.923238,6,7.07446274,-1.03656295,7.07446274,7.06411603,7.06411603
65.93373,6.8556546,7.07402832,-0.467304739,7.07402832,7.0635855,7.0635855
65.944222,7.28010989,7.07359814,0.454435641,7.07359814,7.06305789,7.06305789
65.954713,7.21110255,7.07317226,0.371389681,7.07317226,7.06253323,7.06253323
65.965205,7.54983444,7.07275061,0.690712547,7.07275061,7.06201141,7.06201141
65.975696,6.78232998,7.07233331,-0.538519569,7.07233331,7.06149254,7.06149254
65.986188,6.4807407,7.07192029,-0.768882037,7.07192029,7.0609765,7.0609765
65.99668,6.8556546,7.0715116,-0.464604134,7.0715116,7.06046334,7.06046334
66.007171,7.68114575,7.07110732,0.781049569,7.07110732,7.0599531,7.0599531
66.017663,7,7.07070738,-0.265908597,7.07070738,7.05944568,7.05944568
66.028154,6.8556546,7.07031189,-0.463311223,7.07031189,7.05894117,7.05894117
66.038646,7.07106781,7.06992079,0.0338677092,7.06992079,7.05843946,7.05843946
66.049138,7,7.06953415,-0.26369328,7.06953415,7.05794061,7.05794061
66.059629,7.93725393,7.06915202,0.931719869,7.06915202,7.05744464,7.05744464
66.070121,7.21110255,7.06877436,0.377264087,7.06877436,7.05695145,7.05695145
66.080612,6.8556546,7.06840127,-0.461244695,7.06840127,7.05646115,7.05646115
66.091104,7.41619849,7.0680327,0.590055746,7.0680327,7.05597362,7.05597362
66.101596,7.34846923,7.06766873,0.529906127,7.06766873,7.0554889,7.0554889
66.112087,7.68114575,7.0673094,0.783477089,7.0673094,7.05500704,7.05500704
66.122579,6.4807407,7.06695468,-0.765646123,7.06695468,7.05452794,7.05452794
66.13307,6.40312424,7.06660468,-0.814543089,7.06660468,7.05405169,7.05405169
66.143562,6.70820393,7.06625936,-0.598377325,7.06625936,7.05357817,7.05357817
66.154054,7.41619849,7.06591877,0.591844334,7.06591877,7.05310745,7.05310745
66.164545,7.41619849,7.065583,0.592127935,7.065583,7.05263955,7.05263955
66.175037,7.48331477,7.065252,0.646577741,7.065252,7.05217437,7.05217437
66.185528,7.87400787,7.06492588,0.899489853,7.06492588,7.051712,7.051712
66.19602,6,7.06460461,-1.03179679,7.06460461,7.05125236,7.05125236
66.206512,7.41619849,7.06428827,0.593220213,7.06428827,7.05079546,7.05079546
66.217003,6.92820323,7.06397691,-0.368474803,7.06397691,7.05034135,7.05034135
66.227495,7,7.06367053,-0.252330194,7.06367053,7.04988994,7.04988994
66.237986,8,7.06336921,0.967796872,7.06336921,7.04944131,7.04944131
66.248478,7.48331477,7.06307296,0.648260608,7.06307296,7.04899537,7.04899537
66.25897,6.78232998,7.06278183,-0.529577047,7.06278183,7.04855214,7.04855214
66.269461,6.8556546,7.06249591,-0.454798094,7.06249591,7.04811167,7.04811167
66.279953,7.34846923,7.06221518,0.53502715,7.06221518,7.04767387,7.04767387
66.290444,6.32455532,7.06193974,-0.858710908,7.06193974,7.04723882,7.04723882
66.300936,7.07106781,7.0616696,0.0969443547,7.0616696,7.04680642,7.04680642
66.311428,7.74596669,7.06140484,0.827382533,7.06140484,7.0463767,7.0463767
66.321919,7.41619849,7.06114552,0.595863214,7.06114552,7.04594971,7.04594971
66.332411,7.41619849,7.06089165,0.596076199,7.06089165,7.04552536,7.04552536
66.342902,7.28010989,7.06064335,0.468472564,7.06064335,7.04510372,7.04510372
66.353394,7.28010989,7.06040061,0.468731565,7.06040061,7.0446847,7.0446847
66.363886,7.87400787,7.06016353,0.902133221,7.06016353,7.04426834,7.04426834
66.374377,6.70820393,7.05993218,-0.593066815,7.05993218,7.04385467,7.04385467
66.384869,7.48331477,7.05970659,0.650851891,7.05970659,7.04344361,7.04344361
66.39536,7.07106781,7.05948687,0.107614807,7.05948687,7.04303522,7.04303522
66.405852,7.61577311,7.05927303,0.745989326,7.05927303,7.04262942,7.04262942
66.416344,7.61577311,7.05906518,0.746128626,7.05906518,7.04222625,7.04222625
66.426835,7.21110255,7.0588634,0.390178356,7.0588634,7.04182574,7.04182574
66.437327,6.63324958,7.05866773,-0.652240869,7.05866773,7.0414278,7.0414278
66.447818,6.78232998,7.05847829,-0.525498148,7.05847829,7.04103251,7.04103251
66.45831,7.54983444,7.05829511,0.701098658,7.05829511,7.04063978,7.04063978
66.468802,8.06225775,7.0581183,1.00206759,7.0581183,7.04024964,7.04024964
66.479293,7.68114575,7.05794795,0.789428779,7.05794795,7.03986212,7.03986212
66.489785,7.54983444,7.05778413,0.701462977,7.05778413,7.03947715,7.03947715
66.500276,6.32455532,7.05762695,-0.856196022,7.05762695,7.03909478,7.03909478
66.510768,6.32455532,7.05747647,-0.856108144,7.05747647,7.03871495,7.03871495
66.52126,7.28010989,7.05733282,0.471992658,7.05733282,7.03833768,7.03833768
66.531751,7.21110255,7.05719609,0.392309133,7.05719609,7.03796299,7.03796299
66.542243,7.81024968,7.05706638,0.867861337,7.05706638,7.03759082,7.03759082
66.552734,6.92820323,7.0569438,-0.358804355,7.0569438,7.03722122,7.03722122
66.563226,7.14142843,7.05682844,0.290860775,7.05682844,7.03685413,7.03685413
66.573718,6.92820323,7.05672043,-0.358492956,7.05672043,7.03648956,7.03648956
66.584209,7.07106781,7.0566199,0.12019948,7.0566199,7.03612754,7.03612754
66.594701,7.34846923,7.05652694,0.54031684,7.05652694,7.03576801,7.03576801
66.605192,7.48331477,7.05644171,0.653355239,7.05644171,7.03541102,7.03541102
66.615684,6.32455532,7.0563643,-0.855458347,7.0563643,7.0350565,7.0350565
66.626176,7.14142843,7.05629488,0.291776542,7.05629488,7.03470447,7.03470447
66.636667,6.40312424,7.05623357,-0.808151802,7.05623357,7.03435496,7.03435496
66.647159,7.48331477,7.05618052,0.65355509,7.05618052,7.0340079,7.0340079
66.65765,5.91607978,7.05613587,-1.06773409,7.05613587,7.03366335,7.03366335
66.668142,7,7.05609979,-0.236853937,7.05609979,7.03332124,7.03332124
66.678634,6.92820323,7.05607242,-0.357588016,7.05607242,7.03298158,7.03298158
66.689125,6.78232998,7.05605394,-0.523186347,7.05605394,7.03264442,7.03264442
66.699617,6.92820323,7.05604451,-0.357548986,7.05604451,7.03230967,7.03230967
66.710108,6.55743852,7.05604431,-0.706120235,7.05604431,7.0319774,7.0319774
66.7206,7.81024968,7.05605353,0.868444672,7.05605353,7.03164752,7.03164752
66.731092,6.55743852,7.05607235,-0.706140089,7.05607235,7.03132008,7.03132008
66.741583,7.61577311,7.05610097,0.748112382,7.05610097,7.0309951,7.0309951
66.752075,7.74596669,7.0561396,0.830558302,7.0561396,7.03067249,7.03067249
66.762566,7.21110255,7.05618844,0.393591299,7.05618844,7.03035233,7.03035233
66.773058,6.40312424,7.05624772,-0.808160557,7.05624772,7.03003454,7.03003454
66.78355,6.92820323,7.05631767,-0.357930778,7.05631767,7.02971914,7.02971914
66.794041,7.54983444,7.05639851,0.702449943,7.05639851,7.02940617,7.02940617
66.804533,6.70820393,7.05649051,-0.590158094,7.05649051,7.02909554,7.02909554
66.815024,8.1240384,7.05659389,1.03317206,7.05659389,7.02878732,7.02878732
66.825516,7.34846923,7.05670896,0.540148381,7.05670896,7.02848145,7.02848145
66.836008,6.4807407,7.05683596,-0.759009393,7.05683596,7.02817793,7.02817793
66.846499,7.61577311,7.05697517,0.747527883,7.05697517,7.0278768,7.0278768
66.856991,7.07106781,7.05712692,0.118071563,7.05712692,7.02757799,7.02757799
66.867482,7.14142843,7.05729148,0.290063698,7.05729148,7.02728155,7.02728155
66.877974,7.61577311,7.05746921,0.747197362,7.05746921,7.02698742,7.02698742
66.888466,7.61577311,7.05766042,0.747069397,7.05766042,7.02669562,7.02669562
66.898957,7.34846923,7.05786544,0.539076789,7.05786544,7.02640617,7.02640617
66.909449,7.41619849,7.05808468,0.598426109,7.05808468,7.02611901,7.02611901
66.91994,6.32455532,7.05831846,-0.856599753,7.05831846,7.02583418,7.02583418
66.930432,7.41619849,7.05856721,0.598022803,7.05856721,7.02555163,7.02555163
66.940924,6.63324958,7.05883134,-0.652366276,7.05883134,7.02527138,7.02527138
66.951415,7.54983444,7.05911122,0.70051639,7.05911122,7.02499344,7.02499344
66.961907,7.74596669,7.05940737,0.828588756,7.05940737,7.02471776,7.02471776
66.972398,7,7.05972017,-0.244377106,7.05972017,7.02444438,7.02444438
66.98289,6.63324958,7.06005018,-0.653299774,7.06005018,7.02417325,7.02417325
66.993382,7.21110255,7.06039786,0.388207027,7.06039786,7.02390437,7.02390437
67.003873,7.28010989,7.06076369,0.468344099,7.06076369,7.02363778,7.02363778
67.014365,8.42614977,7.06114831,1.16833277,7.06114831,7.02337341,7.02337341
67.024856,7.21110255,7.0615522,0.386717407,7.0615522,7.02311131,7.02311131
67.035348,7.41619849,7.06197603,0.595165907,7.06197603,7.02285142,7.02285142
67.04584,7.28010989,7.06242039,0.466572072,7.06242039,7.02259376,7.02259376
67.056331,6.40312424,7.06288588,-0.812257131,7.06288588,7.02233835,7.02233835
67.066823,6.164414,7.06337328,-0.948134629,7.06337328,7.02208513,7.02208513
67.077314,7.07106781,7.06388319,0.0847621574,7.06388319,7.02183414,7.02183414
67.087806,6.92820323,7.06441646,-0.369070764,7.06441646,7.02158533,7.02158533
67.098298,7.87400787,7.06497382,0.899463204,7.06497382,7.02133871,7.02133871
67.108789,7.41619849,7.06555602,0.59215071,7.06555602,7.02109431,7.02109431
67.119281,6.63324958,7.06616404,-0.657962356,7.06616404,7.02085207,7.02085207
67.129772,7.54983444,7.06679865,0.69500776,7.06679865,7.02061202,7.02061202
67.140264,7.87400787,7.06746091,0.8980796,7.06746091,7.02037412,7.02037412
67.150756,7.07106781,7.06815174,0.0540007102,7.06815174,7.02013839,7.02013839
67.161247,7.68114575,7.0688721,0.782479169,7.0688721,7.01990483,7.01990483
67.171739,7,7.06962322,-0.263862117,7.06962322,7.01967339,7.01967339
67.18223,7.68114575,7.07040608,0.781498345,7.07040608,7.01944412,7.01944412
67.192722,6.70820393,7.07122205,-0.602509845,7.07122205,7.01921697,7.01921697
67.203214,8.1240384,7.07207228,1.025654,7.07207228,7.01899194,7.01899194
67.213705,6.32455532,7.07295803,-0.865102719,7.07295803,7.01876906,7.01876906
67.224197,7.74596669,7.07388086,0.819808414,7.07388086,7.01854827,7.01854827
67.234688,8.48528137,7.07484204,1.18761919,7.07484204,7.0183296,7.0183296
67.24518,7.14142843,7.0758433,0.256095939,7.0758433,7.01811302,7.01811302
67.255672,6.63324958,7.07688618,-0.666060506,7.07688618,7.01789853,7.01789853
67.266163,6.40312424,7.07797228,-0.821491354,7.07797228,7.01768616,7.01768616
67.276655,8.30662386,7.07910362,1.10793512,7.07910362,7.01747584,7.01747584
67.287146,6.8556546,7.08028189,-0.473948615,7.08028189,7.01726762,7.01726762
67.297638,7.34846923,7.08150932,0.516681627,7.08150932,7.01706144,7.01706144
67.30813,7.21110255,7.08278794,0.358210287,7.08278794,7.01685733,7.01685733
67.318621,6.92820323,7.08411986,-0.394862795,7.08411986,7.01665529,7.01665529
67.329113,7.87400787,7.08550771,0.887975317,7.08550771,7.01645527,7.01645527
67.339604,6.92820323,7.08695375,-0.398435086,7.08695375,7.01625732,7.01625732
67.350096,7.41619849,7.08846092,0.572483684,7.08846092,7.01606138,7.01606138
67.360588,7.54983444,7.09003191,0.678087402,7.09003191,7.01586747,7.01586747
67.371079,7.28010989,7.09166956,0.434097143,7.09166956,7.0156756,7.0156756
67.381571,7.61577311,7.09337736,0.722769494,7.09337736,7.01548572,7.01548572
67.392062,7.07106781,7.09515837,-0.155211339,7.09515837,7.01529787,7.01529787
67.402554,7.14142843,7.09701651,0.210741343,7.09701651,7.015112,7.015112
67.413046,7.87400787,7.09895544,0.880370622,7.09895544,7.01492813,7.01492813
67.423537,7.21110255,7.10097902,0.331848663,7.10097902,7.01474626,7.01474626
67.434029,7.41619849,7.10309195,0.559559231,7.10309195,7.01456635,7.01456635
67.44452,6.55743852,7.10529845,-0.740175608,7.10529845,7.01438843,7.01438843
67.455012,7.34846923,7.10760386,0.490780364,7.10760386,7.01421246,7.01421246
67.465504,6.40312424,7.11001322,-0.8407669,7.11001322,7.01403845,7.01403845
67.475995,7.41619849,7.11253188,0.551059534,7.11253188,7.01386641,7.01386641
67.486487,6.70820393,7.11516632,-0.637936039,7.11516632,7.0136963,7.0136963
67.496978,7.14142843,7.11792245,0.153316583,7.11792245,7.01352815,7.01352815
67.50747,7.61577311,7.12080768,0.703537794,7.12080768,7.01336191,7.01336191
67.517962,6.55743852,7.1238291,-0.752589245,7.1238291,7.0131976,7.0131976
67.528453,6.70820393,7.12699429,-0.647140139,7.12699429,7.01303522,7.01303522
67.538945,6.4807407,7.13031237,-0.805960091,7.13031237,7.01287474,7.01287474
67.549436,6.63324958,7.13379179,-0.707490078,7.13379179,7.01271618,7.01271618
67.559928,6.4807407,7.13744306,-0.81037174,7.13744306,7.0125595,7.0125595
67.57042,6.8556546,7.1412764,-0.534435962,7.1412764,7.01240472,7.01240472
67.580911,7.54983444,7.14530281,0.636028006,7.14530281,7.01225184,7.01225184
67.591403,7.21110255,7.14953538,0.248127334,7.14953538,7.01210082,7.01210082
67.601894,7.87400787,7.15398656,0.848540699,7.15398656,7.01195168,7.01195168
67.612386,6.8556546,7.15867159,-0.550469789,7.15867159,7.0118044,7.0118044
67.622878,5.83095189,7.16360562,-1.15440622,7.16360562,7.01165897,7.01165897
67.633369,7.54983444,7.16880499,0.617275823,7.16880499,7.01151542,7.01151542
67.643861,7.48331477,7.17428905,0.555900822,7.17428905,7.01137369,7.01137369
67.654352,7.21110255,7.18007662,0.176141788,7.18007662,7.01123381,7.01123381
67.664844,6.164414,7.18619049,-1.0108296,7.18619049,7.01109575,7.01109575
67.675336,6.70820393,7.19265372,-0.696024273,7.19265372,7.01095952,7.01095952
67.685827,6.08276253,7.19949137,-1.05675392,7.19949137,7.01082512,7.01082512
67.696319,7.14142843,7.20673293,-0.25554746,7.20673293,7.01069251,7.01069251
67.70681,8.18535277,7.21440778,0.985365413,7.21440778,7.01056172,7.01056172
67.717302,6.8556546,7.22255118,-0.605719881,7.22255118,7.01043272,7.01043272
67.727794,6.92820323,7.2311995,-0.550450967,7.2311995,7.01030551,7.01030551
67.738285,7.21110255,7.24039265,-0.171143507,7.24039265,7.01018009,7.01018009
67.748777,6.55743852,7.25017751,-0.832309429,7.25017751,7.01005644,7.01005644
67.759268,6.4807407,7.26060205,-0.883097587,7.26060205,7.00993457,7.00993457
67.76976,7.28010989,7.27172377,0.09157574,7.27172377,7.00981446,7.00981446
67.780252,7.93725393,7.28360364,0.808486421,7.28360364,7.0096961,7.0096961
67.790743,6.78232998,7.29630994,-0.716923953,7.29630994,7.0095795,7.0095795
67.801235,7.07106781,7.30992389,-0.488729045,7.30992389,7.00946463,7.00946463
67.811726,6.63324958,7.32453265,-0.831434347,7.32453265,7.00935152,7.00935152
67.822218,7.54983444,7.34024269,0.457811913,7.34024269,7.00924012,7.00924012
67.83271,6.244998,7.35717339,-1.05459726,7.35717339,7.00913044,7.00913044
67.843201,7.07106781,7.3754654,-0.551722387,7.3754654,7.0090225,7.0090225
67.853693,7.28010989,7.39529262,-0.339385813,7.39529262,7.00891625,7.00891625
67.864184,8.06225775,7.41685679,0.803368507,7.41685679,7.00881171,7.00881171
67.874676,6.4807407,7.44041323,-0.979628774,7.44041323,7.00870886,7.00870886
67.885168,8.06225775,7.46626852,0.772003385,7.46626852,7.00860771,7.00860771
67.895659,7.61577311,7.49480072,0.34781085,7.49480072,7.00850824,7.00850824
67.906151,7.34846923,7.52648654,-0.42192098,7.52648654,7.00841044,7.00841044
67.916642,7.34846923,7.56190026,-0.461985962,7.56190026,7.00831432,7.00831432
67.927134,7.34846923,7.60176073,-0.503280734,7.60176073,7.00821985,7.00821985
67.937626,7.81024968,7.64692865,0.404129963,7.64692865,7.00812704,7.00812704
67.948117,7.28010989,7.69843397,-0.64677978,7.69843397,7.00803589,7.00803589
67.958609,8.88819442,7.75750828,1.06333727,7.75750828,7.00794637,7.00794637
67.9691,8.30662386,7.82555124,0.693593989,7.82555124,7.0078585,7.0078585
67.979592,7.87400787,7.90417204,-0.173678344,7.90417204,7.00777225,7.00777225
67.990084,8.30662386,7.99511792,0.558127179,7.99511792,7.00768762,7.00768762
68.000575,8.54400375,8.10024371,0.66615316,8.10024371,7.00760461,7.00760461
68.011067,8.36660027,8.22148141,0.380944685,8.22148141,7.0075232,7.0075232
68.021558,8,8.36066911,-0.600557335,8.36066911,7.00744341,7.00744341
68.03205,8.54400375,8.5195407,0.156406675,8.5195407,7.0073652,7.0073652
68.042542,8.77496439,8.69950641,0.274696147,8.69950641,7.00728858,7.00728858
68.053033,8.36660027,8.90155743,-0.73140766,8.90155743,7.00721356,7.00721356
68.063525,8.94427191,9.12621191,-0.426544249,9.12621191,7.0071401,7.0071401
68.074016,10.2956301,9.37325181,0.960405295,9.37325181,7.00706821,7.00706821
68.084508,9.69535971,9.64180318,0.231422841,9.64180318,7.00699788,7.00699788
68.095,10.7238053,9.93007359,0.890916218,9.93007359,7.00692911,7.00692911
68.105491,10.9087121,10.2353197,0.820604897,10.2353197,7.00686189,7.00686189
68.115983,11.4017543,10.5538224,0.920832172,10.5538224,7.00679621,7.00679621
68.126474,11.5758369,10.8805055,0.833865312,10.8805055,7.00673207,7.00673207
68.136966,10.4880885,11.2089659,-0.849044978,11.2089659,7.00666945,7.00666945
68.147458,12.328828,11.5310096,0.893206791,11.5310096,7.00660836,7.00660836
68.157949,12.2474487,11.8365716,0.64099696,11.8365716,7.00654878,7.00654878
68.168441,13.190906,12.1138351,1.03782023,12.1138351,7.00649071,7.00649071
68.178932,12.1655251,12.3495272,-0.428954699,12.3495272,7.00643415,7.00643415
68.189424,12.6885775,12.5302343,0.397923635,12.5302343,7.00637908,7.00637908
68.199916,12.8062485,12.6440177,0.402778801,12.6440177,7.00632549,7.00632549
68.210407,13.56466,12.6825791,0.93919159,12.6825791,7.0062734,7.0062734
68.220899,13.0766968,12.6429492,0.658595193,12.6429492,7.00622277,7.00622277
68.23139,12.4498996,12.5281735,-0.279774648,12.5281735,7.00617362,7.00617362
68.241882,12.1243557,12.3465766,-0.471403178,12.3465766,7.00612592,7.00612592
68.252374,12.8062485,12.1101188,0.834343862,12.1101188,7.00607968,7.00607968
68.262865,11.61895,11.8322966,-0.461894565,11.8322966,7.0060349,7.0060349
68.273357,11.8743421,11.5262759,0.589971326,11.5262759,7.00599155,7.00599155
68.283848,10.3923048,11.2039726,-0.900926039,11.2039726,7.00594964,7.00594964
68.29434,10.9087121,10.8753426,0.182673264,10.8753426,7.00590916,7.00590916
68.304832,10.4880885,10.5485597,-0.245908896,10.5485597,7.0058701,7.0058701
68.315323,10.198039,10.2301156,-0.179099238,10.2301156,7.00583246,7.00583246
68.325815,10,9.92493392,0.273981893,9.92493392,7.00579622,7.00579622
68.336306,8.06225775,9.63683664,-1.25482225,9.63683664,7.00576139,7.00576139
68.346798,9.11043358,9.36846341,-0.507966366,9.36846341,7.00572796,7.00572796
68.35729,9.2736185,9.12159923,0.389896486,9.12159923,7.00569591,7.00569591
68.367781,8.77496439,8.89717788,-0.349590462,8.89717788,7.00566525,7.00566525
68.378273,9.16515139,8.69533669,0.685430306,8.69533669,7.00563596,7.00563596
68.388764,8.60232527,8.51648594,0.292983484,8.51559068,7.00669625,7.00560804
68.399256,8.06225775,8.35782454,-0.543660545,8.35690315,7.00668057,7.00558149
68.409748,7.87400787,8.21881111,-0.587199487,8.21786473,7.00666641,7.00555629
68.420239,7.74596669,8.09774829,-0.593111795,8.09677807,7.00665377,7.00553244
68.430731,8.48528137,7.99274615,0.701808536,7.99175321,7.00664264,7.00550994
68.441222,8.1240384,7.90191595,0.471298685,7.90090136,7.00663303,7.00548877
68.451714,8.42614977,7.82337366,0.776386576,7.82233837,7.00662492,7.00546893
68.462206,6.78232998,7.75537745,-0.986431683,7.75432232,7.00661831,7.00545041
68.472697,7.87400787,7.69634006,0.421506606,7.69526583,7.00661321,7.00543322
68.483189,7.41619849,7.64484012,-0.478164856,7.6437474,7.0066096,7.00541733
68.49368,7,7.59967005,-0.774383655,7.59855933,7.00660749,7.00540274
68.504172,8.06225775,7.55978781,0.708851139,7.55865949,7.00660688,7.00538946
68.514664,8.06225775,7.52433668,0.733431026,7.52319105,7.00660775,7.00537746
68.525155,8,7.49261005,0.712313099,7.49144734,7.00661012,7.00536675
68.535647,7.74596669,7.46402264,0.530984045,7.46284301,7.00661397,7.00535732
68.546138,8.24621125,7.43811079,0.898944083,7.43691433,7.00661931,7.00534915
68.55663,7.48331477,7.41448951,0.262345686,7.41327628,7.00662612,7.00534225
68.567122,7.54983444,7.39285392,0.396207661,7.39162392,7.00663443,7.00533661
68.577613,6.70820393,7.37295566,-0.81532308,7.37170887,7.00664421,7.00533222
68.588105,7.54983444,7.35458567,0.441869628,7.35332204,7.00665546,7.00532908
68.598596,7.48331477,7.33757785,0.381755055,7.33629732,7.0066682,7.00532717
68.609088,6.63324958,7.3217867,-0.829781368,7.32048916,7.00668241,7.0053265
68.61958,7.21110255,7.30709348,-0.309824027,7.30577881,7.00669809,7.00532705
68.630071,8.1240384,7.29339614,0.911395779,7.29206422,7.00671525,7.00532882
68.640563,7.34846923,7.28060232,0.260512788,7.27925299,7.00673388,7.00533181
68.651054,7.34846923,7.26863597,0.282547795,7.26726908,7.00675398,7.005336
68.661546,7.87400787,7.2574253,0.785227723,7.25604067,7.00677556,7.00534138
68.672038,7.54983444,7.24690967,0.550386016,7.24550711,7.0067986,7.00534797
68.682529,6.70820393,7.23703465,-0.727207476,7.23561395,7.00682312,7.00535573
68.693021,7.14142843,7.22774846,-0.293802708,7.22630941,7.0068491,7.00536468
68.703512,6.8556546,7.21900793,-0.602787968,7.21755031,7.00687656,7.0053748
68.714004,7.21110255,7.21077057,0.0182202534,7.20929414,7.0069055,7.00538609
68.724496,6.244998,7.20300021,-0.978775875,7.20150471,7.0069359,7.00539854
68.734987,6.92820323,7.19566382,-0.517165922,7.19414899,7.00696778,7.00541215
68.745479,7,7.1887292,-0.434429737,7.18719477,7.00700113,7.0054269
68.75597,6.78232998,7.18216959,-0.632328719,7.18061528,7.00703596,7.00544279
68.766462,6.4807407,7.175958,-0.833796917,7.1743835,7.00707227,7.00545982
68.776954,7.07106781,7.17007149,-0.314648502,7.16847651,7.00711006,7.00547797
68.787445,7.68114575,7.16448897,0.718788406,7.16287319,7.00714933,7.00549725
68.797937,8.1240384,7.15918946,0.982267245,7.15755254,7.00719009,7.00551765
68.808428,7.28010989,7.1541557,0.354900249,7.1524973,7.00723233,7.00553915
68.81892,7.28010989,7.14936985,0.361579923,7.14768962,7.00727607,7.00556175
68.829412,6.78232998,7.14481686,-0.602068828,7.14311443,7.0073213,7.00558546
68.839903,7.68114575,7.14048278,0.735297876,7.13875779,7.00736802,7.00561025
68.850395,5.91607978,7.1363535,-1.10466,7.13460555,7.00741625,7.00563612
68.860886,6.70820393,7.13241753,-0.651316821,7.13064623,7.00746598,7.00566308
68.871378,7.28010989,7.12866273,0.389162121,7.12686765,7.00751722,7.0056911
68.88187,6.78232998,7.12507893,-0.585447646,7.12325965,7.00756998,7.00572019
68.892361,6.08276253,7.12165665,-1.01926155,7.11981273,7.00762426,7.00575033
68.902853,6.4807407,7.1183861,-0.798527023,7.1165171,7.00768007,7.00578153
68.913344,7.87400787,7.11525947,0.871061654,7.11336492,7.0077374,7.00581378
68.923836,7.54983444,7.11226824,0.661487867,7.11034765,7.00779628,7.00584706
68.934328,6.92820323,7.10940536,-0.42567844,7.10745825,7.00785671,7.00588137
68.944819,7.28010989,7.10666425,0.416468052,7.1046901,7.00791869,7.00591671
68.955311,7.54983444,7.10403796,0.667679922,7.10203625,7.00798223,7.00595308
68.965802,7.68114575,7.10152101,0.761330902,7.0994912,7.00804734,7.00599045
68.976294,6.63324958,7.09910731,-0.682537713,7.09704885,7.00811403,7.00602883
68.986786,6.78232998,7.09679188,-0.560769023,7.09470419,7.00818231,7.00606822
68.997277,7.21110255,7.09457002,0.341368619,7.09245251,7.00825219,7.00610859
69.007769,7.68114575,7.09243669,0.767273785,7.09028876,7.00832368,7.00614996
69.01826,6.8556546,7.09038799,-0.484492917,7.08820901,7.00839678,7.00619231
69.028752,7.81024968,7.08841947,0.849605913,7.0862088,7.00847153,7.00623563
69.039244,7.21110255,7.08652752,0.352951877,7.0842845,7.00854792,7.00627993
69.049735,7,7.08470875,-0.291047671,7.08243269,7.00862596,7.00632518
69.060227,7.34846923,7.08295942,0.515276442,7.08064961,7.00870568,7.00637139
69.070718,6.63324958,7.0812767,-0.669348282,7.07893244,7.00878708,7.00641856
69.08121,6.244998,7.07965729,-0.9135969,7.07727781,7.00887019,7.00646667
69.091702,7.28010989,7.07809854,0.449456729,7.07568307,7.00895502,7.00651571
69.102193,7.61577311,7.07659793,0.73428549,7.07414568,7.00904158,7.00656569
69.112685,6.8556546,7.07515266,-0.468506201,7.07266282,7.0091299,7.0066166
69.123176,7.68114575,7.07376066,0.779349145,7.07123238,7.00921998,7.00666842
69.133668,7.28010989,7.07241941,0.455730705,7.06985183,7.00931187,7.00672115
69.14416,7.28010989,7.07112696,0.457146513,7.06851916,7.00940557,7.0067748
69.154651,7.34846923,7.0698814,0.527814196,7.06723248,7.00950109,7.00682934
69.165143,7,7.06868063,-0.262069889,7.06598961,7.00959849,7.00688478
69.175634,7,7.06752307,-0.259852022,7.06478898,7.00969776,7.00694111
69.186126,8.18535277,7.06640682,1.05780241,7.06362864,7.00979894,7.00699832
69.196618,6.4807407,7.06533039,-0.764584655,7.06250706,7.00990207,7.0070564
69.207109,7.28010989,7.06429236,0.464561655,7.0614228,7.01000714,7.00711535
69.217601,6.244998,7.06329108,-0.904595534,7.06037416,7.01011422,7.00717517
69.228092,7.81024968,7.06232538,0.864826164,7.05935996,7.01022332,7.00723585
69.238584,6.8556546,7.06139379,-0.453584821,7.05837866,7.01033448,7.00729737
69.249076,5.83095189,7.06049517,-1.10884772,7.05742908,7.01044773,7.00735975
69.259567,7.41619849,7.05962843,0.597134872,7.05651012,7.0105631,7.00742295
69.270059,6.40312424,7.05879231,-0.809733333,7.05562044,7.01068064,7.007487
69.28055,6.32455532,7.05798591,-0.856405623,7.05475913,7.01080038,7.00755186
69.291042,7.21110255,7.05720809,0.39229385,7.05392496,7.01092237,7.00761756
69.301534,7.07106781,7.05645797,0.120871188,7.05311703,7.01104665,7.00768406
69.312025,6.78232998,7.05573473,-0.522881194,7.05233446,7.01117326,7.00775137
69.322517,7.07106781,7.05503737,0.126611389,7.0515762,7.01130226,7.00781949
69.333008,6.78232998,7.05436522,-0.521569973,7.05084152,7.01143368,7.00788839
69.3435,7.34846923,7.05371738,0.54291053,7.05012946,7.0115676,7.0079581
69.353992,8,7.0530932,0.973091363,7.0494393,7.01170406,7.00802858
69.364483,6.63324958,7.05249203,-0.647489342,7.04877034,7.01184311,7.00809984
69.374975,6.70820393,7.0519131,-0.586267148,7.04812174,7.01198484,7.00817188
69.385466,7.28010989,7.05135591,0.478282321,7.04749292,7.01212928,7.00824467
69.395958,7.48331477,7.05081976,0.657643531,7.04688311,7.01227653,7.00831823
69.40645,6.55743852,7.05030415,-0.70204389,7.04629173,7.01242665,7.00839254
69.416941,7.07106781,7.04980859,0.145805411,7.04571822,7.0125797,7.0084676
69.427433,6.78232998,7.04933251,-0.51672287,7.04516191,7.01273578,7.0085434
69.437924,6.92820323,7.04887551,-0.347379161,7.04462232,7.01289496,7.00861993
69.448416,7.54983444,7.04843708,0.708094174,7.04409883,7.01305734,7.0086972
69.458908,7.34846923,7.04801683,0.54813538,7.04359098,7.01322301,7.00877519
69.469399,6.78232998,7.04761443,-0.515057712,7.04309831,7.01339206,7.00885389
69.479891,7.34846923,7.04722943,0.548853171,7.04262027,7.0135646,7.00893331
69.490382,7.34846923,7.04686155,0.549188195,7.04215648,7.01374073,7.00901342
69.500874,7.48331477,7.04651043,0.660911752,7.04170643,7.01392059,7.00909425
69.511366,7.41619849,7.04617579,0.608294906,7.04126973,7.01410428,7.00917576
69.521857,6.55743852,7.04585741,-0.698869721,7.04084603,7.01429191,7.00925796
69.532349,7.87400787,7.04555497,0.910193883,7.04043485,7.01448366,7.00934084
69.54284,6.70820393,7.0452683,-0.580572451,7.04003591,7.01467963,7.0094244
69.553332,7.93725393,7.04499716,0.944593445,7.03964876,7.01488001,7.00950863
69.563824,7,7.04474138,-0.211521573,7.0392731,7.01508493,7.00959352
69.574315,7.21110255,7.04450083,0.408168745,7.03890862,7.01529456,7.00967906
69.584807,6.32455532,7.04427533,-0.848363134,7.03855495,7.01550911,7.00976526
69.595298,6.32455532,7.04406481,-0.84823905,7.03821184,7.01572873,7.0098521
69.60579,6.32455532,7.04386913,-0.848123701,7.03787892,7.01595365,7.00993959
69.616282,7,7.04368826,-0.20901737,7.03755595,7.01618408,7.01002771
69.626773,7.34846923,7.04352216,0.552220127,7.03724267,7.01642022,7.01011645
69.637265,6.70820393,7.04337078,-0.578935958,7.03693875,7.01666235,7.01020582
69.647756,7.48331477,7.04323414,0.663385732,7.03664401,7.01691068,7.0102958
69.658248,6.78232998,7.04311226,-0.510668464,7.03635813,7.01716553,7.0103864
69.66874,6.08276253,7.0430052,-0.979919728,7.0360809,7.01742717,7.0104776
69.679231,7.54983444,7.04291305,0.711984115,7.03581211,7.01769587,7.01056939
69.689723,6.55743852,7.04283591,-0.69670466,7.0355515,7.01797203,7.01066178
69.700214,6.32455532,7.04277391,-0.847477784,7.03529889,7.01825592,7.01075475
69.710706,6.08276253,7.04272723,-0.979777884,7.03505402,7.01854799,7.01084831
69.721198,6.32455532,7.04269607,-0.847431855,7.03481672,7.01884859,7.01094245
69.731689,6.55743852,7.04268066,-0.696593236,7.03458682,7.01915814,7.01103714
69.742181,6.8556546,7.04268127,-0.432465805,7.03436408,7.01947713,7.01113241
69.752672,6.164414,7.04269822,-0.937168189,7.03414836,7.019806,7.01122823
69.763164,6.8556546,7.04273184,-0.432524268,7.03393945,7.02014532,7.01132461
69.773656,7.34846923,7.04278254,0.552889398,7.03373719,7.02049564,7.01142153
69.784147,7.14142843,7.04285075,0.313970831,7.03354143,7.0208575,7.01151898
69.794639,7.21110255,7.04293696,0.410079987,7.03335198,7.02123163,7.01161698
69.80513,6.4807407,7.04304169,-0.749867319,7.03316873,7.02161863,7.0117155
69.815622,6.244998,7.04316558,-0.893402251,7.03299147,7.02201935,7.01181455
69.826114,7.21110255,7.04330927,0.409625786,7.03282009,7.02243452,7.01191412
69.836605,6,7.04347346,-1.02150549,7.03265445,7.02286499,7.01201419
69.847097,7.07106781,7.043659,0.16555607,7.0324944,7.02331177,7.01211477
69.857588,7.07106781,7.04386672,0.164927528,7.03233983,7.02377577,7.01221585
69.86808,7.93725393,7.04409764,0.945069467,7.03219057,7.02425818,7.01231743
69.878572,7.21110255,7.04435278,0.408350055,7.03204652,7.02476014,7.0124195
69.889063,7.21110255,7.0446333,0.408006434,7.03190757,7.02528288,7.01252204
69.899555,6.55743852,7.04494052,-0.698213429,7.03177358,7.02582788,7.01262506
69.910046,6.78232998,7.04527578,-0.512782405,7.03164446,7.02639657,7.01272855
69.920538,6.92820323,7.04564069,-0.342691488,7.03152007,7.02699069,7.01283252
69.93103,8.30662386,7.0460369,1.12275864,7.03140031,7.02761199,7.01293695
69.941521,6.32455532,7.04646624,-0.849653414,7.03128509,7.02826237,7.01304182
69.952013,6.92820323,7.04693084,-0.34456873,7.0311743,7.0289441,7.01314714
69.962504,7.07106781,7.04743285,0.153736658,7.03106784,7.02965939,7.01325291
69.972996,6.40312424,7.04797486,-0.803025915,7.03096561,7.03041097,7.01335912
69.983488,7.34846923,7.04855955,0.547640096,7.03086751,7.03120159,7.01346576
69.993979,6.78232998,7.0491899,-0.516584862,7.03077348,7.03203429,7.01357282
70.004471,6.92820323,7.04986937,-0.348806742,7.0306834,7.03291267,7.01368031
70.014962,5.83095189,7.05060155,-1.1043775,7.0305972,7.03384035,7.0137882
70.025454,6.63324958,7.05139068,-0.646638308,7.03051479,7.03482172,7.01389651
70.035946,7.07106781,7.05224129,0.137209786,7.03043608,7.03586136,7.01400523
70.046437,7.21110255,7.05315837,0.397421918,7.03036102,7.03696432,7.01411434
70.056929,6.63324958,7.05414779,-0.648766687,7.0302895,7.0381366,7.01422385
70.06742,7.21110255,7.05521573,0.39482505,7.03022147,7.03938441,7.01433373
70.077912,6.55743852,7.05636951,-0.706350467,7.03015683,7.04071519,7.01444401
70.088404,8,7.05761703,0.970764119,7.03009553,7.04213689,7.01455467
70.098895,7.07106781,7.05896716,0.110002952,7.03003751,7.04365847,7.01466568
70.109387,7.81024968,7.06043034,0.865921094,7.02998267,7.04529045,7.01477707
70.119878,7.34846923,7.06201776,0.535211607,7.02993097,7.04704409,7.01488881
70.13037,7.21110255,7.06374279,0.383874665,7.02988234,7.04893285,7.01500092
70.140862,6.4807407,7.06562012,-0.764774098,7.02983671,7.0509715,7.01511337
70.151353,7.61577311,7.06766648,0.740342236,7.02979403,7.05317682,7.01522615
70.161845,6.32455532,7.06990165,-0.863334425,7.02975424,7.05556872,7.01533929
70.172336,5.65685425,7.07234747,-1.18974502,7.02971727,7.0581691,7.01545274
70.182828,7.21110255,7.07503008,0.368880018,7.02968307,7.0610042,7.01556654
70.19332,7.07106781,7.07797895,-0.0831332798,7.02965159,7.06410359,7.01568065
70.203811,7.41619849,7.08122825,0.578766136,7.02962278,7.06750151,7.01579507
70.214303,7.48331477,7.08481877,0.631265395,7.02959657,7.0712389,7.01590981
70.224794,7.48331477,7.08879691,0.62810657,7.02957293,7.07536223,7.01602485
70.235286,7.41619849,7.09321874,0.568313073,7.02955179,7.07992775,7.01614019
70.245778,7.81024968,7.09814926,0.843860425,7.02953312,7.08500056,7.01625583
70.256269,7.81024968,7.10366548,0.840585625,7.02951686,7.09065784,7.01637175
70.266761,6.63324958,7.10986097,-0.690370473,7.02950296,7.09699334,7.01648796
70.277252,7.87400787,7.1168455,0.870150777,7.02949139,7.10411701,7.01660444
70.287744,7.14142843,7.1247543,0.129128349,7.0294821,7.11216434,7.0167212
70.298236,7.21110255,7.13374948,0.278124196,7.02947505,7.12129771,7.01683823
70.308727,7.28010989,7.14402935,0.368890954,7.02947019,7.13171571,7.01695552
70.319219,6.40312424,7.15584222,-0.867593211,7.02946748,7.14366707,7.01707306
70.32971,7.28010989,7.1694933,0.332590727,7.02946688,7.15745744,7.01719085
70.340202,6.78232998,7.18537255,-0.634856339,7.02946836,7.17347737,7.0173089
70.350694,6.164414,7.20397042,-1.0195864,7.02947188,7.19221797,7.01742719
70.361185,7.28010989,7.22591027,0.232808111,7.02947739,7.21430347,7.0175457
70.371677,7.54983444,7.25198897,0.545752206,7.02948487,7.24053181,7.01766445
70.382168,7.28010989,7.28319238,-0.0555201945,7.02949427,7.2718901,7.01778342
70.39266,8,7.32073356,0.824176219,7.02950557,7.30959291,7.01790262
70.403152,7.21110255,7.36601996,-0.393595487,7.02951872,7.35504927,7.01802203
70.413643,7.34846923,7.4205846,-0.268543045,7.02953371,7.40979377,7.01814164
70.424135,7.74596669,7.48592297,0.509944828,7.02955048,7.47532318,7.01826146
70.434626,8.66025404,7.5630935,1.04745431,7.02956902,7.55269628,7.01838148
70.445118,7.41619849,7.65212693,-0.485724662,7.02958929,7.64194262,7.01850169
70.45561,8.88819442,7.75096343,1.06641033,7.02961127,7.74099836,7.0186221
70.466101,8.71779789,7.8541351,0.929334596,7.02963492,7.84438779,7.01874267
70.476593,8.30662386,7.95166065,0.595787896,7.02966021,7.94211737,7.01886344
70.487084,9.11043358,8.0293207,1.03976578,7.02968712,8.01995208,7.01898437
70.497576,8.60232527,8.07208668,0.728174835,7.02971563,8.06284833,7.01910547
70.508068,8.42614977,8.07014706,0.59665963,7.0297457,8.06098586,7.01922674
70.518559,8.24621125,8.02400382,0.471388834,7.0297773,8.01486848,7.01934815
70.529051,8.71779789,7.94415114,0.879571911,7.02981043,7.93500208,7.01946973
70.539542,8.66025404,7.84576402,0.902491006,7.02984504,7.83657807,7.01959144
70.550034,8.48528137,7.74272639,0.861716303,7.02988113,7.73349586,7.01971331
70.560526,8.54400375,7.64463827,0.948348815,7.02991865,7.63536677,7.01983531
70.571017,7.14142843,7.55662898,-0.644360573,7.0299576,7.54732667,7.01995743
70.581509,7.74596669,7.48051836,0.515216784,7.02999796,7.4711982,7.02007969
70.592,6.55743852,7.41618795,-0.926687341,7.03003969,7.40686321,7.02020206
70.602492,7.68114575,7.36250297,0.564484521,7.03008279,7.3531859,7.02032456
70.612984,8.24621125,7.31797123,0.963452137,7.03012723,7.30867242,7.02044716
70.623475,7.07106781,7.28106374,-0.458253125,7.03017298,7.27179195,7.02056987
70.633967,7.41619849,7.2503789,0.407209507,7.03022005,7.24114121,7.02069268
70.644458,7.07106781,7.22473374,-0.392002462,7.03026841,7.21553568,7.02081558
70.65495,6.92820323,7.20314983,-0.524353507,7.03031804,7.19399572,7.02093858
70.665442,7,7.18485209,-0.42994429,7.03036892,7.17574521,7.02106167
70.675933,6.08276253,7.16922852,-1.04233679,7.03042104,7.16017135,7.02118483
70.686425,7.21110255,7.15579409,0.235177508,7.0304744,7.1467885,7.02130807
70.696916,7.07106781,7.14417139,-0.270376727,7.03052896,7.1352187,7.02143137
70.707408,8.1240384,7.1341174,0.994947738,7.03064675,7.12515745,7.02155476
70.7179,7.93725393,7.12526944,0.901101821,7.03070408,7.1163635,7.0216782
70.728391,7.07106781,7.11749282,-0.215464637,7.03076259,7.10864124,7.02180168
70.738883,6.70820393,7.11062591,-0.634367385,7.03082228,7.10182884,7.02192523
70.749374,7.07106781,7.10453816,-0.182949042,7.03088312,7.09579556,7.02204882
70.759866,7.34846923,7.09911907,0.499349737,7.03094513,7.09043074,7.02217245
70.770358,7.07106781,7.09427802,-0.152348962,7.03100827,7.08564367,7.02229612
70.780849,7.41619849,7.08993889,0.571191387,7.03107255,7.08135808,7.02241982
70.791341,6.78232998,7.08603634,-0.551095599,7.03113796,7.07750859,7.02254355
70.801832,7.81024968,7.08251649,0.853072788,7.0312045,7.07404121,7.02266729
70.812324,7.93725393,7.07933217,0.926240661,7.03127217,7.07090871,7.02279105
70.822816,7.54983444,7.07644398,0.688033758,7.03134095,7.06807163,7.02291483
70.833307,7,7.07381806,-0.271694789,7.03141085,7.06549607,7.02303861
70.843799,7.28010989,7.07142451,0.456820953,7.03148188,7.06315207,7.0231624
70.85429,7.54983444,7.06923836,0.693250366,7.03155402,7.06101464,7.02328617
70.864782,7,7.06723715,-0.259301269,7.03162729,7.05906126,7.02340995
70.875274,7.28010989,7.06540185,0.463365992,7.03170168,7.05727288,7.02353372
70.885765,7.21110255,7.06371581,0.383909812,7.0317772,7.05563281,7.02365745
70.896257,7,7.06216397,-0.249327036,7.03185387,7.05412596,7.02378118
70.906748,6.244998,7.06073367,-0.903180866,7.03193168,7.05273964,7.02390487
70.91724,7.28010989,7.05941321,0.469783652,7.03201066,7.0514621,7.02402853
70.927732,7.61577311,7.0581926,0.746713134,7.03209081,7.05028335,7.02415216
70.938223,6.244998,7.05706298,-0.901146484,7.03217214,7.04919447,7.02427574
70.948715,7.93725393,7.05601616,0.938742656,7.03225468,7.04818725,7.02439929
70.959206,7.41619849,7.05504522,0.600960286,7.03233844,7.04725474,7.02452277
70.969698,7.34846923,7.05414363,0.542517832,7.03242345,7.04639036,7.02464621
70.98019,7.93725393,7.05330579,0.940185163,7.03250973,7.04558849,7.02476958
70.990681,7,7.05252668,-0.229186996,7.03259731,7.04484405,7.02489288
71.001173,6.70820393,7.05180155,-0.586172006,7.03268623,7.04415226,7.02501613
71.011664,7.14142843,7.05112642,0.300502919,7.03277651,7.04350909,7.02513929
71.022156,6.8556546,7.05049744,-0.441410055,7.03286821,7.04291064,7.02526238
71.032648,7.48331477,7.04991129,0.658333867,7.03296136,7.04235355,7.02538538
71.043139,5.74456265,7.049365,-1.14227945,7.033056,7.04183477,7.02550829
71.053631,7.41619849,7.04885569,0.606088108,7.0331522,7.04135138,7.02563111
71.064122,6.08276253,7.04838097,-0.982658864,7.03325001,7.04090091,7.02575383
71.074614,7.81024968,7.04793848,0.873104344,7.0333495,7.04048092,7.02587645
71.085106,6.8556546,7.0475262,-0.438031511,7.03345075,7.04008933,7.02599897
71.095597,7.41619849,7.04714231,0.60749994,7.03355382,7.03972421,7.02612137
71.106089,7.07106781,7.04678502,0.155829353,7.03365882,7.03938369,7.02624366
71.11658,7.61577311,7.04645288,0.754533121,7.03376583,7.0390662,7.02636582
71.127072,6.32455532,7.0461444,-0.849463995,7.03387497,7.03877017,7.02648786
71.137564,6.92820323,7.04585836,-0.34300894,7.03398635,7.03849423,7.02660978
71.148055,8.18535277,7.04559365,1.06759502,7.0341001,7.03823713,7.02673155
71.158547,6.78232998,7.04534916,-0.512853954,7.03421638,7.03799762,7.02685319
71.169038,8.18535277,7.04512403,1.06781494,7.03433533,7.03777467,7.02697468
71.17953,7.54983444,7.04491738,0.710575155,7.03445714,7.03756721,7.02709603
71.190022,7.74596669,7.04472851,0.837399656,7.03458202,7.03737434,7.02721723
71.200513,7.34846923,7.04455678,0.551282549,7.03471015,7.0371952,7.02733826
71.211005,7.28010989,7.04440161,0.485497971,7.03484183,7.03702895,7.02745914
71.221496,6.40312424,7.04426257,-0.800711139,7.0349773,7.03687487,7.02757985
71.231988,6.92820323,7.04413924,-0.34049378,7.03511691,7.03673224,7.02770039
71.24248,8.42614977,7.04403138,1.17563531,7.035261,7.03660041,7.02782076
71.252971,7.68114575,7.0439388,0.798252435,7.03540998,7.03647881,7.02794094
71.263463,7.68114575,7.04386141,0.798300908,7.03556437,7.03636683,7.02806095
71.273954,7.21110255,7.04379927,0.409027231,7.03572472,7.03626397,7.02818075
71.284446,8.1240384,7.04375258,1.03936799,7.03589172,7.03616972,7.02830038
71.294938,7.21110255,7.04372169,0.409122065,7.03606619,7.03608362,7.02841981
71.305429,7.93725393,7.04370716,0.945276028,7.0362491,7.03600526,7.02853902
71.315921,7.54983444,7.04370981,0.711424361,7.0364417,7.0359342,7.02865805
71.326412,7.81024968,7.03812909,0.878703923,7.03103812,7.03587009,7.02877685
71.336904,7.07106781,7.03820732,0.18127463,7.03129256,7.03581256,7.02889544
71.347396,6,7.03830686,-1.01897343,7.03156186,7.03576126,7.02901382
71.357887,8.54400375,7.03843015,1.22701817,7.03184876,7.0357159,7.02913197
71.368379,8.30662386,7.03858029,1.12607441,7.03215667,7.03567617,7.02924989
71.37887,6.4807407,7.03876106,-0.747007606,7.03248964,7.03564178,7.02936758
71.389362,8.30662386,7.03897713,1.12589819,7.03285261,7.03561249,7.02948504
71.399854,7.81024968,7.03923405,0.878074957,7.03325138,7.03558802,7.02960226
71.410345,7.93725393,7.03953835,0.947478542,7.0336927,7.03556816,7.02971922
71.420837,7.68114575,7.0398977,0.800779651,7.03418449,7.03555268,7.02983595
71.431328,7.34846923,7.0403207,0.555111279,7.03473553,7.03554137,7.02995241
71.44182,7.41619849,7.04081707,0.612683785,7.03535576,7.03553403,7.03006862
71.452312,7.34846923,7.04139728,0.554140726,7.03605585,7.03553047,7.03018457
71.462803,7.54983444,7.04207244,0.712574202,7.03684704,7.03553051,7.03030025
71.473295,7.68114575,7.04285417,0.798931524,7.03774117,7.03553399,7.03041567
71.483786,8.42614977,7.04375377,1.17575338,7.03874967,7.03554074,7.0305308
71.494278,7.54983444,7.0447823,0.710670202,7.03988379,7.03555061,7.03064566
71.50477,8.06225775,7.04594945,1.00812117,7.04115332,7.03556345,7.03076024
71.515261,7.34846923,7.04726303,0.548822554,7.04256622,7.03557914,7.03087452
71.525753,7,7.04872863,-0.220745614,7.04412821,7.03559754,7.03098853
71.536244,7.34846923,7.05034779,0.546004976,7.04584095,7.03561851,7.03110222
71.546736,7.41619849,7.05211812,0.603390728,7.04770214,7.03564196,7.03121563
71.557228,6.8556546,7.05403086,-0.445394502,7.04970314,7.03566775,7.03132873
71.567719,7.34846923,7.05606979,0.540739716,7.0518278,7.03569579,7.03144152
71.578211,6.63324958,7.05820977,-0.651889706,7.05405109,7.03572598,7.031554
71.588702,7.68114575,7.06041308,0.787865892,7.05633534,7.03575821,7.03166616
71.599194,7,7.06262854,-0.250256944,7.05862942,7.03579239,7.03177801
71.609686,7.41619849,7.06478807,0.5927988,7.06086533,7.03582843,7.03188953
71.620177,7.21110255,7.06680714,0.379862356,7.06295854,7.03586625,7.03200072
71.630669,7.68114575,7.06858833,0.782660477,7.06481169,7.03590576,7.03211158
71.64116,7.21110255,7.07002775,0.375599258,7.06632091,7.03594689,7.03222209
71.651652,7.74596669,7.07102924,0.821545769,7.06739008,7.03598957,7.03233228
71.662144,6.70820393,7.07151905,-0.602756263,7.06794548,7.03603372,7.03244212
71.672635,8.24621125,7.07146086,1.08385903,7.06795086,7.03607926,7.0325516
71.683127,7.34846923,7.0708634,0.526883125,7.06741503,7.03612615,7.03266074
71.693618,8.06225775,7.06977858,0.996232489,7.06638998,7.03617431,7.03276952
71.70411,7.41619849,7.06829018,0.589837523,7.06495963,7.03622368,7.03287794
71.714602,7.14142843,7.06649896,0.273732471,7.06322482,7.03627421,7.032986
71.725093,7.74596669,7.06450746,0.825505442,7.0612882,7.03632584,7.03309368
71.735585,7.54983444,7.0624084,0.698159036,7.05924259,7.03637852,7.033201
71.746076,6.70820393,7.06028021,-0.593360155,7.0571665,7.03643219,7.03330793
71.756568,7.81024968,7.05818388,0.867217269,7.05512101,7.03648681,7.03341449
71.76706,8.54400375,7.05616544,1.21976978,7.05315219,7.03654233,7.03352067
71.777551,7.54983444,7.0542575,0.703972255,7.0512927,7.0365987,7.03362645
71.788043,7.41619849,7.05248125,0.603089745,7.04956378,7.03665588,7.03373185
71.798534,7.81024968,7.05084991,0.871435463,7.0479787,7.03671382,7.03383684
71.809026,6.78232998,7.04936923,-0.516758406,7.04654325,7.03677249,7.03394144
71.819518,6.32455532,7.0480401,-0.850579086,7.04525833,7.03683185,7.03404564
71.830009,7.07106781,7.04685919,0.155591189,7.04412065,7.03689185,7.03414942
71.840501,7.93725393,7.0458197,0.944157951,7.04312343,7.03695246,7.0342528
71.850992,7.61577311,7.04491293,0.755552892,7.04225801,7.03701365,7.03435575
71.861484,7.48331477,7.04412828,0.662711468,7.04151382,7.03707538,7.0344583
71.871976,7,7.04345449,-0.208457409,7.04087959,7.03713763,7.03456042
71.882467,8.06225775,7.04287989,1.00964244,7.0403437,7.03720034,7.0346621
71.892959,7.41619849,7.04239276,0.611396539,7.03989444,7.03726351,7.03476337
71.90345,8,7.04198204,0.97878392,7.03952077,7.03732708,7.03486419
71.913942,7.54983444,7.04163722,0.712879521,7.03921222,7.03739105,7.03496458
71.924434,7,7.04134884,-0.20334415,7.03895932,7.03745538,7.03506453
71.934925,7.68114575,7.04110841,0.800023335,7.0387536,7.03752004,7.03516403
71.945417,6.55743852,7.04090841,-0.695319989,7.03858759,7.03758501,7.03526309
71.955908,8.30662386,7.04074244,1.12511396,7.03845488,7.03765025,7.03536168
71.9664,7.93725393,7.04060498,0.946915495,7.03834998,7.03771575,7.03545983
71.976892,7.28010989,7.04049144,0.489508375,7.03826832,7.03778149,7.03555751
71.987383,6.8556546,7.040398,-0.42981787,7.0382061,7.03784743,7.03565473
71.997875,7.07106781,7.04032149,0.175346294,7.03816015,7.03791356,7.03575148
72.008366,7.74596669,7.04025933,0.840063902,7.03812793,7.03797985,7.03584776
72.018858,6.55743852,7.04020941,-0.694817161,7.03810733,7.03804629,7.03594357
72.02935,7.48331477,7.04017001,0.665691191,7.03809666,7.03811286,7.0360389
72.039841,6.63324958,7.04013973,-0.637879417,7.03809452,7.03817952,7.03613373
72.050333,7.07106781,7.04011741,0.17592725,7.03809978,7.03824627,7.0362281
72.060824,7.21110255,7.04010211,0.41352199,7.0381115,7.03831308,7.03632196
72.071316,7.28010989,7.04009304,0.489915148,7.03812891,7.03837994,7.03641534
72.081808,7.07106781,7.04008952,0.176006514,7.03815136,7.03844683,7.03650822
72.092299,7.48331477,7.04009099,0.665750539,7.03817828,7.03851373,7.03660059
72.102791,7.07106781,7.04009697,0.175985333,7.03820922,7.03858063,7.03669247
72.113282,7.41619849,7.04010704,0.613262952,7.03824376,7.0386475,7.03678383
72.123774,7.07106781,7.04012082,0.175917583,7.03828154,7.03871434,7.03687469
72.134266,6.40312424,7.04013798,-0.798131406,7.03832224,7.03878112,7.03696504
72.144757,7.41619849,7.04015823,0.613221214,7.03836559,7.03884783,7.03705486
72.155249,6.92820323,7.04018131,-0.334631263,7.03841133,7.03891447,7.03714416
72.16574,7.68114575,7.04020698,0.800586513,7.03845923,7.03898099,7.03723294
72.176232,8,7.04023503,0.97967595,7.0385091,7.03904742,7.03732119
72.186724,7.21110255,7.04026526,0.413324675,7.03856074,7.03911371,7.03740891
72.197215,7.48331477,7.04029749,0.665595433,7.03861398,7.03917986,7.03749608
72.207707,7.61577311,7.04033156,0.758578633,7.03866868,7.03924587,7.03758273
72.218198,6.78232998,7.04036732,-0.507973756,7.03872469,7.0393117,7.03766882
72.22869,6.92820323,7.04040463,-0.334964775,7.03878189,7.03937736,7.03775438
72.239182,7.07106781,7.04044337,0.174998418,7.03884015,7.03944283,7.03783939
72.249673,7.34846923,7.0404834,0.554964706,7.03889937,7.03950809,7.03792384
72.260165,7.87400787,7.04052464,0.912953027,7.03895945,7.03957315,7.03800774
72.270656,6.63324958,7.04056698,-0.638214228,7.03902028,7.03963797,7.03809107
72.281148,7.68114575,7.04061033,0.800334568,7.03908181,7.03970256,7.03817385
72.29164,7.21110255,7.0406546,0.412853431,7.03914394,7.03976691,7.03825606
72.302131,7.87400787,7.0406997,0.91285715,7.03920659,7.03983099,7.03833769
72.312623,8.1240384,7.04074557,1.04081354,7.03926971,7.0398948,7.03841876
72.323114,6.92820323,7.04079214,-0.335542708,7.03933322,7.03995833,7.03849924
72.333606,7.54983444,7.04083934,0.71343892,7.03939708,7.04002158,7.03857916
72.344098,6.70820393,7.04088712,-0.57678695,7.03946123,7.04008453,7.03865849
72.354589,7.07106781,7.0409354,0.173586889,7.03952562,7.04014717,7.03873722
72.365081,7,7.04098416,-0.202445443,7.0395902,7.04020949,7.03881538
72.375572,7.74596669,7.04103332,0.839603105,7.03965492,7.04027148,7.03889293
72.386064,7.93725393,7.04108285,0.94666313,7.03971976,7.04033314,7.0389699
72.396556,6.92820323,7.04113271,-0.336049815,7.03978467,7.04039445,7.03904626
72.407047,6.55743852,7.04118284,-0.695517302,7.0398496,7.0404554,7.03912202
72.417539,6.08276253,7.04123322,-0.979015164,7.03991454,7.04051599,7.03919718
72.42803,6.55743852,7.04128381,-0.69558988,7.03997945,7.04057621,7.03927172
72.438522,7.87400787,7.04133457,0.912509347,7.0400443,7.04063605,7.03934566
72.449014,6.70820393,7.04138547,-0.577218793,7.04010907,7.0406955,7.03941898
72.459505,7.54983444,7.04143647,0.71302031,7.04017372,7.04075455,7.03949168
72.469997,6.78232998,7.04148756,-0.509075221,7.04023823,7.04081321,7.03956376
72.480488,7.81024968,7.0415387,0.87676164,7.04030258,7.04087144,7.03963521
72.49098,7,7.04158987,-0.203935958,7.04036676,7.04092926,7.03970604
72.501472,7.61577311,7.04164105,0.757715023,7.04043074,7.04098666,7.03977623
72.511963,7.07106781,7.0416922,0.171393153,7.04049449,7.04104361,7.03984579
72.522455,7,7.04174331,-0.204311798,7.040558,7.04110013,7.03991472
72.532946,7,7.04179435,-0.204436677,7.04062126,7.0411562,7.03998299
72.543438,7.07106781,7.04184532,0.170945873,7.04068425,7.04121181,7.04005064
72.55393,6,7.04189618,-1.02073316,7.04074696,7.04126696,7.04011763
72.564421,7.28010989,7.04194692,0.488019432,7.04080936,7.04132164,7.04018397
72.574913,6.55743852,7.04199753,-0.696102727,7.04087145,7.04137584,7.04024966
72.585404,6.4807407,7.04204798,-0.749204432,7.04093321,7.04142956,7.04031469
72.595896,7.14142843,7.04209827,0.315166881,7.04099464,7.04148279,7.04037907
72.606388,6.78232998,7.04214837,-0.509723833,7.04105572,7.04153553,7.04044278
72.616879,7.21110255,7.04219827,0.410979659,7.04111643,7.04158776,7.04050583
72.627371,7.14142843,7.04117678,0.316625399,7.04117678,7.04056821,7.04056821
72.637862,6.32455532,7.04123675,-0.846570393,7.04123675,7.04062991,7.04062991
72.648354,6.63324958,7.04129634,-0.638785375,7.04129634,7.04069095,7.04069095
72.658846,7,7.04135552,-0.203360576,7.04135552,7.04075131,7.04075131
72.669337,6.70820393,7.0414143,-0.57724377,7.0414143,7.04081099,7.04081099
72.679829,7.28010989,7.04147268,0.488505081,7.04147268,7.04086998,7.04086998
72.69032,7.28010989,7.04153063,0.488445764,7.04153063,7.04092829,7.04092829
72.700812,7.07106781,7.04158816,0.171696406,7.04158816,7.04098591,7.04098591
72.711304,6.92820323,7.04164526,-0.336811559,7.04164526,7.04104284,7.04104284
72.721795,6.4807407,7.04170192,-0.748973442,7.04170192,7.04109907,7.04109907
72.732287,7.34846923,7.04175814,0.553815032,7.04175814,7.04115461,7.04115461
72.742778,7,7.04181391,-0.204484503,7.04181391,7.04120945,7.04120945
72.75327,6.32455532,7.04186924,-0.84694387,7.04186924,7.04126358,7.04126358
72.763762,7.07106781,7.04192411,0.170715255,7.04192411,7.04131701,7.04131701
72.774253,6.92820323,7.04197852,-0.337305936,7.04197852,7.04136973,7.04136973
72.784745,7.21110255,7.04203248,0.411181311,7.04203248,7.04142174,7.04142174
72.795236,7.14142843,7.04208597,0.315186391,7.04208597,7.04147302,7.04147302
72.805728,7.61577311,7.04213899,0.757386369,7.04213899,7.0415236,7.0415236
72.81622,6.55743852,7.04219155,-0.696242075,7.04219155,7.04157346,7.04157346
72.826711,6.4807407,7.04224364,-0.749334996,7.04224364,7.04162259,7.04162259
72.837203,6.92820323,7.04229525,-0.337775106,7.04229525,7.04167099,7.04167099
72.847694,7.21110255,7.04234639,0.410799414,7.04234639,7.04171867,7.04171867
72.858186,7.21110255,7.04239706,0.410737734,7.04239706,7.04176562,7.04176562
72.868678,6.55743852,7.04244726,-0.696425688,7.04244726,7.04181183,7.04181183
72.879169,6.8556546,7.04249698,-0.432252685,7.04249698,7.0418573,7.0418573
72.889661,6.70820393,7.04254624,-0.578223404,7.04254624,7.04190204,7.04190204
72.900152,6,7.04259501,-1.02107542,7.04259501,7.04194603,7.04194603
72.910644,7.87400787,7.04264332,0.911791944,7.04264332,7.04198928,7.04198928
72.921136,6.63324958,7.04269117,-0.639876227,7.04269117,7.04203178,7.04203178
72.931627,7.74596669,7.04273854,0.838587,7.04273854,7.04207353,7.04207353
72.942119,7.54983444,7.04278545,0.712073724,7.04278545,7.04211453,7.04211453
72.95261,7.21110255,7.04283189,0.41020807,7.04283189,7.04215477,7.04215477
72.963102,6.40312424,7.04287788,-0.799846012,7.04287788,7.04219425,7.04219425
72.973594,7.14142843,7.04292342,0.313855083,7.04292342,7.04223298,7.04223298
72.984085,5.83095189,7.0429685,-1.10091626,7.0429685,7.04227093,7.04227093
72.994577,7.61577311,7.04301313,0.756809072,7.04301313,7.04230813,7.04230813
73.005068,7.21110255,7.04305733,0.409933192,7.04305733,7.04234455,7.04234455
73.01556,6.70820393,7.04310109,-0.578702998,7.04310109,7.0423802,7.0423802
73.026052,6.78232998,7.04314443,-0.510699955,7.04314443,7.04241508,7.04241508
73.036543,7.74596669,7.04318734,0.838319364,7.04318734,7.04244918,7.04244918
73.047035,7.21110255,7.04322983,0.409722732,7.04322983,7.04248251,7.04248251
73.057526,6.78232998,7.04327192,-0.510824763,7.04327192,7.04251505,7.04251505
73.068018,6.70820393,7.04331362,-0.578886589,7.04331362,7.04254681,7.04254681
73.07851,7.14142843,7.04338477,0.313119246,7.04338477,7.04257778,7.04257778
73.089001,6.78232998,7.04342587,-0.510975422,7.04342587,7.04260796,7.04260796
73.099493,7.41619849,7.0434666,0.610517719,7.0434666,7.04263735,7.04263735
73.109984,7,7.04350698,-0.208583268,7.04350698,7.04266594,7.04266594
73.120476,6.55743852,7.04354702,-0.697214813,7.04354702,7.04269374,7.04269374
73.130968,6.244998,7.04358673,-0.89363792,7.04358673,7.04272074,7.04272074
73.141459,6.4807407,7.04362612,-0.750256906,7.04362612,7.04274694,7.04274694
73.151951,7.41619849,7.04366522,0.610355033,7.04366522,7.04277233,7.04277233
73.162442,7.34846923,7.04370403,0.552055429,7.04370403,7.04279692,7.04279692
73.172934,7.34846923,7.04374258,0.552020515,7.04374258,7.0428207,7.0428207
73.183426,7.28010989,7.04378088,0.486136821,7.04378088,7.04284367,7.04284367
73.193917,7.41619849,7.04381895,0.610229086,7.04381895,7.04286582,7.04286582
73.204409,7.34846923,7.04385682,0.551917034,7.04385682,7.04288716,7.04288716
73.2149,8,7.04389449,0.977806476,7.04389449,7.04290768,7.04290768
73.225392,6.08276253,7.04393202,-0.980392516,7.04393202,7.04292738,7.04292738
73.235884,6.78232998,7.0439694,-0.511507009,7.0439694,7.04294625,7.04294625
73.246375,7.14142843,7.04400668,0.312124574,7.04400668,7.0429643,7.0429643
73.256867,7.48331477,7.04404388,0.662775147,7.04404388,7.04298152,7.04298152
73.267358,7.14142843,7.04408103,0.312005451,7.04408103,7.04299791,7.04299791
73.27785,7.14142843,7.04411816,0.311945933,7.04411816,7.04301347,7.04301347
73.288342,7,7.04415532,-0.210131672,7.04415532,7.0430282,7.0430282
73.298833,5.56776436,7.04419253,-1.2150836,7.04419253,7.04304209,7.04304209
73.309325,6.55743852,7.04422984,-0.697704317,7.04422984,7.04305513,7.04305513
73.319816,7.14142843,7.04426728,0.311706825,7.04426728,7.04306734,7.04306734
73.330308,7.93725393,7.04430492,0.944959796,7.04430492,7.0430787,7.0430787
73.3408,7.34846923,7.04434278,0.551476604,7.04434278,7.04308922,7.04308922
73.351291,7.74596669,7.04438093,0.837607164,7.04438093,7.04309889,7.04309889
73.361783,6.164414,7.04441942,-0.938086041,7.04441942,7.0431077,7.0431077
73.372274,7.21110255,7.04445831,0.408220824,7.04445831,7.04311567,7.04311567
73.382766,5.91607978,7.04449766,-1.06227015,7.04449766,7.04312278,7.04312278
73.393258,7.41619849,7.04453755,0.609640008,7.04453755,7.04312903,7.04312903
73.403749,6.55743852,7.04457803,-0.6979538,7.04457803,7.04313442,7.04313442
73.414241,7.21110255,7.0446192,0.408023712,7.0446192,7.04313895,7.04313895
73.424732,6.55743852,7.04466113,-0.698013329,7.04466113,7.04314262,7.04314262
73.435224,7.54983444,7.04470392,0.710725344,7.04470392,7.04314542,7.04314542
73.445716,7.14142843,7.04474766,0.31093531,7.04474766,7.04314736,7.04314736
73.456207,5.83095189,7.04479245,-1.10174433,7.04479245,7.04314842,7.04314842
73.466699,7.21110255,7.04483842,0.407754994,7.04483842,7.04314861,7.04314861
73.47719,6.40312424,7.04488566,-0.801100134,7.04488566,7.04314793,7.04314793
73.487682,7.21110255,7.04493433,0.407637367,7.04493433,7.04314637,7.04314637
73.498174,6.70820393,7.04498455,-0.580328028,7.04498455,7.04314393,7.04314393
73.508665,7.28010989,7.04503648,0.484843697,7.04503648,7.04314062,7.04314062
73.519157,6.4807407,7.04509028,-0.751232044,7.04509028,7.04313642,7.04313642
73.529648,6,7.04514613,-1.02232389,7.04514613,7.04313133,7.04313133
73.54014,6.70820393,7.04520422,-0.580517259,7.04520422,7.04312536,7.04312536
73.550632,5.83095189,7.04526476,-1.10195865,7.04526476,7.0431185,7.0431185
73.561123,6.164414,7.04532797,-0.93857017,7.04532797,7.04311075,7.04311075
73.571615,6.92820323,7.0453941,-0.342331518,7.0453941,7.0431021,7.0431021
73.582106,6.8556546,7.04546341,-0.435670528,7.04546341,7.04309257,7.04309257
73.592598,7.68114575,7.0455362,0.797251243,7.0455362,7.04308213,7.04308213
73.60309,7.54983444,7.04561279,0.710085659,7.04561279,7.0430708,7.0430708
73.613581,7.28010989,7.04569352,0.484165645,7.04569352,7.04305856,7.04305856
73.624073,8.06225775,7.04577877,1.00820582,7.04577877,7.04304543,7.04304543
73.634564,7,7.04586897,-0.214170412,7.04586897,7.04303139,7.04303139
73.645056,7.34846923,7.04596457,0.550004234,7.04596457,7.04301644,7.04301644
73.655548,7.87400787,7.0460661,0.909913061,7.0460661,7.04300058,7.04300058
73.666039,7.81024968,7.0461741,0.874114168,7.0461741,7.04298382,7.04298382
73.676531,7.07106781,7.04628923,0.157412142,7.04628923,7.04296614,7.04296614
73.687022,7.93725393,7.04641219,0.943844132,7.04641219,7.04294755,7.04294755
73.697514,6.55743852,7.0465438,-0.699360621,7.0465438,7.04292804,7.04292804
73.708006,7.87400787,7.04668499,0.909572914,7.04668499,7.04290761,7.04290761
73.718497,6.55743852,7.0468368,-0.699570063,7.0468368,7.04288627,7.04288627
73.728989,6.78232998,7.0470005,-0.514461382,7.0470005,7.042864,7.042864
73.73948,6.78232998,7.04717752,-0.514633398,7.04717752,7.04284082,7.04284082
73.749972,6.8556546,7.04736963,-0.437852745,7.04736963,7.0428167,7.0428167
73.760464,7.48331477,7.04757889,0.660102937,7.04757889,7.04279166,7.04279166
73.770955,6.92820323,7.04780778,-0.34583891,7.04780778,7.04276569,7.04276569
73.781447,7.21110255,7.0480594,0.403786018,7.0480594,7.04273879,7.04273879
73.791938,6.63324958,7.04833741,-0.644273103,7.04833741,7.04271096,7.04271096
73.80243,7,7.04864639,-0.220559259,7.04864639,7.04268219,7.04268219
73.812922,7.41619849,7.04899181,0.605975802,7.04899181,7.04265249,7.04265249
73.823413,6.92820323,7.04938035,-0.34810504,7.04938035,7.04262185,7.04262185
73.833905,6.8556546,7.04982014,-0.440642185,7.04982014,7.04259028,7.04259028
73.844396,6.32455532,7.05032076,-0.851918683,7.05032076,7.04255776,7.04255776
73.854888,7.48331477,7.05089378,0.657587249,7.05089378,7.0425243,7.0425243
73.86538,7.14142843,7.0515526,0.29979297,7.0515526,7.04248989,7.04248989
73.875871,8.06225775,7.0523127,1.00496022,7.0523127,7.04245454,7.04245454
73.886363,7.68114575,7.05319195,0.792435359,7.05319195,7.04241824,7.04241824
73.896854,7.48331477,7.05421007,0.655060843,7.05421007,7.042381,7.042381
73.907346,7.34846923,7.05538911,0.541368744,7.05538911,7.0423428,7.0423428
73.917838,7,7.05675259,-0.238228018,7.05675259,7.04230365,7.04230365
73.928329,7.41619849,7.05832518,0.598225131,7.05832518,7.04226354,7.04226354
73.938821,7.28010989,7.0601326,0.469017367,7.0601326,7.04222248,7.04222248
73.949312,6.32455532,7.06219974,-0.85886228,7.06219974,7.04218047,7.04218047
73.959804,6.164414,7.06455095,-0.948755474,7.06455095,7.04213749,7.04213749
73.970296,7.28010989,7.06720765,0.461413311,7.06720765,7.04209355,7.04209355
73.980787,7.48331477,7.07018733,0.642749908,7.07018733,7.04204866,7.04204866
73.991279,6.8556546,7.07350302,-0.466742344,7.07350302,7.04200279,7.04200279
74.00177,6.92820323,7.0771595,-0.385948532,7.0771595,7.04195597,7.04195597
74.012262,7.74596669,7.08115373,0.815360633,7.08115373,7.04190817,7.04190817
74.022754,7.68114575,7.08547012,0.771800248,7.08547012,7.04185941,7.04185941
74.033245,6.164414,7.09007843,-0.962114561,7.09007843,7.04180968,7.04180968
74.043737,8,7.09493147,0.951350896,7.09493147,7.04175897,7.04175897
74.054228,7.14142843,7.09995765,0.203643746,7.09995765,7.0417073,7.0417073
74.06472,6.63324958,7.10505963,-0.686884306,7.10505963,7.04165465,7.04165465
74.075212,7.61577311,7.11010647,0.71110241,7.11010647,7.04160102,7.04160102
74.085703,6.8556546,7.11493251,-0.50919339,7.11493251,7.04154642,7.04154642
74.096195,6.40312424,7.11934094,-0.84629587,7.11934094,7.04149084,7.04149084
74.106686,6.70820393,7.12311049,-0.644132406,7.12311049,7.04143428,7.04143428
74.117178,6.8556546,7.12601872,-0.519965494,7.12601872,7.04137674,7.04137674
74.12767,6.78232998,7.12786798,-0.587824805,7.12786798,7.04131821,7.04131821
74.138161,7.41619849,7.12851938,0.53635726,7.12851938,7.0412587,7.0412587
74.148653,6.32455532,7.12791898,-0.896305562,7.12791898,7.04119821,7.04119821
74.159144,5.91607978,7.12610841,-1.10001301,7.12610841,7.04113673,7.04113673
74.169636,7.81024968,7.12321618,0.828874837,7.12321618,7.04107425,7.04107425
74.180128,7.61577311,7.11943341,0.704513798,7.11943341,7.04101079,7.04101079
74.190619,6.92820323,7.11498187,-0.432178943,7.11498187,7.04094634,7.04094634
74.201111,6.92820323,7.11008267,-0.426473254,7.11008267,7.0408809,7.0408809
74.211602,6.70820393,7.1049381,-0.629868372,7.1049381,7.04081446,7.04081446
74.222094,7.74596669,7.09971697,0.80389659,7.09971697,7.04074703,7.04074703
74.232586,7.48331477,7.09455483,0.623506169,7.09455483,7.0406786,7.0406786
74.243077,6.8556546,7.08955463,-0.483632122,7.08955463,7.04060918,7.04060918
74.253569,7.81024968,7.08478961,0.851739434,7.08478961,7.04053875,7.04053875
74.26406,6.8556546,7.08031161,-0.473979968,7.08031161,7.04046733,7.04046733
74.274552,8.06225775,7.07615187,0.993028641,7.07615187,7.0403949,7.0403949
74.285044,7.07106781,7.07232795,-0.0354984263,7.07232795,7.04032146,7.04032146
74.295535,6.164414,7.06884538,-0.95101597,7.06884538,7.04024703,7.04024703
74.306027,8.48528137,7.06569922,1.19146219,7.06569922,7.04017159,7.04017159
74.316518,6.55743852,7.06287851,-0.710943029,7.06287851,7.04009515,7.04009515
74.32701,8.06225775,7.06036557,1.00094564,7.06036557,7.04001769,7.04001769
74.337502,7.54983444,7.05813956,0.70120958,7.05813956,7.03993923,7.03993923
74.347993,7.48331477,7.05617696,0.653557809,7.05617696,7.03985976,7.03985976
74.358485,6.70820393,7.05445229,-0.588428721,7.05445229,7.03977927,7.03977927
74.368976,7,7.05294045,-0.230087923,7.05294045,7.03969778,7.03969778
74.379468,7.48331477,7.0516162,0.657037727,7.0516162,7.03961527,7.03961527
74.38996,7.28010989,7.05045591,0.479222262,7.05045591,7.03953174,7.03953174
74.400451,5.91607978,7.04943756,-1.06459278,7.04943756,7.03944721,7.03944721
74.410943,7.07106781,7.04854078,0.150090096,7.04854078,7.03936165,7.03936165
74.421434,7.07106781,7.04774771,0.152709221,7.04774771,7.03927508,7.03927508
74.431926,7.68114575,7.04704234,0.796306101,7.04704234,7.03918748,7.03918748
74.442418,6.32455532,7.04641103,-0.849620923,7.04641103,7.03909886,7.03909886
74.452909,7.41619849,7.0458421,0.608569129,7.0458421,7.03900923,7.03900923
74.463401,6.70820393,7.04532553,-0.58062173,7.04532553,7.03891857,7.03891857
74.473892,6.4807407,7.04485312,-0.751074176,7.04485312,7.03882689,7.03882689
74.484384,7.28010989,7.04441791,0.485481187,7.04441791,7.03873418,7.03873418
74.494876,6.92820323,7.04401427,-0.340310217,7.04401427,7.03864045,7.03864045
74.505367,7.34846923,7.0436376,0.552115596,7.0436376,7.03854569,7.03854569
74.515859,7,7.04328398,-0.208048028,7.04328398,7.0384499,7.0384499
74.52635,7.68114575,7.04295036,0.79887132,7.04295036,7.03835309,7.03835309
74.536842,7.34846923,7.04263409,0.553023631,7.04263409,7.03825524,7.03825524
74.547334,7.54983444,7.04233307,0.712391303,7.04233307,7.03815637,7.03815637
74.557825,6.164414,7.04204553,-0.936819903,7.04204553,7.03805646,7.03805646
74.568317,7.48331477,7.04176994,0.664488403,7.04176994,7.03795552,7.03795552
74.578808,6.63324958,7.04150506,-0.638948726,7.04150506,7.03785355,7.03785355
74.5893,8,7.04124975,0.979157929,7.04124975,7.03775054,7.03775054
74.599792,7.54983444,7.0410031,0.713324146,7.0410031,7.03764649,7.03764649
74.610283,6.92820323,7.0407643,-0.335501217,7.0407643,7.03754142,7.03754142
74.620775,7.61577311,7.04053257,0.758446133,7.04053257,7.0374353,7.0374353
74.631266,7.07106781,7.04030731,0.175386715,7.04030731,7.03732815,7.03732815
74.641758,6.40312424,7.0400879,-0.798100033,7.0400879,7.03721995,7.03721995
74.65225,7.54983444,7.03987384,0.714115257,7.03987384,7.03711072,7.03711072
74.662741,7.14142843,7.03966466,0.319004333,7.03966466,7.03700045,7.03700045
74.673233,6.78232998,7.03945992,-0.507079812,7.03945992,7.03688913,7.03688913
74.683724,7.93725393,7.03925925,0.947625814,7.03925925,7.03677678,7.03677678
74.694216,6.78232998,7.03906226,-0.506687556,7.03906226,7.03666337,7.03666337
74.704708,6.78232998,7.03886865,-0.506496466,7.03886865,7.03654892,7.03654892
74.715199,5.83095189,7.03867814,-1.09896599,7.03867814,7.03643343,7.03643343
74.725691,6.78232998,7.03849042,-0.506122943,7.03849042,7.03631689,7.03631689
74.736182,7.21110255,7.03830527,0.415688928,7.03830527,7.03619932,7.03619932
74.746674,7.14142843,7.03812242,0.321412519,7.03812242,7.03608068,7.03608068
74.757166,6.92820323,7.03794169,-0.331267954,7.03794169,7.035961,7.035961
74.767657,8.1240384,7.03776289,1.04224542,7.03776289,7.03584027,7.03584027
74.778149,7.28010989,7.0375858,0.492467348,7.0375858,7.03571849,7.03571849
74.78864,6.8556546,7.0374103,-0.426328156,7.0374103,7.03559567,7.03559567
74.799132,7.07106781,7.03723619,0.183933752,7.03723619,7.03547179,7.03547179
74.809624,7.54983444,7.03706334,0.716080368,7.03706334,7.03534685,7.03534685
74.820115,6.78232998,7.03689164,-0.50454104,7.03689164,7.03522087,7.03522087
74.830607,7.81024968,7.03672094,0.879504825,7.03672094,7.03509383,7.03509383
74.841098,6.70820393,7.03655114,-0.573015888,7.03655114,7.03496575,7.03496575
74.85159,7.14142843,7.03638211,0.324108498,7.03638211,7.0348366,7.0348366
74.862082,5.91607978,7.03621376,-1.05836382,7.03621376,7.03470639,7.03470639
74.872573,7.48331477,7.03604602,0.668781541,7.03604602,7.03457514,7.03457514
74.883065,7.34846923,7.03587877,0.559097896,7.03587877,7.03444282,7.03444282
74.893556,7.34846923,7.03571196,0.559247058,7.03571196,7.03430946,7.03430946
74.904048,7.28010989,7.03554547,0.494534546,7.03554547,7.03417502,7.03417502
74.91454,6.8556546,7.03537926,-0.423939454,7.03537926,7.03403953,7.03403953
74.925031,7.14142843,7.03521327,0.325906665,7.03521327,7.03390299,7.03390299
74.935523,7.68114575,7.03504742,0.80380242,7.03504742,7.03376537,7.03376537
74.946014,7.34846923,7.03488166,0.559988898,7.03488166,7.03362671,7.03362671
74.956506,7.07106781,7.03471592,0.190661713,7.03471592,7.03348698,7.03348698
74.966998,6.40312424,7.03452515,-0.794607394,7.03452515,7.03334619,7.03334619
74.977489,6.244998,7.03435949,-0.888460183,7.03435949,7.03320434,7.03320434
74.987981,7.21110255,7.03419371,0.420605328,7.03419371,7.03306142,7.03306142
74.998472,7,7.03402778,-0.184466207,7.03402778,7.03291745,7.03291745
75.008964,6.78232998,7.03386164,-0.501529318,7.03386164,7.0327724,7.0327724
75.019456,7,7.03369526,-0.183562691,7.03369526,7.03262629,7.03262629
75.029947,6.40312424,7.03352863,-0.793980094,7.03352863,7.03247913,7.03247913
75.040439,7.21110255,7.03336167,0.421593265,7.03336167,7.03233089,7.03233089
75.05093,7.61577311,7.03319439,0.763268442,7.03319439,7.03218159,7.03218159
75.061422,7.48331477,7.03302673,0.671035054,7.03302673,7.03203122,7.03203122
75.071914,7.74596669,7.03285867,0.844457234,7.03285867,7.03187978,7.03187978
75.082405,6.55743852,7.03269021,-0.689385003,7.03269021,7.03172729,7.03172729
75.092897,7.61577311,7.03252128,0.763709256,7.03252128,7.03157371,7.03157371
75.103388,6.70820393,7.03235189,-0.569339935,7.03235189,7.03141908,7.03141908
75.11388,7.21110255,7.032182,0.422990013,7.032182,7.03126337,7.03126337
75.124372,7.14142843,7.03201159,0.330782161,7.03201159,7.03110659,7.03110659
75.134863,6.92820323,7.03184066,-0.32192768,7.03184066,7.03094875,7.03094875
75.145355,6.92820323,7.03166916,-0.321661207,7.03166916,7.03078983,7.03078983
75.155846,6.55743852,7.03149711,-0.688519123,7.03149711,7.03062986,7.03062986
75.166338,7.07106781,7.03132445,0.199357383,7.03132445,7.0304688,7.0304688
75.17683,7.41619849,7.03115118,0.620521803,7.03115118,7.03030667,7.03030667
75.187321,7.34846923,7.03097731,0.563464213,7.03097731,7.03014348,7.03014348
75.197813,6.244998,7.03080279,-0.88645631,7.03080279,7.0299792,7.0299792
75.208304,7.74596669,7.03062764,0.845777191,7.03062764,7.02981387,7.02981387
75.218796,7.61577311,7.03045181,0.765062939,7.03045181,7.02964746,7.02964746
75.229288,6.164414,7.0302753,-0.930516684,7.0302753,7.02947996,7.02947996
75.239779,7.28010989,7.03009813,0.500011757,7.03009813,7.02931142,7.02931142
75.250271,7.07106781,7.02992025,0.202848617,7.02992025,7.02914178,7.02914178
75.260762,7,7.02974168,-0.172457765,7.02974168,7.02897109,7.02897109
75.271254,6.40312424,7.02956238,-0.791478454,7.02956238,7.0287993,7.0287993
75.281746,7,7.02938236,-0.171412825,7.02938236,7.02862644,7.02862644
75.292237,7.54983444,7.02920162,0.721548901,7.02920162,7.02845253,7.02845253
75.302729,6.55743852,7.02902012,-0.686717992,7.02902012,7.02827752,7.02827752
75.31322,6.92820323,7.0288379,-0.317229683,7.0288379,7.02810146,7.02810146
75.323712,6.244998,7.02865491,-0.885243983,7.02865491,7.0279243,7.0279243
75.334204,5.65685425,7.02847116,-1.1711605,7.02847116,7.02774607,7.02774607
75.344695,6.244998,7.02828666,-0.885035964,7.02828666,7.02756678,7.02756678
75.355187,6.63324958,7.02810137,-0.628372332,7.02810137,7.02738639,7.02738639
75.365678,6.40312424,7.02791532,-0.790437275,7.02791532,7.02720495,7.02720495
75.37617,7.07106781,7.02772848,0.208181008,7.02772848,7.02702242,7.02702242
75.386662,6.92820323,7.02754085,-0.315178715,7.02754085,7.02683881,7.02683881
75.397153,7.48331477,7.02735246,0.675249818,7.02735246,7.02665414,7.02665414
75.407645,7.14142843,7.02716325,0.338031326,7.02716325,7.02646838,7.02646838
75.418136,7,7.02697327,-0.164235412,7.02697327,7.02628155,7.02628155
75.428628,6.32455532,7.02678248,-0.837989949,7.02678248,7.02609364,7.02609364
75.43912,6.55743852,7.02659088,-0.684946975,7.02659088,7.02590465,7.02590465
75.449611,6.8556546,7.02639851,-0.413211699,7.02639851,7.02571459,7.02571459
75.460103,7,7.02620531,-0.161880556,7.02620531,7.02552345,7.02552345
75.470594,5.74456265,7.02601134,-1.13201091,7.02601134,7.02533124,7.02533124
75.481086,7.34846923,7.02581654,0.568025255,7.02581654,7.02513794,7.02513794
75.491578,6.8556546,7.02562094,-0.412269737,7.02562094,7.02494356,7.02494356
75.502069,6.92820323,7.02542455,-0.311803336,7.02542455,7.02474812,7.02474812
75.512561,6.55743852,7.02522734,-0.68395089,7.02522734,7.02455159,7.02455159
75.523052,6.55743852,7.02502936,-0.683806136,7.02502936,7.024354,7.024354
75.533544,7.07106781,7.02483055,0.215028516,7.02483055,7.02415531,7.02415531
75.544036,6.4807407,7.02463094,-0.737489149,7.02463094,7.02395555,7.02395555
75.554527,7.34846923,7.02443056,0.569243943,7.02443056,7.02375472,7.02375472
75.565019,7.34846923,7.02422937,0.569420635,7.02422937,7.0235528,7.0235528
75.57551,7.14142843,7.0240274,0.34263833,7.0240274,7.02334983,7.02334983
75.586002,7.34846923,7.02382463,0.569775917,7.02382463,7.02314575,7.02314575
75.596494,7.34846923,7.02362108,0.569954515,7.02362108,7.0229406,7.0229406
75.606985,6.92820323,7.02341677,-0.308566907,7.02341677,7.02273439,7.02273439
75.617477,7.68114575,7.02321166,0.811131363,7.02321166,7.02252708,7.02252708
75.627968,7.14142843,7.02300581,0.344125881,7.02300581,7.02231872,7.02231872
75.63846,6.32455532,7.02279917,-0.835609867,7.02279917,7.02210926,7.02210926
75.648952,6.8556546,7.02259178,-0.408579463,7.02259178,7.02189872,7.02189872
75.659443,6.55743852,7.02238366,-0.681868853,7.02238366,7.02168712,7.02168712
75.669935,6.4807407,7.02217477,-0.735822041,7.02217477,7.02147443,7.02147443
75.680426,6.63324958,7.02196518,-0.623470607,7.02196518,7.02126068,7.02126068
75.690918,6.70820393,7.02175484,-0.559956164,7.02175484,7.02104584,7.02104584
75.70141,6.78232998,7.02154378,-0.489094878,7.02154378,7.02082991,7.02082991
75.711901,7.21110255,7.02133204,0.435626569,7.02133204,7.02061294,7.02061294
75.722393,7,7.02111959,-0.145325805,7.02111959,7.02039486,7.02039486
75.732884,6.92820323,7.02090647,-0.304472074,7.02090647,7.02017573,7.02017573
75.743376,7.41619849,7.02069267,0.628892533,7.02069267,7.0199555,7.0199555
75.753868,6.78232998,7.02047821,-0.488004328,7.02047821,7.0197342,7.0197342
75.764359,8,7.02026313,0.989816586,7.02026313,7.01951184,7.01951184
75.774851,7.07106781,7.0200474,0.225876993,7.0200474,7.01928839,7.01928839
75.785342,6.8556546,7.01983108,-0.405186966,7.01983108,7.01906388,7.01906388
75.795834,6.8556546,7.01961415,-0.404919185,7.01961415,7.01883828,7.01883828
75.806326,7.14142843,7.01939664,0.349330483,7.01939664,7.0186116,7.0186116
75.816817,7.74596669,7.0191786,0.852518673,7.0191786,7.01838387,7.01838387
75.827309,6.92820323,7.01896001,-0.301258667,7.01896001,7.01815504,7.01815504
75.8378,7.34846923,7.01874094,0.574219724,7.01874094,7.01792516,7.01792516
75.848292,7,7.01852135,-0.136093177,7.01852135,7.01769418,7.01769418
75.858784,7,7.01830131,-0.135282336,7.01830131,7.01746214,7.01746214
75.869275,7.21110255,7.01808086,0.439342341,7.01808086,7.01722904,7.01722904
75.879767,7.93725393,7.01785998,0.958850326,7.01785998,7.01699484,7.01699484
75.890258,7.28010989,7.01763876,0.512319359,7.01763876,7.01675959,7.01675959
75.90075,7.28010989,7.01741719,0.512535563,7.01741719,7.01652325,7.01652325
75.911242,7.21110255,7.01719531,0.440348998,7.01719531,7.01628584,7.01628584
75.921733,7.87400787,7.0169732,0.925761673,7.0169732,7.01604738,7.01604738
75.932225,6.70820393,7.01675085,-0.555469994,7.01675085,7.01580783,7.01580783
75.942716,7.07106781,7.01652835,0.233536863,7.01652835,7.01556722,7.01556722
75.953208,8.06225775,7.0163057,1.02271797,7.0163057,7.01532553,7.01532553
75.9637,7.41619849,7.01608298,0.63254684,7.01608298,7.01508276,7.01508276
75.974191,7.14142843,7.01586027,0.354355978,7.01586027,7.01483894,7.01483894
75.984683,7.68114575,7.01563758,0.815786839,7.01563758,7.01459404,7.01459404
75.995174,6.92820323,7.01541502,-0.295316426,7.01541502,7.01434808,7.01434808
76.005666,7.14142843,7.01519262,0.355296789,7.01519262,7.01410104,7.01410104
76.016158,6.55743852,7.01497047,-0.676411079,7.01497047,7.01385293,7.01385293
76.026649,7.34846923,7.01474868,0.57768551,7.01474868,7.01360377,7.01360377
76.037141,6.55743852,7.01452729,-0.676083401,7.01452729,7.01335352,7.01335352
76.047632,6.92820323,7.01430644,-0.293433479,7.01430644,7.01310223,7.01310223
76.058124,7.48331477,7.01408618,0.685002621,7.01408618,7.01284984,7.01284984
76.068616,7.34846923,7.01386666,0.578448415,7.01386666,7.0125964,7.0125964
76.079107,6.92820323,7.01364801,-0.292309387,7.01364801,7.01234191,7.01234191
76.089599,7.41619849,7.01343032,0.634640188,7.01343032,7.01208633,7.01208633
76.10009,6.92820323,7.01321378,-0.291565679,7.01321378,7.01182971,7.01182971
76.110582,7.21110255,7.01299849,0.44508882,7.01299849,7.011572,7.011572
76.121074,7.68114575,7.01278466,0.817533537,7.01278466,7.01131323,7.01131323
76.131565,7.48331477,7.01257249,0.686106611,7.01257249,7.01105341,7.01105341
76.142057,7.93725393,7.01236214,0.961712945,7.01236214,7.01079252,7.01079252
76.152548,7.28010989,7.01215389,0.517644668,7.01215389,7.01053058,7.01053058
76.16304,7,7.01194793,-0.109306592,7.01194793,7.01026756,7.01026756
76.173532,6.55743852,7.01174458,-0.674022294,7.01174458,7.01000347,7.01000347
76.184023,7.81024968,7.01154416,0.893703262,7.01154416,7.00973835,7.00973835
76.194515,6.78232998,7.01134698,-0.478557208,7.01134698,7.00947215,7.00947215
76.205006,6.63324958,7.0111535,-0.614738905,7.0111535,7.00920491,7.00920491
76.215498,7.14142843,7.01096413,0.361198417,7.01096413,7.00893659,7.00893659
76.22599,6.40312424,7.01077943,-0.779522413,7.01077943,7.00866721,7.00866721
76.236481,6.8556546,7.01060003,-0.393631088,7.01060003,7.0083968,7.0083968
76.246973,6.8556546,7.01042665,-0.393410787,7.01042665,7.0081253,7.0081253
76.257464,7.48331477,7.01026018,0.687789643,7.01026018,7.00785277,7.00785277
76.267956,7,7.01010165,-0.100506957,7.01010165,7.00757917,7.00757917
76.278448,7.48331477,7.00995233,0.688013404,7.00995233,7.0073045,7.0073045
76.288939,7,7.00981376,-0.0990644265,7.00981376,7.00702881,7.00702881
76.299431,6.92820323,7.00968776,-0.285454953,7.00968776,7.00675204,7.00675204
76.309922,7.87400787,7.00957658,0.929747972,7.00957658,7.00647424,7.00647424
76.320414,7,7.00948289,-0.0973801542,7.00948289,7.00619537,7.00619537
76.330906,7.74596669,7.00940994,0.858228849,7.00940994,7.00591544,7.00591544
76.341397,6.70820393,7.00936156,-0.548778301,7.00936156,7.00563448,7.00563448
76.351889,7.41619849,7.0093423,0.637852792,7.0093423,7.00535245,7.00535245
76.36238,7.74596669,7.00935751,0.858259393,7.00935751,7.0050694,7.0050694
76.372872,6.70820393,7.00941335,-0.548825489,7.00941335,7.00478527,7.00478527
76.383364,7.21110255,7.00951689,0.448982916,7.00951689,7.00450009,7.00450009
76.393855,6.63324958,7.00967608,-0.613536058,7.00967608,7.00421389,7.00421389
76.404347,8.1240384,7.00989976,1.05552766,7.00989976,7.00392662,7.00392662
76.414838,7.61577311,7.01019753,0.778187363,7.01019753,7.00363833,7.00363833
76.42533,6.70820393,7.01057974,-0.549887084,7.01057974,7.00334897,7.00334897
76.435822,7.41619849,7.0110571,0.636507175,7.0110571,7.00305856,7.00305856
76.446313,7.14142843,7.01164052,0.360260892,7.01164052,7.00276714,7.00276714
76.456805,7,7.01234092,-0.111089675,7.01234092,7.00247464,7.00247464
76.467296,7.74596669,7.01316843,0.856036369,7.01316843,7.00218113,7.00218113
76.477788,7.61577311,7.01413247,0.77565497,7.01413247,7.00188655,7.00188655
76.48828,6.78232998,7.01524068,-0.482608218,7.01524068,7.00159094,7.00159094
76.498771,7.34846923,7.01649843,0.576169069,7.01649843,7.00129431,7.00129431
76.509263,7,7.01790866,-0.133823255,7.01790866,7.00099661,7.00099661
76.519754,6.78232998,7.01947011,-0.486970353,7.01947011,7.0006979,7.0006979
76.530246,7.34846923,7.02117749,0.572094171,7.02117749,7.00039813,7.00039813
76.540738,7.48331477,7.02301934,0.678450763,7.02301934,7.00009732,7.00009732
76.551229,7.41619849,7.024977,0.625477011,7.024977,6.9997955,6.9997955
76.561721,6.55743852,7.02702357,-0.685262757,7.02702357,6.99949262,6.99949262
76.572212,7.07106781,7.02912067,0.204810018,7.02912067,6.99918874,6.99918874
76.582704,7.48331477,7.03121807,0.672381367,7.03121807,6.99888379,6.99888379
76.593196,7.68114575,7.03325093,0.804919139,7.03325093,6.99857782,6.99857782
76.603687,6.32455532,7.03514034,-0.842962054,7.03514034,6.99827084,6.99827084
76.614179,6,7.03679623,-1.01823191,7.03679623,6.9979628,6.9979628
76.62467,6.70820393,7.0381219,-0.574384861,7.0381219,6.99765376,6.99765376
76.635162,7.14142843,7.03902481,0.320005654,7.03902481,6.99734366,6.99734366
76.645654,6.32455532,7.03942787,-0.845501359,7.03942787,6.99703254,6.99703254
76.656145,7.68114575,7.03928234,0.801163782,7.03928234,6.99672042,6.99672042
76.666637,7.68114575,7.03857633,0.80160428,7.03857633,6.99640724,6.99640724
76.677128,7.34846923,7.03733733,0.557791982,7.03733733,6.99609307,6.99609307
76.68762,7.07106781,7.03562657,0.188258447,7.03562657,6.99577785,6.99577785
76.698112,6.164414,7.03352909,-0.932263422,7.03352909,6.9954616,6.9954616
76.708603,6.63324958,7.03114085,-0.630786227,7.03114085,6.99514437,6.99514437
76.719095,6.92820323,7.02855638,-0.316785645,7.02855638,6.99482608,6.99482608
76.729586,7.14142843,7.02586242,0.339950012,7.02586242,6.9945068,6.9945068
76.740078,6.78232998,7.02313162,-0.490715438,7.02313162,6.99418648,6.99418648
76.75057,6.92820323,7.02042311,-0.303677262,7.02042311,6.99386513,6.99386513
76.761061,7.28010989,7.0177824,0.512179158,7.0177824,6.9935428,6.9935428
76.771553,7.41619849,7.01524239,0.63321094,7.01524239,6.99321943,6.99321943
76.782044,6.8556546,7.01282703,-0.396449784,7.01282703,6.99289507,6.99289507
76.792536,7.21110255,7.01055124,0.447829558,7.01055124,6.99256967,6.99256967
76.803028,7.68114575,7.00842409,0.820196111,7.00842409,6.99224325,6.99224325
76.813519,6.8556546,7.00644936,-0.388323004,7.00644936,6.99191586,6.99191586
76.824011,6.70820393,7.00462608,-0.544446647,7.00462608,6.99158743,6.99158743
76.834502,6.55743852,7.0029507,-0.667466988,7.0029507,6.99125801,6.99125801
76.844994,6.32455532,7.00141643,-0.82271569,7.00141643,6.99092756,6.99092756
76.855486,6.4807407,7.00001503,-0.720606917,7.00001503,6.9905961,6.9905961
76.865977,7.74596669,6.99873689,0.864424549,6.99873689,6.99026367,6.99026367
76.876469,6.8556546,6.99757125,-0.376718257,6.99757125,6.9899302,6.9899302
76.88696,7.07106781,6.99650739,0.273057539,6.99650739,6.98959576,6.98959576
76.897452,7.61577311,6.99553423,0.78755246,6.99553423,6.98926029,6.98926029
76.907944,7.48331477,6.99464127,0.699051863,6.99464127,6.98892381,6.98892381
76.918435,7.14142843,6.99381854,0.38420033,6.99381854,6.98858637,6.98858637
76.928927,7.74596669,6.99305657,0.867703938,6.99305657,6.9882479,6.9882479
76.939418,6.8556546,6.99234702,-0.369719383,6.99234702,6.98790846,6.98790846
76.94991,7.41619849,6.99168217,0.651549165,6.99168217,6.98756799,6.98756799
76.960402,6.78232998,6.99105539,-0.456864754,6.99105539,6.98722653,6.98722653
76.970893,7.07106781,6.99046089,0.283913576,6.99046089,6.98688411,6.98688411
76.981385,7.61577311,6.98989357,0.791125484,6.98989357,6.98654066,6.98654066
76.991876,7.48331477,6.98934928,0.702826786,6.98934928,6.98619625,6.98619625
77.002368,6.4807407,6.98882433,-0.712799853,6.98882433,6.98585082,6.98585082
77.01286,7.54983444,6.98831577,0.749345492,6.98831577,6.9855044,6.9855044
77.023351,7.61577311,6.98782116,0.792434191,6.98782116,6.98515703,6.98515703
77.033843,6.55743852,6.98733834,-0.655667458,6.98733834,6.98480864,6.98480864
77.044334,7.34846923,6.9868657,0.601334788,6.9868657,6.98445929,6.98445929
77.054826,6.55743852,6.98640174,-0.654952836,6.98640174,6.98410893,6.98410893
77.065318,7.21110255,6.98594534,0.474507335,6.98594534,6.98375759,6.98375759
77.075809,8.18535277,6.98549557,1.09537994,6.98549557,6.98340529,6.98340529
77.086301,6.70820393,6.98505152,-0.526163082,6.98505152,6.98305199,6.98305199
77.096792,6.92820323,6.9846126,-0.237506576,6.9846126,6.98269774,6.98269774
77.107284,7.07106781,6.98417815,0.29477053,6.98417815,6.98234247,6.98234247
77.117776,7.14142843,6.98374769,0.397090341,6.98374769,6.98198624,6.98198624
77.128267,7.61577311,6.98332084,0.795268675,6.98332084,6.98162906,6.98162906
77.138759,7.74596669,6.98289714,0.873538527,6.98289714,6.98127087,6.98127087
77.14925,7.07106781,6.98247632,0.297643227,6.98247632,6.98091174,6.98091174
77.159742,7.28010989,6.98205802,0.545941268,6.98205802,6.98055161,6.98055161
77.170234,8.18535277,6.98164201,1.09713753,6.98164201,6.98019052,6.98019052
77.180725,6.92820323,6.98122808,-0.23027126,6.98122808,6.97982848,6.97982848
77.191217,7.48331477,6.98081595,0.708871514,6.98081595,6.97946545,6.97946545
77.201708,6.78232998,6.98040549,-0.445056747,6.98040549,6.97910148,6.97910148
77.2122,7,6.97999645,0.14143391,6.97999645,6.97873652,6.97873652
77.222692,5.74456265,6.9795887,-1.11131726,6.9795887,6.97837059,6.97837059
77.233183,6.32455532,6.97918213,-0.809090115,6.97918213,6.97800374,6.97800374
77.243675,6.70820393,6.97877654,-0.520165939,6.97877654,6.9776359,6.9776359
77.254166,7.28010989,6.97837186,0.549306864,6.97837186,6.97726713,6.97726713
77.264658,8.06225775,6.97796791,1.04129239,6.97796791,6.97689736,6.97689736
77.27515,6.8556546,6.97756461,-0.349156146,6.97756461,6.97652665,6.97652665
77.285641,7.28010989,6.97716192,0.550407093,6.97716192,6.97615501,6.97615501
77.296133,7,6.97675966,0.152447832,6.97675966,6.97578239,6.97578239
77.306624,7.07106781,6.97635782,0.307749885,6.97635782,6.97540885,6.97540885
77.317116,6.92820323,6.97595625,-0.218524647,6.97595625,6.97503432,6.97503432
77.327608,5.83095189,6.97555492,-1.06986122,6.97555492,6.97465885,6.97465885
77.338099,7.21110255,6.97515379,0.485745567,6.97515379,6.97428246,6.97428246
77.348591,8.54400375,6.97475274,1.25269749,6.97475274,6.9739051,6.9739051
77.359082,6.8556546,6.97435177,-0.34452456,6.97435177,6.97352683,6.97352683
77.369574,7.21110255,6.97395076,0.486982327,6.97395076,6.97314758,6.97314758
77.380066,7.41619849,6.9735497,0.665318558,6.9735497,6.97276739,6.97276739
77.390557,7.41619849,6.97314858,0.665619942,6.97314858,6.97238629,6.97238629
77.401049,7.41619849,6.97274728,0.665921324,6.97274728,6.97200422,6.97200422
77.41154,8.1240384,6.97234583,1.07316941,6.97234583,6.97162126,6.97162126
77.422032,7.14142843,6.97194412,0.411684715,6.97194412,6.97123732,6.97123732
77.432524,6.92820323,6.97154216,-0.208180049,6.97154216,6.97085245,6.97085245
77.443015,7,6.97113995,0.169882452,6.97113995,6.97046668,6.97046668
77.453507,7.28010989,6.97073739,0.556212643,6.97073739,6.97007995,6.97007995
77.463998,7,6.97033451,0.172236728,6.97033451,6.96969232,6.96969232
77.47449,7.21110255,6.96993122,0.491091976,6.96993122,6.96930373,6.96930373
77.484982,8.18535277,6.96952754,1.10264466,6.96952754,6.96891422,6.96891422
77.495473,8.06225775,6.96912346,1.04553062,6.96912346,6.96852382,6.96852382
77.505965,5.91607978,6.96871891,-1.02598203,6.96871891,6.96813246,6.96813246
77.516456,7.07106781,6.96831393,0.32055246,6.96831393,6.96774022,6.96774022
77.526948,7.21110255,6.96790843,0.493147159,6.96790843,6.96734702,6.96734702
77.53744,7,6.96750243,0.180270836,6.96750243,6.96695291,6.96695291
77.547931,6.78232998,6.96709594,-0.429844109,6.96709594,6.96655792,6.96655792
77.558423,7.07106781,6.96668888,0.323077282,6.96668888,6.96616197,6.96616197
77.568914,7.07106781,6.96628131,0.32370743,6.96628131,6.96576515,6.96576515
77.579406,7.61577311,6.96581087,0.806202352,6.96581087,6.96536739,6.96536739
77.589898,7.07106781,6.9654025,0.325062018,6.9654025,6.96496871,6.96496871
77.600389,7.07106781,6.9649976,0.325684221,6.9649976,6.96456917,6.96456917
77.610881,6.32455532,6.96458805,-0.800020454,6.96458805,6.96416868,6.96416868
77.621372,7.48331477,6.96417792,0.720511524,6.96417792,6.96376732,6.96376732
77.631864,7.34846923,6.96376712,0.620243587,6.96376712,6.96336503,6.96336503
77.642356,6.70820393,6.96335569,-0.505125487,6.96335569,6.96296183,6.96296183
77.652847,6.55743852,6.96294365,-0.636792846,6.96294365,6.96255778,6.96255778
77.663339,6.8556546,6.96253092,-0.326919446,6.96253092,6.96215279,6.96215279
77.67383,6.32455532,6.96211757,-0.798474954,6.96211757,6.96174694,6.96174694
77.684322,7.14142843,6.96170351,0.423939754,6.96170351,6.96134016,6.96134016
77.694814,6.78232998,6.96128878,-0.423035217,6.96128878,6.96093249,6.96093249
77.705305,7.68114575,6.9608734,0.848688605,6.9608734,6.96052397,6.96052397
77.715797,6.63324958,6.96045729,-0.572020727,6.96045729,6.96011452,6.96011452
77.726288,7.61577311,6.96004053,0.809773162,6.96004053,6.95970422,6.95970422
77.73678,7.07106781,6.95962303,0.333833465,6.95962303,6.959293,6.959293
77.747272,7.34846923,6.95920482,0.623910575,6.95920482,6.9588809,6.9588809
77.757763,6.78232998,6.95878595,-0.420066617,6.95878595,6.95846795,6.95846795
77.768255,7.28010989,6.95836631,0.567224448,6.95836631,6.95805409,6.95805409
77.778746,6.55743852,6.957946,-0.632856603,6.957946,6.95763938,6.95763938
77.789238,7.61577311,6.95752493,0.81132495,6.95752493,6.95722377,6.95722377
77.79973,6.8556546,6.95710313,-0.318509861,6.95710313,6.95680727,6.95680727
77.810221,7.93725393,6.95668064,0.990239006,6.95668064,6.95638995,6.95638995
77.820713,6.40312424,6.95625738,-0.743729214,6.95625738,6.95597171,6.95597171
77.831204,6.70820393,6.95583342,-0.497623846,6.95583342,6.95555265,6.95555265
77.841696,6.92820323,6.95540869,-0.16494077,6.95540869,6.95513268,6.95513268
77.852188,7.14142843,6.95498321,0.431793027,6.95498321,6.95471184,6.95471184
77.862679,6.92820323,6.95455703,-0.162338533,6.95455703,6.95429018,6.95429018
77.873171,6.70820393,6.95413006,-0.495909397,6.95413006,6.95386762,6.95386762
77.883662,6.8556546,6.95370239,-0.313125835,6.95370239,6.95344424,6.95344424
77.894154,6.63324958,6.95327393,-0.565706942,6.95327393,6.95301997,6.95301997
77.904646,6.70820393,6.95284471,-0.494611744,6.95284471,6.95259484,6.95259484
77.915137,7.74596669,6.95241478,0.890815306,6.95241478,6.95216889,6.95216889
77.925629,6.40312424,6.95198406,-0.740850743,6.95198406,6.95174205,6.95174205
77.93612,6.244998,6.95155262,-0.840568038,6.95155262,6.9513144,6.9513144
77.946612,7.28010989,6.95112039,0.573576061,6.95112039,6.95088587,6.95088587
77.957104,7.41619849,6.9506874,0.682283729,6.9506874,6.95045648,6.95045648
77.967595,6.32455532,6.95025369,-0.791010981,6.95025369,6.9500263,6.9500263
77.978087,6.8556546,6.94981918,-0.306862484,6.94981918,6.94959523,6.94959523
77.988578,7.07106781,6.94938396,0.348832128,6.94938396,6.94916336,6.94916336
77.99907,7.34846923,6.94894793,0.632076972,6.94894793,6.94873061,6.94873061
78.009562,7.48331477,6.94851114,0.731302695,6.94851114,6.94829703,6.94829703
78.020053,5.47722558,6.94807363,-1.21278525,6.94807363,6.94786265,6.94786265
78.030545,6.55743852,6.94763532,-0.624657346,6.94763532,6.9474274,6.9474274
78.041036,7.21110255,6.94719629,0.513718072,6.94719629,6.94699136,6.94699136
78.051528,7.07106781,6.94675646,0.352578149,6.94675646,6.94655445,6.94655445
78.06202,7.14142843,6.94631587,0.441715477,6.94631587,6.94611671,6.94611671
78.072511,7.07106781,6.94587455,0.353826595,6.94587455,6.94567819,6.94567819
78.083003,6.164414,6.94543244,-0.883752473,6.94543244,6.9452388,6.9452388
78.093494,6.63324958,6.9449896,-0.558336834,6.9449896,6.94479864,6.94479864
78.103986,7.48331477,6.94454596,0.734008727,6.94454596,6.94435762,6.94435762
78.114478,7.07106781,6.94410156,0.356323234,6.94410156,6.94391578,6.94391578
78.124969,7.54983444,6.94365645,0.778574329,6.94365645,6.94347316,6.94347316
78.135461,7.93725393,6.94321053,0.997017252,6.94321053,6.94302969,6.94302969
78.145952,6.70820393,6.9427639,-0.484313913,6.9427639,6.94258546,6.94258546
78.156444,7.14142843,6.94231647,0.446219636,6.94231647,6.94214037,6.94214037
78.166936,6,6.94186827,-0.970498982,6.94186827,6.94169447,6.94169447
78.177427,6.78232998,6.94141937,-0.398860109,6.94141937,6.94124782,6.94124782
78.187919,6.32455532,6.94096967,-0.785120593,6.94096967,6.94080032,6.94080032
78.19841,5.47722558,6.94051925,-1.20966676,6.94051925,6.94035206,6.94035206
78.208902,7.21110255,6.94006804,0.520609751,6.94006804,6.93990296,6.93990296
78.219394,7,6.93961607,0.245731414,6.93961607,6.93945306,6.93945306
78.229885,6.70820393,6.9391634,-0.480582422,6.9391634,6.93900241,6.93900241
78.240377,6.70820393,6.93870993,-0.480110399,6.93870993,6.93855093,6.93855093
78.250868,7.21110255,6.93825575,0.522347393,6.93825575,6.9380987,6.9380987
78.26136,6.244998,6.93780078,-0.832347755,6.93780078,6.93764564,6.93764564
78.271852,7.41619849,6.93734507,0.691992356,6.93734507,6.93719179,6.93719179
78.282343,7.68114575,6.93688865,0.862703368,6.93688865,6.93673721,6.93673721
78.292835,7.28010989,6.93643144,0.58624095,6.93643144,6.9362818,6.9362818
78.303326,6.8556546,6.93597353,-0.283405942,6.93597353,6.93582565,6.93582565
78.313818,6.63324958,6.93551483,-0.549786551,6.93551483,6.93536868,6.93536868
78.32431,7.68114575,6.93505539,0.863765219,6.93505539,6.93491094,6.93491094
78.334801,7.14142843,6.93459526,0.454789148,6.93459526,6.93445246,6.93445246
78.345293,6.4807407,6.93413434,-0.673345114,6.93413434,6.93399318,6.93399318
78.355784,6.92820323,6.93367273,-0.0739560674,6.93367273,6.93353316,6.93353316
78.366276,7.07106781,6.93321034,0.371291628,6.93321034,6.93307234,6.93307234
78.376768,6.4807407,6.93274721,-0.672314297,6.93274721,6.93261076,6.93261076
78.387259,6.70820393,6.9322834,-0.473370325,6.9322834,6.93214845,6.93214845
78.397751,7.93725393,6.93181881,1.00271388,6.93181881,6.93168534,6.93168534
78.408242,7.61577311,6.93135353,0.827296548,6.93135353,6.93122152,6.93122152
78.418734,7.61577311,6.93088748,0.82757817,6.93088748,6.9307569,6.9307569
78.429226,7.14142843,6.9304207,0.459355775,6.9304207,6.93029152,6.93029152
78.439717,7.54983444,6.92995324,0.787325341,6.92995324,6.92982544,6.92982544
78.450209,8.06225775,6.92948502,1.06431797,6.92948502,6.92935856,6.92935856
78.4607,7.34846923,6.92901611,0.647652003,6.92901611,6.92889099,6.92889099
78.471192,6.55743852,6.92854644,-0.609186275,6.92854644,6.92842262,6.92842262
78.481684,6.70820393,6.92807605,-0.468905237,6.92807605,6.92795351,6.92795351
78.492175,7.28010989,6.92760499,0.593721228,6.92760499,6.9274837,6.9274837
78.502667,7.07106781,6.92713317,0.379387189,6.92713317,6.92701312,6.92701312
78.513158,6.8556546,6.92666068,-0.266469666,6.92666068,6.92654184,6.92654184
78.52365,7,6.92618744,0.271684675,6.92618744,6.92606978,6.92606978
78.534142,7.34846923,6.92571348,0.650196698,6.92571348,6.925597,6.925597
78.544633,6.40312424,6.92523886,-0.722574996,6.92523886,6.92512352,6.92512352
78.555125,7.21110255,6.92476349,0.535106586,6.92476349,6.92464928,6.92464928
78.565616,6.4807407,6.92428746,-0.665993067,6.92428746,6.92417436,6.92417436
78.576108,6.55743852,6.92381069,-0.605286842,6.92381069,6.92369867,6.92369867
78.5866,7.07106781,6.92333321,0.384362595,6.92333321,6.92322226,6.92322226
78.597091,5.91607978,6.92285508,-1.00338193,6.92285508,6.92274518,6.92274518
78.607583,6.63324958,6.9223762,-0.537704958,6.9223762,6.92226734,6.92226734
78.618074,6.40312424,6.92189668,-0.720258594,6.92189668,6.92178883,6.92178883
78.628566,6.63324958,6.92141642,-0.536811734,6.92141642,6.92130957,6.92130957
78.639058,5.91607978,6.92093547,-1.0024249,6.92093547,6.9208296,6.9208296
78.649549,6.55743852,6.92045387,-0.602507549,6.92045387,6.92034897,6.92034897
78.660041,8,6.91997154,1.03924418,6.91997154,6.91986759,6.91986759
78.670532,6.32455532,6.91948858,-0.771319166,6.91948858,6.91938555,6.91938555
78.681024,6.78232998,6.91900488,-0.369695681,6.91900488,6.91890277,6.91890277
78.691516,5.74456265,6.9185205,-1.08349336,6.9185205,6.91841929,6.91841929
78.702007,6.63324958,6.91803549,-0.533653364,6.91803549,6.91793516,6.91793516
78.712499,6.32455532,6.91754976,-0.770061323,6.91754976,6.9174503,6.9174503
78.72299,6.55743852,6.9170634,-0.599687315,6.9170634,6.91696479,6.91696479
78.733482,7,6.91657632,0.288831576,6.91657632,6.91647855,6.91647855
78.743974,7,6.91608857,0.289674695,6.91608857,6.91599163,6.91599163
78.754465,7.28010989,6.9156002,0.603746379,6.9156002,6.91550407,6.91550407
78.764957,6.4807407,6.91511111,-0.659067839,6.91511111,6.91501578,6.91501578
78.775448,6.78232998,6.91462141,-0.363718889,6.91462141,6.91452687,6.91452687
78.78594,6.92820323,6.914131,0.118626419,6.914131,6.91403723,6.91403723
78.796432,7.34846923,6.91363993,0.659415874,6.91363993,6.91354692,6.91354692
78.806923,6.8556546,6.91314825,-0.23977834,6.91314825,6.91305598,6.91305598
78.817415,6.78232998,6.91265587,-0.361006769,6.91265587,6.91256433,6.91256433
78.827906,6.164414,6.91216288,-0.864724742,6.91216288,6.91207206,6.91207206
78.838398,6.55743852,6.9116692,-0.595172808,6.9116692,6.91157909,6.91157909
78.84889,5.74456265,6.91117486,-1.08009824,6.91117486,6.91108545,6.91108545
78.859381,6.164414,6.91067993,-0.863866844,6.91067993,6.9105912,6.9105912
78.869873,6.164414,6.9101843,-0.863579931,6.9101843,6.91009625,6.91009625
78.880364,6.40312424,6.90968808,-0.711732986,6.90968808,6.90960069,6.90960069
78.890856,7.41619849,6.90919117,0.71204446,6.90919117,6.90910443,6.90910443
78.901348,7,6.90869363,0.302169439,6.90869363,6.90860753,6.90860753
78.911839,6.70820393,6.9081955,-0.447204166,6.9081955,6.90811003,6.90811003
78.922331,6.55743852,6.90769669,-0.591826125,6.90769669,6.90761183,6.90761183
78.932822,7.68114575,6.90719729,0.879743403,6.90719729,6.90711305,6.90711305
78.943314,6.63324958,6.90669722,-0.522922214,6.90669722,6.90661357,6.90661357
78.953806,7.34846923,6.90619653,0.665035865,6.90619653,6.90611347,6.90611347
78.964297,6.32455532,6.90569525,-0.762325347,6.90569525,6.90561277,6.90561277
78.974789,6.63324958,6.90519331,-0.521482247,6.90519331,6.9051114,6.9051114
78.98528,8,6.9046908,1.04657021,6.9046908,6.90460945,6.90460945
78.995772,6.32455532,6.90418763,-0.761335871,6.90418763,6.90410682,6.90410682
79.006264,5.74456265,6.90368384,-1.07662491,6.90368384,6.90360357,6.90360357
79.016755,6.40312424,6.90317949,-0.707145848,6.90317949,6.90309975,6.90309975
79.027247,6.08276253,6.90267448,-0.905489893,6.90267448,6.90259526,6.90259526
79.037738,6.40312424,6.90216891,-0.706430939,6.90216891,6.9020902,6.9020902
79.04823,6.92820323,6.90166269,0.162912681,6.90166269,6.90158448,6.90158448
79.058722,6.55743852,6.90115587,-0.586274118,6.90115587,6.90107815,6.90107815
79.069213,6.8556546,6.90064849,-0.212117638,6.90064849,6.90057126,6.90057126
79.079705,6.32455532,6.90014047,-0.758673285,6.90014047,6.90006372,6.90006372
79.090196,6.4807407,6.89963191,-0.647218055,6.89963191,6.89955562,6.89955562
79.100688,6.244998,6.8991227,-0.808779763,6.8991227,6.89904687,6.89904687
79.11118,7.61577311,6.89861291,0.846853115,6.89861291,6.89853753,6.89853753
79.121671,7.21110255,6.89810257,0.559464008,6.89810257,6.89802764,6.89802764
79.132163,6.78232998,6.89759161,-0.339502024,6.89759161,6.8975171,6.8975171
79.142654,6.32455532,6.89708011,-0.756653677,6.89708011,6.89700603,6.89700603
79.153146,6.63324958,6.89656798,-0.51314559,6.89656798,6.89649432,6.89649432
79.163638,6.244998,6.89605527,-0.806881201,6.89605527,6.89598202,6.89598202
79.174129,6.40312424,6.89554204,-0.701724877,6.89554204,6.89546919,6.89546919
79.184621,7.21110255,6.89502819,0.562204913,6.89502819,6.89495574,6.89495574
79.195112,7.34846923,6.89902566,0.670405527,6.89902566,6.89444175,6.89444175
79.205604,7.21110255,6.89853484,0.559077557,6.89853484,6.89392714,6.89392714
79.216096,6.164414,6.89804364,-0.856521827,6.89804364,6.89341196,6.89341196
79.226587,6.92820323,6.89755213,0.175074555,6.89755213,6.89289625,6.89289625
79.237079,6.40312424,6.89706021,-0.702805785,6.89706021,6.89237994,6.89237994
79.24757,7.14142843,6.89656798,0.494833763,6.89656798,6.8918631,6.8918631
79.258062,6.78232998,6.89607534,-0.337261561,6.89607534,6.89134566,6.89134566
79.268554,6.4807407,6.89558236,-0.644082033,6.89558236,6.89082766,6.89082766
79.279045,6.32455532,6.89508909,-0.755336857,6.89508909,6.89030915,6.89030915
79.289537,6.4807407,6.89459543,-0.643315418,6.89459543,6.88979003,6.88979003
79.300028,6.70820393,6.89410148,-0.431158376,6.89410148,6.88927042,6.88927042
79.31052,5.83095189,6.89360715,-1.03085172,6.89360715,6.88875021,6.88875021
79.321012,6.4807407,6.89311251,-0.642161824,6.89311251,6.88822945,6.88822945
79.331503,6.4807407,6.89261759,-0.641776354,6.89261759,6.8877082,6.8877082
79.341995,7.48331477,6.89212231,0.768890412,6.89212231,6.88718636,6.88718636
79.352486,7.21110255,6.89162677,0.56522189,6.89162677,6.88666403,6.88666403
79.362978,7.54983444,6.89113087,0.811605546,6.89113087,6.88614111,6.88614111
79.37347,7.14142843,6.89063468,0.500793117,6.89063468,6.88561767,6.88561767
79.383961,6.244998,6.89013825,-0.80320623,6.89013825,6.88509374,6.88509374
79.394453,7.07106781,6.88964147,0.425941707,6.88964147,6.88456924,6.88456924
79.404944,7.07106781,6.88914447,0.42652473,6.88914447,6.88404426,6.88404426
79.415436,6.92820323,6.88864713,0.198887144,6.88864713,6.88351871,6.88351871
79.425928,6.4807407,6.88814953,-0.638285854,6.88814953,6.88299264,6.88299264
79.436419,7,6.88765171,0.33518397,6.88765171,6.88246611,6.88246611
79.446911,7.54983444,6.88715357,0.814052125,6.88715357,6.88193902,6.88193902
79.457402,6.40312424,6.88665523,-0.69536393,6.88665523,6.88141146,6.88141146
79.467894,6.78232998,6.88615659,-0.322221369,6.88615659,6.88088334,6.88088334
79.478386,7.07106781,6.88565771,0.430592733,6.88565771,6.88035472,6.88035472
79.488877,6.55743852,6.88515864,-0.572468437,6.88515864,6.87982565,6.87982565
79.499369,5.83095189,6.88465928,-1.0265025,6.88465928,6.87929603,6.87929603
79.50986,7.14142843,6.88415974,0.507216606,6.88415974,6.87876596,6.87876596
79.520352,7.21110255,6.88365994,0.572226017,6.88365994,6.87823534,6.87823534
79.530844,7,6.88315991,0.34181879,6.88315991,6.87770424,6.87770424
79.541335,6.244998,6.88265973,-0.798537245,6.88265973,6.8771727,6.8771727
79.551827,7.21110255,6.88215929,0.573535751,6.88215929,6.87664062,6.87664062
79.562318,7.61577311,6.88165871,0.856804762,6.88165871,6.8761081,6.8761081
79.57281,7.61577311,6.88115788,0.857096977,6.88115788,6.87557506,6.87557506
79.583302,6.92820323,6.88065686,0.218051294,6.88065686,6.87504154,6.87504154
79.593793,7,6.88015572,0.346185331,6.88015572,6.87450759,6.87450759
79.604285,7.54983444,6.87965435,0.818645275,6.87965435,6.87397312,6.87397312
79.614776,7,6.87915286,0.347630752,6.87915286,6.87343824,6.87343824
79.625268,6.70820393,6.87865116,-0.412852552,6.87865116,6.87290283,6.87290283
79.63576,7.28010989,6.87814931,0.634003612,6.87814931,6.87236697,6.87236697
79.646251,7.21110255,6.87764736,0.577455795,6.87764736,6.87183069,6.87183069
79.656743,6.164414,6.87714521,-0.844234096,6.87714521,6.8712939,6.8712939
79.667234,6.4807407,6.87664298,-0.629207662,6.87664298,6.87075671,6.87075671
79.677726,6.92820323,6.87614057,0.22817243,6.87614057,6.87021901,6.87021901
79.688218,6.63324958,6.87563804,-0.492329626,6.87563804,6.86968087,6.86968087
79.698709,6.8556546,6.87513544,-0.139573789,6.87513544,6.86914233,6.86914233
79.709201,7.48331477,6.87463269,0.780180803,6.87463269,6.86860329,6.86860329
79.719692,6.8556546,6.87412988,-0.135923794,6.87412988,6.86806387,6.86806387
79.730184,7.21110255,6.87362693,0.580926523,6.87362693,6.86752395,6.86752395
79.740676,6.70820393,6.87312389,-0.406103377,6.87312389,6.8669836,6.8669836
79.751167,6.32455532,6.87262081,-0.740314454,6.87262081,6.86644287,6.86644287
79.761659,7.28010989,6.87211762,0.638742728,6.87211762,6.86590165,6.86590165
79.77215,7.54983444,6.8716144,0.823541154,6.8716144,6.86536007,6.86536007
79.782642,6.70820393,6.87111108,-0.403617577,6.87111108,6.864818,6.864818
79.793134,6.63324958,6.87060771,-0.487194137,6.87060771,6.86427551,6.86427551
79.803625,7.07106781,6.87010434,0.448289498,6.87010434,6.86373266,6.86373266
79.814117,7.14142843,6.86960088,0.521370833,6.86960088,6.86318934,6.86318934
79.824608,7.21110255,6.86909745,0.584812024,6.86909745,6.86264566,6.86264566
79.8351,7.81024968,6.86859394,0.970389476,6.86859394,6.86210151,6.86210151
79.845592,8.42614977,6.86809042,1.24822248,6.86809042,6.86155696,6.86155696
79.856083,7.48331477,6.86758694,0.784683267,6.86758694,6.86101206,6.86101206
79.866575,7.14142843,6.86708342,0.523779542,6.86708342,6.8604667,6.8604667
79.877066,6.78232998,6.86657995,-0.290258454,6.86657995,6.859921,6.859921
79.887558,7,6.86607646,0.365955657,6.86607646,6.85937485,6.85937485
79.89805,7.21110255,6.86557299,0.587817628,6.86557299,6.85882831,6.85882831
79.908541,7.61577311,6.8650696,0.866431478,6.8650696,6.85828143,6.85828143
79.919033,7.41619849,6.86456621,0.742719516,6.86456621,6.85773411,6.85773411
79.929524,6.70820393,6.86406291,-0.394789794,6.86406291,6.85718646,6.85718646
79.940016,7.21110255,6.86355963,0.589527708,6.86355963,6.85663837,6.85663837
79.950508,7.14142843,6.86305642,0.527609712,6.86305642,6.85608991,6.85608991
79.960999,6.63324958,6.86255333,-0.478856714,6.86255333,6.85554113,6.85554113
79.971491,6.70820393,6.86205028,-0.392232522,6.86205028,6.85499192,6.85499192
79.981982,6.4807407,6.86154738,-0.617095357,6.86154738,6.85444239,6.85444239
79.992474,7.41619849,6.86104453,0.745086544,6.86104453,6.85389244,6.85389244
80.002966,7.28010989,6.86054179,0.647740763,6.86054179,6.85334213,6.85334213
80.013457,6.4807407,6.86003923,-0.615872171,6.86003923,6.85279151,6.85279151
80.023949,7.54983444,6.85953675,0.830841553,6.85953675,6.85224049,6.85224049
80.03444,6.4807407,6.85903446,-0.6150559,6.85903446,6.85168916,6.85168916
80.044932,7.07106781,6.85853227,0.461015769,6.85853227,6.85113742,6.85113742
80.055424,6.70820393,6.85803025,-0.387074044,6.85803025,6.85058534,6.85058534
80.065915,7.34846923,6.85752844,0.700671668,6.85752844,6.85003296,6.85003296
80.076407,7.28010989,6.85702677,0.650448398,6.85702677,6.84948019,6.84948019
80.086898,7.28010989,6.85652534,0.650833736,6.85652534,6.84892713,6.84892713
80.09739,6.63324958,6.85602406,-0.471989914,6.85602406,6.84837368,6.84837368
80.107882,6.8556546,6.85552299,0.0114720077,6.85552299,6.8478199,6.8478199
80.118373,6.55743852,6.8550222,-0.545512304,6.8550222,6.84726583,6.84726583
80.128865,6.70820393,6.85452159,-0.38251491,6.85452159,6.84671139,6.84671139
80.139356,7.81024968,6.85402127,0.977869318,6.85402127,6.84615667,6.84615667
80.149848,6.70820393,6.85352116,-0.381204973,6.85352116,6.84560158,6.84560158
80.16034,6.63324958,6.85302132,-0.468798188,6.85302132,6.84504617,6.84504617
80.170831,7,6.85252181,0.384028898,6.85252181,6.8444905,6.8444905
80.181323,6.55743852,6.85202253,-0.542755937,6.85202253,6.84393446,6.84393446
80.191814,7.34846923,6.85152361,0.704943701,6.85152361,6.84337816,6.84337816
80.202306,7.21110255,6.85102495,0.600064666,6.85102495,6.84282151,6.84282151
80.212798,7.34846923,6.85052661,0.705650491,6.85052661,6.84226454,6.84226454
80.223289,6.70820393,6.85002866,-0.376596245,6.85002866,6.84170733,6.84170733
80.233781,6.92820323,6.84953102,0.280485674,6.84953102,6.84114977,6.84114977
80.244272,7,6.84900334,0.388582886,6.84900334,6.84059197,6.84059197
80.254764,6.78232998,6.84850661,-0.257248173,6.84850661,6.84003382,6.84003382
80.265256,6.164414,6.84801026,-0.826798799,6.84801026,6.83947538,6.83947538
80.275747,7.28010989,6.84751436,0.657719951,6.84751436,6.83891671,6.83891671
80.286239,6.92820323,6.84701882,0.284928782,6.84701882,6.8383577,6.8383577
80.29673,7.07106781,6.84652376,0.473860797,6.84652376,6.83779846,6.83779846
80.307222,7.28010989,6.84602909,0.658848087,6.84602909,6.8372389,6.8372389
80.317714,7.14142843,6.84553487,0.543960988,6.84553487,6.83667906,6.83667906
80.328205,7.21110255,6.84504117,0.605030064,6.84504117,6.836119,6.836119
80.338697,6.70820393,6.84454791,-0.369247851,6.84454791,6.83555862,6.83555862
80.349188,7,6.84405519,0.394898482,6.84405519,6.83499803,6.83499803
80.35968,7.07106781,6.84356293,0.476974714,6.84356293,6.83443712,6.83443712
80.370172,6.40312424,6.84307121,-0.663284984,6.84307121,6.83387595,6.83387595
80.380663,6.32455532,6.84258007,-0.719739363,6.84258007,6.83331458,6.83331458
80.391155,6.70820393,6.84208944,-0.365903693,6.84208944,6.83275291,6.83275291
80.401646,6.8556546,6.84159944,0.118554458,6.84159944,6.83219103,6.83219103
80.412138,6.70820393,6.84110998,-0.364562818,6.84110998,6.83162886,6.83162886
80.42263,7.48331477,6.84062113,0.801681761,6.84062113,6.83106644,6.83106644
80.433121,6.164414,6.84013295,-0.822021254,6.84013295,6.83050384,6.83050384
80.443613,6.40312424,6.83964536,-0.66069745,6.83964536,6.82994094,6.82994094
80.454104,7.28010989,6.83915848,0.664041726,6.83915848,6.82937786,6.82937786
80.464596,6.164414,6.83867222,-0.821132279,6.83867222,6.8288145,6.8288145
80.475088,7.14142843,6.83818666,0.550673919,6.83818666,6.82825091,6.82825091
80.485579,7.61577311,6.83770186,0.882083466,6.83770186,6.82768715,6.82768715
80.496071,7.34846923,6.83721775,0.715018516,6.83721775,6.82712311,6.82712311
80.506562,7,6.83673443,0.404061341,6.83673443,6.8265589,6.8265589
80.517054,7.28010989,6.83625184,0.666226726,6.83625184,6.82599443,6.82599443
80.527546,7.14142843,6.83577004,0.55286381,6.83577004,6.82542974,6.82542974
80.538037,6.4807407,6.83528909,-0.595439661,6.83528909,6.82486489,6.82486489
80.548529,7.74596669,6.83480893,0.954545843,6.83480893,6.82429979,6.82429979
80.55902,7.48331477,6.83432966,0.805596122,6.83432966,6.82373453,6.82373453
80.569512,7,6.83385123,0.40761351,6.83385123,6.82316902,6.82316902
80.580004,7.07106781,6.83337369,0.487538845,6.83337369,6.82260331,6.82260331
80.590495,7.28010989,6.83289711,0.668739695,6.83289711,6.82203746,6.82203746
80.600987,6.8556546,6.83242143,0.152424312,6.83242143,6.82147136,6.82147136
80.611478,6.32455532,6.83194676,-0.712314144,6.83194676,6.82090513,6.82090513
80.62197,7.28010989,6.83147303,0.669803595,6.83147303,6.82033866,6.82033866
80.632462,7.68114575,6.83100032,0.922033312,6.83100032,6.81977201,6.81977201
80.642953,6.40312424,6.83052869,-0.653761771,6.83052869,6.81920523,6.81920523
80.653445,6.92820323,6.83005808,0.313281261,6.83005808,6.81863822,6.81863822
80.663936,6.8556546,6.82958861,0.161449657,6.82958861,6.81807109,6.81807109
80.674428,6.244998,6.82912021,-0.764278883,6.82912021,6.81750374,6.81750374
80.68492,7,6.82865296,0.413940871,6.82865296,6.81693622,6.81693622
80.695411,7.21110255,6.82818692,0.61880177,6.82818692,6.81636859,6.81636859
80.705903,7.07106781,6.82772205,0.493300888,6.82772205,6.81580075,6.81580075
80.716394,7.21110255,6.82725845,0.619551533,6.82725845,6.8152328,6.8152328
80.726886,6.63324958,6.82679607,-0.439939191,6.82679607,6.81466464,6.81466464
80.737378,7.14142843,6.82633499,0.561331841,6.82633499,6.81409633,6.81409633
80.747869,6.78232998,6.82587529,-0.208675113,6.82587529,6.81352793,6.81352793
80.758361,7.54983444,6.8254169,0.851127216,6.8254169,6.81295933,6.81295933
80.768852,6.78232998,6.82495995,-0.206470261,6.82495995,6.81239064,6.81239064
80.779344,6.78232998,6.82450439,-0.205364096,6.82450439,6.81182176,6.81182176
80.789836,6.78232998,6.82405031,-0.204255539,6.82405031,6.81125274,6.81125274
80.800327,7.54983444,6.82359777,0.852195202,6.82359777,6.81068365,6.81068365
80.810819,7,6.82314674,0.420539247,6.82314674,6.81011436,6.81011436
80.82131,6.63324958,6.82269734,-0.435255972,6.82269734,6.80954501,6.80954501
80.831802,6.08276253,6.82224953,-0.859934299,6.82224953,6.80897548,6.80897548
80.842294,6.55743852,6.82180339,-0.51416424,6.82180339,6.80840583,6.80840583
80.852785,5.83095189,6.82135901,-0.995192,6.82135901,6.80783612,6.80783612
80.863277,6.8556546,6.82091636,0.18638198,6.82091636,6.80726624,6.80726624
80.873768,6.40312424,6.82047556,-0.646027339,6.82047556,6.8066963,6.8066963
80.88426,6.92820323,6.82003659,0.328886977,6.82003659,6.8061262,6.8061262
80.894752,6.4807407,6.81959953,-0.582115825,6.81959953,6.805556,6.805556
80.905243,7.81024968,6.81916449,0.995532613,6.81916449,6.80498575,6.80498575
80.915735,7.28010989,6.81873144,0.679248441,6.81873144,6.80441534,6.80441534
80.926226,7.54983444,6.81830053,0.855297554,6.81830053,6.8038449,6.8038449
80.936718,5.91607978,6.81787173,-0.949627268,6.81787173,6.80327431,6.80327431
80.94721,7.48331477,6.81744516,0.816008343,6.81744516,6.80270363,6.80270363
80.957701,7.48331477,6.81702092,0.816268247,6.81702092,6.80213292,6.80213292
80.968193,7.34846923,6.81659902,0.729294323,6.81659902,6.80156207,6.80156207
80.978684,6.70820393,6.81617961,-0.328596529,6.81617961,6.8009912,6.8009912
80.989176,6.4807407,6.81576271,-0.578810857,6.81576271,6.8004202,6.8004202
80.999668,6.70820393,6.81534844,-0.32732936,6.81534844,6.79984912,6.79984912
81.010159,6.78232998,6.81493696,-0.180574022,6.81493696,6.79927803,6.79927803
81.020651,6.8556546,6.8145283,0.202796206,6.8145283,6.79870682,6.79870682
81.031142,6.63324958,6.81412266,-0.425291763,6.81412266,6.7981356,6.7981356
81.041634,6.8556546,6.81372012,0.204779095,6.81372012,6.79756426,6.79756426
81.052126,6.78232998,6.81332088,-0.176042304,6.81332088,6.79699287,6.79699287
81.062617,6.4807407,6.81292515,-0.576354447,6.81292515,6.79642148,6.79642148
81.073109,7.14142843,6.81253307,0.573493988,6.81253307,6.79584998,6.79584998
81.0836,6.164414,6.81214498,-0.804817355,6.81214498,6.79527849,6.79527849
81.094092,7.07106781,6.81176107,0.509221704,6.81176107,6.79470691,6.79470691
81.104584,7.21110255,6.81138171,0.632234796,6.81138171,6.79413528,6.79413528
81.115075,6.63324958,6.81100733,-0.421613271,6.81100733,6.79356366,6.79356366
81.125567,6.63324958,6.81063829,-0.421175395,6.81063829,6.79299196,6.79299196
81.136058,7.68114575,6.81027518,0.93320446,6.81027518,6.79242028,6.79242028
81.14655,6.70820393,6.80991852,-0.318927245,6.80991852,6.79184852,6.79184852
81.157042,6.8556546,6.80956901,0.214675553,6.80956901,6.79127673,6.79127673
81.167533,6.164414,6.80922744,-0.803002761,6.80922744,6.79070497,6.79070497
81.178025,7.48331477,6.91008692,0.757118126,6.8088946,6.89160095,6.79013314
81.188516,6.4807407,6.91064959,-0.655674383,6.80857149,6.89192103,6.78956135
81.199008,6.244998,6.91123451,-0.816233123,6.80825909,6.89225282,6.78898949
81.2095,7.07106781,6.91184291,0.399029952,6.80795854,6.89259652,6.78841762
81.219991,7.14142843,6.9124761,0.478489631,6.80767106,6.89295229,6.78784581
81.230483,6.4807407,6.91313563,-0.657567437,6.80739782,6.89332043,6.78727393
81.240974,6.8556546,6.91382284,-0.241180928,6.80714016,6.89370108,6.78670211
81.251466,6.55743852,6.91453932,-0.597579111,6.8068993,6.89409454,6.78613023
81.261958,5.83095189,6.91528644,-1.04131385,6.80667648,6.89450101,6.78555837
81.272449,8.1240384,6.91606549,1.09907821,6.8064729,6.89492068,6.78498657
81.282941,6.4807407,6.91687786,-0.660406817,6.80628954,6.89535388,6.78441472
81.293432,6.70820393,6.91772449,-0.457734151,6.8061273,6.89580078,6.78384295
81.303924,6.70820393,6.91860637,-0.458696457,6.80598679,6.89626169,6.78327114
81.314416,6.164414,6.919524,-0.868970656,6.80586833,6.89673686,6.78269936
81.324907,6.4807407,6.92047748,-0.663126522,6.80577188,6.89722649,6.78212765
81.335399,6.8556546,6.92146674,-0.256538762,6.80569691,6.89773094,6.78155592
81.34589,7.41619849,6.92249077,0.702643381,6.80564234,6.8982504,6.78098427
81.356382,6.70820393,6.92354828,-0.464052094,6.80560637,6.89878524,6.78041261
81.366874,6,6.92463686,-0.961580396,6.80558639,6.89933571,6.77984099
81.377365,6.92820323,6.92575308,0.0494989883,6.80557872,6.89990206,6.77926946
81.387857,7.48331477,6.92689267,0.745937065,6.8055785,6.90048468,6.77869792
81.398348,7.21110255,6.92804958,0.532027226,6.8055795,6.90108378,6.77812648
81.40884,6.78232998,6.92921681,-0.38325817,6.80557403,6.90169979,6.77755504
81.419332,6.63324958,6.93038568,-0.545101913,6.80555307,6.90233298,6.77698366
81.429823,6.70820393,6.93154651,-0.472591343,6.80550652,6.90298362,6.77641239
81.440315,7.28010989,6.93268959,0.5894237,6.80542391,6.90365217,6.77584112
81.450806,6.32455532,6.93380536,-0.780544706,6.80529537,6.90433885,6.77526998
81.461298,5.91607978,6.93488641,-1.00935951,6.80511272,6.90504416,6.77469884
81.47179,7.28010989,6.9359279,0.586670253,6.80487076,6.90576838,6.77412778
81.482281,6.92820323,6.93692871,-0.0934102842,6.80456807,6.90651183,6.77355684
81.492773,7.14142843,6.93789192,0.451150204,6.80420711,6.90727503,6.77298593
81.503264,6.4807407,6.93882382,-0.676818383,6.80379413,6.90805822,6.77241515
81.513756,7.21110255,6.93973371,0.520930749,6.80333792,6.90886197,6.7718444
81.524248,7.41619849,6.9406321,0.689613217,6.8028489,6.9096866,6.77127374
81.534739,6.70820393,6.94152989,-0.483038253,6.80233787,6.91053246,6.77070322
81.545231,6.63324958,6.94243767,-0.556046841,6.80181493,6.91140014,6.77013275
81.555722,6.63324958,6.94336461,-0.556879722,6.80128925,6.91228992,6.76956242
81.566214,7.14142843,6.94431883,0.443970267,6.80076839,6.91320243,6.76899213
81.576706,7.28010989,6.94530682,0.578621701,6.80025864,6.91413805,6.76842195
81.587197,5.91607978,6.94633372,-1.01501426,6.79976493,6.91509716,6.76785193
81.597689,6.78232998,6.94740387,-0.406292853,6.79929091,6.91608045,6.76728197
81.60818,7.21110255,6.94852022,0.512427882,6.7988394,6.91708823,6.76671217
81.618672,7.21110255,6.94968537,0.511289721,6.79841226,6.91812119,6.76614243
81.629164,7,6.95090098,0.221582995,6.7980108,6.9191798,6.76557281
81.639655,7.61577311,6.95216814,0.814619525,6.79763577,6.92026447,6.76500337
81.650147,7.14142843,6.9534879,0.43352108,6.79728738,6.92137598,6.764434
81.660638,7,6.9548605,0.212460582,6.79696565,6.92251469,6.76386481
81.67113,6.40312424,6.95628641,-0.743748732,6.79667014,6.92368141,6.7632957
81.681622,7.34846923,6.95776553,0.625062953,6.79640034,6.92487663,6.76272672
81.692113,7.34846923,6.9592976,0.623836223,6.79615552,6.92610086,6.76215793
81.702605,6.70820393,6.96088269,-0.502671616,6.79593482,6.92735496,6.76158924
81.713096,7,6.96252026,0.193596852,6.79573737,6.92863936,6.76102074
81.723588,5.83095189,6.96421038,-1.06454614,6.79556224,6.92995497,6.76045233
81.73408,6.92820323,6.96595268,-0.194292183,6.79540854,6.93130236,6.75988408
81.744571,6.8556546,6.96774684,-0.334801797,6.79527542,6.93268211,6.75931603
81.755063,7.14142843,6.96959314,0.414530205,6.79516209,6.93409522,6.75874809
81.765554,7.28010989,6.97149125,0.555534552,6.79506785,6.93554216,6.75818036
81.776046,6.244998,6.97344169,-0.853489128,6.79499207,6.93702398,6.75761274
81.786538,7.07106781,6.97544455,0.309230109,6.79493426,6.93854135,6.75704529
81.797029,7.07106781,6.97750003,0.305888514,6.79489402,6.94009493,6.75647806
81.807521,6.78232998,6.97960903,-0.444161059,6.79487104,6.94168586,6.75591096
81.818012,7.54983444,6.98177179,0.753699305,6.79486513,6.94331469,6.75534408
81.828504,6.78232998,6.98398948,-0.44906514,6.79487617,6.94498263,6.75477733
81.838996,7.61577311,6.98626277,0.793416877,6.79490414,6.94669044,6.75421076
81.849487,7.54983444,6.98859239,0.749160896,6.79494912,6.9484389,6.75364443
81.859979,6.78232998,6.99097986,-0.456782092,6.79501125,6.9502293,6.75307824
81.87047,6.63324958,6.9934259,-0.600146918,6.79509072,6.9520623,6.75251229
81.880962,6.78232998,6.99593223,-0.462171228,6.79518782,6.95393929,6.75194649
81.891454,6.4807407,6.99849994,-0.719554891,6.79530286,6.95586115,6.75138089
81.901945,7.21110255,7.00113021,0.458227393,6.79543621,6.95782878,6.75081554
81.912437,8,7.00382502,0.998085657,6.79558831,6.95984368,6.75025034
81.922928,6.55743852,7.00658544,-0.670184239,6.79575961,6.96190663,6.74968541
81.93342,6.63324958,7.00941362,-0.613322136,6.79595063,6.96401922,6.74912063
81.943912,5.91607978,7.01231103,-1.04701062,6.79616192,6.96618247,6.74855607
81.954403,7.41619849,7.01527916,0.633181904,6.79639402,6.96839746,6.74799178
81.964895,7.93725393,7.01832044,0.958610188,6.7966476,6.97066591,6.74742766
81.975386,6.78232998,7.02143622,-0.488984903,6.79692328,6.97298874,6.74686382
81.985878,6.4807407,7.0246291,-0.737487896,6.79722178,6.97536778,6.74630015
81.99637,7,7.02790087,-0.167035523,6.79754383,6.97780426,6.74573671
82.006861,7.61577311,7.03125337,0.764538902,6.79789014,6.98029943,6.74517357
82.017353,6.08276253,7.0346895,-0.975667448,6.79826159,6.98285528,6.7446106
82.027844,7.07106781,7.03821092,0.181264692,6.79865896,6.98547291,6.74404793
82.038336,7.87400787,7.04182073,0.912242917,6.79908321,6.98815447,6.74348545
82.048828,6.8556546,7.04552112,-0.43573675,6.79953522,6.99090138,6.74292322
82.059319,7.14142843,7.04931431,0.303503078,6.80001594,6.99371513,6.74236129
82.069811,7.81024968,7.05320374,0.870083866,6.80052647,6.99659804,6.74179957
82.080302,7,7.05719149,-0.239147417,6.80106779,6.99955144,6.74123815
82.090794,7.21110255,7.06128122,0.387067608,6.80164113,7.00257781,6.74067694
82.101286,7.54983444,7.06547559,0.695958937,6.80224761,7.00567887,6.74011599
82.111777,7.48331477,7.06977735,0.643068754,6.80288841,7.00885636,6.73955536
82.122269,6.8556546,7.07419058,-0.467478321,6.80356496,7.01211303,6.73899495
82.13276,7,7.07871785,-0.28056701,6.80427848,7.01545046,6.73843487
82.143252,6.78232998,7.08336355,-0.548665256,6.80503055,7.01887156,6.737875
82.153744,7.81024968,7.08813094,0.8497757,6.80582259,7.02237838,6.73731542
82.164235,6.4807407,7.09302337,-0.782484937,6.80665611,7.02597303,6.73675617
82.174727,6.4807407,7.09804577,-0.785687645,6.80753291,7.02965871,6.73619716
82.185218,7.21110255,7.10320133,0.328483213,6.80845459,7.03343736,6.73563849
82.19571,7.61577311,7.10849534,0.712234348,6.80942314,7.0373124,6.73508005
82.206202,7,7.11393182,-0.33753788,6.81044042,7.04128629,6.73452192
82.216693,7.54983444,7.11951493,0.65598743,6.81150834,7.04536158,6.73396413
82.227185,6.63324958,7.12525061,-0.701427848,6.81262925,7.04954206,6.73340659
82.237676,7.28010989,7.13114287,0.385962457,6.81380518,7.05383008,6.73284941
82.248168,7.21110255,7.13719815,0.27185363,6.81503874,7.0582297,6.73229249
82.25866,7.14142843,7.14342146,-0.044643385,6.81633232,7.06274392,6.73173587
82.269151,7.07106781,7.14981797,-0.280624585,6.81768843,7.0673758,6.73117962
82.279643,7.34846923,7.15639495,0.438262796,6.81911011,7.07212985,6.73062364
82.290134,6.78232998,7.16315748,-0.617112225,6.82060005,7.07700896,6.73006803
82.300626,6.32455532,7.17011346,-0.919542354,6.82216163,7.082018,6.7295127
82.311118,7.14142843,7.17726917,-0.189316523,6.823798,7.08716059,6.72895769
82.321609,7.14142843,7.18463115,-0.207852652,6.82551249,7.09244047,6.72840306
82.332101,7,7.19220837,-0.438415753,6.82730911,7.09786305,6.72784872
82.342592,7.48331477,7.20000733,0.532266326,6.82919141,7.10343192,6.72729476
82.353084,6.92820323,7.20803782,-0.528993946,6.8311639,7.10915289,6.72674109
82.363576,7.07106781,7.21630784,-0.381103703,6.83323078,7.11503042,6.72618776
82.374067,7.54983444,7.22482572,0.570095359,6.8353965,7.12106911,6.72563484
82.384559,6.4807407,7.23360266,-0.867676182,6.83766642,7.1272755,6.7250822
82.39505,7.07106781,7.24264707,-0.414221271,6.84004535,7.13365402,6.72452998
82.405542,7.21110255,7.25197127,-0.202160142,6.84253935,7.14021173,6.72397806
82.416034,5.91607978,7.26158554,-1.15995938,6.84515412,7.14695414,6.72342649
82.426525,8.06225775,7.27150064,0.889245248,6.84789573,7.15388695,6.72287535
82.437017,6.70820393,7.28173075,-0.757315537,6.85077146,7.16101809,6.72232451
82.447508,6.70820393,7.29228693,-0.764253228,6.85378793,7.16835314,6.72177409
82.458,7.93725393,7.30318484,0.796284557,6.8569534,7.1759007,6.721224
82.468492,6.70820393,7.31443791,-0.778610288,6.86027579,7.18366764,6.72067428
82.478983,7.54983444,7.32606025,0.47304776,6.86376352,7.19166107,6.72012499
82.489475,6.70820393,7.33807011,-0.793641089,6.86742662,7.19989073,6.71957602
82.499966,7.87400787,7.35048218,0.723550752,6.87127442,7.20836366,6.7190275
82.510458,7,7.36331677,-0.602757639,6.87531842,7.21709046,6.71847931
82.52095,8,7.37659171,0.789562088,6.87956978,7.22607975,6.71793151
82.531441,6.40312424,7.39032578,-0.993580167,6.88404046,7.23534049,6.71738415
82.541933,7.87400787,7.40454293,0.685175121,6.88874462,7.24488473,6.71683714
82.552424,7.41619849,7.41926307,-0.0553586359,6.89369568,7.25472146,6.71629059
82.562916,6.92820323,7.43451303,-0.711554492,6.89891004,7.26486385,6.71574438
82.573408,7.34846923,7.450317,-0.319135981,6.90440389,7.27532283,6.71519858
82.583899,7.34846923,7.46670064,-0.343847954,6.91019469,7.2861098,6.71465324
82.594391,7.81024968,7.4836961,0.57144866,6.91630307,7.29723982,6.71410826
82.604882,7.07106781,7.5013312,-0.655944652,6.92274907,7.30872447,6.71356375
82.615374,7.87400787,7.51964253,0.595285938,6.92955701,7.32058028,6.71301961
82.625866,7.21110255,7.53866416,-0.57232998,6.93675155,7.33282127,6.71247589
82.636357,6,7.55843265,-1.248372,6.94435964,7.34546208,6.71193264
82.646849,7.93725393,7.57899336,0.598548719,6.95241331,7.35852175,6.71138978
82.65734,6.8556546,7.60038755,-0.862979111,6.96094485,7.37201535,6.71084739
82.667832,7.48331477,7.62266855,-0.373301191,6.96999369,7.38596387,6.71030539
82.678324,7.54983444,7.64588849,-0.30992588,6.97960143,7.40038548,6.70976382
82.688815,8.18535277,7.67010473,0.717807803,6.98981505,7.41529919,6.70922275
82.699307,7.61577311,7.69538828,-0.282161609,7.00069115,7.43072939,6.70868207
82.709798,7.41619849,7.72180866,-0.5528202,7.01229041,7.4466959,6.70814189
82.72029,7,7.74945471,-0.865710524,7.02468765,7.46322569,6.70760211
82.730782,7.54983444,7.77841916,-0.478105348,7.03796633,7.48034262,6.70706278
82.741273,8.36660027,7.80880781,0.74685504,7.05222403,7.49807171,6.70652396
82.751765,7.68114575,7.84075144,-0.399506808,7.06757995,7.51644456,6.70598554
82.762256,8.06225775,7.87438821,0.433439196,7.0841686,7.53548758,6.70544764
82.772748,7.34846923,7.9098916,-0.749281234,7.10215566,7.55523595,6.70491016
82.78324,7.93725393,7.94745225,-0.100986702,7.12173168,7.57572137,6.70437314
82.793731,8.77496439,7.98729099,0.887509659,7.14312117,7.59697724,6.70383665
82.804223,7.34846923,8.0296756,-0.825352269,7.16659475,7.61904512,6.70330058
82.814714,8.36660027,8.07489817,0.540094526,7.19245971,7.64196067,6.70276504
82.825206,8.48528137,8.12331201,0.601638898,7.22108349,7.66577049,6.70222993
82.835698,8.36660027,8.17530608,0.437371904,7.25288167,7.69051734,6.7016953
82.846189,8.66025404,8.23131948,0.654930957,7.28832784,7.71624645,6.70116122
82.856681,7.41619849,8.29186082,-0.935768311,7.32796761,7.74301339,6.70062757
82.867172,8.77496439,8.3574697,0.646138291,7.3723938,7.77086709,6.70009446
82.877664,8.24621125,8.42876086,-0.427258247,7.42227473,7.79987025,6.69956181
82.888156,9.05538514,8.50637636,0.740951267,7.4783193,7.83008157,6.69902965
82.898647,8.77496439,8.59099315,0.428918684,7.54127716,7.86156334,6.69849804
82.909139,8.71779789,8.68333812,0.185633426,7.61194515,7.8943912,6.6979669
82.91963,8.71779789,8.78411369,-0.257518554,7.69110384,7.92863343,6.69743631
82.930122,8.66025404,8.89404953,-0.483524039,7.77954904,7.96437607,6.69690618
82.940614,9.38083152,9.01381427,0.605819486,7.8780128,8.00170114,6.69637656
82.951105,8.94427191,9.14401495,-0.446926213,7.98715154,8.04069609,6.69584752
82.961597,9.11043358,9.28521176,-0.41806481,8.10754962,8.08146599,6.69531895
82.972088,10.0995049,9.43780029,0.813452299,8.2396098,8.12410799,6.69479095
82.98258,8.42614977,9.60209264,-1.08440899,8.38361432,8.16874267,6.69426343
82.993072,9.64365076,9.77819145,-0.366797891,8.53960815,8.2154871,6.69373643
83.003563,10.6301458,9.96600423,0.814948823,8.70740439,8.26446669,6.69321003
83.014055,10.1488916,10.1652793,-0.128014528,8.88661252,8.31583076,6.6926841
83.024546,10.1488916,10.3754548,-0.475986632,9.07649864,8.3697207,6.69215877
83.035038,10.8166538,10.5957884,0.469963266,9.27609844,8.42630959,6.69163393
83.04553,10.3923048,10.8251921,-0.657941702,9.48406375,8.48576854,6.69110964
83.056021,11.3137085,11.0622585,0.501447939,9.69867922,8.54828193,6.69058595
83.066513,11.7046999,11.305293,0.631986503,9.91788425,8.61406761,6.69006275
83.077004,11.7473401,11.5521096,0.441848972,10.1390754,8.68333661,6.68954016
83.087496,10.7703296,11.8001675,-1.01480928,10.3592156,8.75634441,6.68901808
83.097988,11.8321596,12.0463666,-0.462825093,10.5746345,8.83334815,6.68849656
83.108479,12.2065556,12.2871048,-0.283811944,10.7810665,8.91462671,6.68797566
83.118971,12.2474487,12.5183817,-0.520512269,10.9737323,9.00050767,6.68745527
83.129462,12.2882057,12.7357613,-0.668995912,11.1473181,9.09131567,6.6869355
83.139954,13.3790882,12.9347737,0.666569201,11.2963479,9.18744009,6.68641625
83.150446,11.9163753,13.1111184,-1.09304306,11.415425,9.28928012,6.68589758
83.160937,13.1529464,13.2611815,-0.328990984,11.4997615,9.39727195,6.68537954
83.171429,13.3790882,13.3825455,-0.0587988739,11.5456991,9.51192596,6.68486203
83.18192,13.6747943,13.474314,0.44775029,11.5511161,9.6337596,6.68434516
83.192412,13.3416641,13.5374472,-0.442473892,11.5157403,9.7633893,6.68382882
83.202904,14.1421356,13.5747102,0.753276475,11.4411773,9.90145906,6.68331308
83.213395,13.8564065,13.5904801,0.515680527,11.3307101,10.0486788,6.68279798
83.223887,13.7477271,13.5903297,0.396733369,11.188835,10.2058779,6.68228342
83.234378,14.4222051,13.5805387,0.917423787,11.0208404,10.3739169,6.68176952
83.24487,14.0712473,13.5676301,0.709659906,10.8322077,10.5538167,6.68125617
83.255362,12.922848,13.5580145,-0.796973366,10.6283245,10.746665,6.68074342
83.265853,14.1421356,13.5577474,0.764452866,10.4141751,10.9536735,6.68023134
83.276345,14.6287388,13.5724133,1.02777697,10.1941303,11.1762592,6.67971981
83.286836,13.3041347,13.607103,-0.550425552,9.97204573,11.4159269,6.67920895
83.297328,14.2126704,13.666463,0.739058484,9.75111253,11.6744606,6.67869866
83.30782,14.106736,13.7547542,0.593280511,9.53405216,11.9537994,6.67818899
83.318311,13.3041347,13.8759392,-0.756177578,9.32310915,12.2561305,6.67767999
83.328803,14.2828569,14.033825,0.499030905,9.12004771,12.5840214,6.67717157
83.339294,15.0332964,14.2320798,0.895107011,8.92633555,12.9402654,6.67666383
83.349786,14.6287388,14.4744583,0.392785662,8.74302798,13.3281834,6.67615667
83.360278,15.5241747,14.7648012,0.871420388,8.5709275,13.7514676,6.67565015
83.370769,15.0996689,15.1072018,-0.086792261,8.41054935,14.2143504,6.67514432
83.381261,14.8660687,15.5062686,-0.800124895,8.26210494,14.7218475,6.67463907
83.391752,16.7332005,15.9670593,0.875294967,8.12562922,15.2795681,6.67413453
83.402244,16.5227116,16.4955593,0.164779537,8.000896,15.8942281,6.67363058
83.412736,17.1464282,17.0985889,0.218722002,7.88753983,16.5734452,6.67312728
83.423227,17.5499288,17.7840719,-0.483883421,7.78504437,17.3259984,6.67262468
83.433719,19.4935887,18.5613756,0.965511844,7.69275123,18.1621437,6.67212269
83.44421,19.2353841,19.4408538,-0.453287682,7.60995745,19.0930845,6.6716214
83.454702,21.2837967,20.434229,0.921719952,7.53587724,20.1313715,6.67112074
83.465194,22.0680765,21.5535407,0.717311521,7.46972688,21.2897975,6.67062073
83.475685,22.1133444,22.8103477,-0.834867225,7.41072275,22.5806038,6.67012144
83.486177,24.3926218,24.2144335,0.422123637,7.35808859,24.0141872,6.66962278
83.496668,25.96151,25.7702479,0.437335176,7.31110831,25.5955191,6.66912483
83.50716,26.925824,27.4737466,-0.740217903,7.26909771,27.3210095,6.66862752
83.517652,29.2061637,29.3052577,-0.314792012,7.23144368,29.1713614,6.66813088
83.528143,31.3847097,31.22148,0.404016925,7.19759275,31.1035822,6.66763498
83.538635,32.7261363,33.1463579,-0.648245,7.16704396,33.0418716,6.66713971
83.549126,34.4528664,34.9621964,-0.713673654,7.13936858,34.8687361,6.66664518
83.559618,36.2904946,36.5127202,-0.471408071,7.11418353,36.4280757,6.66615129
83.57011,37.2155881,37.6220163,-0.637517195,7.09116566,37.5441404,6.66565809
83.580601,38.6134692,38.1372959,0.690053102,7.07003792,38.0643184,6.66516564
83.591093,38.6522962,37.9794481,0.820273153,7.0505588,37.9097082,6.66467384
83.601584,37.9605058,37.1731908,0.887307735,7.03253054,37.1052686,6.6641828
83.612076,36.8781778,35.8366163,1.02056921,7.01577926,35.7693543,6.6636924
83.622568,35.48239,34.1380252,1.15946747,7.00016253,34.0705262,6.66320272
83.633059,34.2344855,32.2471878,1.40971549,6.98555956,32.1787948,6.6627138
83.643551,31.5436206,30.3027401,1.11394815,6.97186395,30.2330022,6.66222554
83.654042,29.240383,28.4027877,0.915202336,6.95898991,28.3314236,6.66173805
83.664534,27.1845544,26.6068833,0.760046795,6.94685925,26.5337456,6.66125123
83.675026,25.4950976,24.9463197,0.74079543,6.93540785,24.8713646,6.66076513
83.685517,24.3515913,23.4327347,0.9585701,6.92457988,23.3559966,6.6602798
83.696009,22,22.065067,-0.255082366,6.91432357,21.9866365,6.65979516
83.7065,21.0713075,20.8357796,0.485312136,6.90459696,20.7557867,6.65931129
83.716992,20.4450483,19.7332515,0.843680517,6.89535923,19.6518505,6.65882811
83.727484,18.547237,18.7448797,-0.444570243,6.88657639,18.6622385,6.65834567
83.737975,18.3847763,17.8580208,0.725779229,6.87821778,17.7743124,6.65786401
83.748467,16.2480768,17.0605483,-0.901372001,6.87025335,16.975944,6.65738305
83.758958,16.583124,16.3418155,0.491231605,6.86265869,16.2564819,6.65690288
83.76945,15.5884573,15.692145,-0.322005835,6.85540869,15.6062411,6.65642341
83.779942,15.4596248,15.1033124,0.59691916,6.84848236,15.0169882,6.65594469
83.790433,14.6287388,14.5681974,0.246051769,6.84186031,14.4815938,6.65546677
83.800925,14.4913767,14.0805148,0.640985128,6.83552288,13.9937633,6.65498956
83.811416,14.1421356,13.6350269,0.712115666,6.82945422,13.5482493,6.65451316
83.821908,13.1529464,13.2270304,-0.272183781,6.8236374,13.1403395,6.65403747
83.8324,13.453624,12.8525607,0.77528275,6.81805838,12.7660601,6.65356255
83.842891,13,12.5081531,0.701318001,6.81270405,12.4219379,6.65308844
83.853383,13.3416641,12.1906806,1.072839,6.80756075,12.1048377,6.65261506
83.863874,11.9582607,11.8975186,0.24645931,6.8026177,11.8121268,6.65214249
83.874366,12.0415946,11.6262437,0.644477178,6.79786298,11.5413745,6.65167065
83.884858,12.0415946,11.3747957,0.816577558,6.79328683,11.2905131,6.65119959
83.895349,10.8627805,11.1413453,-0.527792352,6.7888801,11.0577069,6.65072936
83.905841,10.0995049,10.9242041,-0.908129494,6.78463303,10.8412613,6.65025987
83.916332,11.4455231,10.7219523,0.850629703,6.78053806,10.6397503,6.64979121
83.926824,11.045361,10.533246,0.715622145,6.7765866,10.451825,6.64932329
83.937316,10.6770783,10.3569391,0.565808427,6.7727717,10.2763339,6.64885616
83.947807,9.8488578,10.1920017,-0.585784856,6.76908684,10.1122426,6.64838988
83.958299,10.4880885,10.0374632,0.671286301,6.76552488,9.95857612,6.64792435
83.96879,9.43398113,9.8925087,-0.67714664,6.76208043,9.81451561,6.64745966
83.979282,9.43398113,9.75634835,-0.567773913,6.75874715,9.67926765,6.64699573
83.989774,10.2956301,9.6283081,0.816897817,6.75552002,9.55215482,6.6465326
84.000265,10.3440804,9.50777595,0.914496845,6.7523943,9.43256199,6.64607033
84.010757,9.48683298,9.39416336,0.304416846,6.74936466,9.319898,6.64560883
84.021248,9,9.28697874,-0.535703965,6.7464272,9.21366857,6.64514818
84.03174,9.69535971,9.18573393,0.713880788,6.74357716,9.11338344,6.64468831
84.042232,9.11043358,9.09001341,0.142899143,6.74081085,9.01862492,6.64422925
84.052723,8.48528137,8.99943652,-0.717046123,6.73812476,8.92901038,6.64377107
84.063215,9.05538514,8.91362991,0.376503954,6.73551485,8.84416498,6.64331366
84.073706,9.43398113,8.83228425,0.775691229,6.73297826,8.7637777,6.64285712
84.084198,9.11043358,8.7550849,0.596111294,6.73051134,8.68753272,6.64240137
84.09469,8.24621125,8.68176533,-0.659965207,6.72811135,8.61516219,6.64194645
84.105181,9,8.61207949,0.622832647,6.72577566,8.54641893,6.64149241
84.115673,9.2736185,8.54578142,0.853133681,6.72350114,8.48105616,6.64103916
84.126164,8.60232527,8.48266944,0.345913037,6.72128568,8.41887122,6.6405868
84.136656,9.21954446,8.42253342,0.892754749,6.71912644,8.3596534,6.64013524
84.147148,6.8556546,8.36519656,-1.22863418,6.71702135,8.30322517,6.63968452
84.157639,8.06225775,8.31049463,-0.498233764,6.71496841,8.24942166,6.6392347
84.168131,8.24621125,8.25826023,-0.109767849,6.71296518,8.19807513,6.63878568
84.178622,8.60232527,8.20835791,0.627668188,6.71101007,8.14904958,6.63833756
84.189114,8.48528137,8.16064299,0.569770464,6.70910084,8.10220013,6.63789026
84.199606,8.66025404,8.11499482,0.738416695,6.70723591,8.05740577,6.63744381
84.210097,7.68114575,8.07130071,-0.624623854,6.70541376,8.01455347,6.63699826
84.220589,8.30662386,8.02944349,0.526479222,6.70363242,7.97352607,6.63655354
84.23108,7.93725393,7.98932987,-0.228201518,6.70189072,7.93422995,6.63610973
84.241572,8,7.95085755,0.221680958,6.70018685,7.89656287,6.63566674
84.252064,8.42614977,7.91394218,0.7156868,6.69851959,7.86044031,6.63522463
84.262555,7.81024968,7.87850454,-0.261256319,6.69688777,7.82578297,6.63478343
84.273047,8.1240384,7.84446064,0.528751133,6.69528982,7.79250698,6.63434306
84.283538,7.61577311,7.81174477,-0.442686871,6.69372482,7.76054649,6.63390362
84.29403,7.93725393,7.78028294,0.396195649,6.69219132,7.72982769,6.63346502
84.304522,7.07106781,7.75001487,-0.823982438,6.69068838,7.7002903,6.6330273
84.315013,7.61577311,7.72088373,-0.324207681,6.68921507,7.67187749,6.63259052
84.325505,8.54400375,7.69282799,0.92259187,6.68777012,7.64452795,6.63215458
84.335996,8.77496439,7.66580047,1.05316851,6.68635282,7.61819449,6.63171957
84.346488,7.14142843,7.63974656,-0.705916521,6.68496199,7.59282273,6.63128542
84.35698,7.87400787,7.61462237,0.509299027,6.68359689,7.56836884,6.63085216
84.367471,8.1240384,7.59038637,0.730514908,6.68225679,7.54479138,6.63041985
84.377963,7.14142843,7.56699263,-0.652352819,6.68094062,7.52204467,6.6299884
84.388454,7.21110255,7.5444067,-0.577324991,6.67964788,7.5000943,6.62955789
84.398946,7.48331477,7.52258751,-0.198173504,6.67837756,7.47889948,6.62912825
84.409438,7.74596669,7.50150259,0.494433113,6.67712907,7.45842783,6.62869952
84.419929,7.87400787,7.48112108,0.626806823,6.67590186,7.43864862,6.62827174
84.430421,7.28010989,7.4614081,-0.425791277,6.67469503,7.41952724,6.62784484
84.440912,6.70820393,7.44233813,-0.856816316,6.67350817,7.40103822,6.6274189
84.451404,7.48331477,7.42387979,0.243792914,6.67234047,7.38315048,6.62699383
84.461896,7.54983444,7.40600867,0.37924368,6.67119145,7.36583972,6.62656969
84.472387,7.93725393,7.38870151,0.740643248,6.67006067,7.34908282,6.62614651
84.482879,8,7.37193143,0.792507775,6.66894737,7.33285315,6.62572422
84.49337,6.164414,7.35567925,-1.09145098,6.66785125,7.31713164,6.6253029
84.503862,6.40312424,7.33992063,-0.967882429,6.66677161,7.3018942,6.62488247
84.514354,7.14142843,7.324637,-0.428028706,6.66570807,7.2871224,6.62446298
84.524845,7.41619849,7.3098106,0.326171563,6.66466028,7.27279859,6.62404446
84.535337,8,7.29542038,0.839392409,6.6636276,7.25890201,6.62362684
84.545828,7.07106781,7.2814518,-0.458676348,6.6626098,7.24541817,6.62321021
84.55632,7.07106781,7.26788572,-0.443641644,6.66160627,7.23232821,6.62279448
84.566812,7.41619849,7.25470782,0.401859019,6.66061673,7.21961793,6.6223797
84.577303,6.8556546,7.24190437,-0.621489961,6.65964088,7.20727373,6.6219659
84.587795,6.8556546,7.22945872,-0.611395225,6.65867818,7.1952792,6.62155302
84.598286,6.92820323,7.2173597,-0.537732709,6.65772845,7.18362324,6.62114113
84.608778,7.28010989,7.20559206,0.272979539,6.65679117,7.17229085,6.62073016
84.61927,6.8556546,7.19414466,-0.581798988,6.65586611,7.16127101,6.62032015
84.629761,7.54983444,7.18300679,0.60566298,6.65495305,7.15055312,6.61991113
84.640253,7.74596669,7.17216508,0.757496938,6.65405149,7.14012404,6.61950305
84.650744,7,7.16161089,-0.402008569,6.65316133,7.12997519,6.61909596
84.661236,6.78232998,7.15133195,-0.607455317,6.6522821,7.12009454,6.61868981
84.671728,6.244998,7.14131948,-0.946742563,6.65141361,7.11047342,6.61828463
84.682219,7.21110255,7.13156504,0.282023952,6.65055569,7.10110348,6.61788046
84.692711,8.06225775,7.12205781,0.969639077,6.64970792,7.09197412,6.61747722
84.703202,6.8556546,7.11279103,-0.507086212,6.6488702,7.08307863,6.61707501
84.713694,7.68114575,7.10375472,0.759862509,6.64804215,7.07440725,6.61667373
84.724186,7.48331477,7.09494191,0.623195684,6.64722361,7.0659531,6.61627344
84.734677,6,7.0863459,-1.04227918,6.64641443,7.05770957,6.61587417
84.745169,7.61577311,7.07795781,0.733358911,6.64561425,7.04966799,6.61547585
84.75566,6.92820323,7.06977235,-0.376256717,6.644823,7.0418231,6.61507855
84.766152,6.70820393,7.0617813,-0.594623719,6.64404035,7.03416689,6.61468222
84.776644,8.66025404,7.0539791,1.26738902,6.64326616,7.02669386,6.61428687
84.787135,7.54983444,7.04636036,0.709559072,6.64250032,7.01939873,6.61389256
84.797627,7.07106781,7.03891776,0.179304354,6.64174251,7.01227434,6.61349921
84.808118,6.40312424,7.0316471,-0.792794338,6.64099268,7.00531655,6.6131069
84.81861,7.81024968,7.02454158,0.886401768,6.64025053,6.99851872,6.61271555
84.829102,7.41619849,7.01759671,0.631349171,6.63951596,6.99187643,6.61232521
84.839593,7.21110255,7.01080814,0.447542636,6.63878889,6.98538542,6.61193591
84.850085,6.70820393,7.00416977,-0.544027424,6.638069,6.97903974,6.61154759
84.860576,7.68114575,6.99767826,0.826720927,6.6373563,6.97283608,6.61116032
84.871068,7.48331477,6.99132792,0.701417748,6.6366505,6.96676893,6.61077402
84.88156,6.78232998,6.9851151,-0.45031669,6.63595152,6.9608347,6.61038874
84.892051,6.78232998,6.97903628,-0.44351584,6.6352593,6.95502992,6.61000452
84.902543,6.8556546,6.97308633,-0.342683136,6.63457356,6.94934962,6.60962128
84.913034,6.8556546,6.96726257,-0.334077796,6.63389432,6.94379114,6.6092391
84.923526,6.08276253,6.96156023,-0.937442102,6.63322131,6.93834986,6.60885791
84.934018,6.08276253,6.95597631,-0.934459082,6.63255448,6.93302284,6.60847775
84.944509,6.08276253,6.95050793,-0.931528526,6.63189377,6.92780725,6.60809866
84.955001,6.92820323,6.94515075,-0.130182626,6.63123895,6.92269889,6.60772056
84.965492,6.78232998,6.93990262,-0.396954204,6.63059002,6.91769564,6.60734353
84.975984,6.08276253,6.93475949,-0.923036816,6.62994675,6.91279356,6.6069675
84.986476,6.244998,6.92971891,-0.827478649,6.62930911,6.90799027,6.60659251
84.996967,7.74596669,6.9247785,0.906194345,6.62867704,6.90328343,6.6062186
85.007459,7.14142843,6.91993456,0.470631348,6.62805034,6.89866947,6.60584569
85.01795,6.40312424,6.91518537,-0.71558447,6.62742902,6.89414668,6.60547387
85.028442,6.8556546,6.91052745,-0.234249554,6.62681287,6.8897117,6.60510306
85.038934,6.78232998,6.90595879,-0.351608889,6.62620186,6.88536257,6.6047333
85.049425,6.70820393,6.90147742,-0.439628809,6.62559596,6.88109736,6.60436462
85.059917,6.63324958,6.89708017,-0.51364442,6.62499496,6.87691301,6.60399696
85.070408,6.55743852,6.89276564,-0.579074364,6.62439891,6.87280814,6.6036304
85.0809,8,6.88853086,1.05426237,6.6238076,6.86877987,6.60326486
85.091392,6.63324958,6.88437414,-0.501123295,6.62322102,6.86482658,6.60290037
85.101883,6.70820393,6.88029385,-0.414837215,6.62263913,6.86094665,6.60253699
85.112375,7.28010989,6.87628726,0.635470404,6.62206177,6.85713747,6.60217463
85.122866,7.07106781,6.87235323,0.445774136,6.62148895,6.85339791,6.60181338
85.133358,7.34846923,6.86848919,0.692805913,6.62092052,6.84972548,6.60145316
85.14385,6.78232998,6.86469375,-0.286990884,6.62035644,6.84611883,6.60109401
85.154341,6.40312424,6.86096553,-0.67663971,6.6197967,6.84257663,6.60073597
85.164833,7.81024968,6.85730217,0.9761903,6.61924115,6.83909659,6.60037896
85.175324,6.70820393,6.85370276,-0.381443079,6.6186898,6.83567782,6.60002307
85.185816,6.92820323,6.85016503,0.279353177,6.61814251,6.83231815,6.59966823
85.196308,5.91607978,6.84668784,-0.964680288,6.61759927,6.82901645,6.59931446
85.206799,6.164414,6.84327004,-0.823927202,6.61706006,6.8257716,6.59896181
85.217291,7.87400787,6.83990955,1.01690625,6.61652472,6.82258162,6.59861022
85.227782,6.8556546,6.83660564,0.138017978,6.61599331,6.81944578,6.59825974
85.238274,6.70820393,6.83335634,-0.353768865,6.61546567,6.81636219,6.59791032
85.248766,6.63324958,6.83016068,-0.443746663,6.61494179,6.81332989,6.59756199
85.259257,6.55743852,6.8270177,-0.519210143,6.61442168,6.81034796,6.59721479
85.269749,7.14142843,6.82392557,0.563473921,6.61390518,6.80741466,6.59686865
85.28024,6.92820323,6.8208837,0.32759659,6.61339235,6.80452939,6.59652363
85.290732,6.32455532,6.81789037,-0.702378142,6.61288304,6.80169049,6.59617969
85.301224,7.14142843,6.81494476,0.571387498,6.61237725,6.79889718,6.59583685
85.311715,6.78232998,6.81204604,-0.172383461,6.61187498,6.79614866,6.59549514
85.322207,7.14142843,6.80919262,0.576398997,6.6113761,6.79344339,6.5951545
85.332698,6.32455532,6.80638403,-0.694138826,6.61088066,6.79078091,6.59481501
85.34319,7.14142843,6.80361873,0.581213987,6.61038852,6.78815975,6.59447659
85.353682,6.08276253,6.80089192,-0.847425155,6.60989547,6.78557924,6.59413928
85.364173,6.63324958,6.79821116,-0.406154627,6.60940997,6.78303872,6.59380311
85.374665,7.34846923,6.7955709,0.743571337,6.60892766,6.78053682,6.59346803
85.385156,6.92820323,6.79297074,0.367739701,6.60844859,6.77807318,6.5931341
85.395648,6.4807407,6.79040935,-0.556478795,6.60797262,6.77564648,6.59280125
85.40614,7.74596669,6.78788612,0.978815901,6.60749977,6.77325617,6.59246952
85.416631,7.41619849,6.78540049,0.794227923,6.60703006,6.77090169,6.59213895
85.427123,6.55743852,6.78295119,-0.474881738,6.60656334,6.76858181,6.59180947
85.437614,6.55743852,6.78053791,-0.472333978,6.60609969,6.76629626,6.59148115
85.448106,6.08276253,6.77815945,-0.833904621,6.60563897,6.76404386,6.59115392
85.458598,6.78232998,6.7758153,0.0807135632,6.60518121,6.76182414,6.59082783
85.469089,6.08276253,6.77350499,-0.831109173,6.60472641,6.75963663,6.5905029
85.479581,6.40312424,6.77122737,-0.606715033,6.60427445,6.75748023,6.59017906
85.490072,7.34846923,6.76898221,0.761240447,6.6038254,6.75535473,6.5898564
85.500564,6.32455532,6.76676843,-0.664991058,6.60337914,6.75325909,6.58953484
85.511056,6.8556546,6.7645856,0.301776408,6.60293568,6.75119289,6.58921442
85.521547,6.92820323,6.76243331,0.407148522,6.60249504,6.74915574,6.58889518
85.532039,6.32455532,6.76031055,-0.660117585,6.6020571,6.74714667,6.58857704
85.54253,7.07106781,6.75821712,0.559330573,6.60162193,6.74516549,6.58826008
85.553022,6.08276253,6.75615206,-0.820603152,6.60118941,6.74321128,6.58794424
85.563514,6.63324958,6.75411501,-0.347657062,6.60075956,6.74128369,6.58762954
85.574005,7.14142843,6.75210562,0.623957378,6.6003324,6.73938239,6.58731603
85.584497,6.92820323,6.75012296,0.421995577,6.59990782,6.73750649,6.58700363
85.594988,6.70820393,6.74816691,-0.199907419,6.59948588,6.73565586,6.58669242
85.60548,6.55743852,6.74623658,-0.434508979,6.59906647,6.73382966,6.58638233
85.615972,7.28010989,6.74433166,0.731968733,6.59864962,6.73202761,6.58607341
85.626463,5.65685425,6.74245187,-1.04192016,6.59823534,6.7302494,6.58576567
85.636955,6.244998,6.74059636,-0.703987474,6.59782352,6.72849426,6.58545906
85.647446,6.8556546,6.73876504,0.341891148,6.59741424,6.72676208,6.58515364
85.657938,6.63324958,6.73695712,-0.322036548,6.59700739,6.7250521,6.58484935
85.66843,6.70820393,6.73517233,-0.164220573,6.59660298,6.72336408,6.58454624
85.678921,6.244998,6.73341042,-0.698865093,6.59620104,6.72169777,6.58424432
85.689413,6.4807407,6.73167063,-0.500929071,6.59580147,6.72005245,6.58394354
85.699904,7,6.72995291,0.519660557,6.59540434,6.71842805,6.58364395
85.710396,6.70820393,6.72825651,-0.14160713,6.59500953,6.71682389,6.58334552
85.720888,7.28010989,6.72658123,0.743995065,6.59461708,6.71523975,6.58304825
85.731379,6.4807407,6.72492685,-0.494151952,6.59422701,6.71367543,6.58275219
85.741871,6.63324958,6.72329268,-0.300071826,6.59383921,6.71213027,6.58245728
85.752362,6.78232998,6.72167868,0.246274854,6.59345376,6.71060423,6.58216358
85.762854,6.164414,6.72008419,-0.745432884,6.59307056,6.70909669,6.58187103
85.773346,7.07106781,6.71850902,0.593766616,6.59268963,6.70760746,6.58157966
85.783837,6.8556546,6.71695299,0.372426657,6.59231099,6.70613636,6.58128951
85.794329,6.164414,6.71541547,-0.742294729,6.59193455,6.70468281,6.58100051
85.80482,7,6.71389644,0.534886495,6.59156037,6.70324677,6.58071273
85.815312,7.21110255,6.7123953,0.706192081,6.59118837,6.70182768,6.58042611
85.825804,6.92820323,6.71091188,0.466145199,6.59081856,6.70042538,6.58014068
85.836295,7.14142843,6.70944604,0.65725367,6.59045097,6.69903973,6.57985647
85.846787,6.32455532,6.7079972,-0.619226842,6.59008551,6.69767018,6.57957342
85.857278,6.70820393,6.70656535,0.0404793492,6.58972224,6.69631672,6.5792916
85.86777,7,6.70514995,0.543000967,6.58936107,6.69497883,6.57901095
85.878262,6.40312424,6.70375085,-0.548294279,6.58900204,6.69365638,6.57873149
85.888753,7.41619849,6.70236793,0.844884936,6.58864515,6.69234924,6.57845327
85.899245,6.78232998,6.70100066,0.285182964,6.58829033,6.69105692,6.57817621
85.909736,7.07106781,6.69964905,0.609441355,6.58793763,6.68977942,6.57790039
85.920228,6.63324958,6.69831258,-0.255074505,6.58758698,6.68851626,6.57762575
85.93072,6.78232998,6.69699116,0.292128095,6.5872384,6.68726733,6.57735231
85.941211,6.63324958,6.69568466,-0.249870122,6.5868919,6.68603252,6.57708011
85.951703,6.92820323,6.6943926,0.483539688,6.58654742,6.68481138,6.57680909
85.962194,5.29150262,6.693115,-1.18389712,6.586205,6.68360392,6.5765393
85.972686,6.78232998,6.6918514,0.300796577,6.58586457,6.68240971,6.57627071
85.983178,7,6.6906017,0.556235831,6.58552615,6.68122864,6.57600332
85.993669,5.56776436,6.6893658,-1.05905686,6.58518977,6.68006063,6.57573718
86.004161,6.164414,6.58485534,-0.648414482,6.58485534,6.57547223,6.57547223
86.014652,7,6.58452293,0.644575106,6.58452293,6.57520852,6.57520852
86.025144,6.8556546,6.58419246,0.521020286,6.58419246,6.57494601,6.57494601
86.035636,5.91607978,6.58386395,-0.817180623,6.58386395,6.57468471,6.57468471
86.046127,7.61577311,6.58353743,1.01599,6.58353743,6.57442467,6.57442467
86.056619,6.55743852,6.58321282,-0.160543747,6.58321282,6.57416582,6.57416582
86.06711,6.8556546,6.58289017,0.522268539,6.58289017,6.57390823,6.57390823
86.077602,7.61577311,6.58256942,1.01646627,6.58256942,6.57365184,6.57365184
86.088094,6.63324958,6.58225059,0.225829557,6.58225059,6.57339667,6.57339667
86.098585,6.63324958,6.5819337,0.226530089,6.5819337,6.57314276,6.57314276
86.109077,6.4807407,6.58161868,-0.317612939,6.58161868,6.57289006,6.57289006
86.119568,6.55743852,6.58130558,-0.154489657,6.58130558,6.57263861,6.57263861
86.13006,5.56776436,6.58099433,-1.00659325,6.58099433,6.57238837,6.57238837
86.140552,6.63324958,6.58068497,0.229269738,6.58068497,6.57213937,6.57213937
86.151043,6.40312424,6.5803775,-0.421014563,6.5803775,6.57189162,6.57189162
86.161535,5.83095189,6.58007186,-0.865517169,6.58007186,6.5716451,6.5716451
86.172026,6.63324958,6.57976811,0.231260605,6.57976811,6.57139983,6.57139983
86.182518,5.83095189,6.57946618,-0.865167201,6.57946618,6.57115578,6.57115578
86.19301,6.4807407,6.57916609,-0.313728211,6.57916609,6.57091298,6.57091298
86.203501,6.78232998,6.57886786,0.45106776,6.57886786,6.57067144,6.57067144
86.213993,6.63324958,6.57857143,0.233833603,6.57857143,6.57043112,6.57043112
86.224484,6.63324958,6.57827684,0.234462656,6.57827684,6.57019207,6.57019207
86.234976,7.28010989,6.57798405,0.837929498,6.57798405,6.56995424,6.56995424
86.245468,7.41619849,6.57769306,0.915699422,6.57769306,6.56971767,6.56971767
86.255959,6.32455532,6.57740389,-0.502840504,6.57740389,6.56948236,6.56948236
86.266451,7.61577311,6.5771165,1.01914504,6.5771165,6.56924829,6.56924829
86.276942,7,6.57683092,0.650514473,6.57683092,6.56901549,6.56901549
86.287434,5.91607978,6.5765471,-0.812691401,6.5765471,6.56878392,6.56878392
86.297926,6.164414,6.57626505,-0.641756222,6.57626505,6.5685536,6.5685536
86.308417,7.28010989,6.5759848,0.839121616,6.5759848,6.56832457,6.56832457
86.318909,7.14142843,6.57570629,0.752145022,6.57570629,6.56809677,6.56809677
86.3294,7.41619849,6.57542957,0.916934521,6.57542957,6.56787024,6.56787024
86.339892,7.21110255,6.57515458,0.797463462,6.57515458,6.56764496,6.56764496
86.350384,6.32455532,6.57488133,-0.500325908,6.57488133,6.56742094,6.56742094
[truncated: 383,037 more chars]
