# Supplementary material for: Phase Stability of Iron Nitride Fe4N at High Pressure—Pressure-Dependent Evolution of Phase Equilibria in the Fe–N System
Source: Materials (Basel). 2021 Jul 15;14(14):3963. doi: 10.3390/ma14143963 (PMC8307547; doi:10.3390/ma14143963)
Supplement: Supplementary file 1 [file materials-14-03963-s001.zip › xrd_data/4-250_riet.txt]

'y-axis saved as Sqrt(y)
'x,Yobs,Ycalc,Diff,fe4n,epsilon,Bkg
20,7.28010989,0,0,0,0,0
20.010492,7,0,0,0,0,0
20.020983,7.54983444,0,0,0,0,0
20.031475,6,0,0,0,0,0
20.041966,7.41619849,0,0,0,0,0
20.052458,8.30662386,0,0,0,0,0
20.06295,6.78232998,0,0,0,0,0
20.073441,6.55743852,0,0,0,0,0
20.083933,7.07106781,0,0,0,0,0
20.094424,6.8556546,0,0,0,0,0
20.104916,5.83095189,0,0,0,0,0
20.115408,6.78232998,0,0,0,0,0
20.125899,6.92820323,0,0,0,0,0
20.136391,6.63324958,0,0,0,0,0
20.146882,6.4807407,0,0,0,0,0
20.157374,7.68114575,0,0,0,0,0
20.167866,6.55743852,0,0,0,0,0
20.178357,6.4807407,0,0,0,0,0
20.188849,6.55743852,0,0,0,0,0
20.19934,7.41619849,0,0,0,0,0
20.209832,5.83095189,0,0,0,0,0
20.220324,6.78232998,0,0,0,0,0
20.230815,7.14142843,0,0,0,0,0
20.241307,5.74456265,0,0,0,0,0
20.251798,7.14142843,0,0,0,0,0
20.26229,6.55743852,0,0,0,0,0
20.272782,6.8556546,0,0,0,0,0
20.283273,7.28010989,0,0,0,0,0
20.293765,7.14142843,0,0,0,0,0
20.304256,7.21110255,0,0,0,0,0
20.314748,6.32455532,0,0,0,0,0
20.32524,6.70820393,0,0,0,0,0
20.335731,7.41619849,0,0,0,0,0
20.346223,6.8556546,0,0,0,0,0
20.356714,7.07106781,0,0,0,0,0
20.367206,7.28010989,0,0,0,0,0
20.377698,6.4807407,0,0,0,0,0
20.388189,6.70820393,0,0,0,0,0
20.398681,6.55743852,0,0,0,0,0
20.409172,6.70820393,0,0,0,0,0
20.419664,6.92820323,0,0,0,0,0
20.430156,7.61577311,0,0,0,0,0
20.440647,6.8556546,0,0,0,0,0
20.451139,7.34846923,0,0,0,0,0
20.46163,7.14142843,0,0,0,0,0
20.472122,6.78232998,0,0,0,0,0
20.482614,6.55743852,0,0,0,0,0
20.493105,6.78232998,0,0,0,0,0
20.503597,6.92820323,0,0,0,0,0
20.514088,6.32455532,0,0,0,0,0
20.52458,6.40312424,0,0,0,0,0
20.535072,7.54983444,0,0,0,0,0
20.545563,7.14142843,0,0,0,0,0
20.556055,6.4807407,0,0,0,0,0
20.566546,6.244998,0,0,0,0,0
20.577038,7.28010989,0,0,0,0,0
20.58753,7.54983444,0,0,0,0,0
20.598021,6.78232998,0,0,0,0,0
20.608513,6.55743852,0,0,0,0,0
20.619004,7.34846923,0,0,0,0,0
20.629496,7.68114575,0,0,0,0,0
20.639988,6.92820323,0,0,0,0,0
20.650479,7.81024968,0,0,0,0,0
20.660971,6.92820323,0,0,0,0,0
20.671462,6,0,0,0,0,0
20.681954,6.8556546,0,0,0,0,0
20.692446,6.78232998,0,0,0,0,0
20.702937,6.32455532,0,0,0,0,0
20.713429,6.55743852,0,0,0,0,0
20.72392,7.34846923,0,0,0,0,0
20.734412,7.07106781,0,0,0,0,0
20.744904,6.40312424,0,0,0,0,0
20.755395,7.61577311,0,0,0,0,0
20.765887,7.14142843,0,0,0,0,0
20.776378,6.244998,0,0,0,0,0
20.78687,7.28010989,0,0,0,0,0
20.797362,7.41619849,0,0,0,0,0
20.807853,6.164414,0,0,0,0,0
20.818345,7.21110255,0,0,0,0,0
20.828836,6.55743852,0,0,0,0,0
20.839328,6.8556546,0,0,0,0,0
20.84982,6.8556546,0,0,0,0,0
20.860311,6.40312424,0,0,0,0,0
20.870803,6.40312424,0,0,0,0,0
20.881294,6.244998,0,0,0,0,0
20.891786,6,0,0,0,0,0
20.902278,5.91607978,0,0,0,0,0
20.912769,6.8556546,0,0,0,0,0
20.923261,6.63324958,0,0,0,0,0
20.933752,6.32455532,0,0,0,0,0
20.944244,7.34846923,0,0,0,0,0
20.954736,7.07106781,0,0,0,0,0
20.965227,7.21110255,0,0,0,0,0
20.975719,6.55743852,0,0,0,0,0
20.98621,6.70820393,0,0,0,0,0
20.996702,7.14142843,0,0,0,0,0
21.007194,6.8556546,0,0,0,0,0
21.017685,7.07106781,0,0,0,0,0
21.028177,6.40312424,0,0,0,0,0
21.038668,6.244998,0,0,0,0,0
21.04916,7.41619849,0,0,0,0,0
21.059652,6.92820323,0,0,0,0,0
21.070143,6.63324958,0,0,0,0,0
21.080635,7,0,0,0,0,0
21.091126,7,0,0,0,0,0
21.101618,7.07106781,0,0,0,0,0
21.11211,6.92820323,0,0,0,0,0
21.122601,7.74596669,0,0,0,0,0
21.133093,6.164414,0,0,0,0,0
21.143584,6.55743852,0,0,0,0,0
21.154076,7.28010989,0,0,0,0,0
21.164568,6.4807407,0,0,0,0,0
21.175059,7.14142843,0,0,0,0,0
21.185551,7.07106781,0,0,0,0,0
21.196042,7,0,0,0,0,0
21.206534,7.07106781,0,0,0,0,0
21.217026,7.34846923,0,0,0,0,0
21.227517,6.244998,0,0,0,0,0
21.238009,7.07106781,0,0,0,0,0
21.2485,6.40312424,0,0,0,0,0
21.258992,6.63324958,0,0,0,0,0
21.269484,5.91607978,0,0,0,0,0
21.279975,6.8556546,0,0,0,0,0
21.290467,6.40312424,0,0,0,0,0
21.300958,6.63324958,0,0,0,0,0
21.31145,6.08276253,0,0,0,0,0
21.321942,6.70820393,0,0,0,0,0
21.332433,7.21110255,0,0,0,0,0
21.342925,5.91607978,0,0,0,0,0
21.353416,7.28010989,0,0,0,0,0
21.363908,6.8556546,0,0,0,0,0
21.3744,7.28010989,0,0,0,0,0
21.384891,7,0,0,0,0,0
21.395383,6.78232998,0,0,0,0,0
21.405874,6.32455532,0,0,0,0,0
21.416366,6,0,0,0,0,0
21.426858,6.63324958,0,0,0,0,0
21.437349,6.70820393,0,0,0,0,0
21.447841,7.07106781,0,0,0,0,0
21.458332,6.40312424,0,0,0,0,0
21.468824,6.08276253,0,0,0,0,0
21.479316,7.07106781,0,0,0,0,0
21.489807,6,0,0,0,0,0
21.500299,6.92820323,0,0,0,0,0
21.51079,6.78232998,0,0,0,0,0
21.521282,6.78232998,0,0,0,0,0
21.531774,6.4807407,0,0,0,0,0
21.542265,6.244998,0,0,0,0,0
21.552757,6,0,0,0,0,0
21.563248,6.40312424,0,0,0,0,0
21.57374,7.07106781,0,0,0,0,0
21.584232,7.14142843,0,0,0,0,0
21.594723,6.55743852,0,0,0,0,0
21.605215,6.4807407,0,0,0,0,0
21.615706,6.4807407,0,0,0,0,0
21.626198,6.78232998,0,0,0,0,0
21.63669,6.164414,0,0,0,0,0
21.647181,7.14142843,0,0,0,0,0
21.657673,7.81024968,0,0,0,0,0
21.668164,6.08276253,0,0,0,0,0
21.678656,6.55743852,0,0,0,0,0
21.689148,6.55743852,0,0,0,0,0
21.699639,6.4807407,0,0,0,0,0
21.710131,6.32455532,0,0,0,0,0
21.720622,6.70820393,0,0,0,0,0
21.731114,6.4807407,0,0,0,0,0
21.741606,7.21110255,0,0,0,0,0
21.752097,6.164414,0,0,0,0,0
21.762589,5.65685425,0,0,0,0,0
21.77308,7.21110255,0,0,0,0,0
21.783572,6.70820393,0,0,0,0,0
21.794064,6.8556546,0,0,0,0,0
21.804555,5.74456265,0,0,0,0,0
21.815047,6.92820323,0,0,0,0,0
21.825538,7.41619849,0,0,0,0,0
21.83603,6.55743852,0,0,0,0,0
21.846522,6,0,0,0,0,0
21.857013,6.8556546,0,0,0,0,0
21.867505,6.4807407,0,0,0,0,0
21.877996,7.74596669,0,0,0,0,0
21.888488,6.4807407,0,0,0,0,0
21.89898,6.63324958,0,0,0,0,0
21.909471,7.34846923,0,0,0,0,0
21.919963,7.21110255,0,0,0,0,0
21.930454,7.07106781,0,0,0,0,0
21.940946,6.32455532,0,0,0,0,0
21.951438,6.78232998,0,0,0,0,0
21.961929,6.55743852,0,0,0,0,0
21.972421,6.63324958,0,0,0,0,0
21.982912,7.41619849,0,0,0,0,0
21.993404,6.70820393,0,0,0,0,0
22.003896,6.92820323,0,0,0,0,0
22.014387,6.92820323,0,0,0,0,0
22.024879,6,0,0,0,0,0
22.03537,6.244998,0,0,0,0,0
22.045862,6.92820323,0,0,0,0,0
22.056354,6,0,0,0,0,0
22.066845,6,0,0,0,0,0
22.077337,6.40312424,0,0,0,0,0
22.087828,4.89897949,0,0,0,0,0
22.09832,7.34846923,0,0,0,0,0
22.108812,6.63324958,0,0,0,0,0
22.119303,6.244998,0,0,0,0,0
22.129795,7.14142843,0,0,0,0,0
22.140286,6.63324958,0,0,0,0,0
22.150778,7.41619849,0,0,0,0,0
22.16127,6.70820393,0,0,0,0,0
22.171761,6.92820323,0,0,0,0,0
22.182253,5.91607978,0,0,0,0,0
22.192744,6.4807407,0,0,0,0,0
22.203236,7,0,0,0,0,0
22.213728,6.4807407,0,0,0,0,0
22.224219,7.54983444,0,0,0,0,0
22.234711,7.07106781,0,0,0,0,0
22.245202,7,0,0,0,0,0
22.255694,6.244998,0,0,0,0,0
22.266186,6.92820323,0,0,0,0,0
22.276677,6.78232998,0,0,0,0,0
22.287169,6.55743852,0,0,0,0,0
22.29766,7.07106781,0,0,0,0,0
22.308152,5.91607978,0,0,0,0,0
22.318644,5.56776436,0,0,0,0,0
22.329135,7.28010989,0,0,0,0,0
22.339627,6.40312424,0,0,0,0,0
22.350118,6.8556546,0,0,0,0,0
22.36061,6.32455532,0,0,0,0,0
22.371102,6,0,0,0,0,0
22.381593,6.164414,0,0,0,0,0
22.392085,5.65685425,0,0,0,0,0
22.402576,6.40312424,0,0,0,0,0
22.413068,5.91607978,0,0,0,0,0
22.42356,6.32455532,0,0,0,0,0
22.434051,6.164414,0,0,0,0,0
22.444543,7.07106781,0,0,0,0,0
22.455034,5.91607978,0,0,0,0,0
22.465526,6.8556546,0,0,0,0,0
22.476018,6.55743852,0,0,0,0,0
22.486509,6.92820323,0,0,0,0,0
22.497001,6.78232998,0,0,0,0,0
22.507492,6.63324958,0,0,0,0,0
22.517984,6.164414,0,0,0,0,0
22.528476,6.8556546,0,0,0,0,0
22.538967,6.164414,0,0,0,0,0
22.549459,6.78232998,0,0,0,0,0
22.55995,5.91607978,0,0,0,0,0
22.570442,5.91607978,0,0,0,0,0
22.580934,6.78232998,0,0,0,0,0
22.591425,6.40312424,0,0,0,0,0
22.601917,7.54983444,0,0,0,0,0
22.612408,6.164414,0,0,0,0,0
22.6229,6.92820323,0,0,0,0,0
22.633392,6.8556546,0,0,0,0,0
22.643883,6.92820323,0,0,0,0,0
22.654375,6.8556546,0,0,0,0,0
22.664866,6,0,0,0,0,0
22.675358,6.8556546,0,0,0,0,0
22.68585,6.70820393,0,0,0,0,0
22.696341,6.8556546,0,0,0,0,0
22.706833,6.92820323,0,0,0,0,0
22.717324,6.92820323,0,0,0,0,0
22.727816,5.65685425,0,0,0,0,0
22.738308,6.70820393,0,0,0,0,0
22.748799,6.63324958,0,0,0,0,0
22.759291,6.78232998,0,0,0,0,0
22.769782,5.74456265,0,0,0,0,0
22.780274,6.164414,0,0,0,0,0
22.790766,5.65685425,0,0,0,0,0
22.801257,6.63324958,0,0,0,0,0
22.811749,6.70820393,0,0,0,0,0
22.82224,7.41619849,0,0,0,0,0
22.832732,6.70820393,0,0,0,0,0
22.843224,7,0,0,0,0,0
22.853715,6.70820393,0,0,0,0,0
22.864207,6.244998,0,0,0,0,0
22.874698,6.244998,0,0,0,0,0
22.88519,6,0,0,0,0,0
22.895682,6.08276253,0,0,0,0,0
22.906173,5.91607978,0,0,0,0,0
22.916665,6.244998,0,0,0,0,0
22.927156,5.09901951,0,0,0,0,0
22.937648,7.34846923,0,0,0,0,0
22.94814,6.63324958,0,0,0,0,0
22.958631,6.40312424,0,0,0,0,0
22.969123,6.78232998,0,0,0,0,0
22.979614,7.28010989,0,0,0,0,0
22.990106,6.164414,0,0,0,0,0
23.000598,6.40312424,0,0,0,0,0
23.011089,6.63324958,0,0,0,0,0
23.021581,6.08276253,0,0,0,0,0
23.032072,6.32455532,0,0,0,0,0
23.042564,7.28010989,0,0,0,0,0
23.053056,6.78232998,0,0,0,0,0
23.063547,6.4807407,0,0,0,0,0
23.074039,6.244998,0,0,0,0,0
23.08453,6.164414,0,0,0,0,0
23.095022,6.4807407,0,0,0,0,0
23.105514,6.164414,0,0,0,0,0
23.116005,6.63324958,0,0,0,0,0
23.126497,6.55743852,0,0,0,0,0
23.136988,6.63324958,0,0,0,0,0
23.14748,6,0,0,0,0,0
23.157972,6,0,0,0,0,0
23.168463,6.244998,0,0,0,0,0
23.178955,6.8556546,0,0,0,0,0
23.189446,5.56776436,0,0,0,0,0
23.199938,5.65685425,0,0,0,0,0
23.21043,6.55743852,0,0,0,0,0
23.220921,6.63324958,0,0,0,0,0
23.231413,6.92820323,0,0,0,0,0
23.241904,5.74456265,0,0,0,0,0
23.252396,6.40312424,0,0,0,0,0
23.262888,6.32455532,0,0,0,0,0
23.273379,6.244998,0,0,0,0,0
23.283871,6.70820393,0,0,0,0,0
23.294362,7,0,0,0,0,0
23.304854,5.91607978,0,0,0,0,0
23.315346,6.63324958,0,0,0,0,0
23.325837,6.164414,0,0,0,0,0
23.336329,5.65685425,0,0,0,0,0
23.34682,5.47722558,0,0,0,0,0
23.357312,6.164414,0,0,0,0,0
23.367804,6.70820393,0,0,0,0,0
23.378295,6.40312424,0,0,0,0,0
23.388787,7.14142843,0,0,0,0,0
23.399278,6.08276253,0,0,0,0,0
23.40977,6.4807407,0,0,0,0,0
23.420262,6,0,0,0,0,0
23.430753,5.83095189,0,0,0,0,0
23.441245,6.8556546,0,0,0,0,0
23.451736,5.83095189,0,0,0,0,0
23.462228,6.40312424,0,0,0,0,0
23.47272,6.40312424,0,0,0,0,0
23.483211,6,0,0,0,0,0
23.493703,5.56776436,0,0,0,0,0
23.504194,7.21110255,0,0,0,0,0
23.514686,6.63324958,0,0,0,0,0
23.525178,7.61577311,0,0,0,0,0
23.535669,6.63324958,0,0,0,0,0
23.546161,6.8556546,0,0,0,0,0
23.556652,6.08276253,0,0,0,0,0
23.567144,7,0,0,0,0,0
23.577636,5.56776436,0,0,0,0,0
23.588127,6.08276253,0,0,0,0,0
23.598619,6.4807407,0,0,0,0,0
23.60911,5.56776436,0,0,0,0,0
23.619602,6.164414,0,0,0,0,0
23.630094,6.40312424,0,0,0,0,0
23.640585,6.40312424,0,0,0,0,0
23.651077,5.83095189,0,0,0,0,0
23.661568,7.14142843,0,0,0,0,0
23.67206,7,0,0,0,0,0
23.682552,6.32455532,0,0,0,0,0
23.693043,5.83095189,0,0,0,0,0
23.703535,5.91607978,0,0,0,0,0
23.714026,6.244998,0,0,0,0,0
23.724518,6.164414,0,0,0,0,0
23.73501,7.41619849,0,0,0,0,0
23.745501,6.08276253,0,0,0,0,0
23.755993,6.164414,0,0,0,0,0
23.766484,6.63324958,0,0,0,0,0
23.776976,6.244998,0,0,0,0,0
23.787468,5.65685425,0,0,0,0,0
23.797959,5.65685425,0,0,0,0,0
23.808451,5.65685425,0,0,0,0,0
23.818942,6.63324958,0,0,0,0,0
23.829434,5.38516481,0,0,0,0,0
23.839926,7.21110255,0,0,0,0,0
23.850417,7.14142843,0,0,0,0,0
23.860909,6.4807407,0,0,0,0,0
23.8714,6.08276253,0,0,0,0,0
23.881892,5.74456265,0,0,0,0,0
23.892384,5.09901951,0,0,0,0,0
23.902875,6,0,0,0,0,0
23.913367,6.08276253,0,0,0,0,0
23.923858,6.4807407,0,0,0,0,0
23.93435,5.56776436,0,0,0,0,0
23.944842,6.55743852,0,0,0,0,0
23.955333,6.40312424,0,0,0,0,0
23.965825,6.244998,0,0,0,0,0
23.976316,7,0,0,0,0,0
23.986808,5.38516481,0,0,0,0,0
23.9973,6.40312424,0,0,0,0,0
24.007791,6.63324958,0,0,0,0,0
24.018283,6.08276253,0,0,0,0,0
24.028774,6.40312424,0,0,0,0,0
24.039266,6.8556546,0,0,0,0,0
24.049758,5.83095189,0,0,0,0,0
24.060249,6.40312424,0,0,0,0,0
24.070741,6.63324958,0,0,0,0,0
24.081232,6.63324958,0,0,0,0,0
24.091724,5.83095189,0,0,0,0,0
24.102216,6.244998,0,0,0,0,0
24.112707,6.70820393,0,0,0,0,0
24.123199,5.83095189,0,0,0,0,0
24.13369,5.91607978,0,0,0,0,0
24.144182,6.164414,0,0,0,0,0
24.154674,6.8556546,0,0,0,0,0
24.165165,6,0,0,0,0,0
24.175657,6.08276253,0,0,0,0,0
24.186148,7.14142843,0,0,0,0,0
24.19664,6.55743852,0,0,0,0,0
24.207132,6.78232998,0,0,0,0,0
24.217623,6.55743852,0,0,0,0,0
24.228115,6.244998,0,0,0,0,0
24.238606,6.63324958,0,0,0,0,0
24.249098,6,0,0,0,0,0
24.25959,5.83095189,0,0,0,0,0
24.270081,5.47722558,0,0,0,0,0
24.280573,6.4807407,0,0,0,0,0
24.291064,6.4807407,0,0,0,0,0
24.301556,6.244998,0,0,0,0,0
24.312048,6.164414,0,0,0,0,0
24.322539,6.164414,0,0,0,0,0
24.333031,6.4807407,0,0,0,0,0
24.343522,5.91607978,0,0,0,0,0
24.354014,6.08276253,0,0,0,0,0
24.364506,6.08276253,0,0,0,0,0
24.374997,5.74456265,0,0,0,0,0
24.385489,6.70820393,0,0,0,0,0
24.39598,7.21110255,0,0,0,0,0
24.406472,6.55743852,0,0,0,0,0
24.416964,6.4807407,0,0,0,0,0
24.427455,6.70820393,0,0,0,0,0
24.437947,6.78232998,0,0,0,0,0
24.448438,5.83095189,0,0,0,0,0
24.45893,6.70820393,0,0,0,0,0
24.469422,5.83095189,0,0,0,0,0
24.479913,7,0,0,0,0,0
24.490405,6.164414,0,0,0,0,0
24.500896,6.63324958,0,0,0,0,0
24.511388,6.63324958,0,0,0,0,0
24.52188,6.55743852,0,0,0,0,0
24.532371,6.4807407,0,0,0,0,0
24.542863,6,0,0,0,0,0
24.553354,5.83095189,0,0,0,0,0
24.563846,6.164414,0,0,0,0,0
24.574338,6.70820393,0,0,0,0,0
24.584829,6,0,0,0,0,0
24.595321,5.83095189,0,0,0,0,0
24.605812,5.74456265,0,0,0,0,0
24.616304,5.47722558,0,0,0,0,0
24.626796,5.91607978,0,0,0,0,0
24.637287,5.91607978,0,0,0,0,0
24.647779,6.4807407,0,0,0,0,0
24.65827,6.32455532,0,0,0,0,0
24.668762,6.40312424,0,0,0,0,0
24.679254,5.91607978,0,0,0,0,0
24.689745,6,0,0,0,0,0
24.700237,6.4807407,0,0,0,0,0
24.710728,5.74456265,0,0,0,0,0
24.72122,5.74456265,0,0,0,0,0
24.731712,6.08276253,0,0,0,0,0
24.742203,6.70820393,0,0,0,0,0
24.752695,7.14142843,0,0,0,0,0
24.763186,5.91607978,0,0,0,0,0
24.773678,6.40312424,0,0,0,0,0
24.78417,6.244998,0,0,0,0,0
24.794661,5.47722558,0,0,0,0,0
24.805153,5.74456265,0,0,0,0,0
24.815644,6.55743852,0,0,0,0,0
24.826136,6.164414,0,0,0,0,0
24.836628,6,0,0,0,0,0
24.847119,6.08276253,0,0,0,0,0
24.857611,6.244998,0,0,0,0,0
24.868102,4.89897949,0,0,0,0,0
24.878594,6.70820393,0,0,0,0,0
24.889086,5.74456265,0,0,0,0,0
24.899577,6.40312424,0,0,0,0,0
24.910069,5.74456265,0,0,0,0,0
24.92056,6.164414,0,0,0,0,0
24.931052,6.4807407,0,0,0,0,0
24.941544,6.32455532,0,0,0,0,0
24.952035,5.38516481,0,0,0,0,0
24.962527,5.91607978,0,0,0,0,0
24.973018,5.91607978,0,0,0,0,0
24.98351,6.244998,0,0,0,0,0
24.994002,6,0,0,0,0,0
25.004493,6.40312424,0,0,0,0,0
25.014985,5.74456265,0,0,0,0,0
25.025476,6.78232998,0,0,0,0,0
25.035968,5.19615242,0,0,0,0,0
25.04646,6.08276253,0,0,0,0,0
25.056951,5.91607978,0,0,0,0,0
25.067443,6.70820393,0,0,0,0,0
25.077934,6.63324958,0,0,0,0,0
25.088426,6.164414,0,0,0,0,0
25.098918,5.91607978,0,0,0,0,0
25.109409,6.164414,0,0,0,0,0
25.119901,6.164414,0,0,0,0,0
25.130392,5.47722558,0,0,0,0,0
25.140884,6.40312424,0,0,0,0,0
25.151376,6.244998,0,0,0,0,0
25.161867,6.08276253,0,0,0,0,0
25.172359,5.91607978,0,0,0,0,0
25.18285,5.65685425,0,0,0,0,0
25.193342,5.91607978,0,0,0,0,0
25.203834,6.08276253,0,0,0,0,0
25.214325,6.8556546,0,0,0,0,0
25.224817,6.4807407,0,0,0,0,0
25.235308,6.8556546,0,0,0,0,0
25.2458,5.29150262,0,0,0,0,0
25.256292,5.83095189,0,0,0,0,0
25.266783,6.92820323,0,0,0,0,0
25.277275,6.08276253,0,0,0,0,0
25.287766,6.4807407,0,0,0,0,0
25.298258,6.40312424,0,0,0,0,0
25.30875,6.164414,0,0,0,0,0
25.319241,6,0,0,0,0,0
25.329733,6.4807407,0,0,0,0,0
25.340224,7.07106781,0,0,0,0,0
25.350716,6.55743852,0,0,0,0,0
25.361208,6.92820323,0,0,0,0,0
25.371699,5.56776436,0,0,0,0,0
25.382191,6.55743852,0,0,0,0,0
25.392682,6.164414,0,0,0,0,0
25.403174,5.65685425,0,0,0,0,0
25.413666,5.74456265,0,0,0,0,0
25.424157,7.21110255,0,0,0,0,0
25.434649,5.74456265,0,0,0,0,0
25.44514,5.83095189,0,0,0,0,0
25.455632,7,0,0,0,0,0
25.466124,5.74456265,0,0,0,0,0
25.476615,6.08276253,0,0,0,0,0
25.487107,6.40312424,0,0,0,0,0
25.497598,5.65685425,0,0,0,0,0
25.50809,5.83095189,0,0,0,0,0
25.518582,6,0,0,0,0,0
25.529073,5.91607978,0,0,0,0,0
25.539565,5.83095189,0,0,0,0,0
25.550056,5.91607978,0,0,0,0,0
25.560548,5.74456265,0,0,0,0,0
25.57104,5.91607978,0,0,0,0,0
25.581531,6.40312424,0,0,0,0,0
25.592023,6.164414,0,0,0,0,0
25.602514,6.32455532,0,0,0,0,0
25.613006,6.55743852,0,0,0,0,0
25.623498,6.08276253,0,0,0,0,0
25.633989,6.164414,0,0,0,0,0
25.644481,5.38516481,0,0,0,0,0
25.654972,5.74456265,0,0,0,0,0
25.665464,6.78232998,0,0,0,0,0
25.675956,5.65685425,0,0,0,0,0
25.686447,4.58257569,0,0,0,0,0
25.696939,6.8556546,0,0,0,0,0
25.70743,6.08276253,0,0,0,0,0
25.717922,6.164414,0,0,0,0,0
25.728414,6.70820393,0,0,0,0,0
25.738905,5.91607978,0,0,0,0,0
25.749397,5.56776436,0,0,0,0,0
25.759888,6.55743852,0,0,0,0,0
25.77038,5.74456265,0,0,0,0,0
25.780872,7.21110255,0,0,0,0,0
25.791363,6.244998,0,0,0,0,0
25.801855,5.47722558,0,0,0,0,0
25.812346,6.63324958,0,0,0,0,0
25.822838,6,0,0,0,0,0
25.83333,5.65685425,0,0,0,0,0
25.843821,5.83095189,0,0,0,0,0
25.854313,6.55743852,0,0,0,0,0
25.864804,6.55743852,0,0,0,0,0
25.875296,5.47722558,0,0,0,0,0
25.885788,6,0,0,0,0,0
25.896279,6.55743852,0,0,0,0,0
25.906771,6.32455532,0,0,0,0,0
25.917262,5,0,0,0,0,0
25.927754,6.40312424,0,0,0,0,0
25.938246,5.38516481,0,0,0,0,0
25.948737,6,0,0,0,0,0
25.959229,5.91607978,0,0,0,0,0
25.96972,6.164414,0,0,0,0,0
25.980212,6.08276253,0,0,0,0,0
25.990704,6.164414,0,0,0,0,0
26.001195,5.29150262,0,0,0,0,0
26.011687,5.65685425,0,0,0,0,0
26.022178,5.47722558,0,0,0,0,0
26.03267,5,0,0,0,0,0
26.043162,5.56776436,0,0,0,0,0
26.053653,5.74456265,0,0,0,0,0
26.064145,5.91607978,0,0,0,0,0
26.074636,5.38516481,0,0,0,0,0
26.085128,5.74456265,0,0,0,0,0
26.09562,6.08276253,0,0,0,0,0
26.106111,6.244998,0,0,0,0,0
26.116603,5.19615242,0,0,0,0,0
26.127094,6.70820393,0,0,0,0,0
26.137586,5,0,0,0,0,0
26.148078,6.164414,0,0,0,0,0
26.158569,6.32455532,0,0,0,0,0
26.169061,5.83095189,0,0,0,0,0
26.179552,5.19615242,0,0,0,0,0
26.190044,5.56776436,0,0,0,0,0
26.200536,6.32455532,0,0,0,0,0
26.211027,6.32455532,0,0,0,0,0
26.221519,6.164414,0,0,0,0,0
26.23201,4.79583152,0,0,0,0,0
26.242502,6.55743852,0,0,0,0,0
26.252994,6.8556546,0,0,0,0,0
26.263485,7.07106781,0,0,0,0,0
26.273977,5.29150262,0,0,0,0,0
26.284468,5.74456265,0,0,0,0,0
26.29496,6.32455532,0,0,0,0,0
26.305452,6,0,0,0,0,0
26.315943,5.19615242,0,0,0,0,0
26.326435,6.164414,0,0,0,0,0
26.336926,5.83095189,0,0,0,0,0
26.347418,4.79583152,0,0,0,0,0
26.35791,6.32455532,0,0,0,0,0
26.368401,5.74456265,0,0,0,0,0
26.378893,6.32455532,0,0,0,0,0
26.389384,6.244998,0,0,0,0,0
26.399876,4.69041576,0,0,0,0,0
26.410368,5.83095189,0,0,0,0,0
26.420859,6,0,0,0,0,0
26.431351,4.58257569,0,0,0,0,0
26.441842,5.38516481,0,0,0,0,0
26.452334,6,0,0,0,0,0
26.462826,5.65685425,0,0,0,0,0
26.473317,6.08276253,0,0,0,0,0
26.483809,5.56776436,0,0,0,0,0
26.4943,4.89897949,0,0,0,0,0
26.504792,5,0,0,0,0,0
26.515284,5.65685425,0,0,0,0,0
26.525775,6.40312424,0,0,0,0,0
26.536267,6.244998,0,0,0,0,0
26.546758,6.4807407,0,0,0,0,0
26.55725,6.08276253,0,0,0,0,0
26.567742,5.09901951,0,0,0,0,0
26.578233,5.74456265,0,0,0,0,0
26.588725,5.83095189,0,0,0,0,0
26.599216,5.65685425,0,0,0,0,0
26.609708,6.08276253,0,0,0,0,0
26.6202,6,0,0,0,0,0
26.630691,6.40312424,0,0,0,0,0
26.641183,5.47722558,0,0,0,0,0
26.651674,5.19615242,0,0,0,0,0
26.662166,6.08276253,0,0,0,0,0
26.672658,6.08276253,0,0,0,0,0
26.683149,6.08276253,0,0,0,0,0
26.693641,6.32455532,0,0,0,0,0
26.704132,5.91607978,0,0,0,0,0
26.714624,5.91607978,0,0,0,0,0
26.725116,6.08276253,0,0,0,0,0
26.735607,5.65685425,0,0,0,0,0
26.746099,5.09901951,0,0,0,0,0
26.75659,5.19615242,0,0,0,0,0
26.767082,4.89897949,0,0,0,0,0
26.777574,5.91607978,0,0,0,0,0
26.788065,6.08276253,0,0,0,0,0
26.798557,5.74456265,0,0,0,0,0
26.809048,6.40312424,0,0,0,0,0
26.81954,6.244998,0,0,0,0,0
26.830032,4.69041576,0,0,0,0,0
26.840523,5.83095189,0,0,0,0,0
26.851015,5.65685425,0,0,0,0,0
26.861506,5.74456265,0,0,0,0,0
26.871998,5.47722558,0,0,0,0,0
26.88249,5.09901951,0,0,0,0,0
26.892981,5.91607978,0,0,0,0,0
26.903473,5,0,0,0,0,0
26.913964,5.83095189,0,0,0,0,0
26.924456,7,0,0,0,0,0
26.934948,6,0,0,0,0,0
26.945439,6.164414,0,0,0,0,0
26.955931,6.40312424,0,0,0,0,0
26.966422,5.65685425,0,0,0,0,0
26.976914,5.09901951,0,0,0,0,0
26.987406,6.4807407,0,0,0,0,0
26.997897,5.83095189,5.09114834,0.860118337,5.09113994,4.90558036,4.90557164
27.008389,5.38516481,5.111403,0.523222518,5.11139462,4.91268403,4.91267531
27.01888,6.08276253,5.13293404,0.974591449,5.13292568,4.9197467,4.91973798
27.029372,5.83095189,5.15589385,0.821619162,5.15588552,4.92676995,4.92676124
27.039864,5.83095189,5.18044124,0.806542405,5.18043295,4.93375338,4.93374467
27.050355,6.164414,5.20674533,0.978605472,5.20673707,4.94069655,4.94068785
27.060847,5.65685425,5.23499045,0.64951043,5.23498223,4.94760105,4.94759235
27.071338,6,5.26535147,0.857116405,5.26534328,4.9544658,4.9544571
27.08183,6,5.29800607,0.837850778,5.29799793,4.96129235,4.96128365
27.092322,6.244998,5.33309919,0.954933931,5.33309109,4.96808027,4.96807158
27.102813,5.38516481,5.37072853,0.12015104,5.37072048,4.97482917,4.97482048
27.113305,5.47722558,5.41092562,0.257487783,5.41091762,4.98154056,4.98153187
27.123796,6.63324958,5.4535877,1.08612241,5.45357975,4.9882134,4.98820471
27.134288,6.32455532,5.49845696,0.908899533,5.49844907,4.99484918,4.99484049
27.14478,6,5.5450313,0.674513674,5.54502347,5.00144749,5.00143881
27.155271,6.32455532,5.59251436,0.855593922,5.59250659,5.00800793,5.00799925
27.165763,5.65685425,5.63978002,0.130668378,5.63977231,5.01453199,5.01452331
27.176254,6,5.68532446,0.560959479,5.6853168,5.02101862,5.02100994
27.186746,5.74456265,5.7273441,0.131219468,5.72733648,5.02746929,5.02746061
27.197238,6.32455532,5.7638306,0.748815548,5.76382302,5.03388359,5.03387492
27.207729,5.91607978,5.79280074,0.35111115,5.7927932,5.04026113,5.04025246
27.218221,5,5.81258041,-0.901432419,5.81257288,5.04660334,5.04659467
27.228712,6.4807407,5.8220737,0.811583022,5.82206617,5.05290921,5.05290054
27.239204,5.91607978,5.82098246,0.30837854,5.82097493,5.05918016,5.05917149
27.249696,6.4807407,5.80986227,0.819071688,5.80985472,5.06541579,5.06540712
27.260187,6.08276253,5.79002189,0.541055122,5.7900143,5.07161571,5.07160705
27.270679,5.74456265,5.76327499,-0.136793054,5.76326736,5.07778131,5.07777265
27.28117,5.47722558,5.73166366,-0.504418559,5.73165598,5.08391161,5.08390295
27.291662,6.40312424,5.69716846,0.840211745,5.69716072,5.09000798,5.08999932
27.302154,5.65685425,5.66153656,-0.068427377,5.66152876,5.09607003,5.09606137
27.312645,5.47722558,5.62617125,-0.385934805,5.6261634,5.10209738,5.10208873
27.323137,5.19615242,5.59209885,-0.629242744,5.59209095,5.10809138,5.10808272
27.333628,5.38516481,5.5600215,-0.418158693,5.56001354,5.11405106,5.11404241
27.34412,5.19615242,5.53034882,-0.578097221,5.53034081,5.11997777,5.11996911
27.354612,5.56776436,5.50328348,0.253930859,5.50327542,5.1258711,5.12586245
27.365103,5.83095189,5.47887122,0.59336386,5.47886312,5.13173071,5.13172205
27.375595,5.56776436,5.45704556,0.332744354,5.45703741,5.13755787,5.13754922
27.386086,6.08276253,5.43768185,0.803169145,5.43767367,5.14335168,5.14334303
27.396578,4.89897949,5.42061019,-0.722240058,5.42060197,5.14911341,5.14910476
27.40707,6.164414,5.40564838,0.871071539,5.40564013,5.15484268,5.15483403
27.417561,5.65685425,5.3926094,0.51404752,5.39260112,5.16053915,5.1605305
27.428053,5.74456265,5.38130738,0.602706619,5.38129907,5.16620406,5.16619541
27.438544,6,5.37157059,0.792735398,5.37156226,5.17183651,5.17182786
27.449036,5.74456265,5.36323603,0.617516494,5.36322768,5.17743776,5.17742911
27.459528,5.09901951,5.35615707,-0.507087329,5.3561487,5.18300743,5.18299878
27.470019,6,5.35020054,0.806101395,5.35019215,5.18854517,5.18853651
27.480511,5.65685425,5.34524515,0.558219579,5.34523675,5.1940522,5.19404355
27.491002,5.19615242,5.34118419,-0.380830365,5.34117577,5.19952764,5.19951899
27.501494,6,5.33792098,0.81368238,5.33791255,5.2049727,5.20496405
27.511986,5.65685425,5.33537054,0.566995335,5.33536209,5.21038703,5.21037838
27.522477,5.83095189,5.33345712,0.705333095,5.33344866,5.21577027,5.21576162
27.532969,5.19615242,5.33211307,-0.368728413,5.33210459,5.22112361,5.22111496
27.54346,7.07106781,5.33127883,1.31901061,5.33127034,5.2264462,5.22643755
27.553952,6,5.33090123,0.817984581,5.33089273,5.2317392,5.23173055
27.564444,4.89897949,5.33093322,-0.657231875,5.33092472,5.23700228,5.23699362
27.574935,6.164414,5.33133287,0.912732785,5.33132435,5.24223508,5.24222642
27.585427,4.89897949,5.332063,-0.658090809,5.33205448,5.24743875,5.2474301
27.595918,6.40312424,5.33309027,1.03442446,5.33308174,5.25261247,5.25260382
27.60641,6.164414,5.33438529,0.911059117,5.33437675,5.25775738,5.25774872
27.616902,5.65685425,5.33592152,0.566509248,5.33591298,5.26287312,5.26286446
27.627393,5.09901951,5.33767513,-0.488523916,5.33766658,5.26795937,5.2679507
27.637885,5.47722558,5.33962528,0.370945142,5.33961672,5.27301724,5.27300858
27.648376,6,5.34175256,0.811324496,5.341744,5.27804592,5.27803726
27.658868,5.83095189,5.34404032,0.697790495,5.34403175,5.28304652,5.28303786
27.66936,5.74456265,5.34647297,0.630943482,5.3464644,5.2880187,5.28801003
27.679851,6.164414,5.34903638,0.902982624,5.34902781,5.29296214,5.29295347
27.690343,6.08276253,5.35171855,0.8550111,5.35170997,5.29787791,5.29786924
27.700834,6.164414,5.35450762,0.899947989,5.35449903,5.30276524,5.30275657
27.711326,5.65685425,5.35739388,0.547229719,5.35738529,5.30762518,5.30761651
27.721818,5.83095189,5.36036778,0.685991338,5.36035918,5.31245742,5.31244875
27.732309,6.164414,5.36342056,0.894982372,5.36341195,5.31726164,5.31725296
27.742801,5.74456265,5.36654513,0.614831293,5.36653652,5.32203889,5.32203021
27.753292,4.79583152,5.36973389,-0.757563443,5.36972528,5.32678839,5.32677971
27.763784,6.244998,5.37298109,0.933818456,5.37297247,5.33151119,5.33150251
27.774276,6.164414,5.37628059,0.887768785,5.37627197,5.33620698,5.33619829
27.784767,5.74456265,5.37962674,0.604099255,5.37961811,5.34087543,5.34086674
27.795259,5.29150262,5.38301531,-0.302510641,5.38300668,5.34551758,5.34550889
27.80575,5.56776436,5.38644119,0.425820586,5.38643256,5.35013266,5.35012397
27.816242,5.09901951,5.38990094,-0.539334246,5.3898923,5.3547217,5.35471301
27.826734,6.244998,5.39339047,0.922825836,5.39338183,5.35928438,5.35927569
27.837225,6.4807407,5.39690599,1.04107382,5.39689735,5.3638204,5.3638117
27.847717,5.65685425,5.40044499,0.506368698,5.40043634,5.36833075,5.36832205
27.858208,4.89897949,5.40400386,-0.710650671,5.40399521,5.3728147,5.372806
27.8687,5.19615242,5.40758058,-0.459813182,5.40757193,5.37727323,5.37726452
27.879192,5.74456265,5.41117233,0.577399616,5.41116367,5.38170604,5.38169733
27.889683,5.29150262,5.41477645,-0.351103726,5.41476778,5.38611283,5.38610412
27.900175,5.56776436,5.41839151,0.386487848,5.41838283,5.39049457,5.39048585
27.910666,5.47722558,5.42201484,0.234969643,5.42200617,5.39485054,5.39484182
27.921158,6,5.42564533,0.757861907,5.42563665,5.39918169,5.39917297
27.93165,6.32455532,5.42928094,0.946189402,5.42927225,5.40348774,5.40347902
27.942141,6.08276253,5.43291975,0.806128266,5.43291106,5.4077684,5.40775967
27.952633,4.89897949,5.43656102,-0.733199516,5.43655232,5.41202459,5.41201586
27.963124,6.40312424,5.44020269,0.981285659,5.440194,5.41625563,5.41624689
27.973616,4.35889894,5.44384423,-1.04160707,5.44383553,5.42046244,5.4204537
27.984108,6.32455532,5.44748411,0.936520802,5.4474754,5.42464473,5.42463599
27.994599,5.56776436,5.45112091,0.341531042,5.4511122,5.42880222,5.42879348
28.005091,5.47722558,5.45475432,0.149904139,5.45474561,5.43293583,5.43292708
28.015582,5.83095189,5.45838272,0.610384448,5.458374,5.43704488,5.43703613
28.026074,5.91607978,5.46200592,0.673850027,5.4619972,5.44113026,5.4411215
28.036566,5.91607978,5.46562278,0.671160939,5.46561405,5.4451917,5.44518294
28.047057,5.09901951,5.46923218,-0.608451039,5.46922345,5.44922891,5.44922015
28.057549,6.55743852,5.47283412,1.04144342,5.47282538,5.4532428,5.45323403
28.06804,5.47722558,5.47642725,0.0282546052,5.47641851,5.45723269,5.45722392
28.078532,5.47722558,5.48001165,-0.052783316,5.48000291,5.46119946,5.46119069
28.089024,4.58257569,5.48358641,-0.949215842,5.48357766,5.46514284,5.46513406
28.099515,5.19615242,5.48715065,-0.539442514,5.4871419,5.46906256,5.46905378
28.110007,5.29150262,5.49070456,-0.446320439,5.4906958,5.47295948,5.47295069
28.120498,5,5.49424699,-0.703027021,5.49423823,5.47683296,5.47682417
28.13099,4.58257569,5.4977782,-0.956662168,5.49776943,5.48068384,5.48067505
28.141482,5.38516481,5.50129744,-0.340782379,5.50128866,5.48451187,5.48450307
28.151973,5.38516481,5.504804,-0.345888984,5.50479522,5.48831678,5.48830798
28.162465,5.56776436,5.5082982,0.243856857,5.50828941,5.4920994,5.49209059
28.172956,5.38516481,5.51177904,-0.355828942,5.51177026,5.49585912,5.49585031
28.183448,5.29150262,5.5152469,-0.473016146,5.5152381,5.49959675,5.49958794
28.19394,5.09901951,5.51870114,-0.647828393,5.51869234,5.50331204,5.50330322
28.204431,6,5.52214118,0.691273331,5.52213238,5.50700474,5.50699591
28.214923,5.38516481,5.52556743,-0.374703382,5.52555863,5.51067565,5.51066682
28.225414,5.47722558,5.52897901,-0.227493807,5.5289702,5.51432417,5.51431534
28.235906,6.08276253,5.53237635,0.741880169,5.53236753,5.5179511,5.51794226
28.246398,5.09901951,5.53575892,-0.660862624,5.5357501,5.52155618,5.52154734
28.256889,5.83095189,5.53912623,0.540208907,5.5391174,5.52513918,5.52513033
28.267381,6.244998,5.54247875,0.838164216,5.54246991,5.52870087,5.52869202
28.277872,5,5.54581567,-0.738793386,5.54580683,5.53224068,5.53223182
28.288364,5.29150262,5.54913748,-0.507577445,5.54912864,5.53575937,5.5357505
28.298856,6.244998,5.55244374,0.832198447,5.55243489,5.5392567,5.53924783
28.309347,6,5.555734,0.666532817,5.55572515,5.54273243,5.54272355
28.319839,5.74456265,5.55900878,0.430759641,5.55899992,5.54618732,5.54617844
28.33033,5.83095189,5.56226734,0.518347914,5.56225847,5.54962082,5.54961193
28.340822,6.78232998,5.5655102,1.10309555,5.56550133,5.55303365,5.55302476
28.351314,5.56776436,5.56873697,-0.0311865707,5.56872809,5.5564256,5.5564167
28.361805,5.38516481,5.57194725,-0.432183342,5.57193837,5.55979642,5.55978752
28.372297,5.29150262,5.57514159,-0.53257766,5.5751327,5.56314686,5.56313796
28.382788,6.78232998,5.5783193,1.09727421,5.57831041,5.56647637,5.56646746
28.39328,5.74456265,5.58148093,0.403833769,5.58147203,5.56978567,5.56977675
28.403772,5.47722558,5.58462613,-0.327720236,5.58461722,5.57307453,5.5730656
28.414263,5.29150262,5.58775454,-0.544290284,5.58774562,5.57634273,5.5763338
28.424755,5.47722558,5.59086671,-0.337107006,5.59085779,5.57959098,5.57958205
28.435246,4.79583152,5.59396201,-0.893381492,5.59395309,5.58281876,5.58280982
28.445738,6.70820393,5.59704101,1.05411713,5.59703208,5.58602676,5.58601781
28.45623,4.89897949,5.60010336,-0.837331403,5.60009443,5.58921476,5.58920581
28.466721,6.40312424,5.60314877,0.894413479,5.60313982,5.59238255,5.59237359
28.477213,5.47722558,5.60617777,-0.359099149,5.60616883,5.59553082,5.59552186
28.487704,5.19615242,5.60918979,-0.642679835,5.60918084,5.59865906,5.59865009
28.498196,5.65685425,5.61218538,0.211350105,5.61217642,5.60176794,5.60175896
28.508688,5.47722558,5.61516425,-0.371400956,5.61515528,5.60485725,5.60484826
28.519179,5.38516481,5.61812609,-0.48266063,5.61811712,5.60792678,5.60791779
28.529671,5.91607978,5.62107148,0.543146667,5.6210625,5.6109772,5.6109682
28.540162,6.55743852,5.62399985,0.966146299,5.62399087,5.61400801,5.61399901
28.550654,5.38516481,5.62691177,-0.491677699,5.62690277,5.61701988,5.61701087
28.561146,5.38516481,5.62980695,-0.49461312,5.62979795,5.62001259,5.62000358
28.571637,6.08276253,5.63268512,0.670878086,5.63267612,5.62298595,5.62297692
28.582129,5.83095189,5.63554686,0.442046419,5.63553785,5.62594059,5.62593156
28.59262,5.65685425,5.63839162,0.135877274,5.6383826,5.62887605,5.62886701
28.603112,6.08276253,5.64121995,0.664486703,5.64121093,5.63179295,5.63178391
28.613604,4.35889894,5.64403161,-1.13363692,5.64402258,5.6346911,5.63468205
28.624095,6,5.64682634,0.594284156,5.6468173,5.6375703,5.63756125
28.634587,5.74456265,5.6496047,0.308152474,5.64959565,5.64043118,5.64042212
28.645078,5.56776436,5.65236617,-0.290863906,5.65235712,5.64327328,5.64326421
28.65557,5.65685425,5.65511132,0.0417484529,5.65510225,5.64609721,5.64608813
28.666062,5.83095189,5.65783988,0.416067315,5.65783082,5.64890277,5.64889369
28.676553,5.74456265,5.66055165,0.289846511,5.66054257,5.65168979,5.6516807
28.687045,5.19615242,5.66324715,-0.683443286,5.66323806,5.65445886,5.65444977
28.697536,6.244998,5.6659259,0.760967869,5.66591681,5.65720954,5.65720044
28.708028,5.56776436,5.66858845,-0.317528086,5.66857935,5.65994243,5.65993332
28.71852,4.69041576,5.67123456,-0.990362965,5.67122546,5.66265733,5.66264821
28.729011,5,5.67386403,-0.820892214,5.67385491,5.66535407,5.66534495
28.739503,5.91607978,5.67647738,0.489491989,5.67646825,5.66803324,5.6680241
28.749994,6.08276253,5.67907414,0.635364767,5.67906501,5.67069439,5.67068525
28.760486,5.19615242,5.68165486,-0.69678005,5.68164572,5.67333811,5.67332896
28.770978,6,5.68421931,0.561943667,5.68421017,5.67596422,5.67595506
28.781469,5.91607978,5.6867673,0.478865829,5.68675815,5.67857254,5.67856338
28.791961,5.56776436,5.68929934,-0.348618671,5.68929018,5.68116364,5.68115447
28.802452,6.08276253,5.69181499,0.625257978,5.69180582,5.6837371,5.68372792
28.812944,4.47213595,5.69431477,-1.10552196,5.69430559,5.68629349,5.6862843
28.823436,6.4807407,5.69679848,0.885405118,5.69678929,5.68883262,5.68882342
28.833927,6.32455532,5.69926592,0.790752429,5.69925673,5.69135432,5.69134512
28.844419,4.58257569,5.7017176,-1.05789504,5.7017084,5.69385916,5.69384995
28.85491,5.19615242,5.7041531,-0.712741664,5.7041439,5.69634672,5.6963375
28.865402,6,5.70657293,0.541689091,5.70656371,5.69881754,5.69880831
28.875894,5.91607978,5.70897689,0.45508559,5.70896767,5.70127145,5.70126222
28.886385,4.79583152,5.7113648,-0.956835031,5.71135557,5.70370831,5.70369906
28.896877,6.40312424,5.71373716,0.83029337,5.71372792,5.70612862,5.70611937
28.907368,5.19615242,5.71609355,-0.721069436,5.71608431,5.70853201,5.70852275
28.91786,5.65685425,5.71843449,-0.248153653,5.71842523,5.710919,5.71090973
28.928352,4.69041576,5.72075977,-1.01505862,5.7207505,5.71328942,5.71328015
28.938843,5.09901951,5.72306923,-0.789968172,5.72305995,5.71564313,5.71563384
28.949335,5.74456265,5.72536335,0.138561529,5.72535407,5.71798063,5.71797133
28.959826,5.19615242,5.72764174,-0.72903314,5.72763245,5.72030154,5.72029224
28.970318,5.09901951,5.72990489,-0.794282929,5.72989558,5.72260638,5.72259707
28.98081,4.69041576,5.73215261,-1.02065511,5.7321433,5.72489498,5.72488566
28.991301,6.244998,5.73438474,0.714572079,5.73437542,5.72716721,5.72715788
29.001793,6.4807407,5.73660176,0.86263488,5.73659243,5.72942354,5.7294142
29.012284,4.58257569,5.73880329,-1.07528024,5.73879395,5.73166363,5.73165428
29.022776,6,5.74098979,0.508930455,5.74098045,5.73388795,5.7338786
29.033268,4.79583152,5.74316111,-0.973308575,5.74315175,5.73609637,5.736087
29.043759,4.89897949,5.74531707,-0.91996608,5.74530771,5.73828873,5.73827935
29.054251,5.38516481,5.74745815,-0.601908088,5.74744878,5.74046552,5.74045613
29.064742,5.38516481,5.74958398,-0.603671415,5.7495746,5.74262638,5.74261698
29.075234,5.47722558,5.75169502,-0.523898314,5.75168563,5.74477179,5.74476238
29.085726,5.19615242,5.7537911,-0.746752086,5.7537817,5.7469016,5.74689219
29.096217,5.29150262,5.75587208,-0.681446593,5.75586267,5.74901568,5.74900626
29.106709,5.47722558,5.7579384,-0.529823394,5.75792898,5.75111449,5.75110506
29.1172,5.65685425,5.75998972,-0.321147121,5.75998029,5.75319769,5.75318825
29.127692,5.47722558,5.76202648,-0.533667408,5.76201704,5.75526574,5.75525629
29.138184,5.65685425,5.76404852,-0.327405359,5.76403907,5.7573185,5.75730904
29.148675,5.65685425,5.7660557,-0.330456434,5.76604625,5.75935583,5.75934637
29.159167,5.38516481,5.76804846,-0.618775935,5.768039,5.7613782,5.76136872
29.169658,5.65685425,5.77002647,-0.336410788,5.77001699,5.76338526,5.76337577
29.18015,5.83095189,5.77199014,0.242820418,5.77198065,5.76537747,5.76536797
29.190642,5.38516481,5.77393934,-0.623517867,5.77392984,5.76735468,5.76734517
29.201133,5.65685425,5.77587393,-0.344992287,5.77586442,5.76931677,5.76930726
29.211625,6.55743852,5.77779432,0.882974631,5.77778481,5.77126418,5.77125466
29.222116,5.56776436,5.77970021,-0.460364909,5.77969068,5.77319659,5.77318706
29.232608,5,5.781592,-0.884076921,5.78158246,5.77511443,5.77510488
29.2431,5.91607978,5.78346956,0.364156869,5.78346001,5.77701757,5.77700801
29.253591,5.65685425,5.78533275,-0.358438979,5.78532319,5.77890589,5.77889632
29.264083,5.65685425,5.78718199,-0.36100933,5.78717242,5.7807798,5.78077022
29.274574,6,5.78901696,0.459328905,5.78900738,5.78263901,5.78262942
29.285066,6,5.79083806,0.457342254,5.79082847,5.78448392,5.78447432
29.295558,5.65685425,5.79264517,-0.368498201,5.79263557,5.78631442,5.78630481
29.306049,5.56776436,5.79443817,-0.476102726,5.79442856,5.78813039,5.78812077
29.316541,5.74456265,5.79621744,-0.227276901,5.79620781,5.78993223,5.78992259
29.327032,4.79583152,5.79798269,-1.001075,5.79797305,5.79171965,5.79171
29.337524,5.47722558,5.7997343,-0.567898516,5.79972466,5.79349304,5.79348339
29.348016,5.09901951,5.80147216,-0.83812448,5.8014625,5.7952523,5.79524264
29.358507,5.65685425,5.80319614,-0.382546591,5.80318648,5.79699731,5.79698764
29.368999,5.29150262,5.80490663,-0.716522163,5.80489696,5.79872846,5.79871877
29.37949,5.65685425,5.80660335,-0.386974284,5.80659366,5.80044547,5.80043577
29.389982,5,5.80828665,-0.899047638,5.80827696,5.80214872,5.80213901
29.400474,5.65685425,5.80995644,-0.391282754,5.80994673,5.80383811,5.80382838
29.410965,5.19615242,5.8116126,-0.784512701,5.81160288,5.80551352,5.80550379
29.421457,5.56776436,5.81325549,-0.495470612,5.81324576,5.80717533,5.80716559
29.431948,5.38516481,5.81488484,-0.655530348,5.8148751,5.80882327,5.80881352
29.44244,5.47722558,5.81650102,-0.582473558,5.81649127,5.81045772,5.81044796
29.452932,5.56776436,5.81810391,-0.500339433,5.81809414,5.81207857,5.81206879
29.463423,5.56776436,5.81969341,-0.50192534,5.81968363,5.81368571,5.81367592
29.473915,5.56776436,5.82126987,-0.5034933,5.82126007,5.81527951,5.81526971
29.484406,5.47722558,5.82283303,-0.587883875,5.82282322,5.81685971,5.81684989
29.494898,5.83095189,5.82438323,0.0810472863,5.82437342,5.81842666,5.81841684
29.50539,6,5.82592038,0.417228495,5.82591056,5.81998027,5.81997043
29.515881,5.74456265,5.82744438,-0.287891875,5.82743454,5.82152044,5.82151059
29.526373,5.91607978,5.82895555,0.295168136,5.8289457,5.82304751,5.82303765
29.536864,6.164414,5.83045367,0.577893012,5.83044381,5.82456124,5.82455137
29.547356,6.4807407,5.83193905,0.805482243,5.83192918,5.82606198,5.8260521
29.557848,5.91607978,5.83341161,0.287520734,5.83340172,5.82754963,5.82753973
29.568339,5.47722558,5.83487124,-0.59803484,5.83486135,5.82902409,5.82901418
29.578831,5.65685425,5.83631828,-0.423631952,5.83630837,5.8304857,5.83047578
29.589322,6.08276253,5.83775249,0.494984893,5.83774256,5.83193422,5.83192429
29.599814,5.65685425,5.83917418,-0.426989381,5.83916424,5.83336999,5.83336005
29.610306,5.29150262,5.84058327,-0.740999764,5.84057332,5.83479292,5.83478296
29.620797,5.65685425,5.84197967,-0.430262038,5.84196971,5.83620291,5.83619294
29.631289,4.89897949,5.84336369,-0.971794322,5.84335371,5.83760029,5.8375903
29.64178,4.89897949,5.84473511,-0.972499676,5.84472512,5.83898483,5.83897484
29.652272,6.244998,5.84609423,0.631588292,5.84608423,5.84035686,5.84034685
29.662764,6.244998,5.84744097,0.630521238,5.84743095,5.84171628,5.84170625
29.673255,5.74456265,5.84877524,-0.322819756,5.84876522,5.84306301,5.84305297
29.683747,5.65685425,5.85009735,-0.439594243,5.85008731,5.84439736,5.84438731
29.694238,5.09901951,5.85140708,-0.86740277,5.85139703,5.84571912,5.84570906
29.70473,6,5.85270473,0.383790661,5.85269466,5.84702859,5.84701852
29.715222,7,5.85399021,1.07051847,5.85398013,5.8483257,5.84831561
29.725713,5.83095189,5.85526346,-0.15592165,5.85525336,5.84961035,5.84960025
29.736205,5,5.85652474,-0.925486219,5.85651464,5.85088285,5.85087274
29.746696,5.56776436,5.85777387,-0.538525312,5.85776376,5.852143,5.85213288
29.757188,5.91607978,5.85901113,0.238890454,5.859001,5.85339109,5.85338095
29.76768,5.91607978,5.86023644,0.236311953,5.8602263,5.85462704,5.85461688
29.778171,5.83095189,5.86144973,-0.174636298,5.86143957,5.85585077,5.8558406
29.788663,5.83095189,5.86265127,-0.178043183,5.8626411,5.85706258,5.85705239
29.799154,5.47722558,5.86384087,-0.621783964,5.86383069,5.85826226,5.85825207
29.809646,5.83095189,5.86501881,-0.184572247,5.86500861,5.8594501,5.85943989
29.820138,5.83095189,5.86618501,-0.187704853,5.86617479,5.86062603,5.86061581
29.830629,6.08276253,5.8673394,0.464136976,5.86732917,5.86178998,5.86177974
29.841121,5.19615242,5.86848224,-0.819957207,5.868472,5.86294221,5.86293196
29.851612,5.19615242,5.86961337,-0.820646664,5.86960311,5.86408255,5.86407229
29.862104,5.83095189,5.87073303,-0.199452092,5.87072276,5.86521127,5.86520099
29.872596,5.29150262,5.87184116,-0.761799541,5.87183088,5.86632829,5.86631799
29.883087,5.65685425,5.8729377,-0.464847771,5.8729274,5.86743355,5.86742324
29.893579,5.47722558,5.87402289,-0.6299185,5.87401258,5.86852732,5.86851699
29.90407,5.47722558,5.87509658,-0.630770164,5.87508624,5.86960941,5.86959907
29.914562,5.09901951,5.87615899,-0.881555149,5.87614865,5.87068009,5.87066974
29.925054,5.09901951,5.87721009,-0.882151105,5.87719972,5.87173929,5.87172892
29.935545,5.65685425,5.87824979,-0.470526877,5.87823942,5.87278696,5.87277657
29.946037,5.74456265,5.87927835,-0.367036381,5.87926796,5.87382333,5.87381293
29.956528,5.91607978,5.88029561,0.189167053,5.8802852,5.87484826,5.87483784
29.96702,5.38516481,5.8813018,-0.704369925,5.88129138,5.87586197,5.87585154
29.977512,4.58257569,5.88229686,-1.14005314,5.88228643,5.87686441,5.87685397
29.988003,5.19615242,5.88328074,-0.828932037,5.88327029,5.87785554,5.87784508
29.998495,5.91607978,5.88425367,0.178398734,5.88424321,5.87883558,5.8788251
30.008986,6.164414,5.88521551,0.52839237,5.88520502,5.87980438,5.87979389
30.019478,6.32455532,5.88616646,0.6621094,5.88615597,5.88076218,5.88075167
30.02997,5.65685425,5.88710649,-0.479846059,5.88709598,5.88170891,5.88169839
30.040461,6.08276253,5.88803554,0.441278813,5.88802501,5.88264453,5.88263399
30.050953,5.83095189,5.88895383,-0.240835902,5.88894328,5.88356927,5.88355871
30.061444,5.29150262,5.88986122,-0.77353642,5.88985065,5.88448298,5.88447241
30.071936,6.8556546,5.89075792,0.982291546,5.89074734,5.88538588,5.88537529
30.082428,5.74456265,5.89164389,-0.38351172,5.89163329,5.88627792,5.88626732
30.092919,5.38516481,5.89251907,-0.71228805,5.89250846,5.88715906,5.88714844
30.103411,6.08276253,5.89338369,0.435176796,5.89337306,5.88802951,5.88801887
30.113902,6.4807407,5.8942376,0.765834904,5.89422696,5.88888913,5.88887848
30.124394,6.164414,5.89508101,0.518973018,5.89507035,5.88973814,5.88972747
30.134886,4.58257569,5.89591388,-1.14600968,5.8959032,5.89057649,5.89056581
30.145377,5.65685425,5.89673616,-0.489777406,5.89672547,5.89140414,5.89139344
30.155869,6,5.89754805,0.320081164,5.89753734,5.89222129,5.89221057
30.16636,5.19615242,5.89834943,-0.837971962,5.89833871,5.89302782,5.89301708
30.176852,6.08276253,5.8991405,0.428511416,5.89912975,5.89382392,5.89381317
30.187344,6.244998,5.8999212,0.587432374,5.89991044,5.89460955,5.89459879
30.197835,5.91607978,5.90069152,0.124049446,5.90068074,5.89538469,5.8953739
30.208327,5.19615242,5.90145162,-0.839820933,5.90144083,5.89614951,5.89613871
30.218818,6.55743852,5.90220141,0.80946718,5.9021906,5.89690391,5.89689309
30.22931,6,5.90294106,0.311542843,5.90293023,5.89764806,5.89763723
30.239802,5.47722558,5.90367053,-0.653027531,5.90365969,5.89838195,5.89837109
30.250293,5.83095189,5.9043898,-0.270994289,5.90437894,5.89910552,5.89909465
30.260785,6.32455532,5.90509904,0.647654448,5.90508815,5.89981897,5.89980808
30.271276,6.164414,5.90579814,0.508542881,5.90578724,5.90052218,5.90051127
30.281768,5.74456265,5.90648728,-0.402398606,5.90647637,5.90121534,5.90120441
30.29226,5.91607978,5.90716643,0.0944105343,5.9071555,5.90189841,5.90188746
30.302751,6.164414,5.90783556,0.506535724,5.90782461,5.90257136,5.90256039
30.313243,5.65685425,5.90849483,-0.501637902,5.90848386,5.90323436,5.90322338
30.323734,5.56776436,5.90914416,-0.584277156,5.90913317,5.90388732,5.90387632
30.334226,5.91607978,5.90978369,0.0793479089,5.90977268,5.9045304,5.90451938
30.344718,6.8556546,5.91041341,0.972235151,5.91040238,5.90516358,5.90515254
30.355209,5.74456265,5.91103329,-0.408008142,5.91102225,5.90578682,5.90577577
30.365701,4.79583152,5.91164348,-1.05632001,5.91163242,5.90640029,5.90638922
30.376192,4.12310563,5.91224391,-1.33758674,5.91223283,5.90700391,5.90699282
30.386684,5.74456265,5.91283471,-0.410209786,5.91282361,5.90759782,5.90758671
30.397176,6.32455532,5.91341588,0.64120156,5.91340476,5.90818201,5.90817088
30.407667,6.55743852,5.91398738,0.802154063,5.91397624,5.90875645,5.9087453
30.418159,6.244998,5.91454937,0.574846614,5.91453821,5.90932129,5.90931012
30.42865,5.65685425,5.91510176,-0.508180592,5.91509059,5.90987645,5.90986526
30.439142,6.164414,5.91564471,0.498767778,5.91563351,5.91042208,5.91041087
30.449634,5.29150262,5.91617818,-0.790364193,5.91616696,5.91095816,5.91094694
30.460125,5.91607978,5.91670217,-0.0249476127,5.91669093,5.91148468,5.91147343
30.470617,5.83095189,5.9172168,-0.293708879,5.91720554,5.91200176,5.9119905
30.481108,5.74456265,5.91772202,-0.416124225,5.91771074,5.91250935,5.91249806
30.4916,5.09901951,5.91821795,-0.905095815,5.91820665,5.91300758,5.91299627
30.502092,5.83095189,5.91870457,-0.296230788,5.91869326,5.91349642,5.91348509
30.512583,6.08276253,5.91918189,0.404451038,5.91917055,5.91397588,5.91396453
30.523075,6.244998,5.91965001,0.570392836,5.91963865,5.91444607,5.9144347
30.533566,5.74456265,5.92010889,-0.418982388,5.92009751,5.91490694,5.91489555
30.544058,5.74456265,5.92055864,-0.419518763,5.92054724,5.91535861,5.9153472
30.55455,5.74456265,5.92099925,-0.420043576,5.92098783,5.91580107,5.91578964
30.565041,4.79583152,5.92143072,-1.0609426,5.92141928,5.91623432,5.91622287
30.575533,5.91607978,5.92185316,-0.075982735,5.9218417,5.91665846,5.91664699
30.586024,5.65685425,5.92226652,-0.515181783,5.92225504,5.91707345,5.91706196
30.596516,5.83095189,5.92267091,-0.302851475,5.92265941,5.91747941,5.9174679
30.607008,6.32455532,5.92306633,0.63363159,5.9230548,5.91787632,5.91786479
30.617499,6.55743852,5.92345277,0.796232226,5.92344122,5.91826419,5.91825263
30.627991,5.65685425,5.92383033,-0.516697282,5.92381876,5.91864311,5.91863154
30.638482,4.58257569,5.92419898,-1.15828463,5.92418739,5.91901306,5.91900146
30.648974,6,5.92455882,0.274665578,5.92454721,5.91937412,5.9193625
30.659466,6.32455532,5.92490984,0.632175195,5.92489821,5.91972631,5.91971467
30.669957,6.164414,5.92525205,0.489041871,5.9252404,5.92006961,5.92005795
30.680449,5.56776436,5.92558554,-0.598181558,5.92557386,5.92040413,5.92039244
30.69094,5.38516481,5.92591027,-0.735353975,5.92589857,5.92072984,5.92071813
30.701432,6.244998,5.92622635,0.564598659,5.92621463,5.92104682,5.92103509
30.711924,4.69041576,5.92653377,-1.11180844,5.92652203,5.92135508,5.92134332
30.722415,5,5.92683253,-0.962721421,5.92682077,5.92165462,5.92164284
30.732907,5.65685425,5.92712273,-0.519873522,5.92711094,5.92194554,5.92193373
30.743398,5.65685425,5.92740433,-0.520144289,5.92739252,5.92222779,5.92221597
30.75389,6.63324958,5.92767742,0.839983426,5.92766559,5.92250149,5.92248964
30.764382,6.32455532,5.92794201,0.629772425,5.92793015,5.92276661,5.92275474
30.774873,4.89897949,5.9281981,-1.01450412,5.92818622,5.92302318,5.92301129
30.785365,6.32455532,5.92844578,0.629372342,5.92843387,5.92327127,5.92325935
30.795856,6.40312424,5.92868501,0.68879549,5.92867308,5.92351087,5.92349892
30.806348,6.4807407,5.92891588,0.742849119,5.92890393,5.92374204,5.92373008
30.81684,6,5.92913841,0.266198412,5.92912643,5.92396481,5.92395282
30.827331,5.74456265,5.92935258,-0.429872,5.92934058,5.92417918,5.92416716
30.837823,6.32455532,5.92955849,0.628487735,5.92954646,5.92438521,5.92437317
30.848314,5.47722558,5.92975611,-0.672703897,5.92974406,5.92458291,5.92457085
30.858806,5.47722558,5.92994551,-0.672844662,5.92993344,5.92477234,5.92476025
30.869298,5.38516481,5.93012672,-0.738215354,5.93011461,5.92495351,5.92494139
30.879789,5.74456265,5.93029973,-0.430972249,5.9302876,5.92512643,5.92511429
30.890281,5.91607978,5.93046461,-0.119936747,5.93045245,5.92529117,5.925279
30.900772,5.74456265,5.93062136,-0.431345232,5.93060918,5.92544772,5.92543553
30.911264,4.89897949,5.93077003,-1.01577091,5.93075783,5.92559615,5.92558393
30.921756,5.74456265,5.93091065,-0.431680441,5.93089842,5.92573646,5.92572422
30.932247,5.38516481,5.93104322,-0.738835853,5.93103097,5.92586868,5.92585642
30.942739,6.244998,5.93116781,0.560205486,5.93115553,5.92599287,5.92598057
30.95323,6.4807407,5.93128442,0.741253183,5.93127211,5.92610901,5.9260967
30.963722,6.4807407,5.93139309,0.741179877,5.93138076,5.92621718,5.92620483
30.974214,6.4807407,5.93149385,0.741111903,5.93148149,5.92631737,5.926305
30.984705,6.55743852,5.93158671,0.791107968,5.93157432,5.92640963,5.92639723
30.995197,5.56776436,5.93167172,-0.603247343,5.93165931,5.92649398,5.92648156
31.005688,5.19615242,5.9317489,-0.857669209,5.93173646,5.92657045,5.926558
31.01618,6,5.93181828,0.261116303,5.93180581,5.92663907,5.92662659
31.026672,5,5.93187988,-0.965339258,5.93186739,5.92669987,5.92668737
31.037163,6.08276253,5.93193374,0.388366825,5.93192122,5.92675287,5.92674034
31.047655,6,5.93197988,0.260806666,5.93196734,5.92679811,5.92678555
31.058146,5.56776436,5.93201833,-0.603534564,5.93200576,5.92683561,5.92682302
31.068638,6.40312424,5.93204912,0.686349119,5.93203652,5.9268654,5.92685279
31.07913,6.4807407,5.93207228,0.740721552,5.93205965,5.92688751,5.92687487
31.089621,5.38516481,5.93208783,-0.73954244,5.93207517,5.92690197,5.9268893
31.100113,5.47722558,5.9320958,-0.674440673,5.93208311,5.9269088,5.9268961
31.110604,5.47722558,5.93209621,-0.674440981,5.93208349,5.92690803,5.9268953
31.121096,5.47722558,5.9320891,-0.674435711,5.93207636,5.92689969,5.92688693
31.131588,6.244998,5.93207449,0.559395659,5.93206172,5.9268838,5.92687102
31.142079,4.89897949,5.93205242,-1.01640195,5.93203961,5.92686041,5.92684759
31.152571,5.47722558,5.93202289,-0.674386624,5.93201006,5.92682952,5.92681667
31.163062,6.164414,5.93198596,0.482107921,5.93197309,5.92679117,5.92677829
31.173554,5.47722558,5.93194162,-0.674326366,5.93192873,5.92674538,5.92673248
31.184046,6.164414,5.93188993,0.482207503,5.931877,5.92669218,5.92667925
31.194537,5.91607978,5.9318309,-0.125503446,5.93181794,5.92663161,5.92661865
31.205029,6.32455532,5.93176455,0.626730219,5.93175157,5.92656368,5.92655069
31.21552,5.29150262,5.93169093,-0.800117683,5.93167792,5.92648843,5.9264754
31.226012,6.164414,5.93161004,0.482497629,5.931597,5.92640587,5.92639281
31.236504,6.32455532,5.93152192,0.62692376,5.93150884,5.92631603,5.92630295
31.246995,5.91607978,5.9314266,-0.123882278,5.93141349,5.92621896,5.92620584
31.257487,5.91607978,5.93132409,-0.123467856,5.93131096,5.92611465,5.9261015
31.267978,6.08276253,5.93121444,0.389291776,5.93120127,5.92600316,5.92598998
31.27847,5.47722558,5.93109765,-0.673700289,5.93108445,5.92588449,5.92587127
31.288962,6,5.93097376,0.262728449,5.93096053,5.92575867,5.92574543
31.299453,6.08276253,5.93084281,0.38976881,5.93082954,5.92562575,5.92561247
31.309945,6.63324958,5.93070479,0.838179453,5.93069149,5.92548572,5.92547241
31.320436,6.08276253,5.93055975,0.390131743,5.93054642,5.92533865,5.9253253
31.330928,5.83095189,5.93040771,-0.315366156,5.93039434,5.92518451,5.92517114
31.34142,6.40312424,5.93024869,0.687659474,5.93023529,5.92502337,5.92500996
31.351911,5.74456265,5.93008273,-0.430720425,5.9300693,5.92485524,5.9248418
31.362403,5.91607978,5.92990984,-0.117601245,5.92989637,5.92468014,5.92466667
31.372894,6.164414,5.92973006,0.484441889,5.92971656,5.92449812,5.92448461
31.383386,6.08276253,5.92954339,0.391432165,5.92952986,5.92430917,5.92429562
31.393878,6.8556546,5.92934987,0.96244726,5.9293363,5.92411332,5.92409974
31.404369,6.63324958,5.92914955,0.839106687,5.92913595,5.92391064,5.92389702
31.414861,5.56776436,5.92894241,-0.600980901,5.92892877,5.92370109,5.92368744
31.425352,5.29150262,5.92872851,-0.798264297,5.92871484,5.92348476,5.92347107
31.435844,5.74456265,5.92850784,-0.428888325,5.92849413,5.92326161,5.92324789
31.446336,6.32455532,5.92828045,0.629503671,5.9282667,5.9230317,5.92301795
31.456827,6.244998,5.92804638,0.562984567,5.9280326,5.92279507,5.92278128
31.467319,5.19615242,5.9278056,-0.855367278,5.92779179,5.92255171,5.92253788
31.47781,5.83095189,5.9275582,-0.310815552,5.92754435,5.92230168,5.92228782
31.488302,6.4807407,5.92730415,0.743933162,5.92729026,5.92204496,5.92203106
31.498794,5.19615242,5.92704349,-0.854921674,5.92702957,5.9217816,5.92176766
31.509285,6.92820323,5.92677628,1.00071322,5.92676232,5.92151165,5.92149767
31.519777,5.65685425,5.92650248,-0.519276646,5.92648848,5.92123507,5.92122106
31.530268,6.164414,5.92622218,0.488048992,5.92620815,5.92095196,5.92093791
31.54076,5.91607978,5.92593535,-0.0992752025,5.92592127,5.92066227,5.92064819
31.551252,6.08276253,5.92564203,0.396384286,5.92562791,5.92036607,5.92035194
31.561743,5.91607978,5.92534228,-0.0962418432,5.92532812,5.92006339,5.92004923
31.572235,7.07106781,5.92503606,1.07052873,5.92502186,5.91975421,5.91974001
31.582726,6.40312424,5.92472345,0.691665226,5.92470922,5.91943862,5.91942437
31.593218,5.56776436,5.92440443,-0.597193492,5.92439016,5.91911656,5.91910228
31.60371,6.08276253,5.92407904,0.398350966,5.92406473,5.9187881,5.91877378
31.614201,6.63324958,5.92374733,0.842319563,5.92373298,5.9184533,5.91843894
31.624693,6.164414,5.92340928,0.49092232,5.92339489,5.91811211,5.9180977
31.635184,6.55743852,5.92306496,0.796475716,5.92305053,5.91776462,5.91775017
31.645676,5.65685425,5.92271433,-0.515616214,5.92269986,5.91741078,5.9173963
31.656168,6.32455532,5.92235745,0.634190721,5.92234294,5.91705066,5.91703614
31.666659,6.08276253,5.92199438,0.400959042,5.92197982,5.91668431,5.91666974
31.677151,6.63324958,5.92162506,0.843578401,5.92161046,5.91631169,5.91629708
31.687642,6.164414,5.9212496,0.493117026,5.92123496,5.91593288,5.91591823
31.698134,5.65685425,5.92086794,-0.51382263,5.92085326,5.91554785,5.91553315
31.708626,5.19615242,5.92048015,-0.851074454,5.92046542,5.91515664,5.9151419
31.719117,6.63324958,5.92008628,0.844489967,5.92007151,5.91475932,5.91474454
31.729609,5.83095189,5.91968627,-0.297883163,5.91967146,5.91435584,5.91434101
31.7401,6.08276253,5.91928024,0.404329434,5.91926538,5.91394629,5.91393142
31.750592,4.69041576,5.91886812,-1.1083557,5.91885322,5.91353062,5.91351571
31.761084,5.47722558,5.91844997,-0.664247241,5.91843503,5.9131089,5.91309394
31.771575,5.56776436,5.91802586,-0.591828945,5.91801087,5.91268117,5.91266617
31.782067,6.63324958,5.91759573,0.845963267,5.91758069,5.91224739,5.91223234
31.792558,4.58257569,5.91715968,-1.15524196,5.9171446,5.91180766,5.91179257
31.80305,6.92820323,5.91671766,1.00572639,5.91670253,5.91136192,5.91134678
31.813542,6.4807407,5.91626971,0.751312842,5.91625454,5.91091023,5.91089505
31.824033,6.244998,5.91581592,0.573743915,5.9158007,5.91045266,5.91043743
31.834525,5.91607978,5.91535621,0.0268992951,5.91534094,5.90998914,5.90997386
31.845016,5.91607978,5.9148907,0.0344831194,5.91487538,5.90951978,5.90950445
31.855508,6.164414,5.91441931,0.499994691,5.91440395,5.90904452,5.90902914
31.866,6.32455532,5.91394212,0.640791075,5.91392671,5.90856342,5.90854799
31.876491,6.244998,5.91345919,0.575794071,5.91344372,5.90807655,5.90806107
31.886983,6,5.91297044,0.295007721,5.91295493,5.90758383,5.9075683
31.897474,6.164414,5.91247601,0.501934254,5.91246045,5.90708539,5.90706981
31.907966,6,5.9119758,0.296688721,5.91196019,5.90658114,5.90656552
31.918458,6.08276253,5.9114699,0.413875142,5.91145424,5.90607117,5.90605549
31.928949,6.63324958,5.91095836,0.849877178,5.91094265,5.90555553,5.9055398
31.939441,5.56776436,5.91044112,-0.585385991,5.91042536,5.90503416,5.90501838
31.949932,5.74456265,5.90991829,-0.406639456,5.90990248,5.90450716,5.90449133
31.960424,6.08276253,5.9093898,0.416380511,5.90937393,5.90397447,5.90395859
31.970916,6.08276253,5.90885571,0.417021363,5.90883979,5.90343616,5.90342022
31.981407,6.63324958,5.9083161,0.851430254,5.90830013,5.90289229,5.9028763
31.991899,6.63324958,5.90777089,0.85175037,5.90775486,5.90234278,5.90232674
32.00239,5.47722558,5.90722019,-0.65573975,5.90720411,5.90178777,5.90177167
32.012882,6.244998,5.90666394,0.581664905,5.9066478,5.90122716,5.901211
32.023374,5.65685425,5.90610219,-0.499247371,5.906086,5.90066102,5.90064481
32.033865,6.164414,5.90553502,0.508801515,5.90551877,5.90008944,5.90007318
32.044357,5.74456265,5.90496235,-0.40049932,5.90494605,5.89951232,5.89949601
32.054848,5.91607978,5.90438431,0.108145618,5.90436795,5.8989298,5.89891343
32.06534,5.74456265,5.9038008,-0.399046556,5.90378438,5.89834179,5.89832535
32.075832,5.83095189,5.9032119,-0.268812217,5.90319543,5.89774835,5.89773186
32.086323,5.38516481,5.90261769,-0.719341982,5.90260116,5.89714957,5.89713302
32.096815,6.164414,5.90201808,0.51224596,5.90200149,5.89654535,5.89652875
32.107306,6.55743852,5.90141319,0.809953906,5.90139654,5.89593584,5.89591917
32.117798,5.47722558,5.90080294,-0.650828217,5.90078623,5.89532093,5.8953042
32.12829,5.56776436,5.9001874,-0.576561393,5.90017063,5.89470069,5.89468391
32.138781,5.91607978,5.89956665,0.128503421,5.89954982,5.89407522,5.89405837
32.149273,5.91607978,5.8989406,0.130916714,5.8989237,5.89344441,5.8934275
32.159764,5.65685425,5.89830937,-0.491380832,5.89829242,5.8928084,5.89279143
32.170256,6,5.89767288,0.319886111,5.89765586,5.89216709,5.89215006
32.180748,6.92820323,5.89703119,1.01546641,5.89701411,5.89152056,5.89150347
32.191239,6,5.8963844,0.321893774,5.89636725,5.8908689,5.89085174
32.201731,6.55743852,5.89573239,0.813453214,5.89571518,5.89021199,5.89019476
32.212222,6.4807407,5.89507532,0.765287775,5.89505805,5.88954998,5.88953269
32.222714,6.63324958,5.89441307,0.859555994,5.89439573,5.88888277,5.88886541
32.233206,6.55743852,5.89374573,0.814673426,5.89372833,5.88821043,5.88819301
32.243697,6.164414,5.89307339,0.520903654,5.89305591,5.88753306,5.88751557
32.254189,5.91607978,5.89239592,0.153895622,5.89237838,5.88685054,5.88683298
32.26468,6.164414,5.89171349,0.522207351,5.89169588,5.88616302,5.8861454
32.275172,6.164414,5.89102597,0.522865214,5.89100829,5.88547039,5.8854527
32.285664,6.244998,5.89033346,0.595537185,5.89031571,5.88477274,5.88475497
32.296155,5.74456265,5.88963604,-0.380885011,5.88961822,5.88407014,5.88405231
32.306647,6.164414,5.88893359,0.524862278,5.8889157,5.88336249,5.88334459
32.317138,5.29150262,5.88822627,-0.772478901,5.88820831,5.88264994,5.88263196
32.32763,6.08276253,5.88751397,0.441869394,5.88749594,5.88193237,5.88191432
32.338122,6.4807407,5.88679676,0.770677583,5.88677865,5.88120987,5.88119175
32.348613,6.08276253,5.88607474,0.443494972,5.88605656,5.88048253,5.88046433
32.359105,5.83095189,5.88534779,-0.233229268,5.88532953,5.87975022,5.87973195
32.369596,5.19615242,5.88461606,-0.829737087,5.88459772,5.87901311,5.87899476
32.380088,5.09901951,5.88387943,-0.8859232,5.88386102,5.87827107,5.87825265
32.39058,5.65685425,5.883138,-0.475692911,5.88311951,5.8775242,5.8775057
32.401071,7,5.88239184,1.05716988,5.88237328,5.87677258,5.87675399
32.411563,6,5.88164085,0.344033652,5.8816222,5.87601608,5.87599742
32.422054,5.47722558,5.88088517,-0.635342108,5.88086645,5.87525487,5.87523613
32.432546,6.08276253,5.88012469,0.450153135,5.88010588,5.87448883,5.87447001
32.443038,6.164414,5.87935949,0.533904971,5.8793406,5.87371804,5.87369914
32.453529,5.74456265,5.87858966,-0.366097,5.87857069,5.8729426,5.87292361
32.464021,6.78232998,5.87781508,0.951059884,5.87779603,5.87216237,5.8721433
32.474512,5.91607978,5.87703591,0.197595214,5.87701677,5.87137753,5.87135837
32.485004,6.08276253,5.87625203,0.454434264,5.8762328,5.87058794,5.8705687
32.495496,6.164414,5.87546352,0.537541146,5.8754442,5.8697937,5.86977436
32.505987,5.91607978,5.87467048,0.20349277,5.87465107,5.86899489,5.86897547
32.516479,5.91607978,5.87387277,0.205443463,5.87385327,5.86819139,5.86817187
32.52697,5.83095189,5.87307056,-0.205228329,5.87305098,5.86738336,5.86736375
32.537462,5.91607978,5.87226373,0.209322853,5.87224405,5.86657067,5.86655097
32.547954,5.19615242,5.87145235,-0.821766348,5.87143258,5.86575342,5.86573362
32.558445,5.47722558,5.87063654,-0.627224812,5.87061667,5.86493169,5.8649118
32.568937,5.29150262,5.86981615,-0.760469279,5.86979618,5.86410536,5.86408537
32.579428,5,5.86899135,-0.932197055,5.86897128,5.86327459,5.86325451
32.58992,6.244998,5.86816201,0.613869686,5.86814184,5.86243925,5.86241906
32.600412,6.4807407,5.86732822,0.783206539,5.86730795,5.86159943,5.86157914
32.610903,6.63324958,5.86649007,0.87564805,5.8664697,5.86075523,5.86073484
32.621395,5.91607978,5.86564744,0.224571473,5.86562695,5.85990651,5.85988601
32.631886,4.89897949,5.86480048,-0.982761924,5.86477989,5.85905344,5.85903283
32.642378,5.74456265,5.86394907,-0.345523411,5.86392837,5.85819588,5.85817516
32.65287,5.83095189,5.8630933,-0.179280244,5.86307248,5.85733394,5.8573131
32.663361,5.19615242,5.86223327,-0.81613776,5.86221233,5.8564677,5.85644674
32.673853,6.244998,5.86136882,0.619378056,5.86134777,5.85559702,5.85557595
32.684344,6.40312424,5.86050015,0.736630224,5.86047898,5.85472209,5.85470089
32.694836,6.63324958,5.8596271,0.879558114,5.8596058,5.85384275,5.85382142
32.705328,6.164414,5.85874978,0.552869081,5.85872835,5.8529591,5.85293765
32.715819,6.164414,5.85786829,0.553665709,5.85784672,5.85207126,5.85204967
32.726311,6.244998,5.85698246,0.622908929,5.85696076,5.85117905,5.85115733
32.736802,6.32455532,5.8560925,0.684443436,5.85607066,5.85028269,5.85026082
32.747294,5.74456265,5.85519825,-0.332619308,5.85517626,5.84938199,5.84935998
32.757786,6.63324958,5.85429981,0.882581312,5.85427767,5.84847708,5.84845492
32.768277,5.56776436,5.85339728,-0.534446363,5.85337498,5.84756805,5.84754574
32.778769,6.244998,5.85249051,0.626504184,5.85246805,5.84665476,5.84663228
32.78926,5.83095189,5.85157968,-0.143623771,5.85155706,5.84573738,5.84571473
32.799752,5.29150262,5.85066465,-0.747771374,5.85064185,5.84481576,5.84479293
32.810244,6.40312424,5.84974551,0.743894297,5.84972253,5.84389,5.843867
32.820735,6.4807407,5.84882237,0.794932906,5.8487992,5.84296022,5.84293702
32.831227,6.164414,5.84789508,0.562600148,5.84787171,5.84202625,5.84200285
32.841718,5.65685425,5.84696381,-0.436015556,5.84694024,5.84108828,5.84106468
32.85221,5.91607978,5.84602843,0.264672168,5.84600463,5.84014616,5.84012234
32.862702,6,5.84508902,0.393587324,5.84506499,5.83919999,5.83917594
32.873193,5.09901951,5.8441457,-0.863206918,5.84412143,5.83824987,5.83822559
32.883685,5.47722558,5.8431983,-0.604956796,5.84317378,5.83729565,5.83727111
32.894176,6.32455532,5.84224702,0.694484194,5.84222224,5.83633753,5.83631272
32.904668,5.91607978,5.84129171,0.273474086,5.84126664,5.83537533,5.83535024
32.91516,5.47722558,5.84033245,-0.602583505,5.8403071,5.83440916,5.83438378
32.925651,6.40312424,5.83936938,0.750836107,5.8393437,5.83343914,5.83341344
32.936143,5.56776436,5.83840231,-0.520228743,5.8383763,5.8324651,5.83243907
32.946634,6,5.83743145,0.403197905,5.83740509,5.83148724,5.83146086
32.957126,6.4807407,5.83645663,0.802673075,5.8364299,5.83050539,5.83047863
32.967618,6.244998,5.83547797,0.639937521,5.83545083,5.82951967,5.82949251
32.978109,5.83095189,5.83449557,-0.0595287534,5.83446801,5.82853018,5.82850259
32.988601,6.164414,5.83350926,0.575243202,5.83348125,5.82753675,5.82750871
32.999092,5.19615242,5.83251925,-0.797726038,5.83249076,5.82653959,5.82651107
33.009584,5.65685425,5.83152538,-0.417936752,5.83149637,5.82553853,5.8255095
33.020076,5,5.83052774,-0.911332949,5.83049819,5.82453369,5.8245041
33.030567,5.74456265,5.82952646,-0.291485536,5.82949632,5.82352517,5.82349499
33.041059,6.55743852,5.82852137,0.853766453,5.8284906,5.8225128,5.822482
33.05155,6.4807407,5.82751267,0.808225236,5.82748122,5.8214968,5.82146532
33.062042,6.63324958,5.82650018,0.898192294,5.82646802,5.82047698,5.82044478
33.072534,6.164414,5.82548404,0.582176921,5.8254511,5.81945347,5.8194205
33.083025,6.40312424,5.82446434,0.760696981,5.82443058,5.81842638,5.81839259
33.093517,6.244998,5.82344092,0.649274269,5.82340627,5.81739554,5.81736086
33.104008,6.244998,5.822414,0.650064614,5.82237839,5.81636116,5.81632552
33.1145,5.38516481,5.82138339,-0.660468454,5.82134676,5.81532307,5.81528641
33.124992,5.91607978,5.82034921,0.309403577,5.82031149,5.81428138,5.81424362
33.135483,5.74456265,5.81931159,-0.273402527,5.81927269,5.81323621,5.81319728
33.145975,5.83095189,5.81827034,0.112612392,5.81823018,5.81218739,5.81214719
33.156466,5.56776436,5.8172257,-0.499461044,5.81718418,5.81113514,5.81109358
33.166958,6.08276253,5.81617747,0.516318758,5.8161345,5.81007928,5.81003626
33.17745,6.4807407,5.81512579,0.815852261,5.81508125,5.80901993,5.80897534
33.187941,5.47722558,5.81407077,-0.580383659,5.81402455,5.80795721,5.80791094
33.198433,5.83095189,5.81301223,0.133939016,5.81296422,5.80689095,5.80684288
33.208924,6.244998,5.81195042,0.65806351,5.81190046,5.80582137,5.80577136
33.219416,6,5.81088513,0.434873394,5.8108331,5.80474829,5.80469621
33.229908,5.47722558,5.80981651,-0.576706973,5.80976225,5.80367185,5.80361753
33.240399,5.83095189,5.80874467,0.149020878,5.80868802,5.80259216,5.80253544
33.250891,7.07106781,5.80766945,1.12400995,5.80761022,5.80150905,5.80144976
33.261382,5.38516481,5.80659106,-0.649173519,5.80652908,5.80042275,5.80036071
33.271874,5.29150262,5.80550935,-0.716942622,5.80544441,5.79933309,5.79926808
33.282366,6,5.80442442,0.442239279,5.80435631,5.79824019,5.79817201
33.292857,5.29150262,5.80333642,-0.715425608,5.80326492,5.79714418,5.7970726
33.303349,6.78232998,5.80224517,0.989992328,5.80217003,5.79604489,5.79596967
33.31384,5.74456265,5.80115091,-0.237882885,5.80107187,5.79494256,5.79486343
33.324332,6.70820393,5.80005346,0.95296929,5.79997024,5.79383701,5.7937537
33.334824,5.83095189,5.79895296,0.178882455,5.79886527,5.79272837,5.79264059
33.345315,5.38516481,5.79784955,-0.642405432,5.79775707,5.79161679,5.79152422
33.355807,5.47722558,5.79674304,-0.56525876,5.79664545,5.79050209,5.79040439
33.366298,5.91607978,5.79563369,0.347053442,5.79553062,5.78938451,5.78928133
33.37679,5.74456265,5.79452132,-0.223514378,5.7944124,5.78826388,5.78815484
33.387282,5.65685425,5.79340608,-0.369529202,5.7932909,5.78714035,5.78702505
33.397773,5.91607978,5.79228811,0.351840412,5.79216625,5.78601405,5.78589207
33.408265,6.4807407,5.79116723,0.830405604,5.79103824,5.78488482,5.78475569
33.418756,5.47722558,5.79004371,-0.559301468,5.78990711,5.78375291,5.78361616
33.429248,6.40312424,5.78891736,0.783713516,5.78877265,5.78261815,5.78247327
33.43974,6.244998,5.78778835,0.676172795,5.78763498,5.78148068,5.78132714
33.450231,5.91607978,5.78665682,0.35975403,5.78649422,5.78034067,5.78017789
33.460723,5.65685425,5.78552261,-0.358703719,5.78535018,5.77919794,5.77902533
33.471214,5.65685425,5.78438597,-0.357115842,5.78420308,5.77805276,5.77786967
33.481706,6.244998,5.78324675,0.679522807,5.78305272,5.77690496,5.77671072
33.492198,6.32455532,5.7821051,0.736512197,5.78189923,5.7757547,5.7755486
33.502689,5.65685425,5.78096119,-0.352288149,5.78074272,5.77460214,5.77438343
33.513181,6.40312424,5.77981484,0.789499457,5.77958298,5.77344712,5.77321501
33.523672,6.08276253,5.77866635,0.551449168,5.77842027,5.77228992,5.77204357
33.534164,6.32455532,5.77751553,0.739621383,5.77725435,5.77113036,5.7708689
33.544656,5.91607978,5.77636257,0.373787661,5.77608537,5.76996863,5.76969112
33.555147,7,5.77520763,1.10670338,5.77491344,5.76880488,5.76851037
33.565639,5.65685425,5.77405056,-0.342339464,5.77373836,5.76763898,5.76732643
33.57613,5.65685425,5.77289164,-0.340642613,5.77256036,5.76647119,5.76613954
33.586622,6.164414,5.77173072,0.626644464,5.77137923,5.76530136,5.76494949
33.597114,6,5.77056797,0.478990632,5.7701951,5.76412969,5.7637564
33.607605,5.56776436,5.76940359,-0.449042566,5.76900809,5.76295633,5.7625604
33.618097,6.08276253,5.76823741,0.560825391,5.767818,5.76178116,5.76136127
33.628588,5.29150262,5.76706974,-0.689613744,5.76662505,5.76060445,5.76015926
33.63908,6.32455532,5.76590042,0.747432202,5.76542904,5.75942607,5.75895416
33.649572,6.32455532,5.76472966,0.748214986,5.76423009,5.75824621,5.75774608
33.660063,6,5.76355762,0.486253406,5.76302833,5.75706505,5.75653515
33.670555,6.244998,5.76238419,0.694704116,5.76182355,5.75588245,5.75532117
33.681046,6,5.76120966,0.488661786,5.76061598,5.75469872,5.75410437
33.691538,5.91607978,5.76003389,0.395026446,5.75940541,5.75351373,5.75288454
33.70203,6.4807407,5.75885708,0.849637343,5.75819198,5.75232766,5.7516618
33.712521,6,5.75767944,0.492260663,5.75697579,5.75114072,5.75043628
33.723013,5.65685425,5.75650082,-0.315668456,5.75575665,5.74995278,5.74920776
33.733504,6.164414,5.75532155,0.639603355,5.75453479,5.74876415,5.74797649
33.743996,6.40312424,5.75414149,0.805594654,5.75330999,5.7475747,5.74674225
33.754488,6.63324958,5.75296085,0.938237033,5.75208239,5.74638463,5.74550517
33.764979,5.74456265,5.75177984,-0.0849540402,5.75085211,5.74519416,5.74426537
33.775471,5.65685425,5.75059832,-0.306176535,5.74961893,5.74400315,5.74302264
33.785962,6.55743852,5.74941663,0.898900383,5.74838309,5.74281194,5.74177722
33.796454,6.164414,5.74823463,0.645119659,5.74714438,5.74162039,5.74052889
33.806946,6.4807407,5.74705254,0.856555986,5.74590293,5.74042871,5.73927777
33.817437,5.83095189,5.74587057,0.291687025,5.74465887,5.73923712,5.73802401
33.827929,5.56776436,5.74468861,-0.420623637,5.74341196,5.7380455,5.73676738
33.83842,5.56776436,5.74350696,-0.419216653,5.74216247,5.73685417,5.73550812
33.848912,5.74456265,5.74232553,0.0472982082,5.74091017,5.73566301,5.73424601
33.859404,6.55743852,5.74114451,0.90348991,5.73965518,5.73447224,5.73298119
33.869895,5.56776436,5.73996412,-0.414969585,5.73839765,5.73328207,5.73171377
33.880387,5.65685425,5.73878424,-0.286234161,5.73713734,5.73209238,5.73044355
33.890878,5.19615242,5.73760521,-0.735834754,5.7358745,5.73090349,5.72917076
33.90137,6.08276253,5.73642689,0.588502884,5.73460891,5.72971528,5.72789518
33.911862,5.56776436,5.73524949,-0.409249471,5.73334071,5.72852797,5.72661695
33.922353,6.244998,5.73407324,0.71479001,5.73207001,5.72734177,5.72533619
33.932845,6.78232998,5.732898,1.02441787,5.7307966,5.72615655,5.72405268
33.943336,5.56776436,5.7317241,-0.404919424,5.72952073,5.72497264,5.72276666
33.953828,5.74456265,5.73055141,0.118369067,5.72824216,5.7237899,5.72147792
33.96432,6.70820393,5.72938013,0.989355245,5.72696104,5.72260854,5.72018658
33.974811,5.38516481,5.72821047,-0.585701002,5.72567749,5.72142876,5.71889278
33.985303,6.32455532,5.72704229,0.772989668,5.72439128,5.72025044,5.71759628
33.995794,6.32455532,5.72587591,0.773743765,5.72310267,5.71907387,5.71629734
34.006286,6.63324958,5.72471117,0.953172811,5.72181143,5.71789893,5.71499573
34.016778,5.65685425,5.72354829,-0.258251884,5.7205177,5.71672579,5.71369158
34.027269,6.4807407,5.72238743,0.870834813,5.71922159,5.71555466,5.71238504
34.037761,6.70820393,5.72122845,0.993466396,5.71792289,5.71438537,5.71107585
34.048252,5.83095189,5.72007165,0.332986858,5.71662185,5.71321822,5.70976428
34.058744,5.74456265,5.71891686,0.160143025,5.71531824,5.71205305,5.7084501
34.069236,6.4807407,5.71776425,0.873485229,5.71401218,5.71089003,5.70713344
34.079727,5.47722558,5.716614,-0.489273359,5.71270382,5.70972933,5.70581444
34.090219,5,5.71546591,-0.845852182,5.71139292,5.70857077,5.70449286
34.10071,5.91607978,5.71432027,0.449176482,5.71007975,5.70741461,5.70316895
34.111202,6.244998,5.71317688,0.729260662,5.70876405,5.70626068,5.70184249
34.121694,5.56776436,5.71203589,-0.379830925,5.70744597,5.70510911,5.70051361
34.132185,4.58257569,5.71089743,-1.0622249,5.70612565,5.70396003,5.69918244
34.142677,6.244998,5.7097613,0.731598728,5.70480285,5.70281325,5.69784875
34.153168,5.09901951,5.70862772,-0.780774108,5.70347783,5.70166899,5.6965128
34.16366,5.47722558,5.70749648,-0.479865511,5.70215034,5.70052703,5.69517435
34.174152,6.40312424,5.70636769,0.834719443,5.70082053,5.69938749,5.69383353
34.184643,6,5.70524143,0.542916723,5.69948854,5.69825044,5.69249049
34.195135,5.65685425,5.70411748,-0.217401073,5.69815412,5.69711566,5.69114497
34.205626,6.164414,5.702996,0.679277556,5.69681754,5.69598334,5.68979726
34.216118,4.79583152,5.70187676,-0.951864088,5.69547856,5.6948532,5.68844709
34.22661,6.55743852,5.70075982,0.925569396,5.6941373,5.69372533,5.68709462
34.237101,6.164414,5.69964521,0.681739536,5.69279392,5.69259976,5.68573998
34.247593,4.89897949,5.69853266,-0.894177374,5.69144817,5.69147621,5.68438293
34.258084,5.91607978,5.69742231,0.467608244,5.69010032,5.69035483,5.68302373
34.268576,5.74456265,5.69631387,0.219656051,5.68875012,5.68923531,5.68166213
34.279068,6.40312424,5.69520733,0.841377981,5.6873977,5.68811766,5.68029829
34.289559,5.83095189,5.69410271,0.36993133,5.68604322,5.68700189,5.67893233
34.300051,6,5.69299967,0.554076106,5.68468642,5.68588767,5.67756401
34.310542,6.08276253,5.6918983,0.625191353,5.68332758,5.68477508,5.6761936
34.321034,6.164414,5.69079826,0.688197456,5.68196644,5.68366378,5.67482085
34.331526,5.83095189,5.68969951,0.375835578,5.68060314,5.68255373,5.6734459
34.342017,6,5.688602,0.558030466,5.67923784,5.68144488,5.6720689
34.352509,6.4807407,5.68750535,0.890637609,5.67787027,5.68033685,5.67068959
34.363,6.244998,5.68640959,0.74738772,5.67650071,5.67922968,5.66930824
34.373492,6,5.68531434,0.560968499,5.67512891,5.67812297,5.66792461
34.383984,5.56776436,5.68421951,-0.341255247,5.67375501,5.67701663,5.66653883
34.394475,6.55743852,5.68312498,0.935047347,5.67237915,5.67591057,5.66515105
34.404967,6.08276253,5.68203035,0.633034105,5.67100108,5.67480436,5.66376102
34.415458,6.08276253,5.6809356,0.633898202,5.66962108,5.67369798,5.662369
34.42595,6.244998,5.67984028,0.751769721,5.66823889,5.672591,5.66097476
34.436442,6.8556546,5.67874427,1.08485498,5.66685466,5.67148328,5.65957842
34.446933,5.91607978,5.67764742,0.488295367,5.66546853,5.67037467,5.65818013
34.457425,5.83095189,5.67654926,0.392941012,5.66408024,5.66926471,5.65677964
34.467916,5.74456265,5.67544973,0.262893355,5.66269007,5.66815334,5.65537722
34.478408,6.63324958,5.67434836,0.979235018,5.66129776,5.66704009,5.65397262
34.4889,5.29150262,5.67324497,-0.617853017,5.65990347,5.66592476,5.65256598
34.499391,5,5.67213939,-0.819841074,5.65850732,5.6648072,5.65115745
34.509883,6.164414,5.6710311,0.702412204,5.65710908,5.66368688,5.64974676
34.520374,6,5.66992002,0.574525871,5.655709,5.66256373,5.6483342
34.530866,6,5.66880565,0.575494875,5.65430685,5.66143723,5.64691951
34.541358,5.91607978,5.66768777,0.498389419,5.65290275,5.66030718,5.64550283
34.551849,6,5.66656619,0.577437282,5.65149687,5.65917337,5.64408431
34.562341,5.74456265,5.66544036,0.281286832,5.65008893,5.65803527,5.64266369
34.572832,5.56776436,5.66431021,-0.310718271,5.64867922,5.65689279,5.64124124
34.583324,5.38516481,5.66317518,-0.527266885,5.64726747,5.65574538,5.63981672
34.593816,6.244998,5.66203506,0.7635201,5.64585384,5.65459283,5.63839026
34.604307,6.55743852,5.66088963,0.946862656,5.64443848,5.65343492,5.636962
34.614799,6.164414,5.65973837,0.710405259,5.64302111,5.65227112,5.6355317
34.62529,5.38516481,5.65858116,-0.522892296,5.64160202,5.65110131,5.63409963
34.635782,5.65685425,5.65741746,-0.0237320664,5.64018095,5.64992496,5.63266552
34.646274,6.08276253,5.65624706,0.653081518,5.63875804,5.64874185,5.63122953
34.656765,5.91607978,5.65506976,0.510891405,5.63733345,5.64755178,5.62979179
34.667257,5,5.653885,-0.808631563,5.63590691,5.64635421,5.62835206
34.677748,5.47722558,5.65269272,-0.41888799,5.6344787,5.64514905,5.62691061
34.68824,5.65685425,5.65149238,0.0732248208,5.63304856,5.64393576,5.62546717
34.698732,5.47722558,5.65028377,-0.416002641,5.63161664,5.64271415,5.62402189
34.709223,6,5.64906673,0.592396207,5.63018308,5.64148405,5.62257493
34.719715,7.21110255,5.64784074,1.25030469,5.62874762,5.64024493,5.62112601
34.730206,6.63324958,5.64660574,0.993299473,5.62731054,5.63899675,5.61967542
34.740698,5.91607978,5.64536122,0.520306221,5.62587159,5.63773898,5.6182229
34.75119,5.83095189,5.64410704,0.432255549,5.6244309,5.63647148,5.61676859
34.761681,5.91607978,5.64284305,0.522720513,5.62298862,5.63519411,5.61531264
34.772173,6.32455532,5.64156877,0.826430002,5.6215445,5.63390639,5.61385479
34.782664,5.74456265,5.64028421,0.322921719,5.62009881,5.63260832,5.61239531
34.793156,5.74456265,5.63898889,0.324921151,5.61865129,5.63129942,5.61093395
34.803648,5.74456265,5.63768273,0.326924946,5.61720209,5.62997961,5.60947084
34.814139,6.8556546,5.63636564,1.10421418,5.61575135,5.6286488,5.60800615
34.824631,6.244998,5.63503718,0.780999881,5.61429881,5.62730657,5.60653959
34.835122,5.74456265,5.63369745,0.332964265,5.61284475,5.62595297,5.60507147
34.845614,5.29150262,5.632346,-0.583817933,5.61138891,5.6245876,5.6036015
34.856106,5.09901951,5.63098283,-0.729358155,5.60993144,5.62321044,5.60212984
34.866597,5.65685425,5.62960794,0.165064569,5.60847249,5.62182148,5.60065664
34.877089,6.63324958,5.62822094,1.00251117,5.60701178,5.62042033,5.59918163
34.88758,6.4807407,5.62682199,0.924077219,5.6055496,5.61900718,5.59770509
34.898072,6.92820323,5.62541075,1.14139935,5.6040857,5.61758164,5.59622676
34.908564,5.29150262,5.62398727,-0.576614815,5.6026202,5.6161438,5.59474678
34.919055,5.56776436,5.62255163,-0.234066808,5.60115327,5.61469373,5.59326531
34.929547,5.56776436,5.62110353,-0.230952747,5.59968464,5.61323112,5.59178207
34.940038,4.89897949,5.61964322,-0.848919159,5.59821459,5.61175622,5.59029736
34.95053,6.70820393,5.61817042,1.0440467,5.59674285,5.61026875,5.58881089
34.961022,5.09901951,5.61668527,-0.719489926,5.59526958,5.60876886,5.58732283
34.971513,5.19615242,5.61518794,-0.64732953,5.59379492,5.60725672,5.58583332
34.982005,5.74456265,5.6136782,0.361779548,5.5923186,5.60573208,5.58434208
34.992496,5.29150262,5.6121564,-0.566262995,5.59084091,5.6041953,5.58284942
35.002988,5.47722558,5.61062232,-0.36523519,5.58936159,5.60264617,5.58135505
35.01348,6.32455532,5.6090762,0.845859991,5.58788077,5.60108491,5.57985913
35.023971,5.74456265,5.60751829,0.370195021,5.58639862,5.5995118,5.57836181
35.034463,6,5.60594844,0.627735266,5.58491485,5.59792665,5.57686281
35.044954,6.08276253,5.60436707,0.69166138,5.58342977,5.59632991,5.57536243
35.055446,5,5.60277404,-0.776385237,5.58194309,5.59472142,5.57386038
35.065938,6,5.60116967,0.631530152,5.58045497,5.59310152,5.57235683
35.076429,5.38516481,5.5995543,-0.463022126,5.57896556,5.59147053,5.57085192
35.086921,6.32455532,5.59792782,0.852424486,5.57747459,5.58982835,5.56934538
35.097412,5.47722558,5.59629074,-0.345058212,5.57598234,5.5881755,5.5678375
35.107904,5.74456265,5.594643,0.387194591,5.57448855,5.58651189,5.56632801
35.118396,6,5.59298496,0.637977304,5.57299336,5.58483791,5.56481705
35.128887,6.4807407,5.59131704,0.943092602,5.57149693,5.58315397,5.56330478
35.139379,6.78232998,5.58963919,1.09210384,5.56999898,5.58146,5.56179091
35.14987,5.91607978,5.58795198,0.572824409,5.5684998,5.57975661,5.56027576
35.160362,5.47722558,5.58625538,-0.330196612,5.56699913,5.57804373,5.55875903
35.170854,5.91607978,5.58454983,0.575786379,5.5654971,5.57632182,5.55724088
35.181345,5.65685425,5.58283579,0.272063333,5.56399388,5.57459134,5.55572147
35.191837,5.65685425,5.58111324,0.275210837,5.56248919,5.57285227,5.55420051
35.202328,5.29150262,5.57938283,-0.536544689,5.56098331,5.57110524,5.5526783
35.21282,5.65685425,5.57764452,0.281442229,5.55947598,5.56935024,5.55115455
35.223312,5.29150262,5.57589882,-0.533288099,5.55796735,5.56758776,5.54962944
35.233803,6.40312424,5.57414621,0.910482303,5.55645757,5.56581829,5.54810309
35.244295,6.08276253,5.5723867,0.714405927,5.55494636,5.56404183,5.54657525
35.254786,6,5.57062096,0.655270207,5.55343402,5.56225905,5.54504619
35.265278,6.55743852,5.56884897,0.994278406,5.55192026,5.56046995,5.54351565
35.27577,5.38516481,5.56707127,-0.426504937,5.55040525,5.55867504,5.54198377
35.286261,6.63324958,5.56528835,1.0334221,5.54888913,5.55687483,5.54045072
35.296753,5.65685425,5.56350022,0.305538923,5.54737163,5.55506933,5.5389162
35.307244,4.79583152,5.56170756,-0.875143435,5.54585305,5.55325921,5.53738051
35.317736,6.244998,5.55991037,0.827700206,5.5443331,5.55144448,5.53584338
35.328228,5.83095189,5.55810916,0.5223435,5.54281193,5.54962564,5.53430496
35.338719,5.29150262,5.55630445,-0.514588991,5.54128971,5.54780321,5.5327654
35.349211,6,5.55449623,0.66746069,5.53976615,5.54597719,5.53122442
35.359702,5.47722558,5.55268517,-0.274699096,5.53824154,5.54414824,5.52968231
35.370194,6,5.55087126,0.670170681,5.53671562,5.54231635,5.5281388
35.380686,6.08276253,5.549055,0.730552897,5.53518852,5.54048202,5.52659404
35.391177,5.56776436,5.54723687,0.143274172,5.53366041,5.53864575,5.52504818
35.401669,5.09901951,5.54541686,-0.66812974,5.53213101,5.53680751,5.52350094
35.41216,5.19615242,5.54359562,-0.589443124,5.53060061,5.53496794,5.52195263
35.422652,5,5.5417731,-0.736052376,5.52906893,5.53312701,5.52040294
35.433144,5.29150262,5.53994977,-0.498444734,5.52753613,5.53128518,5.51885205
35.443635,6.8556546,5.53812611,1.14783644,5.52600236,5.52944292,5.5173001
35.454127,5.47722558,5.53630203,-0.243056493,5.52446734,5.52760017,5.51574681
35.464618,5.65685425,5.53447818,0.349822919,5.52293137,5.52575755,5.51419248
35.47511,5.83095189,5.53265445,0.546166132,5.52139416,5.52391496,5.51263682
35.485602,5.19615242,5.53083129,-0.578514365,5.51985587,5.52207286,5.51108
35.496093,6.32455532,5.52900912,0.891933964,5.51831666,5.52023165,5.50952216
35.506585,5.91607978,5.52718784,0.623612015,5.51677624,5.51839124,5.50796301
35.517076,6.08276253,5.52536801,0.746588587,5.51523491,5.5165522,5.50640287
35.527568,5.47722558,5.52354952,-0.215229986,5.51369239,5.5147144,5.50484145
35.53806,5.29150262,5.52173275,-0.47982302,5.51214884,5.51287822,5.50327889
35.548551,5.83095189,5.51991808,0.557704057,5.5106044,5.51104406,5.50171536
35.559043,5.29150262,5.51810535,-0.476028074,5.5090588,5.50921174,5.50015056
35.569534,6.244998,5.51629509,0.853640971,5.50751234,5.5073818,5.49858481
35.580026,5.83095189,5.51448713,0.56255201,5.50596472,5.50555406,5.49701781
35.590518,6,5.51268181,0.698081796,5.50441612,5.50372887,5.49544971
35.601009,6.4807407,5.51087944,0.984815343,5.50286668,5.50190654,5.49388069
35.611501,5.83095189,5.50907983,0.567337699,5.50131611,5.50008686,5.49231044
35.621992,5.29150262,5.50728345,-0.464522155,5.49976473,5.49827033,5.49073926
35.632484,6.78232998,5.50549009,1.1299734,5.49821224,5.49645671,5.48916688
35.642976,4.89897949,5.50370003,-0.777637798,5.4966588,5.49464629,5.48759345
35.653467,5.74456265,5.50191354,0.492594262,5.49510457,5.49283935,5.48601912
35.663959,6.08276253,5.50013037,0.76330345,5.49354926,5.49103563,5.4844436
35.67445,5.91607978,5.49835096,0.646319446,5.49199318,5.48923556,5.48286721
35.684942,6.08276253,5.49657502,0.76562883,5.49043603,5.48743887,5.48128964
35.695434,6.32455532,5.49480281,0.910907518,5.48887797,5.4856458,5.47971106
35.705925,5.91607978,5.49303455,0.650419274,5.48731917,5.48385658,5.47813161
35.716417,4.69041576,5.49126995,-0.894904568,5.48575932,5.4820709,5.47655102
35.726908,5.83095189,5.48950938,0.58433083,5.48419875,5.48028916,5.47496959
35.7374,5.65685425,5.48775254,0.411219787,5.48263715,5.47851104,5.47338702
35.747892,5.47722558,5.48599962,-0.0936698743,5.4810747,5.47673674,5.47180348
35.758383,5.74456265,5.48425081,0.51020764,5.47951153,5.47496644,5.47021912
35.768875,6.244998,5.48250578,0.873208003,5.47794737,5.47319981,5.46863364
35.779366,5.83095189,5.48076487,0.591766022,5.47638252,5.47143718,5.46704736
35.789858,6.32455532,5.47902774,0.919525738,5.4748167,5.46967822,5.46545998
35.80035,5.09901951,5.47729454,-0.61504067,5.47325005,5.46792308,5.46387166
35.810841,6.08276253,5.47556542,0.779228534,5.47168274,5.46617191,5.46228255
35.821333,5.09901951,5.47384003,-0.612225873,5.47011448,5.46442435,5.46069237
35.831824,5.29150262,5.47211867,-0.424989468,5.46854557,5.4626807,5.45910143
35.842316,6,5.47040097,0.727735547,5.46697573,5.4609406,5.45750942
35.852808,6,5.46868707,0.728912158,5.46540511,5.45920417,5.45591651
35.863299,5.65685425,5.46697707,0.435748992,5.46383387,5.45747152,5.45432285
35.873791,6.164414,5.4652706,0.836147956,5.46226172,5.45574229,5.45272815
35.884282,6.244998,5.46356794,0.883985329,5.46068896,5.45401674,5.45113272
35.894774,4.79583152,5.4618687,-0.816111008,5.45911532,5.45229449,5.44953627
35.905266,5.09901951,5.46017299,-0.600960462,5.45754094,5.45057563,5.44793894
35.915757,5.19615242,5.45848091,-0.512180127,5.45596598,5.44886028,5.44634091
35.926249,6.55743852,5.45679206,1.04911699,5.45439015,5.44714803,5.44474187
35.93674,5.47722558,5.4551067,0.148724174,5.45281377,5.44543914,5.44314214
35.947232,5.56776436,5.45342443,0.338141882,5.45123654,5.44373321,5.44154141
35.957724,5.29150262,5.45174535,-0.400303294,5.44965861,5.44203032,5.43993986
35.968215,4.69041576,5.45006954,-0.871581193,5.44808015,5.44033058,5.43833763
35.978707,5.38516481,5.44839659,-0.251459315,5.44650086,5.43863356,5.43673442
35.989198,6.08276253,5.44672676,0.797518505,5.44492106,5.43693952,5.43513057
35.99969,5.91607978,5.44505965,0.686309066,5.44334045,5.43524805,5.43352575
36.010182,5.29150262,5.44339533,-0.389734148,5.44175919,5.43355923,5.43192013
36.020673,6.4807407,5.44173388,1.01931684,5.44017745,5.43187314,5.43031388
36.031165,5.38516481,5.4400749,-0.234329026,5.43859492,5.43018937,5.42870669
36.041656,5.19615242,5.43841863,-0.492205451,5.43701191,5.42850816,5.42709888
36.052148,6,5.43676467,0.750490061,5.43542815,5.42682911,5.42549014
36.06264,5.56776436,5.4351131,0.364213217,5.43384377,5.42515229,5.42388064
36.073131,4.47213595,5.43346398,-0.98047337,5.43225895,5.42347779,5.42227054
36.083623,4.89897949,5.43181694,-0.729957159,5.4306734,5.42180519,5.42065954
36.094114,5.65685425,5.4301722,0.476111387,5.42908741,5.42013474,5.41904794
36.104606,5.38516481,5.42852936,-0.208241577,5.4275007,5.41846603,5.41743546
36.115098,6.08276253,5.42688851,0.809860493,5.42591343,5.41679914,5.41582224
36.125589,5.91607978,5.42524973,0.700592646,5.42432576,5.41513416,5.41420846
36.136081,5.56776436,5.42361262,0.379673206,5.42273739,5.41347068,5.41259381
36.146572,5.29150262,5.42197742,-0.361212959,5.42114864,5.41180895,5.4109786
36.157064,6.244998,5.42034376,0.908104753,5.4195592,5.41014857,5.40936254
36.167556,5.09901951,5.4187117,-0.565413286,5.41796925,5.40848963,5.40774578
36.178047,5.91607978,5.41708134,0.706398222,5.41637895,5.40683221,5.40612849
36.188539,5.91607978,5.41545229,0.707550349,5.41478799,5.40517592,5.40451036
36.19903,5.19615242,5.4138248,-0.466553721,5.41319669,5.40352101,5.40289171
36.209522,4.58257569,5.41219849,-0.910836315,5.41160476,5.4018671,5.40127223
36.220014,5.91607978,5.41057345,0.710989685,5.41001235,5.40021427,5.39965209
36.230505,5.83095189,5.40894978,0.649616899,5.40841963,5.39856262,5.39803145
36.240997,5.65685425,5.4073271,0.499526925,5.40682631,5.39691177,5.39641001
36.251488,4.58257569,5.40570567,-0.907265106,5.40523269,5.39526197,5.39478808
36.26198,5.09901951,5.40408511,-0.552327438,5.40363848,5.39361286,5.39316535
36.272472,5.83095189,5.40246554,0.654588694,5.40204384,5.39196452,5.391542
36.282963,5.29150262,5.40084704,-0.330672673,5.40044893,5.39031706,5.38991818
36.293455,5.56776436,5.39922926,0.410530269,5.39885346,5.38867011,5.38829358
36.303946,6.4807407,5.39761246,1.04073447,5.39725775,5.38702394,5.38666853
36.314438,4.69041576,5.39599628,-0.839988408,5.39566149,5.38537817,5.38504272
36.32493,5.65685425,5.39438084,0.512321588,5.39406485,5.38373293,5.38341631
36.335421,4.58257569,5.39276624,-0.900105851,5.39246799,5.38208831,5.38178946
36.345913,6.08276253,5.39115213,0.83163117,5.39087061,5.38044396,5.38016188
36.356404,5.47722558,5.38953878,0.296119568,5.38927303,5.37880015,5.37853387
36.366896,4.89897949,5.38792584,-0.699246992,5.38767495,5.37715652,5.37690513
36.377388,5.47722558,5.38631344,0.301516396,5.38607654,5.3755132,5.37527582
36.387879,5.83095189,5.38470169,0.668019617,5.38447795,5.3738703,5.37364611
36.398371,5.19615242,5.38309025,-0.43236307,5.3828789,5.37222747,5.37201569
36.408862,6.32455532,5.3814794,0.971120963,5.38127969,5.37058499,5.37038488
36.419354,4.58257569,5.3798688,-0.892912706,5.37968003,5.36894252,5.36875337
36.429846,5.47722558,5.37825857,0.314590212,5.37808009,5.36730018,5.36712133
36.440337,5.19615242,5.37664886,-0.42484872,5.37648002,5.36565809,5.36548891
36.450829,4.79583152,5.37503932,-0.761057023,5.37487953,5.36401592,5.36385581
36.46132,6.55743852,5.37343023,1.08812145,5.37327893,5.36237396,5.36222235
36.471812,5.91607978,5.37182128,0.737738777,5.37167794,5.36073186,5.36058823
36.482304,5.47722558,5.37021259,0.32712839,5.37007671,5.35908976,5.3589536
36.492795,5.38516481,5.3686043,0.128687624,5.3684754,5.35744779,5.35731862
36.503287,5.47722558,5.36699609,0.332008261,5.36687373,5.35580562,5.355683
36.513778,5.56776436,5.36538824,0.449862334,5.365272,5.35416354,5.35404705
36.52427,5.47722558,5.36378044,0.33681617,5.36366992,5.35252122,5.35241046
36.534762,4.47213595,5.36217283,-0.943417656,5.36206765,5.3508788,5.3507734
36.545253,6.244998,5.36056554,0.940442691,5.36046536,5.34923642,5.34913602
36.555745,5.91607978,5.35895827,0.74640573,5.35886275,5.34759375,5.34749803
36.566236,5.91607978,5.3573513,0.747481424,5.35726014,5.34595109,5.34585973
36.576728,5.74456265,5.35574433,0.623552978,5.35565724,5.34430811,5.34422083
36.58722,5.29150262,5.3541375,-0.250269607,5.3540542,5.34266496,5.34258148
36.597711,5.29150262,5.35253095,-0.247039127,5.35245119,5.34102179,5.34094185
36.608203,5.19615242,5.35092438,-0.393410675,5.35084791,5.33937827,5.33930163
36.618694,6.32455532,5.34931809,0.987541002,5.34924469,5.3377347,5.33766115
36.629186,5.29150262,5.34771177,-0.237084675,5.34764123,5.33609077,5.33602008
36.639678,6,5.34610556,0.808637397,5.34603769,5.33444661,5.3343786
36.650169,5.74456265,5.34449963,0.632505351,5.34443424,5.33280239,5.33273686
36.660661,5.56776436,5.34289366,0.474205341,5.34283058,5.33115778,5.33109456
36.671152,5.09901951,5.34128796,-0.492207726,5.34122703,5.32951309,5.32945203
36.681644,6.164414,5.33968223,0.908147442,5.33962329,5.32786801,5.32780894
36.692136,6.244998,5.33807661,0.952324202,5.33801953,5.32622267,5.32616547
36.702627,5.65685425,5.33647128,0.566023827,5.33641592,5.32457725,5.32452177
36.713119,5.29150262,5.33486591,-0.208238545,5.33481216,5.32293141,5.32287754
36.72361,5.56776436,5.33326083,0.484255644,5.33320857,5.32128548,5.3212331
36.734102,5.38516481,5.33165574,0.231320278,5.33160486,5.31963913,5.31958814
36.744594,6.4807407,5.33005078,1.07270216,5.33000119,5.31799252,5.31794282
36.755085,6.08276253,5.32844612,0.868513909,5.32839772,5.31634581,5.3162973
36.765577,5.29150262,5.32684146,-0.18798627,5.32679417,5.31469868,5.31465129
36.776068,5.56776436,5.32523711,0.492470558,5.32519086,5.31305144,5.31300508
36.78656,6.32455532,5.32363278,1.00046116,5.32358748,5.31140379,5.31135839
36.797052,5,5.32202862,-0.567475655,5.32198421,5.30975588,5.30971136
36.807543,5.74456265,5.3204248,0.651258666,5.32038121,5.30810786,5.30806417
36.818035,5.38516481,5.31882101,0.257572889,5.31877819,5.30645942,5.3064165
36.828526,5.38516481,5.31721759,0.260666878,5.31717547,5.30481089,5.30476867
36.839018,6,5.31561422,0.827276123,5.31557276,5.30316194,5.30312038
36.84951,6.32455532,5.31401107,1.0052583,5.31397023,5.30151273,5.30147179
36.860001,5.74456265,5.31240831,0.657384466,5.31236804,5.29986343,5.29982306
36.870493,5.83095189,5.31080564,0.721211655,5.3107659,5.29821372,5.29817388
36.880984,5.65685425,5.30920339,0.589619254,5.30916413,5.29656392,5.29652457
36.891476,5.74456265,5.30760124,0.661030561,5.30756245,5.29491371,5.29487482
36.901968,6.32455532,5.30599938,1.00923532,5.30596101,5.29326326,5.2932248
36.912459,6.55743852,5.30439797,1.11939294,5.30436,5.29161273,5.29157467
36.922951,5.56776436,5.30279672,0.514750081,5.30275911,5.28996181,5.28992411
36.933442,5.29150262,5.30119594,-0.0984546321,5.30115867,5.28831081,5.28827346
36.943934,5.19615242,5.29959534,-0.321625432,5.2995584,5.28665942,5.28662239
36.954426,5.47722558,5.2979951,0.423356207,5.29795845,5.28500781,5.28497107
36.964917,5.74456265,5.29639537,0.669452966,5.29635901,5.28335613,5.28331967
36.975409,5.65685425,5.29479588,0.601712863,5.29475977,5.28170407,5.28166787
36.9859,4.35889894,5.29319694,-0.966590913,5.29316107,5.28005195,5.280016
36.996392,5.83095189,5.29159826,0.734406997,5.29156262,5.27839947,5.27836374
37.006884,4.89897949,5.29000001,-0.625316341,5.28996458,5.27674678,5.27671127
37.017375,5.19615242,5.28840237,-0.30372676,5.28836714,5.27509405,5.27505873
37.027867,6.164414,5.28680504,0.936807859,5.28677,5.27344095,5.27340582
37.038358,5.29150262,5.28520835,0.079336469,5.28517348,5.27178782,5.27175287
37.04885,5.83095189,5.28361201,0.739824227,5.2835773,5.27013435,5.27009955
37.059342,5.65685425,5.28201619,0.612240195,5.28198164,5.26848068,5.26844605
37.069833,5.38516481,5.28042107,0.323641366,5.28038667,5.266827,5.2667925
37.080325,5.29150262,5.27882636,0.112588887,5.2787921,5.26517298,5.26513862
37.090816,5.74456265,5.27723239,0.683615575,5.27719825,5.26351894,5.26348471
37.101308,4.89897949,5.27563887,-0.613725824,5.27560486,5.26186458,5.26183047
37.1118,4.69041576,5.27404598,-0.763956949,5.27401208,5.26021005,5.26017606
37.122291,5.29150262,5.27245389,0.138017155,5.27242009,5.25855552,5.25852164
37.132783,5.91607978,5.27086231,0.803254299,5.27082862,5.25690069,5.25686691
37.143274,5,5.26927159,-0.518913853,5.26923799,5.25524586,5.25521217
37.153766,5.83095189,5.26768143,0.75051347,5.26764793,5.25359072,5.25355713
37.164258,5.09901951,5.26609201,-0.408745024,5.2660586,5.25193545,5.25190195
37.174749,5.38516481,5.26450351,0.347363351,5.26447018,5.2502802,5.25024678
37.185241,5.74456265,5.26291565,0.694007921,5.2628824,5.24862466,5.24859132
37.195732,4.79583152,5.26132876,-0.682273582,5.26129559,5.24696915,5.24693589
37.206224,6,5.25974257,0.860382141,5.25970947,5.24531336,5.24528017
37.216716,6.08276253,5.25815725,0.908077792,5.25812422,5.24365746,5.24362434
37.227207,5,5.25657299,-0.506530342,5.25654002,5.2420016,5.24196855
37.237699,5.83095189,5.2549895,0.758921863,5.2549566,5.24034548,5.24031249
37.24819,6.244998,5.25340713,0.99578656,5.25337428,5.23868941,5.23865648
37.258682,5,5.25182559,-0.501822271,5.25179281,5.23703309,5.23700021
37.269174,4.47213595,5.25024508,-0.882104939,5.25021235,5.23537667,5.23534385
37.279665,5.19615242,5.24866577,-0.229157913,5.2486331,5.23372032,5.23368756
37.290157,5.91607978,5.2470874,0.817919545,5.24705478,5.23206374,5.23203102
37.300648,5.91607978,5.2455103,0.818883069,5.24547773,5.23040723,5.23037456
37.31114,5.19615242,5.24393421,-0.218590457,5.24390168,5.22875048,5.22871786
37.321632,5.83095189,5.24235931,0.767197878,5.24232683,5.22709367,5.2270611
37.332123,5.91607978,5.24078579,0.821762735,5.24075335,5.22543695,5.22540442
37.342615,6,5.23921339,0.872230826,5.23918099,5.22378002,5.22374752
37.353106,4.89897949,5.23764244,-0.581947553,5.23761008,5.22212318,5.22209073
37.363598,4.58257569,5.23607269,-0.80839161,5.23604037,5.22046614,5.22043372
37.37409,5,5.23450433,-0.484256469,5.23447205,5.21880905,5.21877667
37.384581,5.09901951,5.23293755,-0.365948127,5.2329053,5.21715208,5.21711973
37.395073,5.74456265,5.23137209,0.716373198,5.23133988,5.21549491,5.2154626
37.405564,6.244998,5.2298083,1.00756623,5.22977612,5.21383787,5.21380559
37.416056,4.24264069,5.22824593,-0.992776532,5.22821378,5.21218064,5.21214839
37.426548,5.83095189,5.22668517,0.777345946,5.22665306,5.21052339,5.21049117
37.437039,5.65685425,5.22512623,0.657060132,5.22509414,5.20886628,5.20883409
37.447531,5.91607978,5.22356886,0.832172413,5.2235368,5.207209,5.20717683
37.458022,5.09901951,5.2220134,-0.350704843,5.22198137,5.20555186,5.20551973
37.468514,6.63324958,5.22045962,1.18860841,5.22042761,5.20389456,5.20386245
37.479006,5.74456265,5.21890772,0.725020642,5.21887573,5.20223726,5.20220518
37.489497,6.244998,5.2173579,1.01372585,5.21732594,5.20058013,5.20054807
37.499989,6.164414,5.21580993,0.973963074,5.215778,5.19892284,5.1988908
37.51048,5.83095189,5.21426418,0.78529467,5.21423226,5.19726573,5.19723371
37.520972,5.19615242,5.2127204,-0.128716648,5.2126885,5.19560848,5.19557648
37.531464,4.79583152,5.21117881,-0.644474428,5.21114694,5.19395125,5.19391926
37.541955,5.38516481,5.20963963,0.418957244,5.20960778,5.1922942,5.19226223
37.552447,5.09901951,5.20810264,-0.330277353,5.2080708,5.19063702,5.19060508
37.562938,5.29150262,5.20656821,0.291435098,5.20653638,5.18898004,5.18894811
37.57343,5.38516481,5.20503611,0.424415717,5.2050043,5.18732295,5.18729103
37.583922,6,5.20350657,0.892464806,5.20347478,5.18566589,5.18563399
37.594413,5.47722558,5.20197983,0.524638683,5.20194805,5.18400904,5.18397716
37.604905,5.38516481,5.20045567,0.429778008,5.20042391,5.18235209,5.18232022
37.615396,5.83095189,5.19893448,0.794995229,5.19890273,5.18069536,5.18066349
37.625888,4.58257569,5.19741606,-0.78411757,5.19738432,5.17903852,5.17900667
37.63638,5.47722558,5.19590065,0.530400724,5.19586892,5.17738176,5.17734992
37.646871,5,5.19438849,-0.440895099,5.19435677,5.17572522,5.17569339
37.657363,5.38516481,5.1928794,0.438503602,5.19284769,5.1740686,5.17403677
37.667854,5.56776436,5.19137377,0.613506797,5.19134207,5.17241221,5.1723804
37.678346,5.29150262,5.18987144,0.318796466,5.18983974,5.17075576,5.17072395
37.688838,4.69041576,5.18837265,-0.705660604,5.18834096,5.16909939,5.16906758
37.699329,5.56776436,5.18687767,0.617160182,5.18684599,5.16744326,5.16741147
37.709821,5,5.18538635,-0.430565153,5.18535468,5.16578708,5.16575529
37.720312,5.19615242,5.1838991,0.110694728,5.18386743,5.16413116,5.16409937
37.730804,4.69041576,5.18241577,-0.701427126,5.18238411,5.16247518,5.1624434
37.741296,5.65685425,5.18093665,0.689867811,5.18090499,5.16081931,5.16078753
37.751787,5.09901951,5.17946203,-0.283623904,5.17943038,5.15916372,5.15913193
37.762279,5.19615242,5.17799178,0.134761413,5.17796013,5.15750808,5.1574763
37.77277,4.12310563,5.17652635,-1.02636286,5.1764947,5.15585272,5.15582094
37.783262,5.56776436,5.17506562,0.626656795,5.17503397,5.15419733,5.15416555
37.793754,5.74456265,5.17360992,0.755614139,5.17357827,5.15254207,5.15251029
37.804245,5.38516481,5.17215956,0.461524914,5.17212791,5.1508871,5.15085531
37.814737,6.08276253,5.17071447,0.955012075,5.17068281,5.14923211,5.14920032
37.825228,5.91607978,5.16927511,0.86417861,5.16924346,5.14757742,5.14754563
37.83572,5.91607978,5.16784144,0.865007713,5.16780978,5.14592272,5.14589093
37.846212,6.40312424,5.1664138,1.11207483,5.16638214,5.14426817,5.14423637
37.856703,5.83095189,5.16499258,0.816063306,5.16496091,5.14261393,5.14258213
37.867195,5.74456265,5.16357773,0.762223667,5.16354606,5.14095969,5.14092788
37.877686,5.56776436,5.16216979,0.636863076,5.16213811,5.13930577,5.13927396
37.888178,4.79583152,5.16076875,-0.604100343,5.16073707,5.13765186,5.13762004
37.89867,6.32455532,5.15937503,1.07943517,5.15934335,5.13599812,5.13596629
37.909161,5.09901951,5.15798906,-0.24283647,5.15795737,5.13434472,5.13431288
37.919653,5.19615242,5.15661089,0.198850521,5.15657919,5.13269133,5.13265948
37.930144,4.79583152,5.15524111,-0.599507784,5.1552094,5.13103828,5.13100643
37.940636,5.83095189,5.15387979,0.822843915,5.15384807,5.12938527,5.1293534
37.951128,4.89897949,5.15252743,-0.503535441,5.1524957,5.12773244,5.12770056
37.961619,5.65685425,5.15118453,0.711104574,5.1511528,5.12607996,5.12604807
37.972111,4.47213595,5.14985125,-0.823234656,5.14981951,5.12442753,5.12439563
37.982602,5.74456265,5.14852826,0.772032631,5.14849651,5.12277545,5.12274354
37.993094,3.87298335,5.14721575,-1.12881903,5.14718399,5.12112342,5.1210915
38.003586,5.29150262,5.14591432,0.381560348,5.14588255,5.11947161,5.11943967
38.014077,4.69041576,5.14462459,-0.673950169,5.1445928,5.11782016,5.11778821
38.024569,5.56776436,5.14334683,0.651473353,5.14331503,5.11616877,5.1161368
38.03506,5.29150262,5.14208185,0.386549832,5.14205004,5.11451776,5.11448578
38.045552,5.91607978,5.14082998,0.880482709,5.14079816,5.11286682,5.11283482
38.056044,5.83095189,5.13959197,0.831480559,5.13956013,5.11121611,5.11118409
38.066535,6.244998,5.1383686,1.05196454,5.13833674,5.10956579,5.10953376
38.077027,4.58257569,5.13716031,-0.744704383,5.13712844,5.10791555,5.1078835
38.087518,5.47722558,5.13596809,0.584172479,5.13593621,5.1062657,5.10623363
38.09801,5.47722558,5.13479248,0.585177832,5.13476058,5.10461594,5.10458386
38.108502,5.19615242,5.13363443,0.250035982,5.13360252,5.10296643,5.10293433
38.118993,5.47722558,5.13249493,0.587137671,5.132463,5.10131733,5.1012852
38.129485,4.79583152,5.1313747,-0.579260887,5.13134275,5.09966833,5.09963618
38.139976,5.19615242,5.13027495,0.256666077,5.13024298,5.09801974,5.09798757
38.150468,5.47722558,5.12919653,0.589939869,5.12916454,5.09637125,5.09633907
38.16096,5.56776436,5.12814067,0.663041245,5.12810867,5.09472304,5.09469083
38.171451,5.09901951,5.12710869,-0.167598246,5.12707667,5.09307525,5.09304302
38.181943,5.29150262,5.12610166,0.406695176,5.12606962,5.09142758,5.09139532
38.192434,6.08276253,5.12512115,0.97859153,5.12508909,5.08978034,5.08974806
38.202926,5.83095189,5.12416844,0.840704143,5.12413636,5.08813322,5.08810092
38.213418,5,5.12324519,-0.351062943,5.12321309,5.08648639,5.08645406
38.223909,6,5.12235316,0.936828073,5.12232105,5.08484001,5.08480765
38.234401,5,5.12149398,-0.348559865,5.12146184,5.08319376,5.08316138
38.244892,4.89897949,5.12066973,-0.470839935,5.12063757,5.08154796,5.08151555
38.255384,4.47213595,5.11988232,-0.804826914,5.11985014,5.0799023,5.07986987
38.265876,5.29150262,5.11913404,0.415172958,5.11910184,5.07825695,5.07822449
38.276367,5.29150262,5.11842734,0.41602318,5.11839512,5.07661206,5.07657957
38.286859,4.69041576,5.11776463,-0.653719262,5.11773239,5.07496732,5.0749348
38.29735,4.24264069,5.11714881,-0.935151391,5.11711655,5.07332305,5.07329051
38.307842,4.79583152,5.11658271,-0.566348999,5.11655043,5.07167894,5.07164637
38.318334,4.79583152,5.1160696,-0.565895814,5.11603729,5.07003515,5.07000255
38.328825,5.65685425,5.11561295,0.735691035,5.11558062,5.06839184,5.06835921
38.339317,5.56776436,5.11521641,0.672716845,5.11518406,5.0667487,5.06671604
38.349808,6.164414,5.11488408,1.02446568,5.1148517,5.06510605,5.06507336
38.3603,5.74456265,5.11462023,0.793689116,5.11458784,5.06346357,5.06343085
38.370792,4.89897949,5.11442963,-0.464166077,5.11439722,5.06182144,5.06178868
38.381283,4.12310563,5.11431739,-0.995596185,5.11428495,5.0601798,5.06014701
38.391775,5.29150262,5.11428902,0.420967466,5.11425656,5.05853834,5.05850553
38.402266,5.83095189,5.11435053,0.846523102,5.11431805,5.05689739,5.05686454
38.412758,5,5.11450848,-0.338391015,5.11447598,5.05525664,5.05522376
38.42325,5.65685425,5.11476996,0.736263738,5.11473743,5.05361624,5.05358332
38.433741,5.19615242,5.11514266,0.284622141,5.11511011,5.05197635,5.0519434
38.444233,5,5.11563506,-0.340051557,5.1156025,5.05033667,5.05030368
38.454724,5.09901951,5.11625625,-0.131288738,5.11622366,5.04869751,5.04866449
38.465216,5.47722558,5.11701632,0.600174353,5.11698371,5.04705856,5.0470255
38.475708,5,5.11792614,-0.34340376,5.11789352,5.04541998,5.04538689
38.486199,5.83095189,5.11899751,0.843773893,5.11896487,5.04378193,5.0437488
38.496691,4.47213595,5.12024362,-0.805051344,5.12021096,5.04214411,5.04211094
38.507182,5.83095189,5.12167844,0.842183744,5.12164576,5.04050682,5.04047361
38.517674,5.56776436,5.12331772,0.666668316,5.12328502,5.03886975,5.03883651
38.528166,6,5.12517828,0.935319047,5.12514557,5.03723308,5.0371998
38.538657,4.12310563,5.1272784,-1.00208421,5.12724567,5.03559695,5.03556363
38.549149,5.56776436,5.12963862,0.661910677,5.12960588,5.03396106,5.0339277
38.55964,5.65685425,5.13228049,0.724274645,5.13224774,5.03232572,5.03229232
38.570132,5.29150262,5.13522841,0.395315332,5.13519565,5.03069063,5.03065719
38.580624,3.87298335,5.13850815,-1.12495547,5.13847538,5.02905594,5.02902246
38.591115,5.29150262,5.14214753,0.386464866,5.14211475,5.02742181,5.02738829
38.601607,4.79583152,5.14617764,-0.59190043,5.14614486,5.02578794,5.02575437
38.612098,4.58257569,5.15063048,-0.753694092,5.1505977,5.02415463,5.02412103
38.62259,5.09901951,5.15554188,-0.237744323,5.1555091,5.02252159,5.02248794
38.633082,5.29150262,5.16094865,0.361322538,5.16091587,5.02088896,5.02085527
38.643573,5.83095189,5.16688936,0.814900323,5.16685659,5.01925691,5.01922318
38.654065,5.74456265,5.17340581,0.755749191,5.17337305,5.01762514,5.01759136
38.664556,5.29150262,5.18053839,0.333112939,5.18050564,5.01599394,5.01596012
38.675048,4.58257569,5.18833003,-0.778302215,5.1882973,5.01436302,5.01432916
38.68554,4.69041576,5.19682036,-0.711621105,5.19678765,5.01273254,5.01269863
38.696031,5.47722558,5.20604556,0.520749476,5.20601287,5.01110265,5.0110687
38.706523,5.65685425,5.2160388,0.663939343,5.21600614,5.00947305,5.00943905
38.717014,6.08276253,5.22682081,0.925171184,5.22678819,5.00784404,5.00780999
38.727506,5.83095189,5.23840323,0.769771826,5.23837065,5.00621533,5.00618123
38.737998,5.47722558,5.25077664,0.475866509,5.2507441,5.00458707,5.00455292
38.748489,6.244998,5.2639071,0.990500327,5.2638746,5.00295941,5.00292522
38.758981,5.83095189,5.27773305,0.743786826,5.27770061,5.00133206,5.00129782
38.769472,5.29150262,5.29214875,-0.0254189997,5.29211636,4.99970532,4.99967103
38.779964,5.65685425,5.3070066,0.591479207,5.30697426,4.99807888,4.99804455
38.790456,6.08276253,5.32210055,0.872159376,5.32206827,4.99645291,4.99641853
38.800947,5.65685425,5.33716479,0.565410873,5.33713257,4.99482757,4.99479313
38.811439,4.47213595,5.35187661,-0.937944911,5.35184444,4.99320254,4.99316805
38.82193,5.19615242,5.36585041,-0.411944156,5.36581828,4.99157814,4.9915436
38.832422,4.47213595,5.37866027,-0.952115703,5.37862818,4.98995406,4.98991947
38.842914,6.32455532,5.38985012,0.966801531,5.38981806,4.98833045,4.98829582
38.853405,5.29150262,5.39896667,-0.327817092,5.39893463,4.98670749,4.9866728
38.863897,4.69041576,5.40559609,-0.845683351,5.40556405,4.98508486,4.98505012
38.874388,5.74456265,5.409395,0.578936648,5.40936295,4.98346287,4.98342807
38.88488,4.89897949,5.41012985,-0.714947805,5.41009776,4.98184122,4.98180637
38.895372,5.29150262,5.40769802,-0.340874454,5.40766587,4.98022006,4.98018516
38.905863,6,5.4021417,0.773212973,5.40210948,4.97859955,4.97856459
38.916355,5.83095189,5.39364045,0.661295278,5.39360815,4.97697939,4.97694438
38.926846,5.91607978,5.38249521,0.730468735,5.3824628,4.97535988,4.97532482
38.937338,4.79583152,5.36909176,-0.757139509,5.36905923,4.97374072,4.9737056
38.94783,5.65685425,5.35387073,0.550439384,5.35383807,4.97212208,4.9720869
38.958321,6,5.33728953,0.814070311,5.33725672,4.97050409,4.97046886
38.968813,5.74456265,5.3197858,0.651749063,5.31975285,4.96888647,4.96885118
38.979304,5,5.30176529,-0.549331679,5.30173218,4.96726952,4.96723418
38.989796,4.69041576,5.28357405,-0.770167702,5.28354078,4.96565293,4.96561753
39.000288,5.29150262,5.26550337,0.161242824,5.26546995,4.96403687,4.96400141
39.010779,5.47722558,5.24778413,0.479000465,5.24775054,4.96242148,4.96238596
39.021271,5.29150262,5.2305855,0.246813935,5.23055176,4.96080647,4.96077089
39.031762,5.09901951,5.21403334,-0.339136889,5.21399945,4.95919214,4.9591565
39.042254,5.09901951,5.19820469,-0.314936781,5.19817065,4.95757818,4.95754249
39.052746,5.29150262,5.18314699,0.329174163,5.18311281,4.95596477,4.95592902
39.063237,5.09901951,5.16888037,-0.264312052,5.16884605,4.95435205,4.95431623
39.073729,4.58257569,5.15540033,-0.756851791,5.15536587,4.95273971,4.95270384
39.08422,6.164414,5.14269272,1.0108023,5.14265812,4.95112807,4.95109214
39.094712,4.58257569,5.13072781,-0.740372957,5.13069309,4.94951682,4.94948083
39.105204,5.74456265,5.11947265,0.790626332,5.1194378,4.94790612,4.94787007
39.115695,5.74456265,5.10888981,0.797290934,5.10885484,4.94629613,4.94626001
39.126187,4.79583152,5.09893671,-0.550549896,5.09890162,4.94468654,4.94465036
39.136678,4.35889894,5.08957415,-0.854795417,5.08953895,4.94307766,4.94304141
39.14717,5.29150262,5.08075967,0.459067476,5.08072436,4.94146918,4.94143287
39.157662,5,5.07245484,-0.269174362,5.07241941,4.93986126,4.93982489
39.168153,5.83095189,5.06462273,0.875402289,5.0645872,4.93825407,4.93821763
39.178645,5.29150262,5.05722623,0.484021066,5.0571906,4.93664728,4.93661078
39.189136,5.29150262,5.05023339,0.491191649,5.05019765,4.93504122,4.93500465
39.199628,5,5.04361171,-0.208834166,5.04357588,4.93343558,4.93339894
39.21012,5.65685425,5.03733301,0.787096718,5.03729708,4.93183051,4.93179381
39.220611,5.09901951,5.03137113,0.260093022,5.03133511,4.93022617,4.93018941
39.231103,5.19615242,5.02570032,0.412858448,5.0256642,4.92862226,4.92858543
39.241594,4.24264069,5.02029904,-0.881849392,5.02026282,4.92701908,4.92698218
39.252086,5.83095189,5.01514543,0.903220052,5.01510913,4.92541634,4.92537937
39.262578,4.79583152,5.01022097,-0.463022083,5.01018458,4.92381418,4.92377715
39.273069,5.09901951,5.00550861,0.305795518,5.00547213,4.92221277,4.92217566
39.283561,5.83095189,5.00099143,0.911021658,5.00095486,4.92061179,4.92057462
39.294052,5.09901951,4.99665563,0.319943567,4.99661896,4.91901156,4.91897432
39.304544,5.83095189,4.99248692,0.915677329,4.99245017,4.91741178,4.91737446
39.315036,5.38516481,4.98847344,0.6298344,4.9884366,4.91581259,4.91577521
39.325527,4.58257569,4.98460425,-0.634057214,4.98456732,4.91421416,4.91417671
39.336019,4.58257569,4.98086827,-0.631104249,4.98083126,4.91261618,4.91257866
39.34651,4.69041576,4.97725674,-0.535575369,4.97721964,4.91101896,4.91098136
39.357002,4.69041576,4.97376025,-0.532301126,4.97372307,4.9094222,4.90938453
39.367494,4.69041576,4.97037117,-0.529108123,4.9703339,4.90782604,4.9077883
39.377985,5,4.96708245,0.181431938,4.9670451,4.90623066,4.90619284
39.388477,4.58257569,4.96388672,-0.617503865,4.96384928,4.90463573,4.90459785
39.398968,5.38516481,4.96077836,0.651449496,4.96074084,4.90304158,4.90300362
39.40946,4.79583152,4.95775106,-0.402392263,4.95771345,4.9014479,4.90140986
39.419952,4.58257569,4.95479983,-0.610101739,4.95476214,4.89985484,4.89981673
39.430443,4.89897949,4.95192007,-0.230088215,4.9518823,4.89826255,4.89822437
39.440935,5.19615242,4.94910674,0.497036901,4.94906889,4.89667075,4.89663249
39.451426,5.19615242,4.94635622,0.499796163,4.94631828,4.89507972,4.89504138
39.461918,4.58257569,4.94366413,-0.600906343,4.9436261,4.89348918,4.89345076
39.47241,5.47722558,4.94102718,0.732255692,4.94098907,4.89189927,4.89186078
39.482901,5.47722558,4.93844231,0.734018574,4.93840412,4.89031014,4.89027158
39.493393,5.38516481,4.93590597,0.670267736,4.93586769,4.88872151,4.88868286
39.503884,5.09901951,4.9334158,0.406944358,4.93337744,4.88713367,4.88709494
39.514376,5.56776436,4.9309687,0.797994779,4.93093025,4.88554632,4.88550752
39.524868,5.29150262,4.92856243,0.602445175,4.9285239,4.88395962,4.88392073
39.535359,4.69041576,4.92619496,-0.485571001,4.92615634,4.88237371,4.88233475
39.545851,5,4.92386369,0.275928094,4.92382499,4.88078831,4.88074926
39.556342,5.19615242,4.92156709,0.524008908,4.9215283,4.87920371,4.87916458
39.566834,5.38516481,4.91930287,0.682540795,4.919264,4.87761961,4.8775804
39.577326,4.35889894,4.91706953,-0.747108149,4.91703057,4.87603617,4.87599688
39.587817,5.56776436,4.91486566,0.808021472,4.91482662,4.87445354,4.87441417
39.598309,5,4.91268934,0.295483772,4.91265021,4.87287142,4.87283196
39.6088,5.47722558,4.91053957,0.752785499,4.91050035,4.87129011,4.87125057
39.619292,4.35889894,4.90841461,-0.741293241,4.90837531,4.86970932,4.8696697
39.629784,4.58257569,4.90631344,-0.568979568,4.90627405,4.86812919,4.86808949
39.640275,4.69041576,4.9042351,-0.462406031,4.90419562,4.86654989,4.8665101
39.650767,3.60555128,4.90217809,-1.13869522,4.90213852,4.86497111,4.86493124
39.661258,5.56776436,4.90014178,0.817081747,4.90010213,4.86339315,4.86335319
39.67175,4.89897949,4.89812483,0.0292344497,4.89808509,4.86181572,4.86177567
39.682242,5.74456265,4.89612653,0.92110592,4.8960867,4.86023896,4.86019883
39.692733,4.47213595,4.89414621,-0.649623166,4.89410629,4.85866304,4.85862282
39.703225,4.69041576,4.8921827,-0.449184752,4.89214269,4.85708765,4.85704735
39.713716,5,4.89023562,0.331307083,4.89019551,4.85551309,4.8554727
39.724208,4.89897949,4.88830387,0.103322848,4.88826368,4.85393907,4.85389859
39.7347,5.29150262,4.88638699,0.636486944,4.88634671,4.85236574,4.85232517
39.745191,5.09901951,4.88448452,0.463179228,4.88444414,4.85079325,4.85075259
39.755683,4.79583152,4.88259549,-0.294557232,4.88255502,4.8492213,4.84918055
39.766174,5.09901951,4.8807197,0.467225658,4.88067914,4.84765019,4.84760936
39.776666,3.87298335,4.87885626,-1.00293216,4.87881561,4.84607964,4.84603871
39.787158,4.89897949,4.87700484,0.148238464,4.8769641,4.84450978,4.84446876
39.797649,5.83095189,4.87516515,0.977643466,4.87512431,4.84294077,4.84289966
39.808141,4.89897949,4.87333637,0.160134683,4.87329544,4.84137231,4.84133111
39.818632,4.69041576,4.87151843,-0.425561589,4.8714774,4.83980471,4.83976342
39.829124,5.38516481,4.86971057,0.71795142,4.86966944,4.83823767,4.83819628
39.839616,5.09901951,4.86791258,0.480735829,4.86787136,4.83667133,4.83662985
39.850107,4.35889894,4.86612426,-0.712197527,4.86608295,4.83510585,4.83506428
39.860599,4.24264069,4.86434493,-0.788482241,4.86430352,4.83354094,4.83349927
39.87109,5.19615242,4.8625746,0.577561966,4.86253309,4.83197689,4.83193512
39.881582,5.09901951,4.86081261,0.488064447,4.86077101,4.8304134,4.83037154
39.892074,4.12310563,4.85905883,-0.857877152,4.85901714,4.82885064,4.82880868
39.902565,5,4.85731316,0.377739121,4.85727136,4.82728874,4.82724669
39.913057,5.91607978,4.85557497,1.02980814,4.85553308,4.82572742,4.82568527
39.923548,4.47213595,4.85384436,-0.617825546,4.85380237,4.82416697,4.82412472
39.93404,4.79583152,4.85212074,-0.237253488,4.85207865,4.82260709,4.82256474
39.944532,4.69041576,4.85040405,-0.39998536,4.85036186,4.82104795,4.8210055
39.955023,4.12310563,4.84869422,-0.851814884,4.84865193,4.81948968,4.81944713
39.965515,4.58257569,4.84699073,-0.514213022,4.84694833,4.81793199,4.81788934
39.976006,4.69041576,4.84529368,-0.393545325,4.84525119,4.81637519,4.81633244
39.986498,5,4.84360257,0.395471144,4.84355998,4.81481897,4.81477612
39.99699,4.47213595,4.84191738,-0.608096559,4.84187468,4.81326348,4.81322053
40.007481,5.56776436,4.84023808,0.852951511,4.84019528,4.81170889,4.81166583
40.017973,5,4.83856419,0.401790748,4.83852129,4.81015489,4.81011173
40.028464,4.12310563,4.83689588,-0.844861083,4.83685287,4.80860177,4.80855851
40.038956,5.29150262,4.83523265,0.675477587,4.83518954,4.80704925,4.80700589
40.049448,5,4.83357454,0.407952769,4.83353132,4.80549748,4.80545401
40.059939,4.79583152,4.83192155,-0.189973753,4.83187823,4.8039466,4.80390303
40.070431,5.91607978,4.83027324,1.04202041,4.83022981,4.80239633,4.80235265
40.080922,5.38516481,4.82862979,0.746012746,4.82858626,4.80084695,4.80080316
40.091414,5.65685425,4.82699077,0.910968431,4.82694713,4.79929818,4.79925429
40.101906,5.38516481,4.82535621,0.748203581,4.82531246,4.79775016,4.79770616
40.112397,4.35889894,4.82372616,-0.68178238,4.8236823,4.79620304,4.79615894
40.122889,4.89897949,4.82210019,0.277271152,4.82205623,4.79465654,4.79461232
40.13338,5.19615242,4.82047852,0.612922424,4.82043445,4.79311094,4.79306662
40.143872,4.12310563,4.81886074,-0.834119365,4.81881656,4.79156596,4.79152152
40.154364,4.89897949,4.8172469,0.285889114,4.81720261,4.79002174,4.78997719
40.164855,4.24264069,4.81563707,-0.756965243,4.81559266,4.78847843,4.78843377
40.175347,5,4.81403084,0.431241413,4.81398633,4.78693573,4.78689097
40.185838,4,4.81242845,-0.901348131,4.81238383,4.78539396,4.78534908
40.19633,4.89897949,4.81082951,0.296900616,4.81078477,4.7838528,4.78380781
40.206822,5.19615242,4.80923409,0.6220276,4.80918923,4.78231242,4.78226732
40.217313,4.89897949,4.80764226,0.302220486,4.8075973,4.78077296,4.78072774
40.227805,4.24264069,4.80605366,-0.750608403,4.80600858,4.77923412,4.77918879
40.238296,4.24264069,4.80446852,-0.749551752,4.80442332,4.77769621,4.77765076
40.248788,5.91607978,4.80288646,1.05507977,4.80284115,4.77615893,4.77611336
40.25928,4.69041576,4.80130758,-0.333004228,4.80126215,4.77462242,4.77457674
40.269771,5.29150262,4.79973196,0.701263621,4.79968641,4.77308685,4.77304105
40.280263,5.09901951,4.79815924,0.548507314,4.79811358,4.77155191,4.77150599
40.290754,4.47213595,4.79658967,-0.569608389,4.79654389,4.7700179,4.76997186
40.301246,4.58257569,4.7950229,-0.46091995,4.794977,4.76848453,4.76843837
40.311738,5.29150262,4.79345901,0.705722051,4.79341299,4.76695194,4.76690567
40.322229,4.79583152,4.79189811,0.062716932,4.79185197,4.76542029,4.7653739
40.332721,4.79583152,4.79033985,0.0741058133,4.79029359,4.76388929,4.76384277
40.343212,4.58257569,4.78878448,-0.45410218,4.7887381,4.76235922,4.76231258
40.353704,5.47722558,4.78723167,0.83065872,4.78718516,4.7608298,4.76078304
40.364196,4.79583152,4.7856815,0.100747313,4.78563488,4.75930118,4.75925429
40.374687,3.87298335,4.7841341,-0.954542168,4.78408735,4.75777349,4.75772649
40.385179,5.09901951,4.78258911,0.562521466,4.78254224,4.75624646,4.75619933
40.39567,5.29150262,4.78104681,0.714461904,4.78099981,4.75472037,4.75467312
40.406162,5,4.77950685,0.469566978,4.77945973,4.75319494,4.75314756
40.416654,4.89897949,4.77796935,0.347865107,4.77792211,4.75167031,4.7516228
40.427145,5.38516481,4.77643442,0.780211757,4.77638705,4.75014663,4.750099
40.437637,5.19615242,4.77490173,0.649038281,4.77485423,4.74862361,4.74857585
40.448128,5.47722558,4.77337154,0.838960089,4.77332392,4.74710154,4.74705365
40.45862,5.29150262,4.77184353,0.720873837,4.77179578,4.74558013,4.74553211
40.469112,5.19615242,4.77031782,0.65256004,4.77026993,4.74405954,4.74401139
40.479603,4.12310563,4.76879451,-0.803547686,4.76874649,4.74253989,4.74249161
40.490095,4.89897949,4.76727329,0.362913479,4.76722515,4.74102092,4.74097251
40.500586,5.09901951,4.76575443,0.577291161,4.76570615,4.7395029,4.73945436
40.511078,4.89897949,4.7642376,0.367072042,4.76418919,4.73798556,4.73793688
40.52157,4.35889894,4.76272293,-0.635471469,4.76267439,4.73646903,4.73642022
40.532061,4.24264069,4.76121054,-0.720117941,4.76116186,4.73495346,4.73490452
40.542553,5.19615242,4.75970011,0.660645379,4.7596513,4.73343857,4.73338949
40.553044,5,4.7581919,0.491739867,4.75814296,4.73192464,4.73187543
40.563536,5.19615242,4.75668562,0.662922924,4.75663654,4.73041139,4.73036204
40.574028,5.09901951,4.75518138,0.586377129,4.75513216,4.72889897,4.72884948
40.584519,3.87298335,4.7536793,-0.938454022,4.75362995,4.72738751,4.72733788
40.595011,4.79583152,4.75217908,0.208931682,4.75212959,4.72587673,4.72582697
40.605502,4.47213595,4.75068098,-0.527773647,4.75063135,4.72436693,4.72431702
40.615994,4.35889894,4.7491847,-0.624728545,4.74913493,4.72285781,4.72280776
40.626486,4.35889894,4.74769036,-0.623531411,4.74764046,4.72134952,4.72129933
40.636977,4.89897949,4.7461981,0.390872596,4.74614805,4.7198422,4.71979188
40.647469,4.79583152,4.7447076,0.226105997,4.74465741,4.71833558,4.71828511
40.65796,5.09901951,4.74321914,0.596490046,4.74316881,4.71682993,4.71677932
40.668452,3.87298335,4.74173241,-0.932067093,4.74168194,4.71532497,4.71527421
40.678944,4.58257569,4.74024755,-0.397079153,4.74019693,4.71382085,4.71376995
40.689435,5.09901951,4.73876467,0.600212329,4.73871391,4.71231771,4.71226666
40.699927,5.19615242,4.73728349,0.67739865,4.73723258,4.71081527,4.71076407
40.710418,4.58257569,4.73580427,-0.391444217,4.73575321,4.70931381,4.70926246
40.72091,5,4.73432671,0.515435045,4.73427551,4.70781305,4.70776155
40.731402,4.89897949,4.73285095,0.407588681,4.7327996,4.70631313,4.70626149
40.741893,4.89897949,4.73137711,0.409392688,4.73132561,4.70481419,4.7047624
40.752385,4.35889894,4.7299049,-0.609102584,4.72985325,4.70331596,4.70326402
40.762876,4.69041576,4.72843459,-0.194984175,4.72838279,4.70181872,4.70176663
40.773368,4.69041576,4.72696588,-0.191180862,4.72691393,4.70032219,4.70026994
40.78386,5.29150262,4.72549891,0.752332181,4.72544681,4.6988265,4.6987741
40.794351,4.12310563,4.72403381,-0.775195575,4.72398155,4.6973318,4.69727925
40.804843,4.89897949,4.72257028,0.420010964,4.72251786,4.69583782,4.69578511
40.815334,3.74165739,4.72110859,-0.989672271,4.72105602,4.69434482,4.69429196
40.825826,4,4.71964846,-0.848320967,4.71959574,4.69285254,4.69279952
40.836318,5.74456265,4.71819002,1.0131005,4.71813714,4.69136112,4.69130794
40.846809,4.79583152,4.7167334,0.281243888,4.71668036,4.68987069,4.68981735
40.857301,5.29150262,4.71527831,0.759094405,4.71522511,4.68838098,4.68832748
40.867792,5.09901951,4.71382501,0.620640395,4.71377166,4.68689226,4.6868386
40.878284,5.09901951,4.71237324,0.621808874,4.71231972,4.68540427,4.68535045
40.888776,4.79583152,4.71092311,0.291390488,4.71086943,4.68391713,4.68386315
40.899267,4,4.70947475,-0.842303243,4.70942092,4.682431,4.68237685
40.909759,3.87298335,4.70802789,-0.91380772,4.70797389,4.68094559,4.68089128
40.92025,4.79583152,4.7065828,0.298745252,4.70652863,4.67946118,4.67940671
40.930742,4.69041576,4.70513918,-0.121340111,4.70508485,4.6779775,4.67792286
40.941234,5.47722558,4.70369718,0.879504631,4.70364268,4.67649469,4.67643987
40.951725,5.65685425,4.70225692,0.977034969,4.70220226,4.67501288,4.6749579
40.962217,4.79583152,4.70081812,0.308242439,4.70076329,4.6735318,4.67347665
40.972708,4.79583152,4.69938106,0.310564754,4.69932606,4.67205173,4.6719964
40.9832,5,4.69794544,0.549594902,4.69789028,4.67057238,4.67051689
40.993692,4.24264069,4.69651141,-0.673699286,4.69645608,4.66909391,4.66903825
41.004183,3.74165739,4.6950791,-0.976433159,4.69502359,4.66761645,4.66756062
41.014675,5.09901951,4.69364823,0.636687748,4.69359254,4.66613973,4.66608372
41.025166,4.47213595,4.69221906,-0.469130153,4.6921632,4.66466402,4.66460783
41.035658,5,4.69079131,0.556065361,4.69073528,4.66318904,4.66313268
41.04615,4.69041576,4.68936513,0.0324133582,4.68930893,4.66171495,4.6616584
41.056641,4.35889894,4.68794065,-0.573621567,4.68788426,4.66024187,4.66018515
41.067133,5,4.68651758,0.559895012,4.68646101,4.65876952,4.65871262
41.077624,5,4.68509619,0.561162909,4.68503945,4.6572982,4.65724112
41.088116,4.58257569,4.68367621,-0.317963076,4.68361929,4.65582762,4.65577035
41.098608,4.35889894,4.68225778,-0.568646494,4.68220067,4.65435792,4.65430047
41.109099,5,4.68084102,0.564941574,4.68078373,4.65288924,4.65283161
41.119591,4.47213595,4.67942566,-0.455290789,4.67936819,4.6514213,4.65136349
41.130082,4.12310563,4.67801197,-0.744920358,4.67795431,4.64995439,4.64989639
41.140574,4.24264069,4.67659967,-0.658755631,4.67654183,4.64848823,4.64843004
41.151066,4.69041576,4.6751889,0.123397173,4.67513087,4.64702295,4.64696457
41.161557,5.19615242,4.67377979,0.72275351,4.67372157,4.64555869,4.64550013
41.172049,5,4.67237206,0.572387926,4.67231366,4.64409519,4.64403643
41.18254,4.69041576,4.67096599,0.139462424,4.6709074,4.64263271,4.64257376
41.193032,5,4.66956131,0.574837972,4.66950252,4.64117099,4.64111184
41.203524,4.47213595,4.66815813,-0.442743921,4.66809916,4.63971016,4.63965082
41.214015,5.65685425,4.66675661,0.995036501,4.66669744,4.63825035,4.63819082
41.224507,5.29150262,4.66535647,0.791293976,4.6652971,4.6367913,4.63673157
41.234998,5.19615242,4.66395796,0.729516592,4.6638984,4.63533329,4.63527336
41.24549,5.56776436,4.66256084,0.951421844,4.66250108,4.63387603,4.6338159
41.255982,5.47722558,4.66116522,0.903360591,4.66110526,4.63241966,4.63235933
41.266473,5.47722558,4.65977124,0.904131815,4.65971108,4.63096433,4.6309038
41.276965,5,4.65837863,0.584483852,4.65831827,4.62950976,4.62944902
41.287456,4.69041576,4.65698765,0.182833549,4.65692709,4.62805622,4.62799528
41.297948,4.69041576,4.65559805,0.186595046,4.65553728,4.62660345,4.6265423
41.30844,4.79583152,4.65420995,0.376326424,4.65414898,4.62515157,4.62509022
41.318931,4.47213595,4.65282348,-0.425073547,4.6527623,4.62370073,4.62363917
41.329423,4.58257569,4.65143837,-0.262416991,4.65137699,4.62225066,4.62218889
41.339914,4.69041576,4.6500549,0.200900125,4.64999331,4.62080163,4.62073965
41.350406,4.47213595,4.64867279,-0.420162872,4.64861099,4.61935336,4.61929116
41.360898,5.09901951,4.64729219,0.672106634,4.64723017,4.617906,4.61784359
41.371389,4.89897949,4.64591321,0.503056935,4.64585098,4.61645967,4.61639705
41.381881,4.24264069,4.64453559,-0.633951816,4.64447315,4.61501412,4.61495128
41.392372,4.89897949,4.64315961,0.505786397,4.64309695,4.61356961,4.61350655
41.402864,4.47213595,4.64178499,-0.41188473,4.64172211,4.61212587,4.61206259
41.413356,5,4.64041186,0.599656684,4.64034877,4.61068304,4.61061954
41.423847,5.09901951,4.63904037,0.678217626,4.63897705,4.60924125,4.60917753
41.434339,5.47722558,4.63767023,0.916272525,4.6376067,4.60780024,4.60773629
41.44483,4.58257569,4.63630173,-0.231788774,4.63623797,4.60636027,4.6062961
41.455322,5.47722558,4.63493459,0.917764121,4.63487061,4.60492108,4.60485668
41.465814,5.09901951,4.63356895,0.682239372,4.63350475,4.60348279,4.60341817
41.476305,4.89897949,4.63220494,0.516502221,4.63214051,4.60204556,4.60198071
41.486797,4.47213595,4.6308423,-0.398379645,4.63077763,4.60060911,4.60054402
41.497288,4.47213595,4.62948128,-0.396667777,4.62941639,4.5991737,4.59910838
41.50778,5,4.62812163,0.609818306,4.62805651,4.59773907,4.59767352
41.518272,4,4.62676349,-0.791683956,4.62669813,4.59630536,4.59623957
41.528763,4.24264069,4.62540697,-0.618681083,4.62534138,4.5948727,4.59480667
41.539255,4.58257569,4.62405182,-0.20365689,4.623986,4.59344082,4.59337456
41.549746,4.58257569,4.62269831,-0.200306302,4.62263224,4.59201,4.59194349
41.560238,4.89897949,4.62134617,0.526909211,4.62127986,4.59057996,4.59051321
41.57073,3.87298335,4.61999553,-0.864298668,4.61992899,4.58915083,4.58908384
41.581221,4.47213595,4.61864653,-0.382766999,4.61857974,4.58772276,4.58765552
41.591713,4.58257569,4.6172989,-0.186341648,4.61723187,4.58629548,4.58622799
41.602204,4,4.61595292,-0.784826678,4.61588563,4.58486925,4.58480151
41.612696,5.29150262,4.61460831,0.822735873,4.61454078,4.58344381,4.58337582
41.623188,5,4.61326521,0.621880049,4.61319743,4.58201929,4.58195105
41.633679,4.69041576,4.61192374,0.280164266,4.61185572,4.58059583,4.58052733
41.644171,4.35889894,4.61058367,-0.501681895,4.61051539,4.57917316,4.57910441
41.654662,5.19615242,4.60924523,0.766098682,4.6091767,4.57775154,4.57768253
41.665154,4.12310563,4.60790818,-0.696277645,4.60783939,4.57633072,4.57626145
41.675646,3.87298335,4.60657265,-0.856498282,4.6065036,4.57491082,4.57484129
41.686137,5.09901951,4.60523877,0.702695343,4.60516946,4.57349198,4.57342219
41.696629,5.09901951,4.60390628,0.703642834,4.6038367,4.57207394,4.57200388
41.70712,4.12310563,4.60257543,-0.692437583,4.6025056,4.57065696,4.57058663
41.717612,5.29150262,4.60124599,0.830816849,4.60117588,4.56924077,4.56917017
41.728104,5.09901951,4.59991806,0.706471124,4.59984769,4.5678255,4.56775464
41.738595,4.69041576,4.5985918,0.303024691,4.59852116,4.56641131,4.56634017
41.749087,4.79583152,4.59726693,0.44560587,4.59719602,4.5649979,4.56492649
41.759578,4.69041576,4.59594372,0.307363036,4.59587254,4.56358557,4.56351388
41.77007,4,4.59462192,-0.771117321,4.59455046,4.56217402,4.56210206
41.780562,5,4.59330166,0.637729051,4.59322992,4.56076341,4.56069117
41.791053,4.35889894,4.59198306,-0.482787854,4.59191104,4.55935387,4.55928134
41.801545,4.79583152,4.59066587,0.452952157,4.59059357,4.55794513,4.55787231
41.812036,4.79583152,4.58935035,0.454402,4.58927776,4.55653745,4.55646434
41.822528,4.58257569,4.58803624,-0.0738955212,4.58796338,4.55513057,4.55505718
41.83302,5,4.58672369,0.642865704,4.58665053,4.55372463,4.55365094
41.843511,4,4.5854128,-0.765122738,4.58533936,4.55231975,4.55224577
41.854003,4.69041576,4.58410335,0.326055842,4.58402961,4.55091568,4.5508414
41.864494,4.24264069,4.58279557,-0.583227985,4.58272154,4.54951267,4.5494381
41.874986,4.47213595,4.58148922,-0.330686056,4.5814149,4.54811047,4.5480356
41.885478,4.35889894,4.58018443,-0.470409918,4.58010981,4.54670921,4.54663403
41.895969,5.47722558,4.57888133,0.947810236,4.57880641,4.54530901,4.54523353
41.906461,5,4.57757967,0.649938713,4.57750444,4.54390962,4.54383384
41.916952,4.35889894,4.5762797,-0.466241089,4.57620416,4.54251131,4.54243521
41.927444,4.89897949,4.57498117,0.569208499,4.57490533,4.54111379,4.54103739
41.937936,5.19615242,4.57368422,0.788966544,4.57360806,4.53971722,4.5396405
41.948427,4.69041576,4.57238896,0.343550288,4.5723125,4.53832172,4.53824469
41.958919,4.58257569,4.57109516,0.10714727,4.57101838,4.53692703,4.53684967
41.96941,3.74165739,4.56980306,-0.910025095,4.56972597,4.53553341,4.53545573
41.979902,4.89897949,4.56851242,0.574862646,4.56843501,4.5341406,4.5340626
41.990394,4.24264069,4.56722337,-0.569721586,4.56714564,4.53274873,4.53267041
42.000885,4.12310563,4.56593604,-0.66545504,4.56585797,4.53135794,4.53127928
42.011377,5.47722558,4.56465017,0.955288128,4.56457178,4.52996796,4.52988897
42.021868,4.89897949,4.56336602,0.579321557,4.5632873,4.52857905,4.52849973
42.03236,4.35889894,4.56208335,-0.450759808,4.5620043,4.52719095,4.52711129
42.042852,4.58257569,4.56080228,0.147558179,4.56072289,4.5258038,4.5257238
42.053343,4.79583152,4.55952294,0.486115815,4.55944321,4.52441773,4.52433738
42.063835,4.69041576,4.55824508,0.363552852,4.55816502,4.52303246,4.52295178
42.074326,3.46410162,4.55696896,-1.04540296,4.55688856,4.52164828,4.52156724
42.084818,4,4.55569434,-0.745449086,4.55561359,4.5202649,4.52018352
42.09531,3.87298335,4.55442133,-0.825492573,4.55434023,4.51888248,4.51880074
42.105801,4.35889894,4.55315007,-0.440739299,4.55306862,4.51750113,4.51741904
42.116293,4.89897949,4.55188032,0.589151226,4.55179851,4.5161206,4.51603814
42.126784,4.89897949,4.55061231,0.590226373,4.55053015,4.51474115,4.51465833
42.137276,4.35889894,4.54934582,-0.436402199,4.5492633,4.51336251,4.51327933
42.147768,5.09901951,4.54808097,0.742252345,4.54799808,4.51198482,4.51190127
42.158259,3.46410162,4.54681788,-1.04053653,4.54673462,4.51060821,4.51052429
42.168751,4.58257569,4.54555631,0.192404215,4.54547269,4.50923242,4.50914812
42.179242,4.79583152,4.54429652,0.501532658,4.54421252,4.50785771,4.50777303
42.189734,4.35889894,4.54303825,-0.429114564,4.54295388,4.50648382,4.50639876
42.200226,4.47213595,4.54178165,-0.2639047,4.54169689,4.50511088,4.50502543
42.210717,4.69041576,4.54052682,0.38715493,4.54044169,4.50373901,4.50365318
42.221209,4,4.53927354,-0.734352463,4.53918802,4.50236797,4.50228175
42.2317,3.74165739,4.53802205,-0.892392661,4.53793614,4.50099801,4.5009114
42.242192,5.29150262,4.53677211,0.868752273,4.53668581,4.49962888,4.49954186
42.252684,4.69041576,4.53552385,0.393563093,4.53543715,4.49826069,4.49817327
42.263175,5.29150262,4.53427739,0.870186894,4.53419029,4.49689359,4.49680576
42.273667,3.60555128,4.5330325,-0.963058267,4.532945,4.49552731,4.49543907
42.284158,4,4.53178942,-0.729238931,4.53170151,4.49416211,4.49407346
42.29465,3.46410162,4.53054791,-1.03268887,4.53045959,4.49279773,4.49270867
42.305142,5.19615242,4.52930811,0.816605361,4.52921937,4.49143431,4.49134483
42.315633,3.31662479,4.52807012,-1.10065677,4.52798096,4.49007198,4.48998206
42.326125,4.35889894,4.52683373,-0.409798471,4.52674415,4.48871046,4.48862012
42.336616,5.29150262,4.52559917,0.875159102,4.52550916,4.48735004,4.48725926
42.347108,4,4.52436621,-0.724131346,4.52427576,4.48599044,4.48589922
42.3576,3.87298335,4.52313497,-0.806319801,4.52304409,4.48463179,4.48454013
42.368091,4.12310563,4.52190557,-0.631506095,4.52181425,4.48327423,4.48318212
42.378583,4.47213595,4.52067779,-0.220322127,4.52058602,4.48191749,4.48182493
42.389074,4.47213595,4.51945187,-0.217522217,4.51935965,4.48056185,4.48046882
42.399566,3.74165739,4.51822757,-0.881232197,4.51813489,4.47920702,4.47911354
42.410058,4.58257569,4.51700502,0.256067716,4.51691188,4.47785316,4.47775921
42.420549,4.58257569,4.51578434,0.258440239,4.51569073,4.47650039,4.47640596
42.431041,3.60555128,4.5145653,-0.953422268,4.51447122,4.47514844,4.47505353
42.441532,4.35889894,4.51334814,-0.393000244,4.51325358,4.47379758,4.47370218
42.452024,4.58257569,4.51213263,0.265411131,4.51203758,4.47244755,4.47235166
42.462516,4.79583152,4.51091889,0.533772079,4.51082335,4.47109848,4.47100209
42.473007,4.47213595,4.50970705,-0.193832649,4.50961102,4.4697505,4.46965361
42.483499,4.12310563,4.50849688,-0.620798884,4.50840034,4.46840335,4.46830595
42.49399,4.47213595,4.50728862,-0.187490427,4.50719156,4.46705729,4.46695937
42.504482,4.12310563,4.50608203,-0.618850875,4.50598446,4.46571207,4.46561361
42.514974,4,4.50487725,-0.710547148,4.50477915,4.4643678,4.46426881
42.525465,3.87298335,4.50367439,-0.794160591,4.50357575,4.46302463,4.46292509
42.535957,4,4.50247323,-0.708853462,4.50237405,4.46168229,4.4615822
42.546448,4.35889894,4.50127401,-0.377326202,4.50117427,4.46034105,4.46024039
42.55694,5.29150262,4.50007649,0.88962134,4.49997619,4.45900064,4.45889941
42.567432,3.46410162,4.49888081,-1.01724097,4.49877993,4.45766119,4.45755938
42.577923,4.69041576,4.49768709,0.439008741,4.49758562,4.45632284,4.45622044
42.588415,4.58257569,4.49649509,0.293394964,4.49639303,4.45498533,4.45488232
42.598906,3.74165739,4.49530506,-0.868128834,4.49520239,4.45364892,4.45354528
42.609398,4.69041576,4.49411678,0.443056413,4.49401348,4.45231334,4.45220908
42.61989,4.24264069,4.49293036,-0.500289585,4.49282642,4.45097874,4.45087382
42.630381,3.16227766,4.49174592,-1.1530257,4.49164134,4.44964523,4.44953965
42.640873,3.46410162,4.49056326,-1.01314443,4.490458,4.44831257,4.44820631
42.651364,4.35889894,4.48938259,-0.361225204,4.48927665,4.44698101,4.44687405
42.661856,4.69041576,4.48820371,0.449679944,4.48809706,4.44565029,4.44554262
42.672348,4.24264069,4.48702673,-0.494354164,4.48691936,4.44432055,4.44421215
42.682839,4.58257569,4.48585177,0.311004707,4.48574365,4.44299192,4.44288276
42.693331,4.69041576,4.48467861,0.453582567,4.48456973,4.44166414,4.4415542
42.703822,4.69041576,4.4835075,0.454871697,4.48339782,4.44033746,4.44022672
42.714314,3.16227766,4.48233821,-1.14893888,4.48222771,4.43901164,4.43890007
42.724806,4.89897949,4.48117086,0.646381178,4.48105952,4.4376868,4.43757438
42.735297,4.79583152,4.48000557,0.561983941,4.47989336,4.43636308,4.43624977
42.745789,4.58257569,4.47884214,0.322076943,4.47872902,4.43504022,4.43492599
42.75628,4.79583152,4.47768078,0.564048526,4.47756672,4.43371848,4.43360329
42.766772,4.58257569,4.4765213,0.32565994,4.47640626,4.43239761,4.43228142
42.777264,4.58257569,4.4753638,0.32743227,4.47524775,4.43107773,4.43096051
42.787755,5.19615242,4.47420842,0.84967288,4.4740913,4.42975898,4.42964068
42.798247,4.58257569,4.47305493,0.330939209,4.47293671,4.4284411,4.42832168
42.808738,4.47213595,4.47190358,0.01524381,4.4717842,4.42712436,4.42700377
42.81923,4.47213595,4.47075415,0.0371726293,4.47063355,4.42580851,4.42568668
42.829722,4.47213595,4.46960676,0.0502910618,4.4694849,4.42449367,4.42437056
42.840213,4.47213595,4.46846154,0.0606169312,4.46833834,4.42317997,4.42305551
42.850705,3.74165739,4.46731828,-0.85185732,4.46719368,4.42186718,4.4217413
42.861196,5.09901951,4.46617721,0.795513863,4.46605114,4.42055554,4.42042817
42.871688,3.31662479,4.46503812,-1.07164049,4.4649105,4.41924481,4.41911587
42.88218,4.24264069,4.46390114,-0.470383307,4.46377189,4.41793512,4.41780452
42.892671,4.58257569,4.46276639,0.3461348,4.46263542,4.4166266,4.41649426
42.903163,3.46410162,4.46163368,-0.998765268,4.46150088,4.41531902,4.41518483
42.913654,4.12310563,4.46050322,-0.580859357,4.4603685,4.41401262,4.41387648
42.924146,4,4.45937482,-0.677771954,4.45923806,4.41270717,4.41256896
42.934638,4,4.45824861,-0.676940626,4.45810969,4.4114028,4.4112624
42.945129,4.24264069,4.45712471,-0.463124199,4.4569835,4.41009964,4.40995693
42.955621,4.24264069,4.45600293,-0.461911505,4.45585928,4.40879746,4.40865228
42.966112,5.47722558,4.45488349,1.01110934,4.45473726,4.40749651,4.40734871
42.976604,3.87298335,4.4537662,-0.762091108,4.45361723,4.40619656,4.40604598
42.987096,4.35889894,4.4526512,-0.306189902,4.45249931,4.40489774,4.4047442
42.997587,4.89897949,4.45153861,0.668910218,4.45138361,4.40360019,4.40344351
43.008079,4.24264069,4.45042823,-0.455837191,4.45026992,4.40230368,4.40214364
43.01857,3.87298335,4.44932031,-0.759168602,4.44915848,4.40100847,4.40084486
43.029062,4.24264069,4.44821466,-0.453402664,4.44804907,4.39971432,4.39954691
43.039554,3.60555128,4.44711141,-0.917365869,4.44694182,4.39842139,4.39824991
43.050045,5.09901951,4.4460107,0.808089609,4.44583682,4.3971298,4.396954
43.060537,4.79583152,4.44491233,0.592384327,4.4447339,4.39583934,4.39565891
43.071028,4.47213595,4.44381656,0.168283678,4.44363325,4.39455027,4.39436491
43.08152,5.29150262,4.4427232,0.921292258,4.44253469,4.39326236,4.39307174
43.092012,3.87298335,4.44163239,-0.754088219,4.44143833,4.39197577,4.39177952
43.102503,4.69041576,4.44054427,0.499871475,4.44034428,4.39069064,4.39048839
43.112995,5.19615242,4.43945867,0.869881462,4.43925235,4.38940675,4.38919808
43.123486,4,4.43837583,-0.662099559,4.43816274,4.38812438,4.38790886
43.133978,3.87298335,4.43729558,-0.751207186,4.43707527,4.38684331,4.38662046
43.14447,4.79583152,4.43621808,0.599677783,4.43599005,4.38556369,4.38533303
43.154961,3.87298335,4.43514346,-0.749773378,4.43490718,4.38428569,4.38404667
43.165453,4.69041576,4.43407158,0.506304437,4.43382649,4.38300909,4.38276114
43.175944,4.47213595,4.43300267,0.197821342,4.43274817,4.38173417,4.38147669
43.186436,4.24264069,4.43193659,-0.435081494,4.43167204,4.38046074,4.38019307
43.196928,4.12310563,4.4308735,-0.554768305,4.43059821,4.37918895,4.37891041
43.207419,3.74165739,4.42981354,-0.829551779,4.42952679,4.37791898,4.37762882
43.217911,4.47213595,4.42875658,0.208277158,4.42845759,4.37665062,4.37634807
43.228402,3.87298335,4.42770288,-0.744794959,4.42739082,4.37538418,4.37506839
43.238894,4.47213595,4.42665229,0.213268987,4.4263263,4.37411946,4.37378955
43.249386,5,4.425605,0.757888514,4.42526413,4.37285664,4.37251166
43.259877,4.12310563,4.42456116,-0.549049667,4.42420443,4.3715959,4.37123484
43.270369,4,4.42352066,-0.650784648,4.423147,4.37033706,4.36995886
43.28086,3.87298335,4.42248376,-0.741282951,4.42209207,4.36908043,4.36868395
43.291352,4.79583152,4.42145035,0.611866956,4.42103943,4.36782584,4.36740987
43.301844,4.69041576,4.42042062,0.519610569,4.41998921,4.36657348,4.36613675
43.312335,4.24264069,4.41939474,-0.420421279,4.41894151,4.36532354,4.3648647
43.322827,3.87298335,4.41837262,-0.738504753,4.41789615,4.36407588,4.36359348
43.333318,4.58257569,4.41735454,0.406474053,4.41685334,4.36283081,4.36232334
43.34381,4.24264069,4.41634041,-0.416772991,4.41581289,4.36158818,4.36105403
43.354302,4,4.41533044,-0.644461356,4.41477491,4.36034821,4.35978567
43.364793,4.69041576,4.41432482,0.525443561,4.41373952,4.3591111,4.35851838
43.375285,4.24264069,4.41332349,-0.41313775,4.41270653,4.35787674,4.35725193
43.385776,4,4.41232674,-0.642126731,4.41167615,4.35664545,4.35598654
43.396268,4.89897949,4.41133451,0.698315812,4.41064819,4.35541712,4.35472199
43.40676,4.58257569,4.41034703,0.415004415,4.40962278,4.35419198,4.35345839
43.417251,4.35889894,4.40936452,-0.224645448,4.40860002,4.35297027,4.35219586
43.427743,4.12310563,4.40838693,-0.534117318,4.40757972,4.35175188,4.35093416
43.438234,4.12310563,4.4074146,-0.533206318,4.4065621,4.35053718,4.34967353
43.448726,4.12310563,4.40644749,-0.532298662,4.40554698,4.34932608,4.34841373
43.459218,4.79583152,4.40548585,0.624776502,4.40453446,4.34811882,4.34715488
43.469709,4.79583152,4.40452992,0.625541048,4.40352466,4.34691569,4.34589711
43.480201,5.09901951,4.4035797,0.833930341,4.4025174,4.3457166,4.34464016
43.490692,4.58257569,4.40263554,0.424193536,4.40151289,4.34452195,4.34338428
43.501184,3.60555128,4.40169744,-0.892270229,4.40051095,4.34333167,4.34212923
43.511676,4.12310563,4.40076567,-0.526934573,4.39951168,4.34214605,4.34087513
43.522167,3.31662479,4.39984052,-1.0407765,4.39851521,4.34096539,4.3396221
43.532659,4.24264069,4.398922,-0.395324318,4.39752135,4.33978964,4.33836989
43.54315,4.47213595,4.39801051,0.272259891,4.39653031,4.33861922,4.33711876
43.553642,3.74165739,4.39710606,-0.809597849,4.39554192,4.33745412,4.33586845
43.564134,4,4.39620898,-0.629451334,4.39455628,4.33629464,4.33461909
43.574625,4,4.39531957,-0.628744439,4.39357351,4.33514111,4.3333708
43.585117,3.87298335,4.39443789,-0.722118094,4.39259343,4.33399352,4.33212333
43.595608,4.24264069,4.39356434,-0.388488941,4.39161625,4.33285233,4.33087693
43.6061,4.89897949,4.39269902,0.711533886,4.3906418,4.33171755,4.32963136
43.616592,4.24264069,4.39184224,-0.386266163,4.38967019,4.33058952,4.32838674
43.627083,4.89897949,4.39099434,0.712730764,4.38870152,4.3294686,4.32714318
43.637575,4.69041576,4.39015544,0.547960142,4.38773564,4.32835482,4.32590044
43.648066,3.87298335,4.38932596,-0.718569841,4.38677273,4.32724866,4.32465878
43.658558,3.87298335,4.38850602,-0.717999077,4.38581264,4.32615016,4.32341793
43.66905,5,4.38769598,0.782498574,4.38485547,4.32505971,4.32217804
43.679541,3.87298335,4.38689621,-0.716877159,4.38390133,4.32397768,4.3209392
43.690033,4.69041576,4.38610684,0.551642018,4.38295007,4.32290416,4.31970119
43.700524,3.16227766,4.38532834,-1.10591622,4.38200187,4.32183962,4.31846424
43.711016,4.69041576,4.38456085,0.553041506,4.38105657,4.32078417,4.31722812
43.721508,5.38516481,4.38380477,1.00067979,4.3801143,4.3197382,4.31599295
43.731999,4.12310563,4.38306048,-0.509857678,4.37917514,4.31870212,4.31475883
43.742491,3.87298335,4.38232815,-0.71368397,4.37823895,4.31767603,4.31352554
43.752982,3.46410162,4.38160827,-0.957865675,4.37730592,4.31666045,4.3122933
43.763474,4.47213595,4.38090101,0.302051236,4.37637589,4.3156555,4.3110619
43.773966,4.47213595,4.38020677,0.303198254,4.37544898,4.31466159,4.30983143
43.784457,4.24264069,4.37952597,-0.369980114,4.37452528,4.31367914,4.30860202
43.794949,4.12310563,4.37885881,-0.505720461,4.37360465,4.31270829,4.30737344
43.80544,5.29150262,4.37820576,0.955665666,4.37268728,4.31174956,4.30614591
43.815932,4.79583152,4.37756703,0.646733709,4.37177301,4.31080309,4.30491921
43.826424,4.35889894,4.37694304,-0.134328331,4.37086196,4.3098693,4.30369345
43.836915,3.74165739,4.3763342,-0.796666059,4.36995424,4.30894862,4.30246874
43.847407,3.31662479,4.37574072,-1.02913358,4.36904968,4.30804121,4.30124486
43.857898,4.69041576,4.37516307,0.561473677,4.36814849,4.30714756,4.30002203
43.86839,3.87298335,4.37460149,-0.708250055,4.36725051,4.30626784,4.29880002
43.878882,4.79583152,4.37405637,0.649442187,4.36635586,4.30540247,4.29757895
43.889373,4.24264069,4.37352811,-0.361783667,4.36546464,4.30455186,4.29635894
43.899865,4.79583152,4.37301694,0.65024194,4.36457671,4.30371616,4.29513975
43.910356,4.58257569,4.3725233,0.45831473,4.36369225,4.30289586,4.29392161
43.920848,4,4.37204743,-0.609956907,4.36281112,4.30209111,4.29270429
43.93134,4.35889894,4.37158969,-0.112653214,4.36193344,4.30130231,4.2914879
43.941831,3.74165739,4.37115045,-0.793405989,4.3610593,4.30052983,4.29027257
43.952323,4.24264069,4.37072994,-0.357895586,4.36018856,4.29977382,4.28905806
43.962814,4,4.37032854,-0.60854625,4.35932143,4.29903472,4.2878446
43.973306,4.89897949,4.36994647,0.727346558,4.35845775,4.29831266,4.28663195
43.983798,4.58257569,4.36958406,0.461510168,4.35759763,4.29760799,4.28542025
43.994289,4.58257569,4.36924162,0.461881021,4.35674118,4.29692104,4.28420959
44.004781,4.69041576,4.36891934,0.567006542,4.35588827,4.29625191,4.28299975
44.015272,4.24264069,4.36861755,-0.35493219,4.35503908,4.29560097,4.28179095
44.025764,4.35889894,4.36833642,-0.0971466497,4.35419348,4.29496832,4.28058298
44.036256,4.58257569,4.3680762,0.463140899,4.35335157,4.29435423,4.27937594
44.046747,3.74165739,4.36783714,-0.791315206,4.35251346,4.29375895,4.27816994
44.057239,5.38516481,4.36761938,1.00873457,4.35167903,4.29318253,4.27696476
44.06773,4.47213595,4.36742314,0.323593597,4.35084845,4.29262525,4.27576063
44.078222,4.89897949,4.36724854,0.72919884,4.35002161,4.29208714,4.27455731
44.088714,3.87298335,4.36709573,-0.702931283,4.34919859,4.29156837,4.27335492
44.099205,4.12310563,4.36696487,-0.493821061,4.34837952,4.29106908,4.27215358
44.109697,3.74165739,4.366856,-0.79069502,4.34756427,4.29058926,4.27095305
44.120188,4,4.36676924,-0.605614763,4.34675302,4.29012905,4.26975356
44.13068,4.47213595,4.36670462,0.324701913,4.34594564,4.2896884,4.26855489
44.141172,3.74165739,4.36666219,-0.79057245,4.34514225,4.28926736,4.26735715
44.151663,4.79583152,4.36664194,0.655125626,4.34434296,4.28886594,4.26616044
44.162155,3.31662479,4.36664385,-1.02470438,4.34354763,4.28848402,4.26496455
44.172646,4.35889894,4.36666789,-0.0881416089,4.34275646,4.2881216,4.26376971
44.183138,3.74165739,4.36671397,-0.7906052,4.34196933,4.28777851,4.26257567
44.19363,4.12310563,4.366782,-0.493635872,4.34118634,4.28745466,4.26138256
44.204121,4.47213595,4.36687184,0.324444322,4.34040761,4.28714992,4.26019048
44.214613,2.44948974,4.36698334,-1.38473593,4.33963301,4.28686403,4.25899922
44.225104,4,4.3671163,-0.605901228,4.33886273,4.28659684,4.257809
44.235596,3.87298335,4.36727052,-0.703055595,4.33809666,4.28634803,4.25661959
44.246088,4.35889894,4.36744573,-0.092448841,4.3373349,4.28611735,4.2554311
44.256579,3.74165739,4.36764164,-0.791191669,4.33657757,4.28590451,4.25424364
44.267071,3.60555128,4.36785797,-0.873101769,4.33582455,4.2857091,4.253057
44.277562,4.79583152,4.36809433,0.6540162,4.33507603,4.2855308,4.25187139
44.288054,4.35889894,4.36835039,-0.0972185378,4.3343319,4.28536913,4.25068658
44.298546,4.24264069,4.3686257,-0.35494368,4.33359226,4.28522366,4.2495027
44.309037,4.58257569,4.3689198,0.462229262,4.33285723,4.28509394,4.24831985
44.319529,4.35889894,4.36923227,-0.101652958,4.33212671,4.28497939,4.24713781
44.33002,3.60555128,4.36956252,-0.874077368,4.33140086,4.2848795,4.2459568
44.340512,3.46410162,4.36991008,-0.951739705,4.33067961,4.28479366,4.2447766
44.351004,4.24264069,4.37027434,-0.357258526,4.32996304,4.28472124,4.24359732
44.361495,4.35889894,4.37065465,-0.108423735,4.32925128,4.28466159,4.24241906
44.371987,3.60555128,4.37105043,-0.874928088,4.32854422,4.28461402,4.24124161
44.382478,3.74165739,4.37146095,-0.793601638,4.32784205,4.28457779,4.24006519
44.39297,4.35889894,4.37188555,-0.113958807,4.32714466,4.28455216,4.23888958
44.403462,4.12310563,4.37232348,-0.499217239,4.32645219,4.28453632,4.23771488
44.413953,4.58257569,4.3727739,0.458041255,4.32576472,4.28452945,4.2365412
44.424445,3.31662479,4.37323612,-1.02791601,4.32508217,4.2845307,4.23536833
44.434936,5,4.37370921,0.791385362,4.32440473,4.28453917,4.23419649
44.445428,4.24264069,4.3741924,-0.362700584,4.3237323,4.28455396,4.23302545
44.45592,4.24264069,4.37468477,-0.363378702,4.32306499,4.28457411,4.23185532
44.466411,5.47722558,4.37518535,1.04978104,4.32240293,4.28459865,4.23068621
44.476903,4.35889894,4.37569331,-0.129593079,4.32174602,4.2846266,4.22951791
44.487394,4.24264069,4.37620759,-0.365468054,4.32109444,4.2846569,4.22835063
44.497886,4.47213595,4.3767273,0.308882922,4.32044811,4.28468853,4.22718415
44.508378,4.35889894,4.37725139,-0.13547119,4.31980715,4.2847204,4.22601858
44.518869,4.58257569,4.37777878,0.452544926,4.31917167,4.28475142,4.22485402
44.529361,4.58257569,4.37830855,0.45195923,4.31854159,4.28478049,4.22369027
44.539852,4.24264069,4.37883952,-0.369051258,4.31791709,4.28480645,4.22252754
44.550344,4.58257569,4.37937072,0.450782624,4.31729811,4.28482818,4.22136561
44.560836,4.12310563,4.37990102,-0.506749833,4.31668474,4.28484451,4.22020458
44.571327,4.12310563,4.38042926,-0.507270772,4.31607712,4.28485425,4.21904457
44.581819,4.79583152,4.38095444,0.644109524,4.31547517,4.28485622,4.21788536
44.59231,3.87298335,4.38147535,-0.713086252,4.31487906,4.28484922,4.21672716
44.602802,4.12310563,4.38199095,-0.508807751,4.31428874,4.28483206,4.21556976
44.613294,3.87298335,4.38250008,-0.71380441,4.31370433,4.28480351,4.21441326
44.623785,4.12310563,4.38300156,-0.509799894,4.31312592,4.28476237,4.21325778
44.634277,3.87298335,4.38349435,-0.714500528,4.31255348,4.28470741,4.21210309
44.644768,4.89897949,4.38397724,0.71763657,4.31198718,4.28463744,4.21094942
44.65526,3.87298335,4.38444919,-0.715168406,4.31142695,4.28455123,4.20979653
44.665752,4.35889894,4.38490906,-0.161276526,4.31087293,4.28444757,4.20864455
44.676243,4,4.38535568,-0.620770234,4.31032522,4.28432529,4.20749358
44.686735,4,4.38578806,-0.621118394,4.30978379,4.28418317,4.2063434
44.697226,5,4.38620502,0.783450688,4.30924879,4.28402006,4.20519424
44.707718,5.19615242,4.38660558,0.89974821,4.3087202,4.28383476,4.20404586
44.71821,5.19615242,4.38698865,0.899535307,4.30819814,4.28362616,4.20289838
44.728701,4.12310563,4.38735318,-0.514050144,4.30768271,4.28339313,4.20175191
44.739193,4.35889894,4.38769821,-0.169703467,4.30717388,4.28313453,4.20060622
44.749684,4.79583152,4.38802271,0.638599106,4.30667183,4.28284932,4.19946155
44.760176,5.19615242,4.38832577,0.898791772,4.30617653,4.28253639,4.19831766
44.770668,5.65685425,4.38860645,1.12616508,4.3056881,4.28219474,4.19717466
44.781159,4.69041576,4.38886382,0.549137448,4.30520665,4.28182339,4.19603268
44.791651,4.69041576,4.38909707,0.548925035,4.30473217,4.28142131,4.19489147
44.802142,5.29150262,4.38930531,0.949840677,4.30426483,4.28098764,4.19375127
44.812634,4.35889894,4.3894878,-0.174896711,4.3038046,4.28052139,4.19261186
44.823126,4.24264069,4.38964377,-0.383409808,4.30335162,4.28002173,4.19147334
44.833617,4.79583152,4.38977248,0.637227622,4.30290599,4.2794879,4.19033582
44.844109,4.47213595,4.3898733,0.286814671,4.30246773,4.27891901,4.18919908
44.8546,4.89897949,4.38994557,0.71346613,4.302037,4.27831443,4.18806334
44.865092,3.74165739,4.38998872,-0.805190249,4.30161378,4.27767334,4.18692839
44.875584,4.24264069,4.39000222,-0.383876974,4.30119821,4.27699516,4.18579432
44.886075,4.58257569,4.38998557,0.438850916,4.30079041,4.27627934,4.18466125
44.896567,4.89897949,4.38993834,0.713471197,4.30039038,4.27552521,4.18352897
44.907058,4.47213595,4.38986014,0.286837605,4.2999983,4.27473239,4.18239768
44.91755,3.60555128,4.38975064,-0.885550317,4.29961417,4.2739003,4.18126716
44.928042,4.47213595,4.38960955,0.287274087,4.29923813,4.2730286,4.18013754
44.938533,4.69041576,4.38943667,0.548615609,4.29887029,4.27211704,4.17900891
44.949025,4.58257569,4.3892318,0.43970888,4.29851069,4.27116515,4.17788105
44.959516,5.19615242,4.38899484,0.898419489,4.29815948,4.27017288,4.17675419
44.970008,5.09901951,4.38872571,0.842789297,4.2978167,4.26913986,4.17562811
44.9805,4.24264069,4.38842442,-0.381816362,4.29748248,4.26806605,4.17450291
44.990991,4.35889894,4.38809106,-0.170857,4.29715694,4.2669515,4.1733787
45.001483,4.35889894,4.38772567,-0.169784343,4.29684012,4.26579599,4.17225526
45.011974,4.24264069,4.38732848,-0.380378492,4.2965322,4.26459978,4.17113281
45.022466,5.29150262,4.38689966,0.951106176,4.29623321,4.26336273,4.17001114
45.032958,4.89897949,4.38643952,0.715918966,4.29594329,4.26208513,4.16889035
45.043449,4.12310563,4.38594843,-0.512681976,4.29566257,4.26076731,4.16777054
45.053941,4.24264069,4.38542672,-0.377870387,4.29539111,4.25940929,4.16665151
45.064432,4.58257569,4.38487491,0.44463557,4.29512908,4.25801164,4.16553346
45.074924,4,4.3842934,-0.619914028,4.29487653,4.25657448,4.16441618
45.085416,3.31662479,4.38368281,-1.03298501,4.29463361,4.25509838,4.16329978
45.095907,3.46410162,4.38304381,-0.958614727,4.29440046,4.25358395,4.16218436
45.106399,4.58257569,4.38237693,0.44743577,4.29417714,4.25203144,4.16106971
45.11689,4.89897949,4.38168301,0.719233259,4.29396383,4.25044172,4.15995605
45.127382,4.35889894,4.38096267,-0.14853863,4.29376061,4.24881513,4.15884315
45.137874,4.35889894,4.38021679,-0.146006315,4.29356762,4.24715249,4.15773112
45.148365,4.47213595,4.37944629,0.304449774,4.29338501,4.24545468,4.15662007
45.158857,5.09901951,4.37865193,0.848744713,4.29321287,4.24372214,4.15550979
45.169348,4.69041576,4.37783478,0.559089419,4.29305136,4.24195601,4.15440049
45.17984,4.69041576,4.37699568,0.55983933,4.2929006,4.2401568,4.15329195
45.190332,4.69041576,4.37613573,0.560606844,4.29276072,4.23832556,4.15218428
45.200823,4,4.37525605,-0.612581464,4.29263189,4.23646339,4.15107759
45.211315,4.35889894,4.37435758,-0.124332769,4.29251422,4.2345709,4.14997166
45.221806,4.79583152,4.37344161,0.649915309,4.29240787,4.23264942,4.1488667
45.232298,4.12310563,4.37250913,-0.499403148,4.29231298,4.23069961,4.14776251
45.24279,4.24264069,4.3715614,-0.359055303,4.29222969,4.2287227,4.14665918
45.253281,4.69041576,4.37059973,0.565522798,4.29215818,4.22671995,4.14555682
45.263773,4.35889894,4.36962517,-0.103567488,4.29209857,4.22469207,4.14445523
45.274264,3.16227766,4.36863917,-1.0983449,4.29205104,4.22264057,4.1433546
45.284756,4.69041576,4.36764283,0.568131088,4.29201574,4.2205662,4.14225473
45.295248,4.69041576,4.36663753,0.569015137,4.29199283,4.2184703,4.14115573
45.305739,3,4.3656247,-1.16859946,4.29198248,4.21635424,4.14005769
45.316231,3.16227766,4.36460547,-1.0965071,4.29198486,4.21421881,4.13896041
45.326722,4.47213595,4.36358138,0.329476208,4.29200014,4.2120656,4.1378641
45.337214,3.87298335,4.36255359,-0.699692967,4.29202849,4.20989539,4.13676854
45.347706,3.87298335,4.36152356,-0.698956521,4.2920701,4.20770961,4.13567384
45.358197,4.89897949,4.36049276,0.733816546,4.29212513,4.20550968,4.1345801
45.368689,5,4.35946237,0.800335951,4.29219379,4.20329638,4.13348712
45.37918,3.60555128,4.35843395,-0.867688118,4.29227624,4.20107135,4.1323951
45.389672,5.47722558,4.35740868,1.05821401,4.29237269,4.19883537,4.13130384
45.400164,3.74165739,4.35638804,-0.784047612,4.29248334,4.19658987,4.13021343
45.410655,4.79583152,4.3553735,0.663670115,4.29260836,4.19433625,4.12912397
45.421147,4.58257569,4.35436622,0.477712749,4.29274799,4.19207528,4.12803527
45.431638,4.79583152,4.35336776,0.665179495,4.29290239,4.18980857,4.12694753
45.44213,4.35889894,4.35237927,0.0807444844,4.29307182,4.18753685,4.12586054
45.452622,4.24264069,4.35140219,-0.329790085,4.29325647,4.18526149,4.1247744
45.463113,3.87298335,4.35043793,-0.690980882,4.29345653,4.18298385,4.12368921
45.473605,4,4.34948761,-0.591174775,4.29367227,4.18070461,4.12260477
45.484096,3.74165739,4.34855273,-0.77903488,4.29390388,4.17842531,4.12152129
45.494588,3.74165739,4.34763437,-0.778445237,4.29415162,4.17614659,4.12043855
45.50508,3.46410162,4.3467339,-0.939485116,4.29441571,4.17386973,4.11935666
45.515571,4.79583152,4.34585263,0.670804663,4.29469637,4.17159599,4.11827572
45.526063,4.58257569,4.34499162,0.487425973,4.29499388,4.16932593,4.11719553
45.536554,4,4.34415223,-0.586644891,4.29530844,4.16706098,4.11611628
45.547046,4.58257569,4.34333548,0.48912188,4.29564037,4.16480166,4.11503778
45.557538,4.12310563,4.34254261,-0.468441019,4.29598989,4.16254911,4.11396012
45.568029,5.19615242,4.34177483,0.924325482,4.29635723,4.16030445,4.11288341
45.578521,4.24264069,4.34103308,-0.313675616,4.29674274,4.15806812,4.11180744
45.589012,3.87298335,4.34031859,-0.683619227,4.2971466,4.15584139,4.11073242
45.599504,4.47213595,4.33963229,0.364010529,4.29756918,4.15362463,4.10965814
45.609996,4.69041576,4.33897526,0.592824171,4.29801072,4.15141884,4.10858469
45.620487,4.89897949,4.33834857,0.748752905,4.29847147,4.14922497,4.1075122
45.630979,4.58257569,4.33775307,0.494795534,4.29895181,4.1470433,4.10644043
45.64147,3.74165739,4.33718983,-0.771707486,4.29945196,4.14487493,4.10536961
45.651962,4.58257569,4.33665965,0.495899229,4.29997231,4.14272008,4.10429953
45.662454,4.47213595,4.33616348,0.368744457,4.30051314,4.14057957,4.10323028
45.672945,4.24264069,4.33570223,-0.305059903,4.30107471,4.13845418,4.10216197
45.683437,5.09901951,4.33527665,0.873923831,4.30165746,4.13634404,4.1010944
45.693928,4.24264069,4.33488763,-0.303721824,4.30226161,4.13425005,4.10002776
45.70442,4,4.33453588,-0.578390772,4.30288762,4.13217229,4.09896186
45.714912,4,4.3342222,-0.578119542,4.30353577,4.13011139,4.09789679
45.725403,5.09901951,4.33394735,0.874684036,4.30420636,4.12806795,4.09683265
45.735895,4.47213595,4.33371197,0.372053733,4.30489988,4.12604195,4.09576925
45.746386,4.79583152,4.33351681,0.679937289,4.30561657,4.12403412,4.09470677
45.756878,4.47213595,4.33336247,0.372523138,4.30635694,4.12204437,4.09364503
45.76737,3.46410162,4.33324961,-0.932281071,4.30712132,4.12007317,4.09258412
45.777861,4.35889894,4.33317886,0.160374827,4.30791001,4.11812094,4.09152413
45.788353,5,4.33315078,0.816608361,4.30872357,4.11618753,4.09046488
45.798844,4.47213595,4.33316597,0.372786783,4.30956227,4.11427349,4.08940655
45.809336,4.79583152,4.33322497,0.680151864,4.31042667,4.11237859,4.08834895
45.819828,5,4.33332831,0.81649966,4.31131713,4.11050315,4.08729218
45.830319,3.87298335,4.33347649,-0.678596452,4.312234,4.10864743,4.08623633
45.840811,5.19615242,4.33367005,0.928699293,4.3131779,4.10681116,4.0851812
45.851302,4.89897949,4.33390942,0.751711424,4.31414911,4.10499472,4.084127
45.861794,5,4.33419513,0.815968671,4.31514829,4.10319778,4.08307352
45.872286,4.69041576,4.3345276,0.596563622,4.31617581,4.10142052,4.08202086
45.882777,3.60555128,4.33490726,-0.85402341,4.31723206,4.09966307,4.08096913
45.893269,4.79583152,4.3353346,0.678599238,4.31831775,4.09792504,4.07991811
45.90376,4.58257569,4.33580996,0.496755202,4.31943318,4.0962067,4.07886802
45.914252,3.46410162,4.33633387,-0.933933751,4.32057908,4.09450762,4.07781864
45.924744,3.74165739,4.33690668,-0.771524005,4.32175589,4.09282786,4.07677008
45.935235,5,4.33752874,0.813923375,4.32296402,4.09116745,4.07572244
45.945727,4.79583152,4.33820058,0.676484255,4.32420427,4.08952592,4.07467552
45.956218,3,4.33892246,-1.15711817,4.32547697,4.08790343,4.07362951
45.96671,4.35889894,4.33969493,0.138578538,4.32678295,4.0862995,4.07258422
45.977202,4.58257569,4.34051832,0.491993263,4.32812268,4.08471409,4.07153974
45.987693,4.24264069,4.34139296,-0.314248737,4.32949665,4.08314715,4.07049617
45.998185,4.24264069,4.3423194,-0.315719358,4.33090572,4.08159818,4.06945332
46.008676,2.82842712,4.34329789,-1.23080087,4.33235029,4.08006724,4.06841138
46.019168,4.69041576,4.34432904,0.588291355,4.33383128,4.07855381,4.06737015
46.02966,4,4.34541318,-0.587718622,4.33534921,4.07705781,4.06632973
46.040151,5.47722558,4.34655063,1.063332,4.33690462,4.07557913,4.06529022
46.050643,3.60555128,4.34774206,-0.861504955,4.33849852,4.07411723,4.06425141
46.061134,4.69041576,4.34898771,0.584318452,4.34013131,4.07267214,4.06321352
46.071626,4.58257569,4.35028827,0.481962059,4.34180403,4.07124334,4.06217633
46.082118,5.19615242,4.35164412,0.918971327,4.3435173,4.06983068,4.06113995
46.092609,4.35889894,4.35305564,0.0764415167,4.3452717,4.06843405,4.06010447
46.103101,4.58257569,4.3545236,0.477548,4.34706835,4.06705291,4.0590697
46.113592,4,4.35604828,-0.596697813,4.34890774,4.06568727,4.05803583
46.124084,5.19615242,4.35763052,0.915708415,4.35079102,4.06433659,4.05700267
46.134576,4,4.35927077,-0.599392,4.35271887,4.06300076,4.0559703
46.145067,4.58257569,4.36096947,0.470750704,4.35469198,4.06167964,4.05493884
46.155559,4.47213595,4.36272757,0.330769376,4.35671161,4.06037272,4.05390808
46.16605,4.69041576,4.36454541,0.570850548,4.35877827,4.05908,4.05287822
46.176542,3.74165739,4.36642401,-0.790421802,4.36089331,4.057801,4.05184906
46.187034,3.31662479,4.36836392,-1.02554333,4.36305748,4.0565356,4.05082069
46.197525,4.79583152,4.37036569,0.652277418,4.36527155,4.05528368,4.04979322
46.208017,3.87298335,4.37243049,-0.706715742,4.36753694,4.0540448,4.04876645
46.218508,4.47213595,4.37455872,0.31237355,4.36985426,4.05281896,4.04774057
46.229,4.12310563,4.37675164,-0.50363282,4.372225,4.05160572,4.04671539
46.239492,4.89897949,4.37900994,0.721089139,4.37465004,4.05040502,4.04569101
46.249983,4.58257569,4.3813343,0.448599365,4.37713023,4.04921678,4.04466751
46.260475,4,4.38372614,-0.619456322,4.3796672,4.04804059,4.04364471
46.270966,3.87298335,4.38618598,-0.716381625,4.38226163,4.04687651,4.0426228
46.281458,3.31662479,4.38871534,-1.03541805,4.38491522,4.04572418,4.04160158
46.29195,4.69041576,4.39131506,0.546900995,4.38762895,4.04458357,4.04058115
46.302441,5.09901951,4.39398603,0.839662722,4.39040382,4.04345465,4.03956161
46.312933,4.24264069,4.3967299,-0.392541995,4.39324165,4.0423371,4.03854276
46.323424,4.47213595,4.3995474,0.269422637,4.39614324,4.04123104,4.03752479
46.333916,4.24264069,4.4024403,-0.399749443,4.3991105,4.04013617,4.03650751
46.344408,5.47722558,4.40540968,1.03528542,4.40214458,4.03905253,4.03549102
46.354899,4.58257569,4.4084566,0.417275808,4.4052466,4.03798016,4.03447541
46.365391,3.74165739,4.41158305,-0.818489869,4.40841864,4.03691883,4.03346048
46.375882,3.74165739,4.41478994,-0.820446554,4.41166161,4.03586871,4.03244644
46.386374,4,4.41807938,-0.64659058,4.4149777,4.03482961,4.03143308
46.396866,3.16227766,4.42145267,-1.12212968,4.41836821,4.03380163,4.0304205
46.407357,4.69041576,4.42491113,0.515271417,4.42183444,4.03278489,4.0294088
46.417849,4.12310563,4.42845711,-0.552586178,4.42537876,4.03177925,4.02839779
46.42834,4.12310563,4.43209172,-0.555865174,4.42900223,4.03078497,4.02738765
46.438832,4.24264069,4.43581747,-0.439518806,4.43270733,4.02980194,4.02637819
46.449324,4.24264069,4.43963592,-0.443841452,4.43649556,4.02883034,4.02536951
46.459815,3.46410162,4.44354867,-0.989670174,4.44036844,4.0278704,4.0243617
46.470307,4.79583152,4.44755848,0.590146627,4.44432865,4.02692206,4.02335457
46.480798,4.35889894,4.45166671,-0.30457801,4.44837745,4.02598565,4.02234831
46.49129,4.79583152,4.4558763,0.583056794,4.45251766,4.02506117,4.02134273
46.501782,4.12310563,4.46018912,-0.580588922,4.45675102,4.0241489,4.02033792
46.512273,4,4.46460708,-0.681620922,4.46107929,4.02324913,4.01933398
46.522765,4.12310563,4.46913342,-0.58824127,4.46550554,4.02236193,4.01833071
46.533256,4.47213595,4.47376976,-0.0404203232,4.47003125,4.0214877,4.01732832
46.543748,4.69041576,4.47851955,0.460321858,4.47465963,4.02062655,4.01632659
46.55424,4.47213595,4.483385,-0.106061525,4.47939272,4.01977883,4.01532564
46.564731,4.79583152,4.48836838,0.554493587,4.48423258,4.01894495,4.01432554
46.575223,4.58257569,4.49347346,0.29849997,4.48918272,4.01812504,4.01332612
46.585714,4.69041576,4.49870219,0.437851084,4.49424487,4.01731962,4.01232757
46.596206,5.56776436,4.50405856,1.03136114,4.49942275,4.01652888,4.01132968
46.606698,4.69041576,4.50954519,0.425288803,4.50471872,4.01575327,4.01033255
46.617189,4.12310563,4.51516476,-0.626146256,4.51013519,4.01499326,4.00933629
46.627681,5,4.52092162,0.69215488,4.51567619,4.01424912,4.00834069
46.638172,4.58257569,4.5268181,0.236130452,4.5213438,4.0135214,4.00734595
46.648664,4.12310563,4.53285884,-0.640119684,4.52714228,4.01281041,4.00635188
46.659156,5,4.53904689,0.678935278,4.53307441,4.01211668,4.00535857
46.669647,4.69041576,4.54538539,0.380828524,4.53914302,4.01144075,4.00436611
46.680139,4.69041576,4.55187941,0.372204721,4.54535278,4.01078298,4.00337431
46.69063,4.35889894,4.55853166,-0.446802775,4.55170613,4.010144,4.00238337
46.701122,4.58257569,4.56534752,0.131256148,4.55820802,4.00952419,4.00139309
46.711614,4.58257569,4.57233057,0.101218208,4.56486173,4.00892416,4.00040357
46.722105,5.19615242,4.57948448,0.785282079,4.57167058,4.0083445,3.99941489
46.732597,5.09901951,4.58681508,0.715684591,4.57863999,4.00778566,3.99842688
46.743088,5.19615242,4.5943256,0.77577498,4.5857729,4.0072483,3.99743971
46.75358,5.38516481,4.60202223,0.884953433,4.59307503,4.0067329,3.9964532
46.764072,3.87298335,4.60990916,-0.858443831,4.60055027,4.0062401,3.99546745
46.774563,4.58257569,4.61799067,-0.188188667,4.60820257,4.00577053,3.99448253
46.785055,5.29150262,4.6262735,0.815615792,4.61603823,4.00532472,3.99349828
46.795546,3.60555128,4.63476145,-1.01449996,4.62406077,4.00490334,3.99251487
46.806038,5.38516481,4.64346166,0.86122189,4.63227688,4.00450693,3.99153211
46.81653,4.24264069,4.65237904,-0.640108077,4.64069117,4.00413614,3.9905501
46.827021,5.09901951,4.66151858,0.661438534,4.64930836,4.00379164,3.98956893
46.837513,3.74165739,4.67088808,-0.963966125,4.6581358,4.00347397,3.98858841
46.848004,4.89897949,4.680492,0.467426448,4.66717774,4.00318382,3.98760873
46.858496,3.87298335,4.69033861,-0.904077023,4.67644204,4.00292175,3.98662971
46.868988,4.58257569,4.70043365,-0.343304457,4.68593419,4.0026884,3.98565142
46.879479,3.87298335,4.71078297,-0.915313948,4.69565985,4.00248441,3.98467397
46.889971,4,4.7213956,-0.849350105,4.70562764,4.00231035,3.98369717
46.900462,4.58257569,4.73227682,-0.386912302,4.71584273,4.00216684,3.9827212
46.910954,5,4.74343622,0.506521256,4.72631437,4.00205446,3.98174588
46.921446,3.87298335,4.75488053,-0.939093808,4.73704915,4.0019738,3.9807713
46.931937,4.79583152,4.76661664,0.170923614,4.74805387,4.00192543,3.97979755
46.942429,5,4.77865506,0.470473106,4.75933874,4.0019099,3.97882444
46.95292,4.58257569,4.79100204,-0.456537343,4.77091004,4.00192775,3.97785216
46.963412,4.89897949,4.80366875,0.308724363,4.78277871,4.00197951,3.97688053
46.973904,4.58257569,4.81666317,-0.483825868,4.79495273,4.00206568,3.97590963
46.984395,4.58257569,4.82999343,-0.497411033,4.80744032,4.00218672,3.97493955
46.994887,4.24264069,4.84367181,-0.775261974,4.82025359,4.00234312,3.97397012
47.005378,5.38516481,4.85770581,0.726263722,4.83340026,4.00253529,3.97300151
47.01587,4.58257569,4.87210851,-0.538082533,4.84689332,4.00276366,3.97203354
47.026362,5.56776436,4.88688938,0.825151489,4.86074248,4.00302859,3.9710663
47.036853,5,4.90205816,0.312956609,4.87495774,4.00333041,3.97009988
47.047345,4.89897949,4.91762928,-0.136564254,4.88955355,4.00366948,3.9691341
47.057836,5.09901951,4.93361179,0.406703488,4.90453944,4.00404601,3.96816914
47.068328,4.12310563,4.95002112,-0.909348941,4.91993095,4.00446033,3.96720481
47.07882,4.69041576,4.96686868,-0.525787902,4.93573995,4.0049126,3.96624121
47.089311,5.19615242,4.98416616,0.46041966,4.95197865,4.00540293,3.96527842
47.099803,4.79583152,5.0019307,-0.45398147,4.96866447,4.00593155,3.96431627
47.110294,5.56776436,5.02017333,0.739993943,4.98580916,4.00649842,3.96335493
47.120786,4.89897949,5.03891243,-0.374076123,5.00343148,4.00710368,3.96239422
47.131278,5,5.05816184,-0.241167658,5.02154601,4.00774726,3.96143424
47.141769,5.29150262,5.0779358,0.46213291,5.04016779,4.00842903,3.96047506
47.152261,4.69041576,5.09825481,-0.638622776,5.05931788,4.009149,3.95951652
47.162752,5,5.1191325,-0.345155764,5.07901095,4.00990686,3.95855878
47.173244,4.79583152,5.14059097,-0.587162201,5.09926974,4.01070253,3.95760168
47.183736,5,5.1626472,-0.403295423,5.12011228,4.01153565,3.95664529
47.194227,4.35889894,5.18531871,-0.909076327,5.14155724,4.01240579,3.9556897
47.204719,4.89897949,5.20863032,-0.556462791,5.16363027,4.01331274,3.95473474
47.21521,5.74456265,5.23259904,0.71551632,5.18634975,4.01425585,3.95378059
47.225702,5.47722558,5.25725172,0.469013703,5.20974348,4.01523478,3.95282706
47.236194,5,5.28260944,-0.531610231,5.23383392,4.01624887,3.95187424
47.246685,4.47213595,5.30869403,-0.914635488,5.25864438,4.01729736,3.95092223
47.257177,5.19615242,5.33553584,-0.373340882,5.28420632,4.01837975,3.94997083
47.267668,4.69041576,5.36315635,-0.820207651,5.31054295,4.01949506,3.94902024
47.27816,5.19615242,5.39158855,-0.442081584,5.3376885,4.02064265,3.94807026
47.288652,6.08276253,5.42085891,0.813574592,5.36567117,4.02182153,3.947121
47.299143,5.09901951,5.45099496,-0.593275182,5.39452021,4.02303061,3.94617253
47.309635,5.19615242,5.48203417,-0.534679109,5.42427459,4.02426907,3.94522468
47.320126,5.38516481,5.51400404,-0.35894182,5.45496377,4.02553559,3.94427762
47.330618,5.29150262,5.54694549,-0.50541356,5.48663024,4.02682923,3.94333118
47.34111,5.29150262,5.58089216,-0.537949384,5.51930964,4.02814864,3.94238544
47.351601,5.19615242,5.61587909,-0.647863157,5.55303901,4.02949239,3.9414405
47.362093,5.29150262,5.65195314,-0.600375313,5.58786695,4.03085937,3.94049617
47.372584,5.83095189,5.68914975,0.376566249,5.62383114,4.03224791,3.93955263
47.383076,6.164414,5.72752031,0.660979341,5.66098476,4.03365676,3.9386097
47.393568,5.56776436,5.76710796,-0.446479117,5.69937316,4.03508425,3.93766747
47.404059,4.35889894,5.80795777,-1.20376859,5.73904364,4.03652863,3.93672603
47.414551,5.91607978,5.85012887,0.256809096,5.78005725,4.03798849,3.9357852
47.425042,6.32455532,5.89366744,0.656420507,5.82246257,4.03946183,3.93484515
47.435534,5.65685425,5.93863858,-0.530833614,5.86632665,4.04094715,3.93390571
47.446026,5.56776436,5.98509813,-0.64601375,5.91170769,4.04244245,3.93296697
47.456517,5.09901951,6.03310453,-0.966480735,5.95866641,4.04394571,3.93202901
47.467009,5.56776436,6.08273315,-0.717613256,6.00728023,4.04545527,3.93109165
47.4775,6,6.1340445,-0.366120888,6.05761208,4.04696884,3.93015508
47.487992,6,6.18712184,-0.432575819,6.10974724,4.04848468,3.92921911
47.498484,6.78232998,6.24203794,0.735045606,6.16376078,4.05000056,3.92828383
47.508975,6.40312424,6.29886908,0.322885678,6.21973126,4.05151422,3.92734933
47.519467,6.70820393,6.35771204,0.592023554,6.27775747,4.05302378,3.92641543
47.529958,5.56776436,6.41864655,-0.922432754,6.33792139,4.05452677,3.92548231
47.54045,5.38516481,6.48177975,-1.04719384,6.40033213,4.05602124,3.92454978
47.550942,5.91607978,6.54720694,-0.794435119,6.46508711,4.0575048,3.92361794
47.561433,6.8556546,6.61502805,0.490536999,6.53228828,4.05897504,3.92268688
47.571925,6.244998,6.68536803,-0.663603824,6.6020624,4.06042992,3.92175641
47.582416,6.4807407,6.75833197,-0.526869315,6.67451652,4.06186687,3.92082672
47.592908,6.164414,6.83405832,-0.818317982,6.74979076,4.0632838,3.91989762
47.6034,7.14142843,6.91267187,0.478285019,6.82801162,4.06467825,3.9189692
47.613891,7.07106781,6.99430341,0.277063895,6.90931152,4.06604774,3.91804155
47.624383,6.40312424,7.0791143,-0.82218615,6.9938532,4.06739016,3.9171145
47.634874,7.41619849,7.1672424,0.498954999,7.08177593,4.06870291,3.91618821
47.645366,6.92820323,7.25886612,-0.575032944,7.1732593,4.0699839,3.91526251
47.655858,7.28010989,7.35414765,-0.27209881,7.2684666,4.07123065,3.9143375
47.666349,7.54983444,7.45325652,0.310769877,7.36756829,4.07244071,3.91341324
47.676841,6.92820323,7.55639925,-0.792588178,7.47077168,4.07361202,3.91248958
47.687332,6.8556546,7.66375359,-0.898943261,7.57825509,4.07474204,3.91156667
47.697824,7.07106781,7.77554609,-0.839332042,7.69024554,4.07582873,3.91064436
47.708316,7.34846923,7.89198272,-0.737233674,7.80694922,4.07686974,3.90972271
47.718807,7.14142843,8.01327705,-0.933728342,7.9285797,4.07786276,3.90880183
47.729299,8,8.13968612,-0.373746066,8.05539393,4.07880582,3.90788153
47.73979,8.36660027,8.27142935,0.308497845,8.18761082,4.07969661,3.90696199
47.750282,8.36660027,8.40878274,-0.205383714,8.32550587,4.08053321,3.90604304
47.760774,8.66025404,8.5519929,0.329030597,8.46932478,4.08131348,3.90512475
47.771265,8.88819442,8.70131041,0.432300827,8.61931691,4.08203539,3.90420722
47.781757,8.30662386,8.85703255,-0.741895335,8.77577829,4.08269715,3.90329027
47.792248,9.21954446,9.01940174,0.447373128,8.93894954,4.08329674,3.90237407
47.80274,8,9.18871953,-1.09028415,9.10913041,4.08383248,3.90145845
47.813232,9.11043358,9.36523806,-0.504781614,9.28657073,4.08430257,3.90054349
47.823723,9.53939201,9.54919811,-0.0990257272,9.47150862,4.08470532,3.89962929
47.834215,9,9.74087813,-0.860742776,9.66421985,4.08503919,3.89871566
47.844706,9.79795897,9.94046477,-0.377499397,9.86488768,4.0853026,3.89780278
47.855198,9.21954446,10.148188,-0.963661505,10.0737387,4.08549416,3.89689048
47.86569,10.5356538,10.3641814,0.414092245,10.2909026,4.0856125,3.89597884
47.876181,10.0498756,10.5885224,-0.733925561,10.5164524,4.08565634,3.89506794
47.886673,10.2469508,10.8212834,-0.757847356,10.7504563,4.0856245,3.89415761
47.897164,11.4455231,11.062365,0.618997654,10.9928095,4.08551591,3.89324803
47.907656,11.7898261,11.3116497,0.691502985,11.2433894,4.08532955,3.89233902
47.918148,11.4455231,11.5688213,-0.351138435,11.5018741,4.08506451,3.89143067
47.928639,11.5325626,11.8334024,-0.548488659,11.7677799,4.08472003,3.89052305
47.939131,11.8321596,12.1048019,-0.522151676,12.0405097,4.08429534,3.88961601
47.949622,11.9163753,12.382107,-0.682445363,12.3191435,4.08378993,3.88870971
47.960114,12.0415946,12.664252,-0.789086449,12.6026089,4.08320318,3.88780397
47.970606,12.4096736,12.9498032,-0.734935089,12.8894646,4.08253474,3.88689888
47.981097,12.328828,13.2370028,-0.952982036,13.1779449,4.08178439,3.88599453
47.991589,13.7477271,13.5238245,0.473183467,13.4660162,4.08095179,3.88509075
48.00208,13.9283883,13.8077653,0.347308201,13.751167,4.08003704,3.8841877
48.012572,13.6014705,14.0860568,-0.696122309,14.0306213,4.07903994,3.88328521
48.023064,13.0766968,14.3554894,-1.1308371,14.3011612,4.07796073,3.88238337
48.033555,14.0712473,14.6125344,-0.73572216,14.5592503,4.07679974,3.88148226
48.044047,14.106736,14.8534807,-0.864143917,14.8011701,4.07555708,3.88058171
48.054538,15.5884573,15.0743626,0.717003978,15.0229478,4.07423344,3.87968189
48.06503,14.4222051,15.2712729,-0.921448752,15.22067,4.07282909,3.87878263
48.075522,16,15.4403641,0.74808819,15.3904834,4.07134478,3.87788402
48.086013,15.2315462,15.5780989,-0.588687227,15.5288462,4.06978143,3.87698613
48.096505,15.6524758,15.6814625,-0.170254631,15.6327403,4.06813956,3.8760888
48.106996,15.6204994,15.7480444,-0.357134514,15.6997529,4.06642044,3.87519219
48.117488,16.2172747,15.7762675,0.664083778,15.7283061,4.06462474,3.87429614
48.12798,17.0293864,15.7654288,1.12425866,15.7176974,4.06275376,3.87340073
48.138471,16.1864141,15.7157833,0.686025317,15.6681837,4.0608089,3.87250604
48.148963,17.0587221,15.6284989,1.1959194,15.5809362,4.05879108,3.8716119
48.159454,16.2788206,15.5056164,0.87932033,15.4580001,4.05670207,3.87071848
48.169946,15.3297097,15.349865,-0.141969357,15.3021106,4.05454294,3.86982561
48.180438,15.4919334,15.1645696,0.572157149,15.1165987,4.05231543,3.86893338
48.190929,14.832397,14.9534517,-0.347929249,14.9051935,4.05002138,3.86804187
48.201421,15.1657509,14.7203786,0.667362166,14.67177,4.04766204,3.8671509
48.211912,15.0665192,14.4693396,0.772773923,14.4203258,4.04523961,3.86626065
48.222404,13.6747943,14.2041318,-0.727555813,14.1546664,4.04275547,3.86537095
48.232896,13.453624,13.9284087,-0.689046202,13.8784538,4.04021173,3.86448188
48.243387,12.9614814,13.6455344,-0.82707496,13.5950603,4.03761058,3.86359352
48.253879,13.0384048,13.3584468,-0.56572258,13.307432,4.03495353,3.86270571
48.26437,12.0415946,13.0698239,-1.01401643,13.0182547,4.03224314,3.8618186
48.274862,11.61895,12.7818615,-1.07838374,12.7297315,4.02948098,3.86093204
48.285354,13.0766968,12.4964795,0.761719997,12.4437892,4.02666945,3.86004611
48.295845,12.4096736,12.2152611,0.44092243,12.1620175,4.02381101,3.85916088
48.306337,11.5325626,11.9394031,-0.637840527,11.8856193,4.02090732,3.8582762
48.316828,12.083046,11.6699382,0.642734585,11.6156326,4.01796119,3.85739222
48.32732,11.5758369,11.4075568,0.410219519,11.3527527,4.01497431,3.85650878
48.337812,11.7473401,11.1528245,0.771048407,11.0975497,4.01194928,3.85562597
48.348303,11.8321596,10.9061318,0.962303373,10.8504181,4.0088887,3.85474385
48.358795,10.2956301,10.667655,-0.609938383,10.6115375,4.0057943,3.85386228
48.369286,10.5356538,10.4375462,0.313221264,10.3810634,4.00266903,3.8529814
48.379778,10.5356538,10.2157715,0.565581349,10.1589641,3.99951463,3.85210106
48.39027,10.5356538,10.0022877,0.73031912,9.94519896,3.99633374,3.85122134
48.400761,11.045361,9.79698864,1.11730586,9.73966339,3.99312903,3.85034232
48.411253,10.198039,9.59966253,0.773547992,9.54214718,3.98990222,3.84946383
48.421744,9.8488578,9.41014091,0.662357076,9.35248299,3.98665627,3.84858604
48.432236,9.59166305,9.22815513,0.602916175,9.170403,3.98339289,3.84770878
48.442728,10,9.0534744,0.972895471,8.99567692,3.98011469,3.84683213
48.453219,9.89949494,8.88585384,1.00679745,8.82806016,3.97682427,3.84595618
48.463711,8.36660027,8.72499412,-0.598660051,8.66725339,3.97352327,3.84508076
48.474202,8.77496439,8.57065732,0.452003397,8.51301845,3.97021456,3.84420603
48.484694,8.1240384,8.42254552,-0.546358047,8.36505703,3.96689973,3.84333182
48.495186,9,8.28040934,0.848286896,8.2231191,3.96358126,3.84245823
48.505677,8.48528137,8.1440024,0.584190869,8.08695745,3.96026162,3.84158533
48.516169,7.68114575,8.01304581,-0.576107684,7.95629229,3.95694227,3.84071295
48.52666,8.30662386,7.88732011,0.647536682,7.83090298,3.95362592,3.83984126
48.537152,8.71779789,7.76656468,0.97531185,7.71052774,3.95031395,3.83897009
48.547644,7.87400787,7.65056448,0.472697999,7.59495013,3.94700865,3.83809953
48.558135,7.41619849,7.53911176,-0.35058989,7.48396092,3.94371226,3.83722965
48.568627,7.54983444,7.43197602,0.343305134,7.37732815,3.94042603,3.8363603
48.579118,7.28010989,7.32897822,-0.221061815,7.27487104,3.9371524,3.83549162
48.58961,7.81024968,7.22990785,0.761801697,7.17637752,3.93389252,3.83462347
48.600102,7.21110255,7.13459337,0.276602928,7.08167424,3.93064841,3.83375592
48.610593,6.70820393,7.04287047,-0.578503704,6.99059505,3.92742202,3.83288905
48.621085,7.34846923,6.95455691,0.627624344,6.902956,3.92421434,3.8320227
48.631576,7.07106781,6.86951333,0.448948196,6.81861575,3.92102751,3.83115702
48.642068,7.54983444,6.78757471,0.87307487,6.73740755,3.91786238,3.83029186
48.65256,6.244998,6.70860824,-0.680889304,6.65919665,3.91472067,3.8294273
48.663051,7,6.63248711,0.60622841,6.58385428,3.91160402,3.82856342
48.673543,7.34846923,6.55906945,0.888481725,6.51123682,3.90851311,3.82770005
48.684034,5.83095189,6.48824868,-0.810738421,6.4412357,3.90544974,3.82683735
48.694526,5.83095189,6.41989658,-0.767427317,6.373721,3.90241448,3.82597516
48.705018,6.70820393,6.35391135,0.595224816,6.308589,3.89940869,3.82511357
48.715509,6.244998,6.2901958,-0.212597749,6.24574064,3.89643368,3.82425265
48.726001,6.40312424,6.22863971,0.41771345,6.18506409,3.89348982,3.82339224
48.736492,6.40312424,6.16916195,0.483696486,6.12647633,3.89057857,3.8225325
48.746984,6.4807407,6.11166277,0.607517846,6.06987608,3.88770019,3.82167326
48.757476,5.65685425,6.05606414,-0.631830584,6.01518357,3.8848557,3.82081462
48.767967,6.32455532,6.00229149,0.567682864,5.96232255,3.88204606,3.81995664
48.778459,6.55743852,5.9502588,0.779217381,5.91120562,3.87927138,3.81909917
48.78895,5.56776436,5.89990416,-0.576315712,5.86176918,3.87653273,3.81824236
48.799442,7,5.85114952,1.07184443,5.81393391,3.87383009,3.81738606
48.809934,5.91607978,5.80393476,0.334880616,5.7676382,3.87116418,3.81653034
48.820425,5.65685425,5.75820234,-0.318352143,5.7228231,3.86853562,3.81567529
48.830917,6,5.7138846,0.534897557,5.67941984,3.86594424,3.81482074
48.841408,6.8556546,5.67093404,1.08844869,5.6373795,3.86339079,3.81396685
48.8519,6.63324958,5.62928903,1.00197832,5.59663948,3.860875,3.81311345
48.862392,5.09901951,5.58890292,-0.699916713,5.55715192,3.85839728,3.81226064
48.872883,5.65685425,5.54973095,0.327296954,5.51887095,3.85595796,3.81140849
48.883375,5.56776436,5.51171942,0.236738129,5.48174203,3.85355664,3.81055684
48.893866,5.47722558,5.47483157,0.0489285725,5.44572731,3.85119376,3.80970584
48.904358,6.92820323,5.43901828,1.22032166,5.41077697,3.84886886,3.80885534
48.91485,6.55743852,5.40424303,1.0738694,5.37685358,3.84658206,3.80800541
48.925341,5.47722558,5.37047069,0.326733655,5.34392119,3.84433345,3.80715614
48.935833,5.74456265,5.3376582,0.637890626,5.31193618,3.84212243,3.80630736
48.946324,5.56776436,5.30577687,0.51184714,5.28086908,3.83994922,3.80545924
48.956816,6.164414,5.27478716,0.943200318,5.2506799,3.83781314,3.80461161
48.967308,5.19615242,5.24466021,-0.220244828,5.22133915,3.83571413,3.80376455
48.977799,6.08276253,5.21536818,0.931340081,5.19281845,3.83365207,3.80291814
48.988291,5.38516481,5.1868762,0.445296089,5.16508262,3.83162621,3.80207222
48.998782,5.47722558,5.1591617,0.563971523,5.13810855,3.82963656,3.80122694
49.009274,5.19615242,5.13219251,0.252902969,5.11186389,3.82768234,3.80038216
49.019766,5.09901951,5.10594562,-0.0832232096,5.08632523,3.8257633,3.79953794
49.030257,5.74456265,5.08039877,0.814962498,5.06147001,3.82387918,3.79869438
49.040749,5.09901951,5.05552344,0.208557114,5.0372696,3.82202913,3.79785129
49.05124,5.56776436,5.03130173,0.732436096,5.0137058,3.82021301,3.79700885
49.061732,4.35889894,5.00770723,-0.805486365,4.99075218,3.81842998,3.7961669
49.072224,5.91607978,4.98472141,0.9650691,4.96839005,3.81667966,3.79532551
49.082715,4.69041576,4.96232636,-0.521450473,4.94660134,3.81496168,3.79448476
49.093207,4.58257569,4.94049851,-0.598266506,4.92536259,3.81327516,3.79364449
49.103698,6.08276253,4.91922356,1.07867464,4.90465934,3.81161985,3.79280486
49.11419,4.12310563,4.89847965,-0.880553248,4.88446987,3.80999488,3.79196572
49.124682,4.69041576,4.87825176,-0.433400507,4.86477913,3.80839982,3.79112713
49.135173,5,4.85852532,0.376131196,4.84557257,3.80683423,3.79028918
49.145665,4.58257569,4.83928076,-0.506660697,4.82683079,3.80529723,3.78945171
49.156156,5.74456265,4.82050655,0.961278368,4.80854228,3.80378852,3.78861488
49.166648,4.79583152,4.80218446,-0.0797053213,4.79068902,3.80230724,3.78777852
49.17714,5.29150262,4.78430224,0.712180019,4.77325884,3.80085295,3.78694271
49.187631,4.47213595,4.76684798,-0.542873857,4.75623993,3.79942518,3.78610755
49.198123,5.09901951,4.74980528,0.590943513,4.73961614,3.79802311,3.78527285
49.208614,4.58257569,4.73316483,-0.388058155,4.72337826,3.79664642,3.78443879
49.219106,4.79583152,4.71691133,0.280927382,4.70751123,3.7952943,3.7836052
49.229598,5.29150262,4.70103473,0.768419088,4.69200514,3.79396633,3.78277216
49.240089,4.35889894,4.68552524,-0.571512292,4.67685038,3.79266208,3.78193975
49.250581,5.91607978,4.67036907,1.11611411,4.66203339,3.79138078,3.78110781
49.261072,4.79583152,4.65555866,0.374530185,4.64754676,3.79012217,3.7802765
49.271564,5,4.64108112,0.599098387,4.63337784,3.78888549,3.77944566
49.282056,4.69041576,4.62692817,0.251967435,4.61951851,3.7876704,3.77861536
49.292547,4.89897949,4.61309176,0.534684698,4.6059609,3.78647654,3.77778569
49.303039,5.47722558,4.59956022,0.936837958,4.59269355,3.78530322,3.77695649
49.31353,5,4.58632743,0.643173827,4.57971049,3.78415026,3.77612791
49.324022,4.89897949,4.57338248,0.570611083,4.567001,3.78301701,3.7752998
49.334514,4.24264069,4.56071855,-0.563983921,4.55455842,3.78190321,3.77447223
49.345005,5.74456265,4.54832902,1.09372466,4.54237624,3.7808086,3.77364528
49.355497,4.47213595,4.536204,-0.253116656,4.53044474,3.77973263,3.77281879
49.365988,5.19615242,4.52433855,0.819642529,4.51875909,3.7786752,3.77199293
49.37648,5.38516481,4.51272341,0.934045713,4.50731015,3.77763581,3.77116752
49.386972,3.31662479,4.501353,-1.08845221,4.49609242,3.7766143,3.77034265
49.397463,4.12310563,4.49022188,-0.605901192,4.4851005,3.77561055,3.76951841
49.407955,4.58257569,4.47932165,0.321331669,4.4743261,3.77462416,3.76869462
49.418446,4.89897949,4.46864838,0.655996267,4.46376528,3.77365514,3.76787144
49.428938,4.69041576,4.45819422,0.481893697,4.45341023,3.77270316,3.76704873
49.43943,5.56776436,4.44795462,1.05821063,4.44325636,3.77176822,3.76622654
49.449921,4.24264069,4.43792513,-0.441909994,4.43329921,3.77085033,3.76540498
49.460413,4.79583152,4.42809867,0.606409808,4.42353163,3.76994925,3.76458386
49.470904,4,4.41847213,-0.646894222,4.41395043,3.76906517,3.76376336
49.481396,4.89897949,4.4090389,0.699957561,4.40454886,3.76819794,3.76294332
49.491888,4.58257569,4.39979529,0.427528245,4.39532312,3.76734771,3.7621238
49.502379,4.58257569,4.39073776,0.437993075,4.38626947,3.76651467,3.76130489
49.512871,4.89897949,4.38186033,0.719109975,4.37738173,3.7656988,3.76048644
49.523362,4.79583152,4.37316063,0.650131441,4.3686573,3.76490043,3.75966859
49.533854,4.58257569,4.36463311,0.46684321,4.36009035,3.76411964,3.7588512
49.544346,3.87298335,4.35627488,-0.695191725,4.35167769,3.76335677,3.75803433
49.554837,4.24264069,4.34808315,-0.324719048,4.34341618,3.76261219,3.75721806
49.565329,5.09901951,4.34005294,0.871186878,4.33530046,3.76188613,3.75640225
49.57582,4.24264069,4.33218253,-0.299235436,4.32732842,3.7611791,3.75558703
49.586312,4.24264069,4.32446733,-0.286053573,4.31949496,3.76049143,3.75477227
49.596804,4.79583152,4.31690515,0.692045068,4.31179742,3.75982365,3.75395802
49.607295,5.09901951,4.30949387,0.888552553,4.30423316,3.75917639,3.75314438
49.617787,5.38516481,4.30222944,1.04064181,4.29679749,3.75855009,3.75233118
49.628278,3.74165739,4.29511071,-0.743944435,4.2894887,3.7579455,3.75151859
49.63877,3.46410162,4.28813395,-0.90776227,4.28230233,3.75736321,3.75070643
49.649262,4.35889894,4.28129762,0.278570143,4.27523612,3.75680401,3.7498948
49.659753,4.79583152,4.27460023,0.721963496,4.26828788,3.75626873,3.74908376
49.670245,4.69041576,4.26803855,0.649905541,4.26145346,3.75575813,3.74827316
49.680736,4.79583152,4.26161198,0.73090324,4.25473149,3.75527319,3.74746316
49.691228,4.58257569,4.25531759,0.572064777,4.24811804,3.75481478,3.7466536
49.70172,4.58257569,4.24915441,0.57742643,4.24161122,3.75438395,3.74584455
49.712211,5.56776436,4.24312158,1.15093127,4.23520915,3.75398183,3.7450361
49.722703,4.35889894,4.2372166,0.348829968,4.2289082,3.75360944,3.74422808
49.733194,3.74165739,4.2314394,-0.699844276,4.22270724,3.75326806,3.74342066
49.743686,5.29150262,4.22578779,1.03233465,4.21660282,3.75295886,3.74261367
49.754178,4,4.22026138,-0.469320124,4.21059332,3.75268319,3.74180719
49.764669,5,4.21485983,0.886081356,4.20467715,3.75244243,3.7410013
49.775161,4.12310563,4.20958139,-0.294067618,4.19885111,3.75223797,3.74019585
49.785652,4.12310563,4.20442646,-0.285168087,4.19311429,3.75207135,3.73939098
49.796144,4.89897949,4.19939358,0.836412522,4.1874636,3.75194408,3.73858655
49.806636,5,4.19448286,0.897506067,4.1818977,3.75185781,3.73778262
49.817127,4.79583152,4.1896945,0.778548022,4.17641523,3.75181423,3.73697928
49.827619,4.69041576,4.18502744,0.710906689,4.17101334,3.75181507,3.73617637
49.83811,5.19615242,4.18048253,1.00780449,4.16569129,3.75186215,3.73537405
49.848602,4.35889894,4.17605898,0.427597894,4.16044635,3.75195735,3.73457215
49.859094,4.12310563,4.17175742,-0.220571518,4.15527737,3.75210262,3.73377075
49.869585,4.24264069,4.16757852,0.273974753,4.15018319,3.75229993,3.73296994
49.880077,4.12310563,4.16352189,-0.201037957,4.14516127,3.75255141,3.73216956
49.890568,4.35889894,4.15958879,0.446441661,4.14021103,3.75285914,3.73136975
49.90106,4.69041576,4.15577907,0.731188544,4.13533002,3.75322536,3.73057037
49.911552,4,4.15209383,-0.38999209,4.13051726,3.75365232,3.72977149
49.922043,5.29150262,4.14853419,1.06909702,4.12577177,3.75414228,3.72897319
49.932535,4.35889894,4.14510037,0.462383575,4.12109127,3.75469773,3.72817531
49.943026,4.79583152,4.14179402,0.808725851,4.11647529,3.75532098,3.72737801
49.953518,4.47213595,4.13861559,0.577512222,4.11192165,3.75601467,3.72658112
49.96401,3.87298335,4.13556657,-0.512428748,4.10742951,3.75678128,3.72578474
49.974501,3.74165739,4.13264849,-0.625292815,4.10299803,3.75762335,3.72498893
49.984993,4.58257569,4.12986215,0.672839914,4.09862516,3.75854368,3.72419354
49.995484,3.74165739,4.12720949,-0.620928418,4.09431055,3.75954482,3.72339872
50.005976,5,4.12469151,0.935579227,4.09005222,3.76062971,3.72260432
50.016468,4.58257569,4.12231005,0.678428804,4.08584945,3.76180105,3.72181041
50.026959,4.47213595,4.12006697,0.593354009,4.08170155,3.76306157,3.72101707
50.037451,4.69041576,4.11796356,0.75660571,4.07760664,3.76441439,3.72022415
50.047942,5,4.11600199,0.940211683,4.07356447,3.76586216,3.7194318
50.058434,4.58257569,4.11418373,0.684391674,4.06957324,3.7674081,3.71863986
50.068926,4.35889894,4.11251087,0.496374933,4.06563235,3.76905506,3.71784841
50.079417,4.47213595,4.11098549,0.600957957,4.06174121,3.77080585,3.71705753
50.089909,4.79583152,4.10960929,0.828385318,4.05789811,3.77266382,3.71626706
50.1004,4.79583152,4.10838456,0.829124215,4.05410287,3.77463165,3.71547716
50.110892,5,4.10731313,0.944821076,4.05035387,3.77671274,3.71468766
50.121384,4.12310563,4.10639723,0.129260959,4.04665059,3.77890996,3.71389866
50.131875,4.58257569,4.10563903,0.690606011,4.04299251,3.7812261,3.71311021
50.142367,5.09901951,4.10504053,0.996984946,4.03937812,3.78366464,3.71232218
50.152858,4.35889894,4.10460399,0.504276666,4.03580726,3.78622813,3.7115347
50.16335,4.24264069,4.10433147,0.37189947,4.03227847,3.78892005,3.71074763
50.173842,4.58257569,4.10422518,0.691628884,4.02879132,3.79174312,3.70996105
50.184333,4.58257569,4.10428725,0.691584014,4.02534535,3.79469999,3.70917502
50.194825,4.79583152,4.1045198,0.831451575,4.02193917,3.7977941,3.7083894
50.205316,4,4.1049249,-0.323921139,4.01857272,3.80102772,3.70760434
50.215808,4.35889894,4.1055047,0.503382799,4.01524462,3.80440425,3.70681968
50.2263,4.24264069,4.1062612,0.369295937,4.01195452,3.8079261,3.70603551
50.236791,4.58257569,4.10719628,0.689477636,4.00870203,3.81159557,3.70525188
50.247283,5,4.10831206,0.944292295,4.0054859,3.81541594,3.70446866
50.257774,4.58257569,4.10961019,0.687724875,4.00230606,3.81938896,3.70368599
50.268266,4.24264069,4.11109271,0.362695426,3.9991613,3.82351778,3.70290372
50.278758,4.24264069,4.11276124,0.360387916,3.99605129,3.82780432,3.70212193
50.289249,4.35889894,4.1146172,0.494248666,3.99297572,3.83225032,3.70134069
50.299741,4.89897949,4.11666249,0.884486857,3.98993342,3.83685868,3.70055985
50.310232,4.79583152,4.11889814,0.822759617,3.98692439,3.84163046,3.69977956
50.320724,4.12310563,4.12132589,0.0421869705,3.98394748,3.84656835,3.69899967
50.331216,4.69041576,4.12394672,0.752641374,3.98100244,3.85167355,3.69822025
50.341707,3.60555128,4.12676143,-0.721948858,3.978089,3.85694705,3.69744138
50.352199,4.69041576,4.12977146,0.748761845,3.97520608,3.86239117,3.6966629
50.36269,5.19615242,4.13297701,1.03110398,3.97235371,3.86800603,3.69588497
50.373182,4.12310563,4.1363793,-0.115211428,3.96953084,3.87379369,3.69510743
50.383674,5,4.13997848,0.927373451,3.96673725,3.87975441,3.69433037
50.394165,4,4.14377446,-0.379176033,3.96397272,3.88588819,3.69355384
50.404657,4.69041576,4.14776806,0.736646252,3.96123625,3.89219661,3.69277771
50.415148,4.24264069,4.15195841,0.301134976,3.9585279,3.89867865,3.69200212
50.42564,4.24264069,4.15634603,0.293759527,3.95584669,3.90533551,3.69122692
50.436132,5.19615242,4.16093002,1.0174588,3.95319245,3.91216634,3.69045219
50.446623,3.60555128,4.16570921,-0.748436996,3.95056498,3.91916998,3.689678
50.457115,4.79583152,4.1706836,0.790662967,3.94796337,3.92634704,3.6889042
50.467606,4.89897949,4.17585107,0.850369573,3.94538769,3.93369521,3.68813094
50.478098,4.12310563,4.18121126,-0.241051103,3.94283704,3.94121468,3.68735806
50.48859,4.35889894,4.18676205,0.414893835,3.94031127,3.9489033,3.68658565
50.499081,4.58257569,4.19250104,0.624559571,3.93781024,3.9567586,3.68581377
50.509573,3.87298335,4.19842722,-0.570476884,3.93533307,3.96478012,3.68504229
50.520064,3.74165739,4.20453712,-0.680352656,3.93287987,3.97296408,3.68427133
50.530556,4.24264069,4.21082931,0.178357447,3.93044981,3.98130954,3.68350076
50.541048,4.12310563,4.21730035,-0.306911596,3.92804275,3.98981296,3.68273065
50.551539,4,4.22394651,-0.473229866,3.92565858,3.99847048,3.68196107
50.562031,3.87298335,4.23076565,-0.598149068,3.92329649,4.00728041,3.68119188
50.572522,3.46410162,4.23775286,-0.87957447,3.9209566,4.01623751,3.68042322
50.583014,4.79583152,4.24490557,0.742243862,3.91863813,4.02533961,3.67965494
50.593506,5,4.25221896,0.864743335,3.91634098,4.03458174,3.67888711
50.603997,4.47213595,4.25968789,0.460920889,3.91406505,4.04395858,3.67811981
50.614489,4.35889894,4.26730908,0.302638172,3.9118096,4.05346726,3.6773529
50.62498,4.58257569,4.27507615,0.554526416,3.90957475,4.063101,3.67658651
50.635472,4,4.28298536,-0.531963684,3.90735977,4.07285645,3.6758205
50.645964,4.69041576,4.29103052,0.631969334,3.90516459,4.08272719,3.67505495
50.656455,4.12310563,4.29920513,-0.419642116,3.90298912,4.09270657,3.67428992
50.666947,4,4.30750478,-0.554531133,3.90083268,4.10279048,3.67352526
50.677438,3.87298335,4.31592167,-0.665536116,3.89869539,4.11297076,3.67276113
50.68793,4.89897949,4.32445095,0.757976603,3.89657658,4.12324287,3.67199738
50.698422,3.60555128,4.33308515,-0.852955963,3.89447619,4.13359913,3.67123408
50.708913,4.12310563,4.3418165,-0.46766534,3.89239415,4.14403158,3.6704713
50.719405,4.24264069,4.35063953,-0.328631771,3.89032982,4.15453505,3.66970889
50.729896,4.35889894,4.35954521,-0.0254217986,3.88828334,4.16510014,3.668947
50.740388,4.35889894,4.36852767,-0.0981260681,3.88625408,4.17572126,3.66818549
50.75088,4.58257569,4.37757829,0.452766386,3.88424198,4.1863896,3.66742442
50.761371,4.12310563,4.38668827,-0.513403003,3.88224701,4.19709615,3.66666387
50.771863,4.35889894,4.39585119,-0.192229668,3.88026855,4.20783478,3.66590369
50.782354,4.89897949,4.405057,0.702796192,3.87830675,4.21859511,3.66514403
50.792846,4.69041576,4.41429899,0.525468142,3.87636103,4.22937068,3.66438474
50.803338,4.69041576,4.42356765,0.516573429,3.87443134,4.2401518,3.66362589
50.813829,4.35889894,4.43285334,-0.271945574,3.87251766,4.25092866,3.66286756
50.824321,4.47213595,4.44214893,0.173167632,3.87061941,4.26169441,3.6621096
50.834812,4.47213595,4.45144361,0.143848327,3.86873674,4.27243792,3.66135215
50.845304,4.35889894,4.46073006,-0.319109874,3.86686911,4.28315213,3.66059506
50.855796,4.69041576,4.46999815,0.469486542,3.86501649,4.29382676,3.65983842
50.866287,3.60555128,4.47923771,-0.934711951,3.86317886,4.3044515,3.65908229
50.876779,4.35889894,4.48844111,-0.359919668,3.86135568,4.31501899,3.65832652
50.88727,4.69041576,4.49759717,0.439111132,3.85954711,4.32551778,3.65757126
50.897762,5.29150262,4.50669816,0.885891899,3.85775262,4.33594039,3.65681637
50.908254,5,4.51573369,0.695892456,3.85597221,4.34627632,3.65606192
50.918745,4.47213595,4.52469336,-0.229254017,3.85420587,4.35651506,3.65530797
50.929237,4.89897949,4.53356933,0.604491651,3.85245309,4.36664904,3.65455439
50.939728,4.47213595,4.54235039,-0.264980064,3.85071403,4.37666683,3.65380131
50.95022,4.89897949,4.55102869,0.589873542,3.84898819,4.38656085,3.65304859
50.960712,4.47213595,4.55959389,-0.295732877,3.84727558,4.39632066,3.65229631
50.971203,4.12310563,4.56803576,-0.667030838,3.8455762,4.40593598,3.65154453
50.981695,4.35889894,4.57634653,-0.466312753,3.84388957,4.41539929,3.65079311
50.992186,5,4.58451529,0.644581035,3.84221585,4.42469952,3.6500422
51.002678,4.79583152,4.59253439,0.450884838,3.84055457,4.43382929,3.64929164
51.01317,5.29150262,4.60039389,0.831329497,3.83890575,4.44277861,3.64854151
51.023661,5.19615242,4.60808405,0.766856162,3.83726939,4.45153771,3.64779189
51.034153,5,4.61559746,0.620002048,3.83564503,4.46009944,3.64704262
51.044644,5.09901951,4.62292393,0.689996799,3.83403286,4.46845349,3.64629386
51.055136,5,4.63005622,0.608230035,3.83243241,4.4765929,3.64554544
51.065628,5.38516481,4.63698519,0.864973769,3.83084372,4.48450851,3.64479746
51.076119,5,4.64370192,0.596907095,3.82926679,4.4921914,3.64404997
51.086611,5.09901951,4.65019961,0.669940222,3.8277012,4.49963505,3.64330284
51.097102,4.47213595,4.65646912,-0.429340383,3.82614711,4.50683023,3.64255621
51.107594,5.19615242,4.66250396,0.730512463,3.8246041,4.51377073,3.64180992
51.118086,4.47213595,4.66829605,-0.442899641,3.8230722,4.52044848,3.64106407
51.128577,5.47722558,4.67383763,0.89631911,3.82155144,4.52685576,3.6403187
51.139069,6,4.67912277,1.14929423,3.82004139,4.53298691,3.63957369
51.14956,4.79583152,4.6841437,0.334197278,3.81854224,4.53883412,3.63882917
51.160052,5,4.6888949,0.557767962,3.81705358,4.54439214,3.63808501
51.170544,5.65685425,4.69336966,0.981572507,3.81557544,4.54965431,3.63734126
51.181035,5.56776436,4.69756167,0.932846554,3.81410785,4.55461436,3.636598
51.191527,5.09901951,4.70146607,0.630518394,3.81265043,4.55926773,3.6358551
51.202018,5.56776436,4.70507677,0.928809773,3.81120334,4.5636083,3.63511268
51.21251,5,4.70838942,0.540009795,3.8097662,4.56763201,3.63437061
51.223002,5.83095189,4.71139894,1.0580893,3.80833906,4.57133383,3.63362897
51.233493,5.29150262,4.71410066,0.759869699,3.80692194,4.5747092,3.6328878
51.243985,5.91607978,4.71649102,1.0952574,3.80551447,4.57775479,3.63214699
51.254476,5.19615242,4.71856583,0.691076399,3.80411683,4.58046646,3.63140666
51.264968,5,4.72032209,0.528845831,3.80272865,4.58284147,3.63066668
51.27546,5.83095189,4.72175649,1.05318346,3.80134997,4.58487661,3.62992711
51.285951,5.83095189,4.72286626,1.05265647,3.79998084,4.5865692,3.62918803
51.296443,5.38516481,4.72364924,0.813336073,3.7986209,4.58791735,3.62844929
51.306934,5.83095189,4.72410329,1.05206873,3.79727032,4.58891897,3.62771103
51.317426,3.74165739,4.72422686,-0.991246424,3.79592875,4.58957278,3.62697312
51.327918,5.09901951,4.7240186,0.612373179,3.79459625,4.58987754,3.62623562
51.338409,4,4.72347768,-0.850574909,3.79327285,4.58983251,3.6254986
51.348901,4.89897949,4.72260345,0.419971466,3.79195822,4.58943735,3.62476192
51.359392,4.47213595,4.72139593,-0.499259429,3.79065253,4.58869212,3.62402572
51.369884,4.89897949,4.71985504,0.42323096,3.78935545,4.58759701,3.62328987
51.380376,5.65685425,4.71798144,0.968954493,3.78806703,4.5861528,3.62255442
51.390867,4.24264069,4.71577629,-0.687848535,3.78678732,4.58436081,3.62181945
51.401359,4.35889894,4.71324046,-0.595265924,3.78551598,4.58222213,3.62108482
51.41185,5.56776436,4.71037607,0.925952643,3.78425321,4.57973899,3.62035066
51.422342,4.79583152,4.70718457,0.297736379,3.78299868,4.57691312,3.61961685
51.432834,4.24264069,4.70366858,-0.678990345,3.78175244,4.57374725,3.61888344
51.443325,5.09901951,4.69983118,0.631813529,3.78051454,4.57024464,3.61815051
51.453817,4.69041576,4.69567471,-0.0725186008,3.77928467,4.56640785,3.61741791
51.464308,4.79583152,4.69120331,0.32346284,3.77806302,4.56224116,3.61668578
51.4748,4.12310563,4.68641988,-0.75054264,3.77684927,4.55774771,3.615954
51.485292,4.58257569,4.68132887,-0.314250177,3.77564348,4.55293211,3.61522261
51.495783,4.35889894,4.67593518,-0.563059707,3.77444571,4.54779942,3.6144917
51.506275,3.74165739,4.67024245,-0.963631187,3.77325566,4.54235355,3.61376112
51.516766,4.58257569,4.66425676,-0.285798997,3.7720735,4.53660069,3.61303101
51.527258,4.47213595,4.65798225,-0.431098938,3.77089894,4.53054523,3.61230124
51.53775,5.29150262,4.65142504,0.800048489,3.76973204,4.52419347,3.61157186
51.548241,4.12310563,4.64459164,-0.722139884,3.76857286,4.5175521,3.61084296
51.558733,3.74165739,4.63748684,-0.946482677,3.76742111,4.51062615,3.61011439
51.569224,5.19615242,4.63011841,0.752352319,3.76627697,4.50342354,3.60938628
51.579716,5.19615242,4.62249155,0.757404035,3.76514016,4.49594972,3.6086585
51.590208,3.87298335,4.61461379,-0.861179684,3.76401074,4.48821241,3.60793113
51.600699,4.47213595,4.60649304,-0.366547523,3.76288877,4.4802197,3.60720422
51.611191,5.19615242,4.59813503,0.773315841,3.76177398,4.47197756,3.60647763
51.621682,3.46410162,4.58954888,-1.06087099,3.76066653,4.46349529,3.60575152
51.632174,4,4.58074065,-0.762063415,3.75956617,4.45477919,3.60502573
51.642666,4,4.57171903,-0.756121039,3.75847295,4.44583815,3.60430033
51.653157,4.47213595,4.56249295,-0.300594407,3.75738694,4.43668131,3.6035754
51.663649,4.24264069,4.5530689,-0.557160852,3.75630788,4.42731537,3.6028508
51.67414,4.47213595,4.54345704,-0.267060071,3.75523594,4.41775071,3.60212666
51.684632,4,4.53366399,-0.730523091,3.75417086,4.40799419,3.60140284
51.695124,4.69041576,4.52369928,0.408309296,3.75311271,4.39805553,3.60067942
51.705615,5,4.51357262,0.697443463,3.75206154,4.38794467,3.59995645
51.716107,5.38516481,4.50329088,0.939081428,3.75101713,4.37766871,3.59923381
51.726598,4.47213595,4.49286491,-0.143975551,3.74997962,4.36723871,3.59851163
51.73709,3.87298335,4.48230171,-0.780588472,3.74894878,4.3566619,3.59778978
51.747582,4.89897949,4.47161125,0.653734069,3.74792468,4.34594848,3.59706831
51.758073,3.74165739,4.46080365,-0.848024919,3.74690738,4.33510879,3.5963473
51.768565,4.47213595,4.44988594,0.1491644,3.74589664,4.32415009,3.59562661
51.779056,3.74165739,4.43886927,-0.834992149,3.74489262,4.31308377,3.59490638
51.789548,4,4.42776068,-0.654034156,3.74389511,4.30191706,3.59418647
51.80004,4.69041576,4.41657029,0.523302468,3.74290415,4.29066035,3.59346694
51.810531,4.89897949,4.40530825,0.702617416,3.74191983,4.27932402,3.59274787
51.821023,4.24264069,4.39398146,-0.389025409,3.74094191,4.26791517,3.59202912
51.831514,5,4.38260103,0.785747394,3.73997055,4.25644517,3.59131083
51.842006,3.87298335,4.37117374,-0.705826037,3.73900555,4.24492101,3.59059285
51.852498,4.47213595,4.35970951,0.335300536,3.73804696,4.23335284,3.58987526
51.862989,4.35889894,4.34821818,0.103347789,3.73709485,4.22175075,3.58915811
51.873481,3.74165739,4.33670622,-0.771394082,3.73614901,4.21012141,3.58844129
51.883972,3.16227766,4.32518437,-1.07838153,3.73520959,4.19847582,3.58772492
51.894464,4.12310563,4.31365888,-0.436524056,3.7342764,4.18682042,3.58700886
51.904956,5.29150262,4.3021391,0.994667544,3.73334949,4.17516481,3.58629318
51.915447,4.69041576,4.2906343,0.632282741,3.73242893,4.16351849,3.58557796
51.925939,4.89897949,4.27915025,0.787292342,3.73151453,4.15188743,3.58486304
51.93643,3.74165739,4.26769698,-0.725285871,3.73060643,4.1402819,3.58414858
51.946922,3.87298335,4.25627995,-0.619109525,3.72970445,4.12870755,3.58343443
51.957414,3.87298335,4.24490771,-0.609856016,3.72880864,4.11717317,3.58272066
51.967905,3.60555128,4.23358859,-0.792488055,3.72791908,4.10568731,3.58200734
51.978397,4.69041576,4.22232753,0.68416974,3.72703558,4.09425507,3.58129432
51.988888,4.12310563,4.21113352,-0.296694944,3.72615828,4.08288571,3.58058176
51.99938,4.24264069,4.20001105,0.206469467,3.725287,4.07158387,3.5798695
52.009872,4.12310563,4.18896761,-0.256635893,3.72442182,4.06035726,3.57915762
52.020363,3.60555128,4.17801042,-0.756610302,3.72356279,4.04921331,3.57844619
52.030855,4,4.16714336,-0.408831697,3.72270974,4.03815603,3.57773507
52.041346,4.35889894,4.15637417,0.450027525,3.72186282,4.02719343,3.57702439
52.051838,5,4.14570628,0.924280108,3.72102185,4.01632904,3.57631401
52.06233,4.89897949,4.13514592,0.873975725,3.7201869,4.00556928,3.57560402
52.072821,4.47213595,4.12469902,0.589437814,3.71935804,3.9949203,3.57489446
52.083313,4.12310563,4.1143683,0.0934736737,3.71853509,3.98438492,3.57418521
52.093804,5.19615242,4.10416015,1.04498434,3.71771822,3.97396972,3.5734764
52.104296,4.69041576,4.09407679,0.772229867,3.71690725,3.96367705,3.5727679
52.114788,4.35889894,4.08412313,0.524190627,3.71610224,3.95351197,3.57205977
52.125279,4.79583152,4.07430373,0.849427919,3.71530328,3.9434792,3.57135208
52.135771,4.12310563,4.06462011,0.24183778,3.71451019,3.93358034,3.5706447
52.146262,4.58257569,4.05507723,0.726290894,3.71372312,3.92382052,3.56993775
52.156754,4.47213595,4.04567614,0.653038909,3.71294193,3.91420086,3.56923111
52.167246,4.47213595,4.03642034,0.660087578,3.71216667,3.904725,3.56852483
52.177737,3.87298335,4.02731305,-0.392848197,3.71139741,3.89539627,3.567819
52.188229,4.89897949,4.01835461,0.938416152,3.71063401,3.88621506,3.56711346
52.19872,4.12310563,4.00954857,0.336982279,3.70987661,3.87718505,3.56640837
52.209212,3.87298335,4.00089484,-0.357647163,3.70912506,3.86830619,3.56570357
52.219704,4.24264069,3.99239561,0.500245018,3.70837943,3.85958075,3.56499914
52.230195,5.19615242,3.98405278,1.10095397,3.7076398,3.85101073,3.56429515
52.240687,3.60555128,3.97586564,-0.608534607,3.70690601,3.84259541,3.56359146
52.251178,4.58257569,3.96783639,0.784053124,3.70617822,3.83433709,3.56288819
52.26167,4.89897949,3.95996394,0.969028146,3.70545628,3.82623467,3.56218523
52.272162,5,3.95224925,1.02359696,3.70474027,3.81828918,3.56148264
52.282653,4.89897949,3.94469306,0.976875848,3.70403025,3.81050139,3.56078048
52.293145,3.74165739,3.93729373,-0.442307973,3.7033261,3.80286963,3.56007861
52.303636,4.79583152,3.93005227,0.930472595,3.70262795,3.79539498,3.55937718
52.314128,3.74165739,3.92296673,-0.425804353,3.70193567,3.78807543,3.55867604
52.32462,5.29150262,3.91603706,1.17280244,3.70124934,3.78091094,3.55797526
52.335111,5.09901951,3.90926295,1.09075963,3.70056903,3.77390123,3.55727492
52.345603,4.47213595,3.90264204,0.754648208,3.69989461,3.76704387,3.55657487
52.356094,4.69041576,3.89617434,0.891202234,3.69922623,3.76033889,3.55587525
52.366586,4.58257569,3.88985724,0.832297097,3.69856376,3.7537836,3.55517593
52.377078,4.69041576,3.88368983,0.898179232,3.69790728,3.74737707,3.55447696
52.387569,4.12310563,3.87767102,0.495413574,3.69725686,3.7411182,3.55377843
52.398061,3.60555128,3.87179789,-0.515990907,3.69661238,3.73500397,3.55308018
52.408552,3.87298335,3.86606968,0.0831484751,3.69597398,3.7290336,3.55238237
52.419044,3.60555128,3.86048329,-0.504907931,3.69534156,3.7232039,3.55168484
52.429536,3.60555128,3.85503721,-0.499485668,3.69471517,3.7175133,3.55098768
52.440027,4.58257569,3.84972975,0.856064217,3.69409491,3.71196009,3.55029094
52.450519,4.24264069,3.84455765,0.630938219,3.69348066,3.70654086,3.54959449
52.46101,3.87298335,3.83951957,0.182931066,3.69287256,3.70125426,3.54889847
52.471502,4.47213595,3.83461217,0.798450866,3.69227051,3.69609681,3.54820273
52.481994,4.12310563,3.82983349,0.541546058,3.69167458,3.69106649,3.54750736
52.492485,3.46410162,3.82518148,-0.600899214,3.69108485,3.68616118,3.5468124
52.502977,3.74165739,3.82065272,-0.281061086,3.69050122,3.68137732,3.54611774
52.513468,3.74165739,3.81624551,-0.273108264,3.68992383,3.67671317,3.5454235
52.52396,4,3.81195642,0.433639918,3.68935258,3.67216515,3.54472954
52.534452,2.64575131,3.80778327,-1.07797586,3.68878755,3.66773099,3.54403594
52.544943,3.74165739,3.8037238,-0.249131324,3.68822881,3.66340838,3.54334277
52.555435,4.24264069,3.79977463,0.665481826,3.68767629,3.65919375,3.54264987
52.565926,4.12310563,3.79593385,0.571989315,3.68713011,3.65508517,3.5419574
52.576418,4.12310563,3.79219811,0.575245611,3.68659019,3.65107911,3.54126522
52.58691,4.24264069,3.78856516,0.673851261,3.68605661,3.64717323,3.54057339
52.597401,4.24264069,3.78503273,0.676467263,3.68552944,3.64336518,3.53988197
52.607893,4,3.78159754,0.46733549,3.68500862,3.63965153,3.53919084
52.618384,3.87298335,3.77825769,0.307775337,3.68449426,3.63603031,3.53850013
52.628876,3.46410162,3.77500999,-0.557591589,3.6839863,3.63249816,3.5378097
52.639368,3.60555128,3.77185227,-0.407800195,3.68348482,3.62905282,3.53711963
52.649859,3.87298335,3.76878234,0.322801805,3.6829899,3.62569202,3.53642997
52.660351,4.69041576,3.76579717,0.961570897,3.68250147,3.62241257,3.53574059
52.670842,5.19615242,3.76289494,1.19718732,3.68201966,3.61921256,3.53505163
52.681334,3.87298335,3.76007274,0.336021741,3.6815444,3.61608895,3.53436295
52.691826,4.58257569,3.75732854,0.908431151,3.68107579,3.61303959,3.53367462
52.702317,5,3.75466034,1.11594788,3.6806139,3.61006242,3.5329867
52.712809,3.87298335,3.75206542,0.347732554,3.68015867,3.60715453,3.53229907
52.7233,4.58257569,3.74954211,0.912706733,3.67971023,3.60431421,3.53161185
52.733792,3.46410162,3.74708785,-0.531964502,3.67926854,3.6015387,3.53092491
52.744284,4.79583152,3.74470081,1.02524666,3.67883368,3.59882612,3.53023831
52.754775,3,3.74237923,-0.861614314,3.67840572,3.59617462,3.52955213
52.765267,3.16227766,3.74012072,-0.760159893,3.67798463,3.59358163,3.52886623
52.775758,4.58257569,3.73792385,0.919049426,3.67757052,3.59104568,3.52818073
52.78625,3.46410162,3.73578637,-0.521233873,3.67716337,3.58856433,3.52749552
52.796742,3.74165739,3.73370672,0.0891664902,3.67676325,3.58613598,3.52681065
52.807233,5,3.73168341,1.12619563,3.67637026,3.58375902,3.52612619
52.817725,3.74165739,3.72971439,0.109284033,3.67598435,3.58143125,3.52544201
52.828216,4.24264069,3.72779845,0.717525079,3.67560566,3.57915143,3.52475824
52.838708,4,3.72593369,0.523513424,3.67523416,3.57691747,3.52407475
52.8492,3.87298335,3.72411884,0.385829634,3.67486993,3.57472803,3.52339159
52.859691,4.24264069,3.72235263,0.721309958,3.67451306,3.57258177,3.52270885
52.870183,4.47213595,3.72063337,0.866892487,3.67416353,3.57047684,3.52202638
52.880674,3.16227766,3.71896008,-0.746111532,3.67382147,3.56841221,3.52134432
52.891166,4.58257569,3.71733119,0.930185201,3.67348686,3.56638614,3.52066253
52.901658,4.35889894,3.71574565,0.801968385,3.67315979,3.56439753,3.51998108
52.912149,4,3.71420248,0.53460034,3.67284034,3.56244532,3.51930004
52.922641,4.47213595,3.71270026,0.871456075,3.67252853,3.56052792,3.51861928
52.933132,4.24264069,3.71123826,0.728973545,3.67222445,3.55864457,3.51793892
52.943624,3.74165739,3.70981518,0.178443856,3.67192813,3.5567938,3.51725883
52.954116,4.35889894,3.70843021,0.806516418,3.67163964,3.55497474,3.51657908
52.964607,3.60555128,3.70708258,-0.318639768,3.67135908,3.55318655,3.51589973
52.975099,3.46410162,3.70577116,-0.491598965,3.67108646,3.55142793,3.51522066
52.98559,4.69041576,3.70449538,0.992935234,3.6708219,3.5496983,3.51454199
52.996082,3.74165739,3.70325422,0.195967248,3.67056541,3.54799644,3.51386359
53.006574,4.35889894,3.70204707,0.810463986,3.67031709,3.54632169,3.51318553
53.017065,4,3.70087333,0.546924737,3.67007703,3.5446734,3.51250787
53.027557,4.47213595,3.69973212,0.878865086,3.66984527,3.54305049,3.51183048
53.038048,4.69041576,3.69862301,0.995887919,3.6696219,3.54145255,3.51115349
53.04854,3.46410162,3.69754522,-0.483160015,3.66940697,3.53987856,3.51047677
53.059032,3.31662479,3.69649827,-0.616338769,3.66920058,3.53832804,3.50980039
53.069523,3.60555128,3.69548173,-0.299884077,3.66900282,3.53680048,3.50912441
53.080015,3.16227766,3.69449492,-0.729532219,3.66881374,3.53529499,3.50844869
53.090506,3.60555128,3.69353754,-0.296624781,3.66863344,3.53381129,3.50777338
53.100998,3.87298335,3.69260896,0.424705063,3.66846199,3.53234855,3.50709833
53.11149,4.12310563,3.69170885,0.65680802,3.66829947,3.53090637,3.50642362
53.121981,4.24264069,3.6908369,0.742834964,3.668146,3.5294844,3.5057493
53.132473,3.74165739,3.68999258,0.227298943,3.66800162,3.52808189,3.50507525
53.142964,3.74165739,3.68917568,0.229088862,3.66786647,3.52669865,3.5044016
53.153456,4.24264069,3.68838573,0.744483016,3.66774059,3.52533397,3.50372821
53.163948,4.24264069,3.68762248,0.74499544,3.66762411,3.52398758,3.50305516
53.174439,3.46410162,3.68688573,-0.472000117,3.66751712,3.52265919,3.5023825
53.184931,4.35889894,3.68617504,0.820197477,3.6674197,3.52134817,3.50171011
53.195422,4,3.68549031,0.560811635,3.66733197,3.5200544,3.50103812
53.205914,4.58257569,3.68483115,0.947493821,3.66725401,3.51877727,3.50036639
53.216406,4,3.68419742,0.561963152,3.66718594,3.51751658,3.49969499
53.226897,3.46410162,3.68358894,-0.468494741,3.66712785,3.51627211,3.49902398
53.237389,3.16227766,3.6830054,-0.721614677,3.66707986,3.5150433,3.49835324
53.24788,3.60555128,3.68244674,-0.277300309,3.66704208,3.51383009,3.49768289
53.258372,4.12310563,3.68191266,0.664223584,3.66701461,3.51263194,3.4970128
53.268864,3.46410162,3.68140305,-0.466156022,3.66699757,3.51144869,3.49634304
53.279355,4.58257569,3.68091781,0.949556676,3.66699108,3.51028017,3.49567368
53.289847,4.24264069,3.68045671,0.74978929,3.66699524,3.50912588,3.49500457
53.300338,4.47213595,3.68001969,0.89000914,3.66701019,3.50798578,3.49433586
53.31083,4,3.67960654,0.566033091,3.66703605,3.5068594,3.49366741
53.321322,4.47213595,3.6792172,0.890459858,3.66707294,3.50574661,3.49299929
53.331813,4.24264069,3.67885158,0.750858914,3.66712098,3.50464725,3.49233156
53.342305,4,3.67850952,0.567001307,3.66718032,3.50356089,3.49166409
53.352796,4.35889894,3.67819099,0.825050275,3.66725107,3.50248749,3.49099701
53.363288,3.60555128,3.67789584,-0.268969445,3.66733339,3.50142663,3.49033019
53.37378,4,3.67762402,0.567781627,3.6674274,3.50037818,3.48966369
53.384271,3.74165739,3.6773755,0.253538735,3.66753323,3.49934204,3.48899758
53.394763,4,3.67715014,0.568198783,3.66765106,3.49831777,3.48833174
53.405254,4.35889894,3.67694795,0.825803244,3.66778099,3.49730537,3.48766628
53.415746,3.74165739,3.67676882,0.25473235,3.66792322,3.49630444,3.48700108
53.426238,4.12310563,3.67661273,0.66820124,3.66807787,3.49531487,3.4863362
53.436729,4.12310563,3.67647965,0.668300811,3.66824508,3.49433655,3.48567171
53.447221,4.35889894,3.67636953,0.826153384,3.66842505,3.4933691,3.48500748
53.457712,3.60555128,3.67628236,-0.265953153,3.66861791,3.49241251,3.48434363
53.468204,4.35889894,3.67621809,0.826245033,3.66882385,3.49146641,3.48368005
53.478696,4,3.67617673,0.569054719,3.66904302,3.49053069,3.48301678
53.489187,4.12310563,3.67615826,0.668541222,3.66927558,3.48960527,3.4823539
53.499679,3.46410162,3.67616268,-0.460500888,3.66952174,3.48868979,3.48169128
53.51017,4.69041576,3.67619,1.00708776,3.66978163,3.48778423,3.48102904
53.520662,4.47213595,3.67624022,0.892129887,3.67005549,3.48688826,3.48036706
53.531154,3.60555128,3.67631336,-0.266011445,3.67034347,3.48600178,3.47970539
53.541645,4.24264069,3.67640944,0.752483383,3.67064574,3.48512471,3.47904411
53.552137,3.87298335,3.67652851,0.443232261,3.67096254,3.48425671,3.47838309
53.562628,4.24264069,3.67667057,0.752309853,3.67129402,3.48339779,3.47772245
53.57312,3,3.67683571,-0.822700253,3.67164043,3.48254763,3.47706207
53.583612,3.87298335,3.67702395,0.442673016,3.67200196,3.48170614,3.476402
53.594103,4,3.67723533,0.568123812,3.67237876,3.48087325,3.47574232
53.604595,4,3.67746997,0.56791727,3.67277114,3.48004866,3.47508289
53.615086,3.87298335,3.6777279,0.44187719,3.67317922,3.47923237,3.47442384
53.625578,3.46410162,3.67800923,-0.462501473,3.67360332,3.47842408,3.47376504
53.63607,4.24264069,3.67831404,0.751216779,3.67404362,3.47762374,3.47310656
53.646561,4.47213595,3.67864239,0.890782557,3.6745003,3.47683128,3.47244846
53.657053,4.24264069,3.67899446,0.750763765,3.67497369,3.47604641,3.47179062
53.667544,4.47213595,3.67937028,0.890373896,3.67546395,3.47526917,3.47113315
53.678036,4.47213595,3.67977006,0.890149368,3.6759714,3.47449927,3.47047594
53.688528,3,3.68019388,-0.824738676,3.67649626,3.47373667,3.46981904
53.699019,3.16227766,3.68064186,-0.719975137,3.67703873,3.47298133,3.46916253
53.709511,4.24264069,3.68111421,0.749350701,3.67759917,3.47223298,3.46850626
53.720002,4.58257569,3.68161102,0.94919159,3.67817775,3.47149166,3.46785037
53.730494,3.31662479,3.68213254,-0.60457237,3.67877485,3.47075712,3.46719473
53.740986,3.31662479,3.68267891,-0.605024064,3.67939068,3.47002934,3.46653941
53.751477,4.47213595,3.68325025,0.888192379,3.68002548,3.46930829,3.46588446
53.761969,4.89897949,3.68384688,1.10233053,3.68067966,3.46859373,3.46522977
53.77246,3.60555128,3.68446889,-0.280922786,3.68135339,3.46788571,3.46457545
53.782952,4.47213595,3.68511661,0.887141109,3.68204709,3.46718401,3.46392138
53.793444,3.74165739,3.68579021,0.236362384,3.68276102,3.46648863,3.46326763
53.803935,4.79583152,3.68648987,1.05325289,3.68349542,3.46579954,3.46261425
53.814427,4.35889894,3.68721596,0.819562678,3.68425075,3.46511655,3.46196112
53.824918,3.74165739,3.68796861,0.231708391,3.6850272,3.46443972,3.46130836
53.83541,3.87298335,3.68874823,0.429226187,3.68582525,3.46376884,3.46065585
53.845902,4.69041576,3.68955502,1.00043028,3.68664518,3.46310394,3.46000366
53.856393,3.60555128,3.69038921,-0.291269527,3.68748725,3.46244501,3.45935184
53.866885,4.47213595,3.69125125,0.883676809,3.68835199,3.46179187,3.45870026
53.877376,4.12310563,3.6921413,0.656478736,3.68923959,3.46114459,3.45804906
53.887868,4.24264069,3.69305983,0.741337207,3.69015061,3.46050302,3.45739811
53.89836,4.79583152,3.69400712,1.04967824,3.69108533,3.45986716,3.45674747
53.908851,4,3.69498341,0.552283071,3.69204406,3.45923704,3.4560972
53.919343,3.60555128,3.69598924,-0.300729063,3.69302739,3.4586125,3.45544718
53.929834,3.31662479,3.69702481,-0.616765772,3.69403553,3.45799362,3.45479753
53.940326,4,3.69809068,0.54946276,3.6950691,3.45738026,3.45414812
53.950818,3.60555128,3.69918715,-0.305999788,3.69612842,3.45677245,3.45349903
53.961309,3.46410162,3.70031452,-0.486017388,3.69721384,3.45617022,3.45285031
53.971801,4.12310563,3.70147342,0.649332124,3.698326,3.45557343,3.45220183
53.982292,4.12310563,3.70266406,0.648414653,3.69946515,3.45498218,3.45155372
53.992784,4.79583152,3.70388712,1.04496144,3.70063198,3.45439632,3.45090586
54.003276,3.74165739,3.70514292,0.191087586,3.70182686,3.45381591,3.45025831
54.013767,3.74165739,3.70643182,0.187684751,3.70305016,3.45324098,3.44961113
54.024259,4.12310563,3.70775454,0.644477376,3.70430261,3.45267141,3.44896419
54.03475,4.12310563,3.70911131,0.643423898,3.70558448,3.45210729,3.44831762
54.045242,3.46410162,3.71050291,-0.496388246,3.70689655,3.45154851,3.44767129
54.055734,4.58257569,3.71192971,0.933084127,3.70823923,3.4509951,3.44702527
54.066225,2.82842712,3.7133921,-0.940725772,3.70961294,3.45044711,3.44637962
54.076717,3.87298335,3.71489092,0.397608389,3.7110185,3.44990442,3.44573422
54.087208,3.87298335,3.71642641,0.395672759,3.71245622,3.44936713,3.44508918
54.0977,4.12310563,3.71799946,0.636479511,3.71392695,3.44883512,3.44444438
54.108192,3.74165739,3.71961048,0.148481994,3.71543117,3.44830843,3.44379989
54.118683,3.31662479,3.72125993,-0.636109377,3.71696935,3.44778711,3.44315577
54.129175,5,3.72294872,1.13006694,3.71854241,3.44727104,3.44251189
54.139666,4.24264069,3.72467715,0.71969684,3.72015069,3.4467603,3.44186838
54.150158,4.24264069,3.72644618,0.718466774,3.72179517,3.44625479,3.44122511
54.16065,4.12310563,3.72825631,0.628370363,3.72347637,3.44575454,3.44058214
54.171141,4.12310563,3.73010803,0.626895206,3.72519482,3.44525957,3.43993954
54.181633,3.74165739,3.73200235,0.0982600347,3.72695155,3.44476977,3.43929718
54.192124,3.74165739,3.73393963,0.0878507797,3.72874698,3.44428521,3.43865518
54.202616,3.74165739,3.73592093,0.0757394173,3.73058217,3.44380578,3.43801343
54.213108,4.24264069,3.7379468,0.71041811,3.73245773,3.44333149,3.43737198
54.223599,4.35889894,3.74001778,0.786690006,3.73437425,3.44286235,3.4367309
54.234091,3.46410162,3.74213502,-0.527288731,3.73633291,3.44239825,3.43609005
54.244582,4.12310563,3.7442989,0.615472768,3.73833416,3.44193923,3.43544957
54.255074,3.74165739,3.74651061,-0.0696650751,3.74037922,3.44148517,3.43480933
54.265566,3.87298335,3.74877076,0.352438058,3.74246877,3.44103606,3.43416939
54.276057,4.12310563,3.75107996,0.609939068,3.74460348,3.4405919,3.43352982
54.286549,3.46410162,3.75343948,-0.537901355,3.74678468,3.44015255,3.43289049
54.29704,3.74165739,3.75584975,-0.119131703,3.74901289,3.43971803,3.43225151
54.307532,3.46410162,3.7583121,-0.542411728,3.75128948,3.4392882,3.43161278
54.318024,3.60555128,3.7608272,-0.394050668,3.75361522,3.43886304,3.43097435
54.328515,3.16227766,3.76339575,-0.775318054,3.75599091,3.4384425,3.43033628
54.339007,4.24264069,3.76601915,0.690377821,3.75841801,3.43802644,3.42969845
54.349498,4.12310563,3.76869789,0.595321538,3.76089713,3.43761484,3.42906098
54.35999,3.87298335,3.77143346,0.318668926,3.76342983,3.43720754,3.42842375
54.370482,3.87298335,3.77422662,0.314255827,3.76601698,3.4368045,3.42778682
54.380973,4,3.77707813,0.472146022,3.76865949,3.43640563,3.42715025
54.391465,4.47213595,3.7799896,0.831953337,3.77135903,3.43601077,3.42651392
54.401956,3.46410162,3.78296155,-0.564676844,3.7741163,3.43561988,3.42587794
54.412448,4.35889894,3.78599567,0.75690374,3.77693306,3.43523276,3.42524221
54.42294,4.47213595,3.78909282,0.826464239,3.77981032,3.43484933,3.42460678
54.433431,4.89897949,3.79225386,1.05201028,3.78274911,3.43446949,3.4239717
54.443923,4.12310563,3.79548059,0.572385394,3.78575133,3.43409304,3.42333686
54.454414,4,3.79877363,0.448582625,3.78881779,3.43371991,3.42270238
54.464906,4.47213595,3.80213487,0.81853594,3.79195049,3.43334988,3.42206814
54.475398,4.12310563,3.8055653,0.563507168,3.79515061,3.43298282,3.4214342
54.485889,4.35889894,3.80906591,0.741507273,3.79841931,3.43261863,3.42080061
54.496381,4.69041576,3.81263873,0.936897556,3.80175877,3.43225704,3.42016726
54.506872,4.24264069,3.81628449,0.652959567,3.80516994,3.43189797,3.41953427
54.517364,3.31662479,3.82000533,-0.70949316,3.80865507,3.43154118,3.41890152
54.527856,5.09901951,3.8238024,1.12925512,3.81221554,3.43118651,3.41826906
54.538347,5,3.82767684,1.08273873,3.8158527,3.4308338,3.41763696
54.548839,3.60555128,3.83163097,-0.475478381,3.81956902,3.43048279,3.41700509
54.55933,4.47213595,3.83566564,0.797790894,3.82336561,3.43013336,3.41637359
54.569822,4.35889894,3.83978331,0.720496799,3.82724506,3.42978522,3.41574231
54.580314,4.79583152,3.84398529,0.975626073,3.83120895,3.42943819,3.41511134
54.590805,5.38516481,3.84827295,1.23971443,3.83525886,3.42909211,3.41448072
54.601297,4.69041576,3.85264892,0.915296039,3.83939761,3.42874667,3.41385033
54.611788,3.87298335,3.85711426,0.125972581,3.84362651,3.42840173,3.4132203
54.62228,3.74165739,3.86167173,-0.346430868,3.84794853,3.42805698,3.41259051
54.632772,4.79583152,3.86632294,0.964110257,3.85236548,3.42771223,3.41196101
54.643263,4.35889894,3.87106947,0.698447904,3.85687924,3.42736727,3.41133186
54.653755,3.46410162,3.87591436,-0.641726378,3.86149302,3.42702179,3.41070295
54.664246,3.74165739,3.88085889,-0.373097172,3.86620838,3.42667563,3.41007439
54.674738,3.87298335,3.88590626,-0.113678978,3.87102871,3.42632845,3.40944607
54.68523,4.24264069,3.89105835,0.592943792,3.87595616,3.42598006,3.40881805
54.695721,3.74165739,3.89631708,-0.393267963,3.88099291,3.42563023,3.40819037
54.706213,4.58257569,3.90168595,0.825160438,3.88614264,3.42527864,3.40756293
54.716704,3.16227766,3.90716652,-0.863069442,3.89140722,3.4249251,3.40693585
54.727196,3.87298335,3.91276252,-0.199447161,3.89679056,3.42456928,3.40630899
54.737688,4.47213595,3.91847618,0.744083176,3.90229517,3.42421098,3.40568243
54.748179,4.58257569,3.92430982,0.811335857,3.90792361,3.42384996,3.40505623
54.758671,5.47722558,3.9302675,1.24376769,3.91368015,3.42348589,3.40443026
54.769162,4.35889894,3.93635115,0.650036765,3.919567,3.42311859,3.40380463
54.779654,4.47213595,3.94256509,0.727716197,3.92558868,3.42274773,3.40317925
54.790146,3.46410162,3.94891204,-0.696283293,3.93174815,3.42237309,3.40255415
54.800637,4,3.95539477,0.211199502,3.93804844,3.42199445,3.40192941
54.811129,3.60555128,3.96201803,-0.597048368,3.94449448,3.42161148,3.4013049
54.82162,4.89897949,3.96878421,0.964466319,3.95108893,3.42122402,3.40068074
54.832112,5.29150262,3.97569835,1.14708512,3.95783703,3.42083173,3.40005681
54.842604,4.69041576,3.98276375,0.841220546,3.96474229,3.42043442,3.39943318
54.853095,4.12310563,3.98998376,0.36485869,3.97180829,3.42003187,3.39880989
54.863587,4.47213595,3.99736395,0.689037013,3.97904079,3.41962377,3.39818684
54.874078,3.60555128,4.00490727,-0.631946194,3.98644296,3.41920997,3.39756414
54.88457,4.35889894,4.01261966,0.588454999,3.99402091,3.41879016,3.39694167
54.895062,3.31662479,4.02050509,-0.838975746,4.00177882,3.41836416,3.39631949
54.905553,4.12310563,4.02856765,0.307470286,4.00972096,3.41793179,3.39569766
54.916045,3.87298335,4.03681388,-0.404759852,4.01785403,3.41749276,3.39507606
54.926536,4.89897949,4.04524745,0.923976208,4.02618189,3.41704694,3.39445481
54.937028,4.35889894,4.05387536,0.552289399,4.03471168,3.41659406,3.3938338
54.94752,4.79583152,4.06270244,0.856229574,4.04344839,3.41613395,3.39321307
54.958011,4.58257569,4.07173364,0.714732156,4.05239712,3.41566649,3.39259269
54.968503,3.46410162,4.08097672,-0.785413971,4.06156575,3.41519141,3.39197254
54.978994,3,4.0904362,-1.04423953,4.07095894,3.41470863,3.39135275
54.989486,3.74165739,4.10012038,-0.598717792,4.0805851,3.4142179,3.39073318
54.999978,4.89897949,4.11003513,0.888225395,4.09045021,3.41371911,3.3901139
55.010469,4.12310563,4.1201865,0.0540289512,4.1005604,3.41321217,3.38949497
55.020961,3.46410162,4.13058368,-0.816383529,4.11092498,3.41269685,3.38887627
55.031452,4.12310563,4.14123228,-0.134635249,4.12154959,3.41217312,3.38825792
55.041944,4.79583152,4.15214215,0.802302545,4.13244419,3.41164078,3.3876398
55.052436,4.58257569,4.16332046,0.647499215,4.14361598,3.41109977,3.38702197
55.062927,4.12310563,4.17477459,-0.227308081,4.15507239,3.41055005,3.38640448
55.073419,5.29150262,4.1865155,1.05118368,4.1668244,3.40999143,3.38578722
55.08391,4.79583152,4.19855012,0.772839832,4.17887898,3.40942395,3.38517032
55.094402,4.35889894,4.21089022,0.384719021,4.1912479,3.40884743,3.38455364
55.104894,4.69041576,4.22354455,0.683279741,4.20393991,3.40826189,3.38393725
55.115385,4.24264069,4.23652215,0.0782210915,4.21696402,3.40766734,3.3833212
55.125877,4.89897949,4.24983612,0.805694336,4.23033334,3.40706364,3.38270539
55.136368,4.58257569,4.26349505,0.564872235,4.24405639,3.40645089,3.38208992
55.14686,5.09901951,4.27751306,0.906369933,4.25814725,3.40582897,3.38147468
55.157352,5.47722558,4.29190086,1.08872619,4.27261659,3.40519793,3.38085973
55.167843,4.79583152,4.30666951,0.699401179,4.28747538,3.40455786,3.38024512
55.178335,4.89897949,4.3218348,0.75970039,4.30273933,3.40390867,3.37963075
55.188826,4.47213595,4.33740736,0.367053943,4.31841897,3.40325052,3.37901671
55.199318,5.19615242,4.35340418,0.918013205,4.33453121,3.40258334,3.37840291
55.20981,5.91607978,4.36983844,1.24347953,4.35108909,3.40190724,3.3777894
55.220301,5.09901951,4.38672374,0.843976167,4.3681061,3.40122237,3.37717622
55.230793,4.79583152,4.40407914,0.625901258,4.38560115,3.40052867,3.37656328
55.241284,5.19615242,4.42191785,0.879906005,4.40358729,3.39982638,3.37595068
55.251776,6.164414,4.44026043,1.31307029,4.42208497,3.39911546,3.37533831
55.262268,5.83095189,4.45912313,1.17125094,4.44111024,3.3983961,3.37472623
55.272759,5.47722558,4.47852274,0.999351208,4.4606797,3.39766848,3.37411449
55.283251,5.47722558,4.49848237,0.989314513,4.48081632,3.39693261,3.37350298
55.293742,5.47722558,4.5190185,0.978880519,4.50153634,3.39618876,3.37289182
55.304234,6.08276253,4.54015614,1.24201706,4.52286459,3.39543694,3.37228088
55.314726,5.47722558,4.56191539,0.956718446,4.54482096,3.39467738,3.37167022
55.325217,5.09901951,4.58431706,0.717427665,4.56742602,3.39391033,3.37105991
55.335709,6,4.60738933,1.18008926,4.59070777,3.39313582,3.37044983
55.3462,4.89897949,4.63115282,0.517519728,4.61468654,3.39235417,3.36984009
55.356692,5.65685425,4.65563808,1.0006079,4.63939269,3.39156544,3.36923058
55.367184,5.09901951,4.6808701,0.646644735,4.66485095,3.39076988,3.36862136
55.377675,5.56776436,4.70687478,0.927841358,4.69108693,3.38996779,3.36801247
55.388167,5.47722558,4.73368666,0.862287026,4.71813497,3.38915922,3.36740382
55.398658,5.29150262,4.76133162,0.728128423,4.74602065,3.38834455,3.36679551
55.40915,5.19615242,4.7898472,0.637420759,4.77478127,3.38752384,3.36618742
55.419642,5.74456265,4.81926457,0.961924153,4.80444773,3.38669739,3.36557962
55.430133,5.56776436,4.84961608,0.8474363,4.83505206,3.38586552,3.36497216
55.440625,6,4.8809443,1.05785429,4.86663663,3.3850283,3.36436493
55.451116,5.47722558,4.9132818,0.750961902,4.89923365,3.38418614,3.36375804
55.461608,5.83095189,4.9466749,0.940360035,4.93288923,3.38333912,3.36315138
55.4721,5.38516481,4.98116264,0.635611644,4.9676421,3.38248756,3.362545
55.482591,6.32455532,5.01678556,1.14357761,5.00353249,3.3816318,3.36193896
55.493083,6.08276253,5.05359631,1.0144783,5.04061281,3.38077191,3.36133315
55.503574,5.83095189,5.09163597,0.859834825,5.07892381,3.37990833,3.36072768
55.514066,5.74456265,5.13096192,0.783326708,5.11852264,3.37904114,3.36012244
55.524558,4.89897949,5.17162312,-0.522152881,5.15945795,3.37817067,3.35951748
55.535049,5.29150262,5.21367042,0.27898424,5.20178027,3.37729727,3.35891287
55.545541,5.74456265,5.25716912,0.698135749,5.2455547,3.37642102,3.35830848
55.556032,5.65685425,5.30217099,0.595552906,5.29083264,3.37554235,3.35770443
55.566524,5.47722558,5.34874718,0.358438827,5.33768505,3.37466135,3.3571006
55.577016,6.78232998,5.39695904,1.17701782,5.38617296,3.37377834,3.35649706
55.587507,6,5.44687021,0.74372696,5.43635971,3.37289368,3.35589386
55.597999,5.91607978,5.49856158,0.646156484,5.488326,3.37200743,3.35529089
55.60849,6.55743852,5.55209802,1.0026667,5.54213637,3.37112002,3.35468825
55.618982,7.28010989,5.60756751,1.2932681,5.5978786,3.37023152,3.35408585
55.629474,5.09901951,5.66504634,-0.752347544,5.65562868,3.36934227,3.35348372
55.639965,6.92820323,5.72461346,1.09708239,5.71546532,3.36845258,3.35288194
55.650457,6.08276253,5.78636833,0.544420975,5.77748777,3.36756252,3.35228038
55.660948,6.92820323,5.85039107,1.03817733,5.84177586,3.3666725,3.35167916
55.67144,6.55743852,5.91678919,0.800405731,5.90843692,3.36578257,3.35107817
55.681932,6.244998,5.98565584,0.509256475,5.97756387,3.36489305,3.35047746
55.692423,6.08276253,6.05708689,0.160236192,6.04925232,3.36400423,3.34987709
55.702915,6.8556546,6.13120215,0.851147728,6.12362192,3.36311616,3.34927694
55.713406,7.14142843,6.20809742,0.966090578,6.20076824,3.36222923,3.34867713
55.723898,7,6.28790041,0.843859934,6.28081881,3.36134347,3.34807755
55.73439,7.07106781,6.3707203,0.836867676,6.36388263,3.36045915,3.34747825
55.744881,6.32455532,6.45666799,-0.363473061,6.45007037,3.35957657,3.34687929
55.755373,6.55743852,6.54588123,0.107504856,6.53951968,3.35869574,3.34628056
55.765864,7.54983444,6.63846665,0.954655849,6.63233696,3.357817,3.34568217
55.776356,7.54983444,6.73456638,0.902921953,6.72866425,3.35694037,3.345084
55.786848,7.48331477,6.83429695,0.805616425,6.8286179,3.3560661,3.34448611
55.797339,7.93725393,6.93777283,0.999740517,6.93231223,3.35519444,3.34388856
55.807831,8.48528137,7.04513603,1.20006056,7.03988915,3.35432537,3.34329123
55.818322,8.1240384,7.15648527,0.983642788,7.15144723,3.35345922,3.34269425
55.828814,7.48331477,7.27195517,0.45973863,7.26712102,3.35259596,3.34209749
55.839306,9,7.39164138,1.26821079,7.38700605,3.3517358,3.34150101
55.849797,7.48331477,7.51562766,-0.179757852,7.51118596,3.35087897,3.34090487
55.860289,7.41619849,7.64401949,-0.477305984,7.63976619,3.35002542,3.34030895
55.87078,8.42614977,7.77685745,0.805786776,7.77278721,3.34917544,3.33971337
55.881272,8.88819442,7.91420971,0.986906635,7.91031717,3.34832896,3.33911802
55.891764,8.18535277,8.05608028,0.359544843,8.05235998,3.34748617,3.33852295
55.902255,8.88819442,8.20243874,0.828103663,8.19888518,3.34664726,3.33792821
55.912747,8.42614977,8.35325696,0.269986686,8.34986463,3.34581214,3.3373337
55.923238,8.94427191,8.50840367,0.660203177,8.50516699,3.34498106,3.33673953
55.93373,8.88819442,8.66774989,0.469515209,8.66466328,3.34415395,3.33614559
55.944222,8.36660027,8.83105789,-0.681511283,8.82811579,3.34333094,3.33555192
55.954713,8.60232527,8.99801334,-0.62903742,8.99521012,3.34251219,3.33495859
55.965205,8.83176087,9.16826343,-0.580088408,9.16559353,3.34169759,3.33436549
55.975696,8.71779789,9.3412942,-0.789617829,9.33875204,3.34088734,3.33377272
55.986188,9.59166305,9.51654789,0.274071447,9.51412794,3.34008135,3.33318018
55.99668,9.89949494,9.69329775,0.454089401,9.6909945,3.33927972,3.33258792
56.007171,9.59166305,9.87068661,-0.528226811,9.8684946,3.33848257,3.33199599
56.017663,10.4880885,10.04777,0.663565015,10.0456838,3.33768976,3.33140429
56.028154,11.4455231,10.2233928,1.10550005,10.2214071,3.33690148,3.33081293
56.038646,9.8488578,10.3963227,-0.739908682,10.3944322,3.33611759,3.33022179
56.049138,10.3440804,10.5651363,-0.470165749,10.5633359,3.33533818,3.32963094
56.059629,10.0995049,10.7282818,-0.792954533,10.7265665,3.33456332,3.32904042
56.070121,11.0905365,10.8841425,0.454306031,10.8825072,3.33379287,3.32845012
56.080612,11.2249722,11.0309556,0.440473126,11.0293955,3.33302698,3.32786016
56.091104,10.7703296,11.1669668,-0.6297914,11.1654773,3.33226548,3.32727042
56.101596,11.9163753,11.2903741,0.791202385,11.2889505,3.33150845,3.32668097
56.112087,9.94987437,11.3994267,-1.20397355,11.3980648,3.33075592,3.32609185
56.122579,11.8743421,11.4925096,0.617925959,11.4912051,3.33000775,3.32550296
56.13307,12.6491106,11.5681325,1.039701,11.5668814,3.32926404,3.3249144
56.143562,11.9582607,11.6250609,0.577234654,11.6238594,3.32852464,3.32432607
56.154054,12.6491106,11.6623131,0.993376827,11.6611577,3.32778956,3.32373801
56.164545,12.083046,11.6792345,0.635461609,11.6781217,3.32705886,3.3231503
56.175037,10.9087121,11.6755255,-0.875678789,11.6744521,3.32633235,3.3225628
56.185528,12.2065556,11.6512469,0.745190408,11.65021,3.32561014,3.32197565
56.19602,12.5698051,11.6068171,0.98131951,11.605814,3.32489203,3.32138871
56.206512,12.2474487,11.543001,0.839313833,11.5420292,3.32417805,3.32080206
56.217003,12.083046,11.4608771,0.788776848,11.4599343,3.32346822,3.32021575
56.227495,11.2694277,11.361759,-0.303860748,11.3608433,3.32276235,3.31962965
56.237986,11.3137085,11.2471974,0.257897554,11.2463067,3.32206052,3.3190439
56.248478,10.6301458,11.1188466,-0.699071392,11.1179794,3.32136255,3.31845836
56.25897,10.7703296,10.9784774,-0.456232207,10.9776323,3.32066844,3.31787311
56.269461,10.5830052,10.8278938,-0.494862159,10.8270693,3.31997821,3.3172882
56.279953,9.79795897,10.6688356,-0.933207694,10.6680306,3.31929165,3.3167035
56.290444,10.2956301,10.5030389,-0.455421495,10.5022525,3.31860885,3.31611915
56.300936,8.83176087,10.3320835,-1.22487659,10.3313148,3.3179296,3.31553502
56.311428,10.2956301,10.1574779,0.371688424,10.1567261,3.31725391,3.31495116
56.321919,10,9.98059759,0.139292525,9.97986205,3.31658179,3.31436765
56.332411,9.16515139,9.80262536,-0.798419669,9.8019055,3.31591303,3.31378435
56.342902,8.66025404,9.62466705,-0.982045321,9.62396239,3.3152477,3.3132014
56.353394,9.59166305,9.447619,0.379531354,9.4469291,3.31458561,3.31261866
56.363886,8.66025404,9.27229335,-0.782329415,9.27161784,3.31392675,3.31203621
56.374377,8,9.09937518,-1.04851093,9.09871371,3.31327113,3.31145409
56.384869,9.05538514,8.92938384,0.354966619,8.92873612,3.31261856,3.3108722
56.39536,7.14142843,8.76279951,-1.27333071,8.76216527,3.31196908,3.31029064
56.405852,7.61577311,8.59994449,-0.992054124,8.59932346,3.31132253,3.3097093
56.416344,7.28010989,8.44110696,-1.07749574,8.44049891,3.31067888,3.30912825
56.426835,7.74596669,8.28650206,-0.735211102,8.28590675,3.31003814,3.30854753
56.437327,7.54983444,8.136239,-0.76577057,8.1356562,3.30940013,3.30796704
56.447818,7.07106781,7.99043301,-0.958835336,7.98986249,3.3087649,3.30738688
56.45831,7.28010989,7.84909819,-0.754313133,7.8485397,3.30813227,3.30680694
56.468802,6.55743852,7.71225383,-1.07462333,7.71170713,3.30750224,3.30622728
56.479293,6.164414,7.57988692,-1.18973649,7.57935177,3.30687481,3.30564796
56.489785,7.61577311,7.45192159,0.404785767,7.45139771,3.3062498,3.30506887
56.500276,6.32455532,7.32831184,-1.0018765,7.32779896,3.30562727,3.3044901
56.510768,6.40312424,7.20894741,-0.897676543,7.20844524,3.30500705,3.30391157
56.52126,5.65685425,7.0937415,-1.19870232,7.09324973,3.30438914,3.30333331
56.531751,6.164414,6.98259631,-0.904534304,6.98211463,3.30377355,3.30275538
56.542243,6.63324958,6.87537544,-0.492062859,6.87490351,3.3031601,3.30217769
56.552734,7.34846923,6.77197972,0.759269063,6.77151719,3.30254886,3.30160032
56.563226,6.78232998,6.67226662,0.331757996,6.67181312,3.30193966,3.30102318
56.573718,5.65685425,6.57612207,-0.958784556,6.57567723,3.30133252,3.30044632
56.584209,6.244998,6.48343039,-0.488295396,6.4829938,3.30072744,3.2998698
56.594701,5.29150262,6.39405006,-1.05002259,6.39362132,3.30012427,3.2992935
56.605192,5.38516481,6.30787598,-0.960578563,6.30745466,3.29952306,3.29871753
56.615684,5.56776436,6.22477148,-0.810559756,6.22435714,3.29892368,3.29814179
56.626176,5.74456265,6.14462738,-0.632506706,6.14421957,3.29832612,3.29756633
56.636667,5.91607978,6.06733631,-0.38891712,6.06693456,3.29773041,3.2969912
56.647159,5.19615242,5.99277202,-0.892535488,5.99237586,3.2971364,3.2964163
56.65765,4.79583152,5.92084081,-1.06066455,5.92044975,3.29654416,3.29584173
56.668142,5.38516481,5.85142442,-0.682832056,5.85103795,3.29595355,3.29526739
56.678634,5.38516481,5.78442901,-0.631873562,5.78404662,3.29536459,3.29469333
56.689125,5.47722558,5.71976344,-0.492481332,5.7193846,3.2947773,3.2941196
56.699617,4.58257569,5.65732176,-1.0366996,5.65694595,3.29419154,3.29354609
56.710108,5.65685425,5.59702602,0.244598095,5.59665269,3.29360739,3.29297292
56.7206,5.47722558,5.53877828,-0.248098177,5.53840687,3.29302472,3.29239998
56.731092,5.19615242,5.48250153,-0.535115979,5.48213148,3.29244355,3.29182731
56.741583,4.79583152,5.42812143,-0.795166589,5.42775216,3.29186392,3.29125498
56.752075,5.91607978,5.37555139,0.735206362,5.37518232,3.2912857,3.29068288
56.762566,6.164414,5.32472856,0.916343517,5.32435911,3.29070896,3.29011111
56.773058,5,5.27557338,-0.524950839,5.27520294,3.29013359,3.28953956
56.78355,5.29150262,5.22802397,0.251949696,5.22765193,3.28955961,3.2889683
56.794041,5.47722558,5.18202072,0.543327575,5.18164646,3.28898707,3.28839736
56.804533,4.89897949,5.13749366,-0.488379126,5.13711655,3.28841585,3.28782666
56.815024,4.89897949,5.09439282,-0.442055803,5.09401223,3.28784603,3.28725629
56.825516,5.29150262,5.05265402,0.488721398,5.0522693,3.28727749,3.28668614
56.836008,5.29150262,5.01222795,0.528464443,5.01183846,3.28671028,3.28611627
56.846499,5.74456265,4.97306717,0.878348152,4.97267224,3.28614444,3.28554674
56.856991,5.19615242,4.93511527,0.510917955,4.93471422,3.28557986,3.28497743
56.867482,5.74456265,4.89833275,0.919907548,4.89792491,3.28501663,3.28440846
56.877974,4.24264069,4.86266787,-0.787418047,4.86225254,3.28445464,3.28383971
56.888466,5,4.82808143,0.414630643,4.82765792,3.28389393,3.28327125
56.898957,5.29150262,4.7945357,0.70495881,4.7941033,3.28333456,3.28270311
56.909449,5.29150262,4.76198514,0.72767952,4.76154313,3.28277642,3.28213521
56.91994,5.38516481,4.73039856,0.809176276,4.72994622,3.2822196,3.28156763
56.930432,4.69041576,4.69973412,-0.0965316673,4.6992707,3.281664,3.28100029
56.940924,4.47213595,4.66996063,-0.444774857,4.66948538,3.28110967,3.28043322
56.951415,4.89897949,4.64104802,0.50786954,4.64056019,3.28055666,3.27986649
56.961907,4.47213595,4.61295937,-0.375264461,4.61245819,3.28000488,3.27929998
56.972398,4.35889894,4.58567002,-0.476204871,4.58515471,3.27945441,3.27873381
56.98289,4.89897949,4.55914598,0.582952404,4.55861574,3.27890517,3.27816786
56.993382,4.24264069,4.53336233,-0.539186097,4.53281637,3.2783572,3.2776022
57.003873,4.35889894,4.50829505,-0.386517927,4.50773256,3.27781056,3.27703686
57.014365,4.24264069,4.48391404,-0.491195844,4.48333419,3.27726515,3.27647176
57.024856,5.09901951,4.46019974,0.799262017,4.4596017,3.27672108,3.27590699
57.035348,3.60555128,4.43712437,-0.9119063,4.4365073,3.27617824,3.27534244
57.04584,4.35889894,4.41466797,-0.23615466,4.414031,3.27563669,3.27477818
57.056331,4.24264069,4.39281122,-0.387518427,4.39215349,3.27509649,3.27421425
57.066823,3.87298335,4.37152946,-0.70607798,4.3708501,3.27455754,3.27365054
57.077314,4.58257569,4.35080711,0.481423502,4.35010523,3.27401995,3.27308717
57.087806,5,4.33062134,0.818155648,4.32989604,3.27348361,3.27252403
57.098298,3.60555128,4.31095605,-0.839883784,4.31020642,3.2729486,3.27196117
57.108789,4.58257569,4.29179566,0.539240235,4.2910208,3.27241495,3.27139864
57.119281,4.47213595,4.27311984,0.446112228,4.2723188,3.27188257,3.27083634
57.129772,4.24264069,4.2549161,-0.110794464,4.25408796,3.27135157,3.27027437
57.140264,4.69041576,4.23716558,0.673238577,4.23630939,3.27082186,3.26971264
57.150756,3.87298335,4.21985523,-0.588958304,4.21897003,3.27029348,3.26915118
57.161247,3.60555128,4.20297242,-0.772930234,4.20205725,3.2697665,3.26859005
57.171739,4.58257569,4.18650025,0.62934525,4.18555414,3.2692408,3.26802915
57.18223,4.12310563,4.17042872,-0.217538716,4.1694507,3.2687165,3.26746859
57.192722,4,4.1547421,-0.393372727,4.15373118,3.26819351,3.26690826
57.203214,3.60555128,4.13942979,-0.730669907,4.13838497,3.26767186,3.2663482
57.213705,3.87298335,4.12448148,-0.501495892,4.12340178,3.26715161,3.26578848
57.224197,4.79583152,4.10988304,0.828220069,4.10876745,3.26663267,3.26522899
57.234688,5.29150262,4.09562642,1.09356125,4.09447395,3.26611512,3.26466983
57.24518,4.58257569,4.08169844,0.70772682,4.08050807,3.26559888,3.2641109
57.255672,4,4.06809043,-0.260941421,4.06686115,3.26508398,3.26355225
57.266163,3.60555128,4.05479393,-0.67025566,4.05352473,3.26457048,3.26299394
57.276655,4.47213595,4.04179706,0.656002205,4.04048694,3.26405828,3.26243585
57.287146,4.24264069,4.02909331,0.462111862,4.02774126,3.26354746,3.2618781
57.297638,4,4.01667158,-0.129118459,4.01527658,3.26303792,3.26132058
57.30813,4.69041576,4.00452471,0.828185399,4.00308575,3.26252971,3.26076333
57.318621,5.09901951,3.99264575,1.05184303,3.99116184,3.26202286,3.26020643
57.329113,3.74165739,3.98102465,-0.489251741,3.97949479,3.26151728,3.25964975
57.339604,4.12310563,3.96965612,0.391726313,3.96807932,3.26101303,3.2590934
57.350096,3.87298335,3.95853073,-0.292484848,3.956906,3.26051003,3.25853728
57.360588,3.60555128,3.94764258,-0.584885721,3.94596895,3.2600083,3.25798145
57.371079,4.47213595,3.93698592,0.731539499,3.93526242,3.25950788,3.25742595
57.381571,4.24264069,3.92655217,0.562217496,3.92477785,3.25900866,3.25687068
57.392062,3.46410162,3.91633704,-0.672484517,3.91451095,3.25851071,3.25631574
57.402554,3.74165739,3.90633247,-0.405801783,3.90445369,3.25801392,3.25576103
57.413046,4.12310563,3.89653357,0.475995857,3.89460117,3.25751833,3.25520661
57.423537,2.64575131,3.88693554,-1.11408448,3.88494864,3.25702395,3.25465252
57.434029,3.60555128,3.87753106,-0.521516813,3.87548877,3.25653067,3.25409866
57.44452,4,3.8683166,0.362882079,3.86621806,3.25603855,3.25354513
57.455012,3.46410162,3.85928524,-0.628636324,3.85712963,3.2555475,3.25299183
57.465504,4.12310563,3.85043291,0.52218073,3.84821939,3.25505751,3.25243882
57.475995,3.74165739,3.8417556,-0.316383018,3.83948339,3.25456861,3.25188614
57.486487,3.31662479,3.83324699,-0.718764358,3.83091532,3.25408067,3.25133368
57.496978,3.87298335,3.8249042,0.219269582,3.82251233,3.25359377,3.25078157
57.50747,3,3.81672125,-0.903726313,3.81426847,3.25310776,3.25022968
57.517962,3.46410162,3.80869472,-0.587020533,3.80618035,3.25262267,3.24967808
57.528453,3.74165739,3.80082125,-0.243236239,3.79824464,3.25213851,3.24912681
57.538945,4.35889894,3.79309537,0.752199155,3.7904559,3.25165514,3.24857577
57.549436,3.46410162,3.78551471,-0.566933057,3.78281179,3.25117262,3.24802507
57.559928,3.46410162,3.77807407,-0.56033245,3.77530716,3.25069081,3.2474746
57.57042,3,3.77077058,-0.877935406,3.76793917,3.25020973,3.24692441
57.580911,3.31662479,3.7636014,-0.668563093,3.76070502,3.24972937,3.24637455
57.591403,3.16227766,3.75656177,-0.770898246,3.75359998,3.24924959,3.24582493
57.601894,2.44948974,3.74964972,-1.14024558,3.74662215,3.24877045,3.24527564
57.612386,4.35889894,3.74286074,0.784881015,3.73976703,3.2482918,3.24472658
57.622878,3.16227766,3.73619238,-0.757571593,3.73303223,3.24781365,3.24417781
57.633369,3.87298335,3.72964225,0.378604143,3.72641541,3.24733598,3.24362937
57.643861,4.47213595,3.72320617,0.865407295,3.71991242,3.24685866,3.24308116
57.654352,3.87298335,3.71688253,0.395095964,3.71352171,3.24638173,3.24253328
57.664844,4.58257569,3.71066735,0.933760325,3.70723935,3.24590504,3.24198564
57.675336,3.16227766,3.70455857,-0.73639725,3.70106332,3.24542858,3.24143828
57.685827,2.82842712,3.69855415,-0.932805995,3.69499165,3.24495234,3.24089126
57.696319,3,3.69265041,-0.832256217,3.68902069,3.24447618,3.24034447
57.70681,4.35889894,3.68684602,0.819788339,3.68314918,3.24400014,3.23979802
57.717302,3.74165739,3.68113749,0.246007928,3.67737367,3.24352405,3.23925179
57.727794,3.46410162,3.67552304,-0.459805851,3.67169244,3.24304792,3.23870585
57.738285,3,3.67000094,-0.818535849,3.66610383,3.24257172,3.23816025
57.748777,4,3.66456793,0.579164973,3.66060462,3.24209532,3.23761487
57.759268,3.74165739,3.65922293,0.28711401,3.65519379,3.24161873,3.23706984
57.76976,4,3.65396283,0.58824924,3.64986828,3.24114181,3.23652503
57.780252,3,3.64878613,-0.80547261,3.64462665,3.24066454,3.23598051
57.790743,4.12310563,3.64369133,0.6923975,3.63946748,3.24018691,3.23543633
57.801235,2.82842712,3.63867555,-0.900138005,3.63438793,3.23970877,3.23489238
57.811726,3.60555128,3.6337379,-0.167888712,3.62938716,3.23923014,3.23434876
57.822218,3.16227766,3.6288756,-0.683079746,3.62446246,3.23875088,3.23380538
57.83271,3.31662479,3.62408738,-0.554493089,3.61961261,3.23827097,3.23326228
57.843201,3.31662479,3.61937195,-0.550224648,3.61483641,3.23779039,3.23271952
57.853693,3.87298335,3.61472676,0.508189519,3.61013132,3.237309,3.23217699
57.864184,3,3.61015105,-0.781121662,3.60549667,3.23682682,3.2316348
57.874676,3.74165739,3.60564237,0.36880214,3.60093006,3.23634371,3.23109284
57.885168,3.31662479,3.60119961,-0.533455544,3.59643043,3.23585965,3.23055117
57.895659,3.16227766,3.59682168,-0.65919953,3.59199676,3.23537463,3.23000983
57.906151,3.60555128,3.59250628,0.114214674,3.5876268,3.2348885,3.22946873
57.916642,3,3.58825281,-0.766976411,3.58332001,3.2344013,3.22892796
57.927134,2.64575131,3.58405907,-0.968662872,3.57907423,3.23391288,3.22838743
57.937626,4.12310563,3.57992411,0.737008492,3.57488857,3.23342323,3.22784718
57.948117,3.46410162,3.57584699,-0.334283377,3.57076215,3.23293235,3.22730727
57.958609,3.46410162,3.57182566,-0.32821341,3.56669297,3.23244009,3.22676759
57.9691,3.46410162,3.56785962,-0.322114896,3.56268058,3.23194649,3.22622825
57.979592,4.12310563,3.56394691,0.747769162,3.55872306,3.23145141,3.22568915
57.990084,4.47213595,3.5600867,0.955012697,3.55481964,3.23095486,3.22515033
58.000575,3.46410162,3.55627821,-0.303605993,3.55096958,3.23045683,3.22461184
58.011067,3.46410162,3.55251958,-0.297351592,3.54717107,3.22995718,3.2240736
58.021558,3.60555128,3.54881043,0.238203366,3.54342376,3.22945597,3.22353569
58.03205,4,3.54514898,0.674426441,3.53972592,3.22895306,3.22299801
58.042542,3.31662479,3.54153453,-0.474246496,3.5360769,3.22844846,3.22246062
58.053033,4,3.53796641,0.679730526,3.53247606,3.22794218,3.22192357
58.063525,3.46410162,3.53444295,-0.265219416,3.52892176,3.22743409,3.22138675
58.074016,3,3.53096386,-0.72867267,3.52541374,3.22692426,3.22085027
58.084508,3.60555128,3.52752753,0.279327316,3.52195044,3.22641256,3.22031403
58.095,3.46410162,3.52413337,-0.245013785,3.51853129,3.225899,3.21977807
58.105491,4.58257569,3.52078082,1.03043431,3.51515576,3.22538362,3.21924245
58.115983,3.46410162,3.51746836,-0.231012432,3.51182235,3.22486629,3.21870706
58.126474,3.60555128,3.51419578,0.302250717,3.50853088,3.22434709,3.21817202
58.136966,4.69041576,3.51096163,1.08602676,3.50527992,3.2238259,3.21763721
58.147458,3.60555128,3.50776542,0.312707295,3.502069,3.22330276,3.21710269
58.157949,2.44948974,3.50460667,-1.02718885,3.49889765,3.2227777,3.2165685
58.168441,3.60555128,3.50148402,0.322594569,3.49576452,3.22225061,3.21603455
58.178932,2.82842712,3.49839731,-0.818517067,3.49266947,3.22172159,3.21550094
58.189424,3.16227766,3.49534525,-0.57712008,3.48961122,3.22119053,3.21496757
58.199916,4,3.49232741,0.712511466,3.48658934,3.22065747,3.21443448
58.210407,2.82842712,3.48934341,-0.812967578,3.48360346,3.22012247,3.21390173
58.220899,4,3.486392,0.716664497,3.48065233,3.21958542,3.21336922
58.23139,3.46410162,3.4834731,-0.139181491,3.47773587,3.21904644,3.21283705
58.241882,3.60555128,3.48058553,0.353504943,3.47485289,3.21850543,3.21230511
58.252374,4.47213595,3.47772895,0.997199581,3.47200304,3.21796245,3.21177347
58.262865,4,3.47490303,0.724635749,3.469186,3.21741756,3.21124216
58.273357,3.16227766,3.47210666,-0.556622849,3.46640063,3.21687068,3.21071109
58.283848,3.74165739,3.46933979,0.521840583,3.46364689,3.21632193,3.21018036
58.29434,3.87298335,3.46660136,0.637480966,3.46092368,3.21577122,3.20964986
58.304832,3.31662479,3.4638911,-0.38375293,3.45823071,3.21521864,3.20911966
58.315323,2.82842712,3.46120874,-0.795475716,3.45556771,3.21466424,3.20858979
58.325815,2.64575131,3.45855326,-0.901555296,3.45293362,3.21410797,3.20806016
58.336306,3.74165739,3.45592468,0.534539711,3.45032845,3.21354995,3.20753087
58.346798,2.64575131,3.45332203,-0.898649384,3.44775118,3.21299011,3.20700182
58.35729,3.74165739,3.45074508,0.539362875,3.44520158,3.21242854,3.20647306
58.367781,3.46410162,3.44819362,0.126126889,3.44267939,3.21186532,3.20594464
58.378273,3.46410162,3.44566674,0.135775077,3.44018368,3.2113004,3.20541645
58.388764,4.24264069,3.44316449,0.894134327,3.43771443,3.2107339,3.20488861
58.399256,3.60555128,3.44068598,0.406036081,3.43527075,3.21016578,3.204361
58.409748,2.64575131,3.43823103,-0.890213301,3.43285242,3.20959612,3.20383369
58.420239,3.46410162,3.4357995,0.168232329,3.43045923,3.20902502,3.20330671
58.430731,3,3.43339053,-0.658324032,3.4280903,3.20845243,3.20277998
58.441222,3.60555128,3.43100422,0.417788294,3.42574567,3.20787851,3.20225358
58.451714,3.46410162,3.42863974,0.188313231,3.42342449,3.20730319,3.20172742
58.462206,3.16227766,3.42629698,-0.513828107,3.42112659,3.20672657,3.20120156
58.472697,3.16227766,3.42397582,-0.511564427,3.41885179,3.20614877,3.20067603
58.483189,3.31662479,3.42167548,-0.324115247,3.41659927,3.20556974,3.20015075
58.49368,3.16227766,3.41939608,-0.50706846,3.4143691,3.20498962,3.1996258
58.504172,3.87298335,3.41713687,0.675164034,3.41216048,3.20440838,3.19910109
58.514664,3,3.41489777,-0.644125584,3.40997327,3.20382613,3.19857668
58.525155,3.74165739,3.41267868,0.573566654,3.40780732,3.20324296,3.19805261
58.535647,3.60555128,3.4104789,0.441669986,3.40566188,3.20265885,3.19752877
58.546138,4.12310563,3.40829856,0.845462633,3.40353703,3.20207394,3.19700528
58.55663,3.16227766,3.40613698,-0.493821143,3.40143202,3.2014882,3.19648203
58.567122,3.31662479,3.4039941,-0.295582995,3.39934673,3.20090174,3.19595907
58.577613,3.46410162,3.40186985,0.249462946,3.39728106,3.20031467,3.19543645
58.588105,3.31662479,3.39976359,-0.288338,3.39523429,3.19972695,3.19491407
58.598596,3.87298335,3.39767547,0.689425759,3.3932065,3.19913874,3.19439203
58.609088,3.31662479,3.39560485,-0.281033903,3.39119703,3.19854999,3.19387024
58.61958,3,3.39355169,-0.62733698,3.38920577,3.19796083,3.19334873
58.630071,3.60555128,3.39151596,0.46263951,3.38723261,3.19737136,3.19282757
58.640563,4,3.38949705,0.781346881,3.38527692,3.19678154,3.19230665
58.651054,3.87298335,3.38749513,0.696769844,3.38333877,3.19619153,3.19178607
58.661546,3.46410162,3.3855096,0.280342669,3.38141754,3.1956013,3.19126573
58.672038,3.60555128,3.38354045,0.471180243,3.37951315,3.19501094,3.19074569
58.682529,4.24264069,3.38158767,0.927929427,3.37762551,3.19442058,3.19022599
58.693021,4.24264069,3.37965067,0.928972562,3.37575402,3.19383017,3.18970653
58.703512,3.74165739,3.37772963,0.603264248,3.37389878,3.19323986,3.18918741
58.714004,2.64575131,3.37582401,-0.854442918,3.3720592,3.19264961,3.18866853
58.724496,3.87298335,3.3739338,0.706434391,3.3702352,3.19205953,3.18814995
58.734987,3.16227766,3.37205899,-0.458018915,3.36842674,3.19146973,3.18763171
58.745479,3.46410162,3.37019905,0.306435261,3.36663323,3.19088015,3.18711371
58.75597,3.46410162,3.36835415,0.309430867,3.36485479,3.19029096,3.18659606
58.766462,3.31662479,3.36652379,-0.223380833,3.36309086,3.1897021,3.18607865
58.776954,3.16227766,3.36470795,-0.449922543,3.36134139,3.18911366,3.18556153
58.787445,3,3.36290666,-0.602417348,3.35960633,3.18852577,3.18504476
58.797937,2.64575131,3.3611194,-0.845794356,3.35788516,3.18793836,3.18452823
58.808428,3.60555128,3.35934636,0.496190403,3.35617797,3.18735157,3.18401204
58.81892,3.31662479,3.35758704,-0.202391321,3.35448426,3.18676536,3.1834961
58.829412,3.16227766,3.35584145,-0.43995885,3.35280398,3.18617982,3.18298045
58.839903,3.31662479,3.35410961,-0.193609968,3.3511371,3.18559504,3.18246514
58.850395,3.74165739,3.35239104,0.623912132,3.34948312,3.18501096,3.18195008
58.860886,3,3.35068591,-0.592187398,3.34784215,3.18442774,3.18143536
58.871378,2.82842712,3.34899377,-0.721503044,3.3462137,3.18384529,3.18092089
58.88187,3.60555128,3.34731462,0.508169911,3.34459775,3.18326371,3.18040671
58.892361,3.31662479,3.34564848,-0.170363401,3.34299428,3.18268309,3.17989288
58.902853,2.64575131,3.3439949,-0.835609709,3.34140281,3.18210336,3.17937929
58.913344,3,3.34235405,-0.585110285,3.33982346,3.18152466,3.17886604
58.923836,2.64575131,3.34072548,-0.833651106,3.33825577,3.1809469,3.17835304
58.934328,4,3.33910921,0.812951898,3.33669972,3.18037018,3.17784034
58.944819,4,3.33750527,0.813937792,3.33515531,3.17979458,3.17732797
58.955311,3.60555128,3.33591321,0.519266852,3.33362207,3.17922001,3.17681586
58.965802,3.60555128,3.33433321,0.520786007,3.33210015,3.17864661,3.17630409
58.976294,2.82842712,3.33276483,-0.710167382,3.33058909,3.17807428,3.17579257
58.986786,4.35889894,3.33120811,1.01375087,3.3290889,3.17750312,3.17528134
58.997277,3.31662479,3.32966305,-0.114185184,3.32759957,3.17693319,3.17477045
59.007769,4,3.32812923,0.819677234,3.32612067,3.17636441,3.17425982
59.01826,3.87298335,3.32660683,0.739172858,3.32465234,3.17579689,3.17374953
59.028752,3,3.32509543,-0.570171406,3.32319416,3.17523055,3.17323948
59.039244,2.64575131,3.32359505,-0.823312663,3.32174612,3.17466545,3.17272973
59.049735,3.87298335,3.32210571,0.742211312,3.32030824,3.17410166,3.17222033
59.060227,3.74165739,3.32062701,0.648868534,3.31888011,3.17353909,3.17171117
59.070718,4,3.31915911,0.825130833,3.31746186,3.17297785,3.17120236
59.08121,4,3.3177016,0.826013558,3.31605309,3.17241784,3.1706938
59.091702,2.64575131,3.31625452,-0.8188426,3.31465383,3.17185913,3.17018553
59.102193,3.31662479,3.31481787,0.0425079091,3.31326406,3.17130177,3.16967761
59.112685,2.64575131,3.31339127,-0.817092381,3.31188342,3.17074566,3.16916994
59.123176,3.74165739,3.31197488,0.655501725,3.31051203,3.17019091,3.16866261
59.133668,3.74165739,3.3105683,0.656573748,3.30914953,3.16963742,3.16815554
59.14416,3.60555128,3.30917157,0.544407668,3.30779592,3.16908524,3.16764875
59.154651,3.46410162,3.30778469,0.395369351,3.30645122,3.16853442,3.16714232
59.165143,4.24264069,3.3064073,0.96759154,3.30511506,3.16798487,3.16663613
59.175634,3.87298335,3.30503954,0.753620466,3.30378758,3.16743667,3.1661303
59.186126,4,3.30368104,0.834457284,3.30246843,3.16688972,3.16562471
59.196618,4.35889894,3.30233182,1.02789451,3.30115762,3.16634407,3.16511941
59.207109,3.31662479,3.30099191,0.125031522,3.29985517,3.16579977,3.16461447
59.217601,3,3.29966093,-0.547412942,3.29856074,3.1652567,3.16410977
59.228092,2.44948974,3.29833903,-0.921330174,3.29727445,3.16471497,3.16360542
59.238584,4.24264069,3.29702586,0.972427287,3.29599598,3.16417445,3.16310133
59.249076,2,3.29572143,-1.1382976,3.29472535,3.16363521,3.16259753
59.259567,3.46410162,3.29442576,0.411917286,3.29346257,3.16309727,3.16209407
59.270059,3.31662479,3.29313851,0.153252343,3.29220732,3.16256052,3.16159087
59.28055,2.23606798,3.29185981,-1.02751731,3.29095973,3.16202506,3.16108801
59.291042,2.64575131,3.29058932,-0.80301806,3.28971949,3.16149077,3.16058541
59.301534,3.87298335,3.28932705,0.763974015,3.28848661,3.16095769,3.1600831
59.312025,3,3.28807303,-0.536724353,3.28726112,3.16042586,3.15958115
59.322517,3.31662479,3.28682692,0.172620592,3.28604271,3.15989516,3.15907944
59.333008,3,3.28558886,-0.534405145,3.28483152,3.15936569,3.15857808
59.3435,3.60555128,3.28435851,0.566738711,3.28362723,3.15883732,3.15807697
59.353992,3.46410162,3.2831359,0.425400658,3.28242987,3.1583101,3.15757617
59.364483,3.87298335,3.28192104,0.768805769,3.28123948,3.15778406,3.15707571
59.374975,3,3.2807136,-0.529824125,3.28005575,3.15725908,3.1565755
59.385466,3.46410162,3.27951374,0.429636915,3.27887882,3.15673526,3.15607564
59.395958,2.64575131,3.27832111,-0.795342569,3.2777084,3.15621246,3.15557604
59.40645,3.46410162,3.27713575,0.432395492,3.27654451,3.15569073,3.15507673
59.416941,3.74165739,3.27595768,0.682421941,3.27538719,3.15517011,3.15457777
59.427433,3.87298335,3.27478658,0.773431809,3.27423614,3.15465047,3.15407907
59.437924,3.74165739,3.27362259,0.684130687,3.27309152,3.15413191,3.15358071
59.448416,3.16227766,3.27246539,-0.331945377,3.27195302,3.15361429,3.15308261
59.458908,3.60555128,3.27131502,0.578131695,3.27082069,3.15309767,3.15258481
59.469399,3,3.27017149,-0.519780231,3.26969457,3.15258206,3.15208735
59.479891,2.82842712,3.2690345,-0.663782627,3.26857437,3.15206737,3.15159016
59.490382,2.64575131,3.26790419,-0.78876668,3.26746023,3.15155366,3.15109331
59.500874,2.64575131,3.26678025,-0.788053894,3.26635188,3.15104082,3.15059671
59.511366,4.12310563,3.26566272,0.925982132,3.26524935,3.15052889,3.15010042
59.521857,3.87298335,3.26455161,0.780020342,3.26415269,3.1500179,3.14960447
59.532349,3.87298335,3.26344664,0.780728315,3.26306162,3.14950774,3.14910878
59.54284,3.16227766,3.26234795,-0.316338878,3.26197629,3.14899848,3.14861344
59.553332,2.82842712,3.26125523,-0.657896728,3.26089642,3.14849002,3.14811835
59.563824,2.64575131,3.26016853,-0.783847699,3.25982206,3.14798238,3.14762357
59.574315,1.73205081,3.25908786,-1.23573341,3.25875326,3.14747561,3.14712914
59.584807,3.46410162,3.25801296,0.453969889,3.25768974,3.14696958,3.14663496
59.595298,3.46410162,3.25694394,0.455145773,3.25663166,3.14646438,3.14614113
59.60579,1.73205081,3.25588054,-1.23443499,3.25557874,3.1459599,3.14564756
59.616282,3.46410162,3.25482279,0.457470029,3.25453105,3.14545618,3.14515429
59.626773,3.74165739,3.25377071,0.698488852,3.25348861,3.14495324,3.14466137
59.637265,3.60555128,3.25272404,0.593992621,3.25245118,3.14445097,3.14416871
59.647756,4.12310563,3.25168291,0.933500249,3.25141889,3.14394946,3.1436764
59.658248,3.87298335,3.25064705,0.788882939,3.25039151,3.1434486,3.14318434
59.66874,4,3.24961651,0.866246786,3.24936906,3.14294843,3.14269259
59.679231,3.46410162,3.2485913,0.46423089,3.24835161,3.14244897,3.14220119
59.689723,3.74165739,3.24757117,0.702912667,3.2473389,3.14195012,3.14171004
59.700214,3.46410162,3.24655625,0.466417582,3.24633108,3.14145196,3.14121925
59.710706,2.64575131,3.2455463,-0.774464322,3.2453279,3.14095439,3.14072871
59.721198,3.31662479,3.24454134,0.268483621,3.24432941,3.14045743,3.14023848
59.731689,3.87298335,3.2435414,0.793373773,3.24333566,3.13996114,3.1397486
59.742181,3,3.24254625,-0.492489848,3.2423464,3.13946539,3.13925898
59.752672,2.64575131,3.24155601,-0.771883864,3.24136179,3.13897028,3.13876971
59.763164,4.12310563,3.24057044,0.93943344,3.24038159,3.13847569,3.1382807
59.773656,3.31662479,3.23958957,0.277552197,3.23940584,3.13798167,3.13779199
59.784147,3.16227766,3.23861344,-0.276289311,3.2384346,3.13748825,3.13730363
59.794639,2.64575131,3.23764182,-0.769344208,3.23746762,3.13699533,3.13681554
59.80513,4.12310563,3.23667483,0.941504536,3.23650506,3.13650299,3.13632779
59.815622,3.60555128,3.23571225,0.608143921,3.23554669,3.13601112,3.13584031
59.826114,3.87298335,3.2347541,0.798892513,3.23459256,3.13551978,3.13535313
59.836605,4,3.23380043,0.875328264,3.23364271,3.13502899,3.1348663
59.847097,3.31662479,3.23285101,0.289437004,3.23269692,3.13453865,3.13437973
59.857588,3.31662479,3.23190597,0.291064972,3.23175534,3.13404885,3.13389351
59.86808,3.16227766,3.23096509,-0.262082861,3.23081773,3.13355949,3.13340756
59.878572,2.64575131,3.2300284,-0.764380196,3.22988416,3.1330706,3.13292191
59.889063,3.31662479,3.22909594,0.295852745,3.22895467,3.13258223,3.13243661
59.899555,3.46410162,3.22816751,0.48573049,3.22802905,3.13209428,3.13195157
59.910046,3,3.22724322,-0.476700342,3.22710743,3.13160682,3.13146689
59.920538,3.46410162,3.22632285,0.487625637,3.22618961,3.13111977,3.13098247
59.93103,3.74165739,3.22540646,0.718506036,3.22527562,3.13063315,3.13049835
59.941521,3.87298335,3.22449409,0.805288307,3.22436553,3.13014702,3.13001459
59.952013,3.16227766,3.22358551,-0.247604229,3.22345912,3.12966127,3.12953109
59.962504,2.82842712,3.22268087,-0.627896289,3.22255653,3.12917599,3.12904794
59.972996,3.60555128,3.22177995,0.619492794,3.22165756,3.12869109,3.12856505
59.983488,3.16227766,3.2208828,-0.242084985,3.22076225,3.1282066,3.12808247
59.993979,3.31662479,3.21998946,0.310862237,3.21987065,3.12772256,3.12760025
60.004471,3.60555128,3.21909972,0.621652275,3.21898257,3.12723888,3.12711828
60.014962,3.46410162,3.21821372,0.495870841,3.21809814,3.12675564,3.12663667
60.025454,3.87298335,3.21733126,0.809723466,3.21721715,3.12627275,3.12615533
60.035946,3,3.21645237,-0.465244415,3.21633967,3.12579025,3.12567429
60.046437,3,3.2155771,-0.464302812,3.21546573,3.12530819,3.1251936
60.056929,3.46410162,3.21470526,0.499395988,3.21459515,3.12482646,3.12471318
60.06742,3.60555128,3.21383698,0.625870831,3.21372806,3.12434516,3.12423312
60.077912,3.31662479,3.21297205,0.321951454,3.21286426,3.12386418,3.12375331
60.088404,3.60555128,3.21211053,0.627248551,3.2120038,3.12338358,3.12327382
60.098895,3.60555128,3.21125247,0.62793217,3.21114674,3.12290339,3.12279468
60.109387,3.31662479,3.21039766,0.325925041,3.21029289,3.12242352,3.1223158
60.119878,3.60555128,3.20954624,0.629289309,3.20944237,3.12194406,3.12183728
60.13037,3.16227766,3.20869802,-0.21545385,3.20859501,3.12146492,3.12135902
60.140862,3,3.20785305,-0.455909036,3.20775084,3.12098613,3.12088108
60.151353,3.74165739,3.20701137,0.731194922,3.20690993,3.12050774,3.12040348
60.161845,3,3.20617281,-0.454062556,3.20607208,3.12002966,3.11992616
60.172336,2.64575131,3.20533747,-0.74805492,3.20523743,3.11955198,3.11944918
60.182828,3.60555128,3.20450519,0.633281992,3.20440579,3.1190746,3.11897248
60.19332,4,3.20367601,0.892369871,3.20357722,3.11859757,3.11849608
60.203811,4,3.20284999,0.892832579,3.20275177,3.11812092,3.11802004
60.214303,3.46410162,3.20202693,0.51193231,3.20192925,3.11764458,3.11754426
60.224794,4.12310563,3.20120696,0.960155541,3.20110981,3.11716862,3.11706884
60.235286,3.16227766,3.20038991,-0.195223597,3.20029325,3.11669295,3.11659369
60.245778,3,3.19957583,-0.446739108,3.19947963,3.11621762,3.11611884
60.256269,3,3.19876477,-0.445830422,3.198669,3.11574267,3.11564436
60.266761,3.60555128,3.19795654,0.638431466,3.19786119,3.11526802,3.11517014
60.277252,3.87298335,3.19715128,0.82209006,3.19705632,3.11479374,3.11469627
60.287744,4.35889894,3.19634881,1.07821618,3.19625422,3.11431975,3.11422267
60.298236,3.16227766,3.19554918,-0.182404833,3.19545495,3.1138461,3.11374939
60.308727,3.87298335,3.19475245,0.82354775,3.19465855,3.11337281,3.11327646
60.319219,3.60555128,3.19395844,0.641555017,3.19386485,3.11289982,3.1128038
60.32971,3.16227766,3.19316727,-0.175754401,3.19307399,3.11242719,3.11233149
60.340202,2.64575131,3.19237878,-0.73934259,3.19228578,3.11195485,3.11185945
60.350694,3.31662479,3.19159301,0.35359833,3.19150029,3.11148284,3.11138773
60.361185,3,3.19081003,-0.43681807,3.19071756,3.1110112,3.11091636
60.371677,3.31662479,3.19002965,0.355802109,3.18993743,3.11053984,3.11044526
60.382168,2.64575131,3.18925201,-0.737224999,3.18916002,3.11006885,3.10997452
60.39266,2.23606798,3.18847694,-0.975914422,3.18838517,3.10959814,3.10950404
60.403152,3,3.18770448,-0.433248756,3.18761293,3.10912775,3.10903388
60.413643,3.87298335,3.18693471,0.828280532,3.18684335,3.10865773,3.10856408
60.424135,3,3.18616744,-0.431471245,3.18607628,3.10818799,3.10809454
60.434626,3,3.1854028,-0.430584252,3.18531182,3.10771861,3.10762536
60.445118,3.87298335,3.18464063,0.82966422,3.18454983,3.10724952,3.10715646
60.45561,3.46410162,3.18388098,0.5293587,3.18379035,3.10678074,3.10668786
60.466101,2.82842712,3.18312391,-0.595564258,3.18303344,3.10631233,3.10621963
60.476593,3.46410162,3.18236925,0.530784668,3.18227893,3.1058442,3.10575166
60.487084,3,3.18161713,-0.426165614,3.18152696,3.10537644,3.10528405
60.497576,2.44948974,3.18086739,-0.8552062,3.18077736,3.10490894,3.10481671
60.508068,3.31662479,3.18012007,0.369465447,3.18003018,3.10444177,3.10434969
60.518559,2.44948974,3.17937524,-0.854333367,3.17928548,3.10397497,3.10388302
60.529051,3.31662479,3.17863274,0.371472811,3.1785431,3.10350844,3.10341663
60.539542,4.24264069,3.17789269,1.03186627,3.17780317,3.10304227,3.10295059
60.550034,2.82842712,3.17715493,-0.590531795,3.17706552,3.10257638,3.10248483
60.560526,3,3.17641951,-0.420023224,3.17633022,3.10211081,3.10201938
60.571017,3.16227766,3.17568649,-0.115796514,3.17559731,3.1016456,3.10155429
60.581509,3.16227766,3.17495572,-0.112596892,3.17486664,3.10118067,3.10108947
60.592,3.87298335,3.17422732,0.835916282,3.17413834,3.1007161,3.10062501
60.602492,3.60555128,3.17350112,0.657305219,3.17341224,3.1002518,3.10016082
60.612984,3.16227766,3.1727772,-0.102467262,3.17268841,3.09978783,3.09969695
60.623475,3.31662479,3.1720556,0.380222558,3.1719669,3.09932422,3.09923344
60.633967,3.31662479,3.17133616,0.381167453,3.17124755,3.09886088,3.09877019
60.644458,3.16227766,3.17061902,-0.0913310477,3.17053049,3.0983979,3.09830731
60.65495,2.44948974,3.16990402,-0.848772217,3.16981558,3.0979352,3.09784471
60.665442,3.46410162,3.16919121,0.543056539,3.16910285,3.09747282,3.09738241
60.675933,3.87298335,3.16848065,0.839346588,3.16839237,3.0970108,3.09692048
60.686425,2,3.16777219,-1.08063509,3.16768398,3.09654906,3.09645882
60.696916,4.12310563,3.16706595,0.977772812,3.16697782,3.09608768,3.09599752
60.707408,3.31662479,3.16636179,0.38763772,3.16627372,3.09562658,3.0955365
60.7179,3.16227766,3.16565975,-0.05815574,3.16557175,3.09516579,3.09507579
60.728391,3,3.16495989,-0.406152549,3.16487197,3.09470537,3.09461544
60.738883,3.46410162,3.16426207,0.547576062,3.16417421,3.09424522,3.09415537
60.749374,3.16227766,3.16356641,-0.0358991067,3.16347861,3.09378544,3.09369566
60.759866,2.64575131,3.16287275,-0.719111563,3.16278502,3.09332593,3.09323622
60.770358,3.74165739,3.16218116,0.761233358,3.16209349,3.09286674,3.0927771
60.780849,3.16227766,3.16149169,0.0280351314,3.16140408,3.09240791,3.09231834
60.791341,3.46410162,3.1608042,0.550724448,3.16071664,3.09194936,3.09185985
60.801832,3.31662479,3.1601188,0.395608381,3.1600313,3.09149117,3.09140173
60.812324,3.16227766,3.15943535,0.0533132762,3.15934791,3.09103326,3.09094388
60.822816,2.82842712,3.15875392,-0.574740632,3.15866653,3.09057567,3.09048635
60.833307,3.46410162,3.15807454,0.553197135,3.1579872,3.09011844,3.09002918
60.843799,3,3.15739709,-0.396733024,3.1573098,3.08966149,3.08957229
60.85429,3.31662479,3.15672168,0.399878868,3.15663444,3.0892049,3.08911576
60.864782,3,3.15604817,-0.39502933,3.15596098,3.08874859,3.0886595
60.875274,2.64575131,3.15537662,-0.713880457,3.15528947,3.0882926,3.08820356
60.885765,3.31662479,3.15470707,0.402390005,3.15461998,3.08783697,3.08774799
60.896257,3.31662479,3.1540394,0.403218784,3.15395235,3.08738162,3.08729269
60.906748,4,3.15337372,0.920122969,3.15328671,3.08692664,3.08683776
60.91724,2.82842712,3.1527099,-0.569458313,3.15262293,3.08647193,3.0863831
60.927732,3.46410162,3.15204798,0.558617614,3.15196105,3.08601754,3.08592876
60.938223,3.31662479,3.15138802,0.406493259,3.15130114,3.08556351,3.08547478
60.948715,3.31662479,3.15072989,0.407301974,3.15064305,3.08510977,3.08502108
60.959206,3.74165739,3.15007371,0.76914477,3.14998691,3.08465639,3.08456774
60.969698,4,3.14941934,0.922269301,3.14933257,3.08420328,3.08411468
60.98019,3.16227766,3.14876683,0.116236098,3.1486801,3.0837505,3.08366194
60.990681,2.82842712,3.14811624,-0.565410574,3.14802955,3.08329808,3.08320957
61.001173,3.31662479,3.14746744,0.411287427,3.14738079,3.08284594,3.08275747
61.011664,3.31662479,3.14682055,0.412073105,3.14673393,3.08239417,3.08230573
61.022156,3.46410162,3.14617542,0.563849441,3.14608884,3.08194267,3.08185428
61.032648,3.31662479,3.14553213,0.413633489,3.14544557,3.0814915,3.08140314
61.043139,2.82842712,3.14489071,-0.562550964,3.14480419,3.08104069,3.08095237
61.053631,3.87298335,3.14425105,0.853658185,3.14416456,3.08059016,3.08050188
61.064122,3.16227766,3.14361325,0.136617739,3.14352679,3.08013999,3.08005175
61.074614,3.87298335,3.1429772,0.854403973,3.14289076,3.07969011,3.0796019
61.085106,3.74165739,3.14234293,0.774154024,3.14225653,3.07924054,3.07915237
61.095597,3.31662479,3.14171052,0.418227537,3.14162414,3.07879135,3.0787032
61.106089,2.82842712,3.14107982,-0.559153555,3.14099347,3.07834243,3.07825432
61.11658,4,3.14045096,0.927118674,3.14036464,3.07789388,3.0778058
61.127072,2.44948974,3.13982381,-0.830863449,3.13973751,3.07744561,3.07735755
61.137564,2.82842712,3.13919843,-0.557468658,3.13911215,3.07699766,3.07690963
61.148055,4,3.13857486,0.928129914,3.13848861,3.07655008,3.07646208
61.158547,3.60555128,3.13795299,0.683811586,3.13786676,3.07610278,3.07601481
61.169038,3.16227766,3.13733293,0.157939016,3.13724671,3.07565584,3.0755679
61.17953,3.60555128,3.13671455,0.68471653,3.13662835,3.07520919,3.07512127
61.190022,2.64575131,3.13609791,-0.700247528,3.13601174,3.07476286,3.07467496
61.200513,3.31662479,3.13548307,0.425607475,3.13539691,3.07431689,3.07422902
61.211005,3.16227766,3.1348699,0.165552901,3.13478376,3.07387121,3.07378336
61.221496,3.31662479,3.13425851,0.427043648,3.13417239,3.07342589,3.07333807
61.231988,3.74165739,3.13364879,0.779749058,3.13356269,3.07298086,3.07289305
61.24248,3,3.1330408,-0.364747579,3.1329547,3.07253615,3.07244836
61.252971,3,3.13243457,-0.363915613,3.1323485,3.07209181,3.07200404
61.263463,3.16227766,3.13183001,0.174492558,3.13174394,3.07164775,3.07156
61.273954,3.87298335,3.13122721,0.861252655,3.13114116,3.07120405,3.07111632
61.284446,3.31662479,3.13062606,0.431275696,3.13054003,3.07076064,3.07067293
61.294938,3.31662479,3.13002663,0.431970098,3.1299406,3.07031756,3.07022985
61.305429,3.60555128,3.12942895,0.69001618,3.12934293,3.06987484,3.06978715
61.315921,4.35889894,3.12883291,1.10908342,3.1287469,3.0694324,3.06934473
61.326412,3.31662479,3.12823864,0.434034736,3.12815264,3.06899033,3.06890267
61.336904,3,3.127646,-0.35727581,3.12756001,3.06854855,3.0684609
61.347396,3.16227766,3.12705507,0.187676827,3.12696908,3.06810709,3.06801945
61.357887,3.60555128,3.12646589,0.692159945,3.12637991,3.067666,3.06757837
61.368379,3.31662479,3.12587834,0.43674529,3.12579237,3.06722519,3.06713757
61.37887,2.44948974,3.12529255,-0.822072263,3.12520658,3.06678475,3.06669714
61.389362,2.23606798,3.12470839,-0.942677261,3.12462243,3.0663446,3.06625699
61.399854,3,3.12412594,-0.352315109,3.12403997,3.06590477,3.06581717
61.410345,3.31662479,3.12354523,0.439408197,3.12345926,3.06546531,3.06537772
61.420837,3.31662479,3.12296616,0.440066624,3.12288019,3.06502613,3.06493855
61.431328,4,3.12238884,0.936809032,3.12230288,3.06458733,3.06449974
61.44182,3.16227766,3.12181316,0.201157895,3.1217272,3.0641488,3.06406122
61.452312,3.31662479,3.12123918,0.442024443,3.12115322,3.06371061,3.06362303
61.462803,3.46410162,3.12066696,0.586032984,3.12058099,3.06327278,3.0631852
61.473295,3.87298335,3.12009638,0.867690595,3.12001041,3.06283524,3.06274766
61.483786,3.16227766,3.11952756,0.206760982,3.11944158,3.06239807,3.06231049
61.494278,3.46410162,3.11896039,0.587487216,3.11887441,3.06196118,3.0618736
61.50477,3.31662479,3.11839492,0.445230127,3.11830894,3.06152462,3.06143704
61.515261,3.74165739,3.11783123,0.789826665,3.11774524,3.06108843,3.06100084
61.525753,3.16227766,3.11726919,0.212151999,3.11718319,3.06065252,3.06056494
61.536244,3.74165739,3.11670892,0.79053682,3.11662292,3.06021699,3.0601294
61.546736,2.23606798,3.11615033,-0.938127042,3.11606431,3.05978174,3.05969414
61.557228,2.82842712,3.11559345,-0.535879024,3.11550743,3.05934682,3.05925921
61.567719,2,3.11503836,-1.05595377,3.11495233,3.05891227,3.05882465
61.578211,3.60555128,3.11448496,0.700761242,3.11439891,3.05847801,3.05839038
61.588702,4.47213595,3.11393334,1.1654195,3.11384728,3.05804411,3.05795648
61.599194,3.16227766,3.11338342,0.221120415,3.11329735,3.0576105,3.05752286
61.609686,3.16227766,3.11283525,0.222356486,3.11274917,3.05717723,3.05708957
61.620177,3.16227766,3.11228889,0.223581675,3.11220279,3.05674432,3.05665665
61.630669,3.31662479,3.11174425,0.452637318,3.11165813,3.0563117,3.05622402
61.64116,2,3.11120143,-1.05413539,3.11111529,3.05587945,3.05579175
61.651652,2.82842712,3.11066033,-0.531256255,3.11057418,3.05544748,3.05535978
61.662144,2.64575131,3.11012103,-0.681446781,3.11003486,3.05501585,3.05492813
61.672635,2.64575131,3.10958357,-0.681052316,3.10949738,3.05458459,3.05449685
61.683127,4,3.10904786,0.94390261,3.10896165,3.05415361,3.05406586
61.693618,2.82842712,3.10851402,-0.529232365,3.10842779,3.05372301,3.05363523
61.70411,3.60555128,3.10798195,0.705385938,3.1078957,3.0532927,3.0532049
61.714602,3.31662479,3.10745172,0.457354425,3.10736544,3.05286271,3.05277489
61.725093,3.16227766,3.10692338,0.2352749,3.10683708,3.0524331,3.05234526
61.735585,3.16227766,3.10639685,0.236391225,3.10631053,3.05200377,3.05191591
61.746076,3.46410162,3.10587223,0.598522666,3.10578589,3.05157482,3.05148693
61.756568,3.60555128,3.10534945,0.70724948,3.10526308,3.05114615,3.05105825
61.76706,2.44948974,3.10482856,-0.809529996,3.10474216,3.05071782,3.05062989
61.777551,3.46410162,3.10430962,0.599826636,3.10422319,3.05028986,3.0502019
61.788043,3.74165739,3.10379256,0.798664404,3.1037061,3.04986218,3.0497742
61.798534,2.82842712,3.10327748,-0.52426172,3.10319099,3.04943488,3.04934687
61.809026,2.82842712,3.1027643,-0.523772061,3.10267778,3.04900787,3.04891983
61.819518,2.82842712,3.10225308,-0.523283822,3.10216654,3.04858119,3.04849312
61.830009,2.82842712,3.1017439,-0.522797071,3.10165732,3.04815488,3.04806678
61.840501,3,3.10123667,-0.318177108,3.10115006,3.04772887,3.04764073
61.850992,2.64575131,3.10073151,-0.674522199,3.10064486,3.04730322,3.04721505
61.861484,4.12310563,3.10022833,1.01137396,3.10014165,3.04687787,3.04678967
61.871976,3.74165739,3.09972721,0.801205449,3.0996405,3.04645284,3.04636461
61.882467,3,3.09922822,-0.315005111,3.09914147,3.04602819,3.04593992
61.892959,3.16227766,3.09873128,0.252084082,3.09864448,3.04560383,3.04551553
61.90345,3.16227766,3.0982365,0.253063554,3.09814967,3.04517984,3.0450915
61.913942,3.31662479,3.09774382,0.46784717,3.09765695,3.04475615,3.04466777
61.924434,3,3.0972533,-0.311854612,3.09716639,3.04433279,3.04424437
61.934925,3.16227766,3.09676502,0.255954371,3.09667807,3.04390979,3.04382134
61.945417,2.23606798,3.09627891,-0.92747557,3.09619192,3.0434871,3.0433986
61.955908,2.82842712,3.09579509,-0.517076363,3.09570806,3.04306477,3.04297623
61.9664,3,3.09531349,-0.308728835,3.09522642,3.04264274,3.04255415
61.976892,4.24264069,3.0948342,1.07135731,3.09474707,3.04222103,3.04213241
61.987383,3.31662479,3.09435727,0.471452561,3.09427011,3.04179971,3.04171103
61.997875,3,3.09388266,-0.306402782,3.09379545,3.04137867,3.04128995
62.008366,3,3.09341049,-0.305631302,3.09332323,3.04095801,3.04086924
62.018858,3.46410162,3.0929407,0.609229771,3.09285339,3.04053764,3.04044883
62.02935,3.74165739,3.09247337,0.805719565,3.09238601,3.0401176,3.04002874
62.039841,3.16227766,3.09200858,0.26508316,3.09192117,3.03969794,3.03960903
62.050333,3,3.09154628,-0.302566151,3.09145882,3.03927857,3.03918961
62.060824,3.31662479,3.09108659,0.474908624,3.09099908,3.03885958,3.03877056
62.071316,3,3.09062947,-0.301047289,3.09054191,3.03844088,3.03835181
62.081808,2.64575131,3.09017501,-0.666651104,3.09008739,3.03802251,3.03793339
62.092299,3.46410162,3.08972328,0.611864636,3.08963561,3.03760451,3.03751534
62.102791,3.16227766,3.08927426,0.270191419,3.08918653,3.03718681,3.03709758
62.113282,4,3.08882806,0.954553265,3.08874028,3.03676949,3.0366802
62.123774,3.16227766,3.08838467,0.271832655,3.08829683,3.03635246,3.03626311
62.134266,2.82842712,3.08794416,-0.509428145,3.08785626,3.03593576,3.03584636
62.144757,3.16227766,3.08750663,0.273442912,3.08741868,3.03551944,3.03542997
62.155249,3.87298335,3.08707206,0.886516376,3.08698405,3.03510341,3.03501389
62.16574,3.31662479,3.08664058,0.479566686,3.08655251,3.03468776,3.03459817
62.176232,3.74165739,3.08621218,0.809595709,3.08612404,3.0342724,3.03418275
62.186724,4.12310563,3.08578694,1.01848843,3.08569874,3.03385737,3.03376766
62.197215,2.64575131,3.08536498,-0.663033686,3.08527671,3.03344272,3.03335295
62.207707,2.23606798,3.08494628,-0.92134592,3.08485795,3.03302837,3.03293853
62.218198,2.44948974,3.08453099,-0.796894755,3.0844426,3.03261439,3.03252448
62.22869,3.31662479,3.08411911,0.48218843,3.08403065,3.03220071,3.03211073
62.239182,3.46410162,3.08371074,0.616758361,3.08362221,3.03178736,3.03169732
62.249673,3,3.083306,-0.288627794,3.0832174,3.03137439,3.03128427
62.260165,3,3.0829049,-0.287932115,3.08281623,3.03096171,3.03087153
62.270656,2.82842712,3.0825076,-0.504063957,3.08241886,3.03054941,3.03045915
62.281148,3.74165739,3.0821141,0.812122705,3.08202529,3.03013741,3.03004707
62.29164,2.44948974,3.08172454,-0.795131934,3.08163565,3.02972574,3.02963533
62.302131,3.87298335,3.08133904,0.889743956,3.08125008,3.02931445,3.02922396
62.312623,3.31662479,3.08095763,0.485455618,3.0808686,3.02890345,3.02881289
62.323114,3.46410162,3.08058049,0.619290822,3.08049139,3.02849283,3.02840219
62.333606,4.12310563,3.08020765,1.02122376,3.08011847,3.02808251,3.02799179
62.344098,2,3.07983926,-1.03915315,3.07975,3.02767252,3.02758172
62.354589,3,3.07947547,-0.281913932,3.07938613,3.02726291,3.02717203
62.365081,2.23606798,3.07911632,-0.918176639,3.0790269,3.02685359,3.02676263
62.375572,3.31662479,3.07876201,0.487711777,3.07867252,3.02644465,3.02635361
62.386064,3.87298335,3.07841261,0.891386971,3.07832304,3.02603601,3.02594489
62.396556,3.31662479,3.07806829,0.488422461,3.07797863,3.02562771,3.0255365
62.407047,3.16227766,3.07772922,0.290772151,3.07763947,3.02521978,3.02512848
62.417539,3.46410162,3.07739548,0.621857008,3.07730565,3.02481215,3.02472077
62.42803,2.82842712,3.07706729,-0.498638311,3.07697738,3.0244049,3.02431342
62.438522,4,3.07674475,0.96086172,3.07665476,3.02399795,3.02390638
62.449014,3.31662479,3.07642807,0.490098682,3.07633799,3.02359133,3.02349967
62.459505,3.16227766,3.07611745,0.293530601,3.07602727,3.02318509,3.02309334
62.469997,3.16227766,3.075813,0.29404873,3.07572274,3.02277915,3.0226873
62.480488,3,3.075515,-0.274799918,3.07542464,3.02237358,3.02228164
62.49098,3.46410162,3.07522356,0.623600875,3.07513312,3.02196832,3.02187628
62.501472,3.46410162,3.07493895,0.623829036,3.07484841,3.02156339,3.02147125
62.511963,3.16227766,3.0746614,0.296000445,3.07457077,3.02115884,3.02106661
62.522455,3.60555128,3.07439108,0.728807376,3.07430036,3.02075458,3.02066225
62.532946,3,3.0741283,-0.272265136,3.07403749,3.02035071,3.02025828
62.543438,3.31662479,3.07387326,0.492698216,3.07378235,3.01994713,3.0198546
62.55393,3,3.07362623,-0.271341547,3.07353523,3.0195439,3.01945126
62.564421,4,3.07338753,0.96260712,3.07329643,3.01914104,3.0190483
62.574913,3,3.0731574,-0.270476243,3.07306619,3.01873848,3.01864563
62.585404,4,3.07293617,0.962841537,3.07284487,3.0183363,3.01824334
62.595896,3.16227766,3.07272414,0.299254942,3.07263274,3.01793442,3.01784135
62.606388,1,3.07252165,-1.43962552,3.07243014,3.01753287,3.0174397
62.616879,2,3.07232907,-1.03553323,3.07223746,3.01713171,3.01703842
62.627371,3.60555128,3.07214673,0.7303455,3.07205502,3.01673084,3.01663745
62.637862,3,3.07197504,-0.268281651,3.07188323,3.01633035,3.01623685
62.648354,3,3.07181439,-0.267982077,3.07172247,3.01593017,3.01583655
62.658846,3.46410162,3.07166522,0.626447444,3.07157319,3.01553032,3.01543658
62.669337,2.64575131,3.07152797,-0.652515636,3.07143583,3.01513085,3.015037
62.679829,2.82842712,3.07140309,-0.492925922,3.07131085,3.01473169,3.01463771
62.69032,3.16227766,3.0712911,0.301639786,3.07119875,3.0143329,3.0142388
62.700812,3.31662479,3.07119249,0.49541124,3.07110003,3.01393441,3.01384019
62.711304,2.64575131,3.07110783,-0.652193617,3.07101526,3.01353626,3.01344192
62.721795,3.46410162,3.07103767,0.626948117,3.07094499,3.01313849,3.01304403
62.732287,3.31662479,3.07098263,0.495623004,3.07088984,3.01274102,3.01264643
62.742778,2.64575131,3.07094333,-0.652067496,3.07085043,3.01234393,3.01224922
62.75327,2.82842712,3.07092044,-0.492436106,3.07082742,3.01194714,3.0118523
62.763762,2.64575131,3.07091467,-0.65204552,3.07082154,3.0115507,3.01145573
62.774253,3.16227766,3.07092675,0.302243127,3.0708335,3.01115463,3.01105953
62.784745,3.87298335,3.07095747,0.895558974,3.0708641,3.01075886,3.01066363
62.795236,3.74165739,3.07100764,0.818932077,3.07091416,3.01036347,3.01026811
62.805728,2.44948974,3.07107814,-0.788408774,3.07098454,3.00996839,3.00987289
62.81622,4.12310563,3.07116987,1.02563919,3.07107615,3.00957364,3.00947801
62.826711,3.60555128,3.0712838,0.730936029,3.07118996,3.00917928,3.0090835
62.837203,2.82842712,3.07142095,-0.492944036,3.07132699,3.00878521,3.0086893
62.847694,3,3.07158237,-0.267548817,3.07148829,3.00839153,3.00829548
62.858186,3,3.07176923,-0.267897791,3.07167503,3.00799815,3.00790195
62.868678,2.82842712,3.0719827,-0.493513497,3.07188838,3.00760511,3.00750877
62.879169,3,3.07222401,-0.268745259,3.07212957,3.00721245,3.00711597
62.889661,3,3.07249456,-0.269248131,3.07239999,3.00682009,3.00672346
62.900152,2,3.07279567,-1.0357585,3.07270098,3.00642812,3.00633134
62.910644,3.87298335,3.0731289,0.894345821,3.07303409,3.00603644,3.00593952
62.921136,3,3.07349577,-0.27110104,3.07340084,3.00564511,3.00554803
62.931627,2.82842712,3.0738979,-0.495450076,3.07380284,3.00525416,3.00515693
62.942119,3.46410162,3.0743371,0.624311232,3.07424192,3.00486351,3.00476613
62.95261,3.16227766,3.07481512,0.295740667,3.07471981,3.00447324,3.0043757
62.963102,2.64575131,3.07533398,-0.655425562,3.07523855,3.00408328,3.00398558
62.973594,2,3.07589567,-1.03725391,3.07580012,3.00369366,3.0035958
62.984085,2.44948974,3.07650229,-0.791841238,3.07640661,3.00330441,3.0032064
62.994577,2.82842712,3.0771562,-0.498727455,3.07706039,3.00291548,3.0028173
63.005068,2.82842712,3.07785965,-0.499432203,3.07776372,3.00252692,3.00242858
63.01556,3.16227766,3.07861527,0.289244512,3.07851922,3.00213867,3.00204016
63.026052,2.23606798,3.07942562,-0.918345056,3.07932944,3.00175076,3.00165208
63.036543,3.16227766,3.08029335,0.286329026,3.08019704,3.00136322,3.00126439
63.047035,3.46410162,3.0812215,0.618773072,3.08112507,3.000976,3.00087699
63.057526,2.64575131,3.08221289,-0.660652393,3.08211634,3.00058915,3.00048997
63.068018,3,3.08327085,-0.288566893,3.08317418,3.00020261,3.00010326
63.07851,3.31662479,3.08439853,0.481898597,3.08430173,2.99981642,2.99971689
63.089001,3.46410162,3.08559919,0.615225506,3.08550227,2.9994306,2.9993309
63.099493,3,3.08687655,-0.294748281,3.08677951,2.99904509,2.99894521
63.109984,3.74165739,3.08823395,0.808346114,3.08813679,2.99865996,2.9985599
63.120476,2.44948974,3.08967533,-0.800115981,3.08957805,2.99827514,2.99817489
63.130968,3.46410162,3.09120431,0.610653181,3.09110691,2.99789066,2.99779023
63.141459,1.41421356,3.09282452,-1.29561219,3.09272701,2.99750656,2.99740595
63.151951,3.60555128,3.09454009,0.714850465,3.09444246,2.99712276,2.99702196
63.162442,2.44948974,3.09635446,-0.804279002,3.09625672,2.99673935,2.99663836
63.172934,3.87298335,3.09827168,0.880177065,3.09817383,2.99635624,2.99625507
63.183426,3.46410162,3.10029517,0.603163697,3.10019721,2.99597348,2.99587211
63.193917,2.44948974,3.10242808,-0.808046002,3.10233002,2.9955911,2.99548953
63.204409,2.82842712,3.10467393,-0.525591858,3.10457576,2.99520902,2.99510726
63.2149,3.46410162,3.10703496,0.597550542,3.10693669,2.99482733,2.99472537
63.225392,2.82842712,3.10951386,-0.530176134,3.10941549,2.99444594,2.99434379
63.235884,3,3.11211195,-0.334831229,3.11201348,2.9940649,2.99396254
63.246375,3.87298335,3.11482976,0.870720156,3.11473119,2.99368423,2.99358168
63.256867,3.16227766,3.1176676,0.211210933,3.11756894,2.99330388,2.99320112
63.267358,3,3.12062359,-0.34730907,3.12052483,2.9929239,2.99282094
63.27785,3,3.12369555,-0.351703778,3.1235967,2.99254424,2.99244106
63.288342,3.16227766,3.12687883,0.188145764,3.1267799,2.99216492,2.99206153
63.298833,4,3.13016688,0.932648446,3.13006786,2.99178598,2.99168238
63.309325,3.46410162,3.13355191,0.574934519,3.13345281,2.99140734,2.99130353
63.319816,2.82842712,3.13702247,-0.555513591,3.13692328,2.99102909,2.99092506
63.330308,4.12310563,3.1405657,0.991231518,3.14046643,2.99065115,2.9905469
63.3408,2.82842712,3.1441648,-0.561905399,3.14406545,2.99027355,2.99016908
63.351291,2.64575131,3.14779978,-0.708553787,3.14770034,2.98989633,2.98979164
63.361783,3.74165739,3.15144836,0.76825063,3.15134883,2.98951943,2.98941451
63.372274,3.60555128,3.15508344,0.67116901,3.15498382,2.9891429,2.98903776
63.382766,2.82842712,3.15867588,-0.574672739,3.15857618,2.98876668,2.98866131
63.393258,3,3.16219223,-0.402730971,3.16209244,2.98839081,2.98828521
63.403749,3.74165739,3.16559605,0.758987045,3.16549615,2.98801532,2.98790948
63.414241,3.60555128,3.1688493,0.660834304,3.16874929,2.98764014,2.98753407
63.424732,4.24264069,3.17191075,1.03476081,3.17181063,2.98726534,2.98715903
63.435224,3.87298335,3.17473924,0.835610022,3.174639,2.98689084,2.9867843
63.445716,3.74165739,3.1772926,0.751242166,3.17719222,2.9865167,2.98640991
63.456207,2.82842712,3.17952974,-0.592539127,3.17942922,2.98614294,2.9860359
63.466699,3,3.18141243,-0.425925385,3.18131175,2.98576948,2.9856622
63.47719,3.46410162,3.18290517,0.530279588,3.18280432,2.98539641,2.98528888
63.487682,4.12310563,3.18397783,0.96908606,3.18387679,2.98502365,2.98491587
63.498174,3,3.18460577,-0.42965774,3.18450453,2.98465123,2.9845432
63.508665,4.12310563,3.1847714,0.968676532,3.18466994,2.9842792,2.98417091
63.519157,2.64575131,3.18446473,-0.733970995,3.18436303,2.98390747,2.98379893
63.529648,3.31662479,3.18368387,0.364610645,3.18358191,2.98353613,2.98342733
63.54014,3,3.18243477,-0.427123831,3.18233253,2.9831651,2.98305603
63.550632,3.31662479,3.18073146,0.368637122,3.18062894,2.98279441,2.98268509
63.561123,3.74165739,3.17859542,0.750374553,3.17849259,2.98242411,2.98231451
63.571615,3.16227766,3.17605383,-0.117371934,3.17595068,2.98205411,2.98194425
63.582106,4.35889894,3.17314015,1.08892552,3.17303666,2.9816845,2.98157437
63.592598,3.31662479,3.16989085,0.38305867,3.16978701,2.9813152,2.9812048
63.60309,3.31662479,3.16634608,0.387657981,3.16624188,2.98094625,2.98083557
63.613581,3,3.16254768,-0.403172028,3.16244311,2.98057768,2.98046672
63.624073,3.46410162,3.15853676,0.55277921,3.1584318,2.98020942,2.98009818
63.634564,2.44948974,3.15435525,-0.839562687,3.15424989,2.97984154,2.97973001
63.645056,3.60555128,3.15004195,0.674914308,3.14993619,2.97947397,2.97936216
63.655548,3.46410162,3.14563461,0.564328813,3.14552844,2.97910676,2.97899465
63.666039,3.46410162,3.14116817,0.568272334,3.14106159,2.97873992,2.97862753
63.676531,3.31662479,3.13667316,0.424207064,3.13656616,2.97837339,2.97826071
63.687022,2.82842712,3.13217843,-0.551136376,3.13207101,2.97800725,2.97789427
63.697514,2.44948974,3.12770771,-0.823539901,3.12759987,2.97764142,2.97752814
63.708006,3,3.12328264,-0.351116273,3.12317436,2.97727594,2.97716235
63.718497,3.74165739,3.11892158,0.789136117,3.11881287,2.97691083,2.97679695
63.728989,3,3.11463861,-0.338583235,3.11452947,2.97654605,2.97643185
63.73948,2.64575131,3.11044664,-0.681685655,3.11033708,2.97618164,2.97606713
63.749972,3.31662479,3.10635444,0.458552451,3.10624445,2.97581755,2.97570273
63.760464,2.64575131,3.10236968,-0.675735425,3.10225925,2.9754538,2.97533866
63.770955,3.16227766,3.09849798,0.252546387,3.09838713,2.97509044,2.97497498
63.781447,2.44948974,3.09474216,-0.803276054,3.09463088,2.97472739,2.97461161
63.791938,3.46410162,3.09110496,0.61073452,3.09099325,2.97436472,2.97424862
63.80243,3.16227766,3.08758646,0.2732969,3.08747432,2.97400236,2.97388594
63.812922,2.44948974,3.08418674,-0.796678727,3.08407416,2.97364035,2.9735236
63.823413,2.64575131,3.08090492,-0.659661741,3.08079192,2.97327873,2.97316164
63.833905,3.60555128,3.07773854,0.726507215,3.07762512,2.97291742,2.97279999
63.844396,4,3.07468576,0.961932555,3.07457191,2.97255649,2.97243873
63.854888,3.87298335,3.07174313,0.895120224,3.07162885,2.97219588,2.97207777
63.86538,3,3.06890775,-0.262502857,3.06879304,2.97183561,2.97171716
63.875871,3.31662479,3.06617642,0.500448166,3.06606129,2.97147572,2.97135692
63.886363,2.82842712,3.06354503,-0.484889578,3.06342947,2.97111615,2.970997
63.896854,2.82842712,3.06101035,-0.482268828,3.06089436,2.97075697,2.97063746
63.907346,3.16227766,3.05856814,0.322039622,3.05845173,2.97039809,2.97027823
63.917838,2.44948974,3.05621489,-0.778925636,3.05609805,2.97003957,2.96991934
63.928329,3.31662479,3.05394706,0.512520959,3.05382979,2.96968143,2.96956084
63.938821,2.23606798,3.05176053,-0.903156994,3.05164284,2.9693236,2.96920264
63.949312,3,3.04965213,-0.222827569,3.04953401,2.96896616,2.96884483
63.959804,2,3.04761792,-1.02353208,3.04749938,2.96860903,2.96848732
63.970296,3.31662479,3.04565472,0.520547856,3.04553574,2.96825225,2.96813017
63.980787,3,3.0437594,-0.209187484,3.04364,2.96789585,2.96777339
63.991279,3.16227766,3.04192844,0.346913845,3.0418086,2.96753976,2.96741692
64.00177,3,3.04015915,-0.200397469,3.04003887,2.96718406,2.96706083
64.012262,3,3.03844825,-0.196082264,3.03832754,2.96682868,2.96670505
64.022754,3.87298335,3.03679315,0.914434359,3.036672,2.96647364,2.96634962
64.033245,3.46410162,3.03519131,0.654912439,3.03506973,2.96611899,2.96599457
64.043737,3.46410162,3.0336399,0.656095812,3.03351787,2.96576465,2.96563983
64.054228,4.47213595,3.03213678,1.19999965,3.03201431,2.9654107,2.96528547
64.06472,2.64575131,3.03067938,-0.620425714,3.03055646,2.96505706,2.96493142
64.075212,2.82842712,3.02926563,-0.448150096,3.02914227,2.96470377,2.96457772
64.085703,2.64575131,3.0278936,-0.618176582,3.02776979,2.96435086,2.9642244
64.096195,2.23606798,3.02656103,-0.889096765,3.02643677,2.96399827,2.96387139
64.106686,3.31662479,3.02526632,0.539776313,3.0251416,2.96364607,2.96351876
64.117178,3.60555128,3.02400744,0.762590218,3.02388226,2.96329418,2.96316644
64.12767,4,3.02278281,0.988542962,3.02265718,2.96294263,2.96281446
64.138161,3.46410162,3.02159096,0.665214742,3.02146487,2.96259148,2.96246287
64.148653,3,3.02043015,-0.142934059,3.02030358,2.96224063,2.96211159
64.159144,3.60555128,3.01929914,0.765671035,3.01917211,2.96189018,2.96176068
64.169636,3.46410162,3.01819638,0.667761363,3.01806887,2.96154003,2.96141009
64.180128,3.46410162,3.01712067,0.668566339,3.01699269,2.96119024,2.96105985
64.190619,2.64575131,3.01607088,-0.608538883,3.01594243,2.96084083,2.96070998
64.201111,3,3.01504567,-0.12266079,3.01491673,2.96049174,2.96036043
64.211602,3.16227766,3.01404412,0.385011093,3.0139147,2.96014304,2.96001126
64.222094,3.46410162,3.013065,0.671592598,3.01293509,2.95979464,2.9596624
64.232586,3.60555128,3.01210741,0.770353076,3.01197701,2.9594466,2.95931388
64.243077,3.31662479,3.01117051,0.55267918,3.01103962,2.95909895,2.95896575
64.253569,3.16227766,3.01025323,0.389903098,3.01012184,2.95875161,2.95861793
64.26406,3,3.0093549,-0.096720744,3.00922301,2.95840465,2.95827048
64.274552,3.60555128,3.00847455,0.772707402,3.00834214,2.95805801,2.95792335
64.285044,3.87298335,3.00761149,0.93025365,3.00747858,2.95771173,2.95757657
64.295535,3.46410162,3.0067651,0.676266604,3.00663166,2.95736582,2.95723016
64.306027,3.46410162,3.00593451,0.676880423,3.00580056,2.95702024,2.95688407
64.316518,2.82842712,3.00511924,-0.42034761,3.00498476,2.95667503,2.95653836
64.32701,2.64575131,3.00431851,-0.598804808,3.00418351,2.95633015,2.95619296
64.337502,3.60555128,3.00353181,0.775899132,3.00339628,2.95598562,2.9558479
64.347993,2.64575131,3.00275866,-0.597500918,3.00262259,2.95564147,2.95550323
64.358485,3,3.00199837,-0.0447031038,3.00186176,2.95529763,2.95515887
64.368976,3,3.00125058,-0.03536352,3.00111342,2.95495419,2.95481488
64.379468,3.60555128,3.00051467,0.777840992,3.00037696,2.95461106,2.95447122
64.38996,2.82842712,2.99979024,-0.413960286,2.99965198,2.95426828,2.95412789
64.400451,3,2.99907694,0.030381936,2.99893812,2.95392589,2.95378495
64.410943,2.64575131,2.9983742,-0.593820586,2.99823482,2.95358381,2.95344232
64.421434,3.87298335,2.99768176,0.935575536,2.99754181,2.95324212,2.95310007
64.431926,2.64575131,2.99699912,-0.59266163,2.99685859,2.95290075,2.95275813
64.442418,2.82842712,2.99632597,-0.409754617,2.99618487,2.95255973,2.95241653
64.452909,3.74165739,2.99566204,0.863710222,2.99552035,2.95221909,2.95207532
64.463401,2.44948974,2.99500687,-0.73859131,2.99486459,2.95187878,2.95173442
64.473892,3.74165739,2.99436027,0.864463488,2.99421739,2.95153885,2.9513939
64.484384,2.82842712,2.99372181,-0.406564494,2.99357834,2.95119923,2.95105369
64.494876,3.16227766,2.99309128,0.411322716,2.9929472,2.95085997,2.95071383
64.505367,3.16227766,2.99246846,0.412079114,2.99232377,2.9505211,2.95037435
64.515859,3.16227766,2.99185297,0.412825249,2.99170766,2.95018254,2.95003518
64.52635,3.16227766,2.99124468,0.413561337,2.99109875,2.94984437,2.94969639
64.536842,3,2.99064323,0.0967304045,2.99049667,2.94950652,2.94935791
64.547334,3.60555128,2.99004845,0.784539882,2.98990125,2.94916902,2.94901978
64.557825,2.64575131,2.98946018,-0.58626689,2.98931234,2.94883191,2.94868203
64.568317,3,2.98887809,0.105460456,2.9887296,2.94849511,2.94834459
64.578808,3.16227766,2.9883021,0.417103771,2.98815296,2.9481587,2.94800753
64.5893,3.74165739,2.98773191,0.86828882,2.98758211,2.94782262,2.94767079
64.599792,3.31662479,2.98716739,0.573983801,2.98701692,2.94748688,2.94733439
64.610283,3,2.9866084,0.115722068,2.98645726,2.94715153,2.94699837
64.620775,2,2.98605469,-0.993002864,2.98590286,2.9468165,2.94666266
64.631266,3,2.98550618,0.120390273,2.98535367,2.94648186,2.94632733
64.641758,3.31662479,2.98496263,0.575901174,2.98480942,2.94614754,2.94599231
64.65225,2.44948974,2.98442393,-0.73139195,2.98427002,2.94581357,2.94565765
64.662741,3.60555128,2.98388999,0.788455001,2.98373537,2.94547999,2.94532335
64.673233,2.64575131,2.98336057,-0.581041529,2.98320523,2.94514673,2.94498938
64.683724,2,2.98283564,-0.991380675,2.98267958,2.94481386,2.94465578
64.694216,3.46410162,2.98231498,0.694108519,2.98215818,2.94448131,2.94432249
64.704708,2.82842712,2.98179851,-0.391626585,2.98164097,2.94414911,2.94398956
64.715199,3.46410162,2.98128616,0.694849233,2.98112787,2.9438173,2.943657
64.725691,3.60555128,2.98077772,0.790426184,2.98061867,2.94348582,2.94332475
64.736182,2.64575131,2.98027319,-0.578378664,2.98011337,2.94315472,2.94299288
64.746674,2.44948974,2.97977236,-0.728205064,2.97961176,2.94282394,2.94266133
64.757166,3.16227766,2.97927518,0.427787897,2.97911379,2.94249352,2.94233012
64.767657,3.31662479,2.97878159,0.581242804,2.97861941,2.94216349,2.94199929
64.778149,3.16227766,2.97829142,0.42893617,2.97812844,2.94183378,2.94166877
64.78864,2,2.97780467,-0.988840063,2.97764087,2.94150446,2.94133863
64.799132,2.23606798,2.97732115,-0.860960613,2.97715653,2.94117546,2.94100881
64.809624,3.16227766,2.97684084,0.430623756,2.97667537,2.94084682,2.94067933
64.820115,3.46410162,2.97636369,0.69838236,2.97619738,2.94051858,2.94035023
64.830607,2.44948974,2.97588955,-0.725534151,2.97572237,2.94019065,2.94002145
64.841098,3.46410162,2.97541842,0.699058795,2.97525036,2.93986312,2.93969304
64.85159,3.16227766,2.97495014,0.432813495,2.9747812,2.93953592,2.93936494
64.862082,3.60555128,2.97448469,0.794396993,2.97431485,2.93920907,2.93903719
64.872573,2.44948974,2.97402205,-0.724246029,2.9738513,2.93888262,2.93870982
64.883065,3.60555128,2.97356207,0.794977487,2.97339039,2.93855649,2.93838276
64.893556,3.31662479,2.97310477,0.586105811,2.97293215,2.93823076,2.93805608
64.904048,3.87298335,2.97265,0.948858969,2.97247642,2.93790535,2.93772972
64.91454,3,2.97219776,0.166740047,2.9720232,2.93758031,2.9374037
64.925031,3.16227766,2.97174802,0.436497011,2.97157247,2.93725566,2.93707806
64.935523,4.12310563,2.97130065,1.07322177,2.9711241,2.93693135,2.93675273
64.946014,3.31662479,2.97085569,0.588021347,2.9706781,2.93660743,2.93642778
64.956506,2,2.97041299,-0.985095421,2.97023436,2.93628385,2.93610314
64.966998,3.60555128,2.96997255,0.797231913,2.96979286,2.93596063,2.93577885
64.977489,2.64575131,2.96953438,-0.569019388,2.96935359,2.93563781,2.93545493
64.987981,3.60555128,2.96909833,0.797780013,2.96891643,2.93531533,2.93513133
64.998472,2.23606798,2.96866445,-0.855918495,2.96848142,2.93499324,2.93480811
65.008964,2.82842712,2.96823261,-0.373905722,2.96804842,2.9346715,2.9344852
65.019456,2.64575131,2.96780283,-0.567495828,2.96761745,2.93435013,2.93416264
65.029947,3.16227766,2.96737509,0.441477717,2.96718849,2.93402917,2.93384045
65.040439,3.31662479,2.96694927,0.591333675,2.96676143,2.93370855,2.93351858
65.05093,3.46410162,2.96652544,0.705390798,2.96633632,2.93338833,2.93319708
65.061422,2.82842712,2.96610346,-0.371047618,2.96591303,2.93306847,2.9328759
65.071914,3.16227766,2.96568335,0.443389574,2.96549158,2.93274899,2.93255506
65.082405,3.16227766,2.96526511,0.443860963,2.96507196,2.93242992,2.9322346
65.092897,3,2.96484863,0.187486992,2.96465406,2.9321112,2.93191446
65.103388,2.64575131,2.96443396,-0.564519841,2.96423793,2.9317929,2.93159469
65.11388,3.31662479,2.964021,0.593804506,2.96382346,2.93147496,2.93127523
65.124372,3.16227766,2.96360975,0.445721783,2.96341066,2.93115742,2.93095612
65.134863,2.23606798,2.96320023,-0.852720503,2.96299954,2.9308403,2.93063739
65.145355,3.87298335,2.96279234,0.954039311,2.96258999,2.93052354,2.93031897
65.155846,3.60555128,2.96238612,0.80197578,2.96218206,2.93020722,2.93000092
65.166338,3,2.96198149,0.194983371,2.96177565,2.92989128,2.92968319
65.17683,2.64575131,2.96157844,-0.56198499,2.96137077,2.92957575,2.92936581
65.187321,3.16227766,2.96117701,0.448442475,2.96096744,2.92926065,2.9290488
65.197813,2.64575131,2.96077709,-0.56127157,2.96056554,2.92894595,2.92873211
65.208304,4,2.96037874,1.01961819,2.96016514,2.9286317,2.92841579
65.218796,2.82842712,2.95998186,-0.362704756,2.95976613,2.92831785,2.92809978
65.229288,2.82842712,2.95958649,-0.36215931,2.95936854,2.92800443,2.92778412
65.239779,3.46410162,2.95919263,0.710569476,2.95897237,2.92769147,2.92746884
65.250271,2.64575131,2.95880021,-0.559507726,2.95857752,2.92737894,2.92715386
65.260762,4.12310563,2.95840927,1.07921099,2.95818407,2.92706688,2.92683927
65.271254,3.60555128,2.95801973,0.804693447,2.9577919,2.92675525,2.92652499
65.281746,2.82842712,2.95763162,-0.35945027,2.95740104,2.92644409,2.92621105
65.292237,2.82842712,2.95724496,-0.35891202,2.9570115,2.92613343,2.92589749
65.302729,3.31662479,2.95685967,0.599804233,2.95662319,2.92582323,2.92558424
65.31322,3,2.95647582,0.208624507,2.95623618,2.92551354,2.92527137
65.323712,4.35889894,2.95609331,1.18440096,2.95585036,2.92520433,2.92495881
65.334204,2.82842712,2.95571218,-0.356770317,2.95546575,2.92489562,2.92464659
65.344695,2,2.95533247,-0.977411106,2.95508238,2.92458747,2.92433475
65.355187,3.31662479,2.95495409,0.601390637,2.95470016,2.92427982,2.92402323
65.365678,2,2.95457712,-0.977024624,2.95431915,2.92397275,2.92371208
65.37617,3.60555128,2.95420147,0.807062455,2.95393925,2.9236662,2.92340124
65.386662,2.44948974,2.95382719,-0.710167193,2.95356048,2.92336023,2.92309075
65.397153,3.74165739,2.9534543,0.887808023,2.95318288,2.92305487,2.92278063
65.407645,3.16227766,2.95308275,0.457378304,2.95280635,2.92275009,2.92247082
65.418136,2.82842712,2.9527126,-0.352541447,2.95243095,2.92244595,2.92216139
65.428628,2.44948974,2.95234378,-0.709122021,2.9520566,2.92214243,2.92185227
65.43912,3,2.95197635,0.219142997,2.95168331,2.92183956,2.9215435
65.449611,3.60555128,2.95161033,0.808666152,2.95131112,2.92153739,2.9212351
65.460103,2.64575131,2.95124567,-0.552715444,2.95093993,2.9212359,2.92092701
65.470594,2.82842712,2.95088245,-0.349936178,2.95056981,2.92093515,2.9206193
65.481086,2.82842712,2.95052061,-0.349418789,2.95020068,2.92063512,2.9203119
65.491578,3.46410162,2.9501602,0.716897071,2.94983255,2.92033585,2.92000485
65.502069,3.60555128,2.94980127,0.809783924,2.94946545,2.92003741,2.91969817
65.512561,2.23606798,2.94944377,-0.844615765,2.94909931,2.91973976,2.9193918
65.523052,2.82842712,2.94908778,-0.34736242,2.94873417,2.919443,2.9190858
65.533544,2.44948974,2.94873325,-0.706571658,2.94836997,2.91914709,2.91878012
65.544036,2.82842712,2.94838025,-0.346342496,2.94800672,2.9188521,2.91847479
65.554527,3.16227766,2.94802883,0.462870208,2.94764444,2.91855809,2.91816982
65.565019,3,2.94767895,0.228737943,2.94728307,2.91826504,2.91786517
65.57551,2.23606798,2.9473166,-0.843355572,2.94690854,2.91797305,2.91756089
65.586002,2.82842712,2.94696997,-0.344300516,2.94654902,2.91768211,2.91725693
65.596494,3,2.94662501,0.231030272,2.9461904,2.91739228,2.91695331
65.606985,2.82842712,2.9462818,-0.343299685,2.94583271,2.91710363,2.91665006
65.617477,3.16227766,2.9459403,0.465120802,2.94547588,2.91681617,2.91634712
65.627968,3.46410162,2.94560062,0.72007013,2.94511997,2.91653,2.91604456
65.63846,3.60555128,2.94526275,0.812581396,2.94476489,2.91624512,2.91574231
65.648952,2.82842712,2.94492676,-0.341320433,2.94441068,2.91596161,2.9154404
65.659443,2.23606798,2.94459274,-0.841739132,2.94405736,2.91567956,2.91513886
65.669935,2.64575131,2.94426068,-0.546360112,2.94370485,2.91539897,2.91483764
65.680426,2.82842712,2.9439307,-0.339858173,2.94335322,2.91511998,2.91453679
65.690918,4,2.9436028,1.02781185,2.9430024,2.91484258,2.91423625
65.70141,4,2.94327708,1.02797029,2.94265239,2.9145669,2.91393606
65.711901,3.16227766,2.94295363,0.468320436,2.94230325,2.91429302,2.91363623
65.722393,3,2.94263247,0.2395152,2.94195488,2.91402097,2.91333672
65.732884,2.44948974,2.94231374,-0.702014239,2.94160735,2.9137509,2.91303758
65.743376,2.64575131,2.94199745,-0.544284978,2.94126059,2.91348283,2.91273876
65.753868,3.46410162,2.94168372,0.722784816,2.94091462,2.91321689,2.91244027
65.764359,2.64575131,2.94137268,-0.543710744,2.94056948,2.91295321,2.91214216
65.774851,3.60555128,2.94106436,0.815160667,2.94022508,2.91269182,2.91184436
65.785342,3.74165739,2.94075892,0.894929308,2.93988149,2.9124329,2.91154693
65.795834,2.64575131,2.9404564,-0.542867471,2.93953864,2.9121765,2.91124982
65.806326,2.82842712,2.94015695,-0.334260116,2.93919655,2.91192276,2.91095304
65.816817,2.64575131,2.93986071,-0.542318536,2.93885525,2.91167183,2.91065664
65.827309,3.46410162,2.93956774,0.724247112,2.93851467,2.91142379,2.91036054
65.8378,4,2.93927822,1.02991348,2.93817487,2.91117882,2.91006482
65.848292,2.82842712,2.93899224,-0.332513336,2.93783579,2.91093702,2.90976941
65.858784,3.31662479,2.93870997,0.614747772,2.93749743,2.91069855,2.90947435
65.869275,2.82842712,2.93843156,-0.331669172,2.93715985,2.91046359,2.90917965
65.879767,2.82842712,2.93815714,-0.331255205,2.93682296,2.91023225,2.90888526
65.890258,2.64575131,2.93788689,-0.540495681,2.93648682,2.91000474,2.90859125
65.90075,2.82842712,2.93762095,-0.330444885,2.93615137,2.90978119,2.90829754
65.911242,3.60555128,2.9373595,0.817429982,2.93581663,2.90956181,2.90800418
65.921733,2.82842712,2.93710276,-0.329659875,2.93548263,2.90934679,2.90771119
65.932225,2.82842712,2.93685086,-0.329277591,2.9351493,2.90913629,2.90741851
65.942716,3,2.93660404,0.251785539,2.9348167,2.90893055,2.9071262
65.953208,3.31662479,2.93636247,0.616654133,2.93448477,2.90872975,2.9068342
65.9637,4,2.93612638,1.0314425,2.93415353,2.90853412,2.90654254
65.974191,2.64575131,2.93589601,-0.538650809,2.933823,2.9083439,2.90625125
65.984683,2.44948974,2.93567154,-0.697267377,2.93349313,2.9081593,2.90596027
65.995174,3.87298335,2.93545326,0.968261374,2.93316397,2.90798059,2.90566966
66.005666,4.12310563,2.93524137,1.08989186,2.93283545,2.90780799,2.90537936
66.016158,3.31662479,2.93503614,0.617728619,2.93250761,2.90764179,2.90508941
66.026649,3,2.93483787,0.255268737,2.93218046,2.90748225,2.90479982
66.037141,2.82842712,2.93464679,-0.325913582,2.93185394,2.90732965,2.90451054
66.047632,2.64575131,2.93446321,-0.53731918,2.93152812,2.90718429,2.90422163
66.058124,3.16227766,2.9342874,0.477483253,2.93120292,2.90704644,2.90393303
66.068616,2.82842712,2.93411968,-0.325103919,2.93087838,2.90691644,2.90364477
66.079107,3,2.93396038,0.256981749,2.93055452,2.90679461,2.90335688
66.089599,3.74165739,2.93380979,0.898803425,2.93023127,2.90668126,2.9030693
66.10009,3.87298335,2.93366828,0.969182682,2.9299087,2.90657675,2.90278209
66.110582,3.46410162,2.93353616,0.728399245,2.92958674,2.90648142,2.90249519
66.121074,3,2.9334138,0.258043022,2.92926541,2.90639563,2.90220863
66.131565,4.47213595,2.93330158,1.24049763,2.92894476,2.90631977,2.90192243
66.142057,3.46410162,2.93319987,0.728630049,2.9286247,2.90625421,2.90163655
66.152548,3.46410162,2.93310906,0.728692363,2.9283053,2.90619934,2.90135103
66.16304,3,2.93302953,0.258786528,2.92798649,2.90615558,2.90106583
66.173532,3.60555128,2.93296172,0.820115575,2.92766831,2.90612334,2.90078096
66.184023,2.64575131,2.93290604,-0.535868203,2.92735078,2.90610305,2.90049646
66.194515,2.82842712,2.93286292,-0.323165283,2.92703384,2.90609516,2.90021227
66.205006,3.74165739,2.93283282,0.899346745,2.92671754,2.9061001,2.89992844
66.215498,3.60555128,2.93281618,0.820204304,2.92640182,2.90611834,2.89964493
66.22599,3.31662479,2.93281346,0.619525081,2.92608672,2.90615037,2.89936176
66.236481,3.46410162,2.93282516,0.728887133,2.92577225,2.90619665,2.89907895
66.246973,3.16227766,2.93285176,0.478984237,2.92545835,2.90625769,2.89879645
66.257464,2.64575131,2.93289376,-0.535856739,2.92514509,2.90633398,2.89851432
66.267956,4,2.93295167,1.03298032,2.9248324,2.90642607,2.89823249
66.278448,2.23606798,2.93302601,-0.834840123,2.9245203,2.90653447,2.89795101
66.288939,2.44948974,2.93311731,-0.695433365,2.92420883,2.9066597,2.89766989
66.299431,2.44948974,2.93322612,-0.695511596,2.92389792,2.90680235,2.89738908
66.309922,3.31662479,2.93335299,0.619089495,2.92358764,2.90696293,2.89710863
66.320414,3.46410162,2.93349849,0.728425101,2.92327791,2.90714206,2.8968285
66.330906,3.31662479,2.93366318,0.618838919,2.92296877,2.9073403,2.8965487
66.341397,3.16227766,2.93384764,0.477943534,2.92266025,2.9075582,2.89626927
66.351889,2.64575131,2.93405248,-0.536936838,2.92235227,2.90779642,2.89599014
66.36238,3.46410162,2.93427827,0.727889655,2.92204491,2.90805552,2.89571138
66.372872,3.60555128,2.93452565,0.81916154,2.9217381,2.90833614,2.89543293
66.383364,3,2.93479522,0.255352266,2.92143186,2.90863891,2.89515482
66.393855,2.23606798,2.93508758,-0.836073921,2.92112623,2.9089644,2.89487707
66.404347,3.46410162,2.9354034,0.727116366,2.92082114,2.90931332,2.89459963
66.414838,3.31662479,2.93574328,0.617155988,2.92051665,2.90968625,2.89432255
66.42533,3.31662479,2.9361079,0.616860512,2.92021271,2.91008391,2.89404578
66.435822,2.64575131,2.93649789,-0.539209215,2.91990933,2.9105069,2.89376935
66.446313,3.87298335,2.93691385,0.967506843,2.91960654,2.91095586,2.89349328
66.456805,3.74165739,2.93735653,0.896828219,2.91930429,2.91143152,2.89321752
66.467296,3,2.93782649,0.24934616,2.91900263,2.91193445,2.89294213
66.477788,3.46410162,2.93832449,0.725104908,2.91870151,2.91246543,2.89266704
66.48828,3.31662479,2.93885113,0.614632944,2.91840094,2.91302507,2.89239229
66.498771,3.74165739,2.93940704,0.895684288,2.91810097,2.91361398,2.89211789
66.509263,3.60555128,2.93999298,0.815817563,2.91780152,2.91423295,2.89184381
66.519754,2.64575131,2.9406095,-0.543008457,2.91750265,2.91488252,2.89157009
66.530246,2.64575131,2.94125737,-0.543604687,2.91720431,2.91556348,2.89129668
66.540738,3,2.94193719,0.240962252,2.91690652,2.91627645,2.89102361
66.551229,3,2.94264956,0.239479524,2.91660931,2.91702199,2.89075089
66.561721,3.60555128,2.94339524,0.813729705,2.91631262,2.91780091,2.89047848
66.572212,3.46410162,2.94417475,0.721059543,2.91601651,2.9186137,2.89020644
66.582704,3.87298335,2.94498886,0.963324703,2.91572091,2.91946117,2.8899347
66.593196,2.82842712,2.94583813,-0.342652896,2.91542586,2.92034387,2.8896633
66.603687,3.16227766,2.94672309,0.464278547,2.91513139,2.92126232,2.88939226
66.614179,3,2.94764451,0.228813215,2.91483743,2.92221733,2.88912152
66.62467,3.46410162,2.94860282,0.71798245,2.91454404,2.92320929,2.88885115
66.635162,2.44948974,2.94959877,-0.707183869,2.91425116,2.924239,2.88858108
66.645654,2.64575131,2.95063284,-0.552160783,2.91395882,2.92530692,2.88831135
66.656145,3.74165739,2.95170549,0.888792384,2.91366705,2.92641351,2.88804198
66.666637,2.64575131,2.95281744,-0.554135478,2.91337579,2.92755952,2.88777291
66.677128,3.16227766,2.95396901,0.456408428,2.91308509,2.92874524,2.8875042
66.68762,2.82842712,2.9551609,-0.355996879,2.9127949,2.9299714,2.88723581
66.698112,2.64575131,2.95639349,-0.557352835,2.91250524,2.93123838,2.88696774
66.708603,3.31662479,2.95766711,0.599130769,2.91221615,2.93254649,2.88670003
66.719095,3.31662479,2.95898243,0.598032077,2.91192756,2.93389643,2.88643263
66.729586,3.16227766,2.96033959,0.4493752,2.91163952,2.93528833,2.88616559
66.740078,3.16227766,2.96173924,0.447815164,2.911352,2.93672285,2.88589886
66.75057,2.44948974,2.96318159,-0.716722995,2.911065,2.9382002,2.88563246
66.761061,4.12310563,2.96466683,1.07630795,2.91077855,2.93972056,2.88536642
66.771553,3.60555128,2.96619552,0.799597243,2.91049261,2.94128451,2.88510068
66.782044,2.82842712,2.96776763,-0.373283418,2.91020722,2.94289201,2.8848353
66.792536,3.16227766,2.96938368,0.439196966,2.90992233,2.94454358,2.88457023
66.803028,3.60555128,2.97104372,0.796559827,2.90963797,2.94623927,2.88430549
66.813519,3.31662479,2.97274772,0.58641033,2.90935415,2.94797905,2.8840411
66.824011,2.23606798,2.97449612,-0.859318416,2.90907084,2.94976337,2.88377703
66.834502,1.73205081,2.97628867,-1.1154541,2.90878807,2.95159197,2.88351331
66.844994,3.31662479,2.97812574,0.581806716,2.9085058,2.95346523,2.88324989
66.855486,2.44948974,2.98000715,-0.728366258,2.90822405,2.95538295,2.88298681
66.865977,3,2.98193267,0.134414774,2.90794285,2.95734492,2.88272408
66.876469,2.23606798,2.98390257,-0.864774301,2.90766214,2.95935139,2.88246166
66.88696,4.12310563,2.98591634,1.06639078,2.90738198,2.96140185,2.8821996
66.897452,3.31662479,2.98797416,0.573280583,2.90710231,2.96349649,2.88193784
66.907944,2.64575131,2.99007563,-0.586791546,2.90682316,2.96563489,2.88167641
66.918435,2.82842712,2.99222025,-0.404713628,2.90654456,2.96781655,2.88141534
66.928927,3.46410162,2.99440809,0.685341905,2.90626644,2.97004155,2.88115457
66.939418,3.87298335,2.99663836,0.936132996,2.90598887,2.97230908,2.88089415
66.94991,2.64575131,2.99891105,-0.594272447,2.90571179,2.97461914,2.88063405
66.960402,3.31662479,3.00122547,0.561604237,2.90543522,2.97697101,2.88037427
66.970893,2.82842712,3.00358085,-0.418513714,2.9051592,2.97936394,2.88011485
66.981385,2.44948974,3.00597705,-0.745980771,2.90488366,2.98179777,2.87985573
66.991876,2.23606798,3.00841297,-0.878831609,2.90460867,2.9842714,2.87959696
67.002368,3.60555128,3.01088838,0.771143886,2.90433416,2.98678458,2.8793385
67.01286,3.46410162,3.01340229,0.671341436,2.90406017,2.98933633,2.87908037
67.023351,2,3.01595365,-1.00794526,2.90378672,2.99192557,2.87882259
67.033843,2.64575131,3.01854208,-0.610565942,2.90351375,2.99455194,2.87856512
67.044334,2.64575131,3.02116617,-0.612711075,2.90324133,2.99721401,2.878308
67.054826,2.23606798,3.02382545,-0.887557025,2.90296939,2.99991129,2.87805119
67.065318,2.44948974,3.02651863,-0.759624178,2.90269796,3.00264249,2.8777947
67.075809,3.60555128,3.02924438,0.759148796,2.90242707,3.00540627,2.87753856
67.086301,3.16227766,3.03200207,0.360937103,2.90215666,3.00820198,2.87728273
67.096792,2.64575131,3.03478997,-0.62372964,2.9018868,3.0110279,2.87702725
67.107284,3.60555128,3.03760738,0.753620524,2.90161741,3.01388331,2.87677208
67.117776,3.31662479,3.04045272,0.525520761,2.90134854,3.01676661,2.87651723
67.128267,3.16227766,3.04332436,0.344896073,2.90108021,3.01967616,2.87626274
67.138759,3.46410162,3.04622143,0.646436528,2.90081236,3.02261109,2.87600854
67.14925,2.64575131,3.04914193,-0.635130391,2.90054505,3.02556937,2.8757547
67.159742,3.46410162,3.05208489,0.641885293,2.90027822,3.02855004,2.87550116
67.170234,2.64575131,3.05504847,-0.639763358,2.9000119,3.03155123,2.87524795
67.180725,2.82842712,3.05803077,-0.479169745,2.89974612,3.03457104,2.87499509
67.191217,3.74165739,3.0610307,0.82500102,2.89948083,3.03760836,2.87474253
67.201708,3.60555128,3.06404598,0.735870431,2.89921606,3.04066089,2.87449033
67.2122,2.44948974,3.06707543,-0.7858662,2.89895179,3.04372744,2.87423842
67.222692,3.31662479,3.07011696,0.496495554,2.89868802,3.0468059,2.87398684
67.233183,3.60555128,3.07316843,0.729645699,2.8984248,3.04989414,2.87373561
67.243675,3.31662479,3.07622855,0.490302193,2.89816205,3.05299084,2.87348469
67.254166,3.16227766,3.07929481,0.28806744,2.89789984,3.05609346,2.87323411
67.264658,4.12310563,3.08236583,1.02016655,2.89763812,3.05920063,2.87298383
67.27515,2.82842712,3.08543932,-0.506963698,2.89737691,3.06231004,2.87273388
67.285641,2.82842712,3.08851295,-0.509986107,2.89711623,3.06541934,2.87248428
67.296133,3.74165739,3.09158526,0.806270505,2.89685605,3.06852705,2.87223498
67.306624,3,3.09465355,-0.307658176,2.89659639,3.07163046,2.87198603
67.317116,3,3.0977163,-0.312596063,2.89633723,3.07472804,2.87173738
67.327608,3,3.10077105,-0.317444565,2.89607857,3.07781731,2.87148905
67.338099,2.82842712,3.10381535,-0.524774452,2.89582046,3.0808958,2.87124107
67.348591,4,3.10684758,0.945067415,2.89556283,3.08396188,2.87099339
67.359082,3,3.10986495,-0.331458824,2.89530573,3.08701275,2.87074606
67.369574,3,3.11286581,-0.335955065,2.89504913,3.09004672,2.87049903
67.380066,4.24264069,3.11584761,1.0615051,2.89479304,3.09306127,2.87025233
67.390557,3.60555128,3.11880784,0.697670006,2.89453749,3.09605383,2.87000597
67.401049,3.31662479,3.12174477,0.441452168,2.89428243,3.09902269,2.86975991
67.41154,3.31662479,3.12465559,0.438142901,2.89402791,3.10196498,2.8695142
67.422032,3,3.12753856,-0.357125414,2.89377387,3.104879,2.86926879
67.432524,3.16227766,3.13039113,0.178567996,2.89352036,3.10776214,2.8690237
67.443015,2.64575131,3.13321076,-0.698182961,2.89326738,3.11061187,2.86877895
67.453507,3,3.1359957,-0.368775949,2.8930149,3.11342642,2.86853451
67.463998,3.87298335,3.13874316,0.856878162,2.89276296,3.11620297,2.86829041
67.47449,3.60555128,3.1414514,0.68124876,2.89251151,3.11893979,2.86804661
67.484982,3.16227766,3.14411791,0.134758102,2.89226058,3.12163435,2.86780313
67.495473,3.16227766,3.14674022,0.124649265,2.89201019,3.12428414,2.86756
67.505965,3.60555128,3.1493166,0.67545146,2.8917603,3.12688745,2.86731716
67.516456,3.16227766,3.15184436,0.102143513,2.89151096,3.12944156,2.86707467
67.526948,3.87298335,3.15432182,0.847739066,2.89126211,3.13194477,2.86683248
67.53744,2.82842712,3.15674659,-0.572991676,2.89101379,3.13439469,2.86659061
67.547931,3.46410162,3.1591163,0.552254752,2.89076601,3.13678893,2.86634909
67.558423,3.87298335,3.16142934,0.843536604,2.89051873,3.13912587,2.86610786
67.568914,2.64575131,3.16368321,-0.719674856,2.890272,3.14140299,2.86586697
67.579406,3.16227766,3.1658763,-0.059988699,2.89002577,3.14361868,2.86562639
67.589898,2.64575131,3.16800643,-0.722672206,2.88978006,3.14577074,2.86538612
67.600389,2.44948974,3.17007144,-0.848870839,2.88953491,3.147857,2.8651462
67.610881,3.16227766,3.17206985,-0.0989554826,2.88929027,3.14987596,2.86490657
67.621372,3,3.17399941,-0.41713237,2.88904617,3.15182537,2.86466729
67.631864,2.64575131,3.1758587,-0.728084739,2.88880259,3.15370379,2.8644283
67.642356,2.64575131,3.17764576,-0.72931094,2.88855953,3.15550925,2.86418963
67.652847,3.16227766,3.17935873,-0.130694579,2.88831703,3.1572399,2.86395131
67.663339,3,3.18099631,-0.425436608,2.88807504,3.15889439,2.86371328
67.67383,3.74165739,3.18255658,0.747730438,2.88783361,3.16047083,2.86347559
67.684322,3.16227766,3.18403832,-0.147514948,2.88759269,3.16196797,2.8632382
67.694814,3.46410162,3.1854399,0.527884183,2.88735231,3.16338418,2.86300112
67.705305,4,3.18675982,0.901798305,2.8871125,3.16471792,2.86276439
67.715797,3.31662479,3.18799697,0.358647211,2.88687319,3.16596812,2.86252796
67.726288,3.31662479,3.18914985,0.357036329,2.88663446,3.16713324,2.86229186
67.73678,3.16227766,3.19021748,-0.167152101,2.88639624,3.16821231,2.86205606
67.747272,3.31662479,3.19119863,0.354155561,2.88615857,3.16920406,2.86182057
67.757763,3.60555128,3.19209214,0.643007878,2.88592147,3.17010737,2.86158543
67.768255,3.46410162,3.19289722,0.520772883,2.88568489,3.1709214,2.86135058
67.778746,2.64575131,3.19361279,-0.740176655,2.88544888,3.17164509,2.86111607
67.789238,3.46410162,3.19423817,0.519483826,2.88521341,3.17227775,2.86088186
67.79973,3,3.19477253,-0.441330414,2.88497848,3.17281854,2.86064796
67.810221,2.82842712,3.19521517,-0.605630288,2.88474413,3.17326674,2.8604144
67.820713,2.82842712,3.19556557,-0.605919501,2.88451032,3.17362185,2.86018114
67.831204,3.60555128,3.19582315,0.640100093,2.88427708,3.17388328,2.85994821
67.841696,3.74165739,3.19598753,0.738694696,2.88404439,3.17405064,2.85971558
67.852188,3.16227766,3.19605835,-0.183795229,2.88381225,3.17412356,2.85948326
67.862679,3.60555128,3.19603533,0.639934328,2.8835807,3.17410177,2.85925128
67.873171,3.46410162,3.1959183,0.517864188,2.8833497,3.17398508,2.85901959
67.883662,3.16227766,3.19570718,-0.182837409,2.88311928,3.17377343,2.85878824
67.894154,3.16227766,3.19540192,-0.182000707,2.88288942,3.17346675,2.85855719
67.904646,3.60555128,3.1950026,0.640740727,2.88266012,3.17306512,2.85832644
67.915137,2,3.19450942,-1.09293615,2.88243142,3.17256876,2.85809604
67.925629,3.60555128,3.19392254,0.641582992,2.88220328,3.17197779,2.85786593
67.93612,4,3.19324238,0.898196873,2.88197574,3.17129265,2.85763615
67.946612,3.46410162,3.19246921,0.521183655,2.88174876,3.17051362,2.85740667
67.957104,3,3.19160358,-0.437725467,2.88152236,3.16964124,2.85717749
67.967595,3.74165739,3.19064616,0.742301305,2.88129657,3.16867616,2.85694866
67.978087,4,3.18959741,0.900223636,2.88107135,3.16761887,2.85672012
67.988578,3.60555128,3.18845824,0.645827401,2.88084675,3.16647028,2.85649191
67.99907,3.60555128,3.18722926,0.646778181,2.88062271,3.16523097,2.85626399
68.009562,2.82842712,3.18591144,-0.597899921,2.88039928,3.16390195,2.85603638
68.020053,3.60555128,3.18450588,0.648880106,2.88017647,3.1624843,2.85580911
68.030545,4.24264069,3.18301335,1.02938202,2.87995424,3.16097879,2.85558213
68.041036,4.58257569,3.18143524,1.18369779,2.87973263,3.15938682,2.85535549
68.051528,3.60555128,3.17977241,0.652517328,2.87951162,3.15770926,2.85512913
68.06202,3.31662479,3.17802628,0.372288213,2.87929122,3.15594751,2.85490309
68.072511,3.16227766,3.17619832,-0.117985854,2.87907146,3.15410308,2.85467738
68.083003,3.46410162,3.17428958,0.538341934,2.8788523,3.15217698,2.85445196
68.093494,3,3.17230185,-0.415092585,2.87863379,3.15017105,2.85422687
68.103986,2.64575131,3.17023628,-0.724213347,2.87841588,3.1480864,2.85400207
68.114478,3.16227766,3.16809462,-0.0762689938,2.8781986,3.1459248,2.85377759
68.124969,3.46410162,3.1658787,0.546097896,2.87798197,3.1436881,2.85355343
68.135461,2.82842712,3.16358979,-0.578932352,2.87776597,3.14137756,2.85332956
68.145952,3.31662479,3.16123007,0.394201377,2.87755063,3.13899537,2.85310603
68.156444,3.16227766,3.15880087,0.0589643511,2.87733591,3.13654286,2.85288278
68.166936,3.16227766,3.15630425,0.0772878655,2.87712185,3.1340221,2.85265984
68.177427,4,3.15374234,0.91992264,2.87690846,3.13143524,2.85243724
68.187919,4,3.15111658,0.921348696,2.87669571,3.1287837,2.85221492
68.19841,4.24264069,3.14842945,1.04604552,2.87648365,3.12606998,2.85199293
68.208902,3.16227766,3.14568244,0.128822421,2.87627223,3.12329557,2.85177123
68.219394,2.64575131,3.14287786,-0.705072019,2.87606149,3.12046279,2.85154984
68.229885,2.64575131,3.14001806,-0.703041071,2.87585145,3.117574,2.85132878
68.240377,2.23606798,3.1371046,-0.94922949,2.87564207,3.11463077,2.85110801
68.250868,3.16227766,3.13414019,0.167742261,2.8754334,3.11163581,2.85088756
68.26136,3,3.13112643,-0.362113834,2.8752254,3.10859071,2.8506674
68.271852,3.60555128,3.12806578,0.691003251,2.87501811,3.10549797,2.85044755
68.282343,3.31662479,3.12496077,0.437794492,2.87481154,3.10236012,2.85022803
68.292835,4,3.12181303,0.937116305,2.87460566,3.09917877,2.8500088
68.303326,2.44948974,3.1186254,-0.818007127,2.87440051,3.0959568,2.84978989
68.313818,3.31662479,3.11539954,0.448581372,2.87419607,3.09269586,2.84957127
68.32431,3.16227766,3.11213802,0.223918826,2.87399236,3.08939852,2.84935295
68.334801,4.12310563,3.10884343,1.00710585,2.8737894,3.0860674,2.84913496
68.345293,2.82842712,3.10551743,-0.526393677,2.87358716,3.08270415,2.84891726
68.355784,3.74165739,3.10216293,0.799683975,2.87338569,3.07931169,2.84869988
68.366276,2.82842712,3.09878157,-0.519956197,2.87318496,3.07589168,2.84848279
68.376768,3.31662479,3.09537596,0.47037095,2.87298499,3.07244672,2.84826601
68.387259,3,3.0919487,-0.303230446,2.8727858,3.06897943,2.84804955
68.397751,3.46410162,3.08850141,0.612862307,2.87258738,3.06549141,2.84783337
68.408242,3,3.08503698,-0.291611015,2.87238975,3.0619856,2.84761752
68.418734,3.74165739,3.08155702,0.812465612,2.8721929,3.05846358,2.84740195
68.429226,2.64575131,3.07806406,-0.657504944,2.87199685,3.05492791,2.84718669
68.439717,3.74165739,3.07456066,0.816759894,2.87180163,3.05138114,2.84697176
68.450209,2.44948974,3.07104834,-0.788389877,2.8716072,3.0478248,2.8467571
68.4607,3.74165739,3.06752993,0.82105265,2.87141362,3.04426173,2.84654277
68.471192,4.24264069,3.06400691,1.08564901,2.87122085,3.0406934,2.84632873
68.481684,3.16227766,3.06048171,0.319054773,2.87102893,3.03712228,2.84611499
68.492175,4,3.05695677,0.971104128,2.87083787,3.03355078,2.84590157
68.502667,2.82842712,3.05343347,-0.474348336,2.87064766,3.02998029,2.84568843
68.513158,2.44948974,3.04991448,-0.77487079,2.87045834,3.02641351,2.84547562
68.52365,3.31662479,3.04640114,0.519830403,2.87026989,3.02285175,2.84526308
68.534142,2.44948974,3.04289573,-0.770328491,2.87008232,3.01929731,2.84505085
68.544633,4,3.03940048,0.980101791,2.86989568,3.01575243,2.84483895
68.555125,3.16227766,3.0359166,0.355473006,2.86970993,3.01221831,2.84462732
68.565616,3.46410162,3.03244658,0.65700459,2.86952513,3.00869745,2.84441602
68.576108,4.58257569,3.02899155,1.24642856,2.86934124,3.00519096,2.84420499
68.5866,3,3.02555357,-0.159854847,2.8691583,3.00170093,2.84399427
68.597091,4.24264069,3.02213467,1.10476514,2.86897635,2.99822938,2.84378387
68.607583,3.16227766,3.01873583,0.378869145,2.86879534,2.99477728,2.84357375
68.618074,3.87298335,3.01535931,0.92607993,2.86861535,2.99134691,2.84336395
68.628566,2.82842712,3.012006,-0.42846106,2.86843633,2.98793914,2.84315443
68.639058,2.64575131,3.00867773,-0.60243375,2.86825833,2.9845558,2.84294521
68.649549,2.44948974,3.00537626,-0.745577976,2.86808138,2.98119865,2.84273631
68.660041,3,3.00210235,-0.04585139,2.86790545,2.97786845,2.84252769
68.670532,3.46410162,2.99885796,0.682087715,2.86773059,2.97456716,2.84231939
68.681024,2.82842712,2.99564377,-0.408921322,2.8675568,2.97129545,2.84211136
68.691516,3.16227766,2.99246132,0.41208778,2.86738409,2.96805484,2.84190364
68.702007,3.31662479,2.98931209,0.57211249,2.8672125,2.96484683,2.84169623
68.712499,2.44948974,2.9861966,-0.732602795,2.86704202,2.96167191,2.84148911
68.72299,3.46410162,2.98311651,0.693530896,2.86687269,2.95853176,2.8412823
68.733482,3.16227766,2.98007226,0.426855245,2.86670451,2.95542678,2.84107577
68.743974,3.46410162,2.9770651,0.697880016,2.8665375,2.95235822,2.84086953
68.754465,3.31662479,2.97409621,0.58525941,2.8663717,2.94932727,2.84066361
68.764957,3,2.97116589,0.1698061,2.8662071,2.94633418,2.84045798
68.775448,3,2.96827548,0.178113786,2.86604375,2.94338031,2.84025265
68.78594,3,2.96542518,0.185943061,2.86588164,2.94046583,2.84004761
68.796432,3,2.96261595,0.193349561,2.86572081,2.93759169,2.83984286
68.806923,3.16227766,2.95984869,0.449921076,2.86556129,2.93475878,2.83963842
68.817415,3.60555128,2.95712345,0.805250164,2.86540307,2.93196713,2.83943426
68.827906,3.74165739,2.95444129,0.887251994,2.86524622,2.92921778,2.83923042
68.838398,3.46410162,2.95180216,0.71575097,2.86509072,2.92651067,2.83902686
68.84889,3,2.94920677,0.225373535,2.86493661,2.92384646,2.83882358
68.859381,3.16227766,2.94665572,0.464351095,2.86478394,2.92122577,2.83862063
68.869873,3.60555128,2.94414886,0.813266508,2.86463269,2.9186484,2.83841795
68.880364,3,2.94168695,0.241480948,2.86448294,2.9161151,2.83821558
68.890856,3,2.93926976,0.246435069,2.86433467,2.9136256,2.83801348
68.901348,3,2.9368977,0.251201707,2.86418793,2.9111803,2.83781169
68.911839,2.82842712,2.93457115,-0.325797524,2.86404277,2.90877955,2.8376102
68.922331,2.64575131,2.93228976,-0.535292864,2.86389919,2.90642297,2.83740899
68.932822,3.46410162,2.93005402,0.730785598,2.86375724,2.90411102,2.83720809
68.943314,4,2.92786353,1.03544023,2.86361693,2.90184325,2.83700746
68.953806,2.82842712,2.92571848,-0.311915621,2.86347832,2.89961984,2.83680713
68.964297,3.46410162,2.923619,0.735175228,2.86334145,2.89744089,2.83660711
68.974789,3.60555128,2.9215646,0.827034872,2.86320632,2.89530585,2.83640736
68.98528,3,2.91955553,0.283627352,2.86307301,2.89321495,2.83620792
68.995772,2.64575131,2.91759124,-0.521382705,2.86294153,2.8911676,2.83600876
69.006264,3.31662479,2.91567172,0.633208552,2.86281193,2.88916375,2.83580989
69.016755,3.60555128,2.91379692,0.831717712,2.86268426,2.8872033,2.83561132
69.027247,3.87298335,2.91196622,0.980314809,2.86255855,2.88528559,2.83541303
69.037738,3.87298335,2.91017967,0.981225597,2.86243485,2.88341063,2.83521505
69.04823,2,2.90843662,-0.953119417,2.86231321,2.8815777,2.83501734
69.058722,2.82842712,2.90673689,-0.279838829,2.86219366,2.87978659,2.83481992
69.069213,3.46410162,2.90508028,0.747677296,2.86207629,2.87803705,2.83462281
69.079705,2.23606798,2.90346606,-0.816944357,2.8619611,2.87632829,2.83442598
69.090196,3.31662479,2.90189414,0.643995845,2.86184819,2.87466017,2.83422944
69.100688,3.16227766,2.90036379,0.511775215,2.86173758,2.87303189,2.83403318
69.11118,3.46410162,2.8988747,0.751815742,2.86162934,2.87144309,2.83383721
69.121671,3.31662479,2.89742655,0.6474552,2.86152354,2.86989339,2.83364155
69.132163,2.82842712,2.89601858,-0.259983569,2.86142023,2.86838195,2.83344615
69.142654,2.23606798,2.89465056,-0.811531008,2.86131947,2.86690849,2.83325107
69.153146,2.64575131,2.89332171,-0.497564463,2.86122133,2.86547216,2.83305625
69.163638,2.64575131,2.89203165,-0.496266394,2.86112588,2.86407249,2.83286172
69.174129,3.16227766,2.89077996,0.521054412,2.8610332,2.86270902,2.8326675
69.184621,2.64575131,2.88956587,-0.493775821,2.86094335,2.86138086,2.83247354
69.195112,3,2.88838907,0.334082227,2.86085641,2.86008765,2.83227989
69.205604,3,2.88724877,0.335784506,2.86077246,2.85882849,2.83208651
69.216096,2.64575131,2.88614453,-0.49029911,2.86069158,2.85760288,2.83189341
69.226587,3.16227766,2.88507589,0.526499542,2.86061387,2.85641027,2.83170062
69.237079,4.12310563,2.88404209,1.11313231,2.86053939,2.85524978,2.8315081
69.24757,3,2.88304276,0.341990112,2.86046826,2.85412097,2.83131588
69.258062,2.64575131,2.88207715,-0.486133561,2.86040057,2.85302296,2.83112393
69.268554,2.82842712,2.88114479,-0.229603276,2.8603364,2.85195519,2.83093226
69.279045,3.31662479,2.8802452,0.660590332,2.86027589,2.8509171,2.8307409
69.289537,2.64575131,2.87937767,-0.483349105,2.86021911,2.84990781,2.8305498
69.300028,3.31662479,2.8785418,0.661878382,2.86016621,2.84892686,2.83035901
69.31052,2.64575131,2.87773689,-0.481648809,2.86011727,2.84797339,2.83016848
69.321012,3.16227766,2.87696248,0.534149026,2.86007243,2.84704682,2.82997823
69.331503,3.16227766,2.87621811,0.53484535,2.86003182,2.84614658,2.82978829
69.341995,3.31662479,2.87550312,0.664169909,2.85999557,2.84527184,2.82959861
69.352486,3,2.87481714,0.353811905,2.85996381,2.84442212,2.82940923
69.362978,2.82842712,2.87415952,-0.213851338,2.85993669,2.84359659,2.82922012
69.37347,3.74165739,2.87352985,0.931733619,2.85991436,2.8427947,2.82903129
69.383961,3.16227766,2.8729277,0.537912592,2.85989697,2.84201589,2.82884276
69.394453,3.46410162,2.8723525,0.769252307,2.85988468,2.84125936,2.8286545
69.404944,2.64575131,2.87180391,-0.47544989,2.85987767,2.84052466,2.82846653
69.415436,3,2.87128138,0.358773774,2.85987611,2.839811,2.82827883
69.425928,2.44948974,2.87078455,-0.649072264,2.85988019,2.83911786,2.82809141
69.436419,3.16227766,2.87031305,0.540337493,2.85989009,2.83844471,2.82790429
69.446911,3.16227766,2.86986642,0.540750624,2.85990602,2.83779081,2.82771743
69.457402,2.44948974,2.86944437,-0.648039065,2.85992818,2.83715572,2.82753087
69.467894,2.64575131,2.86904647,-0.472541173,2.85995681,2.83653874,2.82734457
69.478386,2.82842712,2.86867243,-0.200612329,2.85999212,2.83593936,2.82715855
69.488877,3.46410162,2.86832198,0.771867631,2.86003434,2.8353571,2.82697283
69.499369,3.46410162,2.86799475,0.772079572,2.86008375,2.83479129,2.82678737
69.50986,2.82842712,2.86769055,-0.198150003,2.86014058,2.83424151,2.82660221
69.520352,3,2.86740907,0.364130374,2.86020513,2.83370714,2.8264173
69.530844,3.16227766,2.86715013,0.543256418,2.86027767,2.83318772,2.82623268
69.541335,2.82842712,2.86691354,-0.19617954,2.86035849,2.8326828,2.82604835
69.551827,2.82842712,2.86669909,-0.195632217,2.86044793,2.83219178,2.82586429
69.562318,3,2.86650668,0.365367381,2.86054628,2.8317143,2.82568052
69.57281,2,2.86633614,-0.9307718,2.86065392,2.83124978,2.825497
69.583302,4,2.86618742,1.06480636,2.8607712,2.83079783,2.82531377
69.593793,3.74165739,2.86606045,0.93573337,2.86089846,2.83035804,2.82513083
69.604285,3.60555128,2.86595517,0.859997736,2.86103615,2.8299299,2.82494815
69.614776,4.35889894,2.8658716,1.22189498,2.86118463,2.82951306,2.82476576
69.625268,3,2.86580976,0.366319862,2.86134437,2.82910704,2.82458363
69.63576,2.44948974,2.8657697,-0.645197612,2.86151582,2.82871147,2.82440178
69.646251,2.82842712,2.86575152,-0.193195232,2.86169942,2.82832602,2.82422022
69.656743,3.31662479,2.86575534,0.671468127,2.86189571,2.82795022,2.82403892
69.667234,3.16227766,2.86578133,0.544514768,2.86210517,2.82758378,2.82385791
69.677726,2.64575131,2.86582967,-0.469125101,2.8623284,2.82722629,2.82367715
69.688218,2.44948974,2.86590061,-0.645299052,2.86256595,2.82687743,2.82349668
69.698709,2.82842712,2.8659944,-0.193822798,2.86281838,2.82653689,2.82331649
69.709201,3.74165739,2.86611138,0.935706154,2.8630864,2.8262043,2.82313656
69.719692,3,2.86625187,0.365715909,2.8633706,2.8258794,2.82295692
69.730184,3.60555128,2.86641631,0.859729591,2.86367173,2.82556184,2.82277754
69.740676,3.74165739,2.8666051,0.935442292,2.8639905,2.82525134,2.82259843
69.751167,3.31662479,2.86681873,0.670675823,2.86432764,2.82494765,2.82241961
69.761659,2.64575131,2.86705776,-0.470432192,2.86468402,2.82465045,2.82224104
69.77215,1.73205081,2.86732272,-1.0654914,2.8650604,2.82435953,2.82206277
69.782642,3.74165739,2.8676143,0.934902716,2.86545774,2.82407457,2.82188474
69.793134,3.31662479,2.86793315,0.669844492,2.86587694,2.82379537,2.821707
69.803625,2.64575131,2.86827996,-0.471729429,2.86631891,2.8235217,2.82152953
69.814117,2.64575131,2.86865561,-0.472127416,2.86678474,2.8232533,2.82135233
69.824608,3,2.86906085,0.361855154,2.86727542,2.82298999,2.82117541
69.8351,2.64575131,2.86949666,-0.473017283,2.86779215,2.82273151,2.82099874
69.845592,2.44948974,2.86996397,-0.648439841,2.86833604,2.82247769,2.82082235
69.856083,4.12310563,2.87046374,1.11921485,2.86890824,2.82222835,2.82064624
69.866575,2.64575131,2.87099716,-0.474600724,2.86951013,2.82198326,2.82047038
69.877066,3,2.87156525,0.358377944,2.87014291,2.82174228,2.82029482
69.887558,2.82842712,2.87216933,-0.20914637,2.87080807,2.82150521,2.8201195
69.89805,3.46410162,2.87281061,0.768954489,2.87150699,2.82127189,2.81994445
69.908541,3,2.87349035,0.355681957,2.87224108,2.82104219,2.81976969
69.919033,3.16227766,2.87421006,0.536719296,2.873012,2.82081592,2.81959518
69.929524,3,2.87497105,0.35359433,2.87382121,2.82059296,2.81942095
69.940016,2.64575131,2.87577497,-0.479607819,2.8746705,2.82037315,2.81924697
69.950508,3.60555128,2.8766233,0.853772786,2.87556147,2.82015637,2.81907326
69.960999,3.60555128,2.87751757,0.853248914,2.87649577,2.81994251,2.81889984
69.971491,2.64575131,2.87845958,-0.482398451,2.87747534,2.81973141,2.81872666
69.981982,3.16227766,2.87945083,0.531814653,2.8785018,2.81952299,2.81855377
69.992474,2.82842712,2.88049324,-0.228180011,2.87957715,2.81931711,2.81838113
70.002966,2.82842712,2.88158843,-0.230567356,2.88070314,2.81911367,2.81820876
70.013457,3.87298335,2.88273801,0.995110714,2.88188147,2.8189126,2.81803666
70.023949,3.31662479,2.88394392,0.657784819,2.88311418,2.81871377,2.81786482
70.03444,2.64575131,2.8852076,-0.489342715,2.88440279,2.81851711,2.81769325
70.044932,3.60555128,2.88653092,0.847950681,2.88574927,2.81832251,2.81752194
70.055424,3.16227766,2.88791528,0.523796128,2.88715509,2.8181299,2.81735089
70.065915,2.64575131,2.88936195,-0.493569289,2.88862162,2.81793922,2.81718012
70.076407,2.64575131,2.89087249,-0.495097137,2.89015046,2.81775036,2.81700959
70.086898,2.82842712,2.89244764,-0.253022758,2.89174246,2.81756328,2.81683935
70.09739,3.31662479,2.89408853,0.65002789,2.89339879,2.81737789,2.81666936
70.107882,2.23606798,2.89579552,-0.812236136,2.89511987,2.81719412,2.81649962
70.118373,3,2.89756856,0.320049114,2.89690574,2.81701196,2.81633017
70.128865,3,2.89940771,0.31716287,2.89875648,2.81683129,2.81616096
70.139356,2.82842712,2.9013118,-0.269971618,2.900671,2.8166521,2.81599203
70.149848,3,2.90327977,0.310998759,2.90264828,2.81647431,2.81582335
70.16034,3.31662479,2.90530935,0.641338791,2.9046861,2.81629788,2.81565493
70.170831,2.64575131,2.90739742,-0.511513551,2.9067814,2.81612278,2.81548678
70.181323,3.31662479,2.90954062,0.638031481,2.90893084,2.81594894,2.81531888
70.191814,3.46410162,2.91173374,0.743214555,2.91112926,2.81577634,2.81515126
70.202306,3.46410162,2.91397132,0.741707686,2.91337125,2.81560493,2.81498388
70.212798,4.24264069,2.91624608,1.15169206,2.91564954,2.81543467,2.81481676
70.223289,3.31662479,2.91854941,0.630932153,2.91795557,2.81526555,2.81464992
70.233781,3.60555128,2.920872,0.827453486,2.92028007,2.8150975,2.81448332
70.244272,3.60555128,2.92320224,0.826044207,2.92261145,2.81493053,2.814317
70.254764,3.87298335,2.92552793,0.973373217,2.92493752,2.81476456,2.81415092
70.265256,3.74165739,2.92783472,0.902121206,2.92724398,2.81459961,2.81398509
70.275747,3.31662479,2.93010686,0.621705661,2.92951509,2.81443564,2.81381955
70.286239,3.16227766,2.93232792,0.479530749,2.93173445,2.81427261,2.81365424
70.29673,3.31662479,2.93447941,0.618179083,2.93388359,2.81411052,2.81348921
70.307222,3,2.93654269,0.251907349,2.93594387,2.81394933,2.81332442
70.317714,3.31662479,2.93849776,0.614920343,2.93789533,2.81378902,2.81315988
70.328205,3.31662479,2.94032429,0.613433367,2.93971765,2.81362959,2.81299562
70.338697,3,2.94200244,0.240826821,2.94139098,2.813471,2.8128316
70.349188,3.60555128,2.94351212,0.813657883,2.94289527,2.81331326,2.81266785
70.35968,3,2.94483474,0.234872854,2.94421193,2.81315631,2.81250434
70.370172,3.60555128,2.94595264,0.812156782,2.9453233,2.81300017,2.81234109
70.380663,2.64575131,2.94685009,-0.548724681,2.94621369,2.81284483,2.81217811
70.391155,3.74165739,2.94751392,0.891147277,2.94686991,2.81269025,2.81201536
70.401646,3.16227766,2.9479334,0.46297328,2.94728125,2.81253644,2.81185289
70.412138,2.64575131,2.94810107,-0.549863397,2.94744025,2.81238337,2.81169066
70.42263,3.31662479,2.94801262,0.607134389,2.94734263,2.81223103,2.81152868
70.433121,2.44948974,2.94766734,-0.705816972,2.94698766,2.81207943,2.81136697
70.443613,3,2.94706783,0.230069931,2.94637796,2.81192853,2.8112055
70.454104,4,2.94622028,1.02653773,2.94551973,2.81177835,2.81104429
70.464596,3.74165739,2.94513379,0.892481704,2.94442208,2.81162884,2.81088333
70.475088,2.44948974,2.94382058,-0.703086649,2.94309722,2.81148003,2.81072261
70.485579,3,2.94229544,0.240217732,2.94155998,2.8113319,2.81056217
70.496071,3,2.94057479,0.243772868,2.93982677,2.81118442,2.81040196
70.506562,3.16227766,2.93867725,0.472864052,2.93791622,2.81103761,2.81024201
70.517054,2.82842712,2.93662185,-0.328929661,2.93584737,2.81089144,2.81008231
70.527546,2.23606798,2.93442877,-0.835679841,2.93364042,2.81074591,2.80992285
70.538037,3.46410162,2.93211845,0.729371763,2.9313158,2.81060102,2.80976366
70.548529,3.60555128,2.92971037,0.822095435,2.92889303,2.81045674,2.80960471
70.55902,2.82842712,2.92722437,-0.314320294,2.92639193,2.8103131,2.80944602
70.569512,3.46410162,2.92467846,0.734454326,2.92383054,2.81017005,2.80928756
70.580004,3.60555128,2.92209024,0.826717021,2.92122647,2.81002759,2.80912936
70.590495,2.44948974,2.91947607,-0.68555549,2.91859608,2.80988575,2.80897142
70.600987,2.82842712,2.91685016,-0.297360103,2.91595359,2.80974447,2.80881371
70.611478,3.46410162,2.91422624,0.741535821,2.91331276,2.80960378,2.80865627
70.62197,3.87298335,2.91161561,0.980493617,2.91068488,2.80946365,2.80849906
70.632462,1.73205081,2.90902886,-1.08488619,2.90808055,2.80932407,2.8083421
70.642953,3,2.90647514,0.305818348,2.90550895,2.80918506,2.8081854
70.653445,2.64575131,2.90396158,-0.508143943,2.9029772,2.80904658,2.80802893
70.663936,3.60555128,2.90149501,0.839080609,2.90049215,2.80890865,2.80787273
70.674428,3.31662479,2.89908017,0.646176926,2.89805856,2.80877122,2.80771675
70.68492,2.64575131,2.89672147,-0.500969223,2.89568083,2.80863432,2.80756103
70.695411,3.46410162,2.89442236,0.754770996,2.89336243,2.80849793,2.80740556
70.705903,2.82842712,2.89218479,-0.252502796,2.89110532,2.80836202,2.80725033
70.716394,2.23606798,2.89001084,-0.808667336,2.8889116,2.80822662,2.80709535
70.726886,3,2.88790112,0.334811715,2.88678187,2.80809168,2.80694061
70.737378,3.46410162,2.88585629,0.760424438,2.88471682,2.80795721,2.80678611
70.747869,3.46410162,2.88387653,0.761725072,2.88271662,2.8078232,2.80663187
70.758361,2.82842712,2.88196105,-0.23137399,2.88078051,2.80768963,2.80647786
70.768852,2.64575131,2.88010946,-0.484105512,2.87890811,2.80755651,2.8063241
70.779344,2,2.87832038,-0.937187486,2.87709804,2.8074238,2.80617058
70.789836,4.12310563,2.87659275,1.11647341,2.87534926,2.80729151,2.8060173
70.800327,3,2.8749253,0.353659023,2.8736605,2.80715963,2.80586428
70.810819,3,2.87331613,0.35592678,2.87202988,2.80702812,2.80571149
70.82131,3.31662479,2.87176388,0.666978941,2.87045606,2.80689701,2.80555895
70.831802,3,2.87026652,0.360185337,2.86893701,2.80676625,2.80540664
70.842294,2.64575131,2.8688224,-0.472304023,2.86747109,2.80663584,2.80525457
70.852785,3,2.86742982,0.364101878,2.86605662,2.80650578,2.80510276
70.863277,3.74165739,2.86608669,0.935719348,2.86469152,2.80637604,2.80495117
70.873768,3.16227766,2.86479142,0.545422989,2.86337422,2.80624663,2.80479984
70.88426,2.82842712,2.86354197,-0.187389544,2.86210267,2.80611751,2.80464874
70.894752,3.16227766,2.86233665,0.547668703,2.86087522,2.80598867,2.80449787
70.905243,2.64575131,2.86117383,-0.46413632,2.85969025,2.80586011,2.80434726
70.915735,3.60555128,2.86005158,0.863423242,2.85854582,2.80573181,2.80419688
70.926226,3.31662479,2.85896843,0.676503038,2.8574405,2.80560376,2.80404675
70.936718,2.23606798,2.85792256,-0.788577568,2.85637247,2.80547592,2.80389684
70.94721,3.31662479,2.8569125,0.678020862,2.85534028,2.80534831,2.80374717
70.957701,3.31662479,2.85593683,0.67873998,2.85434252,2.8052209,2.80359775
70.968193,3,2.8549939,0.380796665,2.85337756,2.80509367,2.80344856
70.978684,4,2.85408248,1.07047537,2.85244418,2.80496662,2.80329962
70.989176,3,2.85320104,0.383143519,2.85154087,2.80483972,2.8031509
70.999668,3.60555128,2.85234838,0.867872627,2.85066643,2.80471296,2.80300242
71.010159,3,2.85152332,0.385326724,2.84981971,2.80458633,2.80285419
71.020651,3.46410162,2.8507245,0.783183959,2.84899937,2.8044598,2.80270619
71.031142,3,2.84995094,0.38736166,2.84820443,2.80433337,2.80255843
71.041634,3.46410162,2.8492014,0.784155733,2.84743366,2.80420701,2.80241089
71.052126,3.74165739,2.8484749,0.945083322,2.84668612,2.80408071,2.80226359
71.062617,2.82842712,2.84777051,-0.139080491,2.84596087,2.80395448,2.80211654
71.073109,3,2.84708713,0.391040751,2.84525684,2.80382826,2.80196971
71.0836,3,2.84642399,0.391887756,2.84457327,2.80370207,2.80182313
71.094092,3.46410162,2.84578008,0.786334241,2.84390916,2.80357586,2.80167676
71.104584,2.44948974,2.84515463,-0.62901899,2.84326377,2.80344964,2.80153063
71.115075,3.31662479,2.84454691,0.687079235,2.84263638,2.8033234,2.80138475
71.125567,2.82842712,2.84395605,-0.12461511,2.84202611,2.80319711,2.80123909
71.136058,3.46410162,2.84338143,0.787857974,2.84143239,2.80307076,2.80109368
71.14655,3,2.84282225,0.396456497,2.84085441,2.80294433,2.80094848
71.157042,3.16227766,2.8422779,0.565685212,2.8402916,2.8028178,2.80080351
71.167533,3.31662479,2.84174781,0.689113181,2.83974338,2.80269118,2.80065879
71.178025,3.16227766,2.84123128,0.566609544,2.83920907,2.80256443,2.80051429
71.188516,3.16227766,2.84072784,0.567053634,2.8386882,2.80243756,2.80037004
71.199008,3.31662479,2.84023683,0.690208636,2.83818016,2.80231052,2.800226
71.2095,2.64575131,2.83975779,-0.440461663,2.83768447,2.80218333,2.80008219
71.219991,3,2.83929026,0.400886196,2.8372007,2.80205597,2.79993862
71.230483,2.64575131,2.83883368,-0.439411386,2.8367283,2.8019284,2.79979527
71.240974,2.82842712,2.83838768,-0.0998025651,2.83626691,2.80180065,2.79965217
71.251466,3.46410162,2.83795174,0.791296326,2.83581602,2.80167267,2.79950928
71.261958,2,2.8375255,-0.91516419,2.83537528,2.80154447,2.79936661
71.272449,2.82842712,2.83710859,-0.0931743635,2.83494434,2.80141604,2.79922419
71.282941,4,2.83670056,1.0785636,2.83452275,2.80128735,2.79908199
71.293432,3.60555128,2.83630113,0.877069067,2.83411025,2.80115841,2.79894003
71.303924,2.82842712,2.83590987,-0.0865028746,2.83370642,2.80102919,2.79879828
71.314416,3,2.8355265,0.405553321,2.83331098,2.80089969,2.79865676
71.324907,2.44948974,2.83515074,-0.621016103,2.83292366,2.80076991,2.79851547
71.335399,3.31662479,2.83478222,0.694148811,2.83254411,2.80063982,2.7983744
71.34589,3.74165739,2.83442071,0.952489724,2.8321721,2.80050944,2.79823358
71.356382,3,2.83406588,0.407350116,2.8318073,2.80037873,2.79809296
71.366874,3.16227766,2.8337175,0.573201672,2.8314495,2.8002477,2.79795257
71.377365,2.64575131,2.83337535,-0.433155911,2.83109848,2.80011635,2.79781242
71.387857,3.31662479,2.83303913,0.695403235,2.83075395,2.79998466,2.79767248
71.398348,2.82842712,2.83270867,-0.0654335236,2.83041573,2.79985264,2.79753277
71.40884,3.74165739,2.83238369,0.953558439,2.83008357,2.79972026,2.79739328
71.419332,3.74165739,2.83206401,0.953726047,2.82975727,2.79958754,2.79725401
71.429823,2.23606798,2.83174947,-0.771804052,2.82943668,2.79945447,2.79711498
71.440315,2.64575131,2.83143981,-0.430915888,2.82912155,2.79932104,2.79697616
71.450806,3.46410162,2.83113491,0.795592044,2.82881176,2.79918727,2.79683758
71.461298,2.82842712,2.83083454,-0.0490654562,2.82850708,2.79905312,2.7966992
71.47179,3,2.83053856,0.41165694,2.82820736,2.79891861,2.79656105
71.482281,2.82842712,2.83024684,-0.0426581581,2.82791248,2.79878376,2.79642313
71.492773,3.31662479,2.82995918,0.697614229,2.82762223,2.79864854,2.79628542
71.503264,3.16227766,2.82967548,0.576716728,2.82733651,2.79851298,2.79614795
71.513756,2.82842712,2.82939555,-0.0311194684,2.82705514,2.79837705,2.79601068
71.524248,2.82842712,2.82911928,-0.0263089079,2.82677801,2.79824077,2.79587363
71.534739,2.82842712,2.82884659,-0.020480808,2.826505,2.79810415,2.79573682
71.545231,3.16227766,2.82857729,0.577668045,2.82623596,2.79796719,2.79560021
71.555722,3.74165739,2.82831132,0.955691406,2.82597079,2.79782989,2.79546384
71.566214,3.16227766,2.82804853,0.578125529,2.82570935,2.79769226,2.79532767
71.576706,3.74165739,2.82778884,0.955964721,2.82545155,2.7975543,2.79519173
71.587197,2.82842712,2.82753217,0.0299158245,2.82519729,2.79741604,2.79505601
71.597689,2.64575131,2.82727838,-0.426059933,2.82494645,2.79727746,2.7949205
71.60818,3.16227766,2.82702743,0.579007973,2.82469895,2.7971386,2.79478522
71.618672,3,2.82677919,0.416198047,2.82445466,2.79699944,2.79465014
71.629164,2.82842712,2.8265336,0.0435146879,2.82421352,2.79686,2.79451529
71.639655,3.16227766,2.82629061,0.579643902,2.82397545,2.79672031,2.79438066
71.650147,2.64575131,2.8260501,-0.42461605,2.82374033,2.79658036,2.79424623
71.660638,3.87298335,2.82581205,1.02331388,2.82350813,2.79644018,2.79411204
71.67113,3.31662479,2.82557636,0.70074848,2.82327871,2.79629977,2.79397805
71.681622,3.46410162,2.82534298,0.799223772,2.82305203,2.79615915,2.79384427
71.692113,2.23606798,2.82511187,-0.767491952,2.82282803,2.79601835,2.79371072
71.702605,1.73205081,2.82488295,-1.04538612,2.8226066,2.79587736,2.79357737
71.713096,2.23606798,2.82465621,-0.767195039,2.82238772,2.79573623,2.79344426
71.723588,4.24264069,2.82443154,1.19088587,2.82217127,2.79559494,2.79331134
71.73408,2.44948974,2.82420894,-0.612143121,2.82195722,2.79545354,2.79317864
71.744571,2.23606798,2.82398839,-0.766759682,2.82174553,2.79531204,2.79304616
71.755063,2.82842712,2.82376979,0.0682446482,2.82153609,2.79517045,2.79291388
71.765554,2.44948974,2.82355317,-0.611607247,2.8213289,2.79502882,2.79278183
71.776046,2.23606798,2.82333844,-0.766335736,2.82112385,2.79488714,2.79264998
71.786538,3.16227766,2.82312559,0.582367639,2.82092091,2.79474544,2.79251834
71.797029,3.16227766,2.82291463,0.582548738,2.82072005,2.79460376,2.79238693
71.807521,2.82842712,2.82270548,0.0756415859,2.82052118,2.7944621,2.79225571
71.818012,3,2.82249815,0.421309681,2.8203243,2.79432051,2.79212472
71.828504,2.64575131,2.8222926,-0.420168169,2.82012932,2.794179,2.79199393
71.838996,2.82842712,2.82208882,0.0796134599,2.81993621,2.79403759,2.79186335
71.849487,3.16227766,2.82188682,0.583430238,2.81974495,2.79389633,2.79173299
71.859979,3.16227766,2.82168654,0.583601855,2.81955546,2.79375523,2.79160283
71.87047,2.82842712,2.821488,0.0833013956,2.81936774,2.79361433,2.79147289
71.880962,3.46410162,2.82129117,0.801754604,2.8191817,2.79347363,2.79134315
71.891454,3,2.82109605,0.42297039,2.81899735,2.79333319,2.79121361
71.901945,2,2.82090265,-0.906036783,2.81881464,2.79319304,2.7910843
71.912437,3.31662479,2.82071094,0.704211511,2.81863352,2.79305319,2.79095518
71.922928,2.23606798,2.82052094,-0.764495233,2.81845398,2.7929137,2.79082629
71.93342,2.64575131,2.82033262,-0.41782928,2.81827595,2.79277456,2.79069758
71.943912,3,2.82014599,0.424091978,2.81809943,2.79263583,2.79056909
71.954403,2.44948974,2.81996109,-0.608663572,2.81792439,2.79249756,2.79044082
71.964895,1.73205081,2.81977786,-1.04294154,2.81775077,2.79235974,2.79031274
71.975386,2.82842712,2.81959636,0.0939721333,2.81757858,2.79222245,2.79018487
71.985878,3,2.81941656,0.424951104,2.81740776,2.79208568,2.7900572
71.99637,2.44948974,2.81923848,-0.608069677,2.81723829,2.79194949,2.78992974
72.006861,3.31662479,2.81906214,0.705381211,2.81707016,2.79181393,2.7898025
72.017353,3.16227766,2.81888752,0.585994999,2.81690332,2.791679,2.78967544
72.027844,2.82842712,2.81871467,0.09855177,2.81673777,2.79154476,2.78954861
72.038336,2.82842712,2.81854357,0.0994160614,2.81657346,2.79141124,2.78942196
72.048828,3.31662479,2.81837425,0.705868645,2.81641038,2.79127847,2.78929552
72.059319,3.31662479,2.81820673,0.705987296,2.81624852,2.79114651,2.7891693
72.069811,2.82842712,2.818041,0.101912335,2.81608782,2.79101537,2.78904326
72.080302,2,2.81787711,-0.904365586,2.8159283,2.79088511,2.78891745
72.090794,3.46410162,2.81771505,0.803981694,2.81576991,2.79075576,2.78879182
72.101286,2,2.81755485,-0.904187396,2.81561264,2.79062735,2.78866639
72.111777,2.82842712,2.81739654,0.105026592,2.81545649,2.79049994,2.78854118
72.122269,3.60555128,2.81724012,0.887868886,2.8153014,2.79037355,2.78841616
72.13276,3,2.81708563,0.427684898,2.81514739,2.79024824,2.78829135
72.143252,2.23606798,2.81693307,-0.762145059,2.8149944,2.79012403,2.78816672
72.153744,3.46410162,2.81678247,0.80456146,2.81484245,2.79000096,2.7880423
72.164235,3.16227766,2.81663388,0.587914772,2.81469152,2.7898791,2.7879181
72.174727,3,2.81648729,0.428383839,2.81454157,2.78975845,2.78779407
72.185218,2.44948974,2.81634274,-0.605683912,2.81439261,2.78963908,2.78767027
72.19571,3,2.81620025,0.428718732,2.81424459,2.78952101,2.78754664
72.206202,3,2.81605984,0.428882452,2.81409753,2.7894043,2.78742322
72.216693,2,2.81592156,-0.903283766,2.8139514,2.78928899,2.78730001
72.227185,3.16227766,2.81578541,0.588635923,2.81380618,2.7891751,2.78717698
72.237676,3.74165739,2.81565144,0.962292029,2.81366188,2.7890627,2.78705416
72.248168,2.64575131,2.81551965,-0.412029535,2.81351845,2.78895181,2.78693153
72.25866,3.16227766,2.81539008,0.588971627,2.8133759,2.78884247,2.7868091
72.269151,3.74165739,2.81526278,0.962493952,2.81323422,2.78873474,2.78668687
72.279643,2.82842712,2.81513774,0.115279579,2.81309338,2.78862864,2.78656483
72.290134,2.23606798,2.81501503,-0.760885701,2.81295338,2.78852424,2.78644299
72.300626,3.87298335,2.81489464,1.02863439,2.8128142,2.78842154,2.78632134
72.311118,2,2.81477661,-0.902649771,2.81267583,2.78832061,2.78619989
72.321609,3.60555128,2.81466099,0.889320126,2.81253828,2.78822149,2.78607864
72.332101,3,2.81454778,0.430641636,2.81240151,2.78812421,2.78595757
72.342592,2.82842712,2.81443704,0.118279701,2.81226552,2.78802881,2.78583671
72.353084,2.64575131,2.81432876,-0.410581847,2.8121303,2.78793533,2.78571604
72.363576,3.16227766,2.814223,0.589961574,2.81199583,2.78784382,2.78559555
72.374067,3.87298335,2.81411979,1.02901096,2.81186213,2.78775431,2.78547528
72.384559,3.31662479,2.81401913,0.708946864,2.81172915,2.78766683,2.78535518
72.39505,3.74165739,2.81392109,0.963190688,2.81159691,2.78758144,2.78523528
72.405542,2.64575131,2.81382565,-0.409968707,2.81146538,2.78749816,2.78511557
72.416034,2.64575131,2.81373287,-0.409855537,2.81133456,2.78741702,2.78499605
72.426525,3.31662479,2.81364278,0.709212246,2.81120446,2.78733809,2.78487673
72.437017,2.82842712,2.81355539,0.121949728,2.81107504,2.78726137,2.7847576
72.447508,2.82842712,2.81347074,0.122296304,2.81094631,2.78718691,2.78463866
72.458,3.16227766,2.81338884,0.590668112,2.81081825,2.78711475,2.7845199
72.468492,2.23606798,2.81330973,-0.759764274,2.81069086,2.78704491,2.78440134
72.478983,3.31662479,2.81323344,0.709500777,2.81056414,2.78697744,2.78428297
72.489475,3,2.81315997,0.432249959,2.81043807,2.78691235,2.78416478
72.499966,2.44948974,2.81308937,-0.602992232,2.81031265,2.78684969,2.7840468
72.510458,3.16227766,2.81302165,0.590978856,2.81018786,2.78678948,2.78392899
72.52095,2.82842712,2.81295683,0.124379628,2.8100637,2.78673176,2.78381137
72.531441,2.23606798,2.81289495,-0.759491256,2.80994017,2.78667655,2.78369395
72.541933,3,2.812836,0.432624551,2.80981726,2.78662387,2.7835767
72.552424,2.82842712,2.81278002,0.125088382,2.80969496,2.78657376,2.78345965
72.562916,2.23606798,2.81272702,-0.759380698,2.80957326,2.78652623,2.78334278
72.573408,2.44948974,2.81267702,-0.602650215,2.80945216,2.78648132,2.7832261
72.583899,3.16227766,2.81263005,0.591310083,2.80933166,2.78643904,2.78310961
72.594391,2.64575131,2.8125861,-0.40845414,2.80921174,2.78639941,2.7829933
72.604882,2.44948974,2.81254519,-0.602540829,2.8090924,2.78636246,2.78287719
72.615374,3,2.81250734,0.433004221,2.80897363,2.7863282,2.78276125
72.625866,3,2.81247256,0.433044381,2.80885543,2.78629665,2.78264549
72.636357,3.60555128,2.81244086,0.890567467,2.80873781,2.78626782,2.78252993
72.646849,3.46410162,2.81241224,0.807272798,2.80862073,2.78624172,2.78241454
72.65734,2.44948974,2.81238672,-0.60240931,2.80850421,2.78621837,2.78229935
72.667832,2.82842712,2.81236429,0.126739246,2.80838823,2.78619778,2.78218433
72.678324,3.31662479,2.81234496,0.710126632,2.8082728,2.78617995,2.7820695
72.688815,3.16227766,2.81232873,0.591564818,2.80815791,2.7861649,2.78195485
72.699307,2.82842712,2.81231559,0.126931203,2.80804354,2.78615261,2.78184038
72.709798,3,2.81230556,0.433237162,2.80792972,2.78614311,2.78172611
72.72029,3.46410162,2.81229862,0.80734317,2.8078164,2.78613637,2.781612
72.730782,3.46410162,2.81229477,0.807345556,2.80770361,2.78613242,2.78149807
72.741273,2.23606798,2.81229399,-0.759095525,2.80759134,2.78613123,2.78138434
72.751765,2.82842712,2.81229629,0.12700723,2.80747957,2.78613281,2.78127078
72.762256,2,2.81230164,-0.901277781,2.80736831,2.78613715,2.78115741
72.772748,3,2.81231003,0.433232001,2.80725755,2.78614422,2.7810442
72.78324,2.44948974,2.81232145,-0.602355136,2.80714728,2.78615404,2.78093118
72.793731,2.23606798,2.81233588,-0.759123112,2.80703752,2.78616656,2.78081835
72.804223,3,2.81235329,0.433182076,2.80692824,2.78618179,2.78070569
72.814714,2.82842712,2.81237366,0.126702264,2.80681946,2.7861997,2.78059321
72.825206,2.82842712,2.81239697,0.126610243,2.80671114,2.78622026,2.7804809
72.835698,3,2.81242319,0.433101386,2.80660331,2.78624345,2.78036877
72.846189,2.23606798,2.81245228,-0.759199779,2.80649596,2.78626925,2.78025683
72.856681,3.31662479,2.81248422,0.710028568,2.80638908,2.78629762,2.78014506
72.867172,2.64575131,2.81251897,-0.40837196,2.80628267,2.78632853,2.78003347
72.877664,3,2.81255649,0.43294747,2.80617671,2.78636194,2.77992205
72.888156,3.46410162,2.81259674,0.807158521,2.80607122,2.78639783,2.77981081
72.898647,3.31662479,2.81263967,0.709919095,2.8059662,2.78643613,2.77969975
72.909139,3.87298335,2.81268525,1.02970777,2.80586162,2.78647682,2.77958886
72.91963,3.31662479,2.81273341,0.709853069,2.8057575,2.78651985,2.77947815
72.930122,2.82842712,2.81278412,0.125071997,2.80565383,2.78656517,2.77936761
72.940614,3.16227766,2.81283732,0.591134792,2.8055506,2.78661272,2.77925724
72.951105,3.31662479,2.81289294,0.709740691,2.80544782,2.78666245,2.77914706
72.961597,3,2.81295094,0.432491685,2.80534547,2.78671431,2.77903704
72.972088,2,2.81301125,-0.901671363,2.80524357,2.78676823,2.77892721
72.98258,3.31662479,2.8130738,0.709613265,2.8051421,2.78682416,2.77881753
72.993072,1.73205081,2.81313854,-1.03975369,2.80504106,2.78688203,2.77870803
73.003563,3,2.81320538,0.43219743,2.80494046,2.78694176,2.77859872
73.014055,3.16227766,2.81327426,0.590765093,2.80484027,2.7870033,2.77848956
73.024546,2.82842712,2.8133451,0.122808876,2.80474052,2.78706655,2.77838059
73.035038,2.82842712,2.81341784,0.1225124,2.80464118,2.78713147,2.77827177
73.04553,3.16227766,2.81349237,0.590580465,2.80454227,2.78719795,2.77816313
73.056021,3.31662479,2.81356863,0.709264522,2.80444377,2.78726592,2.77805467
73.066513,2,2.81364653,-0.902023574,2.80434569,2.7873353,2.77794637
73.077004,3.46410162,2.81372597,0.806458706,2.80424802,2.787406,2.77783825
73.087496,3,2.81380688,0.431501005,2.80415076,2.78747794,2.77773029
73.097988,1.41421356,2.81388916,-1.18307887,2.80405391,2.78755102,2.7776225
73.108479,2.64575131,2.81397271,-0.410148026,2.80395747,2.78762514,2.77751489
73.118971,3.60555128,2.81405745,0.889659387,2.80386143,2.78770022,2.77740744
73.129462,2.44948974,2.81414326,-0.603865478,2.80376579,2.78777615,2.77730016
73.139954,2.23606798,2.81423006,-0.760369698,2.80367055,2.78785284,2.77719305
73.150446,2.64575131,2.81431773,-0.410568408,2.80357571,2.78793019,2.7770861
73.160937,2.44948974,2.81440616,-0.604083125,2.80348127,2.78800807,2.77697933
73.171429,2.82842712,2.81449528,0.118033255,2.80338721,2.78808641,2.77687271
73.18192,3,2.81458493,0.430598497,2.80329356,2.78816508,2.77676627
73.192412,3.46410162,2.81467505,0.805870068,2.80320029,2.78824397,2.77665999
73.202904,2.44948974,2.8147655,-0.604380472,2.80310741,2.78832299,2.77655387
73.213395,2.44948974,2.81485616,-0.604455472,2.80301492,2.78840199,2.77644793
73.223887,3,2.81494694,0.430177942,2.80292281,2.78848089,2.77634215
73.234378,3.60555128,2.8150377,0.889108305,2.80283109,2.78855956,2.77623654
73.24487,2.44948974,2.81512834,-0.604680574,2.80273975,2.78863788,2.77613108
73.255362,3.74165739,2.81521874,0.962516831,2.80264878,2.78871575,2.77602579
73.265853,3.31662479,2.81530876,0.708036744,2.8025582,2.78879302,2.77592067
73.276345,2.64575131,2.81539831,-0.41188226,2.80246799,2.78886959,2.7758157
73.286836,2.44948974,2.81548724,-0.604977269,2.80237817,2.78894533,2.77571091
73.297328,3.46410162,2.81557545,0.805311221,2.80228871,2.78902014,2.77560627
73.30782,3.16227766,2.81566281,0.58874005,2.80219962,2.78909387,2.7755018
73.318311,3.16227766,2.81574919,0.588666685,2.80211091,2.7891664,2.77539749
73.328803,3,2.81583449,0.429145097,2.80202256,2.78923763,2.77529334
73.339294,3,2.81591855,0.429047142,2.80193459,2.78930741,2.77518936
73.349786,3,2.81600128,0.428950723,2.80184698,2.78937563,2.77508553
73.360278,2.82842712,2.81608254,0.111106194,2.80175973,2.78944216,2.77498186
73.370769,3,2.8161622,0.428763102,2.80167285,2.78950689,2.77487836
73.381261,3.60555128,2.81624016,0.888431829,2.80158633,2.78956968,2.77477501
73.391752,3.60555128,2.81631628,0.888388991,2.80150018,2.78963042,2.77467183
73.402244,3,2.81639044,0.428496856,2.80141438,2.78968898,2.7745688
73.412736,3,2.81646253,0.428412729,2.80132894,2.78974525,2.77446592
73.423227,2.44948974,2.81653242,-0.605840472,2.80124386,2.78979909,2.77436322
73.433719,3.16227766,2.8166,0.587943589,2.80115914,2.7898504,2.77426067
73.44421,3,2.81666513,0.42817621,2.80107477,2.78989906,2.77415828
73.454702,4,2.81672773,1.08778319,2.80099076,2.78994494,2.77405604
73.465194,2.82842712,2.81678765,0.107886376,2.80090709,2.78998794,2.77395396
73.475685,3.16227766,2.8168448,0.587735366,2.80082379,2.79002793,2.77385204
73.486177,3.31662479,2.81689906,0.706912816,2.80074083,2.79006482,2.77375027
73.496668,2.82842712,2.81695032,0.107129856,2.80065822,2.79009848,2.77364867
73.50716,2.64575131,2.81699848,-0.413820207,2.80057596,2.79012882,2.77354721
73.517652,3.16227766,2.81704342,0.587566371,2.80049405,2.79015572,2.77344591
73.528143,3.74165739,2.81708505,0.961546848,2.80041249,2.79017908,2.77334477
73.538635,2.64575131,2.81712326,-0.413970955,2.80033127,2.7901988,2.77324378
73.549126,3.16227766,2.81715796,0.58746889,2.8002504,2.79021478,2.77314295
73.559618,3.60555128,2.81718906,0.887897638,2.80016986,2.79022693,2.77304227
73.57011,2.82842712,2.81721646,0.105880449,2.80008967,2.79023516,2.77294174
73.580601,3.74165739,2.81724006,0.961466238,2.80000984,2.79023937,2.77284137
73.591093,2.44948974,2.81725979,-0.606440474,2.79993033,2.79023948,2.77274115
73.601584,3.16227766,2.81727556,0.587368791,2.79985117,2.79023541,2.77264109
73.612076,3.74165739,2.8172873,0.961441671,2.79977234,2.79022707,2.77254117
73.622568,2.64575131,2.81729492,-0.414178236,2.79969386,2.79021438,2.7724414
73.633059,1.73205081,2.81729836,-1.04175215,2.79961572,2.79019729,2.7723418
73.643551,2.44948974,2.81729754,-0.606471596,2.7995379,2.79017571,2.77224233
73.654042,2.82842712,2.8172924,0.105521201,2.79946044,2.79014959,2.77214303
73.664534,3.46410162,2.81728288,0.804250418,2.7993833,2.79011885,2.77204387
73.675026,2.82842712,2.81726892,0.105632396,2.79930649,2.79008345,2.77194486
73.685517,3.60555128,2.81725047,0.887863054,2.79923003,2.79004333,2.771846
73.696009,3.16227766,2.81722748,0.587409718,2.79915389,2.78999843,2.77174729
73.7065,3.46410162,2.81719991,0.804301998,2.79907809,2.78994873,2.77164874
73.716992,3.16227766,2.81716771,0.587460595,2.79900262,2.78989416,2.77155032
73.727484,2.82842712,2.81713085,0.106283949,2.79892748,2.78983471,2.77145206
73.737975,2.23606798,2.8170893,-0.762247544,2.79885267,2.78977034,2.77135395
73.748467,3.46410162,2.81704302,0.804399525,2.79877819,2.78970101,2.77125598
73.758958,2.64575131,2.81699201,-0.413812391,2.79870405,2.78962671,2.77115817
73.76945,3.16227766,2.81693623,0.587657582,2.79863022,2.78954742,2.77106049
73.779942,3,2.81687567,0.427930284,2.79855673,2.78946312,2.77096296
73.790433,2.23606798,2.81681034,-0.76206454,2.79848357,2.78937382,2.77086559
73.800925,2.64575131,2.81674022,-0.413508048,2.79841073,2.78927949,2.77076835
73.811416,3.46410162,2.81666531,0.804634266,2.79833822,2.78918016,2.77067127
73.821908,2.44948974,2.81658562,-0.605884378,2.79826604,2.78907581,2.77057433
73.8324,2.64575131,2.81650116,-0.413218886,2.79819418,2.78896645,2.77047753
73.842891,3.74165739,2.81641195,0.961896793,2.79812264,2.78885212,2.77038088
73.853383,3.31662479,2.81631799,0.707323688,2.79805143,2.78873281,2.77028437
73.863874,3.74165739,2.81621933,0.961996912,2.79798055,2.78860857,2.77018801
73.874366,3,2.81611597,0.428817008,2.79790998,2.78847941,2.77009179
73.884858,3.46410162,2.81600797,0.805042638,2.79783974,2.78834537,2.76999571
73.895349,2.44948974,2.81589536,-0.605314476,2.79776983,2.78820649,2.76989978
73.905841,3.31662479,2.81577817,0.707705182,2.79770023,2.78806281,2.76980399
73.916332,3,2.81565646,0.429352465,2.79763096,2.78791439,2.76970835
73.926824,3,2.81553027,0.429499392,2.79756201,2.78776125,2.76961284
73.937316,3.60555128,2.81539967,0.888904725,2.79749337,2.78760347,2.76951747
73.947807,3.31662479,2.81526471,0.708067847,2.79742506,2.78744113,2.76942225
73.958299,2.82842712,2.81512546,0.115332855,2.79735707,2.78727424,2.76932716
73.96879,2.44948974,2.81498199,-0.604559547,2.7972894,2.78710293,2.76923223
73.979282,2.82842712,2.81483435,0.116588037,2.79722205,2.78692722,2.76913742
73.989774,3.31662479,2.81468264,0.708478755,2.79715501,2.78674721,2.76904276
74.000265,3,2.81452695,0.430665818,2.7970883,2.78656301,2.76894824
74.010757,2.44948974,2.81436734,-0.604050986,2.7970219,2.78637465,2.76885385
74.021248,3.46410162,2.81420391,0.806162331,2.79695582,2.78618226,2.76875961
74.03174,3.60555128,2.81403674,0.889671027,2.79689005,2.78598591,2.76866551
74.042232,3.16227766,2.81386593,0.590264118,2.79682461,2.78578569,2.76857153
74.052723,2.64575131,2.8136916,-0.409805186,2.79675948,2.78558174,2.76847771
74.063215,3.87298335,2.81351382,1.02930536,2.79669467,2.78537412,2.76838401
74.073706,2.64575131,2.81333272,-0.409367089,2.79663018,2.78516297,2.76829046
74.084198,2.23606798,2.81314839,-0.759658089,2.79656599,2.78494836,2.76819704
74.09469,3.16227766,2.81296094,0.591030216,2.79650213,2.78473042,2.76810376
74.105181,3.16227766,2.81277052,0.591191289,2.79643858,2.7845093,2.76801061
74.115673,3,2.8125772,0.432923553,2.79637535,2.78428505,2.7679176
74.126164,3.46410162,2.81238113,0.807292068,2.79631243,2.78405786,2.76782473
74.136656,3.16227766,2.81218241,0.591688473,2.79624983,2.78382779,2.76773199
74.147148,3.60555128,2.81198118,0.890825515,2.79618753,2.783595,2.76763938
74.157639,3.46410162,2.81177758,0.807665797,2.79612556,2.78335964,2.76754691
74.168131,3.74165739,2.8115717,0.964409504,2.7960639,2.78312179,2.76745457
74.178622,2.82842712,2.81136371,0.130627002,2.79600256,2.78288162,2.76736238
74.189114,3.74165739,2.81115371,0.964626184,2.79594152,2.78263924,2.7672703
74.199606,2.64575131,2.81094186,-0.406436396,2.7958808,2.78239479,2.76717836
74.210097,2,2.8107283,-0.900404518,2.7958204,2.78214843,2.76708656
74.220589,3,2.81051313,0.435300892,2.7957603,2.78190027,2.76699489
74.23108,3,2.81029655,0.435549598,2.79570053,2.78165048,2.76690335
74.241572,3.60555128,2.81007864,0.891892728,2.79564106,2.78139917,2.76681194
74.252064,4.12310563,2.80985957,1.14596948,2.79558191,2.78114649,2.76672066
74.262555,3.60555128,2.8096395,0.892138876,2.79552307,2.78089263,2.76662952
74.273047,2,2.80941854,-0.899676909,2.79546454,2.78063767,2.7665385
74.283538,3,2.80919687,0.436810171,2.79540633,2.78038181,2.76644762
74.29403,3.74165739,2.80897461,0.965755031,2.79534842,2.78012515,2.76635686
74.304522,3.16227766,2.8087519,0.594580319,2.79529083,2.77986786,2.76626623
74.315013,1.73205081,2.80852894,-1.03753464,2.79523356,2.77961011,2.76617574
74.325505,3.31662479,2.80830581,0.712964924,2.79517659,2.77935202,2.76608537
74.335996,3,2.80808271,0.438083655,2.79511994,2.77909376,2.76599514
74.346488,3.31662479,2.80785975,0.713277673,2.7950636,2.77883545,2.76590502
74.35698,3,2.8076371,0.438591951,2.79500757,2.77857726,2.76581504
74.367471,3,2.80741493,0.438845158,2.79495185,2.77831937,2.76572519
74.377963,3.16227766,2.80719334,0.595889521,2.79489645,2.77806187,2.76563545
74.388454,2.23606798,2.80697253,-0.755582258,2.79484136,2.77780497,2.76554586
74.398946,3.16227766,2.8067526,0.596259225,2.79478658,2.77754876,2.76545638
74.409438,3.16227766,2.80653372,0.596442737,2.79473211,2.77729343,2.76536703
74.419929,3.31662479,2.80631607,0.714358959,2.79467795,2.77703914,2.76527781
74.430421,2.82842712,2.80609974,0.149423493,2.79462411,2.776786,2.76518871
74.440912,2.82842712,2.80588494,0.150140552,2.79457058,2.7765342,2.76509974
74.451404,2.44948974,2.80567176,-0.596809867,2.79451736,2.77628385,2.76501089
74.461896,4.12310563,2.80546037,1.1478873,2.79446445,2.77603511,2.76492217
74.472387,3.31662479,2.80525094,0.71510408,2.79441186,2.77578816,2.76483357
74.482879,3.31662479,2.80504358,0.715249054,2.79435957,2.7755431,2.76474509
74.49337,3.46410162,2.80483847,0.811950212,2.7943076,2.77530012,2.76465675
74.503862,2.64575131,2.80463571,-0.398603059,2.79425594,2.77505933,2.76456852
74.514354,3.31662479,2.80443547,0.715674033,2.7942046,2.77482088,2.76448041
74.524845,3,2.80423791,0.4424501,2.79415357,2.77458494,2.76439243
74.535337,3.46410162,2.80404313,0.812439833,2.79410285,2.77435162,2.76430456
74.545828,3.46410162,2.80385132,0.812557872,2.79405244,2.7741211,2.76421683
74.55632,1.73205081,2.80366257,-1.03518683,2.79400234,2.77389347,2.76412921
74.566812,3,2.80347705,0.443309091,2.79395256,2.77366891,2.76404171
74.577303,2.64575131,2.80329491,-0.39691762,2.7939031,2.77344757,2.76395434
74.587795,3.16227766,2.80311625,0.59930077,2.79385394,2.77322954,2.76386708
74.598286,3.31662479,2.80294124,0.716717203,2.7938051,2.77301501,2.76377995
74.608778,3.46410162,2.80276999,0.813222986,2.79375657,2.77280408,2.76369293
74.61927,2.82842712,2.80260265,0.160699966,2.79370835,2.77259689,2.76360603
74.629761,3,2.80243936,0.444477944,2.79366046,2.7723936,2.76351926
74.640253,2.64575131,2.80228023,-0.395637352,2.79361287,2.77219431,2.76343259
74.650744,2.82842712,2.80212541,0.162178027,2.7935656,2.77199919,2.76334606
74.661236,4.12310563,2.80197502,1.14940446,2.79351864,2.77180833,2.76325963
74.671728,3.16227766,2.80182919,0.600373609,2.79347199,2.77162188,2.76317333
74.682219,2.64575131,2.80168807,-0.394888281,2.79342567,2.77143999,2.76308714
74.692711,3.16227766,2.80155175,0.600604623,2.79337965,2.77126275,2.76300107
74.703202,2.44948974,2.80142039,-0.593237425,2.79333396,2.77109032,2.76291512
74.713694,3.16227766,2.80129408,0.600819089,2.79328857,2.77092279,2.76282928
74.724186,3.16227766,2.80117297,0.600919867,2.7932435,2.77076031,2.76274356
74.734677,3,2.80105719,0.446030053,2.79319875,2.77060302,2.76265796
74.745169,3.60555128,2.80094684,0.896997457,2.79315432,2.770451,2.76257246
74.75566,2.23606798,2.80084205,-0.751514522,2.7931102,2.77030442,2.76248709
74.766152,3.31662479,2.80074294,0.718249157,2.7930664,2.77016335,2.76240183
74.776644,1.73205081,2.80064962,-1.03373053,2.79302291,2.77002794,2.76231668
74.787135,2.82842712,2.80056223,0.166927822,2.79297974,2.76989831,2.76223165
74.797627,3,2.80048086,0.446675659,2.79293689,2.76977456,2.76214673
74.808118,2.23606798,2.80040564,-0.751224108,2.79289436,2.76965683,2.76206193
74.81861,3.16227766,2.80033667,0.601615315,2.79285214,2.7695452,2.76197724
74.829102,2.64575131,2.80027408,-0.393093846,2.79281025,2.76943982,2.76189265
74.839593,2,2.80021798,-0.894549039,2.79276867,2.76934079,2.76180819
74.850085,3.87298335,2.80016847,1.03576777,2.79272741,2.76924821,2.76172383
74.860576,3,2.80012567,0.447073067,2.79268647,2.76916221,2.7616396
74.871068,3.74165739,2.80008968,0.970344116,2.79264585,2.76908287,2.76155546
74.88156,2.64575131,2.80006061,-0.392822228,2.79260555,2.76901033,2.76147144
74.892051,3.60555128,2.80003857,0.897503594,2.79256557,2.76894468,2.76138753
74.902543,3.60555128,2.80002366,0.897511901,2.79252591,2.76888603,2.76130373
74.913034,3.31662479,2.80001599,0.718755037,2.79248657,2.76883449,2.76122004
74.923526,3.16227766,2.80001565,0.601882059,2.79244755,2.76879014,2.76113646
74.934018,2.64575131,2.80002274,-0.392774023,2.79240886,2.7687531,2.76105299
74.944509,3.74165739,2.80003738,0.970371068,2.79237048,2.76872348,2.76096963
74.955001,3,2.80005964,0.447146907,2.79233243,2.76870135,2.76088638
74.965492,3,2.80008964,0.447113366,2.79229471,2.76868683,2.76080324
74.975984,2.82842712,2.80012746,0.168225044,2.7922573,2.76868,2.7607202
74.986476,3.31662479,2.8001732,0.718645665,2.79222022,2.76868097,2.76063726
74.996967,3.31662479,2.80022694,0.718608272,2.79218346,2.76868981,2.76055445
75.007459,2.44948974,2.80028879,-0.592282909,2.79214703,2.76870664,2.76047173
75.01795,2.64575131,2.80035881,-0.393201603,2.79211092,2.76873151,2.76038913
75.028442,2.82842712,2.80043711,0.167302153,2.79207514,2.76876454,2.76030662
75.038934,3.16227766,2.80052377,0.601459797,2.79203968,2.7688058,2.76022422
75.049425,2.64575131,2.80061886,-0.393532142,2.79200456,2.76885537,2.76014194
75.059917,2.44948974,2.80072247,-0.592648906,2.79196975,2.76891334,2.76005975
75.070408,3.16227766,2.80083466,0.601201297,2.79193528,2.76897977,2.75997768
75.0809,3.46410162,2.80095553,0.814337819,2.79190113,2.76905476,2.7598957
75.091392,2.82842712,2.80108514,0.165354107,2.79186731,2.76913837,2.75981383
75.101883,3,2.80122355,0.445843524,2.79183382,2.76923065,2.75973207
75.112375,2.82842712,2.80137085,0.164487916,2.79180066,2.7693317,2.7596504
75.122866,3.46410162,2.80152707,0.813986819,2.79176783,2.76944156,2.75956885
75.133358,2.44948974,2.80169232,-0.593466572,2.79173532,2.76956032,2.75948739
75.14385,3.16227766,2.80186662,0.600342438,2.79170315,2.76968802,2.75940603
75.154341,3.31662479,2.80205002,0.717338675,2.79167132,2.7698247,2.75932479
75.164833,2,2.8022426,-0.895679965,2.79163981,2.76997044,2.75924364
75.175324,2.44948974,2.80244438,-0.594099854,2.79160863,2.77012526,2.7591626
75.185816,3.16227766,2.80265544,0.599685103,2.79157779,2.77028924,2.75908165
75.196308,3.31662479,2.8028758,0.716762858,2.79154728,2.7704624,2.7590008
75.206799,2.64575131,2.80310547,-0.396678911,2.79151711,2.77064476,2.75892006
75.217291,3.74165739,2.80334454,0.9686655,2.79148727,2.7708364,2.75883942
75.227782,3,2.80359298,0.443178319,2.79145777,2.77103729,2.75875888
75.238274,2.82842712,2.80385087,0.156768171,2.7914286,2.77124751,2.75867843
75.248766,3,2.8041182,0.442585362,2.79139977,2.77146705,2.75859809
75.259257,1.41421356,2.80439496,-1.17905954,2.79137127,2.77169591,2.75851785
75.269749,3.16227766,2.80468122,0.59799368,2.79134312,2.77193414,2.7584377
75.28024,3.31662479,2.80497692,0.71529565,2.7913153,2.77218171,2.75835766
75.290732,2.82842712,2.80528213,0.152134789,2.79128782,2.77243865,2.75827771
75.301224,3,2.80559681,0.440911774,2.79126068,2.77270494,2.75819785
75.311715,3,2.80592091,0.440544081,2.79123388,2.77298054,2.7581181
75.322207,2.23606798,2.80625449,-0.755106956,2.79120742,2.77326549,2.75803845
75.332698,2.64575131,2.80659746,-0.401056291,2.79118131,2.77355971,2.75795889
75.34319,2.82842712,2.80694985,0.146551256,2.79115553,2.77386323,2.75787943
75.353682,3,2.80731161,0.438962858,2.7911301,2.77417598,2.75780006
75.364173,2.23606798,2.80768265,-0.756052029,2.79110502,2.7744979,2.75772079
75.374665,3.31662479,2.808063,0.713135185,2.79108027,2.774829,2.75764161
75.385156,2.82842712,2.80845253,0.141331503,2.79105588,2.77516916,2.75756254
75.395648,2.64575131,2.80885126,-0.403856352,2.79103183,2.77551838,2.75748355
75.40614,3.31662479,2.80925909,0.712296075,2.79100812,2.77587658,2.75740466
75.416631,3.31662479,2.8096759,0.712003431,2.79098477,2.77624362,2.75732587
75.427123,3.60555128,2.8101017,0.8918798,2.79096176,2.77661952,2.75724716
75.437614,2.82842712,2.81053631,0.133756565,2.7909391,2.77700409,2.75716856
75.448106,3.46410162,2.81097972,0.808159575,2.79091679,2.77739733,2.75709004
75.458598,2.64575131,2.81143179,-0.407038665,2.79089483,2.77779909,2.75701162
75.469089,2,2.81189236,-0.901050698,2.79087322,2.77820923,2.7569333
75.479581,3.60555128,2.81236141,0.890612072,2.79085197,2.77862769,2.75685506
75.490072,2.82842712,2.81283873,0.124853506,2.79083107,2.77905427,2.75677692
75.500564,3.31662479,2.81332426,0.709436769,2.79081052,2.77948892,2.75669886
75.511056,3.31662479,2.81381783,0.709088822,2.79079032,2.77993147,2.7566209
75.521547,2.82842712,2.81431924,0.118776611,2.79077048,2.7803817,2.75654303
75.532039,2.44948974,2.81482843,-0.604432533,2.790751,2.78083955,2.75646525
75.54253,3.46410162,2.81534513,0.805454208,2.79073188,2.78130477,2.75638757
75.553022,3,2.81586928,0.429104553,2.79071311,2.78177727,2.75630997
75.563514,2.23606798,2.81640065,-0.761795687,2.7906947,2.78225682,2.75623245
75.574005,4.47213595,2.81693898,1.28654459,2.79067665,2.78274319,2.75615504
75.584497,3.31662479,2.8174842,0.706498827,2.79065896,2.78323626,2.75607771
75.594988,3.16227766,2.81803599,0.586721122,2.79064164,2.78373574,2.75600047
75.60548,3.31662479,2.81859424,0.705712798,2.79062467,2.7842415,2.75592331
75.615972,3.60555128,2.81915868,0.886787797,2.79060807,2.78475327,2.75584625
75.626463,2.82842712,2.81972903,0.0932635997,2.79059183,2.78527078,2.75576928
75.636955,2.64575131,2.82030515,-0.417796411,2.79057596,2.78579387,2.75569238
75.647446,2.44948974,2.8208867,-0.609423464,2.79056046,2.78632219,2.75561559
75.657938,2.64575131,2.82147353,-0.419192344,2.79054532,2.78685561,2.75553887
75.66843,2.23606798,2.82206533,-0.765504638,2.79053055,2.78739379,2.75546224
75.678921,2.82842712,2.82266177,0.075929963,2.79051615,2.78793641,2.7553857
75.689413,2.82842712,2.82326268,0.0718640741,2.79050212,2.7884833,2.75530924
75.699904,3,2.82386767,0.41968122,2.79048846,2.78903406,2.75523288
75.710396,2.82842712,2.82447657,0.0628534207,2.79047517,2.78958851,2.75515659
75.720888,2.23606798,2.82508902,-0.767477062,2.79046226,2.79014629,2.75508039
75.731379,3,2.82570465,0.417486944,2.79044972,2.79070703,2.75500428
75.741871,3.16227766,2.82632327,0.579615724,2.79043756,2.79127052,2.75492825
75.752362,3.60555128,2.82694445,0.882387005,2.79042577,2.79183634,2.7548523
75.762854,2.23606798,2.82756797,-0.769090367,2.79041436,2.79240426,2.75477644
75.773346,3.74165739,2.82819345,0.955753074,2.79040333,2.7929739,2.75470066
75.783837,2.82842712,2.82882048,-0.0198332928,2.79039267,2.79354484,2.75462497
75.794329,2.44948974,2.82944886,-0.616408235,2.7903824,2.79411686,2.75454935
75.80482,3.74165739,2.83007809,0.954766618,2.79037251,2.79468948,2.75447383
75.815312,2.23606798,2.83070796,-0.771129031,2.790363,2.79526247,2.75439838
75.825804,2.82842712,2.83133804,-0.0539529027,2.79035388,2.79583539,2.75432301
75.836295,3,2.83196791,0.409917177,2.79034514,2.79640783,2.75424773
75.846787,3.31662479,2.83259731,0.695720832,2.79033679,2.79697952,2.75417252
75.857278,2.64575131,2.83322577,-0.432983203,2.79032883,2.79754996,2.75409741
75.86777,3,2.83385301,0.407611327,2.79032125,2.79811889,2.75402236
75.878262,3.31662479,2.83447859,0.694367479,2.79031407,2.79868587,2.7539474
75.888753,2.64575131,2.83510209,-0.435144547,2.79030727,2.79925044,2.75387252
75.899245,4,2.83572322,1.07901658,2.79030087,2.79981233,2.75379772
75.909736,2.64575131,2.83634148,-0.436566335,2.79029486,2.80037103,2.753723
75.920228,2.82842712,2.83695659,-0.0923551037,2.79028925,2.80092625,2.75364836
75.93072,3.31662479,2.83756811,0.692139208,2.79028403,2.80147754,2.75357379
75.941211,2.64575131,2.83817557,-0.438661901,2.79027921,2.80202444,2.75349931
75.951703,2.23606798,2.83877871,-0.776344469,2.79027479,2.80256665,2.7534249
75.962194,3.31662479,2.83937701,0.690831226,2.79027077,2.80310368,2.75335058
75.972686,2.64575131,2.83997018,-0.440702696,2.79026715,2.8036352,2.75327632
75.983178,2.23606798,2.84055777,-0.777489416,2.79026393,2.80416078,2.75320215
75.993669,3.16227766,2.84113933,0.566690683,2.79026112,2.80467996,2.75312805
76.004161,2.82842712,2.84171458,-0.115271208,2.79025871,2.80519243,2.75305403
76.014652,2.64575131,2.842283,-0.443318949,2.7902567,2.8056977,2.75298009
76.025144,2.82842712,2.84284432,-0.120071641,2.79025511,2.80619546,2.75290622
76.035636,2.64575131,2.8433981,-0.444574836,2.79025392,2.80668526,2.75283243
76.046127,2.82842712,2.84394388,-0.124566272,2.79025315,2.80716667,2.75275871
76.056619,3.16227766,2.84448139,0.563734215,2.79025279,2.80763938,2.75268507
76.06711,2.23606798,2.84501016,-0.780347473,2.79025284,2.80810292,2.75261151
76.077602,3,2.84552989,0.393026861,2.7902533,2.80855699,2.75253801
76.088094,2.44948974,2.84604016,-0.629722494,2.79025418,2.80900116,2.75246459
76.098585,2.82842712,2.84654057,-0.134586189,2.79025548,2.80943502,2.75239125
76.109077,2.64575131,2.84703083,-0.448641863,2.7902572,2.80985828,2.75231798
76.119568,1.73205081,2.84751051,-1.05615326,2.79025934,2.8102705,2.75224479
76.13006,3.16227766,2.84797933,0.560623164,2.7902619,2.81067138,2.75217166
76.140552,2.64575131,2.84843691,-0.450206168,2.79026489,2.81106055,2.75209861
76.151043,3,2.84888286,0.388737884,2.7902683,2.81143761,2.75202563
76.161535,3,2.84931694,0.388179164,2.79027213,2.81180231,2.75195272
76.172026,4,2.84973874,1.07250234,2.7902764,2.81215423,2.75187989
76.182518,2.82842712,2.85014802,-0.147380108,2.79028109,2.81249313,2.75180713
76.19301,3.16227766,2.85054444,0.558330745,2.79028622,2.81281866,2.75173443
76.203501,2.82842712,2.85092766,-0.150001784,2.79029178,2.81313047,2.75166182
76.213993,2.82842712,2.85129746,-0.151229417,2.79029778,2.81342834,2.75158926
76.224484,2.82842712,2.8516535,-0.152402005,2.79030421,2.81371191,2.75151679
76.234976,3.31662479,2.85199556,0.681637171,2.79031108,2.81398097,2.75144437
76.245468,2.64575131,2.85232335,-0.454501971,2.79031839,2.81423522,2.75137203
76.255959,3.31662479,2.8526366,0.681166785,2.79032613,2.81447438,2.75129976
76.266451,2.64575131,2.85293512,-0.455174487,2.79033433,2.81469825,2.75122756
76.276942,3.60555128,2.85321864,0.867371108,2.79034296,2.81490656,2.75115543
76.287434,3.16227766,2.85348698,0.555689378,2.79035205,2.81509911,2.75108336
76.297926,2.64575131,2.85373991,-0.456057666,2.79036158,2.81527569,2.75101136
76.308417,3.31662479,2.85397722,0.680182014,2.79037156,2.81543608,2.75093944
76.318909,3.16227766,2.85419877,0.555048546,2.790382,2.81558011,2.75086757
76.3294,2.23606798,2.85440436,-0.78634368,2.79039288,2.8157076,2.75079578
76.339892,2.64575131,2.85459386,-0.456992947,2.79040423,2.81581839,2.75072406
76.350384,2.44948974,2.85476713,-0.636613998,2.79041603,2.81591234,2.75065239
76.360875,3,2.854924,0.38088844,2.79042828,2.81598931,2.7505808
76.371367,2.64575131,2.85506439,-0.457507468,2.790441,2.81604918,2.75050927
76.381858,2.23606798,2.85518819,-0.786841922,2.79045418,2.81609183,2.75043782
76.39235,2.44948974,2.85529531,-0.637028705,2.79046783,2.81611719,2.75036642
76.402842,2.23606798,2.85538568,-0.786967411,2.79048194,2.81612517,2.75029508
76.413333,2.23606798,2.85545923,-0.787014139,2.79049652,2.8161157,2.75022382
76.423825,2,2.85551592,-0.924941038,2.79051157,2.81608874,2.75015262
76.434316,2.82842712,2.85555572,-0.164707606,2.79052709,2.81604424,2.75008148
76.444808,2.82842712,2.8555786,-0.164777057,2.79054309,2.81598218,2.75001041
76.4553,2.23606798,2.85558457,-0.787093764,2.79055957,2.81590256,2.7499394
76.465791,2.23606798,2.85557363,-0.787086813,2.79057652,2.81580539,2.74986845
76.476283,3.46410162,2.8555458,0.780099873,2.79059395,2.81569067,2.74979757
76.486774,2,2.85550113,-0.924933042,2.79061186,2.81555845,2.74972675
76.497266,3.74165739,2.85543967,0.941391375,2.79063026,2.81540877,2.74965599
76.507758,2.44948974,2.85536147,-0.637080625,2.79064914,2.81524169,2.7495853
76.518249,3.31662479,2.85526663,0.679233509,2.79066851,2.81505732,2.74951467
76.528741,3,2.85515523,0.380584779,2.79068838,2.81485569,2.74944409
76.539232,2.64575131,2.85502739,-0.457467025,2.79070873,2.81463698,2.74937359
76.549724,2.82842712,2.85488321,-0.162653266,2.79072958,2.81440123,2.74930314
76.560216,2.44948974,2.85472284,-0.636579213,2.79075093,2.81414862,2.74923275
76.570707,3.31662479,2.85454643,0.679763457,2.79077277,2.8138793,2.74916242
76.581199,3.46410162,2.85435413,0.780863296,2.79079512,2.81359339,2.74909215
76.59169,2.44948974,2.85414613,-0.636126075,2.79081797,2.81329111,2.74902195
76.602182,2.82842712,2.85392258,-0.159672951,2.79084133,2.81297258,2.7489518
76.612674,2.64575131,2.85368369,-0.455996032,2.79086519,2.81263804,2.74888171
76.623165,3.16227766,2.85342971,0.5557409,2.79088957,2.81228772,2.74881168
76.633657,3.16227766,2.8531608,0.555982784,2.79091445,2.81192178,2.74874171
76.644148,3,2.85287726,0.383565827,2.79093986,2.81154051,2.7486718
76.65464,3,2.85257925,0.383954095,2.79096578,2.81114409,2.74860195
76.665132,3.31662479,2.85226708,0.681437974,2.79099222,2.81073281,2.74853215
76.675623,3.74165739,2.85194103,0.943247772,2.79101918,2.81030696,2.74846242
76.686115,3.46410162,2.85160131,0.782623986,2.79104666,2.80986675,2.74839273
76.696606,3.60555128,2.85124828,0.868506186,2.79107468,2.80941255,2.74832311
76.707098,3.46410162,2.85088216,0.7830833,2.79110322,2.80894455,2.74825354
76.71759,3.31662479,2.85050329,0.682730916,2.79113229,2.8084631,2.74818403
76.728081,2.44948974,2.85011201,-0.632947286,2.7911619,2.80796857,2.74811458
76.738573,2.82842712,2.84970857,-0.14588162,2.79119205,2.80746117,2.74804518
76.749064,2.44948974,2.84929338,-0.632300274,2.79122273,2.80694134,2.74797584
76.759556,3.16227766,2.84886668,0.559831203,2.79125396,2.8064093,2.74790655
76.770048,3.16227766,2.84842887,0.560222091,2.79128573,2.80586545,2.74783732
76.780539,3.60555128,2.84798033,0.870385518,2.79131805,2.80531019,2.74776815
76.791031,2.64575131,2.84752132,-0.449188167,2.79135092,2.80474377,2.74769902
76.801522,1.73205081,2.8470523,-1.05593631,2.79138434,2.80416666,2.74762996
76.812014,3.74165739,2.84657355,0.946088707,2.79141831,2.80357912,2.74756094
76.822506,2.64575131,2.84608547,-0.447587037,2.79145285,2.80298156,2.74749198
76.832997,2.44948974,2.84558849,-0.62936376,2.79148794,2.80237443,2.74742307
76.843489,3.74165739,2.84508289,0.94687618,2.7915236,2.80175799,2.74735422
76.85398,4.47213595,2.84456915,1.27576127,2.79155982,2.80113273,2.74728542
76.864472,2.82842712,2.84404756,-0.124981726,2.79159662,2.80049893,2.74721667
76.874964,3.31662479,2.84351855,0.687827189,2.79163398,2.79985703,2.74714797
76.885455,2.64575131,2.84298257,-0.444107257,2.79167192,2.7992075,2.74707933
76.895947,2.64575131,2.8424399,-0.44349587,2.79171044,2.79855059,2.74701073
76.906438,3.87298335,2.84189104,1.01542715,2.79174953,2.79788683,2.7469422
76.91693,3.46410162,2.84133629,0.78915482,2.79178921,2.79721648,2.7468737
76.927422,2.44948974,2.84077608,-0.625528846,2.79182948,2.79654001,2.74680526
76.937913,3.16227766,2.84021087,0.567509288,2.79187033,2.79585788,2.74673688
76.948405,3.87298335,2.83964094,1.01653451,2.79191178,2.79517036,2.74666854
76.958896,2.82842712,2.8390668,-0.103148813,2.79195382,2.79447796,2.74660025
76.969388,3.16227766,2.83848873,0.569024541,2.79199647,2.79378097,2.74653201
76.97988,2.64575131,2.83790718,-0.438355869,2.79203971,2.79307983,2.74646382
76.990371,3.46410162,2.83732259,0.791693772,2.79208356,2.792375,2.74639568
77.000863,3,2.83673523,0.404060351,2.79212801,2.79166674,2.74632759
77.011354,2.82842712,2.83614561,-0.0878549256,2.79217308,2.79095556,2.74625955
77.021846,3.16227766,2.835554,0.571597465,2.79221876,2.79024173,2.74619155
77.032338,3.74165739,2.83496082,0.952206157,2.79226506,2.78952569,2.74612361
77.042829,3.16227766,2.83436652,0.572635263,2.79231197,2.78880787,2.74605571
77.053321,2.64575131,2.83377134,-0.43361276,2.79235952,2.78808853,2.74598786
77.063812,3.16227766,2.83317577,0.57367403,2.79240768,2.78736815,2.74592006
77.074304,3.46410162,2.83258005,0.794683308,2.79245649,2.78664698,2.7458523
77.084796,1.73205081,2.83198461,-1.04877729,2.79250592,2.78592543,2.74578459
77.095287,2.82842712,2.83138985,-0.0544309087,2.79255599,2.78520394,2.74571693
77.105779,1.73205081,2.830796,-1.04821047,2.7926067,2.7844827,2.74564931
77.11627,2.64575131,2.83020351,-0.429478987,2.79265806,2.7837622,2.74558174
77.126762,3.16227766,2.82961261,0.576771226,2.79271006,2.78304264,2.74551422
77.137254,2.64575131,2.82902369,-0.42810323,2.79276272,2.78232442,2.74544673
77.147745,1.73205081,2.82843711,-1.04708467,2.79281602,2.78160792,2.7453793
77.158237,3.87298335,2.82785308,1.02231613,2.79286999,2.78089333,2.74531191
77.168728,2.82842712,2.82727203,0.0339866855,2.79292462,2.7801811,2.74524457
77.17922,2.23606798,2.82669414,-0.768522063,2.79297992,2.77947138,2.74517726
77.189712,3.31662479,2.82611976,0.700360645,2.79303589,2.77876454,2.74511
77.200203,2.44948974,2.82554923,-0.613236891,2.79309252,2.77806093,2.7450428
77.210695,3.46410162,2.82498272,0.799449122,2.79314984,2.77736071,2.74497562
77.221186,3.16227766,2.8244206,0.581254726,2.79320783,2.77666426,2.7449085
77.231678,3.46410162,2.82386305,0.800149092,2.79326651,2.77597174,2.74484141
77.24217,3.31662479,2.82331035,0.70236347,2.79332588,2.77528344,2.74477437
77.252661,3.60555128,2.82276281,0.884753337,2.79338594,2.77459969,2.74470738
77.263153,3.16227766,2.82222056,0.583144148,2.7934467,2.77392059,2.74464042
77.273644,3.60555128,2.82168394,0.885362826,2.79350815,2.77324651,2.74457351
77.284136,2.82842712,2.82115307,0.0852880952,2.79357032,2.77257753,2.74450663
77.294628,2.44948974,2.8206282,-0.609211338,2.79363319,2.77191393,2.7444398
77.305119,2.64575131,2.82010959,-0.417562304,2.79369677,2.77125598,2.74437301
77.315611,3,2.81959734,0.424738346,2.79376107,2.77060374,2.74430626
77.326102,4.12310563,2.81909173,1.14193428,2.79382608,2.76995753,2.74423955
77.336594,3.60555128,2.81859284,0.887106778,2.79389183,2.7693174,2.74417288
77.347086,3.16227766,2.81810089,0.586665804,2.7939583,2.76868358,2.74410625
77.357577,2.82842712,2.8176161,0.103976099,2.7940255,2.76805629,2.74403966
77.368069,2.82842712,2.8171385,0.106247917,2.79409345,2.76743556,2.74397311
77.37856,2.82842712,2.81666836,0.108437831,2.79416213,2.76682166,2.74390661
77.389052,3.46410162,2.81620571,0.804919816,2.79423156,2.7662146,2.74384013
77.399544,2.82842712,2.81575071,0.112589585,2.79430175,2.76561456,2.7437737
77.410035,2.64575131,2.81530353,-0.411767196,2.79437268,2.76502172,2.74370731
77.420527,2,2.8148642,-0.902698291,2.79444438,2.76443606,2.74364095
77.431018,2.44948974,2.8144329,-0.604105258,2.79451684,2.76385781,2.74357463
77.44151,2.44948974,2.81400965,-0.603754839,2.79459007,2.76328694,2.74350835
77.452002,2.23606798,2.81359456,-0.759951697,2.79466407,2.76272359,2.74344211
77.462493,2.44948974,2.81318776,-0.603073806,2.79473885,2.7621679,2.7433759
77.472985,3.16227766,2.81278924,0.59117546,2.79481441,2.76161981,2.74330973
77.483476,3.31662479,2.81239913,0.710088489,2.79489076,2.76107949,2.7432436
77.493968,3.31662479,2.81201742,0.710357213,2.79496791,2.7605469,2.74317751
77.50446,2.64575131,2.81164419,-0.407299499,2.79504585,2.76002213,2.74311144
77.514951,3.16227766,2.81127952,0.592450957,2.79512459,2.75950526,2.74304542
77.525443,2.64575131,2.81092338,-0.406413663,2.79520414,2.75899623,2.74297943
77.535934,2,2.81057584,-0.900319856,2.7952845,2.75849516,2.74291348
77.546426,3,2.81023688,0.435618089,2.79536568,2.75800196,2.74284756
77.556918,3.60555128,2.80990653,0.891989206,2.79544768,2.75751669,2.74278168
77.567409,3.46410162,2.80958484,0.809022113,2.79553051,2.75703941,2.74271583
77.577901,3,2.80927173,0.436724476,2.79561417,2.75657001,2.74265002
77.588392,3.74165739,2.80896727,0.965758828,2.79569866,2.75610857,2.74258424
77.598884,3.16227766,2.80867139,0.594648021,2.795784,2.755655,2.74251849
77.609376,3,2.8083841,0.437739538,2.7958702,2.75520931,2.74245278
77.619867,3.16227766,2.80810539,0.59512374,2.79595723,2.75477151,2.7423871
77.630359,3,2.8078352,0.438366053,2.79604514,2.7543415,2.74232145
77.64085,2.44948974,2.80757354,-0.598401036,2.7961339,2.7539193,2.74225584
77.651342,3,2.80732032,0.438952934,2.79622354,2.75350481,2.74219026
77.661834,3,2.80707553,0.439231685,2.79631405,2.75309801,2.74212471
77.672325,3.16227766,2.80683913,0.596186656,2.79640544,2.75269889,2.7420592
77.682817,2.64575131,2.80661104,-0.40107322,2.79649772,2.75230731,2.74199371
77.693308,3,2.80639124,0.440009958,2.79659088,2.75192329,2.74192826
77.7038,2.44948974,2.80617962,-0.597235198,2.79668495,2.75154669,2.74186284
77.714292,3.46410162,2.80597616,0.811249317,2.79677993,2.75117746,2.74179744
77.724783,3.16227766,2.8057808,0.597073584,2.79687581,2.75081559,2.74173209
77.735275,2.64575131,2.80559342,-0.39980259,2.79697261,2.75046092,2.74166675
77.745766,4,2.805414,1.09297118,2.79707033,2.75011343,2.74160146
77.756258,2.44948974,2.80524243,-0.596450069,2.79716898,2.74977298,2.74153619
77.76675,2.82842712,2.80507864,0.152802124,2.79726856,2.74943952,2.74147095
77.777241,2.23606798,2.80492256,-0.75422449,2.79736908,2.74911299,2.74140574
77.787733,2.44948974,2.80477408,-0.596057329,2.79747055,2.74879323,2.74134056
77.798224,3,2.80463315,0.442003223,2.79757297,2.74848021,2.74127541
77.808716,2.82842712,2.80449965,0.15468509,2.79767636,2.74817378,2.74121028
77.819208,3.16227766,2.8043735,0.598250921,2.79778071,2.74787386,2.74114519
77.829699,3.31662479,2.80425462,0.715800373,2.79788602,2.7475804,2.74108013
77.840191,2.44948974,2.80414289,-0.595527622,2.79799232,2.74729322,2.74101509
77.850682,2,2.80403825,-0.896681799,2.79809959,2.74701229,2.74095008
77.861174,2.44948974,2.80394057,-0.595357731,2.79820787,2.74673744,2.7408851
77.871666,2.64575131,2.80384977,-0.397615971,2.79831715,2.74646859,2.74082014
77.882157,2.64575131,2.80376576,-0.397510315,2.79842742,2.74620567,2.74075522
77.892649,2.82842712,2.80368842,0.157285409,2.79853871,2.74594852,2.74069031
77.90314,3.31662479,2.80361768,0.716245148,2.79865101,2.74569707,2.74062544
77.913632,2.44948974,2.80355341,-0.595032489,2.79876435,2.74545118,2.74056059
77.924124,2.82842712,2.80349552,0.157897459,2.79887872,2.74521075,2.74049577
77.934615,3,2.80344392,0.443346461,2.79899412,2.74497571,2.74043098
77.945107,3.46410162,2.80339849,0.812836469,2.79911058,2.74474589,2.7403662
77.955598,3.31662479,2.80335915,0.716425601,2.79922808,2.74452123,2.74030146
77.96609,3.46410162,2.80332578,0.812881192,2.79934666,2.74430158,2.74023674
77.976582,3,2.8032983,0.443510654,2.7994663,2.74408685,2.74017205
77.987073,3,2.8032766,0.443535119,2.79958701,2.74387695,2.74010738
77.997565,3.46410162,2.80326058,0.812921299,2.79970882,2.74367173,2.74004273
78.008056,2.82842712,2.80325014,0.158672577,2.7998317,2.74347113,2.73997812
78.018548,2.64575131,2.80324518,-0.396854976,2.7999557,2.743275,2.73991352
78.02904,2.82842712,2.80324562,0.158686825,2.8000808,2.74308325,2.73984894
78.039531,3.46410162,2.80325134,0.81292698,2.80020701,2.74289579,2.73978439
78.050023,3.46410162,2.80326226,0.812920264,2.80033435,2.74271248,2.73971987
78.060514,2.23606798,2.80327828,-0.753133654,2.80046281,2.74253326,2.73965537
78.071006,3.16227766,2.80329931,0.599148023,2.80059242,2.74235798,2.73959088
78.081498,3.16227766,2.80332525,0.599126373,2.80072318,2.74218656,2.73952642
78.091989,2.23606798,2.80335601,-0.753185261,2.80085509,2.74201892,2.73946199
78.102481,3.46410162,2.80339152,0.812840758,2.80098816,2.74185492,2.73939758
78.112972,3.87298335,2.80343166,1.03419132,2.8011224,2.74169449,2.73933319
78.123464,4,2.80347637,1.09385723,2.80125783,2.74153752,2.73926882
78.133956,3.60555128,2.80352555,0.89555889,2.80139445,2.74138391,2.73920446
78.144447,2.64575131,2.80357911,-0.397275476,2.80153226,2.74123359,2.73914014
78.154939,3.60555128,2.80363699,0.895496669,2.80167128,2.74108643,2.73907583
78.16543,2.44948974,2.80369909,-0.595154891,2.80181151,2.74094238,2.73901155
78.175922,2.64575131,2.80376533,-0.397509777,2.80195297,2.74080131,2.73894728
78.186414,2.44948974,2.80383565,-0.595269608,2.80209567,2.74066315,2.73888304
78.196905,3.31662479,2.80390995,0.716041089,2.8022396,2.74052782,2.73881881
78.207397,2.44948974,2.80398817,-0.595397707,2.80238479,2.74039522,2.73875461
78.217888,3.46410162,2.80407023,0.812423155,2.80253123,2.74026529,2.73869043
78.22838,2.64575131,2.80415607,-0.398000957,2.80267895,2.74013791,2.73862626
78.238872,3.16227766,2.80424562,0.598357789,2.80282795,2.74001303,2.73856211
78.249363,2.44948974,2.80433879,-0.595692072,2.80297822,2.73989057,2.73849798
78.259855,3.31662479,2.80443554,0.715673986,2.80312981,2.73977043,2.73843387
78.270346,2.82842712,2.80453578,0.15456825,2.8032827,2.73965256,2.73836978
78.280838,3,2.80463948,0.441996066,2.80343691,2.73953686,2.73830571
78.29133,3,2.80474656,0.441874919,2.80359246,2.73942328,2.73824165
78.301821,3.46410162,2.80485695,0.811938832,2.80374932,2.73931176,2.73817762
78.312313,2.44948974,2.80497062,-0.596222167,2.80390755,2.73920219,2.7381136
78.322804,2.23606798,2.80508748,-0.754333815,2.80406713,2.73909455,2.7380496
78.333296,2.23606798,2.80520752,-0.754413374,2.80422808,2.73898873,2.73798561
78.343788,2.82842712,2.80533066,0.151975225,2.80439042,2.73888469,2.73792164
78.354279,3.60555128,2.80545684,0.894479982,2.80455413,2.73878238,2.73785769
78.364771,3.60555128,2.80558604,0.894407759,2.80471926,2.73868171,2.73779375
78.375262,2.23606798,2.80571818,-0.75475175,2.80488578,2.73858265,2.73772984
78.385754,2.64575131,2.80585325,-0.400127409,2.80505374,2.73848512,2.73766593
78.396246,3.16227766,2.8059912,0.596897364,2.80522314,2.73838907,2.73760204
78.406737,2.82842712,2.80613195,0.149315673,2.80539396,2.73829446,2.73753818
78.417229,3,2.80627551,0.440141438,2.80556626,2.73820121,2.73747432
78.42772,2.44948974,2.80642181,-0.597437919,2.80574,2.7381093,2.73741048
78.438212,3.16227766,2.80657083,0.596411626,2.80591524,2.73801866,2.73734665
78.448704,2.64575131,2.80672253,-0.401212192,2.80609197,2.73792925,2.73728284
78.459195,2.64575131,2.80687686,-0.401404475,2.80627018,2.73784103,2.73721904
78.469687,3.16227766,2.80703382,0.596023355,2.80644993,2.73775393,2.73715526
78.480178,2.23606798,2.80719334,-0.755728368,2.80663118,2.73766794,2.73709149
78.49067,3.31662479,2.80735543,0.713631107,2.80681398,2.73758299,2.73702773
78.501162,3.31662479,2.80752005,0.713515761,2.80699834,2.73749904,2.73696399
78.511653,2.23606798,2.80768715,-0.756055003,2.80718424,2.73741608,2.73690026
78.522145,2.64575131,2.80785673,-0.402623175,2.80737173,2.73733404,2.73683654
78.532636,2.44948974,2.80802875,-0.59878127,2.80756079,2.73725291,2.73677285
78.543128,3,2.80820322,0.437946096,2.80775147,2.73717262,2.73670915
78.55362,3,2.80838009,0.437744116,2.80794376,2.73709317,2.73664547
78.564111,3.16227766,2.80855933,0.594742236,2.80813766,2.73701451,2.73658181
78.574603,2.82842712,2.80874096,0.140307384,2.80833321,2.7369366,2.73651816
78.585094,2.82842712,2.80892493,0.139650262,2.8085304,2.73685944,2.73645452
78.595586,2.82842712,2.80911125,0.13898156,2.80872927,2.73678296,2.73639089
78.606078,3,2.8092999,0.43669223,2.80892982,2.73670716,2.73632727
78.616569,2.64575131,2.80949083,-0.404647406,2.80913205,2.736632,2.73626366
78.627061,2.82842712,2.80968409,0.136905206,2.80933599,2.73655746,2.73620006
78.637552,3.16227766,2.80987961,0.593631238,2.80954164,2.73648352,2.73613648
78.648044,3.46410162,2.81007744,0.808717614,2.80974905,2.73641014,2.7360729
78.658536,2.44948974,2.81027753,-0.600656129,2.8099582,2.7363373,2.73600934
78.669027,2.64575131,2.81047986,-0.405867654,2.81016909,2.73626499,2.73594579
78.679519,2.82842712,2.81068447,0.133201538,2.81038178,2.73619317,2.73588224
78.69001,3.31662479,2.81089132,0.711149402,2.81059625,2.73612185,2.73581871
78.700502,2.82842712,2.81110043,0.131630913,2.81081254,2.73605097,2.73575518
78.710994,3.31662479,2.81131178,0.710853719,2.81103065,2.73598054,2.73569166
78.721485,3.74165739,2.81152536,0.964433529,2.81125058,2.73591053,2.73562816
78.731977,2.64575131,2.81174119,-0.407418556,2.81147238,2.73584093,2.73556466
78.742468,3,2.81195924,0.433636663,2.81169603,2.73577172,2.73550117
78.75296,3,2.81217956,0.433382557,2.81192159,2.73570288,2.73543769
78.763452,3.31662479,2.81240212,0.710086385,2.81214904,2.73563439,2.73537422
78.773943,3.60555128,2.8126269,0.890463014,2.81237839,2.73556626,2.73531075
78.784435,2.64575131,2.81285394,-0.408781888,2.81260969,2.73549845,2.7352473
78.794926,3,2.81308322,0.432338734,2.81284292,2.73543097,2.73518385
78.805418,3.31662479,2.81331477,0.709443456,2.81307814,2.73536379,2.73512041
78.81591,2.64575131,2.81354859,-0.409630659,2.81331534,2.7352969,2.73505697
78.826401,3,2.81378465,0.431526768,2.81355451,2.73523029,2.73499355
78.836893,4,2.81402301,1.08902571,2.81379572,2.73516396,2.73493012
78.847384,3.60555128,2.81426362,0.889543507,2.81403895,2.73509789,2.73486671
78.857876,4.12310563,2.81450655,1.14394015,2.81428425,2.73503207,2.7348033
78.868368,2.82842712,2.81475178,0.116941612,2.81453161,2.7349665,2.7347399
78.878859,3.31662479,2.8149993,0.708255243,2.81478104,2.73490116,2.73467651
78.889351,3.74165739,2.81524916,0.962501026,2.8150326,2.73483605,2.73461312
78.899842,2.82842712,2.81550133,0.113691666,2.81528626,2.73477116,2.73454974
78.910334,3.16227766,2.81575587,0.588661018,2.81554208,2.73470648,2.73448636
78.920826,3.46410162,2.81601276,0.805039662,2.81580006,2.73464201,2.73442298
78.931317,3.74165739,2.816272,0.961969538,2.8160602,2.73457774,2.73435962
78.941809,2,2.81653364,-0.90362251,2.81632256,2.73451367,2.73429625
78.9523,3.74165739,2.81679766,0.961696277,2.81658711,2.73444978,2.7342329
78.962792,2.44948974,2.81706411,-0.606279119,2.81685393,2.73438608,2.73416954
78.973284,2.64575131,2.817333,-0.414224197,2.817123,2.73432256,2.73410619
78.983775,2.23606798,2.8176043,-0.762585288,2.81739433,2.73425922,2.73404285
78.994267,2.82842712,2.81787809,0.102708506,2.81766797,2.73419605,2.7339795
79.004758,2.64575131,2.81815433,-0.415214423,2.81794391,2.73413305,2.73391617
79.01525,3.46410162,2.81843309,0.803535017,2.81822222,2.73407021,2.73385283
79.025742,3.31662479,2.81871437,0.705627679,2.81850288,2.73400754,2.7337895
79.036233,3,2.81899815,0.42544312,2.8187859,2.73394503,2.73372617
79.046725,2,2.81928452,-0.905143367,2.81907135,2.73388267,2.73366285
79.057216,2.64575131,2.81957342,-0.416919791,2.81935919,2.73382048,2.73359953
79.067708,3,2.81986495,0.424423195,2.81964951,2.73375843,2.7335362
79.0782,2.64575131,2.82015909,-0.417621578,2.8199423,2.73369654,2.73347288
79.088691,2.23606798,2.82045584,-0.764452657,2.82023755,2.7336348,2.73340957
79.099183,3,2.82075528,0.423373031,2.82053534,2.73357321,2.73334626
79.109674,3.46410162,2.82105736,0.801900401,2.82083564,2.73351177,2.73328295
79.120166,3.16227766,2.82136218,0.583879682,2.82113852,2.73345048,2.73321963
79.130658,2.82842712,2.82166972,0.0822034489,2.82144399,2.73338934,2.73315632
79.141149,3.46410162,2.82197998,0.801324926,2.82175204,2.73332835,2.73309302
79.151641,2,2.82229304,-0.90680375,2.82206275,2.7332675,2.73302971
79.162132,2.82842712,2.82260887,0.0762774685,2.82237609,2.73320681,2.73296641
79.172624,3,2.82292756,0.420799766,2.82269213,2.73314626,2.7329031
79.183116,4,2.82324909,1.0847815,2.82301088,2.73308586,2.73283979
79.193607,2.23606798,2.82357347,-0.766489067,2.82333233,2.73302561,2.73277649
79.204099,3.31662479,2.82390078,0.701943028,2.82365657,2.73296551,2.73271318
79.21459,3.16227766,2.82423098,0.581417819,2.82398356,2.73290557,2.73264988
79.225082,3.46410162,2.82456417,0.799710849,2.82431339,2.73284578,2.73258657
79.235574,3,2.82490035,0.418449104,2.82464605,2.73278614,2.73252327
79.246065,3.46410162,2.8252395,0.799288505,2.82498154,2.73272666,2.73245996
79.256557,3.16227766,2.82558173,0.580255058,2.82531995,2.73266733,2.73239665
79.267048,2.44948974,2.82592699,-0.613544821,2.82566125,2.73260817,2.73233335
79.27754,2.82842712,2.82627538,0.0463868634,2.82600552,2.73254916,2.73227004
79.288032,3,2.82662691,0.416380949,2.82635276,2.73249031,2.73220672
79.298523,2.23606798,2.82698155,-0.768709031,2.82670297,2.73243164,2.73214341
79.309015,3,2.82733942,0.415524461,2.82705624,2.73237312,2.7320801
79.319506,2.82842712,2.82770048,0.0269563762,2.82741254,2.73231478,2.73201678
79.329998,2.23606798,2.82806482,-0.769413311,2.82777196,2.7322566,2.73195346
79.34049,2.64575131,2.82843245,-0.42741214,2.82813449,2.73219859,2.73189014
79.350981,2.82842712,2.82880336,-0.0193966941,2.82850014,2.73214076,2.73182682
79.361473,2.82842712,2.82917765,-0.0273957083,2.828869,2.73208311,2.73176349
79.371964,3.60555128,2.82955529,0.880906344,2.82924104,2.73202564,2.73170017
79.382456,3.16227766,2.82993638,0.576490484,2.82961635,2.73196834,2.73163683
79.392948,3.46410162,2.83032092,0.796103442,2.82999493,2.73191123,2.73157349
79.403439,2.64575131,2.83070892,-0.430066977,2.83037678,2.73185431,2.73151016
79.413931,2.64575131,2.83110046,-0.430521954,2.83076201,2.73179757,2.73144681
79.424422,3,2.83149553,0.41049296,2.83115057,2.73174103,2.73138347
79.434914,3.31662479,2.83189422,0.696225944,2.83154257,2.73168468,2.73132012
79.445406,3.31662479,2.83229655,0.695936953,2.831938,2.73162852,2.73125676
79.455897,3,2.8327025,0.409020176,2.83233687,2.73157257,2.73119341
79.466389,2.82842712,2.83311218,-0.0684474886,2.83273928,2.73151682,2.73113004
79.47688,3.46410162,2.83352557,0.794088184,2.83314519,2.73146127,2.73106668
79.487372,3.31662479,2.83394277,0.694753205,2.83355472,2.73140592,2.7310033
79.497864,3.87298335,2.83436379,1.01912686,2.83396786,2.73135079,2.73093992
79.508355,2.44948974,2.83478862,-0.620724481,2.83438461,2.73129587,2.73087655
79.518847,4,2.83521739,1.07925095,2.83480509,2.73124116,2.73081316
79.529338,2.44948974,2.83565005,-0.621417979,2.83522924,2.73118667,2.73074977
79.53983,3,2.83608672,0.404862053,2.8356572,2.73113239,2.73068637
79.550322,3.46410162,2.8365274,0.792195817,2.83608896,2.73107833,2.73062296
79.560813,3.16227766,2.8369721,0.570355644,2.83652451,2.73102451,2.73055955
79.571305,2.82842712,2.83742093,-0.0948356979,2.83696398,2.7309709,2.73049613
79.581796,2.64575131,2.83787386,-0.438317867,2.83740733,2.73091753,2.73043271
79.592288,1.73205081,2.83833102,-1.05179856,2.83785467,2.73086438,2.73036928
79.60278,2.82842712,2.83879239,-0.101809957,2.83830601,2.73081146,2.73030584
79.613271,2,2.83925799,-0.91611025,2.83876135,2.73075878,2.7302424
79.623763,3.16227766,2.83972794,0.567934608,2.83922081,2.73070634,2.73017895
79.634254,2.44948974,2.8402022,-0.625069963,2.83968435,2.73065413,2.7301155
79.644746,2.23606798,2.84068091,-0.7775686,2.84015209,2.73060216,2.73005203
79.655238,3.46410162,2.84116405,0.789263936,2.84062405,2.73055044,2.72998855
79.665729,2.44948974,2.84165165,-0.626228315,2.84110022,2.73049896,2.72992508
79.676221,2,2.84214382,-0.917683943,2.84158073,2.73044772,2.72986159
79.686712,3,2.84264053,0.39668561,2.84206553,2.73039673,2.7297981
79.697204,3.46410162,2.84314191,0.788009964,2.84255478,2.73034599,2.72973459
79.707696,3,2.84364797,0.395413741,2.84304845,2.73029549,2.72967108
79.718187,2.23606798,2.84415871,-0.779801727,2.84354657,2.73024525,2.72960756
79.728679,2.82842712,2.84467427,-0.127464297,2.84404926,2.73019525,2.72954403
79.73917,3,2.84519461,0.393453167,2.84455648,2.73014552,2.72948049
79.749662,3,2.84571986,0.392785105,2.84506838,2.73009603,2.72941694
79.760154,2.44948974,2.84625004,-0.629889115,2.84558495,2.73004679,2.72935339
79.770645,3.31662479,2.84678514,0.685448502,2.8461062,2.72999782,2.72928982
79.781137,3.16227766,2.84732532,0.561206148,2.84663228,2.72994909,2.72922625
79.791628,3.16227766,2.84787052,0.560720195,2.84716314,2.72990063,2.72916267
79.80212,2.82842712,2.84842091,-0.141399371,2.84769893,2.72985241,2.72909907
79.812612,2.82842712,2.84897647,-0.143350443,2.84823966,2.72980445,2.72903546
79.823103,2.82842712,2.84953722,-0.145293152,2.84878532,2.72975676,2.72897185
79.833595,2.44948974,2.85010332,-0.632940421,2.84933608,2.72970931,2.72890823
[truncated: 435,195 more chars]
