# Supplementary material for: Phase Stability of Iron Nitride Fe4N at High Pressure—Pressure-Dependent Evolution of Phase Equilibria in the Fe–N System
Source: Materials (Basel). 2021 Jul 15;14(14):3963. doi: 10.3390/ma14143963 (PMC8307547; doi:10.3390/ma14143963)
Supplement: Supplementary file 1 [file materials-14-03963-s001.zip › xrd_data/4-300_riet.txt]

'y-axis saved as Sqrt(y)
'x,Yobs,Ycalc,Diff,epsilon,fe4n,Bkg
20,11.2694277,11.321443,-0.22806863,11.321443,0,11.3213464
20.010492,11.1803399,11.3221301,-0.376550461,11.3221301,0,11.3220332
20.020983,13,11.3227769,1.29507648,11.3227769,0,11.3226796
20.031475,11.3578167,11.3233835,0.185561698,11.3233835,0,11.3232859
20.041966,11.1803399,11.32395,-0.378959286,11.32395,0,11.323852
20.052458,11.2694277,11.3244766,-0.234625045,11.3244766,0,11.3243781
20.06295,12.2882057,11.3249633,0.981449163,11.3249633,0,11.3248645
20.073441,11.0905365,11.3254102,-0.484637657,11.3254102,0,11.325311
20.083933,11.4891253,11.3258175,0.404113622,11.3258175,0,11.3257179
20.094424,11.7898261,11.3261852,0.680911805,11.3261852,0,11.3260853
20.104916,11.1355287,11.3265136,-0.437018208,11.3265136,0,11.3264133
20.115408,11.3137085,11.3268028,-0.114430191,11.3268028,0,11.326702
20.125899,12.1655251,11.3270527,0.915681354,11.3270527,0,11.3269516
20.136391,11.5325626,11.3272637,0.453099257,11.3272637,0,11.3271621
20.146882,11.4891253,11.3274357,0.402106483,11.3274357,0,11.3273338
20.157374,12.2065556,11.3275689,0.937542911,11.3275689,0,11.3274666
20.167866,11.2694277,11.3276635,-0.241320954,11.3276635,0,11.3275608
20.178357,11.4017543,11.3277195,0.2720933,11.3277195,0,11.3276164
20.188849,11.5325626,11.3277371,0.452576525,11.3277371,0,11.3276336
20.19934,11.7473401,11.3277164,0.647783715,11.3277164,0,11.3276124
20.209832,11.3578167,11.3276575,0.173664002,11.3276575,0,11.3275532
20.220324,11.6619038,11.3275606,0.57822419,11.3275606,0,11.3274558
20.230815,12.0415946,11.3274257,0.845085111,11.3274257,0,11.3273205
20.241307,12.083046,11.3272531,0.869363499,11.3272531,0,11.3271475
20.251798,11.4455231,11.3270428,0.344209775,11.3270428,0,11.3269367
20.26229,11.2694277,11.3267949,-0.239514571,11.3267949,0,11.3266884
20.272782,10.7238053,11.3265096,-0.776340331,11.3265096,0,11.3264027
20.283273,11.1355287,11.326187,-0.436644389,11.326187,0,11.3260797
20.293765,11.3578167,11.3258273,0.17885579,11.3258273,0,11.3257195
20.304256,12.083046,11.3254306,0.870411066,11.3254306,0,11.3253223
20.314748,10.8627805,11.3249969,-0.679864963,11.3249969,0,11.3248882
20.32524,10.8627805,11.3245264,-0.679518872,11.3245264,0,11.3244173
20.335731,12.2065556,11.3240193,0.93943403,11.3240193,0,11.3239098
20.346223,11.3578167,11.3234757,0.185313268,11.3234757,0,11.3233657
20.356714,11.7898261,11.3228957,0.68332306,11.3228957,0,11.3227853
20.367206,11.4017543,11.3222794,0.281912767,11.3222794,0,11.3221685
20.377698,12.2065556,11.321627,0.940706423,11.321627,0,11.3215157
20.388189,12.4096736,11.3209387,1.04342462,11.3209387,0,11.3208269
20.398681,12.083046,11.3202145,0.873402264,11.3202145,0,11.3201022
20.409172,11.61895,11.3194546,0.547261809,11.3194546,0,11.3193418
20.419664,11.61895,11.318659,0.547988196,11.318659,0,11.3185457
20.430156,11.7898261,11.3178279,0.68702124,11.3178279,0,11.3177142
20.440647,11.7473401,11.3169617,0.656032369,11.3169617,0,11.3168475
20.451139,11.7046999,11.3160601,0.623409829,11.3160601,0,11.3159454
20.46163,10.7703296,11.3151236,-0.738101587,11.3151236,0,11.3150084
20.472122,11.7473401,11.314152,0.658170266,11.314152,0,11.3140364
20.482614,11.2249722,11.3131457,-0.296940283,11.3131457,0,11.3130295
20.493105,10.7238053,11.3121048,-0.767006851,11.3121048,0,11.3119882
20.503597,11.1803399,11.3110293,-0.361509903,11.3110293,0,11.3109121
20.514088,10.7703296,11.3099195,-0.734567833,11.3099195,0,11.3098019
20.52458,11.2249722,11.3087754,-0.289487858,11.3087754,0,11.3086572
20.535072,11.4455231,11.3075971,0.371383909,11.3075971,0,11.3074785
20.545563,11.5325626,11.306385,0.47558129,11.306385,0,11.3062658
20.556055,11.5325626,11.305139,0.476889523,11.305139,0,11.3050193
20.566546,11.4455231,11.3038593,0.376382512,11.3038593,0,11.3037391
20.577038,11.5758369,11.302546,0.522772291,11.302546,0,11.3024253
20.58753,10.8166538,11.3011993,-0.696093005,11.3011993,0,11.301078
20.598021,11.4891253,11.2998194,0.43509296,11.2998194,0,11.2996976
20.608513,11.5325626,11.2984062,0.483897047,11.2984062,0,11.2982839
20.619004,10.6301458,11.2969602,-0.816587041,11.2969602,0,11.2968373
20.629496,11.4891253,11.2954812,0.440050141,11.2954812,0,11.2953577
20.639988,11.0905365,11.2939694,-0.451035353,11.2939694,0,11.2938454
20.650479,10.7238053,11.2924252,-0.754068889,11.2924252,0,11.2923006
20.660971,11.2249722,11.2908484,-0.256663621,11.2908484,0,11.2907233
20.671462,11.4891253,11.2892394,0.44708599,11.2892394,0,11.2891137
20.681954,11.2694277,11.2875981,-0.134797827,11.2875981,0,11.2874719
20.692446,11.2249722,11.2859248,-0.246885898,11.2859248,0,11.285798
20.702937,11.045361,11.2842198,-0.488731775,11.2842198,0,11.2840924
20.713429,11.4455231,11.2824828,0.403782526,11.2824828,0,11.2823548
20.72392,11,11.2807144,-0.5298249,11.2807144,0,11.2805859
20.734412,11.7473401,11.2789144,0.684416336,11.2789144,0,11.2787853
20.744904,10.6301458,11.2770831,-0.804324092,11.2770831,0,11.2769533
20.755395,10.8627805,11.2752207,-0.642215086,11.2752207,0,11.2750904
20.765887,11,11.2733271,-0.522806982,11.2733271,0,11.2731962
20.776378,11.9163753,11.2714029,0.803101755,11.2714029,0,11.2712713
20.78687,11.8743421,11.2694476,0.777749604,11.2694476,0,11.2693155
20.797362,11.2249722,11.2674618,-0.206130168,11.2674618,0,11.2673291
20.807853,10.2469508,11.2654457,-1.0092051,11.2654457,0,11.2653123
20.818345,10.4403065,11.2633991,-0.907244485,11.2633991,0,11.2632651
20.828836,10.5356538,11.2613224,-0.851861898,11.2613224,0,11.2611878
20.839328,9.79795897,11.2592156,-1.20882448,11.2592156,0,11.2590803
20.84982,10.5830052,11.2570788,-0.821019846,11.2570788,0,11.2569429
20.860311,11.8321596,11.2549125,0.759767753,11.2549125,0,11.254776
20.870803,11.7473401,11.2527164,0.703294902,11.2527164,0,11.2525792
20.881294,11.5758369,11.250491,0.570390985,11.250491,0,11.2503532
20.891786,11.3137085,11.2482361,0.255875725,11.2482361,0,11.2480976
20.902278,11.2249722,11.245952,-0.144844249,11.245952,0,11.2458129
20.912769,11.3578167,11.2436391,0.337901739,11.2436391,0,11.2434993
20.923261,11.4891253,11.2412971,0.497823473,11.2412971,0,11.2411566
20.933752,10.9087121,11.2389265,-0.574642867,11.2389265,0,11.2387854
20.944244,11,11.2365272,-0.486340586,11.2365272,0,11.2363853
20.954736,11.2694277,11.2340993,0.187958338,11.2340993,0,11.2339568
20.965227,11,11.2316434,-0.481293487,11.2316434,0,11.2315002
20.975719,10.9544512,11.2291591,-0.524125896,11.2291591,0,11.2290152
20.98621,10.0995049,11.226647,-1.06166947,11.226647,0,11.2265024
20.996702,11.3578167,11.2241068,0.365663651,11.2241068,0,11.2239615
21.007194,11.7473401,11.2215388,0.725121571,11.2215388,0,11.2213928
21.017685,10.9087121,11.2189435,-0.55698422,11.2189435,0,11.2187968
21.028177,11.2694277,11.2163205,0.230449823,11.2163205,0,11.2161731
21.038668,11.1803399,11.2136705,-0.182566777,11.2136705,0,11.2135223
21.04916,11,11.2109931,-0.459339828,11.2109931,0,11.2108441
21.059652,11.1355287,11.2082886,-0.269740439,11.2082886,0,11.208139
21.070143,11.9582607,11.2055576,0.867584672,11.2055576,0,11.2054072
21.080635,9.74679434,11.2027996,-1.20665041,11.2027996,0,11.2026484
21.091126,11.61895,11.2000152,0.64725174,11.2000152,0,11.1998633
21.101618,10.9087121,11.1972042,-0.537114594,11.1972042,0,11.1970515
21.11211,10.9544512,11.1943669,-0.489811954,11.1943669,0,11.1942134
21.122601,10.3440804,11.1915037,-0.920555976,11.1915037,0,11.1913495
21.133093,10.8166538,11.1886143,-0.609885635,11.1886143,0,11.1884593
21.143584,11.8321596,11.1856993,0.804027511,11.1856993,0,11.1855435
21.154076,10.4880885,11.1827584,-0.833468588,11.1827584,0,11.1826018
21.164568,12.083046,11.1797919,0.95039682,11.1797919,0,11.1796344
21.175059,10.8627805,11.1768002,-0.560374641,11.1768002,0,11.176642
21.185551,11.9582607,11.1737831,0.885707449,11.1737831,0,11.173624
21.196042,11.5758369,11.1707411,0.636471395,11.1707411,0,11.1705812
21.206534,11.2694277,11.1676738,0.318988794,11.1676738,0,11.1675131
21.217026,10.8627805,11.1645818,-0.549364416,11.1645818,0,11.1644202
21.227517,10.6301458,11.1614653,-0.72891666,11.1614653,0,11.161303
21.238009,11.4891253,11.158324,0.575153239,11.158324,0,11.1581609
21.2485,10.7703296,11.1551587,-0.620345941,11.1551587,0,11.1549947
21.258992,11.8321596,11.1519688,0.824736772,11.1519688,0,11.1518039
21.269484,10.8166538,11.1487549,-0.576282074,11.1487549,0,11.1485891
21.279975,11.9582607,11.1455173,0.901522871,11.1455173,0,11.1453506
21.290467,11,11.1422556,-0.377167805,11.1422556,0,11.142088
21.300958,11.7898261,11.1389705,0.806756225,11.1389705,0,11.1388021
21.31145,10.6770783,11.1356617,-0.677187869,11.1356617,0,11.1354924
21.321942,11.1355287,11.1323295,0.056562115,11.1323295,0,11.1321592
21.332433,10.7238053,11.1289744,-0.636528914,11.1289744,0,11.1288032
21.342925,11.1355287,11.1255959,0.0996637031,11.1255959,0,11.1254238
21.353416,10.8627805,11.1221948,-0.509327308,11.1221948,0,11.1220218
21.363908,10.9544512,11.1187706,-0.405363391,11.1187706,0,11.1185967
21.3744,11.3137085,11.1153238,0.445403933,11.1153238,0,11.115149
21.384891,10.5356538,11.1118549,-0.75907914,11.1118549,0,11.1116791
21.395383,11.7473401,11.1083633,0.799360265,11.1083633,0,11.1081866
21.405874,10.3440804,11.1048498,-0.872220961,11.1048498,0,11.1046721
21.416366,11.5325626,11.101314,0.656695199,11.101314,0,11.1011354
21.426858,11.5325626,11.0977563,0.659398443,11.0977563,0,11.0975767
21.437349,11.61895,11.0941772,0.724412091,11.0941772,0,11.0939965
21.447841,11.9582607,11.0905761,0.931495921,11.0905761,0,11.0903945
21.458332,10.2469508,11.0869539,-0.916516856,11.0869539,0,11.0867713
21.468824,11.1803399,11.0833101,0.311496078,11.0833101,0,11.0831264
21.479316,10.9544512,11.0796451,-0.35382755,11.0796451,0,11.0794604
21.489807,11.2694277,11.0759594,0.439850254,11.0759594,0,11.0757737
21.500299,11.9582607,11.0722525,0.941280087,11.0722525,0,11.0720658
21.51079,11.045361,11.0685253,-0.152198129,11.0685253,0,11.0683375
21.521282,10.7703296,11.0647771,-0.542630156,11.0647771,0,11.0645883
21.531774,11.1355287,11.0610085,0.272983969,11.0610085,0,11.0608186
21.542265,10,11.0572199,-1.02821201,11.0572199,0,11.057029
21.552757,11.3137085,11.0534109,0.510193708,11.0534109,0,11.0532188
21.563248,11.5325626,11.0495822,0.694967912,11.0495822,0,11.0493891
21.57374,10.6301458,11.0457333,-0.644660752,11.0457333,0,11.0455391
21.584232,10.5830052,11.0418647,-0.67739165,11.0418647,0,11.0416694
21.594723,11.3137085,11.0379769,0.525101515,11.0379769,0,11.0377804
21.605215,10.9544512,11.0340693,-0.282166914,11.0340693,0,11.0338717
21.615706,9.89949494,11.0301428,-1.06331929,11.0301428,0,11.0299441
21.626198,10.6301458,11.0261969,-0.629325874,11.0261969,0,11.025997
21.63669,11.3578167,11.0222319,0.579296796,11.0222319,0,11.0220309
21.647181,11.2249722,11.0182485,0.454668731,11.0182485,0,11.0180463
21.657673,10.9544512,11.014246,-0.244529911,11.014246,0,11.0140426
21.668164,11.2249722,11.0102254,0.463407782,11.0102254,0,11.0100208
21.678656,10.7703296,11.006186,-0.485650442,11.006186,0,11.0059802
21.689148,11.2694277,11.0021283,0.51701004,11.0021283,0,11.0019213
21.699639,10.3923048,10.9980529,-0.778298171,10.9980529,0,10.9978447
21.710131,10.3923048,10.9939591,-0.775663773,10.9939591,0,10.9937497
21.720622,10.198039,10.9898479,-0.889836458,10.9898479,0,10.9896373
21.731114,10.7703296,10.9857187,-0.464100293,10.9857187,0,10.9855068
21.741606,11.5325626,10.9815719,0.742287468,10.9815719,0,10.9813587
21.752097,10.0498756,10.9774081,-0.963084892,10.9774081,0,10.9771937
21.762589,11.7046999,10.9732267,0.855262066,10.9732267,0,10.973011
21.77308,10.198039,10.9690286,-0.878060112,10.9690286,0,10.9688115
21.783572,10.8627805,10.9648131,-0.319425448,10.9648131,0,10.9645947
21.794064,10.4403065,10.9605808,-0.721300427,10.9605808,0,10.9603611
21.804555,11.2249722,10.9563323,0.518304837,10.9563323,0,10.9561112
21.815047,10.4880885,10.9520668,-0.681159515,10.9520668,0,10.9518444
21.825538,10.9087121,10.9477853,-0.197669388,10.9477853,0,10.9475616
21.83603,10.5830052,10.9434872,-0.600401486,10.9434872,0,10.9432621
21.846522,10.9544512,10.939173,0.123604901,10.939173,0,10.9389465
21.857013,10.3440804,10.9348432,-0.768610951,10.9348432,0,10.9346154
21.867505,11.7898261,10.9304973,0.92699993,10.9304973,0,10.930268
21.877996,10.6301458,10.926136,-0.544049825,10.926136,0,10.9259053
21.888488,10.5356538,10.9217589,-0.621373562,10.9217589,0,10.9215267
21.89898,11.7898261,10.9173663,0.934055575,10.9173663,0,10.9171327
21.909471,10.6770783,10.9129589,-0.485675489,10.9129589,0,10.9127239
21.919963,11.4891253,10.908536,0.761964075,10.908536,0,10.9082995
21.930454,10.3440804,10.9040986,-0.748343628,10.9040986,0,10.9038606
21.940946,10.6770783,10.899646,-0.471770819,10.899646,0,10.8994065
21.951438,11.1355287,10.8951786,0.49025514,10.8951786,0,10.8949376
21.961929,10.8166538,10.8906972,-0.272109095,10.8906972,0,10.8904546
21.972421,9.38083152,10.8862009,-1.22693497,10.8862009,0,10.8859568
21.982912,10.7238053,10.8816909,-0.397348168,10.8816909,0,10.8814452
21.993404,10.4880885,10.8771663,-0.62376099,10.8771663,0,10.876919
22.003896,10.7238053,10.8726277,-0.385775046,10.8726277,0,10.8723789
22.014387,11.1803399,10.8680757,0.558806022,10.8680757,0,10.8678253
22.024879,10.4880885,10.8635096,-0.612716211,10.8635096,0,10.8632576
22.03537,10.5830052,10.8589304,-0.525285832,10.8589304,0,10.8586768
22.045862,11.4455231,10.8543374,0.768886024,10.8543374,0,10.8540821
22.056354,10.2469508,10.8497311,-0.776389317,10.8497311,0,10.8494742
22.066845,11.1803399,10.8451122,0.578988531,10.8451122,0,10.8448535
22.077337,10.4880885,10.8404798,-0.593625553,10.8404798,0,10.8402194
22.087828,11.4891253,10.835835,0.808263759,10.835835,0,10.8355729
22.09832,11.2249722,10.8311771,0.627530959,10.8311771,0,10.8309133
22.108812,10.4403065,10.8265066,-0.621449959,10.8265066,0,10.826241
22.119303,10.4403065,10.8218241,-0.617671093,10.8218241,0,10.8215568
22.129795,11,10.8171289,0.427634322,10.8171289,0,10.8168598
22.140286,11,10.812422,0.433102772,10.812422,0,10.8121511
22.150778,10.6770783,10.8077026,-0.361419958,10.8077026,0,10.8074299
22.16127,10.6301458,10.8029714,-0.415722993,10.8029714,0,10.8026969
22.171761,11.4017543,10.7982289,0.776868924,10.7982289,0,10.7979525
22.182253,10.3440804,10.7934744,-0.670368523,10.7934744,0,10.7931961
22.192744,10.4880885,10.7887089,-0.548288588,10.7887089,0,10.7884287
22.203236,11.2249722,10.7839316,0.664108879,10.7839316,0,10.7836495
22.213728,11.1803399,10.7791431,0.633400984,10.7791431,0,10.7788591
22.224219,10.4880885,10.774344,-0.535028544,10.774344,0,10.7740581
22.234711,9.74679434,10.7695336,-1.01130572,10.7695336,0,10.7692457
22.245202,10.4403065,10.7647129,-0.569566841,10.7647129,0,10.764423
22.255694,11.045361,10.7598811,0.534303214,10.7598811,0,10.7595892
22.266186,12.2065556,10.7550388,1.20478912,10.7550388,0,10.7547449
22.276677,10.2956301,10.7501866,-0.67420804,10.7501866,0,10.7498907
22.287169,11.0905365,10.7453238,0.587548076,10.7453238,0,10.7450257
22.29766,10.3923048,10.7404513,-0.590039361,10.7404513,0,10.7401512
22.308152,10.5830052,10.7355684,-0.390593356,10.7355684,0,10.7352662
22.318644,11,10.7306757,0.518964615,10.7306757,0,10.7303714
22.329135,11.8321596,10.7257738,1.05184872,10.7257738,0,10.7254673
22.339627,10.2956301,10.7208619,-0.652098004,10.7208619,0,10.7205532
22.350118,10.6770783,10.7159411,-0.197136688,10.7159411,0,10.7156302
22.36061,10.7703296,10.7110106,0.243555011,10.7110106,0,10.7106974
22.371102,9.69535971,10.7060709,-1.00534132,10.7060709,0,10.7057555
22.381593,10.2469508,10.7011227,-0.673922779,10.7011227,0,10.700805
22.392085,10.1488916,10.6961651,-0.739779409,10.6961651,0,10.6958452
22.402576,10.7238053,10.6911993,0.180571171,10.6911993,0,10.6908771
22.413068,10.2956301,10.6862245,-0.62497548,10.6862245,0,10.6858999
22.42356,10.7703296,10.6812412,0.298476861,10.6812412,0,10.6809142
22.434051,11,10.67625,0.568990319,10.67625,0,10.6759207
22.444543,10.7703296,10.6712502,0.314768842,10.6712502,0,10.6709184
22.455034,10.2469508,10.6662428,-0.64752762,10.6662428,0,10.6659086
22.465526,10.198039,10.661227,-0.680579129,10.661227,0,10.6608903
22.476018,10.8627805,10.6562034,0.454507546,10.6562034,0,10.6558642
22.486509,11.0905365,10.6511726,0.662845306,10.6511726,0,10.6508309
22.497001,10.2956301,10.6461338,-0.592033518,10.6461338,0,10.6457896
22.507492,11.1803399,10.6410881,0.734337628,10.6410881,0,10.6407413
22.517984,10.8166538,10.6360347,0.424993086,10.6360347,0,10.6356853
22.528476,9.53939201,10.6309741,-1.04478808,10.6309741,0,10.6306221
22.538967,10.2469508,10.6259071,-0.615594265,10.6259071,0,10.6255523
22.549459,10.7238053,10.6208326,0.320893525,10.6208326,0,10.6204752
22.55995,10.6770783,10.615752,0.247641447,10.615752,0,10.6153918
22.570442,11.4017543,10.6106642,0.88943243,10.6106642,0,10.6103013
22.580934,10.3923048,10.60557,-0.461806368,10.60557,0,10.6052043
22.591425,11.61895,10.6004699,1.00919778,10.6004699,0,10.6001014
22.601917,10.4880885,10.5953631,-0.327528017,10.5953631,0,10.5949917
22.612408,10.3440804,10.5902507,-0.496155485,10.5902507,0,10.5898765
22.6229,11.3137085,10.5851319,0.853567001,10.5851319,0,10.5847547
22.633392,10.7703296,10.5800072,0.436259543,10.5800072,0,10.5796272
22.643883,10.3440804,10.5748774,-0.480413301,10.5748774,0,10.5744943
22.654375,10.5830052,10.5697415,0.115168471,10.5697415,0,10.5693554
22.664866,11.2249722,10.5646006,0.812632478,10.5646006,0,10.5642115
22.675358,11.045361,10.559454,0.697070333,10.559454,0,10.5590618
22.68585,10.6770783,10.5543021,0.350394221,10.5543021,0,10.5539068
22.696341,10.4403065,10.5491458,-0.329907939,10.5491458,0,10.5487473
22.706833,10,10.543984,-0.737552681,10.543984,0,10.5435823
22.717324,10.9087121,10.5388179,0.608189328,10.5388179,0,10.538413
22.727816,10.7703296,10.5336466,0.486500791,10.5336466,0,10.5332385
22.738308,11,10.5284708,0.686679843,10.5284708,0,10.5280594
22.748799,10,10.5232911,-0.723388604,10.5232911,0,10.5228763
22.759291,10.198039,10.5181066,-0.565745122,10.5181066,0,10.5176884
22.769782,10,10.5129184,-0.716183219,10.5129184,0,10.5124968
22.780274,10.0995049,10.5077257,-0.638921567,10.5077257,0,10.5073007
22.790766,10.198039,10.5025291,-0.551806193,10.5025291,0,10.5021006
22.801257,10.4403065,10.4973292,-0.238794267,10.4973292,0,10.4968971
22.811749,11.4455231,10.4921252,0.976421003,10.4921252,0,10.4916895
22.82224,9.89949494,10.4869181,-0.766435353,10.4869181,0,10.4864788
22.832732,10.5356538,10.4817071,0.23226418,10.4817071,0,10.4812641
22.843224,10.6770783,10.4764928,0.44786763,10.4764928,0,10.4760462
22.853715,10.8166538,10.4712759,0.587688621,10.4712759,0,10.4708255
22.864207,10.0995049,10.4660555,-0.605434154,10.4660555,0,10.4656012
22.874698,10.2956301,10.4608326,-0.406451032,10.4608326,0,10.4603745
22.88519,10.8627805,10.4556064,0.638101923,10.4556064,0,10.4551444
22.895682,10,10.4503776,-0.671101787,10.4503776,0,10.4499116
22.906173,11,10.4451467,0.744884723,10.4451467,0,10.4446768
22.916665,10.6770783,10.439913,0.48699618,10.439913,0,10.439439
22.927156,10.3440804,10.4346774,-0.300993302,10.4346774,0,10.4341993
22.937648,10.4880885,10.4294392,0.242176226,10.4294392,0,10.4289569
22.94814,11,10.4241989,0.758815615,10.4241989,0,10.4237124
22.958631,10.6770783,10.4189571,0.508056211,10.4189571,0,10.4184664
22.969123,10.2469508,10.4137131,-0.408365451,10.4137131,0,10.4132181
22.979614,11.0905365,10.4084679,0.825874456,10.4084679,0,10.4079685
22.990106,10.9544512,10.4032206,0.742449017,10.4032206,0,10.4027168
23.000598,12.0415946,10.3979719,1.28203849,10.3979719,0,10.3974636
23.011089,9.8488578,10.3927223,-0.737471711,10.3927223,0,10.3922095
23.021581,10.8166538,10.3874711,0.655120414,10.3874711,0,10.3869536
23.032072,10.2469508,10.3822192,-0.367788612,10.3822192,0,10.3816971
23.042564,11.3137085,10.3769659,0.967854626,10.3769659,0,10.3764391
23.053056,11.1803399,10.3717118,0.89923752,10.3717118,0,10.3711801
23.063547,10.8627805,10.3664574,0.704502022,10.3664574,0,10.3659209
23.074039,10.6770783,10.3612019,0.562028778,10.3612019,0,10.3606605
23.08453,10.2469508,10.3559464,-0.330144912,10.3559464,0,10.3554001
23.095022,9.79795897,10.3506901,-0.743458882,10.3506901,0,10.3501387
23.105514,10.2469508,10.3454335,-0.313819553,10.3454335,0,10.344877
23.116005,9.53939201,10.3401772,-0.894866038,10.3401772,0,10.3396156
23.126497,9.48683298,10.3349205,-0.920916664,10.3349205,0,10.3343536
23.136988,10.5830052,10.3296643,0.503329831,10.3296643,0,10.3290921
23.14748,9.79795897,10.3244079,-0.725567991,10.3244079,0,10.3238303
23.157972,10.8627805,10.3191518,0.737311822,10.3191518,0,10.3185687
23.168463,9.21954446,10.3138966,-1.04611287,10.3138966,0,10.313308
23.178955,10.5830052,10.3086415,0.523797425,10.3086415,0,10.3080473
23.189446,10.6301458,10.3033876,0.571627705,10.3033876,0,10.3027876
23.199938,10.3440804,10.298134,0.214351304,10.298134,0,10.2975282
23.21043,9.94987437,10.2928812,-0.585667876,10.2928812,0,10.2922697
23.220921,10.7238053,10.28763,0.660435657,10.28763,0,10.2870125
23.231413,10.0498756,10.2823795,-0.48218654,10.2823795,0,10.281756
23.241904,10.7238053,10.2771307,0.668337203,10.2771307,0,10.2765011
23.252396,9.89949494,10.2718827,-0.610235859,10.2718827,0,10.2712469
23.262888,10.7238053,10.2666363,0.676142745,10.2666363,0,10.2659942
23.273379,9,10.2613919,-1.12311705,10.2613919,0,10.2607435
23.283871,10.4880885,10.2561488,0.481601204,10.2561488,0,10.2554938
23.294362,10.8166538,10.2509079,0.752160823,10.2509079,0,10.2502464
23.304854,10.5356538,10.2456685,0.538502773,10.2456685,0,10.2450004
23.315346,9.64365076,10.2404312,-0.772515627,10.2404312,0,10.2397563
23.325837,10.1488916,10.2351964,-0.293776924,10.2351964,0,10.2345147
23.336329,8.66025404,10.2299635,-1.25288047,10.2299635,0,10.2292748
23.34682,10.1488916,10.2247334,-0.275394043,10.2247334,0,10.2240377
23.357312,9.94987437,10.2195054,-0.519260052,10.2195054,0,10.2188025
23.367804,10.6770783,10.2142799,0.680292842,10.2142799,0,10.2135698
23.378295,9.32737905,10.2090576,-0.938977414,10.2090576,0,10.2083401
23.388787,9.32737905,10.2038377,-0.9361937,10.2038377,0,10.2031127
23.399278,10.198039,10.1986212,-0.0241279546,10.1986212,0,10.1978886
23.40977,9.89949494,10.1934072,-0.542136772,10.1934072,0,10.1926669
23.420262,10,10.1881964,-0.433816086,10.1881964,0,10.1874482
23.430753,10.4403065,10.1829893,0.507264406,10.1829893,0,10.1822332
23.441245,10.9544512,10.1777851,0.881286567,10.1777851,0,10.177021
23.451736,10.198039,10.1725849,0.159543454,10.1725849,0,10.1718125
23.462228,9.59166305,10.1673878,-0.758765268,10.1673878,0,10.1666071
23.47272,9.94987437,10.1621943,-0.460781904,10.1621943,0,10.1614052
23.483211,10.0995049,10.1570052,-0.239792089,10.1570052,0,10.1562074
23.493703,10.4880885,10.1518194,0.579887089,10.1518194,0,10.151013
23.504194,9.11043358,10.1466382,-1.01794137,10.1466382,0,10.1458229
23.514686,10,10.1414606,-0.376112496,10.1414606,0,10.1406362
23.525178,10.1488916,10.1362872,0.112269024,10.1362872,0,10.1354537
23.535669,9.21954446,10.1311187,-0.954763961,10.1311187,0,10.1302759
23.546161,10.3923048,10.1259541,0.516091828,10.1259541,0,10.1251018
23.556652,10.6301458,10.1207945,0.713688527,10.1207945,0,10.1199326
23.567144,10.3440804,10.1156391,0.477955382,10.1156391,0,10.1147674
23.577636,10.7238053,10.1104884,0.783145496,10.1104884,0,10.1096068
23.588127,10.0995049,10.1053431,-0.0764079772,10.1053431,0,10.1044514
23.598619,11.1355287,10.1002023,1.01750992,10.1002023,0,10.0993003
23.60911,9.89949494,10.095067,-0.442235307,10.095067,0,10.0941546
23.619602,9.79795897,10.0899364,-0.540349365,10.0899364,0,10.0890134
23.630094,9.64365076,10.0848111,-0.664199011,10.0848111,0,10.0838773
23.640585,11,10.0796916,0.959327038,10.0796916,0,10.0787469
23.651077,10.6770783,10.0745772,0.776209427,10.0745772,0,10.0736213
23.661568,10.1488916,10.0694688,0.281820464,10.0694688,0,10.0685015
23.67206,10.4880885,10.0643656,0.650939993,10.0643656,0,10.0633868
23.682552,9.89949494,10.0592682,-0.399716496,10.0592682,0,10.0582776
23.693043,10.8627805,10.0541772,0.899223717,10.0541772,0,10.0531747
23.703535,10.2956301,10.0490917,0.496526382,10.0490917,0,10.048077
23.714026,9.79795897,10.0440128,-0.4960381,10.0440128,0,10.0429857
23.724518,10.2956301,10.0389396,0.50664641,10.0389396,0,10.0378999
23.73501,9.74679434,10.0338726,-0.535796883,10.0338726,0,10.0328201
23.745501,9.53939201,10.0288126,-0.699586022,10.0288126,0,10.027747
23.755993,9.05538514,10.0237586,-0.984059687,10.0237586,0,10.0226797
23.766484,11,10.0187117,0.99059998,10.0187117,0,10.0176192
23.776976,10.8166538,10.013671,0.896093105,10.013671,0,10.0125647
23.787468,9.8488578,10.0086371,-0.399723989,10.0086371,0,10.0075168
23.797959,11.1355287,10.0036105,1.06391643,10.0036105,0,10.002476
23.808451,10,9.99859055,0.0375426585,9.99859055,0,9.99744139
23.818942,10.8627805,9.99357813,0.932310228,9.99357813,0,9.99241412
23.829434,10.4880885,9.98857243,0.706764493,9.98857243,0,9.9873933
23.839926,10.5830052,9.98357404,0.774229427,9.98357404,0,9.98237949
23.850417,9.74679434,9.97858352,-0.48144488,9.97858352,0,9.97737326
23.860909,9.53939201,9.97360002,-0.658944615,9.97360002,0,9.97237375
23.8714,9.2736185,9.96862459,-0.833670257,9.96862459,0,9.967382
23.881892,10.5356538,9.96365639,0.756305074,9.96365639,0,9.96239716
23.892384,9.43398113,9.95869598,-0.724372035,9.95869598,0,9.95741978
23.902875,10.0498756,9.95374393,0.310051109,9.95374393,0,9.95245043
23.913367,10.0995049,9.9487994,0.388208109,9.9487994,9.94748826,9.94748826
23.923858,9.74679434,9.94494517,-0.445141355,9.94386343,9.94361618,9.9425343
23.93435,8.94427191,9.94002428,-0.997873924,9.93893518,9.93867693,9.93758769
23.944842,9.64365076,9.93511174,-0.539871262,9.93401521,9.93374567,9.93264899
23.955333,10.4403065,9.93020813,0.714211722,9.92910409,9.92882295,9.92771876
23.965825,10,9.9253126,0.273289964,9.92420099,9.92390792,9.92279616
23.976316,9.69535971,9.92042618,-0.474411707,9.91930693,9.91900161,9.91788219
23.986808,10.7703296,9.91554805,0.924543974,9.91442107,9.91410317,9.91297602
23.9973,10.0498756,9.91067877,0.373090936,9.90954399,9.90921315,9.9080782
24.007791,10.2469508,9.90581891,0.584064946,9.90467625,9.90433211,9.90318928
24.018283,10.5830052,9.90096762,0.825855693,9.899817,9.8994592,9.89830841
24.028774,10.1488916,9.89612594,0.502758021,9.89496729,9.89459544,9.89343661
24.039266,10.4880885,9.89129304,0.772525368,9.89012628,9.88973998,9.88857304
24.049758,9.89949494,9.88646948,0.114129125,9.88529452,9.88489338,9.88371823
24.060249,9.94987437,9.88165582,0.261186811,9.88047259,9.88005617,9.87887275
24.070741,10.0498756,9.87685124,0.415961992,9.87565965,9.87522753,9.87403575
24.081232,10.1488916,9.87205676,0.526150935,9.87085673,9.87040846,9.86920823
24.091724,10.4880885,9.86727156,0.787919365,9.866063,9.86559812,9.86438935
24.102216,10.198039,9.86249619,0.579260595,9.86127902,9.86079705,9.85957966
24.112707,9.8488578,9.85773122,-0.0941987979,9.85650534,9.85600579,9.8547797
24.123199,10.2956301,9.85297582,0.665322718,9.85174116,9.85122352,9.84998864
24.13369,9.59166305,9.84823102,-0.506525389,9.84698747,9.84645123,9.84520746
24.144182,10.0995049,9.843496,0.505973263,9.84224348,9.84168808,9.84043533
24.154674,10.3923048,9.83877131,0.743998343,9.83750973,9.83693462,9.8356728
24.165165,10.8627805,9.83405751,1.01425982,9.83278678,9.83219137,9.83092039
24.175657,8.30662386,9.82935381,-1.23398944,9.82807382,9.82745752,9.82617728
24.186148,9.8488578,9.82466119,0.155552605,9.82337186,9.82273404,9.82144446
24.19664,9,9.81997887,-0.905526844,9.81868009,9.81802012,9.81672108
24.207132,10.3923048,9.81530739,0.759603487,9.81399907,9.81331628,9.8120077
24.217623,10.5830052,9.8106473,0.878838973,9.80932934,9.80862305,9.80730482
24.228115,10.8627805,9.80599783,1.02799935,9.80467012,9.80393962,9.80261164
24.238606,10.4880885,9.80135995,0.828690855,9.8000224,9.79926695,9.79792912
24.249098,10.0498756,9.79673289,0.503132915,9.79538539,9.79460423,9.79325644
24.25959,10.4403065,9.7921172,0.805102049,9.79075965,9.78995199,9.78859414
24.270081,9.38083152,9.78751342,-0.637716162,9.78614571,9.78531074,9.78394272
24.280573,10.6770783,9.78292079,0.945598998,9.7815428,9.78067968,9.77930137
24.291064,10.0498756,9.77834028,0.521090533,9.77695191,9.77605976,9.77467107
24.301556,10,9.77377113,0.475635228,9.77237227,9.77145018,9.77005098
24.312048,10.7703296,9.76921389,1.00055771,9.76780442,9.76685145,9.76544164
24.322539,10.2469508,9.76466911,0.694465017,9.76324892,9.76226408,9.76084355
24.333031,10.0995049,9.76013602,0.58255379,9.758705,9.75768729,9.75625591
24.343522,10.4403065,9.75561561,0.827460511,9.75417363,9.753122,9.75167966
24.354014,10,9.75110713,0.49889164,9.74965408,9.74856743,9.747114
24.364506,9.32737905,9.74661113,-0.647481334,9.74514688,9.74402409,9.74255945
24.374997,10,9.74212815,0.507810838,9.74065259,9.73949247,9.73801651
24.385489,9.69535971,9.73765746,-0.20566416,9.73617045,9.73497179,9.73348437
24.39598,10.3440804,9.73320003,0.781588383,9.73170145,9.73046298,9.72896398
24.406472,10.8166538,9.72875514,1.04302382,9.72724486,9.72596525,9.72445454
24.416964,9.89949494,9.72432333,0.418535074,9.72280122,9.72147911,9.71995655
24.427455,10.198039,9.71990515,0.691472252,9.71837108,9.71700504,9.71547051
24.437947,10.3440804,9.7154999,0.792830711,9.71395373,9.71254227,9.71099564
24.448438,10.198039,9.71110853,0.697804051,9.70955013,9.70809172,9.70653284
24.45893,9,9.70673036,-0.840672563,9.70515959,9.70365261,9.70208134
24.469422,10.4880885,9.70236593,0.886409922,9.70078265,9.69922543,9.69764164
24.479913,9.8488578,9.6980158,0.388383829,9.69641987,9.69481068,9.69321421
24.490405,10.5830052,9.69367929,0.943040802,9.69207055,9.69040757,9.68879829
24.500896,10.3440804,9.68935736,0.809149596,9.68773568,9.68601701,9.68439477
24.511388,8.94427191,9.68504935,-0.860684287,9.68341458,9.68163824,9.68000289
24.52188,9.38083152,9.68075582,-0.547653448,9.6791078,9.67727175,9.67562313
24.532371,9.94987437,9.67647733,0.522873828,9.67481591,9.672918,9.67125597
24.542863,10,9.67221324,0.572526649,9.67053826,9.66857625,9.66690064
24.553354,9.32737905,9.66796451,-0.583597001,9.66627583,9.66424737,9.66255804
24.563846,8.36660027,9.66373052,-1.13891626,9.66202796,9.65993062,9.65822739
24.574338,9.2736185,9.65951185,-0.621203148,9.65779525,9.65562647,9.65390918
24.584829,8.77496439,9.65530907,-0.938266851,9.65357827,9.65133539,9.64960388
24.595321,10.8166538,9.65112158,1.07959819,9.64937641,9.64705663,9.64531073
24.605812,9.69535971,9.64695037,0.220021243,9.64519065,9.64279107,9.6410306
24.616304,9.2736185,9.64279484,-0.607598836,9.64102041,9.63853796,9.63676275
24.626796,10.2469508,9.63865561,0.779932792,9.63686629,9.63429777,9.63250764
24.637287,10.4403065,9.63453327,0.897648726,9.63272888,9.63007096,9.62826574
24.647779,9.8488578,9.63042728,0.467365509,9.62860764,9.6258568,9.62403629
24.65827,10.0995049,9.62633865,0.687870837,9.62450357,9.62165613,9.61982016
24.668762,8.94427191,9.62226684,-0.823404475,9.62041613,9.61746824,9.61561661
24.679254,10.6301458,9.6182125,1.00594896,9.61634597,9.61329357,9.61142609
24.689745,10.0995049,9.61417627,0.696655343,9.61229374,9.60913259,9.60724907
24.700237,9.59166305,9.61015767,-0.135994939,9.60825893,9.60498455,9.60308479
24.710728,9.89949494,9.60615775,0.541606117,9.60424261,9.60085032,9.59893412
24.72122,9.74679434,9.60217605,0.380287116,9.6002443,9.59672916,9.59479631
24.731712,10.0995049,9.59821328,0.70801953,9.59626471,9.59262153,9.59067182
24.742203,9.38083152,9.59427015,-0.461994187,9.59230455,9.58852787,9.5865611
24.752695,10.4880885,9.59034625,0.947492602,9.58836342,9.58444747,9.58246341
24.763186,10.6770783,9.58644271,1.04433497,9.58444242,9.58038115,9.5783796
24.773678,10.2469508,9.58255918,0.815102192,9.58054121,9.57632821,9.57430892
24.78417,9.89949494,9.57869645,0.566390753,9.57666058,9.57228908,9.57025184
24.794661,10.2956301,9.57485533,0.848984579,9.57280133,9.5682642,9.56620879
24.805153,9.43398113,9.57103554,-0.370208602,9.56896318,9.56425287,9.56217904
24.815644,10.5830052,9.56723833,1.00785263,9.56514738,9.5602559,9.55816342
24.826136,8.71779789,9.56346349,-0.919600784,9.5613537,9.55627259,9.55416122
24.836628,10.5356538,9.55971196,0.987897662,9.5575831,9.55230338,9.55017286
24.847119,9.79795897,9.55598471,0.491908797,9.55383652,9.54834869,9.54619879
24.857611,9,9.55228167,-0.743156556,9.5501139,9.54440783,9.54223828
24.868102,9.59166305,9.54860425,0.207506137,9.54641666,9.5404816,9.53829214
24.878594,10.198039,9.54495251,0.808137683,9.54274483,9.53656931,9.53435968
24.889086,9.69535971,9.54132763,0.392469221,9.53909958,9.53267138,9.53044131
24.899577,10.9087121,9.53773081,1.17088911,9.53548215,9.52878824,9.52653746
24.910069,9.59166305,9.53416235,0.239793023,9.53189279,9.5249192,9.52264743
24.92056,9.69535971,9.53062396,0.40587652,9.52833323,9.52106505,9.51877201
24.931052,10.0995049,9.52711611,0.756563829,9.52480391,9.5172251,9.5149105
24.941544,9.69535971,9.52364037,0.414390332,9.52130642,9.51339978,9.51106332
24.952035,9.2736185,9.52019841,-0.496568139,9.51784243,9.5095895,9.50723089
24.962527,9.38083152,9.51679106,-0.368726922,9.51441275,9.50579359,9.50341252
24.973018,10.7238053,9.51342058,1.10017486,9.51101963,9.50201281,9.49960897
24.98351,9.74679434,9.51008809,0.486524667,9.5076642,9.4982465,9.49581958
24.994002,9.64365076,9.50679585,0.369939063,9.5043487,9.49449506,9.49204474
25.004493,9.53939201,9.50354627,0.189329717,9.50107555,9.49075891,9.48828486
25.014985,9.11043358,9.50034105,-0.624425713,9.49784643,9.48703738,9.48453927
25.025476,9.64365076,9.49718332,0.382710655,9.49466448,9.48333123,9.48080871
25.035968,9.59166305,9.49407522,0.312390501,9.49153183,9.4796398,9.47709253
25.04646,9.59166305,9.49102007,0.317242774,9.48845178,9.47596349,9.47339112
25.056951,9.8488578,9.4880214,0.600696594,9.48542788,9.4723027,9.46970486
25.067443,9.69535971,9.4850822,0.458560266,9.48246308,9.46865677,9.46603311
25.077934,9.59166305,9.48220684,0.330841659,9.47956179,9.46502646,9.4623766
25.088426,10.1488916,9.47939894,0.818225293,9.47672758,9.4614111,9.45873466
25.098918,10.6770783,9.47666321,1.09563454,9.47396518,9.45781111,9.4551077
25.109409,9.48683298,9.47400471,0.113261934,9.47127965,9.45422686,9.45149609
25.119901,9.11043358,9.47142806,-0.600828162,9.46867558,9.45065772,9.44789919
25.130392,10.3440804,9.4689392,0.935489836,9.46615892,9.44710442,9.44431771
25.140884,8.71779789,9.46654346,-0.865300858,9.46373499,9.44356631,9.44075101
25.151376,9.89949494,9.46424722,0.659733062,9.46141017,9.44004379,9.43719947
25.161867,9.69535971,9.46205714,0.483014052,9.45919111,9.43653724,9.43366346
25.172359,9.53939201,9.45997956,0.281802154,9.45708415,9.43304603,9.43014235
25.18285,9.53939201,9.45802191,0.285254448,9.45509671,9.42957087,9.42663683
25.193342,9.79795897,9.45619112,0.584609148,9.4532357,9.42611114,9.42314629
25.203834,10.198039,9.45449484,0.862290083,9.45150879,9.42266722,9.41967108
25.214325,9.38083152,9.45294085,-0.268531796,9.44992373,9.41923948,9.41621157
25.224817,10.3440804,9.45153652,0.944745424,9.44848791,9.41582731,9.41276714
25.235308,9.89949494,9.45028975,0.670227712,9.44720921,9.4124314,9.40933847
25.2458,9.79795897,9.44920777,0.590551608,9.44609485,9.40905114,9.40592494
25.256292,9.38083152,9.44829781,-0.259742737,9.44515206,9.40568692,9.40252691
25.266783,9.53939201,9.44756648,0.303027283,9.44438745,9.40233907,9.39914474
25.277275,9.48683298,9.44701937,0.199533493,9.44380658,9.39900702,9.39577782
25.287766,9.2736185,9.4466611,-0.415983899,9.44341409,9.39569144,9.39242681
25.298258,9.8488578,9.44649454,0.634321101,9.44321282,9.39239173,9.3890911
25.30875,10.0995049,9.44652051,0.80807452,9.44320359,9.38910826,9.38577105
25.319241,9.38083152,9.44673693,-0.256720498,9.44338432,9.38584138,9.382467
25.329733,9.94987437,9.44713825,0.709038874,9.44374942,9.38259051,9.37917836
25.340224,10.4880885,9.44771424,1.01998737,9.44428867,9.3793563,9.37590576
25.350716,10.198039,9.44844937,0.865788457,9.44498652,9.3761382,9.37264863
25.361208,9.38083152,9.44932126,-0.261705452,9.44582056,9.37293653,9.36940729
25.371699,10.2469508,9.45029965,0.892553142,9.44676052,9.36975165,9.36618208
25.382191,9.11043358,9.45134569,-0.58387679,9.4477675,9.366583,9.36297242
25.392682,9.21954446,9.45241034,-0.482561792,9.44879246,9.36343122,9.35977895
25.403174,9.16515139,9.45343479,-0.536920291,9.44977653,9.36029574,9.35660107
25.413666,9.43398113,9.45434986,-0.142719054,9.4506505,9.35717692,9.35343912
25.424157,9.79795897,9.45507747,0.585560845,9.45133623,9.35407508,9.35029342
25.434649,9.48683298,9.45553289,0.176918311,9.45174894,9.35098967,9.34716341
25.44514,9.59166305,9.45562772,0.368829673,9.45180019,9.34792134,9.34404969
25.455632,8.66025404,9.45527457,-0.891639239,9.4514025,9.34486952,9.34095169
25.466124,9.89949494,9.45439232,0.66716011,9.45047473,9.34183457,9.33786975
25.476615,9.53939201,9.45291207,0.294074725,9.4489479,9.33881679,9.33480417
25.487107,10.2956301,9.45078181,0.919156314,9.44676995,9.33581567,9.33175439
25.497598,9,9.44797205,-0.66930714,9.44391136,9.33283181,9.32872101
25.50809,9.89949494,9.44447668,0.674550414,9.44036598,9.32986469,9.32570347
25.518582,9.94987437,9.44031528,0.713834079,9.43615337,9.32691463,9.3227021
25.529073,9.64365076,9.43553082,0.45620164,9.43131648,9.32398196,9.31971718
25.539565,7.81024968,9.4301843,-1.27276652,9.4259163,9.32106616,9.31674817
25.550056,10.2956301,9.42435306,0.933422243,9.42003018,9.31816782,9.31379566
25.560548,9.2736185,9.41812107,-0.380134941,9.41374209,9.31528644,9.3108591
25.57104,9.64365076,9.41157718,0.481740163,9.40714089,9.31242233,9.30793879
25.581531,9.48683298,9.40480868,0.286398848,9.40031389,9.30957582,9.30503502
25.592023,8.30662386,9.39789544,-1.04463945,9.39334094,9.30674639,9.30214727
25.602514,9.59166305,9.39091179,0.448052739,9.38629641,9.30393464,9.29927609
25.613006,9.43398113,9.38391982,0.223743855,9.37924235,9.30114007,9.29642096
25.623498,9.48683298,9.37697345,0.331450649,9.37223271,9.298363,9.29358216
25.633989,9.48683298,9.37011662,0.341637766,9.36531141,9.29560373,9.29075998
25.644481,9.05538514,9.36338206,-0.554974705,9.35851116,9.29286179,9.2879539
25.654972,9.43398113,9.35679684,0.277820615,9.35185902,9.29013774,9.28516447
25.665464,10.0995049,9.35037835,0.865520994,9.34537236,9.2874311,9.28239117
25.675956,9.32737905,9.34413989,-0.129463632,9.33906445,9.2847422,9.27963427
25.686447,9.2736185,9.33808975,-0.253911911,9.33294357,9.28207132,9.27689406
25.696939,9.05538514,9.33223059,-0.526161052,9.32701231,9.27941802,9.27417002
25.70743,9.69535971,9.32656417,0.607285393,9.32127243,9.27678284,9.27146269
25.717922,9.89949494,9.32108764,0.760530928,9.31572104,9.27416533,9.26877156
25.728414,9.32737905,9.31579797,0.107615419,9.31035505,9.2715658,9.26609689
25.738905,9.59166305,9.31069067,0.530068279,9.30516995,9.26898454,9.26343897
25.749397,8.77496439,9.3057588,-0.728556391,9.30015875,9.26642111,9.26079728
25.759888,10.0498756,9.30099668,0.865377916,9.29531573,9.26387607,9.25817234
25.77038,10.0498756,9.29639633,0.868031851,9.29063285,9.26134897,9.25556367
25.780872,9.32737905,9.29195086,0.188223796,9.28610318,9.25884012,9.25297151
25.791363,8.83176087,9.28765322,-0.67519801,9.28171963,9.2563498,9.25039613
25.801855,9.21954446,9.28349516,-0.252884761,9.27747387,9.25387762,9.24783705
25.812346,8.94427191,9.27947011,-0.578963041,9.27335931,9.25142409,9.24529475
25.822838,9.21954446,9.27557013,-0.236697422,9.26936791,9.24898882,9.24276876
25.83333,8.94427191,9.27178862,-0.572290753,9.26549305,9.24657209,9.24025934
25.843821,9.59166305,9.2681192,0.568809144,9.26172829,9.2441742,9.23776672
25.854313,8.30662386,9.26455477,-0.978739446,9.25806642,9.24179477,9.23529043
25.864804,8.77496439,9.26108986,-0.697226986,9.25450196,9.23943431,9.23283096
25.875296,9.74679434,9.25771802,0.69933992,9.25102837,9.23709244,9.23038784
25.885788,9.43398113,9.25443412,0.423729875,9.24764044,9.23476947,9.22796131
25.896279,10.1488916,9.25123334,0.947448272,9.24433329,9.23246568,9.2255516
25.906771,9.64365076,9.24811025,0.628920115,9.24110142,9.23018071,9.22315826
25.917262,9.53939201,9.24506099,0.542522828,9.2379409,9.22791509,9.22078175
25.927754,9.2736185,9.24208085,0.177588428,9.23484689,9.22566844,9.21842161
25.938246,9.11043358,9.23916626,-0.358793374,9.2318158,9.22344109,9.21607808
25.948737,9.38083152,9.23631399,0.380154616,9.22884428,9.22123332,9.21375138
25.959229,9.21954446,9.23352023,-0.11821917,9.22592843,9.21904481,9.21144108
25.96972,8.77496439,9.23078255,-0.675143067,9.22306574,9.21687606,9.2091476
25.980212,9.2736185,9.22809771,0.21335601,9.22025286,9.21472676,9.20687051
25.990704,9.21954446,9.2254635,-0.0769352951,9.21748748,9.21259721,9.20461005
26.001195,9.43398113,9.22287791,0.459459711,9.21476751,9.21048772,9.20236641
26.011687,9.38083152,9.2203384,0.400615925,9.21209027,9.208398,9.20013917
26.022178,9.21954446,9.21784361,0.0412413053,9.20945432,9.20632855,9.19792875
26.03267,9.11043358,9.21539139,-0.323971934,9.20685735,9.20427909,9.19573473
26.043162,9.2736185,9.21298047,0.246247889,9.20429799,9.20224994,9.19355733
26.053653,9.43398113,9.21060971,0.472621859,9.20177498,9.20024143,9.19139674
26.064145,9.53939201,9.20827743,0.575425568,9.19928649,9.19825329,9.18925255
26.074636,9.59166305,9.20598297,0.621031459,9.19683175,9.19628604,9.18712516
26.085128,8.60232527,9.20372491,-0.775499612,9.19440916,9.19433945,9.18501417
26.09562,9,9.20150259,-0.448890396,9.19201791,9.19241385,9.18291978
26.106111,9.74679434,9.19931541,0.739918197,9.18965728,9.19050958,9.18084218
26.116603,9.11043358,9.19716225,-0.294497314,9.18732594,9.18862642,9.17878097
26.127094,9.21954446,9.19504289,0.156529757,9.18502355,9.18676492,9.17673654
26.137586,9.21954446,9.19295638,0.163058507,9.18274891,9.18492489,9.17470849
26.148078,8.88819442,9.19090242,-0.550189064,9.18050159,9.18310668,9.17269701
26.158569,9.43398113,9.18888078,0.495076107,9.17828114,9.18131067,9.17070229
26.169061,8.66025404,9.18689069,-0.725697356,9.17608658,9.17953671,9.16872394
26.179552,8.48528137,9.18493221,-0.836451335,9.17391778,9.17778534,9.16676232
26.190044,8.71779789,9.18300469,-0.682060704,9.17177382,9.17605645,9.16481707
26.200536,8.66025404,9.18110809,-0.721702191,9.16965445,9.17435044,9.16288835
26.211027,9.2736185,9.1792424,0.307206927,9.16755942,9.17266771,9.16097635
26.221519,9.79795897,9.17740712,0.787751138,9.16548793,9.17100819,9.15908068
26.23201,9.79795897,9.17560248,0.78889574,9.16344,9.16937247,9.15720171
26.242502,8.94427191,9.17382809,-0.47912021,9.16141487,9.1677605,9.15533906
26.252994,8.94427191,9.17208407,-0.477296718,9.15941241,9.16617274,9.1534929
26.263485,10.5830052,9.17037059,1.18854308,9.15743249,9.16460965,9.1516634
26.273977,9.16515139,9.16868737,-0.0594641011,9.15547443,9.16307125,9.1498502
26.284468,8.18535277,9.16703479,-0.990798679,9.15353833,9.16155818,9.14805363
26.29496,8.88819442,9.16541266,-0.526515184,9.15162355,9.16007051,9.14627334
26.305452,9.89949494,9.16382126,0.857714218,9.14973003,9.15860876,9.1445095
26.315943,9.43398113,9.16226092,0.52126789,9.14785771,9.15717347,9.14276224
26.326435,9.05538514,9.16073156,-0.324571128,9.14600601,9.15576478,9.14103123
26.336926,9.21954446,9.1592337,0.245582481,9.14417507,9.15438342,9.13931679
26.347418,8.83176087,9.15776736,-0.570969781,9.14236434,9.15302958,9.13761858
26.35791,10.6301458,9.15633298,1.21400693,9.1405738,9.15170391,9.13593674
26.368401,9.11043358,9.15493107,-0.210944294,9.13880344,9.15040705,9.13427142
26.378893,9.64365076,9.15356176,0.700063572,9.13705274,9.1491393,9.13262229
26.389384,8.83176087,9.15222573,-0.566096163,9.13532188,9.1479015,9.13098964
26.399876,8.94427191,9.15092323,-0.454589176,9.13361037,9.14669405,9.12937316
26.410368,8.71779789,9.1496549,-0.657158289,9.13191822,9.14551771,9.12777299
26.420859,9.43398113,9.14842145,0.534377847,9.13024544,9.14437332,9.12618925
26.431351,9.59166305,9.14722325,0.666663178,9.12859159,9.14326138,9.12462162
26.441842,10.3440804,9.14606123,1.09454064,9.12695683,9.14218292,9.1230704
26.452334,9.21954446,9.14493588,0.273145712,9.12534075,9.14113856,9.12153527
26.462826,9,9.14384812,-0.379273142,9.12374336,9.14012932,9.12001636
26.473317,9.48683298,9.1427989,0.586544186,9.1221647,9.13915624,9.1185138
26.483809,9.79795897,9.14178895,0.810043223,9.12060437,9.13822015,9.11702728
26.4943,10.0995049,9.14081946,0.979124854,9.11906254,9.13732232,9.11555706
26.504792,9.79795897,9.13989132,0.811213693,9.11753882,9.13646375,9.11410285
26.515284,10.3923048,9.13900577,1.11950841,9.11603326,9.13564575,9.11266477
26.525775,9.05538514,9.13816416,-0.287713439,9.11454591,9.13486973,9.11124293
26.536267,9.69535971,9.13736766,0.74698866,9.11307638,9.13413694,9.10983705
26.546758,9.16515139,9.13661786,0.168918701,9.11162486,9.13344907,9.10844737
26.55725,9.05538514,9.13591619,-0.28377994,9.11019099,9.13280759,9.10707361
26.567742,10.2469508,9.1352644,1.05436538,9.10877483,9.13221431,9.10571587
26.578233,9.16515139,9.13466436,0.174605364,9.10737642,9.13167117,9.10437427
26.588725,9.11043358,9.1341179,-0.153897097,9.10599543,9.13118007,9.10304853
26.599216,9.89949494,9.13362723,0.875138677,9.10463202,9.13074327,9.10173887
26.609708,8.42614977,9.13319455,-0.840859544,9.10328587,9.13036302,9.10044504
26.6202,9.43398113,9.13282235,0.548779357,9.10195704,9.13004186,9.09916712
26.630691,9.53939201,9.13251333,0.63787043,9.10064558,9.12978253,9.09790522
26.641183,9.11043358,9.1322703,-0.147772526,9.09935116,9.12958791,9.09665907
26.651674,8.60232527,9.13209643,-0.727853803,9.09807398,9.1294612,9.09542889
26.662166,8.83176087,9.13199506,-0.5479363,9.09681371,9.12940579,9.09421442
26.672658,9.2736185,9.13196987,0.376362357,9.09557041,9.12942541,9.09301576
26.683149,9.64365076,9.13202485,0.715280302,9.09434414,9.12952406,9.09183298
26.693641,9.43398113,9.13216433,0.54937856,9.0931346,9.12970613,9.09066584
26.704132,9.89949494,9.132393,0.875843557,9.09194195,9.12997635,9.08951454
26.714624,8.30662386,9.13271604,-0.908896131,9.09076592,9.13033992,9.08837884
26.725116,9.2736185,9.13313905,0.37480588,9.08960656,9.13080249,9.08725881
26.735607,9.94987437,9.1336681,0.903441347,9.08846391,9.13137016,9.08615454
26.746099,9,9.13431003,-0.366483329,9.08733771,9.13204979,9.08506578
26.75659,8.94427191,9.13507209,-0.436806799,9.08622811,9.13284867,9.08399273
26.767082,8.66025404,9.13596255,-0.689716255,9.08513484,9.13377509,9.08293515
26.777574,8.83176087,9.13699033,-0.552475755,9.08405796,9.13483802,9.08189311
26.788065,9.48683298,9.13816526,0.590480923,9.08299751,9.13604729,9.08086668
26.798557,8.77496439,9.13949866,-0.603766741,9.08195324,9.13741427,9.07985564
26.809048,9.32737905,9.14100273,0.431713246,9.08092529,9.13895117,9.07886016
26.81954,9.8488578,9.14269176,0.84033686,9.07991342,9.14067232,9.07788001
26.830032,9.64365076,9.14458163,0.706448252,9.07891768,9.1425936,9.07691527
26.840523,8.71779789,9.14669047,-0.654898911,9.0779381,9.14473319,9.07596599
26.851015,10.1488916,9.14904,0.999925779,9.07697444,9.14711283,9.07503197
26.861506,9,9.1516548,-0.389428808,9.07602685,9.1497571,9.07411334
26.871998,9.43398113,9.15456504,0.528598236,9.0750951,9.15269622,9.07320992
26.88249,9,9.1578061,-0.397248155,9.07417922,9.15596559,9.07232174
26.892981,9.05538514,9.16142071,-0.325631043,9.07327925,9.15960796,9.07144888
26.903473,9.48683298,9.1654621,0.566895825,9.07239497,9.16367658,9.07059112
26.913964,8.66025404,9.16999389,-0.713960683,9.0715265,9.16823509,9.06974861
26.924456,9.21954446,9.17509605,0.210827901,9.07067364,9.17336351,9.06892114
26.934948,9,9.18086542,-0.425282749,9.06983641,9.17915868,9.06810878
26.945439,8.88819442,9.18742051,-0.547015621,9.06901485,9.18573917,9.06731155
26.955931,8.83176087,9.19490784,-0.602616774,9.06820875,9.19325153,9.06652929
26.966422,8.66025404,9.20350186,-0.737053474,9.06741822,9.20187024,9.0657621
26.976914,9.8488578,9.21341493,0.797146709,9.06664306,9.21180769,9.0650098
26.987406,10,9.22489598,0.880399923,9.0658833,9.22331289,9.06427244
26.997897,9.11043358,9.23823539,-0.357493785,9.06513898,9.23667624,9.06355005
27.008389,9.16515139,9.25377105,-0.297690548,9.06440989,9.25223571,9.06284247
27.01888,9.89949494,9.27187894,0.79222219,9.06369614,9.27036731,9.06214978
27.029372,8.83176087,9.29298177,-0.679132462,9.06299753,9.29149382,9.06147182
27.039864,8.83176087,9.31753165,-0.696972588,9.06231411,9.31606743,9.06080864
27.050355,8.66025404,9.34600366,-0.82810001,9.06164587,9.34456324,9.06016024
27.060847,9.2736185,9.37889101,-0.324457267,9.06099265,9.37747455,9.05952648
27.071338,8.94427191,9.41666725,-0.687310224,9.06035454,9.41527493,9.05890744
27.08183,8.94427191,9.45978857,-0.717994888,9.05973135,9.4584206,9.05830297
27.092322,8.94427191,9.50864458,-0.75124741,9.05912312,9.50730122,9.05771309
27.102813,9.64365076,9.5635379,0.283042155,9.05852984,9.5622194,9.05713782
27.113305,8.54400375,9.62467121,-1.03955157,9.05795136,9.62337779,9.05657701
27.123796,9.59166305,9.69207764,-0.31688261,9.05738775,9.69080949,9.05603073
27.134288,8.66025404,9.7656322,-1.05136966,9.05683886,9.76438946,9.05549885
27.14478,9.21954446,9.84497202,-0.790839783,9.05630469,9.84375473,9.05498137
27.155271,9.53939201,9.92947068,-0.62456278,9.05578524,9.92827876,9.05447831
27.165763,8.83176087,10.0182153,-1.0892449,9.05528038,10.0170486,9.05398954
27.176254,9.05538514,10.1098915,-1.02689161,9.05479016,10.1087495,9.05351511
27.186746,10.4880885,10.2027848,0.534138255,9.05431443,10.2016671,9.05305489
27.197238,9.79795897,10.2946581,-0.704768875,9.0538532,10.2935638,9.05260889
27.207729,7.54983444,10.3827411,-1.68312407,9.05340647,10.3816691,9.05217711
27.218221,9.64365076,10.4637801,-0.90560994,9.0529741,10.4627293,9.05175944
27.228712,9.74679434,10.5341152,-0.887311035,9.05255614,10.5330838,9.05135591
27.239204,10.5830052,10.5900227,-0.0837701272,9.05215245,10.5890089,9.0509664
27.249696,10.2469508,10.6280923,-0.617366606,9.05176304,10.627094,9.05059092
27.260187,10.4403065,10.6457615,-0.453271438,9.05138789,10.6447766,9.05022946
27.270679,9.74679434,10.6417647,-0.946028741,9.05102689,10.6407909,9.04988191
27.28117,11.3578167,10.616368,0.861074151,9.05068005,10.6154032,9.04954829
27.291662,10.198039,10.571315,-0.610963187,9.05034728,10.5703573,9.04922852
27.302154,9.79795897,10.5095067,-0.843532895,9.05002855,10.5085543,9.04892257
27.312645,9.53939201,10.434516,-0.946109923,9.04972386,10.4335677,9.04863043
27.323137,8.88819442,10.35007,-1.20908046,9.04943308,10.3491248,9.04835201
27.333628,9.8488578,10.2597209,-0.640986036,9.04915625,10.2587781,9.04808731
27.34412,9.89949494,10.1665559,-0.516779441,9.04889325,10.1656151,9.04783626
27.354612,8.42614977,10.0731633,-1.28336023,9.04864407,10.0722243,9.04759882
27.365103,9.64365076,9.98160706,-0.581340092,9.04840869,9.98067002,9.04737499
27.375595,9.32737905,9.8934493,-0.752376402,9.04818701,9.89251432,9.04716467
27.386086,8.48528137,9.809875,-1.15090991,9.04797902,9.80894238,9.04696787
27.396578,8.66025404,9.7316881,-1.03510099,9.04778466,9.73075824,9.0467845
27.40707,9.32737905,9.65942393,-0.57623335,9.04760388,9.65849726,9.04661454
27.417561,8.94427191,9.593369,-0.805665622,9.04743665,9.59244602,9.04645797
27.428053,9.2736185,9.53358447,-0.509868584,9.04728291,9.53266565,9.0463147
27.438544,10,9.47998532,0.721120432,9.04714263,9.47907117,9.04618473
27.449036,9.05538514,9.43232755,-0.613956358,9.04701574,9.43141852,9.04606799
27.459528,9.38083152,9.3902778,-0.0971919552,9.0469022,9.38937434,9.04596445
27.470019,9.05538514,9.35342538,-0.545930617,9.04680198,9.35252788,9.04587406
27.480511,9.11043358,9.32130163,-0.459203714,9.04671501,9.32041045,9.04579678
27.491002,9.38083152,9.29342858,0.295639887,9.04664126,9.29254401,9.04573257
27.501494,9.32737905,9.26931471,0.240965434,9.04658068,9.26843702,9.04568137
27.511986,9.16515139,9.24849199,-0.288687723,9.04653321,9.24762137,9.04564315
27.522477,9.16515139,9.230519,-0.255670897,9.04649882,9.22965561,9.04561787
27.532969,9.69535971,9.21498588,0.693090063,9.04647746,9.21412984,9.04560547
27.54346,9.21954446,9.20153109,0.134213876,9.04646907,9.20068249,9.04560592
27.553952,9.74679434,9.18983117,0.746299657,9.04647361,9.18899005,9.04561916
27.564444,9.64365076,9.17960995,0.681205413,9.04649103,9.17877634,9.04564516
27.574935,8.60232527,9.17063177,-0.753861064,9.04652129,9.16980568,9.04568386
27.585427,8.71779789,9.16269606,-0.667006877,9.04656434,9.16187746,9.04573523
27.595918,9.59166305,9.15563902,0.660321157,9.04662012,9.15482788,9.04579921
27.60641,9.21954446,9.14932298,0.26499336,9.0466886,9.14851927,9.04587577
27.616902,9.74679434,9.14363707,0.776632006,9.04676972,9.14284073,9.04596485
27.627393,9.74679434,9.1384908,0.779938166,9.04686343,9.13770178,9.04606641
27.637885,9.2736185,9.13380914,0.373910889,9.04696969,9.13302736,9.04618041
27.648376,9.74679434,9.1295327,0.785660004,9.04708844,9.1287581,9.04630678
27.658868,8.77496439,9.12561136,-0.592154519,9.04721965,9.12484387,9.04644551
27.66936,9.2736185,9.12200501,0.389375766,9.04736327,9.12124455,9.04659653
27.679851,8.42614977,9.11868034,-0.832184214,9.04751922,9.11792684,9.04675979
27.690343,9.43398113,9.11560858,0.564245119,9.04768749,9.11486196,9.04693526
27.700834,8.1240384,9.11276651,-0.994348079,9.04786799,9.11202669,9.04712287
27.711326,9.48683298,9.11013321,0.613758727,9.04806073,9.10940011,9.0473226
27.721818,9.53939201,9.10769133,0.65703933,9.04826561,9.10696489,9.0475344
27.732309,8.54400375,9.1054257,-0.749280956,9.04848259,9.10470582,9.04775818
27.742801,9.38083152,9.10332228,0.526791461,9.04871164,9.1026089,9.04799395
27.753292,9.11043358,9.10136941,0.0952059529,9.04895268,9.10066244,9.04824162
27.763784,8.18535277,9.0995559,-0.956139703,9.0492057,9.09885528,9.04850118
27.774276,9.69535971,9.09787224,0.772973138,9.04947064,9.09717788,9.04877256
27.784767,9.43398113,9.09630977,0.581094967,9.0497474,9.0956216,9.04905569
27.795259,9.53939201,9.09486021,0.666732181,9.05003601,9.09417815,9.04935057
27.80575,9.38083152,9.09351658,0.536017667,9.05033634,9.09284056,9.04965709
27.816242,9.2736185,9.09227199,0.425847988,9.05064842,9.09160193,9.04997528
27.826734,9.32737905,9.0911205,0.486064353,9.05097216,9.09045633,9.05030505
27.837225,10.198039,9.09005665,1.05260742,9.05130748,9.08939831,9.05064631
27.847717,8.36660027,9.08907513,-0.849985214,9.05165439,9.08842254,9.0509991
27.858208,9.53939201,9.08817143,0.671729545,9.05201277,9.08752452,9.05136328
27.8687,9.69535971,9.08734105,0.779755513,9.05238266,9.08669975,9.05173888
27.879192,9.48683298,9.0865801,0.632655422,9.05276395,9.08594434,9.05212582
27.889683,9.05538514,9.08588494,-0.174641922,9.05315657,9.08525466,9.05252401
27.900175,9.53939201,9.08525204,0.673899087,9.05356053,9.08462716,9.05293347
27.910666,8.83176087,9.08467835,-0.502909023,9.05397571,9.08405882,9.05335409
27.921158,8.36660027,9.08416085,-0.84708948,9.05440214,9.0835466,9.05378588
27.93165,9.79795897,9.08369688,0.845140281,9.05483973,9.08308785,9.05422876
27.942141,9.69535971,9.08328394,0.782352717,9.05528839,9.08268006,9.05468264
27.952633,9.59166305,9.08291962,0.713262525,9.05574814,9.08232083,9.05514755
27.963124,8.66025404,9.08260179,-0.649882875,9.05621885,9.08200803,9.05562336
27.973616,9.43398113,9.08232836,0.593003184,9.05670056,9.08173957,9.05611011
27.984108,10.3440804,9.08209745,1.12338016,9.05719318,9.08151357,9.05660769
27.994599,8.94427191,9.08190731,-0.370992448,9.0576966,9.08132828,9.05711602
28.005091,8.54400375,9.08175623,-0.733316088,9.05821087,9.081182,9.05763514
28.015582,8.77496439,9.08164269,-0.553785433,9.05873584,9.08107319,9.0581649
28.026074,8.48528137,9.08156522,-0.772194173,9.05927156,9.0810004,9.05870535
28.036566,9.48683298,9.08152244,0.636640039,9.05981792,9.08096225,9.05925639
28.047057,8.94427191,9.08151309,-0.370460762,9.06037483,9.08095746,9.05981791
28.057549,8.88819442,9.08153594,-0.43970618,9.06094233,9.08098484,9.06038998
28.06804,8.94427191,9.08158987,-0.370564379,9.06152028,9.08104323,9.06097243
28.078532,9.32737905,9.08167381,0.49568664,9.06210872,9.08113158,9.06156532
28.089024,9.2736185,9.08178675,0.437986012,9.06270755,9.08124888,9.06216855
28.099515,9.38083152,9.08192773,0.546720947,9.06331666,9.08139417,9.062782
28.110007,8.36660027,9.08209587,-0.845869733,9.06393611,9.08156657,9.06340575
28.120498,9.32737905,9.0822903,0.495064391,9.06456574,9.08176522,9.06403963
28.13099,9.21954446,9.08251026,0.370181309,9.06520561,9.08198933,9.06468369
28.141482,9.69535971,9.08275496,0.782690716,9.06585562,9.08223815,9.06533784
28.151973,9.53939201,9.08302366,0.675550407,9.06651563,9.08251092,9.06600196
28.162465,8.66025404,9.08331574,-0.650431934,9.06718574,9.08280702,9.06667612
28.172956,8.60232527,9.08363048,-0.693761643,9.06786576,9.08312574,9.06736014
28.183448,8.54400375,9.08396735,-0.734822157,9.06855577,9.08346654,9.06805411
28.19394,8.66025404,9.08432571,-0.651207859,9.06925565,9.08382879,9.0687579
28.204431,9.32737905,9.08470499,0.492619589,9.06996528,9.08421191,9.0694714
28.214923,8.36660027,9.08510473,-0.847646426,9.07068475,9.08461545,9.07019469
28.225414,9.21954446,9.08552434,0.366087579,9.07141386,9.08503882,9.07092758
28.235906,9.05538514,9.08596343,-0.174866504,9.0721527,9.08548162,9.07167016
28.246398,8.42614977,9.0864215,-0.812571062,9.07290115,9.08594337,9.07242231
28.256889,9.48683298,9.08689807,0.632404069,9.07365909,9.08642357,9.0731839
28.267381,8.71779789,9.08739281,-0.607943194,9.07442661,9.08692191,9.07395503
28.277872,9.11043358,9.08790523,0.150094461,9.07520351,9.08743788,9.0747355
28.288364,9.21954446,9.08843504,0.36209034,9.07598988,9.08797121,9.07552541
28.298856,8.42614977,9.08898183,-0.814144987,9.0767856,9.08852147,9.07632462
28.309347,8.48528137,9.0895452,-0.777344083,9.07759054,9.08908828,9.07713302
28.319839,10.1488916,9.09012491,1.02896388,9.0784048,9.08967139,9.0779507
28.33033,9.48683298,9.09072053,0.62937465,9.07922818,9.09027037,9.07877745
28.340822,9.43398113,9.09133187,0.585362507,9.08006077,9.09088504,9.07961339
28.351314,9.32737905,9.09195857,0.485201491,9.08090245,9.09151503,9.08045838
28.361805,8.83176087,9.09260028,-0.510724399,9.08175308,9.09216,9.08131228
28.372297,7.93725393,9.09325685,-1.07517576,9.08261278,9.0928198,9.08217521
28.382788,8.77496439,9.09392789,-0.56476854,9.08348132,9.09349403,9.08304695
28.39328,8.30662386,9.09461327,-0.887687676,9.08435882,9.09418256,9.08392762
28.403772,9.43398113,9.09531268,0.581952272,9.08524515,9.09488509,9.08481708
28.414263,9.74679434,9.09602582,0.806702252,9.08614016,9.09560132,9.08571519
28.424755,9.21954446,9.09675259,0.35041671,9.08704397,9.09633114,9.08662208
28.435246,9,9.09749262,-0.312238084,9.08795637,9.0970742,9.08753751
28.445738,8.83176087,9.09824585,-0.516221836,9.08887747,9.09783042,9.08846161
28.45623,9.89949494,9.099012,0.894697122,9.08980712,9.09859953,9.08939424
28.466721,8.94427191,9.09979078,-0.394358813,9.0907452,9.09938125,9.09033526
28.477213,9.16515139,9.10058216,0.254104753,9.09169183,9.10017553,9.09128479
28.487704,9.43398113,9.1013858,0.576710788,9.09264676,9.10098203,9.09224261
28.498196,9.64365076,9.10220166,0.735832252,9.09361014,9.10180073,9.09320883
28.508688,8.94427191,9.10302949,-0.398443944,9.09458182,9.10263137,9.09418333
28.519179,9.79795897,9.10386903,0.833120603,9.09556164,9.1034737,9.09516595
28.529671,9.16515139,9.10472028,0.24582739,9.09654976,9.10432771,9.09615683
28.540162,9.53939201,9.10558292,0.658641856,9.09754592,9.10519307,9.09715573
28.550654,9,9.10645694,-0.326277401,9.09855027,9.10606979,9.09816278
28.561146,8.60232527,9.10734212,-0.710645376,9.09956265,9.10695764,9.09917784
28.571637,9.16515139,9.10823821,0.238564841,9.10058292,9.10785637,9.10020076
28.582129,9.43398113,9.10914523,0.569943767,9.10161121,9.10876602,9.10123168
28.59262,7.87400787,9.11006289,-1.11178011,9.10264728,9.10968626,9.10227036
28.603112,9.05538514,9.11099119,-0.235809363,9.10369128,9.11061714,9.10331693
28.613604,9,9.11192994,-0.334559318,9.10474305,9.11155843,9.10437125
28.624095,9.79795897,9.11287889,0.827695645,9.10580245,9.1125099,9.10543316
28.634587,9.2736185,9.11383811,0.399725394,9.10686961,9.1134716,9.10650282
28.645078,8.1240384,9.11480727,-0.995373732,9.10794428,9.11444323,9.10757997
28.65557,8.94427191,9.11578645,-0.414143137,9.10902662,9.11542485,9.10866476
28.666062,8.30662386,9.11677542,-0.900084196,9.11011647,9.11641625,9.10975703
28.676553,9.11043358,9.11777398,-0.0856761411,9.11121368,9.1174172,9.11085664
28.687045,8.77496439,9.11878219,-0.586359793,9.11231839,9.11842779,9.11196374
28.697536,8.48528137,9.11979976,-0.796566622,9.11343036,9.1194477,9.11307805
28.708028,9.32737905,9.12082675,0.454480252,9.11454973,9.12047702,9.11419976
28.71852,8,9.12186297,-1.05918033,9.11567635,9.12151555,9.11532869
28.729011,8.94427191,9.12290821,-0.422653879,9.11681006,9.12256307,9.11646469
28.739503,9.2736185,9.12396256,0.386853895,9.11795103,9.12361968,9.11760792
28.749994,9.32737905,9.12502571,0.449837016,9.11909897,9.12468507,9.11875811
28.760486,9.32737905,9.12609777,0.448643826,9.12025407,9.12575934,9.11991543
28.770978,8.83176087,9.12717853,-0.543523382,9.12141616,9.1268423,9.12107972
28.781469,9.21954446,9.1282678,0.302120275,9.12258507,9.12793374,9.12225081
28.791961,9.32737905,9.12936567,0.444986945,9.12376098,9.12903377,9.12342888
28.802452,10,9.13047185,0.932484931,9.1249436,9.13014209,9.12461364
28.812944,8.48528137,9.13158646,-0.80393102,9.12613312,9.13125881,9.12580528
28.823436,9.16515139,9.13270929,0.180116908,9.12732937,9.13238374,9.12700363
28.833927,9.43398113,9.13384015,0.547851245,9.12853219,9.13351667,9.12820852
28.844419,9.48683298,9.13497915,0.593172679,9.12974174,9.13465774,9.12942013
28.85491,9.05538514,9.13612601,-0.284149378,9.13095775,9.13580663,9.13063818
28.865402,9.38083152,9.13728084,0.493508543,9.13218039,9.13696348,9.13186285
28.875894,8.83176087,9.13844345,-0.553789294,9.13340951,9.13812809,9.13309397
28.886385,8.36660027,9.13961365,-0.879211795,9.13464492,9.13930027,9.13433137
28.896877,9.21954446,9.14079156,0.280629457,9.13588682,9.14048015,9.13557524
28.907368,8.18535277,9.1419769,-0.978071638,9.13713492,9.14166743,9.13682529
28.91786,10.2469508,9.1431698,1.05060981,9.1383894,9.14286226,9.1380817
28.928352,9.38083152,9.14437006,0.486273032,9.13965009,9.14406443,9.1393443
28.938843,9.69535971,9.14557749,0.741473009,9.14091682,9.14527376,9.14061293
28.949335,8.66025404,9.14679225,-0.697522909,9.14218978,9.14649039,9.14188777
28.959826,8.48528137,9.14801401,-0.814083927,9.14346867,9.14771402,9.14316852
28.970318,10.0995049,9.14924295,0.974813823,9.14475369,9.14894479,9.14445539
28.98081,9.11043358,9.15047886,-0.200113171,9.14604467,9.15018253,9.1457482
28.991301,9.69535971,9.15172155,0.737318223,9.14734143,9.15142703,9.14704678
29.001793,8.77496439,9.15297119,-0.614822576,9.14864417,9.15267846,9.14835131
29.012284,9.21954446,9.15422745,0.255571916,9.14995258,9.15393651,9.1496615
29.022776,8.94427191,9.15549052,-0.459585254,9.15126687,9.15520133,9.15097756
29.033268,9.64365076,9.15676018,0.697775449,9.15258687,9.15647275,9.1522993
29.043759,9.69535971,9.15803626,0.733023501,9.15391238,9.15775056,9.15362655
29.054251,9.8488578,9.15931892,0.830384777,9.15524362,9.15903494,9.1549595
29.064742,9.74679434,9.16060785,0.765628168,9.15658028,9.16032557,9.15629787
29.075234,9.11043358,9.16190323,-0.226869229,9.15792256,9.16162263,9.15764184
29.085726,9.21954446,9.16320485,0.237359656,9.15927029,9.16292593,9.15899124
29.096217,9.69535971,9.16451253,0.728592603,9.16062329,9.16423527,9.1603459
29.106709,8.94427191,9.16582646,-0.47069581,9.16198176,9.16555083,9.16170602
29.1172,9,9.1671463,-0.408835295,9.16334539,9.1668723,9.16307129
29.127692,10.1488916,9.16847225,0.990161259,9.16471441,9.16819987,9.16444192
29.138184,9.43398113,9.16980411,0.51398154,9.16608861,9.16953333,9.16581773
29.148675,9.32737905,9.17114169,0.395268722,9.16746783,9.1708725,9.16719854
29.159167,9.2736185,9.17248518,0.318014644,9.16885228,9.17221757,9.16858456
29.169658,9.32737905,9.17383426,0.39184792,9.17024164,9.17356821,9.16997548
29.18015,9.2736185,9.17518912,0.313734562,9.17163612,9.17492461,9.17137151
29.190642,8.54400375,9.17654957,-0.795327494,9.17303555,9.1762866,9.17277248
29.201133,8.88819442,9.17791541,-0.538257368,9.17443974,9.17765396,9.17417819
29.211625,9.69535971,9.17928685,0.718382119,9.17584891,9.17902691,9.17558888
29.222116,9.05538514,9.18066355,-0.353946901,9.17726274,9.1804051,9.1770042
29.232608,7.87400787,9.18204572,-1.14369482,9.17868145,9.18178876,9.1784244
29.2431,8.54400375,9.18343316,-0.799643304,9.18010486,9.18317767,9.17984928
29.253591,8.48528137,9.18482568,-0.836387655,9.18153278,9.18457165,9.18127866
29.264083,8.24621125,9.18622349,-0.969542284,9.18296543,9.18597091,9.18271276
29.274574,9.64365076,9.18762626,0.675295863,9.1844025,9.18737511,9.18415126
29.285066,10.4880885,9.18903419,1.13976063,9.1858442,9.18878446,9.18559438
29.295558,9.43398113,9.19044709,0.493491684,9.18729035,9.19019878,9.18704195
29.306049,9.48683298,9.19186477,0.543109761,9.18874076,9.19161786,9.18849376
29.316541,9.32737905,9.19328743,0.366185227,9.19019566,9.19304191,9.18995006
29.327032,9.21954446,9.19471475,0.157574436,9.19165473,9.19447061,9.1914105
29.337524,9.32737905,9.19622076,0.362157827,9.19319203,9.19590417,9.19287533
29.348016,9.16515139,9.19765789,-0.180295598,9.19465996,9.19734239,9.19434436
29.358507,8.66025404,9.19909951,-0.734060943,9.19613191,9.19878508,9.19581739
29.368999,9.59166305,9.20054582,0.625393658,9.19760811,9.20023247,9.19729466
29.37949,9.16515139,9.2019965,-0.191950798,9.19908823,9.2016842,9.19877583
29.389982,9.21954446,9.20345176,0.126856976,9.20057251,9.20314051,9.20026115
29.400474,9.64365076,9.20491142,0.662374017,9.20206075,9.2046012,9.20175043
29.410965,8.94427191,9.20637528,-0.511960317,9.20355276,9.20606607,9.20324347
29.421457,8.77496439,9.20784355,-0.657935529,9.20504879,9.20753535,9.2047405
29.431948,9.21954446,9.2093159,0.101136319,9.2065485,9.20900871,9.20624121
29.44244,8,9.21079257,-1.1003602,9.20805212,9.21048635,9.20774582
29.452932,9.38083152,9.21227334,0.410558375,9.20955947,9.2119681,9.20925414
29.463423,9.64365076,9.21375803,0.655662054,9.21107036,9.21345376,9.21076599
29.473915,10.4880885,9.21524687,1.12820282,9.21258502,9.21494354,9.2122816
29.484406,8.71779789,9.21673951,-0.706358,9.21410312,9.21643713,9.21380064
29.494898,9.2736185,9.21823619,0.235334454,9.21562489,9.21793473,9.21532335
29.50539,9.05538514,9.21973671,-0.405402975,9.21715016,9.21943617,9.21684954
29.515881,9.43398113,9.22124087,0.461237746,9.21867873,9.22094124,9.21837901
29.526373,9.05538514,9.22274891,-0.40910118,9.22021083,9.22245018,9.21991202
29.536864,9.43398113,9.22426049,0.457952663,9.22174614,9.22396264,9.22144821
29.547356,9.05538514,9.22577584,-0.412784085,9.2232849,9.22547886,9.22298784
29.557848,9.05538514,9.22729476,-0.414619855,9.22482691,9.22699865,9.22453071
29.568339,8.88819442,9.22881706,-0.58362886,9.22637198,9.2285218,9.22607664
29.578831,7.41619849,9.23034298,-1.34690181,9.22792035,9.23004856,9.22762586
29.589322,8.77496439,9.23187217,-0.67594954,9.2294717,9.23157858,9.22917804
29.599814,9.53939201,9.23340487,0.553161048,9.23102626,9.23311211,9.23073342
29.610306,9.74679434,9.23494089,0.715439347,9.23258385,9.23464893,9.23229182
29.620797,9.69535971,9.23648002,0.677406596,9.23414426,9.23618887,9.23385303
29.631289,9.74679434,9.23802251,0.713282435,9.23570775,9.23773215,9.23541732
29.64178,8.94427191,9.23956802,-0.543411548,9.23727397,9.23927844,9.23698433
29.652272,9.32737905,9.24111679,0.293704386,9.23884319,9.24082798,9.23855431
29.662764,8.88819442,9.24266861,-0.595377357,9.2404152,9.24238057,9.24012708
29.673255,8.60232527,9.2442233,-0.801185395,9.2419898,9.24393601,9.24170244
29.683747,8.94427191,9.2457811,-0.549098528,9.24356726,9.24549455,9.24328064
29.694238,8.77496439,9.24734166,-0.687297081,9.24514722,9.24705585,9.24486133
29.70473,9.16515139,9.24890524,-0.289402568,9.24672995,9.24862014,9.24644478
29.715222,9.48683298,9.25047162,0.486170094,9.24831524,9.25018724,9.24803079
29.725713,9.21954446,9.25204062,-0.180266914,9.2499029,9.25175694,9.24961915
29.736205,10.6770783,9.25361248,1.19309085,9.25149319,9.25332949,9.25121014
29.746696,9.79795897,9.25518685,0.736730695,9.25308576,9.25490455,9.25280339
29.757188,9.74679434,9.256764,0.700021677,9.25468086,9.25648237,9.25439917
29.76768,9.2736185,9.25834371,0.123591212,9.25627831,9.25806275,9.25599729
29.778171,9.48683298,9.25992579,0.476347764,9.25787791,9.25964548,9.25759754
29.788663,9.32737905,9.26151049,0.256648713,9.25947991,9.26123084,9.2592002
29.799154,10.7703296,9.26309747,1.22769383,9.26108397,9.26281845,9.26080489
29.809646,8.94427191,9.26468697,-0.566052172,9.26269035,9.26440858,9.2624119
29.820138,9.2736185,9.26627881,0.0856719907,9.26429885,9.26600104,9.26402102
29.830629,9.69535971,9.26787277,0.653824858,9.26590927,9.26759561,9.26563205
29.841121,8.71779789,9.26946912,-0.742745739,9.26752188,9.26919257,9.26724527
29.851612,9.05538514,9.27106751,-0.464416159,9.26913633,9.27079155,9.26886031
29.862104,10,9.27266819,0.852837507,9.27075287,9.27239281,9.27047744
29.872596,9.21954446,9.27427096,-0.233936968,9.27237132,9.27399616,9.27209647
29.883087,9.2736185,9.27587563,-0.0475093443,9.27399148,9.2756014,9.27371719
29.893579,9.79795897,9.27748246,0.721440581,9.27561361,9.27720879,9.27533988
29.90407,8.83176087,9.27909109,-0.668827499,9.27723736,9.27881797,9.27696418
29.914562,9.32737905,9.28070178,0.216049229,9.27886299,9.2804292,9.27859035
29.925054,9.16515139,9.28231434,-0.342290744,9.28049031,9.28204229,9.28021821
29.935545,9.74679434,9.28392857,0.680342397,9.28211912,9.28365704,9.28184754
29.946037,8.94427191,9.28554472,-0.584185597,9.28374969,9.28527371,9.28347863
29.956528,9.38083152,9.28716245,0.306054029,9.28538167,9.28689195,9.28511111
29.96702,8.83176087,9.28878202,-0.676033396,9.28701532,9.28851201,9.28674526
29.977512,8.71779789,9.29040323,-0.756706904,9.28865044,9.29013371,9.28838088
29.988003,8.48528137,9.29202587,-0.898189568,9.29028684,9.29175684,9.29001776
29.998495,8.54400375,9.29365023,-0.865821277,9.2919248,9.29338167,9.29165619
30.008986,9.48683298,9.29527593,0.437672305,9.29356394,9.29500784,9.2932958
30.019478,9.8488578,9.29690326,0.742936434,9.29520455,9.29663562,9.29493687
30.02997,9.05538514,9.298532,-0.49309924,9.29684643,9.29826481,9.2965792
30.040461,9.69535971,9.30016196,0.628647559,9.29848938,9.29989522,9.29822259
30.050953,9.11043358,9.30179341,-0.437446946,9.30013367,9.3015271,9.29986731
30.061444,9.21954446,9.30342599,-0.289623089,9.30177894,9.3031601,9.30151301
30.071936,9.48683298,9.30505997,0.426348458,9.30342548,9.3047945,9.30315996
30.082428,9.11043358,9.30669516,-0.443014196,9.30507307,9.3064301,9.30480797
30.092919,9.2736185,9.30833134,-0.186313844,9.30672153,9.30806668,9.30645683
30.103411,9.53939201,9.3099688,0.47898143,9.30837113,9.30970454,9.30810682
30.113902,10.1488916,9.31160718,0.91503245,9.31002151,9.3113433,9.30975758
30.124394,9.43398113,9.31324675,0.34746854,9.31167294,9.31298324,9.31140939
30.134886,9.11043358,9.3148873,-0.45216559,9.31332524,9.31462416,9.31306206
30.145377,9.59166305,9.31652865,0.524532555,9.31497819,9.31626587,9.31471537
30.155869,9.16515139,9.31817105,-0.391177277,9.31663208,9.31790863,9.31636962
30.16636,9.21954446,9.31981417,-0.316653926,9.31828655,9.31955209,9.31802444
30.176852,9.43398113,9.32145826,0.335444292,9.31994188,9.32119652,9.3196801
30.187344,9.8488578,9.32310313,0.725089422,9.32159787,9.32284173,9.32133642
30.197835,9.2736185,9.32474859,-0.226119643,9.32325432,9.3244875,9.32299319
30.208327,8.54400375,9.3263949,-0.884528775,9.32491151,9.32613413,9.3246507
30.218818,9.64365076,9.32804171,0.56179093,9.32656908,9.32778125,9.32630857
30.22931,9.21954446,9.3296893,-0.331880762,9.32822731,9.32942913,9.32796711
30.239802,9.89949494,9.33133746,0.753762216,9.329886,9.33107759,9.32962609
30.250293,9.16515139,9.332986,-0.409676225,9.33154496,9.33272641,9.33128534
30.260785,8.24621125,9.33463519,-1.04327558,9.33320447,9.33437588,9.33294512
30.271276,9.38083152,9.33628468,0.211061214,9.33486416,9.33602564,9.33460508
30.281768,9.11043358,9.33793475,-0.476970826,9.33652432,9.33767597,9.3362655
30.29226,9.89949494,9.33958519,0.748271174,9.33818475,9.33932666,9.33792618
30.302751,9.53939201,9.34123581,0.445147401,9.33984525,9.34097752,9.33958693
30.313243,9.64365076,9.34288688,0.548419442,9.34150611,9.34262883,9.34124803
30.323734,8.94427191,9.34453805,-0.632665898,9.34316696,9.34428024,9.34290911
30.334226,9.64365076,9.3461896,0.545400005,9.34482809,9.34593201,9.34457046
30.344718,9.2736185,9.34784132,-0.272438666,9.3464893,9.34758395,9.34623189
30.355209,9.05538514,9.34949303,-0.542317152,9.3481504,9.34923587,9.34789319
30.365701,10,9.351145,0.805515364,9.34981166,9.35088803,9.34955465
30.376192,8.94427191,9.35279687,-0.639159575,9.35147272,9.3525401,9.35121592
30.386684,9.05538514,9.35444893,-0.54686725,9.35313388,9.35419234,9.35287726
30.397176,8.30662386,9.35610097,-1.0244399,9.35479494,9.35584456,9.35453849
30.407667,10.3923048,9.3577528,1.01712932,9.35645569,9.35749657,9.35619942
30.418159,10.0498756,9.3594047,0.830945798,9.35811642,9.35914863,9.35786031
30.42865,9.64365076,9.36105632,0.531596129,9.35977678,9.3608004,9.35952083
30.439142,9.11043358,9.36270792,-0.502269196,9.36143704,9.36245216,9.36118124
30.449634,9.11043358,9.36435933,-0.503910459,9.36309702,9.3641037,9.36284135
30.460125,9.53939201,9.36601034,0.416391254,9.36475651,9.36575484,9.36450098
30.470617,9.05538514,9.36766123,-0.558816685,9.3664158,9.36740586,9.36616039
30.481108,9.32737905,9.36931164,-0.204774486,9.36807453,9.36905639,9.36781925
30.4916,9.32737905,9.37096187,-0.208764973,9.36973299,9.37070673,9.36947782
30.502092,10.0498756,9.3726117,0.822960459,9.37139098,9.37235667,9.37113591
30.512583,9.11043358,9.37426096,-0.513641294,9.37304831,9.37400602,9.37279334
30.523075,9.05538514,9.37590991,-0.566149072,9.37470526,9.37565506,9.37445038
30.533566,10,9.37755821,0.788949803,9.37636148,9.37730344,9.37610668
30.544058,9.38083152,9.37920613,0.0403161042,9.37801725,9.37895144,9.37776252
30.55455,10.2469508,9.38085349,0.930643477,9.37967237,9.38059886,9.37941771
30.565041,9.74679434,9.38250008,0.603567947,9.38132665,9.38224551,9.38107205
30.575533,8.88819442,9.38414619,-0.704238433,9.38298038,9.38389167,9.38272583
30.586024,10.198039,9.38579147,0.90124778,9.38463321,9.38553699,9.3843787
30.596516,9.64365076,9.38743619,0.506176423,9.3862854,9.38718175,9.38603094
30.607008,9.64365076,9.38908017,0.504549892,9.38793679,9.38882576,9.38768235
30.617499,9.38083152,9.38958716,-0.0935715739,9.38958716,9.38933274,9.38933274
30.627991,9.53939201,9.3912368,0.384909352,9.3912368,9.3909824,9.3909824
30.638482,9.53939201,9.39288537,0.382761857,9.39288537,9.39263098,9.39263098
30.648974,8.36660027,9.39453315,-1.01387025,9.39453315,9.39427876,9.39427876
30.659466,8.48528137,9.39617994,-0.95441006,9.39617994,9.39592554,9.39592554
30.669957,9.16515139,9.39782555,-0.482363099,9.39782555,9.39757113,9.39757113
30.680449,8.60232527,9.39947027,-0.89282977,9.39947027,9.39921582,9.39921582
30.69094,8.77496439,9.40111374,-0.791295995,9.40111374,9.40085927,9.40085927
30.701432,9.8488578,9.40275625,0.667908341,9.40275625,9.40250174,9.40250174
30.711924,8.94427191,9.40439761,-0.678325659,9.40439761,9.40414305,9.40414305
30.722415,9.59166305,9.40603763,0.430842685,9.40603763,9.40578302,9.40578302
30.732907,9.79795897,9.40767658,0.624725849,9.40767658,9.40742191,9.40742191
30.743398,9.69535971,9.40931414,0.53483229,9.40931414,9.4090594,9.4090594
30.75389,8.88819442,9.41095056,-0.723018772,9.41095056,9.41069575,9.41069575
30.764382,9.79795897,9.41258567,0.620784421,9.41258567,9.41233077,9.41233077
30.774873,9.48683298,9.41421928,0.269469288,9.41421928,9.41396429,9.41396429
30.785365,9.69535971,9.41585167,0.528685204,9.41585167,9.41559658,9.41559658
30.795856,9.43398113,9.41748249,0.128447033,9.41748249,9.41722729,9.41722729
30.806348,9.79795897,9.41911203,0.615505438,9.41911203,9.41885671,9.41885671
30.81684,9.69535971,9.42074009,0.524041625,9.42074009,9.42048465,9.42048465
30.827331,9.43398113,9.42236649,0.107771236,9.42236649,9.42211093,9.42211093
30.837823,9.2736185,9.42399151,-0.387779602,9.42399151,9.42373581,9.42373581
30.848314,9.43398113,9.42561482,0.0914675696,9.42561482,9.42535897,9.42535897
30.858806,9.89949494,9.42723667,0.687210494,9.42723667,9.42698067,9.42698067
30.869298,9.43398113,9.4288569,0.0715837208,9.4288569,9.42860074,9.42860074
30.879789,10.0995049,9.43047532,0.817942308,9.43047532,9.43021898,9.43021898
30.890281,9.43398113,9.4320922,0.0434618531,9.4320922,9.43183569,9.43183569
30.900772,9.48683298,9.43370721,0.230490292,9.43370721,9.43345051,9.43345051
30.911264,9.38083152,9.43532062,-0.233428996,9.43532062,9.43506372,9.43506372
30.921756,10.0995049,9.43693225,0.813985683,9.43693225,9.43667515,9.43667515
30.932247,8.66025404,9.43854191,-0.882206253,9.43854191,9.43828461,9.43828461
30.942739,9.16515139,9.44014989,-0.524402994,9.44014989,9.43989237,9.43989237
30.95323,9.69535971,9.44175585,0.503590973,9.44175585,9.4414981,9.4414981
30.963722,9.8488578,9.44336006,0.636787049,9.44336006,9.44310207,9.44310207
30.974214,8.83176087,9.44496234,-0.783071817,9.44496234,9.44470411,9.44470411
30.984705,9.69535971,9.44656251,0.498795758,9.44656251,9.44630403,9.44630403
30.995197,9.43398113,9.44816084,-0.119078584,9.44816084,9.4479021,9.4479021
31.005688,8.94427191,9.44975701,-0.710974752,9.44975701,9.449498,9.449498
31.01618,9.53939201,9.45135128,0.296716587,9.45135128,9.451092,9.451092
31.026672,9.8488578,9.45294348,0.629217229,9.45294348,9.45268392,9.45268392
31.037163,9.48683298,9.45453343,0.179720767,9.45453343,9.45427357,9.45427357
31.047655,9.38083152,9.45612139,-0.274390001,9.45612139,9.45586123,9.45586123
31.058146,9.89949494,9.45770705,0.664671263,9.45770705,9.45744658,9.45744658
31.068638,9.38083152,9.45929067,-0.280105601,9.45929067,9.45902988,9.45902988
31.07913,9.59166305,9.46087207,0.36165035,9.46087207,9.46061096,9.46061096
31.089621,9.89949494,9.46245108,0.661092925,9.46245108,9.46218963,9.46218963
31.100113,9.74679434,9.46402797,0.531757816,9.46402797,9.46376618,9.46376618
31.110604,9.53939201,9.46560241,0.271642418,9.46560241,9.46534027,9.46534027
31.121096,9.89949494,9.46717468,0.657510655,9.46717468,9.46691217,9.46691217
31.131588,9.21954446,9.46874459,-0.499199488,9.46874459,9.46848171,9.46848171
31.142079,10.198039,9.47031197,0.853069201,9.47031197,9.47004871,9.47004871
31.152571,9.32737905,9.47187709,-0.380128972,9.47187709,9.47161344,9.47161344
31.163062,9.69535971,9.47343963,0.47108395,9.47343963,9.47317558,9.47317558
31.173554,9.16515139,9.47499985,-0.556640335,9.47499985,9.4747354,9.4747354
31.184046,9.38083152,9.47655759,-0.309396299,9.47655759,9.47629273,9.47629273
31.194537,9.69535971,9.47811266,0.466097684,9.47811266,9.47784737,9.47784737
31.205029,8.77496439,9.47966535,-0.839464685,9.47966535,9.47939962,9.47939962
31.21552,9.48683298,9.48121531,0.0749511087,9.48121531,9.48094915,9.48094915
31.226012,9.79795897,9.48276283,0.561423315,9.48276283,9.48249621,9.48249621
31.236504,8.83176087,9.48430773,-0.807803731,9.48430773,9.48404065,9.48404065
31.246995,9.05538514,9.48584984,-0.65609809,9.48584984,9.48558229,9.48558229
31.257487,8.71779789,9.48738943,-0.877263666,9.48738943,9.48712139,9.48712139
31.267978,9.59166305,9.48882178,0.320688732,9.48882178,9.48865764,9.48865764
31.27847,9.43398113,9.49035634,-0.237434649,9.49035634,9.49019131,9.49019131
31.288962,9.43398113,9.49188816,-0.240638784,9.49188816,9.49172222,9.49172222
31.299453,9.43398113,9.49341705,-0.243794823,9.49341705,9.4932502,9.4932502
31.309945,8.71779789,9.49494329,-0.881558505,9.49494329,9.49477552,9.49477552
31.320436,9.59166305,9.49646655,0.308539289,9.49646655,9.49629786,9.49629786
31.330928,8.66025404,9.49798712,-0.915277597,9.49798712,9.49781749,9.49781749
31.34142,10.4403065,9.49950481,0.969949329,9.49950481,9.49933424,9.49933424
31.351911,9.69535971,9.50101946,0.440840401,9.50101946,9.50084794,9.50084794
31.362403,9.69535971,9.50253133,0.439122295,9.50253133,9.50235885,9.50235885
31.372894,9.79795897,9.5040401,0.542142847,9.5040401,9.50386666,9.50386666
31.383386,9.43398113,9.50554606,-0.267516214,9.50554606,9.50537164,9.50537164
31.393878,10,9.50704901,0.702104683,9.50704901,9.50687362,9.50687362
31.404369,10.198039,9.50854881,0.830355476,9.50854881,9.50837242,9.50837242
31.414861,10.1488916,9.51004571,0.799278335,9.51004571,9.50986832,9.50986832
31.425352,9.53939201,9.5115394,0.166891032,9.5115394,9.511361,9.511361
31.435844,10.0498756,9.51303014,0.732697401,9.51303014,9.51285072,9.51285072
31.446336,10.4880885,9.51451777,0.986696869,9.51451777,9.51433733,9.51433733
31.456827,9.74679434,9.51600213,0.480408388,9.51600213,9.51582065,9.51582065
31.467319,8.66025404,9.51748346,-0.92586685,9.51748346,9.51730094,9.51730094
31.47781,9.79795897,9.51896148,0.528202133,9.51896148,9.5187779,9.5187779
31.488302,10,9.52043643,0.692505284,9.52043643,9.52025179,9.52025179
31.498794,9.53939201,9.52190816,0.132226535,9.52190816,9.52172244,9.52172244
31.509285,10.198039,9.5233765,0.821378434,9.5233765,9.5231897,9.5231897
31.519777,9.48683298,9.5248417,-0.194958257,9.5248417,9.52465381,9.52465381
31.530268,8.42614977,9.52630348,-1.04888212,9.52630348,9.52611449,9.52611449
31.54076,10.198039,9.52776208,0.818704435,9.52776208,9.52757197,9.52757197
31.551252,9.59166305,9.52921734,0.249891394,9.52921734,9.52902611,9.52902611
31.561743,9.59166305,9.5306691,0.246969521,9.5306691,9.53047674,9.53047674
31.572235,8.77496439,9.53211763,-0.870145527,9.53211763,9.53192412,9.53192412
31.582726,9.8488578,9.53356261,0.561511526,9.53356261,9.53336795,9.53336795
31.593218,9.69535971,9.53500431,0.400444014,9.53500431,9.53480849,9.53480849
31.60371,9.8488578,9.53644256,0.55894118,9.53644256,9.53624557,9.53624557
31.614201,10.7238053,9.53787721,1.08900325,9.53787721,9.53767903,9.53767903
31.624693,10.1488916,9.53930851,0.780757999,9.53930851,9.53910914,9.53910914
31.635184,9.8488578,9.54073617,0.555087049,9.54073617,9.54053559,9.54053559
31.645676,8.66025404,9.54216044,-0.939098716,9.54216044,9.54195863,9.54195863
31.656168,10,9.54358115,0.675587778,9.54358115,9.54337812,9.54337812
31.666659,9.59166305,9.54499817,0.216020552,9.54499817,9.54479389,9.54479389
31.677151,9.43398113,9.54641173,-0.335306718,9.54641173,9.5462062,9.5462062
31.687642,9,9.54782154,-0.740149676,9.54782154,9.54761475,9.54761475
31.698134,9.48683298,9.54922786,-0.249789679,9.54922786,9.54901979,9.54901979
31.708626,8.77496439,9.55063054,-0.880719109,9.55063054,9.55042118,9.55042118
31.719117,9.2736185,9.5520294,-0.527646576,9.5520294,9.55181874,9.55181874
31.729609,9.21954446,9.55342472,-0.577823729,9.55342472,9.55321274,9.55321274
31.7401,9.48683298,9.55481619,-0.260735903,9.55481619,9.55460289,9.55460289
31.750592,9.69535971,9.55620407,0.373035715,9.55620407,9.55598943,9.55598943
31.761084,9.69535971,9.5575882,0.371175852,9.5575882,9.55737221,9.55737221
31.771575,9.21954446,9.55896844,-0.582601045,9.55896844,9.55875108,9.55875108
31.782067,9.59166305,9.56034502,0.17696901,9.56034502,9.56012628,9.56012628
31.792558,9.38083152,9.56171766,-0.425307116,9.56171766,9.56149753,9.56149753
31.80305,9.11043358,9.56308662,-0.672794945,9.56308662,9.56286508,9.56286508
31.813542,8.77496439,9.56445173,-0.888531003,9.56445173,9.56422878,9.56422878
31.824033,9.64365076,9.56581286,0.278994455,9.56581286,9.56558847,9.56558847
31.834525,9.64365076,9.56717023,0.276551133,9.56717023,9.5669444,9.5669444
31.845016,9.38083152,9.56852358,-0.433234421,9.56852358,9.56829628,9.56829628
31.855508,9.05538514,9.56987315,-0.717278197,9.56987315,9.56964437,9.56964437
31.866,10.5356538,9.57121878,0.9820565,9.57121878,9.57098852,9.57098852
31.876491,9.16515139,9.57256034,-0.638285948,9.57256034,9.57232857,9.57232857
31.886983,9.59166305,9.57389806,0.133285362,9.57389806,9.57366476,9.57366476
31.897474,9.94987437,9.57523166,0.612080638,9.57523166,9.57499683,9.57499683
31.907966,9.43398113,9.57656139,-0.377598017,9.57656139,9.57632501,9.57632501
31.918458,10.198039,9.5778871,0.787497252,9.5778871,9.57764915,9.57764915
31.928949,8.66025404,9.57920865,-0.958621205,9.57920865,9.57896912,9.57896912
31.939441,9.53939201,9.58052627,-0.202815822,9.58052627,9.58028514,9.58028514
31.949932,9.32737905,9.5818397,-0.504440921,9.5818397,9.58159694,9.58159694
31.960424,9.43398113,9.58314916,-0.386222766,9.58314916,9.58290477,9.58290477
31.970916,9.8488578,9.58445451,0.514201602,9.58445451,9.58420848,9.58420848
31.981407,8.71779789,9.58575563,-0.931642496,9.58575563,9.58550792,9.58550792
31.991899,9.21954446,9.58705273,-0.606224603,9.58705273,9.58680334,9.58680334
32.00239,9.53939201,9.58834555,-0.221254457,9.58834555,9.58809446,9.58809446
32.012882,9.48683298,9.58963433,-0.320626488,9.58963433,9.58938152,9.58938152
32.023374,9.94987437,9.59091892,0.599128913,9.59091892,9.59066437,9.59066437
32.033865,9.38083152,9.59219918,-0.459747392,9.59219918,9.59194288,9.59194288
32.044357,9.64365076,9.59347536,0.22399867,9.59347536,9.59321728,9.59321728
32.054848,9.48683298,9.59474718,-0.32850296,9.59474718,9.5944873,9.5944873
32.06534,9.69535971,9.59601487,0.315190177,9.59601487,9.59575318,9.59575318
32.075832,10.2956301,9.59727829,0.835674486,9.59727829,9.59701478,9.59701478
32.086323,9.64365076,9.59853732,0.21239924,9.59853732,9.59827195,9.59827195
32.096815,10.5830052,9.59979218,0.991571009,9.59979218,9.59952494,9.59952494
32.107306,9.94987437,9.60104261,0.590619814,9.60104261,9.60077347,9.60077347
32.117798,9.11043358,9.60228883,-0.701323926,9.60228883,9.60201778,9.60201778
32.12829,9.53939201,9.60353071,-0.25325619,9.60353071,9.60325773,9.60325773
32.138781,10.198039,9.60476812,0.770240808,9.60476812,9.60449319,9.60449319
32.149273,9.2736185,9.60600129,-0.576526488,9.60600129,9.60572438,9.60572438
32.159764,8.88819442,9.60722995,-0.847959629,9.60722995,9.60695104,9.60695104
32.170256,9.74679434,9.60845434,0.371940869,9.60845434,9.60817341,9.60817341
32.180748,8.36660027,9.60967431,-1.1149323,9.60967431,9.60939134,9.60939134
32.191239,10.0498756,9.61088974,0.662560094,9.61088974,9.61060471,9.61060471
32.201731,9.94987437,9.61210085,0.58118286,9.61210085,9.61181373,9.61181373
32.212222,9.69535971,9.6133074,0.286447755,9.6133074,9.61301816,9.61301816
32.222714,9.69535971,9.61450959,0.28434156,9.61450959,9.61421822,9.61421822
32.233206,9.53939201,9.61570731,-0.276252226,9.61570731,9.61541378,9.61541378
32.243697,9.79795897,9.61690042,0.42550976,9.61690042,9.6166047,9.6166047
32.254189,9.94987437,9.61808913,0.57600802,9.61808913,9.61779121,9.61779121
32.26468,9.74679434,9.61927322,0.357101005,9.61927322,9.61897306,9.61897306
32.275172,9.32737905,9.62045288,-0.541362937,9.62045288,9.62015047,9.62015047
32.285664,9.79795897,9.621628,0.41991781,9.621628,9.62132331,9.62132331
32.296155,9.74679434,9.62279846,0.352130499,9.62279846,9.62249145,9.62249145
32.306647,9.53939201,9.62396445,-0.290813404,9.62396445,9.6236551,9.6236551
32.317138,9.38083152,9.62512575,-0.494261299,9.62512575,9.62481404,9.62481404
32.32763,8.60232527,9.62628257,-1.01190775,9.62628257,9.62596846,9.62596846
32.338122,9.32737905,9.62743478,-0.547773424,9.62743478,9.62711825,9.62711825
32.348613,10,9.62858226,0.609440516,9.62858226,9.62826328,9.62826328
32.359105,9,9.62972522,-0.793552277,9.62972522,9.62940376,9.62940376
32.369596,10.6770783,9.63086342,1.02284643,9.63086342,9.63053946,9.63053946
32.380088,8.88819442,9.63199709,-0.862439951,9.63199709,9.63167058,9.63167058
32.39058,10.0995049,9.63312608,0.682919364,9.63312608,9.63279701,9.63279701
32.401071,9.21954446,9.63425029,-0.643976578,9.63425029,9.63391862,9.63391862
32.411563,10,9.63536992,0.603846075,9.63536992,9.63503561,9.63503561
32.422054,9.38083152,9.63648474,-0.505621616,9.63648474,9.63614777,9.63614777
32.432546,9.48683298,9.63759495,-0.388280791,9.63759495,9.63725529,9.63725529
32.443038,9.05538514,9.63870045,-0.763750815,9.63870045,9.63835806,9.63835806
32.453529,9.74679434,9.6398011,0.32709822,9.6398011,9.63945595,9.63945595
32.464021,9.21954446,9.64089711,-0.649116828,9.64089711,9.64054917,9.64054917
32.474512,9.2736185,9.64198827,-0.606934736,9.64198827,9.6416375,9.6416375
32.485004,9.79795897,9.64307476,0.39355331,9.64307476,9.64272112,9.64272112
32.495496,9.79795897,9.64415648,0.392176605,9.64415648,9.64379994,9.64379994
32.505987,10.0498756,9.64523331,0.636115013,9.64523331,9.64487383,9.64487383
32.516479,10.3923048,9.64630545,0.863712567,9.64630545,9.645943,9.645943
32.52697,9.64365076,9.64737267,-0.0610074911,9.64737267,9.64700721,9.64700721
32.537462,9.16515139,9.64843519,-0.695186161,9.64843519,9.64806668,9.64806668
32.547954,9.64365076,9.64949288,-0.0764337288,9.64949288,9.64912128,9.64912128
32.558445,9.2736185,9.65054563,-0.613943916,9.65054563,9.6501709,9.6501709
32.568937,9.32737905,9.65159363,-0.569398438,9.65159363,9.65121574,9.65121574
32.579428,9.59166305,9.65263669,-0.246928412,9.65263669,9.65225558,9.65225558
32.58992,9.53939201,9.65367498,-0.338057631,9.65367498,9.65329062,9.65329062
32.600412,9.79795897,9.65470839,0.378484583,9.65470839,9.65432074,9.65432074
32.610903,10.2469508,9.65573683,0.768904375,9.65573683,9.65534585,9.65534585
32.621395,9.16515139,9.65676047,-0.701148401,9.65676047,9.65636611,9.65636611
32.631886,9.89949494,9.65777912,0.491646031,9.65777912,9.65738133,9.65738133
32.642378,9.11043358,9.65879295,-0.740512912,9.65879295,9.6583917,9.6583917
32.65287,10.3440804,9.65980187,0.827211316,9.65980187,9.6593971,9.6593971
32.663361,9,9.66080577,-0.812899605,9.66080577,9.66039744,9.66039744
32.673853,9.48683298,9.66180483,-0.418296364,9.66180483,9.66139289,9.66139289
32.684344,10.1488916,9.66279885,0.697203495,9.66279885,9.66238325,9.66238325
32.694836,9.53939201,9.66378802,-0.352698181,9.66378802,9.66336872,9.66336872
32.705328,9.21954446,9.66477223,-0.667253906,9.66477223,9.66434917,9.66434917
32.715819,9.59166305,9.66575139,-0.272191732,9.66575139,9.66532451,9.66532451
32.726311,10.2956301,9.66672566,0.793034982,9.66672566,9.66629492,9.66629492
32.736802,9.53939201,9.66769486,-0.358193866,9.66769486,9.66726021,9.66726021
32.747294,10.6770783,9.66865916,1.00420072,9.66865916,9.66822055,9.66822055
32.757786,9.53939201,9.66961848,-0.360869036,9.66961848,9.66917583,9.66917583
32.768277,10.2469508,9.67057269,0.759195675,9.67057269,9.67012597,9.67012597
32.778769,10.0995049,9.67152199,0.654204056,9.67152199,9.67107113,9.67107113
32.78926,9.16515139,9.67246618,-0.712260342,9.67246618,9.67201113,9.67201113
32.799752,10.198039,9.67340544,0.724315941,9.67340544,9.67294614,9.67294614
32.810244,9.32737905,9.67433968,-0.589033635,9.67433968,9.67387605,9.67387605
32.820735,8.88819442,9.67526878,-0.887172117,9.67526878,9.67480078,9.67480078
32.831227,9.69535971,9.67619294,0.138444138,9.67619294,9.6757205,9.6757205
32.841718,9,9.67711195,-0.822868126,9.67711195,9.67663501,9.67663501
32.85221,9.43398113,9.678026,-0.494008979,9.678026,9.67754449,9.67754449
32.862702,10.2469508,9.67893499,0.753668212,9.67893499,9.67844885,9.67844885
32.873193,9.32737905,9.67983883,-0.593683229,9.67983883,9.67934798,9.67934798
32.883685,10.4403065,9.68073768,0.871532459,9.68073768,9.68024206,9.68024206
32.894176,9.74679434,9.68163137,0.255270395,9.68163137,9.68113091,9.68113091
32.904668,9.53939201,9.68252006,-0.378322677,9.68252006,9.68201468,9.68201468
32.91516,10.1488916,9.68340366,0.682266737,9.68340366,9.6828933,9.6828933
32.925651,9.69535971,9.68428209,0.105250294,9.68428209,9.68376666,9.68376666
32.936143,10,9.6851555,0.561110059,9.6851555,9.68463493,9.68463493
32.946634,10.1488916,9.68602373,0.680343911,9.68602373,9.68549794,9.68549794
32.957126,9.11043358,9.68688693,-0.759245249,9.68688693,9.68635585,9.68635585
32.967618,10.0995049,9.68774501,0.641685222,9.68774501,9.68720856,9.68720856
32.978109,10.4403065,9.6885979,0.867011306,9.6885979,9.68805599,9.68805599
32.988601,10,9.68944575,0.557273942,9.68944575,9.68889829,9.68889829
32.999092,9.53939201,9.6902884,-0.388453836,9.6902884,9.6897353,9.6897353
33.009584,8.83176087,9.69112599,-0.927019485,9.69112599,9.69056718,9.69056718
33.020076,9.8488578,9.69195845,0.396105226,9.69195845,9.69139383,9.69139383
33.030567,9.32737905,9.6927857,-0.604488746,9.6927857,9.69221518,9.69221518
33.041059,10,9.69360788,0.553526983,9.69360788,9.69303137,9.69303137
33.05155,10.0498756,9.69442484,0.596196931,9.69442484,9.69384224,9.69384224
33.062042,9.2736185,9.69523673,-0.649321366,9.69523673,9.69464795,9.69464795
33.072534,10.0498756,9.69604347,0.594837918,9.69604347,9.6954484,9.6954484
33.083025,10.4403065,9.69684498,0.86224215,9.69684498,9.69624353,9.69624353
33.093517,8.54400375,9.69764141,-1.07407526,9.69764141,9.69703347,9.69703347
33.104008,9.69535971,9.69843261,-0.055433705,9.69843261,9.69781807,9.69781807
33.1145,9.53939201,9.69921872,-0.399783324,9.69921872,9.69859747,9.69859747
33.124992,9.53939201,9.69999967,-0.400758846,9.69999967,9.6993716,9.6993716
33.135483,10.3440804,9.70077537,0.802063003,9.70077537,9.70014037,9.70014037
33.145975,10.6770783,9.70154598,0.98769037,9.70154598,9.70090394,9.70090394
33.156466,10,9.70231135,0.545608511,9.70231135,9.70166215,9.70166215
33.166958,9.43398113,9.70307162,-0.518739328,9.70307162,9.70241513,9.70241513
33.17745,10.0498756,9.70382672,0.588259213,9.70382672,9.70316282,9.70316282
33.187941,10.2469508,9.70457657,0.736460587,9.70457657,9.70390513,9.70390513
33.198433,10.3923048,9.70532132,0.828844696,9.70532132,9.70464221,9.70464221
33.208924,9.48683298,9.70606081,-0.46821772,9.70606081,9.70537391,9.70537391
33.219416,10.0498756,9.70679521,0.585730668,9.70679521,9.70610037,9.70610037
33.229908,10,9.70752442,0.540810116,9.70752442,9.70682151,9.70682151
33.240399,9.64365076,9.70824838,-0.254160623,9.70824838,9.70753726,9.70753726
33.250891,9.53939201,9.70896724,-0.411795124,9.70896724,9.70824775,9.70824775
33.261382,10,9.70968085,0.538812726,9.70968085,9.70895285,9.70895285
33.271874,9.74679434,9.71038934,0.19080095,9.71038934,9.70965269,9.70965269
33.282366,9.69535971,9.71109266,-0.125431037,9.71109266,9.71034719,9.71034719
33.292857,9.74679434,9.71179073,0.187092523,9.71179073,9.71103629,9.71103629
33.303349,10.0498756,9.71248369,0.58085448,9.71248369,9.71172011,9.71172011
33.31384,10.5830052,9.71317141,0.932648825,9.71317141,9.71239852,9.71239852
33.324332,9.11043358,9.71385402,-0.776801418,9.71385402,9.71307165,9.71307165
33.334824,9.11043358,9.71453146,-0.777237337,9.71453146,9.71373943,9.71373943
33.345315,10.5356538,9.71520366,0.905787004,9.71520366,9.71440179,9.71440179
33.355807,10.0995049,9.71587075,0.619382105,9.71587075,9.71505886,9.71505886
33.366298,10.4880885,9.71653261,0.878382534,9.71653261,9.71571051,9.71571051
33.37679,9.21954446,9.71718936,-0.705439512,9.71718936,9.71635686,9.71635686
33.387282,10.2469508,9.71784095,0.727399349,9.71784095,9.71699785,9.71699785
33.397773,9.69535971,9.71848732,-0.152077632,9.71848732,9.71763341,9.71763341
33.408265,10.3440804,9.71912859,0.790538956,9.71912859,9.71826367,9.71826367
33.418756,10.3923048,9.71976465,0.820085482,9.71976465,9.71888849,9.71888849
33.429248,9.69535971,9.72039561,-0.158227358,9.72039561,9.719508,9.719508
33.43974,9.8488578,9.72102143,0.357542129,9.72102143,9.72012214,9.72012214
33.450231,9.79795897,9.72164204,0.276255191,9.72164204,9.72073084,9.72073084
33.460723,9.94987437,9.72225757,0.477092023,9.72225757,9.72133423,9.72133423
33.471214,9.94987437,9.72286791,0.476451948,9.72286791,9.72193217,9.72193217
33.481706,10,9.72347318,0.525858175,9.72347318,9.72252479,9.72252479
33.492198,10.1488916,9.72407332,0.651780825,9.72407332,9.72311203,9.72311203
33.502689,9.64365076,9.72466829,-0.284635779,9.72466829,9.72369383,9.72369383
33.513181,9.69535971,9.7252582,-0.172911776,9.7252582,9.7242703,9.7242703
33.523672,9.8488578,9.72584294,0.350734741,9.72584294,9.72484133,9.72484133
33.534164,9.11043358,9.72642264,-0.784849709,9.72642264,9.72540702,9.72540702
33.544656,9.05538514,9.72699725,-0.819519441,9.72699725,9.72596732,9.72596732
33.555147,9.53939201,9.72756672,-0.433791084,9.72756672,9.72652218,9.72652218
33.565639,9.59166305,9.72813116,-0.369415909,9.72813116,9.7270717,9.7270717
33.57613,10.2956301,9.72869048,0.752953958,9.72869048,9.72761578,9.72761578
33.586622,10.5830052,9.72924479,0.923991589,9.72924479,9.72815451,9.72815451
33.597114,9.2736185,9.72979404,-0.675407689,9.72979404,9.72868785,9.72868785
33.607605,9.38083152,9.7303382,-0.591190901,9.7303382,9.72921575,9.72921575
33.618097,10.6770783,9.73087738,0.972728572,9.73087738,9.7297383,9.7297383
33.628588,10.3440804,9.73141148,0.782731726,9.73141148,9.7302554,9.7302554
33.63908,10.2469508,9.73194062,0.717642077,9.73194062,9.73076716,9.73076716
33.649572,10.2469508,9.73246475,0.717276805,9.73246475,9.73127352,9.73127352
33.660063,10.198039,9.73298385,0.681949545,9.73298385,9.73177444,9.73177444
33.670555,10.6301458,9.73349801,0.946914886,9.73349801,9.73227,9.73227
33.681046,9.89949494,9.73400716,0.406801885,9.73400716,9.73276012,9.73276012
33.691538,9.94987437,9.73451141,0.464072151,9.73451141,9.7332449,9.7332449
33.70203,9.2736185,9.73501072,-0.679258583,9.73501072,9.73372427,9.73372427
33.712521,10.198039,9.73550506,0.680098501,9.73550506,9.7341982,9.7341982
33.723013,10,9.73599453,0.513814625,9.73599453,9.73466679,9.73466679
33.733504,9.48683298,9.73647907,-0.499645962,9.73647907,9.73512993,9.73512993
33.743996,9.74679434,9.73695877,0.0991744444,9.73695877,9.73558772,9.73558772
33.754488,9.8488578,9.73743362,0.333802607,9.73743362,9.73604011,9.73604011
33.764979,9.69535971,9.73790358,-0.206261649,9.73790358,9.73648706,9.73648706
33.775471,9.53939201,9.73836877,-0.446068103,9.73836877,9.73692867,9.73692867
33.785962,10.5356538,9.7388291,0.892650351,9.7388291,9.73736484,9.73736484
33.796454,9.74679434,9.7392847,0.0866581864,9.7392847,9.73779565,9.73779565
33.806946,9.21954446,9.73973554,-0.721242737,9.73973554,9.73822108,9.73822108
33.817437,9.79795897,9.7401816,0.240369238,9.7401816,9.73864107,9.73864107
33.827929,9.89949494,9.74062299,0.398587443,9.74062299,9.73905571,9.73905571
33.83842,9.2736185,9.74105964,-0.683696676,9.74105964,9.73946493,9.73946493
33.848912,9.74679434,9.74149167,0.072819453,9.74149167,9.7398688,9.7398688
33.859404,9.74679434,9.74191906,0.0698232046,9.74191906,9.74026728,9.74026728
33.869895,8.77496439,9.74234181,-0.983553466,9.74234181,9.74066033,9.74066033
33.880387,10,9.74276001,0.507188319,9.74276001,9.74104804,9.74104804
33.890878,9.38083152,9.74317362,-0.601948586,9.74317362,9.74143034,9.74143034
33.90137,9.32737905,9.74358275,-0.645138511,9.74358275,9.74180728,9.74180728
33.911862,9.59166305,9.7439874,-0.390287523,9.7439874,9.74217885,9.74217885
33.922353,10.198039,9.74438755,0.673536542,9.74438755,9.74254501,9.74254501
33.932845,10.6301458,9.74478333,0.940937022,9.74478333,9.74290582,9.74290582
33.943336,9.89949494,9.7451747,0.392836145,9.7451747,9.74326123,9.74326123
33.953828,10,9.74556177,0.504418709,9.74556177,9.74361129,9.74361129
33.96432,8.42614977,9.74594454,-1.14882321,9.74594454,9.74395599,9.74395599
33.974811,9.64365076,9.74632302,-0.320425123,9.74632302,9.74429529,9.74429529
33.985303,9.79795897,9.74669733,0.226410328,9.74669733,9.74462925,9.74462925
33.995794,9.64365076,9.74706746,-0.321584661,9.74706746,9.74495782,9.74495782
34.006286,9.11043358,9.7474335,-0.79812275,9.7474335,9.74528106,9.74528106
34.016778,9.69535971,9.7477955,-0.228988606,9.7477955,9.74559894,9.74559894
34.027269,9.59166305,9.74815346,-0.395588687,9.74815346,9.74591143,9.74591143
34.037761,9.11043358,9.74850751,-0.798795298,9.74850751,9.7462186,9.7462186
34.048252,9.32737905,9.74885765,-0.649213827,9.74885765,9.74652039,9.74652039
34.058744,10.198039,9.749204,0.669951511,9.749204,9.74681686,9.74681686
34.069236,10.1488916,9.74954661,0.631937465,9.74954661,9.74710798,9.74710798
34.079727,10.2956301,9.7498855,0.738745316,9.7498855,9.74739373,9.74739373
34.090219,9.32737905,9.75022082,-0.650262846,9.75022082,9.74767416,9.74767416
34.10071,9.64365076,9.75055259,-0.326958446,9.75055259,9.74794924,9.74794924
34.111202,9.48683298,9.75088094,-0.513855971,9.75088094,9.748219,9.748219
34.121694,9.38083152,9.75120594,-0.608583943,9.75120594,9.74848343,9.74848343
34.132185,9.43398113,9.75152764,-0.563512647,9.75152764,9.74874251,9.74874251
34.142677,9.64365076,9.7518462,-0.328930748,9.7518462,9.74899629,9.74899629
34.153168,9.32737905,9.75216166,-0.651753489,9.75216166,9.74924472,9.74924472
34.16366,10.1488916,9.7524742,0.629616839,9.7524742,9.74948785,9.74948785
34.174152,10.8166538,9.75278389,1.03144071,9.75278389,9.74972567,9.74972567
34.184643,10.6770783,9.75309083,0.961242645,9.75309083,9.74995816,9.74995816
34.195135,10.3923048,9.7533952,0.799318239,9.7533952,9.75018536,9.75018536
34.205626,8.77496439,9.75369707,-0.989309196,9.75369707,9.75040723,9.75040723
34.216118,10.0995049,9.75399666,0.587799526,9.75399666,9.75062383,9.75062383
34.22661,10.1488916,9.75429407,0.628169958,9.75429407,9.75083512,9.75083512
34.237101,9.64365076,9.75458944,-0.333074588,9.75458944,9.7510411,9.7510411
34.247593,10.2956301,9.754883,0.73535511,9.754883,9.75124182,9.75124182
34.258084,10.0995049,9.75517488,0.586796439,9.75517488,9.75143722,9.75143722
34.268576,8.94427191,9.75546531,-0.900662756,9.75546531,9.75162737,9.75162737
34.279068,10.4403065,9.75575448,0.827376595,9.75575448,9.75181223,9.75181223
34.289559,10.5356538,9.75604257,0.882955932,9.75604257,9.7519918,9.7519918
34.300051,9.89949494,9.75632988,0.378371582,9.75632988,9.75216613,9.75216613
34.310542,9.38083152,9.7566166,-0.613013112,9.7566166,9.75233516,9.75233516
34.321034,10.2469508,9.75690303,0.700034094,9.75690303,9.75249896,9.75249896
34.331526,9.69535971,9.75718945,-0.248655857,9.75718945,9.7526575,9.7526575
34.342017,9.79795897,9.75747612,0.2012035,9.75747612,9.75281077,9.75281077
34.352509,9.16515139,9.75776343,-0.769812991,9.75776343,9.7529588,9.7529588
34.363,8.83176087,9.75805167,-0.962440025,9.75805167,9.75310158,9.75310158
34.373492,10.1488916,9.75834126,0.624940239,9.75834126,9.75323914,9.75323914
34.383984,10.0498756,9.75863259,0.539669368,9.75863259,9.75337146,9.75337146
34.394475,10.3440804,9.75892607,0.764953831,9.75892607,9.75349854,9.75349854
34.404967,9.89949494,9.75922221,0.374530002,9.75922221,9.7536204,9.7536204
34.415458,9.94987437,9.75952148,0.436294498,9.75952148,9.75373704,9.75373704
34.42595,10.6301458,9.75982448,0.932910142,9.75982448,9.75384847,9.75384847
34.436442,10.4880885,9.76013178,0.853203787,9.76013178,9.75395469,9.75395469
34.446933,9.21954446,9.760444,-0.735458729,9.760444,9.7540557,9.7540557
34.457425,10.0995049,9.76076191,0.58201635,9.76076191,9.75415152,9.75415152
34.467916,9.43398113,9.76108621,-0.571931008,9.76108621,9.75424213,9.75424213
34.478408,10.6770783,9.76141781,0.956901479,9.76141781,9.75432757,9.75432757
34.4889,10,9.7617576,0.488100814,9.7617576,9.75440782,9.75440782
34.499391,9.53939201,9.76210653,-0.471926384,9.76210653,9.75448288,9.75448288
34.509883,9.53939201,9.76246576,-0.472306838,9.76246576,9.75455278,9.75455278
34.520374,9.8488578,9.76283643,0.293294001,9.76283643,9.7546175,9.7546175
34.530866,9.32737905,9.7632199,-0.660182436,9.7632199,9.75467707,9.75467707
34.541358,10.7238053,9.76361757,0.979891693,9.76361757,9.75473148,9.75473148
34.551849,10.198039,9.76403093,0.658792906,9.76403093,9.75478074,9.75478074
34.562341,9.89949494,9.76446178,0.367468576,9.76446178,9.75482486,9.75482486
34.572832,9.89949494,9.76491188,0.366855641,9.76491188,9.75486383,9.75486383
34.583324,9.32737905,9.76538331,-0.6618189,9.76538331,9.75489767,9.75489767
34.593816,10.6770783,9.76587823,0.954567976,9.76587823,9.75492638,9.75492638
34.604307,9.74679434,9.76639896,-0.14001648,9.76639896,9.75494997,9.75494997
34.614799,10.5356538,9.76694817,0.876758569,9.76694817,9.75496845,9.75496845
34.62529,9.69535971,9.76752852,-0.268642522,9.76752852,9.75498182,9.75498182
34.635782,9.94987437,9.76814313,0.426299475,9.76814313,9.75499008,9.75499008
34.646274,9.69535971,9.76879516,-0.270989751,9.76879516,9.75499324,9.75499324
34.656765,10.198039,9.769488,0.654638091,9.769488,9.75499132,9.75499132
34.667257,10,9.77022547,0.479348029,9.77022547,9.7549843,9.7549843
34.677748,9.94987437,9.77101136,0.422921993,9.77101136,9.75497222,9.75497222
34.68824,10.198039,9.77185,0.652831545,9.77185,9.75495505,9.75495505
34.698732,10.5830052,9.77274573,0.900144164,9.77274573,9.75493282,9.75493282
34.709223,10.9087121,9.77370309,1.06536802,9.77370309,9.75490554,9.75490554
34.719715,10.2956301,9.77472711,0.721736123,9.77472711,9.75487319,9.75487319
34.730206,9.05538514,9.77582263,-0.848785896,9.77582263,9.75483581,9.75483581
34.740698,9.89949494,9.77699506,0.349999824,9.77699506,9.75479338,9.75479338
34.75119,9.21954446,9.77824957,-0.747465792,9.77824957,9.75474592,9.75474592
34.761681,9.32737905,9.77959134,-0.67246731,9.77959134,9.75469344,9.75469344
34.772173,10.3440804,9.78102587,0.750369616,9.78102587,9.75463593,9.75463593
34.782664,9.32737905,9.78255795,-0.674669472,9.78255795,9.75457342,9.75457342
34.793156,9.48683298,9.78419256,-0.545306863,9.78419256,9.75450589,9.75450589
34.803648,10.4403065,9.78593366,0.808933154,9.78593366,9.75443337,9.75443337
34.814139,10.5356538,9.78778433,0.864794437,9.78778433,9.75435586,9.75435586
34.824631,10.5830052,9.78974698,0.890650475,9.78974698,9.75427336,9.75427336
34.835122,9.48683298,9.7918216,-0.552257745,9.7918216,9.75418588,9.75418588
34.845614,10.3923048,9.7940068,0.773497282,9.7940068,9.75409344,9.75409344
34.856106,10.4880885,9.79629776,0.831739577,9.79629776,9.75399602,9.75399602
34.866597,10.4880885,9.79868604,0.830302622,9.79868604,9.75389366,9.75389366
34.877089,10.4880885,9.80115951,0.828811785,9.80115951,9.75378635,9.75378635
34.88758,9.53939201,9.80369984,-0.514108766,9.80369984,9.7536741,9.7536741
34.898072,10.7703296,9.80628355,0.981858472,9.80628355,9.7535569,9.7535569
34.908564,10.1488916,9.80887961,0.583105439,9.80887961,9.75343478,9.75343478
34.919055,9.94987437,9.81144966,0.37205472,9.81144966,9.75330776,9.75330776
34.929547,9.8488578,9.81394871,0.186839746,9.81394871,9.75317581,9.75317581
34.940038,9.94987437,9.81632406,0.365445361,9.81632406,9.75303897,9.75303897
34.95053,8.94427191,9.81851845,-0.935011516,9.81851845,9.75289722,9.75289722
34.961022,9,9.82047071,-0.905798383,9.82047071,9.75275058,9.75275058
34.971513,9.2736185,9.82211967,-0.740608654,9.82211967,9.75259907,9.75259907
34.982005,10.198039,9.82340829,0.612070862,9.82340829,9.75244268,9.75244268
34.992496,9.89949494,9.82428685,0.27424092,9.82428685,9.75228144,9.75228144
35.002988,10.7703296,9.82471796,0.972425657,9.82471796,9.75211532,9.75211532
35.01348,9.8488578,9.82467917,0.155494801,9.82467917,9.75194436,9.75194436
35.023971,8.24621125,9.82416556,-1.25616651,9.82416556,9.75176857,9.75176857
35.034463,11,9.8231898,1.08480883,9.8231898,9.75158793,9.75158793
35.044954,10.8627805,9.82178146,1.0202936,9.82178146,9.75140249,9.75140249
35.055446,8.83176087,9.81998353,-0.994093891,9.81998353,9.75121221,9.75121221
35.065938,9.74679434,9.81784962,-0.266561963,9.81784962,9.75101712,9.75101712
35.076429,9.74679434,9.8154395,-0.26200221,9.8154395,9.75081724,9.75081724
35.086921,10.0498756,9.81281415,0.486889586,9.81281415,9.75061256,9.75061256
35.097412,10.0498756,9.81003395,0.489736328,9.81003395,9.75040312,9.75040312
35.107904,9.53939201,9.80715391,-0.517457146,9.80715391,9.75018887,9.75018887
35.118396,10.4880885,9.80422371,0.826961167,9.80422371,9.74996986,9.74996986
35.128887,10.1488916,9.8012859,0.589580924,9.8012859,9.74974612,9.74974612
35.139379,10.0995049,9.79837479,0.548753269,9.79837479,9.7495176,9.7495176
35.14987,9.69535971,9.79551865,-0.316478965,9.79551865,9.74928436,9.74928436
35.160362,9.94987437,9.79273812,0.396404145,9.79273812,9.74904636,9.74904636
35.170854,9.64365076,9.79004892,-0.382620126,9.79004892,9.74880364,9.74880364
35.181345,10.7238053,9.78746184,0.967648415,9.78746184,9.74855623,9.74855623
35.191837,9.69535971,9.78498293,-0.299371367,9.78498293,9.74830409,9.74830409
35.202328,9.53939201,9.78261596,-0.493177403,9.78261596,9.74804727,9.74804727
35.21282,10.2956301,9.78036127,0.717822309,9.78036127,9.74778574,9.74778574
35.223312,8.71779789,9.77821792,-1.02976698,9.77821792,9.74751953,9.74751953
35.233803,8.77496439,9.77618348,-1.00060936,9.77618348,9.74724867,9.74724867
35.244295,10.198039,9.77425392,0.650987797,9.77425392,9.74697312,9.74697312
35.254786,9,9.77242521,-0.878877244,9.77242521,9.74669295,9.74669295
35.265278,10.4880885,9.77069216,0.846992514,9.77069216,9.7464081,9.7464081
35.27577,10.4880885,9.76904981,0.847961478,9.76904981,9.74611862,9.74611862
35.286261,9.2736185,9.76749303,-0.702762077,9.76749303,9.74582454,9.74582454
35.296753,10,9.76601624,0.483718683,9.76601624,9.74552581,9.74552581
35.307244,9.16515139,9.76461447,-0.774250012,9.76461447,9.7452225,9.7452225
35.317736,9.2736185,9.76328237,-0.69975987,9.76328237,9.74491456,9.74491456
35.328228,10.198039,9.76201513,0.660321058,9.76201513,9.74460203,9.74460203
35.338719,9.53939201,9.76080811,-0.470548721,9.76080811,9.74428496,9.74428496
35.349211,9.48683298,9.75965658,-0.522325182,9.75965658,9.74396327,9.74396327
35.359702,10,9.75855645,0.491369061,9.75855645,9.74363706,9.74363706
35.370194,9.69535971,9.75750346,-0.249286481,9.75750346,9.74330626,9.74330626
35.380686,9.53939201,9.75649393,-0.465941962,9.75649393,9.74297092,9.74297092
35.391177,9.74679434,9.75552435,-0.0934345098,9.75552435,9.74263108,9.74263108
35.401669,9.89949494,9.75459123,0.380662199,9.75459123,9.74228668,9.74228668
35.41216,9.8488578,9.75369162,0.308490161,9.75369162,9.7419378,9.7419378
35.422652,10.5830052,9.75282249,0.911143653,9.75282249,9.74158438,9.74158438
35.433144,9.48683298,9.75198124,-0.514925491,9.75198124,9.74122646,9.74122646
35.443635,9.8488578,9.75116549,0.312557686,9.75116549,9.74086409,9.74086409
35.454127,9.53939201,9.75037282,-0.45932647,9.75037282,9.74049721,9.74049721
35.464618,10.0995049,9.74960128,0.591526553,9.74960128,9.7401259,9.7401259
35.47511,10.7703296,9.74884879,1.01068334,9.74884879,9.73975009,9.73975009
35.485602,10.8166538,9.74811369,1.03370215,9.74811369,9.73936984,9.73936984
35.496093,10.3440804,9.74739441,0.772454547,9.74739441,9.73898519,9.73898519
35.506585,9.2736185,9.74668933,-0.687801453,9.74668933,9.73859607,9.73859607
35.517076,10.3440804,9.74599725,0.773358377,9.74599725,9.73820257,9.73820257
35.527568,9.79795897,9.7453168,0.229438825,9.7453168,9.73780463,9.73780463
35.53806,9.48683298,9.7446469,-0.507753795,9.7446469,9.73740229,9.73740229
35.548551,9.59166305,9.74398658,-0.39028648,9.74398658,9.7369956,9.7369956
35.559043,10,9.74333478,0.506621375,9.74333478,9.73658449,9.73658449
35.569534,9.79795897,9.74269076,0.235091931,9.74269076,9.73616905,9.73616905
35.580026,11.045361,9.74205359,1.14162491,9.74205359,9.73574922,9.73574922
35.590518,9,9.74142261,-0.861059005,9.74142261,9.73532504,9.73532504
35.601009,9.64365076,9.74079722,-0.31168327,9.74079722,9.73489656,9.73489656
35.611501,10.198039,9.74017669,0.676655257,9.74017669,9.73446371,9.73446371
35.621992,8.77496439,9.73956057,-0.982138578,9.73956057,9.73402659,9.73402659
35.632484,9.48683298,9.73894823,-0.502110799,9.73894823,9.73358512,9.73358512
35.642976,10.1488916,9.73833926,0.640743558,9.73833926,9.73313936,9.73313936
35.653467,9.8488578,9.73773326,0.333353478,9.73773326,9.73268935,9.73268935
35.663959,9.48683298,9.73808155,-0.501247015,9.73712972,9.73318733,9.73223502
35.67445,10.3923048,9.73748641,0.809208524,9.73652838,9.73273497,9.73177647
35.684942,9.79795897,9.73689306,0.24711517,9.73592877,9.73227837,9.73131362
35.695434,8.66025404,9.73630125,-1.03732695,9.73533063,9.73181759,9.73084653
35.705925,8.42614977,9.73571072,-1.1443605,9.73473372,9.73135269,9.73037525
35.716417,9.94987437,9.73512109,0.46341481,9.73413764,9.73088358,9.7298997
35.726908,9.79795897,9.7345322,0.251846718,9.73354224,9.73041036,9.72941998
35.7374,10.2469508,9.73394372,0.716245105,9.73294718,9.72993296,9.72893601
35.747892,10.6301458,9.73335546,0.946990156,9.73235228,9.72945144,9.72844786
35.758383,10.2956301,9.73276727,0.750241874,9.73175739,9.72896585,9.72795557
35.768875,9.32737905,9.73217885,-0.636238792,9.73116219,9.7284761,9.72745906
35.779366,10.3440804,9.73159013,0.782617596,9.73056663,9.72798232,9.72695844
35.789858,10.7703296,9.73100082,1.01947476,9.72997041,9.72748441,9.72645362
35.80035,9.89949494,9.73041082,0.411198391,9.72937343,9.72698242,9.72594467
35.810841,10.5830052,9.72982003,0.923680254,9.72877559,9.72647644,9.72543163
35.821333,10.3440804,9.72922821,0.784125134,9.72817664,9.72596635,9.72491443
35.831824,10.5356538,9.72863532,0.898342044,9.72757656,9.72545229,9.72439318
35.842316,10.198039,9.72804115,0.685563913,9.72697511,9.72493415,9.72386778
35.852808,9.69535971,9.72744562,-0.17912539,9.72637224,9.72441201,9.72333829
35.863299,10.4403065,9.72684869,0.844664325,9.72576789,9.72388592,9.72280479
35.873791,9.53939201,9.72625013,-0.432270888,9.72516183,9.72335579,9.72226717
35.884282,10.9087121,9.72564998,1.0876866,9.72455411,9.72282174,9.72172555
35.894774,10.2956301,9.72504802,0.755368863,9.72394449,9.72228369,9.72117984
35.905266,9.38083152,9.72444423,-0.586184877,9.72333296,9.72174168,9.7206301
35.915757,9.59166305,9.72383859,-0.363559539,9.7227195,9.72119578,9.7200764
35.926249,9.05538514,9.7232309,-0.817218306,9.72210392,9.72064592,9.71951863
35.93674,10.6301458,9.72262121,0.952640856,9.72148625,9.72009219,9.71895693
35.947232,9.8488578,9.72200935,0.356157904,9.72086632,9.71953451,9.71839119
35.957724,9.48683298,9.7213953,-0.484316347,9.72024412,9.71897294,9.71782147
35.968215,9.32737905,9.72077908,-0.627216092,9.71961965,9.71840755,9.71724784
35.978707,10.2956301,9.7201605,0.758597152,9.71899275,9.71783825,9.71667021
35.989198,10.6770783,9.71953964,0.978539019,9.71836347,9.71726515,9.7160887
35.99969,9.59166305,9.71891633,-0.356725778,9.71773164,9.71668815,9.7155032
36.010182,9.48683298,9.71829058,-0.481100404,9.71709729,9.71610734,9.71491378
36.020673,10.198039,9.71766241,0.693092068,9.71646043,9.71552277,9.71432052
36.031165,8.66025404,9.71703167,-1.0279969,9.7158209,9.71493434,9.7137233
36.041656,10.3440804,9.71639843,0.792263844,9.71517877,9.71434218,9.71312226
36.052148,9,9.71576255,-0.846027512,9.7145339,9.71374619,9.71251729
36.06264,10.8627805,9.71512405,1.07128728,9.71388632,9.71314644,9.71190846
36.073131,8.83176087,9.71448296,-0.939532912,9.71323604,9.712543,9.71129584
36.083623,10.3440804,9.71383913,0.793877385,9.71258292,9.71193577,9.71067932
36.094114,10.4403065,9.71319266,0.852709709,9.71192706,9.71132488,9.71005904
36.104606,9.59166305,9.7125434,-0.347678523,9.71126831,9.71071021,9.70943488
36.115098,10.3923048,9.71189139,0.824871778,9.71060669,9.71009186,9.70880692
36.125589,10.3440804,9.71123668,0.795514772,9.70994227,9.70946987,9.70817523
36.136081,10,9.71057911,0.537978519,9.70927488,9.70884416,9.70753969
36.146572,9.79795897,9.7099188,0.296715637,9.70860463,9.70821486,9.70690045
36.157064,9.11043358,9.7092556,-0.773835917,9.70793138,9.70758185,9.7062574
36.167556,9.89949494,9.70858957,0.436927188,9.70725518,9.70694521,9.7056106
36.178047,10,9.70792075,0.540443572,9.70657608,9.70630501,9.70496012
36.188539,9.53939201,9.70724899,-0.409703526,9.70589393,9.70566116,9.70430587
36.19903,9.38083152,9.70657443,-0.570738915,9.70520884,9.70501377,9.70364796
36.209522,10.2469508,9.70589691,0.735563629,9.70452068,9.70436275,9.7029863
36.220014,9.21954446,9.7052165,-0.696901748,9.7038295,9.70370817,9.70232095
36.230505,10.5356538,9.70453325,0.911658104,9.70313536,9.7030501,9.70165199
36.240997,9.53939201,9.70384703,-0.405530534,9.70243811,9.70238843,9.7009793
36.251488,10.0995049,9.70315795,0.629560948,9.70173788,9.70172331,9.70030303
36.26198,10.2469508,9.70246588,0.737892189,9.70103453,9.70105461,9.69962305
36.272472,9.43398113,9.70177089,-0.517484065,9.70032811,9.70038243,9.69893944
36.282963,8.54400375,9.70107303,-1.07567155,9.69961869,9.69970683,9.69825229
36.293455,8.71779789,9.70037217,-0.991248849,9.69890613,9.6990277,9.69756146
36.303946,9.53939201,9.69966844,-0.400345377,9.69819056,9.69834518,9.69686711
36.314438,9.32737905,9.6989617,-0.60957579,9.69747184,9.69765917,9.69616911
36.32493,10.198039,9.69825202,0.706956158,9.69675004,9.69696973,9.69546755
36.335421,9.59166305,9.69753947,-0.325386569,9.69602521,9.69627695,9.6947625
36.345913,9.89949494,9.69682391,0.450189994,9.69529723,9.69558071,9.69405383
36.356404,10.0498756,9.69610547,0.594785799,9.69456622,9.69488116,9.6933417
36.366896,10.3440804,9.69538404,0.805416908,9.69383204,9.69417818,9.69262599
36.377388,8.36660027,9.69465966,-1.15241459,9.69309478,9.69347184,9.69190676
36.387879,10.2956301,9.69393242,0.775691767,9.69235448,9.69276224,9.69118411
36.398371,9.79795897,9.69320218,0.323661531,9.69161103,9.69204925,9.69045791
36.408862,10.5356538,9.69246909,0.918250873,9.69086455,9.69133303,9.6897283
36.419354,9.59166305,9.691733,-0.316338348,9.69011491,9.69061344,9.68899517
36.429846,9.94987437,9.69099399,0.508802892,9.68936217,9.68989058,9.68825858
36.440337,10.0995049,9.69025214,0.639728695,9.68860642,9.68916453,9.68751864
36.450829,9,9.6895073,-0.830365764,9.68784751,9.68843517,9.68677519
36.46132,10.4403065,9.68875964,0.86691803,9.68708559,9.68770264,9.68602841
36.471812,9.8488578,9.68800901,0.401059592,9.68632052,9.68696683,9.68527816
36.482304,10.8627805,9.68725548,1.08421631,9.68555237,9.68622781,9.68452452
36.492795,10.3440804,9.68649915,0.810913858,9.68478122,9.68548569,9.68376758
36.503287,9.21954446,9.68573986,-0.682785037,9.68400692,9.68474032,9.6830072
36.513778,9.48683298,9.68497779,-0.445134592,9.68322964,9.68399187,9.68224355
36.52427,9.59166305,9.68421277,-0.304219865,9.68244922,9.68324022,9.68147648
36.534762,10.5830052,9.68344491,0.948451546,9.68166574,9.68248544,9.68070609
36.545253,10.2469508,9.68267427,0.751183395,9.68087929,9.68172763,9.67993246
36.555745,9.79795897,9.68190073,0.340673217,9.68008971,9.68096665,9.67915546
36.566236,9.94987437,9.68112444,0.518410971,9.67929717,9.68020268,9.67837524
36.576728,10.7703296,9.68034525,1.04402316,9.67850153,9.67943557,9.67759167
36.58722,10.4880885,9.67956326,0.899180304,9.67770285,9.67866542,9.67680484
36.597711,10.198039,9.67877855,0.720597305,9.67690123,9.67789232,9.67601482
36.608203,10,9.67799098,0.567458385,9.67609651,9.67711614,9.6752215
36.618694,10.2469508,9.67720071,0.754817894,9.67528887,9.67633704,9.67442502
36.629186,10.4880885,9.67640761,0.900933336,9.67447814,9.67555489,9.67362525
36.639678,10.4880885,9.67561175,0.901374913,9.67366442,9.67476978,9.67282228
36.650169,10.4403065,9.67481323,0.87492473,9.67284779,9.6739818,9.6720162
36.660661,9.94987437,9.6740119,0.525226114,9.6720281,9.67319082,9.67120686
36.671152,9.16515139,9.67320794,-0.712780854,9.67120552,9.67239702,9.67039443
36.681644,9.59166305,9.67240119,-0.284144584,9.6703799,9.67160024,9.66957878
36.692136,9.79795897,9.67159176,0.355481665,9.66955131,9.67080059,9.66875998
36.702627,9.48683298,9.67077972,-0.428890128,9.66871986,9.66999817,9.66793814
36.713119,9.89949494,9.66996495,0.479092882,9.66788538,9.66919282,9.6671131
36.72361,9.64365076,9.6691476,-0.159677294,9.66704806,9.66838474,9.66628503
36.734102,9.59166305,9.66832754,-0.276883532,9.66620773,9.66757377,9.6654538
36.744594,10.3440804,9.66750485,0.822542145,9.66536448,9.66676002,9.66461949
36.755085,9.79795897,9.66667964,0.362324899,9.66451841,9.66594359,9.66378219
36.765577,10,9.66585175,0.578055574,9.66366935,9.66512432,9.66294176
36.776068,9.69535971,9.66502137,0.174179066,9.66281749,9.66430241,9.66209837
36.78656,9.38083152,9.66418834,-0.53231271,9.66196267,9.66347771,9.66125187
36.797052,9.8488578,9.66335276,0.430702957,9.66110497,9.66265031,9.66040236
36.807543,9.8488578,9.66251474,0.431674721,9.6602445,9.66182032,9.65954992
36.818035,11.1355287,9.66167411,1.21402414,9.65938109,9.6609876,9.65869441
36.828526,9.74679434,9.66083107,0.293194946,9.65851492,9.66015232,9.65783601
36.839018,10.1488916,9.65998546,0.699218209,9.65764584,9.65931435,9.65697456
36.84951,10.198039,9.65913739,0.734099204,9.65677393,9.65847378,9.65611016
36.860001,9.53939201,9.65828694,-0.344811437,9.65589929,9.65763071,9.6552429
36.870493,9.64365076,9.65743398,-0.117401968,9.65502176,9.65678501,9.65437263
36.880984,9.94987437,9.65657869,0.541567798,9.65414152,9.65593686,9.65349953
36.891476,10,9.65572092,0.586752997,9.65325841,9.65508611,9.65262344
36.901968,9.69535971,9.65486077,0.201243497,9.65237253,9.65423286,9.65174446
36.912459,8.36660027,9.65399834,-1.13463566,9.65148397,9.65337723,9.65086269
36.922951,9.53939201,9.65313349,-0.337255797,9.65059257,9.65251906,9.64997797
36.933442,9.32737905,9.65226639,-0.569988894,9.64969851,9.65165854,9.64909049
36.943934,10.3923048,9.65139691,0.860760091,9.64880163,9.65079553,9.64820008
36.954426,10.4880885,9.65052514,0.915184865,9.64790203,9.64993013,9.64730685
36.964917,9.64365076,9.6496512,-0.0774624769,9.6469998,9.64906244,9.64641088
36.975409,10,9.64877492,0.592642455,9.64609478,9.64819233,9.64551203
36.9859,10.0995049,9.6478965,0.67201818,9.64518716,9.64731999,9.64461048
36.996392,9.21954446,9.6470158,-0.653812927,9.64427677,9.64644526,9.64370607
37.006884,9.74679434,9.64613292,0.317271854,9.64336371,9.64556826,9.64279889
37.017375,9.69535971,9.64524795,0.223856564,9.64244808,9.64468909,9.64188905
37.027867,9.8488578,9.64436077,0.452213482,9.64152971,9.6438076,9.64097638
37.038358,9.64365076,9.64347155,0.0133869238,9.64060879,9.642924,9.64006108
37.04885,9.53939201,9.64258016,-0.32122911,9.63968516,9.64203813,9.63914298
37.059342,10.0995049,9.64168669,0.676622679,9.63875891,9.64115011,9.63822218
37.069833,10.2956301,9.64079126,0.809221158,9.63783015,9.64026005,9.63729878
37.080325,10,9.63989372,0.600088561,9.63689871,9.63936779,9.63637261
37.090816,9.48683298,9.63899427,-0.390078563,9.63596477,9.63847354,9.63544388
37.101308,9.16515139,9.63809275,-0.687707322,9.63502817,9.63757715,9.63451241
37.1118,9.43398113,9.63718929,-0.45078615,9.63408901,9.63667874,9.6335783
37.122291,9.05538514,9.63628398,-0.762167201,9.63314739,9.63577841,9.63264165
37.132783,9.8488578,9.63537669,0.462040161,9.63220314,9.63487603,9.63170231
37.143274,10.0498756,9.63446761,0.644521533,9.63125646,9.63397179,9.63076046
37.153766,9.94987437,9.63355661,0.562421341,9.63030717,9.63306554,9.62981594
37.164258,10.0995049,9.63264378,0.683272391,9.62935538,9.63215741,9.62886884
37.174749,8.88819442,9.63172925,-0.862284656,9.62840118,9.6312475,9.62791927
37.185241,10.5830052,9.63081286,0.975803454,9.62744442,9.63033568,9.62696707
37.195732,9.79795897,9.62989484,0.409956261,9.62648527,9.62942215,9.62601242
37.206224,9.16515139,9.62897501,-0.681045979,9.62552358,9.62850676,9.62505516
37.216716,9.21954446,9.62805352,-0.639147137,9.62455945,9.62758963,9.62409539
37.227207,9.53939201,9.62713047,-0.296206777,9.62359296,9.62667089,9.62313322
37.237699,9.8488578,9.62620572,0.471860239,9.62262397,9.62575039,9.62216847
37.24819,9.2736185,9.62527947,-0.593010099,9.62165265,9.62482833,9.62120135
37.258682,9.16515139,9.62435159,-0.677643123,9.62067885,9.62390459,9.62023167
37.269174,8.83176087,9.6234222,-0.889753521,9.61970265,9.62297926,9.61925955
37.279665,10,9.62249141,0.61441728,9.61872418,9.62205249,9.61828509
37.290157,9.8488578,9.62155908,0.476758555,9.61774324,9.62112413,9.61730812
37.300648,9.94987437,9.62062544,0.573802175,9.61676005,9.6201944,9.61632883
37.31114,10.4403065,9.61969032,0.905878681,9.61577442,9.61926314,9.61534706
37.321632,10.4403065,9.61875388,0.906395407,9.61478646,9.6183305,9.61436291
37.332123,8.88819442,9.61781621,-0.85417902,9.61379628,9.6173966,9.61337648
37.342615,9.8488578,9.6168772,0.481643642,9.6128037,9.61646129,9.6123876
37.353106,9.89949494,9.61593706,0.532501527,9.61180892,9.6155248,9.61139648
37.363598,9.43398113,9.61499565,-0.425458004,9.61081176,9.61458699,9.61040293
37.37409,10.0995049,9.61405309,0.696743746,9.60981233,9.613648,9.60940706
37.384581,9.2736185,9.61310953,-0.58265859,9.60881074,9.61270795,9.60840898
37.395073,9.16515139,9.61216482,-0.668590631,9.60780681,9.61176671,9.60740852
37.405564,9.69535971,9.6112192,0.29006985,9.60680074,9.61082451,9.60640587
37.416056,9.94987437,9.61027252,0.582753681,9.60579236,9.60988121,9.60540086
37.426548,9.2736185,9.60932492,-0.579401784,9.60478176,9.60893695,9.6043936
37.437039,9.64365076,9.60837655,0.187814297,9.60376906,9.60799187,9.60338419
37.447531,9.11043358,9.60742727,-0.704977794,9.60275408,9.60704584,9.60237246
37.458022,9.38083152,9.60647731,-0.475021886,9.60173702,9.60609909,9.60135861
37.468514,10.1488916,9.60552655,0.737132971,9.6007177,9.60515149,9.60034246
37.479006,9.69535971,9.60457512,0.301304815,9.59969623,9.6042032,9.59932412
37.489497,9.69535971,9.60362318,0.302880392,9.59867273,9.60325434,9.5983037
37.499989,10,9.6026706,0.630340699,9.59764699,9.60230481,9.59728102
37.51048,10.8627805,9.60171762,1.12297056,9.59661925,9.60135485,9.59625628
37.520972,10.0498756,9.60076412,0.670157817,9.5955893,9.60040432,9.59522931
37.531464,10.0498756,9.59981025,0.670869114,9.59455726,9.59945339,9.59420021
37.541955,9,9.59885617,-0.773857978,9.59352325,9.59850221,9.59316909
37.552447,9.74679434,9.59790176,0.385866021,9.59248707,9.59755067,9.59213578
37.562938,9.11043358,9.59694727,-0.697505332,9.59144893,9.59659901,9.59110047
37.57343,9.8488578,9.59599259,0.502857053,9.59040866,9.59564712,9.59006299
37.583922,9.64365076,9.59503788,0.220483297,9.58936635,9.59469518,9.58902345
37.594413,9.11043358,9.59408331,-0.695449298,9.58832213,9.59374334,9.58798196
37.604905,9.16515139,9.59312877,-0.654199799,9.58727581,9.5927915,9.58693833
37.615396,9.74679434,9.59217452,0.393217268,9.58622759,9.59183992,9.58589278
37.625888,9,9.59122048,-0.768908628,9.58517729,9.59088851,9.58484511
37.63638,10,9.5902668,0.640104051,9.58412502,9.58993744,9.58379545
37.646871,10.0995049,9.58931368,0.714276738,9.5830709,9.58898688,9.58274389
37.657363,10.198039,9.58836102,0.780818807,9.58201474,9.58803676,9.58169027
37.667854,9.43398113,9.58740909,-0.391698815,9.58095674,9.58708735,9.58063478
37.678346,9.59166305,9.58645782,0.072147233,9.57989672,9.58613856,9.57957724
37.688838,9.2736185,9.5855074,-0.558470147,9.57883479,9.58519059,9.57851777
37.699329,10.7238053,9.58455802,1.06735527,9.57777107,9.58424364,9.57745647
37.709821,9.48683298,9.58360961,-0.311089424,9.57670537,9.58329763,9.57639316
37.720312,9.69535971,9.58266247,0.335704107,9.5756379,9.58235286,9.57532806
37.730804,10.198039,9.58171653,0.785062099,9.57456846,9.58140926,9.57426096
37.741296,9.89949494,9.580772,0.564555517,9.57349718,9.58046705,9.573192
37.751787,9.59166305,9.57982912,0.108783871,9.57242417,9.57952646,9.57212127
37.762279,9.74679434,9.57888781,0.409763993,9.57134923,9.57858742,9.5710486
37.77277,10.5356538,9.57794842,0.978624205,9.57027259,9.57765026,9.56997419
37.783262,9.11043358,9.57701089,-0.683064647,9.56919404,9.57671495,9.56889786
37.793754,10.9544512,9.57607547,1.17404245,9.56811371,9.57578172,9.56781971
37.804245,9.69535971,9.57514241,0.346723671,9.56703171,9.57485082,9.56673987
37.814737,9.69535971,9.57421169,0.348063252,9.56594785,9.57392224,9.56565815
37.825228,9.59166305,9.57328365,0.135570629,9.56486233,9.57299632,9.56457475
37.83572,9.38083152,9.5723583,-0.43763773,9.56377498,9.57207307,9.56348949
37.846212,9.53939201,9.57143592,-0.179008103,9.56268591,9.57115275,9.56240248
37.856703,9.8488578,9.57051677,0.527580355,9.56159522,9.57023566,9.56131385
37.867195,9.16515139,9.5696009,-0.635963448,9.56050273,9.56932181,9.56022338
37.877686,10,9.56868868,0.656742963,9.55940866,9.5684116,9.55913131
37.888178,10.0995049,9.56778017,0.729194604,9.55831281,9.56750507,9.55803743
37.89867,9.79795897,9.56687568,0.480711234,9.55721529,9.56660254,9.55694188
37.909161,9,9.56597555,-0.752313463,9.55611623,9.56570435,9.55584475
37.919653,10.0498756,9.56507985,0.69627277,9.55501542,9.56481057,9.55474586
37.930144,9.94987437,9.56418903,0.6210357,9.55391309,9.56392165,9.55364542
37.940636,10.7238053,9.5633032,1.07726603,9.55280904,9.5630377,9.55254325
37.951128,9.21954446,9.56242274,-0.585558091,9.55170339,9.5621591,9.55143945
37.961619,10.0498756,9.56154803,0.698804398,9.55059625,9.56128624,9.55033415
37.972111,9.89949494,9.56067925,0.582078759,9.54948742,9.56041928,9.54922714
37.982602,9,9.55981691,-0.748209133,9.54837714,9.55955873,9.54811865
37.993094,10.1488916,9.55896119,0.768069252,9.54726519,9.5587048,9.54700849
38.003586,9.2736185,9.55811256,-0.533379853,9.5461517,9.55785794,9.54589676
38.014077,9.2736185,9.55727151,-0.532590854,9.54503679,9.55701864,9.54478359
38.024569,10.1488916,9.5564383,0.769709856,9.54392026,9.55618715,9.54366878
38.03506,10.2956301,9.55561354,0.860242178,9.54280232,9.5553641,9.54255255
38.045552,9.43398113,9.55479753,-0.347586538,9.54168278,9.55454979,9.5414347
38.056044,9.94987437,9.55399087,0.629192736,9.54056177,9.55374481,9.54031535
38.066535,9.38083152,9.55319416,-0.415165795,9.53943938,9.55294975,9.53919463
38.077027,10.8627805,9.5524078,1.14471511,9.53831544,9.55216504,9.53807232
38.087518,9.21954446,9.55163254,-0.576270838,9.53719015,9.5513914,9.53694865
38.09801,9.69535971,9.55086886,0.380119533,9.53606332,9.55062934,9.53582343
38.108502,10.0995049,9.5501175,0.741206746,9.53493508,9.54987957,9.53469677
38.118993,9.32737905,9.54937924,-0.47116896,9.53380553,9.5491429,9.5335688
38.129485,10.1488916,9.5486547,0.774749549,9.53267447,9.54841992,9.5324393
38.139976,9.79795897,9.54794482,0.500014154,9.53154214,9.54771159,9.5313085
38.150468,9.32737905,9.5472503,-0.46890431,9.53040832,9.54701861,9.53017621
38.16096,9.21954446,9.54657214,-0.571863346,9.52927314,9.54634197,9.52904255
38.171451,9.32737905,9.54591136,-0.467474397,9.52813672,9.54568269,9.52790763
38.181943,9.48683298,9.54526888,-0.241735178,9.52699886,9.5450417,9.52677124
38.192434,9.53939201,9.54464591,-0.0724837302,9.52585978,9.5444202,9.52563363
38.202926,9.59166305,9.54404351,0.218219001,9.52471927,9.54381927,9.52449457
38.213418,9.43398113,9.54346303,-0.330880484,9.52357746,9.54324023,9.52335421
38.223909,9.79795897,9.54290586,0.505027836,9.52243448,9.5426845,9.52221264
38.234401,10.3440804,9.54237335,0.89538097,9.5212901,9.54215341,9.52106968
38.244892,9.79795897,9.54186716,0.506055145,9.52014457,9.54164863,9.51992554
38.255384,9.59166305,9.54138886,0.224219063,9.51899767,9.54117173,9.51878003
38.265876,9.64365076,9.54094029,0.320484741,9.51784953,9.54072454,9.51763326
38.276367,9.74679434,9.54052344,0.454170573,9.51670027,9.54030906,9.51648536
38.286859,9.32737905,9.54014029,-0.46126049,9.51554969,9.53992727,9.51533611
38.29735,10.3440804,9.53979319,0.896820631,9.514398,9.53958152,9.51418576
38.307842,9.79795897,9.53948448,0.508403864,9.51324501,9.53927414,9.51303409
38.318334,9.59166305,9.53921684,0.229011379,9.51209084,9.53900782,9.51188122
38.328825,9.2736185,9.53899311,-0.515145237,9.5109356,9.53878541,9.51072728
38.339317,9.74679434,9.53881634,0.456046052,9.50977909,9.53860994,9.50957206
38.349808,10.4403065,9.53868991,0.949534937,9.50862155,9.53848479,9.50841579
38.3603,10.3923048,9.53861742,0.923952069,9.50746276,9.53841358,9.50725825
38.370792,9.32737905,9.53860283,-0.459590884,9.50630285,9.53840026,9.50609959
38.381283,9.64365076,9.53865045,0.324037512,9.50514193,9.53844914,9.50493991
38.391775,9.53939201,9.53876497,0.0250407993,9.5039798,9.5385649,9.503779
38.402266,9.69535971,9.53895151,0.395484773,9.5028167,9.53875268,9.50261711
38.412758,9.69535971,9.5392157,0.395150618,9.5016524,9.5390181,9.50145402
38.42325,10.5356538,9.5395637,0.998043114,9.50048704,9.53936731,9.50028984
38.433741,9.64365076,9.5400022,0.321944968,9.49932074,9.53980702,9.49912472
38.444233,10.2469508,9.54053872,0.840483224,9.49815328,9.54034473,9.49795843
38.454724,8.94427191,9.54118135,-0.772599143,9.4969849,9.54098855,9.49679121
38.465216,9.43398113,9.54193925,-0.328569805,9.49581539,9.54174764,9.49562285
38.475708,9.38083152,9.5428224,-0.40248091,9.49464488,9.54263196,9.49445347
38.486199,9.94987437,9.54384186,0.637206806,9.49347348,9.54365258,9.4932832
38.496691,10.6301458,9.54501023,1.04169841,9.49230098,9.54482212,9.49211182
38.507182,10.198039,9.54634125,0.807278004,9.49112762,9.54615429,9.49093957
38.517674,8.54400375,9.54785086,-1.00192171,9.48995319,9.54766504,9.48976623
38.528166,9.94987437,9.54955673,0.6327066,9.4887778,9.54937205,9.48859194
38.538657,9.11043358,9.55147899,-0.664112497,9.48760159,9.55129543,9.48741681
38.549149,9.89949494,9.55364132,0.588093205,9.48642435,9.55345889,9.48624063
38.55964,9.05538514,9.55607038,-0.707591151,9.48524629,9.55588907,9.48506363
38.570132,9.2736185,9.5587982,-0.534022197,9.48406723,9.55861801,9.48388561
38.580624,9.79795897,9.56186182,0.485898292,9.48288726,9.56168274,9.48270669
38.591115,9.8488578,9.56530507,0.532496696,9.48170653,9.5651271,9.481527
38.601607,9.43398113,9.56918129,-0.367695739,9.48052482,9.56900443,9.48034631
38.612098,9.32737905,9.57355296,-0.496159153,9.47934236,9.5733772,9.47916486
38.62259,9.59166305,9.57849679,0.114744299,9.47815894,9.57832214,9.47798245
38.633082,10.0498756,9.58410366,0.682474883,9.47697469,9.58393012,9.47679919
38.643573,10.2469508,9.59048231,0.810227413,9.47578972,9.59030988,9.47561521
38.654065,9.59166305,9.59776437,-0.0781109923,9.47460383,9.59759307,9.4744303
38.664556,8.88819442,9.60610314,-0.847294942,9.47341725,9.60593296,9.47324469
38.675048,8.66025404,9.61568157,-0.977459735,9.47222976,9.61551253,9.47205817
38.68554,9.16515139,9.62670965,-0.67938079,9.4710415,9.62654176,9.47087086
38.696031,9.89949494,9.63942741,0.509968163,9.46985258,9.6392607,9.46968288
38.706523,9.8488578,9.65410918,0.441303321,9.46866279,9.65394366,9.46849403
38.717014,9.48683298,9.67105379,-0.429209513,9.46747237,9.67088949,9.46730454
38.727506,9.21954446,9.69059178,-0.686328872,9.4662811,9.69042874,9.46611419
38.737998,9.2736185,9.71306966,-0.662911126,9.4650891,9.7129079,9.46492311
38.748489,10.2956301,9.7388449,0.746180434,9.46389651,9.73868448,9.46373143
38.758981,9.74679434,9.76828288,-0.146589687,9.4627031,9.76812384,9.46253892
38.769472,10.8166538,9.80172546,1.00743653,9.46150912,9.80156784,9.46134583
38.779964,10.3440804,9.83949414,0.710342376,9.46031434,9.839338,9.46015193
38.790456,9.38083152,9.88184716,-0.707824581,9.45911889,9.88169254,9.45895737
38.800947,10.0498756,9.92895749,0.347732841,9.4579229,9.92880446,9.45776225
38.811439,9.64365076,9.98088955,-0.580722645,9.45672616,9.98073815,9.45656636
38.82193,10.2956301,10.0375174,0.508047992,9.45552889,10.0373677,9.45536995
38.832422,10.0498756,10.0984945,-0.220496968,9.45433088,10.0983465,9.45417279
38.842914,10.0498756,10.1631303,-0.33653338,9.45313226,10.1629841,9.45297501
38.853405,10.4880885,10.2302953,0.507733423,9.45193315,10.2301507,9.45177674
38.863897,10.4403065,10.2983243,0.376805279,9.45073333,10.2981815,9.45057775
38.874388,10.5830052,10.3648763,0.467042789,9.44953305,10.3647352,9.4493783
38.88488,10.1488916,10.4269618,-0.527323614,9.44833209,10.4268223,9.44817815
38.895372,9.94987437,10.4810204,-0.728797641,9.44713056,10.4808823,9.44697743
38.905863,9.79795897,10.5232731,-0.85165377,9.44592861,10.5231364,9.44577628
38.916355,10.0995049,10.5502747,-0.671393882,9.444726,10.550139,9.44457447
38.926846,10.9544512,10.5595335,0.628424713,9.44352298,10.5593987,9.44337224
38.937338,11.2249722,10.5500858,0.821514686,9.44231933,10.5499516,9.44216937
38.94783,10.4880885,10.5227102,-0.186069227,9.44111517,10.5225764,9.44096599
38.958321,10.5356538,10.4797515,0.236436565,9.43991064,10.4796178,9.43976223
38.968813,10.2956301,10.4245769,-0.359091518,9.43870551,10.4244432,9.43855786
38.979304,10.7238053,10.3609564,0.602369441,9.43750001,10.3608226,9.43735313
38.989796,10,10.2924687,-0.540803758,9.43629395,10.2923347,9.43614782
39.000288,10.6770783,10.2221864,0.674456726,9.43508743,10.2220522,9.43494204
39.010779,9.59166305,10.1525176,-0.748902224,9.43388058,10.1523832,9.43373594
39.021271,9.53939201,10.0851948,-0.738784653,9.43267319,10.0850602,9.43252929
39.031762,10,10.0214117,-0.146327421,9.4314655,10.021277,9.43132232
39.042254,10.2956301,9.96188753,0.577704605,9.43025728,9.96175268,9.43011483
39.052746,9.8488578,9.90702075,-0.241169948,9.42904866,9.90688585,9.42890693
39.063237,9.48683298,9.8569591,-0.608379918,9.42783977,9.85682423,9.42769875
39.073729,9.74679434,9.81165642,-0.254680345,9.42663038,9.81152162,9.42649007
39.08422,9.64365076,9.77095866,-0.356802328,9.42542074,9.77082399,9.42528114
39.094712,9.59166305,9.73460691,-0.378079175,9.42421064,9.73447243,9.42407172
39.105204,9.43398113,9.70229692,-0.517992072,9.42300018,9.70216268,9.42286196
39.115695,9,9.67368849,-0.820785289,9.4217895,9.67355454,9.42165197
39.126187,9.64365076,9.64841723,-0.0690396276,9.42057838,9.64828361,9.42044153
39.136678,10,9.62612871,0.611450152,9.41936707,9.62599546,9.41923089
39.14717,9.43398113,9.60646952,-0.415317213,9.41815533,9.60633667,9.41801982
39.157662,10.0498756,9.5891124,0.678795416,9.41694329,9.58897999,9.41680846
39.168153,9.69535971,9.57375451,0.348719376,9.41573109,9.57362255,9.41559691
39.178645,9.89949494,9.56011746,0.582561135,9.4145185,9.55998597,9.41438498
39.189136,10.3923048,9.54795935,0.918882743,9.41330575,9.54782835,9.41317288
39.199628,9.48683298,9.53706367,-0.224122042,9.41209264,9.53693318,9.41196042
39.21012,8.77496439,9.52724694,-0.867342233,9.41087928,9.52711696,9.4107477
39.220611,9.89949494,9.51835236,0.617367459,9.40966581,9.51822291,9.40953487
39.231103,10,9.51024498,0.699824996,9.40845199,9.51011606,9.40832168
39.241594,9.11043358,9.50281468,-0.626403307,9.40723808,9.5026863,9.4071084
39.252086,8.83176087,9.49668725,-0.815430186,9.40675124,9.49583891,9.40589479
39.262578,10.5356538,9.49034797,1.02240197,9.40553961,9.48949702,9.40468098
39.273069,9.59166305,9.48445011,0.327433871,9.40432792,9.48359656,9.4034671
39.283561,9.69535971,9.47893863,0.465210796,9.40311596,9.4780825,9.40225292
39.294052,9.53939201,9.47376952,0.25616888,9.40190397,9.47291081,9.4010387
39.304544,9.94987437,9.46890377,0.693520438,9.40069173,9.46804249,9.39982419
39.315036,9.32737905,9.46430969,-0.370041401,9.39947935,9.46344584,9.39860954
39.325527,10.198039,9.45996014,0.859115177,9.39826698,9.45909372,9.39739487
39.336019,9.69535971,9.45583053,0.489417188,9.39705438,9.45496154,9.39617995
39.34651,10.3440804,9.45190104,0.944552482,9.39584179,9.45102948,9.39496503
39.357002,9.94987437,9.44815284,0.708323038,9.39462901,9.4472787,9.39374988
39.367494,9.16515139,9.44457041,-0.528601003,9.39341614,9.44369368,9.39253464
39.377985,10.0498756,9.44113994,0.780215151,9.39220333,9.44026061,9.39131942
39.388477,9.21954446,9.43784817,-0.467229831,9.39099034,9.43696624,9.390104
39.398968,9,9.43468447,-0.659306051,9.38977741,9.43379992,9.38888863
39.40946,9.69535971,9.43163807,0.513538354,9.38856433,9.4307509,9.38767308
39.419952,8.42614977,9.42870015,-1.00127438,9.38735122,9.42781033,9.38645749
39.430443,10.198039,9.42586269,0.878735645,9.38613821,9.42497022,9.38524196
39.440935,10.1488916,9.42311765,0.851923657,9.38492507,9.42222251,9.38402629
39.451426,8.71779789,9.42045873,-0.838248677,9.38371205,9.41956092,9.38281072
39.461918,9.59166305,9.41787922,0.416873874,9.38249892,9.41697871,9.38159501
39.47241,9.69535971,9.41537371,0.529137033,9.3812858,9.41447049,9.3803793
39.482901,8.94427191,9.41293728,-0.684591386,9.38007284,9.41203133,9.37916371
39.493393,9.59166305,9.4105647,0.425556513,9.37885979,9.40965601,9.37794803
39.503884,9.89949494,9.40825212,0.700887167,9.37764691,9.40734066,9.37673248
39.514376,9,9.4059951,-0.637177445,9.37643397,9.40508087,9.37551685
39.524868,10.0498756,9.40379022,0.80379438,9.37522109,9.40287319,9.37430127
39.535359,9.21954446,9.40163432,-0.426719886,9.37400841,9.40071448,9.37308586
39.545851,8.94427191,9.39952389,-0.674723635,9.3727957,9.39860122,9.37187039
39.556342,9.59166305,9.39745649,0.440688727,9.37158319,9.39653096,9.37065511
39.566834,9.11043358,9.39542908,-0.533849701,9.37037068,9.39450068,9.3694398
39.577326,8.54400375,9.39343943,-0.921648352,9.36915828,9.39250814,9.36822457
39.587817,8.48528137,9.39148546,-0.951947525,9.36794612,9.39055126,9.36700956
39.598309,8.77496439,9.38956472,-0.7839645,9.36673397,9.38862759,9.36579455
39.6088,8.94427191,9.38767564,-0.665885675,9.36552208,9.38673555,9.36457976
39.619292,10.3923048,9.38581606,1.00323915,9.36431022,9.38487299,9.36336499
39.629784,9.21954446,9.38398448,-0.405512054,9.36309853,9.38303842,9.36215035
39.640275,9.11043358,9.38217954,-0.521292585,9.36188712,9.38123046,9.36093598
39.650767,10,9.38039943,0.787147109,9.36067577,9.37944731,9.35972164
39.661258,9,9.37864315,-0.615339866,9.35946472,9.37768797,9.35850758
39.67175,9.32737905,9.37690911,-0.222553488,9.35825376,9.37595084,9.35729358
39.682242,10.0995049,9.3751963,0.851063241,9.357043,9.37423493,9.35607976
39.692733,9.38083152,9.37350379,0.0856021745,9.35583256,9.37253929,9.35486624
39.703225,9.89949494,9.37183022,0.726405336,9.35462224,9.37086257,9.35365281
39.713716,9.89949494,9.37017497,0.72754379,9.35341227,9.36920414,9.3524397
39.724208,8.77496439,9.36853681,-0.770436516,9.35220242,9.36756278,9.35122669
39.7347,10,9.36691506,0.795666347,9.35099282,9.36593781,9.3500139
39.745191,9.16515139,9.36530909,-0.447389877,9.34978359,9.36432859,9.34880146
39.755683,10.4403065,9.36371785,1.03758791,9.34857452,9.36273407,9.34758915
39.766174,9.11043358,9.36214093,-0.501704448,9.34736584,9.36115387,9.34637721
39.776666,10.2956301,9.3605774,0.966981253,9.34615732,9.35958701,9.34516541
39.787158,9.64365076,9.35902677,0.533501627,9.34494911,9.35803304,9.34395388
39.797649,8.83176087,9.35748863,-0.72507087,9.34374131,9.35649153,9.34274274
39.808141,9.11043358,9.35596213,-0.495508377,9.34253371,9.35496163,9.34153177
39.818632,9.48683298,9.35444705,0.36384878,9.34132654,9.35344313,9.34032121
39.829124,9.69535971,9.3529426,0.585164174,9.34011959,9.35193524,9.33911084
39.839616,9.8488578,9.35144849,0.705272507,9.33891297,9.35043765,9.33790078
39.850107,8.71779789,9.34996442,-0.795089009,9.33770682,9.34895008,9.33669115
39.860599,10.3440804,9.34848969,0.997792934,9.3365009,9.34747183,9.33548173
39.87109,9.89949494,9.34702421,0.743283745,9.33529546,9.3460028,9.33427277
39.881582,10.0498756,9.34556733,0.839230776,9.33409028,9.34454233,9.33306403
39.892074,9.74679434,9.34411883,0.634567183,9.33288548,9.34309024,9.33185565
39.902565,10.0995049,9.34267855,0.869957695,9.33168119,9.34164632,9.33064774
39.913057,8.66025404,9.34124588,-0.825222297,9.33047717,9.34020999,9.32944009
39.923548,8.77496439,9.33982081,-0.751569303,9.32927368,9.33878123,9.32823293
39.93404,9.48683298,9.33840278,0.385266399,9.32807049,9.33735949,9.32702604
39.944532,9.2736185,9.33699168,-0.251740311,9.32686771,9.33594464,9.32581954
39.955023,9.53939201,9.33558738,0.451447265,9.32566549,9.33453657,9.32461356
39.965515,9.16515139,9.33418938,-0.4111423,9.32446358,9.33313477,9.32340787
39.976006,9.21954446,9.33279772,-0.33653122,9.32326224,9.33173928,9.32220272
39.986498,8.71779789,9.33141192,-0.783335197,9.32206124,9.33034962,9.32099788
39.99699,8.36660027,9.3300319,-0.981545535,9.32086071,9.32896572,9.31979347
40.007481,10,9.32865761,0.81935486,9.31966075,9.32758751,9.31858962
40.017973,8.60232527,9.3272886,-0.851447788,9.31846117,9.32621455,9.3173861
40.028464,9.64365076,9.32592496,0.563671718,9.31726219,9.32484693,9.31618316
40.038956,9,9.32456624,-0.569707157,9.31606358,9.32348421,9.31498056
40.049448,9,9.32321244,-0.568517758,9.31486548,9.32212637,9.31377844
40.059939,8.88819442,9.32186352,-0.658535576,9.31366801,9.32077338,9.31257692
40.070431,8.24621125,9.32051909,-1.03648822,9.31247095,9.31942485,9.31137576
40.080922,9.38083152,9.31917925,0.248298751,9.31127452,9.31808088,9.31017522
40.091414,9.32737905,9.31784363,0.0976495004,9.31007852,9.3167411,9.30897507
40.101906,10,9.31651222,0.826733196,9.30888306,9.3154055,9.30777543
40.112397,9.32737905,9.31518504,0.110426499,9.30768827,9.3140741,9.30657643
40.122889,9.38083152,9.31386172,0.258785247,9.30649392,9.31274651,9.30537783
40.13338,8.71779789,9.31254239,-0.771196799,9.30530025,9.3114229,9.30417989
40.143872,9.53939201,9.31122671,0.477666523,9.30410704,9.31010289,9.30298237
40.154364,9.05538514,9.30991469,-0.504509223,9.30291442,9.30878652,9.3017854
40.164855,9.94987437,9.30860638,0.800792102,9.3017225,9.30747382,9.30058911
40.175347,8.36660027,9.30730143,-0.969897501,9.30053107,9.30616445,9.29939326
40.185838,9.32737905,9.30599999,0.146215794,9.29934035,9.30485856,9.2981981
40.19633,9.2736185,9.30470175,-0.176304443,9.29815013,9.30355583,9.2970034
40.206822,9.48683298,9.30340674,0.428282893,9.29696054,9.3022563,9.29580929
40.217313,9.11043358,9.30211502,-0.437814389,9.29577168,9.30096001,9.29461589
40.227805,8.83176087,9.30082626,-0.684883486,9.29458335,9.29966666,9.29342297
40.238296,9.8488578,9.29954063,0.741159342,9.29339578,9.2983764,9.29223078
40.248788,10.4880885,9.29825783,1.09079359,9.29220874,9.29708894,9.29103909
40.25928,10.0995049,9.29697792,0.895838722,9.29102236,9.29580433,9.28984802
40.269771,9.38083152,9.29570096,0.291771421,9.28983676,9.29452263,9.28865769
40.280263,9.05538514,9.29442664,-0.488918704,9.28865172,9.29324354,9.28746789
40.290754,8.77496439,9.29315515,-0.71985468,9.28746748,9.29196724,9.28627884
40.301246,9.43398113,9.29188619,0.376954822,9.2862838,9.29069345,9.28509033
40.311738,9.48683298,9.29061985,0.442959519,9.28510083,9.28942221,9.28390248
40.322229,9.8488578,9.28935617,0.747998415,9.28391867,9.28815362,9.28271541
40.332721,9,9.28809489,-0.536744714,9.2827371,9.28688738,9.28152889
40.343212,10.198039,9.28683619,0.954569453,9.28155636,9.28562368,9.28034317
40.353704,9.59166305,9.28557978,0.553247921,9.28037624,9.28436224,9.27915802
40.364196,10.1488916,9.28432576,0.929820308,9.27919685,9.28310315,9.27797356
40.374687,9.2736185,9.28307419,-0.0972404132,9.2780183,9.28184647,9.27678991
40.385179,9.32737905,9.28182481,0.213434407,9.27684039,9.28059193,9.27560685
40.39567,8.71779789,9.2805778,-0.750186587,9.27566335,9.27933973,9.27442462
40.406162,8.71779789,9.27933291,-0.749356403,9.27448695,9.2780896,9.273243
40.416654,8.60232527,9.2780902,-0.82204923,9.27331132,9.27684163,9.2720621
40.427145,8.24621125,9.27684978,-1.01520369,9.27213657,9.27559589,9.27088204
40.437637,9.21954446,9.27561137,-0.23678453,9.27096249,9.27435213,9.26970262
40.448128,8.42614977,9.27437518,-0.920991534,9.26978931,9.27311054,9.26852404
40.45862,9.11043358,9.27314094,-0.403370005,9.26861681,9.27187086,9.26734611
40.469112,9.32737905,9.27190875,0.235521352,9.26744511,9.27063319,9.26616894
40.479603,10,9.27067869,0.854003111,9.26627433,9.26939761,9.26499264
40.490095,9.8488578,9.2694505,0.761188084,9.26510426,9.26816385,9.263817
40.500586,9.74679434,9.2682244,0.691787497,9.26393511,9.26693215,9.26264226
40.511078,9.05538514,9.26700013,-0.460016299,9.26276668,9.26570222,9.26146818
40.52157,9.89949494,9.26577779,0.796063535,9.26159909,9.26447417,9.26029489
40.532061,9.89949494,9.26455745,0.796829644,9.26043245,9.2632481,9.25912251
40.542553,9.94987437,9.26333889,0.828574368,9.25926654,9.26202375,9.25795082
40.553044,9.38083152,9.2621223,0.344542046,9.2581016,9.26080132,9.25678005
40.563536,8.36660027,9.26090743,-0.945678153,9.25693741,9.25958058,9.25560999
40.574028,8.94427191,9.25969439,-0.561624861,9.25577409,9.25836161,9.25444074
40.584519,8.48528137,9.25848328,-0.879318999,9.25461175,9.25714452,9.25327244
40.595011,9.11043358,9.25727383,-0.383197407,9.25345018,9.25592906,9.25210485
40.605502,9.2736185,9.25606628,0.132484791,9.25228961,9.25471543,9.25093822
40.615994,8.94427191,9.25486036,-0.557304632,9.25112982,9.25350341,9.24977232
40.626486,8.94427191,9.25365619,-0.556223232,9.24997093,9.25229307,9.24860727
40.636977,9.32737905,9.25245387,0.273724652,9.24881306,9.25108453,9.24744318
40.647469,8.94427191,9.25125314,-0.554058872,9.24765599,9.24987755,9.24627985
40.65796,9.89949494,9.25005424,0.805878838,9.24649994,9.24867233,9.2451175
40.668452,8.77496439,9.2488569,-0.688398516,9.24534471,9.24746863,9.24395591
40.678944,8.60232527,9.24766125,-0.803328068,9.24419041,9.24626657,9.2427952
40.689435,8.94427191,9.24646738,-0.549723084,9.24303716,9.24506623,9.24163549
40.699927,9.11043358,9.24520202,-0.367108209,9.24181169,9.24386738,9.24047656
40.710418,9.43398113,9.2440117,0.435854824,9.24066059,9.24267024,9.23931864
40.72091,8.60232527,9.24282291,-0.800310968,9.23951033,9.24147457,9.23816151
40.731402,9.53939201,9.24163575,0.545670476,9.23836104,9.24028047,9.23700528
40.741893,8.88819442,9.24045031,-0.593511492,9.23721282,9.23908805,9.23585008
40.752385,9.8488578,9.23926636,0.780763369,9.23606546,9.23789707,9.23469569
40.762876,8.88819442,9.23808413,-0.591514762,9.23491919,9.23670775,9.23354234
40.773368,8.66025404,9.23690338,-0.759374307,9.2337738,9.23551985,9.2323898
40.78386,8.66025404,9.2357242,-0.758597499,9.23262939,9.23433347,9.2312382
40.794351,9.38083152,9.23454672,0.382471962,9.2314861,9.23314874,9.23008765
40.804843,10.0498756,9.23337069,0.903606624,9.23034369,9.2319654,9.22893794
40.815334,8.48528137,9.23219634,-0.864242421,9.2292024,9.23078368,9.22778928
40.825826,9.32737905,9.23102343,0.310412029,9.22806202,9.22960334,9.22664148
40.836318,8.36660027,9.22985206,-0.929113448,9.22692265,9.2284245,9.22549464
40.846809,8.88819442,9.22868236,-0.583513447,9.22578442,9.22724726,9.22434887
40.857301,9,9.22751408,-0.476984362,9.22464711,9.22607138,9.22320397
40.867792,9.2736185,9.22634745,0.217419058,9.22351095,9.22489709,9.22206015
40.878284,9.48683298,9.22518223,0.511518081,9.22237572,9.22372416,9.22091721
40.888776,8.77496439,9.22401854,-0.67011503,9.22124154,9.22255269,9.21977525
40.899267,9.32737905,9.22285648,0.32329951,9.22010852,9.22138279,9.2186344
40.909759,9.16515139,9.22169582,-0.237790735,9.21897646,9.22021424,9.21749443
40.92025,9.32737905,9.22053679,0.32686735,9.21784556,9.21904724,9.21635558
40.930742,10.5356538,9.21937915,1.14729011,9.21671563,9.21788158,9.21521762
40.941234,8.77496439,9.21822302,-0.665776712,9.21558677,9.21671735,9.21408068
40.951725,9.11043358,9.2170685,-0.326550022,9.21445911,9.21555468,9.21294486
40.962217,9.21954446,9.21591536,0.0602419714,9.21333242,9.21439333,9.21180996
40.972708,9.21954446,9.21476383,0.0691420601,9.21220693,9.21323351,9.21067619
40.9832,9.43398113,9.21361369,0.469433111,9.21108244,9.21207501,9.20954334
40.993692,9.21954446,9.21246503,0.0841393391,9.20995904,9.21091794,9.20841153
41.004183,9.43398113,9.21131797,0.471871978,9.20883686,9.20976239,9.20728087
41.014675,9.43398113,9.21017228,0.473084398,9.20771569,9.20860815,9.20615114
41.025166,8.94427191,9.20902819,-0.514544732,9.20659575,9.20745544,9.20502258
41.035658,9.53939201,9.20788547,0.575766049,9.20547682,9.20630402,9.20389496
41.04615,8.94427191,9.20674423,-0.512320525,9.20435902,9.20515401,9.20276839
41.056641,9.05538514,9.20560458,-0.387581525,9.20324247,9.20400552,9.201643
41.067133,9.53939201,9.20446629,0.578727677,9.20212694,9.20285833,9.20051857
41.077624,9.11043358,9.20332959,-0.304788464,9.20101267,9.20171264,9.19939532
41.088116,8.83176087,9.20219425,-0.608632388,9.19989945,9.20056825,9.19827304
41.098608,8.94427191,9.20106039,-0.506743007,9.19878738,9.19942525,9.19715184
41.109099,8.88819442,9.1999281,-0.558331159,9.19767657,9.19828376,9.19603183
41.119591,9.38083152,9.19879718,0.426654826,9.19656683,9.19714355,9.1949128
41.130082,7.87400787,9.19766784,-1.15050422,9.19545836,9.19600485,9.19379497
41.140574,9.59166305,9.19653985,0.628588254,9.19435097,9.19486742,9.19267814
41.151066,10,9.19541334,0.896987546,9.19324475,9.19373139,9.19156241
41.161557,9.38083152,9.19428841,0.431906371,9.19213983,9.19259686,9.19044788
41.172049,9.43398113,9.19316483,0.490730374,9.19103599,9.1914636,9.18933437
41.18254,8.42614977,9.19204283,-0.875153163,9.18993345,9.19033184,9.18822207
41.193032,9.21954446,9.1909222,0.169181152,9.18883201,9.18920136,9.18711078
41.203524,9.2736185,9.18980303,0.289509015,9.18773177,9.18807226,9.18600062
41.214015,9.43398113,9.18868543,0.49527336,9.18663285,9.18694466,9.18489169
41.224507,8.94427191,9.1875692,-0.49325175,9.18553504,9.18581832,9.18378378
41.234998,9.53939201,9.18645454,0.594085408,9.18443856,9.18469348,9.18267711
41.24549,10.1488916,9.18534125,0.981605989,9.18334319,9.18356991,9.18157147
41.255982,9.11043358,9.18422942,-0.271653905,9.18224906,9.18244773,9.18046698
41.266473,9.43398113,9.18311917,0.500861216,9.18115626,9.18132703,9.17936373
41.276965,8.24621125,9.18201029,-0.967367066,9.1800646,9.1802076,9.17826153
41.287456,9.79795897,9.18090298,0.785529113,9.17897429,9.17908966,9.17716058
41.297948,8.48528137,9.17979704,-0.833376067,9.17788512,9.177973,9.17606069
41.30844,8.83176087,9.17869258,-0.589009091,9.1767972,9.17685771,9.17496196
41.318931,9.48683298,9.17758969,0.556096479,9.17571065,9.1757439,9.17386449
41.329423,7.87400787,9.17648817,-1.14126259,9.17462525,9.17463137,9.17276808
41.339914,9.43398113,9.17538823,0.508520309,9.17354123,9.17352033,9.17167295
41.350406,9.89949494,9.17428966,0.851589853,9.17245837,9.17241055,9.17057889
41.360898,8.83176087,9.17319257,-0.584321575,9.17137679,9.17130216,9.16948601
41.371389,9.2736185,9.17209706,0.318624283,9.1702966,9.17019524,9.16839441
41.381881,9.2736185,9.17100293,0.320336645,9.16921759,9.1690896,9.16730389
41.392372,9.11043358,9.16991038,-0.243878666,9.16813997,9.16798544,9.16621466
41.402864,9.53939201,9.16881921,0.60874691,9.16706354,9.16688256,9.16512651
41.413356,9.59166305,9.16772953,0.651101772,9.16598841,9.16578105,9.16403956
41.423847,8.66025404,9.16664143,-0.711609018,9.16491469,9.16468103,9.16295391
41.434339,9.53939201,9.16555472,0.611422354,9.16384217,9.16358228,9.16186936
41.44483,8.88819442,9.1644696,-0.525618854,9.16277106,9.16248501,9.16078611
41.455322,9.64365076,9.16338586,0.693011472,9.16170117,9.16138902,9.15970397
41.465814,8.54400375,9.16230362,-0.786320463,9.16063261,9.16029441,9.15862303
41.476305,9.32737905,9.16122297,0.407622481,9.15956547,9.15920128,9.15754341
41.486797,8.66025404,9.16014371,-0.707028762,9.15849955,9.15810942,9.1564649
41.497288,9.64365076,9.15906605,0.696121192,9.15743508,9.15701905,9.15538772
41.50778,8.48528137,9.15798978,-0.820188032,9.15637184,9.15592996,9.15431165
41.518272,9,9.15691502,-0.396125002,9.15530994,9.15484224,9.1532368
41.528763,7.93725393,9.15584185,-1.1038967,9.15424949,9.15375601,9.15216328
41.539255,8.77496439,9.15477009,-0.616283787,9.15319029,9.15267106,9.15109089
41.549746,9.16515139,9.15369994,0.107011452,9.15213255,9.15158759,9.15001984
41.560238,8.48528137,9.15263119,-0.816914815,9.15107606,9.1505054,9.14894991
41.57073,8.94427191,9.15156395,-0.455293354,9.15002094,9.14942459,9.14788123
41.581221,9.21954446,9.15049832,0.262766318,9.14896729,9.14834527,9.14681388
41.591713,8.71779789,9.1494341,-0.65699027,9.14791492,9.14726722,9.14574768
41.602204,8.94427191,9.1483715,-0.451773826,9.14686402,9.14619067,9.14468282
41.612696,8.88819442,9.14731031,-0.509034278,9.14581439,9.14511539,9.14361911
41.623188,9.05538514,9.14625065,-0.301439062,9.14476616,9.1440415,9.14255665
41.633679,9.59166305,9.1451926,0.66818444,9.14371941,9.14296909,9.14149555
41.644171,8.88819442,9.14413598,-0.505906671,9.14267396,9.14189797,9.14043559
41.654662,8.48528137,9.14308098,-0.811048461,9.14163001,9.14082833,9.139377
41.665154,9.8488578,9.14202741,0.840732057,9.14058736,9.13975998,9.13831957
41.675646,9.05538514,9.14097537,-0.292558082,9.13954611,9.13869301,9.1372634
41.686137,8,9.13992496,-1.06767268,9.13850637,9.13762753,9.13620859
41.696629,8.24621125,9.13887599,-0.944809365,9.13746795,9.13656334,9.13515495
41.70712,9.43398113,9.13782865,0.544198936,9.13643105,9.13550064,9.13410268
41.717612,9.11043358,9.13678275,-0.162324283,9.13539547,9.13443922,9.13305158
41.728104,9.48683298,9.1357384,0.592532349,9.13436131,9.13337919,9.13200175
41.738595,9.11043358,9.13469568,-0.155762972,9.13332869,9.13232065,9.1309533
41.749087,8.94427191,9.13365442,-0.435181005,9.1322974,9.1312634,9.12990603
41.759578,9.8488578,9.1326148,0.84631141,9.13126765,9.13020764,9.12886013
41.77007,8.54400375,9.13157663,-0.766533031,9.13023925,9.12915316,9.12781542
41.780562,8.88819442,9.13054002,-0.4922861,9.12921229,9.12810008,9.12677199
41.791053,8.77496439,9.12950507,-0.595433185,9.12818688,9.12704849,9.12572995
41.801545,8.83176087,9.12847157,-0.544711578,9.12716283,9.12599819,9.12468909
41.812036,8.30662386,9.12743973,-0.905988891,9.12614034,9.12494938,9.12364963
41.822528,9.53939201,9.12640936,0.642637262,9.12511921,9.12390186,9.12261135
41.83302,8.77496439,9.12538056,-0.591959605,9.12409955,9.12285573,9.12157437
41.843511,9.38083152,9.12435343,0.506436663,9.12308146,9.1218111,9.12053878
41.854003,9.59166305,9.12332777,0.684350261,9.12206475,9.12076775,9.11950439
41.864494,9.59166305,9.12230378,0.685097998,9.12104962,9.1197259,9.11847139
41.874986,9.2736185,9.12128127,0.390304013,9.12003588,9.11868535,9.1174396
41.885478,8,9.12026035,-1.05842352,9.11902362,9.11764619,9.11640911
41.895969,9.16515139,9.1192411,0.214266858,9.11801296,9.11660852,9.11538001
41.906461,9.11043358,9.11822335,-0.0882596716,9.11700369,9.11557214,9.11435213
41.916952,9,9.11720728,-0.342355489,9.11599602,9.11453726,9.11332565
41.927444,8.71779789,9.11619271,-0.631185251,9.11498976,9.11350367,9.11230037
41.937936,8.18535277,9.11517973,-0.964275355,9.11398501,9.11247148,9.11127641
41.948427,8.42614977,9.11416845,-0.829468913,9.11298188,9.11144079,9.11025385
41.958919,9.2736185,9.11315868,0.400574362,9.11198016,9.11041139,9.10923251
41.96941,9.21954446,9.1121506,0.327710018,9.11098006,9.10938348,9.10821258
41.979902,8.36660027,9.11114404,-0.8628695,9.10998139,9.10835687,9.10719387
41.990394,9.53939201,9.11013909,0.655173966,9.10898426,9.10733165,9.10617647
42.000885,8.54400375,9.10913585,-0.751752687,9.10798875,9.10630793,9.10516048
42.011377,8.60232527,9.10813413,-0.711202406,9.10699469,9.10528551,9.10414572
42.021868,9.16515139,9.10713413,0.24086773,9.10600227,9.10426458,9.10313237
42.03236,8.66025404,9.10613565,-0.667743675,9.1050113,9.10324495,9.10212024
42.042852,8.88819442,9.10513881,-0.465772897,9.10402188,9.10222672,9.10110944
42.053343,8.24621125,9.10414369,-0.926246424,9.10303412,9.10120998,9.10010005
42.063835,8.36660027,9.10315011,-0.858224822,9.10204782,9.10019453,9.09909189
42.074326,8.83176087,9.10215826,-0.519997499,9.10106319,9.09918059,9.09808515
42.084818,8.71779789,9.10116797,-0.619168862,9.10008003,9.09816794,9.09707964
42.09531,9.21954446,9.10017931,0.345492611,9.09909844,9.09715668,9.09607546
42.105801,10.1488916,9.0991924,1.02454827,9.09811853,9.09614692,9.09507269
42.116293,9.2736185,9.09820705,0.418821494,9.09714011,9.09513846,9.09407116
42.126784,9.74679434,9.09722345,0.805959611,9.09616338,9.09413149,9.09307106
42.137276,8.42614977,9.09624142,-0.818591255,9.09518814,9.09312582,9.09207219
42.147768,8.54400375,9.09526105,-0.742467037,9.0942145,9.09212155,9.09107465
42.158259,10,9.09428244,0.951691947,9.09324256,9.09111877,9.09007853
42.168751,8.60232527,9.09330541,-0.700699752,9.09227214,9.09011729,9.08908365
42.179242,9.38083152,9.09233015,0.537123236,9.09130341,9.08911729,9.0880902
42.189734,9.32737905,9.09135648,0.485821549,9.09033622,9.0881186,9.08709798
42.200226,9.2736185,9.08937065,0.429241015,9.08937065,9.0861071,9.0861071
42.210717,9.16515139,9.08840679,0.27702815,9.08840679,9.08511765,9.08511765
42.221209,9,9.08744448,-0.295710132,9.08744448,9.08412943,9.08412943
42.2317,8.60232527,9.0864839,-0.695815085,9.0864839,9.08314265,9.08314265
42.242192,9.32737905,9.08552487,0.491786725,9.08552487,9.0821571,9.0821571
42.252684,8.88819442,9.08456749,-0.443140012,9.08456749,9.08117289,9.08117289
42.263175,8.94427191,9.08361185,-0.373282655,9.08361185,9.08019011,9.08019011
42.273667,8.1240384,9.08265778,-0.979091097,9.08265778,9.07920858,9.07920858
42.284158,9.16515139,9.08170547,0.288870079,9.08170547,9.07822847,9.07822847
42.29465,7.54983444,9.08075473,-1.23730364,9.08075473,9.07724961,9.07724961
42.305142,9.05538514,9.07980567,-0.156270712,9.07980567,9.07627208,9.07627208
42.315633,8.06225775,9.07885839,-1.00826615,9.07885839,9.07529598,9.07529598
42.326125,7.61577311,9.07791269,-1.20918964,9.07791269,9.07432113,9.07432113
42.336616,8.66025404,9.07696879,-0.645534467,9.07696879,9.07334771,9.07334771
42.347108,9.64365076,9.07602649,0.753408439,9.07602649,9.07237553,9.07237553
42.3576,8.48528137,9.07508589,-0.767987314,9.07508589,9.07140469,9.07140469
42.368091,9.43398113,9.07414709,0.599861683,9.07414709,9.07043528,9.07043528
42.378583,9.11043358,9.07320992,0.192934328,9.07320992,9.06946711,9.06946711
42.389074,8.77496439,9.07227457,-0.54526157,9.07227457,9.06850038,9.06850038
42.399566,8.77496439,9.07134085,-0.544404687,9.07134085,9.06753489,9.06753489
42.410058,9.05538514,9.07040887,-0.122571328,9.07040887,9.06657073,9.06657073
42.420549,8.94427191,9.06947872,-0.35384574,9.06947872,9.06560801,9.06560801
42.431041,8.88819442,9.06855023,-0.424683187,9.06855023,9.06464653,9.06464653
42.441532,8.83176087,9.06762358,-0.485656991,9.06762358,9.06368648,9.06368648
42.452024,8.88819442,9.06669861,-0.42249756,9.06669861,9.06272767,9.06272767
42.462516,8.24621125,9.0657754,-0.905297824,9.0657754,9.0617702,9.0617702
42.473007,9.43398113,9.06485406,0.607558286,9.06485406,9.06081415,9.06081415
42.483499,9.05538514,9.06393442,-0.0924623033,9.06393442,9.05985936,9.05985936
42.49399,8.54400375,9.06301665,-0.720425502,9.06301665,9.05890598,9.05890598
42.504482,9.16515139,9.06210059,0.32101526,9.06210059,9.05795385,9.05795385
42.514974,8,9.06118634,-1.03013899,9.06118634,9.05700306,9.05700306
42.525465,8.77496439,9.06027399,-0.534143806,9.06027399,9.05605369,9.05605369
42.535957,9,9.05936338,-0.243646009,9.05936338,9.05510556,9.05510556
42.546448,9.64365076,9.05845468,0.764981099,9.05845468,9.05415885,9.05415885
42.55694,8.66025404,9.05754773,-0.630312377,9.05754773,9.05321339,9.05321339
42.567432,8.83176087,9.05664263,-0.474216999,9.05664263,9.05226926,9.05226926
42.577923,9,9.05573947,-0.236092074,9.05573947,9.05132654,9.05132654
42.588415,9.43398113,9.0552868,0.615381451,9.0552868,9.05038507,9.05038507
42.598906,8.66025404,9.05438908,-0.627801754,9.05438908,9.04944502,9.04944502
42.609398,9,9.05349316,-0.231285889,9.05349316,9.04850621,9.04850621
42.61989,9.48683298,9.05259915,0.658964214,9.05259915,9.04756872,9.04756872
42.630381,8.30662386,9.05170712,-0.863182055,9.05170712,9.04663265,9.04663265
42.640873,8.36660027,9.05081693,-0.827173905,9.05081693,9.04569782,9.04569782
42.651364,8.66025404,9.04992876,-0.624239314,9.04992876,9.0447644,9.0447644
42.661856,9.11043358,9.04904244,0.247772356,9.04904244,9.04383222,9.04383222
42.672348,9,9.04815807,-0.219449466,9.04815807,9.04290136,9.04290136
42.682839,8.83176087,9.04727574,-0.464235798,9.04727574,9.04197191,9.04197191
42.693331,9.32737905,9.0463953,0.530079003,9.0463953,9.0410437,9.0410437
42.703822,8.48528137,9.04551693,-0.748488848,9.04551693,9.04011689,9.04011689
42.714314,8.71779789,9.04464047,-0.571701478,9.04464047,9.03919132,9.03919132
42.724806,8.77496439,9.04376601,-0.518460819,9.04376601,9.03826706,9.03826706
42.735297,8.94427191,9.04289365,-0.314040986,9.04289365,9.03734421,9.03734421
42.745789,8.94427191,9.04202324,-0.312652089,9.04202324,9.03642259,9.03642259
42.75628,7.93725393,9.04115495,-1.05066694,9.04115495,9.03550237,9.03550237
42.766772,8.88819442,9.04028863,-0.389992586,9.04028863,9.03458337,9.03458337
42.777264,9,9.03942439,-0.19855575,9.03942439,9.03366569,9.03366569
42.787755,9,9.0385623,-0.19637286,9.0385623,9.03274941,9.03274941
42.798247,9.21954446,9.03770223,0.426429632,9.03770223,9.03183435,9.03183435
42.808738,9.32737905,9.03684434,0.539012718,9.03684434,9.03092068,9.03092068
42.81923,8.18535277,9.0359885,-0.922299153,9.0359885,9.03000824,9.03000824
42.829722,8.77496439,9.03513479,-0.510069022,9.03513479,9.0290971,9.0290971
42.840213,8.18535277,9.03428332,-0.921374273,9.03428332,9.02818735,9.02818735
42.850705,8.71779789,9.03343394,-0.561814962,9.03343394,9.02727882,9.02727882
42.861196,8.66025404,9.03258682,-0.610190774,9.03258682,9.02637167,9.02637167
42.871688,9.43398113,9.03174182,0.634223395,9.03174182,9.02546574,9.02546574
42.88218,9.05538514,9.03089903,0.156480366,9.03089903,9.02456111,9.02456111
42.892671,8.42614977,9.03005856,-0.777115686,9.03005856,9.02365786,9.02365786
42.903163,8.54400375,9.02922026,-0.696574848,9.02922026,9.02275582,9.02275582
42.913654,9.11043358,9.02838432,0.286442427,9.02838432,9.02185516,9.02185516
42.924146,8.42614977,9.02755057,-0.775500355,9.02755057,9.0209557,9.0209557
42.934638,8.83176087,9.02671914,-0.441540795,9.02671914,9.02005753,9.02005753
42.945129,8.66025404,9.02589011,-0.604678488,9.02589011,9.01916074,9.01916074
42.955621,9.43398113,9.02506335,0.639466794,9.02506335,9.01826515,9.01826515
42.966112,8.94427191,9.02423904,-0.282784593,9.02423904,9.01737093,9.01737093
42.976604,8.54400375,9.02341703,-0.692396769,9.02341703,9.0164779,9.0164779
42.987096,8.83176087,9.02259744,-0.436848452,9.02259744,9.01558616,9.01558616
42.997587,8.18535277,9.02178035,-0.914564148,9.02178035,9.01469578,9.01469578
43.008079,8.60232527,9.02096565,-0.647024249,9.02096565,9.01380659,9.01380659
43.01857,9.21954446,9.0201535,0.446532151,9.0201535,9.01291876,9.01291876
43.029062,8.77496439,9.01934377,-0.494347432,9.01934377,9.01203213,9.01203213
43.039554,9.69535971,9.01853658,0.822692615,9.01853658,9.01114676,9.01114676
43.050045,9.53939201,9.01773201,0.722260343,9.01773201,9.01026274,9.01026274
43.060537,9.2736185,9.01692995,0.506644397,9.01692995,9.00937991,9.00937991
43.071028,8.88819442,9.01613057,-0.35768164,9.01613057,9.00849843,9.00849843
43.08152,9.05538514,9.01533376,0.200128414,9.01533376,9.00761812,9.00761812
43.092012,8.18535277,9.0145396,-0.910596965,9.0145396,9.00673908,9.00673908
43.102503,9.05538514,9.01374822,0.204051261,9.01374822,9.00586138,9.00586138
43.112995,8.77496439,9.01295949,-0.487847415,9.01295949,9.00498485,9.00498485
43.123486,8.71779789,9.01217359,-0.542564004,9.01217359,9.00410966,9.00410966
43.133978,9.74679434,9.0113904,0.857556964,9.0113904,9.00323564,9.00323564
43.14447,8.66025404,9.01061003,-0.591908772,9.01061003,9.00236286,9.00236286
43.154961,7.87400787,9.0098326,-1.06575078,9.0098326,9.00149142,9.00149142
43.165453,9.64365076,9.00905798,0.79661332,9.00905798,9.00062114,9.00062114
43.175944,8.54400375,9.00828637,-0.681382873,9.00828637,8.99975218,8.99975218
43.186436,9.32737905,9.00751764,0.565562914,9.00751764,8.99888438,8.99888438
43.196928,9,9.00675193,-0.0821701044,9.00675193,8.99801782,8.99801782
43.207419,8.30662386,9.00598933,-0.836280733,9.00598933,8.99715258,8.99715258
43.217911,9,9.00522974,-0.0723169535,9.00522974,8.99628848,8.99628848
43.228402,9.48683298,9.00447336,0.694521146,9.00447336,8.9954257,8.9954257
43.238894,9.11043358,9.00372007,0.32667033,9.00372007,8.99456406,8.99456406
43.249386,8.1240384,9.00297001,-0.937513523,9.00297001,8.99370365,8.99370365
43.259877,8.54400375,9.00222328,-0.676919151,9.00222328,8.99284454,8.99284454
43.270369,9.43398113,9.0014798,0.657648337,9.0014798,8.99198657,8.99198657
43.28086,9.32737905,9.00073975,0.571523672,9.00073975,8.9911299,8.9911299
43.291352,8.48528137,9.00000304,-0.717441053,9.00000304,8.99027436,8.99027436
43.301844,9.11043358,8.9992698,0.333412325,8.9992698,8.98942003,8.98942003
43.312335,8.42614977,8.99854016,-0.756564857,8.99854016,8.98856699,8.98856699
43.322827,8.30662386,8.99781402,-0.831378469,8.99781402,8.98771508,8.98771508
43.333318,9,8.99709159,0.0539296336,8.99709159,8.98686445,8.98686445
43.34381,8.54400375,8.9963728,-0.672583864,8.9963728,8.98601494,8.98601494
43.354302,8.71779789,8.99565777,-0.527124159,8.99565777,8.98516663,8.98516663
43.364793,7.87400787,8.99494663,-1.05874395,8.99494663,8.98431959,8.98431959
43.375285,8.77496439,8.99423932,-0.468268009,8.99423932,8.98347366,8.98347366
43.385776,8.48528137,8.99353604,-0.712919814,8.99353604,8.982629,8.982629
43.396268,8.24621125,8.99283672,-0.864074923,8.99283672,8.98178545,8.98178545
43.40676,9.16515139,8.99214152,0.415944548,8.99214152,8.98094308,8.98094308
43.417251,9.11043358,8.99145057,0.344939132,8.99145057,8.98010197,8.98010197
43.427743,8.48528137,8.99076383,-0.710972891,8.99076383,8.97926196,8.97926196
43.438234,8.94427191,8.99008149,-0.214031734,8.99008149,8.9784232,8.9784232
43.448726,8.42614977,8.98940353,-0.750502336,8.98940353,8.97758553,8.97758553
43.459218,8.71779789,8.98873009,-0.520511482,8.98873009,8.97674903,8.97674903
43.469709,9.64365076,8.98806133,0.809684774,8.98806133,8.97591377,8.97591377
43.480201,8.77496439,8.98739721,-0.460904356,8.98739721,8.97507959,8.97507959
43.490692,8.94427191,8.98673797,-0.206072945,8.98673797,8.97424665,8.97424665
43.501184,9.89949494,8.98608357,0.955725569,8.98608357,8.97341479,8.97341479
43.511676,10,8.98543419,1.00725657,8.98543419,8.97258407,8.97258407
43.522167,9.05538514,8.98479,0.26569745,8.98479,8.97175458,8.97175458
43.532659,8.83176087,8.98415099,-0.390371778,8.98415099,8.97092616,8.97092616
43.54315,9.2736185,8.9835174,0.538610338,8.9835174,8.97009896,8.97009896
43.553642,9,8.98288923,0.130808147,8.98288923,8.96927282,8.96927282
43.564134,9.43398113,8.98226667,0.672097064,8.98226667,8.96844781,8.96844781
43.574625,9.11043358,8.98164991,0.358864418,8.98164991,8.96762401,8.96762401
43.585117,9.16515139,8.98103897,0.429083232,8.98103897,8.96680127,8.96680127
43.595608,8.60232527,8.98043411,-0.614905557,8.98043411,8.96597972,8.96597972
43.6061,8.30662386,8.97983537,-0.82049467,8.97983537,8.96515922,8.96515922
43.616592,8.83176087,8.97924295,-0.38403396,8.97924295,8.96433983,8.96433983
43.627083,9.59166305,8.97865707,0.78294698,8.97865707,8.96352163,8.96352163
43.637575,9.43398113,8.9780778,0.675206142,8.9780778,8.96270447,8.96270447
43.648066,8.42614977,8.9775054,-0.742533252,8.9775054,8.96188849,8.96188849
43.658558,8.77496439,8.97693996,-0.44941693,8.97693996,8.96107354,8.96107354
43.66905,7.81024968,8.97638172,-1.07987594,8.97638172,8.96025968,8.96025968
43.679541,8.54400375,8.97583093,-0.65713559,8.97583093,8.959447,8.959447
43.690033,9,8.97528768,0.15720152,8.97528768,8.95863534,8.95863534
43.700524,9.16515139,8.9747523,0.436347444,8.9747523,8.95782484,8.95782484
43.711016,9.05538514,8.9742249,0.284886366,8.9742249,8.95701534,8.95701534
43.721508,8.54400375,8.97370576,-0.655516603,8.97370576,8.95620693,8.95620693
43.731999,8.30662386,8.97319518,-0.816438192,8.97319518,8.95539967,8.95539967
43.742491,9.11043358,8.97269332,0.371133752,8.97269332,8.95459341,8.95459341
43.752982,9.48683298,8.97220052,0.717378882,8.97220052,8.95378829,8.95378829
43.763474,8.88819442,8.97171697,-0.289002693,8.97171697,8.95298416,8.95298416
43.773966,8.42614977,8.97124301,-0.7383043,8.97124301,8.95218109,8.95218109
43.784457,7.74596669,8.97077898,-1.10671238,8.97077898,8.95137916,8.95137916
43.794949,8.48528137,8.9703251,-0.696450807,8.9703251,8.9505782,8.9505782
43.80544,9.21954446,8.96988179,0.499662555,8.96988179,8.94977837,8.94977837
43.815932,8.83176087,8.9694493,-0.371063923,8.9694493,8.94897951,8.94897951
43.826424,9.05538514,8.96902804,0.293865782,8.96902804,8.9481817,8.9481817
43.836915,8.1240384,8.96861842,-0.919010345,8.96861842,8.94738499,8.94738499
43.847407,8.71779789,8.96822075,-0.500422686,8.96822075,8.94658924,8.94658924
43.857898,9.21954446,8.96783553,0.501706022,8.96783553,8.9457946,8.9457946
43.86839,8.42614977,8.9674631,-0.735739984,8.9674631,8.94500091,8.94500091
43.878882,8.1240384,8.96710396,-0.918186011,8.96710396,8.94420824,8.94420824
43.889373,8.48528137,8.96675861,-0.693885605,8.96675861,8.94341666,8.94341666
43.899865,8.60232527,8.96642748,-0.60340883,8.96642748,8.94262602,8.94262602
43.910356,9.21954446,8.96611117,0.503421585,8.96611117,8.94183647,8.94183647
43.920848,8.42614977,8.96581014,-0.734615797,8.96581014,8.94104784,8.94104784
43.93134,7.68114575,8.96552502,-1.13330458,8.96552502,8.94026021,8.94026021
43.941831,8.54400375,8.96525642,-0.649039814,8.96525642,8.93947366,8.93947366
43.952323,9.2736185,8.96500494,0.555529975,8.96500494,8.93868802,8.93868802
43.962814,9.8488578,8.96477129,0.940258748,8.96477129,8.93790345,8.93790345
43.973306,8.24621125,8.96455612,-0.84755228,8.96455612,8.93711978,8.93711978
43.983798,8.24621125,8.9643602,-0.847436691,8.9643602,8.9363371,8.9363371
43.994289,9.38083152,8.96418432,0.645482147,8.96418432,8.93555546,8.93555546
44.004781,8.42614977,8.96402927,-0.733402682,8.96402927,8.93477472,8.93477472
44.015272,8.77496439,8.96389594,-0.434662573,8.96389594,8.93399501,8.93399501
44.025764,8.77496439,8.96378522,-0.434535195,8.96378522,8.9332162,8.9332162
44.036256,8.36660027,8.96369809,-0.772721055,8.96369809,8.93243834,8.93243834
44.046747,9.16515139,8.96363557,0.448905134,8.96363557,8.93166151,8.93166151
44.057239,9.16515139,8.96359872,0.44894618,8.96359872,8.93088556,8.93088556
44.06773,8.54400375,8.96358867,-0.647753756,8.96358867,8.93011062,8.93011062
44.078222,8.71779789,8.96360664,-0.495791038,8.96360664,8.92933654,8.92933654
44.088714,9.21954446,8.96365389,0.505856275,8.96365389,8.92856341,8.92856341
44.099205,8.48528137,8.96373175,-0.691701072,8.96373175,8.92779127,8.92779127
44.109697,10,8.96384166,1.01791863,8.96384166,8.92701999,8.92701999
44.120188,8.48528137,8.96398512,-0.691884197,8.96398512,8.9262497,8.9262497
44.13068,8.94427191,8.96416374,-0.141038406,8.96416374,8.92548025,8.92548025
44.141172,8.71779789,8.96437922,-0.496569567,8.96437922,8.92471172,8.92471172
44.151663,9.38083152,8.96463333,0.645134238,8.96463333,8.92394416,8.92394416
44.162155,9.43398113,8.96492805,0.684874504,8.96492805,8.92317744,8.92317744
44.172646,9.48683298,8.96526533,0.722196404,8.96526533,8.92241168,8.92241168
44.183138,9.16515139,8.96564744,0.446658654,8.96564744,8.92164675,8.92164675
44.19363,9.21954446,8.96607663,0.503455883,8.96607663,8.9208827,8.9208827
44.204121,8.24621125,8.96655533,-0.848730863,8.96655533,8.92011961,8.92011961
44.214613,9.48683298,8.96708625,0.720934624,8.96708625,8.91935732,8.91935732
44.225104,8.77496439,8.96767209,-0.438984853,8.96767209,8.91859598,8.91859598
44.235596,8.24621125,8.96831596,-0.849767442,8.96831596,8.91783544,8.91783544
44.246088,8.88819442,8.969021,-0.284300162,8.969021,8.91707576,8.91707576
44.256579,9.2736185,8.96979056,0.551205888,8.96979056,8.91631701,8.91631701
44.267071,9.2736185,8.97062847,0.550445296,8.97062847,8.91555905,8.91555905
44.277562,9.53939201,8.97153849,0.753560563,8.97153849,8.914802,8.914802
44.288054,9.53939201,8.97252503,0.752905696,8.97252503,8.91404573,8.91404573
44.298546,9.43398113,8.97359253,0.678519419,8.97359253,8.9132903,8.9132903
44.309037,8.88819442,8.97474576,-0.294196101,8.97474576,8.91253577,8.91253577
44.319529,8.94427191,8.97599021,-0.178096315,8.97599021,8.911782,8.911782
44.33002,8.54400375,8.97733128,-0.658276185,8.97733128,8.91102913,8.91102913
44.340512,8.83176087,8.97877536,-0.383424686,8.97877536,8.91027701,8.91027701
44.351004,8.88819442,8.9803289,-0.303536631,8.9803289,8.9095257,8.9095257
44.361495,9.32737905,8.98199889,0.587690536,8.98199889,8.90877527,8.90877527
44.371987,8.60232527,8.98379335,-0.617631025,8.98379335,8.90802557,8.90802557
44.382478,9.2736185,8.9857203,0.536561458,8.9857203,8.90727675,8.90727675
44.39297,9.38083152,8.98778916,0.626930904,8.98778916,8.90652864,8.90652864
44.403462,8.30662386,8.99000959,-0.826671473,8.99000959,8.90578133,8.90578133
44.413953,8.77496439,8.99239199,-0.466291332,8.99239199,8.90503487,8.90503487
44.424445,8.77496439,8.99494842,-0.469024559,8.99494842,8.90428912,8.90428912
44.434936,9.2736185,8.99769096,0.525288054,8.99769096,8.90354422,8.90354422
44.445428,9.16515139,9.00063379,0.405607696,9.00063379,8.90280001,8.90280001
44.45592,8.48528137,9.00379151,-0.720076481,9.00379151,8.90205656,8.90205656
44.466411,9.38083152,9.00717993,0.611270472,9.00717993,8.90131395,8.90131395
44.476903,9.32737905,9.01081723,0.562638267,9.01081723,8.90057201,8.90057201
44.487394,9.11043358,9.01472176,0.309373272,9.01472176,8.89983089,8.89983089
44.497886,8.24621125,9.01891494,-0.879035658,9.01891494,8.89909045,8.89909045
44.508378,8.36660027,9.02341884,-0.810443444,9.02341884,8.89835074,8.89835074
44.518869,9.8488578,9.02825728,0.905870034,9.02825728,8.89761183,8.89761183
44.529361,8.30662386,9.03345753,-0.852545407,9.03345753,8.89687358,8.89687358
44.539852,9.11043358,9.03904703,0.267182618,9.03904703,8.89613612,8.89613612
44.550344,9.11043358,9.04505758,0.2556873,9.04505758,8.89539931,8.89539931
44.560836,9.79795897,9.05152179,0.863965961,9.05152179,8.89466321,8.89466321
44.571327,8.66025404,9.05847455,-0.631047156,9.05847455,8.89392788,8.89392788
44.581819,8.77496439,9.06595543,-0.539435855,9.06595543,8.89319318,8.89319318
44.59231,10,9.07400382,0.962286953,9.07400382,8.89245924,8.89245924
44.602802,8.66025404,9.08266486,-0.649931398,9.08266486,8.89172593,8.89172593
44.613294,9.53939201,9.09198404,0.66888562,9.09198404,8.89099329,8.89099329
44.623785,8.60232527,9.10200921,-0.706883261,9.10200921,8.8902614,8.8902614
44.634277,7.54983444,9.11279363,-1.25018366,9.11279363,8.88953012,8.88953012
44.644768,8.71779789,9.12438863,-0.637644681,9.12438863,8.88879957,8.88879957
44.65526,9.11043358,9.13685164,-0.162536327,9.13685164,8.88806961,8.88806961
44.665752,8.48528137,9.15023779,-0.815448596,9.15023779,8.88734031,8.88734031
44.676243,8.83176087,9.16460197,-0.576923832,9.16460197,8.88661173,8.88661173
44.686735,9.21954446,9.18000222,0.198852305,9.18000222,8.88588372,8.88588372
44.697226,9.2736185,9.19648787,0.277724007,9.19648787,8.88515643,8.88515643
44.707718,9.16515139,9.21410943,-0.22126464,9.21410943,8.88442969,8.88442969
44.71821,8.71779789,9.23290461,-0.71770936,9.23290461,8.88370358,8.88370358
44.728701,8.77496439,9.25289896,-0.691328125,9.25289896,8.88297817,8.88297817
44.739193,8.60232527,9.27410759,-0.819623281,9.27410759,8.8822533,8.8822533
44.749684,8.83176087,9.29651557,-0.681729198,9.29651557,8.88152911,8.88152911
44.760176,8.66025404,9.3200877,-0.81230146,9.3200877,8.88080546,8.88080546
44.770668,9.59166305,9.34474576,0.49690772,9.34474576,8.8800824,8.8800824
44.781159,9.89949494,9.37036591,0.727412559,9.37036591,8.87936001,8.87936001
44.791651,8.18535277,9.39677735,-1.10064734,9.39677735,8.87863814,8.87863814
44.802142,8.60232527,9.42373594,-0.906317092,9.42373594,8.87791692,8.87791692
44.812634,9.64365076,9.45093661,0.438992203,9.45093661,8.8771962,8.8771962
44.823126,10.0995049,9.47799019,0.788362067,9.47799019,8.87647606,8.87647606
44.833617,8.54400375,9.50443049,-0.980013647,9.50443049,8.87575655,8.87575655
44.844109,8.88819442,9.52972698,-0.800957282,9.52972698,8.87503753,8.87503753
44.8546,8.18535277,9.55328104,-1.16958466,9.55328104,8.87431914,8.87431914
44.865092,8.83176087,9.57446696,-0.861803978,9.57446696,8.87360122,8.87360122
44.875584,9.32737905,9.59264788,-0.515042553,9.59264788,8.87288385,8.87288385
44.886075,9.89949494,9.60722268,0.540622098,9.60722268,8.87216707,8.87216707
44.896567,9.2736185,9.6176715,-0.586560318,9.6176715,8.87145076,8.87145076
44.907058,10.3923048,9.62359013,0.876763774,9.62359013,8.87073505,8.87073505
44.91755,9.64365076,9.62473185,0.137546025,9.62473185,8.87001978,8.87001978
44.928042,9.59166305,9.69328933,-0.318788782,9.62102643,8.94764104,8.86930503
44.938533,9.69535971,9.68538481,0.0998744391,9.61258994,8.94744082,8.86859085
44.949025,9.89949494,9.67307504,0.475835999,9.59970896,8.94724611,8.8678771
44.959516,9.8488578,9.65679606,0.438248498,9.58282198,8.94705699,8.86716392
44.970008,8.71779789,9.63708683,-0.958795568,9.56247108,8.9468735,8.86645115
44.9805,9.64365076,9.61455742,0.170567688,9.53927021,8.94669571,8.86573887
44.990991,9.16515139,9.58984281,-0.651683527,9.51385857,8.9465237,8.86502714
45.001483,9.94987437,9.5635573,0.621544099,9.48685461,8.94635751,8.8643158
45.011974,9.74679434,9.53628269,0.458815495,9.45884435,8.94619722,8.863605
45.022466,10.0995049,9.50852816,0.76875014,9.43034067,8.94604288,8.8628946
45.032958,9.69535971,9.4807374,0.463273473,9.40179071,8.94589457,8.86218464
45.043449,9.48683298,9.45327711,0.183182615,9.37356418,8.94575237,8.8614752
45.053941,9.32737905,9.42643137,-0.314725774,9.34594743,8.94561632,8.86076613
45.064432,9.2736185,9.40042563,-0.356099893,9.31916804,8.94548652,8.86005757
45.074924,8.71779789,9.37541474,-0.81093579,9.29338222,8.94536302,8.85934936
45.085416,9.16515139,9.35150929,-0.431691907,9.26870177,8.9452459,8.85864158
45.095907,9.74679434,9.32877683,0.64654274,9.24519509,8.94513525,8.85793429
45.106399,9.2736185,9.30724442,-0.183373727,9.22288961,8.94503113,8.85722733
45.11689,10.0995049,9.28692068,0.901434555,9.20179438,8.94493362,8.85652085
45.127382,9.64365076,9.26778616,0.61307797,9.18188987,8.9448428,8.8558147
45.137874,8.88819442,9.24981221,-0.601346651,9.16314745,8.94475875,8.85510894
45.148365,9.32737905,9.23295915,0.307278222,9.14552733,8.94468156,8.85440364
45.158857,9.21954446,9.21717552,0.0486716791,9.12897765,8.94461131,8.85369865
45.169348,9.59166305,9.20241156,0.623900225,9.11344845,8.94454808,8.8529941
45.17984,9,9.18860944,-0.434291879,9.0988814,8.94449195,8.85228985
45.190332,8.83176087,9.17571475,-0.586475818,9.08522175,8.94444303,8.85158596
45.200823,8.77496439,9.16367314,-0.623465121,9.0724148,8.94440139,8.8508825
45.211315,9.16515139,9.15242819,0.112797181,9.06040353,8.94436713,8.85017931
45.221806,8.94427191,9.1419296,-0.444587097,9.04913739,8.94434035,8.84947654
45.232298,8.83176087,9.13212528,-0.54805512,9.03856369,8.94432113,8.84877404
45.24279,10,9.12296856,0.936499565,9.02863541,8.94430958,8.84807186
45.253281,9.16515139,9.11441515,0.225247065,9.01930789,8.94430579,8.84737008
45.263773,8.54400375,9.10642106,-0.749944871,9.01053661,8.94430986,8.84666855
45.274264,9.59166305,9.09894805,0.701936604,9.00228307,8.9443219,8.8459674
45.284756,9.16515139,9.09195765,0.270543418,8.99450827,8.94434202,8.84526649
45.295248,9.43398113,9.08541602,0.590394034,8.98717806,8.94437031,8.84456588
45.305739,9.11043358,9.0792916,0.176470891,8.98026061,8.94440689,8.84386562
45.316231,8.77496439,9.07355351,-0.54643309,8.97372452,8.94445186,8.84316559
45.326722,9.2736185,9.06817526,0.453258468,8.96754314,8.94450535,8.84246591
45.337214,9.2736185,9.06313039,0.458789828,8.96168952,8.94456746,8.84176643
45.347706,10.198039,9.05839592,1.06754068,8.95614045,8.94463831,8.84106722
45.358197,8.54400375,9.0539506,-0.714105633,8.95087445,8.94471802,8.84036834
45.368689,8.77496439,9.04977364,-0.524222519,8.94587028,8.94480672,8.83966964
45.37918,9.43398113,9.04584745,0.623003762,8.94111024,8.94490452,8.83897127
45.389672,9.8488578,9.0421544,0.89816669,8.93657626,8.94501156,8.83827307
45.400164,9,9.03867933,-0.196670622,8.932253,8.94512796,8.8375751
45.410655,8.94427191,9.03540826,-0.301887976,8.92812628,8.94525385,8.83687744
45.421147,8.83176087,9.03232743,-0.44784659,8.92418195,8.94538937,8.83617992
45.431638,8.94427191,9.02942536,-0.29181064,8.92040843,8.94553465,8.8354827
45.44213,8.30662386,9.02669039,-0.848567338,8.91679367,8.94568985,8.83478562
45.452622,9.79795897,9.02411259,0.879685387,8.91332758,8.9458551,8.83408874
45.463113,9.32737905,9.02168279,0.552898063,8.91000082,8.94603052,8.83339212
45.473605,10,9.01939187,0.9902566,8.9068039,8.9462163,8.83269564
45.484096,9.69535971,9.01723229,0.823484926,8.90372922,8.94641255,8.8319994
45.494588,9.21954446,9.01519631,0.45204883,8.90076863,8.94661947,8.83130328
45.50508,8.71779789,9.01327736,-0.543580232,8.89791541,8.94683719,8.83060732
45.515571,8.66025404,9.01146933,-0.592634197,8.89516335,8.94706586,8.82991161
45.526063,8.66025404,9.00976612,-0.591195465,8.89250592,8.94730567,8.82921598
45.536554,8.94427191,9.00816269,-0.25276625,8.88993806,8.94755675,8.82852057
45.547046,9.43398113,9.0066538,0.653702786,8.88745411,8.94781933,8.82782525
45.557538,9.53939201,9.00523503,0.730860441,8.88504953,8.94809354,8.82713006
45.568029,9.79795897,9.00390225,0.891098602,8.88272005,8.94837954,8.82643508
45.578521,8.71779789,9.00265129,-0.533716591,8.88046109,8.94867757,8.82574015
45.589012,8.54400375,9.00147871,-0.676368958,8.87826919,8.94898775,8.82504542
45.599504,8.71779789,9.00038092,-0.5315854,8.87614033,8.94931033,8.82435073
45.609996,9.32737905,8.99935489,0.572733942,8.87407133,8.94964548,8.82365614
45.620487,8.71779789,8.99839776,-0.529716781,8.87205922,8.94999335,8.82296173
45.630979,9.05538514,8.99750664,0.240579514,8.87010068,8.95035422,8.82226735
45.64147,8.83176087,9.0004586,-0.410728295,8.87202747,8.95072823,8.82157312
45.651962,8.88819442,8.99970651,-0.333934258,8.87018323,8.95111564,8.8208789
45.662454,9.94987437,8.9990135,0.975120954,8.86838502,8.95151665,8.82018476
45.672945,8.60232527,8.99837759,-0.629326883,8.86663071,8.95193143,8.81949076
45.683437,9.32737905,8.99779678,0.574092567,8.86491784,8.95236029,8.81879675
45.693928,9.05538514,8.9972694,0.241072059,8.86324471,8.95280336,8.81810286
45.70442,9.53939201,8.99679372,0.736612715,8.86160912,8.95326097,8.81740896
45.714912,8.83176087,8.99636827,-0.405718381,8.86000943,8.95373331,8.8167151
45.725403,9.94987437,8.99599166,0.976669191,8.85844411,8.95422058,8.81602134
45.735895,9.38083152,8.99566251,0.62061986,8.85691128,8.95472313,8.81532755
45.746386,9.79795897,8.99537965,0.895867913,8.85540974,8.9552411,8.81463384
45.756878,9.16515139,8.99514191,0.412322057,8.85393779,8.95577487,8.81394009
45.76737,8.06225775,8.99494826,-0.965759034,8.85249425,8.95632463,8.81324634
45.777861,9.64365076,8.99479774,0.805514133,8.85107798,8.95689062,8.81255267
45.788353,8,8.99468943,-0.997341182,8.84968753,8.95747321,8.81185892
45.798844,7.61577311,8.99462253,-1.17424419,8.84832203,8.95807259,8.81116524
45.809336,9.05538514,8.99459625,0.246554025,8.84698016,8.95868914,8.81047146
45.819828,9.21954446,8.99460992,0.474272645,8.84566104,8.95932312,8.80977767
45.830319,8.60232527,8.99466287,-0.626368587,8.84436384,8.95997477,8.80908391
45.840811,9.43398113,8.99475456,0.662741712,8.84308741,8.96064451,8.80839005
45.851302,9.48683298,8.99488441,0.701390454,8.84183112,8.96133253,8.80769622
45.861794,9.16515139,8.99505199,0.412431085,8.84059392,8.9620393,8.80700227
45.872286,7.87400787,8.99525685,-1.05889045,8.83937516,8.96276507,8.80630826
45.882777,8.30662386,8.99549858,-0.829984769,8.83817421,8.96351013,8.80561425
45.893269,9.48683298,8.99577689,0.700753946,8.83699014,8.96427494,8.80492011
45.90376,8.66025404,8.99609142,-0.579514785,8.83582253,8.96505974,8.80422597
45.914252,9.38083152,8.99644199,0.619991557,8.8346705,8.96586501,8.80353167
45.924744,9.48683298,8.99682834,0.700003317,8.83353358,8.96669108,8.80283728
45.935235,9.53939201,8.99725024,0.73630277,8.83241129,8.96753823,8.80214286
45.945727,8.54400375,8.99770765,-0.673575461,8.83130287,8.96840701,8.80144828
45.956218,8.77496439,8.99820035,-0.472478528,8.83020802,8.96929766,8.80075365
45.96671,9.64365076,8.99872836,0.803070607,8.82912604,8.97021076,8.80005884
45.977202,9.21954446,8.9992916,0.469311046,8.82805655,8.97114664,8.79936391
45.987693,9.79795897,8.99988999,0.893347065,8.82699921,8.97210564,8.79866892
45.998185,9.43398113,9.00052367,0.658374864,8.82595337,8.97308838,8.79797372
46.008676,9.48683298,9.00119256,0.696879056,8.82491884,8.97409511,8.79727845
46.019168,10,9.00189687,0.999051115,8.82389503,8.9751265,8.79658296
46.02966,9.32737905,9.00263664,0.569861748,8.82288165,8.97618291,8.79588732
46.040151,9.21954446,9.00341193,0.464900555,8.82187845,8.97726473,8.79519158
46.050643,9.05538514,9.00422305,0.226190378,8.82088488,8.97837266,8.79449561
46.061134,9.64365076,9.00507003,0.799112462,8.81990083,8.97950699,8.79379953
46.071626,9.74679434,9.00595326,0.860721261,8.81892578,8.98066846,8.7931032
46.082118,9.2736185,9.00687288,0.516474215,8.81795953,8.9818575,8.79240668
46.092609,10.0498756,9.00782908,1.02080681,8.81700188,8.98307452,8.79171003
46.103101,8.54400375,9.00882234,-0.681776057,8.81605238,8.98432034,8.79101311
46.113592,9.74679434,9.00985277,0.85845301,8.81511095,8.98559527,8.79031605
46.124084,9.38083152,9.01092094,0.608202749,8.81417715,8.98690015,8.78961871
46.134576,9.21954446,9.01202709,0.455540738,8.81325085,8.98823547,8.78892115
46.145067,8.94427191,9.01317153,-0.26248738,8.81233188,8.98960171,8.78822343
46.155559,8.88819442,9.0143549,-0.355190764,8.81141986,8.99099977,8.7875254
46.16605,9.16515139,9.0155774,0.386747966,8.81051476,8.99243002,8.7868272
46.176542,9.21954446,9.01683975,0.450227393,8.80961618,8.99389343,8.78612868
46.187034,9.11043358,9.01814233,0.303794742,8.80872404,8.99539052,8.7854299
46.197525,9.16515139,9.01948554,0.381661956,8.80783821,8.99692186,8.78473094
46.208017,8.94427191,9.02087018,-0.27676392,8.80695837,8.99848847,8.78403163
46.218508,8.88819442,9.02229656,-0.366199589,8.8060845,9.00009078,8.78333212
46.229,9.2736185,9.02376555,0.499852922,8.80521627,9.00172987,8.78263226
46.239492,9.11043358,9.02527766,0.291814871,8.8043536,9.00340635,8.78193211
46.249983,9.79795897,9.02683339,0.878137565,8.80349644,9.00512088,8.78123173
46.260475,9.16515139,9.02843372,0.36975353,8.80264447,9.0068746,8.78053098
46.270966,8.30662386,9.03007906,-0.850561692,8.80179771,9.00866802,8.77982999
46.281458,8.54400375,9.03177046,-0.698402972,8.80095586,9.01050236,8.77912862
46.29195,8.88819442,9.03350854,-0.381200892,8.80011889,9.01237833,8.77842692
46.302441,8.94427191,9.03529393,-0.301698555,8.79928675,9.01429668,8.77772497
46.312933,9.79795897,9.0371278,0.872256369,8.79845916,9.01625871,8.77702261
46.323424,10,9.03901066,0.980300637,8.79763617,9.01826501,8.77631997
46.333916,9.79795897,9.04094377,0.870066206,8.7968175,9.02031698,8.77561692
46.344408,9.32737905,9.04292787,0.533339652,8.79600315,9.02241544,8.77491352
46.354899,8.30662386,9.04496373,-0.859267051,8.79519307,9.02456124,8.77420982
46.365391,9.32737905,9.04705272,0.529458524,8.79438704,9.02675587,8.77350568
46.375882,9.32737905,9.04919549,0.527431096,8.7935851,9.02900004,8.77280123
46.386374,9.69535971,9.0513935,0.802475056,8.79278702,9.03129531,8.77209634
46.396866,9.11043358,9.05364765,0.238297985,8.79199279,9.03364266,8.77139106
46.407357,9.74679434,9.05595886,0.831165138,8.7912024,9.03604307,8.77068544
46.417849,9.64365076,9.05832874,0.765063409,8.79041564,9.03849824,8.76997936
46.42834,9.64365076,9.06075807,0.763474095,8.78963257,9.04100901,8.76927294
46.438832,9.48683298,9.06324856,0.650833636,8.78885298,9.04357717,8.76856603
46.449324,8.88819442,9.06580129,-0.4214343,8.78807688,9.04620384,8.76785871
46.459815,8.60232527,9.06841735,-0.682709367,8.78730428,9.04889019,8.76715102
46.470307,9.16515139,9.07109863,0.306680229,8.78653497,9.05163815,8.76644282
46.480798,9.94987437,9.07384605,0.935963843,8.78576904,9.05444872,8.76573426
46.49129,9.53939201,9.07666164,0.680242881,8.7850063,9.05732395,8.76502517
46.501782,9.16515139,9.07954665,0.292582874,8.78424675,9.06026517,8.76431563
46.512273,9.21954446,9.0825024,0.370191918,8.78349044,9.06327372,8.7636057
46.522765,8.94427191,9.08553109,-0.375844617,8.78273716,9.06635185,8.76289523
46.533256,9.48683298,9.08863383,0.631030233,8.78198702,9.06950073,8.76218435
46.543748,8.71779789,9.09181296,-0.611567716,8.78123984,9.07272272,8.76147292
46.55424,8.54400375,9.09507001,-0.742338373,8.78049564,9.0760194,8.76076101
46.564731,9.79795897,9.09840652,0.836392525,8.77975448,9.07939233,8.76004866
46.575223,9.64365076,9.10182506,0.736088109,8.77901616,9.08284412,8.75933575
46.585714,9.59166305,9.10532698,0.697377997,8.77828081,9.08637615,8.75862239
46.596206,9.21954446,9.10891501,0.332610058,8.77754826,9.08999118,8.75790846
46.606698,9.94987437,9.11259096,0.91503192,8.77681854,9.09369105,8.757194
46.617189,9.59166305,9.11635667,0.68942467,8.77609172,9.09747761,8.75647907
46.627681,9.05538514,9.12021585,-0.254618756,8.77536835,9.1013539,8.75576355
46.638172,9.74679434,9.12416873,0.789066295,8.7746471,9.10532157,8.75504755
46.648664,10,9.12821919,0.93369203,8.77392855,9.10938382,8.75433094
46.659156,10,9.13236941,0.931466903,8.77321275,9.11354283,8.75361377
46.669647,8.88819442,9.13662158,-0.498424678,8.77249977,9.11780083,8.75289611
46.680139,9.74679434,9.14097921,0.778341269,8.77178944,9.12216133,8.75217781
46.69063,10.198039,9.14544429,1.0259604,8.77108191,9.12662632,8.751459
46.701122,9.74679434,9.15002056,0.772511349,8.77037704,9.13119956,8.75073954
46.711614,9.74679434,9.1547106,0.769469781,8.76967489,9.13588364,8.7500195
46.722105,9.21954446,9.15951706,0.245004885,8.76897552,9.1406812,8.74929893
46.732597,9.11043358,9.16444408,-0.23240159,8.76827882,9.14559639,8.74857769
46.743088,9.05538514,9.16949404,-0.337800098,8.76758492,9.1506316,8.74785591
46.75358,9.8488578,9.17467138,0.821088561,8.76689369,9.15579125,8.74713345
46.764072,9.21954446,9.17997918,0.198910221,8.76620521,9.16107844,8.74641036
46.774563,9,9.18542065,-0.430604979,8.76551956,9.16649636,8.74568672
46.785055,9.53939201,9.19100065,0.590246863,8.76483663,9.17204987,8.74496237
46.795546,10.1488916,9.19672213,0.975791695,8.76415656,9.1777419,8.74423746
46.806038,9.16515139,9.2025903,-0.19349138,8.76347925,9.18357767,8.74351182
46.81653,8.71779789,9.20860892,-0.700579072,8.76280478,9.1895609,8.74278553
46.827021,9.69535971,9.21478185,0.693237235,8.76213325,9.19569546,8.74205865
46.837513,9.43398113,9.22111488,0.461374309,8.76146455,9.20198711,8.74133104
46.848004,9.74679434,9.2276116,0.720543367,8.76079885,9.20843944,8.74060282
46.858496,9.38083152,9.23427823,0.382822793,8.76013606,9.21505863,8.73987385
46.868988,8.71779789,9.24111933,-0.723409593,8.75947627,9.22184922,8.73914419
46.879479,9.69535971,9.24813959,0.668745184,8.75881959,9.2288159,8.73841391
46.889971,9.2736185,9.25534594,0.13517601,8.75816594,9.23596555,8.73768286
46.900462,9.21954446,9.26274281,-0.207842124,8.7575155,9.24330257,8.73695118
46.910954,8.88819442,9.27033762,-0.618177323,8.75686819,9.25083437,8.73621871
46.921446,9.48683298,9.27813596,0.456833685,8.75622412,9.25856649,8.73548552
46.931937,9.38083152,9.28614359,0.307714035,8.75558342,9.26650467,8.73475168
46.942429,8.54400375,9.29436881,-0.866236149,8.75494602,9.27465715,8.73401703
46.95292,9.16515139,9.30281712,-0.371033328,8.75431212,9.28302942,8.73328172
46.963412,8.71779789,9.31149748,-0.77051904,8.75368166,9.29163038,8.73254559
46.973904,9.05538514,9.32041675,-0.51481221,8.75305478,9.30046685,8.73180871
46.984395,9.16515139,9.32958203,-0.405500484,8.75243161,9.3095459,8.73107114
46.994887,9.11043358,9.33900337,-0.478089734,8.75181213,9.31887751,8.73033273
47.005378,9.79795897,9.34868765,0.670277052,8.75119652,9.32846852,8.72959362
47.01587,10.0498756,9.35864572,0.831402372,8.75058478,9.33832972,8.72885367
47.026362,8.94427191,9.3688861,-0.651624271,8.74997706,9.34846959,8.72811293
47.036853,9,9.37941761,-0.615968837,8.74937351,9.35889687,8.72737147
47.047345,9.59166305,9.39025249,0.448787872,8.74877414,9.36962375,8.72662915
47.057836,9.59166305,9.4013994,0.436192213,8.74817916,9.38065883,8.72588609
47.068328,9.74679434,9.41287162,0.577860469,8.74758858,9.39201532,8.72514215
47.07882,10.7703296,9.4246798,1.16002147,8.7470026,9.40370378,8.7243974
47.089311,9.2736185,9.43683496,-0.404000573,8.74642139,9.41573519,8.72365189
47.099803,9.94987437,9.44935217,0.707475939,8.74584498,9.42812452,8.72290548
47.110294,10.1488916,9.46224239,0.828642973,8.74527364,9.44088267,8.72215831
47.120786,9.8488578,9.47552203,0.611012092,8.7447074,9.45402594,8.72141022
47.131278,9.59166305,9.48920448,0.320091499,8.74414649,9.46756765,8.72066129
47.141769,9.2736185,9.50330368,-0.479254826,8.74359112,9.48152167,8.71991157
47.152261,9.21954446,9.51783833,-0.546162864,8.74304137,9.49590656,8.71916092
47.162752,10,9.53282244,0.683503883,8.74249753,9.51073627,8.71840948
47.173244,10.2469508,9.54827645,0.835867406,8.7419597,9.52603111,8.71765709
47.183736,9.89949494,9.56421739,0.57903156,8.74142814,9.54180803,8.71690382
47.194227,9.79795897,9.58066304,0.466150119,8.74090311,9.5580847,8.71614973
47.204719,10.198039,9.59763682,0.774856252,8.74038474,9.57488441,8.71539468
47.21521,10.198039,9.61515682,0.763467227,8.73987338,9.59222516,8.7146388
47.225702,9.21954446,9.63324877,-0.643198499,8.73936917,9.61013251,8.71388195
47.236194,9.8488578,9.65193455,0.443760351,8.73887244,9.62862825,8.71312418
47.246685,10.198039,9.67123706,0.725811247,8.73838352,9.64773515,8.71236556
47.257177,10.8627805,9.69118597,1.0824022,8.73790259,9.66748272,8.71160595
47.267668,9.48683298,9.71180488,-0.474312031,8.73743007,9.68789445,8.71084548
47.27816,10.3923048,9.73312653,0.811897972,8.7369662,9.70900289,8.710084
47.288652,9.79795897,9.75517936,0.206832337,8.73651135,9.73083635,8.70932158
47.299143,10.198039,9.77799316,0.648109454,8.73606594,9.7534245,8.70855828
47.309635,10,9.80160601,0.445414399,8.73563027,9.7768052,8.70779395
47.320126,9.79795897,9.82604902,-0.167600852,8.73520481,9.80100942,8.70702874
47.330618,9.79795897,9.85136437,-0.231096081,8.73478991,9.82607915,8.70626248
47.34111,9.53939201,9.87758946,-0.581547461,8.73438606,9.85205163,8.70549524
47.351601,10.2469508,9.90476359,0.58496767,8.73399376,9.87896597,8.7047271
47.362093,10.0498756,9.93293621,0.341964053,8.73361344,9.90687141,8.7039579
47.372584,10.3923048,9.96214883,0.655862801,8.7332457,9.9358093,8.70318778
47.383076,10,9.9924566,0.0868527583,8.73289102,9.96583452,8.70241658
47.393568,9.48683298,10.0239093,-0.732854921,8.73255001,9.99699671,8.70164438
47.404059,10.2956301,10.0565595,0.488948516,8.73222334,10.0293482,8.70087124
47.414551,10.5356538,10.0904723,0.667219184,8.73191159,10.0629538,8.70009701
47.425042,10.4880885,10.1257039,0.601983832,8.73161552,10.0978696,8.69932183
47.435534,10.4403065,10.1623275,0.527237123,8.73133579,10.1341685,8.69854554
47.446026,9.74679434,10.2004104,-0.673510221,8.73107323,10.1719174,8.69776822
47.456517,10.7238053,10.2400237,0.695544123,8.73082866,10.2111875,8.69698992
47.467009,9.59166305,10.2812548,-0.830416587,8.73060291,10.2520656,8.69621051
47.4775,10.3923048,10.3241807,0.261005939,8.73039696,10.2946288,8.69543011
47.487992,10.5356538,10.3689002,0.408354629,8.73021174,10.3389752,8.69464858
47.498484,10.3440804,10.4155057,-0.267255112,8.73004832,10.3851972,8.69386598
47.508975,11.045361,10.4640954,0.762407808,8.72990782,10.4333927,8.69308238
47.519467,10.0995049,10.5147881,-0.644424701,8.72979137,10.4836802,8.69229763
47.529958,10.4403065,10.5676918,-0.356910695,8.72970027,10.5361673,8.69151186
47.54045,11.7046999,10.6229416,1.04007609,8.72963582,10.590989,8.69072493
47.550942,10.7238053,10.6806671,0.207697433,8.72959945,10.6482743,8.6899369
47.561433,11.045361,10.7410059,0.551683897,8.72959268,10.7081609,8.68914784
47.571925,11.2694277,10.8041235,0.682132063,8.72961711,10.7708137,8.6883576
47.582416,11.3578167,10.8701731,0.698314805,8.72967447,10.8363857,8.68756632
47.592908,10.7703296,10.9393445,-0.411114235,8.7297666,10.9050664,8.68677384
47.6034,10.6301458,11.0118221,-0.617799587,8.72989546,10.9770399,8.68598023
47.613891,10.8627805,11.0878035,-0.474365924,8.73006315,11.0525035,8.68518556
47.624383,10.9544512,11.1675236,-0.461597721,8.73027195,11.1316917,8.68438968
47.634874,10.9544512,11.2512049,-0.544751119,8.73052422,11.2148269,8.68359272
47.645366,11.4455231,11.3391197,0.326195444,8.73082262,11.3021809,8.68279454
47.655858,10.9087121,11.4315369,-0.723066225,8.7311699,11.3940225,8.6819952
47.666349,11.61895,11.5287462,0.300339457,8.73156899,11.4906412,8.68119477
47.676841,12.6491106,11.6310898,1.00897018,8.73202321,11.5923788,8.6803931
47.687332,11.7898261,11.7388987,0.225670998,8.7325359,11.6995662,8.67959032
47.697824,12.6491106,11.8525736,0.892489254,8.73311091,11.8126037,8.67878629
47.708316,13.0766968,11.9725173,1.05079947,8.73375219,11.9318942,8.67798107
47.718807,12.9614814,12.0991666,0.928609044,8.73446401,12.0578743,8.67717474
47.729299,13.7113092,12.2330345,1.21584321,8.7352512,12.1910568,8.67636712
47.73979,12.922848,12.374629,0.740418143,8.73611865,12.3319498,8.67555838
47.750282,12.6885775,12.52456,0.404990765,8.73707202,12.4811632,8.67474835
47.760774,12.7671453,12.6834537,0.289295128,8.73811715,12.6393232,8.6739371
47.771265,13.56466,12.8519954,0.844194645,8.73926035,12.8071154,8.67312471
47.781757,14.1774469,13.0309901,1.0707272,8.74050881,12.9853451,8.67231101
47.792248,13.6381817,13.2212586,0.645695839,8.74186983,13.1748334,8.67149615
47.80274,13.3790882,13.4237845,-0.211415003,8.74335187,13.3765645,8.67067998
47.813232,14.525839,13.6396059,0.941399593,8.7449637,13.5915773,8.66986256
47.823723,14.5945195,13.8698802,0.85125749,8.74671479,13.8210304,8.66904396
47.834215,15.9059737,14.115975,1.33790835,8.74861596,14.0662922,8.66822403
47.844706,15.7480157,14.3793344,1.16990657,8.75067822,14.3288088,8.66740291
47.855198,14.0712473,14.6616914,-0.768403617,8.75291433,14.6103149,8.66658045
47.86569,16.643317,14.964926,1.29552729,8.75533748,14.9126931,8.66575671
47.876181,15.6524758,15.2911604,0.60109522,8.75796197,15.2380685,8.66493177
47.886673,16.673332,15.6428894,1.01510717,8.76080405,15.5889392,8.66410546
47.897164,16.2788206,16.0227869,0.505997701,8.76388023,15.9679832,8.66327794
47.907656,16.7928556,16.4339941,0.599050489,8.76720959,16.3783461,8.66244904
47.918148,17.0293864,16.87989,0.386647606,8.77081179,16.8234119,8.66161883
47.928639,17.4928557,17.3641858,0.358705901,8.77470796,17.3068971,8.6607874
47.939131,18.6815417,17.8910626,0.8890889,8.77892203,17.8329881,8.65995457
47.949622,18.761663,18.4648088,0.544843286,8.78347805,18.4059786,8.6591205
47.960114,18.8148877,19.0901622,-0.524666096,8.78840356,19.030611,8.65828503
47.970606,19.2093727,19.7718613,-0.749992415,8.79372656,19.7116281,8.65744822
47.981097,20.174241,20.5146732,-0.583465659,8.79947665,20.4537998,8.65661015
47.991589,21.4941853,21.3234838,0.413160332,8.80568683,21.2620132,8.65577066
48.00208,21.2367606,22.2026098,-0.982776271,8.81238929,22.1405846,8.65492991
48.012572,22.2036033,23.1561709,-0.975995693,8.81962006,23.0936309,8.65408771
48.023064,23.10844,24.18721,-1.03863851,8.82741414,24.1241895,8.65324416
48.033555,24.4540385,25.297473,-0.918386875,8.8358067,25.2339984,8.65239932
48.044047,24.8797106,26.4871462,-1.26784682,8.84483498,26.4232318,8.65155303
48.054538,25.6515107,27.7532492,-1.44973741,8.85453143,27.6888935,8.65070544
48.06503,26.5141472,29.0893494,-1.60474366,8.8649293,29.0245291,8.64985639
48.075522,28.1069386,30.4831744,-1.54150438,8.87605441,30.4178383,8.64900595
48.086013,29.3598365,31.9150064,-1.59848988,8.88792531,31.8490657,8.6481542
48.096505,31.3847097,33.355977,-1.40401828,8.90055417,33.2892948,8.64730097
48.106996,33.5708207,34.7652382,-1.09289409,8.91393492,34.6976164,8.64644642
48.117488,34.7419055,36.0902549,-1.16118446,8.92804872,36.0214197,8.64559037
48.12798,36.9459064,37.2673214,-0.566934715,8.94285009,37.1969096,8.64473291
48.138471,38.6393582,38.2268867,0.642239401,8.95826495,38.1544351,8.64387411
48.148963,40.1621713,38.9024123,1.12238982,8.97418944,38.8273524,8.6430138
48.159454,41.5090352,39.2409708,1.5060094,8.99047357,39.1626349,8.64215215
48.169946,40.7553677,39.2144385,1.24134172,9.00692837,39.1320751,8.64128897
48.180438,40.2119385,38.8254857,1.17747731,9.02331154,38.7382901,8.64042435
48.190929,40.2740611,38.1071902,1.47202954,9.03933158,38.0143446,8.63955837
48.201421,38.509739,37.1153589,1.18083873,9.05465547,37.0160784,8.63869084
48.211912,36.6606056,35.9180276,0.861729616,9.0689068,35.8116127,8.63782195
48.222404,34.8281495,34.5838391,0.494277717,9.0816912,34.4697221,8.63695151
48.232896,32.4961536,33.1747733,-0.823783773,9.09260707,33.0525635,8.63607959
48.243387,29.8831056,31.7416173,-1.36327242,9.10127526,31.6111348,8.63520629
48.253879,28.6006993,30.3225166,-1.31218036,9.1073681,30.1838125,8.63433142
48.26437,28.0713377,28.9449799,-0.934688294,9.11063168,28.7983472,8.63345515
48.274862,25.9422435,27.6267764,-1.29789555,9.11091214,27.47274,8.63257731
48.285354,25.1793566,26.3790059,-1.09528504,9.10816794,26.2183035,8.63169797
48.295845,23.9582971,25.2075697,-1.11770865,9.10247569,25.0411165,8.63081722
48.306337,23.3023604,24.1143753,-0.901118711,9.09401977,23.9432178,8.62993487
48.316828,23.0867928,23.0992362,-0.111550254,9.0830802,22.9245042,8.6290511
48.32732,21.5174348,22.1598441,-0.801504401,9.07000149,21.9826979,8.62816572
48.337812,20.9523268,21.2930439,-0.583709726,9.05517232,21.1146279,8.62727883
48.348303,21.4709106,20.4949164,0.987924139,9.03899586,20.3163178,8.62639049
48.358795,19.4164878,19.7608738,-0.586844098,9.02186058,19.5830903,8.62550054
48.369286,19.6977156,19.086399,0.781867403,9.0041331,18.9103172,8.62460913
48.379778,18.9208879,18.466647,0.67397398,8.98613265,18.2930301,8.6237161
48.39027,19.2873015,17.8970421,1.17909261,8.96813613,17.7265254,8.62282151
48.400761,17.7200451,17.3731606,0.588969029,8.95037095,17.2062538,8.62192546
48.411253,17.2626765,16.8906747,0.609919497,8.93301175,16.7277707,8.62102777
48.421744,16.7032931,16.4457435,0.507493464,8.91619604,16.2871282,8.6201286
48.432236,17,16.0346698,0.982512202,8.90001659,15.8805361,8.61922778
48.442728,17.4642492,15.6542185,1.34537381,8.88453849,15.5046788,8.61832538
48.453219,16.0934769,15.3014716,0.889946818,8.86979998,15.1565707,8.61742149
48.463711,15.9687194,14.9737254,0.997493859,8.85581402,14.833454,8.61651594
48.474202,16.673332,14.6686989,1.41585065,8.84258253,14.5330031,8.61560888
48.484694,14.7986486,14.3842553,0.64373386,8.83009003,14.2530477,8.61470014
48.495186,15.0665192,14.1185835,0.973619883,8.81831585,13.9917504,8.6137898
48.505677,15.8429795,13.8700745,1.40460136,8.80723281,13.7474828,8.61287795
48.516169,15.0332964,13.6372318,1.18155175,8.79680665,13.5187357,8.6119644
48.52666,14.5945195,13.4188096,1.08430157,8.78700474,13.3042538,8.61104933
48.537152,13.9283883,13.213613,0.845443836,8.77778958,13.1028379,8.61013255
48.547644,14.8660687,13.020629,1.35846964,8.76912629,12.9134725,8.60921415
48.558135,15.1657509,12.8389429,1.52538783,8.76098036,12.7352427,8.60829421
48.568627,13.0384048,12.6676781,0.608873335,8.75331603,12.5672745,8.60737255
48.579118,13.3041347,12.5061039,0.893325701,8.74610191,12.4088398,8.60644934
48.58961,14.106736,12.3534948,1.32410012,8.73930537,12.259218,8.6055244
48.600102,14.0712473,12.2092331,1.36455639,8.73289754,12.1177959,8.60459782
48.610593,13.114877,12.0727521,1.02084523,8.72685119,11.984012,8.60366966
48.621085,13.1529464,11.9434947,1.09975078,8.72113914,11.8573154,8.60273977
48.631576,12.6095202,11.8209984,0.887987508,8.71573819,11.7372491,8.6018083
48.642068,12.2882057,11.7047919,0.76381534,8.71062472,11.6233481,8.60087508
48.65256,12.2882057,11.5944745,0.832905274,8.70577827,11.5152176,8.59994018
48.663051,11.8321596,11.4896759,0.58522104,8.70117983,11.4124926,8.5990037
48.673543,11.4017543,11.390025,0.108301691,8.69681054,11.3148082,8.59806545
48.684034,11.4891253,11.2952166,0.440350649,8.6926546,11.2218645,8.59712561
48.694526,11.7898261,11.2049327,0.764783268,8.6886959,11.1333489,8.59618398
48.705018,11.4455231,11.1189048,0.571505358,8.6849207,11.048998,8.59524066
48.715509,12.4498996,11.0368831,1.18870369,8.68131627,10.9685667,8.59429573
48.726001,12.6491106,10.9586134,1.30019125,8.67786993,10.8918055,8.59334901
48.736492,11.8321596,10.8838887,0.973791979,8.67457126,10.8185118,8.59240067
48.746984,11.2694277,10.812489,0.675972369,8.67140945,10.7484696,8.59145053
48.757476,12.0415946,10.7442299,1.13901919,8.66837541,10.6814985,8.59049866
48.767967,10.1488916,10.6789389,-0.728043524,8.66546079,10.6174297,8.58954517
48.778459,10.9544512,10.6164376,0.581389322,8.66265706,10.5560881,8.58858986
48.78895,10.5356538,10.5565828,-0.144668827,8.6599574,10.4973338,8.58763291
48.799442,11.6619038,10.4992185,1.07827884,8.65735456,10.441014,8.58667413
48.809934,12.1243557,10.4442154,1.29620223,8.65484253,10.3870022,8.58571361
48.820425,10.8166538,10.3914522,0.652074855,8.65241578,10.3351796,8.58475144
48.830917,11.045361,10.3408006,0.839380949,8.65006854,10.2854207,8.58378742
48.841408,10.8166538,10.2921598,0.724219589,8.64779633,10.2376267,8.58282175
48.8519,11.045361,10.2454168,0.894395982,8.64559417,10.1916873,8.58185422
48.862392,11.3137085,10.2004793,1.05509676,8.64345807,10.1475119,8.58088493
48.872883,10.6301458,10.1572601,0.687666836,8.64138433,10.1050153,8.57991397
48.883375,11.4017543,10.1156655,1.13405854,8.63936894,10.0641057,8.57894114
48.893866,10,10.0756229,-0.274996176,8.63740892,10.0247122,8.57796663
48.904358,11.4455231,10.0370492,1.18679146,8.63550079,9.98675341,8.57699024
48.91485,10.4403065,9.99987706,0.663648588,8.63364185,9.95016346,8.57601208
48.925341,9.53939201,9.96404298,-0.65165249,8.63182957,9.91488014,8.57503221
48.935833,10.8166538,9.92947704,0.941900627,8.6300611,9.88083503,8.57405046
48.946324,11,9.89612637,1.0506539,8.62833445,9.84797642,8.573067
48.956816,11.3137085,9.86392857,1.20406808,8.62664712,9.81624317,8.57208165
48.967308,9.89949494,9.83283394,0.258187911,8.62499724,9.78558668,8.57109449
48.977799,10.0995049,9.80279533,0.544710573,8.62338306,9.7559608,8.57010561
48.988291,9.8488578,9.7737598,0.274040144,8.62180251,9.72731366,8.56911483
48.998782,9.32737905,9.74568826,-0.64676828,8.62025425,9.69960703,8.56812232
49.009274,9.38083152,9.71853314,-0.581121,8.61873642,9.67279428,8.56712789
49.019766,8.94427191,9.69225719,-0.864861421,8.61724773,9.64683897,8.56613164
49.030257,10.8627805,9.66682496,1.09359752,8.61578696,9.6217064,8.56513364
49.040749,9.8488578,9.64219575,0.454600978,8.61435257,9.59735667,8.56413372
49.05124,9.74679434,9.61834029,0.35840488,8.61294364,9.57376113,8.56313205
49.061732,11.0905365,9.59522178,1.22283062,8.61155879,9.55088372,8.56212844
49.072224,10.3440804,9.57281197,0.878218914,8.61019711,9.52869675,8.56112299
49.082715,9.64365076,9.55108386,0.304248096,8.60885774,9.50717379,8.56011578
49.093207,10.3440804,9.53000572,0.902260888,8.60753951,9.48628371,8.55910661
49.103698,11.1803399,9.50955539,1.29258829,8.60624181,9.46600483,8.55809568
49.11419,10.0995049,9.48970406,0.780897484,8.60496358,9.44630884,8.55708279
49.124682,9.21954446,9.47043001,-0.500884768,8.60370419,9.42717449,8.55606803
49.135173,9.74679434,9.45171246,0.543214403,8.60246304,9.40858141,8.55505149
49.145665,10.198039,9.43352638,0.874364137,8.60123922,9.390505,8.55403298
49.156156,10.198039,9.41585482,0.884411786,8.60003234,9.37292867,8.55301269
49.166648,8.71779789,9.39867493,-0.825152741,8.59884157,9.35582995,8.55199041
49.17714,9.2736185,9.38196988,-0.32916771,8.59766649,9.33919233,8.55096625
49.187631,9.64365076,9.36572348,0.527188085,8.59650668,9.32299996,8.54994029
49.198123,10.0995049,9.34991579,0.865788168,8.59536143,9.30723317,8.54891234
49.208614,9.48683298,9.33453369,0.390255411,8.5942305,9.29187914,8.54788258
49.219106,9,9.31955891,-0.565295417,8.59311325,9.27691985,8.54685082
49.229598,9.89949494,9.30497823,0.771049092,8.59200939,9.26234233,8.54581715
49.240089,9.53939201,9.29077899,0.498611098,8.59091864,9.24813413,8.54478167
49.250581,10.1488916,9.27694506,0.933780758,8.58984045,9.23427936,8.54374418
49.261072,9.48683298,9.26346629,0.472616857,8.5887747,9.22076804,8.54270486
49.271564,10.4880885,9.25032785,1.11254691,8.58772087,9.20758553,8.54166352
49.282056,8.94427191,9.23751933,-0.54152324,8.58667879,9.19472159,8.54062026
49.292547,9.8488578,9.22503069,0.789827264,8.58564829,9.18216634,8.53957516
49.303039,9.53939201,9.21284883,0.57143957,8.58462892,9.16990681,8.53852803
49.31353,9.11043358,9.20096579,-0.300885712,8.58362065,9.15793517,8.53747906
49.324022,8.66025404,9.18936947,-0.72740321,8.58262309,9.14623943,8.53642804
49.334514,10.2469508,9.17805158,1.03387581,8.58163614,9.13481143,8.53537508
49.345005,10.3923048,9.16700413,1.10693302,8.5806597,9.12364326,8.53432027
49.355497,9.21954446,9.15621636,0.251650754,8.57969344,9.11272423,8.53326341
49.365988,9.94987437,9.14568201,0.89676773,8.57873739,9.10204818,8.53220469
49.37648,9.38083152,9.13539112,0.495419419,8.57779124,9.09160519,8.53114391
49.386972,8.77496439,9.12533706,-0.591922862,8.57685495,9.08138868,8.53008117
49.397463,9.48683298,9.11551343,0.609359952,8.57592851,9.07139232,8.52901656
49.407955,9.38083152,9.10591131,0.524328337,8.57501166,9.06160719,8.52794987
49.418446,9.59166305,9.09652579,0.703659899,8.57410448,9.05202844,8.52688131
49.428938,9.59166305,9.08734859,0.710151009,8.57320673,9.04264776,8.52581068
49.43943,9,9.07837438,-0.279954253,8.57231844,9.03345985,8.52473806
49.449921,9.59166305,9.06959801,0.722540679,8.57143966,9.02445958,8.52366355
49.460413,10.4880885,9.06101206,1.19460304,8.57057017,9.01563946,8.52258696
49.470904,9.11043358,9.05261263,0.240459863,8.56971013,9.00699564,8.52150847
49.481396,9.53939201,9.04439283,0.703561787,8.56885935,8.99852113,8.52042789
49.491888,9.21954446,9.03634834,0.428014152,8.56801791,8.99021161,8.51934531
49.502379,9.16515139,9.02847502,0.369697677,8.56718591,8.98206291,8.51826082
49.512871,8.94427191,9.02076663,-0.276576794,8.5663632,8.9740687,8.51717423
49.523362,8.48528137,9.01322012,-0.726593935,8.56554996,8.96622591,8.51608573
49.533854,9.05538514,9.00582968,0.222610549,8.56474608,8.9585286,8.51499512
49.544346,9.38083152,8.99859238,0.618254915,8.56395225,8.95097325,8.51390249
49.554837,10,8.99150378,1.00423913,8.56316747,8.94355645,8.51280794
49.565329,9,8.98455917,0.124261131,8.56239223,8.93627279,8.51171126
49.57582,9.69535971,8.97775615,0.847114845,8.56162675,8.92911983,8.51061267
49.586312,9.38083152,8.97108983,0.640110683,8.56087097,8.92209249,8.50951194
49.596804,9.64365076,8.96455741,0.824071208,8.56012506,8.91518789,8.50840918
49.607295,8.24621125,8.95815615,-0.843768273,8.55938919,8.90840321,8.50730448
49.617787,10.0995049,8.95188165,1.07127181,8.55866335,8.90173382,8.50619764
49.628278,8.48528137,8.94573201,-0.67856513,8.55794778,8.89517777,8.50508887
49.63877,9.8488578,8.93970311,0.953496035,8.55724251,8.88873069,8.50397794
49.649262,8.60232527,8.9337927,-0.57573208,8.55654773,8.88239019,8.50286496
49.659753,9.38083152,8.92799857,0.672928639,8.55586367,8.87615396,8.50175004
49.670245,9.05538514,8.92231699,0.36478507,8.55519036,8.87001798,8.50063296
49.680736,10.198039,8.91674652,1.13194192,8.55452811,8.86398072,8.49951393
49.691228,9.43398113,8.91128366,0.722978199,8.55387699,8.85803837,8.49839272
49.70172,8.71779789,8.9059266,-0.43373807,8.55323723,8.85218897,8.49726946
49.712211,7.87400787,8.9006736,-1.01324515,8.55260913,8.8464306,8.49614423
49.722703,9.05538514,8.89552151,0.399829504,8.55199277,8.84075977,8.49501682
49.733194,8.77496439,8.89046922,-0.339860022,8.55138851,8.83517525,8.49388745
49.743686,7.81024968,8.8855138,-1.03694943,8.55079646,8.82967373,8.4927559
49.754178,8.83176087,8.88065383,-0.22111754,8.55021696,8.82425357,8.49162226
49.764669,9,8.87588793,0.352295426,8.5496503,8.8189132,8.49048665
49.775161,8.30662386,8.87121345,-0.751391766,8.54909666,8.81364954,8.48934885
49.785652,9.69535971,8.8666296,0.910346152,8.54855645,8.80846163,8.48820907
49.796144,9.43398113,8.86213391,0.756205807,8.54802986,8.80334656,8.48706708
49.806636,9.43398113,8.85772529,0.759115167,8.54751726,8.79830299,8.48592301
49.817127,9.05538514,8.8534027,0.449424562,8.54701903,8.79332957,8.48477694
49.827619,9.48683298,8.84916392,0.798541836,8.54653542,8.78842362,8.48362867
49.83811,8.48528137,8.84500842,-0.599772497,8.54606689,8.78358438,8.4824784
49.848602,9.2736185,8.84093417,0.657787448,8.54561372,8.77880929,8.48132592
49.859094,8.66025404,8.83694036,-0.420340723,8.54517635,8.77409721,8.48017133
49.869585,9,8.83302623,0.408624235,8.54475523,8.76944705,8.47901474
49.880077,9.59166305,8.82918997,0.873197041,8.5443507,8.7648564,8.47785592
49.890568,8.48528137,8.8254313,-0.583223735,8.54396328,8.7603247,8.4766951
49.90106,9,8.82174854,0.42219836,8.54359337,8.75584965,8.47553205
49.911552,8.77496439,8.81814118,-0.207790262,8.54324148,8.75143033,8.47436687
49.922043,8.94427191,8.81460871,0.360087772,8.54290813,8.74706581,8.47319969
49.932535,8.48528137,8.81114968,-0.570848756,8.54259379,8.74275395,8.47203026
49.943026,8.42614977,8.80776403,-0.617749347,8.54229906,8.73849432,8.47085881
49.953518,9.05538514,8.80445046,0.500933805,8.54202444,8.73428489,8.46968513
49.96401,8.36660027,8.80120869,-0.659248382,8.54177055,8.73012486,8.4685093
49.974501,9.64365076,8.79803848,0.919571794,8.54153801,8.72601348,8.46733145
49.984993,9.11043358,8.79493872,0.561689294,8.54132743,8.72194883,8.46615135
49.995484,9.11043358,8.79190957,0.564379317,8.54113949,8.71793059,8.46496921
50.005976,9.79795897,8.78895007,1.00449435,8.54097485,8.71395694,8.46378482
50.016468,8.54400375,8.7860602,-0.491992331,8.54083424,8.71002721,8.46259828
50.026959,8.54400375,8.78323995,-0.489117782,8.54071841,8.70614078,8.4614097
50.037451,9.74679434,8.78048858,0.983008528,8.54062812,8.70229591,8.46021886
50.047942,9.16515139,8.77780646,0.622370415,8.54056419,8.69849239,8.45902597
50.058434,9.21954446,8.77519298,0.666596938,8.54052744,8.69472857,8.45783082
50.068926,9.79795897,8.77264837,1.01257622,8.54051876,8.6910039,8.4566335
50.079417,9.43398113,8.77017289,0.814744279,8.54053905,8.68731786,8.45543413
50.089909,10.0498756,8.76776615,1.13230273,8.54058926,8.68366888,8.45423248
50.1004,9.48683298,8.76542876,0.849355181,8.54067037,8.68005683,8.45302878
50.110892,9.79795897,8.76316047,1.01725046,8.54078342,8.6764802,8.4518228
50.121384,9.38083152,8.7609618,0.787318057,8.54092949,8.67293854,8.45061464
50.131875,8.77496439,8.75883327,0.127008355,8.54110965,8.66943142,8.44940443
50.142367,8.94427191,8.75677488,0.433009271,8.54132513,8.66595743,8.44819192
50.152858,9.38083152,8.75478751,0.791229431,8.54157708,8.66251647,8.44697735
50.16335,8.66025404,8.75287131,-0.304330864,8.54186682,8.6591072,8.44576048
50.173842,9.48683298,8.7510271,0.857791278,8.54219566,8.65572923,8.44454142
50.184333,9.16515139,8.74925574,0.644899724,8.54256493,8.65238221,8.4433203
50.194825,8.83176087,8.74755764,0.290177919,8.54297616,8.64906485,8.44209687
50.205316,9.43398113,8.74593399,0.829486071,8.54343075,8.64577711,8.44087137
50.215808,10.0995049,8.7443854,1.16409602,8.54393038,8.64251776,8.43964356
50.2263,9.05538514,8.74291305,0.558992027,8.54447664,8.63928649,8.43841356
50.236791,9.48683298,8.74151817,0.863316171,8.54507118,8.636083,8.43718148
50.247283,8.06225775,8.74020169,-0.82337351,8.54571593,8.63290611,8.43594708
50.257774,9.11043358,8.73896514,0.609482108,8.54641262,8.62975584,8.43471059
50.268266,9.94987437,8.73780969,1.10093809,8.54716336,8.62663104,8.43347179
50.278758,9.79795897,8.73673695,1.03015631,8.54797013,8.62353147,8.43223078
50.289249,8.42614977,8.7357486,-0.55641606,8.54883501,8.62045689,8.43098768
50.299741,9.05538514,8.73484619,0.56616159,8.54976041,8.61740619,8.42974225
50.310232,8.83176087,8.73403171,0.312616626,8.55074851,8.61437946,8.42849474
50.320724,8.71779789,8.73330697,-0.124535462,8.55180197,8.61137562,8.42724489
50.331216,8.77496439,8.73267413,0.205645949,8.5529233,8.60839448,8.42599282
50.341707,8.66025404,8.73213547,-0.268107124,8.5541151,8.60543585,8.42473866
50.352199,9.53939201,8.73169325,0.898720627,8.55538045,8.60249871,8.42348216
50.36269,8.77496439,8.73135007,0.208840408,8.55672209,8.59958317,8.42222356
50.373182,9.21954446,8.73110855,0.698881896,8.55814345,8.59668824,8.42096261
50.383674,8.48528137,8.73097157,-0.495671462,8.55964768,8.59381376,8.41969945
50.394165,8.54400375,8.73094214,-0.432363735,8.56123812,8.59095958,8.41843417
50.404657,8.94427191,8.73102348,0.461788297,8.5629187,8.58812476,8.41716655
50.415148,8,8.73121895,-0.855113416,8.56469296,8.58530944,8.41589682
50.42564,8.24621125,8.73153223,-0.696649822,8.56656526,8.58251268,8.41462473
50.436132,8.30662386,8.73196711,-0.652183446,8.56853971,8.57973438,8.41335041
50.446623,9,8.73252761,0.517177332,8.57062056,8.57697443,8.41207398
50.457115,8.66025404,8.73321814,-0.270118684,8.57281294,8.57423192,8.41079519
50.467606,8.94427191,8.73404315,0.458507104,8.57512141,8.57150704,8.40951428
50.478098,8.77496439,8.73500763,0.199891854,8.57755167,8.5687989,8.40823101
50.48859,9.43398113,8.73611668,0.83538282,8.58010902,8.56610743,8.4069455
50.499081,9.8488578,8.7373756,1.05426856,8.58279905,8.56343255,8.40565787
50.509573,8.88819442,8.73879044,0.386528101,8.58562847,8.56077342,8.40436787
50.520064,8.54400375,8.74036708,-0.443129024,8.58860324,8.55813023,8.40307574
50.530556,8.42614977,8.74211233,-0.562105471,8.59173085,8.55550216,8.40178125
50.541048,9.59166305,8.744033,0.920668263,8.59501831,8.55288916,8.4004845
50.551539,8.54400375,8.7461362,-0.449591436,8.59847303,8.55029118,8.39918563
50.562031,8.83176087,8.74843019,0.288670527,8.60210385,8.54770743,8.39788438
50.572522,8.66025404,8.75092282,-0.301112569,8.60591874,8.54513811,8.396581
50.583014,7.93725393,8.7536234,-0.903531662,8.60992764,8.54258245,8.39527523
50.593506,8.54400375,8.75576333,-0.460173425,8.61334933,8.54004042,8.39396722
50.603997,8.77496439,8.75891096,0.126702124,8.61777829,8.537512,8.39265706
50.614489,8.06225775,8.76229664,-0.83668327,8.62243244,8.53499644,8.39134452
50.62498,8.60232527,8.76593104,-0.40448211,8.62732258,8.53249396,8.39002985
50.635472,8.54400375,8.76982694,-0.475208585,8.63246208,8.53000382,8.38871278
50.645964,10.0498756,8.77399687,1.12954803,8.63786373,8.52752603,8.38739346
50.656455,8.66025404,8.77845409,-0.343802343,8.64354104,8.52506058,8.38607199
50.666947,9,8.78321412,0.465602709,8.64951013,8.52260675,8.38474813
50.677438,8.60232527,8.78829165,-0.431238201,8.65578585,8.52016478,8.38342212
50.68793,8.60232527,8.79370438,-0.437468989,8.66238649,8.51773398,8.38209372
50.698422,8.30662386,8.79946967,-0.702029779,8.66932968,8.51531436,8.38076305
50.708913,8.83176087,8.80560599,0.161724686,8.67663417,8.51290593,8.37943023
50.719405,9.05538514,8.81213496,0.493203997,8.68432219,8.51050802,8.37809501
50.729896,8,8.81907715,-0.905028811,8.6924145,8.50812086,8.37675765
50.740388,7.81024968,8.82645735,-1.00807126,8.70093652,8.50574381,8.37541788
50.75088,8.1240384,8.8343,-0.842770194,8.70991299,8.50337688,8.37407583
50.761371,8.18535277,8.84263122,-0.810727109,8.71937034,8.50102011,8.37273164
50.771863,8.71779789,8.85148151,-0.365627716,8.72933974,8.49867284,8.37138503
50.782354,8.94427191,8.86088021,0.288776218,8.73985074,8.49633535,8.37003628
50.792846,9.32737905,8.87086248,0.675660099,8.75093921,8.49400699,8.36868511
50.803338,8.60232527,8.88146332,-0.528335175,8.76264048,8.4916878,8.36733166
50.813829,8.30662386,8.89272018,-0.765569276,8.7749924,8.48937783,8.36597606
50.824321,9.05538514,8.90467677,0.388211753,8.78803939,8.48707647,8.36461804
50.834812,8.36660027,8.91737548,-0.742142316,8.80182417,8.48478396,8.36325786
50.845304,8.54400375,8.93086697,-0.621983296,8.81639812,8.48249972,8.36189527
50.855796,9.69535971,8.94520195,0.866116486,8.83181242,8.48022379,8.36053039
50.866287,9,8.96043488,0.198909834,8.84812202,8.47795623,8.35916335
50.876779,8.54400375,8.97662911,-0.657742625,8.86539106,8.47569644,8.35779389
50.88727,8.60232527,8.99384658,-0.625716638,8.88368191,8.4734447,8.35642227
50.897762,8.83176087,9.0121609,-0.424735257,8.90306904,8.47120043,8.35504823
50.908254,8.06225775,9.03164624,-0.984575286,8.92362718,8.46896368,8.3536719
50.918745,8.77496439,9.05238224,-0.526704711,8.94543658,8.46673453,8.3522934
50.929237,8.66025404,9.0744611,-0.643589201,8.96859036,8.46451241,8.35091248
50.939728,9.59166305,9.09797349,0.702630454,8.99317977,8.46229758,8.34952939
50.95022,9.21954446,9.12302638,0.310673591,9.01931273,8.46008951,8.34814388
50.960712,9.53939201,9.14972771,0.624230968,9.04709791,8.45788824,8.34675607
50.971203,8.77496439,9.17819311,-0.635002929,9.07665165,8.45569387,8.34536609
50.981695,9.79795897,9.20855537,0.767726252,9.10810781,8.45350584,8.34397369
50.992186,8.94427191,9.24094496,-0.544677019,9.14159753,8.45132444,8.34257911
51.002678,9,9.2755142,-0.524894463,9.1772742,8.44914912,8.34118211
51.01317,8.60232527,9.3124158,-0.842668697,9.21529135,8.44697996,8.3397828
51.023661,9.05538514,9.35181154,-0.544450554,9.25581153,8.44481706,8.33838133
51.034153,8.66025404,9.39388483,-0.856522502,9.29901925,8.44265988,8.33697742
51.044644,8.48528137,9.4388127,-0.976489288,9.34509218,8.4405087,8.33557135
51.055136,8.60232527,9.48679828,-0.940464254,9.39423448,8.43836301,8.33416283
51.065628,8.71779789,9.53803957,-0.905671952,9.44664482,8.43622289,8.33275201
51.076119,8.94427191,9.59273958,-0.805274906,9.50252677,8.43408844,8.33133903
51.086611,8.77496439,9.65112148,-0.936032633,9.56210427,8.43195913,8.3299236
51.097102,9.89949494,9.71338672,0.431402611,9.62557901,8.42983527,8.328506
51.107594,9.43398113,9.7797565,-0.588026669,9.6931726,8.42771634,8.32708597
51.118086,9.21954446,9.8504238,-0.794279132,9.76507793,8.42560245,8.32566362
51.128577,9.05538514,9.92556205,-0.932832736,9.84146803,8.42349369,8.32423911
51.139069,10,10.005339,-0.0730687801,9.92251025,8.42138955,8.32281215
51.14956,10.0995049,10.0898516,0.0982514599,10.0083001,8.41929034,8.32138302
51.160052,9.59166305,10.1791725,-0.76649163,10.098909,8.41719556,8.31995145
51.170544,9.48683298,10.2732747,-0.886815493,10.1943077,8.41510532,8.31851756
51.181035,9.53939201,10.3720319,-0.912491008,10.2943669,8.41301972,8.31708151
51.191527,10.198039,10.475223,-0.526482622,10.3988621,8.41093827,8.31564301
51.202018,9.16515139,10.5824351,-1.19049724,10.5073757,8.40886127,8.31420234
51.21251,10.7238053,10.6931119,0.175195418,10.6193464,8.40678824,8.31275922
51.223002,10.198039,10.8064502,-0.780007147,10.7339646,8.4047193,8.31131379
51.233493,10.3923048,10.9214005,-0.727389643,10.8501734,8.40265454,8.30986618
51.243985,10.6301458,11.0366777,-0.637598524,10.9666796,8.4005935,8.30841613
51.254476,10.6301458,11.1506708,-0.721474198,11.0818633,8.39853648,8.30696391
51.264968,11.045361,11.2615349,-0.464945019,11.19387,8.39648301,8.30550924
51.27546,11.2694277,11.3671411,-0.312591527,11.3005607,8.3944332,8.30405225
51.285951,10.8627805,11.4651671,-0.776135696,11.3996029,8.39238717,8.30259309
51.296443,12.2474487,11.5532068,0.833211807,11.4885809,8.39034445,8.30113149
51.306934,11.8743421,11.6288265,0.495495249,11.5650518,8.38830535,8.29966771
51.317426,13.0384048,11.6897679,1.16130828,11.6267496,8.38626941,8.29820147
51.327918,12.4096736,11.7340506,0.821962895,11.6716878,8.38423675,8.29673293
51.338409,12.3693169,11.7601483,0.780492527,11.6983358,8.38220749,8.29526221
51.348901,12.6095202,11.7671096,0.917829275,11.7057409,8.38018117,8.29378904
51.359392,12.8840987,11.7546329,1.06276331,11.693602,8.37815811,8.2923137
51.369884,12.922848,11.7230908,1.09533429,11.6622953,8.37613785,8.29083591
51.380376,12.489996,11.6735068,0.903597897,11.6128501,8.37412051,8.2893558
51.390867,11.6619038,11.6074693,0.23331196,11.5468623,8.37210623,8.28787353
51.401359,12.5698051,11.5269754,1.02119034,11.4663385,8.37009454,8.2863888
51.41185,11.045361,11.373597,-0.572918852,11.373597,8.28490189,8.28490189
51.422342,10.6301458,11.2710513,-0.800565724,11.2710513,8.28341254,8.28341254
51.432834,11.4455231,11.1611332,0.533282257,11.1611332,8.28192087,8.28192087
51.443325,10.5830052,11.0461551,-0.68055112,11.0461551,8.28042704,8.28042704
51.453817,10.9087121,10.9281916,-0.139569058,10.9281916,8.27893074,8.27893074
51.464308,10.3923048,10.8091063,-0.64560164,10.8091063,8.27743228,8.27743228
51.4748,9.48683298,10.6904383,-1.09708947,10.6904383,8.27593137,8.27593137
51.485292,10.0995049,10.5734795,-0.68845807,10.5734795,8.27442814,8.27442814
51.495783,9.48683298,10.4592541,-0.986114135,10.4592541,8.27292275,8.27292275
51.506275,10.7703296,10.3485119,0.649474936,10.3485119,8.2714149,8.2714149
51.516766,9.38083152,10.2418324,-0.927901321,10.2418324,8.26990489,8.26990489
51.527258,9.21954446,10.1395737,-0.959181538,10.1395737,8.26839242,8.26839242
51.53775,9.69535971,10.0419746,-0.588740046,10.0419746,8.26687764,8.26687764
51.548241,9.8488578,9.9491512,-0.316691333,9.9491512,8.26536069,8.26536069
51.558733,8.71779789,9.86109903,-1.06925261,9.86109903,8.26384129,8.26384129
51.569224,9.2736185,9.77777387,-0.710038993,9.77777387,8.26231973,8.26231973
51.579716,9.48683298,9.6990452,-0.460664981,9.6990452,8.26079571,8.26079571
51.590208,9.16515139,9.62476656,-0.677949242,9.62476656,8.25926939,8.25926939
51.600699,9.11043358,9.55476283,-0.666580263,9.55476283,8.2577409,8.2577409
51.611191,8.36660027,9.48882246,-1.05934989,9.48882246,8.25620996,8.25620996
51.621682,10.0995049,9.42674957,0.820216661,9.42674957,8.25467686,8.25467686
51.632174,9.89949494,9.36832086,0.728816904,9.36832086,8.2531413,8.2531413
51.642666,9.43398113,9.31333117,0.347347041,9.31333117,8.25160344,8.25160344
51.653157,9.16515139,9.26157805,-0.310526421,9.26157805,8.25006342,8.25006342
51.663649,10.4880885,9.21285117,1.12926406,9.21285117,8.24852095,8.24852095
51.67414,8.77496439,9.16696674,-0.626100911,9.16696674,8.24697632,8.24697632
51.684632,9.43398113,9.12373236,0.556999796,9.12373236,8.24542923,8.24542923
51.695124,8.66025404,9.08297805,-0.650172297,9.08297805,8.24387985,8.24387985
51.705615,9.16515139,9.04454275,0.34728754,9.04454275,8.24232831,8.24232831
51.716107,9.53939201,9.00826469,0.728784829,9.00826469,8.24077432,8.24077432
51.726598,9.32737905,8.97400565,0.594452187,8.97400565,8.23921817,8.23921817
51.73709,8.06225775,8.94162379,-0.937745191,8.94162379,8.23765958,8.23765958
51.747582,8.94427191,8.91099594,0.182417012,8.91099594,8.23609868,8.23609868
51.758073,9.05538514,8.88200696,0.416387059,8.88200696,8.23453564,8.23453564
51.768565,9.05538514,8.85454189,0.448155383,8.85454189,8.23297015,8.23297015
51.779056,8.83176087,8.82850404,0.0570685698,8.82850404,8.2314025,8.2314025
51.789548,8.36660027,8.80379403,-0.661206293,8.80379403,8.22983241,8.22983241
51.80004,9.38083152,8.78032656,0.774922554,8.78032656,8.22826003,8.22826003
51.810531,8.54400375,8.75802223,-0.462621314,8.75802223,8.2266855,8.2266855
51.821023,8.54400375,8.73680137,-0.439087258,8.73680137,8.22510852,8.22510852
51.831514,8.36660027,8.71659789,-0.591605968,8.71659789,8.2235294,8.2235294
51.842006,8.60232527,8.69734306,-0.308249563,8.69734306,8.22194783,8.22194783
51.852498,8.36660027,8.67897854,-0.558908112,8.67897854,8.22036397,8.22036397
51.862989,9.2736185,8.66145001,0.782411964,8.66145001,8.21877798,8.21877798
51.873481,8.60232527,8.64470231,-0.205856858,8.64470231,8.21718953,8.21718953
51.883972,8.1240384,8.62869039,-0.710388617,8.62869039,8.21559896,8.21559896
51.894464,8.54400375,8.61336652,-0.26336813,8.61336652,8.21400593,8.21400593
51.904956,9.2736185,8.59869063,0.821539935,8.59869063,8.21241063,8.21241063
51.915447,8.06225775,8.58462536,-0.722750032,8.58462536,8.21081318,8.21081318
51.925939,9.11043358,8.57113211,0.73437148,8.57113211,8.2092133,8.2092133
51.93643,8,8.55817994,-0.747114407,8.55817994,8.20761129,8.20761129
51.946922,8.1240384,8.54573525,-0.649381898,8.54573525,8.20600684,8.20600684
51.957414,8.42614977,8.53377024,-0.328055581,8.53377024,8.2044001,8.2044001
51.967905,8.1240384,8.52225886,-0.631047107,8.52225886,8.20279124,8.20279124
51.978397,8.71779789,8.51117368,0.454559356,8.51117368,8.20117994,8.20117994
51.988888,8.54400375,8.50049319,0.20859185,8.50049319,8.19956652,8.19956652
51.99938,8.48528137,8.49019333,-0.0700853197,8.49019333,8.19795066,8.19795066
52.009872,8.36660027,8.48025451,-0.337126445,8.48025451,8.19633253,8.19633253
52.020363,8.18535277,8.47065832,-0.53414001,8.47065832,8.19471227,8.19471227
52.030855,9.16515139,8.46138493,0.838907899,8.46138493,8.19308959,8.19308959
52.041346,8.83176087,8.45241915,0.615907227,8.45241915,8.19146479,8.19146479
52.051838,8.94427191,8.44374348,0.707480341,8.44374348,8.18983755,8.18983755
52.06233,8,8.43534389,-0.659805946,8.43534389,8.18820805,8.18820805
52.072821,7.48331477,8.42720719,-0.971541257,8.42720719,8.18657643,8.18657643
52.083313,9.16515139,8.41931876,0.863616019,8.41931876,8.18494239,8.18494239
52.093804,8.18535277,8.41166779,-0.475725776,8.41166779,8.18330624,8.18330624
52.104296,8.30662386,8.40424126,-0.312437822,8.40424126,8.18166766,8.18166766
52.114788,8.94427191,8.39702902,0.739758672,8.39702902,8.18002682,8.18002682
52.125279,8.54400375,8.39002147,0.392405752,8.39002147,8.17838387,8.17838387
52.135771,8.60232527,8.38320765,0.468100013,8.38320765,8.1767385,8.1767385
52.146262,7.93725393,8.37657971,-0.662816551,8.37657971,8.17509103,8.17509103
52.156754,7.74596669,8.37012783,-0.790038693,8.37012783,8.17344114,8.17344114
52.167246,8.06225775,8.36384449,-0.54916914,8.36384449,8.171789,8.171789
52.177737,8.1240384,8.35772257,-0.483408901,8.35772257,8.17013475,8.17013475
52.188229,8.71779789,8.35175361,0.605015935,8.35175361,8.16847809,8.16847809
52.19872,8.36660027,8.34593177,0.143765407,8.34593177,8.16681934,8.16681934
52.209212,8.83176087,8.34024935,0.70107882,8.34024935,8.16515818,8.16515818
52.219704,8.94427191,8.33470057,0.780750499,8.33470057,8.16349476,8.16349476
52.230195,8.88819442,8.32930026,0.74759224,8.32930026,8.16182926,8.16182926
52.240687,7.74596669,8.32400091,-0.760285613,8.32400091,8.16016135,8.16016135
52.251178,9.05538514,8.3188181,0.85823484,8.3188181,8.15849135,8.15849135
52.26167,9.05538514,8.31374538,0.861185091,8.31374538,8.15681895,8.15681895
52.272162,7.87400787,8.30877796,-0.659370977,8.30877796,8.1551443,8.1551443
52.282653,8.06225775,8.30391119,-0.491582585,8.30391119,8.15346758,8.15346758
52.293145,9.2736185,8.29913919,0.987157186,8.29913919,8.15178845,8.15178845
52.303636,8.30662386,8.29445814,0.110298333,8.29445814,8.15010725,8.15010725
52.314128,9,8.28986265,0.842696475,8.28986265,8.14842365,8.14842365
52.32462,9.05538514,8.28534894,0.877517064,8.28534894,8.14673782,8.14673782
52.335111,8.71779789,8.28091351,0.660972293,8.28091351,8.14504991,8.14504991
52.345603,8.71779789,8.27655194,0.664263465,8.27655194,8.14335962,8.14335962
52.356094,9.43398113,8.27226182,1.07783084,8.27226182,8.14166725,8.14166725
52.366586,8.83176087,8.26803946,0.750813828,8.26803946,8.1399725,8.1399725
52.377078,8.36660027,8.26388274,0.32049575,8.26388274,8.13827552,8.13827552
52.387569,8.60232527,8.2597898,0.5852653,8.2597898,8.13657648,8.13657648
52.398061,9.53939201,8.25575784,1.13297581,8.25575784,8.13487506,8.13487506
52.408552,9,8.25178583,0.86499374,8.25178583,8.13317157,8.13317157
52.419044,8.83176087,8.24787133,0.764126652,8.24787133,8.13146571,8.13146571
52.429536,7.93725393,8.24401312,-0.553858452,8.24401312,8.12975763,8.12975763
52.440027,8.30662386,8.24021003,0.257708819,8.24021003,8.1280475,8.1280475
52.450519,8.54400375,8.2364598,0.554566444,8.2364598,8.12633499,8.12633499
52.46101,8.71779789,8.23276166,0.696445425,8.23276166,8.12462044,8.12462044
52.471502,7.93725393,8.22911337,-0.540240161,8.22911337,8.12290352,8.12290352
52.481994,8.06225775,8.22551377,-0.40404953,8.22551377,8.12118439,8.12118439
52.492485,8.06225775,8.2219617,-0.399629773,8.2219617,8.11946321,8.11946321
52.502977,8.36660027,8.21845498,0.384896465,8.21845498,8.11773968,8.11773968
52.513468,7.61577311,8.21499278,-0.774092804,8.21499278,8.1160141,8.1160141
52.52396,8.1240384,8.21157297,-0.295862407,8.21157297,8.11428616,8.11428616
52.534452,8.77496439,8.20819445,0.752841243,8.20819445,8.11255603,8.11255603
52.544943,8.60232527,8.20485613,0.630451533,8.20485613,8.11082387,8.11082387
52.555435,8.60232527,8.201556,0.633063395,8.201556,8.10908935,8.10908935
52.565926,9.11043358,8.19829337,0.955060316,8.19829337,8.1073528,8.1073528
52.576418,8.48528137,8.19506632,0.538716117,8.19506632,8.10561391,8.10561391
52.58691,7.21110255,8.19187392,-0.990339016,8.19187392,8.10387282,8.10387282
52.597401,9.21954446,8.18871527,1.01529759,8.18871527,8.10212972,8.10212972
52.607893,8.30662386,8.18558861,0.347901212,8.18558861,8.10038427,8.10038427
52.618384,8.18535277,8.231872,-0.215683158,8.18249343,8.14852355,8.09863681
52.628876,7.93725393,8.22911332,-0.540240116,8.17942805,8.14707567,8.09688701
52.639368,9.16515139,8.22638629,0.968898909,8.17639176,8.1456283,8.09513503
52.649859,9.16515139,8.22369023,0.970289214,8.17338384,8.14418162,8.09338105
52.660351,8.54400375,8.2210237,0.568313336,8.17040278,8.1427354,8.09162473
52.670842,8.1240384,8.21838632,-0.307161064,8.16744821,8.14128994,8.08986641
52.681334,8.36660027,8.21577676,0.388360017,8.16451871,8.13984501,8.08810575
52.691826,8.54400375,8.21319446,0.575160227,8.1616137,8.13840077,8.08634294
52.702317,8.42614977,8.21063888,0.464231505,8.15873266,8.1369574,8.08457813
52.712809,8.24621125,8.2081088,0.195198491,8.15587424,8.13551467,8.08281099
52.7233,8.36660027,8.20560398,0.40124342,8.15303826,8.13407288,8.08104187
52.733792,8.88819442,8.20312327,0.82769025,8.15022343,8.1326318,8.07927042
52.744284,8.18535277,8.20066624,-0.123747597,8.14742934,8.13119161,8.07749683
52.754775,8.54400375,8.1982325,0.588023167,8.14465558,8.12975248,8.07572125
52.765267,7.48331477,8.19582098,-0.844100826,8.14190098,8.12831417,8.07394336
52.775758,8.1240384,8.19343156,-0.2634258,8.13916545,8.12687701,8.0721635
52.78625,8.24621125,8.19106322,0.234836177,8.13644786,8.12544076,8.07038133
52.796742,8.42614977,8.18871567,0.487272108,8.13374791,8.1240056,8.06859701
52.807233,8.77496439,8.1863886,0.767186931,8.13106528,8.1225717,8.06681073
52.817725,7.68114575,8.18408108,-0.70917934,8.12839894,8.12113885,8.06502215
52.828216,7.74596669,8.18179309,-0.66017149,8.12574888,8.11970734,8.06323161
52.838708,7.87400787,8.17952372,-0.552734878,8.12311408,8.11827696,8.06143877
52.8492,8.83176087,8.17727276,0.809004392,8.12049434,8.11684789,8.0596438
52.859691,8,8.17504,-0.418377823,8.11788942,8.11542031,8.05784688
52.870183,8.83176087,8.17282462,0.811748882,8.11529839,8.11399399,8.05604767
52.880674,7.87400787,8.17062665,-0.544627186,8.1127213,8.11256925,8.05424652
52.891166,8.1240384,8.16844529,-0.210729415,8.11015725,8.11114587,8.05244308
52.901658,7.28010989,8.16628041,-0.941366304,8.10760608,8.10972403,8.05063752
52.912149,8.30662386,8.16413186,0.37748113,8.10506764,8.10830392,8.04883003
52.922641,7.81024968,8.16199891,-0.593084504,8.10254107,8.10688531,8.04702026
52.933132,8.54400375,8.15988164,0.619775853,8.10002648,8.10546853,8.04520856
52.943624,7.54983444,8.15777935,-0.779708223,8.09752304,8.10405336,8.04339458
52.954116,8.1240384,8.15569195,-0.177914434,8.09503066,8.10263998,8.04157851
52.964607,7.74596669,8.15361936,-0.638476835,8.09254923,8.10122859,8.03976051
52.975099,8.66025404,8.15156092,0.713227258,8.09007796,8.09981897,8.03794025
52.98559,8.36660027,8.14951675,0.465922217,8.08761702,8.09841144,8.03611807
52.996082,8.18535277,8.14748623,0.194593262,8.08516563,8.09700579,8.03429363
53.006574,8.30662386,8.14546932,0.401440584,8.08272375,8.09560221,8.0324671
53.017065,8.24621125,8.14346598,0.32053904,8.08029131,8.09420089,8.03063867
53.027557,7.68114575,8.1414756,-0.678476125,8.07786758,8.09280162,8.02880799
53.038048,8.24621125,8.13949837,0.326669377,8.07545277,8.09140473,8.02697541
53.04854,8.48528137,8.13753371,0.589701339,8.07304614,8.09001001,8.02514058
53.059032,8.1240384,8.13558161,-0.107439303,8.0706477,8.08861766,8.02330367
53.069523,7.54983444,8.13364208,-0.764073065,8.06825742,8.08722787,8.02146488
53.080015,7.74596669,8.13171459,-0.62108606,8.06587461,8.08584044,8.01962385
53.090506,7.87400787,8.12979932,-0.505758288,8.0634995,8.0844557,8.01778094
53.100998,7.81024968,8.12789576,-0.563601,8.06113141,8.08307345,8.01593579
53.11149,7.61577311,8.12600395,-0.714304447,8.05877037,8.08169389,8.01408858
53.121981,7.74596669,8.12412391,-0.614944893,8.05641639,8.08031721,8.01223951
53.132473,8.36660027,8.12225517,0.494312755,8.05406882,8.07894323,8.0103882
53.142964,9.2736185,8.12039793,1.07388108,8.0517279,8.07757227,8.00853503
53.153456,7.54983444,8.11855174,-0.754133477,8.04939301,8.07620414,8.00667964
53.163948,7.74596669,8.11671664,-0.608892396,8.04706419,8.07483905,8.00482222
53.174439,7,8.11489272,-1.0558848,8.04474147,8.0734772,8.00296293
53.184931,8.18535277,8.11307951,0.268836874,8.04242425,8.0721184,8.00110143
53.195422,8.36660027,8.11127727,0.505294962,8.04011278,8.07076299,7.99923808
53.205914,7.74596669,8.10948556,-0.602925258,8.03780648,8.06941079,7.99737253
53.216406,7.41619849,8.10770447,-0.83156839,8.03550539,8.068062,7.99550496
53.226897,7.21110255,8.1059341,-0.945955365,8.03320959,8.06671684,7.99363554
53.237389,8.1240384,8.10417403,0.140941015,8.03091848,8.06537512,7.99176393
53.24788,7.93725393,8.10242454,-0.406411866,8.02863236,8.06403719,7.98989048
53.258372,8.66025404,8.10068522,0.748043328,8.02635065,8.06270287,7.98801485
53.268864,7.74596669,8.09895618,-0.594129188,8.02407342,8.06137237,7.98613721
53.279355,8.54400375,8.09723755,0.668405711,8.02180076,8.06004592,7.98425774
53.289847,8.1240384,8.09552894,0.168847447,8.01953211,8.05872334,7.9823761
53.300338,8.18535277,8.09383065,0.302526235,8.01726777,8.05740497,7.98049264
53.31083,8.54400375,8.09214231,0.672206397,8.01500718,8.05609066,7.97860701
53.321322,8.36660027,8.09046404,0.525486651,8.01275044,8.05478063,7.97671938
53.331813,8.36660027,8.088796,0.527071404,8.01049765,8.05347508,7.97482996
53.342305,7.41619849,8.08713783,-0.819108873,8.00824826,8.05217388,7.97293836
53.352796,7.48331477,8.08548984,-0.775999399,8.0060026,8.05087737,7.97104497
53.363288,8.06225775,8.0838517,-0.146948798,8.00376011,8.04958539,7.96914943
53.37378,8.06225775,8.08222356,-0.141300413,8.00152092,8.04829817,7.96725191
53.384271,8.42614977,8.08060556,0.587830085,7.99928513,8.04701595,7.9653526
53.394763,8.24621125,8.07899742,0.408917882,7.99705222,8.04573857,7.96345114
53.405254,7.87400787,8.07739943,-0.450989526,7.99482252,8.04446639,7.96154791
53.415746,7.93725393,8.0758113,-0.372232946,7.9925955,8.04319928,7.95964253
53.426238,8.24621125,8.0742332,0.414702361,7.99037128,8.04193746,7.9577352
53.436729,7.61577311,8.07266531,-0.675938015,7.98815,8.04068118,7.95582611
53.447221,8.1240384,8.07110733,0.230067537,7.98593112,8.0394303,7.95391488
53.457712,8.48528137,8.06955961,0.644764891,7.98371501,8.03818518,7.95200189
53.468204,7.68114575,8.06802187,-0.621993669,7.98150114,8.0369457,7.95008677
53.478696,8.1240384,8.06649431,0.239883511,7.97928964,8.03571211,7.94816973
53.489187,8.48528137,8.0649771,0.648308783,7.97708066,8.03448464,7.94625093
53.499679,7.81024968,8.06347,-0.503210018,7.97487369,8.03326319,7.94433001
53.51017,8.24621125,8.06197335,0.429229427,7.97266907,8.03204811,7.94240736
53.520662,8.24621125,8.06048692,0.430957459,7.97046632,8.0308393,7.9404826
53.531154,8.60232527,8.05901091,0.737098608,7.96826557,8.02963702,7.93855592
53.541645,7.93725393,8.05754552,-0.346830772,7.96606696,8.02844152,7.93662751
53.552137,7.81024968,8.05609054,-0.495823415,7.96387001,8.02725269,7.93469701
53.562628,7.54983444,8.05464631,-0.710501142,7.96167506,8.02607092,7.93276478
53.57312,7.74596669,8.05321264,-0.554297705,7.95948163,8.02489612,7.93083047
53.583612,7.68114575,8.05178974,-0.608805383,7.95728988,8.02372855,7.92889425
53.594103,7.41619849,8.05037784,-0.796353786,7.95509994,8.02256847,7.92695633
53.604595,8.18535277,8.04897675,0.369291246,7.95291134,8.02141581,7.92501633
53.615086,8.24621125,8.04758683,0.445673002,7.95072444,8.02027094,7.92307462
53.625578,8.18535277,8.04620791,0.373021262,7.94853877,8.01913381,7.92113085
53.63607,7.87400787,8.04484023,-0.413318713,7.94635447,8.01800468,7.9191852
53.646561,8.48528137,8.04348403,0.664678378,7.94417171,8.01688383,7.91723785
53.657053,8.83176087,8.04213915,0.888606615,7.94199,8.01577121,7.91528845
53.667544,7.21110255,8.04080597,-0.910880574,7.93980972,8.01466721,7.91333736
53.678036,8.60232527,8.03948435,0.750227241,7.9376304,8.01357178,7.91138423
53.688528,7.87400787,8.03817455,-0.405174877,7.9354522,8.01248521,7.90942923
53.699019,7.93725393,8.03687682,-0.315630941,7.93327528,8.01140779,7.90747257
53.709511,7.61577311,8.03559105,-0.647933596,7.93109917,8.0103395,7.90551386
53.720002,7.74596669,8.03431762,-0.536983169,7.92892425,8.00928072,7.9035535
53.730494,7.81024968,8.03305643,-0.472024098,7.92675005,8.00823145,7.9015911
53.740986,8.60232527,8.03180775,0.755326101,7.92457675,8.00719199,7.89962686
53.751477,8.06225775,8.03057186,0.178005318,7.92240449,8.00616264,7.89766097
53.761969,8.1240384,8.02934867,0.307716969,7.92023283,8.0051434,7.89569307
53.77246,7.87400787,8.02813859,-0.392594856,7.91806215,8.00413469,7.89372352
53.782952,8.1240384,8.02694156,0.311603658,7.91589198,8.00313651,7.89175196
53.793444,8.54400375,8.02575787,0.719892959,7.9137225,8.00214919,7.88977858
53.803935,8.36660027,8.02458781,0.584818309,7.91155387,8.00117304,7.88780357
53.814427,7.74596669,8.02343134,-0.526749133,7.90938565,8.0002081,7.88582656
53.824918,7.74596669,8.02228888,-0.525663568,7.90721821,7.9992548,7.88384794
53.83541,7.48331477,8.0211604,-0.733379595,7.90505111,7.99831318,7.88186732
53.845902,7.48331477,8.02004623,-0.732619584,7.9028845,7.99738358,7.8798849
53.856393,7.34846923,8.01894667,-0.818826868,7.90071858,7.99646633,7.87790088
53.866885,7.87400787,8.01786173,-0.379280706,7.89855289,7.99556152,7.87591487
53.877376,7.93725393,8.01679184,-0.282024656,7.89638782,7.99466957,7.87392727
53.887868,8.48528137,8.01573703,0.685233061,7.89422291,7.99379058,7.8719377
53.89836,7.41619849,8.01469763,-0.773627262,7.89205836,7.99292491,7.86994635
53.908851,8.48528137,8.01367398,0.686736772,7.88989432,7.9920729,7.86795342
53.919343,8.42614977,8.01266614,0.643026929,7.88773036,7.99123469,7.86595853
53.929834,8.18535277,8.01167456,0.416747185,7.88556687,7.99041072,7.86396206
53.940326,8,8.0106993,-0.103437419,7.88340341,7.98960113,7.86196364
53.950818,8.42614977,8.00974074,0.645297633,7.88124015,7.9888063,7.85996346
53.961309,9.11043358,8.00879924,1.0495877,7.87907727,7.98802661,7.85796173
53.971801,8.83176087,8.00736994,0.90795976,7.87640098,7.98726223,7.85595805
53.982292,7.93725393,8.00646504,-0.263080036,7.87424013,7.98651362,7.85395283
53.992784,7.28010989,8.00557789,-0.851744095,7.87207916,7.98578098,7.85194567
54.003276,8.66025404,8.0047089,0.809657421,7.86991826,7.98506472,7.84993678
54.013767,8.54400375,8.00385845,0.734945774,7.86775761,7.98436524,7.84792635
54.024259,7.74596669,8.00302673,-0.507010882,7.86559678,7.98368277,7.845914
54.03475,7.87400787,8.00221421,-0.358059118,7.86343615,7.9830178,7.84390013
54.045242,8.54400375,8.00142108,0.736602105,7.8612753,7.98237057,7.84188434
54.055734,6.40312424,8.00064779,-1.26393178,7.85911441,7.98174153,7.83986685
54.066225,8.1240384,7.99989476,0.352340238,7.85695366,7.98113113,7.83784783
54.076717,7.41619849,7.99916222,-0.76352062,7.85479262,7.98053963,7.83582693
54.087208,7.81024968,7.9984507,-0.433821421,7.85263169,7.97996757,7.83380451
54.0977,7.41619849,7.99776045,-0.7626021,7.85047042,7.97941525,7.83178022
54.108192,7.87400787,7.99709194,-0.350833391,7.84830902,7.97888315,7.82975423
54.118683,8.24621125,7.99644565,0.499765543,7.84614766,7.97837176,7.82772675
54.129175,8.1240384,7.99582189,0.358073344,7.84398592,7.97788143,7.82569739
54.139666,7.61577311,7.99522119,-0.615993577,7.8418242,7.97741271,7.82366656
54.150158,8.18535277,7.99464391,0.436702256,7.83966205,7.97696599,7.82163386
54.16065,7.61577311,7.99409056,-0.61507516,7.83749968,7.97654178,7.81959949
54.171141,7.68114575,7.99356166,-0.558941776,7.83533727,7.97614063,7.81756366
54.181633,7.93725393,7.99305759,-0.236227978,7.8331744,7.97576296,7.81552598
54.192124,7.41619849,7.99257896,-0.759197252,7.83101146,7.97540936,7.81348683
54.202616,8.54400375,7.99212617,0.74288463,7.82884802,7.97508029,7.81144585
54.213108,8.24621125,7.99169981,0.504491267,7.82668428,7.97477635,7.80940322
54.223599,8.54400375,7.99130046,0.743440173,7.82452043,7.9744981,7.80735915
54.234091,8.66025404,7.99092858,0.818123132,7.82235604,7.97424608,7.80531326
54.244582,8.18535277,7.99058482,0.441325218,7.82019151,7.97402092,7.80326592
54.255074,8.1240384,7.99026971,0.365744027,7.81802641,7.97382319,7.80121677
54.265566,7.87400787,7.98998388,-0.340552497,7.81586095,7.97365351,7.799166
54.276057,8.30662386,7.98972796,0.562935076,7.81369531,7.97351255,7.79711382
54.286549,7.54983444,7.98950256,-0.663074747,7.81152906,7.97340093,7.79505982
54.29704,7.74596669,7.98930835,-0.493296724,7.80936262,7.97331934,7.79300442
54.307532,7.81024968,7.98914598,-0.422961354,7.80719555,7.97326845,7.79094723
54.318024,7.81024968,7.98901616,-0.42280786,7.80502805,7.97324898,7.78888844
54.328515,7.61577311,7.98891961,-0.610857185,7.80286032,7.97326166,7.78682825
54.339007,7.68114575,7.98885702,-0.554717295,7.80069194,7.97330722,7.78476628
54.349498,8,7.98882918,0.105692097,7.79852329,7.97338642,7.78270293
54.35999,8.60232527,7.98883684,0.783255021,7.79635397,7.97350008,7.78063781
54.370482,7.93725393,7.9888808,-0.227215461,7.79418418,7.97364898,7.77857112
54.380973,8.18535277,7.98896186,0.443160138,7.79201409,7.97383395,7.77650306
54.391465,6.8556546,7.98908089,-1.06462495,7.78984331,7.97405587,7.77443324
54.401956,7.48331477,7.98923872,-0.711283307,7.78767222,7.97431556,7.77236207
54.412448,7.48331477,7.98943626,-0.71142216,7.78550042,7.974614,7.77028914
54.42294,8.83176087,7.98967443,0.917652677,7.78332809,7.97495208,7.76821468
54.433431,7.87400787,7.98995413,-0.340508816,7.78115543,7.97533071,7.76613886
54.443923,7.28010989,7.99027638,-0.842713765,7.77898203,7.97575096,7.76406132
54.454414,7.81024968,7.99064212,-0.424726314,7.77680829,7.97621374,7.76198244
54.464906,7.68114575,7.99105244,-0.556692638,7.77463379,7.9767202,7.75990184
54.475398,7.93725393,7.99150837,-0.23292582,7.77245874,7.97727134,7.75781972
54.485889,8,7.99201095,0.0893815128,7.77028332,7.97786822,7.75573629
54.496381,8.24621125,7.99256138,0.503636645,7.76810713,7.97851209,7.75365114
54.506872,8.1240384,7.99316073,0.3617702,7.76593056,7.97920397,7.75156469
54.517364,8.24621125,7.99381029,0.502395227,7.7637532,7.97994522,7.74947654
54.527856,8,7.99451123,0.0740862198,7.76157526,7.980737,7.74738689
54.538347,7.81024968,7.99526475,-0.430133785,7.75939693,7.9815805,7.74529596
54.548839,7.14142843,7.99607228,-0.9244695,7.75721779,7.98247719,7.74320334
54.55933,8.18535277,7.99693503,0.434071131,7.75503826,7.98342827,7.74110944
54.569822,8.06225775,7.99785452,0.253777909,7.75285791,7.98443529,7.73901387
54.580314,8,7.99883212,0.0341742804,7.75067694,7.98549962,7.73691683
54.590805,6.92820323,7.99986919,-1.035213,7.74849558,7.98662263,7.73481853
54.601297,8,8.00096744,-0.0311037383,7.74631338,7.98780605,7.73271857
54.611788,9.05538514,8.00212824,1.02628305,7.74413077,7.98905124,7.73061735
54.62228,7.68114575,8.00335342,-0.5676334,7.74194732,7.99036006,7.72851449
54.632772,8.30662386,8.00464455,0.549526445,7.73976325,7.99173407,7.72641018
54.643263,7.21110255,8.00600321,-0.891572013,7.73757876,7.99317487,7.72430464
54.653755,7.07106781,8.00743143,-0.967658835,7.73539342,7.99468451,7.72219747
54.664246,8.1240384,8.00893079,0.339275125,7.73320766,7.99626456,7.72008907
54.674738,7.74596669,8.01050347,-0.514331391,7.73102106,7.99791721,7.71797904
54.68523,8.30662386,8.01215129,0.542653274,7.72883382,7.9996443,7.7158676
54.695721,8.42614977,8.01387609,0.642085413,7.72664615,8.00144768,7.71375496
54.706213,8.36660027,8.01568032,0.592384964,7.72445763,8.00332978,7.7116407
54.716704,7.28010989,8.01756578,-0.858752518,7.72226868,8.00529243,7.70952525
54.727196,7.74596669,8.01953507,-0.523037642,7.72007889,8.00733825,7.7074082
54.737688,9,8.02159033,0.989145932,7.71788846,8.00946936,7.70528976
54.748179,7.74596669,8.02373373,-0.527036091,7.7156976,8.01168795,7.70317014
54.758671,8.18535277,8.02596818,0.399229999,7.7135059,8.01399693,7.70104894
54.769162,8.30662386,8.0282958,0.527568069,7.71131377,8.01639842,7.69892657
54.779654,7.28010989,8.03071968,-0.866377394,7.70912081,8.01889554,7.69680263
54.790146,7.74596669,8.03324235,-0.535981028,7.70692721,8.02149081,7.69467733
54.800637,6.4807407,8.03586641,-1.2470468,7.70473321,8.02418681,7.69255087
54.811129,8.30662386,8.03859529,0.517714762,7.70253837,8.02698702,7.69042286
54.82162,7.61577311,8.04143152,-0.652425024,7.70034313,8.02989394,7.68829371
54.832112,8.30662386,8.0443788,0.512098684,7.69814707,8.03291129,7.68616301
54.842604,8.24621125,8.04744015,0.445837532,7.6959504,8.03604208,7.68403098
54.853095,8.36660027,8.05061864,0.562122431,7.69375335,8.0392894,7.68189782
54.863587,8.18535277,8.05391841,0.362538778,7.6915555,8.04265737,7.67976314
54.874078,8.24621125,8.05734247,0.434590363,7.68935728,8.04614901,7.67762734
54.88457,8.24621125,8.06089527,0.430483428,7.68715827,8.04976878,7.67549003
54.895062,7.68114575,8.06458042,-0.61922102,7.68495871,8.05352028,7.67335141
54.905553,7.68114575,8.06840162,-0.622298864,7.6827588,8.0574072,7.6712117
54.916045,8.71779789,8.07236385,0.803389092,7.68055815,8.06143453,7.66907048
54.926536,7.93725393,8.07647075,-0.373117696,7.67835718,8.06560589,7.66692818
54.937028,8.24621125,8.08072767,0.406796736,7.6761555,8.06992665,7.66478439
54.94752,8.36660027,8.08513897,0.530529258,7.67395332,8.07440115,7.66263932
54.958011,8.06225775,8.08970915,-0.165684653,7.67175087,8.07903388,7.66049318
54.968503,7.81024968,8.09444422,-0.533099001,7.66954777,8.08383085,7.65834557
54.978994,7.87400787,8.09934861,-0.474700676,7.66734444,8.08879646,7.65619691
54.989486,7.74596669,8.1044288,-0.598717051,7.66514048,8.09393722,7.65404678
54.999978,8.36660027,8.10969012,0.506863042,7.66293615,8.0992584,7.6518954
55.010469,8.66025404,8.11513805,0.738319704,7.66073167,8.10476549,7.64974299
55.020961,8.06225775,8.1207799,-0.241913529,7.65852665,8.11046579,7.64758913
55.031452,8.1240384,8.12662111,-0.0508203399,7.65632155,8.11636469,7.64543424
55.041944,8.24621125,8.13266959,0.336959429,7.65411597,8.12247012,7.64327792
55.052436,8.24621125,8.13893188,0.327535293,7.65191017,8.12878857,7.64112038
55.062927,8.1240384,8.14541473,-0.146206436,7.6497044,8.13532676,7.63896183
55.073419,8,8.15212707,-0.390034702,7.64749828,8.14209362,7.63680186
55.08391,7.21110255,8.15907565,-0.9736391,7.64529226,8.14909585,7.63464089
55.094402,8.60232527,8.16627018,0.660344674,7.64308599,8.15634315,7.63247852
55.104894,7.34846923,8.17371875,-0.90843245,7.64087972,8.16384356,7.63031496
55.115385,8.36660027,8.18142972,0.430314468,7.6386737,8.17160543,7.62815042
55.125877,7.54983444,8.18941413,-0.799737265,7.63646757,8.17963974,7.62598449
55.136368,7.61577311,8.19768037,-0.762828466,7.63426179,8.18795488,7.62381759
55.14686,9.43398113,8.20624045,1.1080346,7.63205599,8.19656281,7.62164931
55.157352,9.11043358,8.21510445,0.946218332,7.62985044,8.2054736,7.61947988
55.167843,8.42614977,8.22428282,0.449296062,7.62764536,8.21469769,7.61730949
55.178335,8.18535277,8.23378921,-0.220082801,7.62544036,8.22424871,7.61513774
55.188826,9.38083152,8.2436342,1.06639454,7.62323589,8.23413726,7.61296506
55.199318,8,8.25383265,-0.503818075,7.62103149,8.24437823,7.61079103
55.20981,8.54400375,8.26439722,0.528778335,7.61882736,8.25498433,7.60861586
55.220301,9.11043358,8.27534102,0.913833991,7.61662364,8.26596875,7.60643977
55.230793,8.66025404,8.286681,0.611206217,7.61441979,8.27734857,7.60426236
55.241284,9.11043358,8.29843051,0.901112127,7.61221608,8.28913729,7.60208404
55.251776,8.88819442,8.31060807,0.759991015,7.61001188,8.30135366,7.59990439
55.262268,7.28010989,8.32322959,-1.02133231,7.60780713,8.31401384,7.59772365
55.272759,8.06225775,8.33631159,-0.523501524,7.6056017,8.3271347,7.59554201
55.283251,7.81024968,8.34987529,-0.734592144,7.60339476,8.34073784,7.59335908
55.293742,8.24621125,8.36393768,-0.343112851,7.60118628,8.35484067,7.59117527
55.304234,8.24621125,8.37852205,-0.363745518,7.59897532,8.36946699,7.58899017
55.314726,8.18535277,8.39364876,-0.456394552,7.59676156,8.38463763,7.58680399
55.325217,9.05538514,8.40933911,0.803769888,7.59454468,8.40037438,7.58461696
55.335709,9.05538514,8.42562022,0.793577289,7.59232377,8.41670483,7.58242866
55.3462,9.21954446,8.44251448,0.881493039,7.59009883,8.43365173,7.5802395
55.356692,8.77496439,8.46005212,0.561170448,7.58786911,8.4512456,7.5780491
55.367184,8.77496439,8.47826015,0.544705647,7.58563466,8.46951362,7.57585764
55.377675,8.30662386,8.49716705,-0.436512523,7.58339566,8.48848426,7.57366536
55.388167,8.42614977,8.51680861,-0.301096055,7.58115181,8.50819322,7.57147184
55.398658,9.94987437,8.53721512,1.18855343,7.57890381,8.52867053,7.5692775
55.40915,8.94427191,8.55842662,0.621164464,7.57665161,8.54995588,7.56708194
55.419642,8.66025404,8.58047939,0.282444057,7.57439591,8.57208514,7.56488536
55.430133,9.69535971,8.60341164,1.04496319,7.57213745,8.59509603,7.56268798
55.440625,9.43398113,8.62727057,0.898170674,7.56987633,8.61903532,7.5604894
55.451116,9.16515139,8.65209686,0.716278249,7.56761352,8.64394319,7.55829003
55.461608,9.64365076,8.67794319,0.982704212,7.56534906,8.66987195,7.55608946
55.4721,8.83176087,8.70485795,0.356234351,7.5630836,8.69686961,7.55388791
55.482591,9.11043358,8.73289211,0.614444029,7.56081773,8.72498683,7.55168559
55.493083,9.74679434,8.76210804,0.992313612,7.55855132,8.75428577,7.5494821
55.503574,9.16515139,8.79256052,0.610402218,7.55628503,8.784821,7.54727785
55.514066,9.69535971,8.82431961,0.933295295,7.55401861,8.81666249,7.54507243
55.524558,10.0995049,8.85745062,1.11447491,7.55175242,8.84987545,7.54286607
55.535049,9.59166305,8.89202272,0.836445053,7.54948675,8.884529,7.54065897
55.545541,9.74679434,8.92811979,0.904806361,7.54722122,8.92070704,7.53845072
55.556032,9.48683298,8.96581716,0.721814256,7.5449563,8.95848488,7.53624174
55.566524,8.77496439,9.00520984,-0.479838984,7.54269155,8.99795761,7.53403164
55.577016,9.59166305,9.04638791,0.738427472,7.54042717,9.03921534,7.53182061
55.587507,9.16515139,9.08944715,0.275144029,7.53816336,9.08235391,7.52960888
55.597999,10.0995049,9.13450276,0.982345243,7.53589964,9.12748861,7.52739603
55.60849,9.53939201,9.18166037,0.598106714,7.53363642,9.17472512,7.52518249
55.618982,9.69535971,9.2310515,0.681401657,7.53137321,9.22419507,7.52296785
55.629474,10.5830052,9.28280285,1.14026418,7.52911018,9.27602523,7.52075232
55.639965,10.6770783,9.33704969,1.15759603,7.52684752,9.33035094,7.51853612
55.650457,10.2956301,9.39395344,0.949566588,7.52458474,9.38733373,7.51631883
55.660948,10.9087121,9.45366516,1.20625327,7.52232223,9.44712471,7.51410089
55.67144,10.2469508,9.51637066,0.854739788,7.52005952,9.50990981,7.51188187
55.681932,10.0498756,9.58225183,0.683830236,7.5177968,9.57587096,7.50966199
55.692423,10.0498756,9.65150374,0.631167077,7.51553423,9.64520333,7.50744148
55.702915,10.2956301,9.72435751,0.755825796,7.51327136,9.71813811,7.50521991
55.713406,10.7703296,9.80103392,0.984528157,7.51100859,9.79489616,7.50299772
55.723898,10.9087121,9.88180167,1.0133659,7.50874545,9.87574624,7.50077448
55.73439,11.3137085,9.96692807,1.1605087,7.50648215,9.96095575,7.49855042
55.744881,11.5758369,10.0567016,1.23253208,7.50421886,10.0508132,7.49632576
55.755373,11.0905365,10.1514621,0.96905851,7.50195513,10.1456586,7.49410007
55.765864,11.9582607,10.2515416,1.3064146,7.49969139,10.2458239,7.49187379
55.776356,11.5325626,10.3573409,1.08407644,7.49742717,10.35171,7.4896465
55.786848,11.045361,10.4692662,0.759009113,7.49516268,10.4637233,7.48741842
55.797339,10.8627805,10.5877601,0.524423846,7.49289812,10.5823064,7.48518976
55.807831,11.9582607,10.7133434,1.11575865,7.49063304,10.70798,7.48296011
55.818322,12.4096736,10.846538,1.25025424,7.48836787,10.8412662,7.48072991
55.828814,12.2882057,10.9879716,1.14027811,7.48610217,10.9827928,7.47849872
55.839306,12.489996,11.1382959,1.16262639,7.48383613,11.1332114,7.47626678
55.849797,12.7671453,11.2982302,1.21198811,7.48156998,11.2932415,7.47403429
55.860289,13.2664992,11.4686212,1.3408497,7.47930326,11.4637299,7.47180085
55.87078,13.1529464,11.6503425,1.22580746,7.4770364,11.6455501,7.46956688
55.881272,13.96424,11.8444386,1.45595378,7.47476898,11.8397467,7.46733196
55.891764,13.114877,12.0520165,1.03095127,7.4725012,12.0474268,7.46509632
55.902255,14.4913767,12.2743052,1.48898339,7.47023326,12.2698193,7.46286017
55.912747,14.7986486,12.5127392,1.51192243,7.46796475,12.5083588,7.46062309
55.923238,13.6014705,12.7688138,0.91250026,7.46569608,12.7645408,7.45838552
55.93373,14.2828569,13.0442821,1.11291271,7.46342683,13.0401183,7.45614704
55.944222,14.8996644,13.3409905,1.24846862,7.46115721,13.3369376,7.45390786
55.954713,14.8660687,13.6609466,1.09778056,7.45888743,13.6570062,7.45166821
55.965205,15.5884573,14.0064201,1.25779057,7.45661706,14.002594,7.44942767
55.975696,15.8429795,14.3797074,1.20965785,7.45434653,14.3759971,7.44718666
55.986188,15.2970585,14.7833857,0.716709725,7.45207542,14.7797925,7.44494478
55.99668,15.6524758,15.2200367,0.657601033,7.44980394,15.2165619,7.44270223
56.007171,15.9687194,15.6923038,0.525752434,7.4475323,15.6889482,7.44045925
56.017663,17.8605711,16.2029951,1.28746882,7.44526008,16.1997593,7.4382154
56.028154,17.3205081,16.7546819,0.752214202,7.44298772,16.751566,7.43597112
56.038646,17.2916165,17.3500131,-0.241653991,7.44071477,17.3470171,7.433726
56.049138,18.1107703,17.9912289,0.345747562,7.43844146,17.9883519,7.43148025
56.059629,18.5202592,18.6801454,-0.399857765,7.43616801,18.6773863,7.4292341
56.070121,18.9472953,19.4181642,-0.686198854,7.43389398,19.4155211,7.42698712
56.080612,19.3907194,20.2054919,-0.90264746,7.43161982,20.2029624,7.42473974
56.091104,20.6155281,21.04132,-0.652527333,7.4293451,21.0389011,7.42249155
56.101596,21.3541565,21.9227582,-0.754056844,7.42707003,21.9204462,7.42024276
56.112087,22.4499443,22.844349,-0.628016468,7.42479484,22.8421394,7.41799361
56.122579,23.0434372,23.7974949,-0.868364955,7.42251909,23.7953825,7.41574366
56.13307,24.3515913,24.7688369,-0.645945505,7.42024322,24.7668156,7.41349334
56.143562,25.8650343,25.7399997,0.353602336,7.41796681,25.7380626,7.41124225
56.154054,26.6833281,26.6861787,-0.0533912086,7.41569007,26.6843178,7.4089906
56.164545,26.5706605,27.5762829,-1.00280727,7.41341322,27.5744893,7.40673861
56.175037,28.4604989,28.3740837,0.293964666,7.41113585,28.3723475,7.40448586
56.185528,30.1330383,29.0400652,1.04545356,7.40885838,29.0383755,7.40223278
56.19602,31.4324673,29.5360224,1.3771147,7.40658038,29.5343677,7.39997896
56.206512,31.2409987,29.8298203,1.1879303,7.40430208,29.8281883,7.39772461
56.217003,32.8937684,29.9009238,1.72998399,7.4020237,29.8993021,7.39546995
56.227495,31.9217794,29.744097,1.47569725,7.39974482,29.7424731,7.39321457
56.237986,32.1247568,29.3704816,1.65960091,7.39746586,29.3688434,7.39095889
56.248478,29.4448637,28.8053193,0.799715193,7.3951864,28.8036554,7.38870251
56.25897,28.618176,28.0836899,0.731085598,7.39290667,28.0819897,7.38644563
56.269461,28.2488938,27.2450149,1.00193757,7.39062689,27.2432691,7.38418848
56.279953,24.2487113,26.3278499,-1.44192183,7.38834662,26.3260501,7.38193063
56.290444,24.4540385,25.367004,-0.955492296,7.38606631,25.3651431,7.37967254
56.300936,22.6715681,24.3910231,-1.31127991,7.38378553,24.389095,7.37741376
56.311428,21.5870331,23.4223607,-1.3547426,7.3815045,23.4203603,7.37515452
56.321919,20.6639783,22.4775379,-1.34668468,7.37922345,22.4754612,7.37289504
56.332411,19.8494332,21.5677744,-1.31085511,7.37694195,21.565618,7.37063491
56.342902,18.8414437,20.70061,-1.36351251,7.37466043,20.6983715,7.36837456
56.353394,18.6010752,19.8801866,-1.13097805,7.37237847,19.8778642,7.36611356
56.363886,16.2172747,19.1086226,-1.70039639,7.37009629,19.1062152,7.36385213
56.374377,15.7797338,18.3863892,-1.61451396,7.36781412,18.3838961,7.36159051
56.384869,15.8429795,17.7126134,-1.36734557,7.36553153,17.7100348,7.35932826
56.39536,14.9331845,17.0858898,-1.46721004,7.36324896,17.0832261,7.35706582
56.405852,14.9666295,16.504044,-1.2399252,7.36096598,16.5012961,7.35480277
56.416344,14.0712473,15.9647374,-1.37604148,7.35868281,15.9619066,7.35253933
56.426835,13.3041347,15.4654165,-1.47012987,7.35639968,15.4625045,7.35027573
56.437327,14.8660687,15.0032975,-0.370444029,7.35411617,15.0003062,7.34801153
56.447818,13.892444,14.5757583,-0.826628274,7.3518327,14.5726898,7.34574718
56.45831,13.820275,14.1800576,-0.599818831,7.34954886,14.1769142,7.34348226
56.468802,12.8452326,13.8136639,-0.984089093,7.34726488,13.8104481,7.34121698
56.479293,12.489996,13.4741589,-0.992049866,7.34498096,13.4708732,7.33895157
56.489785,12.1243557,13.1591788,-1.01726258,7.34269669,13.1558256,7.3366856
56.500276,12.083046,12.8666422,-0.885209715,7.34041251,12.8632242,7.33441951
56.510768,11.7473401,12.5945238,-0.920425821,7.33812799,12.5910434,7.33215288
56.52126,11.2249722,12.3410494,-1.05644555,7.33584335,12.337509,7.32988594
56.531751,12.083046,12.1046027,-0.146822258,7.33355883,12.101005,7.32761889
56.542243,11.4455231,11.8836602,-0.661919257,7.33127399,11.8800073,7.32535133
56.552734,11,11.6769297,-0.822757404,7.32898927,11.673224,7.32308368
56.563226,10.3923048,11.4831747,-1.04444715,7.32670425,11.4794183,7.32081552
56.573718,10.6770783,11.301339,-0.790101704,7.32441916,11.2975341,7.31854708
56.584209,10.8166538,11.130472,-0.560194739,7.32213422,11.1266207,7.31627858
56.594701,10.7703296,10.969674,-0.446480044,7.31984899,10.9657784,7.31400959
56.605192,10.8627805,10.8181939,0.211155278,7.31756394,10.8142558,7.31174056
56.615684,11.6619038,10.6752989,0.993279872,7.31527862,10.6713201,7.30947105
56.626176,10.4403065,10.5403662,-0.316322194,7.31299326,10.5363485,7.30720129
56.636667,10.6770783,10.4128299,0.51405088,7.3107081,10.4087751,7.30493151
56.647159,9.64365076,10.2921412,-0.805289064,7.30842269,10.2880509,7.30266127
56.65765,10,10.1778442,-0.421715735,7.3061375,10.1737199,7.30039102
56.668142,10.3923048,10.0694802,0.568176575,7.30385209,10.0653235,7.29812034
56.678634,9.8488578,9.96665997,-0.343223205,7.30156668,9.96247228,7.29584944
56.689125,10.5356538,9.86902483,0.816473469,7.29928151,9.86480758,7.29357855
56.699617,10.0995049,9.77621875,0.568582616,7.29699614,9.77197327,7.29130724
56.710108,9.43398113,9.68794794,-0.503951193,7.29471103,9.68367551,7.28903595
56.7206,9.48683298,9.60390888,-0.342163563,7.29242574,9.59961073,7.28676427
56.731092,9.32737905,9.52384487,-0.443244649,7.2901405,9.51952216,7.2844924
56.741583,8.77496439,9.44751761,-0.820093424,7.28785555,9.44317145,7.28222058
56.752075,9.59166305,9.37468574,0.465808232,7.28557045,9.37031719,7.27994838
56.762566,9.89949494,9.30515237,0.770936163,7.28328565,9.30076245,7.27767623
56.773058,9.38083152,9.23870913,0.376991231,7.28100072,9.23429879,7.27540372
56.78355,8.30662386,9.17518119,-0.931964232,7.2787159,9.17075135,7.27313107
56.794041,8.83176087,9.11440538,-0.53164322,7.2764314,9.1099569,7.27085849
56.804533,9,9.0562133,-0.237093435,7.27414681,9.05174699,7.26858557
56.815024,8.30662386,9.00046961,-0.832974039,7.27186258,8.99598626,7.26631274
56.825516,9,8.94702755,0.230157443,7.26957827,8.94252788,7.26403959
56.836008,7.61577311,8.89576524,-1.13136737,7.26729411,8.89124995,7.26176632
56.846499,8.1240384,8.84656844,-0.850017666,7.26501034,8.84203817,7.25949317
56.856991,9.21954446,8.79931693,0.648249588,7.26272653,8.79477229,7.25721971
56.867482,8.71779789,8.7539158,-0.190047142,7.26044313,8.74935737,7.25494638
56.877974,8.77496439,8.71025941,0.25437173,7.25815971,8.70568772,7.25267275
56.888466,8.94427191,8.66826111,0.525367299,7.2558765,8.66367666,7.25039905
56.898957,8.60232527,8.62783935,-0.159731298,7.25359374,8.62324261,7.2481255
56.909449,9,8.58890658,0.641165676,7.251311,8.58429797,7.24585168
56.91994,8.88819442,8.55139503,0.580344201,7.24902872,8.54677495,7.24357802
56.930432,8.54400375,8.51522716,0.169636639,7.2467465,8.51059597,7.24130411
56.940924,8.66025404,8.48034028,0.424162419,7.24446455,8.47569833,7.23903015
56.951415,8.18535277,8.44667518,-0.511197031,7.24218311,8.44202276,7.23675638
56.961907,7.81024968,8.41416687,-0.777121091,7.23990176,8.40950425,7.23448238
56.972398,9.2736185,8.38276623,0.943849706,7.23762095,8.37809366,7.23220857
56.98289,8.06225775,8.35241531,-0.538662753,7.23534026,8.34773301,7.22993454
56.993382,8.48528137,8.32306804,0.40275717,7.23305991,8.31837618,7.22766051
57.003873,8.54400375,8.29468073,0.499322559,7.23078015,8.28997948,7.22538671
57.014365,8,8.26720434,-0.516918113,7.22850055,8.26249383,7.22311269
57.024856,8,8.24060275,-0.490512743,7.22622157,8.23588309,7.22083892
57.035348,8.30662386,8.21483195,0.302971802,7.22394278,8.21010321,7.21856496
57.04584,7.74596669,8.18985758,-0.666251367,7.22166442,8.18511981,7.21629103
57.056331,9.05538514,8.16564696,0.943259336,7.21938673,8.1609002,7.21401736
57.066823,7.41619849,8.13800186,-0.849590119,7.21241503,8.13740674,7.21174353
57.077314,8.66025404,8.11522025,0.738264034,7.21015398,8.11461253,7.20946997
57.087806,7.87400787,8.09310426,-0.468077327,7.20789314,8.0924836,7.20719625
57.098298,8.42614977,8.07162791,0.595417385,7.20563274,8.07099398,7.20492261
57.108789,7.48331477,8.05076646,-0.75329389,7.20337301,8.05011889,7.20264926
57.119281,8.1240384,8.03049064,0.305855791,7.20111356,8.02982906,7.20037578
57.129772,7.48331477,8.01078023,-0.72626817,7.19885483,8.01010425,7.19810261
57.140264,7.61577311,7.99160866,-0.613054284,7.19659641,7.99091788,7.19582932
57.150756,8.06225775,7.9729561,0.298833808,7.19433855,7.9722501,7.19355614
57.161247,7.68114575,7.9548036,-0.523123167,7.19208148,7.95408194,7.19128329
57.171739,7.87400787,7.93712807,-0.251237336,7.18982481,7.9363903,7.18901034
57.18223,7.41619849,7.91991418,-0.709729308,7.18756897,7.91915981,7.18673774
57.192722,7.87400787,7.90314086,-0.17068389,7.18531359,7.90236941,7.18446506
57.203214,8.94427191,7.88679283,1.02833802,7.18305889,7.88600377,7.18219252
57.213705,7.87400787,7.87085539,0.0561469956,7.18080512,7.87004819,7.17992035
57.224197,7.28010989,7.85531015,-0.758419581,7.17855189,7.85448425,7.17764812
57.234688,7.07106781,7.84014536,-0.876970663,7.17629965,7.83930017,7.17537627
57.24518,7.34846923,7.82534413,-0.690561297,7.17404801,7.82447905,7.17310438
57.255672,7,7.81089456,-0.900496841,7.17179722,7.81000893,7.17083267
57.266163,6.78232998,7.79678518,-1.00720167,7.16954753,7.79587835,7.16856135
57.276655,7.41619849,7.78300114,-0.605642349,7.16729855,7.78207241,7.16629002
57.287146,7.07106781,7.76953339,-0.835742532,7.16505075,7.76858203,7.1640191
57.297638,7.34846923,7.75636825,-0.638669732,7.16280373,7.75539349,7.16174818
57.30813,7.54983444,7.74349637,-0.440070371,7.16055776,7.74249741,7.15947747
57.318621,6.8556546,7.73090872,-0.93555017,7.1583131,7.72988474,7.1572072
57.329113,7.74596669,7.7185932,0.165449375,7.15606936,7.71754332,7.15493695
57.339604,8.36660027,7.7065428,0.812439209,7.15382703,7.70546611,7.15266714
57.350096,7.68114575,7.69474632,-0.116621496,7.15158573,7.69364186,7.15039737
57.360588,8.60232527,7.68319637,0.958712104,7.14934572,7.68206313,7.14812785
57.371079,7.68114575,7.67188581,0.0962285601,7.14710728,7.67072274,7.1458588
57.381571,7.54983444,7.66080467,-0.333121947,7.14487004,7.65961066,7.1435898
57.392062,7.87400787,7.64994751,0.473350149,7.1426345,7.64872141,7.14132129
57.402554,7.34846923,7.63930508,-0.539291995,7.14040029,7.63804566,7.13905285
57.413046,7.54983444,7.62887151,-0.281135338,7.13816769,7.62757749,7.13678469
57.423537,7.81024968,7.61864113,0.437731137,7.135937,7.61731115,7.13451705
57.434029,7.61577311,7.60860564,0.084660909,7.13370788,7.60723829,7.13224949
57.44452,7.54983444,7.59876084,-0.221193134,7.13148082,7.59735464,7.12998246
57.455012,7.61577311,7.58909902,0.163322039,7.12925549,7.58765238,7.12771553
57.465504,7.61577311,7.5796155,0.190151537,7.1270322,7.57812677,7.12544892
57.475995,7.68114575,7.57030576,0.332926397,7.12481127,7.5687732,7.12318286
57.486487,6.8556546,7.56116287,-0.839945398,7.12259237,7.55958463,7.12091692
57.496978,8.18535277,7.55218359,0.795719286,7.12037604,7.55055772,7.11865155
57.50747,8.1240384,7.54336145,0.762021624,7.11816198,7.54168589,7.11638631
57.517962,7.21110255,7.53469273,-0.56884987,7.11595054,7.5329653,7.11412143
57.528453,7.14142843,7.52617383,-0.620278483,7.11374204,7.52439224,7.11185714
57.538945,7.74596669,7.51779892,0.477669108,7.11153623,7.51596073,7.10959301
57.549436,6.244998,7.50956553,-1.12452992,7.10933368,7.50766817,7.10732947
57.559928,8.06225775,7.50146824,0.748858807,7.10713414,7.49950895,7.10506611
57.57042,7.41619849,7.49350408,-0.278038829,7.10493799,7.49147997,7.10280314
57.580911,7.21110255,7.48567022,-0.523992053,7.10274563,7.48357821,7.1005408
57.591403,7.48331477,7.47796176,0.0731643028,7.10055686,7.47579856,7.09827865
57.601894,7.07106781,7.47037686,-0.631909053,7.09837232,7.468139,7.09601713
57.612386,7.93725393,7.46291095,0.688725619,7.09619182,7.4605947,7.09375583
57.622878,6.8556546,7.45556175,-0.774536732,7.09401583,7.45316316,7.09149496
57.633369,8,7.44832705,0.742746894,7.09184483,7.44584193,7.08923474
57.643861,7.41619849,7.44120274,-0.158127339,7.08967871,7.43862657,7.08697476
57.654352,6.63324958,7.43418755,-0.89495138,7.08751819,7.43151555,7.08471544
57.664844,7.07106781,7.42727766,-0.596833183,7.08536323,7.42450468,7.08245638
57.675336,7.28010989,7.42047136,-0.374648464,7.08321438,7.41759192,7.08019778
57.685827,7.21110255,7.41376703,-0.450182721,7.08107227,7.41077526,7.07793988
57.696319,7.34846923,7.40716128,-0.242264421,7.07893692,7.40405088,7.07568224
57.70681,6.78232998,7.40065333,-0.786335394,7.07680921,7.39741757,7.07342531
57.717302,7,7.39424008,-0.627885403,7.07468925,7.39087171,7.07116867
57.727794,7.68114575,7.38792036,0.541502898,7.07257779,7.38441161,7.06891253
57.738285,7.68114575,7.38169311,0.547222661,7.07047564,7.37803566,7.06665711
57.748777,6.78232998,7.37555561,-0.770211416,7.06838302,7.37174048,7.06440201
57.759268,7.14142843,7.36950762,-0.477576368,7.06630106,7.36552518,7.06214764
57.76976,6.55743852,7.36354669,-0.897835266,7.06423009,7.35938657,7.0598936
57.780252,6.8556546,7.35767224,-0.708532033,7.06217115,7.35332328,7.0576401
57.790743,7.34846923,7.35188377,-0.0584341137,7.0601253,7.34733398,7.05538736
57.801235,6.63324958,7.34617927,-0.844351641,7.0580931,7.34141571,7.05313496
57.811726,7.07106781,7.34055904,-0.519125441,7.05607596,7.3355678,7.05088335
57.822218,7.93725393,7.33502134,0.776036465,7.0540746,7.32978744,7.04863209
57.83271,8.30662386,7.32956619,0.988462276,7.05209039,7.3240735,7.0463814
57.843201,6.92820323,7.32419371,-0.629277745,7.05012477,7.31842491,7.04413152
57.853693,6.70820393,7.31890261,-0.781472125,7.04817871,7.31283903,7.04188202
57.864184,8.18535277,7.31369378,0.933626797,7.04625403,7.30731539,7.03963333
57.874676,6.92820323,7.30856621,-0.616735743,7.04435185,7.30185149,7.03738503
57.885168,7.87400787,7.30352052,0.755306132,7.04247396,7.2964464,7.03513735
57.895659,6.40312424,7.29855742,-0.946273313,7.04062219,7.29109927,7.03289051
57.906151,7.87400787,7.29367629,0.761794975,7.0387979,7.28580771,7.03064408
57.916642,6.92820323,7.28887847,-0.600562433,7.03700321,7.28057144,7.0283985
57.927134,7.41619849,7.28416349,0.363366196,7.03523953,7.27538819,7.02615335
57.937626,6.40312424,7.27953231,-0.936166689,7.03350878,7.27025724,7.02390885
57.948117,7.21110255,7.27498576,-0.252751279,7.03181277,7.26517786,7.02166522
57.958609,5.74456265,7.27052332,-1.23529781,7.0301527,7.26014794,7.01942204
57.9691,7.48331477,7.26614596,0.466013746,7.02853016,7.2551673,7.01717975
57.979592,7.21110255,7.2618527,-0.225277927,7.02694578,7.25023391,7.01493793
57.990084,6.70820393,7.25764334,-0.741241798,7.02540016,7.24534718,7.01269679
58.000575,6.70820393,7.25351707,-0.738453208,7.02389325,7.24050653,7.01045657
58.011067,7.68114575,7.24947112,0.6570195,7.02242372,7.23571004,7.00821683
58.021558,7.54983444,7.24550325,0.551662204,7.02098972,7.23095764,7.00597801
58.03205,7.48331477,7.2416084,0.491636422,7.01958753,7.2262475,7.00373969
58.042542,7.48331477,7.23778115,0.495513497,7.0182122,7.22157913,7.0015021
58.053033,7.34846923,7.23401422,0.338312001,7.01685694,7.21695207,6.99926545
58.063525,7.74596669,7.23029725,0.718101277,7.01551243,7.21236459,6.99702933
58.074016,7,7.22661822,-0.476044344,7.01416671,7.2078167,6.99479416
58.084508,7.74596669,7.22296408,0.723189196,7.01280766,7.20330671,6.99255953
58.095,7.61577311,7.21931806,0.629646766,7.01141864,7.19883426,6.99032566
58.105491,6.70820393,7.21566242,-0.712361203,7.00998203,7.19439898,6.98809278
58.115983,7.34846923,7.21197714,0.369448363,7.00847849,7.18999928,6.98586045
58.126474,7.54983444,7.20824315,0.584458112,7.00688883,7.18563524,6.98362911
58.136966,7.07106781,7.20444061,-0.36520241,7.00519389,7.18130532,6.98139835
58.147458,6.244998,7.20055254,-0.977524704,7.00337681,7.17700923,6.97916839
58.157949,7,7.19656505,-0.443356571,7.00142394,7.1727467,6.97693944
58.168441,7.87400787,7.19246723,0.825554748,6.99932528,7.16851625,6.97471109
58.178932,6.92820323,7.18825468,-0.509952398,6.99707669,7.16431804,6.97248377
58.189424,6.92820323,7.18392674,-0.505691125,6.99467867,7.16015064,6.97025705
58.199916,7.07106781,7.17948924,-0.32927409,6.99213775,7.15601383,6.96803117
58.210407,6.8556546,7.17495274,-0.565064718,6.98946531,7.1519074,6.96580635
58.220899,7,7.17033033,-0.412710953,6.98667587,7.14783,6.96358215
58.23139,6.63324958,7.1656395,-0.729650547,6.98378766,7.14378182,6.96135902
58.241882,6.63324958,7.1608974,-0.726393707,6.98081928,7.13976155,6.95913653
58.252374,6.78232998,7.15612278,-0.611385961,6.97779039,7.13576903,6.95691492
58.262865,7.61577311,7.1513337,0.681497914,6.97471992,7.1318041,6.95469439
58.273357,7.61577311,7.14654542,0.685001961,6.9716244,7.12786551,6.95247453
58.283848,7,7.14177307,-0.376527652,6.96851953,7.1239535,6.95025576
58.29434,7.07106781,7.1370278,-0.256826774,6.96541757,7.12006683,6.94803769
58.304832,6.70820393,7.13231988,-0.651241854,6.96232936,7.11620541,6.94582051
58.315323,6.8556546,7.12765743,-0.521538906,6.95926351,7.11236914,6.94360446
58.325815,5.74456265,7.12304527,-1.174088,6.95622575,7.10855682,6.94138911
58.336306,6.8556546,7.11848829,-0.512673082,6.95322118,7.10476875,6.9391749
58.346798,6.164414,7.11398816,-0.974460955,6.95025226,7.10100377,6.93696141
58.35729,7.41619849,7.10954665,0.553761531,6.94732106,7.09726182,6.93474886
58.367781,7.34846923,7.10516458,0.493259209,6.94442865,7.09354285,6.93253746
58.378273,7.14142843,7.10084074,0.20146387,6.94157448,7.08984574,6.9303268
58.388764,6.4807407,7.09657501,-0.784751116,6.93875852,7.0861708,6.92811732
58.399256,7.48331477,7.09236524,0.625259572,6.93597924,7.08251697,6.92590859
58.409748,7.07106781,7.08821019,-0.130928921,6.93323557,7.0788842,6.92370084
58.420239,7.74596669,7.08410842,0.813546723,6.93052627,7.07527248,6.92149427
58.430731,7,7.0800572,-0.282943803,6.92784917,7.07168077,6.91928849
58.441222,7.07106781,7.07605528,-0.0706220192,6.92520307,7.06810941,6.91708391
58.451714,7,7.0720999,-0.26851425,6.92258574,7.06455737,6.91488012
58.462206,7.41619849,7.06818945,0.589922906,6.91999574,7.06102465,6.91267734
58.472697,7.28010989,7.06432235,0.464529373,6.91743163,7.05751129,6.91047579
58.483189,7.14142843,7.06049599,0.284486278,6.91489134,7.05401627,6.90827505
58.49368,7.48331477,7.05670928,0.653150436,6.9123738,7.05053997,6.90607555
58.504172,5.74456265,7.05295979,-1.14385189,6.90987709,7.04708142,6.90387688
58.514664,6.8556546,7.04924625,-0.439990511,6.90740007,7.04364065,6.90167926
58.525155,6.55743852,7.04556745,-0.69866224,6.90494168,7.0402177,6.89948289
58.535647,6.63324958,7.04192123,-0.639274313,6.90250026,7.03681163,6.89728738
58.546138,7,7.0383069,-0.19572149,6.90007513,7.03342283,6.89509314
58.55663,7.48331477,7.03472248,0.669770327,6.89766478,7.03005036,6.89289977
58.567122,5.65685425,7.0311671,-1.1723109,6.89526847,7.0266943,6.89070747
58.577613,7.07106781,7.02763993,0.208393573,6.89288552,7.0233547,6.88851647
58.588105,6.40312424,7.02413924,-0.78804505,6.89051464,7.02003068,6.88632636
58.598596,6.4807407,7.02066468,-0.734795195,6.8881555,7.01672261,6.88413755
58.609088,6.70820393,7.01721464,-0.555887311,6.88580692,7.01342963,6.88194965
58.61958,7.07106781,7.01378856,0.239330848,6.88346848,7.01015182,6.87976285
58.630071,6.8556546,7.01038593,-0.393359032,6.88113978,7.00688925,6.87757739
58.640563,6.4807407,7.00700532,-0.725440984,6.87881981,7.00364109,6.87539286
58.651054,6.78232998,7.00364663,-0.470443037,6.87650849,7.00040772,6.87320966
58.661546,6.55743852,7.00030854,-0.665484798,6.87420489,6.99718831,6.8710274
58.672038,5.91607978,6.99699071,-1.03966866,6.8719088,6.99398297,6.86884629
58.682529,7.87400787,6.99369284,0.938251053,6.86962002,6.99079178,6.86666654
58.693021,6.92820323,6.99041372,-0.249420311,6.86733773,6.98761395,6.86448775
58.703512,7.28010989,6.98715344,0.541254512,6.86506202,6.98444987,6.86231034
58.714004,7.54983444,6.98391086,0.752278924,6.86279213,6.98129875,6.8601339
58.724496,6.63324958,6.98068578,-0.589437192,6.86052798,6.97816069,6.85795865
58.734987,6.70820393,6.97747807,-0.518916314,6.85826951,6.97503582,6.85578479
58.745479,6.164414,6.97428667,-0.899929258,6.85601604,6.97192334,6.85361192
58.75597,6.70820393,6.97111178,-0.512745398,6.85376775,6.96882368,6.85144047
58.766462,6.78232998,6.96795238,-0.430839178,6.851524,6.96573607,6.84927002
58.776954,6.40312424,6.96480842,-0.749455923,6.84928481,6.96266064,6.84710079
58.787445,6.244998,6.96167983,-0.846570629,6.84705019,6.9595975,6.844933
58.797937,6.32455532,6.95856567,-0.79624767,6.84481956,6.95654592,6.84276623
58.808428,6.55743852,6.95546622,-0.630894364,6.84259316,6.95350631,6.84060091
58.81892,6.70820393,6.95238057,-0.494142329,6.84037044,6.95047793,6.83843663
58.829412,7.41619849,6.94930873,0.683293319,6.83815146,6.94746092,6.8362736
58.839903,7.14142843,6.94625069,0.441789246,6.83593629,6.94445541,6.83411204
58.850395,7.07106781,6.94320561,0.357578249,6.83372442,6.94146069,6.83195154
58.860886,6.08276253,6.9401738,-0.925965047,6.83151613,6.93847718,6.82979252
58.871378,6.8556546,6.93715443,-0.285481754,6.8293109,6.93550417,6.82763458
58.88187,7.07106781,6.93414756,0.370027366,6.82710886,6.93254181,6.82547792
58.892361,7.34846923,6.93115323,0.645999995,6.82491011,6.92959023,6.82332277
58.902853,6.8556546,6.92817066,-0.269288063,6.82271415,6.92664874,6.82116871
58.913344,6.164414,6.92520019,-0.872230584,6.82052133,6.92371778,6.81901616
58.923836,6.78232998,6.92224106,-0.374046892,6.81833115,6.92079665,6.81686473
58.934328,7,6.91929334,0.284089171,6.81614376,6.91788551,6.81471462
58.944819,6,6.91635713,-0.957265443,6.81395928,6.91498452,6.81256604
58.955311,6.8556546,6.91343167,-0.240368615,6.81177726,6.91209298,6.81041859
58.965802,6.32455532,6.91051735,-0.765481566,6.80959805,6.90921135,6.80827269
58.976294,7.34846923,6.90761343,0.663969727,6.80742117,6.90633896,6.80612794
58.986786,6.8556546,6.90472003,-0.221507168,6.8052468,6.90347595,6.80398454
58.997277,6.63324958,6.90183725,-0.518254441,6.80307509,6.90062251,6.80184271
59.007769,5.83095189,6.89896438,-1.0334469,6.80090558,6.89777796,6.79970204
59.01826,6.4807407,6.89610183,-0.64448517,6.79873865,6.89494275,6.79756296
59.028752,6.164414,6.8932489,-0.853718276,6.79657384,6.89211623,6.79542505
59.039244,7.07106781,6.89040571,0.425043649,6.79441133,6.88929856,6.79328854
59.049735,6.4807407,6.88757239,-0.637833595,6.79225129,6.88648992,6.79115362
59.060227,7.21110255,6.88474828,0.571274256,6.79009328,6.88368966,6.78901991
59.070718,6.55743852,6.88193376,-0.569644835,6.78793767,6.88089823,6.7868878
59.08121,6.8556546,6.87912819,-0.153210921,6.78578404,6.878115,6.78475692
59.091702,6.70820393,6.87633169,-0.410033854,6.78363256,6.87534013,6.78262745
59.102193,7.48331477,6.87354443,0.780877934,6.78148341,6.87257381,6.78049962
59.112685,6.78232998,6.87076573,-0.297381489,6.77933617,6.86981541,6.77837302
59.123176,6.63324958,6.86799603,-0.484506398,6.77719121,6.86706536,6.77624807
59.133668,6,6.86523468,-0.930179916,6.77504812,6.86432306,6.77412437
59.14416,7.61577311,6.86248183,0.867923545,6.77290707,6.86158869,6.77200212
59.154651,6.4807407,6.85973763,-0.61562727,6.77076825,6.85886242,6.76988154
59.165143,5.83095189,6.85700147,-1.01294105,6.76863125,6.85614365,6.76776223
59.175634,7.14142843,6.85427376,0.535868141,6.76649646,6.85343281,6.76564459
59.186126,7.68114575,6.85155389,0.910819335,6.76436344,6.85072931,6.76352824
59.196618,6.63324958,6.848842,-0.464319312,6.7622324,6.84803334,6.76141338
59.207109,6.40312424,6.84613828,-0.665593001,6.76010352,6.84534506,6.75930021
59.217601,6.78232998,6.84344211,-0.247208668,6.7579764,6.8426639,6.75718835
59.228092,7.07106781,6.84075391,0.479910304,6.75585141,6.83999029,6.7550782
59.238584,6.164414,6.83807309,-0.820767378,6.75372816,6.83732365,6.75296936
59.249076,6.63324958,6.83539982,-0.449611204,6.75160683,6.83466417,6.75086205
59.259567,6.40312424,6.83273426,-0.655446428,6.74948761,6.83201202,6.74875646
59.270059,6.55743852,6.83007582,-0.522146818,6.7473701,6.82936663,6.74665222
59.28055,6.70820393,6.82742494,-0.345283957,6.7452547,6.82672844,6.74454971
59.291042,6.78232998,6.82478103,-0.206036523,6.74314099,6.82409688,6.74244856
59.301534,6.32455532,6.82214427,-0.705399848,6.74102916,6.82147215,6.74034895
59.312025,6.55743852,6.81951482,-0.511933881,6.73891942,6.81885441,6.73825112
59.322517,6.32455532,6.81689212,-0.701667161,6.73681136,6.81624312,6.73615465
59.333008,6.08276253,6.8142766,-0.85528596,6.73470538,6.81363871,6.73405995
59.3435,8.18535277,6.81166769,1.17204312,6.73260106,6.81104063,6.73196664
59.353992,6.70820393,6.80906556,-0.317587195,6.73049862,6.80844905,6.72987492
59.364483,7.28010989,6.8064704,0.688214712,6.72839824,6.80586418,6.72778499
59.374975,7,6.80388165,0.44285252,6.72629952,6.80328546,6.72569646
59.385466,6.40312424,6.80129973,-0.631011483,6.72420286,6.80071332,6.72360973
59.395958,7.21110255,6.79872409,0.642167001,6.72210787,6.79814723,6.72152443
59.40645,6.244998,6.79615492,-0.742399438,6.72001472,6.79558737,6.71944074
59.416941,6.63324958,6.7935924,-0.400428301,6.71792364,6.79303393,6.71735888
59.427433,6.32455532,6.79151835,-0.68334693,6.71583421,6.79096878,6.71527845
59.437924,5.65685425,6.7889711,-1.0640098,6.71374683,6.78843019,6.71319986
59.448416,7.28010989,6.78642985,0.702623681,6.71166111,6.78589739,6.71112272
59.458908,7.61577311,6.78389481,0.912073626,6.70957724,6.7833706,6.70904723
59.469399,5.91607978,6.78136614,-0.930207697,6.70749543,6.78085,6.7069736
59.479891,5.47722558,6.77884333,-1.14088464,6.70541527,6.77833506,6.70490143
59.490382,7.14142843,6.77632679,0.604236409,6.70333716,6.77582622,6.70283114
59.500874,7.48331477,6.773816,0.842317502,6.70126071,6.77332294,6.70076232
59.511366,6.70820393,6.77131114,-0.251211485,6.69918612,6.77082544,6.69869519
59.521857,6,6.76881241,-0.876819487,6.69711358,6.76833389,6.69662994
59.532349,7,6.76631928,0.483405336,6.69504271,6.76584779,6.6945662
59.54284,6.244998,6.76383218,-0.720301451,6.69297389,6.76336756,6.69250435
59.553332,6.63324958,6.76135059,-0.357912007,6.69090674,6.76089268,6.69044402
59.563824,6.244998,6.75887469,-0.716851932,6.68884145,6.75842336,6.6883854
59.574315,6.40312424,6.75640469,-0.594373999,6.68677823,6.75595979,6.6863287
59.584807,6.08276253,6.75394006,-0.819254253,6.68471667,6.75350146,6.68427353
59.595298,7.21110255,6.75148124,0.67795377,6.68265719,6.7510488,6.68222029
59.60579,6.40312424,6.74902771,-0.588135586,6.68059938,6.7486013,6.6801686
59.616282,7.41619849,6.74657966,0.818302406,6.67854344,6.74615915,6.67811865
59.626773,5.74456265,6.74413729,-0.999787301,6.67648958,6.74372257,6.67607065
59.637265,7.07106781,6.7417001,0.573905666,6.6744374,6.74129103,6.67402422
59.647756,6.244998,6.7392685,-0.703043743,6.67238731,6.73886498,6.67197974
59.658248,6.55743852,6.736842,-0.423560479,6.6703389,6.73644391,6.66993684
59.66874,6.08276253,6.7344208,-0.807253533,6.66829238,6.73402803,6.66789572
59.679231,7.28010989,6.73200507,0.740341013,6.66624796,6.73161752,6.66585658
59.689723,6.40312424,6.72959434,-0.571375623,6.66420523,6.7292119,6.66381903
59.700214,5.29150262,6.72718902,-1.19820132,6.66216459,6.72681158,6.66178347
59.710706,6.92820323,6.72478861,0.451015095,6.66012567,6.72441609,6.65974952
59.721198,7.48331477,6.72239333,0.872308115,6.65808865,6.72202561,6.65771738
59.731689,6.40312424,6.72000335,-0.562920163,6.65605373,6.71964035,6.65568725
59.742181,7,6.71761819,0.531396097,6.65402053,6.71725982,6.65365874
59.752672,7.14142843,6.71523827,0.652832411,6.65198945,6.71488444,6.65163225
59.763164,6.4807407,6.71286311,-0.481790841,6.64996009,6.71251374,6.64960741
59.773656,6.8556546,6.71049291,0.381000909,6.64793265,6.7101479,6.6475844
59.784147,6.8556546,6.70812785,0.384092111,6.64590734,6.70778713,6.64556342
59.794639,6.244998,6.70576746,-0.678800017,6.64388376,6.70543094,6.64354411
59.80513,6.78232998,6.70341216,0.280923162,6.64186232,6.70307977,6.64152684
59.815622,6.244998,6.70106147,-0.675324715,6.63984262,6.70073313,6.63951125
59.826114,6.92820323,6.63842903,0.538306793,6.63782486,6.63810171,6.63749752
59.836605,6.8556546,6.636417,0.468228153,6.63580925,6.63609364,6.63548586
59.847097,6.78232998,6.63440676,0.384607885,6.63379539,6.63408728,6.63347589
59.857588,6.92820323,6.6323987,0.543879152,6.63178369,6.63208303,6.63146799
59.86808,5.56776436,6.63039244,-1.03083853,6.62977375,6.63008051,6.6294618
59.878572,6.92820323,6.62838818,0.547553698,6.62776578,6.62807993,6.6274575
59.889063,6.92820323,6.62638611,0.549378851,6.62575997,6.62608147,6.6254553
59.899555,7.21110255,6.62438585,0.765974344,6.62375594,6.62408476,6.62345482
59.910046,7.34846923,6.6223878,0.852104117,6.62175409,6.62209019,6.62145644
59.920538,6.92820323,6.62039158,0.554807763,6.61975402,6.62009738,6.6194598
59.93103,6.32455532,6.61839737,-0.542071997,6.61775594,6.61810654,6.61746508
59.941521,6.4807407,6.61640538,-0.368326868,6.61576004,6.61611786,6.61547249
59.952013,7.34846923,6.61441523,0.856769513,6.61376595,6.61413095,6.61348164
59.962504,5.83095189,6.61242731,-0.884010979,6.61177405,6.61214622,6.61149293
59.972996,6.8556546,6.61044123,0.495190234,6.60978396,6.61016329,6.60950599
59.983488,6.70820393,6.6084572,0.315827055,6.60779588,6.60818234,6.60752099
59.993979,6.78232998,6.60647541,0.419350174,6.60581001,6.60620359,6.60553815
60.004471,6.92820323,6.60449549,0.568953195,6.60382597,6.60422665,6.60355709
60.014962,6.8556546,6.60251782,0.503127003,6.60184413,6.60225191,6.60157819
60.025454,6.32455532,6.60054202,-0.525344365,6.59986414,6.600279,6.59960109
60.035946,6.32455532,6.5985683,-0.523462488,6.59788618,6.59830811,6.59762597
60.046437,6.244998,6.59659683,-0.592957702,6.59591045,6.59633944,6.59565302
60.056929,6.8556546,6.59462727,0.510908343,6.59393657,6.59437261,6.59368189
60.06742,7.07106781,6.59265997,0.691670327,6.59196492,6.59240802,6.59171294
60.077912,7.34846923,6.59069458,0.870502527,6.58999514,6.59044528,6.58974582
60.088404,6.78232998,6.58873128,0.439998523,6.58802742,6.5884846,6.58778071
60.098895,6.164414,6.58677028,-0.649889432,6.58606194,6.58652617,6.58581781
60.109387,6.78232998,6.58481119,0.444430864,6.58409834,6.58456962,6.58385674
60.119878,6.244998,6.5828544,-0.581254165,6.582137,6.58261532,6.58189789
60.13037,6.244998,6.58089955,-0.57957014,6.58017755,6.58066292,6.57994089
60.140862,7.28010989,6.57894681,0.83735481,6.57822017,6.5787126,6.57798594
60.151353,5.91607978,6.57699639,-0.812967779,6.57626507,6.57676456,6.57603321
60.161845,6.4807407,6.57504792,-0.307094808,6.57431187,6.57481843,6.57408236
60.172336,6.164414,6.57310177,-0.639286922,6.57236095,6.57287459,6.57213374
60.182828,7.14142843,6.57115758,0.755162795,6.57041195,6.57093267,6.57018701
60.19332,6.244998,6.56921554,-0.56940104,6.56846505,6.56899287,6.56824235
60.203811,6.78232998,6.56727584,0.463739303,6.56652044,6.56705537,6.56629994
60.214303,7.61577311,6.56533812,1.02490731,6.56457776,6.56511981,6.56435943
60.224794,5.47722558,6.56340274,-1.04219824,6.56263739,6.56318657,6.56242119
60.235286,6.40312424,6.56146935,-0.397926019,6.56069895,6.56125529,6.56048486
60.245778,7,6.55953814,0.663673005,6.55876264,6.55932615,6.55855063
60.256269,7.61577311,6.5576093,1.02867089,6.55682865,6.55739935,6.55661868
60.266761,7.81024968,6.55568245,1.12007465,6.55489661,6.55547452,6.55468866
60.277252,5.74456265,6.55375799,-0.899552857,6.5529669,6.55355204,6.55276093
60.287744,6.63324958,6.55183554,0.285331463,6.55103915,6.55163155,6.55083514
60.298236,6.244998,6.54991529,-0.552193165,6.54911356,6.54971323,6.54891147
60.308727,5.47722558,6.54799743,-1.03478107,6.5471903,6.54779727,6.54699011
60.319219,6.78232998,6.54608161,0.486053878,6.54526902,6.54588332,6.54507071
60.32971,6,6.54416819,-0.737677565,6.54335009,6.54397174,6.54315362
60.340202,6.55743852,6.54225681,0.123214093,6.54143315,6.54206219,6.5412385
60.350694,6.08276253,6.54034767,-0.676450394,6.53951839,6.54015483,6.53932554
60.361185,6.8556546,6.53844094,0.563217243,6.53760599,6.53824988,6.5374149
60.371677,6.55743852,6.53653627,0.14457612,6.53569559,6.53634695,6.53550625
60.382168,6.8556546,6.53463403,0.566586771,6.53378757,6.53444643,6.53359995
60.39266,5.91607978,6.53273387,-0.785273253,6.53188156,6.53254796,6.53169563
60.403152,6.70820393,6.53083596,0.421150774,6.52997775,6.53065173,6.5297935
60.413643,5.91607978,6.5289405,-0.782854209,6.52807632,6.52875792,6.52789372
60.424135,7.21110255,6.52704712,0.827076434,6.52617693,6.52686617,6.52599595
60.434626,6.70820393,6.52515621,0.427840772,6.52427993,6.52497686,6.52410056
60.445118,6.40312424,6.52326739,-0.346616724,6.52238496,6.52308963,6.52220718
60.45561,7,6.52138086,0.691823054,6.52049223,6.52120466,6.520316
60.466101,6.63324958,6.5194968,0.337272554,6.5186019,6.51932215,6.51842722
60.476593,7.28010989,6.51761487,0.87320961,6.51671362,6.51744173,6.51654046
60.487084,6.70820393,6.51573541,0.438712346,6.51482776,6.51556378,6.5146561
60.497576,6.32455532,6.51385808,-0.435089375,6.51294397,6.51368793,6.51277379
60.508068,6.55743852,6.51198307,0.213202838,6.51106242,6.51181438,6.51089371
60.518559,6.92820323,6.51011056,0.646600857,6.5091833,6.50994331,6.50901603
60.529051,6.63324958,6.5082402,0.353566659,6.50730626,6.50807437,6.50714042
60.539542,6.63324958,6.50637234,0.356198311,6.50543167,6.50620793,6.50526722
60.550034,6.244998,6.50450665,-0.509419916,6.50355916,6.50434362,6.5033961
60.560526,6.92820323,6.5026433,0.652349548,6.50168892,6.50248164,6.50152723
60.571017,6.8556546,6.50078247,0.595711447,6.49982113,6.50062216,6.4996608
60.581509,7.81024968,6.49892382,1.14513137,6.49795545,6.49876485,6.49779645
60.592,7,6.49706771,0.70917719,6.49609223,6.49691006,6.49593455
60.602492,5.83095189,6.49521379,-0.815022636,6.49423112,6.49505744,6.49407474
60.612984,5.74456265,6.49336224,-0.865332072,6.49237231,6.49320717,6.49221721
60.623475,7.54983444,6.49151324,1.02874739,6.49051597,6.49135944,6.49036214
60.633967,6.08276253,6.48966645,-0.637890213,6.48866176,6.4895139,6.48850919
60.644458,6.55743852,6.48782223,0.263849,6.48681003,6.48767092,6.4866587
60.65495,5.83095189,6.48598022,-0.809338204,6.48496044,6.48583013,6.48481033
60.665442,6,6.48414062,-0.695802139,6.48311317,6.48399173,6.48296426
60.675933,7.07106781,6.48230359,0.767309729,6.48126839,6.4821559,6.48112068
60.686425,6.78232998,6.4804688,0.549418947,6.47942577,6.48032229,6.47927923
60.696916,6.08276253,6.47863661,-0.629185249,6.47758565,6.47849126,6.47744028
60.707408,6.244998,6.47680666,-0.481465121,6.47574769,6.47666246,6.47560347
60.7179,5.56776436,6.47497914,-0.952478231,6.47391207,6.47483608,6.47376898
60.728391,6.32455532,6.47315423,-0.385485297,6.47207897,6.47301229,6.47193701
60.738883,6.4807407,6.47133159,0.0970005419,6.47024805,6.47119076,6.47010719
60.749374,6.32455532,6.46951157,-0.380731207,6.46841965,6.46937183,6.46827989
60.759866,6.40312424,6.46769383,-0.254105475,6.46659344,6.46755517,6.46645476
60.770358,6.40312424,6.46587855,-0.250508102,6.46476959,6.46574096,6.46463197
60.780849,6.08276253,6.4640659,-0.617497668,6.46294828,6.46392937,6.46281172
60.791341,6.63324958,6.46225555,0.413514243,6.46112916,6.46212006,6.46099365
60.801832,8,6.46044785,1.24078691,6.4593126,6.4603134,6.45917812
60.812324,6.63324958,6.45864246,0.417860168,6.45749824,6.45850903,6.45736478
60.822816,6.32455532,6.45683956,-0.363709003,6.45568627,6.45670713,6.45555382
60.833307,5.91607978,6.45503932,-0.734138638,6.45387686,6.45490789,6.4537454
60.843799,6.8556546,6.45324142,0.634360454,6.45206967,6.45311097,6.4519392
60.85429,6.08276253,6.45144618,-0.607193259,6.45026504,6.45131671,6.45013555
60.864782,6.63324958,6.44965329,0.428481372,6.44846265,6.44952479,6.44833412
60.875274,6,6.44786292,-0.669225615,6.44666267,6.44773537,6.44653509
60.885765,6.78232998,6.44607525,0.579874759,6.44486526,6.44594863,6.44473862
60.896257,6.4807407,6.44428993,0.190920843,6.4430701,6.44416425,6.44294439
60.906748,7.41619849,6.44250732,0.986757907,6.44127753,6.44238256,6.44115274
60.91724,6.4807407,6.44072708,0.200034039,6.43948721,6.44060323,6.43936334
60.927732,6.8556546,6.43894939,0.645527077,6.43769932,6.43882644,6.43757634
60.938223,7.14142843,6.43717443,0.839198428,6.43591403,6.43705236,6.43579195
60.948715,6.32455532,6.43540185,-0.332936231,6.43413101,6.43528067,6.4340098
60.959206,6.08276253,6.43363202,-0.592342373,6.4323506,6.4335117,6.43223026
60.969698,6.4807407,6.43186458,0.221079429,6.43057246,6.43174513,6.43045298
60.98019,6.164414,6.43009973,-0.515447116,6.42879677,6.42998113,6.42867814
60.990681,6.164414,6.42833763,-0.513734981,6.4270237,6.42821987,6.42690592
61.001173,6.63324958,6.42657796,0.454611506,6.42525292,6.42646103,6.42513597
61.011664,6.92820323,6.42482105,0.709494312,6.42348477,6.42470495,6.42336864
61.022156,5.83095189,6.42306658,-0.769489887,6.42171892,6.42295129,6.4216036
61.032648,6.08276253,6.42131472,-0.58185238,6.41995553,6.42120024,6.41984103
61.043139,6.55743852,6.41956565,0.37131237,6.41819479,6.41945196,6.41808108
61.053631,6,6.41781903,-0.646389226,6.41643635,6.41770614,6.41632343
61.064122,6.164414,6.41607521,-0.50165846,6.41468057,6.4159631,6.41456843
61.074614,6.08276253,6.41433387,-0.575822312,6.4129271,6.41422252,6.41281573
61.085106,6.40312424,6.41259516,-0.0973186745,6.41117612,6.41248458,6.41106552
61.095597,6.40312424,6.41085927,-0.08794906,6.4094278,6.41074945,6.40931796
61.106089,6.32455532,6.40912588,-0.290810177,6.40768182,6.40901681,6.40757272
61.11658,6.78232998,6.40739531,0.612319092,6.4059385,6.40728698,6.40583014
61.127072,6.4807407,6.40566725,0.273995339,6.40419751,6.40555965,6.40408989
61.137564,6.70820393,6.40394187,0.551599549,6.40245904,6.403835,6.40235215
61.148055,6.8556546,6.40221934,0.67337602,6.40072325,6.40211318,6.40061707
61.158547,6.4807407,6.40049933,0.283269075,6.39898981,6.40039389,6.39888434
61.169038,7.07106781,6.39878219,0.819930257,6.39725905,6.39867744,6.39715429
61.17953,6.32455532,6.39706758,-0.269281009,6.39553066,6.39696354,6.39542659
61.190022,6.63324958,6.39535569,0.487743671,6.39380479,6.39525234,6.39370141
61.200513,6.164414,6.39364593,-0.478781716,6.39208087,6.39354401,6.39197892
61.211005,6,6.39193949,-0.626050711,6.39036007,6.39183824,6.3902588
61.221496,6.164414,6.39023595,-0.475207264,6.38864198,6.39013536,6.38854137
61.231988,7.14142843,6.38853498,0.867694329,6.38692627,6.38843505,6.38682632
61.24248,6.164414,6.38683676,-0.471617173,6.3852131,6.38673749,6.3851138
61.252971,6.55743852,6.38514146,0.415086815,6.38350265,6.38504283,6.383404
61.263463,7.41619849,6.38344876,1.01624295,6.38179459,6.38335077,6.38169658
61.273954,6,6.38175899,-0.617866485,6.38008926,6.38166164,6.37999188
61.284446,7.28010989,6.38007184,0.94870335,6.37838632,6.37997512,6.37828957
61.294938,6.92820323,6.37838748,0.741495618,6.37668595,6.37829137,6.37658982
61.305429,5.83095189,6.37670607,-0.738751767,6.37498831,6.37661058,6.37489279
61.315921,6.244998,6.3750273,-0.360595758,6.37329308,6.37493242,6.37319818
61.326412,6.164414,6.3733515,-0.457096812,6.37160059,6.37325722,6.37150629
61.336904,5.83095189,6.37167836,-0.735341051,6.36991052,6.37158468,6.36981682
61.347396,6.55743852,6.37000804,0.432932424,6.36822304,6.36991495,6.36812992
61.357887,5.47722558,6.36834072,-0.943988952,6.3665383,6.36824821,6.36644577
61.368379,6.08276253,6.36667608,-0.532835383,6.364856,6.36658415,6.36476404
61.37887,6.70820393,6.36501444,0.58582377,6.36317644,6.36492309,6.36308507
61.389362,6.92820323,6.36335551,0.751563517,6.36149933,6.36326473,6.36140852
61.399854,6.244998,6.36169945,-0.341615936,6.35982482,6.36160923,6.35973458
61.410345,6.63324958,6.36004641,0.522688402,6.35815307,6.35995676,6.35806339
61.420837,5.91607978,6.35839611,-0.665068663,6.35648378,6.358307,6.35639464
61.431328,6.63324958,6.35674886,0.525833362,6.35481725,6.3566603,6.35472867
61.44182,6.70820393,6.35510435,0.594221831,6.35315318,6.35501633,6.35306514
61.452312,6,6.35346275,-0.594527334,6.35149173,6.35337527,6.35140423
61.462803,7.61577311,6.35182423,1.12425481,6.34983306,6.35173729,6.34974609
61.473295,5.91607978,6.35018848,-0.65886926,6.34817686,6.35010207,6.34809042
61.483786,6.63324958,6.34855583,0.533567004,6.34652345,6.34846994,6.34643753
61.494278,6.32455532,6.34692598,-0.149568229,6.34487251,6.3468406,6.3447871
61.50477,6.4807407,6.34529908,0.368023942,6.3432242,6.34521421,6.34313931
61.515261,5.74456265,6.3436753,-0.774023679,6.3415787,6.34359095,6.34149431
61.525753,5.56776436,6.34205435,-0.879937491,6.33993568,6.3419705,6.3398518
61.536244,6.244998,6.34043654,-0.308931293,6.33829546,6.34035319,6.33821208
61.546736,6.164414,6.33882158,-0.417621332,6.33665773,6.33873872,6.33657484
61.557228,6.244998,6.33720963,-0.303663676,6.33502265,6.33712726,6.33494026
61.567719,6.244998,6.33560085,-0.301003072,6.33339039,6.33551897,6.33330848
61.578211,5.91607978,6.33399495,-0.646463583,6.33176063,6.33391355,6.3316792
61.588702,7.34846923,6.33239224,1.00800644,6.33013368,6.33231132,6.33005273
61.599194,6.08276253,6.33079244,-0.49802601,6.32850925,6.33071199,6.32842877
61.609686,6.244998,6.3291957,-0.290168397,6.32688748,6.32911572,6.32680747
61.620177,6.164414,6.32760219,-0.403965572,6.32526854,6.32752267,6.32518899
61.630669,6,6.32601161,-0.570974266,6.32365212,6.32593256,6.32357303
61.64116,6.63324958,6.32442429,0.555720514,6.32203853,6.32434569,6.3219599
61.651652,6.40312424,6.32283993,0.283344854,6.32042746,6.32276178,6.32034929
61.662144,6.40312424,6.3212587,0.286121549,6.31881908,6.321181,6.31874135
61.672635,6.63324958,6.31968075,0.559972169,6.31721354,6.3196035,6.31713626
61.683127,5.56776436,6.31810581,-0.866222514,6.31561054,6.31802899,6.31553369
61.693618,6.63324958,6.31653418,0.562774737,6.31401037,6.3164578,6.31393397
61.70411,6.78232998,6.31496557,0.683640555,6.31241276,6.31488963,6.31233678
61.714602,6,6.31417272,-0.560511122,6.31159071,6.31332465,6.31074229
61.725093,6.55743852,6.31261342,0.494798042,6.3100014,6.31176302,6.30915065
61.735585,6.63324958,6.31105721,0.567619916,6.30841466,6.31020446,6.30756156
61.746076,5.83095189,6.3095044,-0.691774894,6.3068308,6.30864928,6.30597532
61.756568,6.55743852,6.3079547,0.499483556,6.3052495,6.3070972,6.30439163
61.76706,6.63324958,6.30640829,0.571700354,6.30367094,6.30554838,6.30281066
61.777551,6.08276253,6.30486531,-0.471277818,6.30209525,6.30400298,6.30123254
61.788043,6.32455532,6.3033255,0.145704556,6.30052215,6.30246074,6.29965699
61.798534,6.92820323,6.30178917,0.791463241,6.29895193,6.30092195,6.29808431
61.809026,6.4807407,6.30025603,0.424834867,6.29738429,6.29938634,6.2965142
61.819518,6.8556546,6.29872626,0.746276315,6.2958194,6.29785407,6.29494681
61.830009,6.78232998,6.29720002,0.696512719,6.29425741,6.29632532,6.2933823
61.840501,6,6.29567702,-0.543761918,6.292698,6.2947998,6.29182037
61.850992,6.244998,6.29415759,-0.221719631,6.2911415,6.29327782,6.29026131
61.861484,6.70820393,6.29264145,0.644641356,6.2895876,6.29175912,6.28870484
61.871976,6.164414,6.29112877,-0.35597018,6.28803646,6.29024386,6.28715111
61.882467,5.65685425,6.28961971,-0.795465562,6.28648822,6.2887322,6.28560026
61.892959,6.244998,6.288114,-0.207643931,6.28494259,6.28722387,6.28405201
61.90345,6.08276253,6.28661195,-0.451496869,6.28339988,6.28571918,6.28250665
61.913942,7.21110255,6.2851133,0.962283352,6.28185978,6.28421788,6.28096389
61.924434,6.78232998,6.28361821,0.706195278,6.28032245,6.28272011,6.27942388
61.934925,5.74456265,6.28212685,-0.7331877,6.27878803,6.28122606,6.27788677
61.945417,6.4807407,6.28063895,0.447327334,6.27725625,6.27973545,6.27635226
61.955908,7.61577311,6.27915483,1.15612208,6.27572738,6.2782486,6.27482066
61.9664,6.55743852,6.27767423,0.528927496,6.27420115,6.27676525,6.27329167
61.976892,6.244998,6.27619731,-0.17663326,6.2726777,6.27528556,6.27176544
61.987383,6.55743852,6.27472424,0.531708839,6.27115718,6.27380971,6.27024213
61.997875,6.92820323,6.27325476,0.809288867,6.2696393,6.27233743,6.26872143
62.008366,6.08276253,6.27178919,-0.434771962,6.26812435,6.27086903,6.26720365
62.018858,5.91607978,6.27032727,-0.595186936,6.26661205,6.26940427,6.2656885
62.02935,5.74456265,6.26886918,-0.72409014,6.26510254,6.26794331,6.26417612
62.039841,6.08276253,6.26741508,-0.429712166,6.26359597,6.26648633,6.26266666
62.050333,6.244998,6.26596472,-0.144798901,6.26209205,6.26503307,6.26115983
62.060824,6.78232998,6.26451842,0.719591247,6.26059108,6.26358385,6.25965593
62.071316,6.63324958,6.26307593,0.608418974,6.25909277,6.26213843,6.25815467
62.081808,6.164414,6.26163743,-0.311806716,6.25759726,6.26069696,6.25665619
62.092299,5.91607978,6.26020309,-0.586620238,6.25610471,6.25925964,6.25516065
62.102791,5.74456265,6.25877266,-0.717084387,6.25461482,6.25782622,6.25366775
62.113282,6.92820323,6.25734647,0.819058457,6.25312789,6.25639701,6.25217778
62.123774,6.32455532,6.25592428,0.261975263,6.25164362,6.25497178,6.25069047
62.134266,5.91607978,6.25450627,-0.581744345,6.25016218,6.2535507,6.24920595
62.144757,5.74456265,6.2530926,-0.713112864,6.24868369,6.25213396,6.24772438
62.155249,6.4807407,6.25168307,0.478599657,6.24720789,6.25072133,6.24624546
62.16574,6.70820393,6.25027797,0.67670227,6.24573505,6.24931311,6.24476948
62.176232,6.63324958,6.24887709,0.619977813,6.24426489,6.24790909,6.24329617
62.186724,6.40312424,6.24748062,0.394516948,6.24279756,6.24650945,6.24182567
62.197215,6.32455532,6.24608872,0.280118902,6.2413332,6.24511438,6.24035811
62.207707,6.70820393,6.2447012,0.680810352,6.23987153,6.24372365,6.23889323
62.218198,6.164414,6.24331836,-0.280899195,6.23841284,6.24233759,6.2374313
62.22869,5.74456265,6.24194,-0.705249854,6.23695684,6.24095599,6.23597204
62.239182,5.56776436,6.24056632,-0.820245056,6.23550368,6.23957903,6.2345156
62.249673,6.4807407,6.23919749,0.491470459,6.2340535,6.23820692,6.23306211
62.260165,7,6.23783332,0.873021582,6.23260602,6.23683944,6.23161131
62.270656,6.4807407,6.23647413,0.494233312,6.23116152,6.23547693,6.23016347
62.281148,7.81024968,6.23511974,1.25504181,6.22971974,6.23411918,6.22871831
62.29164,6.63324958,6.23377034,0.632043703,6.2282808,6.23276641,6.22727598
62.302131,6.55743852,6.23242613,0.570098585,6.22684484,6.23141881,6.22583662
62.312623,6.164414,6.23108693,-0.258211009,6.2254116,6.23007619,6.22439995
62.323114,6.55743852,6.22975307,0.572438165,6.22398136,6.2287389,6.22296624
62.333606,5.47722558,6.22842439,-0.866717261,6.22255383,6.22740675,6.22153523
62.344098,6.244998,6.22710108,0.133779356,6.22112915,6.22607996,6.22010706
62.354589,5.38516481,6.22578337,-0.916852533,6.21970748,6.22475875,6.21868185
62.365081,5.65685425,6.2244711,-0.753403513,6.21828852,6.22344295,6.21725935
62.375572,7.21110255,6.22316461,0.993950672,6.21687257,6.22213291,6.21583983
62.386064,6.70820393,6.22186375,0.697380942,6.21545934,6.22082848,6.21442301
62.396556,6.164414,6.22056876,-0.236969945,6.21404899,6.21952989,6.21300903
62.407047,6.40312424,6.21927985,0.428770783,6.21264163,6.21823737,6.21159803
62.417539,6,6.21799691,-0.46690139,6.21123701,6.21695078,6.21018974
62.42803,6.70820393,6.21672028,0.701058947,6.20983539,6.2156705,6.20878444
62.438522,6.164414,6.21544986,-0.225911179,6.20843651,6.21439639,6.20738185
62.449014,6.4807407,6.2141859,0.516289456,6.20704051,6.21312871,6.20598211
62.459505,6.08276253,6.21292864,-0.360785401,6.20564752,6.21186772,6.20458535
62.469997,6.08276253,6.21167798,-0.359047983,6.20425727,6.21061331,6.20319132
62.480488,6.78232998,6.21043433,0.75623783,6.20287003,6.20936587,6.20180027
62.49098,6.4807407,6.20919758,0.52109799,6.20148554,6.20812532,6.20041195
62.501472,5.74456265,6.20796803,-0.680738852,6.20010394,6.20689194,6.19902648
62.511963,5.47722558,6.20674596,-0.854119654,6.19872535,6.20566602,6.19764401
62.522455,6.08276253,6.20553131,-0.35038376,6.19734951,6.20444749,6.19626426
62.532946,7.07106781,6.2043245,0.930990499,6.1959767,6.20323678,6.19488751
62.543438,6,6.2031255,-0.450694466,6.19460664,6.20203385,6.19351349
62.55393,6.55743852,6.20193463,0.596241474,6.19323947,6.20083903,6.19214233
62.564421,6.40312424,6.20075221,0.449857782,6.19187532,6.19965264,6.19077417
62.574913,6.4807407,6.19957825,0.530247531,6.19051393,6.19847468,6.18940874
62.585404,4.89897949,6.19841321,-1.13992707,6.18915557,6.19730562,6.18804631
62.595896,5.91607978,6.19725712,-0.530261577,6.18779997,6.19614548,6.18668663
62.606388,5.65685425,6.19611036,-0.734340593,6.18644727,6.19499464,6.18532981
62.616879,6,6.1949733,-0.441557808,6.1850976,6.19385348,6.18397599
62.627371,5.91607978,6.19384603,-0.527035333,6.1837507,6.19272208,6.18262492
62.637862,5.29150262,6.19272906,-0.949329469,6.18240682,6.19160097,6.18127685
62.648354,6.08276253,6.19162252,-0.329939375,6.18106573,6.19049025,6.17993152
62.658846,6.55743852,6.19052685,0.605732343,6.17972753,6.18939038,6.17858907
62.669337,5.91607978,6.18944252,-0.522841027,6.17839237,6.18830182,6.17724963
62.679829,6.32455532,6.18836971,0.369033348,6.17705998,6.18722476,6.17591293
62.69032,6.244998,6.18730902,0.240185302,6.17573063,6.18615979,6.17457924
62.700812,6.244998,6.18626068,0.242357828,6.17440406,6.18510714,6.17324831
62.711304,7,6.18522525,0.90264874,6.1730804,6.18406738,6.17192025
62.721795,5.38516481,6.18420331,-0.893889535,6.17175977,6.18304108,6.1705952
62.732287,5.83095189,6.18319516,-0.593500859,6.17044193,6.18202855,6.16927291
62.742778,7.21110255,6.18220155,1.01434757,6.16912713,6.18103054,6.16795363
62.75327,5.38516481,6.18122286,-0.892220856,6.16781512,6.18004741,6.16663711
62.763762,5.56776436,6.18025979,-0.782620873,6.16650602,6.17907987,6.16532347
62.774253,6.244998,6.17931308,0.256290683,6.16519996,6.17812868,6.16401284
62.784745,6.4807407,6.17838324,0.549870398,6.1638967,6.17719432,6.16270498
62.795236,6.40312424,6.17747118,0.47502953,6.16259647,6.17627772,6.16140013
62.805728,5.74456265,6.17657751,-0.657278375,6.16129905,6.17537947,6.16009804
62.81622,6.40312424,6.17570314,0.47688688,6.16000454,6.17450051,6.15879884
62.826711,6.70820393,6.17484905,0.730311497,6.15871307,6.1736418,6.15750265
62.837203,6.78232998,6.17401602,0.779944846,6.1574244,6.17280412,6.15620923
62.847694,6.55743852,6.17320522,0.61986555,6.15613878,6.17198864,6.15491883
62.858186,6.244998,6.17241759,0.269407515,6.15485596,6.17119631,6.15363119
62.868678,5.83095189,6.17165436,-0.583697234,6.15357606,6.17042834,6.15234645
62.879169,6.70820393,6.17091683,0.732998703,6.15229921,6.16968607,6.15106472
62.889661,6.40312424,6.17020622,0.482615811,6.15102516,6.16897067,6.14978576
62.900152,5.74456265,6.16952407,-0.65189065,6.14975416,6.16828371,6.14850982
62.910644,6.244998,6.16887179,0.275909784,6.14848597,6.1676266,6.14723665
62.921136,5.91607978,6.1682511,-0.502166626,6.14722071,6.16700105,6.14596638
62.931627,6.244998,6.16766384,0.278090199,6.14595849,6.1664089,6.14469912
62.942119,6.40312424,6.1671118,0.485811114,6.14469909,6.16585195,6.14343464
62.95261,5.09901951,6.16659715,-1.03323649,6.14344273,6.16533237,6.14217318
62.963102,6.32455532,6.16612203,0.3980368,6.14218919,6.16485228,6.14091449
62.973594,6.08276253,6.16568889,-0.287969365,6.14093857,6.16441415,6.1396587
62.984085,5.91607978,6.16530037,-0.499219978,6.13969101,6.16402063,6.13840593
62.994577,6.164414,6.16495923,-0.0233501213,6.13844626,6.16367445,6.13715593
63.005068,7,6.1646686,0.91396466,6.13720457,6.16337876,6.13590896
63.01556,6.244998,6.16443175,0.283841938,6.13596569,6.16313683,6.13466476
63.026052,6,6.16425235,-0.405280578,6.13472974,6.16295233,6.13342346
63.036543,7.07106781,6.16413435,0.952330543,6.13349685,6.1628292,6.13218518
63.047035,6.164414,6.16408206,0.018219439,6.13226677,6.16277177,6.13094969
63.057526,7.14142843,6.16410021,0.988599119,6.13103975,6.16278476,6.12971721
63.068018,6.164414,6.16419401,0.0148320987,6.12981555,6.16287337,6.12848751
63.07851,6.8556546,6.16436918,0.831435761,6.12859429,6.16304334,6.12726071
63.089001,6.92820323,6.16463198,0.87382564,6.12737608,6.16330093,6.12603693
63.099493,4.89897949,6.16498945,-1.12517108,6.12616069,6.16365316,6.12481593
63.109984,5.65685425,6.16544926,-0.713158473,6.12494836,6.16410773,6.12359795
63.120476,6.244998,6.16602011,0.281030053,6.12373885,6.16467332,6.12238276
63.130968,5.74456265,6.16671159,-0.649729898,6.12253228,6.16535953,6.12117047
63.141459,5.65685425,6.16753439,-0.714618877,6.12132876,6.16617707,6.11996119
63.151951,6.40312424,6.16850078,0.484379455,6.12012807,6.16713818,6.1187547
63.162442,5.56776436,6.16962421,-0.775796269,6.11893043,6.16825634,6.11755122
63.172934,6.4807407,6.1709203,0.556615127,6.11773562,6.16954715,6.11635053
63.183426,6.08276253,6.17240635,-0.299405775,6.11654376,6.17102793,6.11515274
63.193917,5.74456265,6.17410191,-0.655392447,6.11535494,6.17271823,6.11395797
63.204409,5.83095189,6.17602963,-0.587433174,6.11416896,6.17464071,6.11276598
63.2149,6,6.17821444,-0.422154525,6.11298603,6.17682031,6.11157701
63.225392,5.47722558,6.18068539,-0.838725114,6.11180592,6.17928607,6.11039083
63.235884,6.32455532,6.18347462,0.375607105,6.11062877,6.18207015,6.10920754
63.246375,6.244998,6.18661827,0.241618964,6.10945466,6.18520869,6.10802727
63.256867,6.55743852,6.19015789,0.60603683,6.10828339,6.18874325,6.10684979
63.267358,6.63324958,6.19413859,0.662654502,6.10711517,6.19271897,6.10567532
63.27785,5.65685425,6.19861217,-0.736042063,6.10594978,6.19718764,6.10450363
63.288342,5.91607978,6.20363478,-0.536241544,6.10478733,6.20220544,6.10333485
63.298833,7.07106781,6.20926808,0.928331694,6.10362794,6.20783403,6.10216907
63.309325,7,6.21558118,0.885674219,6.10247138,6.21414255,6.10100609
63.319816,6,6.22264671,-0.471854538,6.10131788,6.22120364,6.09984611
63.330308,6.244998,6.23054545,0.120218751,6.10016721,6.22909811,6.09868892
63.3408,6.92820323,6.23936144,0.829964935,6.09901948,6.23791,6.09753463
63.351291,5.74456265,6.24918286,-0.710366253,6.0978748,6.24772752,6.09638335
63.361783,5.38516481,6.2601042,-0.935381948,6.09673296,6.25864519,6.09523485
63.372274,6.32455532,6.27221785,0.228773846,6.09559417,6.27075542,6.09408936
63.382766,7.34846923,6.2856202,1.0309457,6.09445822,6.28415462,6.09294666
63.393258,6.08276253,6.30040059,-0.466516943,6.09332521,6.29893215,6.09180685
63.403749,7,6.31663964,0.826656131,6.09219525,6.31516865,6.09067005
63.414241,6.78232998,6.33440809,0.669269675,6.09106812,6.33293487,6.08953603
63.424732,7.41619849,6.35374686,1.03075294,6.08994405,6.35227175,6.08840502
63.435224,6.164414,6.37466886,-0.458535558,6.08882281,6.37319218,6.08727679
63.445716,7.07106781,6.39713092,0.820936595,6.08770451,6.395653,6.08615145
63.456207,6.92820323,6.42101912,0.7121686,6.08658926,6.41954025,6.08502912
63.466699,6.8556546,6.44613275,0.639938945,6.08547685,6.44465317,6.08390957
63.47719,7.07106781,6.47214199,0.773902982,6.08436749,6.47066187,6.08279302
63.487682,7,6.4985812,0.708109317,6.08326096,6.49710059,6.08167925
63.498174,5.65685425,6.524812,-0.931642499,6.08215738,6.52333081,6.08056837
63.508665,6.08276253,6.55002503,-0.68356602,6.08105684,6.548543,6.07946049
63.519157,7.61577311,6.57326513,1.0210328,6.07995914,6.57178176,6.07835539
63.529648,6.40312424,6.59346553,-0.436281211,6.07886449,6.59198011,6.07725328
63.54014,7,6.60955231,0.624858136,6.07777267,6.60806387,6.07615396
63.550632,7.14142843,6.62054726,0.721720979,6.07668379,6.61905462,6.07505752
63.561123,7.14142843,6.62570454,0.718139186,6.07559795,6.62420634,6.07396407
63.571615,6.244998,6.62462156,-0.616135993,6.07451496,6.62311636,6.0728734
63.582106,6.4807407,6.61730173,-0.369541645,6.073435,6.61578804,6.07178573
63.592598,7.28010989,6.60415294,0.822166009,6.07235788,6.60262935,6.07070083
63.60309,7.87400787,6.585925,1.13493739,6.0712837,6.58439023,6.06961881
63.613581,7.21110255,6.56359752,0.804676973,6.07021256,6.56205051,6.06853977
63.624073,7.34846923,6.53824291,0.900125721,6.06914426,6.53668279,6.06746352
63.634564,6.70820393,6.51092543,0.44416045,6.06807899,6.50935157,6.06639024
63.645056,7.07106781,6.48259607,0.767119118,6.06701657,6.48100806,6.06531975
63.655548,6.32455532,6.45406052,-0.359868314,6.06595707,6.45245812,6.06425213
63.666039,5.91607978,6.42595395,-0.714054737,6.06490062,6.42433709,6.06318748
63.676531,6.32455532,6.39873891,-0.27236665,6.063847,6.39710764,6.06212561
63.687022,6.244998,6.3727438,-0.35741544,6.06279642,6.37109825,6.06106672
63.697514,6.32455532,6.34816781,-0.153663552,6.06174867,6.34650818,6.0600106
63.708006,6.244998,6.32512461,-0.283066447,6.06070386,6.32345114,6.05895735
63.718497,6,6.30365758,-0.551051341,6.05966207,6.30197053,6.05790707
63.728989,6,6.28375375,-0.532685409,6.05862313,6.28205339,6.05685957
63.73948,6.32455532,6.26537311,0.243273932,6.05758721,6.26365972,6.05581503
63.749972,6.4807407,6.24844518,0.481970454,6.05655413,6.24671901,6.05477326
63.760464,6.63324958,6.23289022,0.632739568,6.05552398,6.23115153,6.05373435
63.770955,6.32455532,6.21861977,0.325477418,6.05449686,6.2168688,6.05269841
63.781447,7.61577311,6.20553768,1.18753334,6.05347257,6.20377464,6.05166524
63.791938,6.08276253,6.19355254,-0.332851333,6.05245131,6.19177764,6.05063502
63.80243,7.14142843,6.18256999,0.979213172,6.05143288,6.18078341,6.04960757
63.812922,6.63324958,6.17250251,0.678783521,6.05041738,6.1707044,6.04858298
63.823413,6.244998,6.16326668,0.285886892,6.04940491,6.16145719,6.04756135
63.833905,5.56776436,6.15478164,-0.766170528,6.04839526,6.15296089,6.04654248
63.844396,6.244998,6.14697546,0.313085509,6.04738864,6.14514355,6.04552655
63.854888,5.91607978,6.13977886,-0.472968373,6.04638485,6.13793588,6.04451339
63.86538,5.56776436,6.1331306,-0.751908395,6.04538398,6.13127661,6.04350308
63.875871,6.55743852,6.12697487,0.65609729,6.04438614,6.12510994,6.04249572
63.886363,6.40312424,6.12125963,0.530909227,6.04339112,6.1193838,6.04149111
63.896854,6.32455532,6.11594027,0.45674397,6.04239912,6.11405357,6.04048945
63.907346,6,6.11097491,-0.33312897,6.04140995,6.10907736,6.03949054
63.917838,6.8556546,6.10632771,0.865636696,6.0404237,6.10441932,6.03849448
63.928329,6.244998,6.10196678,0.378194681,6.03944046,6.10004755,6.03750135
63.938821,6,6.09786271,-0.312830166,6.03846005,6.09593263,6.03651097
63.949312,6.92820323,6.09399103,0.913352177,6.03748265,6.09205008,6.03552353
63.959804,5.29150262,6.09032869,-0.893770705,6.03650808,6.08837686,6.03453884
63.970296,7,6.08685639,0.955585479,6.03553643,6.08489364,6.03355698
63.980787,6.164414,6.08355704,0.284353589,6.03456778,6.08158334,6.03257805
63.991279,6.40312424,6.08041463,0.568075358,6.03360196,6.07842994,6.03160187
64.00177,6.164414,6.07741612,0.294954028,6.03263914,6.0754204,6.03062861
64.012262,6.244998,6.07454887,0.412854856,6.03167915,6.07254207,6.02965809
64.022754,5.83095189,6.07180237,-0.490765194,6.03072207,6.06978444,6.02869039
64.033245,7.14142843,6.06916727,1.03550044,6.029768,6.06713815,6.02772562
64.043737,6.164414,6.06663443,0.312697249,6.02881675,6.06459408,6.02676359
64.054228,6.92820323,6.06419662,0.929519559,6.02786849,6.06214496,6.02580447
64.06472,6.08276253,6.06184639,0.14462415,6.02692306,6.05978336,6.02484808
64.075212,6.08276253,6.05957766,0.152265782,6.02598054,6.05750321,6.02389451
64.085703,6.32455532,6.05738494,0.51688527,6.02504101,6.05529898,6.02294385
64.096195,5.47722558,6.0552626,-0.760287463,6.0241043,6.05316507,6.02199592
64.106686,7,6.05320632,0.973033236,6.02317059,6.05109715,6.0210509
64.117178,6.32455532,6.05118336,0.522849849,6.02221153,6.04909049,6.0201086
64.12767,5.56776436,6.04924609,-0.693888842,6.02128363,6.04714134,6.01916911
64.138161,6.40312424,6.04736295,0.596457283,6.02035873,6.04524623,6.01823252
64.148653,5.29150262,6.04553024,-0.868347636,6.01943664,6.04340148,6.01729865
64.159144,6,6.04374524,-0.209153638,6.01851754,6.04160435,6.01636767
64.169636,6.4807407,6.04200479,0.662371425,6.01760125,6.03985169,6.01543941
64.180128,5.91607978,6.04030645,-0.352458032,6.01668785,6.03814104,6.01451395
64.190619,6.164414,6.03864795,0.354635098,6.01577745,6.03647016,6.01359137
64.201111,6.244998,6.03702675,0.456038644,6.01486985,6.03483648,6.01267151
64.211602,6.32455532,6.0354411,0.537693429,6.01396524,6.03323826,6.01175453
64.222094,5.56776436,6.03388876,-0.682733037,6.01306344,6.03167326,6.01084026
64.232586,6.4807407,6.03236812,0.669606286,6.01216453,6.03013986,6.00992878
64.243077,5.65685425,6.03087766,-0.611574532,6.0112686,6.02863654,6.00902018
64.253569,6.164414,6.02941555,0.367421354,6.01037548,6.02716149,6.00811427
64.26406,5.19615242,6.02798065,-0.912046175,6.00948533,6.02571353,6.00721124
64.274552,5.47722558,6.02657134,-0.74117863,6.00859799,6.02429107,6.0063109
64.285044,6.08276253,6.02518651,0.239950038,6.00771354,6.02289299,6.00541335
64.295535,6,6.02382513,-0.154353922,6.00683207,6.02151825,6.00451866
64.306027,6.8556546,6.02248586,0.912780773,6.00595339,6.02016552,6.00362666
64.316518,5.91607978,6.02116793,-0.324173022,6.00507769,6.01883402,6.00273752
64.32701,6.32455532,6.01987014,0.551982951,6.00420479,6.01752255,6.00185107
64.337502,5.47722558,6.01859173,-0.735775884,6.00333477,6.01623035,6.00096738
64.347993,6,6.01733197,-0.131650944,6.00246772,6.01495669,6.00008655
64.358485,7.14142843,6.01608985,1.06081977,6.00160346,6.01370055,5.9992084
64.368976,6.8556546,6.01486486,0.916945874,6.00074218,6.01246144,5.99833309
64.379468,6.55743852,6.01365609,0.737416054,5.99988369,6.01123842,5.99746047
64.38996,6.244998,6.01246299,0.48221884,5.99902808,6.01003096,5.9965906
64.400451,6.40312424,6.01128507,0.625970583,5.99817543,6.00883855,5.99572356
64.410943,5.65685425,6.01012152,-0.594362912,5.99732557,6.00766041,5.9948592
64.421434,5.74456265,6.00897203,-0.514207528,5.99647867,6.00649619,5.99399767
64.431926,5.91607978,6.00783586,-0.302912656,5.99563457,6.00534517,5.99313881
64.442418,5.91607978,6.00671264,-0.301052919,5.99479335,6.00420698,5.9922827
64.452909,5.47722558,6.00560203,-0.726895075,5.99395507,6.00308126,5.9914294
64.463401,6.55743852,6.00450337,0.7435961,5.99311959,6.00196737,5.99057877
64.473892,6.4807407,6.00341646,0.690886557,5.99228706,6.0008651,5.98973096
64.484384,6.164414,6.00234073,0.40258325,5.99145732,5.99977387,5.9888858
64.494876,6.55743852,6.0012759,0.745763114,5.99063045,5.99869342,5.98804337
64.505367,5.74456265,6.00022174,-0.505627422,5.98980653,5.99762349,5.98720376
64.515859,6.164414,5.9991777,0.406492681,5.98898539,5.99656355,5.98636679
64.52635,6.32455532,5.99814369,0.571324451,5.9881672,5.9955135,5.98553263
64.536842,6.63324958,5.99711921,0.797577814,5.9873518,5.99447284,5.98470111
64.547334,6.164414,5.99610408,0.410255922,5.98653927,5.99344138,5.98387231
64.557825,5.91607978,5.99509813,-0.281102027,5.98572967,5.99241896,5.98304631
64.568317,5.47722558,5.99410092,-0.718940433,5.98492286,5.99140513,5.98222294
64.578808,5.91607978,5.9931124,-0.277547499,5.98411899,5.99039985,5.98140236
64.5893,6,5.99213215,0.0887009251,5.9833179,5.98940268,5.98058442
64.599792,6.70820393,5.99116004,0.84678444,5.98251968,5.98841351,5.97976918
64.610283,6.32455532,5.99019598,0.578238137,5.98172439,5.98743222,5.97895672
64.620775,5.47722558,5.98923957,-0.715551529,5.98093188,5.98645843,5.97814688
64.631266,6.55743852,5.9882908,0.754418796,5.9801423,5.98549214,5.97733982
64.641758,5.65685425,5.98734933,-0.57488702,5.97935551,5.98453297,5.97653538
64.65225,6,5.98641508,0.116554379,5.97857157,5.98358086,5.97573363
64.662741,5.56776436,5.98548796,-0.646315398,5.97779056,5.98263572,5.97493465
64.673233,6.32455532,5.98456764,0.583084624,5.97701233,5.98169721,5.97413828
64.683724,6.08276253,5.98365416,0.314814819,5.97623703,5.98076538,5.97334466
64.694216,5.74456265,5.9827472,-0.488041546,5.97546451,5.97983989,5.97255365
64.704708,5.65685425,5.9818467,-0.570081095,5.97469484,5.9789207,5.97176532
64.715199,6.40312424,5.98095264,0.649747334,5.97392809,5.97800776,5.97097974
64.725691,5.65685425,5.98006471,-0.568516012,5.97316412,5.97710077,5.97019676
64.736182,5.74456265,5.97918296,-0.484376206,5.97240307,5.97619979,5.96941652
64.746674,6,5.97830711,0.147285069,5.9716448,5.97530453,5.96863887
64.757166,6.40312424,5.97743714,0.652447007,5.97088938,5.97441497,5.96786389
64.767657,6.164414,5.97657303,0.433406246,5.97013687,5.97353108,5.96709164
64.778149,6.40312424,5.97571451,0.653765804,5.96938715,5.97265258,5.96632197
64.78864,5.91607978,5.97486165,-0.242449729,5.96864033,5.97177957,5.96555503
64.799132,7.07106781,5.97401421,1.04740327,5.9678963,5.97091176,5.96479067
64.809624,6.08276253,5.97317216,0.331044365,5.96715511,5.97004916,5.96402896
64.820115,5.19615242,5.97233551,-0.881012535,5.96641683,5.96919176,5.96326996
64.830607,5,5.97150402,-0.985649034,5.96568133,5.96833931,5.96251353
64.841098,6.78232998,5.97067776,0.900917432,5.96494874,5.9674919,5.96175981
64.85159,6,5.96985652,0.173618785,5.96421892,5.96664929,5.96100866
64.862082,5.91607978,5.96904029,-0.230131489,5.96349195,5.96581148,5.96026014
64.872573,6.63324958,5.96822908,0.815487894,5.96276789,5.96497848,5.95951432
64.883065,6.8556546,5.96742267,0.942460573,5.9620466,5.96415007,5.95877105
64.893556,5.56776436,5.96662116,-0.631551101,5.96132822,5.96332634,5.95803047
64.904048,6,5.96582432,0.184866651,5.96061261,5.96250706,5.95729245
64.91454,5.91607978,5.96503218,-0.221251895,5.95989985,5.96169225,5.95655704
64.925031,6.8556546,5.96424756,0.944143551,5.95919278,5.96088194,5.95582431
64.935523,5.91607978,5.96346466,-0.217680665,5.95848571,5.9600759,5.95509413
64.946014,5,5.96268636,-0.981165819,5.95778154,5.95927425,5.95436661
64.956506,5.09901951,5.96191248,-0.928920324,5.95708015,5.95847676,5.95364163
64.966998,5.83095189,5.96114304,-0.360820097,5.95638159,5.95768347,5.95291926
64.977489,5.65685425,5.96037805,-0.550929945,5.95568594,5.9568944,5.95219954
64.987981,5.56776436,5.95961734,-0.625981613,5.95499307,5.95610935,5.95148235
64.998472,6.78232998,5.958861,0.907451915,5.9543031,5.95532843,5.95076782
65.008964,6.4807407,5.95810885,0.722932807,5.9536159,5.95455144,5.9500558
65.019456,6.40312424,5.95736092,0.667655085,5.95293155,5.95377842,5.94934637
65.029947,5.56776436,5.95661725,-0.623580696,5.95225009,5.95300939,5.94863959
65.040439,5.38516481,5.95587764,-0.755455382,5.95157142,5.95224416,5.94793531
65.05093,6.40312424,5.95514221,0.669314592,5.95089565,5.95148285,5.94723367
65.061422,6.40312424,5.95441079,0.669860767,5.95022265,5.95072527,5.94653453
65.071914,6.32455532,5.95368341,0.60899254,5.9495525,5.94997145,5.94583796
65.082405,6.164414,5.9529601,0.459841172,5.94888525,5.94922143,5.94514402
65.092897,6.55743852,5.9522407,0.777944615,5.94822078,5.94847503,5.94445257
65.103388,6.164414,5.95152532,0.461398621,5.94755922,5.94773236,5.94376374
65.11388,7.28010989,5.95081378,1.15295104,5.94690044,5.94699325,5.94307739
65.124372,6.55743852,5.95010614,0.779315332,5.94624449,5.94625774,5.94239359
65.134863,6.55743852,5.94940242,0.779766697,5.94559146,5.94552585,5.9417124
65.145355,6.08276253,5.94870248,0.366142118,5.94494121,5.94479743,5.94103369
65.155846,6.244998,5.94800641,0.544969342,5.94429386,5.94407258,5.94035757
65.166338,5.38516481,5.94731407,-0.74976614,5.9436493,5.94335114,5.93968393
65.17683,5.19615242,5.94662549,-0.866298489,5.94300759,5.94263315,5.93901281
65.187321,6.244998,5.94594072,0.546861293,5.94236879,5.94191864,5.93834429
65.197813,6.63324958,5.94525961,0.829451608,5.94173278,5.94120746,5.93767822
65.208304,5.83095189,5.94458226,-0.337091038,5.94109967,5.94049972,5.93701474
65.218796,5.29150262,5.94390853,-0.807716477,5.94046936,5.93979525,5.9363537
65.229288,5.91607978,5.94323846,-0.164798894,5.9398419,5.93909411,5.93569518
65.239779,6.244998,5.94257209,0.549932637,5.93921736,5.93839632,5.93503922
65.250271,5.83095189,5.94190929,-0.333102678,5.93859561,5.93770174,5.93438571
65.260762,5.91607978,5.94125016,-0.158651732,5.93797678,5.93701048,5.93373476
65.271254,6.63324958,5.94059455,0.832258993,5.93736074,5.93632237,5.93308624
65.281746,6.78232998,5.93994252,0.917816683,5.93674757,5.93563748,5.93244021
65.292237,6.92820323,5.93929411,0.994439099,5.93613732,5.93495583,5.93179674
65.302729,6.32455532,5.93864918,0.621213439,5.93552988,5.93427729,5.93115568
65.31322,6.32455532,5.93800785,0.62172942,5.93492536,5.93360195,5.93051717
65.323712,5.56776436,5.93736997,-0.607951978,5.93432365,5.93292968,5.92988108
65.334204,5.91607978,5.9367356,-0.143721305,5.93372481,5.93226052,5.92924745
65.344695,5.29150262,5.93610477,-0.802871193,5.9331289,5.9315945,5.92861636
65.355187,6.32455532,5.93547737,0.623761131,5.93253581,5.93093149,5.92798767
65.365678,6.32455532,5.9348535,0.624261021,5.93194565,5.9302716,5.9273615
65.37617,5.83095189,5.93423302,-0.32137381,5.93135831,5.92961468,5.92673773
65.386662,6.08276253,5.93361599,0.386194949,5.93077386,5.92896077,5.92611641
65.397153,6.08276253,5.93300246,0.386988466,5.93019235,5.92830993,5.9254976
65.407645,5.56776436,5.93239229,-0.603844293,5.92961368,5.92766202,5.92488118
65.418136,6.8556546,5.9317856,0.961181042,5.92903794,5.92701713,5.92426726
65.428628,6.70820393,5.93118227,0.881488323,5.92846505,5.92637513,5.92365571
65.43912,5.29150262,5.93058233,-0.799424613,5.92789506,5.92573607,5.9230466
65.449611,6.78232998,5.92998585,0.923224854,5.92732803,5.9251,5.92243998
65.460103,5.91607978,5.9293927,-0.115381615,5.92676384,5.92446677,5.92183572
65.470594,6.32455532,5.92880298,0.629088496,5.92620262,5.92383649,5.92123394
65.481086,6.244998,5.92821659,0.562833378,5.92564425,5.92320904,5.92063453
65.491578,6.40312424,5.92763356,0.689558322,5.92508881,5.92258444,5.92003752
65.502069,6,5.92705395,0.27008527,5.92453633,5.92196276,5.91944298
65.512561,6.08276253,5.92647764,0.39532884,5.92398673,5.92134386,5.91885079
65.523052,6.244998,5.92590474,0.564883405,5.92344011,5.92072784,5.91826106
65.533544,5.47722558,5.92533513,-0.669409856,5.92289638,5.92011457,5.91767366
65.544036,6.08276253,5.92476887,0.397484165,5.92235558,5.9195041,5.91708866
65.554527,6.32455532,5.924206,0.632731632,5.92181778,5.91889647,5.91650611
65.565019,6.164414,5.92364642,0.490680734,5.92128287,5.91829156,5.91592588
65.57551,7,5.92309023,1.03774263,5.92075098,5.91768947,5.91534808
65.586002,6.70820393,5.92253731,0.886378372,5.92022199,5.91709007,5.91477261
65.596494,6.78232998,5.92198773,0.92754636,5.91969597,5.91649341,5.91419951
65.606985,6.4807407,5.92144153,0.747863066,5.91917296,5.91589953,5.91362883
65.617477,5.47722558,5.92089861,-0.666087859,5.91865289,5.9153083,5.91306046
65.627968,6,5.92035907,0.282207248,5.91813585,5.91471984,5.9124945
65.63846,5.74456265,5.9198228,-0.418640844,5.91762176,5.91413401,5.91193084
65.648952,6.70820393,5.91928987,0.888208347,5.91711066,5.91355086,5.91136954
65.659443,5.74456265,5.91876031,-0.417369932,5.91660261,5.91297044,5.91081063
65.669935,6.40312424,5.91823403,0.696340585,5.91609753,5.91239262,5.91025401
65.680426,6.70820393,5.91771113,0.889096623,5.91559551,5.91181751,5.90969978
65.690918,6.70820393,5.91719151,0.889388791,5.91509648,5.91124498,5.90914784
65.70141,6.4807407,5.91667523,0.751042922,5.91460048,5.91067507,5.90859822
65.711901,6.244998,5.91616233,0.573441947,5.91410757,5.91010784,5.90805097
65.722393,5.74456265,5.91565273,-0.413630366,5.91361766,5.90954317,5.907506
65.732884,5.74456265,5.91514651,-0.413017996,5.91313087,5.90898114,5.90696339
65.743376,5.74456265,5.9146436,-0.412408716,5.91264709,5.90842165,5.90642304
65.753868,7,5.91414403,1.04204413,5.9121664,5.90786474,5.905885
65.764359,6.08276253,5.91364787,0.411235531,5.91168884,5.90731045,5.90534932
65.774851,6.32455532,5.91315502,0.641404943,5.91121433,5.90675867,5.90481588
65.785342,6,5.91266558,0.29552397,5.91074298,5.90620949,5.90428478
65.795834,5.83095189,5.91217947,-0.285004521,5.9102747,5.9056628,5.90375593
65.806326,6.244998,5.91169674,0.577322492,5.90980956,5.90511864,5.90322935
65.816817,6.32455532,5.91121744,0.64291359,5.9093476,5.90457705,5.90270511
65.827309,7.07106781,5.91074148,1.07718445,5.90888875,5.90403793,5.9021831
65.8378,6.55743852,5.91026897,0.804468493,5.90843311,5.90350137,5.9016634
65.848292,5.65685425,5.90979982,-0.502936944,5.9079806,5.90296725,5.90114593
65.858784,5.91607978,5.90969484,0.0799058611,5.90753129,5.90279679,5.90063071
65.869275,6.244998,5.90923425,0.57945125,5.90708522,5.90226937,5.90011781
65.879767,6.164414,5.90877706,0.505605521,5.90664233,5.90174438,5.8996071
65.890258,7.28010989,5.90832337,1.1712329,5.90620272,5.90122191,5.8990987
65.90075,6.63324958,5.90787311,0.851690359,5.9057663,5.90070186,5.89859249
65.911242,6.244998,5.90742633,0.581009181,5.90533315,5.90018426,5.89808852
65.921733,5.19615242,5.90698308,-0.843107738,5.90490332,5.89966917,5.89758683
65.932225,5.19615242,5.90654329,-0.842846884,5.90447674,5.89915647,5.89708733
65.942716,6.8556546,5.90610706,0.974447299,5.90405351,5.89864625,5.8965901
65.953208,6.164414,5.90567432,0.508664606,5.90363356,5.89813841,5.89609504
65.9637,5.65685425,5.90524512,-0.498388277,5.90321696,5.89763298,5.8956022
65.974191,7,5.90481953,1.04650871,5.90280376,5.89713001,5.89511162
65.984683,5,5.90439746,-0.950998141,5.9023939,5.8966294,5.8946232
65.995174,6.244998,5.90397903,0.583968294,5.90198748,5.89613123,5.89413703
66.005666,6,5.90356416,0.310541197,5.90158444,5.8956354,5.89365301
66.016158,4.79583152,5.90315292,-1.0522934,5.90118483,5.89514195,5.89317118
66.026649,6.40312424,5.90274537,0.707374633,5.90078873,5.89465092,5.89269159
66.037141,6.40312424,5.90234143,0.707660094,5.90039607,5.8941622,5.89221414
66.047632,6.244998,5.90194121,0.585710497,5.90000695,5.89367589,5.89173891
66.058124,6.164414,5.90154466,0.512707854,5.89962132,5.89319188,5.89126581
66.068616,5.09901951,5.90115183,-0.895618398,5.89923924,5.89271022,5.89079489
66.079107,6.164414,5.90076278,0.513469789,5.89886077,5.89223094,5.89032617
66.089599,6.55743852,5.90037746,0.810593032,5.89848586,5.89175394,5.88985957
66.10009,5.74456265,5.89999597,-0.394250328,5.89811462,5.8912793,5.88939517
66.110582,5.65685425,5.89961825,-0.492710873,5.89774699,5.89080694,5.88893287
66.121074,5.56776436,5.89924438,-0.575743014,5.89738304,5.89033688,5.88847272
66.131565,5.56776436,5.89887441,-0.575421625,5.89702284,5.88986916,5.88801476
66.142057,6.244998,5.8985083,0.58863376,5.89666633,5.8894037,5.88755889
66.152548,6.164414,5.89814614,0.516011497,5.89631363,5.88894057,5.8871052
66.16304,5.91607978,5.8977879,0.135247503,5.8959647,5.88847967,5.88665359
66.173532,5.29150262,5.89743364,-0.778415707,5.8956196,5.88802104,5.8862041
66.184023,7,5.89708342,1.05019835,5.89527839,5.88756472,5.88575677
66.194515,4.69041576,5.89673721,-1.09832666,5.89494105,5.88711062,5.88531151
66.205006,6.08276253,5.89639512,0.43170292,5.89460767,5.88665881,5.8848684
66.215498,5.29150262,5.8960571,-0.777531016,5.89427823,5.8862092,5.88442736
66.22599,6.08276253,5.89572324,0.432480398,5.8939528,5.88576184,5.88398841
66.236481,5.29150262,5.89539358,-0.777104215,5.89363145,5.88531675,5.8835516
66.246973,6.70820393,5.89506812,0.901740434,5.89331415,5.88487384,5.88311683
66.257464,6.32455532,5.89474695,0.655597717,5.89300102,5.88443319,5.88268419
66.267956,5.38516481,5.89443006,-0.713628231,5.89269202,5.88399471,5.88225358
66.278448,6.4807407,5.89411751,0.765913304,5.89238723,5.88355844,5.88182505
66.288939,6.92820323,5.89380938,1.01705155,5.89208673,5.8831244,5.88139863
66.299431,7.07106781,5.89350565,1.08515536,5.89179052,5.88269252,5.88097423
66.309922,5.47722558,5.89320644,-0.644965782,5.89149868,5.88226287,5.88055194
66.320414,6.55743852,5.89291172,0.815185135,5.89121122,5.88183535,5.88013165
66.330906,6.244998,5.89262159,0.593613016,5.89092822,5.88141001,5.87971342
66.341397,5.65685425,5.89233611,-0.485264732,5.89064975,5.88098688,5.87929726
66.351889,6,5.89205529,0.3285494,5.89037582,5.88056587,5.87888311
66.36238,6.244998,5.89177924,0.594322099,5.89010654,5.88014705,5.87847103
66.372872,6.164414,5.89150796,0.522404098,5.88984191,5.87973033,5.87806095
66.383364,6.40312424,5.89124154,0.71545978,5.88958202,5.87931577,5.87765288
66.393855,6.63324958,5.89098006,0.861550647,5.88932696,5.87890337,5.87724688
66.404347,6.78232998,5.89072354,0.944249141,5.88907675,5.87849307,5.87684285
66.414838,6,5.8904721,0.330950004,5.88883149,5.87808492,5.87644086
66.42533,6.164414,5.89022574,0.523629892,5.88859122,5.87767886,5.87604085
66.435822,5.91607978,5.88998457,0.161540125,5.88835602,5.8772749,5.87564283
66.446313,6.63324958,5.88974868,0.86226498,5.88812599,5.87687309,5.87524684
66.456805,5.47722558,5.88951811,-0.642100097,5.88790117,5.87647334,5.87485281
66.467296,6.164414,5.88929297,0.524519811,5.88768167,5.87607572,5.8744608
66.477788,6.4807407,5.8890733,0.769199191,5.88746755,5.87568015,5.87407073
66.48828,5.19615242,5.88885921,-0.832290088,5.88725889,5.87528665,5.87368263
66.498771,5.29150262,5.88865081,-0.772753639,5.88705581,5.87489527,5.87329654
66.509263,5.83095189,5.88844814,-0.239783742,5.88685837,5.87450592,5.87291238
66.519754,5.91607978,5.88825133,0.166818615,5.88666669,5.87411867,5.87253021
66.530246,6.08276253,5.88806045,0.441250584,5.88648083,5.87373343,5.87214996
66.540738,6,5.88787562,0.334849793,5.88630092,5.87335025,5.87177166
66.551229,5.29150262,5.88769694,-0.772136206,5.88612707,5.87296915,5.87139533
66.561721,5.65685425,5.88752451,-0.480281436,5.88595936,5.87259004,5.87102091
66.572212,5.47722558,5.88735845,-0.640416175,5.88579793,5.87221301,5.87064846
66.582704,6.55743852,5.88719886,0.818681662,5.88564287,5.87183797,5.8702779
66.593196,5.91607978,5.88704587,0.170393406,5.88549431,5.87146494,5.86990927
66.603687,6.63324958,5.88689962,0.863915484,5.8853524,5.87109397,5.86954258
66.614179,6.92820323,5.8867602,1.02051116,5.88521723,5.87072497,5.86917778
66.62467,6.55743852,5.88662778,0.819030366,5.88508897,5.870358,5.86881492
66.635162,6.244998,5.88650248,0.598744955,5.88496772,5.869993,5.86845392
66.645654,6.4807407,5.88638444,0.770945043,5.88485365,5.86962999,5.86809483
66.656145,5.91607978,5.88627383,0.172644017,5.88474691,5.86926899,5.86773765
66.666637,6.164414,5.88617077,0.527487658,5.88464765,5.86890994,5.86738234
66.677128,6.55743852,5.88607546,0.819367477,5.88455603,5.8685529,5.86702893
66.68762,6.92820323,5.88598804,1.02088941,5.88447221,5.86819779,5.86667737
66.698112,5.47722558,5.88590869,-0.63928328,5.88439638,5.86784465,5.86632769
66.708603,6.244998,5.88583759,0.599299928,5.88432872,5.86749349,5.8659799
66.719095,5.91607978,5.88577493,0.174082885,5.8842694,5.86714425,5.86563394
66.729586,6.4807407,5.88572091,0.771375259,5.88421863,5.86679699,5.86528986
66.740078,5.47722558,5.88567571,-0.63910104,5.88417661,5.86645163,5.86494761
66.75057,6.164414,5.88563957,0.527990944,5.88414355,5.8661082,5.8646072
66.761061,6.32455532,5.88561268,0.662527461,5.88411966,5.86576674,5.86426866
66.771553,7.34846923,5.88559529,1.20949326,5.88410519,5.86542716,5.86393193
66.782044,5.83095189,5.88558763,-0.233742873,5.88410035,5.86508953,5.86359706
66.792536,6.70820393,5.88558994,0.906980704,5.88410541,5.86475378,5.86326398
66.803028,6.55743852,5.88560248,0.819656054,5.88412062,5.86441993,5.86293271
66.813519,6.244998,5.88562552,0.599476841,5.88414624,5.86408801,5.8626033
66.824011,5.83095189,5.88565933,-0.233896212,5.88418256,5.86375795,5.86227566
66.834502,6.164414,5.88570421,0.52792972,5.88422986,5.86342982,5.86194986
66.844994,5.83095189,5.88576047,-0.234112311,5.88428845,5.86310353,5.86162582
66.855486,6.244998,5.88582841,0.599307591,5.88435865,5.86277912,5.86130358
66.865977,6.08276253,5.88590836,0.443682513,5.88444077,5.86245661,5.86098315
66.876469,6.164414,5.88600067,0.527648872,5.88453518,5.86213593,5.86066448
66.88696,6.08276253,5.88610569,0.443460077,5.88464222,5.86181714,5.86034761
66.897452,5.91607978,5.88622381,0.172788814,5.88476228,5.86150018,5.86003248
66.907944,6.32455532,5.88635541,0.6619667,5.88489574,5.86118507,5.85971912
66.918435,5.09901951,5.88650088,-0.887401469,5.88504299,5.86087182,5.85940756
66.928927,5.91607978,5.88666068,0.171519971,5.8852045,5.86056039,5.85909771
66.939418,6.164414,5.88683523,0.526857454,5.88538067,5.86025081,5.85878965
66.94991,6.08276253,5.88702501,0.442422331,5.885572,5.85994303,5.8584833
66.960402,6.78232998,5.88723051,0.946096968,5.88577897,5.85963707,5.8581787
66.970893,5.83095189,5.88745221,-0.237697945,5.88600206,5.85933296,5.85787585
66.981385,6.32455532,5.88769068,0.660957365,5.88624186,5.85903063,5.85757471
66.991876,6.40312424,5.88794645,0.717758868,5.88649886,5.85873012,5.85727532
67.002368,5.83095189,5.88822013,-0.239307828,5.88677372,5.85843139,5.85697762
67.01286,6.8556546,5.88851233,0.983433918,5.887067,5.85813445,5.85668163
67.023351,6.08276253,5.88882365,0.440384923,5.88737934,5.85783933,5.85638738
67.033843,6.08276253,5.88915483,0.440008753,5.88771146,5.85754596,5.8560948
67.044334,6.08276253,5.8895065,0.439608947,5.888064,5.85725439,5.85580395
67.054826,6.40312424,5.88987949,0.716411019,5.88843778,5.85696457,5.85551476
67.065318,6.08276253,5.89027453,0.438734546,5.88883354,5.85667652,5.85522726
67.075809,6,5.8906924,0.330617002,5.88925205,5.85639025,5.85494146
67.086301,6.08276253,5.89113404,0.43775392,5.88969426,5.85610571,5.85465732
67.096792,6.164414,5.89160026,0.522315749,5.89016098,5.85582294,5.85437487
67.107284,6.32455532,5.89209211,0.657619349,5.89065326,5.85554189,5.85409406
67.117776,5.29150262,5.89261054,-0.7753115,5.89117204,5.85526259,5.85381491
67.128267,5.91607978,5.89315655,0.15140419,5.89171833,5.85498504,5.85353744
67.138759,6.244998,5.89373135,0.592677521,5.89229334,5.85470919,5.85326159
67.14925,6.78232998,5.894336,0.942334327,5.89289812,5.85443509,5.85298741
67.159742,7.48331477,5.89497184,1.26029478,5.89353402,5.85416269,5.85271484
67.170234,6.63324958,5.8956401,0.858841941,5.89420227,5.85389199,5.85244391
67.180725,6.164414,5.8963421,0.51775661,5.89490419,5.85362303,5.85217463
67.191217,5.83095189,5.8970794,-0.257152681,5.89564133,5.85335575,5.85190694
67.201708,6.78232998,5.89785339,0.94046616,5.8964151,5.85309018,5.8516409
67.2122,6.8556546,5.89866582,0.978258032,5.89722725,5.85282629,5.85137644
67.222692,6.08276253,5.89951834,0.428070308,5.8980794,5.85256407,5.85111358
67.233183,6.08276253,5.90041265,0.427024446,5.89897328,5.85230357,5.85085236
67.243675,5.38516481,5.90135084,-0.718460876,5.89991096,5.85204471,5.8505927
67.254166,5.65685425,5.90233473,-0.495459873,5.90089428,5.85178755,5.85033465
67.264658,6.78232998,5.90336668,0.937530429,5.90192558,5.85153203,5.85007817
67.27515,5.65685425,5.90444884,-0.497588781,5.90300704,5.85127817,5.84982326
67.285641,5.74456265,5.90558353,-0.401274081,5.90414095,5.85102599,5.84956995
67.296133,5.74456265,5.90677353,-0.402754121,5.9053301,5.85077543,5.84931818
67.306624,6.08276253,5.90802132,0.418020588,5.90657698,5.85052654,5.849068
67.317116,5.91607978,5.90933004,0.0821568168,5.90788472,5.85027927,5.84881936
67.327608,5.91607978,5.91070266,0.0733288653,5.90925629,5.85003363,5.84857226
67.338099,6.78232998,5.91214232,0.932838498,5.91069484,5.84978965,5.84832673
67.348591,6.32455532,5.9136528,0.641016787,5.91220414,5.84954726,5.84808272
67.359082,6.08276253,5.91523754,0.409298166,5.91378764,5.84930652,5.84784027
67.369574,6,5.91692044,0.28823525,5.91546924,5.84906737,5.84759932
67.380066,5.47722558,5.91866648,-0.664410191,5.9172139,5.84882982,5.8473599
67.390557,6.70820393,5.92049957,0.887527105,5.91904557,5.8485939,5.84712202
67.401049,5.29150262,5.92242496,-0.7943062,5.92096946,5.84835956,5.84688563
67.41154,6.40312424,5.92444751,0.691864675,5.92299046,5.84812684,5.84665077
67.422032,5.56776436,5.92657322,-0.599006556,5.92511455,5.84789568,5.84641739
67.432524,6.63324958,5.92880792,0.839310231,5.92734758,5.84766611,5.8461855
67.443015,7.07106781,5.93115784,1.06766567,5.92969578,5.84743813,5.84595513
67.453507,6.164414,5.93363039,0.480399434,5.93216654,5.84721171,5.84572622
67.463998,6.164414,5.93623255,0.477683425,5.93476687,5.84698688,5.84549882
67.47449,6.55743852,5.93897286,0.786425879,5.93750529,5.84676359,5.84527287
67.484982,6.244998,5.94185972,0.550579947,5.94039021,5.84654186,5.84504838
67.495473,6.92820323,5.94490213,0.9916154,5.94343063,5.84632171,5.84482539
67.505965,5.74456265,5.94811069,-0.451162994,5.94663715,5.84610308,5.84460383
67.516456,6.32455532,5.95149557,0.61078617,5.95001995,5.84588602,5.84438374
67.526948,6.63324958,5.95506904,0.823517176,5.9535913,5.84567048,5.84416508
67.53744,6.32455532,5.95884328,0.604741298,5.95736338,5.84545648,5.84394786
67.547931,7.74596669,5.96283136,1.33534091,5.96134926,5.84524403,5.8437321
67.558423,6.164414,5.96704853,0.444258342,5.9655642,5.84503308,5.84351775
67.568914,6.40312424,5.97150955,0.656973885,5.97002296,5.84482367,5.84330485
67.579406,5.74456265,5.97623204,-0.481320472,5.97474317,5.84461576,5.84309334
67.589898,6.78232998,5.98123357,0.895039894,5.97974239,5.84440936,5.84288326
67.600389,5.19615242,5.98653291,-0.889033459,5.98503941,5.84420448,5.84267459
67.610881,5.56776436,5.9921518,-0.651450256,5.99065595,5.84400109,5.84246732
67.621372,6.8556546,5.99811129,0.926036341,5.99661311,5.84379922,5.84226146
67.631864,6,6.00443626,-0.0666052588,6.00293572,5.84359882,5.84205697
67.642356,6,6.01115144,-0.105600359,6.00964856,5.84339991,5.84185388
67.652847,6.8556546,6.01828307,0.915080069,6.01677786,5.8432025,5.84165218
67.663339,7,6.02586122,0.986984691,6.0243537,5.84300655,5.84145184
67.67383,6.244998,6.03391482,0.459437889,6.03240501,5.8428121,5.84125289
67.684322,5.74456265,6.04247763,-0.545815887,6.04096556,5.8426191,5.84105529
67.694814,6.32455532,6.0515828,0.522467722,6.05006851,5.84242756,5.84085904
67.705305,6.63324958,6.061265,0.756296623,6.05974853,5.8422375,5.84066417
67.715797,6.32455532,6.0710266,0.503516351,6.07004479,5.84149103,5.84047063
67.726288,5.65685425,6.08198152,-0.652017848,6.08099399,5.84130668,5.84027845
67.73678,6.244998,6.09363148,0.389058497,6.09263829,5.84112373,5.84008759
67.747272,5.83095189,6.1060164,-0.524465926,6.1050176,5.84094221,5.83989807
67.757763,6.08276253,6.11917644,-0.19082428,6.11817209,5.84076212,5.83970989
67.768255,5.29150262,6.13315559,-0.917416463,6.13214576,5.84058343,5.83952301
67.778746,6.4807407,6.14799177,0.576843937,6.14697654,5.84040617,5.83933747
67.789238,6.4807407,6.16372675,0.563039922,6.1627062,5.8402303,5.83915322
67.79973,6.32455532,6.18039496,0.37968455,6.17936919,5.84005584,5.83897027
67.810221,6.40312424,6.19802592,0.452877818,6.19699501,5.83988279,5.83878864
67.820713,6.55743852,6.21664775,0.583772875,6.21561181,5.83971112,5.83860829
67.831204,7.48331477,6.23627259,1.11671043,6.23523171,5.83954085,5.83842924
67.841696,7.07106781,6.25690813,0.902307973,6.25586242,5.83937196,5.83825146
67.852188,6.08276253,6.27854111,-0.442468734,6.27749067,5.83920446,5.83807496
67.862679,6.63324958,6.30113856,0.576290746,6.30008347,5.83903835,5.83789975
67.873171,6.63324958,6.32465027,0.555517157,6.32359063,5.8388736,5.83772579
67.883662,6.63324958,6.34898825,0.533161632,6.34792414,5.83871024,5.8375531
67.894154,7.14142843,6.37403959,0.876007328,6.37297104,5.83854823,5.83738166
67.904646,7.68114575,6.39964483,1.13203397,6.39857187,5.83838759,5.83721146
67.915137,7.34846923,6.42559994,0.960660861,6.42452256,5.83822832,5.83704253
67.925629,6.40312424,6.45166001,-0.220308354,6.45057815,5.8380704,5.83687482
67.93612,7.07106781,6.4775196,0.770420805,6.47643315,5.83791385,5.83670836
67.946612,7,6.50283273,0.705100895,6.50174154,5.83775864,5.83654311
67.957104,7.34846923,6.5271993,0.906239443,6.52610313,5.83760477,5.83637908
67.967595,7.48331477,6.55018077,0.965988614,6.54907931,5.83745227,5.83621629
67.978087,6.55743852,6.57131864,-0.117813911,6.5702115,5.83730109,5.8360547
67.988578,7.54983444,6.59013745,0.979641255,6.58902415,5.83715126,5.83589433
67.99907,7,6.60618168,0.627549453,6.60506169,5.83700276,5.83573514
68.009562,7.14142843,6.61902794,0.722772778,6.61790061,5.83685558,5.83557715
68.020053,6.63324958,6.62831688,0.0702331643,6.62718151,5.83670975,5.83542036
68.030545,7.41619849,6.63377782,0.884545459,6.63263365,5.83656523,5.83526475
68.041036,7.14142843,6.63524361,0.711466664,6.63408984,5.83642205,5.83511033
68.051528,7.34846923,6.63266592,0.846051598,6.63150171,5.83628017,5.83495706
68.06202,7.28010989,6.62611794,0.808697685,6.62494245,5.83613961,5.83480497
68.072511,6.63324958,6.61579057,0.132132537,6.61460297,5.83600038,5.83465405
68.083003,7.14142843,6.6019735,0.734475957,6.60077297,5.83586244,5.83450428
68.093494,7.81024968,6.5850434,1.10689036,6.5838292,5.83572582,5.83435568
68.103986,6.92820323,6.56542832,0.602307989,6.56419971,5.8355905,5.8342082
68.114478,7.07106781,6.54359342,0.726274326,6.54234976,5.83545648,5.83406187
68.124969,6.63324958,6.52001261,0.336507014,6.51875331,5.83532378,5.83391669
68.135461,6.78232998,6.4951399,0.535901187,6.49386445,5.83519236,5.83377262
68.145952,6.78232998,6.46940931,0.559393132,6.46811726,5.83506224,5.8336297
68.156444,6.55743852,6.44320424,0.33798563,6.4418952,5.83493341,5.83348787
68.166936,7.61577311,6.41686768,1.0949454,6.41554133,5.83480587,5.83334717
68.177427,6.08276253,6.39069195,-0.554913886,6.38934801,5.83467963,5.83320758
68.187919,6,6.36491156,-0.604079098,6.3635498,5.83455466,5.83306909
68.19841,5.91607978,6.33972317,-0.650878931,6.33834341,5.83443099,5.83293171
68.208902,6.70820393,6.31527042,0.626844088,6.3138725,5.83430859,5.8327954
68.219394,6.164414,6.29166573,-0.356723595,6.29024952,5.83418747,5.83266019
68.229885,6.4807407,6.26898811,0.46016583,6.2675535,5.83406765,5.83252607
68.240377,7.28010989,6.24728249,1.01628116,6.24582939,5.83394908,5.83239301
68.250868,6.244998,6.22657924,0.135715714,6.22510757,5.83383181,5.83226103
68.26136,5.29150262,6.2068824,-0.956754816,6.20539207,5.83371579,5.83213011
68.271852,6.244998,6.18818731,0.238349926,6.18667826,5.83360105,5.83200025
68.282343,6.08276253,6.17047775,-0.29616755,6.16894989,5.83348759,5.83187145
68.292835,6,6.15372418,-0.392076751,6.15217745,5.83337539,5.8317437
68.303326,6.164414,6.13789739,0.162839235,6.1363317,5.83326447,5.831617
68.313818,6.40312424,6.12295786,0.529307453,6.12137313,5.83315481,5.83149132
68.32431,6.244998,6.1088678,0.368958256,6.10726393,5.83304641,5.83136668
68.334801,5.91607978,6.09558757,-0.423683598,6.09396447,5.83293929,5.83124308
68.345293,5.38516481,6.08307324,-0.835409138,6.08143078,5.83283343,5.83112049
68.355784,6.40312424,6.07128574,0.576054245,6.06962383,5.83272883,5.83099893
68.366276,6.164414,6.06018216,0.322849562,6.05850065,5.8326255,5.83087836
68.376768,5.91607978,6.0497239,-0.365573679,6.04802265,5.83252342,5.83075881
68.387259,6.08276253,6.03987342,0.207096855,6.0381523,5.83242262,5.83064026
68.397751,5.83095189,6.03059201,-0.44681105,6.02885084,5.83232308,5.8305227
68.408242,6.164414,6.02184613,0.377581615,6.02008475,5.83222481,5.83040615
68.418734,6.08276253,6.01360061,0.262986543,6.01181884,5.83212779,5.83029056
68.429226,6.63324958,6.0058245,0.792101686,6.00402215,5.83203203,5.83017596
68.439717,6.164414,5.99848843,0.407339633,5.9966653,5.83193755,5.83006234
68.450209,5.83095189,5.99156273,-0.400762816,5.9897186,5.83184433,5.82994968
68.4607,6.164414,5.9850221,0.42354681,5.98315676,5.83175238,5.82983799
68.471192,6.164414,5.97884038,0.430782573,5.97695358,5.83166169,5.82972725
68.481684,6.55743852,5.97299482,0.764489181,5.97108632,5.83157226,5.82961747
68.492175,6.164414,5.96746407,0.443790411,5.96553363,5.83148412,5.82950864
68.502667,5.83095189,5.96222673,-0.362318691,5.96027406,5.83139724,5.82940075
68.513158,5.83095189,5.95726474,-0.35540518,5.95528957,5.83131164,5.8292938
68.52365,5.91607978,5.95255946,-0.190996528,5.95056151,5.8312273,5.82918777
68.534142,5.65685425,5.94809487,-0.539667137,5.94607384,5.83114424,5.82908267
68.544633,5.91607978,5.94385601,-0.166662028,5.9418116,5.83106247,5.8289785
68.555125,6.55743852,5.93982784,0.785882104,5.93775973,5.83098197,5.82887524
68.565616,5.74456265,5.93599785,-0.437533094,5.9339057,5.83090277,5.82877289
68.576108,6.55743852,5.93235302,0.790623488,5.9302365,5.83082484,5.82867144
68.5866,6.244998,5.92888228,0.562241687,5.92674103,5.8307482,5.8285709
68.597091,6.40312424,5.92557532,0.691049145,5.92340898,5.83067287,5.82847125
68.607583,6.164414,5.92242164,0.491927189,5.92022984,5.83059882,5.82837249
68.618074,6.244998,5.9194127,0.570600826,5.91719505,5.83052608,5.82827462
68.628566,6.164414,5.9165394,0.497870067,5.91429552,5.83045464,5.82817762
68.639058,6.32455532,5.91379413,0.640906535,5.91152361,5.83038451,5.82808149
68.649549,6.63324958,5.91116978,0.849752786,5.9088722,5.8303157,5.82798624
68.660041,6.244998,5.90865902,0.579947396,5.90633394,5.8302482,5.82789184
68.670532,5.56776436,5.90625593,-0.581800285,5.90390292,5.83018204,5.82779831
68.681024,5.56776436,5.90395416,-0.579818759,5.90157276,5.8301172,5.82770563
68.691516,6.32455532,5.90174838,0.650236062,5.89933814,5.83005369,5.82761379
68.702007,5.83095189,5.89963365,-0.26207205,5.89719408,5.82999153,5.8275228
68.712499,6.63324958,5.89760476,0.857697396,5.89513536,5.82993072,5.82743264
68.72299,5.56776436,5.89565758,-0.572619608,5.89315786,5.82987127,5.82734333
68.733482,6.4807407,5.89378755,0.766128677,5.89125699,5.82981317,5.82725482
68.743974,6.63324958,5.89199092,0.860963796,5.88942898,5.82975645,5.82716715
68.754465,6.164414,5.89026417,0.523593191,5.88767032,5.8297011,5.82708029
68.764957,5.83095189,5.88860353,-0.240107544,5.88597719,5.82964715,5.82699424
68.775448,5.74456265,5.88700606,-0.377416763,5.88434667,5.82959459,5.826909
68.78594,6.40312424,5.88546843,0.719483013,5.8827754,5.82954343,5.82682455
68.796432,5.47722558,5.88398794,-0.637779247,5.88126066,5.82949369,5.8267409
68.806923,5.74456265,5.88256204,-0.371482697,5.87979989,5.82944538,5.82665805
68.817415,4.89897949,5.88118793,-0.991064301,5.87839027,5.82939851,5.82657597
68.827906,5.29150262,5.87986351,-0.76704686,5.87702968,5.82935308,5.82649468
68.838398,6.63324958,5.87858627,0.868713594,5.8757156,5.82930911,5.82641416
68.84889,6.55743852,5.87735425,0.824672223,5.87444605,5.82926661,5.82633441
68.859381,6.244998,5.87616555,0.60731577,5.87321912,5.8292256,5.82625543
68.869873,5.38516481,5.87501809,-0.699895194,5.87203269,5.82918609,5.8261772
68.880364,5.56776436,5.8739103,-0.55330456,5.87088519,5.82914809,5.82609974
68.890856,5.74456265,5.8728403,-0.358158697,5.8697747,5.82911162,5.82602301
68.901348,5.38516481,5.87180661,-0.697597166,5.86869974,5.82907668,5.82594703
68.911839,5.74456265,5.87080784,-0.355309992,5.86765889,5.82904332,5.82587179
68.922331,5.65685425,5.86984237,-0.461506356,5.8666505,5.82901152,5.82579728
68.932822,6.32455532,5.86890904,0.675015761,5.86567341,5.82898132,5.82572351
68.943314,6,5.86800642,0.363309202,5.86472614,5.82895273,5.82565045
68.953806,6.08276253,5.86713339,0.464358845,5.86380755,5.82892577,5.82557811
68.964297,5.83095189,5.86628889,-0.187981375,5.86291657,5.82890046,5.82550649
68.974789,5.74456265,5.86547168,-0.347719764,5.86205192,5.82887682,5.82543557
68.98528,6.4807407,5.86468089,0.784894775,5.86121271,5.82885488,5.82536537
68.995772,5,5.8639154,-0.929470494,5.86039778,5.82883465,5.82529585
69.006264,5.83095189,5.86317436,-0.17950618,5.85960627,5.82881616,5.82522702
69.016755,5.47722558,5.86245697,-0.620670121,5.85883734,5.82879944,5.82515889
69.027247,5.65685425,5.86176226,-0.452667666,5.85808999,5.82878451,5.82509144
69.037738,6.08276253,5.86108958,0.470821569,5.85736353,5.82877139,5.82502467
69.04823,5.91607978,5.86043805,0.23588501,5.85665706,5.82876012,5.82495857
69.058722,7.14142843,5.85980701,1.13208719,5.85596988,5.82875072,5.82489313
69.069213,6.32455532,5.85919587,0.682172599,5.85530136,5.82874323,5.82482836
69.079705,5.83095189,5.85860385,-0.166288764,5.85465069,5.82873767,5.82476425
69.090196,6.63324958,5.85803046,0.880465286,5.85401735,5.82873409,5.82470079
69.100688,6.55743852,5.85747502,0.836638215,5.85340059,5.82873251,5.82463798
69.11118,6,5.85693703,0.378236655,5.8527999,5.82873297,5.8245758
69.121671,5.29150262,5.85641602,-0.751607212,5.85221476,5.82873551,5.82451427
69.132163,6.08276253,5.8559114,0.476288915,5.85164451,5.82874016,5.82445337
69.142654,5.47722558,5.85542279,-0.614977408,5.85108876,5.82874698,5.8243931
69.153146,6.08276253,5.85494965,0.477297475,5.8505469,5.828756,5.82433345
69.163638,5.83095189,5.85449161,-0.153426582,5.85001852,5.82876726,5.82427441
69.174129,6.40312424,5.85404831,0.740996577,5.84950321,5.82878082,5.824216
69.184621,5.74456265,5.85361929,-0.330237248,5.84900044,5.82879672,5.82415818
69.195112,6.164414,5.85320426,0.557861759,5.84850989,5.82881501,5.82410098
69.205604,5.83095189,5.85280282,-0.14782057,5.84803107,5.82883575,5.82404436
69.216096,5.56776436,5.85241467,-0.533526294,5.84756364,5.82885899,5.82398834
69.226587,5.47722558,5.85203956,-0.612220532,5.84710729,5.82888479,5.82393291
69.237079,6.4807407,5.85167712,0.793135286,5.84666157,5.82891321,5.82387807
69.24757,5.38516481,5.85132715,-0.682760825,5.84622624,5.82894431,5.8238238
69.258062,6.164414,5.85098934,0.559843423,5.84580088,5.82897817,5.8237701
69.268554,6.40312424,5.85066349,0.743277032,5.84538523,5.82901485,5.82371697
69.279045,6.8556546,5.8503494,1.00264909,5.84497903,5.82905442,5.82366441
69.289537,5.91607978,5.85004681,0.256968826,5.84458191,5.82909696,5.8236124
69.300028,6.78232998,5.84975557,0.965698923,5.84419368,5.82914254,5.82356095
69.31052,6.40312424,5.84947547,0.74407578,5.84381398,5.82919126,5.82351005
69.321012,6.08276253,5.84920636,0.483276492,5.84344262,5.82924319,5.82345969
69.331503,5.74456265,5.84894812,-0.323087414,5.84307936,5.82929843,5.82340987
69.341995,5,5.84870057,-0.92124946,5.84272392,5.82935709,5.82336058
69.352486,6,5.84846362,0.389276739,5.84237612,5.82941924,5.82331183
69.362978,5.83095189,5.84823713,-0.131473312,5.84203569,5.829485,5.8232636
69.37347,5.74456265,5.84802101,-0.321649445,5.84170245,5.82955449,5.82321588
69.383961,6.8556546,5.84781521,1.00391204,5.84137621,5.8296278,5.82316869
69.394453,5.83095189,5.84761962,-0.129103539,5.84105673,5.82970508,5.823122
69.404944,5.56776436,5.84743421,-0.528838204,5.84074388,5.82978643,5.82307583
69.415436,6,5.84725891,0.390821052,5.84043741,5.82987201,5.82303014
69.425928,5.65685425,5.8470937,-0.436164472,5.84013718,5.82996194,5.82298496
69.436419,6.55743852,5.84693858,0.84291159,5.83984305,5.83005636,5.82294027
69.446911,5.19615242,5.84679351,-0.80662326,5.83955479,5.83015546,5.82289606
69.457402,5.83095189,5.84665853,-0.125326105,5.83927231,5.83025936,5.82285234
69.467894,5.91607978,5.84653363,0.26371604,5.83899538,5.83036826,5.82280909
69.478386,5,5.84641887,-0.920010257,5.8387239,5.83048234,5.82276631
69.488877,5.38516481,5.84631431,-0.679079894,5.83845775,5.83060176,5.822724
69.499369,6.08276253,5.84621999,0.486356395,5.83819674,5.83072675,5.82268215
69.50986,6,5.846136,0.392255014,5.83794077,5.8308575,5.82264077
69.520352,4.89897949,5.84606244,-0.973181871,5.83768968,5.83099426,5.82259983
69.530844,5.91607978,5.84599942,0.264726963,5.83744337,5.83113723,5.82255934
69.541335,5.83095189,5.84594707,-0.122454793,5.83720173,5.83128666,5.8225193
69.551827,5.83095189,5.84590554,-0.122285083,5.83696461,5.83144283,5.8224797
69.562318,7.14142843,5.84587499,1.13822381,5.83673193,5.83160599,5.82244053
69.57281,4.79583152,5.8458556,-1.02470683,5.83650355,5.83177646,5.82240179
69.583302,6.244998,5.84584759,0.631783517,5.83627937,5.83195453,5.82236348
69.593793,6.244998,5.84585117,0.631780683,5.83605931,5.8321405,5.82232558
69.604285,6.78232998,5.84586659,0.967710387,5.83584324,5.83233475,5.8222881
69.614776,6.78232998,5.84589412,0.96769616,5.8356311,5.83253761,5.82225104
69.625268,6.08276253,5.84593407,0.486650245,5.83542274,5.83274951,5.82221438
69.63576,6.32455532,5.84598674,0.691786512,5.83521812,5.83297082,5.82217812
69.646251,6,5.84605248,0.392361461,5.83501714,5.83320196,5.82214226
69.656743,5.56776436,5.84613168,-0.527605271,5.8348197,5.83344343,5.82210679
69.667234,6.32455532,5.84622474,0.691614476,5.83462574,5.83369567,5.82207171
69.677726,5.65685425,5.8463321,-0.435290533,5.83443515,5.83395925,5.82203702
69.688218,5.65685425,5.84645423,-0.435430804,5.83424786,5.83423469,5.8220027
69.698709,6.40312424,5.84664368,0.745976244,5.83411597,5.83452255,5.82196876
69.709201,6.32455532,5.84679711,0.691200558,5.83393524,5.83482351,5.82193519
69.719692,6.4807407,5.84696696,0.796099077,5.83375761,5.83513817,5.82190198
69.730184,5.56776436,5.8471539,-0.528573115,5.83358298,5.83546729,5.82186913
69.740676,6.4807407,5.84735861,0.795853056,5.8334113,5.83581161,5.82183664
69.751167,5.91607978,5.84758181,0.26172117,5.83324253,5.83617189,5.82180451
69.761659,6.8556546,5.84782434,1.00390749,5.83307655,5.83654907,5.82177271
69.77215,5.56776436,5.84808702,-0.52945506,5.83291335,5.83694399,5.82174127
69.782642,6.32455532,5.84837083,0.690061225,5.83275283,5.8373577,5.82171016
69.793134,4.79583152,5.84867673,-1.02608246,5.83259494,5.83779123,5.82167938
69.803625,6.32455532,5.84900577,0.689601004,5.83243966,5.83824567,5.82164893
69.814117,6.244998,5.84935919,0.628998259,5.83228688,5.83872231,5.82161881
69.824608,6.244998,5.84973815,0.628696942,5.83213659,5.83922237,5.82158901
69.8351,5.56776436,5.85014409,-0.531394139,5.8319887,5.83974734,5.82155953
69.845592,6.70820393,5.85057844,0.926080718,5.83184318,5.84029869,5.82153035
69.856083,4.58257569,5.85104271,-1.12626241,5.83169999,5.84087798,5.82150149
69.866575,6.08276253,5.85153873,0.480857363,5.83155906,5.84148709,5.82147292
69.877066,4.58257569,5.85206823,-1.12671759,5.83142036,5.84212779,5.82144466
69.887558,6,5.85263334,0.383883657,5.83128382,5.84280226,5.82141668
69.89805,6.4807407,5.85323619,0.792151823,5.83114941,5.84351267,5.821389
69.908541,5.29150262,5.85387909,-0.749917643,5.83101709,5.84426137,5.8213616
69.919033,6.08276253,5.85456478,0.477700485,5.83088681,5.84505115,5.82133449
69.929524,5.19615242,5.85529594,-0.811876541,5.83075855,5.84588471,5.82130765
69.940016,4.89897949,5.85607583,-0.978313011,5.83063223,5.84676538,5.82128108
69.950508,6.164414,5.8569078,0.554532421,5.83050783,5.84769652,5.82125478
69.960999,6.40312424,5.8577955,0.73846377,5.83038532,5.84868183,5.82122874
69.971491,6.08276253,5.85874325,0.47330675,5.83026465,5.84972568,5.82120296
69.981982,6,5.85975545,0.374492387,5.8301458,5.85083248,5.82117744
69.992474,5.29150262,5.86083738,-0.754542746,5.83002871,5.85200757,5.82115217
70.002966,6.4807407,5.86199458,0.786604168,5.82991335,5.85325653,5.82112714
70.013457,5.47722558,5.86323323,-0.621295145,5.82979971,5.85458555,5.82110236
70.023949,5.38516481,5.86456059,-0.692384132,5.82968772,5.85600195,5.82107781
70.03444,5.91607978,5.86598426,0.223820282,5.82957739,5.85751335,5.8210535
70.044932,6.63324958,5.86751332,0.875063577,5.82946864,5.85912888,5.82102941
70.055424,5.56776436,5.86915748,-0.548992817,5.82936147,5.86085829,5.82100555
70.065915,5.74456265,5.87092762,-0.355478509,5.82925586,5.86271248,5.82098191
70.076407,6.164414,5.87283647,0.539979194,5.82915175,5.86470424,5.82095849
70.086898,7.34846923,5.87489755,1.21390761,5.82904913,5.8668471,5.82093528
70.09739,6.32455532,5.87712675,0.668901013,5.82894796,5.86915703,5.82091227
70.107882,5.29150262,5.87954124,-0.766836759,5.82884822,5.87165121,5.82088947
70.118373,6.164414,5.88216002,0.531275806,5.82874989,5.87434868,5.82086687
70.128865,5.19615242,5.88500503,-0.829971452,5.82865292,5.87727145,5.82084447
70.139356,6.164414,5.88809942,0.52565634,5.82855732,5.88044268,5.82082226
70.149848,5.91607978,5.89146987,0.156875484,5.82846303,5.88388912,5.82080023
70.16034,5.83095189,5.89514472,-0.253363024,5.82837004,5.88763916,5.82077838
70.170831,7.21110255,5.89915478,1.14540288,5.82827834,5.89172365,5.82075672
70.181323,6.32455532,5.90353471,0.648861013,5.82818788,5.8961773,5.82073523
70.191814,5.74456265,5.90832013,-0.404669603,5.82809866,5.90103578,5.82071391
70.202306,5.91607978,5.91355108,0.0502862136,5.82801063,5.90633919,5.82069276
70.212798,6.70820393,5.91926862,0.888220304,5.8279238,5.91212864,5.82067176
70.223289,6.32455532,5.92551588,0.631695686,5.82783814,5.91844729,5.82065093
70.233781,5.29150262,5.93233968,-0.800522993,5.82775361,5.92534206,5.82063025
70.244272,5.74456265,5.93978572,-0.44184055,5.82767021,5.93285865,5.82060972
70.254764,5.38516481,5.94790317,-0.750158889,5.82758791,5.94104633,5.82058934
70.265256,5.65685425,5.95673887,-0.547617218,5.8275067,5.94995195,5.8205691
70.275747,5.65685425,5.96633791,-0.556312557,5.82742656,5.95962066,5.820549
70.286239,6.63324958,5.97674504,0.810249676,5.82734745,5.97009725,5.82052903
70.29673,6.40312424,5.98799564,0.64430474,5.82726939,5.9814171,5.82050919
70.307222,6.40312424,6.00012073,0.634825573,5.82719232,5.99361127,5.82048947
70.317714,6.70820393,6.0131355,0.833707645,5.82711626,6.00669495,5.82046988
70.328205,6.08276253,6.02703689,0.23606278,5.82704117,6.02066507,5.82045041
70.338697,5.91607978,6.0418014,-0.354572442,5.82696705,6.03549806,5.82043105
70.349188,5.29150262,6.05736715,-0.875136863,5.82689387,6.05113197,5.8204118
70.35968,6.63324958,6.07363569,0.748073454,5.82682162,6.06746825,5.82039265
70.370172,6.55743852,6.09045088,0.683364942,5.82675028,6.08435059,5.82037361
70.380663,5.56776436,6.10759245,-0.734729941,5.82667985,6.10155848,5.82035467
70.391155,6.244998,6.12477187,0.346736398,5.82661031,6.11880314,5.82033582
70.401646,6,6.14161576,-0.376318691,5.82654164,6.13571083,5.82031706
70.412138,6.164414,6.15768085,0.0820557861,5.82647382,6.1518379,5.82029839
70.42263,6.32455532,6.17245537,0.389999937,5.82640685,6.16667215,5.8202798
70.433121,5.83095189,6.1853902,-0.595347214,5.82634073,6.17966399,5.82026129
70.443613,6.08276253,6.19594121,-0.336420398,5.82627542,6.1902689,5.82024285
70.454104,5.47722558,6.20361168,-0.852282877,5.82621093,6.19798976,5.82022448
70.464596,6.63324958,6.2080134,0.652101357,5.82614723,6.20243814,5.82020618
70.475088,6.92820323,6.20890919,0.848112042,5.82608432,6.20337671,5.82018795
70.485579,6.78232998,6.2062475,0.759000979,5.8260222,6.20075395,5.82016977
70.496071,6,6.20016697,-0.44740023,5.82596084,6.19470871,5.82015165
70.506562,6.70820393,6.19098095,0.719182159,5.82590025,6.18555466,5.82013358
70.517054,7.14142843,6.17913243,0.980966871,5.8258404,6.1737352,5.82011556
70.527546,6.4807407,6.16514797,0.561776405,5.8257813,6.1597774,5.82009758
70.538037,5.74456265,6.14958248,-0.636411687,5.82572293,6.14423666,5.82007965
70.548529,6.32455532,6.1329679,0.437707004,5.82566529,6.12764538,5.82006175
70.55902,6.70820393,6.11579069,0.769683858,5.82560838,6.11049045,5.82004388
70.569512,6.32455532,6.09845972,0.475495107,5.82555218,6.0931811,5.82002604
70.580004,5.74456265,6.08131031,-0.580299628,5.82549669,6.07605293,5.82000823
70.590495,5.91607978,6.06460089,-0.385384358,5.8254419,6.05936459,5.81999044
70.600987,6.70820393,6.04851588,0.812211829,5.82538782,6.04330067,5.81997267
70.611478,6.78232998,6.03318677,0.865530594,5.82533443,6.02799275,5.81995491
70.62197,6.32455532,6.01869105,0.55304997,5.82528173,6.01351838,5.81993716
70.632462,5.74456265,6.00507274,-0.510401894,5.82522973,5.99992161,5.81991942
70.642953,5.47722558,5.99234677,-0.717719441,5.82517841,5.98721738,5.81990169
70.653445,6.244998,5.98050329,0.51429049,5.82512778,5.97539581,5.81988395
70.663936,6.164414,5.96952178,0.441465995,5.82507785,5.96443635,5.81986621
70.674428,6.08276253,5.95936688,0.35127717,5.8250286,5.95430361,5.81984846
70.68492,6.164414,5.94999934,0.463049305,5.82498004,5.94495829,5.8198307
70.695411,6.244998,5.94137531,0.551019684,5.82493218,5.93635647,5.81981292
70.705903,5.47722558,5.93344622,-0.675441073,5.82488501,5.92844955,5.81979513
70.716394,5.38516481,5.92616579,-0.735527689,5.82483855,5.92119117,5.81977731
70.726886,4.35889894,5.91948515,-1.24923425,5.82479279,5.91453242,5.81975947
70.737378,5.91607978,5.91335857,0.0521652843,5.82474775,5.9084275,5.8197416
70.747869,5.83095189,5.90774172,-0.277109766,5.82470344,5.90283203,5.8197237
70.758361,6.40312424,5.90259081,0.707483871,5.82465986,5.89770217,5.81970576
70.768852,5.56776436,5.89786639,-0.574545059,5.82461703,5.89299841,5.81968778
70.779344,5.65685425,5.89352967,-0.486492986,5.82457496,5.88868191,5.81966976
70.789836,6.4807407,5.88954584,0.768891968,5.82453367,5.8847178,5.81965169
70.800327,4.79583152,5.88588258,-1.0440551,5.82449317,5.8810737,5.81963357
70.810819,6,5.8825092,0.342769313,5.82445349,5.87771889,5.8196154
70.82131,5.29150262,5.8793989,-0.766743945,5.82441465,5.87462651,5.81959717
70.831802,5.91607978,5.87652614,0.198880982,5.82437666,5.87177097,5.81957888
70.842294,5.65685425,5.8738686,-0.46584799,5.82433956,5.86912989,5.81956052
70.852785,5.83095189,5.8714061,-0.201132298,5.82430338,5.86668305,5.8195421
70.863277,5.74456265,5.86911982,-0.352926583,5.82426815,5.86441156,5.81952361
70.873768,6.164414,5.86699374,0.545362504,5.82423391,5.86229936,5.81950504
70.88426,5.47722558,5.86501275,-0.622725599,5.8242007,5.86033128,5.8194864
70.894752,5.65685425,5.86316389,-0.454213209,5.82416856,5.85849429,5.81946767
70.905243,6.164414,5.8614356,0.550434744,5.82413754,5.85677678,5.81944886
70.915735,5.74456265,5.85981709,-0.339491445,5.82410768,5.85516789,5.81942996
70.926226,5.56776436,5.85829935,-0.539012973,5.82407906,5.85365854,5.81941097
70.936718,6.08276253,5.85687378,0.475277554,5.82405173,5.85224007,5.81939188
70.94721,6.164414,5.8555331,0.555770547,5.82402575,5.85090511,5.8193727
70.957701,5.83095189,5.8542708,-0.152705304,5.82400121,5.84964706,5.81935342
70.968193,4.35889894,5.85308071,-1.22236728,5.82397817,5.84845968,5.81933403
70.978684,5.09901951,5.85195772,-0.867720118,5.82395672,5.84733776,5.81931453
70.989176,5.29150262,5.85089683,-0.747926605,5.82393695,5.8462762,5.81929492
70.999668,5.56776436,5.84989384,-0.531158621,5.82391896,5.84527072,5.8192752
71.010159,6.92820323,5.84894496,1.03887356,5.82390285,5.84431738,5.81925536
71.020651,6.244998,5.84804648,0.630040888,5.82388873,5.84341238,5.8192354
71.031142,6,5.84719538,0.390902314,5.82387672,5.84255258,5.81921531
71.041634,6.244998,5.84638861,0.631355196,5.82386694,5.84173479,5.8191951
71.052126,6,5.84562363,0.392907589,5.82385951,5.84095633,5.81917476
71.062617,5.83095189,5.84489808,-0.118093983,5.82385459,5.84021471,5.81915428
71.073109,5.47722558,5.84420966,-0.605792113,5.82385229,5.83950748,5.81913366
71.0836,5.56776436,5.84355648,-0.525159137,5.82385279,5.8388326,5.81911291
71.094092,6.164414,5.84293659,0.566989779,5.82385621,5.83818797,5.81909201
71.104584,5.47722558,5.84234838,-0.60425392,5.82386271,5.8375718,5.81907096
71.115075,5.83095189,5.84179033,-0.104107805,5.82387244,5.83698246,5.81904977
71.125567,5.29150262,5.84126092,-0.741456877,5.82388555,5.83641826,5.81902842
71.136058,6.32455532,5.84075893,0.695554738,5.82390216,5.83587783,5.81900692
71.14655,5.38516481,5.84028301,-0.674624492,5.8239224,5.83535971,5.81898526
71.157042,6.32455532,5.83983206,0.696220697,5.82394637,5.83486269,5.81896343
71.167533,5.19615242,5.83940501,-0.802030288,5.82397414,5.83438562,5.81894144
71.178025,5.83095189,5.8390007,-0.0897151178,5.82400573,5.83392732,5.81891928
71.188516,4.89897949,5.83861816,-0.969349616,5.82404112,5.83348685,5.81889695
71.199008,6.08276253,5.83825629,0.494475727,5.82408023,5.83306316,5.81887445
71.2095,5.56776436,5.83791403,-0.519759241,5.82412287,5.83265539,5.81885177
71.219991,5,5.83759031,-0.915199604,5.82416877,5.83226274,5.8188289
71.230483,5.56776436,5.83728389,-0.519152703,5.82421753,5.83188434,5.81880586
71.240974,4.79583152,5.83699354,-1.02037347,5.8242686,5.83151954,5.81878263
71.251466,4.58257569,5.83671781,-1.11988487,5.82432128,5.83116756,5.8187592
71.261958,5.47722558,5.83645521,-0.599357682,5.82437469,5.83082779,5.81873559
71.272449,5.38516481,5.83620406,-0.671594558,5.82442773,5.83049965,5.81871178
71.282941,5.83095189,5.83596248,-0.0707855032,5.82447916,5.83018249,5.81868777
71.293432,5.91607978,5.83572854,0.283462951,5.82452751,5.82987585,5.81866356
71.303924,5.83095189,5.83550007,-0.0674401591,5.82457118,5.82957915,5.81863914
71.314416,6.63324958,5.8352749,0.893294285,5.82460844,5.82929194,5.81861452
71.324907,5.56776436,5.83505083,-0.516997552,5.82463753,5.8290138,5.81858969
71.335399,5.83095189,5.83482565,-0.062239485,5.82465669,5.82874423,5.81856464
71.34589,4.47213595,5.83459737,-1.16724522,5.82466429,5.8284829,5.81853938
71.356382,4.79583152,5.83436415,-1.01908421,5.82465892,5.82822936,5.8185139
71.366874,5.91607978,5.83412456,0.286278228,5.82463947,5.82798329,5.81848819
71.377365,6.4807407,5.83387756,0.804278025,5.82460524,5.82774436,5.81846227
71.387857,5.83095189,5.83362249,-0.0516778404,5.82455591,5.82751221,5.81843611
71.398348,5.83095189,5.83335929,-0.0490652271,5.8244917,5.82728658,5.81840973
71.40884,6.55743852,5.83308823,0.85108771,5.8244132,5.82706713,5.81838311
71.419332,6,5.83281009,0.408888624,5.82432144,5.8268536,5.81835626
71.429823,5.74456265,5.83252598,-0.296586135,5.82421778,5.82664577,5.81832917
71.440315,5.74456265,5.83223718,-0.296098863,5.82410378,5.82644334,5.81830183
71.450806,6.08276253,5.83194523,0.500816629,5.82398118,5.82624611,5.81827425
71.461298,5.29150262,5.83165162,-0.734948299,5.82385173,5.82605382,5.81824643
71.47179,5.56776436,5.8313579,-0.513413608,5.82371717,5.82586629,5.81821835
71.482281,5.91607978,5.8310655,0.291572087,5.82357913,5.82568332,5.81819003
71.492773,5.38516481,5.83077567,-0.667540909,5.82343907,5.82550469,5.81816144
71.503264,6.55743852,5.83048958,0.852613011,5.82329831,5.82533025,5.8181326
71.513756,5.29150262,5.8302081,-0.733965584,5.82315792,5.8251598,5.8181035
71.524248,5.83095189,5.82993202,0.0319355031,5.82301885,5.82499317,5.81807414
71.534739,5.65685425,5.82966193,-0.415701437,5.82288183,5.82483024,5.81804451
71.545231,5.56776436,5.82939821,-0.511501566,5.82274741,5.82467082,5.81801461
71.555722,5.09901951,5.82914119,-0.854471576,5.82261603,5.82451479,5.81798444
71.566214,5.38516481,5.82889096,-0.666127732,5.82248796,5.82436199,5.817954
71.576706,6.55743852,5.82864762,0.853692511,5.82236339,5.82421229,5.81792327
71.587197,5.91607978,5.82841116,0.296088879,5.82224244,5.8240656,5.81789228
71.597689,6.78232998,5.82818144,0.976805273,5.82212511,5.82392176,5.81786099
71.60818,6.244998,5.82795837,0.645786052,5.8220114,5.82378068,5.81782943
71.618672,5.56776436,5.82774173,-0.50987976,5.8219012,5.82364222,5.81779758
71.629164,5.83095189,5.82753133,0.0584855536,5.82179443,5.8235063,5.81776543
71.639655,6.40312424,5.82732698,0.758813061,5.82169098,5.82337283,5.817733
71.650147,5.83095189,5.82712838,0.0618345621,5.82159067,5.82324168,5.81770027
71.660638,5.74456265,5.82693535,-0.287006448,5.82149339,5.82311278,5.81766725
71.67113,5.65685425,5.82674759,-0.412181203,5.82139894,5.82298603,5.81763392
71.681622,6.244998,5.8265649,0.646864052,5.82130718,5.82286135,5.81760029
71.692113,6.70820393,5.82638704,0.939051062,5.82121797,5.82273867,5.81756636
71.702605,5.47722558,5.82621374,-0.590752206,5.82113112,5.82261789,5.81753212
71.713096,5.47722558,5.82604483,-0.590609224,5.8210465,5.82249895,5.81749758
71.723588,5.74456265,5.82588005,-0.285162058,5.82096395,5.82238177,5.81746271
71.73408,5.74456265,5.8257192,-0.284879892,5.82088333,5.82226628,5.81742754
71.744571,5.83095189,5.82556211,0.0734151763,5.82080452,5.82215242,5.81739205
71.755063,6.164414,5.82540855,0.58224175,5.82072738,5.82204011,5.81735624
71.765554,5.74456265,5.82525837,-0.28406993,5.82065179,5.82192932,5.81732011
71.776046,4.89897949,5.82511138,-0.962357466,5.82057764,5.82181996,5.81728365
71.786538,6.55743852,5.82496742,0.855845259,5.8205048,5.82171197,5.81724686
71.797029,5.56776436,5.82482635,-0.507012806,5.82043321,5.82160533,5.81720976
71.807521,6,5.824688,0.418702759,5.82036273,5.82149995,5.81717231
71.818012,5.09901951,5.82455226,-0.8517821,5.8202933,5.8213958,5.81713454
71.828504,5.29150262,5.82441897,-0.730011196,5.82022482,5.82129282,5.81709642
71.838996,6,5.82428802,0.41918013,5.82015722,5.82119097,5.81705797
71.849487,5.65685425,5.8241593,-0.409029405,5.82009043,5.8210902,5.81701918
71.859979,5.09901951,5.82403269,-0.851477056,5.82002437,5.82099046,5.81698005
71.87047,5.74456265,5.8239081,-0.281683245,5.81995899,5.82089173,5.81694057
71.880962,5.65685425,5.8237854,-0.408572091,5.81989421,5.82079394,5.81690075
71.891454,5,5.82366453,-0.907559654,5.81982999,5.82069706,5.81686057
71.901945,5.65685425,5.82354539,-0.408278262,5.81976628,5.82060106,5.81682004
71.912437,6.55743852,5.82342789,0.856744208,5.81970303,5.82050589,5.81677916
71.922928,5.09901951,5.82331196,-0.85105373,5.81964019,5.82041153,5.81673793
71.93342,5.19615242,5.82319752,-0.791861794,5.81957771,5.82031793,5.81669633
71.943912,5.47722558,5.82308451,-0.588097722,5.81951557,5.82022506,5.81665437
71.954403,6.32455532,5.82297286,0.708224869,5.81945372,5.8201329,5.81661205
71.964895,5.29150262,5.82286249,-0.72894435,5.81939213,5.8200414,5.81656937
71.975386,5.65685425,5.82275336,-0.40730715,5.81933078,5.81995055,5.81652632
71.985878,5,5.82264541,-0.906998019,5.81926962,5.8198603,5.8164829
71.99637,6,5.82253857,0.42126171,5.81920863,5.81977063,5.8164391
72.006861,5.91607978,5.82243282,0.306017916,5.8191478,5.81968151,5.81639494
72.017353,6,5.82232808,0.421511474,5.81908708,5.81959292,5.8163504
72.027844,6.32455532,5.82222432,0.708753128,5.81902647,5.81950483,5.81630548
72.038336,6,5.82212149,0.421756456,5.81896593,5.81941721,5.81626018
72.048828,5.56776436,5.82201955,-0.504237234,5.81890545,5.81933004,5.8162145
72.059319,5.29150262,5.82191847,-0.728296538,5.81884501,5.8192433,5.81616843
72.069811,5.47722558,5.82181819,-0.587020114,5.81878459,5.81915696,5.81612198
72.080302,4.89897949,5.8217187,-0.960593155,5.81872419,5.81907101,5.81607514
72.090794,5.91607978,5.82161993,0.307343214,5.81866377,5.81898541,5.81602791
72.101286,4.79583152,5.82152188,-1.01276372,5.81860333,5.81890015,5.81598029
72.111777,6.40312424,5.8214245,0.762692424,5.81854285,5.81881522,5.81593228
72.122269,6,5.82132777,0.422696385,5.81848233,5.81873058,5.81588386
72.13276,6.32455532,5.82123165,0.709453076,5.81842174,5.81864622,5.81583506
72.143252,6.4807407,5.82113612,0.81216044,5.81836108,5.81856211,5.81578585
72.153744,5.74456265,5.82104114,-0.276547459,5.81830033,5.81847825,5.81573623
72.164235,6.40312424,5.82094671,0.763005587,5.8182395,5.81839462,5.81568622
72.174727,6,5.82085278,0.423257864,5.81817855,5.81831119,5.8156358
72.185218,6,5.82075934,0.423368227,5.8181175,5.81822796,5.81558497
72.19571,4.89897949,5.82066636,-0.960045247,5.81805632,5.8181449,5.81553373
72.206202,5.19615242,5.82057382,-0.790203389,5.81799502,5.81806199,5.81548208
72.216693,5.56776436,5.8204817,-0.502709998,5.81793358,5.81797924,5.81543001
72.227185,5.91607978,5.82038998,0.309337683,5.81787199,5.8178966,5.81537753
72.237676,5.91607978,5.82029865,0.309485278,5.81781026,5.81781409,5.81532464
72.248168,5.38516481,5.82020766,-0.659577786,5.81774836,5.81773167,5.81527132
72.25866,5.65685425,5.82011702,-0.404057884,5.8176863,5.81764934,5.81521758
72.269151,5.56776436,5.82002672,-0.502257259,5.81762408,5.81756708,5.81516343
72.279643,4.58257569,5.81993671,-1.1123673,5.81756168,5.81748488,5.81510884
72.290134,5.29150262,5.81984701,-0.726873018,5.8174991,5.81740273,5.81505383
72.300626,5.74456265,5.81975757,-0.274216929,5.81743633,5.81732061,5.81499839
72.311118,5.74456265,5.8196684,-0.274054284,5.81737338,5.8172385,5.81494252
72.321609,5.19615242,5.81957948,-0.789573972,5.81731023,5.81715642,5.81488623
72.332101,5.65685425,5.81949079,-0.403282208,5.81724689,5.81707433,5.81482949
72.342592,6,5.81940233,0.42496785,5.81718335,5.81699223,5.81477233
72.353084,6.40312424,5.81931407,0.764074717,5.8171196,5.8169101,5.81471472
72.363576,6.63324958,5.819226,0.902232554,5.81705564,5.81682793,5.81465668
72.374067,5.74456265,5.81913813,-0.273085115,5.81699148,5.81674573,5.8145982
72.384559,5.91607978,5.81905042,0.311495368,5.8169271,5.81666346,5.81453927
72.39505,6.164414,5.81896288,0.587750901,5.81686251,5.81658114,5.81447991
72.405542,6.55743852,5.81887549,0.859396903,5.8167977,5.81649873,5.81442009
72.416034,5.19615242,5.81878824,-0.789072756,5.81673266,5.81641624,5.81435983
72.426525,6.08276253,5.81870113,0.513869053,5.81666742,5.81633366,5.81429912
72.437017,4.79583152,5.81861413,-1.01132715,5.81660194,5.81625097,5.81423796
72.447508,6.164414,5.81852726,0.588121368,5.81653624,5.81616818,5.81417635
72.458,6,5.81844049,0.426098009,5.81647032,5.81608526,5.81411429
72.468492,6.08276253,5.81835381,0.514206882,5.81640416,5.81600221,5.81405177
72.478983,6.32455532,5.81826724,0.711539235,5.81633779,5.81591902,5.8139888
72.489475,6.40312424,5.81818074,0.76481599,5.81627118,5.81583569,5.81392536
72.499966,5.91607978,5.81809433,0.313026286,5.81620435,5.81575221,5.81386147
72.510458,5.91607978,5.81800798,0.313164183,5.81613728,5.81566856,5.81379711
72.52095,5.83095189,5.81792169,0.114149906,5.81606999,5.81558474,5.8137323
72.531441,5.74456265,5.81783548,-0.270689548,5.81600248,5.81550075,5.81366702
72.541933,4.79583152,5.81774931,-1.01089949,5.81593473,5.81541658,5.81360127
72.552424,6.244998,5.8176632,0.653708499,5.81586676,5.81533221,5.81353506
72.562916,5,5.81757712,-0.904199714,5.81579856,5.81524765,5.81346838
72.573408,5.38516481,5.81749109,-0.657515233,5.81573014,5.81516288,5.81340122
72.583899,4.58257569,5.8174051,-1.11122878,5.8156615,5.8150779,5.8133336
72.594391,5.91607978,5.81731914,0.314262064,5.81559263,5.8149927,5.8132655
72.604882,5.83095189,5.81723322,0.117126768,5.81552355,5.81490728,5.81319694
72.615374,6.4807407,5.81714731,0.814612415,5.81545425,5.81482163,5.81312789
72.625866,5.83095189,5.81706143,0.117857797,5.81538473,5.81473574,5.81305836
72.636357,6.164414,5.81697559,0.589439067,5.81531501,5.81464961,5.81298836
72.646849,5.91607978,5.81688976,0.314944479,5.81524507,5.81456323,5.81291788
72.65734,6,5.81680396,0.428014069,5.81517493,5.8144766,5.81284692
72.667832,5.56776436,5.81671817,-0.498952708,5.81510459,5.8143897,5.81277547
72.678324,5.65685425,5.8166324,-0.39972259,5.81503404,5.81430254,5.81270354
72.688815,6.164414,5.81654666,0.589802803,5.81496331,5.81421511,5.81263113
72.699307,5.91607978,5.81646093,0.315624547,5.81489238,5.8141274,5.81255822
72.709798,5.65685425,5.81637523,-0.399400775,5.81482127,5.81403942,5.81248484
72.72029,5.91607978,5.81628954,0.315895931,5.81474998,5.81395114,5.81241096
72.730782,6.244998,5.81620388,0.654823728,5.81467851,5.81386257,5.81233658
72.741273,6.08276253,5.81611826,0.516376097,5.81460688,5.81377372,5.81226173
72.751765,4.79583152,5.81603265,-1.01005006,5.81453508,5.81368455,5.81218637
72.762256,5.29150262,5.81594709,-0.72418538,5.81446313,5.81359509,5.81211052
72.772748,5.09901951,5.81586155,-0.846665244,5.81439102,5.8135053,5.81203418
72.78324,5.47722558,5.81577605,-0.581850905,5.81431877,5.8134152,5.81195733
72.793731,5.83095189,5.81569061,0.123536592,5.8142464,5.81332479,5.81188
72.804223,6.70820393,5.8156052,0.944774434,5.81417389,5.81323405,5.81180216
72.814714,5.91607978,5.81551986,0.317111846,5.81410127,5.81314299,5.81172382
72.825206,6.164414,5.81543457,0.590744809,5.81402854,5.81305159,5.81164498
72.835698,6.32455532,5.81534935,0.713586691,5.81395571,5.81295985,5.81156563
72.846189,6.08276253,5.81526422,0.517202389,5.8138828,5.81286778,5.81148579
72.856681,5.74456265,5.81517916,-0.265737678,5.81380981,5.81277535,5.81140544
72.867172,5.83095189,5.8150942,0.125927331,5.81373676,5.81268259,5.81132458
72.877664,5.91607978,5.81500934,0.317915782,5.81366365,5.81258946,5.81124321
72.888156,5.56776436,5.81492459,-0.497152114,5.81359051,5.81249598,5.81116134
72.898647,5.74456265,5.81483997,-0.265098703,5.81351734,5.81240214,5.81107896
72.909139,5.74456265,5.81475548,-0.264939298,5.81344415,5.81230794,5.81099606
72.91963,5.19615242,5.81467114,-0.786459612,5.81337098,5.81221337,5.81091266
72.930122,6.78232998,5.81458696,0.983739305,5.81329782,5.81211843,5.81082874
72.940614,5.65685425,5.81450296,-0.397050011,5.8132247,5.81202311,5.81074431
72.951105,6.244998,5.81441916,0.656185066,5.81315164,5.81192743,5.81065937
72.961597,5.74456265,5.81433556,-0.264145623,5.81307865,5.81183135,5.8105739
72.972088,5.91607978,5.81425219,0.31910436,5.81300576,5.8117349,5.81048793
72.98258,6.08276253,5.81416906,0.51826004,5.81293297,5.81163805,5.81040143
72.993072,5.74456265,5.8140862,-0.263673192,5.81286033,5.81154082,5.81031441
73.003563,5.38516481,5.81400363,-0.654857866,5.81278785,5.8114432,5.81022688
73.014055,5.29150262,5.81392137,-0.722785407,5.81271556,5.81134517,5.81013882
73.024546,6,5.81383944,0.431463273,5.81264348,5.81124675,5.81005025
73.035038,6.32455532,5.81375787,0.714700949,5.81257163,5.81114792,5.80996115
73.04553,5.29150262,5.81367669,-0.722616128,5.81250006,5.81104869,5.80987152
73.056021,6,5.81359593,0.431745374,5.81242879,5.81094905,5.80978138
73.066513,5.83095189,5.81351561,0.132046514,5.81235785,5.810849,5.80969071
73.077004,6.40312424,5.81343578,0.76791175,5.81228728,5.81074854,5.80959951
73.087496,6.164414,5.81335646,0.592501092,5.81221711,5.81064766,5.80950778
73.097988,5.47722558,5.81327769,-0.579700021,5.81214739,5.81054636,5.80941553
73.108479,5.83095189,5.81319952,0.133238046,5.81207815,5.81044465,5.80932275
73.118971,5.91607978,5.81312197,0.320870394,5.81200944,5.8103425,5.80922944
73.129462,5.09901951,5.81304511,-0.845000356,5.81194131,5.81023994,5.8091356
73.139954,5.56776436,5.81296897,-0.495181393,5.8118738,5.81013693,5.80904122
73.150446,5.56776436,5.81289361,-0.49510529,5.81180696,5.8100335,5.80894631
73.160937,5.19615242,5.81281908,-0.785281263,5.81174086,5.80992964,5.80885088
73.171429,5.74456265,5.81274544,-0.261118349,5.81167554,5.80982534,5.80875491
73.18192,6.164414,5.81267275,0.593077781,5.81161108,5.80972061,5.80865841
73.192412,6.244998,5.81260107,0.657568957,5.81154754,5.80961543,5.80856136
73.202904,5.56776436,5.81253047,-0.494738418,5.81148499,5.8095098,5.80846378
73.213395,4,5.81246103,-1.34627673,5.8114235,5.80940375,5.80836567
73.223887,5.47722558,5.81239282,-0.578936306,5.81136316,5.80929723,5.80826702
73.234378,5.47722558,5.81232594,-0.578878543,5.81130406,5.80919027,5.80816784
73.24487,5.19615242,5.81226047,-0.784925503,5.81124627,5.80908286,5.8080681
73.255362,6.244998,5.8121965,0.657876505,5.8111899,5.80897499,5.80796783
73.265853,5.09901951,5.81213415,-0.844461154,5.81113507,5.80886668,5.80786703
73.276345,5.09901951,5.81207352,-0.844425253,5.81108187,5.80875789,5.80776568
73.286836,6,5.81201474,0.433572674,5.81103044,5.80864867,5.8076638
73.297328,6.55743852,5.81195792,0.863412189,5.81098089,5.80853897,5.80756136
73.30782,4.89897949,5.8119032,-0.955470416,5.81093336,5.8084288,5.80745838
73.318311,6.4807407,5.81185074,0.817856928,5.81088801,5.80831819,5.80735487
73.328803,4.79583152,5.81180069,-1.00795296,5.810845,5.80820709,5.8072508
73.339294,6,5.81175323,0.433874143,5.81080449,5.80809554,5.8071462
73.349786,6.70820393,5.81170852,0.946834416,5.81076666,5.80798351,5.80704105
73.360278,5.91607978,5.81166678,0.323130015,5.81073173,5.80787101,5.80693535
73.370769,6.244998,5.81162821,0.658308281,5.81069989,5.80775804,5.80682911
73.381261,6.244998,5.81159303,0.658334997,5.81067138,5.8076446,5.80672232
73.391752,5.19615242,5.8115615,-0.784480133,5.81064644,5.80753068,5.80661498
73.402244,5.29150262,5.81153388,-0.721131926,5.81062534,5.80741628,5.80650709
73.412736,5.29150262,5.81151044,-0.721115678,5.81060836,5.8073014,5.80639866
73.423227,6.40312424,5.81149151,0.769176657,5.81059581,5.80718605,5.80628968
73.433719,5.91607978,5.81147739,0.323422925,5.81058801,5.8070702,5.80618014
73.44421,6.08276253,5.81146846,0.520858974,5.81058533,5.80695388,5.80607007
73.454702,5.74456265,5.81146508,-0.258655046,5.81058814,5.80683707,5.80595943
73.465194,6.32455532,5.81146766,0.716301373,5.81059685,5.80671977,5.80584824
73.475685,6,5.81147665,0.434192759,5.81061189,5.806602,5.80573651
73.486177,5.19615242,5.8114925,-0.784436155,5.81063375,5.80648372,5.80562422
73.496668,6.70820393,5.81151573,0.946936219,5.81066291,5.80636497,5.80551139
73.50716,5.74456265,5.81154687,-0.258813104,5.81069993,5.80624571,5.80539799
73.517652,6.244998,5.81158649,0.658339961,5.81074537,5.80612596,5.80528405
73.528143,5.74456265,5.81163521,-0.25898372,5.81079985,5.80600573,5.80516955
73.538635,5.65685425,5.81169369,-0.393496432,5.81086403,5.80588499,5.8050545
73.549126,6.08276253,5.81176261,0.520576526,5.8109386,5.80576377,5.8049389
73.559618,6.08276253,5.81184272,0.520499573,5.8110243,5.80564203,5.80482273
73.57011,6.08276253,5.81193481,0.520411109,5.81112192,5.8055198,5.80470602
73.580601,5.83095189,5.81203968,0.137521706,5.81123227,5.80539708,5.80458875
73.591093,5.74456265,5.81215821,-0.259991478,5.81135624,5.80527385,5.80447092
73.601584,6.4807407,5.81229131,0.817587539,5.81149471,5.80515013,5.80435255
73.612076,5.38516481,5.81243995,-0.653662863,5.81164867,5.80502589,5.8042336
73.622568,5,5.81260508,-0.901446105,5.81181907,5.80490116,5.80411411
73.633059,5.83095189,5.81278771,0.134774569,5.81200693,5.80477592,5.80399406
73.643551,5.56776436,5.8129889,-0.495201511,5.81221329,5.80465017,5.80387345
73.654042,6.78232998,5.81320965,0.984439098,5.81243916,5.80452393,5.80375229
73.664534,6,5.81345102,0.431913168,5.81268561,5.80439716,5.80363056
73.675026,6.32455532,5.81371399,0.714731652,5.81295361,5.80426989,5.80350828
73.685517,5.47722558,5.81399946,-0.580322227,5.81324407,5.80414212,5.80338545
73.696009,5.29150262,5.81430834,-0.723053055,5.81355789,5.80401383,5.80326205
73.7065,6.164414,5.81464127,0.59141587,5.81389572,5.80388504,5.8031381
73.716992,5.91607978,5.81499883,0.317932312,5.81425812,5.80375572,5.80301358
73.727484,6.164414,5.81538124,0.590789952,5.81464534,5.80362589,5.8028885
73.737975,6.164414,5.81578838,0.590445279,5.81505724,5.80349557,5.80276288
73.748467,6.164414,5.81621982,0.590079812,5.8154934,5.80336471,5.80263669
73.758958,5.65685425,5.81667444,-0.399775174,5.8159527,5.80323335,5.80250994
73.76945,6.40312424,5.81715063,0.765489127,5.81643353,5.80310147,5.80238263
73.779942,5.65685425,5.81764589,-0.400988326,5.81693338,5.80296907,5.80225476
73.790433,5.74456265,5.81815677,-0.271282369,5.81744881,5.80283616,5.80212634
73.800925,6.32455532,5.81867896,0.711249856,5.81797552,5.80270273,5.80199734
73.811416,6.244998,5.8192068,0.65252678,5.81850782,5.80256878,5.8018678
73.821908,6.164414,5.8197336,0.587094888,5.81903905,5.80243431,5.80173769
73.8324,5.47722558,5.82025125,-0.58568394,5.81956109,5.80229932,5.80160702
73.842891,6.40312424,5.82075047,0.763134173,5.82006465,5.80216382,5.8014758
73.853383,5.29150262,5.82122102,-0.727817555,5.82053949,5.80202779,5.80134401
73.863874,6.78232998,5.82165163,0.980142005,5.82097436,5.80189125,5.80121167
73.874366,5.29150262,5.82203076,-0.728373629,5.8213577,5.80175417,5.80107876
73.884858,6,5.82234672,0.421489361,5.82167781,5.80161658,5.80094528
73.895349,6,5.82258838,0.421202586,5.82192359,5.80147847,5.80081126
73.905841,5.19615242,5.82274587,-0.791576558,5.82208515,5.80133983,5.80067667
73.916332,6.08276253,5.822811,0.509854423,5.8221543,5.80120068,5.80054153
73.926824,6.244998,5.82277794,0.649784628,5.82212521,5.80106099,5.80040581
73.937316,5.29150262,5.82264355,-0.728794162,5.82199475,5.80092078,5.80026954
73.947807,5.83095189,5.8224077,0.0924347952,5.82176278,5.80078005,5.80013272
73.958299,5.74456265,5.82207313,-0.278407052,5.82143204,5.80063879,5.79999533
73.96879,6.32455532,5.82164545,0.709161382,5.82100815,5.80049701,5.79985738
73.979282,6,5.8211325,0.4229273,5.82049894,5.8003547,5.79971887
73.989774,5.29150262,5.82054406,-0.727352348,5.8199142,5.80021186,5.7995798
74.000265,5.19615242,5.81989119,-0.789771342,5.819265,5.80006851,5.79944018
74.010757,6,5.81918539,0.425223013,5.81856282,5.79992462,5.79929998
74.021248,6.4807407,5.81843844,0.813819548,5.81781947,5.79978021,5.79915924
74.03174,6.164414,5.81766145,0.58885699,5.81704603,5.79963526,5.79901793
74.042232,5.56776436,5.81686492,-0.499099743,5.81625302,5.79948979,5.79887606
74.052723,5.19615242,5.81605831,-0.787341022,5.8154499,5.7993438,5.79873364
74.063215,6.40312424,5.81524965,0.766729799,5.81464471,5.79919728,5.79859066
74.073706,6.164414,5.81444604,0.591580905,5.81384452,5.79905023,5.79844712
74.084198,6.40312424,5.81365301,0.767770299,5.81305489,5.79890265,5.79830301
74.09469,4.89897949,5.81287518,-0.95597892,5.81228044,5.79875454,5.79815835
74.105181,5,5.81211613,-0.90117486,5.81152474,5.79860591,5.79801314
74.115673,6,5.81137827,0.434306031,5.8107902,5.79845674,5.79786736
74.126164,5.19615242,5.81066353,-0.783907587,5.81007875,5.79830705,5.79772103
74.136656,5.91607978,5.80997287,0.32574056,5.80939137,5.79815683,5.79757414
74.147148,6.55743852,5.80930694,0.864946003,5.80872868,5.79800607,5.79742668
74.157639,5.56776436,5.80866591,-0.490817221,5.80809087,5.7978548,5.79727869
74.168131,6.4807407,5.80804944,0.820177575,5.8074776,5.79770299,5.79713012
74.178622,5.83095189,5.80745718,0.153279862,5.8068885,5.79755066,5.79698101
74.189114,6.164414,5.80688831,0.597934519,5.80632278,5.79739778,5.79683133
74.199606,5.29150262,5.80634208,-0.717523141,5.80577967,5.79724438,5.79668109
74.210097,5.83095189,5.8058176,0.158537983,5.80525829,5.79709047,5.79653032
74.220589,6.164414,5.80531379,0.599249706,5.80475756,5.79693601,5.79637897
74.23108,6.164414,5.80482973,0.599653464,5.80427654,5.79678104,5.79622708
74.241572,6.164414,5.80436428,0.600041439,5.80381412,5.79662552,5.79607463
74.252064,6.55743852,5.80391646,0.868056487,5.8033693,5.79646947,5.79592161
74.262555,5.38516481,5.80348531,-0.64677701,5.80294113,5.79631291,5.79576806
74.273047,5.74456265,5.80306975,-0.241882425,5.80252854,5.79615581,5.79561395
74.283538,5.91607978,5.80266893,0.336765284,5.80213064,5.79599819,5.79545929
74.29403,6.164414,5.80228184,0.601774182,5.80174646,5.79584003,5.79530406
74.304522,6.4807407,5.80190765,0.823913253,5.80137517,5.79568134,5.79514829
74.315013,6.70820393,5.80154557,0.952186094,5.80101596,5.79552214,5.79499197
74.325505,6.244998,5.80119475,0.666185593,5.80066798,5.79536239,5.79483509
74.335996,6.32455532,5.80085451,0.723671754,5.80033056,5.79520214,5.79467768
74.346488,5.91607978,5.80052409,0.339934839,5.80000294,5.79504134,5.79451969
74.35698,5.74456265,5.80020286,-0.235881769,5.79968449,5.79488001,5.79436116
74.367471,5.47722558,5.79989023,-0.568035784,5.79937461,5.79471817,5.79420209
74.377963,5.91607978,5.79874783,0.342537519,5.79823488,5.79455578,5.79404246
74.388454,6,5.79845337,0.448939447,5.79794314,5.79439289,5.7938823
74.398946,6.4807407,5.79816582,0.826180897,5.79765828,5.79422945,5.79372157
74.409438,5.74456265,5.79788474,-0.230915774,5.79737987,5.79406549,5.79356029
74.419929,6.32455532,5.79760971,0.725910194,5.7971075,5.79390102,5.79339848
74.430421,5.74456265,5.79734027,-0.229733811,5.79684069,5.793736,5.79323611
74.440912,6.55743852,5.79707609,0.871987634,5.79657912,5.79357048,5.79307321
74.451404,5.29150262,5.79682216,-0.710858309,5.79632778,5.79340441,5.79290974
74.461896,5.65685425,5.7965674,-0.373782226,5.79607559,5.79323782,5.79274573
74.472387,5.09901951,5.79631691,-0.835043352,5.79582766,5.79307072,5.79258119
74.482879,6,5.79607036,0.451585692,5.79558364,5.79290308,5.7924161
74.49337,6.40312424,5.79582753,0.779292441,5.79534332,5.79273494,5.79225047
74.503862,5.91607978,5.79558812,0.347119086,5.79510641,5.79256625,5.79208429
74.514354,5.91607978,5.79535194,0.347459125,5.7948727,5.79239704,5.79191756
74.524845,6.4807407,5.79511879,0.828022892,5.794642,5.79222733,5.7917503
74.535337,5.74456265,5.79488843,-0.224334088,5.79441408,5.79205707,5.79158249
74.545828,5.47722558,5.79466072,-0.563413834,5.79418879,5.79188631,5.79141416
74.55632,6.32455532,5.79443546,0.728093307,5.79396593,5.79171502,5.79124527
74.566812,6.164414,5.79421249,0.608441869,5.79374535,5.7915432,5.79107584
74.577303,6.40312424,5.79399171,0.780469427,5.79352693,5.79137088,5.79090588
74.587795,5,5.79377293,-0.890939351,5.79331049,5.79119802,5.79073538
74.598286,6.08276253,5.79355606,0.537779203,5.79309595,5.79102466,5.79056435
74.608778,6.8556546,5.79334095,1.03068601,5.79288315,5.79085076,5.79039277
74.61927,6.70820393,5.7931275,0.956596274,5.792672,5.79067634,5.79022065
74.629761,5.19615242,5.79291564,-0.772504509,5.79246242,5.79050143,5.79004801
74.640253,5.38516481,5.79270523,-0.638388925,5.79225426,5.79032597,5.78987482
74.650744,5.83095189,5.79249621,0.196101199,5.79204749,5.79015002,5.78970112
74.661236,5.83095189,5.79228848,0.19663015,5.79184198,5.78997354,5.78952686
74.671728,6.244998,5.79208196,0.672990368,5.79163768,5.78979654,5.78935208
74.682219,4.89897949,5.79187662,-0.944932341,5.79143452,5.78961904,5.78917677
74.692711,5.47722558,5.79167233,-0.560755519,5.79123241,5.78944101,5.78900092
74.703202,5.38516481,5.79146908,-0.63742001,5.79103132,5.78926248,5.78882456
74.713694,6.08276253,5.79126676,0.539903478,5.79083116,5.78908342,5.78864765
74.724186,6.164414,5.79106536,0.611022624,5.79063188,5.78890385,5.78847021
74.734677,5.47722558,5.79086482,-0.560035039,5.79043346,5.78872379,5.78829226
74.745169,5.74456265,5.79066507,-0.214714747,5.7902358,5.78854319,5.78811377
74.75566,6,5.7904661,0.457748733,5.79003892,5.7883621,5.78793477
74.766152,6,5.79026783,0.457965254,5.78984271,5.78818049,5.78775522
74.776644,6,5.79007023,0.458180932,5.78964717,5.78799836,5.78757515
74.787135,6,5.7898733,0.458395785,5.78945228,5.78781575,5.78739457
74.797627,6.55743852,5.78967697,0.87622004,5.78925797,5.7876326,5.78721346
74.808118,5.29150262,5.78948123,-0.70567599,5.78906424,5.78744897,5.78703184
74.81861,5.47722558,5.78928602,-0.558623702,5.78887102,5.78726481,5.78684968
74.829102,5.91607978,5.78909133,0.356354395,5.78867831,5.78708015,5.78666699
74.839593,6.244998,5.78889716,0.675352382,5.78848611,5.786895,5.78648381
74.850085,6.08276253,5.78870344,0.542272151,5.78829435,5.78670933,5.78630009
74.860576,6,5.7885102,0.459880199,5.78810304,5.78652317,5.78611587
74.871068,6.40312424,5.78831738,0.784096206,5.78791214,5.78633649,5.78593112
74.88156,5.91607978,5.78812497,0.357707723,5.78772165,5.78614931,5.78574585
74.892051,7.07106781,5.78793298,1.13275542,5.78753155,5.78596164,5.78556008
74.902543,6.244998,5.78774135,0.676207545,5.78734181,5.78577346,5.78537378
74.913034,6.08276253,5.78755012,0.543334527,5.78715245,5.78558479,5.78518699
74.923526,6.164414,5.78735923,0.614047857,5.78696342,5.78539561,5.78499966
74.934018,6.08276253,5.78716869,0.543685422,5.78677472,5.78520593,5.78481183
74.944509,6.164414,5.78697851,0.614357788,5.78658637,5.78501577,5.7846235
74.955001,6.55743852,5.78678865,0.877866664,5.78639833,5.7848251,5.78443465
74.965492,5.47722558,5.78659912,-0.556213582,5.78621061,5.78463394,5.7842453
74.975984,5.56776436,5.78640991,-0.46759549,5.78602319,5.78444228,5.78405543
74.986476,5.83095189,5.786221,0.211496788,5.78583607,5.78425012,5.78386505
74.996967,5.47722558,5.78603243,-0.55570393,5.78564926,5.78405749,5.78367419
75.007459,5,5.78584416,-0.886478515,5.78546274,5.78386434,5.7834828
75.01795,6.164414,5.78565621,0.615433013,5.78527654,5.78367072,5.78329093
75.028442,5,5.78546855,-0.886266638,5.78509062,5.7834766,5.78309853
75.038934,5.65685425,5.78528121,-0.358367078,5.784905,5.78328198,5.78290564
75.049425,5.47722558,5.7850942,-0.554859106,5.7847197,5.7830869,5.78271226
75.059917,6.8556546,5.78490749,1.03476911,5.78453469,5.78289131,5.78251837
75.070408,5.29150262,5.78472113,-0.702295168,5.78435,5.78269525,5.782324
75.0809,5.74456265,5.78453507,-0.199931043,5.78416562,5.78249869,5.78212911
75.091392,5.83095189,5.78434935,0.215876234,5.78398156,5.78230164,5.78193372
75.101883,5.56776436,5.78379785,-0.464794029,5.78379785,5.78173786,5.78173786
75.112375,6.164414,5.78361447,0.61708957,5.78361447,5.78154149,5.78154149
75.122866,5.29150262,5.78343145,-0.701376379,5.78343145,5.78134464,5.78134464
75.133358,6.08276253,5.78324877,0.547278499,5.78324877,5.78114728,5.78114728
75.14385,5.65685425,5.78306648,-0.355263601,5.78306648,5.78094944,5.78094944
75.154341,5.83095189,5.78288458,0.219242589,5.78288458,5.78075112,5.78075112
75.164833,5.74456265,5.78270307,-0.195295743,5.78270307,5.78055229,5.78055229
75.175324,6.32455532,5.782522,0.736229121,5.782522,5.780353,5.780353
75.185816,5.19615242,5.78234135,-0.765629757,5.78234135,5.7801532,5.7801532
75.196308,6.164414,5.78216115,0.618266007,5.78216115,5.77995292,5.77995292
75.206799,5.83095189,5.78198144,0.221292696,5.78198144,5.77975217,5.77975217
75.217291,5.47722558,5.78180221,-0.551884617,5.78180221,5.77955092,5.77955092
75.227782,6.08276253,5.78162351,0.548761353,5.78162351,5.77934921,5.77934921
75.238274,4.89897949,5.78144533,-0.939396534,5.78144533,5.779147,5.779147
75.248766,5.29150262,5.78126773,-0.699832197,5.78126773,5.77894432,5.77894432
75.259257,6,5.78109073,0.46787741,5.78109073,5.77874117,5.77874117
75.269749,6.78232998,5.78091434,1.00070757,5.78091434,5.77853753,5.77853753
75.28024,6.164414,5.78073861,0.619415363,5.78073861,5.77833343,5.77833343
75.290732,5.09901951,5.78056355,-0.825556806,5.78056355,5.77812884,5.77812884
75.301224,6.32455532,5.78038921,0.737676154,5.78038921,5.77792377,5.77792377
75.311715,5.91607978,5.78021564,0.368597533,5.78021564,5.77771826,5.77771826
75.322207,5.56776436,5.78004284,-0.46073689,5.78004284,5.77751225,5.77751225
75.332698,5.29150262,5.77987089,-0.698833507,5.77987089,5.7773058,5.7773058
75.34319,5.47722558,5.7796998,-0.549976565,5.7796998,5.77709886,5.77709886
75.353682,6.08276253,5.77952962,0.550665881,5.77952962,5.77689145,5.77689145
75.364173,5.38516481,5.77936042,-0.62784999,5.77936042,5.7766836,5.7766836
75.374665,6.32455532,5.77919221,0.738487041,5.77919221,5.77647526,5.77647526
75.385156,5.47722558,5.77902508,-0.549362821,5.77902508,5.77626648,5.77626648
75.395648,6,5.77885906,0.47025625,5.77885906,5.77605722,5.77605722
75.40614,6.08276253,5.77869421,0.551423903,5.77869421,5.7758475,5.7758475
75.416631,5.38516481,5.77853061,-0.62718881,5.77853061,5.77563734,5.77563734
75.427123,6.55743852,5.7783683,0.88264955,5.7783683,5.77542671,5.77542671
75.437614,6.40312424,5.77820736,0.79051684,5.77820736,5.77521564,5.77521564
75.448106,5.19615242,5.77804785,-0.762820707,5.77804785,5.77500409,5.77500409
75.458598,5.74456265,5.77788986,-0.182557416,5.77788986,5.77479209,5.77479209
75.469089,4.35889894,5.77773347,-1.19114841,5.77773347,5.77457966,5.77457966
75.479581,5.83095189,5.77757874,0.231026314,5.77757874,5.77436676,5.77436676
75.490072,5.47722558,5.77742579,-0.547905293,5.77742579,5.77415343,5.77415343
75.500564,6.40312424,5.77727468,0.791106542,5.77727468,5.77393964,5.77393964
75.511056,5.65685425,5.77712552,-0.346801489,5.77712552,5.77372539,5.77372539
75.521547,5.19615242,5.77697844,-0.762119425,5.77697844,5.77351072,5.77351072
75.532039,5.56776436,5.77683352,-0.457240804,5.77683352,5.77329559,5.77329559
75.54253,6.63324958,5.77669089,0.92550456,5.77669089,5.77308004,5.77308004
75.553022,6.164414,5.77655066,0.622786757,5.77655066,5.77286403,5.77286403
75.563514,6.164414,5.77641297,0.622897291,5.77641297,5.77264757,5.77264757
75.574005,6.08276253,5.77627797,0.553610479,5.77627797,5.77243071,5.77243071
75.584497,5.56776436,5.77614578,-0.456488134,5.77614578,5.77221338,5.77221338
75.594988,5.65685425,5.77601658,-0.345198978,5.77601658,5.77199564,5.77199564
75.60548,6.244998,5.77589052,0.684914211,5.77589052,5.77177744,5.77177744
75.615972,6.70820393,5.77576778,0.965627335,5.77576778,5.77155882,5.77155882
75.626463,5.56776436,5.77564856,-0.455943198,5.77564856,5.77133978,5.77133978
75.636955,5.91607978,5.77553304,0.374895645,5.77553304,5.7711203,5.7711203
75.647446,4.69041576,5.77542144,-1.04163606,5.77542144,5.7709004,5.7709004
[truncated: 424,369 more chars]
