# Supplementary material for: Phase Stability of Iron Nitride Fe4N at High Pressure—Pressure-Dependent Evolution of Phase Equilibria in the Fe–N System
Source: Materials (Basel). 2021 Jul 15;14(14):3963. doi: 10.3390/ma14143963 (PMC8307547; doi:10.3390/ma14143963)
Supplement: Supplementary file 1 [file materials-14-03963-s001.zip › xrd_data/4-400a_riet.txt]

'y-axis saved as Sqrt(y)
'x,Yobs,Ycalc,Diff,fe4n,alpha,Bkg
20,10.5356538,0,0,0,0,0
20.010492,11.5325626,0,0,0,0,0
20.020983,10.8166538,0,0,0,0,0
20.031475,11.2694277,0,0,0,0,0
20.041966,11.4455231,0,0,0,0,0
20.052458,10.198039,0,0,0,0,0
20.06295,10.2469508,0,0,0,0,0
20.073441,11.5325626,0,0,0,0,0
20.083933,10.9544512,0,0,0,0,0
20.094424,10.2469508,0,0,0,0,0
20.104916,11.4455231,0,0,0,0,0
20.115408,10.5356538,0,0,0,0,0
20.125899,11.1803399,0,0,0,0,0
20.136391,12.1243557,0,0,0,0,0
20.146882,10.7238053,0,0,0,0,0
20.157374,12.1243557,0,0,0,0,0
20.167866,11.1803399,0,0,0,0,0
20.178357,11.6619038,0,0,0,0,0
20.188849,11.3137085,0,0,0,0,0
20.19934,10.3923048,0,0,0,0,0
20.209832,11.4891253,0,0,0,0,0
20.220324,10.7238053,0,0,0,0,0
20.230815,11.0905365,0,0,0,0,0
20.241307,11.4891253,0,0,0,0,0
20.251798,11.7473401,0,0,0,0,0
20.26229,12.2065556,0,0,0,0,0
20.272782,11.2694277,0,0,0,0,0
20.283273,11.2694277,0,0,0,0,0
20.293765,11.61895,0,0,0,0,0
20.304256,11,0,0,0,0,0
20.314748,11.4017543,0,0,0,0,0
20.32524,11.5325626,0,0,0,0,0
20.335731,11.5758369,0,0,0,0,0
20.346223,11.2694277,0,0,0,0,0
20.356714,11,0,0,0,0,0
20.367206,10.4880885,0,0,0,0,0
20.377698,11.1803399,0,0,0,0,0
20.388189,11.1803399,0,0,0,0,0
20.398681,11.4017543,0,0,0,0,0
20.409172,11.045361,0,0,0,0,0
20.419664,11.9582607,0,0,0,0,0
20.430156,11.2249722,0,0,0,0,0
20.440647,11.0905365,0,0,0,0,0
20.451139,11,0,0,0,0,0
20.46163,11.7473401,0,0,0,0,0
20.472122,11.4017543,0,0,0,0,0
20.482614,10.9087121,0,0,0,0,0
20.493105,11.4017543,0,0,0,0,0
20.503597,11.045361,0,0,0,0,0
20.514088,11.7473401,0,0,0,0,0
20.52458,11.0905365,0,0,0,0,0
20.535072,11.4455231,0,0,0,0,0
20.545563,11.5758369,0,0,0,0,0
20.556055,11.4455231,0,0,0,0,0
20.566546,11.4891253,0,0,0,0,0
20.577038,12.5698051,0,0,0,0,0
20.58753,12.0415946,0,0,0,0,0
20.598021,10,0,0,0,0,0
20.608513,10.6770783,0,0,0,0,0
20.619004,11.3137085,0,0,0,0,0
20.629496,11.6619038,0,0,0,0,0
20.639988,11.7473401,0,0,0,0,0
20.650479,10.9087121,0,0,0,0,0
20.660971,10.8627805,0,0,0,0,0
20.671462,11.61895,0,0,0,0,0
20.681954,11.0905365,0,0,0,0,0
20.692446,11.8743421,0,0,0,0,0
20.702937,10.9087121,0,0,0,0,0
20.713429,11.61895,0,0,0,0,0
20.72392,11.045361,0,0,0,0,0
20.734412,12.2065556,0,0,0,0,0
20.744904,11.6619038,0,0,0,0,0
20.755395,10.9544512,0,0,0,0,0
20.765887,12.1243557,0,0,0,0,0
20.776378,10.9544512,0,0,0,0,0
20.78687,11.5758369,0,0,0,0,0
20.797362,11.6619038,0,0,0,0,0
20.807853,11.8321596,0,0,0,0,0
20.818345,10.8166538,0,0,0,0,0
20.828836,11.8321596,0,0,0,0,0
20.839328,11.2694277,0,0,0,0,0
20.84982,11.5325626,0,0,0,0,0
20.860311,10.9544512,0,0,0,0,0
20.870803,12.083046,0,0,0,0,0
20.881294,11.4455231,0,0,0,0,0
20.891786,11.045361,0,0,0,0,0
20.902278,11.4017543,0,0,0,0,0
20.912769,11.4455231,0,0,0,0,0
20.923261,11.4017543,0,0,0,0,0
20.933752,12,0,0,0,0,0
20.944244,11.1803399,0,0,0,0,0
20.954736,12.4096736,0,0,0,0,0
20.965227,11.5758369,0,0,0,0,0
20.975719,11.2249722,0,0,0,0,0
20.98621,11.045361,0,0,0,0,0
20.996702,10.8627805,0,0,0,0,0
21.007194,11.1355287,0,0,0,0,0
21.017685,11.61895,0,0,0,0,0
21.028177,11.7473401,0,0,0,0,0
21.038668,12.489996,0,0,0,0,0
21.04916,12.1655251,0,0,0,0,0
21.059652,11.5758369,0,0,0,0,0
21.070143,11.6619038,0,0,0,0,0
21.080635,12.3693169,0,0,0,0,0
21.091126,11.6619038,0,0,0,0,0
21.101618,10.6301458,0,0,0,0,0
21.11211,11.2249722,0,0,0,0,0
21.122601,10.9087121,0,0,0,0,0
21.133093,12.5299641,0,0,0,0,0
21.143584,10.2956301,0,0,0,0,0
21.154076,10.4880885,0,0,0,0,0
21.164568,11.7473401,0,0,0,0,0
21.175059,11.8743421,0,0,0,0,0
21.185551,10.9087121,0,0,0,0,0
21.196042,12,0,0,0,0,0
21.206534,11.2249722,0,0,0,0,0
21.217026,12.0415946,0,0,0,0,0
21.227517,11,0,0,0,0,0
21.238009,11,0,0,0,0,0
21.2485,12.083046,0,0,0,0,0
21.258992,10.5830052,0,0,0,0,0
21.269484,12.489996,0,0,0,0,0
21.279975,12.3693169,0,0,0,0,0
21.290467,11.8321596,0,0,0,0,0
21.300958,11.9163753,0,0,0,0,0
21.31145,11.4455231,0,0,0,0,0
21.321942,13.2664992,0,0,0,0,0
21.332433,12.5698051,0,0,0,0,0
21.342925,12.328828,0,0,0,0,0
21.353416,11.7046999,0,0,0,0,0
21.363908,11.8743421,0,0,0,0,0
21.3744,10.7703296,0,0,0,0,0
21.384891,12,0,0,0,0,0
21.395383,11,0,0,0,0,0
21.405874,11.7473401,0,0,0,0,0
21.416366,12.1655251,0,0,0,0,0
21.426858,11.9582607,0,0,0,0,0
21.437349,12.5299641,0,0,0,0,0
21.447841,11.7473401,0,0,0,0,0
21.458332,12.1655251,0,0,0,0,0
21.468824,11.5325626,0,0,0,0,0
21.479316,11.61895,0,0,0,0,0
21.489807,11.7046999,0,0,0,0,0
21.500299,11.5325626,0,0,0,0,0
21.51079,11.1355287,0,0,0,0,0
21.521282,11.9163753,0,0,0,0,0
21.531774,11.7898261,0,0,0,0,0
21.542265,11.5758369,0,0,0,0,0
21.552757,11.6619038,0,0,0,0,0
21.563248,11.8743421,0,0,0,0,0
21.57374,11.2694277,0,0,0,0,0
21.584232,11.4891253,0,0,0,0,0
21.594723,11.2694277,0,0,0,0,0
21.605215,12.1243557,0,0,0,0,0
21.615706,11.9582607,0,0,0,0,0
21.626198,11.61895,0,0,0,0,0
21.63669,12.2065556,0,0,0,0,0
21.647181,11.7046999,0,0,0,0,0
21.657673,11.61895,0,0,0,0,0
21.668164,11.4455231,0,0,0,0,0
21.678656,12.2474487,0,0,0,0,0
21.689148,12.3693169,0,0,0,0,0
21.699639,11.3137085,0,0,0,0,0
21.710131,11.4891253,0,0,0,0,0
21.720622,12.0415946,0,0,0,0,0
21.731114,11.5325626,0,0,0,0,0
21.741606,10.6301458,0,0,0,0,0
21.752097,10.7703296,0,0,0,0,0
21.762589,11.4455231,0,0,0,0,0
21.77308,11.6619038,0,0,0,0,0
21.783572,11.9163753,0,0,0,0,0
21.794064,11.9582607,0,0,0,0,0
21.804555,11.045361,0,0,0,0,0
21.815047,11.8321596,0,0,0,0,0
21.825538,12.328828,0,0,0,0,0
21.83603,11.1803399,0,0,0,0,0
21.846522,11.3137085,0,0,0,0,0
21.857013,11.8743421,0,0,0,0,0
21.867505,11.4455231,0,0,0,0,0
21.877996,10.8627805,0,0,0,0,0
21.888488,11.3578167,0,0,0,0,0
21.89898,10.8166538,0,0,0,0,0
21.909471,11.9582607,0,0,0,0,0
21.919963,11.7473401,0,0,0,0,0
21.930454,11.8321596,0,0,0,0,0
21.940946,12.2474487,0,0,0,0,0
21.951438,11.7046999,0,0,0,0,0
21.961929,11.4891253,0,0,0,0,0
21.972421,11.3137085,0,0,0,0,0
21.982912,11.5325626,0,0,0,0,0
21.993404,12.328828,0,0,0,0,0
22.003896,11.61895,0,0,0,0,0
22.014387,11.2694277,0,0,0,0,0
22.024879,11.4891253,0,0,0,0,0
22.03537,11.9582607,0,0,0,0,0
22.045862,11.6619038,0,0,0,0,0
22.056354,12.2882057,0,0,0,0,0
22.066845,12,0,0,0,0,0
22.077337,12.1243557,0,0,0,0,0
22.087828,11.8743421,0,0,0,0,0
22.09832,11.4891253,0,0,0,0,0
22.108812,11.7473401,0,0,0,0,0
22.119303,12.1243557,0,0,0,0,0
22.129795,11.0905365,0,0,0,0,0
22.140286,10.6301458,0,0,0,0,0
22.150778,12.0415946,0,0,0,0,0
22.16127,12.328828,0,0,0,0,0
22.171761,11.5758369,0,0,0,0,0
22.182253,11.6619038,0,0,0,0,0
22.192744,12.328828,0,0,0,0,0
22.203236,11.7046999,0,0,0,0,0
22.213728,11.7473401,0,0,0,0,0
22.224219,10.4880885,0,0,0,0,0
22.234711,10.9087121,0,0,0,0,0
22.245202,11.0905365,0,0,0,0,0
22.255694,10.4403065,0,0,0,0,0
22.266186,12.328828,0,0,0,0,0
22.276677,11.4891253,0,0,0,0,0
22.287169,10.7703296,0,0,0,0,0
22.29766,11.7898261,0,0,0,0,0
22.308152,11.6619038,0,0,0,0,0
22.318644,10.4403065,0,0,0,0,0
22.329135,11,0,0,0,0,0
22.339627,10.6301458,0,0,0,0,0
22.350118,11.2249722,0,0,0,0,0
22.36061,9.8488578,0,0,0,0,0
22.371102,11.4455231,0,0,0,0,0
22.381593,11.0905365,0,0,0,0,0
22.392085,11.2694277,0,0,0,0,0
22.402576,11.2249722,0,0,0,0,0
22.413068,11.4891253,0,0,0,0,0
22.42356,11.3578167,0,0,0,0,0
22.434051,12,0,0,0,0,0
22.444543,12.0415946,0,0,0,0,0
22.455034,11.3137085,0,0,0,0,0
22.465526,12.5698051,0,0,0,0,0
22.476018,10.4880885,0,0,0,0,0
22.486509,11.61895,0,0,0,0,0
22.497001,11.2249722,0,0,0,0,0
22.507492,12.2882057,0,0,0,0,0
22.517984,11.4891253,0,0,0,0,0
22.528476,12.2474487,0,0,0,0,0
22.538967,10.7238053,0,0,0,0,0
22.549459,10.6301458,0,0,0,0,0
22.55995,11.61895,0,0,0,0,0
22.570442,11.2694277,0,0,0,0,0
22.580934,11.4891253,0,0,0,0,0
22.591425,11.7046999,0,0,0,0,0
22.601917,11.7473401,0,0,0,0,0
22.612408,11.2694277,0,0,0,0,0
22.6229,11.4017543,0,0,0,0,0
22.633392,11.9582607,0,0,0,0,0
22.643883,10.8627805,0,0,0,0,0
22.654375,11.4455231,0,0,0,0,0
22.664866,11,0,0,0,0,0
22.675358,12.0415946,0,0,0,0,0
22.68585,11.4017543,0,0,0,0,0
22.696341,11.7046999,0,0,0,0,0
22.706833,11.61895,0,0,0,0,0
22.717324,11.4891253,0,0,0,0,0
22.727816,10.2956301,0,0,0,0,0
22.738308,11.5325626,0,0,0,0,0
22.748799,11.0905365,0,0,0,0,0
22.759291,12,0,0,0,0,0
22.769782,11.6619038,0,0,0,0,0
22.780274,11.2694277,0,0,0,0,0
22.790766,11.3578167,0,0,0,0,0
22.801257,10.8166538,0,0,0,0,0
22.811749,11.3578167,0,0,0,0,0
22.82224,11.6619038,0,0,0,0,0
22.832732,11.7046999,0,0,0,0,0
22.843224,11.5325626,0,0,0,0,0
22.853715,11.3137085,0,0,0,0,0
22.864207,12,0,0,0,0,0
22.874698,10.2956301,0,0,0,0,0
22.88519,11.7898261,0,0,0,0,0
22.895682,10.5356538,0,0,0,0,0
22.906173,11.5758369,0,0,0,0,0
22.916665,11.4017543,0,0,0,0,0
22.927156,11.7898261,0,0,0,0,0
22.937648,11.5325626,0,0,0,0,0
22.94814,10.5356538,0,0,0,0,0
22.958631,11.7898261,0,0,0,0,0
22.969123,11.0905365,0,0,0,0,0
22.979614,11.2694277,0,0,0,0,0
22.990106,11.3578167,0,0,0,0,0
23.000598,11.61895,0,0,0,0,0
23.011089,11.0905365,0,0,0,0,0
23.021581,12,0,0,0,0,0
23.032072,11.5758369,0,0,0,0,0
23.042564,10.7238053,0,0,0,0,0
23.053056,11.4017543,0,0,0,0,0
23.063547,11.2694277,0,0,0,0,0
23.074039,10.5356538,0,0,0,0,0
23.08453,10.4403065,0,0,0,0,0
23.095022,11.5758369,0,0,0,0,0
23.105514,11,0,0,0,0,0
23.116005,11.3578167,0,0,0,0,0
23.126497,10.7703296,0,0,0,0,0
23.136988,11.045361,0,0,0,0,0
23.14748,11.8321596,0,0,0,0,0
23.157972,11.2249722,0,0,0,0,0
23.168463,11.045361,0,0,0,0,0
23.178955,11.7046999,0,0,0,0,0
23.189446,11.3578167,0,0,0,0,0
23.199938,10.8627805,0,0,0,0,0
23.21043,11,0,0,0,0,0
23.220921,10.3923048,0,0,0,0,0
23.231413,10.8166538,0,0,0,0,0
23.241904,10.9544512,0,0,0,0,0
23.252396,11.7473401,0,0,0,0,0
23.262888,10.9544512,0,0,0,0,0
23.273379,11.9163753,0,0,0,0,0
23.283871,10.7238053,0,0,0,0,0
23.294362,11.7898261,0,0,0,0,0
23.304854,11.045361,0,0,0,0,0
23.315346,11.7898261,0,0,0,0,0
23.325837,9.89949494,0,0,0,0,0
23.336329,10.9087121,0,0,0,0,0
23.34682,11.5758369,0,0,0,0,0
23.357312,11.2249722,0,0,0,0,0
23.367804,10.5356538,0,0,0,0,0
23.378295,11.045361,0,0,0,0,0
23.388787,11.3137085,0,0,0,0,0
23.399278,11.2249722,0,0,0,0,0
23.40977,10.8627805,0,0,0,0,0
23.420262,10.3923048,0,0,0,0,0
23.430753,11.2249722,0,0,0,0,0
23.441245,11.2249722,0,0,0,0,0
23.451736,11.1355287,0,0,0,0,0
23.462228,12.1655251,0,0,0,0,0
23.47272,11.3137085,0,0,0,0,0
23.483211,11.61895,0,0,0,0,0
23.493703,11.3578167,0,0,0,0,0
23.504194,11.045361,0,0,0,0,0
23.514686,9.89949494,0,0,0,0,0
23.525178,10.0498756,0,0,0,0,0
23.535669,11.8321596,0,0,0,0,0
23.546161,11.3137085,0,0,0,0,0
23.556652,11.5758369,0,0,0,0,0
23.567144,11.9582607,0,0,0,0,0
23.577636,11.045361,0,0,0,0,0
23.588127,11.045361,0,0,0,0,0
23.598619,10.4880885,0,0,0,0,0
23.60911,10.9087121,0,0,0,0,0
23.619602,10.7238053,0,0,0,0,0
23.630094,11.1803399,0,0,0,0,0
23.640585,10.1488916,0,0,0,0,0
23.651077,11.4891253,0,0,0,0,0
23.661568,11.0905365,0,0,0,0,0
23.67206,11.3137085,0,0,0,0,0
23.682552,11.5758369,0,0,0,0,0
23.693043,10.7703296,0,0,0,0,0
23.703535,10.4403065,0,0,0,0,0
23.714026,11.4017543,0,0,0,0,0
23.724518,11.4891253,0,0,0,0,0
23.73501,11.5325626,0,0,0,0,0
23.745501,11.045361,0,0,0,0,0
23.755993,10.6301458,0,0,0,0,0
23.766484,10.5356538,0,0,0,0,0
23.776976,10.7238053,0,0,0,0,0
23.787468,11.61895,0,0,0,0,0
23.797959,10.8166538,0,0,0,0,0
23.808451,10.5830052,0,0,0,0,0
23.818942,11.61895,0,0,0,0,0
23.829434,10.4403065,0,0,0,0,0
23.839926,11.1803399,0,0,0,0,0
23.850417,10.8627805,0,0,0,0,0
23.860909,11,0,0,0,0,0
23.8714,11.045361,0,0,0,0,0
23.881892,10.3440804,0,0,0,0,0
23.892384,10.7238053,0,0,0,0,0
23.902875,9.48683298,0,0,0,0,0
23.913367,10.3440804,0,0,0,0,0
23.923858,11.4017543,0,0,0,0,0
23.93435,11.6619038,0,0,0,0,0
23.944842,10.9087121,0,0,0,0,0
23.955333,10.5830052,0,0,0,0,0
23.965825,11.3578167,0,0,0,0,0
23.976316,11,0,0,0,0,0
23.986808,11.2694277,0,0,0,0,0
23.9973,11.045361,0,0,0,0,0
24.007791,10.9544512,0,0,0,0,0
24.018283,10.7238053,0,0,0,0,0
24.028774,11.045361,0,0,0,0,0
24.039266,10.7238053,0,0,0,0,0
24.049758,10.6770783,0,0,0,0,0
24.060249,9.59166305,0,0,0,0,0
24.070741,10.7703296,0,0,0,0,0
24.081232,10.7703296,0,0,0,0,0
24.091724,10.2956301,0,0,0,0,0
24.102216,9.89949494,0,0,0,0,0
24.112707,10.9544512,0,0,0,0,0
24.123199,10.2956301,0,0,0,0,0
24.13369,10.8627805,0,0,0,0,0
24.144182,10.3440804,0,0,0,0,0
24.154674,10.7703296,0,0,0,0,0
24.165165,9.94987437,0,0,0,0,0
24.175657,10.8627805,0,0,0,0,0
24.186148,10.8166538,0,0,0,0,0
24.19664,10.4403065,0,0,0,0,0
24.207132,11.4891253,0,0,0,0,0
24.217623,11.045361,0,0,0,0,0
24.228115,10.198039,0,0,0,0,0
24.238606,11.4891253,0,0,0,0,0
24.249098,10.2956301,0,0,0,0,0
24.25959,10.6770783,0,0,0,0,0
24.270081,11.1803399,0,0,0,0,0
24.280573,10.6301458,0,0,0,0,0
24.291064,10.3923048,0,0,0,0,0
24.301556,11.0905365,0,0,0,0,0
24.312048,9.79795897,0,0,0,0,0
24.322539,10.0498756,0,0,0,0,0
24.333031,11.0905365,0,0,0,0,0
24.343522,11.5758369,0,0,0,0,0
24.354014,11.045361,0,0,0,0,0
24.364506,10.9544512,0,0,0,0,0
24.374997,10.0498756,0,0,0,0,0
24.385489,10.8166538,0,0,0,0,0
24.39598,10.6770783,0,0,0,0,0
24.406472,10.5356538,0,0,0,0,0
24.416964,10.8627805,0,0,0,0,0
24.427455,10.1488916,0,0,0,0,0
24.437947,10.8166538,0,0,0,0,0
24.448438,10.9087121,0,0,0,0,0
24.45893,10.5830052,0,0,0,0,0
24.469422,10.6301458,0,0,0,0,0
24.479913,10.198039,0,0,0,0,0
24.490405,10.5830052,0,0,0,0,0
24.500896,9.94987437,0,0,0,0,0
24.511388,10.4403065,0,0,0,0,0
24.52188,10.5830052,0,0,0,0,0
24.532371,11,0,0,0,0,0
24.542863,10.7238053,0,0,0,0,0
24.553354,10.198039,0,0,0,0,0
24.563846,10.2469508,0,0,0,0,0
24.574338,10.0995049,0,0,0,0,0
24.584829,10.5356538,0,0,0,0,0
24.595321,10.2956301,0,0,0,0,0
24.605812,10.5356538,0,0,0,0,0
24.616304,10.8627805,0,0,0,0,0
24.626796,9.21954446,0,0,0,0,0
24.637287,10.4403065,0,0,0,0,0
24.647779,10.3923048,0,0,0,0,0
24.65827,10.4880885,0,0,0,0,0
24.668762,10.198039,0,0,0,0,0
24.679254,10.8627805,0,0,0,0,0
24.689745,10.2469508,0,0,0,0,0
24.700237,10.5830052,0,0,0,0,0
24.710728,10.2469508,0,0,0,0,0
24.72122,10.198039,0,0,0,0,0
24.731712,10.4880885,0,0,0,0,0
24.742203,10.6770783,0,0,0,0,0
24.752695,10.3923048,0,0,0,0,0
24.763186,10.6301458,0,0,0,0,0
24.773678,10.6770783,0,0,0,0,0
24.78417,10.0995049,0,0,0,0,0
24.794661,9.8488578,0,0,0,0,0
24.805153,10.5356538,0,0,0,0,0
24.815644,9.64365076,0,0,0,0,0
24.826136,10.0498756,0,0,0,0,0
24.836628,9.79795897,0,0,0,0,0
24.847119,10.5830052,0,0,0,0,0
24.857611,10.3440804,0,0,0,0,0
24.868102,10.198039,0,0,0,0,0
24.878594,10.6770783,0,0,0,0,0
24.889086,10.3923048,0,0,0,0,0
24.899577,10.2469508,0,0,0,0,0
24.910069,10.6301458,0,0,0,0,0
24.92056,10.198039,0,0,0,0,0
24.931052,11.1355287,0,0,0,0,0
24.941544,10.9087121,0,0,0,0,0
24.952035,10.7238053,0,0,0,0,0
24.962527,11.0905365,0,0,0,0,0
24.973018,9.38083152,0,0,0,0,0
24.98351,10.3440804,0,0,0,0,0
24.994002,10.6770783,0,0,0,0,0
25.004493,10.1488916,0,0,0,0,0
25.014985,9.8488578,0,0,0,0,0
25.025476,11.1355287,0,0,0,0,0
25.035968,9.53939201,0,0,0,0,0
25.04646,10.4880885,0,0,0,0,0
25.056951,9.8488578,0,0,0,0,0
25.067443,10.7238053,0,0,0,0,0
25.077934,10.7703296,0,0,0,0,0
25.088426,9.94987437,0,0,0,0,0
25.098918,10.2956301,0,0,0,0,0
25.109409,9.53939201,0,0,0,0,0
25.119901,11.6619038,0,0,0,0,0
25.130392,9.43398113,0,0,0,0,0
25.140884,10.5356538,0,0,0,0,0
25.151376,10.2469508,0,0,0,0,0
25.161867,11.1803399,0,0,0,0,0
25.172359,10.4880885,0,0,0,0,0
25.18285,10.0498756,0,0,0,0,0
25.193342,10.2469508,0,0,0,0,0
25.203834,9.69535971,0,0,0,0,0
25.214325,10.2469508,0,0,0,0,0
25.224817,10.9544512,0,0,0,0,0
25.235308,10.3923048,0,0,0,0,0
25.2458,9.74679434,0,0,0,0,0
25.256292,11,0,0,0,0,0
25.266783,10.198039,0,0,0,0,0
25.277275,10.4880885,0,0,0,0,0
25.287766,9.64365076,0,0,0,0,0
25.298258,10.8166538,0,0,0,0,0
25.30875,10.4880885,0,0,0,0,0
25.319241,10.4880885,0,0,0,0,0
25.329733,9.59166305,0,0,0,0,0
25.340224,10.5356538,0,0,0,0,0
25.350716,10.7703296,0,0,0,0,0
25.361208,8.66025404,0,0,0,0,0
25.371699,9.59166305,0,0,0,0,0
25.382191,10.6301458,0,0,0,0,0
25.392682,10,0,0,0,0,0
25.403174,10.0498756,0,0,0,0,0
25.413666,10,0,0,0,0,0
25.424157,10.2469508,0,0,0,0,0
25.434649,10.0498756,0,0,0,0,0
25.44514,9.64365076,0,0,0,0,0
25.455632,10.3440804,0,0,0,0,0
25.466124,10,0,0,0,0,0
25.476615,10.2469508,0,0,0,0,0
25.487107,9.69535971,0,0,0,0,0
25.497598,10.4403065,0,0,0,0,0
25.50809,9.89949494,0,0,0,0,0
25.518582,9.79795897,0,0,0,0,0
25.529073,10.2469508,0,0,0,0,0
25.539565,10.4880885,0,0,0,0,0
25.550056,10,0,0,0,0,0
25.560548,9.74679434,0,0,0,0,0
25.57104,10.1488916,0,0,0,0,0
25.581531,10.1488916,0,0,0,0,0
25.592023,10.0498756,0,0,0,0,0
25.602514,9.38083152,0,0,0,0,0
25.613006,10.3923048,0,0,0,0,0
25.623498,10.2469508,0,0,0,0,0
25.633989,10.5830052,0,0,0,0,0
25.644481,9.94987437,0,0,0,0,0
25.654972,10.1488916,0,0,0,0,0
25.665464,9.48683298,0,0,0,0,0
25.675956,9.94987437,0,0,0,0,0
25.686447,10.2956301,0,0,0,0,0
25.696939,10.3923048,0,0,0,0,0
25.70743,9.59166305,0,0,0,0,0
25.717922,9.79795897,0,0,0,0,0
25.728414,9.43398113,0,0,0,0,0
25.738905,8.36660027,0,0,0,0,0
25.749397,10.7703296,0,0,0,0,0
25.759888,9.43398113,0,0,0,0,0
25.77038,10.0498756,0,0,0,0,0
25.780872,10.0995049,0,0,0,0,0
25.791363,10.7703296,0,0,0,0,0
25.801855,9.05538514,0,0,0,0,0
25.812346,10.1488916,0,0,0,0,0
25.822838,9.32737905,0,0,0,0,0
25.83333,10,0,0,0,0,0
25.843821,10,0,0,0,0,0
25.854313,10.0498756,0,0,0,0,0
25.864804,10.6770783,0,0,0,0,0
25.875296,10.0995049,0,0,0,0,0
25.885788,10.8166538,0,0,0,0,0
25.896279,9.74679434,0,0,0,0,0
25.906771,9.53939201,0,0,0,0,0
25.917262,10,0,0,0,0,0
25.927754,9.8488578,0,0,0,0,0
25.938246,10.3440804,0,0,0,0,0
25.948737,9.21954446,0,0,0,0,0
25.959229,9.43398113,0,0,0,0,0
25.96972,9.74679434,0,0,0,0,0
25.980212,9.05538514,0,0,0,0,0
25.990704,9.48683298,0,0,0,0,0
26.001195,9.16515139,0,0,0,0,0
26.011687,9.64365076,0,0,0,0,0
26.022178,9.05538514,0,0,0,0,0
26.03267,10.0995049,0,0,0,0,0
26.043162,10.1488916,0,0,0,0,0
26.053653,9.11043358,0,0,0,0,0
26.064145,9.32737905,0,0,0,0,0
26.074636,9.79795897,0,0,0,0,0
26.085128,9.74679434,0,0,0,0,0
26.09562,9.8488578,0,0,0,0,0
26.106111,9.11043358,0,0,0,0,0
26.116603,9.94987437,0,0,0,0,0
26.127094,9.53939201,0,0,0,0,0
26.137586,9.59166305,0,0,0,0,0
26.148078,10.3923048,0,0,0,0,0
26.158569,10.0498756,0,0,0,0,0
26.169061,9.2736185,0,0,0,0,0
26.179552,8.94427191,0,0,0,0,0
26.190044,10,0,0,0,0,0
26.200536,10.0498756,0,0,0,0,0
26.211027,10.7238053,0,0,0,0,0
26.221519,9.43398113,0,0,0,0,0
26.23201,8.60232527,0,0,0,0,0
26.242502,9.05538514,0,0,0,0,0
26.252994,9.64365076,0,0,0,0,0
26.263485,9.8488578,0,0,0,0,0
26.273977,8.83176087,0,0,0,0,0
26.284468,8.88819442,0,0,0,0,0
26.29496,9.89949494,0,0,0,0,0
26.305452,9.05538514,0,0,0,0,0
26.315943,10.198039,0,0,0,0,0
26.326435,10.0498756,0,0,0,0,0
26.336926,9.8488578,0,0,0,0,0
26.347418,9,0,0,0,0,0
26.35791,10.2469508,0,0,0,0,0
26.368401,9.69535971,0,0,0,0,0
26.378893,10.198039,0,0,0,0,0
26.389384,9.59166305,0,0,0,0,0
26.399876,9.79795897,0,0,0,0,0
26.410368,10.0498756,0,0,0,0,0
26.420859,9.53939201,0,0,0,0,0
26.431351,9.69535971,0,0,0,0,0
26.441842,9.69535971,0,0,0,0,0
26.452334,8.83176087,0,0,0,0,0
26.462826,8.94427191,0,0,0,0,0
26.473317,9.2736185,0,0,0,0,0
26.483809,9.11043358,0,0,0,0,0
26.4943,9.74679434,0,0,0,0,0
26.504792,9.74679434,0,0,0,0,0
26.515284,9.16515139,0,0,0,0,0
26.525775,9,0,0,0,0,0
26.536267,9.89949494,0,0,0,0,0
26.546758,9.16515139,0,0,0,0,0
26.55725,9.2736185,0,0,0,0,0
26.567742,9.69535971,0,0,0,0,0
26.578233,9.43398113,0,0,0,0,0
26.588725,9.43398113,0,0,0,0,0
26.599216,8.88819442,0,0,0,0,0
26.609708,10,0,0,0,0,0
26.6202,9.89949494,0,0,0,0,0
26.630691,9.16515139,0,0,0,0,0
26.641183,9.94987437,0,0,0,0,0
26.651674,9.64365076,0,0,0,0,0
26.662166,8.71779789,0,0,0,0,0
26.672658,9.11043358,0,0,0,0,0
26.683149,10.0498756,0,0,0,0,0
26.693641,8.54400375,0,0,0,0,0
26.704132,9.89949494,0,0,0,0,0
26.714624,9.32737905,0,0,0,0,0
26.725116,9.89949494,0,0,0,0,0
26.735607,9.11043358,0,0,0,0,0
26.746099,9.79795897,0,0,0,0,0
26.75659,9.2736185,0,0,0,0,0
26.767082,10.3440804,0,0,0,0,0
26.777574,9.48683298,0,0,0,0,0
26.788065,9.21954446,0,0,0,0,0
26.798557,8.77496439,0,0,0,0,0
26.809048,9.2736185,0,0,0,0,0
26.81954,8.88819442,0,0,0,0,0
26.830032,9.43398113,0,0,0,0,0
26.840523,9.94987437,0,0,0,0,0
26.851015,8.24621125,0,0,0,0,0
26.861506,9.21954446,0,0,0,0,0
26.871998,9,0,0,0,0,0
26.88249,9.64365076,0,0,0,0,0
26.892981,9.38083152,0,0,0,0,0
26.903473,8.88819442,0,0,0,0,0
26.913964,9.16515139,0,0,0,0,0
26.924456,9.64365076,0,0,0,0,0
26.934948,9.32737905,0,0,0,0,0
26.945439,9.53939201,0,0,0,0,0
26.955931,8.94427191,0,0,0,0,0
26.966422,9.11043358,0,0,0,0,0
26.976914,9.53939201,0,0,0,0,0
26.987406,9.8488578,0,0,0,0,0
26.997897,9.79795897,0,0,0,0,0
27.008389,8.88819442,0,0,0,0,0
27.01888,8.18535277,0,0,0,0,0
27.029372,8.94427191,0,0,0,0,0
27.039864,8.94427191,0,0,0,0,0
27.050355,8.1240384,0,0,0,0,0
27.060847,9.64365076,0,0,0,0,0
27.071338,9.48683298,0,0,0,0,0
27.08183,10.1488916,0,0,0,0,0
27.092322,8.94427191,0,0,0,0,0
27.102813,9.8488578,0,0,0,0,0
27.113305,9.43398113,0,0,0,0,0
27.123796,9.32737905,0,0,0,0,0
27.134288,9.21954446,0,0,0,0,0
27.14478,9.38083152,0,0,0,0,0
27.155271,9.32737905,0,0,0,0,0
27.165763,9.38083152,0,0,0,0,0
27.176254,8.94427191,0,0,0,0,0
27.186746,9.11043358,0,0,0,0,0
27.197238,9.89949494,0,0,0,0,0
27.207729,9,0,0,0,0,0
27.218221,9.94987437,0,0,0,0,0
27.228712,9.94987437,0,0,0,0,0
27.239204,8.88819442,0,0,0,0,0
27.249696,8.54400375,0,0,0,0,0
27.260187,10.0498756,0,0,0,0,0
27.270679,8.71779789,0,0,0,0,0
27.28117,7.74596669,0,0,0,0,0
27.291662,9.21954446,0,0,0,0,0
27.302154,8.94427191,0,0,0,0,0
27.312645,8.94427191,0,0,0,0,0
27.323137,8.71779789,0,0,0,0,0
27.333628,9.38083152,0,0,0,0,0
27.34412,9.32737905,0,0,0,0,0
27.354612,9.69535971,0,0,0,0,0
27.365103,8.30662386,0,0,0,0,0
27.375595,9,0,0,0,0,0
27.386086,8.30662386,0,0,0,0,0
27.396578,8.66025404,0,0,0,0,0
27.40707,8.94427191,0,0,0,0,0
27.417561,9.11043358,0,0,0,0,0
27.428053,9.11043358,0,0,0,0,0
27.438544,8.66025404,0,0,0,0,0
27.449036,8.48528137,0,0,0,0,0
27.459528,8.30662386,0,0,0,0,0
27.470019,8,0,0,0,0,0
27.480511,8.36660027,0,0,0,0,0
27.491002,8.83176087,0,0,0,0,0
27.501494,8.54400375,0,0,0,0,0
27.511986,8.36660027,0,0,0,0,0
27.522477,9.79795897,0,0,0,0,0
27.532969,8.88819442,0,0,0,0,0
27.54346,8.71779789,0,0,0,0,0
27.553952,9.05538514,0,0,0,0,0
27.564444,8.24621125,0,0,0,0,0
27.574935,8.77496439,0,0,0,0,0
27.585427,7.74596669,0,0,0,0,0
27.595918,9.53939201,0,0,0,0,0
27.60641,8.71779789,0,0,0,0,0
27.616902,8.94427191,0,0,0,0,0
27.627393,9.16515139,0,0,0,0,0
27.637885,8.83176087,0,0,0,0,0
27.648376,7.87400787,0,0,0,0,0
27.658868,8.77496439,0,0,0,0,0
27.66936,9.21954446,0,0,0,0,0
27.679851,9.05538514,0,0,0,0,0
27.690343,7.81024968,0,0,0,0,0
27.700834,9.2736185,0,0,0,0,0
27.711326,8.94427191,0,0,0,0,0
27.721818,8.54400375,0,0,0,0,0
27.732309,9.2736185,0,0,0,0,0
27.742801,8.71779789,0,0,0,0,0
27.753292,8.60232527,0,0,0,0,0
27.763784,7.87400787,0,0,0,0,0
27.774276,8.83176087,0,0,0,0,0
27.784767,8.42614977,0,0,0,0,0
27.795259,8.30662386,0,0,0,0,0
27.80575,8.71779789,0,0,0,0,0
27.816242,8.48528137,0,0,0,0,0
27.826734,8.88819442,0,0,0,0,0
27.837225,8.54400375,0,0,0,0,0
27.847717,8.66025404,0,0,0,0,0
27.858208,7.74596669,0,0,0,0,0
27.8687,8.24621125,0,0,0,0,0
27.879192,8.77496439,0,0,0,0,0
27.889683,8.06225775,0,0,0,0,0
27.900175,7.87400787,0,0,0,0,0
27.910666,8.18535277,0,0,0,0,0
27.921158,8.94427191,0,0,0,0,0
27.93165,8.88819442,0,0,0,0,0
27.942141,8.42614977,0,0,0,0,0
27.952633,8.66025404,0,0,0,0,0
27.963124,8.88819442,0,0,0,0,0
27.973616,8.42614977,0,0,0,0,0
27.984108,8.42614977,0,0,0,0,0
27.994599,7.74596669,0,0,0,0,0
28.005091,8.36660027,0,0,0,0,0
28.015582,8.24621125,0,0,0,0,0
28.026074,8.77496439,0,0,0,0,0
28.036566,7.68114575,0,0,0,0,0
28.047057,8.24621125,0,0,0,0,0
28.057549,8.54400375,0,0,0,0,0
28.06804,9.38083152,0,0,0,0,0
28.078532,8.30662386,0,0,0,0,0
28.089024,7.54983444,0,0,0,0,0
28.099515,7.48331477,0,0,0,0,0
28.110007,8.54400375,0,0,0,0,0
28.120498,8.18535277,0,0,0,0,0
28.13099,8,0,0,0,0,0
28.141482,8.54400375,0,0,0,0,0
28.151973,8.1240384,0,0,0,0,0
28.162465,8.94427191,0,0,0,0,0
28.172956,8.88819442,0,0,0,0,0
28.183448,7.81024968,0,0,0,0,0
28.19394,8.54400375,0,0,0,0,0
28.204431,7.87400787,0,0,0,0,0
28.214923,9.21954446,0,0,0,0,0
28.225414,8.1240384,0,0,0,0,0
28.235906,8.66025404,0,0,0,0,0
28.246398,8.88819442,0,0,0,0,0
28.256889,8.24621125,0,0,0,0,0
28.267381,8.94427191,0,0,0,0,0
28.277872,8.71779789,0,0,0,0,0
28.288364,8.60232527,0,0,0,0,0
28.298856,8.71779789,0,0,0,0,0
28.309347,8.24621125,0,0,0,0,0
28.319839,8.71779789,0,0,0,0,0
28.33033,8.54400375,0,0,0,0,0
28.340822,8.88819442,0,0,0,0,0
28.351314,8.60232527,0,0,0,0,0
28.361805,8.54400375,0,0,0,0,0
28.372297,7.81024968,0,0,0,0,0
28.382788,9.05538514,0,0,0,0,0
28.39328,9.38083152,0,0,0,0,0
28.403772,7.61577311,0,0,0,0,0
28.414263,8.77496439,0,0,0,0,0
28.424755,8.88819442,0,0,0,0,0
28.435246,8.06225775,0,0,0,0,0
28.445738,7.68114575,0,0,0,0,0
28.45623,8.83176087,0,0,0,0,0
28.466721,7.74596669,0,0,0,0,0
28.477213,8.06225775,0,0,0,0,0
28.487704,8.24621125,0,0,0,0,0
28.498196,7.93725393,0,0,0,0,0
28.508688,7.61577311,0,0,0,0,0
28.519179,8,0,0,0,0,0
28.529671,7.54983444,0,0,0,0,0
28.540162,8.18535277,0,0,0,0,0
28.550654,8,0,0,0,0,0
28.561146,8,0,0,0,0,0
28.571637,9.11043358,0,0,0,0,0
28.582129,9.48683298,0,0,0,0,0
28.59262,8.42614977,0,0,0,0,0
28.603112,8.42614977,0,0,0,0,0
28.613604,8.24621125,0,0,0,0,0
28.624095,7.41619849,0,0,0,0,0
28.634587,7.74596669,0,0,0,0,0
28.645078,7.14142843,0,0,0,0,0
28.65557,8.77496439,0,0,0,0,0
28.666062,7.87400787,0,0,0,0,0
28.676553,8.06225775,0,0,0,0,0
28.687045,7.54983444,0,0,0,0,0
28.697536,8.60232527,0,0,0,0,0
28.708028,8.71779789,0,0,0,0,0
28.71852,8.60232527,0,0,0,0,0
28.729011,7.74596669,0,0,0,0,0
28.739503,7.41619849,0,0,0,0,0
28.749994,8.1240384,0,0,0,0,0
28.760486,8.36660027,0,0,0,0,0
28.770978,7.21110255,0,0,0,0,0
28.781469,7.41619849,0,0,0,0,0
28.791961,7.81024968,0,0,0,0,0
28.802452,8.18535277,0,0,0,0,0
28.812944,7.54983444,0,0,0,0,0
28.823436,7.41619849,0,0,0,0,0
28.833927,7.48331477,0,0,0,0,0
28.844419,8.48528137,0,0,0,0,0
28.85491,8.54400375,0,0,0,0,0
28.865402,7.81024968,0,0,0,0,0
28.875894,8.66025404,0,0,0,0,0
28.886385,8.77496439,0,0,0,0,0
28.896877,7.34846923,0,0,0,0,0
28.907368,7.81024968,0,0,0,0,0
28.91786,7.68114575,0,0,0,0,0
28.928352,7,0,0,0,0,0
28.938843,8.24621125,0,0,0,0,0
28.949335,8.30662386,0,0,0,0,0
28.959826,8.42614977,0,0,0,0,0
28.970318,8,0,0,0,0,0
28.98081,8.42614977,0,0,0,0,0
28.991301,7.28010989,0,0,0,0,0
29.001793,8.60232527,0,0,0,0,0
29.012284,7.48331477,0,0,0,0,0
29.022776,7.93725393,0,0,0,0,0
29.033268,8,0,0,0,0,0
29.043759,7.93725393,0,0,0,0,0
29.054251,8.1240384,0,0,0,0,0
29.064742,7.14142843,0,0,0,0,0
29.075234,7.07106781,0,0,0,0,0
29.085726,7.41619849,0,0,0,0,0
29.096217,8.18535277,0,0,0,0,0
29.106709,7.81024968,0,0,0,0,0
29.1172,8.42614977,0,0,0,0,0
29.127692,7.81024968,0,0,0,0,0
29.138184,8,0,0,0,0,0
29.148675,8,0,0,0,0,0
29.159167,7.07106781,0,0,0,0,0
29.169658,7.68114575,0,0,0,0,0
29.18015,7.61577311,0,0,0,0,0
29.190642,7.81024968,0,0,0,0,0
29.201133,8.1240384,0,0,0,0,0
29.211625,7.28010989,0,0,0,0,0
29.222116,7,0,0,0,0,0
29.232608,8.60232527,0,0,0,0,0
29.2431,7.81024968,0,0,0,0,0
29.253591,7.14142843,0,0,0,0,0
29.264083,7.14142843,0,0,0,0,0
29.274574,7.74596669,0,0,0,0,0
29.285066,7.68114575,0,0,0,0,0
29.295558,7.54983444,0,0,0,0,0
29.306049,7.14142843,0,0,0,0,0
29.316541,7.41619849,0,0,0,0,0
29.327032,7.41619849,0,0,0,0,0
29.337524,7.93725393,0,0,0,0,0
29.348016,8.18535277,0,0,0,0,0
29.358507,8.94427191,0,0,0,0,0
29.368999,8.18535277,0,0,0,0,0
29.37949,7.21110255,0,0,0,0,0
29.389982,6.4807407,0,0,0,0,0
29.400474,7.28010989,0,0,0,0,0
29.410965,8,0,0,0,0,0
29.421457,7.68114575,0,0,0,0,0
29.431948,7.81024968,0,0,0,0,0
29.44244,7.54983444,0,0,0,0,0
29.452932,7.93725393,0,0,0,0,0
29.463423,7.48331477,0,0,0,0,0
29.473915,7.34846923,0,0,0,0,0
29.484406,6.92820323,0,0,0,0,0
29.494898,7.48331477,0,0,0,0,0
29.50539,7,0,0,0,0,0
29.515881,7.93725393,0,0,0,0,0
29.526373,7.07106781,0,0,0,0,0
29.536864,7.61577311,0,0,0,0,0
29.547356,7.61577311,0,0,0,0,0
29.557848,7.14142843,0,0,0,0,0
29.568339,7.61577311,0,0,0,0,0
29.578831,7.68114575,0,0,0,0,0
29.589322,8,0,0,0,0,0
29.599814,6.08276253,0,0,0,0,0
29.610306,8.1240384,0,0,0,0,0
29.620797,8.24621125,0,0,0,0,0
29.631289,7.28010989,0,0,0,0,0
29.64178,6.92820323,0,0,0,0,0
29.652272,7.74596669,0,0,0,0,0
29.662764,8.54400375,0,0,0,0,0
29.673255,7,0,0,0,0,0
29.683747,7.21110255,0,0,0,0,0
29.694238,7.48331477,0,0,0,0,0
29.70473,7.81024968,0,0,0,0,0
29.715222,7.21110255,0,0,0,0,0
29.725713,8.06225775,0,0,0,0,0
29.736205,7.07106781,0,0,0,0,0
29.746696,7.41619849,0,0,0,0,0
29.757188,7.21110255,0,0,0,0,0
29.76768,7.81024968,0,0,0,0,0
29.778171,6.4807407,0,0,0,0,0
29.788663,7.68114575,0,0,0,0,0
29.799154,7.87400787,0,0,0,0,0
29.809646,7.28010989,0,0,0,0,0
29.820138,8.36660027,0,0,0,0,0
29.830629,6.70820393,0,0,0,0,0
29.841121,7.14142843,0,0,0,0,0
29.851612,7.34846923,0,0,0,0,0
29.862104,7.48331477,0,0,0,0,0
29.872596,6.4807407,0,0,0,0,0
29.883087,6.164414,0,0,0,0,0
29.893579,7.21110255,0,0,0,0,0
29.90407,6.55743852,0,0,0,0,0
29.914562,7.81024968,0,0,0,0,0
29.925054,6.70820393,0,0,0,0,0
29.935545,6.78232998,0,0,0,0,0
29.946037,6.78232998,0,0,0,0,0
29.956528,6.55743852,0,0,0,0,0
29.96702,7.41619849,0,0,0,0,0
29.977512,7.21110255,0,0,0,0,0
29.988003,7.48331477,0,0,0,0,0
29.998495,6.244998,7.11305733,-0.931697018,7.11305733,0,7.11254712
30.008986,8,7.10973536,0.943538361,7.10973536,0,7.10922434
30.019478,7.07106781,7.10641212,-0.18800082,7.10641212,0,7.10590029
30.02997,7.68114575,7.10308794,0.760301129,7.10308794,0,7.1025753
30.040461,7.54983444,7.09976316,0.670873517,7.09976316,0,7.0992497
30.050953,7.61577311,7.09643716,0.720649671,7.09643716,0,7.09592289
30.061444,7.48331477,7.09311059,0.62466326,7.09311059,0,7.0925955
30.071936,8,7.08978283,0.954053025,7.08978283,0,7.08926692
30.082428,6.70820393,7.08645421,-0.615020551,7.08645421,0,7.08593748
30.092919,7,7.08312508,-0.288314199,7.08312508,0,7.08260753
30.103411,6.70820393,7.07979481,-0.60958254,7.07979481,0,7.07927643
30.113902,7.28010989,7.07646405,0.451271362,7.07646405,0,7.07594484
30.124394,6.63324958,7.07313218,-0.66323646,7.07313218,0,7.07261215
30.134886,7,7.06979955,-0.264196041,7.06979955,0,7.06927868
30.145377,7.34846923,7.06646648,0.531039314,7.06646648,0,7.06594478
30.155869,5.91607978,7.06313235,-1.0710054,7.06313235,0,7.06260982
30.16636,7,7.05979781,-0.244535913,7.05979781,0,7.05927445
30.176852,6.40312424,7.05646225,-0.808293274,7.05646225,0,7.05593805
30.187344,8,7.05312601,0.973074505,7.05312601,0,7.05260096
30.197835,5.83095189,7.0497894,-1.10400974,7.0497894,0,7.04926352
30.208327,7.68114575,7.04645182,0.7966768,7.04645182,0,7.04592509
30.218818,7.07106781,7.04311392,0.167194169,7.04311392,0,7.04258634
30.22931,7,7.03977508,-0.199436895,7.03977508,0,7.03924665
30.239802,8.77496439,7.03643562,1.31853281,7.03643562,0,7.03590634
30.250293,6.8556546,7.03309589,-0.421237804,7.03309589,0,7.03256576
30.260785,7.07106781,7.02975526,0.203254894,7.02975526,0,7.02922428
30.271276,8,7.02641439,0.986704419,7.02641439,0,7.02588255
30.281768,6.78232998,7.02307265,-0.490655348,7.02307265,0,7.02253996
30.29226,6.63324958,7.01973039,-0.621675806,7.01973039,0,7.01919684
30.302751,7.07106781,7.01638793,0.233837304,7.01638793,0,7.01585351
30.313243,7.07106781,7.01304465,0.240879977,7.01304465,0,7.01250937
30.323734,6.55743852,7.00970121,-0.672504782,7.00970121,0,7.00916506
30.334226,6.78232998,7.00635698,-0.473314899,7.00635698,0,7.00581997
30.344718,7.81024968,7.0030123,0.8984639,7.0030123,0,7.00247442
30.355209,7.07106781,6.9996675,0.267208372,6.9996675,0,6.99912875
30.365701,7.61577311,6.99632196,0.787052187,6.99632196,0,6.99578233
30.376192,6.63324958,6.99297634,-0.599772253,6.99297634,0,6.99243584
30.386684,6.8556546,6.98963,-0.366026507,6.98963,0,6.98908863
30.397176,6.70820393,6.9862833,-0.527332309,6.9862833,0,6.98574104
30.407667,6.55743852,6.98293655,-0.652302097,6.98293655,0,6.98239341
30.418159,6.244998,6.97958914,-0.857082926,6.97958914,0,6.97904512
30.42865,6.70820393,6.97624172,-0.517723662,6.97624172,0,6.97569681
30.439142,6.4807407,6.97289367,-0.701536153,6.97289367,0,6.97234788
30.449634,8.18535277,6.96954532,1.10263659,6.96954532,0,6.96899864
30.460125,6.78232998,6.96619701,-0.428797188,6.96619701,0,6.96564943
30.470617,7.68114575,6.96284811,0.847524416,6.96284811,0,6.96229964
30.481108,7.41619849,6.95949928,0.67579524,6.95949928,0,6.95894991
30.4916,6.92820323,6.95614989,-0.167172554,6.95614989,0,6.95559963
30.502092,6.63324958,6.95280028,-0.565288158,6.95280028,0,6.95224912
30.512583,7.68114575,6.94945078,0.855391702,6.94945078,0,6.94889872
30.523075,6.8556546,6.94610077,-0.300742703,6.94610077,0,6.9455478
30.533566,7.07106781,6.94275091,0.358213492,6.94275091,0,6.94219703
30.544058,7.07106781,6.93940056,0.36285983,6.93940056,0,6.93884577
30.55455,6.8556546,6.93605006,-0.283540928,6.93605006,0,6.93549436
30.565041,7.68114575,6.93269975,0.865127737,6.93269975,0,6.93214314
30.575533,6.8556546,6.929349,-0.271467121,6.929349,0,6.92879147
30.586024,6.92820323,6.92599847,0.0469549208,6.92599847,0,6.92544003
30.596516,6.78232998,6.92264753,-0.374589832,6.92264753,0,6.92208817
30.607008,7.14142843,6.91929651,0.471308729,6.91929651,0,6.91873623
30.617499,7.14142843,6.91594576,0.474850158,6.91594576,0,6.91538455
30.627991,7,6.91259464,0.29564398,6.91259464,0,6.91203251
30.638482,7.74596669,6.90924381,0.914725579,6.90924381,0,6.90868075
30.648974,8.1240384,6.90589264,1.10369641,6.90589264,0,6.90532866
30.659466,7.74596669,6.90254148,0.918381846,6.90254148,0,6.90197656
30.669957,7.48331477,6.89919064,0.764280139,6.89919064,0,6.89862479
30.680449,6.55743852,6.89583952,-0.581722437,6.89583952,0,6.89527273
30.69094,7.14142843,6.89248875,0.498938548,6.89248875,0,6.89192103
30.701432,7.14142843,6.88913773,0.502285478,6.88913773,0,6.88856906
30.711924,6.78232998,6.88578677,-0.321646992,6.88578677,0,6.88521716
30.722415,6.4807407,6.88243622,-0.633794541,6.88243622,0,6.88186567
30.732907,6.55743852,6.87908545,-0.567139243,6.87908545,0,6.87851395
30.743398,6.63324958,6.87573511,-0.492428193,6.87573511,0,6.87516266
30.75389,6.55743852,6.87238457,-0.561200543,6.87238457,0,6.87181117
30.764382,6.70820393,6.86903418,-0.401036471,6.86903418,0,6.86845983
30.774873,6.63324958,6.86568427,-0.482114807,6.86568427,0,6.86510896
30.785365,7.68114575,6.8623342,0.904882062,6.8623342,0,6.86175794
30.795856,6.63324958,6.85898464,-0.475115838,6.85898464,0,6.85840741
30.806348,6.70820393,6.85563496,-0.383967477,6.85563496,0,6.85505677
30.81684,6.63324958,6.85228548,-0.468012717,6.85228548,0,6.85170633
30.827331,6.70820393,6.84893656,-0.37514347,6.84893656,0,6.84835644
30.837823,7.41619849,6.84558755,0.75538794,6.84558755,0,6.84500646
30.848314,6.8556546,6.84223911,0.115825248,6.84223911,0,6.84165705
30.858806,8.48528137,6.83889062,1.28311759,6.83889062,0,6.83830759
30.869298,7.93725393,6.83554242,1.04962446,6.83554242,0,6.83495841
30.879789,6.40312424,6.83219482,-0.655034798,6.83219482,0,6.83160984
30.890281,6.08276253,6.82884722,-0.86376194,6.82884722,0,6.82826125
30.900772,5.74456265,6.82550025,-1.03968149,6.82550025,0,6.8249133
30.911264,7.54983444,6.82215331,0.853042278,6.82215331,0,6.82156537
30.921756,7.07106781,6.81880671,0.502256014,6.81880671,0,6.81821779
30.932247,7.34846923,6.81546079,0.730074268,6.81546079,0,6.81487088
30.942739,7.34846923,6.81211493,0.732362136,6.81211493,0,6.81152403
30.95323,7.28010989,6.80876978,0.686542141,6.80876978,0,6.80817788
30.963722,6.55743852,6.80542471,-0.497982114,6.80542471,0,6.80483182
30.974214,6.92820323,6.80208006,0.355138243,6.80208006,0,6.80148617
30.984705,6.244998,6.79873616,-0.744135846,6.79873616,0,6.79814126
30.995197,7.54983444,6.79539238,0.868586242,6.79539238,0,6.79479648
31.005688,7.07106781,6.79204937,0.528221961,6.79204937,0,6.79145247
31.01618,7.21110255,6.78870652,0.64992002,6.78870652,0,6.78810861
31.026672,7.34846923,6.78536415,0.750403278,6.78536415,0,6.78476523
31.037163,6.32455532,6.78202259,-0.676363269,6.78202259,0,6.78142266
31.047655,7,6.77868123,0.470445293,6.77868123,0,6.77808028
31.058146,6.78232998,6.7753407,0.0836019204,6.7753407,0,6.77473874
31.068638,5.83095189,6.77200039,-0.970076543,6.77200039,0,6.77139741
31.07913,6.244998,6.76866064,-0.72364538,6.76866064,0,6.76805663
31.089621,7.61577311,6.76532176,0.922199192,6.76532176,0,6.76471672
31.100113,6.55743852,6.76198313,-0.452266081,6.76198313,0,6.76137707
31.110604,6.92820323,6.75864541,0.411773986,6.75864541,0,6.75803832
31.121096,6.40312424,6.75530798,-0.593450707,6.75530798,0,6.75469986
31.131588,6.8556546,6.75197116,0.321999136,6.75197116,0,6.751362
31.142079,7,6.74863528,0.501362864,6.74863528,0,6.74802509
31.152571,6.63324958,6.74529972,-0.334738914,6.74529972,0,6.74468849
31.163062,7,6.74196513,0.507971324,6.74196513,0,6.74135286
31.173554,7.48331477,6.73863089,0.862950683,6.73863089,0,6.73801757
31.184046,7.14142843,6.73529733,0.637284159,6.73529733,0,6.73468296
31.194537,7.34846923,6.73196477,0.785177977,6.73196477,0,6.73134936
31.205029,6.63324958,6.7286326,-0.308841416,6.7286326,0,6.72801614
31.21552,7.21110255,6.72530146,0.696994325,6.72530146,0,6.72468394
31.226012,6.78232998,6.72197073,0.245681195,6.72197073,0,6.72135216
31.236504,6.32455532,6.71864075,-0.627762236,6.71864075,0,6.71802111
31.246995,7.41619849,6.71531183,0.837189739,6.71531183,0,6.71469113
31.257487,6.40312424,6.71198336,-0.555750951,6.71198336,0,6.7113616
31.267978,6.244998,6.70865598,-0.68092436,6.70865598,0,6.70803316
31.27847,7.07106781,6.70532908,0.604763368,6.70532908,0,6.70470519
31.288962,6.8556546,6.70200298,0.391984209,6.70200298,0,6.70137802
31.299453,7,6.69867801,0.548928035,6.69867801,0,6.69805197
31.309945,6.70820393,6.69535356,0.113359503,6.69535356,0,6.69472644
31.320436,7.21110255,6.69203025,0.720466721,6.69203025,0,6.69140206
31.330928,5.74456265,6.68870749,-0.97167116,6.68870749,0,6.68807821
31.34142,5.65685425,6.68538559,-1.01416534,6.68538559,0,6.68475523
31.351911,6.78232998,6.68206488,0.316646657,6.68206488,0,6.68143343
31.362403,6.32455532,6.67874474,-0.595138152,6.67874474,0,6.6781122
31.372894,5.65685425,6.67542582,-1.00924307,6.67542582,0,6.67479219
31.383386,6.08276253,6.6721075,-0.767688066,6.6721075,0,6.67147277
31.393878,6.63324958,6.6687901,-0.188521925,6.6687901,0,6.66815428
31.404369,6.78232998,6.66547395,0.341842117,6.66547395,0,6.66483703
31.414861,6.78232998,6.66215844,0.34665768,6.66215844,0,6.66152042
31.425352,6.32455532,6.6588442,-0.578177203,6.6588442,0,6.65820507
31.435844,6.40312424,6.65553062,-0.502400618,6.65553062,0,6.65489039
31.446336,7.41619849,6.65221802,0.874059761,6.65221802,0,6.65157668
31.456827,6.63324958,6.64890674,-0.125128562,6.64890674,0,6.64826428
31.467319,6.70820393,6.64559615,0.25021548,6.64559615,0,6.64495258
31.47781,6.92820323,6.64228689,0.534711455,6.64228689,0,6.6416422
31.488302,6.32455532,6.63897835,-0.560734367,6.63897835,0,6.63833254
31.498794,6.8556546,6.63567085,0.469024249,6.63567085,0,6.63502392
31.509285,6,6.63236473,-0.795213637,6.63236473,0,6.63171667
31.519777,5.65685425,6.62905935,-0.986004617,6.62905935,0,6.62841017
31.530268,6.08276253,6.62575537,-0.736880481,6.62575537,0,6.62510506
31.54076,5.74456265,6.62245217,-0.936957588,6.62245217,0,6.62180072
31.551252,7.21110255,6.61915006,0.769384486,6.61915006,0,6.61849748
31.561743,6.92820323,6.61584939,0.558886252,6.61584939,0,6.61519566
31.572235,8,6.61254952,1.17790088,6.61254952,0,6.61189465
31.582726,7.07106781,6.60925111,0.679570971,6.60925111,0,6.60859509
31.593218,6.40312424,6.60595353,-0.450365727,6.60595353,0,6.60529636
31.60371,7.61577311,6.6026571,1.00653664,6.6026571,0,6.60199879
31.614201,6.55743852,6.59936217,-0.204752633,6.59936217,0,6.5987027
31.624693,6.164414,6.59606809,-0.657003875,6.59606809,0,6.59540747
31.635184,6.78232998,6.59277553,0.435378515,6.59277553,0,6.59211375
31.645676,6.244998,6.58948386,-0.586929179,6.58948386,0,6.58882092
31.656168,6.55743852,6.5861934,-0.169572635,6.5861934,0,6.5855293
31.666659,6.40312424,6.58290449,-0.424005011,6.58290449,0,6.58223922
31.677151,6.4807407,6.5796165,-0.314445221,6.5796165,0,6.57895005
31.687642,6.63324958,6.57633007,0.23857811,6.57633007,0,6.57566245
31.698134,7.28010989,6.57304458,0.840871753,6.57304458,0,6.5723758
31.708626,6.92820323,6.56976037,0.598700973,6.56976037,0,6.56909041
31.719117,7.28010989,6.56647776,0.8447675,6.56647776,0,6.56580661
31.729609,6.78232998,6.56319613,0.468117353,6.56319613,0,6.5625238
31.7401,6.63324958,6.55991611,0.270801533,6.55991611,0,6.55924259
31.750592,7.41619849,6.5566371,0.927125336,6.5566371,0,6.55596239
31.761084,6.70820393,6.55335941,0.393502886,6.55335941,0,6.55268351
31.771575,5.83095189,6.55008337,-0.848016203,6.55008337,0,6.54940628
31.782067,6.08276253,6.54680837,-0.681209104,6.54680837,0,6.54613008
31.792558,7.21110255,6.54353505,0.817048044,6.54353505,0,6.54285555
31.80305,6.55743852,6.54026277,0.131056286,6.54026277,0,6.53958208
31.813542,6.55743852,6.53699188,0.142991748,6.53699188,0,6.53630998
31.824033,6.63324958,6.5337227,0.315478816,6.5337227,0,6.53303958
31.834525,6.63324958,6.5304546,0.32061656,6.5304546,0,6.52977028
31.845016,6.70820393,6.52718823,0.425459401,6.52718823,0,6.52650269
31.855508,6.164414,6.52392297,-0.599590668,6.52392297,0,6.52323621
31.866,5.91607978,6.52065915,-0.777547017,6.52065915,0,6.51997117
31.876491,7.34846923,6.51739708,0.911631586,6.51739708,0,6.51670787
31.886983,6.32455532,6.51413616,-0.435408814,6.51413616,0,6.51344572
31.897474,6.4807407,6.51087701,-0.173598128,6.51087701,0,6.51018535
31.907966,6.92820323,6.50761903,0.648524635,6.50761903,0,6.50692613
31.918458,6.63324958,6.50436253,0.359008421,6.50436253,0,6.5036684
31.928949,6.63324958,6.50110785,0.363513043,6.50110785,0,6.50041248
31.939441,6.63324958,6.49785436,0.367960895,6.49785436,0,6.49715775
31.949932,7.28010989,6.4946027,0.886288434,6.4946027,0,6.49390484
31.960424,5.91607978,6.49135226,-0.75846719,6.49135226,0,6.49065315
31.970916,6.8556546,6.48810336,0.606260044,6.48810336,0,6.487403
31.981407,6.244998,6.48485632,-0.489753325,6.48485632,0,6.4841547
31.991899,6.8556546,6.48161053,0.611591428,6.48161053,0,6.48090766
32.00239,6.4807407,6.47836661,0.0487245908,6.47836661,0,6.47766248
32.012882,6.40312424,6.47512397,-0.268327661,6.47512397,0,6.47441858
32.023374,6.8556546,6.47188292,0.619493084,6.47188292,0,6.47117626
32.033865,7,6.46864378,0.728941851,6.46864378,0,6.46793585
32.044357,6,6.46540594,-0.682206668,6.46540594,0,6.46469673
32.054848,6.70820393,6.46217003,0.49601805,6.46217003,0,6.46145955
32.06534,6.92820323,6.45893544,0.685031234,6.45893544,0,6.45822368
32.075832,5.91607978,6.45570249,-0.734590163,6.45570249,0,6.45498945
32.086323,6.40312424,6.4524715,-0.222142442,6.4524715,0,6.45175718
32.096815,7.48331477,6.44924187,1.01689375,6.44924187,0,6.44852625
32.107306,6.55743852,6.44601421,0.333802809,6.44601421,0,6.4452973
32.117798,6.55743852,6.44278792,0.338600945,6.44278792,0,6.44206972
32.12829,7.07106781,6.43956333,0.794672562,6.43956333,0,6.43884383
32.138781,6,6.43634074,-0.660560932,6.43634074,0,6.43561994
32.149273,6.08276253,6.43311956,-0.591909648,6.43311956,0,6.43239746
32.159764,5.91607978,6.42990041,-0.716812823,6.42990041,0,6.42917699
32.170256,6.40312424,6.42668267,-0.153487575,6.42668267,0,6.42595795
32.180748,6.4807407,6.42346668,0.239319909,6.42346668,0,6.42274064
32.191239,6.08276253,6.42025274,-0.580939077,6.42025274,0,6.41952539
32.201731,5.91607978,6.41704026,-0.707785613,6.41704026,0,6.41631158
32.212222,7,6.41382985,0.765617498,6.41382985,0,6.41309985
32.222714,6.4807407,6.41062091,0.264801416,6.41062091,0,6.40988958
32.233206,6.92820323,6.40741376,0.721657448,6.40741376,0,6.4066811
32.243697,7,6.40420871,0.771875177,6.40420871,0,6.40347472
32.254189,6.08276253,6.40100516,-0.56412998,6.40100516,0,6.40026984
32.26468,6.92820323,6.39780374,0.728285308,6.39780374,0,6.39706707
32.275172,5.91607978,6.39460384,-0.69175433,6.39460384,0,6.39386583
32.285664,6.164414,6.39140577,-0.476436528,6.39140577,0,6.39066641
32.296155,5.56776436,6.38820985,-0.905784459,6.38820985,0,6.38746914
32.306647,6.4807407,6.38501548,0.309394924,6.38501548,0,6.38427342
32.317138,6.63324958,6.38182328,0.501424275,6.38182328,0,6.38107986
32.32763,6.78232998,6.37863264,0.635371812,6.37863264,0,6.37788787
32.338122,5.65685425,6.37544389,-0.84769667,6.37544389,0,6.37469775
32.348613,6.244998,6.37225734,-0.356734269,6.37225734,0,6.37150983
32.359105,6,6.36907238,-0.607513274,6.36907238,0,6.3683235
32.369596,5.74456265,6.36588963,-0.788242974,6.36588963,0,6.36513938
32.380088,6.164414,6.3627085,-0.445302705,6.3627085,0,6.36195687
32.39058,5.83095189,6.3595293,-0.72703329,6.3595293,0,6.35877629
32.401071,6.32455532,6.35635234,-0.178317182,6.35635234,0,6.35559794
32.411563,5.91607978,6.35317702,-0.661133297,6.35317702,0,6.35242123
32.422054,6.164414,6.35000396,-0.430801527,6.35000396,0,6.34924678
32.432546,6.32455532,6.34683256,-0.149255618,6.34683256,0,6.34607399
32.443038,6.55743852,6.34366313,0.462358508,6.34366313,0,6.34290317
32.453529,6.32455532,6.34049599,-0.126256381,6.34049599,0,6.33973462
32.464021,6.4807407,6.33733054,0.378695334,6.33733054,6.33656777,6.33656777
32.474512,6.08276253,6.33425563,-0.501490876,6.33416739,6.33349146,6.33340321
32.485004,7.48331477,6.33109432,1.07341532,6.33100595,6.33032874,6.33024035
32.495496,6.92820323,6.32793504,0.774769767,6.32784653,6.32716804,6.32707951
32.505987,5.74456265,6.32477808,-0.761718737,6.32468943,6.32400966,6.323921
32.516479,6.8556546,6.32162286,0.730774755,6.32153407,6.32085301,6.32076421
32.52697,5.47722558,6.31846998,-0.917193767,6.31838105,6.31769871,6.31760977
32.537462,5.56776436,6.31531886,-0.864612337,6.31522979,6.31454615,6.31445708
32.547954,5.83095189,6.31216979,-0.693698709,6.31208059,6.31139566,6.31130644
32.558445,6.8556546,6.3090231,0.739345317,6.30893376,6.30824753,6.30815817
32.568937,6.08276253,6.30587819,-0.472351205,6.30578871,6.30510118,6.30501168
32.579428,6.55743852,6.30273567,0.504680946,6.30264604,6.30195721,6.30186757
32.58992,6.32455532,6.29959494,0.157988546,6.29950518,6.29881503,6.29872526
32.600412,5.47722558,6.29645632,-0.905113663,6.29636641,6.29567496,6.29558504
32.610903,6,6.29332011,-0.541590352,6.29323006,6.29253729,6.29244724
32.621395,5.91607978,6.29018572,-0.611642004,6.29009554,6.28940145,6.28931125
32.631886,6.78232998,6.28705377,0.703758634,6.28696344,6.28626803,6.28617769
32.642378,6.244998,6.28392365,-0.197295857,6.28383318,6.28313645,6.28304597
32.65287,7.14142843,6.28079569,0.927702939,6.28070508,6.28000701,6.27991639
32.663361,5.83095189,6.27767017,-0.668369867,6.27757942,6.27688002,6.27678926
32.673853,6.4807407,6.27454653,0.454086084,6.27445563,6.2737549,6.27366399
32.684344,6.55743852,6.27142535,0.534801994,6.27133431,6.27063224,6.27054119
32.694836,6.40312424,6.26830606,0.36717595,6.26821488,6.26751146,6.26742027
32.705328,6.40312424,6.26518896,0.371396393,6.26509763,6.26439287,6.26430153
32.715819,6.8556546,6.26207435,0.770441595,6.26198288,6.26127677,6.26118529
32.726311,6.63324958,6.25896165,0.611790757,6.25887004,6.25816257,6.25807095
32.736802,5.56776436,6.25585146,-0.829510156,6.25575971,6.25505088,6.25495912
32.747294,6.32455532,6.2527432,0.267977834,6.2526513,6.25194112,6.25184921
32.757786,7,6.24963717,0.866234859,6.24954513,6.24883358,6.24874152
32.768277,6.244998,6.24653367,-0.0391876804,6.24644149,6.24572857,6.24563637
32.778769,4.89897949,6.24343213,-1.15950534,6.24333979,6.2426255,6.24253316
32.78926,6.244998,6.24033313,0.0682998309,6.24024065,6.23952499,6.2394325
32.799752,5.65685425,6.2372361,-0.761827969,6.23714348,6.23642643,6.2363338
32.810244,5.09901951,6.23414135,-1.06542097,6.23404858,6.23333015,6.23323737
32.820735,6.4807407,6.23104916,0.49969144,6.23095625,6.23023643,6.23014351
32.831227,6.40312424,6.22795897,0.418527496,6.22786591,6.22714471,6.22705163
32.841718,5.74456265,6.22487137,-0.693043089,6.22477816,6.22405556,6.22396234
32.85221,5.91607978,6.22178578,-0.552906858,6.22169242,6.22096842,6.22087506
32.862702,6.4807407,6.21870249,0.511896674,6.21860899,6.21788359,6.21779008
32.873193,6.55743852,6.21562182,0.584650923,6.21552817,6.21480137,6.21470771
32.883685,5.91607978,6.21254318,-0.544484528,6.21244939,6.21172117,6.21162736
32.894176,6.32455532,6.20946717,0.339246441,6.20937323,6.2086436,6.20854964
32.904668,5.74456265,6.20639321,-0.679581168,6.20629912,6.20556807,6.20547397
32.91516,5.65685425,6.2033216,-0.739234298,6.20322735,6.20249489,6.20240064
32.925651,6.4807407,6.20025263,0.529611239,6.20015824,6.19942436,6.19932995
32.936143,6.70820393,6.19718574,0.714855363,6.1970912,6.19635589,6.19626134
32.946634,5.47722558,6.19412152,-0.846697078,6.19402683,6.19329008,6.19319538
32.957126,6.08276253,6.19105938,-0.329084864,6.19096454,6.19022636,6.19013151
32.967618,6.164414,6.18799963,-0.153576119,6.18790464,6.18716502,6.18707002
32.978109,6.55743852,6.18494256,0.610324472,6.18484742,6.18410636,6.18401121
32.988601,6.40312424,6.18188761,0.470357977,6.18179232,6.18104981,6.18095451
32.999092,6.4807407,6.17883536,0.549459132,6.17873992,6.17799596,6.1779005
33.009584,6.63324958,6.17578524,0.676361105,6.17568964,6.17494423,6.17484862
33.020076,5.83095189,6.17273754,-0.58462436,6.17264179,6.17189492,6.17179916
33.030567,5.83095189,6.16969256,-0.582014318,6.16959667,6.16884833,6.16875242
33.041059,6.32455532,6.16664974,0.397373356,6.16655369,6.16580388,6.16570782
33.05155,6.55743852,6.16360965,0.627557867,6.16351345,6.16276217,6.16266596
33.062042,6.63324958,6.16057172,0.687515714,6.16047537,6.15972262,6.15962625
33.072534,6.32455532,6.15753626,0.408679652,6.15743976,6.15668552,6.15658901
33.083025,5.74456265,6.15450356,-0.640266283,6.1544069,6.15365118,6.15355451
33.093517,5.74456265,6.15147305,-0.637895288,6.15137623,6.15061903,6.1505222
33.104008,5.83095189,6.1484453,-0.563465534,6.14834834,6.14758964,6.14749266
33.1145,6.164414,6.14541976,0.137819593,6.14532265,6.14456245,6.14446532
33.124992,6.32455532,6.14239672,0.426800421,6.14229945,6.14153776,6.14144047
33.135483,5.74456265,6.13937647,-0.628342126,6.13927905,6.13851585,6.13841841
33.145975,6,6.13635845,-0.36926745,6.13626087,6.13549616,6.13539857
33.156466,6.63324958,6.13334323,0.707040555,6.1332455,6.13247928,6.13238153
33.166958,6.63324958,6.13033026,0.70916805,6.13023237,6.12946463,6.12936672
33.17745,6.244998,6.12731981,0.34304254,6.12722177,6.12645251,6.12635445
33.187941,5.83095189,6.1243122,-0.541627459,6.124214,6.12344321,6.123345
33.198433,6.164414,6.12130685,0.207622633,6.12120849,6.12043618,6.1203378
33.208924,6,6.11830433,-0.343953968,6.11820582,6.11743197,6.11733344
33.219416,6.78232998,6.11530409,0.816716529,6.11520542,6.11443004,6.11433135
33.229908,5.65685425,6.11230643,-0.67487197,6.1122076,6.11143067,6.11133183
33.240399,6.08276253,6.10931162,-0.162938909,6.10921263,6.10843416,6.10833516
33.250891,6.32455532,6.10631911,0.467157589,6.10621996,6.10543994,6.10534078
33.261382,6.4807407,6.10332947,0.61433804,6.10323017,6.10244859,6.10234928
33.271874,6,6.10034215,-0.316768284,6.10024269,6.09945955,6.09936007
33.282366,6.244998,6.09735742,0.384240257,6.0972578,6.0964731,6.09637347
33.292857,6,6.09437559,-0.307206111,6.09427582,6.09348955,6.09338976
33.303349,5.83095189,6.0913961,-0.510337343,6.09129616,6.09050832,6.09040837
33.31384,7.21110255,6.08841951,1.05956738,6.08831941,6.08752999,6.08742988
33.324332,5.65685425,6.08544526,-0.65466863,6.08534501,6.08455401,6.08445374
33.334824,6.78232998,6.08247366,0.836574161,6.08237324,6.08158065,6.08148022
33.345315,5.91607978,6.07950498,-0.404258818,6.0794044,6.07861022,6.07850963
33.355807,5.29150262,6.07653866,-0.886022594,6.07643792,6.07564215,6.0755414
33.366298,6.8556546,6.07357528,0.884352485,6.07347439,6.07267701,6.0725761
33.37679,6.164414,6.07061429,0.306267393,6.07051323,6.06971425,6.06961318
33.387282,6.08276253,6.06765596,0.122908791,6.06755474,6.06675415,6.06665292
33.397773,5.91607978,6.06470059,-0.385513691,6.06459921,6.06379701,6.06369561
33.408265,6,6.06174762,-0.248490683,6.06164607,6.06084226,6.0607407
33.418756,6.244998,6.05879762,0.431509419,6.05869591,6.05789047,6.05778875
33.429248,6.78232998,6.05585003,0.852337932,6.05574816,6.0549411,6.05483921
33.43974,6.164414,6.05291891,0.333908813,6.05281688,6.05199442,6.05189237
33.450231,5.29150262,6.04997702,-0.870904357,6.04987483,6.04905072,6.04894851
33.460723,6.40312424,6.04703757,0.59672998,6.04693521,6.04610945,6.04600707
33.471214,5.47722558,6.04410111,-0.752911376,6.04399859,6.04317118,6.04306864
33.481706,5.56776436,6.04116711,-0.688042692,6.04106442,6.04023534,6.04013264
33.492198,5.91607978,6.03823583,-0.3495083,6.03813298,6.03730224,6.03719937
33.502689,6.08276253,6.03530758,0.217841574,6.03520456,6.03437215,6.03426911
33.513181,6.08276253,6.03238179,0.224456547,6.03227861,6.03144452,6.03134132
33.523672,6.164414,6.02945903,0.367362184,6.02935568,6.02851991,6.02841655
33.534164,5.91607978,6.02653875,-0.332353674,6.02643523,6.02559778,6.02549425
33.544656,6,6.02362123,-0.153691998,6.02351755,6.0226784,6.02257471
33.555147,6.08276253,6.02070676,0.249109956,6.02060291,6.01976207,6.01965821
33.565639,6.08276253,6.01779479,0.254887706,6.01769078,6.01684823,6.0167442
33.57613,6.63324958,6.01488587,0.786361054,6.01478169,6.01393745,6.01383325
33.586622,6.08276253,6.01197947,0.266050859,6.01187512,6.01102917,6.0109248
33.597114,6.244998,6.00907586,0.485718166,6.00897135,6.00812367,6.00801914
33.607605,6.70820393,6.00617533,0.837871472,6.00607065,6.00522125,6.00511655
33.618097,5.65685425,6.00327732,-0.588577161,6.00317247,6.00232135,6.00221649
33.628588,5.56776436,6.00038241,-0.657737063,6.00027739,5.99942454,5.9993195
33.63908,6.92820323,5.99749003,0.964734782,5.99738484,5.99653026,5.99642505
33.649572,6.08276253,5.99460048,0.296920952,5.99449512,5.99363879,5.99353342
33.660063,5.56776436,5.99171403,-0.651114173,5.9916085,5.99075043,5.99064489
33.670555,5.38516481,5.98883014,-0.77695903,5.98872444,5.98786462,5.98775891
33.681046,6.70820393,5.98594937,0.849855615,5.9858435,5.98498192,5.98487604
33.691538,5.29150262,5.98307116,-0.831606002,5.98296513,5.98210179,5.98199573
33.70203,6.40312424,5.98019581,0.650329473,5.98008961,5.9792245,5.97911827
33.712521,5.74456265,5.9773236,-0.482453053,5.97721722,5.97635034,5.97624394
33.723013,5.19615242,5.97445397,-0.882214001,5.97434742,5.97347876,5.97337219
33.733504,7.07106781,5.97158748,1.04856108,5.97148076,5.97061032,5.97050358
33.743996,5.74456265,5.96872359,-0.473456382,5.9686167,5.96774447,5.96763756
33.754488,5.74456265,5.96586259,-0.470425275,5.96575552,5.9648815,5.96477442
33.764979,6.40312424,5.96300474,0.663415028,5.9628975,5.96202168,5.96191442
33.775471,6.244998,5.96014951,0.533711991,5.9600421,5.95916447,5.95905704
33.785962,4.58257569,5.95729745,-1.17248529,5.95718986,5.95631043,5.95620283
33.796454,6.08276253,5.95444802,0.358210151,5.95434026,5.95345901,5.95335123
33.806946,5.38516481,5.9516015,-0.752619883,5.95149356,5.95061049,5.95050254
33.817437,5.83095189,5.94875816,-0.343229168,5.94865005,5.94776516,5.94765703
33.827929,6.4807407,5.94591747,0.731316097,5.94580918,5.94492246,5.94481416
33.83842,5.47722558,5.94307997,-0.682535269,5.94297151,5.94208295,5.94197447
33.848912,6.70820393,5.94024513,0.876332587,5.9401365,5.93924609,5.93913744
33.859404,5.56776436,5.93741323,-0.607987552,5.93730442,5.93641216,5.93630334
33.869895,6.40312424,5.93458453,0.684499603,5.93447555,5.93358144,5.93347244
33.880387,6.32455532,5.93175851,0.626735038,5.93164935,5.93075338,5.93064421
33.890878,6.63324958,5.92893571,0.839234097,5.92882638,5.92792854,5.92781919
33.90137,5.83095189,5.9261156,-0.308486148,5.92600609,5.92510638,5.92499685
33.911862,6.164414,5.92329845,0.49103519,5.92318876,5.92228717,5.92217747
33.922353,5.91607978,5.92048453,-0.0663682437,5.92037466,5.91947119,5.91936131
33.932845,5,5.91767331,-0.957952666,5.91756327,5.91665791,5.91654785
33.943336,6.164414,5.91486534,0.499548461,5.91475512,5.91384787,5.91373763
33.953828,5.74456265,5.91206008,-0.409264503,5.91194968,5.91104053,5.91093011
33.96432,5.47722558,5.90925781,-0.657291588,5.90914723,5.90823617,5.90812557
33.974811,5.83095189,5.90645879,-0.274785185,5.90634803,5.90543507,5.90532429
33.985303,5.65685425,5.90366251,-0.496798005,5.90355157,5.90263668,5.90252572
33.995794,6.78232998,5.90086949,0.938861275,5.90075837,5.89984156,5.89973042
34.006286,6,5.89807921,0.319250352,5.89796791,5.89704917,5.89693785
34.016778,6.78232998,5.89529195,0.941826968,5.89518047,5.89425979,5.89414829
34.027269,6.78232998,5.89250796,0.94330378,5.8923963,5.89147368,5.891362
34.037761,4.47213595,5.88972673,-1.19062621,5.88961489,5.88869032,5.88857846
34.048252,6.4807407,5.88694879,0.770578942,5.88683677,5.88591025,5.8857982
34.058744,6.55743852,5.88417362,0.820527211,5.88406142,5.88313293,5.88302071
34.069236,5.29150262,5.88140148,-0.768048736,5.8812891,5.88035864,5.88024624
34.079727,6,5.87863265,0.348378172,5.87852008,5.87758766,5.87747507
34.090219,5.91607978,5.8758666,0.200532257,5.87575384,5.87481944,5.87470667
34.10071,5.65685425,5.87310386,-0.46502646,5.87299092,5.87205453,5.87194158
34.111202,5.74456265,5.87034391,-0.354656542,5.87023079,5.86929241,5.86917927
34.121694,6.08276253,5.86758702,0.463870144,5.86747372,5.86653333,5.86642001
34.132185,5.74456265,5.86483346,-0.346800823,5.86471997,5.86377758,5.86366407
34.142677,6.63324958,5.8620827,0.878161079,5.86196903,5.86102463,5.86091094
34.153168,5,5.85933528,-0.927003386,5.85922142,5.858275,5.85816113
34.16366,5.65685425,5.85659067,-0.446918809,5.85647663,5.85552819,5.85541412
34.174152,6.4807407,5.85384915,0.791764833,5.85373492,5.85278444,5.8526702
34.184643,5.47722558,5.85111097,-0.611461687,5.85099656,5.85004404,5.84992961
34.195135,6.164414,5.84837562,0.562172909,5.84826102,5.84730647,5.84719185
34.205626,5.74456265,5.84564363,-0.317932361,5.84552885,5.84457224,5.84445743
34.216118,6,5.84291448,0.396340155,5.84279951,5.84184084,5.84172585
34.22661,6.244998,5.84018843,0.636246465,5.84007327,5.83911254,5.83899736
34.237101,6.55743852,5.83746576,0.848512091,5.83735041,5.8363876,5.83627224
34.247593,5.83095189,5.83474593,-0.0615957559,5.8346304,5.83366551,5.83354996
34.258084,6,5.83202948,0.409842062,5.83191376,5.83094679,5.83083105
34.268576,6.244998,5.8293159,0.644734131,5.82919999,5.82823092,5.82811499
34.279068,6,5.82660544,0.416406724,5.82648934,5.82551818,5.82540205
34.289559,4.89897949,5.82389837,-0.961727032,5.82378208,5.82280881,5.8226925
34.300051,5,5.82119418,-0.906197647,5.8210777,5.82010231,5.81998581
34.310542,5.83095189,5.81849338,0.111617722,5.81837671,5.81739921,5.81728251
34.321034,6.55743852,5.81579547,0.861187005,5.81567861,5.81469898,5.81458209
34.331526,5.19615242,5.8131007,-0.785460553,5.81298365,5.81200189,5.81188481
34.342017,6.40312424,5.81040935,0.76987979,5.8102921,5.8093082,5.80919093
34.352509,6.244998,5.80772089,0.661269316,5.80760346,5.8066174,5.80649994
34.363,6.244998,5.80503585,0.663296427,5.80491822,5.80393001,5.80381236
34.373492,5.19615242,5.80235371,-0.778589296,5.8022359,5.80124552,5.80112768
34.383984,5.91607978,5.79967475,0.341181819,5.79955674,5.79856419,5.79844616
34.394475,5.83095189,5.79699921,0.184262543,5.79688101,5.79588628,5.79576805
34.404967,5.47722558,5.79432659,-0.563117232,5.79420819,5.79321128,5.79309286
34.415458,6.4807407,5.79165741,0.830110408,5.79153882,5.79053971,5.7904211
34.42595,5.83095189,5.78899115,0.204843211,5.78887237,5.78787106,5.78775225
34.436442,6,5.78632809,0.462246593,5.78620911,5.78520559,5.78508659
34.446933,6,5.78366847,0.465114539,5.78354929,5.78254356,5.78242436
34.457425,5.47722558,5.78101179,-0.551168042,5.78089242,5.77988446,5.77976507
34.467916,5.38516481,5.77835856,-0.627051634,5.77823899,5.77722881,5.77710922
34.478408,6.164414,5.77570828,0.623462687,5.77558852,5.77457609,5.77445631
34.4889,5.91607978,5.77306121,0.378177964,5.77294125,5.77192658,5.7718066
34.499391,5.56776436,5.7704176,-0.450170235,5.77029745,5.76928052,5.76916034
34.509883,6,5.76777696,0.48189526,5.76765661,5.76663741,5.76651704
34.520374,5.47722558,5.76513978,-0.536576376,5.76501924,5.76399777,5.7638772
34.530866,6,5.76250558,0.487333995,5.76238483,5.76136109,5.76124032
34.541358,5.47722558,5.7598746,-0.531647461,5.75975366,5.75872762,5.75860666
34.551849,5.65685425,5.7572471,-0.316848306,5.75712596,5.75609763,5.75597647
34.562341,4.89897949,5.75462258,-0.925009782,5.75450124,5.75347061,5.75334925
34.572832,6.164414,5.75200155,0.64219347,5.75188001,5.75084707,5.75072551
34.583324,6.08276253,5.74938351,0.577389834,5.74926177,5.74822651,5.74810475
34.593816,5.09901951,5.74676871,-0.804828677,5.74664677,5.74560918,5.74548722
34.604307,5.83095189,5.74415741,0.294609034,5.74403527,5.74299535,5.74287318
34.614799,5.65685425,5.74154911,-0.291023819,5.74142677,5.7403845,5.74026214
34.62529,6.32455532,5.73894432,0.765252249,5.73882178,5.73777715,5.73765458
34.635782,6.244998,5.73634253,0.713200862,5.73621979,5.7351728,5.73505003
34.646274,5.56776436,5.733744,-0.407405988,5.73362106,5.7325717,5.73244873
34.656765,5.91607978,5.73114899,0.430035808,5.73102584,5.7299741,5.72985093
34.667257,5.56776436,5.72855699,-0.400989564,5.72843365,5.72737952,5.72725614
34.677748,6.4807407,5.72596852,0.868776255,5.72584497,5.72478844,5.72466487
34.68824,6.08276253,5.72338307,0.599482662,5.72325931,5.72220038,5.7220766
34.698732,5,5.7208009,-0.84899994,5.72067694,5.71961559,5.71949161
34.709223,6.164414,5.71822225,0.66797586,5.71809809,5.71703432,5.71691014
34.719715,6.08276253,5.71564665,0.605900884,5.71552228,5.71445608,5.71433169
34.730206,5.74456265,5.71307458,0.177448782,5.71295001,5.71188136,5.71175677
34.740698,5.56776436,5.71050555,-0.377811046,5.71038078,5.70930968,5.70918488
34.75119,5.47722558,5.70793982,-0.480327224,5.70781484,5.70674128,5.70661627
34.761681,5.74456265,5.70537763,0.197952066,5.70525244,5.70417641,5.7040512
34.772173,4.89897949,5.70281849,-0.896570692,5.7026931,5.70161459,5.70148918
34.782664,5.56776436,5.7002629,-0.364003489,5.7001373,5.69905631,5.69893069
34.793156,6.63324958,5.69771038,0.967232755,5.69758457,5.69650108,5.69637525
34.803648,5.74456265,5.69516116,0.222264445,5.69503515,5.69394915,5.69382311
34.814139,6.244998,5.6926155,0.743224391,5.69248928,5.69140077,5.69127452
34.824631,6,5.69007292,0.556710952,5.68994649,5.68885545,5.68872899
34.835122,5.19615242,5.68753389,-0.700986068,5.68740725,5.68631368,5.68618701
34.845614,5.65685425,5.68499794,-0.167760825,5.6848711,5.68377497,5.6836481
34.856106,6.08276253,5.68246532,0.632690452,5.68233827,5.68123959,5.68111251
34.866597,6.164414,5.67993627,0.696044348,5.679809,5.67870776,5.67858047
34.877089,5.74456265,5.67741031,0.259137687,5.67728283,5.67617901,5.67605151
34.88758,6.32455532,5.67488792,0.806019481,5.67476023,5.67365382,5.67352611
34.898072,4.47213595,5.67236862,-1.09555131,5.67224073,5.67113172,5.6710038
34.908564,6.244998,5.66985267,0.758383367,5.66972456,5.66861295,5.66848482
34.919055,5.09901951,5.66734029,-0.753870533,5.66721197,5.66609775,5.6659694
34.929547,7.21110255,5.66483103,1.24349167,5.66470249,5.66358564,5.66345708
34.940038,5,5.66232534,-0.813833732,5.6621966,5.66107711,5.66094834
34.95053,5.56776436,5.65982277,-0.303411288,5.65969382,5.65857168,5.6584427
34.961022,5.74456265,5.65732356,0.295362644,5.65719439,5.65606959,5.65594039
34.971513,5.65685425,5.65482793,0.0450146491,5.65469855,5.65357108,5.65344167
34.982005,5.29150262,5.65233543,-0.600693603,5.65220583,5.65107569,5.65094606
34.992496,5.83095189,5.64984652,0.42556477,5.64971671,5.64858388,5.64845404
35.002988,5.29150262,5.64736074,-0.596538448,5.64723072,5.64609518,5.64596512
35.01348,6,5.64487833,0.59592086,5.64474809,5.64360984,5.64347957
35.023971,5.83095189,5.64239952,0.434226178,5.64226906,5.64112809,5.64099761
35.034463,6.40312424,5.63992385,0.87361341,5.63979317,5.63864947,5.63851877
35.044954,5.29150262,5.63745178,-0.588174432,5.63732089,5.63617444,5.63604352
35.055446,5.74456265,5.63498286,0.331028375,5.63485176,5.63370255,5.63357141
35.065938,5.38516481,5.63251732,-0.497345464,5.63238599,5.63123402,5.63110266
35.076429,5.09901951,5.63005539,-0.728722084,5.62992385,5.62876909,5.62863752
35.086921,5.74456265,5.62759661,0.342002977,5.62746485,5.6263073,5.62617551
35.097412,5.56776436,5.62514145,-0.239535151,5.62500947,5.62384912,5.62371711
35.107904,5.65685425,5.62268945,0.184837233,5.62255725,5.62139408,5.62126185
35.118396,5.91607978,5.62024083,0.543910792,5.62010842,5.61894242,5.61880998
35.128887,5.74456265,5.61779585,0.356043256,5.61766321,5.61649438,5.61636171
35.139379,5.91607978,5.61535402,0.548384683,5.61522117,5.61404948,5.61391659
35.14987,5.65685425,5.61291583,0.209614936,5.61278275,5.6116082,5.6114751
35.160362,6.4807407,5.6104808,0.932877214,5.61034751,5.60917008,5.60903675
35.170854,5.65685425,5.60804918,0.2209187,5.60791566,5.60673534,5.6066018
35.181345,5.38516481,5.60562119,-0.469527829,5.60548745,5.60430423,5.60417046
35.191837,6.63324958,5.60319638,1.01491537,5.60306242,5.60187629,5.60174229
35.202328,5.83095189,5.6007752,0.479767329,5.60064102,5.59945197,5.59931775
35.21282,5.38516481,5.59835721,-0.461727631,5.59822281,5.59703081,5.59689637
35.223312,6.63324958,5.59594263,1.01848267,5.595808,5.59461306,5.5944784
35.233803,5.83095189,5.5935317,0.487257831,5.59339685,5.59219894,5.59206405
35.244295,6.08276253,5.59112396,0.701169434,5.59098888,5.58978799,5.58965288
35.254786,5.74456265,5.58871986,0.394769284,5.58858456,5.58738068,5.58724534
35.265278,5.65685425,5.58631895,0.265584816,5.58618343,5.58497655,5.58484099
35.27577,5.47722558,5.58392147,-0.326643383,5.58378572,5.58257582,5.58244004
35.286261,6,5.58152765,0.64689439,5.58139167,5.58017874,5.58004273
35.296753,6.08276253,5.57913702,0.709665772,5.57900082,5.57778484,5.5776486
35.307244,6.08276253,5.57675005,0.71134554,5.57661362,5.57539459,5.57525812
35.317736,5.74456265,5.57436629,0.412548614,5.57422963,5.57300752,5.57287083
35.328228,4.47213595,5.57198596,-1.04873734,5.57184907,5.57062388,5.57048696
35.338719,5.65685425,5.56960929,0.295372582,5.56947217,5.56824388,5.56810673
35.349211,5.56776436,5.56723583,0.0229898699,5.56709849,5.56586708,5.5657297
35.359702,6.164414,5.56486604,0.774304829,5.56472846,5.56349393,5.56335632
35.370194,5,5.56249946,-0.749999638,5.56236166,5.56112398,5.56098614
35.380686,5.91607978,5.56013632,0.596609974,5.55999829,5.55875745,5.55861939
35.391177,5.83095189,5.55777686,0.522661494,5.5576386,5.55639458,5.55625629
35.401669,5.56776436,5.55542061,0.111102428,5.55528212,5.55403492,5.5538964
35.41216,5.74456265,5.55306804,0.437600965,5.55292932,5.55167892,5.55154016
35.422652,6.32455532,5.5507187,0.879679842,5.55057974,5.54932612,5.54918713
35.433144,6.244998,5.5483728,0.834640759,5.54823362,5.54697676,5.54683754
35.443635,5.47722558,5.54603059,-0.262307092,5.54589117,5.54463106,5.54449161
35.454127,6.164414,5.5436916,0.78785938,5.54355195,5.54228858,5.54214889
35.464618,5.65685425,5.54135629,0.339849902,5.54121641,5.53994976,5.53980984
35.47511,6.164414,5.53902422,0.790815895,5.53888411,5.53761416,5.53747401
35.485602,5.83095189,5.53669561,0.542453944,5.53655526,5.535282,5.53514162
35.496093,6,5.53437069,0.682370364,5.5342301,5.53295351,5.53281289
35.506585,5.47722558,5.532049,-0.234144026,5.53190818,5.53062825,5.53048739
35.517076,6,5.529731,0.685761621,5.52958995,5.52830665,5.52816556
35.527568,4.79583152,5.52741624,-0.855327259,5.52727495,5.52598828,5.52584695
35.53806,6,5.52510496,0.68912629,5.52496343,5.52367336,5.5235318
35.548551,5.56776436,5.52279736,0.212054249,5.5226556,5.52136211,5.52122031
35.559043,6,5.52049301,0.692464432,5.52035101,5.5190541,5.51891206
35.569534,5.56776436,5.51819235,0.222647725,5.51805012,5.51674976,5.51660749
35.580026,4.89897949,5.51589495,-0.785439664,5.51575248,5.51444866,5.51430614
35.590518,5.74456265,5.51360102,0.480584668,5.51345831,5.51215101,5.51200826
35.601009,6.55743852,5.51131079,1.02280386,5.51116784,5.50985704,5.50971405
35.611501,6.08276253,5.50902382,0.757455421,5.50888062,5.50756631,5.50742308
35.621992,5.56776436,5.50674054,0.247030008,5.50659711,5.50527925,5.50513578
35.632484,6.164414,5.50446052,0.812375209,5.50431685,5.50299544,5.50285173
35.642976,4.79583152,5.50218399,-0.840447777,5.50204008,5.5007151,5.50057115
35.653467,5.19615242,5.49991116,-0.551143114,5.499767,5.49843843,5.49829424
35.663959,5.74456265,5.49764159,0.496911519,5.49749719,5.49616501,5.49602058
35.67445,6.4807407,5.49537572,0.992655517,5.49523109,5.49389527,5.4937506
35.684942,6,5.49311313,0.711959881,5.49296825,5.49162879,5.49148387
35.695434,6,5.49085402,0.713544659,5.4907089,5.48936577,5.48922061
35.705925,6,5.48859862,0.715123335,5.48845325,5.48710643,5.48696103
35.716417,4.89897949,5.48634649,-0.766398722,5.48620088,5.48485035,5.4847047
35.726908,5.47722558,5.48409806,-0.0829004717,5.48395221,5.48259796,5.48245207
35.7374,5.74456265,5.48185292,0.512552172,5.48170682,5.48034882,5.48020268
35.747892,5.56776436,5.47961127,0.296905873,5.47946492,5.47810315,5.47795677
35.758383,4.69041576,5.47737332,-0.887106285,5.47722673,5.47586117,5.47571454
35.768875,6.164414,5.47513866,0.830226081,5.47499182,5.47362245,5.47347558
35.779366,5.83095189,5.4729077,0.598367939,5.47276062,5.47138742,5.4712403
35.789858,5.38516481,5.47068004,-0.29242987,5.47053271,5.46915565,5.46900828
35.80035,6,5.46845587,0.729070733,5.46830829,5.46692736,5.46677974
35.810841,5.74456265,5.46623541,0.527567285,5.46608758,5.46470276,5.46455489
35.821333,5.91607978,5.46401824,0.672355223,5.46387016,5.46248142,5.46233331
35.831824,4.69041576,5.46180478,-0.878287549,5.46165646,5.46026377,5.46011541
35.842316,5.47722558,5.45959461,0.132781636,5.45944604,5.45804939,5.45790078
35.852808,5.91607978,5.45738795,0.677267919,5.45723913,5.45583849,5.45568963
35.863299,6.08276253,5.455185,0.792197911,5.45503593,5.45363128,5.45348217
35.873791,5.56776436,5.45298535,0.338790522,5.45283602,5.45142734,5.45127798
35.884282,6.08276253,5.45078941,0.794967373,5.45063983,5.4492271,5.44907748
35.894774,6,5.44859676,0.742565307,5.44844694,5.44703012,5.44688025
35.905266,5.74456265,5.44640763,0.546035728,5.44625755,5.44483663,5.44468651
35.915757,6.08276253,5.44422221,0.799087178,5.44407188,5.44264683,5.44249646
35.926249,6.164414,5.4420401,0.849925825,5.44188951,5.44046031,5.44030968
35.93674,5.74456265,5.4398617,0.551997238,5.43971086,5.43827747,5.43812659
35.947232,5.91607978,5.4376866,0.691659731,5.43753551,5.43609792,5.43594678
35.957724,5.65685425,5.43551501,0.470467039,5.43536367,5.43392185,5.43377046
35.968215,6.32455532,5.43334715,0.944038226,5.43319555,5.43174947,5.43159782
35.978707,5.83095189,5.43118259,0.632273127,5.43103073,5.42958037,5.42942847
35.989198,5.19615242,5.42902175,-0.482565357,5.42886964,5.42741496,5.42726281
35.99969,5.91607978,5.42686421,0.699439468,5.42671185,5.42525284,5.42510042
36.010182,6.244998,5.4247102,0.905697413,5.42455757,5.4230942,5.42294153
36.020673,5.19615242,5.4225599,-0.475822945,5.42240702,5.42093925,5.42078632
36.031165,6.08276253,5.42041291,0.813848647,5.42025977,5.41878759,5.4186344
36.041656,5.74456265,5.41826964,0.571220625,5.41811625,5.41663962,5.41648617
36.052148,5.09901951,5.41612969,-0.563125366,5.41597603,5.41449493,5.41434122
36.06264,5.29150262,5.41399326,-0.34998662,5.41383934,5.41235373,5.41219977
36.073131,6.08276253,5.41186054,0.819086069,5.41170637,5.41021622,5.410062
36.083623,5.56776436,5.40973114,0.397533922,5.40957671,5.408082,5.40792751
36.094114,5.19615242,5.40760547,-0.459840238,5.40745077,5.40595147,5.40579672
36.104606,5.65685425,5.40548311,0.501369266,5.40532815,5.40382422,5.40366922
36.115098,5.38516481,5.40336427,-0.134905383,5.40320905,5.40170047,5.4015452
36.125589,4.69041576,5.40124915,-0.84310936,5.40109367,5.3995804,5.39942487
36.136081,5.65685425,5.39913736,0.507658244,5.39898161,5.39746362,5.39730783
36.146572,5,5.39702928,-0.630102597,5.39687327,5.39535054,5.39519448
36.157064,5.74456265,5.39492453,0.591302052,5.39476826,5.39324074,5.39308442
36.167556,5.65685425,5.3928233,0.51383942,5.39266676,5.39113443,5.39097784
36.178047,5.83095189,5.39072579,0.663495367,5.39056899,5.38903181,5.38887496
36.188539,6.08276253,5.38863161,0.833145198,5.38847454,5.38693248,5.38677536
36.19903,4.35889894,5.38654115,-1.01372689,5.38638381,5.38483684,5.38467945
36.209522,5.74456265,5.38445401,0.600090522,5.38429641,5.38274448,5.38258683
36.220014,5.29150262,5.3823704,-0.301442829,5.38221253,5.38065562,5.3804977
36.230505,5.65685425,5.38029051,0.525893275,5.38013238,5.37857044,5.37841226
36.240997,6.55743852,5.37821395,1.08592107,5.37805555,5.37648856,5.3763301
36.251488,5.47722558,5.37614111,0.317937827,5.37598244,5.37441036,5.37425163
36.26198,5.19615242,5.3740716,-0.421804671,5.37391266,5.37233545,5.37217645
36.272472,5,5.37200562,-0.609922634,5.37184641,5.37026402,5.37010476
36.282963,5.29150262,5.36994336,-0.280072735,5.36978388,5.36819629,5.36803676
36.293455,5.29150262,5.36788443,-0.276372586,5.36772468,5.36613184,5.36597204
36.303946,4.12310563,5.36582922,-1.11477513,5.3656692,5.36407108,5.36391101
36.314438,5.19615242,5.36377734,-0.409420225,5.36361705,5.36201361,5.36185326
36.32493,5.65685425,5.36172899,0.543254319,5.36156843,5.35995962,5.359799
36.335421,4.79583152,5.35968437,-0.750901355,5.35952353,5.35790932,5.35774843
36.345913,5.91607978,5.35764307,0.74728623,5.35748196,5.3558623,5.35570114
36.356404,5.38516481,5.3556055,0.171928196,5.35544412,5.35381897,5.35365753
36.366896,5.65685425,5.35357127,0.550711344,5.35340961,5.35177893,5.35161722
36.377388,4.24264069,5.35154056,-1.05304315,5.35137863,5.34974237,5.34958039
36.387879,5.74456265,5.34951357,0.628529297,5.34935136,5.34770949,5.34754723
36.398371,5.56776436,5.34748992,0.469334043,5.34732744,5.3456799,5.34551737
36.408862,5.74456265,5.34546999,0.631737808,5.34530723,5.34365399,5.34349118
36.419354,5.65685425,5.3434534,0.559822162,5.34329036,5.34163137,5.34146828
36.429846,5.65685425,5.34144033,0.561617233,5.34127702,5.33961223,5.33944886
36.440337,5.91607978,5.33943099,0.759373948,5.3392674,5.33759676,5.33743312
36.450829,5.29150262,5.33742499,-0.214295039,5.33726112,5.33558458,5.33542066
36.46132,5,5.3354227,-0.579156889,5.33525855,5.33357608,5.33341188
36.471812,5.19615242,5.33342376,-0.370501464,5.33325933,5.33157086,5.33140638
36.482304,5.47722558,5.33142834,0.381834038,5.33126364,5.32956913,5.32940436
36.492795,5.29150262,5.32943665,-0.194766594,5.32927166,5.32757106,5.32740601
36.503287,5.38516481,5.32744829,0.240242612,5.32728303,5.32557628,5.32541095
36.513778,5.56776436,5.32546366,0.492240493,5.32529811,5.32358516,5.32341956
36.52427,6,5.32348237,0.82250692,5.32331654,5.32159734,5.32143145
36.534762,6.244998,5.3215046,0.960985637,5.32133849,5.31961299,5.31944681
36.545253,5.29150262,5.31953056,-0.167415468,5.31936416,5.3176323,5.31746584
36.555745,5.38516481,5.31755986,0.260009513,5.31739318,5.3156549,5.31548816
36.566236,5.91607978,5.31559288,0.774910901,5.31542591,5.31368116,5.31351414
36.576728,6,5.31362924,0.828474961,5.31346199,5.31171071,5.3115434
36.58722,6.40312424,5.31166913,1.04472729,5.3115016,5.30974373,5.30957613
36.597711,4.89897949,5.30971274,-0.640884746,5.30954492,5.3077804,5.30761252
36.608203,5.09901951,5.3077597,-0.456880931,5.30759159,5.30582036,5.30565219
36.618694,5.38516481,5.30581037,0.281699194,5.30564198,5.30386398,5.30369552
36.629186,6,5.30386439,0.834347416,5.30369571,5.30191087,5.30174213
36.639678,5.19615242,5.30192194,-0.325222259,5.30175297,5.29996124,5.29979221
36.650169,5.91607978,5.29998321,0.784918197,5.29981395,5.29801525,5.29784593
36.660661,4.47213595,5.29804782,-0.908796934,5.29787827,5.29607255,5.29590294
36.671152,5.65685425,5.29611615,0.600614766,5.29594632,5.2941335,5.2939636
36.681644,5.19615242,5.29418783,-0.313106066,5.2940177,5.29219772,5.29202753
36.692136,4.12310563,5.29226304,-1.08127583,5.29209262,5.29026541,5.29009493
36.702627,5.38516481,5.29034197,0.30793317,5.29017126,5.28833674,5.28816597
36.713119,5.47722558,5.28842425,0.434512748,5.28825325,5.28641135,5.28624029
36.72361,6,5.28651024,0.844683231,5.28633895,5.2844896,5.28431825
36.734102,5.29150262,5.28459958,0.0830845378,5.28442799,5.28257113,5.28239948
36.744594,5.38516481,5.28269246,0.320113026,5.28252058,5.28065612,5.28048417
36.755085,5.47722558,5.28078905,0.443211604,5.28061687,5.27874474,5.2785725
36.765577,4.69041576,5.27888899,-0.76712009,5.27871652,5.27683663,5.2766641
36.776068,5.91607978,5.27699265,0.799429254,5.27681989,5.27493216,5.27475933
36.78656,5.38516481,5.27509966,0.331760674,5.2749266,5.27303097,5.27285784
36.797052,5.09901951,5.27321021,-0.417361588,5.27303685,5.27113322,5.27095979
36.807543,5.09901951,5.27132447,-0.415096321,5.27115082,5.2692391,5.26906538
36.818035,4.89897949,5.26944209,-0.608656389,5.26926813,5.26734825,5.26717423
36.828526,5.56776436,5.26756342,0.547905965,5.26738917,5.26546103,5.26528671
36.839018,5.38516481,5.2656881,0.345654024,5.26551355,5.26357707,5.26340245
36.84951,5.38516481,5.26381633,0.348351089,5.26364148,5.26169656,5.26152164
36.860001,5.09901951,5.26194826,-0.403644337,5.26177312,5.25981967,5.25964445
36.870493,4.79583152,5.26008356,-0.681360431,5.25990811,5.25794605,5.25777053
36.880984,4.79583152,5.25822257,-0.679993418,5.25804682,5.25607604,5.25590022
36.891476,5.74456265,5.25636494,0.698711459,5.25618889,5.2542093,5.25403317
36.901968,5.56776436,5.25451085,0.559690548,5.2543345,5.25234599,5.25216956
36.912459,5.74456265,5.25266048,0.701357375,5.25248382,5.25048629,5.25030956
36.922951,4.89897949,5.25081347,-0.59315595,5.25063651,5.24862986,5.24845282
36.933442,5,5.24897017,-0.498969108,5.24879291,5.24677703,5.24659969
36.943934,5.74456265,5.24713024,0.705288882,5.24695267,5.24492746,5.24474982
36.954426,5.29150262,5.24529385,0.214962259,5.24511598,5.24308132,5.24290337
36.964917,4.79583152,5.24346118,-0.669051308,5.243283,5.24123878,5.24106053
36.975409,6.4807407,5.24163187,1.11315265,5.24145338,5.2393995,5.23922094
36.9859,5.38516481,5.23980628,0.381259131,5.23962749,5.23756381,5.23738495
36.996392,5.29150262,5.23798406,0.231340783,5.23780496,5.23573138,5.2355522
37.006884,5.38516481,5.23616539,0.386004424,5.23598598,5.23390237,5.23372288
37.017375,5.09901951,5.23435044,-0.367873517,5.23417072,5.23207695,5.23189716
37.027867,5.47722558,5.23253886,0.494658181,5.23235883,5.23025478,5.23007467
37.038358,5.47722558,5.230731,0.496482201,5.23055066,5.2284362,5.22825578
37.04885,5.19615242,5.22892652,-0.181036169,5.22874587,5.22662086,5.22644013
37.059342,5.19615242,5.22712559,-0.175991939,5.22694463,5.22480894,5.2246279
37.069833,5.09901951,5.22532838,-0.355399582,5.22514711,5.2230006,5.22281925
37.080325,4.58257569,5.22353455,-0.800599059,5.22335297,5.2211955,5.22101383
37.090816,5.65685425,5.22174445,0.659628535,5.22156255,5.21939398,5.219212
37.101308,4.47213595,5.21995773,-0.864766889,5.21977552,5.2175957,5.2174134
37.1118,5.19615242,5.21817457,-0.148398598,5.21799204,5.21580082,5.21561821
37.122291,5.38516481,5.21645335,0.410744999,5.21627052,5.21400951,5.21382659
37.132783,4.69041576,5.21467736,-0.724059112,5.21449421,5.21222144,5.2120382
37.143274,6.40312424,5.21290509,1.09097165,5.21272162,5.21043694,5.21025338
37.153766,4.58257569,5.21113622,-0.792818092,5.21095244,5.20865566,5.20847179
37.164258,5.65685425,5.20937092,0.66894195,5.20918681,5.20687778,5.20669359
37.174749,5.09901951,5.20760935,-0.329529717,5.20742493,5.20510347,5.20491896
37.185241,5.47722558,5.20585118,0.520936075,5.20566644,5.20333238,5.20314755
37.195732,6.244998,5.20409675,1.02024568,5.20391169,5.20156484,5.2013797
37.206224,5.74456265,5.20234573,0.736353798,5.20216035,5.19980053,5.19961506
37.216716,4.89897949,5.20059829,-0.549198326,5.20041259,5.1980396,5.19785381
37.227207,5.47722558,5.19885459,0.527608744,5.19866857,5.19628223,5.19609612
37.237699,5.19615242,5.1971143,-0.0310142224,5.19692796,5.19452807,5.19434164
37.24819,4.89897949,5.19537777,-0.544424729,5.19519111,5.19277746,5.1925907
37.258682,5.29150262,5.19364466,0.312822572,5.19345767,5.19103006,5.19084298
37.269174,5.47722558,5.19191514,0.534144583,5.19172783,5.18928604,5.18909863
37.279665,5.38516481,5.19018938,0.441560222,5.19000174,5.18754555,5.18735782
37.290157,5,5.18846705,-0.434127917,5.18827909,5.18580827,5.18562022
37.300648,5.09901951,5.18674848,-0.296190765,5.1865602,5.18407453,5.18388615
37.31114,5.19615242,5.18503336,0.105446973,5.18484475,5.18234399,5.18215529
37.321632,5.09901951,5.18332184,-0.290348633,5.18313291,5.18061682,5.18042779
37.332123,5.56776436,5.1816141,0.621409898,5.18142484,5.17889318,5.17870381
37.342615,4.69041576,5.17990981,-0.699638517,5.17972022,5.17717273,5.17698304
37.353106,4.89897949,5.17820931,-0.528422013,5.17801939,5.1754558,5.17526578
37.363598,4.79583152,5.17651227,-0.61699331,5.17632202,5.17374207,5.17355172
37.37409,5.91607978,5.17481886,0.860965113,5.17462828,5.1720317,5.17184101
37.384581,5.65685425,5.17312924,0.69550342,5.17293833,5.17032483,5.17013382
37.395073,4.69041576,5.17144311,-0.693561351,5.17125187,5.16862116,5.16842981
37.405564,4.58257569,5.16976078,-0.76628003,5.16956921,5.166921,5.16672932
37.416056,5.91607978,5.16808194,0.864868684,5.16789004,5.16522402,5.165032
37.426548,5.09901951,5.16640676,-0.259590544,5.16621452,5.16353038,5.16333803
37.437039,5,5.16473541,-0.4058761,5.16454283,5.16184025,5.16164756
37.447531,5.65685425,5.16306757,0.702699569,5.16287466,5.16015329,5.15996027
37.458022,6,5.16140356,0.915749115,5.16121031,5.15846983,5.15827648
37.468514,5.19615242,5.15974308,0.190812329,5.1595495,5.15678954,5.15659585
37.479006,4.89897949,5.15808629,-0.509025348,5.15789237,5.15511259,5.15491856
37.489497,5.91607978,5.15643336,0.871576975,5.15623911,5.15343912,5.15324476
37.499989,4.79583152,5.15478398,-0.599126413,5.15458939,5.15176882,5.15157412
37.51048,4.89897949,5.15313848,-0.504141837,5.15294355,5.15010201,5.14990696
37.520972,4.79583152,5.15149654,-0.596376575,5.15130127,5.14843836,5.14824297
37.531464,5.19615242,5.14985834,0.215160588,5.14966274,5.14677802,5.1465823
37.541955,5.83095189,5.14822405,0.82627347,5.1480281,5.14512116,5.1449251
37.552447,4.47213595,5.14659335,-0.821253551,5.14639706,5.14346746,5.14327105
37.562938,4.69041576,5.14496658,-0.674203839,5.14476994,5.14181723,5.14162047
37.57343,4.58257569,5.14334343,-0.748844263,5.14314645,5.14017015,5.13997305
37.583922,4.69041576,5.14172406,-0.671794838,5.14152675,5.13852637,5.13832893
37.594413,5,5.14010866,-0.374310914,5.139911,5.13688606,5.13668827
37.604905,5.09901951,5.13849692,-0.198689215,5.13829891,5.13524889,5.13505075
37.615396,5.74456265,5.13688916,0.779534149,5.13669081,5.13361517,5.13341669
37.625888,5.29150262,5.13528509,0.39524364,5.13508639,5.1319846,5.13178577
37.63638,5.19615242,5.13368488,0.249935086,5.13348583,5.13035732,5.13015814
37.646871,5.47722558,5.13208869,0.587483519,5.1318893,5.12873348,5.12853396
37.657363,4.89897949,5.13049624,-0.481161882,5.1302965,5.12711278,5.12691291
37.667854,4.58257569,5.12890785,-0.739142854,5.12870777,5.12549552,5.12529529
37.678346,5.65685425,5.12732324,0.727688815,5.1271228,5.12388138,5.12368081
37.688838,5.47722558,5.12574257,0.592860024,5.12554178,5.12227053,5.1220696
37.699329,5.83095189,5.12416601,0.840705587,5.12396487,5.1206631,5.12046183
37.709821,4.69041576,5.12259329,-0.657402104,5.1223918,5.1190588,5.11885717
37.720312,5.56776436,5.12102472,0.66838585,5.12082288,5.11745792,5.11725594
37.730804,4.24264069,5.11946003,-0.936386321,5.11925784,5.11586016,5.11565783
37.741296,5.91607978,5.11789939,0.893409419,5.11769685,5.11426567,5.11406298
37.751787,5.19615242,5.11634298,0.282505647,5.11614008,5.11267459,5.11247154
37.762279,5.09901951,5.11479053,-0.12558269,5.11458727,5.11108662,5.11088321
37.77277,4.79583152,5.11324235,-0.563392247,5.11303874,5.10950205,5.10929829
37.783262,5.65685425,5.11169818,0.738346848,5.11149421,5.10792059,5.10771648
37.793754,5.19615242,5.11015821,0.293247707,5.10995388,5.10634239,5.10613791
37.804245,4.79583152,5.1086226,-0.559277278,5.10841792,5.10476758,5.10456274
37.814737,4.79583152,5.1070911,-0.55790642,5.10688606,5.10319587,5.10299067
37.825228,5.09901951,5.10556403,-0.0808982003,5.10535863,5.10162755,5.10142199
37.83572,5.29150262,5.10404115,0.432968212,5.10383539,5.10006232,5.0998564
37.846212,4.69041576,5.10252263,-0.641955506,5.10231651,5.09850032,5.09829404
37.856703,5.09901951,5.10100866,-0.0445999035,5.10080219,5.09694172,5.09673507
37.867195,4.79583152,5.099499,-0.551060323,5.09929216,5.09538619,5.09517918
37.877686,5.09901951,5.09799398,0.0320239661,5.09778678,5.09383404,5.09362667
37.888178,5.38516481,5.09649335,0.53728154,5.09628579,5.09228496,5.09207723
37.89867,5.19615242,5.09499732,0.318048899,5.09478939,5.09073911,5.09053101
37.909161,5.47722558,5.09350607,0.619450967,5.09329778,5.08919663,5.08898816
37.919653,4.79583152,5.09201939,-0.544231443,5.09181073,5.08765721,5.08744838
37.930144,5,5.0905376,-0.300894666,5.09032858,5.08612116,5.08591195
37.940636,4.47213595,5.08906049,-0.785445439,5.0888511,5.08458816,5.08437859
37.951128,4.79583152,5.08758827,-0.540145118,5.08737851,5.08305838,5.08284843
37.961619,5.38516481,5.08612115,0.546848845,5.08591102,5.08153194,5.08132162
37.972111,5.29150262,5.08465891,0.454800738,5.08444842,5.08000856,5.07979787
37.982602,4.79583152,5.08320192,-0.536069395,5.08299106,5.07848852,5.07827746
37.993094,5.38516481,5.08174998,0.550831037,5.08153874,5.07697153,5.07676009
38.003586,4.69041576,5.08030331,-0.624409758,5.0800917,5.07545773,5.07524592
38.014077,6.70820393,5.07886214,1.27645673,5.07865016,5.07394726,5.07373508
38.024569,4.89897949,5.07742629,-0.422429649,5.07721395,5.07243983,5.07222727
38.03506,6.08276253,5.07599615,1.00337749,5.07578343,5.07093573,5.07072279
38.045552,5.56776436,5.07457154,0.702276883,5.07435845,5.06943466,5.06922135
38.056044,5,5.07315272,-0.270467599,5.07293926,5.06793676,5.06772308
38.066535,5,5.07173995,-0.267843137,5.07152611,5.06644219,5.06622812
38.077027,5.47722558,5.07033307,0.637881259,5.07011886,5.06495063,5.06473619
38.087518,5.74456265,5.06893251,0.821967233,5.06871792,5.06346238,5.06324756
38.09801,4.58257569,5.06753814,-0.696392454,5.06732318,5.06197716,5.06176195
38.108502,5.29150262,5.06615026,0.474712931,5.06593491,5.06049509,5.0602795
38.118993,5.38516481,5.06476914,0.566035037,5.06455342,5.05901632,5.05880035
38.129485,4.47213595,5.06339472,-0.768933527,5.06317862,5.05754055,5.0573242
38.139976,5.74456265,5.06202745,0.826156887,5.06181097,5.05606808,5.05585134
38.150468,4.35889894,5.06066725,-0.837716125,5.06045039,5.05459861,5.05438149
38.16096,5.47722558,5.05931448,0.646460434,5.05909724,5.05313228,5.05291478
38.171451,5.65685425,5.0579695,0.773876443,5.05775188,5.05166923,5.05145134
38.181943,4.35889894,5.05663229,-0.835304345,5.05641429,5.05020918,5.0499909
38.192434,5.47722558,5.05530338,0.649555385,5.05508499,5.04875239,5.04853373
38.202926,5.38516481,5.05398278,0.575484167,5.05376401,5.0472986,5.04707954
38.213418,5.09901951,5.05267093,0.215287206,5.05245178,5.04584793,5.04562848
38.223909,5,5.05136828,-0.226645716,5.05114875,5.04440051,5.04418068
38.234401,4.79583152,5.05007492,-0.504225544,5.04985501,5.04295608,5.04273585
38.244892,5.19615242,5.04879148,0.383876211,5.04857118,5.0415149,5.04129428
38.255384,5.09901951,5.0475181,0.226939221,5.04729742,5.04007669,5.03985568
38.265876,5.38516481,5.04625535,0.582159301,5.04603428,5.03864158,5.03842018
38.276367,4.89897949,5.04500382,-0.382131303,5.04478236,5.03720972,5.03698792
38.286859,5.09901951,5.04376376,0.235065428,5.04354191,5.03578082,5.03555863
38.29735,5.38516481,5.04253596,0.585345069,5.04231373,5.03435515,5.03413256
38.307842,5.38516481,5.04132077,0.586382155,5.04109816,5.03293244,5.03270945
38.318334,5.19615242,5.04011897,0.395010696,5.03989597,5.03151282,5.03128943
38.328825,4.35889894,5.03893137,-0.824640785,5.03870797,5.03009642,5.02987263
38.339317,5.65685425,5.03775851,0.786826374,5.03753473,5.02868296,5.02845878
38.349808,5.19615242,5.03660147,0.399438301,5.0363773,5.02727272,5.02704814
38.3603,5.19615242,5.03546097,0.400863378,5.03523642,5.02586542,5.02564043
38.370792,5.19615242,5.03433821,0.40226138,5.03411326,5.02446119,5.0242358
38.381283,4.79583152,5.03323447,-0.487240128,5.03300913,5.02306016,5.02283436
38.391775,5,5.03215093,-0.17930679,5.0319252,5.02166205,5.02143586
38.402266,4.89897949,5.03108939,-0.363469262,5.03086328,5.02026715,5.02004054
38.412758,4.89897949,5.03005154,-0.362038749,5.02982504,5.01887516,5.01864815
38.42325,5.65685425,5.02903973,0.792347474,5.02881284,5.01748623,5.01725881
38.433741,5.65685425,5.02805677,0.792967514,5.02782949,5.01610047,5.01587265
38.444233,5.29150262,5.02710581,0.514195303,5.02687815,5.01471763,5.01448941
38.454724,4.47213595,5.02619117,-0.74434885,5.02596311,5.01333797,5.01310933
38.465216,5.09901951,5.02531782,0.271480559,5.02508938,5.0119612,5.01173216
38.475708,5.19615242,5.02449235,0.414318803,5.02426353,5.01058748,5.01035802
38.486199,4.12310563,5.02372302,-0.949008636,5.02349381,5.00921691,5.00898704
38.496691,6,5.02301999,0.988422989,5.02279041,5.00784923,5.00761895
38.507182,5.19615242,5.02239644,0.416840479,5.02216647,5.00648471,5.00625402
38.517674,4.24264069,5.02186858,-0.882738858,5.02163824,5.00512308,5.00489197
38.528166,4.89897949,5.02145691,-0.349967754,5.02122621,5.00376446,5.00353294
38.538657,5.56776436,5.02118683,0.739308823,5.02095575,5.00240899,5.00217704
38.549149,4.35889894,5.02108947,-0.813750899,5.02085804,5.00105638,5.00082403
38.55964,4.24264069,5.02120291,-0.88236173,5.02097113,4.99970691,4.99947414
38.570132,5.47722558,5.02157306,0.675020384,5.02134094,4.99836032,4.99812712
38.580624,5.74456265,5.02225463,0.849887062,5.02202219,4.99701671,4.9967831
38.591115,4.69041576,5.02331191,-0.576971535,5.02307916,4.99567623,4.99544219
38.601607,5.29150262,5.02481983,0.516413394,5.02458679,4.9943386,4.99410414
38.612098,5.29150262,5.02686353,0.514430838,5.02663024,4.99300408,4.99276921
38.62259,5.65685425,5.02953947,0.792032058,5.02930594,4.99167242,4.99143712
38.633082,5.09901951,5.03295356,0.257032986,5.03271983,4.99034373,4.99010801
38.643573,4.79583152,5.03722016,-0.491313177,5.03698627,4.98901814,4.98878199
38.654065,4.35889894,5.04246147,-0.826778405,5.04222747,4.98769539,4.98745881
38.664556,5.19615242,5.0488016,0.383863032,5.04856752,4.98637573,4.98613873
38.675048,6.4807407,5.05636657,1.19347146,5.05613249,4.9850589,4.98482147
38.68554,5,5.06527578,-0.255491261,5.06504175,4.98374503,4.98350717
38.696031,5.38516481,5.07563755,0.556351742,5.07540363,4.98243424,4.98219595
38.706523,5.29150262,5.0875463,0.451615241,5.08731257,4.98112626,4.98088754
38.717014,4.79583152,5.10106877,-0.552482804,5.1008353,4.97982136,4.9795822
38.727506,5.56776436,5.11624606,0.671951115,5.11601292,4.97851927,4.97827968
38.737998,5.29150262,5.1330784,0.398025401,5.13284567,4.97722011,4.97698009
38.748489,6,5.15152205,0.92112863,5.15128979,4.97592401,4.97568356
38.758981,4.89897949,5.17148975,-0.522025153,5.17125803,4.97463071,4.97438982
38.769472,5.74456265,5.19283385,0.742784486,5.19260273,4.97334046,4.97309913
38.779964,5.19615242,5.21535809,-0.138584519,5.21512761,4.972053,4.97181124
38.790456,5.74456265,5.23880168,0.711168732,5.23857187,4.97076846,4.97052626
38.800947,4,5.26284404,-1.12376334,5.26261493,4.96948695,4.96924431
38.811439,4.89897949,5.28711213,-0.623002924,5.28688371,4.96820823,4.96796514
38.82193,5.56776436,5.31116554,0.506555846,5.3109378,4.96693252,4.966689
38.832422,5.09901951,5.33451758,-0.485281432,5.33429049,4.9656596,4.96541563
38.842914,5.29150262,5.35662462,-0.255190124,5.35639811,4.96438957,4.96414516
38.853405,6.164414,5.3769036,0.88741783,5.37667759,4.96312255,4.96287769
38.863897,5.19615242,5.39475465,-0.445648095,5.39452903,4.96185829,4.96161299
38.874388,5.19615242,5.40957477,-0.461976563,5.40934942,4.96059703,4.96035129
38.88488,5.56776436,5.42080866,0.383348012,5.42058343,4.95933854,4.95909234
38.895372,5.65685425,5.42798302,0.478404878,5.42775773,4.95808291,4.95783627
38.905863,6.32455532,5.43075922,0.9454079,5.4305337,4.95683027,4.95658318
38.916355,5.65685425,5.42897104,0.477371143,5.42874509,4.95558038,4.95533284
38.926846,6.63324958,5.42264371,1.10027536,5.42241714,4.95433346,4.95408547
38.937338,5.38516481,5.41198968,-0.163782992,5.4117623,4.95308929,4.95284085
38.94783,5.83095189,5.39738527,0.658457761,5.39715692,4.95184796,4.95159907
38.958321,6,5.3793292,0.787826632,5.37909972,4.9506096,4.95036025
38.968813,6.4807407,5.35838887,1.05941108,5.35815813,4.94937396,4.94912416
38.979304,5.74456265,5.33516968,0.639838235,5.33493757,4.94814128,4.94789102
38.989796,5.56776436,5.31026526,0.507443695,5.3100317,4.94691132,4.9466606
39.000288,5.56776436,5.28424833,0.532462236,5.28401325,4.94568419,4.94543301
39.010779,5.38516481,5.2576496,0.357092711,5.25741296,4.94445999,4.94420836
39.021271,4.79583152,5.23094099,-0.659628278,5.23070276,4.94323851,4.94298641
39.031762,5.56776436,5.20454872,0.602673746,5.2043089,4.94201995,4.9417674
39.042254,4.89897949,5.17883078,-0.529009731,5.17858939,4.94080409,4.94055108
39.052746,5.29150262,5.15409368,0.370687116,5.15385075,4.93959104,4.93933756
39.063237,5.38516481,5.13058456,0.504559459,5.13034013,4.93838091,4.93812697
39.073729,5.09901951,5.10848592,-0.0972954419,5.10824004,4.93717347,4.93691906
39.08422,5.65685425,5.08793341,0.754268412,5.08768615,4.93596893,4.93571405
39.094712,4.24264069,5.06900235,-0.909044367,5.06875377,4.93476707,4.93451172
39.105204,4.58257569,5.05172651,-0.684945848,5.05147668,4.93356799,4.93331218
39.115695,5.09901951,5.0360971,0.250843405,5.0358461,4.93237181,4.93211553
39.126187,4.79583152,5.02206528,-0.475640361,5.02181317,4.9311783,4.93092154
39.136678,5.29150262,5.0095591,0.530983539,5.00930596,4.92998766,4.92973044
39.14717,5.56776436,4.99847951,0.754509674,4.99822541,4.92879969,4.92854199
39.157662,5.74456265,4.98871577,0.869394543,4.98846076,4.92761448,4.9273563
39.168153,4.58257569,4.9801474,-0.630532872,4.97989154,4.92643214,4.92617349
39.178645,5.91607978,4.97264764,0.971304351,4.97239099,4.92525244,4.92499332
39.189136,5.47722558,4.96609362,0.714934932,4.96583621,4.9240756,4.923816
39.199628,5.19615242,4.96036411,0.485580392,4.96010599,4.9229014,4.92264132
39.21012,5,4.95534696,0.211312649,4.95508817,4.92172994,4.92146938
39.220611,5.83095189,4.95093882,0.93809012,4.95067939,4.92056133,4.92030029
39.231103,5.19615242,4.94704525,0.499106377,4.94678519,4.91939534,4.91913382
39.241594,5.47722558,4.9435841,0.730507686,4.94332344,4.91823218,4.91797018
39.252086,4.47213595,4.94048242,-0.684358436,4.94022118,4.91707164,4.91680916
39.262578,4.12310563,4.93767851,-0.902536914,4.9374167,4.91591382,4.91565085
39.273069,5.19615242,4.93511999,0.510913331,4.93485762,4.91475882,4.91449537
39.283561,5.09901951,4.93276239,0.407746399,4.93249947,4.91360643,4.91334248
39.294052,4.58257569,4.93056977,-0.589910225,4.93030631,4.91245684,4.91219241
39.304544,4.12310563,4.92851193,-0.897444319,4.92824794,4.91130985,4.91104493
39.315036,5.19615242,4.92656494,0.519218144,4.92630042,4.91016555,4.90990014
39.325527,5.19615242,4.92470954,0.521001808,4.92444448,4.90902405,4.90875815
39.336019,5.09901951,4.92292983,0.419630408,4.92266425,4.90788513,4.90761874
39.34651,4,4.92121382,-0.959798841,4.92094771,4.906749,4.90648212
39.357002,4.79583152,4.91955135,-0.351738299,4.91928473,4.90561544,4.90534806
39.367494,6.08276253,4.91793485,1.07927183,4.9176677,4.90448456,4.90421668
39.377985,5.09901951,4.91635829,0.427388844,4.91609062,4.90335644,4.90308807
39.388477,5,4.91481646,0.291862195,4.91454827,4.90223089,4.90196201
39.398968,4.89897949,4.91330572,-0.119692229,4.91303701,4.9011081,4.90083872
39.40946,5,4.91182258,0.29694683,4.91155336,4.89998785,4.89971798
39.419952,5.65685425,4.91036459,0.863996331,4.91009485,4.89887026,4.89859988
39.430443,5.65685425,4.90892971,0.864826304,4.90865945,4.89775541,4.89748454
39.440935,5.29150262,4.90751586,0.619666656,4.90724508,4.8966431,4.89637172
39.451426,4.79583152,4.90612174,-0.332099708,4.90585044,4.89553354,4.89526165
39.461918,4.69041576,4.90474575,-0.462957868,4.90447393,4.89442649,4.8941541
39.47241,4.12310563,4.90338684,-0.883335278,4.9031145,4.89332207,4.89304917
39.482901,4.89897949,4.9020441,-0.0553589452,4.90177124,4.89222038,4.89194697
39.493393,4.69041576,4.90071634,-0.458585407,4.90044295,4.8911212,4.89084728
39.503884,4.47213595,4.89940296,-0.653656642,4.89912906,4.89002474,4.88975031
39.514376,4.69041576,4.89810296,-0.455727111,4.89782853,4.88893077,4.88865583
39.524868,5.19615242,4.89681576,0.547116684,4.89654081,4.88783942,4.88756396
39.535359,5.19615242,4.89554083,0.548280575,4.89526536,4.88675076,4.88647479
39.545851,4.58257569,4.89427736,-0.558302481,4.89400136,4.88566459,4.8853881
39.556342,4.47213595,4.8930333,-0.648766015,4.89274849,4.8845894,4.88430411
39.566834,5.38516481,4.89179137,0.702405468,4.89150603,4.88350841,4.88322259
39.577326,5,4.89055948,0.33081795,4.89027361,4.88243,4.88214365
39.587817,4.35889894,4.88933733,-0.728312014,4.88905093,4.88135426,4.88106738
39.598309,4.24264069,4.88812428,-0.803419934,4.88783734,4.88028099,4.87999359
39.6088,4.79583152,4.88692017,-0.301808962,4.88663269,4.87921038,4.87892245
39.619292,4.47213595,4.88572444,-0.643108453,4.88543642,4.87814224,4.87785377
39.629784,4.69041576,4.88453686,-0.440591762,4.88424831,4.87707664,4.87678765
39.640275,5.56776436,4.88335725,0.827289016,4.88306815,4.8760137,4.87572417
39.650767,5.19615242,4.88218509,0.560327883,4.88189545,4.8749532,4.87466314
39.661258,3.60555128,4.88102034,-1.12936666,4.88073016,4.87389534,4.87360474
39.67175,5,4.87986252,0.346608539,4.8795718,4.87283992,4.87254878
39.682242,5.29150262,4.87871152,0.642488213,4.87842026,4.87178702,4.87149535
39.692733,6,4.87756722,1.05944928,4.87727541,4.87073676,4.87044454
39.703225,5.91607978,4.87642919,1.01963258,4.87613684,4.86968891,4.86939615
39.713716,5.47722558,4.87529746,0.775840262,4.87500457,4.86864368,4.86835038
39.724208,4,4.87417163,-0.934971461,4.87387819,4.86760085,4.86730701
39.7347,5.38516481,4.87305164,0.715620828,4.87275765,4.86656054,4.86626615
39.745191,5.38516481,4.87193742,0.716398902,4.87164288,4.86552282,4.86522789
39.755683,5.38516481,4.87082861,0.71717236,4.87053352,4.8644875,4.86419203
39.766174,4.79583152,4.86972528,-0.271834069,4.86942964,4.86345478,4.86315875
39.776666,4.89897949,4.86862709,0.1742194,4.86833089,4.86242444,4.86212786
39.787158,5.19615242,4.867534,0.573252499,4.86723724,4.86139658,4.86109945
39.797649,4.47213595,4.86644599,-0.62794111,4.86614868,4.86037129,4.86007361
39.808141,4.79583152,4.86536276,-0.263687755,4.86506489,4.85934838,4.85905015
39.818632,5,4.86428438,0.36839601,4.86398596,4.85832803,4.85802924
39.829124,4.89897949,4.86321056,0.189126754,4.86291157,4.85731005,4.8570107
39.839616,4.24264069,4.86214129,-0.787083606,4.86184175,4.85629452,4.85599462
39.850107,4.89897949,4.86107659,0.194686669,4.86077648,4.85528155,4.85498108
39.860599,5.47722558,4.86001616,0.785626768,4.85971549,4.85427092,4.8539699
39.87109,5.29150262,4.85896011,0.657679639,4.85865888,4.85326283,4.85296125
39.881582,4.24264069,4.85790818,-0.784389887,4.85760639,4.85225708,4.85195493
39.892074,4.79583152,4.85686038,-0.247040194,4.85655802,4.85125377,4.85095105
39.902565,5.19615242,4.85581674,0.583382966,4.85551381,4.85025297,4.84994969
39.913057,5,4.85477699,0.381081375,4.85447349,4.84925451,4.84895066
39.923548,5,4.85374125,0.382437897,4.85343719,4.84825855,4.84795414
39.93404,4.58257569,4.85270928,-0.519743773,4.85240464,4.84726491,4.84695993
39.944532,4,4.85168111,-0.922865707,4.8513759,4.84627368,4.84596813
39.955023,4,4.85065678,-0.922310567,4.850351,4.84528495,4.84497882
39.965515,4,4.84963604,-0.921757039,4.84932968,4.84429852,4.84399182
39.976006,4.35889894,4.84861903,-0.699800031,4.84831209,4.84331457,4.8430073
39.986498,4.24264069,4.8476055,-0.777794839,4.84729798,4.84233292,4.84202507
39.99699,4.58257569,4.84659551,-0.513828581,4.84628741,4.84135365,4.84104522
40.007481,5.38516481,4.8455891,0.734558174,4.84528042,4.84037685,4.84006784
40.017973,5.19615242,4.84458603,0.592930341,4.84427677,4.83940233,4.83909274
40.028464,5.38516481,4.84358647,0.735920064,4.84327662,4.83843027,4.8381201
40.038956,5.19615242,4.84259016,0.594611016,4.84227974,4.83746048,4.83714973
40.049448,5.38516481,4.84159718,0.73727039,4.84128617,4.83649305,4.83618171
40.059939,5.29150262,4.84060757,0.671487193,4.84029597,4.83552806,4.83521613
40.070431,5.47722558,4.83962111,0.798501384,4.83930892,4.83456532,4.83425281
40.080922,5.65685425,4.83863796,0.904553088,4.83832518,4.83360502,4.83329192
40.091414,5.29150262,4.83765789,0.673679992,4.83734452,4.83264697,4.83233327
40.101906,4.89897949,4.83668096,0.249596721,4.836367,4.83169124,4.83137695
40.112397,4.79583152,4.83570724,-0.19968905,4.83539268,4.83073794,4.83042305
40.122889,4.58257569,4.83473651,-0.502156162,4.83442135,4.82978686,4.82947138
40.13338,5,4.83376892,0.407714463,4.83345317,4.82883819,4.82852212
40.143872,5.38516481,4.83280426,0.743209626,4.83248791,4.82789175,4.82757507
40.154364,4.89897949,4.8318426,0.259107866,4.83152565,4.8269476,4.82663033
40.164855,5.09901951,4.830884,0.517818031,4.83056645,4.82600585,4.82568798
40.175347,4,4.82992826,-0.911003982,4.8296101,4.82506631,4.82474784
40.185838,3.74165739,4.82897552,-1.04274548,4.82865676,4.82412915,4.82381007
40.19633,5.09901951,4.82802559,0.520570766,4.82770623,4.82319418,4.8228745
40.206822,3.87298335,4.82707854,-0.976777963,4.82675856,4.8222615,4.82194121
40.217313,4.79583152,4.82613442,-0.174077272,4.82581384,4.82133118,4.82101028
40.227805,5.09901951,4.82519304,0.523284312,4.82487185,4.82040304,4.82008153
40.238296,5,4.82425456,0.419220035,4.82393276,4.81947725,4.81915513
40.248788,4.47213595,4.82331878,-0.592606805,4.82299636,4.81855364,4.81823091
40.25928,4.89897949,4.82238576,0.276755707,4.82206273,4.81763229,4.81730894
40.269771,4.69041576,4.82145558,-0.361994233,4.82113194,4.81671327,4.8163893
40.280263,4.89897949,4.82052805,0.280091843,4.82020378,4.81579641,4.81547183
40.290754,3.31662479,4.8196033,-1.22596024,4.81927842,4.81488187,4.81455667
40.301246,5.91607978,4.81868117,1.04756795,4.81835566,4.81396949,4.81364367
40.311738,5.09901951,4.81776171,0.530337447,4.81743558,4.81305933,4.81273289
40.322229,5,4.81684499,0.427966132,4.81651824,4.81215149,4.81182442
40.332721,5.29150262,4.81593083,0.689617135,4.81560345,4.81124578,4.81091808
40.343212,5.09901951,4.81501938,0.53291663,4.81469138,4.81034237,4.81001405
40.353704,4.79583152,4.81411045,-0.135199593,4.81378182,4.80944108,4.80911213
40.364196,5.74456265,4.81320412,0.965069181,4.81287486,4.80854199,4.80821242
40.374687,5.38516481,4.81230046,0.756878029,4.81197057,4.8076452,4.80731499
40.385179,5.56776436,4.81139927,0.869692528,4.81106875,4.8067505,4.80641966
40.39567,4.89897949,4.81050072,0.297453807,4.81016956,4.80585809,4.80552661
40.406162,4.24264069,4.80960462,-0.752970074,4.80927283,4.80496777,4.80463566
40.416654,4.35889894,4.80871104,-0.670680326,4.80837861,4.80407963,4.80374688
40.427145,4.47213595,4.80782006,-0.579382521,4.80748699,4.80319375,4.80286036
40.437637,3.74165739,4.80693149,-1.03212117,4.80659778,4.80230995,4.80197592
40.448128,5.19615242,4.80604549,0.62458541,4.80571114,4.80142839,4.80109372
40.45862,4.47213595,4.80516187,-0.577083979,4.80482688,4.80054892,4.8002136
40.469112,5.83095189,4.80428072,1.01324784,4.80394508,4.79967159,4.79933563
40.479603,4.12310563,4.80340209,-0.824800865,4.8030658,4.7987965,4.79845988
40.490095,4,4.80252582,-0.895838053,4.80218888,4.79792346,4.7975862
40.500586,5.19615242,4.80165205,0.628092646,4.80131446,4.79705264,4.79671473
40.511078,4.79583152,4.80078061,-0.0703497558,4.80044237,4.79618387,4.79584531
40.52157,4.24264069,4.79991157,-0.746505784,4.79957268,4.79531723,4.79497801
40.532061,4.24264069,4.79904501,-0.745925144,4.79870546,4.7944528,4.79411292
40.542553,4.79583152,4.79818074,-0.0484687015,4.79784053,4.79359039,4.79324986
40.553044,4.47213595,4.79731892,-0.57024816,4.79697805,4.79273018,4.79238899
40.563536,4.89897949,4.79645938,0.320187616,4.79611785,4.79187199,4.79153014
40.574028,5.09901951,4.79560218,0.550833308,4.79525999,4.79101591,4.79067339
40.584519,5.29150262,4.7947474,0.704808639,4.79440455,4.790162,4.78981882
40.595011,5,4.79389487,0.453988025,4.79355136,4.7893101,4.78896625
40.605502,4.24264069,4.79304474,-0.741892212,4.79270056,4.78846036,4.78811585
40.615994,5.19615242,4.79219684,0.635575005,4.79185198,4.78761263,4.78726744
40.626486,4.24264069,4.79135123,-0.740749986,4.79100571,4.78676696,4.78642111
40.636977,5.19615242,4.79050799,0.636902215,4.7901618,4.78592345,4.78557693
40.647469,4.69041576,4.78966695,-0.315041574,4.78932008,4.78508192,4.78473472
40.65796,5.09901951,4.78882827,0.556948155,4.78848072,4.78424253,4.78389466
40.668452,5.09901951,4.78799176,0.557698623,4.78764354,4.78340512,4.78305656
40.678944,4.47213595,4.78715751,-0.561267807,4.78680861,4.78256975,4.78222052
40.689435,4.35889894,4.78632558,-0.653778734,4.785976,4.78173651,4.78138659
40.699927,5.38516481,4.7854958,0.774382983,4.78514554,4.78090522,4.78055462
40.710418,5,4.78466833,0.464038432,4.78431739,4.78007605,4.77972476
40.72091,4.24264069,4.783843,-0.735664541,4.78349137,4.77924882,4.77889685
40.731402,5.29150262,4.78301988,0.713079756,4.78266756,4.77842362,4.77807096
40.741893,4.79583152,4.78219904,0.116758209,4.78184603,4.77760051,4.77724716
40.752385,5.56776436,4.78138032,0.886782975,4.78102662,4.77677934,4.77642529
40.762876,4.35889894,4.78056386,-0.649357308,4.78020946,4.77596025,4.77560551
40.773368,5.19615242,4.77974949,0.645292902,4.7793944,4.77514308,4.77478765
40.78386,4.58257569,4.7789373,-0.443127076,4.77858151,4.77432791,4.77397178
40.794351,4.79583152,4.77812735,0.133057049,4.77777086,4.77351481,4.77315798
40.804843,5.09901951,4.77731947,0.567186078,4.77696228,4.77270362,4.77234608
40.815334,4.69041576,4.77651381,-0.293424693,4.77615592,4.77189448,4.77153625
40.825826,4.69041576,4.77571022,-0.292052146,4.77535162,4.77108724,4.7707283
40.836318,4.58257569,4.77490875,-0.438557929,4.77454945,4.77028197,4.76992233
40.846809,4.24264069,4.77410949,-0.729019067,4.77374948,4.76947875,4.76911839
40.857301,4.89897949,4.77331226,0.35449573,4.77295155,4.7686774,4.76831634
40.867792,4.69041576,4.77251722,-0.286533528,4.7721558,4.76787809,4.76751631
40.878284,5.38516481,4.77172421,0.783224489,4.77136207,4.76708065,4.76671816
40.888776,4.24264069,4.77093329,-0.726837395,4.77057043,4.76628515,4.76592194
40.899267,4.69041576,4.77014453,-0.282362829,4.76978095,4.76549167,4.76512774
40.909759,6.164414,4.76935777,1.18112499,4.76899348,4.76470005,4.7643354
40.92025,4.47213595,4.76857316,-0.544460476,4.76820815,4.76391042,4.76354505
40.930742,4.69041576,4.76779055,-0.278163241,4.76742481,4.76312265,4.76275656
40.941234,5.29150262,4.76700999,0.724218635,4.76664353,4.76233679,4.76196997
40.951725,5.19615242,4.76623156,0.655683509,4.76586437,4.76155292,4.76118538
40.962217,5.09901951,4.7654551,0.577550358,4.76508718,4.76077088,4.76040261
40.972708,5.19615242,4.76468075,0.656865035,4.7643121,4.75999082,4.75962182
40.9832,5.74456265,4.76390836,0.990279905,4.76353898,4.75921258,4.75884284
40.993692,4.12310563,4.76313799,-0.800020227,4.76276788,4.75843624,4.75806576
41.004183,4.89897949,4.76236971,0.369607591,4.76199887,4.75766185,4.75729063
41.014675,5,4.76160338,0.488258767,4.76123179,4.75688927,4.75651731
41.025166,5.83095189,4.76083912,1.03446256,4.76046679,4.75611863,4.75574594
41.035658,4.24264069,4.76007678,-0.71933031,4.75970371,4.7553498,4.75497636
41.04615,4.79583152,4.75931644,0.191089205,4.75894263,4.75458283,4.75420864
41.056641,3.16227766,4.75855815,-1.26343994,4.7581836,4.75381779,4.75344286
41.067133,4.79583152,4.75780178,0.195012174,4.75742647,4.75305453,4.75267885
41.077624,5.09901951,4.75704744,0.584783783,4.75667139,4.7522932,4.75191676
41.088116,5.09901951,4.756295,0.585426778,4.75591819,4.75153363,4.75115645
41.098608,4.24264069,4.75554452,-0.716173048,4.75516696,4.75077591,4.75039797
41.109099,5.65685425,4.75479607,0.949767436,4.75441775,4.75002009,4.74964139
41.119591,4.35889894,4.75404949,-0.628610009,4.75367041,4.74926602,4.74888657
41.130082,4.69041576,4.75330492,-0.250777113,4.75292508,4.74851385,4.74813363
41.140574,4.58257569,4.75256222,-0.412294218,4.75218162,4.74776343,4.74738245
41.151066,4.12310563,4.75182144,-0.792916022,4.75144008,4.74701482,4.74663307
41.161557,4.69041576,4.75108266,-0.246306521,4.75070053,4.74626809,4.74588557
41.172049,4.89897949,4.75034573,0.38553049,4.74996283,4.74552309,4.7451398
41.18254,5.09901951,4.74961077,0.591108062,4.7492271,4.74477995,4.74439589
41.193032,4.69041576,4.74887765,-0.241788942,4.74849321,4.74403854,4.74365371
41.203524,4.35889894,4.74814643,-0.623897017,4.74776122,4.74329891,4.7429133
41.214015,5.09901951,4.74741717,0.592960658,4.74703118,4.74256113,4.74217475
41.224507,4.24264069,4.74668973,-0.709964113,4.74630296,4.74182506,4.7414379
41.234998,4.58257569,4.74596424,-0.404213485,4.74557668,4.74109083,4.74070288
41.24549,5,4.74524055,0.504737011,4.74485221,4.7403583,4.73996956
41.255982,5.83095189,4.74451873,1.04232105,4.74412961,4.73962752,4.739238
41.266473,5.09901951,4.74379884,0.596003917,4.74340894,4.73889857,4.73850826
41.276965,4.47213595,4.74308075,-0.520523574,4.74269005,4.7381713,4.7377802
41.287456,4.79583152,4.74236457,0.231229227,4.74197308,4.73744584,4.73705394
41.297948,4.79583152,4.74165017,0.232768891,4.74125788,4.73672205,4.73632936
41.30844,5.09901951,4.74093761,0.598399455,4.74054453,4.736,4.73560651
41.318931,4.79583152,4.74022695,0.235806228,4.73983307,4.73527974,4.73488545
41.329423,5.47722558,4.73951805,0.858899021,4.73912337,4.73456113,4.73416604
41.339914,5,4.73881104,0.511066494,4.73841556,4.73384432,4.73344842
41.350406,4.58257569,4.73810578,-0.394373027,4.73770949,4.73312914,4.73273244
41.360898,4.12310563,4.73740233,-0.783770825,4.73700524,4.73241568,4.73201816
41.371389,6.164414,4.73670076,1.19486955,4.73630285,4.73170398,4.73130566
41.381881,5.74456265,4.73600091,1.00427174,4.7356022,4.73099391,4.73059478
41.392372,5.09901951,4.73530293,0.603089198,4.7349034,4.7302856,4.72988565
41.402864,5.83095189,4.73460667,1.04706505,4.73420633,4.72957892,4.72917814
41.413356,4.79583152,4.7339122,0.248835939,4.73351103,4.72887391,4.72847232
41.423847,4.69041576,4.73321957,-0.20689081,4.73281758,4.72817064,4.72776823
41.434339,4.58257569,4.73252864,-0.387237585,4.73212583,4.72746898,4.72706574
41.44483,5.56776436,4.73183955,0.91428924,4.73143592,4.72676905,4.72636499
41.455322,5,4.73115215,0.518505398,4.73074769,4.72607072,4.72566582
41.465814,4.24264069,4.73046651,-0.69844529,4.73006122,4.72537404,4.72496831
41.476305,5.38516481,4.72978269,0.809556744,4.72937656,4.72467907,4.72427251
41.486797,4.58257569,4.72910054,-0.382785637,4.72869358,4.72398568,4.72357829
41.497288,4.24264069,4.7284202,-0.696978845,4.7280124,4.723294,4.72288577
41.50778,5.09901951,4.72774153,0.609325848,4.72733289,4.72260389,4.72219481
41.518272,5.09901951,4.72706458,0.60988108,4.72665511,4.72191541,4.72150548
41.528763,5.19615242,4.72638943,0.685392586,4.72597911,4.72122861,4.72081784
41.539255,4.47213595,4.72571592,-0.503567243,4.72530476,4.72054337,4.72013175
41.549746,4.58257569,4.7250442,-0.377450001,4.72463218,4.7198598,4.71944734
41.560238,5.09901951,4.72437412,0.612082836,4.72396125,4.71917778,4.71876446
41.57073,4.58257569,4.72370574,-0.375672784,4.72329202,4.71849736,4.71808319
41.581221,4.69041576,4.72303912,-0.180619367,4.72262454,4.71781861,4.71740357
41.591713,4.24264069,4.72237412,-0.692627921,4.72195869,4.71714138,4.71672548
41.602204,4.69041576,4.72171088,-0.176904271,4.72129459,4.7164658,4.71604904
41.612696,4.79583152,4.72104926,0.273463466,4.7206321,4.71579174,4.71537412
41.623188,4.12310563,4.72038931,-0.772841304,4.71997128,4.71511926,4.71470077
41.633679,5.19615242,4.71973109,0.69023281,4.7193122,4.71444841,4.71402905
41.644171,4.47213595,4.71907448,-0.496929092,4.71865471,4.71377907,4.71335883
41.654662,4.69041576,4.71841959,-0.167343441,4.71799895,4.71311134,4.71269023
41.665154,4.47213595,4.71776629,-0.495611071,4.71734478,4.71244512,4.71202313
41.675646,5.29150262,4.71711464,0.757883884,4.71669225,4.71178044,4.71135757
41.686137,5.65685425,4.7164647,0.969736846,4.71604143,4.71111737,4.71069362
41.696629,5.19615242,4.71581633,0.693062832,4.71539218,4.71045578,4.71003114
41.70712,4.47213595,4.71516967,-0.492984493,4.71474462,4.70979578,4.70937026
41.717612,5.19615242,4.71452456,0.693994134,4.71409864,4.70913725,4.70871084
41.728104,5.65685425,4.71388109,0.971068052,4.71345427,4.70848025,4.70805294
41.738595,5.29150262,4.71323929,0.760436277,4.71281158,4.70782483,4.70739663
41.749087,4.47213595,4.71259905,-0.490370362,4.71217044,4.70717086,4.70674176
41.759578,4.47213595,4.71196047,-0.489718815,4.71153096,4.70651846,4.70608846
41.77007,4.12310563,4.71132344,-0.766953594,4.71089303,4.70586751,4.7054366
41.780562,5.09901951,4.71068801,0.623162503,4.7102567,4.70521805,4.70478624
41.791053,4.79583152,4.71005423,0.292877607,4.70962201,4.70457015,4.70413742
41.801545,3.87298335,4.70942198,-0.914570191,4.70898885,4.70392367,4.70349004
41.812036,4.58257569,4.70879138,-0.355268462,4.70835733,4.70327874,4.70284419
41.822528,5.29150262,4.70816229,0.763767199,4.70772733,4.70263523,4.70219976
41.83302,4.58257569,4.70753477,-0.353495516,4.7070989,4.70199319,4.7015568
41.843511,5.09901951,4.70690889,0.626187371,4.7064721,4.70135267,4.70091537
41.854003,4.58257569,4.70628451,-0.351722638,4.70584679,4.70071356,4.70027533
41.864494,4.89897949,4.70566175,0.439679131,4.70522311,4.70007597,4.69963681
41.874986,5.29150262,4.70504048,0.765808163,4.70460091,4.69943977,4.69899968
41.885478,5,4.70442076,0.543671995,4.70398026,4.69880502,4.69836399
41.895969,5.74456265,4.70380265,1.02017646,4.70336121,4.69817176,4.6977298
41.906461,5.09901951,4.70318601,0.629153004,4.70274364,4.69753989,4.69709699
41.916952,4.35889894,4.70257097,-0.58623547,4.70212766,4.6969095,4.69646566
41.927444,4.89897949,4.7019574,0.4438717,4.70151315,4.69628049,4.6958357
41.937936,5.47722558,4.70134535,0.880840633,4.70090016,4.69565289,4.69520716
41.948427,5.38516481,4.70073489,0.827302799,4.70028875,4.69502677,4.69458009
41.958919,4.79583152,4.70012588,0.309363294,4.69967879,4.694402,4.69395437
41.96941,5.19615242,4.69951843,0.704722633,4.69907039,4.6937787,4.69333011
41.979902,5,4.69891244,0.548714462,4.69846344,4.69315674,4.69270719
41.990394,5.65685425,4.69830794,0.97905378,4.69785799,4.69253617,4.69208566
42.000885,5.09901951,4.697705,0.633493891,4.69725409,4.69191706,4.69146558
42.011377,5.56776436,4.6971035,0.933092099,4.69665162,4.69129927,4.69084683
42.021868,4.24264069,4.69650353,-0.673693437,4.69605069,4.69068292,4.69022951
42.03236,4.69041576,4.695905,-0.0740893768,4.69545118,4.69006788,4.6896135
42.042852,4,4.69530793,-0.833851266,4.69485314,4.68945422,4.68899886
42.053343,4.58257569,4.6947124,-0.334868193,4.69425663,4.68884198,4.68838564
42.063835,5.83095189,4.69411828,1.066224,4.69366153,4.68823104,4.68777372
42.074326,5.56776436,4.69352568,0.935007319,4.69306795,4.68762151,4.68716321
42.084818,5,4.69293448,0.554134933,4.69247577,4.68701328,4.68655399
42.09531,4,4.69234473,-0.83207255,4.69188503,4.68640639,4.68594611
42.105801,4.12310563,4.69175649,-0.754089425,4.6912958,4.68580089,4.68533962
42.116293,4.24264069,4.69116963,-0.669723037,4.69070795,4.68519668,4.68473441
42.126784,4.12310563,4.69058427,-0.753311787,4.6901216,4.68459385,4.68413058
42.137276,4.35889894,4.69000029,-0.575414069,4.68953662,4.68399229,4.68352802
42.147768,4.69041576,4.68941775,0.0315913586,4.68895307,4.68339205,4.68292677
42.158259,6.08276253,4.68883668,1.18064637,4.68837099,4.68279317,4.68232689
42.168751,4.79583152,4.68825698,0.32798559,4.68779028,4.68219555,4.68172826
42.179242,5.09901951,4.68767875,0.641358533,4.68721104,4.6815993,4.68113098
42.189734,4.79583152,4.68710187,0.329741794,4.68663315,4.68100428,4.68053495
42.200226,5.38516481,4.68652641,0.835845919,4.68605667,4.68041056,4.6799402
42.210717,5.19615242,4.6859524,0.714282874,4.68548164,4.67981818,4.6793468
42.221209,5.47722558,4.68537973,0.889857202,4.68490795,4.67922703,4.67875463
42.2317,5.47722558,4.68480852,0.890178104,4.68433571,4.67863721,4.67816378
42.242192,4.69041576,4.68423864,0.078594668,4.6837648,4.67804862,4.67757415
42.252684,4.12310563,4.68367014,-0.748708566,4.68319527,4.67746129,4.67698578
42.263175,4.35889894,4.68310308,-0.569389267,4.68262717,4.67687528,4.67639873
42.273667,4.79583152,4.68253734,0.33659201,4.68206039,4.67629047,4.67581288
42.284158,4.47213595,4.68197303,-0.458079768,4.68149504,4.67570697,4.67522834
42.29465,4.24264069,4.68141003,-0.662396665,4.68093099,4.67512467,4.67464499
42.305142,4,4.68084839,-0.825135378,4.6803683,4.67454361,4.67406287
42.315633,4.24264069,4.68028817,-0.661549302,4.67980703,4.67396384,4.67348205
42.326125,5.91607978,4.67972924,1.11191301,4.67924705,4.67338525,4.6729024
42.336616,5.09901951,4.67917172,0.64795663,4.67868847,4.67280795,4.67232403
42.347108,4.24264069,4.67861549,-0.66028388,4.67813117,4.67223181,4.67174683
42.3576,4.47213595,4.6780606,-0.453789208,4.67757522,4.67165689,4.67117084
42.368091,4.69041576,4.6775071,0.113616282,4.67702065,4.67108324,4.67059612
42.378583,4.12310563,4.67695488,-0.744210491,4.67646736,4.67051074,4.67002255
42.389074,4.58257569,4.67640404,-0.306314129,4.67591544,4.6699395,4.66945023
42.399566,4.79583152,4.67585447,0.346377036,4.6753648,4.66936941,4.66887905
42.410058,5,4.67530622,0.569819074,4.67481546,4.66880051,4.66830907
42.420549,4.24264069,4.67475934,-0.657357326,4.6742675,4.66823285,4.66774032
42.431041,5.56776436,4.67421372,0.945278078,4.67372079,4.66766632,4.6671727
42.441532,4.89897949,4.67366945,0.474668339,4.67317543,4.66710103,4.66660631
42.452024,5.29150262,4.67312644,0.786368987,4.67263132,4.66653685,4.66604103
42.462516,4.24264069,4.67258472,-0.655701179,4.6720885,4.66597384,4.66547692
42.473007,4.47213595,4.67204435,-0.447111169,4.67154703,4.66541205,4.66491402
42.483499,4.89897949,4.67150522,0.476942622,4.67100679,4.66485137,4.66435223
42.49399,5.09901951,4.67096743,0.654256898,4.67046789,4.66429189,4.66379163
42.504482,4.69041576,4.67043086,0.141367959,4.66993021,4.6637335,4.66323214
42.514974,4.89897949,4.66989557,0.478627113,4.6693938,4.66317627,4.66267378
42.525465,4.35889894,4.66936161,-0.557191767,4.66885872,4.66262022,4.66211661
42.535957,4.12310563,4.66882886,-0.738730829,4.66832485,4.66206525,4.66156051
42.546448,4.47213595,4.66829743,-0.442901206,4.6677923,4.66151147,4.6610056
42.55694,4.89897949,4.66776721,0.480845372,4.66726095,4.66095876,4.66045175
42.567432,5,4.66723825,0.576855051,4.66673085,4.66040717,4.65989902
42.577923,5.09901951,4.66671059,0.657502032,4.66620205,4.65985674,4.65934745
42.588415,4.47213595,4.66618413,-0.440508995,4.66567445,4.65930737,4.65879694
42.598906,5.65685425,4.66565896,0.99558791,4.66514814,4.65875916,4.65824758
42.609398,4.24264069,4.66513499,-0.649995615,4.66462301,4.658212,4.65769926
42.61989,4.35889894,4.66461225,-0.552913469,4.66409912,4.65766593,4.65715203
42.630381,4.47213595,4.66409079,-0.438126507,4.66357651,4.657121,4.65660594
42.640873,5,4.66357051,0.580025419,4.66305507,4.6565771,4.65606089
42.651364,4.69041576,4.66305151,0.165421433,4.6625349,4.65603434,4.65551696
42.661856,4.24264069,4.66253368,-0.647991505,4.6620159,4.6554926,4.65497404
42.672348,5.29150262,4.66201706,0.79340126,4.66149812,4.65495193,4.6544322
42.682839,5.47722558,4.66150171,0.903174327,4.66098159,4.65441238,4.65389147
42.693331,5,4.66098752,0.582247786,4.66046622,4.65387384,4.65335174
42.703822,4.79583152,4.66047458,0.367908882,4.6599521,4.6533364,4.65281312
42.714314,4.35889894,4.65996279,-0.548692854,4.65943912,4.65279997,4.6522755
42.724806,4.35889894,4.6594522,-0.548227379,4.65892735,4.65226458,4.65173891
42.735297,5.29150262,4.65894286,0.795336259,4.65841681,4.65173028,4.65120342
42.745789,4,4.65843465,-0.811439863,4.6579074,4.65119697,4.6506689
42.75628,4.47213595,4.65792768,-0.431035644,4.65739923,4.65066474,4.65013547
42.766772,5.19615242,4.65742185,0.733982682,4.65689219,4.65013349,4.64960301
42.777264,4.24264069,4.65691719,-0.643643147,4.65638632,4.64960326,4.64907156
42.787755,5.09901951,4.65641375,0.665286224,4.65588168,4.6490741,4.64854118
42.798247,4.89897949,4.65591144,0.493019313,4.65537815,4.64854589,4.64801176
42.808738,5.47722558,4.65541035,0.906540252,4.65487583,4.64801875,4.64748339
42.81923,4.47213595,4.65491037,-0.427521242,4.65437463,4.64749256,4.64695596
42.829722,5,4.65441155,0.587867717,4.65387458,4.64696737,4.64642954
42.840213,4.47213595,4.65391393,-0.426354286,4.65337573,4.64644322,4.64590415
42.850705,3.87298335,4.65341742,-0.8834218,4.65287798,4.64592001,4.6453797
42.861196,5,4.65292211,0.589133169,4.65238143,4.64539783,4.64485627
42.871688,4.24264069,4.65242789,-0.640146239,4.65188597,4.64487658,4.64433377
42.88218,5,4.65193482,0.58997049,4.65139165,4.6443563,4.64381224
42.892671,4.58257569,4.65144293,-0.262425683,4.65089851,4.64383705,4.64329173
42.903163,4.58257569,4.65095214,-0.261488891,4.65040645,4.64331871,4.64277213
42.913654,4.69041576,4.65046251,0.19988308,4.64991557,4.64280138,4.64225353
42.924146,5.09901951,4.64997397,0.670108602,4.64942576,4.64228495,4.64173583
42.934638,5.09901951,4.64948656,0.670472187,4.64893708,4.64176948,4.64121908
42.945129,4.47213595,4.64900031,-0.420552444,4.64844956,4.64125499,4.64070332
42.955621,4.79583152,4.64851514,0.383818168,4.6479631,4.64074141,4.64018844
42.966112,4.69041576,4.64803112,0.205875297,4.6474778,4.6402288,4.63967455
42.976604,4.58257569,4.64754817,-0.254896991,4.64699357,4.63971708,4.63916154
42.987096,5.19615242,4.64706633,0.741003438,4.64651043,4.63920629,4.63864945
42.997587,4.69041576,4.64658563,0.209356455,4.64602844,4.63869646,4.63813832
43.008079,4.79583152,4.646106,0.386943829,4.6455475,4.63818751,4.63762806
43.01857,5.29150262,4.6456275,0.803663562,4.64506771,4.63767951,4.63711876
43.029062,4.12310563,4.64515006,-0.722526421,4.64458895,4.63717238,4.63661031
43.039554,4.89897949,4.6446737,0.504287404,4.64411128,4.63666614,4.63610276
43.050045,4.47213595,4.64419848,-0.414804198,4.64363474,4.63616086,4.63559615
43.060537,3.87298335,4.64372429,-0.877918531,4.64315924,4.63565642,4.63509038
43.071028,6,4.64325124,1.16479559,4.64268485,4.63515292,4.63458555
43.08152,4,4.64277921,-0.801735127,4.6422115,4.63465025,4.63408154
43.092012,4.35889894,4.64230826,-0.53236202,4.64173922,4.63414847,4.63357842
43.102503,4.35889894,4.64183843,-0.531920566,4.64126804,4.6336476,4.63307621
43.112995,4.47213595,4.64136962,-0.411380199,4.64079789,4.63314756,4.63257482
43.123486,4.89897949,4.64090192,0.508013347,4.64032884,4.63264844,4.63207433
43.133978,4.79583152,4.64043524,0.394203347,4.63986081,4.63215012,4.63157466
43.14447,4.12310563,4.63996962,-0.71893254,4.63939383,4.63165267,4.63107584
43.154961,5,4.6395051,0.600412273,4.63892795,4.63115611,4.63057792
43.165453,4.58257569,4.63904159,-0.237625539,4.63846307,4.63066035,4.63008079
43.175944,5.29150262,4.63857917,0.808036786,4.63799928,4.63016549,4.62958454
43.186436,4.89897949,4.63811776,0.510746242,4.63753649,4.62967141,4.62908908
43.196928,4,4.63765739,-0.798534528,4.63707474,4.62917817,4.62859445
43.207419,5.09901951,4.63719811,0.679574429,4.63661407,4.6286858,4.62810069
43.217911,4.35889894,4.63673982,-0.527106135,4.63615439,4.62819421,4.62760771
43.228402,4.12310563,4.63628261,-0.716363725,4.63569579,4.62770349,4.62711558
43.238894,5.29150262,4.63582639,0.809738371,4.63523817,4.62721354,4.62662422
43.249386,4.24264069,4.6353712,-0.626682149,4.63478158,4.62672439,4.62613366
43.259877,5.29150262,4.63491709,0.810299659,4.63432605,4.6262361,4.62564396
43.270369,5.38516481,4.63446395,0.86642995,4.6338715,4.62574857,4.625155
43.28086,5.56776436,4.63401188,0.966308691,4.63341801,4.62526188,4.62466688
43.291352,4.35889894,4.63356078,-0.5240819,4.63296549,4.62477593,4.6241795
43.301844,4.24264069,4.6331107,-0.624876,4.63251398,4.62429077,4.62369291
43.312335,3.60555128,4.63266168,-1.01346456,4.63206352,4.62380644,4.62320714
43.322827,3.60555128,4.63221363,-1.01324348,4.63161403,4.62332285,4.62272209
43.333318,4.89897949,4.63176662,0.516926359,4.63116558,4.62284007,4.62223787
43.34381,4.24264069,4.63132059,-0.623441977,4.6307181,4.62235802,4.62175436
43.354302,4.58257569,4.63087555,-0.219772283,4.63027161,4.62187673,4.62127161
43.364793,4.47213595,4.63043156,-0.397863802,4.62982616,4.62139625,4.62078966
43.375285,4.24264069,4.62998853,-0.622372748,4.62938166,4.62091648,4.62030842
43.385776,4.47213595,4.62954653,-0.396750014,4.62893819,4.62043751,4.61982797
43.396268,5.47722558,4.62910548,0.920934358,4.62849567,4.61995924,4.61934822
43.40676,4.79583152,4.62866543,0.408859502,4.62805414,4.61948171,4.6188692
43.417251,5,4.62822641,0.609732394,4.62761363,4.61900496,4.61839096
43.427743,5.19615242,4.62778833,0.753899258,4.62717406,4.61852891,4.61791341
43.438234,4.24264069,4.62735128,-0.620250427,4.62673552,4.61805363,4.61743662
43.448726,3.60555128,4.62691517,-1.0106255,4.62629791,4.61757902,4.61696051
43.459218,4.24264069,4.62648004,-0.619547699,4.62586127,4.61710514,4.61648512
43.469709,4.79583152,4.62604593,0.412050479,4.62542565,4.61663202,4.61601048
43.480201,4.69041576,4.62561275,0.254564355,4.62499095,4.61615957,4.6155365
43.490692,4.69041576,4.62518059,0.255411773,4.62455727,4.61568787,4.61506327
43.501184,4.79583152,4.62474935,0.413620804,4.62412451,4.61521682,4.61459069
43.511676,4.47213595,4.62431909,-0.390106569,4.62369271,4.61474648,4.6141188
43.522167,4.58257569,4.62388984,-0.203258802,4.62326192,4.61427687,4.61364765
43.532659,4.24264069,4.6234615,-0.617106812,4.62283205,4.61380791,4.61317713
43.54315,4.79583152,4.62303418,0.415689001,4.62240317,4.61333967,4.61270734
43.553642,4.58257569,4.62260777,-0.200080176,4.62197521,4.61287208,4.61223818
43.564134,4.58257569,4.62218233,-0.199014146,4.6215482,4.61240516,4.61176969
43.574625,4,4.62175788,-0.78851625,4.62112219,4.61193895,4.61130191
43.585117,4.79583152,4.62133434,0.417728596,4.62069709,4.61147337,4.61083475
43.595608,3.31662479,4.6209118,-1.14205386,4.62027297,4.6110085,4.61036829
43.6061,4.79583152,4.62049018,0.418737801,4.61984976,4.61054424,4.60990244
43.616592,5.29150262,4.6200695,0.819410228,4.6194275,4.61008064,4.60943724
43.627083,4.69041576,4.61964981,0.266018697,4.61900621,4.60961773,4.60897273
43.637575,4.35889894,4.61923103,-0.510227487,4.61858583,4.60915542,4.60850881
43.648066,4.35889894,4.61881324,-0.509817902,4.61816643,4.60869379,4.60804557
43.658558,4.12310563,4.61839635,-0.703768939,4.61774793,4.60823276,4.60758292
43.66905,4.58257569,4.6179804,-0.188161373,4.61733037,4.60777237,4.6071209
43.679541,3.60555128,4.61756543,-1.00598914,4.61691378,4.60731264,4.60665954
43.690033,3.46410162,4.61715136,-1.07380154,4.61649808,4.6068535,4.60619875
43.700524,4.69041576,4.61673827,0.271435976,4.61608335,4.60639501,4.60573863
43.711016,4,4.61632608,-0.785064378,4.61566952,4.60593711,4.60527907
43.721508,5.19615242,4.61591482,0.761733288,4.61525662,4.60547981,4.60482011
43.731999,4.35889894,4.61550454,-0.506562525,4.61484468,4.60502316,4.6043618
43.742491,5.09901951,4.61509515,0.695646727,4.61443363,4.60456707,4.60390405
43.752982,4.47213595,4.61468673,-0.377558963,4.61402355,4.60411162,4.60344692
43.763474,5.29150262,4.6142792,0.822935857,4.61361435,4.60365673,4.60299035
43.773966,4.47213595,4.6138726,-0.376479274,4.61320607,4.60320242,4.60253435
43.784457,4,4.61346697,-0.783241321,4.61279876,4.60274875,4.60207898
43.794949,3.87298335,4.61306222,-0.860278373,4.61239233,4.60229561,4.60162414
43.80544,4.24264069,4.61265845,-0.608290851,4.61198686,4.60184309,4.60116992
43.815932,4.47213595,4.61225556,-0.374325529,4.61158227,4.6013911,4.60071622
43.826424,4.12310563,4.61185359,-0.699105117,4.61117859,4.60093968,4.60026308
43.836915,3.46410162,4.61145259,-1.0711447,4.61077587,4.60048887,4.59981054
43.847407,4.35889894,4.61105247,-0.502148906,4.61037404,4.60003857,4.59935851
43.857898,4.24264069,4.61065331,-0.606640439,4.60997315,4.59958887,4.59890708
43.86839,4.89897949,4.61025503,0.537330859,4.60957314,4.59913969,4.59845615
43.878882,5.47722558,4.60985768,0.93132588,4.60917405,4.59869105,4.59800576
43.889373,3.46410162,4.60946128,-1.07021478,4.60877591,4.59824299,4.59755594
43.899865,5.19615242,4.60906577,0.7662158,4.60837864,4.59779544,4.59710662
43.910356,4.79583152,4.60867121,0.432620283,4.60798233,4.59734846,4.59665787
43.920848,4.69041576,4.60827754,0.286597663,4.60758689,4.59690197,4.59620961
43.93134,5.19615242,4.60788478,0.766986075,4.60719236,4.596456,4.59576186
43.941831,4,4.60749298,-0.779418362,4.60679878,4.5960106,4.59531467
43.952323,4.89897949,4.60710206,0.540256812,4.60640608,4.59556568,4.59486795
43.962814,4.79583152,4.6067121,0.434878633,4.60601432,4.59512132,4.59442178
43.973306,4.24264069,4.60632301,-0.603060799,4.60562344,4.59467742,4.59397607
43.983798,3.60555128,4.60593485,-1.00019177,4.60523347,4.59423403,4.59353086
43.994289,4.58257569,4.60554764,-0.151564973,4.60484444,4.59379118,4.59308619
44.004781,5.65685425,4.6051613,1.02552082,4.60445629,4.59334879,4.59264196
44.015272,5.09901951,4.60477593,0.703024598,4.60406909,4.59290693,4.59219827
44.025764,4.35889894,4.60439143,-0.495471987,4.60368276,4.59246552,4.59175501
44.036256,4.89897949,4.60400786,0.543112907,4.60329735,4.5920246,4.59131224
44.046747,4.58257569,4.60362523,-0.145084593,4.60291288,4.5915842,4.59086998
44.057239,5.19615242,4.60324349,0.770005798,4.60252929,4.59114424,4.59042815
44.06773,4.35889894,4.60286271,-0.493926884,4.60214664,4.59070479,4.58998683
44.078222,3.16227766,4.60248281,-1.20008548,4.60176487,4.59026577,4.58954593
44.088714,4.79583152,4.60210383,0.440145084,4.60138402,4.58982722,4.58910548
44.099205,5.09901951,4.6017258,0.705190548,4.60100411,4.58938917,4.58866554
44.109697,5.19615242,4.60134867,0.771235215,4.60062509,4.58895153,4.588226
44.120188,5.65685425,4.60097248,1.02756108,4.60024701,4.58851439,4.58778694
44.13068,4.47213595,4.60059719,-0.358414894,4.59986981,4.58807765,4.58734829
44.141172,4.35889894,4.60022282,-0.491247268,4.59949354,4.58764137,4.58691008
44.151663,4.12310563,4.59984941,-0.690466355,4.59911821,4.58720556,4.58647234
44.162155,4.69041576,4.59947689,0.301560717,4.59874376,4.58677015,4.58603499
44.172646,4.24264069,4.59910534,-0.597046606,4.59837028,4.58633522,4.58559811
44.183138,5.19615242,4.59873467,0.772928036,4.59799767,4.58590067,4.5851616
44.19363,4.79583152,4.59836494,0.444372124,4.59762599,4.58546655,4.58472552
44.204121,5,4.59799617,0.63403772,4.59725527,4.58503289,4.58428989
44.214613,4.69041576,4.5976283,0.304610345,4.59688543,4.5845996,4.58385463
44.225104,5,4.59726139,0.634616897,4.59651656,4.58416677,4.58341981
44.235596,4.35889894,4.59689539,-0.487848796,4.59614858,4.58373431,4.58298536
44.246088,5.09901951,4.59653032,0.708864719,4.59578153,4.58330226,4.5825513
44.256579,4.35889894,4.59616623,-0.487100901,4.59541544,4.58287064,4.58211768
44.267071,4.47213595,4.59580304,-0.351663316,4.59505025,4.58243939,4.5816844
44.277562,3.87298335,4.59544083,-0.849974991,4.59468604,4.58200857,4.58125156
44.288054,4.24264069,4.59507953,-0.593665598,4.59432272,4.58157809,4.58081905
44.298546,4.58257569,4.59471917,-0.110197457,4.59396034,4.58114801,4.58038692
44.309037,5.38516481,4.5943598,0.889272178,4.59359893,4.58071834,4.57995521
44.319529,5,4.59400134,0.637180238,4.59323844,4.58028902,4.57952383
44.33002,4.89897949,4.59364388,0.552571815,4.59287892,4.57986011,4.57909285
44.340512,4.89897949,4.59328733,0.552894347,4.59252032,4.57943152,4.57866219
44.351004,4.79583152,4.59293174,0.450443989,4.59216266,4.57900331,4.57823189
44.361495,5.38516481,4.59257714,0.890273928,4.59180599,4.57857549,4.57780199
44.371987,4.69041576,4.59222347,0.313356486,4.59145025,4.578148,4.5773724
44.382478,4.58257569,4.5918708,-0.0964111508,4.59109549,4.5777209,4.57694319
44.39297,4.35889894,4.59151907,-0.48230709,4.59074166,4.57729411,4.57651429
44.403462,4.69041576,4.59116831,0.315035629,4.5903888,4.57686767,4.57608572
44.413953,5.47722558,4.59081856,0.941491909,4.59003693,4.57644161,4.57565753
44.424445,5,4.59046975,0.639945503,4.58968601,4.57601586,4.57522963
44.434936,4.35889894,4.59012196,-0.480856546,4.58933608,4.57559047,4.5748021
44.445428,5.09901951,4.58977512,0.713613616,4.58898711,4.57516538,4.57437485
44.45592,5.29150262,4.58942927,0.837898176,4.58863911,4.57474062,4.57394792
44.466411,5.56776436,4.58908444,0.989282528,4.58829213,4.57431622,4.57352135
44.476903,4.58257569,4.58874058,-0.0785167702,4.5879461,4.57389211,4.57309505
44.487394,4.35889894,4.58839775,-0.479060334,4.5876011,4.57346834,4.57266909
44.497886,4.79583152,4.58805589,0.455824129,4.58725705,4.57304486,4.5722434
44.508378,4.12310563,4.58771503,-0.68162263,4.58691401,4.57262168,4.57181801
44.518869,5,4.58737523,0.642358757,4.58657201,4.57219885,4.57139296
44.529361,5.09901951,4.5870364,0.71552995,4.58623098,4.57177627,4.57096816
44.539852,5.65685425,4.58669863,1.03448326,4.58589099,4.57135404,4.57054369
44.550344,4.35889894,4.58636186,-0.476930723,4.58555199,4.57093206,4.57011946
44.560836,4.12310563,4.58602611,-0.680382603,4.58521401,4.57051038,4.56969552
44.571327,4.35889894,4.58569143,-0.476227351,4.58487709,4.57008901,4.56927189
44.581819,3.74165739,4.58535776,-0.918531642,4.58454117,4.5696679,4.5688485
44.59231,4.47213595,4.58502517,-0.335989904,4.58420631,4.5692471,4.56842541
44.602802,4.58257569,4.5846936,-0.0460206674,4.58387247,4.56882653,4.56800256
44.613294,5.29150262,4.58436308,0.840915895,4.58353967,4.56840624,4.56757996
44.623785,4.58257569,4.58403365,-0.0381832412,4.58320796,4.56798626,4.56715767
44.634277,4.12310563,4.58370527,-0.678674916,4.58287728,4.5675665,4.56673559
44.644768,5.19615242,4.58337798,0.782799106,4.58254768,4.56714705,4.5663138
44.65526,4.24264069,4.58305175,-0.583447564,4.58221913,4.56672781,4.56589222
44.665752,4.89897949,4.5827266,0.562363662,4.58189166,4.56630882,4.56547088
44.676243,4.35889894,4.58240257,-0.472761702,4.5815653,4.56589013,4.56504982
44.686735,4.89897949,4.58207961,0.562938606,4.58123999,4.56547164,4.56462896
44.697226,4.24264069,4.58175779,-0.582337617,4.58091581,4.56505343,4.56420838
44.707718,5.29150262,4.58143704,0.84265389,4.58059271,4.56463543,4.56378798
44.71821,4.58257569,4.58111742,0.038187363,4.58027071,4.56421766,4.56336781
44.728701,4.89897949,4.58079895,0.564074936,4.57994986,4.56380016,4.5629479
44.739193,4.69041576,4.58048159,0.331563225,4.5796301,4.56338285,4.56252817
44.749684,6.08276253,4.58016539,1.22580469,4.5793115,4.5629658,4.56210869
44.760176,4.24264069,4.57985032,-0.580697538,4.57899401,4.56254894,4.56168939
44.770668,4.35889894,4.5795364,-0.469720614,4.57867767,4.56213229,4.56127029
44.781159,4.12310563,4.57922367,-0.675365122,4.57836251,4.5617159,4.56085144
44.791651,4.12310563,4.57891209,-0.675134405,4.57804849,4.56129968,4.56043274
44.802142,4.35889894,4.57860172,-0.468724626,4.57773566,4.56088371,4.56001428
44.812634,4.58257569,4.57829251,0.0654460741,4.57742399,4.56046789,4.55959598
44.823126,4.24264069,4.57798449,-0.579088772,4.5771135,4.56005228,4.55917787
44.833617,4.69041576,4.57767772,0.335764865,4.57680424,4.55963691,4.55875998
44.844109,5.29150262,4.57737213,0.845062422,4.57649615,4.55922169,4.55834223
44.8546,4.24264069,4.57706779,-0.578296726,4.57618932,4.5588067,4.5579247
44.865092,5.19615242,4.57676466,0.787011919,4.57588367,4.55839185,4.55750731
44.875584,4.79583152,4.57646278,0.468368172,4.57557926,4.55797719,4.55709009
44.886075,4.89897949,4.57616218,0.568170138,4.57527613,4.55756274,4.55667308
44.896567,4.58257569,4.57586282,0.0819321477,4.57497422,4.55714843,4.55625619
44.907058,5.56776436,4.57556476,0.996092165,4.57467361,4.55673434,4.5558395
44.91755,5.09901951,4.57526796,0.723706813,4.57437424,4.55632037,4.55542293
44.928042,4.69041576,4.57497246,0.339769476,4.57407616,4.55590657,4.55500651
44.938533,4.69041576,4.5746783,0.340202086,4.57377941,4.55549296,4.55459029
44.949025,5.09901951,4.57438543,0.724316287,4.57348394,4.55507948,4.55417417
44.959516,4,4.57409392,-0.757689858,4.57318982,4.55466619,4.55375823
44.970008,4.12310563,4.57380373,-0.671340527,4.572897,4.55425302,4.5533424
44.9805,4,4.57351489,-0.757307661,4.57260554,4.55383999,4.5529267
44.990991,4.35889894,4.57322745,-0.462956272,4.57231545,4.55342714,4.55251117
45.001483,4.12310563,4.57294137,-0.670697953,4.57202671,4.5530144,4.55209574
45.011974,4.69041576,4.57265671,0.343160388,4.57173938,4.55260183,4.55168047
45.022466,4.12310563,4.57237343,-0.670274423,4.57145342,4.55218936,4.55126528
45.032958,3.46410162,4.57209157,-1.05261102,4.57116888,4.55177702,4.55085021
45.043449,5.56776436,4.57181117,0.997974543,4.57088578,4.55136485,4.5504353
45.053941,4,4.5715322,-0.755997489,4.5706041,4.55095276,4.55002046
45.064432,4.58257569,4.57125472,0.106400055,4.57032389,4.55054083,4.54960576
45.074924,4.35889894,4.5709787,-0.460521176,4.57004513,4.55012898,4.54919114
45.085416,4.24264069,4.57070417,-0.572768259,4.56976785,4.54971725,4.54877661
45.095907,4.12310563,4.57043117,-0.668824002,4.5694921,4.54930566,4.54836223
45.106399,4.35889894,4.57015968,-0.459631083,4.56921783,4.54889414,4.5479479
45.11689,5,4.56988975,0.655827912,4.56894512,4.54848277,4.5475337
45.127382,5.09901951,4.56962136,0.727597523,4.56867393,4.54807146,4.54711955
45.137874,5.19615242,4.56935454,0.791705679,4.56840431,4.54766025,4.54670548
45.148365,4.35889894,4.56908934,-0.458465264,4.56813629,4.54724917,4.54629154
45.158857,5.19615242,4.56882573,0.792039578,4.56786985,4.54683814,4.54587763
45.169348,4.47213595,4.56856377,-0.310528284,4.56760505,4.54642724,4.54546384
45.17984,5,4.56830343,0.657036199,4.56734185,4.54601638,4.54505008
45.190332,4.47213595,4.56804476,-0.309691469,4.56708031,4.5456056,4.54463639
45.200823,4.35889894,4.5677878,-0.457043604,4.56682047,4.54519495,4.54422281
45.211315,5,4.56753252,0.657622599,4.56656229,4.54478432,4.54380925
45.221806,4.47213595,4.56727898,-0.308452636,4.56630586,4.54437381,4.54339578
45.232298,4.35889894,4.56702717,-0.456210726,4.56605112,4.54396333,4.54298233
45.24279,4.69041576,4.56677712,0.351622862,4.56579815,4.54355292,4.54256893
45.253281,5.38516481,4.56652889,0.904785014,4.56554696,4.5431426,4.54215562
45.263773,4.12310563,4.56628243,-0.665715261,4.56529756,4.5427323,4.54174232
45.274264,3.74165739,4.56603784,-0.90795399,4.56504999,4.5423221,4.54132909
45.284756,4.79583152,4.56579507,0.479621159,4.56480424,4.54191191,4.54091587
45.295248,4,4.56555418,-0.75203336,4.56456035,4.54150177,4.54050268
45.305739,4.47213595,4.56531521,-0.305252766,4.56431837,4.54109172,4.54008957
45.316231,3.87298335,4.56507814,-0.831922347,4.56407828,4.54068167,4.53967644
45.326722,4.35889894,4.56484304,-0.45381064,4.56384015,4.5402717,4.53926338
45.337214,4.12310563,4.56460989,-0.664457876,4.56360395,4.53986172,4.5388503
45.347706,5,4.56437875,0.660016099,4.56336974,4.53945178,4.53843724
45.358197,4.89897949,4.56414965,0.578644827,4.56313757,4.53904191,4.53802423
45.368689,4.24264069,4.56392258,-0.566817337,4.56290741,4.53863203,4.5376112
45.37918,4.89897949,4.56369761,0.579035295,4.56267934,4.53822221,4.53719822
45.389672,5.38516481,4.56347473,0.906471222,4.56245334,4.53781237,4.5367852
45.400164,4.89897949,4.56325399,0.579418242,4.56222947,4.53740255,4.53637219
45.410655,4.58257569,4.56303543,0.139786509,4.56200776,4.53699278,4.53595922
45.421147,4.58257569,4.56281904,0.140558363,4.56178822,4.53658299,4.5355462
45.431638,3.87298335,4.5626049,-0.830434558,4.56157091,4.53617324,4.53513322
45.44213,4.89897949,4.562393,0.580160743,4.56135582,4.53576346,4.53472019
45.452622,5,4.56218338,0.661677125,4.561143,4.53535368,4.53430715
45.463113,4.79583152,4.56197611,0.483585998,4.56093251,4.53494394,4.53389413
45.473605,4.79583152,4.56177116,0.48379785,4.56072434,4.53453416,4.53348105
45.484096,4,4.56156863,-0.749378828,4.56051856,4.53412441,4.53306799
45.494588,4.12310563,4.56136849,-0.662014251,4.56031517,4.53371461,4.53265486
45.50508,3.87298335,4.56117082,-0.829570655,4.56011422,4.5333048,4.53224171
45.515571,4.89897949,4.56097565,0.581380971,4.55991577,4.53289501,4.53182856
45.526063,5.09901951,4.560783,0.733646042,4.55971981,4.53248517,4.53141534
45.536554,4.79583152,4.56059293,0.485014014,4.55952642,4.53207534,4.53100212
45.547046,4.47213595,4.56040545,-0.297101823,4.55933561,4.53166545,4.53058882
45.557538,5.19615242,4.56022061,0.797453328,4.55914743,4.53125553,4.53017548
45.568029,4.12310563,4.56003848,-0.661008966,4.55896193,4.53084562,4.52976213
45.578521,4.24264069,4.55985905,-0.563221419,4.55877913,4.53043563,4.52934869
45.589012,4,4.55968241,-0.748119251,4.5585991,4.53002565,4.52893524
45.599504,4.69041576,4.55950857,0.36181099,4.55842184,4.52961559,4.5285217
45.609996,4.69041576,4.55933758,0.362047212,4.55824743,4.52920549,4.52810809
45.620487,4.24264069,4.5591695,-0.562608934,4.55807591,4.52879538,4.52769446
45.630979,4.69041576,4.55900435,0.362507113,4.55790731,4.52838519,4.52728073
45.64147,5.09901951,4.55884221,0.734967551,4.5577417,4.52797498,4.52686696
45.651962,4.89897949,4.5586831,0.583349286,4.5575791,4.52756468,4.52645309
45.662454,4.47213595,4.55852707,-0.293923653,4.55741957,4.52715432,4.52603914
45.672945,5,4.55837471,0.66454894,4.55726369,4.52674394,4.52562516
45.683437,5.38516481,4.55822501,0.909362304,4.55711046,4.52633346,4.52521105
45.693928,5.47722558,4.55807856,0.958721551,4.55696047,4.52592295,4.52479691
45.70442,4.58257569,4.5579354,0.156972275,4.55681374,4.52551233,4.52438263
45.714912,4.69041576,4.55779559,0.364170528,4.55667034,4.52510165,4.52396827
45.725403,4.35889894,4.55765919,-0.445825356,4.55653035,4.52469093,4.52355386
45.735895,3.31662479,4.55752625,-1.11395756,4.55639379,4.52428009,4.52313931
45.746386,4.47213595,4.55739683,-0.291994655,4.55626075,4.52386921,4.5227247
45.756878,4.89897949,4.55727099,0.584558377,4.55613125,4.52345821,4.52230995
45.76737,4.58257569,4.55714879,0.159458167,4.55600539,4.52304712,4.5218951
45.777861,4.24264069,4.5570303,-0.56070457,4.55588322,4.52263599,4.52148018
45.788353,4.35889894,4.55691557,-0.444990594,4.55576479,4.52222472,4.52106511
45.798844,4.89897949,4.55680469,0.584957091,4.55565019,4.5218134,4.52064997
45.809336,4.12310563,4.55669769,-0.658477082,4.55553947,4.52140195,4.52023468
45.819828,4.69041576,4.55659467,0.365815654,4.55543269,4.52099039,4.51981926
45.830319,4.79583152,4.55649569,0.489219616,4.55532995,4.52057877,4.51940377
45.840811,4.69041576,4.55640082,0.366080515,4.55523129,4.52016701,4.51898811
45.851302,4,4.55631014,-0.745862008,4.55513681,4.51975518,4.51857236
45.861794,4.24264069,4.55622371,-0.559984837,4.55504656,4.5193432,4.51815644
45.872286,5.09901951,4.55614161,0.736802485,4.55496063,4.51893111,4.51774039
45.882777,4.69041576,4.55606394,0.366540335,4.5548791,4.51851894,4.51732425
45.893269,4.79583152,4.55599076,0.489735399,4.55480205,4.51810661,4.51690793
45.90376,4.89897949,4.55592217,0.585710951,4.55472957,4.5176942,4.5164915
45.914252,5.65685425,4.55585823,1.04928357,4.55466172,4.51728162,4.5160749
45.924744,5,4.55579904,0.666484026,4.55459861,4.51686892,4.51565814
45.935235,4.47213595,4.5557447,-0.289151769,4.55454032,4.51645613,4.51524128
45.945727,5.19615242,4.55569528,0.800285661,4.55448694,4.51604317,4.51482422
45.956218,4.58257569,4.55565089,0.164087785,4.55443857,4.51563012,4.51440705
45.96671,4.58257569,4.55561162,0.164207417,4.5543953,4.51521688,4.51398968
45.977202,4.58257569,4.55557756,0.164311089,4.55435722,4.51480351,4.51357215
45.987693,4.89897949,4.55554882,0.586029575,4.55432445,4.51439003,4.51315449
45.998185,3.87298335,4.5555255,-0.826161095,4.55429707,4.51397637,4.51273663
46.008676,4.79583152,4.55550771,0.490228331,4.5542752,4.5135626,4.51231864
46.019168,5,4.55549554,0.666711675,4.55425895,4.51314864,4.51190044
46.02966,4.79583152,4.55548912,0.490247285,4.55424842,4.51273453,4.51148206
46.040151,4.35889894,4.55548856,-0.443384275,4.55424372,4.5123203,4.51106355
46.050643,4.69041576,4.55549397,0.367317017,4.55424498,4.51190587,4.51064482
46.061134,4.35889894,4.55550547,-0.443403344,4.55425231,4.51149133,4.51022594
46.071626,5.29150262,4.55552319,0.857892439,4.55426584,4.51107657,4.50980684
46.082118,3.87298335,4.55554724,-0.826174253,4.55428569,4.51066166,4.50938755
46.092609,4.35889894,4.55557776,-0.44348486,4.55431199,4.51024661,4.50896811
46.103101,4,4.55561489,-0.745395794,4.55434486,4.50983136,4.50854843
46.113592,4.58257569,4.55565875,0.164063854,4.55438445,4.50941597,4.5081286
46.124084,4,4.55570948,-0.745459243,4.5544309,4.50900036,4.50770853
46.134576,5.09901951,4.55576724,0.737056495,4.55448435,4.50858457,4.50728826
46.145067,3.46410162,4.55583215,-1.0448591,4.55454494,4.50816865,4.50686782
46.155559,4.47213595,4.55590438,-0.28942775,4.55461282,4.5077525,4.50644714
46.16605,4.79583152,4.55598407,0.489742233,4.55468814,4.5073362,4.50602629
46.176542,4.69041576,4.55607139,0.366530172,4.55477108,4.50691968,4.50560518
46.187034,3.87298335,4.55616651,-0.826548946,4.55486179,4.50650296,4.50518386
46.197525,4.79583152,4.55626957,0.48945067,4.55496042,4.5060861,4.50476237
46.208017,4.12310563,4.55638076,-0.658236382,4.55506717,4.50566899,4.50434061
46.218508,4.79583152,4.55650025,0.489214959,4.55518219,4.50525173,4.50391867
46.229,5.19615242,4.55662823,0.799702565,4.55530568,4.50483422,4.50349646
46.239492,5,4.55676488,0.665759054,4.55543782,4.50441652,4.50307403
46.249983,4.89897949,4.55691038,0.584866742,4.55557879,4.50399864,4.5026514
46.260475,3.60555128,4.55706495,-0.975455623,4.5557288,4.50358052,4.50222851
46.270966,4.35889894,4.55722876,-0.445342359,4.55588804,4.50316223,4.50180541
46.281458,4.12310563,4.55740205,-0.659011705,4.55605674,4.50274369,4.50138204
46.29195,4.12310563,4.55758502,-0.659150513,4.5562351,4.50232493,4.50095843
46.302441,3.46410162,4.55777788,-1.04578978,4.55642332,4.50190599,4.50053461
46.312933,3.87298335,4.55798087,-0.827645772,4.55662165,4.50148679,4.50011051
46.323424,4.69041576,4.5581942,0.363622829,4.5568303,4.50106741,4.4996862
46.333916,3.16227766,4.55841814,-1.18158389,4.55704954,4.50064777,4.4992616
46.344408,5.09901951,4.55865292,0.735096314,4.5572796,4.50022789,4.49883674
46.354899,5.09901951,4.55889877,0.734929072,4.55752071,4.49980783,4.49841167
46.365391,5.29150262,4.559156,0.855772531,4.55777317,4.4993875,4.4979863
46.375882,6.244998,4.55942482,1.29829626,4.55803721,4.49896697,4.49756071
46.386374,4.79583152,4.55970556,0.485927945,4.55831314,4.49854617,4.49713481
46.396866,4.24264069,4.55999847,-0.563345175,4.55860123,4.49812513,4.49670865
46.407357,4.47213595,4.56030383,-0.296930762,4.55890173,4.49770388,4.49628226
46.417849,5.09901951,4.56062199,0.733755765,4.55921502,4.49728236,4.49585556
46.42834,5.38516481,4.5609532,0.907861007,4.55954133,4.49686063,4.49542863
46.438832,5,4.56129784,0.662345953,4.55988105,4.49643861,4.49500138
46.449324,4.69041576,4.56165621,0.358830813,4.56023448,4.49601634,4.49457385
46.459815,4.79583152,4.56202861,0.48353171,4.56060192,4.49559386,4.49414608
46.470307,4.89897949,4.56241546,0.580141381,4.56098379,4.49517108,4.49371799
46.480798,5.09901951,4.56281706,0.732258463,4.56138038,4.49474809,4.49328965
46.49129,4.24264069,4.56323384,-0.56620946,4.56179214,4.49432479,4.49286098
46.501782,5,4.56366616,0.660555709,4.5622194,4.49390124,4.49243202
46.512273,5.19615242,4.56411436,0.795008218,4.56266253,4.49347746,4.49200281
46.522765,3.60555128,4.56457894,-0.979299576,4.56312202,4.49305338,4.49157326
46.533256,3.87298335,4.56506023,-0.831911582,4.56359819,4.49262907,4.49114346
46.543748,4.69041576,4.56555875,0.353351108,4.56409158,4.49220445,4.49071331
46.55424,4.58257569,4.56607492,0.128455331,4.56460259,4.49177956,4.49028287
46.564731,5,4.56660914,0.658324279,4.56513163,4.49135443,4.48985215
46.575223,4.69041576,4.567162,0.351075153,4.56567928,4.49092899,4.48942109
46.585714,4.24264069,4.56773387,-0.570169434,4.56624592,4.49050331,4.48898976
46.596206,4.47213595,4.56832538,-0.310144207,4.56683219,4.49007731,4.48855808
46.606698,4,4.56893701,-0.754279134,4.56743854,4.48965103,4.48812609
46.617189,4.12310563,4.56956924,-0.668179326,4.56806547,4.4892245,4.48769381
46.627681,5.19615242,4.57022275,0.791157176,4.56871367,4.48879764,4.48726118
46.638172,4.24264069,4.57089799,-0.572937436,4.56938358,4.48837054,4.48682827
46.648664,5.47722558,4.57159571,0.95164587,4.57007594,4.4879431,4.48639499
46.659156,4.69041576,4.57231646,0.343655782,4.57079131,4.48751537,4.48596138
46.669647,4.58257569,4.57306082,0.0975442347,4.57153026,4.48708739,4.48552749
46.680139,4.35889894,4.57382959,-0.463606128,4.5722936,4.48665907,4.48509323
46.69063,3.60555128,4.57462331,-0.984414565,4.57308188,4.48623049,4.48465867
46.701122,3.74165739,4.57544286,-0.913118544,4.57389596,4.48580157,4.48422374
46.711614,5.09901951,4.57628891,0.723001112,4.57473651,4.48537234,4.48378847
46.722105,4.79583152,4.57716212,0.467621003,4.57560422,4.48494285,4.4833529
46.732597,3.74165739,4.57806347,-0.914552396,4.57650004,4.48451301,4.48291695
46.743088,4.47213595,4.57899361,-0.326890893,4.57742462,4.4840829,4.4824807
46.75358,4.89897949,4.57995357,0.564823792,4.57837901,4.48365245,4.48204405
46.764072,4.24264069,4.58094415,-0.581638598,4.57936399,4.48322167,4.48160706
46.774563,4.69041576,4.58196616,0.329316872,4.58038039,4.48279063,4.48116976
46.785055,4.89897949,4.58302076,0.562102064,4.58142935,4.48235922,4.48073206
46.795546,4.89897949,4.58410872,0.561133461,4.58251166,4.48192754,4.48029405
46.806038,4.69041576,4.5852313,0.324321538,4.58362856,4.48149549,4.47985564
46.81653,5.56776436,4.58638945,0.990643689,4.58478101,4.48106313,4.47941687
46.827021,4.47213595,4.58758415,-0.339776683,4.58597,4.48063047,4.47897778
46.837513,4.58257569,4.58881679,-0.0790006155,4.58719691,4.48019745,4.47853829
46.848004,4.24264069,4.59008833,-0.589446896,4.5884627,4.47976415,4.47809847
46.858496,5.29150262,4.59140025,0.836721204,4.58976885,4.47933047,4.47765824
46.868988,6.08276253,4.59275372,1.22065917,4.59111653,4.47889646,4.47721763
46.879479,4.58257569,4.59414995,-0.107583694,4.59250695,4.47846215,4.4767767
46.889971,5.38516481,4.59559059,0.888579885,4.59394178,4.47802747,4.47633535
46.900462,4.79583152,4.59707684,0.445819115,4.59542218,4.47759249,4.47589366
46.910954,4.35889894,4.59861048,-0.489603449,4.59694997,4.47715713,4.47545155
46.921446,5.65685425,4.60019295,1.02794032,4.59852656,4.47672143,4.47500906
46.931937,4,4.60182573,-0.775774276,4.60015345,4.47628542,4.47456623
46.942429,4.79583152,4.60351084,0.438543824,4.60183266,4.47584903,4.47412297
46.95292,4.24264069,4.60524974,-0.602170282,4.60356564,4.47541234,4.47367937
46.963412,4.24264069,4.60704461,-0.603658783,4.60535459,4.47497525,4.47323533
46.973904,4.47213595,4.60889724,-0.369812501,4.60720127,4.47453781,4.4727909
46.984395,4,4.61080945,-0.781542995,4.60910753,4.47410006,4.47234611
46.994887,4.79583152,4.61278372,0.427840857,4.61107583,4.47366192,4.47190089
47.005378,4.89897949,4.61482188,0.533064358,4.61310801,4.47322346,4.47145532
47.01587,4.12310563,4.6169266,-0.702723966,4.61520674,4.4727846,4.4710093
47.026362,4.79583152,4.6191001,0.420394366,4.61737424,4.47234538,4.47056287
47.036853,4,4.62134467,-0.788254193,4.61961281,4.47190585,4.47011609
47.047345,4.79583152,4.62366337,0.414931505,4.62192549,4.4714659,4.46966885
47.057836,4.79583152,4.62605849,0.412035233,4.62431459,4.47102564,4.46922125
47.068328,4.69041576,4.62853337,0.24876172,4.62678344,4.47058497,4.4687732
47.07882,4.69041576,4.63109078,0.243567201,4.62933483,4.47014393,4.46832473
47.089311,4.12310563,4.63373361,-0.714582388,4.63197163,4.46970256,4.46787589
47.099803,4.47213595,4.63646568,-0.405376031,4.63469766,4.46926078,4.46742659
47.110294,4.12310563,4.63928991,-0.718459659,4.63751585,4.46881867,4.46697691
47.120786,4,4.64221046,-0.801380347,4.64043037,4.46837614,4.46652677
47.131278,4.47213595,4.64530065,-0.416130623,4.64351456,4.46793323,4.46607621
47.141769,4.89897949,4.64842459,0.500554592,4.64663247,4.46748999,4.46562526
47.152261,5.38516481,4.65165685,0.85645079,4.64985871,4.46704633,4.46517385
47.162752,4.79583152,4.65500122,0.375273637,4.65319707,4.46660233,4.46472205
47.173244,5.19615242,4.65846296,0.733273116,4.6566528,4.46615791,4.46426977
47.183736,4.79583152,4.66204661,0.365766199,4.66023046,4.4657131,4.46381706
47.194227,4.47213595,4.66575692,-0.440023823,4.66393479,4.46526794,4.46336396
47.204719,5.38516481,4.66959998,0.84591065,4.66777188,4.46482236,4.46291038
47.21521,4.89897949,4.67358071,0.474761812,4.67174666,4.46437643,4.46245641
47.225702,5.56776436,4.67770584,0.943429131,4.67586587,4.46393007,4.46200195
47.236194,4.89897949,4.68198128,0.465830664,4.6801354,4.46348332,4.46154705
47.246685,3,4.68641322,-1.29861974,4.68456147,4.46303622,4.46109174
47.257177,4.24264069,4.69100951,-0.669603484,4.68915191,4.46258868,4.46063595
47.267668,5.09901951,4.69577665,0.635014067,4.69391323,4.46214078,4.46017975
47.27816,4.89897949,4.70072334,0.445259635,4.69885414,4.46169245,4.45972306
47.288652,4.12310563,4.70585739,-0.763381792,4.70398244,4.46124372,4.45926592
47.299143,4.79583152,4.71118696,0.290937383,4.70930631,4.46079463,4.45880836
47.309635,4.69041576,4.71672232,-0.162192979,4.71483601,4.46034509,4.45835031
47.320126,5.47722558,4.72247215,0.868765459,4.72058023,4.45989519,4.45789184
47.330618,4.58257569,4.7284479,-0.381932199,4.72655043,4.45944485,4.45743287
47.34111,4.58257569,4.73465998,-0.389979852,4.73275701,4.4589941,4.45697343
47.351601,4.89897949,4.74111938,0.397316131,4.73921098,4.45854298,4.45651358
47.362093,4.35889894,4.74783968,-0.623651132,4.74592592,4.45809142,4.45605322
47.372584,4.58257569,4.75483268,-0.415038536,4.75291363,4.45763948,4.45559243
47.383076,4.58257569,4.76211366,-0.42371921,4.7601894,4.4571871,4.45513113
47.393568,4.24264069,4.76969677,-0.725986285,4.76776739,4.45673429,4.45466936
47.404059,4.35889894,4.77759699,-0.64706881,4.77566257,4.45628112,4.45420716
47.414551,4,4.78583263,-0.886472011,4.78389328,4.45582749,4.45374445
47.425042,4.79583152,4.79441998,0.0375704782,4.79247581,4.45537348,4.4532813
47.435534,5.19615242,4.8033798,0.626715741,4.80143092,4.45491902,4.45281763
47.446026,4,4.81273165,-0.901516305,4.81077818,4.45446413,4.45235347
47.456517,4.79583152,4.82249632,-0.163293582,4.82053839,4.45400887,4.45188889
47.467009,3.87298335,4.83269897,-0.979650768,4.83073673,4.45355314,4.45142377
47.4775,4.35889894,4.84336254,-0.696034189,4.84139613,4.45309703,4.45095821
47.487992,5.19615242,4.85451574,0.584496944,4.85254534,4.45264045,4.45049212
47.498484,4.69041576,4.86618618,-0.419249827,4.86421194,4.45218345,4.45002555
47.508975,4.47213595,4.87840329,-0.637391041,4.87642541,4.45172607,4.44955852
47.519467,4.79583152,4.8912024,-0.308821761,4.88922107,4.45126821,4.44909096
47.529958,4.35889894,4.90461642,-0.738726928,4.90263184,4.45080997,4.44862295
47.54045,5.09901951,4.91868603,0.424656901,4.91669844,4.45035125,4.4481544
47.550942,5.09901951,4.93345099,0.406901122,4.93146063,4.4498921,4.44768535
47.561433,5.47722558,4.94895398,0.726822949,4.9469611,4.44943256,4.44721585
47.571925,3.87298335,4.96524572,-1.04511357,4.9632506,4.44897255,4.4467458
47.582416,4.24264069,4.98237458,-0.860077842,4.98037751,4.44851214,4.44627529
47.592908,5.65685425,5.00039964,0.810218863,4.99840094,4.44805126,4.44580424
47.6034,4.47213595,5.01937963,-0.739759201,5.01737962,4.44758993,4.44533268
47.613891,4.35889894,5.03937795,-0.824911513,5.03737699,4.44712822,4.44486065
47.624383,5.29150262,5.06046946,0.480659092,5.05846793,4.44666602,4.44438807
47.634874,4.58257569,5.08272714,-0.707213863,5.08072545,4.44620342,4.44391503
47.645366,4.58257569,5.10623919,-0.723645976,5.10423777,4.44574034,4.44344143
47.655858,4.58257569,5.13109483,-0.74062078,5.12909414,4.44527681,4.44296731
47.666349,4,5.15739102,-1.07582109,5.15539155,4.44481289,4.44249272
47.676841,5.19615242,5.18524162,0.104454789,5.1832439,4.44434848,4.44201757
47.687332,6.08276253,5.21476007,0.931666495,5.21276466,4.44388367,4.44154194
47.697824,6,5.24608232,0.868284333,5.24408981,4.44341836,4.44106575
47.708316,4.35889894,5.2793483,-0.959400517,5.27735933,4.44295261,4.44058904
47.718807,5.38516481,5.31471118,0.265431017,5.31272644,4.44248646,4.44011184
47.729299,5.47722558,5.35235031,0.353376949,5.3503705,4.44201981,4.43963408
47.73979,6,5.39244808,0.779456167,5.390474,4.44155276,4.43915583
47.750282,5.38516481,5.4352219,-0.223734435,5.43325435,4.44108521,4.43867701
47.760774,5.38516481,5.4808996,-0.309410388,5.47893946,4.44061721,4.43819765
47.771265,5.09901951,5.52973281,-0.656287512,5.52778102,4.4401488,4.43771781
47.781757,5,5.58201616,-0.762899838,5.58007371,4.4396799,4.4372374
47.792248,5.65685425,5.63805696,0.137103223,5.63612489,4.43921058,4.43675649
47.80274,4.89897949,5.69822176,-0.894003511,5.69630121,4.43874077,4.43627499
47.813232,5.19615242,5.76290576,-0.75283022,5.76099792,4.43827049,4.43579296
47.823723,5.56776436,5.83255682,-0.514579881,5.83066296,4.43779981,4.43531044
47.834215,4.89897949,5.90771176,-1.00435665,5.90583324,4.43732863,4.43482733
47.844706,5.65685425,5.9889667,-0.576291987,5.98710498,4.43685703,4.43434372
47.855198,5.83095189,6.07706587,-0.496098752,6.07522251,4.43638493,4.43385951
47.86569,5.65685425,6.17288958,-0.718355991,6.17106628,4.43591237,4.43337477
47.876181,6.4807407,6.27753647,0.450781796,6.2757351,4.43543939,4.43288952
47.886673,6.244998,6.39244481,-0.383988039,6.39066744,4.43496591,4.43240367
47.897164,6.08276253,6.51943386,-0.660811117,6.51768284,4.43449201,4.43191732
47.907656,6.4807407,6.66094707,-0.424507207,6.6592251,4.4340176,4.43143037
47.918148,5.83095189,6.82014733,-0.994583044,6.81845753,4.43354273,4.43094287
47.928639,6.8556546,7.00114521,-0.381432309,6.99949123,4.43306745,4.43045486
47.939131,7.21110255,7.20925019,0.0430390412,7.20763626,4.43259165,4.42996624
47.949622,7.74596669,7.45096346,0.543141997,7.44939439,4.43211543,4.42947711
47.960114,8.1240384,7.73415863,0.624403537,7.73263973,4.43163871,4.42898738
47.970606,7.74596669,8.06773024,-0.567242051,8.06626712,4.43116151,4.42849708
47.981097,8,8.46120761,-0.679122679,8.45980579,4.4306839,4.42800627
47.991589,9,8.92419936,0.275319152,8.92286382,4.43020578,4.42751485
48.00208,9.74679434,9.46517191,0.5306811,9.46390659,4.42972723,4.42702291
48.012572,9.21954446,10.0908247,-0.933423926,10.089632,4.42924817,4.42653035
48.023064,11.6619038,10.8047636,0.925818663,10.8036443,4.42876864,4.42603722
48.033555,10.6770783,11.606883,-0.964263858,11.605836,4.42828869,4.42554358
48.044047,12.7279221,12.4931898,0.484491726,12.4922123,4.42780822,4.42504931
48.054538,13.3041347,13.4550206,-0.388440359,13.4541085,4.42732733,4.42455452
48.06503,14.7648231,14.4797361,0.533935379,14.4788843,4.42684592,4.4240591
48.075522,15.132746,15.5500132,-0.645962266,15.5492161,4.42636405,4.42356311
48.086013,16.8522995,16.6438182,0.45659757,16.6430698,4.42588175,4.42306659
48.096505,17.0880075,17.7339591,-0.803711156,17.7332532,4.42539893,4.42256944
48.106996,17.9722008,18.7860155,-0.90211683,18.7853459,4.42491568,4.42207176
48.117488,19.7484177,19.7577048,-0.0963698372,19.7570649,4.42443192,4.42157345
48.12798,20.5912603,20.5978055,-0.0809025869,20.5971886,4.42394769,4.42107456
48.138471,21.6564078,21.2493645,0.637999473,21.2487635,4.42346303,4.42057514
48.148963,21,21.6577575,-0.811022509,21.6571649,4.42297786,4.42007507
48.159454,21.8632111,21.7828522,0.283476535,21.78226,4.42249225,4.41957447
48.169946,21,21.6112601,-0.781831219,21.6106601,4.42200613,4.41907324
48.180438,21.330729,21.1608668,0.412143401,21.160251,4.42151954,4.41857141
48.190929,20.6397674,20.474983,0.405936462,20.4743434,4.42103251,4.41806904
48.201421,19.5448203,19.6094178,-0.254160365,19.6087465,4.42054497,4.41756603
48.211912,17.2626765,18.6208903,-1.16542431,18.6201797,4.42005701,4.41706248
48.222404,17.2626765,17.5591541,-0.544497565,17.5583967,4.41956852,4.41655828
48.232896,15.3297097,16.4654464,-1.06570948,16.4646345,4.41907956,4.41605349
48.243387,14.9666295,15.3728977,-0.637391669,15.3720236,4.41859017,4.41554814
48.253879,14.6287388,14.3077516,0.56655733,14.3068076,4.41810026,4.41504215
48.26437,12.2065556,13.2913261,-1.04152318,13.2903047,4.41760993,4.41453561
48.274862,13.0766968,12.3399502,0.858339464,12.3388442,4.41711908,4.41402841
48.285354,11.4017543,11.4658604,-0.253191935,11.4646639,4.41662775,4.41352062
48.295845,11,10.6769157,0.568405062,10.675624,4.41613599,4.41301227
48.306337,10.0995049,9.97645722,0.350781579,9.97506763,4.41564372,4.41250326
48.316828,9.2736185,9.36399975,-0.300634746,9.36251147,4.41515102,4.4119937
48.32732,9.11043358,8.83524849,0.524580873,8.83366282,4.4146578,4.41148348
48.337812,9.43398113,8.38328092,1.02503669,8.38160092,4.41416411,4.41097265
48.348303,7.14142843,7.9993314,-0.926230515,7.99756141,4.41367,4.41046126
48.358795,9,7.67373109,1.15163749,7.67187618,4.41317536,4.40994921
48.369286,7.93725393,7.39702063,0.735005649,7.39508606,4.4126803,4.40943659
48.379778,6.8556546,7.16038109,-0.552020368,7.15837189,4.41218472,4.40892331
48.39027,6.78232998,6.95620917,-0.416988238,6.95412991,4.41168867,4.40840942
48.400761,7.87400787,6.77818245,1.04681681,6.77603709,4.4111922,4.40789496
48.411253,6.70820393,6.62119209,0.294977691,6.61898403,4.4106952,4.40737983
48.421744,6.4807407,6.48130608,-0.0237777924,6.47903816,4.41019779,4.40686413
48.432236,6.40312424,6.35546243,0.21831585,6.35313706,4.40969986,4.40634777
48.442728,6,6.24136356,-0.491287655,6.23898281,4.40920146,4.40583078
48.453219,6.08276253,6.1372567,-0.233439857,6.13482236,4.40870263,4.40531322
48.463711,5.74456265,6.04176476,-0.545162465,6.03927843,4.4082033,4.40479498
48.474202,4.58257569,5.95383891,-1.17100948,5.95130203,4.40770354,4.40427617
48.484694,5.38516481,5.87260628,-0.69817009,5.87002017,4.40720326,4.40375668
48.495186,5.19615242,5.79736988,-0.775382139,5.79473578,4.40670253,4.40323657
48.505677,6.164414,5.72754187,0.660963037,5.72486091,4.40620137,4.40271588
48.516169,5.91607978,5.66259942,0.503468338,5.65987268,4.4056997,4.4021945
48.52666,6.78232998,5.60210992,1.08637934,5.59933843,4.40519761,4.40167255
48.537152,5,5.54567026,-0.73869497,5.54285496,4.40469501,4.40114992
48.547644,5.47722558,5.49293769,-0.125347982,5.49007948,4.40419195,4.40062665
48.558135,5.47722558,5.44360502,0.183359077,5.44070475,4.40368847,4.4001028
48.568627,5.19615242,5.39738339,-0.448587749,5.39444184,4.40318449,4.39957826
48.579118,5.74456265,5.35402935,0.624926633,5.35104726,4.40268009,4.39905314
48.58961,5.29150262,5.31330733,-0.147664187,5.31028541,4.40217518,4.39852733
48.600102,4.89897949,5.27501552,-0.613217769,5.2719544,4.40166982,4.39800088
48.610593,4.79583152,5.23897051,-0.665686853,5.23587082,4.40116404,4.39747384
48.621085,5.29150262,5.20499607,0.294119964,5.20185836,4.40065776,4.39694611
48.631576,5.91607978,5.17294432,0.862053052,5.16976912,4.40015107,4.39641778
48.642068,4.58257569,5.14266887,-0.748393727,5.13945667,4.39964388,4.39588877
48.65256,5.47722558,5.11404462,0.602644967,5.11079587,4.39913624,4.39535911
48.663051,4.89897949,5.08695695,-0.433563681,5.08367207,4.39862819,4.39482885
48.673543,5.09901951,5.06129374,0.194231237,5.05797311,4.39811964,4.3942979
48.684034,4.35889894,5.03696165,-0.823445631,5.03360563,4.39761069,4.39376635
48.694526,6,5.01386617,0.993042714,5.01047508,4.39710125,4.39323411
48.705018,6,4.99192695,1.00402841,4.98850108,4.39659135,4.39270121
48.715509,4.89897949,4.97106986,-0.268496501,4.96760949,4.39608106,4.39216771
48.726001,4.69041576,4.95122103,-0.510690976,4.94772641,4.39557027,4.39163352
48.736492,4.58257569,4.93231966,-0.591391547,4.928791,4.39505909,4.39109872
48.746984,5.29150262,4.91430267,0.614166064,4.91074017,4.39454742,4.39056321
48.757476,4.79583152,4.89711685,-0.318253557,4.89352068,4.39403531,4.39002705
48.767967,4.79583152,4.88071281,-0.291343928,4.87708313,4.39352281,4.38949029
48.778459,4.35889894,4.86504037,-0.711436171,4.86137731,4.39300982,4.38895282
48.78895,5.09901951,4.85005879,0.498959645,4.84636246,4.39249644,4.38841474
48.799442,5.91607978,4.83572474,1.03940129,4.83199525,4.39198259,4.38787595
48.809934,5.65685425,4.82200203,0.913702476,4.81823945,4.3914683,4.3873365
48.820425,5.29150262,4.80885686,0.69472711,4.80506126,4.39095362,4.38679645
48.830917,4.58257569,4.79625422,-0.462253745,4.79242563,4.39043847,4.38625568
48.841408,5.38516481,4.78416613,0.775241044,4.78030459,4.38992295,4.3857143
48.8519,6.164414,4.77256207,1.17976775,4.76866759,4.38940694,4.3851722
48.862392,5.09901951,4.7614168,0.5810359,4.75748939,4.38889052,4.38462944
48.872883,5.47722558,4.75070666,0.852360789,4.74674631,4.38837372,4.38408607
48.883375,4.12310563,4.74040663,-0.785685053,4.7364133,4.38785646,4.38354198
48.893866,6.55743852,4.73049709,1.35164398,4.72647075,4.38733883,4.38299727
48.904358,5.83095189,4.72095601,1.05356342,4.71689661,4.38682073,4.38245184
48.91485,6,4.71176545,1.13500421,4.70767292,4.38630222,4.38190574
48.925341,6.164414,4.70290849,1.20892742,4.69878277,4.38578335,4.38135903
48.935833,5.29150262,4.69436685,0.772745606,4.69020785,4.38526403,4.38081159
48.946324,5.56776436,4.68612652,0.938955721,4.68193415,4.38474435,4.38026353
48.956816,4.69041576,4.67817127,0.110654813,4.67394542,4.38422421,4.37971475
48.967308,4.69041576,4.6704881,0.141165368,4.66622865,4.38370368,4.37916529
48.977799,4.58257569,4.66306469,-0.283705829,4.65877152,4.38318279,4.37861521
48.988291,5.09901951,4.65588743,0.665681667,4.6515604,4.38266147,4.3780644
48.998782,4.79583152,4.64894614,0.383256292,4.64458511,4.38213979,4.37751297
49.009274,4.69041576,4.64222864,0.219515642,4.63783346,4.38161768,4.37696081
49.019766,5.65685425,4.63572535,1.01050923,4.63129585,4.38109519,4.37640797
49.030257,4.89897949,4.62942716,0.519184285,4.62496317,4.38057236,4.3758545
49.040749,4.35889894,4.62332375,-0.514222527,4.61882509,4.38004909,4.3753003
49.05124,4.89897949,4.61740761,0.530633462,4.6128741,4.3795255,4.37474548
49.061732,5,4.61166946,0.623161725,4.60710089,4.37900149,4.37418992
49.072224,5.29150262,4.60610213,0.827889181,4.6014983,4.3784771,4.37363367
49.082715,4.58257569,4.60069877,-0.134621972,4.59605947,4.3779524,4.3730768
49.093207,5.19615242,4.59545144,0.775049021,4.59077645,4.37742728,4.37251918
49.103698,4.35889894,4.59035453,-0.481098316,4.58564363,4.37690184,4.37196094
49.11419,4,4.58540086,-0.76511493,4.58065379,4.376376,4.37140196
49.124682,5.38516481,4.58058497,0.896983745,4.57580151,4.37584981,4.37084229
49.135173,4.47213595,4.57590168,-0.322126873,4.57108157,4.37532331,4.37028198
49.145665,3.74165739,4.57134476,-0.910871766,4.56648774,4.37479641,4.36972094
49.156156,5.19615242,4.56691,0.793248022,4.56201581,4.37426922,4.36915925
49.166648,4.47213595,4.56259173,-0.300758658,4.55766009,4.37374165,4.36859683
49.17714,4.69041576,4.55838577,0.363359308,4.55341641,4.37321373,4.36803371
49.187631,4.35889894,4.55428815,-0.442028513,4.54928078,4.37268553,4.36746996
49.198123,4.47213595,4.55029392,-0.279567463,4.54524824,4.37215696,4.36690546
49.208614,4,4.54639988,-0.73918866,4.54131559,4.37162811,4.36634032
49.219106,5,4.54260152,0.676312412,4.53747831,4.37109889,4.36577443
49.229598,5.91607978,4.53889565,1.17353489,4.53373321,4.37056936,4.36520785
49.240089,4.69041576,4.53527912,0.393873883,4.53007712,4.37003957,4.36464062
49.250581,3.74165739,4.53174796,-0.888870391,4.52650606,4.36950942,4.36407265
49.261072,4.89897949,4.52829971,0.608834771,4.52301758,4.36897902,4.36350403
49.271564,4.58257569,4.52493072,0.240093686,4.51960802,4.36844827,4.36293467
49.282056,4.47213595,4.52163847,-0.222491598,4.51627483,4.36791723,4.3623646
49.292547,4.47213595,4.51842053,-0.215138508,4.51301562,4.36738595,4.36179389
49.303039,4.35889894,4.51527369,-0.395442463,4.50982711,4.36685435,4.36122242
49.31353,4.69041576,4.51219603,0.422160781,4.50670743,4.36632251,4.36065031
49.324022,4.35889894,4.5091846,-0.387666939,4.50365358,4.36579036,4.36007744
49.334514,5.19615242,4.50623739,0.83061124,4.50066357,4.36525793,4.35950387
49.345005,6.08276253,4.5033525,1.25674581,4.49773548,4.3647253,4.35892965
49.355497,5.09901951,4.50052726,0.773622808,4.49486664,4.36419237,4.35835467
49.365988,3.87298335,4.49776023,-0.790428289,4.49205558,4.36365923,4.35777904
49.37648,4.89897949,4.49504893,0.635555316,4.48929984,4.3631258,4.35720266
49.386972,4.12310563,4.49239178,-0.607689196,4.48659783,4.36259214,4.35662556
49.397463,4.89897949,4.48978728,0.639681331,4.48394803,4.36205829,4.35604782
49.407955,5.19615242,4.48723321,0.841973403,4.48134821,4.36152417,4.35546931
49.418446,5.29150262,4.48472844,0.898206092,4.47879724,4.36098988,4.35489016
49.428938,4.47213595,4.48227091,-0.10067253,4.47629305,4.36045533,4.35431024
49.43943,4.79583152,4.47985938,0.562113997,4.47383438,4.35992058,4.3537296
49.449921,3.87298335,4.47749261,-0.777501938,4.47142001,4.35938567,4.35314832
49.460413,4.35889894,4.47516877,-0.340983615,4.46904808,4.35885053,4.35256627
49.470904,5,4.47288697,0.726025504,4.46671769,4.35831525,4.35198356
49.481396,4.35889894,4.47064548,-0.334285119,4.46442712,4.35777974,4.35140009
49.491888,4.69041576,4.46844331,0.471139527,4.46217534,4.35724406,4.3508159
49.502379,5.09901951,4.46627945,0.795449596,4.45996137,4.35670828,4.35023106
49.512871,3.87298335,4.46415237,-0.768875167,4.45778364,4.35617228,4.34964545
49.523362,4.58257569,4.46206136,0.347151742,4.45564144,4.35563619,4.34905918
49.533854,4.89897949,4.46000497,0.662551516,4.45353332,4.35509992,4.34847214
49.544346,5.65685425,4.45798239,1.09493007,4.45145844,4.35456351,4.34788438
49.554837,5.19615242,4.45599282,0.860325292,4.44941601,4.35402703,4.34729596
49.565329,4.12310563,4.45403492,-0.575264547,4.44740468,4.35349038,4.34670677
49.57582,4.12310563,4.45210818,-0.573587445,4.44542392,4.35295369,4.34611692
49.586312,4.89897949,4.45021134,0.669901592,4.44347245,4.35241684,4.3455263
49.596804,4.24264069,4.44834374,-0.453544989,4.44154963,4.35187991,4.34493496
49.607295,4.47213595,4.44650475,0.160097496,4.43965479,4.35134296,4.34434295
49.617787,3.87298335,4.44469321,-0.75611498,4.43778677,4.35080588,4.34375017
49.628278,4.47213595,4.44290872,0.170959742,4.43594518,4.3502688,4.34315673
49.63877,5.47722558,4.44115021,1.01787787,4.4341289,4.34973162,4.34256251
49.649262,5.83095189,4.43941713,1.17963332,4.4323374,4.3491944,4.34196756
49.659753,4.69041576,4.43770898,0.502699494,4.43057016,4.34865721,4.34137195
49.670245,4.79583152,4.43602476,0.59983895,4.42882616,4.34811995,4.34077557
49.680736,5,4.43436416,0.752087657,4.42710509,4.34758273,4.34017851
49.691228,4.69041576,4.43272624,0.50763128,4.42540599,4.34704546,4.33958068
49.70172,5.38516481,4.43111059,0.976756992,4.42372843,4.34650821,4.33898212
49.712211,4.79583152,4.42951676,0.605239427,4.42207198,4.34597105,4.3383829
49.722703,4.69041576,4.42794391,0.512320068,4.42043575,4.34543386,4.33778289
49.733194,5.47722558,4.4263918,1.02510184,4.41881951,4.34489679,4.33718222
49.743686,4.47213595,4.42485961,0.217431247,4.41722241,4.34435972,4.33658076
49.754178,4.89897949,4.423347,0.689661142,4.41564411,4.34382273,4.33597857
49.764669,4.79583152,4.42185362,0.611537332,4.41408425,4.34328588,4.33537572
49.775161,4.69041576,4.42037871,0.519650888,4.41254205,4.34274909,4.33477208
49.785652,5.74456265,4.41892212,1.15136463,4.41101734,4.34221246,4.33416777
49.796144,4.12310563,4.41748313,-0.542565666,4.40950938,4.3416759,4.33356267
49.806636,5.09901951,4.41606144,0.826412774,4.40801788,4.34113949,4.33295685
49.817127,5.09901951,4.41465679,0.827262185,4.40654254,4.34060329,4.33235035
49.827619,5.38516481,4.41326851,0.985848008,4.40508269,4.34006722,4.33174307
49.83811,4.24264069,4.41189649,-0.411407096,4.4036382,4.33953138,4.33113511
49.848602,5,4.41054008,0.767762932,4.4022084,4.33899569,4.33052636
49.859094,5.56776436,4.40919907,1.07636671,4.40079307,4.33846022,4.32991689
49.869585,4.79583152,4.40787323,0.622862981,4.39939196,4.33792503,4.32930674
49.880077,5.19615242,4.40656198,0.88858902,4.39800447,4.33739005,4.32869579
49.890568,5.74456265,4.40526523,1.15728018,4.3966305,4.33685538,4.32808418
49.90106,5.74456265,4.40398243,1.15783428,4.39526948,4.33632095,4.32747177
49.911552,5.74456265,4.4027134,1.15838217,4.3939212,4.33578682,4.32685863
49.922043,5.29150262,4.40145796,0.943421782,4.39258549,4.33525306,4.32624481
49.932535,6.244998,4.40021559,1.35822767,4.39126177,4.33471959,4.3256302
49.943026,5.38516481,4.39898625,0.993065235,4.38995002,4.33418653,4.32501492
49.953518,4,4.39776943,-0.630689646,4.38864969,4.33365379,4.32439884
49.96401,5.29150262,4.396565,0.94601143,4.38736063,4.33312145,4.32378202
49.974501,4.89897949,4.39537281,0.7096525,4.38608268,4.33258958,4.32316453
49.984993,7,4.39419241,1.6142514,4.38481535,4.33205809,4.32254624
49.995484,4.35889894,4.39303001,-0.184745943,4.38355862,4.33153343,4.32192728
50.005976,5.91607978,4.3918727,1.23458782,4.38231201,4.33100288,4.32130751
50.016468,6.08276253,4.3907266,1.30078281,4.38107537,4.33047283,4.32068701
50.026959,5.09901951,4.38959161,0.84227543,4.37984862,4.32994336,4.32006584
50.037451,4.47213595,4.38846731,0.289255323,4.37863126,4.32941438,4.31944386
50.047942,5.19615242,4.38735372,0.899332367,4.37742333,4.32888602,4.3188212
50.058434,4.89897949,4.38625042,0.716051022,4.37622437,4.32835821,4.31819775
50.068926,4.24264069,4.38515734,-0.377513781,4.37503428,4.32783102,4.31757355
50.079417,4.58257569,4.38407441,0.44553483,4.37385298,4.32730453,4.31694868
50.089909,5.38516481,4.38300124,1.0010812,4.37268003,4.32677865,4.31632301
50.1004,5.38516481,4.38193788,1.00161216,4.37151548,4.32625353,4.31569665
50.110892,5.56776436,4.38088395,1.08944041,4.3703589,4.32572907,4.31506949
50.121384,5.65685425,4.37983941,1.13005081,4.36921023,4.32520538,4.3144416
50.131875,5.74456265,4.3788042,1.16865668,4.36806939,4.32468251,4.31381302
50.142367,4.69041576,4.37777798,0.559140214,4.36693599,4.32416041,4.31318364
50.152858,5.47722558,4.37676081,1.04903039,4.36581008,4.32363919,4.31255357
50.16335,5.19615242,4.37575235,0.905759388,4.36469128,4.3231188,4.31192271
50.173842,6.08276253,4.37475259,1.30690855,4.36357953,4.32259931,4.3112911
50.184333,6,4.37376147,1.27524058,4.36247478,4.32208081,4.31065881
50.194825,5.09901951,4.37277871,0.852197634,4.36137667,4.32156323,4.31002571
50.205316,5.29150262,4.37180436,0.959009,4.36028526,4.3210467,4.30939193
50.215808,4.47213595,4.37083814,0.318273182,4.3592002,4.32053117,4.30875735
50.2263,4.58257569,4.36988002,0.46118941,4.35812144,4.3200167,4.30812202
50.236791,4.69041576,4.36893001,0.566997134,4.35704895,4.3195034,4.30748601
50.247283,5.74456265,4.36798782,1.17327526,4.35598239,4.3189912,4.30684919
50.257774,4.58257569,4.36705353,0.464243644,4.35492183,4.31848023,4.30621169
50.268266,4.79583152,4.36612689,0.655518598,4.35386695,4.31797045,4.30557338
50.278758,5.09901951,4.36520789,0.856628052,4.35281771,4.31746193,4.30493433
50.289249,4.89897949,4.36429655,0.731220168,4.3517741,4.31695477,4.30429459
50.299741,4.47213595,4.36339261,0.329762556,4.35073579,4.31644892,4.30365404
50.310232,5,4.36249617,0.798438367,4.34970288,4.31594451,4.30301281
50.320724,5.47722558,4.361607,1.05622847,4.34867504,4.3154415,4.30237077
50.331216,5.91607978,4.36072512,1.24713859,4.34765226,4.31493998,4.30172798
50.341707,5.83095189,4.35985054,1.21288967,4.34663454,4.31444004,4.30108451
50.352199,5.19615242,4.35898304,0.914969605,4.34562157,4.31394164,4.30044023
50.36269,4.58257569,4.35812275,0.473764652,4.34461345,4.31344492,4.29979526
50.373182,5.29150262,4.35726944,0.966557387,4.34360988,4.31294985,4.29914948
50.383674,4.24264069,4.35642315,-0.337316564,4.34261086,4.31245652,4.29850295
50.394165,5.65685425,4.35558393,1.14073236,4.34161639,4.31196503,4.29785574
50.404657,4.24264069,4.35475156,-0.33482962,4.34062618,4.31147535,4.29720772
50.415148,4.12310563,4.35392619,-0.480437884,4.33964033,4.31098763,4.29655901
50.42564,4.35889894,4.35310761,0.0761008071,4.33865857,4.31050183,4.29590949
50.436132,4.79583152,4.35229589,0.665984711,4.3376809,4.31001806,4.29525921
50.446623,4.79583152,4.35149107,0.666588666,4.33670732,4.30953643,4.29460826
50.457115,5.47722558,4.35069299,1.06138239,4.33573758,4.30905691,4.29395649
50.467606,5.09901951,4.34990178,0.865515876,4.33477176,4.30857967,4.29330403
50.478098,4.69041576,4.34911728,0.584207565,4.33380961,4.30810467,4.29265076
50.48859,4.47213595,4.34833956,0.351847123,4.33285115,4.30763204,4.29199674
50.499081,3.46410162,4.34756868,-0.939929287,4.33189638,4.30716189,4.29134203
50.509573,4.47213595,4.3468045,0.354021827,4.33094505,4.30669421,4.29068651
50.520064,4.58257569,4.34604717,0.486341982,4.32999727,4.30622916,4.2900303
50.530556,4.58257569,4.34529655,0.487113069,4.32905279,4.30576674,4.28937328
50.541048,4.69041576,4.34455273,0.588101207,4.32811162,4.30530706,4.2887155
50.551539,4.24264069,4.34381579,-0.31808034,4.32717379,4.30485026,4.28805704
50.562031,4.47213595,4.34308561,0.35923578,4.32623906,4.30439633,4.28739776
50.572522,4.89897949,4.34236235,0.746067781,4.32530753,4.30394546,4.2867378
50.583014,4.24264069,4.34164591,-0.314650951,4.32437896,4.30349765,4.28607702
50.593506,4.58257569,4.34093638,0.491568222,4.32345338,4.30305303,4.28541548
50.603997,4.89897949,4.34023387,0.74749289,4.32253082,4.30261174,4.28475326
50.614489,4.89897949,4.33953828,0.747958027,4.32161105,4.30217381,4.28409023
50.62498,4.47213595,4.33884979,0.365083781,4.32069417,4.30173942,4.2834265
50.635472,4.12310563,4.33816832,-0.463748524,4.31977995,4.30130859,4.28276196
50.645964,5.09901951,4.33749399,0.872654298,4.31886844,4.30088147,4.28209667
50.656455,3.74165739,4.33682692,-0.771472316,4.31795965,4.30045823,4.28143069
50.666947,4.35889894,4.33616705,0.150770996,4.31705337,4.30003889,4.28076389
50.677438,4.24264069,4.33551457,-0.304752169,4.31614971,4.29962365,4.28009641
50.68793,4.35889894,4.33486943,0.155014548,4.31524844,4.29921257,4.2794281
50.698422,4.47213595,4.33423178,0.371354518,4.31434962,4.29880582,4.27875905
50.708913,4.58257569,4.33360175,0.498972893,4.31345326,4.29840356,4.2780893
50.719405,4.24264069,4.33297931,-0.300563844,4.31255915,4.29800586,4.27741874
50.729896,4.12310563,4.33236468,-0.457448422,4.31166742,4.29761293,4.27674749
50.740388,5.19615242,4.33175785,0.929728226,4.31077785,4.29722485,4.27607542
50.75088,4.12310563,4.33115897,-0.45612865,4.30989047,4.29684181,4.2754026
50.761371,4,4.33056822,-0.574950624,4.30900533,4.296464,4.27472909
50.771863,4.79583152,4.3299856,0.682529064,4.30812222,4.29609152,4.27405476
50.782354,4.47213595,4.32941135,0.377789101,4.30724126,4.29572459,4.27337974
50.792846,3.87298335,4.32884549,-0.67517564,4.30636224,4.29536334,4.27270391
50.803338,4.69041576,4.32828822,0.60177034,4.3054852,4.29500797,4.27202732
50.813829,4.58257569,4.32773973,0.504812804,4.3046102,4.2946587,4.27135004
50.824321,3.87298335,4.32720007,-0.673956026,4.30373701,4.29431567,4.27067194
50.834812,4.58257569,4.32666951,0.505871706,4.30286577,4.29397913,4.26999316
50.845304,5.09901951,4.32614812,0.879131046,4.30199628,4.29364924,4.26931356
50.855796,5,4.32563612,0.821196616,4.30112858,4.29332623,4.2686332
50.866287,4.35889894,4.32513374,0.183753094,4.30026272,4.29301037,4.26795215
50.876779,4.89897949,4.3246411,0.757851165,4.2993985,4.29270182,4.26727029
50.88727,4.58257569,4.32415847,0.50834754,4.29853604,4.29240088,4.26658774
50.897762,4.58257569,4.323686,0.508812046,4.29767515,4.29210775,4.26590436
50.908254,4,4.32322394,-0.568527867,4.29681588,4.29182271,4.26522024
50.918745,4.47213595,4.32277257,0.386475597,4.29595828,4.29154605,4.26453542
50.929237,4.79583152,4.32233205,0.688112979,4.29510214,4.29127801,4.26384979
50.939728,5,4.32190273,0.823466619,4.29424762,4.29101892,4.26316347
50.95022,4.24264069,4.32148478,-0.280791902,4.29339449,4.29076903,4.26247633
50.960712,4.69041576,4.32107853,0.607731214,4.29254283,4.29052868,4.26178843
50.971203,3.87298335,4.32068431,-0.669104601,4.29169268,4.29029821,4.26109985
50.981695,4.35889894,4.32030235,0.196460149,4.29084385,4.29007793,4.26041045
50.992186,4.35889894,4.31993305,0.19739781,4.28999648,4.28986821,4.25972036
51.002678,4.24264069,4.31957666,-0.277373344,4.28915037,4.28966939,4.25902945
51.01317,4.12310563,4.31923357,-0.442863351,4.28830557,4.28948186,4.25833778
51.023661,3.46410162,4.31890419,-0.924555338,4.28746215,4.28930605,4.25764543
51.034153,4.79583152,4.31858882,0.69082755,4.28661991,4.28914231,4.25695226
51.044644,4.58257569,4.31828793,0.514089255,4.28577899,4.28899111,4.25625841
51.055136,3.46410162,4.31800189,-0.924067243,4.2849392,4.28885288,4.25556373
51.065628,4.47213595,4.31773114,0.392943775,4.2841006,4.28872808,4.2548683
51.076119,3.74165739,4.31747619,-0.758827257,4.28326324,4.28861722,4.25417218
51.086611,4.35889894,4.31723746,0.204111452,4.28242694,4.28852077,4.25347524
51.097102,4.47213595,4.31701549,0.393853355,4.28159184,4.28843929,4.25277762
51.107594,4.35889894,4.31681077,0.205154031,4.28075775,4.28837331,4.25207918
51.118086,5,4.31662386,0.826665675,4.27992473,4.2883234,4.25137998
51.128577,4.12310563,4.31645536,-0.43971552,4.27909284,4.28829018,4.2506801
51.139069,4.35889894,4.31630584,0.206380961,4.2782619,4.28827426,4.2499794
51.14956,4.35889894,4.31617596,0.206695397,4.27743204,4.2882763,4.24927801
51.160052,4.79583152,4.31606634,0.692650837,4.27660309,4.28829699,4.2485758
51.170544,4.69041576,4.3159777,0.61191344,4.2757751,4.28833703,4.24787284
51.181035,4,4.31591077,-0.5620594,4.27494813,4.28839719,4.2471692
51.191527,4.12310563,4.31586629,-0.439045175,4.27412201,4.28847824,4.24646473
51.202018,5.19615242,4.31584508,0.938246955,4.27329687,4.288581,4.24575958
51.21251,4.79583152,4.31584795,0.692808466,4.27247254,4.28870634,4.24505361
51.223002,3.74165739,4.31587581,-0.75777201,4.27164908,4.28885516,4.24434689
51.233493,4.69041576,4.31592955,0.611952782,4.27082655,4.2890284,4.24363949
51.243985,5.19615242,4.31601017,0.938158969,4.27000477,4.28922706,4.24293126
51.254476,5,4.31611866,0.826971182,4.26918388,4.28945216,4.24222235
51.264968,4.69041576,4.31625612,0.611685896,4.26836371,4.28970483,4.24151262
51.27546,4.35889894,4.31642367,0.206095311,4.26754431,4.2899862,4.24080214
51.285951,4.89897949,4.31662246,0.763123207,4.26672576,4.29029745,4.24009098
51.296443,4.58257569,4.31685378,0.515482219,4.26590788,4.2906399,4.239379
51.306934,4.89897949,4.3171189,0.762797868,4.26509081,4.29101483,4.23866633
51.317426,4.89897949,4.31741925,0.762600967,4.26427437,4.29142371,4.23795285
51.327918,4.47213595,4.31775627,0.392911803,4.26345864,4.29186798,4.23723862
51.338409,4,4.31813146,-0.564031431,4.26264367,4.29234916,4.2365237
51.348901,5.29150262,4.3185465,0.986385384,4.26182929,4.29286898,4.23580797
51.359392,4.79583152,4.31900303,0.690527693,4.26101564,4.29342908,4.23509155
51.369884,3.87298335,4.31950294,-0.668221216,4.26020256,4.2940314,4.23437431
51.380376,4.12310563,4.3200481,-0.443782014,4.25939011,4.2946778,4.23365633
51.390867,4,4.32064047,-0.566251245,4.25857834,4.29537028,4.23293766
51.401359,4,4.3212823,-0.566817692,4.2577671,4.29611111,4.23221818
51.41185,4.89897949,4.32197571,0.759607644,4.25695653,4.29690244,4.23149802
51.422342,4.79583152,4.32272324,0.687828671,4.25614646,4.29774684,4.23077703
51.432834,5,4.32352736,0.822479569,4.25533694,4.29864678,4.2300553
51.443325,4.89897949,4.32439066,0.758016374,4.25452806,4.2996049,4.22933289
51.453817,4.47213595,4.32531617,0.383170705,4.25371964,4.30062424,4.22860966
51.464308,5,4.32630672,0.820788205,4.25291181,4.30170767,4.22788576
51.4748,4.24264069,4.32736573,-0.291075667,4.25210443,4.30285864,4.22716103
51.485292,4.47213595,4.32849652,0.378997935,4.25129755,4.30408048,4.22643556
51.495783,4.79583152,4.32970261,0.682736344,4.25049124,4.30537674,4.22570941
51.506275,5.29150262,4.33098809,0.980058433,4.24968534,4.30675156,4.22498244
51.516766,5.19615242,4.33235685,0.929406034,4.24887998,4.30820883,4.2242548
51.527258,5.19615242,4.33381353,0.928622041,4.24807501,4.30975325,4.22352634
51.53775,4.24264069,4.3353627,-0.304502894,4.24727049,4.31138942,4.22279713
51.548241,5,4.33700921,0.814242463,4.24646648,4.3131222,4.22206724
51.558733,6.164414,4.33875872,1.35116812,4.24566283,4.31495731,4.22133654
51.569224,5,4.34061662,0.812024249,4.24485967,4.31690015,4.22060517
51.579716,4.47213595,4.34258938,0.359925788,4.24405685,4.31895727,4.21987297
51.590208,4.69041576,4.3446834,0.587990098,4.24325444,4.32113507,4.21914004
51.600699,5.83095189,4.34690551,1.21821443,4.24245249,4.32344043,4.21840642
51.611191,4.24264069,4.34926367,-0.326531743,4.24165085,4.32588136,4.21767199
51.621682,4.35889894,4.35176555,0.0844594287,4.24084967,4.32846558,4.21693689
51.632174,5.83095189,4.35442035,1.21512614,4.24004877,4.33120234,4.21620097
51.642666,5.09901951,4.35723724,0.861267829,4.23924823,4.33410085,4.21546431
51.653157,4.89897949,4.36022605,0.73399825,4.23844813,4.33717099,4.21472698
51.663649,3.87298335,4.36339827,-0.700296311,4.23764829,4.34042433,4.21398883
51.67414,5.19615242,4.36676509,0.910707053,4.23684886,4.34387209,4.21325001
51.684632,4.35889894,4.37033988,-0.106962312,4.23604968,4.34752774,4.21251037
51.695124,5.65685425,4.37413614,1.13257146,4.23525083,4.35140482,4.21177
51.705615,5,4.37816844,0.788562973,4.23445236,4.35551798,4.21102895
51.716107,4.35889894,4.38245373,-0.153475703,4.23365413,4.35988426,4.21028708
51.726598,4.69041576,4.38700885,0.550823846,4.23285627,4.36452057,4.20954455
51.73709,5.29150262,4.39185379,0.948498197,4.23205863,4.369447,4.2088012
51.747582,4.12310563,4.39700902,-0.523357803,4.23126128,4.3746841,4.20805712
51.758073,4,4.40249674,-0.634426311,4.23046428,4.3802542,4.20731236
51.768565,4,4.40834285,-0.639017094,4.22966748,4.38618328,4.20656679
51.779056,3.87298335,4.4145734,-0.735928019,4.22887103,4.39249754,4.20582055
51.789548,4.24264069,4.42121931,-0.422585634,4.22807476,4.39922801,4.2050735
51.80004,4.89897949,4.42831265,0.68605163,4.22727875,4.40640692,4.20432572
51.810531,5.29150262,4.43588853,0.924994102,4.22648307,4.41406951,4.20357726
51.821023,5.38516481,4.44398781,0.970142771,4.22568756,4.42225682,4.20282799
51.831514,3.87298335,4.45265242,-0.761360018,4.22489237,4.43101095,4.20207806
51.842006,5,4.46193195,0.733531216,4.22409734,4.4403817,4.20132731
51.852498,4.69041576,4.47187867,0.46747951,4.22330254,4.45042153,4.20057583
51.862989,4.79583152,4.4825503,0.559715306,4.22250804,4.46118841,4.19982368
51.873481,4.69041576,4.49401405,0.443172326,4.22171368,4.47274981,4.19907073
51.883972,4.69041576,4.50634034,0.429040119,4.22091962,4.48517639,4.1983171
51.894464,4.12310563,4.51961227,-0.629687736,4.2201257,4.49855161,4.19756267
51.904956,5.47722558,4.53391911,0.971239653,4.21933199,4.51296503,4.19680751
51.915447,4,4.54936068,-0.741188693,4.21853855,4.52851683,4.19605168
51.925939,3.74165739,4.56605388,-0.907962827,4.21774525,4.54532436,4.19529504
51.93643,4.89897949,4.58412478,0.561119157,4.21695221,4.56351409,4.19453774
51.946922,5.29150262,4.60372431,0.82932401,4.21615929,4.58323749,4.19377963
51.957414,4.79583152,4.62503995,0.413269367,4.21536657,4.60468268,4.19302079
51.967905,4.89897949,4.64823473,0.500744201,4.2145741,4.62801317,4.19226128
51.978397,4.47213595,4.67357598,-0.448820704,4.21378174,4.65349721,4.19150097
51.988888,4.89897949,4.70136687,0.444536406,4.21298964,4.68143893,4.19074
51.99938,4.79583152,4.73201667,0.252616023,4.21219764,4.71224897,4.18997823
52.009872,4.89897949,4.76607743,0.364557336,4.21140582,4.74648117,4.18921572
52.020363,5.29150262,4.80433671,0.697972719,4.21061424,4.78492567,4.18845255
52.030855,4.47213595,4.84796316,-0.613047472,4.20982276,4.82875499,4.18768858
52.041346,5.19615242,4.89867973,0.545410574,4.20903151,4.87969763,4.18692395
52.051838,4.58257569,4.95907698,-0.613597007,4.20824036,4.94035228,4.18615851
52.06233,5.38516481,5.03295367,0.593473787,4.20744937,5.01452905,4.18539235
52.072821,5.56776436,5.12577089,0.664825894,4.20665862,5.10770412,4.18462553
52.083313,5,5.24514292,-0.495119096,4.20586794,5.2275105,4.1838579
52.093804,5.47722558,5.40112482,0.275863645,4.2050775,5.38402372,4.18308962
52.104296,5.83095189,5.60634307,0.473929135,4.20428714,5.58988885,4.18232054
52.114788,5.47722558,5.87541312,-0.631021031,4.20349693,5.85973202,4.18155073
52.125279,6,6.22375895,-0.473031656,4.20270695,6.20897361,4.18078027
52.135771,6.63324958,6.6658815,-0.180643067,4.20191705,6.65209324,4.180009
52.146262,8.30662386,7.21296207,1.04578286,4.20112737,7.20023425,4.17923708
52.156754,7.34846923,7.87119963,-0.72300097,4.20033776,7.85954902,4.17846436
52.167246,8.48528137,8.64014774,-0.393530639,4.1995483,8.62954509,4.17769092
52.177737,9.53939201,9.51224751,0.164755907,4.19875906,9.50262643,4.17691682
52.188229,10.4880885,10.4732229,0.121924513,4.19796989,10.4644927,4.17614193
52.19872,11.2694277,11.5020945,-0.482355468,4.19718094,11.4941522,4.17536638
52.209212,12.083046,12.5727107,-0.699760494,4.19639206,12.5654507,4.17459003
52.219704,13.892444,13.6540999,0.48820497,4.19560332,13.64742,4.17381296
52.230195,14.3527001,14.7118025,-0.599251523,4.19481481,14.7056072,4.17303525
52.240687,16.1864141,15.7092784,0.690750091,4.19402636,15.7034804,4.17225673
52.251178,16.8522995,16.6083843,0.493877784,4.19323813,16.6029036,4.17147757
52.26167,17.3493516,17.3715139,-0.148870024,4.19244997,17.366277,4.17069761
52.272162,16.3095064,17.9629218,-1.28585202,4.19166196,17.9578601,4.16991693
52.282653,18.5202592,18.3519205,0.410291004,4.19087416,18.3469684,4.1691356
52.293145,18.6547581,18.516617,0.37167339,4.19008643,18.5117112,4.16835348
52.303636,19.078784,18.4471843,0.794732486,4.18929893,18.442262,4.16757071
52.314128,17.7763888,18.1478505,-0.609476546,4.18851149,18.1428488,4.16678715
52.32462,18.734994,17.6360036,1.04832741,4.18772421,17.6308585,4.16600287
52.335111,16.9115345,16.9392574,-0.166501789,4.18693714,16.933902,4.16521794
52.345603,16.4316767,16.091424,0.583311891,4.18615015,16.0857878,4.16443222
52.356094,15.5563492,15.1297732,0.653127861,4.18536339,15.1237798,4.16364586
52.366586,14.4913767,14.0921371,0.63185414,4.1845767,14.0857033,4.16285871
52.377078,12.2065556,13.0159328,-0.899653918,4.18379017,13.0089677,4.16207084
52.387569,11.9582607,11.9366792,0.146906719,4.18300386,11.9290846,4.16128233
52.398061,11.0905365,10.8865392,0.451660607,4.18221764,10.8782119,4.16049303
52.408552,10.3440804,9.89398308,0.670892949,4.18143165,9.8848197,4.15970309
52.419044,8.88819442,8.9819544,-0.306202524,4.18064575,8.97185923,4.15891237
52.429536,8.24621125,8.16767052,0.28025119,4.17986001,8.15656678,4.15812092
52.440027,7.74596669,7.46158775,0.533271921,4.17907451,7.44943026,4.15732884
52.450519,7.34846923,6.86689872,0.693952814,4.1782891,6.85368438,4.15653597
52.46101,6.63324958,6.38026763,0.502973114,4.17750393,6.36604048,4.15574247
52.471502,5.38516481,5.99235498,-0.779224085,4.17671886,5.97720103,4.15494817
52.481994,5.56776436,5.68992871,-0.34952017,4.17593397,5.67396271,4.15415317
52.492485,5.47722558,5.4578032,0.139364181,4.17514933,5.44115086,4.15335753
52.502977,5.19615242,5.28082777,-0.290990287,4.17436479,5.26360943,4.1525611
52.513468,5.29150262,5.14552759,0.382066795,4.17358051,5.12784794,4.15176404
52.52396,4.89897949,5.040733,-0.376501682,4.17279635,5.0226766,4.1509662
52.534452,5.09901951,4.9578509,0.375724123,4.17201237,4.93948275,4.15016765
52.544943,4.24264069,4.89056953,-0.804940272,4.17122866,4.87193805,4.14936846
52.555435,4.47213595,4.83441944,-0.601899894,4.17044508,4.81556017,4.1485685
52.565926,4.79583152,4.78635805,0.0973317584,4.16966177,4.76729721,4.1477679
52.576418,4.79583152,4.74431855,0.226964699,4.16887859,4.72507578,4.14696652
52.58691,4.89897949,4.70692732,0.438237571,4.16809562,4.6875178,4.14616443
52.597401,4.24264069,4.67325575,-0.656212666,4.16731294,4.65369165,4.14536172
52.607893,4.58257569,4.64265327,-0.245107281,4.16653039,4.6229446,4.14455822
52.618384,4.79583152,4.614665,0.425636614,4.16574815,4.59482028,4.1437541
52.628876,5.09901951,4.58894111,0.714197731,4.16496606,4.56896775,4.14294919
52.639368,4.58257569,4.56521568,0.131757423,4.16418419,4.54512021,4.14214359
52.649859,3.74165739,4.5432725,-0.895329612,4.16340264,4.52306075,4.14133736
52.660351,4.47213595,4.52292451,-0.22536316,4.16262126,4.50260169,4.14053035
52.670842,3.60555128,4.504019,-0.947875376,4.16184019,4.48358981,4.13972272
52.681334,4.58257569,4.48641589,0.310096449,4.1610593,4.46588453,4.13891431
52.691826,4.79583152,4.46999701,0.570819158,4.16027867,4.44936729,4.1381052
52.702317,4.24264069,4.45465742,-0.460452752,4.15949838,4.43393277,4.13729546
52.712809,4.24264069,4.44029939,-0.44458824,4.15871827,4.41948287,4.13648496
52.7233,4.58257569,4.42684105,0.394632285,4.15793852,4.40593543,4.13567383
52.733792,4.89897949,4.41420389,0.696258282,4.15715897,4.39321163,4.13486193
52.744284,4.24264069,4.40232104,-0.399600244,4.15637971,4.38124436,4.13404933
52.754775,3.87298335,4.39113216,-0.719825542,4.15560081,4.36997303,4.13323611
52.765267,4.47213595,4.38057968,0.302582666,4.15482214,4.35933985,4.13242212
52.775758,4.89897949,4.37061561,0.726886423,4.15404385,4.34929663,4.13160751
52.78625,4.47213595,4.36119269,0.333081468,4.1532658,4.33979591,4.13079213
52.796742,4.58257569,4.3522708,0.479900922,4.15248806,4.33079742,4.12997606
52.807233,4.79583152,4.34381339,0.672322936,4.15171073,4.32226444,4.12915937
52.817725,3.60555128,4.33578486,-0.854537058,4.15093366,4.31416122,4.12834191
52.828216,5.19615242,4.32815579,0.931663369,4.150157,4.30645823,4.12752384
52.838708,3.87298335,4.32089645,-0.669263105,4.14938062,4.29912558,4.126705
52.8492,5.09901951,4.31398176,0.886023561,4.14860459,4.2921381,4.12588547
52.859691,5.09901951,4.3073887,0.889736371,4.14782901,4.28547266,4.12506533
52.870183,4.69041576,4.30109432,0.623956277,4.14705372,4.2791062,4.12424442
52.880674,4.35889894,4.29507995,0.252624214,4.14627889,4.27301996,4.1234229
52.891166,3.31662479,4.28932614,-0.986256227,4.14550438,4.2671944,4.12260062
52.901658,4,4.28381665,-0.532744448,4.14473026,4.2616132,4.12177764
52.912149,3.74165739,4.27853648,-0.732720335,4.14395663,4.2562613,4.12095406
52.922641,5.09901951,4.2734703,0.908597386,4.14318334,4.25112328,4.12012972
52.933132,3.87298335,4.2686059,-0.628985335,4.14241055,4.24618687,4.11930477
52.943624,3.60555128,4.2639301,-0.811405464,4.14163812,4.24143883,4.11847906
52.954116,4,4.25943209,-0.509344765,4.14086614,4.23686827,4.11765266
52.964607,4.47213595,4.25510179,0.465869261,4.14009469,4.23246508,4.11682566
52.975099,4.24264069,4.25092864,-0.0910381829,4.13932364,4.22821863,4.1159979
52.98559,4.24264069,4.24690442,-0.0652972538,4.13855313,4.22412067,4.11516953
52.996082,4.79583152,4.24301996,0.743512987,4.13778304,4.22016196,4.11434041
53.006574,4.35889894,4.23926785,0.34587728,4.13701344,4.21633504,4.1135106
53.017065,4.12310563,4.23564115,-0.335463155,4.13624443,4.21263296,4.1126802
53.027557,3.87298335,4.23213239,-0.599290452,4.13547587,4.20904816,4.11184904
53.038048,3.31662479,4.22873591,-0.95504509,4.13470791,4.20557499,4.11101727
53.04854,3,4.22544516,-1.10699826,4.13394042,4.20220681,4.11018476
53.059032,5,4.22225492,0.881898563,4.13317349,4.19893842,4.10935156
53.069523,4.12310563,4.21916035,-0.309926959,4.1324072,4.19576489,4.10851777
53.080015,4.47213595,4.21615599,0.505944631,4.13164141,4.19268076,4.10768322
53.090506,5,4.21323789,0.886996118,4.1308763,4.18968205,4.10684808
53.100998,4,4.21040124,-0.458695148,4.13011172,4.18676389,4.10601219
53.11149,5,4.20764234,0.890144744,4.12934775,4.18392256,4.10517562
53.121981,4.24264069,4.20495768,0.19412111,4.1285845,4.18115455,4.10433846
53.132473,3.74165739,4.20234324,-0.678738429,4.12782182,4.17845576,4.10350055
53.142964,4.24264069,4.1997962,0.206989089,4.12705987,4.17582337,4.10266205
53.153456,4,4.19731296,-0.444199239,4.12629853,4.17325374,4.10182279
53.163948,5.38516481,4.19489083,1.09099678,4.12553787,4.17074416,4.10098287
53.174439,4.35889894,4.19252726,0.407886846,4.124778,4.16829206,4.10014236
53.184931,4.35889894,4.1902192,0.410706396,4.12401877,4.16589434,4.0993011
53.195422,3.87298335,4.18796462,-0.561231924,4.12326035,4.16354897,4.09845926
53.205914,4.24264069,4.18576077,0.238495117,4.12250262,4.16125314,4.09761667
53.216406,4.69041576,4.18360566,0.71190596,4.12174565,4.15900487,4.09677341
53.226897,4.58257569,4.18149744,0.633307397,4.12098953,4.15680227,4.09592956
53.237389,3.46410162,4.17943372,-0.845773078,4.12023415,4.15464291,4.09508498
53.24788,4.79583152,4.17741304,0.786395881,4.11947966,4.15252534,4.09423981
53.258372,4.58257569,4.17543327,0.638077133,4.11872593,4.15044736,4.09339389
53.268864,4.58257569,4.17349293,0.639595786,4.11797305,4.14840749,4.09254732
53.279355,3.60555128,4.17159061,-0.752355859,4.11722112,4.14640431,4.09170016
53.289847,3.46410162,4.16972447,-0.840013607,4.11647001,4.14443592,4.09085227
53.300338,4.24264069,4.16789344,0.273399421,4.11571988,4.14250125,4.09000379
53.31083,3.46410162,4.16609582,-0.837850946,4.11497061,4.14059856,4.08915457
53.321322,4.35889894,4.16433051,0.441099119,4.11422228,4.13872673,4.0883047
53.331813,4.12310563,4.16259645,-0.198722996,4.113475,4.13688469,4.08745425
53.342305,4.24264069,4.16089217,0.285916977,4.11272863,4.13507091,4.08660306
53.352796,4,4.15921688,-0.399019902,4.11198335,4.13328462,4.0857513
53.363288,4,4.15756923,-0.396949908,4.11123902,4.1315244,4.0848988
53.37378,3.31662479,4.15594838,-0.916146051,4.11049575,4.1297894,4.08404565
53.384271,4.69041576,4.15435353,0.732162704,4.10975362,4.12807883,4.08319193
53.394763,4.89897949,4.15278349,0.863826367,4.10901252,4.12639141,4.08233747
53.405254,3.46410162,4.1512377,-0.828936718,4.10827261,4.1247266,4.08148244
53.415746,3.74165739,4.14971503,-0.638793901,4.10753377,4.12308322,4.08062668
53.426238,4.58257569,4.14821488,0.659060559,4.1067961,4.12146065,4.07977027
53.436729,4.69041576,4.14673662,0.737346012,4.1060597,4.11985825,4.07891329
53.447221,4.24264069,4.14527927,0.312027907,4.10532444,4.11827498,4.07805558
53.457712,4.24264069,4.14384244,0.31432188,4.10459049,4.11671046,4.0771973
53.468204,5,4.14242521,0.92605334,4.10385774,4.11516369,4.0763383
53.478696,3.74165739,4.1410271,-0.63195705,4.10312628,4.1136342,4.07547865
53.489187,4,4.13964766,-0.373694602,4.10239622,4.11212152,4.07461844
53.499679,4.35889894,4.13828605,0.469694465,4.10166744,4.11062475,4.0737575
53.51017,3.46410162,4.13694202,-0.820268495,4.1009401,4.10914363,4.072896
53.520662,4.47213595,4.13561479,0.580104445,4.10021409,4.10767733,4.07203377
53.531154,4.12310563,4.134304,-0.10582237,4.09948953,4.10622548,4.0711709
53.541645,4.47213595,4.13300931,0.58234581,4.09876649,4.10478771,4.07030747
53.552137,3.87298335,4.13173003,-0.508671492,4.09804488,4.10336328,4.06944332
53.562628,4.24264069,4.13046598,0.334924923,4.09732487,4.10195199,4.06857862
53.57312,4.69041576,4.12921651,0.749132329,4.09660634,4.10055314,4.06771319
53.583612,4.24264069,4.12798136,0.338613834,4.0958894,4.09916645,4.06684712
53.594103,3.46410162,4.12676026,-0.814038481,4.09517415,4.09779164,4.0659805
53.604595,4,4.12555264,-0.354334083,4.0944605,4.09642806,4.06511316
53.615086,4.24264069,4.12435839,0.343921941,4.09374859,4.0950756,4.06424527
53.625578,4,4.12317694,-0.350965728,4.09303835,4.09373363,4.06337666
53.63607,4.47213595,4.12200812,0.591716009,4.09232987,4.09240195,4.06250742
53.646561,3.87298335,4.12085173,-0.497863822,4.09162325,4.09108034,4.06163762
53.657053,3.60555128,4.11970728,-0.717046721,4.0909184,4.08976824,4.06076712
53.667544,3.74165739,4.1185747,-0.613935921,4.09021548,4.08846559,4.05989606
53.678036,4.35889894,4.11745354,0.491370946,4.08951441,4.08717184,4.05902429
53.688528,3.46410162,4.11634365,-0.807615026,4.0888153,4.08588684,4.05815189
53.699019,3.87298335,4.1152449,-0.492200722,4.08811824,4.08461043,4.05727895
53.709511,3.87298335,4.11415686,-0.4910942,4.08742314,4.08334209,4.0564053
53.720002,3.46410162,4.11307953,-0.805591655,4.08673019,4.08208183,4.0555311
53.730494,4.69041576,4.1120125,0.760528279,4.08603929,4.08082915,4.05465619
53.740986,3.74165739,4.11095567,-0.607699174,4.08535055,4.07958394,4.05378066
53.751477,4.47213595,4.10990897,0.601852956,4.08466408,4.07834608,4.05290459
53.761969,4.12310563,4.10887203,0.119304645,4.0839798,4.07711512,4.05202781
53.77246,4.12310563,4.10784486,0.12353446,4.08329788,4.07589108,4.05115049
53.782952,4.69041576,4.10682713,0.76392973,4.08261825,4.07467353,4.05027247
53.793444,4.35889894,4.10581877,0.503070742,4.08194101,4.07346238,4.04939383
53.803935,5,4.10481975,0.946139657,4.08126628,4.07225755,4.04851465
53.814427,4.35889894,4.10382973,0.505043771,4.08059399,4.07105863,4.04763476
53.824918,4,4.10284879,-0.320700466,4.07992431,4.06986567,4.04675435
53.83541,4.12310563,4.10187661,0.14570181,4.07925717,4.06867827,4.04587323
53.845902,4.12310563,4.10091317,0.148971314,4.07859268,4.06749638,4.0449915
53.856393,3.31662479,4.09995847,-0.885061398,4.07793097,4.06631995,4.04410924
53.866885,4,4.09901221,-0.314662064,4.07727197,4.06514859,4.04322627
53.877376,3.60555128,4.0980745,-0.701799987,4.07661587,4.06398239,4.04234278
53.887868,4.89897949,4.09714505,0.895452083,4.07596258,4.06282096,4.0414586
53.89836,4.24264069,4.09622389,0.38264448,4.07531225,4.06166429,4.0405738
53.908851,4.12310563,4.09531102,0.166717144,4.07466499,4.06051234,4.03968847
53.919343,4.89897949,4.0944062,0.896980092,4.07402074,4.05936477,4.03880245
53.929834,4.12310563,4.09350954,0.172035123,4.0733797,4.05822166,4.03791591
53.940326,4.58257569,4.09262081,0.699967771,4.0727418,4.05708267,4.03702867
53.950818,4.12310563,4.09174005,0.177103282,4.07210718,4.0559478,4.03614083
53.961309,4,4.09086729,-0.301442023,4.07147597,4.05481702,4.03525246
53.971801,4.12310563,4.09000233,0.181943121,4.07084811,4.05369002,4.03436341
53.982292,4.58257569,4.08914528,0.702446022,4.0702238,4.0525669,4.03347383
53.992784,4.12310563,4.08829596,0.186573475,4.069603,4.05144734,4.03258357
54.003276,4.69041576,4.08745443,0.776505847,4.06898584,4.05033135,4.03169271
54.013767,3.87298335,4.08662073,-0.462209247,4.06837246,4.04921893,4.03080133
54.024259,4.79583152,4.0857947,0.842636825,4.06776282,4.04810976,4.02990926
54.03475,4.69041576,4.08497648,0.778099785,4.06715713,4.04700398,4.02901668
54.045242,4.69041576,4.08416591,0.778620477,4.06655534,4.04590128,4.02812342
54.055734,4,4.08336306,-0.288726623,4.0659576,4.04480167,4.02722956
54.066225,3.46410162,4.08256801,-0.786426347,4.06536407,4.04370518,4.02633519
54.076717,4.24264069,4.08178062,0.40107364,4.06477471,4.04261151,4.02544013
54.087208,3.16227766,4.08100105,-0.958500594,4.06418973,4.0415208,4.02454457
54.0977,5.09901951,4.08022916,1.00935145,4.06360912,4.04043275,4.02364833
54.108192,4.69041576,4.07946505,0.781633359,4.06303303,4.03934739,4.02275149
54.118683,3,4.07870882,-1.03860908,4.0624616,4.03826475,4.02185415
54.129175,3.74165739,4.07796036,-0.579916347,4.06189485,4.03718456,4.02095613
54.139666,4.58257569,4.07721983,0.710883861,4.06133297,4.03610695,4.02005761
54.150158,3.87298335,4.07648714,-0.451113953,4.06077597,4.03503164,4.01915842
54.16065,3.74165739,4.07576241,-0.578018188,4.06022401,4.03395869,4.01825863
54.171141,3.46410162,4.07504575,-0.781629154,4.05967726,4.03288811,4.01735835
54.181633,3.74165739,4.07433707,-0.576783915,4.05913573,4.03181965,4.01645739
54.192124,3.31662479,4.07363657,-0.870064241,4.05859964,4.03075345,4.01555593
54.202616,4.24264069,4.07294418,0.411942355,4.058069,4.02968925,4.01465381
54.213108,4,4.07226003,-0.268812267,4.05754401,4.0286271,4.0137511
54.223599,4.89897949,4.07158426,0.909612677,4.05702483,4.02756703,4.01284789
54.234091,4.58257569,4.07091682,0.715303345,4.0565115,4.02650879,4.01194402
54.244582,3.74165739,4.07025791,-0.573236882,4.05600425,4.02545253,4.01103965
54.255074,4.24264069,4.0696075,0.415972586,4.05550312,4.02439801,4.01013462
54.265566,4.58257569,4.06896573,0.716665866,4.0550083,4.02334526,4.00922901
54.276057,4.12310563,4.06833278,0.234036001,4.05451999,4.02229435,4.00832291
54.286549,4.24264069,4.06770861,0.418248823,4.05403824,4.02124502,4.00741615
54.29704,4.47213595,4.06709346,0.636429492,4.0535633,4.02019742,4.0065089
54.307532,3.74165739,4.06648732,-0.569938531,4.05309523,4.01915132,4.00560098
54.318024,3.74165739,4.06589036,-0.56941459,4.05263425,4.01810678,4.0046925
54.328515,3.16227766,4.06530278,-0.950276336,4.05218056,4.01706384,4.00378353
54.339007,4.69041576,4.06472457,0.791006439,4.05173426,4.01602226,4.0028739
54.349498,4.35889894,4.064156,0.542902332,4.05129559,4.01498222,4.00196379
54.35999,4.24264069,4.06359709,0.423135434,4.05086466,4.01394346,4.00105302
54.370482,3.87298335,4.06304805,-0.435964104,4.0504417,4.01290605,4.00014168
54.380973,4.24264069,4.06250907,0.424419152,4.05002693,4.01187005,3.99922986
54.391465,4,4.06198022,-0.248958269,4.04962048,4.01083523,3.99831739
54.401956,4.47213595,4.06146176,0.640838663,4.04922263,4.00980175,3.99740445
54.412448,3.60555128,4.06095377,-0.674835163,4.04883351,4.00876937,3.99649085
54.42294,4.35889894,4.06045648,0.546298878,4.04845336,4.00773817,3.99557669
54.433431,3.46410162,4.05997012,-0.771925192,4.04808246,4.00670821,3.99466205
54.443923,4.58257569,4.05949478,0.723243327,4.04772094,4.00567926,3.99374677
54.454414,4.35889894,4.05903078,0.547602199,4.04736912,4.00465148,3.99283101
54.464906,4.69041576,4.05857821,0.794882098,4.04702718,4.00362465,3.9919146
54.475398,4.24264069,4.05813735,0.429538516,4.04669538,4.00259884,3.99099764
54.485889,3.46410162,4.05770846,-0.770458855,4.04637402,4.00157411,3.99008021
54.496381,4,4.0572917,-0.23935684,4.04606329,4.00055025,3.98916214
54.506872,4.35889894,4.05688738,0.549555791,4.04576354,3.99952742,3.9882436
54.517364,4.35889894,4.05649567,0.549912057,4.04547497,3.99850539,3.98732441
54.527856,3.16227766,4.05611689,-0.94543071,4.04519791,3.99748425,3.98640468
54.538347,3.16227766,4.05575132,-0.945237358,4.04493268,3.99646406,3.98548448
54.548839,4.58257569,4.05539919,0.726069216,4.04467952,3.9954446,3.98456364
54.55933,4.12310563,4.05506084,0.260853952,4.04443882,3.99442604,3.98364234
54.569822,4.24264069,4.05473652,0.433479147,4.04421083,3.99340817,3.98272041
54.580314,3.74165739,4.05442656,-0.559257695,4.04399593,3.99239106,3.98179792
54.590805,3.60555128,4.05413131,-0.669761178,4.04379447,3.99137478,3.98087498
54.601297,3.46410162,4.05385106,-0.767951457,4.04360678,3.99035911,3.97995141
54.611788,4,4.05358619,-0.231486914,4.04343325,3.98934424,3.97902738
54.62228,3.87298335,4.05333702,-0.424680676,4.04327424,3.98832994,3.97810272
54.632772,3.60555128,4.05310395,-0.668993775,4.04313015,3.98731629,3.97717751
54.643263,3.60555128,4.05288737,-0.668831885,4.04300139,3.98630337,3.97625185
54.653755,3.87298335,4.05268764,-0.423915428,4.04288838,3.98529096,3.97532557
54.664246,4.79583152,4.05250521,0.86216374,4.04279155,3.98427924,3.97439883
54.674738,3.74165739,4.05234047,-0.557389527,4.04271133,3.983268,3.97347147
54.68523,4,4.05219389,-0.228459814,4.04264819,3.98225731,3.97254357
54.695721,4.58257569,4.05206592,0.728361018,4.04260263,3.98124726,3.97161523
54.706213,4.35889894,4.05195703,0.554023389,4.04257511,3.98023763,3.97068626
54.716704,4.58257569,4.05186772,0.728497068,4.04256616,3.9792286,3.96975684
54.727196,4.47213595,4.05179848,0.648334387,4.04257629,3.97821996,3.96882681
54.737688,4.35889894,4.05174985,0.554210332,4.04260607,3.97721179,3.96789624
54.748179,3.74165739,4.05172238,-0.556834803,4.04265604,3.97620417,3.96696523
54.758671,3.87298335,4.05171664,-0.422768605,4.0427268,3.97519689,3.96603361
54.769162,4.35889894,4.05173321,0.55422535,4.04281894,3.97419014,3.96510154
54.779654,4.69041576,4.05177269,0.799151466,4.0429331,3.97318369,3.96416886
54.790146,4.58257569,4.05183574,0.728519014,4.04306994,3.97217764,3.96323565
54.800637,3.87298335,4.05192299,-0.423012582,4.04323009,3.97117206,3.96230201
54.811129,4.35889894,4.05203514,0.553952888,4.0434143,3.97016676,3.96136775
54.82162,4,4.05217288,-0.228413833,4.04362324,3.9691619,3.96043306
54.832112,4.58257569,4.05233696,0.728174932,4.0438577,3.96815729,3.95949776
54.842604,4,4.05252814,-0.229190189,4.04411845,3.967153,3.95856194
54.853095,3.74165739,4.05274719,-0.557754249,4.04440626,3.96614912,3.95762569
54.863587,3.87298335,4.05299496,-0.42427776,4.04472202,3.96514545,3.95668883
54.874078,4.12310563,4.05327227,0.264260008,4.04506654,3.96414216,3.95575155
54.88457,4.12310563,4.05358006,0.263677012,4.04544079,3.96313906,3.95481366
54.895062,4.12310563,4.05391922,0.263033097,4.04584566,3.96213622,3.95387525
54.905553,3.46410162,4.05429067,-0.768237627,4.04628209,3.96113373,3.95293642
54.916045,5,4.05469548,0.972267721,4.04675117,3.96013139,3.95199699
54.926536,2.44948974,4.05513461,-1.26714043,4.04725386,3.95912937,3.95105713
54.937028,4,4.05560922,-0.235816081,4.04779134,3.95812748,3.95011668
54.94752,4,4.0561204,-0.236897451,4.04836471,3.95712581,3.94917571
54.958011,4.79583152,4.05666926,0.859745465,4.04897509,3.95612443,3.94823433
54.968503,4.24264069,4.05725712,0.430561926,4.04962382,3.95512315,3.94729235
54.978994,3.87298335,4.05788512,-0.430002068,4.05031206,3.95412214,3.94634995
54.989486,4.12310563,4.05855473,0.254068689,4.05104126,3.95312121,3.94540696
54.999978,4.12310563,4.05926724,0.252662595,4.05181275,3.95212045,3.94446347
55.010469,3.74165739,4.06002402,-0.564239872,4.0526279,3.95111993,3.94351956
55.020961,3.87298335,4.06082671,-0.433409002,4.05348837,3.95011946,3.94257507
55.031452,3.74165739,4.06167671,-0.565702506,4.05439556,3.94911923,3.94163016
55.041944,3.60555128,4.06257582,-0.676035902,4.05535128,3.94811902,3.94068466
55.052436,4.24264069,4.06352564,0.423219856,4.05635716,3.94711894,3.93973866
55.062927,4.35889894,4.06452786,0.54255975,4.05741488,3.94611907,3.93879226
55.073419,3.87298335,4.06558452,-0.438863499,4.0585265,3.9451192,3.93784527
55.08391,4.69041576,4.06669734,0.789758455,4.05969376,3.94411952,3.93689788
55.094402,4.12310563,4.06786857,0.235025653,4.0609189,3.94311984,3.9359499
55.104894,4.12310563,4.0691002,0.232390665,4.06220394,3.94212023,3.93500143
55.115385,4,4.07039434,-0.265319309,4.06355097,3.9411208,3.93405257
55.125877,2.82842712,4.07175352,-1.11504547,4.06496257,3.94012133,3.93310312
55.136368,4.47213595,4.07317991,0.631629671,4.0664409,3.93912202,3.93215327
55.14686,4.47213595,4.07467633,0.630443994,4.06798879,3.93812267,3.93120284
55.157352,4.58257569,4.07624528,0.711568984,4.06960875,3.93712336,3.93025193
55.167843,4.24264069,4.07788938,0.405895679,4.07130342,3.93612419,3.92930062
55.178335,5,4.07961188,0.959368605,4.07307605,3.93512495,3.92834874
55.188826,4.47213595,4.08141549,0.62507637,4.07492935,3.93412584,3.92739646
55.199318,4.47213595,4.08330376,0.623564108,4.07686691,3.93312665,3.92644361
55.20981,4.12310563,4.08527989,0.194488391,4.07889192,3.93212747,3.92549028
55.220301,4.24264069,4.08734722,0.394072921,4.08100772,3.9311284,3.92453657
55.230793,4.12310563,4.08950985,0.183291508,4.08321845,3.93012924,3.92358228
55.241284,4.47213595,4.09177127,0.616737128,4.08552758,3.92913017,3.92262761
55.251776,3.60555128,4.09413601,-0.698988367,4.08793967,3.92813099,3.92167237
55.262268,4.35889894,4.09660819,0.512143297,4.09045884,3.9271318,3.92071665
55.272759,4.47213595,4.09919208,0.610691307,4.09308938,3.92613269,3.91976056
55.283251,4.24264069,4.10189297,0.375163581,4.09583658,3.92513346,3.91880389
55.293742,4.35889894,4.10471539,0.504166197,4.09870497,3.92413429,3.91784685
55.304234,3.74165739,4.10766517,-0.604985774,4.10170043,3.92313499,3.91688925
55.314726,5.09901951,4.11074767,0.994118628,4.10482828,3.92213566,3.91593118
55.325217,3.74165739,4.11396847,-0.610172994,4.10809415,3.92113638,3.91497273
55.335709,3.60555128,4.11733443,-0.715390213,4.1115049,3.92013695,3.91401372
55.3462,4,4.12085151,-0.347637033,4.11506649,3.91913756,3.91305434
55.356692,4.24264069,4.12452733,0.343676242,4.11878656,3.91813802,3.91209441
55.367184,4.79583152,4.12836894,0.816983835,4.12267217,3.91713842,3.91113401
55.377675,3.87298335,4.13238374,-0.509313649,4.12673074,3.91613885,3.91017324
55.388167,3.16227766,4.13658075,-0.987067927,4.13097129,3.91513912,3.90921192
55.398658,4.47213595,4.14096792,0.57547201,4.13540178,3.9141394,3.90825023
55.40915,4,4.14555535,-0.381517162,4.14003233,3.91313952,3.90728799
55.419642,4.24264069,4.15035245,0.303789789,4.14487236,3.91213955,3.90632529
55.430133,3.74165739,4.15536919,-0.643204323,4.14993185,3.91113959,3.90536223
55.440625,4.69041576,4.16061759,0.727872358,4.15522284,3.91013944,3.90439862
55.451116,3.87298335,4.16610844,-0.541410281,4.16075613,3.9091393,3.90343465
55.461608,4.79583152,4.1718553,0.789921655,4.16654529,3.90813896,3.90247014
55.4721,4.35889894,4.17787101,0.42547378,4.17260318,3.90713853,3.90150517
55.482591,3.74165739,4.18416914,-0.665215567,4.17894338,3.90613809,3.90053985
55.493083,4.35889894,4.19076603,0.41004014,4.18558224,3.90513744,3.89957399
55.503574,3.46410162,4.19767656,-0.856489899,4.19253468,3.90413678,3.89860777
55.514066,3.31662479,4.20491928,-0.942493762,4.19981924,3.90313591,3.89764101
55.524558,3.31662479,4.21251195,-0.946513161,4.20745371,3.90213493,3.89667381
55.535049,3.87298335,4.22047348,-0.589482942,4.21545701,3.90113392,3.89570625
55.545541,3.46410162,4.22882644,-0.874485461,4.22385172,3.9001327,3.89473817
55.556032,3.60555128,4.23759177,-0.795009743,4.23265882,3.89913144,3.89376973
55.566524,4.79583152,4.2467953,0.740969786,4.24190415,3.89812997,3.89280076
55.577016,4.47213595,4.25646214,0.464406946,4.25161284,3.89712836,3.89183135
55.587507,3.60555128,4.26661914,-0.813060801,4.26181176,3.89612671,3.89086159
55.597999,3.87298335,4.27729812,-0.635857508,4.27253275,3.89512483,3.88989131
55.60849,4.12310563,4.2885292,-0.406722974,4.28380596,3.89412291,3.88892068
55.618982,4.35889894,4.30034915,0.241970642,4.29566818,3.89312076,3.88794953
55.629474,4.12310563,4.31279424,-0.435532564,4.30815571,3.89211846,3.88697794
55.639965,4.35889894,4.32590344,0.181646641,4.32130753,3.89111611,3.88600602
55.650457,4.58257569,4.3397227,0.492801175,4.33516963,3.89011351,3.88503357
55.660948,4.89897949,4.35429635,0.738026511,4.34978638,3.88911087,3.88406078
55.67144,4.12310563,4.369678,-0.496560542,4.3652114,3.88810797,3.88308748
55.681932,5.38516481,4.38592134,0.999621663,4.38149843,3.88710492,3.88211375
55.692423,4.47213595,4.4030844,0.262776618,4.39870552,3.88610181,3.88113968
55.702915,4.69041576,4.42123527,0.518826072,4.41690079,3.88509844,3.8801651
55.713406,4.24264069,4.44044091,-0.444747366,4.43615125,3.88409501,3.87919019
55.723898,3.74165739,4.46078161,-0.848011924,4.45653723,3.88309132,3.87821476
55.73439,4.24264069,4.48233913,-0.489590081,4.47814053,3.88208747,3.87723891
55.744881,3.46410162,4.50520238,-1.02034346,4.50105009,3.88108354,3.87626274
55.755373,4.58257569,4.52947526,0.230435314,4.52536986,3.88007935,3.87528605
55.765864,4.58257569,4.55526215,0.165268102,4.55120427,3.87907509,3.87430905
55.776356,5.09901951,4.58268747,0.718562481,4.5786778,3.87807056,3.87333153
55.786848,4.69041576,4.61188031,0.280241762,4.60791957,3.87706586,3.8723536
55.797339,4.69041576,4.64298262,0.217791506,4.63907159,3.87606107,3.87137535
55.807831,5.29150262,4.67616085,0.78443723,4.67230039,3.87505602,3.87039659
55.818322,4.47213595,4.71158755,-0.489337911,4.70777855,3.87405088,3.86941752
55.828814,3.87298335,4.74947002,-0.936208672,4.74571348,3.87304547,3.86843794
55.839306,5.09901951,4.79003226,0.555866217,4.78632921,3.87203988,3.86745796
55.849797,4.58257569,4.8335304,-0.5009538,4.82988198,3.8710342,3.86647766
55.860289,4.58257569,4.88027541,-0.545618656,4.87668284,3.87002824,3.86549686
55.87078,5.65685425,4.93061617,0.852196036,4.92708079,3.86902219,3.86451576
55.881272,5.74456265,4.98499242,0.871533264,4.98151572,3.86801586,3.86353415
55.891764,4.69041576,5.04392584,-0.594567138,5.04050947,3.86700934,3.86255215
55.902255,5,5.10806347,-0.32873008,5.10470928,3.86600273,3.86156984
55.912747,5.38516481,5.17823764,0.45489248,5.17494778,3.86499583,3.86058703
55.923238,5.91607978,5.25547142,0.812778177,5.25224833,3.86398884,3.85960392
55.93373,6.164414,5.34109009,0.90737198,5.33793665,3.86298156,3.85862032
55.944222,6.244998,5.43673623,0.899033795,5.43365577,3.86197409,3.85763633
55.954713,5.91607978,5.54445256,0.609612355,5.54144897,3.86096652,3.85665203
55.965205,6.70820393,5.66677377,1.02050486,5.66385152,3.85995865,3.85566725
55.975696,7.14142843,5.80668825,1.15530956,5.8038524,3.85895069,3.85468217
55.986188,6.55743852,5.96773048,0.767924504,5.96498657,3.85794243,3.85369661
55.99668,6.70820393,6.1538378,0.744557676,6.1511917,3.85693398,3.85271065
56.007171,7.21110255,6.36925462,0.917522714,6.36671222,3.85592542,3.85172441
56.017663,6.55743852,6.61840257,-0.246908985,6.61596943,3.85491657,3.85073768
56.028154,7.93725393,6.90545863,1.01577326,6.90313951,3.85390761,3.84975066
56.038646,7.41619849,7.23422069,0.426588551,7.23201916,3.85289836,3.84876317
56.049138,8.18535277,7.60758684,0.760109159,7.60550485,3.8518889,3.84777529
56.059629,8,8.02729878,-0.165223424,8.02533645,3.85087934,3.84678712
56.070121,9.59166305,8.49381942,1.04778033,8.491975,3.84986948,3.84579848
56.080612,9.69535971,9.00586734,0.830356774,9.00413725,3.84885951,3.84480956
56.091104,10.198039,9.56067472,0.798350995,9.55905386,3.84784924,3.84382016
56.101596,10.198039,10.153634,0.210725078,10.152116,3.84683876,3.84283039
56.112087,10.9544512,10.7784309,0.419547627,10.7770087,3.84582818,3.84184034
56.122579,11.3578167,11.4272229,-0.263450514,11.4258886,3.84481729,3.84084981
56.13307,12.083046,12.0901242,-0.0841319445,12.0888698,3.84380629,3.83985902
56.143562,12.4498996,12.7554679,-0.552782289,12.7542853,3.84279498,3.83886775
56.154054,13.7113092,13.4089922,0.549833654,13.4078732,3.84178347,3.83787612
56.164545,15.3948043,14.0335724,1.16671843,14.0325089,3.84077185,3.83688421
56.175037,15.6843871,14.6090598,1.0369799,14.6080436,3.83975992,3.83589184
56.185528,15.3948043,15.1120662,0.531731216,15.1110891,3.83874788,3.8348992
56.19602,16.3095064,15.5176375,0.889870158,15.5166909,3.83773554,3.8339061
56.206512,15.4919334,15.8015623,-0.55644312,15.8006376,3.83672298,3.83291263
56.217003,16.4316767,15.9444423,0.698021761,15.9435307,3.83571031,3.8319189
56.227495,16.2480768,15.9356856,0.558919655,15.9347782,3.83469733,3.83092472
56.237986,16,15.77595,0.473339231,15.7750381,3.83368424,3.82993027
56.248478,16.1864141,15.4769729,0.842283277,15.4760483,3.83267084,3.82893537
56.25897,15.3948043,15.0588769,0.579592484,15.0579315,3.83165723,3.82794011
56.269461,14.1421356,14.5461186,-0.635596542,14.5451449,3.83064351,3.82694459
56.279953,14.6287388,13.9635271,0.815605132,13.962518,3.82962948,3.82594862
56.290444,14.4568323,13.3341679,1.05955859,13.3331166,3.82861533,3.82495239
56.300936,12.5299641,12.6778105,-0.384508022,12.6767105,3.82760087,3.82395572
56.311428,12.2065556,12.0112277,0.441959174,12.0100725,3.8265862,3.82295869
56.321919,10.9544512,11.3483834,-0.627640212,11.347167,3.82557142,3.82196141
56.332411,10.2956301,10.7006948,-0.636446932,10.6994113,3.82455632,3.82096369
56.342902,10.3440804,10.077834,0.515990741,10.076478,3.82354112,3.81996572
56.353394,10.0498756,9.48744601,0.749953073,9.48601292,3.8225256,3.81896731
56.363886,8.83176087,8.93565671,-0.322328784,8.93414277,3.82150987,3.81796856
56.374377,8.94427191,8.42688903,0.719293321,8.42529173,3.82049402,3.81696956
56.384869,8.42614977,7.96373035,0.68001428,7.9620486,3.81947787,3.81597012
56.39536,7.28010989,7.54729521,-0.516899723,7.54552951,3.81846159,3.81497044
56.405852,6.63324958,7.17697202,-0.737375369,7.17512442,3.81744501,3.81397032
56.416344,7.34846923,6.85089956,0.705386187,6.84897362,3.81642822,3.81296987
56.426835,6.32455532,6.56609407,-0.491465918,6.56409452,3.81541131,3.81196918
56.437327,7.48331477,6.31870719,1.07916986,6.31663959,3.8143941,3.81096805
56.447818,6.4807407,6.1045472,0.613346151,6.10241758,3.81337676,3.80996669
56.45831,5.91607978,5.91920577,-0.0559105136,5.91702024,3.81235912,3.80896491
56.468802,7,5.75847439,1.11423768,5.75623884,3.81134127,3.80796279
56.479293,5.83095189,5.61846521,0.460962775,5.61618514,3.8103233,3.80696044
56.489785,5.91607978,5.49569874,0.648367986,5.49337907,3.80930503,3.80595767
56.500276,6.08276253,5.38724277,0.833978274,5.38488788,3.80828664,3.80495466
56.510768,5.74456265,5.29061408,0.673757056,5.28822779,3.80726794,3.80395124
56.52126,5.56776436,5.20381595,0.603281375,5.20140157,3.80624903,3.80294749
56.531751,5.47722558,5.12524469,0.593279769,5.12280511,3.80523001,3.80194351
56.542243,5.38516481,5.0536062,0.575811258,5.05114393,3.80421068,3.80093912
56.552734,5.74456265,4.98790307,0.869861816,4.98542031,3.80319123,3.79993451
56.563226,5,4.92732224,0.269588124,4.92482098,3.80217148,3.79892948
56.573718,5.19615242,4.8712322,0.570017739,4.8687142,3.80115152,3.79792413
56.584209,4.69041576,4.81912324,-0.358758249,4.81659012,3.80013145,3.79691856
56.594701,4.35889894,4.77056428,-0.641611512,4.76801751,3.79911107,3.79591259
56.605192,4.47213595,4.72521392,-0.503068545,4.72265487,3.79809058,3.7949064
56.615684,5.65685425,4.68276635,0.986958917,4.68019629,3.79706979,3.79389979
56.626176,4.24264069,4.64297011,-0.632715908,4.64039023,3.79604879,3.79289288
56.636667,5.47722558,4.60560509,0.933606172,4.60301649,3.79502767,3.79188576
56.647159,5.09901951,4.57046659,0.727016453,4.56787031,3.79400626,3.79087823
56.65765,3.87298335,4.53738508,-0.815108419,4.53478209,3.79298473,3.7898705
56.668142,3.46410162,4.5061959,-1.02083019,4.50358711,3.7919629,3.78886236
56.678634,4,4.47675923,-0.69047754,4.47414549,3.79094086,3.78785392
56.689125,4.24264069,4.44894792,-0.454210555,4.44633003,3.78991872,3.78684527
56.699617,4.12310563,4.42263859,-0.547296052,4.42001732,3.78889627,3.78583623
56.710108,4.89897949,4.39772864,0.707990709,4.39510468,3.78787372,3.78482698
56.7206,3.87298335,4.37411491,-0.707906467,4.37148893,3.78685086,3.78381734
56.731092,4.24264069,4.35170977,-0.330256089,4.34908239,3.7858278,3.7828074
56.741583,4.24264069,4.33043261,-0.296297021,4.32780441,3.78480463,3.78179726
56.752075,4.12310563,4.31020358,-0.432548206,4.3075751,3.78378117,3.78078673
56.762566,4,4.29095685,-0.539404165,4.28832862,3.7827576,3.77977601
56.773058,5.47722558,4.27262463,1.09754314,4.26999712,3.78173373,3.7787649
56.78355,4,4.2551497,-0.505123449,4.25252336,3.78070966,3.7777535
56.794041,4.12310563,4.23847909,-0.339666703,4.23585435,3.77968549,3.77674191
56.804533,5.38516481,4.2225593,1.07824186,4.21993655,3.77866102,3.77572993
56.815024,4.35889894,4.20734683,0.389296942,4.20472645,3.77763644,3.77471776
56.825516,3.74165739,4.19279572,-0.671668319,4.19017804,3.77661157,3.77370522
56.836008,4.24264069,4.17886754,0.252533456,4.1762529,3.77558651,3.77269239
56.846499,4,4.16552655,-0.40684954,4.16291525,3.77456134,3.77167937
56.856991,3.46410162,4.15273586,-0.829839889,4.15012819,3.77353588,3.77066598
56.867482,3.87298335,4.140466,-0.517187252,4.13786224,3.77251032,3.76965241
56.877974,4.47213595,4.12868497,0.586046918,4.12608535,3.77148446,3.76863846
56.888466,3.16227766,4.11736632,-0.977286376,4.11477109,3.77045841,3.76762424
56.898957,4.47213595,4.10648535,0.604690506,4.10389473,3.76943227,3.76660983
56.909449,3.31662479,4.09601597,-0.882831343,4.09343016,3.76840583,3.76559506
56.91994,5.09901951,4.08593779,1.00651961,4.08335699,3.76737929,3.76458011
56.930432,4.12310563,4.07622796,0.216512517,4.07365234,3.76635247,3.7635648
56.940924,3.74165739,4.06686789,-0.570272306,4.06429763,3.76532545,3.76254921
56.951415,3.87298335,4.05784013,-0.429949748,4.05527539,3.76429835,3.76153346
56.961907,4.58257569,4.04912582,0.730376528,4.04656674,3.76327095,3.76051734
56.972398,3.16227766,4.04071056,-0.937247514,4.03815728,3.76224346,3.75950105
56.98289,3.87298335,4.03257769,-0.399492608,4.03003033,3.76121568,3.75848441
56.993382,4,4.02471388,-0.157206489,4.02217256,3.76018772,3.7574675
57.003873,3.87298335,4.01710657,-0.379635646,4.01457141,3.75915966,3.75645042
57.014365,4.12310563,4.00974183,0.336695403,4.00721293,3.75813132,3.75543299
57.024856,3.31662479,4.00260933,-0.828241838,4.00008679,3.7571029,3.7544154
57.035348,4.24264069,3.99569667,0.496934621,3.99318057,3.75607419,3.75339745
57.04584,3.74165739,3.98899413,-0.497329611,3.98648455,3.75504529,3.75237925
57.056331,3.87298335,3.98249251,-0.330921695,3.97998954,3.75401631,3.7513609
57.066823,4.58257569,3.97618134,0.778713266,3.97368504,3.75298705,3.75034219
57.077314,4.12310563,3.97005309,0.391219287,3.96756353,3.7519577,3.74932333
57.087806,4,3.96409836,0.189477273,3.9616156,3.75092807,3.74830412
57.098298,4,3.95830996,0.204181398,3.95583405,3.74989827,3.74728466
57.108789,3.60555128,3.95268105,-0.5891772,3.95021204,3.74886838,3.74626505
57.119281,3.87298335,3.9472036,-0.272433951,3.94474155,3.74783821,3.7452451
57.129772,4.35889894,3.94187208,0.645776169,3.93941702,3.74680797,3.744225
57.140264,4.12310563,3.93667923,0.431771229,3.9342312,3.74577744,3.74320457
57.150756,3.16227766,3.93161965,-0.877121425,3.92917869,3.74474675,3.74218389
57.161247,4.35889894,3.92668821,0.657427358,3.92425434,3.74371597,3.74116307
57.171739,4.35889894,3.92187865,0.661075102,3.9194519,3.74268492,3.74014191
57.18223,3.74165739,3.91718685,-0.418962362,3.91476725,3.7416538,3.73912061
57.192722,3.60555128,3.91260712,-0.554126196,3.91019469,3.7406224,3.73809898
57.203214,3.46410162,3.90813536,-0.666358572,3.90573012,3.73959083,3.73707711
57.213705,3.87298335,3.90376767,-0.175454622,3.90136963,3.73855919,3.73605511
57.224197,3.87298335,3.8994991,-0.16283659,3.89710828,3.73752728,3.73503278
57.234688,4,3.89532656,0.323532756,3.89294296,3.7364953,3.73401032
57.24518,4,3.89124552,0.329779445,3.88886916,3.73546305,3.73298753
57.255672,4.69041576,3.88725284,0.896193571,3.88488373,3.73443063,3.73196451
57.266163,3.60555128,3.88334552,-0.527061901,3.88098366,3.73339815,3.73094136
57.276655,2.64575131,3.8795196,-1.11075123,3.87716499,3.7323654,3.72991789
57.287146,3.60555128,3.87577272,-0.519828285,3.87342537,3.73133258,3.7288943
57.297638,4.12310563,3.87210126,0.501003359,3.86976116,3.7302995,3.72787039
57.30813,3.60555128,3.86850278,-0.512787969,3.86616993,3.72926626,3.72684625
57.318621,4.47213595,3.86497494,0.779205375,3.86264934,3.72823295,3.725822
57.329113,4.47213595,3.86151453,0.781422696,3.85919617,3.72719938,3.72479742
57.339604,4.35889894,3.85811976,0.707657529,3.85580864,3.72616575,3.72377273
57.350096,4.58257569,3.85478768,0.853104925,3.85248379,3.72513187,3.72274773
57.360588,4.79583152,3.85151638,0.971758788,3.8492197,3.72409782,3.72172252
57.371079,4.24264069,3.84830404,0.627962301,3.84601457,3.72306372,3.72069719
57.381571,3.74165739,3.845148,-0.321699567,3.84286573,3.72202936,3.71967155
57.392062,4,3.84204692,0.397433113,3.83977184,3.72099494,3.7186458
57.402554,4,3.83899835,0.401250113,3.83673044,3.71996027,3.71761974
57.413046,4.47213595,3.83600079,0.797580823,3.83374003,3.71892545,3.71659348
57.423537,3.60555128,3.8330528,-0.476971201,3.83079919,3.71789057,3.71556711
57.434029,3.74165739,3.83015219,-0.297480764,3.82790571,3.71685544,3.71454044
57.44452,2.64575131,3.82729793,-1.08698971,3.82505856,3.71582026,3.71351367
57.455012,3.46410162,3.82448797,-0.600321875,3.82225569,3.71478483,3.71248659
57.465504,3,3.82172113,-0.906488348,3.81949592,3.71374926,3.71145932
57.475995,3,3.81899627,-0.904984125,3.81677812,3.71271363,3.71043195
57.486487,3.74165739,3.81631154,-0.273229119,3.81410043,3.71167776,3.70940428
57.496978,4,3.81366617,0.431664028,3.81146207,3.71064184,3.70837651
57.50747,3.46410162,3.81105842,-0.58903039,3.80886132,3.70960568,3.70734846
57.517962,3.31662479,3.80848735,-0.70132914,3.80629723,3.70856937,3.70632021
57.528453,2.82842712,3.80595208,-0.988698616,3.80376891,3.70753302,3.70529187
57.538945,3.74165739,3.80345101,-0.248583234,3.80127478,3.70649643,3.70426324
57.549436,3.87298335,3.80098358,0.26832773,3.79881425,3.7054598,3.70323452
57.559928,3.46410162,3.79854829,-0.578313644,3.79638585,3.70442293,3.70220552
57.57042,4.58257569,3.7961444,0.886809614,3.79398883,3.70338592,3.70117633
57.580911,4,3.79377121,0.4541242,3.79162248,3.70234888,3.70014706
57.591403,2,3.79142735,-1.33844214,3.78928544,3.70131159,3.6991175
57.601894,3.31662479,3.7891124,-0.687377341,3.78697728,3.70027428,3.69808787
57.612386,4.69041576,3.78682507,0.950573873,3.78469672,3.69923673,3.69705795
57.622878,3.16227766,3.78456478,-0.788851775,3.78244318,3.69819904,3.69602786
57.633369,3.87298335,3.78233096,0.301085346,3.78021607,3.69716132,3.69499769
57.643861,4.47213595,3.78012243,0.831873505,3.77801423,3.69612338,3.69396724
57.654352,3.74165739,3.77793888,-0.190477008,3.77583735,3.6950854,3.69293672
57.664844,3.16227766,3.77577919,-0.783263387,3.77368431,3.69404719,3.69190593
57.675336,3.87298335,3.77364291,0.31518318,3.77155464,3.69300886,3.69087497
57.685827,3.74165739,3.77152957,-0.172835714,3.76944789,3.6919705,3.68984394
57.696319,3.74165739,3.76943815,-0.166675609,3.76736303,3.69093192,3.68881264
57.70681,4.58257569,3.76736842,0.902888294,3.76529985,3.6898933,3.68778128
57.717302,3.87298335,3.76531942,0.328121814,3.76325736,3.68885447,3.68674965
57.727794,3.87298335,3.76329077,0.331198697,3.7612352,3.68781552,3.68571785
57.738285,4.12310563,3.76128211,0.601517677,3.759233,3.68677654,3.68468599
57.748777,3.46410162,3.75929253,-0.543314745,3.75724985,3.68573735,3.68365388
57.759268,4.24264069,3.75732189,0.69664826,3.75528561,3.68469813,3.6826217
57.76976,3.31662479,3.75536932,-0.662377938,3.75333943,3.6836587,3.68158926
57.780252,3.31662479,3.75343454,-0.66091584,3.751411,3.68261915,3.68055667
57.790743,3.31662479,3.75151725,-0.659463768,3.74950003,3.68157959,3.67952403
57.801235,3.31662479,3.74961665,-0.658021168,3.74760573,3.68053981,3.67849113
57.811726,4.69041576,3.74773265,0.970918691,3.74572801,3.67950002,3.67745817
57.822218,3.46410162,3.74586449,-0.530813411,3.74386609,3.67846001,3.67642497
57.83271,4,3.74401193,0.505952633,3.74201975,3.6774199,3.67539162
57.843201,4.12310563,3.74217476,0.617195974,3.74018876,3.67637978,3.67435822
57.853693,4.24264069,3.74035223,0.708723118,3.7383724,3.67533944,3.67332457
57.864184,3.31662479,3.73854433,-0.649553337,3.73657063,3.6742991,3.67229088
57.874676,4.12310563,3.73675035,0.621574834,3.73478277,3.67325856,3.67125695
57.885168,3.74165739,3.73497012,0.0817756953,3.73300862,3.67221791,3.67022287
57.895659,3.74165739,3.73320347,0.091945174,3.73124802,3.67117726,3.66918875
57.906151,4,3.73144974,0.518218356,3.72950031,3.6701364,3.66815439
57.916642,3.16227766,3.72970893,-0.75328034,3.72776551,3.66909554,3.66712
57.927134,2.44948974,3.72798042,-1.13070362,3.72604297,3.66805448,3.66608537
57.937626,3.87298335,3.72626407,0.383039526,3.72433257,3.66701333,3.6650506
57.948117,3.31662479,3.72455975,-0.638697861,3.72263417,3.66597217,3.6640158
57.958609,3.87298335,3.72286686,0.387448693,3.72094717,3.66493082,3.66298077
57.9691,4.12310563,3.72118544,0.633971754,3.71927162,3.66388947,3.66194571
57.979592,3.46410162,3.71951492,-0.505384311,3.71760694,3.66284793,3.66091042
57.990084,3.31662479,3.71785519,-0.6334275,3.71595302,3.66180629,3.659875
58.000575,4.24264069,3.71620616,0.725558079,3.71430978,3.66076467,3.65883955
58.011067,3.74165739,3.71456728,0.164590725,3.71267666,3.65972285,3.65780388
58.021558,4,3.71293862,0.535781092,3.71105374,3.65868104,3.65676819
58.03205,3.87298335,3.71131965,0.402074248,3.70944047,3.65763904,3.65573227
58.042542,3.87298335,3.70971029,0.404070613,3.70783679,3.65659696,3.65469624
58.053033,4.47213595,3.70811048,0.874085508,3.70624264,3.65555489,3.65366018
58.063525,3.74165739,3.70651971,0.187450464,3.7046575,3.65451264,3.65262391
58.074016,3.46410162,3.70493808,-0.490750917,3.70308147,3.6534704,3.65158762
58.084508,3.60555128,3.70336508,-0.312751988,3.70151405,3.65242798,3.65055112
58.095,3.60555128,3.70180068,-0.310240881,3.69995519,3.65138548,3.6495145
58.105491,4.89897949,3.70024483,1.09486741,3.69840487,3.650343,3.64847787
58.115983,4.12310563,3.69869706,0.651466472,3.6968626,3.64930034,3.64744104
58.126474,3.74165739,3.69715748,0.210950001,3.69532849,3.64825771,3.64640419
58.136966,3.74165739,3.69562563,0.214550121,3.69380209,3.64721489,3.64536714
58.147458,4.47213595,3.69410149,0.882062622,3.69228337,3.64617201,3.64432998
58.157949,4,3.69258503,0.554450155,3.6907723,3.64512915,3.64329281
58.168441,4.47213595,3.6910758,0.883776076,3.68926845,3.64408611,3.64225544
58.178932,3.87298335,3.68957395,0.428263232,3.68777194,3.64304311,3.64121807
58.189424,3.60555128,3.68807903,-0.287276443,3.68628235,3.64199993,3.6401805
58.199916,4.47213595,3.68659104,0.886309718,3.68479965,3.64095669,3.63914284
58.210407,4.35889894,3.68510997,0.820846495,3.68332386,3.63991348,3.63810517
58.220899,4,3.68363541,0.562462964,3.68185454,3.6388701,3.63706731
58.23139,4.58257569,3.6821675,0.948898409,3.68039185,3.63782676,3.63602945
58.241882,3.16227766,3.68070583,-0.720019563,3.67893538,3.63678325,3.63499141
58.252374,4.58257569,3.67925041,0.950434262,3.67748513,3.63573968,3.63395327
58.262865,5.09901951,3.67780124,1.19214859,3.67604111,3.63469615,3.63291514
58.273357,3.31662479,3.67635794,-0.599777586,3.67460293,3.63365247,3.63187682
58.283848,4.35889894,3.67492066,0.827029797,3.67317075,3.63260882,3.63083852
58.29434,4.24264069,3.673489,0.754421425,3.67174417,3.63156501,3.62980003
58.304832,4.47213595,3.67206299,0.894467977,3.67032321,3.63052115,3.62876145
58.315323,4.35889894,3.67064266,0.829612127,3.66890791,3.62947733,3.62772289
58.325815,4.69041576,3.66922763,1.01053854,3.66749788,3.62843336,3.62668416
58.336306,5,3.66781805,1.15420187,3.66609328,3.62738944,3.62564544
58.346798,3.87298335,3.66641356,0.454499485,3.66469375,3.62634537,3.62460654
58.35729,3.16227766,3.6650142,-0.709039167,3.66329932,3.62530124,3.62356757
58.367781,3.60555128,3.66362,-0.240974522,3.66191003,3.62425717,3.62252862
58.378273,4.89897949,3.66223059,1.11209213,3.66052551,3.62321295,3.6214895
58.388764,3.74165739,3.66084615,0.284273177,3.65914593,3.62216879,3.6204504
58.399256,3.74165739,3.65946632,0.286689841,3.65777094,3.62112448,3.61941114
58.409748,4,3.65809115,0.584729722,3.65640059,3.62008012,3.61837181
58.420239,3.74165739,3.65672068,0.29143902,3.65503492,3.61903583,3.6173325
58.430731,4.12310563,3.65535457,0.683923281,3.65367358,3.61799139,3.61629303
58.441222,4.79583152,3.65399299,1.06856845,3.65231675,3.61694702,3.6152536
58.451714,4.12310563,3.6526356,0.685908173,3.65096409,3.6159025,3.614214
58.462206,3.60555128,3.65128246,-0.213848508,3.64961565,3.61485795,3.61317434
58.472697,4.58257569,3.64993361,0.965733961,3.64827149,3.61381346,3.61213472
58.483189,4.47213595,3.64858873,0.90749503,3.64693126,3.61276884,3.61109494
58.49368,3.74165739,3.64724799,0.307261127,3.64559516,3.61172429,3.6100552
58.504172,3.74165739,3.64591107,0.309429024,3.64426286,3.6106796,3.60901531
58.514664,3.60555128,3.64457802,-0.197551881,3.64293441,3.60963489,3.60797536
58.525155,4.58257569,3.64324891,0.969188724,3.64160988,3.60859024,3.60693546
58.535647,4.35889894,3.64192342,0.846744074,3.64028893,3.60754547,3.6058954
58.546138,3.60555128,3.64060172,-0.187217645,3.63897177,3.60650077,3.6048554
58.55663,4.69041576,3.63928351,1.02524741,3.63765807,3.60545594,3.60381524
58.567122,4.35889894,3.63796885,0.849076021,3.6363479,3.60441109,3.60277504
58.577613,3.74165739,3.63665781,0.324036384,3.63504132,3.60336632,3.6017349
58.588105,4.47213595,3.63535007,0.914760017,3.63373803,3.60232143,3.6006946
58.598596,4.12310563,3.63404582,0.699328112,3.6324382,3.60127662,3.59965437
58.609088,4.12310563,3.63274476,0.700257715,3.63114155,3.60023169,3.59861399
58.61958,3.87298335,3.63144695,0.49146352,3.62984813,3.59918674,3.59757358
58.630071,4.35889894,3.63015248,0.853666484,3.62855802,3.59814187,3.59653322
58.640563,3.60555128,3.62886103,-0.152675312,3.62727091,3.59709689,3.59549273
58.651054,3.31662479,3.62757279,-0.557627119,3.625987,3.596052,3.5944523
58.661546,4.58257569,3.62628748,0.977899898,3.624706,3.59500699,3.59341174
58.672038,3.87298335,3.62500517,0.497974071,3.62342796,3.59396198,3.59237114
58.682529,3.46410162,3.62372593,-0.399530113,3.62215298,3.59291705,3.59133062
58.693021,4.24264069,3.62244946,0.787522209,3.62088076,3.59187202,3.59028996
58.703512,4,3.62117596,0.61548683,3.61961148,3.59082708,3.58924937
58.714004,4,3.61990515,0.616518328,3.61834488,3.58978203,3.58820866
58.724496,3.60555128,3.6186371,-0.114393299,3.61708101,3.58873699,3.58716792
58.734987,3.87298335,3.61737189,0.505580316,3.61581996,3.58769203,3.58612726
58.745479,4,3.61610923,0.619589192,3.61456145,3.58664698,3.58508648
58.75597,4.24264069,3.61484933,0.79233286,3.61330567,3.58560203,3.58404577
58.766462,4.12310563,3.61359189,0.713802307,3.61205234,3.58455697,3.58300495
58.776954,3.16227766,3.61233701,-0.670864626,3.61080155,3.58351192,3.58196411
58.787445,4.12310563,3.61108475,0.715556338,3.60955336,3.58246698,3.58092335
58.797937,3.31662479,3.60983485,-0.541488745,3.60830751,3.58142194,3.57988247
58.808428,3.31662479,3.6085875,-0.540335741,3.60706419,3.580377,3.57884168
58.81892,4.35889894,3.60734243,0.86692359,3.60582313,3.57933198,3.57780078
58.829412,3.87298335,3.60609972,0.516607802,3.60458442,3.57828696,3.57675987
58.839903,3.46410162,3.60485946,-0.375177084,3.60334813,3.57724205,3.57571905
58.850395,3.16227766,3.60362137,-0.664337043,3.60211399,3.57619706,3.57467812
58.860886,4.24264069,3.60238565,0.800159383,3.60088221,3.57515218,3.57363729
58.871378,4.24264069,3.60115203,0.800929867,3.59965252,3.57410721,3.57259635
58.88187,4.47213595,3.59992061,0.933924699,3.598425,3.57306226,3.5715554
58.892361,3.87298335,3.59869146,0.523728826,3.59719974,3.57201743,3.57051456
58.902853,3.74165739,3.59746432,0.379727617,3.59597646,3.57097252,3.56947361
58.913344,3.46410162,3.5962394,-0.363507609,3.59475539,3.56992772,3.56843277
58.923836,3.46410162,3.59501642,-0.361821508,3.59353624,3.56888285,3.56739183
58.934328,3.46410162,3.59379548,-0.36013034,3.59231911,3.567838,3.56635089
58.944819,3.60555128,3.59257666,0.113906181,3.59110409,3.56679327,3.56531006
58.955311,3.16227766,3.5913597,-0.655043541,3.58989091,3.56574847,3.56426913
58.965802,4,3.59014481,0.640199337,3.58867978,3.5647038,3.56322831
58.976294,3.31662479,3.58893173,-0.52183037,3.58747044,3.56365906,3.5621874
58.986786,3.60555128,3.58772054,0.133531783,3.58626298,3.56261434,3.56114651
58.997277,3.46410162,3.58651134,-0.349871007,3.58505749,3.56156976,3.56010572
59.007769,4.12310563,3.58530386,0.733349686,3.58385371,3.5605251,3.55906485
59.01826,3.16227766,3.58409832,-0.649477223,3.58265185,3.55948058,3.5580241
59.028752,3.60555128,3.58289446,0.150521797,3.58145165,3.558436,3.55698326
59.039244,3.31662479,3.58169237,-0.514847146,3.5802532,3.55739145,3.55594245
59.049735,4.35889894,3.58049214,0.882273653,3.5790566,3.55634704,3.55490175
59.060227,2.64575131,3.57929352,-0.966199882,3.57786159,3.55530257,3.55386097
59.070718,3.16227766,3.57809672,-0.644840334,3.57666837,3.55425824,3.55282032
59.08121,3,3.57690147,-0.759540303,3.57547671,3.55321386,3.55177959
59.091702,3.87298335,3.57570788,0.545229733,3.57428668,3.55216951,3.55073889
59.102193,3.74165739,3.57451604,0.408829236,3.57309839,3.55112531,3.54969831
59.112685,3.16227766,3.5733257,-0.641130284,3.57191157,3.55008106,3.54865767
59.123176,3.74165739,3.57213706,0.411728458,3.57072645,3.54903695,3.54761715
59.133668,4.12310563,3.57094988,0.743071828,3.56954277,3.54799279,3.54657657
59.14416,3.46410162,3.56976426,-0.325057905,3.56836062,3.54694868,3.54553602
59.154651,4.58257569,3.56858027,1.0069734,3.5671801,3.54590473,3.5444956
59.165143,4,3.56739769,0.657725102,3.56600097,3.54486072,3.54345512
59.175634,4.12310563,3.56621671,0.746249899,3.56482343,3.54381687,3.54241478
59.186126,3.60555128,3.5650371,0.201281338,3.56364723,3.54277298,3.54137438
59.196618,3.16227766,3.56385894,-0.633704411,3.56247248,3.54172914,3.54033402
59.207109,3.74165739,3.56268233,0.423054433,3.56129926,3.54068546,3.5392938
59.217601,3.31662479,3.56150704,-0.494855783,3.56012734,3.53964175,3.53825352
59.228092,4.24264069,3.56033325,0.826019027,3.55895692,3.53859819,3.53721339
59.238584,4.47213595,3.55916075,0.95549736,3.55778775,3.53755459,3.53617321
59.249076,3.16227766,3.55798961,-0.6290564,3.55661995,3.53651106,3.53513307
59.259567,3.46410162,3.55681995,-0.304496848,3.55545359,3.53546769,3.53409309
59.270059,3.46410162,3.5556515,-0.302572122,3.55428845,3.53442429,3.53305305
59.28055,3,3.5544845,-0.744637158,3.55312473,3.53338106,3.53201317
59.291042,3.46410162,3.55331869,-0.298692268,3.55196219,3.5323378,3.53097324
59.301534,4.58257569,3.55215417,1.01509681,3.55080092,3.53129461,3.52993337
59.312025,4,3.55099104,0.67008131,3.54964104,3.53025159,3.52889365
59.322517,3.74165739,3.54982906,0.437982107,3.54848228,3.52920854,3.5278539
59.333008,4.12310563,3.54866844,0.757916343,3.54732488,3.52816567,3.5268143
59.3435,3.74165739,3.54750895,0.440622783,3.54616858,3.52712278,3.52577466
59.353992,3.74165739,3.54635068,0.441935187,3.5450135,3.52607996,3.52473509
59.364483,3.74165739,3.54519372,0.443242218,3.54385971,3.52503732,3.52369568
59.374975,3.16227766,3.54403785,-0.617867456,3.542707,3.52399466,3.52265624
59.385466,2.82842712,3.54288327,-0.84525508,3.54155556,3.52295219,3.52161696
59.395958,2.23606798,3.54172976,-1.14265558,3.54040517,3.5219097,3.52057765
59.40645,4.12310563,3.54057739,0.763235373,3.53925592,3.52086729,3.51953842
59.416941,3.31662479,3.53942628,-0.472018529,3.53810791,3.51982506,3.51849935
59.427433,3.74165739,3.53827619,0.450978041,3.53696091,3.51878283,3.51746026
59.437924,3.74165739,3.53712734,0.452249988,3.53581512,3.51774078,3.51642134
59.448416,3.74165739,3.53597948,0.453517267,3.53467032,3.51669873,3.5153824
59.458908,4.47213595,3.53483271,0.968144226,3.53352661,3.51565676,3.51434353
59.469399,3.87298335,3.53368714,0.582491375,3.53238407,3.51461499,3.51330485
59.479891,3.31662479,3.53254254,-0.464669507,3.53124249,3.51357322,3.51226614
59.490382,2.82842712,3.53139911,-0.838434246,3.53010207,3.51253163,3.51122762
59.500874,3.74165739,3.53025662,0.459783387,3.52896257,3.51149005,3.51018908
59.511366,3.87298335,3.52911518,0.586402734,3.52782411,3.51044857,3.50915063
59.521857,4.24264069,3.52797488,0.845379092,3.52668678,3.50940728,3.50811236
59.532349,3.87298335,3.52683549,0.588343317,3.52555034,3.50836599,3.50707408
59.54284,2.44948974,3.52569722,-1.0374042,3.52441501,3.50732491,3.50603599
59.553332,3.60555128,3.52455985,0.284589933,3.52328057,3.50628384,3.50499789
59.563824,4,3.52342346,0.69034523,3.5221471,3.50524286,3.50395988
59.574315,4.24264069,3.52228817,0.848735832,3.52101472,3.5042021,3.50292207
59.584807,3.16227766,3.52115375,-0.599062677,3.51988319,3.50316134,3.50188425
59.595298,3.31662479,3.5200204,-0.450994026,3.51875272,3.50212079,3.50084663
59.60579,4,3.5188879,0.693622447,3.51762308,3.50108026,3.499809
59.616282,4.12310563,3.51775635,0.778041951,3.51649438,3.50003983,3.49877148
59.626773,3.60555128,3.51662584,0.298203679,3.51536672,3.49899962,3.49773415
59.637265,3.60555128,3.51549616,0.300091849,3.51423986,3.49795943,3.49669683
59.647756,3.46410162,3.5143675,-0.224200556,3.51311403,3.49691945,3.49565972
59.658248,3.74165739,3.51323966,0.477930673,3.51198899,3.49587949,3.49462261
59.66874,3,3.51211272,-0.715620513,3.51086484,3.49483965,3.4935856
59.679231,4.12310563,3.51098678,0.782380241,3.50974169,3.49380003,3.4925488
59.689723,3.60555128,3.50986163,0.309337422,3.50861931,3.49276043,3.49151202
59.700214,3.31662479,3.50873748,-0.43830661,3.5074979,3.49172106,3.49047544
59.710706,3.60555128,3.50761408,0.312949183,3.50637726,3.49068171,3.48943888
59.721198,2.64575131,3.50649156,-0.92776088,3.50525747,3.48964249,3.48840243
59.731689,3.16227766,3.50537001,-0.585740854,3.50413864,3.48860349,3.4873662
59.742181,3.87298335,3.5042492,0.607234834,3.50302054,3.48756453,3.48632999
59.752672,4.12310563,3.50312935,0.787385722,3.50190339,3.48652579,3.48529399
59.763164,3.87298335,3.50201023,0.609075621,3.50078696,3.48548709,3.48425801
59.773656,2.82842712,3.50089195,-0.820039527,3.49967135,3.48444852,3.48322216
59.784147,3.16227766,3.4997746,-0.580944869,3.49855667,3.48341019,3.48218653
59.794639,3.31662479,3.49865797,-0.426653462,3.49744268,3.48237189,3.48115092
59.80513,4.12310563,3.49754225,0.790925643,3.49632961,3.48133383,3.48011554
59.815622,3.87298335,3.49642724,0.613641674,3.49521723,3.48029581,3.47908019
59.826114,3.31662479,3.49531303,-0.422715323,3.49410564,3.47925793,3.47804496
59.836605,3.31662479,3.49419973,-0.421396415,3.49299495,3.47822029,3.47700997
59.847097,4.24264069,3.49308711,0.865767624,3.49188492,3.47718269,3.47597501
59.857588,4.12310563,3.49197538,0.794437063,3.49077578,3.47614534,3.47494028
59.86808,3.60555128,3.49086432,0.338654622,3.4896673,3.47510803,3.47390558
59.878572,3.60555128,3.48975404,0.340289928,3.48855958,3.47407088,3.47287102
59.889063,3.60555128,3.48864463,0.341916135,3.48745273,3.47303397,3.4718367
59.899555,3.74165739,3.48753588,0.504104657,3.48634652,3.47199711,3.47080242
59.910046,4.24264069,3.48642799,0.869604906,3.48524116,3.4709605,3.46976838
59.920538,4.24264069,3.48532075,0.870241308,3.48413645,3.46992395,3.46873438
59.93103,3.60555128,3.48421426,0.348334631,3.48303246,3.46888755,3.46770053
59.941521,4,3.48310862,0.718951587,3.48192932,3.4678514,3.46666692
59.952013,4.24264069,3.4820036,0.872145105,3.4808268,3.46681532,3.46563336
59.962504,4.24264069,3.48089943,0.872777898,3.4797251,3.46577949,3.46460004
59.972996,2.82842712,3.47979588,-0.807074193,3.47862402,3.46474372,3.46356677
59.983488,3.60555128,3.47869305,0.356171624,3.47752365,3.46370812,3.46253366
59.993979,2.23606798,3.47759105,-1.11423654,3.4764241,3.46267277,3.46150079
60.004471,3.60555128,3.47648965,0.359251477,3.47532514,3.4616375,3.46046799
60.014962,4,3.47538907,0.724300302,3.47422699,3.46060248,3.45943543
60.025454,3.87298335,3.4742891,0.631422403,3.47312943,3.45956754,3.45840293
60.035946,4.47213595,3.47318982,0.999472929,3.47203256,3.45853276,3.45737059
60.046437,4.79583152,3.47209135,1.15053908,3.47093649,3.45749825,3.45633851
60.056929,3.74165739,3.47099346,0.520253713,3.46984099,3.45646381,3.4553065
60.06742,4.47213595,3.46989637,1.00111917,3.46874628,3.45542965,3.45427474
60.077912,3.16227766,3.46879986,-0.553644471,3.46765213,3.45439556,3.45324305
60.088404,3.46410162,3.46770403,-0.0600201484,3.46655867,3.45336165,3.45221152
60.098895,3.74165739,3.46660899,0.524450568,3.46546597,3.45232801,3.45118026
60.109387,3.74165739,3.46551451,0.525492981,3.46437383,3.45129445,3.45014907
60.119878,2.64575131,3.46442081,-0.904803571,3.46328246,3.45026117,3.44911814
60.13037,3.46410162,3.46332768,0.0278197364,3.46219165,3.44922797,3.44808729
60.140862,2.23606798,3.4622352,-1.10732436,3.46110148,3.44819496,3.44705662
60.151353,4.35889894,3.4611435,0.947499576,3.46001208,3.44716222,3.44602621
60.161845,3.74165739,3.46005234,0.53066472,3.45892321,3.44612958,3.44499588
60.172336,2.82842712,3.45896194,-0.794062226,3.4578351,3.44509722,3.44396583
60.182828,3.16227766,3.45787209,-0.54368597,3.45674752,3.44406495,3.44293586
60.19332,3.46410162,3.45678289,0.0855495432,3.45566058,3.44303287,3.44190607
60.203811,3.31662479,3.45569444,-0.372920428,3.45457438,3.44200107,3.44087656
60.214303,3.31662479,3.45460652,-0.371458919,3.4534887,3.44096937,3.43984713
60.224794,3.31662479,3.45351934,-0.36999264,3.45240376,3.43993797,3.43881798
60.235286,4,3.4524327,0.739977905,3.45131935,3.43890666,3.43778892
60.245778,3,3.45134669,-0.671823407,3.45023555,3.43787555,3.43676005
60.256269,2.82842712,3.45026141,-0.788564702,3.44915248,3.43684473,3.43573147
60.266761,3.74165739,3.44917666,0.540814872,3.44806993,3.43581401,3.43470298
60.277252,3.87298335,3.44809264,0.651836414,3.44698809,3.4347836,3.43367477
60.287744,3.16227766,3.44700913,-0.53360235,3.44590677,3.43375329,3.43264667
60.298236,4.24264069,3.44592624,0.892588621,3.44482605,3.43272318,3.43161875
60.308727,3.74165739,3.44484407,0.544805757,3.44374605,3.43169337,3.43059113
60.319219,2.64575131,3.44376242,-0.893314674,3.44266655,3.43066367,3.42956361
60.32971,4.24264069,3.44268148,0.894404388,3.44158775,3.42963428,3.42853639
60.340202,3.16227766,3.44160104,-0.528510533,3.44050945,3.428605,3.42750927
60.350694,3.60555128,3.44052122,0.406238918,3.43943175,3.42757593,3.42648235
60.361185,3,3.4394421,-0.662904291,3.43835475,3.42654717,3.42545573
60.371677,3.16227766,3.43836348,-0.525438693,3.43727825,3.42551852,3.42442922
60.382168,4.69041576,3.43728557,1.11943298,3.43620243,3.42449019,3.42340301
60.39266,3.60555128,3.43620815,0.411513219,3.43512711,3.42346198,3.42237691
60.403152,3.60555128,3.43513132,0.412819514,3.43405237,3.42243398,3.42135103
60.413643,3.74165739,3.4340552,0.554618957,3.43297832,3.4214063,3.42032544
60.424135,3.87298335,3.43297956,0.663327809,3.43190476,3.42037874,3.41929998
60.434626,2.64575131,3.43190462,-0.88665287,3.43083188,3.41935151,3.41827482
60.445118,2.23606798,3.43083017,-1.09305178,3.42975947,3.41832439,3.41724978
60.45561,3,3.4297563,-0.655558007,3.42868765,3.41729751,3.41622496
60.466101,3.74165739,3.42868312,0.55944103,3.4276165,3.41627094,3.41520045
60.476593,3.31662479,3.42761042,-0.333145061,3.42654583,3.41524451,3.41417606
60.487084,3.87298335,3.42653841,0.668165353,3.42547584,3.4142184,3.41315199
60.497576,3.87298335,3.42546687,0.668966722,3.42440631,3.41319242,3.41212805
60.508068,3.74165739,3.42439591,0.563259685,3.42333736,3.41216668,3.41110433
60.518559,3.87298335,3.42332564,0.670565218,3.42226907,3.41114127,3.41008093
60.529051,3.74165739,3.42225583,0.565156223,3.42120125,3.41011599,3.40905766
60.539542,3.46410162,3.4211867,0.20715915,3.4201341,3.40909105,3.40803471
60.550034,3.87298335,3.42011804,0.672952675,3.41906742,3.40806624,3.4070119
60.560526,3.87298335,3.41904996,0.673745789,3.41800129,3.40704168,3.40598931
60.571017,3,3.41798254,-0.646515694,3.41693583,3.40601745,3.40496706
60.581509,3,3.4169156,-0.645690015,3.41587083,3.40499336,3.40394494
60.592,3.46410162,3.41584932,0.219664058,3.41480649,3.40396962,3.40292315
60.602492,3.31662479,3.4147835,-0.313302908,3.41374261,3.40294602,3.40190151
60.612984,4.12310563,3.41371825,0.842251371,3.41267928,3.40192267,3.4008801
60.623475,3.74165739,3.41265367,0.573588456,3.41161662,3.40089966,3.39985902
60.633967,3.46410162,3.41158955,0.229155118,3.4105544,3.3998768,3.39883809
60.644458,3,3.41052609,-0.640723097,3.40949284,3.39885429,3.3978175
60.65495,3.46410162,3.40946309,0.233748858,3.40843174,3.39783194,3.39679705
60.665442,4.12310563,3.40840065,0.845402259,3.40737118,3.39680983,3.39577685
60.675933,2.64575131,3.40733886,-0.872689838,3.40631128,3.39578808,3.394757
60.686425,3.31662479,3.40627754,-0.299420689,3.40525182,3.39476648,3.39373729
60.696916,3.60555128,3.40521687,0.447587314,3.40419302,3.39374524,3.39271793
60.707408,2.82842712,3.40415666,-0.758768433,3.40313466,3.39272416,3.39169872
60.7179,3.31662479,3.403097,-0.294061577,3.40207685,3.39170334,3.39067976
60.728391,3.74165739,3.402038,0.582768726,3.40101969,3.39068288,3.38966116
60.738883,3.16227766,3.40097945,-0.48857117,3.39996298,3.38966258,3.38864271
60.749374,4,3.39992155,0.774647306,3.39890691,3.38864264,3.38762462
60.759866,3.16227766,3.39886411,-0.486401527,3.39785128,3.38762287,3.38660668
60.770358,3.74165739,3.39780721,0.586387394,3.3967962,3.38660337,3.38558901
60.780849,3.31662479,3.39675097,-0.283065677,3.39574176,3.38558423,3.38457169
60.791341,3.46410162,3.39569517,0.261546252,3.39468776,3.38456526,3.38355454
60.801832,3.74165739,3.39464003,0.589081792,3.39363441,3.38354666,3.38253774
60.812324,3.31662479,3.39358533,-0.277417632,3.3925815,3.38252824,3.38152112
60.822816,3.60555128,3.39253119,0.461540995,3.39152913,3.38151008,3.38050476
60.833307,3.31662479,3.39147769,-0.273592571,3.3904774,3.3804923,3.37948876
60.843799,4,3.39042463,0.780753077,3.38942611,3.3794747,3.37847294
60.85429,3.87298335,3.38937223,0.695421541,3.38837546,3.37845748,3.37745749
60.864782,3.46410162,3.38832027,0.275284121,3.38732525,3.37744043,3.37644221
60.875274,4,3.38726885,0.782771452,3.38627558,3.37642367,3.3754272
60.885765,3.87298335,3.38621809,0.697685645,3.38522655,3.37540728,3.37441256
60.896257,3.60555128,3.38516777,0.469450221,3.38417795,3.37439108,3.3733981
60.906748,3.46410162,3.38411809,0.28281359,3.38313,3.37337526,3.37238402
60.91724,3.60555128,3.38306886,0.47168042,3.38208248,3.37235963,3.37137012
60.927732,4.24264069,3.38202017,0.92769635,3.3810355,3.37134429,3.3703565
60.938223,3.31662479,3.38097213,-0.253667768,3.37998916,3.37032933,3.36934326
60.948715,3.74165739,3.37992453,0.601442315,3.37894326,3.36931456,3.3683302
60.959206,4.24264069,3.37887757,0.929388569,3.37789799,3.36830019,3.36731753
60.969698,3.60555128,3.37783106,0.477200388,3.37685316,3.367286,3.36630504
60.98019,4.35889894,3.3767851,0.991016571,3.37580887,3.36627212,3.36529284
60.990681,3.46410162,3.37573978,0.297257191,3.37476522,3.36525862,3.36428103
61.001173,3,3.3746949,-0.612123272,3.37372201,3.36424533,3.36326941
61.011664,3.46410162,3.37365067,0.300750642,3.37267943,3.36323242,3.36225818
61.022156,3.60555128,3.37260688,0.482643138,3.37163729,3.36221973,3.36124714
61.032648,3.46410162,3.37156363,0.304200564,3.37059569,3.36120733,3.3602364
61.043139,4,3.37052103,0.793397107,3.36955472,3.36019533,3.35922605
61.053631,3.60555128,3.36947888,0.485872823,3.36851419,3.35918354,3.3582159
61.064122,4.24264069,3.36843736,0.934988409,3.36747431,3.35817215,3.35720615
61.074614,3.16227766,3.3673963,-0.45290025,3.36643486,3.35716097,3.3561966
61.085106,3.74165739,3.36635577,0.612618651,3.36539595,3.3561501,3.35518735
61.095597,4.24264069,3.3653159,0.936656175,3.36435767,3.35513963,3.3541785
61.106089,3.60555128,3.36427647,0.491197321,3.36331984,3.35412937,3.35316985
61.11658,3.46410162,3.36323768,0.317590827,3.36228265,3.35311953,3.35216161
61.127072,3.87298335,3.36219934,0.714691544,3.3612459,3.3521099,3.35115358
61.137564,3.31662479,3.36116155,-0.211037345,3.36020969,3.35110059,3.35014586
61.148055,3.16227766,3.36012441,-0.444799669,3.35917411,3.35009168,3.34913855
61.158547,3.60555128,3.35908771,0.496450971,3.35813898,3.349083,3.34813144
61.169038,3.74165739,3.35805166,0.619359127,3.3571045,3.34807474,3.34712475
61.17953,4,3.35701606,0.801862795,3.35607045,3.34706669,3.34611828
61.190022,2.44948974,3.35598101,-0.952098347,3.35503695,3.34605897,3.34511212
61.200513,2.82842712,3.3549466,-0.725616619,3.35400409,3.34505167,3.34410637
61.211005,3.16227766,3.35391265,-0.437761339,3.35297167,3.3440446,3.34310084
61.221496,4.24264069,3.35287935,0.943271615,3.3519399,3.34303794,3.34209573
61.231988,3.74165739,3.3518465,0.624348372,3.35090858,3.34203152,3.34109085
61.24248,3.60555128,3.3508142,0.504714846,3.3498778,3.34102543,3.34008629
61.252971,3.16227766,3.34978255,-0.433018351,3.34884767,3.34001976,3.33908214
61.263463,3.60555128,3.34875136,0.506754294,3.34781799,3.33901432,3.33807823
61.273954,3.46410162,3.34772082,0.341146292,3.34678895,3.33800932,3.33707473
61.284446,2.82842712,3.34669074,-0.719905282,3.34576037,3.33700455,3.33607147
61.294938,3.16227766,3.34566121,-0.428233061,3.34473233,3.33600012,3.33506854
61.305429,3.16227766,3.34463234,-0.427030073,3.34370494,3.33499611,3.33406604
61.315921,2.44948974,3.34360393,-0.945576115,3.34267801,3.33399236,3.33306377
61.326412,3.87298335,3.34257618,0.72829058,3.34165173,3.33298903,3.33206193
61.336904,3.74165739,3.34154888,0.632541305,3.34062591,3.33198595,3.33106032
61.347396,3.16227766,3.34052215,-0.422190114,3.33960064,3.33098321,3.33005906
61.357887,2.82842712,3.33949608,-0.714890869,3.33857602,3.32998091,3.32905822
61.368379,3.16227766,3.33847047,-0.419753275,3.33755187,3.32897886,3.32805764
61.37887,2.82842712,3.33744553,-0.713455256,3.33652837,3.32797725,3.32705748
61.389362,4.35889894,3.33642105,1.01117649,3.33550533,3.32697589,3.32605757
61.399854,3.87298335,3.33539714,0.733202707,3.33448285,3.32597488,3.32505801
61.410345,3.87298335,3.33437389,0.733900168,3.33346103,3.32497432,3.32405888
61.420837,3.60555128,3.33335111,0.521728054,3.33243968,3.32397401,3.32306001
61.431328,3,3.33232901,-0.57647984,3.33141899,3.32297415,3.32206157
61.44182,2.44948974,3.33130737,-0.939051452,3.33039877,3.32197455,3.32106339
61.452312,2.64575131,3.33028631,-0.827366303,3.32937912,3.3209753,3.32006556
61.462803,3.87298335,3.32926592,0.737371972,3.32836013,3.3199765,3.31906818
61.473295,3.31662479,3.32824601,-0.107801766,3.32734162,3.31897797,3.31807105
61.483786,3.74165739,3.32722678,0.643762854,3.32632377,3.31797989,3.31707437
61.494278,3.46410162,3.32620802,0.371340267,3.3253064,3.31698208,3.31607795
61.50477,3.46410162,3.32518985,0.37270869,3.32428961,3.31598463,3.31508189
61.515261,3.16227766,3.32417235,-0.402361396,3.32327349,3.31498763,3.31408628
61.525753,3,3.32315535,-0.568467541,3.32225785,3.31399091,3.31309093
61.536244,2.64575131,3.32213902,-0.822427936,3.32124289,3.31299464,3.31209605
61.546736,3.46410162,3.32112319,0.378124885,3.32022842,3.31199865,3.31110142
61.557228,3.74165739,3.32010794,0.649268392,3.31921453,3.31100303,3.31010716
61.567719,2.82842712,3.31909338,-0.700475738,3.31820132,3.31000787,3.30911336
61.578211,3.60555128,3.31807932,0.536164108,3.31718861,3.30901299,3.30811983
61.588702,3.87298335,3.31706596,0.745598679,3.31617658,3.30801858,3.30712677
61.599194,3.87298335,3.31605309,0.746277601,3.31516504,3.30702444,3.30613398
61.609686,3.46410162,3.31504082,0.386083923,3.3141541,3.30603069,3.30514155
61.620177,2.82842712,3.31402925,-0.69685158,3.31314386,3.3050374,3.3041496
61.630669,3.16227766,3.31301819,-0.388253173,3.31213411,3.30404439,3.30315792
61.64116,3.31662479,3.31200783,0.0679482466,3.31112507,3.30305186,3.30216671
61.651652,3.46410162,3.31099798,0.391284599,3.31011653,3.30205962,3.30117578
61.662144,3.31662479,3.30998874,0.0814619523,3.3091086,3.30106775,3.30018523
61.672635,3.16227766,3.30898021,-0.383017693,3.30810137,3.30007637,3.29919515
61.683127,3.16227766,3.30797221,-0.381699548,3.30709465,3.29908527,3.29820535
61.693618,4.12310563,3.30696491,0.903405066,3.30608865,3.29809465,3.29721603
61.70411,3.46410162,3.30595814,0.397672568,3.30508317,3.29710433,3.296227
61.714602,3.87298335,3.304952,0.753678543,3.3040783,3.2961144,3.29523836
61.725093,2.44948974,3.30394658,-0.924368344,3.30307415,3.29512495,3.29425019
61.735585,3.31662479,3.30294169,0.116974777,3.30207054,3.29413579,3.29326231
61.746076,3.31662479,3.30193753,0.121190993,3.30106764,3.29314713,3.29227491
61.756568,3.60555128,3.30093476,0.551920751,3.30006613,3.29215876,3.29128781
61.76706,2.64575131,3.29993178,-0.808814238,3.29906441,3.29117079,3.2903011
61.777551,3.16227766,3.29892954,-0.369664552,3.29806342,3.29018331,3.28931488
61.788043,4,3.29792785,0.837897457,3.29706297,3.28919613,3.28832895
61.798534,4.24264069,3.29692691,0.972478165,3.29606327,3.28820944,3.28734352
61.809026,3.31662479,3.29592652,0.143868947,3.29506412,3.28722307,3.28635838
61.819518,3.16227766,3.29492678,-0.364210274,3.29406562,3.28623709,3.28537364
61.830009,3.46410162,3.29392781,0.412521282,3.29306786,3.28525161,3.2843894
61.840501,3,3.2929294,-0.541229525,3.29207068,3.28426644,3.28340545
61.850992,3.74165739,3.29193175,0.670615862,3.29107425,3.28328177,3.28242201
61.861484,2.44948974,3.29093468,-0.91730308,3.2900784,3.28229741,3.28143887
61.871976,3.87298335,3.28993829,0.76357387,3.28908321,3.28131346,3.28045613
61.882467,3.31662479,3.28894267,0.166379439,3.2880888,3.28033002,3.2794739
61.892959,3.74165739,3.28794764,0.673579796,3.28709497,3.27934689,3.27849197
61.90345,3,3.2869534,-0.535680316,3.28610192,3.27836427,3.27751055
61.913942,2.64575131,3.28595976,-0.800130267,3.28510946,3.27738196,3.27652945
61.924434,3.46410162,3.28496681,0.423243199,3.2841177,3.27640007,3.27554875
61.934925,2.44948974,3.28397466,-0.913501461,3.28312674,3.27541869,3.27456856
61.945417,3.74165739,3.28298313,0.677254944,3.28213638,3.27443764,3.27358868
61.955908,3.16227766,3.2819924,-0.345998181,3.28114683,3.2734571,3.27260932
61.9664,2.64575131,3.2810023,-0.797026342,3.2801579,3.27247688,3.27163027
61.976892,3.31662479,3.28001293,0.191342272,3.27916968,3.27149708,3.27065165
61.987383,3.16227766,3.27902437,-0.341682183,3.27818229,3.2705178,3.26967353
61.997875,3.74165739,3.27803647,0.680897144,3.27719554,3.26953886,3.26869574
62.008366,3.16227766,3.27704939,-0.338779772,3.27620962,3.26856043,3.26771847
62.018858,3.60555128,3.27606298,0.574010713,3.27522435,3.26758233,3.26674152
62.02935,3,3.27507732,-0.524478136,3.27423983,3.26660466,3.265765
62.039841,3.31662479,3.27409251,0.20623356,3.27325616,3.26562751,3.26478899
62.050333,3.31662479,3.27310838,0.208605877,3.27227316,3.2646507,3.26381332
62.060824,4.12310563,3.27212512,0.922486048,3.27129103,3.26367441,3.26283816
62.071316,3,3.27114255,-0.520713497,3.27030958,3.26269847,3.26186335
62.081808,2.23606798,3.27016077,-1.01690353,3.26932892,3.26172295,3.26088896
62.092299,2.82842712,3.26917988,-0.663892125,3.26834915,3.26074797,3.2599151
62.102791,3.74165739,3.2681997,0.688082614,3.26737009,3.25977333,3.25894157
62.113282,3,3.26722044,-0.516933687,3.26639193,3.25879922,3.25796857
62.123774,3.74165739,3.2662419,0.689503797,3.2654145,3.25782546,3.25699592
62.134266,3.60555128,3.2652642,0.583341304,3.2644379,3.25685214,3.2560237
62.144757,3.31662479,3.26428743,0.2287736,3.26346222,3.25587935,3.25505201
62.155249,2.44948974,3.26331142,-0.902120656,3.26248731,3.25490691,3.25408067
62.16574,2.64575131,3.26233637,-0.785229301,3.26151334,3.25393501,3.25310986
62.176232,4.12310563,3.26136209,0.928301426,3.26054015,3.25296346,3.2521394
62.186724,2.44948974,3.26038869,-0.900499279,3.25956783,3.25199236,3.25116938
62.197215,2.82842712,3.25941629,-0.656497647,3.2585965,3.2510218,3.2501999
62.207707,4.35889894,3.25844469,1.04902538,3.25762597,3.2500516,3.24923077
62.218198,3.16227766,3.2574741,-0.308539203,3.25665645,3.24908194,3.24826218
62.22869,3,3.25650435,-0.506462583,3.25568776,3.24811264,3.24729394
62.239182,3.16227766,3.25553554,-0.305381525,3.25472001,3.24714379,3.24632616
62.249673,2.82842712,3.25456777,-0.65279449,3.2537533,3.24617549,3.24535892
62.260165,3.16227766,3.25360088,-0.30219732,3.25278746,3.24520756,3.24439203
62.270656,2.64575131,3.25263506,-0.779027441,3.25182269,3.24424017,3.2434257
62.281148,3,3.25167015,-0.501667372,3.25085882,3.24327315,3.24245972
62.29164,2.44948974,3.25070625,-0.895106982,3.24989596,3.24230659,3.2414942
62.302131,3.60555128,3.24974347,0.596496274,3.24893422,3.24134058,3.24052923
62.312623,3,3.24878164,-0.498780152,3.24797342,3.24037494,3.23956462
62.323114,3.60555128,3.24782096,0.598105603,3.24701377,3.23940986,3.23860057
62.333606,2,3.24686127,-1.11662942,3.24605511,3.23844515,3.23763688
62.344098,3.46410162,3.24590268,0.46711769,3.24509753,3.2374809,3.23667366
62.354589,3,3.24494529,-0.49491948,3.24414116,3.23651722,3.23571099
62.365081,3.60555128,3.24398895,0.601300528,3.24318583,3.23555391,3.2347487
62.375572,3.46410162,3.24303386,0.470178433,3.24223175,3.23459116,3.23378696
62.386064,4.24264069,3.24207985,1.00028038,3.24127875,3.23362879,3.2328256
62.396556,3.16227766,3.24112704,-0.280801323,3.24032695,3.23266689,3.2318647
62.407047,4.12310563,3.24017555,0.939643588,3.23937645,3.23170556,3.23090437
62.417539,3.16227766,3.23922522,-0.277394231,3.23842712,3.23074461,3.22994441
62.42803,2.82842712,3.23827625,-0.640194601,3.23747914,3.22978423,3.22898502
62.438522,3.31662479,3.2373285,0.281595978,3.23653237,3.22882424,3.22802601
62.449014,2.64575131,3.23638207,-0.768525053,3.23558693,3.22786472,3.22706748
62.459505,3.31662479,3.23543709,0.284934558,3.23464293,3.22690577,3.22610951
62.469997,3.60555128,3.23449341,0.609145195,3.23370022,3.22594722,3.22515193
62.480488,3.87298335,3.23355124,0.79964499,3.23275902,3.22498924,3.22419492
62.49098,3.31662479,3.23261043,0.289852308,3.23181919,3.22403164,3.2232383
62.501472,3.74165739,3.23167111,0.714133233,3.23088084,3.22307454,3.22228215
62.511963,3.16227766,3.23073341,-0.261640494,3.22994409,3.22211801,3.22132658
62.522455,2.44948974,3.22979718,-0.883350121,3.22900882,3.22116187,3.22037141
62.532946,3,3.22886264,-0.478395904,3.22807524,3.22020632,3.2194168
62.543438,4.24264069,3.22792966,1.00732866,3.22714321,3.21925116,3.2184626
62.55393,3.46410162,3.22699837,0.486932488,3.22621287,3.2182965,3.21750888
62.564421,3.16227766,3.2260689,-0.252569274,3.22528435,3.21734242,3.21655574
62.574913,2.64575131,3.22514113,-0.761176599,3.22435752,3.21638874,3.21560299
62.585404,3.60555128,3.22421527,0.617524089,3.22343261,3.21543564,3.21465083
62.595896,2.82842712,3.22329122,-0.628382129,3.22250949,3.21448295,3.21369907
62.606388,3.60555128,3.22236912,0.61901709,3.22158832,3.21353076,3.21274781
62.616879,3.31662479,3.2214491,0.308505571,3.22066923,3.21257915,3.21179713
62.627371,2.82842712,3.22053107,-0.626182035,3.21975212,3.21162796,3.21084685
62.637862,3.16227766,3.21961525,-0.239452684,3.21883722,3.21067735,3.20989716
62.648354,3,3.21870154,-0.467655368,3.21792444,3.20972716,3.20894788
62.658846,2.64575131,3.21779011,-0.756332467,3.21701392,3.20877747,3.2079991
62.669337,3.74165739,3.21688112,0.724414433,3.21610584,3.20782837,3.20705091
62.679829,3.31662479,3.21597447,0.317254354,3.2152001,3.20687969,3.20610313
62.69032,3.31662479,3.21507042,0.318675968,3.21429696,3.20593161,3.20515594
62.700812,2.64575131,3.21416889,-0.753934732,3.21339634,3.20498394,3.20420917
62.711304,3,3.21327007,-0.461811724,3.21249842,3.20403678,3.20326291
62.721795,2.64575131,3.21237414,-0.752743532,3.21160338,3.20309023,3.20231724
62.732287,3.46410162,3.21148103,0.502613755,3.21071117,3.20214409,3.20137199
62.742778,2.23606798,3.21059103,-0.987179342,3.20982207,3.20119856,3.20042733
62.75327,4.12310563,3.20970409,0.955720425,3.20893602,3.20025345,3.1994831
62.763762,3,3.20882043,-0.456968743,3.20805324,3.19930885,3.19853938
62.774253,3.16227766,3.20794026,-0.213688095,3.20717396,3.19836486,3.19759626
62.784745,3.31662479,3.20706356,0.331000346,3.20629814,3.1974213,3.19665357
62.795236,4.35889894,3.20619065,1.07364254,3.2054261,3.19647835,3.19571148
62.805728,1.73205081,3.20532153,-1.21378364,3.20455786,3.19553583,3.19476982
62.81622,3.31662479,3.20445644,0.334915433,3.20369365,3.19459383,3.19382868
62.826711,3.74165739,3.20359567,0.733526902,3.20283375,3.19365244,3.19288814
62.837203,3.16227766,3.20273924,-0.201150644,3.20197818,3.19271148,3.19194803
62.847694,3.60555128,3.20188753,0.635345376,3.20112734,3.19177114,3.19100854
62.858186,2.64575131,3.20104059,-0.745177351,3.20028127,3.19083124,3.19006948
62.868678,2.82842712,3.20019876,-0.609730791,3.1994403,3.18989186,3.18913094
62.879169,3.16227766,3.19936237,-0.192573896,3.19860476,3.1889531,3.18819302
62.889661,3.16227766,3.19853152,-0.19040447,3.19777477,3.18801478,3.18725553
62.900152,2.44948974,3.19770669,-0.864995343,3.19695079,3.18707707,3.18631866
62.910644,2.64575131,3.19688801,-0.742385819,3.19613297,3.18613982,3.18538223
62.921136,3,3.19607593,-0.442804616,3.19532174,3.18520309,3.18444632
62.931627,3.87298335,3.19527087,0.823232943,3.19451753,3.18426699,3.18351104
62.942119,2.64575131,3.19447307,-0.74075756,3.19372058,3.18333133,3.1825762
62.95261,2.82842712,3.19368312,-0.604364126,3.19293147,3.1823963,3.18164199
62.963102,3.16227766,3.19290132,-0.174996162,3.19215051,3.18146172,3.18070821
62.973594,3.16227766,3.19212823,-0.172773177,3.19137827,3.18052767,3.17977498
62.984085,3.46410162,3.19136447,0.52224242,3.19061535,3.17959426,3.17884237
62.994577,3,3.19061047,-0.436589586,3.18986219,3.1786613,3.17791021
63.005068,3.46410162,3.189867,0.523674153,3.18911956,3.17772897,3.17697867
63.01556,2.82842712,3.1891346,-0.600589275,3.188388,3.17679709,3.17604759
63.026052,3.16227766,3.1884141,-0.161667698,3.18766834,3.17586576,3.17511705
63.036543,3.46410162,3.1877064,0.52573303,3.18696147,3.17493506,3.17418714
63.047035,3,3.18701225,-0.432449126,3.18626816,3.17400482,3.17325769
63.057526,3.60555128,3.1863328,0.647470832,3.18558955,3.17307522,3.17232886
63.068018,3.74165739,3.18566904,0.74564626,3.18492663,3.17214607,3.1714005
63.07851,3.16227766,3.18502231,-0.15081329,3.18428074,3.17121748,3.17047268
63.089001,3.16227766,3.1843941,-0.148715957,3.18365337,3.17028953,3.1695455
63.099493,3.16227766,3.18378593,-0.146656981,3.18304604,3.16936204,3.16861879
63.109984,2.64575131,3.18319984,-0.733108809,3.18246079,3.1684352,3.16769271
63.120476,3.31662479,3.18263794,0.366042141,3.18189974,3.16750882,3.16676709
63.130968,3,3.18210295,-0.42673522,3.1813656,3.166583,3.16584203
63.141459,3.60555128,3.18159807,0.651116891,3.18086157,3.16565782,3.16491761
63.151951,2,3.18112702,-1.08679668,3.18039138,3.16473311,3.16399366
63.162442,2.23606798,3.18069453,-0.971919004,3.17995975,3.16380905,3.16307035
63.172934,4.12310563,3.18030615,0.970978619,3.17957223,3.16288547,3.16214751
63.183426,3.31662479,3.17996883,0.369670071,3.17923579,3.16196244,3.16122523
63.193917,2.82842712,3.17969105,-0.592675225,3.1789589,3.16104007,3.1603036
63.204409,2.64575131,3.17948307,-0.730569477,3.17875182,3.16011817,3.15938244
63.2149,3.16227766,3.17935753,-0.130689959,3.17862719,3.15919693,3.15846193
63.225392,1.73205081,3.17932963,-1.20302902,3.17860023,3.15827616,3.1575419
63.235884,2.64575131,3.17941777,-0.730524785,3.17868933,3.15735596,3.15662243
63.246375,3.16227766,3.17964387,-0.131780934,3.17891642,3.15643642,3.15570361
63.256867,2.64575131,3.18003395,-0.730946398,3.17930751,3.15551736,3.15478528
63.267358,3.31662479,3.18061834,0.368790526,3.17989296,3.15459896,3.1538676
63.27785,2.44948974,3.18143235,-0.855536442,3.18070807,3.15368104,3.1529504
63.288342,3.16227766,3.18251613,-0.142261975,3.18179302,3.1527637,3.15203377
63.298833,4,3.18391479,0.903374344,3.18319292,3.15184702,3.1511178
63.309325,3.46410162,3.1856787,0.527657957,3.18495813,3.15093083,3.15020231
63.319816,3.60555128,3.18786203,0.646288822,3.18714287,3.1500153,3.14928749
63.330308,3.60555128,3.19052335,0.644226612,3.18980569,3.14910026,3.14837315
63.3408,3.46410162,3.1937231,0.519979344,3.19300705,3.1481858,3.14745939
63.351291,3.31662479,3.19752248,0.345112024,3.19680818,3.147272,3.1465463
63.361783,3.74165739,3.20198277,0.734625495,3.20127036,3.1463587,3.14563369
63.372274,3.87298335,3.20716041,0.81597974,3.20645003,3.14544607,3.14472175
63.382766,2.82842712,3.21310767,-0.620226207,3.21239949,3.14453394,3.14381031
63.393258,2.82842712,3.21986657,-0.62565122,3.21916075,3.14362239,3.14289944
63.403749,3.31662479,3.22746687,0.298593243,3.22676357,3.14271151,3.14198925
63.414241,3.16227766,3.23592528,-0.271380957,3.23522469,3.14180113,3.14107955
63.424732,3.16227766,3.24523722,-0.288027014,3.2445395,3.14089143,3.14017052
63.435224,3.74165739,3.2553798,0.697336061,3.25468511,3.13998223,3.13926199
63.445716,3.60555128,3.26630289,0.582450326,3.26561137,3.13907361,3.13835405
63.456207,3.16227766,3.27792815,-0.340074246,3.27723992,3.13816568,3.13744679
63.466699,3.46410162,3.29014937,0.417075831,3.28946452,3.13725825,3.13654002
63.47719,4,3.30282114,0.83497237,3.30213975,3.1363515,3.13563394
63.487682,2.64575131,3.31576426,-0.818543184,3.31508635,3.13544526,3.13472836
63.498174,3.74165739,3.32875362,0.642575886,3.32807917,3.13453962,3.13382337
63.508665,2.64575131,3.34151867,-0.834126705,3.34084761,3.13363465,3.13291906
63.519157,4,3.35374608,0.803899195,3.35307827,3.1327302,3.13201526
63.529648,4,3.36507453,0.796822105,3.36440976,3.13182643,3.13111214
63.54014,3.74165739,3.37511427,0.605428041,3.37445227,3.13092318,3.13020953
63.550632,3.60555128,3.38345912,0.471266542,3.38279954,3.13002053,3.12930752
63.561123,3,3.38972077,-0.624276193,3.38906318,3.12911856,3.1284062
63.571615,4.47213595,3.39356852,1.03854101,3.39291246,3.12821711,3.12750539
63.582106,3.60555128,3.3947654,0.459114225,3.39411035,3.12731635,3.12660526
63.592598,4.47213595,3.39320391,1.03871654,3.39254932,3.12641611,3.12570566
63.60309,2.82842712,3.38891992,-0.748660668,3.38826528,3.12551648,3.12480665
63.613581,2.82842712,3.38208877,-0.744084435,3.38143357,3.12461754,3.12390834
63.624073,4,3.37299699,0.791835217,3.37234079,3.12371912,3.12301054
63.634564,4.47213595,3.36200952,1.05362538,3.36135194,3.1228214,3.12211344
63.645056,3.87298335,3.34952323,0.723505439,3.34886396,3.1219242,3.12121686
63.655548,2.82842712,3.33593891,-0.712398612,3.33527772,3.12102761,3.12032089
63.666039,4,3.32163383,0.823629876,3.32097056,3.12013173,3.11942562
63.676531,3.60555128,3.3069425,0.546451074,3.30627705,3.11923636,3.11853087
63.687022,3.16227766,3.29215989,-0.360391769,3.29149222,3.1183417,3.11763681
63.697514,3.31662479,3.27752955,0.197725172,3.27685967,3.11744757,3.11674329
63.708006,4,3.26325569,0.85833811,3.26258365,3.11655406,3.11585038
63.718497,2.44948974,3.24950229,-0.894434206,3.24882817,3.11566125,3.11495817
63.728989,3.16227766,3.236393,-0.27224132,3.23571692,3.11476897,3.11406649
63.73948,3.87298335,3.22402384,0.805580232,3.22334593,3.1138774,3.11317551
63.749972,3,3.21245646,-0.460929994,3.21177688,3.11298636,3.11228507
63.760464,3.31662479,3.20172986,0.338961544,3.20104877,3.11209595,3.11139524
63.770955,2.64575131,3.19185953,-0.738991353,3.1911771,3.11120624,3.11050612
63.781447,2.44948974,3.18283805,-0.856357579,3.18215445,3.11031708,3.10961754
63.791938,2.64575131,3.1746448,-0.727250637,3.1739602,3.10942862,3.10872966
63.80243,3.60555128,3.16724213,0.662049203,3.1665567,3.1085407,3.10784233
63.812922,3.60555128,3.16058427,0.66705847,3.15989816,3.10765342,3.10695561
63.823413,3,3.15461766,-0.393214527,3.15393101,3.10676684,3.10606961
63.833905,2.23606798,3.14928229,-0.955622476,3.14859524,3.10588081,3.10518415
63.844396,4.12310563,3.14451814,0.989235807,3.14383081,3.10499549,3.1042994
63.854888,3,3.14026313,-0.374517189,3.13957561,3.10411072,3.1034152
63.86538,3.46410162,3.13645824,0.572401409,3.13577065,3.10322659,3.10253163
63.875871,3,3.13304735,-0.36475656,3.13235976,3.10234317,3.10164877
63.886363,3.87298335,3.12997733,0.86197797,3.12928981,3.1014603,3.10076646
63.896854,2.82842712,3.12720097,-0.546602089,3.12651359,3.10057815,3.09988486
63.907346,3.16227766,3.12467488,0.193914362,3.12398769,3.09969655,3.09900382
63.917838,3.60555128,3.12236152,0.695118517,3.12167456,3.09881559,3.09812341
63.928329,3.60555128,3.12022817,0.696651349,3.11954148,3.09793535,3.09724372
63.938821,3.31662479,3.11824613,0.445397198,3.11755974,3.09705567,3.09636458
63.949312,3.87298335,3.11639173,0.86982275,3.11570566,3.09617671,3.09548617
63.959804,3.87298335,3.1146444,0.870826587,3.11395868,3.09529831,3.09460831
63.970296,3.31662479,3.11298746,0.45126193,3.11230211,3.09442055,3.09373109
63.980787,2.44948974,3.1114071,-0.813583036,3.11072212,3.09354352,3.09285459
63.991279,3.31662479,3.10989152,0.4546793,3.10920694,3.09266705,3.09197865
64.00177,2.23606798,3.10843162,-0.93400409,3.10774743,3.09179131,3.09110344
64.012262,3.74165739,3.1070194,0.796641691,3.10633563,3.09091613,3.09022879
64.022754,3.46410162,3.10564873,0.598709346,3.10496537,3.0900416,3.08935479
64.033245,3,3.10431459,-0.32297769,3.10363165,3.0891678,3.08848151
64.043737,3.60555128,3.10301248,0.708899707,3.10232996,3.08829457,3.0876088
64.054228,3.60555128,3.10173917,0.709797231,3.10105708,3.08742207,3.08673682
64.06472,2.82842712,3.10049149,-0.521597896,3.09980983,3.08655014,3.0858654
64.075212,3.16227766,3.09926713,0.251018981,3.09858591,3.08567886,3.08499464
64.085703,2.82842712,3.09806413,-0.519265831,3.09738334,3.08480832,3.08412461
64.096195,3.60555128,3.09688047,0.713211614,3.09620012,3.08393835,3.08325515
64.106686,3.16227766,3.09571484,0.257997713,3.09503493,3.08306912,3.08238642
64.117178,3.74165739,3.09456566,0.804420115,3.09388619,3.08220046,3.08151826
64.12767,3.31662479,3.09343186,0.47243299,3.09275283,3.08133246,3.08065076
64.138161,3.60555128,3.09231247,0.716406874,3.09163388,3.0804652,3.079784
64.148653,2.82842712,3.09120631,-0.512619925,3.09052817,3.07959852,3.07891781
64.159144,3.87298335,3.09011274,0.884799754,3.08943504,3.07873258,3.07805237
64.169636,2.44948974,3.08903076,-0.799713085,3.0883535,3.07786721,3.0771875
64.180128,3.74165739,3.08795975,0.808515698,3.08728294,3.07700251,3.07632329
64.190619,2.44948974,3.08689916,-0.798379246,3.08622279,3.07613856,3.07545982
64.201111,3.16227766,3.08584818,0.27645882,3.08517225,3.07527519,3.07459693
64.211602,3.46410162,3.08480645,0.615869437,3.08413096,3.07441256,3.07373478
64.222094,2.23606798,3.08377326,-0.92070912,3.08309821,3.07355052,3.07287322
64.232586,2.64575131,3.08274823,-0.661057428,3.08207362,3.07268915,3.07201232
64.243077,3.16227766,3.08173102,0.283807392,3.08105685,3.07182852,3.07115217
64.253569,2.82842712,3.08072103,-0.502288668,3.0800473,3.07096848,3.07029261
64.26406,2.64575131,3.07971806,-0.65876153,3.07904477,3.0701092,3.06943379
64.274552,3.87298335,3.07872158,0.891213646,3.07804872,3.0692505,3.06857556
64.285044,3,3.07773135,-0.278803434,3.07705893,3.06839248,3.067718
64.295535,2.64575131,3.07674717,-0.656502745,3.07607517,3.06753521,3.06686119
64.306027,2.64575131,3.07576854,-0.655756991,3.07509698,3.06667853,3.06600498
64.316518,2.64575131,3.07479541,-0.655014577,3.07412428,3.0658226,3.06514951
64.32701,2.64575131,3.07382732,-0.654275181,3.07315663,3.06496728,3.06429464
64.337502,3.31662479,3.07286415,0.493721213,3.07219388,3.06411262,3.06344044
64.347993,2.44948974,3.07190577,-0.788933476,3.07123593,3.06325873,3.062587
64.358485,3,3.07095179,-0.266367775,3.07028237,3.06240543,3.06173415
64.368976,2.64575131,3.0700022,-0.651345447,3.06933321,3.0615529,3.06088206
64.379468,3.74165739,3.06905665,0.820122394,3.06838808,3.06070096,3.06003057
64.38996,2.44948974,3.06811504,-0.786527368,3.06744689,3.0598497,3.05917975
64.400451,3.46410162,3.06717733,0.630019276,3.0665096,3.05899921,3.0583297
64.410943,3,3.06624317,-0.257377486,3.06557586,3.05814932,3.05748024
64.421434,3.16227766,3.06531261,0.311392113,3.06464572,3.05730019,3.05663155
64.431926,3,3.06438534,-0.25374267,3.06371886,3.05645167,3.05578346
64.442418,2.64575131,3.06346133,-0.646304895,3.06279526,3.05560384,3.05493605
64.452909,3.46410162,3.06254054,0.633688468,3.06187488,3.05475677,3.05408941
64.463401,3.46410162,3.06162269,0.634412266,3.06095744,3.0539103,3.05324338
64.473892,3.74165739,3.06070786,0.825196662,3.06004302,3.05306461,3.05239811
64.484384,3.74165739,3.05979576,0.825749131,3.05913132,3.05221953,3.05155344
64.494876,3.87298335,3.0588864,0.902273211,3.05822237,3.05137513,3.05070947
64.505367,2.64575131,3.05797977,-0.6420502,3.05731614,3.05053151,3.04986626
64.515859,3.87298335,3.05707562,0.903276107,3.05641239,3.0496885,3.04902366
64.52635,3.16227766,3.05617404,0.325735501,3.05551121,3.04884626,3.04818184
64.536842,4.12310563,3.05527479,1.03335901,3.05461236,3.04800464,3.04734062
64.547334,3,3.05437788,-0.233190659,3.05371584,3.04716371,3.0465001
64.557825,3,3.05348334,-0.231264645,3.05282169,3.04632355,3.04566035
64.568317,3.31662479,3.05259092,0.513842266,3.05192966,3.04548402,3.04482121
64.578808,3.46410162,3.05170073,0.642184461,3.05103986,3.04464526,3.04398285
64.5893,2.82842712,3.05081256,-0.471577605,3.05015208,3.04380711,3.04314511
64.599792,3.31662479,3.04992643,0.516428463,3.04926634,3.04296967,3.04230806
64.610283,3,3.04904238,-0.221455142,3.04838266,3.04213301,3.04147179
64.620775,3.16227766,3.04816018,0.337812782,3.04750085,3.04129697,3.04063614
64.631266,2.82842712,3.04727997,-0.467817105,3.04662101,3.04046171,3.03980127
64.641758,2.82842712,3.04640152,-0.466877282,3.04574294,3.03962707,3.03896702
64.65225,2.64575131,3.04552488,-0.6322765,3.04486668,3.03879314,3.03813347
64.662741,3.31662479,3.0446501,0.521511927,3.04399227,3.03795999,3.03730071
64.673233,3.60555128,3.04377696,0.749516051,3.04311951,3.03712746,3.03646856
64.683724,3.74165739,3.04290561,0.835913739,3.04224852,3.03629573,3.0356372
64.694216,3.60555128,3.04203583,0.750676658,3.04137911,3.03546461,3.03480647
64.704708,2.44948974,3.04116768,-0.769206043,3.04051132,3.03463421,3.03397644
64.715199,3.16227766,3.04030121,0.349251272,3.03964521,3.0338046,3.0331472
64.725691,2.64575131,3.03943622,-0.627443154,3.03878059,3.03297561,3.03231858
64.736182,4.12310563,3.03857286,1.04140903,3.03791758,3.03214742,3.03149075
64.746674,2.44948974,3.03771092,-0.766955785,3.037056,3.03131986,3.03066356
64.757166,4.12310563,3.03685047,1.04223566,3.0361959,3.03049301,3.02983707
64.767657,3.31662479,3.03599155,0.529748277,3.03533734,3.02966695,3.02901137
64.778149,3.60555128,3.03513399,0.755259744,3.03448013,3.02884152,3.02818631
64.78864,3.46410162,3.03427793,0.655609399,3.03362442,3.02801689,3.02736203
64.799132,4,3.03342318,0.98314639,3.03277001,3.0271929,3.02653839
64.809624,2.82842712,3.03256979,-0.451821499,3.03191697,3.02636962,3.02571547
64.820115,4.24264069,3.03171784,1.1004194,3.03106536,3.02554714,3.02489333
64.830607,3.16227766,3.03086713,0.362505899,3.030215,3.0247253,3.02407184
64.841098,2.82842712,3.03001782,-0.448988527,3.02936602,3.02390426,3.02325114
64.85159,2.64575131,3.02916972,-0.619207892,3.02851826,3.02308386,3.02243108
64.862082,3.16227766,3.02832291,0.365998299,3.02767178,3.02226417,3.02161174
64.872573,3,3.02747743,-0.165763167,3.02682663,3.02144529,3.0207932
64.883065,4,3.02663312,0.986593576,3.02598265,3.02062705,3.01997529
64.893556,3.74165739,3.02579011,0.8460894,3.02513998,3.01980961,3.01915819
64.904048,3,3.02494825,-0.157950152,3.02429844,3.01899282,3.01834173
64.91454,2.64575131,3.02410759,-0.615106721,3.0234581,3.01817676,3.01752599
64.925031,2.64575131,3.0232682,-0.614424029,3.02261903,3.01736149,3.01671106
64.935523,2.82842712,3.0224299,-0.440457466,3.02178106,3.01654688,3.01589677
64.946014,3,3.02159286,-0.146945077,3.02094433,3.01573307,3.01508328
64.956506,3.31662479,3.02075688,0.543937414,3.02010867,3.0149199,3.01427044
64.966998,3.87298335,3.01992205,0.923613176,3.01927415,3.01410747,3.01345833
64.977489,2.64575131,3.01908843,-0.611013187,3.01844084,3.01329585,3.01264702
64.987981,3,3.01825585,-0.135114194,3.01760857,3.01248488,3.01183636
64.998472,3.46410162,3.01742446,0.668339105,3.01677749,3.01167471,3.01102651
65.008964,2.64575131,3.01659409,-0.608968618,3.01594743,3.0108652,3.01021731
65.019456,2.44948974,3.01576481,-0.752512505,3.01511846,3.01005643,3.00940885
65.029947,3.16227766,3.0149367,0.383850178,3.01429065,3.00924846,3.00860119
65.040439,3.46410162,3.01410959,0.670814453,3.01346383,3.00844115,3.00779418
65.05093,3.16227766,3.01328361,0.385997468,3.01263816,3.00763466,3.00698799
65.061422,3.16227766,3.01245862,0.38706464,3.01181346,3.00682882,3.00618245
65.071914,3.60555128,3.01163469,0.77065984,3.01098982,3.00602372,3.00537765
65.082405,3.31662479,3.01081187,0.553003545,3.01016729,3.00521943,3.00457366
65.092897,3.46410162,3.00999001,0.673878033,3.00934573,3.00441581,3.00377033
65.103388,3.60555128,3.00916926,0.772257737,3.00852526,3.003613,3.00296781
65.11388,3,3.00834946,-0.0913753792,3.00770575,3.00281085,3.00216595
65.124372,2.23606798,3.00753067,-0.878329492,3.00688724,3.00200945,3.00136483
65.134863,3.46410162,3.00671298,0.676305136,3.00606983,3.00120886,3.00056453
65.145355,2.44948974,3.00589621,-0.745926582,3.00525334,3.00040894,2.99976489
65.155846,2.64575131,3.00508052,-0.599440745,3.00443792,2.99960983,2.99896607
65.166338,3.46410162,3.00426574,0.678111991,3.00362343,2.9988114,2.99816791
65.17683,2.44948974,3.00345196,-0.74428638,3.00280991,2.9980137,2.99737049
65.187321,2.23606798,3.00263924,-0.875540552,3.00199746,2.99721683,2.9965739
65.197813,2.23606798,3.00182741,-0.875076818,3.00118591,2.99642063,2.99577797
65.208304,2.64575131,3.00101665,-0.596041386,3.00037541,2.99562525,2.99498286
65.218796,2.23606798,3.00020677,-0.874150325,2.9995658,2.99483055,2.99418842
65.229288,3.16227766,2.99939786,0.403583698,2.99875715,2.99403659,2.99339473
65.239779,4.24264069,2.99858999,1.11537021,2.99794954,2.99324345,2.99260186
65.250271,2.64575131,2.997783,-0.593322581,2.99714281,2.99245099,2.99180966
65.260762,3.31662479,2.99697704,0.565373995,2.9963371,2.99165936,2.99101829
65.271254,3.16227766,2.99617195,0.407560684,2.99553227,2.9908684,2.99022758
65.281746,3.46410162,2.99536781,0.684641371,2.99472838,2.99007819,2.98943763
65.292237,4,2.99456469,1.00271397,2.99392551,2.98928881,2.98864851
65.302729,2.82842712,2.99376243,-0.406614441,2.9931235,2.98850011,2.98786006
65.31322,3.87298335,2.99296118,0.938094965,2.9923225,2.98771224,2.98707243
65.323712,3.16227766,2.99216079,0.41245226,2.99152236,2.98692505,2.98628549
65.334204,3.16227766,2.99136133,0.413420278,2.99072314,2.98613861,2.9854993
65.344695,2.23606798,2.99056288,-0.868616659,2.98992492,2.985353,2.98471393
65.355187,1.73205081,2.98976527,-1.12147869,2.98912755,2.98456808,2.98392925
65.365678,2.82842712,2.98896866,-0.400676347,2.98833118,2.98378399,2.9831454
65.37617,3,2.98817289,0.108752505,2.98753565,2.98300058,2.98236223
65.386662,3.31662479,2.98737804,0.573800269,2.98674103,2.98221793,2.98157981
65.397153,3.60555128,2.98658418,0.786744619,2.9859474,2.98143611,2.98079823
65.407645,2.44948974,2.98579115,-0.732326028,2.9851546,2.98065498,2.98001733
65.418136,2.64575131,2.98499911,-0.582449828,2.98436279,2.97987469,2.97923727
65.428628,3.60555128,2.9842079,0.788253367,2.9835718,2.97909508,2.97845789
65.43912,2.23606798,2.9834176,-0.864493853,2.98278172,2.97831624,2.97767927
65.449611,3.46410162,2.98262827,0.693882801,2.98199261,2.97753823,2.97690148
65.460103,3,2.98183977,0.134759886,2.98120433,2.97676092,2.97612439
65.470594,2,2.98105225,-0.990480816,2.98041702,2.97598444,2.97534813
65.481086,3.16227766,2.98026554,0.426628783,2.97963053,2.97520865,2.97457256
65.491578,3.46410162,2.97947973,0.696147888,2.97884493,2.97443363,2.97379775
65.502069,3.31662479,2.97869489,0.581317381,2.9780603,2.97365945,2.97302378
65.512561,2.64575131,2.97791087,-0.576332853,2.97727648,2.97288596,2.97225051
65.523052,3.31662479,2.97712781,0.582663694,2.97649363,2.97211332,2.97147807
65.533544,3,2.97634557,0.153799979,2.97571159,2.97134137,2.97070633
65.544036,3.74165739,2.97556421,0.875267489,2.97493044,2.97057019,2.96993535
65.554527,3.46410162,2.97478381,0.699512546,2.97415024,2.96979985,2.96916522
65.565019,3,2.97400423,0.161232045,2.97337085,2.96903021,2.96839578
65.57551,3,2.9732256,0.163628851,2.97259242,2.96826142,2.96762718
65.586002,2.82842712,2.97244778,-0.379500532,2.97181479,2.96749332,2.96685928
65.596494,3.46410162,2.97167084,0.701734121,2.97103804,2.966726,2.96609215
65.606985,2.64575131,2.97089485,-0.570213592,2.97026225,2.96595952,2.96532586
65.617477,3.16227766,2.97011967,0.43835829,2.96948725,2.96519374,2.96456028
65.627968,3.74165739,2.96934544,0.878812806,2.96871321,2.96442882,2.96379554
65.63846,2.64575131,2.96857201,-0.568173125,2.96793996,2.96366459,2.9630315
65.648952,2.44948974,2.96779946,-0.719937299,2.96716759,2.96290114,2.96226823
65.659443,3.31662479,2.96702785,0.59126723,2.96639617,2.96213854,2.96150581
65.669935,2.82842712,2.96625705,-0.371254526,2.96562554,2.96137664,2.96074409
65.680426,3.46410162,2.96548719,0.706126353,2.96485585,2.9606156,2.95998323
65.690918,4.58257569,2.96471813,1.2719503,2.96408697,2.95985526,2.95922306
65.70141,3.60555128,2.96394994,0.801000212,2.96331895,2.9590957,2.95846368
65.711901,2.23606798,2.96318269,-0.852710216,2.96255187,2.95833699,2.95770514
65.722393,3.31662479,2.96241624,0.595154226,2.96178559,2.95757899,2.95694731
65.732884,2,2.96165073,-0.980637919,2.96102024,2.95682184,2.95619033
65.743376,2.64575131,2.96088601,-0.561368597,2.96025569,2.95606541,2.95543406
65.753868,2.82842712,2.96012216,-0.362898113,2.959492,2.95530975,2.95467857
65.764359,3.16227766,2.95935926,0.450464653,2.95872925,2.95455495,2.95392393
65.774851,3.16227766,2.95859714,0.451309783,2.9579673,2.95380087,2.95317
65.785342,3.46410162,2.95783596,0.711523473,2.95720627,2.95304763,2.95241692
65.795834,2.82842712,2.95707558,-0.35867597,2.95644604,2.95229512,2.95166456
65.806326,3.46410162,2.95631605,0.712590739,2.95568667,2.95154338,2.95091298
65.816817,3.16227766,2.95555747,0.454664923,2.95492823,2.95079251,2.95016225
65.827309,2,2.95479967,-0.977138513,2.95417058,2.95004235,2.94941224
65.8378,3.46410162,2.95404281,0.714184012,2.95341387,2.94929304,2.94866309
65.848292,2.44948974,2.95328674,-0.709786587,2.95265794,2.94854446,2.94791465
65.858784,2.64575131,2.95253153,-0.553877443,2.95190287,2.94779666,2.94716699
65.869275,3.74165739,2.95177726,0.888752007,2.95114874,2.94704973,2.9464202
65.879767,3.16227766,2.95102377,0.459623639,2.95039539,2.94630351,2.94567412
65.890258,3,2.95027122,0.222999516,2.94964297,2.94555815,2.9449289
65.90075,3.46410162,2.94951945,0.717343826,2.94889133,2.94481351,2.94418439
65.911242,2.44948974,2.94876854,-0.706596632,2.94814056,2.94406967,2.94344068
65.921733,2.44948974,2.94801857,-0.706065737,2.94739071,2.94332669,2.94269783
65.932225,3.31662479,2.94726938,0.607746172,2.94664165,2.94258443,2.9419557
65.942716,3.74165739,2.94652112,0.891704134,2.94589352,2.94184303,2.94121443
65.953208,3.87298335,2.94577365,0.962917282,2.94514617,2.94110236,2.94047388
65.9637,2.44948974,2.94502704,-0.703944102,2.94439968,2.94036248,2.93973412
65.974191,3.74165739,2.94428136,0.892959141,2.94365412,2.93962346,2.93899523
65.984683,3,2.94353646,0.23762057,2.94290934,2.93888517,2.93825706
65.995174,3.60555128,2.9427925,0.81409998,2.94216549,2.93814775,2.93751975
66.005666,3.46410162,2.94204932,0.722531866,2.94142242,2.93741106,2.93678317
66.016158,3,2.94130699,0.242266393,2.94068021,2.93667516,2.93604738
66.026649,3,2.9405656,0.243791714,2.93993892,2.93594013,2.93531246
66.037141,3.16227766,2.93982499,0.471648883,2.93919842,2.93520582,2.93457827
66.047632,2.23606798,2.93908531,-0.838461289,2.93845884,2.93447239,2.93384494
66.058124,3,2.93834642,0.248301397,2.93772005,2.93373968,2.93311234
66.068616,2.23606798,2.93760838,-0.837580086,2.93698211,2.93300778,2.93238053
66.079107,3.46410162,2.93687127,0.726106293,2.9362451,2.93227675,2.9316496
66.089599,4.12310563,2.93613494,1.08948184,2.93550887,2.93154644,2.93091939
66.10009,3.31662479,2.93539954,0.617434407,2.93477357,2.93081701,2.93019006
66.110582,3.16227766,2.93466493,0.477087758,2.93403905,2.93008831,2.92946145
66.121074,2.64575131,2.93393118,-0.536823867,2.93330538,2.92936042,2.92873365
66.131565,3.16227766,2.93319835,0.478622309,2.93257264,2.92863339,2.92800671
66.142057,2.82842712,2.9324663,-0.322551047,2.93184069,2.9279071,2.92728051
66.152548,3,2.93173518,0.261275363,2.93110965,2.92718169,2.92655518
66.16304,3.16227766,2.93100485,0.480908314,2.9303794,2.92645701,2.92583058
66.173532,3.74165739,2.93027538,0.900767455,2.92965001,2.92573313,2.92510679
66.184023,2.64575131,2.92954683,-0.532724618,2.92892154,2.92501013,2.92438387
66.194515,3.16227766,2.92881907,0.483175531,2.92819385,2.92428787,2.92366168
66.205006,2.82842712,2.92809223,-0.315697806,2.92746709,2.92356648,2.92294037
66.215498,3,2.92736618,0.269506626,2.92674111,2.92284583,2.9222198
66.22599,3.74165739,2.92664098,0.902782589,2.92601598,2.92212599,2.92150003
66.236481,2.64575131,2.92591672,-0.529306532,2.92529178,2.92140703,2.92078113
66.246973,3,2.92519323,0.273508256,2.92456837,2.92068881,2.92006298
66.257464,3,2.92447068,0.274825987,2.92384587,2.91997146,2.9193457
66.267956,2.64575131,2.92374891,-0.527254774,2.92312417,2.91925486,2.91862915
66.278448,3.31662479,2.923028,0.627372931,2.92240331,2.91853906,2.91791342
66.288939,3.31662479,2.92230801,0.627946481,2.92168338,2.91782415,2.91719857
66.299431,2.23606798,2.92158881,-0.827961853,2.92096424,2.91710998,2.91648445
66.309922,3.46410162,2.92087053,0.737042117,2.92024602,2.91639669,2.91577122
66.320414,2.64575131,2.92015305,-0.523833691,2.91952858,2.91568414,2.91505872
66.330906,3.46410162,2.91943642,0.738014361,2.918812,2.91497241,2.91434704
66.341397,3.31662479,2.91872071,0.630796383,2.91809635,2.91426156,2.91363623
66.351889,3.16227766,2.9180058,0.494238669,2.91738148,2.91355145,2.91292617
66.36238,3,2.91729181,0.287590319,2.91666753,2.91284223,2.91221699
66.372872,3.16227766,2.91657861,0.495680394,2.91595437,2.91213375,2.91150856
66.383364,3.31662479,2.91586626,0.633054916,2.91524207,2.91142609,2.91080094
66.393855,3.31662479,2.91515485,0.63361656,2.91453068,2.91071931,2.9100942
66.404347,3.46410162,2.91444422,0.741388831,2.91382009,2.91001328,2.9093882
66.414838,3.16227766,2.91373451,0.498541018,2.91311042,2.90930813,2.90868309
66.42533,1.73205081,2.9130256,-1.08672664,2.91240154,2.90860374,2.90797872
66.435822,3.31662479,2.91231755,0.63585159,2.91169351,2.90790016,2.90727518
66.446313,3.60555128,2.91161042,0.833031127,2.91098641,2.90719746,2.90657251
66.456805,3.74165739,2.91090408,0.911456695,2.9102801,2.90649552,2.90587059
66.467296,3.31662479,2.91019867,0.637515587,2.90957471,2.90579447,2.90516956
66.477788,3.16227766,2.90949405,0.502775909,2.90887011,2.90509416,2.90446928
66.48828,3.74165739,2.90879028,0.912615529,2.90816636,2.90439468,2.90376981
66.498771,3.31662479,2.90808745,0.63916926,2.90746354,2.90369608,2.90307123
66.509263,2.44948974,2.9073854,-0.67667988,2.90676151,2.90299824,2.90237341
66.519754,3.16227766,2.90668428,0.505562435,2.90606041,2.90230129,2.90167646
66.530246,2.64575131,2.90598396,-0.510130031,2.90536009,2.90160509,2.90098027
66.540738,2.82842712,2.90528449,-0.277231616,2.90466063,2.90090971,2.9002849
66.551229,2.82842712,2.90458595,-0.275968893,2.9039621,2.90021522,2.89959042
66.561721,3.60555128,2.90388821,0.837653309,2.90326436,2.89952149,2.89889669
66.572212,2.82842712,2.90319139,-0.273430549,2.90256754,2.89882864,2.89820385
66.582704,2.44948974,2.90249536,-0.673056923,2.90187151,2.89813656,2.89751177
66.593196,2.82842712,2.9018002,-0.270874649,2.90117635,2.8974453,2.89682051
66.603687,3.74165739,2.90110596,0.916815916,2.9004821,2.89675493,2.89613013
66.614179,3.16227766,2.90041252,0.511727604,2.89978865,2.89606532,2.89544051
66.62467,2.82842712,2.89972,-0.267007265,2.89909613,2.8953766,2.89475178
66.635162,3.46410162,2.89902828,0.751713596,2.8984044,2.89468864,2.89406381
66.645654,3.60555128,2.89833743,0.840960076,2.89771353,2.8940015,2.89337667
66.656145,3.31662479,2.89764749,0.647284556,2.89702358,2.89331526,2.89269041
66.666637,1.41421356,2.89695836,-1.21768009,2.89633443,2.89262978,2.89200491
66.677128,3.46410162,2.89627015,0.753545926,2.8956462,2.89194519,2.89132031
66.68762,3,2.89558274,0.323136592,2.89495877,2.89126137,2.89063646
66.698112,2.23606798,2.8948962,-0.811682338,2.8942722,2.89057837,2.88995344
66.708603,3.16227766,2.89421058,0.517751952,2.89358655,2.88989627,2.88927131
66.719095,2.64575131,2.89352575,-0.497769468,2.8929017,2.88921493,2.88858995
66.729586,2.82842712,2.89284186,-0.253800585,2.89221778,2.88853448,2.88790947
66.740078,3.16227766,2.89215877,0.519729635,2.89153465,2.8878548,2.88722976
66.75057,3.87298335,2.89147654,0.990710255,2.89085239,2.88717595,2.88655088
66.761061,3.87298335,2.89079523,0.991054041,2.89017105,2.886498,2.88587288
66.771553,3.16227766,2.89011473,0.52169237,2.88949051,2.88582081,2.88519566
66.782044,3.46410162,2.88943516,0.758067581,2.88881089,2.88514452,2.88451932
66.792536,3.16227766,2.88875638,0.522992615,2.88813208,2.88446899,2.88384376
66.803028,3.16227766,2.88807848,0.523640319,2.88745412,2.8837943,2.88316902
66.813519,2.82842712,2.8874015,-0.242846397,2.8867771,2.8831205,2.88249518
66.824011,2.64575131,2.88672532,-0.490891035,2.88610087,2.88244748,2.8818221
66.834502,3.31662479,2.88605007,0.656181926,2.88542557,2.88177535,2.88114992
66.844994,2.64575131,2.88537562,-0.489514365,2.88475107,2.88110398,2.8804785
66.855486,2.82842712,2.88470204,-0.237223352,2.88407743,2.88043346,2.87980792
66.865977,2.82842712,2.88402939,-0.235801333,2.88340472,2.87976383,2.87913823
66.876469,3,2.88335755,0.34152958,2.88273281,2.87909497,2.87846931
66.88696,2.64575131,2.88268663,-0.486760021,2.88206183,2.87842701,2.87780129
66.897452,2.44948974,2.88201652,-0.657667676,2.88139166,2.87775982,2.87713403
66.907944,3.60555128,2.88134727,0.851001767,2.88072234,2.87709347,2.87646761
66.918435,4.35889894,2.88067895,1.21582071,2.88005396,2.87642801,2.87580209
66.928927,2.44948974,2.88001144,-0.656141524,2.87938637,2.87576333,2.87513734
66.939418,3.60555128,2.87934486,0.852177454,2.87871972,2.87509955,2.87447348
66.94991,3,2.87867909,0.348311516,2.87805387,2.87443654,2.8738104
66.960402,3.16227766,2.87801418,0.533163651,2.87738889,2.87377437,2.87314815
66.970893,3.31662479,2.87735021,0.662777929,2.87672483,2.8731131,2.8724868
66.981385,3.46410162,2.87668704,0.766429759,2.87606158,2.8724526,2.87182622
66.991876,3.31662479,2.8760248,0.663777062,2.87539926,2.87179301,2.87116655
67.002368,3.31662479,2.87536337,0.664275106,2.87473774,2.87113419,2.87050764
67.01286,2.82842712,2.87470281,-0.215117849,2.8740771,2.87047621,2.86984957
67.023351,3,2.87404319,0.354903949,2.87341738,2.86981913,2.8691924
67.033843,3.46410162,2.87338437,0.768581321,2.87275846,2.86916283,2.86853601
67.044334,2.64575131,2.87272648,-0.476419112,2.87210048,2.86850743,2.86788051
67.054826,3.60555128,2.8720694,0.856435562,2.87144331,2.86785281,2.86722579
67.065318,3,2.8714132,0.358590021,2.870787,2.86719903,2.86657191
67.075809,3.16227766,2.87075792,0.539925677,2.87013162,2.86654615,2.86591893
67.086301,2.64575131,2.87010346,-0.473658262,2.86947706,2.86589405,2.86526673
67.096792,3.74165739,2.86944993,0.933920476,2.86882342,2.86524286,2.86461543
67.107284,3,2.86879721,0.362219256,2.86817059,2.86459244,2.8639649
67.117776,3.31662479,2.86814536,0.669686066,2.86751863,2.86394286,2.86331521
67.128267,2.23606798,2.86749445,-0.794623479,2.86686761,2.86329419,2.86266643
67.138759,3.60555128,2.86684435,0.859480614,2.86621739,2.8626463,2.86201842
67.14925,2.44948974,2.86619518,-0.645527258,2.8655681,2.86199932,2.86137132
67.159742,2,2.86554683,-0.930347692,2.86491963,2.86135311,2.86072499
67.170234,3.60555128,2.86489935,0.860611369,2.86427202,2.86070775,2.86007951
67.180725,3,2.8642528,0.368438866,2.86362535,2.86006329,2.85943492
67.191217,3.31662479,2.86360707,0.673065912,2.86297949,2.85941962,2.85879112
67.201708,2.82842712,2.86296227,-0.185836347,2.86233457,2.85877685,2.85814822
67.2122,2.64575131,2.86231829,-0.465367573,2.86169045,2.85813486,2.8575061
67.222692,3,2.86167518,0.371920447,2.86104721,2.85749372,2.85686483
67.233183,3.46410162,2.86103301,0.776574919,2.8604049,2.85685348,2.85622446
67.243675,2.82842712,2.86039165,-0.178786263,2.85976341,2.85621403,2.85558486
67.254166,3.31662479,2.85975123,0.675924225,2.85912284,2.85557548,2.85494618
67.264658,3,2.85911163,0.375350998,2.8584831,2.85493772,2.85430827
67.27515,3.31662479,2.8584729,0.676869183,2.85784422,2.85430081,2.85367121
67.285641,2.64575131,2.85783511,-0.460525567,2.85720628,2.8536648,2.85303505
67.296133,2,2.85719813,-0.925849953,2.85656916,2.85302957,2.85239968
67.306624,3,2.8565621,0.378731965,2.85593297,2.85239526,2.85176521
67.317116,3.46410162,2.85592688,0.779855586,2.85529759,2.85176173,2.85113152
67.327608,3.74165739,2.85529254,0.941469515,2.8546631,2.85112905,2.85049868
67.338099,3.16227766,2.85465914,0.554633685,2.85402953,2.85049727,2.84986675
67.348591,2.44948974,2.85402655,-0.636032081,2.85339679,2.84986628,2.8492356
67.359082,3.46410162,2.85339491,0.781477261,2.85276498,2.8492362,2.84860535
67.369574,4,2.85276408,1.071091,2.85213398,2.84860691,2.84797589
67.380066,3,2.85213413,0.384533312,2.85150387,2.84797846,2.84734728
67.390557,2.44948974,2.85150512,-0.634046829,2.85087469,2.84735092,2.84671957
67.401049,2.82842712,2.85087694,-0.149832615,2.85024633,2.84672418,2.84609265
67.41154,3.46410162,2.85024969,0.783487029,2.8496189,2.84609834,2.84546663
67.422032,2.44948974,2.84962326,-0.632561081,2.8489923,2.84547329,2.8448414
67.432524,2.64575131,2.84899772,-0.450828578,2.84836657,2.84484908,2.84421702
67.443015,2.82842712,2.84837311,-0.141230268,2.84774178,2.84422579,2.84359354
67.453507,2.64575131,2.84774933,-0.449441898,2.84711781,2.84360329,2.84297085
67.463998,2.23606798,2.84712649,-0.781702316,2.84649478,2.8429817,2.84234907
67.47449,2.23606798,2.84650447,-0.781304353,2.84587257,2.84236089,2.84172808
67.484982,2.82842712,2.84588333,-0.132121948,2.84525124,2.84174094,2.84110793
67.495473,2.44948974,2.84526314,-0.629105235,2.84463085,2.8411219,2.84048869
67.505965,2.64575131,2.84464377,-0.445973607,2.84401129,2.84050364,2.83987024
67.516456,3.16227766,2.84402534,0.564138564,2.84339266,2.8398863,2.8392527
67.526948,3,2.84340774,0.395717403,2.84277485,2.83926975,2.83863594
67.53744,2.82842712,2.84279102,-0.11984946,2.84215793,2.83865405,2.83802004
67.547931,3.60555128,2.84217524,0.873713931,2.84154194,2.83803926,2.83740504
67.558423,2.23606798,2.84156029,-0.778133866,2.84092678,2.83742527,2.83679083
67.568914,3,2.84094628,0.39881539,2.84031256,2.83681218,2.83617753
67.579406,3.74165739,2.8403331,0.949380999,2.83969917,2.83619989,2.83556503
67.589898,2,2.83972081,-0.916362816,2.83908665,2.83558845,2.83495337
67.600389,3,2.83910946,0.40111163,2.83847508,2.83497791,2.83434261
67.610881,2.23606798,2.83849894,-0.776164262,2.83786434,2.83436818,2.83373265
67.621372,2,2.83788936,-0.915362967,2.83725454,2.83375935,2.8331236
67.631864,3.60555128,2.83728061,0.876510503,2.83664556,2.83315132,2.83251534
67.642356,3.60555128,2.83667275,0.876857185,2.83603747,2.83254414,2.83190793
67.652847,3.16227766,2.83606584,0.571149562,2.83543032,2.83193787,2.83130143
67.663339,3.60555128,2.83545975,0.877548587,2.834824,2.8313324,2.83069572
67.67383,3,2.83485461,0.406380839,2.83421863,2.83072783,2.83009092
67.684322,3.31662479,2.83425031,0.694531845,2.83361408,2.83012407,2.82948691
67.694814,3.60555128,2.83364689,0.878580894,2.83301042,2.82952115,2.82888375
67.705305,2.82842712,2.83304442,-0.0679506569,2.8324077,2.82891915,2.82828151
67.715797,3.16227766,2.83244278,0.57431253,2.83180581,2.82831794,2.82768005
67.726288,2.44948974,2.83184209,-0.618346459,2.83120487,2.82771765,2.82707951
67.73678,2.64575131,2.83124223,-0.430686565,2.83060476,2.82711815,2.82647975
67.747272,2.82842712,2.83064326,-0.0470758624,2.83000554,2.82651951,2.82588085
67.757763,2.64575131,2.83004524,-0.429294692,2.82940726,2.82592177,2.82528286
67.768255,2.44948974,2.82944806,-0.61640759,2.82880982,2.82532484,2.82468566
67.778746,3.31662479,2.82885183,0.698407449,2.82821332,2.82472881,2.82408937
67.789238,2.23606798,2.82825643,-0.769537815,2.82761766,2.82413358,2.82349388
67.79973,3.31662479,2.82766192,0.6992588,2.82702288,2.82353921,2.82289924
67.810221,3.31662479,2.82706837,0.699683089,2.82642906,2.82294575,2.82230551
67.820713,3.60555128,2.82647565,0.882652609,2.82583606,2.82235309,2.82171257
67.831204,2.23606798,2.82588388,-0.767994728,2.82524402,2.82176134,2.82112054
67.841696,3,2.82529295,0.417979723,2.82465281,2.82117038,2.82052931
67.852188,2.44948974,2.82470292,-0.612546467,2.8240625,2.82058029,2.81993893
67.862679,2,2.82411384,-0.907807158,2.82347313,2.8199911,2.81934946
67.873171,3.16227766,2.82352559,0.582024112,2.8228846,2.81940271,2.81876078
67.883662,2.64575131,2.8229383,-0.420935853,2.82229702,2.81881524,2.81817302
67.894154,2.44948974,2.82235185,-0.610624362,2.82171028,2.81822856,2.81758605
67.904646,3,2.8217663,0.422177328,2.82112444,2.81764274,2.81699993
67.915137,3.46410162,2.82118171,0.801822866,2.82053954,2.81705783,2.81641473
67.925629,2,2.82059795,-0.905868617,2.81995548,2.81647373,2.81583032
67.93612,3.60555128,2.82001515,0.886304758,2.81937238,2.81589053,2.81524682
67.946612,2.82842712,2.81943319,0.094836335,2.81879012,2.81530813,2.81466411
67.957104,3,2.81885214,0.425614688,2.81820875,2.81472659,2.81408226
67.967595,3.74165739,2.81827204,0.96092942,2.81762834,2.81414596,2.81350132
67.978087,3,2.81769278,0.426974494,2.81704877,2.81356613,2.81292118
67.988578,3.16227766,2.81711448,0.587505896,2.81647016,2.81298722,2.81234195
67.99907,3.46410162,2.81653703,0.804713977,2.81589239,2.8124091,2.81176351
68.009562,2.82842712,2.81596048,0.111654125,2.81531552,2.81183184,2.81118593
68.020053,3.16227766,2.81538489,0.588976036,2.8147396,2.81125549,2.81060925
68.030545,3,2.81481015,0.430336906,2.81416453,2.81067995,2.81003338
68.041036,2.82842712,2.81423636,0.119124983,2.81359041,2.81010531,2.80945841
68.051528,3,2.81366343,0.431667199,2.81301715,2.80953148,2.80888425
68.06202,3.60555128,2.8130914,0.890202154,2.81244478,2.8089585,2.80831093
68.072511,2.82842712,2.81252033,0.126122129,2.81187338,2.80838644,2.80773853
68.083003,2.64575131,2.81195012,-0.407674878,2.81130282,2.80781517,2.80716692
68.093494,2.82842712,2.81138086,0.130561332,2.81073322,2.80724482,2.80659622
68.103986,3,2.81081246,0.434956937,2.81016447,2.80667527,2.80602632
68.114478,2.23606798,2.81024497,-0.757744675,2.80959663,2.80610658,2.80545728
68.124969,3.46410162,2.80967844,0.80896426,2.80902975,2.80553879,2.80488914
68.135461,2.82842712,2.80911277,0.138976099,2.80846372,2.80497181,2.80432181
68.145952,3,2.80854806,0.437552214,2.80789865,2.80440575,2.80375538
68.156444,2.44948974,2.80798421,-0.598744074,2.80733444,2.80384048,2.80318975
68.166936,2.23606798,2.80742127,-0.755879152,2.80677114,2.80327607,2.80262498
68.177427,3.31662479,2.8068593,0.713978637,2.8062088,2.80271257,2.80206111
68.187919,4.35889894,2.80629818,1.24603401,2.80564731,2.80214988,2.80149805
68.19841,2.44948974,2.80573804,-0.596865391,2.8050868,2.80158809,2.80093589
68.208902,2.64575131,2.80517875,-0.399283661,2.80452714,2.80102711,2.80037453
68.219394,1.41421356,2.80462038,-1.17915513,2.80396839,2.80046699,2.79981403
68.229885,2.82842712,2.80406299,0.156090161,2.80341061,2.79990778,2.79925443
68.240377,2.64575131,2.80350645,-0.397184014,2.80285369,2.79934937,2.79869563
68.250868,3.16227766,2.80295089,0.599438714,2.80229774,2.79879187,2.79813775
68.26136,2.64575131,2.80239619,-0.395783881,2.80174265,2.79823517,2.79758066
68.271852,3.46410162,2.80184241,0.813793094,2.80118848,2.79767933,2.79702442
68.282343,1.73205081,2.80128961,-1.03404004,2.80063528,2.7971244,2.7964691
68.292835,1.73205081,2.80073768,-1.03377312,2.80008295,2.79657028,2.79591457
68.303326,2.64575131,2.80018672,-0.392982706,2.79953159,2.79601706,2.79536095
68.313818,2.64575131,2.79963663,-0.392282193,2.79898109,2.79546465,2.79480813
68.32431,2.82842712,2.79908747,0.171288229,2.79843152,2.7949131,2.79425617
68.334801,3.46410162,2.79853928,0.815820037,2.79788292,2.79436245,2.79370511
68.345293,2.23606798,2.79799197,-0.749615898,2.7973352,2.79381261,2.79315486
68.355784,3.46410162,2.79744564,0.816490033,2.79678845,2.79326368,2.79260551
68.366276,2.64575131,2.79690019,-0.388778698,2.79624258,2.79271555,2.79205696
68.376768,3.46410162,2.79635566,0.817157238,2.79569763,2.79216828,2.79150926
68.387259,2.44948974,2.79581212,-0.588491613,2.79515366,2.79162192,2.79096247
68.397751,3.87298335,2.79526946,1.03812999,2.79461057,2.79107637,2.79041648
68.408242,2.64575131,2.79472779,-0.385974707,2.79406846,2.79053172,2.7898714
68.418734,2.64575131,2.79418699,-0.385273516,2.79352723,2.78998787,2.78932712
68.429226,3,2.79364714,0.454260787,2.79298694,2.78944489,2.78878369
68.439717,2.82842712,2.79310827,0.187933115,2.79244763,2.78890281,2.78824117
68.450209,2.82842712,2.79257029,0.189359014,2.7919092,2.78836153,2.78769945
68.4607,2.64575131,2.7920333,-0.382468284,2.79137176,2.78782117,2.78715863
68.471192,3.60555128,2.7914972,0.902249453,2.79083521,2.78728161,2.78661862
68.481684,2.23606798,2.79096204,-0.744912119,2.7902996,2.7867429,2.78607946
68.492175,2.82842712,2.79042788,0.194933947,2.78976498,2.78620511,2.7855412
68.502667,3.16227766,2.78989461,0.610231961,2.78923125,2.78566811,2.78500375
68.513158,3.60555128,2.78936235,0.903431752,2.78869852,2.78513203,2.7844672
68.52365,3.31662479,2.78883097,0.726494196,2.78816668,2.78459675,2.78393145
68.534142,2.64575131,2.78830055,-0.377556939,2.78763579,2.78406232,2.78339655
68.544633,3,2.78777114,0.460683041,2.7871059,2.78352881,2.78286256
68.555125,3,2.78724262,0.461256306,2.78657691,2.78299609,2.78232936
68.565616,3,2.78671511,0.461827769,2.78604892,2.78246429,2.78179708
68.576108,4.24264069,2.78618851,1.20683561,2.78552183,2.78193329,2.78126559
68.5866,2.23606798,2.78566287,-0.741346672,2.7849957,2.78140314,2.78073495
68.597091,2.82842712,2.78513823,0.208059824,2.78447058,2.7808739,2.78020522
68.607583,2.64575131,2.78461452,-0.372643535,2.78394637,2.78034547,2.77967629
68.618074,3.16227766,2.78409181,0.614968169,2.78342316,2.77981794,2.77914826
68.628566,3,2.78357002,0.465220352,2.78290088,2.77929122,2.77862104
68.639058,3,2.78304921,0.465779769,2.78237956,2.77876535,2.77809466
68.649549,3.31662479,2.78252941,0.730818295,2.78185925,2.77824038,2.77756919
68.660041,3.60555128,2.78201054,0.907491454,2.78133987,2.77771622,2.77704452
68.670532,3.60555128,2.78149269,0.907776727,2.78082151,2.77719297,2.77652075
68.681024,2.23606798,2.78097577,-0.7381787,2.78030407,2.77667052,2.77599778
68.691516,3.16227766,2.78045983,0.617914094,2.77978761,2.77614892,2.77547566
68.702007,3.31662479,2.77994493,0.732584373,2.77927218,2.77562823,2.77495444
68.712499,3.16227766,2.77943096,0.618746072,2.77875769,2.77510835,2.77443403
68.72299,2.82842712,2.77891803,0.2225064,2.77824423,2.77458937,2.77391451
68.733482,2.82842712,2.77840604,0.223653944,2.7777317,2.77407119,2.7733958
68.743974,2.82842712,2.77789504,0.22479342,2.77722017,2.77355386,2.77287794
68.754465,2.82842712,2.77738509,0.225924835,2.77670968,2.77303744,2.77236097
68.764957,2.44948974,2.7768761,-0.572176855,2.77620014,2.77252183,2.77184481
68.775448,3.31662479,2.77636815,0.735021524,2.77569164,2.77200712,2.77132954
68.78594,2.64575131,2.77586116,-0.360707431,2.7751841,2.77149321,2.77081508
68.796432,3.16227766,2.77535518,0.62203093,2.77467757,2.77098015,2.77030147
68.806923,3.16227766,2.77485027,0.622436659,2.77417209,2.770468,2.76978875
68.817415,3.31662479,2.77434632,0.736395596,2.77366758,2.76995665,2.76927684
68.827906,4.24264069,2.77384344,1.21193946,2.77316414,2.7694462,2.76876582
68.838398,3.16227766,2.77334153,0.62364744,2.77266166,2.76893656,2.76825561
68.84889,2.44948974,2.77284065,-0.568639526,2.77216021,2.76842777,2.76774624
68.859381,3.16227766,2.77234086,0.6244492,2.77165984,2.76791988,2.76723777
68.869873,3,2.77184205,0.477658825,2.77116045,2.76741279,2.7667301
68.880364,3.31662479,2.77134433,0.738431084,2.77066214,2.76690661,2.76622333
68.890856,3.60555128,2.7708476,0.913621188,2.77016483,2.76640122,2.76571736
68.901348,2.64575131,2.77035192,-0.352988121,2.76966856,2.76589669,2.76521223
68.911839,3.16227766,2.76985735,0.626434602,2.76917339,2.76539306,2.764708
68.922331,2.64575131,2.76936379,-0.351585659,2.76867923,2.76489024,2.76420457
68.932822,3.31662479,2.76887133,0.740103679,2.76818618,2.76438831,2.76370204
68.943314,3.87298335,2.7683799,1.05100116,2.76769414,2.76388719,2.76320031
68.953806,2.44948974,2.76788955,-0.564269265,2.76720317,2.76338691,2.76269942
68.964297,3.46410162,2.76740032,0.834686348,2.76671333,2.76288754,2.76219943
68.974789,3.46410162,2.76691212,0.834978737,2.76622452,2.76238897,2.76170024
68.98528,2.64575131,2.76642507,-0.347381288,2.76573685,2.76189129,2.76120194
68.995772,3.31662479,2.76593907,0.742082019,2.76525022,2.76139442,2.76070444
69.006264,3.60555128,2.76545417,0.916568114,2.76476469,2.7608984,2.76020779
69.016755,2.23606798,2.76497043,-0.727256797,2.76428032,2.76040328,2.75971203
69.027247,3.46410162,2.76448775,0.836429232,2.76379701,2.75990896,2.75921707
69.037738,3.16227766,2.76400625,0.63108748,2.76331487,2.75941553,2.758723
69.04823,3.60555128,2.76352584,0.917619441,2.76283381,2.75892291,2.75822973
69.058722,2.44948974,2.76304656,-0.559961443,2.76235389,2.75843114,2.75773731
69.069213,3.60555128,2.76256848,0.918140947,2.76187515,2.75794026,2.75724577
69.079705,3.16227766,2.7620915,0.632602685,2.76139752,2.75745019,2.75675504
69.090196,3.46410162,2.76161574,0.838144306,2.7609211,2.75696101,2.75626519
69.100688,2.23606798,2.7611411,-0.724619294,2.7604458,2.75647263,2.75577615
69.11118,3.16227766,2.76066764,0.633727085,2.75997167,2.7559851,2.75528795
69.121671,2.64575131,2.76019542,-0.338295892,2.75949878,2.75549847,2.75480064
69.132163,3,2.75972436,0.490179195,2.75902704,2.75501263,2.75431412
69.142654,3.31662479,2.75925455,0.74657233,2.75855655,2.75452769,2.7538285
69.153146,2.64575131,2.75878591,-0.336206192,2.75808724,2.75404355,2.75334367
69.163638,2.64575131,2.75831851,-0.335510362,2.75761915,2.75356026,2.75285969
69.174129,1.73205081,2.7578524,-1.01281864,2.75715235,2.75307786,2.75237659
69.184621,3,2.7573875,0.492557101,2.75668675,2.75259626,2.75189429
69.195112,3.87298335,2.75692391,1.05643714,2.75622246,2.75211556,2.75141288
69.205604,3.46410162,2.75646156,0.84121344,2.75575941,2.75163565,2.75093226
69.216096,3,2.75600051,0.493963049,2.75529764,2.75115659,2.75045249
69.226587,3.16227766,2.7555408,0.637759249,2.75483723,2.75067842,2.74997361
69.237079,3.87298335,2.75508238,1.05730836,2.75437809,2.75020105,2.74949551
69.24757,3.16227766,2.75462533,0.638476569,2.75392032,2.74972457,2.74901831
69.258062,2.44948974,2.7541696,-0.551978128,2.75346387,2.7492489,2.7485419
69.268554,2.82842712,2.75371523,0.273334764,2.75300877,2.74877406,2.74806633
69.279045,3.31662479,2.7532623,0.750574775,2.75255511,2.74830012,2.74759165
69.289537,4,2.75281072,1.11677629,2.7521028,2.74782697,2.74711776
69.300028,2.64575131,2.75236062,-0.326510807,2.75165195,2.74735472,2.74664476
69.31052,3.16227766,2.75191191,0.640597962,2.7512025,2.74688326,2.74617255
69.321012,3.31662479,2.75146467,0.751771323,2.75075451,2.74641265,2.74570118
69.331503,2.44948974,2.75101895,-0.549116752,2.75030804,2.74594292,2.74523069
69.341995,2.82842712,2.7505747,0.27902048,2.74986303,2.74547399,2.744761
69.352486,2.82842712,2.75013201,0.279812635,2.74941958,2.74500595,2.74429219
69.362978,2.82842712,2.74969084,0.280599861,2.74897765,2.74453871,2.74382417
69.37347,2.82842712,2.74925125,0.28138208,2.74853728,2.74407231,2.74335699
69.383961,3,2.7488133,0.501185292,2.74809856,2.74360679,2.7428907
69.394453,3,2.74837695,0.501620427,2.74766143,2.74314208,2.74242519
69.404944,1.73205081,2.74794229,-1.00791442,2.74722599,2.74267825,2.74196057
69.415436,2.44948974,2.74750929,-0.545911665,2.7467922,2.74221521,2.74149674
69.425928,3.31662479,2.74707801,0.754683233,2.74636013,2.74175302,2.74103374
69.436419,2,2.74664852,-0.864088261,2.74592984,2.74129171,2.74057163
69.446911,2.23606798,2.74622079,-0.714249824,2.74550131,2.7408312,2.7401103
69.457402,2.64575131,2.74579492,-0.316296713,2.74507464,2.74037157,2.73964986
69.467894,2.44948974,2.74537088,-0.543949572,2.74464979,2.73991273,2.7391902
69.478386,2.64575131,2.74494874,-0.314956238,2.74422684,2.73945474,2.73873139
69.488877,2.64575131,2.74452859,-0.314288535,2.74380587,2.73899763,2.73827344
69.499369,3.74165739,2.7441104,0.998772742,2.74338685,2.73854131,2.73781629
69.50986,3.16227766,2.74369428,0.646980202,2.7429699,2.73808588,2.73736002
69.520352,3.87298335,2.74328021,1.06287494,2.742555,2.73763124,2.73690454
69.530844,2.82842712,2.74286827,0.292504446,2.74214223,2.73717744,2.73644989
69.541335,2,2.74245857,-0.861660359,2.74173169,2.73672452,2.73599611
69.551827,4,2.74205108,1.12158322,2.74132336,2.73627239,2.73554313
69.562318,3.31662479,2.74164594,0.758273596,2.74091737,2.73582114,2.73509102
69.57281,3.16227766,2.74124314,0.64887173,2.74051371,2.73537069,2.7346397
69.583302,3.16227766,2.74084277,0.649180165,2.74011249,2.73492107,2.73418921
69.593793,3,2.74044496,0.509465448,2.73971381,2.73447234,2.73373959
69.604285,2.64575131,2.74004969,-0.30708041,2.73931767,2.73402439,2.73329076
69.614776,3.16227766,2.73965712,0.650092714,2.73892424,2.73357732,2.73284281
69.625268,2.23606798,2.73926727,-0.709365413,2.7385335,2.73313105,2.73239564
69.63576,4.12310563,2.73888025,1.17653108,2.7381456,2.73268561,2.7319493
69.646251,3,2.73849619,0.511374432,2.73776066,2.73224105,2.73150383
69.656743,2.23606798,2.73811513,-0.708552855,2.73737871,2.73179728,2.73105915
69.667234,2.82842712,2.73773723,0.301147632,2.73699992,2.73135438,2.73061534
69.677726,3.74165739,2.73736254,1.00214512,2.73662433,2.73091228,2.73017232
69.688218,2.64575131,2.73699121,-0.302059425,2.73625209,2.73047101,2.72973013
69.698709,2.44948974,2.7366234,-0.535848536,2.73588338,2.73003061,2.7292888
69.709201,2.64575131,2.73625917,-0.300845237,2.73551824,2.729591,2.72884826
69.719692,3.16227766,2.73589873,0.652976974,2.73515688,2.72915227,2.72840859
69.730184,2.44948974,2.73554217,-0.534838692,2.7347994,2.72871433,2.7279697
69.740676,3.31662479,2.73518967,0.762518928,2.73444598,2.72827722,2.72753164
69.751167,3.16227766,2.73484145,0.653786059,2.73409683,2.72784098,2.72709445
69.761659,2,2.73449761,-0.85702836,2.73375205,2.72740553,2.72665804
69.77215,3.74165739,2.73415842,1.00374248,2.73341192,2.72697095,2.72622249
69.782642,2.64575131,2.73382401,-0.296770442,2.73307657,2.72653717,2.72578773
69.793134,3.74165739,2.73349464,1.00407308,2.73274625,2.72610421,2.72535379
69.803625,3.74165739,2.73317057,1.00423444,2.73242124,2.72567212,2.72492072
69.814117,2.82842712,2.73285201,0.309152252,2.73210172,2.72524082,2.72448843
69.824608,2.82842712,2.73253928,0.309657631,2.73178803,2.72481038,2.72405701
69.8351,2,2.73223261,-0.855705912,2.7314804,2.72438074,2.72362636
69.845592,2.23606798,2.73193235,-0.704176377,2.73117917,2.72395192,2.72319654
69.856083,2.64575131,2.73163887,-0.293065785,2.73088472,2.72352398,2.72276758
69.866575,3.74165739,2.73135247,1.00513925,2.73059735,2.72309681,2.7223394
69.877066,3.31662479,2.73107363,0.765213147,2.73031753,2.72267052,2.72191209
69.887558,2.23606798,2.73080272,-0.703373826,2.73004564,2.72224501,2.72148555
69.89805,2.44948974,2.73054024,-0.530141961,2.72978218,2.72182033,2.72105983
69.908541,3.16227766,2.73028676,0.657260148,2.72952771,2.72139651,2.72063498
69.919033,2.44948974,2.73004281,-0.529672599,2.72928276,2.72097348,2.7202109
69.929524,3.46410162,2.72980908,0.856908706,2.72904805,2.72055131,2.71978768
69.940016,3.46410162,2.72958629,0.857038695,2.72882425,2.72012993,2.71936524
69.950508,2.44948974,2.72937528,-0.529042096,2.72861224,2.71970937,2.71894362
69.960999,2.64575131,2.72917704,-0.288835119,2.728413,2.71928967,2.71852285
69.971491,3.16227766,2.72899262,0.658243904,2.72822758,2.71887076,2.71810286
69.981982,2.82842712,2.72882336,0.315600645,2.72805731,2.71845271,2.71768373
69.992474,3,2.72867071,0.520892777,2.72790366,2.71803544,2.71726538
70.002966,3,2.72853648,0.521021608,2.72776842,2.717619,2.71684784
70.013457,2.64575131,2.72842278,-0.287526459,2.7276537,2.71720341,2.71643116
70.023949,2,2.72833207,-0.853423733,2.72756198,2.71678861,2.71601525
70.03444,2.82842712,2.72826736,0.316480279,2.72749627,2.71637467,2.7156002
70.044932,3.46410162,2.72823219,0.857828317,2.7274601,2.71596151,2.71518592
70.055424,1.73205081,2.72823083,-0.998088185,2.72745773,2.71554916,2.71477245
70.065915,3,2.72826834,0.521278873,2.72749424,2.71513768,2.71435984
70.076407,2.82842712,2.72835074,0.316348517,2.72757566,2.71472698,2.713948
70.086898,2.82842712,2.72848517,0.316135982,2.7277091,2.71431714,2.71353702
70.09739,3,2.72868005,0.520883814,2.72790301,2.71390807,2.7131268
70.107882,2.64575131,2.72894525,-0.288433595,2.72816726,2.71349982,2.7127174
70.118373,3.31662479,2.7292922,0.766376274,2.72851327,2.71309243,2.71230885
70.128865,2.23606798,2.72973422,-0.702613862,2.72895437,2.71268582,2.71190107
70.139356,3.31662479,2.7302864,0.76572736,2.72950566,2.71228006,2.71149413
70.149848,3.74165739,2.73096608,1.00533144,2.73018447,2.71187508,2.71108797
70.16034,2.82842712,2.73179254,0.310861039,2.73101011,2.71147092,2.71068262
70.170831,3.31662479,2.73278717,0.764092677,2.73200396,2.71106761,2.71027812
70.181323,2.44948974,2.73397375,-0.533370419,2.7331898,2.71066507,2.70987438
70.191814,3.16227766,2.73537757,0.653375917,2.73459295,2.71026339,2.70947149
70.202306,2.44948974,2.73702619,-0.53622425,2.73624095,2.70986249,2.70906937
70.212798,3.31662479,2.73894813,0.760050433,2.73816235,2.7094624,2.70866806
70.223289,2,2.74117274,-0.860913896,2.74038649,2.70906315,2.70826759
70.233781,3.87298335,2.74373033,1.06266317,2.74294372,2.70866469,2.70786789
70.244272,4.12310563,2.74664991,1.1732245,2.74586302,2.70826707,2.70746903
70.254764,3,2.74996028,0.50003972,2.74917323,2.70787023,2.70707094
70.265256,3.74165739,2.75368723,0.99396688,2.75290012,2.7074742,2.70667366
70.275747,3.31662479,2.75785313,0.747510308,2.75706609,2.70707902,2.70627722
70.286239,2.82842712,2.76247721,0.256807147,2.76169036,2.70668461,2.70588154
70.29673,2.44948974,2.76757147,-0.563987345,2.76678493,2.70629105,2.7054867
70.307222,3.16227766,2.77314303,0.623806566,2.77235693,2.70589826,2.70509263
70.317714,2.64575131,2.77918966,-0.365292139,2.77840413,2.70550628,2.70469936
70.328205,2.82842712,2.78569984,0.206705802,2.784915,2.70511515,2.70430693
70.338697,3,2.79265368,0.455352964,2.79186965,2.70472479,2.70391526
70.349188,3.16227766,2.80001728,0.601880699,2.79923416,2.70433527,2.70352443
70.35968,3.46410162,2.80774689,0.810157222,2.80696476,2.70394652,2.70313436
70.370172,3,2.81578278,0.429205335,2.81500172,2.70355858,2.70274509
70.380663,3.60555128,2.82404996,0.88402563,2.82327002,2.70317148,2.70235666
70.391155,3.31662479,2.8324593,0.695820012,2.83168051,2.70278515,2.70196899
70.401646,3,2.84090062,0.398872635,2.84012298,2.70239967,2.70158215
70.412138,2.64575131,2.84924795,-0.45110602,2.84847141,2.70201495,2.70119608
70.42263,3.31662479,2.8573534,0.677695645,2.85657788,2.70163103,2.7008108
70.433121,3.16227766,2.86505039,0.54518554,2.86427577,2.70124796,2.70042635
70.443613,3.31662479,2.87215833,0.666683181,2.87138444,2.70086566,2.70004267
70.454104,3.31662479,2.87848308,0.661922741,2.87770969,2.70048419,2.69965981
70.464596,2.64575131,2.88383084,-0.487933942,2.8830577,2.70010349,2.69927772
70.475088,3.60555128,2.88801582,0.847074646,2.88724259,2.69972359,2.69889642
70.485579,4.12310563,2.89087682,1.11005802,2.89010315,2.69934453,2.69851595
70.496071,3.16227766,2.89229234,0.519601117,2.89151783,2.69896623,2.69813623
70.506562,3.60555128,2.89219188,0.844606061,2.89141612,2.69858877,2.69775735
70.517054,4,2.89056465,1.05329737,2.88978722,2.69821208,2.69737922
70.527546,3.16227766,2.88746068,0.524229892,2.88668118,2.69783618,2.69700188
70.538037,3.31662479,2.88298566,0.65851282,2.8822037,2.69746112,2.69662537
70.548529,3,2.87728759,0.350303316,2.87650282,2.69708682,2.69624961
70.55902,3.16227766,2.87054582,0.540122063,2.86975794,2.69671336,2.69587468
70.569512,3,2.86295184,0.370200166,2.86216059,2.69634066,2.6955005
70.580004,2,2.85470072,-0.924500251,2.85390589,2.69596875,2.69512711
70.590495,3.16227766,2.84597958,0.56240384,2.84518101,2.69559768,2.69475455
70.600987,3,2.83695841,0.403784091,2.83615599,2.69522737,2.69438274
70.611478,3.31662479,2.82779246,0.69916545,2.82698611,2.69485789,2.69401175
70.62197,3,2.81861421,0.425894104,2.8178039,2.69448917,2.69364151
70.632462,3.31662479,2.80953956,0.71209917,2.80872528,2.69412124,2.69327206
70.642953,2.82842712,2.80066616,0.166616234,2.79984792,2.69375414,2.69290343
70.653445,3.16227766,2.79207217,0.60844514,2.79125004,2.69338781,2.69253555
70.663936,2.64575131,2.78382352,-0.371580694,2.78299757,2.6930223,2.69216849
70.674428,3.16227766,2.77596869,0.621537588,2.775139,2.69265754,2.69180217
70.68492,3.46410162,2.7685455,0.83400007,2.76771217,2.69229358,2.69143664
70.695411,3.46410162,2.7615798,0.838165744,2.76074294,2.69193045,2.69107193
70.705903,3.31662479,2.75508483,0.749359703,2.75424456,2.69156807,2.69070797
70.716394,3.16227766,2.74906682,0.64281478,2.74822326,2.69120652,2.69034482
70.726886,4.12310563,2.74352133,1.17455706,2.74267461,2.69084572,2.68998241
70.737378,3,2.73843845,0.511430881,2.73758869,2.69048571,2.68962079
70.747869,2.82842712,2.73380214,0.307611741,2.73294945,2.69012652,2.68925999
70.758361,2.44948974,2.72959026,-0.529245232,2.72873476,2.68976809,2.68889992
70.768852,2.82842712,2.72577867,0.320387974,2.72492047,2.68941048,2.68854067
70.779344,3.31662479,2.72233916,0.770899235,2.72147836,2.68905363,2.68818217
70.789836,3.16227766,2.719243,0.665608486,2.71837969,2.68869756,2.68782444
70.800327,3.60555128,2.71646065,0.942916024,2.71559491,2.68834231,2.68746752
70.810819,3.60555128,2.71396184,0.944240136,2.71309376,2.68798781,2.68711134
70.82131,3.46410162,2.71171803,0.867400474,2.71084768,2.68763414,2.68675598
70.831802,2.44948974,2.70970101,-0.510109072,2.70882844,2.68728121,2.68640135
70.842294,2.64575131,2.7078848,-0.249265895,2.70701006,2.68692907,2.6860475
70.852785,3,2.70624525,0.541991471,2.70536839,2.68657774,2.68569446
70.863277,3.16227766,2.7047598,0.676400666,2.70388086,2.68622716,2.68534216
70.873768,3,2.70340862,0.544602034,2.70252764,2.6858774,2.68499066
70.88426,2.64575131,2.70217349,-0.237533533,2.70129048,2.68552839,2.6846399
70.894752,3.16227766,2.70103862,0.679145815,2.70015361,2.68518016,2.68428992
70.905243,2.23606798,2.69999018,-0.681118347,2.69910318,2.68483275,2.68394074
70.915735,4,2.69901587,1.14060691,2.69812689,2.68448608,2.68359229
70.926226,3.74165739,2.69810544,1.0215439,2.6972145,2.68414022,2.68324465
70.936718,3.31662479,2.69724982,0.787003796,2.69635692,2.68379511,2.68289774
70.94721,3.31662479,2.6964415,0.787517169,2.69554665,2.68345078,2.6825516
70.957701,2.82842712,2.69567415,0.364352818,2.69477736,2.68310726,2.68220627
70.968193,3.87298335,2.69494223,1.08537603,2.69404348,2.68276448,2.68186166
70.978684,3.31662479,2.69424134,0.788912831,2.69334065,2.68242252,2.68151786
70.989176,3.16227766,2.69356755,0.684624063,2.69266491,2.6820813,2.68117479
70.999668,2.64575131,2.69291777,-0.217178394,2.69201317,2.68174085,2.68083248
71.010159,3.46410162,2.69228937,0.878528454,2.69138281,2.68140121,2.68049097
71.020651,1.73205081,2.69168001,-0.979606658,2.69077149,2.68106232,2.6801502
71.031142,3.16227766,2.69108792,0.686432619,2.69017743,2.68072423,2.67981022
71.041634,2.82842712,2.69051139,0.37137008,2.68959892,2.68038688,2.67947097
71.052126,3.60555128,2.68994912,0.956871026,2.68903467,2.6800503,2.67913248
71.062617,3.31662479,2.68939998,0.791975256,2.68848355,2.67971453,2.67879478
71.073109,2.82842712,2.68886288,0.373582977,2.68794445,2.6793795,2.67845782
71.0836,2.82842712,2.68833704,0.374286105,2.6874166,2.67904528,2.67812164
71.094092,3.16227766,2.68782157,0.688807731,2.68689912,2.67871179,2.6777862
71.104584,2.82842712,2.68731585,0.375647806,2.68639137,2.67837907,2.67745151
71.115075,2.64575131,2.68681931,-0.202652415,2.68589281,2.67804715,2.67711761
71.125567,2.64575131,2.68633131,-0.201444784,2.68540277,2.67771597,2.67678444
71.136058,2,2.68585144,-0.828161484,2.68492085,2.67738559,2.67645206
71.14655,3,2.68537916,0.560910721,2.68444651,2.67705595,2.6761204
71.157042,2.44948974,2.6849141,-0.48520548,2.68397938,2.67672708,2.6757895
71.167533,2.82842712,2.68445592,0.379435377,2.68351912,2.676399,2.67545938
71.178025,2.44948974,2.68400418,-0.484266907,2.68306529,2.67607166,2.67512999
71.188516,4.58257569,2.68355864,1.37804828,2.68261766,2.67574511,2.67480138
71.199008,3.87298335,2.68311892,1.09080907,2.68217583,2.6754193,2.67447349
71.2095,2.64575131,2.68268478,-0.192180821,2.68173957,2.67509425,2.67414636
71.219991,2.44948974,2.68225599,-0.482458548,2.68130865,2.67477,2.67382001
71.230483,3.31662479,2.68183224,0.796738696,2.68088276,2.67444648,2.67349437
71.240974,3.16227766,2.68141337,0.693443789,2.68046174,2.67412375,2.67316952
71.251466,3,2.6809991,0.564801649,2.6800453,2.67380176,2.67284539
71.261958,2.64575131,2.68058926,-0.186649256,2.67963328,2.67348053,2.67252201
71.272449,3.60555128,2.6801837,0.961960278,2.67922554,2.67316008,2.67219941
71.282941,2,2.67978218,-0.824489039,2.67882182,2.67284037,2.67187752
71.293432,2.23606798,2.6793846,-0.665820261,2.67842203,2.67252145,2.67155641
71.303924,3.16227766,2.67899073,0.69518841,2.67802595,2.67220326,2.67123602
71.314416,3.74165739,2.67860048,1.03104651,2.67763346,2.67188582,2.67091637
71.324907,2.64575131,2.67821373,-0.180173304,2.67724447,2.67156918,2.6705975
71.335399,3,2.67783029,0.567599958,2.67685877,2.67125326,2.67027934
71.34589,3.60555128,2.6774501,0.963380078,2.67647631,2.67093812,2.66996196
71.356382,2.44948974,2.67707299,-0.477056855,2.67609691,2.67062372,2.66964529
71.366874,2.82842712,2.67669887,0.389523114,2.6757205,2.67031007,2.66932936
71.377365,3.16227766,2.67632768,0.697101124,2.675347,2.6699972,2.6690142
71.387857,2,2.67595926,-0.822167418,2.67497626,2.66968506,2.66869975
71.398348,2.82842712,2.67559359,0.390939301,2.67460825,2.66937371,2.66838607
71.40884,2.64575131,2.6752305,-0.171695049,2.67424282,2.66906307,2.66807311
71.419332,3.46410162,2.67486996,0.888387111,2.67387991,2.66875319,2.66776088
71.429823,3.46410162,2.67451191,0.888588603,2.67351949,2.66844409,2.66744942
71.440315,3,2.67415622,0.570827276,2.67316141,2.66813571,2.66713866
71.450806,2.64575131,2.67380289,-0.167486049,2.67280568,2.66782812,2.66682868
71.461298,2.64575131,2.67345178,-0.166434572,2.67245216,2.66752124,2.66651939
71.47179,2.23606798,2.67310286,-0.66108614,2.67210081,2.66721511,2.66621085
71.482281,2.82842712,2.67275611,0.394551657,2.67175162,2.66690977,2.66590307
71.492773,2.44948974,2.67241141,-0.472145814,2.67140446,2.66660514,2.66559599
71.503264,3,2.67206877,0.572652803,2.67105934,2.66630128,2.66528967
71.513756,2.82842712,2.67172806,0.395852322,2.67071615,2.66599815,2.66498406
71.524248,2.44948974,2.67138929,-0.471062144,2.67037487,2.66569576,2.66467918
71.534739,2.82842712,2.67105242,0.396704808,2.67003549,2.66539415,2.66437506
71.545231,2.44948974,2.67071736,-0.470348397,2.6696979,2.66509325,2.66407164
71.555722,3,2.67038412,0.574121834,2.66936212,2.66479313,2.66376898
71.566214,2.44948974,2.6700526,-0.469641205,2.66902804,2.66449372,2.66346702
71.576706,3,2.6697228,0.574697482,2.66869566,2.66419506,2.66316579
71.587197,3,2.66939471,0.574982857,2.66836498,2.66389717,2.66286531
71.597689,3.74165739,2.66906824,1.0356588,2.6680359,2.66359999,2.66256553
71.60818,3.31662479,2.6687434,0.804910796,2.66770844,2.66330358,2.66226651
71.618672,2.64575131,2.66842011,-0.150561628,2.66738252,2.66300789,2.66196818
71.629164,3.16227766,2.66809838,0.702978864,2.66705813,2.66271293,2.66167058
71.639655,3.31662479,2.66777819,0.805510149,2.66673527,2.66241875,2.66137373
71.650147,3.74165739,2.66745946,1.0364352,2.66641386,2.66212527,2.66107757
71.660638,3.46410162,2.66714224,0.892725814,2.66609393,2.66183256,2.66078216
71.67113,3.74165739,2.66682642,1.03674055,2.66577539,2.66154056,2.66048745
71.681622,3.60555128,2.66651201,0.969040383,2.66545825,2.6612493,2.66019346
71.692113,3.74165739,2.66619903,1.03704308,2.66514252,2.66095881,2.65990021
71.702605,3.87298335,2.66588739,1.09867919,2.66482811,2.66066902,2.65960766
71.713096,3.60555128,2.66557713,0.96952264,2.66451506,2.66037999,2.65931585
71.723588,3.31662479,2.66526816,0.807066682,2.6642033,2.66009167,2.65902474
71.73408,4.12310563,2.6649605,1.2075368,2.66389282,2.65980409,2.65873434
71.744571,3.46410162,2.66465417,0.894118252,2.66358365,2.65951727,2.65844468
71.755063,3.60555128,2.66434907,0.970155764,2.6632757,2.65923115,2.65815572
71.765554,2.64575131,2.66404525,-0.135255102,2.66296901,2.6589458,2.65786749
71.776046,3.16227766,2.66374265,0.70607012,2.66266351,2.65866115,2.65757995
71.786538,3.31662479,2.66344126,0.808197706,2.66235922,2.65837723,2.65729313
71.797029,3.16227766,2.6631411,0.706495971,2.66205614,2.65809406,2.65700704
71.807521,3.46410162,2.66284211,0.895130999,2.6617542,2.6578116,2.65672164
71.818012,2.82842712,2.66254432,0.40728713,2.66145345,2.6575299,2.65643698
71.828504,2.23606798,2.66224766,-0.652824389,2.66115381,2.6572489,2.656153
71.838996,3.31662479,2.66195215,0.809118435,2.66085531,2.65696863,2.65586973
71.849487,3.16227766,2.6616578,0.707544953,2.66055794,2.65668911,2.65558719
71.859979,2.82842712,2.66136455,0.408732895,2.66026165,2.65641029,2.65530534
71.87047,2.64575131,2.66107243,-0.123778502,2.65996648,2.65613223,2.65502422
71.880962,3.46410162,2.66078138,0.896281336,2.65967236,2.65585486,2.65474378
71.891454,2.44948974,2.66049142,-0.459349192,2.65937931,2.65557822,2.65446404
71.901945,3.46410162,2.66020257,0.896604176,2.65908734,2.65530233,2.65418504
71.912437,3.60555128,2.65991475,0.972438443,2.65879639,2.65502714,2.65390672
71.922928,2,2.65962801,-0.812174867,2.6585065,2.65475269,2.65362912
71.93342,3.87298335,2.6593423,1.10165378,2.65821761,2.65447895,2.6533522
71.943912,3.16227766,2.65905762,0.70938004,2.65792974,2.65420592,2.65307599
71.954403,3.31662479,2.65877399,0.811080019,2.65764291,2.65393365,2.6528005
71.964895,2.64575131,2.65849136,-0.112871822,2.65735704,2.65366207,2.65252568
71.975386,3.16227766,2.65820976,0.709977393,2.65707219,2.65339123,2.65225159
71.985878,3.74165739,2.65792914,1.04102269,2.65678829,2.65312109,2.65197817
71.99637,2.82842712,2.65764951,0.413252482,2.65650537,2.65285167,2.65170545
72.006861,2.64575131,2.65680899,-0.105155481,2.65566129,2.65258299,2.65143346
72.017353,3.60555128,2.65653176,0.974176328,2.65538072,2.652315,2.65116213
72.027844,2.23606798,2.65625553,-0.64821875,2.65510113,2.65204776,2.65089153
72.038336,3.16227766,2.65598023,0.711545803,2.65482245,2.6517812,2.65062159
72.048828,3,2.65570589,0.586765803,2.65454471,2.65151537,2.65035235
72.059319,3.60555128,2.65543253,0.974740347,2.65426792,2.65125027,2.65008383
72.069811,2,2.65516009,-0.809419599,2.65399203,2.65098586,2.64981597
72.080302,2.64575131,2.65488861,-0.0955892001,2.65371708,2.6507222,2.64954883
72.090794,3.16227766,2.65461803,0.712502371,2.65344302,2.65045922,2.64928236
72.101286,3.16227766,2.65434838,0.712691573,2.65316985,2.65019695,2.64901657
72.111777,3.31662479,2.65407968,0.813968742,2.65289761,2.64993542,2.6487515
72.122269,2.82842712,2.65360138,0.418121686,2.65262624,2.64946377,2.6484871
72.13276,3.16227766,2.6533347,0.713402382,2.65235577,2.64920386,2.64822341
72.143252,3,2.6530689,0.589008574,2.65208616,2.64894464,2.64796037
72.153744,3,2.652804,0.589233403,2.65181743,2.64868614,2.64769803
72.164235,3.16227766,2.65254001,0.713959136,2.65154959,2.64842836,2.6474364
72.174727,1.73205081,2.65227689,-0.959284152,2.65128258,2.64817127,2.64717542
72.185218,1.73205081,2.65201468,-0.959147471,2.65101647,2.64791491,2.64691515
72.19571,3.16227766,2.65175332,0.714509859,2.65075118,2.64765923,2.64665554
72.206202,3,2.65149284,0.590344951,2.65048675,2.64740426,2.64639662
72.216693,3.16227766,2.65123325,0.714873702,2.65022318,2.64715002,2.6461384
72.227185,2.64575131,2.65097451,-0.0722716685,2.64996043,2.64689647,2.64588083
72.237676,3.16227766,2.65071665,0.715234936,2.64969855,2.64664364,2.64562397
72.248168,2.82842712,2.65045962,0.421861949,2.64943747,2.64639149,2.64536776
72.25866,2.44948974,2.65020345,-0.448010834,2.64917722,2.64614004,2.64511224
72.269151,3.46410162,2.64994815,0.902304528,2.64891782,2.64588932,2.64485741
72.279643,2.82842712,2.64969368,0.422768784,2.64865922,2.64563928,2.64460323
72.290134,3.46410162,2.64944007,0.90258603,2.64840146,2.64538997,2.64434976
72.300626,3.60555128,2.64918728,0.977938644,2.64814448,2.64514133,2.64409693
72.311118,3.60555128,2.64893533,0.978067455,2.64788832,2.64489339,2.64384478
72.321609,3.60555128,2.64868423,0.97819581,2.64763299,2.64464618,2.64359333
72.332101,2,2.64843394,-0.805253961,2.64737843,2.64439964,2.64334252
72.342592,3.87298335,2.6481845,1.10670631,2.6471247,2.64415383,2.64309241
72.353084,2.82842712,2.64793586,0.424842637,2.64687174,2.64390869,2.64284295
72.363576,1.73205081,2.64768804,-0.956889351,2.64661957,2.64366425,2.64259415
72.374067,3.46410162,2.64744106,0.903692734,2.64636822,2.64342052,2.64234605
72.384559,3,2.64719487,0.593974016,2.64611763,2.64317748,2.6420986
72.39505,2,2.64694951,-0.804331719,2.64586784,2.64293515,2.64185183
72.405542,2.82842712,2.64670495,0.426288845,2.64561881,2.64269349,2.64160571
72.416034,2.64575131,2.64646118,-0.0266434236,2.64537056,2.64245253,2.64136025
72.426525,2.64575131,2.64621825,-0.0216087069,2.64512311,2.64221228,2.64111548
72.437017,2.44948974,2.64597609,-0.443267804,2.6448764,2.64197271,2.64087135
72.447508,3,2.64573475,0.595201854,2.64463049,2.64173385,2.64062791
72.458,3,2.64549419,0.595403906,2.64438531,2.64149566,2.64038511
72.468492,2.44948974,2.64525442,-0.442453021,2.6441409,2.64125817,2.64014297
72.478983,3.16227766,2.64501546,0.719209426,2.64389728,2.64102138,2.63990151
72.489475,4,2.64477727,1.16414034,2.64365439,2.64078527,2.63966069
72.499966,2.44948974,2.64453989,-0.441644821,2.64341227,2.64054987,2.63942055
72.510458,3.46410162,2.64430327,0.905427161,2.64317089,2.64031514,2.63918105
72.52095,2,2.64406743,-0.802538119,2.64293026,2.64008109,2.6389422
72.531441,2.64575131,2.6438324,0.043805403,2.6426904,2.63984776,2.63870403
72.541933,2.82842712,2.64359812,0.429917442,2.64245126,2.63961509,2.6384665
72.552424,2,2.64336464,-0.802100141,2.64221288,2.63938313,2.63822964
72.562916,3.16227766,2.64313191,0.720517699,2.64197523,2.63915184,2.63799341
72.573408,2,2.64289995,-0.801810419,2.64173831,2.63892123,2.63775784
72.583899,3.46410162,2.64266878,0.906329319,2.64150215,2.63869133,2.63752294
72.594391,2.82842712,2.64243836,0.431264147,2.6412667,2.6384621,2.63728867
72.604882,3.31662479,2.64220873,0.821228387,2.64103201,2.63823357,2.63705508
72.615374,4,2.64197984,1.16534122,2.64079802,2.6380057,2.63682211
72.625866,2.82842712,2.64175171,0.432059504,2.64056476,2.63777852,2.63658979
72.636357,2,2.64152436,-0.800952161,2.64033225,2.63755204,2.63635814
72.646849,3.16227766,2.64129776,0.721789376,2.64010045,2.63732622,2.63612711
72.65734,3,2.64107193,0.599106061,2.63986938,2.63710111,2.63589675
72.667832,3.31662479,2.64084683,0.82205715,2.63963901,2.63687666,2.63566702
72.678324,3.31662479,2.64062249,0.82219359,2.63940936,2.63665289,2.63543793
72.688815,3.46410162,2.64039892,0.90758068,2.63918045,2.63642982,2.6352095
72.699307,2.44948974,2.64017609,-0.436676475,2.63895223,2.63620741,2.6349817
72.709798,2.44948974,2.63995402,-0.436422132,2.63872474,2.6359857,2.63475456
72.72029,3,2.63973268,0.600222726,2.63849794,2.63576465,2.63452804
72.730782,2.64575131,2.63951209,0.0789887654,2.63827184,2.63554427,2.63430216
72.741273,3,2.63929226,0.600589495,2.63804648,2.6353246,2.63407694
72.751765,3,2.63907315,0.600771876,2.6378218,2.63510558,2.63385234
72.762256,1.73205081,2.63885481,-0.95226257,2.63759784,2.63488726,2.6336284
72.772748,2.82842712,2.63863719,0.435648869,2.63737456,2.6346696,2.63340507
72.78324,2.64575131,2.6384203,0.0856212954,2.63715199,2.63445261,2.63318238
72.793731,2.64575131,2.63820418,0.0868742229,2.63693013,2.63423632,2.63296034
72.804223,3.46410162,2.63798877,0.9089075,2.63670894,2.63402068,2.63273892
72.814714,2.82842712,2.63777412,0.4366383,2.63648847,2.63380574,2.63251815
72.825206,3.16227766,2.63756018,0.724373853,2.63626867,2.63359145,2.632298
72.835698,2,2.63734698,-0.798340138,2.63604956,2.63337784,2.63207847
72.846189,3,2.63713452,0.602383165,2.63583117,2.63316492,2.6318596
72.856681,3,2.63692278,0.602558894,2.63561344,2.63295265,2.63164133
72.867172,2.82842712,2.63671179,0.437853102,2.63539641,2.63274108,2.63142372
72.877664,2,2.6365015,-0.797810442,2.63518005,2.63253015,2.63120671
72.888156,3.31662479,2.63629194,0.824822919,2.63496437,2.6323199,2.63099033
72.898647,2.23606798,2.63608313,-0.632467512,2.6347494,2.63211034,2.63077459
72.909139,3.31662479,2.63587502,0.825075613,2.63453508,2.63190143,2.63055946
72.91963,2.44948974,2.63566766,-0.431483392,2.63432146,2.63169321,2.63034498
72.930122,2.82842712,2.635461,0.439279096,2.6341085,2.63148564,2.6301311
72.940614,2.64575131,2.63525506,0.102451202,2.63389621,2.63127874,2.62991784
72.951105,3,2.63504986,0.604111029,2.63368462,2.63107253,2.62970522
72.961597,3.46410162,2.63484537,0.91063508,2.63347368,2.63086697,2.62949321
72.972088,2.44948974,2.63464161,-0.430292766,2.63326343,2.63066209,2.62928183
72.98258,2.23606798,2.63443855,-0.63116604,2.63305383,2.63045787,2.62907106
72.993072,3.31662479,2.6342362,0.826068149,2.6328449,2.63025431,2.6288609
73.003563,2.82842712,2.6340346,0.440899682,2.63263666,2.63005143,2.62865138
73.014055,3.16227766,2.63383368,0.726941523,2.63242906,2.62984921,2.62844245
73.024546,2,2.6336335,-0.796010995,2.63222214,2.62964767,2.62823417
73.035038,3,2.63343402,0.605446926,2.63201587,2.62944677,2.62802647
73.04553,3,2.63323525,0.605611057,2.63181026,2.62924655,2.62781939
73.056021,2.23606798,2.63303721,-0.630054941,2.63160532,2.629047,2.62761295
73.066513,3.31662479,2.63283986,0.826912893,2.63140103,2.6288481,2.62740709
73.077004,2.23606798,2.63264324,-0.629742217,2.63119741,2.62864989,2.62720187
73.087496,2.82842712,2.63244731,0.442696078,2.63099443,2.62845232,2.62699723
73.097988,2.64575131,2.63225209,0.116186162,2.63079211,2.62825541,2.62679321
73.108479,3,2.63205759,0.606582565,2.63059045,2.62805919,2.62658981
73.118971,3,2.63186379,0.606742296,2.63038943,2.62786361,2.62638701
73.129462,2,2.63167071,-0.794777142,2.63018908,2.62766871,2.62618483
73.139954,2.23606798,2.63147831,-0.628816615,2.62998936,2.62747446,2.62598323
73.150446,1.73205081,2.63128662,-0.948280452,2.62979028,2.62728086,2.62578224
73.160937,2.44948974,2.63109566,-0.426152455,2.62959187,2.62708795,2.62558187
73.171429,2.44948974,2.63090538,-0.425929143,2.62939409,2.62689568,2.62538209
73.18192,2.82842712,2.63071582,0.444647395,2.62919697,2.6267041,2.62518293
73.192412,2.82842712,2.63052694,0.444859731,2.62900048,2.62651315,2.62498435
73.202904,2.44948974,2.63033877,-0.425263481,2.62880463,2.62632286,2.62478637
73.213395,3.16227766,2.63015132,0.729469905,2.62860943,2.62613326,2.62458901
73.223887,3.31662479,2.62996455,0.82864965,2.62841486,2.62594429,2.62439223
73.234378,3.46410162,2.62977849,0.913412897,2.62822094,2.625756,2.62419607
73.24487,2.82842712,2.62959312,0.445908064,2.62802765,2.62556836,2.62400048
73.255362,2.23606798,2.62940845,-0.627168617,2.62783498,2.62538137,2.62380549
73.265853,2.44948974,2.6292245,-0.423951357,2.62764297,2.62519507,2.62361111
73.276345,1.73205081,2.62904122,-0.947095779,2.62745158,2.6250094,2.62341731
73.286836,3.31662479,2.62885866,0.829316664,2.62726083,2.62482441,2.62322412
73.297328,3.46410162,2.62867678,0.914015773,2.6270707,2.62464006,2.62303151
73.30782,2,2.6284956,-0.792777142,2.6268812,2.62445637,2.62283948
73.318311,2.64575131,2.62831513,0.132046141,2.62669234,2.62427335,2.62264807
73.328803,2.44948974,2.62813534,-0.422664871,2.6265041,2.62409098,2.62245722
73.339294,2.64575131,2.62795626,0.133398102,2.6263165,2.62390928,2.62226699
73.349786,2,2.62777786,-0.792324338,2.6261295,2.62372822,2.62207732
73.360278,3.46410162,2.62760015,0.91460454,2.62594313,2.62354782,2.62188824
73.370769,3,2.62742316,0.610390731,2.6257574,2.6233681,2.62169976
73.381261,3.16227766,2.62724684,0.731458011,2.62557227,2.62318901,2.62151185
73.391752,3,2.62707123,0.610678941,2.62538778,2.6230106,2.62132454
73.402244,2,2.6268963,-0.791767832,2.6252039,2.62283283,2.6211378
73.412736,3,2.62672206,0.61096476,2.62502063,2.62265572,2.62095164
73.423227,3.16227766,2.62654853,0.731935192,2.62483799,2.62247928,2.62076608
73.433719,2.82842712,2.62637568,0.449501327,2.62465596,2.62230348,2.62058108
73.44421,2.44948974,2.62620354,-0.420373401,2.62447455,2.62212835,2.62039668
73.454702,3.16227766,2.62603207,0.732287914,2.62429375,2.62195387,2.62021284
73.465194,3.74165739,2.62586129,1.0563125,2.62411355,2.62178004,2.62002958
73.475685,2,2.62569123,-0.791006465,2.62393399,2.62160689,2.61984691
73.486177,2.64575131,2.62552183,0.142230365,2.62375502,2.62143437,2.6196648
73.496668,2.23606798,2.62535315,-0.623927216,2.62357667,2.62126253,2.61948328
73.50716,2.64575131,2.62518514,0.143409108,2.62339892,2.62109133,2.61930232
73.517652,2.44948974,2.62501782,-0.418960711,2.62322177,2.62092079,2.61912193
73.528143,4,2.62485121,1.17266738,2.62304524,2.62075092,2.61894213
73.538635,3,2.62468527,0.612629357,2.62286931,2.62058169,2.61876289
73.549126,2.64575131,2.62452004,0.145709544,2.62269399,2.62041314,2.61858423
73.559618,1.73205081,2.62435548,-0.9446188,2.62251926,2.62024523,2.61840612
73.57011,3.74165739,2.62419162,1.05710253,2.62234514,2.62007797,2.61822859
73.580601,2.44948974,2.62402846,-0.417778312,2.62217163,2.61991139,2.61805164
73.591093,3.16227766,2.62386598,0.733765414,2.6219987,2.61974545,2.61787523
73.601584,2.44948974,2.6237042,-0.417390055,2.62182639,2.61958018,2.61769941
73.612076,3.16227766,2.6235431,0.733985396,2.62165466,2.61941556,2.61752414
73.622568,2.82842712,2.62338269,0.452818327,2.62148353,2.61925159,2.61734943
73.633059,3.74165739,2.62322298,1.05756059,2.621313,2.6190883,2.6171753
73.643551,3.87298335,2.62306395,1.11799794,2.62114306,2.61892565,2.61700172
73.654042,3.31662479,2.62290563,0.832898048,2.62097373,2.61876368,2.61682872
73.664534,3,2.62274798,0.614208446,2.62080497,2.61860235,2.61665625
73.675026,2.44948974,2.62259103,-0.416054428,2.6206368,2.61844168,2.61648435
73.685517,3,2.62243478,0.614463358,2.62046924,2.61828168,2.61631302
73.696009,4,2.62227921,1.17376352,2.62030226,2.61812233,2.61614224
73.7065,3.74165739,2.62212435,1.05807988,2.62013588,2.61796365,2.61597202
73.716992,3.31662479,2.62197016,0.833459437,2.61997007,2.61780562,2.61580235
73.727484,2.44948974,2.62181666,-0.415122778,2.61980484,2.61764825,2.61563323
73.737975,2.23606798,2.62166388,-0.620963686,2.61964022,2.61749156,2.61546467
73.748467,3,2.62151177,0.615213973,2.61947616,2.61733552,2.61529666
73.758958,2.82842712,2.62136037,0.455045885,2.61931271,2.61718015,2.61512921
73.76945,2.64575131,2.62120965,0.156657795,2.61914982,2.61702543,2.6149623
73.779942,2.82842712,2.62105962,0.455376224,2.61898751,2.61687137,2.61479594
73.790433,3.46410162,2.6209103,0.918254493,2.6188258,2.61671799,2.61463014
73.800925,2.44948974,2.62076166,-0.41385012,2.61866465,2.61656526,2.61446488
73.811416,2.64575131,2.62061374,0.158548331,2.61850409,2.61641321,2.61430018
73.821908,3.60555128,2.62046649,0.992514374,2.6183441,2.61626181,2.614136
73.8324,3,2.62031994,0.616181837,2.61818468,2.61611108,2.61397238
73.842891,2.44948974,2.62017411,-0.413139641,2.61802585,2.61596103,2.61380931
73.853383,3.16227766,2.62002895,0.736375385,2.61786759,2.61581163,2.61364677
73.863874,3.16227766,2.61988451,0.736473455,2.61770991,2.61566291,2.61348479
73.874366,3,2.61974075,0.616651641,2.61755278,2.61551484,2.61332334
73.884858,3,2.6195977,0.616767626,2.61739623,2.61536745,2.61316242
73.895349,2.82842712,2.61945535,0.457134304,2.61724027,2.61522074,2.61300206
73.905841,3.31662479,2.6193137,0.835051552,2.61708485,2.61507468,2.61284223
73.916332,4.12310563,2.61917276,1.22634941,2.61693003,2.61492932,2.61268294
73.926824,3.16227766,2.6190325,0.737051665,2.61677575,2.6147846,2.61252418
73.937316,2.64575131,2.61889295,0.163885194,2.61662204,2.61464057,2.61236596
73.947807,2.64575131,2.61875412,0.164308213,2.61646891,2.61449722,2.61220828
73.958299,2,2.61861598,-0.786521444,2.61631633,2.61435453,2.61205112
73.96879,2.82842712,2.61847856,0.458201445,2.61616433,2.61421253,2.61189452
73.979282,2.64575131,2.61834183,0.165558081,2.61601288,2.61407119,2.61173842
73.989774,2.82842712,2.61820581,0.458498977,2.61586198,2.61393053,2.61158286
74.000265,3.16227766,2.61807051,0.737703969,2.61571167,2.61379056,2.61142785
74.010757,3,2.61793591,0.618113329,2.61556189,2.61365126,2.61127335
74.021248,3.87298335,2.61780203,1.12034875,2.61541269,2.61351265,2.61111939
74.03174,2.64575131,2.61766885,0.167578212,2.61526404,2.61337472,2.61096594
74.042232,1.73205081,2.61753639,-0.941002433,2.61511594,2.61323746,2.61081303
74.052723,3,2.61740465,0.618542927,2.61496841,2.6131009,2.61066065
74.063215,3.16227766,2.61727361,0.738243897,2.61482142,2.61296501,2.61050878
74.073706,1,2.6171433,-1.27166949,2.614675,2.61282983,2.61035745
74.084198,3.16227766,2.6170137,0.73841991,2.61452912,2.61269532,2.61020663
74.09469,3.16227766,2.61688481,0.738507175,2.61438379,2.61256149,2.61005632
74.105181,2.44948974,2.61675666,-0.408982785,2.61423902,2.61242837,2.60990656
74.115673,2.64575131,2.61662922,0.17065196,2.61409479,2.61229594,2.6097573
74.126164,3.16227766,2.61650251,0.738765962,2.61395113,2.6121642,2.60960857
74.136656,2.23606798,2.61637652,-0.61669161,2.61380799,2.61203315,2.60946035
74.147148,2.82842712,2.61625125,0.460625524,2.61366541,2.61190279,2.60931264
74.157639,2.23606798,2.61612672,-0.616489048,2.61352338,2.61177315,2.60916547
74.168131,3.31662479,2.61600291,0.837031587,2.61338189,2.61164419,2.60901879
74.178622,4,2.61587985,1.17648636,2.61324095,2.61151595,2.60887265
74.189114,2.44948974,2.6157575,-0.407759434,2.61310055,2.6113884,2.608727
74.199606,2.82842712,2.61563589,0.461293006,2.61296069,2.61126155,2.60858186
74.210097,2.23606798,2.61551502,-0.615992732,2.61282138,2.61113542,2.60843725
74.220589,3,2.61539489,0.620165392,2.6126826,2.61100999,2.60829314
74.23108,2.64575131,2.6152755,0.174573223,2.61254437,2.61088528,2.60814955
74.241572,2.23606798,2.61515685,-0.615701932,2.61240667,2.61076127,2.60800645
74.252064,3,2.61503894,0.620452306,2.6122695,2.61063797,2.60786387
74.262555,2.64575131,2.61492178,0.175583393,2.61213289,2.6105154,2.6077218
74.273047,3.31662479,2.61480537,0.837746634,2.6119968,2.61039354,2.60758022
74.283538,2.44948974,2.61468971,-0.406447992,2.61186125,2.61027242,2.60743916
74.29403,3,2.6145748,0.620826223,2.61172623,2.610152,2.6072986
74.304522,2.64575131,2.61446064,0.176891682,2.61159174,2.61003231,2.60715853
74.315013,3.31662479,2.61434725,0.838020009,2.6114578,2.60991335,2.60701898
74.325505,3,2.61423462,0.621100141,2.61132437,2.60979512,2.60687992
74.335996,2.64575131,2.61412275,0.177844208,2.61119149,2.60967763,2.60674137
74.346488,3.16227766,2.61401164,0.740449879,2.61105913,2.60956086,2.60660331
74.35698,3.31662479,2.61390129,0.838286048,2.61092729,2.60944483,2.60646575
74.367471,3.16227766,2.61379173,0.740598361,2.61079599,2.60932956,2.60632869
74.377963,3.16227766,2.61368293,0.740671812,2.61066521,2.60921501,2.60619212
74.388454,2.82842712,2.61357491,0.463521535,2.61053497,2.60910122,2.60605606
74.398946,2.23606798,2.61346766,-0.614328648,2.61040524,2.60898817,2.60592048
74.409438,3,2.6133612,0.621802862,2.61027603,2.60887587,2.60578539
74.419929,2.23606798,2.61325553,-0.614155968,2.61014736,2.60876433,2.6056508
74.430421,2.64575131,2.61315064,0.180556563,2.6100192,2.60865355,2.6055167
74.440912,3.31662479,2.61304655,0.83879571,2.60989157,2.60854353,2.6053831
74.451404,2.23606798,2.61294324,-0.613901673,2.60976445,2.60843427,2.60524997
74.461896,1.73205081,2.61284073,-0.93850409,2.60963785,2.60832577,2.60511734
74.472387,2.82842712,2.61273904,0.464422317,2.60951178,2.60821806,2.6049852
74.482879,2.44948974,2.61263813,-0.403916318,2.60938622,2.60811111,2.60485354
74.49337,3,2.61253805,0.622464416,2.60926118,2.60800495,2.60472238
74.503862,1.73205081,2.61243877,-0.938289914,2.60913665,2.60789956,2.60459169
74.514354,3,2.6123403,0.622623237,2.60901264,2.60779496,2.60446148
74.524845,3.60555128,2.61224267,0.996648688,2.60888915,2.60769115,2.60433177
74.535337,3,2.61214585,0.622779376,2.60876616,2.60758813,2.60420253
74.545828,3,2.61204986,0.622856432,2.6086437,2.60748592,2.60407378
74.55632,3.46410162,2.6119547,0.923118037,2.60852173,2.60738449,2.6039455
74.566812,1.73205081,2.61186038,-0.937981649,2.60840028,2.60728388,2.60381769
74.577303,2.82842712,2.61176691,0.465467741,2.60827935,2.60718408,2.60369038
74.587795,3.16227766,2.61167427,0.742026542,2.60815891,2.60708509,2.60356354
74.598286,3.31662479,2.61158249,0.839667969,2.608039,2.60698693,2.60343718
74.608778,4,2.61149156,1.17834988,2.60791958,2.60688958,2.60331128
74.61927,3.31662479,2.61140149,0.839775744,2.60780066,2.60679306,2.60318586
74.629761,2.23606798,2.61131229,-0.612571886,2.60768227,2.60669739,2.60306092
74.640253,3.31662479,2.61122396,0.83988144,2.60756436,2.60660254,2.60293645
74.650744,1.73205081,2.6111365,-0.9375957,2.60744698,2.60650855,2.60281246
74.661236,2.44948974,2.61104992,-0.401945496,2.60733008,2.60641539,2.60268892
74.671728,2.82842712,2.61096423,0.466329169,2.60721368,2.6063231,2.60256586
74.682219,2.44948974,2.61087944,-0.401733363,2.6070978,2.60623167,2.60244328
74.692711,2.64575131,2.61079553,0.18696464,2.60698241,2.6061411,2.60232115
74.703202,2.64575131,2.61071254,0.187186454,2.60686752,2.60605141,2.6021995
74.713694,3.31662479,2.61063045,0.840234692,2.60675313,2.60596259,2.60207831
74.724186,3.31662479,2.61054928,0.840282995,2.60663923,2.60587465,2.60195758
74.734677,2.23606798,2.61046903,-0.611883206,2.60652584,2.60578762,2.60183732
74.745169,3,2.61038971,0.624187702,2.60641293,2.60570147,2.60171752
74.75566,2.64575131,2.61031133,0.188255086,2.60630053,2.60561623,2.60159819
74.766152,2.64575131,2.61023389,0.188460662,2.60618861,2.6055319,2.60147931
74.776644,2.64575131,2.6101574,0.188663497,2.60607719,2.60544849,2.60136089
74.787135,1.41421356,2.61008187,-1.09355764,2.60596627,2.605366,2.60124294
74.797627,1.73205081,2.61000729,-0.936993322,2.60585582,2.60528445,2.60112544
74.808118,3.60555128,2.6099337,0.997806382,2.60574589,2.60520384,2.60100841
74.81861,3.46410162,2.60986108,0.924251338,2.60563643,2.60512417,2.60089182
74.829102,3.46410162,2.60978945,0.924290089,2.60552745,2.60504545,2.60077568
74.839593,2,2.60971882,-0.780844938,2.60541898,2.60496771,2.60066002
74.850085,2.23606798,2.60964918,-0.611212898,2.60531099,2.60489093,2.60054479
74.860576,3,2.60958057,0.624835521,2.60520349,2.60481514,2.60043003
74.871068,2.82842712,2.60951297,0.467882624,2.60509646,2.60474033,2.60031571
74.88156,2.64575131,2.60944641,0.190538454,2.60498992,2.60466651,2.60020184
74.892051,2.64575131,2.6093774,0.190719469,2.60488038,2.60459372,2.60008843
74.902543,2,2.60931292,-0.780584987,2.60477481,2.60452193,2.59997545
74.913034,2.44948974,2.60924951,-0.3996996,2.60466973,2.60445118,2.59986294
74.923526,2.82842712,2.60918717,0.468230667,2.60456512,2.60438145,2.59975086
74.934018,3,2.6091259,0.625199246,2.60446099,2.60431277,2.59963923
74.944509,2.44948974,2.60906573,-0.399469637,2.60435736,2.60424516,2.59952805
74.955001,2.23606798,2.60900666,-0.610687058,2.60425419,2.60417861,2.59941731
74.965492,2.23606798,2.60894871,-0.610639605,2.60415151,2.60411314,2.59930702
74.975984,2.23606798,2.60889187,-0.610593064,2.60404929,2.60404876,2.59919716
74.986476,2.82842712,2.60883617,0.468605333,2.60394756,2.60398548,2.59908774
74.996967,2.44948974,2.60878162,-0.399113861,2.6038463,2.60392332,2.59897878
75.007459,1.73205081,2.60872822,-0.936310533,2.60374552,2.60386227,2.59887024
75.01795,3.31662479,2.60867601,0.841396925,2.60364521,2.60380238,2.59876215
75.028442,3.31662479,2.60862497,0.841427253,2.60354537,2.60374363,2.59865449
75.038934,2.82842712,2.60857513,0.468883775,2.603446,2.60368604,2.59854726
75.049425,2.64575131,2.60852651,0.1929373,2.60334712,2.60362964,2.59844048
75.059917,2.44948974,2.60847911,-0.398734708,2.60324869,2.60357442,2.59833413
75.070408,3,2.60843296,0.625753182,2.60315074,2.60352042,2.59822822
75.0809,3.60555128,2.60838805,0.998580604,2.60305325,2.60346763,2.59812273
75.091392,3.16227766,2.60834442,0.744266915,2.60295623,2.60341607,2.59801767
75.101883,3.31662479,2.60830208,0.841619102,2.60285969,2.60336578,2.59791305
75.112375,3.46410162,2.60826103,0.925116523,2.6027636,2.60331675,2.59780885
75.122866,3.31662479,2.60822131,0.841667083,2.60266799,2.603269,2.59770509
75.133358,3.31662479,2.60818292,0.841689889,2.60257284,2.60322255,2.59760175
75.14385,2.82842712,2.60814588,0.469341283,2.60247814,2.60317742,2.59749884
75.154341,3,2.60811022,0.626011004,2.60238392,2.60313363,2.59739636
75.164833,2,2.60807595,-0.779792245,2.60229016,2.60309119,2.5972943
75.175324,2.44948974,2.60804308,-0.398187564,2.60219686,2.60305013,2.59719267
75.185816,3.46410162,2.60801164,0.925251305,2.60210401,2.60301046,2.59709146
75.196308,3.16227766,2.60798164,0.744510589,2.60201163,2.60297219,2.59699066
75.206799,2.23606798,2.60795312,-0.60982386,2.60191971,2.60293536,2.5968903
75.217291,3.31662479,2.60792608,0.84184245,2.60182824,2.60289999,2.59679035
75.227782,3.16227766,2.60790055,0.744565046,2.60173724,2.60286609,2.59669083
75.238274,3.46410162,2.60787656,0.925324299,2.60164669,2.60283368,2.59659171
75.248766,3,2.60785412,0.626215525,2.60155659,2.60280279,2.59649302
75.259257,2.23606798,2.60783326,-0.609725576,2.60146696,2.60277345,2.59639475
75.269749,2.64575131,2.607814,0.194775036,2.60137777,2.60274567,2.59629688
75.28024,2.23606798,2.60779637,-0.609695325,2.60128904,2.60271949,2.59619944
75.290732,2.44948974,2.60778039,-0.39785757,2.60120076,2.60269492,2.59610241
75.301224,2.82842712,2.60776609,0.469745713,2.60111293,2.602672,2.59600578
75.311715,3.60555128,2.6077535,0.998898281,2.60102556,2.60265074,2.59590958
75.322207,3,2.60774264,0.626304525,2.60093863,2.60263119,2.59581378
75.332698,3.16227766,2.60773355,0.744677185,2.60085216,2.60261336,2.5957184
75.34319,1.73205081,2.60772625,-0.935775316,2.60076613,2.60259729,2.59562342
75.353682,2,2.60772077,-0.779564476,2.60068055,2.602583,2.59552885
75.364173,2.23606798,2.60771715,-0.609630357,2.60059543,2.60257054,2.59543469
75.374665,3.16227766,2.60771541,0.744689362,2.60051074,2.60255992,2.59534093
75.385156,2.23606798,2.6077156,-0.609629085,2.6004265,2.60255119,2.59524759
75.395648,2.64575131,2.60771774,0.195021979,2.60034271,2.60254437,2.59515464
75.40614,2.44948974,2.60772187,-0.397784019,2.60025935,2.60253951,2.59506209
75.416631,3.60555128,2.60772802,0.998911033,2.60017645,2.60253664,2.59496996
75.427123,2.23606798,2.60773624,-0.609646017,2.60009398,2.60253579,2.59487821
75.437614,3.46410162,2.60774656,0.925394538,2.60001197,2.60253701,2.59478688
75.448106,2,2.60775903,-0.779589013,2.59993038,2.60254033,2.59469594
75.458598,3.16227766,2.60777368,0.744650242,2.59984924,2.6025458,2.5946054
75.469089,1.73205081,2.60779055,-0.935809672,2.59976854,2.60255346,2.59451526
75.479581,3.16227766,2.60780969,0.744626057,2.59968827,2.60256335,2.59442551
75.490072,3,2.60783115,0.62623386,2.59960845,2.60257552,2.59433617
75.500564,2.64575131,2.60785497,0.194669818,2.59952906,2.60259001,2.59424721
75.511056,3,2.6078812,0.626193897,2.59945011,2.60260688,2.59415864
75.521547,2.23606798,2.60790989,-0.609788417,2.5993716,2.60262616,2.59407048
75.532039,3,2.60794109,0.626146076,2.59929352,2.60264792,2.5939827
75.54253,3.46410162,2.60797485,0.925271183,2.59921588,2.60267221,2.59389533
75.553022,2.23606798,2.60801123,-0.609871509,2.59913866,2.60269907,2.59380833
75.563514,2.64575131,2.60805029,0.194167502,2.59906188,2.60272858,2.59372172
75.574005,2,2.60809208,-0.77980259,2.59898554,2.60276077,2.59363551
75.584497,2.82842712,2.60813666,0.469351107,2.59890962,2.60279573,2.59354968
75.594988,1.41421356,2.6081841,-1.09268959,2.59883414,2.6028335,2.59346424
75.60548,2.23606798,2.60823446,-0.61005449,2.59875908,2.60287415,2.59337918
75.615972,2.82842712,2.60828781,0.469190066,2.59868445,2.60291775,2.59329451
75.626463,2.82842712,2.6083442,0.469129961,2.59861025,2.60296437,2.59321023
75.636955,2.23606798,2.60840374,-0.610193213,2.59853648,2.60301408,2.59312632
75.647446,2.82842712,2.60846646,0.468999641,2.59846314,2.60306695,2.5930428
75.657938,2.64575131,2.60853247,0.192921851,2.59839022,2.60312307,2.59295966
75.66843,2,2.60860184,-0.780129372,2.59831773,2.6031825,2.59287689
75.678921,3,2.60867463,0.625560042,2.59824567,2.60324532,2.59279452
75.689413,3,2.60875096,0.625499031,2.59817402,2.60331164,2.59271251
75.699904,2.64575131,2.60883089,0.192146866,2.5981028,2.60338153,2.59263089
75.710396,2.23606798,2.60891453,-0.610611625,2.59803201,2.60345508,2.59254964
75.720888,2.44948974,2.60900197,-0.399389819,2.59796163,2.60353239,2.59246876
75.731379,3.16227766,2.60909329,0.74376365,2.59789168,2.60361356,2.59238826
75.741871,2.82842712,2.60918862,0.468229117,2.59782214,2.60369868,2.59230813
75.752362,2.82842712,2.60928804,0.468122941,2.59775303,2.60378786,2.59222838
75.762854,3.46410162,2.60939167,0.924505242,2.59768434,2.60388122,2.592149
75.773346,3.46410162,2.60949963,0.924446853,2.59761606,2.60397887,2.59206999
75.783837,1.41421356,2.60961202,-1.09334279,2.5975482,2.60408091,2.59199135
75.794329,2.64575131,2.60972898,0.189795505,2.59748076,2.60418748,2.59191307
75.80482,3,2.60985061,0.624619394,2.59741374,2.60429869,2.59183517
75.815312,3.31662479,2.60997708,0.840623406,2.59734712,2.6044147,2.59175763
75.825804,2.64575131,2.6101085,0.188793032,2.59728093,2.60453562,2.59168046
75.836295,3.46410162,2.61024501,0.924043617,2.59721515,2.60466159,2.59160366
75.846787,2.64575131,2.61038677,0.188054613,2.59714978,2.60479278,2.59152722
75.857278,3.46410162,2.61053392,0.923887273,2.59708483,2.60492932,2.59145114
75.86777,2.82842712,2.61068664,0.466626706,2.59702029,2.60507139,2.59137543
75.878262,2.23606798,2.61084508,-0.612190417,2.59695615,2.60521915,2.59130007
75.888753,2.64575131,2.61100941,0.186391801,2.59689244,2.60537276,2.59122508
75.899245,3.46410162,2.61117982,0.923537652,2.59682913,2.60553242,2.59115045
75.909736,2,2.61135648,-0.781892882,2.59676623,2.60569829,2.59107618
75.920228,3.31662479,2.61153961,0.839693503,2.59670374,2.60587059,2.59100226
75.93072,2.64575131,2.6117294,0.184450287,2.59664165,2.60604953,2.5909287
75.941211,2,2.61192605,-0.782257021,2.59657998,2.60623527,2.5908555
75.951703,2.82842712,2.6121298,0.465077762,2.59651871,2.6064281,2.59078265
75.962194,2.64575131,2.61234085,0.182785277,2.59645785,2.60662819,2.59071016
75.972686,2.23606798,2.61255949,-0.613589041,2.59639739,2.60683583,2.59063802
75.983178,3,2.61278593,0.62226527,2.59633733,2.60705124,2.59056623
75.993669,3,2.61302043,0.622076821,2.59627769,2.60727467,2.5904948
76.004161,3,2.61326329,0.621881588,2.59621844,2.60750644,2.59042371
76.014652,2.23606798,2.61351476,-0.614366974,2.5961596,2.60774678,2.59035298
76.025144,2.82842712,2.61377517,0.463305462,2.59610116,2.60799604,2.59028259
76.035636,2.64575131,2.61404483,0.178063143,2.59604312,2.6082545,2.59021255
76.046127,3.46410162,2.61432402,0.921833822,2.59598549,2.60852247,2.59014286
76.056619,3.31662479,2.61461314,0.837861355,2.59592825,2.60880034,2.59007352
76.06711,2.82842712,2.61491249,0.462076436,2.59587141,2.60908841,2.59000452
76.077602,2.44948974,2.6152225,-0.407102887,2.59581497,2.60938712,2.58993586
76.088094,2.64575131,2.61554354,0.173803837,2.59575893,2.60969682,2.58986755
76.098585,3.87298335,2.61587597,1.121208,2.59570329,2.61001789,2.58979958
76.109077,3.46410162,2.6162203,0.920804713,2.59564805,2.61035083,2.58973195
76.119568,3,2.61657689,0.619211681,2.5955932,2.61069601,2.58966467
76.13006,2,2.61694631,-0.785459297,2.59553875,2.61105399,2.58959772
76.140552,3.46410162,2.617329,0.920202488,2.59548469,2.61142522,2.58953111
76.151043,3,2.61772544,0.618283556,2.59543103,2.61181018,2.58946484
76.161535,2.44948974,2.61813627,-0.410665953,2.59537776,2.6122095,2.58939891
76.172026,3.16227766,2.61856196,0.7373708,2.59532489,2.61262368,2.58933331
76.182518,2.82842712,2.61900321,0.457628572,2.59527241,2.61305339,2.58926805
76.19301,3,2.61946062,0.616878743,2.59522032,2.61349923,2.58920312
76.203501,2.82842712,2.61993479,0.45660961,2.59516862,2.61396183,2.58913853
76.213993,2.23606798,2.62042653,-0.61996657,2.59511731,2.61444198,2.58907427
76.224484,4.12310563,2.62093647,1.2256301,2.5950664,2.61494033,2.58901034
76.234976,2.82842712,2.6214655,0.454930346,2.59501587,2.61545775,2.58894674
76.245468,2.44948974,2.6220144,-0.415360877,2.59496573,2.61599503,2.58888347
76.255959,2.64575131,2.62258397,0.152208208,2.59491599,2.61655297,2.58882053
76.266451,3.31662479,2.62317525,0.832736179,2.59486663,2.61713261,2.58875792
76.276942,2.82842712,2.62378908,0.452369368,2.59481766,2.61773482,2.58869564
76.287434,3.31662479,2.62442663,0.831984471,2.59476907,2.61836073,2.58863368
76.297926,3.74165739,2.62508891,1.05667804,2.59472087,2.61901138,2.58857204
76.308417,2.44948974,2.62577702,-0.419865788,2.59467306,2.61968787,2.58851074
76.318909,3.46410162,2.62649232,0.915209973,2.59462563,2.62039155,2.58844975
76.3294,3,2.62723598,0.610544035,2.5945786,2.6211236,2.5883891
76.339892,1.73205081,2.62800954,-0.946550969,2.59453194,2.62188557,2.58832875
76.350384,2.82842712,2.62881444,0.446780358,2.59448566,2.62267889,2.58826873
76.360875,3.31662479,2.62965219,0.828838105,2.59443977,2.62350508,2.58820904
76.371367,3,2.63052468,0.607844814,2.59439426,2.62436605,2.58814966
76.381858,1.73205081,2.63143364,-0.948357965,2.59434914,2.62526351,2.5880906
76.39235,3.31662479,2.63238126,0.827190142,2.59430439,2.62619967,2.58803185
76.402842,3.60555128,2.6333697,0.985992686,2.59426002,2.62717669,2.58797342
76.413333,2.44948974,2.63440131,-0.430013451,2.59421604,2.62819692,2.58791532
76.423825,2.64575131,2.63547902,0.101352329,2.59417244,2.62926331,2.58785752
76.434316,3,2.63660566,0.602821982,2.59412922,2.63037869,2.58780004
76.444808,2.44948974,2.63778488,-0.43392988,2.59408637,2.63154672,2.58774287
76.4553,2.44948974,2.6390205,-0.4353513,2.5940439,2.63277122,2.58768601
76.465791,3.16227766,2.64031686,0.722468543,2.59400181,2.63405656,2.58762946
76.476283,2.64575131,2.64167944,0.0638112523,2.5939601,2.63540821,2.58757323
76.486774,3.74165739,2.64311404,1.04811419,2.59391877,2.63683201,2.5875173
76.497266,3,2.64462814,0.59613074,2.59387781,2.63833544,2.58746168
76.507758,3.60555128,2.64623015,0.979449397,2.59383722,2.63992694,2.58740637
76.518249,2.82842712,2.64793016,0.424849343,2.59379702,2.64161661,2.58735137
76.528741,3.87298335,2.64974082,1.10600295,2.59375718,2.64341714,2.58729667
76.539232,2.44948974,2.65167676,-0.449652102,2.59371773,2.64534319,2.58724228
76.549724,3,2.65375648,0.588424607,2.59367864,2.64741333,2.58718819
76.560216,3.16227766,2.65600196,0.711530533,2.59363993,2.64964956,2.58713441
76.570707,3,2.65843995,0.584431389,2.59360159,2.65207871,2.58708093
76.581199,2,2.66110383,-0.813082918,2.59356362,2.65473424,2.58702774
76.59169,2.64575131,2.66403323,-0.135210632,2.59352603,2.65765587,2.58697487
76.602182,2,2.66727748,-0.816870541,2.59348881,2.66089306,2.58692229
76.612674,3.60555128,2.67089553,0.966775952,2.59345195,2.6645049,2.58687
76.623165,3,2.67495853,0.570124085,2.59341547,2.66856268,2.58681802
76.633657,1.73205081,2.67955327,-0.97339738,2.59337936,2.67315343,2.58676634
76.644148,3.60555128,2.68478189,0.959567291,2.59334362,2.67837953,2.58671495
76.65464,2.64575131,2.69076788,-0.212171076,2.59330825,2.68436473,2.58666385
76.665132,2.82842712,2.69765558,0.361623491,2.59327324,2.69125372,2.58661305
76.675623,2,2.70561403,-0.840008352,2.59323861,2.69921593,2.58656255
76.686115,3.16227766,2.71484221,0.668906158,2.59320434,2.70845077,2.58651234
76.696606,2.44948974,2.72556608,-0.525429666,2.59317044,2.71918469,2.58646242
76.707098,2.82842712,2.73804735,0.300632284,2.59313691,2.73167996,2.58641279
76.71759,3.46410162,2.75257834,0.843518393,2.59310374,2.74622948,2.58636345
76.728081,3.46410162,2.76948423,0.833437092,2.59307094,2.76315909,2.5863144
76.738573,3.31662479,2.78912757,0.726290037,2.5930385,2.78283199,2.58626564
76.749064,3.74165739,2.81189421,0.964242281,2.59300644,2.80563467,2.58621717
76.759556,3.31662479,2.83820316,0.691680291,2.59297473,2.8319868,2.58616898
76.770048,3,2.86848619,0.362648332,2.59294339,2.86232071,2.58612108
76.780539,4,2.90318338,1.04729013,2.59291242,2.89707696,2.58607347
76.791031,3.60555128,2.94274315,0.814130287,2.5928818,2.93670434,2.58602614
76.801522,3,2.98758579,0.111419091,2.59285156,2.9816233,2.58597909
76.812014,3.16227766,3.03811768,0.352363422,2.59282167,3.03224023,2.58593232
76.822506,3.16227766,3.09468804,0.259980043,2.59279215,3.0889041,2.58588584
76.832997,3.31662479,3.15758255,0.398801003,2.59276299,3.15190011,2.58583964
76.843489,3.16227766,3.22702767,-0.254460228,2.59273419,3.22145404,2.58579372
76.85398,2.82842712,3.3031345,-0.68899011,2.59270575,3.29767608,2.58574808
76.864472,3.31662479,3.38593799,-0.263273993,2.59267767,3.3806001,2.58570271
76.874964,3.46410162,3.47534023,-0.106012353,2.59264996,3.47012698,2.58565762
76.885455,3.87298335,3.57112261,0.549418547,2.5926226,3.56603678,2.58561282
76.895947,3.60555128,3.67297257,-0.259656113,2.59259561,3.66801566,2.58556828
76.906438,3.46410162,3.78042069,-0.562422504,2.59256897,3.77559282,2.58552402
76.91693,3.87298335,3.89291971,-0.141196206,2.5925427,3.88821981,2.58548004
76.927422,4.58257569,4.00978218,0.756831232,2.59251678,4.00520797,2.58543632
76.937913,4.58257569,4.13021695,0.672576201,2.59249122,4.1257651,2.58539288
76.948405,4.47213595,4.25337505,0.467718827,2.59246602,4.24904135,2.58534971
76.958896,5,4.3782815,0.788491278,2.59244118,4.37406093,2.58530682
76.969388,4.24264069,4.50393972,-0.51117417,2.5924167,4.49982662,2.58526419
76.97988,4.47213595,4.62926243,-0.396391815,2.59239257,4.62525062,2.58522183
76.990371,5.19615242,4.75312007,0.665606755,2.5923688,4.74920295,2.58517974
77.000863,4.89897949,4.87438952,0.156811885,2.59234539,4.87056019,2.58513792
77.011354,5.47722558,4.99188533,0.696663651,2.59232234,4.98813665,2.58509636
77.021846,5.19615242,5.10446555,0.302798404,2.59229964,5.10079022,2.58505507
77.032338,5.74456265,5.21096587,0.730477087,2.59227729,5.20735646,2.58501404
77.042829,6.40312424,5.3102502,1.04540616,2.59225531,5.3066992,2.58497328
77.053321,6.164414,5.40125227,0.873591283,2.59223368,5.39775214,2.58493278
77.063812,5.47722558,5.48292639,-0.0755037452,2.5922124,5.47946951,2.58489255
77.074304,6.32455532,5.55433554,0.877621664,2.59219148,5.55091428,2.58485257
77.084796,5.91607978,5.61461151,0.549061266,2.59217091,5.61121822,2.58481286
77.095287,5.29150262,5.66300302,-0.609508324,2.5921507,5.65962998,2.5847734
77.105779,5.56776436,5.69890477,-0.36213313,2.59213084,5.69554424,2.58473421
77.11627,5.65685425,5.72184329,-0.254929478,2.59211134,5.71848748,2.58469527
77.126762,5,5.7315213,-0.855290183,2.59209219,5.72816237,2.58465659
77.137254,6.55743852,5.72780716,0.910841018,2.59207339,5.72443722,2.58461817
77.147745,5.29150262,5.71075221,-0.647494855,2.59205495,5.70736329,2.58458
77.158237,5.29150262,5.68057976,-0.62376048,2.59203686,5.67716383,2.58454209
77.168728,5.83095189,5.63768951,0.439616179,2.59201913,5.63423846,2.58450443
77.17922,5.56776436,5.58262455,-0.121902377,2.59200174,5.57913019,2.58446702
77.189712,5.09901951,5.51607839,-0.645800961,2.59198471,5.51253244,2.58442987
77.200203,5.19615242,5.43887032,-0.492664081,2.59196803,5.4352644,2.58439297
77.210695,6.32455532,5.35189953,0.986233132,2.5919517,5.34822517,2.58435631
77.221186,4.58257569,5.25617868,-0.820733202,2.59193573,5.25242734,2.58431992
77.231678,5.56776436,5.15275149,0.644214927,2.59192011,5.14891451,2.58428376
77.24217,5.19615242,5.04273651,0.391683439,2.59190484,5.03880519,2.58424786
77.252661,4.89897949,4.92728769,-0.168250408,2.59188992,4.92325332,2.5842122
77.263153,4.79583152,4.8075437,-0.108222817,2.59187535,4.80339758,2.58417679
77.273644,4.58257569,4.6846919,-0.319556267,2.59186113,4.68042541,2.58414163
77.284136,5.38516481,4.55986381,0.908460785,2.59184727,4.55546849,2.58410671
77.294628,4.47213595,4.43420308,0.194763635,2.59183375,4.42967076,2.58407203
77.305119,5,4.30881749,0.831373868,2.59182059,4.30414039,2.5840376
77.315611,4.35889894,4.18472903,0.417336693,2.59180778,4.17989989,2.58400341
77.326102,4.35889894,4.06294513,0.544016374,2.59179532,4.05795741,2.58396947
77.336594,4,3.94435096,0.235900489,2.59178321,3.93919895,2.58393576
77.347086,4.47213595,3.82978027,0.801470951,2.59177145,3.82445928,2.5839023
77.357577,3.74165739,3.71996781,0.147273809,2.59176004,3.71447437,2.58386907
77.368069,4.12310563,3.6155097,0.712457664,2.59174898,3.60984162,2.58383608
77.37856,3.16227766,3.51692958,-0.595526587,2.59173827,3.51108617,2.58380333
77.389052,3.87298335,3.42459264,0.669619821,2.59172791,3.41857468,2.58377082
77.399544,4,3.3387724,0.813159025,2.5917179,3.33258223,2.58373854
77.410035,3.60555128,3.2596201,0.588159138,2.59170824,3.25326158,2.5837065
77.420527,2.44948974,3.18714889,-0.858870859,2.59169893,3.18062724,2.58367469
77.431018,2.64575131,3.12129426,-0.689596223,2.59168997,3.11461599,2.58364312
77.44151,3.31662479,3.06186791,0.504734467,2.59168136,3.05504053,2.58361178
77.452002,2,3.00861786,-1.00429968,2.5916731,3.00164972,2.58358067
77.462493,3,2.96122137,0.196922909,2.59166519,2.95412137,2.5835498
77.472985,2.64575131,2.91928958,-0.523008863,2.59165763,2.91206689,2.58351915
77.483476,3.16227766,2.8824149,0.529020564,2.59165043,2.87507874,2.58348873
77.493968,2,2.85015309,-0.922037465,2.59164357,2.84271249,2.58345854
77.50446,2.44948974,2.82206393,-0.610388557,2.59163706,2.81452757,2.58342858
77.514951,2,2.79771061,-0.893146467,2.5916309,2.79008666,2.58339885
77.525443,3.31662479,2.77666424,0.734820081,2.59162509,2.76896025,2.58336935
77.535934,3.60555128,2.75852762,0.920338882,2.59161963,2.75075048,2.58334007
77.546426,3.87298335,2.74292389,1.06304255,2.59161452,2.73507979,2.58331101
77.556918,2.44948974,2.72951332,-0.529172542,2.59160977,2.72160773,2.58328218
77.567409,3.16227766,2.71798864,0.66655009,2.59160536,2.71002637,2.58325358
77.577901,2.64575131,2.70807289,-0.249642901,2.5916013,2.70005812,2.58322519
77.588392,3.16227766,2.69952616,0.680258405,2.59159759,2.69146248,2.58319703
77.598884,3,2.69213595,0.55485498,2.59159424,2.68402642,2.58316909
77.609376,2.64575131,2.68572116,-0.199924608,2.59159123,2.67756836,2.58314136
77.619867,3.16227766,2.68012655,0.694371019,2.59158858,2.67193267,2.58311386
77.630359,1.41421356,2.67521877,-1.12294488,2.59158627,2.66698563,2.58308658
77.64085,2,2.67088731,-0.819077107,2.59158432,2.66261642,2.58305952
77.651342,2.82842712,2.66703789,0.401732788,2.59158272,2.6587305,2.58303267
77.661834,3.16227766,2.66359314,0.706175984,2.59158147,2.65525028,2.58300603
77.672325,2.82842712,2.6604888,0.409802792,2.59158057,2.65211133,2.58297962
77.682817,2.82842712,2.65767096,0.413226525,2.59158002,2.64925957,2.58295342
77.693308,2.82842712,2.65509633,0.416330156,2.59157983,2.64665158,2.58292743
77.7038,3,2.65272835,0.589297588,2.59157998,2.64425072,2.58290166
77.714292,2.82842712,2.65053776,0.421769332,2.59158049,2.6420276,2.58287609
77.724783,2,2.6485005,-0.805295287,2.59158136,2.63995813,2.58285075
77.735275,3,2.64659632,0.594477655,2.59158257,2.63802198,2.58282561
77.745766,2.64575131,2.64480925,0.0306930475,2.59158414,2.63620313,2.58280068
77.756258,3,2.64312548,0.597389755,2.59158606,2.63448774,2.58277596
77.76675,2.64575131,2.64153404,0.0649404842,2.59158833,2.6328648,2.58275145
77.777241,1.73205081,2.6400258,-0.95287722,2.59159096,2.63132515,2.58272715
77.787733,2.44948974,2.63859269,-0.434859691,2.59159394,2.6298607,2.58270305
77.798224,2.23606798,2.63722843,-0.633372285,2.59159728,2.62846514,2.58267916
77.808716,3,2.63592716,0.603384488,2.59160097,2.62713261,2.58265548
77.819208,3,2.63468422,0.604413581,2.59160501,2.62585842,2.582632
77.829699,2.44948974,2.63349557,-0.428959005,2.59160941,2.62463853,2.58260873
77.840191,3.31662479,2.63235733,0.827204603,2.59161417,2.62346904,2.58258566
77.850682,2.64575131,2.63126652,0.120352781,2.59161928,2.62234696,2.58256279
77.861174,3.31662479,2.63022005,0.828495468,2.59162475,2.62126919,2.58254012
77.871666,2.23606798,2.62921546,-0.62701474,2.59163057,2.62023327,2.58251765
77.882157,3.16227766,2.62825052,0.730771609,2.59163675,2.61923694,2.58249539
77.892649,3.16227766,2.6273229,0.731406015,2.59164329,2.6182779,2.58247332
77.90314,2.44948974,2.62643085,-0.420643683,2.59165018,2.61735436,2.58245146
77.913632,2.44948974,2.6255724,-0.419622039,2.59165744,2.61646436,2.58242979
77.924124,3.16227766,2.62474597,0.733165529,2.59166505,2.61560631,2.58240832
77.934615,2.82842712,2.62395009,0.45219137,2.59167302,2.61477874,2.58238704
77.945107,2,2.62318317,-0.789419514,2.59168135,2.61398004,2.58236596
77.955598,2.82842712,2.622444,0.453853635,2.59169004,2.61320902,2.58234508
77.96609,2.82842712,2.62173119,0.454638251,2.59169909,2.61246425,2.58232439
77.976582,2,2.62104359,-0.78806319,2.5917085,2.61174462,2.58230389
77.987073,2.64575131,2.62038018,0.159283176,2.59171827,2.61104906,2.58228359
77.997565,3.46410162,2.61973976,0.918891642,2.59172841,2.6103764,2.58226348
78.008056,3,2.61912147,0.617153574,2.5917389,2.60972575,2.58224356
78.018548,3.31662479,2.61852423,0.835524126,2.59174976,2.60909605,2.58222383
78.02904,2.64575131,2.61794721,0.166745612,2.59176098,2.60848646,2.58220429
78.039531,2.64575131,2.61738964,0.16840925,2.59177257,2.60789619,2.58218494
78.050023,2.82842712,2.61685059,0.459974494,2.59178452,2.60732432,2.58216578
78.060514,3.31662479,2.61632942,0.836836525,2.59179683,2.60677021,2.5821468
78.071006,2.23606798,2.61582531,-0.616244539,2.59180951,2.60623302,2.58212802
78.081498,1.41421356,2.61533762,-1.09595806,2.59182256,2.60571213,2.58210941
78.091989,2.82842712,2.61486576,0.462127003,2.59183597,2.60520693,2.582091
78.102481,1.41421356,2.61440901,-1.09553432,2.59184975,2.6047167,2.58207277
78.112972,2.64575131,2.61396687,0.178281914,2.5918639,2.60424094,2.58205472
78.123464,3.16227766,2.61353871,0.740769163,2.59187842,2.60377902,2.58203686
78.133956,3,2.61312403,0.621993544,2.59189331,2.60333043,2.58201918
78.144447,2.44948974,2.61272237,-0.40402058,2.59190856,2.60289471,2.58200168
78.154939,2.82842712,2.61233317,0.464859068,2.59192419,2.60247129,2.58198436
78.16543,2.64575131,2.61195604,0.183834888,2.59194019,2.60205979,2.58196722
78.175922,0,2.61159048,-1.61604161,2.59195656,2.6016597,2.58195026
78.186414,2,2.6112361,-0.781815901,2.59197331,2.60127063,2.58193348
78.196905,3.46410162,2.61089254,0.923693171,2.59199042,2.60089221,2.58191688
78.207397,2.64575131,2.61055935,0.187595205,2.59200792,2.600524,2.58190046
78.217888,2.64575131,2.61023623,0.188454452,2.59202578,2.60016569,2.58188421
78.22838,2,2.60992277,-0.780975527,2.59204403,2.59981687,2.58186814
78.238872,2.64575131,2.60961868,0.190085858,2.59206265,2.59947723,2.58185224
78.249363,3,2.60932365,0.625041075,2.59208165,2.5991465,2.58183652
78.259855,2,2.60903734,-0.780408447,2.59210102,2.59882429,2.58182098
78.270346,2.82842712,2.60875951,0.468687116,2.59212078,2.59851039,2.5818056
78.280838,2.44948974,2.60848983,-0.398748144,2.59214092,2.59820444,2.5817904
78.29133,2.82842712,2.60822805,0.469253747,2.59216144,2.59790621,2.58177537
78.301821,3,2.60797394,0.626119842,2.59218234,2.59761548,2.58176051
78.312313,3.31662479,2.60772722,0.841960549,2.59220362,2.59733193,2.58174583
78.322804,2.64575131,2.6074877,0.195610862,2.59222529,2.59705539,2.58173131
78.333296,2.82842712,2.60725511,0.470289292,2.59224734,2.59678558,2.58171696
78.343788,3.31662479,2.60702925,0.842374943,2.59226978,2.59652231,2.58170278
78.354279,3.31662479,2.60680994,0.842505107,2.59229261,2.59626538,2.58168876
78.364771,3.46410162,2.60659693,0.926015486,2.59231582,2.59601457,2.58167492
78.375262,2.23606798,2.60639009,-0.608540973,2.59233943,2.5957697,2.58166124
78.385754,2.82842712,2.60618919,0.471421185,2.59236342,2.59553057,2.58164772
78.396246,2.44948974,2.60599407,-0.395606279,2.59238781,2.59529701,2.58163437
78.406737,3.16227766,2.60580458,0.74597123,2.59241259,2.59506887,2.58162118
78.417229,2.23606798,2.60562053,-0.607908343,2.59243776,2.59484595,2.58160816
78.42772,3.46410162,2.60544179,0.926638993,2.59246333,2.59462813,2.5815953
78.438212,3.16227766,2.60526818,0.746330674,2.59248929,2.59441522,2.5815826
78.448704,2,2.60509958,-0.77788147,2.59251565,2.59420709,2.58157007
78.459195,2.44948974,2.60493586,-0.394266554,2.59254241,2.59400362,2.58155769
78.469687,3.31662479,2.60477685,0.843710814,2.59256957,2.59380464,2.58154547
78.480178,3.16227766,2.60462247,0.746763145,2.59259713,2.59361005,2.58153342
78.49067,2,2.60447255,-0.777478325,2.59262509,2.59341969,2.58152152
78.501162,2.23606798,2.60432699,-0.60684348,2.59265346,2.59323347,2.58150977
78.511653,2.23606798,2.60418569,-0.60672705,2.59268223,2.59305127,2.58149819
78.522145,3.31662479,2.60404852,0.844142329,2.59271141,2.59287296,2.58148676
78.532636,3.31662479,2.60391539,0.84422118,2.59274099,2.59269845,2.58147549
78.543128,2.82842712,2.60378618,0.473963022,2.59277098,2.59252761,2.58146438
78.55362,2.44948974,2.6036608,-0.39264622,2.59280139,2.59236036,2.58145341
78.564111,2.82842712,2.60353916,0.474223536,2.5928322,2.59219661,2.58144261
78.574603,3,2.60342116,0.629745059,2.59286343,2.59203624,2.58143195
78.585094,2.23606798,2.60330673,-0.606002267,2.59289507,2.59187919,2.58142145
78.595586,3.16227766,2.60319575,0.747717802,2.59292713,2.59172534,2.5814111
78.606078,3.16227766,2.60308816,0.747789744,2.59295961,2.59157462,2.5814009
78.616569,2.82842712,2.60298389,0.474808632,2.5929925,2.59142696,2.58139085
78.627061,2.44948974,2.60288284,-0.391654305,2.59302582,2.59128226,2.58138095
78.637552,3.46410162,2.60278495,0.928071475,2.59305956,2.59114046,2.5813712
78.648044,3.31662479,2.60269015,0.844946534,2.59309372,2.59100147,2.58136159
78.658536,3.16227766,2.60259835,0.748117174,2.59312831,2.59086522,2.58135214
78.669027,3,2.60250952,0.63046846,2.59316333,2.59073167,2.58134283
78.679519,3,2.60242356,0.630536625,2.59319878,2.59060071,2.58133367
78.69001,1.73205081,2.60234044,-0.932893151,2.59323465,2.59047231,2.58132465
78.700502,1.73205081,2.60226007,-0.932850073,2.59327096,2.59034638,2.58131578
78.710994,3,2.6021824,0.630727834,2.59330771,2.59022287,2.58130706
78.721485,3.46410162,2.60210739,0.928436442,2.59334488,2.59010173,2.58129847
78.731977,2.44948974,2.60203496,-0.390570377,2.5933825,2.58998289,2.58129003
78.742468,1.73205081,2.60196508,-0.932691951,2.59342056,2.58986631,2.58128174
78.75296,3.31662479,2.60189769,0.845415342,2.59345906,2.58975192,2.58127358
78.763452,2.44948974,2.60183274,-0.390311404,2.593498,2.58963967,2.58126557
78.773943,2.64575131,2.60177018,0.209716787,2.59353739,2.58952952,2.58125769
78.784435,3.16227766,2.60170997,0.748710688,2.59357723,2.58942142,2.58124996
78.794926,3.60555128,2.60165206,1.00194771,2.59361751,2.58931531,2.58124237
78.805418,2.44948974,2.60159641,-0.390008545,2.59365825,2.58921115,2.58123491
78.81591,2.64575131,2.60154297,0.210257788,2.59369944,2.5891089,2.58122759
78.826401,2.23606798,2.60149172,-0.60450289,2.59374109,2.58900853,2.58122041
78.836893,2.82842712,2.6014426,0.476428927,2.5937832,2.58890996,2.58121336
78.847384,3,2.60139559,0.631351259,2.59382576,2.58881319,2.58120646
78.857876,2.82842712,2.60135063,0.476525437,2.59386879,2.58871814,2.58119968
78.868368,2.82842712,2.60130771,0.476570477,2.59391228,2.5886248,2.58119304
78.878859,2.64575131,2.60126678,0.210913573,2.59395624,2.58853314,2.58118654
78.889351,3,2.6012278,0.631484123,2.59400067,2.5884431,2.58118017
78.899842,2.44948974,2.60119076,-0.38948815,2.59404557,2.58835466,2.58117393
78.910334,2,2.60115561,-0.775342257,2.59409094,2.58826777,2.58116782
78.920826,2.23606798,2.60112233,-0.604197283,2.59413679,2.58818241,2.58116185
78.931317,3.46410162,2.6010909,0.928983703,2.59418312,2.58809855,2.581156
78.941809,2.23606798,2.60106126,-0.604146741,2.59422993,2.58801615,2.58115029
78.9523,2.64575131,2.60103341,0.211466064,2.59427722,2.58793518,2.5811447
78.962792,2.64575131,2.60100732,0.211527755,2.594325,2.58785561,2.58113925
78.973284,2.64575131,2.60098295,0.21158534,2.59437327,2.58777742,2.58113392
78.983775,3.74165739,2.6009603,1.06803422,2.59442203,2.58770058,2.58112872
78.994267,2.23606798,2.60093932,-0.60404581,2.59447129,2.58762505,2.58112365
79.004758,2.82842712,2.60092,0.47697707,2.59452103,2.58755081,2.5811187
79.01525,2.82842712,2.60090231,0.476995609,2.59457128,2.58747784,2.58111388
79.025742,3.46410162,2.60088624,0.929093846,2.59462204,2.5874061,2.58110919
79.036233,2.44948974,2.60087176,-0.389078424,2.59467329,2.58733559,2.58110462
79.046725,2.23606798,2.60085885,-0.603979202,2.59472506,2.58726626,2.58110017
79.057216,3.31662479,2.6008475,0.846036223,2.59477733,2.58719811,2.58109585
79.067708,3.60555128,2.60083768,1.00235403,2.59483013,2.5871311,2.58109165
79.0782,3.31662479,2.60082937,0.84604694,2.59488343,2.58706521,2.58108757
79.088691,2.64575131,2.60082255,0.211964046,2.59493726,2.58700042,2.58108361
79.099183,2.82842712,2.60081722,0.477084798,2.59499161,2.58693671,2.58107977
79.109674,2.82842712,2.60081335,0.477088855,2.59504648,2.58687407,2.58107606
79.120166,3,2.60081092,0.631814115,2.59510189,2.58681246,2.58107246
79.130658,3.74165739,2.60080993,1.06810461,2.59515783,2.58675187,2.58106898
79.141149,3.31662479,2.60081035,0.846058178,2.5952143,2.58669229,2.58106562
79.151641,2.44948974,2.60081217,-0.389001835,2.59527131,2.58663368,2.58106238
79.162132,3,2.60081538,0.631810591,2.59532886,2.58657605,2.58105926
79.172624,2.82842712,2.60081996,0.477081929,2.59538696,2.58651935,2.58105625
79.183116,2.23606798,2.6008259,-0.603951919,2.59544561,2.58646359,2.58105336
79.193607,3.16227766,2.60083318,0.749295986,2.59550481,2.58640874,2.58105058
79.204099,3.31662479,2.60084181,0.846039587,2.59556456,2.58635478,2.58104792
79.21459,3.46410162,2.60085175,0.929112407,2.59562488,2.58630171,2.58104537
79.225082,3,2.60086301,0.631772896,2.59568576,2.5862495,2.58104294
79.235574,2.23606798,2.60087557,-0.603993036,2.59574721,2.58619814,2.58104062
79.246065,3.60555128,2.60088941,1.00232822,2.59580922,2.58614762,2.58103841
79.256557,2.64575131,2.60090454,0.211770566,2.59587181,2.58609791,2.58103631
79.267048,2.82842712,2.60092093,0.47697609,2.59593498,2.58604901,2.58103433
79.27754,2.23606798,2.60093859,-0.604045209,2.59599873,2.5860009,2.58103246
79.288032,2.44948974,2.6009575,-0.389188591,2.59606307,2.58595357,2.58103069
79.298523,2.82842712,2.60097765,0.476916629,2.596128,2.58590701,2.58102904
79.309015,1.73205081,2.60099904,-0.932173929,2.59619352,2.58586119,2.58102749
79.319506,2.23606798,2.60102165,-0.60411396,2.59625964,2.58581612,2.58102605
79.329998,2.64575131,2.60104549,0.211437515,2.59632637,2.58577177,2.58102472
79.34049,2.64575131,2.60107053,0.211378279,2.5963937,2.58572813,2.5810235
79.350981,2.64575131,2.60109678,0.21131618,2.59646164,2.5856852,2.58102238
79.361473,3.31662479,2.60112423,0.845872661,2.5965302,2.58564296,2.58102137
79.371964,2.23606798,2.60115287,-0.604222553,2.59659937,2.5856014,2.58102047
79.382456,1.73205081,2.6011827,-0.932272434,2.59666917,2.58556051,2.58101966
79.392948,2.23606798,2.60121371,-0.604272894,2.59673961,2.58552027,2.58101897
79.403439,2.44948974,2.60124589,-0.389558911,2.59681067,2.58548069,2.58101838
79.413931,2.82842712,2.60127924,0.47660034,2.59688237,2.58544173,2.58101789
79.424422,2.64575131,2.60131376,0.21080217,2.59695471,2.58540341,2.5810175
79.434914,2.82842712,2.60134943,0.476526694,2.59702771,2.5853657,2.58101721
79.445406,3.60555128,2.60138627,1.00208034,2.59710136,2.5853286,2.58101703
79.455897,2.82842712,2.60142425,0.476448182,2.59717566,2.5852921,2.58101695
79.466389,2.64575131,2.60146339,0.210446954,2.59725063,2.58525618,2.58101696
79.47688,2,2.60150367,-0.775566676,2.59732626,2.58522084,2.58101708
79.487372,2.82842712,2.60154509,0.476321355,2.59740257,2.58518607,2.5810173
79.497864,3.87298335,2.60158765,1.12756184,2.59747956,2.58515186,2.58101761
79.508355,2.23606798,2.60163135,-0.604618368,2.59755723,2.58511821,2.58101802
79.518847,3,2.60167618,0.631129003,2.59763559,2.5850851,2.58101853
79.529338,3.31662479,2.60172214,0.845519159,2.59771464,2.58505253,2.58101914
79.53983,2.64575131,2.60176924,0.209719037,2.59779439,2.58502048,2.58101984
79.550322,2.44948974,2.60181746,-0.390291835,2.59787486,2.58498895,2.58102064
79.560813,3.60555128,2.6018668,1.00184054,2.59795602,2.58495793,2.58102153
79.571305,2.82842712,2.60191728,0.475930506,2.59803792,2.58492742,2.58102252
79.581796,2.82842712,2.60196887,0.4758763,2.59812052,2.58489741,2.5810236
79.592288,2,2.60202159,-0.775900506,2.59820387,2.58486788,2.58102478
79.60278,2.44948974,2.60207544,-0.390622194,2.59828795,2.58483884,2.58102605
79.613271,3.16227766,2.6021304,0.74842986,2.59837276,2.58481027,2.58102741
79.623763,2.82842712,2.6021865,0.475647589,2.59845833,2.58478217,2.58102886
79.634254,2.44948974,2.6022437,-0.390837513,2.59854465,2.58475453,2.58103041
79.644746,3.46410162,2.60230204,0.928331607,2.59863173,2.58472735,2.58103204
79.655238,3.16227766,2.6023615,0.748275455,2.59871958,2.58470061,2.58103377
79.665729,3.16227766,2.60242208,0.748234975,2.5988082,2.58467432,2.58103558
79.676221,2.23606798,2.60248379,-0.605322903,2.5988976,2.58464846,2.58103749
79.686712,2.64575131,2.60254663,0.207857367,2.59898778,2.58462304,2.58103948
79.697204,2.64575131,2.60261059,0.207703439,2.59907877,2.58459803,2.58104156
79.707696,2.23606798,2.60267569,-0.605481388,2.59917056,2.58457345,2.58104373
79.718187,2.64575131,2.60274191,0.207387081,2.59926314,2.58454927,2.58104599
79.728679,1.73205081,2.60280927,-0.933144396,2.59935655,2.5845255,2.58104833
79.73917,2.23606798,2.60287776,-0.605648235,2.59945078,2.58450214,2.58105075
79.749662,2.64575131,2.6029474,0.206891067,2.59954584,2.58447917,2.58105327
79.760154,2.23606798,2.60301817,-0.605764143,2.59964174,2.58445658,2.58105587
79.770645,3,2.60309009,0.630007867,2.59973848,2.58443438,2.58105855
79.781137,3,2.60316316,0.629949874,2.59983608,2.58441256,2.58106132
79.791628,3.46410162,2.60323737,0.927827704,2.59993453,2.58439112,2.58106416
79.80212,3.46410162,2.60331274,0.927787086,2.60003386,2.58437004,2.5810671
79.812612,2.44948974,2.60338927,-0.392300301,2.60013406,2.58434933,2.58107011
79.823103,2.82842712,2.60346695,0.474299665,2.60023514,2.58432898,2.58107321
79.833595,2,2.60354581,-0.776882107,2.60033713,2.58430898,2.58107639
79.844086,2.82842712,2.60362583,0.474132152,2.60044001,2.58428933,2.58107964
79.854578,2.82842712,2.60370703,0.474046513,2.6005438,2.58427003,2.58108298
79.86507,3.16227766,2.60378941,0.747320715,2.60064852,2.58425106,2.5810864
79.875561,1.73205081,2.60387296,-0.933714173,2.60075416,2.58423244,2.5810899
79.886053,3,2.60395772,0.629318904,2.60086074,2.58421414,2.58109347
79.896544,2.44948974,2.60404366,-0.393133456,2.60096826,2.58419617,2.58109713
79.907036,3.16227766,2.60413081,0.747092267,2.60107674,2.58417853,2.58110086
79.917528,2.23606798,2.60421916,-0.60675463,2.60118619,2.5841612,2.58110467
79.928019,2.82842712,2.60430872,0.473411458,2.60129661,2.58414419,2.58110855
79.938511,3.16227766,2.6043995,0.746912418,2.60140802,2.58412749,2.58111251
79.949002,3.31662479,2.6044915,0.843879904,2.60152041,2.5841111,2.58111655
79.959494,3.16227766,2.60458474,0.746788406,2.60163382,2.58409501,2.58112066
79.969986,2,2.60467921,-0.777611223,2.60174824,2.58407922,2.58112485
79.980477,3.16227766,2.60477493,0.746661057,2.60186367,2.58406372,2.58112911
79.990969,2.44948974,2.6048719,-0.394185435,2.60198015,2.58404852,2.58113344
80.00146,2.82842712,2.60497012,0.472712387,2.60209767,2.5840336,2.58113785
80.011952,3.16227766,2.60506962,0.746463687,2.60221625,2.58401897,2.58114233
80.022444,2.82842712,2.6051704,0.472500502,2.6023359,2.58400462,2.58114688
80.032935,2.44948974,2.60527245,-0.39469318,2.60245662,2.58399055,2.58115151
80.043427,3.16227766,2.6053758,0.746258575,2.60257844,2.58397675,2.5811562
80.053918,3.46410162,2.60548044,0.926618139,2.60270135,2.58396323,2.58116097
80.06441,3.60555128,2.6055864,0.999982438,2.60282538,2.58394997,2.5811658
80.074902,3.60555128,2.60569368,0.999928796,2.60295054,2.58393697,2.58117071
80.085393,2.23606798,2.60580227,-0.608057805,2.60307682,2.58392423,2.58117568
80.095885,3,2.60591221,0.627764117,2.60320426,2.58391176,2.58118072
80.106376,2,2.60602349,-0.778475106,2.60333285,2.58389953,2.58118583
80.116868,2.64575131,2.60613614,0.199035613,2.60346263,2.58388756,2.58119101
80.12736,3.46410162,2.60625015,0.926202714,2.60359359,2.58387584,2.58119626
80.137851,3.16227766,2.60636552,0.745595155,2.60372574,2.58386436,2.58120157
80.148343,2.64575131,2.6064823,0.198164099,2.60385912,2.58385313,2.58120695
80.158834,2.82842712,2.60660046,0.470984777,2.60399371,2.58384213,2.58121239
80.169326,2.44948974,2.60672005,-0.39652277,2.60412955,2.58383138,2.5812179
80.179818,3,2.60684106,0.627023878,2.60426664,2.58382085,2.58122348
80.190309,2.44948974,2.60696348,-0.396829613,2.60440499,2.58381056,2.58122912
80.200801,3.60555128,2.60708737,0.999231658,2.60454463,2.5838005,2.58123482
80.211292,2,2.6072127,-0.779238538,2.60468556,2.58379066,2.58124059
80.221784,2.82842712,2.60733951,0.470199546,2.60482781,2.58378104,2.58124641
80.232276,3,2.60746781,0.626523897,2.60497138,2.58377165,2.58125231
80.242767,2.23606798,2.60759758,-0.609532285,2.60511628,2.58376247,2.58125826
80.253259,2.64575131,2.60772888,0.194993403,2.60526256,2.58375351,2.58126427
80.26375,3.16227766,2.60786169,0.744591141,2.60541018,2.58374476,2.58127035
80.274242,2.23606798,2.60799605,-0.609859061,2.60555922,2.58373623,2.58127649
80.284734,2.82842712,2.60813196,0.469356116,2.60570965,2.5837279,2.58128268
80.295225,3,2.60826942,0.625883837,2.60586149,2.58371977,2.58128894
80.305717,3,2.60840848,0.62577274,2.60601478,2.58371185,2.58129526
80.316208,3,2.60854911,0.62566036,2.60616951,2.58370413,2.58130163
80.3267,3.31662479,2.60869137,0.841387792,2.60632573,2.58369661,2.58130806
80.337192,2.44948974,2.60883526,-0.399181058,2.60648343,2.58368929,2.58131455
80.347683,3.16227766,2.60898077,0.743839287,2.60664263,2.58368216,2.5813211
80.358175,3.31662479,2.60912796,0.841128307,2.60680337,2.58367522,2.58132771
80.368666,2.23606798,2.60927681,-0.610908203,2.60696563,2.58366847,2.58133437
80.379158,2.82842712,2.60942736,0.467974102,2.60712947,2.58366191,2.58134108
80.38965,3.16227766,2.60957963,0.743436636,2.60729489,2.58365554,2.58134786
80.400141,2.44948974,2.60973361,-0.400304713,2.6074619,2.58364935,2.58135468
80.410633,3,2.60988934,0.624588391,2.60763054,2.58364334,2.58136157
80.421124,3,2.61004683,0.624462307,2.60780081,2.5836375,2.5813685
80.431616,2.64575131,2.61020611,0.188534348,2.60797275,2.58363185,2.5813755
80.442108,2,2.61036719,-0.781260005,2.60814637,2.58362637,2.58138254
80.452599,2.64575131,2.61053008,0.18767319,2.60832167,2.58362107,2.58138964
80.463091,2,2.61069483,-0.781469661,2.60849872,2.58361593,2.58139679
80.473582,2.64575131,2.61086142,0.186788352,2.60867749,2.58361097,2.58140399
80.484074,2.82842712,2.61102991,0.466258741,2.60885805,2.58360617,2.58141124
80.494566,3,2.6112003,0.623538047,2.6090404,2.58360154,2.58141855
80.505057,2.23606798,2.6113726,-0.612621111,2.60922454,2.58359708,2.5814259
80.515549,3.31662479,2.61154687,0.839689183,2.60941054,2.58359277,2.58143331
80.52604,3,2.61172308,0.623118705,2.60959837,2.58358863,2.58144076
80.536532,3.16227766,2.6119013,0.741873546,2.60978811,2.58358464,2.58144827
80.547024,3.46410162,2.61208154,0.923049336,2.60997975,2.58358081,2.58145582
80.557515,2.64575131,2.61226379,0.182995946,2.61017331,2.58357714,2.58146342
80.568007,2.23606798,2.61244813,-0.613498291,2.61036885,2.58357362,2.58147108
80.578498,3,2.61263454,0.622386909,2.61056635,2.58357025,2.58147877
80.58899,2.82842712,2.61282307,0.464331838,2.61076587,2.58356703,2.58148652
80.599482,2.64575131,2.61301374,0.180935268,2.61096744,2.58356396,2.58149431
80.609973,2.82842712,2.61320656,0.46391871,2.61117105,2.58356104,2.58150215
80.620465,2.44948974,2.61340158,-0.404860266,2.61137677,2.58355826,2.58151004
80.630956,3.16227766,2.6135988,0.740728602,2.61158459,2.58355562,2.58151797
80.641448,2.82842712,2.61379828,0.463280524,2.61179457,2.58355313,2.58152595
80.65194,1.41421356,2.61400004,-1.09534765,2.61200674,2.58355077,2.58153397
80.662431,3.31662479,2.61420407,0.838105435,2.61222109,2.58354856,2.58154203
80.672923,2.64575131,2.61441045,0.177033491,2.6124377,2.58354648,2.58155014
80.683414,2.64575131,2.61461918,0.176443005,2.61265655,2.58354454,2.58155829
80.693906,3.16227766,2.61483031,0.739896852,2.61287773,2.58354274,2.58156649
80.704398,2.64575131,2.61504386,0.175235414,2.61310124,2.58354106,2.58157473
80.714889,3.46410162,2.61525984,0.921326094,2.61332708,2.58353952,2.58158301
80.725381,3.16227766,2.61547833,0.739458809,2.61355535,2.58353811,2.58159134
80.735872,2.44948974,2.61569931,-0.407688078,2.61378603,2.58353682,2.5815997
80.746364,1.73205081,2.61592286,-0.940144699,2.61401919,2.58353567,2.58160811
80.756856,2.44948974,2.616149,-0.408239213,2.61425485,2.58353464,2.58161656
80.767347,1.73205081,2.61637773,-0.940386581,2.61449302,2.58353373,2.58162504
80.777839,3.16227766,2.61660913,0.738693797,2.61473378,2.58353295,2.58163357
80.78833,3,2.61684321,0.618996603,2.61497714,2.58353229,2.58164214
80.798822,2.64575131,2.61708003,0.169325975,2.61522315,2.58353175,2.58165074
80.809314,3.16227766,2.61731961,0.738212742,2.61547186,2.58353132,2.58165939
80.819805,2.82842712,2.61756197,0.459200563,2.61572326,2.58353102,2.58166807
80.830297,1.73205081,2.61780719,-0.941146313,2.61597745,2.58353083,2.5816768
80.840788,3.16227766,2.61805527,0.737714303,2.61623441,2.58353076,2.58168555
80.85128,2.23606798,2.61830629,-0.618254245,2.61649425,2.5835308,2.58169435
80.861772,3.16227766,2.61856027,0.737371948,2.61675697,2.58353096,2.58170319
80.872263,2.44948974,2.61881723,-0.411494214,2.61702259,2.58353122,2.58171205
80.882755,2.23606798,2.61907726,-0.618877438,2.61729121,2.5835316,2.58172096
80.893246,2.23606798,2.61934035,-0.619089959,2.61756282,2.58353209,2.5817299
80.903738,3.87298335,2.61960661,1.11954309,2.61783752,2.58353268,2.58173888
80.91423,1.41421356,2.61987604,-1.09802663,2.61811533,2.58353338,2.58174789
80.924721,2,2.62014867,-0.787495186,2.61839627,2.58353419,2.58175694
80.935213,2.23606798,2.6204246,-0.619965015,2.61868044,2.5835351,2.58176602
80.945704,3.16227766,2.62070382,0.735917006,2.61896783,2.58353611,2.58177513
80.956196,3.74165739,2.62098644,1.05861747,2.61925855,2.58353723,2.58178428
80.966688,2.82842712,2.62127248,0.455142445,2.61955263,2.58353845,2.58179346
80.977179,2.23606798,2.62156196,-0.620881619,2.61985008,2.58353977,2.58180268
80.987671,3.31662479,2.621855,0.83352852,2.62015102,2.58354118,2.58181192
80.998162,3.31662479,2.62215158,0.833350594,2.62045545,2.5835427,2.5818212
81.008654,3.16227766,2.62245182,0.734728413,2.62076347,2.58354431,2.58183051
81.019146,2.44948974,2.62275575,-0.416252334,2.62107511,2.58354602,2.58183985
81.029637,3.16227766,2.62306339,0.734312107,2.6213904,2.58354782,2.58184922
81.040129,3,2.62337486,0.613697921,2.62170947,2.58354971,2.58185863
81.05062,3,2.62369016,0.61344098,2.6220323,2.5835517,2.58186806
81.061112,2.64575131,2.62400942,0.147451329,2.62235902,2.58355378,2.58187752
81.071604,3.16227766,2.62433265,0.733447346,2.62268966,2.58355595,2.58188701
81.082095,2.23606798,2.6246599,-0.623371414,2.62302426,2.58355821,2.58189654
81.092587,2.64575131,2.62499128,0.144083401,2.62336294,2.58356056,2.58190609
81.103078,3,2.62532681,0.612105536,2.6237057,2.58356299,2.58191566
81.11357,3,2.62566661,0.611827905,2.62405268,2.58356552,2.58192527
81.124062,2.44948974,2.62601073,-0.420144002,2.62440392,2.58356813,2.5819349
81.134553,2.82842712,2.62635918,0.449519681,2.62475944,2.58357082,2.58194456
81.145045,2.64575131,2.62671212,0.137982576,2.62511939,2.58357359,2.58195425
81.155536,2.23606798,2.62706955,-0.625301183,2.62548377,2.58357645,2.58196397
81.166028,3.16227766,2.6274316,0.7313317,2.62585273,2.5835794,2.58197371
81.17652,3,2.62779834,0.610083326,2.62622631,2.58358242,2.58198348
81.187011,2.82842712,2.62816978,0.447501222,2.62660455,2.58358552,2.58199327
81.197503,2.44948974,2.62854609,-0.423150503,2.62698761,2.5835887,2.58200309
81.207994,2,2.62892727,-0.793049352,2.62737548,2.58359196,2.58201293
81.218486,3.16227766,2.62931349,0.730043953,2.62776834,2.5835953,2.58202279
81.228978,2.44948974,2.62970478,-0.424517413,2.62816622,2.58359872,2.58203269
81.239469,2.44948974,2.63010119,-0.424984058,2.62856918,2.58360221,2.5820426
81.249961,2.82842712,2.6305029,0.444886757,2.62897737,2.58360577,2.58205254
81.260452,3,2.63090991,0.607527854,2.62939083,2.58360941,2.5820625
81.270944,3.16227766,2.63132239,0.728666777,2.6298097,2.58361312,2.58207249
81.281436,3,2.6317404,0.606843968,2.63023406,2.58361691,2.58208249
81.291927,1.73205081,2.63216399,-0.94874295,2.63066395,2.58362076,2.58209252
81.302419,3.31662479,2.63259335,0.827061931,2.63109957,2.58362469,2.58210258
81.31291,3.31662479,2.63302849,0.826798825,2.63154091,2.58362869,2.58211265
81.323402,2.64575131,2.6334696,0.110822863,2.63198819,2.58363275,2.58212274
81.333894,2.64575131,2.63391675,0.10878678,2.63244145,2.58363689,2.58213286
81.344385,3.16227766,2.63436999,0.726572551,2.63290076,2.58364109,2.58214299
81.354877,3,2.63482952,0.60429337,2.63336632,2.58364536,2.58215315
81.365368,2,2.63529538,-0.797054188,2.63383816,2.58364969,2.58216333
81.37586,2.64575131,2.63576776,0.0999177391,2.63431648,2.58365409,2.58217352
81.386352,2.23606798,2.63624673,-0.632596835,2.63480135,2.58365856,2.58218374
81.396843,2.82842712,2.63673238,0.437829583,2.63529285,2.58366309,2.58219397
81.407335,2.23606798,2.63722492,-0.633369514,2.6357912,2.58366768,2.58220422
81.417826,2.82842712,2.63772438,0.436695257,2.63629643,2.58367233,2.5822145
81.428318,3.16227766,2.63823098,0.723910683,2.63680877,2.58367704,2.58222479
81.43881,3.16227766,2.63874482,0.723555693,2.6373283,2.58368182,2.58223509
81.449301,3.16227766,2.63926597,0.723195468,2.6378551,2.58368665,2.58224542
81.459793,3.46410162,2.63979469,0.907913503,2.63838943,2.58369155,2.58225576
81.470284,3.16227766,2.640331,0.722458763,2.63893131,2.5836965,2.58226612
81.480776,3.31662479,2.64087515,0.822039924,2.639481,2.58370151,2.58227649
81.491268,2.44948974,2.64142726,-0.438106736,2.6400386,2.58370658,2.58228688
81.501759,3.31662479,2.6419874,0.821363128,2.6406042,2.58371171,2.58229729
81.512251,2.64575131,2.64255586,0.0565283362,2.64117808,2.58371689,2.58230771
81.522742,2.64575131,2.64313268,0.0511726058,2.64176028,2.58372212,2.58231815
81.533234,3.46410162,2.64371813,0.905750234,2.64235108,2.58372741,2.5823286
81.543726,2.82842712,2.64431233,0.429085995,2.64295059,2.58373276,2.58233907
81.554217,2.44948974,2.6449154,-0.442069746,2.64355893,2.58373816,2.58234955
81.564709,2.44948974,2.64552763,-0.442761661,2.6441764,2.58374361,2.58236005
81.5752,2.44948974,2.64614908,-0.443462897,2.64480306,2.58374911,2.58237056
81.585692,3.31662479,2.64678006,0.818440423,2.64543921,2.58375466,2.58238108
81.596184,2.23606798,2.64742071,-0.641367858,2.64608499,2.58376027,2.58239162
81.606675,2.23606798,2.64807114,-0.641874729,2.64674053,2.58376592,2.58240217
81.617167,2.64575131,2.6487317,-0.0545929686,2.64740616,2.58377162,2.58241273
81.627658,2.82842712,2.64940246,0.423113061,2.64808195,2.58377737,2.58242331
81.63815,3,2.65008376,0.591537181,2.64876826,2.58378317,2.58243389
81.648642,3.31662479,2.65077576,0.81599573,2.64946522,2.58378902,2.58244449
81.659133,2.23606798,2.65147861,-0.644523566,2.65017301,2.58379492,2.5824551
81.669625,3.16227766,2.65219266,0.714202349,2.65089198,2.58380086,2.58246572
81.680116,2,2.65291804,-0.808033438,2.65162223,2.58380684,2.58247636
81.690608,2,2.6536551,-0.808489395,2.65236414,2.58381287,2.582487
81.7011,3.60555128,2.65440404,0.975267778,2.65311789,2.58381895,2.58249765
81.711591,3.31662479,2.65516503,0.813301768,2.65388367,2.58382507,2.58250832
81.722083,2.23606798,2.65593847,-0.647974147,2.65466188,2.58383123,2.58251899
81.732574,2.44948974,2.6567245,-0.455230443,2.65545263,2.58383744,2.58252967
81.743066,2.44948974,2.65752353,-0.456107212,2.65625636,2.58384369,2.58254037
81.753558,3.46410162,2.65833578,0.897644605,2.65707328,2.58384998,2.58255107
81.764049,3.16227766,2.65916145,0.709306851,2.6579036,2.58385631,2.58256178
81.774541,3.60555128,2.66000101,0.972394091,2.65874777,2.58386268,2.5825725
81.785032,3,2.66085459,0.582361921,2.65960595,2.58386909,2.58258322
81.795524,2.82842712,2.66172269,0.408294547,2.66047861,2.58387554,2.58259396
81.806016,2.44948974,2.66260554,-0.461644661,2.66136599,2.58388203,2.5826047
81.816507,2.23606798,2.66350338,-0.653785444,2.66226835,2.58388856,2.58261545
81.826999,3.46410162,2.66441675,0.894251009,2.6631862,2.58389512,2.58262621
81.83749,2.44948974,2.66534581,-0.464603126,2.66411972,2.58390173,2.58263697
81.847982,3.16227766,2.6662911,0.70426313,2.66506945,2.58390837,2.58264775
[truncated: 420,130 more chars]
