# Supplementary material for: Phase Stability of Iron Nitride Fe4N at High Pressure—Pressure-Dependent Evolution of Phase Equilibria in the Fe–N System
Source: Materials (Basel). 2021 Jul 15;14(14):3963. doi: 10.3390/ma14143963 (PMC8307547; doi:10.3390/ma14143963)
Supplement: Supplementary file 1 [file materials-14-03963-s001.zip › xrd_data/4-400b_riet.txt]

'y-axis saved as Sqrt(y)
'x,Yobs,Ycalc,Diff,epsilon,fe4n,Bkg
20,21.977261,20.6706737,1.14306048,20.670646,20.6706734,20.6706457
20.010492,20.7123152,20.6813851,0.175869628,20.6813573,20.6813847,20.6813569
20.020983,21.0713075,20.6919752,0.615899581,20.6919474,20.6919749,20.691947
20.031475,20.1494417,20.7024469,-0.74364319,20.702419,20.7024465,20.7024186
20.041966,21.0475652,20.7127987,0.578590091,20.7127707,20.7127983,20.7127704
20.052458,20.7605395,20.7230333,0.19366524,20.7230052,20.7230329,20.7230049
20.06295,21.4941853,20.7331503,0.8723732,20.7331222,20.7331499,20.7331218
20.073441,20.5912603,20.7431494,-0.389729481,20.7431212,20.743149,20.7431208
20.083933,20.3715488,20.7530331,-0.617644142,20.7530049,20.7530327,20.7530045
20.094424,20.0997512,20.7628002,-0.814278164,20.7627719,20.7627998,20.7627715
20.104916,21.1896201,20.7724531,0.645884649,20.7724248,20.7724528,20.7724244
20.115408,20.2237484,20.7819916,-0.747156735,20.7819632,20.7819912,20.7819628
20.125899,20.808652,20.7914153,0.131288652,20.7913868,20.791415,20.7913865
20.136391,20.9284495,20.8007267,0.357383286,20.8006981,20.8007264,20.8006978
20.146882,20.9523268,20.8099246,0.377362226,20.8098959,20.8099242,20.8098956
20.157374,19.5448203,20.8190113,-1.12880069,20.8189826,20.8190109,20.8189822
20.167866,20.2731349,20.8279865,-0.744883614,20.8279577,20.8279862,20.8279574
20.178357,20.5912603,20.8368501,-0.49557016,20.8368212,20.8368497,20.8368208
20.188849,21.0950231,20.8456042,0.499418603,20.8455752,20.8456038,20.8455749
20.19934,20.5669638,20.8542478,-0.53598876,20.8542187,20.8542474,20.8542184
20.209832,20.8566536,20.862783,-0.0782906472,20.862754,20.8627827,20.8627536
20.220324,21.4476106,20.8712098,0.75921065,20.8711806,20.8712094,20.8711802
20.230815,21.2602916,20.8795277,0.617060676,20.8794985,20.8795274,20.8794981
20.241307,21.2837967,20.8877391,0.629331038,20.8877098,20.8877387,20.8877094
20.251798,20.904545,20.8958428,0.0932852182,20.8958134,20.8958424,20.8958131
20.26229,20.5912603,20.903841,-0.559089221,20.9038116,20.9038407,20.9038112
20.272782,20.8326667,20.9117335,-0.281188284,20.911704,20.9117331,20.9117036
20.283273,21.0475652,20.91952,0.357833948,20.9194904,20.9195197,20.91949
20.293765,21.2837967,20.9272027,0.597154896,20.927173,20.9272023,20.9271726
20.304256,20.4205779,20.9347805,-0.717079247,20.9347507,20.9347801,20.9347503
20.314748,20.904545,20.9422555,-0.194191979,20.9422256,20.9422551,20.9422252
20.32524,20.0997512,20.9496274,-0.921887301,20.9495975,20.949627,20.9495971
20.335731,21.2367606,20.9568962,0.529022093,20.9568662,20.9568958,20.9568658
20.346223,21.4242853,20.9640637,0.678396331,20.9640336,20.9640633,20.9640332
20.356714,20.7605395,20.9711291,-0.458900423,20.9710989,20.9711287,20.9710985
20.367206,20.7605395,20.9780942,-0.466427637,20.978064,20.9780938,20.9780636
20.377698,20.4694895,20.984959,-0.717962033,20.9849286,20.9849586,20.9849282
20.388189,22.1585198,20.9917232,1.08018361,20.9916928,20.9917228,20.9916924
20.398681,18.8944436,20.9983887,-1.4504982,20.9983582,20.9983883,20.9983577
20.409172,21.0950231,21.0049547,0.300114074,21.0049241,21.0049542,21.0049237
20.419664,21.2367606,21.0114229,0.474697454,21.0113922,21.0114225,21.0113918
20.430156,21.4009346,21.0177933,0.618984053,21.0177625,21.0177929,21.0177621
20.440647,21,21.0240657,-0.155131346,21.0240349,21.0240653,21.0240345
20.451139,21.3775583,21.0302419,0.58933558,21.030211,21.0302415,21.0302106
20.46163,20.904545,21.0363211,-0.363009852,21.0362901,21.0363207,21.0362897
20.472122,20.6155281,21.042305,-0.653281632,21.0422739,21.0423046,21.0422735
20.482614,21.0475652,21.0481935,-0.0250667501,21.0481623,21.0481931,21.0481619
20.493105,21.1660105,21.0539866,0.334699766,21.0539553,21.0539861,21.0539549
20.503597,20.5912603,21.0596857,-0.684416116,21.0596543,21.0596853,21.0596539
20.514088,21.3775583,21.0652904,0.558809424,21.0652589,21.0652899,21.0652585
20.52458,20.8326667,21.0708021,-0.487991185,21.0707705,21.0708016,21.0707701
20.535072,21.0475652,21.0762207,-0.169279501,21.0761891,21.0762203,21.0761887
20.545563,22.181073,21.0815463,1.04858317,21.0815146,21.0815459,21.0815142
20.556055,20.7123152,21.0867804,-0.611935628,21.0867486,21.08678,21.0867481
20.566546,21.7715411,21.0919223,0.824389919,21.0918904,21.0919219,21.09189
20.577038,20.7605395,21.0969736,-0.580029378,21.0969416,21.0969731,21.0969411
20.58753,20.1990099,21.1019341,-0.950223256,21.101902,21.1019337,21.1019016
20.598021,21.9089023,21.1068039,0.895599445,21.1067717,21.1068035,21.1067713
20.608513,20.7605395,21.1115844,-0.592490441,21.1115521,21.111584,21.1115517
20.619004,21.6333077,21.1162751,0.719049763,21.1162427,21.1162747,21.1162423
20.629496,20.7605395,21.1208773,-0.600281443,21.1208448,21.1208769,21.1208444
20.639988,20.2731349,21.125391,-0.923177181,21.1253585,21.1253906,21.125358
20.650479,20.174241,21.1298163,-0.977535332,21.1297837,21.1298159,21.1297832
20.660971,21.3541565,21.1341544,0.469043774,21.1341217,21.134154,21.1341212
20.671462,20.5669638,21.138405,-0.755937294,21.1383721,21.1384045,21.1383717
20.681954,21.7485632,21.1425692,0.778456132,21.1425363,21.1425688,21.1425358
20.692446,20.2237484,21.1466471,-0.960676185,21.1466141,21.1466467,21.1466136
20.702937,20.9284495,21.1506388,-0.471369588,21.1506057,21.1506384,21.1506052
20.713429,20.174241,21.1545454,-0.990103243,21.1545122,21.154545,21.1545117
20.72392,20.7846097,21.1583667,-0.611356658,21.1583333,21.1583662,21.1583328
20.734412,21.6794834,21.1621036,0.71929115,21.1620702,21.1621032,21.1620697
20.744904,20.9284495,21.1657564,-0.487141537,21.1657228,21.165756,21.1657224
20.755395,21.2837967,21.1693251,0.338336479,21.1692914,21.1693246,21.1692909
20.765887,22.2036033,21.1728107,1.01527956,21.1727769,21.1728103,21.1727765
20.776378,20.5182845,21.1762131,-0.811127955,21.1761792,21.1762126,21.1761787
20.78687,20.7123152,21.1795332,-0.683533504,21.1794992,21.1795328,21.1794988
20.797362,20.3469899,21.1827712,-0.914210738,21.1827371,21.1827708,21.1827367
20.807853,21.6794834,21.1859272,0.702535561,21.185893,21.1859267,21.1858925
20.818345,21.2367606,21.1890021,0.218537174,21.1889678,21.1890016,21.1889673
20.828836,21.1423745,21.1919958,-0.22275829,21.1919614,21.1919953,21.1919609
20.839328,20.808652,21.1949092,-0.621495889,21.1948747,21.1949087,21.1948742
20.84982,20.4694895,21.1977424,-0.853377382,21.1977078,21.197742,21.1977073
20.860311,21.2837967,21.2004957,0.288619079,21.2004609,21.2004952,21.2004605
20.870803,20.8566536,21.2031698,-0.588656255,21.203135,21.2031693,21.2031345
20.881294,21.0713075,21.2057647,-0.366684031,21.2057297,21.2057642,21.2057292
20.891786,20.1494417,21.2082812,-1.02899929,21.2082461,21.2082807,21.2082457
20.902278,21.9544984,21.2107195,0.862426166,21.2106843,21.210719,21.2106838
20.912769,21.8174242,21.2130797,0.777395969,21.2130444,21.2130792,21.213044
20.923261,20.7605395,21.2153627,-0.674405838,21.2153273,21.2153622,21.2153268
20.933752,21.7944947,21.2175684,0.759556649,21.2175329,21.2175679,21.2175324
20.944244,21.2367606,21.2196976,0.130625361,21.219662,21.2196971,21.2196615
20.954736,21.0950231,21.2217504,-0.355987809,21.2217147,21.2217499,21.2217142
20.965227,19.8494332,21.2237271,-1.1723028,21.2236912,21.2237266,21.2236907
20.975719,20.3715488,21.2256283,-0.924164249,21.2255924,21.2256278,21.2255919
20.98621,20.976177,21.2274542,-0.501275588,21.2274181,21.2274537,21.2274176
20.996702,21.6333077,21.2292053,0.635690451,21.2291691,21.2292048,21.2291686
21.007194,20.7364414,21.2308819,-0.70316467,21.2308456,21.2308814,21.2308451
21.017685,21.4242853,21.2324842,0.437951012,21.2324477,21.2324837,21.2324472
21.028177,21.5406592,21.2340128,0.553756617,21.2339763,21.2340123,21.2339757
21.038668,21.6564078,21.2354679,0.64879884,21.2354312,21.2354674,21.2354307
21.04916,20.0499377,21.23685,-1.08945506,21.2368132,21.2368495,21.2368127
21.059652,21.6101828,21.2381593,0.60993724,21.2381224,21.2381588,21.2381219
21.070143,21.2132034,21.2393962,-0.161841769,21.2393591,21.2393957,21.2393586
21.080635,20.5669638,21.2405611,-0.820729743,21.2405239,21.2405606,21.2405234
21.091126,21.4941853,21.2416542,0.502524659,21.2416169,21.2416537,21.2416164
21.101618,21.1423745,21.2426761,-0.316704247,21.2426387,21.2426756,21.2426381
21.11211,20.1494417,21.2436269,-1.04603311,21.2435894,21.2436264,21.2435888
21.122601,21.2602916,21.244507,0.125636749,21.2444693,21.2445065,21.2444688
21.133093,21.6564078,21.2453169,0.641163748,21.2452791,21.2453163,21.2452785
21.143584,21.5870331,21.2460567,0.583931926,21.2460187,21.2460561,21.2460182
21.154076,21.1187121,21.2467268,-0.357791492,21.2466888,21.2467263,21.2466882
21.164568,21.7025344,21.2473277,0.674690099,21.2472895,21.2473271,21.2472889
21.175059,22,21.2478595,0.867260349,21.2478211,21.2478589,21.2478206
21.185551,21.330729,21.2483227,0.287065038,21.2482842,21.2483221,21.2482837
21.196042,20.4694895,21.2487175,-0.882738913,21.2486789,21.2487169,21.2486783
21.206534,20.6397674,21.2490443,-0.780561893,21.2490056,21.2490438,21.249005
21.217026,20.7846097,21.2493034,-0.6816845,21.2492646,21.2493029,21.249264
21.227517,21.7485632,21.2494952,0.706447428,21.2494562,21.2494946,21.2494556
21.238009,20.6639783,21.2496199,-0.765272245,21.2495808,21.2496194,21.2495802
21.2485,20.5426386,21.2496779,-0.840856313,21.2496386,21.2496774,21.2496381
21.258992,20.9284495,21.2496695,-0.566762718,21.2496301,21.2496689,21.2496295
21.269484,21.2132034,21.249595,-0.190765761,21.2495555,21.2495944,21.2495549
21.279975,21.4009346,21.2494547,0.389204079,21.2494151,21.2494542,21.2494145
21.290467,21.1423745,21.249249,-0.326916635,21.2492092,21.2492484,21.2492086
21.300958,21.3541565,21.2489781,0.324312163,21.2489382,21.2489775,21.2489376
21.31145,20.4450483,21.2486424,-0.896434092,21.2486023,21.2486418,21.2486017
21.321942,21.6333077,21.2482421,0.620536503,21.2482018,21.2482415,21.2482013
21.332433,21.6564078,21.2477776,0.639241889,21.2477372,21.247777,21.2477366
21.342925,21.5406592,21.2472492,0.541673358,21.2472087,21.2472486,21.2472081
21.353416,21.3072758,21.2466572,0.246208345,21.2466165,21.2466566,21.2466159
21.363908,21.4476106,21.2460018,0.44900864,21.245961,21.2460012,21.2459604
21.3744,20.9523268,21.2452834,-0.541254651,21.2452425,21.2452828,21.2452419
21.384891,21.4009346,21.2445024,0.395515058,21.2444613,21.2445018,21.2444607
21.395383,22.0680765,21.2436589,0.907974464,21.2436176,21.2436583,21.243617
21.405874,20.8326667,21.2427533,-0.640380069,21.2427119,21.2427527,21.2427112
21.416366,21.4242853,21.2417858,0.427199588,21.2417442,21.2417852,21.2417436
21.426858,21.3541565,21.2407568,0.336748779,21.240715,21.2407561,21.2407144
21.437349,21.3541565,21.2396666,0.338363586,21.2396247,21.239666,21.2396241
21.447841,21.2602916,21.2385154,0.147567863,21.2384733,21.2385147,21.2384727
21.458332,21.8632111,21.2373036,0.79114319,21.2372614,21.2373029,21.2372607
21.468824,21.4242853,21.2360313,0.433882484,21.2359889,21.2360306,21.2359883
21.479316,21.4009346,21.2346989,0.407720084,21.2346564,21.2346983,21.2346558
21.489807,21.1896201,21.2333068,-0.209013706,21.2332642,21.2333062,21.2332635
21.500299,21.1660105,21.2318551,-0.256602064,21.2318123,21.2318545,21.2318116
21.51079,20.8326667,21.2303443,-0.630616862,21.2303013,21.2303436,21.2303007
21.521282,21.2132034,21.2287743,-0.124783465,21.2287312,21.2287737,21.2287306
21.531774,20.7605395,21.2271457,-0.683085816,21.2271024,21.2271451,21.2271018
21.542265,21.023796,21.2254589,-0.449068826,21.2254154,21.2254582,21.2254147
21.552757,21.9544984,21.2237137,0.854859471,21.2236701,21.223713,21.2236694
21.563248,21,21.2219108,-0.471074126,21.221867,21.2219102,21.2218664
21.57374,21.9317122,21.2200502,0.843600603,21.2200063,21.2200496,21.2200056
21.584232,20.2484567,21.2181323,-0.984721059,21.2180882,21.2181316,21.2180875
21.594723,20.6397674,21.2161575,-0.75920358,21.2161132,21.2161568,21.2161126
21.605215,20.4205779,21.2141258,-0.890813067,21.2140813,21.2141251,21.2140806
21.615706,21.5174348,21.2120377,0.552627414,21.2119931,21.2120371,21.2119924
21.626198,21.2132034,21.2098933,0.0575341879,21.2098485,21.2098926,21.2098478
21.63669,20.4694895,21.2076928,-0.859187586,21.2076478,21.2076921,21.2076471
21.647181,22.0454077,21.2054369,0.916499226,21.2053917,21.2054362,21.205391
21.657673,21.330729,21.2031252,0.357216683,21.2030799,21.2031246,21.2030792
21.668164,21.8403297,21.2007587,0.799731817,21.2007132,21.200758,21.2007125
21.678656,21.8174242,21.198337,0.786820975,21.1982913,21.1983363,21.1982906
21.689148,21.3541565,21.1958606,0.397864162,21.1958148,21.1958599,21.1958141
21.699639,21.2367606,21.1933301,0.208399858,21.1932841,21.1933294,21.1932833
21.710131,21.4709106,21.1907452,0.529306519,21.190699,21.1907445,21.1906982
21.720622,20.976177,21.1881066,-0.460358167,21.1880602,21.1881059,21.1880595
21.731114,20.8326667,21.1854142,-0.593925505,21.1853676,21.1854134,21.1853669
21.741606,21.023796,21.1826683,-0.398587872,21.1826216,21.1826676,21.1826209
21.752097,21.4009346,21.1798696,0.47017541,21.1798227,21.1798689,21.179822
21.762589,21.0713075,21.1770178,-0.325131207,21.1769707,21.1770171,21.17697
21.77308,21.6333077,21.1741136,0.67763857,21.1740663,21.1741129,21.1740656
21.783572,21.5870331,21.1711568,0.644884771,21.1711093,21.171156,21.1711085
21.794064,20.8326667,21.1681478,-0.579207341,21.1681001,21.1681471,21.1680994
21.804555,20.7364414,21.1650872,-0.654710529,21.1650393,21.1650865,21.1650386
21.815047,20.808652,21.1619747,-0.594409523,21.1619267,21.161974,21.1619259
21.825538,20.904545,21.1588111,-0.504248124,21.1587629,21.1588104,21.1587621
21.83603,21.3072758,21.1555961,0.389460744,21.1555476,21.1555953,21.1555469
21.846522,20.880613,21.1523301,-0.521264904,21.1522815,21.1523294,21.1522807
21.857013,21.2837967,21.1490138,0.367127841,21.148965,21.149013,21.1489642
21.867505,21.0713075,21.1456467,-0.272652224,21.1455977,21.145646,21.1455969
21.877996,20.8566536,21.1422298,-0.534393301,21.1421806,21.142229,21.1421798
21.888488,21.330729,21.1387626,0.438139702,21.1387132,21.1387618,21.1387124
21.89898,21.3072758,21.1352457,0.414765075,21.135196,21.1352449,21.1351952
21.909471,21.4709106,21.1316796,0.582435347,21.1316298,21.1316788,21.131629
21.919963,21.7944947,21.128064,0.816352099,21.1280139,21.1280632,21.1280131
21.930454,20.7364414,21.1243997,-0.622862987,21.1243494,21.1243989,21.1243486
21.940946,21.725561,21.1206862,0.777736957,21.1206357,21.1206854,21.1206349
21.951438,21.4009346,21.1169242,0.532926212,21.1168735,21.1169234,21.1168727
21.961929,20.9284495,21.1131143,-0.429726335,21.1130634,21.1131134,21.1130626
21.972421,21.1896201,21.1092559,0.283485884,21.1092048,21.109255,21.1092039
21.982912,21.2602916,21.10535,0.393626302,21.1052986,21.1053491,21.1052978
21.993404,21.4709106,21.1013961,0.607877039,21.1013445,21.1013952,21.1013437
22.003896,20.0997512,21.0973947,-0.998821057,21.097343,21.0973939,21.0973422
22.014387,21.4242853,21.0933466,0.575272672,21.0932947,21.0933458,21.0932938
22.024879,20.2237484,21.0892512,-0.930324013,21.089199,21.0892503,21.0891982
22.03537,21.4242853,21.0851094,0.582388095,21.085057,21.0851085,21.0850561
22.045862,21.2602916,21.0809207,0.423522058,21.0808681,21.0809198,21.0808672
22.056354,20.5669638,21.0766857,-0.713948104,21.0766328,21.0766848,21.076632
22.066845,21.2602916,21.072405,0.433458865,21.072352,21.0724042,21.0723511
22.077337,21.3775583,21.0680781,0.556309453,21.0680248,21.0680773,21.068024
22.087828,22.090722,21.063706,1.013418,21.0636525,21.0637051,21.0636516
22.09832,21.5174348,21.059288,0.676865405,21.0592343,21.0592871,21.0592334
22.108812,20.7846097,21.0548248,-0.519822232,21.0547709,21.054824,21.05477
22.119303,20.8326667,21.0503171,-0.466530237,21.0502629,21.0503162,21.050262
22.129795,21.2367606,21.0457642,0.437031335,21.0457097,21.0457633,21.0457088
22.140286,21.6564078,21.0411672,0.784372792,21.0411125,21.0411662,21.0411116
22.150778,21.0475652,21.0365253,0.105070705,21.0364704,21.0365244,21.0364695
22.16127,21.4709106,21.0318394,0.662624467,21.0317842,21.0318385,21.0317833
22.171761,20.904545,21.0271099,-0.350092818,21.0270545,21.027109,21.0270536
22.182253,20.904545,21.0223364,-0.343207507,21.0222807,21.0223354,21.0222798
22.192744,21.023796,21.0175197,0.0792232231,21.0174638,21.0175188,21.0174629
22.203236,21.4709106,21.0126593,0.676942549,21.0126032,21.0126584,21.0126023
22.213728,20.9284495,21.0077559,-0.2816138,21.0076995,21.0077549,21.0076985
22.224219,20.0997512,21.00281,-0.950294032,21.0027534,21.002809,21.0027524
22.234711,21.4009346,20.997821,0.634912272,20.9977641,20.99782,20.9977631
22.245202,20.808652,20.99279,-0.429112929,20.9927328,20.992789,20.9927319
22.255694,22,20.9877162,1.00612316,20.9876588,20.9877152,20.9876578
22.266186,20.5912603,20.9826004,-0.62557181,20.9825427,20.9825994,20.9825418
22.276677,20.2977831,20.9774432,-0.824414974,20.9773853,20.9774422,20.9773843
22.287169,21.3775583,20.9722438,0.63664314,20.9721857,20.9722429,20.9721847
22.29766,21.1187121,20.9670035,0.38949781,20.9669451,20.9670025,20.9669441
22.308152,20.6881609,20.9617215,-0.523030222,20.9616628,20.9617205,20.9616618
22.318644,20.3960781,20.9563984,-0.748545458,20.9563394,20.9563974,20.9563384
22.329135,21.1187121,20.9510349,0.409484063,20.9509757,20.9510339,20.9509747
22.339627,21.1896201,20.9456302,0.493953303,20.9455708,20.9456292,20.9455697
22.350118,21.0713075,20.9401856,0.36210754,20.9401259,20.9401846,20.9401249
22.36061,20.808652,20.9347002,-0.35503267,20.9346402,20.9346992,20.9346392
22.371102,21.8403297,20.9291748,0.95454434,20.9291145,20.9291737,20.9291134
22.381593,21.3775583,20.9236099,0.673756918,20.9235494,20.9236089,20.9235483
22.392085,21.2837967,20.9180049,0.604807211,20.917944,20.9180038,20.917943
22.402576,20.4205779,20.9123609,-0.701272431,20.9122998,20.9123598,20.9122987
22.413068,21.1423745,20.906677,0.485486862,20.9066156,20.906676,20.9066145
22.42356,21.3541565,20.900954,0.673203138,20.9008923,20.900953,20.9008913
22.434051,21.8174242,20.8951927,0.960328875,20.8951307,20.8951916,20.8951296
22.444543,21.4709106,20.889392,0.762573616,20.8893298,20.8893909,20.8893287
22.455034,21.1660105,20.8835534,0.531466929,20.8834908,20.8835523,20.8834897
22.465526,20.976177,20.8776758,0.313848902,20.877613,20.8776747,20.8776119
22.476018,21.6564078,20.8717601,0.885803442,20.871697,20.871759,20.8716958
22.486509,20.904545,20.8658069,0.196819803,20.8657435,20.8658058,20.8657424
22.497001,21.3072758,20.8598154,0.668924782,20.8597517,20.8598143,20.8597505
22.507492,21.330729,20.8537868,0.690610022,20.8537228,20.8537857,20.8537216
22.517984,20.7123152,20.8477202,-0.367974226,20.8476559,20.8477191,20.8476547
22.528476,21.6101828,20.8416164,0.876679205,20.8415517,20.8416152,20.8415506
22.538967,21.0713075,20.835476,0.485624844,20.8354111,20.8354749,20.8354099
22.549459,21,20.8292982,0.413160743,20.8292329,20.829297,20.8292318
22.55995,21.3072758,20.8230843,0.695838693,20.8230187,20.8230831,20.8230175
22.570442,20.976177,20.8168332,0.399178849,20.8167673,20.816832,20.8167661
22.580934,20.4939015,20.8105458,-0.562711533,20.8104796,20.8105446,20.8104784
22.591425,21.4941853,20.8042228,0.830639777,20.8041563,20.8042216,20.8041551
22.601917,21.1423745,20.7978632,0.586950821,20.7977964,20.797862,20.7977952
22.612408,20.3960781,20.7914685,-0.628800769,20.7914013,20.7914672,20.7914001
22.6229,21.7715411,20.7850374,0.993228892,20.7849699,20.7850362,20.7849687
22.633392,20,20.7785709,-0.882366661,20.7785031,20.7785697,20.7785019
22.643883,20.7123152,20.7720698,-0.244447486,20.7720016,20.7720685,20.7720004
22.654375,19.9499373,20.7655328,-0.90310326,20.7654644,20.7655316,20.7654631
22.664866,20.6881609,20.7589616,-0.266084106,20.7588928,20.7589604,20.7588916
22.675358,20.5669638,20.752355,-0.430570778,20.7522859,20.7523537,20.7522846
22.68585,20.8566536,20.7457138,0.333076325,20.7456443,20.7457125,20.745643
22.696341,20.0499377,20.7390388,-0.830121142,20.7389689,20.7390375,20.7389677
22.706833,21.1660105,20.7323289,0.65854508,20.7322587,20.7323276,20.7322574
22.717324,21.2132034,20.7255855,0.698296436,20.725515,20.7255842,20.7255137
22.727816,21.023796,20.7188076,0.552257566,20.7187368,20.7188063,20.7187354
22.738308,21.330729,20.711996,0.786595852,20.7119248,20.7119946,20.7119234
22.748799,20.6881609,20.7051514,-0.13034774,20.7050798,20.7051501,20.7050785
22.759291,21.2132034,20.6982728,0.717586702,20.6982008,20.6982714,20.6981995
22.769782,20.2731349,20.6913615,-0.646704419,20.6912892,20.6913602,20.6912879
22.780274,21.1896201,20.6844166,0.710776703,20.6843439,20.6844152,20.6843426
22.790766,19.6214169,20.6774387,-1.02762923,20.6773657,20.6774373,20.6773643
22.801257,20.5669638,20.6704288,-0.321659685,20.6703554,20.6704274,20.670354
22.811749,20.174241,20.6633856,-0.699388697,20.6633118,20.6633842,20.6633104
22.82224,21.5638587,20.6563106,0.952653163,20.6562365,20.6563092,20.6562351
22.832732,21.1896201,20.6492027,0.735130856,20.6491282,20.6492013,20.6491268
22.843224,21.1660105,20.6420628,0.723842343,20.6419879,20.6420613,20.6419864
22.853715,20.8566536,20.6348915,0.470916219,20.6348162,20.6348901,20.6348148
22.864207,20.808652,20.6276879,0.425398865,20.6276122,20.6276864,20.6276107
22.874698,19.6468827,20.6204533,-0.986696787,20.6203772,20.6204518,20.6203757
22.88519,21.0950231,20.6131865,0.694144504,20.6131101,20.613185,20.6131086
22.895682,21.4009346,20.6058885,0.891653561,20.6058116,20.605887,20.6058102
22.906173,20.1990099,20.59856,-0.63209979,20.5984828,20.5985585,20.5984813
22.916665,20.4694895,20.5911999,-0.348870165,20.5911222,20.5911984,20.5911207
22.927156,21.7025344,20.5838096,1.05769787,20.5837316,20.5838081,20.5837301
22.937648,20.7605395,20.576388,0.429128742,20.5763096,20.5763865,20.576308
22.94814,20.9284495,20.5689359,0.599594566,20.568857,20.5689343,20.5688555
22.958631,21.0713075,20.5614541,0.714040174,20.5613749,20.5614526,20.5613733
22.969123,21.1423745,20.5539415,0.767093893,20.5538618,20.5539399,20.5538602
22.979614,20.7846097,20.5463995,0.488067827,20.5463194,20.5463979,20.5463178
22.990106,20.5182845,20.5388269,-0.143326094,20.5387464,20.5388253,20.5387448
23.000598,20.3469899,20.5312246,-0.429225612,20.5311436,20.531223,20.531142
23.011089,20.6639783,20.5235934,0.374679754,20.523512,20.5235918,20.5235104
23.021581,20.6397674,20.5159321,0.351902498,20.5158502,20.5159304,20.5158486
23.032072,20.7364414,20.5082422,0.477701949,20.5081599,20.5082405,20.5081583
23.042564,18.627936,20.5005225,-1.36842481,20.5004398,20.5005208,20.5004381
23.053056,21.4941853,20.4927738,1.0007055,20.4926906,20.4927721,20.4926889
23.063547,21.725561,20.484997,1.11380609,20.4849134,20.4849953,20.4849117
23.074039,21.7944947,20.4771908,1.14773862,20.4771067,20.4771891,20.477105
23.08453,20.2237484,20.4693568,-0.495588913,20.4692723,20.4693551,20.4692705
23.095022,20.0249844,20.4614937,-0.660688491,20.4614087,20.4614919,20.461407
23.105514,20.6639783,20.4536023,0.458667621,20.4535169,20.4536006,20.4535151
23.116005,20.0748599,20.4456837,-0.608953004,20.4455978,20.4456819,20.445596
23.126497,20.808652,20.4377363,0.60902853,20.4376499,20.4377345,20.4376481
23.136988,20.7364414,20.4297619,0.553786468,20.4296751,20.4297601,20.4296733
23.14748,21.0475652,20.4217591,0.791079061,20.4216718,20.4217573,20.42167
23.157972,20.8566536,20.4137288,0.665525972,20.413641,20.413727,20.4136392
23.168463,20.9523268,20.4056719,0.739361169,20.4055836,20.40567,20.4055818
23.178955,21.4242853,20.397587,1.0132612,20.3974982,20.3975852,20.3974964
23.189446,20.7364414,20.3894759,0.589037774,20.3893866,20.389474,20.3893847
23.199938,20.8566536,20.381337,0.689432109,20.3812472,20.3813351,20.3812453
23.21043,20.8326667,20.3731713,0.677860851,20.3730811,20.3731694,20.3730791
23.220921,20.2977831,20.3649798,-0.259223208,20.364889,20.3649779,20.3648871
23.231413,20.9284495,20.356761,0.756100879,20.3566697,20.356759,20.3566678
23.241904,21.2602916,20.3485166,0.954869106,20.3484248,20.3485146,20.3484228
23.252396,21.2367606,20.3402452,0.946844947,20.3401529,20.3402432,20.3401509
23.262888,21.1423745,20.3319478,0.900237055,20.3318549,20.3319457,20.3318529
23.273379,20.3469899,20.3236251,0.152855531,20.3235318,20.3236231,20.3235297
23.283871,19.5448203,20.3152759,-0.87775602,20.315182,20.3152739,20.31518
23.294362,20.5912603,20.3069018,0.53325271,20.3068074,20.3068998,20.3068053
23.304854,20.4450483,20.2985014,0.382814427,20.2984064,20.2984993,20.2984044
23.315346,20.3224014,20.2900756,0.179793842,20.2899801,20.2900735,20.289978
23.325837,20.5182845,20.2816253,0.486476288,20.2815293,20.2816232,20.2815272
23.336329,19.4935887,20.2731492,-0.882927221,20.2730525,20.273147,20.2730504
23.34682,20.7605395,20.2646488,0.704195059,20.2645516,20.2646466,20.2645495
23.357312,20.6639783,20.2561228,0.638635674,20.256025,20.2561206,20.2560229
23.367804,21.0950231,20.2475721,0.920571042,20.2474737,20.2475699,20.2474715
23.378295,20.2237484,20.2389976,-0.123487473,20.2388987,20.2389953,20.2388964
23.388787,20.2977831,20.2303978,0.259586817,20.2302983,20.2303956,20.2302961
23.399278,20.0249844,20.2217746,-0.443610383,20.2216745,20.2217723,20.2216722
23.40977,20.8566536,20.2131263,0.802201534,20.2130257,20.213124,20.2130234
23.420262,20.5426386,20.204454,0.581536389,20.2043528,20.2044517,20.2043505
23.430753,20.174241,20.1957586,-0.146688857,20.1956568,20.1957563,20.1956544
23.441245,20.7605395,20.1870386,0.757298405,20.1869362,20.1870363,20.1869338
23.451736,20.9523268,20.1782958,0.879790343,20.1781927,20.1782934,20.1781904
23.462228,20.3469899,20.1695286,0.421261609,20.1694249,20.1695262,20.1694225
23.47272,20.3469899,20.160738,0.431569142,20.1606337,20.1607356,20.1606313
23.483211,20.5182845,20.151925,0.605276392,20.1518201,20.1519226,20.1518176
23.493703,21.023796,20.143088,0.938460446,20.1429825,20.1430856,20.14298
23.504194,20.5912603,20.1342289,0.676040973,20.1341227,20.1342264,20.1341202
23.514686,20.2731349,20.125346,0.384433247,20.1252392,20.1253435,20.1252367
23.525178,20,20.1164404,-0.34123362,20.1163329,20.1164378,20.1163303
23.535669,20.3224014,20.107513,0.463560625,20.1074048,20.1075104,20.1074023
23.546161,19.5703858,20.0985622,-0.72675748,20.0984534,20.0985596,20.0984508
23.556652,20.9523268,20.08959,0.928836308,20.0894805,20.0895873,20.0894779
23.567144,20.4205779,20.0805946,0.583080851,20.0804844,20.0805919,20.0804818
23.577636,20.3715488,20.0715771,0.547696731,20.0714663,20.0715744,20.0714636
23.588127,19.7989899,20.0625384,-0.513369817,20.0624269,20.0625357,20.0624242
23.598619,20.0997512,20.0534771,0.215114321,20.0533649,20.0534743,20.0533621
23.60911,20.6155281,20.0443948,0.755733625,20.0442819,20.044392,20.0442792
23.619602,20.880613,20.0352901,0.91941446,20.0351765,20.0352873,20.0351737
23.630094,21.2837967,20.0261638,1.1214423,20.0260495,20.026161,20.0260467
23.640585,21.1187121,20.0170171,1.04961661,20.016902,20.0170142,20.0168992
23.651077,19.2873015,20.0078482,-0.84885019,20.0077324,20.0078453,20.0077295
23.661568,20.2237484,19.998659,0.474435877,19.9985426,19.9986561,19.9985396
23.67206,20.5182845,19.989448,0.727211494,19.9893308,19.989445,19.9893278
23.682552,20,19.980216,0.140655491,19.9800981,19.980213,19.9800951
23.693043,19.7230829,19.9709642,-0.49787677,19.9708455,19.9709612,19.9708425
23.703535,20.5426386,19.9616908,0.762199285,19.9615714,19.9616878,19.9615683
23.714026,19.7989899,19.9523978,-0.391673263,19.9522776,19.9523947,19.9522745
23.724518,19.5703858,19.9430835,-0.61048973,19.9429625,19.9430804,19.9429594
23.73501,19.1833261,19.9337489,-0.866269469,19.9336271,19.9337457,19.933624
23.745501,20.0499377,19.924395,0.354320012,19.9242724,19.9243918,19.9242692
23.755993,20.3469899,19.9150201,0.657244109,19.9148968,19.9150169,19.9148935
23.766484,19.8997487,19.9056262,-0.0766647769,19.9055021,19.9056229,19.9054988
23.776976,20.6397674,19.8962116,0.862296835,19.8960867,19.8962083,19.8960833
23.787468,19.078784,19.8867773,-0.898884446,19.8866515,19.8867739,19.8866482
23.797959,20.2237484,19.8773243,0.588578086,19.8771977,19.8773209,19.8771943
23.808451,19.7484177,19.8678509,-0.345591078,19.8677234,19.8678474,19.86772
23.818942,20.0249844,19.858359,0.408197748,19.8582307,19.8583555,19.8582273
23.829434,19.4164878,19.848847,-0.657540223,19.8487179,19.8488435,19.8487144
23.839926,20.9523268,19.8393158,1.05499336,19.8391859,19.8393123,19.8391823
23.850417,20.5669638,19.8297666,0.85860189,19.8296358,19.829763,19.8296322
23.860909,19.8997487,19.8201975,0.282048238,19.8200658,19.8201939,19.8200622
23.8714,18.4119526,19.8106106,-1.1826487,19.810478,19.8106069,19.8104743
23.881892,19.8746069,19.8010041,0.271298444,19.8008706,19.8010003,19.8008669
23.892384,19.5703858,19.791379,-0.470099123,19.7912446,19.7913752,19.7912408
23.902875,18.9208879,19.7817364,-0.927819176,19.7816011,19.7817325,19.7815972
23.913367,20.0748599,19.7720745,0.550259422,19.7719383,19.7720706,19.7719344
23.923858,20.174241,19.7623953,0.641752071,19.7622582,19.7623913,19.7622542
23.93435,19.0262976,19.7526971,-0.852290715,19.752559,19.7526931,19.752555
23.944842,19.5448203,19.7429808,-0.445152258,19.7428418,19.7429768,19.7428378
23.955333,19.8997487,19.7332476,0.408045494,19.7331077,19.7332435,19.7331036
23.965825,19.9499373,19.7234957,0.475858845,19.7233548,19.7234916,19.7233507
23.976316,19.5192213,19.713727,-0.441028058,19.7135852,19.7137229,19.713581
23.986808,19.9749844,19.7039399,0.520619312,19.703797,19.7039356,19.7037928
23.9973,19.8494332,19.6941353,0.394078632,19.6939914,19.694131,19.6939871
24.007791,20.0249844,19.6843142,0.583669554,19.6841694,19.6843099,19.684165
24.018283,20.2237484,19.674475,0.741129795,19.6743292,19.6744706,19.6743248
24.028774,19.8494332,19.6646196,0.429899517,19.6644728,19.6646152,19.6644683
24.039266,19.5703858,19.6547463,-0.290448782,19.6545984,19.6547418,19.6545938
24.049758,19.4164878,19.644856,-0.47787882,19.644707,19.6448514,19.6447025
24.060249,20.3715488,19.6349499,0.858253417,19.6347998,19.6349452,19.6347952
24.070741,18.9208879,19.6250261,-0.839129392,19.624875,19.6250213,19.6248703
24.081232,19.9248588,19.6150866,0.556571853,19.6149345,19.6150818,19.6149297
24.091724,19.1833261,19.6051297,-0.649464116,19.6049765,19.6051249,19.6049716
24.102216,19.7230829,19.5951565,0.357668098,19.5950021,19.5951515,19.5949972
24.112707,19,19.5851678,-0.764962646,19.5850124,19.5851629,19.5850074
24.123199,19.7230829,19.5751621,0.384604745,19.5750055,19.5751571,19.5750005
24.13369,19.4164878,19.5651413,-0.385555989,19.5649836,19.5651361,19.5649784
24.144182,19.7737199,19.5551035,0.467564384,19.5549446,19.5550983,19.5549394
24.154674,20.7605395,19.5450498,1.10249248,19.5448898,19.5450446,19.5448845
24.165165,19.2613603,19.5349814,-0.523088043,19.5348202,19.534976,19.5348148
24.175657,20.0249844,19.5248963,0.70716906,19.524734,19.5248909,19.5247285
24.186148,19.4422221,19.5147967,-0.269396653,19.5146331,19.5147911,19.5146276
24.19664,20.174241,19.5046806,0.818266724,19.5045158,19.504675,19.5045102
24.207132,19.6977156,19.4945491,0.450739912,19.4943832,19.4945435,19.4943775
24.217623,19.3649167,19.4844034,-0.345668459,19.4842362,19.4843976,19.4842304
24.228115,19.1833261,19.4742416,-0.539365816,19.4740731,19.4742357,19.4740673
24.238606,19.1311265,19.4640657,-0.57700883,19.4638959,19.4640597,19.46389
24.249098,19.7484177,19.4538738,0.542718928,19.4537028,19.4538678,19.4536968
24.25959,19.9499373,19.4436671,0.711526673,19.4434949,19.443661,19.4434887
24.270081,19.2093727,19.4334467,-0.473364515,19.4332731,19.4334404,19.4332669
24.280573,19.5192213,19.4232106,0.309855941,19.4230357,19.4232043,19.4230294
24.291064,19.7484177,19.4129609,0.57918626,19.4127847,19.4129545,19.4127783
24.301556,20.6639783,19.4026958,1.12306833,19.4025183,19.4026893,19.4025117
24.312048,19.5448203,19.3924164,0.390389391,19.3922375,19.3924098,19.3922308
24.322539,20.3469899,19.3821237,0.982276057,19.3819434,19.382117,19.3819366
24.333031,19.5959179,19.3718158,0.473394228,19.3716341,19.371809,19.3716273
24.343522,19.1311265,19.3614949,-0.479967136,19.3613118,19.361488,19.3613048
24.354014,19.9499373,19.3511591,0.773807658,19.3509745,19.351152,19.3509674
24.364506,19.6214169,19.3408093,0.529724036,19.3406233,19.3408021,19.3406161
24.374997,20.2731349,19.3304468,0.97092128,19.3302594,19.3304395,19.330252
24.385489,19.8746069,19.3200696,0.744672606,19.3198807,19.3200622,19.3198733
24.39598,19,19.3096799,-0.556488872,19.3094895,19.3096723,19.3094819
24.406472,19.8242276,19.2992756,0.724535691,19.2990837,19.2992679,19.299076
24.416964,19.2353841,19.288858,-0.231244369,19.2886646,19.2888502,19.2886568
24.427455,19.078784,19.2784281,-0.446815489,19.2782331,19.2784201,19.2782252
24.437947,19.7484177,19.267984,0.69313321,19.2677875,19.2679759,19.2677794
24.448438,19.7230829,19.2575278,0.682315992,19.2573297,19.2575196,19.2573215
24.45893,19.7737199,19.2470576,0.725715045,19.2468579,19.2470492,19.2468495
24.469422,19.9248588,19.2365745,0.829629046,19.2363732,19.2365659,19.2363646
24.479913,19.3907194,19.2260796,0.405758391,19.2258766,19.2260708,19.2258679
24.490405,19.3649167,19.2155709,0.386452884,19.2153663,19.215562,19.2153574
24.500896,18.973666,19.2050506,-0.481024586,19.2048443,19.2050416,19.2048353
24.511388,19.9248588,19.1945168,0.854600527,19.1943088,19.1945076,19.1942996
24.52188,19.1572441,19.1839705,-0.163482256,19.1837608,19.1839611,19.1837515
24.532371,19.3132079,19.1734129,0.373891736,19.1732015,19.1734033,19.1731919
24.542863,19.4422221,19.162842,0.528564189,19.1626288,19.1628322,19.1626191
24.553354,19.4164878,19.1522599,0.514031029,19.152045,19.15225,19.1520351
24.563846,20.0748599,19.1416648,0.966020239,19.1414481,19.1416547,19.1414379
24.574338,19.4164878,19.1310577,0.534256654,19.1308391,19.1310473,19.1308288
24.584829,19,19.1204397,-0.347044162,19.1202193,19.1204291,19.1202087
24.595321,19.5448203,19.1098088,0.659553994,19.1095866,19.1097981,19.1095758
24.605812,20.174241,19.0991673,1.03685762,19.0989432,19.0991563,19.0989322
24.616304,19.4164878,19.0885131,0.572690791,19.0882871,19.0885019,19.0882759
24.626796,19.1049732,19.0778474,0.164699104,19.0776194,19.0778359,19.077608
24.637287,19.6468827,19.0671712,0.761387859,19.0669413,19.0671595,19.0669296
24.647779,19.6468827,19.0564827,0.768374906,19.0562508,19.0564708,19.0562389
24.65827,19.1572441,19.0457839,0.333856447,19.04555,19.0457717,19.0455378
24.668762,19.2093727,19.035073,0.417492221,19.034837,19.0350605,19.0348246
24.679254,19.1572441,19.0243509,0.364545157,19.0241129,19.0243382,19.0241002
24.689745,19,19.0136188,-0.116699776,19.0133788,19.0136058,19.0133658
24.700237,18.9208879,19.0028748,-0.286333578,19.0026327,19.0028615,19.0026194
24.710728,19.4422221,18.9921211,0.670895703,18.9918767,18.9921074,18.9918631
24.72122,18.5202592,18.9813555,-0.679040728,18.981109,18.9813416,18.9810951
24.731712,19.6214169,18.9705793,0.806745066,18.9703306,18.970565,18.9703164
24.742203,19.2093727,18.9597935,0.499579026,18.9595426,18.9597789,18.959528
24.752695,19.4164878,18.9489962,0.683733573,18.9487431,18.9489813,18.9487282
24.763186,18.8944436,18.9381896,-0.209155391,18.9379342,18.9381743,18.9379189
24.773678,18.8679623,18.9273716,-0.243740368,18.9271139,18.927356,18.9270983
24.78417,18.8414437,18.9165434,-0.274043339,18.9162834,18.9165274,18.9162673
24.794661,18.2482876,18.9057061,-0.810813505,18.9054437,18.9056897,18.9054273
24.805153,18.2756669,18.8948577,-0.786886815,18.8945929,18.8948409,18.8945761
24.815644,19,18.8840004,0.340587109,18.8837332,18.8839832,18.8837159
24.826136,19.2873015,18.8731322,0.643559895,18.8728625,18.8731145,18.8728448
24.836628,18.1659021,18.8622541,-0.834477096,18.8619819,18.862236,18.8619638
24.847119,18.4119526,18.8513674,-0.662883698,18.8510927,18.8513488,18.851074
24.857611,18.2208672,18.8404701,-0.787148589,18.8401927,18.8404509,18.8401736
24.868102,19.3390796,18.8295642,0.713803494,18.8292843,18.8295445,18.8292646
24.878594,18.4661853,18.8186478,-0.593685509,18.8183652,18.8186276,18.818345
24.889086,18.3303028,18.807722,-0.690955323,18.8074368,18.8077013,18.8074161
24.899577,19.3907194,18.796788,0.77066945,18.7965001,18.7967667,18.7964787
24.910069,19.2353841,18.7858438,0.670477661,18.7855531,18.7858218,18.7855311
24.92056,19.0262976,18.7748914,0.501404193,18.774598,18.7748688,18.7745754
24.931052,18.3030052,18.763929,-0.678913675,18.7636327,18.7639057,18.7636095
24.941544,19.0262976,18.7529576,0.522819265,18.7526585,18.7529337,18.7526345
24.952035,17.9722008,18.7419784,-0.877369723,18.7416763,18.7419537,18.7416517
24.962527,19.078784,18.7309893,0.589741216,18.7306843,18.7309639,18.7306589
24.973018,19.3907194,18.7199926,0.818979137,18.7196846,18.7199664,18.7196584
24.98351,19.1833261,18.7089862,0.688723377,18.7086752,18.7089592,18.7086482
24.994002,18.734994,18.6979713,0.192412937,18.6976572,18.6979433,18.6976293
25.004493,19.078784,18.6869489,0.625967356,18.6866317,18.6869201,18.6866029
25.014985,17.8885438,18.6759171,-0.88734057,18.6755968,18.6758873,18.675567
25.025476,18.8679623,18.6648781,0.450648638,18.6645545,18.6648473,18.6645237
25.035968,17.8605711,18.6538298,-0.890650697,18.653503,18.6537979,18.6534711
25.04646,18.3847763,18.6427733,-0.507934063,18.6424432,18.6427404,18.6424103
25.056951,19.1833261,18.6317099,0.742708696,18.6313764,18.6316758,18.6313423
25.067443,19.2613603,18.6206374,0.800451658,18.6203006,18.6206021,18.6202653
25.077934,19.078784,18.6095581,0.685000649,18.6092178,18.6095215,18.6091812
25.088426,18.8679623,18.59847,0.519126451,18.5981262,18.598432,18.5980882
25.098918,18.6547581,18.5873741,0.259584245,18.5870268,18.5873347,18.5869874
25.109409,18.5741756,18.5762717,-0.0457827568,18.5759207,18.5762308,18.5758798
25.119901,18.5741756,18.5651606,0.0949473177,18.564806,18.5651181,18.5647635
25.130392,17.9722008,18.5540432,-0.762785953,18.5536848,18.5539989,18.5536406
25.140884,17.7482393,18.5429173,-0.891447089,18.5425552,18.5428712,18.5425091
25.151376,19.1833261,18.5317841,0.807181537,18.5314181,18.5317361,18.5313702
25.161867,18.547237,18.5206447,0.163071403,18.5202749,18.5205947,18.5202249
25.172359,18.7882942,18.5094972,0.528012365,18.5091234,18.509445,18.5090712
25.18285,19.6977156,18.4983437,1.09515841,18.4979659,18.4982892,18.4979114
25.193342,17.691806,18.4871821,-0.891838619,18.4868003,18.4871252,18.4867433
25.203834,18.0554701,18.4760138,-0.648493384,18.4756278,18.4759541,18.4755681
25.214325,18.1383571,18.4648397,-0.571386493,18.4644495,18.4647772,18.464387
25.224817,19.5192213,18.4536579,1.03226133,18.4532634,18.4535924,18.4531979
25.235308,18.2208672,18.4424705,-0.470747659,18.4420717,18.4424018,18.442003
25.2458,18.3847763,18.4312756,-0.215637023,18.4308724,18.4312034,18.4308002
25.256292,17.4928557,18.4200744,-0.962921955,18.4196667,18.4199984,18.4195907
25.266783,17.7482393,18.4088679,-0.812790597,18.4084556,18.4087878,18.4083756
25.277275,18.0831413,18.3976542,-0.560814475,18.3972373,18.3975697,18.3971528
25.287766,18.1659021,18.3864355,-0.469609807,18.3860139,18.3863462,18.3859247
25.298258,19.3390796,18.3752098,0.981768721,18.3747834,18.3751153,18.374689
25.30875,19.3649167,18.3639783,1.00046913,18.363547,18.3638782,18.3634469
25.319241,18.493242,18.3527421,0.374833177,18.3523059,18.3526358,18.3521997
25.329733,18.1659021,18.3414993,-0.419043192,18.3410581,18.3413863,18.3409451
25.340224,18.0831413,18.3302522,-0.497102495,18.3298059,18.3301318,18.3296855
25.350716,18.1383571,18.3189988,-0.425019571,18.3185473,18.3188703,18.3184188
25.361208,18.6815417,18.3077403,0.611393005,18.3072835,18.3076028,18.307146
25.371699,18.5741756,18.296478,0.526970243,18.2960158,18.2963305,18.2958684
25.382191,18.5202592,18.2852099,0.484818762,18.2847423,18.2850514,18.2845838
25.392682,18.9472953,18.2739386,0.820583184,18.2734654,18.2737677,18.2732945
25.403174,18.2756669,18.262662,0.114039155,18.2621831,18.2624773,18.2619985
25.413666,18.4390889,18.2513815,0.43325212,18.2508969,18.2511813,18.2506967
25.424157,19.1311265,18.2400987,0.94394268,18.2396083,18.239881,18.2393905
25.434649,18.4119526,18.2288118,0.427949634,18.2283154,18.2285741,18.2280777
25.44514,17.7482393,18.2175234,-0.685043081,18.2170209,18.217263,18.2167605
25.455632,18.0554701,18.206232,-0.388280748,18.2057234,18.2059455,18.2054369
25.466124,18.493242,18.1949395,0.54617073,18.1944246,18.1946229,18.194108
25.476615,18.3030052,18.1836479,0.345481212,18.1831266,18.1832962,18.1827749
25.487107,18.6010752,18.1723563,0.654766335,18.1718285,18.1719634,18.1714355
25.497598,17.5783958,18.1610682,-0.76332981,18.1605338,18.1606266,18.1600922
25.50809,17.7200451,18.1497837,-0.655544448,18.1492425,18.1492839,18.1487427
25.518582,18.4390889,18.1385065,0.548253938,18.1379584,18.1379364,18.1373883
25.529073,18.5202592,18.1272423,0.626910566,18.1266872,18.1265851,18.12603
25.539565,18.4661853,18.1159966,0.591767424,18.1154344,18.1152281,18.1146659
25.550056,18.3847763,18.1047866,0.529140528,18.1042171,18.1038675,18.103298
25.560548,19.3132079,18.0936401,1.10434042,18.0930632,18.0925013,18.0919244
25.57104,17.6351921,18.0826159,-0.66889747,18.0820315,18.0811307,18.0805462
25.581531,17.8605711,18.0718153,-0.459613151,18.0712232,18.0697566,18.0691644
25.592023,18.493242,18.0613886,0.657155567,18.0607886,18.0583772,18.0577771
25.602514,18,18.0515274,-0.226996579,18.0509196,18.0469945,18.0463865
25.613006,17.7482393,18.0424046,-0.542370062,18.0417887,18.0356066,18.0349904
25.623498,18.7882942,18.0340853,0.868452025,18.0334611,18.0242145,18.02359
25.633989,17.3493516,18.0264063,-0.822833377,18.0257738,18.0128194,18.0121864
25.644481,17.9443584,18.0188549,-0.272940424,18.0182139,18.0014193,18.0007777
25.654972,18.2482876,18.0104957,0.487639142,18.0098459,17.9900163,17.9893658
25.665464,17.2046505,18.0001816,-0.891925477,17.9995229,17.9786084,17.9779489
25.675956,18.4390889,17.9873821,0.672091339,17.9867142,17.9671966,17.966528
25.686447,18.1383571,17.972751,0.406947385,17.9720736,17.9557823,17.9551043
25.696939,17.1464282,17.9574504,-0.900567702,17.9567633,17.9443632,17.9436756
25.70743,17.8044938,17.9423724,-0.371320008,17.9416754,17.9329416,17.9322442
25.717922,17.7763888,17.9279736,-0.389338895,17.9272665,17.9215154,17.9208081
25.728414,18.1107703,17.9143828,0.443156295,17.9136654,17.9100858,17.9093683
25.738905,18.1659021,17.9015159,0.514185032,17.9007881,17.8986538,17.8979259
25.749397,18.2756669,17.8891888,0.621673643,17.8884503,17.8872175,17.886479
25.759888,17.8044938,17.8772159,-0.269670401,17.8764667,17.8757791,17.8750297
25.77038,17.9164729,17.8654493,0.225884031,17.8646889,17.8643363,17.8635759
25.780872,18.2756669,17.8537959,0.649515953,17.8530242,17.8528905,17.8521188
25.791363,17.8044938,17.8422041,-0.194191439,17.8414209,17.8414427,17.8406595
25.801855,18.5202592,17.8306446,0.830430332,17.8298496,17.8299909,17.8291958
25.812346,17.6351921,17.8191062,-0.428852109,17.8182991,17.8185373,17.8177301
25.822838,17.4068952,17.8075797,-0.632996493,17.8067602,17.8070798,17.8062603
25.83333,18.1934054,17.7960623,0.63035153,17.7952302,17.7956195,17.7947874
25.843821,17.8605711,17.7845526,0.275714595,17.7837075,17.7841577,17.7833126
25.854313,17.8325545,17.7730464,0.243942851,17.7721881,17.7726921,17.7718338
25.864804,17.3781472,17.7615447,-0.619190987,17.7606729,17.7612251,17.7603533
25.875296,18.0554701,17.7500442,0.552653473,17.7491586,17.7497545,17.7488689
25.885788,17.175564,17.7385454,-0.750320807,17.7376456,17.7382816,17.7373818
25.896279,17.4355958,17.7270486,-0.539863665,17.7261343,17.7268073,17.7258931
25.906771,17.4068952,17.7155512,-0.555568162,17.7146221,17.7153298,17.7144007
25.917262,17.9443584,17.704055,0.490207521,17.7031108,17.7038511,17.7029069
25.927754,17.3493516,17.6925577,-0.585837942,17.6915979,17.6923692,17.6914095
25.938246,18.0831413,17.68106,0.63409886,17.6800843,17.6808853,17.6799096
25.948737,18.4661853,17.6695628,0.892537107,17.6685708,17.6694005,17.6684085
25.959229,17.4355958,17.658064,-0.471665332,17.6570553,17.6579127,17.656904
25.96972,17.4355958,17.6465655,-0.45931436,17.6455396,17.6464242,17.6453984
25.980212,17.9443584,17.6350651,0.55614152,17.6340217,17.6349328,17.6338894
25.990704,18.547237,17.6235638,0.961079176,17.6225024,17.6234398,17.6223784
26.001195,17.4068952,17.6120628,-0.452954301,17.6109829,17.6119462,17.6108663
26.011687,17.9722008,17.6005598,0.609623635,17.599461,17.60045,17.5993512
26.022178,17.6068169,17.589057,0.133266181,17.5879388,17.5889534,17.5878352
26.03267,17.3493516,17.5775522,-0.477703519,17.5764141,17.5774543,17.5763162
26.043162,17.2916165,17.5660466,-0.523860806,17.564888,17.5659539,17.5647954
26.053653,18.0277564,17.5545413,0.687906324,17.5533617,17.5544534,17.5532739
26.064145,17.7763888,17.543034,0.483068108,17.5418329,17.5429507,17.5417495
26.074636,17.9164729,17.5315272,0.620439933,17.5303039,17.5314479,17.5302246
26.085128,17.2336879,17.5200185,-0.535098622,17.5187725,17.519943,17.518697
26.09562,17.8044938,17.5085091,0.544044736,17.5072398,17.5084373,17.5071679
26.106111,16.643317,17.4970003,-0.923949851,17.4957069,17.4969317,17.4956383
26.116603,17.4928557,17.4854898,0.0858245456,17.4841718,17.4854243,17.4841063
26.127094,18,17.47398,0.725272378,17.4726365,17.4739174,17.4725739
26.137586,17.8885438,17.4624686,0.652744366,17.461099,17.4624087,17.4610391
26.148078,18.2482876,17.4509569,0.892933754,17.4495605,17.4508995,17.4495031
26.158569,17.2626765,17.439446,-0.420439666,17.4380219,17.439391,17.4379669
26.169061,17.5783958,17.4279338,0.387894322,17.4264813,17.427881,17.4264285
26.179552,16.4924225,17.4164226,-0.961249243,17.4149408,17.4163719,17.41489
26.190044,17.8885438,17.4049102,0.695437684,17.4033983,17.4048615,17.4033495
26.200536,17.2626765,17.3933979,-0.361554169,17.3918548,17.393351,17.3918079
26.211027,17.0293864,17.3818868,-0.593717473,17.3803117,17.3818416,17.3802665
26.221519,17.0587221,17.3703748,-0.558258617,17.3687667,17.3703313,17.3687231
26.23201,17.7763888,17.3588642,0.646161486,17.357222,17.3588222,17.35718
26.242502,17.7763888,17.3473528,0.655008401,17.3456756,17.3473123,17.3456351
26.252994,17.175564,17.335842,-0.400347257,17.3341285,17.3358029,17.3340894
26.263485,16.8226038,17.3243328,-0.70832826,17.3225819,17.324295,17.3225441
26.273977,17.9443584,17.3128231,0.794691956,17.3110337,17.3127866,17.3109972
26.284468,17.7763888,17.3013154,0.689255723,17.299486,17.3012801,17.2994507
26.29496,17.2916165,17.2898074,0.0425330529,17.2879369,17.2897732,17.2879027
26.305452,17.5783958,17.2783004,0.547809656,17.2763873,17.2782673,17.2763542
26.315943,17.2336879,17.2667956,-0.181955137,17.2648385,17.2667636,17.2648065
26.326435,16.2172747,17.2552909,-1.01883079,17.2532883,17.2552599,17.2532573
26.336926,16.8226038,17.2437887,-0.648987539,17.241739,17.2437585,17.2417089
26.347418,18.2208672,17.2322868,0.994273802,17.2301884,17.2322575,17.2301591
26.35791,16.7332005,17.2207864,-0.698273522,17.2186376,17.2207581,17.2186092
26.368401,16.643317,17.2092889,-0.752311075,17.2070878,17.2092614,17.2070603
26.378893,17.4928557,17.1977922,0.543197491,17.1955369,17.1977654,17.1955101
26.389384,16.7332005,17.1862985,-0.673125522,17.1839871,17.1862725,17.1839611
26.399876,17.0293864,17.1748059,-0.381339094,17.1724362,17.1747806,17.1724109
26.410368,16.3707055,17.1633155,-0.890286466,17.1608855,17.1632909,17.1608609
26.420859,16.2788206,17.1518287,-0.934349053,17.149336,17.1518048,17.1493121
26.431351,17.175564,17.1403435,0.18767139,17.1377856,17.1403202,17.1377623
26.441842,16.7928556,17.1288621,-0.579660669,17.1262366,17.1288394,17.1262139
26.452334,16.8226038,17.1173826,-0.542935342,17.1146868,17.1173605,17.1146646
26.462826,17.2046505,17.1059063,0.314235939,17.1031373,17.1058847,17.1031157
26.473317,16.7928556,17.0944345,-0.549161934,17.0915894,17.0944134,17.0915683
26.483809,18.0831413,17.0829651,1.00008811,17.0800407,17.0829446,17.0800202
26.4943,17.0880075,17.0715006,0.128479079,17.0684937,17.0714806,17.0684737
26.504792,16.7032931,17.0600391,-0.597282181,17.0569462,17.0600196,17.0569267
26.515284,15.9059737,17.0485819,-1.0689285,17.0453992,17.0485628,17.0453802
26.525775,17.4068952,17.0371302,0.608083001,17.0338541,17.0371116,17.0338354
26.536267,17.5499288,17.0256824,0.724048615,17.0223085,17.0256642,17.0222903
26.546758,17.0293864,17.0142407,0.123067677,17.0107647,17.014223,17.010747
26.55725,17.2916165,17.0028034,0.537413325,16.9992207,17.002786,16.9992033
26.567742,16.7332005,16.9913718,-0.508105584,16.9876775,16.9913548,16.9876605
26.578233,17.1464282,16.9799474,0.408020531,16.9761363,16.9799309,16.9761197
26.588725,17.175564,16.9685285,0.455011606,16.9645949,16.9685122,16.9645787
26.599216,16.9410743,16.9571175,-0.126661515,16.9530556,16.9571016,16.9530398
26.609708,16.0934769,16.9457127,-0.923166177,16.9415163,16.9456972,16.9415008
26.6202,17.4928557,16.9343158,0.747355286,16.9299781,16.9343006,16.9299629
26.630691,17.4355958,16.9229282,0.71600811,16.9184421,16.9229133,16.9184272
26.641183,16.4924225,16.9115483,-0.647399251,16.9069062,16.9115337,16.9068916
26.651674,16.7332005,16.9001789,-0.408629876,16.8953726,16.9001646,16.8953583
26.662166,16.3401346,16.8888185,-0.740731948,16.8838392,16.8888045,16.8838252
26.672658,16.643317,16.8774687,-0.483892268,16.8723071,16.877455,16.8722934
26.683149,16.583124,16.8661315,-0.531984503,16.8607775,16.866118,16.8607641
26.693641,16.0312195,16.8548054,-0.907516295,16.8492482,16.8547922,16.849235
26.704132,17.5783958,16.8434934,0.857264479,16.8377215,16.8434805,16.8377086
26.714624,16.9115345,16.8321945,0.281673643,16.8261952,16.8321818,16.8261825
26.725116,17.5214155,16.8209106,0.836961688,16.8146705,16.8208982,16.814658
26.735607,16.881943,16.809644,0.268884764,16.8031485,16.8096318,16.8031363
26.746099,16.881943,16.7983938,0.289048846,16.791627,16.7983818,16.791615
26.75659,16.4316767,16.7871635,-0.59622708,16.7801083,16.7871517,16.7800966
26.767082,16.6132477,16.7759524,-0.403366672,16.7685903,16.7759409,16.7685788
26.777574,16.5227116,16.7647633,-0.491987506,16.7570741,16.764752,16.7570627
26.788065,17.2046505,16.7535992,0.671603541,16.7455608,16.7535881,16.7455497
26.798557,15.3297097,16.7424599,-1.1885917,16.7340483,16.742449,16.7340374
26.809048,17.0587221,16.7313499,0.572164473,16.7225388,16.7313392,16.7225281
26.81954,17.0880075,16.7202696,0.606413947,16.7110302,16.7202591,16.7110197
26.830032,17.0880075,16.7092229,0.615454755,16.6995237,16.7092126,16.6995133
26.840523,15.6843871,16.6982141,-1.00688977,16.6880203,16.698204,16.6880101
26.851015,16.9410743,16.6872448,0.503815013,16.6765179,16.6872348,16.6765078
26.861506,16.4924225,16.676321,-0.428833893,16.6650187,16.6763112,16.6650089
26.871998,17.2046505,16.6654454,0.734305883,16.6535207,16.6654357,16.653511
26.88249,15.5563492,16.6546243,-1.04798621,16.6420249,16.6546148,16.6420154
26.892981,15.5884573,16.6438647,-1.02733023,16.6305325,16.6438553,16.6305231
26.903473,16.2172747,16.6331714,-0.644900542,16.6190414,16.6331622,16.6190321
26.913964,16.6132477,16.6225546,-0.0964719459,16.6075537,16.6225455,16.6075446
26.924456,16.3095064,16.6120238,-0.550015796,16.59607,16.6120122,16.5960584
26.934948,16.2172747,16.6015855,-0.61992805,16.5845861,16.6015741,16.5845746
26.945439,16.583124,16.5912557,-0.090176292,16.5731058,16.5912444,16.5730945
26.955931,16.2480768,16.5810469,-0.577035598,16.561627,16.5810357,16.5616158
26.966422,17,16.570978,0.654997692,16.5501519,16.570967,16.5501408
26.976914,15.5884573,16.5610674,-0.986209962,16.5386783,16.5610564,16.5386674
26.987406,16.583124,16.5513398,0.178281033,16.5272075,16.551329,16.5271966
26.997897,16.8522995,16.541825,0.557202427,16.5157404,16.5418143,16.5157297
27.008389,16.5529454,16.5325557,0.14279252,16.504275,16.5325451,16.5042644
27.01888,16.673332,16.5235754,0.386983925,16.4928135,16.523565,16.492803
27.029372,16.881943,16.5149339,0.605812754,16.4813538,16.5149235,16.4813434
27.039864,15.5884573,16.5066951,-0.958247266,16.469897,16.5066848,16.4698867
27.050355,15.8745079,16.4989381,-0.790208979,16.4584443,16.4989279,16.458434
27.060847,16.0934769,16.4917599,-0.631096659,16.4469934,16.4917499,16.4469833
27.071338,17.2046505,16.4852866,0.848153245,16.4355466,16.4852766,16.4355366
27.08183,15.6843871,16.4796768,-0.89179012,16.4241018,16.4796669,16.4240919
27.092322,15.5884573,16.4751383,-0.941637409,16.4126602,16.4751285,16.4126503
27.102813,16.2788206,16.471944,-0.439458123,16.4012227,16.4719343,16.401213
27.113305,17.1172428,16.4704595,0.804228345,16.3897874,16.4704499,16.3897777
27.123796,16.0934769,16.4711927,-0.614585827,16.3783564,16.4711832,16.3783468
27.134288,15.9059737,16.4748947,-0.75426851,16.3669276,16.4748853,16.3669181
27.14478,15.7162336,16.4827975,-0.875536304,16.3555021,16.4827881,16.3554927
27.155271,16.4620776,16.4971762,-0.187346216,16.3440811,16.497167,16.3440717
27.165763,15.2970585,16.5225633,-1.1070252,16.3326623,16.5225542,16.3326531
27.176254,16.0934769,16.5678372,-0.68873815,16.3212481,16.5678281,16.3212389
27.186746,16.4924225,16.6488672,-0.395530891,16.3098363,16.6488583,16.3098272
27.197238,15.9687194,16.7896648,-0.906060383,16.298428,16.7896561,16.298419
27.207729,16.4924225,17.018565,-0.725356834,16.2870244,17.0185565,16.2870154
27.218221,16.881943,17.356679,-0.689010867,16.2756233,17.3566706,16.2756144
27.228712,17.2626765,17.7994255,-0.732631579,16.2642269,17.7994175,16.264218
27.239204,16.7332005,18.2951349,-1.24977372,16.2528331,18.2951271,16.2528243
27.249696,16.881943,18.720092,-1.35578355,16.241443,18.7200845,16.2414343
27.260187,16.6132477,18.8887355,-1.50847202,16.2300578,18.8887281,16.2300492
27.270679,17.7482393,18.6961449,-0.973604404,16.2186753,18.6961374,16.2186667
27.28117,17.3205081,18.2480631,-0.963096565,16.2072977,18.2480555,16.2072892
27.291662,17.3781472,17.7299924,-0.593165433,16.195923,17.7299847,16.1959145
27.302154,16.5529454,17.2651315,-0.843911206,16.1845521,17.2651236,16.1845437
27.312645,16,16.9049466,-0.95128683,16.1731863,16.9049386,16.1731779
27.323137,16,16.6538041,-0.808581505,16.1618234,16.653796,16.1618151
27.333628,16.3707055,16.4906659,-0.346352905,16.1504656,16.4906578,16.1504574
27.34412,16.2172747,16.3871334,-0.412139161,16.1391108,16.3871254,16.1391026
27.354612,17.175564,16.3192296,0.92538341,16.1277602,16.3192215,16.127752
27.365103,16.1245155,16.2711253,-0.382896627,16.1164147,16.2711173,16.1164067
27.375595,16.4620776,16.2339591,0.477617549,16.1050724,16.2339511,16.1050644
27.386086,16.7630546,16.2032453,0.748204052,16.0937354,16.2032374,16.0937274
27.396578,16.673332,16.1767187,0.704707962,16.0824016,16.1767108,16.0823937
27.40707,16.7032931,16.1531596,0.741709857,16.0710721,16.1531517,16.0710642
27.417561,15.9687194,16.1318229,-0.403860657,16.059748,16.131815,16.0597401
27.428053,16.2172747,16.1121979,0.324155525,16.0484272,16.1121901,16.0484194
27.438544,16.3095064,16.0939235,0.464309133,16.0371119,16.0939157,16.0371042
27.449036,16.0623784,16.0767233,-0.119770367,16.0258,16.0767156,16.0257923
27.459528,15.8113883,16.0603922,-0.499002926,16.0144926,16.0603845,16.0144849
27.470019,16.4924225,16.0447717,0.669067115,16.0031908,16.0447641,16.0031832
27.480511,15.3297097,16.0297339,-0.836674476,15.9918925,16.0297263,15.9918849
27.491002,15,16.0151832,-1.007563,15.9805999,16.0151756,15.9805923
27.501494,16,16.0010382,-0.0322206858,15.9693108,16.0010306,15.9693033
27.511986,15.5241747,15.987237,-0.680486816,15.9580264,15.9872295,15.9580189
27.522477,15.5563492,15.9737296,-0.646049858,15.9467479,15.9737221,15.9467404
27.532969,15.0996689,15.9604713,-0.927794415,15.9354729,15.9604639,15.9354655
27.54346,15.5241747,15.9474301,-0.650580845,15.9242039,15.9474227,15.9241965
27.553952,14.7309199,15.9345747,-1.09711204,15.9129386,15.9345673,15.9129312
27.564444,15.9373775,15.9218822,0.124479725,15.9016782,15.9218749,15.9016708
27.574935,15.4272486,15.9093338,-0.694323541,15.8904237,15.9093265,15.8904164
27.585427,16.2480768,15.8969099,0.592593405,15.8791731,15.8969026,15.8791658
27.595918,15.7797338,15.8845983,-0.323827852,15.8679285,15.8845911,15.8679213
27.60641,15.3948043,15.8723844,-0.691071694,15.8566879,15.8723772,15.8566807
27.616902,15.9059737,15.8602587,0.213810748,15.8454523,15.8602515,15.8454451
27.627393,16.3707055,15.8482131,0.722836359,15.8342228,15.848206,15.8342157
27.637885,16.1864141,15.8362375,0.591757137,15.8229974,15.8362304,15.8229903
27.648376,15.0332964,15.8243273,-0.889399195,15.8117782,15.8243202,15.8117711
27.658868,15.5241747,15.8124741,-0.53693523,15.8005632,15.812467,15.8005561
27.66936,15.3622915,15.8006739,-0.66210455,15.7893533,15.8006669,15.7893462
27.679851,15.0665192,15.7889232,-0.849943541,15.7781498,15.7889161,15.7781427
27.690343,15.7480157,15.7772156,-0.170879718,15.7669504,15.7772086,15.7669434
27.700834,15.132746,15.7655499,-0.795489738,15.7557575,15.7655429,15.7557505
27.711326,15.9059737,15.7539205,0.389939979,15.7445688,15.7539136,15.7445618
27.721818,15.132746,15.7423259,-0.780756012,15.7333855,15.7423189,15.7333786
27.732309,15.8429795,15.7307646,0.334984999,15.7222088,15.7307576,15.7222018
27.742801,15.8745079,15.7192321,0.39405048,15.7110364,15.7192252,15.7110295
27.753292,16.0934769,15.7077286,0.621086379,15.6998705,15.7077218,15.6998636
27.763784,16.1245155,15.6962503,0.654419765,15.6887092,15.6962434,15.6887023
27.774276,16.2788206,15.6847964,0.770729636,15.6775533,15.6847896,15.6775465
27.784767,15.4596248,15.6733668,-0.462322314,15.6664042,15.6733599,15.6663973
27.795259,15.3948043,15.6619578,-0.516868891,15.6552596,15.6619509,15.6552527
27.80575,15.2970585,15.6505705,-0.594568681,15.6441217,15.6505637,15.6441149
27.816242,15.9373775,15.6392016,0.546054827,15.6329884,15.6391948,15.6329816
27.826734,15.3622915,15.6278512,-0.515324893,15.6218609,15.6278445,15.6218541
27.837225,16,15.6165196,0.619257903,15.6107402,15.6165129,15.6107334
27.847717,15.4596248,15.6052038,-0.381548169,15.5996242,15.6051971,15.5996175
27.858208,16.0312195,15.5939052,0.66129744,15.5885151,15.5938985,15.5885084
27.8687,15.3297097,15.582621,-0.502902879,15.5774108,15.5826143,15.5774041
27.879192,16.2172747,15.5713517,0.803693395,15.5663124,15.571345,15.5663057
27.889683,15.6204994,15.5600977,0.245767503,15.5552209,15.560091,15.5552143
27.900175,15.2643375,15.5488564,-0.533403135,15.5441344,15.5488498,15.5441277
27.910666,15.2970585,15.5376296,-0.490480403,15.5330549,15.5376229,15.5330482
27.921158,14.832397,15.5264145,-0.833077166,15.5219804,15.5264079,15.5219737
27.93165,14.9331845,15.515212,-0.762907267,15.5109119,15.5152054,15.5109052
27.942141,15.3948043,15.5040227,-0.330482078,15.4998505,15.5040161,15.4998439
27.952633,15.7162336,15.4928442,0.47264095,15.4887942,15.4928376,15.4887876
27.963124,14.3178211,15.4816782,-1.07882211,15.4777451,15.4816716,15.4777385
27.973616,15.1986842,15.4705224,-0.521381118,15.4667011,15.4705158,15.4666945
27.984108,16.1554944,15.4593776,0.834336148,15.4556634,15.459371,15.4556568
27.994599,15.5563492,15.4482446,0.328792608,15.4446329,15.448238,15.4446263
28.005091,15.0332964,15.4371211,-0.635472017,15.4336076,15.4371145,15.433601
28.015582,15.2970585,15.4260089,-0.359096587,15.4225897,15.4260024,15.4225831
28.026074,15.5241747,15.4149058,0.330558443,15.4115771,15.4148993,15.4115705
28.036566,15.3948043,15.4038127,-0.0949124339,15.4005708,15.4038062,15.4005642
28.047057,15.3297097,15.3927304,-0.251039259,15.389572,15.3927239,15.3895654
28.057549,15.8429795,15.3816568,0.679207443,15.3785785,15.3816503,15.378572
28.06804,15.2315462,15.3705937,-0.372890698,15.3675925,15.3705872,15.367586
28.078532,15.132746,15.3595389,-0.476227882,15.356612,15.3595324,15.3566055
28.089024,15.5563492,15.3484935,0.455911938,15.345638,15.348487,15.3456315
28.099515,15.9373775,15.3374583,0.774544502,15.3346716,15.3374518,15.3346651
28.110007,15.7162336,15.3264311,0.624341717,15.3237107,15.3264246,15.3237042
28.120498,15.4919334,15.3154139,0.420142215,15.3127575,15.3154074,15.312751
28.13099,15.4272486,15.3044046,0.350491117,15.3018098,15.3043981,15.3018034
28.141482,15.6204994,15.2934041,0.571922402,15.2908689,15.2933977,15.2908624
28.151973,14.7986486,15.2824134,-0.695532067,15.2799356,15.282407,15.2799291
28.162465,15.1657509,15.2714304,-0.325083872,15.269008,15.271424,15.2690016
28.172956,15.3297097,15.2604571,0.263158998,15.2580883,15.2604506,15.2580818
28.183448,15.8113883,15.2494912,0.749597936,15.2471742,15.2494848,15.2471678
28.19394,14.4913767,15.2385339,-0.86438255,15.236267,15.2385275,15.2362606
28.204431,15.6524758,15.2275862,0.651835621,15.2253677,15.2275797,15.2253612
28.214923,15.1986842,15.2166458,-0.134021015,15.2144742,15.2166393,15.2144677
28.225414,14.7648231,15.2057148,-0.663996828,15.2035886,15.2057084,15.2035821
28.235906,15.2315462,15.1947912,0.191715884,15.1927089,15.1947848,15.1927025
28.246398,14.4568323,15.1838759,-0.852668548,15.1818362,15.1838695,15.1818297
28.256889,14.7986486,15.17297,-0.611818127,15.1709715,15.1729636,15.170965
28.267381,16.0623784,15.1620713,0.94884514,15.1601127,15.1620649,15.1601063
28.277872,15.4272486,15.1511819,0.525420523,15.1492621,15.1511755,15.1492556
28.288364,14.6628783,15.1402997,-0.69095686,15.1384174,15.1402933,15.138411
28.298856,14.6287388,15.1294257,-0.707592286,15.1275799,15.1294193,15.1275735
28.309347,15.4272486,15.1185609,0.555596709,15.1167505,15.1185545,15.1167441
28.319839,14.2478068,15.1077033,-0.927306019,15.1059273,15.1076969,15.1059208
28.33033,14.7648231,15.0968549,-0.576222035,15.0951122,15.0968485,15.0951058
28.340822,14.6287388,15.0860136,-0.676220952,15.0843033,15.0860072,15.0842969
28.351314,15,15.0751805,-0.274190604,15.0735017,15.0751741,15.0734953
28.361805,14.3874946,15.0643565,-0.822716214,15.0627084,15.0643501,15.0627019
28.372297,14.8996644,15.0535397,-0.392269389,15.0519213,15.0535333,15.0519149
28.382788,14.832397,15.042732,-0.458622996,15.0411426,15.0427256,15.0411361
28.39328,15.132746,15.0319315,0.31751298,15.0303701,15.031925,15.0303637
28.403772,14.0712473,15.021139,-0.974623898,15.0196051,15.0211326,15.0195987
28.414263,15.132746,15.0103557,0.349843116,15.0088485,15.0103493,15.008842
28.424755,15.0665192,14.9995796,0.258726885,14.9980982,14.9995731,14.9980918
28.435246,14.2828569,14.9888126,-0.840211701,14.9873565,14.9888061,14.9873501
28.445738,14.832397,14.9780527,-0.381648641,14.9766212,14.9780462,14.9766148
28.45623,15.1657509,14.9673009,0.44547726,14.9658934,14.9672944,14.965887
28.466721,15,14.9565583,0.208426707,14.9551742,14.9565519,14.9551677
28.477213,14.9666295,14.9458228,0.144245289,14.9444615,14.9458164,14.944455
28.487704,15.4919334,14.9350966,0.746215,14.9337574,14.9350901,14.9337509
28.498196,15.0332964,14.9243774,0.330028732,14.9230599,14.9243709,14.9230534
28.508688,13.7840488,14.9136664,-1.06283474,14.91237,14.91366,14.9123635
28.519179,15.3622915,14.9029647,0.677736546,14.9016888,14.9029582,14.9016823
28.529671,15.7162336,14.8922701,0.907724397,14.8910143,14.8922636,14.8910078
28.540162,14.4913767,14.8815847,-0.624666256,14.8803485,14.8815782,14.880342
28.550654,14.4913767,14.8709065,-0.616059845,14.8696894,14.8709,14.869683
28.561146,14.4568323,14.8602365,-0.635141089,14.8590381,14.86023,14.8590316
28.571637,15.2315462,14.8495758,0.618037578,14.8483956,14.8495693,14.8483891
28.582129,15.0332964,14.8389223,0.440878809,14.8377599,14.8389157,14.8377534
28.59262,14.7986486,14.828278,-0.172132,14.8271331,14.8282715,14.8271266
28.603112,14.8660687,14.817641,0.220063006,14.8165131,14.8176345,14.8165066
28.613604,15.7480157,14.8070123,0.970053318,14.805901,14.8070058,14.8058945
28.624095,13.892444,14.7963929,-0.950762277,14.7952978,14.7963864,14.7952913
28.634587,14.3527001,14.7857952,-0.658099655,14.7847016,14.7857887,14.784695
28.645078,15,14.7751925,0.474138692,14.7741143,14.775186,14.7741078
28.65557,13.892444,14.7645971,-0.933891366,14.763534,14.7645905,14.7635275
28.666062,14.7648231,14.75401,0.103985901,14.7529617,14.7540034,14.7529552
28.676553,14.6628783,14.7434323,-0.283820336,14.7423985,14.7434257,14.7423919
28.687045,13.7477271,14.7328619,-0.992539598,14.7318423,14.7328554,14.7318357
28.697536,15.0332964,14.722301,0.557669601,14.7212952,14.7222944,14.7212886
28.708028,15.0665192,14.7117474,0.595627169,14.7107552,14.7117409,14.7107487
28.71852,15.3297097,14.7012023,0.792784579,14.7002234,14.7011957,14.7002168
28.729011,14.525839,14.6906666,-0.405989656,14.6897007,14.69066,14.6896941
28.739503,14.4222051,14.6801384,-0.507871357,14.6791852,14.6801318,14.6791786
28.749994,14.3527001,14.6696197,-0.562956095,14.6686789,14.669613,14.6686723
28.760486,14.5945195,14.6591084,-0.254143398,14.6581798,14.6591017,14.6581732
28.770978,14.4222051,14.6486056,-0.47581563,14.647689,14.648599,14.6476824
28.781469,14.5602198,14.6381124,-0.279092433,14.6372075,14.6381057,14.6372008
28.791961,14.832397,14.6276266,0.452515552,14.6267332,14.62762,14.6267266
28.802452,14.6628783,14.6171505,0.213840625,14.6162683,14.6171438,14.6162616
28.812944,15,14.6066819,0.627150785,14.6058107,14.6066752,14.605804
28.823436,15.2970585,14.5962219,0.837159873,14.5953615,14.5962152,14.5953548
28.833927,14.5602198,14.5857715,-0.159849006,14.5849217,14.5857648,14.584915
28.844419,14.5602198,14.5753287,-0.122918368,14.5744893,14.575322,14.5744826
28.85491,14.3874946,14.5648956,-0.421189966,14.5640663,14.5648888,14.5640596
28.865402,13.7113092,14.5544701,-0.918237917,14.5536508,14.5544633,14.5536441
28.875894,14.1421356,14.5440533,-0.633969745,14.5432438,14.5440465,14.543237
28.886385,14.0356688,14.5336461,-0.705675057,14.5328463,14.5336394,14.5328395
28.896877,14.4568323,14.5232467,-0.257709967,14.5224563,14.5232399,14.5224495
28.907368,14.5945195,14.512857,0.285766499,14.5120758,14.5128502,14.512069
28.91786,15.0332964,14.5024751,0.728574836,14.501703,14.5024683,14.5016962
28.928352,14.525839,14.4921019,0.183676723,14.4913387,14.4920951,14.4913319
28.938843,13.8564065,14.4817385,-0.790779385,14.480984,14.4817317,14.4809772
28.949335,13.4164079,14.4713829,-1.02711977,14.470637,14.471376,14.4706301
28.959826,14.4913767,14.4610371,0.174182812,14.4602996,14.4610302,14.4602928
28.970318,14.3527001,14.4506991,-0.313047994,14.4499699,14.4506923,14.4499631
28.98081,13.9283883,14.44037,-0.715529008,14.439649,14.4403632,14.4396421
28.991301,15.1986842,14.4300508,0.87671738,14.4293377,14.4300439,14.4293308
29.001793,14.5945195,14.4197394,0.418067072,14.4190342,14.4197325,14.4190273
29.012284,15.2970585,14.409438,0.942136167,14.4087404,14.4094311,14.4087335
29.022776,14.2828569,14.3991445,-0.341009687,14.3984544,14.3991375,14.3984475
29.033268,13.892444,14.3888599,-0.704567879,14.3881773,14.3888529,14.3881703
29.043759,14.0712473,14.3785852,-0.554380705,14.3779099,14.3785783,14.377903
29.054251,13.6014705,14.3683186,-0.875698632,14.3676505,14.3683116,14.3676435
29.064742,13.7113092,14.3580619,-0.804209382,14.3574009,14.3580549,14.3573939
29.075234,15.1986842,14.3478133,0.922426615,14.3471591,14.3478063,14.3471521
29.085726,13.2664992,14.3375737,-1.0349273,14.3369264,14.3375667,14.3369193
29.096217,14.0356688,14.3273441,-0.540069678,14.3267035,14.3273371,14.3266964
29.106709,14.1421356,14.3171226,-0.418314461,14.3164886,14.3171155,14.3164815
29.1172,14.7648231,14.3069112,0.676691868,14.3062836,14.3069041,14.3062765
29.127692,13.9283883,14.2967079,-0.606893394,14.2960867,14.2967008,14.2960796
29.138184,14.9331845,14.2865137,0.804158468,14.2858987,14.2865066,14.2858916
29.148675,13.6014705,14.2763296,-0.821498078,14.2757208,14.2763225,14.2757137
29.159167,14,14.2661537,-0.515900868,14.265551,14.2661466,14.2655438
29.169658,14.1774469,14.255988,-0.280251801,14.2553912,14.2559808,14.255384
29.18015,14.0712473,14.2458304,-0.41783147,14.2452395,14.2458232,14.2452323
29.190642,13.114877,14.2356821,-1.0586808,14.2350969,14.2356749,14.2350897
29.201133,13.7477271,14.225544,-0.691242991,14.2249645,14.2255367,14.2249573
29.211625,13.96424,14.2154141,-0.501172681,14.2148402,14.2154069,14.214833
29.222116,14.106736,14.2052945,-0.313940262,14.2047261,14.2052872,14.2047188
29.232608,13.5277493,14.1951831,-0.816966272,14.1946202,14.1951759,14.1946129
29.2431,14.2478068,14.1850811,0.25045104,14.1845235,14.1850738,14.1845162
29.253591,14.106736,14.1749894,-0.261253511,14.174437,14.1749821,14.1744297
29.264083,14.6287388,14.164906,0.681052746,14.1643588,14.1648987,14.1643514
29.274574,14.4222051,14.1548329,0.517080438,14.1542908,14.1548256,14.1542834
29.285066,13.820275,14.1447683,-0.569643127,14.1442311,14.1447609,14.1442237
29.295558,14.5945195,14.134713,0.678090372,14.1341807,14.1347056,14.1341734
29.306049,13.820275,14.124668,-0.551718293,14.1241407,14.1246606,14.1241333
29.316541,13.8564065,14.1146316,-0.508158541,14.114109,14.1146241,14.1141015
29.327032,14.6628783,14.1046055,0.747176565,14.1040876,14.104598,14.1040802
29.337524,14.106736,14.0945879,0.110218369,14.0940747,14.0945804,14.0940672
29.348016,14.106736,14.0845798,0.148849624,14.0840711,14.0845723,14.0840636
29.358507,14.5602198,14.0745821,0.696877101,14.0740779,14.0745746,14.0740704
29.368999,13.7113092,14.0645929,-0.594376771,14.0640932,14.0645854,14.0640857
29.37949,14.2126704,14.0546143,0.397562732,14.0541189,14.0546067,14.0541114
29.389982,14.1421356,14.0446442,0.31223618,14.0441531,14.0446366,14.0441456
29.400474,14.4913767,14.0346837,0.675790714,14.0341968,14.0346761,14.0341892
29.410965,13.5277493,14.0247336,-0.704971191,14.024251,14.024726,14.0242434
29.421457,13.7840488,14.0147923,-0.480357682,14.0143137,14.0147846,14.0143061
29.431948,14.3874946,14.0048614,0.618573481,14.004387,14.0048538,14.0043793
29.44244,14.5945195,13.9949393,0.774325686,13.9944688,13.9949316,13.9944611
29.452932,13.190906,13.9850267,-0.891134536,13.9845602,13.985019,13.9845525
29.463423,13.0766968,13.9751248,-0.947854392,13.9746622,13.975117,13.9746544
29.473915,14.1421356,13.9652316,0.420599646,13.9647728,13.9652238,13.964765
29.484406,14,13.955349,0.21130791,13.954894,13.9553412,13.9548862
29.494898,13.1529464,13.9454751,-0.890240805,13.9450239,13.9454673,13.9450161
29.50539,14.3874946,13.935611,0.672222853,13.9351634,13.9356032,13.9351556
29.515881,14.1774469,13.9257576,0.501686484,13.9253136,13.9257497,13.9253058
29.526373,13.8564065,13.9159129,-0.243939422,13.9154725,13.915905,13.9154647
29.536864,14.0712473,13.906079,0.406409063,13.9056421,13.9060711,13.9056342
29.547356,13.6014705,13.8962538,-0.542939531,13.8958205,13.8962459,13.8958126
29.557848,13.3790882,13.8864385,-0.712285313,13.8860086,13.8864306,13.8860007
29.568339,14,13.876634,0.351235028,13.8762074,13.876626,13.8761994
29.578831,14.8660687,13.8668383,0.999615164,13.8664151,13.8668303,13.8664071
29.589322,13.56466,13.8570534,-0.540734126,13.8566335,13.8570453,13.8566254
29.599814,13.7113092,13.8472774,-0.368738624,13.8468607,13.8472693,13.8468527
29.610306,12.9614814,13.8375113,-0.935964668,13.8370978,13.8375032,13.8370897
29.620797,13.3041347,13.827756,-0.72361679,13.8273457,13.8277478,13.8273376
29.631289,13.7840488,13.8180096,-0.184284759,13.8176025,13.8180015,13.8175943
29.64178,13.6747943,13.8082741,-0.365348884,13.8078701,13.808266,13.8078619
29.652272,13.56466,13.7985477,-0.483619364,13.7981466,13.7985395,13.7981385
29.662764,13.9283883,13.7888311,0.373573497,13.7884331,13.7888229,13.7884249
29.673255,12.6491106,13.7791255,-1.06302156,13.7787304,13.7791172,13.7787222
29.683747,13.3790882,13.7694289,-0.624772527,13.7690367,13.7694206,13.7690285
29.694238,12.5698051,13.7597432,-1.09084284,13.759354,13.7597349,13.7593457
29.70473,13.1529464,13.7500666,-0.772735495,13.7496802,13.7500583,13.7496719
29.715222,14.0356688,13.7404,0.543386461,13.7400164,13.7403916,13.7400081
29.725713,13.190906,13.7307444,-0.734736971,13.7303636,13.730736,13.7303552
29.736205,13.892444,13.7210979,0.413939745,13.7207198,13.7210895,13.7207114
29.746696,14.9331845,13.7114624,1.10531541,13.711087,13.7114539,13.7110786
29.757188,13.114877,13.701836,-0.766132467,13.7014634,13.7018275,13.7014549
29.76768,14.3178211,13.6922197,0.790949632,13.6918497,13.6922112,13.6918412
29.778171,13.892444,13.6826145,0.458071488,13.6822471,13.682606,13.6822386
29.788663,13.0766968,13.6730185,-0.772218645,13.6726536,13.6730099,13.6726451
29.799154,14.0356688,13.6634335,0.610110948,13.6630712,13.6634249,13.6630626
29.809646,14.4568323,13.6538577,0.896088483,13.653498,13.6538491,13.6534893
29.820138,12.4096736,13.6442921,-1.11113388,13.6439349,13.6442835,13.6439262
29.830629,13.190906,13.6347376,-0.666206933,13.6343828,13.634729,13.6343741
29.841121,13.4907376,13.6251924,-0.366680856,13.62484,13.6251837,13.6248313
29.851612,13.3416641,13.6156583,-0.523444591,13.6153083,13.6156496,13.6152995
29.862104,12.3693169,13.6061335,-1.11212258,13.6057859,13.6061247,13.6057771
29.872596,13.4907376,13.5966189,-0.325394179,13.5962736,13.5966101,13.5962648
29.883087,13.0766968,13.5871155,-0.714435922,13.5867725,13.5871067,13.5867637
29.893579,13.7477271,13.5776215,0.412438643,13.5772807,13.5776126,13.5772718
29.90407,13.892444,13.5681386,0.569478208,13.5678001,13.5681297,13.5677912
29.914562,14,13.5586651,0.664330452,13.5583288,13.5586561,13.5583199
29.925054,12.8062485,13.5492018,-0.861947425,13.5488678,13.5491929,13.5488588
29.935545,13.7113092,13.5397498,0.41419725,13.539418,13.5397408,13.539409
29.946037,13.7113092,13.5303073,0.425443226,13.5299775,13.5302982,13.5299685
29.956528,14.3874946,13.5208759,0.930923546,13.5205483,13.5208668,13.5205392
29.96702,12.9614814,13.511454,-0.741601399,13.5111285,13.5114449,13.5111194
29.977512,13.8564065,13.5020425,0.595284768,13.5017191,13.5020334,13.5017099
29.988003,13.6381817,13.4926422,0.381496326,13.4923209,13.4926331,13.4923117
29.998495,13.7477271,13.4832515,0.514271911,13.4829321,13.4832423,13.4829229
30.008986,13.114877,13.473872,-0.599161889,13.4735547,13.4738628,13.4735454
30.019478,12.8062485,13.4645021,-0.811328289,13.4641867,13.4644928,13.4641774
30.02997,12.6885775,13.4551425,-0.87553698,13.4548291,13.4551332,13.4548198
30.040461,12.4096736,13.4457943,-1.01790014,13.4454829,13.445785,13.4454735
30.050953,12.8062485,13.4364557,-0.793855931,13.4361461,13.4364463,13.4361367
30.061444,13.56466,13.4271284,0.370852446,13.4268207,13.427119,13.4268113
30.071936,13.9283883,13.4178107,0.714547092,13.4175049,13.4178013,13.4174954
30.082428,13.96424,13.4085035,0.745477381,13.4081995,13.408494,13.40819
30.092919,13.6747943,13.3992077,0.524963466,13.3989055,13.3991981,13.398896
30.103411,13.8564065,13.3899215,0.682997052,13.3896211,13.3899119,13.3896116
30.113902,12.9614814,13.3806467,-0.64742976,13.3803481,13.3806371,13.3803385
30.124394,13.2287566,13.3713815,-0.377657237,13.3710848,13.3713719,13.3710751
30.134886,13.1529464,13.3621269,-0.457362554,13.3618319,13.3621172,13.3618222
30.145377,12.9614814,13.3528838,-0.625621598,13.3525905,13.352874,13.3525807
30.155869,13.453624,13.3436503,0.33162289,13.3433587,13.3436405,13.3433489
30.16636,12.7671453,13.3344283,-0.753181888,13.3341384,13.3344185,13.3341285
30.176852,12.9614814,13.325216,-0.603104129,13.3249277,13.3252061,13.3249179
30.187344,13.0766968,13.3160143,-0.489200836,13.3157277,13.3160044,13.3157178
30.197835,13.2287566,13.3068241,-0.279405661,13.3065391,13.3068141,13.3065292
30.208327,13.0384048,13.2976436,-0.509154994,13.2973603,13.2976336,13.2973503
30.218818,13.892444,13.2884747,0.777154631,13.2881929,13.2884646,13.2881829
30.22931,13.4907376,13.2793155,0.459806559,13.2790353,13.2793054,13.2790253
30.239802,12.9614814,13.270167,-0.555594796,13.2698884,13.2701569,13.2698783
30.250293,13,13.26103,-0.510910947,13.2607529,13.2610198,13.2607428
30.260785,12.6491106,13.2519028,-0.776396926,13.2516273,13.2518926,13.2516171
30.271276,12.0415946,13.2427872,-1.09598934,13.2425132,13.242777,13.242503
30.281768,13.6381817,13.2336814,0.636003346,13.2334089,13.2336712,13.2333986
30.29226,13.5277493,13.2245864,0.550602291,13.2243153,13.2245761,13.224305
30.302751,12.6095202,13.2155029,-0.778448897,13.2152333,13.2154925,13.215223
30.313243,12.4498996,13.2064293,-0.869787152,13.2061612,13.2064189,13.2061508
30.323734,14.2126704,13.1973673,1.00762251,13.1971006,13.1973568,13.1970901
30.334226,12.4096736,13.1883152,-0.882406666,13.1880499,13.1883047,13.1880394
30.344718,13.5277493,13.1792738,0.590318083,13.17901,13.1792633,13.1789994
30.355209,13.7477271,13.1702441,0.75992301,13.1699816,13.1702335,13.169971
30.365701,13.5277493,13.1612243,0.60541304,13.1609632,13.1612137,13.1609526
30.376192,13.5277493,13.1522162,0.612807548,13.1519564,13.1522055,13.1519458
30.386684,12.5698051,13.143218,-0.757240306,13.1429596,13.1432072,13.1429489
30.397176,13.8564065,13.1342306,0.849809316,13.1339735,13.1342198,13.1339628
30.407667,12.6491106,13.1252549,-0.690032058,13.1249992,13.1252441,13.1249883
30.418159,12.7279221,13.1162892,-0.623191055,13.1160347,13.1162783,13.1160239
30.42865,13,13.1073351,-0.327620389,13.107082,13.1073242,13.1070711
30.439142,13.453624,13.0983911,0.59601423,13.0981392,13.0983801,13.0981283
30.449634,13.2664992,13.0894579,0.420762702,13.0892073,13.0894469,13.0891963
30.460125,13.190906,13.0805365,0.332219056,13.0802871,13.0805254,13.0802761
30.470617,13.114877,13.071625,0.20797119,13.0713769,13.0716139,13.0713658
30.481108,13.0766968,13.0627253,0.118201037,13.0624785,13.0627142,13.0624673
30.4916,12.2065556,13.0538357,-0.920478187,13.0535901,13.0538245,13.0535788
30.502092,12.4096736,13.044957,-0.79704663,13.0447125,13.0449457,13.0447013
30.512583,12.9614814,13.03609,-0.273145768,13.0358468,13.0360787,13.0358354
30.523075,13.9283883,13.0272331,0.949291925,13.026991,13.0272217,13.0269797
30.533566,12.922848,13.018388,-0.309095488,13.0181471,13.0183766,13.0181357
30.544058,12.922848,13.009553,-0.294457139,13.0093132,13.0095415,13.0093017
30.55455,12.6491106,13.0007289,-0.592974103,13.0004903,13.0007174,13.0004788
30.565041,12.5299641,12.9919167,-0.679670933,12.9916792,12.9919051,12.9916676
30.575533,13.190906,12.9831145,0.455841452,12.9828782,12.9831029,12.9828665
30.586024,11.9163753,12.9743242,-1.02856644,12.974089,12.9743125,12.9740773
30.596516,12.328828,12.965544,-0.797944878,12.9653099,12.9655323,12.9652981
30.607008,13.114877,12.9567749,0.397620667,12.9565418,12.956763,12.95653
30.617499,13.8564065,12.9480175,0.953094408,12.9477855,12.9480056,12.9477737
30.627991,13.7113092,12.9392703,0.878657419,12.9390394,12.9392584,12.9390275
30.638482,12.8062485,12.930535,-0.352542972,12.9303052,12.930523,12.9302932
30.648974,12.8062485,12.9218099,-0.339943263,12.9215811,12.9217979,12.921569
30.659466,12.328828,12.9130958,-0.764374122,12.912868,12.9130837,12.9128559
30.669957,12.922848,12.9043936,0.135846969,12.9041668,12.9043814,12.9041547
30.680449,12.9614814,12.8957016,0.256475756,12.8954758,12.8956894,12.8954636
30.69094,14.106736,12.8870215,1.10440686,12.8867967,12.8870092,12.8867844
30.701432,13.2287566,12.8783516,0.591950139,12.8781278,12.8783393,12.8781155
30.711924,12.5698051,12.8696928,-0.547620025,12.86947,12.8696804,12.8694576
30.722415,12.3693169,12.8610459,-0.701233914,12.8608241,12.8610334,12.8608116
30.732907,12.8840987,12.8524092,0.178015413,12.8521884,12.8523967,12.8521759
30.743398,11.5758369,12.8437845,-1.1260318,12.8435646,12.8437719,12.8435521
30.75389,13.3416641,12.8351701,0.711683912,12.8349511,12.8351574,12.8349385
30.764382,12.083046,12.8265667,-0.862276502,12.8263487,12.826554,12.826336
30.774873,13.8564065,12.8179753,1.01903441,12.8177583,12.8179626,12.8177455
30.785365,13.4907376,12.8093942,0.825435229,12.8091781,12.8093814,12.8091653
30.795856,12.6885775,12.8008251,-0.335033666,12.8006099,12.8008122,12.800597
30.806348,12.1243557,12.7922663,-0.817257987,12.7920519,12.7922533,12.792039
30.81684,13.0384048,12.7837186,0.504664466,12.7835051,12.7837056,12.7834921
30.827331,13.2664992,12.7751829,0.700939579,12.7749703,12.7751698,12.7749572
30.837823,12.3693169,12.7666575,-0.630349598,12.7664458,12.7666443,12.7664327
30.848314,12.6095202,12.7581441,-0.385517679,12.7579333,12.7581309,12.7579201
30.858806,13.7840488,12.7496411,1.01705836,12.7494311,12.7496278,12.7494178
30.869298,12.4096736,12.7411492,-0.575739128,12.7409401,12.7411358,12.7409267
30.879789,12.5299641,12.7326693,-0.450227979,12.732461,12.7326559,12.7324476
30.890281,12.9614814,12.7241998,0.487115559,12.7239924,12.7241863,12.7239789
30.900772,12.1243557,12.7157423,-0.769016702,12.7155357,12.7157288,12.7155222
30.911264,12.9614814,12.7072952,0.504168768,12.7070895,12.7072816,12.7070758
30.921756,12.7279221,12.6988594,0.17047784,12.6986544,12.6988457,12.6986407
30.932247,12.922848,12.6904355,0.482091777,12.6902313,12.6904217,12.6902176
30.942739,11.7046999,12.6820221,-0.988596047,12.6818187,12.6820082,12.6818048
30.95323,12.922848,12.6736206,0.499226752,12.673418,12.6736067,12.6734041
30.963722,12.7279221,12.6652296,0.250384539,12.6650278,12.6652157,12.6650138
30.974214,12.8840987,12.6568499,0.476706234,12.6566488,12.6568358,12.6566348
30.984705,13.0766968,12.6484822,0.654381118,12.6482819,12.6484681,12.6482678
30.995197,11.8743421,12.6401249,-0.875090188,12.6399254,12.6401107,12.6399112
31.005688,12.6095202,12.6317797,-0.149196193,12.6315809,12.6317654,12.6315667
31.01618,12.6491106,12.623445,0.160205078,12.6232469,12.6234306,12.6232326
31.026672,12.2474487,12.6151215,-0.606360275,12.6149242,12.6151071,12.6149098
31.037163,13.892444,12.6068101,1.13385797,12.6066135,12.6067956,12.606599
31.047655,12.4498996,12.5985092,-0.385499099,12.5983133,12.5984946,12.5982987
31.058146,12.9614814,12.5902203,0.609311991,12.5900252,12.5902056,12.5900105
31.068638,12.1655251,12.5819419,-0.645303706,12.5817475,12.5819272,12.5817328
31.07913,12,12.5736749,-0.757413271,12.5734811,12.57366,12.5734663
31.089621,12.6885775,12.5654199,0.350938261,12.5652268,12.565405,12.5652119
31.100113,13.0766968,12.5571754,0.720778347,12.5569831,12.5571604,12.5569681
31.110604,11.4455231,12.548943,-1.05043795,12.5487514,12.548928,12.5487363
31.121096,12.3693169,12.5407212,-0.414010017,12.5405302,12.540706,12.540515
31.131588,12.8062485,12.5325106,0.523199619,12.5323203,12.5324954,12.5323051
31.142079,13.3790882,12.5243122,0.924540947,12.5241225,12.5242969,12.5241072
31.152571,12.4498996,12.5161243,-0.257341618,12.5159353,12.5161089,12.5159199
31.163062,12.4498996,12.5079485,-0.240933445,12.5077602,12.507933,12.5077447
31.173554,12.1243557,12.4997833,-0.612721504,12.4995956,12.4997677,12.49958
31.184046,13.0766968,12.4916294,0.764897003,12.4914423,12.4916137,12.4914267
31.194537,12.8062485,12.4834876,0.568120446,12.4833012,12.4834719,12.4832855
31.205029,12.8062485,12.4753564,0.575232163,12.4751706,12.4753406,12.4751548
31.21552,13.8564065,12.4672374,1.17863018,12.4670522,12.4672214,12.4670362
31.226012,11.7046999,12.4591289,-0.868578698,12.4589443,12.4591129,12.4589283
31.236504,12.7671453,12.4510317,0.562239811,12.4508478,12.4510156,12.4508317
31.246995,12.4498996,12.4429467,0.0833838637,12.4427634,12.4429305,12.4427472
31.257487,12,12.4348723,-0.6594485,12.4346896,12.434856,12.4346733
31.267978,12.083046,12.4268101,-0.586313982,12.4266279,12.4267937,12.4266115
31.27847,12.3693169,12.4187584,-0.222354499,12.4185768,12.4187419,12.4185603
31.288962,13.2287566,12.4107181,0.904454773,12.4105371,12.4107016,12.4105205
31.299453,13.2664992,12.40269,0.929413351,12.4025095,12.4026733,12.4024929
31.309945,12.6885775,12.3946725,0.542130122,12.3944926,12.3946557,12.3944758
31.320436,11.8321596,12.3866671,-0.744652632,12.3864878,12.3866503,12.3864709
31.330928,12.6491106,12.3786724,0.520036792,12.3784936,12.3786554,12.3784767
31.34142,12.1655251,12.370689,-0.452950304,12.3705108,12.370672,12.3704938
31.351911,12.0415946,12.3627179,-0.566677405,12.3625402,12.3627007,12.3625231
31.362403,12,12.3547573,-0.59561508,12.3545802,12.3547401,12.354563
31.372894,11.7898261,12.3468089,-0.746312821,12.3466324,12.3467916,12.346615
31.383386,12.7279221,12.3388712,0.623739398,12.3386952,12.3388538,12.3386777
31.393878,11.7898261,12.3309449,-0.735607769,12.3307694,12.3309274,12.3307518
31.404369,12.083046,12.3230308,-0.48988243,12.3228558,12.3230131,12.3228381
31.414861,12.1655251,12.3151273,-0.38678447,12.3149528,12.3151095,12.314935
31.425352,11.9163753,12.307236,-0.625188523,12.307062,12.3072181,12.3070441
31.435844,13.1529464,12.2993553,0.923899941,12.2991819,12.2993374,12.2991639
31.446336,12.2474487,12.2914861,-0.20985092,12.2913132,12.291468,12.2912951
31.456827,12.0415946,12.2836291,-0.491970025,12.2834566,12.2836109,12.2834384
31.467319,11.7898261,12.2757827,-0.697105878,12.2756108,12.2757644,12.2755925
31.47781,11.7473401,12.2679485,-0.721531999,12.2677771,12.2679301,12.2677587
31.488302,13.2287566,12.2601251,0.984190782,12.2599541,12.2601065,12.2599355
31.498794,11.2694277,12.252313,-0.991405738,12.2521425,12.2522944,12.2521239
31.509285,11.6619038,12.2445131,-0.763288509,12.2443431,12.2444944,12.2443243
31.519777,11.5758369,12.236724,-0.812949607,12.2365544,12.2367051,12.2365355
31.530268,12.7279221,12.228947,0.706381682,12.2287779,12.228928,12.2287589
31.54076,12.4096736,12.2211807,0.434157745,12.221012,12.2211616,12.2209929
31.551252,12.1655251,12.2134259,-0.218862523,12.2132577,12.2134067,12.2132384
31.561743,11.6619038,12.2056832,-0.737414014,12.2055155,12.2056639,12.2054961
31.572235,12.1243557,12.1979513,-0.27128515,12.197784,12.1979318,12.1977645
31.582726,12.8062485,12.1902315,0.784867462,12.1900647,12.190212,12.1900451
31.593218,12.489996,12.1825225,0.554502912,12.1823561,12.1825028,12.1823364
31.60371,12.2882057,12.1748249,0.336720623,12.1746589,12.1748051,12.1746391
31.614201,12.4498996,12.1671396,0.531751846,12.166974,12.1671196,12.1669541
31.624693,12.1655251,12.1594649,0.07784689,12.1592998,12.1594449,12.1592797
31.635184,13.2287566,12.1518025,1.03776399,12.1516377,12.1517823,12.1516175
31.645676,13,12.1441507,0.925121215,12.1439864,12.1441304,12.1439661
31.656168,12.1655251,12.1365105,0.170336681,12.1363466,12.13649,12.1363261
31.666659,12.489996,12.1288824,0.600927276,12.1287189,12.1288618,12.1286983
31.677151,13.1529464,12.1212651,1.01571717,12.121102,12.1212444,12.1210813
31.687642,11.4017543,12.1136599,-0.843745036,12.1134972,12.1136391,12.1134764
31.698134,12.4096736,12.1060655,0.551006447,12.1059032,12.1060446,12.1058823
31.708626,12.6095202,12.0984826,0.714868936,12.0983207,12.0984615,12.0982996
31.719117,12.4498996,12.0909119,0.599155835,12.0907504,12.0908906,12.0907291
31.729609,11.7473401,12.0833519,-0.579665228,12.0831908,12.0833305,12.0831694
31.7401,12.6491106,12.0758041,0.757170081,12.0756433,12.0757826,12.0756218
31.750592,12.2882057,12.0682671,0.46897618,12.0681067,12.0682454,12.068085
31.761084,12.1655251,12.0607415,0.323702881,12.0605815,12.0607197,12.0605597
31.771575,12.3693169,12.0532281,0.562217703,12.0530685,12.0532062,12.0530465
31.782067,11.8743421,12.0457255,-0.413984816,12.0455662,12.0457034,12.0455441
31.792558,12.5698051,12.0382351,0.729088474,12.0380762,12.0382128,12.0380539
31.80305,12.1655251,12.0307554,0.367109845,12.0305968,12.030733,12.0305745
31.813542,11.2694277,12.0232872,-0.868250864,12.023129,12.0232647,12.0231065
31.824033,12.489996,12.0158312,0.688596229,12.0156734,12.0158085,12.0156507
31.834525,11.8321596,12.008386,-0.419793315,12.0082285,12.0083632,12.0082056
31.845016,11.5758369,12.0009529,-0.652009232,12.0007958,12.0009299,12.0007728
31.855508,11.9582607,11.9935307,-0.187802863,11.9933738,11.9935075,11.9933507
31.866,12.1243557,11.9861199,0.371800755,11.9859633,11.9860965,11.98594
31.876491,11.2249722,11.9787212,-0.86818723,11.978565,11.9786978,11.9785416
31.886983,12.328828,11.9713334,0.597908549,11.9711775,11.9713098,11.9711539
31.897474,12.2065556,11.9639577,0.492542299,11.9638022,11.9639339,11.9637784
31.907966,11.7898261,11.9565928,-0.408370758,11.9564376,11.9565689,11.9564136
31.918458,11.5325626,11.9492394,-0.645505057,11.9490845,11.9492153,11.9490604
31.928949,11.8321596,11.9418981,-0.331268106,11.9417435,11.9418738,11.9417192
31.939441,12.3693169,11.9345677,0.65935516,11.9344134,11.9345432,11.9343889
31.949932,11.9582607,11.9272493,0.176100525,11.9270954,11.9272247,11.9270707
31.960424,12,11.9199418,0.282945537,11.9197881,11.919917,11.9197634
31.970916,12.6491106,11.9126458,0.858175314,11.9124924,11.9126208,11.9124674
31.981407,11.3137085,11.9053619,-0.769190086,11.9052088,11.9053368,11.9051837
31.991899,12.3693169,11.8980888,0.686460557,11.897936,11.8980635,11.8979107
32.00239,12.2474487,11.8908278,0.597177424,11.8906753,11.8908024,11.8906498
32.012882,11.4891253,11.8835777,-0.628054441,11.8834254,11.883552,11.8833998
32.023374,12.3693169,11.876339,0.702123848,11.876187,11.8763131,11.8761612
32.033865,11.5758369,11.8691124,-0.541549203,11.8689608,11.8690864,11.8689347
32.044357,11.6619038,11.8618967,-0.447205651,11.8617453,11.8618705,11.8617191
32.054848,11.5325626,11.8546931,-0.567565401,11.854542,11.8546667,11.8545155
32.06534,11.8743421,11.8475003,0.163834778,11.8473494,11.8474737,11.8473228
32.075832,12.2474487,11.8403189,0.638067256,11.8401683,11.8402921,11.8401415
32.086323,12.1655251,11.8331497,0.576520065,11.8329993,11.8331227,11.8329724
32.096815,11.4017543,11.8259912,-0.651334774,11.8258412,11.8259641,11.825814
32.107306,12.083046,11.8188449,0.514004894,11.8186951,11.8188176,11.8186677
32.117798,12.6095202,11.8117094,0.893202546,11.8115599,11.8116819,11.8115323
32.12829,12.1655251,11.8045854,0.60078257,11.804436,11.8045576,11.8044083
32.138781,11.7898261,11.7974734,-0.0874489232,11.7973244,11.7974455,11.7972964
32.149273,11.3578167,11.7903723,-0.657689588,11.7902235,11.7903441,11.7901953
32.159764,11.2694277,11.7832833,-0.716837215,11.7831347,11.7832549,11.7831063
32.170256,11.3578167,11.776205,-0.646829439,11.7760567,11.7761764,11.776028
32.180748,12,11.7691382,0.480480784,11.7689901,11.7691094,11.7689613
32.191239,12.5698051,11.7620835,0.898733305,11.7619356,11.7620545,11.7619066
32.201731,11.4017543,11.7550396,-0.594378144,11.754892,11.7550104,11.7548627
32.212222,11.5325626,11.7480078,-0.464160792,11.7478604,11.7479784,11.7478309
32.222714,11.4455231,11.7409868,-0.5435657,11.7408396,11.7409571,11.7408099
32.233206,11.6619038,11.7339772,-0.268464968,11.7338302,11.7339473,11.7338003
32.243697,11.7473401,11.7269797,0.142689789,11.726833,11.7269496,11.7268028
32.254189,12.489996,11.719993,0.877498126,11.7198465,11.7199627,11.7198161
32.26468,12.083046,11.7130184,0.608298902,11.712872,11.7129878,11.7128414
32.275172,12.0415946,11.7060546,0.579258155,11.7059084,11.7060237,11.7058776
32.285664,11.61895,11.6991021,-0.283111474,11.6989562,11.6990711,11.6989251
32.296155,11.4455231,11.6921618,-0.496627291,11.692016,11.6921305,11.6919847
32.306647,12.489996,11.6852322,0.897086263,11.6850867,11.6852007,11.6850551
32.317138,11.2249722,11.6783147,-0.673307193,11.6781694,11.6782829,11.6781375
32.32763,11.1355287,11.671408,-0.732037753,11.6712628,11.6713759,11.6712307
32.338122,11.3578167,11.6645127,-0.553801392,11.6643677,11.6644804,11.6643354
32.348613,11.0905365,11.6576294,-0.753055715,11.6574846,11.6575968,11.657452
32.359105,11,11.6507569,-0.806695056,11.6506123,11.6507241,11.6505795
32.369596,11.8321596,11.6438965,0.433892955,11.643752,11.6438634,11.6437189
32.380088,11.5325626,11.6370468,-0.323240128,11.6369025,11.6370134,11.6368691
32.39058,11.3578167,11.6302085,-0.521911668,11.6300644,11.6301749,11.6300308
32.401071,12.1655251,11.6233822,0.736303487,11.6232383,11.6233484,11.6232044
32.411563,12.3693169,11.6165667,0.867611748,11.616423,11.6165326,11.6163888
32.422054,11.4891253,11.6097633,-0.34732978,11.6096197,11.6097288,11.6095852
32.432546,13.114877,11.6029705,1.22959607,11.6028271,11.6029358,11.6027924
32.443038,12.1243557,11.5961892,0.726750609,11.5960459,11.5961542,11.5960109
32.453529,11.3578167,11.5894199,-0.481251701,11.5892768,11.5893846,11.5892415
32.464021,11.1803399,11.5826613,-0.634288123,11.5825183,11.5826257,11.5824828
32.474512,11.2249722,11.5759147,-0.592404073,11.5757719,11.5758789,11.5757361
32.485004,11.7046999,11.5691789,0.36813177,11.5690362,11.5691428,11.5690001
32.495496,11.4455231,11.5624544,-0.341952189,11.5623119,11.562418,11.5622755
32.505987,11,11.555742,-0.745481037,11.5555996,11.5557052,11.5555628
32.516479,11.7046999,11.5490402,0.394537298,11.548898,11.5490032,11.5488609
32.52697,11.7046999,11.5423505,0.402926086,11.5422084,11.5423131,11.542171
32.537462,11.3578167,11.5356714,-0.421728291,11.5355295,11.5356337,11.5354918
32.547954,11.4455231,11.5290038,-0.288930119,11.5288619,11.5289657,11.5288239
32.558445,11.7898261,11.522348,0.517182826,11.5222063,11.5223097,11.522168
32.568937,11.4017543,11.515703,-0.337563022,11.5155615,11.5156644,11.5155228
32.579428,11.9582607,11.50907,0.670216929,11.5089286,11.509031,11.5088896
32.58992,12.7671453,11.5024477,1.12458777,11.5023063,11.5024084,11.502267
32.600412,12.1243557,11.4958367,0.792791888,11.4956955,11.495797,11.4956558
32.610903,10.9544512,11.4892376,-0.731290964,11.4890965,11.4891976,11.4890565
32.621395,11.045361,11.4826493,-0.661277739,11.4825083,11.4826089,11.4824679
32.631886,11.7473401,11.4760728,0.520833251,11.475932,11.4760321,11.4758913
32.642378,11.6619038,11.4695071,0.438630451,11.4693663,11.4694661,11.4693253
32.65287,11.9163753,11.4629527,0.673366612,11.462812,11.4629113,11.4627706
32.663361,11,11.4564102,-0.675581376,11.4562696,11.4563684,11.4562278
32.673853,11.9163753,11.4498784,0.683005794,11.4497379,11.4498362,11.4496958
32.684344,11.1803399,11.4433585,-0.512853369,11.4432181,11.4433159,11.4431756
32.694836,12.083046,11.4368492,0.803863637,11.436709,11.4368063,11.436666
32.705328,12.2474487,11.4303513,0.903934424,11.4302111,11.430308,11.4301678
32.715819,11.7473401,11.4238652,0.568748547,11.4237251,11.4238215,11.4236814
32.726311,12.2065556,11.4173898,0.888350044,11.4172498,11.4173457,11.4172057
32.736802,10.8166538,11.4109263,-0.770890703,11.4107864,11.4108818,11.4107419
32.747294,10.7703296,11.4044734,-0.796331479,11.4043336,11.4044285,11.4042887
32.757786,11.2249722,11.3980318,-0.416004418,11.3978921,11.3979865,11.3978468
32.768277,11.4455231,11.3916021,0.232209044,11.3914624,11.3915564,11.3914167
32.778769,11.9163753,11.385183,0.728829391,11.3850434,11.3851369,11.3849973
32.78926,10.9544512,11.3787758,-0.651402039,11.3786362,11.3787292,11.3785897
32.799752,11.5758369,11.3723792,0.451062908,11.3722397,11.3723322,11.3721927
32.810244,12.5299641,11.3659938,1.07887455,11.3658544,11.3659463,11.3658069
32.820735,10.7238053,11.3596202,-0.797380054,11.3594809,11.3595724,11.359433
32.831227,10.198039,11.3532573,-1.07481082,11.3531181,11.353209,11.3530697
32.841718,11.3137085,11.3469062,-0.182202448,11.346767,11.3468574,11.3467182
32.85221,10.8166538,11.3405657,-0.723817601,11.3404266,11.3405165,11.3403773
32.862702,10.8627805,11.3342365,-0.68662652,11.3340974,11.3341867,11.3340476
32.873193,11.9582607,11.327919,0.793940643,11.3277799,11.3278688,11.3277297
32.883685,11.6619038,11.3216121,0.583345238,11.3214731,11.3215614,11.3214224
32.894176,11,11.315317,-0.561530979,11.3151781,11.3152659,11.3151269
32.904668,11.2694277,11.3090325,-0.199009735,11.3088936,11.3089809,11.3088419
32.91516,10.6770783,11.3027592,-0.790999986,11.3026204,11.302707,11.3025682
32.925651,12.2882057,11.2964977,0.99584539,11.2963589,11.296445,11.2963062
32.936143,11.5325626,11.2902467,0.492255907,11.2901079,11.2901935,11.2900547
32.946634,10.6770783,11.2840075,-0.779056643,11.2838687,11.2839538,11.283815
32.957126,11.1803399,11.2777789,-0.312152157,11.2776401,11.2777246,11.2775858
32.967618,11.61895,11.2715614,0.589396876,11.2714227,11.2715065,11.2713678
32.978109,10.9544512,11.2653556,-0.557588067,11.2652169,11.2653002,11.2651615
32.988601,12.083046,11.2591604,0.907681432,11.2590217,11.2591045,11.2589658
32.999092,11.045361,11.2529769,-0.455648865,11.2528383,11.2529204,11.2527818
33.009584,11.1803399,11.246804,-0.257806265,11.2466653,11.2467469,11.2466083
33.020076,11.9582607,11.2406421,0.847123729,11.2405035,11.2405845,11.2404459
33.030567,11.61895,11.234492,0.620046797,11.2343534,11.2344338,11.2342952
33.041059,11.5758369,11.2283524,0.589478156,11.2282138,11.2282936,11.228155
33.05155,11.2694277,11.2222245,0.217262921,11.2220859,11.222165,11.2220265
33.062042,11.8743421,11.2161071,0.811316828,11.2159685,11.216047,11.2159084
33.072534,11.9582607,11.2100008,0.865020209,11.2098622,11.2099401,11.2098015
33.083025,10.7703296,11.2039061,-0.658465277,11.2037676,11.2038448,11.2037062
33.093517,11.6619038,11.197822,0.681235497,11.1976834,11.19776,11.1976214
33.104008,11.8743421,11.1917495,0.826191624,11.1916109,11.1916868,11.1915483
33.1145,11.4455231,11.1856875,0.509740785,11.1855489,11.1856242,11.1854856
33.124992,10.6770783,11.1796365,-0.708913441,11.1794979,11.1795725,11.1794339
33.135483,11.8743421,11.1735972,0.837105069,11.1734586,11.1735325,11.1733939
33.145975,11.2694277,11.1675683,0.319154099,11.1674297,11.167503,11.1673643
33.156466,12.0415946,11.1615511,0.938106335,11.1614124,11.161485,11.1613463
33.166958,10.6770783,11.1555443,-0.691712397,11.1554056,11.1554775,11.1553388
33.17745,12.0415946,11.1495485,0.944481896,11.1494098,11.149481,11.1493423
33.187941,10.4403065,11.1435643,-0.838604698,11.1434256,11.1434961,11.1433573
33.198433,11.7473401,11.1375906,0.780864594,11.1374519,11.1375216,11.1373828
33.208924,11.4891253,11.1316284,0.597910403,11.1314897,11.1315586,11.1314199
33.219416,10.198039,11.1256767,-0.963139491,11.1255379,11.1256061,11.1254673
33.229908,11.4891253,11.119736,0.607774083,11.1195971,11.1196646,11.1195257
33.240399,11.2249722,11.1138068,0.333414762,11.1136679,11.1137345,11.1135957
33.250891,11.5325626,11.107888,0.651670644,11.107749,11.1078149,11.107676
33.261382,11.61895,11.1019807,0.719005793,11.1018417,11.1019068,11.1017679
33.271874,10.4880885,11.0960838,-0.779740576,11.0959448,11.0960091,11.0958701
33.282366,11.045361,11.0901979,-0.21174731,11.0900589,11.0901224,11.0899833
33.292857,11.2694277,11.0843235,0.430237294,11.0841844,11.0842471,11.084108
33.303349,10.9087121,11.0784595,-0.412004133,11.0783204,11.0783822,11.078243
33.31384,11.4017543,11.072607,0.573713571,11.0724678,11.0725287,11.0723895
33.324332,10.7703296,11.0667648,-0.54445864,11.0666255,11.0666856,11.0665464
33.334824,11.1803399,11.0609336,0.345552179,11.0607942,11.0608534,11.0607141
33.345315,11.3137085,11.0551138,0.508522076,11.0549744,11.0550327,11.0548933
33.355807,11.3137085,11.0493044,0.514202428,11.0491649,11.0492223,11.0490828
33.366298,11.5325626,11.0435064,0.699325546,11.0433668,11.0434233,11.0432838
33.37679,11.4017543,11.0377187,0.603353568,11.0375791,11.0376347,11.037495
33.387282,12,11.031942,0.98389941,11.0318023,11.0318569,11.0317172
33.397773,10.9087121,11.0261766,-0.342730923,11.0260368,11.0260905,11.0259507
33.408265,11,11.0204216,-0.142904039,11.0202817,11.0203344,11.0201945
33.418756,11.2694277,11.0146779,0.504727389,11.014538,11.0145896,11.0144497
33.429248,11,11.0089446,-0.0945759084,11.0088046,11.0088552,11.0087152
33.43974,11.3137085,11.0032221,0.557213052,11.003082,11.0031316,11.0029915
33.450231,10.4880885,10.997511,-0.713738413,10.9973708,10.9974193,10.9972791
33.460723,10.8627805,10.9918102,-0.359207019,10.9916699,10.9917173,10.9915771
33.471214,10.9087121,10.9861207,-0.278223993,10.9859803,10.9860267,10.9858863
33.481706,11.9582607,10.9804415,0.98884743,10.980301,10.9803463,10.9802058
33.492198,10.8166538,10.9747731,-0.397642148,10.9746325,10.9746766,10.974536
33.502689,11.4891253,10.969116,0.721116672,10.9689753,10.9690183,10.9688776
33.513181,11.4455231,10.9634692,0.694301032,10.9633284,10.9633702,10.9632294
33.523672,10.0995049,10.9578337,-0.926460349,10.9576928,10.9577334,10.9575925
33.534164,11.3578167,10.9522084,0.636873806,10.9520674,10.9521068,10.9519658
33.544656,10.7703296,10.9465939,-0.419838451,10.9464528,10.9464909,10.9463498
33.555147,11.1803399,10.9409907,0.489233245,10.9408495,10.9408863,10.9407451
33.565639,11,10.9353977,0.2541698,10.9352563,10.9352919,10.9351505
33.57613,11.7473401,10.929816,0.90417042,10.9296745,10.9297087,10.9295672
33.586622,11.045361,10.9242444,0.348018075,10.9241028,10.9241357,10.9239941
33.597114,10.2956301,10.9186836,-0.789337367,10.9185419,10.9185734,10.9184317
33.607605,10.9544512,10.913134,0.203266092,10.9129921,10.9130223,10.9128804
33.618097,11.4017543,10.9075946,0.702964866,10.9074526,10.9074814,10.9073393
33.628588,11.5325626,10.9020665,0.794037858,10.9019243,10.9019516,10.9018094
33.63908,10.4880885,10.8965485,-0.639108741,10.8964061,10.896432,10.8962896
33.649572,11.5325626,10.8910411,0.800950348,10.8908987,10.890923,10.8907805
33.660063,10.8166538,10.885545,-0.262471287,10.8854024,10.8854251,10.8852825
33.670555,11.6619038,10.880059,0.88421987,10.8799163,10.8799374,10.8797947
33.681046,11.045361,10.8745842,0.413251521,10.8744413,10.8744608,10.8743179
33.691538,10.5830052,10.8691195,-0.5348965,10.8689764,10.8689944,10.8688513
33.70203,10.7238053,10.8636655,-0.373978835,10.8635222,10.8635385,10.8633952
33.712521,10.7238053,10.8582226,-0.366629612,10.8580792,10.8580937,10.8579503
33.723013,11.6619038,10.8527898,0.899507651,10.8526462,10.852659,10.8525154
33.733504,11.0905365,10.8473681,0.493121071,10.8472244,10.8472353,10.8470916
33.743996,10.6770783,10.8419565,-0.406052084,10.8418127,10.8418218,10.8416779
33.754488,10.6770783,10.8365556,-0.399346122,10.8364115,10.8364187,10.8362747
33.764979,12.1655251,10.8311657,1.15514473,10.8310215,10.8310268,10.8308825
33.775471,10.1488916,10.8257859,-0.822735893,10.8256415,10.8256448,10.8255004
33.785962,11.0905365,10.8204172,0.519730029,10.8202726,10.8202739,10.8201293
33.796454,12,10.8150585,1.08855016,10.8149138,10.814913,10.8147682
33.806946,11.7898261,10.8097104,0.990007916,10.8095655,10.8095626,10.8094176
33.817437,11.0905365,10.8043734,0.534942144,10.8042282,10.8042232,10.804078
33.827929,10.9544512,10.7990464,0.394214089,10.798901,10.7988938,10.7987484
33.83842,10.5830052,10.7937304,-0.459048136,10.7935849,10.7935753,10.7934298
33.848912,10.3923048,10.7884245,-0.629380364,10.7882787,10.7882669,10.7881211
33.859404,10.7238053,10.7831291,-0.2435647,10.7829831,10.7829688,10.7828229
33.869895,9.89949494,10.7778446,-0.937203129,10.7776985,10.7776818,10.7775356
33.880387,10.9087121,10.7725702,0.368974108,10.7724238,10.7724046,10.7722582
33.890878,10.5830052,10.7673068,-0.429303569,10.7671602,10.7671384,10.7669918
33.90137,11.5325626,10.7620534,0.877786554,10.7619066,10.7618821,10.7617353
33.911862,10.4403065,10.7568104,-0.562586784,10.7566634,10.7566362,10.7564892
33.922353,10.2956301,10.7515784,-0.675239414,10.7514312,10.7514012,10.751254
33.932845,10.8627805,10.7463564,0.341209777,10.7462089,10.7461761,10.7460287
33.943336,11.1803399,10.7411453,0.662717575,10.7409976,10.7409619,10.7408142
33.953828,10.2956301,10.7359442,-0.66356163,10.7357962,10.7357575,10.7356096
33.96432,11.61895,10.7307535,0.9424418,10.7306053,10.7305635,10.7304153
33.974811,11.7898261,10.7255737,1.03162609,10.7254253,10.7253803,10.7252319
33.985303,11.4455231,10.7204039,0.851539333,10.7202553,10.720207,10.7200584
33.995794,11.2694277,10.715245,0.744434469,10.7150961,10.7150445,10.7148956
34.006286,10.5356538,10.710096,-0.417662831,10.7099468,10.7098918,10.7097426
34.016778,11.4017543,10.7049574,0.834743584,10.704808,10.7047494,10.7046
34.027269,10.8627805,10.6998297,0.403671645,10.69968,10.6996178,10.6994681
34.037761,10.9544512,10.6947119,0.509646211,10.694562,10.694496,10.6943461
34.048252,10.9087121,10.689605,0.468088836,10.6894548,10.6893849,10.6892347
34.058744,11.045361,10.6845079,0.600710498,10.6843575,10.6842836,10.6841332
34.069236,10.9087121,10.6794212,0.478843262,10.6792705,10.6791926,10.6790419
34.079727,11.1803399,10.6743454,0.711332878,10.6741944,10.6741123,10.6739613
34.090219,10.0995049,10.6692795,-0.754834115,10.6691282,10.6690417,10.6688904
34.10071,11.5325626,10.6642244,0.931846673,10.6640728,10.6639818,10.6638303
34.111202,10.6770783,10.6591791,0.133787597,10.6590273,10.6589317,10.6587799
34.121694,11,10.6541442,0.588095031,10.6539921,10.6538917,10.6537396
34.132185,10.1488916,10.6491202,-0.7072684,10.6489678,10.6488625,10.64871
34.142677,10.8627805,10.6441059,0.467626518,10.6439532,10.6438429,10.6436902
34.153168,11.3137085,10.6391025,0.821344012,10.6389495,10.6388339,10.6386809
34.16366,11.0905365,10.6341089,0.675594229,10.6339556,10.6338346,10.6336813
34.174152,11,10.6291257,0.608994501,10.6289721,10.6288455,10.6286919
34.184643,11.4455231,10.6241532,0.906294598,10.6239993,10.623867,10.6237131
34.195135,11.4891253,10.6191906,0.932702879,10.6190364,10.6188981,10.6187439
34.205626,9.94987437,10.6142388,-0.815085538,10.6140843,10.6139398,10.6137852
34.216118,11.3578167,10.6092968,0.86517043,10.609142,10.6089911,10.6088362
34.22661,10.5830052,10.6043651,-0.146150251,10.60421,10.6040525,10.6038973
34.237101,10.4880885,10.5994442,-0.333700101,10.5992887,10.5991244,10.5989689
34.247593,11.3578167,10.5945332,0.873660984,10.5943773,10.594206,10.5940501
34.258084,11.2694277,10.5896329,0.824496684,10.5894767,10.589298,10.5891419
34.268576,11.5325626,10.5847424,0.973560555,10.5845859,10.5843997,10.5842432
34.279068,10.9087121,10.5798623,0.57345428,10.5797054,10.5795113,10.5793545
34.289559,10.8627805,10.5749929,0.536458339,10.5748357,10.5746335,10.5744763
34.300051,10.9544512,10.5701334,0.619933643,10.5699759,10.5697652,10.5696076
34.310542,11.2249722,10.5652847,0.812211465,10.5651268,10.5649073,10.5647494
34.321034,11.2694277,10.5604458,0.842010598,10.5602875,10.560059,10.5599007
34.331526,10.2956301,10.5556173,-0.509889337,10.5554586,10.5552206,10.555062
34.342017,10.8166538,10.5507995,0.515610611,10.5506405,10.5503927,10.5502336
34.352509,10.198039,10.5459917,-0.589875094,10.5458323,10.5455742,10.5454148
34.363,10.0995049,10.5411946,-0.664597361,10.5410348,10.5407661,10.5406064
34.373492,10.8627805,10.5364074,0.571290698,10.5362473,10.5359675,10.5358074
34.383984,10.8166538,10.5316306,0.533875627,10.5314701,10.5311789,10.5310183
34.394475,10.6770783,10.5268647,0.387573942,10.5267038,10.5264005,10.5262396
34.404967,11.2694277,10.5221087,0.864476132,10.5219474,10.5216316,10.5214703
34.415458,10.0498756,10.5173636,-0.68373089,10.5172018,10.5168731,10.5167114
34.42595,10.7703296,10.5126284,0.507642805,10.5124663,10.5121239,10.5119618
34.436442,10.5830052,10.5079037,0.274046615,10.5077412,10.5073846,10.5072221
34.446933,11.3578167,10.5031899,0.924460257,10.503027,10.5026556,10.5024927
34.457425,10.7238053,10.4984862,0.474677878,10.4983229,10.497936,10.4977727
34.467916,10.6770783,10.4937935,0.428117723,10.4936297,10.4932266,10.4930629
34.478408,10.0498756,10.4891108,-0.662748234,10.4889467,10.4885266,10.4883625
34.4889,11.2249722,10.4844388,0.860542471,10.4842742,10.4838364,10.4836718
34.499391,10.6301458,10.4797779,0.38777306,10.4796128,10.4791565,10.4789914
34.509883,11.045361,10.4751272,0.755138309,10.4749617,10.4744858,10.4743203
34.520374,10.5356538,10.4704876,0.255276619,10.4703217,10.4698254,10.4696594
34.530866,10.6770783,10.4658584,0.459586629,10.465692,10.4651742,10.4650078
34.541358,10.6301458,10.46124,0.410981531,10.4610732,10.4605328,10.460366
34.551849,10.5356538,10.4566329,0.281106413,10.4564657,10.4559016,10.4557343
34.562341,9.38083152,10.4520364,-1.03499028,10.4518687,10.4512796,10.4511118
34.572832,10.2956301,10.4474513,-0.389642398,10.4472831,10.4466677,10.4464995
34.583324,10.7238053,10.442877,0.530026732,10.4427083,10.4420651,10.4418964
34.593816,10.6301458,10.4383138,0.437986329,10.4381446,10.4374722,10.437303
34.604307,11.0905365,10.4337624,0.810416031,10.4335927,10.4328894,10.4327197
34.614799,9.94987437,10.4292219,-0.692349302,10.4290518,10.4283157,10.4281456
34.62529,11.1803399,10.4246935,0.869279252,10.4245229,10.4237522,10.4235816
34.635782,9.89949494,10.4201763,-0.721582516,10.4200052,10.4191978,10.4190267
34.646274,10.5830052,10.4156709,0.409065215,10.4154993,10.4146531,10.4144815
34.656765,9.89949494,10.411178,-0.715320222,10.4110059,10.4101184,10.4099462
34.667257,10.9544512,10.4066968,0.740104296,10.4065242,10.4055928,10.4054202
34.677748,10.198039,10.4022284,-0.451873214,10.4020553,10.4010772,10.4009041
34.68824,10.198039,10.3977723,-0.446915265,10.3975986,10.3965708,10.3963971
34.698732,11.61895,10.393329,1.10707769,10.3931548,10.3920739,10.3918997
34.709223,10.5356538,10.3888994,0.383085354,10.3887247,10.387587,10.3874123
34.719715,10.7238053,10.3845371,0.582467311,10.3843619,10.3831092,10.3829339
34.730206,11.5325626,10.380135,1.07351182,10.3799592,10.3786413,10.3784655
34.740698,10.2469508,10.3757467,-0.358881442,10.3755703,10.3741825,10.3740061
34.75119,10.8166538,10.3713731,0.667293595,10.3711962,10.3697331,10.3695562
34.761681,9.74679434,10.3670152,-0.787541009,10.3668377,10.3652937,10.3651162
34.772173,11.3578167,10.3626727,0.997569031,10.3624947,10.3608633,10.3606852
34.782664,10.4880885,10.3583472,0.36019619,10.3581686,10.3564428,10.3562641
34.793156,11.5325626,10.3540385,1.08559848,10.3538594,10.3520312,10.351852
34.803648,10.4403065,10.349748,0.300929368,10.3495683,10.3476291,10.3474493
34.814139,11,10.3454771,0.809025899,10.3452968,10.3432369,10.3430565
34.824631,11.1803399,10.3412261,0.916031555,10.3410451,10.3388536,10.3386726
34.835122,10.4403065,10.3369971,0.321417779,10.3368156,10.3344801,10.3342985
34.845614,10.2469508,10.332791,-0.292984982,10.3326088,10.3301155,10.3299333
34.856106,10.2469508,10.3286098,-0.285760489,10.3284271,10.3257603,10.3255775
34.866597,10.4880885,10.3244562,0.404514869,10.3242728,10.3214149,10.3212315
34.877089,10.2469508,10.3203318,-0.270889339,10.3201478,10.3170784,10.3168943
34.88758,10.6770783,10.3162403,0.600697854,10.3160557,10.3127516,10.3125669
34.898072,10,10.3121845,-0.558734768,10.3119993,10.3084337,10.3082484
34.908564,11.8743421,10.308169,1.25146838,10.3079831,10.3041251,10.3039391
34.919055,9.32737905,10.3041991,-0.988342049,10.3040125,10.2998262,10.2996395
34.929547,9.94987437,10.3002801,-0.591950812,10.300093,10.2955361,10.2953488
34.940038,10.4403065,10.2964204,0.379323222,10.2962326,10.2912557,10.2910678
34.95053,11.045361,10.2926283,0.867601702,10.2924398,10.2869841,10.2867955
34.961022,10.0498756,10.2889156,-0.488917154,10.2887264,10.2827218,10.2825325
34.971513,11.9163753,10.2852969,1.27713678,10.2851071,10.278469,10.2782791
34.982005,10.2469508,10.2817897,-0.186651884,10.2815992,10.2742251,10.2740344
34.992496,10.8627805,10.2784177,0.764436237,10.2782265,10.2699908,10.2697994
35.002988,10.5830052,10.2752105,0.554792549,10.2750186,10.2657652,10.2655731
35.01348,10.4403065,10.2722078,0.409998455,10.2720152,10.2615488,10.261356
35.023971,10.7238053,10.2694626,0.674049439,10.2692694,10.2573419,10.2571484
35.034463,10.9087121,10.2670462,0.801040541,10.2668522,10.2531437,10.2529495
35.044954,10.2956301,10.2650578,0.174849554,10.2648631,10.2489551,10.2487602
35.055446,9.32737905,10.2636371,-0.967604269,10.2634417,10.2447752,10.2445795
35.065938,10.0498756,10.2629884,-0.461641438,10.2627924,10.2406044,10.2404079
35.076429,9.69535971,10.2634263,-0.753701953,10.2632297,10.236443,10.2362458
35.086921,10.5356538,10.265487,0.519775631,10.2652897,10.2322903,10.2320924
35.097412,10.8166538,10.2702137,0.73921587,10.2700158,10.2281471,10.2279484
35.107904,9.89949494,10.2798117,-0.616698312,10.2796133,10.2240125,10.223813
35.118396,9.69535971,10.2987485,-0.776781014,10.2985497,10.2198869,10.2196866
35.128887,10.7238053,10.3347038,0.623779984,10.334505,10.2157708,10.2155697
35.139379,9.8488578,10.397625,-0.740788231,10.3974267,10.2116632,10.2114613
35.14987,10.4880885,10.4943842,-0.0793452753,10.494187,10.207565,10.2073623
35.160362,11.0905365,10.6159591,0.688895776,10.6157635,10.2034754,10.2032719
35.170854,10.8166538,10.7169128,0.315817996,10.7167183,10.1993948,10.1991904
35.181345,10.6770783,10.7278297,-0.225280889,10.7276347,10.1953235,10.1951183
35.191837,10.5356538,10.6347977,-0.314871364,10.6346003,10.1912607,10.1910546
35.202328,11.2249722,10.5031281,0.849614065,10.5029274,10.1872072,10.1870003
35.21282,10.1488916,10.3900425,-0.491071221,10.3898389,10.1831623,10.1829545
35.223312,10.8627805,10.3111467,0.742720508,10.3109408,10.1791262,10.1789176
35.233803,10.7238053,10.261594,0.679861266,10.2613862,10.1750994,10.1748899
35.244295,10.2469508,10.2313678,0.124831716,10.2311586,10.1710811,10.1708706
35.254786,11.0905365,10.2119843,0.937311182,10.2117739,10.167072,10.1668606
35.265278,10.7703296,10.1982467,0.756361651,10.1980352,10.1630713,10.1628591
35.27577,10.2469508,10.1875382,0.243747011,10.1873256,10.1590795,10.1588663
35.286261,10.4880885,10.1786291,0.556290721,10.1784156,10.1550968,10.1548828
35.296753,10.5830052,10.1709035,0.641951548,10.1706889,10.1511226,10.1509076
35.307244,10.0995049,10.1640118,-0.253982085,10.1637963,10.1471575,10.1469416
35.317736,10.4880885,10.1577289,0.574769177,10.1575123,10.1432008,10.1429839
35.328228,10.7238053,10.1519028,0.756242326,10.1516853,10.1392529,10.139035
35.338719,9.94987437,10.146427,-0.443342574,10.1462084,10.135314,10.1350952
35.349211,10.9087121,10.1412231,0.876064486,10.1410035,10.1313836,10.1311638
35.359702,10.2956301,10.1362355,0.399242575,10.1360149,10.1274622,10.1272414
35.370194,10,10.1314209,-0.36252014,10.1311992,10.1235491,10.1233273
35.380686,10.6770783,10.1267475,0.741842786,10.1265249,10.1196447,10.1194219
35.391177,9.53939201,10.1221913,-0.763412905,10.1219676,10.1157493,10.1155255
35.401669,10.3923048,10.117732,0.523997006,10.1175072,10.1118622,10.1116374
35.41216,11.4017543,10.1133553,1.13507661,10.1131295,10.1079842,10.1077583
35.422652,10.8166538,10.1090484,0.841192832,10.1088216,10.1041144,10.1038874
35.433144,10.7703296,10.104802,0.815798753,10.1045741,10.1002532,10.1000251
35.443635,9.89949494,10.1006085,-0.448456923,10.1003795,10.0964009,10.0961718
35.454127,10.2469508,10.0964608,0.387930334,10.0962307,10.0925569,10.0923267
35.464618,10.9544512,10.0923543,0.928491705,10.0921231,10.0887218,10.0884905
35.47511,10.1488916,10.0882838,0.246186445,10.0880515,10.0848949,10.0846625
35.485602,9.69535971,10.084246,-0.623607487,10.0840126,10.0810765,10.080843
35.496093,11.045361,10.0802382,0.982406636,10.0800036,10.0772671,10.0770324
35.506585,9.8488578,10.076257,-0.47686395,10.0760213,10.0734657,10.0732299
35.517076,10.0498756,10.072301,-0.14975094,10.0720641,10.0696733,10.0694363
35.527568,9.69535971,10.0683674,-0.610743522,10.0681293,10.0658889,10.0656508
35.53806,9.16515139,10.064455,-0.948316177,10.0642157,10.0621131,10.0618737
35.548551,9.38083152,10.0605627,-0.824458118,10.0603223,10.058346,10.0581055
35.559043,9.94987437,10.0566886,-0.326824508,10.056447,10.054587,10.0543453
35.569534,11.1355287,10.0528324,1.04052695,10.0525895,10.0508368,10.0505939
35.580026,10.3440804,10.0489923,0.543220119,10.0487482,10.0470947,10.0468505
35.590518,9.2736185,10.045168,-0.878378902,10.0449226,10.043361,10.0431155
35.601009,9.69535971,10.041359,-0.588217042,10.0411124,10.039636,10.0393893
35.611501,10.6770783,10.037564,0.799696347,10.0373161,10.035919,10.035671
35.621992,10.1488916,10.0337832,0.339276309,10.033534,10.0322107,10.0319615
35.632484,10.0498756,10.0300152,0.140926948,10.0297647,10.0285104,10.0282599
35.642976,10.198039,10.0262601,0.414462203,10.0260083,10.0248185,10.0245666
35.653467,10.5356538,10.0225178,0.716335096,10.0222647,10.0211352,10.020882
35.663959,10.1488916,10.0187872,0.36069988,10.0185327,10.0174598,10.0172053
35.67445,9.11043358,10.0150686,-0.951123047,10.0148128,10.0137931,10.0135373
35.684942,11.2694277,10.0113612,1.12163563,10.011104,10.0101343,10.0098771
35.695434,10.7703296,10.0076649,0.873306765,10.0074063,10.0064838,10.0062252
35.705925,10.2469508,10.0039799,0.492920734,10.00372,10.0028418,10.0025818
35.716417,10.1488916,10.0003053,0.385468911,10.0000439,9.99920775,9.99894635
35.726908,11.0905365,9.99664151,1.04589435,9.99637871,9.99558224,9.99531941
35.7374,10.5830052,9.99298771,0.768125988,9.99272347,9.99196458,9.99170031
35.747892,10.4403065,9.98934407,0.67153737,9.98907836,9.98835511,9.98808938
35.758383,9.79795897,9.98571078,-0.433303364,9.9854436,9.98475415,9.98448694
35.768875,9.69535971,9.982087,-0.535469216,9.98181833,9.981161,9.9808923
35.779366,9.8488578,9.97847329,-0.360021508,9.97820311,9.97757633,9.97730613
35.789858,10.5830052,9.97486884,0.779831009,9.97459714,9.97399945,9.97372772
35.80035,9.48683298,9.97127389,-0.696017895,9.97100065,9.97043068,9.97015741
35.810841,9.53939201,9.96768867,-0.654443775,9.96741387,9.96687034,9.96659552
35.821333,9.21954446,9.9641124,-0.862883503,9.96383603,9.96331775,9.96304136
35.831824,9.8488578,9.96054567,-0.334197342,9.9602677,9.95977357,9.95949559
35.842316,10.198039,9.95698771,0.490969773,9.95670814,9.9562371,9.95595751
35.852808,10.0498756,9.95343879,0.310542802,9.95315759,9.95270867,9.95242746
35.863299,10.1488916,9.94989917,0.446085639,9.94961633,9.9491886,9.94890574
35.873791,11.045361,9.9463681,1.04832863,9.9460836,9.94567621,9.94539169
35.884282,9.69535971,9.94284619,-0.497480129,9.94256001,9.94217215,9.94188595
35.894774,10.1488916,9.93933271,0.457775984,9.93904483,9.93867573,9.93838783
35.905266,10.4403065,9.93582794,0.710266549,9.93553834,9.93518729,9.93489767
35.915757,10.4880885,9.93233214,0.745490669,9.9320408,9.93170712,9.93141577
35.926249,10.8166538,9.92884461,0.942236284,9.92855151,9.92823457,9.92794145
35.93674,9.64365076,9.92536595,-0.530768493,9.92507108,9.92477027,9.92447537
35.947232,8.77496439,9.92189546,-1.07094868,9.92159879,9.92131354,9.92101685
35.957724,10,9.91843342,0.285598632,9.91813493,9.91786471,9.91756621
35.968215,10.6301458,9.91498012,0.845674698,9.91467979,9.91442409,9.91412375
35.978707,10.0995049,9.91153485,0.433555174,9.91123266,9.91099101,9.91068881
35.989198,9.94987437,9.90809824,0.204392113,9.90779417,9.90756611,9.90726202
35.99969,9.79795897,9.90466958,-0.326665897,9.90436361,9.90414871,9.90384273
36.010182,10.3440804,9.90124917,0.665455677,9.90094128,9.90073914,9.90043123
36.020673,10.5356538,9.89783731,0.798634111,9.89752747,9.8973377,9.89702784
36.031165,10.5830052,9.8944333,0.829802353,9.89412149,9.89394372,9.8936319
36.041656,10.7238053,9.89103776,0.912560976,9.89072396,9.89055785,9.89024404
36.052148,10.0498756,9.88765001,0.402772405,9.8873342,9.88717942,9.8868636
36.06264,10.4403065,9.88427035,0.745678323,9.8839525,9.88380874,9.88349088
36.073131,9.8488578,9.88089906,-0.179000719,9.88057915,9.88044612,9.8801262
36.083623,9.79795897,9.87753547,-0.282093076,9.87721348,9.8770909,9.87676889
36.094114,9.53939201,9.87418021,-0.578608842,9.8738561,9.8737437,9.87341958
36.104606,9.53939201,9.87083259,-0.575708757,9.87050635,9.87040387,9.87007761
36.115098,9.43398113,9.86749291,-0.658416114,9.86716451,9.86707172,9.8667433
36.125589,9,9.86416147,-0.929602855,9.86383088,9.86374755,9.86341695
36.136081,10.2956301,9.8608376,0.659388006,9.8605048,9.8604307,9.86009789
36.146572,10.1488916,9.85752191,0.539786675,9.85718688,9.85712181,9.85678677
36.157064,10.7703296,9.85421375,0.957139418,9.85387645,9.85382022,9.85348291
36.167556,9.43398113,9.8509134,-0.645702928,9.85057381,9.85052624,9.85018664
36.178047,10.4880885,9.84762117,0.800292019,9.84727926,9.84724016,9.84689823
36.188539,11.2249722,9.84433639,1.17500458,9.84399213,9.84396134,9.84361707
36.19903,9.69535971,9.84105967,-0.381706633,9.84071304,9.84069039,9.84034374
36.209522,9.38083152,9.83779036,-0.675987311,9.83744133,9.83742668,9.83707763
36.220014,10.4880885,9.83452877,0.808430403,9.83417729,9.83417049,9.83381901
36.230505,9.89949494,9.83127516,0.261189157,9.83092123,9.83092214,9.83056819
36.240997,10.3923048,9.82802891,0.751183025,9.82767248,9.82768098,9.82732453
36.251488,9.8488578,9.82479061,0.155136055,9.82443165,9.82444761,9.82408864
36.26198,9.8488578,9.82155962,0.165221622,9.82119811,9.82122141,9.82085989
36.272472,11.4455231,9.81833623,1.27561237,9.81797213,9.81800267,9.81763856
36.282963,9.2736185,9.81512073,-0.735868355,9.81475402,9.81479167,9.81442495
36.293455,10,9.81191249,0.433690572,9.81154312,9.81158781,9.81121843
36.303946,9.2736185,9.80871209,-0.73150092,9.80834004,9.80839166,9.80801959
36.314438,9.69535971,9.80551891,-0.331902395,9.80514414,9.80520261,9.80482782
36.32493,10.3440804,9.80233324,0.736034775,9.80195572,9.80202094,9.80164341
36.335421,10.0995049,9.79915536,0.548041585,9.79877505,9.79884695,9.79846663
36.345913,9.53939201,9.79598464,-0.506549728,9.79560151,9.79568002,9.79529687
36.356404,10,9.79282167,0.45516846,9.79243568,9.79252073,9.79213472
36.366896,9.79795897,9.78966584,0.0910666556,9.78927695,9.78936846,9.78897956
36.377388,10.2469508,9.78651741,0.678552397,9.78612559,9.78622351,9.78583168
36.387879,9.94987437,9.78337668,0.408041284,9.78298189,9.78308616,9.78269136
36.398371,9.79795897,9.78024303,0.133101244,9.77984523,9.7799558,9.77955799
36.408862,10,9.77711704,0.472104822,9.77671619,9.776833,9.77643214
36.419354,9.74679434,9.77399809,-0.164935575,9.77359415,9.77371717,9.77331322
36.429846,9.79795897,9.77088647,0.164537243,9.7704794,9.77060857,9.7702015
36.440337,9.69535971,9.76778245,-0.269114724,9.76737221,9.7675075,9.76709726
36.450829,8.88819442,9.76468543,-0.936210986,9.76427198,9.76441335,9.7639999
36.46132,10.0995049,9.76159598,0.581299375,9.76117928,9.76132669,9.76090998
36.471812,10,9.75851349,0.491412773,9.75809349,9.75824693,9.75782692
36.482304,10.1488916,9.75543824,0.62725858,9.75501491,9.75517433,9.75475098
36.492795,10.2956301,9.75243956,0.737014638,9.75201285,9.75210918,9.75168245
36.503287,9.48683298,9.74937889,-0.512392344,9.74894875,9.74905088,9.74862072
36.513778,9.59166305,9.74632571,-0.393271741,9.74589209,9.746,9.74556636
36.52427,10.3440804,9.74327941,0.775113556,9.74284226,9.74295594,9.74251878
36.534762,10.2469508,9.74024027,0.711836006,9.73979955,9.73991898,9.73947825
36.545253,10.2956301,9.73720856,0.747276108,9.73676423,9.7368894,9.73644505
36.555745,9.74679434,9.73418369,0.112297164,9.73373569,9.73386659,9.73341858
36.566236,9.74679434,9.73116622,0.125012484,9.7307145,9.73085114,9.7303994
36.576728,10.8166538,9.72815556,1.0433112,9.72770007,9.72784243,9.72738693
36.58722,10.1488916,9.72515199,0.650952824,9.72469267,9.72484076,9.72438143
36.597711,9.94987437,9.72215556,0.477198925,9.72169237,9.72184638,9.72138318
36.608203,9.53939201,9.71916609,-0.423997735,9.71869898,9.71885872,9.71839158
36.618694,9.48683298,9.71618395,-0.478906013,9.71571285,9.71587833,9.71540721
36.629186,10.2956301,9.71320854,0.763165514,9.7127334,9.71290462,9.71242946
36.639678,9.79795897,9.71024013,0.296173661,9.70976089,9.70993788,9.70945862
36.650169,9.53939201,9.707279,-0.409740142,9.7067956,9.70697836,9.70649494
36.660661,10.8627805,9.70432455,1.07631591,9.70383694,9.70402548,9.70353786
36.671152,9.79795897,9.70137735,0.310775843,9.70088546,9.70107981,9.70058791
36.681644,10.0995049,9.6984368,0.633299405,9.69794058,9.69814075,9.69764451
36.692136,8.94427191,9.69550319,-0.86673599,9.69500256,9.69520859,9.69470795
36.702627,9.21954446,9.69257676,-0.68777344,9.69207168,9.69228357,9.69177847
36.713119,9.89949494,9.68965696,0.458080758,9.68914734,9.68936514,9.68885551
36.72361,9.79795897,9.68674431,0.33348862,9.6862301,9.68645383,9.68593961
36.734102,10,9.68383826,0.562282618,9.68331939,9.68354908,9.68303019
36.744594,9.38083152,9.68093906,-0.547820717,9.68041546,9.68065114,9.68012753
36.755085,9.8488578,9.67804697,0.413292668,9.67751857,9.67776029,9.67723188
36.765577,9.48683298,9.67516144,-0.433968266,9.67462816,9.67487595,9.67434267
36.776068,9.69535971,9.67228298,0.151910269,9.67174477,9.67199867,9.67146043
36.78656,10.5830052,9.66941105,0.955821212,9.66886782,9.66912787,9.66858462
36.797052,9.8488578,9.66654591,0.426979971,9.66599758,9.66626383,9.66571548
36.807543,10.8627805,9.6636878,1.09503091,9.66313429,9.66340679,9.66285327
36.818035,10.0995049,9.66083617,0.662320746,9.66027741,9.66055621,9.65999744
36.828526,10.0498756,9.65799155,0.626006448,9.65742746,9.6577126,9.6571485
36.839018,8.83176087,9.65515338,-0.907409784,9.65458389,9.65487542,9.65430591
36.84951,10.5830052,9.65232193,0.964719295,9.65174693,9.65204493,9.65146992
36.860001,9.79795897,9.64949744,0.385307065,9.64891686,9.64922137,9.64864078
36.870493,10.2469508,9.64667936,0.774771841,9.64609312,9.6464042,9.64581794
36.880984,9.8488578,9.64386822,0.452757751,9.64327622,9.64359394,9.64300193
36.891476,9.53939201,9.64106347,-0.318859615,9.64046562,9.64079005,9.64019218
36.901968,9.8488578,9.63826536,0.458903524,9.63766157,9.63799277,9.63738896
36.912459,10.2469508,9.63547414,0.78196971,9.63486432,9.63520236,9.63459252
36.922951,10.2956301,9.63268927,0.81421181,9.63207331,9.63241828,9.6318023
36.933442,10.3440804,9.62991127,0.845085302,9.62928908,9.62964104,9.62901883
36.943934,8.60232527,9.62713958,-1.01233113,9.62651107,9.62687009,9.62624156
36.954426,9.94987437,9.62437447,0.570525982,9.62373953,9.6241057,9.62347074
36.964917,9.2736185,9.62161619,-0.589913294,9.6209747,9.62134812,9.62070661
36.975409,9.74679434,9.61886419,0.357673253,9.61821606,9.61859679,9.61794864
36.9859,10.3923048,9.61611898,0.88101411,9.6154641,9.61585224,9.61519734
36.996392,9.8488578,9.61338004,0.485260511,9.61271829,9.61311394,9.61245217
37.006884,10.2469508,9.6106476,0.797686132,9.60997887,9.61038212,9.60971336
37.017375,10.2469508,9.60792192,0.799392799,9.60724609,9.60765703,9.60698118
37.027867,10.8627805,9.60520246,1.12141787,9.60451941,9.60493815,9.60425508
37.038358,10.4403065,9.60248973,0.915323321,9.60179934,9.60222598,9.60153558
37.04885,9.43398113,9.59978319,-0.407187994,9.59908535,9.59951999,9.59882212
37.059342,10.0498756,9.59708311,0.672898592,9.59637767,9.59682043,9.59611497
37.069833,10.0498756,9.59438971,0.674896965,9.59367655,9.59412753,9.59341435
37.080325,9,9.59170247,-0.769221991,9.59098146,9.59144079,9.59071975
37.090816,9.11043358,9.5890219,-0.69180078,9.58829289,9.58876069,9.58803166
37.101308,9.2736185,9.58634746,-0.559221753,9.58561033,9.58608671,9.58534956
37.1118,10.4403065,9.58367941,0.925541514,9.58293401,9.5834191,9.58267367
37.122291,10.3440804,9.58101799,0.873534454,9.58026416,9.58075811,9.58000426
37.132783,9.69535971,9.57836267,0.342048306,9.57760027,9.5781032,9.57734078
37.143274,9.21954446,9.57571395,-0.596799376,9.57494283,9.57545487,9.57468373
37.153766,10.0498756,9.57307132,0.690510176,9.57229132,9.57281262,9.5720326
37.164258,10.5830052,9.57043501,1.00626549,9.56964597,9.57017668,9.56938762
37.174749,9.43398113,9.56780526,-0.365819809,9.56700703,9.56754728,9.56674902
37.185241,10.1488916,9.56518157,0.764009158,9.56437396,9.56492393,9.56411629
37.195732,8.88819442,9.56256442,-0.821200342,9.56174727,9.5623071,9.56148992
37.206224,9.05538514,9.5599533,-0.710329613,9.55912642,9.55969629,9.55886939
37.216716,9.69535971,9.55734844,0.371498681,9.55651167,9.55709173,9.55625493
37.227207,9.59166305,9.5547501,0.192127424,9.55390324,9.55449367,9.55364679
37.237699,8.42614977,9.55215776,-1.06113523,9.55130062,9.5519016,9.55104444
37.24819,10.5830052,9.5495719,1.01657924,9.54870429,9.54931599,9.54844837
37.258682,9.11043358,9.54699202,-0.66072569,9.54611374,9.54673636,9.54585806
37.269174,9.89949494,9.54595291,0.594594,9.54352921,9.54569753,9.54327376
37.279665,9.69535971,9.54338907,0.389834122,9.54095091,9.54313391,9.54069569
37.290157,8.71779789,9.5408312,-0.907211833,9.53837836,9.54057625,9.53812335
37.300648,8.77496439,9.53827976,-0.873679218,9.53581202,9.53802501,9.5355572
37.31114,9.43398113,9.53573427,-0.318987684,9.53325139,9.53547971,9.53299676
37.321632,9.59166305,9.53319497,0.241801736,9.5306967,9.53294058,9.53044224
37.332123,10.1488916,9.53066207,0.786275711,9.52814817,9.53040785,9.52789388
37.342615,9.38083152,9.5281351,-0.383801483,9.52560531,9.52788103,9.52535117
37.353106,11.0905365,9.52561452,1.25096842,9.52306858,9.52536059,9.52281458
37.363598,9.38083152,9.52309984,-0.377184736,9.52053749,9.52284605,9.52028362
37.37409,9.89949494,9.52059131,0.615551483,9.51801226,9.52033763,9.51775852
37.384581,9.32737905,9.51808914,-0.436703663,9.51549313,9.51783558,9.51523949
37.395073,9.69535971,9.51559286,0.423989215,9.51297958,9.5153394,9.51272605
37.405564,9.05538514,9.51310293,-0.676548441,9.51047209,9.51284956,9.51021865
37.416056,9.59166305,9.51058813,0.284736582,9.50797017,9.51033483,9.50771681
37.426548,10.0995049,9.50811023,0.769021919,9.50547404,9.50785701,9.50522075
37.437039,9.79795897,9.50563866,0.540666545,9.50298392,9.5053855,9.50273069
37.447531,9.69535971,9.50317295,0.438391115,9.50049932,9.50291984,9.50024614
37.458022,9.89949494,9.50071355,0.631491398,9.4980207,9.50046049,9.49776757
37.468514,9.59166305,9.49826,0.305619119,9.49554758,9.49800697,9.49529448
37.479006,9.94987437,9.49581252,0.673841113,9.49308017,9.49555952,9.49282709
37.489497,9.79795897,9.49337135,0.551894573,9.49061869,9.49311836,9.49036563
37.499989,10.0995049,9.49093601,0.780108279,9.48816267,9.49068303,9.48790961
37.51048,9.48683298,9.48850696,-0.0409143337,9.48571254,9.48825398,9.48545949
37.520972,9.94987437,9.48608374,0.681021754,9.48326785,9.48583075,9.48301478
37.531464,9.59166305,9.48366658,0.328628163,9.48082879,9.48341357,9.4805757
37.541955,9.2736185,9.48125569,-0.455672249,9.47839559,9.48100266,9.47814248
37.552447,9.69535971,9.47885063,0.465305364,9.47596777,9.47859756,9.47571462
37.562938,9.38083152,9.47645185,-0.30922537,9.47354577,9.47619874,9.47329258
37.57343,9.69535971,9.47405889,0.470426221,9.47112913,9.47380572,9.47087589
37.583922,9.32737905,9.47167197,-0.379859075,9.46871806,9.47141875,9.46846476
37.594413,9.16515139,9.46929133,-0.55148884,9.46631277,9.46903804,9.4660594
37.604905,9.8488578,9.46691651,0.618013988,9.46391278,9.46666315,9.46365934
37.615396,10.3923048,9.46454797,0.963201368,9.46151855,9.46429452,9.46126502
37.625888,9.89949494,9.46218525,0.661293945,9.4591296,9.46193172,9.45887598
37.63638,9.59166305,9.45982859,0.363090143,9.45674614,9.45957496,9.45649242
37.646871,9.21954446,9.45747822,-0.487784542,9.45436839,9.45722448,9.45411457
37.657363,10.198039,9.45513368,0.861919572,9.45199587,9.45487983,9.45174194
37.667854,10.3440804,9.45279543,0.944078917,9.44962904,9.45254146,9.44937498
37.678346,9.79795897,9.45046303,0.589487861,9.44726741,9.45020894,9.44701323
37.688838,10.4880885,9.44813672,1.01978025,9.4449112,9.44788249,9.44465689
37.699329,9.79795897,9.44581671,0.593415758,9.44256063,9.44556234,9.44230617
37.709821,9.32737905,9.44350258,-0.34076902,9.44021522,9.44324806,9.43996061
37.720312,9.79795897,9.44119477,0.597297412,9.43787541,9.4409401,9.43762065
37.730804,10.6770783,9.43889286,1.11273779,9.43554074,9.43863803,9.43528582
37.741296,10.0498756,9.43659708,0.783121023,9.43321142,9.43634208,9.43295633
37.751787,10.2469508,9.43430766,0.901467194,9.43088766,9.43405249,9.43063239
37.762279,9.11043358,9.43202418,-0.567089591,9.42856899,9.43176883,9.42831355
37.77277,9.38083152,9.42974709,-0.221168646,9.42625585,9.42949155,9.42600022
37.783262,9.48683298,9.42747597,0.243632947,9.42394778,9.42722023,9.42369195
37.793754,8.54400375,9.42521105,-0.938726429,9.42164499,9.42495512,9.42138895
37.804245,9.05538514,9.42295258,-0.606273405,9.41934768,9.42269644,9.41909143
37.814737,9.16515139,9.42070014,-0.505518299,9.41705539,9.42044378,9.41679893
37.825228,9.74679434,9.41845419,0.573009737,9.41476856,9.41819761,9.41451188
37.83572,9.21954446,9.41621432,-0.443474755,9.41248672,9.41595751,9.41222982
37.846212,8.30662386,9.41398077,-1.05231027,9.41021009,9.41372373,9.40995295
37.856703,8.88819442,9.41175379,-0.723574024,9.40793887,9.41149651,9.40768149
37.867195,8.88819442,9.40953298,-0.722037782,9.4056726,9.40927546,9.40541498
37.877686,9.48683298,9.40731879,0.2819826,9.40341171,9.40706103,9.40315384
37.888178,9.94987437,9.40511085,0.738080969,9.40115576,9.40485283,9.40089763
37.89867,9.48683298,9.40290941,0.289695657,9.39890493,9.40265112,9.39864654
37.909161,9.05538514,9.4007147,-0.587647483,9.39665944,9.40045615,9.39640078
37.919653,9.43398113,9.39852637,0.188294362,9.39441884,9.39826754,9.3941599
37.930144,9.2736185,9.39634486,-0.35032323,9.39218354,9.39608576,9.39192432
37.940636,9.59166305,9.39416982,0.444402096,9.3899531,9.39391044,9.3896936
37.951128,9.2736185,9.39200151,-0.344068335,9.38772772,9.39174184,9.38746793
37.961619,10.2956301,9.3898402,0.951729973,9.38550761,9.38958022,9.38524751
37.972111,9.59166305,9.38768552,0.451638707,9.38329231,9.38742525,9.38303191
37.982602,9.21954446,9.38553797,-0.407423013,9.38108224,9.38527739,9.38082154
37.993094,10.4403065,9.38339719,1.02806095,9.37887697,9.3831363,9.37861595
38.003586,9.69535971,9.38126347,0.560442896,9.37667669,9.38100226,9.37641534
38.014077,9.43398113,9.3791371,0.234188028,9.37448159,9.37887556,9.37421992
38.024569,8.48528137,9.37701775,-0.94431794,9.37229124,9.37675588,9.37202924
38.03506,9.53939201,9.37490591,0.405568864,9.37010605,9.37464371,9.36984372
38.045552,9.38083152,9.37280129,0.0896115633,9.36792559,9.37253875,9.36766291
38.056044,9.38083152,9.37070418,0.100634669,9.36575004,9.3704413,9.36548702
38.066535,10.198039,9.36861491,0.910727247,9.36357961,9.36835167,9.36331623
38.077027,9.79795897,9.36653318,0.656830106,9.36141386,9.36626959,9.36115013
38.087518,8.36660027,9.36445953,-0.998929061,9.3592532,9.36419558,9.3589891
38.09801,9.48683298,9.3623937,0.352759521,9.35709719,9.36212938,9.35683273
38.108502,9.2736185,9.36033603,-0.294478407,9.35494603,9.36007134,9.35468119
38.118993,8.88819442,9.35828687,-0.685632883,9.35279992,9.3580218,9.3525347
38.129485,9.48683298,9.356246,0.361368212,9.35065842,9.35598055,9.35039281
38.139976,9.43398113,9.35421398,0.282430787,9.34852193,9.35394815,9.34825593
38.150468,9.11043358,9.35219063,-0.491687964,9.34639003,9.35192441,9.34612364
38.16096,9,9.35017635,-0.591757002,9.3442629,9.34990973,9.34399612
38.171451,9.43398113,9.34817154,0.292932739,9.34214075,9.34790452,9.34187356
38.181943,9.48683298,9.34617607,0.375042544,9.34002315,9.34590865,9.33975555
38.192434,10.198039,9.34419057,0.924039208,9.33791048,9.34392274,9.33764247
38.202926,9.43398113,9.34221494,0.302929353,9.33580234,9.34194669,9.33553391
38.213418,9.8488578,9.34024966,0.713167678,9.33369891,9.33998099,9.33343005
38.223909,10,9.33829525,0.813452363,9.33160038,9.33802616,9.33133109
38.234401,9.43398113,9.33635168,0.312457125,9.32950632,9.33608215,9.3292366
38.244892,9.89949494,9.33441968,0.751714877,9.32741714,9.33414972,9.32714697
38.255384,8.83176087,9.3324993,-0.707628739,9.32533241,9.3322289,9.3250618
38.265876,9.59166305,9.33059115,0.51095195,9.32325232,9.33032031,9.32298126
38.276367,9.2736185,9.32869589,-0.234685741,9.32117705,9.3284246,9.32090554
38.286859,9.05538514,9.32681367,-0.520988034,9.3191062,9.32654192,9.31883423
38.29735,9.48683298,9.3249454,0.402352559,9.31704015,9.32467319,9.31676772
38.307842,9.05538514,9.32309133,-0.517403312,9.31497849,9.32281866,9.31470558
38.318334,8.88819442,9.32125228,-0.658071323,9.3129214,9.32097915,9.31264802
38.328825,8.66025404,9.31942916,-0.811896004,9.31086906,9.31915555,9.3105952
38.339317,9.89949494,9.31762238,0.762805711,9.30882107,9.3173483,9.30854673
38.349808,9.2736185,9.31583315,-0.205462049,9.30677781,9.31555859,9.30650298
38.3603,10.0498756,9.31406204,0.857795767,9.30473887,9.313787,9.30446355
38.370792,9.64365076,9.31231025,0.575621844,9.30270444,9.31203472,9.30242862
38.381283,9.21954446,9.31057906,-0.301719407,9.30067469,9.31030303,9.30039836
38.391775,9.64365076,9.30886935,0.578602983,9.29864922,9.30859282,9.29837239
38.402266,9.05538514,9.3071828,-0.50179444,9.29662841,9.30690577,9.29635106
38.412758,9.8488578,9.30552057,0.737114127,9.29461185,9.30524303,9.29433399
38.42325,10.0498756,9.30388445,0.863707805,9.29259973,9.30360641,9.29232135
38.433741,10.0498756,9.30227641,0.864638196,9.29059223,9.30199785,9.29031332
38.444233,9.32737905,9.30069815,0.163342906,9.28858894,9.30041907,9.2883095
38.454724,10,9.29915219,0.837166539,9.28659024,9.29887259,9.28631026
38.465216,9.59166305,9.29764071,0.542238266,9.28459573,9.29736059,9.28431521
38.475708,9.69535971,9.29616662,0.631817292,9.28260558,9.29588597,9.28232452
38.486199,8.36660027,9.29502053,-0.963545673,9.2809078,9.29445197,9.28033838
38.496691,9.53939201,9.29363136,0.49574253,9.27892687,9.29306176,9.27835638
38.507182,9.21954446,9.29229013,-0.269714063,9.27695047,9.2917195,9.27637889
38.517674,8.77496439,9.29100097,-0.718356865,9.27497819,9.29042929,9.27440552
38.528166,9.64365076,9.28976895,0.594879664,9.27301021,9.28919622,9.27243645
38.538657,9.21954446,9.28859976,-0.262783756,9.27104671,9.28802599,9.27047185
38.549149,10.0498756,9.28749955,0.873141497,9.2690873,9.28692473,9.26851134
38.55964,8.36660027,9.28647576,-0.959101402,9.26713234,9.2858999,9.26655526
38.570132,9.2736185,9.28553651,-0.109169654,9.26518144,9.28495959,9.26460325
38.580624,8.94427191,9.2846914,-0.583454786,9.26323477,9.28411343,9.26265546
38.591115,9.2736185,9.28395146,-0.101651205,9.26129252,9.28337244,9.26071208
38.601607,9.53939201,9.28332926,0.506026441,9.25935428,9.28274919,9.25877271
38.612098,9.38083152,9.28283963,0.313036561,9.25742043,9.28225852,9.25683772
38.62259,10.198039,9.28249971,0.956838188,9.25549058,9.28191755,9.25490673
38.633082,9.32737905,9.28232973,0.212248268,9.2535649,9.28174653,9.25297989
38.643573,8.24621125,9.28235345,-1.01791071,9.25164356,9.28176923,9.25105739
38.654065,9.48683298,9.2825991,0.451922426,9.24972618,9.28201385,9.24913885
38.664556,9.64365076,9.28310022,0.600458612,9.24781311,9.28251396,9.24722461
38.675048,9.8488578,9.28389721,0.751638604,9.24590397,9.28330995,9.2453143
38.68554,8.60232527,9.28503872,-0.826264758,9.24399894,9.28445047,9.24340809
38.696031,9.32737905,9.28658374,0.201978508,9.24209819,9.28599453,9.24150614
38.706523,8.94427191,9.28860507,-0.586799079,9.24020133,9.28801493,9.23960809
38.717014,10,9.29119185,0.841907446,9.23830871,9.2906008,9.23771428
38.727506,9.64365076,9.29445618,0.590926879,9.23641997,9.29386426,9.23582433
38.737998,9.64365076,9.29853823,0.587462787,9.23453526,9.29794549,9.23393841
38.748489,10.3923048,9.30361591,1.04340258,9.23265476,9.3030224,9.23205669
38.758981,9.59166305,9.3099196,0.530795112,9.2307781,9.3093254,9.2301788
38.769472,9.74679434,9.31774664,0.655017329,9.22890561,9.31715185,9.22830509
38.779964,9.89949494,9.32749326,0.756307926,9.22703693,9.32689798,9.22643517
38.790456,9.43398113,9.33969157,0.307066059,9.22517222,9.33909596,9.22456923
38.800947,9.59166305,9.35508524,0.486392644,9.22331166,9.35448951,9.22270741
38.811439,9.69535971,9.37478732,0.566191128,9.22145486,9.37419173,9.22084936
38.82193,9.21954446,9.40060736,-0.425514864,9.21960218,9.40001228,9.21899542
38.832422,9.74679434,9.43580628,0.557663037,9.21775324,9.43521231,9.21714521
38.842914,9.94987437,9.48649542,0.680719438,9.21590821,9.4859035,9.21529891
38.853405,9.79795897,9.56378069,0.483919703,9.21406726,9.56319244,9.21345668
38.863897,9.69535971,9.68583854,0.0975764862,9.21223001,9.6852566,9.21161815
38.874388,9.38083152,9.87746497,-0.704722249,9.21039681,9.87689323,9.20978366
38.88488,9.43398113,10.1642063,-0.85453211,9.20856729,10.1636496,9.20795284
38.895372,10.0995049,10.5591855,-0.677997434,9.20674162,10.5586486,9.20612587
38.905863,11.4891253,11.0442285,0.667005808,9.20491996,11.0437143,9.20430289
38.916355,11.045361,11.5455259,-0.707223374,9.20310194,11.545033,9.20248356
38.926846,11.6619038,11.9154106,-0.503494622,9.2012879,11.9149321,9.2006682
38.937338,12.0415946,11.9852659,0.237336548,9.19947749,11.9847893,9.19885646
38.94783,12.083046,11.7121461,0.60901552,9.19767085,11.7116573,9.19704849
38.958321,10.5830052,11.2334584,-0.806506763,9.19586816,11.2329478,9.19524446
38.968813,10.6770783,10.7236348,-0.215769585,9.19406906,10.7230989,9.19344401
38.979304,10.4880885,10.285323,0.450294935,9.19227386,10.2847631,9.19164746
38.989796,10.3440804,9.95393084,0.624619558,9.19048223,9.95335123,9.18985447
39.000288,9.21954446,9.72541662,-0.711246908,9.18869432,9.72482221,9.1880652
39.010779,8.94427191,9.57686897,-0.795359705,9.18691029,9.57626414,9.18627979
39.021271,9.94987437,9.48189031,0.684093607,9.18512978,9.4812782,9.1844979
39.031762,8.48528137,9.41941747,-0.966507163,9.18335312,9.41880008,9.18271986
39.042254,9,9.3758132,-0.613036055,9.18157997,9.37519169,9.18094531
39.052746,9.43398113,9.34338446,0.300992812,9.17981047,9.34275954,9.17917441
39.063237,9.43398113,9.31804007,0.340501195,9.17804478,9.31741218,9.17740732
39.073729,8.30662386,9.29755621,-0.995455851,9.17628255,9.29692567,9.17564368
39.08422,9.8488578,9.28062751,0.753810515,9.17452412,9.27999454,9.17388382
39.094712,9.64365076,9.26639706,0.614209819,9.17276912,9.26576183,9.1721274
39.105204,8.48528137,9.25426676,-0.876918115,9.17101772,9.25362939,9.17037457
39.115695,9,9.24379749,-0.493758536,9.16927006,9.2431581,9.16862548
39.126187,8.42614977,9.2346565,-0.899170021,9.16752581,9.23401517,9.16687978
39.136678,9.32737905,9.2265926,0.317468827,9.16578529,9.22594938,9.16513781
39.14717,9.94987437,9.21940838,0.85467303,9.16404814,9.21876334,9.1633992
39.157662,9.38083152,9.21295223,0.409730753,9.16231565,9.21230428,9.16166412
39.168153,9.53939201,9.20710081,0.576447052,9.16058573,9.20645111,9.15993273
39.178645,9.16515139,9.20175688,-0.191325615,9.15885915,9.20110545,9.15820467
39.189136,8.88819442,9.19684294,-0.555561445,9.15713623,9.1961898,9.15648026
39.199628,9.48683298,9.19229415,0.542714318,9.15541663,9.19163932,9.15475917
39.21012,9.32737905,9.18805857,0.373256595,9.1537005,9.18740207,9.15304154
39.220611,8.88819442,9.18409323,-0.543965816,9.151988,9.18343506,9.15132753
39.231103,9.8488578,9.18036134,0.817616331,9.15027878,9.17970152,9.1496168
39.241594,9.21954446,9.17683343,0.206666466,9.14857316,9.17617197,9.14790965
39.252086,8.71779789,9.17348342,-0.675044839,9.1468708,9.17282032,9.14620577
39.262578,9.74679434,9.17029013,0.759278747,9.14517186,9.16962538,9.14450529
39.273069,8.94427191,9.16723551,-0.472190212,9.14347647,9.16656912,9.14280836
39.283561,9.64365076,9.1643033,0.692349235,9.14178431,9.16363528,9.14111465
39.294052,9.43398113,9.16148058,0.522015852,9.14009569,9.16081093,9.13942447
39.304544,8.48528137,9.15875519,-0.820654505,9.13841027,9.1580839,9.13773749
39.315036,9,9.15611731,-0.395116831,9.1367282,9.15544438,9.13605385
39.325527,10,9.1535584,0.920022609,9.13504964,9.15288383,9.1343737
39.336019,9.48683298,9.1510703,0.579450323,9.13337424,9.1503941,9.13269672
39.34651,8.94427191,9.14864678,-0.452078386,9.13170231,9.14796893,9.1310232
39.357002,8.94427191,9.14628145,-0.449454709,9.13003353,9.14560195,9.12935283
39.367494,8.77496439,9.14396932,-0.607457766,9.12836805,9.14328817,9.12768573
39.377985,9.05538514,9.14170601,-0.293804136,9.126706,9.1410232,9.12602207
39.388477,9.21954446,9.13948697,0.282944322,9.12504706,9.1388025,9.12436151
39.398968,8.54400375,9.13730898,-0.770263092,9.12339154,9.13662284,9.12270436
39.40946,9.59166305,9.13516836,0.675643904,9.1217391,9.13448056,9.12105029
39.419952,9.53939201,9.13306242,0.637439875,9.1200899,9.13237294,9.11939944
39.430443,9.69535971,9.13098873,0.751246288,9.11844408,9.13029757,9.11775196
39.440935,8.83176087,9.12894455,-0.545145561,9.11680131,9.1282517,9.11610754
39.451426,10,9.12692815,0.93438314,9.11516189,9.1262336,9.11446645
39.461918,9.8488578,9.12493723,0.850835222,9.11352551,9.12424099,9.11282839
39.47241,9.05538514,9.12297025,-0.259971371,9.1118923,9.1222723,9.1111935
39.482901,8.77496439,9.12102583,-0.588269876,9.1102624,9.12032618,9.10956192
39.493393,9.32737905,9.11910218,0.456373613,9.10863551,9.1184008,9.10793332
39.503884,9.59166305,9.11719835,0.688813977,9.10701191,9.11649525,9.10630802
39.514376,8.88819442,9.11531281,-0.476569397,9.10539128,9.11460797,9.10468568
39.524868,9.53939201,9.11344465,0.652646434,9.10377377,9.11273808,9.10306645
39.535359,9.38083152,9.11159305,0.518881938,9.10215952,9.11088474,9.10145047
39.545851,9.21954446,9.10975677,0.331342251,9.1005482,9.1090467,9.09983742
39.556342,9.32737905,9.10793531,0.468448227,9.09894013,9.10722348,9.0982276
39.566834,9.38083152,9.10612757,0.524122078,9.09733497,9.10541397,9.09662069
39.577326,9.53939201,9.104333,0.659590033,9.09573287,9.10361764,9.09501683
39.587817,8.48528137,9.10255114,-0.785665174,9.09413397,9.10183399,9.09341616
39.598309,9.8488578,9.10078104,0.864914311,9.09253796,9.1000621,9.09181837
39.6088,9.38083152,9.09902247,0.530856897,9.09094512,9.09830174,9.09022375
39.619292,9.11043358,9.09727461,0.114712567,9.08935515,9.09655207,9.08863198
39.629784,8.06225775,9.09553712,-1.0165035,9.08776818,9.09481277,9.08704321
39.640275,8.83176087,9.09380974,-0.511907097,9.08618435,9.09308357,9.08545757
39.650767,8.83176087,9.09209173,-0.510226284,9.08460334,9.09136373,9.08387475
39.661258,9.38083152,9.09038302,0.53893274,9.08302546,9.08965319,9.08229504
39.67175,9.59166305,9.08868294,0.709210903,9.08145039,9.08795127,9.08071813
39.682242,9.79795897,9.08699132,0.843188978,9.07987826,9.08625779,9.07914416
39.692733,8.94427191,9.085308,-0.375547723,9.07830921,9.08457262,9.07757326
39.703225,9,9.08363238,-0.289192635,9.07674294,9.08289513,9.07600513
39.713716,9.43398113,9.0819645,0.593309896,9.07517973,9.08122537,9.07444005
39.724208,8.94427191,9.08030379,-0.368824996,9.07361928,9.07956277,9.07287772
39.7347,9.94987437,9.07865016,0.933393918,9.07206171,9.07790726,9.07131826
39.745191,8.94427191,9.07700356,-0.364323556,9.07050717,9.07625876,9.06976183
39.755683,9,9.07536346,-0.274524058,9.06895535,9.07461674,9.06820811
39.766174,8.71779789,9.07372996,-0.596600433,9.06740654,9.07298133,9.06665738
39.776666,8.88819442,9.07210258,-0.428845152,9.06586042,9.07135202,9.06510934
39.787158,8.83176087,9.07048129,-0.488590243,9.06431714,9.06972879,9.06356413
39.797649,8.77496439,9.06886608,-0.542127009,9.06277683,9.06811164,9.06202188
39.808141,9.21954446,9.06725649,0.390240915,9.06123918,9.06650009,9.06048229
39.818632,9.05538514,9.06565266,-0.101328795,9.05970449,9.06489431,9.05894563
39.829124,8.30662386,9.06405417,-0.870304719,9.05817244,9.06329384,9.05741162
39.839616,9.94987437,9.06246102,0.942026195,9.05664317,9.06169871,9.05588037
39.850107,8.48528137,9.06087324,-0.758677711,9.05511681,9.06010895,9.05435203
39.860599,8.88819442,9.05929042,-0.413637522,9.05359306,9.05852412,9.05282629
39.87109,8.71779789,9.05771273,-0.583022163,9.05207221,9.05694443,9.05130343
39.881582,9.32737905,9.05613977,0.520806376,9.05055395,9.05536945,9.04978316
39.892074,9.16515139,9.05457159,0.332535407,9.04903842,9.05379925,9.0482656
39.902565,8.71779789,9.05300824,-0.578973536,9.04752574,9.05223386,9.04675089
39.913057,9.05538514,9.05144933,0.0627360065,9.04601563,9.05067291,9.04523874
39.923548,8.54400375,9.04989507,-0.711260376,9.04450835,9.04911659,9.04372941
39.93404,8.88819442,9.04834507,-0.400188271,9.04300361,9.04756453,9.04222261
39.944532,9.16515139,9.04679941,0.344023232,9.04150155,9.04601679,9.04071847
39.955023,9.16515139,9.04525815,0.346256039,9.04000229,9.04447344,9.03921713
39.965515,8.66025404,9.04372092,-0.619247029,9.03850553,9.04293413,9.03771828
39.976006,9.32737905,9.04218796,0.534032862,9.03701156,9.04139906,9.03622221
39.986498,9,9.04065889,-0.201640495,9.03552007,9.03986788,9.03472862
39.99699,8.77496439,9.0391338,-0.51397414,9.03403121,9.03834067,9.03323763
40.007481,9.74679434,9.03761278,0.842129185,9.03254509,9.03681752,9.03174938
40.017973,8.54400375,9.03609547,-0.7014925,9.03106143,9.03529806,9.03026358
40.028464,9.38083152,9.03458211,0.588429613,9.0295805,9.03378255,9.0287805
40.038956,8.83176087,9.03307235,-0.448677483,9.02810201,9.03227063,9.02729984
40.049448,9.05538514,9.03156628,0.154333582,9.02662608,9.03076239,9.02582174
40.059939,8.94427191,9.030064,-0.292902874,9.02515284,9.02925792,9.02434632
40.070431,9.43398113,9.02856517,0.636722826,9.02368202,9.0277569,9.0228733
40.080922,9,9.02707003,-0.164529738,9.02221386,9.02625955,9.02140295
40.091414,9.64365076,9.02557825,0.786175876,9.02074809,9.02476556,9.01993496
40.101906,9.53939201,9.02408993,0.717845446,9.01928484,9.02327501,9.01846948
40.112397,8.71779789,9.02260516,-0.552093539,9.01782423,9.02178801,9.01700663
40.122889,9.79795897,9.02112363,0.881382631,9.01636597,9.02030422,9.01554613
40.13338,8.83176087,9.01964557,-0.433456691,9.01491033,9.01882391,9.01408824
40.143872,9.05538514,9.01817067,0.192910531,9.01345703,9.01734673,9.01263267
40.154364,7.93725393,9.01669902,-1.03896347,9.01200619,9.01587281,9.01117955
40.164855,9.59166305,9.01523074,0.759231393,9.01055794,9.01440223,9.00972901
40.175347,9.38083152,9.0137655,0.605859732,9.009112,9.0129347,9.00828076
40.185838,8.88819442,9.01230356,-0.352291282,9.00766862,9.01147044,9.00683507
40.19633,9.16515139,9.01084461,0.39281902,9.00622753,9.01000916,9.00539166
40.206822,8.18535277,9.00938874,-0.907764269,9.00478885,9.00855096,9.00395064
40.217313,8.66025404,9.00793607,-0.589645683,9.00335271,9.00709594,9.00251215
40.227805,9.05538514,9.00648629,0.221130839,9.00191882,9.0056438,9.00107591
40.238296,9.43398113,9.00503965,0.654936244,9.00048745,9.00419479,8.99964217
40.248788,9.16515139,9.00359584,0.401939734,8.99905832,9.0027486,8.99821065
40.25928,9.05538514,9.00215498,0.230716629,8.99763154,9.00130534,8.99678148
40.269771,9.69535971,9.00071716,0.833452188,8.99620726,8.99986512,8.99535479
40.280263,8.30662386,8.99928211,-0.832260923,8.99478518,8.99842765,8.99393029
40.290754,8.48528137,8.99785005,-0.715939017,8.99336556,8.99699316,8.99250824
40.301246,9.53939201,8.9964207,0.736865874,8.99194813,8.99556137,8.99108837
40.311738,10.0498756,8.99499416,1.02707422,8.99053301,8.99413237,8.9896708
40.322229,9.2736185,8.99357055,0.529195564,8.98912033,8.9927063,8.98825565
40.332721,8.54400375,8.99214957,-0.669436949,8.9877098,8.99128284,8.98684264
40.343212,9.11043358,8.99073148,0.345979915,8.98630169,8.98986225,8.98543204
40.353704,7.93725393,8.98931597,-1.02570075,8.98489572,8.98844424,8.98402356
40.364196,9.2736185,8.98790316,0.534523463,8.98349201,8.98702892,8.98261734
40.374687,9.05538514,8.98649317,0.262472792,8.98209068,8.9856164,8.98121348
40.385179,7.81024968,8.98508571,-1.08389853,8.98069147,8.98420639,8.97981172
40.39567,8.66025404,8.98368101,-0.568706404,8.97929461,8.98279914,8.97841231
40.406162,8.71779789,8.9822788,-0.514277082,8.97789985,8.98139437,8.97701498
40.416654,9.59166305,8.9808792,0.781526616,8.9765073,8.97999218,8.97561985
40.427145,8.48528137,8.9794823,-0.702994257,8.97511709,8.97859269,8.97422705
40.437637,8.42614977,8.97808783,-0.742925339,8.97372894,8.97719561,8.97283629
40.448128,8.48528137,8.97669604,-0.701009748,8.9723431,8.9758012,8.97144783
40.45862,8.18535277,8.97530664,-0.888793491,8.97095931,8.97440917,8.9700614
40.469112,9.16515139,8.97391975,0.437300401,8.96957768,8.97301963,8.96867712
40.479603,8.83176087,8.97253548,-0.375199428,8.96819834,8.9716327,8.96729512
40.490095,8.42614977,8.97115355,-0.738243708,8.96682101,8.97024809,8.96591511
40.500586,8.88819442,8.9697742,-0.285621747,8.96544595,8.96886605,8.96453736
40.511078,8.48528137,8.96839716,-0.695065311,8.96407288,8.96748631,8.96316159
40.52157,8.60232527,8.96702254,-0.603901711,8.96270193,8.96610898,8.96178793
40.532061,7.54983444,8.96565046,-1.18988068,8.96133322,8.96473417,8.96041648
40.542553,9,8.96428064,0.188995656,8.95996648,8.9633616,8.95904699
40.553044,9.38083152,8.96291332,0.646465927,8.95860195,8.96199153,8.95767971
40.563536,9,8.96154824,0.196091216,8.95723937,8.96062366,8.95631436
40.574028,9.59166305,8.96018549,0.794655622,8.95587887,8.95925813,8.95495106
40.584519,9.53939201,8.9588252,0.761949351,8.95452055,8.95789504,8.95358994
40.595011,8.66025404,8.9574671,-0.545172503,8.95316416,8.95653411,8.95223073
40.605502,8.24621125,8.95611142,-0.842555736,8.95180993,8.95517561,8.95087367
40.615994,9,8.9547579,0.212701907,8.95045761,8.95381924,8.9495185
40.626486,8.30662386,8.95340665,-0.804228067,8.94910732,8.95246512,8.94816534
40.636977,9.11043358,8.95205778,0.397964569,8.94775916,8.95111338,8.9468143
40.647469,8.77496439,8.95071103,-0.41922147,8.94641288,8.94976373,8.94546513
40.65796,9.32737905,8.94936663,0.614827147,8.94506873,8.94841643,8.94411807
40.668452,8.94427191,8.94802432,-0.0612569386,8.94372643,8.94707119,8.94277284
40.678944,8.66025404,8.94668421,-0.53519172,8.94238611,8.94572814,8.94142958
40.689435,9.38083152,8.94534642,0.659912946,8.94104789,8.9443874,8.9400884
40.699927,9.32737905,8.94401068,0.619167485,8.9397115,8.94304868,8.93874904
40.710418,8.94427191,8.94267722,0.0399335113,8.93837718,8.94171224,8.93741173
40.72091,9.64365076,8.94134579,0.838036376,8.93704468,8.9403778,8.93607623
40.731402,8.71779789,8.9400165,-0.47140069,8.93571411,8.93904549,8.93474263
40.741893,9.74679434,8.93868945,0.898946545,8.93438559,8.93771541,8.93341107
40.752385,9.11043358,8.9373644,0.416015845,8.93305886,8.93638729,8.93208129
40.762876,8.60232527,8.93604156,-0.57768183,8.93173415,8.93506139,8.93075351
40.773368,8.54400375,8.93472069,-0.625073554,8.93041122,8.93373744,8.92942749
40.78386,8.77496439,8.9334019,-0.398042098,8.92909018,8.93241554,8.92810334
40.794351,8.54400375,8.93208529,-0.622961916,8.92777113,8.93109581,8.92678117
40.804843,8.36660027,8.93077062,-0.751112741,8.92645383,8.92977799,8.92546073
40.815334,8.94427191,8.9294581,0.121711987,8.92513852,8.92846232,8.92414226
40.825826,8.83176087,8.92814749,-0.310461957,8.92382493,8.92714854,8.9228255
40.836318,8.77496439,8.9268389,-0.389710809,8.92251319,8.92583676,8.92151056
40.846809,7.93725393,8.92553244,-0.994121978,8.9212034,8.92452709,8.92019756
40.857301,8.36660027,8.92422785,-0.746744659,8.91989531,8.92321927,8.91888625
40.867792,8.48528137,8.92292537,-0.661546668,8.91858917,8.92191355,8.91757685
40.878284,9.05538514,8.92162473,0.365732694,8.9172847,8.92060965,8.91626912
40.888776,9,8.92032606,0.282265721,8.91598204,8.9193077,8.91496318
40.899267,9.53939201,8.91902947,0.787630972,8.91468129,8.9180078,8.91365912
40.909759,8.36660027,8.91773468,-0.74238428,8.91338219,8.9167097,8.91235671
40.92025,9.16515139,8.91644196,0.498707763,8.912085,8.91541364,8.91105617
40.930742,9,8.91515102,0.291288474,8.91078944,8.91411935,8.90975726
40.941234,8.77496439,8.9138628,-0.37269078,8.90949644,8.91282695,8.90846008
40.951725,8.1240384,8.9125758,-0.887996283,8.90820451,8.91153655,8.90716475
40.962217,8.48528137,8.91129057,-0.652693797,8.9069142,8.9102479,8.90587102
40.972708,8.94427191,8.91000733,0.185106944,8.90562574,8.90896122,8.90457912
40.9832,9.2736185,8.90872584,0.604063456,8.90433887,8.90767628,8.9032888
40.993692,9.69535971,8.9074462,0.887644925,8.90305372,8.90639317,8.90200017
41.004183,8.54400375,8.90616854,-0.601801288,8.9017704,8.90511201,8.90071335
41.014675,8.94427191,8.90489258,0.198442246,8.90048865,8.90383254,8.89942808
41.025166,9.89949494,8.90361858,0.997936047,8.89920871,8.902555,8.8981446
41.035658,7.93725393,8.90234628,-0.982391135,8.89793032,8.90127914,8.89686265
41.04615,8.83176087,8.90107578,-0.263277251,8.89665361,8.90000506,8.89558236
41.056641,8.54400375,8.8998072,-0.596492625,8.89537868,8.89873288,8.89430383
41.067133,8.42614977,8.89854028,-0.687306708,8.89410528,8.89746235,8.89302681
41.077624,8.36660027,8.89727527,-0.728474437,8.89283365,8.8961937,8.89175154
41.088116,8.18535277,8.89601191,-0.843006011,8.89156354,8.89492667,8.89047776
41.098608,8.71779789,8.8947503,-0.420657122,8.89029506,8.89366138,8.88920559
41.109099,8.66025404,8.89349057,-0.482945679,8.88902831,8.89239794,8.88793514
41.119591,8.54400375,8.89223245,-0.590109064,8.88776306,8.8911361,8.88666615
41.130082,8.83176087,8.89097619,-0.243341991,8.88649954,8.88987608,8.88539887
41.140574,8.83176087,8.88972153,-0.240750213,8.88523749,8.88861765,8.88413305
41.151066,8.54400375,8.88846859,-0.586911271,8.88397703,8.88736091,8.88286879
41.161557,8.06225775,8.88721746,-0.90827293,8.88271826,8.88610597,8.88160621
41.172049,9.16515139,8.88596792,0.528378153,8.88146096,8.88485258,8.88034505
41.18254,8.54400375,8.88472018,-0.583709201,8.88020533,8.88360097,8.87908556
41.193032,8.94427191,8.88347399,0.246572334,8.87895114,8.8823509,8.87782748
41.203524,9.05538514,8.88222948,0.416119764,8.8776985,8.88110248,8.87657092
41.214015,9,8.88098675,0.344982978,8.87644752,8.8798558,8.875316
41.224507,8.77496439,8.87974554,-0.323699173,8.87519795,8.87861064,8.87406246
41.234998,9,8.8785061,0.348559752,8.87395002,8.87736721,8.87281055
41.24549,8.94427191,8.87726817,0.258850801,8.87270349,8.87612527,8.87156001
41.255982,7.48331477,8.87603187,-1.18013436,8.87145847,8.87488494,8.87031095
41.266473,8.54400375,8.8747973,-0.575146553,8.87021507,8.87364631,8.86906348
41.276965,8.54400375,8.87356423,-0.574073584,8.86897304,8.87240915,8.86781737
41.287456,8.42614977,8.87233286,-0.667969379,8.86773262,8.87117368,8.86657283
41.297948,8.83176087,8.87110298,-0.19834846,8.86649355,8.86993965,8.86532962
41.30844,9,8.86987467,0.360728882,8.86525595,8.86870719,8.86408786
41.318931,8.94427191,8.86864806,0.274997907,8.86401993,8.86747638,8.86284764
41.329423,9.05538514,8.8674229,0.433546123,8.86278525,8.86624701,8.86160874
41.339914,8.71779789,8.86619941,-0.38522918,8.86155213,8.86501927,8.86037138
41.350406,8.48528137,8.86497735,-0.616194757,8.86032033,8.86379295,8.8591353
41.360898,8.94427191,8.86375684,0.283751779,8.85908996,8.86256814,8.85790064
41.371389,8.71779789,8.86253797,-0.380447219,8.85786113,8.86134495,8.85666748
41.381881,9.2736185,8.86132052,0.642104335,8.8566336,8.86012314,8.85543559
41.392372,8.88819442,8.8601047,0.167599884,8.85540759,8.85890294,8.8542052
41.402864,8.1240384,8.85889027,-0.857235011,8.85418287,8.85768411,8.85297607
41.413356,8.71779789,8.85767734,-0.374004618,8.85295954,8.85646674,8.85174829
41.423847,9,8.85646602,0.378858781,8.85173771,8.85525096,8.85052199
41.434339,9.21954446,8.85525608,0.603563071,8.85051714,8.85403652,8.84929693
41.44483,8.71779789,8.85404772,-0.369120355,8.84929805,8.85282364,8.84807331
41.455322,9.38083152,8.85284072,0.726629751,8.84808022,8.85161209,8.84685092
41.465814,7.61577311,8.85163519,-1.11169334,8.84686373,8.85040197,8.84562985
41.476305,8.06225775,8.85043122,-0.887791346,8.84564871,8.84919339,8.84441021
41.486797,9.2736185,8.84922859,0.651452152,8.84443492,8.84798611,8.84319177
41.497288,8.48528137,8.84802751,-0.602284099,8.84322257,8.84678036,8.84197474
41.50778,9.8488578,8.84682775,1.00101451,8.84201144,8.84557589,8.8407589
41.518272,9,8.84562941,0.392900226,8.84080162,8.84437282,8.83954433
41.528763,9,8.84443261,0.394420325,8.83959322,8.84317124,8.83833117
41.539255,9.2736185,8.8432371,0.656034601,8.83838602,8.84197093,8.83711916
41.549746,9.38083152,8.84204311,0.73402208,8.83718023,8.8407721,8.83590853
41.560238,8.54400375,8.84085039,-0.54483635,8.83597561,8.83957452,8.83469903
41.57073,8.18535277,8.83965907,-0.808892019,8.83477227,8.8383783,8.83349079
41.581221,8.88819442,8.83846924,0.222991428,8.83357032,8.83718354,8.83228391
41.591713,8.30662386,8.83728067,-0.728461947,8.83236953,8.83599,8.83107814
41.602204,8.60232527,8.83609358,-0.483495929,8.83117011,8.83479791,8.82987371
41.612696,8,8.83490774,-0.913732858,8.82997183,8.83360703,8.82867039
41.623188,8.77496439,8.83372324,-0.242402261,8.82877479,8.83241747,8.82746828
41.633679,8.83176087,8.83254021,-0.0279167098,8.82757911,8.83122933,8.82626749
41.644171,8.06225775,8.8313584,-0.876983837,8.82638455,8.83004237,8.82506778
41.654662,7.93725393,8.83017803,-0.944946612,8.82519132,8.82885683,8.82386937
41.665154,7.93725393,8.82899888,-0.94432248,8.8239992,8.82767246,8.82267203
41.675646,8.66025404,8.82782104,-0.409349488,8.82280829,8.82648937,8.82147587
41.686137,8.77496439,8.82664463,-0.227332879,8.8216187,8.82530767,8.82028099
41.696629,8.83176087,8.8254694,0.0793187569,8.8204302,8.82412712,8.81908715
41.70712,8.66025404,8.82429559,-0.405020428,8.81924299,8.82294794,8.81789458
41.717612,9.16515139,8.82312295,0.584831978,8.81805686,8.82176991,8.81670304
41.728104,8.77496439,8.82195159,-0.216765322,8.81687191,8.82059311,8.81551264
41.738595,9,8.82078163,0.423341913,8.81568823,8.81941767,8.81432348
41.749087,8.77496439,8.81961282,-0.211301748,8.81450561,8.81824334,8.81313534
41.759578,8.30662386,8.81844538,-0.715417024,8.81332426,8.81707035,8.81194842
41.77007,8.66025404,8.81727909,-0.396263869,8.81214394,8.81589846,8.8107625
41.780562,8.18535277,8.81611405,-0.79420481,8.81096477,8.81472778,8.80957769
41.791053,8.94427191,8.81495037,0.359613046,8.80978685,8.81355842,8.80839408
41.801545,8.77496439,8.81378781,-0.197036597,8.80860994,8.81239013,8.80721144
41.812036,9.43398113,8.81262659,0.788260453,8.80743427,8.81122315,8.80603
41.822528,8.60232527,8.81146649,-0.457319602,8.8062596,8.81005724,8.80484953
41.83302,8.71779789,8.8103076,-0.304154092,8.80508605,8.80889251,8.80367011
41.843511,8.36660027,8.80915003,-0.665244142,8.80391371,8.80772905,8.80249188
41.854003,8.66025404,8.80799356,-0.384368998,8.80274235,8.80656664,8.80131458
41.864494,7.93725393,8.8068384,-0.932515131,8.8015722,8.8054055,8.80013844
41.874986,8.36660027,8.80568433,-0.662634182,8.80040302,8.80424539,8.79896322
41.885478,9.11043358,8.80453143,0.553084212,8.79923492,8.80308643,8.79778904
41.895969,8.83176087,8.80337983,0.168466715,8.798068,8.80192871,8.796616
41.906461,8.83176087,8.8022293,0.171847523,8.79690203,8.80077201,8.79544386
41.916952,8.54400375,8.80108004,-0.507026913,8.79573723,8.79961654,8.79427285
41.927444,9.32737905,8.79993183,0.726255618,8.79457338,8.79846208,8.79310273
41.937936,8.88819442,8.79878478,0.299014443,8.79341057,8.79730872,8.7919336
41.948427,8.48528137,8.79763899,-0.558889627,8.79224891,8.79615657,8.79076558
41.958919,8.71779789,8.79649423,-0.280528693,8.79108817,8.79500541,8.78959843
41.96941,9,8.79535073,0.452381778,8.78992857,8.79385545,8.78843237
41.979902,8.77496439,8.79420824,-0.138722227,8.78876988,8.79270646,8.78726717
41.990394,8.54400375,8.79306689,-0.499062262,8.78761221,8.79155855,8.78610294
42.000885,8.83176087,8.79192676,0.199584835,8.78645566,8.79041182,8.78493977
42.011377,8.36660027,8.79078764,-0.651296687,8.78529999,8.78926604,8.78377744
42.021868,9.05538514,8.78964974,0.515495296,8.78414544,8.78812142,8.78261617
42.03236,8.36660027,8.78851283,-0.649547971,8.78299176,8.78697775,8.78145572
42.042852,8.88819442,8.78737702,0.317517547,8.78183907,8.78583512,8.7802962
42.053343,9.2736185,8.78624242,0.698123253,8.78068747,8.78469364,8.77913772
42.063835,8.66025404,8.78510879,-0.353347922,8.77953673,8.78355309,8.77798004
42.074326,8.06225775,8.78397636,-0.849540233,8.77838707,8.78241366,8.77682338
42.084818,8.66025404,8.78284489,-0.35012976,8.77723826,8.78127515,8.77566752
42.09531,8.60232527,8.78171449,-0.423543649,8.7760904,8.78013766,8.77451256
42.105801,8.36660027,8.78058527,-0.643416662,8.7749436,8.77900128,8.7733586
42.116293,8.36660027,8.779457,-0.642539283,8.77379764,8.77786579,8.77220541
42.126784,8,8.77832989,-0.882230065,8.77265272,8.77673141,8.77105321
42.137276,7.81024968,8.77720372,-0.983338215,8.77150863,8.7755979,8.76990177
42.147768,8.54400375,8.7760786,-0.481741482,8.77036546,8.77446539,8.76875119
42.158259,9.2736185,8.77495463,0.706161361,8.76922332,8.77333395,8.76760159
42.168751,8.48528137,8.77383158,-0.537168694,8.76808199,8.77220338,8.76645272
42.179242,9.11043358,8.77270967,0.58114018,8.76694167,8.77107389,8.76530481
42.189734,8.88819442,8.77158868,0.341475827,8.76580215,8.76994525,8.76415763
42.200226,8.1240384,8.7704687,-0.804008892,8.76466353,8.76881756,8.76301129
42.210717,8.48528137,8.76934985,-0.532980747,8.7635259,8.76769093,8.76186588
42.221209,8.1240384,8.7682319,-0.802616656,8.76238906,8.76656514,8.76072118
42.2317,9.48683298,8.76711506,0.848361903,8.76125321,8.76544038,8.75957741
42.242192,7.34846923,8.76599912,-1.19060064,8.76011812,8.76431646,8.75843433
42.252684,8.24621125,8.76488417,-0.7201895,8.7589839,8.76319346,8.75729205
42.263175,8,8.76377031,-0.873939536,8.75785066,8.76207148,8.75615068
42.273667,8.1240384,8.76265734,-0.799136367,8.75671817,8.76095032,8.75500999
42.284158,9.16515139,8.76154545,0.635299881,8.75558664,8.75983017,8.75387019
42.29465,7.61577311,8.76043443,-1.06988846,8.75445586,8.75871082,8.75273106
42.305142,9,8.75932439,0.490587008,8.75332591,8.75759236,8.7515927
42.315633,8.88819442,8.75821541,0.360526008,8.75219692,8.7564749,8.75045521
42.326125,9,8.7571073,0.492841456,8.75106865,8.75535823,8.74931837
42.336616,8.66025404,8.75600025,-0.309428843,8.74994132,8.75424254,8.74818239
42.347108,8.24621125,8.75489404,-0.713220016,8.7488147,8.75312762,8.74704705
42.3576,8.42614977,8.75378879,-0.572397603,8.7476889,8.75201358,8.74591245
42.368091,9.05538514,8.75268459,0.550182291,8.74656402,8.7509005,8.74477869
42.378583,9.05538514,8.75158122,0.551184108,8.74543985,8.74978818,8.74364555
42.389074,9.05538514,8.75047889,0.552183164,8.74431658,8.74867682,8.74251324
42.399566,8.48528137,8.74937739,-0.513902732,8.74319401,8.7475662,8.74138154
42.410058,9.48683298,8.74827682,0.859392901,8.74207223,8.74645643,8.74025055
42.420549,8.54400375,8.74717728,-0.450747753,8.74095135,8.7453476,8.73912036
42.431041,8.06225775,8.74607856,-0.826934585,8.73983114,8.7442395,8.73799077
42.441532,9.32737905,8.74498085,0.763150182,8.73871182,8.74313234,8.73686198
42.452024,9.32737905,8.74388396,0.763868507,8.73759317,8.74202589,8.73573377
42.462516,9.05538514,8.74278797,0.559103898,8.73647529,8.74092027,8.73460623
42.473007,8.06225775,8.74169299,-0.82427862,8.73535828,8.73981556,8.73347948
42.483499,9.48683298,8.74059881,0.863848465,8.73424192,8.73871155,8.73235329
42.49399,8.60232527,8.73950563,-0.370378677,8.73312643,8.73760845,8.73122786
42.504482,9.11043358,8.73841324,0.609934699,8.73201158,8.73650605,8.73010299
42.514974,9,8.73732174,0.512521471,8.73089748,8.73540444,8.72897877
42.525465,8.42614977,8.73623123,-0.556849585,8.72978423,8.73430372,8.7278553
42.535957,8.48528137,8.7351415,-0.49986011,8.72867161,8.73320368,8.72673236
42.546448,7.61577311,8.73405276,-1.05748742,8.72755984,8.73210453,8.72561016
42.55694,8.71779789,8.73296478,-0.123153959,8.72644868,8.73100604,8.72448848
42.567432,8.24621125,8.73187768,-0.696897721,8.72533826,8.72990833,8.72336742
42.577923,8.18535277,8.73079156,-0.738538277,8.72422866,8.72881148,8.72224709
42.588415,8,8.72970619,-0.85422842,8.72311967,8.72771529,8.72112726
42.598906,8.66025404,8.7286218,-0.261472292,8.7220115,8.72661995,8.72000814
42.609398,7.28010989,8.72753816,-1.20309113,8.72090394,8.72552527,8.71888952
42.61989,9.16515139,8.72645538,0.662341313,8.71979708,8.72443133,8.71777148
42.630381,8.88819442,8.72537355,0.403510677,8.71869103,8.72333823,8.71665414
42.640873,8.77496439,8.72429247,0.225104227,8.71758556,8.72224577,8.71553728
42.651364,8.06225775,8.72321235,-0.812991145,8.7164809,8.72115414,8.7144211
42.661856,8.77496439,8.72213297,0.229850863,8.71537683,8.72006313,8.71330539
42.672348,9.11043358,8.72105443,0.624002523,8.71427344,8.71897285,8.71219024
42.682839,8.06225775,8.71997684,-0.81099882,8.71317083,8.71788339,8.71107575
42.693331,8.83176087,8.71889998,0.33594775,8.71206881,8.71679454,8.70996172
42.703822,9,8.71782405,0.531202359,8.71096756,8.7157065,8.70884834
42.714314,8.83176087,8.71674886,0.339134197,8.70986688,8.71461907,8.7077354
42.724806,8.71779789,8.7156745,0.0460801948,8.70876686,8.71353233,8.70662299
42.735297,9.32737905,8.71460107,0.782801367,8.70766762,8.7124464,8.70551123
42.745789,8.42614977,8.71352837,-0.536077042,8.70656893,8.71136105,8.70439988
42.75628,8.42614977,8.71245659,-0.535076457,8.70547101,8.71027649,8.70328916
42.766772,9.2736185,8.71138553,0.749821957,8.70437364,8.70919252,8.70217886
42.777264,8.94427191,8.71031529,0.483690625,8.70327691,8.70810922,8.70106906
42.787755,9,8.70924597,0.539216125,8.70218095,8.7070267,8.69995988
42.798247,9.21954446,8.70817736,0.715099358,8.70108552,8.70594475,8.69885109
42.808738,9.16515139,8.70710968,0.676787791,8.69999084,8.70486357,8.6977429
42.81923,8.66025404,8.7060427,-0.21398285,8.6988967,8.70378295,8.69663509
42.829722,7.93725393,8.70497653,-0.876197808,8.69780319,8.70270298,8.69552777
42.840213,9.21954446,8.70391128,0.718076028,8.69671042,8.70162378,8.69442103
42.850705,8.83176087,8.70284673,0.359046152,8.69561818,8.70054512,8.69331466
42.861196,8.71779789,8.70178309,0.126549597,8.69452668,8.69946721,8.69220887
42.871688,9,8.70072015,0.547064758,8.69343569,8.69838984,8.69110343
42.88218,8.83176087,8.69965802,0.363459554,8.69234533,8.69731311,8.68999845
42.892671,8.54400375,8.69859713,-0.393183655,8.69125604,8.69623712,8.68889403
42.903163,9.32737905,8.69753661,0.793626138,8.69016692,8.69516166,8.68778995
42.913654,9.48683298,8.69647698,0.889019683,8.68907852,8.69408692,8.68668642
42.924146,9,8.69541806,0.551889428,8.68799063,8.69301271,8.68558323
42.934638,8.42614977,8.69435994,-0.517890107,8.68690336,8.69193911,8.68448046
42.945129,7.34846923,8.69330271,-1.15966956,8.6858168,8.69086624,8.68337823
42.955621,8.77496439,8.69224619,0.287607717,8.68473075,8.68979387,8.68227631
42.966112,9.38083152,8.69119056,0.83044624,8.6836454,8.68872222,8.68117491
42.976604,8.60232527,8.69013563,-0.296328142,8.68256056,8.68765107,8.68007383
42.987096,8.94427191,8.6890815,0.505163741,8.68147633,8.68658051,8.67897315
42.997587,9.11043358,8.68802827,0.649927155,8.6803928,8.68551066,8.67787297
43.008079,8.54400375,8.68697574,-0.378116376,8.67930976,8.68444131,8.67677309
43.01857,8.24621125,8.6859241,-0.663108477,8.67822743,8.68337264,8.6756737
43.029062,7.74596669,8.68487317,-0.968971864,8.6771456,8.68230446,8.6745746
43.039554,8.60232527,8.68382303,-0.285478128,8.67606436,8.68123686,8.67347588
43.050045,9.38083152,8.68277379,0.835498492,8.67498382,8.68016995,8.67237764
43.060537,8.30662386,8.68172525,-0.612455213,8.67390377,8.67910351,8.67127967
43.071028,8.36660027,8.68067761,-0.560426042,8.67282442,8.67803775,8.67018217
43.08152,8.94427191,8.67963068,0.514432923,8.67174557,8.67697245,8.66908492
43.092012,8.66025404,8.67858455,-0.135390204,8.6706673,8.67590773,8.66798804
43.102503,8.83176087,8.67753932,0.392710517,8.66958973,8.67484367,8.66689161
43.112995,8.66025404,8.67649479,-0.127439221,8.66851265,8.67378006,8.66579542
43.123486,8.48528137,8.67545118,-0.436084627,8.66743627,8.67271712,8.66469969
43.133978,8.71779789,8.67440827,0.208301749,8.66636037,8.67165463,8.66360418
43.14447,8.18535277,8.67336617,-0.698579558,8.66528507,8.6705927,8.66250901
43.154961,8.06225775,8.67232498,-0.78106801,8.66421047,8.66953141,8.66141427
43.165453,9,8.67128451,0.573337149,8.66313635,8.66847057,8.66031975
43.175944,9.16515139,8.67024496,0.703495864,8.66206293,8.66741037,8.65922566
43.186436,7.87400787,8.66920612,-0.891738891,8.66099,8.66635061,8.65813177
43.196928,9.16515139,8.66816811,0.70497041,8.65991767,8.66529138,8.6570382
43.207419,8.36660027,8.66713102,-0.548206854,8.65884603,8.66423279,8.65594503
43.217911,8,8.66609466,-0.816146224,8.65777489,8.66317464,8.65485206
43.228402,8.42614977,8.66505923,-0.488783646,8.65670445,8.66211711,8.65375949
43.238894,8.30662386,8.66402453,-0.597829964,8.6556345,8.66106,8.6526671
43.249386,8.88819442,8.66299067,0.474556371,8.65456516,8.66000342,8.651575
43.259877,8.48528137,8.66195775,-0.420328887,8.65349652,8.65894746,8.65048329
43.270369,7.93725393,8.66092557,-0.850688921,8.65242839,8.65789191,8.64939175
43.28086,8.48528137,8.65989435,-0.417867171,8.65136096,8.65683698,8.64830058
43.291352,8.06225775,8.65886388,-0.772402827,8.65029405,8.65578247,8.64720958
43.301844,7.87400787,8.65783426,-0.885339702,8.64922774,8.65472846,8.64611885
43.312335,8.30662386,8.65680561,-0.591761563,8.64816215,8.65367506,8.64502847
43.322827,8.18535277,8.65577773,-0.685875321,8.64709708,8.65262207,8.64393825
43.333318,9.59166305,8.65475082,0.967942266,8.64603273,8.65156968,8.64284838
43.34381,9.2736185,8.65372469,0.787333353,8.6449689,8.65051768,8.64175865
43.354302,7.81024968,8.65269944,-0.917850622,8.6439057,8.64946619,8.64066916
43.364793,8.77496439,8.65167518,0.351125625,8.64284324,8.64841529,8.63958001
43.375285,9,8.65065172,0.591056914,8.64178131,8.64736479,8.63849099
43.385776,9.2736185,8.64962927,0.789929888,8.64072012,8.64631487,8.6374023
43.396268,7.81024968,8.64860762,-0.915618888,8.63965947,8.64526535,8.63631373
43.40676,8.42614977,8.6475869,-0.470571062,8.63859948,8.64421631,8.63522538
43.417251,9.38083152,8.64656719,0.856892249,8.63754024,8.64316786,8.63413735
43.427743,8,8.64554832,-0.80346022,8.63648156,8.64211978,8.63304942
43.438234,8.66025404,8.64452542,0.125413801,8.63541856,8.64107229,8.6319618
43.448726,7.41619849,8.64350845,-1.10784023,8.63436124,8.64002518,8.63087428
43.459218,9.11043358,8.64249244,0.68406223,8.63330459,8.63897855,8.62978695
43.469709,7.93725393,8.6414775,-0.839180296,8.63224873,8.63793249,8.62869992
43.480201,8.30662386,8.64046344,-0.577788523,8.63119346,8.6368868,8.62761298
43.490692,8.54400375,8.63945046,-0.30894452,8.63013899,8.63584169,8.62652632
43.501184,8.1240384,8.63843838,-0.717216829,8.62908513,8.63479694,8.62543974
43.511676,9.2736185,8.63742731,0.797615936,8.62803199,8.63375266,8.62435334
43.522167,9.64365076,8.63641736,1.00361018,8.62697967,8.63270895,8.62326721
43.532659,9.32737905,8.63540834,0.831847769,8.62592799,8.6316656,8.62218114
43.54315,8.30662386,8.63440046,-0.572517771,8.62487715,8.63062282,8.62109534
43.553642,8.30662386,8.63339354,-0.571637716,8.62382697,8.6295804,8.62000959
43.564134,8.71779789,8.63238769,0.292250233,8.62277754,8.62853844,8.618924
43.574625,7.87400787,8.63138301,-0.870273026,8.621729,8.62749703,8.61783866
43.585117,8.48528137,8.63037934,-0.380917268,8.62068113,8.62645599,8.61675336
43.595608,8.83176087,8.62937687,0.449871088,8.61963417,8.62541549,8.61566831
43.6061,8.60232527,8.62837543,-0.161400636,8.61858792,8.62437536,8.6145833
43.616592,8.42614977,8.62737513,-0.4485815,8.61754248,8.62333568,8.61349842
43.627083,8.36660027,8.62637609,-0.509682082,8.61649799,8.62229655,8.61241377
43.637575,8.06225775,8.62537812,-0.75041347,8.61545424,8.62125777,8.61132914
43.648066,8.42614977,8.62438145,-0.445232156,8.61441146,8.62021954,8.61024474
43.658558,8.83176087,8.62338588,0.456481089,8.61336946,8.61918166,8.60916035
43.66905,8.30662386,8.62239155,-0.561932099,8.61232836,8.61814423,8.60807607
43.679541,8.54400375,8.62139855,-0.278199226,8.61128826,8.61710734,8.60699201
43.690033,9.21954446,8.62040674,0.77403987,8.610249,8.61607081,8.60590795
43.700524,8.30662386,8.6194163,-0.559278499,8.60921078,8.61503481,8.6048241
43.711016,9.43398113,8.61842709,0.90308031,8.60817343,8.61399917,8.60374023
43.721508,8.54400375,8.6174392,-0.270989774,8.60713707,8.61296396,8.60265647
43.731999,8.30662386,8.61645277,-0.556622771,8.60610181,8.6119293,8.60157289
43.742491,8.60232527,8.61546763,-0.114640142,8.60506747,8.61089498,8.6004893
43.752982,7.34846923,8.61448399,-1.12517321,8.60403429,8.60986121,8.59940589
43.763474,8.54400375,8.61350169,-0.263624622,8.60300208,8.60882777,8.59832246
43.773966,8.71779789,8.61252085,0.324464236,8.60197097,8.60779478,8.5972391
43.784457,8.06225775,8.61154159,-0.741136857,8.60094107,8.60676233,8.59615591
43.794949,7.61577311,8.61056376,-0.997391925,8.59991222,8.60573021,8.59507269
43.80544,10.2956301,8.60958757,1.29847702,8.59888465,8.60469864,8.59398963
43.815932,8.18535277,8.60861287,-0.650584428,8.59785818,8.60366741,8.59290653
43.826424,8.36660027,8.60763978,-0.490957757,8.59683294,8.60263662,8.59182348
43.836915,8.71779789,8.60666844,0.333360835,8.59580907,8.60160636,8.59074059
43.847407,8.18535277,8.60569869,-0.648340896,8.59478639,8.60057645,8.58965764
43.857898,8.60232527,8.60473075,-0.0490457394,8.59376513,8.59954707,8.58857484
43.86839,8.1240384,8.60376448,-0.692622608,8.59274515,8.59851804,8.58749197
43.878882,8.54400375,8.60280001,-0.242479416,8.59172656,8.59748945,8.58640914
43.889373,9.69535971,8.60183748,1.04571614,8.5907095,8.59646139,8.58532645
43.899865,8.06225775,8.60087674,-0.733906661,8.58969383,8.59543368,8.58424368
43.910356,7.28010989,8.59991802,-1.14882902,8.58867977,8.5944065,8.58316104
43.920848,9.32737905,8.59896118,0.853474002,8.58766717,8.59337967,8.58207831
43.93134,8,8.59800637,-0.773308719,8.58665618,8.59235328,8.58099561
43.941831,7.68114575,8.59705373,-0.957030818,8.58564694,8.59132743,8.57991302
43.952323,8.94427191,8.59610313,0.590058281,8.5846393,8.59030192,8.57883034
43.962814,8.18535277,8.59515481,-0.640157823,8.58363351,8.58927696,8.57774776
43.973306,8.54400375,8.59420864,-0.224064486,8.58262943,8.58825234,8.57666509
43.983798,8.42614977,8.59326477,-0.408797012,8.58162722,8.58722816,8.57558242
43.994289,8.60232527,8.59232336,0.100009553,8.58062701,8.58620453,8.57449984
44.004781,8.60232527,8.59138428,0.104599159,8.57962869,8.58518125,8.57341716
44.015272,8.71779789,8.5904478,0.356861443,8.57863252,8.58415851,8.57233456
44.025764,7.61577311,8.58951379,-0.986782998,8.57763835,8.58313613,8.57125185
44.036256,9.48683298,8.58858243,0.94776081,8.57664637,8.58211419,8.57016912
44.046747,7.21110255,8.58765387,-1.17326524,8.57565673,8.5810928,8.56908647
44.057239,8,8.58672803,-0.765981744,8.57466933,8.58007177,8.56800369
44.06773,7.68114575,8.58580516,-0.951135856,8.57368442,8.57905129,8.56692099
44.078222,8.88819442,8.58488518,0.550735179,8.57270192,8.57803116,8.56583815
44.088714,8.54400375,8.58396826,-0.199911272,8.57172199,8.57701149,8.56475528
44.099205,8.18535277,8.58305459,-0.630636044,8.57074483,8.57599238,8.56367247
44.109697,8.66025404,8.5821441,0.279481558,8.56977034,8.57497363,8.56258951
44.120188,9.21954446,8.58123705,0.798941426,8.5687988,8.57395544,8.56150661
44.13068,9,8.5803334,0.647816792,8.56783015,8.57293761,8.56042355
44.141172,8.1240384,8.57943335,-0.674829565,8.56686457,8.57192025,8.55934045
44.151663,8.77496439,8.57853709,0.443201195,8.56590229,8.57090346,8.55825739
44.162155,9.21954446,8.57764459,0.80118654,8.56494323,8.56988703,8.55717417
44.172646,7.68114575,8.57675614,-0.946366944,8.56398771,8.56887118,8.55609098
44.183138,9.11043358,8.57587173,0.73113737,8.56303568,8.5678557,8.55500763
44.19363,8.18535277,8.57499157,-0.62421054,8.56208738,8.5668407,8.55392421
44.204121,9.38083152,8.57411591,0.898173485,8.56114303,8.56582627,8.55284082
44.214613,9.48683298,8.57324474,0.955818098,8.56020262,8.56481223,8.55175725
44.225104,7.87400787,8.5723784,-0.835685664,8.55926649,8.56379877,8.5506737
44.235596,8.1240384,8.5715169,-0.668938337,8.55833463,8.5627857,8.54958996
44.246088,8.24621125,8.57066052,-0.569604481,8.55740732,8.56177312,8.54850614
44.256579,8.54400375,8.56980952,-0.160641754,8.55648484,8.56076112,8.54742234
44.267071,8.88819442,8.56896396,0.565004832,8.55556721,8.55974953,8.54633833
44.277562,8.18535277,8.56812421,-0.618685251,8.55465482,8.55873853,8.54525434
44.288054,8.88819442,8.56729035,0.566483948,8.55374772,8.55772793,8.54417014
44.298546,8.60232527,8.56646271,0.18937412,8.55284624,8.55671784,8.54308584
44.309037,8.06225775,8.56564161,-0.7094955,8.55195071,8.55570836,8.54200154
44.319529,7.87400787,8.56482718,-0.831155404,8.55106124,8.55469929,8.54091702
44.33002,8.1240384,8.56401985,-0.663310973,8.55017827,8.55369083,8.5398325
44.340512,7.87400787,8.56418337,-0.830768017,8.54930192,8.55364757,8.53874776
44.351004,8.18535277,8.56339275,-0.614849555,8.54843261,8.55264187,8.5376629
44.361495,8.94427191,8.5626102,0.617787757,8.54757075,8.55163681,8.53657802
44.371987,8.83176087,8.56183593,0.519543004,8.54671652,8.55063218,8.53549292
44.382478,9.2736185,8.56107049,0.844125589,8.54587047,8.54962818,8.53440779
44.39297,8.60232527,8.56031411,0.204966225,8.54503283,8.54862464,8.53332242
44.403462,9,8.55956732,0.663651021,8.54420412,8.54762164,8.53223693
44.413953,9.21954446,8.55883064,0.812843046,8.54338485,8.54661929,8.53115139
44.424445,8.88819442,8.55810441,0.574534597,8.54257536,8.54561741,8.53006562
44.434936,8.83176087,8.5573893,0.523804895,8.54177631,8.54461618,8.52897981
44.445428,8.83176087,8.55668571,0.524476077,8.54098809,8.54361542,8.52789375
44.45592,9.32737905,8.55599431,0.878285116,8.54021137,8.54261524,8.52680753
44.466411,8.71779789,8.55531578,0.403090691,8.53944683,8.54161573,8.52572127
44.476903,8.30662386,8.55465067,-0.4980229,8.53869499,8.54061671,8.52463476
44.487394,8.71779789,8.55399982,0.404719736,8.53795671,8.53961836,8.52354818
44.497886,8.77496439,8.55336387,0.470744638,8.53723261,8.53862052,8.52246135
44.508378,9.05538514,8.55274371,0.708972093,8.53652356,8.53762328,8.52137435
44.518869,8.24621125,8.55214026,-0.553108501,8.53583051,8.53662673,8.52028728
44.529361,8.30662386,8.55155437,-0.494904541,8.53515426,8.53563071,8.51919995
44.539852,9.16515139,8.55098714,0.783686321,8.53449595,8.53463539,8.51811254
44.550344,8.88819442,8.55043956,0.581166804,8.53385653,8.5336406,8.51702486
44.560836,8.88819442,8.54991286,0.581619769,8.53323722,8.53264644,8.515937
44.571327,7.93725393,8.54940834,-0.782402971,8.53263935,8.53165301,8.51484906
44.581819,9,8.54892727,0.671619484,8.53206415,8.53066013,8.51376083
44.59231,8.94427191,8.5484712,0.629126941,8.53151318,8.529668,8.51267252
44.602802,8.60232527,8.54804164,0.232988472,8.53098793,8.52867642,8.51158391
44.613294,8,8.54764034,-0.740027258,8.53049016,8.52768551,8.51049512
44.623785,8.30662386,8.54726921,-0.490556159,8.53002177,8.52669536,8.50940623
44.634277,8.88819442,8.54693018,0.584178256,8.52958469,8.5257058,8.50831704
44.644768,7.54983444,8.54662552,-0.998394255,8.52918118,8.52471702,8.50722775
44.65526,8.24621125,8.54635756,-0.547856105,8.52881356,8.52372883,8.50613816
44.665752,8.1240384,8.54612893,-0.649684943,8.52848446,8.52274135,8.50504836
44.676243,8.24621125,8.54594248,-0.547477148,8.52819673,8.52175467,8.50395845
44.686735,9.59166305,8.54580128,1.02267383,8.52795344,8.52076861,8.50286823
44.697226,7.93725393,8.54570875,-0.780035138,8.52775801,8.51978338,8.50177789
44.707718,7.93725393,8.5456686,-0.780009403,8.52761413,8.51879878,8.50068724
44.71821,9.11043358,8.54568494,0.751497599,8.52752592,8.51781493,8.49959637
44.728701,7.93725393,8.54576225,-0.780069431,8.52749788,8.51683192,8.49850537
44.739193,7.68114575,8.54590552,-0.929924604,8.52753496,8.51584958,8.49741405
44.749684,8.06225775,8.5461202,-0.695602219,8.52764266,8.51486811,8.4963226
44.760176,8.94427191,8.5464124,0.630761058,8.52782705,8.51388732,8.49523082
44.770668,7.21110255,8.54678884,-1.15571895,8.52809489,8.51290733,8.49413881
44.781159,8.60232527,8.54725696,0.234666382,8.52845361,8.51192822,8.49304666
44.791651,7,8.54782518,-1.24411622,8.52891164,8.51094984,8.49195417
44.802142,8.77496439,8.54850271,0.475879902,8.52947821,8.50997237,8.49086154
44.812634,7.74596669,8.5493001,-0.896288685,8.53016388,8.50899563,8.48976857
44.823126,9.05538514,8.550229,0.710743371,8.53098031,8.50801974,8.48867535
44.833617,8.42614977,8.55130247,-0.353769268,8.53194061,8.5070448,8.48758198
44.844109,8.24621125,8.55253558,-0.553465742,8.53305984,8.50607063,8.48648826
44.8546,8.71779789,8.55394492,0.40478756,8.53435465,8.50509742,8.48539439
44.865092,8.30662386,8.55554986,-0.498924845,8.53584444,8.50412502,8.48430015
44.875584,9.05538514,8.55737206,0.705700417,8.53755089,8.50315351,8.48320566
44.886075,8.88819442,8.55943618,0.573374434,8.53949876,8.502183,8.48211101
44.896567,7.41619849,8.56177115,-1.07031428,8.54171701,8.50121333,8.48101599
44.907058,8.24621125,8.56440941,-0.564090561,8.54423816,8.50024469,8.47992081
44.91755,8.66025404,8.56738946,0.304736897,8.54710079,8.49927691,8.47882525
44.928042,7.61577311,8.57075519,-0.977231848,8.55034891,8.49831009,8.47772943
44.938533,7.74596669,8.57455768,-0.910269732,8.55403373,8.49734433,8.47663343
44.949025,7.68114575,8.57885796,-0.947476759,8.5582164,8.49637948,8.47553705
44.959516,8.06225775,8.58372621,-0.722127732,8.56296731,8.49541573,8.4744405
44.970008,7.74596669,8.58924745,-0.918303196,8.56837166,8.4944529,8.47334356
44.9805,7.54983444,8.59552137,-1.02258835,8.57452941,8.4934911,8.47224634
44.990991,7.61577311,8.60266718,-0.993425427,8.58156009,8.49253045,8.47114894
45.001483,8.1240384,8.61083086,-0.697705134,8.58961002,8.49157077,8.47005114
45.011974,8.88819442,8.62018635,0.517694953,8.59885363,8.49061226,8.46895316
45.022466,9.05538514,8.63095017,0.651486739,8.60950797,8.48965475,8.46785477
45.032958,8.24621125,8.64338615,-0.630218133,8.62183757,8.48869835,8.4667561
45.043449,8.71779789,8.65782187,0.244900014,8.63617088,8.48774318,8.46565722
45.053941,10.2469508,8.67467298,1.25390501,8.6529246,8.48678906,8.46455795
45.064432,7.93725393,8.69445933,-0.8701755,8.67261994,8.48583619,8.46345847
45.074924,8.54400375,8.71785491,-0.416954633,8.6959326,8.4848844,8.46235859
45.085416,7.34846923,8.74572729,-1.18205671,8.72373236,8.48393382,8.46125839
45.095907,7.93725393,8.779219,-0.917586546,8.75716466,8.48298454,8.460158
45.106399,9.64365076,8.81988679,0.907614439,8.79779005,8.4820364,8.45905718
45.11689,8.60232527,8.86991904,-0.517294672,8.84780228,8.48108961,8.45795616
45.127382,8.66025404,8.93268881,-0.521952845,8.9105824,8.480144,8.45685471
45.137874,8.60232527,9.01387589,-0.641522116,8.99182346,8.47919968,8.45575294
45.148365,8.77496439,9.12382859,-0.590647271,9.10189723,8.47825676,8.45465096
45.158857,8.54400375,9.28160085,-0.858834735,9.25989883,8.47731509,8.45354855
45.169348,9.16515139,9.51965839,-0.595404902,9.49835813,8.47637485,8.45244592
45.17984,9.8488578,9.88574908,-0.192071014,9.86510097,8.4754359,8.45134286
45.190332,10.5356538,10.43458,0.317921024,10.4148876,8.47449835,8.45023946
45.200823,11.7046999,11.2054367,0.706585631,11.1869768,8.4735623,8.44913584
45.211315,12.0415946,12.1918986,-0.387690622,12.1748188,8.47262761,8.44803178
45.221806,13,13.3123864,-0.558915347,13.296639,8.47169447,8.44692749
45.232298,13.7840488,14.3811611,-0.772730475,14.3664852,8.47076272,8.44582275
45.24279,16.0312195,15.0989031,0.965565337,15.0848291,8.46983249,8.44471768
45.253281,16.1864141,15.1754784,1.00545294,15.1613786,8.46890388,8.44361236
45.263773,14.8996644,14.5704852,0.573741428,14.5556974,8.46797674,8.4425066
45.274264,14.4568323,13.5412275,0.956872418,13.5252034,8.46705127,8.44140059
45.284756,13.6014705,12.4075767,1.09265449,12.3899642,8.46612733,8.44029412
45.295248,11.7473401,11.3811708,0.605119253,11.3618324,8.46520503,8.43918731
45.305739,11,10.5616206,0.662102252,10.5406317,8.46428448,8.43808025
45.316231,10.2956301,9.9680603,0.572337178,9.9456613,8.46336553,8.43697272
45.326722,9.38083152,9.56782094,-0.432422735,9.54431675,8.46244839,8.43586495
45.337214,8.66025404,9.30670997,-0.804024836,9.28237211,8.46153291,8.43475671
45.347706,9.38083152,9.13433776,0.496481382,9.10936162,8.46061921,8.4336481
45.358197,8.66025404,9.01499751,-0.595603452,8.98950771,8.4597074,8.43253924
45.368689,9.11043358,8.92730208,0.427938659,8.90137518,8.45879735,8.43142991
45.37918,8.42614977,8.85957525,-0.658350573,8.83326008,8.45788925,8.43032031
45.389672,8.66025404,8.80545034,-0.381046327,8.7787801,8.45698296,8.42921024
45.400164,8.71779789,8.76124335,-0.208435762,8.73424214,8.45607861,8.4280998
45.410655,8.88819442,8.72458926,0.40448134,8.69727522,8.45517631,8.42698908
45.421147,7.54983444,8.69382914,-1.06957688,8.66621613,8.45427593,8.42587789
45.431638,9.69535971,8.66775531,1.01370824,8.63985403,8.45337766,8.42476642
45.44213,9.2736185,8.64544576,0.792573486,8.6172644,8.45248138,8.42365447
45.452622,8.1240384,8.62619785,-0.708632091,8.59774268,8.4515872,8.42254214
45.463113,8.83176087,8.60946365,0.471484057,8.58073945,8.45069525,8.42142952
45.473605,8,8.5948074,-0.771237578,8.56581764,8.44980539,8.42031642
45.484096,8,8.5818877,-0.762815642,8.55263491,8.44891783,8.41920304
45.494588,8.36660027,8.57042577,-0.451470379,8.54091159,8.44803244,8.41808915
45.50508,8.60232527,8.56019904,0.205246759,8.53042447,8.44714934,8.41697488
45.515571,9.32737905,8.55102557,0.881109233,8.52099107,8.44626867,8.41586032
45.526063,8.60232527,8.54275335,0.244073596,8.51245884,8.44539029,8.41474526
45.536554,8.1240384,8.53525943,-0.641265175,8.50470447,8.44451441,8.41362991
45.547046,7.87400787,8.52843861,-0.808968936,8.49762238,8.4436409,8.41251405
45.557538,9.38083152,8.52220456,0.926621258,8.49112594,8.44276991,8.41139779
45.568029,8.60232527,8.51648434,0.29298622,8.48514198,8.44190154,8.41028124
45.578521,9.43398113,8.51121457,0.960607392,8.47960683,8.44103569,8.40916417
45.589012,9.16515139,8.50634314,0.811670036,8.47446823,8.44017256,8.40804681
45.599504,7.68114575,8.50182365,-0.905912747,8.46967954,8.43931205,8.40692893
45.609996,8.77496439,8.49761744,0.526637399,8.46520195,8.43845427,8.40581063
45.620487,7.87400787,8.49369104,-0.787199571,8.46100188,8.43759936,8.40469204
45.630979,8.48528137,8.49001438,-0.0687968682,8.45704905,8.43674721,8.40357292
45.64147,9.53939201,8.48656263,1.02607475,8.45331854,8.43589803,8.4024535
45.651962,8.18535277,8.48331279,-0.545857141,8.44978721,8.43505172,8.40133355
45.662454,9.11043358,8.48024564,0.793843774,8.44643571,8.4342084,8.40021318
45.672945,8.60232527,8.47734423,0.353526578,8.44324702,8.43336823,8.3990925
45.683437,9,8.4745928,0.724849777,8.44020524,8.43253108,8.39797129
45.693928,9.43398113,8.47197844,0.980817358,8.4372974,8.43169718,8.39684976
45.70442,9,8.46948873,0.728362049,8.4345109,8.43086643,8.3957277
45.714912,8.18535277,8.46711329,-0.530811187,8.43183533,8.43003897,8.39460521
45.725403,8.94427191,8.46484287,0.692408147,8.42926136,8.42921494,8.3934824
45.735895,8.66025404,8.46266857,0.44450587,8.42677995,8.42839424,8.39235905
45.746386,8.48528137,8.46058322,0.157156467,8.42438388,8.4275771,8.39123538
45.756878,8,8.45857961,-0.677185063,8.42206581,8.42676343,8.39011116
45.76737,8.36660027,8.45665181,-0.300085894,8.41981973,8.42595337,8.38898651
45.777861,8.06225775,8.45479446,-0.626527506,8.41764025,8.42514707,8.38786153
45.788353,8,8.45300223,-0.673054402,8.41552186,8.42434444,8.386736
45.798844,8,8.45127092,-0.671767016,8.41346036,8.42354571,8.38561014
45.809336,8.42614977,8.44959613,-0.153122023,8.41145118,8.42275081,8.38448373
45.819828,8.36660027,8.44797429,-0.285261324,8.4094907,8.42195988,8.38335687
45.830319,8.30662386,8.44640217,-0.373869377,8.40757564,8.42117307,8.38222968
45.840811,8.06225775,8.44487641,-0.618561767,8.40570247,8.42039032,8.38110193
45.851302,9.11043358,8.44339448,0.816724618,8.40386864,8.41961185,8.37997384
45.861794,8.1240384,8.44195354,-0.563839635,8.40207115,8.4188376,8.37884519
45.872286,8.60232527,8.4405514,0.402211226,8.40030775,8.41806773,8.37771608
45.882777,8.36660027,8.43918604,-0.269417471,8.39857637,8.4173024,8.37658664
45.893269,8.54400375,8.43785525,0.325804385,8.39687461,8.41654155,8.37545663
45.90376,8.60232527,8.43655748,0.407145902,8.39520092,8.41578541,8.37432627
45.914252,8.83176087,8.43529085,0.629658654,8.39355322,8.41503394,8.37319534
45.924744,8.36660027,8.43405396,-0.259718484,8.39193007,8.4142873,8.37206396
45.935235,8.83176087,8.43284554,0.631597441,8.39033011,8.41354566,8.37093222
45.945727,8.30662386,8.43166409,-0.353610274,8.38875168,8.41280898,8.36979991
45.956218,9,8.43050866,0.7546465,8.38719379,8.4120775,8.36866724
45.96671,9,8.42937796,0.75539529,8.38565496,8.41135118,8.367534
45.977202,8,8.4282711,-0.654424249,8.38413424,8.41063021,8.36640029
45.987693,8,8.42718728,-0.653595654,8.38263074,8.40991476,8.36526622
45.998185,9,8.42612545,0.757545078,8.38114322,8.40920481,8.36413157
46.008676,8.48528137,8.42508506,0.245349374,8.37967108,8.4085006,8.36299656
46.019168,9.11043358,8.42406519,0.82847353,8.37821322,8.40780212,8.36186097
46.02966,8.48528137,8.4230653,0.249431512,8.37676899,8.40710956,8.3607249
46.040151,8.18535277,8.42208488,-0.486551235,8.37533782,8.40642311,8.35958847
46.050643,8.42614977,8.4211232,0.0708983274,8.37391875,8.40574276,8.35845144
46.061134,9,8.42017995,0.761459156,8.37251142,8.40506877,8.35731405
46.071626,7.81024968,8.4192545,-0.780387612,8.37111498,8.40440116,8.35617607
46.082118,8.24621125,8.41834652,-0.414891875,8.36972901,8.40374011,8.35503761
46.092609,8.60232527,8.41745572,0.429964594,8.36835311,8.40308583,8.35389877
46.103101,8.54400375,8.41658158,0.356962417,8.36698654,8.40243835,8.35275934
46.113592,8.30662386,8.41572397,-0.330303048,8.3656291,8.40179793,8.35161953
46.124084,8.77496439,8.41488244,0.600068285,8.3642801,8.4011646,8.35047913
46.134576,9.32737905,8.41405684,0.95567893,8.36293926,8.40053857,8.34933823
46.145067,8,8.41324701,-0.64284291,8.36160633,8.39992007,8.34819696
46.155559,8.36660027,8.41245261,-0.214131604,8.36028069,8.39930915,8.34705508
46.16605,7.68114575,8.41167362,-0.854709234,8.35896227,8.39870608,8.34591282
46.176542,8.36660027,8.41090976,-0.210498201,8.35765049,8.39811092,8.34476996
46.187034,8.30662386,8.41016096,-0.321771816,8.35634517,8.3975239,8.3436266
46.197525,8.83176087,8.40942721,0.649872029,8.35504616,8.39694527,8.34248286
46.208017,7.41619849,8.40870828,-0.996247858,8.35375294,8.3963751,8.34133851
46.218508,7.81024968,8.40800425,-0.773145895,8.3524655,8.39581369,8.34019376
46.229,7.93725393,8.40731494,-0.685609954,8.35118336,8.39526112,8.33904841
46.239492,7.61577311,8.4066404,-0.8893072,8.34990642,8.39471766,8.33790255
46.249983,8.60232527,8.40598069,0.443107867,8.34863458,8.39418356,8.33675631
46.260475,8.30662386,8.40533568,-0.314184369,8.34736739,8.39365894,8.33560944
46.270966,8.24621125,8.40470554,-0.39811341,8.34610491,8.3931441,8.33446218
46.281458,7.81024968,8.40409018,-0.770610477,8.34484672,8.39263918,8.33331431
46.29195,7.41619849,8.40348974,-0.993625307,8.34359275,8.39214447,8.33216592
46.302441,8.60232527,8.40290433,0.446565712,8.34234298,8.39166023,8.33101714
46.312933,8.66025404,8.40233395,0.507858339,8.341097,8.39118663,8.32986774
46.323424,8.48528137,8.40177879,0.288968131,8.33985492,8.390724,8.32871793
46.333916,7.81024968,8.40123889,-0.768758229,8.33861634,8.39027252,8.3275675
46.344408,8.30662386,8.40071443,-0.306741852,8.33738126,8.38983249,8.32641656
46.354899,9.05538514,8.4002056,0.809431615,8.33614967,8.38940424,8.32526521
46.365391,7.87400787,8.39971247,-0.725054894,8.33492122,8.38898795,8.32411323
46.375882,8.77496439,8.39923532,0.612967425,8.33369604,8.38858401,8.32296085
46.386374,8.30662386,8.39877425,-0.303562822,8.33247377,8.38819262,8.32180783
46.396866,8.88819442,8.39832951,0.699903501,8.33125444,8.38781414,8.3206543
46.407357,8.83176087,8.39790136,0.658680128,8.33003806,8.38744891,8.31950036
46.417849,8.18535277,8.39748995,-0.460583517,8.32882432,8.3870972,8.31834578
46.42834,8.24621125,8.39709561,-0.388438365,8.32761335,8.3867594,8.31719079
46.438832,8.71779789,8.39671854,0.566638636,8.32640486,8.38643579,8.31603516
46.449324,7.74596669,8.39635905,-0.806469069,8.32519886,8.38612676,8.31487901
46.459815,7.34846923,8.39601747,-1.02349804,8.32399542,8.38583272,8.31372244
46.470307,8.36660027,8.39569403,-0.170568941,8.32279422,8.38555396,8.31256523
46.480798,8.30662386,8.39538913,-0.297935001,8.32159544,8.38529095,8.3114076
46.49129,8.48528137,8.39510304,0.30029707,8.32039877,8.38504403,8.31024934
46.501782,8,8.39483616,-0.6283599,8.31920428,8.38481365,8.30909054
46.512273,8.83176087,8.39458888,0.661189826,8.31801203,8.38460024,8.30793132
46.522765,9.11043358,8.39436154,0.8462104,8.31682174,8.3844042,8.30677145
46.533256,9.16515139,8.39415458,0.878064238,8.31563357,8.38422604,8.30561116
46.543748,7.81024968,8.3939684,-0.764014873,8.31444727,8.38406618,8.30445023
46.55424,8.88819442,8.39380346,0.703129406,8.31326291,8.38392512,8.30328875
46.564731,7.68114575,8.39366021,-0.844105719,8.31208054,8.38380338,8.30212686
46.575223,8.66025404,8.39353913,0.516444488,8.31089992,8.38370145,8.30096431
46.585714,9.21954446,8.39344072,0.908902489,8.30972123,8.38361988,8.29980133
46.596206,8.48528137,8.39336549,0.303176323,8.30854421,8.38355921,8.2986377
46.606698,8,8.39331399,-0.6271475,8.30736895,8.38352001,8.29747352
46.617189,8.66025404,8.39328677,0.516688757,8.30619552,8.38350287,8.29630892
46.627681,8.06225775,8.39328441,-0.575349165,8.30502369,8.3835084,8.29514366
46.638172,7.74596669,8.39330752,-0.804574935,8.30385365,8.38353721,8.29397797
46.648664,8.42614977,8.39335673,0.181088504,8.30268515,8.38358998,8.29281162
46.659156,8.30662386,8.39343268,-0.294633368,8.30151829,8.38366737,8.29164472
46.669647,9.21954446,8.39353606,0.908850043,8.30035316,8.38377005,8.29047738
46.680139,8.30662386,8.39366757,-0.295031704,8.29918952,8.38389878,8.28930939
46.69063,8.77496439,8.39382792,0.617362506,8.29802759,8.38405427,8.28814096
46.701122,8.36660027,8.39401791,-0.165582746,8.29686712,8.38423731,8.28697186
46.711614,8,8.39423831,-0.62788399,8.29570823,8.3844487,8.28580222
46.722105,8.71779789,8.3944899,0.568601785,8.29455101,8.38468924,8.28463213
46.732597,8.77496439,8.39477359,0.616596142,8.29339524,8.38495983,8.28346137
46.743088,8.42614977,8.3950902,0.176237274,8.29224113,8.3852613,8.28229018
46.75358,8.60232527,8.39544071,0.454845641,8.29108846,8.38559463,8.28111832
46.764072,7.87400787,8.39582605,-0.722369831,8.28993735,8.38596075,8.2799459
46.774563,8.54400375,8.39624715,0.384391196,8.2887879,8.38636061,8.27877303
46.785055,8.48528137,8.39670514,0.297617597,8.2876399,8.38679531,8.2775995
46.795546,8.24621125,8.39720099,-0.388573975,8.28649357,8.38726582,8.27642551
46.806038,8.66025404,8.39773589,0.512365244,8.2853487,8.38777335,8.27525086
46.81653,7.81024968,8.39831098,-0.76685155,8.28420542,8.388319,8.27407564
46.827021,8.60232527,8.39892737,0.450996564,8.28306383,8.3889039,8.27289998
46.837513,8.77496439,8.39958643,0.612680957,8.28192374,8.38952939,8.27172364
46.848004,9.11043358,8.40028934,0.842700561,8.28078537,8.39019665,8.27054685
46.858496,8.24621125,8.40103759,-0.393479776,8.27964853,8.39090714,8.26936938
46.868988,7.54983444,8.4018325,-0.923037411,8.27851334,8.39166219,8.26819135
46.879479,8.94427191,8.40267545,0.735932372,8.27737994,8.39246315,8.26701286
46.889971,8.48528137,8.40356814,0.285855265,8.27624813,8.39331169,8.2658337
46.900462,8.60232527,8.40451197,0.444762067,8.27511814,8.39420921,8.26465408
46.910954,8.06225775,8.40550877,-0.585876289,8.2739898,8.3951575,8.26347378
46.921446,8.42614977,8.40656018,0.139962823,8.27286323,8.39615818,8.26229291
46.931937,8.60232527,8.40766787,0.441199948,8.27173858,8.3972129,8.26111158
46.942429,8.71779789,8.40883393,0.555845263,8.27061567,8.39832371,8.25992957
46.95292,9.32737905,8.41006008,0.957767706,8.26949473,8.3994923,8.2587471
46.963412,8,8.41134857,-0.641364618,8.26837561,8.40072091,8.25756395
46.973904,9.11043358,8.41270143,0.835303629,8.26725844,8.40201151,8.25638022
46.984395,8.30662386,8.41412071,-0.327867111,8.26614338,8.40336613,8.25519603
46.994887,9.11043358,8.41560899,0.833561387,8.26503025,8.40478731,8.25401115
47.005378,8.48528137,8.41716841,0.260984607,8.26391932,8.40627714,8.25282581
47.01587,8.18535277,8.41880177,-0.483165604,8.26281043,8.40783838,8.25163978
47.026362,8.1240384,8.42051157,-0.544493493,8.26170373,8.40947348,8.25045318
47.036853,8.66025404,8.42230037,0.487804951,8.26059939,8.41118496,8.24926611
47.047345,7.81024968,8.42417139,-0.783531567,8.25949726,8.412976,8.24807835
47.057836,9.21954446,8.42612729,0.890739674,8.2583976,8.41484918,8.24689012
47.068328,8.77496439,8.42817159,0.588891163,8.25730029,8.41680798,8.2457012
47.07882,8.48528137,8.43030739,0.234465314,8.25620548,8.41885544,8.2445117
47.089311,8.54400375,8.43253794,0.333864954,8.25511336,8.42099476,8.24332173
47.099803,8.1240384,8.43486727,-0.557520286,8.25402379,8.42322989,8.24213107
47.110294,7.48331477,8.43729874,-0.976721029,8.25293707,8.42556412,8.24093993
47.120786,8.54400375,8.43983678,0.322749068,8.25185306,8.42800183,8.2397481
47.131278,8.77496439,8.44248534,0.576609957,8.25077197,8.43054687,8.23855569
47.141769,7.81024968,8.44524853,-0.796868153,8.24969399,8.43320329,8.2373628
47.152261,7.81024968,8.44813147,-0.798675021,8.24861901,8.43597612,8.23616922
47.162752,7.34846923,8.45113843,-1.05008057,8.24754734,8.43886956,8.23497516
47.173244,8.94427191,8.45427507,0.699997744,8.24647888,8.44188917,8.23378041
47.183736,8.94427191,8.45754644,0.697657126,8.24541385,8.44503991,8.23258506
47.194227,9.16515139,8.46095783,0.839162416,8.24435246,8.44832698,8.23138925
47.204719,9.16515139,8.46451579,0.837039781,8.24329464,8.45175682,8.23019272
47.21521,9.2736185,8.46822587,0.897436695,8.24224072,8.45533488,8.22899573
47.225702,9.69535971,8.47209534,1.10601283,8.24119064,8.45906831,8.22779803
47.236194,9,8.47613075,0.723788126,8.24014464,8.46296355,8.22659974
47.246685,7.93725393,8.48033898,-0.736943042,8.23910296,8.46702738,8.22540097
47.257177,8.24621125,8.48472854,-0.48838232,8.23806558,8.47126816,8.2242015
47.267668,8.30662386,8.4893067,-0.427414132,8.23703285,8.47569305,8.22300155
47.27816,8.42614977,8.49408293,-0.260639906,8.23600475,8.48031135,8.22180089
47.288652,9.43398113,8.49906587,0.966910161,8.23498156,8.48513157,8.22059964
47.299143,7.93725393,8.5042646,-0.75300111,8.23396358,8.49016267,8.21939791
47.309635,8.24621125,8.50969029,-0.513302095,8.2329508,8.49541563,8.21819547
47.320126,8.88819442,8.51535264,0.610607709,8.23194364,8.50090001,8.21699255
47.330618,8.24621125,8.52126415,-0.524454863,8.23094213,8.50662812,8.21578891
47.34111,8.66025404,8.52743638,0.364441568,8.2299466,8.51261134,8.21458469
47.351601,7.41619849,8.53388152,-1.05720529,8.22895739,8.5188617,8.21337998
47.362093,7.87400787,8.54061444,-0.816459776,8.22797458,8.52539385,8.21217456
47.372584,8.71779789,8.54764832,0.4124919,8.22699862,8.53222079,8.21096865
47.383076,7.68114575,8.55499992,-0.934801673,8.22602962,8.53935904,8.20976203
47.393568,9.21954446,8.56268495,0.810468695,8.22506798,8.54682411,8.20855481
47.404059,7.68114575,8.57072009,-0.943172486,8.22411412,8.55463246,8.20734711
47.414551,8.06225775,8.57912548,-0.718935136,8.22316818,8.56280394,8.2061387
47.425042,7.87400787,8.58791934,-0.844932818,8.22223071,8.57135658,8.20492979
47.435534,8.36660027,8.59712456,-0.480129457,8.22130191,8.58031295,8.20372017
47.446026,8.18535277,8.60676294,-0.649161127,8.22038227,8.58969459,8.20250995
47.456517,8.83176087,8.61685769,0.463576506,8.2194723,8.59952446,8.20129925
47.467009,8.66025404,8.62743667,0.181155658,8.21857227,8.60983005,8.20008782
47.4775,9.16515139,8.63852557,0.725689891,8.21768283,8.62063681,8.19887591
47.487992,10,8.65015631,1.16182774,8.21680432,8.63197627,8.19766328
47.498484,8.88819442,8.66235978,0.475220614,8.21593734,8.64387899,8.19645004
47.508975,8.06225775,8.67516903,-0.782886506,8.21508255,8.65637769,8.19523632
47.519467,8.48528137,8.68862343,-0.450934646,8.21424038,8.66951132,8.19402187
47.529958,8,8.7027601,-0.838307876,8.21341163,8.68331666,8.19280694
47.54045,8.24621125,8.71762457,-0.686595458,8.21259681,8.69783878,8.19159128
47.550942,8,8.73326171,-0.856307021,8.21179673,8.71312215,8.19037502
47.561433,7.93725393,8.74971975,-0.901368859,8.21101222,8.72921458,8.18915827
47.571925,8.54400375,8.76705581,-0.472283886,8.21024395,8.74617267,8.18794079
47.582416,9.11043358,8.7853249,0.570183023,8.20949293,8.764051,8.18672282
47.592908,7.81024968,8.80459383,-0.997168066,8.20875994,8.78291584,8.18550413
47.6034,7.74596669,8.82492954,-1.03873136,8.20804604,8.80283362,8.18428483
47.613891,8.83176087,8.8464045,-0.121010868,8.20735236,8.82387631,8.18306503
47.624383,7.68114575,8.86910405,-1.089935,8.20667988,8.84612863,8.18184452
47.634874,8.54400375,8.89311223,-0.590854028,8.20602995,8.86967409,8.1806235
47.645366,8.18535277,8.91853019,-0.856257796,8.20540373,8.89461318,8.17940177
47.655858,9.16515139,8.94546111,0.468711299,8.20480266,8.92104849,8.17817942
47.666349,8.66025404,8.97401753,-0.560145952,8.2042283,8.94909198,8.17695657
47.676841,8.71779789,9.00433147,-0.535288314,8.20368213,8.97887492,8.175733
47.687332,9.2736185,9.03653585,0.486911337,8.20316597,9.01052965,8.17450894
47.697824,9.32737905,9.07078961,0.506546588,8.20268156,9.04421434,8.17328414
47.708316,8.77496439,9.1072579,-0.576449051,8.20223096,9.08009348,8.17205873
47.718807,8.88819442,9.14612239,-0.507866096,8.20181634,9.11834813,8.17083283
47.729299,9.11043358,9.18759585,-0.27778097,8.20143994,9.15919023,8.1696062
47.73979,9.32737905,9.23189741,0.309001041,8.20110435,9.20283836,8.16837907
47.750282,8.60232527,9.27928799,-0.822777443,8.20081222,9.24955261,8.16715121
47.760774,8.60232527,9.33004398,-0.85306431,8.20056651,9.29960879,8.16592274
47.771265,9.53939201,9.38447263,0.393598002,8.20037045,9.3533136,8.16469376
47.781757,8.06225775,9.44293394,-1.17502179,8.20022745,9.41102633,8.16346406
47.792248,9.43398113,9.50580764,-0.268004685,8.20014133,9.47312634,8.16223386
47.80274,9.43398113,9.5735452,-0.373582747,8.20011618,9.54006452,8.16100293
47.813232,9.8488578,9.64663494,0.449691965,8.2001565,9.61232895,8.15977138
47.823723,9.21954446,9.72562651,-0.711394443,8.20026719,9.69046919,8.15853933
47.834215,9.2736185,9.81116652,-0.733176665,8.20045363,9.77513166,8.15730655
47.844706,8.94427191,9.90395424,-0.979633773,8.20072168,9.867016,8.15607327
47.855198,9.21954446,10.0048233,-0.8861596,8.20107786,9.96695612,8.15483925
47.86569,8.88819442,10.1146962,-1.10747542,8.20152928,10.0758754,8.15360462
47.876181,10.1488916,10.2346279,-0.292807658,8.20208371,10.19483,8.15236949
47.886673,9.48683298,10.3658695,-0.937569471,8.20274995,10.3250725,8.15113362
47.897164,9.94987437,10.509812,-0.748289833,8.20353744,10.4679964,8.14989725
47.907656,10.8627805,10.6681269,0.441195597,8.20445698,10.6252755,8.14866015
47.918148,10.1488916,10.8427134,-0.832959691,8.20552031,10.798813,8.14742243
47.928639,10.8166538,11.0357885,-0.468118174,8.20674049,10.9908305,8.1461842
47.939131,11.045361,11.2500197,-0.452392158,8.20813244,11.204001,8.14494524
47.949622,10.8627805,11.4884702,-0.791005481,8.20971235,11.4413947,8.14370578
47.960114,10.6770783,11.754878,-1.03817136,8.21149896,11.7067582,8.14246558
47.970606,11.8743421,12.0536321,-0.423426516,8.2135129,12.0044905,8.14122476
47.981097,10.8166538,12.3900035,-1.25433237,8.21577734,12.3398752,8.13998344
47.991589,11.61895,12.7704893,-1.07309795,8.21831922,12.7194236,8.13874138
48.00208,12.328828,13.2028618,-0.934897767,8.22116808,13.1509256,8.13749882
48.012572,13.190906,13.696885,-0.711322015,8.22435869,13.6441649,8.13625552
48.023064,13.6381817,14.2646034,-0.79146805,8.22792985,14.2112101,8.1350116
48.033555,14.4222051,14.9213893,-0.706529709,8.23192594,14.8674619,8.13376717
48.044047,14.6969385,15.6879975,-0.995519505,8.23639923,15.6337107,8.13252201
48.054538,15.4272486,16.5939233,-1.08012717,8.24140833,16.5395023,8.13127634
48.06503,17.4642492,17.6861321,-0.47104445,8.24702315,17.631882,8.13002993
48.075522,18.5202592,19.0431838,-0.723135267,8.25332357,18.9895395,8.12878291
48.086013,20.6397674,20.7956895,-0.394869733,8.26040281,20.7432707,8.12753537
48.096505,22.2485955,23.1408881,-0.944612446,8.26837266,23.0905015,8.1262871
48.106996,26.3248932,26.3225581,0.0483225559,8.27736207,26.2750564,8.12503832
48.117488,30.1164407,30.5614599,-0.667097596,8.28752774,30.5174648,8.1237888
48.12798,34.9284984,35.947093,-1.00925446,8.29905408,35.9067518,8.12253866
48.138471,40.8044115,42.348534,-1.24262724,8.31216239,42.3114832,8.12128801
48.148963,46.5403051,49.3505503,-1.6763786,8.32712451,49.31603,8.12003663
48.159454,54.277067,56.1249216,-1.35935816,8.34426572,56.0918418,8.11878473
48.169946,59.455866,61.2458521,-1.33790363,8.36399209,61.2126814,8.1175321
48.180438,62.5939294,62.9351477,-0.584138932,8.38680045,62.8996691,8.11627884
48.190929,60.6877253,60.3926134,0.543242009,8.41331021,60.3517821,8.11502508
48.201421,55.569776,54.7275859,0.917709134,8.44431124,54.6775597,8.11377057
48.211912,47.7074418,47.7764518,-0.262697625,8.48080268,47.7124537,8.11251556
48.222404,39.8497177,40.8503823,-1.00033226,8.52411093,40.7662336,8.11125981
48.232896,35.0142828,34.6661768,0.590005092,8.57604173,34.5538345,8.11000343
48.243387,29.866369,29.56805,0.546185888,8.63924525,29.4174233,8.10874654
48.253879,25.0399681,25.6309874,-0.768777858,8.71798595,25.4298174,8.10748892
48.26437,22.9346899,22.7285719,0.454002142,8.81956133,22.4613957,8.10623079
48.274862,20.6397674,20.6298068,0.0998029217,8.95687418,20.2744643,8.10497191
48.285354,19.5192213,19.1084273,0.640932106,9.1518002,18.6291895,8.10371241
48.295845,18.5741756,18.0057799,0.753920252,9.43811672,17.3430043,8.1024524
48.306337,17.4355958,17.2409247,0.441215499,9.86064007,16.2986676,8.10119165
48.316828,17.2626765,16.790538,0.687123317,10.4659432,15.4270889,8.09993039
48.32732,16.3707055,16.6569877,-0.535053423,11.2848095,14.6866178,8.09866839
48.337812,17.175564,16.8350461,0.583539188,12.3114467,14.0504461,8.09740576
48.348303,17.691806,17.2811497,0.640824701,13.4888512,13.499502,8.09614263
48.358795,17.0880075,17.8893287,-0.895165484,14.6988671,13.0191571,8.09487875
48.369286,17.5783958,18.4725078,-0.945574937,15.7489548,12.598038,8.09361437
48.379778,18.1383571,18.7760093,-0.798531271,16.3868443,12.2268547,8.09234924
48.39027,17.2336879,18.5816243,-1.1610066,16.4065962,11.8981509,8.09108348
48.400761,16.7630546,17.8576125,-1.0462112,15.8001543,11.6057998,8.08981722
48.411253,16.673332,16.7713636,-0.313099925,14.7648876,11.3446628,8.08855022
48.421744,14.6628783,15.5499159,-0.941826761,13.5557969,11.1105534,8.08728271
48.432236,15.1657509,14.3679065,0.893221344,12.3698402,10.8998816,8.08601445
48.442728,13.6381817,13.3301054,0.555046188,11.3295004,10.7096798,8.08474556
48.453219,12.5299641,12.4836636,0.215175525,10.4950954,10.5374292,8.08347618
48.463711,11.8743421,11.8303518,0.209738554,9.87498615,10.3809406,8.08220604
48.474202,11.0905365,11.3420558,-0.501516944,9.4402859,10.2383958,8.0809354
48.484694,11.4455231,10.9780984,0.683684653,9.14463187,10.108181,8.07966401
48.495186,10.4403065,10.7001158,-0.509714865,8.94281763,9.98893925,8.078392
48.505677,10,10.4790024,-0.692100026,8.8002836,9.87949188,8.07711948
48.516169,10.5356538,10.2955873,0.489965782,8.6944677,9.77878525,8.07584622
48.52666,10,10.1383663,-0.371976227,8.61207556,9.68593549,8.07457244
48.537152,9.2736185,10.0005294,-0.852590685,8.54553314,9.60013492,8.07329793
48.547644,9.21954446,9.8779644,-0.811430798,8.49046822,9.52069755,8.07202278
48.558135,9.53939201,9.76796013,-0.478087977,8.44416173,9.44701737,8.07074714
48.568627,8.42614977,9.66853781,-1.11462461,8.40475952,9.37853927,8.06947074
48.579118,9.59166305,9.57820913,0.115991,8.37092706,9.31479587,8.06819384
48.58961,9.64365076,9.49574933,0.384579545,8.34163732,9.25534868,8.06691619
48.600102,10,9.42017586,0.761461843,8.31609742,9.19982348,8.06563792
48.610593,9.21954446,9.35066949,-0.362111906,8.29367861,9.14788519,8.06435914
48.621085,8.30662386,9.28652268,-0.989898388,8.27387158,9.09922005,8.06307962
48.631576,8.77496439,9.22715773,-0.672453229,8.25627207,9.05356416,8.06179959
48.642068,8.77496439,9.17205903,-0.630154459,8.24054439,9.0106636,8.06051881
48.65256,9.2736185,9.12079756,0.390923186,8.22641758,8.97030153,8.05923741
48.663051,8.24621125,9.07300067,-0.909279618,8.21366745,8.93228163,8.0579555
48.673543,8.54400375,9.02833077,-0.695936075,8.20210421,8.89641615,8.05667285
48.684034,8.88819442,8.98650804,-0.313550033,8.19157326,8.86254802,8.05538969
48.694526,9.74679434,8.94727086,0.894160773,8.18194064,8.83052224,8.05410578
48.705018,8.42614977,8.91039863,-0.695879916,8.17309573,8.80020682,8.05282125
48.715509,10,8.87569496,1.06033251,8.16494428,8.77148115,8.05153622
48.726001,9.05538514,8.84297544,0.460879266,8.15740358,8.74422745,8.05025044
48.736492,9.59166305,8.81208698,0.882936052,8.15040537,8.71834807,8.04896415
48.746984,9.38083152,8.78288086,0.773272694,8.14388825,8.69374415,8.04767712
48.757476,8.88819442,8.75523135,0.364641014,8.13780085,8.67033198,8.04638946
48.767967,8.83176087,8.72902461,0.320524976,8.13209848,8.64803445,8.0451013
48.778459,9.32737905,8.70415052,0.789448243,8.1267406,8.62677468,8.04381239
48.78895,9.43398113,8.68051829,0.868022375,8.12169369,8.60648972,8.04252299
48.799442,9,8.65803663,0.584776346,8.11692645,8.58711411,8.04123283
48.809934,9.2736185,8.63662862,0.798116452,8.11241262,8.56859286,8.03994205
48.820425,9.43398113,8.61622383,0.904299346,8.10812898,8.55087501,8.03865076
48.830917,8.42614977,8.59675221,-0.413040484,8.10405377,8.53390863,8.03735873
48.841408,8.24621125,8.57815676,-0.576147121,8.10016913,8.51765187,8.0360662
48.8519,9.21954446,8.56037822,0.811890534,8.09645774,8.50205994,8.03477292
48.862392,8.54400375,8.54336709,0.0252320618,8.09290514,8.48709566,8.03347902
48.872883,9.11043358,8.5270776,0.763777443,8.08949836,8.47272437,8.03218461
48.883375,9.48683298,8.51146307,0.987608177,8.08622485,8.4589099,8.03088946
48.893866,8.48528137,8.49648612,-0.105852493,8.08307449,8.44562372,8.02959381
48.904358,8.71779789,8.48210664,0.485480425,8.08003702,8.43283429,8.02829741
48.91485,8.48528137,8.46829148,0.130345277,8.07710399,8.42051583,8.02700038
48.925341,9,8.45500978,0.738234531,8.07426778,8.40864416,8.02570286
48.935833,9,8.44222923,0.746840527,8.07152065,8.39719345,8.02440459
48.946324,9.11043358,8.42992451,0.824929734,8.06885662,8.38614376,8.02310582
48.956816,9.8488578,8.41806751,1.19615647,8.06626924,8.37547238,8.02180631
48.967308,8.30662386,8.40663532,-0.316245877,8.06375336,8.36516098,8.02050617
48.977799,9.8488578,8.39560651,1.20550873,8.06130427,8.35519236,8.01920553
48.988291,9.43398113,8.38495802,1.02421829,8.05891699,8.34554761,8.01790415
48.998782,7.87400787,8.37467225,-0.707576412,8.05658782,8.33621257,8.01660227
49.009274,8,8.36472891,-0.603927899,8.05431253,8.32717045,8.01529964
49.019766,9.11043358,8.35511177,0.86909252,8.05208785,8.31840803,8.01399639
49.030257,8.83176087,8.34580558,0.697104934,8.04991077,8.30991279,8.01269264
49.040749,9.64365076,8.33679344,1.1431786,8.04777794,8.30167063,8.01138815
49.05124,8.36660027,8.32806286,0.196309466,8.04568701,8.2936713,8.01008316
49.061732,8.77496439,8.31959882,0.674807802,8.04363508,8.28590218,8.00877742
49.072224,8.83176087,8.31138959,0.721367646,8.04162003,8.27835352,8.00747107
49.082715,9.16515139,8.30342407,0.928292689,8.03963988,8.2710161,8.00616421
49.093207,8.60232527,8.29568963,0.553746905,8.03769225,8.26387918,8.00485661
49.103698,8.77496439,8.28817721,0.697701351,8.03577568,8.25693525,8.00354852
49.11419,9.43398113,8.28087548,1.07382757,8.03388806,8.25017462,8.00223968
49.124682,9.69535971,8.2737758,1.19230194,8.032028,8.24359003,8.00093022
49.135173,7.48331477,8.26686996,-0.885186526,8.03019417,8.23717457,7.99962026
49.145665,7.93725393,8.2601483,-0.568237951,8.02838484,8.23091992,7.99830956
49.156156,8.94427191,8.25360419,0.831064212,8.02659907,8.2248205,7.99699837
49.166648,8.30662386,8.24722889,0.243710835,8.02483532,8.21886878,7.99568643
49.17714,7.61577311,8.24101595,-0.79072299,8.02309262,8.21305926,7.99437388
49.187631,9.59166305,8.23495922,1.1647763,8.02137009,8.2073867,7.99306082
49.198123,8.88819442,8.22905116,0.811876378,8.01966643,8.20184455,7.99174703
49.208614,8.24621125,8.22328687,0.151407996,8.01798103,8.19642864,7.99043274
49.219106,8.48528137,8.21765951,0.517321821,8.01631272,8.191133,7.98911771
49.229598,8.83176087,8.21216418,0.787144642,8.01466086,8.18595343,7.98780206
49.240089,9.11043358,8.20677017,0.950612125,8.01302484,8.18085979,7.98648592
49.250581,8.24621125,8.20152365,0.211394424,8.01140364,8.17589912,7.98516904
49.261072,9.16515139,8.19639486,0.984254303,8.0097969,8.17104213,7.98385166
49.271564,8.1240384,8.19137837,-0.259499445,8.0082037,8.16628402,7.98253354
49.282056,7.93725393,8.18647043,-0.499215877,8.00662361,8.16162155,7.98121481
49.292547,8.66025404,8.18166744,0.691799537,8.0050562,8.1570516,7.97989558
49.303039,8.66025404,8.17696465,0.695190181,8.00350068,8.15256993,7.97857561
49.31353,8.30662386,8.17235928,0.366421325,8.00195685,8.14817418,7.97725516
49.324022,8.24621125,8.16784694,0.279936259,8.00042395,8.14386044,7.97593396
49.334514,8.60232527,8.16342475,0.662495674,7.9989017,8.13962616,7.97461214
49.345005,8.24621125,8.15908991,0.295163244,7.99738983,8.13546895,7.97328984
49.355497,8.30662386,8.15483856,0.38959633,7.99588767,8.1313853,7.97196679
49.365988,8.30662386,8.1506686,0.394911716,7.99439514,8.12737343,7.97064326
49.37648,8.60232527,8.14657645,0.675091709,7.99291163,8.1234301,7.96931899
49.386972,8.24621125,8.14255986,0.321949365,7.99143695,8.11955335,7.9679941
49.397463,8.24621125,8.13865811,0.327952951,7.99001317,8.11574125,7.96666872
49.407955,8.94427191,8.13478517,0.89971481,7.9885553,8.11199093,7.96534261
49.418446,8.83176087,8.13098084,0.837126052,7.98710555,8.10830101,7.96401601
49.428938,8.54400375,8.12724217,0.645570738,7.98566337,8.10466881,7.96268867
49.43943,7.81024968,8.12356739,-0.559747899,7.98422867,8.10109277,7.96136071
49.449921,9.21954446,8.11995479,1.04861321,7.98280135,8.09757138,7.96003227
49.460413,7.87400787,8.11640174,-0.492335114,7.98138094,8.09410221,7.9587031
49.470904,7.41619849,8.11290703,-0.834690685,7.97996749,8.09068423,7.95737343
49.481396,7.93725393,8.10946819,-0.414987058,7.97856056,8.08731516,7.95604303
49.491888,7.48331477,8.10608384,-0.78915719,7.97716009,8.08399378,7.95471202
49.502379,8.18535277,8.10275264,0.287402389,7.97576607,8.08071889,7.95338053
49.512871,8.24621125,8.09947236,0.383065129,7.97437805,8.07748843,7.95204829
49.523362,9.05538514,8.0962421,0.979358483,7.97299616,8.07430162,7.95071558
49.533854,8.18535277,8.09305979,0.303797602,7.97161999,8.07115652,7.94938213
49.544346,7.81024968,8.08992433,-0.528842748,7.97024956,8.06805216,7.94804806
49.554837,9.05538514,8.08683466,0.984149622,7.96888486,8.06498758,7.94671352
49.565329,7.48331477,8.0837889,-0.774902657,7.96752552,8.06196102,7.94537824
49.57582,7.74596669,8.08078639,-0.578636063,7.96617169,8.0589719,7.94404248
49.586312,7.87400787,8.07782535,-0.45146149,7.96482303,8.05601855,7.94270598
49.596804,8.60232527,8.07490493,0.726237107,7.96347956,8.05310019,7.94136888
49.607295,9.21954446,8.07202429,1.07122368,7.96214132,8.05021607,7.94003129
49.617787,9.05538514,8.06918183,0.993077694,7.96080799,8.04736465,7.93869298
49.628278,8.30662386,8.06637706,0.490149775,7.95947974,8.04454551,7.93735418
49.63877,8.06225775,8.06360847,-0.0367521791,7.95815626,8.04175721,7.93601465
49.649262,9.53939201,8.06087538,1.21594269,7.9568376,8.03899912,7.93467451
49.659753,8.24621125,8.05817715,0.433628992,7.95552385,8.03627065,7.93333389
49.670245,8.60232527,8.05551238,0.739467976,7.95421469,8.03357044,7.93199254
49.680736,8.71779789,8.05288074,0.815424519,7.95291034,8.03089821,7.93065072
49.691228,8.06225775,8.05028093,0.109438651,7.95161051,8.02825269,7.92930816
49.70172,8.24621125,8.04771242,0.445532077,7.95031528,8.02563338,7.927965
49.712211,8.30662386,8.0451747,0.511320995,7.94902475,8.02303981,7.92662136
49.722703,8.60232527,8.04266658,0.748103393,7.94773864,8.02047078,7.92527699
49.733194,7.21110255,8.04018786,-0.910541216,7.94645719,8.01792614,7.92393214
49.743686,8.42614977,8.03773738,0.623227402,7.94518013,8.01540472,7.92258657
49.754178,8,8.03531474,-0.187922174,7.94390757,8.01290614,7.92124039
49.764669,7.54983444,8.03291957,-0.695043259,7.94263963,8.01043003,7.91989374
49.775161,7.74596669,8.0305508,-0.533464251,7.94137606,8.00797532,7.91854636
49.785652,8.48528137,8.02820833,0.676071775,7.94011711,8.00554192,7.9171985
49.796144,8.60232527,8.02589116,0.759232575,7.93886253,8.0031288,7.91584992
49.806636,8.88819442,8.02359901,0.929836228,7.93761247,8.00073567,7.91450073
49.817127,9,8.02133157,0.989276721,7.93636704,7.99836223,7.91315108
49.827619,8,8.01908794,-0.138159107,7.93512604,7.99600753,7.91180069
49.83811,9.32737905,8.01686808,1.14477551,7.93388971,7.99367153,7.91044984
49.848602,8.88819442,8.01467113,0.934624678,7.93265786,7.99135332,7.90909826
49.859094,8.48528137,8.01249687,0.687593268,7.93143063,7.98905266,7.90774608
49.869585,8.66025404,8.01034511,0.806169294,7.93020816,7.98676932,7.90639343
49.880077,8.42614977,8.00821503,0.646478723,7.92899027,7.98450246,7.90504005
49.890568,7.87400787,8.00610669,-0.363454004,7.92777723,7.98225207,7.90368621
49.90106,7.81024968,8.00401931,-0.440192722,7.92656885,7.98001733,7.90233164
49.911552,8.88819442,8.00195276,0.941404088,7.9253653,7.97779807,7.90097647
49.922043,8.1240384,7.99990691,0.352322992,7.92416675,7.9755941,7.89962084
49.932535,8.54400375,7.99788107,0.739001135,7.92297303,7.97340466,7.89826448
49.943026,7.48331477,7.99587532,-0.715933338,7.92178443,7.97122978,7.89690766
49.953518,8,7.993889,0.0781728763,7.92060078,7.96906872,7.89555011
49.96401,8.42614977,7.99192204,0.65895958,7.91942228,7.96692134,7.89419197
49.974501,8.42614977,7.98997438,0.660435757,7.91824911,7.96478752,7.89283337
49.984993,8.77496439,7.98804541,0.887084539,7.91708113,7.96266654,7.89147404
49.995484,7.61577311,7.98613527,-0.608573874,7.91591864,7.96055848,7.89011425
50.005976,8.42614977,7.98424338,0.664760403,7.91476152,7.95846266,7.88875373
50.016468,8.36660027,7.98236974,0.619863314,7.91360997,7.95637897,7.88739263
50.026959,8.36660027,7.98051433,0.621358136,7.9124642,7.95430734,7.88603106
50.037451,9,7.97867664,1.01060544,7.91132409,7.95224709,7.88466877
50.047942,7.81024968,7.97685685,-0.40817542,7.91018997,7.95019834,7.88330602
50.058434,8.36660027,7.97505447,0.625736201,7.90906174,7.94816046,7.88194255
50.068926,7.41619849,7.97326955,-0.746371932,7.90793963,7.94613337,7.8805785
50.079417,8.54400375,7.97150212,0.756638369,7.90682387,7.94411703,7.87921398
50.089909,8.54400375,7.96975176,0.75779416,7.90571437,7.94211081,7.87784874
50.1004,8.06225775,7.96801868,0.306983822,7.90461149,7.94011486,7.87648304
50.110892,8.30662386,7.96630249,0.583370703,7.90351516,7.93812858,7.87511663
50.121384,8.94427191,7.96460326,0.989782121,7.90242563,7.93615193,7.87374963
50.131875,7.93725393,7.96292112,-0.16020981,7.90134317,7.93418489,7.87238217
50.142367,8.24621125,7.96125568,0.533812304,7.90026773,7.93222687,7.871014
50.152858,7.81024968,7.95960723,-0.386468045,7.89919968,7.93027805,7.86964537
50.16335,7.93725393,7.95797543,-0.14394963,7.89813899,7.92833784,7.86827602
50.173842,9.21954446,7.95636043,1.1239146,7.89708596,7.92640626,7.86690609
50.184333,8.66025404,7.9547624,0.839935497,7.89604087,7.92448329,7.86553571
50.194825,8.94427191,7.95318103,0.995535475,7.89500373,7.92256837,7.86416461
50.205316,8.54400375,7.95161666,0.769666868,7.89397493,7.92066171,7.86279306
50.215808,8.54400375,7.95006903,0.770671601,7.8929545,7.91876276,7.86142079
50.2263,8,7.94853835,0.226851613,7.89194276,7.91687154,7.86004794
50.236791,8,7.94702482,0.230163372,7.89094005,7.91498805,7.85867464
50.247283,8.42614977,7.94552825,0.693268724,7.88994641,7.91311178,7.85730063
50.257774,8.48528137,7.94404901,0.735684961,7.88896228,7.91124293,7.85592617
50.268266,7.14142843,7.94258694,-0.895074582,7.88798775,7.909381,7.85455099
50.278758,8.54400375,7.94114229,0.776441536,7.88702318,7.907526,7.85317524
50.289249,9.2736185,7.93971534,1.15494725,7.88606895,7.90567798,7.85179904
50.299741,8.18535277,7.93830598,0.497038014,7.88512518,7.90383643,7.85042212
50.310232,8.54400375,7.93691465,0.779159222,7.88419235,7.90200157,7.84904476
50.320724,8.36660027,7.93554127,0.656550834,7.88327061,7.90017292,7.84766669
50.331216,8.06225775,7.93418617,0.3578709,7.88236039,7.89835052,7.84628804
50.341707,8.36660027,7.9328497,0.658597424,7.88146212,7.89653441,7.84490895
50.352199,8.54400375,7.93153184,0.78260584,7.880576,7.89472412,7.84352915
50.36269,7.68114575,7.93023311,-0.49908653,7.87970256,7.89291987,7.8421489
50.373182,8.66025404,7.92895353,0.8551611,7.87884206,7.89112121,7.84076795
50.383674,7.61577311,7.92769352,-0.558498354,7.87799497,7.88932819,7.83938642
50.394165,8.42614977,7.92645351,0.706891977,7.87716181,7.88754086,7.83800445
50.404657,8.18535277,7.92523359,0.510018801,7.87634287,7.88575877,7.83662178
50.415148,7.93725393,7.92403437,0.114976338,7.87553878,7.88398216,7.83523866
50.42564,9.2736185,7.92286336,1.16221992,7.87474986,7.88221797,7.83385484
50.436132,8.18535277,7.92170636,0.513465107,7.8739767,7.88045149,7.83247044
50.446623,7.93725393,7.92057125,0.129161465,7.87321991,7.87869018,7.83108561
50.457115,8.24621125,7.91945828,0.571623105,7.8724799,7.87693359,7.82970007
50.467606,8.06225775,7.91836813,0.379327847,7.87175739,7.87518197,7.82831409
50.478098,8.18535277,7.91730112,0.517737053,7.87105284,7.87343488,7.82692741
50.48859,9.11043358,7.91625787,1.09278347,7.87036696,7.87169241,7.82554017
50.499081,8.71779789,7.91523906,0.895856477,7.86970047,7.86995463,7.82415248
50.509573,7.93725393,7.91424509,0.151686663,7.86905394,7.86822111,7.82276409
50.520064,7.93725393,7.91327678,0.154845565,7.8684282,7.86649212,7.82137527
50.530556,8.24621125,7.91233463,0.577820581,7.86782391,7.86476722,7.81998575
50.541048,8.66025404,7.91141942,0.865352309,7.8672419,7.8630465,7.81859566
50.551539,7.81024968,7.91053199,-0.316673825,7.86668306,7.86133005,7.81720514
50.562031,8.54400375,7.90967295,0.796448867,7.86614815,7.85961747,7.81581392
50.572522,8.18535277,7.90884329,0.525841684,7.86563818,7.85790899,7.81442227
50.583014,8.36660027,7.90804374,0.677168017,7.865154,7.85620422,7.81302992
50.593506,9,7.90727529,1.04533473,7.86469667,7.85450326,7.811637
50.603997,7.34846923,7.90653899,-0.74704067,7.86426728,7.85280618,7.81024366
50.614489,8.66025404,7.90583572,0.868572577,7.86386683,7.8511126,7.80884961
50.62498,8.36660027,7.90516669,0.679289024,7.86349657,7.84942277,7.80745514
50.635472,7.81024968,7.90453292,-0.30705576,7.86315763,7.8477363,7.80605998
50.645964,7.81024968,7.90393567,-0.306081684,7.86285133,7.84605329,7.80466425
50.656455,8.54400375,7.90337628,0.800392069,7.86257902,7.84437383,7.8032681
50.666947,8.1240384,7.90285597,0.470300364,7.86234207,7.84269754,7.80187125
50.677438,8.36660027,7.90237626,0.681339858,7.86214201,7.84102467,7.80047398
50.68793,8.18535277,7.90193856,0.532366616,7.86198035,7.83935486,7.79907601
50.698422,8.60232527,7.90154448,0.837126504,7.86185876,7.83768819,7.79767749
50.708913,8.06225775,7.90119574,0.401325315,7.86177899,7.83602477,7.79627854
50.719405,8.71779789,7.90089403,0.903827341,7.86174284,7.83436423,7.7948789
50.729896,7.93725393,7.90064126,0.191344372,7.86175225,7.83270683,7.79347884
50.740388,8.18535277,7.90043938,0.533772789,7.86180926,7.83105219,7.79207809
50.75088,7.54983444,7.90029049,-0.591993293,7.86191602,7.82940043,7.79067678
50.761371,7.87400787,7.90019682,-0.161829995,7.86207478,7.82775164,7.78927505
50.771863,8,7.90016069,0.315973594,7.86228798,7.82610546,7.78787263
50.782354,8.06225775,7.90018459,0.402583113,7.86255812,7.82446217,7.7864698
50.792846,8.1240384,7.90027115,0.473040435,7.86288794,7.82282138,7.78506628
50.803338,8.36660027,7.90042318,0.682771618,7.86328028,7.82118322,7.7836622
50.813829,8.24621125,7.90064362,0.587850005,7.86373811,7.81954779,7.78225771
50.824321,7.41619849,7.90093566,-0.696230692,7.86426472,7.81791474,7.78085253
50.834812,7.48331477,7.9013026,-0.646519779,7.86486342,7.81628433,7.77944693
50.845304,9.05538514,7.90174806,1.07407499,7.86553795,7.8146562,7.77804066
50.855796,7.74596669,7.9022758,-0.395359472,7.8662921,7.81303048,7.77663383
50.866287,8.54400375,7.90288981,0.800695907,7.86712987,7.81140726,7.77522659
50.876779,7.81024968,7.90359449,-0.30552384,7.86805578,7.80978621,7.77381866
50.88727,8.71779789,7.9043943,0.901888897,7.86907431,7.80816759,7.77241032
50.897762,7.93725393,7.90529429,0.178772593,7.87019059,7.80655105,7.7710013
50.908254,7.14142843,7.90629961,-0.874569142,7.87140981,7.8049367,7.76959174
50.918745,8,7.90741574,0.304276614,7.87273749,7.80332467,7.76818176
50.929237,9.05538514,7.90864887,1.07085773,7.87417992,7.80171461,7.7667711
50.939728,9.16515139,7.91000515,1.12033309,7.87574328,7.80010678,7.76536004
50.95022,8.18535277,7.91149171,0.523317361,7.87743478,7.79850085,7.76394829
50.960712,8.42614977,7.91311577,0.716263918,7.87926168,7.79689694,7.76253601
50.971203,7.68114575,7.91488505,-0.483465932,7.88123175,7.79529516,7.76112331
50.981695,8.83176087,7.91680837,0.95653149,7.8833539,7.79369517,7.75970994
50.992186,6.92820323,7.91889448,-0.995334745,7.88563692,7.79209724,7.75829616
51.002678,8.18535277,7.9211536,0.514003085,7.88809112,7.79050105,7.75688171
51.01317,8.66025404,7.92359612,0.858287785,7.89072694,7.7889067,7.75546671
51.023661,7.87400787,7.92623319,-0.228528583,7.89355559,7.78731433,7.75405131
51.034153,8.30662386,7.92907765,0.614447895,7.89659001,7.78572359,7.75263524
51.044644,8.24621125,7.93214229,0.560418562,7.89984302,7.78413476,7.75121877
51.055136,8.77496439,7.93544212,0.916254476,7.90332975,7.7825475,7.74980162
51.065628,8,7.93899252,0.24699692,7.90706564,7.78096195,7.74838393
51.076119,8.48528137,7.94281009,0.736526502,7.91106735,7.77937821,7.74696585
51.086611,7.68114575,7.946914,-0.515527156,7.91535417,7.77779597,7.74554709
51.097102,8.36660027,7.95132354,0.644419678,7.91994546,7.7762155,7.74412794
51.107594,8,7.95606144,0.209615257,7.92486406,7.77463647,7.74270811
51.118086,8.30662386,7.96115117,0.587769256,7.93013353,7.773059,7.74128775
51.128577,8.36660027,7.96661826,0.632441309,7.93577949,7.77148322,7.739867
51.139069,8.24621125,7.97249231,0.523181557,7.9418317,7.7699088,7.73844558
51.14956,7.61577311,7.9788035,-0.602520036,7.94832041,7.76833602,7.73702376
51.160052,8.48528137,7.98558739,0.706890359,7.95528135,7.76676456,7.73560127
51.170544,7.81024968,7.99288122,-0.427354115,7.96275186,7.76519454,7.73417825
51.181035,7.81024968,8.00072584,-0.436435746,7.97077295,7.76362608,7.73275484
51.191527,7.34846923,8.00916872,-0.812834235,7.97939228,7.76205888,7.73133077
51.202018,8.60232527,8.0182591,0.76424222,7.9886592,7.76049319,7.7299063
51.21251,7.87400787,8.02805503,-0.392488409,7.99863201,7.75892871,7.72848117
51.223002,8.42614977,8.03861823,0.622520315,8.00937261,7.75736555,7.72705552
51.233493,8.71779789,8.05001719,0.817178497,8.02094969,7.75580386,7.72562947
51.243985,8.1240384,8.06233169,0.248408356,8.03344331,7.7542433,7.72420276
51.254476,8.60232527,8.07564613,0.725726625,8.04693809,7.75268416,7.72277566
51.264968,8.36660027,8.09006024,0.525870727,8.0615341,7.75112612,7.7213479
51.27546,8.48528137,8.10568198,0.616116379,8.07733959,7.74956931,7.71991962
51.285951,8.60232527,8.1226326,0.692598489,8.09447615,7.74801386,7.71849095
51.296443,8.71779789,8.14105414,0.75943647,8.11308625,7.74645946,7.71706163
51.306934,9,8.16110021,0.915914727,8.13332391,7.74490637,7.71563192
51.317426,8.1240384,8.18295313,-0.242723566,8.15537196,7.74335429,7.71420155
51.327918,7.87400787,8.20681438,-0.576893843,8.1794324,7.74180335,7.71277066
51.338409,8.88819442,8.23291368,0.809494122,8.20573555,7.74025368,7.71133939
51.348901,8.48528137,8.2615224,0.473031687,8.23455347,7.73870496,7.70990746
51.359392,8.24621125,8.29294151,-0.216171823,8.26618789,7.73715748,7.70847515
51.369884,9.16515139,8.32753095,0.915216063,8.30099962,7.73561092,7.70704219
51.380376,8.36660027,8.36569819,0.030034506,8.3393971,7.73406541,7.70560871
51.390867,8.88819442,8.40791661,0.693020787,8.38185476,7.7325211,7.70417485
51.401359,9.43398113,8.45475244,0.989559847,8.42894015,7.73097766,7.70274034
51.41185,8.1240384,8.50685201,-0.618719324,8.48130093,7.72943537,7.70130545
51.422342,9.43398113,8.56499819,0.932192545,8.53972166,7.72789394,7.69986991
51.432834,7.81024968,8.63010246,-0.905457225,8.60511559,7.72635348,7.69843386
51.443325,8.66025404,8.70324889,-0.207352001,8.67856885,7.72481414,7.69699744
51.453817,8.88819442,8.78575891,0.320055472,8.7614053,7.7232756,7.69556036
51.464308,7.81024968,8.87919283,-1.03389707,8.85518789,7.72173815,7.69412291
51.4748,8.83176087,8.98548441,-0.392075945,8.96185354,7.72020148,7.69268481
51.485292,8.66025404,9.10698336,-0.668378126,9.08375548,7.71866572,7.69124621
51.495783,10,9.24664099,0.867962561,9.22384919,7.717131,7.68980723
51.506275,9.21954446,9.40835918,-0.434528155,9.38604183,7.71559703,7.6883676
51.516766,9.38083152,9.59748728,-0.465462953,9.57568972,7.71406408,7.68692761
51.527258,10.198039,9.82212987,0.613114313,9.800908,7.71253184,7.68548697
51.53775,10.8166538,10.0952309,0.849366181,10.0746573,7.71100046,7.68404583
51.548241,10.0498756,10.4382509,-0.623197639,10.4184242,7.70947006,7.68260431
51.558733,10.9544512,10.8862321,0.261187817,10.8672884,7.70794035,7.68116216
51.569224,11.4455231,11.4920815,-0.215773764,11.4741993,7.7064116,7.67971964
51.579716,12.489996,12.3269495,0.403790173,12.3103365,7.70488351,7.67827648
51.590208,13.2664992,13.4699986,-0.451109077,13.4548477,7.70335622,7.67683281
51.600699,15.5884573,14.9869726,0.775554406,14.9734017,7.70182986,7.67538879
51.611191,17.5783958,16.9044511,0.820941367,16.8924599,7.70030413,7.67394412
51.621682,19.4422221,19.1894164,0.502797915,19.1788879,7.69877931,7.67249909
51.632174,21.5870331,21.7441203,-0.396342165,21.7348589,7.6972551,7.67105342
51.642666,23.430749,24.4039464,-0.986507672,24.3957207,7.69573165,7.66960726
51.653157,27.0370117,26.9295231,0.327854512,26.9220922,7.69420907,7.66816073
51.663649,29.563491,28.9923217,0.755757428,28.9854408,7.69268708,7.66671357
51.67414,30.5614136,30.2037833,0.598021974,30.1971985,7.69116595,7.66526605
51.684632,29.8496231,30.2654783,-0.644868383,30.2589266,7.68964539,7.6638179
51.695124,29.5465734,29.1587041,0.622791521,29.1519237,7.68812554,7.66236925
51.705615,28.213472,27.1608437,1.02597673,27.1535856,7.68660652,7.66092025
51.716107,25.0998008,24.6616098,0.661959945,24.6536389,7.68508805,7.65947061
51.726598,21.4009346,22.0003081,-0.77419216,21.9913979,7.6835704,7.65802062
51.73709,19.078784,19.4238852,-0.587453087,19.4138208,7.68205328,7.65657
51.747582,16.7332005,17.1036634,-0.608656571,17.0922643,7.68053682,7.65511888
51.758073,14.4913767,15.1445137,-0.808168904,15.1316739,7.67902117,7.65366742
51.768565,13.3790882,13.5851763,-0.453969265,13.5708995,7.67750602,7.65221532
51.779056,11.9163753,12.4048622,-0.698918402,12.3892668,7.67599166,7.65076288
51.789548,11.4455231,11.5401896,-0.307679145,11.5234677,7.67447779,7.64930981
51.80004,10.7703296,10.9122065,-0.37666547,10.8945661,7.67296455,7.64785625
51.810531,10.198039,10.4484106,-0.500371397,10.4300324,7.67145207,7.64640234
51.821023,10.7703296,10.0937925,0.822518736,10.0748148,7.66994008,7.64494781
51.831514,9.43398113,9.81184009,-0.614702331,9.79236382,7.66842883,7.64349293
51.842006,10.0995049,9.57992629,0.720818044,9.56002569,7.66691805,7.64203742
51.852498,9.21954446,9.38448442,-0.406128012,9.36421672,7.66540787,7.64058144
51.862989,10.0995049,9.21711204,0.939357704,9.19652367,7.66389843,7.6391251
51.873481,8.77496439,9.07220786,-0.545200398,9.05133794,7.66238943,7.63766815
51.883972,9.05538514,8.9458162,0.331011989,8.92469852,7.66088116,7.63621086
51.894464,9.21954446,8.83487921,0.620213872,8.81354318,7.65937332,7.63475294
51.904956,8.83176087,8.73700332,0.307827144,8.71547474,7.65786606,7.63329454
51.915447,8.30662386,8.65024377,-0.586191016,8.62854531,7.65635951,7.63183581
51.925939,8.77496439,8.57297928,0.449427528,8.55113082,7.65485338,7.63037646
51.93643,8.71779789,8.5038941,0.462497332,8.48191316,7.65334796,7.62891676
51.946922,8.60232527,8.44186504,0.400574869,8.41976703,7.65184295,7.62745645
51.957414,9.11043358,8.38596742,0.85115578,8.36376593,7.65033849,7.62599567
51.967905,8.36660027,8.33542007,0.176579137,8.31312711,7.64883472,7.62453455
51.978397,7.87400787,8.28954758,-0.64462369,8.26717372,7.64733135,7.62307281
51.988888,8.24621125,8.24779165,-0.0397542714,8.22534628,7.64582867,7.62161074
51.99938,7.54983444,8.20965944,-0.812296133,8.18715084,7.64432638,7.62014806
52.009872,8.06225775,8.17473849,-0.335381491,8.152174,7.64282462,7.6186849
52.020363,8.77496439,8.14267245,0.79516787,8.12005858,7.64132353,7.61722142
52.030855,8.24621125,8.11314423,0.364783523,8.09048675,7.63982283,7.61575732
52.041346,9.05538514,8.08588924,0.98462983,8.06319327,7.6383228,7.61429289
52.051838,8.24621125,8.06066666,0.430748873,8.03793675,7.63682315,7.61282785
52.06233,7.21110255,8.037273,-0.908939191,8.01451317,7.63532401,7.61136235
52.072821,8.42614977,8.01552928,0.640796761,7.99274311,7.63382553,7.60989651
52.083313,7.74596669,7.99527207,-0.499304897,7.97246271,7.63232743,7.60843007
52.093804,8.60232527,7.97636455,0.791176796,7.95353481,7.63082997,7.6069633
52.104296,7.81024968,7.95867855,-0.385264686,7.93583092,7.62933289,7.60549593
52.114788,8.71779789,7.94210534,0.880734093,7.919242,7.62783631,7.60402809
52.125279,8.30662386,7.92654789,0.616503022,7.90367075,7.62634038,7.60255993
52.135771,8.06225775,7.91191538,0.387740078,7.88902615,7.62484481,7.60109117
52.146262,8.77496439,7.89813202,0.936393274,7.87523217,7.62334988,7.59962208
52.156754,8.88819442,7.88512475,1.00153366,7.86221557,7.62185532,7.59815239
52.167246,7.48331477,7.87283162,-0.624112845,7.84991422,7.62036125,7.59668224
52.177737,8.24621125,7.8611967,0.620495411,7.83827204,7.61886782,7.59521177
52.188229,8.36660027,7.85016638,0.718633347,7.82723527,7.61737475,7.59374071
52.19872,8.66025404,7.8396963,0.905846423,7.81675943,7.61588231,7.59226932
52.209212,8.30662386,7.82974239,0.69056605,7.80680034,7.61439023,7.59079733
52.219704,8.42614977,7.82026753,0.77838438,7.79732074,7.61289865,7.58932489
52.230195,7.34846923,7.81123787,-0.680271006,7.78828672,7.61140769,7.58785214
52.240687,8.18535277,7.80262016,0.618653873,7.77966491,7.60991709,7.58637878
52.251178,7.87400787,7.79438729,0.2821712,7.77142815,7.60842713,7.58490512
52.26167,7.87400787,7.78651147,0.295797905,7.76354855,7.60693752,7.58343086
52.272162,8.06225775,7.77896955,0.532248248,7.7560029,7.6054484,7.58195614
52.282653,8.30662386,7.77174028,0.731357358,7.74876988,7.60395991,7.58048112
52.293145,9.38083152,7.76480222,1.27123141,7.741828,7.60247178,7.5790055
52.303636,9.38083152,7.75813832,1.27384975,7.73516016,7.60098428,7.57752958
52.314128,8.60232527,7.75173046,0.922276967,7.72874818,7.59949713,7.57605306
52.32462,8.54400375,7.74556383,0.89355465,7.72257721,7.59801048,7.5745761
52.335111,8.06225775,7.73962481,0.568007868,7.71663359,7.59652447,7.57309882
52.345603,7.54983444,7.73389926,-0.429027771,7.71090315,7.59503881,7.57162096
52.356094,8.18535277,7.72837637,0.6760003,7.70537501,7.59355379,7.5701428
52.366586,8.06225775,7.72304416,0.582420458,7.7000372,7.59206913,7.56866405
52.377078,8.42614977,7.7178932,0.841579805,7.69488024,7.59058496,7.56718485
52.387569,8.24621125,7.71291488,0.730271435,7.68989549,7.58910144,7.56570535
52.398061,8.24621125,7.7081,0.733560667,7.68507373,7.58761828,7.56422527
52.408552,7.68114575,7.70344203,-0.14931939,7.68040841,7.58613577,7.56274488
52.419044,8.30662386,7.69893342,0.779545024,7.67589195,7.58465362,7.56126391
52.429536,8.1240384,7.69456872,0.655339364,7.67151889,7.58317198,7.55978251
52.440027,8.88819442,7.69034321,1.09446389,7.66728448,7.58169099,7.5583008
52.450519,8.30662386,7.68625172,0.787637064,7.66318356,7.58021037,7.55681851
52.46101,8.77496439,7.6822915,1.04530995,7.65921335,7.57873041,7.55533593
52.471502,8.54400375,7.67845914,0.930346498,7.65537043,7.57725082,7.55385277
52.481994,8.36660027,7.67475329,0.831773395,7.65165344,7.57577175,7.55236917
52.492485,7.93725393,7.67117361,0.515829747,7.64806205,7.57429335,7.55088528
52.502977,7.34846923,7.66771995,-0.565022763,7.64459612,7.57281533,7.54940081
52.513468,7.81024968,7.66439492,0.381909349,7.64125823,7.57133798,7.54791604
52.52396,7.87400787,7.66120152,0.461309387,7.63805141,7.56986102,7.54643071
52.534452,7.87400787,7.65814579,0.464609607,7.63498171,7.56838459,7.54494494
52.544943,8.1240384,7.65523637,0.6846912,7.6320578,7.56690884,7.54345888
52.555435,8.06225775,7.65248465,0.640135216,7.62929111,7.56543349,7.54197225
52.565926,7.68114575,7.64990834,0.17674108,7.62669938,7.56395883,7.54048533
52.576418,7.93725393,7.64753238,0.538257884,7.62430764,7.56248458,7.53899784
52.58691,8.30662386,7.64539692,0.81315862,7.62215615,7.56101088,7.53750992
52.597401,7.48331477,7.64356816,-0.400316609,7.62031133,7.55953787,7.53602172
52.607893,7.93725393,7.64215907,0.543226349,7.61888647,7.55806529,7.53453294
52.618384,8.18535277,7.64136484,0.737555374,7.61807737,7.55659341,7.53304389
52.628876,7.28010989,7.64150984,-0.601165496,7.6182094,7.55512196,7.53155426
52.639368,7.68114575,7.64310236,0.195047155,7.61979238,7.55365109,7.53006422
52.649859,8.60232527,7.64687145,0.97747318,7.62355763,7.55218094,7.52857389
52.660351,8.88819442,7.65375243,1.11105445,7.63044328,7.55071123,7.527083
52.670842,8.18535277,7.66477254,0.721512464,7.64147969,7.54924225,7.52559182
52.681334,8.54400375,7.680822,0.929075747,7.65755971,7.54777372,7.52410009
52.691826,8,7.70230477,0.545614545,7.67908834,7.5463058,7.52260793
52.702317,7.41619849,7.72871866,-0.559035038,7.70556168,7.54483862,7.5211155
52.712809,7.81024968,7.75816527,0.228220086,7.73507539,7.54337191,7.51962251
52.7233,7.07106781,7.78672125,-0.845963021,7.76369433,7.54190596,7.51812924
52.733792,7.87400787,7.80812846,0.256669849,7.78514196,7.54044049,7.51663542
52.744284,7.87400787,7.81531564,0.242264803,7.79232645,7.53897565,7.51514118
52.754775,8.54400375,7.80476047,0.859792576,7.78171518,7.53751159,7.51364666
52.765267,7.34846923,7.77946976,-0.656506307,7.75632331,7.53604804,7.51215159
52.775758,7.81024968,7.74635091,0.252782047,7.72307806,7.53458527,7.51065625
52.78625,7.48331477,7.71179986,-0.478001137,7.68839411,7.53312301,7.50916036
52.796742,7.28010989,7.67995049,-0.632329507,7.65641791,7.53166142,7.50766405
52.807233,8,7.65288242,0.589166854,7.62923572,7.53020065,7.50616748
52.817725,7.41619849,7.6312105,-0.46369388,7.60746467,7.5287404,7.50467035
52.828216,8.36660027,7.61460933,0.867174108,7.59077866,7.52728099,7.50317296
52.838708,8.06225775,7.60222133,0.678259843,7.57831766,7.52582213,7.50167501
52.8492,7.87400787,7.5930234,0.530079682,7.56905551,7.52436397,7.50017666
52.859691,8.54400375,7.58606521,0.978743346,7.56203896,7.52290666,7.49867805
52.870183,8.06225775,7.58059183,0.694021556,7.55651075,7.52144992,7.49717889
52.880674,8.30662386,7.57607258,0.854722925,7.55193855,7.51999405,7.49567946
52.891166,6.92820323,7.57216249,-0.802470724,7.54797626,7.51853878,7.49417949
52.901658,7.41619849,7.56865274,-0.390453908,7.54441442,7.51708426,7.49267912
52.912149,7.81024968,7.56542014,0.494802526,7.54112945,7.51563062,7.49117849
52.922641,7.87400787,7.56239071,0.558226807,7.53804711,7.51417761,7.48967731
52.933132,8.36660027,7.55951953,0.898376724,7.53512236,7.51272551,7.48817588
52.943624,8,7.55677576,0.665750881,7.53232423,7.51127405,7.4866739
52.954116,7.93725393,7.55413807,0.618963537,7.52963131,7.50982338,7.48517153
52.964607,8.30662386,7.55159035,0.868926645,7.52702744,7.50837365,7.4836689
52.975099,7.28010989,7.54911928,-0.518661153,7.52449925,7.5069246,7.48216573
52.98559,8.48528137,7.54671506,0.968796324,7.5220369,7.5054765,7.48066231
52.996082,8.06225775,7.54436884,0.719644991,7.5196315,7.50402911,7.47915835
53.006574,7.93725393,7.54207395,0.628633428,7.51727635,7.50258255,7.477654
53.017065,7.34846923,7.53982486,-0.437442152,7.5149659,7.50113699,7.47614939
53.027557,8.42614977,7.53761636,0.942620505,7.51269489,7.49969216,7.47464425
53.038048,8,7.53544479,0.681582872,7.51045967,7.49824835,7.47313887
53.04854,7.87400787,7.5333063,0.583696475,7.50825633,7.49680529,7.47163294
53.059032,7.54983444,7.53119815,0.136514783,7.50608214,7.49536313,7.47012663
53.069523,8.30662386,7.529118,0.881762931,7.50393472,7.49392202,7.46862008
53.080015,6.8556546,7.52706324,-0.81939529,7.50181147,7.49248171,7.46711299
53.090506,7.93725393,7.52503236,0.642044836,7.49971083,7.49104247,7.46560566
53.100998,8.18535277,7.52302329,0.813836274,7.49763072,7.48960406,7.4640978
53.11149,7.28010989,7.52103474,-0.490840966,7.49556984,7.48816661,7.46258955
53.121981,7.68114575,7.5190656,0.402591791,7.49352707,7.48673027,7.46108106
53.132473,7.41619849,7.51711431,-0.317672516,7.49150082,7.4852948,7.45957205
53.142964,8.24621125,7.51518023,0.855003524,7.48949043,7.48386047,7.45806279
53.153456,7.34846923,7.51326203,-0.405946797,7.48749456,7.48242704,7.45655302
53.163948,7.28010989,7.51135907,-0.480883753,7.48551256,7.48099464,7.45504285
53.174439,7.87400787,7.50947077,0.603769078,7.48354383,7.47956343,7.45353246
53.184931,8.06225775,7.50759608,0.744756111,7.4815873,7.47813316,7.45202154
53.195422,8.06225775,7.50573473,0.746004702,7.47964268,7.4767041,7.45051038
53.205914,6.78232998,7.50388579,-0.849444413,7.47770902,7.47527602,7.44899871
53.216406,7.93725393,7.50204892,0.659700699,7.47578597,7.47384905,7.44748666
53.226897,7.68114575,7.5002238,0.425349204,7.4738732,7.47242336,7.44597437
53.237389,7.48331477,7.49840965,-0.1228612,7.47196989,7.47099868,7.44446157
53.24788,7.48331477,7.49660639,-0.115289288,7.47007598,7.46957531,7.44294854
53.258372,8.30662386,7.49481332,0.901005298,7.4681907,7.46815299,7.44143499
53.268864,7.41619849,7.49303023,-0.2771854,7.46631387,7.46673187,7.43992107
53.279355,8.24621125,7.49125699,0.86888104,7.46444531,7.46531212,7.43840692
53.289847,7.61577311,7.48949294,0.355359207,7.46258435,7.46389347,7.43689226
53.300338,6.70820393,7.48773814,-0.882912343,7.46073104,7.46247622,7.43537737
53.31083,7.61577311,7.48599198,0.360251474,7.45888474,7.46106012,7.43386197
53.321322,7.07106781,7.48425439,-0.642795908,7.45704536,7.45964532,7.4323462
53.331813,8.60232527,7.4825253,1.05820601,7.45521282,7.45823198,7.43083021
53.342305,7.81024968,7.48080415,0.573973452,7.45338653,7.45681985,7.42931371
53.352796,6.32455532,7.47909108,-1.07449326,7.45156661,7.45540921,7.42779699
53.363288,8.06225775,7.47738561,0.764769338,7.44975256,7.45399983,7.42627976
53.37378,7.68114575,7.47568762,0.453274893,7.44794423,7.45259185,7.42476217
53.384271,7.61577311,7.47399715,0.376531475,7.44614167,7.45118544,7.42324436
53.394763,7.81024968,7.47231373,0.581322584,7.44434433,7.44978035,7.42172604
53.405254,7.28010989,7.47063751,-0.436494699,7.4425524,7.44837687,7.42020751
53.415746,7.87400787,7.46896804,0.636427399,7.44076536,7.44697476,7.41868847
53.426238,7.21110255,7.46730534,-0.506164783,7.43898322,7.44557418,7.41716908
53.436729,8.48528137,7.46564944,1.00976826,7.437206,7.44417527,7.41564947
53.447221,8.36660027,7.4639999,0.950052825,7.43543321,7.44277781,7.41412936
53.457712,7.93725393,7.46235692,0.68912772,7.43366506,7.44138208,7.41260904
53.468204,7.34846923,7.46072008,-0.335038587,7.43190107,7.43998785,7.41108822
53.478696,7.34846923,7.45908945,-0.332596177,7.43014129,7.43859527,7.40956704
53.489187,6.8556546,7.45746506,-0.775764437,7.42838575,7.43720451,7.40804566
53.499679,7.87400787,7.45584654,0.646653956,7.426634,7.43581532,7.40652378
53.51017,7.81024968,7.45423409,0.59667042,7.42488627,7.434428,7.40500169
53.520662,7.54983444,7.45262733,0.311780544,7.42314212,7.43304232,7.40347911
53.531154,8.18535277,7.45102634,0.856928489,7.4214016,7.43165843,7.40195618
53.541645,8.42614977,7.44943119,0.988290736,7.41966478,7.43027651,7.40043305
53.552137,7.61577311,7.44784153,0.409794554,7.41793122,7.42889631,7.39890942
53.562628,8.18535277,7.44625758,0.859706456,7.41620118,7.42751813,7.39738559
53.57312,7.74596669,7.44467899,0.548896805,7.41447422,7.42614174,7.39586127
53.583612,7.48331477,7.44310585,0.200521627,7.41275043,7.42476731,7.3943366
53.594103,7.87400787,7.44153826,0.657624218,7.41102988,7.42339499,7.39281174
53.604595,7.61577311,7.43997588,0.419281803,7.40931216,7.42202457,7.39128639
53.615086,7.68114575,7.43841895,0.492673119,7.40759753,7.42065633,7.38976084
53.625578,8,7.43686713,0.750421791,7.40588558,7.41929006,7.3882348
53.63607,6.8556546,7.43532055,-0.761357966,7.4041764,7.41792592,7.38670842
53.646561,7.28010989,7.43377931,-0.392006917,7.40247008,7.41656407,7.38518185
53.657053,7.21110255,7.43224309,-0.47025582,7.40076623,7.41520429,7.3836548
53.667544,6.92820323,7.43071214,-0.70887863,7.3990651,7.41384689,7.38212755
53.678036,8.36660027,7.42918616,0.968201481,7.39736631,7.41249164,7.38059982
53.688528,8.1240384,7.42766526,0.834489751,7.39566996,7.41113872,7.37907176
53.699019,7.81024968,7.42614957,0.619758102,7.39397614,7.40978828,7.3775435
53.709511,7.21110255,7.42463878,-0.462099809,7.39228448,7.40844012,7.37601477
53.720002,7.54983444,7.42313317,0.355951206,7.39059524,7.40709454,7.37448585
53.730494,8.60232527,7.42163244,1.0865969,7.38890805,7.40575133,7.37295645
53.740986,7.68114575,7.42013672,0.510890429,7.387223,7.40441065,7.37142672
53.751477,7.61577311,7.41864614,0.443989826,7.38554022,7.40307268,7.3698968
53.761969,8.1240384,7.41716042,0.840760361,7.38385932,7.40173722,7.36836641
53.77246,8.94427191,7.41567984,1.23636244,7.38218058,7.40040456,7.36683584
53.782952,8.42614977,7.41420411,1.0059551,7.38050364,7.3990745,7.3653048
53.793444,7.61577311,7.41273339,0.450599289,7.3788286,7.39774721,7.36377342
53.803935,8.18535277,7.41126781,0.879820985,7.37715558,7.39642288,7.36224187
53.814427,7.93725393,7.4098071,0.726255351,7.37548422,7.3951013,7.36070985
53.824918,7.81024968,7.40835155,0.633954354,7.37381479,7.39378278,7.35917765
53.83541,6.92820323,7.4069009,-0.691879811,7.37214694,7.39246712,7.35764498
53.845902,8,7.4054553,0.771067245,7.37048078,7.3911545,7.35611199
53.856393,6.32455532,7.40401491,-1.03897045,7.36881644,7.38984511,7.35457882
53.866885,7.54983444,7.40257946,0.383738157,7.36715355,7.38853875,7.35304519
53.877376,6.92820323,7.40114926,-0.687710717,7.36549241,7.38723573,7.35151139
53.887868,7.41619849,7.39972405,0.128352771,7.36383264,7.38593586,7.34997712
53.89836,7.81024968,7.398304,0.641829939,7.36217439,7.38463933,7.34844253
53.908851,7.34846923,7.39688928,-0.220045563,7.36051777,7.38334633,7.34690777
53.919343,7.61577311,7.39547963,0.469354313,7.35886243,7.38205667,7.34537256
53.929834,8.24621125,7.39407538,0.92311206,7.35720866,7.38077067,7.34383717
53.940326,7.48331477,7.39267627,0.301062292,7.35555612,7.37948815,7.34230132
53.950818,8.06225775,7.39128249,0.819130794,7.35390492,7.3782093,7.34076517
53.961309,7.74596669,7.38989421,0.596718095,7.35225519,7.37693432,7.33922884
53.971801,8.1240384,7.3885112,0.857628826,7.3506066,7.37566303,7.33769206
53.982292,7.28010989,7.38713378,-0.327145063,7.34895943,7.37439575,7.33615512
53.992784,7.07106781,7.38576173,-0.560975865,7.34731334,7.37313232,7.33461772
54.003276,7.68114575,7.38439524,0.544748118,7.34566845,7.37187293,7.33308001
54.013767,7.34846923,7.38303447,-0.185917311,7.3440249,7.37061779,7.33154214
54.024259,6.92820323,7.38167925,-0.673406278,7.34238235,7.36936673,7.33000382
54.03475,7.48331477,7.38032986,0.320912621,7.34074109,7.36812008,7.32846535
54.045242,8.1240384,7.37898613,0.863164105,7.33910078,7.36687769,7.32692642
54.055734,7.41619849,7.37764825,0.196342152,7.33746155,7.36563976,7.32538719
54.066225,7.21110255,7.3763164,-0.406465061,7.33582354,7.3644065,7.3238478
54.076717,7.41619849,7.3749904,0.202997754,7.33418641,7.36317778,7.32230796
54.087208,7.14142843,7.37367058,-0.481915085,7.33255046,7.3619539,7.32076797
54.0977,8.18535277,7.37235676,0.901662917,7.33091535,7.36073475,7.31922754
54.108192,7.34846923,7.37104914,-0.150266127,7.32928121,7.35952054,7.31768681
54.118683,7.41619849,7.36974793,0.215523922,7.32764818,7.35831147,7.31614592
54.129175,7.34846923,7.36845296,-0.141363821,7.32601594,7.35710744,7.31460459
54.139666,8.66025404,7.36716457,1.13714092,7.32438477,7.35590876,7.31306312
54.150158,6.70820393,7.3658826,-0.810973899,7.32275434,7.35471533,7.3115212
54.16065,7,7.36460726,-0.603827181,7.32112479,7.35352737,7.30997899
54.171141,7.74596669,7.36333879,0.618569241,7.31949626,7.35234511,7.30843663
54.181633,7.34846923,7.36207702,-0.116652445,7.31786843,7.35116843,7.30689384
54.192124,6.78232998,7.36082231,-0.760586832,7.31624157,7.34999769,7.3053509
54.202616,7.68114575,7.35957453,0.5670725,7.31461538,7.34883279,7.30380752
54.213108,7.41619849,7.3583339,0.240550598,7.31298999,7.34767396,7.30226386
54.223599,7.93725393,7.35710065,0.761677937,7.31136553,7.34652145,7.30072005
54.234091,6.70820393,7.35587468,-0.804779936,7.30974168,7.34537517,7.29917581
54.244582,7.87400787,7.35465633,0.720660493,7.30811875,7.34423547,7.29763144
54.255074,7.48331477,7.3534455,0.360373802,7.3064964,7.34310228,7.29608663
54.265566,7.21110255,7.35224243,-0.375685879,7.30487477,7.34197586,7.29454153
54.276057,7.34846923,7.35104738,-0.0507754864,7.30325402,7.34085645,7.2929963
54.286549,7.48331477,7.34986025,0.365314279,7.3016338,7.339744,7.29145064
54.29704,7.07106781,7.34868142,-0.526890506,7.30001443,7.33863888,7.28990485
54.307532,6.63324958,7.3475108,-0.845139764,7.29839558,7.33754103,7.28835863
54.318024,8.24621125,7.34634867,0.94861087,7.2967774,7.33645073,7.28681213
54.328515,6.32455532,7.34519529,-1.01026727,7.29516002,7.33536825,7.2852655
54.339007,7.68114575,7.3440506,0.58059896,7.29354313,7.33429356,7.28371844
54.349498,6.8556546,7.34291499,-0.698040389,7.29192702,7.33322705,7.28217125
54.35999,8,7.34178841,0.811302403,7.29031138,7.33216869,7.28062365
54.370482,7.54983444,7.34067116,0.457343717,7.28869636,7.33111878,7.27907576
54.380973,7.87400787,7.33956352,0.731057011,7.28708208,7.3300776,7.27752776
54.391465,7.41619849,7.33846548,0.278806405,7.28546825,7.32904517,7.27597933
54.401956,7.54983444,7.33737743,0.460930589,7.28385515,7.32802189,7.27443078
54.412448,8.42614977,7.33629937,1.043959,7.28224247,7.32700776,7.27288181
54.42294,7.14142843,7.33523162,-0.440230844,7.28063037,7.32600312,7.27133257
54.433431,7.68114575,7.3341745,0.589042655,7.27901897,7.32500828,7.26978321
54.443923,8.06225775,7.33312802,0.853890937,7.27740797,7.32402327,7.26823343
54.454414,8,7.33209261,0.817256014,7.27579768,7.32304853,7.26668353
54.464906,7.61577311,7.33106831,0.533577355,7.27418776,7.32208411,7.26513323
54.475398,8.36660027,7.33005547,1.01810844,7.27257838,7.32113037,7.26358265
54.485889,8.06225775,7.32905444,0.856272917,7.27096968,7.32018764,7.26203196
54.496381,7.87400787,7.32806528,0.738879282,7.26936135,7.31925602,7.26048086
54.506872,7.48331477,7.32708845,0.395254753,7.26775368,7.31833596,7.25892965
54.517364,6.92820323,7.32612405,-0.630809655,7.26614638,7.31742757,7.25737803
54.527856,8,7.32517245,0.821478877,7.26453958,7.31653123,7.25582614
54.538347,7.28010989,7.32423405,-0.210057513,7.26293344,7.31564732,7.25427415
54.548839,7.41619849,7.32330896,0.304777832,7.26132764,7.31477599,7.25272175
54.55933,7,7.32239768,-0.567800742,7.2597225,7.31391772,7.25116924
54.569822,7.41619849,7.32150037,0.307730594,7.2581177,7.31307269,7.24961633
54.580314,7.74596669,7.32061744,0.652188047,7.25651338,7.3122413,7.24806316
54.590805,7.34846923,7.31974934,0.169469434,7.25490972,7.31142401,7.24650989
54.601297,7.93725393,7.31889625,0.786357224,7.25330639,7.310621,7.24495622
54.611788,6.70820393,7.31805871,-0.780931993,7.2517037,7.30983281,7.24340244
54.62228,7,7.31723695,-0.563237914,7.25010134,7.30905967,7.24184826
54.632772,7.87400787,7.31643144,0.746710408,7.24849948,7.30830207,7.24029383
54.643263,6.8556546,7.31564267,-0.678224207,7.24689826,7.30756047,7.2387393
54.653755,7.48331477,7.31487093,0.410419111,7.24529738,7.30683518,7.23718438
54.664246,7.28010989,7.31411678,-0.184409585,7.24369714,7.30612676,7.23562936
54.674738,6.8556546,7.31338056,-0.676554477,7.24209726,7.30543553,7.23407394
54.68523,7.21110255,7.3126628,-0.318685187,7.24049787,7.30476204,7.23251827
54.695721,7.07106781,7.31196406,-0.490811821,7.23889914,7.30410682,7.23096251
54.706213,7.61577311,7.3112847,0.551804677,7.23730077,7.30347027,7.22940636
54.716704,7,7.31062539,-0.557337775,7.23570307,7.30285301,7.22785012
54.727196,7.21110255,7.30998655,-0.31445826,7.23410574,7.30225548,7.22629348
54.737688,7.61577311,7.30936879,0.553537999,7.23250894,7.30167827,7.22473661
54.748179,7.41619849,7.30877276,0.327758648,7.23091283,7.30112203,7.22317964
54.758671,8.30662386,7.30819894,0.999212151,7.22931713,7.30058725,7.22162229
54.769162,7.61577311,7.30764808,0.55509011,7.22772213,7.30007463,7.22006485
54.779654,7.07106781,7.30712071,-0.485852752,7.22612756,7.29958473,7.21850702
54.790146,8.06225775,7.30661757,0.869275665,7.22453358,7.29911825,7.21694896
54.800637,7.07106781,7.30613939,-0.484841808,7.22294035,7.29867592,7.21539081
54.811129,7.21110255,7.30568682,-0.307545553,7.22134758,7.29825837,7.21383229
54.82162,7.14142843,7.30526069,-0.404761975,7.21975561,7.29786641,7.21227367
54.832112,8.24621125,7.3048617,0.970231702,7.21816414,7.29750074,7.21071468
54.842604,6.78232998,7.3044907,-0.722606892,7.21657335,7.29716218,7.20915546
54.853095,7.93725393,7.30414858,0.795679176,7.21498341,7.29685159,7.20759615
54.863587,7.34846923,7.30383614,0.211265434,7.21339405,7.29656977,7.20603647
54.874078,6.78232998,7.30355436,-0.72195871,7.2118056,7.29631764,7.20447671
54.88457,7.28010989,7.30330413,-0.152296562,7.21021778,7.29609608,7.20291658
54.895062,7,7.30308647,-0.550532894,7.20863078,7.29590608,7.20135622
54.905553,7.81024968,7.30290241,0.712283135,7.20704479,7.29574864,7.19979578
54.916045,7.41619849,7.302753,0.336816697,7.20545955,7.29562477,7.19823497
54.926536,8.42614977,7.30263937,1.05995773,7.2038754,7.29553555,7.19667409
54.937028,7.61577311,7.30256267,0.559652063,7.2022921,7.29548209,7.19511284
54.94752,8.1240384,7.30252412,0.906374251,7.20070983,7.29546556,7.19355137
54.958011,7.21110255,7.30252498,-0.302361415,7.19912881,7.29548716,7.19198982
54.968503,7,7.30256656,-0.550060502,7.19754881,7.29554816,7.19042791
54.978994,7,7.30265022,-0.55013655,7.19597019,7.29564985,7.18886593
54.989486,7.61577311,7.30277743,0.559460161,7.19439273,7.29579361,7.18730359
54.999978,6.78232998,7.30294968,-0.721539808,7.19281665,7.29598086,7.18574103
55.010469,7.34846923,7.3031685,0.212839687,7.19124221,7.29621305,7.1841784
55.020961,7.54983444,7.30343557,0.496385799,7.1896692,7.29649178,7.18261542
55.031452,7.14142843,7.30375257,-0.402894701,7.18809802,7.29681858,7.18105237
55.041944,7.48331477,7.30412134,0.423312451,7.18652852,7.29719522,7.17948895
55.052436,7.81024968,7.30454374,0.711130038,7.18496096,7.29762341,7.17792533
55.062927,7.48331477,7.3050217,0.422247649,7.18339564,7.29810493,7.17636165
55.073419,7.07106781,7.30555736,-0.48424121,7.18183244,7.29864179,7.17479761
55.08391,7.48331477,7.30615364,0.420905139,7.18027267,7.29923587,7.17323351
55.094402,7.34846923,7.30681126,0.204102839,7.17871456,7.29988939,7.17166906
55.104894,7.68114575,7.3075334,0.61123837,7.17715932,7.30060447,7.1701044
55.115385,7.07106781,7.30832251,-0.487087978,7.17560735,7.30138331,7.16853968
55.125877,7.21110255,7.3091814,-0.313175425,7.17405865,7.30222846,7.16697462
55.136368,7.74596669,7.3101127,0.66019239,7.17251381,7.30314224,7.1654095
55.14686,6.78232998,7.31111956,-0.727179195,7.17097292,7.30412746,7.16384402
55.157352,6.32455532,7.31220503,-0.993805671,7.16943651,7.30518677,7.16227835
55.167843,7.21110255,7.31337229,-0.31979641,7.16790519,7.30632294,7.16071263
55.178335,7.28010989,7.3146251,-0.185782687,7.16637918,7.30753921,7.15914656
55.188826,7.81024968,7.31596692,0.703052459,7.16485936,7.3088385,7.15758045
55.199318,7.34846923,7.31740198,0.176259032,7.1633461,7.31022438,7.15601398
55.20981,7.28010989,7.31893439,-0.197039337,7.16184033,7.31170023,7.15444733
55.220301,8.48528137,7.32056848,1.07921865,7.16034305,7.31326955,7.15288062
55.230793,6.70820393,7.32230941,-0.78364882,7.15885501,7.31493649,7.15131358
55.241284,7.61577311,7.32416199,0.540010291,7.15737764,7.31670479,7.14974649
55.251776,7,7.32613218,-0.571079833,7.15591205,7.31857905,7.14817906
55.262268,7.61577311,7.32822579,0.536234383,7.15445994,7.32056359,7.14661144
55.272759,7.87400787,7.33044913,0.737264365,7.15302334,7.32266291,7.14504378
55.283251,8.36660027,7.33280971,1.01675491,7.15160415,7.32488243,7.14347578
55.293742,7.68114575,7.33531482,0.588073914,7.15020526,7.32722693,7.14190775
55.304234,7.41619849,7.33797345,0.279687396,7.14882948,7.32970244,7.14033938
55.314726,7.61577311,7.34079476,0.524383778,7.14748066,7.33231456,7.13877082
55.325217,8.24621125,7.34378891,0.949959124,7.1461634,7.33506919,7.13720223
55.335709,7.41619849,7.34696823,0.263116428,7.14488288,7.3379734,7.13563331
55.3462,7.54983444,7.35034539,0.446641963,7.14364603,7.34103351,7.13406435
55.356692,7.87400787,7.35393636,0.721159838,7.14246097,7.34425743,7.13249507
55.367184,7.61577311,7.35775883,0.507951052,7.14133856,7.34765258,7.1309256
55.377675,7.41619849,7.36183436,0.233161158,7.14029328,7.3512268,7.1293561
55.388167,7.68114575,7.36619197,0.561207427,7.13934531,7.35498946,7.12778628
55.398658,7.14142843,7.37086959,-0.479000169,7.13852564,7.35894903,7.12621643
55.40915,8.36660027,7.37592522,0.995326604,7.13788338,7.36311605,7.12464625
55.419642,7.81024968,7.38144667,0.654830515,7.13749966,7.36750051,7.1230759
55.430133,7.74596669,7.38757229,0.598660503,7.13750763,7.372113,7.12150552
55.440625,8,7.39451878,0.77812674,7.13811952,7.37696615,7.11993482
55.451116,7.93725393,7.40260417,0.731197483,7.13965522,7.38207149,7.1183641
55.461608,7.61577311,7.41227251,0.451110407,7.14256315,7.38744333,7.11679306
55.4721,6.92820323,7.42408139,-0.70418617,7.14741262,7.39309538,7.11522185
55.482591,7.74596669,7.4386521,0.554359623,7.15484038,7.39904246,7.11365062
55.493083,7.21110255,7.45656491,-0.495441578,7.16544046,7.40530161,7.11207907
55.503574,7.54983444,7.47818342,0.267677073,7.17958538,7.41188897,7.11050751
55.514066,7.54983444,7.50346545,0.215334598,7.19722214,7.41882422,7.10893563
55.524558,7.41619849,7.5317199,-0.33988441,7.21762188,7.42612659,7.10736358
55.535049,8.1240384,7.56134807,0.750126877,7.23910419,7.43381654,7.10579152
55.545541,7.87400787,7.58958019,0.533317618,7.25875402,7.44191826,7.10421915
55.556032,7.74596669,7.61251101,0.36531586,7.27245765,7.45045467,7.10264676
55.566524,7.87400787,7.62627604,0.497726667,7.27611786,7.45945361,7.10107407
55.577016,7.34846923,7.62932984,-0.529962836,7.26804571,7.46894256,7.09950122
55.587507,8.18535277,7.62368888,0.749442386,7.25027664,7.47895098,7.09792835
55.597999,7.54983444,7.61344364,-0.252208658,7.22703039,7.48951352,7.09635518
55.60849,7.48331477,7.60248437,-0.345209502,7.20234307,7.50066361,7.09478201
55.618982,6.92820323,7.59348566,-0.815648475,7.17898694,7.51244156,7.09320852
55.629474,8.06225775,7.58795496,0.688696443,7.15852015,7.52488772,7.09163489
55.639965,7.48331477,7.5865256,-0.321264422,7.14158297,7.53804563,7.09006125
55.650457,7.54983444,7.58922514,-0.198470919,7.12816915,7.5519663,7.0884873
55.660948,7.61577311,7.59570287,0.141669475,7.11787159,7.56669988,7.08691336
55.67144,7.07106781,7.60543313,-0.731002953,7.11008248,7.58230642,7.08533912
55.681932,8,7.61786979,0.61816681,7.1041669,7.59884698,7.08376472
55.692423,8.30662386,7.63254812,0.821021161,7.09956658,7.61638792,7.08219033
55.702915,7.93725393,7.64913397,0.536768075,7.09584672,7.63500672,7.08061564
55.713406,7.28010989,7.66741558,-0.62233889,7.09270111,7.65478109,7.07904096
55.723898,6.78232998,7.68729519,-0.95129659,7.0899275,7.67580354,7.07746598
55.73439,7.34846923,7.70875023,-0.600234119,7.08740038,7.69816973,7.07589085
55.744881,7.34846923,7.73181374,-0.619148216,7.08504364,7.72198443,7.07431573
55.755373,8.54400375,7.75656405,0.887377987,7.08281042,7.74736975,7.07274032
55.765864,8.06225775,7.78309879,0.528354952,7.08067197,7.77445076,7.07116492
55.776356,8.06225775,7.8115477,0.500709543,7.07860842,7.8033757,7.06958923
55.786848,8.1240384,7.8419819,0.531089923,7.07652652,7.8343006,7.0680134
55.797339,8.60232527,7.8747081,0.853004788,7.07457543,7.86739794,7.06643758
55.807831,6.92820323,7.90984729,-0.99077952,7.07266688,7.90286878,7.06486148
55.818322,8,7.9476037,0.228902386,7.07079472,7.94092356,7.06328539
55.828814,8.06225775,7.98822552,0.272088633,7.06895327,7.98181564,7.06170902
55.839306,7.81024968,8.03196681,-0.470868489,7.06713834,8.02580324,7.06013251
55.849797,8.71779789,8.07912691,0.799168928,7.06534644,8.07318923,7.05855602
55.860289,8,8.13005171,-0.360626826,7.0635742,8.12432251,7.05697924
55.87078,7.93725393,8.18511228,-0.497853744,7.06181941,8.17957664,7.05540249
55.881272,8.54400375,8.24474889,0.547041912,7.06007957,8.23939405,7.05382546
55.891764,8.36660027,8.3094442,0.239073356,7.05835302,8.30425924,7.05224829
55.902255,8.83176087,8.37974542,0.672320942,7.05663834,8.37472103,7.05067115
55.912747,8.60232527,8.45629647,0.382137144,7.05493387,8.45142476,7.04909374
55.923238,9.2736185,8.53980448,0.856629449,7.05323878,8.53507879,7.04751635
55.93373,8.54400375,8.63111149,-0.295140215,7.05155174,8.62652627,7.04593868
55.944222,9.21954446,8.73116144,0.698844058,7.04987204,8.72671213,7.04436089
55.954713,9.89949494,8.84104213,1.02881135,7.04819909,8.83672506,7.04278313
55.965205,9.48683298,8.96204631,0.724421609,7.0465319,8.95785865,7.0412051
55.975696,9.64365076,9.09563308,0.740282166,7.04487021,9.09157272,7.0396271
55.986188,10,9.24355783,0.869736842,7.04321318,9.2396234,7.03804883
55.99668,9.2736185,9.40784203,-0.366365299,7.04156053,9.40403281,7.03647044
56.007171,10.0498756,9.59086721,0.677501598,7.03991201,9.58718307,7.03489208
56.017663,9.59166305,9.79551164,-0.451495945,7.03826695,9.79195306,7.03331346
56.028154,10.198039,10.0251323,0.415820497,7.03662535,10.0217003,7.03173487
56.038646,10.0498756,10.2838439,-0.483702682,7.0349866,10.28054,7.03015602
56.049138,11,10.5765492,0.650730966,7.03335062,10.5733754,7.02857706
56.059629,12,10.9092133,1.04440736,7.03171733,10.906172,7.02699813
56.070121,12.5299641,11.2892849,1.11385778,7.03008622,11.2863791,7.02541895
56.080612,13.3416641,11.7259864,1.27109309,7.02845741,11.7232192,7.0238398
56.091104,12.6885775,12.2315083,0.676068974,7.02683042,12.2288834,7.0222604
56.101596,14.832397,12.822601,1.41767274,7.02520526,12.8201227,7.02068088
56.112087,14.5945195,13.524353,1.03448852,7.02358195,13.5220267,7.01910142
56.122579,16.0623784,14.3770824,1.29818951,7.02196006,14.3749152,7.01752169
56.13307,18.0277564,15.4456892,1.60688119,7.02033977,15.4436908,7.01594201
56.143562,19.3907194,16.8297205,1.60031214,7.01872069,16.8279032,7.01436208
56.154054,22.2036033,18.6623703,1.88181641,7.01710287,18.6607461,7.01278205
56.164545,23.8537209,21.0880682,1.66302517,7.01548637,21.0866433,7.01120206
56.175037,27.2763634,24.2165795,1.74922379,7.01387081,24.2153492,7.00962183
56.185528,29.8831056,28.0683507,1.3471284,7.01225644,28.067298,7.00804165
56.19602,34.7562944,32.5380574,1.48937471,7.01064286,32.5371566,7.00646121
56.206512,39.3319209,37.3594885,1.40443313,7.00903018,37.3587102,7.00488068
56.217003,43.7264222,42.0285831,1.30301155,7.0074185,42.0278967,7.00330021
56.227495,47.138095,45.6790509,1.20790896,7.00580745,45.6784241,7.00171949
56.237986,47.8434949,47.1981676,0.803322622,7.0041973,47.1975655,7.00013883
56.248478,47.2969344,45.9798196,1.14765619,7.00258769,45.9792061,6.99855792
56.25897,43.2087954,42.533583,0.821713066,7.00097874,42.5329245,6.99697692
56.269461,37.8021163,37.9481456,-0.382137782,6.99937055,37.9474127,6.99539598
56.279953,31.638584,33.1221612,-1.21802182,6.9977628,33.1213273,6.99381481
56.290444,28.1780056,28.5967717,-0.647121412,6.99615576,28.5958125,6.99223369
56.300936,23.4520788,24.6617797,-1.09986404,6.99454908,24.6606748,6.99065234
56.311428,20.8326667,21.4418073,-0.780474645,6.9929429,21.4405448,6.9890709
56.321919,19.1311265,18.9305948,0.447807617,6.99133733,18.9291741,6.98748952
56.332411,17.4642492,17.0273728,0.660966291,6.98973206,17.0258033,6.98590791
56.342902,15.7162336,15.5905314,0.354545061,6.98812736,15.5888281,6.98432637
56.353394,13.3790882,14.4840557,-1.05117434,6.9865229,14.4822335,6.98274459
56.363886,13.6381817,13.6044219,0.183738258,6.98491882,13.6024938,6.98116274
56.374377,12.8062485,12.882728,-0.276549283,6.98331526,12.8807041,6.97958095
56.384869,11.4891253,12.2759397,-0.887025614,6.98171189,12.2738284,6.97799894
56.39536,10.5356538,11.757454,-1.10535074,6.980109,11.7552625,6.976417
56.405852,11.045361,11.3095041,-0.513948504,6.97850627,11.307239,6.97483483
56.416344,10.2956301,10.9195412,-0.789880428,6.97690383,10.9172087,6.97325258
56.426835,9.74679434,10.5780051,-0.911707599,6.97530183,10.5756108,6.97167041
56.437327,10.198039,10.2772305,-0.281409734,6.97369996,10.2747799,6.97008802
56.447818,9.59166305,10.0111319,-0.647664127,6.97209849,10.0086301,6.9685057
56.45831,10.0995049,9.77461641,0.569989939,6.97049712,9.77206806,6.96692317
56.468802,9.05538514,9.56354663,-0.71285447,6.968896,9.56095612,6.96534056
56.479293,9.48683298,9.37447229,0.335202458,6.96729525,9.37184366,6.96375803
56.489785,8.77496439,9.20445037,-0.655351804,6.96569457,9.20178736,6.96217529
56.500276,8.83176087,9.0510681,-0.468302502,6.96409426,9.04837414,6.96059263
56.510768,9.05538514,8.91222206,0.378368974,6.962494,8.90950032,6.95900975
56.52126,7.74596669,8.78616406,-1.01990067,6.96089393,8.78341747,6.95742681
56.531751,8.36660027,8.6713962,-0.55208327,6.95929421,8.66862742,6.95584395
56.542243,8.18535277,8.56659971,-0.617451976,6.95769451,8.56381119,6.95426088
56.552734,8.30662386,8.47067784,-0.405035769,6.95609514,8.46787183,6.9526779
56.563226,7.81024968,8.38264361,-0.756567204,6.95449579,8.37982218,6.95109471
56.573718,7.54983444,8.30166564,-0.867082003,6.95289661,8.29883067,6.94951146
56.584209,8.60232527,8.22701714,0.61262397,6.95129774,8.22417038,6.9479283
56.594701,8,8.15804114,-0.397543883,6.94969886,8.15518417,6.94634493
56.605192,8.48528137,8.09418748,0.625375,6.94810029,8.09132176,6.94476166
56.615684,7.74596669,8.034947,-0.537568888,6.94650172,8.03207386,6.94317818
56.626176,7.81024968,7.97988761,-0.411871263,6.94490328,7.97700827,6.94159464
56.636667,8.24621125,7.9286257,0.563547293,6.94330513,7.92574129,6.94001121
56.647159,7.81024968,7.88080621,-0.265624796,6.94170696,7.87791775,6.93842757
56.65765,7.54983444,7.83613145,-0.535067297,6.94010908,7.83323989,6.93684403
56.668142,7.87400787,7.79431853,0.282293007,6.93851116,7.79142474,6.93526029
56.678634,8,7.75512676,0.494846684,6.93691337,7.75223153,6.9336765
56.689125,7.54983444,7.71833973,-0.41049397,6.93531586,7.7154438,6.93209282
56.699617,8.30662386,7.68375269,0.789221877,6.9337183,7.68085672,6.93050893
56.710108,7.87400787,7.65119453,0.472031081,6.93212102,7.64829915,6.92892516
56.7206,7.74596669,7.62049839,0.354215053,6.93052369,7.61760415,6.92734119
56.731092,7.93725393,7.59152244,0.587989365,6.92892648,7.58862986,6.92575717
56.741583,8,7.56413787,0.660198555,6.92732952,7.56124744,6.92417326
56.752075,7.93725393,7.5382201,0.631691246,6.92573252,7.53533225,6.92258916
56.762566,7.74596669,7.51366585,0.481975973,6.92413577,7.51078099,6.92100517
56.773058,8.1240384,7.49037168,0.796031863,6.92253897,7.48749016,6.91942099
56.78355,7.68114575,7.46825006,0.461406206,6.92094228,7.46537224,6.91783678
56.794041,7.74596669,7.44722083,0.546576495,6.91934583,7.44434701,6.91625268
56.804533,7.87400787,7.42720472,0.668433355,6.91774933,7.42433519,6.91466839
56.815024,7.34846923,7.4081368,-0.24426947,6.91615308,7.40527182,6.91308421
56.825516,7.21110255,7.38995019,-0.422903817,6.91455677,7.38709,6.91149985
56.836008,6.8556546,7.37258876,-0.718981332,6.91296056,7.36973358,6.90991546
56.846499,8.24621125,7.3560007,0.943509701,6.91136458,7.35315073,6.90833119
56.856991,7,7.34013362,-0.583209758,6.90976855,7.33728906,6.90674674
56.867482,7.07106781,7.32494528,-0.503862549,6.90817277,7.32210628,6.90516241
56.877974,7.14142843,7.31039086,-0.411050394,6.90657691,7.30755757,6.9035779
56.888466,6.63324958,7.29643314,-0.814360832,6.90498115,7.29360571,6.90199337
56.898957,7.28010989,7.28303759,-0.0541082721,6.90338563,7.28021615,6.90040895
56.909449,7.61577311,7.27016841,0.587881529,6.90179005,7.26735306,6.89882437
56.91994,7,7.25779731,-0.50773744,6.9001947,7.25498816,6.89723991
56.930432,7.14142843,7.24589329,-0.323210244,6.89859929,7.24309043,6.89565527
56.940924,7.41619849,7.234431,0.426341983,6.89700397,7.23163452,6.89407062
56.951415,6.55743852,7.22338676,-0.816056513,6.89540888,7.22059672,6.89248609
56.961907,7.28010989,7.21273539,0.25956599,6.89381373,7.20995187,6.89090139
56.972398,7,7.20245748,-0.44995275,6.89221882,7.19968054,6.88931683
56.98289,7.74596669,7.192531,0.743932584,6.89062384,7.18976069,6.8877321
56.993382,7.21110255,7.18293826,0.167822213,6.88902895,7.18017462,6.88614735
57.003873,6.70820393,7.17366262,-0.682245326,6.88743429,7.17090569,6.88456274
57.014365,7.68114575,7.16468592,0.718651392,6.88583957,7.16193574,6.88297796
57.024856,6.70820393,7.15599458,-0.669171614,6.88424508,7.15325117,6.88139333
57.035348,7.28010989,7.14757254,0.364056792,6.88265053,7.14483592,6.87980852
57.04584,6.4807407,7.13940718,-0.811582701,6.88105606,7.13667736,6.87822371
57.056331,8.06225775,7.1314866,0.964764817,6.87946183,7.1287636,6.87663904
57.066823,8.06225775,7.12379738,0.968741643,6.87786754,7.12108121,6.87505421
57.077314,7.74596669,7.11632984,0.7934966,6.87627348,7.1136205,6.87346953
57.087806,6.8556546,7.10907202,-0.503405824,6.87467936,7.10636952,6.87188468
57.098298,6.40312424,7.10201477,-0.83599673,6.87308533,7.0993191,6.87029983
57.108789,7.14142843,7.09514941,0.215125597,6.87149153,7.09246056,6.86871513
57.119281,7.41619849,7.08846582,0.572479405,6.86989767,7.08578378,6.86713027
57.129772,7.61577311,7.081957,0.7306272,6.86830406,7.07928176,6.86554557
57.140264,7.81024968,7.07561388,0.857108978,6.86671038,7.07294542,6.86396071
57.150756,8,7.06942968,0.964660727,6.86511678,7.06676799,6.86237585
57.161247,7.54983444,7.063398,0.697449951,6.86352344,7.06074306,6.86079114
57.171739,7.07106781,7.05751106,0.116433448,6.86193003,7.05486284,6.85920629
57.18223,7,7.05176375,-0.227516478,6.86033686,7.04912221,6.85762159
57.192722,6.40312424,7.04614902,-0.801888263,6.85874363,7.04351415,6.85603674
57.203214,7.41619849,7.04066184,0.612810452,6.8571505,7.0380336,6.8544519
57.213705,6.40312424,7.03529738,-0.795093165,6.85555762,7.03267574,6.85286722
57.224197,7.48331477,7.03004957,0.673249733,6.85396467,7.0274345,6.85128239
57.234688,7.54983444,7.02491463,0.724513494,6.85237198,7.02230609,6.84969773
57.24518,6.08276253,7.01988703,-0.96805191,6.85077923,7.01728498,6.84811292
57.255672,6,7.01496294,-1.00745369,6.84918658,7.01236734,6.84652813
57.266163,6.244998,7.01013873,-0.874723229,6.84759418,7.00754953,6.8449435
57.276655,7.54983444,7.00540954,0.737851539,6.84600172,7.00282671,6.84335873
57.287146,8.1240384,7.00077259,1.05984235,6.84440952,6.99819607,6.84177412
57.297638,7.14142843,6.99622344,0.381057728,6.84281727,6.99365319,6.84018939
57.30813,7.81024968,6.99175917,0.904704651,6.84122513,6.98919515,6.83860466
57.318621,7.54983444,6.987377,0.749971625,6.83963324,6.98481914,6.83702011
57.329113,7.07106781,6.98307302,0.296639168,6.83804131,6.98052128,6.83543543
57.339604,6.92820323,6.97884514,-0.22503757,6.83644963,6.97629946,6.83385091
57.350096,6.55743852,6.97468977,-0.645949878,6.83485792,6.9721501,6.83226627
57.360588,7.14142843,6.97060466,0.413308317,6.83326631,6.96807094,6.83068165
57.371079,7.34846923,6.96658767,0.617965665,6.83167497,6.96405984,6.8290972
57.381571,7.87400787,6.96263558,0.954658206,6.83008359,6.96011359,6.82751263
57.392062,7,6.95874686,0.203108689,6.82849248,6.95623063,6.82592823
57.402554,7.28010989,6.95491854,0.570255514,6.82690134,6.95240801,6.82434371
57.413046,6.244998,6.95114888,-0.840327839,6.82531031,6.94864399,6.82275922
57.423537,7.21110255,6.9474362,0.513484518,6.82371956,6.94493688,6.82117491
57.434029,6.92820323,6.94377786,-0.124798374,6.82212878,6.94128405,6.81959048
57.44452,7.14142843,6.94017271,0.448615332,6.82053827,6.93768433,6.81800623
57.455012,6.4807407,6.93661828,-0.675187069,6.81894775,6.93413525,6.81642186
57.465504,7,6.9331132,0.25862482,6.81735735,6.93063546,6.81483752
57.475995,6.92820323,6.92965619,-0.0381176576,6.81576724,6.92718365,6.81325337
57.486487,6.78232998,6.926245,-0.379361329,6.8141771,6.9237776,6.81166911
57.496978,7.61577311,6.9228788,0.832402731,6.81258726,6.92041645,6.81008503
57.50747,7.61577311,6.9195555,0.834396553,6.81099741,6.91709811,6.80850084
57.517962,6.32455532,6.91627404,-0.769232551,6.8094077,6.91382153,6.80691669
57.528453,5.74456265,6.9130334,-1.08095826,6.80781828,6.91058569,6.80533273
57.538945,6.78232998,6.90983169,-0.357073815,6.80622887,6.90738868,6.80374866
57.549436,7.48331477,6.9066683,0.75937242,6.80463975,6.90422991,6.80216478
57.559928,6.63324958,6.90354145,-0.519896016,6.80305064,6.90110757,6.8005808
57.57042,6.08276253,6.9004503,-0.904260899,6.80146169,6.89802085,6.79899686
57.580911,7.07106781,6.89739408,0.41674181,6.79987305,6.89496894,6.79741312
57.591403,6.4807407,6.89437113,-0.643141067,6.79828443,6.89195021,6.79582927
57.601894,7.21110255,6.89138104,0.565439217,6.79669612,6.88896423,6.79424563
57.612386,6.8556546,6.88842227,-0.181018432,6.79510784,6.88600946,6.79266188
57.622878,7.34846923,6.88549418,0.6804227,6.79351973,6.88308525,6.79107818
57.633369,7.21110255,6.88259613,0.573154793,6.79193196,6.88019098,6.78949468
57.643861,7.21110255,6.87972673,0.57565252,6.79034422,6.87732522,6.78791109
57.654352,6.55743852,6.87688567,-0.565196558,6.78875683,6.87448769,6.7863277
57.664844,7.07106781,6.87407163,0.443842522,6.78716948,6.87167703,6.78474421
57.675336,7.21110255,6.87128409,0.582939499,6.78558233,6.86889276,6.78316078
57.685827,7.07106781,6.86852258,0.45005025,6.78399554,6.86613437,6.78157756
57.696319,6.164414,6.86578586,-0.837479467,6.78240881,6.86340062,6.77999424
57.70681,7.68114575,6.86307375,0.904473326,6.78082246,6.86069134,6.77841114
57.717302,7.28010989,6.86038507,0.647861727,6.77923618,6.85800533,6.77682794
57.727794,6.4807407,6.85771944,-0.613985946,6.77765013,6.85534221,6.77524481
57.738285,6.70820393,6.85507649,-0.383239551,6.77606448,6.8527016,6.77366189
57.748777,5.91607978,6.85245511,-0.967664882,6.77447892,6.85008239,6.77207888
57.759268,6.164414,6.84985523,-0.827913777,6.77289377,6.84748449,6.77049609
57.76976,7,6.84727579,0.390799452,6.77130874,6.84490685,6.76891321
57.780252,6.70820393,6.84471651,-0.369476081,6.76972398,6.84234917,6.7673304
57.790743,6.55743852,6.8421771,-0.533609013,6.76813965,6.83981116,6.76574781
57.801235,6.63324958,6.83965659,-0.454320384,6.76655547,6.83729182,6.76416514
57.811726,7.14142843,6.83715497,0.551609878,6.76497175,6.83479114,6.76258269
57.822218,7.14142843,6.8346713,0.5538566,6.7633882,6.83230818,6.76100016
57.83271,7.07106781,6.83220535,0.48873557,6.76180497,6.8298427,6.75941771
57.843201,6.92820323,6.82975695,0.313761506,6.76022224,6.82739449,6.75783547
57.853693,6,6.82732519,-0.909574179,6.75863972,6.82496265,6.75625317
57.864184,7.54983444,6.82491013,0.851424867,6.75705773,6.82254722,6.75467109
57.874676,7.07106781,6.82251093,0.498554791,6.75547597,6.82014735,6.75308893
57.885168,7,6.82012744,0.42411385,6.75389463,6.81776287,6.75150686
57.895659,6.70820393,6.81775952,-0.330991831,6.75231386,6.81539361,6.74992501
57.906151,7.61577311,6.81540638,0.894632175,6.75073339,6.81303877,6.74834309
57.916642,6.92820323,6.81306812,0.339315657,6.74915354,6.81069844,6.74676141
57.927134,7,6.81074397,0.43503567,6.74757403,6.80837181,6.74517966
57.937626,6.55743852,6.80843384,-0.500994329,6.74599505,6.80605878,6.74359799
57.948117,5.91607978,6.80613766,-0.943428789,6.74441676,6.80375924,6.74201656
57.958609,6.40312424,6.80385471,-0.633032754,6.7428389,6.80147244,6.74043507
57.9691,6.32455532,6.80158513,-0.690673445,6.7412618,6.79919851,6.73885381
57.979592,7,6.79932823,0.447964023,6.73968519,6.79693671,6.73727249
57.990084,6.32455532,6.79708399,-0.687407208,6.73810927,6.79468697,6.73569126
58.000575,6.63324958,6.79485237,-0.401998494,6.73653422,6.79244924,6.73411028
58.011067,6.4807407,6.79263272,-0.558472937,6.73495979,6.7902228,6.73252923
58.021558,7,6.79042525,0.457793352,6.73338634,6.78800782,6.73094843
58.03205,6.40312424,6.78822933,-0.62056836,6.73181361,6.78580363,6.72936757
58.042542,6.8556546,6.78604498,0.263836349,6.73024181,6.78361018,6.72778681
58.053033,7.14142843,6.78387224,0.597960023,6.72867116,6.78142744,6.72620629
58.063525,6.55743852,6.78171052,-0.473573646,6.72710143,6.77925475,6.72462572
58.074016,7,6.77956009,0.469510285,6.72553301,6.77709232,6.7230454
58.084508,5.74456265,6.7774204,-1.0162961,6.72396567,6.77493949,6.72146503
58.095,6.92820323,6.77529154,0.391039243,6.72239968,6.77279627,6.71988477
58.105491,6.40312424,6.7731736,-0.60831683,6.72083527,6.77066264,6.71830475
58.115983,7.48331477,6.7710661,0.843948264,6.71927228,6.768538,6.71672469
58.126474,6.4807407,6.76896937,-0.536869326,6.71771114,6.76642256,6.71514488
58.136966,7,6.76688305,0.482821861,6.71615177,6.7643157,6.71356503
58.147458,6.78232998,6.76480715,0.132373836,6.71459434,6.76221746,6.71198528
58.157949,5.56776436,6.76274195,-1.09315031,6.71303926,6.76012785,6.71040579
58.168441,6.55743852,6.7606871,-0.450830984,6.71148644,6.75804629,6.70882627
58.178932,6.8556546,6.75864304,0.311466783,6.70993642,6.75597301,6.707247
58.189424,5.91607978,6.75660949,-0.916804074,6.70838917,6.75390744,6.70566769
58.199916,5.29150262,6.75458679,-1.20958016,6.70684515,6.75184962,6.7040885
58.210407,6.55743852,6.7525753,-0.441742887,6.70530486,6.74979959,6.70250957
58.220899,6.4807407,6.7505749,-0.519455677,6.7037684,6.74775679,6.7009306
58.23139,7.87400787,6.74858626,1.0608589,6.70223652,6.74572147,6.6993519
58.241882,6.8556546,6.74660939,0.330219943,6.70070946,6.74369309,6.69777317
58.252374,7.28010989,6.74464494,0.731754706,6.69918798,6.7416717,6.69619455
58.262865,6.78232998,6.74269366,0.19908873,6.69767293,6.73965736,6.69461621
58.273357,7.28010989,6.74075587,0.734407257,6.69616486,6.73764954,6.69303784
58.283848,6.40312424,6.73883277,-0.579403602,6.69466502,6.7356485,6.69145973
58.29434,7.48331477,6.73692501,0.86393852,6.69317428,6.73365373,6.6898816
58.304832,6.4807407,6.73503398,-0.504275006,6.69169413,6.73166528,6.6883036
58.315323,6.32455532,6.73316135,-0.639222991,6.69022632,6.72968323,6.68672587
58.325815,6.55743852,6.73130858,-0.416977281,6.68877252,6.72770708,6.68514811
58.336306,6.55743852,6.72947823,-0.414776691,6.68733536,6.7257371,6.68357064
58.346798,7.41619849,6.72767272,0.829774528,6.68591745,6.72377278,6.68199314
58.35729,6.70820393,6.72589575,-0.133010592,6.68452259,6.7218142,6.68041577
58.367781,6.78232998,6.72415212,0.241200883,6.68315568,6.71986146,6.67883868
58.378273,6.40312424,6.72244789,-0.565087297,6.68182299,6.71791406,6.67726158
58.388764,7.61577311,6.72079274,0.946034021,6.68053429,6.71597228,6.67568476
58.399256,6.08276253,6.71920069,-0.797770747,6.67930385,6.71403564,6.67410792
58.409748,8,6.71769474,1.13238918,6.67815485,6.71210424,6.67253122
58.420239,6.244998,6.71631161,-0.686522839,6.67712429,6.71017815,6.6709548
58.430731,6.4807407,6.71510884,-0.484115832,6.67627019,6.70825693,6.66937837
58.441222,5.19615242,6.71417471,-1.23208047,6.67568133,6.70634084,6.66780224
58.451714,6.8556546,6.71363614,0.376853366,6.67548549,6.70442943,6.66622609
58.462206,6.164414,6.71366442,-0.741114307,6.6758549,6.7025228,6.66465008
58.472697,6.40312424,6.71447075,-0.557984326,6.67700195,6.70062105,6.66307437
58.483189,6.244998,6.71628853,-0.686506032,6.67916135,6.69872372,6.66149864
58.49368,6.92820323,6.71933632,0.457019597,6.68255274,6.6968311,6.65992322
58.504172,6.8556546,6.7237657,0.363165108,6.68732847,6.69494275,6.65834779
58.514664,7.48331477,6.72959287,0.868171588,6.69350466,6.69305877,6.6567725
58.525155,6.164414,6.73662422,-0.756445779,6.7008865,6.69117927,6.65519752
58.535647,7.41619849,6.74437554,0.819648066,6.70898715,6.68930381,6.65362253
58.546138,7.21110255,6.7519767,0.677588264,6.71693188,6.68743269,6.65204785
58.55663,6.08276253,6.75813478,-0.821810346,6.72342125,6.68556546,6.65047316
58.567122,7.14142843,6.76130605,0.616540652,6.72690395,6.68370225,6.64889863
58.577613,7.28010989,6.76026009,0.721006104,6.72614378,6.68184317,6.64732441
58.588105,5.65685425,6.754769,-1.04781427,6.72091236,6.67998778,6.64575018
58.598596,6.08276253,6.74576652,-0.814250571,6.71214858,6.67813639,6.64417627
58.609088,7.61577311,6.7347751,0.938614938,6.7013829,6.67628857,6.64260236
58.61958,7,6.72322475,0.526094334,6.69005257,6.67444445,6.64102861
58.630071,6.70820393,6.71213814,-0.0627232233,6.67918539,6.67260413,6.63945517
58.640563,6.92820323,6.70212257,0.475479398,6.66939171,6.67076721,6.63788174
58.651054,6.40312424,6.69346513,-0.538832903,6.66095993,6.66893398,6.63630862
58.661546,6.8556546,6.68621262,0.411633314,6.65393705,6.66710404,6.63473552
58.672038,8.06225775,6.68025424,1.17558645,6.64821167,6.6652775,6.63316258
58.682529,7.54983444,6.67538825,0.935118274,6.64358096,6.66345448,6.63158996
58.693021,7.21110255,6.67138001,0.734658108,6.63980918,6.66163459,6.63001735
58.703512,7.68114575,6.66800782,1.00654753,6.63667347,6.65981812,6.62844506
58.714004,6.92820323,6.66508425,0.512951243,6.63398559,6.65800468,6.62687279
58.724496,6.4807407,6.662467,-0.426293677,6.63160254,6.65619438,6.62530069
58.734987,7,6.66005522,0.583047836,6.629423,6.65438735,6.62372892
58.745479,6.70820393,6.65778101,0.224550489,6.62737883,6.6525832,6.62215716
58.75597,7.28010989,6.65560164,0.790258344,6.6254271,6.65078223,6.62058573
58.766462,7.34846923,6.65348969,0.83365433,6.62354034,6.64898405,6.61901432
58.776954,6.244998,6.65142843,-0.637518968,6.62170178,6.64718878,6.61744309
58.787445,7.48331477,6.64940716,0.913185421,6.61990067,6.64539656,6.61587219
58.797937,7.21110255,6.6474181,0.750789221,6.61812928,6.643607,6.61430131
58.808428,6.164414,6.64545633,-0.693572149,6.61638268,6.6418204,6.61273076
58.81892,5.91607978,6.64351748,-0.852899582,6.61465654,6.64003638,6.61116025
58.829412,7.74596669,6.64159859,1.0508892,6.61294793,6.63825507,6.60958992
58.839903,5.56776436,6.63969728,-1.03534193,6.61125447,6.63647659,6.60801992
58.850395,6.8556546,6.6378111,0.466737079,6.60957376,6.63470058,6.60644995
58.860886,5.91607978,6.63593866,-0.848444973,6.60790442,6.63292733,6.60488032
58.871378,6.08276253,6.63407812,-0.74250629,6.60624469,6.63115647,6.60331072
58.88187,7.48331477,6.63222843,0.92254341,6.6045935,6.62938813,6.60174132
58.892361,6,6.6303887,-0.793970212,6.60295,6.62762245,6.60017225
58.902853,6.244998,6.62855767,-0.619321945,6.60131299,6.62585905,6.59860322
58.913344,6.8556546,6.62673491,0.478455525,6.59968202,6.62409823,6.59703454
58.923836,6.40312424,6.6249194,-0.47095134,6.59805616,6.62233964,6.59546589
58.934328,6.08276253,6.62311073,-0.735083804,6.596435,6.62058339,6.59389744
58.944819,6.08276253,6.62130855,-0.733856948,6.59481821,6.61882964,6.59232933
58.955311,6.8556546,6.61951208,0.48594498,6.59320506,6.617078,6.59076127
58.965802,6.164414,6.61772125,-0.673280959,6.59159551,6.61532879,6.58919356
58.976294,6.244998,6.61593539,-0.609046295,6.58998891,6.61358165,6.5876259
58.986786,6.70820393,6.61415434,0.306675056,6.58838514,6.6118367,6.58605843
58.997277,6.244998,6.61237801,-0.60611881,6.58678411,6.61009409,6.58449132
59.007769,6,6.6106058,-0.781412698,6.58518529,6.60835346,6.58292425
59.01826,6.164414,6.60883784,-0.666651211,6.5835888,6.60661511,6.58135754
59.028752,5.56776436,6.60707358,-1.01946516,6.58199415,6.60487868,6.57979089
59.039244,6.32455532,6.60531302,-0.529865735,6.58040135,6.60314431,6.57822444
59.049735,6.164414,6.60355615,-0.662678011,6.57881041,6.60141215,6.57665834
59.060227,6.92820323,6.60180249,0.571314919,6.5772209,6.59968182,6.5750923
59.070718,6.32455532,6.60005225,-0.524878014,6.57563302,6.59795365,6.57352663
59.08121,6.55743852,6.59830496,-0.20215448,6.57404636,6.59622727,6.57196101
59.091702,6.32455532,6.59656067,-0.521541324,6.57246099,6.59450283,6.5703956
59.102193,6.40312424,6.59260324,-0.435291863,6.57087698,6.59056357,6.56883056
59.112685,7,6.59086833,0.639634012,6.56929394,6.5888466,6.56726557
59.123176,6,6.58913629,-0.767552141,6.56771213,6.58713166,6.56570096
59.133668,6.244998,6.5874067,-0.585156991,6.56613117,6.58541838,6.56413641
59.14416,7,6.58567966,0.643677201,6.56455116,6.58370692,6.56257207
59.154651,6.4807407,6.58395526,-0.321270224,6.56297221,6.58199741,6.56100811
59.165143,7.07106781,6.58223309,0.699167163,6.56139397,6.58028951,6.55944421
59.175634,6,6.58051343,-0.76191432,6.55981669,6.57858352,6.55788068
59.186126,6.32455532,6.57879589,-0.50422274,6.55824004,6.57687909,6.55631723
59.196618,6.164414,6.57708058,-0.642391296,6.55666413,6.57517638,6.554754
59.207109,6.92820323,6.57536761,0.593999684,6.55508909,6.57347551,6.55319114
59.217601,5.47722558,6.5736566,-1.04710602,6.55351458,6.57177616,6.55162836
59.228092,6.4807407,6.57194783,-0.302005179,6.55194088,6.57007861,6.55006595
59.238584,6.40312424,6.57024093,-0.408799086,6.55036766,6.56838254,6.54850363
59.249076,7,6.56853603,0.656859172,6.54879505,6.56668808,6.54694153
59.259567,5.29150262,6.56683324,-1.12930537,6.54722318,6.56499538,6.54537981
59.270059,6,6.56513221,-0.751752758,6.54565172,6.5633041,6.54381817
59.28055,6.164414,6.56343322,-0.631679679,6.54408097,6.56161454,6.54225691
59.291042,6.164414,6.56173591,-0.63033476,6.54251061,6.55992636,6.54069574
59.301534,6.92820323,6.56004042,0.606764213,6.54094077,6.55823971,6.5391348
59.312025,7.14142843,6.55834687,0.763597773,6.53937158,6.55655474,6.53757425
59.322517,6.92820323,6.55665491,0.609547636,6.53780274,6.5548711,6.53601379
59.333008,6.32455532,6.55496483,-0.480009911,6.53623453,6.5531891,6.53445371
59.3435,6.55743852,6.55327629,0.0645153554,6.53466664,6.55150841,6.53289372
59.353992,6.8556546,6.55158942,0.551421055,6.53309921,6.54982917,6.53133397
59.364483,6.92820323,6.54990435,0.61506006,6.53153238,6.54815152,6.52977462
59.374975,6,6.54822074,-0.740419301,6.52996584,6.54647514,6.52821536
59.385466,7.41619849,6.54657772,0.932534591,6.52843883,6.54480032,6.52665649
59.395958,6.32455532,6.54489732,-0.469406012,6.5268732,6.54312673,6.52509772
59.40645,6.164414,6.54321848,-0.615470936,6.52530799,6.54145452,6.52353919
59.416941,7,6.54154132,0.677095772,6.52374333,6.53978384,6.52198106
59.427433,7.28010989,6.5398655,0.860374561,6.52217894,6.53811435,6.52042303
59.437924,6,6.53819134,-0.733615254,6.52061509,6.53644635,6.5188654
59.448416,5.91607978,6.53651849,-0.787679315,6.51905149,6.53477953,6.51730787
59.458908,6.4807407,6.53484708,-0.232607793,6.51748828,6.53311402,6.5157506
59.469399,7.74596669,6.53317727,1.10126719,6.51592561,6.53144996,6.51419372
59.479891,6.40312424,6.53150872,-0.3583078,6.51436317,6.52978704,6.51263696
59.490382,6.32455532,6.52984172,-0.45308542,6.51280125,6.52812555,6.51108059
59.500874,6.08276253,6.52817594,-0.667392996,6.51123956,6.52646517,6.50952434
59.511366,7.28010989,6.52651153,0.868100431,6.50967824,6.52480604,6.50796834
59.521857,7,6.52484863,0.689312246,6.50811744,6.52314832,6.50641276
59.532349,6.164414,6.5231869,-0.598976542,6.50655685,6.52149166,6.50485728
59.54284,6.4807407,6.52152665,-0.201955325,6.50499678,6.51983639,6.50330222
59.553332,6.244998,6.51986755,-0.524280031,6.50343691,6.51818216,6.50174726
59.563824,6.244998,6.51820974,-0.522696605,6.5018774,6.51652914,6.50019258
59.574315,6.92820323,6.51655336,0.64159946,6.5003184,6.51487746,6.49863831
59.584807,6.08276253,6.51489809,-0.657370188,6.4987596,6.5132268,6.49708415
59.595298,6.8556546,6.51324423,0.585158411,6.49720129,6.51157747,6.49553041
59.60579,6.32455532,6.51159146,-0.432476745,6.4956432,6.50992914,6.4939768
59.616282,6.92820323,6.5099399,0.64673281,6.49408544,6.50828196,6.49242345
59.626773,7.14142843,6.50828972,0.795700136,6.49252819,6.50663607,6.49087052
59.637265,6.4807407,6.50664059,-0.16093442,6.49097113,6.50499116,6.48931772
59.647756,6.78232998,6.5049928,0.526628128,6.48941456,6.50334752,6.48776534
59.658248,6.70820393,6.50334603,0.452612306,6.48785819,6.50170484,6.48621308
59.66874,6.4807407,6.50170044,-0.144774787,6.48630216,6.50006327,6.48466111
59.679231,6.32455532,6.50005616,-0.418928199,6.48474662,6.49842294,6.48310955
59.689723,6,6.49841287,-0.705983616,6.48319128,6.49678355,6.48155813
59.700214,6.32455532,6.49677087,-0.414988614,6.48163642,6.49514538,6.48000714
59.710706,6.70820393,6.49512984,0.461599489,6.48008175,6.49350813,6.47845627
59.721198,6.40312424,6.49348994,-0.300608882,6.47852743,6.49187194,6.47690569
59.731689,7.54983444,6.49185129,1.02858307,6.47697358,6.49023696,6.47535555
59.742181,7.14142843,6.49021359,0.806978832,6.47541993,6.48860287,6.47380554
59.752672,6.55743852,6.48857714,0.262414529,6.47386677,6.48696998,6.47225596
59.763164,6.70820393,6.48694161,0.470385293,6.4723138,6.48533796,6.47070652
59.773656,6.55743852,6.48530715,0.268572846,6.47076116,6.48370695,6.46915737
59.784147,5.38516481,6.48367391,-1.04809785,6.46920901,6.48207713,6.46760865
59.794639,6.78232998,6.48204157,0.547985776,6.46765705,6.48044815,6.46606008
59.80513,6.32455532,6.48041043,-0.394784896,6.46610557,6.47882033,6.46451195
59.815622,6.40312424,6.47878018,-0.275056253,6.46455429,6.47719335,6.46296396
59.826114,5.56776436,6.47715096,-0.953617635,6.46300334,6.47556735,6.46141627
59.836605,6.164414,6.47552291,-0.557771376,6.46145288,6.47394249,6.45986902
59.847097,6.164414,6.47389573,-0.556310815,6.45990261,6.47231845,6.45832192
59.857588,6,6.4722697,-0.687218818,6.45835282,6.47069554,6.45677526
59.86808,6.55743852,6.47064453,0.29460821,6.45680323,6.46907343,6.45522876
59.878572,6.70820393,6.46902034,0.489063992,6.45525397,6.46745227,6.45368256
59.889063,6.63324958,6.4673973,0.40724965,6.4537052,6.46583222,6.4521368
59.899555,6.8556546,6.46577509,0.624403326,6.45215663,6.46421295,6.4505912
59.910046,5.09901951,6.464154,-1.1683897,6.45060854,6.46259478,6.44904605
59.920538,5.65685425,6.46253372,-0.897596497,6.44906064,6.46097739,6.44750106
59.93103,6.78232998,6.4609144,0.566935251,6.44751309,6.45936092,6.44595637
59.941521,5.83095189,6.4592962,-0.792681715,6.44596602,6.45774552,6.44441214
59.952013,6.70820393,6.45767878,0.500524876,6.44441915,6.45613088,6.44286807
59.962504,7.14142843,6.45606246,0.827868328,6.44287277,6.45451731,6.44132445
59.972996,5.65685425,6.45444692,-0.89308044,6.44132658,6.45290448,6.439781
59.983488,5.83095189,6.45283231,-0.78859395,6.43978074,6.45129256,6.43823786
59.993979,6.08276253,6.45121878,-0.607005974,6.43823539,6.44968168,6.43669519
60.004471,6,6.44960602,-0.670526671,6.43669024,6.44807153,6.43515268
60.014962,6.70820393,6.44799432,0.510107456,6.43514558,6.44646242,6.43361063
60.025454,5.91607978,6.44638337,-0.728219463,6.43360112,6.44485404,6.43206875
60.035946,5.29150262,6.44477332,-1.07390442,6.432057,6.44324653,6.43052719
60.046437,6.244998,6.44316433,-0.445158772,6.43051338,6.44164004,6.42898609
60.056929,6.32455532,6.44155607,-0.34205373,6.42896996,6.44003427,6.42744517
60.06742,5.91607978,6.43994886,-0.723788005,6.42742704,6.4384295,6.42590472
60.077912,6.70820393,6.43834237,0.519482012,6.42588432,6.43682544,6.42436445
60.088404,6,6.43673676,-0.660860622,6.42434195,6.43522222,6.42282449
60.098895,6.244998,6.43513218,-0.43604378,6.42280008,6.43362001,6.42128501
60.109387,6.63324958,6.43352831,0.446901862,6.42125842,6.43201849,6.41974571
60.119878,6.40312424,6.43192545,-0.169709207,6.41971725,6.43041795,6.41820688
60.13037,6.08276253,6.4303233,-0.589542851,6.41817629,6.4288181,6.41666824
60.140862,5.56776436,6.42872201,-0.927878035,6.41663569,6.42721908,6.41512993
60.151353,6.32455532,6.42712172,-0.320259891,6.41509558,6.42562104,6.41359209
60.161845,7.07106781,6.42552212,0.803458581,6.41355569,6.42402366,6.41205444
60.172336,6.244998,6.42392352,-0.422995883,6.4120163,6.42242726,6.41051727
60.182828,5.56776436,6.4223256,-0.924424812,6.41047712,6.42083152,6.40898028
60.19332,6.40312424,6.42072851,-0.132681098,6.40893831,6.41923659,6.40744364
60.203811,7.07106781,6.41913241,0.807425169,6.40739999,6.41764262,6.40590747
60.214303,5.91607978,6.41753698,-0.708136424,6.40586189,6.4160493,6.4043715
60.224794,6.55743852,6.41594252,0.376159543,6.4043243,6.41445693,6.40283602
60.235286,6.4807407,6.41434873,0.257666383,6.40278693,6.41286521,6.40130073
60.245778,5.91607978,6.41275576,-0.704752422,6.40124992,6.41127428,6.39976578
60.256269,5.29150262,6.41116375,-1.05814041,6.39971342,6.40968429,6.39823132
60.266761,6.08276253,6.40957239,-0.571672864,6.39817714,6.40809494,6.39669706
60.277252,6.8556546,6.407982,0.669083407,6.39664137,6.40650653,6.39516329
60.287744,6.08276253,6.4062873,-0.568792376,6.39500069,6.40491874,6.39362972
60.298236,6,6.4046985,-0.636159182,6.39346567,6.40333173,6.3920965
60.308727,5.91607978,6.40311066,-0.697875974,6.39193117,6.40174565,6.39056377
60.319219,5.65685425,6.40152345,-0.862942178,6.39039689,6.40016019,6.38903125
60.32971,6.244998,6.39993718,-0.393623152,6.38886312,6.39857565,6.38749923
60.340202,6.4807407,6.39835155,0.287035098,6.38732959,6.39699173,6.38596741
60.350694,6.08276253,6.3967667,-0.560360749,6.38579642,6.39540856,6.38443595
60.361185,6.92820323,6.39518278,0.730082496,6.38426378,6.39382631,6.38290499
60.371677,6.78232998,6.39359948,0.623482558,6.38273136,6.39224467,6.38137424
60.382168,5.83095189,6.39201711,-0.749042868,6.38119947,6.39066393,6.37984399
60.39266,6.55743852,6.39043536,0.408660204,6.3796678,6.3890838,6.37831396
60.403152,6.32455532,6.38885438,-0.253572591,6.37813652,6.38750441,6.37678428
60.413643,6.55743852,6.38727431,0.41250965,6.37660576,6.38592593,6.37525512
60.424135,6.164414,6.38569486,-0.470404992,6.37507523,6.38434804,6.37372616
60.434626,6.4807407,6.38411632,0.310844626,6.37354523,6.38277104,6.37219772
60.445118,6.244998,6.38253838,-0.370864373,6.37201547,6.38119464,6.3706695
60.45561,6.40312424,6.3809612,0.148872545,6.37048608,6.37961897,6.36914165
60.466101,6.70820393,6.37938493,0.573427419,6.36895723,6.37804419,6.3676143
60.476593,6.8556546,6.37780925,0.691263587,6.36742862,6.37647,6.36608718
60.487084,6,6.37623448,-0.613379554,6.36590054,6.37489668,6.36456058
60.497576,6.08276253,6.3746603,-0.540275641,6.36437271,6.37332395,6.3630342
60.508068,6.4807407,6.37308686,0.328106436,6.36284526,6.37175195,6.36150819
60.518559,5.56776436,6.37151432,-0.896521032,6.36131834,6.37018082,6.3599827
60.529051,6,6.36994237,-0.608228881,6.35979168,6.36861027,6.35845744
60.539542,5.83095189,6.36837131,-0.733088954,6.35826554,6.36704058,6.3569327
60.550034,5.56776436,6.36680083,-0.893888399,6.35673966,6.36547147,6.3554082
60.560526,6.40312424,6.36523109,0.194661622,6.35521417,6.36390308,6.35388407
60.571017,5.91607978,6.36366223,-0.669016029,6.35368922,6.36233556,6.35236046
60.581509,6,6.36209395,-0.60174243,6.35216452,6.3607686,6.3508371
60.592,5.74456265,6.36052655,-0.78483368,6.35064036,6.3592025,6.34931425
60.602492,5.65685425,6.35895973,-0.837917347,6.34911646,6.35763697,6.34779165
60.612984,6.70820393,6.35739363,0.59229241,6.34759295,6.35607215,6.34626943
60.623475,5.91607978,6.35582841,-0.663135452,6.34607,6.35450819,6.34474774
60.633967,6.164414,6.35426376,-0.43571752,6.34454729,6.35294478,6.34322629
60.644458,5.65685425,6.35269998,-0.834173681,6.34302514,6.35138223,6.34170538
60.65495,6.164414,6.35113677,-0.432114298,6.34150324,6.34982023,6.34018471
60.665442,5.47722558,6.34957428,-0.933996093,6.33998175,6.34825894,6.33866443
60.675933,5.83095189,6.34801265,-0.719069367,6.33846081,6.3466985,6.33714468
60.686425,5.38516481,6.34645159,-0.980452335,6.33694013,6.34513861,6.33562519
60.696916,6.164414,6.34489139,-0.424826302,6.33542001,6.34357957,6.33410623
60.707408,6.78232998,6.34333175,0.662569415,6.33390015,6.34202108,6.33258752
60.7179,6.40312424,6.34177283,0.247692165,6.3323807,6.34046328,6.33106921
60.728391,5.83095189,6.34021476,-0.71362656,6.33086181,6.33890633,6.32955144
60.738883,5.38516481,6.33865726,-0.976469379,6.32934318,6.33734992,6.32803392
60.749374,5.29150262,6.3371006,-1.02254486,6.32782512,6.33579436,6.32651695
60.759866,5.91607978,6.33554451,-0.647660966,6.32630732,6.33423933,6.32500024
60.770358,6.55743852,6.33398912,0.472704351,6.32478994,6.332685,6.32348393
60.780849,5.56776436,6.33243458,-0.874454242,6.32327312,6.33113151,6.32196816
60.791341,7.28010989,6.3308806,0.974283988,6.32175658,6.32957856,6.32045266
60.801832,7.41619849,6.32932747,1.04253106,6.3202406,6.32802644,6.31893771
60.812324,6.164414,6.32777489,-0.404179273,6.3187249,6.32647487,6.31742302
60.822816,5.56776436,6.32622301,-0.870895312,6.31720962,6.32492398,6.31590873
60.833307,6.244998,6.32467197,-0.282265789,6.3156949,6.32337392,6.31439501
60.843799,5.83095189,6.32312149,-0.701548,6.31418047,6.3218244,6.31288154
60.85429,6.8556546,6.32157185,0.730809653,6.31266661,6.32027571,6.31136864
60.864782,5.83095189,6.32002276,-0.699336019,6.31115303,6.31872756,6.309856
60.875274,6.32455532,6.31847437,0.0779804665,6.30963987,6.31718009,6.30834378
60.885765,6.32455532,6.31692681,0.0873413155,6.30812729,6.31563345,6.30683212
60.896257,6.8556546,6.31537981,0.735033871,6.306615,6.31408734,6.30532073
60.906748,7,6.31383364,0.828351589,6.30510328,6.31254206,6.3038099
60.91724,6.32455532,6.31228802,0.110757824,6.30359185,6.31099731,6.30229935
60.927732,6.8556546,6.3107431,0.738181213,6.30208085,6.30945324,6.30078922
60.938223,6.55743852,6.30919901,0.498236405,6.30057043,6.30791,6.29927965
60.948715,5.91607978,6.30765546,-0.625760082,6.2990603,6.30636728,6.29777036
60.959206,6.78232998,6.30611276,0.690084942,6.29755076,6.30482539,6.29626164
60.969698,6.244998,6.30457059,-0.244074974,6.29604151,6.30328404,6.29475321
60.98019,5.38516481,6.30302912,-0.958052352,6.29453269,6.30174335,6.2932452
60.990681,5.29150262,6.30148848,-1.00498052,6.29302447,6.3002035,6.29173776
61.001173,6.164414,6.29994838,-0.368149938,6.29151654,6.29866417,6.2902306
61.011664,6.08276253,6.29840912,-0.464377634,6.29000919,6.29712566,6.28872402
61.022156,6.164414,6.2968704,-0.363945591,6.28850215,6.29558768,6.28721773
61.032648,5.74456265,6.29533236,-0.742138609,6.28699555,6.29405038,6.28571187
61.043139,6.244998,6.29379516,-0.220900801,6.28548955,6.2925139,6.28420658
61.053631,5.65685425,6.2922585,-0.797122483,6.28398384,6.29097794,6.28270159
61.064122,7.07106781,6.29072268,0.883371459,6.28247873,6.28944281,6.28119718
61.074614,6.78232998,6.28918739,0.702241121,6.28097393,6.2879082,6.27969306
61.085106,5.65685425,6.28765279,-0.794228268,6.27946957,6.28637427,6.27818938
61.095597,5.91607978,6.28611902,-0.608308509,6.27796582,6.28484116,6.27668629
61.106089,6.244998,6.2845858,-0.198966831,6.27646237,6.28330857,6.27518349
61.11658,6.78232998,6.2830534,0.70659506,6.27495952,6.28177681,6.27368128
61.127072,5.74456265,6.28152155,-0.732774797,6.27345698,6.28024557,6.27217936
61.137564,6.78232998,6.27999038,0.708759199,6.2719549,6.27871501,6.2706779
61.148055,6.70820393,6.27846004,0.65554854,6.27045342,6.27718526,6.26917702
61.158547,6.164414,6.27693025,-0.335434413,6.26895226,6.27565605,6.26767644
61.169038,6.63324958,6.27540128,0.598204226,6.2674517,6.27412765,6.26617646
61.17953,6.78232998,6.27387286,0.713061794,6.26595147,6.27259979,6.26467678
61.190022,6.164414,6.27234512,-0.328528721,6.26445169,6.27107259,6.26317756
61.200513,6.40312424,6.27081822,0.363738943,6.26295252,6.26954622,6.26167892
61.211005,5.65685425,6.26929186,-0.782583929,6.26145367,6.26802038,6.2601806
61.221496,6.4807407,6.26776632,0.461491467,6.25995544,6.26649535,6.25868288
61.231988,6.4807407,6.26624134,0.46314076,6.25845753,6.26497086,6.25718547
61.24248,6.55743852,6.26471703,0.541037421,6.25696008,6.26344704,6.25568851
61.252971,6.70820393,6.26319357,0.667090974,6.25546325,6.26192404,6.25419216
61.263463,5.91607978,6.26167064,-0.587869762,6.25396675,6.26040157,6.25269612
61.273954,6.164414,6.26014855,-0.309409995,6.25247087,6.25887993,6.25120069
61.284446,6.164414,6.258627,-0.306941358,6.25097531,6.25735881,6.24970557
61.294938,5.47722558,6.25710614,-0.883108468,6.24948023,6.25583838,6.24821092
61.305429,6,6.25558612,-0.505555258,6.24798577,6.25431877,6.24671688
61.315921,6,6.25406664,-0.504050237,6.24649165,6.25279969,6.24522315
61.326412,6.55743852,6.252548,0.552168928,6.24499814,6.25128143,6.24373004
61.336904,7.28010989,6.2510299,1.0144358,6.24350497,6.24976371,6.24223725
61.347396,5.65685425,6.2495125,-0.769843004,6.24201229,6.24824667,6.24074493
61.357887,6.4807407,6.24799594,0.482436279,6.24052023,6.24673045,6.23925323
61.368379,5.65685425,6.24647992,-0.767870867,6.23902851,6.24521477,6.23776185
61.37887,5.65685425,6.24496474,-0.766883623,6.23753741,6.24369992,6.23627108
61.389362,6.4807407,6.24345011,0.487124816,6.23604666,6.2421856,6.23478065
61.399854,6.164414,6.24193618,-0.278428047,6.2345564,6.24067197,6.2332907
61.410345,5.74456265,6.24042309,-0.704173588,6.23306677,6.23915917,6.23180136
61.420837,6.08276253,6.23891055,-0.395155692,6.23157748,6.23764691,6.23031235
61.431328,6.164414,6.23739886,-0.270157088,6.23008883,6.23613548,6.22882397
61.44182,6.244998,6.23588771,0.0954478077,6.22860053,6.23462459,6.22733593
61.452312,5.83095189,6.23437727,-0.635157759,6.22711272,6.23311439,6.22584836
61.462803,6,6.23286768,-0.482563652,6.22562555,6.23160502,6.22436142
61.473295,6.70820393,6.23135864,0.690539856,6.22413873,6.2300962,6.22287483
61.483786,6.8556546,6.22985045,0.791077841,6.22265255,6.22858822,6.22138885
61.494278,5.47722558,6.22834282,-0.866670205,6.22116672,6.22708078,6.21990323
61.50477,6.4807407,6.22683589,0.503889674,6.2196814,6.22557404,6.21841809
61.515261,5.83095189,6.22532982,-0.627995163,6.21819671,6.22406813,6.21693358
61.525753,6.08276253,6.22382431,-0.375581921,6.21671239,6.22256278,6.21544941
61.536244,5.29150262,6.22231965,-0.964788593,6.21522871,6.22105826,6.21396588
61.546736,7,6.22081556,0.882714246,6.2137454,6.2195543,6.2124827
61.557228,6.164414,6.21931218,-0.234303603,6.21226259,6.21805104,6.21100002
61.567719,6.92820323,6.21780966,0.842848487,6.21078042,6.21654863,6.20951797
61.578211,6.4807407,6.21630771,0.514230485,6.20929863,6.21504677,6.20803627
61.588702,5.56776436,6.21480661,-0.804389366,6.20781748,6.21354577,6.20655521
61.599194,5.91607978,6.2133061,-0.54518466,6.2063367,6.21204532,6.20507451
61.609686,6.40312424,6.2118063,0.437399062,6.20485644,6.21054558,6.20359431
61.620177,5.91607978,6.21030736,-0.542427488,6.20337682,6.20904669,6.20211475
61.630669,6.4807407,6.20880901,0.5214707,6.20189759,6.20754837,6.20063555
61.64116,5.56776436,6.20731152,-0.799716923,6.200419,6.20605091,6.19915699
61.651652,6.08276253,6.20581461,-0.350787805,6.19894079,6.20455401,6.19767879
61.662144,7.41619849,6.20431844,1.10085424,6.1974631,6.20305784,6.19620111
61.672635,6.244998,6.20282313,0.205365201,6.19598607,6.20156252,6.19472407
61.683127,5.74456265,6.20132842,-0.675844487,6.19450942,6.20006778,6.19324739
61.693618,6.08276253,6.19983458,-0.342157928,6.19303343,6.1985739,6.19177137
61.70411,5.19615242,6.19834133,-1.00109386,6.19155782,6.1970806,6.19029571
61.714602,6,6.19684882,-0.443676485,6.19008274,6.19558803,6.18882057
61.725093,6.244998,6.1953572,0.222802156,6.18860832,6.19409633,6.18734608
61.735585,7,6.19386617,0.897849557,6.18713428,6.19260522,6.18587196
61.746076,7.28010989,6.19237603,1.0429448,6.18566092,6.19111498,6.18439849
61.756568,4.24264069,6.1908865,-1.39579576,6.18418794,6.18962534,6.18292541
61.76706,6.55743852,6.18939772,0.60666367,6.18271549,6.18813643,6.18145284
61.777551,5.91607978,6.18790983,-0.521373228,6.18124371,6.1866484,6.17998093
61.788043,5.91607978,6.18642255,-0.519944965,6.17977233,6.18516097,6.1785094
61.798534,5.83095189,6.18493617,-0.594965778,6.17830162,6.18367444,6.17703853
61.809026,5.47722558,6.18345041,-0.840371844,6.1768313,6.1821885,6.17556804
61.819518,6.4807407,6.18196542,0.546603405,6.17536152,6.18070332,6.17409807
61.830009,5.19615242,6.18048133,-0.992133511,6.17389242,6.17921903,6.17262877
61.840501,6.40312424,6.17899787,0.473419868,6.17242371,6.17773536,6.17115986
61.850992,6.78232998,6.17751532,0.777698312,6.17095568,6.17625259,6.16969161
61.861484,6.8556546,6.1760334,0.824391409,6.16948806,6.17477044,6.16822375
61.871976,5.83095189,6.17455227,-0.586174355,6.16802098,6.17328905,6.16675642
61.882467,6.40312424,6.17307206,0.479637551,6.16655458,6.17180858,6.16528976
61.892959,5.29150262,6.17159249,-0.93813105,6.16508858,6.17032874,6.1638235
61.90345,6,6.17011385,-0.412448606,6.16362327,6.16884981,6.1623579
61.913942,5.91607978,6.16863587,-0.502549583,6.16215837,6.16737153,6.1608927
61.924434,6.244998,6.16715868,0.278996991,6.16069402,6.16589403,6.15942804
61.934925,5.56776436,6.16568243,-0.77325162,6.15923035,6.16441745,6.15796405
61.945417,6.55743852,6.16420685,0.627081875,6.1577671,6.16294153,6.15650046
61.955908,6.55743852,6.16273221,0.628256566,6.15630453,6.16146655,6.15503755
61.9664,5.74456265,6.16125825,-0.645519638,6.15484239,6.15999222,6.15357504
61.976892,6.32455532,6.15978511,0.405918976,6.15338079,6.1585187,6.15211307
61.987383,5.38516481,6.15831292,-0.879288415,6.15191989,6.15704613,6.15065178
61.997875,6.08276253,6.15684143,-0.272174388,6.15045941,6.15557423,6.1491909
62.008366,5.56776436,6.1553709,-0.766554982,6.14899963,6.15410329,6.1477307
62.018858,6.164414,6.15390108,0.102532562,6.14754026,6.15263303,6.14627091
62.02935,5.38516481,6.15243209,-0.875937945,6.14608146,6.15116361,6.14481166
62.039841,5.65685425,6.15096409,-0.702929473,6.14462336,6.14969515,6.14335311
62.050333,6.164414,6.14949681,0.12213597,6.14316568,6.1482274,6.14189496
62.060824,6.78232998,6.14803052,0.796429195,6.1417087,6.14676063,6.14043751
62.071316,6,6.14656496,-0.382838031,6.14025215,6.14529458,6.13898046
62.081808,6.8556546,6.14510027,0.842943851,6.13879617,6.14382938,6.13752398
62.092299,5.65685425,6.14363659,-0.697697885,6.1373409,6.14236518,6.13606818
62.102791,6.08276253,6.14217366,-0.243743976,6.13588605,6.14090171,6.1346128
62.113282,6.32455532,6.14071175,0.428769831,6.13443192,6.13943926,6.13315812
62.123774,5.91607978,6.13925061,-0.472409592,6.13297821,6.13797755,6.13170386
62.134266,6.55743852,6.13779036,0.647802563,6.13152508,6.13651674,6.13025016
62.144757,5.74456265,6.13633117,-0.625914151,6.13007267,6.13505696,6.12879715
62.155249,6.8556546,6.13487276,0.848988717,6.12862069,6.13359794,6.12734457
62.16574,6,6.13341541,-0.365260745,6.12716943,6.13213998,6.1258927
62.176232,6.92820323,6.13195886,0.89232526,6.1257186,6.1306828,6.12444124
62.186724,6.08276253,6.13050325,-0.218496507,6.12426836,6.12922655,6.12299036
62.197215,5.47722558,6.12904874,-0.80735566,6.12281883,6.12777138,6.12154017
62.207707,6.244998,6.12759504,0.342641146,6.12136975,6.12631702,6.12009042
62.218198,6.08276253,6.12614246,-0.208278489,6.11992138,6.12486375,6.11864138
62.22869,5.83095189,6.12469072,-0.541976772,6.11847347,6.12341131,6.11719276
62.239182,5.56776436,6.12323997,-0.745302356,6.11702614,6.12195985,6.11574472
62.249673,6.4807407,6.12179035,0.599124649,6.11557953,6.12050951,6.11429739
62.260165,5.83095189,6.12034161,-0.537949551,6.11413338,6.11906003,6.1128505
62.270656,6.08276253,6.11889404,-0.190082896,6.11268795,6.11761171,6.11140431
62.281148,6.40312424,6.11744736,0.534487493,6.11124297,6.11616426,6.10995857
62.29164,6.08276253,6.11600173,-0.182316196,6.10979859,6.11471785,6.10851341
62.302131,5.56776436,6.11455729,-0.73945448,6.10835494,6.11327262,6.10706896
62.312623,6.08276253,6.11311379,-0.174216135,6.10691174,6.11182831,6.10562495
62.323114,6.08276253,6.11167152,-0.17002643,6.10546928,6.11038521,6.10418166
62.333606,5.65685425,6.11023021,-0.673331981,6.10402727,6.10894306,6.10273882
62.344098,6.4807407,6.10879001,0.6098776,6.10258587,6.10750201,6.10129656
62.354589,6.164414,6.10735109,0.238878458,6.1011452,6.10606222,6.09985502
62.365081,5.91607978,6.10591317,-0.435698733,6.09970499,6.10462342,6.09841393
62.375572,6.08276253,6.10447655,-0.147356793,6.09826552,6.10318591,6.09697357
62.386064,5.47722558,6.10304098,-0.791084957,6.09682652,6.10174943,6.09553365
62.396556,5.91607978,6.10160661,-0.430728257,6.09538812,6.10031414,6.09409433
62.407047,7,6.1001736,0.948591798,6.09395047,6.09888018,6.09265573
62.417539,6.92820323,6.09874169,0.910747793,6.09251329,6.09744731,6.09121759
62.42803,5.56776436,6.09731117,-0.727699668,6.09107685,6.09601583,6.08978018
62.438522,6.40312424,6.0958818,0.554294543,6.08964088,6.09458547,6.08834322
62.449014,5.38516481,6.09445373,-0.842192923,6.08820552,6.0931564,6.08690686
62.459505,6.164414,6.09302712,0.26718324,6.08677091,6.09172878,6.08547124
62.469997,5.19615242,6.09160173,-0.946281832,6.08533678,6.09030236,6.08403607
62.480488,6.40312424,6.09017785,0.559416115,6.0839034,6.08887743,6.08260164
62.49098,5.91607978,6.08875524,-0.415542361,6.0824705,6.08745376,6.08116768
62.501472,6.63324958,6.08733406,0.738860963,6.08103821,6.08603151,6.07973432
62.511963,6.08276253,6.08591447,-0.0561421796,6.07960668,6.08461083,6.07830169
62.522455,7.28010989,6.08449625,1.09344119,6.07817564,6.0831915,6.07686953
62.532946,5.65685425,6.08307968,-0.652859428,6.07674535,6.08177382,6.07543812
62.543438,6.40312424,6.08166454,0.566974159,6.07531554,6.08035754,6.07400717
62.55393,6,6.08025099,-0.28328606,6.07388636,6.07894284,6.07257683
62.564421,5.29150262,6.07883921,-0.88731989,6.07245794,6.07752989,6.07114724
62.574913,6.32455532,6.07742896,0.497118051,6.07103001,6.07611846,6.06971812
62.585404,5.74456265,6.07602056,-0.57572382,6.06960284,6.07470886,6.06828975
62.595896,5.65685425,6.07461379,-0.646343203,6.06817616,6.07330086,6.06686185
62.606388,6.244998,6.07320881,0.414474595,6.06675012,6.07189466,6.06543457
62.616879,7.54983444,6.07180581,1.215742,6.06532484,6.07049041,6.06400803
62.627371,6.164414,6.07040459,0.306609551,6.06390005,6.06908792,6.06258198
62.637862,6.244998,6.06900545,0.419514664,6.06247604,6.0676875,6.06115668
62.648354,6.08276253,6.06760818,0.123103006,6.06105252,6.06628894,6.05973186
62.658846,5.91607978,6.06621298,-0.387470259,6.05962964,6.06489244,6.05830766
62.669337,6.164414,6.06482005,0.315585091,6.05820754,6.06349818,6.05688422
62.679829,5.19615242,6.06342919,-0.931276954,6.05678593,6.06210597,6.05546126
62.69032,5.29150262,6.06204072,-0.877802996,6.0553651,6.06071614,6.05403906
62.700812,6.244998,6.06065447,0.429352456,6.05394478,6.05932851,6.05261735
62.711304,4.89897949,6.05927063,-1.07716811,6.0525251,6.05794328,6.05119627
62.721795,5.38516481,6.05788943,-0.820197919,6.0511062,6.05656067,6.04977594
62.732287,5.83095189,6.0565107,-0.474930311,6.0496878,6.0551805,6.04835611
62.742778,5.19615242,6.05513477,-0.926813007,6.04827019,6.05380314,6.04693705
62.75327,7.14142843,6.05376151,1.04291271,6.04685309,6.05242841,6.04551847
62.763762,6.32455532,6.05239113,0.521693581,6.04543664,6.05105655,6.04410053
62.774253,6.4807407,6.05102388,0.655527891,6.04402098,6.04968781,6.04268336
62.784745,5,6.04965963,-1.02452898,6.04260583,6.04832205,6.04126668
62.795236,5.19615242,6.04829876,-0.923117724,6.04119146,6.04695964,6.03985078
62.805728,5.83095189,6.04694114,-0.464746426,6.03977762,6.04560048,6.03843537
62.81622,6.244998,6.04558704,0.446554536,6.03836443,6.04424482,6.03702061
62.826711,5.47722558,6.04423677,-0.753001455,6.03695204,6.04289296,6.03560661
62.837203,5.19615242,6.04289021,-0.92018356,6.03554016,6.04154481,6.03419312
62.847694,6.164414,6.0415478,0.350522757,6.03412908,6.04020078,6.03278041
62.858186,5.47722558,6.04020948,-0.750322533,6.03271852,6.03886083,6.0313682
62.868678,4.69041576,6.03887557,-1.16123202,6.03130863,6.03752527,6.02995664
62.879169,5.29150262,6.03754643,-0.863738273,6.02989953,6.03619446,6.02854585
62.889661,6.164414,6.03622202,0.358039079,6.02849096,6.03486837,6.02713557
62.900152,4.79583152,6.03490286,-1.11313581,6.0270832,6.0335475,6.02572608
62.910644,6.164414,6.03358895,0.361697457,6.02567596,6.03223187,6.0243171
62.921136,5.47722558,6.03228073,-0.745020235,6.02426939,6.03092191,6.02290877
62.931627,5.29150262,6.03097861,-0.859927899,6.02286363,6.02961804,6.02150122
62.942119,6.08276253,6.0296827,0.230390594,6.0214584,6.02832035,6.02009419
62.95261,5.29150262,6.02839361,-0.858423549,6.02005398,6.02702947,6.01868794
62.963102,5.19615242,6.02711149,-0.911569561,6.01865009,6.02574553,6.01728222
62.973594,6.244998,6.02583688,0.468146471,6.01724688,6.0244691,6.01587715
62.984085,5.56776436,6.02457038,-0.67587426,6.01584448,6.02320075,6.01447287
62.994577,6.244998,6.02331224,0.470835167,6.01444263,6.02194075,6.01306911
63.005068,5.91607978,6.02206327,-0.325551051,6.01304158,6.0206899,6.01166615
63.01556,5.83095189,6.02082382,-0.435742953,6.01164108,6.01944854,6.01026371
63.026052,5.91607978,6.01959466,-0.321737274,6.01024127,6.01821746,6.00886193
63.036543,5.83095189,6.01837662,-0.432925777,6.00884226,6.0169975,6.00746095
63.047035,6.40312424,6.01717027,0.621251938,6.00744381,6.01578919,6.00606049
63.057526,5.74456265,6.01597668,-0.520974116,6.00604617,6.01459362,6.00466083
63.068018,6.244998,6.01479657,0.479793113,6.00464909,6.01341153,6.00326171
63.07851,7.14142843,6.01363109,1.06197803,6.0032527,6.01224405,6.00186325
63.089001,6.78232998,6.01248151,0.877410095,6.00185712,6.01109244,6.00046559
63.099493,5.74456265,6.01134886,-0.516513514,6.00046211,6.00995775,5.99906847
63.109984,5.47722558,6.01023476,-0.730074778,5.99906791,6.00884159,5.99767215
63.120476,5.91607978,6.00914055,-0.305058622,5.99767428,6.00774531,5.99627637
63.130968,6.55743852,6.00806806,0.741195295,5.99628134,6.00667073,5.99488126
63.141459,5.74456265,6.00701932,-0.512305253,5.99488923,6.00561988,5.99348696
63.151951,4.89897949,6.00599627,-1.05214865,5.99349768,6.00459472,5.9920932
63.162442,5.56776436,6.00500152,-0.661239105,5.99210696,6.00359782,5.99070025
63.172934,6,6.00403756,-0.0635418088,5.99071681,6.00263172,5.98930784
63.183426,6.08276253,6.00310754,0.282232159,5.98932736,6.00169953,5.98791611
63.193917,6.08276253,6.00221496,0.283809044,5.98793875,6.00080477,5.9865252
63.204409,6.32455532,6.00136352,0.568499601,5.9865507,5.99995115,5.98513483
63.2149,6.78232998,6.0005578,0.884178818,5.98516349,5.99914322,5.98374527
63.225392,5.09901951,5.99980265,-0.949095957,5.98377685,5.99838586,5.98235627
63.235884,5.29150262,5.99910388,-0.841190379,5.98239092,5.99768486,5.98096794
63.246375,5.83095189,5.9984681,-0.409287441,5.98100584,5.99704686,5.97958044
63.256867,5.38516481,5.99790278,-0.78277581,5.97962132,5.9964793,5.97819349
63.267358,6,5.99741674,0.0508258173,5.97823765,5.99599102,5.97680736
63.27785,6.164414,5.99702003,0.409138086,5.97685457,5.99559207,5.97542179
63.288342,5.65685425,5.99672452,-0.58298394,5.97547219,5.99529432,5.9740369
63.298833,6,5.99654407,0.0587871664,5.97409066,5.99511163,5.97265284
63.309325,5.19615242,5.99649491,-0.894618628,5.97270972,5.99506025,5.97126934
63.319816,5.74456265,5.99659632,-0.502029554,5.97132962,5.99515944,5.96988666
63.330308,6.63324958,5.99687122,0.797733267,5.96995011,5.99543214,5.96850455
63.3408,6,5.997347,0.0515072355,5.96857133,5.99590576,5.96712313
63.351291,6.08276253,5.9980566,0.291042827,5.96719339,5.99661322,5.96574254
63.361783,5.47722558,5.99904013,-0.722367327,5.96581605,5.99759465,5.96436252
63.372274,6.08276253,6.0003462,0.287082442,5.96443956,5.99889868,5.96298332
63.382766,5.83095189,6.00203511,-0.413622065,5.96306366,6.00058562,5.9616047
63.393258,6.32455532,6.00418125,0.566015962,5.9616885,6.00272988,5.96022678
63.403749,6.164414,6.00687777,0.396908337,5.96031419,6.00542463,5.95884969
63.414241,6,6.01024397,-0.10121248,5.95894048,6.00878918,5.95747317
63.424732,6.08276253,6.01443334,0.261398526,5.95756763,6.0129771,5.95609749
63.435224,6.55743852,6.01965338,0.733338355,5.95619538,6.01819591,5.95472238
63.445716,5.09901951,6.02619424,-0.962899126,5.95482387,6.02473583,5.95334798
63.456207,5.38516481,6.03448786,-0.805805838,5.95345322,6.03302892,5.95197442
63.466699,6.08276253,6.04521661,0.193767698,5.95208318,6.0437577,5.95060144
63.47719,6.55743852,6.05948262,0.705659909,5.95071401,6.05802457,5.9492293
63.487682,5.91607978,6.07907007,-0.403720554,5.94934544,6.07761412,5.94785774
63.498174,6.08276253,6.10673151,-0.154819171,5.94797761,6.10527955,5.94648689
63.508665,6.164414,6.14640373,0.134202366,5.94661066,6.14495853,5.94511689
63.519157,7.54983444,6.20314476,1.16046959,5.94524432,6.20171016,5.94374747
63.529648,6.92820323,6.28248399,0.803566576,5.94387885,6.2810649,5.9423789
63.54014,5.65685425,6.38914754,-0.85574137,5.942514,6.38774956,5.94101092
63.550632,7,6.524969,0.689224926,5.94114989,6.52359756,5.93964365
63.561123,7.28010989,6.68600011,0.77078517,5.93978667,6.68465918,5.93827724
63.571615,8.06225775,6.85826287,1.097267,5.93842406,6.85695314,5.93691141
63.582106,8.42614977,7.01268721,1.18889132,5.93706234,7.01140387,5.93554644
63.592598,7.68114575,7.10723355,0.75756993,5.93570123,7.10596484,5.93418206
63.60309,7.21110255,7.10708541,0.322516884,5.93434089,7.1058142,5.9328184
63.613581,7.34846923,7.01177786,0.580251125,5.93298142,7.01048684,5.9314556
63.624073,6.70820393,6.85557811,-0.383893442,5.93162258,6.85425506,5.9300934
63.634564,6.8556546,6.68072586,0.418244831,5.93026463,6.67936547,5.92873205
63.645056,6.164414,6.51657291,-0.593429784,5.92890731,6.51517545,5.9273713
63.655548,7.07106781,6.37741953,0.832855499,5.92755075,6.37598868,5.92601128
63.666039,5.91607978,6.26738485,-0.592709936,5.92619509,6.26592591,5.92465213
63.676531,6.55743852,6.18471631,0.610509802,5.92484005,6.18323482,5.92329357
63.687022,5.38516481,6.12477082,-0.860003498,5.92348591,6.12327174,5.92193588
63.697514,4.89897949,6.08200507,-1.0876698,5.92213241,6.08049231,5.92057879
63.708006,6.08276253,6.05135756,0.177214463,5.92077968,6.04983394,5.91922244
63.718497,6.08276253,6.0288623,0.232164222,5.91942784,6.02732976,5.91786696
63.728989,6.63324958,6.01173655,0.788360975,5.91807664,6.01019637,5.91651208
63.73948,6.164414,5.99818346,0.407713796,5.91672635,5.99663649,5.91515807
63.749972,6.63324958,5.98708394,0.803844287,5.9153767,5.98553075,5.91380468
63.760464,5.91607978,5.97775124,-0.248337392,5.91402782,5.97619224,5.91245202
63.770955,6.40312424,5.96974907,0.65831236,5.91267985,5.96818456,5.91110024
63.781447,5.83095189,5.96278301,-0.363085544,5.91133253,5.96121321,5.90974907
63.791938,6,5.95664621,0.208215739,5.90998611,5.9550713,5.90839877
63.80243,6.55743852,5.95118233,0.778624553,5.90864035,5.94960245,5.90704909
63.812922,5.83095189,5.94627249,-0.339588855,5.90729537,5.94468773,5.90570016
63.823413,5.91607978,5.94182309,-0.160447223,5.9059513,5.94023355,5.9043521
63.833905,6,5.93775837,0.249482722,5.90460789,5.93616411,5.90300467
63.844396,6.78232998,5.93401871,0.921038152,5.90326539,5.93241976,5.90165811
63.854888,6.164414,5.9305543,0.483590434,5.90192354,5.92895071,5.90031217
63.86538,6.4807407,5.92732529,0.743918953,5.90058249,5.92571708,5.89896699
63.875871,6.78232998,5.92429878,0.926299736,5.89924236,5.92268597,5.89762269
63.886363,5.83095189,5.92144663,-0.300823436,5.89790289,5.91982922,5.89627902
63.896854,6.63324958,5.91874635,0.845282928,5.89656434,5.91712435,5.89493623
63.907346,5.74456265,5.91617805,-0.4142649,5.89522646,5.91455145,5.89359407
63.917838,6.78232998,5.91372562,0.931989464,5.89388937,5.91209441,5.89225267
63.928329,6.40312424,5.91137536,0.701248086,5.89255321,5.90973953,5.89091215
63.938821,6.4807407,5.90911493,0.756059367,5.89121772,5.90747447,5.88957227
63.949312,5.83095189,5.90693457,-0.275649558,5.88988316,5.90528946,5.88823328
63.959804,5.83095189,5.90482508,-0.27179622,5.88854927,5.90317529,5.88689492
63.970296,5.47722558,5.90277906,-0.652344603,5.88721619,5.90112457,5.88555733
63.980787,6.08276253,5.90079008,0.426582288,5.88588403,5.89913088,5.88422062
63.991279,6.32455532,5.89885202,0.652459427,5.88455256,5.89718806,5.88288456
64.00177,6.08276253,5.89696019,0.431047958,5.88322202,5.89529146,5.88154939
64.012262,6.08276253,5.89510981,0.433189013,5.88189216,5.89343627,5.88021486
64.022754,5.65685425,5.89329716,-0.486253959,5.88056312,5.89161878,5.8788811
64.033245,5.38516481,5.89151897,-0.711585666,5.87923501,5.88983572,5.87754824
64.043737,6.78232998,5.88977183,0.944752957,5.87790759,5.88808368,5.87621602
64.054228,5.83095189,5.88805338,-0.23895917,5.87658111,5.88636028,5.8748847
64.06472,6.08276253,5.88636086,0.443172279,5.87525532,5.88466278,5.87355403
64.075212,6,5.88469228,0.3395699,5.87393035,5.88298919,5.87222414
64.085703,6.78232998,5.88304587,0.948305919,5.87260632,5.88133772,5.87089514
64.096195,6.08276253,5.88141956,0.448712567,5.87128299,5.87970633,5.8695668
64.106686,6.78232998,5.87981212,0.950009402,5.86996061,5.87809375,5.86823936
64.117178,6.32455532,5.87822182,0.668081954,5.86863893,5.87649828,5.86691257
64.12767,5.19615242,5.87664756,-0.824921289,5.86731807,5.8749188,5.86558657
64.138161,5.74456265,5.87508831,-0.361283362,5.86599817,5.8733543,5.86426147
64.148653,5.38516481,5.87354276,-0.698840432,5.86467897,5.87180345,5.86293703
64.159144,6.40312424,5.87201023,0.72877569,5.86336072,5.87026558,5.86161349
64.169636,5.83095189,5.87048958,-0.198840857,5.86204318,5.86873955,5.86029062
64.180128,5.83095189,5.86898017,-0.195008388,5.86072647,5.8672247,5.85896853
64.190619,5.83095189,5.86748141,-0.191126962,5.85941073,5.86572047,5.85764736
64.201111,5.83095189,5.86599237,-0.187191013,5.85809569,5.86422591,5.85632684
64.211602,5.91607978,5.86451273,0.227083807,5.85678162,5.8627407,5.85500725
64.222094,5.83095189,5.86304165,-0.179136132,5.85546826,5.861264,5.85368831
64.232586,6.4807407,5.86157877,0.786868434,5.85415574,5.85979546,5.85237017
64.243077,6.40312424,5.86012375,0.736885666,5.85284419,5.85833473,5.85105295
64.253569,5.29150262,5.8586759,-0.753109074,5.85153336,5.85688112,5.84973639
64.26406,6,5.85723509,0.377842444,5.8502235,5.8554345,5.84842075
64.274552,5.47722558,5.85580067,-0.615284568,5.84891437,5.85399422,5.84710579
64.285044,5.56776436,5.85437246,-0.535357915,5.84760608,5.8525601,5.84579162
64.295535,5.38516481,5.85295026,-0.683948432,5.84629876,5.85113194,5.84447837
64.306027,5.65685425,5.85153353,-0.441224748,5.84499218,5.84970919,5.8431658
64.316518,5.91607978,5.85012225,0.256821988,5.84368657,5.84829184,5.84185415
64.32701,6.08276253,5.84871591,0.48378365,5.8423817,5.84687938,5.84054318
64.337502,6.78232998,5.84731441,0.966962032,5.84107768,5.84547171,5.83923301
64.347993,5.74456265,5.84591767,-0.318363038,5.83977464,5.84406874,5.83792377
64.358485,7.21110255,5.84452522,1.16900699,5.83847234,5.84267001,5.8366152
64.368976,5.47722558,5.84313713,-0.604906239,5.83717103,5.84127558,5.83530757
64.379468,5.74456265,5.84175297,-0.311753631,5.83587045,5.83988503,5.83400062
64.38996,5.91607978,5.84037271,0.275149187,5.83457074,5.83849831,5.83269448
64.400451,5.74456265,5.83899634,-0.307300654,5.83327205,5.83711541,5.83138927
64.410943,5.56776436,5.83762341,-0.519479594,5.83197407,5.83573591,5.83008474
64.421434,6.08276253,5.83625408,0.496496175,5.83067709,5.83435995,5.82878115
64.431926,6.63324958,5.83488795,0.893510845,5.82938086,5.83298714,5.82747825
64.442418,5.74456265,5.83352504,-0.298265649,5.8280855,5.83161749,5.82617616
64.452909,5.83095189,5.83216537,-0.0348350249,5.82679114,5.83025101,5.82487501
64.463401,5.83095189,5.83080858,0.0119714916,5.82549754,5.82888735,5.82357455
64.473892,5.19615242,5.82945482,-0.795802988,5.82420493,5.82752666,5.82227503
64.484384,6.244998,5.82810374,0.64567349,5.82291309,5.82616859,5.82097621
64.494876,5.56776436,5.82675539,-0.508911615,5.82162212,5.82481319,5.8196782
64.505367,5.19615242,5.82540982,-0.79325746,5.82033216,5.82346049,5.81838113
64.515859,5.65685425,5.82406669,-0.408916176,5.81904297,5.82211018,5.81708477
64.52635,5,5.82272618,-0.907042546,5.81775478,5.82076242,5.81578934
64.536842,5.09901951,5.82138797,-0.849922619,5.81646736,5.81941689,5.81449462
64.547334,5.91607978,5.82005213,0.309883294,5.81518084,5.81807367,5.81320072
64.557825,6.40312424,5.81871871,0.764464208,5.81389532,5.8167328,5.81190777
64.568317,5.56776436,5.81738742,-0.499622911,5.81261058,5.81539399,5.81061552
64.578808,5.38516481,5.81605844,-0.656424885,5.81132686,5.81405742,5.80932422
64.5893,5.47722558,5.81473147,-0.580952576,5.81004392,5.8127228,5.80803362
64.599792,6.08276253,5.8134066,0.518995121,5.80876187,5.81139019,5.80674385
64.610283,5.83095189,5.81208389,0.137360858,5.80748085,5.81005969,5.80545504
64.620775,5.56776436,5.81076306,-0.492948979,5.80620061,5.80873098,5.80416694
64.631266,5.29150262,5.80944431,-0.719681659,5.80492139,5.80740429,5.80287978
64.641758,6.40312424,5.80812736,0.771360406,5.80364296,5.80607932,5.80159334
64.65225,5.83095189,5.80681229,0.155369244,5.80236545,5.80475616,5.80030774
64.662741,5.38516481,5.8054992,-0.648332006,5.80108896,5.8034349,5.79902309
64.673233,6.32455532,5.80418779,0.721365046,5.79981326,5.80211525,5.79773916
64.683724,5.29150262,5.80287829,-0.715105355,5.7985386,5.80079742,5.79645618
64.694216,6.244998,5.80157042,0.665903582,5.79726474,5.79948115,5.79517392
64.704708,5.74456265,5.80026427,-0.23601191,5.7959918,5.79816652,5.7938925
64.715199,6.164414,5.79895994,0.604527967,5.79471989,5.79685364,5.79261205
64.725691,6.244998,5.79765716,0.668835437,5.79344879,5.79554221,5.79133231
64.736182,5.65685425,5.79635614,-0.373499524,5.79217873,5.79423248,5.79005354
64.746674,5.56776436,5.79505663,-0.476751786,5.79090948,5.79292416,5.78877549
64.757166,5.38516481,5.79375871,-0.639213506,5.78964116,5.79161736,5.78749828
64.767657,6.4807407,5.7924625,0.829625336,5.78837389,5.79031218,5.78622204
64.778149,5.83095189,5.79116772,0.199459698,5.78710743,5.78900834,5.78494653
64.78864,5.38516481,5.78987461,-0.636168061,5.78584202,5.78770608,5.78367198
64.799132,6.08276253,5.78858289,0.542383295,5.78457743,5.78640514,5.78239817
64.809624,6,5.78729268,0.461202039,5.78331378,5.7851056,5.7811252
64.820115,4.35889894,5.78600408,-1.19461506,5.78205119,5.78380759,5.7798532
64.830607,6.92820323,5.78471682,1.06933924,5.78078942,5.78251084,5.77858194
64.841098,6,5.78343115,0.465369587,5.77952872,5.78121558,5.77731165
64.85159,6.244998,5.78214679,0.680331688,5.77826884,5.77992154,5.77604209
64.862082,5.83095189,5.78086387,0.223803547,5.77700991,5.77862884,5.77477339
64.872573,5.29150262,5.77958248,-0.698627123,5.77575205,5.77733758,5.77350566
64.883065,5.47722558,5.77784075,-0.548283845,5.7740331,5.77604751,5.77223868
64.893556,5.56776436,5.77656279,-0.456944662,5.77277779,5.77475885,5.77097267
64.904048,5.56776436,5.77528608,-0.455545519,5.77152331,5.77347135,5.76970739
64.91454,5.65685425,5.77401075,-0.342281314,5.77026978,5.77218513,5.76844298
64.925031,5.83095189,5.77273689,0.241277853,5.76901734,5.77090029,5.76717955
64.935523,5.83095189,5.77146426,0.243900861,5.76776574,5.76961657,5.76591686
64.946014,5.74456265,5.7701931,-0.160095135,5.76651523,5.76833421,5.76465516
64.956506,6.244998,5.76892314,0.689981779,5.76526556,5.76705297,5.7633942
64.966998,6.78232998,5.76765451,1.00731101,5.76401687,5.76577293,5.7621341
64.977489,5.29150262,5.76638731,-0.689118778,5.76276926,5.76449424,5.76087499
64.987981,5.74456265,5.7651213,-0.143382902,5.76152251,5.76321662,5.75961663
64.998472,6,5.76385671,0.485945764,5.76027685,5.76194031,5.75835926
65.008964,5.09901951,5.7625933,-0.814600385,5.75903206,5.76066507,5.75710263
65.019456,5.56776436,5.76133117,-0.439962283,5.75778824,5.75939101,5.75584688
65.029947,6.164414,5.76007045,0.635880142,5.75654553,5.75811823,5.75459212
65.040439,5.09901951,5.75881088,-0.812275425,5.75530368,5.7568465,5.75333811
65.05093,6.08276253,5.7575527,0.570271715,5.75406295,5.75557605,5.75208509
65.061422,5.65685425,5.75629567,-0.315343336,5.75282308,5.75430662,5.75083283
65.071914,6.55743852,5.7550399,0.895767061,5.75158421,5.75303834,5.74958144
65.082405,5.38516481,5.7537855,-0.607141412,5.75034645,5.75177131,5.74833105
65.092897,5.29150262,5.75253224,-0.678991617,5.74910957,5.75050529,5.74708142
65.103388,6.32455532,5.75128034,0.757149244,5.74787381,5.74924052,5.74583278
65.11388,6.63324958,5.75002957,0.939797855,5.74663894,5.74797676,5.74458491
65.124372,5.29150262,5.74878004,-0.676222908,5.74540507,5.7467141,5.74333791
65.134863,6.08276253,5.74753187,0.578991071,5.74417233,5.74545268,5.74209192
65.145355,5.47722558,5.74628481,-0.518709203,5.74294048,5.74419224,5.74084669
65.155846,6.08276253,5.74503911,0.581139764,5.74170977,5.74293302,5.73960246
65.166338,5,5.74379451,-0.86243522,5.74047995,5.74167478,5.738359
65.17683,5.09901951,5.74311069,-0.80255291,5.73925115,5.74097739,5.73711642
65.187321,5.29150262,5.74186942,-0.671093732,5.73802349,5.73972221,5.73587485
65.197813,5.91607978,5.74062926,0.418868151,5.73679674,5.738468,5.73463405
65.208304,6,5.73939043,0.510499332,5.73557114,5.73721499,5.73339425
65.218796,6.4807407,5.73815271,0.861735451,5.73434644,5.73596294,5.73215522
65.229288,5.83095189,5.73691621,0.306652389,5.73312279,5.73471197,5.73091709
65.239779,5.19615242,5.73568104,-0.734526117,5.73190028,5.73346218,5.72967996
65.250271,5.74456265,5.73444697,0.100576722,5.7306787,5.73221335,5.72844361
65.260762,6.4807407,5.73321423,0.864596129,5.72945827,5.7309657,5.72720827
65.271254,6.32455532,5.73198259,0.769787457,5.72823878,5.729719,5.72597371
65.281746,6.40312424,5.73075216,0.819982972,5.72702033,5.72847335,5.72474004
65.292237,6.92820323,5.72956326,1.09482417,5.72584327,5.72722889,5.72350738
65.302729,5.47722558,5.7283353,-0.501108493,5.72462697,5.72598536,5.72227551
65.31322,5.29150262,5.72710866,-0.660004576,5.72341184,5.724743,5.72104465
65.323712,5.65685425,5.72588312,-0.262733465,5.72219766,5.72350157,5.71981457
65.334204,5.29150262,5.7246588,-0.658146012,5.72098454,5.72226119,5.71858539
65.344695,5.65685425,5.7234358,-0.258034004,5.7197726,5.72102198,5.71735723
65.355187,6.32455532,5.72221389,0.776106582,5.71856162,5.71978369,5.71612986
65.365678,5.74456265,5.72099332,0.153523051,5.71735183,5.71854656,5.7149035
65.37617,5.74456265,5.71977384,0.157444609,5.71614299,5.71731035,5.71367794
65.386662,5.47722558,5.71855558,-0.491253501,5.71493524,5.71607518,5.71245328
65.397153,6.164414,5.71733864,0.668636941,5.71372869,5.71484117,5.71122964
65.407645,5,5.71612281,-0.846240397,5.71252311,5.71360807,5.71000679
65.418136,5.91607978,5.71490831,0.448521433,5.71131874,5.71237613,5.70878496
65.428628,6,5.71369491,0.535074848,5.71011534,5.71114509,5.70756393
65.43912,5.29150262,5.71248272,-0.648829795,5.70891305,5.70991509,5.70634381
65.449611,4.89897949,5.71127188,-0.901272651,5.70771197,5.70868624,5.70512471
65.460103,6.08276253,5.71006214,0.610491928,5.70651188,5.7074583,5.70390641
65.470594,5.83095189,5.70885373,0.349425474,5.70531301,5.70623149,5.70268914
65.481086,6.08276253,5.70764644,0.612467217,5.70411514,5.7050056,5.70147267
65.491578,5.65685425,5.70644037,-0.222679413,5.70291839,5.70378073,5.70025711
65.502069,5.38516481,5.70523565,-0.565748034,5.70172288,5.70255701,5.69904259
65.512561,7,5.70403204,1.13840589,5.70052837,5.70133418,5.69782886
65.523052,5.65685425,5.70282977,-0.214419034,5.69933511,5.7001125,5.69661617
65.533544,6.164414,5.70162863,0.680283305,5.69814286,5.69889172,5.69540428
65.544036,5.74456265,5.70042872,0.210080762,5.69695175,5.69767195,5.69419331
65.554527,6.32455532,5.69923017,0.790775034,5.6957619,5.69645333,5.69298337
65.565019,6.164414,5.69803274,0.682921127,5.69457308,5.6952356,5.69177424
65.57551,5.91607978,5.69683667,0.468234039,5.69338552,5.69401901,5.69056615
65.586002,5.47722558,5.69564173,-0.467350143,5.692199,5.69280331,5.68935887
65.596494,5.56776436,5.69444804,-0.35592651,5.69101364,5.69158863,5.68815251
65.606985,5.29150262,5.69325572,-0.633839963,5.68982956,5.69037509,5.68694719
65.617477,6.32455532,5.69206454,0.795292889,5.68864652,5.68916244,5.68574268
65.627968,5.38516481,5.69087473,-0.552910413,5.68746478,5.68795092,5.68453921
65.63846,5,5.68968607,-0.830473402,5.68628409,5.6867403,5.68333656
65.648952,5.65685425,5.68849868,-0.177888805,5.68510459,5.68553069,5.68213483
65.659443,4.69041576,5.68731266,-0.998447246,5.68392639,5.68432221,5.68093415
65.669935,5.47722558,5.68612781,-0.457058237,5.68274926,5.68311462,5.67973429
65.680426,5.09901951,5.68494434,-0.765457267,5.68157345,5.68190816,5.67853547
65.690918,5.38516481,5.68376204,-0.546440512,5.68039872,5.6807026,5.67733747
65.70141,6.164414,5.68258102,0.694141902,5.6792252,5.67949805,5.6761404
65.711901,5.74456265,5.6814014,0.251319004,5.678053,5.67829462,5.67494438
65.722393,5.56776436,5.68022297,-0.33534848,5.6768819,5.67709209,5.67374918
65.732884,5.91607978,5.67904593,0.486861221,5.67571214,5.67589069,5.67255504
65.743376,5.74456265,5.67787009,0.25824902,5.67454349,5.67469018,5.67136171
65.753868,6.40312424,5.67669555,0.852307859,5.67337608,5.67349068,5.67016933
65.764359,6.40312424,5.67552243,0.852995783,5.67221001,5.6722923,5.66897799
65.774851,5.83095189,5.67435051,0.395728924,5.67104508,5.67109482,5.66778749
65.785342,6.244998,5.67318003,0.756186467,5.66988151,5.66989846,5.66659803
65.795834,6.55743852,5.67201075,0.940971719,5.66871909,5.66870299,5.66540941
65.806326,6.244998,5.6708428,0.757730294,5.66755792,5.66750854,5.66422173
65.816817,4.69041576,5.6696763,-0.989575937,5.66639814,5.66631521,5.6630351
65.827309,5.56776436,5.66851102,-0.317406136,5.66523952,5.66512277,5.66184931
65.8378,5.47722558,5.6673472,-0.436029381,5.66408228,5.66393146,5.66066457
65.848292,5.56776436,5.66618461,-0.313720017,5.66292623,5.66274104,5.65948067
65.858784,4.89897949,5.66502338,-0.875239337,5.66177147,5.66155163,5.65829772
65.869275,5.19615242,5.66386363,-0.683894146,5.66061812,5.66036334,5.65711582
65.879767,5.56776436,5.66270512,-0.308124588,5.65946596,5.65917595,5.65593476
65.890258,6.244998,5.66154811,0.763838917,5.65831523,5.65798968,5.65475477
65.90075,5.83095189,5.66039236,0.412988544,5.65716571,5.6568043,5.65357561
65.911242,5.38516481,5.65923799,-0.523519997,5.65601752,5.65561994,5.65239741
65.921733,5.74456265,5.65808513,0.294070594,5.65487077,5.6544367,5.65122026
65.932225,5.74456265,5.65693356,0.296022106,5.65372526,5.65325435,5.65004397
65.942716,5.19615242,5.6557835,-0.677960972,5.65258121,5.65207313,5.64886873
65.953208,5.56776436,5.65463475,-0.294737822,5.6514384,5.65089281,5.64769434
65.9637,5.47722558,5.65348741,-0.419835487,5.65029696,5.64971349,5.64652091
65.974191,5.56776436,5.65234161,-0.29082168,5.649157,5.6485353,5.64534854
65.984683,5.47722558,5.65119714,-0.417098985,5.64801832,5.64735801,5.64417702
65.995174,5.19615242,5.65005422,-0.673722341,5.64688113,5.64618184,5.64300657
66.005666,5.65685425,5.64891263,0.0891157439,5.64574524,5.64500656,5.64183697
66.016158,5.65685425,5.64777251,0.0952981627,5.64461075,5.6438323,5.64066833
66.026649,5.65685425,5.64663396,0.101095446,5.64347778,5.64265917,5.63950077
66.037141,6.08276253,5.64549678,0.66126073,5.64234614,5.64148693,5.63833405
66.047632,5.09901951,5.64436118,-0.738472525,5.64121603,5.64031582,5.63716841
66.058124,6.08276253,5.64322698,0.662974777,5.64008726,5.6391456,5.63600362
66.068616,5.65685425,5.64209427,0.121490665,5.63895995,5.6379764,5.63483979
66.079107,6.70820393,5.64096318,1.03307345,5.6378342,5.63680833,5.63367705
66.089599,6.8556546,5.6398335,1.10264278,5.63670982,5.63564116,5.63251515
66.10009,6.08276253,5.63870546,0.666376075,5.63558703,5.63447511,5.63135434
66.110582,5.38516481,5.63757885,-0.502408239,5.63446563,5.63330996,5.63019438
66.121074,5.38516481,5.63645378,-0.501287319,5.63334573,5.63214583,5.6290354
66.131565,4.58257569,5.63533039,-1.02603835,5.63222745,5.63098283,5.62787749
66.142057,5.29150262,5.63420845,-0.585410823,5.63111059,5.62982073,5.62672044
66.152548,6.40312424,5.63308821,0.877516969,5.62999537,5.62865975,5.62556448
66.16304,5.56776436,5.63196944,-0.253387217,5.62888159,5.62749968,5.62440938
66.173532,5.65685425,5.63085229,0.161251246,5.62776938,5.62634063,5.62325525
66.184023,4.79583152,5.62973685,-0.913184167,5.62665884,5.62518271,5.62210221
66.194515,5.47722558,5.62862293,-0.389098127,5.62554978,5.62402569,5.62095003
66.205006,6.164414,5.62751075,0.732736822,5.62444243,5.6228698,5.61979894
66.215498,5.65685425,5.62640012,0.174511112,5.62333657,5.62171481,5.61864871
66.22599,6.08276253,5.62529115,0.676366303,5.62223235,5.62056085,5.61749946
66.236481,5.74456265,5.62418397,0.346956306,5.62112986,5.61940801,5.6163513
66.246973,6.08276253,5.62307837,0.678000121,5.62002891,5.61825609,5.61520401
66.257464,5.38516481,5.62197457,-0.486631036,5.61892974,5.61710529,5.61405781
66.267956,6.08276253,5.62087239,0.679624999,5.61783214,5.6159554,5.61291249
66.278448,6.244998,5.61977194,0.790712374,5.61673623,5.61480654,5.61176814
66.288939,5.56776436,5.61867334,-0.225630178,5.61564213,5.6136588,5.61062489
66.299431,4.79583152,5.6175764,-0.906501447,5.61454966,5.61251198,5.60948251
66.309922,5.29150262,5.61648133,-0.570069041,5.61345902,5.61136629,5.60834122
66.320414,6.4807407,5.61538796,0.930243377,5.61237004,5.61022151,5.60720081
66.330906,6.164414,5.61429639,0.741699138,5.61128283,5.60907776,5.60606139
66.341397,5.65685425,5.61320492,0.208924223,5.61019567,5.60793513,5.60492306
66.351889,5.74456265,5.61211702,0.363930798,5.60911206,5.60679343,5.60378561
66.36238,5.74456265,5.61103108,0.365419706,5.60803037,5.60565285,5.60264926
66.372872,5.91607978,5.60994692,0.553292744,5.60695042,5.6045132,5.60151379
66.383364,5.83095189,5.60886466,0.471261328,5.60587233,5.60337456,5.60037931
66.393855,4.58257569,5.60778441,-1.01252591,5.60479623,5.60223707,5.59924593
66.404347,5.65685425,5.60670599,0.223938079,5.60372191,5.60110049,5.59811343
66.414838,6.55743852,5.60562962,0.97560694,5.60264962,5.59996505,5.59698203
66.42533,5.56776436,5.60455513,-0.191809191,5.60157917,5.59883052,5.59585152
66.435822,5.83095189,5.60348263,0.476937381,5.60051068,5.59769703,5.594722
66.446313,5.29150262,5.60241225,-0.557592705,5.59944427,5.59656467,5.59359359
66.456805,5.47722558,5.6013438,-0.352304166,5.59837976,5.59543323,5.59246606
66.467296,5.38516481,5.60027752,-0.463802445,5.59731739,5.59430294,5.59133964
66.477788,5.47722558,5.59921321,-0.349267284,5.59625696,5.59317356,5.59021411
66.48828,5.29150262,5.59815101,-0.553758423,5.5951986,5.59204521,5.58908958
66.498771,5.19615242,5.59709105,-0.633197146,5.59414245,5.59091801,5.58796615
66.509263,5.74456265,5.59603314,0.385395263,5.59308832,5.58979173,5.58684362
66.519754,4.89897949,5.59497751,-0.83426496,5.59203644,5.58866659,5.58572219
66.530246,6,5.59392399,0.637240937,5.59098663,5.58754237,5.58460166
66.540738,5.91607978,5.5928727,0.568513043,5.58993904,5.58641919,5.58348213
66.551229,5.65685425,5.59182378,0.255010723,5.58889377,5.58529715,5.58236371
66.561721,6.4807407,5.59077705,0.943378846,5.58785066,5.58417604,5.58124619
66.572212,6.08276253,5.58973274,0.7021608,5.58680995,5.58305607,5.58012978
66.582704,6.8556546,5.58869068,1.12559492,5.58577145,5.58193703,5.57901427
66.593196,5.74456265,5.58765101,0.396120736,5.58473532,5.58081903,5.57789976
66.603687,5.56776436,5.58661385,-0.137293431,5.58370166,5.57970217,5.57678637
66.614179,6,5.58557904,0.643755359,5.58267032,5.57858624,5.57567388
66.62467,6.4807407,5.58454681,0.946675177,5.58164154,5.57747146,5.57456251
66.635162,5.83095189,5.58351699,0.497428286,5.58061514,5.57635761,5.57345203
66.645654,5.83095189,5.58248974,0.498459786,5.57959127,5.5752448,5.57234257
66.656145,5.47722558,5.58146517,-0.322861565,5.57857006,5.57413314,5.57123423
66.666637,5.19615242,5.58044312,-0.61991185,5.57755135,5.57302241,5.57012679
66.677128,5.09901951,5.57942385,-0.693112066,5.57653538,5.57191283,5.56902047
66.68762,6.08276253,5.57840719,0.710179798,5.57552199,5.57080419,5.56791505
66.698112,5.19615242,5.57739327,-0.617447041,5.57451133,5.56969658,5.56681065
66.708603,6.244998,5.57638225,0.817689276,5.57350352,5.56859013,5.56570738
66.719095,4.79583152,5.57537396,-0.882917006,5.57249843,5.56748462,5.56460501
66.729586,5.56776436,5.57436866,-0.0812668197,5.57149629,5.56638025,5.56350376
66.740078,5.65685425,5.57336619,0.288943005,5.57049695,5.56527683,5.56240342
66.75057,6.08276253,5.5723667,0.714419927,5.56950057,5.56417445,5.56130411
66.761061,6,5.57137033,0.65469815,5.56850729,5.56307323,5.56020591
66.771553,5.74456265,5.57037695,0.417355597,5.56751697,5.56197294,5.55910863
66.782044,6,5.5693868,0.656211245,5.56652985,5.56087381,5.55801248
66.792536,6.40312424,5.56839975,0.91363258,5.56554579,5.55977562,5.55691724
66.803028,5.47722558,5.56741594,-0.300317104,5.56456496,5.55867848,5.55582302
66.813519,5.74456265,5.56643553,0.422051082,5.56358751,5.5575825,5.55472993
66.824011,4.58257569,5.5654584,-0.991404409,5.5626133,5.55648746,5.55363776
66.834502,4.79583152,5.56448478,-0.876728727,5.56164258,5.55539357,5.55254672
66.844994,5.65685425,5.56351457,0.305515427,5.56067525,5.55430064,5.5514566
66.855486,6.08276253,5.56254792,0.721259042,5.55971144,5.55320875,5.5503675
66.865977,6.08276253,5.561585,0.721926265,5.55875134,5.55211802,5.54927953
66.876469,5.65685425,5.56062568,0.310207297,5.55779482,5.55102824,5.54819249
66.88696,5.65685425,5.55967023,0.311743509,5.55684215,5.54993962,5.54710657
66.897452,5.56776436,5.55871855,0.0951094839,5.55589321,5.54885195,5.54602158
66.907944,5.65685425,5.5577708,0.314775242,5.55494818,5.54776534,5.54493762
66.918435,5.56776436,5.55682715,0.104581132,5.55400723,5.54667988,5.5438548
66.928927,5.65685425,5.55588751,0.317752634,5.55307026,5.54559538,5.5427729
66.939418,5.91607978,5.55495215,0.600938956,5.55213755,5.54451204,5.54169213
66.94991,5.56776436,5.55402099,0.117232148,5.55120901,5.54342965,5.5406123
66.960402,5.47722558,5.55309419,-0.275442586,5.55028481,5.54234832,5.53953349
66.970893,5.83095189,5.55217196,0.52799615,5.54936516,5.54126816,5.53845583
66.981385,6.244998,5.55125421,0.832912831,5.54844996,5.54018895,5.53737909
66.991876,5.91607978,5.55034124,0.604763216,5.54753951,5.5391109,5.53630349
67.002368,5.65685425,5.54943296,0.327751873,5.54663374,5.53803381,5.53522882
67.01286,6.08276253,5.54852959,0.730912406,5.54573284,5.53695779,5.53415519
67.023351,5.09901951,5.54763132,-0.669784895,5.54483703,5.53588293,5.5330827
67.033843,6.08276253,5.54673811,0.732136887,5.54394625,5.53480903,5.53201115
67.044334,6.78232998,5.54585025,1.1119711,5.54306081,5.53373629,5.53094073
67.054826,6.164414,5.54496772,0.787049101,5.54218065,5.53266452,5.52987126
67.065318,4.89897949,5.54409072,-0.803188167,5.54130602,5.53159381,5.52880282
67.075809,5.47722558,5.54321948,-0.256892797,5.54043713,5.53052427,5.52773552
67.086301,5.47722558,5.542354,-0.255202707,5.53957395,5.52945569,5.52666916
67.096792,5.29150262,5.54149458,-0.499991953,5.53871683,5.52838829,5.52560395
67.107284,5.47722558,5.54064122,-0.251824624,5.53786574,5.52732185,5.52453968
67.117776,5.29150262,5.53979417,-0.498288617,5.53702094,5.52625647,5.52347645
67.128267,5.74456265,5.53895368,0.453441244,5.53618268,5.52519227,5.52241437
67.138759,5.56776436,5.53811979,0.172176004,5.53535099,5.52412904,5.52135322
67.14925,5.29150262,5.53729282,-0.495772326,5.53452621,5.52306697,5.52029323
67.159742,6.4807407,5.53647283,0.971734466,5.53370837,5.52200588,5.51923418
67.170234,6.40312424,5.53566009,0.931377555,5.53289777,5.52094586,5.51817618
67.180725,5.38516481,5.53485489,-0.38689803,5.53209469,5.51988701,5.51711932
67.191217,6.32455532,5.53405731,0.889099549,5.5312992,5.51882914,5.51606341
67.201708,5.74456265,5.53326773,0.459668269,5.53051169,5.51777243,5.51500865
67.2122,4.79583152,5.53248624,-0.858285916,5.52973225,5.51671671,5.51395484
67.222692,6.164414,5.53171316,0.795424943,5.52896121,5.51566205,5.51290208
67.233183,5,5.53094885,-0.728662367,5.5281989,5.51460857,5.51185048
67.243675,5.74456265,5.53019341,0.463000251,5.52744546,5.51355607,5.51079982
67.254166,4.89897949,5.5294473,-0.794020036,5.52670131,5.51250475,5.50975031
67.264658,6.40312424,5.52871067,0.935100832,5.52596662,5.5114544,5.50870176
67.27515,4.58257569,5.52798391,-0.972321044,5.52524179,5.51040513,5.50765426
67.285641,4.69041576,5.52726741,-0.914795961,5.52452719,5.50935704,5.50660791
67.296133,6,5.52656139,0.688068754,5.52382306,5.50830993,5.50556252
67.306624,5.65685425,5.52586635,0.361922512,5.52312987,5.507264,5.50451828
67.317116,5.83095189,5.52518252,0.552964169,5.5224479,5.50621905,5.503475
67.327608,5.91607978,5.52451039,0.625755059,5.52177759,5.50517518,5.50243278
67.338099,5.47722558,5.52385043,-0.215927887,5.52111943,5.5041325,5.50139171
67.348591,6.55743852,5.52320295,1.01697373,5.52047373,5.50309079,5.5003516
67.359082,4.89897949,5.52256854,-0.789676551,5.51984109,5.50205027,5.49931265
67.369574,5.47722558,5.52194757,-0.211475747,5.51922186,5.50101074,5.49827466
67.380066,5.56776436,5.5213406,0.215461752,5.51861662,5.49997229,5.49723772
67.390557,5.83095189,5.52074822,0.556959309,5.51802596,5.49893502,5.49620195
67.401049,4.79583152,5.5201709,-0.851081297,5.51745032,5.49789875,5.49516714
67.41154,5.83095189,5.51960932,0.557980797,5.51689042,5.49686365,5.49413349
67.422032,5.56776436,5.51906402,0.220681539,5.51634677,5.49582955,5.4931008
67.432524,5.38516481,5.5185357,-0.3651998,5.51582008,5.49479654,5.49206918
67.443015,6.164414,5.51802511,0.803983143,5.51531111,5.49376471,5.49103872
67.453507,5.74456265,5.51753288,0.47647641,5.51482048,5.49273387,5.49000922
67.463998,5.47722558,5.51705988,-0.199585326,5.51434906,5.49170423,5.48898089
67.47449,6.78232998,5.51660683,1.12504362,5.51389759,5.49067557,5.48795352
67.484982,5.74456265,5.51617466,0.477899559,5.51346696,5.48964801,5.48692722
67.495473,5.09901951,5.5157643,-0.645557735,5.51305814,5.48862164,5.48590209
67.505965,4.69041576,5.51537665,-0.908273579,5.51267201,5.48759626,5.48487792
67.516456,5.65685425,5.51501281,0.376618425,5.51230968,5.48657208,5.48385492
67.526948,6.4807407,5.51467379,0.982887028,5.51197214,5.48554889,5.48283289
67.53744,5.91607978,5.51436077,0.633813073,5.5116606,5.48452679,5.48181193
67.547931,5.91607978,5.51407501,0.634038465,5.5113763,5.48350589,5.48079213
67.558423,4.89897949,5.51381774,-0.784116223,5.51112048,5.48248599,5.47977331
67.568914,5.56776436,5.51359038,0.232753043,5.51089456,5.48146729,5.47875566
67.579406,5.38516481,5.51339437,-0.358091553,5.51069997,5.48044958,5.47773898
67.589898,4.58257569,5.51323127,-0.964704915,5.51053828,5.47943298,5.47672338
67.600389,6.164414,5.51310276,0.807038565,5.51041118,5.47841757,5.47570894
67.610881,5.19615242,5.51301057,-0.562901545,5.51032038,5.47740316,5.47469548
67.621372,4.89897949,5.51295662,-0.783566929,5.51026781,5.47638995,5.47368319
67.631864,5,5.51294289,-0.716200315,5.51025546,5.47537775,5.47267187
67.642356,6.164414,5.51297155,0.80711985,5.51028549,5.47436665,5.47166164
67.652847,5.56776436,5.51304488,0.23392195,5.51036018,5.47335675,5.47065257
67.663339,5.38516481,5.51316536,-0.357771651,5.51048202,5.47234785,5.46964449
67.67383,5.38516481,5.5133356,-0.358009482,5.5106536,5.47134016,5.46863757
67.684322,6,5.51355844,0.697453626,5.5108778,5.47033348,5.46763164
67.694814,5.19615242,5.51383691,-0.563635066,5.51115761,5.4693279,5.46662679
67.705305,5.09901951,5.51417423,-0.644325008,5.51149628,5.46832352,5.46562311
67.715797,5.09901951,5.51457396,-0.644635125,5.51189735,5.46732016,5.46462041
67.726288,5.83095189,5.51503979,0.562060588,5.51236454,5.466318,5.46361889
67.73678,5.38516481,5.51557587,-0.361124717,5.51290197,5.46531685,5.46261835
67.747272,5,5.51618654,-0.718461228,5.513514,5.46431681,5.4616189
67.757763,6.4807407,5.51687646,0.98176588,5.51420529,5.46331798,5.46062062
67.768255,5.47722558,5.51765087,-0.201060416,5.51498108,5.46232017,5.45962332
67.778746,5.83095189,5.51851516,0.558960402,5.51584677,5.46132356,5.45862721
67.789238,5.38516481,5.51947551,-0.366484241,5.51680852,5.46032797,5.45763208
67.79973,5,5.52053833,-0.721483425,5.51787278,5.45933349,5.45663804
67.810221,5.65685425,5.52171061,0.36761888,5.5190465,5.45834022,5.45564517
67.820713,6.40312424,5.52300025,0.938149235,5.52033762,5.45734797,5.45465329
67.831204,4.89897949,5.52441541,-0.790845073,5.52175429,5.45635694,5.4536626
67.841696,5.09901951,5.52596552,-0.653411053,5.52330593,5.45536692,5.45267289
67.852188,5,5.52766045,-0.7264024,5.52500243,5.45437802,5.45168427
67.862679,5.83095189,5.52951098,0.54903635,5.52685458,5.45339033,5.45069684
67.873171,5.38516481,5.53152947,-0.382576353,5.52887474,5.45240367,5.44971039
67.883662,5.74456265,5.53372874,0.459166536,5.53107572,5.45141822,5.44872513
67.894154,5,5.53612369,-0.732204679,5.53347245,5.4504338,5.44774086
67.904646,5.56776436,5.53873013,0.170394347,5.53608073,5.4494505,5.44675768
67.915137,5.91607978,5.54156543,0.61197578,5.53891795,5.44846842,5.44577568
67.925629,6,5.54464963,0.674796541,5.54200416,5.44748736,5.44479468
67.93612,5.38516481,5.54800379,-0.403533129,5.54536042,5.44650752,5.44381487
67.946612,4.58257569,5.55165256,-0.984417017,5.54901139,5.44552871,5.44283605
67.957104,5.65685425,5.55562236,0.318169599,5.5529835,5.44455103,5.44185832
67.967595,6,5.55994258,0.66336824,5.55730617,5.44357457,5.44088178
67.978087,5.19615242,5.56464733,-0.607037814,5.56201352,5.44259914,5.43990623
67.988578,5.56776436,5.56977306,-0.0448185002,5.567142,5.44162493,5.43893188
67.99907,5.19615242,5.57536262,-0.615800452,5.57273448,5.44065176,5.43795852
68.009562,6.08276253,5.58146274,0.708025277,5.57883773,5.43967971,5.43698626
68.020053,6,5.58812604,0.641774075,5.58550438,5.43870889,5.43601518
68.030545,5.65685425,5.59541402,0.247871392,5.59279597,5.43773911,5.43504511
68.041036,5.47722558,5.60339378,-0.355201639,5.6007796,5.43677055,5.43407622
68.051528,6.32455532,5.61214467,0.844044224,5.60953468,5.43580304,5.43310834
68.06202,5.83095189,5.62175497,0.4573805,5.61914952,5.43483666,5.43214155
68.072511,5.47722558,5.63232567,-0.393827488,5.62972515,5.4338715,5.43117596
68.083003,5.65685425,5.64397604,0.113482221,5.64138089,5.43290739,5.43021137
68.093494,5.09901951,5.65683963,-0.746873564,5.65425035,5.4319445,5.42924797
68.103986,6.164414,5.67107678,0.702379688,5.66849392,5.43098266,5.42828557
68.114478,6.244998,5.68687194,0.747078346,5.68429616,5.43002196,5.42732428
68.124969,6,5.70444457,0.543650098,5.70187657,5.42906249,5.42636417
68.135461,5.74456265,5.72406676,0.14316386,5.72150737,5.42810407,5.42540508
68.145952,4.69041576,5.74607144,-1.02745106,5.74352164,5.42714689,5.42444717
68.156444,5.29150262,5.76947437,-0.691355011,5.76836065,5.4246748,5.42349028
68.166936,5.47722558,5.79772574,-0.566127337,5.79661465,5.42372221,5.42253448
68.177427,6.08276253,5.83022231,0.502533805,5.82911459,5.42277084,5.42157988
68.187919,6.08276253,5.86818038,0.463230131,5.867077,5.42182052,5.42062629
68.19841,6.08276253,5.91337649,0.411565357,5.9122787,5.42087144,5.4196739
68.208902,5.91607978,5.96844143,-0.228826678,5.96735093,5.4199234,5.41872251
68.219394,5.91607978,6.03715905,-0.347964459,6.03607811,5.41897651,5.41777223
68.229885,6.40312424,6.12481137,0.52755366,6.12374306,5.41803085,5.41682315
68.240377,6.08276253,6.2384602,-0.394585445,6.23740853,5.41708625,5.41587507
68.250868,6.40312424,6.38690092,0.127370805,6.38587089,5.41614288,5.4149282
68.26136,7.21110255,6.58032627,0.794214252,6.57932378,5.41520056,5.41398234
68.271852,7,6.82924811,0.41322136,6.82827949,5.4142594,5.41303758
68.282343,8.06225775,7.14293999,0.958810597,7.14201132,5.41331947,5.41209402
68.292835,7.54983444,7.52762944,0.149013397,7.52674575,5.41238061,5.41115148
68.303326,8.30662386,7.98448895,0.567569304,7.98365344,5.41144298,5.41021013
68.313818,8.42614977,8.50865945,-0.287244979,8.50787316,5.41050642,5.40926981
68.32431,7.87400787,9.08851677,-1.10204759,9.08777851,5.40957101,5.40833059
68.334801,8.94427191,9.70591499,-0.872721653,9.70522167,5.40863685,5.40739257
68.345293,10.0995049,10.3366672,-0.48699306,10.3360142,5.40770375,5.40645556
68.355784,11.3578167,10.9500341,0.638578537,10.9494159,5.4067719,5.40551976
68.366276,12.2474487,11.5086003,0.859562906,11.5080103,5.40584111,5.40458498
68.376768,11.61895,11.9680581,-0.590853655,11.967489,5.40491149,5.4036513
68.387259,13.0384048,12.2813694,0.870077823,12.2808131,5.40398312,5.40271883
68.397751,11.6619038,12.4091664,-0.864443526,12.4086142,5.40305582,5.40178738
68.408242,12.5299641,12.3333578,0.443403098,12.3328004,5.40212977,5.40085713
68.418734,12.2882057,12.0650056,0.472440637,12.064434,5.4012048,5.3999279
68.429226,10.9087121,11.6392236,-0.854699629,11.6386292,5.400281,5.39899979
68.439717,10.9544512,11.1020522,-0.384188883,11.1014271,5.39935845,5.39807287
68.450209,10.9087121,10.4987074,0.640316105,10.4980441,5.39843699,5.39714698
68.4607,10.4403065,9.86857563,0.75612888,9.86786768,5.39751678,5.39622229
68.471192,9.16515139,9.24389126,-0.280606258,9.24313295,5.39659766,5.39529863
68.481684,7.41619849,8.6506545,-1.11106076,8.64984145,5.39567971,5.39437608
68.492175,8.48528137,8.10868089,0.613677834,8.10781054,5.39476302,5.39345474
68.502667,7.74596669,7.63122236,0.338739332,7.63029437,5.39384742,5.39253442
68.513158,6.40312424,7.22510588,-0.906632031,7.22412232,5.39293309,5.3916153
68.52365,7.21110255,6.89062103,0.566110869,6.8895861,5.39201985,5.39069722
68.534142,6.40312424,6.62286574,-0.468765938,6.62178515,5.39110779,5.38978025
68.544633,6.70820393,6.41326929,0.543078858,6.41214938,5.390197,5.38886448
68.555125,6.244998,6.25147306,-0.0804677823,6.25032001,5.38928731,5.38794974
68.565616,6.92820323,6.12716339,0.895008289,6.12598264,5.38837889,5.38703621
68.576108,5.74456265,6.03109047,-0.535282941,6.02988647,5.38747158,5.38612371
68.5866,6.244998,5.95573687,0.537830022,5.95451308,5.38656545,5.38521232
68.597091,6.164414,5.89535787,0.518706211,5.89411688,5.38566061,5.38430215
68.607583,6,5.84577182,0.392718961,5.84451553,5.38475687,5.383393
68.618074,5.47722558,5.80407641,-0.571708694,5.80280622,5.38385441,5.38248506
68.628566,5.91607978,5.76827365,0.384455636,5.7669906,5.38295306,5.38157815
68.639058,5.65685425,5.73701829,-0.283132547,5.73572317,5.38205292,5.38067236
68.649549,5.83095189,5.709388,0.348660149,5.70808143,5.38115406,5.37976778
68.660041,5.65685425,5.68472703,-0.166951446,5.68340953,5.38025632,5.37886424
68.670532,5.83095189,5.66256565,0.410348931,5.66123761,5.37935987,5.3779619
68.681024,5,5.64253838,-0.801584919,5.64120015,5.37846455,5.37706059
68.691516,4.47213595,5.6243619,-1.07341788,5.62301376,5.37757043,5.37616041
68.702007,4.89897949,5.60780463,-0.841917542,5.60644683,5.37667762,5.37526143
68.712499,5.38516481,5.59266871,-0.455525958,5.59130145,5.37578593,5.3743635
68.72299,5.47722558,5.57879204,-0.318694935,5.57741549,5.37489555,5.37346677
68.733482,6.08276253,5.5660304,0.718840821,5.56464471,5.3740063,5.37257107
68.743974,5.83095189,5.55426305,0.526012206,5.55286832,5.37311827,5.37167651
68.754465,5.19615242,5.54338496,-0.589264403,5.54198128,5.37223155,5.37078315
68.764957,5.29150262,5.53330155,-0.491730545,5.531889,5.37134598,5.36989083
68.775448,6,5.52393396,0.689975393,5.52251258,5.37046172,5.36899971
68.78594,5.47722558,5.51520936,-0.194894303,5.51377919,5.36957861,5.36810964
68.796432,5.47722558,5.50706623,-0.172744491,5.50562729,5.36869674,5.3672207
68.806923,5.65685425,5.49945011,0.396741902,5.49800239,5.36781619,5.36633296
68.817415,5,5.49231067,-0.701648539,5.49085417,5.3669368,5.36544626
68.827906,6.08276253,5.48560595,0.772759069,5.48414065,5.36605874,5.36456078
68.838398,4.79583152,5.47929606,-0.826719139,5.47782192,5.36518184,5.36367634
68.84889,5.83095189,5.47334724,0.598000549,5.47186422,5.36430619,5.36279302
68.859381,5.83095189,5.46772924,0.602679566,5.46623729,5.36343189,5.36191092
68.869873,4.58257569,5.46241337,-0.937996627,5.46091242,5.36255875,5.36102985
68.880364,5.83095189,5.45737588,0.61120865,5.45586587,5.36168697,5.36015
68.890856,6.244998,5.45259349,0.890171053,5.45107434,5.36081636,5.3592712
68.901348,5.74456265,5.44804658,0.544532887,5.4465182,5.35994703,5.35839352
68.911839,5.09901951,5.44371736,-0.587109743,5.44217966,5.35907905,5.35751705
68.922331,5.29150262,5.43958854,-0.384819327,5.4380414,5.35821227,5.35664163
68.932822,5.83095189,5.43564596,0.628733593,5.4340893,5.35734685,5.35576742
68.943314,5.47722558,5.43187531,0.212956027,5.43030899,5.35648263,5.35489426
68.953806,6.164414,5.4282646,0.857991496,5.4266885,5.35561971,5.35402223
68.964297,5.47722558,5.42480289,0.228959998,5.4232169,5.35475816,5.35315141
68.974789,4.79583152,5.42147924,-0.790978963,5.4198832,5.35389783,5.35228163
68.98528,6.164414,5.41828487,0.863787665,5.41667865,5.35303888,5.35141307
68.995772,6.164414,5.41521055,0.865565397,5.41359399,5.35218116,5.35054556
69.006264,5.38516481,5.41224867,-0.164571758,5.41062162,5.35132476,5.34967918
69.016755,5.29150262,5.40939225,-0.343350588,5.40775454,5.35046976,5.34881401
69.027247,5.09901951,5.40663405,-0.554630088,5.40498552,5.349616,5.3479499
69.037738,4.89897949,5.40396844,-0.710625752,5.40230892,5.34876366,5.34708699
69.04823,5.19615242,5.40138925,-0.453030713,5.39971853,5.34791257,5.34622514
69.058722,5.19615242,5.39889148,-0.450265541,5.39720939,5.34706282,5.34536442
69.069213,5.19615242,5.39647052,-0.447569098,5.39477686,5.3462145,5.34450491
69.079705,5.74456265,5.39412142,0.591980767,5.39241598,5.34536746,5.34364645
69.090196,5,5.39184047,-0.62597162,5.39012304,5.34452186,5.34278921
69.100688,6.244998,5.38962338,0.924864648,5.38789374,5.34367755,5.34193302
69.11118,4.24264069,5.38746679,-1.06996547,5.38572471,5.34283461,5.34107797
69.121671,6.164414,5.38536758,0.882636065,5.38361282,5.34199314,5.34022413
69.132163,5.65685425,5.38332224,0.52300288,5.38155456,5.34115298,5.33937134
69.142654,5,5.38132828,-0.617517835,5.37954743,5.3403143,5.33851977
69.153146,5.91607978,5.37938263,0.732596175,5.37758834,5.33947695,5.33766925
69.163638,4.69041576,5.37748297,-0.828895176,5.37567498,5.33864101,5.33681986
69.174129,5.65685425,5.37562714,0.5303085,5.37380517,5.33780658,5.3359717
69.184621,5,5.3738126,-0.611402158,5.37197636,5.3369735,5.33512458
69.195112,5.38516481,5.37203763,0.114573874,5.37018682,5.33614195,5.33427869
69.205604,5.38516481,5.37029999,0.121921345,5.3684343,5.33531178,5.33343384
69.216096,5,5.36859805,-0.607122762,5.36671715,5.33448306,5.33259014
69.226587,5.56776436,5.36693027,0.448145165,5.36503385,5.33365591,5.33174765
69.237079,5.38516481,5.36529477,0.140961122,5.36338247,5.33283016,5.33090621
69.24757,5.29150262,5.36369036,-0.268677764,5.36176184,5.33200598,5.330066
69.258062,6.244998,5.36211535,0.939618352,5.36017023,5.33118324,5.32922683
69.268554,5,5.36056858,-0.60047363,5.35860649,5.33036203,5.32838881
69.279045,5.19615242,5.35905151,-0.403607591,5.3570695,5.32954499,5.327552
69.289537,5.09901951,5.35755759,-0.508466393,5.3555578,5.32872686,5.32671626
69.300028,5.19615242,5.35608855,-0.399920153,5.35407057,5.32791038,5.32588172
69.31052,5.47722558,5.35464309,0.350117812,5.35260648,5.3270954,5.32504825
69.321012,5.74456265,5.35322038,0.625573551,5.35116468,5.32628201,5.32421592
69.331503,4.89897949,5.35181963,-0.672933979,5.34974438,5.32547032,5.3233848
69.341995,6,5.3504397,0.805953039,5.34834441,5.32466017,5.32255474
69.352486,5.74456265,5.34908005,0.628874073,5.34696422,5.32385175,5.3217259
69.362978,6,5.34773964,0.807626376,5.34560275,5.32304492,5.32089812
69.37347,5.91607978,5.34641787,0.754759507,5.34425938,5.32223977,5.32007148
69.383961,5.74456265,5.34511418,0.632019356,5.34293353,5.32143641,5.31924605
69.394453,5.74456265,5.34382767,0.633036318,5.34162427,5.32063469,5.31842169
69.404944,5.56776436,5.34255796,0.474559167,5.34033122,5.3198348,5.31759854
69.415436,5.91607978,5.34130423,0.758139531,5.33905351,5.3190366,5.31677646
69.425928,5.56776436,5.34006606,0.477177434,5.33779071,5.31824021,5.31595551
69.436419,5,5.33884303,-0.582102251,5.33654237,5.31744571,5.31513579
69.446911,5.74456265,5.33763442,0.637909262,5.33530775,5.31665298,5.31431712
69.457402,4.89897949,5.33643999,-0.661407973,5.33408658,5.31586221,5.31349968
69.467894,5.56776436,5.33525908,0.482188019,5.33287815,5.31507326,5.31268329
69.478386,5.38516481,5.33409137,0.225994323,5.33168214,5.31428626,5.31186805
69.488877,5.65685425,5.33293659,0.569137642,5.33049824,5.3135013,5.31105402
69.499369,5.83095189,5.33179415,0.706510968,5.3293258,5.31271828,5.31024106
69.50986,5.83095189,5.3306639,0.707310396,5.32816467,5.31193737,5.30942932
69.520352,6.4807407,5.3295453,1.07293774,5.32701425,5.31115846,5.30861864
69.530844,5.74456265,5.32843814,0.64507713,5.32587429,5.31038167,5.3078091
69.541335,5.09901951,5.32734224,-0.477831276,5.32474458,5.30960713,5.30700079
69.551827,5.38516481,5.32625711,0.242709087,5.32362457,5.30883471,5.30619353
69.562318,6.32455532,5.32518268,0.999686269,5.32251417,5.30806462,5.3053875
69.57281,4.69041576,5.32411852,-0.796054497,5.32141286,5.30729676,5.30458253
69.583302,4.79583152,5.3230645,-0.7261081,5.32032049,5.30653126,5.3037787
69.593793,4.58257569,5.32202049,-0.859909761,5.31923687,5.30576824,5.30297609
69.604285,5.83095189,5.32098611,0.714118887,5.31816154,5.30500762,5.30217454
69.614776,5.65685425,5.31996136,0.580424747,5.31709447,5.30424961,5.30137422
69.625268,4.35889894,5.31894588,-0.979819851,5.31603521,5.30349412,5.30057496
69.63576,5.09901951,5.31793961,-0.467888983,5.31498364,5.3027413,5.29977684
69.646251,6.244998,5.31694251,0.963356369,5.31393963,5.30199129,5.29897995
69.656743,4.79583152,5.31595424,-0.721195336,5.31290279,5.30124403,5.29818412
69.667234,5.83095189,5.31497488,0.7183154,5.31187312,5.30049975,5.29738951
69.677726,5.09901951,5.31400415,-0.463664354,5.31085021,5.29975838,5.29659596
69.688218,5.83095189,5.31304204,0.719659542,5.30983399,5.2990201,5.29580356
69.698709,4.89897949,5.31208857,-0.642735626,5.30882438,5.29828508,5.29501238
69.709201,6.08276253,5.3111435,0.878418484,5.30782101,5.29755328,5.29422226
69.719692,5.91607978,5.31020695,0.778378336,5.30682391,5.29682496,5.29343337
69.730184,6.08276253,5.30927871,0.879479288,5.30583274,5.29610009,5.29264554
69.740676,5,5.30835886,-0.555300689,5.30484744,5.29537889,5.29185886
69.751167,5,5.30744746,-0.554479449,5.30386796,5.29466154,5.29107339
69.761659,4.58257569,5.30654436,-0.85086348,5.30289397,5.29394807,5.290289
69.77215,5.09901951,5.30565381,-0.454570453,5.3019296,5.29323878,5.28950582
69.782642,4.47213595,5.30476756,-0.912486498,5.30096639,5.29253368,5.28872371
69.793134,4.79583152,5.30388982,-0.712782084,5.30000838,5.29183304,5.28794275
69.803625,6,5.30302074,0.834852835,5.29905554,5.29113712,5.28716301
69.814117,5.09901951,5.30216026,-0.450711377,5.29810758,5.290446,5.28638433
69.824608,5.91607978,5.30130864,0.784073427,5.29716455,5.28976002,5.28560687
69.8351,4.24264069,5.30046588,-1.02850629,5.29622619,5.28907931,5.28483049
69.845592,5.47722558,5.29963219,0.421418296,5.29529246,5.2884042,5.28405525
69.856083,6,5.29880786,0.837372162,5.29436337,5.28773503,5.28328122
69.866575,5.65685425,5.29799293,0.599050346,5.29343864,5.28707198,5.28250827
69.877066,6,5.2971878,0.838338954,5.29251835,5.2864155,5.28173654
69.887558,5.56776436,5.29639258,0.520933569,5.29160224,5.28576585,5.28096587
69.89805,6,5.29560765,0.83928085,5.29069031,5.28512346,5.28019636
69.908541,5.47722558,5.29483344,0.427073925,5.28978256,5.28448882,5.27942806
69.919033,5.47722558,5.29407016,0.427966602,5.28887875,5.28386228,5.27866083
69.929524,6.63324958,5.2933184,1.15755397,5.28797895,5.28324446,5.27789482
69.940016,5.74456265,5.29257848,0.67229768,5.28708293,5.28263578,5.27712988
69.950508,5.47722558,5.29185099,0.430551486,5.2861907,5.2820369,5.27636608
69.960999,5.83095189,5.2911366,0.734721234,5.28530228,5.28144854,5.27560351
69.971491,6,5.29043582,0.842356326,5.28441742,5.28087131,5.274842
69.981982,4.12310563,5.2897495,-1.0801129,5.28353624,5.2803061,5.27408172
69.992474,5.29150262,5.28907832,0.0492371789,5.28265849,5.27975368,5.2733225
70.002966,5.47722558,5.28842324,0.434513904,5.28178421,5.27921506,5.27256444
70.013457,5.09901951,5.28778532,-0.434471871,5.28091341,5.27869135,5.27180758
70.023949,4.58257569,5.28716554,-0.839398505,5.28004587,5.27818361,5.27105181
70.03444,5.74456265,5.28656527,0.676755031,5.27918171,5.27769324,5.27029724
70.044932,6.63324958,5.28598578,1.16071693,5.2783207,5.27722159,5.26954376
70.055424,4.89897949,5.28542867,-0.621650373,5.27746287,5.27677031,5.26879141
70.065915,5.09901951,5.28489574,-0.431133649,5.27660825,5.27634123,5.26804029
70.076407,5.56776436,5.28438883,0.532330289,5.27575664,5.27593628,5.26729024
70.086898,5.47722558,5.28391023,0.439676407,5.27490814,5.27555777,5.2665414
70.09739,5.83095189,5.28346234,0.73992537,5.27406255,5.27520816,5.26579364
70.107882,5.09901951,5.283048,-0.428985419,5.27321991,5.27489035,5.26504702
70.118373,5.38516481,5.28267042,0.320147439,5.27238024,5.27460756,5.26430162
70.128865,5.74456265,5.28233314,0.679874625,5.27154336,5.27436341,5.26355729
70.139356,5.29150262,5.28204032,0.0972743399,5.27070938,5.27416209,5.26281418
70.149848,5.38516481,5.28179662,0.321509231,5.26987809,5.27400832,5.26207215
70.16034,5.56776436,5.28160745,0.534936364,5.26904955,5.27390753,5.26133126
70.170831,6.08276253,5.28147902,0.895144408,5.26822379,5.27386599,5.26059158
70.181323,6,5.28141847,0.847691884,5.26740062,5.2738909,5.25985298
70.191814,6.164414,5.28143412,0.939670093,5.26658016,5.27399058,5.2591156
70.202306,5.65685425,5.28153429,0.612633628,5.26576086,5.27417479,5.25837929
70.212798,5.09901951,5.281733,-0.42744998,5.26494549,5.27445487,5.25764412
70.223289,5.65685425,5.28204215,0.612218995,5.26413272,5.27484412,5.25691017
70.233781,5.83095189,5.28247749,0.740590575,5.26332239,5.27535835,5.2561773
70.244272,5.56776436,5.28305757,0.533579231,5.2625146,5.27601613,5.25544563
70.254764,5.19615242,5.28380471,-0.296061284,5.26170917,5.27683987,5.25471505
70.265256,5.83095189,5.28474556,0.739057737,5.26090616,5.27785626,5.25398561
70.275747,6.32455532,5.28591225,1.0191384,5.26010561,5.2790975,5.25325738
70.286239,5.29150262,5.2873443,0.0644850817,5.25930735,5.28060316,5.25253023
70.29673,5.56776436,5.28908967,0.527896475,5.25851149,5.28242131,5.25180429
70.307222,5.65685425,5.29120877,0.604686263,5.25771786,5.28461242,5.25107943
70.317714,5.91607978,5.29377752,0.78886137,5.25692651,5.28725252,5.25035571
70.328205,6.40312424,5.29689464,1.0517745,5.2561375,5.29044046,5.24963321
70.338697,5.83095189,5.30069477,0.728187565,5.25535065,5.29431105,5.24891178
70.349188,5.38516481,5.30536749,0.282484183,5.25456608,5.29905409,5.24819157
70.35968,5.65685425,5.31119742,0.58792587,5.25378362,5.30495453,5.24747243
70.370172,4.89897949,5.31862198,-0.647798189,5.25300333,5.31245026,5.24675443
70.380663,5.74456265,5.32832287,0.645166473,5.25222527,5.32222372,5.24603765
70.391155,5,5.34134806,-0.584250001,5.25144925,5.335324,5.24532194
70.401646,6.164414,5.35922892,0.89732106,5.25067541,5.353284,5.24460745
70.412138,4,5.38407128,-1.17646559,5.24990358,5.37821165,5.24389403
70.42263,4.24264069,5.41850254,-1.08437164,5.24913382,5.41273671,5.24318175
70.433121,6.164414,5.46542183,0.836057517,5.24836619,5.45976072,5.24247069
70.443613,5.83095189,5.527502,0.55086286,5.2476005,5.52195822,5.2417607
70.454104,5.65685425,5.60636836,0.224690648,5.24683691,5.60095473,5.24105192
70.464596,6.55743852,5.70158849,0.92512163,5.24607523,5.69631579,5.24034422
70.475088,6.55743852,5.80915834,0.8650319,5.24531554,5.80403208,5.23963767
70.485579,5.83095189,5.91946506,-0.29751162,5.24455788,5.91448147,5.23893232
70.496071,7.14142843,6.01547884,1.06110772,5.24380209,6.01062047,5.23822805
70.506562,7.41619849,6.07464468,1.15825464,5.24304831,6.06987812,5.23752499
70.517054,6.70820393,6.07868639,0.793421417,5.24229637,6.07396675,5.236823
70.527546,7.61577311,6.02589734,1.26090276,5.24154633,6.02117979,5.23612216
70.538037,7.34846923,5.93259919,1.18990337,5.24079825,5.92785086,5.23542253
70.548529,6.55743852,5.82162801,0.857793984,5.24005198,5.81683273,5.23472397
70.55902,5.56776436,5.71129438,-0.378853556,5.23930763,5.70645019,5.23402662
70.569512,5.47722558,5.61225591,-0.367464739,5.23856506,5.60737007,5.23333035
70.580004,5.47722558,5.52922902,-0.228042646,5.23782432,5.52431365,5.23263522
70.590495,4.89897949,5.46310346,-0.751081868,5.23708548,5.4581723,5.2319413
70.600987,6.08276253,5.41247646,0.818710005,5.23634837,5.40754265,5.23124846
70.611478,6.40312424,5.37479559,1.0140654,5.23561313,5.36987034,5.23055682
70.62197,4.12310563,5.34714503,-1.10636314,5.23487961,5.34223703,5.22986626
70.632462,5.65685425,5.32683242,0.574475262,5.23414786,5.32194798,5.22917684
70.642953,6.164414,5.31166596,0.923443578,5.23341794,5.30680933,5.22848863
70.653445,5.29150262,5.30002288,-0.0923052589,5.2326897,5.29519683,5.22780149
70.663936,5.74456265,5.29079131,0.673625515,5.23196328,5.28599754,5.22711556
70.674428,5.19615242,5.28323903,-0.295104398,5.23123852,5.27847858,5.2264307
70.68492,5.91607978,5.27689832,0.799488249,5.23051548,5.27217179,5.22574699
70.695411,5,5.2714671,-0.521025048,5.22979422,5.26677479,5.22506448
70.705903,5.09901951,5.26674269,-0.409540203,5.22907459,5.26208473,5.22438305
70.716394,5.65685425,5.26258507,0.627908576,5.22835673,5.25796146,5.22370282
70.726886,6.244998,5.25889,0.993029709,5.22764048,5.25430064,5.22302367
70.737378,4.89897949,5.25557879,-0.597159363,5.22692591,5.25102353,5.22234566
70.747869,5.47722558,5.25258948,0.473957903,5.22621307,5.2480681,5.22166885
70.758361,5.83095189,5.24987158,0.762286242,5.22550182,5.24538382,5.22099312
70.768852,5.74456265,5.24738503,0.705108232,5.22479229,5.2429306,5.22031859
70.779344,4.35889894,5.24509606,-0.941380433,5.22408434,5.24067466,5.21964514
70.789836,5.56776436,5.2429774,0.569900833,5.22337802,5.23858869,5.21897282
70.800327,5,5.24100632,-0.490923941,5.2226734,5.23664993,5.21830171
70.810819,4.69041576,5.23916324,-0.740774918,5.22197033,5.23483883,5.21763168
70.82131,5.38516481,5.23743236,0.384359786,5.22126894,5.23313956,5.21696284
70.831802,5.74456265,5.23579967,0.713276224,5.2205691,5.2315381,5.21629508
70.842294,5.47722558,5.2342537,0.492921778,5.21987085,5.23002298,5.21562846
70.852785,4.79583152,5.2327846,-0.661024265,5.21917426,5.22858434,5.21496304
70.863277,5,5.23138356,-0.48102345,5.2184792,5.22721338,5.2142987
70.873768,5.38516481,5.23004345,0.393854482,5.21778578,5.22590296,5.21363555
70.88426,5.56776436,5.22875764,0.582242839,5.21709388,5.22464644,5.21297348
70.894752,4.89897949,5.22752068,-0.573185134,5.21640355,5.2234384,5.21231255
70.905243,5.74456265,5.22632785,0.719885269,5.21571484,5.22227408,5.21165282
70.915735,5.74456265,5.22517465,0.72068578,5.21502764,5.22114902,5.21099416
70.926226,5.83095189,5.22405759,0.779034214,5.21434205,5.22005969,5.2103367
70.936718,5.74456265,5.22297315,0.722211533,5.21365796,5.21900261,5.20968032
70.94721,5.29150262,5.22191853,0.263787968,5.2129754,5.21797497,5.20902507
70.957701,5.29150262,5.22089125,0.265728003,5.21229446,5.21697427,5.20837102
70.968193,5.56776436,5.21988882,0.589809752,5.21161499,5.21599805,5.20771804
70.978684,4.47213595,5.21890938,-0.864160533,5.21093712,5.21504444,5.20706626
70.989176,5.56776436,5.21795092,0.591450285,5.21026072,5.21411143,5.20641556
70.999668,5.09901951,5.2170119,-0.3435002,5.20958584,5.21319748,5.20576598
71.010159,5.56776436,5.21609093,0.593020601,5.20891256,5.21230121,5.20511761
71.020651,4.69041576,5.21518651,-0.724410624,5.20824073,5.21142112,5.20447031
71.031142,5,5.21429763,-0.462922915,5.20757049,5.21055618,5.2038242
71.041634,4.69041576,5.21342302,-0.723192411,5.2069017,5.20970516,5.20317917
71.052126,5.47722558,5.21256181,0.51445482,5.20623442,5.20886716,5.20253527
71.062617,5.19615242,5.21171319,-0.124742803,5.20556872,5.20804137,5.20189257
71.073109,5.56776436,5.21087619,0.597401185,5.20490447,5.20722684,5.20125093
71.0836,5.56776436,5.21008834,0.598060217,5.20427994,5.20642298,5.2006105
71.094092,5.09901951,5.20927264,-0.332043856,5.20361874,5.20562898,5.19997113
71.104584,4.69041576,5.20846662,-0.719757503,5.20295905,5.2048443,5.1993329
71.115075,5.83095189,5.20766982,0.789482157,5.20230093,5.20406846,5.19869585
71.125567,5.38516481,5.20688156,0.42223601,5.20164426,5.2033008,5.19805989
71.136058,5,5.20610153,-0.45398406,5.20098915,5.20254099,5.19742511
71.14655,5.09901951,5.20532914,-0.326051575,5.20033549,5.20178845,5.1967914
71.157042,5.91607978,5.20456409,0.843513898,5.19968335,5.20104287,5.19615883
71.167533,5.38516481,5.20380607,0.425862348,5.19903278,5.20030395,5.19552745
71.178025,5.65685425,5.2030546,0.673646528,5.19838366,5.19957121,5.19489713
71.188516,5.74456265,5.20230953,0.736378378,5.19773612,5.19884447,5.19426801
71.199008,5.47722558,5.20157042,0.525028717,5.19709004,5.19812332,5.19363996
71.2095,4.69041576,5.20083708,-0.714437767,5.19644548,5.19740754,5.19301304
71.219991,5.74456265,5.20010934,0.737870792,5.19580251,5.19669697,5.1923873
71.230483,6,5.19938683,0.894769896,5.19516101,5.19599123,5.19176264
71.240974,5.65685425,5.19866949,0.676893463,5.19452111,5.19529024,5.19113917
71.251466,4.69041576,5.19795698,-0.712419272,5.1938827,5.19459368,5.19051676
71.261958,5.47722558,5.19724919,0.529127944,5.19324583,5.19390143,5.18989548
71.272449,4.69041576,5.19654604,-0.711428335,5.19261059,5.19321337,5.18927539
71.282941,5.47722558,5.19584722,0.530451087,5.19197685,5.19252922,5.18865637
71.293432,5.47722558,5.19515274,0.531105299,5.19134475,5.19184895,5.18803854
71.303924,6.32455532,5.19446233,1.06305832,5.19071417,5.1911723,5.18742177
71.314416,4.89897949,5.19377593,-0.542951608,5.1900852,5.1904992,5.18680613
71.324907,5.91607978,5.19309352,0.850285991,5.1894579,5.18982958,5.18619168
71.335399,5.47722558,5.19241484,0.533676618,5.18883217,5.18916321,5.18557829
71.34589,5.56776436,5.19173995,0.613208296,5.18820814,5.1885001,5.18496609
71.356382,5.38516481,5.19106862,0.440563483,5.18758571,5.18784003,5.18435495
71.366874,6.40312424,5.19040086,1.1012372,5.18696497,5.18718297,5.18374494
71.377365,6.08276253,5.18973664,0.94500047,5.18634598,5.18652887,5.18313611
71.387857,5.65685425,5.18907579,0.683943315,5.18572866,5.18587755,5.18252835
71.398348,6.4807407,5.18841838,1.13680355,5.18511316,5.18522903,5.18192178
71.40884,5.74456265,5.18776423,0.746189261,5.18449937,5.18458313,5.18131626
71.419332,5.47722558,5.18711338,0.538620642,5.1838874,5.18393983,5.18071188
71.429823,5.56776436,5.18646584,0.61749374,5.18327734,5.18329912,5.18010867
71.440315,4.58257569,5.18582148,-0.776688991,5.1826691,5.18266083,5.17950653
71.450806,6,5.1851804,0.902673583,5.18206285,5.18202501,5.17890556
71.461298,5.91607978,5.18454247,0.855299547,5.18145852,5.18139149,5.17830567
71.47179,6,5.18390774,0.903378246,5.18085622,5.18076027,5.17770689
71.482281,5.19615242,5.1832763,0.113473014,5.18025606,5.18013136,5.17710929
71.492773,5.47722558,5.18264802,0.542749989,5.179658,5.1795046,5.17651276
71.503264,5.47722558,5.18202307,0.543325412,5.17906222,5.17888005,5.1759174
71.513756,5,5.18140136,-0.425912381,5.17846868,5.17825757,5.17532311
71.524248,5.65685425,5.18078299,0.689979175,5.17787754,5.17763715,5.17472994
71.534739,6.32455532,5.18016809,1.06976036,5.17728895,5.17701884,5.17413795
71.545231,6.55743852,5.17955661,1.17383215,5.1767029,5.17640246,5.17354701
71.555722,5.91607978,5.17894876,0.858563349,5.17611964,5.1757881,5.17295726
71.566214,5,5.17834453,-0.422308577,5.17553919,5.17517562,5.17236856
71.576706,5.56776436,5.17774412,0.624516008,5.17496178,5.17456504,5.17178099
71.587197,5,5.17714772,-0.420889197,5.17438762,5.17395638,5.17119458
71.597689,4.89897949,5.17655539,-0.526854728,5.17381682,5.1733495,5.17060924
71.60818,5,5.17596746,-0.41948475,5.17324972,5.1727445,5.17002507
71.618672,5.91607978,5.17538404,0.860636826,5.17268647,5.17214122,5.16944197
71.629164,5,5.17480547,-0.41809744,5.17212743,5.17153971,5.16885997
71.639655,4.89897949,5.17423213,-0.524645252,5.17157299,5.17093998,5.16827915
71.650147,4.69041576,5.17366427,-0.695160783,5.17102345,5.17034192,5.16769939
71.660638,5.74456265,5.17310246,0.755949858,5.17047936,5.1697456,5.16712081
71.67113,5.74456265,5.17254709,0.756317098,5.16994118,5.1691509,5.16654328
71.681622,6,5.17199885,0.909945687,5.16940958,5.16855786,5.16596686
71.692113,5.74456265,5.17145852,0.757036412,5.16888537,5.1679665,5.16539161
71.702605,5.19615242,5.17092692,0.158825375,5.16836941,5.1673767,5.16481742
71.713096,5.19615242,5.17040534,0.160458984,5.16786297,5.16678855,5.1642444
71.723588,5.09901951,5.1698952,-0.266224885,5.16736753,5.16620192,5.16367244
71.73408,5.19615242,5.16939868,0.163565726,5.16688524,5.16561686,5.16310159
71.744571,5.38516481,5.16891877,0.465022621,5.16641915,5.16503341,5.16253191
71.755063,5.47722558,5.16845967,0.555667083,5.16597345,5.16445143,5.16196328
71.765554,5.38516481,5.1680277,0.465979732,5.16555448,5.16387103,5.16139582
71.776046,4.47213595,5.16763185,-0.833963967,5.16517126,5.16329208,5.16082941
71.786538,4.89897949,5.16728523,-0.517982379,5.1648369,5.16271462,5.16026412
71.797029,4.69041576,5.16700619,-0.690355296,5.16456978,5.16213869,5.15969998
71.807521,6.08276253,5.16681967,0.957049036,5.16439487,5.16156419,5.15913691
71.818012,5.91607978,5.16675848,0.86563347,5.16434498,5.16099119,5.15857499
71.828504,5.09901951,5.16686368,-0.26046913,5.16446124,5.16041958,5.15801414
71.838996,5.47722558,5.16718412,0.55681366,5.1647925,5.15984941,5.15745438
71.849487,5.56776436,5.16777413,0.632447811,5.16539313,5.15928071,5.15689579
71.859979,5.38516481,5.16868956,0.465269005,5.16631902,5.15871338,5.15633826
71.87047,6.164414,5.16998112,0.997212557,5.16762091,5.15814751,5.15578188
71.880962,5.83095189,5.17168682,0.811951397,5.16933684,5.15758297,5.15522656
71.891454,6.32455532,5.17382185,1.07272246,5.17148199,5.15701983,5.15467234
71.901945,5.65685425,5.17636863,0.693170703,5.17403879,5.15645811,5.15411928
71.912437,4.79583152,5.17926744,-0.619222025,5.17694751,5.15589771,5.15356727
71.922928,5,5.18240408,-0.427087902,5.1800939,5.15533873,5.15301642
71.93342,5.56776436,5.18560055,0.61819399,5.18329988,5.15478105,5.15246662
71.943912,5,5.18860355,-0.434285107,5.18631205,5.15422471,5.15191792
71.954403,5.29150262,5.19108803,0.316882623,5.18880522,5.15366977,5.15137038
71.964895,5.29150262,5.19269332,0.314339463,5.19041858,5.1531161,5.15082389
71.975386,5.09901951,5.19310526,-0.306734004,5.19083784,5.15256382,5.15027855
71.985878,6.164414,5.19216632,0.986026208,5.18990541,5.1520128,5.14973426
71.99637,6.40312424,5.18994089,1.10144603,5.18768572,5.15146309,5.14919107
72.006861,5.65685425,5.18668691,0.685687491,5.18443685,5.15091474,5.14864904
72.017353,5.56776436,5.18275516,0.620491099,5.1805097,5.15036764,5.14810805
72.027844,5.65685425,5.17849248,0.691637021,5.17625129,5.14982189,5.14756822
72.038336,5.47722558,5.17418385,0.55049226,5.17194673,5.14927737,5.14702943
72.048828,5.47722558,5.1700405,0.55424279,5.16780735,5.14873414,5.14649174
72.059319,5.56776436,5.16620431,0.633687664,5.16397507,5.14819223,5.1459552
72.069811,4.35889894,5.16275752,-0.896581606,5.1605322,5.14765155,5.1454197
72.080302,7.07106781,5.15973628,1.38250915,5.15751489,5.14711219,5.14488536
72.090794,5.09901951,5.15713825,-0.241078276,5.15492082,5.14657405,5.14435206
72.101286,5.19615242,5.15493502,0.203020705,5.15272154,5.14603716,5.14381985
72.111777,4.89897949,5.15308079,-0.504084625,5.15087127,5.14550157,5.1432888
72.122269,4.89897949,5.15152088,-0.502534972,5.14931529,5.14496719,5.14275878
72.13276,5.65685425,5.15020006,0.711796451,5.14799834,5.1444341,5.14222991
72.143252,5.29150262,5.14906643,0.37740719,5.14686852,5.14390221,5.14170209
72.153744,5.83095189,5.14807546,0.82636338,5.14588128,5.14337155,5.14117536
72.164235,5.19615242,5.14719072,0.221272918,5.14500017,5.14284217,5.14064977
72.174727,4.89897949,5.14638365,-0.497397392,5.14419662,5.14231398,5.14012522
72.185218,4.47213595,5.14563322,-0.820668791,5.14344961,5.14178706,5.13960182
72.19571,5.29150262,5.14492398,0.382855904,5.14274367,5.14126132,5.13907945
72.206202,4.89897949,5.14424525,-0.495243136,5.14206813,5.14073679,5.13855818
72.216693,4.69041576,5.14358966,-0.673181921,5.14141561,5.14021353,5.13803805
72.227185,5.47722558,5.14295198,0.578163988,5.14078088,5.13969143,5.13751896
72.237676,5.74456265,5.14232881,0.776037268,5.14016055,5.13917059,5.137001
72.248168,5.91607978,5.14171754,0.879978546,5.13955201,5.13865091,5.13648409
72.25866,5.38516481,5.14111645,0.494012502,5.13895354,5.13813243,5.13596826
72.269151,6.08276253,5.14052425,0.97068959,5.13836385,5.1376152,5.13545357
72.279643,5.65685425,5.13993977,0.71896765,5.13778176,5.13709912,5.13493992
72.290134,4.89897949,5.13936228,-0.490288476,5.13720657,5.13658428,5.13442741
72.300626,5,5.13879097,-0.372546596,5.13663745,5.13607058,5.13391593
72.311118,5.19615242,5.13822531,0.24068052,5.13607389,5.13555807,5.13340553
72.321609,5.29150262,5.13766486,0.392221572,5.13551543,5.1350468,5.13289627
72.332101,5.47722558,5.13710908,0.583195075,5.13496154,5.13453666,5.13238805
72.342592,5.29150262,5.1365577,0.393630436,5.13441197,5.13402775,5.13188096
72.353084,4.79583152,5.1360103,-0.583248465,5.13386626,5.13351997,5.1313749
72.363576,5.47722558,5.13546663,0.584601528,5.13332421,5.13301336,5.13086992
72.374067,6.08276253,5.1349265,0.973568708,5.13278561,5.13250798,5.13036608
72.384559,5.29150262,5.13438959,0.39637486,5.13225014,5.13200372,5.12986327
72.39505,4.79583152,5.13385581,-0.581398558,5.1317177,5.13150067,5.12936158
72.405542,4.79583152,5.13332487,-0.580941777,5.13118803,5.13099875,5.12886093
72.416034,5.56776436,5.13279668,0.659520796,5.13066102,5.13049798,5.12836136
72.426525,4.79583152,5.13227115,-0.580034162,5.13013658,5.12999843,5.12786292
72.437017,5.47722558,5.13174806,0.587773355,5.12961451,5.12949999,5.1273655
72.447508,5.09901951,5.13122739,-0.179465528,5.12909478,5.12900275,5.12686922
72.458,4.12310563,5.13070895,-1.00379446,5.1285772,5.12850663,5.12637396
72.468492,5.65685425,5.1301927,0.725714513,5.12806173,5.12801165,5.12587978
72.478983,3.60555128,5.12971115,-1.2345687,5.12758091,5.12751787,5.12538672
72.489475,4.35889894,5.12919906,-0.877667432,5.12706946,5.1270252,5.12489469
72.499966,5.74456265,5.12868899,0.78477618,5.12655995,5.12653372,5.12440378
72.510458,6,5.12818078,0.933712599,5.12605223,5.12604334,5.1239139
72.52095,5,5.12767443,-0.357315583,5.1255463,5.12555411,5.1234251
72.531441,5.74456265,5.12716992,0.785743422,5.12504214,5.12506606,5.12293741
72.541933,6,5.12666713,0.934522806,5.12453963,5.12457911,5.12245075
72.552424,5,5.12616609,-0.355198668,5.12403882,5.12409334,5.12196521
72.562916,5.38516481,5.12566669,0.509409574,5.12353958,5.12360866,5.12148069
72.573408,6.08276253,5.12516893,0.978567114,5.12304191,5.12312512,5.12099724
72.583899,5.19615242,5.12467283,0.26735667,5.12254584,5.12264275,5.12051491
72.594391,4.89897949,5.12417827,-0.474551135,5.12205123,5.12216147,5.1200336
72.604882,5.65685425,5.1236853,0.730184191,5.12155817,5.12168137,5.11955341
72.615374,5.56776436,5.12319381,0.666761242,5.12106652,5.12120235,5.11907424
72.625866,5.19615242,5.12270382,0.271014019,5.12057632,5.12072446,5.11859614
72.636357,4.89897949,5.12221537,-0.472478446,5.12008759,5.12024774,5.11811915
72.646849,5.29150262,5.12172832,0.412036767,5.11960022,5.1197721,5.11764318
72.65734,4,5.12124277,-1.05888752,5.11911428,5.11929762,5.11716832
72.667832,4.89897949,5.12075859,-0.470934293,5.11862966,5.11882422,5.11669448
72.678324,6.08276253,5.12027583,0.981064068,5.11814639,5.11835194,5.11622171
72.688815,5.19615242,5.11979449,0.276329384,5.11766451,5.11788082,5.11575004
72.699307,5.09901951,5.1193145,-0.142460456,5.11718391,5.11741078,5.11527939
72.709798,5.65685425,5.11883591,0.733497337,5.11670466,5.11694189,5.11480985
72.72029,5.09901951,5.11835862,-0.139065122,5.11622667,5.11647407,5.11434133
72.730782,5.56776436,5.11788268,0.670732201,5.11574996,5.11600737,5.11387387
72.741273,4.58257569,5.11740811,-0.731322371,5.11527458,5.11554182,5.11340751
72.751765,5.83095189,5.11693481,0.844995318,5.11480042,5.11507733,5.11294217
72.762256,5.38516481,5.11646286,0.518364685,5.11432757,5.114614,5.11247793
72.772748,5.91607978,5.11599217,0.894476169,5.11385592,5.11415173,5.11201471
72.78324,5.74456265,5.11552276,0.793120346,5.11338551,5.11369056,5.11155254
72.793731,4.47213595,5.11505468,-0.80182213,5.11291638,5.11323055,5.11109148
72.804223,5.47722558,5.11458783,0.602194107,5.11244843,5.11277159,5.11063142
72.814714,5.38516481,5.11412229,0.520617437,5.11198174,5.11231378,5.11017247
72.825206,5.38516481,5.11365796,0.521063186,5.11151623,5.11185702,5.10971453
72.835698,4.79583152,5.11319489,-0.563350125,5.11105192,5.11140137,5.10925764
72.846189,5.74456265,5.1127331,0.794877065,5.11058885,5.11094685,5.10880185
72.856681,5.09901951,5.1122725,-0.115121636,5.11012694,5.11049339,5.10834707
72.867172,5.19615242,5.11181319,0.290412182,5.10966626,5.11004107,5.10789339
72.877664,4.47213595,5.11135505,-0.799511787,5.10920672,5.10958979,5.10744071
72.888156,3.87298335,5.11089814,-1.11261619,5.10874836,5.10913961,5.10698909
72.898647,5.47722558,5.11044249,0.605626195,5.10829121,5.10869057,5.10653856
72.909139,4.89897949,5.109988,-0.459356634,5.1078352,5.10824257,5.10608903
72.91963,5.91607978,5.10953477,0.898078513,5.10738039,5.10779571,5.1056406
72.930122,5.09901951,5.10908269,-0.100315394,5.10692671,5.10734989,5.10519318
72.940614,5.65685425,5.10863187,0.740420405,5.10647424,5.10690516,5.1047468
72.951105,5,5.10818223,-0.328910675,5.10602291,5.10646156,5.10430151
72.961597,5.91607978,5.10773374,0.899080667,5.10557269,5.106019,5.10385722
72.972088,5.38516481,5.10728647,0.527141664,5.10512366,5.10557756,5.10341402
72.98258,5.09901951,5.10684035,-0.0884354831,5.10467573,5.10513717,5.10297183
72.993072,6.244998,5.1063954,1.06705323,5.10422894,5.10469785,5.10253067
73.003563,5.74456265,5.10595167,0.799131386,5.10378334,5.10425966,5.10209061
73.014055,5.09901951,5.10550908,-0.0805578211,5.10333882,5.10382251,5.10165154
73.024546,5.19615242,5.1050693,0.301799809,5.10289549,5.10338809,5.10121356
73.035038,5.65685425,5.10462904,0.743118572,5.10245324,5.10295309,5.10077658
73.04553,5.09901951,5.10418994,-0.0719056726,5.10201211,5.10251917,5.10034063
73.056021,4.35889894,5.10375204,-0.863048724,5.10157216,5.10208637,5.09990577
73.066513,5.38516481,5.10331526,0.530895039,5.10113329,5.1016546,5.09947191
73.077004,5.56776436,5.10287968,0.681824524,5.10069557,5.10122394,5.09903913
73.087496,5.19615242,5.10244521,0.306116339,5.10025894,5.10079432,5.09860734
73.097988,5.91607978,5.10201189,0.902257111,5.09982342,5.10036576,5.09817659
73.108479,6,5.10157976,0.947850328,5.09938906,5.09993832,5.09774692
73.118971,4.89897949,5.10114873,-0.44963234,5.09895577,5.0995119,5.09731824
73.129462,6,5.10071888,0.948304338,5.09852363,5.09908659,5.09689063
73.139954,5,5.10029014,-0.316686184,5.09809255,5.09866231,5.09646402
73.150446,5.38516481,5.09986253,0.534136942,5.09766259,5.0982391,5.09603845
73.160937,5.65685425,5.09943611,0.746604408,5.09723377,5.09781698,5.09561394
73.171429,5.74456265,5.09901078,0.803462427,5.09680601,5.0973959,5.09519043
73.18192,5.47722558,5.09858662,0.615336459,5.09637939,5.09697591,5.09476799
73.192412,5.91607978,5.09816355,0.904387214,5.09595383,5.09655695,5.09434654
73.202904,5.56776436,5.09774161,0.685582052,5.09552938,5.09613905,5.09392611
73.213395,5.74456265,5.09732084,0.804513395,5.09510606,5.09572224,5.09350676
73.223887,5.09901951,5.09690116,0.0460255656,5.09468379,5.09530646,5.09308839
73.234378,5.56776436,5.09648264,0.686499614,5.09426266,5.09489177,5.0926711
73.24487,5.56776436,5.09606521,0.686803577,5.09384258,5.0944781,5.09225478
73.255362,6,5.0956489,0.950973765,5.0934236,5.09406549,5.0918395
73.265853,4.35889894,5.09523375,-0.85809953,5.09300575,5.09365396,5.09142527
73.276345,5.56776436,5.09481967,0.687709741,5.09258894,5.09324346,5.09101204
73.286836,5.38516481,5.09440676,0.53921985,5.09217327,5.09283404,5.09059986
73.297328,5.09901951,5.09399492,0.0708843353,5.09175864,5.09242564,5.09018867
73.30782,5,5.0935842,-0.305915355,5.0913451,5.09201829,5.0897785
73.318311,5.09901951,5.09317464,0.076451787,5.09093269,5.09161203,5.08936939
73.328803,4.12310563,5.09276615,-0.984713421,5.09052132,5.09120678,5.08896126
73.339294,5.29150262,5.09235881,0.446255326,5.09011107,5.09080261,5.08855419
73.349786,5.56776436,5.09195254,0.689791145,5.08970187,5.09039946,5.0881481
73.360278,5.65685425,5.09154738,0.751868915,5.08929375,5.08999734,5.08774303
73.370769,4.89897949,5.09114338,-0.43836502,5.08888676,5.08959632,5.08733901
73.381261,5,5.09074044,-0.301231541,5.0884808,5.08919629,5.08693597
73.391752,5.38516481,5.09033865,0.542978963,5.08807597,5.08879735,5.08653398
73.402244,5.47722558,5.08993793,0.622324385,5.08767218,5.08839942,5.08613297
73.412736,4.69041576,5.08953832,-0.631761477,5.08726947,5.08800252,5.08573298
73.423227,5.19615242,5.08913986,0.327127747,5.08686787,5.0876067,5.08533403
73.433719,5.09901951,5.08874246,0.101375783,5.08646732,5.08721189,5.08493606
73.44421,5.56776436,5.08834621,0.692400281,5.08606789,5.08681815,5.08453914
73.454702,5,5.08795103,-0.296565392,5.0856695,5.08642541,5.08414319
73.465194,4.58257569,5.08755696,-0.710620336,5.08527219,5.08603371,5.08374826
73.475685,5.29150262,5.08716403,0.452038268,5.084876,5.08564308,5.08335437
73.486177,5.38516481,5.08677216,0.546253277,5.08448085,5.08525344,5.08296144
73.496668,4.79583152,5.08638145,-0.539026831,5.08408682,5.08486488,5.08256957
73.50716,5.09901951,5.0859918,0.114139005,5.08369383,5.08447731,5.08217866
73.517652,4.89897949,5.08560326,-0.431999742,5.08330193,5.08409078,5.08178876
73.528143,5.83095189,5.08521587,0.863560088,5.08291114,5.08370531,5.0813999
73.538635,5.09901951,5.08482955,0.119121644,5.0825214,5.08332084,5.08101201
73.549126,4.89897949,5.08444437,-0.430656345,5.08213278,5.08293743,5.08062516
73.559618,5.09901951,5.08406027,0.122307975,5.08174521,5.08255502,5.08023927
73.57011,5,5.08367728,-0.289270262,5.08135873,5.08217363,5.07985439
73.580601,4.79583152,5.08329545,-0.536156622,5.08097337,5.0817933,5.07947054
73.591093,6.244998,5.08291469,1.07799968,5.08058907,5.08141396,5.07908766
73.601584,5.56776436,5.08253508,0.69658401,5.08020589,5.08103569,5.07870581
73.612076,3.87298335,5.08215656,-1.09962412,5.07982377,5.0806584,5.07832492
73.622568,3.60555128,5.08177915,-1.21500118,5.07944274,5.08028213,5.07794504
73.633059,5.38516481,5.08140291,0.551145986,5.07906285,5.07990692,5.07756618
73.643551,4.69041576,5.08102776,-0.624989596,5.07868403,5.0795327,5.07718828
73.654042,5.19615242,5.08065377,0.339850933,5.07830634,5.07915953,5.07681142
73.664534,5.09901951,5.08028087,0.136889154,5.07792973,5.07878735,5.07643551
73.675026,4.12310563,5.07990912,-0.978163325,5.07755423,5.07841618,5.0760606
73.685517,5.56776436,5.07953853,0.698731585,5.07717988,5.07804607,5.07568671
73.696009,6.164414,5.07916906,1.0417509,5.07680661,5.07767693,5.07531378
73.7065,5.38516481,5.07880077,0.553501611,5.0764345,5.07730885,5.07494188
73.716992,5.09901951,5.07843361,0.143477901,5.07606349,5.07694174,5.07457093
73.727484,4.47213595,5.0780676,-0.778416111,5.07569361,5.07657565,5.07420097
73.737975,5.09901951,5.07770279,0.146002474,5.07532491,5.07621061,5.07383203
73.748467,4.47213595,5.07733912,-0.77794805,5.07495733,5.07584654,5.07346405
73.758958,5.47722558,5.07697667,0.632652275,5.07459094,5.07548352,5.07309709
73.76945,5.38516481,5.07661538,0.555472257,5.07422568,5.07512148,5.07273107
73.779942,4.35889894,5.07625529,-0.846968914,5.0738616,5.07476044,5.07236605
73.790433,5,5.07589644,-0.275493077,5.07349873,5.07440045,5.07200204
73.800925,5.29150262,5.07553877,0.464719107,5.07313703,5.07404142,5.07163898
73.811416,4.58257569,5.07518238,-0.701859448,5.07277658,5.07368344,5.07127693
73.821908,5.19615242,5.0748272,0.348317701,5.07241732,5.07332643,5.07091583
73.8324,5.74456265,5.07447329,0.81858986,5.07205929,5.07297043,5.07055572
73.842891,5.65685425,5.07412069,0.763369873,5.07170256,5.07261546,5.07019661
73.853383,5.56776436,5.07376935,0.702847786,5.07134707,5.07226146,5.06983845
73.863874,4.47213595,5.07341937,-0.775424669,5.07099291,5.07190849,5.0694813
73.874366,5.38516481,5.0730707,0.558653832,5.07064003,5.07155649,5.0691251
73.884858,5.65685425,5.0727234,0.764284533,5.07028851,5.0712055,5.06876987
73.895349,4.79583152,5.07237753,-0.525876419,5.06993838,5.07085553,5.06841565
73.905841,5,5.07203306,-0.268389751,5.06958964,5.07050653,5.06806237
73.916332,3.87298335,5.07169008,-1.09485466,5.06924236,5.07015856,5.0677101
73.926824,4.89897949,5.07134858,-0.415173569,5.06889654,5.06981155,5.06735876
73.937316,5.65685425,5.07100862,0.765405531,5.06855223,5.06946553,5.0670084
73.947807,4.69041576,5.0706703,-0.616647823,5.06820954,5.06912055,5.06665904
73.958299,4.69041576,5.07033359,-0.616374752,5.06786845,5.06877652,5.06631062
73.96879,5.91607978,5.06999864,0.919826691,5.06752908,5.06843352,5.0659632
73.979282,4.89897949,5.06966544,-0.413141572,5.06719144,5.06809148,5.06561671
73.989774,6.244998,5.06933412,1.08428035,5.06685565,5.06775043,5.06527119
74.000265,4.47213595,5.06900478,-0.772572863,5.06652183,5.0674104,5.06492667
74.010757,5.09901951,5.06867748,0.174189638,5.06619003,5.06707133,5.06458308
74.021248,5.19615242,5.0683524,0.357491289,5.06586041,5.06673327,5.06424049
74.03174,5,5.06802961,-0.260824866,5.06553307,5.06639618,5.06389883
74.042232,5,5.0677093,-0.260210116,5.06520818,5.06606006,5.06355813
74.052723,5.56776436,5.0673917,0.707370246,5.06488598,5.06572497,5.06321842
74.063215,5.47722558,5.06707695,0.64042847,5.06456661,5.06539083,5.06287965
74.073706,5,5.06676539,-0.25838999,5.0642504,5.0650577,5.06254186
74.084198,5.09901951,5.06645728,0.180450096,5.06393762,5.06472552,5.062205
74.09469,4.47213595,5.06615306,-0.770725053,5.06362872,5.06439433,5.0618691
74.105181,5.38516481,5.06585332,0.565076532,5.06332426,5.06406414,5.06153419
74.115673,5.09901951,5.06555873,0.182922889,5.06302494,5.06373491,5.0612002
74.126164,5.74456265,5.06527039,0.824191884,5.06273184,5.06340668,5.0608672
74.136656,5.47722558,5.06498971,0.642055971,5.06244639,5.0630794,5.06053512
74.147148,5.09901951,5.06471884,0.185204411,5.06217073,5.0627531,5.060204
74.157639,5.29150262,5.06446086,0.476489,5.06190793,5.0624278,5.05987385
74.168131,6.08276253,5.06422001,1.00922867,5.06166226,5.06210345,5.05954463
74.178622,5.09901951,5.06400233,0.187128794,5.06143974,5.0617801,5.05921639
74.189114,5.29150262,5.06381581,0.477165392,5.06124837,5.0614577,5.05888907
74.199606,4.12310563,5.06367095,-0.969827472,5.06109866,5.06113627,5.05856269
74.210097,5.47722558,5.06358082,0.643152202,5.06100369,5.06081584,5.0582373
74.220589,5.56776436,5.06356094,0.71007283,5.06097897,5.06049635,5.05791281
74.23108,6.244998,5.06362873,1.08690812,5.06104195,5.06017786,5.05758931
74.241572,4.69041576,5.06380238,-0.611053694,5.06121081,5.0598603,5.05726672
74.252064,5.56776436,5.06409905,0.709693818,5.06150274,5.05954372,5.05694507
74.262555,5.56776436,5.06453194,0.70938877,5.06193093,5.05922813,5.0566244
74.273047,5.29150262,5.06511004,0.475807293,5.06250439,5.05891348,5.05630464
74.283538,4.69041576,5.06583132,-0.612711648,5.06322108,5.05859982,5.05598584
74.29403,5.47722558,5.06668246,0.640736386,5.06406767,5.05828709,5.05566796
74.304522,5.29150262,5.06763466,0.473146869,5.06501535,5.05797533,5.05535102
74.315013,5.19615242,5.06864058,0.357088006,5.06601676,5.05766456,5.05503504
74.325505,4.89897949,5.06963126,-0.413100202,5.0670029,5.05735473,5.05471998
74.335996,5.38516481,5.07051366,0.560937736,5.06788067,5.05704588,5.05440587
74.346488,5.65685425,5.0711752,0.765296707,5.06853745,5.05673796,5.05409268
74.35698,5.19615242,5.07149916,0.353062694,5.06885645,5.056431,5.05378041
74.367471,5.38516481,5.07139505,0.560151553,5.06874713,5.05612503,5.05346911
74.377963,4.24264069,5.07083088,-0.910049554,5.06817749,5.05581998,5.05315871
74.388454,5.38516481,5.06984689,0.561531756,5.06718779,5.05551592,5.05284928
74.398946,5.19615242,5.06853853,0.357230868,5.06587352,5.05521278,5.05254074
74.409438,5.47722558,5.06702366,0.640470077,5.06435259,5.0549106,5.05223313
74.419929,4.79583152,5.0654135,-0.519212841,5.06273631,5.0546094,5.05192648
74.430421,4.35889894,5.06379781,-0.839582557,5.06111446,5.05430912,5.05162073
74.440912,5.74456265,5.06224317,0.82602632,5.05955366,5.05400982,5.05131593
74.451404,5.74456265,5.06079402,0.826903036,5.05809838,5.05371144,5.05101203
74.461896,4.89897949,5.05947715,-0.400621599,5.05677543,5.05341401,5.05070905
74.472387,5.91607978,5.05830446,0.926161606,5.05559671,5.05311756,5.05040703
74.482879,5.09901951,5.05727578,0.204312831,5.05456204,5.05282203,5.0501059
74.49337,5.29150262,5.05638262,0.484891739,5.05366295,5.05252747,5.04980572
74.503862,5.56776436,5.05561043,0.715649311,5.05288485,5.05223383,5.04950643
74.514354,5.74456265,5.05494185,0.830434104,5.05221039,5.05194113,5.04920806
74.524845,4.58257569,5.05435874,-0.68686465,5.05162144,5.0516494,5.04891063
74.535337,5.38516481,5.05384376,0.575604944,5.05110061,5.05135859,5.0486141
74.545828,5.74456265,5.05338171,0.83137292,5.05063273,5.05106875,5.04831851
74.55632,5.09901951,5.05295978,0.214615311,5.05020496,5.05077982,5.0480238
74.566812,5.29150262,5.05256784,0.488809551,5.04980717,5.05049183,5.04773001
74.577303,5.83095189,5.05219817,0.882470242,5.04943162,5.0502048,5.04743717
74.587795,5,5.05184494,-0.227694835,5.04907251,5.04991869,5.0471452
74.598286,4.69041576,5.0515041,-0.600906264,5.04872577,5.04963354,5.04685418
74.608778,5.47722558,5.05117267,0.652727279,5.04838842,5.0493493,5.04656404
74.61927,5.47722558,5.05084868,0.652975419,5.04805848,5.04906599,5.0462748
74.629761,5.38516481,5.05053073,0.578475653,5.04773455,5.04878364,5.04598651
74.640253,5.83095189,5.05021777,0.883591605,5.04741561,5.04850221,5.04569909
74.650744,5,5.04990916,-0.223403578,5.04710098,5.04822172,5.0454126
74.661236,4.89897949,5.04960431,-0.388104137,5.04679009,5.04794215,5.045127
74.671728,5.47722558,5.04930284,0.654158034,5.04648255,5.0476635,5.0448423
74.682219,5,5.04900447,-0.221369533,5.04617809,5.04738581,5.04455853
74.692711,4.79583152,5.04870888,-0.502869122,5.04587638,5.04710902,5.04427563
74.703202,4,5.0484159,-1.02392182,5.04557727,5.04683319,5.04399366
74.713694,5.47722558,5.0481253,0.655057457,5.0452805,5.04655825,5.04371257
74.724186,4.58257569,5.04783695,-0.682100621,5.04498596,5.04628424,5.04343237
74.734677,4.35889894,5.04755074,-0.829850465,5.04469353,5.04601118,5.0431531
74.745169,6.164414,5.04726649,1.05695199,5.04440303,5.04573902,5.0428747
74.75566,5,5.04698415,-0.216758269,5.04411442,5.04546781,5.04259722
74.766152,5.29150262,5.04670357,0.494771712,5.04382755,5.04519749,5.04232061
74.776644,4.79583152,5.04642471,-0.50059284,5.04354237,5.04492809,5.04204489
74.787135,6.08276253,5.04614752,1.01814292,5.04325883,5.04465964,5.04177009
74.797627,4.24264069,5.04587996,-0.89623617,5.0429849,5.04439208,5.04149616
74.808118,6,5.04560587,0.976930976,5.0427044,5.04412546,5.04122315
74.81861,4.35889894,5.04533322,-0.828513291,5.04242532,5.04385974,5.040951
74.829102,5.09901951,5.04506199,0.232287588,5.04214764,5.04359493,5.04067973
74.839593,5.19615242,5.04479217,0.389050448,5.04187134,5.04333106,5.04040938
74.850085,5.29150262,5.04452367,0.496969767,5.04159633,5.04306808,5.0401399
74.860576,4.69041576,5.04425651,-0.594845151,5.04132264,5.04280604,5.03987132
74.871068,5.83095189,5.04399061,0.887108384,5.04105017,5.04254489,5.0396036
74.88156,6.164414,5.04372596,1.05862554,5.04077893,5.04228464,5.03933677
74.892051,5.65685425,5.04346257,0.783193255,5.04050892,5.04202534,5.03907084
74.902543,5.56776436,5.04320037,0.724267902,5.04024007,5.04176691,5.03880577
74.913034,5.09901951,5.04293938,0.236812449,5.0399724,5.04150942,5.0385416
74.923526,5,5.04267953,-0.206590251,5.03970585,5.04125281,5.03827829
74.934018,5.56776436,5.04242084,0.724805852,5.03944043,5.04099711,5.03801586
74.944509,5.83095189,5.04216331,0.888137706,5.03917614,5.04074234,5.03775433
74.955001,4.69041576,5.04190688,-0.592866867,5.03891293,5.04048845,5.03749365
74.965492,5.38516481,5.04165159,0.586100008,5.03865082,5.04023548,5.03723387
74.975984,5.29150262,5.04139737,0.500105243,5.03838976,5.0399834,5.03697494
74.986476,5,5.04114424,-0.202840422,5.03812975,5.03973221,5.03671688
74.996967,4.79583152,5.04089221,-0.495036044,5.03787082,5.03948195,5.03645972
75.007459,4.12310563,5.04064122,-0.957880785,5.03761291,5.03923257,5.03620341
75.01795,5.19615242,5.04039132,0.394665808,5.03735605,5.0389841,5.03594799
75.028442,5.56776436,5.04014245,0.726375876,5.03710019,5.03873652,5.03569341
75.038934,4.89897949,5.03989462,-0.37538665,5.03684535,5.03848982,5.0354397
75.049425,5.09901951,5.03964786,0.243663001,5.03659154,5.03824405,5.03518688
75.059917,5.09901951,5.0394021,0.244166782,5.0363387,5.03799915,5.0349349
75.070408,4,5.03915739,-1.01939069,5.03608689,5.03775517,5.03468382
75.0809,4.58257569,5.03891367,-0.675527924,5.03583604,5.03751205,5.03443357
75.091392,4.69041576,5.03867097,-0.590131521,5.03558618,5.03726983,5.03418418
75.101883,5.09901951,5.0384293,0.246150786,5.03533732,5.03702852,5.03393568
75.112375,5,5.03818862,-0.195419087,5.03508941,5.03678808,5.03368801
75.122866,5.38516481,5.03794896,0.589250243,5.0348425,5.03654855,5.03344123
75.133358,4.24264069,5.03771027,-0.891666745,5.03459653,5.03630989,5.03319528
75.14385,5.56776436,5.03747258,0.728211359,5.03435152,5.03607211,5.03295019
75.154341,4.79583152,5.0372359,-0.491329192,5.0341075,5.03583524,5.03270597
75.164833,5.91607978,5.03700018,0.937592449,5.03386441,5.03559924,5.03246259
75.175324,5.38516481,5.03676547,0.590253619,5.0336223,5.03536414,5.03222009
75.185816,5.56776436,5.03653172,0.728857079,5.03338111,5.0351299,5.03197841
[truncated: 472,203 more chars]
