# Supplementary material for: Phase Stability of Iron Nitride Fe4N at High Pressure—Pressure-Dependent Evolution of Phase Equilibria in the Fe–N System
Source: Materials (Basel). 2021 Jul 15;14(14):3963. doi: 10.3390/ma14143963 (PMC8307547; doi:10.3390/ma14143963)
Supplement: Supplementary file 1 [file materials-14-03963-s001.zip › xrd_data/4-450_riet.txt]

'y-axis saved as Sqrt(y)
'x,Yobs,Ycalc,Diff,fe4n,gamma,epsilon,Bkg
20,11.3578167,0,0,0,0,0,0
20.010492,10.8166538,0,0,0,0,0,0
20.020983,11.61895,0,0,0,0,0,0
20.031475,10.6770783,0,0,0,0,0,0
20.041966,11,0,0,0,0,0,0
20.052458,10.8166538,0,0,0,0,0,0
20.06295,10.2956301,0,0,0,0,0,0
20.073441,10.198039,0,0,0,0,0,0
20.083933,10.7703296,0,0,0,0,0,0
20.094424,10.7238053,0,0,0,0,0,0
20.104916,11.1803399,0,0,0,0,0,0
20.115408,10.8627805,0,0,0,0,0,0
20.125899,11.3137085,0,0,0,0,0,0
20.136391,10.4403065,0,0,0,0,0,0
20.146882,11.7046999,0,0,0,0,0,0
20.157374,11.0905365,0,0,0,0,0,0
20.167866,10.5356538,0,0,0,0,0,0
20.178357,11.6619038,0,0,0,0,0,0
20.188849,10.9087121,0,0,0,0,0,0
20.19934,10.7703296,0,0,0,0,0,0
20.209832,11.7473401,0,0,0,0,0,0
20.220324,10.0498756,0,0,0,0,0,0
20.230815,11.9163753,0,0,0,0,0,0
20.241307,12.2474487,0,0,0,0,0,0
20.251798,10.198039,0,0,0,0,0,0
20.26229,10.198039,0,0,0,0,0,0
20.272782,11.0905365,0,0,0,0,0,0
20.283273,11.045361,0,0,0,0,0,0
20.293765,11.4017543,0,0,0,0,0,0
20.304256,11,0,0,0,0,0,0
20.314748,11.5758369,0,0,0,0,0,0
20.32524,11.2694277,0,0,0,0,0,0
20.335731,11.045361,0,0,0,0,0,0
20.346223,11,0,0,0,0,0,0
20.356714,10.7703296,0,0,0,0,0,0
20.367206,11.7046999,0,0,0,0,0,0
20.377698,11.8321596,0,0,0,0,0,0
20.388189,11.3578167,0,0,0,0,0,0
20.398681,11.4891253,0,0,0,0,0,0
20.409172,11.2249722,0,0,0,0,0,0
20.419664,11.4017543,0,0,0,0,0,0
20.430156,11,0,0,0,0,0,0
20.440647,10.9087121,0,0,0,0,0,0
20.451139,11.8743421,0,0,0,0,0,0
20.46163,11.2249722,0,0,0,0,0,0
20.472122,11.5758369,0,0,0,0,0,0
20.482614,10.9544512,0,0,0,0,0,0
20.493105,11.2249722,0,0,0,0,0,0
20.503597,10.7238053,0,0,0,0,0,0
20.514088,12.5698051,0,0,0,0,0,0
20.52458,10.5830052,0,0,0,0,0,0
20.535072,12.2065556,0,0,0,0,0,0
20.545563,12.083046,0,0,0,0,0,0
20.556055,10.3440804,0,0,0,0,0,0
20.566546,11.3137085,0,0,0,0,0,0
20.577038,10.9544512,0,0,0,0,0,0
20.58753,11.9582607,0,0,0,0,0,0
20.598021,10.7703296,0,0,0,0,0,0
20.608513,10.3440804,0,0,0,0,0,0
20.619004,11.61895,0,0,0,0,0,0
20.629496,10.9087121,0,0,0,0,0,0
20.639988,11.1355287,0,0,0,0,0,0
20.650479,10.8166538,0,0,0,0,0,0
20.660971,11.3137085,0,0,0,0,0,0
20.671462,10.2956301,0,0,0,0,0,0
20.681954,11.045361,0,0,0,0,0,0
20.692446,11.2249722,0,0,0,0,0,0
20.702937,11.8321596,0,0,0,0,0,0
20.713429,10.3923048,0,0,0,0,0,0
20.72392,10.4403065,0,0,0,0,0,0
20.734412,10.9544512,0,0,0,0,0,0
20.744904,10.6770783,0,0,0,0,0,0
20.755395,11.5325626,0,0,0,0,0,0
20.765887,11,0,0,0,0,0,0
20.776378,12.1655251,0,0,0,0,0,0
20.78687,10.0995049,0,0,0,0,0,0
20.797362,12.2474487,0,0,0,0,0,0
20.807853,11.045361,0,0,0,0,0,0
20.818345,11.4017543,0,0,0,0,0,0
20.828836,11.0905365,0,0,0,0,0,0
20.839328,10.198039,0,0,0,0,0,0
20.84982,12,0,0,0,0,0,0
20.860311,10.9544512,0,0,0,0,0,0
20.870803,10.8627805,0,0,0,0,0,0
20.881294,10.7703296,0,0,0,0,0,0
20.891786,11.4017543,0,0,0,0,0,0
20.902278,12.328828,0,0,0,0,0,0
20.912769,11.4891253,0,0,0,0,0,0
20.923261,12.0415946,0,0,0,0,0,0
20.933752,11.2249722,0,0,0,0,0,0
20.944244,10.8166538,0,0,0,0,0,0
20.954736,11.3137085,0,0,0,0,0,0
20.965227,11.7046999,0,0,0,0,0,0
20.975719,11.045361,0,0,0,0,0,0
20.98621,11.2694277,0,0,0,0,0,0
20.996702,11.61895,0,0,0,0,0,0
21.007194,11.7898261,0,0,0,0,0,0
21.017685,10.5356538,0,0,0,0,0,0
21.028177,11.7473401,0,0,0,0,0,0
21.038668,11.3137085,0,0,0,0,0,0
21.04916,10.8627805,0,0,0,0,0,0
21.059652,10.6301458,0,0,0,0,0,0
21.070143,11.3137085,0,0,0,0,0,0
21.080635,11.4017543,0,0,0,0,0,0
21.091126,10.2469508,0,0,0,0,0,0
21.101618,10.7238053,0,0,0,0,0,0
21.11211,10.8627805,0,0,0,0,0,0
21.122601,11.7046999,0,0,0,0,0,0
21.133093,11.8321596,0,0,0,0,0,0
21.143584,11.0905365,0,0,0,0,0,0
21.154076,11.1355287,0,0,0,0,0,0
21.164568,12.1243557,0,0,0,0,0,0
21.175059,11.1803399,0,0,0,0,0,0
21.185551,11.1355287,0,0,0,0,0,0
21.196042,11.3578167,0,0,0,0,0,0
21.206534,10.9087121,0,0,0,0,0,0
21.217026,11.7898261,0,0,0,0,0,0
21.227517,11.1803399,0,0,0,0,0,0
21.238009,11.9163753,0,0,0,0,0,0
21.2485,10.7238053,0,0,0,0,0,0
21.258992,11.4891253,0,0,0,0,0,0
21.269484,11.1355287,0,0,0,0,0,0
21.279975,11.7473401,0,0,0,0,0,0
21.290467,11.045361,0,0,0,0,0,0
21.300958,12.2882057,0,0,0,0,0,0
21.31145,11.0905365,0,0,0,0,0,0
21.321942,10.5830052,0,0,0,0,0,0
21.332433,11.7473401,0,0,0,0,0,0
21.342925,10.7238053,0,0,0,0,0,0
21.353416,11.4455231,0,0,0,0,0,0
21.363908,11.9582607,0,0,0,0,0,0
21.3744,11.61895,0,0,0,0,0,0
21.384891,11.3578167,0,0,0,0,0,0
21.395383,11.2249722,0,0,0,0,0,0
21.405874,11.5325626,0,0,0,0,0,0
21.416366,11.61895,0,0,0,0,0,0
21.426858,10.8166538,0,0,0,0,0,0
21.437349,11.1355287,0,0,0,0,0,0
21.447841,11.5758369,0,0,0,0,0,0
21.458332,10.6770783,0,0,0,0,0,0
21.468824,12.3693169,0,0,0,0,0,0
21.479316,12.4498996,0,0,0,0,0,0
21.489807,11.8743421,0,0,0,0,0,0
21.500299,11.2694277,0,0,0,0,0,0
21.51079,10.4880885,0,0,0,0,0,0
21.521282,10.5830052,0,0,0,0,0,0
21.531774,11.61895,0,0,0,0,0,0
21.542265,11.4455231,0,0,0,0,0,0
21.552757,10.4880885,0,0,0,0,0,0
21.563248,11.045361,0,0,0,0,0,0
21.57374,11.3578167,0,0,0,0,0,0
21.584232,11.2249722,0,0,0,0,0,0
21.594723,11.7046999,0,0,0,0,0,0
21.605215,11.2694277,0,0,0,0,0,0
21.615706,11.3578167,0,0,0,0,0,0
21.626198,10.4403065,0,0,0,0,0,0
21.63669,11.5758369,0,0,0,0,0,0
21.647181,11.4891253,0,0,0,0,0,0
21.657673,11.0905365,0,0,0,0,0,0
21.668164,11.7046999,0,0,0,0,0,0
21.678656,11.7046999,0,0,0,0,0,0
21.689148,10.7238053,0,0,0,0,0,0
21.699639,10.4880885,0,0,0,0,0,0
21.710131,11.045361,0,0,0,0,0,0
21.720622,11.3137085,0,0,0,0,0,0
21.731114,11.1355287,0,0,0,0,0,0
21.741606,11.2694277,0,0,0,0,0,0
21.752097,12,0,0,0,0,0,0
21.762589,10.3440804,0,0,0,0,0,0
21.77308,10.2956301,0,0,0,0,0,0
21.783572,11.5758369,0,0,0,0,0,0
21.794064,11.5758369,0,0,0,0,0,0
21.804555,11.2694277,0,0,0,0,0,0
21.815047,11.2694277,0,0,0,0,0,0
21.825538,11.2694277,0,0,0,0,0,0
21.83603,12.0415946,0,0,0,0,0,0
21.846522,12.2882057,0,0,0,0,0,0
21.857013,11.9163753,0,0,0,0,0,0
21.867505,10.9544512,0,0,0,0,0,0
21.877996,11.7473401,0,0,0,0,0,0
21.888488,10.3440804,0,0,0,0,0,0
21.89898,11.5325626,0,0,0,0,0,0
21.909471,11.61895,0,0,0,0,0,0
21.919963,11.0905365,0,0,0,0,0,0
21.930454,10.5830052,0,0,0,0,0,0
21.940946,11.2249722,0,0,0,0,0,0
21.951438,11.0905365,0,0,0,0,0,0
21.961929,11.1803399,0,0,0,0,0,0
21.972421,10.7238053,0,0,0,0,0,0
21.982912,11.1355287,0,0,0,0,0,0
21.993404,11.6619038,0,0,0,0,0,0
22.003896,11,0,0,0,0,0,0
22.014387,11.5325626,0,0,0,0,0,0
22.024879,11.8743421,0,0,0,0,0,0
22.03537,10.8166538,0,0,0,0,0,0
22.045862,10.9087121,0,0,0,0,0,0
22.056354,11.4455231,0,0,0,0,0,0
22.066845,10.6301458,0,0,0,0,0,0
22.077337,10.9544512,0,0,0,0,0,0
22.087828,10.6770783,0,0,0,0,0,0
22.09832,11.1355287,0,0,0,0,0,0
22.108812,11.0905365,0,0,0,0,0,0
22.119303,11.3578167,0,0,0,0,0,0
22.129795,11.2694277,0,0,0,0,0,0
22.140286,11.5325626,0,0,0,0,0,0
22.150778,12,0,0,0,0,0,0
22.16127,11.5758369,0,0,0,0,0,0
22.171761,11.3137085,0,0,0,0,0,0
22.182253,10.6301458,0,0,0,0,0,0
22.192744,11.0905365,0,0,0,0,0,0
22.203236,11.2694277,0,0,0,0,0,0
22.213728,10.7238053,0,0,0,0,0,0
22.224219,11.7046999,0,0,0,0,0,0
22.234711,11.5758369,0,0,0,0,0,0
22.245202,11,0,0,0,0,0,0
22.255694,11.4017543,0,0,0,0,0,0
22.266186,11.3137085,0,0,0,0,0,0
22.276677,11.8743421,0,0,0,0,0,0
22.287169,10.8627805,0,0,0,0,0,0
22.29766,11.4891253,0,0,0,0,0,0
22.308152,11.1355287,0,0,0,0,0,0
22.318644,11.1355287,0,0,0,0,0,0
22.329135,11.9163753,0,0,0,0,0,0
22.339627,10.5830052,0,0,0,0,0,0
22.350118,11.0905365,0,0,0,0,0,0
22.36061,11.1803399,0,0,0,0,0,0
22.371102,11.5325626,0,0,0,0,0,0
22.381593,11.2249722,0,0,0,0,0,0
22.392085,11.4455231,0,0,0,0,0,0
22.402576,11.6619038,0,0,0,0,0,0
22.413068,10.8627805,0,0,0,0,0,0
22.42356,10.198039,0,0,0,0,0,0
22.434051,11.7898261,0,0,0,0,0,0
22.444543,11,0,0,0,0,0,0
22.455034,11.0905365,0,0,0,0,0,0
22.465526,10.9544512,0,0,0,0,0,0
22.476018,10.9087121,0,0,0,0,0,0
22.486509,11.4891253,0,0,0,0,0,0
22.497001,11.1355287,0,0,0,0,0,0
22.507492,11.9582607,0,0,0,0,0,0
22.517984,10.9544512,0,0,0,0,0,0
22.528476,10.6770783,0,0,0,0,0,0
22.538967,10.4880885,0,0,0,0,0,0
22.549459,10.8166538,0,0,0,0,0,0
22.55995,10.9087121,0,0,0,0,0,0
22.570442,12.1243557,0,0,0,0,0,0
22.580934,10.9087121,0,0,0,0,0,0
22.591425,11.4455231,0,0,0,0,0,0
22.601917,10.7238053,0,0,0,0,0,0
22.612408,11.1803399,0,0,0,0,0,0
22.6229,11.5325626,0,0,0,0,0,0
22.633392,11.4455231,0,0,0,0,0,0
22.643883,11,0,0,0,0,0,0
22.654375,11.7473401,0,0,0,0,0,0
22.664866,11.0905365,0,0,0,0,0,0
22.675358,11.4017543,0,0,0,0,0,0
22.68585,10.2956301,0,0,0,0,0,0
22.696341,10.7238053,0,0,0,0,0,0
22.706833,10.9544512,0,0,0,0,0,0
22.717324,11.5325626,0,0,0,0,0,0
22.727816,11.5325626,0,0,0,0,0,0
22.738308,10.9087121,0,0,0,0,0,0
22.748799,10.1488916,0,0,0,0,0,0
22.759291,11.2694277,0,0,0,0,0,0
22.769782,11.9163753,0,0,0,0,0,0
22.780274,11.5325626,0,0,0,0,0,0
22.790766,11.2694277,0,0,0,0,0,0
22.801257,11.3137085,0,0,0,0,0,0
22.811749,11.8321596,0,0,0,0,0,0
22.82224,11.2694277,0,0,0,0,0,0
22.832732,11.2694277,0,0,0,0,0,0
22.843224,10.3440804,0,0,0,0,0,0
22.853715,10.7238053,0,0,0,0,0,0
22.864207,11.1355287,0,0,0,0,0,0
22.874698,13.0766968,0,0,0,0,0,0
22.88519,11.7898261,0,0,0,0,0,0
22.895682,11.0905365,0,0,0,0,0,0
22.906173,10.6770783,0,0,0,0,0,0
22.916665,9.53939201,0,0,0,0,0,0
22.927156,12,0,0,0,0,0,0
22.937648,10.6301458,0,0,0,0,0,0
22.94814,11,0,0,0,0,0,0
22.958631,10.0995049,0,0,0,0,0,0
22.969123,11.4017543,0,0,0,0,0,0
22.979614,10.6770783,0,0,0,0,0,0
22.990106,11.7898261,0,0,0,0,0,0
23.000598,10.3923048,0,0,0,0,0,0
23.011089,10.8166538,0,0,0,0,0,0
23.021581,10.8627805,0,0,0,0,0,0
23.032072,10.4403065,0,0,0,0,0,0
23.042564,10.8627805,0,0,0,0,0,0
23.053056,11.2249722,0,0,0,0,0,0
23.063547,11.1803399,0,0,0,0,0,0
23.074039,11.6619038,0,0,0,0,0,0
23.08453,9.21954446,0,0,0,0,0,0
23.095022,11.4017543,0,0,0,0,0,0
23.105514,10.5830052,0,0,0,0,0,0
23.116005,10.5356538,0,0,0,0,0,0
23.126497,11.2249722,0,0,0,0,0,0
23.136988,11.2249722,0,0,0,0,0,0
23.14748,11.2694277,0,0,0,0,0,0
23.157972,11.1355287,0,0,0,0,0,0
23.168463,10.6770783,0,0,0,0,0,0
23.178955,11.0905365,0,0,0,0,0,0
23.189446,10.3923048,0,0,0,0,0,0
23.199938,10.3923048,0,0,0,0,0,0
23.21043,10.3440804,0,0,0,0,0,0
23.220921,10.8166538,0,0,0,0,0,0
23.231413,11.5325626,0,0,0,0,0,0
23.241904,11.61895,0,0,0,0,0,0
23.252396,10.6770783,0,0,0,0,0,0
23.262888,10.6770783,0,0,0,0,0,0
23.273379,10.1488916,0,0,0,0,0,0
23.283871,10.8627805,0,0,0,0,0,0
23.294362,11.0905365,0,0,0,0,0,0
23.304854,11.5325626,0,0,0,0,0,0
23.315346,10.8627805,0,0,0,0,0,0
23.325837,9.94987437,0,0,0,0,0,0
23.336329,10.5356538,0,0,0,0,0,0
23.34682,10.5356538,0,0,0,0,0,0
23.357312,10.7238053,0,0,0,0,0,0
23.367804,10.3440804,0,0,0,0,0,0
23.378295,9.8488578,0,0,0,0,0,0
23.388787,10.2469508,0,0,0,0,0,0
23.399278,10.3440804,0,0,0,0,0,0
23.40977,11.3137085,0,0,0,0,0,0
23.420262,10.6770783,0,0,0,0,0,0
23.430753,10.5830052,0,0,0,0,0,0
23.441245,11.8321596,0,0,0,0,0,0
23.451736,10.9544512,0,0,0,0,0,0
23.462228,10.4403065,0,0,0,0,0,0
23.47272,11.5325626,0,0,0,0,0,0
23.483211,11.7473401,0,0,0,0,0,0
23.493703,11.2249722,0,0,0,0,0,0
23.504194,10.8627805,0,0,0,0,0,0
23.514686,11.1803399,0,0,0,0,0,0
23.525178,11.2694277,0,0,0,0,0,0
23.535669,11,0,0,0,0,0,0
23.546161,10.6301458,0,0,0,0,0,0
23.556652,10.9544512,0,0,0,0,0,0
23.567144,10.7703296,0,0,0,0,0,0
23.577636,10.7703296,0,0,0,0,0,0
23.588127,10.3440804,0,0,0,0,0,0
23.598619,11.045361,0,0,0,0,0,0
23.60911,11.6619038,0,0,0,0,0,0
23.619602,11,0,0,0,0,0,0
23.630094,10.6301458,0,0,0,0,0,0
23.640585,10.2956301,0,0,0,0,0,0
23.651077,10.7238053,0,0,0,0,0,0
23.661568,10,0,0,0,0,0,0
23.67206,10.2469508,0,0,0,0,0,0
23.682552,11.1355287,0,0,0,0,0,0
23.693043,11.4891253,0,0,0,0,0,0
23.703535,10.2956301,0,0,0,0,0,0
23.714026,10.8166538,0,0,0,0,0,0
23.724518,10.8627805,0,0,0,0,0,0
23.73501,11.0905365,0,0,0,0,0,0
23.745501,10.6301458,0,0,0,0,0,0
23.755993,11.0905365,0,0,0,0,0,0
23.766484,10.4880885,0,0,0,0,0,0
23.776976,10.5830052,0,0,0,0,0,0
23.787468,10.9544512,0,0,0,0,0,0
23.797959,11.4017543,0,0,0,0,0,0
23.808451,9.2736185,0,0,0,0,0,0
23.818942,11.7046999,0,0,0,0,0,0
23.829434,10.8166538,0,0,0,0,0,0
23.839926,10.4880885,0,0,0,0,0,0
23.850417,10.4403065,0,0,0,0,0,0
23.860909,10.2956301,0,0,0,0,0,0
23.8714,10.4403065,0,0,0,0,0,0
23.881892,10.8627805,0,0,0,0,0,0
23.892384,10.9544512,0,0,0,0,0,0
23.902875,10.1488916,0,0,0,0,0,0
23.913367,10.8166538,0,0,0,0,0,0
23.923858,8.83176087,0,0,0,0,0,0
23.93435,11.3137085,0,0,0,0,0,0
23.944842,9.43398113,0,0,0,0,0,0
23.955333,11.0905365,0,0,0,0,0,0
23.965825,9.53939201,0,0,0,0,0,0
23.976316,11.1803399,0,0,0,0,0,0
23.986808,10.3923048,0,0,0,0,0,0
23.9973,9.74679434,0,0,0,0,0,0
24.007791,10.5356538,0,0,0,0,0,0
24.018283,10.9087121,0,0,0,0,0,0
24.028774,10.5830052,0,0,0,0,0,0
24.039266,10.198039,0,0,0,0,0,0
24.049758,9.74679434,0,0,0,0,0,0
24.060249,10.5356538,0,0,0,0,0,0
24.070741,10.4403065,0,0,0,0,0,0
24.081232,10.2469508,0,0,0,0,0,0
24.091724,10.7238053,0,0,0,0,0,0
24.102216,10.6301458,0,0,0,0,0,0
24.112707,10,0,0,0,0,0,0
24.123199,10.3923048,0,0,0,0,0,0
24.13369,10.8166538,0,0,0,0,0,0
24.144182,10.5830052,0,0,0,0,0,0
24.154674,10.2956301,0,0,0,0,0,0
24.165165,9.69535971,0,0,0,0,0,0
24.175657,9.69535971,0,0,0,0,0,0
24.186148,9.8488578,0,0,0,0,0,0
24.19664,9.89949494,0,0,0,0,0,0
24.207132,10.3923048,0,0,0,0,0,0
24.217623,11.0905365,0,0,0,0,0,0
24.228115,10.198039,0,0,0,0,0,0
24.238606,9.59166305,0,0,0,0,0,0
24.249098,10.198039,0,0,0,0,0,0
24.25959,10.0995049,0,0,0,0,0,0
24.270081,10.2956301,0,0,0,0,0,0
24.280573,9.8488578,0,0,0,0,0,0
24.291064,11.0905365,0,0,0,0,0,0
24.301556,10.3923048,0,0,0,0,0,0
24.312048,11.1355287,0,0,0,0,0,0
24.322539,10.3923048,0,0,0,0,0,0
24.333031,10.1488916,0,0,0,0,0,0
24.343522,9.05538514,0,0,0,0,0,0
24.354014,10.0995049,0,0,0,0,0,0
24.364506,10.3440804,0,0,0,0,0,0
24.374997,9.94987437,0,0,0,0,0,0
24.385489,10.3923048,0,0,0,0,0,0
24.39598,10.3440804,0,0,0,0,0,0
24.406472,10.3923048,0,0,0,0,0,0
24.416964,9.53939201,0,0,0,0,0,0
24.427455,10.6301458,0,0,0,0,0,0
24.437947,10.1488916,0,0,0,0,0,0
24.448438,10.6301458,0,0,0,0,0,0
24.45893,9.43398113,0,0,0,0,0,0
24.469422,9.59166305,0,0,0,0,0,0
24.479913,9.74679434,0,0,0,0,0,0
24.490405,9.64365076,0,0,0,0,0,0
24.500896,9.94987437,0,0,0,0,0,0
24.511388,10.5356538,0,0,0,0,0,0
24.52188,10.1488916,0,0,0,0,0,0
24.532371,10.3440804,0,0,0,0,0,0
24.542863,9.8488578,0,0,0,0,0,0
24.553354,11.3137085,0,0,0,0,0,0
24.563846,9.79795897,0,0,0,0,0,0
24.574338,10.0498756,0,0,0,0,0,0
24.584829,9.89949494,0,0,0,0,0,0
24.595321,9.69535971,0,0,0,0,0,0
24.605812,10,0,0,0,0,0,0
24.616304,10.2956301,0,0,0,0,0,0
24.626796,10.198039,0,0,0,0,0,0
24.637287,9.94987437,0,0,0,0,0,0
24.647779,9.89949494,0,0,0,0,0,0
24.65827,9.38083152,0,0,0,0,0,0
24.668762,11.0905365,0,0,0,0,0,0
24.679254,10.6301458,0,0,0,0,0,0
24.689745,9.53939201,0,0,0,0,0,0
24.700237,9.94987437,0,0,0,0,0,0
24.710728,8.66025404,0,0,0,0,0,0
24.72122,10.7238053,0,0,0,0,0,0
24.731712,10.2956301,0,0,0,0,0,0
24.742203,9.69535971,0,0,0,0,0,0
24.752695,9.11043358,0,0,0,0,0,0
24.763186,10.0498756,0,0,0,0,0,0
24.773678,9.74679434,0,0,0,0,0,0
24.78417,9.8488578,0,0,0,0,0,0
24.794661,10.4403065,0,0,0,0,0,0
24.805153,9.89949494,0,0,0,0,0,0
24.815644,10.8627805,0,0,0,0,0,0
24.826136,10.6770783,0,0,0,0,0,0
24.836628,10.4880885,0,0,0,0,0,0
24.847119,10.7238053,0,0,0,0,0,0
24.857611,10.6770783,0,0,0,0,0,0
24.868102,10.9087121,0,0,0,0,0,0
24.878594,9.69535971,0,0,0,0,0,0
24.889086,9.43398113,0,0,0,0,0,0
24.899577,10.2469508,0,0,0,0,0,0
24.910069,9.89949494,0,0,0,0,0,0
24.92056,9.8488578,0,0,0,0,0,0
24.931052,9.89949494,0,0,0,0,0,0
24.941544,9.79795897,0,0,0,0,0,0
24.952035,8.83176087,0,0,0,0,0,0
24.962527,10.3923048,0,0,0,0,0,0
24.973018,10.0995049,0,0,0,0,0,0
24.98351,9.64365076,0,0,0,0,0,0
24.994002,9.8488578,0,0,0,0,0,0
25.004493,10.0995049,0,0,0,0,0,0
25.014985,9.89949494,0,0,0,0,0,0
25.025476,10.0498756,0,0,0,0,0,0
25.035968,9.59166305,0,0,0,0,0,0
25.04646,10.2469508,0,0,0,0,0,0
25.056951,10.2469508,0,0,0,0,0,0
25.067443,9.79795897,0,0,0,0,0,0
25.077934,10.198039,0,0,0,0,0,0
25.088426,10.1488916,0,0,0,0,0,0
25.098918,9.79795897,0,0,0,0,0,0
25.109409,9.8488578,0,0,0,0,0,0
25.119901,10.7703296,0,0,0,0,0,0
25.130392,10,0,0,0,0,0,0
25.140884,10.1488916,0,0,0,0,0,0
25.151376,9.59166305,0,0,0,0,0,0
25.161867,8.94427191,0,0,0,0,0,0
25.172359,9.59166305,0,0,0,0,0,0
25.18285,9.79795897,0,0,0,0,0,0
25.193342,10.6301458,0,0,0,0,0,0
25.203834,9.43398113,0,0,0,0,0,0
25.214325,9.89949494,0,0,0,0,0,0
25.224817,9.8488578,0,0,0,0,0,0
25.235308,10,0,0,0,0,0,0
25.2458,10.3440804,0,0,0,0,0,0
25.256292,9.8488578,0,0,0,0,0,0
25.266783,10.5830052,0,0,0,0,0,0
25.277275,10.5356538,0,0,0,0,0,0
25.287766,9.38083152,0,0,0,0,0,0
25.298258,9.38083152,0,0,0,0,0,0
25.30875,9.16515139,0,0,0,0,0,0
25.319241,9.94987437,0,0,0,0,0,0
25.329733,9.74679434,0,0,0,0,0,0
25.340224,10.2956301,0,0,0,0,0,0
25.350716,10,0,0,0,0,0,0
25.361208,9.38083152,0,0,0,0,0,0
25.371699,9.43398113,0,0,0,0,0,0
25.382191,8.30662386,0,0,0,0,0,0
25.392682,9.64365076,0,0,0,0,0,0
25.403174,9.43398113,0,0,0,0,0,0
25.413666,9.16515139,0,0,0,0,0,0
25.424157,9.64365076,0,0,0,0,0,0
25.434649,10.0995049,0,0,0,0,0,0
25.44514,9.53939201,0,0,0,0,0,0
25.455632,9.2736185,0,0,0,0,0,0
25.466124,10.3440804,0,0,0,0,0,0
25.476615,9.21954446,0,0,0,0,0,0
25.487107,9.38083152,0,0,0,0,0,0
25.497598,9.16515139,0,0,0,0,0,0
25.50809,10.0995049,0,0,0,0,0,0
25.518582,9.59166305,0,0,0,0,0,0
25.529073,9.74679434,0,0,0,0,0,0
25.539565,9.59166305,0,0,0,0,0,0
25.550056,9.94987437,0,0,0,0,0,0
25.560548,9.05538514,0,0,0,0,0,0
25.57104,8.54400375,0,0,0,0,0,0
25.581531,9.2736185,0,0,0,0,0,0
25.592023,9.74679434,0,0,0,0,0,0
25.602514,10.3923048,0,0,0,0,0,0
25.613006,9.79795897,0,0,0,0,0,0
25.623498,9.8488578,0,0,0,0,0,0
25.633989,9.2736185,0,0,0,0,0,0
25.644481,9.74679434,0,0,0,0,0,0
25.654972,9.11043358,0,0,0,0,0,0
25.665464,9.48683298,0,0,0,0,0,0
25.675956,9.38083152,0,0,0,0,0,0
25.686447,9.69535971,0,0,0,0,0,0
25.696939,10,0,0,0,0,0,0
25.70743,9.2736185,0,0,0,0,0,0
25.717922,9.05538514,0,0,0,0,0,0
25.728414,10.6770783,0,0,0,0,0,0
25.738905,9.32737905,0,0,0,0,0,0
25.749397,9.38083152,0,0,0,0,0,0
25.759888,9.48683298,0,0,0,0,0,0
25.77038,9.53939201,0,0,0,0,0,0
25.780872,9.53939201,0,0,0,0,0,0
25.791363,8.77496439,0,0,0,0,0,0
25.801855,9.43398113,0,0,0,0,0,0
25.812346,9.69535971,0,0,0,0,0,0
25.822838,9.69535971,0,0,0,0,0,0
25.83333,9.59166305,0,0,0,0,0,0
25.843821,10.3923048,0,0,0,0,0,0
25.854313,8.94427191,0,0,0,0,0,0
25.864804,9.38083152,0,0,0,0,0,0
25.875296,8.60232527,0,0,0,0,0,0
25.885788,9.43398113,0,0,0,0,0,0
25.896279,9.59166305,0,0,0,0,0,0
25.906771,9.89949494,0,0,0,0,0,0
25.917262,9.21954446,0,0,0,0,0,0
25.927754,10.0498756,0,0,0,0,0,0
25.938246,9.53939201,0,0,0,0,0,0
25.948737,9.11043358,0,0,0,0,0,0
25.959229,9.2736185,0,0,0,0,0,0
25.96972,9.2736185,0,0,0,0,0,0
25.980212,9.32737905,0,0,0,0,0,0
25.990704,9.38083152,0,0,0,0,0,0
26.001195,9.43398113,0,0,0,0,0,0
26.011687,9.21954446,0,0,0,0,0,0
26.022178,8.71779789,0,0,0,0,0,0
26.03267,8.77496439,0,0,0,0,0,0
26.043162,8.54400375,0,0,0,0,0,0
26.053653,9,0,0,0,0,0,0
26.064145,9.21954446,0,0,0,0,0,0
26.074636,8.24621125,0,0,0,0,0,0
26.085128,9.32737905,0,0,0,0,0,0
26.09562,8.88819442,0,0,0,0,0,0
26.106111,8.94427191,0,0,0,0,0,0
26.116603,9.11043358,0,0,0,0,0,0
26.127094,9.79795897,0,0,0,0,0,0
26.137586,9.53939201,0,0,0,0,0,0
26.148078,9.38083152,0,0,0,0,0,0
26.158569,9.8488578,0,0,0,0,0,0
26.169061,9.79795897,0,0,0,0,0,0
26.179552,10,0,0,0,0,0,0
26.190044,9.74679434,0,0,0,0,0,0
26.200536,9.21954446,0,0,0,0,0,0
26.211027,9.69535971,0,0,0,0,0,0
26.221519,9.79795897,0,0,0,0,0,0
26.23201,8.71779789,0,0,0,0,0,0
26.242502,10.0498756,0,0,0,0,0,0
26.252994,8.42614977,0,0,0,0,0,0
26.263485,8.94427191,0,0,0,0,0,0
26.273977,8.71779789,0,0,0,0,0,0
26.284468,8.88819442,0,0,0,0,0,0
26.29496,9,0,0,0,0,0,0
26.305452,9.69535971,0,0,0,0,0,0
26.315943,9.64365076,0,0,0,0,0,0
26.326435,9.16515139,0,0,0,0,0,0
26.336926,9.48683298,0,0,0,0,0,0
26.347418,9,0,0,0,0,0,0
26.35791,9.16515139,0,0,0,0,0,0
26.368401,9.32737905,0,0,0,0,0,0
26.378893,9.2736185,0,0,0,0,0,0
26.389384,9.43398113,0,0,0,0,0,0
26.399876,9.59166305,0,0,0,0,0,0
26.410368,9.21954446,0,0,0,0,0,0
26.420859,9.59166305,0,0,0,0,0,0
26.431351,9,0,0,0,0,0,0
26.441842,8.71779789,0,0,0,0,0,0
26.452334,9.43398113,0,0,0,0,0,0
26.462826,9.11043358,0,0,0,0,0,0
26.473317,9.21954446,0,0,0,0,0,0
26.483809,9.48683298,0,0,0,0,0,0
26.4943,9,0,0,0,0,0,0
26.504792,9.74679434,0,0,0,0,0,0
26.515284,9.38083152,0,0,0,0,0,0
26.525775,8.48528137,0,0,0,0,0,0
26.536267,8.83176087,0,0,0,0,0,0
26.546758,9,0,0,0,0,0,0
26.55725,8.71779789,0,0,0,0,0,0
26.567742,9.64365076,0,0,0,0,0,0
26.578233,8.88819442,0,0,0,0,0,0
26.588725,9.59166305,0,0,0,0,0,0
26.599216,8.71779789,0,0,0,0,0,0
26.609708,9,0,0,0,0,0,0
26.6202,9.2736185,0,0,0,0,0,0
26.630691,9.11043358,0,0,0,0,0,0
26.641183,8.54400375,0,0,0,0,0,0
26.651674,8.60232527,0,0,0,0,0,0
26.662166,9.69535971,0,0,0,0,0,0
26.672658,8.88819442,0,0,0,0,0,0
26.683149,8.88819442,0,0,0,0,0,0
26.693641,8.88819442,0,0,0,0,0,0
26.704132,9.53939201,0,0,0,0,0,0
26.714624,9.48683298,0,0,0,0,0,0
26.725116,9.32737905,0,0,0,0,0,0
26.735607,8.83176087,0,0,0,0,0,0
26.746099,9.38083152,0,0,0,0,0,0
26.75659,9.32737905,0,0,0,0,0,0
26.767082,9.8488578,0,0,0,0,0,0
26.777574,8.88819442,0,0,0,0,0,0
26.788065,9.32737905,0,0,0,0,0,0
26.798557,8.77496439,0,0,0,0,0,0
26.809048,8.83176087,0,0,0,0,0,0
26.81954,9.32737905,0,0,0,0,0,0
26.830032,9.53939201,0,0,0,0,0,0
26.840523,9,0,0,0,0,0,0
26.851015,8.36660027,0,0,0,0,0,0
26.861506,9.32737905,0,0,0,0,0,0
26.871998,9.32737905,0,0,0,0,0,0
26.88249,7.93725393,0,0,0,0,0,0
26.892981,8.42614977,0,0,0,0,0,0
26.903473,9,0,0,0,0,0,0
26.913964,9,0,0,0,0,0,0
26.924456,8.54400375,0,0,0,0,0,0
26.934948,8.36660027,0,0,0,0,0,0
26.945439,8.48528137,0,0,0,0,0,0
26.955931,9.38083152,0,0,0,0,0,0
26.966422,8.42614977,0,0,0,0,0,0
26.976914,9.2736185,0,0,0,0,0,0
26.987406,9.05538514,0,0,0,0,0,0
26.997897,8.18535277,0,0,0,0,0,0
27.008389,8.94427191,0,0,0,0,0,0
27.01888,8.66025404,0,0,0,0,0,0
27.029372,9.53939201,0,0,0,0,0,0
27.039864,8.1240384,0,0,0,0,0,0
27.050355,9,0,0,0,0,0,0
27.060847,8.94427191,0,0,0,0,0,0
27.071338,7.74596669,0,0,0,0,0,0
27.08183,8.77496439,0,0,0,0,0,0
27.092322,9.05538514,0,0,0,0,0,0
27.102813,8.66025404,0,0,0,0,0,0
27.113305,9.2736185,0,0,0,0,0,0
27.123796,8.54400375,0,0,0,0,0,0
27.134288,8.60232527,0,0,0,0,0,0
27.14478,8.30662386,0,0,0,0,0,0
27.155271,9.05538514,0,0,0,0,0,0
27.165763,8.36660027,0,0,0,0,0,0
27.176254,8.36660027,0,0,0,0,0,0
27.186746,8.77496439,0,0,0,0,0,0
27.197238,9.05538514,0,0,0,0,0,0
27.207729,9.05538514,0,0,0,0,0,0
27.218221,8.1240384,0,0,0,0,0,0
27.228712,8.60232527,0,0,0,0,0,0
27.239204,8.83176087,0,0,0,0,0,0
27.249696,8.94427191,0,0,0,0,0,0
27.260187,8.24621125,0,0,0,0,0,0
27.270679,7.68114575,0,0,0,0,0,0
27.28117,8.83176087,0,0,0,0,0,0
27.291662,8.42614977,0,0,0,0,0,0
27.302154,9,0,0,0,0,0,0
27.312645,8.83176087,0,0,0,0,0,0
27.323137,9.05538514,0,0,0,0,0,0
27.333628,7.87400787,0,0,0,0,0,0
27.34412,8.88819442,0,0,0,0,0,0
27.354612,8.1240384,0,0,0,0,0,0
27.365103,8.24621125,0,0,0,0,0,0
27.375595,7.48331477,0,0,0,0,0,0
27.386086,7.81024968,0,0,0,0,0,0
27.396578,9.2736185,0,0,0,0,0,0
27.40707,8.60232527,0,0,0,0,0,0
27.417561,8.71779789,0,0,0,0,0,0
27.428053,8.71779789,0,0,0,0,0,0
27.438544,8.77496439,0,0,0,0,0,0
27.449036,8.54400375,0,0,0,0,0,0
27.459528,8.88819442,0,0,0,0,0,0
27.470019,8.18535277,0,0,0,0,0,0
27.480511,7.61577311,0,0,0,0,0,0
27.491002,8.30662386,0,0,0,0,0,0
27.501494,8.1240384,0,0,0,0,0,0
27.511986,9,0,0,0,0,0,0
27.522477,8.18535277,0,0,0,0,0,0
27.532969,8.36660027,0,0,0,0,0,0
27.54346,9,0,0,0,0,0,0
27.553952,7.81024968,0,0,0,0,0,0
27.564444,8.30662386,0,0,0,0,0,0
27.574935,9.05538514,0,0,0,0,0,0
27.585427,8.83176087,0,0,0,0,0,0
27.595918,8.30662386,0,0,0,0,0,0
27.60641,8.94427191,0,0,0,0,0,0
27.616902,9.32737905,0,0,0,0,0,0
27.627393,8.66025404,0,0,0,0,0,0
27.637885,8.06225775,0,0,0,0,0,0
27.648376,8.24621125,0,0,0,0,0,0
27.658868,8.88819442,0,0,0,0,0,0
27.66936,8.54400375,0,0,0,0,0,0
27.679851,8.83176087,0,0,0,0,0,0
27.690343,8.06225775,0,0,0,0,0,0
27.700834,9,0,0,0,0,0,0
27.711326,8.42614977,0,0,0,0,0,0
27.721818,8,0,0,0,0,0,0
27.732309,8,0,0,0,0,0,0
27.742801,7.81024968,0,0,0,0,0,0
27.753292,8,0,0,0,0,0,0
27.763784,8.77496439,0,0,0,0,0,0
27.774276,8.54400375,0,0,0,0,0,0
27.784767,7.93725393,0,0,0,0,0,0
27.795259,8.71779789,0,0,0,0,0,0
27.80575,7.74596669,0,0,0,0,0,0
27.816242,7.68114575,0,0,0,0,0,0
27.826734,8.06225775,0,0,0,0,0,0
27.837225,8.18535277,0,0,0,0,0,0
27.847717,8.1240384,0,0,0,0,0,0
27.858208,7.81024968,0,0,0,0,0,0
27.8687,8.77496439,0,0,0,0,0,0
27.879192,8.42614977,0,0,0,0,0,0
27.889683,7.68114575,0,0,0,0,0,0
27.900175,9.69535971,0,0,0,0,0,0
27.910666,8.1240384,0,0,0,0,0,0
27.921158,7.28010989,0,0,0,0,0,0
27.93165,8.42614977,0,0,0,0,0,0
27.942141,7.93725393,0,0,0,0,0,0
27.952633,8.54400375,0,0,0,0,0,0
27.963124,8.42614977,0,0,0,0,0,0
27.973616,8.1240384,0,0,0,0,0,0
27.984108,8.30662386,0,0,0,0,0,0
27.994599,8.36660027,0,0,0,0,0,0
28.005091,8,0,0,0,0,0,0
28.015582,8,0,0,0,0,0,0
28.026074,8.60232527,0,0,0,0,0,0
28.036566,7.34846923,0,0,0,0,0,0
28.047057,7.41619849,0,0,0,0,0,0
28.057549,8.36660027,0,0,0,0,0,0
28.06804,8.77496439,0,0,0,0,0,0
28.078532,7.54983444,0,0,0,0,0,0
28.089024,8.30662386,0,0,0,0,0,0
28.099515,8.06225775,0,0,0,0,0,0
28.110007,7.28010989,0,0,0,0,0,0
28.120498,7.61577311,0,0,0,0,0,0
28.13099,7.74596669,0,0,0,0,0,0
28.141482,7.14142843,0,0,0,0,0,0
28.151973,7.93725393,0,0,0,0,0,0
28.162465,7.41619849,0,0,0,0,0,0
28.172956,8.18535277,0,0,0,0,0,0
28.183448,7.68114575,0,0,0,0,0,0
28.19394,8.1240384,0,0,0,0,0,0
28.204431,7.93725393,0,0,0,0,0,0
28.214923,8.1240384,0,0,0,0,0,0
28.225414,9.43398113,0,0,0,0,0,0
28.235906,7.74596669,0,0,0,0,0,0
28.246398,8.18535277,0,0,0,0,0,0
28.256889,8.06225775,0,0,0,0,0,0
28.267381,8.66025404,0,0,0,0,0,0
28.277872,8.36660027,0,0,0,0,0,0
28.288364,7.68114575,0,0,0,0,0,0
28.298856,8.54400375,0,0,0,0,0,0
28.309347,7.81024968,0,0,0,0,0,0
28.319839,8,0,0,0,0,0,0
28.33033,9.2736185,0,0,0,0,0,0
28.340822,8,0,0,0,0,0,0
28.351314,9.05538514,0,0,0,0,0,0
28.361805,7.48331477,0,0,0,0,0,0
28.372297,7.28010989,0,0,0,0,0,0
28.382788,7.28010989,0,0,0,0,0,0
28.39328,8.36660027,0,0,0,0,0,0
28.403772,7.74596669,0,0,0,0,0,0
28.414263,8,0,0,0,0,0,0
28.424755,7.87400787,0,0,0,0,0,0
28.435246,7.68114575,0,0,0,0,0,0
28.445738,9,0,0,0,0,0,0
28.45623,6.70820393,0,0,0,0,0,0
28.466721,8.1240384,0,0,0,0,0,0
28.477213,7.54983444,0,0,0,0,0,0
28.487704,7.28010989,0,0,0,0,0,0
28.498196,7.21110255,0,0,0,0,0,0
28.508688,7.54983444,0,0,0,0,0,0
28.519179,8.54400375,0,0,0,0,0,0
28.529671,8.1240384,0,0,0,0,0,0
28.540162,8.48528137,0,0,0,0,0,0
28.550654,7.81024968,0,0,0,0,0,0
28.561146,8,0,0,0,0,0,0
28.571637,7.48331477,0,0,0,0,0,0
28.582129,8.60232527,0,0,0,0,0,0
28.59262,8,0,0,0,0,0,0
28.603112,8.42614977,0,0,0,0,0,0
28.613604,7.93725393,0,0,0,0,0,0
28.624095,7.93725393,0,0,0,0,0,0
28.634587,7.93725393,0,0,0,0,0,0
28.645078,8.24621125,0,0,0,0,0,0
28.65557,7.07106781,0,0,0,0,0,0
28.666062,7.74596669,0,0,0,0,0,0
28.676553,7.68114575,0,0,0,0,0,0
28.687045,6.70820393,0,0,0,0,0,0
28.697536,8.54400375,0,0,0,0,0,0
28.708028,7.81024968,0,0,0,0,0,0
28.71852,7.07106781,0,0,0,0,0,0
28.729011,7.41619849,0,0,0,0,0,0
28.739503,7.48331477,0,0,0,0,0,0
28.749994,7.28010989,0,0,0,0,0,0
28.760486,7.34846923,0,0,0,0,0,0
28.770978,7.34846923,0,0,0,0,0,0
28.781469,7.21110255,0,0,0,0,0,0
28.791961,7,0,0,0,0,0,0
28.802452,7.81024968,0,0,0,0,0,0
28.812944,6.40312424,0,0,0,0,0,0
28.823436,8.1240384,0,0,0,0,0,0
28.833927,7.21110255,0,0,0,0,0,0
28.844419,7.34846923,0,0,0,0,0,0
28.85491,7.34846923,0,0,0,0,0,0
28.865402,8.48528137,0,0,0,0,0,0
28.875894,7.14142843,0,0,0,0,0,0
28.886385,7.21110255,0,0,0,0,0,0
28.896877,8,0,0,0,0,0,0
28.907368,7.93725393,0,0,0,0,0,0
28.91786,7.61577311,0,0,0,0,0,0
28.928352,7.41619849,0,0,0,0,0,0
28.938843,8.1240384,0,0,0,0,0,0
28.949335,7.68114575,0,0,0,0,0,0
28.959826,7.61577311,0,0,0,0,0,0
28.970318,8.1240384,0,0,0,0,0,0
28.98081,7.14142843,0,0,0,0,0,0
28.991301,7.54983444,0,0,0,0,0,0
29.001793,7.14142843,0,0,0,0,0,0
29.012284,7.48331477,0,0,0,0,0,0
29.022776,8.48528137,0,0,0,0,0,0
29.033268,7.41619849,0,0,0,0,0,0
29.043759,6.8556546,0,0,0,0,0,0
29.054251,7.93725393,0,0,0,0,0,0
29.064742,8.30662386,0,0,0,0,0,0
29.075234,7.14142843,0,0,0,0,0,0
29.085726,8.66025404,0,0,0,0,0,0
29.096217,6.55743852,0,0,0,0,0,0
29.106709,7.28010989,0,0,0,0,0,0
29.1172,7.28010989,0,0,0,0,0,0
29.127692,7.93725393,0,0,0,0,0,0
29.138184,7.28010989,0,0,0,0,0,0
29.148675,7.41619849,0,0,0,0,0,0
29.159167,7.81024968,0,0,0,0,0,0
29.169658,7.87400787,0,0,0,0,0,0
29.18015,7.81024968,0,0,0,0,0,0
29.190642,7.48331477,0,0,0,0,0,0
29.201133,7.74596669,0,0,0,0,0,0
29.211625,7.93725393,0,0,0,0,0,0
29.222116,7,0,0,0,0,0,0
29.232608,7.07106781,0,0,0,0,0,0
29.2431,7.14142843,0,0,0,0,0,0
29.253591,6.92820323,0,0,0,0,0,0
29.264083,8.18535277,0,0,0,0,0,0
29.274574,8.30662386,0,0,0,0,0,0
29.285066,7.07106781,0,0,0,0,0,0
29.295558,6.4807407,0,0,0,0,0,0
29.306049,7.54983444,0,0,0,0,0,0
29.316541,7.34846923,0,0,0,0,0,0
29.327032,7.21110255,0,0,0,0,0,0
29.337524,7.14142843,0,0,0,0,0,0
29.348016,6.78232998,0,0,0,0,0,0
29.358507,7.48331477,0,0,0,0,0,0
29.368999,7.54983444,0,0,0,0,0,0
29.37949,7.34846923,0,0,0,0,0,0
29.389982,7.34846923,0,0,0,0,0,0
29.400474,6.8556546,0,0,0,0,0,0
29.410965,7.48331477,0,0,0,0,0,0
29.421457,7.28010989,0,0,0,0,0,0
29.431948,6.92820323,0,0,0,0,0,0
29.44244,7,0,0,0,0,0,0
29.452932,6.70820393,0,0,0,0,0,0
29.463423,7.87400787,0,0,0,0,0,0
29.473915,6.70820393,0,0,0,0,0,0
29.484406,7,0,0,0,0,0,0
29.494898,6.55743852,0,0,0,0,0,0
29.50539,7.61577311,0,0,0,0,0,0
29.515881,7.74596669,0,0,0,0,0,0
29.526373,7.34846923,0,0,0,0,0,0
29.536864,7.34846923,0,0,0,0,0,0
29.547356,7.61577311,0,0,0,0,0,0
29.557848,7.41619849,0,0,0,0,0,0
29.568339,7.41619849,0,0,0,0,0,0
29.578831,6.244998,0,0,0,0,0,0
29.589322,7.81024968,0,0,0,0,0,0
29.599814,7.21110255,0,0,0,0,0,0
29.610306,6.70820393,0,0,0,0,0,0
29.620797,8.30662386,0,0,0,0,0,0
29.631289,7,0,0,0,0,0,0
29.64178,7.14142843,0,0,0,0,0,0
29.652272,7.74596669,0,0,0,0,0,0
29.662764,7.74596669,0,0,0,0,0,0
29.673255,7.87400787,0,0,0,0,0,0
29.683747,7.81024968,0,0,0,0,0,0
29.694238,6.8556546,0,0,0,0,0,0
29.70473,7.61577311,0,0,0,0,0,0
29.715222,7.48331477,0,0,0,0,0,0
29.725713,7.07106781,0,0,0,0,0,0
29.736205,7.07106781,0,0,0,0,0,0
29.746696,8.24621125,0,0,0,0,0,0
29.757188,6.70820393,0,0,0,0,0,0
29.76768,6.32455532,0,0,0,0,0,0
29.778171,7.41619849,0,0,0,0,0,0
29.788663,6.40312424,0,0,0,0,0,0
29.799154,7.28010989,0,0,0,0,0,0
29.809646,7,0,0,0,0,0,0
29.820138,7.48331477,0,0,0,0,0,0
29.830629,6.92820323,0,0,0,0,0,0
29.841121,7,0,0,0,0,0,0
29.851612,6.63324958,0,0,0,0,0,0
29.862104,6.4807407,0,0,0,0,0,0
29.872596,6.70820393,0,0,0,0,0,0
29.883087,7.28010989,0,0,0,0,0,0
29.893579,7.28010989,0,0,0,0,0,0
29.90407,7.48331477,0,0,0,0,0,0
29.914562,7.48331477,0,0,0,0,0,0
29.925054,6.92820323,0,0,0,0,0,0
29.935545,7.41619849,0,0,0,0,0,0
29.946037,6.70820393,0,0,0,0,0,0
29.956528,6.63324958,0,0,0,0,0,0
29.96702,7.48331477,0,0,0,0,0,0
29.977512,6.55743852,0,0,0,0,0,0
29.988003,6.55743852,0,0,0,0,0,0
29.998495,7,6.99285984,0.0844994544,6.99262437,0,6.99266663,6.99243115
30.008986,7.07106781,6.98781101,0.288542552,6.98757505,0,6.98761744,6.98738148
30.019478,7.21110255,6.98276914,0.477842449,6.98253271,0,6.98257523,6.98233879
30.02997,7.48331477,6.97773473,0.71104152,6.97749781,0,6.97754047,6.97730354
30.040461,8.1240384,6.97270824,1.07300054,6.97247083,0,6.97251362,6.97227621
30.050953,6.78232998,6.9676887,-0.43053306,6.9674508,0,6.96749373,6.96725583
30.061444,7.81024968,6.96267725,0.920636969,6.96243886,0,6.96248175,6.96224336
30.071936,6.63324958,6.95767256,-0.56958141,6.95743369,0,6.95747671,6.95723783
30.082428,6.164414,6.9526753,-0.887840804,6.95243593,0,6.95247909,6.95223971
30.092919,7.28010989,6.94768591,0.576562204,6.94744605,0,6.94748935,6.94724948
30.103411,6.63324958,6.94270346,-0.556285791,6.94246311,0,6.94250654,6.94226618
30.113902,7.68114575,6.93772888,0.862216252,6.93748803,0,6.93753161,6.93729075
30.124394,6.92820323,6.93276122,-0.0675129059,6.93251987,0,6.93256359,6.93232223
30.134886,7.48331477,6.92780095,0.745327998,6.9275591,0,6.92760296,6.9273611
30.145377,6.8556546,6.92284853,-0.259217914,6.92260618,0,6.92265018,6.92240782
30.155869,6.78232998,6.91790301,-0.368202423,6.91766016,0,6.9177043,6.91746144
30.16636,6.164414,6.91296533,-0.865188606,6.91272197,0,6.91276626,6.9125229
30.176852,8,6.90803454,1.04497151,6.90779068,0,6.90783511,6.90759124
30.187344,7.41619849,6.9031111,0.716301183,6.90286674,0,6.90291132,6.90266694
30.197835,6.32455532,6.89819549,-0.757390366,6.89795061,0,6.89799534,6.89775046
30.208327,7.34846923,6.89328675,0.67467213,6.89304136,0,6.89308624,6.89284085
30.218818,7.41619849,6.88838581,0.726507177,6.88813992,0,6.88818494,6.88793904
30.22931,7.14142843,6.88349174,0.507874682,6.88324533,0,6.8832905,6.88304409
30.239802,7.07106781,6.87860499,0.438705852,6.87835807,0,6.87840339,6.87815646
30.250293,6.63324958,6.87372602,-0.490383974,6.87347859,0,6.87352406,6.87327661
30.260785,7.14142843,6.86885391,0.522086701,6.86860595,0,6.86865157,6.86840361
30.271276,7.28010989,6.86398956,0.645073896,6.86374109,0,6.86378686,6.86353838
30.281768,6.4807407,6.85913205,-0.615135227,6.85888306,0,6.85892898,6.85867998
30.29226,6.32455532,6.85428183,-0.72782313,6.85403232,0,6.8540784,6.85382888
30.302751,7.54983444,6.84943936,0.836896096,6.84918933,0,6.84923556,6.84898552
30.313243,6.92820323,6.84460371,0.289135814,6.84435315,0,6.84439954,6.84414897
30.323734,6.244998,6.8397758,-0.771218386,6.83952471,0,6.83957126,6.83932016
30.334226,7.28010989,6.83495469,0.667199518,6.83470308,0,6.83474978,6.83449816
30.344718,6.244998,6.83014085,-0.764946306,6.82988871,0,6.82993557,6.82968342
30.355209,7.41619849,6.82533472,0.768676633,6.82508205,0,6.82512907,6.82487639
30.365701,6.63324958,6.82053539,-0.432765299,6.82028218,0,6.82032936,6.82007615
30.376192,6.63324958,6.81574375,-0.427193362,6.81549001,0,6.81553735,6.8152836
30.386684,7.28010989,6.81095889,0.68494598,6.81070462,0,6.81075212,6.81049784
30.397176,7,6.80618127,0.440248487,6.80592646,0,6.80597412,6.8057193
30.407667,6.164414,6.80141133,-0.79812112,6.80115598,0,6.8012038,6.80094844
30.418159,7.07106781,6.79664815,0.523850805,6.79639226,0,6.79644024,6.79618434
30.42865,7.07106781,6.79189263,0.528370307,6.7916362,0,6.79168435,6.79142791
30.439142,6.40312424,6.78714387,-0.619693175,6.78688689,0,6.78693521,6.78667823
30.449634,6.244998,6.78240231,-0.733078651,6.78214479,0,6.78219327,6.78193574
30.460125,6.78232998,6.77766839,0.0682758664,6.77741032,0,6.77745897,6.7772009
30.470617,6.78232998,6.77294121,0.0968956939,6.77268259,0,6.77273141,6.77247279
30.481108,6.32455532,6.76822166,-0.66608283,6.76796249,0,6.76801148,6.7677523
30.4916,7.28010989,6.76350883,0.71874965,6.76324911,0,6.76329827,6.76303854
30.502092,6.63324958,6.75880317,-0.354335423,6.7585429,0,6.75859223,6.75833195
30.512583,7.74596669,6.75410512,0.995922471,6.7538443,0,6.7538938,6.75363296
30.523075,6.70820393,6.74941378,-0.203002096,6.7491524,0,6.74920207,6.74894068
30.533566,7.48331477,6.74473004,0.859409527,6.74446809,0,6.74451794,6.74425599
30.544058,7.93725393,6.74005299,1.09416678,6.73979048,0,6.73984051,6.739578
30.55455,6.70820393,6.73538308,-0.164860987,6.73512001,0,6.73517021,6.73490714
30.565041,6.78232998,6.73072074,0.227176678,6.73045711,0,6.73050749,6.73024385
30.575533,7.28010989,6.72606508,0.744341862,6.72580088,0,6.72585144,6.72558724
30.586024,6.8556546,6.72141698,0.36638452,6.72115222,0,6.72120296,6.72093818
30.596516,7.07106781,6.71677555,0.595224544,6.71651022,0,6.71656114,6.71629579
30.607008,7.34846923,6.71214123,0.797701698,6.71187532,0,6.71192642,6.71166051
30.617499,7,6.70751444,0.540819339,6.70724796,0,6.70729924,6.70703276
30.627991,6.92820323,6.70289431,0.47466717,6.70262725,0,6.70267872,6.70241165
30.638482,6.8556546,6.6982817,0.396702537,6.69801406,0,6.69806572,6.69779807
30.648974,6.70820393,6.69367573,0.120533006,6.69340751,0,6.69345935,6.69319113
30.659466,6.55743852,6.68907683,-0.362819935,6.68880804,0,6.68886006,6.68859126
30.669957,7.07106781,6.68448544,0.62175749,6.68421606,0,6.68426827,6.68399889
30.680449,6.4807407,6.67990066,-0.44627342,6.6796307,0,6.67968311,6.67941314
30.69094,6.55743852,6.67532338,-0.343343643,6.67505283,0,6.67510543,6.67483487
30.701432,6.78232998,6.67075271,0.334031844,6.67048157,0,6.67053436,6.67026322
30.711924,7,6.66618908,0.577763724,6.66591735,0,6.66597033,6.6656986
30.722415,7.74596669,6.66163292,1.04131349,6.6613606,0,6.66141377,6.66114144
30.732907,7.07106781,6.65708335,0.643416244,6.65681044,0,6.6568638,6.65659088
30.743398,6,6.65254123,-0.807800244,6.65226772,0,6.65232129,6.65204777
30.75389,6.40312424,6.6480057,-0.494854993,6.64773159,0,6.64778536,6.64751124
30.764382,6.78232998,6.64347718,0.372629583,6.64320247,0,6.64325643,6.64298171
30.774873,6.55743852,6.63895609,-0.285512805,6.63868078,0,6.63873494,6.63845962
30.785365,6.32455532,6.63444156,-0.556674266,6.63416564,0,6.63422001,6.63394408
30.795856,7.54983444,6.62993445,0.959114167,6.62965793,0,6.62971249,6.62943596
30.806348,6.55743852,6.62543389,-0.26075922,6.62515677,0,6.62521153,6.62493439
30.81684,6.164414,6.62094032,-0.675667309,6.62066258,0,6.62071755,6.6204398
30.827331,6.70820393,6.61645413,0.302902293,6.61617578,0,6.61623096,6.6159526
30.837823,6.244998,6.61197449,-0.605785844,6.61169552,0,6.61175091,6.61147193
30.848314,7.28010989,6.60750222,0.820126616,6.60722264,0,6.60727824,6.60699864
30.858806,7.14142843,6.60303648,0.733751965,6.60275628,0,6.60281209,6.60253187
30.869298,7.07106781,6.59857769,0.687379172,6.59829686,0,6.59835288,6.59807205
30.879789,6.4807407,6.59412625,-0.336727712,6.5938448,0,6.59390104,6.59361958
30.890281,6.8556546,6.58968132,0.515725973,6.58939925,0,6.5894557,6.58917361
30.900772,6.32455532,6.58524374,-0.510576555,6.58496104,0,6.5850177,6.58473499
30.911264,5.91607978,6.58081265,-0.815311516,6.58052932,0,6.5805862,6.58030286
30.921756,5.91607978,6.57638848,-0.812593805,6.57610451,0,6.57616161,6.57587764
30.932247,5.65685425,6.57197162,-0.956617674,6.57168703,0,6.57174435,6.57145974
30.942739,6.40312424,6.56756125,-0.405508338,6.56727602,0,6.56733356,6.56704831
30.95323,7.34846923,6.56315819,0.886177771,6.56287231,0,6.56293008,6.5626442
30.963722,7.21110255,6.55876159,0.807676273,6.55847508,0,6.55853306,6.55824654
30.974214,7.14142843,6.55437187,0.766196163,6.55408471,0,6.55414292,6.55385576
30.984705,6.164414,6.54998944,-0.620947208,6.54970164,0,6.54976008,6.54947226
30.995197,6.55743852,6.54561346,0.108743134,6.54532501,0,6.54538367,6.54509521
31.005688,5.83095189,6.54124475,-0.842788735,6.54095565,0,6.54101455,6.54072544
31.01618,5.83095189,6.53688247,-0.84019675,6.53659272,0,6.53665185,6.53636209
31.026672,6.70820393,6.53252705,0.419138265,6.53223664,0,6.532296,6.53200559
31.037163,6.32455532,6.52817887,-0.451246666,6.52788781,0,6.52794741,6.52765633
31.047655,6.08276253,6.52383712,-0.664134465,6.52354539,0,6.52360523,6.52331349
31.058146,7.21110255,6.5195026,0.831624886,6.51921021,0,6.51927029,6.51897789
31.068638,6.63324958,6.51517449,0.343620564,6.51488144,0,6.51494175,6.51464869
31.07913,6,6.51085319,-0.714739946,6.51055947,0,6.51062003,6.5103263
31.089621,6.40312424,6.50653911,-0.321581826,6.50624472,0,6.50630552,6.50601112
31.100113,6.70820393,6.50223141,0.453841953,6.50193636,0,6.5019974,6.50170233
31.110604,6.78232998,6.49793092,0.533290784,6.49763519,0,6.49769648,6.49740073
31.121096,6.55743852,6.49363681,0.252590017,6.4933404,0,6.49340193,6.49310551
31.131588,6.244998,6.48934947,-0.494319202,6.48905238,0,6.48911417,6.48881706
31.142079,6.8556546,6.48506932,0.608757163,6.48477154,0,6.48483358,6.4845358
31.152571,7.07106781,6.48079552,0.768291801,6.48049706,0,6.48055935,6.48026088
31.163062,6.164414,6.47652889,-0.558672431,6.47622974,0,6.47629229,6.47599313
31.173554,6.164414,6.4722686,-0.554846466,6.47196877,0,6.47203157,6.47173172
31.184046,5.47722558,6.46801507,-0.995384092,6.46771454,0,6.4677776,6.46747706
31.194537,5.74456265,6.46376867,-0.848060154,6.46346745,0,6.46353077,6.46322953
31.205029,5.74456265,6.4595286,-0.845556597,6.45922669,0,6.45929026,6.45898833
31.21552,6.32455532,6.45529567,-0.361580348,6.45499305,0,6.45505689,6.45475426
31.226012,7.14142843,6.45106905,0.83087868,6.45076572,0,6.45082983,6.4505265
31.236504,6.40312424,6.44684914,-0.209105004,6.44654511,0,6.44660948,6.44630544
31.246995,6.4807407,6.44263634,0.195203377,6.4423316,0,6.44239625,6.4420915
31.257487,6.63324958,6.43842984,0.441383895,6.43812439,0,6.4381893,6.43788384
31.267978,6.32455532,6.43423043,-0.331172325,6.43392427,0,6.43398945,6.43368328
31.27847,7,6.43003731,0.754958737,6.42973043,0,6.42979589,6.42948899
31.288962,6.78232998,6.42585086,0.597058725,6.42554326,0,6.425609,6.42530139
31.299453,7.41619849,6.42167149,0.997259744,6.42136317,0,6.42142918,6.42112085
31.309945,6.92820323,6.41749838,0.714636163,6.41718934,0,6.41725563,6.41694657
31.320436,6.40312424,6.41333234,-0.101035137,6.41302256,0,6.41308914,6.41277935
31.330928,6.164414,6.40917254,-0.494730775,6.40886203,0,6.4089289,6.40861838
31.34142,5.83095189,6.4050194,-0.757672423,6.40470815,0,6.4047753,6.40446405
31.351911,6.08276253,6.40087328,-0.564013079,6.4005613,0,6.40062874,6.40031675
31.362403,6.08276253,6.39673341,-0.560331043,6.39642069,0,6.39648842,6.39617568
31.372894,6.08276253,6.39260055,-0.556630956,6.39228709,0,6.39235511,6.39204163
31.383386,5.91607978,6.38847392,-0.687309346,6.38815971,0,6.38822803,6.3879138
31.393878,6.55743852,6.3843539,0.4160344,6.38403894,0,6.38410756,6.38379258
31.404369,6.164414,6.38024088,-0.464571714,6.37992517,0,6.37999408,6.37967836
31.414861,6.40312424,6.37613407,0.164286856,6.37581759,0,6.37588682,6.37557033
31.425352,6.32455532,6.37203423,-0.217896568,6.371717,0,6.37178653,6.37146929
31.435844,6.40312424,6.3679406,0.187573027,6.3676226,0,6.36769244,6.36737443
31.446336,6.40312424,6.36385354,0.198168361,6.36353478,0,6.36360492,6.36328615
31.456827,6.40312424,6.35977344,0.208208543,6.35945391,0,6.35952436,6.35920482
31.467319,6.55743852,6.35569952,0.449153656,6.35537922,0,6.35544998,6.35512967
31.47781,5.65685425,6.35163254,-0.833533618,6.35131147,0,6.35138255,6.35106146
31.488302,6.32455532,6.34757173,-0.151711594,6.34724987,0,6.34732127,6.34699941
31.498794,7,6.34351746,0.810236101,6.34319482,0,6.34326654,6.34294389
31.509285,6.244998,6.33947012,-0.307363168,6.33914669,0,6.33921874,6.3388953
31.519777,6.8556546,6.33542892,0.721266722,6.33510471,0,6.33517707,6.33485285
31.530268,6.4807407,6.33139463,0.386453197,6.33106962,0,6.33114232,6.3308173
31.54076,6.70820393,6.32736647,0.6171203,6.32704067,0,6.3271137,6.32678788
31.551252,6.78232998,6.32334482,0.677484437,6.32301822,0,6.32309158,6.32276497
31.561743,6,6.31933006,-0.565092965,6.31900266,0,6.31907635,6.31874894
31.572235,6.40312424,6.31532141,0.296315414,6.31499321,0,6.31506724,6.31473902
31.582726,7.14142843,6.31131964,0.911103063,6.31099062,0,6.311065,6.31073597
31.593218,5.29150262,6.30732396,-1.00787963,6.30699413,0,6.30706885,6.30673901
31.60371,5.56776436,6.30333477,-0.857654013,6.30300412,0,6.30307919,6.30274852
31.614201,6.08276253,6.29935242,-0.46539219,6.29902095,0,6.29909637,6.29876488
31.624693,5.38516481,6.29537616,-0.954049973,6.29504386,0,6.29511963,6.29478732
31.635184,6.244998,6.29140673,-0.215426853,6.29107361,0,6.29114973,6.29081659
31.645676,6.32455532,6.28744337,0.192644625,6.28710941,0,6.28718589,6.28685192
31.656168,6,6.28348645,-0.532434458,6.28315166,0,6.2832285,6.2828937
31.666659,6.32455532,6.27953635,0.212176748,6.27920072,0,6.27927792,6.27894228
31.677151,6.55743852,6.2755923,0.530891918,6.27525582,0,6.27533339,6.2749969
31.687642,6.08276253,6.27165504,-0.434617659,6.27131772,0,6.27139565,6.27105832
31.698134,6.244998,6.26772382,-0.150750873,6.26738565,0,6.26746396,6.26712577
31.708626,7.07106781,6.26379902,0.898481383,6.26345999,0,6.26353867,6.26319963
31.719117,6.4807407,6.25988098,0.469957141,6.2595411,0,6.25962016,6.25928025
31.729609,5.83095189,6.25596897,-0.651933337,6.25562822,0,6.25570766,6.25536689
31.7401,6.164414,6.25206372,-0.296056947,6.2517221,0,6.25180192,6.25146029
31.750592,6.40312424,6.24816447,0.393649289,6.24782198,0,6.2479022,6.24755969
31.761084,6.40312424,6.2442716,0.398563212,6.24392823,0,6.24400884,6.24366546
31.771575,6.164414,6.24038547,-0.275629221,6.24004122,0,6.24012222,6.23977796
31.782067,6.70820393,6.23650533,0.686803179,6.23616019,0,6.23624159,6.23589644
31.792558,6.40312424,6.2326319,0.412907172,6.23228588,0,6.23236768,6.23202164
31.80305,6,6.22876446,-0.478293278,6.22841754,0,6.22849974,6.22815281
31.813542,5.74456265,6.22490335,-0.693066164,6.22455554,0,6.22463815,6.22429032
31.824033,6.4807407,6.22104895,0.509599598,6.22070023,0,6.22078325,6.22043452
31.834525,6.164414,6.2172005,-0.229753121,6.21685088,0,6.21693431,6.21658467
31.845016,4.79583152,6.21335874,-1.19059952,6.2130082,0,6.21309205,6.2127415
31.855508,6.78232998,6.20952292,0.756840185,6.20917147,0,6.20925574,6.20890427
31.866,6.244998,6.2056934,0.198253862,6.20534103,0,6.20542573,6.20507334
31.876491,6.244998,6.20187055,0.207671484,6.20151726,0,6.20160238,6.20124907
31.886983,5.65685425,6.19805363,-0.735662544,6.1976994,0,6.19778496,6.19743071
31.897474,6.55743852,6.19424335,0.602656763,6.19388819,0,6.19397418,6.193619
31.907966,6,6.19043899,-0.436393155,6.19008288,0,6.19016931,6.1898132
31.918458,6.4807407,6.18664089,0.542309697,6.18628385,0,6.18637072,6.18601366
31.928949,7.14142843,6.18284942,0.979070481,6.18249143,0,6.18257875,6.18222074
31.939441,5,6.17906385,-1.08584706,6.1787049,0,6.17879267,6.1784337
31.949932,6.244998,6.17528488,0.264032419,6.17492497,0,6.1750132,6.17465327
31.960424,5.19615242,6.1715118,-0.987602842,6.17115092,0,6.17123961,6.17087872
31.970916,6.78232998,6.16774495,0.783954741,6.16738311,0,6.16747225,6.1671104
31.981407,5.74456265,6.16398469,-0.647628009,6.16362187,0,6.16371148,6.16334865
31.991899,5.74456265,6.16023029,-0.644722917,6.15986649,0,6.15995658,6.15959276
32.00239,6.78232998,6.15648246,0.791105255,6.15611768,0,6.15620824,6.15584344
32.012882,6.08276253,6.15274048,-0.264533458,6.15237471,0,6.15246575,6.15209996
32.023374,5.91607978,6.1490047,-0.482622959,6.14863794,0,6.14872946,6.14836268
32.033865,6.63324958,6.14527548,0.698551434,6.14490771,0,6.14499972,6.14463194
32.044357,6.164414,6.14155208,0.151201603,6.1411833,0,6.14127581,6.14090702
32.054848,6.08276253,6.13783521,-0.2346757,6.13746543,0,6.13755843,6.13718863
32.06534,6,6.13412417,-0.366229667,6.13375336,0,6.13384687,6.13347605
32.075832,6.55743852,6.13041929,0.653467088,6.13004746,0,6.13014147,6.12976963
32.086323,5.09901951,6.12672092,-1.01375609,6.12634806,0,6.12644259,6.12606971
32.096815,6.4807407,6.12302835,0.598090585,6.12265446,0,6.1227495,6.12237559
32.107306,6.8556546,6.11934228,0.858086431,6.11896734,0,6.1190629,6.11868795
32.117798,6.164414,6.11566199,0.220798581,6.11528601,0,6.11538209,6.11500609
32.12829,6.4807407,6.11198783,0.60725025,6.1116108,0,6.11170742,6.11133036
32.138781,6.8556546,6.10832015,0.864485079,6.10794205,0,6.10803921,6.10766109
32.149273,5.19615242,6.10465823,-0.953155711,6.10427907,0,6.10437677,6.10399759
32.159764,6.4807407,6.10100277,0.616228794,6.10062254,0,6.10072078,6.10034053
32.170256,5.83095189,6.09735307,-0.516140652,6.09697176,0,6.09707055,6.09668922
32.180748,5.83095189,6.09370946,-0.512598832,6.09332706,0,6.09342641,6.093044
32.191239,6.08276253,6.09007228,-0.0854970931,6.0896888,0,6.08978871,6.0894052
32.201731,5.29150262,6.08644084,-0.891593081,6.08605626,0,6.08615674,6.08577214
32.212222,6.40312424,6.08281582,0.565957961,6.08243014,0,6.08253119,6.08214548
32.222714,5.91607978,6.07919653,-0.403877138,6.07880973,0,6.07891135,6.07852454
32.233206,6,6.07558329,-0.274924151,6.07519538,0,6.07529758,6.07490965
32.243697,6.244998,6.07197645,0.415958591,6.07158741,0,6.07169021,6.07130115
32.254189,6.40312424,6.06837531,0.57857491,6.06798514,0,6.06808853,6.06769835
32.26468,5.74456265,6.06478056,-0.565877998,6.06438925,0,6.06449324,6.06410192
32.275172,6.40312424,6.06119149,0.584750159,6.06079904,0,6.06090364,6.06051117
32.285664,7.14142843,6.05760845,1.04106675,6.05721485,0,6.05732006,6.05692644
32.296155,5.83095189,6.05403177,-0.47231332,6.05363701,0,6.05374283,6.05334806
32.306647,6.70820393,6.05046076,0.811013673,6.05006483,0,6.05017128,6.04977534
32.317138,6.78232998,6.04689609,0.857574426,6.04649899,0,6.04660607,6.04620895
32.32763,6.40312424,6.04333708,0.599822607,6.0429388,0,6.04304651,6.04264821
32.338122,6.08276253,6.03978406,0.207312501,6.03938459,0,6.03949295,6.03909346
32.348613,6.08276253,6.03623736,0.215696946,6.03583669,0,6.0359457,6.03554502
32.359105,5.56776436,6.0326963,-0.681859174,6.03229443,0,6.03240409,6.0320022
32.369596,7.14142843,6.02916154,1.05464064,6.02875846,0,6.02886879,6.02846569
32.380088,6.08276253,6.02563241,0.239019079,6.02522811,0,6.02533911,6.02493479
32.39058,5.29150262,6.02210923,-0.854755294,6.0217037,0,6.02181538,6.02140983
32.401071,6,6.01859234,-0.136353736,6.01818557,0,6.01829793,6.01789115
32.411563,6.244998,6.01508105,0.479496553,6.01467304,0,6.01478609,6.01437806
32.422054,5.83095189,6.01157603,-0.424998987,6.01116677,0,6.01128052,6.01087123
32.432546,6,6.00807661,-0.08986994,6.00766608,0,6.00778053,6.00736999
32.443038,5.56776436,6.0045831,-0.660922639,6.0041713,0,6.00428647,6.00387465
32.453529,6.244998,6.00109584,0.493864519,6.00068276,0,6.00079865,6.00038555
32.464021,5.56776436,5.99761414,-0.655629302,5.99719978,0,5.9973164,5.99690202
32.474512,5.38516481,5.99413868,-0.780367783,5.99372303,0,5.99384037,5.9934247
32.485004,6.55743852,5.99066878,0.752841113,5.99025182,0,5.99036991,5.98995293
32.495496,5.47722558,5.98720477,-0.714128274,5.98678649,0,5.98690533,5.98648703
32.505987,6.40312424,5.98374696,0.647593454,5.98332736,0,5.98344696,5.98302734
32.516479,5.91607978,5.98029469,-0.253406597,5.97987375,0,5.97999412,5.97957317
32.52697,6.08276253,5.97684861,0.325444192,5.97642633,0,5.97654747,5.97612518
32.537462,6.244998,5.97340806,0.521142918,5.97298443,0,5.97310635,5.97268271
32.547954,5.47722558,5.96997336,-0.701959956,5.96954837,0,5.96967108,5.96924607
32.558445,5.74456265,5.96654482,-0.471149843,5.96611846,0,5.96624198,5.9658156
32.568937,6.32455532,5.9631218,0.601193417,5.96269405,0,5.96281838,5.96239061
32.579428,6.55743852,5.95970492,0.773132331,5.95927579,0,5.95940093,5.95897178
32.58992,6,5.95629354,0.209060889,5.95586301,0,5.95598898,5.95555842
32.600412,5.29150262,5.95288798,-0.813256023,5.95245603,0,5.95258284,5.95215087
32.610903,6.32455532,5.94948855,0.612426954,5.94905517,0,5.94918283,5.94874943
32.621395,5.29150262,5.94609459,-0.809068579,5.94565978,0,5.94578829,5.94535346
32.631886,6.244998,5.94270674,0.549810199,5.94227049,0,5.94239986,5.94196359
32.642378,6.32455532,5.93932436,0.620669767,5.93888665,0,5.9390169,5.93857917
32.65287,5.91607978,5.93594776,-0.140953802,5.93550858,0,5.93563971,5.93520052
32.663361,5.56776436,5.93257725,-0.60399742,5.93213659,0,5.93226862,5.93182794
32.673853,6.32455532,5.92921218,0.628763186,5.92877004,0,5.92890296,5.9284608
32.684344,5.91607978,5.92585318,-0.0988605151,5.92540954,0,5.92554339,5.92509972
32.694836,4.58257569,5.92249962,-1.15755083,5.92205447,0,5.92218924,5.92174406
32.705328,6.32455532,5.9191518,0.636713058,5.91870512,0,5.91884083,5.91839412
32.715819,6.32455532,5.91581004,0.639331905,5.91536182,0,5.91549847,5.91505023
32.726311,5.56776436,5.91247368,-0.587119508,5.91202391,0,5.91216152,5.91171173
32.736802,6.92820323,5.90914336,1.00948495,5.90869203,0,5.90883061,5.90837926
32.747294,5.09901951,5.90581844,-0.898219866,5.90536554,0,5.9055051,5.90505217
32.757786,6.244998,5.90249923,0.585233944,5.90204474,0,5.90218529,5.90173077
32.768277,6.244998,5.89918603,0.588057792,5.89872994,0,5.89887149,5.89841537
32.778769,5.56776436,5.89587821,-0.572812228,5.8954205,0,5.89556307,5.89510534
32.78926,5.83095189,5.89257639,-0.24824282,5.89211706,0,5.89226065,5.89180129
32.799752,6.32455532,5.88927994,0.659754032,5.88881896,0,5.8889636,5.88850259
32.810244,6.164414,5.88598915,0.527659785,5.88552652,0,5.88567221,5.88520955
32.820735,5.38516481,5.88270435,-0.705364829,5.88224005,0,5.8823868,5.88192248
32.831227,6,5.87942489,0.347239272,5.8789589,0,5.87910673,5.87864073
32.841718,5.19615242,5.87615139,-0.824620499,5.87568371,0,5.87583263,5.87536492
32.85221,6,5.87288322,0.356534397,5.87241383,0,5.87256386,5.87209443
32.862702,5.47722558,5.86962069,-0.626414495,5.86914957,0,5.86930072,5.86882957
32.873193,5.65685425,5.8663641,-0.457722465,5.86589124,0,5.86604351,5.86557062
32.883685,6.164414,5.86311283,0.548909078,5.8626382,0,5.86279162,5.86231697
32.894176,6.244998,5.85986747,0.620588853,5.85939108,0,5.85954566,5.85906923
32.904668,5.91607978,5.85662742,0.243828554,5.85614923,0,5.85630499,5.85582677
32.91516,5.38516481,5.85339297,-0.684271992,5.85291297,0,5.85306992,5.8525899
32.925651,5.56776436,5.85016442,-0.53141326,5.8496826,0,5.84984075,5.84935891
32.936143,5.83095189,5.84694114,-0.126448605,5.84645749,0,5.84661686,5.84613318
32.946634,5.09901951,5.84372376,-0.862962483,5.84323825,0,5.84339885,5.84291331
32.957126,6.4807407,5.84051164,0.800143147,5.84002426,0,5.84018611,5.8396987
32.967618,5.83095189,5.83730509,-0.0797069352,5.83681581,0,5.83697894,5.83648963
32.978109,6.55743852,5.8341044,0.850490518,5.83361322,0,5.83377762,5.83328641
32.988601,6.164414,5.83090896,0.577498953,5.83041585,0,5.83058156,5.83008842
32.999092,6.164414,5.82771937,0.580253938,5.82722431,0,5.82739134,5.82689625
33.009584,6.244998,5.82453501,0.648431173,5.82403799,0,5.82420635,5.8237093
33.020076,6.244998,5.82135619,0.650877724,5.82085718,0,5.82102689,5.82052786
33.030567,5,5.81818319,-0.90453479,5.81768218,0,5.81785326,5.81735222
33.041059,5.19615242,5.8150154,-0.786678446,5.81451237,0,5.81468484,5.81418178
33.05155,6,5.81185343,0.433758658,5.81134836,0,5.81152223,5.81101713
33.062042,6,5.80869665,0.43738238,5.80818952,0,5.80836482,5.80785766
33.072534,5.47722558,5.80554538,-0.572991974,5.80503616,0,5.8052129,5.80470366
33.083025,5.65685425,5.80239989,-0.381504444,5.80188857,0,5.80206677,5.80155543
33.093517,6.08276253,5.79925958,0.532449946,5.79874614,0,5.79892583,5.79841236
33.104008,6.55743852,5.79612505,0.872532791,5.79560946,0,5.79579065,5.79527503
33.1145,5.83095189,5.79299569,0.194823518,5.79247793,0,5.79266065,5.79214286
33.124992,5.09901951,5.78987179,-0.831175239,5.78935184,0,5.7895361,5.78901612
33.135483,6.55743852,5.78675364,0.8778866,5.78623148,0,5.7864173,5.78589511
33.145975,5.38516481,5.78364064,-0.631249424,5.78311624,0,5.78330365,5.78277922
33.156466,7.07106781,5.78053338,1.13601692,5.78000672,0,5.78019574,5.77966905
33.166958,5.83095189,5.77743126,0.231345283,5.77690231,0,5.77709296,5.77656398
33.17745,6.08276253,5.77433456,0.555362921,5.7738033,0,5.77399561,5.77346432
33.187941,5.83095189,5.77124357,0.244352865,5.77070998,0,5.77090397,5.77037034
33.198433,5.83095189,5.76815771,0.250587687,5.76762175,0,5.76781745,5.76728146
33.208924,5.38516481,5.76507754,-0.616370613,5.7645392,0,5.76473662,5.76419825
33.219416,5.65685425,5.76200248,-0.324265676,5.76146172,0,5.7616609,5.76112011
33.229908,5.38516481,5.75893281,-0.611365686,5.75838962,0,5.75859057,5.75804734
33.240399,6.78232998,5.75586882,1.0131442,5.75532316,0,5.75552591,5.75498022
33.250891,4.47213595,5.75280991,-1.13166866,5.75226176,0,5.75246634,5.75191815
33.261382,6.08276253,5.74975764,0.577065761,5.74920599,0,5.7494134,5.74886172
33.271874,5.91607978,5.74670947,0.411546248,5.74615527,0,5.74636456,5.74581033
33.282366,6.08276253,5.74366666,0.58231939,5.74310987,0,5.74332108,5.74276427
33.292857,6.164414,5.74062949,0.650987338,5.74007009,0,5.74028324,5.73972381
33.303349,6.244998,5.73759737,0.712320591,5.73703533,0,5.73725045,5.73668838
33.31384,5.65685425,5.73457089,-0.278777035,5.73400617,0,5.73422329,5.73365854
33.324332,6.32455532,5.73154944,0.770068752,5.73098202,0,5.73120117,5.73063371
33.334824,5.65685425,5.72853332,-0.267729465,5.72796315,0,5.72818437,5.72761417
33.345315,6.164414,5.7255228,0.662488646,5.72494986,0,5.72517317,5.7246002
33.355807,5.19615242,5.7225173,-0.725510083,5.72194156,0,5.72216699,5.72159122
33.366298,5.56776436,5.7195174,-0.389554919,5.71893882,0,5.7191664,5.71858779
33.37679,5.29150262,5.7165225,-0.651935489,5.71594105,0,5.71617082,5.71558933
33.387282,6,5.7135329,0.535226213,5.71294853,0,5.71318053,5.71259613
33.397773,6.8556546,5.71054887,1.07009613,5.70996155,0,5.71019581,5.70960846
33.408265,5.65685425,5.70756982,-0.225201187,5.70697952,0,5.70721608,5.70662574
33.418756,5.47722558,5.70459634,-0.476834102,5.70400301,0,5.7042419,5.70364854
33.429248,5.29150262,5.70162783,-0.640410186,5.70103144,0,5.7012727,5.70067628
33.43974,5.29150262,5.69866458,-0.638092435,5.69806509,0,5.69830875,5.69770923
33.450231,5.38516481,5.69570686,-0.557263002,5.69510423,0,5.69535034,5.69474767
33.460723,5.19615242,5.69275411,-0.704699711,5.69214829,0,5.69239689,5.69179103
33.471214,5,5.68980687,-0.830546127,5.68919783,0,5.68944895,5.68883987
33.481706,6,5.68686458,0.55958504,5.68625227,0,5.68650596,5.68589361
33.492198,5.29150262,5.68392752,-0.626438265,5.6833119,0,5.68356819,5.68295253
33.502689,5.91607978,5.68099596,0.484854437,5.68037698,0,5.68063593,5.68001691
33.513181,6.4807407,5.67806933,0.895919288,5.67744695,0,5.67770859,5.67708617
33.523672,5.83095189,5.67514818,0.394719793,5.67452235,0,5.67478673,5.67416086
33.534164,5.74456265,5.67223195,0.268943661,5.67160262,0,5.67186979,5.67124042
33.544656,5.56776436,5.66932092,-0.318679396,5.66868804,0,5.66895805,5.66832513
33.555147,5.19615242,5.66641535,-0.685757193,5.66577887,0,5.66605176,5.66541525
33.565639,5.91607978,5.66351468,0.502558554,5.66287456,0,5.66315038,5.66251021
33.57613,5.56776436,5.66061947,-0.304721353,5.65997564,0,5.66025444,5.65961058
33.586622,7,5.65772914,1.15856414,5.65708156,0,5.6573634,5.65671578
33.597114,5.29150262,5.65484398,-0.60277803,5.65419259,0,5.65447751,5.65382608
33.607605,5.74456265,5.65196424,0.30429986,5.65130899,0,5.65159705,5.65094176
33.618097,6,5.64908938,0.592377091,5.64843021,0,5.64872147,5.64806225
33.628588,6.244998,5.64621994,0.773807508,5.64555679,0,5.6458513,5.6451881
33.63908,5.74456265,5.64335536,0.318130927,5.64268817,0,5.64298599,5.64231875
33.649572,5.83095189,5.64049591,0.436412629,5.63982462,0,5.64012581,5.63945447
33.660063,6.164414,5.63764186,0.725790701,5.6369664,0,5.63727103,5.63659552
33.670555,5.09901951,5.63479266,-0.731965261,5.63411297,0,5.63442109,5.63374135
33.681046,5.65685425,5.63194884,0.157814488,5.63126486,0,5.63157653,5.6308925
33.691538,5.29150262,5.62910985,-0.581039784,5.62842151,0,5.62873681,5.62804842
33.70203,5.56776436,5.62627597,-0.241891729,5.6255832,0,5.62590218,5.62520937
33.712521,6.78232998,5.62344745,1.07651406,5.62275018,0,5.62307293,5.62237561
33.723013,5.65685425,5.62062376,0.190343086,5.61992192,0,5.62024849,5.61954659
33.733504,5.38516481,5.61780542,-0.482328321,5.61709893,0,5.6174294,5.61672286
33.743996,5.19615242,5.61499188,-0.647178075,5.61428067,0,5.61461511,5.61390385
33.754488,6.244998,5.61218343,0.795496432,5.61146741,0,5.61180591,5.61108985
33.764979,4.47213595,5.6093803,-1.06641659,5.60865941,0,5.60900203,5.60828109
33.775471,6,5.60658197,0.627230442,5.60585612,0,5.60620295,5.60547704
33.785962,5.56776436,5.60378897,-0.189801488,5.60305807,0,5.60340918,5.60267824
33.796454,5.38516481,5.60100075,-0.464581469,5.60026472,0,5.60062021,5.59988413
33.806946,5.09901951,5.59821758,-0.706539498,5.59747633,0,5.59783627,5.59709498
33.817437,5.91607978,5.59543971,0.566250893,5.59469315,0,5.59505765,5.59431104
33.827929,5.91607978,5.59266661,0.568694266,5.59191466,0,5.59228379,5.59153178
33.83842,5.47722558,5.58989882,-0.335668349,5.58914136,0,5.58951522,5.58875771
33.848912,6.164414,5.58713578,0.759788276,5.58637273,0,5.58675141,5.58598831
33.859404,5.19615242,5.58437776,-0.623077316,5.58360902,0,5.58399263,5.58322383
33.869895,6.32455532,5.58162503,0.861934041,5.58085049,0,5.58123912,5.58046453
33.880387,5.83095189,5.57887704,0.502070564,5.5780966,0,5.57849036,5.57770987
33.890878,6.08276253,5.57613433,0.711778198,5.57534787,0,5.57574687,5.57496036
33.90137,5.83095189,5.57339635,0.507499302,5.57260378,0,5.57300812,5.57221548
33.911862,5.47722558,5.57066338,-0.305675977,5.56986457,0,5.57027436,5.56947549
33.922353,6,5.56793566,0.657316014,5.56713049,0,5.56754586,5.56674063
33.932845,5.65685425,5.56521267,0.302723605,5.56440102,0,5.56482208,5.56401038
33.943336,5.91607978,5.56249492,0.594630018,5.56167668,0,5.56210355,5.56128525
33.953828,6.244998,5.5597819,0.827777805,5.55895693,0,5.55938974,5.55856471
33.96432,5.38516481,5.55707386,-0.41461917,5.55624203,0,5.55668091,5.55584902
33.974811,5.74456265,5.55437106,0.436109609,5.55353223,0,5.55397731,5.55313842
33.985303,5.91607978,5.55167296,0.603661181,5.550827,0,5.55127842,5.5504324
33.995794,5.91607978,5.54898009,0.605887523,5.54812686,0,5.54858475,5.54773145
34.006286,6.4807407,5.54629193,0.966668902,5.54543127,0,5.54589579,5.54503506
34.016778,5.65685425,5.54360873,0.33651971,5.5427405,0,5.54321179,5.54234349
34.027269,4.58257569,5.54093075,-0.978956105,5.54005478,0,5.540533,5.53965697
34.037761,5.65685425,5.53825747,0.344378832,5.5373736,0,5.53785891,5.53697498
34.048252,5.65685425,5.5355894,0.348231035,5.53469747,0,5.53519003,5.53429804
34.058744,5.38516481,5.53292602,-0.384397207,5.53202586,0,5.53252584,5.53162562
34.069236,6.32455532,5.53026759,0.891228212,5.52935903,0,5.5298666,5.52895797
34.079727,5.91607978,5.52761437,0.623269938,5.52669721,0,5.52721256,5.52629534
34.090219,5.83095189,5.52496584,0.553160067,5.52403991,0,5.52456321,5.52363721
34.10071,6.164414,5.5223225,0.801306124,5.5213876,0,5.52191905,5.52098408
34.111202,5.38516481,5.51968385,-0.366768383,5.51873979,0,5.51927958,5.51833544
34.121694,5.38516481,5.51705015,-0.363160219,5.51609671,0,5.51664505,5.51569154
34.132185,5.38516481,5.51442164,-0.359523064,5.51345861,0,5.51401572,5.51305261
34.142677,5.09901951,5.51179782,-0.642478254,5.51082498,0,5.51139107,5.51041815
34.153168,6.08276253,5.50917919,0.75735285,5.50819632,0,5.5087716,5.50778866
34.16366,5.19615242,5.50656525,-0.557147044,5.50557211,0,5.50615683,5.50516361
34.174152,5.56776436,5.50395625,0.252602671,5.5029526,0,5.503547,5.50254327
34.184643,5.29150262,5.50135245,-0.458093685,5.50033804,0,5.50094235,5.49992786
34.195135,4.69041576,5.49875333,-0.899075956,5.4977279,0,5.49834239,5.49731689
34.205626,5.91607978,5.49615941,0.648012631,5.4951227,0,5.49574763,5.49471084
34.216118,4.35889894,5.49357019,-1.06520949,5.49252191,0,5.49315756,5.4921092
34.22661,5.65685425,5.49098592,0.40726936,5.48992579,0,5.49057244,5.48951223
34.237101,6.244998,5.48840684,0.869822486,5.48733457,0,5.48799251,5.48692016
34.247593,5.29150262,5.48583247,-0.440828598,5.48474775,0,5.48541729,5.48433248
34.258084,5.83095189,5.48326331,0.58965124,5.48216581,0,5.48284727,5.48174969
34.268576,5.47722558,5.48071171,-0.0590435336,5.47958826,0,5.48029481,5.47917128
34.279068,5.65685425,5.47815225,0.422731596,5.47701534,0,5.47773449,5.47659749
34.289559,5.74456265,5.475598,0.51861802,5.47444728,0,5.47517937,5.47402857
34.300051,5.65685425,5.47304848,0.428725753,5.47188359,0,5.47262899,5.47146401
34.310542,5.19615242,5.47050419,-0.523785991,5.46932474,0,5.47008383,5.46890429
34.321034,5.47722558,5.46796464,0.0962337287,5.46677024,0,5.46754341,5.46634892
34.331526,6.40312424,5.4654301,0.968346083,5.46422034,0,5.46500799,5.46379814
34.342017,6.40312424,5.46290081,0.969651191,5.46167525,0,5.46247782,5.46125217
34.352509,5.91607978,5.46037629,0.675058144,5.4591345,0,5.45995242,5.45871054
34.363,5.65685425,5.45785703,0.446091043,5.45659855,0,5.45743229,5.45617371
34.373492,5.56776436,5.45534257,0.335293585,5.45406693,0,5.45491695,5.4536412
34.383984,6.70820393,5.45283317,1.12043329,5.45153985,0,5.45240665,5.45111323
34.394475,5.09901951,5.45032906,-0.592713714,5.44901756,0,5.44990165,5.44859005
34.404967,5.47722558,5.44782979,0.17145199,5.44649956,0,5.44740149,5.44607116
34.415458,5.29150262,5.44533585,-0.392215791,5.44398633,0,5.44490665,5.44355703
34.42595,5.74456265,5.44284678,0.549286692,5.44147738,0,5.44241668,5.44104718
34.436442,5.38516481,5.44036283,-0.23494259,5.43897295,0,5.43993184,5.43854185
34.446933,5.47722558,5.43788426,0.198346457,5.43647327,0,5.43745236,5.43604126
34.457425,5.83095189,5.43541061,0.628920726,5.43397784,0,5.43497781,5.43354493
34.467916,6.08276253,5.43294239,0.806114222,5.43148715,0,5.43250868,5.43105332
34.478408,5.65685425,5.43047914,0.475788935,5.4290007,0,5.43004452,5.42856596
34.4889,5.38516481,5.42802112,-0.207017663,5.42651873,0,5.42758558,5.42608307
34.499391,5.09901951,5.42556859,-0.57144473,5.42404146,0,5.42513214,5.42360489
34.509883,5.74456265,5.42312112,0.566958135,5.42156843,0,5.42268375,5.42113093
34.520374,4.69041576,5.4206792,-0.854554526,5.41910008,0,5.4202409,5.41866166
34.530866,5.83095189,5.41824239,0.642424705,5.41663595,0,5.41780317,5.41619659
34.541358,6.32455532,5.41581098,0.953280832,5.41417625,0,5.41537083,5.41373597
34.551849,5.09901951,5.41338521,-0.560683243,5.41172123,0,5.41294413,5.41128001
34.562341,5.29150262,5.41096468,-0.345632841,5.40927039,0,5.41052267,5.40882824
34.572832,5.29150262,5.40854989,-0.342121716,5.40682421,0,5.40810694,5.40638112
34.583324,6.164414,5.40614042,0.870789056,5.4043822,0,5.40569653,5.40393817
34.593816,6,5.40373656,0.772180963,5.4019446,0,5.40329173,5.40149962
34.604307,6.08276253,5.40133858,0.825484069,5.39951163,0,5.4008928,5.3990657
34.614799,5.47722558,5.39894609,0.279784709,5.39708281,0,5.39849937,5.39663593
34.62529,5.74456265,5.39655961,0.589917826,5.39465861,0,5.39611193,5.39421078
34.635782,4.69041576,5.39417873,-0.83890582,5.39223855,0,5.3937301,5.39178976
34.646274,5.65685425,5.39180378,0.514830528,5.38982286,0,5.39135419,5.38937311
34.656765,4.89897949,5.38943504,-0.700325318,5.38741176,0,5.38898449,5.38696104
34.667257,5.47722558,5.38707214,0.300255614,5.38500478,0,5.38662063,5.38455309
34.677748,5.19615242,5.38471563,-0.434238654,5.38260237,0,5.38426315,5.38214971
34.68824,6.164414,5.38236515,0.884335259,5.38020407,0,5.3819117,5.37975044
34.698732,5.29150262,5.38002103,-0.297520434,5.37781011,0,5.37956661,5.3773555
34.709223,6.244998,5.3776836,0.931297159,5.37542069,0,5.3772282,5.3749651
34.719715,5.91607978,5.37535253,0.735341588,5.37303536,0,5.37489616,5.37257879
34.730206,4.24264069,5.3730284,-1.06319693,5.37065457,0,5.37257105,5.37019701
34.740698,5.74456265,5.3707109,0.611434172,5.36827785,0,5.37025256,5.3678193
34.75119,5.56776436,5.3684004,0.446501918,5.36590542,0,5.36794107,5.36544588
34.761681,5.56776436,5.36609728,0.449073579,5.36353751,0,5.36563697,5.36307697
34.772173,6.244998,5.36380129,0.938720785,5.36117365,0,5.36333998,5.36071211
34.782664,6,5.36151303,0.799053795,5.35881428,0,5.36105073,5.35835174
34.793156,5.56776436,5.35923229,0.456653117,5.35645896,0,5.35876899,5.35599541
34.803648,5.29150262,5.35695951,-0.255845438,5.35410789,0,5.3564952,5.35364334
34.814139,6.32455532,5.35469514,0.984814795,5.3517613,0,5.35422982,5.35129573
34.824631,5.09901951,5.35243901,-0.503407886,5.34941872,5.34895214,5.35197269,5.34895214
34.835122,4.89897949,5.35042956,-0.671900343,5.34708061,5.34685086,5.34972451,5.346613
34.845614,4.69041576,5.34819166,-0.811033846,5.34474649,5.34451616,5.34748518,5.34427786
34.856106,5.74456265,5.34596316,0.631347355,5.3424166,5.34218566,5.34525524,5.34194694
34.866597,6.08276253,5.34374465,0.859661489,5.34009114,5.33985961,5.34303529,5.33962045
34.877089,5.09901951,5.34153612,-0.492459753,5.33776967,5.33753753,5.34082531,5.33729795
34.88758,5.29150262,5.33933842,-0.218713966,5.33545262,5.33521987,5.33862615,5.33497985
34.898072,5.47722558,5.33715163,0.374264538,5.33313953,5.33290617,5.33643791,5.33266573
34.908564,5.65685425,5.3349765,0.567342708,5.33083063,5.33059666,5.33426132,5.33035578
34.919055,4.89897949,5.33281383,-0.658661025,5.32852613,5.32829154,5.33209719,5.32805023
34.929547,5.47722558,5.33066387,0.382833789,5.32622558,5.32599037,5.32994575,5.32574863
34.940038,5.74456265,5.32852774,0.645007683,5.32392941,5.32369358,5.32780816,5.3234514
34.95053,4.79583152,5.32640584,-0.728405322,5.32163717,5.32140072,5.32568478,5.3211581
34.961022,6.164414,5.32429926,0.916577734,5.31934908,5.319112,5.32357673,5.31886895
34.971513,5.47722558,5.32220919,0.393721197,5.31706535,5.31682764,5.32148519,5.31658415
34.982005,5.38516481,5.32013634,0.255006807,5.31478553,5.31454719,5.31941085,5.31430326
34.992496,4.69041576,5.31808231,-0.792254091,5.31251006,5.31227108,5.31735534,5.31202671
35.002988,5,5.31604808,-0.562181537,5.31023849,5.30999887,5.31531962,5.30975406
35.01348,5.56776436,5.31403539,0.503715166,5.30797103,5.30773077,5.31330545,5.30748552
35.023971,6.08276253,5.31204616,0.877904535,5.30570789,5.30546698,5.31131472,5.30522129
35.034463,5.91607978,5.31008193,0.778458636,5.30344863,5.30320708,5.30934901,5.30296094
35.044954,5.19615242,5.3081453,-0.334653362,5.30119367,5.30095147,5.30741088,5.30070489
35.055446,5.74456265,5.30623836,0.662060636,5.29894259,5.29869973,5.30550245,5.2984527
35.065938,5.38516481,5.30436416,0.284254545,5.29669557,5.29645206,5.30362675,5.29620458
35.076429,5.09901951,5.30252613,-0.451117082,5.29445284,5.29420866,5.30178723,5.29396074
35.086921,5.56776436,5.30072772,0.516755888,5.29221395,5.29196911,5.29998732,5.29172074
35.097412,4.24264069,5.29897369,-1.02778062,5.28997934,5.28973383,5.29823179,5.28948501
35.107904,5.47722558,5.29726901,0.424212881,5.28774855,5.28750237,5.29652562,5.2872531
35.118396,5.29150262,5.29562028,-0.0641690039,5.2855218,5.28527495,5.29487541,5.28502523
35.128887,5.91607978,5.29403569,0.788697723,5.2832993,5.28305177,5.29328932,5.2828016
35.139379,5.19615242,5.29252514,-0.310439562,5.28108061,5.28083239,5.2917773,5.28058177
35.14987,4.47213595,5.29110234,-0.904967617,5.27886614,5.27861724,5.29035302,5.27836617
35.160362,5.29150262,5.28978489,0.0414454786,5.27665548,5.27640589,5.28903411,5.27615436
35.170854,5.65685425,5.28859718,0.60684188,5.27444881,5.27419854,5.28784495,5.27394655
35.181345,5.56776436,5.28757239,0.529331632,5.27224636,5.27199539,5.28681872,5.27174295
35.191837,4.58257569,5.28675541,-0.839154166,5.27004768,5.26979601,5.28600033,5.26954311
35.202328,6.08276253,5.28620743,0.892499354,5.26785319,5.26760082,5.28545098,5.26734746
35.21282,4.89897949,5.28600967,-0.622117497,5.26566246,5.26540939,5.28525188,5.26515557
35.223312,5.19615242,5.28626841,-0.300193244,5.2634757,5.26322192,5.28550935,5.26296765
35.233803,6.244998,5.28711879,0.978713037,5.26129311,5.26103862,5.28635855,5.26078388
35.244295,5,5.2887279,-0.537334066,5.25911427,5.25885905,5.28796657,5.25860386
35.254786,4.69041576,5.29129439,-0.775163613,5.25693957,5.25668364,5.29053211,5.25642798
35.265278,5.09901951,5.29504603,-0.442748815,5.25476861,5.25451195,5.29428297,5.25425583
35.27577,5.56776436,5.30022987,0.517237363,5.25260157,5.25234419,5.29946623,5.2520876
35.286261,5.83095189,5.30709793,0.723777568,5.25043867,5.25018055,5.30633394,5.2499235
35.296753,5.09901951,5.31588905,-0.465692535,5.24827947,5.24802062,5.315125,5.24776311
35.307244,4.89897949,5.32679833,-0.654078623,5.24612439,5.2458648,5.32603451,5.24560682
35.317736,6.08276253,5.33995318,0.861863879,5.24397301,5.24371268,5.33918991,5.24345422
35.328228,5.74456265,5.35537412,0.623849765,5.24182552,5.24156444,5.3546117,5.24130552
35.338719,4.69041576,5.37294215,-0.826151555,5.23968212,5.23942029,5.37218089,5.2391609
35.349211,5.29150262,5.39236793,-0.317592995,5.2375424,5.23727981,5.39160807,5.23701995
35.359702,5.19615242,5.41313894,-0.465818118,5.23540676,5.23514341,5.41238066,5.23488308
35.370194,5.56776436,5.43448659,0.365072288,5.23327478,5.23301066,5.43372995,5.23274986
35.380686,4.79583152,5.45532579,-0.812092524,5.23114665,5.23088177,5.4545707,5.23062049
35.391177,5.65685425,5.47424043,0.427333377,5.22902259,5.22875693,5.47348662,5.22849518
35.401669,6,5.48955151,0.714456777,5.22690216,5.22663573,5.48879846,5.2263735
35.41216,5.91607978,5.49951861,0.645415506,5.22478577,5.22451856,5.49876557,5.22425585
35.422652,4.58257569,5.50272807,-0.959245734,5.22267301,5.22240502,5.50197413,5.22214183
35.433144,5.19615242,5.49850019,-0.549861593,5.22056408,5.22029529,5.49774432,5.22003163
35.443635,5.56776436,5.48712537,0.283970054,5.21845916,5.21818958,5.48636656,5.21792543
35.454127,5.74456265,5.46975306,0.524222842,5.21635785,5.21608747,5.46899047,5.21582284
35.464618,5.47722558,5.44803195,0.17086141,5.21426054,5.21398936,5.44726494,5.21372425
35.47511,6.55743852,5.42368846,1.064777,5.21216682,5.21189483,5.42291661,5.21162925
35.485602,5.47722558,5.3982583,0.281011173,5.2100769,5.2098041,5.3974814,5.20953802
35.496093,5.47722558,5.37296405,0.322895529,5.20799095,5.20771733,5.37218208,5.20745078
35.506585,6.4807407,5.34870008,1.06397397,5.20590858,5.20563414,5.34791313,5.2053671
35.517076,6,5.32608835,0.820921221,5.20383017,5.2035549,5.32529661,5.20328737
35.527568,5.56776436,5.3055072,0.512110503,5.20175532,5.20147922,5.30471093,5.20121121
35.53806,5.74456265,5.28714991,0.676322952,5.19968423,5.19940729,5.28634942,5.19913879
35.548551,4.47213595,5.2710549,-0.893822657,5.19761708,5.1973393,5.27025048,5.19707031
35.559043,5.29150262,5.25713682,0.185380162,5.19555346,5.19527484,5.25632879,5.19500536
35.569534,5.38516481,5.24523079,0.374077554,5.19349378,5.19321431,5.24441943,5.19294433
35.580026,5.38516481,5.23511273,0.387365565,5.19143762,5.19115729,5.23429829,5.19088682
35.590518,5.09901951,5.22653612,-0.357094672,5.18938518,5.18910399,5.22571884,5.18883303
35.601009,5.56776436,5.21925079,0.590350382,5.18733665,5.18705459,5.21843084,5.18678313
35.611501,4,5.2130185,-1.10137119,5.18529162,5.18500869,5.21219604,5.18473674
35.621992,5.65685425,5.20762883,0.670242805,5.18325049,5.18296668,5.20680399,5.18269423
35.632484,4.69041576,5.20289981,-0.715879916,5.18121284,5.18092815,5.20207267,5.1806552
35.642976,5.19615242,5.19868321,-0.0503069251,5.17917888,5.1788933,5.19785384,5.17861985
35.653467,5.29150262,5.19486084,0.310872613,5.17714879,5.17686232,5.1940293,5.17658837
35.663959,5.19615242,5.19134024,0.0693698882,5.17512217,5.1748348,5.19050657,5.17456035
35.67445,5.47722558,5.18805266,0.537748,5.1730994,5.17281113,5.18721689,5.17253617
35.684942,5.19615242,5.18494581,0.105861302,5.1710801,5.17079091,5.18410794,5.17051546
35.695434,4.35889894,5.18198199,-0.907239246,5.16906444,5.16877434,5.18114206,5.16849838
35.705925,4.89897949,5.17913364,-0.529295902,5.16705261,5.16676159,5.17829164,5.16648512
35.716417,5.56776436,5.17637972,0.625607418,5.16504423,5.16475227,5.17553566,5.1644753
35.726908,5.91607978,5.17370555,0.861611416,5.16303966,5.16274677,5.17285944,5.16246929
35.7374,5.09901951,5.17109909,-0.26847639,5.16103851,5.16074469,5.17025092,5.1604667
35.747892,5.56776436,5.16855165,0.631832818,5.15904098,5.15874621,5.16770144,5.15846771
35.758383,5.74456265,5.16605639,0.760595985,5.15704725,5.15675152,5.16520413,5.15647251
35.768875,4.79583152,5.16360705,-0.606444992,5.15505692,5.15476023,5.16275273,5.15448071
35.779366,4.89897949,5.16119929,-0.512074019,5.15307037,5.15277272,5.16034291,5.15249269
35.789858,5.65685425,5.15882856,0.70570935,5.15108721,5.15078859,5.15797013,5.15050805
35.80035,6.32455532,5.15649161,1.08076996,5.14910764,5.14880804,5.15563112,5.14852698
35.810841,5.47722558,5.15418562,0.568366041,5.14713182,5.14683123,5.15332305,5.14654966
35.821333,5.09901951,5.15190748,-0.229973834,5.14515937,5.1448578,5.15104284,5.14457571
35.831824,5.38516481,5.14965529,0.48529323,5.14319067,5.1428881,5.14878857,5.14260549
35.842316,5,5.14742655,-0.383961652,5.14122533,5.14092176,5.14655775,5.14063863
35.852808,6.4807407,5.14521964,1.15564746,5.13926353,5.13895895,5.14434875,5.1386753
35.863299,5.29150262,5.14303314,0.385317374,5.13730545,5.13699985,5.14216016,5.13671568
35.873791,4.79583152,5.14086517,-0.587395649,5.13535072,5.13504409,5.13999008,5.1347594
35.884282,5.19615242,5.13871484,0.239661396,5.13339969,5.13309203,5.13783764,5.13280681
35.894774,5.47722558,5.13658056,0.583648023,5.13145199,5.13114329,5.13570124,5.13085755
35.905266,5.56776436,5.13446149,0.65825745,5.1295078,5.12919806,5.13358005,5.12891179
35.915757,6.32455532,5.13235688,1.0918784,5.12756729,5.1272565,5.1314733,5.1269697
35.926249,5.74456265,5.13026548,0.78377112,5.1256301,5.12531824,5.12937976,5.12503091
35.93674,4.58257569,5.1281869,-0.738654997,5.12369657,5.12338364,5.12729903,5.12309579
35.947232,4.89897949,5.12612005,-0.476592658,5.12176634,5.12145233,5.12523002,5.12116395
35.957724,4.79583152,5.12406448,-0.572916189,5.11983958,5.11952449,5.12317229,5.11923558
35.968215,5.19615242,5.12201982,0.272273027,5.11791647,5.11760029,5.12112545,5.11731084
35.978707,6.08276253,5.11998514,0.981212203,5.11599664,5.11567936,5.11908858,5.11538938
35.989198,6.164414,5.11796035,1.02296317,5.11408044,5.11376206,5.1170616,5.11347154
35.99969,5.91607978,5.11594462,0.894502746,5.11216751,5.11184801,5.11504366,5.11155695
36.010182,5.47722558,5.11393774,0.602733638,5.11025801,5.10993739,5.11303456,5.1096458
36.020673,4.79583152,5.11193952,-0.562234824,5.10835213,5.10803037,5.11103412,5.10773824
36.031165,5.56776436,5.10994925,0.676620362,5.10644949,5.10612659,5.10904162,5.10583393
36.041656,5.74456265,5.10796699,0.797869451,5.10455045,5.10422641,5.10705711,5.1039332
36.052148,6.08276253,5.10599206,0.988316986,5.10265464,5.10232944,5.10507994,5.10203569
36.06264,5.47722558,5.10402441,0.610901929,5.10076224,5.10043587,5.10311002,5.10014157
36.073131,5.56776436,5.10206395,0.682422456,5.09887341,5.09854587,5.10114729,5.09825103
36.083623,4.69041576,5.1001101,-0.6400737,5.0969878,5.09665907,5.09919115,5.09636369
36.094114,5.47722558,5.09816301,0.615680572,5.09510575,5.09477582,5.09724176,5.09447989
36.104606,6.40312424,5.09622211,1.1431982,5.0932269,5.09289577,5.09529855,5.09259929
36.115098,5.38516481,5.09428741,0.539330511,5.09135141,5.09101908,5.09336153,5.09072205
36.125589,4.58257569,5.09235891,-0.713991049,5.08947947,5.08914592,5.09143071,5.08884834
36.136081,6.08276253,5.0904361,0.996155825,5.08761071,5.08727592,5.08950555,5.08697779
36.146572,5.83095189,5.08851919,0.861645346,5.08574548,5.08540945,5.08758629,5.08511077
36.157064,4.69041576,5.08660768,-0.629437783,5.08388342,5.08354613,5.08567241,5.0832469
36.167556,6.164414,5.08470162,1.03909209,5.08202469,5.08168614,5.08376398,5.08138635
36.178047,4.89897949,5.08280108,-0.428744203,5.08016947,5.07982965,5.08186104,5.07952931
36.188539,5,5.08090557,-0.284439038,5.07831739,5.0779763,5.07996313,5.07767539
36.19903,5.65685425,5.07901535,0.760157156,5.07646881,5.07612642,5.07807049,5.07582496
36.209522,5.38516481,5.07712996,0.555008871,5.07462336,5.07427967,5.07618268,5.07397765
36.220014,4.69041576,5.07524949,-0.620349684,5.07278122,5.07243622,5.07429977,5.07213363
36.230505,4.89897949,5.07337403,-0.417605727,5.07094255,5.07059622,5.07242185,5.07029308
36.240997,4.69041576,5.07150313,-0.617322747,5.06910699,5.06875933,5.07054849,5.06845562
36.251488,5.29150262,5.06963709,0.471026047,5.06727489,5.06692589,5.06867996,5.06662161
36.26198,5.74456265,5.06777545,0.822670769,5.06544589,5.06509553,5.06681584,5.06479069
36.272472,5.47722558,5.06591834,0.641332389,5.06362017,5.06326844,5.06495622,5.06296303
36.282963,5.09901951,5.06406587,0.186958945,5.06179788,5.06144477,5.06310122,5.06113879
36.293455,5.29150262,5.06221761,0.478837147,5.05997867,5.05962417,5.06125043,5.05931763
36.303946,6.08276253,5.06037386,1.01113237,5.05816289,5.05780699,5.05940413,5.05749987
36.314438,5,5.05853422,-0.241938458,5.05635018,5.05599286,5.05756192,5.05568517
36.32493,5.29150262,5.05669883,0.484565568,5.05454071,5.05418196,5.05572396,5.05387369
36.335421,4.69041576,5.05486776,-0.603698602,5.05273463,5.05237444,5.05389029,5.05206561
36.345913,5.38516481,5.05304064,0.576302146,5.05093161,5.05056997,5.05206057,5.05026056
36.356404,5.29150262,5.05121778,0.49018858,5.04913198,5.04876887,5.05023508,5.04845888
36.366896,5.47722558,5.04939877,0.654084704,5.04733539,5.0469708,5.04841343,5.04666023
36.377388,5.56776436,5.04758377,0.721235466,5.045542,5.04517592,5.04659577,5.04486477
36.387879,6.08276253,5.04577288,1.01832689,5.04375199,5.04338439,5.04478221,5.04307267
36.398371,4.47213595,5.04396574,-0.756194278,5.04196499,5.04159588,5.04297239,5.04128357
36.408862,5.38516481,5.04216265,0.585663859,5.04018134,5.0398107,5.04116659,5.0394978
36.419354,5.47722558,5.04036323,0.660955627,5.03840071,5.03802851,5.03936445,5.03771503
36.429846,5.65685425,5.03856763,0.786312039,5.03662324,5.03624949,5.03756611,5.03593542
36.440337,5.47722558,5.03677597,0.663663776,5.03484911,5.03447378,5.0357717,5.03415913
36.450829,5.29150262,5.03498789,0.506472839,5.03307797,5.03270105,5.03398084,5.03238581
36.46132,6.244998,5.03320369,1.10081529,5.03131015,5.03093162,5.03219386,5.03061579
36.471812,6.244998,5.03142301,1.10162379,5.02954531,5.02916516,5.03041037,5.02884873
36.482304,5,5.029646,-0.17218014,5.0277836,5.02740181,5.02863054,5.0270848
36.492795,4.79583152,5.02787948,-0.481713565,5.0260252,5.02564176,5.02686118,5.02532415
36.503287,4.79583152,5.02610972,-0.479873102,5.02426976,5.02388464,5.02508855,5.02356644
36.513778,4.12310563,5.02434371,-0.949335599,5.0225176,5.0221308,5.02331966,5.021812
36.52427,4.79583152,5.02258109,-0.476182281,5.02076839,5.02037989,5.02155414,5.02006049
36.534762,5.74456265,5.02082201,0.850729474,5.01902228,5.01863206,5.01979214,5.01831206
36.545253,6,5.01906661,0.990420813,5.01727945,5.01688749,5.01803381,5.01656689
36.555745,5.65685425,5.01731454,0.799712264,5.01553954,5.01514583,5.01627878,5.01482463
36.566236,4.58257569,5.01556612,-0.658020078,5.01380288,5.0134074,5.01452737,5.0130856
36.576728,4.89897949,5.01382098,-0.338882713,5.01206914,5.01167187,5.01277923,5.01134946
36.58722,6.164414,5.01207927,1.07346855,5.01033848,5.0099394,5.01103451,5.00961638
36.597711,5.47722558,5.01034115,0.683289413,5.00861104,5.00821014,5.00929335,5.00788652
36.608203,4.89897949,5.00860626,-0.331099347,5.00688651,5.00648377,5.00755539,5.00615953
36.618694,4.79583152,5.00687492,-0.459394597,5.0051652,5.00476059,5.00582097,5.00443575
36.629186,4.47213595,5.00514677,-0.730075899,5.00344677,5.00304028,5.00408971,5.00271483
36.639678,4.58257569,5.00342197,-0.648726659,5.00173139,5.00132299,5.00236178,5.00099693
36.650169,5.47722558,5.00170067,0.689583141,5.0000192,4.99960889,5.00063733,4.99928221
36.660661,4.79583152,4.99998251,-0.451830708,4.99830989,4.99789763,4.99891599,4.99757033
36.671152,5.09901951,4.99826782,0.317414076,4.99660376,4.99618954,4.9971981,4.99586162
36.681644,5.47722558,4.99655624,0.693303202,4.99490049,4.99448428,4.99548331,4.99415575
36.692136,5,4.99484794,0.0717778474,4.99320023,4.99278202,4.99377175,4.99245286
36.702627,3.87298335,4.99314305,-1.05837598,4.99150314,4.9910829,4.9920636,4.99075312
36.713119,4.69041576,4.99144124,-0.548657894,4.98980889,4.98938659,4.99035849,4.9890562
36.72361,5.38516481,4.98974282,0.628825876,4.98811779,4.98769342,4.98865675,4.9873624
36.734102,5.29150262,4.98804746,0.550867648,4.98642952,4.98600305,4.98695803,4.98567141
36.744594,4.89897949,4.98635529,-0.295593985,4.98474423,4.98431564,4.98526249,4.98398337
36.755085,5.19615242,4.98466647,0.459876018,4.98306208,4.98263135,4.98357027,4.98229844
36.765577,5.29150262,4.98298067,0.555447527,4.98138273,4.98094983,4.98188104,4.9806163
36.776068,5.74456265,4.98129819,0.873650078,4.97970651,4.97927142,4.9801951,4.97893725
36.78656,5.65685425,4.9796187,0.822943225,4.97803309,4.97759577,4.97851213,4.97726098
36.797052,5.29150262,4.97794235,0.55996453,4.97636261,4.97592306,4.97683226,4.97558763
36.807543,5.09901951,4.97626929,0.350357287,4.97469524,4.97425342,4.97515566,4.97391735
36.818035,5.09901951,4.97459918,0.352732666,4.97303066,4.97258653,4.97348198,4.97224983
36.828526,5.65685425,4.97293234,0.826995713,4.97136916,4.97092271,4.97181154,4.97058537
36.839018,4.58257569,4.97126844,-0.623452276,4.96971043,4.96926163,4.970144,4.96892365
36.84951,4.24264069,4.96960761,-0.852623556,4.96805462,4.96760344,4.96847952,4.96726482
36.860001,4.89897949,4.96795003,-0.26262243,4.96640189,4.9659483,4.96681823,4.96560903
36.870493,5.65685425,4.96629534,0.83099874,4.96475191,4.96429587,4.96515982,4.96395596
36.880984,4.58257569,4.96464387,-0.618116636,4.96310499,4.96264648,4.96350459,4.96230593
36.891476,4.58257569,4.96299528,-0.616781638,4.9614608,4.9609998,4.96185221,4.9606586
36.901968,4.79583152,4.96134973,-0.40683929,4.95981952,4.95935598,4.96020282,4.95901413
36.912459,5.65685425,4.95970736,0.834953226,4.95818127,4.95771517,4.95855659,4.95737267
36.922951,4.89897949,4.95806784,-0.243080973,4.95654574,4.95607705,4.95691318,4.9557339
36.933442,5.47722558,4.95643149,0.721660643,4.95491325,4.95444193,4.95527289,4.95409812
36.943934,4.89897949,4.95479798,-0.236259377,4.95328347,4.95280949,4.9536354,4.95246502
36.954426,4.79583152,4.95316745,-0.396655933,4.95165655,4.95117987,4.95200087,4.95083475
36.964917,5.19615242,4.95154006,0.494583019,4.95003265,4.94955323,4.95036943,4.94920746
36.975409,5,4.94991548,0.223795708,4.94841144,4.94792926,4.94874076,4.94758282
36.9859,5,4.94829402,0.227389494,4.94679323,4.94630824,4.94711517,4.94596115
36.996392,5.09901951,4.94667535,0.390312902,4.9451777,4.94468988,4.94549234,4.94434212
37.006884,4.58257569,4.94505963,-0.602066388,4.94356501,4.94307431,4.94387241,4.94272588
37.017375,5.83095189,4.943447,0.942074783,4.9419553,4.94146168,4.94225553,4.94111259
37.027867,5.56776436,4.94183714,0.791155626,4.94034827,4.93985169,4.94064138,4.93950193
37.038358,5.09901951,4.94023035,0.398483577,4.9387442,4.93824462,4.93903026,4.9378942
37.04885,4.69041576,4.93862632,-0.49820735,4.93714279,4.93664017,4.93742185,4.93628908
37.059342,5.09901951,4.9370252,0.402485173,4.93554419,4.93503849,4.9358163,4.93468672
37.069833,5.83095189,4.93542712,0.946321706,4.93394854,4.93343972,4.93421376,4.93308728
37.080325,5.19615242,4.9338319,0.512172353,4.93235554,4.93184355,4.93261402,4.93149043
37.090816,4.89897949,4.9322396,-0.182373544,4.93076548,4.93025027,4.93101714,4.92989648
37.101308,4.58257569,4.93065001,-0.589978232,4.92917805,4.92865958,4.92942294,4.92830511
37.1118,5.19615242,4.92906329,0.51680667,4.9275934,4.92707162,4.92783155,4.92671647
37.122291,5.38516481,4.92747958,0.676524374,4.92601168,4.92548655,4.92624313,4.92513072
37.132783,5.38516481,4.92589857,0.677691847,4.92443257,4.92390404,4.92465735,4.92354752
37.143274,6.244998,4.92432055,1.14920731,4.92285638,4.92232439,4.92307451,4.92196719
37.153766,5.09901951,4.92274523,0.419850316,4.9212828,4.9207473,4.9214943,4.92038942
37.164258,5.47722558,4.92117273,0.745689511,4.91971197,4.91917292,4.91991687,4.91881434
37.174749,5.83095189,4.91960321,0.954645845,4.91814404,4.91760137,4.91834236,4.91724211
37.185241,4.69041576,4.91803635,-0.477095998,4.91657871,4.91603237,4.91677046,4.91567242
37.195732,5.65685425,4.91647246,0.860454411,4.91501626,4.9144662,4.91520145,4.91410555
37.206224,4.89897949,4.91498965,-0.126531279,4.9134564,4.91298102,4.91363504,4.91254122
37.216716,5.65685425,4.91343214,0.862219295,4.91189927,4.91142015,4.9120722,4.91097954
37.227207,4.79583152,4.91187674,-0.340654098,4.910345,4.90986209,4.9105114,4.90942068
37.237699,6.244998,4.91032398,1.15528093,4.90879331,4.90830653,4.90895318,4.90786433
37.24819,4.58257569,4.90877414,-0.571137852,4.90724449,4.90675378,4.90739782,4.90631078
37.258682,4.89897949,4.90722693,-0.090815455,4.90569822,4.90520352,4.90584501,4.90475972
37.269174,5.29150262,4.90568249,0.621144211,4.90415466,4.90365591,4.9042949,4.90321129
37.279665,5.29150262,4.90414096,0.622383855,4.90261394,4.90211107,4.90274763,4.90166565
37.290157,5.56776436,4.90260204,0.815574844,4.90107578,4.90056871,4.9012029,4.90012248
37.300648,4.58257569,4.90106601,-0.564349462,4.89954045,4.89902912,4.89966098,4.89858208
37.31114,4.24264069,4.89953258,-0.810488677,4.89800767,4.897492,4.89812159,4.89704414
37.321632,5.74456265,4.89800189,0.920087361,4.89647756,4.89595748,4.89658486,4.89550881
37.332123,3.87298335,4.89647409,-1.01167719,4.89495028,4.89442571,4.89505093,4.89397622
37.342615,4.24264069,4.89494886,-0.807655975,4.89342553,4.89289639,4.8935195,4.89244608
37.353106,5.56776436,4.89342651,0.82118077,4.8919036,4.89136981,4.89199086,4.89091868
37.363598,4.24264069,4.89190672,-0.805770461,4.89038418,4.88984566,4.8904647,4.88939371
37.37409,4.24264069,4.89038965,-0.804828532,4.88886743,4.88832409,4.88894117,4.88787131
37.384581,4.89897949,4.88887544,0.100518891,4.88735348,4.88680524,4.8874204,4.88635163
37.395073,4.79583152,4.88736378,-0.302542987,4.88584204,4.88528881,4.88590209,4.88483437
37.405564,6.32455532,4.88585497,1.19945836,4.88433339,4.88377507,4.88438654,4.88331981
37.416056,5.09901951,4.88434871,0.463325809,4.88282725,4.88226375,4.88287343,4.88180765
37.426548,3.31662479,4.88284514,-1.25148725,4.88132375,4.88075497,4.88136292,4.88029804
37.437039,4.24264069,4.8813444,-0.799189407,4.87982304,4.87924888,4.87985513,4.87879111
37.447531,5.47722558,4.87984619,0.772903216,4.87832481,4.87774518,4.87834977,4.87728657
37.458022,4.79583152,4.87835081,-0.287261708,4.87682937,4.87624415,4.87684713,4.8757847
37.468514,4.79583152,4.87685796,-0.284651433,4.8753364,4.87474549,4.87534691,4.87428521
37.479006,5.29150262,4.87536778,0.645085142,4.87384607,4.87324936,4.87384924,4.87278823
37.489497,5.09901951,4.87388041,0.474488254,4.8723585,4.87175587,4.87235426,4.8712939
37.499989,5.56776436,4.87239556,0.833887763,4.87087342,4.87026475,4.87086168,4.86980193
37.51048,4.47213595,4.87091351,-0.631488367,4.86939109,4.86877627,4.86937178,4.86831259
37.520972,4.69041576,4.86943398,-0.423105446,4.86791123,4.86729013,4.86788427,4.86682561
37.531464,5,4.8679571,0.363377079,4.86643399,4.86580648,4.86639928,4.86534111
37.541955,4.89897949,4.86648301,0.180267789,4.86495951,4.86432546,4.86491694,4.86385922
37.552447,4.79583152,4.86501143,-0.263020731,4.86348749,4.86284676,4.86343697,4.86237967
37.562938,4.12310563,4.86354263,-0.860486494,4.86201821,4.86137067,4.86195964,4.86090272
37.57343,3.87298335,4.86207634,-0.994531544,4.86055141,4.85989691,4.86048467,4.8594281
37.583922,5.91607978,4.86061269,1.02735928,4.8590872,4.85842559,4.85901219,4.85795592
37.594413,5.09901951,4.85915181,0.489762905,4.85762574,4.85695687,4.85754233,4.85648633
37.604905,5.29150262,4.85769343,0.658641928,4.85616674,4.85549045,4.8560748,4.85501905
37.615396,4.35889894,4.85623783,-0.705222579,4.85471047,4.85402661,4.85460988,4.85355434
37.625888,4.47213595,4.85478472,-0.618586102,4.85325667,4.85256506,4.85314729,4.85209192
37.63638,5.09901951,4.85333424,0.49566649,4.85180546,4.85110594,4.85168715,4.85063192
37.646871,5.65685425,4.85188654,0.897199929,4.85035699,4.84964937,4.8502296,4.84917448
37.657363,4.24264069,4.85044132,-0.779615697,4.84891098,4.84819508,4.84877435,4.84771931
37.667854,5.83095189,4.84899888,0.990935426,4.84746771,4.84674334,4.84732168,4.84626668
37.678346,4.12310563,4.84755892,-0.851148222,4.84602689,4.84529385,4.8458713,4.84481632
37.688838,5.09901951,4.8461216,0.502889568,4.84458867,4.84384677,4.84442335,4.84336835
37.699329,4.79583152,4.84468704,-0.221032838,4.84315319,4.84240221,4.84297795,4.84192291
37.709821,4.47213595,4.84325498,-0.609195388,4.84172017,4.8409599,4.84153482,4.84047971
37.720312,4.79583152,4.84182568,-0.214462483,4.84028988,4.8395201,4.84009424,4.83903902
37.730804,5.29150262,4.84039888,0.671642569,4.83886206,4.83808254,4.83865592,4.83760056
37.741296,4.12310563,4.83897472,-0.846090475,4.83743685,4.83664734,4.83721998,4.83616447
37.751787,5.38516481,4.83755333,0.740007758,4.83601438,4.83521464,4.83578658,4.83473088
37.762279,4.24264069,4.83613444,-0.770385455,4.83459438,4.83378416,4.83435541,4.8332995
37.77277,4.79583152,4.83471832,-0.197197367,4.83317713,4.83235616,4.83292676,4.8318706
37.783262,5,4.83330472,0.40828333,4.83176236,4.83093037,4.83150033,4.83044391
37.793754,4.89897949,4.83189377,0.259009106,4.83035022,4.82950692,4.83007627,4.82901955
37.804245,5.09901951,4.8304856,0.518202579,4.82894083,4.82808593,4.82865469,4.82759766
37.814737,4.12310563,4.82907996,-0.840222786,4.82753393,4.82666713,4.82723533,4.82617795
37.825228,4.58257569,4.82767711,-0.495077177,4.8261298,4.82525079,4.82581845,4.8247607
37.83572,5,4.82627681,0.41680114,4.82472818,4.82383662,4.82440379,4.82334562
37.846212,4.24264069,4.82487917,-0.76304553,4.82332921,4.82242477,4.82299144,4.82193284
37.856703,4.35889894,4.82348434,-0.681605013,4.82193302,4.82101534,4.82158155,4.82052251
37.867195,5,4.82209206,0.421791344,4.82053936,4.81960808,4.82017384,4.81911433
37.877686,5.09901951,4.82070261,0.527557484,4.8191485,4.81820325,4.81876857,4.81770857
37.888178,5.65685425,4.81931574,0.915171301,4.81776019,4.81680056,4.81736548,4.81630496
37.89867,5.19615242,4.81793158,0.614996623,4.81637457,4.81540016,4.81596469,4.81490363
37.909161,5,4.81655027,0.42831032,4.81499177,4.81400216,4.81456633,4.8135047
37.919653,5.38516481,4.81517157,0.754978968,4.81361156,4.81260629,4.81317012,4.8121079
37.930144,5,4.81379574,0.431513917,4.8122342,4.81121282,4.81177632,4.81071349
37.940636,5.38516481,4.81242254,0.756797374,4.81085944,4.80982147,4.81038467,4.80932121
37.951128,5.09901951,4.81105212,0.536625938,4.80948743,4.80843237,4.80899528,4.80793117
37.961619,5.56776436,4.80968461,0.870677755,4.80811831,4.80704564,4.80760829,4.80654351
37.972111,4.35889894,4.80831982,-0.670388603,4.80675185,4.80566102,4.80622348,4.80515795
37.982602,4.47213595,4.80695794,-0.578638044,4.80538831,4.80427877,4.804841,4.80377475
37.993094,5.29150262,4.80559877,0.697068041,4.80402746,4.80289861,4.80346063,4.80239364
38.003586,5.38516481,4.80424246,0.762182623,4.80266945,4.80152067,4.80208251,4.80101476
38.014077,5.19615242,4.80288915,0.627107064,4.80131442,4.80014508,4.80070675,4.79963822
38.024569,5.09901951,4.80153862,0.545418087,4.79996215,4.79877157,4.79933308,4.79826375
38.03506,5.47722558,4.80019115,0.822821016,4.7986129,4.79740039,4.79796177,4.79689162
38.045552,4.47213595,4.7988465,-0.571585994,4.79726646,4.79603128,4.79659255,4.79552155
38.056044,5,4.79750484,0.449994626,4.79592298,4.79466437,4.79522553,4.79415367
38.066535,4.35889894,4.79616631,-0.661261949,4.79458262,4.79329977,4.79386085,4.79278811
38.077027,4.69041576,4.7948307,-0.323133003,4.79324515,4.79193722,4.79249824,4.7914246
38.087518,4.79583152,4.79349829,0.0483035562,4.79191087,4.79057697,4.79113795,4.79006339
38.09801,5.38516481,4.79216887,0.770062295,4.79057955,4.78921877,4.78977972,4.78870422
38.108502,4.12310563,4.7908426,-0.817151747,4.78925136,4.78786273,4.78842367,4.78734721
38.118993,4.58257569,4.78951966,-0.454910939,4.78792648,4.78650898,4.78706992,4.78599248
38.129485,4,4.78819983,-0.887806188,4.78660468,4.78515726,4.78571822,4.78463978
38.139976,5.56776436,4.78688341,0.883674687,4.78528629,4.78380781,4.7843688,4.78328935
38.150468,4,4.78557021,-0.886323986,4.78397108,4.78246037,4.78302142,4.78194093
38.16096,3.74165739,4.7842604,-1.02107934,4.78265925,4.78111507,4.78167619,4.78059465
38.171451,4.69041576,4.78295418,-0.304201279,4.78135099,4.77977203,4.78033323,4.77925062
38.181943,4.69041576,4.78165135,-0.302052293,4.78004609,4.77843099,4.77899229,4.77790859
38.192434,5.65685425,4.78035223,0.936216867,4.77874489,4.77709219,4.77765361,4.7765688
38.202926,4.79583152,4.77905665,0.12951786,4.77744721,4.77575538,4.77631693,4.775231
38.213418,5.19615242,4.77776481,0.646828892,4.77615325,4.77442068,4.77498237,4.7738953
38.223909,4.58257569,4.77647692,-0.440342163,4.77486322,4.77308821,4.77365006,4.77256184
38.234401,4.12310563,4.77519282,-0.807519159,4.77357696,4.77175771,4.77231973,4.77123033
38.244892,5.19615242,4.77391286,0.649799634,4.77229482,4.77042943,4.77099164,4.76990105
38.255384,5.91607978,4.7726369,1.06931889,4.77101666,4.7691031,4.76966552,4.76857372
38.265876,4.69041576,4.77136518,-0.28451611,4.76974273,4.76777886,4.7683415,4.76724847
38.276367,5.65685425,4.77009793,0.941677394,4.76847325,4.76645682,4.7670197,4.76592542
38.286859,4.58257569,4.76883507,-0.431577769,4.76720813,4.76513673,4.76569985,4.76460431
38.29735,5.47722558,4.76757695,0.842406446,4.76594775,4.76381882,4.7643822,4.76328539
38.307842,4.47213595,4.76632352,-0.5423906,4.76469202,4.76250285,4.76306651,4.7619684
38.318334,4.47213595,4.76507504,-0.541238476,4.76344124,4.76118893,4.76175288,4.76065346
38.328825,4.12310563,4.76384218,-0.800460214,4.76219571,4.75987719,4.76045179,4.7593407
38.339317,4.58257569,4.7626042,-0.424297666,4.76095538,4.75856736,4.75914229,4.75802984
38.349808,4.89897949,4.76137191,0.370954957,4.75972072,4.75725969,4.75783496,4.75672115
38.3603,4.35889894,4.76014528,-0.633440084,4.75849171,4.75595393,4.75652955,4.75541436
38.370792,4.47213595,4.75892471,-0.535526618,4.75726874,4.7546502,4.75522618,4.75410959
38.381283,4.69041576,4.75771059,-0.259412466,4.7560522,4.75334861,4.75392497,4.75280697
38.391775,4.69041576,4.75650298,-0.257074344,4.75484215,4.75204892,4.75262567,4.75150623
38.402266,4.69041576,4.75530245,-0.254728656,4.75363917,4.75075136,4.75132851,4.75020763
38.412758,5.09901951,4.75410913,0.587290711,4.75244339,4.74945567,4.75003325,4.7489109
38.42325,4.79583152,4.75292355,0.207142401,4.75125532,4.74816199,4.74873999,4.74761618
38.433741,4.35889894,4.75174624,-0.626775315,4.75007552,4.74687043,4.74744887,4.74632356
38.444233,5,4.75057746,0.499422205,4.74890422,4.74558073,4.74615963,4.74503281
38.454724,5.47722558,4.74941797,0.85311641,4.7477422,4.74429313,4.7448725,4.74374416
38.465216,4.69041576,4.74826812,-0.240525168,4.74658981,4.74300739,4.74358724,4.74245737
38.475708,4.69041576,4.74712867,-0.238144715,4.7454478,4.74172363,4.74230397,4.74117254
38.486199,4.24264069,4.74600043,-0.709478503,4.74431699,4.74044195,4.7410228,4.7398898
38.496691,3.87298335,4.744884,-0.933756204,4.74319797,4.73916211,4.73974348,4.7386089
38.507182,5.29150262,4.74378044,0.740082551,4.74209181,4.73788435,4.73846625,4.73733007
38.517674,4.79583152,4.74269053,0.230523293,4.74099929,4.73660842,4.73719086,4.73605307
38.528166,5.65685425,4.74161547,0.956681126,4.7399216,4.73533443,4.73591743,4.73477801
38.538657,5.47722558,4.74055657,0.85829424,4.73886007,4.73406251,4.73464607,4.73350501
38.549149,4.69041576,4.739515,-0.221583477,4.73781584,4.7327924,4.73337654,4.73223382
38.55964,5.19615242,4.73849248,0.676505686,4.73679066,4.73152434,4.73210907,4.73096468
38.570132,4.79583152,4.73749056,0.241538747,4.73578607,4.73025809,4.73084342,4.72969735
38.580624,5.56776436,4.73651129,0.911730809,4.73480412,4.72899375,4.7295797,4.72843192
38.591115,3.74165739,4.73555703,-0.996945155,4.73384717,4.72773145,4.72831802,4.72716853
38.601607,3.87298335,4.73463016,-0.928249329,4.73291761,4.72647094,4.72705815,4.72590693
38.612098,5.29150262,4.73373391,0.74683915,4.73201865,4.72521245,4.72580031,4.72464734
38.62259,5,4.73287168,0.516844582,4.73115371,4.72395574,4.72454426,4.72338953
38.633082,3.74165739,4.73204795,-0.995183681,4.73032727,4.72270092,4.72329011,4.72213362
38.643573,5,4.73127709,0.518384904,4.72954487,4.72144811,4.72204683,4.7208797
38.654065,4.12310563,4.73054837,-0.77938613,4.72881343,4.72019706,4.72079649,4.71962755
38.664556,4.58257569,4.72988012,-0.383802588,4.72814247,4.71894801,4.71954815,4.71837739
38.675048,5.56776436,4.72928503,0.915685171,4.72754468,4.71770072,4.71830158,4.71712898
38.68554,4.89897949,4.72878097,0.412551223,4.72703794,4.71645529,4.71705688,4.71588243
38.696031,5.19615242,4.72839304,0.683929366,4.72664735,4.71521184,4.71581418,4.71463787
38.706523,5.74456265,4.72815649,1.00816971,4.72640816,4.71397012,4.71457324,4.71339503
38.717014,5,4.72812079,0.52142038,4.7263699,4.71273038,4.71333427,4.71215417
38.727506,4.69041576,4.7283544,-0.19477843,4.72660103,4.71149237,4.71209703,4.71091503
38.737998,4.24264069,4.72895033,-0.697359049,4.72719461,4.71025619,4.71086165,4.70967772
38.748489,5.29150262,4.73003191,0.749313494,4.728274,4.70902197,4.70962823,4.70844237
38.758981,5.09901951,4.73175864,0.60602052,4.72999876,4.70778947,4.70839654,4.70720873
38.769472,4.69041576,4.73432951,-0.209556088,4.73256796,4.70655891,4.7071668,4.70597703
38.779964,5.09901951,4.73798521,0.600861297,4.73622239,4.70533005,4.70593878,4.70474703
38.790456,3.87298335,4.74300334,-0.932748621,4.74123973,4.704103,4.70471258,4.70351884
38.800947,4.35889894,4.74968863,-0.625131739,4.74792485,4.70287789,4.70348832,4.70229258
38.811439,5.29150262,4.75835784,0.730167636,4.7565946,4.70165446,4.70226576,4.701068
38.82193,4.47213595,4.76930983,-0.545136565,4.76754795,4.70043295,4.70104513,4.69984534
38.832422,5.19615242,4.78279866,0.642925939,4.78103906,4.69921311,4.69982618,4.69862435
38.842914,5.09901951,4.7989892,0.547750231,4.79723284,4.69799507,4.69860904,4.69740515
38.853405,4.47213595,4.81791829,-0.588032593,4.81616613,4.69677893,4.69739381,4.69618784
38.863897,5,4.83946205,0.400671876,4.83771499,4.69556445,4.69618026,4.6949722
38.874388,4.89897949,4.86328966,0.188917518,4.86154845,4.69435187,4.6949686,4.69375845
38.88488,4.12310563,4.88885155,-0.875069097,4.88711675,4.69314093,4.69375861,4.69254634
38.895372,4.58257569,4.91534394,-0.576860682,4.91361578,4.69193177,4.6925504,4.691336
38.905863,5.38516481,4.94169989,0.665931616,4.93997824,4.69072447,4.69134407,4.69012753
38.916355,5.56776436,4.96659401,0.775351762,4.96487828,4.68951882,4.69013939,4.6889207
38.926846,5,4.98845429,0.107450958,4.98674337,4.68831503,4.68893659,4.68771572
38.937338,4.58257569,5.005584,-0.650390886,5.00387622,4.68711287,4.68773543,4.68651238
38.94783,5.47722558,5.01636474,0.678867315,5.0146579,4.68591246,4.68653602,4.68531077
38.958321,5.74456265,5.01959079,0.851452791,5.01788231,4.68471389,4.68533847,4.68411101
38.968813,4.58257569,5.01478834,-0.657428813,5.01307546,4.68351693,4.68414254,4.68291286
38.979304,4.47213595,5.00235583,-0.728161986,5.00063592,4.68232182,4.68294847,4.68171655
38.989796,5,4.98343985,0.128686233,4.9817106,4.68112831,4.68175601,4.68052184
39.000288,5.65685425,4.95962871,0.835000322,4.95788832,4.67993652,4.68056528,4.67932884
39.010779,5.09901951,4.93262379,0.407916313,4.930871,4.67874655,4.67937638,4.67813766
39.021271,4.69041576,4.90400143,-0.462153293,4.9022355,4.67755817,4.67818908,4.67694807
39.031762,4.79583152,4.87511924,-0.281580741,4.87333992,4.67637161,4.67700361,4.67576029
39.042254,5,4.84706106,0.391074088,4.84526848,4.67518662,4.67581973,4.67457409
39.052746,3.60555128,4.82065688,-1.10231829,4.81885148,4.67400333,4.67463755,4.67338958
39.063237,5.38516481,4.79648766,0.767252989,4.79467013,4.67282184,4.67345718,4.67220686
39.073729,5.09901951,4.77489844,0.569316317,4.77306965,4.67164192,4.67227839,4.6710257
39.08422,4.47213595,4.75604092,-0.532827331,4.75420179,4.67046378,4.6711014,4.66984634
39.094712,3.87298335,4.73988912,-0.931077748,4.73804061,4.6692872,4.66992598,4.66866852
39.105204,4,4.7262918,-0.852227552,4.72443484,4.66811229,4.66875223,4.66749237
39.115695,4.24264069,4.71500599,-0.687288368,4.71314142,4.66693915,4.66758027,4.66631799
39.126187,3.87298335,4.70573324,-0.912551313,4.70386183,4.66576755,4.66640986,4.66514515
39.136678,4.35889894,4.69816094,-0.582462013,4.69628331,4.66459772,4.66524122,4.66397407
39.14717,4.69041576,4.69198067,-0.0395589668,4.69009734,4.66342943,4.66407414,4.66280452
39.157662,3.87298335,4.68691249,-0.902180218,4.68502389,4.66226277,4.6629087,4.66163661
39.168153,5.19615242,4.68271257,0.716547174,4.68081901,4.66109786,4.66174502,4.66047045
39.178645,5.74456265,4.67917658,1.0321754,4.67727832,4.65993448,4.66058288,4.6593058
39.189136,4.89897949,4.67614194,0.472056722,4.67423915,4.65877283,4.65942248,4.65814289
39.199628,4.69041576,4.67348105,0.130133442,4.67157386,4.6576127,4.65826361,4.65698149
39.21012,4.35889894,4.67109827,-0.558748,4.66918678,4.65645418,4.65710636,4.6558217
39.220611,5.47722558,4.66892297,0.899056507,4.66700724,4.65529739,4.65595085,4.65466363
39.231103,3.16227766,4.66690341,-1.22663187,4.66498349,4.65414209,4.65479685,4.65350705
39.241594,4.69041576,4.66500332,0.159412798,4.66307923,4.65298851,4.65364457,4.65235219
39.252086,4.79583152,4.66319628,0.364191212,4.66126805,4.65183642,4.65249379,4.65119881
39.262578,4.47213595,4.66146399,-0.435118412,4.65953161,4.65068592,4.65134462,4.65004702
39.273069,4.35889894,4.6597933,-0.548538378,4.65785679,4.64953712,4.65019715,4.64889693
39.283561,4.35889894,4.65817417,-0.547060533,4.65623354,4.64838979,4.64905117,4.64774831
39.294052,4.79583152,4.65659963,0.373137899,4.65465487,4.64724416,4.64790689,4.64660137
39.304544,4.47213595,4.65506374,-0.427700578,4.65311485,4.64609999,4.64676409,4.6454559
39.315036,4.69041576,4.65356215,0.191972932,4.65160912,4.64495739,4.64562287,4.64431199
39.325527,4.58257569,4.65209133,-0.263658175,4.65013415,4.64381647,4.64448334,4.64316976
39.336019,4.79583152,4.65064789,0.381029703,4.64868656,4.64267699,4.64334526,4.64202897
39.34651,4.89897949,4.64922947,0.499749954,4.64726399,4.64153919,4.64220887,4.64088984
39.357002,4.58257569,4.6478335,-0.255456081,4.64586385,4.64040282,4.64107393,4.63975216
39.367494,4.79583152,4.64645813,0.386488547,4.64448429,4.63926801,4.63994054,4.63861602
39.377985,3.60555128,4.6451017,-1.01958345,4.64312367,4.63813484,4.63880882,4.63748152
39.388477,4.35889894,4.64376239,-0.533726001,4.64178016,4.63700311,4.63767854,4.63634845
39.398968,5,4.64243906,0.597963994,4.64045262,4.63587301,4.63654991,4.63521702
39.40946,4.24264069,4.64113022,-0.631260275,4.63913955,4.63474434,4.63542271,4.63408701
39.419952,4.89897949,4.63983488,0.509062476,4.63783997,4.63361719,4.63429705,4.63295851
39.430443,3.87298335,4.63855216,-0.874967894,4.63655299,4.63249166,4.63317302,4.63183164
39.440935,3.87298335,4.63728092,-0.87424114,4.63527747,4.63136755,4.63205042,4.63070618
39.451426,4,4.63602058,-0.797508986,4.63401285,4.63024505,4.63092944,4.62958232
39.461918,3.74165739,4.63477018,-0.945046453,4.63275815,4.62912395,4.62980987,4.62845987
39.47241,4.58257569,4.63352918,-0.225728787,4.63151283,4.62800435,4.62869181,4.6273389
39.482901,3.74165739,4.63229709,-0.943737092,4.63027641,4.62688636,4.62757537,4.62621954
39.493393,4.35889894,4.63107312,-0.521703152,4.62904809,4.62576975,4.62646033,4.62510156
39.503884,4.47213595,4.62985702,-0.39714112,4.62782763,4.62465473,4.62534689,4.62398517
39.514376,5.38516481,4.62864811,0.869779685,4.62661433,4.62354109,4.62423483,4.62287015
39.524868,4.89897949,4.62744607,0.521088679,4.6254079,4.62242893,4.62312427,4.62175661
39.535359,4.79583152,4.62625066,0.411801969,4.62420807,4.62131835,4.6220153,4.62064464
39.545851,5,4.62506129,0.612322388,4.62301427,4.62020913,4.6209077,4.61953404
39.556342,5,4.62387788,0.61328796,4.62182641,4.61910148,4.61980169,4.61842499
39.566834,4.79583152,4.6226999,0.416090885,4.62064396,4.61799519,4.61869704,4.6173173
39.577326,5,4.6215272,0.615201432,4.61946677,4.61689035,4.61759386,4.61621107
39.587817,4.89897949,4.62035964,0.527844526,4.61829471,4.61578707,4.61649224,4.61510638
39.598309,5.09901951,4.61919678,0.692692383,4.61712733,4.61468514,4.61539198,4.61400303
39.6088,5.09901951,4.61803861,0.693527866,4.61596462,4.61358474,4.61429328,4.61290123
39.619292,4.69041576,4.61688473,0.271166049,4.61480618,4.61248569,4.61319593,4.61180075
39.629784,4.47213595,4.61573507,-0.378944738,4.61365194,4.61138806,4.61210002,4.6107017
39.640275,4.35889894,4.61458956,-0.505658597,4.61250184,4.61029197,4.61100565,4.60960419
39.650767,3.87298335,4.61344783,-0.860502461,4.6113555,4.6091972,4.60991262,4.60850799
39.661258,4.69041576,4.61230996,0.279474155,4.61021299,4.60810395,4.60882112,4.60741331
39.67175,5.19615242,4.61117558,0.764837788,4.60907396,4.60701202,4.60773094,4.60631993
39.682242,5.19615242,4.61004469,0.765576732,4.60793839,4.60592149,4.60664219,4.60522797
39.692733,4.89897949,4.60891727,0.538574242,4.60680628,4.60483248,4.60555496,4.60413751
39.703225,5.09901951,4.607793,0.700875534,4.6056773,4.60374476,4.60446905,4.60304834
39.713716,4.79583152,4.60667199,0.434924746,4.60455156,4.60265855,4.60338464,4.60196068
39.724208,4,4.60555393,-0.778173455,4.60342875,4.60157363,4.60230154,4.6008743
39.7347,4.47213595,4.60443883,-0.363734621,4.60230888,4.6004901,4.60121984,4.5997893
39.745191,4.79583152,4.60332672,0.438753693,4.60119198,4.59940805,4.60013964,4.59870579
39.755683,4.79583152,4.60221731,0.440016156,4.60007776,4.59832729,4.59906073,4.59762355
39.766174,5.29150262,4.60111072,0.830898248,4.59896634,4.597248,4.59798331,4.59654279
39.776666,4.47213595,4.60000669,-0.357590182,4.59785746,4.59616998,4.59690718,4.59546329
39.787158,4.24264069,4.59890525,-0.596879021,4.59675115,4.59509333,4.59583242,4.59438516
39.797649,5.09901951,4.59780644,0.707964031,4.59564745,4.59401814,4.59475914,4.59330849
39.808141,4.12310563,4.59671,-0.688189199,4.59454609,4.59294422,4.59368713,4.59223307
39.818632,4.47213595,4.59561607,-0.351397378,4.59344723,4.59187175,4.5926166,4.5911591
39.829124,5.09901951,4.5945244,0.710278194,4.59235061,4.59080052,4.59154732,4.59008637
39.839616,4.69041576,4.59343504,0.311417278,4.59125627,4.58973065,4.5904794,4.58901499
39.850107,4,4.59234804,-0.769641503,4.59016428,4.58866221,4.58941294,4.58794505
39.860599,4.47213595,4.59126316,-0.345148095,4.58907438,4.58759502,4.58834772,4.58687634
39.87109,5.09901951,4.59018056,0.713329484,4.58798674,4.58652926,4.58728396,4.58580906
39.881582,5.19615242,4.58909999,0.779135695,4.58690111,4.58546472,4.58622143,4.584743
39.892074,4.47213595,4.58802152,-0.340419687,4.58581755,4.58440151,4.58516024,4.58367827
39.902565,4.79583152,4.58694521,0.457040824,4.58473614,4.58333973,4.58410049,4.58261495
39.913057,3.87298335,4.58587082,-0.84432664,4.58365663,4.58227916,4.58304197,4.58155284
39.923548,4.69041576,4.58479853,0.324988046,4.58257919,4.58122,4.58198487,4.58049214
39.93404,5,4.5837281,0.64519137,4.58150359,4.58016205,4.58092899,4.57943264
39.944532,4.58257569,4.58265959,-0.00915965308,4.58042989,4.5791054,4.57987444,4.57837445
39.955023,4.89897949,4.5815931,0.563370562,4.57935818,4.57805015,4.57882129,4.57731765
39.965515,4.69041576,4.58052837,0.331492669,4.57828822,4.5769961,4.57776935,4.57626203
39.976006,3.74165739,4.57946559,-0.915318637,4.57722019,4.57594344,4.57671882,4.57520781
39.986498,3.31662479,4.57840454,-1.1232897,4.57615385,4.57489197,4.57566949,4.57415477
39.99699,4.12310563,4.57734528,-0.67397304,4.57508929,4.57384177,4.57462145,4.573103
40.007481,4.35889894,4.57628791,-0.466249893,4.57402659,4.57279296,4.57357481,4.57205262
40.017973,5.74456265,4.57523218,1.08135585,4.57296551,4.57174533,4.57252936,4.5710034
40.028464,4.79583152,4.57417829,0.470800632,4.57190625,4.57069906,4.57148529,4.56995554
40.038956,4.89897949,4.57312601,0.570835772,4.57084857,4.56965396,4.5704424,4.56890885
40.049448,4.69041576,4.57207542,0.34400631,4.56979256,4.56861012,4.56940079,4.56786342
40.059939,4.69041576,4.5710266,0.345527361,4.5687383,4.56756764,4.56836055,4.56681934
40.070431,4.58257569,4.56997934,0.112233473,4.56768558,4.56652632,4.56732147,4.56577641
40.080922,4.89897949,4.56893382,0.574496011,4.56663456,4.56548634,4.56628377,4.56473482
40.091414,4.47213595,4.56788982,-0.309441209,4.56558505,4.56444751,4.56524722,4.56369437
40.101906,4.24264069,4.56684742,-0.569391545,4.56453711,4.56340992,4.56421193,4.56265517
40.112397,3.46410162,4.56580671,-1.0496214,4.56349084,4.56237367,4.56317799,4.56161729
40.122889,4.79583152,4.56476747,0.480691222,4.56244602,4.56133856,4.5621452,4.56058055
40.13338,4.58257569,4.56372989,0.13728001,4.56140283,4.56030477,4.56111375,4.55954512
40.143872,3.87298335,4.56269376,-0.830488058,4.56036106,4.55927211,4.56008345,4.55851082
40.154364,4.58257569,4.56165916,0.144625508,4.5593208,4.55824067,4.55905438,4.55747774
40.164855,5.09901951,4.56062617,0.733752917,4.55828213,4.55721055,4.55802664,4.55644597
40.175347,5.19615242,4.55959459,0.797845746,4.55724484,4.55618154,4.55700003,4.5554153
40.185838,4.89897949,4.5585646,0.583450845,4.55620911,4.55515384,4.55597475,4.55438595
40.19633,4.89897949,4.55753599,0.584331668,4.55517474,4.55412725,4.55495059,4.55335769
40.206822,5,4.55650884,0.665951316,4.55414181,4.55310186,4.55392764,4.55233063
40.217313,3.74165739,4.55548326,-0.902122979,4.55311041,4.55207776,4.55290601,4.55130486
40.227805,4.79583152,4.55445901,0.491296762,4.55208034,4.55105476,4.55188548,4.55028018
40.238296,6,4.55343631,1.20273176,4.55105177,4.55003305,4.55086626,4.54925678
40.248788,4.35889894,4.55241492,-0.43990451,4.5500245,4.54901242,4.54984815,4.54823447
40.25928,4.12310563,4.55139495,-0.654438176,4.54899861,4.54799298,4.54883123,4.54721333
40.269771,5,4.55037648,0.670539721,4.54797421,4.54697481,4.5478156,4.54619346
40.280263,5,4.54935931,0.671297766,4.54695107,4.54595772,4.54680107,4.54517466
40.290754,4.69041576,4.54834362,0.376924585,4.54592938,4.5449419,4.54578781,4.54415713
40.301246,3.60555128,4.5473292,-0.970452434,4.54490895,4.54392714,4.54477565,4.54314066
40.311738,4.79583152,4.54631615,0.499515134,4.54388986,4.54291355,4.54376466,4.54212534
40.322229,3.74165739,4.54530456,-0.896463704,4.54287219,4.54190121,4.54275494,4.54111128
40.332721,4.24264069,4.54429422,-0.549229941,4.54185575,4.54088993,4.5417463,4.54009827
40.343212,4.58257569,4.54328531,0.198218028,4.54084071,4.5398799,4.54073892,4.53908649
40.353704,4.58257569,4.54227764,0.200743763,4.53982689,4.53887091,4.53973261,4.53807577
40.364196,4.12310563,4.54127129,-0.646657299,4.53881436,4.53786307,4.53872745,4.53706618
40.374687,5,4.54026635,0.678036613,4.53780321,4.53685646,4.53772355,4.53605782
40.385179,4.58257569,4.53926263,0.208117921,4.53679325,4.5358509,4.53672071,4.53505049
40.39567,5.38516481,4.5382603,0.92027415,4.53578466,4.53484656,4.53571911,4.53404439
40.406162,4.69041576,4.53725916,0.391352265,4.53477723,4.53384325,4.53471855,4.53303931
40.416654,4.69041576,4.53625932,0.392627612,4.53377107,4.53284106,4.53371914,4.53203535
40.427145,5.19615242,4.53526085,0.812952383,4.53276625,4.53184009,4.53272096,4.5310326
40.437637,5.91607978,4.53426355,1.1755068,4.53176257,4.53084014,4.53172382,4.53003086
40.448128,4.58257569,4.53326761,0.222054236,4.53076023,4.52984139,4.5307279,4.52903033
40.45862,5.09901951,4.53227284,0.752825795,4.52975902,4.52884366,4.52973302,4.5280308
40.469112,4.24264069,4.53127931,-0.53725099,4.52875903,4.52784704,4.52873926,4.52703237
40.479603,4.35889894,4.53028713,-0.413990561,4.52776035,4.52685161,4.52774671,4.52603513
40.490095,4.47213595,4.52929609,-0.239081853,4.52676278,4.52585718,4.52675518,4.52503889
40.500586,4.79583152,4.52830637,0.517228335,4.52576652,4.52486394,4.52576485,4.52404383
40.511078,3.87298335,4.52731779,-0.808909416,4.52477135,4.52387169,4.52477554,4.52304976
40.52157,4.12310563,4.52633042,-0.634999842,4.52377737,4.52288053,4.52378734,4.52205676
40.532061,4.69041576,4.52534437,0.406289788,4.52278467,4.52189054,4.52280033,4.52106494
40.542553,4.89897949,4.52435942,0.612062138,4.52179306,4.52090154,4.52181432,4.5200741
40.553044,4.69041576,4.52337578,0.408705252,4.5208027,4.51991371,4.5208295,4.51908442
40.563536,3.74165739,4.52239323,-0.883592578,4.51981342,4.51892685,4.51984567,4.51809571
40.574028,5.29150262,4.52141188,0.877548145,4.5188253,4.51794106,4.51886293,4.51710806
40.584519,4.35889894,4.5204318,-0.401911502,4.51783843,4.51695643,4.51788137,4.51612156
40.595011,4.47213595,4.51945281,-0.217524372,4.51685261,4.51597276,4.51690079,4.51513602
40.605502,5.29150262,4.51847508,0.879219847,4.51586802,4.51499024,4.51592139,4.51415163
40.615994,4.58257569,4.51749843,0.255102452,4.51488448,4.51400869,4.51494296,4.51316818
40.626486,5,4.51652295,0.695325141,4.51390207,4.51302817,4.5139656,4.51218578
40.636977,4.24264069,4.51554871,-0.522405997,4.51292088,4.5120488,4.51298939,4.51120452
40.647469,5.47722558,4.51457554,0.981147307,4.51194072,4.51107038,4.51201416,4.51022419
40.65796,5.19615242,4.5136036,0.826165129,4.51096176,4.51009308,4.51104008,4.50924499
40.668452,4.12310563,4.51263272,-0.624121055,4.50998382,4.50911673,4.51006695,4.50826672
40.678944,4.12310563,4.51166297,-0.62334368,4.50900699,4.50814141,4.50909488,4.50728948
40.689435,4.58257569,4.51069445,0.268106784,4.50803135,4.5071672,4.50812395,4.50631335
40.699927,4.35889894,4.50972696,-0.388365829,4.50705671,4.50619393,4.50715397,4.50533814
40.710418,4.35889894,4.50876069,-0.387119808,4.50608325,4.50522177,4.50618513,4.50436404
40.72091,4.35889894,4.50779544,-0.385871093,4.50511079,4.50425053,4.50521723,4.50339086
40.731402,5.09901951,4.50683131,0.769537654,4.5041394,4.5032803,4.50425036,4.50241869
40.741893,4.12310563,4.50586838,-0.618678233,4.50316918,4.50231118,4.50328461,4.5014476
40.752385,5.29150262,4.50490646,0.886902564,4.50219994,4.50134296,4.5023198,4.50047743
40.762876,5,4.50394574,0.704311197,4.50123186,4.50037584,4.50135611,4.49950834
40.773368,4.12310563,4.50298601,-0.616344375,4.50026474,4.49940963,4.50039334,4.49854015
40.78386,4.35889894,4.50202738,-0.378323194,4.49929868,4.49844441,4.49943159,4.49757295
40.794351,4.58257569,4.50106993,0.285492147,4.49833376,4.49748028,4.49847095,4.49660682
40.804843,3.87298335,4.50011347,-0.791915475,4.4973698,4.49651704,4.49751122,4.49564159
40.815334,4.58257569,4.49915817,0.288820918,4.49640698,4.49555487,4.4965526,4.49467742
40.825826,5,4.49820386,0.708375705,4.49544509,4.49459359,4.49559488,4.49371414
40.836318,4.47213595,4.49725062,-0.158476069,4.49448424,4.49363329,4.49463816,4.49275182
40.846809,3.60555128,4.49629853,-0.943794076,4.49352452,4.49267406,4.49368254,4.49179057
40.857301,6.32455532,4.49534742,1.35248213,4.49256572,4.4917157,4.49272781,4.49083018
40.867792,4.79583152,4.49439745,0.549030121,4.49160803,4.4907584,4.49177417,4.48987085
40.878284,3.74165739,4.49344844,-0.867058854,4.49065127,4.48980197,4.49082142,4.48891238
40.888776,4.58257569,4.49250049,0.300125321,4.48969552,4.4888465,4.48986965,4.48795486
40.899267,4.24264069,4.49155366,-0.498911793,4.48874087,4.48789208,4.48891896,4.48699839
40.909759,4.58257569,4.49060779,0.303262101,4.48778713,4.48693852,4.48796915,4.48604277
40.92025,4.47213595,4.48966305,-0.13238993,4.48683448,4.485986,4.48702041,4.48508818
40.930742,4.47213595,4.48871925,-0.128776131,4.48588274,4.48503433,4.48607255,4.48413444
40.941234,4.47213595,4.48777647,-0.125062062,4.48493198,4.48408361,4.48512565,4.48318163
40.951725,4.58257569,4.48683482,0.309420229,4.4839823,4.48313391,4.48417981,4.48222985
40.962217,4.79583152,4.48589409,0.556720246,4.48303351,4.48218506,4.48323484,4.4812789
40.972708,5,4.48495447,0.717666725,4.48208579,4.48123723,4.48229092,4.48032897
40.9832,3.87298335,4.48401578,-0.781685634,4.48113895,4.48029024,4.48134786,4.47937987
40.993692,3.74165739,4.48307809,-0.861057899,4.48019309,4.47934418,4.48040575,4.47843169
41.004183,4.12310563,4.4821415,-0.599196027,4.47924828,4.47839912,4.47946468,4.47748452
41.014675,3.87298335,4.48120583,-0.779886198,4.47830434,4.4774549,4.47852447,4.47653816
41.025166,4.24264069,4.48027124,-0.487473645,4.47736145,4.47651168,4.47758529,4.47559281
41.035658,4.89897949,4.47933756,0.64779775,4.47641942,4.47556928,4.47664696,4.47464826
41.04615,4.12310563,4.47840487,-0.596069834,4.47547834,4.47462779,4.47570956,4.47370462
41.056641,4.69041576,4.47747326,0.461456931,4.4745383,4.47368729,4.47477318,4.47276197
41.067133,4.35889894,4.47654255,-0.34299213,4.47359911,4.47274761,4.47383765,4.47182012
41.077624,4.79583152,4.4756129,0.56587863,4.47266095,4.47180891,4.47290313,4.47087925
41.088116,3.60555128,4.47468414,-0.932272958,4.47172364,4.47087102,4.47196944,4.46993918
41.098608,5.29150262,4.47375636,0.904293238,4.47078726,4.46993402,4.47103668,4.46899999
41.109099,4.47213595,4.47282964,-0.0263378658,4.46985189,4.468998,4.47010492,4.46806177
41.119591,4.24264069,4.47190379,-0.478814272,4.46891736,4.46806277,4.46917398,4.46712435
41.130082,3.60555128,4.470979,-0.930283681,4.46798384,4.46712851,4.46824405,4.46618788
41.140574,4.58257569,4.47005508,0.335440919,4.46705114,4.46619505,4.46731493,4.4652522
41.151066,4.12310563,4.46913212,-0.58824017,4.46611936,4.46526246,4.46638672,4.46431738
41.161557,4.47213595,4.4682102,0.0626558136,4.46518858,4.46433082,4.46545951,4.46338352
41.172049,5,4.46728915,0.729870435,4.46425861,4.46339997,4.4645331,4.46245043
41.18254,5,4.46636913,0.730500427,4.46332963,4.46247008,4.46360767,4.46151829
41.193032,4.35889894,4.46544996,-0.326421535,4.46240146,4.46154095,4.46268305,4.46058691
41.203524,4.58257569,4.46453174,0.343575255,4.46147419,4.46061269,4.46175932,4.45965638
41.214015,4.69041576,4.46361454,0.476236516,4.46054789,4.45968537,4.46083657,4.45872679
41.224507,4.24264069,4.46269819,-0.46910287,4.4596224,4.45875881,4.45991461,4.45779796
41.234998,4.12310563,4.46178286,-0.58195982,4.45869788,4.45783319,4.45899362,4.45687005
41.24549,4.79583152,4.46086837,0.578760016,4.45777415,4.45690833,4.45807342,4.4559429
41.255982,4.58257569,4.4599548,0.350172662,4.45685129,4.45598431,4.4571541,4.45501658
41.266473,5,4.45904225,0.735498304,4.4559294,4.45506122,4.45623573,4.45409118
41.276965,4.24264069,4.45813052,-0.464208826,4.45500829,4.45413887,4.45531815,4.45316652
41.287456,5.09901951,4.4572198,0.801124031,4.45408814,4.45321745,4.45440153,4.45224277
41.297948,4.12310563,4.4563099,-0.577238494,4.45316876,4.45229677,4.45348568,4.45131976
41.30844,3.87298335,4.45540092,-0.763162875,4.45225024,4.45137692,4.45257069,4.45039757
41.318931,4.69041576,4.45449293,0.485718882,4.45133266,4.45045798,4.45165664,4.44947628
41.329423,3.31662479,4.45358575,-1.06628372,4.45041585,4.44953977,4.45074337,4.44855572
41.339914,5,4.45267957,0.739811079,4.44949998,4.44862247,4.44983103,4.44763605
41.350406,4,4.45177419,-0.672141497,4.44858487,4.44770589,4.44891946,4.4467171
41.360898,3.74165739,4.45086971,-0.842147449,4.4476706,4.44679012,4.44800873,4.44579895
41.371389,3.74165739,4.44996621,-0.841610851,4.44675726,4.44587525,4.44709894,4.44488169
41.381881,4,4.44906351,-0.670122014,4.44584466,4.4449611,4.4461899,4.44396514
41.392372,3.16227766,4.44816179,-1.13396831,4.44493299,4.44404784,4.44528178,4.44304948
41.402864,4.47213595,4.44726086,0.157718401,4.44402206,4.44313529,4.44437442,4.44213451
41.413356,5.19615242,4.44636081,0.86590508,4.44311195,4.44222353,4.44346789,4.44122033
41.423847,4.35889894,4.44546173,-0.294215547,4.44220276,4.44131265,4.44256227,4.44030703
41.434339,5.65685425,4.44456344,1.10104079,4.4412943,4.44040248,4.4416574,4.43939441
41.44483,4.12310563,4.4436661,-0.566180605,4.44038674,4.43949318,4.44075343,4.43848267
41.455322,4.69041576,4.44276955,0.49764064,4.43947992,4.43858458,4.43985021,4.43757161
41.465814,4.47213595,4.44187387,0.173960011,4.4385739,4.43767675,4.4389478,4.43666132
41.476305,4.79583152,4.44097914,0.595694878,4.43766877,4.43676979,4.4380463,4.43575189
41.486797,3.87298335,4.44008518,-0.753061639,4.43676437,4.43586352,4.43714552,4.43484313
41.497288,4.12310563,4.43919217,-0.562215741,4.43586085,4.43495811,4.43624564,4.43393523
41.50778,5.09901951,4.43829992,0.812846597,4.43495804,4.43405338,4.43534649,4.433028
41.518272,4.89897949,4.43740854,0.679390131,4.43405603,4.43314941,4.43444814,4.43212153
41.528763,4.69041576,4.43651808,0.503882602,4.4331549,4.4322463,4.43355068,4.43121589
41.539255,4.35889894,4.43562839,-0.277000814,4.43225447,4.43134385,4.43265394,4.43031092
41.549746,4.58257569,4.43473964,0.384494549,4.43135491,4.43044225,4.43175808,4.42940678
41.560238,3,4.43385164,-1.19743544,4.43045605,4.42954132,4.43086293,4.42850331
41.57073,4.47213595,4.43296448,0.197917849,4.42955797,4.42864113,4.42996858,4.42760057
41.581221,3.16227766,4.43207824,-1.12685429,4.42866075,4.42774178,4.4290751,4.42669866
41.591713,4.58257569,4.43119276,0.389079599,4.42776422,4.42684309,4.42818233,4.42579739
41.602204,4.47213595,4.43030819,0.204518362,4.42686854,4.42594522,4.42729043,4.42489695
41.612696,4.35889894,4.42942438,-0.265566247,4.42597355,4.42504801,4.42639922,4.42399715
41.623188,5.74456265,4.42854138,1.1471797,4.42507932,4.42415154,4.4255088,4.42309808
41.633679,4.58257569,4.4276593,0.393594197,4.42418594,4.42325588,4.42461924,4.42219981
41.644171,4.69041576,4.42677796,0.513456715,4.42329323,4.42236087,4.42373037,4.42130218
41.654662,4.12310563,4.42589753,-0.550265299,4.42240136,4.42146667,4.42284236,4.42040535
41.665154,3.87298335,4.42501782,-0.742990227,4.42151017,4.4205731,4.42195504,4.41950916
41.675646,4.24264069,4.42413894,-0.426026117,4.42061972,4.41968026,4.42106849,4.41861367
41.686137,4.69041576,4.42326095,0.516870204,4.4197301,4.41878823,4.42018278,4.41771898
41.696629,4.24264069,4.42238369,-0.42396109,4.41884114,4.41789682,4.41929776,4.41682491
41.70712,4.47213595,4.42150733,0.225008061,4.41795301,4.41700621,4.41841358,4.41593162
41.717612,4.12310563,4.42063169,-0.545459494,4.41706553,4.41611622,4.41753008,4.41503896
41.728104,4.79583152,4.41975685,0.613249276,4.41617879,4.41522695,4.41664734,4.41414698
41.738595,4.35889894,4.4188829,-0.244916218,4.41529286,4.41433846,4.41576543,4.41325579
41.749087,4.35889894,4.41800966,-0.243126963,4.41440758,4.41345059,4.41488419,4.41236521
41.759578,4.24264069,4.41713731,-0.417727931,4.41352312,4.4125635,4.41400379,4.4114754
41.77007,4.89897949,4.41626567,0.694776089,4.41263929,4.41167702,4.41312405,4.41058618
41.780562,4.79583152,4.41539483,0.616795507,4.41175618,4.41079123,4.41224506,4.40969766
41.791053,3.74165739,4.41452486,-0.820284993,4.41087387,4.40990622,4.41136689,4.40880989
41.801545,4.79583152,4.41365559,0.618203794,4.4099922,4.40902181,4.41048938,4.40792272
41.812036,4,4.4127872,-0.642485174,4.40911133,4.40813817,4.40961269,4.40703631
41.822528,4,4.41191951,-0.641809557,4.40823108,4.40725513,4.40873666,4.40615048
41.83302,4.79583152,4.4110526,0.620305508,4.40735153,4.40637276,4.40786136,4.40526533
41.843511,4,4.41018656,-0.640458083,4.40647278,4.40549116,4.40698687,4.40438092
41.854003,4.47213595,4.40932121,0.2506287,4.40559464,4.40461014,4.40611304,4.40349709
41.864494,4.12310563,4.40845672,-0.534182644,4.40471729,4.40372988,4.40524001,4.40261401
41.874986,5.19615242,4.40759293,0.888008724,4.40384055,4.40285021,4.40436763,4.4017315
41.885478,4.69041576,4.40672991,0.532621678,4.40296451,4.40197119,4.40349597,4.40084964
41.895969,3.46410162,4.40586774,-0.970446353,4.40208924,4.40109293,4.40262511,4.39996852
41.906461,4.69041576,4.40500626,0.534237307,4.40121457,4.40021524,4.40175489,4.39908796
41.916952,4.24264069,4.40414563,-0.401876775,4.40034067,4.39933829,4.40088547,4.39820814
41.927444,4.58257569,4.40328568,0.423426513,4.39946738,4.39846191,4.40001669,4.39732887
41.937936,4.35889894,4.4024265,-0.208632586,4.39859476,4.39758618,4.39914862,4.39645025
41.948427,5,4.40156816,0.773583764,4.3977229,4.39671119,4.39828134,4.39557234
41.958919,4.89897949,4.4007105,0.705881709,4.39685164,4.39583675,4.39741468,4.39469499
41.96941,4.58257569,4.39985368,0.42745996,4.39598113,4.39496305,4.39654882,4.39381835
41.979902,4.47213595,4.39899753,0.270441165,4.39511121,4.3940899,4.39568358,4.39294226
41.990394,4.47213595,4.39814214,0.272018042,4.39424196,4.39321738,4.39481905,4.3920668
42.000885,4.69041576,4.39728758,0.54141313,4.39337346,4.39234559,4.39395529,4.39119205
42.011377,4.58257569,4.39643369,0.431441769,4.39250553,4.39147435,4.39309216,4.39031783
42.021868,5.19615242,4.39558064,0.894746771,4.39163835,4.39060382,4.3922298,4.38944431
42.03236,3.87298335,4.39472825,-0.722319114,4.39077174,4.38973383,4.39136806,4.38857133
42.042852,4,4.3938766,-0.627595892,4.38990579,4.38886447,4.39050701,4.38769896
42.053343,4.69041576,4.39302579,0.545334736,4.38904057,4.38799581,4.38964674,4.38682729
42.063835,4.79583152,4.39217563,0.635339196,4.38817592,4.38712769,4.38878707,4.38595614
42.074326,4.35889894,4.39132629,-0.18007596,4.38731199,4.38626027,4.38792818,4.38508568
42.084818,4.89897949,4.39047762,0.713093168,4.38644863,4.38539339,4.38706989,4.38421574
42.09531,5,4.38962968,0.781262003,4.38558592,4.38452711,4.38621228,4.38334639
42.105801,3.74165739,4.38878256,-0.804440909,4.38472392,4.38366152,4.38535544,4.38247773
42.116293,4.24264069,4.3879361,-0.38117635,4.38386248,4.38279646,4.3844992,4.38160958
42.126784,4.24264069,4.38709045,-0.380065466,4.38300175,4.38193209,4.38364372,4.38074211
42.137276,4.58257569,4.38624545,0.443091693,4.38214158,4.38106823,4.38278883,4.37987514
42.147768,5.29150262,4.38540118,0.95189361,4.38128204,4.38020497,4.38193463,4.37900876
42.158259,4.69041576,4.38455772,0.553044339,4.3804232,4.3793424,4.38108117,4.37814305
42.168751,4.69041576,4.38371491,0.553805789,4.37956491,4.37848033,4.38022831,4.37727783
42.179242,4.89897949,4.3828729,0.718405583,4.37870732,4.37761893,4.37937621,4.37641328
42.189734,4.24264069,4.38203154,-0.373350849,4.37785027,4.37675805,4.37852469,4.37554922
42.200226,3.74165739,4.38119091,-0.799708398,4.37699384,4.37589775,4.37767384,4.37468574
42.210717,4.47213595,4.38035108,0.302960194,4.37613811,4.37503811,4.37682373,4.37382291
42.221209,5.38516481,4.37951189,1.00282248,4.37528291,4.37417897,4.37597421,4.37296056
42.2317,5.56776436,4.37867349,1.09045443,4.3744284,4.3733205,4.37512544,4.37209887
42.242192,4.89897949,4.37783574,0.721902863,4.37357442,4.37246252,4.37427725,4.37123765
42.252684,4.79583152,4.37699871,0.647172941,4.37272104,4.37160511,4.37342971,4.370377
42.263175,4.89897949,4.37616247,0.723060865,4.37186835,4.37074835,4.37258292,4.36951699
42.273667,4.58257569,4.37532687,0.455245896,4.37101617,4.36989209,4.3717367,4.36865745
42.284158,4.12310563,4.37449206,-0.501384519,4.37016468,4.36903646,4.37089123,4.36779855
42.29465,4.58257569,4.37365789,0.457075276,4.36931371,4.36818133,4.37004632,4.36694011
42.305142,4.89897949,4.37282443,0.725365466,4.36846333,4.36732675,4.36920207,4.36608223
42.315633,4.69041576,4.37199175,0.56429071,4.36761362,4.36647281,4.36835855,4.36522497
42.326125,5.38516481,4.37115971,1.0069782,4.36676442,4.36561935,4.36751561,4.36436817
42.336616,5.38516481,4.37032846,1.00739086,4.36591589,4.36476653,4.36667339,4.363512
42.347108,4.24264069,4.36949784,-0.35617012,4.36506786,4.36391417,4.36583174,4.36265629
42.3576,4.58257569,4.36866793,0.462501641,4.36422042,4.36306236,4.36499074,4.36180111
42.368091,4.35889894,4.3678388,-0.0945508058,4.36337364,4.36221118,4.36415047,4.36094654
42.378583,3.60555128,4.3670103,-0.872616193,4.36252736,4.36136047,4.36331076,4.36009242
42.389074,4,4.36618258,-0.605130216,4.36168173,4.36051038,4.36247177,4.35923892
42.399566,4.35889894,4.36535549,-0.0803526113,4.3608366,4.35966074,4.36163335,4.35838586
42.410058,4.58257569,4.3645291,0.4669546,4.35999204,4.35881164,4.36079556,4.35753332
42.420549,4.47213595,4.3637299,0.329250745,4.35917457,4.35796316,4.3599585,4.35668139
42.431041,4.58257569,4.36290493,0.468690477,4.35833117,4.35711513,4.359122,4.35582989
42.441532,5,4.36208074,0.798698478,4.35748841,4.35626771,4.35828622,4.35497899
42.452024,5.09901951,4.36125717,0.858930929,4.35664613,4.35542074,4.35745099,4.35412852
42.462516,4.24264069,4.36043431,-0.34321075,4.35580442,4.3545743,4.35661641,4.35327857
42.473007,4.35889894,4.35961222,-0.0267071687,4.35496334,4.35372845,4.35578253,4.3524292
42.483499,5.09901951,4.35879075,0.860365484,4.35412274,4.35288305,4.35494921,4.35158026
42.49399,4.79583152,4.35797006,0.661711015,4.35328278,4.35203825,4.35411661,4.35073191
42.504482,4.35889894,4.35714998,0.0418205613,4.35244329,4.35119388,4.35328456,4.34988398
42.514974,4.35889894,4.35633061,0.0506787254,4.35160435,4.35035003,4.35245314,4.34903654
42.525465,4.69041576,4.35551201,0.57870869,4.35076604,4.34950676,4.35162243,4.34818969
42.535957,5,4.35469403,0.803309385,4.34992819,4.34866393,4.35079228,4.34734325
42.546448,4.24264069,4.35387683,-0.333520826,4.34909097,4.34782169,4.34996283,4.34649738
42.55694,4.79583152,4.35306024,0.665410611,4.34825422,4.34697986,4.34913394,4.34565192
42.567432,4.58257569,4.35224435,0.479928476,4.347418,4.34613854,4.34830567,4.34480695
42.577923,4.35889894,4.35142924,0.0864274627,4.34658241,4.34529781,4.34747811,4.34396254
42.588415,3.60555128,4.35061474,-0.863170588,4.34574727,4.34445748,4.3466511,4.34311854
42.598906,4.79583152,4.34980102,0.667855154,4.34491274,4.34361774,4.3458248,4.3422751
42.609398,4,4.34898791,-0.590751987,4.34407867,4.34277841,4.34499904,4.34143206
42.61989,4.47213595,4.3481755,0.352080181,4.34324513,4.34193957,4.34417391,4.34058949
42.630381,5.29150262,4.34736386,0.971668029,4.3424122,4.34110129,4.34334948,4.33974748
42.640873,4.35889894,4.34655285,0.111112992,4.34157971,4.34026343,4.3425256,4.33890585
42.651364,5,4.3457426,0.808861792,4.34074783,4.33942613,4.34170243,4.33806478
42.661856,4.79583152,4.34493298,0.671489797,4.3399164,4.33858923,4.3408798,4.3372241
42.672348,4.47213595,4.34412405,0.357787518,4.33908548,4.33775281,4.3400578,4.33638387
42.682839,4.47213595,4.34331589,0.358915121,4.33825516,4.33691695,4.3392365,4.33554419
42.693331,5,4.34250836,0.810858585,4.33742529,4.33608148,4.33841574,4.3347049
42.703822,4.35889894,4.34170159,0.131138667,4.336596,4.33524657,4.33759569,4.33386613
42.714314,4.69041576,4.34089545,0.591202425,4.33576715,4.33441205,4.33677618,4.33302775
42.724806,4.47213595,4.34009001,0.363381267,4.33493881,4.333578,4.3359573,4.33218982
42.735297,4.89897949,4.33928534,0.74812709,4.33411106,4.33274449,4.33513912,4.33135241
42.745789,4.12310563,4.3384813,-0.464085845,4.33328374,4.33191137,4.33432149,4.33051538
42.75628,4.58257569,4.33767803,0.494871365,4.33245701,4.3310788,4.33350456,4.32967888
42.766772,4.35889894,4.33687538,0.148403374,4.3316307,4.3302466,4.33268817,4.32884273
42.777264,4.79583152,4.33607344,0.678054633,4.33080489,4.32941486,4.33187241,4.32800703
42.787755,4.12310563,4.33527227,-0.460615507,4.32997966,4.32858366,4.33105735,4.32717185
42.798247,5.19615242,4.33447173,0.928267576,4.32915486,4.32775283,4.33024284,4.32633703
42.808738,5.19615242,4.33367197,0.928698257,4.32833062,4.32692254,4.32942903,4.32550272
42.81923,4.89897949,4.33287284,0.75240059,4.32750681,4.32609261,4.32861577,4.32466877
42.829722,5.29150262,4.33207441,0.979504064,4.32668349,4.32526314,4.32780314,4.32383525
42.840213,3.31662479,4.33127676,-1.00729935,4.32586074,4.32443418,4.32699121,4.32300223
42.850705,4.24264069,4.33047975,-0.296376557,4.3250384,4.3236056,4.32617983,4.32216957
42.861196,4.47213595,4.32968352,0.377428714,4.32421663,4.32277753,4.32536916,4.32133741
42.871688,4.47213595,4.32888793,0.378481215,4.32339526,4.32194982,4.32455903,4.32050559
42.88218,3.46410162,4.32809304,-0.92951139,4.32257438,4.32112255,4.32374954,4.31967419
42.892671,3.87298335,4.32729894,-0.674029374,4.32175407,4.3202958,4.32294075,4.31884328
42.903163,4.24264069,4.32650548,-0.289594194,4.32093415,4.3194694,4.32213252,4.31801272
42.913654,5.19615242,4.32571282,0.93297353,4.3201148,4.31864351,4.321325,4.31718264
42.924146,5,4.32492079,0.821632041,4.31929584,4.31781797,4.32051803,4.3163529
42.934638,5.56776436,4.32412948,1.11518379,4.31847736,4.31699286,4.3197117,4.31552357
42.945129,3.87298335,4.32333897,-0.671085405,4.31765944,4.31616825,4.31890607,4.31469473
42.955621,4,4.3225491,-0.567934062,4.31684191,4.31534398,4.31810101,4.31386621
42.966112,4.35889894,4.32176003,0.192714589,4.31602493,4.31452022,4.31729666,4.31303818
42.976604,3.87298335,4.32097161,-0.669319256,4.31520834,4.3136968,4.31649287,4.31221046
42.987096,4.69041576,4.32018392,0.608466793,4.31439222,4.31287379,4.31568973,4.31138315
42.997587,4.69041576,4.31939704,0.609113064,4.31357665,4.31205128,4.3148873,4.31055631
43.008079,4.89897949,4.31861081,0.761819323,4.31276146,4.3112291,4.31408543,4.30972978
43.01857,4.58257569,4.31782538,0.514538931,4.31194682,4.31040741,4.31328429,4.30890373
43.029062,4.35889894,4.31704062,0.204593059,4.31113256,4.30958606,4.31248372,4.30807799
43.039554,4.58257569,4.3162566,0.516061133,4.31031876,4.30876511,4.31168379,4.30725264
43.050045,4.35889894,4.3154734,0.208387973,4.3095055,4.30794464,4.31088459,4.30642775
43.060537,2.44948974,4.31469086,-1.36572366,4.30869261,4.3071245,4.31008597,4.30560317
43.071028,5.09901951,4.31390914,0.886064541,4.30788027,4.30630484,4.30928808,4.30477905
43.08152,3.87298335,4.3131281,-0.663434062,4.3070683,4.3054855,4.30849076,4.30395524
43.092012,4.12310563,4.31234781,-0.435019751,4.30625678,4.30466656,4.3076941,4.3031318
43.102503,3.60555128,4.31156835,-0.840248221,4.30544579,4.30384809,4.30689818,4.30230881
43.112995,5,4.31078957,0.830186985,4.30463518,4.30302994,4.30610285,4.30148612
43.123486,3.74165739,4.31001163,-0.753892724,4.30382509,4.30221226,4.30530826,4.30066389
43.133978,4.58257569,4.30923437,0.522820545,4.30301538,4.30139489,4.30451425,4.29984194
43.14447,4.58257569,4.30845789,0.523562612,4.30220611,4.30057791,4.30372092,4.29902036
43.154961,4.35889894,4.30768224,0.226311068,4.30139736,4.29976139,4.30292834,4.29819923
43.165453,4.12310563,4.3069073,-0.428720978,4.30058898,4.29894518,4.30213635,4.29737838
43.175944,4.58257569,4.30613321,0.525777978,4.29978111,4.29812943,4.30134512,4.29655797
43.186436,4.35889894,4.30535983,0.231385203,4.29897362,4.29731399,4.3005545,4.29573785
43.196928,4.24264069,4.30458724,-0.248890635,4.29816656,4.29649892,4.29976456,4.29491808
43.207419,4.35889894,4.3038155,0.234698618,4.29736001,4.2956843,4.29897538,4.29409875
43.217911,4.79583152,4.30304449,0.701987916,4.29655383,4.29486999,4.29818682,4.29327969
43.228402,3.31662479,4.30227435,-0.992798851,4.29574816,4.29405612,4.29739903,4.29246107
43.238894,5.29150262,4.30150494,0.994986275,4.29494285,4.29324255,4.29661186,4.29164272
43.249386,5,4.30073633,0.83621987,4.29413796,4.29242935,4.29582539,4.29082471
43.259877,5.19615242,4.29996861,0.946669855,4.29333359,4.29161659,4.29503971,4.29000713
43.270369,3.87298335,4.29920163,-0.652853954,4.29252958,4.29080413,4.29425466,4.28918982
43.28086,4.35889894,4.29843555,0.245893058,4.29172606,4.2899921,4.29347039,4.28837293
43.291352,5.47722558,4.29767022,1.08607337,4.2909229,4.28918036,4.29268678,4.2875563
43.301844,3.46410162,4.29690572,-0.912581012,4.29012017,4.28836898,4.29190388,4.28674
43.312335,4.47213595,4.29614213,0.41951618,4.28931794,4.28755804,4.29112178,4.28592413
43.322827,3.60555128,4.29537931,-0.830558869,4.28851606,4.28674737,4.29034035,4.28510851
43.333318,4.47213595,4.29461741,0.421329496,4.28771467,4.28593714,4.28955972,4.2842933
43.34381,4.35889894,4.29385629,0.255034605,4.28691364,4.28512719,4.28877976,4.28347835
43.354302,3.87298335,4.29309604,-0.648161006,4.28611302,4.28431758,4.28800055,4.28266372
43.364793,4.79583152,4.29233672,0.709573679,4.2853129,4.28350841,4.28722216,4.2818495
43.375285,4.24264069,4.2915782,-0.221218242,4.28451312,4.2826995,4.28644446,4.28103553
43.385776,3.74165739,4.29082063,-0.741055493,4.28371384,4.28189102,4.28566759,4.28022196
43.396268,4.69041576,4.29006388,0.63273366,4.2829149,4.28108281,4.28489142,4.27940863
43.40676,5.09901951,4.28930801,0.899839708,4.28211637,4.28027494,4.28411603,4.27859563
43.417251,4.12310563,4.28855312,-0.406752379,4.28131834,4.27946749,4.28334148,4.27778301
43.427743,4.58257569,4.28779907,0.542933354,4.28052064,4.2786603,4.28256766,4.27697064
43.438234,4.35889894,4.287046,0.268053995,4.27972343,4.27785353,4.28179469,4.27615866
43.448726,4.12310563,4.28633064,-0.404011158,4.27896348,4.27704701,4.28102246,4.27534692
43.459218,5.09901951,4.28557938,0.901909161,4.27816704,4.27624083,4.28025104,4.27453548
43.469709,4.79583152,4.28482913,0.714844317,4.27737109,4.27543506,4.2794805,4.27372444
43.480201,4,4.28407975,-0.532991321,4.27657547,4.27462955,4.27871071,4.27291362
43.490692,4.69041576,4.2833314,0.638031632,4.27578034,4.27382444,4.27794182,4.27210318
43.501184,4.69041576,4.28258394,0.638617117,4.27498553,4.27301958,4.2771737,4.27129298
43.511676,4.12310563,4.28183745,-0.398411629,4.27419114,4.27221505,4.27640642,4.27048307
43.522167,4.24264069,4.28109202,-0.196090114,4.27339722,4.27141093,4.27564007,4.26967354
43.532659,4.12310563,4.28034751,-0.396537367,4.27260363,4.27060704,4.27487451,4.26886423
43.54315,4.24264069,4.27960407,-0.192258636,4.27181052,4.26980356,4.2741099,4.26805529
43.553642,4.47213595,4.27886157,0.439629824,4.27101774,4.26900032,4.27334609,4.26724658
43.564134,5.09901951,4.2781201,0.906034997,4.27022536,4.2681974,4.27258317,4.26643815
43.574625,4.24264069,4.27737973,-0.186384118,4.26943345,4.26739487,4.27182122,4.26563009
43.585117,5.74456265,4.27664033,1.21157844,4.26864188,4.26659257,4.27106011,4.26482225
43.595608,4.12310563,4.27590206,-0.390891841,4.26785077,4.26579067,4.27029999,4.26401477
43.6061,5,4.27516478,0.85137255,4.26705999,4.26498901,4.26954073,4.2632075
43.616592,4.35889894,4.27442858,0.290637849,4.26626961,4.26418765,4.26878241,4.26240051
43.627083,4.12310563,4.27369355,-0.388056598,4.26547969,4.26338668,4.26802511,4.26159388
43.637575,3.87298335,4.27295955,-0.632436717,4.2646901,4.26258594,4.26726871,4.26078746
43.648066,4.35889894,4.27222673,0.294401447,4.26390099,4.26178559,4.26651335,4.25998139
43.658558,4.24264069,4.27149498,-0.169865503,4.26311219,4.26098546,4.2657589,4.25917552
43.66905,4.58257569,4.27076436,0.55840069,4.26232378,4.26018563,4.26500546,4.25836993
43.679541,4,4.27003498,-0.519648901,4.26153585,4.25938618,4.2642531,4.25756469
43.690033,4.47213595,4.2693067,0.450365692,4.26074823,4.25858695,4.26350169,4.25675964
43.700524,4.79583152,4.26857967,0.726121099,4.25996108,4.2577881,4.26275139,4.25595494
43.711016,4.58257569,4.26785378,0.561000815,4.25917425,4.25698947,4.26200208,4.25515043
43.721508,4.12310563,4.26712911,-0.379504257,4.25838781,4.25619113,4.26125383,4.25434619
43.731999,4.58257569,4.26640574,0.562289925,4.25760183,4.25539317,4.26050674,4.25354229
43.742491,3.87298335,4.26568355,-0.626657961,4.25681617,4.25459541,4.25976067,4.25273858
43.752982,4.79583152,4.26496269,0.72860746,4.25603097,4.25379803,4.25901579,4.25193521
43.763474,4.79583152,4.26424306,0.729101136,4.25524609,4.25300086,4.25827197,4.25113202
43.773966,3.74165739,4.26352472,-0.722403861,4.2544616,4.25220397,4.25752929,4.25032909
43.784457,4.12310563,4.26280778,-0.373767518,4.25367757,4.25140745,4.25678785,4.24952649
43.794949,4.79583152,4.26209211,0.730574712,4.25289386,4.25061113,4.25604752,4.24872407
43.80544,4.12310563,4.26137787,-0.371849766,4.25211061,4.24981518,4.25530846,4.24792198
43.815932,5.09901951,4.26066495,0.915617041,4.25132767,4.24901943,4.25457054,4.24712007
43.826424,3.87298335,4.25995342,-0.62206919,4.25054511,4.24822396,4.25383387,4.2463184
43.836915,4.69041576,4.25924339,0.656637168,4.24976302,4.24742884,4.25309852,4.24551707
43.847407,4.89897949,4.25853473,0.800277921,4.24898124,4.24663393,4.25236439,4.2447159
43.857898,4.58257569,4.25782761,0.569866721,4.24819992,4.24583937,4.25163162,4.24391505
43.86839,4.35889894,4.25712192,0.319025114,4.24741891,4.24504501,4.25090011,4.24311438
43.878882,4.47213595,4.25641774,0.464454749,4.24663829,4.24425092,4.25016994,4.24231394
43.889373,5,4.25571517,0.862719439,4.24585813,4.24345717,4.24944121,4.24151382
43.899865,4,4.2550141,-0.504989206,4.24507827,4.24266363,4.2487138,4.24071387
43.910356,4.12310563,4.25431469,-0.362227911,4.24429888,4.24187042,4.24798788,4.23991422
43.920848,4.35889894,4.25361683,0.32447206,4.2435198,4.24107741,4.24726333,4.23911474
43.93134,4.35889894,4.25292061,0.32554313,4.2427411,4.24028467,4.24654025,4.23831549
43.941831,5.38516481,4.25222615,1.06439591,4.24196286,4.23949226,4.24581874,4.23751655
43.952323,4.79583152,4.25153332,0.737765685,4.24118493,4.23870005,4.24509868,4.23671777
43.962814,3.31662479,4.25084229,-0.966549275,4.24040746,4.23790817,4.24438024,4.23591929
43.973306,3.74165739,4.25015297,-0.713088761,4.2396303,4.23711647,4.24366332,4.23512097
43.983798,4.24264069,4.24946544,-0.0826120925,4.23885352,4.23632504,4.24294801,4.23432287
43.994289,4.12310563,4.24877982,-0.354505567,4.2380772,4.23553394,4.24223442,4.23352507
44.004781,4.89897949,4.248096,0.806773501,4.23730119,4.23474302,4.24152243,4.23272742
44.015272,4.47213595,4.24741415,0.474048311,4.23652564,4.23395243,4.24081223,4.23193006
44.025764,4.89897949,4.24673418,0.807617053,4.23575041,4.23316202,4.24010371,4.23113285
44.036256,4.12310563,4.24605619,-0.35064307,4.23497555,4.23237186,4.23939697,4.23033586
44.046747,4.47213595,4.24538028,0.476188698,4.23420115,4.23158203,4.23869212,4.22953916
44.057239,5.09901951,4.24470636,0.92429062,4.23342707,4.23079238,4.23798907,4.22874261
44.06773,4.12310563,4.24403461,-0.347748454,4.23265344,4.23000305,4.23728798,4.22794634
44.078222,3.87298335,4.24336494,-0.608589842,4.23188012,4.22921389,4.23658876,4.22715021
44.088714,4.24264069,4.24269746,-0.00753483778,4.23110719,4.22842498,4.23589153,4.22635429
44.099205,4,4.24203228,-0.49196776,4.23033472,4.22763638,4.2351964,4.22555866
44.109697,5.19615242,4.24136931,0.977130038,4.22956256,4.22684796,4.23450327,4.22476316
44.120188,5.38516481,4.24070874,1.06979253,4.22879087,4.22605986,4.23381233,4.22396794
44.13068,4.47213595,4.24005049,0.481752495,4.22801948,4.22527192,4.23312349,4.22317285
44.141172,4.89897949,4.23939467,0.812148271,4.22724848,4.22448422,4.23243687,4.22237797
44.151663,4.69041576,4.2387414,0.672067226,4.22647794,4.22369684,4.23175259,4.22158336
44.162155,3.74165739,4.23809062,-0.704580182,4.22570772,4.22290962,4.23107058,4.22078888
44.172646,5.19615242,4.2374425,0.979137337,4.22493796,4.22212271,4.23039101,4.21999467
44.183138,4,4.23679698,-0.486617899,4.22416851,4.22133596,4.22971381,4.21920059
44.19363,4.47213595,4.23615418,0.485779549,4.22339945,4.22054944,4.22903912,4.2184067
44.204121,4.47213595,4.23551424,0.486437782,4.22263086,4.21976324,4.22836706,4.21761308
44.214613,4,4.23487709,-0.484641196,4.22186258,4.21897719,4.22769755,4.21681958
44.225104,4,4.23424292,-0.483986491,4.22109477,4.21819144,4.22703081,4.21602635
44.235596,4.35889894,4.23361169,0.353959392,4.22032728,4.21740585,4.22636676,4.21523324
44.246088,4,4.23298353,-0.482683676,4.21956017,4.21662049,4.22570555,4.21444031
44.256579,4.35889894,4.23235858,0.35572513,4.21879354,4.21583543,4.22504731,4.21364765
44.267071,4.47213595,4.23173679,0.49030518,4.21802722,4.21505053,4.224392,4.2128551
44.277562,3.60555128,4.23111836,-0.790927991,4.21726138,4.21426592,4.22373981,4.21206281
44.288054,4.89897949,4.23050327,0.817603946,4.21649585,4.21348146,4.22309071,4.21127062
44.298546,5.09901951,4.22989167,0.932270266,4.21573072,4.21269722,4.22244485,4.21047862
44.309037,4,4.22928369,-0.478835763,4.21496607,4.21191328,4.22180237,4.20968688
44.319529,4.47213595,4.22867932,0.493413248,4.21420173,4.21112949,4.22116326,4.20889524
44.33002,3.74165739,4.22807878,-0.697439168,4.21343787,4.21034599,4.22052771,4.20810385
44.340512,4.35889894,4.22748205,0.36251468,4.21267434,4.20956263,4.21989572,4.20731257
44.351004,4.24264069,4.2268893,0.125504542,4.21191121,4.2087795,4.21926745,4.20652146
44.361495,3.87298335,4.22630069,-0.594405031,4.21114855,4.20799665,4.21864307,4.2057306
44.371987,4.79583152,4.22571622,0.755059799,4.21038622,4.20721394,4.21802256,4.20493983
44.382478,4,4.22513614,-0.474485128,4.20962437,4.20643152,4.21740617,4.20414932
44.39297,5,4.22456044,0.88059046,4.20886286,4.20564924,4.21679391,4.2033589
44.403462,5.38516481,4.22398932,1.07757853,4.20810175,4.20486717,4.21618595,4.20256864
44.413953,4.24264069,4.22342297,0.138627998,4.20734112,4.20408539,4.21558248,4.20177863
44.424445,4.24264069,4.22286141,0.140638833,4.20658083,4.20330374,4.21498353,4.20098871
44.434936,4,4.2223049,-0.471492201,4.20582102,4.20252238,4.21438936,4.20019903
44.445428,4.47213595,4.22175348,0.500382329,4.20506155,4.20174115,4.2138,4.19940944
44.45592,5.19615242,4.22120737,0.987393059,4.2043025,4.20096013,4.21321566,4.19862001
44.466411,4.24264069,4.22066678,0.148235974,4.20354393,4.20017938,4.21263657,4.19783082
44.476903,4.79583152,4.22013179,0.758748796,4.20278571,4.19939877,4.21206277,4.19704171
44.487394,5.29150262,4.21960266,1.03532602,4.20202797,4.19861844,4.21149456,4.19625283
44.497886,5.19615242,4.2190795,0.988469991,4.20127059,4.19783823,4.21093202,4.19546404
44.508378,4.35889894,4.21856254,0.374615008,4.20051363,4.19705823,4.21037538,4.1946754
44.518869,4,4.21805203,-0.466960421,4.19975716,4.1962785,4.2098249,4.19388699
44.529361,4.47213595,4.2175481,0.504566995,4.19900105,4.1954989,4.20928069,4.19309866
44.539852,4.47213595,4.21705106,0.505059298,4.19824543,4.19471957,4.20874307,4.19231055
44.550344,4.79583152,4.21656105,0.761098205,4.19749017,4.19394037,4.20821216,4.19152252
44.560836,4.69041576,4.21607835,0.688721577,4.19673534,4.19316136,4.20768827,4.19073464
44.571327,4.24264069,4.21560327,0.164430589,4.19598102,4.19238262,4.20717168,4.18994698
44.581819,3.74165739,4.21513598,-0.688097808,4.19522706,4.19160401,4.20666257,4.18915939
44.59231,3.87298335,4.21467685,-0.584545555,4.19447361,4.19082566,4.2061613,4.18837203
44.602802,4.69041576,4.21422609,0.690064978,4.19372052,4.19004743,4.20566807,4.18758473
44.613294,4.89897949,4.21378403,0.827765336,4.19296788,4.1892694,4.20518323,4.18679757
44.623785,5.47722558,4.21335105,1.12422174,4.19221575,4.18849163,4.20470714,4.18601063
44.634277,3.87298335,4.2129274,-0.583047214,4.19146399,4.18771398,4.20424004,4.18522376
44.644768,4.79583152,4.21251351,0.76375259,4.19071276,4.1869366,4.20378238,4.1844371
44.65526,4,4.21210967,-0.460553653,4.1899619,4.18615932,4.20333443,4.1836505
44.665752,4.79583152,4.21171631,0.764274307,4.1892115,4.18538224,4.20289662,4.18286404
44.676243,4.12310563,4.21133387,-0.297032395,4.18846162,4.18460542,4.2024694,4.18207779
44.686735,3.74165739,4.21096271,-0.685058626,4.18771213,4.18382871,4.2020531,4.1812916
44.697226,3.87298335,4.21060334,-0.58105077,4.18696317,4.18305227,4.20164827,4.18050562
44.707718,4.12310563,4.21025618,-0.295212734,4.1862146,4.18227593,4.20125528,4.17971969
44.71821,4.89897949,4.20992176,0.830095009,4.1854665,4.18149978,4.20087468,4.1789339
44.728701,4.69041576,4.20960063,0.693408342,4.18471894,4.18072388,4.20050702,4.1781483
44.739193,5,4.20929329,0.88921691,4.18397178,4.1799481,4.20015278,4.17736277
44.749684,4,4.20900037,-0.457165585,4.18322516,4.17917257,4.19981262,4.17657743
44.760176,4.47213595,4.20872245,0.513238258,4.18247895,4.17839715,4.19948708,4.17579214
44.770668,3.74165739,4.20846019,-0.683229682,4.18173322,4.1776219,4.19917684,4.17500698
44.781159,4.69041576,4.2082143,0.694407269,4.18098805,4.17684692,4.19888262,4.17422202
44.791651,4.24264069,4.20798548,0.186159092,4.18024329,4.17607203,4.19860508,4.1734371
44.802142,5.09901951,4.20777452,0.944057726,4.1794991,4.1752974,4.19834504,4.17265238
44.812634,4.24264069,4.20758221,0.187239098,4.17875532,4.17452288,4.19810326,4.1718677
44.823126,4.24264069,4.20740941,0.187699958,4.17801205,4.17374853,4.19788062,4.17108315
44.833617,4.24264069,4.20725707,0.188105343,4.17726934,4.17297443,4.19767806,4.17029878
44.844109,4.58257569,4.20712611,0.612739414,4.17652707,4.17220043,4.1974965,4.16951446
44.8546,4.69041576,4.20701758,0.695268423,4.17578538,4.17142668,4.19733699,4.16873033
44.865092,4.24264069,4.20693256,0.188965946,4.17504413,4.17065304,4.1972006,4.16794623
44.875584,4.79583152,4.20687221,0.767436848,4.1743034,4.16987956,4.19708849,4.16716225
44.886075,4.24264069,4.20683776,0.189216603,4.17356325,4.16910633,4.19700191,4.16637846
44.896567,4.35889894,4.20683053,0.389959507,4.17282356,4.1683332,4.19694214,4.1655947
44.907058,5.09901951,4.20685189,0.944546251,4.17208447,4.16756032,4.19691058,4.16481112
44.91755,4.35889894,4.20690335,0.389866124,4.17134584,4.16678753,4.19690872,4.16402758
44.928042,4.12310563,4.20698648,-0.28962192,4.17060774,4.16601492,4.19693814,4.16324415
44.938533,3.31662479,4.20710297,-0.943651515,4.16987026,4.16524254,4.19700053,4.1624609
44.949025,4.58257569,4.20725465,0.612634516,4.16913325,4.16447027,4.19709771,4.16167768
44.959516,3.87298335,4.20744341,-0.578325221,4.16839686,4.16369823,4.19723159,4.16089463
44.970008,3.60555128,4.20767136,-0.775963971,4.16766096,4.16292629,4.19740426,4.16011162
44.9805,3.60555128,4.2079407,-0.776137505,4.16692561,4.16215452,4.19761793,4.15932871
44.990991,4.47213595,4.20825378,0.51369463,4.1661909,4.16138298,4.19787495,4.15854597
45.001483,4.35889894,4.2086132,0.38766705,4.16545668,4.16061154,4.19817793,4.15776326
45.011974,4.79583152,4.20902164,0.766035173,4.16472312,4.15984034,4.19852953,4.15698072
45.022466,4,4.20948211,-0.457692152,4.16399006,4.15906923,4.19893278,4.1561982
45.032958,4.24264069,4.20999774,0.180673583,4.16325758,4.15829829,4.19939083,4.15541578
45.043449,5,4.21057191,0.888497658,4.16252577,4.15752758,4.19990703,4.15463353
45.053941,4.35889894,4.2112084,0.384305275,4.16179448,4.15675696,4.20048518,4.1538513
45.064432,3.60555128,4.21191107,-0.778691078,4.16106386,4.15598658,4.20112916,4.15306924
45.074924,4.69041576,4.21268436,0.691181166,4.16033377,4.15521629,4.20184339,4.15228719
45.085416,3.87298335,4.21353285,-0.583566197,4.1596043,4.15444616,4.20263248,4.15150524
45.095907,4.24264069,4.21446152,0.167866508,4.15887552,4.15367627,4.20350141,4.15072345
45.106399,4.58257569,4.21547601,0.605887516,4.1581473,4.15290646,4.20445584,4.14994168
45.11689,5.47722558,4.21658209,1.12278381,4.15741977,4.15213689,4.20550154,4.14916007
45.127382,4.58257569,4.21778644,0.603977863,4.15669281,4.1513674,4.20664519,4.14837847
45.137874,3.31662479,4.21909601,-0.949984851,4.1559665,4.15059808,4.20789379,4.14759695
45.148365,5.09901951,4.22051837,0.937283919,4.1552409,4.14982898,4.20925492,4.1468156
45.158857,5.09901951,4.22206219,0.936459993,4.15451589,4.14905998,4.21073726,4.14603426
45.169348,3.31662479,4.2237364,-0.952424072,4.15379162,4.1482912,4.21234976,4.14525307
45.17984,4.89897949,4.22555139,0.820626648,4.15306794,4.14752251,4.21410283,4.14447189
45.190332,3.87298335,4.22751808,-0.595428194,4.15234495,4.14675398,4.21600743,4.14369079
45.200823,4.79583152,4.22964844,0.75245138,4.15162271,4.14598568,4.21807557,4.14290985
45.211315,5.29150262,4.23195628,1.02934268,4.15090109,4.14521747,4.22032108,4.14212891
45.221806,4.69041576,4.23445595,0.675247961,4.15018024,4.14444948,4.22275836,4.14134812
45.232298,3.46410162,4.23716427,-0.879239814,4.14946004,4.14368158,4.22540426,4.14056734
45.24279,5,4.2400991,0.871722948,4.14874054,4.14291383,4.22827671,4.13978663
45.253281,4.89897949,4.24328024,0.809752584,4.14802184,4.14214631,4.23139555,4.13900607
45.263773,4.35889894,4.24673059,0.334915449,4.14730381,4.14137888,4.23478376,4.13822551
45.274264,4.47213595,4.25047439,0.470809482,4.14658658,4.14061167,4.23846565,4.1374451
45.284756,4.35889894,4.25454012,0.32304616,4.14587004,4.13984455,4.24246978,4.13666468
45.295248,3.74165739,4.25895861,-0.719236556,4.14515425,4.13907758,4.24682705,4.13588434
45.305739,3.31662479,4.26376442,-0.973210987,4.1444393,4.13831084,4.25157216,4.13510414
45.316231,4.24264069,4.26899799,-0.162349335,4.14372505,4.13754418,4.25674565,4.13432394
45.326722,4,4.27470336,-0.524121512,4.14301166,4.13677774,4.2623917,4.13354387
45.337214,3.46410162,4.28093311,-0.903787308,4.142299,4.13601139,4.26856304,4.13276381
45.347706,3.31662479,4.2877465,-0.985455076,4.14158714,4.13524519,4.27531911,4.1319838
45.358197,4.35889894,4.29521302,0.252360702,4.14087617,4.13447922,4.28272963,4.13120394
45.368689,3.87298335,4.30341808,-0.656075253,4.14016595,4.13371333,4.29088024,4.13042407
45.37918,4.24264069,4.31246291,-0.264238943,4.13945663,4.13294766,4.29987249,4.12964434
45.389672,4.47213595,4.32247766,0.386856949,4.13874809,4.13218208,4.30983691,4.12886459
45.400164,5.09901951,4.33362609,0.87486766,4.13804041,4.13141665,4.32093776,4.12808491
45.410655,3.87298335,4.34612199,-0.68785074,4.13733366,4.13065144,4.33338946,4.12730536
45.421147,4.24264069,4.36025278,-0.342946195,4.13662773,4.12988631,4.34748027,4.1265258
45.431638,4.47213595,4.3763975,0.309416311,4.13592275,4.12912141,4.36359034,4.12574637
45.44213,4.69041576,4.39507046,0.543456806,4.13521861,4.12835659,4.38223545,4.12496692
45.452622,4,4.4169517,-0.645717975,4.13451538,4.12759192,4.40409758,4.12418753
45.463113,4.12310563,4.44293518,-0.565534748,4.13381314,4.12682748,4.43007319,4.12340827
45.473605,4.89897949,4.47418251,0.651764512,4.13311177,4.12606311,4.46132706,4.122629
45.484096,4.79583152,4.51214466,0.532622627,4.13241142,4.12529897,4.49931395,4.12184985
45.494588,4.47213595,4.55860568,-0.294057347,4.13171197,4.12453491,4.54582235,4.12107068
45.50508,4.24264069,4.61565087,-0.610745599,4.1310135,4.123771,4.60294236,4.12029157
45.515571,3.74165739,4.68561649,-0.971575576,4.13031608,4.12300732,4.67301501,4.11951258
45.526063,3.87298335,4.77099751,-0.947636093,4.1296196,4.12224372,4.75853951,4.11873356
45.536554,4.24264069,4.87422392,-0.794722108,4.1289242,4.12148034,4.86194868,4.11795468
45.547046,4.69041576,4.99748699,-0.554140081,4.12822977,4.12071704,4.98543466,4.11717576
45.557538,4.58257569,5.14241145,-0.748221728,4.12753639,4.11995389,5.13062039,4.1163969
45.568029,5.29150262,5.30980391,-0.135282246,4.12684414,4.11919097,5.29830787,4.11561815
45.578521,5.74456265,5.49947248,0.495065822,4.1261529,4.11842813,5.48829808,4.11483938
45.589012,4,5.70994921,-1.30765026,4.12546281,4.11766551,5.69911385,4.11406073
45.599504,5.09901951,5.93852852,-0.916247243,4.12477377,4.11690298,5.92803937,4.11328205
45.609996,6.70820393,6.18109606,0.726021953,4.12408586,4.1161406,6.17094965,4.11250342
45.620487,6.4807407,6.43214412,0.220446321,4.12339915,4.11537844,6.42232676,4.1117249
45.630979,6.63324958,6.68477107,-0.226983452,4.12271354,4.11461636,6.67525949,4.11094635
45.64147,7.93725393,6.93037679,1.00343268,4.12202917,4.11385451,6.92113861,4.11016792
45.651962,7.34846923,7.15871074,0.435612768,4.12134592,4.11309274,7.1497048,4.10938945
45.662454,7.28010989,7.35779142,-0.278714068,4.12066389,4.11233112,7.34896765,4.10861103
45.672945,7.81024968,7.51466714,0.543675025,4.11998316,4.11156973,7.5059666,4.10783271
45.683437,7.61577311,7.6170671,-0.0359721005,4.11930361,4.11080843,7.60842258,4.10705436
45.693928,6.55743852,7.65573017,-1.04799411,4.11862539,4.11004735,7.64706789,4.10627613
45.70442,7.28010989,7.62689411,-0.588883874,4.1179484,4.10928635,7.61813662,4.10549785
45.714912,5.91607978,7.53334708,-1.27171824,4.11727272,4.1085255,7.52441678,4.10471961
45.725403,5.83095189,7.38362553,-1.24606325,4.11659843,4.10776489,7.37444794,4.10394149
45.735895,6.70820393,7.18966945,-0.693877167,4.11592543,4.10700436,7.18017537,4.10316332
45.746386,6.78232998,6.96443681,-0.426739764,4.11525386,4.10624405,6.95456361,4.10238526
45.756878,6.164414,6.72002805,-0.745395228,4.11458363,4.10548383,6.70972008,4.10160715
45.76737,5.91607978,6.46701763,-0.742251874,4.11391481,4.10472377,6.45622669,4.10082908
45.777861,5.74456265,6.21424458,-0.685333451,4.1132475,4.10396394,6.20293069,4.10005112
45.788353,5.47722558,5.96885028,-0.701159541,4.11258158,4.10320419,5.95698261,4.09927311
45.798844,5.19615242,5.73659482,-0.735147877,4.11191722,4.10244467,5.72415327,4.09849521
45.809336,5.19615242,5.52175274,-0.570613985,4.11125431,4.10168524,5.50872881,4.09771726
45.819828,5.38516481,5.32731488,0.240520108,4.11059293,4.10092596,5.31371243,4.09693934
45.830319,4.58257569,5.15494924,-0.756553727,4.10993318,4.10016692,5.14078403,4.09616152
45.840811,4.35889894,5.00504184,-0.803830141,4.10927496,4.09940797,4.99033987,4.09538365
45.851302,5.56776436,4.87696997,0.831140415,4.10861841,4.09864925,4.86176511,4.09460589
45.861794,4.79583152,4.76920228,0.1631847,4.10796345,4.09789061,4.75353297,4.09382807
45.872286,4.89897949,4.67966123,0.46831427,4.10731016,4.09713214,4.6635675,4.09305028
45.882777,4.12310563,4.60594564,-0.694866903,4.10665863,4.0963739,4.58946628,4.09227259
45.893269,4.12310563,4.545557,-0.649962592,4.10600878,4.09561576,4.52872741,4.09149484
45.90376,4.24264069,4.4961376,-0.503484769,4.10536074,4.09485785,4.47898873,4.09071719
45.914252,4.89897949,4.45554434,0.665909259,4.10471444,4.09410003,4.43810206,4.08993949
45.924744,4.12310563,4.42195317,-0.546669503,4.10406996,4.09334237,4.40423848,4.08916182
45.935235,4,4.39385751,-0.627580681,4.1034274,4.09258495,4.375887,4.08838423
45.945727,4.58257569,4.37004641,0.461008984,4.10278666,4.09182763,4.35183285,4.08760659
45.956218,4.58257569,4.34958715,0.482688875,4.10214791,4.09107054,4.33114026,4.08682904
45.96671,4.47213595,4.33176046,0.374667179,4.10151106,4.09031355,4.31308747,4.08605144
45.977202,3.74165739,4.31603068,-0.757874194,4.1008762,4.08955673,4.29713694,4.08527386
45.987693,4.24264069,4.30199742,-0.243632375,4.10024344,4.08880015,4.28288687,4.08449636
45.998185,4.47213595,4.2893579,0.427525503,4.09961268,4.08804367,4.27003333,4.08371881
46.008676,4.35889894,4.27788897,0.284622506,4.09898408,4.08728742,4.25835239,4.08294134
46.019168,4,4.26741616,-0.517122964,4.09835757,4.08653128,4.24766887,4.08216382
46.02966,3.46410162,4.25780666,-0.890901254,4.09773325,4.08577531,4.23784949,4.08138631
46.040151,3.60555128,4.24895467,-0.802124298,4.09711121,4.08501959,4.22878803,4.08060889
46.050643,4.35889894,4.24077157,0.343696626,4.09649139,4.08426396,4.22039551,4.0798314
46.061134,4.35889894,4.2331867,0.354559231,4.09587393,4.08350859,4.21260099,4.079054
46.071626,4,4.22613722,-0.475538876,4.09525877,4.08275332,4.20534135,4.07827654
46.082118,4.24264069,4.21957114,0.151886635,4.09464602,4.08199822,4.19856437,4.07749909
46.092609,4.47213595,4.21344304,0.50861863,4.09403577,4.08124338,4.19222447,4.07672173
46.103101,4.47213595,4.20771136,0.514222318,4.09342795,4.08048864,4.18627982,4.07594429
46.113592,4.12310563,4.20234152,-0.281488709,4.09282274,4.07973415,4.18069572,4.07516694
46.124084,3.87298335,4.19730075,-0.569488718,4.09222007,4.07897977,4.1754392,4.07438953
46.134576,4.35889894,4.1925613,0.40784512,4.09162005,4.07822558,4.17048237,4.07361212
46.145067,4.69041576,4.18809831,0.708743573,4.09102278,4.07747164,4.16580023,4.07283479
46.155559,4.47213595,4.18388821,0.536887092,4.09042821,4.07671781,4.16136905,4.07205739
46.16605,4.24264069,4.17991143,0.250458099,4.0898365,4.07596424,4.15716916,4.07128008
46.176542,3.31662479,4.17614884,-0.927105197,4.0892476,4.07521078,4.15318126,4.07050269
46.187034,3.74165739,4.17258425,-0.656450199,4.08866163,4.07445752,4.14938906,4.06972531
46.197525,4.12310563,4.16920301,-0.214703007,4.0880787,4.07370451,4.1457778,4.068948
46.208017,4.24264069,4.16599088,0.276857024,4.08749875,4.07295162,4.1423331,4.06817063
46.218508,3.87298335,4.16293617,-0.538472677,4.08692198,4.072199,4.1390432,4.06739333
46.229,4.24264069,4.16002711,0.287425773,4.08634832,4.0714465,4.13589616,4.06661595
46.239492,3.74165739,4.15725382,-0.644667695,4.0857779,4.07069419,4.13288203,4.06583858
46.249983,4.69041576,4.15460727,0.731989402,4.08521084,4.06994215,4.12999169,4.06506128
46.260475,4.47213595,4.15207848,0.565736221,4.08464711,4.06919023,4.127216,4.06428391
46.270966,5.29150262,4.1496602,1.06857027,4.08408689,4.06843859,4.12454766,4.06350661
46.281458,3.74165739,4.14734487,-0.636936015,4.08353014,4.06768708,4.12197897,4.06272923
46.29195,4.12310563,4.14512625,-0.148393481,4.08297699,4.06693576,4.11950359,4.06195186
46.302441,5,4.14299858,0.925743714,4.08242757,4.06618473,4.11711568,4.06117455
46.312933,4.69041576,4.14095597,0.741255551,4.08188186,4.06543382,4.11480922,4.06039717
46.323424,5,4.13899379,0.927904202,4.08134005,4.0646832,4.11257951,4.05961985
46.333916,4.69041576,4.13710704,0.743847244,4.08080211,4.06393271,4.11042138,4.05884246
46.344408,4.47213595,4.13529163,0.580382911,4.08026819,4.06318243,4.10833068,4.05806506
46.354899,3.46410162,4.13354381,-0.81819447,4.07973843,4.06243244,4.10630356,4.05728773
46.365391,4.69041576,4.13185959,0.747366154,4.07921281,4.06168258,4.10433589,4.05651032
46.375882,4.69041576,4.13023596,0.748451605,4.07869154,4.06093302,4.10242458,4.05573298
46.386374,5.09901951,4.12866948,0.985063465,4.07817461,4.0601836,4.10056604,4.05495556
46.396866,5.56776436,4.12715746,1.20025285,4.07766217,4.0594344,4.09875748,4.05417813
46.407357,4.12310563,4.12569738,-0.0509092648,4.07715437,4.05868549,4.09699629,4.05340076
46.417849,4.12310563,4.12428648,-0.0343636185,4.07665123,4.05793673,4.09527955,4.05262331
46.42834,4.24264069,4.12292277,0.34600277,4.07615294,4.05718827,4.09360519,4.05184593
46.438832,3.46410162,4.12160386,-0.810865121,4.07565954,4.05643997,4.09197064,4.05106846
46.449324,4.12310563,4.12032792,0.0527039161,4.07517117,4.0556919,4.09037398,4.05029097
46.459815,4.47213595,4.11909326,0.594173963,4.07468801,4.05494412,4.08881341,4.04951356
46.470307,3.31662479,4.11789793,-0.895138617,4.07421009,4.05419651,4.0872868,4.04873605
46.480798,4.89897949,4.11674062,0.884442688,4.07373763,4.05344921,4.08579275,4.04795861
46.49129,4.35889894,4.11561963,0.493233529,4.07327066,4.05270207,4.08432937,4.04718108
46.501782,4.12310563,4.11453373,0.0925845283,4.07280937,4.05195517,4.08289531,4.04640354
46.512273,3.74165739,4.11348177,-0.609774043,4.07235394,4.05120859,4.08148931,4.04562606
46.522765,4,4.11246238,-0.335354114,4.07190443,4.05046218,4.08010978,4.04484849
46.533256,4.69041576,4.11147469,0.760881774,4.07146106,4.04971609,4.07875576,4.04407097
46.543748,3.46410162,4.1105175,-0.803999925,4.07102392,4.04897018,4.07742584,4.04329337
46.55424,4.24264069,4.10958998,0.364761162,4.07059319,4.04822451,4.07611904,4.04251575
46.564731,3,4.10869138,-1.05294415,4.07016908,4.04747918,4.07483448,4.04173819
46.575223,4.47213595,4.10782072,0.603585318,4.06975168,4.04673403,4.07357094,4.04096054
46.585714,3.74165739,4.10697745,-0.604417127,4.06934124,4.04598921,4.07232777,4.04018295
46.596206,4.47213595,4.10616074,0.604958856,4.06893786,4.04524458,4.07110386,4.03940526
46.606698,3.74165739,4.10537005,-0.603085951,4.06854176,4.04450022,4.06989855,4.03862755
46.617189,4.47213595,4.1046049,0.606243395,4.06815317,4.04375619,4.06871118,4.0378499
46.627681,4.58257569,4.10386463,0.691889492,4.06777222,4.04301237,4.0675408,4.03707215
46.638172,4.89897949,4.1031489,0.892093371,4.06739917,4.04226889,4.06638698,4.03629446
46.648664,4.12310563,4.10245717,0.143695701,4.06703418,4.04152561,4.06524886,4.03551668
46.659156,3.16227766,4.10178912,-0.969283994,4.06667748,4.04078262,4.06412594,4.03473887
46.669647,4.12310563,4.10114448,0.148192945,4.06632934,4.04003998,4.06301776,4.03396112
46.680139,4.58257569,4.10052281,0.694300284,4.06598992,4.03929755,4.06192357,4.03318327
46.69063,5.19615242,4.09992398,1.04700928,4.06565953,4.03855548,4.06084309,4.03240547
46.701122,3.74165739,4.09934764,-0.598072116,4.06533835,4.03781364,4.05977561,4.03162757
46.711614,3.74165739,4.09879366,-0.5976088,4.06502667,4.03707208,4.05872079,4.03084965
46.722105,4.47213595,4.09826194,0.611452386,4.06472479,4.0363309,4.05767831,4.03007178
46.732597,4.12310563,4.09775223,0.159227511,4.06443291,4.03558995,4.05664756,4.02929381
46.743088,4.24264069,4.09726454,0.381282244,4.06415139,4.03484937,4.05562835,4.0285159
46.75358,4.12310563,4.09679871,0.162194056,4.06388047,4.03410904,4.05462012,4.02773788
46.764072,4.35889894,4.09635477,0.512390649,4.06362046,4.03336901,4.05362264,4.02695983
46.774563,3.87298335,4.09593273,-0.472175161,4.06337173,4.03262937,4.05263567,4.02618184
46.785055,4.12310563,4.09553254,0.166051441,4.06313454,4.03188998,4.05165871,4.02540374
46.795546,4.35889894,4.09515434,0.513560708,4.06290928,4.03115099,4.05069166,4.02462569
46.806038,4.35889894,4.09479813,0.513907398,4.06269625,4.03041225,4.04973407,4.02384754
46.81653,5,4.09446405,0.951596526,4.06249586,4.02967384,4.04878576,4.02306936
46.827021,3.46410162,4.09415227,-0.793757305,4.06230849,4.02893583,4.04784659,4.02229123
46.837513,3.16227766,4.0938629,-0.965186636,4.0621345,4.0281981,4.04691614,4.02151299
46.848004,4.12310563,4.09359618,0.171783133,4.06197434,4.02746078,4.04599437,4.0207348
46.858496,4.35889894,4.09335228,0.5153122,4.06182839,4.02672373,4.04508091,4.0199565
46.868988,4.89897949,4.09313147,0.897690376,4.06169711,4.02598704,4.04417564,4.01917818
46.879479,4.79583152,4.09293406,0.838389806,4.06158098,4.02525077,4.04327847,4.01839989
46.889971,4,4.09276029,-0.304565746,4.06148044,4.02451479,4.04238906,4.01762151
46.900462,3.87298335,4.09261055,-0.468644009,4.061396,4.02377925,4.04150741,4.01684316
46.910954,3.16227766,4.09248517,-0.964472659,4.06132817,4.023044,4.04063322,4.01606471
46.921446,4.12310563,4.09238455,0.175274286,4.06127749,4.02230913,4.03976641,4.01528623
46.931937,4.69041576,4.09230913,0.773373541,4.06124452,4.02157471,4.03890695,4.01450779
46.942429,4.12310563,4.09225934,0.175631119,4.06122982,4.0208406,4.03805454,4.01372924
46.95292,4,4.09223568,-0.303703272,4.06123401,4.02010695,4.03720924,4.01295073
46.963412,4.47213595,4.09223867,0.616358085,4.06125771,4.01937362,4.03637077,4.01217212
46.973904,4.69041576,4.09226886,0.773399574,4.06130157,4.01864069,4.03553913,4.01139347
46.984395,4.24264069,4.09232684,0.387703301,4.06136627,4.01790823,4.03471429,4.01061486
46.994887,4.79583152,4.09241324,0.838700355,4.06145253,4.01717611,4.03389603,4.00983614
47.005378,5,4.09252871,0.952612876,4.06156108,4.01644448,4.03308442,4.00905746
47.01587,4.58257569,4.09267397,0.699929801,4.0616927,4.01571319,4.03227925,4.00827867
47.026362,4.58257569,4.09284975,0.699804217,4.06184819,4.01498233,4.03148052,4.00749984
47.036853,4.12310563,4.09305682,0.173345907,4.06202838,4.01425197,4.03068826,4.00672105
47.047345,4.58257569,4.09329604,0.699485277,4.06223418,4.01352197,4.02990228,4.00594215
47.057836,3.87298335,4.09356824,-0.46966466,4.06246646,4.01279249,4.02912268,4.00516329
47.068328,4.47213595,4.09387438,0.615029732,4.06272623,4.01206338,4.02834928,4.00438431
47.07882,4.47213595,4.09421542,0.614752417,4.06301446,4.01133473,4.02758214,4.0036053
47.089311,4.47213595,4.09459233,0.614445784,4.06333218,4.0106066,4.0268213,4.00282632
47.099803,4.69041576,4.09500627,0.771627821,4.06368054,4.00987888,4.02606661,4.00204723
47.110294,5.56776436,4.09545827,1.21338621,4.06406061,4.00915169,4.0253182,4.00126818
47.120786,4.24264069,4.09594963,0.383002692,4.06447368,4.00842492,4.02457593,4.00048901
47.131278,4.12310563,4.09648154,0.163168887,4.06492096,4.00769863,4.02383987,3.9997098
47.141769,3.60555128,4.09705528,-0.701073464,4.06540374,4.0069729,4.02311012,3.99893063
47.152261,5.29150262,4.09767233,1.09262541,4.06592346,4.0062476,4.02238653,3.99815134
47.162752,4.69041576,4.09833405,0.769468458,4.0664815,4.00552287,4.02166929,3.99737209
47.173244,2.23606798,4.0990421,-1.3649081,4.06707948,4.00479859,4.02095829,3.99659272
47.183736,4.12310563,4.09979802,0.152668289,4.06771894,4.00407483,4.02025362,3.99581331
47.194227,4.58257569,4.10060345,0.694242209,4.06840148,4.00335167,4.0195554,3.99503393
47.204719,5.38516481,4.10146033,1.13300683,4.06912901,4.00262897,4.01886355,3.99425443
47.21521,3.74165739,4.10237039,-0.600593877,4.06990323,4.00190688,4.01817825,3.99347497
47.225702,4.79583152,4.10333579,0.832163283,4.07072625,4.00118528,4.01749944,3.99269539
47.236194,3.74165739,4.10435855,-0.602246761,4.07160002,4.00046423,4.01682726,3.99191577
47.246685,5.29150262,4.10544076,1.08906467,4.07252663,3.99974382,4.01616184,3.99113617
47.257177,4.24264069,4.10658497,0.368857312,4.07350853,3.99902391,4.01550315,3.99035646
47.267668,3.87298335,4.10779341,-0.484572047,4.07454791,3.99830466,4.0148514,3.98957678
47.27816,4.35889894,4.10906892,0.499829997,4.0756475,3.99758593,4.01420656,3.98879698
47.288652,4.35889894,4.11041411,0.498482533,4.07680988,3.99686779,4.01356881,3.98801714
47.299143,3.46410162,4.11183174,-0.804816825,4.07803773,3.99615034,4.01293833,3.98723733
47.309635,4.24264069,4.11332513,0.359604719,4.07933425,3.99543343,4.01231511,3.98645739
47.320126,4.35889894,4.11489724,0.493965286,4.08070234,3.99471722,4.0116994,3.98567749
47.330618,3.74165739,4.11655177,-0.612286196,4.08214558,3.99400158,4.01109124,3.98489746
47.34111,5.09901951,4.1182922,0.990316774,4.08366736,3.99328658,4.01049082,3.98411739
47.351601,3.31662479,4.12012218,-0.896380156,4.08527124,3.9925723,4.00989837,3.98333735
47.362093,4.12310563,4.12204609,0.0325504427,4.08696146,3.99185862,4.00931394,3.98255719
47.372584,4.58257569,4.12406789,0.677132044,4.08874187,3.99114569,4.00873782,3.98177705
47.383076,4,4.1261925,-0.355235841,4.09061726,3.99043337,4.00817009,3.98099679
47.393568,4.47213595,4.12842458,0.58626903,4.09259215,3.98972175,4.007611,3.98021648
47.404059,3.74165739,4.13076903,-0.623788139,4.09467134,3.9890109,4.00706082,3.97943621
47.414551,4.12310563,4.13323175,-0.100628639,4.09686055,3.9883007,4.00651967,3.9786558
47.425042,3.60555128,4.13581807,-0.728194202,4.09916499,3.9875913,4.00598789,3.97787543
47.435534,4.12310563,4.13853466,-0.124213663,4.10159114,3.98688256,4.00546563,3.97709493
47.446026,3.87298335,4.14138784,-0.518077695,4.10414517,3.98617458,4.00495319,3.97631438
47.456517,4.12310563,4.14438434,-0.145872238,4.10683367,3.98546743,4.0044509,3.97553386
47.467009,4.89897949,4.14753217,0.866860611,4.10966443,3.98476099,4.00395897,3.97475321
47.4775,4.35889894,4.15083871,0.456136204,4.11264471,3.98405539,4.00347779,3.97397259
47.487992,3.74165739,4.15431309,-0.642382833,4.11578339,3.98335053,4.00300759,3.97319185
47.498484,4.12310563,4.15796411,-0.186704266,4.1190891,3.98264649,4.00254876,3.97241105
47.508975,4.35889894,4.16180112,0.44395701,4.12257104,3.98194333,4.00210171,3.97163028
47.519467,3.74165739,4.16583526,-0.651289392,4.12624007,3.98124094,4.00166672,3.97084938
47.529958,4.24264069,4.17007693,0.269376599,4.13010645,3.98053947,4.00124428,3.97006851
47.54045,4.69041576,4.17453892,0.718245667,4.13418269,3.9798388,4.00083473,3.96928751
47.550942,4.58257569,4.17923369,0.635092126,4.13848105,3.979139,4.00043855,3.96850646
47.561433,4.47213595,4.18417457,0.536620334,4.14301471,3.97844017,4.00005626,3.96772543
47.571925,4.58257569,4.18937738,0.627055271,4.14779914,3.97774217,3.99968826,3.96694428
47.582416,4.69041576,4.19485713,0.703959251,4.15284923,3.97704516,3.99933515,3.96616315
47.592908,3.31662479,4.20063212,-0.940216638,4.15818294,3.97634903,3.99899741,3.96538189
47.6034,4.69041576,4.20672046,0.695482065,4.16381822,3.97565384,3.99867564,3.96460058
47.613891,3,4.21314165,-1.1014271,4.16977436,3.97495969,3.99837049,3.96381929
47.624383,4.24264069,4.21991868,0.150738197,4.17607403,3.97426645,3.99808253,3.96303787
47.634874,4.58257569,4.22707383,0.596239768,4.18273936,3.97357428,3.99781251,3.96225648
47.645366,4.24264069,4.23463401,0.0894800314,4.18979694,3.97288306,3.99756108,3.96147495
47.655858,4.69041576,4.2426263,0.669170723,4.19727368,3.97219287,3.99732904,3.96069338
47.666349,4,4.25108005,-0.501078882,4.20519875,3.9715038,3.99711719,3.95991182
47.676841,4.69041576,4.26002966,0.656038186,4.21360626,3.97081573,3.99692636,3.95913013
47.687332,4.35889894,4.26950922,0.298981143,4.22253019,3.97012881,3.99675746,3.95834847
47.697824,5.09901951,4.27955956,0.905240272,4.23201111,3.96944293,3.99661141,3.95756668
47.708316,4,4.2902225,-0.538723027,4.24209072,3.96875818,3.99648924,3.95678483
47.718807,3.74165739,4.30154364,-0.748255476,4.25281457,3.96807463,3.99639202,3.956003
47.729299,3.60555128,4.31357635,-0.841442257,4.26423579,3.96739218,3.99632085,3.95522104
47.73979,4,4.32637456,-0.571292013,4.27640839,3.96671097,3.99627694,3.9544391
47.750282,4.24264069,4.34000256,-0.312028637,4.28939652,3.96603091,3.99626156,3.95365703
47.760774,4.35889894,4.3545273,0.0661184394,4.30326722,3.96535206,3.99627605,3.95287491
47.771265,4.12310563,4.37002246,-0.496907272,4.31809436,3.96467453,3.99632185,3.9520928
47.781757,4.35889894,4.38657411,-0.166358537,4.33396404,3.96399819,3.99640048,3.95131056
47.792248,4.69041576,4.40427115,0.534924862,4.35096557,3.96332321,3.99651355,3.95052835
47.80274,4.35889894,4.42321909,-0.25361417,4.36920469,3.96264947,3.9966628,3.949746
47.813232,4.69041576,4.4435299,0.496876098,4.38879393,3.96197707,3.99685006,3.94896359
47.823723,3.87298335,4.46532799,-0.769639293,4.40985838,3.96130609,3.99707727,3.9481812
47.834215,4.12310563,4.48875871,-0.604692556,4.43254408,3.96063643,3.99734656,3.94739868
47.844706,4.47213595,4.51397572,-0.204547706,4.45700578,3.95996824,3.99766011,3.94661618
47.855198,5.09901951,4.5411611,0.746899199,4.48342663,3.95930141,3.99802037,3.94583355
47.86569,4,4.57051214,-0.755322539,4.51200544,3.95863605,3.99842985,3.94505086
47.876181,4.69041576,4.60225116,0.296925243,4.54296636,3.95797223,3.99889124,3.94426818
47.886673,4.79583152,4.63664008,0.398988028,4.57657327,3.95730986,3.99940756,3.94348537
47.897164,5.09901951,4.67396508,0.65196199,4.61311502,3.95664908,3.99998184,3.94270258
47.907656,5.19615242,4.71457147,0.693960336,4.65293984,3.95598982,4.00061755,3.94191966
47.918148,4.12310563,4.75885282,-0.797337566,4.6964451,3.95533214,4.00131827,3.94113668
47.928639,4.89897949,4.80727975,0.302819645,4.74410615,3.95467616,4.0020878,3.94035372
47.939131,4.69041576,4.86044592,-0.412347132,4.79652243,3.95402176,4.00293047,3.93957062
47.949622,5.29150262,4.91908238,0.610262441,4.85443288,3.95336912,4.00385064,3.93878754
47.960114,4.89897949,4.98416955,-0.291873369,4.91882825,3.95271813,4.00485333,3.93800432
47.970606,4.58257569,5.05700504,-0.688788318,4.99102049,3.95206889,4.00594373,3.93722105
47.981097,6,5.13936382,0.927704792,5.07280433,3.95142149,4.00712738,3.93643779
47.991589,4.12310563,5.23371793,-1.05385592,5.16667868,3.95077584,4.00841067,3.9356544
48.00208,6.32455532,5.34341369,0.990525937,5.27602597,3.95013211,4.00979999,3.93487102
48.012572,5.29150262,5.47299373,-0.426017737,5.40543488,3.9494902,4.01130283,3.93408751
48.023064,5.91607978,5.62834361,0.536410455,5.56084626,3.94885021,4.01292691,3.93330394
48.033555,5.74456265,5.81680581,-0.268780878,5.74966284,3.94821225,4.01468059,3.93252038
48.044047,5.56776436,6.04710881,-0.69234706,5.98066981,3.94757621,4.01657347,3.93173669
48.054538,7,6.32877016,0.819286175,6.26342498,3.94694228,4.01861533,3.93095301
48.06503,8,6.67142832,1.15263684,6.60757718,3.94631035,4.02081761,3.9301692
48.075522,7.61577311,7.08351292,0.72956164,7.02152568,3.94568055,4.02319222,3.92938533
48.086013,8.77496439,7.57100072,1.09725278,7.51117487,3.94505296,4.02575214,3.92860148
48.096505,8.66025404,8.13640737,0.723772528,8.07893588,3.94442751,4.02851238,3.92781748
48.106996,10,8.77762463,1.10561086,8.72257916,3.94380436,4.03148837,3.92703351
48.117488,10.9544512,9.48795505,1.21098972,9.43528878,3.94318344,4.03469822,3.92624939
48.12798,10.5356538,10.2557044,0.5291024,10.2052665,3.94256485,4.03816101,3.92546522
48.138471,12.2882057,11.0645054,1.10620991,11.0160621,3.9419487,4.04189774,3.92468106
48.148963,12.6095202,11.8936244,0.846106275,11.8468789,3.94133493,4.04593273,3.92389677
48.159454,14.2126704,12.7170674,1.2229485,12.6716716,3.94072368,4.05029143,3.92311248
48.169946,15.0332964,13.5033148,1.23692422,13.4588731,3.94011491,4.05500372,3.92232807
48.180438,15.8429795,14.2137873,1.27639816,14.1698484,3.93950872,4.06010161,3.92154359
48.190929,15.7162336,14.8034249,0.955410236,14.7594664,3.93890522,4.06562075,3.92075912
48.201421,15.7480157,15.2247219,0.723390529,15.1801307,3.93830435,4.07160269,3.91997452
48.211912,15.2643375,15.4362901,-0.414671683,15.3903472,3.93770628,4.07809199,3.91918993
48.222404,14.7648231,15.4149066,-0.806277554,15.3667797,3.93711095,4.08514154,3.9184052
48.232896,15.4272486,15.1634415,0.513621612,15.1121867,3.93651848,4.09280985,3.91762042
48.243387,14.4913767,14.7099305,-0.467497359,14.6544933,3.93592898,4.10116431,3.91683564
48.253879,13.892444,14.0978878,-0.453259083,14.0370928,3.93534241,4.11028634,3.91605073
48.26437,12,13.3751619,-1.17267296,13.3076903,3.93475894,4.12026942,3.91526583
48.274862,12.4096736,12.5856465,-0.419491233,12.5099955,3.93417852,4.13123117,3.9144808
48.285354,10.9544512,11.7667569,-0.901280063,11.6811952,3.93360128,4.14331471,3.9136957
48.295845,9.53939201,10.9493266,-1.18740665,10.8518485,3.93302734,4.15670192,3.91291062
48.306337,10.8627805,10.1583774,0.839287226,10.0466585,3.93245666,4.17163268,3.9121254
48.316828,9.79795897,9.41444444,0.619285497,9.28581388,3.93188942,4.18841672,3.91134019
48.32732,8.48528137,8.73323094,-0.497945344,8.58464095,3.93132558,4.20747192,3.91055484
48.337812,7.68114575,8.12602859,-0.666995383,7.95403228,3.93076528,4.22934858,3.90976943
48.348303,8.36660027,7.59933497,0.875936812,7.40003782,3.93020865,4.25477433,3.90898404
48.358795,7,7.15484048,-0.393497745,6.92378883,3.92965566,4.28470862,3.9081985
48.369286,7.41619849,6.7903049,0.791134366,6.52230713,3.92910651,4.32037323,3.90741298
48.379778,6.4807407,6.50020163,-0.139502459,6.18902129,3.92856116,4.36331503,3.90662732
48.39027,7.28010989,6.27728174,1.00141308,5.91525872,3.92801976,4.41540919,3.9058416
48.400761,6.32455532,6.11377536,0.459107786,5.69138676,3.92748245,4.47885818,3.90505589
48.411253,5.29150262,6.00247688,-0.843192893,5.50789057,3.92694923,4.55615946,3.90427004
48.421744,6.32455532,5.93754169,0.622104197,5.35629915,3.92642028,4.64995296,3.90348421
48.432236,5.19615242,5.91463468,-0.847633328,5.2294481,3.9258956,4.76290109,3.90269824
48.442728,5.83095189,5.93084392,-0.316056999,5.12168173,3.92537535,4.89740257,3.9019122
48.453219,5.74456265,5.98423194,-0.489560311,5.02868108,3.92485967,5.05533837,3.90112618
48.463711,5.09901951,6.07332337,-0.987068312,4.94722086,3.92434857,5.23784833,3.90034001
48.474202,5.74456265,6.19651675,-0.672275315,4.87497876,3.92384227,5.44498893,3.89955386
48.484694,5.09901951,6.35166965,-1.11921854,4.81024302,3.92334077,5.67568885,3.89876757
48.495186,6,6.53568699,-0.731906406,4.75177728,3.92284424,5.92753114,3.89798122
48.505677,6.08276253,6.74432849,-0.813367049,4.69865712,3.92235285,6.19677271,3.89719488
48.516169,6.70820393,6.97216703,-0.513773391,4.65015832,3.92186662,6.47843344,3.89640841
48.52666,6.244998,7.21238292,-0.983557282,4.60572412,3.92138577,6.76611018,3.89562194
48.537152,7,7.45683854,-0.675898322,4.56488344,3.92091034,7.05210797,3.89483533
48.547644,7.34846923,7.69579401,-0.589342672,4.52725306,3.92044052,7.32711413,3.89404867
48.558135,7.81024968,7.91787253,-0.328059227,4.49250485,3.91997647,7.58016281,3.89326201
48.568627,8,8.11027097,-0.332070734,4.46034498,3.91951827,7.79884101,3.89247522
48.579118,9.43398113,8.25935279,1.08380272,4.43052825,3.91906613,7.96986363,3.89168843
48.58961,9.2736185,8.35240761,0.959797313,4.40282736,3.91862013,8.0808706,3.89090151
48.600102,8.54400375,8.37986202,0.405144078,4.37704903,3.91818046,8.1226457,3.89011453
48.610593,9.05538514,8.33759802,0.847223183,4.35302105,3.91774733,8.09146105,3.88932755
48.621085,9,8.22795718,0.878659671,4.33058332,3.91732082,7.99008252,3.88854044
48.631576,8.54400375,8.05899352,0.696426758,4.30960122,3.91690118,7.82699502,3.88775334
48.642068,7.48331477,7.84229524,-0.599149783,4.28994629,3.9164885,7.61420279,3.8869661
48.65256,7.07106781,7.59069715,-0.720853205,4.27150892,3.91608302,7.36491412,3.8861788
48.663051,6.63324958,7.31651732,-0.826600111,4.25419025,3.91568495,7.09177248,3.88539151
48.673543,8,7.03059682,0.984582746,4.23789648,3.91529441,6.8059013,3.88460409
48.684034,6.08276253,6.7422646,-0.812097327,4.22254905,3.91491168,6.51688129,3.88381667
48.694526,6.244998,6.45920395,-0.462823888,4.20807115,3.9145369,6.23263058,3.88302911
48.705018,5.29150262,6.18778032,-0.946719442,4.19439738,3.9141703,5.95974201,3.88224149
48.715509,5.74456265,5.93303631,-0.434135531,4.18146821,3.91381215,5.7034802,3.88145389
48.726001,5.65685425,5.69864327,-0.204423635,4.16922598,3.91346261,5.4677271,3.88066614
48.736492,5.74456265,5.48707928,0.507428187,4.15762279,3.91312198,5.25514995,3.87987841
48.746984,5.65685425,5.29947399,0.597812896,4.14661062,3.91279044,5.06703095,3.87909054
48.757476,5.09901951,5.13585687,-0.191930592,4.13614877,3.91246827,4.90350418,3.8783026
48.767967,4.24264069,4.99524877,-0.867529874,4.12619992,3.91215577,4.76363957,3.87751468
48.778459,4.12310563,4.87585693,-0.867612415,4.11672713,3.91185314,4.64563904,3.87672662
48.78895,4.58257569,4.77543124,-0.439153211,4.10770008,3.91156073,4.54720087,3.87593857
48.799442,5.38516481,4.6914232,0.832911527,4.09908756,3.91127876,4.4656928,3.87515038
48.809934,4.12310563,4.62128805,-0.705820389,4.09086332,3.91100756,4.39846838,3.87436213
48.820425,5.09901951,4.56261867,0.732393916,4.08300312,3.91074748,4.34301486,3.87357389
48.830917,4.79583152,4.51324535,0.531588352,4.07548243,3.91049877,4.29706424,3.87278551
48.841408,5.19615242,4.4713313,0.851364271,4.06828146,3.91026183,4.25869297,3.87199715
48.8519,5.19615242,4.43534268,0.872244083,4.06137918,3.91003695,4.22629716,3.87120864
48.862392,4,4.40406122,-0.635658099,4.05475814,3.90982451,4.19860299,3.87042007
48.872883,4.79583152,4.3765321,0.647533339,4.04840212,3.9096249,4.17461409,3.86963152
48.883375,5.29150262,4.35201361,0.969272415,4.04229431,3.90943848,4.15355987,3.86884283
48.893866,5.19615242,4.32995118,0.93069933,4.03642141,3.90926567,4.13486483,3.86805415
48.904358,4.69041576,4.30991743,0.616845469,4.03076885,3.90910685,4.11808895,3.86726533
48.91485,4.69041576,4.29159432,0.631523114,4.02532469,3.90896248,4.10290573,3.86647645
48.925341,5.65685425,4.27473883,1.17563405,4.02007781,3.90883301,4.08906736,3.86568758
48.935833,4.12310563,4.25915812,-0.368852937,4.01501633,3.90871889,4.07637956,3.86489857
48.946324,5.19615242,4.24470551,0.975421401,4.01013113,3.90862061,4.0646948,3.86410958
48.956816,5.09901951,4.23125724,0.931537584,4.00541183,3.90853865,4.05389063,3.86332044
48.967308,5.65685425,4.21871487,1.19922449,4.00085007,3.90847356,4.04386987,3.86253125
48.977799,4.89897949,4.20699527,0.831855886,3.99643804,3.90842588,4.03455115,3.86174207
48.988291,5.83095189,4.19602389,1.27864303,3.99216715,3.90839615,4.0258626,3.86095275
48.998782,5.09901951,4.18573998,0.955656597,3.98803101,3.90838498,4.01774543,3.86016344
49.009274,4.79583152,4.1760862,0.787239048,3.98402204,3.90839296,4.01014515,3.859374
49.019766,4.47213595,4.1670145,0.552377997,3.98013428,3.90842074,4.00301596,3.85858449
49.030257,4.35889894,4.15848188,0.447679647,3.97636212,3.90846898,3.99631712,3.857795
49.040749,4.69041576,4.15044741,0.734825388,3.97269923,3.90853837,3.99001042,3.85700537
49.05124,5,4.14287735,0.925809187,3.96914103,3.90862962,3.98406407,3.85621575
49.061732,4.79583152,4.13573839,0.812461157,3.96568188,3.90874349,3.97844729,3.85542599
49.072224,3.60555128,4.12900252,-0.723499302,3.96231744,3.90888076,3.97313397,3.85463618
49.082715,5.09901951,4.12264427,0.988117021,3.95904364,3.90904223,3.96810053,3.85384637
49.093207,5.29150262,4.11663881,1.08391135,3.95585568,3.90922877,3.96332425,3.85305643
49.103698,4.12310563,4.11096586,0.110180608,3.95275026,3.90944124,3.95878635,3.8522665
49.11419,4.69041576,4.10560485,0.764729306,3.94972308,3.90968061,3.95446809,3.85147644
49.124682,4.24264069,4.10053862,0.376964281,3.94677095,3.90994783,3.95035368,3.85068632
49.135173,4.47213595,4.09575149,0.613501808,3.94389085,3.91024387,3.94642872,3.8498962
49.145665,5,4.09122784,0.953295422,3.94107909,3.91056987,3.94267897,3.84910596
49.156156,5.09901951,4.08695516,1.00601409,3.93833326,3.91092685,3.93909287,3.84831572
49.166648,3.87298335,4.08292044,-0.458188932,3.93565002,3.91131605,3.93565848,3.84752535
49.17714,4.89897949,4.07911299,0.905464798,3.933027,3.91173864,3.93236586,3.84673492
49.187631,3.87298335,4.075523,-0.450044063,3.93046191,3.91219585,3.92920587,3.8459445
49.198123,4.12310563,4.0721406,0.225754359,3.92795189,3.91268911,3.92616921,3.84515395
49.208614,3.87298335,4.06895804,-0.442690286,3.92549514,3.9132197,3.92324853,3.84436341
49.219106,4.35889894,4.06596711,0.541231778,3.92308905,3.91378919,3.9204359,3.84357273
49.229598,3.87298335,4.06316123,-0.436093898,3.92073182,3.91439907,3.91772487,3.842782
49.240089,4.24264069,4.06053444,0.426739088,3.9184217,3.91505088,3.91510943,3.84199128
49.250581,4.79583152,4.0580806,0.858924281,3.91615643,3.91574643,3.91258332,3.84120042
49.261072,5,4.05579517,0.971702025,3.91393467,3.91648737,3.91014168,3.84040958
49.271564,4.79583152,4.05367322,0.861486099,3.91175433,3.91727571,3.90777913,3.8396186
49.282056,3.16227766,4.05171101,-0.943097739,3.90961402,3.91811333,3.9054913,3.83882756
49.292547,5.09901951,4.0499052,1.02426282,3.90751244,3.91900221,3.90327418,3.83803654
49.303039,3.46410162,4.04825242,-0.764297591,3.90544772,3.9199447,3.90112338,3.83724538
49.31353,4.24264069,4.04675041,0.442594936,3.90341889,3.92094289,3.89903566,3.83645424
49.324022,3.87298335,4.04539671,-0.415226877,3.90142423,3.92199939,3.89700719,3.83566297
49.334514,3.74165739,4.0441897,-0.550029379,3.8994627,3.92311664,3.895035,3.83487163
49.345005,4,4.04312814,-0.207673154,3.89753326,3.92429721,3.89311632,3.83408031
49.355497,4.89897949,4.04221083,0.925617986,3.89563442,3.92554415,3.89124799,3.83328885
49.365988,4.79583152,4.04143735,0.868558674,3.89376542,3.92686019,3.8894278,3.83249742
49.37648,4.12310563,4.04080734,0.286876782,3.89192488,3.92824875,3.88765299,3.83170584
49.386972,4,4.04032101,-0.200800913,3.89011196,3.92971303,3.88592147,3.83091421
49.397463,4.35889894,4.0399789,0.564730061,3.88832588,3.93125641,3.88423128,3.83012259
49.407955,3.74165739,4.03978184,-0.54600774,3.88656537,3.93288291,3.88258012,3.82933084
49.418446,5.09901951,4.03973111,1.02921737,3.88482991,3.93459616,3.88096645,3.82853911
49.428938,4.69041576,4.03982834,0.806589993,3.88311831,3.93640068,3.87938821,3.82774724
49.43943,3.60555128,4.04007556,-0.659184562,3.88142993,3.93830075,3.87784392,3.82695532
49.449921,4.12310563,4.04047514,0.287455193,3.87976416,3.94030088,3.8763322,3.82616341
49.460413,4.79583152,4.04102996,0.868793163,3.87811994,3.94240644,3.87485129,3.82537137
49.470904,4.12310563,4.04174317,0.285241047,3.87649688,3.94462236,3.87340014,3.82457935
49.481396,4.89897949,4.04261857,0.925397708,3.87489398,3.94695469,3.87197717,3.82378719
49.491888,4.47213595,4.04366023,0.654580575,3.87331074,3.94940924,3.87058132,3.82299497
49.502379,4.89897949,4.04487262,0.924179021,3.87174668,3.95199215,3.86921159,3.82220278
49.512871,4,4.0462611,-0.215083928,3.8702009,3.95471075,3.86786665,3.82141045
49.523362,3.87298335,4.04783101,-0.418147902,3.86867312,3.95757176,3.86654573,3.82061814
49.533854,4.12310563,4.04958887,0.271139735,3.86716248,3.96058351,3.86524764,3.81982569
49.544346,3.87298335,4.05154131,-0.422561194,3.8656686,3.96375401,3.86397159,3.81903319
49.554837,5.09901951,4.05369554,1.02241087,3.8641911,3.96709179,3.86271687,3.81824071
49.565329,4.69041576,4.05606006,0.796464501,3.8627292,3.97060698,3.86148242,3.8174481
49.57582,3.74165739,4.05864324,-0.56301497,3.86128271,3.97430904,3.86026772,3.8166555
49.586312,5.09901951,4.06145518,1.01860902,3.85985089,3.97820957,3.85907181,3.81586277
49.596804,2.82842712,4.06450607,-1.11179087,3.85843344,3.9823199,3.85789415,3.81506999
49.607295,3.60555128,4.06780691,-0.679893839,3.85703006,3.98665212,3.85673419,3.81427723
49.617787,5.47722558,4.07137065,1.18568753,3.85564008,3.99122053,3.8555911,3.81348433
49.628278,4.69041576,4.07520996,0.784350559,3.85426336,3.99603876,3.85446452,3.81269146
49.63877,4,4.0793401,-0.281673741,3.85289926,4.00112332,3.85335369,3.81189845
49.649262,5,4.08377645,0.957195668,3.85154755,4.00649059,3.85225821,3.81110539
49.659753,3.46410162,4.08853567,-0.790211399,3.85020801,4.01215816,3.85117768,3.81031235
49.670245,3.60555128,4.09363725,-0.698631499,3.84888002,4.01814673,3.85011143,3.80951917
49.680736,3.46410162,4.09910041,-0.796868115,3.84756352,4.02447636,3.84905923,3.80872602
49.691228,4.12310563,4.10494817,0.134749594,3.84625794,4.03117123,3.84802045,3.80793274
49.70172,4,4.11120395,-0.333472565,3.8449631,4.03825563,3.84699481,3.80713941
49.712211,4.69041576,4.11789313,0.756652251,3.84367882,4.04575585,3.84598202,3.80634609
49.722703,3.46410162,4.12504538,-0.81298448,3.84240457,4.05370268,3.84498153,3.80555265
49.733194,4.12310563,4.1326903,-0.0979013618,3.84114031,4.06212654,3.8439932,3.80475922
49.743686,4.79583152,4.14086319,0.809301139,3.83988555,4.07106382,3.84301652,3.80396567
49.754178,4.47213595,4.14960032,0.567922209,3.83864014,4.08055171,3.84205127,3.80317206
49.764669,4.24264069,4.15894125,0.289308552,3.83740394,4.09063067,3.84109727,3.80237848
49.775161,4.47213595,4.16893212,0.550639474,3.83617649,4.10134798,3.84015406,3.80158477
49.785652,4.47213595,4.17961969,0.540847726,3.83495778,4.11275127,3.83922156,3.80079108
49.796144,4.69041576,4.19105947,0.706651465,3.83374736,4.12489722,3.83829935,3.79999726
49.806636,3.74165739,4.20330928,-0.6794497,3.83254512,4.13784465,3.83738729,3.79920339
49.817127,4.24264069,4.21643264,0.161888997,3.83135096,4.15165811,3.83648524,3.79840954
49.827619,4.79583152,4.23050358,0.751882933,3.83016446,4.16641288,3.83559283,3.79761556
49.83811,4.47213595,4.24559841,0.4759596,3.82898563,4.18218633,3.83471003,3.79682161
49.848602,4.47213595,4.2618075,0.458615798,3.82781407,4.19907017,3.83383649,3.79602752
49.859094,4.35889894,4.27922652,0.282263045,3.8266497,4.21716128,3.83297213,3.79523339
49.869585,5,4.29796148,0.837877392,3.82549245,4.23656697,3.83211685,3.79443928
49.880077,4.35889894,4.31813625,0.201897736,3.82434193,4.25741265,3.83127035,3.79364505
49.890568,4.12310563,4.33988148,-0.465591943,3.82319818,4.27983034,3.83043263,3.79285083
49.90106,4.58257569,4.3633526,0.468212662,3.82206083,4.30397718,3.82960341,3.7920565
49.911552,4,4.38871882,-0.623473192,3.82092982,4.33002407,3.82878264,3.79126211
49.922043,5.19615242,4.4161732,0.883164323,3.81980511,4.35816586,3.82797027,3.79046774
49.932535,4.12310563,4.44594809,-0.568192278,3.81868633,4.38863714,3.82716605,3.78967325
49.943026,4.24264069,4.47830632,-0.48545405,3.81757355,4.42170297,3.82637001,3.78887879
49.953518,4.12310563,4.51358002,-0.624879503,3.81646643,4.45769843,3.82558192,3.78808419
49.96401,5.47722558,4.55217402,0.961796006,3.81536492,4.49703175,3.82480177,3.78728955
49.974501,5.47722558,4.59461174,0.939475298,3.814269,4.54023071,3.82402954,3.78649494
49.984993,4.58257569,4.64160685,-0.242963271,3.81317834,4.588015,3.82326502,3.7857002
49.995484,4.24264069,4.69411989,-0.671922023,3.81209302,4.64135303,3.82250827,3.78490549
50.005976,5.29150262,4.75352018,0.733472864,3.8110127,4.70162529,3.82175911,3.78411065
50.016468,5.38516481,4.82172644,0.750625316,3.80993738,4.77076559,3.82101754,3.78331576
50.026959,5.47722558,4.90145047,0.758798462,3.80886704,4.85150602,3.82028358,3.7825209
50.037451,4.69041576,4.99651402,-0.553261474,3.80780137,4.94769509,3.81955706,3.78172592
50.047942,5.29150262,5.11211974,0.42353617,3.80674046,5.06456798,3.81883808,3.78093096
50.058434,5.65685425,5.25524766,0.63372438,3.80568401,5.20914216,3.81812646,3.78013588
50.068926,5,5.43480448,-0.659397054,3.80463201,5.39036133,3.81742226,3.77934075
50.079417,6.40312424,5.66163634,0.861096918,3.80358447,5.61910064,3.81672551,3.77854565
50.089909,6.32455532,5.94823517,0.613449391,3.80254109,5.90786325,3.81603607,3.77775043
50.1004,7.07106781,6.30771888,0.873698423,3.80150198,6.26974921,3.81535407,3.77695523
50.110892,6.08276253,6.75275739,-0.818532137,3.80046684,6.71737843,3.81467936,3.77615992
50.121384,7.74596669,7.29376271,0.672461135,3.79943569,7.26108328,3.81401202,3.77536455
50.131875,7.87400787,7.93738867,-0.251755431,3.79840854,7.907422,3.81335211,3.77456922
50.142367,7.68114575,8.68550158,-1.00217555,3.7973851,8.65816743,3.81269953,3.77377376
50.152858,9.05538514,9.53392643,-0.69176679,3.7963655,9.5090659,3.81205441,3.77297834
50.16335,10.2956301,10.4727262,-0.420827829,3.79534946,10.4501266,3.81141665,3.77218279
50.173842,11.7046999,11.4857452,0.467925968,3.794337,11.4651637,3.81078634,3.7713872
50.184333,12.1655251,12.5512177,-0.621041604,3.79332813,12.5324022,3.81016358,3.77059163
50.194825,13.1529464,13.6426909,-0.699817454,3.7923226,13.6253943,3.80954827,3.76979595
50.205316,14.6969385,14.7289809,-0.179004131,3.79132053,14.7129693,3.80894059,3.7690003
50.215808,15.3622915,15.7757095,-0.642975919,3.79032165,15.7607661,3.80834045,3.76820452
50.2263,15,16.7452846,-1.32109219,3.78932599,16.731209,3.80774798,3.7674087
50.236791,16.4620776,17.5981252,-1.06585533,3.78833358,17.5847318,3.80716329,3.76661292
50.247283,17.4928557,18.2943549,-0.895264909,3.78734417,18.2814688,3.80658631,3.76581701
50.257774,17.6351921,18.7960679,-1.07743946,3.78635789,18.783521,3.80601725,3.76502114
50.268266,18.0277564,19.0723395,-1.02204848,3.78537447,19.0599674,3.80545605,3.76422515
50.278758,18.6010752,19.1043329,-0.709406547,3.78439397,19.0919724,3.80490285,3.76342911
50.289249,18.0831413,18.8897539,-0.898116127,3.78341641,18.8772413,3.80435778,3.76263311
50.299741,19.3132079,18.4432725,0.93270328,3.78244156,18.4304427,3.80382083,3.76183699
50.310232,19.1572441,17.7933326,1.16786619,3.78146953,17.7800169,3.80329221,3.7610409
50.320724,16.8522995,16.9763731,-0.352240722,3.7805001,16.9623957,3.80277189,3.76024469
50.331216,16.9705627,16.032286,0.968646847,3.7795333,16.0174607,3.80226005,3.75944844
50.341707,16.5227116,15.001024,1.23356702,3.77856918,14.9851498,3.80175683,3.75865223
50.352199,13.3416641,13.920499,-0.760812028,3.7776075,13.9033572,3.80126227,3.7578559
50.36269,12.6095202,12.8263144,-0.46561162,3.7766484,12.807668,3.80077657,3.7570596
50.373182,11.5758369,11.7502363,-0.417611573,3.77569164,11.7298318,3.80029977,3.75626319
50.383674,10.7703296,10.7202094,0.223875332,3.77473727,10.6977842,3.79983206,3.75546674
50.394165,9.05538514,9.75933113,-0.839014893,3.77378534,9.73462618,3.79937362,3.75467032
50.404657,8,8.88498828,-0.94073816,3.77283562,8.85776708,3.7989245,3.75387378
50.415148,7.07106781,8.10901325,-1.01879607,3.77188825,8.0790869,3.79848496,3.75307729
50.42564,6.164414,7.43685699,-1.12802615,3.770943,7.40410893,3.79805506,3.75228067
50.436132,6,6.86830185,-0.931827156,3.76999994,6.83270838,3.79763501,3.75148402
50.446623,6,6.39786261,-0.630763512,3.76905909,6.35949947,3.79722503,3.7506874
50.457115,6.08276253,6.01584619,0.258681922,3.76812026,5.97487685,3.79682523,3.74989067
50.467606,5.09901951,5.71013935,-0.78174154,3.76718357,5.66678969,3.79643586,3.74909398
50.478098,5.29150262,5.46752925,-0.419555274,3.76624882,5.42205313,3.79605706,3.74829717
50.48859,5.56776436,5.27531444,0.540786391,3.76531605,5.22796322,3.79568906,3.74750032
50.499081,6,5.12217633,0.936922448,3.76438532,5.07317673,3.79533211,3.74670351
50.509573,5.09901951,4.99865194,0.31680841,3.76345641,4.94819442,3.79498636,3.74590659
50.520064,4.69041576,4.89731391,-0.454860586,3.76252948,4.84555097,3.79465212,3.74510971
50.530556,5.29150262,4.81249994,0.6921002,3.7616043,4.75954906,3.79432956,3.74431271
50.541048,4,4.74007867,-0.860278253,3.76068094,4.68602861,3.79401896,3.74351568
50.551539,4.79583152,4.67708377,0.344597956,3.75975945,4.62200084,3.7937206,3.74271869
50.562031,3.46410162,4.62139872,-1.07577744,3.75883963,4.56533221,3.7934347,3.74192158
50.572522,4.89897949,4.57154823,0.572216091,3.75792162,4.51453527,3.7931616,3.74112452
50.583014,4.47213595,4.52646682,-0.233089816,3.75700521,4.46853543,3.79290152,3.74032734
50.593506,3.74165739,4.48539576,-0.862402674,3.75609047,4.42656754,3.7926548,3.73953013
50.603997,5,4.44777192,0.743120503,3.75517746,4.38806365,3.79242178,3.73873296
50.614489,4.12310563,4.41315436,-0.538561731,3.75426596,4.35257893,3.79220272,3.73793567
50.62498,4.69041576,4.38120593,0.556066393,3.75335613,4.31977332,3.79199801,3.73713843
50.635472,4.47213595,4.35163949,0.34712601,3.75244777,4.28935703,3.79180796,3.73634108
50.645964,4.24264069,4.32422194,-0.285624319,3.75154094,4.2610948,3.79163295,3.7355437
50.656455,4.12310563,4.29875284,-0.419102869,3.7506357,4.23478431,3.79147338,3.73474636
50.666947,3.87298335,4.27505066,-0.634087781,3.74973186,4.21024202,3.79132959,3.7339489
50.677438,5.09901951,4.25296411,0.919812701,3.74882956,4.18731513,3.79120204,3.7331515
50.68793,4.35889894,4.23235068,0.35573623,3.7479286,4.16585936,3.7910911,3.73235398
50.698422,4.58257569,4.21308896,0.607854204,3.74702905,4.14575187,3.79099724,3.73155643
50.708913,3.46410162,4.19506986,-0.854966809,3.74613097,4.12688221,3.79092091,3.73075892
50.719405,4.47213595,4.17819042,0.542167441,3.74523417,4.10914588,3.79086258,3.72996131
50.729896,3.87298335,4.16236415,-0.537941267,3.7443388,4.09245521,3.79082273,3.72916374
50.740388,4.35889894,4.14750711,0.459773672,3.74344467,4.07672483,3.79080188,3.72836606
50.75088,2.64575131,4.13354757,-1.21975254,3.74255183,4.06188185,3.79080055,3.72756835
50.761371,4.35889894,4.12042038,0.488342668,3.74166036,4.04785999,3.7908193,3.72677069
50.771863,4.47213595,4.10806288,0.603384685,3.74077007,4.03459523,3.79085869,3.72597292
50.782354,5.19615242,4.09642271,1.04867999,3.7398811,4.02203426,3.79091932,3.72517519
50.792846,4.12310563,4.08544793,0.194055921,3.73899326,4.01012381,3.7910018,3.72437736
50.803338,3.74165739,4.07509433,-0.57743999,3.73810664,3.99881864,3.79110679,3.72357951
50.813829,2.82842712,4.06532147,-1.11215752,3.73722128,3.9880773,3.79123493,3.72278169
50.824321,5,4.05608976,0.971550433,3.736337,3.97785889,3.79138695,3.72198378
50.834812,4.24264069,4.04736642,0.441898481,3.73545396,3.96812975,3.79156353,3.7211859
50.845304,3.87298335,4.03911823,-0.407596473,3.73457196,3.95885536,3.79176546,3.72038793
50.855796,4.35889894,4.03131711,0.572347653,3.73369108,3.95000661,3.79199351,3.71958993
50.866287,4.79583152,4.02393721,0.878575164,3.73281139,3.94155665,3.79224847,3.71879197
50.876779,4,4.01695279,-0.130202898,3.73193269,3.93347842,3.79253123,3.71799391
50.88727,4.47213595,4.01034286,0.679553602,3.73105515,3.92574998,3.79284264,3.71719591
50.897762,4,4.00408562,-0.0639188294,3.73017857,3.91834817,3.79318365,3.71639779
50.908254,4.24264069,3.99816285,0.494447005,3.72930303,3.91125369,3.79355522,3.71559965
50.918745,4.35889894,3.99255771,0.605261293,3.72842859,3.90444862,3.79395831,3.71480157
50.929237,4.35889894,3.98725319,0.609627554,3.72755508,3.89791447,3.79439402,3.71400337
50.939728,4.58257569,3.98223561,0.774816164,3.72668265,3.89163654,3.79486338,3.71320523
50.95022,4.58257569,3.97749051,0.777872218,3.72581111,3.88559884,3.79536761,3.71240699
50.960712,4.35889894,3.97300595,0.621202856,3.72494054,3.87978821,3.79590784,3.71160873
50.971203,4.47213595,3.96877091,0.709482235,3.72407101,3.87419237,3.79648528,3.71081051
50.981695,4,3.96477408,0.187685689,3.72320233,3.86879833,3.79710132,3.71001219
50.992186,4,3.96100658,0.197467514,3.72233466,3.86359601,3.79775719,3.70921393
51.002678,4.35889894,3.95745885,0.633593001,3.72146782,3.85857406,3.79845444,3.70841557
51.01317,5.19615242,3.95412316,1.11446366,3.72060188,3.85372329,3.79919449,3.70761718
51.023661,4.58257569,3.95099239,0.794722153,3.71973692,3.8490351,3.7999788,3.70681884
51.034153,5.09901951,3.94805919,1.07282819,3.71887275,3.84450013,3.80080915,3.70602041
51.044644,4.35889894,3.94531797,0.643102616,3.71800953,3.84011133,3.80168708,3.70522203
51.055136,3.46410162,3.94276262,-0.691853315,3.71714708,3.83586043,3.80261452,3.70442355
51.065628,4,3.9403884,0.244154878,3.71628548,3.83174092,3.80359325,3.70362506
51.076119,4,3.93819096,0.24861424,3.71542479,3.82774661,3.80462513,3.70282661
51.086611,4,3.93616586,0.252654185,3.71456484,3.82387063,3.80571239,3.70202807
51.097102,4,3.93430992,0.256300763,3.71370579,3.82010795,3.80685696,3.70122958
51.107594,4.12310563,3.93261965,0.436446995,3.71284745,3.81645243,3.80806133,3.700431
51.118086,4.79583152,3.93109253,0.929913435,3.71198991,3.81289933,3.80932773,3.69963239
51.128577,4.24264069,3.92972639,0.559387427,3.71113323,3.80944418,3.81065852,3.69883385
51.139069,3.31662479,3.92851909,-0.782236729,3.71027724,3.80608178,3.81205656,3.6980352
51.14956,4.12310563,3.92746934,0.442307904,3.70942209,3.80280851,3.81352433,3.69723662
51.160052,4.47213595,3.92657582,0.738620425,3.70856762,3.79961972,3.81506497,3.69643793
51.170544,3.60555128,3.92583788,-0.565938692,3.70771389,3.79651191,3.81668139,3.69563923
51.181035,2.82842712,3.92525517,-1.04729559,3.70686098,3.79348177,3.8183766,3.69484059
51.191527,4.12310563,3.92482755,0.445284266,3.70600871,3.79052533,3.8201543,3.69404186
51.202018,3.87298335,3.92455543,-0.227094884,3.70515724,3.78763994,3.82201768,3.69324318
51.21251,4.35889894,3.92443946,0.659135407,3.70430641,3.784822,3.82397083,3.69244441
51.223002,4.58257569,3.92448071,0.811230536,3.70345627,3.78206892,3.82601751,3.69164562
51.233493,4.35889894,3.92468059,0.658952469,3.70260691,3.7793782,3.82816168,3.69084689
51.243985,4.47213595,3.92504091,0.739658737,3.70175815,3.77674675,3.83040811,3.69004807
51.254476,4.69041576,3.92556378,0.874558165,3.70091015,3.77417261,3.83276103,3.68924931
51.264968,5.74456265,3.92625184,1.34844756,3.70006274,3.77165296,3.83522578,3.68845046
51.27546,4.24264069,3.927108,0.561722963,3.69921599,3.76918583,3.83780732,3.68765159
51.285951,3.60555128,3.92813552,-0.567965006,3.69836998,3.76676935,3.84051088,3.68685279
51.296443,4.35889894,3.92933838,0.6554087,3.69752454,3.76440105,3.84334278,3.68605389
51.306934,4.79583152,3.93072057,0.93011341,3.69667982,3.76207949,3.84630863,3.68525506
51.317426,3.87298335,3.93228703,-0.243523475,3.69583565,3.7598024,3.84941554,3.68445613
51.327918,4.35889894,3.93404281,0.651809891,3.69499211,3.7575683,3.85267014,3.68365719
51.338409,3.87298335,3.93599339,-0.251018011,3.69414927,3.75537574,3.85607948,3.68285832
51.348901,3.74165739,3.93814533,-0.443269608,3.69330697,3.75322275,3.85965199,3.68205935
51.359392,3.87298335,3.940505,-0.259849299,3.69246535,3.75110823,3.86339531,3.68126045
51.369884,4.58257569,3.94308021,0.799684618,3.69162426,3.74903038,3.86731899,3.68046146
51.380376,3.46410162,3.94587872,-0.694101654,3.69078377,3.74698803,3.87143209,3.67966246
51.390867,3.74165739,3.94890892,-0.455248872,3.68994394,3.74498008,3.87574423,3.67886353
51.401359,4.12310563,3.95218076,0.413430609,3.68910462,3.7430049,3.88026689,3.67806451
51.41185,4.12310563,3.95570377,0.409147723,3.68826596,3.7410617,3.88501064,3.67726555
51.422342,4.47213595,3.95948958,0.71599328,3.68742779,3.73914897,3.88998855,3.6764665
51.432834,4.58257569,3.96354973,0.786782032,3.68659019,3.73726582,3.89521319,3.67566745
51.443325,2.82842712,3.9678966,-1.06745936,3.68575324,3.73541139,3.90069797,3.67486846
51.453817,4.69041576,3.97254482,0.847272645,3.68491676,3.73358435,3.90645883,3.67406939
51.464308,4.35889894,3.97750845,0.617568207,3.68408091,3.73178408,3.91251064,3.67327038
51.4748,4.12310563,3.98280452,0.374567891,3.68324553,3.73000936,3.91887168,3.67247129
51.485292,3.46410162,3.98844998,-0.724119025,3.68241069,3.72825947,3.92555977,3.67167219
51.495783,4.24264069,3.99446303,0.49817432,3.68157647,3.72653375,3.93259398,3.67087316
51.506275,3.74165739,4.00086512,-0.509124473,3.6807427,3.72483108,3.93999687,3.67007405
51.516766,4.35889894,4.00767697,0.592639832,3.67990954,3.72315101,3.94778991,3.669275
51.527258,4.24264069,4.01492362,0.477197098,3.67907683,3.7214925,3.95599917,3.66847588
51.53775,2.82842712,4.02263012,-1.09279595,3.67824463,3.719855,3.96465051,3.66767674
51.548241,5.19615242,4.03082352,1.07950401,3.67741303,3.71823799,3.97377173,3.66687768
51.558733,3.74165739,4.03953549,-0.545782102,3.67658186,3.7166405,3.98339551,3.66607853
51.569224,3.31662479,4.0487971,-0.85567068,3.67575127,3.71506223,3.99355357,3.66527946
51.579716,4.12310563,4.05864558,0.25388982,3.67492111,3.71350228,4.00428413,3.6644803
51.590208,4.58257569,4.06911866,0.716559163,3.67409145,3.71196022,4.01562561,3.66368114
51.600699,3.74165739,4.0802572,-0.5818933,3.67326236,3.71043564,4.0276196,3.66288205
51.611191,4.12310563,4.09210893,0.17605878,3.67243368,3.70892772,4.04031479,3.66208288
51.621682,3.60555128,4.10472139,-0.706519717,3.67160557,3.70743623,4.05375932,3.66128378
51.632174,4.24264069,4.11815119,0.352830698,3.67077787,3.70596041,4.06801077,3.6604846
51.642666,3.60555128,4.13245649,-0.72588237,3.66995064,3.70449991,4.08312799,3.65968543
51.653157,4.24264069,4.14770062,0.308123456,3.66912397,3.70305443,4.09917502,3.65888632
51.663649,4.58257569,4.1639574,0.64700718,3.6682977,3.70162324,4.11622663,3.65808714
51.67414,4.47213595,4.18130161,0.539290594,3.66747197,3.70020619,4.13435824,3.65728803
51.684632,4.47213595,4.19982194,0.521837154,3.66664663,3.69880262,4.1536595,3.65648884
51.695124,3.87298335,4.21961087,-0.588750814,3.66582176,3.69741225,4.17422364,3.65568965
51.705615,3.87298335,4.24077006,-0.606454217,3.66499743,3.69603484,4.19615309,3.65489054
51.716107,4.79583152,4.26341816,0.729666612,3.66417347,3.69466977,4.21956747,3.65409135
51.726598,4.12310563,4.28767826,-0.405675523,3.66335005,3.69331695,4.24459062,3.65329224
51.73709,4.24264069,4.31369697,-0.266563851,3.66252701,3.69197576,4.27137021,3.65249305
51.747582,4,4.34163187,-0.584492831,3.66170441,3.69064602,4.30006467,3.65169387
51.758073,4.24264069,4.37166132,-0.359194428,3.66088234,3.68932754,4.33085333,3.65089476
51.768565,5.09901951,4.40399925,0.833678754,3.66006063,3.68801975,4.36395133,3.65009557
51.779056,4.79583152,4.43888291,0.597451764,3.65923945,3.68672261,4.39959702,3.64929647
51.789548,5,4.47660844,0.723458056,3.65841862,3.68543559,4.43808807,3.64849729
51.80004,4.24264069,4.51752499,-0.524294099,3.65759824,3.68415854,4.47977522,3.64769811
51.810531,4.12310563,4.56206609,-0.662540917,3.65677836,3.68289131,4.52509397,3.64689901
51.821023,4.58257569,4.61079507,-0.167986234,3.65595884,3.6816334,4.57461034,3.64609984
51.831514,4.47213595,4.66441797,-0.438499729,3.65513983,3.6803848,4.62903345,3.64530075
51.842006,4.47213595,4.72387546,-0.501736487,3.65432117,3.67914503,4.68930822,3.64450159
51.852498,4.12310563,4.79037879,-0.816867901,3.65350294,3.67791399,4.75665101,3.64370243
51.862989,4.89897949,4.86550371,0.182963877,3.6526852,3.67669155,4.8326438,3.64290336
51.873481,4.69041576,4.95130361,-0.510771816,3.65186781,3.67547727,4.9193477,3.64210421
51.883972,4.69041576,5.05034713,-0.599942806,3.65105092,3.67427118,5.01933969,3.64130514
51.894464,5.47722558,5.16585174,0.55800881,3.65023437,3.67307283,5.1358463,3.64050601
51.904956,4.69041576,5.30165423,-0.781817416,3.64941824,3.67188214,5.27271259,3.63970688
51.915447,6.40312424,5.46219293,0.970016139,3.6486026,3.67069903,5.4343831,3.63890784
51.925939,5.91607978,5.65242985,0.513468531,3.6477873,3.6695231,5.62582273,3.63810872
51.93643,6.32455532,5.87750448,0.66861861,3.64697248,3.66835438,5.852168,3.63730969
51.946922,6.08276253,6.1425252,-0.244464049,3.646158,3.66719249,6.11851825,3.63651059
51.957414,6.32455532,6.45200754,-0.357004504,3.64534393,3.66603735,6.42937285,3.6357115
51.967905,6.164414,6.80945639,-0.803145308,3.64453034,3.66488892,6.78821492,3.6349125
51.978397,6.78232998,7.2170516,-0.65933422,3.64371709,3.66374683,7.19719943,3.63411343
51.988888,8.24621125,7.67507229,0.755737363,3.64290431,3.66261112,7.65657954,3.63331444
51.99938,8.77496439,8.18197741,0.770056476,3.64209186,3.66148145,8.16479093,3.63251539
52.009872,8.06225775,8.73404618,-0.819627009,3.64127981,3.66035776,8.71809339,3.63171635
52.020363,9.59166305,9.32551245,0.515897856,3.64046825,3.65924003,9.31070664,3.6309174
52.030855,10.4880885,9.9488419,0.734334105,3.639657,3.65812791,9.93508788,3.63011838
52.041346,11.5758369,10.594448,0.990650731,3.63884624,3.65702147,10.5816464,3.62931945
52.051838,11.4455231,11.2511943,0.440827466,3.63803579,3.65592038,11.2392453,3.62852045
52.06233,12.3693169,11.9059088,0.680740831,3.63722575,3.65482462,11.8947146,3.62772147
52.072821,13.3416641,12.5433427,0.89348832,3.63641617,3.65373417,12.5328083,3.62692257
52.083313,13.5277493,13.1460283,0.617835738,3.63560692,3.65264871,13.136062,3.62612362
52.093804,13.96424,13.6936285,0.520203345,3.63479814,3.65156832,13.6841409,3.62532475
52.104296,13.114877,14.1636436,-1.02409305,3.63398968,3.65049269,14.1545469,3.62452582
52.114788,15.3297097,14.5323016,0.892977095,3.63318161,3.64942181,14.5235084,3.62372691
52.125279,16,14.7774337,1.10569722,3.63237401,3.64835569,14.7688565,3.62292808
52.135771,15.3622915,14.8823105,0.692806602,3.63156673,3.64729401,14.8738622,3.6221292
52.146262,15.0996689,14.8391832,0.510377995,3.63075992,3.64623688,14.8307776,3.6213304
52.156754,15.0665192,14.6513075,0.644369216,3.62995342,3.64518401,14.6428611,3.62053155
52.167246,14.1421356,14.3320546,-0.435796965,3.62914732,3.64413539,14.3234872,3.61973271
52.177737,13.6747943,13.9018072,-0.476458718,3.62834168,3.64309103,13.8930427,3.61893397
52.188229,12.6491106,13.3838667,-0.857179112,3.62753636,3.64205066,13.3748323,3.61813517
52.19872,13.3790882,12.8015533,0.759957171,3.62673151,3.64101437,12.792179,3.61733646
52.209212,12.8840987,12.1760105,0.841479803,3.62592697,3.6399819,12.1662281,3.61653769
52.219704,11.4891253,11.525952,-0.191902742,3.62512282,3.63895325,11.515694,3.61573894
52.230195,12.1655251,10.8675896,1.1392697,3.62431915,3.63792844,10.8567895,3.61494029
52.240687,10.2469508,10.2147407,0.179471689,3.62351578,3.6369072,10.203333,3.61414158
52.251178,10.2956301,9.57954575,0.846217698,3.62271288,3.63588966,9.56746828,3.61334296
52.26167,9.43398113,8.97209882,0.679619242,3.6219103,3.63487553,8.95929435,3.61254429
52.272162,9.59166305,8.40088538,1.0912276,3.62110811,3.63386485,8.38730532,3.61174564
52.282653,9.32737905,7.8724967,1.20618504,3.62030639,3.63285765,7.85810467,3.61094708
52.293145,8.24621125,7.39138399,0.92456869,3.61950499,3.63185366,7.37615916,3.61014848
52.303636,8.30662386,6.96015263,1.16037547,3.61870405,3.63085301,6.94409292,3.60934996
52.314128,7.07106781,6.57921007,0.701325702,3.61790343,3.62985544,6.56233311,3.6085514
52.32462,7.21110255,6.24723357,0.981768294,3.6171032,3.62886099,6.2295763,3.60775286
52.335111,5.83095189,5.96130446,-0.361043721,3.61630344,3.62786969,5.94292033,3.60695441
52.345603,7.28010989,5.717236,1.25014955,3.615504,3.62688129,5.69819018,3.60615592
52.356094,6.55743852,5.51021464,1.02333958,3.61470503,3.62589593,5.49057896,3.60535752
52.366586,6.55743852,5.33504768,1.10561785,3.61390638,3.62491335,5.31489509,3.60455907
52.377078,6.08276253,5.18670343,0.946603982,3.61310813,3.62393359,5.16610386,3.60376064
52.387569,4.79583152,5.06052308,-0.51448183,3.61231034,3.6229567,5.03954041,3.60296232
52.398061,5.38516481,4.95237116,0.657870538,3.61151288,3.62198243,4.93106158,3.60216395
52.408552,4.89897949,4.85879425,0.200462549,3.6107159,3.62101092,4.83720597,3.60136567
52.419044,4.47213595,4.77692978,-0.55208136,3.60991924,3.62004194,4.75510337,3.60056735
52.429536,4.79583152,4.70452032,0.302177433,3.60912297,3.61907553,4.68248969,3.59976906
52.440027,5,4.63979967,0.600166921,3.60832719,3.61811173,4.61759309,3.59897086
52.450519,4.35889894,4.58138826,-0.471687736,3.60753173,3.61715031,4.55902943,3.59817262
52.46101,4.58257569,4.52825036,0.233077958,3.60673675,3.61619141,4.50575936,3.59737448
52.471502,4.69041576,4.47957271,0.459176491,3.6059421,3.6152348,4.45696676,3.5965763
52.481994,4.58257569,4.43474082,0.384493007,3.60514785,3.61428054,4.41203493,3.59577814
52.492485,4.58257569,4.39327344,0.435088793,3.60435409,3.61332866,4.37048084,3.59498009
52.502977,3.46410162,4.35477581,-0.943755369,3.60356066,3.61237896,4.33190831,3.59418199
52.513468,4.69041576,4.31894069,0.609487551,3.60276771,3.61143156,4.29600893,3.593384
52.52396,4.58257569,4.28549915,0.545047283,3.6019751,3.61048624,4.26251278,3.59258596
52.534452,4.58257569,4.25423238,0.573012489,3.6011829,3.60954307,4.2312002,3.59178795
52.544943,4.35889894,4.22495087,0.365989165,3.60039119,3.60860209,4.20188091,3.59099005
52.555435,3.60555128,4.19748042,-0.769369315,3.59959982,3.60766308,4.17438005,3.59019211
52.565926,4.69041576,4.17167698,0.720235227,3.59880894,3.6067262,4.14855295,3.58939427
52.576418,4,4.14740203,-0.383929724,3.59801841,3.60579122,4.12426053,3.58859639
52.58691,3.60555128,4.12453809,-0.720407397,3.5972283,3.6048582,4.10138479,3.58779854
52.597401,3.46410162,4.10297873,-0.799297888,3.59643868,3.60392719,4.07981881,3.5870008
52.607893,4.24264069,4.08262148,0.400024008,3.59564941,3.60299799,4.05945971,3.58620302
52.618384,4.69041576,4.06338099,0.791855269,3.59486064,3.60207075,4.0402217,3.58540535
52.628876,3.60555128,4.04517222,-0.663039176,3.59407223,3.60114524,4.02201938,3.58460764
52.639368,3.87298335,4.02792289,-0.393623605,3.59328425,3.60022154,4.0047801,3.58380996
52.649859,4.12310563,4.01156677,0.333974327,3.59249677,3.59929969,3.98843732,3.58301239
52.660351,3.87298335,3.99603869,-0.350792457,3.59170965,3.5983795,3.97292556,3.58221479
52.670842,3.46410162,3.98128483,-0.719154516,3.59092304,3.59746111,3.95819072,3.58141729
52.681334,4,3.96725022,0.180969011,3.5901368,3.59654432,3.94417757,3.58061976
52.691826,3.46410162,3.95388842,-0.699847702,3.589351,3.59562919,3.93083943,3.57982226
52.702317,4,3.9411566,0.242576579,3.58856571,3.59471577,3.91813325,3.57902488
52.712809,3.46410162,3.92901176,-0.681843194,3.5877808,3.59380388,3.9060158,3.57822745
52.7233,4.12310563,3.91741884,0.453527047,3.58699641,3.59289365,3.89445186,3.57743015
52.733792,3.87298335,3.90634113,-0.18264113,3.58621239,3.59198489,3.88340452,3.5766328
52.744284,4.79583152,3.89574788,0.948727383,3.58542883,3.59107766,3.87284287,3.5758355
52.754775,3,3.88561055,-0.941068836,3.5846458,3.59017202,3.86273822,3.57503831
52.765267,4.79583152,3.87589991,0.959130654,3.58386315,3.58926778,3.85306118,3.57424108
52.775758,4.89897949,3.86659252,1.01606445,3.58308104,3.58836509,3.84378819,3.57344397
52.78625,3.46410162,3.85766312,-0.627344804,3.58229932,3.58746375,3.83489386,3.57264683
52.796742,3.31662479,3.84909082,-0.729702697,3.58151806,3.58656382,3.82635718,3.57184972
52.807233,4.47213595,3.84085613,0.794531197,3.58073735,3.58566538,3.81815858,3.57105274
52.817725,3,3.83293863,-0.912654715,3.57995704,3.58476822,3.8102775,3.57025572
52.828216,4,3.82532228,0.417944632,3.57917728,3.58387251,3.80269784,3.56945881
52.838708,5,3.81798928,1.08720317,3.57839793,3.58297804,3.79540169,3.56866188
52.8492,3.46410162,3.8109251,-0.588917215,3.57761905,3.58208488,3.78837447,3.56786499
52.859691,3.87298335,3.80411616,0.262425584,3.57684074,3.5811931,3.78160248,3.56706822
52.870183,3.46410162,3.79754785,-0.577448035,3.57606285,3.58030252,3.77507108,3.56627142
52.880674,4.12310563,3.79120901,0.576104695,3.57528552,3.57941327,3.76876902,3.56547473
52.891166,3.46410162,3.7850868,-0.566555542,3.57450862,3.57852518,3.76268342,3.56467802
52.901658,4.24264069,3.77917097,0.6807861,3.57373221,3.57763831,3.75680396,3.56388135
52.912149,3.87298335,3.77345191,0.315486037,3.57295638,3.57675273,3.75112097,3.56308481
52.922641,3.16227766,3.76791899,-0.77822961,3.57218099,3.57586825,3.74562379,3.56228823
52.933132,4,3.76256438,0.487273661,3.57140619,3.57498503,3.74030453,3.56149178
52.943624,2.82842712,3.75737875,-0.963821366,3.57063182,3.57410287,3.73515383,3.5606953
52.954116,4.12310563,3.75235487,0.608893056,3.56985798,3.57322185,3.73016441,3.55989887
52.964607,3.46410162,3.74748601,-0.532338607,3.56908473,3.57234204,3.7253295,3.55910256
52.975099,4.35889894,3.74276456,0.784942278,3.56831194,3.57146325,3.72064148,3.55830622
52.98559,4.24264069,3.73818534,0.710250199,3.56753976,3.57058564,3.71609511,3.55751001
52.996082,3.60555128,3.73374193,-0.358037223,3.56676804,3.56970901,3.71168396,3.55671377
53.006574,3.16227766,3.72942984,-0.753095065,3.56599686,3.56883346,3.70740351,3.55591758
53.017065,4.35889894,3.72524519,0.796023716,3.5652263,3.56795903,3.70324987,3.55512152
53.027557,3.87298335,3.72118361,0.389614855,3.56445622,3.56708555,3.69921865,3.55432543
53.038048,3.31662479,3.7172431,-0.632944163,3.56368676,3.56621318,3.69530783,3.55352947
53.04854,3.46410162,3.71342098,-0.499318899,3.5629178,3.56534173,3.69151473,3.55273349
53.059032,3.31662479,3.70971659,-0.626970335,3.5621494,3.56447127,3.68783869,3.55193756
53.069523,4.12310563,3.7061302,0.645736344,3.56138164,3.56360188,3.68427998,3.55114175
53.080015,3.74165739,3.70266197,0.197472573,3.56061439,3.56273338,3.68083878,3.55034593
53.090506,3,3.69931428,-0.836250132,3.55984779,3.56186591,3.67751747,3.54955023
53.100998,3.60555128,3.69608895,-0.300894785,3.5590817,3.56099931,3.6743179,3.54875451
53.11149,4.69041576,3.69298921,0.998712445,3.55831621,3.56013364,3.67124332,3.54795885
53.121981,4,3.69001843,0.556759887,3.55755138,3.55926897,3.6682971,3.54716331
53.132473,3.31662479,3.68717881,-0.608731481,3.55678709,3.55840514,3.66548149,3.54636776
53.142964,5.09901951,3.68447284,1.18934716,3.55602347,3.55754228,3.66279899,3.54557233
53.153456,3,3.68190054,-0.825772693,3.5552604,3.55668022,3.66024961,3.54477689
53.163948,3.87298335,3.67946064,0.439912155,3.55449795,3.55581905,3.65783209,3.5439815
53.174439,3.60555128,3.67714909,-0.26757768,3.5537362,3.55495882,3.65554234,3.54318625
53.184931,3,3.67495776,-0.821558132,3.55297501,3.55409937,3.6533722,3.54239097
53.195422,4.12310563,3.67287525,0.670992086,3.55221453,3.55324084,3.65131019,3.54159583
53.205914,5,3.67088437,1.15287277,3.55145462,3.55238307,3.64933905,3.54080068
53.216406,3.60555128,3.66896272,-0.251816301,3.55069537,3.55152612,3.64743623,3.54000558
53.226897,4.58257569,3.66708125,0.956814739,3.54993685,3.55067008,3.64557249,3.53921061
53.237389,3.31662479,3.66520329,-0.590405367,3.54917892,3.54981476,3.64371098,3.53841563
53.24788,3.16227766,3.66328675,-0.707819959,3.54842174,3.54896031,3.64180936,3.53762079
53.258372,3.46410162,3.6612858,-0.444054259,3.54766516,3.54810658,3.63982151,3.53682593
53.268864,4,3.65915822,0.583816562,3.54690927,3.54725363,3.63770498,3.53603113
53.279355,3.46410162,3.65687311,-0.439057502,3.54615415,3.54640153,3.63542868,3.53523647
53.289847,4.24264069,3.65441744,0.766957138,3.54539966,3.54555011,3.6329795,3.5344418
53.300338,4.12310563,3.65180076,0.686516471,3.54464595,3.54469953,3.63036706,3.53364726
53.31083,4.47213595,3.64905027,0.907240696,3.54389288,3.54384961,3.62761872,3.53285271
53.321322,3.60555128,3.64620527,-0.201628365,3.54314055,3.54300044,3.62477398,3.53205822
53.331813,4,3.64330828,0.59723674,3.54238901,3.54215207,3.62187562,3.53126387
53.342305,3.74165739,3.64039805,0.318212717,3.54163815,3.54130435,3.61896265,3.53046951
53.352796,3.46410162,3.6375084,-0.416421401,3.54088811,3.54045742,3.61606904,3.52967529
53.363288,3.31662479,3.63466501,-0.563950551,3.54013875,3.53961112,3.61322066,3.52888106
53.37378,4.12310563,3.6318878,0.700869335,3.53939017,3.53876553,3.61043752,3.5280869
53.384271,3.87298335,3.6291908,0.493753532,3.53864243,3.5379207,3.60773373,3.52729287
53.394763,3.31662479,3.62658232,-0.556738293,3.53789541,3.53707649,3.60511767,3.52649884
53.405254,4.24264069,3.62406738,0.786494314,3.53714925,3.53623303,3.60259438,3.52570495
53.415746,4.58257569,3.62164653,0.980269945,3.53640382,3.53539017,3.6001644,3.52491105
53.426238,5.19615242,3.61931819,1.2557206,3.53565921,3.53454797,3.59782615,3.52411721
53.436729,3.16227766,3.61707854,-0.674389263,3.5349155,3.53370651,3.59557578,3.52332353
53.447221,3.16227766,3.61492155,-0.672788145,3.53417254,3.53286563,3.59340722,3.52252983
53.457712,3.31662479,3.61284105,-0.544257532,3.53343051,3.53202547,3.59131427,3.52173628
53.468204,3.74165739,3.6108296,0.36170124,3.53268925,3.53118588,3.58928943,3.52094272
53.478696,3.74165739,3.60888032,0.364385874,3.53194886,3.53034692,3.58732578,3.52014923
53.489187,3.87298335,3.60698663,0.515748695,3.53120942,3.52950867,3.5854167,3.51935589
53.499679,4.24264069,3.60514193,0.798435194,3.53047079,3.52867097,3.58355553,3.51856254
53.51017,5,3.60334102,1.18180328,3.52973313,3.52783396,3.58173706,3.51776934
53.520662,3.87298335,3.60157872,0.520965087,3.52899631,3.52699748,3.57995606,3.51697614
53.531154,3.31662479,3.59985113,-0.532190136,3.52826042,3.52616162,3.57820859,3.51618301
53.541645,3.87298335,3.59815498,0.524240754,3.52752552,3.52532643,3.57649137,3.51539002
53.552137,4.12310563,3.59648712,0.725684851,3.5267915,3.52449176,3.57480123,3.51459703
53.562628,4.12310563,3.59484559,0.726814997,3.52605851,3.52365776,3.57313617,3.5138042
53.57312,3.74165739,3.59322818,0.385265116,3.52532641,3.52282427,3.57149397,3.51301136
53.583612,4,3.59163352,0.639035583,3.5245953,3.52199136,3.56987326,3.51221859
53.594103,3.16227766,3.59006051,-0.654051109,3.52386526,3.5211591,3.5682729,3.51142598
53.604595,3.87298335,3.58850779,0.533362496,3.52313616,3.52032734,3.56669152,3.51063336
53.615086,4,3.58697477,0.642670389,3.52240815,3.51949622,3.56512853,3.5098409
53.625578,3.87298335,3.58546038,0.53621168,3.5216811,3.51866559,3.56358284,3.50904843
53.63607,3.74165739,3.58396409,0.397106149,3.52095511,3.51783551,3.5620539,3.50825604
53.646561,3.46410162,3.58248544,-0.344069508,3.52023025,3.51700607,3.56054125,3.50746381
53.657053,3.87298335,3.58102359,0.540333004,3.51950641,3.51617709,3.55904402,3.50667158
53.667544,4,3.57957831,0.648399326,3.51878372,3.51534875,3.55756198,3.5058795
53.678036,3.16227766,3.57814886,-0.644880764,3.51806209,3.51452086,3.55609437,3.50508742
53.688528,4.35889894,3.57673493,0.884400372,3.51734157,3.51369351,3.55464087,3.50429542
53.699019,4.35889894,3.57533623,0.88519078,3.51662227,3.51286677,3.55320118,3.50350358
53.709511,4,3.5739521,0.652723447,3.51590406,3.51204048,3.55177462,3.50271174
53.720002,3.31662479,3.57258244,-0.505922573,3.51518709,3.51121479,3.55036108,3.50192005
53.730494,3.60555128,3.57122662,0.185269133,3.51447125,3.51038955,3.5489599,3.50112837
53.740986,3.74165739,3.56988444,0.414454995,3.51375662,3.50956483,3.54757088,3.50033678
53.751477,4.24264069,3.5685557,0.821026786,3.51304329,3.50874069,3.54619381,3.49954534
53.761969,3.74165739,3.56723984,0.417633271,3.51233113,3.50791699,3.54482809,3.4987539
53.77246,3,3.5659368,-0.752287712,3.5116203,3.50709388,3.54347368,3.49796263
53.782952,3.46410162,3.56464606,-0.317087448,3.5109107,3.50627119,3.54213001,3.49717136
53.793444,2.64575131,3.56336748,-0.95792284,3.51020239,3.505449,3.54079693,3.49638017
53.803935,4.24264069,3.5621009,0.824948352,3.50949548,3.50462738,3.53947428,3.49558914
53.814427,4,3.56084585,0.662687069,3.50878984,3.50380618,3.53816155,3.49479813
53.824918,4,3.55960231,0.663624659,3.50808563,3.50298555,3.53685873,3.49400727
53.83541,3.87298335,3.55836983,0.560904196,3.50738273,3.50216533,3.53556531,3.49321642
53.845902,3.74165739,3.5571483,0.429545213,3.50668125,3.5013456,3.5342812,3.49242566
53.856393,4.58257569,3.55593762,1.0132315,3.50598126,3.50052642,3.53300627,3.49163506
53.866885,4.12310563,3.55473736,0.753902028,3.50528265,3.49970764,3.53174005,3.49084447
53.877376,4.24264069,3.55354755,0.830116338,3.50458558,3.49888942,3.53048258,3.49005404
53.887868,3.46410162,3.55236778,-0.297096226,3.50388994,3.4980716,3.52923341,3.48926362
53.89836,3.74165739,3.55119798,0.436416546,3.50319583,3.49725424,3.52799245,3.48847329
53.908851,4,3.5500381,0.670791998,3.50250332,3.49643743,3.52675963,3.48768313
53.919343,3.74165739,3.54888773,0.43905542,3.50181232,3.49562101,3.52553451,3.48689298
53.929834,4.12310563,3.54774693,0.758524022,3.50112298,3.49480513,3.52431716,3.48610299
53.940326,2.82842712,3.54661535,-0.847459867,3.50043519,3.49398963,3.52310716,3.48531302
53.950818,3,3.54549294,-0.738574937,3.49974905,3.49317459,3.52190446,3.48452314
53.961309,4.69041576,3.54437966,1.07053076,3.49906466,3.49236008,3.52070899,3.48373342
53.971801,3.87298335,3.54327516,0.574202216,3.4983819,3.49154595,3.51952038,3.48294372
53.982292,4.47213595,3.54217953,0.964342483,3.49770094,3.49073235,3.5183387,3.48215419
53.992784,3.46410162,3.54109243,-0.277472187,3.49702167,3.48991912,3.51716355,3.48136467
54.003276,4.24264069,3.54001384,0.838228395,3.4963442,3.48910633,3.51599492,3.48057524
54.013767,3.74165739,3.53894376,0.4502373,3.49566861,3.48829407,3.51483276,3.47978599
54.024259,3.87298335,3.53788186,0.578879505,3.49499481,3.48748218,3.51367672,3.47899675
54.03475,4.35889894,3.53682825,0.906681141,3.49432296,3.4866708,3.51252689,3.47820768
54.045242,2.82842712,3.53578262,-0.841044291,3.49365297,3.48585978,3.5113829,3.47741863
54.055734,4,3.53474521,0.68209588,3.49298516,3.48504921,3.51024474,3.47662967
54.066225,3.31662479,3.53371556,-0.465930008,3.49231916,3.48423914,3.50911241,3.47584088
54.076717,3.74165739,3.53269362,0.457125545,3.49165512,3.48342943,3.50798555,3.47505212
54.087208,3.16227766,3.5316795,-0.607784373,3.4909932,3.48262023,3.50686427,3.47426352
54.0977,3.60555128,3.53067293,0.273639072,3.49033332,3.48181138,3.50574824,3.47347495
54.108192,3.87298335,3.52967393,0.585926117,3.48967556,3.48100296,3.50463745,3.47268647
54.118683,3.87298335,3.52868252,0.586771525,3.48902003,3.48019504,3.50353191,3.47189817
54.129175,3.60555128,3.52769845,0.279021191,3.48836665,3.47938748,3.50243129,3.47110989
54.139666,4.24264069,3.52672184,0.846119879,3.48771559,3.47858041,3.50133571,3.47032178
54.150158,3.46410162,3.52575244,-0.248295835,3.48706675,3.47777369,3.50024486,3.4695337
54.16065,2.82842712,3.52479029,-0.83448377,3.48642025,3.47696739,3.49915874,3.46874571
54.171141,4,3.52383543,0.69004679,3.48577618,3.47616159,3.49807736,3.4679579
54.181633,4,3.52288762,0.690733216,3.48513448,3.47535612,3.49700043,3.46717012
54.192124,3.46410162,3.52194701,-0.240510705,3.4844953,3.47455116,3.49592805,3.46638251
54.202616,4.47213595,3.52101338,0.975255136,3.48385858,3.47374653,3.49485995,3.46559493
54.213108,3,3.52008676,-0.721170409,3.48322441,3.47294231,3.49379613,3.46480744
54.223599,4.69041576,3.51916722,1.08224237,3.48259293,3.47213859,3.49273662,3.46402014
54.234091,3.31662479,3.51825454,-0.449032016,3.48196404,3.4713352,3.49168113,3.46323286
54.244582,2.82842712,3.51734888,-0.830013105,3.48133792,3.4705323,3.49062978,3.46244576
54.255074,3.16227766,3.51645003,-0.595123829,3.48071452,3.46972973,3.48958231,3.46165869
54.265566,3.74165739,3.51555806,0.475499025,3.48009393,3.46892757,3.48853872,3.46087172
54.276057,3.16227766,3.51467304,-0.593628993,3.47947628,3.4681259,3.48749905,3.46008493
54.286549,3.74165739,3.51379478,0.477349566,3.47886151,3.46732455,3.48646304,3.45929818
54.29704,3.46410162,3.51292343,-0.220956597,3.47824979,3.46652369,3.4854308,3.4585116
54.307532,4.24264069,3.51205883,0.854740814,3.47764106,3.46572316,3.48440208,3.45772505
54.318024,3.87298335,3.51120104,0.601483419,3.47703545,3.46492304,3.4833769,3.45693861
54.328515,4.35889894,3.51035015,0.92116708,3.47643308,3.46412339,3.48235531,3.45615235
54.339007,4,3.509506,0.700352766,3.4758339,3.46332407,3.48133703,3.45536612
54.349498,4.35889894,3.50866875,0.922079276,3.47523808,3.46252523,3.48032221,3.45458007
54.35999,3.16227766,3.50783825,-0.587844019,3.47464559,3.46172672,3.47931059,3.45379406
54.370482,4.12310563,3.50701459,0.784914667,3.47405655,3.46092861,3.47830221,3.45300816
54.380973,3.46410162,3.50619786,-0.205173702,3.47347109,3.46013097,3.47729712,3.45222244
54.391465,4.12310563,3.50538793,0.785950187,3.47288917,3.45933366,3.47629505,3.45143675
54.401956,4,3.50458496,0.703857255,3.47231098,3.45853682,3.47529615,3.45065125
54.412448,3.60555128,3.50378884,0.319002249,3.47173649,3.45774031,3.47430018,3.44986578
54.42294,4,3.50299966,0.704982509,3.47116584,3.4569442,3.47330717,3.44908042
54.433431,3,3.50221754,-0.708673081,3.47059916,3.45614856,3.47231718,3.44829525
54.443923,4.24264069,3.50144235,0.860928767,3.47003644,3.45535324,3.47132996,3.44751012
54.454414,3.46410162,3.50067428,-0.191239804,3.46947786,3.4545584,3.47034565,3.44672517
54.464906,3.74165739,3.49991323,0.491674849,3.4689234,3.45376387,3.46936403,3.44594027
54.475398,3.31662479,3.49915932,-0.427240599,3.46837323,3.45296975,3.46838513,3.44515547
54.485889,3.60555128,3.49841267,0.327320344,3.46782748,3.4521761,3.46740901,3.44437086
54.496381,3.87298335,3.49767319,0.612625628,3.46728615,3.45138277,3.46643543,3.44358629
54.506872,3.16227766,3.49694107,-0.578501004,3.46674944,3.45058991,3.46546454,3.44280191
54.517364,2.44948974,3.49621625,-1.02309653,3.46621736,3.44979737,3.46449612,3.44201757
54.527856,3.46410162,3.49549885,-0.177192643,3.46569007,3.44900523,3.4635302,3.44123335
54.538347,4.12310563,3.49478901,0.792664251,3.46516772,3.44821356,3.46256685,3.44044932
54.548839,3.46410162,3.49408667,-0.173161941,3.46465033,3.44742221,3.46160584,3.43966532
54.55933,1.73205081,3.49339205,-1.32715532,3.46413811,3.44663133,3.46064732,3.43888152
54.569822,4.12310563,3.49270508,0.793977671,3.4636311,3.44584078,3.45969106,3.43809776
54.580314,3.74165739,3.49202594,0.499631315,3.46312946,3.44505062,3.45873712,3.43731412
54.590805,4,3.49135476,0.713193691,3.46263337,3.44426093,3.45778556,3.43653067
54.601297,3.31662479,3.49069152,-0.417213051,3.46214286,3.44347156,3.45683616,3.43574727
54.611788,4.35889894,3.49003645,0.932127939,3.46165818,3.44268267,3.45588907,3.43496406
54.62228,4.24264069,3.48938953,0.867900433,3.46117936,3.4418941,3.45494407,3.43418089
54.632772,4.47213595,3.48875092,0.991657718,3.46070659,3.44110592,3.45400122,3.43339784
54.643263,2.44948974,3.48812082,-1.01913251,3.46024008,3.44031822,3.45306058,3.43261499
54.653755,3.31662479,3.48749922,-0.413369607,3.45977989,3.43953084,3.45212193,3.43183219
54.664246,4.24264069,3.48688637,0.869341313,3.45932626,3.43874394,3.45118543,3.43104958
54.674738,4.35889894,3.48628228,0.934139532,3.45887927,3.43795736,3.45025087,3.43026701
54.68523,3.46410162,3.48568715,-0.146920172,3.45843914,3.43717118,3.44931831,3.42948457
54.695721,3.74165739,3.48510119,0.506513768,3.45800608,3.43638547,3.4483878,3.42870233
54.706213,4.12310563,3.48452443,0.799112755,3.4575802,3.43560009,3.44745915,3.42792013
54.716704,4.12310563,3.48395715,0.799467623,3.45716175,3.43481518,3.4465325,3.42713814
54.727196,4.12310563,3.48339939,0.799816375,3.45675086,3.4340306,3.44560765,3.42635619
54.737688,4,3.4828514,0.71913045,3.45634776,3.43324642,3.44468466,3.42557436
54.748179,3.74165739,3.48231339,0.509258282,3.4559527,3.43246272,3.4437636,3.42479274
54.758671,3.87298335,3.48178546,0.625458145,3.45556582,3.43167935,3.44284426,3.42401117
54.769162,4.24264069,3.48126789,0.872566785,3.4551874,3.43089646,3.4419268,3.42322979
54.779654,3.31662479,3.4807608,-0.405137031,3.45481762,3.43011389,3.44101101,3.42244847
54.790146,4.12310563,3.48026445,0.801773766,3.45445673,3.42933173,3.44009696,3.42166728
54.800637,4.12310563,3.47977911,0.80207638,3.45410502,3.42855005,3.43918472,3.42088628
54.811129,4.12310563,3.4793049,0.802371938,3.45376267,3.42776871,3.43827409,3.42010534
54.82162,3.46410162,3.47884216,-0.121410653,3.45343002,3.42698785,3.43736523,3.4193246
54.832112,4.24264069,3.47839106,0.874213721,3.45310726,3.42620732,3.43645793,3.41854392
54.842604,4,3.47795189,0.722528971,3.45279472,3.4254272,3.43555226,3.41776337
54.853095,2.64575131,3.47752496,-0.912016255,3.4524927,3.42464756,3.4346483,3.41698302
54.863587,3,3.47711048,-0.690731844,3.45220146,3.42386827,3.43374584,3.41620272
54.874078,2.82842712,3.47670882,-0.80515942,3.45192136,3.42308946,3.43284505,3.41542263
54.88457,4.24264069,3.4763202,0.875397334,3.45165268,3.42231099,3.43194573,3.41464259
54.895062,3.60555128,3.47594497,0.360008752,3.45139578,3.42153293,3.43104795,3.41386269
54.905553,3.87298335,3.47558352,0.630396566,3.45115102,3.42075537,3.43015178,3.41308299
54.916045,3.31662479,3.4752361,-0.398260349,3.45091872,3.41997815,3.42925703,3.41230336
54.926536,3.87298335,3.47490314,0.630935979,3.45069931,3.41920142,3.42836385,3.41152392
54.937028,4,3.47458495,0.724855194,3.45049313,3.41842503,3.42747207,3.41074455
54.94752,2.82842712,3.47428195,-0.803650935,3.45030061,3.41764907,3.42658174,3.40996531
54.958011,4.24264069,3.47399457,0.876724652,3.45012218,3.4168736,3.42569295,3.40918628
54.968503,3.60555128,3.47372318,0.363081389,3.44995824,3.41609849,3.4248055,3.40840731
54.978994,3.16227766,3.47346827,-0.557844607,3.44980929,3.41532387,3.42391955,3.40762854
54.989486,4.35889894,3.47323024,0.941099733,3.44967576,3.41454961,3.42303492,3.40684984
54.999978,3.16227766,3.47300959,-0.557433341,3.44955816,3.41377577,3.42215169,3.40607128
55.010469,3.60555128,3.47280685,0.364341091,3.44945701,3.41300244,3.42126992,3.40529292
55.020961,2.82842712,3.47262248,-0.802617813,3.44937282,3.41222946,3.42038943,3.40451463
55.031452,4.58257569,3.47245707,1.05362167,3.44930615,3.41145699,3.41951038,3.40373655
55.041944,3.60555128,3.47231114,0.365020739,3.44925758,3.41068489,3.4186326,3.40295853
55.052436,4.35889894,3.47218529,0.94165474,3.44922771,3.40991322,3.41775615,3.40218065
55.062927,3.60555128,3.47208016,0.365336988,3.44921716,3.40914206,3.41688111,3.40140298
55.073419,3.74165739,3.47199636,0.519288967,3.44922658,3.40837126,3.41600731,3.40062538
55.08391,3.74165739,3.47193456,0.519348461,3.44925665,3.40760098,3.41513491,3.39984799
55.094402,3.60555128,3.47189547,0.365589673,3.44930807,3.40683107,3.41426373,3.39907067
55.104894,4.24264069,3.4718798,0.877929886,3.44938159,3.40606161,3.41339384,3.39829348
55.115385,3.87298335,3.47188833,0.633320628,3.44947797,3.40529267,3.41252533,3.39751652
55.125877,3.87298335,3.47192184,0.633294167,3.44959802,3.4045241,3.41165802,3.39673962
55.136368,4,3.47198117,0.726649041,3.44974256,3.40375606,3.41079208,3.39596293
55.14686,3.87298335,3.47206719,0.633179401,3.44991251,3.4029884,3.40992734,3.39518631
55.157352,3.60555128,3.47218081,0.365199208,3.45010875,3.40222119,3.40906388,3.39440984
55.167843,3.46410162,3.47232297,-0.0906717001,3.45033223,3.40145451,3.40820177,3.39363358
55.178335,3.31662479,3.47249469,-0.394803624,3.45058399,3.40068822,3.40734085,3.3928574
55.188826,4.47213595,3.47269698,0.999719446,3.45086504,3.39992247,3.4064813,3.39208143
55.199318,4.12310563,3.47293098,0.806334077,3.45117651,3.39915711,3.40562294,3.39130553
55.20981,4,3.47319781,0.725811399,3.45151955,3.39839221,3.40476586,3.39052977
55.220301,4.24264069,3.47349865,0.877007432,3.4518953,3.39762786,3.40391014,3.38975424
55.230793,2.44948974,3.47383481,-1.01209934,3.45230511,3.3968639,3.40305563,3.38897877
55.241284,4.47213595,3.47420756,0.998963659,3.45275022,3.39610049,3.40220251,3.38820353
55.251776,3.87298335,3.47461835,0.631161621,3.4532321,3.39533749,3.4013506,3.38742836
55.262268,3.87298335,3.47506862,0.630804827,3.45375217,3.39457496,3.40050001,3.38665334
55.272759,3.31662479,3.47555983,-0.398666582,3.4543119,3.39381299,3.39965083,3.38587854
55.283251,2.82842712,3.47609371,-0.804777352,3.454913,3.39305143,3.39880292,3.38510381
55.293742,3.74165739,3.47667184,0.514767468,3.45555704,3.39229043,3.39795644,3.3843293
55.304234,2.82842712,3.47729612,-0.805524048,3.45624592,3.39152985,3.39711126,3.38355487
55.314726,3.87298335,3.47796836,0.628502173,3.45698144,3.39076976,3.39626747,3.38278059
55.325217,3.46410162,3.47869049,-0.120784409,3.4577655,3.39001024,3.3954252,3.38200654
55.335709,3.60555128,3.47946471,0.3550867,3.4586003,3.38925115,3.39458429,3.38123256
55.3462,3.46410162,3.48029308,-0.127245682,3.45948786,3.38849263,3.39374495,3.3804588
55.356692,2.64575131,3.48117807,-0.914016825,3.46043065,3.38773455,3.39290704,3.37968512
55.367184,4,3.48212205,0.719637376,3.461431,3.38697697,3.39207069,3.3789116
55.377675,3.46410162,3.4831275,-0.13793435,3.46249136,3.38621997,3.39123602,3.3781383
55.388167,3.16227766,3.48419735,-0.567379667,3.46361463,3.38546342,3.39040292,3.37736507
55.398658,3.87298335,3.48533427,0.622614711,3.46480343,3.38470746,3.38957161,3.37659208
55.40915,3.31662479,3.48654153,-0.412209583,3.466061,3.38395195,3.38874199,3.37581916
55.419642,3.60555128,3.48782226,0.343116618,3.46739041,3.38319696,3.3879142,3.3750464
55.430133,3.46410162,3.48917975,-0.158360772,3.46879488,3.38244257,3.38708841,3.37427387
55.440625,4.24264069,3.49061788,0.867192485,3.47027825,3.38168864,3.38626455,3.37350142
55.451116,3.16227766,3.49214023,-0.574336631,3.471844,3.38093532,3.38544286,3.37272919
55.461608,3.16227766,3.49375116,-0.575737356,3.47349643,3.38018247,3.38462331,3.37195705
55.4721,3.46410162,3.49545489,-0.177068558,3.47523963,3.37943016,3.38380609,3.37118507
55.482591,4.47213595,3.49725584,0.987360173,3.47707793,3.37867847,3.38299144,3.37041331
55.493083,3.46410162,3.49915928,-0.187236932,3.47901646,3.37792726,3.38217935,3.36964164
55.503574,4,3.50117008,0.706278924,3.48105993,3.37717667,3.38137018,3.3688702
55.514066,4,3.50329421,0.704773571,3.48321412,3.37642658,3.380564,3.36809885
55.524558,3.74165739,3.50553747,0.48592172,3.48548461,3.37567704,3.37976116,3.36732765
55.535049,4,3.50790602,0.701494104,3.48787728,3.37492815,3.37896206,3.36655668
55.545541,3.87298335,3.51040721,0.602142954,3.49039911,3.37417975,3.37816696,3.36578581
55.556032,3,3.51304797,-0.716273667,3.4930566,3.373432,3.37737653,3.36501516
55.566524,4.35889894,3.51583682,0.918184143,3.49585766,3.37268476,3.37659129,3.3642446
55.577016,3.16227766,3.51878225,-0.597080056,3.49881001,3.37193811,3.37581218,3.3634742
55.587507,3,3.52189347,-0.722421944,3.50192181,3.37119211,3.37504042,3.36270404
55.597999,2.82842712,3.5251815,-0.83471814,3.50520276,3.37044664,3.37427735,3.36193396
55.60849,3.60555128,3.52865724,0.277297742,3.50866193,3.36970184,3.37352506,3.36116412
55.618982,3.31662479,3.53233412,-0.464445184,3.51231043,3.36895757,3.37278598,3.36039437
55.629474,4.12310563,3.53622603,0.76608067,3.51615911,3.36821392,3.37206347,3.35962478
55.639965,3.74165739,3.54034844,0.448674656,3.52021958,3.36747094,3.37136178,3.35885543
55.650457,4.12310563,3.54471987,0.760516772,3.52450552,3.36672852,3.37068603,3.35808617
55.660948,4.12310563,3.54935928,0.757460458,3.52902999,3.36598678,3.3700428,3.35731715
55.67144,4,3.55428963,0.667615439,3.53380879,3.36524561,3.36943972,3.35654822
55.681932,3.87298335,3.55953489,0.559864674,3.53885762,3.36450507,3.36888593,3.35577945
55.692423,3.60555128,3.56512134,0.201071956,3.54419333,3.36376525,3.36839186,3.35501092
55.702915,3.46410162,3.57107915,-0.32707421,3.5498357,3.363026,3.36796886,3.35424248
55.713406,3.46410162,3.57743841,-0.336655303,3.55580395,3.36228747,3.3676292,3.35347429
55.723898,3.46410162,3.58423328,-0.346600153,3.56212118,3.36154953,3.36738522,3.35270619
55.73439,3,3.59149739,-0.769088672,3.56881066,3.36081225,3.36724889,3.35193825
55.744881,4,3.59926476,0.633036524,3.57589754,3.36007571,3.36723077,3.35117056
55.755373,4.12310563,3.60757158,0.718006996,3.5834113,3.35933978,3.36733906,3.35040296
55.765864,3.31662479,3.61645008,-0.547563045,3.59138116,3.3586046,3.36757851,3.3496356
55.776356,3.31662479,3.62593418,-0.556155902,3.59984215,3.35787004,3.36794927,3.34886834
55.786848,3.31662479,3.63605302,-0.565179819,3.60883028,3.35713618,3.36844568,3.34810125
55.797339,4.24264069,3.64683268,0.771886008,3.61838508,3.35640308,3.369055,3.3473344
55.807831,3.74165739,3.65829911,0.288718341,3.62855327,3.35567062,3.36975642,3.34656765
55.818322,4,3.67047045,0.574046642,3.63938295,3.35493895,3.3705193,3.34580115
55.828814,3.31662479,3.68336583,-0.605591481,3.65093264,3.35420793,3.37130222,3.34503474
55.839306,3.74165739,3.6969979,0.211327909,3.66326563,3.35347764,3.37205126,3.3442685
55.849797,3.46410162,3.71137804,-0.497268964,3.6764549,3.35274816,3.37269984,3.34350251
55.860289,4.58257569,3.72652563,0.925229738,3.69059006,3.35201935,3.37317073,3.34273662
55.87078,4.12310563,3.74246747,0.616958797,3.70577216,3.35129136,3.37338134,3.34197098
55.881272,3,3.75926434,-0.871357757,3.72212984,3.35056406,3.37325447,3.34120543
55.891764,3.74165739,3.77701981,-0.188048998,3.7398163,3.34983753,3.37273194,3.34044006
55.902255,3.16227766,3.79590484,-0.796007022,3.75902225,3.34911184,3.37178773,3.33967494
55.912747,3.87298335,3.81618056,0.238333349,3.77999375,3.34838687,3.37043403,3.33890992
55.923238,3.16227766,3.83819622,-0.822142663,3.80303365,3.34766276,3.36871864,3.33814514
55.93373,3.60555128,3.86241242,-0.506814707,3.82853594,3.34693937,3.36671293,3.33738047
55.944222,4.12310563,3.88939513,0.483436137,3.85699216,3.3462168,3.36449869,3.33661598
55.954713,3,3.91983455,-0.959080056,3.88902122,3.34549511,3.36215599,3.33585173
55.965205,4.24264069,3.95457535,0.536717186,3.92540651,3.34477418,3.35975507,3.33508759
55.975696,3.16227766,3.99461895,-0.912327403,3.96709968,3.34405415,3.35735485,3.3343237
55.986188,3.60555128,4.0411751,-0.660018047,4.01527339,3.3433349,3.3550009,3.33355992
55.99668,4,4.09565444,-0.309280518,4.07131157,3.3426165,3.35272797,3.33279631
56.007171,3.16227766,4.15968391,-0.998702284,4.13682382,3.34189903,3.35056071,3.33203296
56.017663,4.12310563,4.23511884,-0.334683753,4.21365625,3.34118237,3.34851441,3.33126971
56.028154,3.74165739,4.32396307,-0.763089568,4.3038091,3.34046666,3.34659773,3.33050672
56.038646,3.87298335,4.42836832,-0.745241555,4.40943564,3.33975177,3.34481231,3.32974383
56.049138,4.79583152,4.55048742,0.495322227,4.532693,3.33903779,3.34315526,3.32898112
56.059629,4.58257569,4.69237742,-0.331363434,4.67564431,3.33832479,3.34161977,3.32821867
56.070121,4.47213595,4.85591528,-0.619499255,4.84017337,3.33761265,3.3401958,3.32745632
56.080612,4.58257569,5.04255505,-0.67821778,5.02774022,3.33690151,3.33887212,3.32669423
56.091104,3.74165739,5.25332333,-1.22949825,5.23937679,3.33619125,3.33763622,3.32593225
56.101596,3.87298335,5.48858378,-1.27106272,5.47545047,3.33548194,3.33647588,3.32517045
56.112087,5.19615242,5.74800207,-0.742865835,5.73562948,3.33477368,3.33537944,3.32440891
56.122579,5.29150262,6.03058646,-0.859699856,6.01892384,3.33406633,3.33433589,3.32364748
56.13307,5.83095189,6.33449735,-0.709609368,6.32349481,3.33336004,3.33333582,3.32288631
56.143562,6.40312424,6.65728743,-0.504145999,6.64689595,3.33265469,3.33237079,3.32212524
56.154054,6.4807407,6.99574182,-0.717635788,6.98591303,3.33195037,3.33143393,3.32136437
56.164545,6.08276253,7.34601036,-1.12394298,7.33669668,3.33124714,3.33051963,3.32060375
56.175037,8.1240384,7.70376203,0.64828726,7.69491705,3.33054488,3.32962313,3.31984324
56.185528,7.81024968,8.06397795,-0.503714473,8.05555636,3.32984376,3.32874097,3.319083
56.19602,8.77496439,8.42123079,0.594755075,8.41318871,3.32914364,3.32787014,3.31832286
56.206512,9.79795897,8.76942127,1.01416848,8.76171601,3.3284446,3.32700856,3.31756292
56.217003,10.0498756,9.1018472,0.97366751,9.09443714,3.32774674,3.32615464,3.31680323
56.227495,9.94987437,9.41126718,0.733898626,9.40411153,3.32704992,3.32530693,3.31604366
56.237986,10.0995049,9.68972737,0.640138706,9.68278572,3.3263543,3.32446463,3.31528435
56.248478,10.7238053,9.92898363,0.891527712,9.92221558,3.32565976,3.32362683,3.31452516
56.25897,11.4017543,10.1207304,1.13182323,10.1140952,3.32496638,3.32279302,3.31376616
56.269461,10.8166538,10.257381,0.747845463,10.2508373,3.32427424,3.32196284,3.31300742
56.279953,11.045361,10.3329531,0.844042602,10.326459,3.32358323,3.32113575,3.31224879
56.290444,11.045361,10.3438614,0.837555746,10.3373747,3.32289349,3.32031161,3.31149043
56.300936,11.5325626,10.2895533,1.11490327,10.2830318,3.32220492,3.31949,3.31073219
56.311428,10.9544512,10.1725911,0.884228513,10.1659929,3.32151758,3.31867081,3.30997414
56.321919,10.1488916,9.99824693,0.388129661,9.99153094,3.32083158,3.31785391,3.30921635
56.332411,11,9.77362491,1.10741821,9.76675071,3.32014678,3.31703899,3.30845869
56.342902,9.32737905,9.50689594,-0.423694332,9.49982388,3.31946335,3.31622607,3.30770129
56.353394,9.64365076,9.2063595,0.661280017,9.19905041,3.31878117,3.31541486,3.30694401
56.363886,8.42614977,8.88010352,-0.673760896,8.87251848,3.31810033,3.31460533,3.30618692
56.374377,8.06225775,8.53567418,-0.688052638,8.52777433,3.3174209,3.31379746,3.3054301
56.384869,7.41619849,8.17988426,-0.873891169,8.17163063,3.31674279,3.31299099,3.3046734
56.39536,7.34846923,7.8190579,-0.685994662,7.81041167,3.31606613,3.312186,3.30391697
56.405852,8.06225775,7.45880328,0.776823315,7.44972606,3.31539083,3.31138227,3.30316067
56.416344,7.81024968,7.10428128,0.840219254,7.09473587,3.31471696,3.31057979,3.30240455
56.426835,7.54983444,6.76010423,0.888667659,6.75005567,3.31404462,3.30977859,3.30164871
56.437327,6.4807407,6.43021891,0.224770533,6.41963555,3.3133737,3.30897845,3.30089299
56.447818,6,6.11808698,-0.343637862,6.10694215,3.31270434,3.30817948,3.30013754
56.45831,5.47722558,5.82638917,-0.590900666,5.81466243,3.31203645,3.30738147,3.29938222
56.468802,5.19615242,5.55718757,-0.600862002,5.5448663,3.3113701,3.30658446,3.29862709
56.479293,5,5.3117991,-0.558389735,5.29887955,3.3107054,3.30578849,3.29787224
56.489785,5,5.09073411,-0.301221026,5.07722176,3.31004224,3.30499336,3.29711751
56.500276,5.56776436,4.89388151,0.820903682,4.87979115,3.30938076,3.30419919,3.29636305
56.510768,4.35889894,4.72041328,-0.601260622,4.70576789,3.30872088,3.3034058,3.29560872
56.52126,5.65685425,4.56901938,1.04299323,4.55384879,3.30806267,3.30261324,3.29485459
56.531751,4.24264069,4.4379713,-0.441962236,4.42231014,3.30740624,3.30182155,3.29410073
56.542243,4.35889894,4.32523494,0.183477541,4.30912034,3.30675147,3.30103056,3.293347
56.552734,4.12310563,4.22868889,-0.324935788,4.2121586,3.30609853,3.3002404,3.29259355
56.563226,3.46410162,4.14616426,-0.825870838,4.12925464,3.30544733,3.2994509,3.29184022
56.573718,2.82842712,4.07561041,-1.11677361,4.0583553,3.30479794,3.2986621,3.2910871
56.584209,3.87298335,4.01513538,-0.37703055,3.99756517,3.30415048,3.29787407,3.29033425
56.594701,3.31662479,3.96303789,-0.803998196,3.9451791,3.30350483,3.29708664,3.28958153
56.605192,3.87298335,3.91786374,-0.211849936,3.89973904,3.30286117,3.29629995,3.28882909
56.615684,3.31662479,3.87836657,-0.749494352,3.85999493,3.30221939,3.29551382,3.28807678
56.626176,4.12310563,3.84352495,0.528753886,3.82492203,3.3015796,3.29472832,3.28732467
56.636667,3.74165739,3.81250581,-0.266173671,3.79368441,3.30094189,3.29394351,3.28657284
56.647159,3.60555128,3.7846317,-0.423178946,3.76560217,3.30030618,3.29315923,3.28582114
56.65765,4.12310563,3.75937354,0.603102056,3.74014426,3.29967261,3.29237561,3.28506973
56.668142,3.87298335,3.73630439,0.369701174,3.71688206,3.29904112,3.2915925,3.28431844
56.678634,4.12310563,3.71509406,0.638757833,3.69548408,3.29841179,3.29080996,3.28356736
56.689125,3.87298335,3.695482,0.421309087,3.67568873,3.29778473,3.29002805,3.28281656
56.699617,3,3.67725671,-0.822956079,3.65728362,3.29715986,3.28924662,3.2820659
56.710108,3.87298335,3.66025551,0.461224279,3.64010544,3.29653733,3.28846581,3.28131551
56.7206,3.74165739,3.64434085,0.311955986,3.62401601,3.29591708,3.28768546,3.28056526
56.731092,3.31662479,3.62940408,-0.559266745,3.60890625,3.29529919,3.28690563,3.27981522
56.741583,3.31662479,3.6153545,-0.546561719,3.59468508,3.29468379,3.2861264,3.27906546
56.752075,4,3.60211149,0.630784044,3.58127148,3.29407079,3.2853476,3.27831584
56.762566,2.44948974,3.58961039,-1.06776432,3.56860054,3.29346036,3.28456939,3.2775665
56.773058,2.44948974,3.57779019,-1.06221488,3.55661095,3.29285244,3.2837916,3.2768173
56.78355,4.12310563,3.56660025,0.745992877,3.54525182,3.29224712,3.2830143,3.27606831
56.794041,3,3.55599524,-0.745650881,3.53447761,3.29164451,3.28223757,3.2753196
56.804533,3.16227766,3.54593146,-0.619397932,3.52424439,3.29104457,3.28146124,3.27457103
56.815024,3.16227766,3.53637306,-0.611633386,3.51451613,3.29044744,3.28068546,3.27382274
56.825516,3,3.52728386,-0.726143138,3.50525643,3.28985308,3.27991008,3.2730746
56.836008,3.74165739,3.51863336,0.472254196,3.49643462,3.28926159,3.27913517,3.27232666
56.846499,3.60555128,3.51039354,0.308476482,3.48802251,3.28867309,3.2783608,3.27157902
56.856991,3.60555128,3.50253638,0.320959341,3.4799919,3.28808753,3.27758682,3.27083151
56.867482,4,3.49503903,0.71060606,3.47231981,3.28750508,3.27681336,3.27008429
56.877974,3.74165739,3.48787763,0.503765578,3.46498218,3.2869257,3.27604028,3.26933721
56.888466,4.24264069,3.48103219,0.87270184,3.45795889,3.28634949,3.27526764,3.26859035
56.898957,4.24264069,3.47448415,0.876445399,3.45123125,3.28577659,3.27449553,3.26784377
56.909449,3.74165739,3.46821458,0.522917586,3.44478016,3.28520695,3.27372378,3.26709734
56.91994,2.82842712,3.46220825,-0.796103714,3.43859026,3.28464075,3.27295255,3.26635119
56.930432,3.46410162,3.45644879,0.0874804297,3.43264503,3.28407795,3.27218167,3.26560519
56.940924,3.16227766,3.45092266,-0.537256926,3.4269308,3.28351869,3.27141123,3.26485941
56.951415,2.64575131,3.44561724,-0.894352241,3.42143484,3.28296309,3.27064129,3.26411391
56.961907,3.31662479,3.44051932,-0.351986551,3.41614376,3.28241113,3.2698717,3.26336857
56.972398,3.31662479,3.43561852,-0.344954674,3.4110471,3.28186299,3.26910261,3.26262351
56.98289,4.79583152,3.43090333,1.16830141,3.40613317,3.28131865,3.26833387,3.26187859
56.993382,3.87298335,3.42636437,0.668295576,3.4013925,3.28077824,3.26756555,3.2611339
57.003873,3.60555128,3.42199285,0.428437184,3.39681617,3.28024192,3.26679772,3.2603895
57.014365,4.47213595,3.41777937,1.02681867,3.39239461,3.27970965,3.26603023,3.25964524
57.024856,3.60555128,3.41371671,0.437989231,3.38812052,3.27918165,3.26526322,3.25890128
57.035348,3.74165739,3.40979659,0.5760736,3.38398545,3.27865791,3.26449656,3.25815747
57.04584,3.60555128,3.40601241,0.446697735,3.37998267,3.27813857,3.2637303,3.25741387
57.056331,3.16227766,3.40235793,-0.489979863,3.37610586,3.27762379,3.26296452,3.25667057
57.066823,3.60555128,3.39882631,0.454670174,3.37234798,3.27711357,3.26219907,3.25592742
57.077314,2.82842712,3.39541246,-0.752984285,3.36870386,3.27660813,3.2614341,3.25518457
57.087806,1.73205081,3.39211033,-1.28843297,3.36516726,3.27610746,3.26066946,3.25444186
57.098298,2.82842712,3.38891517,-0.748657496,3.36173332,3.27561175,3.25990522,3.25369938
57.108789,3.87298335,3.38582252,0.697969075,3.35839745,3.27512116,3.25914145,3.25295719
57.119281,2.64575131,3.38282731,-0.858531301,3.35515441,3.27463571,3.25837801,3.25221515
57.129772,3.60555128,3.37992591,0.475000389,3.35200046,3.27415563,3.25761503,3.25147341
57.140264,4,3.37711382,0.789231388,3.3489309,3.27368095,3.25685238,3.25073183
57.150756,3.46410162,3.3743876,0.299522979,3.34594218,3.27321185,3.25609012,3.24999046
57.161247,3.46410162,3.37174401,0.30390394,3.3430309,3.27274852,3.25532832,3.2492494
57.171739,3.74165739,3.36917926,0.610309863,3.34019308,3.27229102,3.25456684,3.24850849
57.18223,3.60555128,3.36669073,0.488733611,3.33742598,3.27183958,3.25380583,3.24776787
57.192722,4.35889894,3.36427505,0.997308324,3.33472602,3.27139426,3.25304513,3.24702741
57.203214,3.74165739,3.3619297,0.616220482,3.33209053,3.27095528,3.25228482,3.24628718
57.213705,3.74165739,3.35965232,0.618065582,3.32951699,3.27052283,3.25152497,3.24554725
57.224197,4.12310563,3.35744004,0.87502319,3.32700231,3.270097,3.25076544,3.24480747
57.234688,3.60555128,3.35529099,0.50026022,3.32454448,3.26967806,3.25000636,3.244068
57.24518,3.46410162,3.35320259,0.333015046,3.32214069,3.26926609,3.24924759,3.24332868
57.255672,3.46410162,3.35117303,0.33604848,3.31978894,3.26886133,3.24848921,3.24258959
57.266163,4.24264069,3.34920058,0.945219608,3.31748733,3.26846401,3.24773128,3.2418508
57.276655,4.24264069,3.34728305,0.946233393,3.31523341,3.26807426,3.24697367,3.24111216
57.287146,3.87298335,3.34541912,0.726336164,3.31302571,3.26769236,3.2462165,3.24037383
57.297638,3.60555128,3.34365985,0.511753289,3.31086198,3.26737268,3.24545965,3.23963566
57.30813,4.24264069,3.34189796,0.949074667,3.30874071,3.26700706,3.24470318,3.23889772
57.318621,3.31662479,3.34018517,-0.153493894,3.30666045,3.26664996,3.24394716,3.23816008
57.329113,2.82842712,3.33851981,-0.71420773,3.30461924,3.26630154,3.24319144,3.23742261
57.339604,3.31662479,3.33690097,-0.142394435,3.30261598,3.26596212,3.24243618,3.23668543
57.350096,3.60555128,3.33532718,0.519830837,3.30064886,3.26563189,3.24168122,3.23594842
57.360588,3,3.33379751,-0.577752119,3.29871673,3.26531116,3.24092665,3.23521164
57.371079,4.35889894,3.3323111,1.01320671,3.29681847,3.26500022,3.24017252,3.23447516
57.381571,4.12310563,3.33086671,0.890078037,3.29495249,3.26469931,3.2394187,3.23373885
57.392062,2.82842712,3.32946375,-0.70783941,3.29311796,3.26440878,3.23866532,3.23300284
57.402554,3.87298335,3.32810115,0.738161364,3.29131341,3.26412889,3.23791225,3.232267
57.413046,3.60555128,3.32677827,0.527989586,3.28953795,3.26385998,3.23715956,3.23153139
57.423537,2.64575131,3.32549456,-0.824465434,3.28779071,3.26360241,3.23640732,3.23079609
57.434029,3,3.32424914,-0.569428786,3.28607038,3.26335648,3.23565538,3.23006095
57.44452,3.46410162,3.32304167,0.37557948,3.28437635,3.26312259,3.2349039,3.22932612
57.455012,4.35889894,3.32187139,1.0183455,3.2827074,3.26290108,3.23415271,3.22859145
57.465504,3.16227766,3.32073796,-0.398070726,3.28106283,3.26269235,3.2334019,3.22785702
57.475995,4.24264069,3.31964106,0.960728695,3.27944197,3.26249683,3.23265154,3.2271229
57.486487,4.35889894,3.31858011,1.01996021,3.27784373,3.2623149,3.23190149,3.22638895
57.496978,2.82842712,3.31755501,-0.699376782,3.27626765,3.26214703,3.23115188,3.2256553
57.50747,3.16227766,3.31656528,-0.392794626,3.27471271,3.26199365,3.23040258,3.22492182
57.517962,3.87298335,3.31561081,0.746573868,3.27317837,3.26185525,3.22965366,3.22418859
57.528453,4.35889894,3.3146915,1.02186469,3.2716641,3.26173233,3.22890518,3.22345566
57.538945,3.46410162,3.31380707,0.387678399,3.27016898,3.26162539,3.22815702,3.2227229
57.549436,3.87298335,3.31295761,0.748348674,3.26869268,3.26153498,3.2274093,3.22199045
57.559928,3.74165739,3.31214291,0.655373536,3.26723432,3.26146164,3.22666188,3.22125817
57.57042,3.60555128,3.31136309,0.542391171,3.26579349,3.26140597,3.22591485,3.22052613
57.580911,2.64575131,3.31061828,-0.81539375,3.26436977,3.26136858,3.22516826,3.2197944
57.591403,2.64575131,3.30990844,-0.814958361,3.26296237,3.2613501,3.22442199,3.21906284
57.601894,3.60555128,3.30923388,0.544350439,3.26157106,3.26135119,3.22367616,3.2183316
57.612386,3.60555128,3.30859466,0.544937256,3.26019509,3.26137256,3.22293065,3.21760053
57.622878,3,3.30799113,-0.554969484,3.25883413,3.26141491,3.22218552,3.2168697
57.633369,3.31662479,3.30742363,0.0959226802,3.25748785,3.26147902,3.22144083,3.21613918
57.643861,3.46410162,3.30689242,0.396496146,3.25615558,3.26156567,3.22069646,3.21540884
57.654352,3.31662479,3.30639801,0.101127521,3.25483715,3.26167568,3.21995255,3.21467881
57.664844,3.60555128,3.30594078,0.547366873,3.25353191,3.26180994,3.21920895,3.21394895
57.675336,3.74165739,3.30552129,0.660406008,3.2522396,3.26196935,3.21846573,3.21321934
57.685827,3.31662479,3.30514015,0.107166392,3.25095998,3.26215483,3.21772297,3.21249005
57.696319,3.16227766,3.30479794,-0.377518576,3.24969244,3.26236743,3.21698053,3.21176093
57.70681,4,3.30449539,0.833969188,3.24843688,3.26260813,3.21623854,3.21103212
57.717302,3.60555128,3.30423323,0.548924442,3.24719274,3.2628781,3.21549687,3.21030349
57.727794,2.64575131,3.30401231,-0.811332851,3.2459598,3.26317844,3.2147556,3.20957511
57.738285,3.87298335,3.30383352,0.754420192,3.24473788,3.26351033,3.21401478,3.20884705
57.748777,2.64575131,3.30369781,-0.811139011,3.24352645,3.26387511,3.21327429,3.20811916
57.759268,3.87298335,3.30360622,0.75457082,3.24232545,3.26427403,3.21253427,3.20739159
57.76976,3.16227766,3.30355987,-0.375875261,3.24113438,3.26470856,3.21179456,3.20666419
57.780252,3.16227766,3.30355995,-0.375875371,3.23995307,3.26518014,3.21105526,3.20593705
57.790743,3.31662479,3.30360775,0.114092259,3.23878139,3.26569026,3.21031642,3.20521022
57.801235,3.46410162,3.30370463,0.400495927,3.23761885,3.26624065,3.20957792,3.20448358
57.811726,4.24264069,3.30385204,0.968911062,3.23646545,3.26683292,3.20883989,3.20375725
57.822218,4.35889894,3.30405158,1.02705762,3.23532072,3.26746898,3.20810219,3.2030311
57.83271,3.87298335,3.3043049,0.754107715,3.23418455,3.26815068,3.2073649,3.20230521
57.843201,2.82842712,3.30461375,-0.69006277,3.23305683,3.26887996,3.20662809,3.20157963
57.853693,3.31662479,3.30498009,0.10791063,3.23193713,3.26965907,3.20589161,3.20085424
57.864184,3.60555128,3.30540586,0.547855289,3.23082546,3.27049009,3.20515562,3.20012916
57.874676,3.46410162,3.3058933,0.397754089,3.22972142,3.27137556,3.20441998,3.19940427
57.885168,4.24264069,3.30644467,0.967572229,3.2286249,3.27231789,3.20368475,3.19867963
57.895659,3.46410162,3.30706234,0.396281807,3.22753585,3.27331961,3.20295002,3.19795531
57.906151,3.31662479,3.30774905,0.0942111596,3.22645385,3.27438372,3.20221563,3.19723118
57.916642,3.16227766,3.30850742,-0.382399996,3.22537896,3.27551297,3.20148175,3.19650737
57.927134,3.60555128,3.30934055,0.544252447,3.22431079,3.2767107,3.20074822,3.19578374
57.937626,3,3.31025152,-0.557002263,3.22324929,3.27798014,3.20001512,3.19506037
57.948117,3.60555128,3.31124358,0.542501331,3.2221944,3.27932468,3.19928253,3.19433732
57.958609,4.24264069,3.31232049,0.964531075,3.22114575,3.28074831,3.19855032,3.19361445
57.9691,3.60555128,3.31348586,0.540430771,3.22010342,3.28225474,3.19781861,3.19289191
57.979592,4.12310563,3.31474396,0.899089355,3.21906704,3.28384847,3.19708728,3.19216956
57.990084,3.46410162,3.31609902,0.384711057,3.21803658,3.28553387,3.1963564,3.19144746
58.000575,4,3.31755552,0.826101979,3.21701201,3.28731552,3.19562605,3.19072569
58.011067,4.58257569,3.31911868,1.12403604,3.21599299,3.28919888,3.19489608,3.1900041
58.021558,3.46410162,3.32079348,0.378560608,3.21497959,3.291189,3.19416665,3.18928284
58.03205,3.16227766,3.32258588,-0.400385086,3.21397151,3.29329205,3.19343762,3.18856177
58.042542,3.87298335,3.32450175,0.740595433,3.2129687,3.29551403,3.19270907,3.18784096
58.053033,4.24264069,3.32654737,0.95712764,3.21197115,3.29786133,3.19198107,3.18712047
58.063525,3.60555128,3.32873004,0.526138037,3.21097856,3.30034145,3.19125348,3.18640017
58.074016,4,3.33105675,0.817889511,3.20999101,3.30296147,3.19052645,3.1856802
58.084508,3.60555128,3.3335359,0.521550932,3.2090082,3.30572998,3.18979985,3.18496042
58.095,3.60555128,3.33617583,0.519013919,3.20803012,3.30865542,3.18907376,3.1842409
58.105491,3.16227766,3.33898544,-0.42036624,3.20705676,3.31174683,3.18834825,3.18352171
58.115983,3.74165739,3.34197515,0.632204266,3.20608784,3.31501482,3.18762319,3.18280271
58.126474,3.74165739,3.34515507,0.6296843,3.20512346,3.31846957,3.18689873,3.18208404
58.136966,4.12310563,3.34853731,0.880095627,3.20416332,3.32212339,3.18617473,3.18136556
58.147458,2.82842712,3.35213405,-0.723675978,3.20320744,3.32598858,3.18545127,3.18064735
58.157949,4.35889894,3.35595844,1.00146917,3.20225582,3.33007841,3.18472844,3.17992946
58.168441,3.16227766,3.36002601,-0.444689053,3.20130819,3.3344086,3.18400611,3.17921177
58.178932,3.16227766,3.36435216,-0.449526977,3.20036465,3.33899465,3.18328441,3.1784944
58.189424,3.87298335,3.36895558,0.709949133,3.19942493,3.34385546,3.18256324,3.17777724
58.199916,4.12310563,3.3738557,0.865592242,3.19848906,3.3490106,3.18184265,3.17706033
58.210407,3.16227766,3.37907428,-0.465614238,3.19755704,3.35448198,3.18112275,3.17634376
58.220899,3.31662479,3.3846376,-0.260792647,3.19662862,3.3602961,3.18040339,3.17562738
58.23139,2.82842712,3.39057362,-0.749764296,3.19570391,3.36648109,3.17968474,3.17491133
58.241882,3.74165739,3.39691739,0.587145639,3.19478266,3.37307224,3.17896667,3.17419548
58.252374,3.60555128,3.40370844,0.449269219,3.19386488,3.38010936,3.17824926,3.1734799
58.262865,4.12310563,3.41099432,0.843866878,3.19295061,3.38764022,3.1775326,3.17276465
58.273357,3.74165739,3.41883527,0.568174372,3.19203959,3.39572549,3.17681657,3.17204959
58.283848,2.64575131,3.42730258,-0.884053885,3.19113194,3.40443683,3.17610131,3.17133488
58.29434,3.31662479,3.43648894,-0.346214023,3.19022743,3.41386747,3.17538673,3.17062035
58.304832,3.74165739,3.44650846,0.543276105,3.18932609,3.42413215,3.1746729,3.1699061
58.315323,2.82842712,3.4575059,-0.793144862,3.18842793,3.4353764,3.17395991,3.16919218
58.325815,3.16227766,3.46966913,-0.554428955,3.18753273,3.44778911,3.17324766,3.16847846
58.336306,2.64575131,3.4832325,-0.915139982,3.18664061,3.46160582,3.17253629,3.16776507
58.346798,4.12310563,3.49849971,0.790320135,3.18575134,3.47713181,3.17182571,3.16705189
58.35729,3.60555128,3.51585087,0.299500266,3.18486496,3.49474903,3.171116,3.16633897
58.367781,3.60555128,3.53576374,0.264173309,3.18398149,3.51493751,3.17040728,3.16562639
58.378273,3.87298335,3.55884075,0.560484251,3.18310072,3.53830247,3.16969942,3.16491401
58.388764,4,3.58581622,0.643571112,3.18222277,3.56558136,3.1689926,3.16420197
58.399256,4.12310563,3.61759595,0.710992038,3.18134741,3.59768369,3.16828673,3.16349013
58.409748,2.44948974,3.65525902,-1.09807526,3.1804747,3.63569258,3.1675819,3.16277856
58.420239,3.60555128,3.70007715,-0.307450602,3.17960467,3.68088399,3.16687824,3.16206733
58.430731,5.19615242,3.75353567,1.20108982,3.1787371,3.73474761,3.16617564,3.16135631
58.441222,4.24264069,3.8172935,0.652186464,3.17787212,3.79894622,3.1654743,3.16064562
58.451714,4.69041576,3.89320112,0.892868767,3.17700952,3.87533358,3.16477412,3.15993513
58.462206,3.31662479,3.98321527,-0.816449923,3.17614934,3.96586829,3.16407524,3.15922492
58.472697,4.79583152,4.08934529,0.840527353,3.17529163,4.07255984,3.16337777,3.15851505
58.483189,4.24264069,4.21360395,0.170401695,3.17443618,4.19741915,3.16268166,3.15780538
58.49368,4.89897949,4.35782861,0.735629576,3.17358311,4.34227923,3.16198711,3.15709605
58.504172,4.69041576,4.52366843,0.408347071,3.17273223,4.50878288,3.16129405,3.15638693
58.514664,5.09901951,4.71238214,0.621801718,3.17188358,4.69818041,3.16060264,3.15567808
58.525155,5.56776436,4.92477267,0.801867631,3.17103721,4.91126506,3.15991303,3.15496957
58.535647,5.29150262,5.16118075,0.361001211,3.17019292,5.14836752,3.15922518,3.15426127
58.546138,4.58257569,5.42128138,-0.915808759,3.16935083,5.40915274,3.15853934,3.15355331
58.55663,5.09901951,5.70423924,-0.777958691,3.16851075,5.69277647,3.15785548,3.15284556
58.567122,6.55743852,6.00853446,0.740880599,3.16767274,5.9977111,3.1571738,3.15213809
58.577613,5.83095189,6.33204609,-0.70788007,3.16683683,6.32182954,3.1564945,3.15143095
58.588105,6.63324958,6.6721879,-0.197327956,3.16600284,6.6625413,3.15581759,3.15072403
58.598596,7.07106781,7.0257304,0.212925832,3.16517089,7.01661394,3.15514336,3.15001745
58.609088,7.81024968,7.38911385,0.648949787,3.1643408,7.38048633,3.15447187,3.14931108
58.61958,7,7.75826918,-0.870786529,3.16351262,7.750089,3.15380337,3.14860498
58.630071,7.93725393,8.12877591,-0.437632234,3.1626864,8.12100187,3.15313815,3.14789923
58.640563,8.1240384,8.49602826,-0.609909714,3.16186196,8.48862031,3.1524763,3.14719369
58.651054,8.66025404,8.85504263,-0.441348611,3.16103941,8.847962,3.15181822,3.1464885
58.661546,9.32737905,9.20078953,0.355794219,3.16021859,9.19399909,3.15116407,3.14578352
58.672038,9,9.52800415,-0.726638943,3.15939953,9.52146834,3.15051424,3.14507881
58.682529,10.3440804,9.83135566,0.716048024,3.1585823,9.82504035,3.14986914,3.14437446
58.693021,9.79795897,10.1055991,-0.554653134,3.15776672,10.0994715,3.14922907,3.14367031
58.703512,9.79795897,10.3454851,-0.73995008,3.15695291,10.3395135,3.14859462,3.14296651
58.714004,11.045361,10.5461141,0.706574072,3.1561407,10.5402675,3.14796619,3.14226293
58.724496,10.4403065,10.7029742,-0.512511129,3.15533014,10.6972223,3.14734447,3.14155962
58.734987,11.61895,10.8122799,0.898148152,3.15452128,10.8065926,3.14673026,3.14085666
58.745479,11.045361,10.8712548,0.417260382,3.15371395,10.8656019,3.14612434,3.14015392
58.75597,11.61895,10.878315,0.860601538,3.15290828,10.8726663,3.14552793,3.13945152
58.766462,11.7473401,10.8332602,0.956075288,3.1521041,10.8275851,3.14494228,3.13874934
58.776954,11.5325626,10.737281,0.891785608,3.15130146,10.7315483,3.1443692,3.13804744
58.787445,11.2694277,10.5928649,0.822534329,3.15050041,10.5870424,3.14381099,3.13734589
58.797937,11.1803399,10.4035098,0.881379648,3.14970079,10.3975637,3.14327042,3.13664456
58.808428,10.8166538,10.1735657,0.80192776,3.14890273,10.1674603,3.14275139,3.13594357
58.81892,10,9.90782578,0.303602074,3.14810606,9.90152238,3.14225866,3.13524281
58.829412,9.89949494,9.61145431,0.536694164,3.14731082,9.60491027,3.1417986,3.13454232
58.839903,8.94427191,9.28976798,-0.58778914,3.14651709,9.28293536,3.14137935,3.13384219
58.850395,10.0995049,8.94801586,1.07307459,3.14572469,8.9408397,3.14101105,3.13314227
58.860886,8.94427191,8.59151979,0.593929386,3.14493376,8.5839362,3.1407066,3.13244271
58.871378,9.2736185,8.22535466,1.02384757,3.14414412,8.21728817,3.14048166,3.13174336
58.88187,8.24621125,7.85453047,0.625844052,3.14335583,7.84589119,3.14035528,3.1310443
58.892361,7.93725393,7.48384034,0.673359929,3.14256896,7.47452046,3.14034989,3.13034559
58.902853,7,7.11770033,-0.343074822,3.14178334,7.10757,3.14049138,3.1296471
58.913344,7.74596669,6.7603378,0.992788441,3.1409991,6.74924107,3.14080884,3.12894897
58.923836,7.48331477,6.41545962,1.03337077,3.14021607,6.40320973,3.14133405,3.12825105
58.934328,5.83095189,6.08643333,-0.505451719,3.13943432,6.07280898,3.14210037,3.12755342
58.944819,5.65685425,5.77612569,-0.345356978,3.1386539,5.76086805,3.14314136,3.12685614
58.955311,5.83095189,5.48677444,0.586666392,3.13787466,5.46958542,3.1444893,3.12615909
58.965802,4.79583152,5.2201479,-0.651395712,3.13709672,5.2006921,3.1461723,3.12546239
58.976294,5.47722558,4.97730398,0.707051339,3.13631992,4.95521269,3.14821273,3.12476591
58.986786,4.47213595,4.75876224,-0.5353749,3.13554433,4.73364281,3.15062355,3.12406972
58.997277,4.24264069,4.56443406,-0.567268341,3.13477,4.53588319,3.15340575,3.12337388
59.007769,4.24264069,4.39361935,-0.388559735,3.13399677,4.36123939,3.15654644,3.12267827
59.01826,3.87298335,4.2451934,-0.610090203,3.13322478,4.20861439,3.16001429,3.12198301
59.028752,4.35889894,4.11756773,0.49125473,3.13245386,4.0764695,3.16375893,3.12128798
59.039244,4,4.00889228,-0.0942988866,3.13168408,3.96303324,3.16770326,3.12059323
59.049735,4,3.91712344,0.287882894,3.1309155,3.86636112,3.17175242,3.11989885
59.060227,3.87298335,3.8400973,0.181345107,3.13014797,3.78442168,3.17577538,3.11920468
59.070718,4,3.77568553,0.473618485,3.1293816,3.71524727,3.1796116,3.11851088
59.08121,3.87298335,3.72181042,0.388809628,3.12861625,3.65694567,3.18307256,3.1178173
59.091702,4,3.67654804,0.568728375,3.12785199,3.60779922,3.1859467,3.11712401
59.102193,3.87298335,3.63815329,0.484592666,3.12708886,3.56627268,3.18801807,3.11643108
59.112685,3.46410162,3.60509093,-0.37548544,3.12632671,3.53101828,3.18909439,3.11573838
59.123176,4,3.57608806,0.651085201,3.12556568,3.50089976,3.18903894,3.11504603
59.133668,3.46410162,3.55012479,-0.293297076,3.12480562,3.4749543,3.18780004,3.11435391
59.14416,4,3.52644775,0.68815133,3.12404658,3.45239562,3.18542216,3.11366208
59.154651,3.87298335,3.50453185,0.607002052,3.12328862,3.43258342,3.18203628,3.11297062
59.165143,3.31662479,3.48402877,-0.40915031,3.1225316,3.41499765,3.17783099,3.11227938
59.175634,3.16227766,3.46472909,-0.549955846,3.12177565,3.39923013,3.17302144,3.1115885
59.186126,3.16227766,3.44650177,-0.533126734,3.1210206,3.38495235,3.16781839,3.11089785
59.196618,3.87298335,3.42927294,0.666115914,3.12026654,3.37190954,3.16241316,3.1102075
59.207109,3.60555128,3.41299768,0.438809292,3.11951351,3.35990157,3.1569682,3.1095175
59.217601,3.16227766,3.39764201,-0.485143637,3.11876136,3.34876826,3.15161382,3.10882774
59.228092,3.16227766,3.38318488,-0.470007676,3.11801024,3.33838747,3.14645339,3.10813833
59.238584,3,3.36960121,-0.607948363,3.11725998,3.32865899,3.1415621,3.10744916
59.249076,3.31662479,3.35686825,-0.200607727,3.11651066,3.31950551,3.13699345,3.10676028
59.259567,3.74165739,3.34495885,0.62984009,3.11576232,3.31086471,3.13278045,3.10607177
59.270059,3.16227766,3.33383726,-0.414197531,3.11501483,3.30268349,3.12893726,3.10538348
59.28055,3.46410162,3.32346668,0.375013248,3.11426832,3.29492078,3.12546473,3.10469556
59.291042,3.46410162,3.31380123,0.387685939,3.11352263,3.28753928,3.12235018,3.10400787
59.301534,3.46410162,3.30479413,0.399133416,3.11277783,3.28050916,3.11957274,3.10332048
59.312025,3.74165739,3.29639588,0.667279185,3.11203399,3.27380453,3.11710488,3.10263346
59.322517,2.82842712,3.28855362,-0.678326243,3.11129095,3.26740086,3.11491433,3.10194666
59.333008,2.64575131,3.28121818,-0.797161758,3.11054885,3.26127867,3.11296805,3.10126023
59.3435,3.46410162,3.27433934,0.435617118,3.10980753,3.25541824,3.11123223,3.10057403
59.353992,3.74165739,3.26787191,0.688320767,3.10906707,3.24980334,3.10967521,3.09988814
59.364483,2.82842712,3.26177416,-0.658290998,3.10832753,3.24441915,3.10826778,3.0992026
59.374975,2.23606798,3.25600671,-1.00992016,3.10758875,3.23925061,3.10698347,3.0985173
59.385466,3.74165739,3.25053663,0.700800083,3.10685087,3.23428577,3.1057998,3.09783237
59.395958,3.74165739,3.24533302,0.704502925,3.10611375,3.22951177,3.10469723,3.09714767
59.40645,3.46410162,3.24037038,0.473002365,3.10537745,3.22491802,3.10365986,3.09646328
59.416941,3.16227766,3.2356267,-0.270830272,3.10464202,3.22049467,3.10267472,3.09577924
59.427433,3.87298335,3.23108174,0.801187625,3.10390734,3.21623134,3.10173114,3.09509545
59.437924,3,3.22671973,-0.476150956,3.10317352,3.21211997,3.10082105,3.09441202
59.448416,3.60555128,3.22252552,0.618890746,3.10244043,3.20815149,3.0999378,3.09372883
59.458908,2.23606798,3.2184871,-0.991170584,3.10170812,3.20431857,3.09907646,3.09304594
59.469399,2.44948974,3.21459404,-0.874702405,3.10097666,3.20061436,3.09823326,3.09236342
59.479891,3.46410162,3.21083604,0.503254982,3.10024591,3.19703139,3.09740507,3.09168114
59.490382,2.82842712,3.20720536,-0.615449619,3.099516,3.19356403,3.09658973,3.09099922
59.500874,3,3.20369373,-0.451324422,3.09878678,3.19020569,3.09578532,3.09031754
59.511366,3,3.20029467,-0.44754292,3.09805832,3.18695117,3.09499049,3.08963617
59.521857,3.87298335,3.19700222,0.822180713,3.09733068,3.18379556,3.09420421,3.08895517
59.532349,4.47213595,3.19381005,1.13063076,3.09660372,3.18073338,3.09342541,3.0882744
59.54284,4.69041576,3.19071348,1.22462332,3.09587757,3.17776061,3.09265348,3.08759401
59.553332,3.16227766,3.18770702,-0.159465873,3.09515209,3.17487238,3.09188764,3.08691385
59.563824,3.31662479,3.18478643,0.363095524,3.09442734,3.17206492,3.09112742,3.086234
59.574315,3.31662479,3.18194771,0.366983758,3.09370339,3.16933466,3.09037243,3.08555452
59.584807,3.16227766,3.17918635,-0.130033429,3.09298009,3.16667749,3.0896221,3.08487528
59.595298,2.82842712,3.17649915,-0.589976295,3.09225757,3.1640905,3.08887621,3.08419641
59.60579,2.64575131,3.17388211,-0.726726079,3.0915357,3.16157002,3.0881343,3.08351778
59.616282,2.82842712,3.17133218,-0.585580956,3.09081454,3.15911327,3.08739614,3.08283946
59.626773,3.31662479,3.16884652,0.384419397,3.09009414,3.15671762,3.08666154,3.08216151
59.637265,3,3.16642173,-0.407948198,3.08937438,3.15437992,3.08593013,3.08148381
59.647756,2.64575131,3.16405554,-0.719933488,3.08865538,3.15209806,3.08520181,3.08080647
59.658248,3.31662479,3.1617449,0.393547828,3.087937,3.14986921,3.08447627,3.08012938
59.66874,3.46410162,3.15948759,0.551918497,3.0872193,3.14769129,3.08375338,3.07945259
59.679231,4,3.15728151,0.917997001,3.08650236,3.14556234,3.08303306,3.07877618
59.689723,2.44948974,3.15512405,-0.84002042,3.08578602,3.14347992,3.08231501,3.07810002
59.700214,3,3.15301355,-0.391169471,3.08507042,3.14144246,3.08159924,3.07742422
59.710706,3.31662479,3.15094767,0.407034547,3.08435543,3.13944775,3.08088549,3.07674867
59.721198,3.16227766,3.14892473,0.115554863,3.0836411,3.13749423,3.08017371,3.07607343
59.731689,3.31662479,3.14694318,0.411924276,3.08292749,3.13558042,3.07946385,3.07539857
59.742181,2.82842712,3.14500096,-0.562648949,3.08221448,3.13370437,3.07875569,3.07472395
59.752672,2.82842712,3.14309687,-0.560954317,3.08150218,3.13186494,3.07804928,3.0740497
59.763164,1.41421356,3.14122903,-1.31415961,3.08079047,3.13006036,3.07734439,3.0733757
59.773656,3,3.13939621,-0.373358016,3.08007941,3.12828944,3.07664101,3.07270201
59.784147,3.16227766,3.1375972,0.157100146,3.07936905,3.12655105,3.07593915,3.0720287
59.794639,3.16227766,3.13583039,0.162626171,3.07865926,3.12484364,3.07523859,3.07135563
59.80513,3.31662479,3.13409487,0.427235207,3.07795018,3.12316636,3.07453942,3.07068294
59.815622,3.31662479,3.13238914,0.429226803,3.07724166,3.12151776,3.07384145,3.0700105
59.826114,2,3.13071226,-1.06334955,3.07653377,3.11989695,3.07314469,3.06933837
59.836605,2.44948974,3.12906332,-0.824362526,3.07582657,3.11830305,3.07244915,3.06866661
59.847097,3,3.12744099,-0.356988776,3.07511992,3.1167348,3.07175466,3.06799511
59.857588,2.44948974,3.12584461,-0.822407967,3.07441396,3.11519156,3.07106131,3.06732398
59.86808,3.16227766,3.12427295,0.194947956,3.07370855,3.11367216,3.07036892,3.0666531
59.878572,2.44948974,3.1227253,-0.820509328,3.07300375,3.1121759,3.06967754,3.06598253
59.889063,2.64575131,3.12120095,-0.689528561,3.07229963,3.1107021,3.06898718,3.06531234
59.899555,3.16227766,3.1196988,0.206346454,3.07159604,3.10924972,3.06829768,3.0646424
59.910046,3.74165739,3.11821838,0.78958154,3.07089313,3.10781829,3.06760915,3.06397284
59.920538,3.87298335,3.11675866,0.869611801,3.07019074,3.10640683,3.06692142,3.06330353
59.93103,3.74165739,3.11531909,0.791415376,3.06948896,3.1050148,3.06623454,3.06263453
59.941521,3.87298335,3.11389912,0.871254396,3.06878783,3.10364168,3.06554854,3.06196592
59.952013,3.74165739,3.11249785,0.793195777,3.06808723,3.10228659,3.06486328,3.06129755
59.962504,3.60555128,3.11111491,0.703161693,3.06738729,3.10094918,3.06417885,3.06062957
59.972996,3,3.10974945,-0.331284553,3.06668786,3.09962864,3.06349512,3.05996183
59.983488,2.44948974,3.10840105,-0.81173352,3.06598902,3.09832455,3.06281212,3.05929442
59.993979,3.31662479,3.10706928,0.45777234,3.06529082,3.09703649,3.0621299,3.05862738
60.004471,2,3.10575336,-1.05154808,3.06459314,3.09576372,3.06144832,3.05796059
60.014962,3.46410162,3.10445304,0.599707074,3.0638961,3.09450599,3.06076748,3.05729419
60.025454,3.31662479,3.1031676,0.462014274,3.06319956,3.09326261,3.06008725,3.05662804
60.035946,3.16227766,3.1018967,0.245725375,3.0625036,3.09203324,3.05940767,3.05596221
60.046437,3,3.10064001,-0.317238102,3.06180827,3.09081758,3.0587288,3.05529676
60.056929,4.12310563,3.09939687,1.01178493,3.06111344,3.08961497,3.05805049,3.05463156
60.06742,2.64575131,3.09816711,-0.672618614,3.06041923,3.08842525,3.05737286,3.05396674
60.077912,3,3.09695009,-0.3113681,3.05972553,3.0872478,3.05669576,3.05330218
60.088404,2.64575131,3.09574556,-0.670816108,3.05903238,3.08608239,3.05601927,3.05263794
60.098895,2.64575131,3.09455326,-0.669926827,3.05833985,3.08492876,3.05534341,3.05197408
60.109387,3,3.09337262,-0.305569342,3.05764781,3.08378635,3.05466807,3.05131048
60.119878,2.64575131,3.09220352,-0.668170796,3.05695639,3.08265505,3.05399336,3.05064725
60.13037,3.46410162,3.09104542,0.610783263,3.05626546,3.08153433,3.05331913,3.04998429
60.140862,3.46410162,3.08989811,0.611721754,3.05557507,3.080424,3.05264545,3.04932164
60.151353,3.60555128,3.0887614,0.718880989,3.05488529,3.07932387,3.05197238,3.04865938
60.161845,2.82842712,3.08763478,-0.509124401,3.05419599,3.07823344,3.05129977,3.04799738
60.172336,3.31662479,3.08651819,0.479694282,3.0535073,3.07715265,3.05062775,3.04733576
60.182828,3.87298335,3.08541114,0.887452652,3.05281908,3.07608104,3.04995619,3.0466744
60.19332,2.44948974,3.08431347,-0.796758264,3.0521314,3.07501844,3.04928513,3.04601336
60.203811,3.31662479,3.08322505,0.483114623,3.05144433,3.07396472,3.04861464,3.0453527
60.214303,3.46410162,3.08214542,0.618026049,3.05075771,3.07291945,3.04794459,3.0446923
60.224794,3.74165739,3.08107455,0.812762475,3.0500717,3.07188258,3.0472751,3.04403229
60.235286,3.16227766,3.08001201,0.2868199,3.04938615,3.07085371,3.04660603,3.04337254
60.245778,2.82842712,3.07895768,-0.500530272,3.04870113,3.06983273,3.04593744,3.0427131
60.256269,3.60555128,3.07791145,0.726388204,3.0480167,3.06881951,3.0452694,3.04205406
60.266761,2.64575131,3.07687293,-0.656598519,3.04733273,3.06781368,3.04460176,3.04139527
60.277252,3.31662479,3.0758421,0.49069613,3.04664935,3.06681522,3.04393466,3.04073687
60.287744,3.60555128,3.07481858,0.72851403,3.04596643,3.06582377,3.04326796,3.04007874
60.298236,3,3.07380229,-0.271665776,3.04528402,3.06483925,3.04260172,3.03942092
60.308727,3.46410162,3.07279315,0.625546534,3.0446022,3.06386156,3.041936,3.03876349
60.319219,2.64575131,3.07179078,-0.652716991,3.04392083,3.06289037,3.04127067,3.03810633
60.32971,2.44948974,3.07079522,-0.788229329,3.04324004,3.06192568,3.04060585,3.03744955
60.340202,2.82842712,3.06980611,-0.49130335,3.0425597,3.06096716,3.03994142,3.03679303
60.350694,3.16227766,3.06882338,0.30570292,3.04187986,3.06001476,3.03927743,3.03613684
60.361185,3.31662479,3.06784699,0.498776298,3.04120061,3.0590684,3.03861395,3.03548103
60.371677,3.46410162,3.0668766,0.630257892,3.04052179,3.05812778,3.03795084,3.03482549
60.382168,3,3.06591226,-0.256733822,3.03984355,3.05719292,3.03728823,3.03417033
60.39266,3.16227766,3.06495363,0.311968,3.03916575,3.05626353,3.03662599,3.03351544
60.403152,2.82842712,3.06400068,-0.485359201,3.03848846,3.05533956,3.03596418,3.03286088
60.413643,3.16227766,3.06305337,0.314998873,3.03781173,3.05442096,3.03530286,3.0322067
60.424135,3.31662479,3.0621114,0.504493206,3.03713544,3.05350745,3.0346419,3.03155279
60.434626,2.23606798,3.06117481,-0.908353916,3.03645971,3.05259908,3.03398142,3.03089927
60.445118,3.87298335,3.06024333,0.901520947,3.03578442,3.05169557,3.03332131,3.03024601
60.45561,3.31662479,3.05931691,0.507255237,3.03510962,3.05079688,3.03266161,3.02959308
60.466101,2.82842712,3.05839555,-0.479550231,3.03443538,3.049903,3.03200239,3.02894054
60.476593,3,3.05747895,-0.239747675,3.03376158,3.04901365,3.03134353,3.02828827
60.487084,2.82842712,3.05656718,-0.477640092,3.03308833,3.04812891,3.03068514,3.02763638
60.497576,3.16227766,3.05565998,0.326523634,3.03241551,3.04724849,3.0300271,3.02698476
60.508068,3.31662479,3.05475732,0.51172988,3.03174318,3.0463724,3.02936946,3.02633347
60.518559,3.46410162,3.0538592,0.640501687,3.03107141,3.04550062,3.0287123,3.02568257
60.529051,3.31662479,3.05296536,0.513477779,3.03040006,3.04463289,3.02805549,3.02503194
60.539542,4,3.05207587,0.973613951,3.02972926,3.0437693,3.02739914,3.0243817
60.550034,3.16227766,3.05119049,0.333297426,3.02905888,3.04290959,3.02674313,3.02373173
60.560526,3.46410162,3.0503092,0.643266989,3.02838899,3.04205377,3.02608752,3.02308208
60.571017,3.87298335,3.049432,0.907497296,3.02771965,3.04120183,3.02543238,3.02243283
60.581509,3.16227766,3.04855866,0.337222472,3.02705073,3.04035354,3.02477757,3.02178384
60.592,3.74165739,3.04768926,0.833047491,3.02638235,3.03950898,3.02412323,3.02113525
60.602492,4.47213595,3.04682356,1.19386448,3.02571438,3.03866792,3.02346922,3.02048693
60.612984,3.46410162,3.04596157,0.646637492,3.0250469,3.03783036,3.02281561,3.01983893
60.623475,3.31662479,3.04510329,0.521077248,3.02437996,3.03699632,3.02216245,3.01919133
60.633967,3.74165739,3.0442485,0.835110105,3.02371344,3.03616556,3.02150963,3.018544
60.644458,2.44948974,3.04339728,-0.77065397,3.02304745,3.03533819,3.02085726,3.01789707
60.65495,2.82842712,3.04254942,-0.462733505,3.02238188,3.03451398,3.02020522,3.0172504
60.665442,3.16227766,3.04170493,0.347235849,3.02171678,3.03369295,3.01955358,3.01660406
60.675933,3.74165739,3.04086381,0.837134143,3.02105222,3.0328751,3.01890238,3.01595812
60.686425,3.31662479,3.04002587,0.525926729,3.02038807,3.03206024,3.01825152,3.01531245
60.696916,2.44948974,3.03919118,-0.767920204,3.01972445,3.03124845,3.0176011,3.01466717
60.707408,2.82842712,3.03835955,-0.458183829,3.01906124,3.03043953,3.01695101,3.01402217
60.7179,3.31662479,3.03753098,0.5282933,3.01839851,3.0296335,3.01630131,3.01337749
60.728391,4.24264069,3.03670551,1.0981508,3.0177363,3.02883038,3.01565206,3.01273322
60.738883,2.82842712,3.03588292,-0.455473154,3.0170745,3.02802997,3.01500313,3.01208921
60.749374,2.82842712,3.03506332,-0.454572539,3.01641323,3.02723237,3.01435465,3.0114456
60.759866,3.46410162,3.0342465,0.65563337,3.01575236,3.02643737,3.01370649,3.01080226
60.770358,2.44948974,3.03343249,-0.764161467,3.01509196,3.02564502,3.01305872,3.01015925
60.780849,2.44948974,3.03262132,-0.763630524,3.01443209,3.02485532,3.01241139,3.00951665
60.791341,2.64575131,3.03181279,-0.621338456,3.01377262,3.0240681,3.01176438,3.00887431
60.801832,3.60555128,3.031007,0.757986988,3.01311368,3.02328346,3.01111782,3.00823237
60.812324,2.64575131,3.03020376,-0.620042299,3.01245514,3.0225012,3.01047157,3.0075907
60.822816,3.31662479,3.02940311,0.535930672,3.01179705,3.02172135,3.00982571,3.00694937
60.833307,3.16227766,3.02860506,0.365612633,3.0111395,3.02094395,3.00918029,3.00630844
60.843799,3.74165739,3.02780944,0.844895227,3.01048234,3.02016881,3.00853519,3.00566778
60.85429,2.82842712,3.02701635,-0.445633513,3.0098257,3.01939605,3.00789054,3.00502751
60.864782,3,3.02622561,-0.161943216,3.00916946,3.01862546,3.0072462,3.00438753
60.875274,3.16227766,3.02543724,0.369919482,3.00851368,3.0178571,3.00660224,3.00374787
60.885765,2.23606798,3.02465129,-0.888022133,3.00785842,3.01709099,3.00595872,3.00310862
60.896257,3.60555128,3.02386756,0.76268192,3.00720356,3.01632696,3.00531551,3.00246964
60.906748,2.44948974,3.02308619,-0.757361502,3.00654921,3.01556512,3.00467275,3.00183106
60.91724,3.60555128,3.02230697,0.763704332,3.00589526,3.01480529,3.0040303,3.00119275
60.927732,3.46410162,3.02152995,0.665260598,3.00524176,3.0140475,3.00338823,3.00055478
60.938223,3.46410162,3.02075518,0.665842654,3.00458879,3.0132918,3.0027466,2.99991721
60.948715,3.31662479,3.01998246,0.544648814,3.0039362,3.01253802,3.00210529,2.99927992
60.959206,3.16227766,3.01921192,0.378240319,3.00328413,3.01178626,3.00146441,2.99864303
60.969698,2.23606798,3.01844338,-0.884519871,3.00263245,3.01103635,3.00082385,2.99800641
60.98019,3.16227766,3.01767688,0.38026409,3.00198122,3.01028834,3.00018366,2.99737013
60.990681,3.31662479,3.01691247,0.547459882,3.00133051,3.00954227,2.99954392,2.99673425
61.001173,2.82842712,3.01614997,-0.43326994,3.00068019,3.00879796,2.99890448,2.99609865
61.011664,3.60555128,3.01538949,0.768219881,3.00003038,3.00805554,2.99826548,2.99546345
61.022156,2.82842712,3.01463087,-0.43151332,2.99938096,3.00731483,2.9976268,2.99482852
61.032648,3.60555128,3.01387415,0.769205515,2.99873199,3.00657588,2.99698849,2.99419394
61.043139,3.60555128,3.01311938,0.769695977,2.99808353,3.00583873,2.99635062,2.99355976
61.053631,4.24264069,3.01236638,1.10917731,2.99743546,3.00510323,2.99571306,2.99292585
61.064122,3.60555128,3.01161528,0.77067243,2.9967879,3.00436947,2.99507594,2.99229235
61.074614,2.64575131,3.01086591,-0.604247132,2.99614073,3.00363731,2.99443913,2.99165912
61.085106,3.16227766,3.01011831,0.390076084,2.99549401,3.00290679,2.9938027,2.99102624
61.095597,4.35889894,3.00937253,1.16169119,2.99484779,3.00217795,2.9931667,2.99039375
61.106089,2.64575131,3.00862841,-0.602392815,2.99420196,3.00145063,2.99253101,2.98976155
61.11658,3.16227766,3.00788607,0.392926949,2.99355664,3.00072496,2.99189576,2.98912974
61.127072,3.31662479,3.00714534,0.556308769,2.99291171,3.00000077,2.99126082,2.98849822
61.137564,4.24264069,3.00640628,1.11186079,2.99226722,2.9992781,2.99062625,2.98786704
61.148055,3,3.00566892,-0.0752922605,2.99162324,2.99855702,2.98999212,2.98723626
61.158547,3.46410162,3.00493312,0.677619727,2.99097964,2.99783735,2.9893583,2.98660576
61.169038,3.16227766,3.00419899,0.397591085,2.99033655,2.99711923,2.98872491,2.98597567
61.17953,4.69041576,3.00346637,1.29882616,2.98969385,2.99640248,2.98809184,2.98534586
61.190022,3.16227766,3.00273531,0.39942753,2.98905158,2.99568717,2.98745914,2.98471638
61.200513,3.60555128,3.00200586,0.776881853,2.98840983,2.99497334,2.98682688,2.98408731
61.211005,3,3.00127787,-0.0357473196,2.98776846,2.99426084,2.98619492,2.98345853
61.221496,3.60555128,3.00055146,0.777817344,2.98712759,2.99354979,2.9855634,2.98283014
61.231988,2.64575131,2.99982646,-0.59504214,2.9864871,2.99284003,2.98493219,2.98220204
61.24248,3.60555128,2.99910294,0.778747931,2.98584706,2.99213161,2.98430136,2.98157429
61.252971,3.60555128,2.99838094,0.779211358,2.98520753,2.99142459,2.98367096,2.98094693
61.263463,3.31662479,2.9976603,0.56476941,2.98456837,2.99071882,2.98304087,2.98031986
61.273954,3.60555128,2.99694116,0.780134675,2.98392972,2.99001441,2.98241121,2.97969319
61.284446,1.41421356,2.99622336,-1.25777971,2.98329145,2.98931122,2.98178186,2.97906681
61.294938,2.44948974,2.99550695,-0.73892977,2.98265363,2.98860929,2.98115289,2.97844077
61.305429,3.87298335,2.99479198,0.937118651,2.98201631,2.98790868,2.98052435,2.97781514
61.315921,3.16227766,2.9940783,0.410121149,2.98137936,2.98720925,2.97989613,2.97718978
61.326412,3.16227766,2.99336604,0.410988588,2.98074293,2.9865111,2.97926833,2.97656484
61.336904,2.44948974,2.99265504,-0.736997489,2.98010687,2.9858141,2.97864085,2.97594018
61.347396,3.60555128,2.99194536,0.783330016,2.97947126,2.98511829,2.97801374,2.97531586
61.357887,2.23606798,2.99123705,-0.869004645,2.97883615,2.98442373,2.97738706,2.97469195
61.368379,2,2.99052996,-0.995253719,2.97820142,2.98373027,2.9767607,2.97406833
61.37887,3,2.98982422,0.100875058,2.97756719,2.98303804,2.97613477,2.9734451
61.389362,2.82842712,2.98911968,-0.400864757,2.97693334,2.98234689,2.97550915,2.97282217
61.399854,4.24264069,2.98841639,1.11992156,2.97629994,2.98165687,2.9748839,2.97219958
61.410345,3,2.9877144,0.110840428,2.97566704,2.98096803,2.97425909,2.9715774
61.420837,2.64575131,2.98701357,-0.584176569,2.97503452,2.98028024,2.97363458,2.9709555
61.431328,3.31662479,2.98631403,0.574726682,2.9744025,2.97959361,2.97301051,2.97033401
61.44182,3.87298335,2.98561563,0.942001975,2.97377086,2.978908,2.97238676,2.96971281
61.452312,2.44948974,2.98491841,-0.731729917,2.97313967,2.97822346,2.97176337,2.96909195
61.462803,2.82842712,2.98422245,-0.394709164,2.97250897,2.97754005,2.97114042,2.9684715
61.473295,3.74165739,2.98352759,0.870706493,2.97187866,2.97685763,2.97051778,2.96785134
61.483786,3,2.98283396,0.131019252,2.97124886,2.97617632,2.96989558,2.96723159
61.494278,3.74165739,2.98214141,0.871502141,2.97061943,2.97549597,2.96927368,2.96661212
61.50477,3.46410162,2.98145,0.694731329,2.96999045,2.97481665,2.96865216,2.965993
61.515261,3.16227766,2.98075978,0.426049152,2.96936197,2.9741384,2.96803107,2.96537429
61.525753,2.82842712,2.98007062,-0.389414297,2.96873387,2.97346109,2.9674103,2.96475586
61.536244,2.82842712,2.97938263,-0.388529933,2.96810628,2.97278484,2.96678996,2.96413785
61.546736,3.31662479,2.97869568,0.581316701,2.96747907,2.97210951,2.96616993,2.96352012
61.557228,4.35889894,2.97800982,1.17511239,2.9668523,2.97143515,2.96555027,2.96290274
61.567719,2.82842712,2.97732511,-0.385873022,2.96622604,2.97076182,2.96493105,2.96228577
61.578211,2.64575131,2.97664141,-0.575230476,2.96560016,2.97008938,2.96431214,2.96166909
61.588702,2.44948974,2.97595884,-0.725581902,2.96497478,2.96941795,2.96369366,2.96105281
61.599194,3.87298335,2.97527726,0.947473529,2.96434979,2.9687474,2.9630755,2.96043683
61.609686,3.60555128,2.97459673,0.794326475,2.96372524,2.96807778,2.96245771,2.9598212
61.620177,3,2.9739173,0.161501396,2.9631012,2.96740915,2.96184035,2.95920597
61.630669,3.60555128,2.97323884,0.795180757,2.96247755,2.96674137,2.9612233,2.95859104
61.64116,2.82842712,2.97256147,-0.379650292,2.9618544,2.96607456,2.96060669,2.95797651
61.651652,3.46410162,2.97188505,0.701581474,2.96123164,2.96540858,2.9599904,2.95736227
61.662144,3.46410162,2.97120964,0.702062656,2.96060932,2.96474349,2.95937447,2.95674839
61.672635,3.16227766,2.9705353,0.437883956,2.95998751,2.96407935,2.95875898,2.95613491
61.683127,3.46410162,2.96986189,0.703021852,2.95936609,2.96341603,2.95814381,2.95552173
61.693618,3,2.96918953,0.175529109,2.95874518,2.96275364,2.95752907,2.95490895
61.70411,3.87298335,2.96851809,0.951033782,2.95812466,2.96209204,2.95691464,2.95429647
61.714602,2.44948974,2.96784763,-0.719970751,2.95750459,2.9614313,2.95630059,2.95368434
61.725093,3.31662479,2.96717819,0.591140084,2.95688502,2.96077148,2.95568696,2.95307262
61.735585,2.23606798,2.96650966,-0.854658808,2.95626585,2.96011243,2.95507366,2.95246119
61.746076,4,2.96584214,1.01693552,2.95564719,2.95945428,2.95446079,2.95185017
61.756568,2.82842712,2.96517551,-0.36979506,2.95502892,2.95879689,2.95384823,2.95123944
61.76706,3.46410162,2.96450983,0.706818074,2.9544111,2.95814033,2.95323605,2.95062907
61.777551,3.16227766,2.96384514,0.44545765,2.95379379,2.95748464,2.9526243,2.9500191
61.788043,3.31662479,2.96318133,0.594511112,2.95317688,2.95682971,2.95201287,2.94940943
61.798534,3.16227766,2.9625185,0.446944243,2.95256049,2.95617563,2.95140187,2.94880017
61.809026,2.82842712,2.96185654,-0.365279912,2.95194449,2.9555223,2.95079118,2.94819121
61.819518,3.16227766,2.96119549,0.448421865,2.95132895,2.95486975,2.95018088,2.94758259
61.830009,2.82842712,2.96053542,-0.363467044,2.95071392,2.95421806,2.949571,2.94697439
61.840501,2.64575131,2.95987619,-0.560468444,2.95009929,2.95356708,2.94896144,2.94636648
61.850992,2.82842712,2.95921792,-0.361650104,2.94948518,2.95291694,2.94835232,2.94575898
61.861484,2.23606798,2.95856049,-0.849995597,2.94887147,2.95226751,2.94774351,2.94515178
61.871976,3.60555128,2.95790395,0.804765383,2.94825823,2.95161884,2.94713508,2.94454493
61.882467,3.87298335,2.95724837,0.956940426,2.9476455,2.95097099,2.94652708,2.94393849
61.892959,3.16227766,2.9565936,0.453524042,2.94703318,2.95032384,2.9459194,2.94333235
61.90345,3.74165739,2.95593978,0.886407133,2.94642138,2.94967749,2.94531215,2.94272662
61.913942,2.82842712,2.95528677,-0.356173621,2.94580999,2.94903183,2.94470522,2.94212119
61.924434,2.64575131,2.95463464,-0.555772728,2.94519907,2.94838691,2.94409867,2.94151611
61.934925,2.44948974,2.95398343,-0.710277191,2.94458867,2.94774278,2.94349255,2.94091144
61.945417,3.16227766,2.95333303,0.457104617,2.94397869,2.94709932,2.94288674,2.94030707
61.955908,4.24264069,2.95268355,1.1357628,2.94336923,2.94645664,2.94228138,2.93970311
61.9664,3.16227766,2.95203487,0.458522401,2.94276019,2.94581462,2.94167633,2.93909944
61.976892,3.31662479,2.95138704,0.60434903,2.94215162,2.94517332,2.94107165,2.93849614
61.987383,3,2.95074013,0.221945655,2.94154359,2.94453279,2.94046741,2.93789324
61.997875,3,2.950094,0.22339651,2.94093597,2.94389291,2.93986349,2.93729064
62.008366,2.44948974,2.94944878,-0.707077816,2.94032889,2.94325379,2.93926001,2.93668845
62.018858,3,2.94880434,0.226264571,2.93972224,2.94261531,2.93865684,2.93608657
62.02935,2.64575131,2.94816075,-0.549917664,2.93911606,2.94197752,2.93805405,2.93548503
62.039841,3,2.94751805,0.229089387,2.93851043,2.94134048,2.9374517,2.93488391
62.050333,2.64575131,2.94687613,-0.548748413,2.93790523,2.94070406,2.93684966,2.93428309
62.060824,2.44948974,2.94623511,-0.704801649,2.93730057,2.94006839,2.93624806,2.93368268
62.071316,2.82842712,2.94559485,-0.342297718,2.93669635,2.93943334,2.93564678,2.93308257
62.081808,3,2.94495543,0.234615794,2.93609262,2.93879895,2.93504588,2.93248282
62.092299,3,2.9443169,0.235972678,2.93548944,2.9381653,2.93444541,2.93188348
62.102791,2.64575131,2.94367913,-0.545827644,2.9348867,2.93753226,2.93384527,2.93128444
62.113282,3,2.94304225,0.238658236,2.93428451,2.93689994,2.93324555,2.93068581
62.123774,2.44948974,2.94240613,-0.702080043,2.93368277,2.93626822,2.93264616,2.93008748
62.134266,3.16227766,2.94177084,0.469581543,2.93308154,2.93563715,2.93204715,2.92948951
62.144757,2.44948974,2.94113642,-0.701175214,2.93248087,2.9350068,2.93144857,2.92889196
62.155249,3.46410162,2.94050277,0.7236013,2.93188065,2.93437703,2.93085032,2.9282947
62.16574,2.64575131,2.93987001,-0.54232711,2.931281,2.93374797,2.9302525,2.92769786
62.176232,2.23606798,2.939238,-0.838552336,2.93068181,2.93311949,2.929655,2.92710131
62.186724,3.74165739,2.93860681,0.896130893,2.93008314,2.93249165,2.92905788,2.92650513
62.197215,2.82842712,2.9379765,-0.330982442,2.92948505,2.93186451,2.92846119,2.92590936
62.207707,2.23606798,2.93734695,-0.837424012,2.92888742,2.93123793,2.92786483,2.92531389
62.218198,3.31662479,2.93671829,0.61636556,2.92829038,2.93061205,2.9272689,2.92471883
62.22869,3.16227766,2.93609038,0.475591506,2.92769382,2.92998673,2.9266733,2.92412408
62.239182,4.35889894,2.93546329,1.19307822,2.9270978,2.92936204,2.92607807,2.92352968
62.249673,3,2.93483709,0.255270267,2.92650237,2.92873803,2.92548329,2.9229357
62.260165,3.31662479,2.93421165,0.618395618,2.92590743,2.92811457,2.92488882,2.92234202
62.270656,2.64575131,2.93358709,-0.536503292,2.92531309,2.92749179,2.92429479,2.92174876
62.281148,3.31662479,2.9329633,0.619404139,2.92471925,2.92686955,2.92370108,2.92115579
62.29164,2.44948974,2.93234034,-0.694874519,2.92412596,2.92624793,2.92310776,2.92056319
62.302131,2.23606798,2.93171827,-0.834056526,2.9235333,2.92562697,2.92251487,2.919971
62.312623,3,2.93109696,0.26249388,2.92294115,2.92500656,2.9219223,2.91937912
62.323114,2.23606798,2.93047655,-0.833311811,2.92234962,2.9243868,2.92133018,2.91878765
62.333606,3.46410162,2.92985692,0.730920444,2.92175861,2.92376759,2.92073837,2.91819648
62.344098,3,2.92923812,0.266011044,2.92116819,2.92314897,2.92014695,2.91760567
62.354589,3.46410162,2.92862023,0.731765936,2.92057841,2.922531,2.91955596,2.91701528
62.365081,3.46410162,2.92800312,0.732187471,2.91998917,2.92191356,2.9189653,2.91642519
62.375572,3.74165739,2.92738692,0.902369361,2.91940059,2.92129677,2.91837507,2.91583551
62.386064,2.44948974,2.92677152,-0.690855828,2.91881256,2.9206805,2.91778517,2.91524614
62.396556,3.16227766,2.92615697,0.485922516,2.91822514,2.92006482,2.91719565,2.91465713
62.407047,3.46410162,2.92554334,0.733865298,2.91763841,2.91944977,2.91660657,2.91406854
62.417539,2.44948974,2.92492809,-0.689520377,2.91704981,2.91883525,2.91601782,2.91348025
62.42803,2.44948974,2.9243162,-0.689076528,2.91646433,2.91822135,2.9154295,2.91289238
62.438522,3.60555128,2.92370513,0.825739754,2.91587945,2.91760798,2.91484151,2.91230481
62.449014,3.87298335,2.92309495,0.974622183,2.91529521,2.91699517,2.9142539,2.9117176
62.459505,3.16227766,2.92248571,0.489685564,2.9147117,2.91638299,2.91366673,2.91113081
62.469997,3.46410162,2.92187731,0.736358817,2.9141288,2.91577132,2.91307988,2.91054432
62.480488,2,2.92126987,-0.959828042,2.91354663,2.91516027,2.91249348,2.90995825
62.49098,3,2.92066328,0.28166774,2.9129651,2.91454973,2.9119074,2.90937248
62.501472,2.64575131,2.92005762,-0.523742597,2.91238427,2.91393974,2.9113217,2.90878708
62.511963,3.31662479,2.91945294,0.630215717,2.91180421,2.91333038,2.91073644,2.90820209
62.522455,3.16227766,2.91884914,0.493384758,2.91122481,2.91272151,2.91015151,2.90761741
62.532946,3,2.91824635,0.285925958,2.9106462,2.91211325,2.90956701,2.90703314
62.543438,3.60555128,2.91764445,0.829401485,2.91006829,2.91150549,2.90898285,2.90644918
62.55393,4.12310563,2.91704353,1.09820859,2.90949113,2.91089827,2.90839907,2.90586558
62.564421,3.16227766,2.91644364,0.495816519,2.9089148,2.91029166,2.90781572,2.9052824
62.574913,3.16227766,2.91584469,0.496420157,2.90833921,2.90968555,2.90723271,2.90469953
62.585404,4.35889894,2.9152468,1.20152076,2.90776447,2.90908003,2.90665013,2.90411707
62.595896,3.31662479,2.91464987,0.634014921,2.90719049,2.908475,2.90606789,2.90353492
62.606388,2.44948974,2.91405398,-0.681589491,2.90661735,2.9078705,2.90548603,2.90295313
62.616879,3.60555128,2.91345919,0.83192072,2.90604512,2.90726661,2.9049046,2.90237176
62.627371,1.41421356,2.91286541,-1.22419437,2.9054737,2.90666319,2.90432351,2.9017907
62.637862,3,2.91227277,0.296187824,2.90490323,2.90606037,2.90374285,2.90121005
62.648354,3.60555128,2.91168118,0.832988654,2.90433361,2.90545803,2.90316253,2.90062971
62.658846,3.46410162,2.9110907,0.743647034,2.90376492,2.90485621,2.90258259,2.90004974
62.669337,2,2.91050143,-0.954201985,2.90319724,2.90425499,2.90200309,2.89947018
62.679829,3.87298335,2.90991326,0.981361345,2.90263048,2.90365423,2.90142392,2.89889093
62.69032,3.16227766,2.90932633,0.502942675,2.90206478,2.90305406,2.90084519,2.89831209
62.700812,2.23606798,2.90874055,-0.820166185,2.90150004,2.90245436,2.90026679,2.89773357
62.711304,3.16227766,2.90815601,0.504104804,2.90093636,2.90185518,2.89968878,2.89715541
62.721795,3.16227766,2.90757278,0.504682948,2.90037382,2.90125658,2.89911121,2.89657767
62.732287,2.44948974,2.90699079,-0.676388239,2.89981233,2.90065845,2.89853396,2.89600023
62.742778,3,2.90641018,0.305924534,2.89925205,2.90006089,2.89795716,2.89542321
62.75327,2.82842712,2.90583086,-0.278215274,2.89869289,2.89946379,2.89738069,2.89484651
62.763762,3.16227766,2.90525294,0.50697606,2.89813494,2.89886721,2.89680461,2.89427016
62.774253,3,2.90467648,0.308745065,2.89757829,2.8982712,2.89622897,2.89369423
62.784745,3.16227766,2.90410144,0.50811044,2.89702289,2.89767564,2.89565366,2.89311862
62.795236,3.60555128,2.90352795,0.837868319,2.89646887,2.89708066,2.89507879,2.89254342
62.805728,3.46410162,2.90295596,0.74909656,2.89591618,2.89648612,2.89450426,2.89196853
62.81622,3.46410162,2.90238556,0.74947719,2.89536491,2.8958921,2.89393011,2.89139401
62.826711,3.16227766,2.90181685,0.510353615,2.89481518,2.89529864,2.8933564,2.8908199
62.837203,3,2.90124978,0.314245482,2.89426692,2.89470564,2.89278302,2.8902461
62.847694,3.31662479,2.90068451,0.644934324,2.8937203,2.89411319,2.89221009,2.88967273
62.858186,2.82842712,2.90012099,-0.267757106,2.89317527,2.89352119,2.89163749,2.88909966
62.868678,3.31662479,2.89955935,0.645806043,2.89263196,2.89292969,2.89106528,2.88852695
62.879169,3.31662479,2.89899969,0.646239198,2.89209048,2.89233875,2.89049351,2.88795467
62.889661,2.82842712,2.89844199,-0.264603214,2.8915508,2.89174826,2.88992208,2.8873827
62.900152,3.16227766,2.89788642,0.514189888,2.89101309,2.89115832,2.88935109,2.88681114
62.910644,2.82842712,2.89733296,-0.262499219,2.89047735,2.89056882,2.88878043,2.8862399
62.921136,2.82842712,2.89678176,-0.261447197,2.88994372,2.88997981,2.88821016,2.88566902
62.931627,1.41421356,2.896293,-1.21740685,2.88941232,2.88945155,2.88764033,2.88509856
62.942119,3.74165739,2.89574662,0.919734073,2.88888317,2.88886357,2.88707084,2.88452841
62.95261,3.74165739,2.89520285,0.920029641,2.88835648,2.88827615,2.88650179,2.88395868
62.963102,3.46410162,2.89466169,0.754612437,2.88783225,2.88768916,2.88593308,2.88338926
62.973594,3.31662479,2.89412331,0.650001139,2.88731067,2.88710266,2.88536476,2.88282021
62.984085,2.44948974,2.8935879,-0.666406903,2.88679191,2.8865167,2.88479688,2.88225157
62.994577,2.23606798,2.89305551,-0.810547672,2.88627602,2.88593118,2.88422933,2.88168325
63.005068,3,2.89252637,0.32783171,2.88576325,2.8853462,2.88366223,2.88111535
63.01556,3.16227766,2.89200056,0.519881815,2.88525367,2.88476165,2.88309547,2.88054776
63.026052,2.23606798,2.8914783,-0.80957416,2.8847475,2.88417759,2.8825291,2.87998053
63.036543,2.23606798,2.89095983,-0.809253887,2.88424499,2.88359406,2.88196317,2.87941373
63.047035,2.23606798,2.89044526,-0.808935898,2.88374625,2.88301096,2.88139758,2.87884724
63.057526,3.16227766,2.88993492,0.521864675,2.8832516,2.8824284,2.88083243,2.87828116
63.068018,2.82842712,2.88942895,-0.246985468,2.88276118,2.88184627,2.88026762,2.8777154
63.07851,2.82842712,2.88892766,-0.245968558,2.88227533,2.88126461,2.8797032,2.87715001
63.089001,3.46410162,2.88843139,0.758729349,2.88179436,2.88068349,2.87913923,2.87658503
63.099493,2,2.88794038,-0.942305882,2.88131853,2.88010279,2.87857559,2.87602037
63.109984,3.46410162,2.88745506,0.759372473,2.88084826,2.87952262,2.8780124,2.87545613
63.120476,2,2.88697575,-0.941793902,2.88038389,2.87894288,2.87744955,2.8748922
63.130968,2.82842712,2.88650295,-0.24098926,2.87992589,2.8783636,2.87688708,2.87432864
63.141459,3.60555128,2.8860372,0.848241757,2.87947483,2.87778486,2.87632507,2.87376549
63.151951,3.46410162,2.885579,0.760606744,2.87903121,2.87720654,2.87576339,2.87320266
63.162442,3.46410162,2.88512911,0.760902425,2.87859578,2.87662874,2.87520216,2.87264025
63.172934,2.64575131,2.88468826,-0.488811776,2.87816928,2.87605136,2.87464127,2.87207816
63.183426,3.46410162,2.88425744,0.761475,2.8777527,2.87547445,2.87408078,2.87151643
63.193917,3,2.88383782,0.340825728,2.87734722,2.87489806,2.87352072,2.87095512
63.204409,2.64575131,2.88343072,-0.487523754,2.87695415,2.87432209,2.87296101,2.87039413
63.2149,2.44948974,2.88303791,-0.658443744,2.87657527,2.87374663,2.87240175,2.86983355
63.225392,2.82842712,2.88266139,-0.232882504,2.87621259,2.8731716,2.87184282,2.86927329
63.235884,3.74165739,2.88230377,0.92701328,2.87586873,2.87259702,2.87128429,2.8687134
63.246375,2,2.88196825,-0.939131648,2.8755469,2.87202297,2.87072621,2.86815392
63.256867,3.31662479,2.88165869,0.659519595,2.87525095,2.87144933,2.87016847,2.86759477
63.267358,3.16227766,2.88137997,0.529997821,2.87498578,2.8708762,2.86961117,2.86703603
63.27785,3.74165739,2.88113793,0.927641879,2.87475726,2.87030349,2.86905422,2.8664776
63.288342,3.87298335,2.8809398,0.996013829,2.87457261,2.86973123,2.86849766,2.86591955
63.298833,2,2.88079428,-0.938506411,2.87444057,2.86915949,2.86794155,2.86536191
63.309325,3.46410162,2.88071178,0.763799601,2.87437156,2.86858816,2.86738578,2.86480459
63.319816,2.23606798,2.8807047,-0.802892723,2.87437801,2.86801734,2.86683046,2.86424769
63.330308,3.31662479,2.88078757,0.660179687,2.87447448,2.86744692,2.86627548,2.86369111
63.3408,2.23606798,2.88097727,-0.803062448,2.8746779,2.86687697,2.8657209,2.86313489
63.351291,2.44948974,2.88129311,-0.657117465,2.8750076,2.86630752,2.86516677,2.86257909
63.361783,2.44948974,2.88175694,-0.657470304,2.8754855,2.86573848,2.86461298,2.86202361
63.372274,3.60555128,2.88239297,0.850387153,2.87613583,2.86516995,2.86405964,2.86146855
63.382766,3.16227766,2.88322779,0.528251714,2.87698527,2.86460181,2.86350664,2.86091381
63.393258,3.87298335,2.88428978,0.994330714,2.87806224,2.86403414,2.86295404,2.86035943
63.403749,2.44948974,2.88560862,-0.660392971,2.87939649,2.86346697,2.86240189,2.85980547
63.414241,3,2.88721504,0.335834715,2.88101881,2.8629002,2.86185008,2.85925183
63.424732,3.87298335,2.88913906,0.99188925,2.88295926,2.86233393,2.86129873,2.85869862
63.435224,3.16227766,2.89141003,0.52044945,2.88524727,2.86176807,2.86074772,2.85814571
63.445716,4,2.89405427,1.05163955,2.8879092,2.86120265,2.8601971,2.85759318
63.456207,2.82842712,2.89709401,-0.262043666,2.89096732,2.86063774,2.85964694,2.85704106
63.466699,3.60555128,2.9005469,0.839645387,2.89443932,2.86007323,2.85909712,2.85648927
63.47719,3.60555128,2.90442241,0.837334382,2.89833465,2.85950921,2.85854775,2.85593789
63.487682,3.16227766,2.90872279,0.503542323,2.90265559,2.8589456,2.85799873,2.85538683
63.498174,3.60555128,2.91343918,0.831932744,2.90739323,2.85838243,2.85745011,2.85483614
63.508665,4,2.91855107,1.03992737,2.912527,2.85781976,2.85690194,2.85428587
63.519157,3,2.92402655,0.275632826,2.91802491,2.85725748,2.85635412,2.85373591
63.529648,3.31662479,2.92981762,0.621938233,2.92383888,2.85669571,2.85580674,2.85318638
63.54014,3.31662479,2.93586317,0.617058844,2.92990764,2.85613432,2.85525972,2.85263716
63.550632,3,2.94208402,0.240657396,2.93615185,2.85557338,2.85471309,2.85208831
63.561123,1.73205081,2.94838341,-1.1028747,2.94247455,2.85501294,2.85416692,2.85153989
63.571615,2.64575131,2.954648,-0.555784755,2.94876218,2.85445289,2.8536211,2.85099178
63.582106,3,2.96074321,0.198133264,2.95487989,2.85389333,2.85307572,2.85044409
63.592598,2.64575131,2.96651852,-0.566363145,2.96067687,2.85333417,2.8525307,2.84989672
63.60309,3.60555128,2.97180584,0.796081302,2.9659847,2.85277544,2.85198608,2.84934972
63.613581,3.31662479,2.9764267,0.583265022,2.97062461,2.85221721,2.85144191,2.84880314
63.624073,2.64575131,2.9802026,-0.57831764,2.97441775,2.85165937,2.85089809,2.84825688
63.634564,3,2.98296479,0.130519002,2.97719506,2.85110202,2.85035472,2.84771103
63.645056,3.46410162,2.984573,0.69248005,2.97881603,2.85054506,2.8498117,2.84716551
63.655548,2.44948974,2.98492898,-0.731737134,2.97918225,2.84998854,2.84926909,2.84662035
63.666039,3.46410162,2.98399036,0.692900611,2.97825127,2.84943251,2.84872693,2.84607562
63.676531,3.31662479,2.98177568,0.578661483,2.97604167,2.84887686,2.84818512,2.84553121
63.687022,2.64575131,2.9783624,-0.576724445,2.97263107,2.8483217,2.84764376,2.84498721
63.697514,2.82842712,2.97387534,-0.381376731,2.96814453,2.84776693,2.84710276,2.84444353
63.708006,3,2.96847349,0.177557061,2.96274133,2.84721259,2.84656216,2.84390023
63.718497,3.60555128,2.96233353,0.802008572,2.95659848,2.84665875,2.84602201,2.84335734
63.728989,3.46410162,2.95563358,0.713069447,2.94989444,2.84610528,2.84548222,2.84281477
63.73948,4,2.94854683,1.02540391,2.94280272,2.84555231,2.84494288,2.84227263
63.749972,2.82842712,2.94122993,-0.335861294,2.93548029,2.84499971,2.8444039,2.8417308
63.760464,2.82842712,2.93382413,-0.324649049,2.92806864,2.84444755,2.84386532,2.84118934
63.770955,3.31662479,2.92645208,0.624638063,2.92069069,2.84389588,2.84332719,2.84064831
63.781447,2.82842712,2.9192158,-0.301311584,2.91344864,2.84334458,2.84278942,2.84010759
63.791938,3,2.91220229,0.296306782,2.90642968,2.84279377,2.84225211,2.83956729
63.80243,3,2.90547907,0.307442561,2.89970147,2.84224334,2.84171515,2.83902731
63.812922,2.64575131,2.89910001,-0.503337563,2.89331798,2.84169335,2.84117859,2.8384877
63.823413,3.46410162,2.89310433,0.755643626,2.8873185,2.84114383,2.8406425,2.83794852
63.833905,3.46410162,2.88751614,0.759332253,2.88172725,2.8405947,2.84010675,2.83740965
63.844396,2.82842712,2.88234981,-0.232212592,2.87655857,2.84004604,2.83957147,2.8368712
63.854888,3.74165739,2.8776069,0.929543158,2.87181407,2.83949777,2.83903654,2.83633307
63.86538,2.64575131,2.87328134,-0.477001077,2.86748765,2.83894992,2.83850202,2.83579532
63.875871,2.44948974,2.86935923,-0.647973368,2.8635654,2.83840255,2.83796796,2.83525798
63.886363,2.64575131,2.86581946,-0.469114214,2.86002617,2.83785557,2.83743425,2.83472096
63.896854,3.16227766,2.86263781,0.547393685,2.85684569,2.83730906,2.836901,2.83418437
63.907346,2,2.85978564,-0.927246268,2.85399526,2.83676292,2.83636811,2.83364809
63.917838,2.23606798,2.85723344,-0.78814051,2.85144532,2.83621722,2.83583563,2.83311218
63.928329,3.60555128,2.85495095,0.866371933,2.84916553,2.83567199,2.83530361,2.8325767
63.938821,2.64575131,2.85290757,-0.455144221,2.84712526,2.83512714,2.83477195,2.83204153
63.949312,2.44948974,2.85107469,-0.633707308,2.84529582,2.83458276,2.83424074,2.83150679
63.959804,3.16227766,2.84942463,0.559332663,2.84364947,2.83403876,2.8337099,2.83097236
63.970296,3.60555128,2.84793237,0.870413066,2.84216115,2.83349519,2.83317946,2.83043831
63.980787,3,2.8465752,0.391694782,2.8408081,2.83295209,2.83264949,2.82990468
63.991279,3.31662479,2.84533249,0.686507318,2.83956966,2.83240936,2.83211988,2.82937136
64.00177,3.16227766,2.84418662,0.563995604,2.83842815,2.83186711,2.83159072,2.82883847
64.012262,3.16227766,2.84312186,0.564938757,2.83736784,2.83132523,2.83106193,2.8283059
64.022754,2.44948974,2.84212507,-0.626606201,2.83637553,2.83078377,2.83053355,2.8277737
64.033245,3.74165739,2.84118513,0.948932168,2.83544009,2.83024279,2.83000563,2.82724192
64.043737,3,2.84029244,0.399634279,2.83455192,2.82970218,2.82947808,2.82671046
64.054228,2.44948974,2.8394394,-0.62445949,2.83370337,2.82916204,2.82895098,2.82617942
64.06472,2.64575131,2.83861941,-0.439167501,2.83288785,2.82862228,2.82842425,2.8256487
64.075212,2.44948974,2.8378273,-0.623167356,2.83210017,2.82808293,2.82789794,2.82511835
64.085703,3.16227766,2.83705887,0.570279574,2.83133613,2.82754406,2.82737208,2.82458842
64.096195,3,2.8363105,0.404585585,2.8305921,2.82700555,2.82684659,2.82405882
64.106686,3,2.83557954,0.405487927,2.82986542,2.82646752,2.82632156,2.82352963
64.117178,2.82842712,2.83486356,-0.0802274047,2.82915365,2.82592986,2.8257969,2.82300077
64.12767,3,2.83416079,0.40723361,2.82845503,2.82539261,2.82527265,2.82247227
64.138161,1.73205081,2.83346978,-1.0494851,2.8277681,2.82485584,2.82474887,2.8219442
64.148653,2,2.83278915,-0.912572822,2.82709148,2.82431943,2.82422545,2.82141645
64.159144,2.82842712,2.83211803,-0.0607527991,2.82642429,2.82378349,2.8237025,2.82088911
64.169636,2.23606798,2.8314554,-0.771613522,2.82576553,2.82324792,2.82317992,2.8203621
64.180128,3.31662479,2.83080062,0.69701088,2.82511453,2.82271277,2.82265775,2.81983546
64.190619,3,2.83015312,0.412124833,2.82447073,2.82217809,2.82213604,2.81930924
64.201111,3.16227766,2.82951223,0.576858237,2.82383346,2.82164377,2.82161471,2.81878334
64.211602,2.64575131,2.82887761,-0.427932589,2.82320238,2.82110992,2.82109384,2.81825787
64.222094,3.16227766,2.82824871,0.577952375,2.82257694,2.82057644,2.82057334,2.81773271
64.232586,2.82842712,2.82762522,0.0283178808,2.82195683,2.82004337,2.82005326,2.81720792
64.243077,3,2.82700686,0.415924434,2.82134177,2.81951077,2.81953365,2.81668356
64.253569,3,2.82639322,0.416661474,2.82073133,2.81897853,2.81901441,2.81615951
64.26406,3.87298335,2.82578412,1.02332753,2.82012536,2.81844676,2.81849563,2.81563589
64.274552,3.60555128,2.82517919,0.883386713,2.81952347,2.81791536,2.81797723,2.81511259
64.285044,3.16227766,2.82457827,0.581119085,2.81892551,2.81738436,2.81745924,2.81458966
64.295535,2.44948974,2.82398119,-0.611957063,2.8183313,2.81685384,2.81694173,2.81406715
64.306027,2.64575131,2.82338764,-0.421469251,2.81774054,2.81632367,2.81642459,2.81354496
64.316518,3,2.82279755,0.420954211,2.81715314,2.81579397,2.81590792,2.81302319
64.32701,3.74165739,2.82221064,0.958877858,2.81656884,2.81526464,2.81539162,2.81250174
64.337502,3,2.8216268,0.422342512,2.81598753,2.81473571,2.81487574,2.81198066
64.347993,3,2.82104595,0.423029611,2.8154091,2.81420725,2.81436034,2.81146001
64.358485,3.46410162,2.82046783,0.802267902,2.81483333,2.81367915,2.81384531,2.81093967
64.368976,3.46410162,2.81989243,0.802626431,2.81426018,2.81315152,2.81333075,2.81041976
64.379468,3,2.81931952,0.425065271,2.81368944,2.81262424,2.81281656,2.80990017
64.38996,2.82842712,2.81874904,0.0983772734,2.81312104,2.81209738,2.81230281,2.80938095
64.400451,3.16227766,2.81818094,0.586597578,2.81255493,2.81157098,2.81178952,2.80886214
64.410943,2.82842712,2.81761503,0.103981246,2.81199091,2.81104494,2.81127661,2.80834366
64.421434,3.16227766,2.8170513,0.587559662,2.81142899,2.81051936,2.81076418,2.80782561
64.431926,3,2.81648959,0.428381155,2.81086899,2.80999414,2.81025212,2.80730787
64.442418,3.46410162,2.81592985,0.805091156,2.81031087,2.80946933,2.80974049,2.8067905
64.452909,3.60555128,2.81537206,0.888920253,2.80975462,2.80894498,2.80922934,2.80627356
64.463401,3.16227766,2.81481605,0.58945874,2.80920005,2.80842099,2.80871856,2.80575693
64.473892,3.87298335,2.81426187,1.02894192,2.80864721,2.80789746,2.80820826,2.80524073
64.484384,2.44948974,2.81370933,-0.60350608,2.80809592,2.80737429,2.80769834,2.80472484
64.494876,2.23606798,2.81315844,-0.759664706,2.80754619,2.80685153,2.80718885,2.80420933
64.505367,2.82842712,2.8126092,0.125769341,2.80699801,2.80632923,2.80667984,2.80369424
64.515859,2.82842712,2.81206144,0.127928437,2.80645123,2.80580728,2.80617121,2.80317947
64.52635,3,2.81151523,0.434148333,2.80590589,2.80528579,2.80566306,2.80266512
64.536842,2.44948974,2.8109704,-0.601232618,2.80536185,2.80476466,2.80515529,2.8021511
64.547334,2.64575131,2.81042698,-0.405802505,2.80481912,2.80424394,2.80464795,2.80163744
64.557825,2.64575131,2.80988498,-0.405134133,2.80427771,2.80372367,2.80414109,2.8011242
64.568317,3.16227766,2.80934424,0.594081997,2.80373747,2.80320377,2.80363462,2.80061129
64.578808,3.16227766,2.80880484,0.594535801,2.80319847,2.80268431,2.80312863,2.80009879
64.5893,4.24264069,2.80826664,1.19765356,2.80266057,2.80216522,2.80262302,2.79958662
64.599792,3,2.80772966,0.438486417,2.8021238,2.80164653,2.80211785,2.79907482
64.610283,3.60555128,2.80719392,0.893508453,2.80158817,2.8011283,2.80161316,2.79856344
64.620775,3.74165739,2.80665929,0.966952998,2.80105355,2.80061042,2.80110886,2.79805238
64.631266,3.16227766,2.80612583,0.596784574,2.80052001,2.800093,2.80060504,2.79754174
64.641758,3.16227766,2.80559343,0.597230464,2.79998742,2.79957593,2.80010162,2.79703142
64.65225,3.60555128,2.80506211,0.8947006,2.79945582,2.79905927,2.79959862,2.79652147
64.662741,2,2.8045319,-0.896957021,2.79892522,2.79854306,2.79909612,2.79601194
64.673233,3.31662479,2.80400267,0.715976343,2.79839551,2.79802721,2.798594,2.79550274
64.683724,3.46410162,2.8034745,0.812789714,2.79786676,2.79751181,2.79809237,2.79499395
64.694216,2.44948974,2.80294727,-0.594522939,2.79733885,2.79699676,2.79759113,2.79448549
64.704708,2.82842712,2.80242101,0.161264111,2.79681181,2.79648212,2.79709033,2.79397739
64.715199,2.82842712,2.80189576,0.162884518,2.79628567,2.79596793,2.79659002,2.79346972
64.725691,2,2.80137139,-0.895193494,2.79576031,2.7954541,2.79609011,2.79296237
64.736182,2.64575131,2.80084799,-0.393823163,2.79523583,2.79494072,2.79559068,2.79245544
64.746674,3.31662479,2.80032545,0.718539727,2.79471209,2.79442769,2.79509165,2.79194883
64.757166,3,2.7998038,0.447432903,2.79418914,2.79391506,2.79459306,2.79144259
64.767657,2.64575131,2.79928307,-0.391831285,2.79366701,2.79340289,2.79409496,2.79093677
64.778149,3.16227766,2.79876315,0.602921647,2.79314559,2.79289107,2.79359726,2.79043127
64.78864,3,2.79824413,0.449172433,2.79262496,2.7923797,2.79310006,2.78992619
64.799132,2.44948974,2.79772589,-0.590115367,2.79210501,2.79186868,2.79260325,2.78942143
64.809624,3,2.79720848,0.450323799,2.79158578,2.79135806,2.79210689,2.78891705
64.820115,3.31662479,2.79669193,0.721063704,2.7910673,2.7908479,2.79161102,2.78841308
64.830607,2.82842712,2.79617613,0.179585631,2.79054946,2.79033808,2.79111555,2.78790944
64.841098,2,2.79566117,-0.891998412,2.79003236,2.78982872,2.79062058,2.78740621
64.85159,3.16227766,2.79514694,0.605913129,2.78951589,2.78931971,2.79012601,2.78690331
64.862082,3.60555128,2.79463349,0.900509739,2.78900007,2.78881109,2.7896319,2.78640077
64.872573,3.46410162,2.79412084,0.818523532,2.78848496,2.78830293,2.78913827,2.78589866
64.883065,2,2.7936089,-0.890847296,2.78797045,2.78779512,2.78864506,2.78539687
64.893556,1.73205081,2.79309776,-1.03007133,2.78745662,2.78728775,2.78815234,2.78489549
64.904048,3.31662479,2.79258731,0.723904331,2.78694337,2.78678074,2.78766003,2.78439444
64.91454,3.60555128,2.79207759,0.901927761,2.78643073,2.78627413,2.78716818,2.78389376
64.925031,3.60555128,2.79156864,0.902209862,2.78591876,2.78576796,2.78667682,2.7833935
64.935523,3.31662479,2.79106036,0.724958226,2.78540734,2.78526214,2.78618588,2.78289356
64.946014,3.46410162,2.79055284,0.820700174,2.78489657,2.78475678,2.78569544,2.78239404
64.956506,4,2.79004597,1.0999791,2.78438634,2.78425176,2.78520541,2.78189484
64.966998,2.82842712,2.78953981,0.197198671,2.7838767,2.78374714,2.78471583,2.78139601
64.977489,2.64575131,2.78903438,-0.378527506,2.78336767,2.78324296,2.78422677,2.7808976
64.987981,2.82842712,2.7885296,0.19974365,2.78285918,2.78273914,2.78373811,2.78039951
64.998472,3,2.78802554,0.460406837,2.78235129,2.78223576,2.78324997,2.77990184
65.008964,2.64575131,2.78752212,-0.376524645,2.78184392,2.78173273,2.78276224,2.77940449
65.019456,2,2.78701937,-0.88714112,2.78133709,2.78123009,2.78227497,2.77890751
65.029947,2.82842712,2.78651733,0.204718815,2.78083087,2.7807279,2.78178821,2.77841095
65.040439,3.16227766,2.78601591,0.613401784,2.78032514,2.78022607,2.78130187,2.77791471
65.05093,3.16227766,2.7855152,0.613809791,2.77982,2.77972467,2.78081604,2.77741889
65.061422,2.44948974,2.7850151,-0.579245505,2.77931535,2.77922362,2.78033063,2.77692339
65.071914,2.44948974,2.78451565,-0.578814223,2.77881122,2.77872297,2.77984569,2.77642827
65.082405,3,2.78401689,0.464739826,2.77830767,2.77822277,2.77936126,2.77593356
65.092897,3.16227766,2.78351874,0.61543393,2.77780459,2.77772291,2.77887726,2.77543917
65.103388,3.16227766,2.78302127,0.615837956,2.77730207,2.77722349,2.77839377,2.7749452
65.11388,2.82842712,2.7825244,0.214249214,2.77680002,2.77672443,2.77791071,2.77445155
65.124372,3.60555128,2.78202816,0.907481743,2.77629848,2.77622575,2.77742812,2.77395827
65.134863,2.44948974,2.78153261,-0.576231606,2.77579749,2.77572752,2.77694605,2.77346541
65.145355,2.23606798,2.78103764,-0.738220602,2.77529696,2.77522964,2.77646441,2.77297287
65.155846,3.16227766,2.78054334,0.617846519,2.77479697,2.7747322,2.77598329,2.77248075
65.166338,4.24264069,2.78004962,1.20937631,2.77429743,2.77423511,2.7755026,2.77198895
65.17683,2.82842712,2.77955653,0.221066943,2.77379839,2.77373841,2.77502239,2.77149752
65.187321,3.31662479,2.77906411,0.733185298,2.77329987,2.77324215,2.7745427,2.7710065
65.197813,3.31662479,2.77857226,0.733520641,2.7728018,2.77274624,2.77406345,2.77051581
65.208304,4,2.77808108,1.10540442,2.77230426,2.77225077,2.77358472,2.77002554
65.218796,2.64575131,2.77759046,-0.363096612,2.77180715,2.77175564,2.77310643,2.76953558
65.229288,2.82842712,2.77710046,0.226553885,2.77131051,2.77126091,2.77262862,2.769046
65.239779,2.64575131,2.77661112,-0.361745507,2.7708144,2.77076662,2.77215135,2.76855684
65.250271,3.31662479,2.77612235,0.735188711,2.77031872,2.77027267,2.77167451,2.76806799
65.260762,3.60555128,2.77563423,0.910997828,2.76982355,2.76977917,2.77119821,2.76757956
65.271254,3,2.77514668,0.474187009,2.7693288,2.76928601,2.77072235,2.76709146
65.281746,2.82842712,2.77465974,0.231877961,2.76883452,2.76879324,2.77024698,2.76660372
65.292237,2.82842712,2.77417345,0.232924193,2.76834075,2.76830091,2.76977215,2.7661164
65.302729,3,2.77368771,0.475722908,2.76784739,2.76780893,2.76929776,2.7656294
65.31322,3.16227766,2.77320264,0.623758787,2.76735453,2.76731738,2.76882392,2.76514282
65.323712,3.60555128,2.77271812,0.912596932,2.76686209,2.76682618,2.76835052,2.76465656
65.334204,3.16227766,2.7722342,0.624534595,2.7663701,2.76633537,2.76787762,2.76417067
65.344695,3.60555128,2.77175093,0.913126685,2.76587861,2.765845,2.76740526,2.76368519
65.355187,3.31662479,2.77126822,0.738482611,2.76538752,2.76535498,2.76693336,2.76320004
65.365678,1.73205081,2.77078616,-1.01918367,2.76489693,2.76486539,2.766462,2.7627153
65.37617,2.82842712,2.77030466,0.241086017,2.76440674,2.76437614,2.7659911,2.76223089
65.386662,3.16227766,2.76982375,0.626461417,2.76391699,2.76388729,2.76552071,2.76174684
65.397153,3.74165739,2.7693435,0.98605978,2.76342774,2.76339887,2.76505086,2.76126321
65.407645,3.60555128,2.7688638,0.914706225,2.76293888,2.7629108,2.76458147,2.7607799
65.418136,3.31662479,2.76838474,0.740432337,2.7624505,2.76242316,2.76411264,2.760297
65.428628,3.46410162,2.76790625,0.834383227,2.76196252,2.76193586,2.76364428,2.75981443
65.43912,3,2.76742835,0.48225683,2.76147498,2.76144896,2.76317642,2.75933223
65.449611,2.82842712,2.7669511,0.247943591,2.76098792,2.76096249,2.76270912,2.75885044
65.460103,3.31662479,2.76647441,0.74172123,2.76050125,2.76047637,2.7622423,2.75836897
65.470594,3.87298335,2.76599836,1.05213354,2.76001505,2.75999067,2.76177603,2.75788792
65.481086,4,2.76552287,1.11107026,2.75952925,2.75950533,2.76131024,2.75740719
65.491578,3.31662479,2.76504798,0.742682171,2.75904387,2.75902037,2.76084497,2.75692683
65.502069,3.16227766,2.76457374,0.630637706,2.75855897,2.75853584,2.76038026,2.75644688
65.512561,2.64575131,2.76410006,-0.344018534,2.75807445,2.75805166,2.75991603,2.75596725
65.523052,3.31662479,2.76362703,0.743638191,2.7575904,2.75756791,2.75945238,2.75548804
65.533544,2,2.76315456,-0.873587178,2.75710674,2.75708451,2.7589892,2.75500915
65.544036,3,2.76268269,0.487152245,2.75662349,2.75660149,2.75852656,2.75453063
65.554527,3.16227766,2.76221147,0.632507855,2.75614072,2.7561189,2.75806448,2.75405252
65.565019,3.60555128,2.76174082,0.918591562,2.75565833,2.75563666,2.7576029,2.75357473
65.57551,2.82842712,2.76127082,0.259145343,2.7551764,2.75515485,2.7571419,2.75309736
65.586002,2.44948974,2.76080138,-0.557953075,2.75469484,2.75467338,2.75668139,2.75262031
65.596494,2.44948974,2.76033255,-0.557532783,2.7542137,2.7541923,2.75622142,2.75214363
65.606985,3.16227766,2.75986437,0.634360535,2.75373303,2.75371165,2.75576203,2.75166736
65.617477,2.23606798,2.75939676,-0.723414671,2.75325273,2.75323135,2.75530314,2.75119141
65.627968,2.82842712,2.75892981,0.263623427,2.75277289,2.75275147,2.75484484,2.75071587
65.63846,2,2.75846343,-0.870898061,2.75229343,2.75227193,2.75438705,2.75024066
65.648952,3.31662479,2.75799767,0.747413623,2.75181437,2.75179279,2.7539298,2.74976582
65.659443,2.82842712,2.75753256,0.266260333,2.75133578,2.75131407,2.75347315,2.74929138
65.669935,4,2.75706803,1.11486859,2.75085755,2.75083569,2.75301701,2.74881727
65.680426,3.46410162,2.75660416,0.84112868,2.75037978,2.75035775,2.75256147,2.74834357
65.690918,3.31662479,2.75614087,0.748654743,2.74990237,2.74988014,2.75210644,2.7478702
65.70141,2.82842712,2.7556782,0.269720093,2.74942538,2.74940292,2.75165198,2.74739719
65.711901,3,2.75521619,0.49475631,2.74894884,2.74892613,2.75119812,2.74692459
65.722393,2.64575131,2.75429352,-0.329457448,2.74847266,2.74798737,2.75074478,2.74645231
65.732884,1.73205081,2.75383332,-1.01083258,2.74799694,2.7475119,2.75029206,2.74598045
65.743376,2.64575131,2.7533737,-0.328058519,2.74752158,2.74703676,2.74983986,2.74550891
65.753868,2.82842712,2.75291472,0.274795213,2.74704663,2.74656201,2.74938824,2.74503773
65.764359,3,2.7524564,0.497537533,2.74657212,2.74608769,2.74893724,2.74456697
65.774851,2.23606798,2.75199868,-0.718283164,2.74609798,2.7456137,2.74848677,2.74409653
65.785342,3,2.75154164,0.498455977,2.74562429,2.74514015,2.74803692,2.7436265
65.795834,3.74165739,2.75108519,0.995274935,2.74515095,2.74466693,2.74758762,2.74315679
65.806326,3,2.75062938,0.499370222,2.74467802,2.74419409,2.74713891,2.74268744
65.816817,1.73205081,2.75017426,-1.00902104,2.74420554,2.74372168,2.74669082,2.74221851
65.827309,2.82842712,2.74971974,0.280548371,2.74373341,2.74324961,2.74624329,2.7417499
65.8378,2.44948974,2.7492659,-0.547518184,2.74326173,2.74277797,2.7457964,2.7412817
65.848292,3.46410162,2.74881268,0.845747561,2.7427904,2.74230666,2.74535006,2.74081382
65.858784,4.12310563,2.7483601,1.17249543,2.74231948,2.74183574,2.74490433,2.74034631
65.869275,3.46410162,2.74790823,0.846282098,2.741849,2.74136524,2.74445924,2.73987921
65.879767,3.60555128,2.74745696,0.926333802,2.74137887,2.74089507,2.74401471,2.73941243
65.890258,2.64575131,2.7470064,-0.318206049,2.74090919,2.74042534,2.74357085,2.73894606
65.90075,2.44948974,2.74655646,-0.54503827,2.74043986,2.73995594,2.74312755,2.73848001
65.911242,4,2.74610718,1.11977356,2.73997093,2.73948692,2.74268487,2.73801433
65.921733,3.31662479,2.74565861,0.755623039,2.73950244,2.73901833,2.74224286,2.73754906
65.932225,3.74165739,2.74521067,0.998221775,2.7390343,2.73855007,2.74180143,2.73708411
65.942716,2.44948974,2.74476345,-0.543390936,2.7385666,2.73808224,2.74136067,2.73661956
65.953208,2.44948974,2.74431686,-0.542979853,2.73809926,2.73761474,2.74092049,2.73615534
65.9637,3.60555128,2.74387096,0.928267375,2.7376323,2.73714763,2.74048096,2.73569149
65.974191,3.16227766,2.74342577,0.647187675,2.73716579,2.73668094,2.74004211,2.73522804
65.984683,2.82842712,2.74298123,0.29231129,2.73669963,2.73621458,2.73960385,2.73476492
65.995174,2.64575131,2.74253743,-0.311104672,2.7362339,2.73574865,2.73916629,2.7343022
66.005666,3,2.74209427,0.507844195,2.73576853,2.73528305,2.73872934,2.73383981
66.016158,3.60555128,2.74165182,0.92946192,2.73530354,2.73481783,2.73829304,2.73337778
66.026649,2.44948974,2.7412101,-0.54011143,2.73483899,2.73435304,2.73785744,2.73291615
66.037141,2.64575131,2.74076905,-0.308249469,2.73437479,2.73388858,2.73742246,2.73245485
66.047632,2.64575131,2.74032874,-0.307534441,2.73391103,2.73342455,2.73698819,2.73199396
66.058124,3,2.73988911,0.510010676,2.73344761,2.73296085,2.73655456,2.73153339
66.068616,3.74165739,2.73945019,1.00110299,2.73298458,2.73249753,2.73612159,2.73107318
66.079107,2.82842712,2.73901204,0.299023555,2.73252199,2.73203463,2.73568935,2.73061339
66.089599,3.31662479,2.73857457,0.760296143,2.73205974,2.73157206,2.73525776,2.73015391
66.10009,3.31662479,2.73813786,0.760583281,2.73159793,2.73110992,2.73482689,2.72969484
66.110582,3.31662479,2.73770185,0.760869857,2.73113646,2.73064811,2.73439668,2.72923609
66.121074,1.73205081,2.73726658,-1.00260449,2.73067538,2.73018668,2.73396717,2.7287777
66.131565,3.60555128,2.73683209,0.932051065,2.73021473,2.72972567,2.73353841,2.72831973
66.142057,1.41421356,2.7363983,-1.14986292,2.72975443,2.72926499,2.73311031,2.72786207
66.152548,2.44948974,2.73596531,-0.535234122,2.72929456,2.72880474,2.73268297,2.72740482
66.16304,2.44948974,2.73553303,-0.534830147,2.72883503,2.72834482,2.7322563,2.72694789
66.173532,3.16227766,2.73510151,0.653587139,2.72837589,2.72788527,2.73183036,2.72649133
66.184023,2.64575131,2.7346708,-0.298193712,2.72791718,2.72742615,2.73140519,2.72603517
66.194515,2.64575131,2.73424082,-0.297471864,2.72745881,2.72696736,2.73098072,2.72557933
66.205006,3,2.73381166,0.515934436,2.72700087,2.72650899,2.73055703,2.7251239
66.215498,2.64575131,2.73338324,-0.296026899,2.72654327,2.72605095,2.73013404,2.72466879
66.22599,2.44948974,2.7329556,-0.532415119,2.72608606,2.72559329,2.72971181,2.72421404
66.236481,2.64575131,2.7325288,-0.294580192,2.72562927,2.72513605,2.72929038,2.72375969
66.246973,2.82842712,2.73210276,0.310361671,2.72517283,2.72467914,2.72886967,2.72330567
66.257464,3.16227766,2.73167756,0.656201264,2.72471682,2.72422265,2.72844977,2.72285206
66.267956,3.16227766,2.73125313,0.656524582,2.72426114,2.72376649,2.72803062,2.72239876
66.278448,2.64575131,2.73082952,-0.291681696,2.72380585,2.72331071,2.72761224,2.72194583
66.288939,4.12310563,2.73040678,1.18012662,2.72335099,2.72285535,2.72719469,2.7214933
66.299431,3.16227766,2.72998482,0.657489803,2.72289646,2.72240032,2.72677791,2.72104109
66.309922,3.16227766,2.72956374,0.657809945,2.72244236,2.7219457,2.72636196,2.72058929
66.320414,3.16227766,2.72914346,0.65812932,2.7219886,2.72149142,2.72594679,2.72013781
66.330906,3.74165739,2.72872403,1.0064459,2.72153523,2.72103751,2.72553243,2.71968669
66.341397,2.82842712,2.7283055,0.316420019,2.72108227,2.72058403,2.72511894,2.71923597
66.351889,2.44948974,2.72788779,-0.527634385,2.72062966,2.72013087,2.72470624,2.71878558
66.36238,2.82842712,2.72747099,0.317735952,2.72017747,2.71967813,2.72429442,2.71833559
66.372872,2.44948974,2.72705503,-0.526844652,2.71972562,2.71922572,2.72388342,2.71788591
66.383364,2.82842712,2.72663996,0.319041012,2.71927415,2.71877368,2.72347326,2.7174366
66.393855,2.44948974,2.72622582,-0.526057102,2.7188231,2.71832206,2.72306401,2.7169877
66.404347,3.31662479,2.72581254,0.768643122,2.71837239,2.71787078,2.72265559,2.71653911
66.414838,2.64575131,2.72540021,-0.28222137,2.71792211,2.7174199,2.72224809,2.71609093
66.42533,2.64575131,2.72498876,-0.28149148,2.71747216,2.71696936,2.72184144,2.71564307
66.435822,4,2.72457824,1.12934572,2.71702259,2.71651919,2.72143569,2.71519557
66.446313,2.82842712,2.7241687,0.322890739,2.71657344,2.71606944,2.72103089,2.71474847
66.456805,3.16227766,2.72376005,0.662206619,2.71612463,2.71562002,2.72062696,2.71430169
66.467296,3,2.7233524,0.525972999,2.71567624,2.71517101,2.72022399,2.71385531
66.477788,2.44948974,2.72294568,-0.522930145,2.71522819,2.71472234,2.71982192,2.71340926
66.48828,3.16227766,2.72253993,0.663127238,2.71478051,2.71427403,2.7194208,2.71296356
66.498771,2.82842712,2.72213519,0.326024433,2.71433326,2.71382614,2.71902066,2.71251827
66.509263,2.64575131,2.72173142,-0.275644888,2.71388634,2.71337858,2.71862146,2.7120733
66.519754,2.23606798,2.72132868,-0.69660656,2.71343984,2.71293144,2.71822326,2.71162873
66.530246,2.44948974,2.72092691,-0.520996324,2.71299368,2.71248462,2.71782602,2.71118447
66.540738,2.23606798,2.72052617,-0.696030312,2.71254789,2.71203817,2.71742977,2.71074058
66.551229,3.46410162,2.7201265,0.862539919,2.71210252,2.71159214,2.71703456,2.71029709
66.561721,2.64575131,2.71972784,-0.27198627,2.71165749,2.71114644,2.71664033,2.70985392
66.572212,2.64575131,2.71933028,-0.271254427,2.71121287,2.71070115,2.71624718,2.70941115
66.582704,2.44948974,2.71893374,-0.519079951,2.71076859,2.71025619,2.71585502,2.7089687
66.593196,2.44948974,2.71853828,-0.518698891,2.71032469,2.7098116,2.71546392,2.70852661
66.603687,3.31662479,2.71814396,0.773615431,2.7098812,2.70936743,2.71507393,2.70808492
66.614179,2.44948974,2.7177507,-0.51793914,2.70943805,2.70892358,2.71468497,2.70764355
66.62467,2.23606798,2.71735859,-0.693751118,2.70899532,2.70848014,2.71429715,2.70720258
66.635162,2.82842712,2.71696758,0.333855574,2.70855292,2.70803703,2.71391039,2.70676193
66.645654,2.64575131,2.71657771,-0.266132302,2.70811089,2.7075943,2.71352475,2.70632163
66.656145,3,2.71618904,0.53273911,2.70766928,2.70715197,2.71314028,2.70588174
66.666637,2.64575131,2.7158015,-0.264669967,2.707228,2.70670997,2.71275692,2.70544217
66.677128,3.16227766,2.71541519,0.668477728,2.70678714,2.70626839,2.71237476,2.70500299
66.68762,3.60555128,2.71503004,0.943674329,2.70634661,2.70582713,2.71199373,2.70456414
66.698112,2.44948974,2.7146461,-0.514933353,2.70590646,2.70538624,2.7116139,2.70412564
66.708603,2.44948974,2.71426343,-0.514561649,2.70546672,2.70494576,2.71123531,2.70368754
66.719095,2.23606798,2.71388198,-0.691240912,2.70502731,2.70450561,2.71085791,2.70324976
66.729586,3.87298335,2.71350182,1.07679224,2.70458832,2.70406586,2.71048178,2.70281239
66.740078,1,2.7131229,-1.30886321,2.70414966,2.70362645,2.71010688,2.70237532
66.75057,2.64575131,2.71274529,-0.258831942,2.70371138,2.7031874,2.70973324,2.70193862
66.761061,2.64575131,2.71236902,-0.258104061,2.70327351,2.70274877,2.70936093,2.70150232
66.771553,3.46410162,2.71199404,0.867241356,2.70283596,2.70231046,2.7089899,2.70106633
66.782044,3,2.71162046,0.537009815,2.70239884,2.70187256,2.70862022,2.70063074
66.792536,2.44948974,2.7112482,-0.511623359,2.70196204,2.70143498,2.70825186,2.70019547
66.803028,2,2.71087734,-0.843135421,2.70152562,2.70099778,2.70788486,2.69976056
66.813519,2.82842712,2.71050792,0.343393665,2.70108961,2.70056098,2.70751928,2.69932604
66.824011,3.31662479,2.71013989,0.778771408,2.70065393,2.70012451,2.70715507,2.69889184
66.834502,2,2.70977334,-0.842480467,2.70021866,2.69968845,2.70679232,2.69845804
66.844994,2.64575131,2.70940822,-0.252303218,2.69978373,2.69925271,2.70643098,2.69802456
66.855486,2.82842712,2.7090446,0.345517759,2.69934916,2.69881734,2.70607111,2.69759144
66.865977,2.82842712,2.70868253,0.346041321,2.69891501,2.69838238,2.70571277,2.69715871
66.876469,3.16227766,2.70832196,0.673762349,2.69848118,2.69794774,2.7053559,2.6967263
66.88696,3,2.70796298,0.540404498,2.69804777,2.69751351,2.70500061,2.69629428
66.897452,2.82842712,2.70760555,0.347593979,2.69761469,2.69707961,2.70464685,2.69586259
66.907944,3.31662479,2.70724973,0.780624788,2.69718198,2.69664607,2.70429467,2.69543125
66.918435,3.16227766,2.70689558,0.674820037,2.69674968,2.69621294,2.70394414,2.6950003
66.928927,2.82842712,2.70654305,0.349118997,2.69631771,2.69578013,2.70359521,2.69456968
66.939418,2.64575131,2.70619224,-0.245847377,2.69588615,2.69534773,2.70324798,2.69413945
66.94991,3.16227766,2.70584312,0.675599395,2.69545492,2.69491565,2.70290241,2.69370953
66.960402,2.44948974,2.70549573,-0.505970345,2.69502406,2.69448394,2.70255856,2.69327997
66.970893,3.60555128,2.70515015,0.948894685,2.69459361,2.69405264,2.70221649,2.69285081
66.981385,3.60555128,2.70480634,0.949075833,2.69416349,2.69362166,2.70187617,2.69242196
66.991876,3,2.70446439,0.543631871,2.69373377,2.69319109,2.7015377,2.69199351
67.002368,3.16227766,2.70412427,0.676870292,2.69330439,2.69276083,2.70120103,2.69156538
67.01286,3.16227766,2.70378604,0.677120091,2.69287537,2.69233095,2.70086623,2.6911376
67.023351,3.31662479,2.70344978,0.783054924,2.69244677,2.69190147,2.70053338,2.69071022
67.033843,2.23606798,2.70311544,-0.683408707,2.69201849,2.69147231,2.70020243,2.69028315
67.044334,3.16227766,2.70278313,0.677860259,2.69159062,2.69104356,2.69987349,2.68985647
67.054826,2.64575131,2.70245282,-0.238120789,2.69116308,2.69061513,2.69954653,2.68943012
67.065318,2.64575131,2.70212458,-0.237430559,2.69073591,2.69018706,2.69922162,2.68900411
67.075809,3,2.70179848,0.546078309,2.69030915,2.6897594,2.69889883,2.68857851
67.086301,2.82842712,2.70147449,0.356304128,2.68988271,2.68933206,2.69857813,2.68815321
67.096792,2.44948974,2.70115272,-0.501660224,2.68945668,2.68890512,2.69825963,2.68772831
67.107284,3,2.70083315,0.54696147,2.68903098,2.68847851,2.69794331,2.68730373
67.117776,3.60555128,2.70051585,0.9513335,2.68860564,2.68805226,2.69762923,2.6868795
67.128267,3.46410162,2.70020089,0.874014146,2.68818072,2.68762641,2.69731748,2.68645566
67.138759,3.60555128,2.69988826,0.951663291,2.68775612,2.68720089,2.69700804,2.68603214
67.14925,2.64575131,2.69957806,-0.232005925,2.68733192,2.68677576,2.69670102,2.68560902
67.159742,2.44948974,2.69927029,-0.499780496,2.68690806,2.68635096,2.6963964,2.6851862
67.170234,2.82842712,2.69896501,0.359808435,2.68648456,2.68592653,2.69609426,2.68476374
67.180725,2.64575131,2.69866232,-0.230023941,2.68606147,2.68550249,2.69579468,2.68434168
67.191217,2.82842712,2.69836221,0.360645138,2.6856387,2.68507878,2.69549767,2.68391992
67.201708,3.74165739,2.69806478,1.0215638,2.68521634,2.68465546,2.69520331,2.68349857
67.2122,2.82842712,2.69777004,0.361465195,2.68479431,2.68423247,2.69491163,2.68307752
67.222692,2.82842712,2.69747806,0.361868845,2.68437264,2.68380984,2.6946227,2.68265683
67.233183,2.44948974,2.69718895,-0.497693887,2.68395138,2.68338761,2.6943366,2.68223653
67.243675,3.31662479,2.69690269,0.787224299,2.68353044,2.6829657,2.69405335,2.68181654
67.254166,3,2.69661942,0.550799947,2.68310991,2.6825442,2.69377306,2.68139695
67.264658,3.31662479,2.69633913,0.787582159,2.68268971,2.68212301,2.69349574,2.68097767
67.27515,3,2.69606193,0.551305786,2.68226987,2.68170218,2.69322149,2.68055874
67.285641,1.41421356,2.69578791,-1.1320664,2.68185043,2.68128176,2.69295039,2.6801402
67.296133,2.44948974,2.69551708,-0.496011425,2.68143133,2.68086165,2.69268248,2.67972198
67.306624,2.82842712,2.69524957,0.364935002,2.68101262,2.68044194,2.69241786,2.67930415
67.317116,3.16227766,2.69498541,0.683587781,2.68059424,2.68002256,2.69215658,2.67888663
67.327608,2.64575131,2.69472469,-0.221299303,2.68017623,2.67960353,2.69189872,2.67846946
67.338099,2.44948974,2.69446753,-0.49495231,2.67975862,2.6791849,2.69164441,2.67805268
67.348591,2.82842712,2.69421396,0.366351151,2.67934133,2.6787666,2.69139366,2.67763622
67.359082,2.44948974,2.69396411,-0.49444349,2.67892445,2.67834869,2.69114662,2.67722014
67.369574,2.64575131,2.69371802,-0.219013031,2.6785079,2.6779311,2.69090332,2.67680438
67.380066,3.16227766,2.69347581,0.684691063,2.67809171,2.67751387,2.69066388,2.67638897
67.390557,2.44948974,2.69323759,-0.493708264,2.67767592,2.67709703,2.69042842,2.67597395
67.401049,2.23606798,2.69300343,-0.675970005,2.67726045,2.67668052,2.69019699,2.67555925
67.41154,2.82842712,2.69277345,0.368311924,2.67684539,2.6762644,2.68996974,2.67514493
67.422032,2.64575131,2.69254773,-0.216324806,2.67643066,2.67584861,2.68974673,2.67473092
67.432524,2.44948974,2.6923264,-0.492784594,2.67601629,2.67543317,2.68952809,2.67431727
67.443015,2.82842712,2.69210958,0.369212055,2.67560232,2.67501812,2.68931395,2.673904
67.453507,3.60555128,2.69189736,0.955852455,2.67518867,2.6746034,2.68910438,2.67349105
67.463998,3,2.69168989,0.555256796,2.67477543,2.67418907,2.68889955,2.67307848
67.47449,3.16227766,2.69148726,0.686141677,2.67436251,2.67377506,2.68869955,2.67266623
67.484982,2.64575131,2.69128962,-0.213397058,2.67394995,2.67336141,2.68850451,2.67225432
67.495473,2.44948974,2.69109711,-0.491535724,2.6735378,2.67294816,2.6883146,2.6718428
67.505965,3.16227766,2.69090985,0.686562315,2.67312597,2.67253522,2.68812992,2.6714316
67.516456,2.64575131,2.690728,-0.212077092,2.67271454,2.67212268,2.68795063,2.67102078
67.526948,2.23606798,2.6905517,-0.674154076,2.67230344,2.67171045,2.68777687,2.67061028
67.53744,2.82842712,2.69038109,0.371545463,2.6718927,2.67129858,2.6876088,2.67020012
67.547931,2.44948974,2.69021637,-0.490639003,2.67148236,2.67088711,2.6874466,2.66979035
67.558423,2.44948974,2.69005767,-0.490477246,2.67107234,2.67047595,2.6872904,2.66938089
67.568914,2.23606798,2.68990519,-0.673674411,2.67066273,2.67006519,2.68714041,2.66897182
67.579406,3.60555128,2.68975908,0.956970323,2.67025344,2.66965475,2.68699677,2.66856306
67.589898,3.16227766,2.68961954,0.687501363,2.66984451,2.66924466,2.68685968,2.66815465
67.600389,3.46410162,2.68948677,0.880122061,2.66943598,2.66883496,2.68672936,2.66774662
67.610881,2.64575131,2.68936096,-0.208829235,2.66902778,2.66842558,2.68660598,2.66733891
67.621372,3,2.68924233,0.557456425,2.66861997,2.6680166,2.68648977,2.66693158
67.631864,3.60555128,2.68913109,0.957298379,2.66821249,2.66760793,2.68638093,2.66652456
67.642356,2.23606798,2.68902746,-0.673022646,2.66780537,2.66719961,2.68627969,2.66611789
67.652847,2.64575131,2.68893169,-0.207798897,2.66739865,2.66679169,2.6861863,2.6657116
67.663339,3.16227766,2.68884401,0.688065148,2.66699226,2.66638409,2.68610098,2.66530563
67.67383,2.23606798,2.68876469,-0.672827403,2.66658626,2.66597687,2.68602401,2.66490004
67.684322,2.64575131,2.68869398,-0.20722613,2.66618059,2.66556998,2.68595563,2.66449475
67.694814,2.44948974,2.68863216,-0.4890219,2.66577528,2.66516343,2.68589614,2.66408982
67.705305,3.31662479,2.68857953,0.792493068,2.66537037,2.66475728,2.68584582,2.66368527
67.715797,2.82842712,2.68853637,0.374019725,2.66496578,2.66435144,2.68580496,2.66328103
67.726288,1.73205081,2.68850301,-0.977983743,2.66456159,2.663946,2.68577389,2.66287718
67.73678,3,2.68847976,0.558139979,2.66415773,2.66354087,2.68575292,2.66247363
67.747272,2.44948974,2.68846698,-0.488852981,2.66375422,2.66313609,2.6857424,2.66207043
67.757763,2.64575131,2.68846501,-0.20667293,2.66335112,2.66273171,2.68574269,2.66166761
67.768255,4.12310563,2.68847423,1.19776099,2.66294834,2.66232763,2.68575415,2.66126511
67.778746,2.64575131,2.68849502,-0.206745514,2.66254595,2.66192395,2.68577717,2.66086298
67.789238,2.82842712,2.68852779,0.374031196,2.66214389,2.66152059,2.68581216,2.66046117
67.79973,2.82842712,2.68857296,0.373970803,2.66174219,2.66111757,2.68585955,2.6600597
67.810221,2.23606798,2.68863098,-0.672728028,2.66134089,2.66071495,2.68591977,2.65965861
67.820713,2.44948974,2.68870231,-0.489093613,2.66093992,2.66031264,2.68599329,2.65925783
67.831204,2.44948974,2.68878742,-0.489180617,2.66053934,2.65991072,2.68608059,2.65885744
67.841696,2.82842712,2.68888684,0.373550913,2.66013908,2.65950911,2.68618219,2.65845735
67.852188,2.82842712,2.6890011,0.37339795,2.65973919,2.65910785,2.68629862,2.65805761
67.862679,3.31662479,2.68913073,0.792145228,2.65933969,2.65870698,2.68643042,2.65765825
67.873171,3.87298335,2.68927635,1.087983,2.65894052,2.65830643,2.68657819,2.65725919
67.883662,2.82842712,2.68943853,0.372811736,2.65854174,2.65790626,2.68674253,2.65686052
67.894154,2.64575131,2.68961797,-0.20944368,2.65814329,2.65750641,2.68692411,2.65646216
67.904646,2.82842712,2.6898153,0.372306088,2.6577452,2.65710691,2.68712358,2.65606414
67.915137,2.64575131,2.69003123,-0.210427935,2.6573475,2.65670779,2.68734164,2.6556665
67.925629,2.23606798,2.69026653,-0.673942542,2.65695013,2.65630899,2.68757907,2.65526917
67.93612,3.31662479,2.69052194,0.79126661,2.65655316,2.65591057,2.68783661,2.65487222
67.946612,2.82842712,2.69079834,0.370983538,2.65615651,2.65551247,2.68811513,2.65447558
67.957104,3.46410162,2.69109656,0.879207059,2.65576022,2.65511472,2.68841548,2.65407928
67.967595,2.44948974,2.69141749,-0.491861513,2.65536433,2.65471735,2.68873853,2.65368336
67.978087,2.23606798,2.69176214,-0.675051232,2.65496876,2.6543203,2.6890853,2.65328774
67.988578,2.64575131,2.69213147,-0.215360529,2.65457359,2.65392363,2.68945675,2.65289251
67.99907,2.44948974,2.6925266,-0.492987684,2.65417875,2.65352727,2.689854,2.65249758
68.009562,3.60555128,2.69294863,0.955302386,2.65378426,2.65313126,2.69027815,2.652103
68.020053,2,2.69339869,-0.832705647,2.65339017,2.65273564,2.69073035,2.6517088
68.030545,3.16227766,2.69387814,0.684397196,2.65299641,2.65234033,2.69121192,2.6513149
68.041036,3.16227766,2.69438819,0.684024463,2.65260304,2.65194541,2.69172411,2.65092138
68.051528,3.16227766,2.69493036,0.683628045,2.65221,2.65155079,2.69226842,2.65052816
68.06202,3.16227766,2.69550606,0.683206851,2.65181731,2.65115652,2.69284627,2.65013529
68.072511,2.64575131,2.69611681,-0.224422589,2.65142503,2.65076264,2.69345918,2.6497428
68.083003,3,2.69676438,0.550668336,2.65103307,2.65036907,2.69410893,2.64935061
68.093494,2.64575131,2.69745042,-0.227374374,2.65064151,2.64997588,2.69479714,2.6489588
68.103986,2.23606798,2.69817691,-0.679785942,2.65025027,2.649583,2.69552582,2.64856729
68.114478,2.82842712,2.69894576,0.359835186,2.64985939,2.64919047,2.69629689,2.64817613
68.124969,2.44948974,2.69975902,-0.500269202,2.64946891,2.64879833,2.69711237,2.64778534
68.135461,2,2.70061905,-0.837029898,2.64907875,2.64840649,2.69797465,2.64739486
68.145952,2.44948974,2.70152808,-0.502034195,2.64868899,2.64801504,2.69888594,2.64700476
68.156444,3.31662479,2.70248879,0.783668296,2.64829956,2.64762389,2.69984895,2.64661496
68.166936,2.82842712,2.70350381,0.353444931,2.64791049,2.64723309,2.70086627,2.6462255
68.177427,2.44948974,2.70457588,-0.505060528,2.64752181,2.64684268,2.70194069,2.64583642
68.187919,3.46410162,2.70570827,0.870857819,2.64713346,2.64645257,2.70307545,2.64544764
68.19841,2.82842712,2.70690404,0.348601616,2.64674551,2.64606285,2.70427362,2.64505924
68.208902,2.44948974,2.70816688,-0.508603123,2.64635788,2.64567343,2.7055389,2.64467114
68.219394,3,2.70950042,0.538980133,2.64597062,2.64528436,2.70687492,2.64428338
68.229885,3.16227766,2.71090849,0.671840134,2.64558375,2.64489567,2.70828552,2.643896
68.240377,3,2.71239565,0.536287565,2.64519721,2.64450729,2.70977524,2.64350892
68.250868,2.82842712,2.71396617,0.338320793,2.64481107,2.64411929,2.71134837,2.64312221
68.26136,2.23606798,2.71562525,-0.692500737,2.64442526,2.6437316,2.71301013,2.64273581
68.271852,2.64575131,2.71737802,-0.267631667,2.6440398,2.64334425,2.71476563,2.64234975
68.282343,3.31662479,2.71922995,0.772913214,2.64365475,2.64295728,2.71662036,2.64196406
68.292835,3,2.72118748,0.528027004,2.64327002,2.64257062,2.71858075,2.64157868
68.303326,2.23606798,2.72325679,-0.69798912,2.64288569,2.64218435,2.72065299,2.64119367
68.313818,2.82842712,2.72544533,0.320907772,2.64250169,2.64179837,2.72284454,2.64080896
68.32431,2,2.72776053,-0.853088817,2.64211805,2.64141275,2.72516284,2.64042459
68.334801,3,2.7302104,0.519412744,2.64173481,2.6410275,2.72761591,2.6400406
68.345293,2.82842712,2.73280433,0.309229361,2.6413519,2.64064255,2.73021313,2.63965691
68.355784,2.82842712,2.7355515,0.30475503,2.64096939,2.64025799,2.7329637,2.63927359
68.366276,3.16227766,2.73846296,0.651010526,2.6405872,2.63987374,2.73587868,2.63889057
68.376768,3.16227766,2.74154994,0.648635276,2.64020538,2.63948982,2.73896931,2.63850789
68.387259,3.74165739,2.7448247,0.998415086,2.63982396,2.63910629,2.74224786,2.63812558
68.397751,2,2.7483017,-0.865044335,2.63944287,2.63872306,2.74572879,2.63774358
68.408242,2.64575131,2.75199559,-0.325951343,2.63906218,2.63834021,2.74942677,2.63736195
68.418734,2.64575131,2.75592413,-0.331922912,2.63868182,2.63795766,2.75335958,2.63698061
68.429226,2.82842712,2.76010619,0.261382735,2.63830183,2.63757546,2.75754609,2.63659962
68.439717,3.16227766,2.76456316,0.630646094,2.63792224,2.63719363,2.76200773,2.636219
68.450209,2.23606798,2.769321,-0.730241757,2.63754297,2.63681211,2.76677046,2.63583867
68.4607,2.44948974,2.77440807,-0.570016075,2.63716411,2.63643097,2.77186268,2.63545872
68.471192,2.44948974,2.77985992,-0.57477837,2.63678559,2.63605013,2.77731995,2.63507907
68.481684,2.64575131,2.78571753,-0.374120594,2.63640742,2.63566963,2.78318331,2.63469976
68.492175,2.23606798,2.79203059,-0.745629007,2.63602966,2.63528951,2.78950247,2.63432082
68.502667,2.44948974,2.79886202,-0.59107722,2.63565224,2.63490969,2.79634039,2.63394217
68.513158,3.46410162,2.80628695,0.811057743,2.63527522,2.63453025,2.80377229,2.6335639
68.52365,3.46410162,2.81440201,0.806039458,2.63489853,2.63415111,2.81189485,2.63318593
68.534142,2.82842712,2.82332557,0.0714251886,2.6345222,2.63377231,2.82082655,2.63280829
68.544633,3,2.83320555,0.408404764,2.63414629,2.63339389,2.83071543,2.63243103
68.555125,3.16227766,2.84422954,0.563957551,2.63377071,2.63301577,2.84174922,2.63205406
68.565616,2,2.85662604,-0.925540944,2.63339553,2.63263803,2.85415659,2.63167746
68.576108,3.16227766,2.87068146,0.539996484,2.63302069,2.63226059,2.86822417,2.63130116
68.5866,2.64575131,2.88674137,-0.490907384,2.63264622,2.63188349,2.88429779,2.6309252
68.597091,3.46410162,2.90522185,0.747582613,2.63227216,2.63150676,2.90279381,2.6305496
68.607583,2.23606798,2.92662295,-0.830996376,2.63189843,2.63113034,2.92421262,2.63017431
68.618074,3.60555128,2.95152116,0.808721284,2.63152511,2.63075429,2.94913108,2.62979938
68.628566,2.44948974,2.98058686,-0.728764102,2.63115214,2.63037854,2.97821998,2.62942475
68.639058,2.64575131,3.01456505,-0.607300366,2.63077953,2.63000314,3.01222469,2.62905045
68.649549,3.31662479,3.0542693,0.512206493,2.63040733,2.6296281,3.05195918,2.62867653
68.660041,3.31662479,3.10057577,0.464810738,2.63003548,2.62925337,3.09829993,2.6283029
68.670532,3,3.15436785,-0.392896742,2.62966403,2.62887901,3.15213057,2.62792964
68.681024,2.82842712,3.21653405,-0.622982283,2.62929293,2.62850495,3.21433973,2.62755667
68.691516,4,3.2878905,0.843865807,2.6289222,2.62813123,3.28574349,2.62718404
68.702007,2.82842712,3.36914273,-0.735333667,2.62855188,2.62775788,3.36704715,2.62681178
68.712499,3,3.46086138,-0.678867719,2.62818191,2.62738483,3.45882096,2.62643981
68.72299,4.58257569,3.56337888,1.00955278,2.62781236,2.62701216,3.56139677,2.62606821
68.733482,3.87298335,3.67681658,0.442907171,2.62744314,2.62663978,3.6748952,2.62569691
68.743974,4.35889894,3.80098917,0.746933582,2.62707431,2.62626774,3.7991301,2.62532594
68.754465,3.60555128,3.93540972,-0.574333041,2.6267059,2.62589608,3.93361368,2.62495534
68.764957,3.46410162,4.07932539,-0.784362016,2.62633783,2.62552471,4.07759223,2.62458503
68.775448,4.79583152,4.23163156,0.751132453,2.62597018,2.62515371,4.22996027,2.62421509
68.78594,4.69041576,4.39099226,0.547196031,2.62560288,2.62478302,4.38938111,2.62384544
68.796432,4.69041576,4.55575935,0.366955599,2.62523597,2.62441266,4.55420592,2.62347613
68.806923,5.19615242,4.72403076,0.687111102,2.62486947,2.62404267,4.7225321,2.62310718
68.817415,4.58257569,4.89371456,-0.557798231,2.62450333,2.62367298,4.8922673,2.62273853
68.827906,6.164414,5.06242417,1.04975704,2.62413761,2.62330366,5.06102455,2.62237024
68.838398,5.47722558,5.22760515,0.499620286,2.62377225,2.62293464,5.22624915,2.62200225
68.84889,4.79583152,5.38641709,-0.768495653,2.62340727,2.62256595,5.38510046,2.62163458
68.859381,5.47722558,5.53578269,-0.241985764,2.62304272,2.62219763,5.53450095,2.62126729
68.869873,5.56776436,5.67244725,-0.323547349,2.62267854,2.62182961,5.67119574,2.62090028
68.880364,6.70820393,5.7929433,0.95669255,2.62231477,2.62146197,5.79171716,2.62053365
68.890856,5.91607978,5.89382443,0.149182296,2.62195137,2.62109461,5.89261858,2.6201673
68.901348,6.164414,5.97179084,0.438888553,2.62158837,2.6207276,5.97060003,2.61980129
68.911839,6.40312424,6.02401664,0.615717145,2.6212258,2.62036095,6.02283541,2.61943564
68.922331,6.32455532,6.04846605,0.525441974,2.62086359,2.6199946,6.04728883,2.61907028
68.932822,7,6.04412653,0.977687821,2.62050182,2.61962861,6.04294765,2.61870529
68.943314,6.4807407,6.01117142,0.68525125,2.62014042,2.61926293,6.00998524,2.61834059
68.953806,5.91607978,5.95092775,-0.186676093,2.61977942,2.61889757,5.94972867,2.61797622
68.964297,6.08276253,5.86570307,0.465896405,2.61941886,2.61853259,5.86448563,2.61761221
68.974789,5.56776436,5.75846464,-0.436692428,2.61905868,2.6181679,5.75722354,2.61724849
68.98528,5.83095189,5.63259198,0.445376149,2.61869893,2.61780358,5.63132208,2.61688514
68.995772,5.29150262,5.49153468,-0.447249433,2.61833957,2.61743955,5.49023103,2.61652208
69.006264,5.47722558,5.33870386,0.372185059,2.61798062,2.61707586,5.33736169,2.61615935
69.016755,5.09901951,5.1773344,-0.279847975,2.61762211,2.61671253,5.17594911,2.61579698
69.027247,4.58257569,5.01038642,-0.654072412,2.61726399,2.6163495,5.00895358,2.6154349
69.037738,4.24264069,4.84064317,-0.773306199,2.61690632,2.61598684,4.8391586,2.61507319
69.04823,5.38516481,4.67058878,0.84532599,2.61654904,2.61562447,4.66904856,2.61471176
69.058722,4.12310563,4.50252605,-0.61597112,2.61619218,2.61526243,4.50092662,2.61435066
69.069213,4.69041576,4.33852575,0.593203179,2.61583579,2.61490076,4.33686402,2.61398993
69.079705,4.24264069,4.18037098,0.24953899,2.61547978,2.61453938,4.1786444,2.61362948
69.090196,4,4.02965106,-0.172194838,2.61512424,2.61417837,4.02785777,2.6132694
69.100688,4.24264069,3.88762241,0.5958341,2.6147691,2.61381765,3.88576133,2.61290961
69.11118,3.60555128,3.75529555,-0.38696806,2.6144144,2.61345726,3.75336644,2.61255014
69.121671,2.82842712,3.63337649,-0.897189702,2.61406017,2.61309724,3.63138003,2.61219104
69.132163,3.31662479,3.5222338,-0.453441294,2.61370635,2.61273751,3.52017157,2.61183222
69.142654,3.87298335,3.42198854,0.671561469,2.613353,2.61237815,3.41986294,2.61147376
69.153146,4.12310563,3.33245047,0.889187921,2.61300007,2.61201907,3.33026462,2.6111156
69.163638,2.82842712,3.2532226,-0.65176336,2.61264759,2.61166033,3.25098021,2.61075776
69.174129,2.44948974,3.18371084,-0.856867022,2.6122956,2.61130195,3.18141599,2.61040028
69.184621,4.12310563,3.12315712,0.999974252,2.61194404,2.61094387,3.12081411,2.61004309
69.195112,3.31662479,3.07073511,0.495872641,2.61159297,2.61058615,3.06834825,2.60968625
69.205604,3.87298335,3.0255509,0.920560943,2.61124233,2.61022872,3.02312435,2.60932971
69.216096,3,2.98672297,0.115225991,2.61089216,2.60987162,2.98426067,2.60897349
69.226587,2.64575131,2.95339869,-0.554659699,2.6105425,2.60951488,2.95090422,2.60861763
69.237079,3.31662479,2.92477295,0.6259807,2.61019328,2.60915843,2.92224949,2.60826206
69.24757,3.60555128,2.9001265,0.839895696,2.60984458,2.60880235,2.89757684,2.60790685
69.258062,3.16227766,2.8788123,0.532414652,2.60949633,2.60844655,2.87623882,2.60755192
69.268554,2.82842712,2.86027575,-0.178461821,2.60914858,2.60809109,2.85768047,2.60719732
69.279045,2.64575131,2.84404376,-0.4453004,2.60880135,2.60773599,2.84142835,2.60684308
69.289537,2.64575131,2.82971545,-0.428910404,2.6084546,2.60738117,2.82708129,2.60648912
69.300028,2.82842712,2.81696475,0.107062488,2.60810838,2.60702672,2.81431296,2.60613552
69.31052,2.44948974,2.80552038,-0.596683032,2.60776265,2.60667256,2.80285187,2.60578221
69.321012,3.16227766,2.79516591,0.605897474,2.60741743,2.60631873,2.7924814,2.60542922
69.331503,2.64575131,2.78572706,-0.374133335,2.60707277,2.60596526,2.78302713,2.60507659
69.341995,2.64575131,2.77706177,-0.362367852,2.60672862,2.60561208,2.77434686,2.60472425
69.352486,3.60555128,2.76905958,0.914599198,2.60638503,2.60525925,2.76633006,2.60437226
69.362978,3.46410162,2.7616292,0.838136273,2.60604196,2.60490672,2.75888533,2.60402056
69.37347,3.60555128,2.75469929,0.922416385,2.60569943,2.60455452,2.75194127,2.60366918
69.383961,3.74165739,2.74821206,0.996717276,2.60535751,2.60420267,2.74544005,2.60331815
69.394453,2.44948974,2.74211857,-0.540951775,2.60501611,2.60385111,2.73933265,2.60296741
69.404944,2,2.73638056,-0.858126189,2.60467533,2.60349991,2.7335808,2.60261703
69.415436,2,2.73096391,-0.854964273,2.6043351,2.603149,2.72815033,2.60226694
69.425928,3.46410162,2.72584114,0.859220852,2.60399547,2.60279842,2.72301372,2.60191716
69.436419,3.16227766,2.72098857,0.664295936,2.60365647,2.60244819,2.71814727,2.60156774
69.446911,3.46410162,2.71638421,0.864706544,2.60331805,2.60209825,2.71352896,2.6012186
69.457402,3.16227766,2.71201037,0.671019588,2.60298029,2.60174867,2.70914107,2.60086982
69.467894,2,2.70784967,-0.841338024,2.60264313,2.60139938,2.70496619,2.60052132
69.478386,2.82842712,2.70388766,0.352901501,2.60230662,2.60105042,2.70098986,2.60017315
69.488877,2.64575131,2.70011122,-0.233152107,2.6019708,2.60070181,2.69719893,2.59982532
69.499369,3.31662479,2.69650738,0.787475343,2.60163562,2.60035348,2.69358041,2.59947779
69.50986,2.44948974,2.69306562,-0.49353407,2.60130115,2.60000552,2.69012375,2.5991306
69.520352,2.64575131,2.68977502,-0.209818272,2.60096735,2.59965784,2.68681801,2.5987837
69.530844,2.23606798,2.68662645,-0.671236522,2.60063427,2.59931049,2.68365404,2.59843712
69.541335,2.44948974,2.68361147,-0.483861265,2.60030194,2.59896349,2.68062337,2.59809089
69.551827,2.23606798,2.68072145,-0.666823416,2.59997032,2.59861678,2.67771736,2.59774494
69.562318,3.31662479,2.67794948,0.799171638,2.59963949,2.59827042,2.67492907,2.59739935
69.57281,2.64575131,2.67528814,-0.171862825,2.59930941,2.59792435,2.67225105,2.59705404
69.583302,3.31662479,2.67273128,0.802429755,2.59898013,2.5975786,2.66967713,2.59670905
69.593793,2.23606798,2.67029532,-0.658959287,2.59865169,2.59725597,2.66720156,2.59636441
69.604285,3.16227766,2.66793001,0.703098606,2.59832406,2.59691088,2.66481833,2.59602005
69.614776,2.64575131,2.66565276,-0.141072506,2.59799731,2.59656614,2.66252271,2.59567605
69.625268,2.44948974,2.66345835,-0.462567405,2.59767141,2.59622169,2.66030943,2.59533233
69.63576,2.23606798,2.66134251,-0.652130767,2.59734642,2.59587756,2.65817423,2.59498892
69.646251,2.82842712,2.65930129,0.411249118,2.59702238,2.59553378,2.6561131,2.59464586
69.656743,3.31662479,2.65733038,0.811969461,2.59669927,2.59519029,2.65412172,2.59430309
69.667234,3.31662479,2.65542655,0.813140974,2.59637717,2.59484715,2.65219681,2.59396067
69.677726,3.16227766,2.65358601,0.713226228,2.59605605,2.5945043,2.65033456,2.59361853
69.688218,1.73205081,2.65180577,-0.959038564,2.59573598,2.59416177,2.64853195,2.59327671
69.698709,3,2.65008303,0.591537802,2.59541701,2.59381958,2.64678612,2.59293523
69.709201,2.82842712,2.64841465,0.424278766,2.59509912,2.59347769,2.64509393,2.59259404
69.719692,3,2.64679835,0.594307703,2.59478241,2.59313615,2.64345303,2.59225319
69.730184,3.16227766,2.64523137,0.71905931,2.59446685,2.59279489,2.64186063,2.59191263
69.740676,1.73205081,2.64371156,-0.954809273,2.59415253,2.59245395,2.64031453,2.59157238
69.751167,2.44948974,2.64223689,-0.439029783,2.5938395,2.59211336,2.63881268,2.59123248
69.761659,2.44948974,2.6405546,-0.437109664,2.59327272,2.59177305,2.6373527,2.59089286
69.77215,1.41421356,2.63916411,-1.10677484,2.5929626,2.5914331,2.63593294,2.59055359
69.782642,2.44948974,2.63781277,-0.433962013,2.59265387,2.59109343,2.63455126,2.5902146
69.793134,2.82842712,2.63649905,0.438095964,2.59234661,2.59075408,2.63320608,2.58987593
69.803625,2.23606798,2.63522149,-0.631785967,2.59204091,2.59041508,2.63189587,2.5895376
69.814117,2.64575131,2.63397835,0.108503298,2.59173678,2.59007636,2.63061883,2.58919955
69.824608,4,2.63276847,1.16928676,2.59143435,2.58973799,2.62937375,2.58886185
69.8351,2.82842712,2.63159032,0.443662942,2.59113362,2.58939991,2.628159,2.58852443
69.845592,2,2.63044277,-0.794004266,2.59083471,2.58906214,2.62697338,2.58818732
69.856083,2.44948974,2.62932478,-0.424069617,2.59053771,2.58872472,2.62581578,2.58785056
69.866575,3,2.62823505,0.609725311,2.59024267,2.58838758,2.62468479,2.58751407
69.877066,2.23606798,2.62717275,-0.6253837,2.58994973,2.58805079,2.62357952,2.58717794
69.887558,3.46410162,2.62613674,0.915404215,2.58965894,2.58771429,2.6224987,2.58684208
69.89805,3.60555128,2.62512622,0.990164157,2.58937042,2.5873781,2.62144143,2.58650653
69.908541,3.46410162,2.62414045,0.916493955,2.58908433,2.58704226,2.62040686,2.58617133
69.919033,3.16227766,2.62317845,0.734233754,2.58880073,2.5867067,2.61939389,2.58583641
69.929524,3,2.6222397,0.614622076,2.5885198,2.58637148,2.61840186,2.58550183
69.940016,2.82842712,2.62132334,0.455086567,2.58824165,2.58603655,2.61742976,2.58516753
69.950508,3.46410162,2.62042884,0.918516619,2.58796644,2.58570194,2.61647691,2.58483355
69.960999,2.82842712,2.6195557,0.457024534,2.58769438,2.58536767,2.61554266,2.5844999
69.971491,3.46410162,2.61870325,0.919455473,2.58742559,2.58503368,2.61462613,2.58416654
69.981982,2.23606798,2.61787117,-0.617902253,2.58716032,2.58470004,2.61372682,2.58383351
69.992474,2,2.61705889,-0.785530963,2.58689876,2.58436667,2.61284393,2.58350077
70.002966,2.64575131,2.61626613,0.1717125,2.58664116,2.58403363,2.61197693,2.58316834
70.013457,2.82842712,2.61549264,0.461448248,2.58638782,2.58370092,2.61112533,2.58283624
70.023949,2.44948974,2.61473803,-0.406507423,2.58613899,2.5833685,2.6102884,2.58250443
70.03444,3.16227766,2.61400225,0.740456216,2.58589507,2.58303643,2.60946578,2.58217296
70.044932,2.64575131,2.61328506,0.180183944,2.5856564,2.58270463,2.6086568,2.58184176
70.055424,2.44948974,2.61258648,-0.403852375,2.58542347,2.58237315,2.60786108,2.58151088
70.065915,2.44948974,2.61190666,-0.403009822,2.58519681,2.58204201,2.6070782,2.58118033
70.076407,2.82842712,2.61124563,0.466027353,2.584977,2.58171115,2.6063076,2.58085007
70.086898,3,2.61060383,0.624016159,2.58476483,2.58138063,2.60554899,2.58052014
70.09739,2.64575131,2.60998161,0.18912879,2.58456113,2.5810504,2.60480182,2.58019049
70.107882,3,2.60937969,0.624996247,2.58436698,2.58072047,2.60406579,2.57986115
70.118373,2.82842712,2.60879902,0.468644965,2.58418365,2.58039089,2.60334059,2.57953215
70.128865,2.64575131,2.60824067,0.19367665,2.58401267,2.58006159,2.60262572,2.57920342
70.139356,2.64575131,2.60770625,0.195051443,2.58385593,2.57973263,2.601921,2.57887503
70.149848,2.23606798,2.60719758,-0.60920407,2.58371565,2.57940395,2.60122595,2.57854692
70.16034,3,2.60671711,0.627122707,2.58359458,2.57907558,2.60054033,2.57821912
70.170831,2.23606798,2.60626786,-0.608440534,2.58349603,2.57874755,2.59986391,2.57789166
70.181323,2,2.60585337,-0.778365833,2.58342391,2.5784198,2.59919627,2.57756447
70.191814,2.64575131,2.60547812,0.200681822,2.58338295,2.57809239,2.59853727,2.57723762
70.202306,2.64575131,2.6051473,0.201504373,2.5833787,2.57776526,2.59788651,2.57691105
70.212798,2.64575131,2.6048672,0.20219819,2.58341773,2.57743843,2.5972438,2.57658478
70.223289,2.82842712,2.60464518,0.473055959,2.58350765,2.57711195,2.59660896,2.57625885
70.233781,2,2.60448971,-0.777489362,2.58365726,2.57678575,2.59598163,2.57593319
70.244272,3.87298335,2.60441057,1.12630936,2.58387661,2.57645989,2.59536171,2.57560787
70.254764,3.31662479,2.60441881,0.843922971,2.58417706,2.5761343,2.59474886,2.57528283
70.265256,2.82842712,2.60452681,0.473181055,2.58457126,2.57580902,2.59414294,2.57495809
70.275747,2.44948974,2.6047482,-0.394028502,2.58507308,2.57548408,2.59354379,2.57463369
70.286239,3,2.60509784,0.628412414,2.58569771,2.57515942,2.59295112,2.57430956
70.29673,3,2.6055915,0.628019509,2.58646116,2.5748351,2.59236484,2.57398577
70.307222,3,2.60624589,0.627498298,2.58738043,2.57451105,2.59178467,2.57366225
70.317714,2.23606798,2.60707805,-0.609105962,2.5884728,2.57418732,2.59121049,2.57333904
70.328205,2.44948974,2.60810502,-0.398265334,2.58975553,2.57386392,2.59064219,2.57301616
70.338697,1.73205081,2.60934368,-0.936639137,2.59124578,2.57354079,2.5900795,2.57269356
70.349188,3,2.6108095,0.623851346,2.59295918,2.57321801,2.58952237,2.57237129
70.35968,3,2.6125168,0.622481489,2.59491029,2.5728955,2.58897055,2.57204929
70.370172,2.64575131,2.61447716,0.176844981,2.59711083,2.57257329,2.58842395,2.5717276
70.380663,2.44948974,2.61669902,-0.408912314,2.59956935,2.57225142,2.58788247,2.57140624
70.391155,2.44948974,2.6191876,-0.411944004,2.60229123,2.57192983,2.58734589,2.57108515
70.401646,2.82842712,2.62194267,0.454405603,2.60527625,2.57160858,2.58681417,2.5707644
70.412138,3.31662479,2.62495965,0.831664079,2.60851993,2.5712876,2.5862871,2.57044392
70.42263,3.60555128,2.62822715,0.98859705,2.61201084,2.57096692,2.58576459,2.57012374
70.433121,2.44948974,2.63172695,-0.426892505,2.61573071,2.57064658,2.58524658,2.5698039
70.443613,3.46410162,2.63543444,0.910311582,2.61965488,2.57032652,2.58473287,2.56948433
70.454104,3.31662479,2.63931555,0.822987994,2.62374911,2.57000679,2.58422343,2.56916509
70.464596,3,2.64332893,0.59721945,2.62797193,2.56968734,2.58371808,2.56884612
70.475088,2.23606798,2.64742269,-0.641369405,2.63227123,2.56936819,2.58321674,2.56852745
70.485579,2.23606798,2.65153489,-0.64456723,2.63658478,2.56904937,2.58271939,2.56820911
70.496071,3.16227766,2.65554854,0.711849084,2.64084104,2.56873083,2.58217882,2.56789105
70.506562,3.31662479,2.65947165,0.810649823,2.64495617,2.56841262,2.58168907,2.56757332
70.517054,2.82842712,2.6631664,0.406522719,2.64883781,2.56809468,2.58120291,2.56725586
70.527546,3,2.66653128,0.577467506,2.65238406,2.56777705,2.58072032,2.56693869
70.538037,2,2.66945985,-0.818205263,2.65548807,2.56745976,2.58024126,2.56662186
70.548529,3.31662479,2.67184672,0.802980738,2.65804413,2.56714273,2.57976556,2.5663053
70.55902,4.24264069,2.67359272,1.25261645,2.65995272,2.56682604,2.57929322,2.56598907
70.569512,2,2.67461501,-0.821349507,2.66113082,2.56650962,2.57882408,2.56567311
70.580004,2.82842712,2.67485404,0.391884021,2.66151878,2.5661935,2.57835811,2.56535745
70.590495,3.16227766,2.67428092,0.698567633,2.66108775,2.56587772,2.57789529,2.56504212
70.600987,2.64575131,2.67290045,-0.164769952,2.65984278,2.56556221,2.57743545,2.56472706
70.611478,3.16227766,2.67075091,0.701089685,2.6578225,2.56524703,2.57697863,2.56441233
70.62197,2.64575131,2.66789868,-0.148819927,2.65509378,2.56493212,2.57652466,2.56409786
70.632462,3.46410162,2.66443209,0.894242431,2.65174551,2.56461751,2.57607353,2.5637837
70.642953,3.87298335,2.66045274,1.10114968,2.64787989,2.56430323,2.57562522,2.56346986
70.653445,2.44948974,2.65606609,-0.454506704,2.643603,2.56398923,2.57517959,2.5631563
70.663936,3,2.65137766,0.590442494,2.63902092,2.56367555,2.57473665,2.56284306
70.674428,4,2.64648515,1.16340657,2.6342319,2.56336215,2.57429628,2.56253009
70.68492,2.23606798,2.64147868,-0.636718699,2.62932653,2.56304905,2.57385845,2.56221741
70.695411,3,2.63643816,0.602960897,2.62438512,2.56273628,2.57342317,2.56190507
70.705903,2.82842712,2.63143148,0.443841916,2.61947596,2.56242377,2.57299029,2.56159299
70.716394,3.31662479,2.6265181,0.830726603,2.61465877,2.5621116,2.57255985,2.56128124
70.726886,3.46410162,2.62174578,0.917799453,2.60998158,2.5617997,2.57213171,2.56096976
70.737378,1.73205081,2.6171545,-0.940799495,2.60548458,2.56148809,2.57170588,2.56065857
70.747869,2.82842712,2.61277565,0.464382894,2.6011993,2.56117682,2.57128234,2.56034771
70.758361,2.64575131,2.60863152,0.192664966,2.59714817,2.56086581,2.57086098,2.56003711
70.768852,3.31662479,2.6047388,0.843733364,2.59334794,2.56055514,2.57044182,2.55972685
70.779344,3.87298335,2.6011061,1.12777535,2.5898073,2.56024473,2.57002475,2.55941685
70.789836,3,2.59773731,0.634241822,2.58653016,2.55993462,2.56960977,2.55910714
70.800327,2.64575131,2.59463109,0.226097804,2.58351517,2.55962484,2.56919687,2.55879776
70.810819,3,2.59178084,0.638920311,2.58075572,2.55931533,2.56878594,2.55848865
70.82131,3,2.58917744,0.640954413,2.57824266,2.55900614,2.56837702,2.55817986
70.831802,3,2.58680788,0.642800219,2.57596295,2.55869722,2.56797,2.55787133
70.842294,2.64575131,2.58465772,0.247171177,2.57390209,2.5583886,2.56756488,2.55756311
70.852785,2.82842712,2.58271098,0.495697634,2.57204403,2.55808031,2.56716165,2.5572552
70.863277,3.16227766,2.58095026,0.762448293,2.57037133,2.55777229,2.56676023,2.55694756
70.873768,2,2.57935857,-0.761156076,2.56886693,2.55746459,2.56636064,2.55664025
70.88426,4,2.57791844,1.19251061,2.56751332,2.55715716,2.56596277,2.5563332
70.894752,2.23606798,2.57661339,-0.583562691,2.56629395,2.55685002,2.56556665,2.55602644
70.905243,3.16227766,2.57542775,0.766061297,2.5651931,2.55654321,2.56517227,2.55572001
70.915735,3.31662479,2.57434655,0.861555709,2.56419579,2.55623667,2.56477952,2.55541384
70.926226,3.46410162,2.57335647,0.943792956,2.56328862,2.55593045,2.56438846,2.55510799
70.936718,3,2.57244507,0.653876849,2.56245916,2.5556245,2.56399899,2.55480241
70.94721,3,2.57160148,0.654521595,2.5616965,2.55531884,2.5636111,2.55449712
70.957701,1.73205081,2.57081611,-0.915841311,2.56099103,2.55501351,2.56322482,2.55419215
70.968193,4.12310563,2.57008036,1.24620434,2.56033414,2.55470845,2.56284004,2.55388745
70.978684,2.44948974,2.56938706,-0.346261924,2.55971865,2.5544037,2.56245682,2.55358306
70.989176,2.82842712,2.56872982,0.509605048,2.55913817,2.55409923,2.56207505,2.55327894
70.999668,2.44948974,2.56810338,-0.34440331,2.55858746,2.55379505,2.56169474,2.55297512
71.010159,3,2.56750332,0.657644796,2.55806206,2.55349119,2.56131592,2.55267161
71.020651,2.64575131,2.56692576,0.280758877,2.55755814,2.5531876,2.56093848,2.55236836
71.031142,3,2.56636768,0.658507643,2.55707265,2.55288433,2.56056247,2.55206544
71.041634,3,2.56582637,0.658918529,2.55660293,2.55258132,2.56018781,2.55176278
71.052126,1,2.56529973,-1.25111939,2.55614686,2.55227861,2.5598145,2.55146041
71.062617,3,2.56478602,0.659707494,2.55570273,2.55197622,2.55944256,2.55115836
71.073109,2.64575131,2.56428368,0.285425355,2.55526898,2.55167409,2.55907191,2.55085657
71.0836,3,2.56379157,0.660460772,2.5548445,2.55137229,2.55870258,2.5505551
71.094092,2.82842712,2.56330859,0.514896629,2.55442819,2.55107075,2.55833449,2.55025389
71.104584,2.44948974,2.56283393,-0.33666628,2.55401927,2.5507695,2.55796767,2.54995297
71.115075,3.46410162,2.56236692,0.949597123,2.55361707,2.55046858,2.55760211,2.54965237
71.125567,2.64575131,2.56190686,0.289559057,2.55322093,2.55016791,2.55723775,2.54935204
71.136058,3.31662479,2.56145333,0.869006018,2.5528304,2.54986757,2.55687462,2.54905201
71.14655,2.82842712,2.56100578,0.517127976,2.55244499,2.54956749,2.55651265,2.54875226
71.157042,2.44948974,2.56056387,-0.333277847,2.55206435,2.5492677,2.55615184,2.54845278
71.167533,2.23606798,2.56012728,-0.569262068,2.55168818,2.54896824,2.55579223,2.54815363
71.178025,2.23606798,2.55969563,-0.568882811,2.55131612,2.54866903,2.55543372,2.54785474
71.188516,3.16227766,2.55926872,0.776536501,2.55094797,2.54837014,2.55507637,2.54755616
71.199008,3.87298335,2.55884622,1.1463582,2.55058344,2.54807152,2.55472009,2.54725785
71.2095,2.64575131,2.55842795,0.295505269,2.55022233,2.54777319,2.5543649,2.54695982
71.219991,2.82842712,2.55801372,0.520012886,2.54986448,2.54747517,2.55401083,2.54666211
71.230483,2.64575131,2.55760328,0.296897341,2.54950966,2.54717742,2.55365779,2.54636465
71.240974,4,2.55719652,1.20116755,2.54915776,2.54687998,2.55330584,2.54606752
71.251466,2.23606798,2.5567932,-0.566326071,2.54880856,2.54658281,2.55295489,2.54577064
71.261958,3.87298335,2.5563932,1.14742762,2.54846196,2.54628593,2.55260496,2.54547405
71.272449,3.31662479,2.55599642,0.872140108,2.54811785,2.54598936,2.55225608,2.54517777
71.282941,2.64575131,2.55560266,0.300247654,2.54777606,2.54569305,2.55190817,2.54488176
71.293432,2.64575131,2.55521185,0.300897751,2.54743652,2.54539707,2.55156127,2.54458605
71.303924,2.23606798,2.55482382,-0.564584666,2.54709908,2.54510134,2.55121532,2.54429061
71.314416,3.31662479,2.55443849,0.873032818,2.54676367,2.5448059,2.55087033,2.54399545
71.324907,2.82842712,2.55405579,0.523804674,2.54643023,2.54451078,2.55052633,2.54370061
71.335399,2.64575131,2.55367555,0.30343988,2.5460986,2.54421591,2.55018324,2.54340602
71.34589,2.82842712,2.55329776,0.524527756,2.54576877,2.54392137,2.5498411,2.54311175
71.356382,2.82842712,2.55292225,0.524885581,2.5454406,2.54362708,2.54949986,2.54281774
71.366874,2.44948974,2.55254899,-0.321028419,2.54511406,2.54333308,2.54915952,2.54252401
71.377365,3.87298335,2.55217793,1.14926299,2.5447891,2.54303939,2.54882012,2.54223059
71.387857,2.64575131,2.55180892,0.306500223,2.5444656,2.54274597,2.54848157,2.54193743
71.398348,2.44948974,2.55144198,-0.319299609,2.54414357,2.54245286,2.54814393,2.54164458
71.40884,2.82842712,2.55107697,0.526640442,2.54382289,2.54216001,2.54780713,2.54135199
71.419332,3,2.55071386,0.670288105,2.54350354,2.54186744,2.54747119,2.54105968
71.429823,2.64575131,2.55035262,0.308866781,2.5431855,2.54157519,2.54713613,2.54076769
71.440315,3.16227766,2.54999314,0.782486113,2.54286866,2.5412832,2.54680189,2.54047595
71.450806,3.46410162,2.54963543,0.956277251,2.54255303,2.54099152,2.5464685,2.54018452
71.461298,2.44948974,2.54927938,-0.315894977,2.54223853,2.54070009,2.54613591,2.53989335
71.47179,3.16227766,2.54892497,0.783168369,2.54192513,2.54040896,2.54580414,2.53960246
71.482281,3.16227766,2.54857218,0.783393565,2.54161284,2.54011814,2.54547321,2.53931188
71.492773,3.31662479,2.54822092,0.876586488,2.54130156,2.53982757,2.54514305,2.53902156
71.503264,3.74165739,2.54787121,1.09260523,2.54099131,2.53953732,2.54481371,2.53873155
71.513756,3.16227766,2.54752293,0.784062961,2.540682,2.53924732,2.54448512,2.53844179
71.524248,3.16227766,2.5471761,0.784284107,2.54037364,2.53895761,2.54415732,2.53815231
71.534739,2.23606798,2.5468307,-0.557460965,2.54006622,2.53866821,2.54383031,2.53786315
71.545231,2,2.54648665,-0.739247352,2.53975967,2.53837907,2.54350404,2.53757423
71.555722,2.82842712,2.54614396,0.531303267,2.539454,2.53809024,2.54317855,2.53728563
71.566214,3.74165739,2.54580256,1.09355148,2.53914915,2.53780166,2.54285379,2.53699728
71.576706,3,2.54546243,0.674194017,2.53884512,2.53751337,2.54252977,2.53670922
71.587197,3.46410162,2.54512359,0.958633418,2.53854192,2.53722539,2.54220651,2.53642146
71.597689,2.82842712,2.54478594,0.532579748,2.53823946,2.53693766,2.54188396,2.53613395
71.60818,3.60555128,2.54444952,1.03009793,2.53793778,2.53665025,2.54156216,2.53584675
71.618672,3.31662479,2.54411425,0.878925787,2.53763682,2.53636309,2.54124105,2.53555981
71.629164,3.87298335,2.54378014,1.15291076,2.53733657,2.53607621,2.54092066,2.53527314
71.639655,3,2.54344718,0.675686923,2.53703706,2.53578964,2.540601,2.53498679
71.650147,3,2.54311531,0.675932461,2.53673821,2.53550333,2.54028202,2.53470068
71.660638,4.35889894,2.54278456,1.34763288,2.53644005,2.53521732,2.53996376,2.53441489
71.67113,2.82842712,2.54245484,0.534763762,2.53614253,2.53493158,2.53964616,2.53412934
71.681622,3.16227766,2.54212618,0.78749697,2.53584565,2.53464611,2.53932926,2.53384408
71.692113,3.60555128,2.54179859,1.03138387,2.53554943,2.53436095,2.53901306,2.53355912
71.702605,2.82842712,2.54147198,0.535681945,2.53525379,2.53407604,2.53869752,2.53327441
71.713096,2.82842712,2.5411464,0.535985749,2.53495879,2.53379145,2.53838267,2.53299001
71.723588,3.74165739,2.54082178,1.09582645,2.53466436,2.5335071,2.53806847,2.53270586
71.73408,4.12310563,2.54049813,1.25801729,2.53437051,2.53322304,2.53775493,2.53242198
71.744571,3.46410162,2.54017546,0.961210776,2.53407725,2.53293928,2.53744209,2.53213842
71.755063,3.31662479,2.5398537,0.881346178,2.53378453,2.53265578,2.53712987,2.5318551
71.765554,4.12310563,2.53953291,1.25840086,2.53349239,2.53237259,2.53681833,2.53157209
71.776046,2.82842712,2.539213,0.537786319,2.53320077,2.53208964,2.53650742,2.53128933
71.786538,4,2.53889399,1.20876218,2.53290968,2.53180698,2.53619715,2.53100685
71.797029,4.24264069,2.53857591,1.30539832,2.53261914,2.53152462,2.53588756,2.53072467
71.807521,2.64575131,2.53825868,0.327860686,2.53232909,2.53124252,2.53557858,2.53044274
71.818012,2.23606798,2.53794235,-0.549430956,2.53203957,2.53096072,2.53527027,2.53016111
71.828504,2.44948974,2.53762685,-0.296878952,2.53175053,2.53067917,2.53496256,2.52987973
71.838996,3.74165739,2.53731221,1.09742662,2.53146198,2.5303979,2.53465549,2.52959863
71.849487,3.46410162,2.53699844,0.962861973,2.53117395,2.53011694,2.53434908,2.52931784
71.859979,3.31662479,2.53668547,0.883141734,2.53088636,2.52983623,2.53404327,2.52903729
71.87047,3.60555128,2.53637336,1.0340106,2.53059928,2.52955582,2.53373811,2.52875705
71.880962,3.46410162,2.53606203,0.96334811,2.53031264,2.52927566,2.53343356,2.52847705
71.891454,3.16227766,2.53575152,0.79153404,2.53002646,2.52899578,2.53312963,2.52819733
71.901945,2.44948974,2.53544185,-0.293175894,2.52974076,2.52871621,2.53282635,2.52791791
71.912437,2.64575131,2.53513294,0.3325934,2.52945548,2.52843688,2.53252366,2.52763874
71.922928,3.46410162,2.53482486,0.963990019,2.52917068,2.52815786,2.53222163,2.52735987
71.93342,1.73205081,2.53451753,-0.895805071,2.52888628,2.52787909,2.53192019,2.52708125
71.943912,3.46410162,2.53421099,0.964308365,2.52860232,2.5276006,2.53161938,2.5268029
71.954403,2.23606798,2.53390526,-0.545744705,2.52831882,2.52732241,2.53131921,2.52652486
71.964895,2.82842712,2.53360027,0.542979604,2.52803571,2.52704447,2.53101964,2.52624706
71.975386,3.16227766,2.53329609,0.793083584,2.52775305,2.52676683,2.53072073,2.52596956
71.985878,2,2.53299264,-0.730063452,2.52747078,2.52648944,2.53042241,2.52569231
71.99637,3.31662479,2.53268997,0.885400939,2.52718892,2.52621232,2.53012472,2.52541533
72.006861,3,2.53238808,0.683821553,2.5269075,2.52593551,2.52982768,2.52513865
72.017353,2.82842712,2.53208694,0.54437137,2.52662645,2.52565895,2.52953125,2.52486222
72.027844,3,2.53178658,0.684261222,2.52634583,2.52538268,2.52923549,2.52458609
72.038336,3,2.53148696,0.684480124,2.52606558,2.52510667,2.52894033,2.5243102
72.048828,3.31662479,2.5311881,0.886248659,2.52578572,2.52483093,2.52864582,2.52403459
72.059319,2.82842712,2.53089004,0.545469598,2.52550628,2.52455549,2.52835198,2.52375927
72.069811,2.82842712,2.53059272,0.545742067,2.5252272,2.5242803,2.52805877,2.5234842
72.080302,3,2.5302962,0.685349402,2.52494852,2.52400541,2.52776624,2.52320943
72.090794,3,2.53000042,0.685565154,2.5246702,2.52373077,2.52747435,2.52293491
72.101286,1.73205081,2.52970542,-0.893115118,2.52439226,2.5234564,2.52718313,2.52266065
72.111777,2.64575131,2.52941124,0.34108661,2.52411471,2.52318233,2.52689262,2.5223867
72.122269,3,2.52911781,0.686208561,2.52383752,2.52290851,2.52660277,2.52211299
72.13276,2.64575131,2.52882521,0.341944583,2.52356071,2.52263498,2.52631365,2.52183957
72.143252,2.23606798,2.52853339,-0.540800717,2.52328425,2.52236171,2.52602521,2.5215664
72.153744,2.44948974,2.52824239,-0.280629018,2.52300815,2.5220887,2.52573749,2.5212935
72.164235,2.44948974,2.52795224,-0.280111578,2.52273243,2.521816,2.52545053,2.5210209
72.174727,2.64575131,2.5276629,0.343639942,2.52245705,2.52154354,2.5251643,2.52074854
72.185218,1.41421356,2.52737445,-1.0550644,2.52218205,2.52127138,2.52487886,2.52047648
72.19571,2.64575131,2.52708683,0.34447711,2.52190738,2.52099946,2.52459418,2.52020466
72.206202,2.44948974,2.52680011,-0.278047412,2.52163306,2.52072782,2.5243103,2.51993311
72.216693,3.16227766,2.52651432,0.797347693,2.52135912,2.52045647,2.52402727,2.51966185
72.227185,2.64575131,2.52622943,0.345719362,2.52108549,2.52018537,2.52374507,2.51939084
72.237676,2.82842712,2.52594554,0.549983261,2.52081224,2.51991457,2.52346379,2.51912012
72.248168,2.64575131,2.5256626,0.346538174,2.52053931,2.51964401,2.52318338,2.51884965
72.25866,2.82842712,2.5253807,0.550496525,2.52026671,2.51937372,2.52290394,2.51857945
72.269151,3.46410162,2.5250999,0.969021011,2.51999449,2.51910373,2.52262552,2.51830953
72.279643,3.31662479,2.52482019,0.889834032,2.51972257,2.51883398,2.52234812,2.51803987
72.290134,3.60555128,2.52454169,1.03971611,2.51945102,2.51856453,2.52207187,2.51777049
72.300626,2.23606798,2.52426442,-0.536839309,2.51917978,2.51829532,2.52179678,2.51750136
72.311118,3,2.52398851,0.689935861,2.51890887,2.51802638,2.52152297,2.51723249
72.321609,3,2.52371409,0.690134707,2.51863831,2.51775774,2.5212506,2.51696392
72.332101,3,2.52344124,0.690332353,2.51836806,2.51748934,2.52097974,2.51669559
72.342592,3,2.5231702,0.690528635,2.51809817,2.51722123,2.52071062,2.51642755
72.353084,2.64575131,2.52290114,0.350499889,2.51782857,2.51695337,2.52044341,2.51615976
72.363576,2.64575131,2.52263434,0.350880279,2.5175593,2.51668578,2.52017842,2.51589223
72.374067,2.64575131,2.52237017,0.351256513,2.51729038,2.51641848,2.51991599,2.51562499
72.384559,2.44948974,2.522109,-0.269479604,2.51702176,2.51615143,2.51965651,2.51535799
72.39505,3.87298335,2.52185138,1.16238202,2.51675348,2.51588467,2.51940052,2.51509129
72.405542,2.64575131,2.52159789,0.352354108,2.5164855,2.51561815,2.51914862,2.51482482
72.416034,3,2.52134932,0.691845853,2.51621784,2.51535189,2.51890157,2.51455862
72.426525,2.82842712,2.52110658,0.554364996,2.51595052,2.51508594,2.51866032,2.51429271
72.437017,2.82842712,2.52087071,0.554577695,2.51568349,2.51482022,2.51842588,2.51402704
72.447508,2.23606798,2.52064301,-0.533455744,2.5154168,2.51455479,2.51819958,2.51376166
72.458,3,2.52042491,0.692513606,2.51515039,2.51428961,2.51798283,2.51349652
72.468492,3.16227766,2.52021809,0.801286196,2.51488431,2.5140247,2.51777732,2.51323165
72.478983,2.82842712,2.52002447,0.555340128,2.51461855,2.51376007,2.51758497,2.51296707
72.489475,3.60555128,2.51984608,1.04197178,2.51435309,2.51349569,2.51740783,2.51270272
72.499966,2.23606798,2.51968525,-0.532557298,2.51408796,2.5132316,2.51724821,2.51243866
72.510458,2.64575131,2.51954438,0.355256155,2.51382311,2.51296775,2.51710852,2.51217485
72.52095,3.16227766,2.51942601,0.801780303,2.51355856,2.51270416,2.51699131,2.51191129
72.531441,3.16227766,2.51933274,0.801838463,2.51329435,2.51244087,2.51689918,2.51164803
72.541933,2.64575131,2.51926712,0.355646165,2.51303043,2.51217781,2.51683467,2.511385
72.552424,2.64575131,2.51923157,0.35569613,2.51276683,2.51191505,2.51680024,2.51112226
72.562916,3,2.5192283,0.693377024,2.5125035,2.51165253,2.51679806,2.51085976
72.573408,2.64575131,2.51925914,0.355657379,2.51224048,2.51139027,2.51682998,2.51059753
72.583899,2.82842712,2.51932543,0.555969151,2.51197779,2.5111283,2.51689735,2.51033558
72.594391,2,2.51942791,-0.720713473,2.51171538,2.51086657,2.5170009,2.51007386
72.604882,2.64575131,2.51956654,0.355224957,2.51145329,2.51060513,2.5171406,2.50981244
72.615374,3.31662479,2.51974044,0.892683792,2.51119147,2.51034393,2.51731555,2.50955125
72.625866,2.44948974,2.51994767,-0.265439121,2.51092995,2.51008299,2.51752384,2.50929032
72.636357,3.87298335,2.52018517,1.16309852,2.51066875,2.50982234,2.51776238,2.50902968
72.646849,2,2.52044871,-0.721421312,2.51040783,2.50956193,2.51802695,2.50876928
72.65734,2.44948974,2.52073264,-0.266913651,2.51014723,2.50930181,2.51831189,2.50850916
72.667832,1.73205081,2.52102999,-0.888245001,2.50988689,2.50904193,2.51861023,2.50824928
72.678324,3.31662479,2.5213322,0.891791786,2.50962686,2.50878231,2.5189134,2.50798966
72.688815,1.73205081,2.52162915,-0.888582208,2.50936714,2.50852297,2.51921126,2.50773032
72.699307,3,2.52190921,0.691441096,2.50910769,2.50826388,2.51949219,2.50747123
72.709798,3,2.52215918,0.691260312,2.50884855,2.50800507,2.51974297,2.50721241
72.72029,2.64575131,2.52236473,0.351264268,2.50858968,2.5077465,2.51994923,2.50695383
72.730782,2.44948974,2.52251075,-0.270223991,2.50833111,2.50748819,2.52009589,2.50669551
72.741273,2.64575131,2.52258233,0.350954388,2.50807285,2.50723017,2.520168,2.50643748
72.751765,2.44948974,2.52256585,-0.270325932,2.50781485,2.50697238,2.52015194,2.50617968
72.762256,2.64575131,2.52245035,0.351142373,2.50755717,2.50671488,2.52003672,2.50592216
72.772748,2.64575131,2.52222871,0.351457824,2.50729975,2.50645762,2.51981524,2.50566488
72.78324,2.64575131,2.52189872,0.351926962,2.50704262,2.50620062,2.51948527,2.50540786
72.793731,2.64575131,2.52146336,0.352544968,2.5067858,2.5059439,2.51904979,2.50515112
72.804223,3,2.52093017,0.692148703,2.50652925,2.50568742,2.51851637,2.50489462
72.814714,3.31662479,2.5203107,0.892364329,2.506273,2.50543122,2.51789654,2.5046384
72.825206,3,2.51961866,0.693095474,2.50601702,2.50517526,2.51720406,2.50438241
72.835698,2,2.51886913,-0.72032571,2.50576132,2.50491956,2.51645399,2.50412668
72.846189,2.64575131,2.51807717,0.357315184,2.50550593,2.50466415,2.51566143,2.50387123
72.856681,2.44948974,2.51725686,-0.260321175,2.5052508,2.50440897,2.51484046,2.50361601
72.867172,3.16227766,2.5164213,0.803651889,2.50499598,2.50415407,2.5140042,2.50336108
72.877664,2,2.51558179,-0.718040246,2.50474141,2.50389941,2.51316396,2.50310638
72.888156,2.64575131,2.51474829,0.361943389,2.50448713,2.50364501,2.5123297,2.50285194
72.898647,2.82842712,2.5139292,0.560801148,2.50423315,2.50339089,2.51150984,2.50259778
72.909139,2.44948974,2.51313118,-0.252272539,2.50397943,2.503137,2.51071104,2.50234385
72.91963,3.46410162,2.5123598,0.975572557,2.50372602,2.5028834,2.50993889,2.5020902
72.930122,2.82842712,2.51161903,0.562857079,2.50347286,2.50263003,2.50919734,2.50183678
72.940614,2,2.51091183,-0.71478097,2.50321998,2.50237692,2.50848937,2.50158362
72.951105,2.64575131,2.51024005,0.368118543,2.50296741,2.5021241,2.50781683,2.50133074
72.961597,2.44948974,2.50960434,-0.245182785,2.50271509,2.5018715,2.50718037,2.50107809
72.972088,2.82842712,2.50900475,0.565174643,2.50246307,2.50161919,2.50658003,2.50082572
72.98258,2.44948974,2.50844034,-0.242797442,2.5022113,2.50136711,2.50601489,2.50057359
72.993072,2.44948974,2.50790976,-0.241702323,2.50195982,2.50111529,2.50548358,2.5003217
73.003563,3.46410162,2.50741115,0.978105551,2.50170863,2.50086375,2.50498425,2.5000701
73.014055,3.16227766,2.50694219,0.809527932,2.5014577,2.50061244,2.50451458,2.49981873
73.024546,3.16227766,2.50650051,0.809800683,2.50120707,2.50036141,2.50407219,2.49956763
73.035038,2.44948974,2.50608347,-0.237894371,2.50095669,2.50011062,2.50365444,2.49931677
73.04553,3,2.50568852,0.703072881,2.50070658,2.49986008,2.50325877,2.49906616
73.056021,2.82842712,2.50531316,0.568431142,2.50045677,2.49960982,2.50288269,2.49881583
73.066513,2.82842712,2.5049549,0.568746186,2.50020722,2.4993598,2.50252371,2.49856573
73.077004,3.16227766,2.50461155,0.810966157,2.49995796,2.49911005,2.50217962,2.4983159
73.087496,2.82842712,2.50428098,0.569338336,2.49970895,2.49886053,2.50184831,2.49806631
73.097988,2.64575131,2.50396137,0.376550052,2.49946022,2.49861127,2.50152794,2.49781697
73.108479,2.64575131,2.50365109,0.376961832,2.49921178,2.49836229,2.50121689,2.4975679
73.118971,3.31662479,2.50334864,0.901818246,2.49896359,2.49811354,2.50091367,2.49731907
73.129462,3.31662479,2.50305285,0.901982229,2.4987157,2.49786507,2.50061707,2.49707051
73.139954,2.44948974,2.50276259,-0.230809124,2.49846805,2.49761683,2.50032601,2.49682218
73.150446,2.23606798,2.50247702,-0.516148277,2.49822068,2.49736885,2.5000396,2.4965741
73.160937,2.23606798,2.50219541,-0.515875407,2.4979736,2.49712114,2.49975715,2.4963263
73.171429,2,2.50191711,-0.708461083,2.49772677,2.49687366,2.49947797,2.49607873
73.18192,2.23606798,2.50164165,-0.515338406,2.49748023,2.49662646,2.49920163,2.49583143
73.192412,3,2.50136859,0.706138381,2.49723394,2.49637949,2.49892767,2.49558436
73.202904,3,2.50109761,0.706330227,2.49698792,2.49613278,2.49865577,2.49533754
73.213395,3,2.50082848,0.706520714,2.49674219,2.49588634,2.4983857,2.495091
73.223887,2.82842712,2.50056093,0.572596014,2.4964967,2.49564013,2.49811719,2.49484468
73.234378,2.64575131,2.50029484,0.381387566,2.49625151,2.49539419,2.49785012,2.49459864
73.24487,1.73205081,2.50003001,-0.876344224,2.49600657,2.49514849,2.4975843,2.49435283
73.255362,3.46410162,2.49976635,0.982005733,2.49576189,2.49490304,2.49731963,2.49410726
73.265853,2.23606798,2.49950381,-0.513260004,2.4955175,2.49465786,2.49705605,2.49386197
73.276345,2.82842712,2.49924224,0.573746355,2.49527336,2.49441291,2.49679344,2.49361691
73.286836,3.46410162,2.49898164,0.982405197,2.4950295,2.49416824,2.49653177,2.49337212
73.297328,3,2.49872191,0.708009954,2.49478589,2.4939238,2.49627094,2.49312755
73.30782,3.46410162,2.498463,0.982669126,2.49454255,2.4936796,2.49601093,2.49288324
73.318311,2.23606798,2.49820493,-0.511993114,2.49429949,2.49343569,2.49575173,2.4926392
73.328803,3.74165739,2.49794758,1.11521738,2.49405668,2.493192,2.49549325,2.49239538
73.339294,2.82842712,2.497691,0.575096623,2.49381416,2.49294858,2.4952355,2.49215184
73.349786,2.64575131,2.49743509,0.385118451,2.49357188,2.4927054,2.49497841,2.49190852
73.360278,3.16227766,2.49717986,0.815535286,2.49332986,2.49246246,2.49472199,2.49166545
73.370769,1.73205081,2.4969253,-0.874571036,2.49308813,2.4922198,2.49446622,2.49142265
73.381261,2,2.49667136,-0.704749145,2.49284664,2.49197736,2.49421104,2.49118008
73.391752,2,2.49641805,-0.704569407,2.49260544,2.4917352,2.49395648,2.49093778
73.402244,3.16227766,2.49616531,0.816157062,2.49236448,2.49149326,2.49370248,2.4906957
73.412736,2.44948974,2.49591315,-0.215460922,2.49212379,2.49125158,2.49344904,2.49045388
73.423227,2.82842712,2.49566158,0.57685834,2.49188338,2.49101016,2.49319616,2.49021232
73.433719,2.64575131,2.49541053,0.387738027,2.49164321,2.49076898,2.4929438,2.48997098
73.44421,3.31662479,2.49516005,0.906346922,2.49140332,2.49052806,2.49269198,2.48972992
73.454702,2.23606798,2.49491006,-0.508765255,2.49116367,2.49028737,2.49244064,2.48948908
73.465194,2.64575131,2.49466059,0.3887039,2.49092429,2.49004693,2.4921898,2.48924849
73.475685,2.64575131,2.49441164,0.389023996,2.49068519,2.48980677,2.49193946,2.48900817
73.486177,2.44948974,2.49416316,-0.211360878,2.49044633,2.48956682,2.49168958,2.48876807
73.496668,2.44948974,2.49391519,-0.210773455,2.49020775,2.48932715,2.49144019,2.48852824
73.50716,1.73205081,2.49366767,-0.872706631,2.48996942,2.48908771,2.49119123,2.48828863
73.517652,2,2.49342062,-0.70243905,2.48973134,2.48884851,2.49094273,2.48804927
73.528143,3.46410162,2.49317405,0.985356569,2.48949354,2.48860958,2.49069469,2.48781017
73.538635,3.16227766,2.4929279,0.818137981,2.48925599,2.48837088,2.49044706,2.4875713
73.549126,2.23606798,2.49268223,-0.506571075,2.48901871,2.48813244,2.49019988,2.4873327
73.559618,2.64575131,2.49243697,0.391553747,2.48878167,2.48789424,2.4899531,2.48709432
73.57011,2.44948974,2.49219215,-0.206645609,2.48854489,2.48765628,2.48970675,2.48685619
73.580601,2.44948974,2.49194778,-0.206053477,2.4883084,2.48741858,2.48946082,2.48661832
73.591093,2.64575131,2.49170381,0.39248886,2.48807214,2.48718112,2.48921528,2.48638068
73.601584,2.82842712,2.49146027,0.580488458,2.48783616,2.48694392,2.48897017,2.4861433
73.612076,2.23606798,2.49121713,-0.505122913,2.48760042,2.48670694,2.48872543,2.48590614
73.622568,2.82842712,2.4909744,0.580906809,2.48736493,2.48647022,2.48848108,2.48566923
73.633059,2.23606798,2.4907321,-0.504642572,2.48712973,2.48623376,2.48823715,2.48543258
73.643551,2.82842712,2.49049018,0.581323442,2.48689476,2.48599752,2.48799358,2.48519616
73.654042,3.87298335,2.49024868,1.17589739,2.48666007,2.48576155,2.48775041,2.48496
73.664534,2.82842712,2.49000755,0.581738406,2.48642561,2.48552581,2.48750761,2.48472406
73.675026,1,2.48976682,-1.22056004,2.48619141,2.48529031,2.48726518,2.48448837
73.685517,3.31662479,2.48952649,0.909449447,2.48595749,2.48505507,2.48702314,2.48425294
73.696009,2.82842712,2.48928653,0.582357786,2.48572381,2.48482006,2.48678146,2.48401773
73.7065,2.64575131,2.48904698,0.395858976,2.4854904,2.48458532,2.48654016,2.48378279
73.716992,2.82842712,2.48880779,0.58276868,2.48525723,2.4843508,2.48629921,2.48354806
73.727484,2.64575131,2.48856898,0.396462271,2.48502432,2.48411652,2.48605863,2.48331358
73.737975,1,2.48833057,-1.21997154,2.48479168,2.48388251,2.48581843,2.48307936
73.748467,2.64575131,2.48809251,0.397062715,2.48455927,2.48364872,2.48557857,2.48284537
73.758958,2.82842712,2.48785485,0.583585703,2.48432714,2.4834152,2.48533909,2.48261163
73.76945,2.44948974,2.48761754,-0.195263414,2.48409525,2.4831819,2.48509995,2.48237812
73.779942,2.82842712,2.48738061,0.583991882,2.48386361,2.48294884,2.48486116,2.48214485
73.790433,3,2.48714406,0.716139607,2.48363224,2.48271605,2.48462275,2.48191184
73.800925,2,2.48690787,-0.697787839,2.48340111,2.48248348,2.48438468,2.48167905
73.811416,2.64575131,2.48667206,0.3988474,2.48317026,2.48225117,2.48414698,2.48144652
73.821908,2.44948974,2.4864366,-0.192215661,2.48293963,2.48201909,2.48390961,2.48121421
73.8324,3.31662479,2.48620151,0.911275633,2.48270926,2.48178724,2.48367259,2.48098214
73.842891,2.23606798,2.48596681,-0.49989882,2.48247917,2.48155567,2.48343594,2.48075034
73.853383,2.64575131,2.48573245,0.400023579,2.48224931,2.48132431,2.48319963,2.48051875
73.863874,3,2.48549848,0.717287616,2.48201972,2.48109321,2.48296369,2.48028742
73.874366,2.44948974,2.48526485,-0.18914308,2.48179036,2.48086234,2.48272807,2.48005631
73.884858,2.82842712,2.48503158,0.585999608,2.48156126,2.48063171,2.48249281,2.47982545
73.895349,2.23606798,2.48479871,-0.498729116,2.48133242,2.48040134,2.48225791,2.47959484
73.905841,2.23606798,2.48456618,-0.498495937,2.48110382,2.48017119,2.48202335,2.47936445
73.916332,2,2.48433403,-0.695941113,2.4808755,2.4799413,2.48178916,2.47913432
73.926824,3.16227766,2.48410223,0.823514073,2.4806474,2.47971163,2.4815553,2.47890441
73.937316,2.64575131,2.4838708,0.402343773,2.48041956,2.47948221,2.48132179,2.47867473
73.947807,2,2.48363976,-0.695442129,2.48019199,2.47925304,2.48108866,2.47844532
73.958299,2.82842712,2.48340906,0.587382386,2.47996464,2.4790241,2.48085585,2.47821613
73.96879,3.46410162,2.48317875,0.990415501,2.47973758,2.47879541,2.48062343,2.47798719
73.979282,2.64575131,2.48294879,0.403487941,2.47951074,2.47856695,2.48039133,2.47775847
73.989774,3.16227766,2.48271921,0.824353355,2.47928415,2.47833872,2.4801596,2.47752999
74.000265,3.46410162,2.48249001,0.990763141,2.47905783,2.47811076,2.47992824,2.47730176
74.010757,2.23606798,2.48226117,-0.496178594,2.47883174,2.47788301,2.47969722,2.47707376
74.021248,2,2.48203273,-0.694285772,2.47860592,2.47765553,2.47946658,2.47684601
74.03174,2.44948974,2.48180465,-0.179763471,2.47838033,2.47742826,2.47923629,2.47661847
74.042232,3.60555128,2.48157694,1.06017656,2.478155,2.47720123,2.47900636,2.47639118
74.052723,1.73205081,2.48134964,-0.865620491,2.47792993,2.47697447,2.47877682,2.47616414
74.063215,2.23606798,2.48112271,-0.495030027,2.47770509,2.47674792,2.47854763,2.47593732
74.073706,2.64575131,2.48089618,0.406023564,2.47748052,2.47652162,2.47831883,2.47571075
74.084198,2.44948974,2.48067002,-0.176579372,2.47725618,2.47629555,2.47809039,2.4754844
74.09469,2.64575131,2.48044425,0.406579709,2.47703208,2.47606972,2.47786233,2.47525829
74.105181,3.31662479,2.4802189,0.914552287,2.47680826,2.47584414,2.47763467,2.47503243
74.115673,2.23606798,2.47993516,-0.493829098,2.47658466,2.47561878,2.47734853,2.47480679
74.126164,2.82842712,2.47971066,0.590522199,2.47636134,2.47539368,2.47712169,2.47458141
74.136656,2,2.47948655,-0.69244967,2.47613824,2.4751688,2.47689522,2.47435624
74.147148,2.23606798,2.47926285,-0.493147919,2.47591539,2.47494415,2.47666916,2.4741313
74.157639,2.23606798,2.47903959,-0.492921507,2.4756928,2.47471976,2.47644351,2.47390662
74.168131,3,2.47881673,0.721930236,2.47547045,2.47449559,2.47621826,2.47368215
74.178622,2.64575131,2.47859433,0.408848361,2.47524836,2.47427167,2.47599344,2.47345794
74.189114,2.23606798,2.47837234,-0.492244208,2.4750265,2.47404797,2.47576902,2.47323395
74.199606,3.46410162,2.47815079,0.992950566,2.47480488,2.47382451,2.47554502,2.47301018
74.210097,2.82842712,2.47792971,0.592028221,2.47458353,2.47360131,2.47532149,2.47278668
74.220589,3,2.47770907,0.722696986,2.47436241,2.47337832,2.47509837,2.47256338
74.23108,3.16227766,2.47748891,0.827519639,2.47414156,2.47315558,2.47487572,2.47234034
74.241572,2.44948974,2.4772692,-0.166671709,2.47392093,2.47293306,2.47465351,2.47211752
74.252064,1.73205081,2.47704998,-0.863133344,2.47370055,2.47271078,2.47443177,2.47189492
74.262555,2.44948974,2.47683127,-0.165352725,2.47348043,2.47248876,2.47421053,2.47167258
74.273047,2,2.47661304,-0.690371666,2.47326054,2.47226694,2.47398976,2.47145046
74.283538,2,2.47639534,-0.690213984,2.47304092,2.47204539,2.4737695,2.47122858
74.29403,2.23606798,2.47617816,-0.490010387,2.47282152,2.47182405,2.47354974,2.47100692
74.304522,3.46410162,2.47596151,0.994052366,2.47260236,2.47160294,2.4733305,2.47078549
74.315013,1,2.47574544,-1.21480263,2.47238347,2.47138209,2.47311182,2.47056432
74.325505,2.82842712,2.47552991,0.594051523,2.47216481,2.47116145,2.47289368,2.47034335
74.335996,2.44948974,2.475315,-0.160702373,2.47194641,2.47094107,2.47267613,2.47012264
74.346488,2.44948974,2.47510066,-0.160034121,2.47172824,2.4707209,2.47245915,2.46990214
74.35698,1.41421356,2.47488695,-1.02988999,2.47151031,2.47050096,2.47224278,2.46968187
74.367471,3,2.47467391,0.724793826,2.47129264,2.47028128,2.47202706,2.46946186
74.377963,2.64575131,2.47446151,0.413871717,2.4710752,2.47006181,2.47181197,2.46924205
74.388454,1.41421356,2.47424983,-1.02958063,2.47085802,2.4698426,2.47159758,2.4690225
74.398946,2.23606798,2.47403885,-0.487822581,2.47064107,2.4696236,2.47138388,2.46880316
74.409438,1.73205081,2.47382862,-0.861265237,2.47042436,2.46940483,2.47117091,2.46858405
74.419929,2.23606798,2.47361919,-0.487392257,2.47020792,2.46918631,2.47095873,2.46836518
74.430421,3.31662479,2.47341056,0.918266968,2.46999169,2.46896801,2.47074735,2.46814653
74.440912,2.64575131,2.47320283,0.415389559,2.46977574,2.46874996,2.47053683,2.46792813
74.451404,2,2.47299598,-0.687747032,2.46956,2.46853212,2.47032719,2.46770994
74.461896,3.31662479,2.4727901,0.91860475,2.46934451,2.46831452,2.47011851,2.46749198
74.472387,2.44948974,2.47258528,-0.151972163,2.46912928,2.46809717,2.46991086,2.46727427
74.482879,2.23606798,2.47238155,-0.486120945,2.46891427,2.46788002,2.4697043,2.46705677
74.49337,1.73205081,2.47217904,-0.860307058,2.46869952,2.46766314,2.46949894,2.46683952
74.503862,2.64575131,2.47197782,0.416861473,2.468485,2.46744646,2.46929486,2.46662248
74.514354,1.41421356,2.47177805,-1.02837955,2.46827072,2.46723001,2.46909221,2.46640567
74.524845,2.82842712,2.4715799,0.597366906,2.4680567,2.46701382,2.46889117,2.46618911
74.535337,2.44948974,2.47138354,-0.147965542,2.46784291,2.46679783,2.4686919,2.46597275
74.545828,2.44948974,2.47118925,-0.147307539,2.46762937,2.4665821,2.46849469,2.46575665
74.55632,2.44948974,2.4709973,-0.14665454,2.46741606,2.46636658,2.46829981,2.46554075
74.566812,2.64575131,2.47080806,0.418262174,2.46720299,2.46615129,2.46810763,2.46532508
74.577303,2.82842712,2.47062203,0.598168116,2.46699018,2.46593625,2.46791864,2.46510966
74.587795,2.82842712,2.47043972,0.598320489,2.46677759,2.46572141,2.46773336,2.46489445
74.598286,2.23606798,2.47026184,-0.483935802,2.46656526,2.46550683,2.4675525,2.46467949
74.608778,2,2.47008918,-0.685630499,2.46635315,2.46529246,2.46737686,2.46446473
74.61927,2.64575131,2.46992275,0.419319168,2.46614129,2.46507832,2.46720743,2.4642502
74.629761,3.16227766,2.46976372,0.832174224,2.46592968,2.46486443,2.4670454,2.46403592
74.640253,2,2.46961345,-0.685283482,2.4657183,2.46465075,2.46689212,2.46382184
74.650744,2.64575131,2.46947357,0.419854425,2.46550717,2.46443732,2.46674922,2.46360802
74.661236,2.23606798,2.46934591,-0.482988541,2.46529627,2.46422409,2.46661854,2.46339439
74.671728,2.64575131,2.46923258,0.420141327,2.4650856,2.4640111,2.46650219,2.463181
74.682219,2,2.46913595,-0.684934996,2.4648752,2.46379835,2.46640255,2.46296785
74.692711,3,2.46905862,0.728657245,2.46466501,2.46358582,2.46632221,2.46275491
74.703202,2.44948974,2.46900345,-0.139691467,2.46445509,2.46337353,2.46626405,2.46254222
74.713694,2.44948974,2.46897347,-0.139584115,2.46424538,2.46316145,2.46623108,2.46232973
74.724186,3.31662479,2.46897187,0.920680681,2.46403592,2.4629496,2.46622651,2.46211747
74.734677,2.64575131,2.46900194,0.420415716,2.46382671,2.46273799,2.46625362,2.46190545
74.745169,2.82842712,2.46906692,0.599466599,2.46361773,2.4625266,2.46631568,2.46169364
74.75566,2,2.46916997,-0.684959833,2.463409,2.46231545,2.46641583,2.46148207
74.766152,2.82842712,2.46931403,0.599260458,2.46320049,2.46210451,2.46655702,2.46127071
74.776644,2.64575131,2.46950163,0.419821005,2.46299222,2.4618938,2.46674179,2.46105957
74.787135,2.64575131,2.46973481,0.419543211,2.4627842,2.46168333,2.46697216,2.46084868
74.797627,2.44948974,2.47001495,-0.14326621,2.46257641,2.46147307,2.46724954,2.460638
74.808118,3,2.47034256,0.727775682,2.46236888,2.46126306,2.46757442,2.46042755
74.81861,3.31662479,2.47071724,0.919732324,2.46216156,2.46105325,2.46794642,2.46021732
74.829102,3.46410162,2.47113741,0.996475892,2.46195448,2.46084367,2.46836393,2.4600073
74.839593,3,2.47160017,0.726911155,2.46174766,2.46063434,2.46882408,2.45979753
74.850085,2.44948974,2.47210138,-0.150371668,2.46154106,2.46042522,2.4693227,2.45958797
74.860576,2.64575131,2.47263519,0.416072251,2.46133471,2.46021634,2.46985394,2.45937865
74.871068,2.64575131,2.47319434,0.41539977,2.46112858,2.46000766,2.47041053,2.45916953
74.88156,2.23606798,2.4737697,-0.487546631,2.46092269,2.45979921,2.47098333,2.45896063
74.892051,1.41421356,2.47435031,-1.02962942,2.46071706,2.45959101,2.47156139,2.45875198
74.902543,3.31662479,2.47492357,0.917442761,2.46051165,2.45938301,2.47213206,2.45854354
74.913034,2.23606798,2.47547477,-0.489292132,2.46030649,2.45917526,2.47268064,2.45833533
74.923526,2.64575131,2.47598769,0.412023816,2.46010155,2.45896771,2.47319088,2.45812733
74.934018,3,2.4764445,0.723571353,2.45989684,2.45876039,2.47364493,2.45791955
74.944509,2.64575131,2.47682652,0.411004617,2.4596924,2.45855332,2.47402408,2.45771201
74.955001,3,2.47711518,0.723107751,2.45948816,2.45834644,2.47430977,2.45750468
74.965492,2.64575131,2.47729304,0.410436683,2.45928419,2.45813982,2.4744845,2.45729758
74.975984,2.44948974,2.47734545,-0.166900281,2.45908043,2.45793339,2.47453363,2.45709069
74.986476,2,2.47726187,-0.690841425,2.45887691,2.45772719,2.4744466,2.45688402
74.996967,2.23606798,2.47703723,-0.490886193,2.45867365,2.45752124,2.47421833,2.4566776
75.007459,2.44948974,2.47667237,-0.164871542,2.4584706,2.45731549,2.47384966,2.45647137
75.01795,2.44948974,2.47617413,-0.163353556,2.4582678,2.45710998,2.47334744,2.45626539
75.028442,2.64575131,2.47555427,0.412549444,2.45806523,2.45690468,2.47272345,2.4560596
75.038934,3,2.47482844,0.724687215,2.45786288,2.4566996,2.47199334,2.45585404
75.049425,3.16227766,2.4740146,0.829616214,2.4576608,2.45649476,2.47117511,2.45564872
75.059917,2.82842712,2.47313131,0.596066953,2.45745893,2.45629012,2.47028732,2.4554436
75.070408,2.23606798,2.47219719,-0.485931284,2.45725731,2.45608573,2.46934863,2.45523872
75.0809,2,2.47122943,-0.686461527,2.45705591,2.45588155,2.46837623,2.45503404
75.091392,2.82842712,2.47024394,0.598484069,2.45685475,2.45567758,2.46738607,2.45482958
75.101883,2.23606798,2.46925488,-0.482894301,2.45665384,2.45547386,2.46639231,2.45462536
75.112375,3,2.46827426,0.729195272,2.45645315,2.45527034,2.46540697,2.45442134
75.122866,2.64575131,2.4673126,0.42242006,2.45625271,2.45506706,2.46444061,2.45421756
75.133358,2.44948974,2.46637833,-0.129956106,2.45605248,2.45486398,2.46350164,2.45401398
75.14385,2,2.46547843,-0.6822598,2.45585249,2.45466113,2.46259707,2.45381062
75.154341,2,2.4646183,-0.681629154,2.45565276,2.45445851,2.46173228,2.4536075
75.164833,2.44948974,2.46380161,-0.119632214,2.45545324,2.4542561,2.46091097,2.45340458
75.175324,2.82842712,2.46303098,0.60448006,2.45525397,2.45405393,2.46013575,2.45320189
75.185816,3.16227766,2.46230752,0.836642184,2.45505492,2.45385197,2.45940773,2.45299941
75.196308,3,2.46163144,0.733736026,2.4548561,2.45365022,2.45872714,2.45279714
75.206799,2.44948974,2.46100204,-0.107295377,2.45465753,2.45344871,2.45809326,2.45259512
75.217291,2.44948974,2.46041762,-0.104536479,2.45445918,2.45324741,2.45750438,2.45239329
75.227782,2.82842712,2.4598761,0.607084038,2.45426109,2.45304634,2.45695844,2.4521917
75.238274,2.64575131,2.4593747,0.431713573,2.45406321,2.45284548,2.45645266,2.4519903
75.248766,2.44948974,2.4589105,-0.0970605619,2.45386556,2.45264483,2.45598409,2.45178913
75.259257,2.23606798,2.45848032,-0.471606132,2.45366816,2.45244443,2.45554957,2.45158819
75.269749,3,2.45808082,0.736151598,2.45347098,2.45224423,2.45514574,2.45138745
75.28024,3,2.45770883,0.736404218,2.45327405,2.45204426,2.45476943,2.45118695
75.290732,2.64575131,2.4573611,0.434039406,2.45307734,2.4518445,2.4544174,2.45098664
75.301224,2.64575131,2.4570347,0.434415247,2.45288085,2.45164496,2.4540867,2.45078656
[truncated: 533,564 more chars]
