# Supplementary material for: Phase Stability of Iron Nitride Fe4N at High Pressure—Pressure-Dependent Evolution of Phase Equilibria in the Fe–N System
Source: Materials (Basel). 2021 Jul 15;14(14):3963. doi: 10.3390/ma14143963 (PMC8307547; doi:10.3390/ma14143963)
Supplement: Supplementary file 1 [file materials-14-03963-s001.zip › xrd_data/4-500_riet.txt]

'y-axis saved as Sqrt(y)
'x,Yobs,Ycalc,Diff,epsilon,Bkg
20,10,10.6317601,-0.794833361,0,10.6317601
20.010492,10.0498756,10.6230208,-0.757063551,0,10.6230208
20.020983,10.3440804,10.6142987,-0.519825219,0,10.6142987
20.031475,10.198039,10.605592,-0.638398723,0,10.605592
20.041966,9.94987437,10.5969023,-0.80438046,0,10.5969023
20.052458,10.5356538,10.588228,-0.229290847,0,10.588228
20.06295,10.3440804,10.57957,-0.485272708,0,10.57957
20.073441,10.2956301,10.5709291,-0.524689374,0,10.5709291
20.083933,10.7238053,10.5623035,0.401872818,0,10.5623035
20.094424,9.79795897,10.553695,-0.869330813,0,10.553695
20.104916,9.94987437,10.5451019,-0.771509927,0,10.5451019
20.115408,10.5830052,10.5365251,0.215592624,0,10.5365251
20.125899,10.7238053,10.5279652,0.442538214,0,10.5279652
20.136391,10.2469508,10.5194208,-0.521986605,0,10.5194208
20.146882,10.2469508,10.5108934,-0.513753439,0,10.5108934
20.157374,10.4880885,10.5023813,-0.119552726,0,10.5023813
20.167866,10.3923048,10.4938855,-0.318717224,0,10.4938855
20.178357,10.1488916,10.4854067,-0.580099246,0,10.4854067
20.188849,9.21954446,10.4769433,-1.12133796,0,10.4769433
20.19934,9.69535971,10.4684968,-0.879282169,0,10.4684968
20.209832,9.59166305,10.4600658,-0.931881299,0,10.4600658
20.220324,10.2469508,10.4516509,-0.452438038,0,10.4516509
20.230815,10.2469508,10.4432531,-0.443060155,0,10.4432531
20.241307,10.4880885,10.4348706,0.230690082,0,10.4348706
20.251798,10.5356538,10.426505,0.330376623,0,10.426505
20.26229,10.2469508,10.4181549,-0.413768194,0,10.4181549
20.272782,10.198039,10.4098209,-0.460197641,0,10.4098209
20.283273,10.3923048,10.4015039,-0.0959115082,0,10.4015039
20.293765,11.4017543,10.3932022,1.00426692,0,10.3932022
20.304256,11.2694277,10.3849175,0.940484023,0,10.3849175
20.314748,10.6770783,10.3766481,0.548115082,0,10.3766481
20.32524,10.7703296,10.3683949,0.633983217,0,10.3683949
20.335731,10.3440804,10.3601586,-0.126799739,0,10.3601586
20.346223,10.198039,10.3519377,-0.392299178,0,10.3519377
20.356714,9.64365076,10.3437337,-0.836709564,0,10.3437337
20.367206,10.3440804,10.335545,0.0923874871,0,10.335545
20.377698,10.3440804,10.3273724,0.129259393,0,10.3273724
20.388189,9.64365076,10.3192168,-0.821928244,0,10.3192168
20.398681,9.94987437,10.3110765,-0.601000935,0,10.3110765
20.409172,9.74679434,10.3029531,-0.745760508,0,10.3029531
20.419664,10.1488916,10.294845,-0.382038524,0,10.294845
20.430156,9.59166305,10.286753,-0.833720563,0,10.286753
20.440647,9.64365076,10.2786779,-0.796885912,0,10.2786779
20.451139,10.3440804,10.2706181,0.271039284,0,10.2706181
20.46163,10.1488916,10.2625752,-0.337170066,0,10.2625752
20.472122,9.59166305,10.2545476,-0.814177236,0,10.2545476
20.482614,10,10.2465361,-0.496524019,0,10.2465361
20.493105,9.32737905,10.2385414,-0.954548255,0,10.2385414
20.503597,9.2736185,10.2305621,-0.978234922,0,10.2305621
20.514088,10.5830052,10.2225995,0.600338007,0,10.2225995
20.52458,9.32737905,10.2146523,-0.941951823,0,10.2146523
20.535072,10.4403065,10.2067211,0.483306726,0,10.2067211
20.545563,10.0995049,10.1988068,-0.315121908,0,10.1988068
20.556055,10,10.1909077,-0.436929844,0,10.1909077
20.566546,10.2469508,10.1830254,0.252834625,0,10.1830254
20.577038,9.64365076,10.1751584,-0.72904573,0,10.1751584
20.58753,10.2956301,10.1673075,0.358221506,0,10.1673075
20.598021,10.2469508,10.1594733,0.295765851,0,10.1594733
20.608513,9.74679434,10.1516544,-0.636286174,0,10.1516544
20.619004,10.198039,10.1438523,0.232780389,0,10.1438523
20.629496,9.38083152,10.1360655,-0.869041971,0,10.1360655
20.639988,10.1488916,10.1282946,0.143516325,0,10.1282946
20.650479,9.48683298,10.1205405,-0.796057508,0,10.1205405
20.660971,10,10.1128017,-0.335859651,0,10.1128017
20.671462,9.8488578,10.1050796,-0.506183568,0,10.1050796
20.681954,8.71779789,10.0973728,-1.17455305,0,10.0973728
20.692446,9.69535971,10.0896819,-0.627950785,0,10.0896819
20.702937,10.2956301,10.0820078,0.462193017,0,10.0820078
20.713429,9.2736185,10.0743489,-0.89483538,0,10.0743489
20.72392,10,10.0667066,-0.258276301,0,10.0667066
20.734412,10.0498756,10.0590797,-0.0959377788,0,10.0590797
20.744904,10.1488916,10.0514687,0.31212641,0,10.0514687
20.755395,10.7703296,10.0438743,0.852323458,0,10.0438743
20.765887,10,10.0362952,-0.190513068,0,10.0362952
20.776378,9.21954446,10.0287328,-0.899548958,0,10.0287328
20.78687,10.4403065,10.0211856,0.647395514,0,10.0211856
20.797362,9.79795897,10.0136543,-0.46443007,0,10.0136543
20.807853,10.5356538,10.0061396,0.727677226,0,10.0061396
20.818345,10.1488916,9.99864016,0.387622764,0,9.99864016
20.828836,10.4403065,9.99115734,0.670185924,0,9.99115734
20.839328,9.8488578,9.98368971,-0.367194647,0,9.98368971
20.84982,10.2956301,9.97623799,0.565147903,0,9.97623799
20.860311,10,9.96880287,0.176627084,0,9.96880287
20.870803,9.74679434,9.96138294,-0.463237084,0,9.96138294
20.881294,10.2469508,9.9539796,0.54126811,0,9.9539796
20.891786,10.0498756,9.94659143,0.321378576,0,9.94659143
20.902278,8.83176087,9.93921914,-1.05235843,0,9.93921914
20.912769,10.6770783,9.93186342,0.863258267,0,9.93186342
20.923261,10.8627805,9.92452285,0.968637,0,9.92452285
20.933752,10.4403065,9.91719885,0.723261822,0,9.91719885
20.944244,9.32737905,9.90988999,-0.76322404,0,9.90988999
20.954736,9.8488578,9.90259698,-0.231817115,0,9.90259698
20.965227,10.6301458,9.8953205,0.857219527,0,9.8953205
20.975719,11.045361,9.88805915,1.07577965,0,9.88805915
20.98621,9.53939201,9.88081432,-0.584313538,0,9.88081432
20.996702,11.1355287,9.87358462,1.12336285,0,9.87358462
21.007194,10.1488916,9.86637074,0.531526882,0,9.86637074
21.017685,9.8488578,9.85917334,-0.101565461,0,9.85917334
21.028177,9.32737905,9.85199106,-0.72430105,0,9.85199106
21.038668,9.43398113,9.84482526,-0.640971239,0,9.84482526
21.04916,10,9.83767456,0.402896313,0,9.83767456
21.059652,10,9.83053964,0.411655631,0,9.83053964
21.070143,10.2469508,9.82342118,0.650791511,0,9.82342118
21.080635,10.2469508,9.8163178,0.656226309,0,9.8163178
21.091126,9.21954446,9.80923086,-0.76791041,0,9.80923086
21.101618,9.59166305,9.80215899,-0.458798371,0,9.80215899
21.11211,10.3923048,9.79510288,0.772788438,0,9.79510288
21.122601,9.64365076,9.78806317,-0.38001633,0,9.78806317
21.133093,10.0498756,9.78103853,0.518495025,0,9.78103853
21.143584,9.94987437,9.77403028,0.419337677,0,9.77403028
21.154076,9.64365076,9.76703709,-0.351263901,0,9.76703709
21.164568,10.7703296,9.76005961,1.00512189,0,9.76005961
21.175059,10.1488916,9.7530985,0.62912087,0,9.7530985
21.185551,9.11043358,9.74615242,-0.797319786,0,9.74615242
21.196042,9.2736185,9.7392227,-0.682351963,0,9.7392227
21.206534,9.38083152,9.732308,-0.592854517,0,9.732308
21.217026,9.74679434,9.72540898,0.146237365,0,9.72540898
21.227517,9.43398113,9.71852628,-0.533427739,0,9.71852628
21.238009,9.11043358,9.7116586,-0.775387012,0,9.7116586
21.2485,10.0498756,9.70480722,0.587425229,0,9.70480722
21.258992,10.0995049,9.69797084,0.633667182,0,9.69797084
21.269484,9.69535971,9.6911501,0.0648815309,0,9.6911501
21.279975,9.11043358,9.68434565,-0.757569843,0,9.68434565
21.290467,8.83176087,9.67755617,-0.919671301,0,9.67755617
21.300958,9.8488578,9.67078296,0.421989153,0,9.67078296
21.31145,9.74679434,9.66402471,0.287697123,0,9.66402471
21.321942,10.198039,9.65728207,0.735361787,0,9.65728207
21.332433,8.83176087,9.65055567,-0.904872809,0,9.65055567
21.342925,10.0498756,9.64384421,0.637205939,0,9.64384421
21.353416,10,9.63714898,0.602371167,0,9.63714898
21.363908,9.48683298,9.63046868,-0.378993004,0,9.63046868
21.3744,9.32737905,9.62380395,-0.544449164,0,9.62380395
21.384891,8.54400375,9.6171554,-1.03593034,0,9.6171554
21.395383,10.1488916,9.61052178,0.733736863,0,9.61052178
21.405874,9.53939201,9.60390433,-0.25399275,0,9.60390433
21.416366,10.4403065,9.59730179,0.918152887,0,9.59730179
21.426858,8.77496439,9.59071477,-0.903189005,0,9.59071477
21.437349,9.48683298,9.58414389,-0.311946971,0,9.58414389
21.447841,10.0498756,9.5775879,0.687231923,0,9.5775879
21.458332,9.74679434,9.57104804,0.419221067,0,9.57104804
21.468824,9.64365076,9.56452305,0.281296482,0,9.56452305
21.479316,9.79795897,9.55801355,0.489842245,0,9.55801355
21.489807,9.59166305,9.55152014,0.200356952,0,9.55152014
21.500299,10.6770783,9.54504158,1.06397212,0,9.54504158
21.51079,9.59166305,9.5385791,0.230399528,0,9.5385791
21.521282,9.74679434,9.53213146,0.463317258,0,9.53213146
21.531774,9.94987437,9.52569927,0.651287267,0,9.52569927
21.542265,9.53939201,9.51928312,0.141805832,0,9.51928312
21.552757,9.32737905,9.51288179,-0.430700286,0,9.51288179
21.563248,9.94987437,9.50649649,0.665866266,0,9.50649649
21.57374,9.59166305,9.50012599,0.302550921,0,9.50012599
21.584232,9.32737905,9.49377089,-0.407911555,0,9.49377089
21.594723,10,9.48743179,0.715938691,0,9.48743179
21.605215,9.64365076,9.48110747,0.403166576,0,9.48110747
21.615706,9.38083152,9.47479913,-0.306541373,0,9.47479913
21.626198,9.8488578,9.46850556,0.616727041,0,9.46850556
21.63669,9.94987437,9.46222734,0.698317282,0,9.46222734
21.647181,9.89949494,9.45596508,0.665980375,0,9.45596508
21.657673,9.2736185,9.44971755,-0.419641583,0,9.44971755
21.668164,9.32737905,9.44348596,-0.340744631,0,9.44348596
21.678656,9.89949494,9.43726909,0.679871935,0,9.43726909
21.689148,9.79795897,9.43106754,0.605715639,0,9.43106754
21.699639,8.48528137,9.42488188,-0.969329925,0,9.42488188
21.710131,9.79795897,9.41871093,0.615831183,0,9.41871093
21.720622,8.94427191,9.41255585,-0.684312747,0,9.41255585
21.731114,9,9.40641546,-0.637507222,0,9.40641546
21.741606,9.59166305,9.40029034,0.437461663,0,9.40029034
21.752097,8.88819442,9.39418106,-0.711327382,0,9.39418106
21.762589,9.32737905,9.38808645,-0.246388715,0,9.38808645
21.77308,8.66025404,9.38200766,-0.849560842,0,9.38200766
21.783572,10.0995049,9.37594352,0.850624133,0,9.37594352
21.794064,8.60232527,9.36989461,-0.876110346,0,9.36989461
21.804555,10.2469508,9.36386148,0.939728306,0,9.36386148
21.815047,8.54400375,9.35784297,-0.902130383,0,9.35784297
21.825538,8.60232527,9.35184024,-0.865745326,0,9.35184024
21.83603,8.88819442,9.34585211,-0.676504022,0,9.34585211
21.846522,9.8488578,9.33987916,0.713427393,0,9.33987916
21.857013,9.16515139,9.33392193,-0.410816924,0,9.33392193
21.867505,9.79795897,9.3279793,0.685550634,0,9.3279793
21.877996,9.48683298,9.32205237,0.405931776,0,9.32205237
21.888488,10,9.31614002,0.826958272,0,9.31614002
21.89898,9.05538514,9.31024278,-0.504834276,0,9.31024278
21.909471,9.43398113,9.30436123,0.360027645,0,9.30436123
21.919963,8.18535277,9.29849421,-1.05505518,0,9.29849421
21.930454,8.77496439,9.29264285,-0.719498759,0,9.29264285
21.940946,9.21954446,9.28680602,-0.259348334,0,9.28680602
21.951438,9.43398113,9.28098426,0.391148152,0,9.28098426
21.961929,9.2736185,9.27517811,-0.0394919753,0,9.27517811
21.972421,9.53939201,9.26938647,0.519620579,0,9.26938647
21.982912,9.05538514,9.26361042,-0.456317083,0,9.26361042
21.993404,9.32737905,9.25784885,0.263685801,0,9.25784885
22.003896,9.48683298,9.25210231,0.484490117,0,9.25210231
22.014387,9.64365076,9.24637132,0.63030107,0,9.24637132
22.024879,8.54400375,9.24065479,-0.834656244,0,9.24065479
22.03537,9.11043358,9.2349538,-0.352874223,0,9.2349538
22.045862,9.79795897,9.22926724,0.754116525,0,9.22926724
22.056354,9.8488578,9.22359565,0.790735197,0,9.22359565
22.066845,8.48528137,9.21793956,-0.855954547,0,9.21793956
22.077337,10.198039,9.21229788,0.992844976,0,9.21229788
22.087828,9.53939201,9.20667168,0.576819155,0,9.20667168
22.09832,9.94987437,9.20105986,0.865340689,0,9.20105986
22.108812,9.94987437,9.19546297,0.868568596,0,9.19546297
22.119303,9.59166305,9.18988151,0.633862399,0,9.18988151
22.129795,8.30662386,9.18431441,-0.9368514,0,9.18431441
22.140286,9.21954446,9.17876272,0.201944876,0,9.17876272
22.150778,9.53939201,9.17322538,0.605117039,0,9.17322538
22.16127,9.59166305,9.1677029,0.651122217,0,9.1677029
22.171761,9.69535971,9.1621958,0.73018074,0,9.1621958
22.182253,8.94427191,9.15670301,-0.460902488,0,9.15670301
22.192744,9.59166305,9.15122558,0.663654633,0,9.15122558
22.203236,8.71779789,9.14576243,-0.654189991,0,9.14576243
22.213728,9.38083152,9.14031409,0.490425759,0,9.14031409
22.224219,8.88819442,9.13488107,-0.496675601,0,9.13488107
22.234711,8.71779789,9.12946231,-0.641610803,0,9.12946231
22.245202,10.0498756,9.12405884,0.962193735,0,9.12405884
22.255694,9.89949494,9.11866961,0.883643213,0,9.11866961
22.266186,9.38083152,9.11329513,0.5172392,0,9.11329513
22.276677,9.11043358,9.1079359,0.0499767946,0,9.1079359
22.287169,8.42614977,9.10259088,-0.8224604,0,9.10259088
22.29766,8.77496439,9.09726109,-0.567711812,0,9.09726109
22.308152,8.71779789,9.09194549,-0.611676059,0,9.09194549
22.318644,9.38083152,9.08664458,0.542390026,0,9.08664458
22.329135,9.69535971,9.08135885,0.783582071,0,9.08135885
22.339627,9.43398113,9.07608729,0.598242295,0,9.07608729
22.350118,9.79795897,9.07083088,0.85271806,0,9.07083088
22.36061,9.59166305,9.06558862,0.725309886,0,9.06558862
22.371102,9.69535971,9.06036098,0.796868078,0,9.06036098
22.381593,9.59166305,9.05514846,0.732471558,0,9.05514846
22.392085,8.54400375,9.04995006,-0.71129903,0,9.04995006
22.402576,8.48528137,9.04476674,-0.747987542,0,9.04476674
22.413068,8.60232527,9.03959751,-0.661265634,0,9.03959751
22.42356,9.05538514,9.03444285,0.144714514,0,9.03444285
22.434051,8.88819442,9.02930324,-0.375644539,0,9.02930324
22.444543,9.16515139,9.02417768,0.375464655,0,9.02417768
22.455034,8.36660027,9.01906715,-0.807754222,0,9.01906715
22.465526,9,9.01397065,-0.118197503,0,9.01397065
22.476018,8.94427191,9.00888866,-0.25419825,0,9.00888866
22.486509,9.21954446,9.00382165,0.464459694,0,9.00382165
22.497001,10.0995049,8.99876864,1.04915981,0,8.99876864
22.507492,9.16515139,8.99373058,0.414029958,0,8.99373058
22.517984,8.88819442,8.98870651,-0.317036414,0,8.98870651
22.528476,10,8.98369687,1.00811861,0,8.98369687
22.538967,8.94427191,8.97870215,-0.185553877,0,8.97870215
22.549459,9.38083152,8.97372137,0.638051836,0,8.97372137
22.55995,9.11043358,8.96875548,0.376401516,0,8.96875548
22.570442,9.38083152,8.9638035,0.645777063,0,8.9638035
22.580934,9.48683298,8.95886591,0.726613424,0,8.95886591
22.591425,9.2736185,8.95394316,0.565398386,0,8.95394316
22.601917,9.79795897,8.9490343,0.921371085,0,8.9490343
22.612408,8.42614977,8.94414024,-0.719715546,0,8.94414024
22.6229,8.94427191,8.93926005,0.0707944953,0,8.93926005
22.633392,9.64365076,8.93439418,0.842173726,0,8.93439418
22.643883,8.06225775,8.92954307,-0.931281548,0,8.92954307
22.654375,9.32737905,8.92470579,0.634565411,0,8.92470579
22.664866,8.94427191,8.91988325,0.156168685,0,8.91988325
22.675358,7.93725393,8.91507452,-0.988848109,0,8.91507452
22.68585,9.2736185,8.91028003,0.602775632,0,8.91028003
22.696341,9.32737905,8.90550024,0.649521986,0,8.90550024
22.706833,9,8.90073422,0.31506472,0,8.90073422
22.717324,8.06225775,8.89598286,-0.913085492,0,8.89598286
22.727816,8.36660027,8.89124525,-0.724323813,0,8.89124525
22.738308,9.48683298,8.88652182,0.774797494,0,8.88652182
22.748799,9.43398113,8.88181302,0.743080155,0,8.88181302
22.759291,8.94427191,8.87711791,0.259140879,0,8.87711791
22.769782,9.89949494,8.8724374,1.01343847,0,8.8724374
22.780274,9.53939201,8.86777058,0.81952513,0,8.86777058
22.790766,8.83176087,8.86311786,-0.177079069,0,8.86311786
22.801257,9.21954446,8.8584797,0.600886647,0,8.8584797
22.811749,8.60232527,8.85385517,-0.501527573,0,8.85385517
22.82224,8.77496439,8.84924516,-0.272545,0,8.84924516
22.832732,9.2736185,8.84464878,0.654957799,0,8.84464878
22.843224,9.16515139,8.84006644,0.570162218,0,8.84006644
22.853715,8.94427191,8.83549856,0.329808047,0,8.83549856
22.864207,7.81024968,8.83094427,-1.01029431,0,8.83094427
22.874698,7.81024968,8.82640442,-1.00804501,0,8.82640442
22.88519,9.43398113,8.82187812,0.782370125,0,8.82187812
22.895682,8.88819442,8.8173658,0.266136466,0,8.8173658
22.906173,9.32737905,8.81286787,0.71729435,0,8.81286787
22.916665,9,8.80838346,0.437740271,0,8.80838346
22.927156,9.69535971,8.8039134,0.944164346,0,8.8039134
22.937648,9.48683298,8.79945684,0.829081504,0,8.79945684
22.94814,9.38083152,8.79501418,0.76538705,0,8.79501418
22.958631,9.11043358,8.79058584,0.56555083,0,8.79058584
22.969123,9.05538514,8.78617095,0.518858548,0,8.78617095
22.979614,9.32737905,8.78177033,0.738653315,0,8.78177033
22.990106,8.71779789,8.77738315,-0.244100921,0,8.77738315
23.000598,8.77496439,8.77300979,0.0442108012,0,8.77300979
23.011089,8.36660027,8.76865067,-0.634074447,0,8.76865067
23.021581,8.1240384,8.76430493,-0.800166563,0,8.76430493
23.032072,8.18535277,8.7599734,-0.758037351,0,8.7599734
23.042564,8.71779789,8.75565522,-0.194569611,0,8.75565522
23.053056,8.66025404,8.7513508,-0.301822404,0,8.7513508
23.063547,9.32737905,8.74706053,0.7617864,0,8.74706053
23.074039,7.34846923,8.74278359,-1.18081089,0,8.74278359
23.08453,8.42614977,8.73852075,-0.558901585,0,8.73852075
23.095022,8.83176087,8.73427122,0.312233327,0,8.73427122
23.105514,9.05538514,8.73003536,0.570394406,0,8.73003536
23.116005,9.32737905,8.72581357,0.775606523,0,8.72581357
23.126497,8.54400375,8.72160504,-0.421427683,0,8.72160504
23.136988,9.53939201,8.71741054,0.906631941,0,8.71741054
23.14748,9,8.71322926,0.535509794,0,8.71322926
23.157972,8.77496439,8.70906159,0.256715402,0,8.70906159
23.168463,8.71779789,8.70490791,0.113534051,0,8.70490791
23.178955,9,8.7007674,0.547021569,0,8.7007674
23.189446,9.05538514,8.69664085,0.598952657,0,8.69664085
23.199938,8.1240384,8.69252745,-0.753982129,0,8.69252745
23.21043,9.16515139,8.68842759,0.690451883,0,8.68842759
23.220921,9,8.68434162,0.561834832,0,8.68434162
23.231413,9.89949494,8.68026877,1.10418575,0,8.68026877
23.241904,8.88819442,8.67620978,0.460417894,0,8.67620978
23.252396,9.43398113,8.67216387,0.872821435,0,8.67216387
23.262888,8.18535277,8.66813142,-0.694822746,0,8.66813142
23.273379,8.71779789,8.66411279,0.231700457,0,8.66411279
23.283871,9.74679434,8.66010719,1.04244288,0,8.66010719
23.294362,9.43398113,8.65611537,0.881966983,0,8.65611537
23.304854,8.77496439,8.65213657,0.350468001,0,8.65213657
23.315346,9.74679434,8.64817113,1.04815228,0,8.64817113
23.325837,7.68114575,8.64421943,-0.981363178,0,8.64421943
23.336329,8.94427191,8.6402807,0.55135398,0,8.6402807
23.34682,8.77496439,8.63635566,0.372301929,0,8.63635566
23.357312,8.77496439,8.63244356,0.37751931,0,8.63244356
23.367804,8.30662386,8.62854475,-0.567380723,0,8.62854475
23.378295,9.11043358,8.62465958,0.696974889,0,8.62465958
23.388787,8.48528137,8.62078731,-0.368111308,0,8.62078731
23.399278,9.2736185,8.61692865,0.810364023,0,8.61692865
23.40977,9.2736185,8.61308284,0.812733445,0,8.61308284
23.420262,8.60232527,8.60925025,-0.0832164933,0,8.60925025
23.430753,8.88819442,8.60543122,0.531754829,0,8.60543122
23.441245,8.83176087,8.601625,0.479724781,0,8.601625
23.451736,8.88819442,8.59783231,0.538852587,0,8.59783231
23.462228,8.83176087,8.5940524,0.487553556,0,8.5940524
23.47272,8.48528137,8.59028562,-0.324043579,0,8.59028562
23.483211,8.88819442,8.58653231,0.549237756,0,8.58653231
23.493703,8.83176087,8.58279173,0.498968069,0,8.58279173
23.504194,8.42614977,8.5790646,-0.391043248,0,8.5790646
23.514686,8.60232527,8.57535017,0.164240987,0,8.57535017
23.525178,8.88819442,8.57164878,0.562623885,0,8.57164878
23.535669,9.2736185,8.56796078,0.840034354,0,8.56796078
23.546161,9.11043358,8.56428544,0.739018364,0,8.56428544
23.556652,8.42614977,8.56062344,-0.366706514,0,8.56062344
23.567144,8.71779789,8.55697407,0.401028445,0,8.55697407
23.577636,8.06225775,8.55333767,-0.700770948,0,8.55333767
23.588127,8.42614977,8.54971456,-0.351517826,0,8.54971456
23.598619,8.42614977,8.54610402,-0.346344122,0,8.54610402
23.60911,9.16515139,8.54250675,0.78907835,0,8.54250675
23.619602,9,8.53892202,0.67902723,0,8.53892202
23.630094,7.87400787,8.53535017,-0.813229549,0,8.53535017
23.640585,8.36660027,8.53179152,-0.406437276,0,8.53179152
23.651077,8.36660027,8.52824538,-0.402051133,0,8.52824538
23.661568,9.89949494,8.5247124,1.17251121,0,8.5247124
23.67206,9.48683298,8.52119188,0.98267039,0,8.52119188
23.682552,8.48528137,8.51768417,-0.180007753,0,8.51768417
23.693043,9.11043358,8.51418955,0.772168392,0,8.51418955
23.703535,9.05538514,8.51070736,0.738022882,0,8.51070736
23.714026,9.16515139,8.50723824,0.811118453,0,8.50723824
23.724518,8.71779789,8.50378152,0.462619034,0,8.50378152
23.73501,9.38083152,8.50033749,0.938346432,0,8.50033749
23.745501,8.77496439,8.49690648,0.527311959,0,8.49690648
23.755993,8.83176087,8.49348782,0.581612455,0,8.49348782
23.766484,8.88819442,8.49008213,0.630961401,0,8.49008213
23.776976,8.60232527,8.48668875,0.340053701,0,8.48668875
23.787468,9.48683298,8.48330798,1.00176095,0,8.48330798
23.797959,8.77496439,8.47994014,0.543161345,0,8.47994014
23.808451,8.48528137,8.47658456,0.0932567219,0,8.47658456
23.818942,8.71779789,8.47324186,0.494526066,0,8.47324186
23.829434,7.74596669,8.46991138,-0.850849394,0,8.46991138
23.839926,9,8.46659344,0.730346877,0,8.46659344
23.850417,8.94427191,8.46328832,0.693529805,0,8.46328832
23.860909,9.64365076,8.45999538,1.08795927,0,8.45999538
23.8714,8.42614977,8.45671522,-0.174829776,0,8.45671522
23.881892,8.48528137,8.45344721,0.178421303,0,8.45344721
23.892384,8.30662386,8.45019164,-0.378903389,0,8.45019164
23.902875,9.05538514,8.4469488,0.780023293,0,8.4469488
23.913367,10.3923048,8.44371805,1.3959179,0,8.44371805
23.923858,8.66025404,8.44049999,0.468779311,0,8.44049999
23.93435,8.71779789,8.437294,0.529626179,0,8.437294
23.944842,8.83176087,8.43410035,0.630603296,0,8.43410035
23.955333,8.60232527,8.43091934,0.414011995,0,8.43091934
23.965825,8.88819442,8.42775033,0.678560305,0,8.42775033
23.976316,9.8488578,8.42459392,1.19342527,0,8.42459392
23.986808,8.71779789,8.42144948,0.544378916,0,8.42144948
23.9973,8.83176087,8.4183173,0.642995772,0,8.4183173
24.007791,8.77496439,8.41519766,0.599805573,0,8.41519766
24.018283,9.16515139,8.41208994,0.867791131,0,8.41208994
24.028774,8.71779789,8.40899472,0.555700608,0,8.40899472
24.039266,9.79795897,8.40591139,1.17985066,0,8.40591139
24.049758,8.48528137,8.40284022,0.287125673,0,8.40284022
24.060249,8.1240384,8.39978149,-0.525112454,0,8.39978149
24.070741,8,8.3967346,-0.629868718,0,8.3967346
24.081232,7.54983444,8.39370011,-0.918621617,0,8.39370011
24.091724,8.71779789,8.39067742,0.571944462,0,8.39067742
24.102216,8.88819442,8.3876668,0.707479763,0,8.3876668
24.112707,8.94427191,8.38466853,0.748066431,0,8.38466853
24.123199,8.60232527,8.381682,0.469726803,0,8.381682
24.13369,8.60232527,8.37870777,0.472882117,0,8.37870777
24.144182,8.71779789,8.37574526,0.584852656,0,8.37574526
24.154674,8.71779789,8.37279472,0.587369699,0,8.37279472
24.165165,8.24621125,8.36985643,-0.351632166,0,8.36985643
24.175657,8.66025404,8.3669298,0.541594163,0,8.3669298
24.186148,8.18535277,8.36401537,-0.422684987,0,8.36401537
24.19664,8.48528137,8.36111257,0.352375948,0,8.36111257
24.207132,8.30662386,8.35822165,-0.227151457,0,8.35822165
24.217623,8,8.35534287,-0.596106424,0,8.35534287
24.228115,9.38083152,8.35247566,1.01407882,0,8.35247566
24.238606,8.71779789,8.34962056,0.606776177,0,8.34962056
24.249098,8.24621125,8.34677699,-0.317121016,0,8.34677699
24.25959,8.88819442,8.34394521,0.737732475,0,8.34394521
24.270081,8.60232527,8.34112548,0.51107709,0,8.34112548
24.280573,8.06225775,8.33831722,-0.52541362,0,8.33831722
24.291064,8.66025404,8.33552097,0.569853554,0,8.33552097
24.301556,8.24621125,8.33273616,-0.294151162,0,8.33273616
24.312048,9.43398113,8.32996304,1.05072265,0,8.32996304
24.322539,8.88819442,8.32720187,0.748994358,0,8.32720187
24.333031,8.36660027,8.32445209,0.205300213,0,8.32445209
24.343522,8.83176087,8.3217142,0.714175512,0,8.3217142
24.354014,7.93725393,8.31898768,-0.617846051,0,8.31898768
24.364506,8,8.31627275,-0.562381319,0,8.31627275
24.374997,8.18535277,8.31356966,-0.358073852,0,8.31356966
24.385489,8.48528137,8.31087786,0.417616462,0,8.31087786
24.39598,9.11043358,8.30819787,0.895676119,0,8.30819787
24.406472,8.88819442,8.30552914,0.763325145,0,8.30552914
24.416964,7.48331477,8.30287191,-0.905293951,0,8.30287191
24.427455,8.54400375,8.30022642,0.493738117,0,8.30022642
24.437947,8.36660027,8.29759213,0.26269399,0,8.29759213
24.448438,8.71779789,8.29496954,0.650252525,0,8.29496954
24.45893,7.34846923,8.29235812,-0.971539446,0,8.29235812
24.469422,8.88819442,8.28975811,0.773586652,0,8.28975811
24.479913,7.87400787,8.28716973,-0.642776673,0,8.28716973
24.490405,8,8.28459246,-0.533472079,0,8.28459246
24.500896,9.79795897,8.28202678,1.23123198,0,8.28202678
24.511388,8.54400375,8.27947219,0.514326316,0,8.27947219
24.52188,8.83176087,8.2769289,0.744870439,0,8.2769289
24.532371,8.66025404,8.27439713,0.621173813,0,8.27439713
24.542863,7.81024968,8.27187639,-0.679431172,0,8.27187639
24.553354,8.30662386,8.26936714,0.193020007,0,8.26936714
24.563846,7.87400787,8.26686887,-0.626786247,0,8.26686887
24.574338,9.79795897,8.26438181,1.23837682,0,8.26438181
24.584829,8.94427191,8.26190618,0.826054316,0,8.26190618
24.595321,8.06225775,8.25944147,-0.444053739,0,8.25944147
24.605812,9.16515139,8.25698815,0.952975993,0,8.25698815
24.616304,8.94427191,8.25454571,0.830497559,0,8.25454571
24.626796,8.30662386,8.25211439,0.233472637,0,8.25211439
24.637287,7.81024968,8.24969438,-0.662906259,0,8.24969438
24.647779,8.54400375,8.24728521,0.544718763,0,8.24728521
24.65827,8.1240384,8.24488732,-0.347633307,0,8.24488732
24.668762,7.93725393,8.24250023,-0.552490988,0,8.24250023
24.679254,7.48331477,8.24012414,-0.869947909,0,8.24012414
24.689745,8.77496439,8.23775926,0.732942784,0,8.23775926
24.700237,8.54400375,8.23540513,0.555516531,0,8.23540513
24.710728,8.60232527,8.23306217,0.607670224,0,8.23306217
24.72122,7.87400787,8.23072991,-0.597262114,0,8.23072991
24.731712,8.94427191,8.22840855,0.846087085,0,8.22840855
24.742203,8.18535277,8.22609831,-0.201855239,0,8.22609831
24.752695,8.42614977,8.22379871,0.449834484,0,8.22379871
24.763186,8.60232527,8.22151017,0.617102173,0,8.22151017
24.773678,8.36660027,8.21923225,0.383885422,0,8.21923225
24.78417,8,8.21696513,-0.465795156,0,8.21696513
24.794661,8.24621125,8.21470901,0.177488716,0,8.21470901
24.805153,9.11043358,8.21246344,0.947612865,0,8.21246344
24.815644,8.48528137,8.21022882,0.524454526,0,8.21022882
24.826136,8.77496439,8.20800472,0.752967239,0,8.20800472
24.836628,7.87400787,8.20579133,-0.576006471,0,8.20579133
24.847119,8.60232527,8.20358883,0.63145581,0,8.20358883
24.857611,8.66025404,8.20139678,0.677390034,0,8.20139678
24.868102,7.87400787,8.19921558,-0.570269856,0,8.19921558
24.878594,7.87400787,8.1970448,-0.568363375,0,8.1970448
24.889086,8.48528137,8.19488462,0.538884731,0,8.19488462
24.899577,8.71779789,8.19273523,0.724612074,0,8.19273523
24.910069,8.1240384,8.19059619,-0.257987964,0,8.19059619
24.92056,8.48528137,8.1884679,0.544805903,0,8.1884679
24.931052,7.61577311,8.18634993,-0.755365357,0,8.18634993
24.941544,8.30662386,8.18424246,0.34983054,0,8.18424246
24.952035,8.18535277,8.18214566,0.0566313478,0,8.18214566
24.962527,8.30662386,8.18005913,0.355759378,0,8.18005913
24.973018,8.94427191,8.17798323,0.875379164,0,8.17798323
24.98351,7.68114575,8.17591755,-0.703400174,0,8.17591755
24.994002,8.94427191,8.17386227,0.877729821,0,8.17386227
25.004493,9.2736185,8.17181756,1.04966706,0,8.17181756
25.014985,8.83176087,8.16978302,0.813620212,0,8.16978302
25.025476,8.30662386,8.167759,0.372645763,0,8.167759
25.035968,7.93725393,8.1657451,-0.478007498,0,8.1657451
25.04646,8.1240384,8.1637415,-0.199256356,0,8.1637415
25.056951,8.88819442,8.16174836,0.852318048,0,8.16174836
25.067443,8.71779789,8.15976529,0.747015797,0,8.15976529
25.077934,8.1240384,8.15779263,-0.183723235,0,8.15779263
25.088426,8.06225775,8.15583,-0.305895819,0,8.15583
25.098918,8.36660027,8.15387756,0.461218717,8.15387756,8.15387756
25.109409,9.05538514,8.15193552,0.950499668,8.15193552,8.15193548
25.119901,8.18535277,8.15000347,0.188014113,8.15000347,8.15000335
25.130392,9.21954446,8.14808183,1.03511479,8.14808183,8.14808155
25.140884,8.1240384,8.14617031,-0.148767952,8.14617031,8.14616966
25.151376,8.88819442,8.14426959,0.862510768,8.14426959,8.14426786
25.161867,8.36660027,8.14238004,0.473518982,8.14238004,8.14237631
25.172359,8.66025404,8.14050509,0.720936163,8.14050509,8.14049463
25.18285,8.71779789,8.1386445,0.76102128,8.1386445,8.13862315
25.193342,8.1240384,8.13679636,-0.112951141,8.13679636,8.13676149
25.203834,8.42614977,8.13495979,0.539620224,8.13495979,8.13490982
25.214325,6.8556546,8.13312396,-1.1302519,8.13312396,8.13306828
25.224817,8.54400375,8.13129424,0.642424707,8.13129424,8.13123651
25.235308,9.21954446,8.1294748,1.04406401,8.1294748,8.12941484
25.2458,8.42614977,8.12766513,0.546337479,8.12766513,8.12760288
25.256292,9.11043358,8.12586558,0.992253999,8.12586558,8.12580081
25.266783,8.88819442,8.12407608,0.874138624,8.12407608,8.12400877
25.277275,7.68114575,8.12229656,-0.664191847,8.12229656,8.12222639
25.287766,8.60232527,8.12052705,0.69411686,8.12052705,8.120454
25.298258,7.68114575,8.1187675,-0.661529854,8.1187675,8.11869123
25.30875,8.60232527,8.11701779,0.696640132,8.11701779,8.11693824
25.319241,8.30662386,8.11527835,0.437430578,8.11527835,8.11519517
25.329733,7.68114575,8.11354862,-0.657573471,8.11354862,8.11346166
25.340224,7.87400787,8.11182912,-0.487669193,8.11182912,8.11173803
25.350716,8.1240384,8.11011936,0.117978986,8.11011936,8.11002392
25.361208,7.68114575,8.10841965,-0.653661918,8.10841965,8.10831949
25.371699,8.54400375,8.10673008,0.661266711,8.10673008,8.10662486
25.382191,8.42614977,8.10505036,0.566656346,8.10505036,8.1049397
25.392682,8.24621125,8.10338089,0.377929047,8.10338089,8.1032643
25.403174,8.94427191,8.10172122,0.9179056,8.10172122,8.10159833
25.413666,7.81024968,8.10007181,-0.538351311,8.10007181,8.09994192
25.424157,8.42614977,8.09843246,0.572465989,8.09843246,8.09829522
25.434649,8.42614977,8.09680347,0.573887017,8.09680347,8.09665788
25.44514,8.77496439,8.09518445,0.824487681,8.09518445,8.09503019
25.455632,7.74596669,8.09357614,-0.589584133,8.09357614,8.09341183
25.466124,8.60232527,8.09197755,0.71438625,8.09197755,8.09180293
25.476615,8.06225775,8.0903905,-0.167728205,8.0903905,8.09020361
25.487107,7.93725393,8.08881293,-0.389305785,8.08881293,8.08861357
25.497598,7.68114575,8.0872475,-0.637261131,8.0872475,8.08703306
25.50809,8.24621125,8.08569173,0.400648871,8.08569173,8.08546178
25.518582,7.87400787,8.0841484,-0.458410871,8.0841484,8.08389986
25.529073,7.74596669,8.08261557,-0.580214514,8.08261557,8.08234741
25.539565,8.77496439,8.08109559,0.832987871,8.08109559,8.08080413
25.550056,7.61577311,8.07958706,-0.681038876,8.07958706,8.07927029
25.560548,8.54400375,8.07809208,0.682577221,8.07809208,8.07774556
25.57104,7.87400787,8.07661003,-0.450113496,8.07661003,8.07623009
25.581531,8.60232527,8.07514275,0.726073353,8.07514275,8.07472398
25.592023,6.78232998,8.07369112,-1.13638072,8.07369112,8.07322694
25.602514,9.16515139,8.07225544,1.04541664,8.07225544,8.07173922
25.613006,8.66025404,8.07084063,0.767732638,8.07084063,8.07026052
25.623498,8.24621125,8.06944315,0.420437984,8.06944315,8.06879097
25.633989,8.66025404,8.06807701,0.769530395,8.06807701,8.06733067
25.644481,7.93725393,8.06672998,-0.359827805,8.06672998,8.06587934
25.654972,7.74596669,8.06543705,-0.565217093,8.06543705,8.06443722
25.665464,8.24621125,8.06416582,0.426667822,8.06416582,8.06300402
25.675956,7.74596669,8.06300878,-0.563064902,8.06300878,8.06157986
25.686447,7.21110255,8.06187625,-0.922373947,8.06187625,8.06016485
25.696939,8,8.06105014,-0.247083274,8.06105014,8.0587587
25.70743,7.93725393,8.06030387,-0.350784751,8.06030387,8.05736165
25.717922,8.42614977,8.06051063,0.604681023,8.06051063,8.05597342
25.728414,7.93725393,8.06131203,-0.352218815,8.06131203,8.05459412
25.738905,8.06225775,8.06534389,-0.0555530808,8.06534389,8.05322386
25.749397,8.60232527,8.07215411,0.728128531,8.07215411,8.05186236
25.759888,8.54400375,8.08738567,0.675735209,8.08738567,8.05050986
25.77038,8.36660027,8.10584362,0.510643365,8.10584362,8.04916607
25.780872,8,8.13052323,-0.361279985,8.13052323,8.0478311
25.791363,8.24621125,8.14484214,0.318385162,8.14484214,8.04650507
25.801855,8.42614977,8.1457561,0.529522119,8.1457561,8.04518769
25.812346,8.54400375,8.12963811,0.643712386,8.12963811,8.04387919
25.822838,7.87400787,8.09820947,-0.473499313,8.09820947,8.04257932
25.83333,8.54400375,8.07455155,0.685165813,8.07455155,8.04128815
25.843821,8.18535277,8.0556408,0.360155489,8.0556408,8.04000581
25.854313,8.30662386,8.0467959,0.509733222,8.0467959,8.03873203
25.864804,7.87400787,8.04197108,-0.409833145,8.04197108,8.03746702
25.875296,7.54983444,8.03937332,-0.699670554,8.03937332,8.03621052
25.885788,7.68114575,8.03730819,-0.596793464,8.03730819,8.03496263
25.896279,8.94427191,8.03563977,0.953221977,8.03563977,8.03372345
25.906771,8.60232527,8.0340215,0.753859251,8.0340215,8.03249273
25.917262,8.77496439,8.03257397,0.861620811,8.03257397,8.03127067
25.927754,7.87400787,8.03114282,-0.396402499,8.03114282,8.03005702
25.938246,8.60232527,8.02979566,0.756656864,8.02979566,8.02885188
25.948737,8.77496439,8.02846565,0.864001586,8.02846565,8.02765534
25.959229,8.36660027,8.02718213,0.582596034,8.02718213,8.02646715
25.96972,8.71779789,8.02591499,0.831794987,8.02591499,8.02528751
25.980212,8.60232527,8.0246766,0.760032015,8.0246766,8.02411619
25.990704,7.61577311,8.02345333,-0.638498411,8.02345333,8.02295326
26.001195,7.61577311,8.02224995,-0.637555362,8.02224995,8.02179883
26.011687,7.14142843,8.02106044,-0.937886992,8.02106044,8.02065264
26.022178,8.18535277,8.01988588,0.406776217,8.01988588,8.0195149
26.03267,8.88819442,8.01872423,0.932453852,8.01872423,8.01838536
26.043162,8.1240384,8.0175746,0.326287914,8.0175746,8.01726412
26.053653,8.83176087,8.01643729,0.902952698,8.01643729,8.01615127
26.064145,8.36660027,8.01531023,0.592697255,8.01531023,8.01504655
26.074636,7.81024968,8.01419481,-0.451602855,8.01419481,8.01395018
26.085128,8.36660027,8.01308863,0.594568442,8.01308863,8.01286191
26.09562,7.81024968,8.01199344,-0.449158955,8.01199344,8.01178182
26.106111,8.06225775,8.01090706,0.226606903,8.01090706,8.01071001
26.116603,8.30662386,8.00983111,0.544786891,8.00983111,8.00964625
26.127094,8.06225775,8.0087636,0.231288016,8.0087636,8.00859071
26.137586,8.24621125,8.00770604,0.48836995,8.00770604,8.00754317
26.148078,8.18535277,8.00665675,0.422724517,8.00665675,8.00650372
26.158569,7.41619849,8.00561702,-0.767735976,8.00561702,8.00547243
26.169061,7.21110255,8.00458549,-0.890776591,8.00458549,8.00444908
26.179552,7.93725393,8.00356307,-0.2575056,8.00356307,8.00343385
26.190044,7.87400787,8.00254886,-0.358526134,8.00254886,8.00242652
26.200536,7.93725393,8.00154335,-0.253553571,8.00154335,8.00142717
26.211027,8.88819442,8.00054622,0.942150838,8.00054622,8.00043588
26.221519,7.87400787,7.99955743,-0.354329727,7.99955743,7.99945242
26.23201,7.87400787,7.99857699,-0.352943507,7.99857699,7.99847697
26.242502,7.48331477,7.99760471,-0.717140107,7.99760471,7.99750932
26.252994,7.54983444,7.99664063,-0.668435635,7.99664063,7.99654955
26.263485,8.60232527,7.99568474,0.778871316,7.99568474,7.99559772
26.273977,8.60232527,7.99473692,0.779479537,7.99473692,7.99465363
26.284468,9.05538514,7.99379715,1.03033392,7.99379715,7.99371743
26.29496,8.94427191,7.9928654,0.975400694,7.9928654,7.99278894
26.305452,8.1240384,7.9919415,0.363451373,7.9919415,7.99186821
26.315943,9,7.99102574,1.00447711,7.99102574,7.99095532
26.326435,7.68114575,7.99011766,-0.555852421,7.99011766,7.99005007
26.336926,8.42614977,7.98921761,0.661008441,7.98921761,7.98915261
26.347418,8.66025404,7.98832517,0.819712674,7.98832517,7.98826274
26.35791,7.34846923,7.98744037,-0.799356708,7.98744037,7.98738054
26.368401,8.42614977,7.98656311,0.66301332,7.98656311,7.98650607
26.378893,8.48528137,7.98569229,0.70681616,7.98569229,7.98563913
26.389384,7.68114575,7.9848272,-0.551072997,7.9848272,7.98477987
26.399876,7.93725393,7.9839635,-0.216123972,7.9839635,7.98392811
26.410368,8,7.98311139,0.129956194,7.98311139,7.98308391
26.420859,8.18535277,7.98227481,0.450641727,7.98227481,7.98224733
26.431351,9.38083152,7.98141818,1.18296802,7.98141818,7.98141818
26.441842,8,7.9805966,0.139296073,7.9805966,7.9805966
26.452334,8.06225775,7.97978243,0.28718517,7.97978243,7.97978243
26.462826,7.07106781,7.9789757,-0.952842007,7.9789757,7.9789757
26.473317,7.68114575,7.97817649,-0.545005265,7.97817649,7.97817649
26.483809,8.94427191,7.97738461,0.983304278,7.97738461,7.97738461
26.4943,7.87400787,7.97660019,-0.320300359,7.97660019,7.97660019
26.504792,7.28010989,7.97582308,-0.834094231,7.97582308,7.97582308
26.515284,7.68114575,7.97505331,-0.542132419,7.97505331,7.97505331
26.525775,7.41619849,7.97429094,-0.747055856,7.97429094,7.97429094
26.536267,8.88819442,7.97353581,0.956377859,7.97353581,7.97353581
26.546758,8.60232527,7.97278803,0.793433824,7.97278803,7.97278803
26.55725,7.87400787,7.97204745,-0.313112728,7.97204745,7.97204745
26.567742,8.48528137,7.97131412,0.716915095,7.97131412,7.97131412
26.578233,8.42614977,7.97058808,0.674953103,7.97058808,7.97058808
26.588725,7.41619849,7.96986918,-0.744090512,7.96986918,7.96986918
26.599216,7.93725393,7.96915752,-0.17861576,7.96915752,7.96915752
26.609708,8,7.96845296,0.177614854,7.96845296,7.96845296
26.6202,7.34846923,7.96775555,-0.786947468,7.96775555,7.96775555
26.630691,7.81024968,7.96706532,-0.395999546,7.96706532,7.96706532
26.641183,8.60232527,7.96638212,0.797460436,7.96638212,7.96638212
26.651674,8.18535277,7.96570607,0.468664809,7.96570607,7.96570607
26.662166,7.93725393,7.96503701,-0.166682569,7.96503701,7.96503701
26.672658,6.92820323,7.96437499,-1.01792522,7.96437499,7.96437499
26.683149,8.54400375,7.96372006,0.761763539,7.96372006,7.96372006
26.693641,7.68114575,7.96307205,-0.530967329,7.96307205,7.96307205
26.704132,8.30662386,7.96243109,0.586679449,7.96243109,7.96243109
26.714624,7.93725393,7.96179702,-0.156662321,7.96179702,7.96179702
26.725116,7.74596669,7.96116988,-0.463899977,7.96116988,7.96116988
26.735607,8.36660027,7.96054972,0.637220955,7.96054972,7.96054972
26.746099,7.74596669,7.95993639,-0.462568591,7.95993639,7.95993639
26.75659,8.54400375,7.95933,0.764639618,7.95933,7.95933
26.767082,8.54400375,7.9587304,0.765031597,7.9587304,7.9587304
26.777574,7.93725393,7.95813763,-0.14451194,7.95813763,7.95813763
26.788065,8.24621125,7.95755174,0.53727043,7.95755174,7.95755174
26.798557,8.30662386,7.95697257,0.59131319,7.95697257,7.95697257
26.809048,8.54400375,7.95640024,0.766553004,7.95640024,7.95640024
26.81954,8.24621125,7.9558346,0.538866081,7.9558346,7.9558346
26.830032,8.06225775,7.95527569,0.327081121,7.95527569,7.95527569
26.840523,8.24621125,7.95472354,0.539896017,7.95472354,7.95472354
26.851015,8,7.95417803,0.214060663,7.95417803,7.95417803
26.861506,8.30662386,7.95363924,0.594125087,7.95363924,7.95363924
26.871998,7.48331477,7.95310705,-0.685413947,7.95310705,7.95310705
26.88249,8.18535277,7.95258149,0.482463763,7.95258149,7.95258149
26.892981,8.1240384,7.95206258,0.414699676,7.95206258,7.95206258
26.903473,7.81024968,7.95155022,-0.375899642,7.95155022,7.95155022
26.913964,7.74596669,7.95104447,-0.452855135,7.95104447,7.95104447
26.924456,8.71779789,7.95054521,0.875929605,7.95054521,7.95054521
26.934948,7.74596669,7.95005249,-0.45175856,7.95005249,7.95005249
26.945439,8.36660027,7.94956632,0.645781657,7.94956632,7.94956632
26.955931,7.54983444,7.94908659,-0.631864028,7.94908659,7.94908659
26.966422,7.34846923,7.94861336,-0.774689703,7.94861336,7.94861336
26.976914,7.48331477,7.94814655,-0.681785723,7.94814655,7.94814655
26.987406,8.36660027,7.94768615,0.647235748,7.94768615,7.94768615
26.997897,7.93725393,7.94723221,-0.0998913133,7.94723221,7.94723221
27.008389,8.77496439,7.94678461,0.910043835,7.94678461,7.94678461
27.01888,6.92820323,7.94634341,-1.00902933,7.94634341,7.94634341
27.029372,8,7.94590852,0.232575752,7.94590852,7.94590852
27.039864,6.70820393,7.94547995,-1.1123291,7.94547995,7.94547995
27.050355,7.41619849,7.94505773,-0.727227094,7.94505773,7.94505773
27.060847,7.81024968,7.94464176,-0.366595255,7.94464176,7.94464176
27.071338,8.30662386,7.94423208,0.601989849,7.94423208,7.94423208
27.08183,8.1240384,7.94382862,0.424511232,7.94382862,7.94382862
27.092322,8.60232527,7.94343138,0.811722791,7.94343138,7.94343138
27.102813,8.18535277,7.94304038,0.492252367,7.94304038,7.94304038
27.113305,7.81024968,7.94265553,-0.36387615,7.94265553,7.94265553
27.123796,7.93725393,7.94227688,-0.07087274,7.94227688,7.94227688
27.134288,7.68114575,7.94190434,-0.510645268,7.94190434,7.94190434
27.14478,7.87400787,7.94153792,-0.259865442,7.94153792,7.94153792
27.155271,7.21110255,7.94117765,-0.85444432,7.94117765,7.94117765
27.165763,7,7.94082342,-0.969960526,7.94082342,7.94082342
27.176254,8.18535277,7.9404753,0.494850964,7.9404753,7.9404753
27.186746,8.1240384,7.94013318,0.428841723,7.94013318,7.94013318
27.197238,8.48528137,7.93979709,0.738569076,7.93979709,7.93979709
27.207729,7,7.93946704,-0.969261081,7.93946704,7.93946704
27.218221,8.1240384,7.93914295,0.429994716,7.93914295,7.93914295
27.228712,8.36660027,7.93882485,0.654045423,7.93882485,7.93882485
27.239204,7.68114575,7.93851267,-0.507313434,7.93851267,7.93851267
27.249696,8,7.93820641,0.248583158,7.93820641,7.93820641
27.260187,8.18535277,7.93790609,0.497440124,7.93790609,7.93790609
27.270679,8.06225775,7.93761164,0.353052564,7.93761164,7.93761164
27.28117,7.87400787,7.93732307,-0.251625112,7.93732307,7.93732307
27.291662,8.24621125,7.93704033,0.556031405,7.93704033,7.93704033
27.302154,8.24621125,7.93676341,0.556280359,7.93676341,7.93676341
27.312645,7.68114575,7.93649233,-0.505318302,7.93649233,7.93649233
27.323137,7.28010989,7.93622702,-0.810010573,7.93622702,7.93622702
27.333628,8.54400375,7.9359675,0.779766791,7.9359675,7.9359675
27.34412,8.06225775,7.9357137,0.3557303,7.9357137,7.9357137
27.354612,7.93725393,7.93546564,0.0422882424,7.93546564,7.93546564
27.365103,6.8556546,7.93522331,-1.03902296,7.93522331,7.93522331
27.375595,7.81024968,7.93498665,-0.353181216,7.93498665,7.93498665
27.386086,7.07106781,7.93475568,-0.929348088,7.93475568,7.93475568
27.396578,8.30662386,7.93453035,0.609994686,7.93453035,7.93453035
27.40707,8.30662386,7.93431064,0.610174744,7.93431064,7.93431064
27.417561,7.34846923,7.93409658,-0.765262929,7.93409658,7.93409658
27.428053,8,7.93388809,0.257122371,7.93388809,7.93388809
27.438544,8.1240384,7.93368519,0.436294872,7.93368519,7.93368519
27.449036,8.30662386,7.93348783,0.610848618,7.93348783,7.93348783
27.459528,7.21110255,7.93329601,-0.84981966,7.93329601,7.93329601
27.470019,7.93725393,7.93310972,0.0643755764,7.93310972,7.93310972
27.480511,7.54983444,7.93292891,-0.618946263,7.93292891,7.93292891
27.491002,7.41619849,7.9327536,-0.718717687,7.9327536,7.9327536
27.501494,7.74596669,7.93258373,-0.431991944,7.93258373,7.93258373
27.511986,8,7.93241931,0.259962871,7.93241931,7.93241931
27.522477,7.81024968,7.93226032,-0.349300214,7.93226032,7.93226032
27.532969,8.06225775,7.93210671,0.360764515,7.93210671,7.93210671
27.54346,7.68114575,7.93195851,-0.5008121,7.93195851,7.93195851
27.553952,7.21110255,7.93181565,-0.848948232,7.93181565,7.93181565
27.564444,7.87400787,7.93167814,-0.240146348,7.93167814,7.93167814
27.574935,8.30662386,7.93154597,0.61243603,7.93154597,7.93154597
27.585427,8.88819442,7.93141909,0.978148926,7.93141909,7.93141909
27.595918,7.61577311,7.93129752,-0.561715597,7.93129752,7.93129752
27.60641,8.1240384,7.9311812,0.439155105,7.9311812,7.9311812
27.616902,6.92820323,7.93107013,-1.00143242,7.93107013,7.93107013
27.627393,6.63324958,7.9309643,-1.13917282,7.9309643,7.9309643
27.637885,7.81024968,7.93086368,-0.347295264,7.93086368,7.93086368
27.648376,7.81024968,7.93076825,-0.347157857,7.93076825,7.93076825
27.658868,8.18535277,7.930678,0.504653125,7.930678,7.930678
27.66936,7.54983444,7.93059289,-0.617056285,7.93059289,7.93059289
27.679851,8,7.93051294,0.263603989,7.93051294,7.93051294
27.690343,8.1240384,7.93043809,0.440000357,7.93043809,7.93043809
27.700834,7.34846923,7.93036835,-0.762823126,7.93036835,7.93036835
27.711326,7.74596669,7.93030368,-0.429344838,7.93030368,7.93030368
27.721818,7.68114575,7.93024408,-0.499097516,7.93024408,7.93024408
27.732309,9.05538514,7.93018952,1.06075238,7.93018952,7.93018952
27.742801,7,7.93013998,-0.964437652,7.93013998,7.93013998
27.753292,7.93725393,7.93009546,0.084607776,7.93009546,7.93009546
27.763784,8.06225775,7.93005591,0.363595703,7.93005591,7.93005591
27.774276,8.1240384,7.93002134,0.440473684,7.93002134,7.93002134
27.784767,8.83176087,7.92999172,0.949615264,7.92999172,7.92999172
27.795259,7.93725393,7.92996702,0.0853634053,7.92996702,7.92996702
27.80575,7.93725393,7.92994724,0.0854791774,7.92994724,7.92994724
27.816242,8.66025404,7.92993236,0.854588603,7.92993236,7.92993236
27.826734,7.68114575,7.92992235,-0.498775099,7.92992235,7.92992235
27.837225,7.41619849,7.9299172,-0.71674173,7.9299172,7.9299172
27.847717,8.48528137,7.92991688,0.745227812,7.92991688,7.92991688
27.858208,8,7.92992139,0.26472365,7.92992139,7.92992139
27.8687,8.66025404,7.9299307,0.854589573,7.9299307,7.9299307
27.879192,7.68114575,7.92994479,-0.498797599,7.92994479,7.92994479
27.889683,8.60232527,7.92996365,0.819976595,7.92996365,7.92996365
27.900175,7.87400787,7.92998726,-0.236599627,7.92998726,7.92998726
27.910666,7.48331477,7.93001559,-0.668356804,7.93001559,7.93001559
27.921158,7.48331477,7.93004864,-0.668381526,7.93004864,7.93004864
27.93165,7.41619849,7.93008638,-0.716859743,7.93008638,7.93008638
27.942141,7.14142843,7.93012879,-0.888088036,7.93012879,7.93012879
27.952633,7.81024968,7.93017586,-0.3463036,7.93017586,7.93017586
27.963124,7,7.93022756,-0.964483055,7.93022756,7.93022756
27.973616,7.87400787,7.93028389,-0.237225669,7.93028389,7.93028389
27.984108,7,7.93034482,-0.964543842,7.93034482,7.93034482
27.994599,7.87400787,7.93041033,-0.237492016,7.93041033,7.93041033
28.005091,8.18535277,7.93048041,0.504848848,7.93048041,7.93048041
28.015582,8.1240384,7.93055503,0.439867447,7.93055503,7.93055503
28.026074,7.93725393,7.93063419,0.0813617912,7.93063419,7.93063419
28.036566,7.61577311,7.93071786,-0.561199391,7.93071786,7.93071786
28.047057,7.93725393,7.93080602,0.0802989075,7.93080602,7.93080602
28.057549,7.34846923,7.93089866,-0.763170643,7.93089866,7.93089866
28.06804,7.41619849,7.93099575,-0.717493736,7.93099575,7.93099575
28.078532,7.87400787,7.93109729,-0.23893391,7.93109729,7.93109729
28.089024,7.74596669,7.93120325,-0.430391167,7.93120325,7.93120325
28.099515,7.93725393,7.9313136,0.0770735253,7.9313136,7.9313136
28.110007,7.81024968,7.93142836,-0.348107286,7.93142836,7.93142836
28.120498,8,7.93154747,0.261634346,7.93154747,7.93154747
28.13099,8.06225775,7.93167094,0.361367964,7.93167094,7.93167094
28.141482,8.06225775,7.93179875,0.361191082,7.93179875,7.93179875
28.151973,7.34846923,7.93193086,-0.763846604,7.93193086,7.93193086
28.162465,8.88819442,7.93206728,0.977817536,7.93206728,7.93206728
28.172956,7.54983444,7.93220797,-0.618363598,7.93220797,7.93220797
28.183448,8.1240384,7.93235294,0.437818985,7.93235294,7.93235294
28.19394,7.61577311,7.93250215,-0.562786858,7.93250215,7.93250215
28.204431,7.54983444,7.93265558,-0.618725418,7.93265558,7.93265558
28.214923,7.41619849,7.93281323,-0.718759169,7.93281323,7.93281323
28.225414,7.28010989,7.93297506,-0.808000724,7.93297506,7.93297506
28.235906,7.54983444,7.93314108,-0.619117633,7.93314108,7.93314108
28.246398,7.74596669,7.93331126,-0.432833184,7.93331126,7.93331126
28.256889,7.81024968,7.93348556,-0.351049689,7.93348556,7.93348556
28.267381,9.11043358,7.933664,1.08479011,7.933664,7.933664
28.277872,8.24621125,7.93384654,0.55889598,7.93384654,7.93384654
28.288364,7.93725393,7.93403317,0.056751738,7.93403317,7.93403317
28.298856,8,7.93422388,0.256468549,7.93422388,7.93422388
28.309347,7.68114575,7.93441863,-0.503262239,7.93441863,7.93441863
28.319839,7.87400787,7.93461743,-0.246190083,7.93461743,7.93461743
28.33033,8.30662386,7.93482023,0.609757025,7.93482023,7.93482023
28.340822,7.48331477,7.93502706,-0.672095442,7.93502706,7.93502706
28.351314,8,7.93523787,0.254484052,7.93523787,7.93523787
28.361805,7,7.93545263,-0.967187999,7.93545263,7.93545263
28.372297,8.24621125,7.93567136,0.557261066,7.93567136,7.93567136
28.382788,8.66025404,7.935894,0.851093437,7.935894,7.935894
28.39328,7.41619849,7.93612058,-0.721056235,7.93612058,7.93612058
28.403772,8.1240384,7.93635106,0.433228972,7.93635106,7.93635106
28.414263,7.74596669,7.93658541,-0.436599031,7.93658541,7.93658541
28.424755,8.18535277,7.93682364,0.498526964,7.93682364,7.93682364
28.435246,7.81024968,7.9370657,-0.356112371,7.9370657,7.9370657
28.445738,8,7.93731161,0.250376495,7.93731161,7.93731161
28.45623,8.30662386,7.93756134,0.607505162,7.93756134,7.93756134
28.466721,9,7.93781485,1.03062367,7.93781485,7.93781485
28.477213,8.36660027,7.93807216,0.654620584,7.93807216,7.93807216
28.487704,8.06225775,7.93833321,0.352029175,7.93833321,7.93833321
28.498196,8.94427191,7.93859803,1.00283293,7.93859803,7.93859803
28.508688,7.41619849,7.93886659,-0.722957885,7.93886659,7.93886659
28.519179,8,7.93913884,0.246700554,7.93913884,7.93913884
28.529671,8.88819442,7.93941481,0.974053186,7.93941481,7.93941481
28.540162,7.81024968,7.93969443,-0.359784321,7.93969443,7.93969443
28.550654,7.41619849,7.93997775,-0.723725959,7.93997775,7.93997775
28.561146,7.87400787,7.94026472,-0.257404048,7.94026472,7.94026472
28.571637,6.92820323,7.94055529,-1.00615707,7.94055529,7.94055529
28.582129,8.54400375,7.9408495,0.776630055,7.9408495,7.9408495
28.59262,8.71779789,7.94114729,0.881277821,7.94114729,7.94114729
28.603112,7.41619849,7.94144869,-0.72474147,7.94144869,7.94144869
28.613604,7.74596669,7.94175365,-0.442478198,7.94175365,7.94175365
28.624095,7.34846923,7.94206213,-0.770449805,7.94206213,7.94206213
28.634587,7.81024968,7.94237418,-0.363489341,7.94237418,7.94237418
28.645078,8.36660027,7.94268971,0.651084139,7.94268971,7.94268971
28.65557,7.41619849,7.94300877,-0.725816979,7.94300877,7.94300877
28.666062,7.61577311,7.94333132,-0.572327019,7.94333132,7.94333132
28.676553,7.41619849,7.94365731,-0.726263603,7.94365731,7.94365731
28.687045,9,7.94398678,1.02762504,7.94398678,7.94398678
28.697536,8,7.94431965,0.235966841,7.94431965,7.94431965
28.708028,8.1240384,7.94465597,0.423535631,7.94465597,7.94465597
28.71852,7.07106781,7.9449957,-0.934841104,7.9449957,7.9449957
28.729011,7.54983444,7.94533878,-0.628891365,7.94533878,7.94533878
28.739503,7.41619849,7.94568527,-0.727658426,7.94568527,7.94568527
28.749994,7.81024968,7.94603508,-0.368490711,7.94603508,7.94603508
28.760486,7.07106781,7.94638826,-0.935585618,7.94638826,7.94638826
28.770978,7.34846923,7.94674477,-0.773482732,7.94674477,7.94674477
28.781469,7.28010989,7.94710454,-0.816697406,7.94710454,7.94710454
28.791961,8.06225775,7.94746765,0.338806881,7.94746765,7.94746765
28.802452,7.48331477,7.94783399,-0.681556466,7.94783399,7.94783399
28.812944,7.93725393,7.94820363,-0.104640786,7.94820363,7.94820363
28.823436,6.92820323,7.94857651,-1.01013528,7.94857651,7.94857651
28.833927,7.34846923,7.94895258,-0.77490861,7.94895258,7.94895258
28.844419,7.28010989,7.9493319,-0.818059909,7.9493319,7.9493319
28.85491,7.21110255,7.94971439,-0.859425294,7.94971439,7.94971439
28.865402,8,7.95010008,0.22338289,7.95010008,7.95010008
28.875894,8.42614977,7.95048895,0.689681684,7.95048895,7.95048895
28.886385,8.71779789,7.95088092,0.875737954,7.95088092,7.95088092
28.896877,7.93725393,7.95127607,-0.118415103,7.95127607,7.95127607
28.907368,8.48528137,7.9516743,0.73048414,7.9516743,7.9516743
28.91786,7.81024968,7.95207566,-0.376597911,7.95207566,7.95207566
28.928352,8,7.95248012,0.217990559,7.95248012,7.95248012
28.938843,7.68114575,7.9528876,-0.521288648,7.9528876,7.9528876
28.949335,8.1240384,7.95329818,0.413207239,7.95329818,7.95329818
28.959826,7.54983444,7.95371176,-0.635513437,7.95371176,7.95371176
28.970318,7.81024968,7.95412841,-0.379313503,7.95412841,7.95412841
28.98081,6.78232998,7.95454806,-1.08269021,7.95454806,7.95454806
28.991301,8.24621125,7.95497067,0.539667099,7.95497067,7.95497067
29.001793,7.54983444,7.9553963,-0.636837394,7.9553963,7.9553963
29.012284,8.48528137,7.95582485,0.727637631,7.95582485,7.95582485
29.022776,8.42614977,7.95625639,0.685487696,7.95625639,7.95625639
29.033268,7.14142843,7.95669086,-0.902918842,7.95669086,7.95669086
29.043759,7.48331477,7.95712821,-0.688341077,7.95712821,7.95712821
29.054251,7.54983444,7.9575685,-0.638540578,7.9575685,7.9575685
29.064742,7.41619849,7.95801164,-0.736079585,7.95801164,7.95801164
29.075234,7.34846923,7.95845769,-0.781017583,7.95845769,7.95845769
29.085726,8,7.9589066,0.202715064,7.9589066,7.9589066
29.096217,7.54983444,7.95935831,-0.639940525,7.95935831,7.95935831
29.106709,7.61577311,7.95981289,-0.586549045,7.95981289,7.95981289
29.1172,7.81024968,7.96027023,-0.387324874,7.96027023,7.96027023
29.127692,7.34846923,7.96073042,-0.782471208,7.96073042,7.96073042
29.138184,7.07106781,7.96119339,-0.943464666,7.96119339,7.96119339
29.148675,7.61577311,7.96165908,-0.588120714,7.96165908,7.96165908
29.159167,7.48331477,7.96212757,-0.691963,7.96212757,7.96212757
29.169658,6.70820393,7.96259875,-1.11999768,7.96259875,7.96259875
29.18015,7.41619849,7.96307269,-0.739509436,7.96307269,7.96307269
29.190642,7.54983444,7.96354935,-0.643206741,7.96354935,7.96354935
29.201133,6.4807407,7.96402865,-1.2179031,7.96402865,7.96402865
29.211625,7.41619849,7.96451067,-0.740481051,7.96451067,7.96451067
29.222116,8.30662386,7.96499532,0.584489989,7.96499532,7.96499532
29.232608,7.54983444,7.96548265,-0.644707854,7.96548265,7.96548265
29.2431,8.30662386,7.96597262,0.583653355,7.96597262,7.96597262
29.253591,7.81024968,7.96646517,-0.395241054,7.96646517,7.96646517
29.264083,7.28010989,7.96696036,-0.828764425,7.96696036,7.96696036
29.274574,7.54983444,7.9674581,-0.646238086,7.9674581,7.9674581
29.285066,7.93725393,7.96795846,-0.175227069,7.96795846,7.96795846
29.295558,7.14142843,7.96846138,-0.909413521,7.96846138,7.96846138
29.306049,8.06225775,7.9689668,0.30543567,7.9689668,7.9689668
29.316541,8.24621125,7.9694748,0.52605746,7.9694748,7.9694748
29.327032,7.93725393,7.96998527,-0.180918035,7.96998527,7.96998527
29.337524,7.34846923,7.97049829,-0.78868819,7.97049829,7.97049829
29.348016,7.14142843,7.9710138,-0.910815772,7.9710138,7.9710138
29.358507,8.36660027,7.97153173,0.628544773,7.97153173,7.97153173
29.368999,8.06225775,7.97205218,0.300342422,7.97205218,7.97205218
29.37949,8.1240384,7.97257502,0.389182973,7.97257502,7.97257502
29.389982,7.61577311,7.97310034,-0.597768546,7.97310034,7.97310034
29.400474,8.24621125,7.97362808,0.522094983,7.97362808,7.97362808
29.410965,8.30662386,7.97415817,0.576598379,7.97415817,7.97415817
29.421457,8.1240384,7.9746907,0.386455302,7.9746907,7.9746907
29.431948,8.06225775,7.97522556,0.295012183,7.97522556,7.97522556
29.44244,8.54400375,7.97576283,0.753817562,7.97576283,7.97576283
29.452932,8.1240384,7.97630244,0.384364361,7.97630244,7.97630244
29.463423,7,7.97684434,-0.988354359,7.97684434,7.97684434
29.473915,7.21110255,7.9773886,-0.875377663,7.9773886,7.9773886
29.484406,7.68114575,7.97793512,-0.544783788,7.97793512,7.97793512
29.494898,8.66025404,7.97848399,0.82569368,7.97848399,7.97848399
29.50539,7.87400787,7.97903512,-0.32407908,7.97903512,7.97903512
29.515881,7.14142843,7.97958847,-0.915510811,7.97958847,7.97958847
29.526373,7.68114575,7.98014412,-0.54680744,7.98014412,7.98014412
29.536864,7.81024968,7.98070196,-0.41285867,7.98070196,7.98070196
29.547356,7.74596669,7.98126207,-0.485072544,7.98126207,7.98126207
29.557848,7.81024968,7.98182438,-0.414215771,7.98182438,7.98182438
29.568339,8.18535277,7.98238884,0.450515188,7.98238884,7.98238884
29.578831,8,7.98295553,0.130554483,7.98295553,7.98295553
29.589322,7.48331477,7.98352433,-0.707254944,7.98352433,7.98352433
29.599814,8.60232527,7.98409534,0.786275987,7.98409534,7.98409534
29.610306,7.54983444,7.98466849,-0.659419482,7.98466849,7.98466849
29.620797,8.24621125,7.98524371,0.510849825,7.98524371,7.98524371
29.631289,8.1240384,7.98582109,0.371775887,7.98582109,7.98582109
29.64178,7.48331477,7.98640053,-0.709285381,7.98640053,7.98640053
29.652272,7.87400787,7.9869821,-0.336116381,7.9869821,7.9869821
29.662764,7.81024968,7.98756574,-0.421089138,7.98756574,7.98756574
29.673255,7.48331477,7.98815138,-0.71051855,7.98815138,7.98815138
29.683747,9.43398113,7.98873913,1.20218218,7.98873913,7.98873913
29.694238,7.81024968,7.98932885,-0.423177472,7.98932885,7.98932885
29.70473,7.93725393,7.98992064,-0.229492289,7.98992064,7.98992064
29.715222,7.81024968,7.99051444,-0.424575986,7.99051444,7.99051444
29.725713,9,7.99111018,1.00443508,7.99111018,7.99111018
29.736205,8.1240384,7.99170795,0.363772535,7.99170795,7.99170795
29.746696,7.68114575,7.99230762,-0.557818856,7.99230762,7.99230762
29.757188,7.21110255,7.99290931,-0.884198371,7.99290931,7.99290931
29.76768,7,7.99351293,-0.99675119,7.99351293,7.99351293
29.778171,7.74596669,7.99411843,-0.498148306,7.99411843,7.99411843
29.788663,7.48331477,7.99472589,-0.715130139,7.99472589,7.99472589
29.799154,7.74596669,7.99533519,-0.499368101,7.99533519,7.99533519
29.809646,8.54400375,7.99594644,0.740308926,7.99594644,7.99594644
29.820138,8.06225775,7.99655956,0.256316577,7.99655956,7.99655956
29.830629,7.21110255,7.99717448,-0.886606977,7.99717448,7.99717448
29.841121,7.14142843,7.99779131,-0.925398769,7.99779131,7.99779131
29.851612,8.06225775,7.99840991,0.252681291,7.99840991,7.99840991
29.862104,7.93725393,7.9990304,-0.248548714,7.9990304,7.9990304
29.872596,8,7.99965269,0.018636309,7.99965269,7.99965269
29.883087,8.18535277,8.00027672,0.430204668,8.00027672,8.00027672
29.893579,8.18535277,8.00090259,0.429476643,8.00090259,8.00090259
29.90407,7.81024968,8.00153017,-0.43735625,8.00153017,8.00153017
29.914562,7.21110255,8.00215956,-0.889413858,8.00215956,8.00215956
29.925054,8,8.0027907,-0.0528271037,8.0027907,8.0027907
29.935545,7.81024968,8.00342352,-0.43951546,8.00342352,8.00342352
29.946037,7.61577311,8.00405811,-0.623125189,8.00405811,8.00405811
29.956528,6.92820323,8.00469434,-1.0375409,8.00469434,8.00469434
29.96702,7.93725393,8.00533234,-0.260918384,8.00533234,8.00533234
29.977512,7.07106781,8.00597201,-0.966904441,8.00597201,8.00597201
29.988003,7.81024968,8.00661329,-0.443129342,8.00661329,8.00661329
29.998495,8.36660027,8.00725629,0.599453066,8.00725629,8.00725629
30.008986,8.06225775,8.00790087,0.233145623,8.00790087,8.00790087
30.019478,8.06225775,8.00854714,0.231755495,8.00854714,8.00854714
30.02997,7.48331477,8.00919503,-0.725176017,8.00919503,8.00919503
30.040461,8.24621125,8.00984446,0.486175675,8.00984446,8.00984446
30.050953,7.68114575,8.01049555,-0.573890065,8.01049555,8.01049555
30.061444,7.68114575,8.01114816,-0.574458368,8.01114816,8.01114816
30.071936,7.41619849,8.01180241,-0.771753794,8.01180241,8.01180241
30.082428,7.68114575,8.0124582,-0.575597477,8.0124582,8.0124582
30.092919,7.34846923,8.01311548,-0.815258398,8.01311548,8.01311548
30.103411,7.87400787,8.01377436,-0.373853559,8.01377436,8.01377436
30.113902,7.81024968,8.01443469,-0.451868359,8.01443469,8.01443469
30.124394,8.18535277,8.01509659,0.412621109,8.01509659,8.01509659
30.134886,7.68114575,8.01575999,-0.578458506,8.01575999,8.01575999
30.145377,8.36660027,8.01642481,0.591756247,8.01642481,8.01642481
30.155869,7.93725393,8.01709116,-0.282554825,8.01709116,8.01709116
30.16636,7.74596669,8.01775891,-0.521336953,8.01775891,8.01775891
30.176852,7.34846923,8.01842817,-0.818510197,8.01842817,8.01842817
30.187344,7.74596669,8.01909887,-0.522620488,8.01909887,8.01909887
30.197835,8.36660027,8.01977092,0.588922188,8.01977092,8.01977092
30.208327,6.8556546,8.02044445,-1.0792543,8.02044445,8.02044445
30.218818,7.74596669,8.02111932,-0.524549926,8.02111932,8.02111932
30.22931,8.1240384,8.02179563,0.319754234,8.02179563,8.02179563
30.239802,7.54983444,8.02247333,-0.687487376,8.02247333,8.02247333
30.250293,7.41619849,8.02315232,-0.779072418,8.02315232,8.02315232
30.260785,7.21110255,8.02383273,-0.90151549,8.02383273,8.02383273
30.271276,8.48528137,8.02451441,0.678798174,8.02451441,8.02451441
30.281768,7.93725393,8.02519749,-0.296552791,8.02519749,8.02519749
30.29226,6.63324958,8.02588189,-1.18009843,8.02588189,8.02588189
30.302751,7.21110255,8.02656752,-0.90303099,8.02656752,8.02656752
30.313243,7.54983444,8.02725451,-0.690955916,8.02725451,8.02725451
30.323734,7.34846923,8.02794272,-0.824301822,8.02794272,8.02794272
30.334226,8.06225775,8.02863227,0.183372521,8.02863227,8.02863227
30.344718,7.93725393,8.02932307,-0.303428966,8.02932307,8.02932307
30.355209,8.06225775,8.03001505,0.179562505,8.03001505,8.03001505
30.365701,7.28010989,8.03070834,-0.866370851,8.03070834,8.03070834
30.376192,8.54400375,8.03140278,0.715961564,8.03140278,8.03140278
30.386684,7.07106781,8.03209851,-0.980321731,8.03209851,8.03209851
30.397176,7.87400787,8.03279543,-0.398481564,8.03279543,8.03279543
30.407667,8.06225775,8.03349348,0.169600326,8.03349348,8.03349348
30.418159,7.41619849,8.03419277,-0.786126124,8.03419277,8.03419277
30.42865,8.18535277,8.03489316,0.387891236,8.03489316,8.03489316
30.439142,7.54983444,8.03559477,-0.696965092,8.03559477,8.03559477
30.449634,6.92820323,8.03629753,-1.05266058,8.03629753,8.03629753
30.460125,7.61577311,8.03700136,-0.649020995,8.03700136,8.03700136
30.470617,8.36660027,8.03770637,0.573492716,8.03770637,8.03770637
30.481108,7.07106781,8.03841243,-0.983536789,8.03841243,8.03841243
30.4916,7.74596669,8.03911965,-0.541436014,8.03911965,8.03911965
30.502092,8.42614977,8.03982796,0.621547916,8.03982796,8.03982796
30.512583,7.93725393,8.04053728,-0.321377268,8.04053728,8.04053728
30.523075,7.81024968,8.04124774,-0.480622575,8.04124774,8.04124774
30.533566,8.66025404,8.04195918,0.786317278,8.04195918,8.04195918
30.544058,8.1240384,8.04267173,0.285248445,8.04267173,8.04267173
30.55455,7.21110255,8.04338531,-0.912295327,8.04338531,8.04338531
30.565041,7.07106781,8.04409985,-0.986423865,8.04409985,8.04409985
30.575533,7.61577311,8.04481547,-0.655013257,8.04481547,8.04481547
30.586024,8.1240384,8.04553202,0.280189905,8.04553202,8.04553202
30.596516,8.18535277,8.04624963,0.372965338,8.04624963,8.04624963
30.607008,8.42614977,8.04696821,0.6157772,8.04696821,8.04696821
30.617499,7.74596669,8.0476877,-0.549291366,8.0476877,8.0476877
30.627991,8,8.04840821,-0.220018649,8.04840821,8.04840821
30.638482,8.30662386,8.04912959,0.507438934,8.04912959,8.04912959
30.648974,7.41619849,8.04985198,-0.796023551,8.04985198,8.04985198
30.659466,6.8556546,8.05057529,-1.09312428,8.05057529,8.05057529
30.669957,8,8.05129945,-0.22649382,8.05129945,8.05129945
30.680449,8.48528137,8.05202458,0.658222451,8.05202458,8.05202458
30.69094,8.48528137,8.05275053,0.657670771,8.05275053,8.05275053
30.701432,8.71779789,8.05347743,0.815058558,8.05347743,8.05347743
30.711924,7.61577311,8.05420521,-0.662142055,8.05420521,8.05420521
30.722415,8.30662386,8.05493377,0.501687246,8.05493377,8.05493377
30.732907,8.30662386,8.05566325,0.500959689,8.05566325,8.05566325
30.743398,7.74596669,8.05639351,-0.557159594,8.05639351,8.05639351
30.75389,7.14142843,8.05712466,-0.956920178,8.05712466,8.05712466
30.764382,7.21110255,8.05785662,-0.920192411,8.05785662,8.05785662
30.774873,7.61577311,8.05858933,-0.665444381,8.05858933,8.05858933
30.785365,6.32455532,8.0593229,-1.31710576,8.0593229,8.0593229
30.795856,7.93725393,8.06005719,-0.350432962,8.06005719,8.06005719
30.806348,7.48331477,8.06079233,-0.759919441,8.06079233,8.06079233
30.81684,8,8.06152823,-0.248048853,8.06152823,8.06152823
30.827331,8.48528137,8.06226482,0.650397227,8.06226482,8.06226482
30.837823,7.81024968,8.06300223,-0.502745015,8.06300223,8.06300223
30.848314,7.87400787,8.06374029,-0.435582852,8.06374029,8.06374029
30.858806,7.07106781,8.06447916,-0.996700229,8.06447916,8.06447916
30.869298,7.54983444,8.06521874,-0.717902711,8.06521874,8.06521874
30.879789,8.30662386,8.06595895,0.490576102,8.06595895,8.06595895
30.890281,7.68114575,8.06669993,-0.620930094,8.06669993,8.06669993
30.900772,8.94427191,8.06744152,0.936392219,8.06744152,8.06744152
30.911264,8,8.06818386,-0.261120391,8.06818386,8.06818386
30.921756,8.48528137,8.06892686,0.645255387,8.06892686,8.06892686
30.932247,7.81024968,8.06967044,-0.509333651,8.06967044,8.06967044
30.942739,7.48331477,8.07041474,-0.76622449,8.07041474,8.07041474
30.95323,6.55743852,8.07115961,-1.23033373,8.07115961,8.07115961
30.963722,8.66025404,8.07190516,0.76703903,8.07190516,8.07190516
30.974214,7.74596669,8.07265134,-0.571563332,8.07265134,8.07265134
30.984705,8.48528137,8.07339804,0.641781375,8.07339804,8.07339804
30.995197,7.87400787,8.07414541,-0.44736734,8.07414541,8.07414541
31.005688,8.83176087,8.0748933,0.869981363,8.0748933,8.0748933
31.01618,8.18535277,8.07564183,0.331226428,8.07564183,8.07564183
31.026672,9,8.07639092,0.961045826,8.07639092,8.07639092
31.037163,8.06225775,8.0771405,-0.121994879,8.0771405,8.0771405
31.047655,8.18535277,8.07789069,0.32781409,8.07789069,8.07789069
31.058146,8.30662386,8.07864135,0.47747514,8.07864135,8.07864135
31.068638,8.36660027,8.07939261,0.535917582,8.07939261,8.07939261
31.07913,7.74596669,8.08014438,-0.578081043,8.08014438,8.08014438
31.089621,8.88819442,8.08089659,0.898497537,8.08089659,8.08089659
31.100113,7.93725393,8.08164937,-0.379993996,8.08164937,8.08164937
31.110604,6.8556546,8.08240256,-1.10758655,8.08240256,8.08240256
31.121096,7.81024968,8.0831563,-0.52240466,8.0831563,8.0831563
31.131588,8.30662386,8.08391052,0.47192515,8.08391052,8.08391052
31.142079,8.36660027,8.08466511,0.530975661,8.08466511,8.08466511
31.152571,8.30662386,8.08542023,0.470322901,8.08542023,8.08542023
31.163062,8.71779789,8.08617572,0.794746607,8.08617572,8.08617572
31.173554,8,8.08693171,-0.294841834,8.08693171,8.08693171
31.184046,7.41619849,8.08768812,-0.819444708,8.08768812,8.08768812
31.194537,7.68114575,8.08844487,-0.638199905,8.08844487,8.08844487
31.205029,8.06225775,8.08920209,-0.164147317,8.08920209,8.08920209
31.21552,8.42614977,8.08995963,0.579819057,8.08995963,8.08995963
31.226012,7.21110255,8.09071763,-0.937877968,8.09071763,8.09071763
31.236504,8.48528137,8.09147601,0.627539135,8.09147601,8.09147601
31.246995,7.81024968,8.09223468,-0.531022598,8.09223468,8.09223468
31.257487,7.34846923,8.09299377,-0.862858356,8.09299377,8.09299377
31.267978,8,8.09375314,-0.306191345,8.09375314,8.09375314
31.27847,7.93725393,8.09451292,-0.396558931,8.09451292,8.09451292
31.288962,7.81024968,8.09527303,-0.533875782,8.09527303,8.09527303
31.299453,8.54400375,8.09603338,0.669305883,8.09603338,8.09603338
31.309945,8.06225775,8.09679412,-0.185839629,8.09679412,8.09679412
31.320436,8.24621125,8.09755508,0.385559555,8.09755508,8.09755508
31.330928,7.93725393,8.09831641,-0.401325898,8.09831641,8.09831641
31.34142,7.48331477,8.09907802,-0.784705835,8.09907802,8.09907802
31.351911,8.18535277,8.09983983,0.292425953,8.09983983,8.09983983
31.362403,8.36660027,8.10060198,0.515750212,8.10060198,8.10060198
31.372894,7.93725393,8.10136432,-0.405105398,8.10136432,8.10136432
31.383386,7.74596669,8.10212697,-0.596791653,8.10212697,8.10212697
31.393878,7.81024968,8.10288986,-0.540962277,8.10288986,8.10288986
31.404369,7.54983444,8.10365291,-0.744189809,8.10365291,8.10365291
31.414861,7.93725393,8.10441625,-0.408854882,8.10441625,8.10441625
31.425352,8.18535277,8.10517973,0.283148452,8.10517973,8.10517973
31.435844,7.87400787,8.10594348,-0.481596933,8.10594348,8.10594348
31.446336,7.93725393,8.10670743,-0.411647294,8.10670743,8.10670743
31.456827,8,8.10747149,-0.327828443,8.10747149,8.10747149
31.467319,7.93725393,8.1082358,-0.413499533,8.1082358,8.1082358
31.47781,8.30662386,8.1090002,0.44454883,8.1090002,8.1090002
31.488302,8.42614977,8.10976484,0.562481055,8.10976484,8.10976484
31.498794,8.06225775,8.11052962,-0.219708611,8.11052962,8.11052962
31.509285,8.06225775,8.11129448,-0.221442381,8.11129448,8.11129448
31.519777,7.74596669,8.11205954,-0.605056067,8.11205954,8.11205954
31.530268,8.48528137,8.11282465,0.610292328,8.11282465,8.11282465
31.54076,8.18535277,8.11358995,0.26788584,8.11358995,8.11358995
31.551252,7.93725393,8.11435536,-0.420834199,8.11435536,8.11435536
31.561743,8.42614977,8.11512079,0.557699725,8.11512079,8.11512079
31.572235,8.24621125,8.11588639,0.361005352,8.11588639,8.11588639
31.582726,8.24621125,8.11665199,0.359943411,8.11665199,8.11665199
31.593218,8.24621125,8.11741774,0.358878123,8.11741774,8.11741774
31.60371,9.2736185,8.11818356,1.07491159,8.11818356,8.11818356
31.614201,8.42614977,8.11894936,0.55425663,8.11894936,8.11894936
31.624693,8.83176087,8.11971528,0.843827935,8.11971528,8.11971528
31.635184,8.06225775,8.12048117,-0.241295303,8.12048117,8.12048117
31.645676,8.30662386,8.12124716,0.430553944,8.12124716,8.12124716
31.656168,8.30662386,8.12201318,0.429663453,8.12201318,8.12201318
31.666659,8.18535277,8.12277914,0.250147224,8.12277914,8.12277914
31.677151,7.93725393,8.12354518,-0.431614692,8.12354518,8.12354518
31.687642,7.68114575,8.12431114,-0.665706686,8.12431114,8.12431114
31.698134,6.8556546,8.12507717,-1.12668654,8.12507717,8.12507717
31.708626,8.66025404,8.12584317,0.731034106,8.12584317,8.12584317
31.719117,8.24621125,8.12660908,0.345835464,8.12660908,8.12660908
31.729609,8.18535277,8.12737503,0.240785674,8.12737503,8.12737503
31.7401,8.36660027,8.12814086,0.48832305,8.12814086,8.12814086
31.750592,7.14142843,8.12890672,-0.993719422,8.12890672,8.12890672
31.761084,7.68114575,8.12967252,-0.669721411,8.12967252,8.12967252
31.771575,8.1240384,8.13043817,-0.0799985531,8.13043817,8.13043817
31.782067,8.24621125,8.13120383,0.339127443,8.13120383,8.13120383
31.792558,8.1240384,8.13196933,-0.0890557381,8.13196933,8.13196933
31.80305,8.18535277,8.13273481,0.22938605,8.13273481,8.13273481
31.813542,7.87400787,8.1335002,-0.509403889,8.1335002,8.1335002
31.824033,7.87400787,8.1342654,-0.510154415,8.1342654,8.1342654
31.834525,8.42614977,8.13503056,0.539554639,8.13503056,8.13503056
31.845016,7.87400787,8.13579553,-0.511651893,8.13579553,8.13579553
31.855508,7.68114575,8.13656044,-0.674844202,8.13656044,8.13656044
31.866,8.1240384,8.13732522,-0.115268443,8.13732522,8.13732522
31.876491,7.14142843,8.13808977,-0.998329277,8.13808977,8.13808977
31.886983,8.24621125,8.13885425,0.327653785,8.13885425,8.13885425
31.897474,8.1240384,8.13961849,-0.124820209,8.13961849,8.13961849
31.907966,8.1240384,8.14038263,-0.127844551,8.14038263,8.14038263
31.918458,7.87400787,8.1411466,-0.516854649,8.1411466,8.1411466
31.928949,8.60232527,8.14191031,0.678538838,8.14191031,8.14191031
31.939441,7.54983444,8.1426739,-0.769960693,8.1426739,8.1426739
31.949932,8.24621125,8.14343722,0.320583885,8.14343722,8.14343722
31.960424,8.48528137,8.14420041,0.584021374,8.14420041,8.14420041
31.970916,8.36660027,8.14496338,0.470783269,8.14496338,8.14496338
31.981407,8.42614977,8.14572605,0.529550488,8.14572605,8.14572605
31.991899,7.93725393,8.14648857,-0.45742173,8.14648857,8.14648857
32.00239,7.87400787,8.14725078,-0.522726416,8.14725078,8.14725078
32.012882,8.06225775,8.14801281,-0.29283966,8.14801281,8.14801281
32.023374,8.18535277,8.1487746,0.191254214,8.1487746,8.1487746
32.033865,8.1240384,8.14953605,-0.159679814,8.14953605,8.14953605
32.044357,8.06225775,8.1502973,-0.296714602,8.1502973,8.1502973
32.054848,7.28010989,8.15105821,-0.933246121,8.15105821,8.15105821
32.06534,8,8.15181891,-0.389639461,8.15181891,8.15181891
32.075832,8.1240384,8.15257932,-0.168940564,8.15257932,8.15257932
32.086323,7.93725393,8.15333936,-0.464849895,8.15333936,8.15333936
32.096815,8.83176087,8.15409917,0.823202102,8.15409917,8.15409917
32.107306,8.77496439,8.15485859,0.787467966,8.15485859,8.15485859
32.117798,8.83176087,8.15561777,0.82227921,8.15561777,8.15561777
32.12829,8.54400375,8.15637662,0.622597083,8.15637662,8.15637662
32.138781,8.30662386,8.15713506,0.386637814,8.15713506,8.15713506
32.149273,8.77496439,8.15789324,0.785538762,8.15789324,8.15789324
32.159764,8.36660027,8.158651,0.456014547,8.158651,8.158651
32.170256,8.48528137,8.15940847,0.570852784,8.15940847,8.15940847
32.180748,7.87400787,8.16016559,-0.53493711,8.16016559,8.16016559
32.191239,8.71779789,8.16092226,0.746241,8.16092226,8.16092226
32.201731,7.93725393,8.16167862,-0.473734831,8.16167862,8.16167862
32.212222,8.18535277,8.16243453,0.151387704,8.16243453,8.16243453
32.222714,7.81024968,8.16319013,-0.594087916,8.16319013,8.16319013
32.233206,8.36660027,8.16394532,0.450172125,8.16394532,8.16394532
32.243697,8,8.16470004,-0.40583253,8.16470004,8.16470004
32.254189,8.24621125,8.16545442,0.284177461,8.16545442,8.16545442
32.26468,7.87400787,8.16620831,-0.540555674,8.16620831,8.16620831
32.275172,8.42614977,8.16696185,0.509105025,8.16696185,8.16696185
32.285664,8.1240384,8.16771495,-0.208989342,8.16771495,8.16771495
32.296155,8.18535277,8.16846754,0.12994318,8.16846754,8.16846754
32.306647,7.41619849,8.16921976,-0.867767983,8.16921976,8.16921976
32.317138,8.1240384,8.16997145,-0.214319965,8.16997145,8.16997145
32.32763,8.36660027,8.17072276,0.442580511,8.17072276,8.17072276
32.338122,8.83176087,8.17147359,0.812580625,8.17147359,8.17147359
32.348613,9,8.17222389,0.909822023,8.17222389,8.17222389
32.359105,8.83176087,8.17297377,0.811657006,8.17297377,8.17297377
32.369596,8.94427191,8.1737231,0.877809099,8.1737231,8.1737231
32.380088,7.54983444,8.174472,-0.790340157,8.174472,8.174472
32.39058,8.42614977,8.1752204,0.50092851,8.1752204,8.1752204
32.401071,9.21954446,8.17596823,1.02155579,8.17596823,8.17596823
32.411563,7.81024968,8.17671561,-0.605364295,8.17671561,8.17671561
32.422054,8.18535277,8.1774624,0.0888277915,8.1774624,8.1774624
32.432546,7.28010989,8.17820873,-0.947680769,8.17820873,8.17820873
32.443038,8.30662386,8.17895453,0.357308459,8.17895453,8.17895453
32.453529,8.83176087,8.17969972,0.807503035,8.17969972,8.17969972
32.464021,7.87400787,8.18044443,-0.553567117,8.18044443,8.18044443
32.474512,8.88819442,8.18118851,0.84083643,8.18118851,8.18118851
32.485004,7.41619849,8.18193211,-0.875062069,8.18193211,8.18193211
32.495496,7.48331477,8.18267514,-0.836277687,8.18267514,8.18267514
32.505987,8.71779789,8.18341753,0.731013239,8.18341753,8.18341753
32.516479,8.94427191,8.18415941,0.87184431,8.18415941,8.18415941
32.52697,8.71779789,8.18490063,0.72999812,8.18490063,8.18490063
32.537462,8.94427191,8.18564133,0.870994017,8.18564133,8.18564133
32.547954,7.68114575,8.18638143,-0.710799328,8.18638143,8.18638143
32.558445,7.48331477,8.18712086,-0.838931514,8.18712086,8.18712086
32.568937,8.24621125,8.18785974,0.241560569,8.18785974,8.18785974
32.579428,7.87400787,8.18859794,-0.560883289,8.18859794,8.18859794
32.58992,7.87400787,8.18933558,-0.561540476,8.18933558,8.18933558
32.600412,7.54983444,8.19007259,-0.800148834,8.19007259,8.19007259
32.610903,8.48528137,8.1908089,0.542653185,8.1908089,8.1908089
32.621395,7.74596669,8.19154463,-0.667516243,8.19154463,8.19154463
32.631886,8.48528137,8.19227964,0.541296348,8.19227964,8.19227964
32.642378,8.83176087,8.19301406,0.799216368,8.19301406,8.19301406
32.65287,7.48331477,8.19374783,-0.842871909,8.19374783,8.19374783
32.663361,8.42614977,8.19448085,0.481319976,8.19448085,8.19448085
32.673853,8.1240384,8.19521328,-0.26678619,8.19521328,8.19521328
32.684344,8.42614977,8.19594495,0.47979665,8.19594495,8.19594495
32.694836,8.83176087,8.196676,0.796922119,8.196676,8.196676
32.705328,8.71779789,8.19740636,0.721381676,8.19740636,8.19740636
32.715819,8.66025404,8.19813596,0.679792674,8.19813596,8.19813596
32.726311,8.48528137,8.19886492,0.535178902,8.19886492,8.19886492
32.736802,8.36660027,8.1995931,0.408665107,8.1995931,8.1995931
32.747294,7.61577311,8.20032063,-0.764557075,8.20032063,8.20032063
32.757786,7.41619849,8.20104743,-0.88591701,8.20104743,8.20104743
32.768277,8.48528137,8.20177345,0.532454626,8.20177345,8.20177345
32.778769,7.54983444,8.20249879,-0.807876447,8.20249879,8.20249879
32.78926,8.1240384,8.20322332,-0.281398151,8.20322332,8.20322332
32.799752,8.54400375,8.20394718,0.583143691,8.20394718,8.20394718
32.810244,8.60232527,8.20467029,0.630598907,8.20467029,8.20467029
32.820735,9.2736185,8.20539256,1.03355016,8.20539256,8.20539256
32.831227,8.54400375,8.20611414,0.58128272,8.20611414,8.20611414
32.841718,8,8.20683489,-0.454791037,8.20683489,8.20683489
32.85221,8.1240384,8.20755492,-0.288992245,8.20755492,8.20755492
32.862702,8.24621125,8.20827418,0.194774422,8.20827418,8.20827418
32.873193,8,8.20899257,-0.457157055,8.20899257,8.20899257
32.883685,7.21110255,8.20971025,-0.999303605,8.20971025,8.20971025
32.894176,8.42614977,8.21042705,0.464459603,8.21042705,8.21042705
32.904668,9.05538514,8.21114312,0.918826436,8.21114312,8.21114312
32.91516,8.94427191,8.21185838,0.855811623,8.21185838,8.21185838
32.925651,7.48331477,8.21257275,-0.853966027,8.21257275,8.21257275
32.936143,8.60232527,8.21328637,0.623729828,8.21328637,8.21328637
32.946634,7.54983444,8.21399909,-0.814962979,8.21399909,8.21399909
32.957126,8.60232527,8.21471105,0.622586714,8.21471105,8.21471105
32.967618,7.87400787,8.21542217,-0.584306679,8.21542217,8.21542217
32.978109,8,8.21613238,-0.464900394,8.21613238,8.21613238
32.988601,9.05538514,8.2168418,0.91572012,8.2168418,8.2168418
32.999092,8.42614977,8.2175503,0.456726911,8.2175503,8.2175503
33.009584,8.60232527,8.21825801,0.619731601,8.21825801,8.21825801
33.020076,8.71779789,8.21896485,0.706281132,8.21896485,8.21896485
33.030567,8.77496439,8.21967075,0.745180271,8.21967075,8.21967075
33.041059,8.1240384,8.22037584,-0.310382728,8.22037584,8.22037584
33.05155,8.36660027,8.22107998,0.381471208,8.22107998,8.22107998
33.062042,8.54400375,8.2217833,0.567644646,8.2217833,8.2217833
33.072534,8.30662386,8.22248573,0.290065746,8.22248573,8.22248573
33.083025,7.61577311,8.22318718,-0.779367743,8.22318718,8.22318718
33.093517,7.68114575,8.2238878,-0.736710293,8.2238878,8.2238878
33.104008,8.36660027,8.22458745,0.376845881,8.22458745,8.22458745
33.1145,8.1240384,8.22528624,-0.318194652,8.22528624,8.22528624
33.124992,7.74596669,8.22598411,-0.692832896,8.22598411,8.22598411
33.135483,7.68114575,8.22668099,-0.738603579,8.22668099,8.22668099
33.145975,8.42614977,8.22737701,0.445839393,8.22737701,8.22737701
33.156466,8.88819442,8.22807202,0.812479167,8.22807202,8.22807202
33.166958,7.21110255,8.22876616,-1.00879314,8.22876616,8.22876616
33.17745,8.36660027,8.22945934,0.370325426,8.22945934,8.22945934
33.187941,8.94427191,8.23015151,0.845056445,8.23015151,8.23015151
33.198433,9,8.23084279,0.877016082,8.23084279,8.23084279
33.208924,8.71779789,8.23153304,0.69732693,8.23153304,8.23153304
33.219416,7.48331477,8.23222239,-0.865394484,8.23222239,8.23222239
33.229908,9.16515139,8.23291076,0.965526091,8.23291076,8.23291076
33.240399,7.81024968,8.23359809,-0.650652296,8.23359809,8.23359809
33.250891,8.48528137,8.2342845,0.500995886,8.2342845,8.2342845
33.261382,8.66025404,8.23496985,0.652138164,8.23496985,8.23496985
33.271874,9.32737905,8.23565428,1.04485634,8.23565428,8.23565428
33.282366,8.94427191,8.23633771,0.841388259,8.23633771,8.23633771
33.292857,8.18535277,8.23702007,-0.227304411,8.23702007,8.23702007
33.303349,7.28010989,8.23770148,-0.97856609,8.23770148,8.23770148
33.31384,8.83176087,8.23838182,0.770311007,8.23838182,8.23838182
33.324332,8.60232527,8.2390612,0.602713918,8.2390612,8.2390612
33.334824,8.36660027,8.23973956,0.356175108,8.23973956,8.23973956
33.345315,7.87400787,8.24041682,-0.605317229,8.24041682,8.24041682
33.355807,8.18535277,8.24109312,-0.23609393,8.24109312,8.24109312
33.366298,7.54983444,8.24176831,-0.831825626,8.24176831,8.24176831
33.37679,8.06225775,8.24244252,-0.424481766,8.24244252,8.24244252
33.387282,8.54400375,8.24311568,0.548532647,8.24311568,8.24311568
33.397773,8.06225775,8.24378773,-0.426063349,8.24378773,8.24378773
33.408265,8.60232527,8.24445878,0.598219434,8.24445878,8.24445878
33.418756,8,8.2451287,-0.495104735,8.2451287,8.2451287
33.429248,8.83176087,8.24579762,0.765482363,8.24579762,8.24579762
33.43974,7.81024968,8.24646546,-0.660466341,8.24646546,8.24646546
33.450231,7.41619849,8.24713217,-0.911555638,8.24713217,8.24713217
33.460723,8.88819442,8.24779785,0.800247814,8.24779785,8.24779785
33.471214,7.87400787,8.24846239,-0.611926886,8.24846239,8.24846239
33.481706,8.36660027,8.24912589,0.342745346,8.24912589,8.24912589
33.492198,8.06225775,8.2497883,-0.433047981,8.2497883,8.2497883
33.502689,8.71779789,8.25044955,0.683628803,8.25044955,8.25044955
33.513181,7.81024968,8.25110975,-0.663972945,8.25110975,8.25110975
33.523672,8.77496439,8.25176877,0.72332262,8.25176877,8.25176877
33.534164,8.36660027,8.25242675,0.337895718,8.25242675,8.25242675
33.544656,8.83176087,8.2530836,0.760708396,8.2530836,8.2530836
33.555147,9.16515139,8.25373927,0.954679066,8.25373927,8.25373927
33.565639,7.61577311,8.25439387,-0.799137513,8.25439387,8.25439387
33.57613,8.60232527,8.25504727,0.589302972,8.25504727,8.25504727
33.586622,8.66025404,8.2556996,0.636045939,8.2556996,8.2556996
33.597114,8.83176087,8.25635078,0.758557896,8.25635078,8.25635078
33.607605,7.87400787,8.25700076,-0.61886419,8.25700076,8.25700076
33.618097,8.60232527,8.25764964,0.587090814,8.25764964,8.25764964
33.628588,9.21954446,8.25829731,0.980432123,8.25829731,8.25829731
33.63908,8.1240384,8.25894387,-0.3672948,8.25894387,8.25894387
33.649572,7.81024968,8.25958927,-0.670327979,8.25958927,8.25958927
33.660063,8.36660027,8.26023344,0.326139268,8.26023344,8.26023344
33.670555,9.11043358,8.2608765,0.921714208,8.2608765,8.2608765
33.681046,8.36660027,8.26151831,0.324163465,8.26151831,8.26151831
33.691538,8.24621125,8.26215901,-0.126284421,8.26215901,8.26215901
33.70203,8.60232527,8.26279851,0.582689245,8.26279851,8.26279851
33.712521,9.53939201,8.26343676,1.12958189,8.26343676,8.26343676
33.723013,8.77496439,8.26407388,0.714766052,8.26407388,8.26407388
33.733504,7.68114575,8.26470973,-0.763913598,8.26470973,8.26470973
33.743996,8.66025404,8.26534444,0.628418328,8.26534444,8.26534444
33.754488,8.36660027,8.26597794,0.317210218,8.26597794,8.26597794
33.764979,7.54983444,8.26661017,-0.846626088,8.26661017,8.26661017
33.775471,8.36660027,8.26724124,0.315212673,8.26724124,8.26724124
33.785962,7.87400787,8.26787102,-0.627585172,8.26787102,8.26787102
33.796454,8.18535277,8.26849964,-0.288351987,8.26849964,8.26849964
33.806946,9.11043358,8.26912703,0.917227644,8.26912703,8.26912703
33.817437,10.198039,8.26975312,1.38862735,8.26975312,8.26975312
33.827929,7.81024968,8.27037803,-0.678327618,8.27037803,8.27037803
33.83842,7.93725393,8.27100164,-0.577709019,8.27100164,8.27100164
33.848912,7.61577311,8.27162407,-0.809846257,8.27162407,8.27162407
33.859404,9.69535971,8.27224524,1.19294362,8.27224524,8.27224524
33.869895,8.66025404,8.27286509,0.622405774,8.27286509,8.27286509
33.880387,8.24621125,8.27348374,-0.165143854,8.27348374,8.27348374
33.890878,8.66025404,8.27410107,0.621412072,8.27410107,8.27410107
33.90137,9.43398113,8.2747172,1.0766912,8.2747172,8.2747172
33.911862,7.54983444,8.27533204,-0.851761474,8.27533204,8.27533204
33.922353,8,8.27594556,-0.525305204,8.27594556,8.27594556
33.932845,8.83176087,8.27655785,0.745119465,8.27655785,8.27655785
33.943336,9,8.2771688,0.850194803,8.2771688,8.2771688
33.953828,9,8.27777852,0.849836151,8.27777852,8.27777852
33.96432,8.54400375,8.27838694,0.515380252,8.27838694,8.27838694
33.974811,8.60232527,8.27899401,0.568622243,8.27899401,8.27899401
33.985303,8.48528137,8.27959984,0.45352126,8.27959984,8.27959984
33.995794,7.28010989,8.28020431,-1.00004721,8.28020431,8.28020431
34.006286,8.18535277,8.28080752,-0.308957522,8.28080752,8.28080752
34.016778,9.32737905,8.28140943,1.02272657,8.28140943,8.28140943
34.027269,8.42614977,8.28200996,0.379657501,8.28200996,8.28200996
34.037761,9,8.28260922,0.846989243,8.28260922,8.28260922
34.048252,7.74596669,8.28320711,-0.732966858,8.28320711,8.28320711
34.058744,8.83176087,8.28380372,0.740241275,8.28380372,8.28380372
34.069236,9.59166305,8.284399,1.14335648,8.284399,8.284399
34.079727,8.42614977,8.28499289,0.375708502,8.28499289,8.28499289
34.090219,8.60232527,8.2855855,0.562796379,8.2855855,8.2855855
34.10071,8.77496439,8.28617671,0.699133519,8.28617671,8.28617671
34.111202,8.06225775,8.28676663,-0.47382368,8.28676663,8.28676663
34.121694,8.66025404,8.28735519,0.610654439,8.28735519,8.28735519
34.132185,8.36660027,8.28794235,0.280460184,8.28794235,8.28794235
34.142677,7.81024968,8.2885282,-0.691576842,8.2885282,8.2885282
34.153168,8.36660027,8.28911264,0.278365992,8.28911264,8.28911264
34.16366,7.68114575,8.28969577,-0.780096159,8.28969577,8.28969577
34.174152,8.54400375,8.29027752,0.503712441,8.29027752,8.29027752
34.184643,9.11043358,8.29085785,0.905304219,8.29085785,8.29085785
34.195135,8.88819442,8.29143686,0.772500849,8.29143686,8.29143686
34.205626,8.88819442,8.29201443,0.772126926,8.29201443,8.29201443
34.216118,9.48683298,8.29259067,1.09281394,8.29259067,8.29259067
34.22661,8.54400375,8.29316552,0.500837521,8.29316552,8.29316552
34.237101,8.66025404,8.29373893,0.605404912,8.29373893,8.29373893
34.247593,9.53939201,8.294311,1.11583198,8.294311,8.294311
34.258084,9.94987437,8.29488161,1.28646522,8.29488161,8.29488161
34.268576,9.16515139,8.29545088,0.932577348,8.29545088,8.29545088
34.279068,9.05538514,8.29601874,0.871416317,8.29601874,8.29601874
34.289559,9.64365076,8.29658514,1.16063156,8.29658514,8.29658514
34.300051,8.71779789,8.29715018,0.648573596,8.29715018,8.29715018
34.310542,9.32737905,8.29771375,1.01472425,8.29771375,8.29771375
34.321034,9.11043358,8.29827595,0.901197886,8.29827595,8.29827595
34.331526,8.18535277,8.29883673,-0.3368738,8.29883673,8.29883673
34.342017,8.77496439,8.29939603,0.689614645,8.29939603,8.29939603
34.352509,8.30662386,8.29995395,0.0816695248,8.29995395,8.29995395
34.363,9.74679434,8.30051039,1.20261547,8.30051039,8.30051039
34.373492,9.11043358,8.30106544,0.899648898,8.30106544,8.30106544
34.383984,8.60232527,8.30161905,0.548366862,8.30161905,8.30161905
34.394475,8.06225775,8.30217117,-0.489809573,8.30217117,8.30217117
34.404967,8.88819442,8.30272189,0.765161767,8.30272189,8.30272189
34.415458,9.05538514,8.3032711,0.867245083,8.3032711,8.3032711
34.42595,8.48528137,8.30381892,0.425984101,8.30381892,8.30381892
34.436442,9.2736185,8.30436528,0.984506586,8.30436528,8.30436528
34.446933,8.36660027,8.30491012,0.248375001,8.30491012,8.30491012
34.457425,8.94427191,8.30545356,0.799261129,8.30545356,8.30545356
34.467916,8.54400375,8.30599547,0.487860916,8.30599547,8.30599547
34.478408,8.66025404,8.30653597,0.594742019,8.30653597,8.30653597
34.4889,8.06225775,8.30707499,-0.494790099,8.30707499,8.30707499
34.499391,8.54400375,8.30761248,0.486200845,8.30761248,8.30761248
34.509883,7.54983444,8.30814855,-0.870812329,8.30814855,8.30814855
34.520374,8.60232527,8.30868308,0.541887617,8.30868308,8.30868308
34.530866,7.74596669,8.30921617,-0.750499486,8.30921617,8.30921617
34.541358,8.30662386,8.30974777,-0.0558919648,8.30974777,8.30974777
34.551849,8.77496439,8.31027783,0.681679216,8.31027783,8.31027783
34.562341,8.24621125,8.31080645,-0.254155852,8.31080645,8.31080645
34.572832,8.06225775,8.31133351,-0.499074908,8.31133351,8.31133351
34.583324,8.48528137,8.31185912,0.416439972,8.31185912,8.31185912
34.593816,8.60232527,8.31238323,0.538462661,8.31238323,8.31238323
34.604307,9.16515139,8.31290578,0.923171497,8.31290578,8.31290578
34.614799,8.77496439,8.31342686,0.679365533,8.31342686,8.31342686
34.62529,7.87400787,8.31394638,-0.663278604,8.31394638,8.31394638
34.635782,8.18535277,8.31446443,-0.359321108,8.31446443,8.31446443
34.646274,8,8.31498305,-0.561233504,8.31498305,8.31498096
34.656765,7.54983444,8.3155011,-0.875023807,8.3155011,8.31549592
34.667257,7.87400787,8.31601879,-0.664839018,8.31601879,8.31600939
34.677748,8.36660027,8.31654183,0.223737428,8.31654183,8.31652129
34.68824,8.94427191,8.3170701,0.791960736,8.3170701,8.3170317
34.698732,9.16515139,8.31761895,0.920615251,8.31761895,8.31754058
34.709223,7.81024968,8.31819999,-0.712706329,8.31819999,8.31804787
34.719715,8.24621125,8.31884912,-0.269514126,8.31884912,8.31855366
34.730206,8.94427191,8.31965244,0.790328713,8.31965244,8.31905786
34.740698,8.71779789,8.320669,0.630181627,8.320669,8.31956056
34.75119,9.11043358,8.32172183,0.888094447,8.32172183,8.32006171
34.761681,9.32737905,8.32280872,1.00228256,8.32280872,8.32056126
34.772173,8.77496439,8.3235986,0.671837618,8.3235986,8.32105929
34.782664,8.54400375,8.32419613,0.468836445,8.32419613,8.32155572
34.793156,8.48528137,8.32480079,0.40060028,8.32480079,8.32205064
34.803648,9.05538514,8.32540755,0.85438726,8.32540755,8.32254398
34.814139,8.66025404,8.32602412,0.578126212,8.32602412,8.32303571
34.824631,9.11043358,8.32664212,0.885319975,8.32664212,8.32352592
34.835122,8.66025404,8.32727354,0.577044625,8.32727354,8.32401451
34.845614,8.54400375,8.32790531,0.46486389,8.32790531,8.32450156
34.856106,8.60232527,8.32855522,0.523230396,8.32855522,8.32498703
34.866597,7.74596669,8.32920564,-0.763700824,8.32920564,8.32547088
34.877089,7.93725393,8.32987669,-0.626596169,8.32987669,8.32595318
34.88758,8.77496439,8.33055096,0.666643403,8.33055096,8.32643386
34.898072,8.42614977,8.33124767,0.308061849,8.33124767,8.32691298
34.908564,9,8.33195199,0.817342038,8.33195199,8.32739051
34.919055,8.54400375,8.33268049,0.459699097,8.33268049,8.3278664
34.929547,9,8.33342278,0.816441802,8.33342278,8.32834073
34.940038,8.48528137,8.33419108,0.388703344,8.33419108,8.32881342
34.95053,8.54400375,8.3349819,0.457189071,8.3349819,8.32928455
34.961022,7.87400787,8.33580046,-0.679553224,8.33580046,8.32975407
34.971513,8,8.33665385,-0.580218795,8.33665385,8.33022193
34.982005,8.88819442,8.33753631,0.74206341,8.33753631,8.33068823
34.992496,8.60232527,8.33847167,0.513666817,8.33847167,8.33115286
35.002988,8.66025404,8.33943649,0.566407583,8.33943649,8.33161592
35.01348,8.83176087,8.34048084,0.700913706,8.34048084,8.33207736
35.023971,7.87400787,8.34155323,-0.683772883,8.34155323,8.33253714
35.034463,8.94427191,8.34274496,0.775581686,8.34274496,8.33299533
35.044954,7.93725393,8.34396049,-0.637735493,8.34396049,8.33345184
35.055446,8.88819442,8.34535608,0.736775635,8.34535608,8.33390677
35.065938,9,8.34676929,0.808226895,8.34676929,8.33436007
35.076429,8,8.348451,-0.590297387,8.348451,8.33481168
35.086921,8.71779789,8.35017226,0.606321387,8.35017226,8.3352617
35.097412,8.83176087,8.35224093,0.692473781,8.35224093,8.33571004
35.107904,8.71779789,8.35442334,0.602805561,8.35442334,8.33615677
35.118396,9.05538514,8.35706815,0.835653632,8.35706815,8.33660186
35.128887,8.88819442,8.35997849,0.726784649,8.35997849,8.33704526
35.139379,8.30662386,8.36353376,-0.238557957,8.36353376,8.33748704
35.14987,8,8.3677197,-0.606398963,8.3677197,8.33792713
35.160362,8,8.37290821,-0.610662108,8.37290821,8.33836561
35.170854,8.30662386,8.379694,-0.270314889,8.379694,8.33880242
35.181345,8.30662386,8.38820432,-0.285622935,8.38820432,8.33923753
35.191837,8.1240384,8.40082209,-0.52610235,8.40082209,8.33967102
35.202328,9.21954446,8.41646974,0.896144363,8.41646974,8.34010281
35.21282,8.71779789,8.44358927,0.523649329,8.44358927,8.34053296
35.223312,8.06225775,8.47632764,-0.643482624,8.47632764,8.34096144
35.233803,8.77496439,8.54403622,0.480549863,8.54403622,8.34138821
35.244295,9.53939201,8.62212187,0.957742213,8.62212187,8.34181335
35.254786,8.77496439,8.80805052,-0.181895937,8.80805052,8.34223676
35.265278,9.32737905,9.00810456,0.565043802,9.00810456,8.34265854
35.27577,9.48683298,9.47337224,0.116020427,9.47337224,8.34307863
35.286261,9.48683298,9.93781737,-0.671553714,9.93781737,8.34349699
35.296753,10.0995049,10.5378479,-0.662074767,10.5378479,8.34391371
35.307244,10.8166538,11.0230352,-0.454292202,11.0230352,8.3443287
35.317736,11.3137085,10.9696988,0.58652338,10.9696988,8.34474204
35.328228,10.5356538,10.762203,-0.475971893,10.762203,8.34515368
35.338719,10.5356538,10.0048732,0.728546909,10.0048732,8.34556358
35.349211,9.21954446,9.32573811,-0.325873674,9.32573811,8.34597183
35.359702,9.05538514,8.90497036,0.387833444,8.90497036,8.34637833
35.370194,8.48528137,8.61346791,-0.358031468,8.61346791,8.34678317
35.380686,8.18535277,8.52525821,-0.583014099,8.52525821,8.34718631
35.391177,8.48528137,8.46804879,0.131272953,8.46804879,8.34758769
35.401669,8.06225775,8.44119937,-0.615582347,8.44119937,8.34798741
35.41216,8.36660027,8.42240498,-0.236230225,8.42240498,8.34838537
35.422652,8,8.40891755,-0.639466614,8.40891755,8.34878166
35.433144,7.48331477,8.39944142,-0.957145048,8.39944142,8.34917623
35.443635,8.42614977,8.39170647,0.185589079,8.39170647,8.34956905
35.454127,8,8.38631517,-0.621542577,8.38631517,8.34996018
35.464618,7.87400787,8.38154161,-0.712414023,8.38154161,8.35034955
35.47511,7.87400787,8.37825308,-0.710102251,8.37825308,8.35073723
35.485602,8.24621125,8.37515616,-0.359089005,8.37515616,8.35112319
35.496093,7.81024968,8.37305878,-0.75020604,8.37305878,8.35150737
35.506585,8.42614977,8.37102859,0.234779008,8.37102859,8.35188987
35.517076,8,8.36960783,-0.607953805,8.36960783,8.35227059
35.527568,8.71779789,8.36825821,0.591218805,8.36825821,8.35264961
35.53806,7.81024968,8.36727627,-0.746342144,8.36727627,8.3530269
35.548551,8.42614977,8.36637253,0.244493847,8.36637253,8.35340241
35.559043,8.71779789,8.36569562,0.593382058,8.36569562,8.35377621
35.569534,9,8.36509518,0.796809148,8.36509518,8.35414823
35.580026,9.05538514,8.36463648,0.831112906,8.36463648,8.35451855
35.590518,8.18535277,8.36424895,-0.422961197,8.36424895,8.35488711
35.601009,8.36660027,8.36395018,0.0514789545,8.36395018,8.35525389
35.611501,8.42614977,8.3637161,0.249867316,8.3637161,8.35561895
35.621992,8.36660027,8.36353692,0.0553475087,8.36353692,8.35598223
35.632484,9.16515139,8.36341583,0.895396874,8.36341583,8.35634378
35.642976,8.94427191,8.36332762,0.762197015,8.36332762,8.35670357
35.653467,8,8.36329128,-0.602736491,8.36329128,8.35706157
35.663959,8.66025404,8.3632733,0.544959391,8.3632733,8.35741784
35.67445,8.60232527,8.36330148,0.488900589,8.36330148,8.35777232
35.684942,8.54400375,8.36333838,0.42504749,8.36333838,8.35812506
35.695434,8.30662386,8.36341633,-0.238311701,8.36341633,8.35847603
35.705925,8.54400375,8.36349683,0.42486105,8.36349683,8.3588252
35.716417,7.74596669,8.36361327,-0.785904944,8.36361327,8.35917263
35.726908,9.05538514,8.36373111,0.831657399,8.36373111,8.35951826
35.7374,8.24621125,8.36387518,-0.343021758,8.36387518,8.35986215
35.747892,8.18535277,8.36402249,-0.422693406,8.36402249,8.36020425
35.758383,7.87400787,8.36418864,-0.700129106,8.36418864,8.36054455
35.768875,8.1240384,8.36435908,-0.490225123,8.36435908,8.36088309
35.779366,8.71779789,8.36454259,0.594352839,8.36454259,8.36121983
35.789858,8.54400375,8.36473052,0.423406688,8.36473052,8.36155481
35.80035,8.88819442,8.36492664,0.723372499,8.36492664,8.361888
35.810841,9.11043358,8.36512492,0.86331261,8.36512492,8.36221937
35.821333,7.87400787,8.36532577,-0.700940722,8.36532577,8.36254899
35.831824,8.18535277,8.36551786,-0.424458587,8.36551786,8.36287678
35.842316,8,8.36570294,-0.604733774,8.36570294,8.36320281
35.852808,9.2736185,8.36583349,0.95277752,8.36583349,8.36352705
35.863299,7.81024968,8.3659355,-0.745443373,8.3659355,8.36384946
35.873791,8.88819442,8.36579683,0.722770771,8.36579683,8.3641701
35.884282,9.38083152,8.3655797,1.00759705,8.3655797,8.36448891
35.894774,8.42614977,8.36581662,0.245628078,8.36581662,8.36480595
35.905266,8.60232527,8.36613182,0.485997377,8.36613182,8.36512118
35.915757,8.66025404,8.36543458,0.542972799,8.36543458,8.36543458
35.926249,7.81024968,8.3657462,-0.745316391,8.3657462,8.3657462
35.93674,8.54400375,8.36605598,0.421838552,8.36605598,8.36605598
35.947232,7.41619849,8.36636398,-0.974764329,8.36636398,8.36636398
35.957724,8.66025404,8.36667017,0.541833798,8.36667017,8.36667017
35.968215,7.93725393,8.36697452,-0.655530767,8.36697452,8.36697452
35.978707,7.68114575,8.36727708,-0.828330449,8.36727708,8.36727708
35.989198,8.60232527,8.3675778,0.484507453,8.3675778,8.3675778
35.99969,7.74596669,8.36787672,-0.788612723,8.36787672,8.36787672
36.010182,8.30662386,8.36817382,-0.248092646,8.36817382,8.36817382
36.020673,8.36660027,8.36846908,-0.0432297695,8.36846908,8.36846908
36.031165,9.11043358,8.36876254,0.861203252,8.36876254,8.36876254
36.041656,7.87400787,8.36905414,-0.703595245,8.36905414,8.36905414
36.052148,8.30662386,8.36934395,-0.250439788,8.36934395,8.36934395
36.06264,8.77496439,8.36963193,0.636657253,8.36963193,8.36963193
36.073131,8.94427191,8.36991805,0.757861372,8.36991805,8.36991805
36.083623,7.68114575,8.37020237,-0.830094345,8.37020237,8.37020237
36.094114,8.94427191,8.37048483,0.757487349,8.37048483,8.37048483
36.104606,9.94987437,8.37076548,1.256626,8.37076548,8.37076548
36.115098,8.66025404,8.37104429,0.537782248,8.37104429,8.37104429
36.125589,8.18535277,8.37132124,-0.431240618,8.37132124,8.37132124
36.136081,9.11043358,8.37159638,0.859556396,8.37159638,8.37159638
36.146572,9,8.37186965,0.792546747,8.37186965,8.37186965
36.157064,8,8.37214111,-0.610033695,8.37214111,8.37214111
36.167556,8.06225775,8.37241072,-0.556913794,8.37241072,8.37241072
36.178047,8.60232527,8.37267846,0.479214777,8.37267846,8.37267846
36.188539,8.88819442,8.37294439,0.717809189,8.37294439,8.37294439
36.19903,8.42614977,8.37320843,0.230089848,8.37320843,8.37320843
36.209522,7.87400787,8.37347066,-0.706726811,8.37347066,8.37347066
36.220014,8.66025404,8.37373103,0.535278436,8.37373103,8.37373103
36.230505,8.30662386,8.37398953,-0.259548972,8.37398953,8.37398953
36.240997,8.36660027,8.3742462,-0.0874410409,8.3742462,8.3742462
36.251488,7.28010989,8.37450099,-1.04613149,8.37450099,8.37450099
36.26198,9,8.37475395,0.790725016,8.37475395,8.37475395
36.272472,7.68114575,8.37500505,-0.832982174,8.37500505,8.37500505
36.282963,8.54400375,8.37525427,0.410791282,8.37525427,8.37525427
36.293455,8.48528137,8.37550165,0.331330236,8.37550165,8.37550165
36.303946,8,8.37574715,-0.612982174,8.37574715,8.37574715
36.314438,8.30662386,8.3759908,-0.263376042,8.3759908,8.3759908
36.32493,8.42614977,8.3762326,0.223421525,8.3762326,8.3762326
36.335421,8.94427191,8.3764725,0.753524658,8.3764725,8.3764725
36.345913,8.88819442,8.37671056,0.715180997,8.37671056,8.37671056
36.356404,8.18535277,8.37694673,-0.43771447,8.37694673,8.37694673
36.366896,9.2736185,8.37718105,0.946803804,8.37718105,8.37718105
36.377388,8.83176087,8.3774135,0.674052938,8.3774135,8.3774135
36.387879,8.24621125,8.37764406,-0.362536631,8.37764406,8.37764406
36.398371,8.1240384,8.37787277,-0.503819771,8.37787277,8.37787277
36.408862,8.48528137,8.37809958,0.327386313,8.37809958,8.37809958
36.419354,8.48528137,8.37832453,0.32704257,8.37832453,8.37832453
36.429846,8.71779789,8.37854761,0.582451952,8.37854761,8.37854761
36.440337,9.43398113,8.37876879,1.02723529,8.37876879,8.37876879
36.450829,8.36660027,8.37898811,-0.111300694,8.37898811,8.37898811
36.46132,8.1240384,8.37920553,-0.505140697,8.37920553,8.37920553
36.471812,8.30662386,8.37942109,-0.269809606,8.37942109,8.37942109
36.482304,9.11043358,8.37963476,0.85486772,8.37963476,8.37963476
36.492795,8.77496439,8.37984653,0.628584009,8.37984653,8.37984653
36.503287,8.42614977,8.38005643,0.214693591,8.38005643,8.38005643
36.513778,8.66025404,8.38026443,0.52914044,8.38026443,8.38026443
36.52427,8.36660027,8.38047056,-0.117772225,8.38047056,8.38047056
36.534762,9.11043358,8.3806748,0.854259197,8.3806748,8.3806748
36.545253,8.42614977,8.38087713,0.212773681,8.38087713,8.38087713
36.555745,8.1240384,8.38107759,-0.506990323,8.38107759,8.38107759
36.566236,7.87400787,8.38127614,-0.712227679,8.38127614,8.38127614
36.576728,8.1240384,8.38147281,-0.507379945,8.38147281,8.38147281
36.58722,9.16515139,8.38166759,0.885146202,8.38166759,8.38166759
36.597711,9.16515139,8.38186045,0.885037251,8.38186045,8.38186045
36.608203,8.48528137,8.38205144,0.321294157,8.38205144,8.38205144
36.618694,9,8.38224051,0.785976776,8.38224051,8.38224051
36.629186,8.83176087,8.3824277,0.670323184,8.3824277,8.3824277
36.639678,8.48528137,8.38261298,0.320419087,8.38261298,8.38261298
36.650169,8.66025404,8.38279635,0.526742524,8.38279635,8.38279635
36.660661,7.87400787,8.38297784,-0.713421307,8.38297784,8.38297784
36.671152,9.79795897,8.3831574,1.18945432,8.3831574,8.3831574
36.681644,8.30662386,8.38333507,-0.276967888,8.38333507,8.38333507
36.692136,9.74679434,8.38351084,1.16759732,8.38351084,8.38351084
36.702627,9.64365076,8.38368469,1.1224821,8.38368469,8.38368469
36.713119,9.2736185,8.38385665,0.943271885,8.38385665,8.38385665
36.72361,8.94427191,8.38402668,0.748495312,8.38402668,8.38402668
36.734102,8.18535277,8.38419482,-0.445917083,8.38419482,8.38419482
36.744594,9.74679434,8.38436104,1.16723318,8.38436104,8.38436104
36.755085,9.16515139,8.38452534,0.883530444,8.38452534,8.38452534
36.765577,8.18535277,8.38468775,-0.446469456,8.38468775,8.38468775
36.776068,8.77496439,8.38484822,0.6245928,8.38484822,8.38484822
36.78656,8.94427191,8.3850068,0.747840299,8.3850068,8.3850068
36.797052,9.48683298,8.38516346,1.04960446,8.38516346,8.38516346
36.807543,8.06225775,8.38531819,-0.568384058,8.38531819,8.38531819
36.818035,9.21954446,8.38547101,0.913276216,8.38547101,8.38547101
36.828526,8.06225775,8.3856219,-0.568651173,8.3856219,8.3856219
36.839018,8.66025404,8.38577089,0.52391139,8.38577089,8.38577089
36.84951,8.94427191,8.38591796,0.747230853,8.38591796,8.38591796
36.860001,8.24621125,8.3860631,-0.373967705,8.3860631,8.3860631
36.870493,9.05538514,8.38620632,0.818033506,8.38620632,8.38620632
36.880984,9.11043358,8.38634761,0.850932411,8.38634761,8.38634761
36.891476,8.48528137,8.38648699,0.314315741,8.38648699,8.38648699
36.901968,8.71779789,8.38662444,0.57547671,8.38662444,8.38662444
36.912459,7.93725393,8.38675996,-0.670452106,8.38675996,8.38675996
36.922951,8.88819442,8.38689356,0.708026027,8.38689356,8.38689356
36.933442,8.54400375,8.38702523,0.396205148,8.38702523,8.38702523
36.943934,8.71779789,8.38715497,0.575015577,8.38715497,8.38715497
36.954426,7.68114575,8.38728279,-0.840319608,8.38728279,8.38728279
36.964917,9.43398113,8.38740867,1.02302124,8.38740867,8.38740867
36.975409,9.59166305,8.38753263,1.09732877,8.38753263,8.38753263
36.9859,8.42614977,8.38765464,0.196201758,8.38765464,8.38765464
36.996392,8.1240384,8.38777474,-0.513552659,8.38777474,8.38777474
37.006884,8.54400375,8.3878929,0.395108649,8.3878929,8.3878929
37.017375,8.71779789,8.38800912,0.574272382,8.38800912,8.38800912
37.027867,9.38083152,8.38812341,0.996347383,8.38812341,8.38812341
37.038358,7.61577311,8.38823576,-0.878898546,8.38823576,8.38823576
37.04885,8.88819442,8.38834618,0.706999459,8.38834618,8.38834618
37.059342,8.77496439,8.38845467,0.621699058,8.38845467,8.38845467
37.069833,7.74596669,8.38856121,-0.801619931,8.38856121,8.38856121
37.080325,9.11043358,8.38866582,0.849569163,8.38866582,8.38866582
37.090816,9.11043358,8.38876848,0.849508741,8.38876848,8.38876848
37.101308,9.53939201,8.38886921,1.07262426,8.38886921,8.38886921
37.1118,8.36660027,8.388968,-0.149558461,8.388968,8.388968
37.122291,8.06225775,8.38906484,-0.571670439,8.38906484,8.38906484
37.132783,8.06225775,8.38915975,-0.571753441,8.38915975,8.38915975
37.143274,8.77496439,8.3892527,0.62105691,8.3892527,8.3892527
37.153766,8.66025404,8.38934372,0.520490456,8.38934372,8.38934372
37.164258,8.60232527,8.3894328,0.461402717,8.3894328,8.3894328
37.174749,8.94427191,8.38951992,0.744816747,8.38951992,8.38951992
37.185241,9.21954446,8.38960511,0.911010069,8.38960511,8.38960511
37.195732,8.48528137,8.38968834,0.309181226,8.38968834,8.38968834
37.206224,9.59166305,8.38976964,1.09630899,8.38976964,8.38976964
37.216716,8.48528137,8.38984898,0.308921333,8.38984898,8.38984898
37.227207,8.66025404,8.38992638,0.51993044,8.38992638,8.38992638
37.237699,8.60232527,8.39000183,0.460785679,8.39000183,8.39000183
37.24819,9.21954446,8.39007532,0.910751963,8.39007532,8.39007532
37.258682,9,8.39014687,0.780930938,8.39014687,8.39014687
37.269174,8.1240384,8.39021647,-0.515924476,8.39021647,8.39021647
37.279665,8,8.39028411,-0.62472723,8.39028411,8.39028411
37.290157,8.88819442,8.39034981,0.705581043,8.39034981,8.39034981
37.300648,8.36660027,8.39041355,-0.154315528,8.39041355,8.39041355
37.31114,8.54400375,8.39047534,0.39182701,8.39047534,8.39047534
37.321632,9.16515139,8.39053518,0.880122839,8.39053518,8.39053518
37.332123,8.24621125,8.39059306,-0.379976058,8.39059306,8.39059306
37.342615,8.60232527,8.39064898,0.460082908,8.39064898,8.39064898
37.353106,8.94427191,8.39070295,0.744022148,8.39070295,8.39070295
37.363598,9,8.39075497,0.780541497,8.39075497,8.39075497
37.37409,8,8.39080503,-0.62514401,8.39080503,8.39080503
37.384581,8.83176087,8.39085313,0.664008835,8.39085313,8.39085313
37.395073,9.21954446,8.39089928,0.910299498,8.39089928,8.39089928
37.405564,8.71779789,8.39094347,0.571711834,8.39094347,8.39094347
37.416056,8.48528137,8.3909857,0.307076013,8.3909857,8.3909857
37.426548,9,8.39102597,0.780367882,8.39102597,8.39102597
37.437039,8.83176087,8.39106428,0.663849825,8.39106428,8.39106428
37.447531,7.87400787,8.39110063,-0.719091618,8.39110063,8.39110063
37.458022,8.36660027,8.39113502,-0.156635729,8.39113502,8.39113502
37.468514,8.54400375,8.39116745,0.390942832,8.39116745,8.39116745
37.479006,9.74679434,8.39119792,1.16430083,8.39119792,8.39119792
37.489497,9.11043358,8.39122642,0.848060822,8.39122642,8.39122642
37.499989,8.83176087,8.39125297,0.663707693,8.39125297,8.39125297
37.51048,9.16515139,8.39127754,0.879700998,8.39127754,8.39127754
37.520972,8.30662386,8.39130016,-0.290991924,8.39130016,8.39130016
37.531464,8.77496439,8.39132082,0.619389676,8.39132082,8.39132082
37.541955,8.30662386,8.39133951,-0.291059517,8.39133951,8.39133951
37.552447,8.66025404,8.39135623,0.518553572,8.39135623,8.39135623
37.562938,8.30662386,8.39137099,-0.291113598,8.39137099,8.39137099
37.57343,8.54400375,8.39138378,0.390666048,8.39138378,8.39138378
37.583922,8.24621125,8.39139461,-0.381029345,8.39139461,8.39139461
37.594413,7.93725393,8.39140347,-0.673906181,8.39140347,8.39140347
37.604905,7.68114575,8.39141037,-0.842771987,8.39141037,8.39141037
37.615396,9.43398113,8.3914153,1.02106113,8.3914153,8.3914153
37.625888,8.71779789,8.39141826,0.571296445,8.39141826,8.39141826
37.63638,8.06225775,8.39141925,-0.573725983,8.39141925,8.39141925
37.646871,8.54400375,8.39141828,0.390621901,8.39141828,8.39141828
37.657363,8.30662386,8.39141533,-0.291189747,8.39141533,8.39141533
37.667854,7.93725393,8.39141042,-0.673911334,8.39141042,8.39141042
37.678346,8.24621125,8.39140354,-0.381041054,8.39140354,8.39140354
37.688838,8.18535277,8.39139468,-0.453918398,8.39139468,8.39139468
37.699329,8,8.39138386,-0.625606795,8.39138386,8.39138386
37.709821,8,8.39137107,-0.62559657,8.39137107,8.39137107
37.720312,8.54400375,8.39135631,0.390701214,8.39135631,8.39135631
37.730804,7.81024968,8.39133957,-0.762292526,8.39133957,8.39133957
37.741296,8.66025404,8.39132086,0.518587671,8.39132086,8.39132086
37.751787,8.06225775,8.39130019,-0.57362221,8.39130019,8.39130019
37.762279,9.16515139,8.39127754,0.879701001,8.39127754,8.39127754
37.77277,8.77496439,8.39125292,0.619444485,8.39125292,8.39125292
37.783262,8.71779789,8.39122632,0.571464403,8.39122632,8.39122632
37.793754,8.30662386,8.39119775,-0.290815906,8.39119775,8.39119775
37.804245,9.16515139,8.39116722,0.879763704,8.39116722,8.39116722
37.814737,8.18535277,8.3911347,-0.453631931,8.3911347,8.3911347
37.825228,8.54400375,8.39110022,0.39102881,8.39110022,8.39110022
37.83572,9.05538514,8.39106375,0.81505913,8.39106375,8.39106375
37.846212,8.18535277,8.39102532,-0.453511348,8.39102532,8.39102532
37.856703,8.77496439,8.39098491,0.619660778,8.39098491,8.39098491
37.867195,8.48528137,8.39094252,0.307146307,8.39094252,8.39094252
37.877686,8.48528137,8.39089816,0.307218507,8.39089816,8.39089816
37.888178,9.64365076,8.39085183,1.11928501,8.39085183,8.39085183
37.89867,8.24621125,8.39080351,-0.380252893,8.39080351,8.39080351
37.909161,8.42614977,8.39075323,0.188139689,8.39075323,8.39075323
37.919653,9.05538514,8.39070097,0.815281652,8.39070097,8.39070097
37.930144,7.87400787,8.39064673,-0.718775944,8.39064673,8.39064673
37.940636,8.88819442,8.39059052,0.70541045,8.39059052,8.39059052
37.951128,8.66025404,8.39053232,0.519347394,8.39053232,8.39053232
37.961619,8.83176087,8.39047216,0.664295648,8.39047216,8.39047216
37.972111,9.05538514,8.39041001,0.815460071,8.39041001,8.39041001
37.982602,9,8.39034589,0.780803501,8.39034589,8.39034589
37.993094,8.83176087,8.39027979,0.664440422,8.39027979,8.39027979
38.003586,9.16515139,8.39021171,0.880306581,8.39021171,8.39021171
38.014077,7.93725393,8.39014166,-0.672969339,8.39014166,8.39014166
38.024569,8.18535277,8.39006963,-0.452456471,8.39006963,8.39006963
38.03506,8.71779789,8.38999562,0.572540184,8.38999562,8.38999562
38.045552,7.87400787,8.38991963,-0.718269978,8.38991963,8.38991963
38.056044,8.1240384,8.38984167,-0.515561114,8.38984167,8.38984167
38.066535,9.59166305,8.38976173,1.0963126,8.38976173,8.38976173
38.077027,8.60232527,8.3896798,0.461134974,8.3896798,8.3896798
38.087518,8.77496439,8.38959591,0.620780541,8.38959591,8.38959591
38.09801,9.94987437,8.38951002,1.24914545,8.38951002,8.38951002
38.108502,7.68114575,8.38942216,-0.841591597,8.38942216,8.38942216
38.118993,7.74596669,8.38933233,-0.802100766,8.38933233,8.38933233
38.129485,8.71779789,8.38924051,0.573199245,8.38924051,8.38924051
38.139976,7.93725393,8.38914672,-0.672229715,8.38914672,8.38914672
38.150468,9.21954446,8.38905095,0.911314167,8.38905095,8.38905095
38.16096,9.21954446,8.38895319,0.911367801,8.38895319,8.38895319
38.171451,8.36660027,8.38885346,-0.149175057,8.38885346,8.38885346
38.181943,8.60232527,8.38875175,0.462140152,8.38875175,8.38875175
38.192434,8.1240384,8.38864806,-0.514402233,8.38864806,8.38864806
38.202926,8.36660027,8.38854239,-0.148128736,8.38854239,8.38854239
38.213418,8.60232527,8.38843473,0.462483009,8.38843473,8.38843473
38.223909,9.74679434,8.38832511,1.16553388,8.38832511,8.38832511
38.234401,8.71779789,8.3882135,0.574094409,8.3882135,8.3882135
38.244892,9.2736185,8.38809991,0.941019968,8.38809991,8.38809991
38.255384,8.71779789,8.38798434,0.574293954,8.38798434,8.38798434
38.265876,9.21954446,8.38786679,0.911963633,8.38786679,8.38786679
38.276367,8.54400375,8.38774727,0.395292901,8.38774727,8.38774727
38.286859,7.93725393,8.38762576,-0.671097476,8.38762576,8.38762576
38.29735,8.83176087,8.38750227,0.666527263,8.38750227,8.38750227
38.307842,8.24621125,8.3873768,-0.375720044,8.3873768,8.3873768
38.318334,7.68114575,8.38724935,-0.84029971,8.38724935,8.38724935
38.328825,7.34846923,8.38711993,-1.01914214,8.38711993,8.38711993
38.339317,9.16515139,8.38698852,0.882135404,8.38698852,8.38698852
38.349808,8.66025404,8.38685514,0.522875604,8.38685514,8.38685514
38.3603,9.05538514,8.38671977,0.817719615,8.38671977,8.38671977
38.370792,9.32737905,8.38658242,0.969946717,8.38658242,8.38658242
38.381283,8.1240384,8.3864431,-0.512254523,8.3864431,8.3864431
38.391775,9.16515139,8.38630179,0.88252456,8.38630179,8.38630179
38.402266,7.74596669,8.38615851,-0.80011988,8.38615851,8.38615851
38.412758,8.71779789,8.38601325,0.576007501,8.38601325,8.38601325
38.42325,8.66025404,8.385866,0.52382062,8.385866,8.385866
38.433741,8.06225775,8.38571678,-0.56873459,8.38571678,8.38571678
38.444233,8.71779789,8.38556557,0.576395969,8.38556557,8.38556557
38.454724,8.66025404,8.3854124,0.524253409,8.3854124,8.3854124
38.465216,8.06225775,8.38525723,-0.568330438,8.38525723,8.38525723
38.475708,8.60232527,8.38510009,0.466074219,8.38510009,8.38510009
38.486199,8.36660027,8.38494098,-0.135427893,8.38494098,8.38494098
38.496691,8.88819442,8.38477988,0.709517119,8.38477988,8.38477988
38.507182,8.71779789,8.38461681,0.577218398,8.38461681,8.38461681
38.517674,9.53939201,8.38445175,1.07468147,8.38445175,8.38445175
38.528166,7.81024968,8.38428471,-0.757650996,8.38428471,8.38428471
38.538657,8.48528137,8.3841157,0.318065512,8.3841157,8.3841157
38.549149,9.32737905,8.38394471,0.971305485,8.38394471,8.38394471
38.55964,8.77496439,8.38377175,0.625453947,8.38377175,8.38377175
38.570132,8.48528137,8.38359679,0.318880197,8.38359679,8.38359679
38.580624,7.68114575,8.38341986,-0.838017968,8.38341986,8.38341986
38.591115,9.16515139,8.38324097,0.884256988,8.38324097,8.38324097
38.601607,7.81024968,8.38306008,-0.756842392,8.38306008,8.38306008
38.612098,8.60232527,8.38287723,0.468452807,8.38287723,8.38287723
38.62259,7.87400787,8.38269239,-0.713221226,8.38269239,8.38269239
38.633082,7.87400787,8.38250557,-0.713090245,8.38250557,8.38250557
38.643573,8.48528137,8.38231679,0.320880946,8.38231679,8.38231679
38.654065,8.18535277,8.38212602,-0.443591306,8.38212602,8.38212602
38.664556,8.60232527,8.38193329,0.469459244,8.38193329,8.38193329
38.675048,8,8.38173856,-0.617849948,8.38173856,8.38173856
38.68554,8.06225775,8.38154185,-0.565052303,8.38154185,8.38154185
38.696031,8.54400375,8.38134319,0.40331198,8.38134319,8.38134319
38.706523,8.94427191,8.38114254,0.750419466,8.38114254,8.38114254
38.717014,9.38083152,8.38093992,0.999945797,8.38093992,8.38093992
38.727506,8.24621125,8.38073531,-0.366775222,8.38073531,8.38073531
38.737998,9,8.38052873,0.787064971,8.38052873,8.38052873
38.748489,8.60232527,8.38032019,0.471174145,8.38032019,8.38032019
38.758981,8.24621125,8.38010966,-0.365921312,8.38010966,8.38010966
38.769472,8.30662386,8.37989717,-0.270690425,8.37989717,8.37989717
38.779964,8,8.37968269,-0.616183971,8.37968269,8.37968269
38.790456,7.74596669,8.37946623,-0.795926841,8.37946623,8.37946623
38.800947,8.60232527,8.37924782,0.472310756,8.37924782,8.37924782
38.811439,7.93725393,8.37902741,-0.664660423,8.37902741,8.37902741
38.82193,7.93725393,8.37880505,-0.66449313,8.37880505,8.37880505
38.832422,8.60232527,8.3785807,0.473016455,8.3785807,8.3785807
38.842914,8.36660027,8.37835437,-0.10841637,8.37835437,8.37835437
38.853405,8.06225775,8.3781261,-0.562021663,8.3781261,8.3781261
38.863897,8.66025404,8.37789583,0.531373891,8.37789583,8.37789583
38.874388,9,8.3776636,0.788883005,8.3776636,8.3776636
38.88488,8.1240384,8.37742939,-0.503379563,8.37742939,8.37742939
38.895372,8.88819442,8.3771932,0.714843491,8.3771932,8.3771932
38.905863,7.54983444,8.37695506,-0.909461725,8.37695506,8.37695506
38.916355,8.60232527,8.37671493,0.47498456,8.37671493,8.37671493
38.926846,8.54400375,8.37647286,0.409305374,8.37647286,8.37647286
38.937338,8.36660027,8.37622878,-0.0981250183,8.37622878,8.37622878
38.94783,8.66025404,8.37598274,0.533170981,8.37598274,8.37598274
38.958321,7.81024968,8.37573475,-0.751987419,8.37573475,8.37573475
38.968813,8.42614977,8.37548477,0.225088874,8.37548477,8.37548477
38.979304,8.94427191,8.37523284,0.754346781,8.37523284,8.37523284
38.989796,8.30662386,8.37497892,-0.261448009,8.37497892,8.37497892
39.000288,8.36660027,8.37472304,-0.0901264116,8.37472304,8.37472304
39.010779,8.18535277,8.3744652,-0.434870591,8.3744652,8.3744652
39.021271,8.24621125,8.37420538,-0.357762667,8.37420538,8.37420538
39.031762,8.94427191,8.37394361,0.755200835,8.37394361,8.37394361
39.042254,8.48528137,8.37367985,0.334068146,8.37367985,8.37367985
39.052746,8.18535277,8.37341412,-0.433660407,8.37341412,8.37341412
39.063237,8.1240384,8.37314645,-0.49910725,8.37314645,8.37314645
39.073729,9,8.37287679,0.791911112,8.37287679,8.37287679
39.08422,8.71779789,8.37260519,0.587531018,8.37260519,8.37260519
39.094712,8.71779789,8.3723316,0.587763804,8.3723316,8.3723316
39.105204,9.38083152,8.37205604,1.00437816,8.37205604,8.37205604
39.115695,8.88819442,8.37177854,0.718620813,8.37177854,8.37177854
39.126187,8.18535277,8.37149906,-0.431446736,8.37149906,8.37149906
39.136678,8.06225775,8.37121763,-0.555841601,8.37121763,8.37121763
39.14717,8.54400375,8.37093422,0.416016256,8.37093422,8.37093422
39.157662,8.54400375,8.37064884,0.416359104,8.37064884,8.37064884
39.168153,8.48528137,8.37036153,0.338998297,8.37036153,8.37036153
39.178645,8.1240384,8.37007223,-0.496017964,8.37007223,8.37007223
39.189136,9.11043358,8.36978099,0.860611754,8.36978099,8.36978099
39.199628,9,8.36948776,0.794048008,8.36948776,8.36948776
39.21012,7.87400787,8.36919257,-0.703693611,8.36919257,8.36919257
39.220611,8.24621125,8.36889545,-0.350263045,8.36889545,8.36889545
39.231103,8.60232527,8.36859634,0.483455194,8.36859634,8.36859634
39.241594,9.11043358,8.3682953,0.861474479,8.3682953,8.3682953
39.252086,8.66025404,8.36799227,0.540612398,8.36799227,8.36799227
39.262578,8.30662386,8.36768728,-0.24711014,8.36768728,8.36768728
39.273069,8.24621125,8.36738037,-0.348093544,8.36738037,8.36738037
39.283561,8.71779789,8.36707146,0.592221602,8.36707146,8.36707146
39.294052,8.36660027,8.36676063,-0.0126634498,8.36676063,8.36676063
39.304544,8.42614977,8.36644781,0.244339856,8.36644781,8.36644781
39.315036,9.11043358,8.36613303,0.862728548,8.36613303,8.36613303
39.325527,8,8.36581633,-0.604827519,8.36581633,8.36581633
39.336019,7.81024968,8.36549764,-0.745149624,8.36549764,8.36549764
39.34651,8.24621125,8.36517702,-0.344914152,8.36517702,8.36517702
39.357002,7.93725393,8.36485442,-0.653911684,8.36485442,8.36485442
39.367494,7.54983444,8.36452987,-0.902604805,8.36452987,8.36452987
39.377985,7.81024968,8.36420339,-0.74428067,8.36420339,8.36420339
39.388477,9.64365076,8.36387493,1.13127178,8.36387493,8.36387493
39.398968,8.42614977,8.36354455,0.250210365,8.36354455,8.36354455
39.40946,9.2736185,8.36321218,0.954152146,8.36321218,8.36321218
39.419952,8.42614977,8.36287786,0.251539091,8.36287786,8.36287786
39.430443,8.83176087,8.36254162,0.684995801,8.36254162,8.36254162
39.440935,8.94427191,8.3622034,0.762934147,8.3622034,8.3622034
39.451426,8.06225775,8.36186326,-0.547362319,8.36186326,8.36186326
39.461918,8.60232527,8.36152113,0.490717977,8.36152113,8.36152113
39.47241,8.48528137,8.36117706,0.352284421,8.36117706,8.36117706
39.482901,8.30662386,8.36083107,-0.232824418,8.36083107,8.36083107
39.493393,7.93725393,8.3604831,-0.650560658,8.3604831,8.3604831
39.503884,8.66025404,8.36013322,0.547832839,8.36013322,8.36013322
39.514376,9,8.35978135,0.800136643,8.35978135,8.35978135
39.524868,8.30662386,8.35942754,-0.229790509,8.35942754,8.35942754
39.535359,9.38083152,8.35907182,1.0108213,8.35907182,8.35907182
39.545851,7.74596669,8.35871411,-0.782781847,8.35871411,8.35871411
39.556342,8.24621125,8.3583545,-0.334877957,8.3583545,8.3583545
39.566834,8.30662386,8.3579929,-0.226647393,8.3579929,8.3579929
39.577326,9.38083152,8.35762937,1.01153455,8.35762937,8.35762937
39.587817,7.41619849,8.35726392,-0.97008527,8.35726392,8.35726392
39.598309,8.66025404,8.35689649,0.550779033,8.35689649,8.35689649
39.6088,8,8.35652716,-0.597098956,8.35652716,8.35652716
39.619292,7.87400787,8.35615585,-0.694368764,8.35615585,8.35615585
39.629784,7.93725393,8.3557826,-0.646937919,8.3557826,8.3557826
39.640275,8.18535277,8.35540745,-0.412376864,8.35540745,8.35540745
39.650767,8.30662386,8.35503032,-0.220014673,8.35503032,8.35503032
39.661258,9.16515139,8.35465129,0.900277793,8.35465129,8.35465129
39.67175,7.41619849,8.35427028,-0.968541062,8.35427028,8.35427028
39.682242,9.21954446,8.35388733,0.930406969,8.35388733,8.35388733
39.692733,8.24621125,8.35350248,-0.3275534,8.35350248,8.35350248
39.703225,7.87400787,8.35311566,-0.692176123,8.35311566,8.35311566
39.713716,9,8.35272694,0.804532822,8.35272694,8.35272694
39.724208,8.06225775,8.35233624,-0.538589357,8.35233624,8.35233624
39.7347,8.24621125,8.35194361,-0.325165132,8.35194361,8.35194361
39.745191,7.93725393,8.35154909,-0.643657638,8.35154909,8.35154909
39.755683,8.36660027,8.35115259,0.124288676,8.35115259,8.35115259
39.766174,8.1240384,8.3507542,-0.476146818,8.3507542,8.3507542
39.776666,8,8.35035383,-0.591906946,8.35035383,8.35035383
39.787158,8.30662386,8.34995154,-0.208153007,8.34995154,8.34995154
39.797649,8.88819442,8.34954735,0.733925793,8.34954735,8.34954735
39.808141,9.2736185,8.34914119,0.961497429,8.34914119,8.34914119
39.818632,7.81024968,8.34873314,-0.733814326,8.34873314,8.34873314
39.829124,8.18535277,8.34832312,-0.403695865,8.34832312,8.34832312
39.839616,8.54400375,8.34791118,0.442823406,8.34791118,8.34791118
39.850107,8.36660027,8.34749734,0.138213328,8.34749734,8.34749734
39.860599,9.05538514,8.34708154,0.841607747,8.34708154,8.34708154
39.87109,8.18535277,8.34666385,-0.401635504,8.34666385,8.34666385
39.881582,8.42614977,8.34624419,0.282675748,8.34624419,8.34624419
39.892074,8.54400375,8.34582261,0.445175394,8.34582261,8.34582261
39.902565,9,8.34539915,0.80907407,8.34539915,8.34539915
39.913057,8.88819442,8.34497372,0.737035073,8.34497372,8.34497372
39.923548,8.36660027,8.34454641,0.148505416,8.34454641,8.34454641
39.93404,9.11043358,8.34411713,0.875395024,8.34411713,8.34411713
39.944532,8.1240384,8.34368593,-0.468665689,8.34368593,8.34368593
39.955023,9.05538514,8.34325286,0.843879306,8.34325286,8.34325286
39.965515,8.24621125,8.34281782,-0.310815965,8.34281782,8.34281782
39.976006,8,8.3423809,-0.58513323,8.3423809,8.3423809
39.986498,8.30662386,8.34194202,-0.187931251,8.34194202,8.34194202
39.99699,8.48528137,8.34150122,0.379183536,8.34150122,8.34150122
40.007481,8.54400375,8.34105855,0.450494393,8.34105855,8.34105855
40.017973,7.21110255,8.34061391,-1.06278472,8.34061391,8.34061391
40.028464,7.87400787,8.34016741,-0.682758767,8.34016741,8.34016741
40.038956,8.06225775,8.33971894,-0.526745854,8.33971894,8.33971894
40.049448,8.1240384,8.33926856,-0.463929045,8.33926856,8.33926856
40.059939,7.54983444,8.33881631,-0.888246519,8.33881631,8.33881631
40.070431,7.74596669,8.33836211,-0.769672277,8.33836211,8.33836211
40.080922,8,8.33790603,-0.581296851,8.33790603,8.33790603
40.091414,7.61577311,8.337448,-0.849514503,8.337448,8.337448
40.101906,8.30662386,8.33698805,-0.174253239,8.33698805,8.33698805
40.112397,7.21110255,8.33652624,-1.06085988,8.33652624,8.33652624
40.122889,7.87400787,8.33606248,-0.679745987,8.33606248,8.33606248
40.13338,8.06225775,8.33559685,-0.522818424,8.33559685,8.33559685
40.143872,7.87400787,8.33512927,-0.679059201,8.33512927,8.33512927
40.154364,9.38083152,8.33465978,1.02282537,8.33465978,8.33465978
40.164855,8.48528137,8.33418843,0.388706753,8.33418843,8.33418843
40.175347,8.42614977,8.33371513,0.304030656,8.33371513,8.33371513
40.185838,8.30662386,8.33323997,-0.163144444,8.33323997,8.33323997
40.19633,8.42614977,8.33276286,0.305592721,8.33276286,8.33276286
40.206822,8.77496439,8.33228385,0.665342422,8.33228385,8.33228385
40.217313,8.77496439,8.33180298,0.665703695,8.33180298,8.33180298
40.227805,8,8.33132016,-0.575604168,8.33132016,8.33132016
40.238296,7.14142843,8.33083548,-1.0905994,8.33083548,8.33083548
40.248788,8,8.33034886,-0.574759832,8.33034886,8.33034886
40.25928,8.06225775,8.32986034,-0.517303195,8.32986034,8.32986034
40.269771,8.30662386,8.32936997,-0.150818132,8.32936997,8.32936997
40.280263,7.68114575,8.32887765,-0.804817934,8.32887765,8.32887765
40.290754,8.06225775,8.32838349,-0.515873763,8.32838349,8.32838349
40.301246,8.60232527,8.32788738,0.523868199,8.32788738,8.32788738
40.311738,8.24621125,8.32738937,-0.284917741,8.32738937,8.32738937
40.322229,8.94427191,8.32688952,0.785736847,8.32688952,8.32688952
40.332721,7.87400787,8.32638772,-0.672591888,8.32638772,8.32638772
40.343212,7.61577311,8.32588408,-0.842680826,8.32588408,8.32588408
40.353704,8,8.3253785,-0.570419583,8.3253785,8.3253785
40.364196,8.24621125,8.32487103,-0.280463504,8.32487103,8.32487103
40.374687,8.36660027,8.32436171,0.205520197,8.32436171,8.32436171
40.385179,8.24621125,8.32385046,-0.278638134,8.32385046,8.32385046
40.39567,8.42614977,8.32333737,0.320643735,8.32333737,8.32333737
40.406162,8.54400375,8.32282234,0.470299274,8.32282234,8.32282234
40.416654,8.36660027,8.32230542,0.210463404,8.32230542,8.32230542
40.427145,8.60232527,8.32178667,0.529658947,8.32178667,8.32178667
40.437637,7.87400787,8.32126598,-0.668773581,8.32126598,8.32126598
40.448128,8.54400375,8.32074345,0.472504278,8.32074345,8.32074345
40.45862,8.36660027,8.32021899,0.215363113,8.32021899,8.32021899
40.469112,8.36660027,8.31969265,0.216581651,8.31969265,8.31969265
40.479603,9.05538514,8.31916448,0.858033017,8.31916448,8.31916448
40.490095,7.61577311,8.31863438,-0.838368219,8.31863438,8.31863438
40.500586,8.18535277,8.31810244,-0.364348281,8.31810244,8.31810244
40.511078,8.36660027,8.31756858,0.221431001,8.31756858,8.31756858
40.52157,7.74596669,8.31703283,-0.755689183,8.31703283,8.31703283
40.532061,7.61577311,8.31649526,-0.837091487,8.31649526,8.31649526
40.542553,6.70820393,8.31595577,-1.26797154,8.31595577,8.31595577
40.553044,9.11043358,8.31541444,0.891638456,8.31541444,8.31541444
40.563536,7.21110255,8.31487119,-1.05060394,8.31487119,8.31487119
40.574028,8.36660027,8.31432607,0.228635508,8.31432607,8.31432607
40.584519,8.66025404,8.31377912,0.588621197,8.31377912,8.31377912
40.595011,8.30662386,8.31323026,-0.0812797168,8.31323026,8.31323026
40.605502,8.06225775,8.31267957,-0.500421641,8.31267957,8.31267957
40.615994,8.94427191,8.31212695,0.79507544,8.31212695,8.31212695
40.626486,7.93725393,8.31157247,-0.611815773,8.31157247,8.31157247
40.636977,8.1240384,8.31101618,-0.432409264,8.31101618,8.31101618
40.647469,8.48528137,8.31045796,0.418118903,8.31045796,8.31045796
40.65796,9.2736185,8.30989793,0.981692706,8.30989793,8.30989793
40.668452,8.66025404,8.30933597,0.592383376,8.30933597,8.30933597
40.678944,7.74596669,8.30877216,-0.750203616,8.30877216,8.30877216
40.689435,8.24621125,8.30820653,-0.248988512,8.30820653,8.30820653
40.699927,9.32737905,8.30763899,1.0098218,8.30763899,8.30763899
40.710418,7.93725393,8.30706963,-0.608124741,8.30706963,8.30706963
40.72091,7.68114575,8.30649837,-0.790792398,8.30649837,8.30649837
40.731402,7.48331477,8.30592524,-0.906978755,8.30592524,8.30592524
40.741893,7.93725393,8.3053503,-0.606709461,8.3053503,8.3053503
40.752385,7.68114575,8.30477346,-0.789701024,8.30477346,8.30477346
40.762876,7.54983444,8.30419481,-0.868539217,8.30419481,8.30419481
40.773368,7.61577311,8.30361424,-0.829361887,8.30361424,8.30361424
40.78386,7.41619849,8.30303183,-0.941718291,8.30303183,8.30303183
40.794351,8.66025404,8.30244761,0.598169229,8.30244761,8.30244761
40.804843,7.74596669,8.30186148,-0.745583525,8.30186148,8.30186148
40.815334,7.74596669,8.30127356,-0.74518915,8.30127356,8.30127356
40.825826,9.2736185,8.30068373,0.986374556,8.30068373,8.30068373
40.836318,8.18535277,8.30009205,-0.338731866,8.30009205,8.30009205
40.846809,8.24621125,8.29949857,-0.230840468,8.29949857,8.29949857
40.857301,8.83176087,8.29890319,0.729971009,8.29890319,8.29890319
40.867792,8.1240384,8.29830602,-0.417453728,8.29830602,8.29830602
40.878284,7.87400787,8.29770694,-0.650921707,8.29770694,8.29770694
40.888776,7.68114575,8.29710602,-0.784831366,8.29710602,8.29710602
40.899267,7.07106781,8.29650331,-1.1069939,8.29650331,8.29650331
40.909759,6.92820323,8.2958987,-1.16948513,8.2958987,8.2958987
40.92025,8,8.2952923,-0.543408043,8.2952923,8.2952923
40.930742,8.48528137,8.294684,0.436574587,8.294684,8.294684
40.941234,8.42614977,8.29407387,0.363422492,8.29407387,8.29407387
40.951725,8.30662386,8.29346194,0.114725402,8.29346194,8.29346194
40.962217,8.36660027,8.29284813,0.271573449,8.29284813,8.29284813
40.972708,7.54983444,8.29223253,-0.861625263,8.29223253,8.29223253
40.9832,8.83176087,8.29161504,0.734946141,8.29161504,8.29161504
40.993692,8.06225775,8.29099571,-0.478265573,8.29099571,8.29099571
41.004183,7.81024968,8.2903746,-0.692910474,8.2903746,8.2903746
41.014675,9.21954446,8.2897516,0.96425767,8.2897516,8.2897516
41.025166,7.87400787,8.28912683,-0.644297257,8.28912683,8.28912683
41.035658,9.32737905,8.28850017,1.01925408,8.28850017,8.28850017
41.04615,8,8.28787167,-0.536536737,8.28787167,8.28787167
41.056641,8.54400375,8.2872414,0.506717219,8.2872414,8.2872414
41.067133,9.05538514,8.28660925,0.876798659,8.28660925,8.28660925
41.077624,7.74596669,8.28597533,-0.734852799,8.28597533,8.28597533
41.088116,8.1240384,8.28533952,-0.4016231,8.28533952,8.28533952
41.098608,7.74596669,8.28470188,-0.733985825,8.28470188,8.28470188
41.109099,8.42614977,8.28406248,0.376944677,8.28406248,8.28406248
41.119591,7.87400787,8.2834212,-0.639854144,8.2834212,8.2834212
41.130082,8.66025404,8.28277815,0.614390661,8.28277815,8.28277815
41.140574,7.14142843,8.28213322,-1.06803783,8.28213322,8.28213322
41.151066,9.11043358,8.28148647,0.910465323,8.28148647,8.28148647
41.161557,7.48331477,8.28083797,-0.893041541,8.28083797,8.28083797
41.172049,8.66025404,8.28018758,0.616495304,8.28018758,8.28018758
41.18254,8.24621125,8.27953543,-0.182549127,8.27953543,8.27953543
41.193032,7.34846923,8.27888141,-0.96457876,8.27888141,8.27888141
41.203524,8.71779789,8.27822557,0.663002498,8.27822557,8.27822557
41.214015,8.42614977,8.27756799,0.385463082,8.27756799,8.27756799
41.224507,8.1240384,8.27690852,-0.39098608,8.27690852,8.27690852
41.234998,8.30662386,8.2762473,0.174288721,8.2762473,8.2762473
41.24549,7.54983444,8.27558422,-0.851909491,8.27558422,8.27558422
41.255982,8.42614977,8.27491932,0.388883603,8.27491932,8.27491932
41.266473,8.18535277,8.27425267,-0.298160862,8.27425267,8.27425267
41.276965,9,8.27358416,0.852300325,8.27358416,8.27358416
41.287456,8.54400375,8.2729139,0.520662894,8.2729139,8.2729139
41.297948,7.61577311,8.27224177,-0.810227537,8.27224177,8.27224177
41.30844,8.18535277,8.27156783,-0.293624013,8.27156783,8.27156783
41.318931,8.30662386,8.27089216,0.189028313,8.27089216,8.27089216
41.329423,8.06225775,8.27021462,-0.456022885,8.27021462,8.27021462
41.339914,9.11043358,8.26953534,0.917005036,8.26953534,8.26953534
41.350406,7.34846923,8.2688542,-0.959366965,8.2688542,8.2688542
41.360898,8.30662386,8.26817126,0.196093352,8.26817126,8.26817126
41.371389,7.54983444,8.26748659,-0.847143524,8.26748659,8.26748659
41.381881,7.93725393,8.26680005,-0.574061074,8.26680005,8.26680005
41.392372,8.18535277,8.26611178,-0.2841813,8.26611178,8.26611178
41.402864,7.68114575,8.26542166,-0.764379427,8.26542166,8.26542166
41.413356,8.54400375,8.26472973,0.528463821,8.26472973,8.26472973
41.423847,7.81024968,8.26403609,-0.673636706,8.26403609,8.26403609
41.434339,8.24621125,8.26334058,-0.13087907,8.26334058,8.26334058
41.44483,8.54400375,8.26264335,0.530434154,8.26264335,8.26264335
41.455322,7.68114575,8.26194427,-0.762101385,8.26194427,8.26194427
41.465814,7.81024968,8.2612434,-0.67156066,8.2612434,8.2612434
41.476305,8.66025404,8.2605408,0.632228784,8.2605408,8.2605408
41.486797,8.66025404,8.25983636,0.632785652,8.25983636,8.25983636
41.497288,8.71779789,8.25913019,0.677250097,8.25913019,8.25913019
41.50778,8.54400375,8.25842218,0.534398322,8.25842218,8.25842218
41.518272,7.74596669,8.25771238,-0.715364026,8.25771238,8.25771238
41.528763,7.61577311,8.25700087,-0.800766986,8.25700087,8.25700087
41.539255,7.21110255,8.25628751,-1.02234288,8.25628751,8.25628751
41.549746,7.14142843,8.25557244,-1.05553021,8.25557244,8.25557244
41.560238,8.24621125,8.25485553,-0.0929746092,8.25485553,8.25485553
41.57073,8,8.25413684,-0.504119864,8.25413684,8.25413684
41.581221,9.16515139,8.25341644,0.95484813,8.25341644,8.25341644
41.591713,8.71779789,8.2526942,0.681985111,8.2526942,8.2526942
41.602204,7.41619849,8.25197025,-0.914205536,8.25197025,8.25197025
41.612696,8.48528137,8.25124446,0.483773617,8.25124446,8.25124446
41.623188,7.74596669,8.2505169,-0.710316979,8.2505169,8.2505169
41.633679,8.30662386,8.24978764,0.238403481,8.24978764,8.24978764
41.644171,8.54400375,8.24905655,0.543090416,8.24905655,8.24905655
41.654662,9.11043358,8.24832375,0.928498696,8.24832375,8.24832375
41.665154,8,8.24758912,-0.497583279,8.24758912,8.24758912
41.675646,8.30662386,8.24685272,0.244481369,8.24685272,8.24685272
41.686137,8.60232527,8.24611463,0.596833841,8.24611463,8.24611463
41.696629,8.60232527,8.24537471,0.597453393,8.24537471,8.24537471
41.70712,9.05538514,8.2446331,0.900417705,8.2446331,8.2446331
41.717612,8.48528137,8.24388965,0.491316318,8.24388965,8.24388965
41.728104,8.06225775,8.24314445,-0.425307767,8.24314445,8.24314445
41.738595,7.74596669,8.24239755,-0.704578499,8.24239755,8.24239755
41.749087,9.05538514,8.24164883,0.902073337,8.24164883,8.24164883
41.759578,7.93725393,8.24089843,-0.551039469,8.24089843,8.24089843
41.77007,8.36660027,8.2401462,0.355603805,8.2401462,8.2401462
41.780562,7.61577311,8.23939222,-0.78969558,8.23939222,8.23939222
41.791053,8.66025404,8.23863655,0.649320788,8.23863655,8.23863655
41.801545,8.30662386,8.23787907,0.262192291,8.23787907,8.23787907
41.812036,8.30662386,8.2371199,0.26363604,8.2371199,8.2371199
41.822528,8.30662386,8.23635892,0.26507536,8.23635892,8.23635892
41.83302,9.32737905,8.23559618,1.04488414,8.23559618,8.23559618
41.843511,8.77496439,8.23483178,0.734937147,8.23483178,8.23483178
41.854003,8.06225775,8.23406555,-0.414497052,8.23406555,8.23406555
41.864494,7.74596669,8.23329766,-0.698090945,8.23329766,8.23329766
41.874986,8.48528137,8.23252795,0.502745884,8.23252795,8.23252795
41.885478,8.71779789,8.2317565,0.697166686,8.2317565,8.2317565
41.895969,8.1240384,8.23098338,-0.327024429,8.23098338,8.23098338
41.906461,8.36660027,8.23020845,0.369312623,8.23020845,8.23020845
41.916952,8.36660027,8.22943186,0.370362535,8.22943186,8.22943186
41.927444,7.61577311,8.22865345,-0.78286675,8.22865345,8.22865345
41.937936,8.1240384,8.22787331,-0.322234246,8.22787331,8.22787331
41.948427,8.30662386,8.22709152,0.282014801,8.22709152,8.22709152
41.958919,8,8.22630791,-0.475718308,8.22630791,8.22630791
41.96941,8.60232527,8.22552265,0.613842505,8.22552265,8.22552265
41.979902,8.83176087,8.22473558,0.779118276,8.22473558,8.22473558
41.990394,9.69535971,8.22394678,1.21301811,8.22394678,8.22394678
42.000885,7.93725393,8.22315633,-0.534698418,8.22315633,8.22315633
42.011377,8.83176087,8.22236408,0.780638704,8.22236408,8.22236408
42.021868,8.71779789,8.22157018,0.704434318,8.22157018,8.22157018
42.03236,8.48528137,8.22077448,0.51430234,8.22077448,8.22077448
42.042852,8.18535277,8.21997705,-0.186076011,8.21997705,8.21997705
42.053343,7.68114575,8.21917798,-0.733506807,8.21917798,8.21917798
42.063835,8.06225775,8.21837712,-0.395119438,8.21837712,8.21837712
42.074326,8.71779789,8.21757461,0.707264644,8.21757461,8.21757461
42.084818,8,8.21677031,-0.465585983,8.21677031,8.21677031
42.09531,8.1240384,8.21596429,-0.303192816,8.21596429,8.21596429
42.105801,7.61577311,8.21515663,-0.774198634,8.21515663,8.21515663
42.116293,7.93725393,8.21434718,-0.526396475,8.21434718,8.21434718
42.126784,7.28010989,8.2135361,-0.966139849,8.2135361,8.2135361
42.137276,8.36660027,8.21272322,0.392271642,8.21272322,8.21272322
42.147768,8.66025404,8.21190864,0.669585989,8.21190864,8.21190864
42.158259,8.83176087,8.21109243,0.787825133,8.21109243,8.21109243
42.168751,8.24621125,8.21027443,0.189570106,8.21027443,8.21027443
42.179242,8.24621125,8.2094548,0.191719726,8.2094548,8.2094548
42.189734,7.61577311,8.20863339,-0.769974208,8.20863339,8.20863339
42.200226,8.06225775,8.20781027,-0.381513462,8.20781027,8.20781027
42.210717,8.1240384,8.20698553,-0.288005427,8.20698553,8.20698553
42.221209,8.24621125,8.20615901,0.200130558,8.20615901,8.20615901
42.2317,8.24621125,8.20533087,0.202188974,8.20533087,8.20533087
42.242192,8.94427191,8.20450095,0.860099389,8.20450095,8.20450095
42.252684,7.93725393,8.20366934,-0.516154436,8.20366934,8.20366934
42.263175,6.92820323,8.2028361,-1.1289964,8.2028361,8.2028361
42.273667,8,8.2020011,-0.44944532,8.2020011,8.2020011
42.284158,8.30662386,8.20116447,0.324745114,8.20116447,8.20116447
42.29465,8.71779789,8.20032608,0.719355132,8.20032608,8.20032608
42.305142,8.1240384,8.199486,-0.274677251,8.199486,8.199486
42.315633,8.42614977,8.1986443,0.476975335,8.1986443,8.1986443
42.326125,8.88819442,8.19780084,0.830899258,8.19780084,8.19780084
42.336616,7.41619849,8.19695577,-0.88360471,8.19695577,8.19695577
42.347108,7.41619849,8.19610894,-0.883125387,8.19610894,8.19610894
42.3576,6.70820393,8.19526042,-1.21944925,8.19526042,8.19526042
42.368091,8.36660027,8.19441029,0.414957795,8.19441029,8.19441029
42.378583,7.34846923,8.19355841,-0.919287322,8.19355841,8.19355841
42.389074,7.87400787,8.19270492,-0.564532594,8.19270492,8.19270492
42.399566,8.77496439,8.19184968,0.763619479,8.19184968,8.19184968
42.410058,7.81024968,8.19099276,-0.617043824,8.19099276,8.19099276
42.420549,7,8.19013424,-1.09093274,8.19013424,8.19013424
42.431041,7.74596669,8.18927396,-0.66581324,8.18927396,8.18927396
42.441532,7.74596669,8.1884121,-0.665165697,8.1884121,8.1884121
42.452024,8.83176087,8.18754847,0.802628427,8.18754847,8.18754847
42.462516,8.24621125,8.18668318,0.243983749,8.18668318,8.18668318
42.473007,8.30662386,8.1858163,0.347573823,8.1858163,8.1858163
42.483499,7.93725393,8.18494767,-0.497688392,8.18494767,8.18494767
42.49399,8,8.18407745,-0.429042483,8.18407745,8.18407745
42.504482,7.81024968,8.18320549,-0.610701082,8.18320549,8.18320549
42.514974,8.06225775,8.18233186,-0.346517111,8.18233186,8.18233186
42.525465,8.94427191,8.18145665,0.873392961,8.18145665,8.18145665
42.535957,8.36660027,8.18057969,0.431301025,8.18057969,8.18057969
42.546448,8.18535277,8.17970116,0.0751772148,8.17970116,8.17970116
42.55694,7.28010989,8.17882088,-0.948003688,8.17882088,8.17882088
42.567432,8.42614977,8.17793895,0.498207612,8.17793895,8.17793895
42.577923,6.70820393,8.17705544,-1.21196184,8.17705544,8.17705544
42.588415,7.61577311,8.1761702,-0.748596748,8.1761702,8.1761702
42.598906,8,8.17528338,-0.418668582,8.17528338,8.17528338
42.609398,8.48528137,8.17439483,0.557572009,8.17439483,8.17439483
42.61989,7.34846923,8.17350462,-0.908314591,8.17350462,8.17350462
42.630381,7.54983444,8.17261286,-0.789163114,8.17261286,8.17261286
42.640873,8.06225775,8.17171935,-0.330849823,8.17171935,8.17171935
42.651364,8.06225775,8.17082429,-0.329494372,8.17082429,8.17082429
42.661856,8.06225775,8.16992749,-0.328130684,8.16992749,8.16992749
42.672348,7.74596669,8.16902905,-0.650432442,8.16902905,8.16902905
42.682839,7.81024968,8.16812906,-0.598230207,8.16812906,8.16812906
42.693331,8.24621125,8.16722733,0.281040779,8.16722733,8.16722733
42.703822,7.68114575,8.16632405,-0.696547417,8.16632405,8.16632405
42.714314,8.30662386,8.16541905,0.375772291,8.16541905,8.16541905
42.724806,7.87400787,8.16451241,-0.538984723,8.16451241,8.16451241
42.735297,8.77496439,8.16360421,0.781895245,8.16360421,8.16360421
42.745789,8.24621125,8.1626943,0.288992995,8.1626943,8.1626943
42.75628,8.18535277,8.16178284,0.15352502,8.16178284,8.16178284
42.766772,8.60232527,8.16086966,0.664421257,8.16086966,8.16086966
42.777264,8,8.15995485,-0.39994356,8.15995485,8.15995485
42.787755,7.93725393,8.1590385,-0.470940087,8.1590385,8.1590385
42.798247,8.42614977,8.15812043,0.517715503,8.15812043,8.15812043
42.808738,7.21110255,8.15720082,-0.972675832,8.15720082,8.15720082
42.81923,8.48528137,8.1562795,0.573586846,8.1562795,8.1562795
42.829722,7.81024968,8.15535656,-0.587457986,8.15535656,8.15535656
42.840213,8.18535277,8.15443208,0.175842795,8.15443208,8.15443208
42.850705,7.41619849,8.1535059,-0.858666064,8.1535059,8.1535059
42.861196,6.92820323,8.15257818,-1.10651477,8.15257818,8.15257818
42.871688,7.54983444,8.15164875,-0.775766922,8.15164875,8.15164875
42.88218,7.14142843,8.15071771,-1.0046339,8.15071771,8.15071771
42.892671,8.77496439,8.14978514,0.790682773,8.14978514,8.14978514
42.903163,8.48528137,8.14885087,0.580026297,8.14885087,8.14885087
42.913654,8.24621125,8.14791507,0.313522214,8.14791507,8.14791507
42.924146,7.74596669,8.14697758,-0.633254202,8.14697758,8.14697758
42.934638,6.92820323,8.14603847,-1.10355573,8.14603847,8.14603847
42.945129,8.06225775,8.14509785,-0.287819556,8.14509785,8.14509785
42.955621,8.71779789,8.14415552,0.757391817,8.14415552,8.14415552
42.966112,7.74596669,8.14321169,-0.630273744,8.14321169,8.14321169
42.976604,8,8.14226615,-0.377181857,8.14226615,8.14226615
42.987096,7.48331477,8.14131902,-0.811174608,8.14131902,8.14131902
42.997587,8.24621125,8.14037037,0.325331952,8.14037037,8.14037037
43.008079,7.74596669,8.13942004,-0.627258593,8.13942004,8.13942004
43.01857,8.54400375,8.13846819,0.636816736,8.13846819,8.13846819
43.029062,7.48331477,8.13751466,-0.808826239,8.13751466,8.13751466
43.039554,7.54983444,8.13655953,-0.765979826,8.13655953,8.13655953
43.050045,6.78232998,8.1356029,-1.16330259,8.1356029,8.1356029
43.060537,8.30662386,8.13464458,0.414703848,8.13464458,8.13464458
43.071028,8.30662386,8.13368476,0.415859469,8.13368476,8.13368476
43.08152,7.21110255,8.13272327,-0.960010789,8.13272327,8.13272327
43.092012,8,8.13176018,-0.362987851,8.13176018,8.13176018
43.102503,7.34846923,8.1307956,-0.884492153,8.1307956,8.1307956
43.112995,7.61577311,8.12982934,-0.716977149,8.12982934,8.12982934
43.123486,7.21110255,8.12886159,-0.957997409,8.12886159,8.12886159
43.133978,8,8.12789216,-0.357620131,8.12789216,8.12789216
43.14447,8.30662386,8.12692115,0.423913569,8.12692115,8.12692115
43.154961,8.42614977,8.12594865,0.547906124,8.12594865,8.12594865
43.165453,7.61577311,8.12497448,-0.713583477,8.12497448,8.12497448
43.175944,7.34846923,8.12399883,-0.880641586,8.12399883,8.12399883
43.186436,8,8.12302151,-0.350744224,8.12302151,8.12302151
43.196928,7.28010989,8.12204261,-0.917568921,8.12204261,8.12204261
43.207419,7.34846923,8.12106224,-0.878972702,8.12106224,8.12106224
43.217911,8.06225775,8.1200802,-0.240462993,8.1200802,8.1200802
43.228402,8.54400375,8.11909668,0.651848957,8.11909668,8.11909668
43.238894,7.81024968,8.1181115,-0.554852978,8.1181115,8.1181115
43.249386,7.54983444,8.11712476,-0.753186778,8.11712476,8.11712476
43.259877,7.34846923,8.11613654,-0.876166258,8.11613654,8.11613654
43.270369,7.68114575,8.11514666,-0.658787458,8.11514666,8.11514666
43.28086,8.60232527,8.11415532,0.698691598,8.11415532,8.11415532
43.291352,6.40312424,8.11316232,-1.30768424,8.11316232,8.11316232
43.301844,7.81024968,8.11216776,-0.549470728,8.11216776,8.11216776
43.312335,7.93725393,8.11117173,-0.417034531,8.11117173,8.11117173
43.322827,8.24621125,8.11017406,0.368832203,8.11017406,8.11017406
43.333318,9.11043358,8.10917492,1.00062913,8.10917492,8.10917492
43.34381,7.81024968,8.10817413,-0.545824568,8.10817413,8.10817413
43.354302,7.68114575,8.1071718,-0.652706709,8.1071718,8.1071718
43.364793,8.36660027,8.106168,0.510325644,8.106168,8.106168
43.375285,8.88819442,8.10516256,0.884890871,8.10516256,8.10516256
43.385776,8.48528137,8.10415567,0.617353791,8.10415567,8.10415567
43.396268,8,8.10314714,-0.32116528,8.10314714,8.10314714
43.40676,7.74596669,8.10213706,-0.596800105,8.10213706,8.10213706
43.417251,8.30662386,8.10112553,0.45331924,8.10112553,8.10112553
43.427743,7.74596669,8.10011236,-0.595101396,8.10011236,8.10011236
43.438234,7.93725393,8.09909775,-0.402298174,8.09909775,8.09909775
43.448726,8.60232527,8.09808151,0.710101232,8.09808151,8.09808151
43.459218,7.28010989,8.09706372,-0.903854985,8.09706372,8.09706372
43.469709,7.81024968,8.0960445,-0.534597815,8.0960445,8.0960445
43.480201,8,8.09502364,-0.308259053,8.09502364,8.09502364
43.490692,7,8.09400135,-1.0459452,8.09400135,8.09400135
43.501184,8.48528137,8.09297743,0.626341715,8.09297743,8.09297743
43.511676,8.83176087,8.09195198,0.860121438,8.09195198,8.09195198
43.522167,7.61577311,8.0909251,-0.689312694,8.0909251,8.0909251
43.532659,7.34846923,8.08989659,-0.861061762,8.08989659,8.08989659
43.54315,9.05538514,8.08886665,0.983116721,8.08886665,8.08886665
43.553642,6.92820323,8.08783509,-1.07686204,8.08783509,8.08783509
43.564134,8.18535277,8.08680201,0.313927959,8.08680201,8.08680201
43.574625,7.48331477,8.0857675,-0.776178285,8.0857675,8.0857675
43.585117,8.1240384,8.08473138,0.198259995,8.08473138,8.08473138
43.595608,7.74596669,8.08369384,-0.581142962,8.08369384,8.08369384
43.6061,8.54400375,8.08265468,0.679226818,8.08265468,8.08265468
43.616592,7.81024968,8.081614,-0.520926409,8.081614,8.081614
43.627083,7.07106781,8.08057191,-1.00474081,8.08057191,8.08057191
43.637575,7.74596669,8.07952821,-0.577547846,8.07952821,8.07952821
43.648066,7.28010989,8.07848309,-0.893517321,8.07848309,8.07848309
43.658558,7,8.07743637,-1.03799632,8.07743637,8.07743637
43.66905,8,8.07638814,-0.27638404,8.07638814,8.07638814
43.679541,8.24621125,8.0753385,0.413367574,8.0753385,8.0753385
43.690033,7.61577311,8.07428726,-0.67713673,8.07428726,8.07428726
43.700524,8.77496439,8.07323461,0.837693128,8.07323461,8.07323461
43.711016,7.54983444,8.07218036,-0.722735031,8.07218036,8.07218036
43.721508,8.83176087,8.07112461,0.87214463,8.07112461,8.07112461
43.731999,7.21110255,8.07006746,-0.9268036,8.07006746,8.07006746
43.742491,8.06225775,8.06900872,-0.0821642787,8.06900872,8.06900872
43.752982,8.18535277,8.06794858,0.342642957,8.06794858,8.06794858
43.763474,7.87400787,8.06688684,-0.439179877,8.06688684,8.06688684
43.773966,8.66025404,8.06582361,0.770993145,8.06582361,8.06582361
43.784457,8.1240384,8.06475899,0.243473646,8.06475899,8.06475899
43.794949,7.14142843,8.06369278,-0.960345952,8.06369278,8.06369278
43.80544,7.21110255,8.06262518,-0.922779837,8.06262518,8.06262518
43.815932,8.24621125,8.06155599,0.429715324,8.06155599,8.06155599
43.826424,7.07106781,8.06048532,-0.99469468,8.06048532,8.06048532
43.836915,7.54983444,8.05941326,-0.713847903,8.05941326,8.05941326
43.847407,7.21110255,8.05833963,-0.92045482,8.05833963,8.05833963
43.857898,9,8.05726461,0.970945617,8.05726461,8.05726461
43.86839,7.61577311,8.05618801,-0.66363763,8.05618801,8.05618801
43.878882,8.24621125,8.05510993,0.437151368,8.05510993,8.05510993
43.889373,8.48528137,8.05403048,0.656696956,8.05403048,8.05403048
43.899865,8.48528137,8.05294945,0.657519521,8.05294945,8.05294945
43.910356,7.81024968,8.05186706,-0.491545908,8.05186706,8.05186706
43.920848,7.87400787,8.05078308,-0.42044644,8.05078308,8.05078308
43.93134,8.1240384,8.04969764,0.272655029,8.04969764,8.04969764
43.941831,8.60232527,8.04861083,0.744119907,8.04861083,8.04861083
43.952323,8.36660027,8.04752245,0.564869731,8.04752245,8.04752245
43.962814,7.61577311,8.04643271,-0.656246605,8.04643271,8.04643271
43.973306,7.68114575,8.0453414,-0.603486251,8.0453414,8.0453414
43.983798,8.48528137,8.04424863,0.66410296,8.04424863,8.04424863
43.994289,7.41619849,8.0431545,-0.791805543,8.0431545,8.0431545
44.004781,7.48331477,8.04205881,-0.747491833,8.04205881,8.04205881
44.015272,7.93725393,8.04096177,-0.32203701,8.04096177,8.04096177
44.025764,7.34846923,8.03986316,-0.831501013,8.03986316,8.03986316
44.036256,7.54983444,8.0387631,-0.699234344,8.0387631,8.0387631
44.046747,7.81024968,8.03766169,-0.476877362,8.03766169,8.03766169
44.057239,8.1240384,8.03655873,0.295769632,8.03655873,8.03655873
44.06773,7.14142843,8.03545442,-0.945529476,8.03545442,8.03545442
44.078222,8.30662386,8.03434856,0.521800065,8.03434856,8.03434856
44.088714,7.28010989,8.03324124,-0.867831409,8.03324124,8.03324124
44.099205,8.48528137,8.03213259,0.673163264,8.03213259,8.03213259
44.109697,8.1240384,8.03102239,0.304985264,8.03102239,8.03102239
44.120188,9.32737905,8.02991086,1.13906461,8.02991086,8.02991086
44.13068,7.41619849,8.02879777,-0.782687221,8.02879777,8.02879777
44.141172,7.87400787,8.02768325,-0.392014511,8.02768325,8.02768325
44.151663,7.87400787,8.0265674,-0.390588687,8.0265674,8.0265674
44.162155,8.24621125,8.02545,0.469852372,8.02545,8.02545
44.172646,6.92820323,8.02433128,-1.04696134,8.02433128,8.02433128
44.183138,8.24621125,8.02321101,0.472229012,8.02321101,8.02321101
44.19363,8.48528137,8.02208932,0.680582147,8.02208932,8.02208932
44.204121,6.92820323,8.0209663,-1.04535308,8.0209663,8.0209663
44.214613,9.2736185,8.01984174,1.11972173,8.01984174,8.01984174
44.225104,8.1240384,8.01871587,0.324534334,8.01871587,8.01871587
44.235596,8.36660027,8.01758846,0.590772207,8.01758846,8.01758846
44.246088,8.30662386,8.01645964,0.53866894,8.01645964,8.01645964
44.256579,8.24621125,8.01532949,0.48050157,8.01532949,8.01532949
44.267071,7.74596669,8.01419782,-0.517910347,8.01419782,8.01419782
44.277562,8.24621125,8.01306484,0.482852373,8.01306484,8.01306484
44.288054,7.81024968,8.01193033,-0.449088692,8.01193033,8.01193033
44.298546,7.87400787,8.01079441,-0.369846632,8.01079441,8.01079441
44.309037,7.61577311,8.00965718,-0.62760184,8.00965718,8.00965718
44.319529,8.60232527,8.00851843,0.770588633,8.00851843,8.00851843
44.33002,7.87400787,8.00737837,-0.365199258,8.00737837,8.00737837
44.340512,8.1240384,8.0062368,0.343222382,8.0062368,8.0062368
44.351004,6.70820393,8.00509382,-1.13881073,8.00509382,8.00509382
44.361495,7.41619849,8.00394955,-0.766649241,8.00394955,8.00394955
44.371987,7.68114575,8.00280376,-0.567149018,8.00280376,8.00280376
44.382478,7.81024968,8.00165667,-0.437500853,8.00165667,8.00165667
44.39297,8.24621125,8.00050808,0.49568455,8.00050808,8.00050808
44.403462,7.34846923,7.99935808,-0.806776831,7.99935808,7.99935808
44.413953,7.81024968,7.9982068,-0.433540222,7.9982068,7.9982068
44.424445,8.36660027,7.99705401,0.607903163,7.99705401,7.99705401
44.434936,8.71779789,7.99589993,0.84964578,7.99589993,7.99589993
44.445428,8.42614977,7.99474436,0.656814599,7.99474436,7.99474436
44.45592,7.21110255,7.99358739,-0.884581729,7.99358739,7.99358739
44.466411,8.30662386,7.99242913,0.560530756,7.99242913,7.99242913
44.476903,7.21110255,7.99126938,-0.883270533,7.99126938,7.99126938
44.487394,8.54400375,7.99010836,0.744241484,7.99010836,7.99010836
44.497886,7.87400787,7.98894584,-0.339025016,7.98894584,7.98894584
44.508378,8.48528137,7.98778193,0.705336406,7.98778193,7.98778193
44.518869,7.61577311,7.98661675,-0.60896933,7.98661675,7.98661675
44.529361,6.63324958,7.98545008,-1.16284156,7.98545008,7.98545008
44.539852,7.54983444,7.98428214,-0.659126472,7.98428214,7.98428214
44.550344,7.87400787,7.98311271,-0.330310219,7.98311271,7.98311271
44.560836,7.93725393,7.98194191,-0.211395312,7.98194191,7.98194191
44.571327,8.77496439,7.98076985,0.891175932,7.98076985,7.98076985
44.581819,7.48331477,7.97959629,-0.704472512,7.97959629,7.97959629
44.59231,8.1240384,7.97842148,0.381597851,7.97842148,7.97842148
44.602802,8.1240384,7.97724519,0.383136023,7.97724519,7.97724519
44.613294,8,7.97606753,0.154701218,7.97606753,7.97606753
44.623785,8.36660027,7.97488862,0.625868713,7.97488862,7.97488862
44.634277,7.93725393,7.97370823,-0.190930079,7.97370823,7.97370823
44.644768,7.68114575,7.97252659,-0.539797035,7.97252659,7.97252659
44.65526,8.71779789,7.97134347,0.863975935,7.97134347,7.97134347
44.665752,7.68114575,7.97015899,-0.537599523,7.97015899,7.97015899
44.676243,7.61577311,7.96897327,-0.594306459,7.96897327,7.96897327
44.686735,8.54400375,7.96778608,0.759090023,7.96778608,7.96778608
44.697226,7.41619849,7.96659765,-0.741888915,7.96659765,7.96659765
44.707718,7.14142843,7.96540775,-0.907733067,7.96540775,7.96540775
44.71821,7,7.9642165,-0.981945261,7.9642165,7.9642165
44.728701,8.77496439,7.96302401,0.901077344,7.96302401,7.96302401
44.739193,8.42614977,7.96183006,0.681410094,7.96183006,7.96183006
44.749684,7.14142843,7.96063487,-0.90510024,7.96063487,7.96063487
44.760176,8.60232527,7.95943823,0.801802369,7.95943823,7.95943823
44.770668,8.06225775,7.95824024,0.322517453,7.95824024,7.95824024
44.781159,7.54983444,7.95704103,-0.638127409,7.95704103,7.95704103
44.791651,7.74596669,7.95585893,-0.458139971,7.95585893,7.95584035
44.802142,7.81024968,7.95468033,-0.380040335,7.95468033,7.95463846
44.812634,8.54400375,7.95351967,0.768429615,7.95351967,7.95343511
44.823126,8,7.95238165,0.218216296,7.95238165,7.95223043
44.833617,7.07106781,7.95130846,-0.938211408,7.95130846,7.95102453
44.844109,7.87400787,7.95028998,-0.276192145,7.95028998,7.94981718
44.8546,8.30662386,7.94948852,0.597608017,7.94948852,7.94860861
44.865092,7.61577311,7.94881162,-0.57709489,7.94881162,7.9473986
44.875584,8.42614977,7.94883868,0.690877049,7.94883868,7.94618726
44.886075,8,7.94912828,0.225547603,7.94912828,7.94497472
44.896567,7.74596669,7.95165654,-0.453530421,7.95165654,7.94376073
44.907058,9.43398113,7.9546696,1.21626951,7.9546696,7.94254553
44.91755,7.81024968,7.96469467,-0.39299491,7.96469467,7.9413289
44.928042,8,7.97535971,0.156972257,7.97535971,7.94011095
44.938533,7.54983444,7.98622619,-0.660599543,7.98622619,7.9388918
44.949025,8.42614977,7.99609225,0.655787708,7.99609225,7.93767121
44.959516,7.41619849,7.99726969,-0.762280264,7.99726969,7.93644943
44.970008,7.93725393,7.99850339,-0.247486281,7.99850339,7.93522622
44.9805,7.48331477,7.99997219,-0.718788857,7.99997219,7.93400169
44.990991,7.93725393,8.00153892,-0.253544847,8.00153892,7.93277597
45.001483,7.93725393,8.00334899,-0.257089596,8.00334899,7.93154883
45.011974,8.66025404,8.00531251,0.80928458,8.00531251,7.9303205
45.022466,7.07106781,8.00752497,-0.967707167,8.00752497,7.92909075
45.032958,8.36660027,8.00996491,0.597189544,8.00996491,7.92785969
45.043449,7.87400787,8.01265486,-0.372353305,8.01265486,7.92662745
45.053941,7.21110255,8.01567104,-0.896977421,8.01567104,7.92539379
45.064432,7.48331477,8.01893239,-0.731859016,8.01893239,7.92415895
45.074924,7.87400787,8.02265224,-0.385544247,8.02265224,7.9229227
45.085416,8.1240384,8.02660313,0.31214624,8.02660313,7.92168515
45.095907,8.18535277,8.03119055,0.392634974,8.03119055,7.92044643
45.106399,7.87400787,8.03598032,-0.402458,8.03598032,7.91920629
45.11689,8.1240384,8.0416503,0.287033285,8.0416503,7.91796499
45.127382,8.06225775,8.04747144,0.121598981,8.04747144,7.91672228
45.137874,8.06225775,8.05450945,0.0880244175,8.05450945,7.91547828
45.148365,7.74596669,8.06167326,-0.561877714,8.06167326,7.91423312
45.158857,8.54400375,8.07040204,0.688187258,8.07040204,7.91298655
45.169348,7.87400787,8.07939309,-0.453194454,8.07939309,7.91173882
45.17984,8.36660027,8.09018941,0.525747897,8.09018941,7.91048969
45.190332,8.1240384,8.10158115,0.149857446,8.10158115,7.90923929
45.200823,8.42614977,8.11506222,0.557752231,8.11506222,7.90798772
45.211315,8.36660027,8.12966976,0.486755079,8.12966976,7.90673476
45.221806,7.74596669,8.14670745,-0.63304088,8.14670745,7.90548065
45.232298,8.77496439,8.1657294,0.780535068,8.1657294,7.90422515
45.24279,8.36660027,8.18758682,0.423099808,8.18758682,7.90296837
45.253281,9.21954446,8.2128461,1.00334359,8.2128461,7.90171045
45.263773,7.68114575,8.24141214,-0.748509444,8.24141214,7.90045114
45.274264,8.06225775,8.27582443,-0.46213275,8.27582443,7.89919068
45.284756,7.81024968,8.31406788,-0.709801524,8.31406788,7.89792885
45.295248,8.48528137,8.36272766,0.350076724,8.36272766,7.89666575
45.305739,8,8.41578091,-0.644810753,8.41578091,7.89540151
45.316231,9.32737905,8.4897596,0.915215521,8.4897596,7.89413589
45.326722,9.48683298,8.56883188,0.95812374,8.56883188,7.89286913
45.337214,8.66025404,8.69345288,-0.182205481,8.69345288,7.891601
45.347706,8.30662386,8.82256499,-0.718290421,8.82256499,7.89033161
45.358197,9.64365076,9.04342333,0.774743463,9.04342333,7.8890611
45.368689,9.94987437,9.27408014,0.822067047,9.27408014,7.88778921
45.37918,10.7703296,9.6693987,1.04925255,9.6693987,7.8865162
45.389672,9.79795897,10.1111496,-0.559634339,10.1111496,7.88524181
45.400164,10.6770783,10.8415935,-0.405604764,10.8415935,7.88396619
45.410655,12.4498996,11.7214566,0.853488698,11.7214566,7.88268944
45.421147,13.6014705,13.0635977,0.733398154,13.0635977,7.88141132
45.431638,14.2828569,14.7722828,-0.699589863,14.7722828,7.88013209
45.44213,17,17.1091222,-0.330336473,17.1091222,7.8788515
45.452622,20.7364414,20.0698128,0.816473237,20.0698128,7.87756967
45.463113,24,23.6232512,0.613798649,23.6232512,7.87628673
45.473605,27.4772633,27.0377398,0.662965716,27.0377398,7.87500243
45.484096,30.016662,30.3225766,-0.553095466,30.3225766,7.87371702
45.494588,31.1769145,30.9584738,0.467376423,30.9584738,7.87243026
45.50508,31.1287648,30.1437343,0.992487049,30.1437343,7.87114227
45.515571,26.6458252,26.5258195,0.346418428,26.5258195,7.86985318
45.526063,21.7944947,20.9404043,0.924170121,20.9404043,7.86856274
45.536554,16.6132477,17.0647813,-0.671962482,17.0647813,7.8672712
45.547046,14.3178211,13.0660347,1.1188326,13.0660347,7.86597831
45.557538,11.8743421,11.6389467,0.485175602,11.6389467,7.86468421
45.568029,10.4880885,10.4338873,0.232811383,10.4338873,7.86338901
45.578521,11.2694277,9.97239702,1.13887253,9.97239702,7.86209246
45.589012,9.43398113,9.51123433,-0.277944587,9.51123433,7.86079483
45.599504,8.66025404,9.25099162,-0.76859455,9.25099162,7.85949586
45.609996,9.16515139,9.00424689,0.401129028,9.00424689,7.85819568
45.620487,8.77496439,8.84301076,-0.260857005,8.84301076,7.85689441
45.630979,8.42614977,8.69558719,-0.519073616,8.69558719,7.85559181
45.64147,8.1240384,8.58901446,-0.681891528,8.58901446,7.85428813
45.651962,9.05538514,8.49412401,0.749173628,8.49412401,7.85298312
45.662454,7.93725393,8.42001409,-0.694809443,8.42001409,7.8516769
45.672945,7.87400787,8.35535308,-0.693790461,8.35535308,7.85036961
45.683437,7.68114575,8.30167822,-0.787738834,8.30167822,7.84906099
45.693928,8.30662386,8.25556813,0.225955166,8.25556813,7.8477513
45.70442,8.24621125,8.21536736,0.175624299,8.21536736,7.84644029
45.714912,8.30662386,8.18124478,0.354089093,8.18124478,7.84512808
45.725403,8.94427191,8.15027894,0.891062831,8.15027894,7.84381481
45.735895,7.87400787,8.12423838,-0.500230452,8.12423838,7.84250021
45.746386,8.88819442,8.09980344,0.887913832,8.09980344,7.84118456
45.756878,7.68114575,8.07940202,-0.631075491,8.07940202,7.83986759
45.76737,8.42614977,8.05971285,0.605340339,8.05971285,7.83854943
45.777861,8.30662386,8.04336415,0.513088402,8.04336415,7.83723022
45.788353,7.61577311,8.02729128,-0.641496825,8.02729128,7.83590969
45.798844,7.87400787,8.01384167,-0.373943574,8.01384167,7.83458811
45.809336,7.14142843,8.00062891,-0.926930679,8.00062891,7.83326523
45.819828,7.93725393,7.98924375,-0.22801275,7.98924375,7.83194116
45.830319,7.48331477,7.97820223,-0.703482375,7.97820223,7.83061605
45.840811,8.42614977,7.96843866,0.676543504,7.96843866,7.82928964
45.851302,8.1240384,7.95907199,0.406160582,7.95907199,7.82796218
45.861794,8.94427191,7.95059883,0.996831522,7.95059883,7.82663342
45.872286,8.18535277,7.94254384,0.492756468,7.94254384,7.82530349
45.882777,7.54983444,7.93511081,-0.620706348,7.93511081,7.82397252
45.893269,8.36660027,7.9280982,0.662194886,7.9280982,7.82264026
45.90376,8,7.92151154,0.280157923,7.92151154,7.82130696
45.914252,8,7.91533383,0.29097452,7.91533383,7.81997237
45.924744,7.81024968,7.90943759,-0.314941127,7.90943759,7.81863662
45.935235,8.54400375,7.90392823,0.800047196,7.90392823,7.81729984
45.945727,7.21110255,7.89859355,-0.829150769,7.89859355,7.81596178
45.956218,8.60232527,7.89360844,0.841853213,7.89360844,7.81462268
45.96671,9.05538514,7.88871925,1.08012309,7.88871925,7.8132823
45.977202,7.81024968,7.88409515,-0.271745231,7.88409515,7.81194077
45.987693,8.66025404,7.87950723,0.883598782,7.87950723,7.81059822
45.998185,9.05538514,7.87496613,1.0864709,7.87496613,7.80925439
46.008676,7.87400787,7.87039148,0.0601364236,7.87039148,7.80790954
46.019168,8,7.86530202,0.36701224,7.86530202,7.80656342
46.02966,8.06225775,7.85988408,0.449859609,7.85988408,7.80521616
46.040151,8.60232527,7.85266585,0.865828745,7.85266585,7.80386787
46.050643,7.41619849,7.84384107,-0.653943869,7.84384107,7.80251833
46.061134,8.24621125,7.83011438,0.645055713,7.83011438,7.80116777
46.071626,7,7.82058228,-0.905859968,7.82058228,7.79981594
46.082118,8.24621125,7.81923291,0.653435794,7.81923291,7.79846298
46.092609,8.24621125,7.79710902,0.670150906,7.79710902,7.79710902
46.103101,8.36660027,7.79575379,0.755543828,7.79575379,7.79575379
46.113592,7,7.79439756,-0.89128983,7.79439756,7.79439756
46.124084,7.68114575,7.79304008,-0.334506095,7.79304008,7.79304008
46.134576,8.18535277,7.79168146,0.627432314,7.79168146,7.79168146
46.145067,7.54983444,7.79032186,-0.490395168,7.79032186,7.79032186
46.155559,6.164414,7.78896099,-1.27457718,7.78896099,7.78896099
46.16605,8.66025404,7.78759914,0.934159995,7.78759914,7.78759914
46.176542,8.18535277,7.78623604,0.631756862,7.78623604,7.78623604
46.187034,8.18535277,7.78487182,0.632835645,7.78487182,7.78487182
46.197525,7.41619849,7.78350661,-0.606059505,7.78350661,7.78350661
46.208017,8.42614977,7.78214016,0.802502097,7.78214016,7.78214016
46.218508,8.18535277,7.78077272,0.636066073,7.78077272,7.78077272
46.229,7.34846923,7.77940405,-0.656456257,7.77940405,7.77940405
46.239492,7.48331477,7.77803426,-0.542880728,7.77803426,7.77803426
46.249983,8.24621125,7.77666349,0.685235548,7.77666349,7.77666349
46.260475,7.61577311,7.77529149,-0.39939753,7.77529149,7.77529149
46.270966,7.48331477,7.77391852,-0.539076752,7.77391852,7.77391852
46.281458,8.42614977,7.77254431,0.808458696,7.77254431,7.77254431
46.29195,7.93725393,7.771169,0.407535193,7.771169,7.771169
46.302441,7.93725393,7.76979272,0.409220248,7.76979272,7.76979272
46.312933,8.77496439,7.76841521,1.00326924,7.76841521,7.76841521
46.323424,7.54983444,7.76703674,-0.466049684,7.76703674,7.76703674
46.333916,7.41619849,7.76565705,-0.5911502,7.76565705,7.76565705
46.344408,8.1240384,7.76427626,0.599801758,7.76427626,7.76427626
46.354899,7.54983444,7.76289451,-0.461584306,7.76289451,7.76289451
46.365391,8.1240384,7.76151154,0.602102041,7.76151154,7.76151154
46.375882,8.77496439,7.76012761,1.00739107,7.76012761,7.76012761
46.386374,8.06225775,7.75874247,0.550922208,7.75874247,7.75874247
46.396866,8.36660027,7.75735624,0.780540853,7.75735624,7.75735624
46.407357,8.48528137,7.75596907,0.853997839,7.75596907,7.75596907
46.417849,8.66025404,7.75458068,0.951668725,7.75458068,7.75458068
46.42834,7.48331477,7.75319134,-0.519496456,7.75319134,7.75319134
46.438832,8.06225775,7.7518008,0.557186641,7.7518008,7.7518008
46.449324,8,7.75040918,0.499590657,7.75040918,7.75040918
46.459815,7.61577311,7.74901661,-0.365025353,7.74901661,7.74901661
46.470307,8.60232527,7.74762285,0.924501173,7.74762285,7.74762285
46.480798,7.41619849,7.74622815,-0.574482078,7.74622815,7.74622815
46.49129,7.14142843,7.74483224,-0.776790713,7.74483224,7.74483224
46.501782,7.81024968,7.74343527,0.258484827,7.74343527,7.74343527
46.512273,8.66025404,7.74203737,0.958236229,7.74203737,7.74203737
46.522765,8.42614977,7.74063827,0.827956222,7.74063827,7.74063827
46.533256,8.06225775,7.73923824,0.568348051,7.73923824,7.73923824
46.543748,9.11043358,7.73783702,1.17157866,7.73783702,7.73783702
46.55424,7.93725393,7.73643474,0.448128542,7.73643474,7.73643474
46.564731,7.93725393,7.73503154,0.44969144,7.73503154,7.73503154
46.575223,7.14142843,7.73362715,-0.769544491,7.73362715,7.73362715
46.585714,7.81024968,7.73222185,0.279334622,7.73222185,7.73222185
46.596206,7.74596669,7.73081535,0.123090781,7.73081535,7.73081535
46.606698,8.77496439,7.72940781,1.02252461,7.72940781,7.72940781
46.617189,7.21110255,7.72799935,-0.718955356,7.72799935,7.72799935
46.627681,7,7.72658972,-0.852402322,7.72658972,7.72658972
46.638172,8.06225775,7.72517917,0.580584684,7.72517917,7.72517917
46.648664,8.54400375,7.72376745,0.905668976,7.72376745,7.72376745
46.659156,6.70820393,7.72235469,-1.00705052,7.72235469,7.72235469
46.669647,7,7.72094102,-0.849082458,7.72094102,7.72094102
46.680139,7.68114575,7.71952618,-0.19590925,7.71952618,7.71952618
46.69063,8.30662386,7.71811044,0.767146284,7.71811044,7.71811044
46.701122,8.42614977,7.71669353,0.842292253,7.71669353,7.71669353
46.711614,7.34846923,7.71527559,-0.605645413,7.71527559,7.71527559
46.722105,9.05538514,7.71385676,1.15824366,7.71385676,7.71385676
46.732597,7.93725393,7.71243676,0.474148893,7.71243676,7.71243676
46.743088,8.60232527,7.71101587,0.944091837,7.71101587,7.71101587
46.75358,7.93725393,7.70959382,0.477137416,7.70959382,7.70959382
46.764072,9.05538514,7.70817075,1.16069565,7.70817075,7.70817075
46.774563,8.24621125,7.70674679,0.734482447,7.70674679,7.70674679
46.785055,8.30662386,7.70532167,0.775436775,7.70532167,7.70532167
46.795546,8.30662386,7.70389567,0.77635571,7.70389567,7.70389567
46.806038,8.18535277,7.70246852,0.694898732,7.70246852,7.70246852
46.81653,7.41619849,7.70104036,-0.533705793,7.70104036,7.70104036
46.827021,9,7.69961132,1.14034586,7.69961132,7.69961132
46.837513,7.61577311,7.69818113,-0.287067981,7.69818113,7.69818113
46.848004,8.94427191,7.69675007,1.11692517,7.69675007,7.69675007
46.858496,7.81024968,7.69531787,0.339015943,7.69531787,7.69531787
46.868988,7.41619849,7.69388466,-0.526959361,7.69388466,7.69388466
46.879479,8.48528137,7.69245058,0.890410466,7.69245058,7.69245058
46.889971,8.42614977,7.69101536,0.857399798,7.69101536,7.69101536
46.900462,7.21110255,7.68957928,-0.691720123,7.68957928,7.68957928
46.910954,7.93725393,7.68814206,0.499111081,7.68814206,7.68814206
46.921446,7.54983444,7.68670385,-0.369958664,7.68670385,7.68670385
46.931937,8.42614977,7.68526478,0.860746767,7.68526478,7.68526478
46.942429,8.36660027,7.68382457,0.826302421,7.68382457,7.68382457
46.95292,8.24621125,7.68238352,0.750884635,7.68238352,7.68238352
46.963412,7.61577311,7.68094133,-0.255280681,7.68094133,7.68094133
46.973904,7.74596669,7.67949816,0.257814921,7.67949816,7.67949816
46.984395,7.68114575,7.67805414,0.0556022588,7.67805414,7.67805414
46.994887,8.36660027,7.67660899,0.830657133,7.67660899,7.67660899
47.005378,8.1240384,7.675163,0.669981643,7.675163,7.675163
47.01587,8,7.67371589,0.571212839,7.67371589,7.67371589
47.026362,7.61577311,7.6722678,-0.237686134,7.6722678,7.6722678
47.036853,8.30662386,7.67081888,0.797373807,7.67081888,7.67081888
47.047345,7.21110255,7.66936883,-0.676953678,7.66936883,7.66936883
47.057836,7.34846923,7.66791795,-0.565197952,7.66791795,7.66791795
47.068328,7.87400787,7.66646596,0.455567679,7.66646596,7.66646596
47.07882,7.93725393,7.665013,0.521767122,7.665013,7.665013
47.089311,7.48331477,7.66355921,-0.424552045,7.66355921,7.66355921
47.099803,7.07106781,7.66210431,-0.768788985,7.66210431,7.66210431
47.110294,7.14142843,7.66064859,-0.720569332,7.66064859,7.66064859
47.120786,7.74596669,7.65919176,0.294575845,7.65919176,7.65919176
47.131278,7.81024968,7.65773398,0.390532586,7.65773398,7.65773398
47.141769,7.68114575,7.65627537,0.157703465,7.65627537,7.65627537
47.152261,7.54983444,7.65481566,-0.324008059,7.65481566,7.65481566
47.162752,8,7.65335513,0.588765546,7.65335513,7.65335513
47.173244,7.48331477,7.65189351,-0.410583413,7.65189351,7.65189351
47.183736,7.87400787,7.65043094,0.472839227,7.65043094,7.65043094
47.194227,7.81024968,7.64896755,0.401599455,7.64896755,7.64896755
47.204719,8.30662386,7.64750308,0.81186254,7.64750308,7.64750308
47.21521,7.61577311,7.6460378,-0.173967499,7.6460378,7.6460378
47.225702,7.93725393,7.64457143,0.541001391,7.64457143,7.64457143
47.236194,7.34846923,7.64310411,-0.542802806,7.64310411,7.64310411
47.246685,8.30662386,7.641636,0.815467881,7.641636,7.641636
47.257177,7.48331477,7.6401668,-0.396045486,7.6401668,7.6401668
47.267668,7.68114575,7.6386968,0.206031415,7.6386968,7.6386968
47.27816,7.14142843,7.63722573,-0.704128753,7.63722573,7.63722573
47.288652,8.30662386,7.63575372,0.819066629,7.63575372,7.63575372
47.299143,7.68114575,7.63428092,0.216482867,7.63428092,7.63428092
47.309635,8.83176087,7.63280704,1.0949675,7.63280704,7.63280704
47.320126,7.54983444,7.63133237,-0.285478438,7.63133237,7.63133237
47.330618,7.61577311,7.62985664,-0.11867406,7.62985664,7.62985664
47.34111,8.1240384,7.62837998,0.704030133,7.62837998,7.62837998
47.351601,8.24621125,7.62690253,0.786961703,7.62690253,7.62690253
47.362093,8.18535277,7.62542402,0.748283873,7.62542402,7.62542402
47.372584,8,7.62394473,0.613233458,7.62394473,7.62394473
47.383076,7.34846923,7.62246437,-0.523445456,7.62246437,7.62246437
47.393568,8,7.6209831,0.615643482,7.6209831,7.6209831
47.404059,8.71779789,7.61950106,1.04799658,7.61950106,7.61950106
47.414551,8.24621125,7.61801795,0.79258646,7.61801795,7.61801795
47.425042,7.48331477,7.61653408,-0.364992202,7.61653408,7.61653408
47.435534,7.68114575,7.61504915,0.257092577,7.61504915,7.61504915
47.446026,8.24621125,7.61356332,0.795391685,7.61356332,7.61356332
47.456517,7.48331477,7.61207672,-0.358834146,7.61207672,7.61207672
47.467009,8.54400375,7.61058907,0.966133881,7.61058907,7.61058907
47.4775,7.81024968,7.60910066,0.448496397,7.60910066,7.60910066
47.487992,8.60232527,7.6076112,0.99735353,7.6076112,7.6076112
47.498484,8.06225775,7.60612085,0.67537908,7.60612085,7.60612085
47.508975,7.87400787,7.60462973,0.519016512,7.60462973,7.60462973
47.519467,7.41619849,7.60313758,-0.43236454,7.60313758,7.60313758
47.529958,8.36660027,7.60164468,0.874617395,7.60164468,7.60164468
47.54045,8.60232527,7.60015074,1.00108667,7.60015074,7.60015074
47.550942,8.36660027,7.59865591,0.876324346,7.59865591,7.59865591
47.561433,8.48528137,7.59716033,0.942401745,7.59716033,7.59716033
47.571925,7.74596669,7.59566372,0.387689279,7.59566372,7.59566372
47.582416,8.36660027,7.59416636,0.87888219,7.59416636,7.59416636
47.592908,8.24621125,7.59266798,0.808420232,7.59266798,7.59266798
47.6034,7.34846923,7.59116872,-0.492645397,7.59116872,7.59116872
47.613891,7.48331477,7.58966871,-0.326119517,7.58966871,7.58966871
47.624383,7.87400787,7.58816769,0.53464024,7.58816769,7.58816769
47.634874,7.93725393,7.58666593,0.592104724,7.58666593,7.58666593
47.645366,8.18535277,7.58516315,0.77471906,7.58516315,7.58516315
47.655858,7.74596669,7.5836595,0.40287367,7.5836595,7.5836595
47.666349,9.11043358,7.58215512,1.2362356,7.58215512,7.58215512
47.676841,8.30662386,7.58064972,0.852041162,7.58064972,7.58064972
47.687332,7,7.5791436,-0.761014849,7.5791436,7.5791436
47.697824,7.21110255,7.57763647,-0.605420448,7.57763647,7.57763647
47.708316,8.36660027,7.57612847,0.889084806,7.57612847,7.57612847
47.718807,7.28010989,7.57461976,-0.542687635,7.57461976,7.57461976
47.729299,7.48331477,7.57311004,-0.299658577,7.57311004,7.57311004
47.73979,8.06225775,7.5715996,0.700469949,7.5715996,7.5715996
47.750282,8.06225775,7.57008816,0.701547994,7.57008816,7.57008816
47.760774,8.42614977,7.56857586,0.926052865,7.56857586,7.56857586
47.771265,7.61577311,7.56706286,0.220703983,7.56706286,7.56706286
47.781757,7.81024968,7.5656509,0.494569279,7.5656509,7.56554885
47.792248,8.18535277,7.56419973,0.78813263,7.56419973,7.56403414
47.80274,8.1240384,7.56283722,0.749133625,7.56283722,7.56251844
47.813232,7,7.56149209,-0.74932776,7.56149209,7.56100189
47.823723,8.24621125,7.56041371,0.828128939,7.56041371,7.55948464
47.834215,8.1240384,7.55937097,0.751443565,7.55937097,7.5579664
47.844706,8.60232527,7.55908722,1.02139025,7.55908722,7.55644746
47.855198,8.54400375,7.5590374,0.992454705,7.5590374,7.55492753
47.86569,8,7.56082713,0.662701191,7.56082713,7.55340677
47.876181,7.74596669,7.56376494,0.426850971,7.56376494,7.55188532
47.886673,8.36660027,7.57110381,0.89190608,7.57110381,7.55036288
47.897164,7.48331477,7.5828991,-0.315569851,7.5828991,7.54883976
47.907656,7.14142843,7.60503211,-0.680884483,7.60503211,7.54731566
47.918148,8.54400375,7.62702258,0.957591335,7.62702258,7.54579073
47.928639,8.36660027,7.64882827,0.847214256,7.64882827,7.54426512
47.939131,8.60232527,7.66146999,0.969976949,7.66146999,7.54273854
47.949622,9,7.66456241,1.15561135,7.66456241,7.54121127
47.960114,8.1240384,7.66797016,0.675328247,7.66797016,7.53968304
47.970606,8.66025404,7.67160298,0.994309338,7.67160298,7.53815399
47.981097,7.34846923,7.67566125,-0.572007011,7.67566125,7.53662427
47.991589,6.63324958,7.67992206,-1.02307013,7.67992206,7.53509358
48.00208,8.06225775,7.68475018,0.614416443,7.68475018,7.53356222
48.012572,7.61577311,7.68974545,-0.271978569,7.68974545,7.5320299
48.023064,9.11043358,7.6954912,1.18951351,7.6954912,7.53049677
48.033555,7.81024968,7.70135025,0.329999135,7.70135025,7.52896298
48.044047,7.68114575,7.70819694,-0.164472458,7.70819694,7.52742823
48.054538,8.24621125,7.7151441,0.728743544,7.7151441,7.52589282
48.06503,8.18535277,7.72325938,0.679774518,7.72325938,7.52435646
48.075522,8.71779789,7.7315833,0.993083375,7.7315833,7.5228193
48.086013,8,7.74117222,0.508751201,7.74117222,7.52128148
48.096505,7.61577311,7.75118527,-0.367983912,7.75118527,7.51974272
48.106996,7.48331477,7.76256513,-0.52844144,7.76256513,7.5182033
48.117488,8.66025404,7.77467435,0.941052434,7.77467435,7.51666294
48.12798,8.18535277,7.78825264,0.630158816,7.78825264,7.51512179
48.138471,8,7.8029936,0.443854025,7.8029936,7.51357999
48.148963,8.36660027,7.81929751,0.739799135,7.81929751,7.51203725
48.159454,8.60232527,7.83739099,0.874605212,7.83739099,7.51049388
48.169946,8.42614977,7.8571179,0.754342012,7.8571179,7.50894956
48.180438,7.81024968,7.87954925,-0.263248121,7.87954925,7.50740447
48.190929,8.42614977,7.90363334,0.722852979,7.90363334,7.50585873
48.201421,8.36660027,7.93177287,0.659414437,7.93177287,7.50431207
48.211912,8.88819442,7.96149842,0.962650505,7.96149842,7.50276477
48.222404,9.16515139,7.99731102,1.08066663,7.99731102,7.50121655
48.232896,8.18535277,8.03447925,0.388424408,8.03447925,7.49966755
48.243387,8.54400375,8.08086503,0.680542959,8.08086503,7.49811793
48.253879,8.83176087,8.12806666,0.838864833,8.12806666,7.49656738
48.26437,8.06225775,8.18950316,-0.356714749,8.18950316,7.49501621
48.274862,8.54400375,8.25245491,0.539952619,8.25245491,7.49346412
48.285354,9.43398113,8.33461892,1.04850475,8.33461892,7.49191127
48.295845,8.71779789,8.42230046,0.543596749,8.42230046,7.4903578
48.306337,8.66025404,8.53792283,0.349758781,8.53792283,7.48880341
48.316828,9.05538514,8.66918084,0.621453375,8.66918084,7.48724841
48.32732,8.24621125,8.8436715,-0.772955531,8.8436715,7.4856925
48.337812,8.71779789,9.05408752,-0.579904848,9.05408752,7.48413584
48.348303,10.6301458,9.3259075,1.14203254,9.3259075,7.48257856
48.358795,9.21954446,9.67707881,-0.676412855,9.67707881,7.48102038
48.369286,10.5356538,10.1137798,0.649518222,10.1137798,7.4794616
48.379778,10.4880885,10.7301154,-0.491962309,10.7301154,7.47790192
48.39027,11.045361,11.4617341,-0.645269786,11.4617341,7.47634148
48.400761,11.9163753,12.5789531,-0.813988856,12.5789531,7.47478045
48.411253,13.4164079,13.8157553,-0.631939441,13.8157553,7.47321852
48.421744,14.4568323,15.8223491,-1.1685533,15.8223491,7.471656
48.432236,16.4924225,17.865721,-1.1718782,17.865721,7.47009258
48.442728,20.3960781,21.312746,-0.957427756,21.312746,7.46852843
48.453219,24.1660919,24.542369,-0.613414277,24.542369,7.46696368
48.463711,28.5306852,29.778365,-1.11699587,29.778365,7.46539805
48.474202,33.4962684,34.3895489,-0.945135172,34.3895489,7.46383183
48.484694,39.0384426,39.0524345,-0.118287485,39.0524345,7.46226473
48.495186,42.3792402,42.6033882,-0.473442707,42.6033882,7.46069689
48.505677,42.7551167,41.3328788,1.19257616,41.3328788,7.45912848
48.516169,39.1535439,38.9868845,0.408239367,38.9868845,7.45755918
48.52666,33.0302891,32.0205475,1.004859,32.0205475,7.45598931
48.537152,25.1594913,24.745807,0.643182886,24.745807,7.45441857
48.547644,19.2353841,19.6479061,-0.642278813,19.6479061,7.4528471
48.558135,15.8745079,15.1350725,0.859904302,15.1350725,7.45127506
48.568627,12.922848,13.2946223,-0.609733029,13.2946223,7.44970215
48.579118,12,11.8702579,0.360197347,11.8702579,7.44812867
48.58961,11.1355287,11.0474194,0.296832227,11.0474194,7.44655433
48.600102,9.79795897,10.4162362,-0.786306038,10.4162362,7.44497927
48.610593,9.69535971,9.93476167,-0.489287189,9.93476167,7.44340365
48.621085,9.8488578,9.57250562,0.5256921,9.57250562,7.44182717
48.631576,9.05538514,9.26565794,-0.458555125,9.26565794,7.44025013
48.642068,8.83176087,9.03779346,-0.453908132,9.03779346,7.43867224
48.65256,9.8488578,8.83070908,1.00903356,8.83070908,7.43709364
48.663051,8.83176087,8.67812082,0.39196944,8.67812082,7.43551448
48.673543,8.77496439,8.53196849,0.492946137,8.53196849,7.43393447
48.684034,9.05538514,8.42473558,0.794134471,8.42473558,7.43235392
48.694526,9.05538514,8.3193406,0.857930383,8.3193406,7.43077251
48.705018,8.06225775,8.23946414,-0.420958896,8.23946414,7.42919041
48.715509,8.24621125,8.16170539,0.290698925,8.16170539,7.42760776
48.726001,9.16515139,8.099798,1.03215957,8.099798,7.42602427
48.736492,8.30662386,8.0407636,0.515616392,8.0407636,7.42444024
48.746984,9.16515139,7.99175879,1.08323248,7.99175879,7.42285537
48.757476,8.94427191,7.94583234,0.99921948,7.94583234,7.42126981
48.767967,8.42614977,7.90632319,0.720990004,7.90632319,7.41968372
48.778459,8.88819442,7.86983669,1.00913712,7.86983669,7.41809679
48.78895,8.36660027,7.83745822,0.727421505,7.83745822,7.41650934
48.799442,8.66025404,7.80793134,0.923213244,7.80793134,7.41492104
48.809934,8.71779789,7.78100734,0.967879406,7.78100734,7.41333208
48.820425,8.36660027,7.75672114,0.780947581,7.75672114,7.41174258
48.830917,8.60232527,7.73404227,0.931817039,7.73404227,7.41015226
48.841408,8.94427191,7.71377009,1.10927987,7.71377009,7.40856142
48.8519,8.1240384,7.69444134,0.655436545,7.69444134,7.40696975
48.862392,8.60232527,7.67729342,0.961785761,7.67729342,7.40537742
48.872883,8.36660027,7.66064442,0.840211783,7.66064442,7.40378457
48.883375,8.42614977,7.64596573,0.883280277,7.64596573,7.4021909
48.893866,8.54400375,7.63148252,0.955259766,7.63148252,7.40059671
48.904358,8.18535277,7.61877914,0.752710856,7.61877914,7.39900172
48.91485,7.93725393,7.60619624,0.575376128,7.60619624,7.39740606
48.925341,9.05538514,7.59495526,1.20848247,7.59495526,7.3958099
48.935833,8.83176087,7.58391979,1.11706807,7.58391979,7.39421292
48.946324,8.30662386,7.5738751,0.856007455,7.5738751,7.39261544
48.956816,8.24621125,7.5640939,0.825903962,7.5640939,7.39101716
48.967308,8.88819442,7.55503067,1.1546271,7.55503067,7.38941823
48.977799,8.42614977,7.54624826,0.938030659,7.54624826,7.38781879
48.988291,8.54400375,7.53795135,1.00302163,7.53795135,7.38621856
48.998782,8.36660027,7.529877,0.914725784,7.529877,7.38461783
49.009274,8.54400375,7.52206077,1.01091195,7.52206077,7.38301631
49.019766,7.61577311,7.51421929,0.318675096,7.51421929,7.38141414
49.030257,7.34846923,7.50635671,-0.397350576,7.50635671,7.37981149
49.040749,7.14142843,7.49767107,-0.596860657,7.49767107,7.37820804
49.05124,9.11043358,7.48853977,1.27353595,7.48853977,7.3766041
49.061732,8,7.47614731,0.723776683,7.47614731,7.37499938
49.072224,8.42614977,7.46262082,0.981595107,7.46262082,7.37339403
49.082715,8.30662386,7.43849784,0.931732808,7.43849784,7.37178819
49.093207,7.21110255,7.41225785,-0.448503401,7.41225785,7.37018157
49.103698,7.34846923,7.40900427,-0.246038695,7.40900427,7.36857448
49.11419,7.48331477,7.3669666,0.341098476,7.3669666,7.3669666
49.124682,7.93725393,7.3653581,0.756237945,7.3653581,7.3653581
49.135173,8.06225775,7.36374913,0.835768278,7.36374913,7.36374913
49.145665,8.18535277,7.36213939,0.907311073,7.36213939,7.36213939
49.156156,7.34846923,7.36052918,-0.109817802,7.36052918,7.36052918
49.166648,7.14142843,7.3589182,-0.466357982,7.3589182,7.3589182
49.17714,7.93725393,7.3573066,0.761542735,7.3573066,7.3573066
49.187631,7.61577311,7.35569454,0.509978989,7.35569454,7.35569454
49.198123,7.61577311,7.35408171,0.511557812,7.35408171,7.35408171
49.208614,7.28010989,7.35246843,-0.268995425,7.35246843,7.35246843
49.219106,8.54400375,7.35085438,1.09231377,7.35085438,7.35085438
49.229598,7.87400787,7.34923973,0.724408825,7.34923973,7.34923973
49.240089,8.54400375,7.34762462,1.09379117,7.34762462,7.34762462
49.250581,7.87400787,7.34600876,0.726635475,7.34600876,7.34600876
49.261072,8.36660027,7.34439245,1.01104293,7.34439245,7.34439245
49.271564,7.93725393,7.34277538,0.77102435,7.34277538,7.34277538
49.282056,8.48528137,7.34115772,1.06963716,7.34115772,7.34115772
49.292547,7.48331477,7.33953962,0.379176948,7.33953962,7.33953962
49.303039,8.60232527,7.33792076,1.12445743,7.33792076,7.33792076
49.31353,8.06225775,7.33630147,0.852030681,7.33630147,7.33630147
49.324022,7.81024968,7.33468143,0.689614565,7.33468143,7.33468143
49.334514,7.93725393,7.3330608,0.777298614,7.3330608,7.3330608
49.345005,8.06225775,7.33143974,0.854878946,7.33143974,7.33143974
49.355497,8.24621125,7.32981793,0.957284345,7.32981793,7.32981793
49.365988,7.34846923,7.3281957,0.142385137,7.3281957,7.3281957
49.37648,8.30662386,7.32657273,0.989975318,7.32657273,7.32657273
49.386972,7.93725393,7.32494918,0.782499042,7.32494918,7.32494918
49.397463,7.61577311,7.32332521,0.540784521,7.32332521,7.32332521
49.407955,8.71779789,7.3217005,1.18156565,7.3217005,7.3217005
49.418446,8,7.32007538,0.82457542,7.32007538,7.32007538
49.428938,7.61577311,7.31844952,0.545273862,7.31844952,7.31844952
49.43943,7.81024968,7.3168231,0.702443293,7.3168231,7.3168231
49.449921,7.21110255,7.31519625,-0.322635558,7.31519625,7.31519625
49.460413,7.81024968,7.31356869,0.704755976,7.31356869,7.31356869
49.470904,8,7.31194071,0.829493391,7.31194071,7.31194071
49.481396,7.68114575,7.31031202,0.608961188,7.31031202,7.31031202
49.491888,7.34846923,7.30868276,0.199465455,7.30868276,7.30868276
49.502379,7.68114575,7.3070531,0.61163114,7.3070531,7.3070531
49.512871,7.48331477,7.30542272,0.421772516,7.30542272,7.30542272
49.523362,7.68114575,7.30379194,0.614291307,7.30379194,7.30379194
49.533854,8.24621125,7.30216045,0.971622769,7.30216045,7.30216045
49.544346,8.30662386,7.3005284,1.0030431,7.3005284,7.3005284
49.554837,8.06225775,7.29889596,0.87370578,7.29889596,7.29889596
49.565329,8.42614977,7.29726281,1.06249092,7.29726281,7.29726281
49.57582,7.34846923,7.29562927,0.229869437,7.29562927,7.29562927
49.586312,7.81024968,7.29399503,0.718508628,7.29399503,7.29399503
49.596804,7.74596669,7.29236024,0.673503121,7.29236024,7.29236024
49.607295,8,7.29072506,0.842184622,7.29072506,7.29072506
49.617787,7.34846923,7.28908919,0.243680197,7.28908919,7.28908919
49.628278,7.68114575,7.28745293,0.627449452,7.28745293,7.28745293
49.63877,7.14142843,7.28581598,-0.379983623,7.28581598,7.28581598
49.649262,8.18535277,7.2841785,0.949301994,7.2841785,7.2841785
49.659753,7.07106781,7.28254063,-0.459861739,7.28254063,7.28254063
49.670245,8.30662386,7.28090208,1.01277924,7.28090208,7.28090208
49.680736,7.34846923,7.27926315,0.263070483,7.27926315,7.27926315
49.691228,7.07106781,7.27762354,-0.45448402,7.27762354,7.27762354
49.70172,7.28010989,7.2759834,0.064237788,7.2759834,7.2759834
49.712211,7.14142843,7.27434289,-0.364574352,7.27434289,7.27434289
49.722703,7.28010989,7.2727017,0.0860708571,7.2727017,7.2727017
49.733194,7.61577311,7.27106014,0.587122614,7.27106014,7.27106014
49.743686,8.18535277,7.26941791,0.957044859,7.26941791,7.26941791
49.754178,7.48331477,7.26777516,0.46426244,7.26777516,7.26777516
49.764669,8.06225775,7.26613205,0.892258761,7.26613205,7.26613205
49.775161,7.93725393,7.26448827,0.820222935,7.26448827,7.26448827
49.785652,7.14142843,7.26284413,-0.348447563,7.26284413,7.26284413
49.796144,8.1240384,7.26119933,0.928891316,7.26119933,7.26119933
49.806636,7.07106781,7.25955401,-0.434149975,7.25955401,7.25955401
49.817127,8,7.25790835,0.861447417,7.25790835,7.25790835
49.827619,8.1240384,7.25626202,0.93154516,7.25626202,7.25626202
49.83811,8.1240384,7.25461534,0.932428582,7.25461534,7.25461534
49.848602,7.48331477,7.25296801,0.479944543,7.25296801,7.25296801
49.859094,7.68114575,7.25132017,0.65561084,7.25132017,7.25132017
49.869585,7.74596669,7.249672,0.704481863,7.249672,7.249672
49.880077,6.8556546,7.24802317,-0.6263933,7.24802317,7.24802317
49.890568,7.41619849,7.246374,0.412097669,7.246374,7.246374
49.90106,6.32455532,7.24472418,-0.959254324,7.24472418,7.24472418
49.911552,8.30662386,7.24307387,1.0312856,7.24307387,7.24307387
49.922043,7.87400787,7.24142322,0.795351903,7.24142322,7.24142322
49.932535,7.48331477,7.23977194,0.493500596,7.23977194,7.23977194
49.943026,7.21110255,7.23812032,-0.16437082,7.23812032,7.23812032
49.953518,7.61577311,7.23646806,0.615877462,7.23646806,7.23646806
49.96401,8.24621125,7.23481532,1.00568183,7.23481532,7.23481532
49.974501,8.06225775,7.23316225,0.910546813,7.23316225,7.23316225
49.984993,8.24621125,7.23150855,1.00732453,7.23150855,7.23150855
49.995484,7.54983444,7.22985452,0.565667668,7.22985452,7.22985452
50.005976,7.61577311,7.22819987,0.622553803,7.22819987,7.22819987
50.016468,7.41619849,7.22654474,0.435492535,7.22654474,7.22654474
50.026959,7.93725393,7.22488929,0.844016966,7.22488929,7.22488929
50.037451,7.81024968,7.22323322,0.76616999,7.22323322,7.22323322
50.047942,7.93725393,7.22157684,0.845977005,7.22157684,7.22157684
50.058434,6.78232998,7.21991983,-0.661505744,7.21991983,7.21991983
50.068926,6.92820323,7.21826236,-0.538571379,7.21826236,7.21826236
50.079417,7.41619849,7.21660458,0.446759336,7.21660458,7.21660458
50.089909,7.87400787,7.21494619,0.811826144,7.21494619,7.21494619
50.1004,7.34846923,7.21328749,0.367670697,7.21328749,7.21328749
50.110892,8.18535277,7.21162817,0.986774847,7.21162817,7.21162817
50.121384,7,7.2099684,-0.458223092,7.2099684,7.2099684
50.131875,7.54983444,7.20830833,0.584402345,7.20830833,7.20830833
50.142367,8.24621125,7.20664766,1.01958991,7.20664766,7.20664766
50.152858,7.81024968,7.20498669,0.777986496,7.20498669,7.20498669
50.16335,7.93725393,7.20332511,0.856696459,7.20332511,7.20332511
50.173842,7.68114575,7.20166309,0.692446866,7.20166309,7.20166309
50.184333,7.54983444,7.20000077,0.59146738,7.20000077,7.20000077
50.194825,7.14142843,7.19833786,-0.238556976,7.19833786,7.19833786
50.205316,7.74596669,7.19667466,0.741142382,7.19667466,7.19667466
50.215808,7.81024968,7.19501087,0.784371602,7.19501087,7.19501087
50.2263,7.14142843,7.19334663,-0.227855663,7.19334663,7.19334663
50.236791,8.42614977,7.19168212,1.111066,7.19168212,7.19168212
50.247283,7.87400787,7.19001701,0.8270374,7.19001701,7.19001701
50.257774,7.07106781,7.18835163,-0.342467256,7.18835163,7.18835163
50.268266,7.61577311,7.18668566,0.655047664,7.18668566,7.18668566
50.278758,7.48331477,7.18501926,0.546164362,7.18501926,7.18501926
50.289249,7.61577311,7.1833526,0.657586885,7.1833526,7.1833526
50.299741,7.68114575,7.18168534,0.706725128,7.18168534,7.18168534
50.310232,7.54983444,7.18001782,0.608125491,7.18001782,7.18001782
50.320724,7.28010989,7.17834972,0.318998693,7.17834972,7.17834972
50.331216,8.83176087,7.1766812,1.28649899,7.1766812,7.1766812
50.341707,7.61577311,7.17501242,0.663898098,7.17501242,7.17501242
50.352199,7.28010989,7.17334306,0.326751931,7.17334306,7.17334306
50.36269,7.93725393,7.17167345,0.87497456,7.17167345,7.17167345
50.373182,7.07106781,7.17000327,-0.314540068,7.17000327,7.17000327
50.383674,7.21110255,7.16833267,0.206808806,7.16833267,7.16833267
50.394165,7.81024968,7.16666182,0.802239276,7.16666182,7.16666182
50.404657,7,7.1649904,-0.406190109,7.1649904,7.1649904
50.415148,7.81024968,7.16331874,0.804320169,7.16331874,7.16331874
50.42564,7.48331477,7.16164651,0.567158055,7.16164651,7.16164651
50.436132,7.74596669,7.15997388,0.765501671,7.15997388,7.15997388
50.446623,7.28010989,7.15830101,0.349011284,7.15830101,7.15830101
50.457115,7.34846923,7.15662758,0.437997313,7.15662758,7.15662758
50.467606,6.92820323,7.15495391,-0.476183455,7.15495391,7.15495391
50.478098,7.74596669,7.15327969,0.769861678,7.15327969,7.15327969
50.48859,7.48331477,7.15160507,0.575942447,7.15160507,7.15160507
50.499081,8.24621125,7.14993022,1.0470344,7.14993022,7.14993022
50.509573,7.87400787,7.14825482,0.851911413,7.14825482,7.14825482
50.520064,7.21110255,7.14657919,0.254014493,7.14657919,7.14657919
50.530556,7.21110255,7.14490301,0.257292713,7.14490301,7.14490301
50.541048,7.81024968,7.14322645,0.8167149,7.14322645,7.14322645
50.551539,7.14142843,7.14154966,-0.0110106254,7.14154966,7.14154966
50.562031,7.93725393,7.13987233,0.89296226,7.13987233,7.13987233
50.572522,7.54983444,7.13819479,0.641591496,7.13819479,7.13819479
50.583014,7.14142843,7.1365167,0.0700837182,7.1365167,7.1365167
50.593506,7.48331477,7.13483824,0.590319011,7.13483824,7.13483824
50.603997,7.87400787,7.13315956,0.860725457,7.13315956,7.13315956
50.614489,6.92820323,7.13148035,-0.450862641,7.13148035,7.13148035
50.62498,7.21110255,7.12980093,0.28513439,7.12980093,7.12980093
50.635472,7.87400787,7.12812098,0.863647436,7.12812098,7.12812098
50.645964,7.14142843,7.12644066,0.122424535,7.12644066,7.12644066
50.656455,7.54983444,7.12476014,0.651977222,7.12476014,7.12476014
50.666947,7,7.12307909,-0.350826296,7.12307909,7.12307909
50.677438,7,7.12139784,-0.348421927,7.12139784,7.12139784
50.68793,7.81024968,7.11971607,0.830983518,7.11971607,7.11971607
50.698422,7.74596669,7.11803394,0.792422081,7.11803394,7.11803394
50.708913,6.70820393,7.11635161,-0.638864367,7.11635161,7.11635161
50.719405,7.14142843,7.11466877,0.163583797,7.11466877,7.11466877
50.729896,6.92820323,7.11298573,-0.429863355,7.11298573,7.11298573
50.740388,7.48331477,7.11130219,0.609928345,7.11130219,7.11130219
50.75088,8.54400375,7.10961829,1.19765832,7.10961829,7.10961829
50.761371,8.83176087,7.1079342,1.3129458,7.1079342,7.1079342
50.771863,7.87400787,7.10624961,0.876218159,7.10624961,7.10624961
50.782354,7.07106781,7.10456484,-0.183021923,7.10456484,7.10456484
50.792846,6.55743852,7.10287956,-0.738539797,7.10287956,7.10287956
50.803338,7.34846923,7.10119394,0.497267828,7.10119394,7.10119394
50.813829,8,7.09950814,0.948942498,7.09950814,7.09950814
50.824321,7.93725393,7.09782184,0.91620527,7.09782184,7.09782184
50.834812,7.28010989,7.09613536,0.428922517,7.09613536,7.09613536
50.845304,7.48331477,7.0944484,0.623591515,7.0944484,7.0944484
50.855796,7.21110255,7.0927611,0.344007929,7.0927611,7.0927611
50.866287,7.07106781,7.09107363,-0.141441908,7.09107363,7.09107363
50.876779,7.14142843,7.08938567,0.228128831,7.08938567,7.08938567
50.88727,7.61577311,7.08769754,0.726688081,7.08769754,7.08769754
50.897762,6.78232998,7.08600893,-0.551070724,7.08600893,7.08600893
50.908254,7.93725393,7.08431999,0.923544229,7.08431999,7.08431999
50.918745,7.34846923,7.08263089,0.515595127,7.08263089,7.08263089
50.929237,7.81024968,7.08094132,0.853995527,7.08094132,7.08094132
50.939728,7.48331477,7.07925158,0.635659652,7.07925158,7.07925158
50.95022,7.28010989,7.07756137,0.45005391,7.07756137,7.07756137
50.960712,6.92820323,7.07587084,-0.384275434,7.07587084,7.07587084
50.971203,8,7.07418016,0.962195323,7.07418016,7.07418016
50.981695,7.28010989,7.07248901,0.455654344,7.07248901,7.07248901
50.992186,7.34846923,7.07079771,0.526945463,7.07079771,7.07079771
51.002678,7.74596669,7.06910594,0.822715476,7.06910594,7.06910594
51.01317,7,7.06741386,-0.259641798,7.06741386,7.06741386
51.023661,6.4807407,7.06572164,-0.764840471,7.06572164,7.06572164
51.034153,8.71779789,7.06402896,1.28598947,7.06402896,7.06402896
51.044644,7.54983444,7.06233614,0.69821078,7.06233614,7.06233614
51.055136,7.48331477,7.06064286,0.650132228,7.06064286,7.06064286
51.065628,7.81024968,7.05894928,0.866775862,7.05894928,7.05894928
51.076119,7.21110255,7.05725557,0.392233328,7.05725557,7.05725557
51.086611,7.87400787,7.0555614,0.904680316,7.0555614,7.0555614
51.097102,7.34846923,7.0538671,0.54277263,7.0538671,7.0538671
51.107594,6.70820393,7.05217235,-0.586488207,7.05217235,7.05217235
51.118086,7.68114575,7.05047731,0.794146358,7.05047731,7.05047731
51.128577,6.63324958,7.04878215,-0.644618155,7.04878215,7.04878215
51.139069,7.07106781,7.04708654,0.154858891,7.04708654,7.04708654
51.14956,7.74596669,7.0453908,0.837004115,7.0453908,7.0453908
51.160052,7.07106781,7.04369463,0.165448432,7.04369463,7.04369463
51.170544,8.06225775,7.04199817,1.01007899,7.04199817,7.04199817
51.181035,7.14142843,7.0403016,0.318004445,7.0403016,7.0403016
51.191527,8.06225775,7.03860459,1.01175746,7.03860459,7.03860459
51.202018,8.24621125,7.03690747,1.09968349,7.03690747,7.03690747
51.21251,7.41619849,7.03573375,0.616818235,7.03573375,7.03520991
51.223002,7.54983444,7.03435179,0.7179712,7.03435179,7.03351209
51.233493,7.93725393,7.03338492,0.950720258,7.03338492,7.03181415
51.243985,6.32455532,7.03249963,-0.841394263,7.03249963,7.03011579
51.254476,8.83176087,7.03279403,1.3412557,7.03279403,7.02841732
51.264968,7.74596669,7.03325224,0.844224169,7.03325224,7.02671843
51.27546,7.93725393,7.03687847,0.948881164,7.03687847,7.02501927
51.285951,7.48331477,7.04146477,0.664717987,7.04146477,7.02332002
51.296443,8.06225775,7.05335026,1.00444387,7.05335026,7.02162034
51.306934,7.81024968,7.06963187,0.860591542,7.06963187,7.01992057
51.317426,6.40312424,7.10244691,-0.836255146,7.10244691,7.01822038
51.327918,6.8556546,7.15125265,-0.543689293,7.15125265,7.01651994
51.338409,7.68114575,7.23638094,0.666906899,7.23638094,7.01481941
51.348901,7.87400787,7.31948501,0.744662921,7.31948501,7.01311847
51.359392,8.18535277,7.40008266,0.886154677,7.40008266,7.01141744
51.369884,7.54983444,7.44819125,0.318815289,7.44819125,7.009716
51.380376,7.21110255,7.46321588,-0.502108886,7.46321588,7.00801432
51.390867,8.06225775,7.47935874,0.763478229,7.47935874,7.00631256
51.401359,8,7.4962851,0.709728751,7.4962851,7.00461039
51.41185,7.68114575,7.51471888,0.407954489,7.51471888,7.00290815
51.422342,8,7.53384327,0.682756716,7.53384327,7.0012055
51.432834,8.06225775,7.55497302,0.712239233,7.55497302,6.99950262
51.443325,8.30662386,7.57664907,0.854385623,7.57664907,6.99779967
51.453817,7.74596669,7.60096736,0.380787784,7.60096736,6.99609633
51.464308,7.54983444,7.62562671,-0.27530397,7.62562671,6.99439291
51.4748,8.60232527,7.65374504,0.973950836,7.65374504,6.9926891
51.485292,8.71779789,7.68214273,1.01767144,7.68214273,6.99098507
51.495783,8.66025404,7.71459243,0.972451338,7.71459243,6.98928097
51.506275,8.77496439,7.74767845,1.01355115,7.74767845,6.98757649
51.516766,7.81024968,7.7851132,0.158544875,7.7851132,6.98587195
51.527258,7.93725393,7.8239001,0.336680614,7.8239001,6.98416702
51.53775,8.48528137,7.86733079,0.786098329,7.86733079,6.98246188
51.548241,8.18535277,7.91311337,0.521765661,7.91311337,6.98075668
51.558733,7.41619849,7.96380873,-0.74000692,7.96380873,6.9790511
51.569224,7.93725393,8.01827855,-0.284648242,8.01827855,6.97734548
51.579716,8.30662386,8.07786491,0.478287518,8.07786491,6.97563947
51.590208,8.42614977,8.14325517,0.531878377,8.14325517,6.97393326
51.600699,8.94427191,8.21383183,0.854657876,8.21383183,6.97222701
51.611191,8.18535277,8.29312376,-0.328284914,8.29312376,6.97052038
51.621682,9.2736185,8.37746431,0.946654208,8.37746431,6.96881371
51.632174,8.94427191,8.47474522,0.68522018,8.47474522,6.96710668
51.642666,9.89949494,8.57656137,1.15018849,8.57656137,6.96539944
51.653157,9.89949494,8.69755079,1.09633213,8.69755079,6.96369217
51.663649,9.59166305,8.82189266,0.877365596,8.82189266,6.96198454
51.67414,9.79795897,8.97487856,0.907237793,8.97487856,6.96027687
51.684632,10.1488916,9.12884713,1.00997249,9.12884713,6.95856885
51.695124,10.6770783,9.32634841,1.16220904,9.32634841,6.95686064
51.705615,10.7703296,9.52589255,1.11554339,9.52589255,6.95515239
51.716107,10.8166538,9.78317455,1.01660183,9.78317455,6.9534438
51.726598,10.7703296,10.053423,0.846703391,10.053423,6.95173518
51.73709,11.5325626,10.4062675,1.06127051,10.4062675,6.95002621
51.747582,11.3578167,10.7998816,0.746950511,10.7998816,6.94831706
51.758073,12.083046,11.316274,0.875655194,11.316274,6.94660789
51.768565,12.4498996,11.9224285,0.726272054,11.9224285,6.94489837
51.779056,12.7279221,12.6856659,0.205563144,12.6856659,6.94318884
51.789548,14.0712473,13.6338609,0.661351954,13.6338609,6.94147897
51.80004,14.7309199,14.772178,-0.203120979,14.772178,6.93976893
51.810531,16.1864141,16.3012577,-0.338885844,16.3012577,6.93805887
51.821023,18.761663,18.0476673,0.844982697,18.0476673,6.93634848
51.831514,20.1494417,20.5660956,-0.645487356,20.5660956,6.93463808
51.842006,23.2379001,23.2582116,-0.142518368,23.2582116,6.93292735
51.852498,26.3818119,27.3771099,-0.997646233,27.3771099,6.93121646
51.862989,30.8382879,31.4722289,-0.796204157,31.4722289,6.92950556
51.873481,37.8813938,38.0101136,-0.358775376,38.0101136,6.92779434
51.883972,45.8911756,44.0765558,1.34707826,44.0765558,6.92608312
51.894464,52.5071424,53.4048831,-0.947491802,53.4048831,6.92437157
51.904956,61.4654374,61.6213741,-0.394888111,61.6213741,6.92265987
51.915447,69.7638875,69.5361796,0.477187444,69.5361796,6.92094817
51.925939,73.5119038,75.6103798,-1.44861174,75.6103798,6.91923616
51.93643,72.9931504,73.0636661,-0.265548071,73.0636661,6.91752416
51.946922,65.9848467,68.7127311,-1.65163083,68.7127311,6.91581184
51.957414,54.9909083,56.3498592,-1.16574046,56.3498592,6.91409937
51.967905,42.3910368,43.2904132,-0.948354571,43.2904132,6.91238692
51.978397,32.4037035,33.9173041,-1.23028477,33.9173041,6.91067416
51.988888,26,25.3119182,0.829506959,25.3119182,6.90896142
51.99938,20.5426386,21.5397045,-0.998531902,21.5397045,6.90724837
52.009872,18.627936,18.4846821,0.378488984,18.4846821,6.90553519
52.020363,16.0934769,16.6522863,-0.747535555,16.6522863,6.90382202
52.030855,14.5602198,15.1907874,-0.794082907,15.1907874,6.90210856
52.041346,12.922848,14.0443127,-1.05899233,14.0443127,6.90039512
52.051838,12.4498996,13.1505266,-0.837034625,13.1505266,6.89868139
52.06233,11.4017543,12.3745931,-0.986325941,12.3745931,6.89696752
52.072821,11.9163753,11.7804431,0.368689889,11.7804431,6.89525369
52.083313,11.5325626,11.2292692,0.550720789,11.2292692,6.89353957
52.093804,10.198039,10.8124041,-0.783814461,10.8124041,6.89182548
52.104296,10.1488916,10.4063496,-0.507403194,10.4063496,6.8901111
52.114788,9.38083152,10.1019226,-0.849170845,10.1019226,6.8883966
52.125279,9.38083152,9.79788808,-0.645799167,9.79788808,6.88668214
52.135771,9.64365076,9.56477793,0.280843075,9.56477793,6.8849674
52.146262,8,9.33401712,-1.15499659,9.33401712,6.88325271
52.156754,8.06225775,9.14873287,-1.04234117,9.14873287,6.88153773
52.167246,8.77496439,8.9695422,-0.441109756,8.9695422,6.87982264
52.177737,8.1240384,8.81992434,-0.83419778,8.81992434,6.8781076
52.188229,7.54983444,8.67807653,-1.06218741,8.67807653,6.87639228
52.19872,8.60232527,8.55555446,0.2162656,8.55555446,6.87467702
52.209212,7.81024968,8.44137917,-0.794436589,8.44137917,6.87296148
52.219704,7.81024968,8.33979116,-0.72769601,8.33979116,6.87124584
52.230195,8.36660027,8.24654799,0.346485613,8.24654799,6.86953026
52.240687,8.66025404,8.16139082,0.706302501,8.16139082,6.86781441
52.251178,7.41619849,8.08424331,-0.817340091,8.08424331,6.86609863
52.26167,7.07106781,8.01214526,-0.970091466,8.01214526,6.86438258
52.272162,7.41619849,7.94756704,-0.728950308,7.94756704,6.86266643
52.282653,8.54400375,7.88597679,0.811188606,7.88597679,6.86095035
52.293145,6.70820393,7.83135892,-1.05979007,7.83135892,6.85923401
52.303636,7.54983444,7.77830363,-0.477984508,7.77830363,6.85751775
52.314128,8.18535277,7.73167087,0.673559132,7.73167087,6.85580123
52.32462,6.92820323,7.68561535,-0.870294274,7.68561535,6.85408462
52.335111,8.30662386,7.64545978,0.813119966,7.64545978,6.85236808
52.345603,7.87400787,7.60559329,0.518087424,7.60559329,6.8506513
52.356094,7.21110255,7.57031937,-0.599346991,7.57031937,6.84893459
52.366586,7.34846923,7.53559962,-0.432585706,7.53559962,6.84721764
52.377078,8.18535277,7.50428401,0.825268905,7.50428401,6.84550061
52.387569,7.54983444,7.47376372,0.275809192,7.47376372,6.84378367
52.398061,7.21110255,7.44571799,-0.484371176,7.44571799,6.84206648
52.408552,7.93725393,7.41853913,0.720218581,7.41853913,6.84034938
52.419044,7.74596669,7.39302709,0.594087203,7.39302709,6.83863205
52.429536,6.4807407,7.36816874,-0.942033992,7.36816874,6.83691464
52.440027,6.63324958,7.34412164,-0.843132292,7.34412164,6.83519732
52.450519,7.48331477,7.31978585,0.404387091,7.31978585,6.83347977
52.46101,7,7.29516231,-0.543288426,7.29516231,6.83176232
52.471502,6.55743852,7.26733844,-0.842555587,7.26733844,6.83004464
52.481994,6.70820393,7.23762982,-0.727616582,7.23762982,6.8283269
52.492485,7.14142843,7.19615879,-0.233945214,7.19615879,6.82660926
52.502977,6.244998,7.15011643,-0.951377124,7.15011643,6.82489139
52.513468,7.41619849,7.06725317,0.590715933,7.06725317,6.82317363
52.52396,6.55743852,6.97547488,-0.646557312,6.97547488,6.82145565
52.534452,7.41619849,6.96631911,0.670730482,6.96631911,6.81973761
52.544943,7.07106781,6.8184495,0.502611489,6.8184495,6.81801968
52.555435,7.74596669,6.81675054,0.963958586,6.81675054,6.81630154
52.565926,7.28010989,6.81505352,0.681950413,6.81505352,6.81458351
52.576418,7,6.81335737,0.432021563,6.81335737,6.81286527
52.58691,6.244998,6.81166308,-0.7527716,6.81166308,6.81114698
52.597401,7.34846923,6.80997052,0.73382471,6.80997052,6.80942882
52.607893,6.92820323,6.80827972,0.346299736,6.80827972,6.80771044
52.618384,7.41619849,6.8065914,0.780773391,6.8065914,6.80599219
52.628876,6.78232998,6.80490484,-0.150249324,6.80490484,6.80427373
52.639368,6.70820393,6.80322162,-0.308249394,6.80322162,6.80255524
52.649859,7.14142843,6.80154044,0.582999136,6.80154044,6.80083687
52.660351,6.32455532,6.79986383,-0.689426219,6.79986383,6.7991183
52.670842,7.81024968,6.79818911,1.00601221,6.79818911,6.79739987
52.681334,6.40312424,6.79652092,-0.62721343,6.79652092,6.79568123
52.691826,6.78232998,6.79485414,-0.11191138,6.79485414,6.79396257
52.702317,6.92820323,6.793197,0.367431943,6.793197,6.79224405
52.712809,7.87400787,6.79154071,1.04041682,6.79154071,6.79052533
52.7233,7.28010989,6.78989766,0.700151579,6.78989766,6.78880676
52.733792,7,6.78825636,0.460156103,6.78825636,6.787088
52.744284,7.34846923,6.78663059,0.749558959,6.78663059,6.78536921
52.754775,7.93725393,6.78500977,1.07342637,6.78500977,6.78365057
52.765267,6.55743852,6.78340744,-0.475361879,6.78340744,6.78193175
52.775758,6.92820323,6.7818149,0.382607282,6.7818149,6.78021308
52.78625,6.70820393,6.78024491,-0.268404504,6.78024491,6.77849422
52.796742,5.91607978,6.77869302,-0.928769746,6.77869302,6.77677536
52.807233,7.21110255,6.7771694,0.658736027,6.7771694,6.77505665
52.817725,7.28010989,6.77567968,0.710232503,6.77567968,6.77333776
52.828216,7.54983444,6.77422621,0.880686224,6.77422621,6.77161903
52.838708,7.41619849,6.77284287,0.802094519,6.77284287,6.76990013
52.8492,7.14142843,6.7715106,0.608208704,6.7715106,6.76818123
52.859691,7.41619849,6.77033159,0.803658445,6.77033159,6.76646249
52.870183,7.41619849,6.76922687,0.804345459,6.76922687,6.76474358
52.880674,7,6.76842655,0.481220795,6.76842655,6.76302484
52.891166,6.8556546,6.76771862,0.296540019,6.76771862,6.76130593
52.901658,6.8556546,6.76763505,0.29668089,6.76763505,6.75958703
52.912149,6.32455532,6.76765225,-0.665655263,6.76765225,6.7578683
52.922641,7.34846923,6.76907254,0.761181113,6.76907254,6.75614941
52.933132,7.68114575,6.77070895,0.95416812,6.77070895,6.7544307
52.943624,6.78232998,6.77524283,0.0841852486,6.77524283,6.75271183
52.954116,6.8556546,6.78069041,0.273795898,6.78069041,6.75099297
52.964607,7.61577311,6.79159492,0.907842601,6.79159492,6.7492743
52.975099,6.78232998,6.80559444,-0.1525269,6.80559444,6.74755547
52.98559,7,6.8295226,0.41288909,6.8295226,6.74583683
52.996082,6.55743852,6.86067495,-0.550669069,6.86067495,6.74411804
53.006574,7.34846923,6.90633169,0.664934236,6.90633169,6.74239927
53.017065,6.70820393,6.95327661,-0.495048158,6.95327661,6.74068069
53.027557,6.164414,7.00204652,-0.91522266,7.00204652,6.73896196
53.038048,6.63324958,7.01455436,-0.617498809,7.01455436,6.73724343
53.04854,7.48331477,6.9937029,0.699722713,6.9937029,6.73552476
53.059032,6.4807407,6.9379555,-0.676176604,6.9379555,6.73380612
53.069523,7.07106781,6.85954598,0.459915031,6.85954598,6.73208768
53.080015,5.47722558,6.80926043,-1.15413814,6.80926043,6.7303691
53.090506,7.14142843,6.77066657,0.608902176,6.77066657,6.72865073
53.100998,7.28010989,6.75421276,0.725187653,6.75421276,6.72693222
53.11149,6.4807407,6.74326293,-0.512369238,6.74326293,6.72521375
53.121981,6.63324958,6.73756113,-0.322972986,6.73756113,6.72349549
53.132473,7.81024968,6.73246919,1.03816207,6.73246919,6.7217771
53.142964,6.32455532,6.72897728,-0.635941786,6.72897728,6.72005892
53.153456,6.78232998,6.72556084,0.238262762,6.72556084,6.71834061
53.163948,7.14142843,6.72280327,0.647012491,6.72280327,6.71662236
53.174439,7.28010989,6.72011177,0.748330218,6.72011177,6.71490431
53.184931,6.8556546,6.71772771,0.371385099,6.71772771,6.71318615
53.195422,6.70820393,6.71540164,-0.0848393103,6.71540164,6.71146821
53.205914,7.14142843,6.71323114,0.654367854,6.71323114,6.70975015
53.216406,6.92820323,6.71110844,0.465934321,6.71110844,6.70803215
53.226897,5.83095189,6.70906914,-0.937079101,6.70906914,6.70631437
53.237389,6.70820393,6.70706861,0.0336945927,6.70706861,6.70459648
53.24788,6.8556546,6.70511417,0.387995399,6.70511417,6.70287882
53.258372,7,6.70319133,0.544801495,6.70319133,6.70116105
53.268864,5.83095189,6.70129415,-0.932921357,6.70129415,6.69944334
53.279355,7.07106781,6.69942324,0.609626584,6.69942324,6.69772586
53.289847,7.41619849,6.69756636,0.847721728,6.69756636,6.69600829
53.300338,6.78232998,6.69573124,0.294276642,6.69573124,6.69429094
53.31083,6.40312424,6.69390349,-0.539239511,6.69390349,6.6925735
53.321322,6.4807407,6.69209376,-0.459731509,6.69209376,6.69085614
53.331813,7.28010989,6.69028777,0.767998773,6.69028777,6.689139
53.342305,6.164414,6.6884968,-0.723935629,6.6884968,6.68742178
53.352796,6.8556546,6.68670748,0.411031781,6.68670748,6.6857048
53.363288,6.92820323,6.68493029,0.49322707,6.68493029,6.68398773
53.37378,5.65685425,6.6831543,-1.01306468,6.6831543,6.68227074
53.384271,6.63324958,6.68138722,-0.219402907,6.68138722,6.680554
53.394763,5.38516481,6.67962167,-1.137742,6.67962167,6.67883717
53.405254,6.63324958,6.67786251,-0.211217721,6.67786251,6.67712059
53.415746,6.32455532,6.67610516,-0.592916385,6.67610516,6.67540393
53.426238,6.78232998,6.67435224,0.328599665,6.67435224,6.67368736
53.436729,6.40312424,6.67260161,-0.519112096,6.67260161,6.67197105
53.447221,6.08276253,6.67085394,-0.766871185,6.67085394,6.67025466
53.457712,6.55743852,6.6691086,-0.334170727,6.6691086,6.66853852
53.468204,7,6.6673653,0.576744921,6.6673653,6.66682232
53.478696,5.38516481,6.66562411,-1.13157382,6.66562411,6.66510621
53.489187,7,6.6638846,0.579754603,6.6638846,6.66339036
53.499679,6.40312424,6.66214696,-0.508942748,6.66214696,6.66167445
53.51017,5.83095189,6.66041048,-0.91074617,6.66041048,6.6599588
53.520662,6.4807407,6.65867574,-0.42182347,6.65867574,6.6582431
53.531154,6.244998,6.65694161,-0.641828338,6.65694161,6.65652749
53.541645,6.40312424,6.65520929,-0.502080724,6.65520929,6.65481215
53.552137,6.4807407,6.65347713,-0.415615729,6.65347713,6.65309676
53.562628,6.70820393,6.65174619,0.237608384,6.65174619,6.65138164
53.57312,6.244998,6.65001519,-0.63640961,6.65001519,6.64966647
53.583612,6.08276253,6.64828384,-0.75201151,6.64828384,6.6479514
53.594103,6.70820393,6.6465522,0.248297676,6.6465522,6.64623662
53.604595,6.32455532,6.64481731,-0.565916945,6.64481731,6.64452179
53.615086,5.74456265,6.64307984,-0.947901467,6.64307984,6.64280724
53.625578,6.92820323,6.64133352,0.535602193,6.64133352,6.64109264
53.63607,6.92820323,6.63957671,0.537239725,6.63957671,6.63937816
53.646561,6.32455532,6.63779953,-0.559682239,6.63779953,6.63766397
53.657053,6.92820323,6.6360496,0.540512377,6.6360496,6.63594974
53.667544,6.164414,6.63433568,-0.685508337,6.63433568,6.6342358
53.678036,7.28010989,6.63252182,0.804728571,6.63252182,6.63252182
53.688528,6,6.63080796,-0.7942342,6.63080796,6.63080796
53.699019,6.70820393,6.62909441,0.281264155,6.62909441,6.62909441
53.709511,7.14142843,6.62738082,0.716971136,6.62738082,6.62738082
53.720002,6.92820323,6.62566753,0.550032458,6.62566753,6.62566753
53.730494,6.4807407,6.6239542,-0.378435604,6.6239542,6.6239542
53.740986,7.21110255,6.62224102,0.767373137,6.62224102,6.62224102
53.751477,6,6.62052814,-0.787736083,6.62052814,6.62052814
53.761969,6.8556546,6.61881523,0.486661453,6.61881523,6.61881523
53.77246,6.32455532,6.61710263,-0.540876427,6.61710263,6.61710263
53.782952,6.78232998,6.61539001,0.408582887,6.61539001,6.61539001
53.793444,6.32455532,6.61367753,-0.537700856,6.61367753,6.61367753
53.803935,6.40312424,6.61196536,-0.456991385,6.61196536,6.61196536
53.814427,6.32455532,6.61025318,-0.534507119,6.61025318,6.61025318
53.824918,6.8556546,6.60854131,0.497104908,6.60854131,6.60854131
53.83541,5.56776436,6.60682943,-1.01934541,6.60682943,6.60682943
53.845902,6.63324958,6.6051177,0.16772561,6.6051177,6.6051177
53.856393,6.70820393,6.60340629,0.323724641,6.60340629,6.60340629
53.866885,6.164414,6.60169487,-0.661272159,6.60169487,6.60169487
53.877376,6.70820393,6.59998377,0.328968324,6.59998377,6.59998377
53.887868,6.40312424,6.59827267,-0.441756082,6.59827267,6.59827267
53.89836,5.29150262,6.59656173,-1.14239184,6.59656173,6.59656173
53.908851,7.21110255,6.59485112,0.785016836,6.59485112,6.59485112
53.919343,7,6.59314051,0.637855387,6.59314051,6.59314051
53.929834,6.63324958,6.59143022,0.204497822,6.59143022,6.59143022
53.940326,6,6.58971994,-0.767932251,6.58971994,6.58971994
53.950818,5.91607978,6.58800983,-0.819713394,6.58800983,6.58800983
53.961309,6.92820323,6.58630005,0.584724872,6.58630005,6.58630005
53.971801,7.34846923,6.58459029,0.874001683,6.58459029,6.58459029
53.982292,6.32455532,6.58288086,-0.508257352,6.58288086,6.58288086
53.992784,5.74456265,6.58117144,-0.914663212,6.58117144,6.58117144
54.003276,5.74456265,6.5794622,-0.913728379,6.5794622,6.5794622
54.013767,6.92820323,6.5777533,0.591988119,6.5777533,6.5777533
54.024259,6.40312424,6.57604442,-0.415836721,6.57604442,6.57604442
54.03475,6.92820323,6.57433588,0.594867507,6.57433588,6.57433588
54.045242,5.47722558,6.57262736,-1.04661444,6.57262736,6.57262736
54.055734,6.92820323,6.57091903,0.597732547,6.57091903,6.57091903
54.066225,6,6.56921105,-0.754460769,6.56921105,6.56921105
54.076717,6.08276253,6.5675031,-0.696233126,6.5675031,6.5675031
54.087208,6,6.56579549,-0.752193787,6.56579549,6.56579549
54.0977,5.65685425,6.56408792,-0.952488147,6.56408792,6.56408792
54.108192,7.07106781,6.56238054,0.713223157,6.56238054,6.56238054
54.118683,5.91607978,6.56067352,-0.80286595,6.56067352,6.56067352
54.129175,6.92820323,6.55896653,0.607648502,6.55896653,6.55896653
54.139666,6.55743852,6.5572599,0.0133650332,6.5572599,6.5572599
54.150158,7.28010989,6.55555331,0.851208893,6.55555331,6.55555331
54.16065,6.78232998,6.55384692,0.477999021,6.55384692,6.55384692
54.171141,6,6.5521409,-0.743061838,6.5521409,6.5521409
54.181633,6.32455532,6.55043491,-0.475267917,6.55043491,6.55043491
54.192124,7.61577311,6.5487293,1.03297812,6.5487293,6.5487293
54.202616,6.78232998,6.54702373,0.485083758,6.54702373,6.54702373
54.213108,6.8556546,6.54531837,0.557078296,6.54531837,6.54531837
54.223599,5.83095189,6.54361339,-0.844192805,6.54361339,6.54361339
54.234091,6.40312424,6.54190845,-0.372537533,6.54190845,6.54190845
54.244582,6.70820393,6.54020389,0.40987808,6.54020389,6.54020389
54.255074,6.164414,6.53849939,-0.611625199,6.53849939,6.53849939
54.265566,6.08276253,6.5367951,-0.673819388,6.5367951,6.5367951
54.276057,6.4807407,6.53509119,-0.233131921,6.53509119,6.53509119
54.286549,7.21110255,6.53338734,0.823234601,6.53338734,6.53338734
54.29704,6,6.53168388,-0.729166564,6.53168388,6.53168388
54.307532,7.54983444,6.52998047,1.00987819,6.52998047,6.52998047
54.318024,5.74456265,6.5282773,-0.885276596,6.5282773,6.5282773
54.328515,7.28010989,6.52657451,0.868064157,6.52657451,6.52657451
54.339007,6.08276253,6.52487179,-0.664912969,6.52487179,6.52487179
54.349498,5.74456265,6.52316946,-0.882386995,6.52316946,6.52316946
54.35999,6.78232998,6.5214672,0.510747283,6.5214672,6.5214672
54.370482,6.8556546,6.51976517,0.579559688,6.51976517,6.51976517
54.380973,6.32455532,6.51806354,-0.439895689,6.51806354,6.51806354
54.391465,6.55743852,6.51636198,0.202673487,6.51636198,6.51636198
54.401956,6.164414,6.51466083,-0.591816545,6.51466083,6.51466083
54.412448,6.8556546,6.51295975,0.585401446,6.51295975,6.51295975
54.42294,5.83095189,6.51125891,-0.82480726,6.51125891,6.51125891
54.433431,6,6.50955848,-0.713833649,6.50955848,6.50955848
54.443923,6.63324958,6.50785813,0.354106556,6.50785813,6.50785813
54.454414,6.63324958,6.50615819,0.356498801,6.50615819,6.50615819
54.464906,6.63324958,6.50445833,0.358874981,6.50445833,6.50445833
54.475398,6.70820393,6.50275872,0.453260644,6.50275872,6.50275872
54.485889,6.55743852,6.50105953,0.23744262,6.50105953,6.50105953
54.496381,6.70820393,6.49936042,0.456993994,6.49936042,6.49936042
54.506872,5.91607978,6.49766173,-0.762615204,6.49766173,6.49766173
54.517364,6.32455532,6.49596314,-0.414014272,6.49596314,6.49596314
54.527856,6.08276253,6.4942648,-0.641484426,6.4942648,6.4942648
54.538347,6.164414,6.49256688,-0.572846296,6.49256688,6.49256688
54.548839,6.4807407,6.49086906,-0.100639772,6.49086906,6.49086906
54.55933,5.83095189,6.48917167,-0.811307446,6.48917167,6.48917167
54.569822,6.08276253,6.48747437,-0.636169664,6.48747437,6.48747437
54.580314,6.40312424,6.48577734,-0.287494529,6.48577734,6.48577734
54.590805,6.40312424,6.48408074,-0.284528563,6.48408074,6.48408074
54.601297,6.244998,6.48238425,-0.487222995,6.48238425,6.48238425
54.611788,6,6.48068818,-0.693316797,6.48068818,6.48068818
54.62228,6.4807407,6.47899223,0.041814728,6.47899223,6.47899223
54.632772,6.244998,6.47729655,-0.481973596,6.47729655,6.47729655
54.643263,6.8556546,6.4756013,0.616484632,6.4756013,6.4756013
54.653755,6.08276253,6.47390617,-0.625414772,6.47390617,6.47390617
54.664246,6.164414,6.47221148,-0.554794982,6.47221148,6.47221148
54.674738,5.91607978,6.4705169,-0.744605343,6.4705169,6.4705169
54.68523,7.07106781,6.46882261,0.77604459,6.46882261,6.46882261
54.695721,6.32455532,6.46712875,-0.377588976,6.46712875,6.46712875
54.706213,6.40312424,6.46543503,-0.249621291,6.46543503,6.46543503
54.716704,5.74456265,6.46374174,-0.848044278,6.46374174,6.46374174
54.727196,6,6.46204859,-0.679741559,6.46204859,6.46204859
54.737688,6.4807407,6.46035572,0.142775975,6.46035572,6.46035572
54.748179,6.4807407,6.4586633,0.148584642,6.4586633,6.4586633
54.758671,6.08276253,6.45697102,-0.611725825,6.45697102,6.45697102
54.769162,6.244998,6.45527918,-0.458564265,6.45527918,6.45527918
54.779654,6.63324958,6.45358748,0.423865659,6.45358748,6.45358748
54.790146,6.4807407,6.45189608,0.169837031,6.45189608,6.45189608
54.800637,6.40312424,6.45020514,-0.216981335,6.45020514,6.45020514
54.811129,6.70820393,6.44851433,0.509597489,6.44851433,6.44851433
54.82162,5.47722558,6.44682399,-0.984681884,6.44682399,6.44682399
54.832112,6.63324958,6.44513378,0.433723179,6.44513378,6.44513378
54.842604,7.54983444,6.44344389,1.05185101,6.44344389,6.44344389
54.853095,6.78232998,6.44175445,0.583588493,6.44175445,6.44175445
54.863587,6.8556546,6.44006517,0.644662262,6.44006517,6.44006517
54.874078,5.91607978,6.43837635,-0.722700884,6.43837635,6.43837635
54.88457,6.08276253,6.43668768,-0.594916089,6.43668768,6.43668768
54.895062,5.91607978,6.43499933,-0.720360705,6.43499933,6.43499933
54.905553,6.4807407,6.43331145,0.21778258,6.43331145,6.43331145
54.916045,7.07106781,6.43162372,0.799652483,6.43162372,6.43162372
54.926536,6.40312424,6.42993647,-0.163744407,6.42993647,6.42993647
54.937028,6.55743852,6.42824937,0.359428921,6.42824937,6.42824937
54.94752,7.07106781,6.4265626,0.802810819,6.4265626,6.4265626
54.958011,6.78232998,6.42487639,0.597874228,6.42487639,6.42487631
54.968503,6.63324958,6.42319039,0.458322145,6.42319039,6.42319018
54.978994,6.92820323,6.42150492,0.711827443,6.42150492,6.42150453
54.989486,6.08276253,6.41981977,-0.580566308,6.41981977,6.41981905
54.999978,7,6.41813509,0.762800699,6.41813509,6.4181339
55.010469,5.47722558,6.41645124,-0.969136554,6.41645124,6.41644923
55.020961,6.4807407,6.41476803,0.256851452,6.41476803,6.41476474
55.031452,6.244998,6.41308601,-0.409985374,6.41308601,6.41308074
55.041944,6.164414,6.4114056,-0.496982492,6.4114056,6.41139691
55.052436,6.63324958,6.40972695,0.472781804,6.40972695,6.40971341
55.062927,5.74456265,6.40805298,-0.814549161,6.40805298,6.40803041
55.073419,6.8556546,6.406382,0.670278002,6.406382,6.40634759
55.08391,6.78232998,6.40472337,0.614497042,6.40472337,6.40466527
55.094402,5.91607978,6.40307017,-0.697846965,6.40307017,6.40298313
55.104894,6.8556546,6.40145019,0.673946889,6.40145019,6.40130133
55.115385,6.4807407,6.39983963,0.284431135,6.39983963,6.39962004
55.125877,7.41619849,6.39822575,1.00894635,6.39822575,6.39793893
55.136368,5.47722558,6.39661193,-0.958846367,6.39661193,6.39625833
55.14686,6.4807407,6.39494615,0.292907062,6.39494615,6.39457792
55.157352,5.91607978,6.39327948,-0.690796424,6.39327948,6.39289785
55.167843,5.56776436,6.39161469,-0.90766201,6.39161469,6.3912183
55.178335,6,6.38995037,-0.62446006,6.38995037,6.38953895
55.188826,6.92820323,6.38828797,0.73478926,6.38828797,6.3878601
55.199318,6.244998,6.38662629,-0.376335338,6.38662629,6.38618146
55.20981,6.63324958,6.38496641,0.498280211,6.38496641,6.38450317
55.220301,6.78232998,6.38330786,0.631681979,6.38330786,6.3828254
55.230793,5.29150262,6.381651,-1.04410171,6.381651,6.38114783
55.241284,6.55743852,6.37999585,0.421239449,6.37999585,6.37947078
55.251776,6.92820323,6.3783424,0.741526013,6.3783424,6.37779394
55.262268,7.14142843,6.37669103,0.874492654,6.37669103,6.37611746
55.272759,6,6.37504164,-0.612406436,6.37504164,6.37444151
55.283251,6.4807407,6.37339485,0.327636757,6.37339485,6.37276577
55.293742,6.40312424,6.37174999,0.177127778,6.37174999,6.37109056
55.304234,6.63324958,6.37010862,0.512972673,6.37010862,6.36941555
55.314726,6,6.36846887,-0.607016369,6.36846887,6.36774093
55.325217,6.164414,6.36683414,-0.449911256,6.36683414,6.36606683
55.335709,6.40312424,6.36520064,0.19473983,6.36520064,6.36439295
55.3462,6.63324958,6.36357377,0.519303197,6.36357377,6.36271961
55.356692,6.08276253,6.36194779,-0.528379843,6.36194779,6.36104649
55.367184,6.244998,6.3603304,-0.339606239,6.3603304,6.35937375
55.377675,6.63324958,6.35871461,0.52396085,6.35871461,6.35770155
55.388167,5.83095189,6.35710836,-0.725366433,6.35710836,6.35602958
55.398658,6.244998,6.35550523,-0.332426274,6.35550523,6.35435815
55.40915,5.19615242,6.35391292,-1.07599279,6.35391292,6.35268694
55.419642,6.70820393,6.35232591,0.596555127,6.35232591,6.35101613
55.430133,6.164414,6.35075152,-0.431668297,6.35075152,6.34934586
55.440625,5.83095189,6.34918592,-0.71988473,6.34918592,6.34767582
55.451116,6,6.34763465,-0.589605503,6.34763465,6.34600634
55.461608,6.55743852,6.34609792,0.459717957,6.34609792,6.34433709
55.4721,7.07106781,6.34457734,0.852344106,6.34457734,6.34266824
55.482591,6.4807407,6.34308095,0.37102527,6.34308095,6.34099994
55.493083,5.38516481,6.3416027,-0.977976427,6.3416027,6.33933188
55.503574,5.56776436,6.34016452,-0.878862988,6.34016452,6.33766438
55.514066,6.63324958,6.33874669,0.542681207,6.33874669,6.33599713
55.524558,6.70820393,6.33739842,0.608938019,6.33739842,6.33433027
55.535049,6,6.33607293,-0.579717974,6.33607293,6.33266398
55.545541,6.08276253,6.33488456,-0.502117544,6.33488456,6.33099794
55.556032,6,6.33372078,-0.577685711,6.33372078,6.32933246
55.566524,5.09901951,6.33284428,-1.11077665,6.33284428,6.32766724
55.577016,6.164414,6.33200557,-0.409379491,6.33200557,6.32600242
55.587507,6.32455532,6.33167013,-0.0843493191,6.33167013,6.32433818
55.597999,5.91607978,6.33146046,-0.644500328,6.33146046,6.32267418
55.60849,6,6.33206689,-0.576252457,6.33206689,6.32101077
55.618982,6.92820323,6.3330994,0.771429732,6.3330994,6.31934761
55.629474,6.32455532,6.33558255,-0.105010616,6.33558255,6.31768487
55.639965,5.83095189,6.33928722,-0.712976382,6.33928722,6.3160227
55.650457,5.47722558,6.34557894,-0.931854797,6.34557894,6.3143608
55.660948,5.56776436,6.35508293,-0.887309734,6.35508293,6.31269948
55.67144,6,6.36911405,-0.607547573,6.36911405,6.31103842
55.681932,6.55743852,6.39093755,0.408045303,6.39093755,6.30937779
55.692423,7.14142843,6.42021972,0.84924008,6.42021972,6.30771775
55.702915,6.32455532,6.464073,-0.373520661,6.464073,6.30605797
55.713406,6.32455532,6.5172617,-0.438983347,6.5172617,6.30439879
55.723898,6.4807407,6.57112966,-0.300647575,6.57112966,6.30273987
55.73439,6.78232998,6.62503911,0.396599133,6.62503911,6.30108139
55.744881,7.21110255,6.61654554,0.771075232,6.61654554,6.2994235
55.755373,6,6.59141866,-0.769037489,6.59141866,6.29776589
55.765864,7.14142843,6.51085763,0.794084882,6.51085763,6.29610887
55.776356,6.8556546,6.42185465,0.658634916,6.42185465,6.29445213
55.786848,6.92820323,6.37604026,0.743076695,6.37604026,6.29279584
55.797339,5.91607978,6.33322711,-0.645869434,6.33322711,6.29114014
55.807831,6.08276253,6.32018886,-0.487264132,6.32018886,6.28948473
55.818322,6.92820323,6.3083229,0.787324797,6.3083229,6.28782992
55.828814,6.32455532,6.30250313,0.148499794,6.30250313,6.2861754
55.839306,6.164414,6.29719663,-0.364393506,6.29719663,6.28452132
55.849797,6.32455532,6.29337052,0.176592182,6.29337052,6.28286785
55.860289,7.07106781,6.28985546,0.883862177,6.28985546,6.28121468
55.87078,6.92820323,6.28691423,0.800805223,6.28691423,6.27956211
55.881272,4.89897949,6.28417896,-1.17694497,6.28417896,6.27790984
55.891764,6.70820393,6.28169984,0.653072809,6.28169984,6.27625803
55.902255,5.74456265,6.27936422,-0.731301289,6.27936422,6.27460682
55.912747,6.08276253,6.27715043,-0.440894432,6.27715043,6.27295592
55.923238,5.83095189,6.27504032,-0.6663996,6.27504032,6.27130564
55.93373,6.32455532,6.27298986,0.227080287,6.27298986,6.26965565
55.944222,5.91607978,6.27101659,-0.59576573,6.27101659,6.26800613
55.954713,6,6.26907254,-0.51872203,6.26907254,6.26635723
55.965205,5.83095189,6.26718744,-0.660481299,6.26718744,6.26470864
55.975696,6.244998,6.26531561,-0.142539874,6.26531561,6.26306067
55.986188,6,6.26348993,-0.513312705,6.26348993,6.26141301
55.99668,5.91607978,6.26166921,-0.587868544,6.26166921,6.25976582
56.007171,5.83095189,6.25988497,-0.654929825,6.25988497,6.25811926
56.017663,6.244998,6.25810373,-0.114480287,6.25810373,6.25647301
56.028154,5.29150262,6.25634717,-0.982265007,6.25634717,6.2548274
56.038646,5.83095189,6.25459485,-0.650878605,6.25459485,6.2531821
56.049138,5.56776436,6.25285929,-0.827704612,6.25285929,6.25153728
56.059629,6.32455532,6.25112887,0.27097315,6.25112887,6.24989309
56.070121,6.40312424,6.24940984,0.392064276,6.24940984,6.24824922
56.080612,6.55743852,6.24769614,0.556545047,6.24769614,6.246606
56.091104,6.8556546,6.24599027,0.780810051,6.24599027,6.2449631
56.101596,5.56776436,6.24428951,-0.822511489,6.24428951,6.24332068
56.112087,6.08276253,6.24259446,-0.399789861,6.24259446,6.2416789
56.122579,5.74456265,6.2409042,-0.704515121,6.2409042,6.24003745
56.13307,6.244998,6.23921792,0.0760268243,6.23921792,6.23839665
56.143562,6.4807407,6.2375362,0.493157682,6.2375362,6.23675618
56.154054,6.244998,6.23585708,0.0956081533,6.23585708,6.2351162
56.164545,6.63324958,6.23418258,0.631717498,6.23418258,6.23347687
56.175037,6.70820393,6.23250966,0.68970593,6.23250966,6.23183788
56.185528,5.38516481,6.2308411,-0.919606597,6.2308411,6.23019954
56.19602,5.38516481,6.2291735,-0.918699456,6.2291735,6.22856154
56.206512,6.08276253,6.2275098,-0.380456663,6.2275098,6.22692403
56.217003,7.14142843,6.22584706,0.956860159,6.22584706,6.22528718
56.227495,6,6.22418752,-0.473484443,6.22418752,6.22365068
56.237986,5.91607978,6.22252895,-0.553578509,6.22252895,6.22201484
56.248478,5.56776436,6.22087282,-0.808151261,6.22087282,6.22037934
56.25897,6.164414,6.21921761,-0.234101695,6.21921761,6.21874435
56.269461,6,6.21756444,-0.466438032,6.21756444,6.21711002
56.279953,5.74456265,6.2159119,-0.686548796,6.2159119,6.21547604
56.290444,6.70820393,6.21426061,0.702811016,6.21426061,6.21384272
56.300936,6.32455532,6.2126093,0.334583352,6.2126093,6.21220977
56.311428,6.244998,6.21095799,0.184499355,6.21095799,6.21057732
56.321919,6.244998,6.20930491,0.188926149,6.20930491,6.20894554
56.332411,5.29150262,6.20764985,-0.957155802,6.20764985,6.20731413
56.342902,6.08276253,6.20598707,-0.351033535,6.20598707,6.20568338
56.353394,7.21110255,6.20431915,1.00338597,6.20431915,6.204053
56.363886,5.19615242,6.20262667,-1.0032319,6.20262667,6.20242313
56.374377,6.244998,6.20092402,0.209938042,6.20092402,6.20079395
56.384869,6.08276253,6.19927994,-0.341346465,6.19927994,6.19916512
56.39536,7.07106781,6.19765183,0.934567271,6.19765183,6.19753698
56.405852,6.40312424,6.19590921,0.455208776,6.19590921,6.19590921
56.416344,6.92820323,6.19428196,0.856692051,6.19428196,6.19428196
56.426835,6.8556546,6.1926554,0.814247631,6.1926554,6.1926554
56.437327,5.19615242,6.19102921,-0.997435102,6.19102921,6.19102921
56.447818,6,6.1894037,-0.435205355,6.1894037,6.1894037
56.45831,5.74456265,6.18777857,-0.665744641,6.18777857,6.18777857
56.468802,6,6.18615398,-0.43145565,6.18615398,6.18615398
56.479293,6.78232998,6.18453007,0.773175213,6.18453007,6.18453007
56.489785,5.38516481,6.18290655,-0.893163894,6.18290655,6.18290655
56.500276,5.65685425,6.18128372,-0.724175025,6.18128372,6.18128372
56.510768,6.40312424,6.17966127,0.472718699,6.17966127,6.17966127
56.52126,6.244998,6.17803936,0.25876367,6.17803936,6.17803936
56.531751,6.32455532,6.17641815,0.384885919,6.17641815,6.17641815
56.542243,6.55743852,6.17479733,0.618579985,6.17479733,6.17479733
56.552734,5.56776436,6.1731772,-0.778082798,6.1731772,6.1731772
56.563226,6.164414,6.17155747,-0.0845190331,6.17155747,6.17155747
56.573718,5.83095189,6.16993828,-0.582225377,6.16993828,6.16993828
56.584209,6,6.1683198,-0.410267963,6.1683198,6.1683198
56.594701,6.70820393,6.16670171,0.735868343,6.16670171,6.16670171
56.605192,6.244998,6.16508433,0.282690052,6.16508433,6.16508433
56.615684,6.164414,6.16346735,0.0307677304,6.16346735,6.16346735
56.626176,5.65685425,6.16185092,-0.710631178,6.16185092,6.16185092
56.636667,5.83095189,6.1602352,-0.573832124,6.1602352,6.1602352
56.647159,5,6.15861988,-1.07639207,6.15861988,6.15861988
56.65765,5.91607978,6.15700528,-0.490841621,6.15700528,6.15700528
56.668142,5.65685425,6.15539108,-0.706071407,6.15539108,6.15539108
56.678634,6.40312424,6.15377744,0.499346367,6.15377744,6.15377744
56.689125,5.56776436,6.15216452,-0.764460698,6.15216452,6.15216452
56.699617,5.91607978,6.15055201,-0.484223324,6.15055201,6.15055201
56.710108,6.4807407,6.14894022,0.57602125,6.14894022,6.14894022
56.7206,6.55743852,6.14732884,0.640398069,6.14732884,6.14732884
56.731092,5.83095189,6.14571803,-0.561040222,6.14571803,6.14571803
56.741583,7,6.14410794,0.925144348,6.14410794,6.14410794
56.752075,6.55743852,6.14249826,0.644158568,6.14249826,6.14249826
56.762566,5.74456265,6.14088932,-0.629544812,6.14088932,6.14088932
56.773058,5.65685425,6.13928079,-0.69456932,6.13928079,6.13928079
56.78355,5.74456265,6.13767284,-0.626985,6.13767284,6.13767284
56.794041,7.41619849,6.13606561,1.13142957,6.13606561,6.13606561
56.804533,5.91607978,6.13445881,-0.467310423,6.13445881,6.13445881
56.815024,6.55743852,6.13285275,0.651602468,6.13285275,6.13285275
56.825516,5.56776436,6.13124711,-0.750654877,6.13124711,6.13124711
56.836008,5.38516481,6.12964205,-0.862830946,6.12964205,6.12964205
56.846499,5.65685425,6.12803773,-0.686428057,6.12803773,6.12803773
56.856991,6,6.12643384,-0.355575358,6.12643384,6.12643384
56.867482,6.32455532,6.12483068,0.446905626,6.12483068,6.12483068
56.877974,6.32455532,6.12322796,0.448695172,6.12322796,6.12322796
56.888466,5.56776436,6.12162583,-0.744218697,6.12162583,6.12162583
56.898957,6.63324958,6.12002444,0.716397332,6.12002444,6.12002444
56.909449,6.164414,6.11842349,0.214453979,6.11842349,6.11842349
56.91994,6.55743852,6.11682329,0.663788547,6.11682329,6.11682329
56.930432,5.09901951,6.11522352,-1.00806945,6.11522352,6.11522352
56.940924,6.244998,6.11362436,0.362455022,6.11362436,6.11362436
56.951415,6.244998,6.11202594,0.364653346,6.11202594,6.11202594
56.961907,5.83095189,6.11042796,-0.528654959,6.11042796,6.11042796
56.972398,6,6.10883074,-0.329895039,6.10883074,6.10883074
56.98289,6.08276253,6.10723396,-0.156433471,6.10723396,6.10723396
56.993382,6.244998,6.10563779,0.373309806,6.10563779,6.10563779
57.003873,6.08276253,6.10404237,-0.145876107,6.10404237,6.10404237
57.014365,5.74456265,6.1024474,-0.5982347,6.1024474,6.1024474
57.024856,6.244998,6.10085319,0.379664068,6.10085319,6.10085319
57.035348,5.56776436,6.09925944,-0.729037089,6.09925944,6.09925944
57.04584,6.32455532,6.0976663,0.476328694,6.0976663,6.0976663
57.056331,5.91607978,6.09607391,-0.424257149,6.09607391,6.09607391
57.066823,4.58257569,6.09448199,-1.22959599,6.09448199,6.09448199
57.077314,5,6.09289083,-1.04541419,6.09289083,6.09289083
57.087806,6.78232998,6.09130013,0.831282054,6.09130013,6.09130013
57.098298,6.4807407,6.08971005,0.625324437,6.08971005,6.08971005
57.108789,5.83095189,6.08812073,-0.507118168,6.08812073,6.08812073
57.119281,6.08276253,6.08653188,-0.0613950485,6.08653188,6.08653188
57.129772,6.55743852,6.0849438,0.687382514,6.0849438,6.0849438
57.140264,6,6.08335619,-0.288714728,6.08335619,6.08335619
57.150756,6.244998,6.08176921,0.404015831,6.08176921,6.08176921
57.161247,5,6.08018299,-1.03931852,6.08018299,6.08018299
57.171739,6.08276253,6.07859725,0.0645389635,6.07859725,6.07859725
57.18223,5.74456265,6.07701229,-0.576584462,6.07701229,6.07701229
57.192722,6.40312424,6.0754278,0.572447759,6.0754278,6.0754278
57.203214,6.40312424,6.07384394,0.573829501,6.07384394,6.07384394
57.213705,6,6.07226086,-0.268813806,6.07226086,6.07226086
57.224197,6.55743852,6.07067826,0.697682063,6.07067826,6.07067826
57.234688,5.91607978,6.06909645,-0.391173445,6.06909645,6.06909645
57.24518,6.244998,6.06751511,0.421287176,6.06751511,6.06751511
57.255672,5.09901951,6.06593442,-0.983318312,6.06593442,6.06593442
57.266163,6.55743852,6.0643545,0.702199417,6.0643545,6.0643545
57.276655,6.55743852,6.06277508,0.703323144,6.06277508,6.06277508
57.287146,5.65685425,6.06119644,-0.635879072,6.06119644,6.06119644
57.297638,5.47722558,6.0596183,-0.763146593,6.0596183,6.0596183
57.30813,6.32455532,6.05804079,0.516250451,6.05804079,6.05804079
57.318621,5.74456265,6.05646408,-0.558481364,6.05646408,6.05646408
57.329113,6.08276253,6.05488786,0.166957084,6.05488786,6.05488786
57.339604,6,6.05331244,-0.230894868,6.05331244,6.05331244
57.350096,5.09901951,6.05173751,-0.976072743,6.05173751,6.05173751
57.360588,6.63324958,6.05016324,0.763600907,6.05016324,6.05016324
57.371079,5.56776436,6.04858976,-0.693415743,6.04858976,6.04858976
57.381571,5.47722558,6.04701678,-0.754845151,6.04701678,6.04701678
57.392062,6.32455532,6.0454446,0.528309304,6.0454446,6.0454446
57.402554,5.19615242,6.04387293,-0.920717385,6.04387293,6.04387293
57.413046,5.19615242,6.04230191,-0.91986384,6.04230191,6.04230191
57.423537,6,6.04073169,-0.20182094,6.04073169,6.04073169
57.434029,6.40312424,6.03916198,0.603292842,6.03916198,6.03916198
57.44452,5.91607978,6.03759309,-0.348587582,6.03759309,6.03759309
57.455012,6.8556546,6.0360247,0.90533414,6.0360247,6.0360247
57.465504,5.65685425,6.03445697,-0.614493871,6.03445697,6.03445697
57.475995,5.74456265,6.03289005,-0.536961268,6.03289005,6.03289005
57.486487,5.91607978,6.03132365,-0.339475865,6.03132365,6.03132365
57.496978,5.83095189,6.02975806,-0.445876846,6.02975806,6.02975806
57.50747,5.38516481,6.02819298,-0.801890377,6.02819298,6.02819298
57.517962,6.8556546,6.02662858,0.910508662,6.02662858,6.02662858
57.528453,6.164414,6.02506499,0.373294808,6.02506499,6.02506499
57.538945,5.38516481,6.02350192,-0.79896002,6.02350192,6.02350192
57.549436,5.91607978,6.02193967,-0.325361169,6.02193967,6.02193967
57.559928,6.32455532,6.02037795,0.551522775,6.02037795,6.02037795
57.57042,6,6.0188169,-0.137174697,6.0188169,6.0188169
57.580911,6.08276253,6.01725667,0.255941127,6.01725667,6.01725667
57.591403,5.65685425,6.01569697,-0.599034824,6.01569697,6.01569697
57.601894,6.32455532,6.0141381,0.557150989,6.0141381,6.0141381
57.612386,6.244998,6.01257975,0.482097757,6.01257975,6.01257975
57.622878,5.56776436,6.01102209,-0.665776031,6.01102209,6.01102209
57.633369,6.32455532,6.00946525,0.561328842,6.00946525,6.00946525
57.643861,6.32455532,6.00790895,0.5627134,6.00790895,6.00790895
57.654352,5.47722558,6.00635348,-0.727411786,6.00635348,6.00635348
57.664844,5.65685425,6.00479855,-0.589868035,6.00479855,6.00479855
57.675336,5.29150262,6.0032443,-0.843647841,6.0032443,6.0032443
57.685827,5.29150262,6.00169089,-0.842726687,6.00169089,6.00169089
57.696319,5.38516481,6.00013802,-0.784202278,6.00013802,6.00013802
57.70681,6.4807407,5.99858599,0.69437361,5.99858599,5.99858599
57.717302,6.164414,5.9970345,0.409120404,5.9970345,5.9970345
57.727794,5.38516481,5.9954837,-0.781229092,5.9954837,5.9954837
57.738285,5.47722558,5.99393375,-0.718824158,5.99393375,5.99393375
57.748777,6.164414,5.99238434,0.414764591,5.99238434,5.99238434
57.759268,5.47722558,5.99083577,-0.716666029,5.99083577,5.99083577
57.76976,6.08276253,5.98928776,0.305736445,5.98928776,5.98928776
57.780252,6.63324958,5.98774044,0.803435835,5.98774044,5.98774044
57.790743,5.47722558,5.98619397,-0.71342021,5.98619397,5.98619397
57.801235,5.65685425,5.98464806,-0.572532799,5.98464806,5.98464806
57.811726,6.63324958,5.98310299,0.806316682,5.98310299,5.98310299
57.822218,6.08276253,5.98155848,0.31812584,5.98155848,5.98155848
57.83271,6.08276253,5.98001468,0.320543063,5.98001468,5.98001468
57.843201,4.79583152,5.97847172,-1.08749262,5.97847172,5.97847172
57.853693,6.244998,5.97692933,0.51775348,5.97692933,5.97692933
57.864184,5,5.9753878,-0.987617231,5.9753878,5.9753878
57.874676,5,5.97384682,-0.986836776,5.97384682,5.97384682
57.885168,5.74456265,5.97230656,-0.477225223,5.97230656,5.97230656
57.895659,5.47722558,5.97076716,-0.702525147,5.97076716,5.97076716
57.906151,6.63324958,5.96922832,0.814874997,5.96922832,5.96922832
57.916642,5.74456265,5.96769034,-0.472363947,5.96769034,5.96769034
57.927134,4.58257569,5.96615294,-1.1762556,5.96615294,5.96615294
57.937626,5.38516481,5.96461625,-0.76121708,5.96461625,5.96461625
57.948117,5.74456265,5.96308042,-0.467458852,5.96308042,5.96308042
57.958609,5.74456265,5.96154517,-0.465813833,5.96154517,5.96154517
57.9691,4.69041576,5.96001079,-1.12676308,5.96001079,5.96001079
57.979592,6.164414,5.95847698,0.453802845,5.95847698,5.95847698
57.990084,6.244998,5.9569439,0.53670672,5.9569439,5.9569439
58.000575,5.65685425,5.95541168,-0.546404091,5.95541168,5.95541168
58.011067,4.79583152,5.95388004,-1.07612663,5.95388004,5.95388004
58.021558,5.74456265,5.95234928,-0.455836194,5.95234928,5.95234928
58.03205,6.244998,5.9508191,0.542382611,5.9508191,5.9508191
58.042542,5.47722558,5.94928965,-0.687069192,5.94928965,5.94928965
58.053033,6.164414,5.94776107,0.465459911,5.94776107,5.94776107
58.063525,5.74456265,5.94623309,-0.449077319,5.94623309,5.94623309
58.074016,5.65685425,5.94470641,-0.536518555,5.94470641,5.94470597
58.084508,5.29150262,5.94318019,-0.807265485,5.94318019,5.94317945
58.095,4.69041576,5.94165493,-1.11858802,5.94165493,5.94165366
58.105491,5.38516481,5.94013073,-0.744960352,5.94013073,5.94012876
58.115983,6.244998,5.93860777,0.553525277,5.93860777,5.93860445
58.126474,5.74456265,5.93708603,-0.43877487,5.93708603,5.93708102
58.136966,5.83095189,5.93556662,-0.32344199,5.93556662,5.93555818
58.147458,5.56776436,5.93404855,-0.605214166,5.93404855,5.93403609
58.157949,5.47722558,5.93253596,-0.674766915,5.93253596,5.93251488
58.168441,5.47722558,5.93102491,-0.673646296,5.93102491,5.93099428
58.178932,6,5.92952685,0.265467791,5.92952685,5.92947456
58.189424,5.56776436,5.92803098,-0.60022214,5.92803098,5.92795544
58.199916,6.164414,5.92656625,0.487696371,5.92656625,5.92643707
58.210407,5.65685425,5.92511073,-0.517934822,5.92511073,5.9249196
58.220899,5.91607978,5.92372099,-0.0874140093,5.92372099,5.92340273
58.23139,5.29150262,5.92233028,-0.794246598,5.92233028,5.92188675
58.241882,6,5.92093286,0.28118879,5.92093286,5.92037138
58.252374,5.74456265,5.91950785,-0.418264518,5.91950785,5.91885676
58.262865,6.32455532,5.91801744,0.637603234,5.91801744,5.91734305
58.273357,5.47722558,5.91652861,-0.662799395,5.91652861,5.91582994
58.283848,5.65685425,5.9150422,-0.508121981,5.9150422,5.91431774
58.29434,6.244998,5.91355779,0.575708443,5.91355779,5.91280614
58.304832,5.09901951,5.9120756,-0.90169623,5.9120756,5.91129531
58.315323,4.69041576,5.91059623,-1.10461779,5.91059623,5.90978538
58.325815,5.47722558,5.90911887,-0.657185889,5.90911887,5.90827607
58.336306,5,5.90764497,-0.952704033,5.90764497,5.90676767
58.346798,4.79583152,5.90617296,-1.0537274,5.90617296,5.90525988
58.35729,5.83095189,5.90470512,-0.271575449,5.90470512,5.90375286
58.367781,6.40312424,5.90323924,0.707025461,5.90323924,5.90224675
58.378273,5,5.90177847,-0.94962017,5.90177847,5.90074126
58.388764,6.70820393,5.90031935,0.898823998,5.90031935,5.89923669
58.399256,5.09901951,5.89886675,-0.894341789,5.89886675,5.89773274
58.409748,5.56776436,5.89741557,-0.574152601,5.89741557,5.89622956
58.420239,4.58257569,5.8959723,-1.14603517,5.8959723,5.89472729
58.430731,5.65685425,5.89453092,-0.487520946,5.89453092,5.89322566
58.441222,5.74456265,5.89309804,-0.385402892,5.89309804,5.89172494
58.451714,5.29150262,5.89166831,-0.774703615,5.89166831,5.89022485
58.462206,5,5.89024755,-0.943529307,5.89024755,5.88872554
58.472697,5.09901951,5.88883201,-0.888713959,5.88883201,5.88722715
58.483189,5.47722558,5.88742592,-0.640468847,5.88742592,5.8857294
58.49368,5.47722558,5.88602757,-0.639376256,5.88602757,5.88423257
58.504172,6.40312424,5.88463926,0.720059011,5.88463926,5.88273638
58.514664,6.63324958,5.88326218,0.866018128,5.88326218,5.88124097
58.525155,5.47722558,5.88189589,-0.636137029,5.88189589,5.87974648
58.535647,4.79583152,5.88054596,-1.04149625,5.88054596,5.87825264
58.546138,5.29150262,5.87920708,-0.76661885,5.87920708,5.87675972
58.55663,5.65685425,5.87789228,-0.470146814,5.87789228,5.87526745
58.567122,5.38516481,5.87658827,-0.701016024,5.87658827,5.87377597
58.577613,5.65685425,5.87532016,-0.467403368,5.87532016,5.87228542
58.588105,6,5.87406182,0.354877702,5.87406182,5.87079551
58.598596,6.32455532,5.87285719,0.67208491,5.87285719,5.86930654
58.609088,5.83095189,5.87166,-0.201762505,5.87166,5.86781822
58.61958,5.56776436,5.87054503,-0.550255089,5.87054503,5.86633069
58.630071,5.47722558,5.86944181,-0.626271692,5.86944181,5.8648441
58.640563,6.55743852,5.8684524,0.830051883,5.8684524,5.86335816
58.651054,6.164414,5.86749799,0.544900006,5.86749799,5.86187316
58.661546,6.40312424,5.86671163,0.732401941,5.86671163,5.86038882
58.672038,6,5.86601861,0.36603468,5.86601861,5.85890528
58.682529,5.65685425,5.8655864,-0.456872142,5.8655864,5.85742267
58.693021,5.56776436,5.86536127,-0.545524437,5.86536127,5.85594073
58.703512,6.08276253,5.86551056,0.466102957,5.86551056,5.85445973
58.714004,6.08276253,5.86610779,0.465461854,5.86610779,5.85297939
58.724496,5.83095189,5.86725424,-0.190531747,5.86725424,5.85149986
58.734987,5.56776436,5.86942283,-0.549234435,5.86942283,5.85002127
58.745479,5.47722558,5.87245293,-0.628671105,5.87245293,5.84854335
58.75597,5.19615242,5.87781193,-0.825626738,5.87781193,5.84706638
58.766462,5.74456265,5.88449997,-0.374081978,5.88449997,5.84559008
58.776954,6.164414,5.89645483,0.517647727,5.89645483,5.84411459
58.787445,5.83095189,5.91033676,-0.281753205,5.91033676,5.84264004
58.797937,5.56776436,5.93592967,-0.606766273,5.93592967,5.84116617
58.808428,5.91607978,5.96392599,-0.218737757,5.96392599,5.83969326
58.81892,6.244998,6.01660919,0.477900419,6.01660919,5.83822101
58.829412,6.32455532,6.07147067,0.503075192,6.07147067,5.83674959
58.839903,6.92820323,6.16502289,0.873601934,6.16502289,5.83527912
58.850395,6.08276253,6.25689725,-0.417294521,6.25689725,5.83380933
58.860886,7.48331477,6.34495633,1.06693882,6.34495633,5.83234049
58.871378,6.92820323,6.40637539,0.722376523,6.40637539,5.83087234
58.88187,6.70820393,6.36316013,0.587404292,6.36316013,5.82940501
58.892361,5.91607978,6.29068488,-0.612049915,6.29068488,5.82793864
58.902853,5.91607978,6.14501367,-0.478470357,6.14501367,5.82647295
58.913344,6.244998,6.02374224,0.47037831,6.02374224,5.82500822
58.923836,6,5.94552658,0.233395407,5.94552658,5.82354419
58.934328,5.29150262,5.89322445,-0.77570731,5.89322445,5.82208097
58.944819,5.47722558,5.87014247,-0.626830837,5.87014247,5.82061873
58.955311,6,5.854873,0.380955373,5.854873,5.81915717
58.965802,5.47722558,5.8455286,-0.606879741,5.8455286,5.81769659
58.976294,5.09901951,5.83868963,-0.860040766,5.83868963,5.81623669
58.986786,5.83095189,5.8331214,-0.0465779559,5.8331214,5.81477763
58.997277,5.38516481,5.82881461,-0.666070422,5.82881461,5.81331954
59.007769,6.08276253,5.82491118,0.507790656,5.82491118,5.81186214
59.01826,4.79583152,5.82175133,-1.01287699,5.82175133,5.81040572
59.028752,6.08276253,5.81872141,0.513849318,5.81872141,5.80894999
59.039244,5.38516481,5.81616613,-0.65650691,5.81616613,5.8074951
59.049735,6,5.81365092,0.431681694,5.81365092,5.80604119
59.060227,5.83095189,5.8114337,0.139707539,5.8114337,5.80458798
59.070718,5.83095189,5.8092434,0.14733804,5.8092434,5.80313575
59.08121,6.40312424,5.80722812,0.771943078,5.80722812,5.80168422
59.091702,4.79583152,5.80524397,-1.0046952,5.80524397,5.80023353
59.102193,5.56776436,5.80336634,-0.485388476,5.80336634,5.79878383
59.112685,5.47722558,5.80151957,-0.56946817,5.80151957,5.79733483
59.123176,5.83095189,5.79973895,0.176671856,5.79973895,5.79588681
59.133668,6,5.79798731,0.449458216,5.79798731,5.7944395
59.14416,6,5.79627714,0.451356688,5.79627714,5.79299305
59.154651,5.74456265,5.79459375,-0.223676339,5.79459375,5.79154757
59.165143,5.74456265,5.79293635,-0.219940237,5.79293635,5.79010281
59.175634,5.29150262,5.79130311,-0.706965688,5.79130311,5.78865904
59.186126,5.19615242,5.78968607,-0.770411352,5.78968607,5.78721598
59.196618,4.35889894,5.78809054,-1.19548802,5.78809054,5.78577377
59.207109,5.56776436,5.78650517,-0.467697349,5.78650517,5.78433256
59.217601,5.65685425,5.78493888,-0.357889133,5.78493888,5.78289206
59.228092,5.38516481,5.78337858,-0.631041814,5.78337858,5.78145256
59.238584,5.74456265,5.78183533,-0.193061338,5.78183533,5.78001377
59.249076,5.38516481,5.78029515,-0.62859394,5.78029515,5.77857585
59.259567,5.91607978,5.77877054,0.370552624,5.77877054,5.77713892
59.270059,6.63324958,5.77724781,0.925203635,5.77724781,5.77570271
59.28055,5.56776436,5.77573749,-0.45604071,5.77573749,5.7742675
59.291042,5.65685425,5.77422945,-0.342600641,5.77422945,5.77283302
59.301534,6.40312424,5.7727307,0.793973261,5.7727307,5.7713994
59.312025,6.08276253,5.77123503,0.558146486,5.77123503,5.76996678
59.322517,5.29150262,5.7697463,-0.691551646,5.7697463,5.76853489
59.333008,4.69041576,5.76826096,-1.03819324,5.76826096,5.767104
59.3435,5.65685425,5.76678087,-0.331551835,5.76678087,5.76567384
59.353992,5,5.76530418,-0.874816654,5.76530418,5.76424455
59.364483,5.74456265,5.76383173,-0.138813137,5.76383173,5.76281626
59.374975,6,5.76236258,0.487480682,5.76236258,5.76138871
59.385466,5.83095189,5.7608967,0.264679427,5.7608967,5.75996217
59.395958,5.38516481,5.75943397,-0.611775421,5.75943397,5.75853636
59.40645,5.83095189,5.75797357,0.270145005,5.75797357,5.75711143
59.416941,5.29150262,5.75651619,-0.681919033,5.75651619,5.75568751
59.427433,5.56776436,5.75506032,-0.432777028,5.75506032,5.75426432
59.437924,6.164414,5.75360636,0.640942775,5.75360636,5.75284215
59.448416,6.8556546,5.75215334,1.05047668,5.75215334,5.75142072
59.458908,5.19615242,5.75069926,-0.744679016,5.75069926,5.75000016
59.469399,5,5.74924598,-0.865589963,5.74924598,5.74858063
59.479891,6,5.74778428,0.502210836,5.74778428,5.74716183
59.490382,4.79583152,5.7463212,-0.974930603,5.7463212,5.74574406
59.500874,5,5.7448359,-0.863038758,5.7448359,5.74432703
59.511366,5.65685425,5.74333964,-0.294083988,5.74333964,5.74291088
59.521857,5.56776436,5.74179301,-0.417167414,5.74179301,5.74149575
59.532349,6.32455532,5.74028395,0.764376456,5.74028395,5.74008138
59.54284,5.65685425,5.73887065,-0.286385052,5.73887065,5.73866802
59.553332,6.08276253,5.73725541,0.587798533,5.73725541,5.73725541
59.563824,5.38516481,5.7358437,-0.592181468,5.7358437,5.7358437
59.574315,4.89897949,5.73443301,-0.914031466,5.73443301,5.73443301
59.584807,6,5.73302307,0.516698104,5.73302307,5.73302307
59.595298,5.65685425,5.73161416,-0.273422581,5.73161416,5.73161416
59.60579,6,5.730206,0.519416977,5.730206,5.730206
59.616282,6,5.72879874,0.52076987,5.72879874,5.72879874
59.626773,5.09901951,5.72739251,-0.792699815,5.72739251,5.72739251
59.637265,5.74456265,5.72598704,0.136292366,5.72598704,5.72598704
59.647756,5.56776436,5.7245826,-0.396002819,5.7245826,5.7245826
59.658248,6.244998,5.72317892,0.722370461,5.72317892,5.72317892
59.66874,6.40312424,5.72177613,0.825438128,5.72177613,5.72177613
59.679231,5.47722558,5.72037438,-0.493101217,5.72037438,5.72037438
59.689723,6.63324958,5.7189734,0.956177901,5.7189734,5.7189734
59.700214,5.74456265,5.71757345,0.164283882,5.71757345,5.71757345
59.710706,5.74456265,5.71617427,0.168488501,5.71617427,5.71617427
59.721198,5.56776436,5.71477599,-0.383420957,5.71477599,5.71477599
59.731689,6.164414,5.71337875,0.671591581,5.71337875,5.71337875
59.742181,5.65685425,5.71198228,-0.234793594,5.71198228,5.71198228
59.752672,4.79583152,5.71058685,-0.956428422,5.71058685,5.71058685
59.763164,6.244998,5.70919219,0.731987573,5.70919219,5.70919219
59.773656,5.47722558,5.70779844,-0.480180033,5.70779844,5.70779844
59.784147,5.38516481,5.70640573,-0.566781194,5.70640573,5.70640573
59.794639,6.08276253,5.7050138,0.614612671,5.7050138,5.7050138
59.80513,5.83095189,5.7036229,0.35683188,5.7036229,5.7036229
59.815622,5.38516481,5.70223279,-0.563087901,5.70223279,5.70223279
59.826114,5.38516481,5.70084359,-0.561852991,5.70084359,5.70084359
59.836605,6,5.69945544,0.54821945,5.69945544,5.69945544
59.847097,5.74456265,5.69806806,0.215626031,5.69806806,5.69806806
59.857588,6.4807407,5.69668173,0.885471041,5.69668173,5.69668173
59.86808,4.35889894,5.69529619,-1.15602649,5.69529619,5.69529619
59.878572,5.65685425,5.69391156,-0.192502765,5.69391156,5.69391156
59.889063,6.08276253,5.69252799,0.624687557,5.69252799,5.69252799
59.899555,5.74456265,5.6911452,0.231122155,5.6911452,5.6911452
59.910046,6.40312424,5.68976346,0.84460688,5.68976346,5.68976346
59.920538,5.47722558,5.68838251,-0.45951815,5.68838251,5.68838251
59.93103,6,5.68700248,0.559461817,5.68700248,5.68700248
59.941521,5.29150262,5.6856235,-0.627790473,5.6856235,5.6856235
59.952013,5.29150262,5.68424532,-0.626691864,5.68424532,5.68424532
59.962504,5.47722558,5.68286819,-0.453478346,5.68286819,5.68286819
59.972996,6.32455532,5.68149185,0.801912383,5.68149185,5.68149185
59.983488,5.56776436,5.68011644,-0.335189614,5.68011644,5.68011644
59.993979,6,5.67874209,0.566796182,5.67874209,5.67874209
60.004471,6,5.67736853,0.568006573,5.67736853,5.67736853
60.014962,5,5.67599604,-0.822189781,5.67599604,5.67599604
60.025454,4.47213595,5.67462434,-1.09658031,5.67462434,5.67462434
60.035946,5.19615242,5.67325357,-0.690725089,5.67325357,5.67325357
60.046437,5.09901951,5.67188387,-0.75687803,5.67188387,5.67188387
60.056929,5.56776436,5.67051496,-0.320547344,5.67051496,5.67051496
60.06742,5.83095189,5.66914712,0.40224964,5.66914712,5.66914712
60.077912,4.35889894,5.66778009,-1.14406343,5.66778009,5.66778009
60.088404,6.70820393,5.66641398,1.02068112,5.66641398,5.66641398
60.098895,6.244998,5.66504895,0.761543861,5.66504895,5.66504895
60.109387,5.56776436,5.66368472,-0.309710113,5.66368472,5.66368472
60.119878,5.91607978,5.66232155,0.50374421,5.66232155,5.66232155
60.13037,4.58257569,5.6609592,-1.03845246,5.6609592,5.6609592
60.140862,5.56776436,5.65959779,-0.303040298,5.65959779,5.65959779
60.151353,5.09901951,5.65823744,-0.74780875,5.65823744,5.65823744
60.161845,6.70820393,5.65687791,1.02534191,5.65687791,5.65687791
60.172336,5.83095189,5.65551944,0.418846572,5.65551944,5.65551944
60.182828,5.83095189,5.65416179,0.420464149,5.65416179,5.65416179
60.19332,5.65685425,5.65280509,0.0636330168,5.65280509,5.65280509
60.203811,5.56776436,5.65144946,-0.28928376,5.65144946,5.65144946
60.214303,5.74456265,5.65009464,0.30735648,5.65009464,5.65009464
60.224794,5.74456265,5.6487409,0.309550879,5.6487409,5.6487409
60.235286,5.38516481,5.64738798,-0.512077309,5.64738798,5.64738798
60.245778,5.65685425,5.646036,0.104010801,5.646036,5.646036
60.256269,6,5.64468511,0.596082959,5.64468511,5.64468511
60.266761,5.91607978,5.64333503,0.522249704,5.64333503,5.64333503
60.277252,5.56776436,5.64198603,-0.272436542,5.64198603,5.64198603
60.287744,5.47722558,5.64063786,-0.404242851,5.64063786,5.64063786
60.298236,5.38516481,5.63929064,-0.504108945,5.63929064,5.63929064
60.308727,4.69041576,5.63794449,-0.973410877,5.63794449,5.63794449
60.319219,5.38516481,5.63659918,-0.501432321,5.63659918,5.63659918
60.32971,5.83095189,5.63525495,0.442376477,5.63525495,5.63525495
60.340202,5.56776436,5.63391154,-0.25719094,5.63391154,5.63391154
60.350694,4.79583152,5.63256909,-0.914733606,5.63256909,5.63256909
60.361185,5,5.63122773,-0.794498415,5.63122773,5.63122773
60.371677,5.09901951,5.6298872,-0.728606673,5.6298872,5.6298872
60.382168,5.65685425,5.62854775,0.16824535,5.62854775,5.62854775
60.39266,5.65685425,5.62720914,0.172177559,5.62720914,5.62720914
60.403152,6,5.62587148,0.611660458,5.62587148,5.62587148
60.413643,5.74456265,5.62453492,0.34645018,5.62453492,5.62453492
60.424135,4.47213595,5.62319919,-1.07287615,5.62319919,5.62319919
60.434626,4.79583152,5.62186455,-0.908863591,5.62186455,5.62186455
60.445118,5.91607978,5.62053075,0.543644217,5.62053075,5.62053075
60.45561,5.47722558,5.61919791,-0.376792164,5.61919791,5.61919791
60.466101,5.09901951,5.61786616,-0.720310108,5.61786616,5.61786616
60.476593,5.47722558,5.61653526,-0.373242125,5.61653526,5.61653526
60.487084,5.19615242,5.61520545,-0.64734305,5.61520545,5.61520545
60.497576,5.38516481,5.61387648,-0.478238089,5.61387648,5.61387648
60.508068,4.79583152,5.61254848,-0.903723936,5.61254848,5.61254848
60.518559,6.08276253,5.61122157,0.686688401,5.61122157,5.61122157
60.529051,5.09901951,5.60989551,-0.714755899,5.60989551,5.60989551
60.539542,6.08276253,5.60857055,0.688615992,5.60857055,5.60857055
60.550034,5.19615242,5.60724643,-0.641166129,5.60724643,5.60724643
60.560526,5.65685425,5.60592328,0.225678901,5.60592328,5.60592328
60.571017,5.29150262,5.60460124,-0.559552156,5.60460124,5.60460124
60.581509,5.74456265,5.60328004,0.375875784,5.60328004,5.60328004
60.592,4.58257569,5.60195995,-1.00964561,5.60195995,5.60195995
60.602492,5.47722558,5.6006407,-0.351304891,5.6006407,5.6006407
60.612984,5.91607978,5.59932243,0.562812002,5.59932243,5.59932243
60.623475,4.89897949,5.59800527,-0.836077618,5.59800527,5.59800527
60.633967,5.74456265,5.59668896,0.384543482,5.59668896,5.59668896
60.644458,4.89897949,5.59537375,-0.834502405,5.59537375,5.59537375
60.65495,5.47722558,5.5940594,-0.341809629,5.5940594,5.5940594
60.665442,5.29150262,5.59274603,-0.548856451,5.59274603,5.59274603
60.675933,5.47722558,5.59143376,-0.337947017,5.59143376,5.59143376
60.686425,5.38516481,5.59012235,-0.452722373,5.59012235,5.59012235
60.696916,4.12310563,5.58881206,-1.21066363,5.58881206,5.58881206
60.707408,5.47722558,5.58750262,-0.332079871,5.58750262,5.58750262
60.7179,5.47722558,5.58619416,-0.330103901,5.58619416,5.58619416
60.728391,5.83095189,5.58488682,0.496049472,5.58488682,5.58488682
60.738883,5.19615242,5.58358033,-0.622437073,5.58358033,5.58358033
60.749374,6,5.58227496,0.646316516,5.58227496,5.58227496
60.759866,5.91607978,5.58097045,0.578886284,5.58097045,5.58097045
60.770358,5.91607978,5.57966693,0.580011076,5.57966693,5.57966693
60.780849,5.91607978,5.57836453,0.581132734,5.57836453,5.57836453
60.791341,4.47213595,5.57706299,-1.0511551,5.57706299,5.57706299
60.801832,5.29150262,5.57576256,-0.533160335,5.57576256,5.57576256
60.812324,5.65685425,5.57446301,0.287038746,5.57446301,5.57446301
60.822816,5.38516481,5.57316444,-0.433589248,5.57316444,5.57316444
60.833307,5.56776436,5.571867,-0.0640518007,5.571867,5.571867
60.843799,6,5.57057042,0.655308768,5.57057042,5.57057042
60.85429,5,5.56927496,-0.754503121,5.56927496,5.56927496
60.864782,5.83095189,5.56798037,0.51280749,5.56798037,5.56798037
60.875274,5.09901951,5.56668678,-0.683862025,5.56668678,5.56668678
60.885765,5.56776436,5.56539431,0.0486831606,5.56539431,5.56539431
60.896257,5.83095189,5.56410272,0.516574465,5.56410272,5.56410272
60.906748,5.83095189,5.56281224,0.517822027,5.56281224,5.56281224
60.91724,5.29150262,5.56152264,-0.519634509,5.56152264,5.56152264
60.927732,5.74456265,5.56023405,0.429335067,5.56023405,5.56023405
60.938223,5.09901951,5.55894657,-0.678179223,5.55894657,5.55894657
60.948715,4.69041576,5.55765998,-0.931259479,5.55765998,5.55765998
60.959206,5.74456265,5.55637451,0.433806571,5.55637451,5.55637451
60.969698,4.89897949,5.55508992,-0.810006438,5.55508992,5.55508992
60.98019,6,5.55380633,0.667977299,5.55380633,5.55380633
60.990681,6.08276253,5.55252387,0.728174885,5.55252387,5.55252387
61.001173,4.89897949,5.55124229,-0.807627888,5.55124229,5.55124229
61.011664,5.19615242,5.54996184,-0.594818811,5.54996184,5.54996184
61.022156,6,5.54868228,0.671801849,5.54868228,5.54868228
61.032648,5.65685425,5.54740372,0.330833087,5.54740372,5.54740372
61.043139,5.09901951,5.54612629,-0.668660434,5.54612629,5.54612629
61.053631,6.40312424,5.54484975,0.926431049,5.54484975,5.54484975
61.064122,5.83095189,5.54357434,0.536076073,5.54357434,5.54357434
61.074614,4.89897949,5.54229982,-0.802072523,5.54229982,5.54229982
61.085106,5.74456265,5.54102631,0.451150019,5.54102631,5.54102631
61.095597,6.63324958,5.53975393,1.04570342,5.53975393,5.53975393
61.106089,5.83095189,5.53848244,0.54080445,5.53848244,5.53848244
61.11658,4.69041576,5.53721209,-0.920215371,5.53721209,5.53721209
61.127072,6.244998,5.53594263,0.842054255,5.53594263,5.53594263
61.137564,5.47722558,5.53467418,-0.239684393,5.53467418,5.53467418
61.148055,5.47722558,5.53340687,-0.237025945,5.53340687,5.53340687
61.158547,6,5.53214046,0.684002589,5.53214046,5.53214046
61.169038,4.69041576,5.53087518,-0.916765739,5.53087518,5.53087518
61.17953,5.19615242,5.5296108,-0.57745855,5.5296108,5.5296108
61.190022,5.09901951,5.52834744,-0.655231198,5.52834744,5.52834744
61.200513,5.47722558,5.52708521,-0.223292714,5.52708521,5.52708521
61.211005,5.56776436,5.52582389,0.204793743,5.52582389,5.52582389
61.221496,5.47722558,5.5245637,-0.217573263,5.5245637,5.5245637
61.231988,6.32455532,5.52330441,0.895126195,5.52330441,5.52330441
61.24248,4.79583152,5.52204615,-0.852182274,5.52204615,5.52204615
61.252971,5.56776436,5.52078903,0.216737939,5.52078903,5.52078903
61.263463,5,5.51953281,-0.720786244,5.51953281,5.51953281
61.273954,4.89897949,5.51827773,-0.786955048,5.51827773,5.51827773
61.284446,5.91607978,5.51702356,0.63170897,5.51702356,5.51702356
61.294938,4.58257569,5.51577041,-0.96602004,5.51577041,5.51577041
61.305429,5,5.51451841,-0.717299387,5.51451841,5.51451841
61.315921,5.19615242,5.51326731,-0.563129551,5.51326731,5.51326731
61.326412,5.47722558,5.51201736,-0.186525571,5.51201736,5.51201736
61.336904,5.56776436,5.51076832,0.238738437,5.51076832,5.51076832
61.347396,5.19615242,5.50952031,-0.559792716,5.50952031,5.50952031
61.357887,5.91607978,5.50827344,0.638597168,5.50827344,5.50827344
61.368379,4.58257569,5.50702748,-0.96148416,5.50702748,5.50702748
61.37887,5.65685425,5.50578268,0.388679268,5.50578268,5.50578268
61.389362,5,5.50453878,-0.710308933,5.50453878,5.50453878
61.399854,5.09901951,5.50329592,-0.635827337,5.50329592,5.50329592
61.410345,5.83095189,5.5020542,0.573496027,5.5020542,5.5020542
61.420837,4.58257569,5.5008134,-0.958247205,5.5008134,5.5008134
61.431328,5.19615242,5.49957375,-0.550836936,5.49957375,5.49957375
61.44182,5.91607978,5.49833502,0.646331775,5.49833502,5.49833502
61.452312,5.91607978,5.49709732,0.647288547,5.49709732,5.49709732
61.462803,6,5.49586077,0.710027623,5.49586077,5.49586077
61.473295,4.79583152,5.49462515,-0.835938768,5.49462515,5.49462515
61.483786,4.89897949,5.49339067,-0.770980666,5.49339067,5.49339067
61.494278,4.89897949,5.49215712,-0.77018026,5.49215712,5.49215712
61.50477,5.29150262,5.4909246,-0.446566881,5.4909246,5.4909246
61.515261,6.164414,5.48969324,0.82141388,5.48969324,5.48969324
61.525753,5.65685425,5.4884628,0.410355272,5.4884628,5.4884628
61.536244,4.79583152,5.48723352,-0.831505859,5.48723352,5.48723352
61.546736,5.65685425,5.48600516,0.413338956,5.48600516,5.48600516
61.557228,5.74456265,5.48477784,0.509690895,5.48477784,5.48477784
61.567719,6.08276253,5.48355168,0.77408711,5.48355168,5.48355168
61.578211,5.38516481,5.48232644,-0.311707609,5.48232644,5.48232644
61.588702,6.08276253,5.48110236,0.775667562,5.48110236,5.48110236
61.599194,5.65685425,5.47987921,0.420684009,5.47987921,5.47987921
61.609686,5.19615242,5.47865711,-0.531511698,5.47865711,5.47865711
61.620177,5.91607978,5.47743616,0.66230176,5.47743616,5.47743616
61.630669,5.47722558,5.47621615,0.0317715261,5.47621615,5.47621615
61.64116,6,5.47499729,0.724570707,5.47499729,5.47499729
61.651652,5.19615242,5.47377937,-0.526903162,5.47377937,5.47377937
61.662144,5.74456265,5.47256249,0.521536345,5.47256249,5.47256249
61.672635,6.4807407,5.47134677,1.00468598,5.47134677,5.47134677
61.683127,5.65685425,5.47013199,0.432113712,5.47013199,5.47013199
61.693618,5.74456265,5.46891837,0.525018357,5.46891837,5.46891837
61.70411,5.47722558,5.46770569,0.0975699178,5.46770569,5.46770569
61.714602,5.29150262,5.46649405,-0.418319769,5.46649405,5.46649405
61.725093,5.38516481,5.46528358,-0.283052601,5.46528358,5.46528358
61.735585,6.08276253,5.46407405,0.786567532,5.46407405,5.46407405
61.746076,4.58257569,5.46286568,-0.938237703,5.46286568,5.46286568
61.756568,6.164414,5.46165825,0.838305285,5.46165825,5.46165825
61.76706,5.47722558,5.46045187,0.129513323,5.46045187,5.46045187
61.777551,4.47213595,5.45924667,-0.993534453,5.45924667,5.45924667
61.788043,6.32455532,5.4580424,0.93086676,5.4580424,5.4580424
61.798534,6.164414,5.45683929,0.841174601,5.45683929,5.45683929
61.809026,6.244998,5.45563713,0.888459827,5.45563713,5.45563713
61.819518,5.65685425,5.45443603,0.449909125,5.45443603,5.45443603
61.830009,5.56776436,5.45323609,0.338420254,5.45323609,5.45323609
61.840501,5.56776436,5.4520371,0.340187096,5.4520371,5.4520371
61.850992,6.08276253,5.45083928,0.794936003,5.45083928,5.45083928
61.861484,5.83095189,5.4496424,0.617502624,5.4496424,5.4496424
61.871976,6.63324958,5.44844659,1.08848656,5.44844659,5.44844659
61.882467,5.56776436,5.44725194,0.347148991,5.44725194,5.44725194
61.892959,5.65685425,5.44605824,0.459125265,5.44605824,5.44605824
61.90345,5.65685425,5.44486571,0.460422127,5.44486571,5.44486571
61.913942,5.74456265,5.44367413,0.548533054,5.44367413,5.44367413
61.924434,5.47722558,5.44248362,0.186391949,5.44248362,5.44248362
61.934925,5.74456265,5.44129427,0.550698078,5.44129427,5.44129427
61.945417,5.29150262,5.44010588,-0.38549093,5.44010588,5.44010588
61.955908,5.65685425,5.43891866,0.466835719,5.43891866,5.43891866
61.9664,5.19615242,5.43773239,-0.491507853,5.43773239,5.43773239
61.976892,5.38516481,5.43654719,-0.226676821,5.43654719,5.43654719
61.987383,6.4807407,5.43536316,1.02243706,5.43536316,5.43536316
61.997875,5.83095189,5.43418009,0.629898252,5.43418009,5.43418009
62.008366,5.29150262,5.43299819,-0.376158966,5.43299819,5.43299819
62.018858,4.47213595,5.43181725,-0.979633243,5.43181725,5.43181725
62.02935,6.63324958,5.43063737,1.09663677,5.43063737,5.43063737
62.039841,5.09901951,5.42945867,-0.574838376,5.42945867,5.42945867
62.050333,5.47722558,5.42828093,0.221234367,5.42828093,5.42828093
62.060824,4.69041576,5.42710437,-0.858305661,5.42710437,5.42710437
62.071316,5.29150262,5.42592876,-0.366641706,5.42592876,5.42592876
62.081808,5.38516481,5.42475423,-0.1989709,5.42475423,5.42475423
62.092299,5.56776436,5.42358087,0.379715014,5.42358087,5.42358087
62.102791,5.47722558,5.42240847,0.23413052,5.42240847,5.42240847
62.113282,5,5.42123726,-0.649027935,5.42123726,5.42123726
62.123774,4.24264069,5.42006701,-1.08509277,5.42006701,5.42006701
62.134266,6,5.41889782,0.762300582,5.41889782,5.41889782
62.144757,5.56776436,5.41772982,0.387342923,5.41772982,5.41772982
62.155249,4.69041576,5.41656279,-0.852142609,5.41656279,5.41656279
62.16574,5.47722558,5.41539693,0.248653662,5.41539693,5.41539693
62.176232,5.19615242,5.41423204,-0.466989954,5.41423204,5.41423204
62.186724,5.83095189,5.41306822,0.646439225,5.41306822,5.41306822
62.197215,6,5.41190559,0.766873137,5.41190559,5.41190559
62.207707,5,5.41074392,-0.640893068,5.41074392,5.41074392
62.218198,5.91607978,5.40958344,0.711685562,5.40958344,5.40958344
62.22869,4.69041576,5.40842393,-0.847353626,5.40842393,5.40842393
62.239182,4.35889894,5.40726549,-1.02389772,5.40726549,5.40726549
62.249673,5.19615242,5.40610824,-0.458209357,5.40610824,5.40610824
62.260165,4.58257569,5.40495195,-0.906849634,5.40495195,5.40495195
62.270656,5.29150262,5.40379686,-0.335103321,5.40379686,5.40379686
62.281148,5.91607978,5.40264273,0.71654522,5.40264273,5.40264273
62.29164,5.38516481,5.40148968,-0.127768835,5.40148968,5.40148968
62.302131,4.58257569,5.40033782,-0.904302012,5.40033782,5.40033782
62.312623,5.38516481,5.39918693,-0.118415064,5.39918693,5.39918693
62.323114,5.47722558,5.39803724,0.281404228,5.39803724,5.39803724
62.333606,5.65685425,5.39688851,0.509868357,5.39688851,5.39688851
62.344098,4.89897949,5.39574086,-0.704813008,5.39574086,5.39574086
62.354589,4.89897949,5.39459441,-0.703999234,5.39459441,5.39459441
62.365081,4.35889894,5.39344892,-1.0171283,5.39344892,5.39344892
62.375572,5.29150262,5.39230463,-0.317493327,5.39230463,5.39230463
62.386064,5.29150262,5.39116132,-0.315687656,5.39116132,5.39116132
62.396556,4.47213595,5.39001909,-0.958062175,5.39001909,5.39001909
62.407047,5.56776436,5.38887805,0.422949543,5.38887805,5.38887805
62.417539,5.29150262,5.38773798,-0.310218247,5.38773798,5.38773798
62.42803,5.29150262,5.38659911,-0.308377189,5.38659911,5.38659911
62.438522,5.19615242,5.38546122,-0.435096307,5.38546122,5.38546122
62.449014,6.164414,5.38432441,0.883226806,5.38432441,5.38432441
62.459505,5.29150262,5.3831888,-0.302797254,5.3831888,5.3831888
62.469997,6.08276253,5.38205417,0.837083249,5.38205417,5.38205417
62.480488,5.38516481,5.38092073,0.0651466124,5.38092073,5.38092073
62.49098,6.244998,5.37978827,0.930166508,5.37978827,5.37978827
62.501472,5.19615242,5.3786569,-0.427205422,5.3786569,5.3786569
62.511963,4.69041576,5.37752672,-0.828921565,5.37752672,5.37752672
62.522455,6.244998,5.37639753,0.931987378,5.37639753,5.37639753
62.532946,4.79583152,5.37526953,-0.761208254,5.37526953,5.37526953
62.543438,5.09901951,5.37414251,-0.524521688,5.37414251,5.37414251
62.55393,4.58257569,5.37301659,-0.88906743,5.37301659,5.37301659
62.564421,4.47213595,5.37189186,-0.948554642,5.37189186,5.37189186
62.574913,5.56776436,5.37076812,0.443842587,5.37076812,5.37076812
62.585404,4.35889894,5.36964558,-1.00535896,5.36964558,5.36964558
62.595896,4.79583152,5.36852402,-0.75676449,5.36852402,5.36852402
62.606388,5.09901951,5.36740355,-0.518057946,5.36740355,5.36740355
62.616879,5.19615242,5.36628428,-0.412470434,5.36628428,5.36628428
62.627371,5.19615242,5.365166,-0.411112609,5.365166,5.365166
62.637862,6,5.36404892,0.797465411,5.36404892,5.36404892
62.648354,4.89897949,5.36293282,-0.681141203,5.36293282,5.36293282
62.658846,5.65685425,5.36181782,0.543172555,5.36181782,5.36181782
62.669337,5.83095189,5.36070403,0.685746213,5.36070403,5.36070403
62.679829,5.91607978,5.35959122,0.745981613,5.35959122,5.35959122
62.69032,5.19615242,5.35847961,-0.402898479,5.35847961,5.35847961
62.700812,4.89897949,5.35736899,-0.677044683,5.35736899,5.35736899
62.711304,5.38516481,5.35625947,0.170015707,5.35625947,5.35625947
62.721795,5.09901951,5.35515115,-0.50609449,5.35515115,5.35515115
62.732287,5.47722558,5.35404382,0.350972587,5.35404382,5.35404382
62.742778,4.89897949,5.35293769,-0.673764207,5.35293769,5.35293769
62.75327,5.56776436,5.35183256,0.464684629,5.35183256,5.35183256
62.763762,6.32455532,5.35072852,0.98682663,5.35072852,5.35072852
62.774253,5.29150262,5.34962569,-0.241087266,5.34962569,5.34962569
62.784745,5.19615242,5.34852385,-0.390347834,5.34852385,5.34852385
62.795236,5.47722558,5.34742322,0.360280938,5.34742322,5.34742322
62.805728,5.47722558,5.34632358,0.361803804,5.34632358,5.34632358
62.81622,5.19615242,5.34522504,-0.386099237,5.34522504,5.34522504
62.826711,5.19615242,5.34412771,-0.384675561,5.34412771,5.34412771
62.837203,5,5.34303137,-0.585688802,5.34303137,5.34303137
62.847694,4.89897949,5.34193624,-0.665549964,5.34193624,5.34193624
62.858186,6,5.34084211,0.811885395,5.34084211,5.34084211
62.868678,5.29150262,5.33974907,-0.219650747,5.33974907,5.33974907
62.879169,5.83095189,5.33865725,0.70163712,5.33865725,5.33865725
62.889661,6.164414,5.33756642,0.9093116,5.33756642,5.33756642
62.900152,6,5.3364768,0.814569336,5.3364768,5.3364768
62.910644,5.74456265,5.33538817,0.63966747,5.33538817,5.33538817
62.921136,4,5.33430066,-1.15511933,5.33430066,5.33430066
62.931627,4.58257569,5.33321434,-0.86639405,5.33321434,5.33321434
62.942119,5.29150262,5.33212903,-0.201559948,5.33212903,5.33212903
62.95261,5.19615242,5.33104493,-0.367277157,5.33104493,5.33104493
62.963102,5.74456265,5.32996183,0.643895034,5.32996183,5.32996183
62.973594,4.89897949,5.32887984,-0.655667866,5.32887984,5.32887984
62.984085,5,5.32779905,-0.572537379,5.32779905,5.32779905
62.994577,5.56776436,5.32671927,0.490963437,5.32671927,5.32671927
63.005068,5.74456265,5.32564069,0.647241806,5.32564069,5.32564069
63.01556,5.56776436,5.32456312,0.49315438,5.32456312,5.32456312
63.026052,5.09901951,5.32348666,-0.473779636,5.32348666,5.32348666
63.036543,6.08276253,5.3224114,0.871981151,5.3224114,5.3224114
63.047035,4.58257569,5.32133715,-0.859512338,5.32133715,5.32133715
63.057526,5,5.32026412,-0.565918824,5.32026412,5.32026412
63.068018,5.56776436,5.31919208,0.498570236,5.31919208,5.31919208
63.07851,4.12310563,5.31812116,-1.09316766,5.31812116,5.31812116
63.089001,5.56776436,5.31705144,0.500712411,5.31705144,5.31705144
63.099493,5.74456265,5.31598274,0.654660147,5.31598274,5.31598274
63.109984,5.29150262,5.31491524,-0.153011832,5.31491524,5.31491524
63.120476,5,5.31384876,-0.560222059,5.31384876,5.31384876
63.130968,5.74456265,5.31278338,0.657099131,5.31278338,5.31278338
63.141459,5.91607978,5.31171921,0.777406309,5.31171921,5.31171921
63.151951,5.38516481,5.31065606,0.272962909,5.31065606,5.31065606
63.162442,5.74456265,5.30959411,0.659521442,5.30959411,5.30959411
63.172934,5.38516481,5.30853318,0.276824181,5.30853318,5.30853318
63.183426,5,5.30747336,-0.554502802,5.30747336,5.30747336
63.193917,5.47722558,5.30641475,0.413292665,5.30641475,5.30641475
63.204409,4.35889894,5.30535715,-0.972860836,5.30535715,5.30535715
63.2149,5.91607978,5.30430077,0.782163038,5.30430077,5.30430077
63.225392,5.19615242,5.30324539,-0.327250622,5.30324539,5.30324539
63.235884,6,5.30219113,0.835349548,5.30219113,5.30219113
63.246375,4.58257569,5.30113809,-0.847680595,5.30113809,5.30113809
63.256867,4.89897949,5.30008605,-0.633329745,5.30008605,5.30008605
63.267358,5.19615242,5.29903523,-0.320753503,5.29903523,5.29903523
63.27785,5.65685425,5.29798543,0.59905661,5.29798543,5.29798543
63.288342,5.83095189,5.29693674,0.730763408,5.29693674,5.29693674
63.298833,5.09901951,5.29588926,-0.443700063,5.29588926,5.29588926
63.309325,6,5.2948428,0.839736388,5.2948428,5.2948428
63.319816,5.56776436,5.29379755,0.523418391,5.29379755,5.29379755
63.330308,5.09901951,5.29275332,-0.440152027,5.29275332,5.29275332
63.3408,4.69041576,5.2917102,-0.77543178,5.2917102,5.2917102
63.351291,4.89897949,5.2906683,-0.625850477,5.2906683,5.2906683
63.361783,5.91607978,5.28962742,0.791487436,5.28962742,5.28962742
63.372274,5.19615242,5.28858775,-0.304031793,5.28858775,5.28858775
63.382766,6,5.2875491,0.844068064,5.2875491,5.2875491
63.393258,5.19615242,5.28651157,-0.300597983,5.28651157,5.28651157
63.403749,4.35889894,5.28547525,-0.962588339,5.28547525,5.28547525
63.414241,4.35889894,5.28443995,-0.96205042,5.28443995,5.28443995
63.424732,4.79583152,5.28340587,-0.698265242,5.28340587,5.28340587
63.435224,6.244998,5.28237281,0.981134644,5.28237281,5.28237281
63.445716,5.91607978,5.28134086,0.796705039,5.28134086,5.28134086
63.456207,4.79583152,5.28031014,-0.696044979,5.28031014,5.28031014
63.466699,5.09901951,5.27928043,-0.424571448,5.27928043,5.27928043
63.47719,5.38516481,5.27825194,0.326975336,5.27825194,5.27825194
63.487682,5.09901951,5.27722447,-0.422143285,5.27722447,5.27722447
63.498174,5.47722558,5.27619812,0.448360858,5.27619812,5.27619812
63.508665,5.56776436,5.27517298,0.540917166,5.27517298,5.27517298
63.519157,5.19615242,5.27414887,-0.279278443,5.27414887,5.27414887
63.529648,5.91607978,5.27312598,0.801844003,5.27312598,5.27312598
63.54014,5.38516481,5.27210411,0.336245002,5.27210411,5.27210411
63.550632,5.56776436,5.27108335,0.54468432,5.27108335,5.27108335
63.561123,5,5.27006382,-0.519676651,5.27006382,5.27006382
63.571615,5.83095189,5.26904531,0.749604284,5.26904531,5.26904531
63.582106,4.79583152,5.26802802,-0.687165553,5.26802802,5.26802802
63.592598,5.65685425,5.26701175,0.624373683,5.26701175,5.26701175
63.60309,4.35889894,5.26599661,-0.952416749,5.26599661,5.26599661
63.613581,5.47722558,5.26498268,0.460698269,5.26498268,5.26498268
63.624073,5.56776436,5.26396978,0.551175639,5.26396978,5.26396978
63.634564,4.35889894,5.26295809,-0.950820251,5.26295809,5.26295809
63.645056,4.58257569,5.26194744,-0.824240099,5.26194744,5.26194744
63.655548,6.32455532,5.2609379,1.03131829,5.2609379,5.2609379
63.666039,4.69041576,5.25992958,-0.754661397,5.25992958,5.25992958
63.676531,5.29150262,5.25892229,0.180500219,5.25892229,5.25892229
63.687022,4.79583152,5.25791622,-0.679768121,5.25791622,5.25791622
63.697514,5.91607978,5.25691118,0.811891991,5.25691118,5.25691118
63.708006,5.56776436,5.25590726,0.558441676,5.25590726,5.25590726
63.718497,6.08276253,5.25490456,0.909867009,5.25490456,5.25490456
63.728989,5.47722558,5.25390288,0.472570305,5.25390288,5.25390288
63.73948,6.08276253,5.25290243,0.910966576,5.25290243,5.25290243
63.749972,5.65685425,5.251903,0.636357798,5.251903,5.251903
63.760464,6.244998,5.2509047,0.997042274,5.2509047,5.2509047
63.770955,5.38516481,5.24990762,0.367773283,5.24990762,5.24990762
63.781447,4.79583152,5.24891157,-0.673112208,5.24891157,5.24891157
63.791938,5.65685425,5.24791673,0.639482224,5.24791673,5.24791673
63.80243,5.29150262,5.24692293,0.21113903,5.24692293,5.24692293
63.812922,4.79583152,5.24593025,-0.670893979,5.24593025,5.24593025
63.823413,5.74456265,5.2449388,0.706840753,5.2449388,5.2449388
63.833905,4.89897949,5.24394837,-0.587340518,5.24394837,5.24394837
63.844396,5.19615242,5.24295916,-0.216348654,5.24295916,5.24295916
63.854888,5.65685425,5.24197099,0.644114324,5.24197099,5.24197099
63.86538,6.08276253,5.24098394,0.917484928,5.24098394,5.24098394
63.875871,5,5.23999811,-0.489896017,5.23999811,5.23999811
63.886363,5.83095189,5.23901331,0.769375451,5.23901331,5.23901331
63.896854,5.29150262,5.23802973,0.23124206,5.23802973,5.23802973
63.907346,6.08276253,5.23704719,0.919627829,5.23704719,5.23704719
63.917838,5.56776436,5.23606577,0.575932804,5.23606577,5.23606577
63.928329,5.19615242,5.23508557,-0.197314843,5.23508557,5.23508557
63.938821,5.56776436,5.23410641,0.577631334,5.23410641,5.23410641
63.949312,5.74456265,5.23312846,0.715146269,5.23312846,5.23312846
63.959804,4.79583152,5.23215155,-0.660545249,5.23215155,5.23215155
63.970296,4.89897949,5.23117577,-0.576364711,5.23117577,5.23117577
63.980787,5.56776436,5.2302012,0.581001859,5.2302012,5.2302012
63.991279,4.89897949,5.22922767,-0.574672244,5.22922767,5.22922767
64.00177,4.58257569,5.22825536,-0.803541953,5.22825536,5.22825536
64.012262,5.29150262,5.22728409,0.253413755,5.22728409,5.22728409
64.022754,5.83095189,5.22631395,0.77758469,5.22631395,5.22631395
64.033245,5.65685425,5.22534502,0.656893621,5.22534502,5.22534502
64.043737,5.47722558,5.22437713,0.502840377,5.22437713,5.22437713
64.054228,5.09901951,5.22341046,-0.352691008,5.22341046,5.22341046
64.06472,5.09901951,5.22244483,-0.351319389,5.22244483,5.22244483
64.075212,4.89897949,5.22148032,-0.567891571,5.22148032,5.22148032
64.085703,4.35889894,5.22051704,-0.928233857,5.22051704,5.22051704
64.096195,6,5.21955479,0.883428102,5.21955479,5.21955479
64.106686,5.29150262,5.21859376,0.270016408,5.21859376,5.21859376
64.117178,5.47722558,5.21763377,0.509501525,5.21763377,5.21763377
64.12767,4.89897949,5.21667491,-0.563644767,5.21667491,5.21667491
64.138161,5.65685425,5.21571727,0.664181437,5.21571727,5.21571727
64.148653,5.38516481,5.21476066,0.412800367,5.21476066,5.21476066
64.159144,4.89897949,5.21380528,-0.561093393,5.21380528,5.21380528
64.169636,5.38516481,5.21285094,0.41510706,5.21285094,5.21285094
64.180128,5,5.21189772,-0.460323494,5.21189772,5.21189772
64.190619,5.19615242,5.21094572,-0.121627715,5.21094572,5.21094572
64.201111,5.38516481,5.20999477,0.418533201,5.20999477,5.20999477
64.211602,5.83095189,5.20904503,0.788610718,5.20904503,5.20904503
64.222094,5.38516481,5.20809633,0.420795052,5.20809633,5.20809633
64.232586,3.74165739,5.20714876,-1.21057481,5.20714876,5.20714876
64.243077,6.78232998,5.20620242,1.25543919,5.20620242,5.20620242
64.253569,5.38516481,5.20525711,0.424155279,5.20525711,5.20525711
64.26406,4.12310563,5.20431302,-1.03981123,5.20431302,5.20431302
64.274552,4.58257569,5.20336997,-0.78790499,5.20336997,5.20336997
64.285044,5.47722558,5.20242805,0.524211336,5.20242805,5.20242805
64.295535,4.58257569,5.20148735,-0.786709385,5.20148735,5.20148735
64.306027,5.09901951,5.20054769,-0.318634868,5.20054769,5.20054769
64.316518,4.89897949,5.19960925,-0.548297153,5.19960925,5.19960925
64.32701,4.79583152,5.19867186,-0.63469704,5.19867186,5.19867186
64.337502,5.47722558,5.19773559,0.528668126,5.19773559,5.19773559
64.347993,4.58257569,5.19680054,-0.78372498,5.19680054,5.19680054
64.358485,4.35889894,5.19586653,-0.914859328,5.19586653,5.19586653
64.368976,4.79583152,5.19493375,-0.631745377,5.19493375,5.19493375
64.379468,5.74456265,5.194002,0.741997741,5.194002,5.194002
64.38996,5.09901951,5.19307138,-0.306678773,5.19307138,5.19307138
64.400451,5.19615242,5.19214199,0.0633279992,5.19214199,5.19214199
64.410943,5.56776436,5.19121363,0.613637295,5.19121363,5.19121363
64.421434,4.89897949,5.1902865,-0.539728647,5.1902865,5.1902865
64.431926,4.79583152,5.1893604,-0.627318803,5.1893604,5.1893604
64.442418,5.65685425,5.18843544,0.684411285,5.18843544,5.18843544
64.452909,5.09901951,5.1875117,-0.29747636,5.1875117,5.1875117
64.463401,5.47722558,5.186589,0.539107204,5.186589,5.186589
64.473892,6.244998,5.18566752,1.02923782,5.18566752,5.18566752
64.484384,4.89897949,5.18474708,-0.534572344,5.18474708,5.18474708
64.494876,5.19615242,5.18382777,0.111016462,5.18382777,5.18382777
64.505367,5.65685425,5.18290968,0.688436324,5.18290968,5.18290968
64.515859,5.29150262,5.18199263,0.330922939,5.18199263,5.18199263
64.52635,4.47213595,5.1810768,-0.841986251,5.1810768,5.1810768
64.536842,5.56776436,5.18016202,0.622577181,5.18016202,5.18016202
64.547334,5.09901951,5.17924836,-0.283246976,5.17924836,5.17924836
64.557825,5.29150262,5.17833593,0.33640258,5.17833593,5.17833593
64.568317,5.09901951,5.17742453,-0.280008965,5.17742453,5.17742453
64.578808,5.29150262,5.17651436,0.339099193,5.17651436,5.17651436
64.5893,4.79583152,5.17560523,-0.616257824,5.17560523,5.17560523
64.599792,5.19615242,5.17469723,0.146475916,5.17469723,5.17469723
64.610283,5.29150262,5.17379045,0.343092081,5.17379045,5.17379045
64.620775,5,5.17288471,-0.41579407,5.17288471,5.17288471
64.631266,3.87298335,5.17198019,-1.13973543,5.17198019,5.17198019
64.641758,5.19615242,5.17107671,0.158353124,5.17107671,5.17107671
64.65225,5.19615242,5.17017437,0.161177099,5.17017437,5.17017437
64.662741,4.24264069,5.16927324,-0.962617551,5.16927324,5.16927324
64.673233,5.74456265,5.16837315,0.759071468,5.16837315,5.16837315
64.683724,4.12310563,5.16747429,-1.02194357,5.16747429,5.16747429
64.694216,5,5.16657646,-0.408137799,5.16657646,5.16657646
64.704708,5.65685425,5.16567977,0.700838411,5.16567977,5.16567977
64.715199,5.19615242,5.1647843,0.177110494,5.1647843,5.1647843
64.725691,5.38516481,5.16388987,0.470398705,5.16388987,5.16388987
64.736182,5.09901951,5.16299665,-0.252937022,5.16299665,5.16299665
64.746674,5.29150262,5.16210448,0.35971953,5.16210448,5.16210448
64.757166,6.4807407,5.16121344,1.14870678,5.16121344,5.16121344
64.767657,6.08276253,5.16032362,0.960436833,5.16032362,5.16032362
64.778149,5.38516481,5.15943484,0.475110476,5.15943484,5.15943484
64.78864,5.19615242,5.15854728,0.193920454,5.15854728,5.15854728
64.799132,4.24264069,5.15766076,-0.956566818,5.15766076,5.15766076
64.809624,5.74456265,5.15677538,0.766672857,5.15677538,5.15677538
64.820115,4.69041576,5.15589121,-0.68225761,5.15589121,5.15589121
64.830607,5.65685425,5.15500808,0.708411017,5.15500808,5.15500808
64.841098,5.83095189,5.15412617,0.822694187,5.15412617,5.15412617
64.85159,6.4807407,5.1532453,1.15216986,5.1532453,5.1532453
64.862082,5.65685425,5.15236557,0.710273666,5.15236557,5.15236557
64.872573,5.74456265,5.15148705,0.770114017,5.15148705,5.15148705
64.883065,4.79583152,5.15060957,-0.595632478,5.15060957,5.15060957
64.893556,4.69041576,5.14973331,-0.677729703,5.14973331,5.14973331
64.904048,5.38516481,5.14885809,0.486113889,5.14885809,5.14885809
64.91454,4.69041576,5.14798401,-0.676437912,5.14798401,5.14798401
64.925031,5.38516481,5.14711114,0.487907441,5.14711114,5.14711114
64.935523,5.19615242,5.14623931,0.223412428,5.14623931,5.14623931
64.946014,5,5.1453687,-0.381272469,5.1453687,5.1453687
64.956506,5.74456265,5.14449913,0.774637669,5.14449913,5.14449913
64.966998,4.89897949,5.14363069,-0.494622285,5.14363069,5.14363069
64.977489,5.29150262,5.14276346,0.385667159,5.14276346,5.14276346
64.987981,5.91607978,5.14189729,0.87987641,5.14189729,5.14189729
64.998472,5.29150262,5.14103232,0.38790502,5.14103232,5.14103232
65.008964,6.164414,5.1401684,1.0120502,5.1401684,5.1401684
65.019456,5,5.1393056,-0.37323666,5.1393056,5.1393056
65.029947,5.74456265,5.13844402,0.778536206,5.13844402,5.13844402
65.040439,5.29150262,5.13758349,0.39232529,5.13758349,5.13758349
65.05093,5.47722558,5.13672416,0.583524987,5.13672416,5.13672416
65.061422,5.29150262,5.13586589,0.394508219,5.13586589,5.13586589
65.071914,4.58257569,5.13500874,-0.743258397,5.13500874,5.13500874
65.082405,5,5.1341528,-0.366268754,5.1341528,5.1341528
65.092897,5.29150262,5.13329791,0.397749562,5.13329791,5.13329791
65.103388,5,5.13244423,-0.363928875,5.13244423,5.13244423
65.11388,5,5.13159159,-0.362755551,5.13159159,5.13159159
65.124372,5.56776436,5.13074008,0.66107812,5.13074008,5.13074008
65.134863,4.24264069,5.12988978,-0.941939009,5.12988978,5.12988978
65.145355,5,5.12904053,-0.359222119,5.12904053,5.12904053
65.155846,4,5.12819249,-1.06216406,5.12819249,5.12819249
65.166338,5.74456265,5.12734549,0.785631693,5.12734549,5.12734549
65.17683,5.29150262,5.12649962,0.406205615,5.12649962,5.12649962
65.187321,6.40312424,5.12565496,1.13025187,5.12565496,5.12565496
65.197813,4.69041576,5.12481134,-0.659086932,5.12481134,5.12481134
65.208304,5.47722558,5.12396894,0.594353969,5.12396894,5.12396894
65.218796,4.89897949,5.12312757,-0.473442803,5.12312757,5.12312757
65.229288,5,5.12228734,-0.349696066,5.12228734,5.12228734
65.239779,4.58257569,5.12144831,-0.734079434,5.12144831,5.12144831
65.250271,6,5.12061033,0.937757789,5.12061033,5.12061033
65.260762,5.74456265,5.11977355,0.790436015,5.11977355,5.11977355
65.271254,5.65685425,5.11893782,0.73342786,5.11893782,5.11893782
65.281746,5.19615242,5.11810322,0.279372872,5.11810322,5.11810322
65.292237,5.74456265,5.11726982,0.792018196,5.11726982,5.11726982
65.302729,5.09901951,5.11643747,-0.131977112,5.11643747,5.11643747
65.31322,4.24264069,5.11560633,-0.934326302,5.11560633,5.11560633
65.323712,5.29150262,5.11477622,0.420388389,5.11477622,5.11477622
65.334204,4.69041576,5.11394725,-0.65079297,5.11394725,5.11394725
65.344695,5,5.11311948,-0.336332393,5.11311948,5.11311948
65.355187,4.79583152,5.11229275,-0.562548869,5.11229275,5.11229275
65.365678,5.19615242,5.11146723,0.291007201,5.11146723,5.11146723
65.37617,5.29150262,5.11064276,0.425276223,5.11064276,5.11064276
65.386662,5.29150262,5.10981941,0.426243143,5.10981941,5.10981941
65.397153,4.89897949,5.10899726,-0.458276959,5.10899726,5.10899726
65.407645,4.89897949,5.10817615,-0.457380223,5.10817615,5.10817615
65.418136,5.29150262,5.10735625,0.429122789,5.10735625,5.10735625
65.428628,4.89897949,5.1065374,-0.455585243,5.1065374,5.1065374
65.43912,5.65685425,5.10571967,0.742384389,5.10571967,5.10571967
65.449611,5.19615242,5.10490314,0.302074965,5.10490314,5.10490314
65.460103,4.89897949,5.10408765,-0.452888693,5.10408765,5.10408765
65.470594,4.89897949,5.10327337,-0.45198881,5.10327337,5.10327337
65.481086,4.79583152,5.10246013,-0.55374056,5.10246013,5.10246013
65.491578,5.09901951,5.10164802,-0.0512689226,5.10164802,5.10164802
65.502069,5,5.1008371,-0.317548579,5.1008371,5.1008371
65.512561,5.47722558,5.10002723,0.614164754,5.10002723,5.10002723
65.523052,5.19615242,5.09921856,0.311342038,5.09921856,5.09921856
65.533544,5.19615242,5.09841093,0.312636356,5.09841093,5.09841093
65.544036,4.47213595,5.09760443,-0.790865647,5.09760443,5.09760443
65.554527,4.58257569,5.09679912,-0.717093735,5.09679912,5.09679912
65.565019,5.38516481,5.09599486,0.537745245,5.09599486,5.09599486
65.57551,4.79583152,5.09519179,-0.547138256,5.09519179,5.09519179
65.586002,3.87298335,5.09438977,-1.10517258,5.09438977,5.09438977
65.596494,5.83095189,5.09358888,0.858698445,5.09358888,5.09358888
65.606985,4.58257569,5.09278917,-0.714292292,5.09278917,5.09278917
65.617477,4.89897949,5.09199052,-0.439330207,5.09199052,5.09199052
65.627968,4.24264069,5.09119305,-0.921169022,5.09119305,5.09119305
65.63846,5.29150262,5.09039664,0.448448421,5.09039664,5.09039664
65.648952,5.09901951,5.08960134,0.0970472848,5.08960134,5.08960134
65.659443,4,5.08880724,-1.04345926,5.08880724,5.08880724
65.669935,5.47722558,5.08801418,0.623868095,5.08801418,5.08801418
65.680426,4.79583152,5.08722231,-0.53980625,5.08722231,5.08722231
65.690918,5,5.08643149,-0.293992329,5.08643149,5.08643149
65.70141,4.79583152,5.08564179,-0.538340286,5.08564179,5.08564179
65.711901,4.69041576,5.08485328,-0.628042608,5.08485328,5.08485328
65.722393,4.79583152,5.08406581,-0.536874554,5.08406581,5.08406581
65.732884,6.08276253,5.08327954,0.999741463,5.08327954,5.08327954
65.743376,5.91607978,5.08249431,0.913009024,5.08249431,5.08249431
65.753868,5.65685425,5.08171019,0.758382527,5.08171019,5.08171019
65.764359,5.09901951,5.08092727,0.134507407,5.08092727,5.08092727
65.774851,6,5.08014539,0.959090511,5.08014539,5.08014539
65.785342,4.69041576,5.0793647,-0.623657714,5.0793647,5.0793647
65.795834,4.47213595,5.07858506,-0.77874842,5.07858506,5.07858506
65.806326,5.47722558,5.07780653,0.631996082,5.07780653,5.07780653
65.816817,5.19615242,5.07702919,0.34514234,5.07702919,5.07702919
65.827309,5.47722558,5.07625289,0.633224041,5.07625289,5.07625289
65.8378,4.89897949,5.07547778,-0.420117002,5.07547778,5.07547778
65.848292,5.74456265,5.07470371,0.818449103,5.07470371,5.07470371
65.858784,4.24264069,5.07393076,-0.911751103,5.07393076,5.07393076
65.869275,5.29150262,5.073159,0.467272539,5.073159,5.073159
65.879767,5.74456265,5.07238827,0.819862412,5.07238827,5.07238827
65.890258,5.29150262,5.07161874,0.468917781,5.07161874,5.07161874
65.90075,5,5.07085024,-0.266177086,5.07085024,5.07085024
65.911242,5,5.07008286,-0.264731674,5.07008286,5.07008286
65.921733,6.70820393,5.06931666,1.28019033,5.06931666,5.06931666
65.932225,5.47722558,5.06855151,0.639276205,5.06855151,5.06855151
65.942716,5.38516481,5.06778754,0.563362466,5.06778754,5.06778754
65.953208,5.56776436,5.06702461,0.707629673,5.06702461,5.06702461
65.9637,5.09901951,5.06626279,0.180988184,5.06626279,5.06626279
65.974191,4.58257569,5.06550216,-0.694929106,5.06550216,5.06550216
65.984683,4.79583152,5.06474256,-0.518566331,5.06474256,5.06474256
65.995174,4,5.06398415,-1.03149608,5.06398415,5.06398415
66.005666,4.47213595,5.06322678,-0.768824314,5.06322678,5.06322678
66.016158,5.09901951,5.06247052,0.191177909,5.06247052,5.06247052
66.026649,4.47213595,5.06171544,-0.767840796,5.06171544,5.06171544
66.037141,4.58257569,5.0609614,-0.691654327,5.0609614,5.0609614
66.047632,4.24264069,5.06020854,-0.90419459,5.06020854,5.06020854
66.058124,5.09901951,5.05945672,0.198903971,5.05945672,5.05945672
66.068616,5.19615242,5.05870601,0.370737656,5.05870601,5.05870601
66.079107,4.89897949,5.05795648,-0.398719196,5.05795648,5.05795648
66.089599,5.56776436,5.05720799,0.714532276,5.05720799,5.05720799
66.10009,5.29150262,5.05646068,0.484811248,5.05646068,5.05646068
66.110582,4.35889894,5.0557144,-0.834754728,5.0557144,5.0557144
66.121074,5,5.05496923,-0.234455178,5.05496923,5.05496923
66.131565,5.47722558,5.05422524,0.650384759,5.05422524,5.05422524
66.142057,4.58257569,5.05348229,-0.686226341,5.05348229,5.05348229
66.152548,5,5.05274051,-0.229653021,5.05274051,5.05274051
66.16304,5.83095189,5.05199977,0.882582645,5.05199977,5.05199977
66.173532,5.29150262,5.05126014,0.490145373,5.05126014,5.05126014
66.184023,5.65685425,5.05052168,0.778673598,5.05052168,5.05052168
66.194515,6.164414,5.04978425,1.05576027,5.04978425,5.04978425
66.205006,5.56776436,5.04904801,0.720219658,5.04904801,5.04904801
66.215498,5.19615242,5.0483128,0.38449919,5.0483128,5.0483128
66.22599,5.74456265,5.04757869,0.834855652,5.04757869,5.04757869
66.236481,5.56776436,5.04684575,0.721746915,5.04684575,5.04684575
66.246973,4,5.04611385,-1.02279707,5.04611385,5.04611385
66.257464,5.83095189,5.04538313,0.886323173,5.04538313,5.04538313
66.267956,5.56776436,5.04465344,0.723264078,5.04465344,5.04465344
66.278448,5.56776436,5.04392485,0.723767584,5.04392485,5.04392485
66.288939,4.79583152,5.04319743,-0.49735893,5.04319743,5.04319743
66.299431,4.89897949,5.04247104,-0.378802797,5.04247104,5.04247104
66.309922,4.47213595,5.04174583,-0.754725033,5.04174583,5.04174583
66.320414,5.47722558,5.04102165,0.660457361,5.04102165,5.04102165
66.330906,5.74456265,5.04029857,0.839204431,5.04029857,5.04029857
66.341397,5.38516481,5.03957666,0.587867457,5.03957666,5.03957666
66.351889,4.89897949,5.03885578,-0.374000396,5.03885578,5.03885578
66.36238,5,5.03813607,-0.195284592,5.03813607,5.03813607
66.372872,5.29150262,5.03741739,0.504068674,5.03741739,5.03741739
66.383364,5.19615242,5.03669981,0.399315174,5.03669981,5.03669981
66.393855,5,5.0359834,-0.189692919,5.0359834,5.0359834
66.404347,5.38516481,5.03526802,0.591520739,5.03526802,5.03526802
66.414838,4.69041576,5.03455381,-0.586632805,5.03455381,5.03455381
66.42533,4.79583152,5.03384062,-0.487861763,5.03384062,5.03384062
66.435822,5.09901951,5.03312854,0.256692379,5.03312854,5.03312854
66.446313,5,5.03241761,-0.180048922,5.03241761,5.03241761
66.456805,6.55743852,5.03170772,1.23520476,5.03170772,5.03170772
66.467296,5.91607978,5.03099899,0.940787325,5.03099899,5.03099899
66.477788,4.58257569,5.03029129,-0.669115534,5.03029129,5.03029129
66.48828,4.69041576,5.02958469,-0.582382116,5.02958469,5.02958469
66.498771,5.19615242,5.02887925,0.408990434,5.02887925,5.02887925
66.509263,4.89897949,5.02817483,-0.359437544,5.02817483,5.02817483
66.519754,4.58257569,5.02747158,-0.667005162,5.02747158,5.02747158
66.530246,6,5.02676936,0.986524528,5.02676936,5.02676936
66.540738,5.38516481,5.02606823,0.599246679,5.02606823,5.02606823
66.551229,5.65685425,5.02536825,0.794660931,5.02536825,5.02536825
66.561721,5.29150262,5.02466931,0.516559108,5.02466931,5.02466931
66.572212,5.19615242,5.02397152,0.414946862,5.02397152,5.02397152
66.582704,5,5.02327477,-0.152560693,5.02327477,5.02327477
66.593196,5.09901951,5.0225791,0.2764786,5.0225791,5.0225791
66.603687,4.35889894,5.02188459,-0.814239304,5.02188459,5.02188459
66.614179,4.89897949,5.0211911,-0.349587781,5.0211911,5.0211911
66.62467,5.19615242,5.02049877,0.419110545,5.02049877,5.02049877
66.635162,5.38516481,5.01980747,0.604447961,5.01980747,5.01980747
66.645654,5.29150262,5.01911726,0.521905515,5.01911726,5.01911726
66.656145,5.47722558,5.0184282,0.677345833,5.0184282,5.0184282
66.666637,4.24264069,5.01774016,-0.880397339,5.01774016,5.01774016
66.677128,5.83095189,5.01705328,0.902163297,5.01705328,5.01705328
66.68762,5.38516481,5.01636742,0.607286906,5.01636742,5.01636742
66.698112,4.58257569,5.01568265,-0.65810862,5.01568265,5.01568265
66.708603,4.35889894,5.01499903,-0.810000054,5.01499903,5.01499903
66.719095,5.74456265,5.01431644,0.854544447,5.01431644,5.01431644
66.729586,5.38516481,5.01363499,0.609532458,5.01363499,5.01363499
66.740078,4.79583152,5.01295457,-0.465964637,5.01295457,5.01295457
66.75057,6.164414,5.01227523,1.07337728,5.01227523,5.01227523
66.761061,5.56776436,5.01159704,0.745766266,5.01159704,5.01159704
66.771553,5.29150262,5.01091987,0.529700623,5.01091987,5.01091987
66.782044,5.19615242,5.01024385,0.431171161,5.01024385,5.01024385
66.792536,4.69041576,5.00956885,-0.564936362,5.00956885,5.00956885
66.803028,5.65685425,5.00889494,0.804959199,5.00889494,5.00889494
66.813519,4.89897949,5.00822217,-0.330518809,5.00822217,5.00822217
66.824011,5.09901951,5.00755042,0.302438581,5.00755042,5.00755042
66.834502,4.35889894,5.00687981,-0.80497259,5.00687981,5.00687981
66.844994,5,5.00621023,-0.0788049976,5.00621023,5.00621023
66.855486,5.38516481,5.00554172,0.616135606,5.00554172,5.00554172
66.865977,4.58257569,5.00487436,-0.64984511,5.00487436,5.00487436
66.876469,5.47722558,5.00420802,0.687762718,5.00420802,5.00420802
66.88696,5.09901951,5.00354282,0.308993034,5.00354282,5.00354282
66.897452,4.79583152,5.00287863,-0.455024297,5.00287863,5.00287863
66.907944,4,5.00221553,-1.00110715,5.00221553,5.00221553
66.918435,6.08276253,5.00155357,1.03981198,5.00155357,5.00155357
66.928927,5.47722558,5.00089262,0.690168789,5.00089262,5.00089262
66.939418,4.89897949,5.00023281,-0.318203276,5.00023281,5.00023281
66.94991,5.74456265,4.99957402,0.863127238,4.99957402,4.99957402
66.960402,5.47722558,4.9989163,0.69159907,4.9989163,4.9989163
66.970893,5.09901951,4.99825972,0.317426826,4.99825972,4.99825972
66.981385,5.19615242,4.99760416,0.445587548,4.99760416,4.99760416
66.991876,5.38516481,4.99694973,0.623069077,4.99694973,4.99694973
67.002368,4.79583152,4.99629632,-0.447732951,4.99629632,4.99629632
67.01286,5.19615242,4.99564398,0.447781691,4.99564398,4.99564398
67.023351,4.79583152,4.99499278,-0.446274862,4.99499278,4.99499278
67.033843,4.47213595,4.99434258,-0.722638657,4.99434258,4.99434258
67.044334,5,4.99369353,0.0794133045,4.99369353,4.99369353
67.054826,5.19615242,4.99304548,0.450673876,4.99304548,4.99304548
67.065318,5.09901951,4.99239851,0.326528724,4.99239851,4.99239851
67.075809,4.79583152,4.99175266,-0.442629802,4.99175266,4.99175266
67.086301,4.79583152,4.99110783,-0.441900792,4.99110783,4.99110783
67.096792,5.09901951,4.99046413,0.329477435,4.99046413,4.99046413
67.107284,5.91607978,4.98982144,0.962423161,4.98982144,4.98982144
67.117776,5.56776436,4.98917982,0.760647449,4.98917982,4.98917982
67.128267,5.56776436,4.98853933,0.76106835,4.98853933,4.98853933
67.138759,5.38516481,4.98789985,0.630289585,4.98789985,4.98789985
67.14925,5.56776436,4.98726149,0.76190739,4.98726149,4.98726149
67.159742,5.74456265,4.98662414,0.870596636,4.98662414,4.98662414
67.170234,5.83095189,4.98598786,0.919219252,4.98598786,4.98598786
67.180725,5.56776436,4.98535271,0.763158997,4.98535271,4.98535271
67.191217,5.56776436,4.98471856,0.763574359,4.98471856,4.98471856
67.201708,5.19615242,4.98408554,0.460507203,4.98408554,4.98408554
67.2122,5.09901951,4.98345352,0.339949985,4.98345352,4.98345352
67.222692,5.19615242,4.98282257,0.461876449,4.98282257,4.98282257
67.233183,4.58257569,4.98219274,-0.632152707,4.98219274,4.98219274
67.243675,5.74456265,4.98156391,0.873497986,4.98156391,4.98156391
67.254166,6.08276253,4.98093621,1.04967915,4.98093621,4.98093621
67.264658,5,4.98030951,0.140322795,4.98030951,4.98030951
67.27515,4.47213595,4.97968388,-0.712423975,4.97968388,4.97968388
67.285641,6.244998,4.97905936,1.12513939,4.97905936,4.97905936
67.296133,5.38516481,4.97843584,0.637753058,4.97843584,4.97843584
67.306624,6.244998,4.97781345,1.12569292,4.97781345,4.97781345
67.317116,4.69041576,4.97719205,-0.535514981,4.97719205,4.97719205
67.327608,6.63324958,4.97657172,1.28711999,4.97657172,4.97657172
67.338099,4.47213595,4.9759525,-0.709800357,4.9759525,4.9759525
67.348591,5,4.97533428,0.157053225,4.97533428,4.97533428
67.359082,4.58257569,4.97471718,-0.626212015,4.97471718,4.97471718
67.369574,5.56776436,4.97410108,0.770495479,4.97410108,4.97410108
67.380066,5.29150262,4.97348603,0.563929595,4.97348603,4.97348603
67.390557,5.56776436,4.9728721,0.77129259,4.9728721,4.9728721
67.401049,5.38516481,4.97225917,0.64257734,4.97225917,4.97225917
67.41154,5,4.97164735,0.168382457,4.97164735,4.97164735
67.422032,5.29150262,4.97103652,0.566097252,4.97103652,4.97103652
67.432524,5.38516481,4.97042675,0.644001595,4.97042675,4.97042675
67.443015,4.47213595,4.96981809,-0.705465902,4.96981809,4.96981809
67.453507,4.58257569,4.96921043,-0.621799594,4.96921043,4.96921043
67.463998,5.47722558,4.96860388,0.713177186,4.96860388,4.96860388
67.47449,6.164414,4.96799832,1.09380788,4.96799832,4.96799832
67.484982,4.89897949,4.96739381,-0.261561317,4.96739381,4.96739381
67.495473,4.69041576,4.96679041,-0.525713466,4.96679041,4.96679041
67.505965,5.09901951,4.966188,0.364460579,4.966188,4.966188
67.516456,4.89897949,4.9655867,-0.258083735,4.9655867,4.9655867
67.526948,4.47213595,4.96498639,-0.702033073,4.96498639,4.96498639
67.53744,5.09901951,4.96438713,0.366922857,4.96438713,4.96438713
67.547931,4.58257569,4.96378897,-0.617424716,4.96378897,4.96378897
67.558423,5.83095189,4.96319181,0.931536411,4.96319181,4.96319181
67.568914,4.89897949,4.96259575,-0.252222645,4.96259575,4.96259575
67.579406,4.79583152,4.96200068,-0.407638507,4.96200068,4.96200068
67.589898,5.74456265,4.96140665,0.884961014,4.96140665,4.96140665
67.600389,5.83095189,4.96081372,0.932811969,4.96081372,4.96081372
67.610881,6,4.96022179,1.01969516,4.96022179,4.96022179
67.621372,4.69041576,4.95963095,-0.51885951,4.95963095,4.95963095
67.631864,5.38516481,4.9590411,0.652781514,4.9590411,4.9590411
67.642356,6,4.95845229,1.02056245,4.95845229,4.95845229
67.652847,5.65685425,4.95786459,0.836056017,4.95786459,4.95786459
67.663339,5,4.95727786,0.206693339,4.95727786,4.95727786
67.67383,5.09901951,4.95669224,0.377262874,4.95669224,4.95669224
67.684322,5.19615242,4.9561076,0.489943698,4.9561076,4.9561076
67.694814,5.83095189,4.95552399,0.935643041,4.95552399,4.95552399
67.705305,5.56776436,4.95494149,0.782830043,4.95494149,4.95494149
67.715797,5.56776436,4.95435996,0.783201378,4.95435996,4.95435996
67.726288,5.91607978,4.95377953,0.980969036,4.95377953,4.95377953
67.73678,4.47213595,4.95320009,-0.693587868,4.95320009,4.95320009
67.747272,4.79583152,4.95266512,-0.396022216,4.95266512,4.95262167
67.757763,5.83095189,4.9521226,0.937458957,4.9521226,4.95204435
67.768255,5.91607978,4.95161606,0.982071139,4.95161606,4.95146801
67.778746,4.69041576,4.95111897,-0.510591037,4.95111897,4.95089277
67.789238,5,4.95070924,0.222015223,4.95070924,4.9503185
67.79973,5.29150262,4.95031005,0.584116916,4.95031005,4.94974526
67.810221,5.29150262,4.95012269,0.58427727,4.95012269,4.94917311
67.820713,5.38516481,4.94997898,0.659686155,4.94997898,4.94860194
67.831204,5.56776436,4.95026275,0.785812711,4.95026275,4.94803186
67.841696,4.58257569,4.95073616,-0.606762277,4.95073616,4.94746275
67.852188,5.47722558,4.95205537,0.72468628,4.95205537,4.94689468
67.862679,4.47213595,4.95400517,-0.694167999,4.95400517,4.94632769
67.873171,5.19615242,4.95760566,0.488412491,4.95760566,4.94576167
67.883662,4.47213595,4.96306467,-0.700663054,4.96306467,4.94519674
67.894154,5.19615242,4.97168355,0.473781458,4.97168355,4.94463278
67.904646,5.19615242,4.98541818,0.459057999,4.98541818,4.94406985
67.915137,4.79583152,5.00502482,-0.457376537,5.00502482,4.943508
67.925629,5,5.02325289,-0.152488997,5.02325289,4.94294712
67.93612,5.19615242,5.04038172,0.394677976,5.04038172,4.94238732
67.946612,5.56776436,5.0479932,0.72095157,5.0479932,4.9418285
67.957104,5.56776436,5.05052429,0.719194046,5.05052429,4.9412707
67.967595,4.58257569,5.05325652,-0.686061825,5.05325652,4.94071397
67.978087,6.08276253,5.05605761,1.01326448,5.05605761,4.94015822
67.988578,5.19615242,5.0591121,0.370189575,5.0591121,4.93960354
67.99907,5,5.06221498,-0.249429308,5.06221498,4.93904983
68.009562,4.12310563,5.0656345,-0.970839263,5.0656345,4.93849714
68.020053,5.65685425,5.06908548,0.766660795,5.06908548,4.93794553
68.030545,5,5.07290939,-0.270017392,5.07290939,4.93739488
68.041036,5,5.07678318,-0.277097788,5.07678318,4.93684531
68.051528,6,5.08103782,0.95862515,5.08103782,4.9362967
68.06202,5.19615242,5.08539544,0.332801722,5.08539544,4.93574911
68.072511,5.56776436,5.090138,0.691105174,5.090138,4.93520259
68.083003,4.89897949,5.0950508,-0.442799408,5.0950508,4.93465703
68.093494,5.91607978,5.10034935,0.903177963,5.10034935,4.93411255
68.103986,5.47722558,5.10590289,0.609362527,5.10590289,4.93356902
68.114478,5.09901951,5.11183778,-0.113217764,5.11183778,4.93302651
68.124969,4.69041576,5.11813409,-0.654001781,5.11813409,4.93248507
68.135461,5.09901951,5.12479947,-0.160561373,5.12479947,4.93194459
68.145952,5.65685425,5.13196295,0.724493824,5.13196295,4.93140517
68.156444,5,5.13947175,-0.373459168,5.13947175,4.93086672
68.166936,5,5.14765386,-0.384257544,5.14765386,4.93032927
68.177427,4.58257569,5.15614089,-0.757340872,5.15614089,4.92979289
68.187919,5.91607978,5.16552557,0.866345323,5.16552557,4.92925747
68.19841,5.29150262,5.1751555,0.341096942,5.1751555,4.92872311
68.208902,5.47722558,5.18597094,0.539680124,5.18597094,4.92818971
68.219394,5.91607978,5.19694454,0.848018421,5.19694454,4.92765731
68.229885,4.79583152,5.20947432,-0.643150679,5.20947432,4.92712597
68.240377,5.65685425,5.22214836,0.659322297,5.22214836,4.92659559
68.250868,5.29150262,5.23663952,0.234228749,5.23663952,4.92606627
68.26136,5.29150262,5.25145085,0.200129391,5.25145085,4.9255379
68.271852,6.4807407,5.26822865,1.10114125,5.26822865,4.92501054
68.282343,5.38516481,5.28565887,0.315445616,5.28565887,4.92448423
68.292835,5.38516481,5.30520769,0.2827669,5.30520769,4.92395888
68.303326,5.29150262,5.32588598,-0.18542751,5.32588598,4.92343457
68.313818,4.69041576,5.34882826,-0.811426216,5.34882826,4.92291122
68.32431,5.91607978,5.37358538,0.736542197,5.37358538,4.92238887
68.334801,5.56776436,5.40072713,0.40870189,5.40072713,4.92186758
68.345293,6.244998,5.43067254,0.902399833,5.43067254,4.92134723
68.355784,5.56776436,5.46308299,0.323545003,5.46308299,4.92082793
68.366276,5.91607978,5.4997397,0.645244202,5.4997397,4.92030958
68.376768,6.08276253,5.53885722,0.737499365,5.53885722,4.91979223
68.387259,5.65685425,5.58436071,0.269246239,5.58436071,4.91927593
68.397751,5.83095189,5.63215566,0.445865709,5.63215566,4.91876057
68.408242,6.40312424,5.68961385,0.844695441,5.68961385,4.91824626
68.418734,5.74456265,5.7488846,-0.0657415713,5.7488846,4.91773289
68.429226,6.8556546,5.82308437,1.01615463,5.82308437,4.91722052
68.439717,6.32455532,5.89803099,0.6530883,5.89803099,4.9167092
68.450209,7,5.99742434,1.001287,5.99742434,4.91619881
68.4607,5.74456265,6.09907637,-0.595410547,6.09907637,4.91568947
68.471192,6.63324958,6.23707308,0.629425532,6.23707308,4.91518107
68.481684,6.40312424,6.38488995,0.135034388,6.38488995,4.91467366
68.492175,6.55743852,6.58531958,-0.166976206,6.58531958,4.91416729
68.502667,7.61577311,6.80912386,0.898136543,6.80912386,4.91366187
68.513158,7.28010989,7.0997516,0.424686102,7.0997516,4.91315748
68.52365,7.28010989,7.43898741,-0.398594432,7.43898741,4.91265403
68.534142,7.54983444,7.86055829,-0.557426096,7.86055829,4.91215156
68.544633,7.28010989,8.38245626,-1.04992684,8.38245626,4.91165014
68.555125,9.64365076,9.00520672,0.799026932,9.00520672,4.91114965
68.565616,10.2469508,9.82107819,0.652589133,9.82107819,4.91065019
68.576108,11.1355287,10.7434139,0.626190689,10.7434139,4.91015167
68.5866,11.2694277,12.0119113,-0.861674885,12.0119113,4.90965414
68.597091,13.3790882,13.358924,0.142000645,13.358924,4.90915763
68.607583,15.1657509,15.2843912,-0.344442088,15.2843912,4.90866206
68.618074,17.691806,17.2034679,0.698811897,17.2034679,4.90816752
68.628566,20.880613,19.9676643,0.955483512,19.9676643,4.90767391
68.639058,24.0208243,22.5667334,1.20585692,22.5667334,4.90718129
68.649549,25.9036677,25.8864037,0.131392474,25.8864037,4.90668969
68.660041,30.2324329,28.8744091,1.16534277,28.8744091,4.90619902
68.670532,32.3264598,31.0270375,1.13992202,31.0270375,4.90570938
68.681024,34.4528664,32.6550298,1.34083427,32.6550298,4.90522067
68.691516,33.286634,31.3607616,1.38775805,31.3607616,4.90473293
68.702007,30.7408523,29.4805108,1.12264933,29.4805108,4.90424622
68.712499,27.3130006,25.2621804,1.43206849,25.2621804,4.90376043
68.72299,20.904545,20.8418129,0.250463599,20.8418129,4.90327567
68.733482,18.1659021,17.0822647,1.04097907,17.0822647,4.90279183
68.743974,14.6628783,13.6577464,1.00256264,13.6577464,4.90230897
68.754465,11.5325626,11.7085115,-0.419462683,11.7085115,4.90182713
68.764957,9.89949494,10.1677411,-0.517924828,10.1677411,4.90134621
68.775448,9.2736185,9.26192911,0.108117456,9.26192911,4.90086631
68.78594,9,8.56553182,0.659142,8.56553182,4.90038733
68.796432,7.93725393,8.0365895,-0.315175455,8.0365895,4.89990932
68.806923,7.61577311,7.62942885,-0.116857803,7.62942885,4.89943232
68.817415,7.87400787,7.27668381,0.772867432,7.27668381,4.89895625
68.827906,7.34846923,7.0088539,0.58276524,7.0088539,4.89848119
68.838398,7.68114575,6.76105981,0.959211101,6.76105981,4.89800705
68.84889,5.47722558,6.57507704,-1.04778407,6.57507704,4.89753388
68.859381,5.47722558,6.39466277,-0.957829419,6.39466277,4.89706171
68.869873,7.07106781,6.26033951,0.90040452,6.26033951,4.89659047
68.880364,6,6.12710285,-0.356514866,6.12710285,4.89612023
68.890856,6.164414,6.02497883,0.373410196,6.02497883,4.89565091
68.901348,6.55743852,5.92485015,0.795354244,5.92485015,4.89518255
68.911839,4.69041576,5.84453009,-1.07429713,5.84453009,4.8947152
68.922331,6.244998,5.76749396,0.69101667,5.76749396,4.89424877
68.932822,6.40312424,5.70323506,0.836593795,5.70323506,4.89378333
68.943314,5.65685425,5.64275972,0.118720404,5.64275972,4.89331881
68.953806,5.47722558,5.59057403,-0.336672629,5.59057403,4.89285525
68.964297,5.91607978,5.54226904,0.611400637,5.54226904,4.8923927
68.974789,5.19615242,5.49933014,-0.550615762,5.49933014,4.89193105
68.98528,5.09901951,5.46014878,-0.60094032,5.46014878,4.8914704
68.995772,6.40312424,5.42440066,0.989304592,5.42440066,4.89101066
69.006264,4.47213595,5.39218542,-0.95919209,5.39218542,4.89055188
69.016755,4.79583152,5.36211127,-0.75251561,5.36211127,4.89009409
69.027247,5.65685425,5.33530604,0.567052208,5.33530604,4.88963722
69.037738,6.32455532,5.30976089,1.00737006,5.30976089,4.88918134
69.04823,5.38516481,5.28721577,0.312968114,5.28721577,4.88872636
69.058722,5.19615242,5.26532726,-0.263011103,5.26532726,4.88827234
69.069213,5.19615242,5.24618219,-0.22367335,5.24618219,4.88781931
69.079705,5.19615242,5.22728042,-0.176431277,5.22728042,4.88736718
69.090196,5.38516481,5.21087691,0.417478026,5.21087691,4.88691604
69.100688,5.38516481,5.19462314,0.436510788,5.19462314,4.88646581
69.11118,4.69041576,5.18026677,-0.69989357,5.18026677,4.88601653
69.121671,5.56776436,5.16619551,0.633694602,5.16619551,4.88556823
69.132163,5.47722558,5.1535439,0.568930286,5.1535439,4.88512083
69.142654,4.79583152,5.14127499,-0.587744388,5.14127499,4.88467442
69.153146,4.79583152,5.1300628,-0.578127387,5.1300628,4.88422891
69.163638,4.89897949,5.11929471,-0.469377488,5.11929471,4.88378435
69.174129,6.08276253,5.10930698,0.986638513,5.10930698,4.88334076
69.184621,5.74456265,5.09979986,0.802971223,5.09979986,4.88289808
69.195112,5.38516481,5.09085845,0.542500099,5.09085845,4.88245638
69.205604,5.65685425,5.08241748,0.757916068,5.08241748,4.88201557
69.216096,5.83095189,5.07437536,0.869814083,5.07437536,4.8815757
69.226587,5.56776436,5.06684245,0.70775837,5.06684245,4.88113681
69.237079,5,5.05957879,-0.244087667,5.05957879,4.88069882
69.24757,5.47722558,5.0528226,0.651462179,5.0528226,4.8802618
69.258062,5.29150262,5.04623556,0.495244445,5.04623556,4.87982568
69.268554,4.47213595,5.04013992,-0.753660379,5.04013992,4.87939049
69.279045,5.56776436,5.03413519,0.730499262,5.03413519,4.87895628
69.289537,6.244998,5.02859598,1.10290617,5.02859598,4.87852296
69.300028,5.09901951,5.02309769,0.275539146,5.02309769,4.87809061
69.31052,5.47722558,5.01801135,0.677653468,5.01801135,4.87765915
69.321012,6,5.01295984,0.993498949,5.01295984,4.87722862
69.331503,4.79583152,5.00819404,-0.460828076,5.00819404,4.87679906
69.341995,4.24264069,5.00346277,-0.872251159,5.00346277,4.87637038
69.352486,3.87298335,4.99887137,-1.06107871,4.99887137,4.87594268
69.362978,5.74456265,4.9942517,0.866204913,4.9942517,4.87551586
69.37347,5.56776436,4.98957305,0.760388921,4.98957305,4.87508997
69.383961,4.24264069,4.98464949,-0.861399328,4.98464949,4.87466505
69.394453,4.89897949,4.97935847,-0.283511879,4.97935847,4.874241
69.404944,5.29150262,4.97321439,0.564170395,4.97321439,4.87381792
69.415436,5.56776436,4.96619182,0.77561108,4.96619182,4.87339573
69.425928,4.89897949,4.95672209,-0.240296911,4.95672209,4.87297445
69.436419,4.69041576,4.94552134,-0.505079779,4.94552134,4.87255414
69.446911,5.47722558,4.92780869,0.741226607,4.92780869,4.87213471
69.457402,5.19615242,4.9069877,0.537740391,4.9069877,4.87171624
69.467894,5,4.90197031,0.313096937,4.90197031,4.87129864
69.478386,5.74456265,4.90155624,0.918153804,4.90155624,4.87088196
69.488877,4.69041576,4.87046624,-0.424323561,4.87046624,4.87046624
69.499369,4.89897949,4.8700514,0.170082583,4.8700514,4.8700514
69.50986,6.4807407,4.86963751,1.2692924,4.86963751,4.86963751
69.520352,5.19615242,4.8692245,0.571776115,4.8692245,4.8692245
69.530844,5.09901951,4.8688124,0.479799038,4.8688124,4.8688124
69.541335,4,4.86840125,-0.93188049,4.86840125,4.86840125
69.551827,4.35889894,4.86799097,-0.713506852,4.86799097,4.86799097
69.562318,5.74456265,4.86758165,0.936472638,4.86758165,4.86758165
69.57281,5.19615242,4.86717319,0.573567112,4.86717319,4.86717319
69.583302,4.79583152,4.86676565,-0.266334605,4.86676565,4.86676565
69.593793,4.89897949,4.86635905,0.180611291,4.86635905,4.86635905
69.604285,5.83095189,4.86595332,0.982343411,4.86595332,4.86595332
69.614776,5.19615242,4.86554853,0.574981642,4.86554853,4.86554853
69.625268,5.47722558,4.86514462,0.78235603,4.86514462,4.86514462
69.63576,5.65685425,4.86474161,0.890007103,4.86474161,4.86474161
69.646251,5,4.86433954,0.368321141,4.86433954,4.86433954
69.656743,5.09901951,4.86393833,0.484851709,4.86393833,4.86393833
69.667234,5.29150262,4.86353807,0.654189996,4.86353807,4.86353807
69.677726,4.58257569,4.86313867,-0.529681958,4.86313867,4.86313867
69.688218,5.29150262,4.86274017,0.654799549,4.86274017,4.86274017
69.698709,5.47722558,4.86234261,0.784144733,4.86234261,4.86234261
69.709201,4.79583152,4.86194591,-0.257127185,4.86194591,4.86194591
69.719692,5.38516481,4.86155015,0.723612229,4.86155015,4.86155015
69.730184,5.56776436,4.86115525,0.84060045,4.86115525,4.86115525
69.740676,4.58257569,4.86076124,-0.527432975,4.86076124,4.86076124
69.751167,5,4.86036816,0.373673434,4.86036816,4.86036816
69.761659,5.83095189,4.85997595,0.985381118,4.85997595,4.85997595
69.77215,5.47722558,4.85958466,0.785901338,4.85958466,4.85958466
69.782642,4.58257569,4.85919423,-0.525945375,4.85919423,4.85919423
69.793134,4.35889894,4.8588047,-0.707040135,4.8588047,4.8588047
69.803625,5.74456265,4.85841609,0.941353578,4.85841609,4.85841609
69.814117,4,4.85802833,-0.926298187,4.85802833,4.85802833
69.824608,5.38516481,4.8576415,0.726307996,4.8576415,4.8576415
69.8351,5,4.85725553,0.377815397,4.85725553,4.85725553
69.845592,5.83095189,4.85687044,0.986955652,4.85687044,4.85687044
69.856083,4.79583152,4.85648627,-0.246281846,4.85648627,4.85648627
69.866575,4.58257569,4.85610295,-0.522998336,4.85610295,4.85610295
69.877066,5.56776436,4.85572056,0.843826879,4.85572056,4.85572056
69.887558,5.09901951,4.85533901,0.49364005,4.85533901,4.85533901
69.89805,4.24264069,4.85495835,-0.782507294,4.85495835,4.85495835
69.908541,5.47722558,4.85457861,0.789079823,4.85457861,4.85457861
69.919033,5.19615242,4.85419971,0.58476723,4.85419971,4.85419971
69.929524,4.47213595,4.85382173,-0.61780723,4.85382173,4.85382173
69.940016,5.74456265,4.85344459,0.943990496,4.85344459,4.85344459
69.950508,5.09901951,4.85306833,0.495934655,4.85306833,4.85306833
69.960999,4.58257569,4.85269299,-0.519728095,4.85269299,4.85269299
69.971491,5.19615242,4.85231848,0.586373548,4.85231848,4.85231848
69.981982,4.69041576,4.85194489,-0.401906873,4.85194489,4.85194489
69.992474,5.65685425,4.85157214,0.89737512,4.85157214,4.85157214
70.002966,4.69041576,4.85120027,-0.400979435,4.85120027,4.85120027
70.013457,4,4.8508293,-0.922404087,4.8508293,4.8508293
70.023949,5.19615242,4.85045917,0.587956845,4.85045917,4.85045917
70.03444,4.12310563,4.85008995,-0.852633757,4.85008995,4.85008995
70.044932,5.38516481,4.84972156,0.731739875,4.84972156,4.84972156
70.055424,5.74456265,4.84935405,0.946154638,4.84935405,4.84935405
70.065915,5,4.84898744,0.388603351,4.84898744,4.84898744
70.076407,5.19615242,4.84862166,0.5895174,4.84862166,4.84862166
70.086898,5.09901951,4.84825678,0.500762151,4.84825678,4.84825678
70.09739,4,4.84789274,-0.920810913,4.84789274,4.84789274
70.107882,5.09901951,4.84752956,0.501487741,4.84752956,4.84752956
70.118373,5.38516481,4.84716728,0.733483147,4.84716728,4.84716728
70.128865,4.35889894,4.84680583,-0.69850332,4.84680583,4.84680583
70.139356,4,4.84644528,-0.920024608,4.84644528,4.84644528
70.149848,5.09901951,4.84608556,0.5029254,4.84608556,4.84608556
70.16034,4.79583152,4.84572669,-0.223372267,4.84572669,4.84572669
70.170831,4.79583152,4.84536872,-0.222569543,4.84536872,4.84536872
70.181323,4.58257569,4.84501158,-0.512284966,4.84501158,4.84501158
70.191814,5.47722558,4.84465533,0.795342847,4.84465533,4.84465533
70.202306,5.29150262,4.8442999,0.668732172,4.8442999,4.8442999
70.212798,4.69041576,4.84394533,-0.391828502,4.84394533,4.84394533
70.223289,5.09901951,4.84359165,0.505398713,4.84359165,4.84359165
70.233781,5.09901951,4.84323879,0.505747683,4.84323879,4.84323879
70.244272,5.19615242,4.84288682,0.594361506,4.84288682,4.84288682
70.254764,5.29150262,4.84253567,0.670049962,4.84253567,4.84253567
70.265256,4.69041576,4.84218537,-0.389576194,4.84218537,4.84218537
70.275747,4.47213595,4.84183596,-0.608029605,4.84183596,4.84183596
70.286239,5.83095189,4.84148736,0.994718321,4.84148736,4.84148736
70.29673,4.35889894,4.84113964,-0.694435525,4.84113964,4.84113964
70.307222,5.09901951,4.84079274,0.508160183,4.84079274,4.84079274
70.317714,5.47722558,4.84044669,0.797984264,4.84044669,4.84044669
70.328205,4.35889894,4.84010152,-0.693687662,4.84010152,4.84010152
70.338697,4.47213595,4.83975716,-0.606317739,4.83975716,4.83975716
70.349188,5.09901951,4.83941367,0.509515299,4.83941367,4.83941367
70.35968,4.79583152,4.839071,-0.207941046,4.839071,4.839071
70.370172,4.47213595,4.83872917,-0.60546942,4.83872917,4.83872917
70.380663,4.58257569,4.83838822,-0.505779127,4.83838822,4.83838822
70.391155,5.29150262,4.83804808,0.673390338,4.83804808,4.83804808
70.401646,4.24264069,4.8377088,-0.771406583,4.8377088,4.8377088
70.412138,4.24264069,4.83737034,-0.771187169,4.83737034,4.83737034
70.42263,5.56776436,4.83703271,0.854828434,4.83703271,4.83703271
70.433121,5.74456265,4.83669595,0.952820389,4.83669595,4.83669595
70.443613,4.89897949,4.83636,0.250238856,4.83636,4.83636
70.454104,5.56776436,4.83602491,0.855417704,4.83602491,4.83602491
70.464596,3.60555128,4.83569063,-1.10911648,4.83569063,4.83569063
70.475088,4.12310563,4.83535718,-0.843949974,4.83535718,4.83535718
70.485579,5.19615242,4.8350246,0.600939118,4.8350246,4.8350246
70.496071,5.29150262,4.83469282,0.675877065,4.83469282,4.83469282
70.506562,4.79583152,4.83436189,-0.196291546,4.83436189,4.83436189
70.517054,4.79583152,4.83403177,-0.195448837,4.83403177,4.83403177
70.527546,5.38516481,4.83370248,0.742605097,4.83370248,4.83370248
70.538037,3.87298335,4.83337404,-0.979995254,4.83337404,4.83337404
70.548529,5.19615242,4.8330464,0.602582789,4.8330464,4.8330464
70.55902,6.244998,4.83271962,1.18839319,4.83271962,4.83271962
70.569512,4.47213595,4.83239364,-0.600214697,4.83239364,4.83239364
70.580004,4.69041576,4.83206848,-0.376367793,4.83206848,4.83206848
70.590495,5.29150262,4.83174417,0.678054905,4.83174417,4.83174417
70.600987,4.69041576,4.83142065,-0.37550618,4.83142065,4.83142065
70.611478,5.29150262,4.83109799,0.678531233,4.83109799,4.83109799
70.62197,4.89897949,4.83077611,0.261157753,4.83077611,4.83077611
70.632462,5.19615242,4.83045506,0.604729165,4.83045506,4.83045506
70.642953,5.47722558,4.83013486,0.804419493,4.83013486,4.83013486
70.653445,5.65685425,4.82981544,0.909416743,4.82981544,4.82981544
70.663936,5.09901951,4.82949687,0.519155705,4.82949687,4.82949687
70.674428,4.47213595,4.82917908,-0.59753086,4.82917908,4.82917908
70.68492,5.29150262,4.82886211,0.680176821,4.82886211,4.82886211
70.695411,4,4.82854599,-0.910245016,4.82854599,4.82854599
70.705903,4.58257569,4.82823065,-0.495635906,4.82823065,4.82823065
70.716394,5,4.82791615,0.414829909,4.82791615,4.82791615
70.726886,4.58257569,4.82760243,-0.49500175,4.82760243,4.82760243
70.737378,4.58257569,4.82728952,-0.494685581,4.82728952,4.82728952
70.747869,5.38516481,4.82697745,0.747119373,4.82697745,4.82697745
70.758361,5.09901951,4.82666616,0.521874846,4.82666616,4.82666616
70.768852,3.74165739,4.82635571,-1.04148851,4.82635571,4.82635571
70.779344,4.47213595,4.82604603,-0.594903415,4.82604603,4.82604603
70.789836,4.58257569,4.82573716,-0.493114046,4.82573716,4.82573716
70.800327,4.79583152,4.82542912,-0.17203952,4.82542912,4.82542912
70.810819,5.09901951,4.82512186,0.523352326,4.82512186,4.82512186
70.82131,4.89897949,4.82481543,0.272330792,4.82481543,4.82481543
70.831802,5.19615242,4.82450977,0.609625013,4.82450977,4.82450977
70.842294,5.56776436,4.82420491,0.862298936,4.82420491,4.82420491
70.852785,5.83095189,4.82390088,1.00351931,4.82390088,4.82390088
70.863277,5,4.82359762,0.420002833,4.82359762,4.82359762
70.873768,4.58257569,4.82329519,-0.490631728,4.82329519,4.82329519
70.88426,5.74456265,4.82299352,0.959983918,4.82299352,4.82299352
70.894752,4.47213595,4.82269265,-0.592078288,4.82269265,4.82269265
70.905243,4.89897949,4.82239261,0.27674334,4.82239261,4.82239261
70.915735,5,4.82209333,0.421789841,4.82209333,4.82209333
70.926226,6.164414,4.82179487,1.15871443,4.82179487,4.82179487
70.936718,5.29150262,4.82149718,0.685569431,4.82149718,4.82149718
70.94721,5.19615242,4.82120027,0.612333364,4.82120027,4.82120027
70.957701,5.19615242,4.82090419,0.612575084,4.82090419,4.82090419
70.968193,4.12310563,4.82060887,-0.835166594,4.82060887,4.82060887
70.978684,4,4.82031436,-0.905712073,4.82031436,4.82031436
70.989176,4.69041576,4.82002061,-0.360006737,4.82002061,4.82002061
70.999668,4.35889894,4.81972765,-0.678843653,4.81972765,4.81972765
71.010159,5.19615242,4.8194355,0.613772697,4.8194355,4.8194355
71.020651,5.47722558,4.81914411,0.811222206,4.81914411,4.81914411
71.031142,5.47722558,4.81885353,0.811401287,4.81885353,4.81885353
71.041634,4.35889894,4.8185637,-0.677985809,4.8185637,4.8185637
71.052126,5.29150262,4.81827466,0.687915668,4.81827466,4.81827466
71.062617,5.56776436,4.81798642,0.86589719,4.81798642,4.81798642
71.073109,4.58257569,4.81769893,-0.48489508,4.81769893,4.81769893
71.0836,5.38516481,4.81741225,0.753493565,4.81741225,4.81741225
71.094092,4.69041576,4.81712633,-0.355964277,4.81712633,4.81712633
71.104584,5.19615242,4.81684117,0.615882496,4.81684117,4.81684117
71.115075,4.24264069,4.81655682,-0.75757253,4.81655682,4.81655682
71.125567,4.69041576,4.81627322,-0.354763954,4.81627322,4.81627322
71.136058,5.19615242,4.81599042,0.616572786,4.81599042,4.81599042
71.14655,4.79583152,4.81570837,-0.140985259,4.81570837,4.81570837
71.157042,5,4.81542708,0.429619503,4.81542708,4.81542708
71.167533,5.29150262,4.8151466,0.690185501,4.8151466,4.8151466
71.178025,5.83095189,4.81486685,1.00801044,4.81486685,4.81486685
71.188516,4.89897949,4.81458791,0.290502289,4.81458791,4.81458791
71.199008,5.38516481,4.8143097,0.75554954,4.8143097,4.8143097
71.2095,4.58257569,4.81403226,-0.481099329,4.81403226,4.81403226
71.219991,5.47722558,4.81375561,0.814536655,4.81375561,4.81375561
71.230483,5.74456265,4.8134797,0.964926393,4.8134797,4.8134797
71.240974,5.83095189,4.81320458,1.00883463,4.81320458,4.81320458
71.251466,4.69041576,4.8129302,-0.350020632,4.8129302,4.8129302
71.261958,4.69041576,4.81265658,-0.34962955,4.81265658,4.81265658
71.272449,5.19615242,4.81238375,0.619490657,4.81238375,4.81238375
71.282941,5.65685425,4.81211165,0.919098798,4.81211165,4.81211165
71.293432,5.74456265,4.81184034,0.965775497,4.81184034,4.81184034
71.303924,5,4.81156975,0.43408553,4.81156975,4.81156975
71.314416,5.47722558,4.81129993,0.816042675,4.81129993,4.81129993
71.324907,5.19615242,4.81103088,0.620581614,4.81103088,4.81103088
71.335399,5.74456265,4.81076257,0.966333316,4.81076257,4.81076257
71.34589,5.47722558,4.81049503,0.816535695,4.81049503,4.81049503
71.356382,5.38516481,4.81022823,0.758245725,4.81022823,4.81022823
71.366874,5.19615242,4.80996217,0.621442074,4.80996217,4.80996217
71.377365,5.09901951,4.80969689,0.537887182,4.80969689,4.80969689
71.387857,4.69041576,4.80943234,-0.344987796,4.80943234,4.80943234
71.398348,5.74456265,4.80916856,0.967157736,4.80916856,4.80916856
71.40884,5.47722558,4.8089055,0.817508454,4.8089055,4.8089055
71.419332,4.47213595,4.80864319,-0.580092439,4.80864319,4.80864319
71.429823,5.19615242,4.80838167,0.622712412,4.80838167,4.80838165
71.440315,6,4.80812088,1.09173216,4.80812088,4.80812084
71.450806,5.56776436,4.80786087,0.871724435,4.80786087,4.80786079
71.461298,6.244998,4.8076016,1.19891467,4.8076016,4.80760145
71.47179,5.38516481,4.8073431,0.760145843,4.8073431,4.80734287
71.482281,4.79583152,4.80708542,-0.10608438,4.80708542,4.80708504
71.492773,5.29150262,4.80682852,0.696185393,4.80682852,4.80682793
71.503264,5.19615242,4.80657248,0.624163396,4.80657248,4.80657159
71.513756,5.56776436,4.80631734,0.87260932,4.80631734,4.80631596
71.524248,5.19615242,4.8060631,0.624571312,4.8060631,4.80606107
71.534739,5.29150262,4.8058101,0.696916438,4.8058101,4.80580693
71.545231,5.74456265,4.8055581,0.969022469,4.8055581,4.80555351
71.555722,5.65685425,4.80530806,0.922792605,4.80530806,4.80530085
71.566214,4.58257569,4.80505919,-0.471681559,4.80505919,4.80504889
71.576706,6.164414,4.80481399,1.16601887,4.80481399,4.80479767
71.587197,5.91607978,4.80457022,1.05428154,4.80457022,4.8045472
71.597689,6,4.80433426,1.09346502,4.80433426,4.80429744
71.60818,6.244998,4.80409978,1.2003742,4.80409978,4.80404843
71.618672,5.29150262,4.80386415,0.698311157,4.80386415,4.80380013
71.629164,5.29150262,4.80362826,0.69848004,4.80362826,4.80355255
71.639655,5.56776436,4.80338357,0.874288737,4.80338357,4.80330572
71.650147,5.09901951,4.80313961,0.543948434,4.80313961,4.8030596
71.660638,5.19615242,4.80289655,0.627101164,4.80289655,4.80281422
71.67113,4.79583152,4.80265425,-0.0825997804,4.80265425,4.80256954
71.681622,5.56776436,4.80241281,0.874843733,4.80241281,4.80232559
71.692113,5.56776436,4.80217219,0.87498124,4.80217219,4.80208237
71.702605,5,4.80193241,0.445047847,4.80193241,4.80183986
71.713096,5.38516481,4.80169349,0.763852939,4.80169349,4.80159809
71.723588,5.74456265,4.8014554,0.971137089,4.8014554,4.80135701
71.73408,5.74456265,4.80121818,0.971259215,4.80121818,4.80111665
71.744571,5.09901951,4.80098183,0.54592828,4.80098183,4.80087703
71.755063,4.58257569,4.80074637,-0.467087438,4.80074637,4.8006381
71.765554,5.83095189,4.80051176,1.01510597,4.80051176,4.80039991
71.776046,6,4.8002781,1.09531817,4.8002781,4.8001624
71.786538,4.89897949,4.80004525,0.314538127,4.80004525,4.79992561
71.797029,4.69041576,4.79981348,-0.330753257,4.79981348,4.79968956
71.807521,5.91607978,4.79958245,1.05664437,4.79958245,4.79945419
71.818012,5.29150262,4.7993526,0.701534051,4.7993526,4.79921955
71.828504,6.32455532,4.79912347,1.23508374,4.79912347,4.7989856
71.838996,5.09901951,4.79889558,0.547835685,4.79889558,4.79875235
71.849487,4.47213595,4.79866848,-0.571430246,4.79866848,4.79851984
71.859979,5,4.79844261,0.448951433,4.79844261,4.798288
71.87047,5,4.79821762,0.449201935,4.79821762,4.7980569
71.880962,5.09901951,4.79799388,0.548658034,4.79799388,4.79782647
71.891454,5.56776436,4.79777109,0.877492605,4.79777109,4.79759674
71.901945,5.38516481,4.79754961,0.766560631,4.79754961,4.79736774
71.912437,4.89897949,4.7973292,0.318826425,4.7973292,4.79713942
71.922928,6.164414,4.79711009,1.16931771,4.79711009,4.79691181
71.93342,6.244998,4.79689224,1.20337266,4.79689224,4.79668489
71.943912,5.56776436,4.79667568,0.878116555,4.79667568,4.79645866
71.954403,4.58257569,4.79646065,-0.462476976,4.79646065,4.79623314
71.964895,5.65685425,4.79624686,0.927689274,4.79624686,4.7960083
71.975386,4.35889894,4.79603493,-0.6611626,4.79603493,4.79578418
71.985878,4.58257569,4.7958242,-0.461788372,4.7958242,4.79556073
71.99637,5.09901951,4.79561573,0.550821012,4.79561573,4.79533796
72.006861,5,4.79540842,0.452318007,4.79540842,4.79511592
72.017353,4.69041576,4.79520394,-0.323710032,4.79520394,4.79489453
72.027844,5,4.7950005,0.452768705,4.7950005,4.79467386
72.038336,5.09901951,4.79480069,0.551560355,4.79480069,4.79445386
72.048828,5.29150262,4.7946019,0.704911855,4.7946019,4.79423454
72.059319,5,4.79440746,0.453423135,4.79440746,4.79401593
72.069811,4.89897949,4.79421443,0.323674298,4.79421443,4.79379798
72.080302,5.56776436,4.7940263,0.879623817,4.7940263,4.79358074
72.090794,6.63324958,4.7938404,1.3562482,4.7938404,4.79336416
72.101286,5.09901951,4.79366003,0.552593414,4.79366003,4.79314826
72.111777,5.91607978,4.79348323,1.05952657,4.79348323,4.79293306
72.122269,5,4.79331273,0.454628715,4.79331273,4.79271852
72.13276,5.47722558,4.79314792,0.827089868,4.79314792,4.79250468
72.143252,5.56776436,4.79299038,0.880212465,4.79299038,4.7922915
72.153744,5.38516481,4.79284216,0.769625004,4.79284216,4.79207899
72.164235,4.69041576,4.79270247,-0.319822939,4.79270247,4.79186718
72.174727,5.09901951,4.79257914,0.553570569,4.79257914,4.79165603
72.185218,5.56776436,4.7924662,0.880510174,4.7924662,4.79144556
72.19571,5.56776436,4.79238459,0.880556513,4.79238459,4.79123575
72.206202,5.09901951,4.7923161,0.553808098,4.7923161,4.79102661
72.216693,4.47213595,4.7923076,-0.565837122,4.7923076,4.79081816
72.227185,5.29150262,4.79231415,0.706532711,4.79231415,4.79061036
72.237676,5.91607978,4.79242717,1.06002481,4.79242717,4.79040325
72.248168,4.69041576,4.79255285,-0.319588933,4.79255285,4.79019679
72.25866,5.65685425,4.79287284,0.929506005,4.79287284,4.78999099
72.269151,4.89897949,4.79322492,0.325199263,4.79322492,4.78978588
72.279643,5.38516481,4.79389804,0.768938725,4.79389804,4.78958141
72.290134,4.24264069,4.79468646,-0.742997825,4.79468646,4.78937762
72.300626,5.19615242,4.79600252,0.632574029,4.79600252,4.78917448
72.311118,5,4.79764027,0.449844121,4.79764027,4.788972
72.321609,5.38516481,4.80013612,0.764871679,4.80013612,4.7887702
72.332101,5.56776436,4.8034117,0.87427265,4.8034117,4.78856903
72.342592,5,4.80803652,0.43813637,4.80803652,4.78836855
72.353084,4.79583152,4.81423856,-0.135672527,4.81423856,4.7881687
72.363576,5.19615242,4.82229119,0.611441928,4.82229119,4.78796951
72.374067,5.29150262,4.83215546,0.677751551,4.83215546,4.78777099
72.384559,6,4.84347456,1.07541873,4.84347456,4.78757311
72.39505,6.63324958,4.85267768,1.33438072,4.85267768,4.7873759
72.405542,4.69041576,4.86072289,-0.412682848,4.86072289,4.78717932
72.416034,5.19615242,4.85833639,0.581219435,4.85833639,4.78698339
72.426525,5.65685425,4.85227675,0.896982439,4.85227675,4.78678813
72.437017,4.47213595,4.83810852,-0.604956666,4.83810852,4.78659351
72.447508,5.83095189,4.82227238,1.00433038,4.82227238,4.78639954
72.458,5,4.81124149,0.434463478,4.81124149,4.78620621
72.468492,5.38516481,4.80070192,0.764501723,4.80070192,4.78601352
72.478983,5,4.79649434,0.451116011,4.79649434,4.7858215
72.489475,4.24264069,4.79257563,-0.741575987,4.79257563,4.7856301
72.499966,4.47213595,4.79093575,-0.564623589,4.79093575,4.78543936
72.510458,5.47722558,4.78945152,0.829321441,4.78945152,4.78524924
72.52095,4.47213595,4.78856382,-0.562519215,4.78856382,4.78505977
72.531441,4.58257569,4.78776155,-0.452974458,4.78776155,4.78487095
72.541933,4.47213595,4.78715724,-0.561267572,4.78715724,4.78468275
72.552424,4.58257569,4.78661082,-0.451702474,4.78661082,4.78449521
72.562916,6.244998,4.786153,1.20782656,4.786153,4.78430829
72.573408,5.65685425,4.78573709,0.933336572,4.78573709,4.784122
72.583899,5.29150262,4.78536524,0.711433327,4.78536524,4.78393637
72.594391,5.38516481,4.78502463,0.77468715,4.78502463,4.78375135
72.604882,5.09901951,4.78470677,0.56063602,4.78470677,4.78356698
72.615374,5.19615242,4.7844128,0.6416694,4.7844128,4.78338322
72.625866,4.79583152,4.78413071,0.108170287,4.78413071,4.78320009
72.636357,4.79583152,4.78386738,0.109380748,4.78386738,4.78301761
72.646849,4.89897949,4.78361011,0.339660684,4.78361011,4.78283574
72.65734,5,4.78336781,0.46543763,4.78336781,4.78265452
72.667832,4.89897949,4.78312842,0.340369009,4.78312842,4.7824739
72.678324,5.38516481,4.78290119,0.776056454,4.78290119,4.78229391
72.688815,4.79583152,4.78267557,0.114699394,4.78267557,4.78211456
72.699307,3.31662479,4.7824591,-1.21071644,4.7824591,4.78193582
72.709798,4.79583152,4.78224423,0.116564526,4.78224423,4.78175772
72.72029,5.19615242,4.78203582,0.643518925,4.78203582,4.78158022
72.730782,5.09901951,4.78182925,0.563196467,4.78182925,4.78140333
72.741273,3.74165739,4.78162735,-1.01978918,4.78162735,4.78122709
72.751765,4.47213595,4.78142741,-0.556139782,4.78142741,4.78105145
72.762256,5,4.78123088,0.467727614,4.78123088,4.78087643
72.772748,4.35889894,4.78103633,-0.649721007,4.78103633,4.78070202
72.78324,4.58257569,4.7808443,-0.445273626,4.7808443,4.78052823
72.793731,4.58257569,4.78065426,-0.445060184,4.78065426,4.78035506
72.804223,5.38516481,4.78046611,0.777623753,4.78046611,4.78018249
72.814714,5,4.78027989,0.468743113,4.78027989,4.78001055
72.825206,4.79583152,4.78009512,0.125444823,4.78009512,4.7798392
72.835698,5.09901951,4.7799122,0.564895839,4.7799122,4.77966846
72.846189,6.164414,4.77973044,1.17672578,4.77973044,4.77949835
72.856681,5.47722558,4.77955045,0.835269493,4.77955045,4.77932882
72.867172,5.29150262,4.77937138,0.715633456,4.77937138,4.77915992
72.877664,5.38516481,4.779194,0.778441269,4.779194,4.77899161
72.888156,4.24264069,4.77901736,-0.73237741,4.77901736,4.7788239
72.898647,4.47213595,4.77884236,-0.553810807,4.77884236,4.77865682
72.909139,4.79583152,4.77866804,0.131009468,4.77866804,4.77849032
72.91963,4.89897949,4.77849516,0.347108525,4.77849516,4.77832443
72.930122,4.79583152,4.77832299,0.132319832,4.77832299,4.77815913
72.940614,5.74456265,4.77815204,0.983061852,4.77815204,4.77799443
72.951105,5.83095189,4.77798189,1.02614327,4.77798189,4.77783035
72.961597,5.83095189,4.77781279,1.02622566,4.77781279,4.77766684
72.972088,5.09901951,4.77764451,0.566899465,4.77764451,4.77750395
72.98258,4.58257569,4.77747717,-0.441476474,4.77747717,4.77734163
72.993072,5.29150262,4.77731065,0.717071805,4.77731065,4.77717991
73.003563,5.56776436,4.777145,0.88916779,4.777145,4.7770188
73.014055,4.89897949,4.77698017,0.349284006,4.77698017,4.77685827
73.024546,4.89897949,4.77681614,0.34951874,4.77681614,4.77669834
73.035038,5.47722558,4.77665291,0.837002188,4.77665291,4.77653898
73.04553,5.29150262,4.77649041,0.717643512,4.77649041,4.77638022
73.056021,3.60555128,4.77632874,-1.08202471,4.77632874,4.77622205
73.066513,4.47213595,4.77616773,-0.551390763,4.77616773,4.77606446
73.077004,5.19615242,4.77600753,0.648185845,4.77600753,4.77590747
73.087496,4.58257569,4.77584795,-0.439627408,4.77584795,4.77575105
73.097988,5.38516481,4.77568914,0.780689229,4.77568914,4.77559522
73.108479,4,4.77553093,-0.880642341,4.77553093,4.77543998
73.118971,5,4.77537338,0.473947905,4.77537338,4.7752853
73.129462,4.47213595,4.77521642,-0.550527442,4.77521642,4.77513122
73.139954,5,4.77505993,0.474278476,4.77505993,4.77497771
73.150446,5.47722558,4.77490392,0.838046335,4.77490392,4.77482478
73.160937,4.69041576,4.77474811,-0.29040032,4.77474811,4.77467243
73.171429,4.58257569,4.77459248,-0.438197197,4.77459248,4.77452065
73.18192,4.69041576,4.77443652,-0.289863353,4.77443652,4.77436946
73.192412,4.89897949,4.77427996,0.353128197,4.77427996,4.77421883
73.202904,4.89897949,4.77412211,0.353351625,4.77412211,4.77406877
73.213395,5.38516481,4.77396162,0.781794849,4.77396162,4.7739193
73.223887,5.47722558,4.77379816,0.838705796,4.77379816,4.77377039
73.234378,4.79583152,4.77364361,0.148956069,4.77364361,4.77362205
73.24487,5.38516481,4.77349584,0.782092686,4.77349584,4.77347428
73.255362,4.79583152,4.77332707,0.150014838,4.77332707,4.77332707
73.265853,4.79583152,4.77318045,0.150502752,4.77318045,4.77318045
73.276345,3.74165739,4.77303437,-1.01556732,4.77303437,4.77303437
73.286836,5.09901951,4.77288887,0.571078488,4.77288887,4.77288887
73.297328,5.74456265,4.77274393,0.985808662,4.77274393,4.77274393
73.30782,4.89897949,4.77259955,0.355499563,4.77259955,4.77259955
73.318311,5.29150262,4.77245574,0.720449085,4.77245574,4.77245574
73.328803,5.83095189,4.77231248,1.02890204,4.77231248,4.77231248
73.339294,4.89897949,4.77216979,0.356103488,4.77216979,4.77216979
73.349786,5.38516481,4.77202765,0.783030751,4.77202765,4.77202765
73.360278,5.19615242,4.77188607,0.651357319,4.77188607,4.77188607
73.370769,4.79583152,4.77174505,0.155198171,4.77174505,4.77174505
73.381261,4.12310563,4.77160458,-0.805294327,4.77160458,4.77160458
73.391752,4.89897949,4.77146467,0.35709216,4.77146467,4.77146467
73.402244,5.38516481,4.77132531,0.783479097,4.77132531,4.77132531
73.412736,5.09901951,4.7711865,0.572567039,4.7711865,4.7711865
73.423227,5.38516481,4.77104825,0.78365589,4.77104825,4.77104825
73.433719,4.12310563,4.77091054,-0.804863291,4.77091054,4.77091054
73.44421,3.87298335,4.7707734,-0.947517836,4.7707734,4.7707734
73.454702,4.58257569,4.77063678,-0.433660108,4.77063678,4.77063678
73.465194,5.29150262,4.77050072,0.721804615,4.77050072,4.77050072
73.475685,5.65685425,4.77036521,0.941535467,4.77036521,4.77036521
73.486177,4.47213595,4.77023024,-0.545980115,4.77023024,4.77023024
73.496668,4.58257569,4.77009582,-0.433035945,4.77009582,4.77009582
73.50716,4,4.76996194,-0.877474751,4.76996194,4.76996194
73.517652,4.35889894,4.76982859,-0.641037948,4.76982859,4.76982859
73.528143,4.58257569,4.7696958,-0.43257382,4.7696958,4.7696958
73.538635,4.69041576,4.76956354,-0.281332156,4.76956354,4.76956354
73.549126,6.244998,4.76943183,1.21472885,4.76943183,4.76943183
73.559618,4.89897949,4.76930065,0.360109484,4.76930065,4.76930065
73.57011,5.65685425,4.76917,0.94216997,4.76917,4.76917
73.580601,4,4.7690399,-0.876949198,4.7690399,4.7690399
73.591093,4.35889894,4.76891032,-0.640321305,4.76891032,4.76891032
73.601584,4.35889894,4.76878129,-0.640220542,4.76878129,4.76878129
73.612076,4.89897949,4.76865277,0.36100791,4.76865277,4.76865277
73.622568,5.38516481,4.76852479,0.785264295,4.76852479,4.76852479
73.633059,4.58257569,4.76839736,-0.431070369,4.76839736,4.76839736
73.643551,5.38516481,4.76827044,0.785426234,4.76827044,4.76827044
73.654042,4.58257569,4.76814406,-0.430776467,4.76814406,4.76814406
73.664534,5.29150262,4.7680182,0.723522236,4.7680182,4.7680182
73.675026,5.29150262,4.76789286,0.723608846,4.76789286,4.76789286
73.685517,5.56776436,4.76776807,0.894425121,4.76776807,4.76776806
73.696009,5.19615242,4.76764378,0.654605713,4.76764378,4.76764377
73.7065,5,4.76752004,0.48216176,4.76752004,4.76752002
73.716992,5.29150262,4.7673968,0.72395153,4.7673968,4.76739678
73.727484,4.89897949,4.7672741,0.36291237,4.7672741,4.76727406
73.737975,4.12310563,4.76715193,-0.802524953,4.76715193,4.76715188
73.748467,4.89897949,4.76703028,0.363248137,4.76703028,4.7670302
73.758958,4.69041576,4.76690916,-0.276574404,4.76690916,4.76690905
73.76945,3.87298335,4.76678858,-0.945412734,4.76678858,4.7667884
73.779942,5.09901951,4.76666853,0.576498901,4.76666853,4.76666827
73.790433,6,4.76654908,1.11060835,4.76654908,4.76654867
73.800925,4.24264069,4.76643015,-0.723733006,4.76643015,4.76642957
73.811416,4.79583152,4.76631192,0.1718127,4.76631192,4.766311
73.821908,4.79583152,4.76619424,0.172154822,4.76619424,4.76619293
73.8324,4.89897949,4.76607741,0.364557364,4.76607741,4.76607536
73.842891,5.09901951,4.7659613,0.577111959,4.7659613,4.76595832
73.853383,5.74456265,4.76584634,0.989300919,4.76584634,4.76584178
73.863874,5.56776436,4.76573183,0.895562693,4.76573183,4.76572575
73.874366,4.12310563,4.76561767,-0.801568488,4.76561767,4.76561023
73.884858,4.69041576,4.76550354,-0.274021488,4.76550354,4.7654952
73.895349,4.89897949,4.76538925,0.36549998,4.76538925,4.7653807
73.905841,5,4.76527547,0.48448378,4.76527547,4.76526668
73.916332,4.89897949,4.7651622,0.365810444,4.7651622,4.76515318
73.926824,4.89897949,4.76504945,0.365964533,4.76504945,4.76504017
73.937316,5,4.7649372,0.48483276,4.7649372,4.76492766
73.947807,4.58257569,4.76482547,-0.42690722,4.76482547,4.76481566
73.958299,5.29150262,4.76471424,0.72580189,4.76471424,4.76470415
73.96879,5,4.76460354,0.485176735,4.76460354,4.76459315
73.979282,4.79583152,4.76449332,0.177025989,4.76449332,4.76448264
73.989774,4.79583152,4.76438363,0.177335541,4.76438363,4.76437261
74.000265,4.24264069,4.76427444,-0.722242173,4.76427444,4.7642631
74.010757,4.47213595,4.76416577,-0.540397831,4.76416577,4.76415407
74.021248,4.35889894,4.7640576,-0.636520746,4.7640576,4.76404554
74.03174,5.65685425,4.76394995,0.944936136,4.76394995,4.76393749
74.042232,5.83095189,4.76384279,1.03300973,4.76384279,4.76382993
74.052723,5.38516481,4.76373616,0.788307454,4.76373616,4.76372287
74.063215,3.74165739,4.76363003,-1.01092662,4.76363003,4.76361629
74.073706,5.38516481,4.76352442,0.788441746,4.76352442,4.76351021
74.084198,4.35889894,4.76341931,-0.636019153,4.76341931,4.7634046
74.09469,5.29150262,4.76331471,0.726765377,4.76331471,4.76329948
74.105181,5.47722558,4.76321063,0.844994049,4.76321063,4.76319485
74.115673,5.19615242,4.76310706,0.658061824,4.76310706,4.7630907
74.126164,5.65685425,4.76300401,0.945436533,4.76300401,4.76298703
74.136656,4.35889894,4.76290147,-0.635611928,4.76290147,4.76288384
74.147148,5.65685425,4.76279945,0.945544711,4.76279945,4.76278113
74.157639,4.69041576,4.76269795,-0.268853468,4.76269795,4.76267891
74.168131,5,4.76259698,0.487240211,4.76259698,4.76257716
74.178622,4.69041576,4.76249652,-0.268478596,4.76249652,4.76247589
74.189114,5.91607978,4.76239661,1.07409645,4.76239661,4.76237509
74.199606,4.79583152,4.76229719,0.183123824,4.76229719,4.76227476
74.210097,5.47722558,4.76219836,0.845592817,4.76219836,4.76217492
74.220589,4.79583152,4.76210001,0.183661402,4.76210001,4.76207554
74.23108,4.69041576,4.76200228,-0.267556579,4.76200228,4.76197664
74.241572,4.69041576,4.76190503,-0.267374778,4.76190503,4.76187821
74.252064,5.38516481,4.7618084,0.78952923,4.7618084,4.76178024
74.262555,4.24264069,4.76171229,-0.720466239,4.76171229,4.76168275
74.273047,5.83095189,4.7616168,1.0340866,4.7616168,4.76158573
74.283538,4.79583152,4.76152185,0.185228702,4.76152185,4.76148917
74.29403,4.89897949,4.76142754,0.370879965,4.76142754,4.76139307
74.304522,5.47722558,4.7613338,0.846103878,4.7613338,4.76129744
74.315013,4.79583152,4.76124073,0.185986012,4.76124073,4.76120228
74.325505,5.09901951,4.76114828,0.581266919,4.76114828,4.76110758
74.335996,5.56776436,4.7610565,0.898169171,4.7610565,4.76101334
74.346488,5.29150262,4.76096544,0.728379831,4.76096544,4.76091956
74.35698,5,4.76087505,0.489004042,4.76087505,4.76082624
74.367471,5.09901951,4.76078552,0.581578884,4.76078552,4.76073338
74.377963,4.35889894,4.76069663,-0.633875138,4.76069663,4.76064097
74.388454,5.38516481,4.76060881,0.790288553,4.76060881,4.76054903
74.398946,4.58257569,4.76052162,-0.421836374,4.76052162,4.76045753
74.409438,4.12310563,4.76043577,-0.798329599,4.76043577,4.76036649
74.419929,5.47722558,4.76035054,0.84668473,4.76035054,4.76027591
74.430421,4.79583152,4.76026711,0.188585283,4.76026711,4.76018578
74.440912,4.12310563,4.76018431,-0.798172087,4.76018431,4.7600961
74.451404,4.79583152,4.76010397,0.18901733,4.76010397,4.76000687
74.461896,5.09901951,4.76002453,0.582232755,4.76002453,4.75991809
74.472387,5,4.75994846,0.48995055,4.75994846,4.75982976
74.482879,4.79583152,4.75987405,0.18962457,4.75987405,4.75974187
74.49337,4.35889894,4.75980427,-0.63317085,4.75980427,4.75965444
74.503862,5.47722558,4.75973762,0.847046607,4.75973762,4.75956744
74.514354,5.09901951,4.75967714,0.582531007,4.75967714,4.75948089
74.524845,4.69041576,4.75962273,-0.263072177,4.75962273,4.75939479
74.535337,5,4.75957673,0.490329753,4.75957673,4.75930913
74.545828,4.89897949,4.75954314,0.37341176,4.75954314,4.75922391
74.55632,4,4.75952161,-0.871505372,4.75952161,4.75913912
74.566812,5.29150262,4.75952583,0.729367391,4.75952583,4.75905478
74.577303,5.19615242,4.75954729,0.660761024,4.75954729,4.75897088
74.587795,4.47213595,4.75962217,-0.536177407,4.75962217,4.75888741
74.598286,4.47213595,4.75972076,-0.536269337,4.75972076,4.75880438
74.608778,4.47213595,4.75992926,-0.536463706,4.75992926,4.75872178
74.61927,5.19615242,4.76016759,0.660291475,4.76016759,4.75863962
74.629761,5.65685425,4.76062441,0.946694166,4.76062441,4.7585579
74.640253,4.89897949,4.76111081,0.371306719,4.76111081,4.7584766
74.650744,3.46410162,4.76197199,-1.13924114,4.76197199,4.75839574
74.661236,5.83095189,4.76286584,1.03348249,4.76286584,4.7583153
74.671728,5.38516481,4.76406801,0.788096945,4.76406801,4.75823529
74.682219,5.09901951,4.76520333,0.57776828,4.76520333,4.75815572
74.692711,3.60555128,4.76599608,-1.07723944,4.76599608,4.75807656
74.703202,4.47213595,4.76639576,-0.542457189,4.76639576,4.75799784
74.713694,5.19615242,4.76565807,0.656120688,4.76565807,4.75791954
74.724186,3.87298335,4.7645539,-0.944230141,4.7645539,4.75784166
74.734677,4.35889894,4.76277068,-0.635509041,4.76277068,4.75776422
74.745169,4.47213595,4.76121591,-0.537661562,4.76121591,4.75768718
74.75566,5,4.75994742,0.489951612,4.75994742,4.75761058
74.766152,4.89897949,4.75905901,0.374059455,4.75905901,4.75753438
74.776644,3.87298335,4.75849724,-0.941017479,4.75849724,4.75745861
74.787135,5.29150262,4.75813031,0.730323431,4.75813031,4.75738326
74.797627,5.65685425,4.75787705,0.948144083,4.75787705,4.75730832
74.808118,4.79583152,4.75769283,0.1952913,4.75769283,4.75723381
74.81861,5.19615242,4.75753497,0.662282005,4.75753497,4.7571597
74.829102,5.19615242,4.75740557,0.662379686,4.75740557,4.75708601
74.839593,5.38516481,4.75728279,0.792390065,4.75728279,4.75701274
74.850085,5.19615242,4.75717614,0.66255285,4.75717614,4.75693987
74.860576,4.47213595,4.75707148,-0.533793526,4.75707148,4.75686742
74.871068,5.56776436,4.75697721,0.900437203,4.75697721,4.75679537
74.88156,4.89897949,4.75688397,0.376955593,4.75688397,4.75672373
74.892051,4.24264069,4.75679679,-0.717046791,4.75679679,4.75665251
74.902543,4.47213595,4.75671081,-0.533455575,4.75671081,4.75658168
74.913034,5.29150262,4.75662856,0.731350851,4.75662856,4.75651127
74.923526,5,4.75654751,0.493409048,4.75654751,4.75644126
74.934018,4.24264069,4.75646887,-0.716818099,4.75646887,4.75637165
74.944509,5.38516481,4.75639141,0.792952332,4.75639141,4.75630245
74.955001,5.29150262,4.75631556,0.731564803,4.75631556,4.75623364
74.965492,4.89897949,4.75624081,0.377807722,4.75624081,4.75616525
74.975984,5.74456265,4.75616721,0.994180787,4.75616721,4.75609724
74.986476,4.12310563,4.75609462,-0.795606054,4.75609462,4.75602964
74.996967,4.58257569,4.7560229,-0.416469927,4.7560229,4.75596244
75.007459,5.56776436,4.7559521,0.901006249,4.7559521,4.75589563
75.01795,4.89897949,4.75588199,0.378282301,4.75588199,4.75582922
75.028442,4.89897949,4.75581274,0.378373822,4.75581274,4.7557632
75.038934,4.35889894,4.75574403,-0.629956419,4.75574403,4.75569758
75.049425,4.58257569,4.75567615,-0.416053429,4.75567615,4.75563235
75.059917,5.47722558,4.75560873,0.84948034,4.75560873,4.75556751
75.070408,4.69041576,4.75554207,-0.255198577,4.75554207,4.75550307
75.0809,4.58257569,4.75547584,-0.415812629,4.75547584,4.75543901
75.091392,4.69041576,4.7554103,-0.254940261,4.7554103,4.75537534
75.101883,4.79583152,4.75534518,0.201212177,4.75534518,4.75531206
75.112375,4.79583152,4.75528068,0.20137241,4.75528068,4.75524917
75.122866,5.65685425,4.75521661,0.949546018,4.75521661,4.75518666
75.133358,3.74165739,4.75515309,-1.00672523,4.75515309,4.75512454
75.14385,4.47213595,4.75509,-0.531934251,4.75509,4.7550628
75.154341,4.35889894,4.75502743,-0.629387389,4.75502743,4.75500145
75.164833,5.29150262,4.75496529,0.732487084,4.75496529,4.75494047
75.175324,4,4.75490363,-0.868851904,4.75490363,4.75487988
75.185816,4.79583152,4.75484241,0.202457689,4.75484241,4.75481967
75.196308,4.79583152,4.75478162,0.202607747,4.75478162,4.75475983
75.206799,4.35889894,4.75472129,-0.629144137,4.75472129,4.75470038
75.217291,4.12310563,4.75466137,-0.794704814,4.75466137,4.7546413
75.227782,4.47213595,4.75460189,-0.531475244,4.75460189,4.7545826
75.238274,4.69041576,4.75454281,-0.253233193,4.75454281,4.75452427
75.248766,4.69041576,4.75448417,-0.253117376,4.75448417,4.75446631
75.259257,4.24264069,4.75442592,-0.715391662,4.75442592,4.75440874
75.269749,5.29150262,4.7543681,0.732894622,4.7543681,4.75435153
75.28024,4.69041576,4.75431066,-0.2527744,4.75431066,4.75429469
75.290732,5.38516481,4.75425364,0.794299166,4.75425364,4.75423822
75.301224,5.29150262,4.754197,0.733011338,4.754197,4.75418212
75.311715,4.69041576,4.75414078,-0.252438152,4.75414078,4.7541264
75.322207,5.09901951,4.75408493,0.587311318,4.75408493,4.75407103
75.332698,4.12310563,4.75402949,-0.794307158,4.75402949,4.75401604
75.34319,4.89897949,4.75397442,0.380795312,4.75397442,4.7539614
75.353682,5,4.75391974,0.496064776,4.75391974,4.75390713
75.364173,5.29150262,4.75386544,0.733237466,4.75386544,4.75385323
75.374665,5.09901951,4.75381152,0.587544034,4.75381152,4.75379969
75.385156,5,4.75375798,0.496227788,4.75375798,4.75374651
75.395648,5.29150262,4.75370482,0.73334699,4.75370482,4.75369369
75.40614,4.79583152,4.75365202,0.205376492,4.75365202,4.75364122
75.416631,5.38516481,4.7535996,0.79471077,4.7535996,4.75358912
75.427123,5.09901951,4.75354754,0.587768638,4.75354754,4.75353737
75.437614,4.79583152,4.75349585,0.205756338,4.75349585,4.75348599
75.448106,5.65685425,4.75344452,0.950478685,4.75344452,4.75343495
75.458598,4.79583152,4.75339354,0.206004815,4.75339354,4.75338427
75.469089,4.79583152,4.75334291,0.20612767,4.75334291,4.75333394
75.479581,5,4.75329262,0.496696467,4.75329262,4.75328397
75.490072,4.35889894,4.75324264,-0.627967907,4.75324264,4.75323435
75.500564,5.09901951,4.75319299,0.588070167,4.75319299,4.75318507
75.511056,4.58257569,4.75314355,-0.412998619,4.75314355,4.75313615
75.521547,4.12310563,4.75309444,-0.793718345,4.75309444,4.75308758
75.532039,5.56776436,4.75304536,0.902617859,4.75304536,4.75303935
75.54253,4.89897949,4.7529965,0.382077199,4.7529965,4.75299147
75.553022,4.47213595,4.75294739,-0.529916438,4.75294739,4.75294393
75.563514,3.87298335,4.75289907,-0.938038231,4.75289907,4.75289674
75.574005,5.38516481,4.75285223,0.795180848,4.75285223,4.7528499
75.584497,4.58257569,4.75280339,-0.412586592,4.75280339,4.75280339
75.594988,5.38516481,4.75275723,0.795240578,4.75275723,4.75275723
75.60548,4.24264069,4.75271141,-0.714192355,4.75271141,4.75271141
75.615972,5.29150262,4.75266592,0.73405497,4.75266592,4.75266592
75.626463,4.58257569,4.75262078,-0.412365235,4.75262078,4.75262078
75.636955,3.74165739,4.75257597,-1.00544447,4.75257597,4.75257597
75.647446,5,4.75253151,0.49746205,4.75253151,4.75253151
75.657938,4.89897949,4.75248737,0.38274288,4.75248737,4.75248737
75.66843,5.09901951,4.75244357,0.588707007,4.75244357,4.75244357
75.678921,5.09901951,4.75240011,0.588743918,4.75240011,4.75240011
75.689413,5.65685425,4.75235698,0.951050614,4.75235698,4.75235698
75.699904,5,4.75231418,0.497680437,4.75231418,4.75231418
75.710396,5,4.75227171,0.497723104,4.75227171,4.75227171
75.720888,4.58257569,4.75222957,-0.411890613,4.75222957,4.75222957
75.731379,5.09901951,4.75218777,0.58892423,4.75218777,4.75218777
75.741871,4.79583152,4.75214628,0.209010145,4.75214628,4.75214628
75.752362,4.47213595,4.75210513,-0.529121135,4.75210513,4.75210513
75.762854,5.19615242,4.7520643,0.666399371,4.7520643,4.7520643
75.773346,4.24264069,4.7520238,-0.713710803,4.7520238,4.7520238
75.783837,3.87298335,4.75198362,-0.937550145,4.75198362,4.75198362
75.794329,5,4.75194376,0.498052443,4.75194376,4.75194376
75.80482,4.79583152,4.75190423,0.209588381,4.75190423,4.75190423
75.815312,5.29150262,4.75186502,0.7346003,4.75186502,4.75186502
75.825804,5.29150262,4.75182613,0.734626772,4.75182613,4.75182613
75.836295,4.89897949,4.75178756,0.383656,4.75178756,4.75178756
75.846787,5.38516481,4.7517493,0.79587405,4.7517493,4.7517493
75.857278,4.69041576,4.75171137,-0.247579505,4.75171137,4.75171137
75.86777,4.79583152,4.75167375,0.210137509,4.75167375,4.75167375
75.878262,4.12310563,4.75163645,-0.792799357,4.75163645,4.75163645
75.888753,4.69041576,4.75159946,-0.247353389,4.75159946,4.75159946
75.899245,5.38516481,4.75156278,0.795991221,4.75156278,4.75156278
75.909736,5,4.75152642,0.49847124,4.75152642,4.75152642
75.920228,4,4.75149037,-0.866885443,4.75149037,4.75149037
75.93072,5.65685425,4.75145463,0.951524892,4.75145463,4.75145463
75.941211,4.79583152,4.7514192,0.210742311,4.7514192,4.7514192
75.951703,4.79583152,4.75138408,0.210825624,4.75138408,4.75138408
75.962194,4.58257569,4.75134927,-0.41082061,4.75134927,4.75134927
75.972686,5.09901951,4.75131476,0.589664949,4.75131476,4.75131476
75.983178,4.89897949,4.75128056,0.384316178,4.75128056,4.75128056
75.993669,5,4.75124667,0.498751774,4.75124667,4.75124667
76.004161,5.29150262,4.75121308,0.735043907,4.75121308,4.75121308
76.014652,5.38516481,4.75117979,0.79623176,4.75117979,4.75117979
76.025144,5.29150262,4.7511468,0.735088986,4.7511468,4.7511468
76.035636,4.89897949,4.75111412,0.384532659,4.75111412,4.75111412
76.046127,4.58257569,4.75108174,-0.410494877,4.75108174,4.75108174
76.056619,5,4.75104965,0.498949242,4.75104965,4.75104965
76.06711,5.09901951,4.75101787,0.589916641,4.75101787,4.75101787
76.077602,5.19615242,4.75098638,0.667207645,4.75098638,4.75098638
76.088094,4.89897949,4.75095519,0.384739258,4.75095519,4.75095519
76.098585,5.19615242,4.7509243,0.66725417,4.7509243,4.7509243
76.109077,5.29150262,4.75089369,0.735261129,4.75089369,4.75089369
76.119568,4.69041576,4.75086339,-0.245860995,4.75086339,4.75086339
76.13006,4.79583152,4.75083337,0.212127674,4.75083337,4.75083337
76.140552,4.69041576,4.75080365,-0.245739476,4.75080365,4.75080365
76.151043,5,4.75077422,0.499225179,4.75077422,4.75077422
76.161535,4.89897949,4.75074508,0.385012217,4.75074508,4.75074508
76.172026,5.09901951,4.75071623,0.590172251,4.75071623,4.75071623
76.182518,4.12310563,4.75068766,-0.792200755,4.75068766,4.75068766
76.19301,4.47213595,4.75065938,-0.52775319,4.75065938,4.75065938
76.203501,5.47722558,4.7506314,0.852404939,4.7506314,4.7506314
76.213993,4.89897949,4.75060369,0.38519579,4.75060369,4.75060369
76.224484,5.47722558,4.75057627,0.852437274,4.75057627,4.75057627
76.234976,5.38516481,4.75054913,0.79662769,4.75054913,4.75054913
76.245468,4.58257569,4.75052228,-0.40981286,4.75052228,4.75052228
76.255959,4.79583152,4.7504957,0.212922098,4.7504957,4.7504957
76.266451,5.09901951,4.75046941,0.590381321,4.75046941,4.75046941
76.276942,4.69041576,4.7504434,-0.245005385,4.7504434,4.7504434
76.287434,5.09901951,4.75041766,0.590425144,4.75041766,4.75041766
76.297926,5.29150262,4.75039221,0.735602077,4.75039221,4.75039221
76.308417,4.89897949,4.75036703,0.385502863,4.75036703,4.75036703
76.318909,5.91607978,4.75034212,1.07969332,4.75034212,4.75034212
76.3294,5.19615242,4.7503175,0.667708714,4.7503175,4.7503175
76.339892,5.38516481,4.75029355,0.79678809,4.75029355,4.75029314
76.350384,4.35889894,4.75026975,-0.625596364,4.75026975,4.75026906
76.360875,5.47722558,4.75024635,0.852630765,4.75024635,4.75024525
76.371367,4.69041576,4.75022344,-0.244556083,4.75022344,4.75022171
76.381858,5.19615242,4.75020111,0.667795861,4.75020111,4.75019845
76.39235,4.58257569,4.75017944,-0.409394366,4.75017944,4.75017545
76.402842,5.91607978,4.75015886,1.07977818,4.75015886,4.75015272
76.413333,5.83095189,4.75013924,1.0396214,4.75013924,4.75013026
76.423825,5.19615242,4.75012192,0.667855149,4.75012192,4.75010806
76.434316,5.19615242,4.75010605,0.667867034,4.75010605,4.75008614
76.444808,4.89897949,4.75009543,0.385854968,4.75009543,4.75006447
76.4553,4,4.75008693,-0.866075591,4.75008693,4.75004307
76.465791,5,4.7500907,0.49990929,4.7500907,4.75002194
76.476283,5.38516481,4.75009732,0.796911219,4.75009732,4.75000106
76.486774,5.19615242,4.75013269,0.667847087,4.75013269,4.74998045
76.497266,4.47213595,4.75017162,-0.527290876,4.75017162,4.74996009
76.507758,4.89897949,4.75027632,0.385620497,4.75027632,4.74994
76.518249,4.89897949,4.75037939,0.385486828,4.75037939,4.74992016
76.528741,4.69041576,4.75046674,-0.245053024,4.75046674,4.74990059
76.539232,4,4.75053636,-0.866335014,4.75053636,4.74988126
76.549724,5.19615242,4.75053354,0.667546913,4.75053354,4.7498622
76.560216,5.56776436,4.75053133,0.904009421,4.75053133,4.74984339
76.570707,4.47213595,4.75053021,-0.527630795,4.75053021,4.74982483
76.581199,5,4.75052985,0.49946987,4.75052985,4.74980653
76.59169,5.47722558,4.75053054,0.852464095,4.75053054,4.74978847
76.602182,5.09901951,4.75053218,0.590328161,4.75053218,4.74977067
76.612674,5.47722558,4.75053481,0.852461591,4.75053481,4.74975312
76.623165,5.65685425,4.75053861,0.952006115,4.75053861,4.74973582
76.633657,4.89897949,4.75054333,0.38527413,4.75054333,4.74971877
76.644148,5.74456265,4.75054948,0.99700209,4.75054948,4.74970196
76.65464,5,4.75055646,0.49944323,4.75055646,4.7496854
76.665132,5,4.75056518,0.499434501,4.75056518,4.74966909
76.675623,5.65685425,4.75057461,0.951987205,4.75057461,4.74965302
76.686115,5.09901951,4.75058615,0.590282441,4.75058615,4.7496372
76.696606,4.24264069,4.75059826,-0.71271142,4.75059826,4.74962162
76.707098,4.35889894,4.75061292,-0.625870572,4.75061292,4.74960628
76.71759,4.12310563,4.75062806,-0.792163137,4.75062806,4.74959118
76.728081,4.35889894,4.75064606,-0.625897052,4.75064606,4.74957632
76.738573,5,4.75066473,0.499334829,4.75066473,4.7495617
76.749064,4.69041576,4.75068629,-0.245500568,4.75068629,4.74954732
76.759556,4.24264069,4.75070889,-0.712789031,4.75070889,4.74953318
76.770048,4.79583152,4.7507344,0.212360823,4.7507344,4.74951927
76.780539,4.47213595,4.75076143,-0.527849861,4.75076143,4.7495056
76.791031,5.56776436,4.75079136,0.90386559,4.75079136,4.74949216
76.801522,4.35889894,4.75082339,-0.626038697,4.75082339,4.74947896
76.812014,5,4.75085828,0.499140986,4.75085828,4.74946599
76.822506,5.29150262,4.75089602,0.735259549,4.75089602,4.74945326
76.832997,5.38516481,4.75093649,0.796384528,4.75093649,4.74944075
76.843489,4.47213595,4.75098077,-0.528057586,4.75098077,4.74942848
76.85398,4.24264069,4.7510276,-0.713012559,4.7510276,4.74941643
76.864472,5.19615242,4.75107942,0.667137921,4.75107942,4.74940461
76.874964,5,4.75113351,0.498865202,4.75113351,4.74939302
76.885455,4.12310563,4.75119409,-0.792520326,4.75119409,4.74938166
76.895947,4.69041576,4.75125654,-0.246659235,4.75125654,4.74937053
76.906438,3.87298335,4.75132739,-0.937200108,4.75132739,4.74935961
76.91693,5,4.75139951,0.498598528,4.75139951,4.74934893
76.927422,3.31662479,4.75148249,-1.19785546,4.75148249,4.74933846
76.937913,4.47213595,4.75156685,-0.528612235,4.75156685,4.74932822
76.948405,5.29150262,4.75166331,0.734737577,4.75166331,4.7493182
76.958896,4.47213595,4.75176257,-0.528797328,4.75176257,4.7493084
76.969388,4.69041576,4.75187478,-0.247909297,4.75187478,4.74929882
76.97988,4.69041576,4.75199204,-0.248145682,4.75199204,4.74928946
76.990371,4.69041576,4.75212308,-0.248409586,4.75212308,4.74928032
77.000863,5.29150262,4.75226232,0.734329834,4.75226232,4.74927139
77.011354,4.79583152,4.75241614,0.208363581,4.75241614,4.74926268
77.021846,5.47722558,4.75258254,0.851259677,4.75258254,4.74925418
77.032338,4.58257569,4.75276422,-0.412539125,4.75276422,4.7492459
77.042829,4.79583152,4.75296462,0.207043234,4.75296462,4.74923784
77.053321,4.89897949,4.75318077,0.381835975,4.75318077,4.74922998
77.063812,4.79583152,4.75342443,0.205929828,4.75342443,4.74922234
77.074304,3.74165739,4.75368383,-1.00599525,4.75368383,4.74921491
77.084796,4.35889894,4.75398348,-0.628557503,4.75398348,4.74920768
77.095287,5.47722558,4.75429799,0.850251486,4.75429799,4.74920067
77.105779,4.79583152,4.75467154,0.202879224,4.75467154,4.74919387
77.11627,3.60555128,4.75505769,-1.07215037,4.75505769,4.74918727
77.126762,5.56776436,4.75553142,0.901239672,4.75553142,4.74918088
77.137254,5.19615242,4.7560147,0.663428759,4.7560147,4.74917469
77.147745,4.79583152,4.75662808,0.19799859,4.75662808,4.74916871
77.158237,4.79583152,4.75726244,0.196390132,4.75726244,4.74916294
77.168728,4.47213595,4.75807064,-0.534728609,4.75807064,4.74915736
77.17922,4.58257569,4.75894075,-0.419958399,4.75894075,4.74915199
77.189712,5.56776436,4.76005692,0.898725454,4.76005692,4.74914682
77.200203,5.47722558,4.76131781,0.846113328,4.76131781,4.74914185
77.210695,5.47722558,4.76292573,0.845162612,4.76292573,4.74913708
77.221186,5.19615242,4.76483002,0.656751399,4.76483002,4.74913251
77.231678,5.83095189,4.76720143,1.03138279,4.76720143,4.74912813
77.24217,4.24264069,4.77016638,-0.726309642,4.77016638,4.74912396
77.252661,5,4.77376743,0.475639118,4.77376743,4.74911998
77.263153,6.164414,4.77858822,1.17721102,4.77858822,4.74911619
77.273644,4.79583152,4.7843024,0.107373768,4.7843024,4.7491126
77.284136,4.24264069,4.79252407,-0.741541218,4.79252407,4.7491092
77.294628,4.24264069,4.80196874,-0.747882381,4.80196874,4.749106
77.305119,3.74165739,4.81652267,-1.0367571,4.81652267,4.74910298
77.315611,4.69041576,4.83261624,-0.377094784,4.83261624,4.74910016
77.326102,5.65685425,4.85895643,0.893251263,4.85895643,4.74909753
77.336594,5.09901951,4.88685925,0.46060858,4.88685925,4.74909508
77.347086,4.58257569,4.93424062,-0.593013427,4.93424062,4.74909283
77.357577,5.19615242,4.98351141,0.461130147,4.98351141,4.74909076
77.368069,5.09901951,5.06056069,0.196109225,5.06056069,4.74908888
77.37856,5.38516481,5.13944232,0.49570403,5.13944232,4.74908718
77.389052,5.56776436,5.23540449,0.57650661,5.23540449,4.74908567
77.399544,4.47213595,5.32176201,-0.921751621,5.32176201,4.74908435
77.410035,5.29150262,5.38109089,-0.299312985,5.38109089,4.7490832
77.420527,5,5.40514373,-0.636509014,5.40514373,4.74908224
77.431018,5.83095189,5.35726596,0.688248457,5.35726596,4.74908146
77.44151,6.32455532,5.27788822,1.02306749,5.27788822,4.74908086
77.452002,4.79583152,5.15347789,-0.598035424,5.15347789,4.74908044
77.462493,5,5.04342655,-0.20839037,5.04342655,4.7490802
77.472985,5.47722558,4.94769439,0.727688935,4.94769439,4.74908014
77.483476,4.69041576,4.88357735,-0.439501529,4.88357735,4.74908026
77.493968,5.19615242,4.8403692,0.596475667,4.8403692,4.74908055
77.50446,6,4.81583086,1.08819536,4.81583086,4.74908101
77.514951,4.89897949,4.79928574,0.315743157,4.79928574,4.74908165
77.525443,5.09901951,4.78987028,0.556011902,4.78987028,4.74908247
77.535934,4.79583152,4.78228592,0.116385597,4.78228592,4.74908346
77.546426,4.12310563,4.7775164,-0.808956599,4.7775164,4.74908462
77.556918,4.58257569,4.77309417,-0.436484221,4.77309417,4.74908595
77.567409,4.58257569,4.7701831,-0.433136706,4.7701831,4.74908745
77.577901,5,4.76736491,0.482322602,4.76736491,4.74908913
77.588392,5,4.76537191,0.484384234,4.76537191,4.74909097
77.598884,4.79583152,4.76347391,0.179882234,4.76347391,4.74909297
77.609376,5,4.7620405,0.487810923,4.7620405,4.74909515
77.619867,5.74456265,4.76070468,0.991896145,4.76070468,4.74909749
77.630359,5.47722558,4.75964005,0.8471042,4.75964005,4.7491
77.64085,5.09901951,4.75866606,0.583398193,4.75866606,4.74910267
77.651342,4.35889894,4.75785414,-0.631629003,4.75785414,4.74910551
77.661834,4.35889894,4.75712316,-0.631050091,4.75712316,4.74910851
77.672325,4.89897949,4.75649026,0.377477448,4.75649026,4.74911167
77.682817,4.35889894,4.75592844,-0.63010277,4.75592844,4.74911499
77.693308,5,4.75542583,0.494544411,4.75542583,4.74911847
77.7038,4.58257569,4.75498528,-0.415222335,4.75498528,4.74912212
77.714292,4.35889894,4.75457975,-0.629031642,4.75457975,4.74912592
77.724783,4.79583152,4.75422842,0.203968379,4.75422842,4.74912988
77.735275,4.69041576,4.7538968,-0.251954444,4.7538968,4.74913399
77.745766,4.24264069,4.7536125,-0.714822924,4.7536125,4.74913827
77.756258,4,4.75333813,-0.867950536,4.75333813,4.74914269
77.76675,4.79583152,4.75310516,0.206703556,4.75310516,4.74914728
77.777241,4.69041576,4.75287642,-0.249921306,4.75287642,4.74915201
77.787733,5.38516481,4.75268292,0.795287296,4.75268292,4.7491569
77.798224,4.69041576,4.75249273,-0.2491525,4.75249273,4.74916195
77.808716,5.83095189,4.75232829,1.03856805,4.75232829,4.74916714
77.819208,5.29150262,4.75216876,0.734393532,4.75216876,4.74917248
77.829699,4.89897949,4.75202809,0.383342398,4.75202809,4.74917798
77.840191,4.79583152,4.75189329,0.209614496,4.75189329,4.74918362
77.850682,4.79583152,4.75177223,0.209903063,4.75177223,4.74918941
77.861174,4.89897949,4.75165757,0.383825367,4.75165757,4.74919535
77.871666,5.56776436,4.75155285,0.903444249,4.75155285,4.74920143
77.882157,4.79583152,4.7514548,0.210657831,4.7514548,4.74920766
77.892649,5.74456265,4.75136382,0.996593609,4.75136382,4.74921404
77.90314,5.47722558,4.75127957,0.852024652,4.75127957,4.74922055
77.913632,3.74165739,4.75120024,-1.0047601,4.75120024,4.74922722
77.924124,4.35889894,4.75112754,-0.626281563,4.75112754,4.74923402
77.934615,4.47213595,4.75105816,-0.528130857,4.75105816,4.74924097
77.945107,4.69041576,4.75099524,-0.246128986,4.75099524,4.74924805
77.955598,5.74456265,4.7509344,0.996809033,4.7509344,4.74925528
77.96609,4.24264069,4.75087981,-0.712908913,4.75087981,4.74926265
77.976582,5.09901951,4.75082635,0.590078947,4.75082635,4.74927015
77.987073,5.47722558,4.7507789,0.85231841,4.7507789,4.74927779
77.997565,4.58257569,4.75073213,-0.410068815,4.75073213,4.74928557
78.008056,6,4.75069059,1.1177251,4.75069059,4.74929349
78.018548,4.69041576,4.75064985,-0.245426336,4.75064985,4.74930154
78.02904,6.08276253,4.75061325,1.15418771,4.75061325,4.74930972
78.039531,4.89897949,4.75057776,0.385229446,4.75057776,4.74931804
78.050023,5.19615242,4.75054554,0.667537929,4.75054554,4.74932649
78.060514,5.74456265,4.75051464,0.997019563,4.75051464,4.74933507
78.071006,5.09901951,4.7504863,0.59036702,4.7504863,4.74934378
78.081498,5,4.75045944,0.499540352,4.75045944,4.74935263
78.091989,5.19615242,4.75043456,0.667621049,4.75043456,4.7493616
78.102481,4.89897949,4.75041127,0.385445473,4.75041127,4.7493707
78.112972,3.74165739,4.75038949,-1.00435656,4.75038949,4.74937993
78.123464,4.58257569,4.75036936,-0.409626252,4.75036936,4.74938929
78.133956,5.83095189,4.75035033,1.03951987,4.75035033,4.74939877
78.144447,4.24264069,4.75033295,-0.712525275,4.75033295,4.74940838
78.154939,4.47213595,4.75031635,-0.527428093,4.75031635,4.74941812
78.16543,5.38516481,4.75030138,0.796783176,4.75030138,4.74942797
78.175922,5.56776436,4.75028691,0.904144597,4.75028691,4.74943795
78.186414,4.12310563,4.75027393,-0.791939585,4.75027393,4.74944806
78.196905,4.79583152,4.75026124,0.213471969,4.75026124,4.74945828
78.207397,3.87298335,4.75024968,-0.936624968,4.75024968,4.74946863
78.217888,5.56776436,4.75023826,0.904171501,4.75023826,4.74947909
78.22838,4.69041576,4.7502271,-0.244563576,4.7502271,4.74948968
78.238872,4,4.7502158,-0.86614999,4.7502158,4.74950038
78.249363,5.38516481,4.75020339,0.796844663,4.75020339,4.7495112
78.259855,4,4.7501898,-0.866134978,4.7501898,4.74952214
78.270346,4.58257569,4.75017278,-0.409386235,4.75017278,4.7495332
78.280838,4.89897949,4.75015163,0.385782137,4.75015163,4.74954437
78.29133,4.24264069,4.75012305,-0.712377962,4.75012305,4.74955565
78.301821,5.38516481,4.75008254,0.796920487,4.75008254,4.74956705
78.312313,4.47213595,4.7500277,-0.527154388,4.7500277,4.74957856
78.322804,4.89897949,4.74994136,0.386054563,4.74994136,4.74959018
78.333296,4.69041576,4.74982908,-0.243748468,4.74982908,4.74960191
78.343788,5,4.74979655,0.500203408,4.74979655,4.74961376
78.354279,4.69041576,4.7498085,-0.243706267,4.7498085,4.74962571
78.364771,4.58257569,4.74963778,-0.408732289,4.74963778,4.74963778
78.375262,5.29150262,4.74964995,0.736106427,4.74964995,4.74964995
78.385754,4.58257569,4.74966223,-0.4087622,4.74966223,4.74966223
78.396246,4.58257569,4.74967462,-0.408777351,4.74967462,4.74967462
78.406737,5.09901951,4.74968711,0.591043487,4.74968711,4.74968711
78.417229,4.79583152,4.74969971,0.214783181,4.74969971,4.74969971
78.42772,4.58257569,4.74971241,-0.408823574,4.74971241,4.74971241
78.438212,4.58257569,4.74972522,-0.408839237,4.74972522,4.74972522
78.448704,3.87298335,4.74973813,-0.936351846,4.74973813,4.74973813
78.459195,4.58257569,4.74975114,-0.408870935,4.74975114,4.74975114
78.469687,5.56776436,4.74976425,0.904433587,4.74976425,4.74976425
78.480178,4.47213595,4.74977746,-0.526916983,4.74977746,4.74977746
78.49067,4.35889894,4.74979078,-0.625213429,4.74979078,4.74979078
78.501162,4.12310563,4.74980419,-0.791642952,4.74980419,4.74980419
78.511653,5.65685425,4.7498177,0.952384666,4.7498177,4.7498177
78.522145,4.47213595,4.74983131,-0.526968075,4.74983131,4.74983131
78.532636,4.69041576,4.74984501,-0.243781155,4.74984501,4.74984501
78.543128,5.09901951,4.74985881,0.590898215,4.74985881,4.74985881
78.55362,4.89897949,4.74987271,0.386143465,4.74987271,4.74987271
78.564111,4.89897949,4.7498867,0.38612535,4.7498867,4.7498867
78.574603,5.91607978,4.74990079,1.07989768,4.74990079,4.74990079
78.585094,4.89897949,4.74991496,0.386088751,4.74991496,4.74991496
78.595586,5.38516481,4.74992923,0.797016671,4.74992923,4.74992923
78.606078,4.79583152,4.7499436,0.214214678,4.7499436,4.7499436
78.616569,5.09901951,4.74995805,0.590814241,4.74995805,4.74995805
78.627061,4.47213595,4.74997259,-0.52710211,4.74997259,4.74997259
78.637552,4.79583152,4.74998722,0.214112827,4.74998722,4.74998722
78.648044,5.83095189,4.75000194,1.03968743,4.75000194,4.75000194
78.658536,5,4.75001675,0.49998325,4.75001675,4.75001675
78.669027,5.38516481,4.75003164,0.796952422,4.75003164,4.75003164
78.679519,4.58257569,4.75004663,-0.409232124,4.75004663,4.75004663
78.69001,4.89897949,4.75006169,0.385898682,4.75006169,4.75006169
78.700502,4.69041576,4.75007684,-0.244256187,4.75007684,4.75007684
78.710994,4.47213595,4.75009208,-0.527215446,4.75009208,4.75009208
78.721485,4.58257569,4.7501074,-0.40930637,4.7501074,4.7501074
78.731977,5.19615242,4.7501228,0.667854491,4.7501228,4.7501228
78.742468,3.87298335,4.75013828,-0.936565501,4.75013828,4.75013828
78.75296,5.47722558,4.75015385,0.85268501,4.75015385,4.75015385
78.763452,4.58257569,4.75016949,-0.409382217,4.75016949,4.75016949
78.773943,4.24264069,4.75018522,-0.712421597,4.75018522,4.75018522
78.784435,4.12310563,4.75020102,-0.791893552,4.75020102,4.75020102
78.794926,5.09901951,4.7502169,0.590595132,4.7502169,4.7502169
78.805418,5.09901951,4.75023286,0.590581621,4.75023286,4.75023286
78.81591,5.47722558,4.7502489,0.852629272,4.7502489,4.7502489
78.826401,4.79583152,4.75026501,0.213463144,4.75026501,4.75026501
78.836893,5.65685425,4.7502812,0.952141299,4.7502812,4.7502812
78.847384,5.09901951,4.75029746,0.590526931,4.75029746,4.75029746
78.857876,4.89897949,4.75031379,0.385571904,4.75031379,4.75031379
78.868368,4.58257569,4.7503302,-0.409578449,4.7503302,4.7503302
78.878859,4.79583152,4.75034668,0.213271758,4.75034668,4.75034668
78.889351,5,4.75036323,0.499636635,4.75036323,4.75036323
78.899842,4.89897949,4.75037985,0.385486227,4.75037985,4.75037985
78.910334,5.09901951,4.75039655,0.590443025,4.75039655,4.75039655
78.920826,4.35889894,4.75041331,-0.625711089,4.75041331,4.75041331
78.931317,4.58257569,4.75043014,-0.409700433,4.75043014,4.75043014
78.941809,5.38516481,4.75044704,0.796691765,4.75044704,4.75044704
78.9523,4.69041576,4.750464,-0.245047432,4.750464,4.750464
78.962792,4.35889894,4.75048104,-0.625765206,4.75048104,4.75048104
78.973284,4.79583152,4.75049814,0.212916388,4.75049814,4.75049814
78.983775,5.65685425,4.7505153,0.952018357,4.7505153,4.7505153
78.994267,4.47213595,4.75053253,-0.527632988,4.75053253,4.75053253
79.004758,4.35889894,4.75054981,-0.625820159,4.75054981,4.75054981
79.01525,4.89897949,4.75056717,0.385243191,4.75056717,4.75056717
79.025742,4.89897949,4.75058459,0.385220586,4.75058459,4.75058459
79.036233,4.69041576,4.75060206,-0.245328968,4.75060206,4.75060206
79.046725,4.69041576,4.7506196,-0.24536471,4.7506196,4.7506196
79.057216,5.09901951,4.7506372,0.590239202,4.7506372,4.7506372
79.067708,4.69041576,4.75065486,-0.245436542,4.75065486,4.75065486
79.0782,5.29150262,4.75067257,0.735411483,4.75067257,4.75067257
79.088691,5.47722558,4.75069035,0.852370359,4.75069035,4.75069035
79.099183,5,4.75070818,0.499291321,4.75070818,4.75070818
79.109674,5.19615242,4.75072606,0.667402696,4.75072606,4.75072606
79.120166,5,4.75074401,0.499255438,4.75074401,4.75074401
79.130658,4.69041576,4.75076201,-0.24565473,4.75076201,4.75076201
79.141149,4.89897949,4.75078006,0.384966788,4.75078006,4.75078006
79.151641,4.24264069,4.75079816,-0.712851652,4.75079816,4.75079816
79.162132,5.65685425,4.75081632,0.951860245,4.75081632,4.75081632
79.172624,4.24264069,4.75083454,-0.712877162,4.75083454,4.75083454
79.183116,4.69041576,4.7508528,-0.245839458,4.7508528,4.7508528
79.193607,4.47213595,4.75087111,-0.527953745,4.75087111,4.75087111
79.204099,5,4.75088948,0.499109731,4.75088948,4.75088948
79.21459,5,4.75090789,0.499091286,4.75090789,4.75090789
79.225082,4.47213595,4.75092635,-0.528006057,4.75092635,4.75092635
79.235574,4.69041576,4.75094486,-0.246026629,4.75094486,4.75094486
79.246065,5,4.75096342,0.499035652,4.75096342,4.75096342
79.256557,4.58257569,4.75098202,-0.410373401,4.75098202,4.75098202
79.267048,4.69041576,4.75100067,-0.246140025,4.75100067,4.75100067
79.27754,4.79583152,4.75101937,0.211688818,4.75101937,4.75101937
79.288032,3.87298335,4.75103811,-0.937045763,4.75103811,4.75103811
79.298523,4.89897949,4.75105689,0.384607065,4.75105689,4.75105689
79.309015,4.89897949,4.75107572,0.384582588,4.75107572,4.75107572
79.319506,4.58257569,4.75109459,-0.410510526,4.75109459,4.75109459
79.329998,4.79583152,4.7511135,0.211466368,4.7511135,4.7511135
79.34049,5.38516481,4.75113245,0.796261487,4.75113245,4.75113245
79.350981,4.58257569,4.75115144,-0.410579771,4.75115144,4.75115144
79.361473,5.09901951,4.75117048,0.589787282,4.75117048,4.75117048
79.371964,5.09901951,4.75118955,0.589771114,4.75118955,4.75118955
79.382456,4.58257569,4.75120866,-0.410649439,4.75120866,4.75120866
79.392948,4.69041576,4.75122781,-0.246600984,4.75122781,4.75122781
79.403439,4.89897949,4.75124699,0.384359853,4.75124699,4.75124699
79.413931,4.12310563,4.75126621,-0.792565823,4.75126621,4.75126621
79.424422,5.29150262,4.75128547,0.734994664,4.75128547,4.75128547
79.434914,4.89897949,4.75130476,0.384284696,4.75130476,4.75130476
79.445406,4.35889894,4.75132408,-0.626438457,4.75132408,4.75132408
79.455897,4.89897949,4.75134344,0.38423436,4.75134344,4.75134344
79.466389,4.58257569,4.75136284,-0.410837122,4.75136284,4.75136284
79.47688,5.19615242,4.75138226,0.666910911,4.75138226,4.75138226
79.487372,4.35889894,4.75140172,-0.626500417,4.75140172,4.75140172
79.497864,5.47722558,4.7514212,0.851941531,4.7514212,4.7514212
79.508355,4.24264069,4.75144072,-0.713302203,4.75144072,4.75144072
79.518847,4.47213595,4.75146027,-0.528511412,4.75146027,4.75146027
79.529338,5.09901951,4.75147984,0.589524954,4.75147984,4.75147984
79.53983,4.35889894,4.75149945,-0.626578409,4.75149945,4.75149945
79.550322,4.89897949,4.75151908,0.384005738,4.75151908,4.75151908
79.560813,4.79583152,4.75153874,0.210458516,4.75153874,4.75153874
79.571305,5,4.75155842,0.498439142,4.75155842,4.75155842
79.581796,5.09901951,4.75157813,0.589441586,4.75157813,4.75157813
79.592288,4.58257569,4.75159787,-0.411123061,4.75159787,4.75159787
79.60278,5,4.75161763,0.498379748,4.75161763,4.75161763
79.613271,5.29150262,4.75163741,0.734755207,4.75163741,4.75163741
79.623763,4.12310563,4.75165722,-0.792812455,4.75165722,4.75165722
79.634254,4.58257569,4.75167704,-0.411219342,4.75167704,4.75167704
79.644746,5.19615242,4.75169689,0.666674981,4.75169689,4.75169689
79.655238,4.58257569,4.75171676,-0.411267637,4.75171676,4.75171676
79.665729,4.69041576,4.75173665,-0.247630559,4.75173665,4.75173665
79.676221,5.09901951,4.75175656,0.589290208,4.75175656,4.75175656
79.686712,4.79583152,4.75177649,0.209892902,4.75177649,4.75177649
79.697204,5.09901951,4.75179644,0.589256372,4.75179644,4.75179644
79.707696,5.56776436,4.75181641,0.903298375,4.75181641,4.75181641
79.718187,4.69041576,4.75183639,-0.247831857,4.75183639,4.75183639
79.728679,5.29150262,4.75185639,0.734606176,4.75185639,4.75185639
79.73917,4.79583152,4.7518764,0.209654767,4.7518764,4.7518764
79.749662,5.19615242,4.75189643,0.666525311,4.75189643,4.75189643
79.760154,4.35889894,4.75191648,-0.626911105,4.75191648,4.75191648
79.770645,5.19615242,4.75193653,0.666495228,4.75193653,4.75193653
79.781137,4,4.75195661,-0.867154314,4.75195661,4.75195661
79.791628,5.38516481,4.75197669,0.795731186,4.75197669,4.75197669
79.80212,4.47213595,4.75199678,-0.529018741,4.75199678,4.75199678
79.812612,5.65685425,4.75201689,0.951229394,4.75201689,4.75201689
79.823103,5.09901951,4.75203701,0.589052212,4.75203701,4.75203701
79.833595,5,4.75205713,0.497938618,4.75205713,4.75205713
79.844086,4.79583152,4.75207727,0.209175179,4.75207727,4.75207727
79.854578,5.09901951,4.75209741,0.589000934,4.75209741,4.75209741
79.86507,5.19615242,4.75211757,0.666359405,4.75211757,4.75211757
79.875561,4.69041576,4.75213772,-0.248439057,4.75213772,4.75213772
79.886053,4.35889894,4.75215789,-0.627103619,4.75215789,4.75215789
79.896544,4.79583152,4.75217806,0.208934104,4.75217806,4.75217806
79.907036,4.35889894,4.75219824,-0.62713579,4.75219824,4.75219824
79.917528,4.89897949,4.75221843,0.383094061,4.75221843,4.75221843
79.928019,4.35889894,4.75223861,-0.627167974,4.75223861,4.75223861
79.938511,5.29150262,4.7522588,0.734332227,4.7522588,4.7522588
79.949002,5.56776436,4.75227899,0.903042285,4.75227899,4.75227899
79.959494,4.89897949,4.75229919,0.382988635,4.75229919,4.75229919
79.969986,4.79583152,4.75231939,0.208595624,4.75231939,4.75231939
79.980477,5.38516481,4.75233959,0.795503124,4.75233959,4.75233959
79.990969,5,4.75235979,0.497634619,4.75235979,4.75235979
80.00146,4.58257569,4.75237998,-0.412073158,4.75237998,4.75237998
80.011952,5.29150262,4.75240018,0.734235957,4.75240018,4.75240018
80.022444,4.79583152,4.75242038,0.208353415,4.75242038,4.75242038
80.032935,4.58257569,4.75244057,-0.412146667,4.75244057,4.75244057
80.043427,4.58257569,4.75246076,-0.412171162,4.75246076,4.75246076
80.053918,6.08276253,4.75248095,1.15337833,4.75248095,4.75248095
80.06441,4.35889894,4.75250113,-0.627377231,4.75250113,4.75250113
80.074902,4.58257569,4.75252131,-0.41224461,4.75252131,4.75252131
80.085393,4.79583152,4.75254149,0.208062581,4.75254149,4.75254149
80.095885,5.19615242,4.75256165,0.666026102,4.75256165,4.75256165
80.106376,5.19615242,4.75258182,0.666010967,4.75258182,4.75258182
80.116868,4.47213595,4.75260197,-0.529590422,4.75260197,4.75260197
80.12736,4.12310563,4.75262212,-0.793420754,4.75262212,4.75262212
80.137851,5.38516481,4.75264226,0.795312864,4.75264226,4.75264226
80.148343,5.47722558,4.75266239,0.851212776,4.75266239,4.75266239
80.158834,4.89897949,4.7526825,0.382487883,4.7526825,4.7526825
80.169326,4.58257569,4.75270262,-0.412464448,4.75270262,4.75270262
80.179818,4.47213595,4.75272272,-0.529704409,4.75272272,4.75272272
80.190309,4.79583152,4.7527428,0.207578229,4.7527428,4.7527428
80.200801,5.19615242,4.75276288,0.665875021,4.75276288,4.75276288
80.211292,3.87298335,4.75278294,-0.93797633,4.75278294,4.75278294
80.221784,5.47722558,4.75280299,0.85113018,4.75280299,4.75280299
80.232276,4,4.75282303,-0.86765375,4.75282303,4.75282303
80.242767,4.79583152,4.75284305,0.207336618,4.75284305,4.75284305
80.253259,5.29150262,4.75286306,0.73392068,4.75286306,4.75286306
80.26375,4.79583152,4.75288305,0.207240139,4.75288305,4.75288305
80.274242,5.74456265,4.75290302,0.99582108,4.75290302,4.75290302
80.284734,4.89897949,4.75292298,0.382173393,4.75292298,4.75292298
80.295225,4.12310563,4.75294292,-0.793622894,4.75294292,4.75294292
80.305717,5.09901951,4.75296285,0.588265813,4.75296285,4.75296285
80.316208,4.47213595,4.75298275,-0.529949805,4.75298275,4.75298275
80.3267,4.47213595,4.75300264,-0.529968567,4.75300264,4.75300264
80.337192,4.35889894,4.7530225,-0.627792609,4.7530225,4.7530225
80.347683,4.58257569,4.75304235,-0.412876074,4.75304235,4.75304235
80.358175,5.29150262,4.75306217,0.733785016,4.75306217,4.75306217
80.368666,3.87298335,4.75308197,-0.938135719,4.75308197,4.75308197
80.379158,4.69041576,4.75310176,-0.250371715,4.75310176,4.75310176
80.38965,4.79583152,4.75312151,0.206664001,4.75312151,4.75312151
80.400141,5.56776436,4.75314125,0.902564743,4.75314125,4.75314125
80.410633,3.46410162,4.75316096,-1.13536749,4.75316096,4.75316096
80.421124,5.38516481,4.75318064,0.794974316,4.75318064,4.75318064
80.431616,4.69041576,4.75320031,-0.250568446,4.75320031,4.75320031
80.442108,4.35889894,4.75321994,-0.627949838,4.75321994,4.75321994
80.452599,3.31662479,4.75323955,-1.19858865,4.75323955,4.75323955
80.463091,4.89897949,4.75325913,0.381733352,4.75325913,4.75325913
80.473582,3.60555128,4.75327869,-1.07132041,4.75327869,4.75327869
80.484074,4.24264069,4.75329822,-0.714603056,4.75329822,4.75329822
80.494566,4.12310563,4.75331771,-0.793858985,4.75331771,4.75331771
80.505057,5.29150262,4.75333718,0.7335976,4.75333718,4.75333718
80.515549,4.58257569,4.75335662,-0.413256492,4.75335662,4.75335662
80.52604,4.89897949,4.75337603,0.381580207,4.75337603,4.75337603
80.536532,5,4.75339541,0.496592982,4.75339541,4.75339541
80.547024,4.58257569,4.75341476,-0.413326824,4.75341476,4.75341476
80.557515,4.24264069,4.75343407,-0.714698108,4.75343407,4.75343407
80.568007,4.35889894,4.75345336,-0.628135664,4.75345336,4.75345336
80.578498,4.89897949,4.7534726,0.381453643,4.7534726,4.7534726
80.58899,4.58257569,4.75349182,-0.413420034,4.75349182,4.75349182
80.599482,4.79583152,4.753511,0.205719522,4.753511,4.753511
80.609973,4.12310563,4.75353015,-0.793992772,4.75353015,4.75353015
80.620465,5,4.75354926,0.496438054,4.75354926,4.75354926
80.630956,5.91607978,4.75356833,1.07819824,4.75356833,4.75356833
80.641448,5.38516481,4.75358737,0.794718463,4.75358737,4.75358737
80.65194,4.69041576,4.75360637,-0.251377433,4.75360637,4.75360637
80.662431,4.69041576,4.75362534,-0.251415147,4.75362534,4.75362534
80.672923,4.35889894,4.75364426,-0.628287608,4.75364426,4.75364426
80.683414,5.09901951,4.75366315,0.587670287,4.75366315,4.75366315
80.693906,5.47722558,4.75368199,0.850613649,4.75368199,4.75368199
80.704398,4.58257569,4.7537008,-0.413672706,4.7537008,4.7537008
80.714889,5.83095189,4.75371957,1.03789803,4.75371957,4.75371957
80.725381,3.87298335,4.75373829,-0.938485455,4.75373829,4.75373829
80.735872,4,4.75375719,-0.868191908,4.75375719,4.75375698
80.746364,4.69041576,4.75377594,-0.251714481,4.75377594,4.75377562
80.756856,4.79583152,4.75379476,0.205028698,4.75379476,4.75379422
80.767347,4.47213595,4.75381354,-0.530733066,4.75381354,4.75381277
80.777839,5.29150262,4.75383254,0.733259903,4.75383254,4.75383129
80.78833,4.79583152,4.75385153,0.204890196,4.75385153,4.75384975
80.798822,4.89897949,4.75387098,0.380931098,4.75387098,4.75386818
80.809314,5.19615242,4.75389058,0.665027699,4.75389058,4.75388655
80.819805,4.89897949,4.75391109,0.380878459,4.75391109,4.75390488
80.830297,4.58257569,4.75393217,-0.413952261,4.75393217,4.75392317
80.840788,4.12310563,4.75395499,-0.794260261,4.75395499,4.75394141
80.85128,4.79583152,4.75397956,0.204577536,4.75397956,4.7539596
80.861772,5,4.75400736,0.495976453,4.75400736,4.75397774
80.872263,3.16227766,4.75403989,-1.2616506,4.75403989,4.75399583
80.882755,4.69041576,4.7540783,-0.252314373,4.7540783,4.75401388
80.893246,5.56776436,4.75412885,0.902017469,4.75412885,4.75403187
80.903738,4.47213595,4.75418972,-0.531087344,4.75418972,4.75404981
80.91423,5.47722558,4.7542464,0.850281823,4.7542464,4.7540677
80.924721,5.09901951,4.75430062,0.587127666,4.75430062,4.75408554
80.935213,5,4.75433205,0.495649015,4.75433205,4.75410333
80.945704,4.47213595,4.75435491,-0.53124284,4.75435491,4.75412107
80.956196,5,4.75437799,0.49560267,4.75437799,4.75413875
80.966688,4.89897949,4.75440109,0.380234664,4.75440109,4.75415638
80.977179,5.47722558,4.75442446,0.850177108,4.75442446,4.75417396
80.987671,4.12310563,4.75444782,-0.794570446,4.75444782,4.75419148
80.998162,4.79583152,4.75447152,0.203371583,4.75447152,4.75420894
81.008654,5.74456265,4.75449522,0.995021321,4.75449522,4.75422636
81.019146,5.19615242,4.75451926,0.664554863,4.75451926,4.75424371
81.029637,5,4.75454333,0.495435836,4.75454333,4.75426101
81.040129,4.79583152,4.75456775,0.203134875,4.75456775,4.75427825
81.05062,3.74165739,4.75459225,-1.00644665,4.75459225,4.75429543
81.061112,4.12310563,4.75461709,-0.794676956,4.75461709,4.75431255
81.071604,4.69041576,4.75464209,-0.253429145,4.75464209,4.75432962
81.082095,4.79583152,4.7546674,0.202889441,4.7546674,4.75434662
81.092587,5,4.75469296,0.495284808,4.75469296,4.75436357
81.103078,4.89897949,4.7547188,0.379816648,4.7547188,4.75438045
81.11357,4.24264069,4.75474499,-0.715614636,4.75474499,4.75439727
81.124062,5.29150262,4.75477144,0.732619397,4.75477144,4.75441404
81.134553,4.58257569,4.75479836,-0.414997185,4.75479836,4.75443074
81.145045,5.38516481,4.75482549,0.793939116,4.75482549,4.75444737
81.155536,5.09901951,4.75485323,0.586656871,4.75485323,4.75446395
81.166028,5.09901951,4.75488113,0.586633091,4.75488113,4.75448046
81.17652,4.79583152,4.75490982,0.202291136,4.75490982,4.75449691
81.187011,5.38516481,4.75493859,0.793867882,4.75493859,4.75451329
81.197503,5.29150262,4.75496837,0.732484986,4.75496837,4.75452961
81.207994,4.69041576,4.75499818,-0.254130718,4.75499818,4.75454586
81.218486,5,4.75502916,0.494945294,4.75502916,4.75456204
81.228978,4.12310563,4.75506025,-0.794955736,4.75506025,4.75457816
81.239469,4.24264069,4.75509252,-0.715857408,4.75509252,4.75459421
81.249961,5.19615242,4.75512508,0.664098894,4.75512508,4.7546102
81.260452,4.79583152,4.75515884,0.201674707,4.75515884,4.75462611
81.270944,5,4.75519311,0.494779638,4.75519311,4.75464196
81.281436,5.09901951,4.75522858,0.58633688,4.75522858,4.75465774
81.291927,5.19615242,4.75526484,0.663993664,4.75526484,4.75467345
81.302419,5.19615242,4.75530228,0.663965471,4.75530228,4.75468909
81.31291,4.47213595,4.75534086,-0.532169998,4.75534086,4.75470465
81.323402,4.35889894,4.75538058,-0.629667881,4.75538058,4.75472015
81.333894,4.47213595,4.75542191,-0.532246139,4.75542191,4.75473558
81.344385,5.83095189,4.75546428,1.03705719,4.75546428,4.75475093
81.354877,5.09901951,4.75550884,0.58609784,4.75550884,4.75476621
81.365368,4.79583152,4.75555432,0.200691818,4.75555432,4.75478141
81.37586,5.19615242,4.75560271,0.663739193,4.75560271,4.75479655
81.386352,5.29150262,4.75565184,0.732018292,4.75565184,4.75481161
81.396843,4.79583152,4.75570481,0.200316525,4.75570481,4.75482659
81.407335,5.38516481,4.75575826,0.793351464,4.75575826,4.7548415
81.417826,5.19615242,4.75581676,0.663577927,4.75581676,4.75485633
81.428318,5.19615242,4.75587574,0.663533481,4.75587574,4.75487109
81.43881,5.09901951,4.75594055,0.585729433,4.75594055,4.75488577
81.449301,5,4.75600646,0.493957022,4.75600646,4.75490037
81.459793,4.79583152,4.75607869,0.199381133,4.75607869,4.7549149
81.470284,4.89897949,4.75615314,0.37792373,4.75615314,4.75492935
81.480776,4.24264069,4.75623441,-0.716654536,4.75623441,4.75494372
81.491268,5,4.75631949,0.493640058,4.75631949,4.75495801
81.501759,4.58257569,4.75641188,-0.416936674,4.75641188,4.75497222
81.512251,4.24264069,4.75651035,-0.716847026,4.75651035,4.75498635
81.522742,4.12310563,4.75661659,-0.795934018,4.75661659,4.7550004
81.533234,5.19615242,4.75673213,0.662887842,4.75673213,4.75501437
81.543726,4.12310563,4.75685585,-0.796084308,4.75685585,4.75502826
81.554217,5.74456265,4.75699356,0.993765105,4.75699356,4.75504206
81.564709,4.79583152,4.75713964,0.196702512,4.75713964,4.75505579
81.5752,4.47213595,4.75730671,-0.534013819,4.75730671,4.75506943
81.585692,5.38516481,4.75748196,0.792264377,4.75748196,4.75508299
81.596184,4.35889894,4.75768897,-0.631498243,4.75768897,4.75509646
81.606675,3.74165739,4.75790324,-1.0080902,4.75790324,4.75510985
81.617167,4.47213595,4.75816694,-0.534818649,4.75816694,4.75512315
81.627658,4.47213595,4.75843568,-0.535069834,4.75843568,4.75513637
81.63815,4.35889894,4.75878541,-0.632365766,4.75878541,4.75514951
81.648642,5.56776436,4.75914688,0.899231607,4.75914688,4.75516255
81.659133,5.29150262,4.75962367,0.729300316,4.75962367,4.75517551
81.669625,4.69041576,4.76013778,-0.264049267,4.76013778,4.75518839
81.680116,5.09901951,4.76081526,0.581553313,4.76081526,4.75520117
81.690608,4.79583152,4.76157999,0.185071691,4.76157999,4.75521387
81.7011,4.35889894,4.76256967,-0.635350868,4.76256967,4.75522648
81.711591,4.89897949,4.76374709,0.367739574,4.76374709,4.755239
81.722083,5.29150262,4.76524039,0.725439336,4.76524039,4.75525143
81.732574,4.69041576,4.76713499,-0.276982362,4.76713499,4.75526377
81.743066,4.35889894,4.76948849,-0.640772617,4.76948849,4.75527602
81.753558,4.58257569,4.77268891,-0.436019744,4.77268891,4.75528818
81.764049,5.29150262,4.7765526,0.717600186,4.7765526,4.75530025
81.774541,4.89897949,4.78217403,0.341768136,4.78217403,4.75531223
81.785032,5,4.78872046,0.459651547,4.78872046,4.75532411
81.795524,4.24264069,4.79881649,-0.745771954,4.79881649,4.75533591
81.806016,4.79583152,4.8100937,-0.119424349,4.8100937,4.75534761
81.816507,5.38516481,4.82796856,0.74645579,4.82796856,4.75535921
81.826999,5.19615242,4.84703121,0.590864799,4.84703121,4.75537072
81.83749,4.89897949,4.87562551,0.152820088,4.87562551,4.75538214
81.847982,5.65685425,4.90488174,0.867163487,4.90488174,4.75539346
81.858474,4.24264069,4.93928687,-0.834653331,4.93928687,4.75540469
81.868965,5.65685425,4.97170231,0.827739051,4.97170231,4.75541582
81.879457,4.69041576,4.99125563,-0.548488713,4.99125563,4.75542685
81.889948,5.83095189,5.0027915,0.910033185,5.0027915,4.75543779
81.90044,5.65685425,4.98515502,0.81957259,4.98515502,4.75544863
81.910932,5.38516481,4.95961886,0.652338831,4.95961886,4.75545938
81.921423,4.69041576,4.91619778,-0.475165257,4.91619778,4.75547002
81.931915,4.47213595,4.8758826,-0.635410609,4.8758826,4.75548057
81.942406,5.83095189,4.84049061,0.995219215,4.84049061,4.75549101
81.952898,4.58257569,4.81375319,-0.480809206,4.81375319,4.75550136
81.96339,5.09901951,4.79600726,0.550465487,4.79600726,4.75551161
81.973881,5.09901951,4.78441173,0.560899085,4.78441173,4.75552176
81.984373,4.69041576,4.77714225,-0.294493617,4.77714225,4.75553181
81.994864,5.38516481,4.77263769,0.782641118,4.77263769,4.75554175
82.005356,4.35889894,4.76942466,-0.640722809,4.76942466,4.7555516
82.015848,3.74165739,4.76731614,-1.01274812,4.76731614,4.75556134
82.026339,5.09901951,4.76552771,0.577487489,4.76552771,4.75557098
82.036831,4.58257569,4.76428937,-0.426278867,4.76428937,4.75558052
82.047322,5,4.763134,0.486688811,4.763134,4.75558996
82.057814,5,4.76232312,0.487521163,4.76232312,4.75559929
82.068306,4.89897949,4.76153809,0.3707309,4.76153809,4.75560851
82.078797,5.19615242,4.76096526,0.659687174,4.76096526,4.75561764
82.089289,5.56776436,4.76041437,0.898526569,4.76041437,4.75562665
82.09978,4.35889894,4.75998981,-0.633317348,4.75998981,4.75563557
82.110272,5.47722558,4.75958983,0.84713384,4.75958983,4.75564437
82.120764,5.19615242,4.75926704,0.66097306,4.75926704,4.75565307
82.131255,5.29150262,4.75896848,0.729749368,4.75896848,4.75566166
82.141747,4.47213595,4.75871784,-0.535333437,4.75871784,4.75567015
82.152238,4.58257569,4.75848978,-0.419421127,4.75848978,4.75567853
82.16273,5.38516481,4.75829167,0.791753204,4.75829167,4.7556868
82.173222,4.12310563,4.75811404,-0.79687415,4.75811404,4.75569496
82.183713,4.58257569,4.75795507,-0.418783213,4.75795507,4.75570302
82.194205,4.47213595,4.75781445,-0.534489003,4.75781445,4.75571096
82.204696,4.89897949,4.75768521,0.37589131,4.75768521,4.75571879
82.215188,4.24264069,4.75757231,-0.717587363,4.75757231,4.75572652
82.22568,5.19615242,4.75746603,0.662334052,4.75746603,4.75573413
82.236171,4.58257569,4.7573743,-0.418089226,4.7573743,4.75574164
82.246663,4.58257569,4.75728603,-0.417983651,4.75728603,4.75574903
82.257154,4.89897949,4.7572107,0.376521961,4.7572107,4.75575631
82.267646,5.65685425,4.75713675,0.948534397,4.75713675,4.75576348
82.278138,4.58257569,4.75707431,-0.41773031,4.75707431,4.75577053
82.288629,4.58257569,4.75701267,-0.417656533,4.75701267,4.75577747
82.299121,4.89897949,4.7569597,0.376855132,4.7569597,4.7557843
82.309612,4.58257569,4.75690801,-0.41753121,4.75690801,4.75579102
82.320104,4.35889894,4.75686269,-0.630843678,4.75686269,4.75579762
82.330596,4.35889894,4.75681903,-0.630809077,4.75681903,4.75580411
82.341087,4.58257569,4.75678005,-0.417377955,4.75678005,4.75581048
82.351579,4.89897949,4.75674295,0.377142588,4.75674295,4.75581674
82.36207,4.58257569,4.75670924,-0.417293116,4.75670924,4.75582288
82.372562,4.35889894,4.75667753,-0.630696907,4.75667753,4.7558289
82.383054,4.35889894,4.75664823,-0.630673673,4.75664823,4.75583481
82.393545,4.69041576,4.75662098,-0.257303755,4.75662098,4.7558406
82.404037,4.58257569,4.75659539,-0.417156681,4.75659539,4.75584628
82.414528,4.58257569,4.75657186,-0.417128481,4.75657186,4.75585183
82.42502,4.58257569,4.75654942,-0.417101574,4.75654942,4.75585727
82.435512,5,4.756529,0.493427805,4.756529,4.75586259
82.446003,4.47213595,4.75650923,-0.533266607,4.75650923,4.75586779
82.456495,5.74456265,4.75649143,0.994017714,4.75649143,4.75587287
82.466986,4,4.75647394,-0.869755101,4.75647394,4.75587784
82.477478,5,4.75645835,0.493499394,4.75645835,4.75588268
82.48797,4.69041576,4.75644284,-0.25695735,4.75644284,4.7558874
82.498461,5.19615242,4.75642909,0.66311638,4.75642909,4.755892
82.508953,5.47722558,4.75641541,0.8490054,4.75641541,4.75589648
82.519444,5.19615242,4.75640309,0.663135981,4.75640309,4.75590084
82.529936,5.38516481,4.75639096,0.792952612,4.75639096,4.75590507
82.540428,4.69041576,4.75637989,-0.256834824,4.75637989,4.75590919
82.550919,5.09901951,4.75636908,0.585363505,4.75636908,4.75591318
82.561411,5.38516481,4.75635907,0.792972722,4.75635907,4.75591704
82.571902,4.47213595,4.75634939,-0.53311672,4.75634939,4.75592079
82.582394,4.35889894,4.7563403,-0.6304295,4.7563403,4.75592441
82.592886,5.47722558,4.75633158,0.849054764,4.75633158,4.7559279
82.603377,5,4.75632328,0.493636224,4.75632328,4.75593127
82.613869,5.38516481,4.75631538,0.793000266,4.75631538,4.75593452
82.62436,5.09901951,4.75630776,0.585415884,4.75630776,4.75593764
82.634852,5,4.75630056,0.493659233,4.75630056,4.75594063
82.645344,5.09901951,4.75629351,0.585428049,4.75629351,4.7559435
82.655835,4.89897949,4.75628691,0.377746706,4.75628691,4.75594624
82.666327,4.47213595,4.75628036,-0.533051969,4.75628036,4.75594886
82.676818,5.65685425,4.75627424,0.948988939,4.75627424,4.75595134
82.68731,5.09901951,4.75626809,0.585449758,4.75626809,4.7559537
82.697802,5.09901951,4.75626237,0.585454649,4.75626237,4.75595593
82.708293,4.69041576,4.75625656,-0.256594629,4.75625656,4.75595804
82.718785,5.29150262,4.75625111,0.731608854,4.75625111,4.75596001
82.729276,4.12310563,4.75624558,-0.795700919,4.75624558,4.75596186
82.739768,4.47213595,4.75624026,-0.533014354,4.75624026,4.75596357
82.75026,5,4.75623486,0.493725775,4.75623486,4.75596516
82.760751,4.12310563,4.75622951,-0.79569082,4.75622951,4.75596661
82.771243,5.38516481,4.756224,0.793057883,4.756224,4.75596794
82.781734,5.56776436,4.75621832,0.900858503,4.75621832,4.75596913
82.792226,5.19615242,4.75621224,0.663279868,4.75621224,4.7559702
82.802718,4.69041576,4.75620566,-0.256495415,4.75620566,4.75597113
82.813209,5.29150262,4.75619802,0.731645135,4.75619802,4.75597193
82.823701,4,4.75618937,-0.869591498,4.75618937,4.75597259
82.834192,4.69041576,4.75617804,-0.256441567,4.75617804,4.75597313
82.844684,4.89897949,4.75616492,0.377908149,4.75616492,4.75597353
82.855176,4.89897949,4.75614517,0.377934273,4.75614517,4.75597379
82.865667,4.24264069,4.75612253,-0.716576474,4.75612253,4.75597393
82.876159,6.164414,4.75608397,1.18673082,4.75608397,4.75597393
82.88665,5.19615242,4.7560983,0.663365757,4.7560983,4.75597379
82.897142,5.09901951,4.75612512,0.585571849,4.75612512,4.75597352
82.907634,5.47722558,4.7561824,0.849142611,4.7561824,4.75597311
82.918125,5.09901951,4.75618654,0.585519405,4.75618654,4.75597257
82.928617,4.47213595,4.75631445,-0.533083951,4.75631445,4.7559719
82.939108,5.38516481,4.75645552,0.792911904,4.75645552,4.75597108
82.9496,4.69041576,4.7567398,-0.257534541,4.7567398,4.75597013
82.960092,4.35889894,4.75704018,-0.630984339,4.75704018,4.75596905
82.970583,4.58257569,4.75766628,-0.418438273,4.75766628,4.75596782
82.981075,5.47722558,4.75836322,0.847857506,4.75836322,4.75596646
82.991566,4.35889894,4.75967945,-0.633072277,4.75967945,4.75596496
83.002058,5,4.76128023,0.488589575,4.76128023,4.75596332
83.01255,4.79583152,4.76404493,0.178287951,4.76404493,4.75596155
83.023041,5.91607978,4.76769038,1.07162932,4.76769038,4.75595963
83.033533,4.24264069,4.77349,-0.728594063,4.77349,4.75595757
83.044024,5.19615242,4.78172796,0.643758082,4.78172796,4.75595538
83.054516,4.35889894,4.79386829,-0.659522057,4.79386829,4.75595304
83.065008,4.24264069,4.80507023,-0.749953024,4.80507023,4.75595057
83.075499,5.29150262,4.81525483,0.690107089,4.81525483,4.75594795
83.085991,4.24264069,4.82038431,-0.76009448,4.82038431,4.7559452
83.096482,5.29150262,4.82173264,0.685397683,4.82173264,4.7559423
83.106974,4.47213595,4.82313666,-0.592453125,4.82313666,4.75593926
83.117466,3.74165739,4.82456836,-1.04063008,4.82456836,4.75593607
83.127957,4.24264069,4.82606873,-0.763824613,4.82606873,4.75593275
83.138449,4.47213595,4.82759067,-0.596200228,4.82759067,4.75592928
83.14894,4.69041576,4.8291965,-0.372532874,4.8291965,4.75592567
83.159432,5,4.83081644,0.411319287,4.83081644,4.75592192
83.169924,4.89897949,4.83253796,0.257762544,4.83253796,4.75591802
83.180415,5.09901951,4.83426906,0.514539066,4.83426906,4.75591398
83.190907,4.79583152,4.83611264,-0.200701552,4.83611264,4.75590979
83.201398,4.35889894,4.8379724,-0.692151326,4.8379724,4.75590546
83.21189,5.56776436,4.83994291,0.853124523,4.83994291,4.75590099
83.222382,5.09901951,4.84194452,0.507025634,4.84194452,4.75589637
83.232873,5.19615242,4.84405368,0.593379086,4.84405368,4.7558916
83.243365,4.79583152,4.8462116,-0.22445506,4.8462116,4.75588669
83.253856,5.09901951,4.84847295,0.500546266,4.84847295,4.75588163
83.264348,4.58257569,4.85080374,-0.517907371,4.85080374,4.75587643
83.27484,5.38516481,4.85323249,0.729336901,4.85323249,4.75587108
83.285331,3.60555128,4.85575473,-1.11812497,4.85575473,4.75586558
83.295823,5.65685425,4.85836753,0.893580839,4.85836753,4.75585993
83.306314,5.47722558,4.86110285,0.784934856,4.86110285,4.75585414
83.316806,5.74456265,4.86391873,0.9384263,4.86391873,4.75584819
83.327298,4.24264069,4.86689185,-0.790095667,4.86689185,4.7558421
83.337789,3.87298335,4.86993207,-0.998473195,4.86993207,4.75583586
83.348281,5.38516481,4.87317075,0.715537599,4.87317075,4.75582948
83.358772,5,4.87646004,0.35148252,4.87646004,4.75582294
83.369264,5.47722558,4.87999652,0.772805965,4.87999652,4.75581625
83.379756,5.56776436,4.88356309,0.827164601,4.88356309,4.75580941
83.390247,4.35889894,4.88743423,-0.727004327,4.88743423,4.75580243
83.400739,4.24264069,4.89133473,-0.80541545,4.89133473,4.75579529
83.41123,4.89897949,4.89555892,0.0584855656,4.89555892,4.755788
83.421722,5.19615242,4.89984504,0.544341237,4.89984504,4.75578056
83.432214,5,4.90445783,0.309098963,4.90445783,4.75577297
83.442705,6,4.90918116,1.04442273,4.90918116,4.75576522
83.453197,4.47213595,4.914231,-0.664902283,4.914231,4.75575733
83.463688,4.69041576,4.91945299,-0.478578338,4.91945299,4.75574928
83.47418,4,4.92499662,-0.961767444,4.92499662,4.75574108
83.484672,5.19615242,4.93078979,0.515133605,4.93078979,4.75573272
83.495163,5.65685425,4.93689285,0.848505393,4.93689285,4.75572422
83.505655,4.69041576,4.94334198,-0.502917709,4.94334198,4.75571556
83.516146,4.24264069,4.95008263,-0.841095679,4.95008263,4.75570674
83.526638,6,4.95728941,1.02113201,4.95728941,4.75569777
83.53713,5.29150262,4.96475986,0.571614169,4.96475986,4.75568865
83.547621,4.24264069,4.97284557,-0.854520263,4.97284557,4.75567937
83.558113,4.58257569,4.98115363,-0.631330293,4.98115363,4.75566994
83.568604,5.38516481,4.99026619,0.628409595,4.99026619,4.75566035
83.579096,5.47722558,4.99954116,0.691147176,4.99954116,4.75565061
83.589588,4.89897949,5.00986069,-0.332988292,5.00986069,4.75564071
83.600079,5.29150262,5.02026813,0.520801778,5.02026813,4.75563065
83.610571,5,5.03200185,-0.178890618,5.03200185,4.75562044
83.621062,5.09901951,5.04387082,0.234837592,5.04387082,4.75561007
83.631554,5.47722558,5.05714925,0.648132952,5.05714925,4.75559955
83.642046,4.69041576,5.07076556,-0.61672506,5.07076556,4.75558886
83.652537,5.56776436,5.08586926,0.694186648,5.08586926,4.75557802
83.663029,5.83095189,5.10158835,0.854027834,5.10158835,4.75556702
83.67352,5.83095189,5.11886781,0.843850745,5.11886781,4.75555587
83.684012,6.4807407,5.13714195,1.15913707,5.13714195,4.75554455
83.694504,5,5.15703582,-0.396277449,5.15703582,4.75553308
83.704995,6,5.17844345,0.90639757,5.17844345,4.75552145
83.715487,5.47722558,5.20150228,0.525093607,5.20150228,4.75550965
83.725978,5.83095189,5.22679986,0.777272174,5.22679986,4.7554977
83.73647,5,5.25373031,-0.503716502,5.25373031,4.75548559
83.746962,5.47722558,5.28391806,0.439667503,5.28391806,4.75547332
83.757453,5,5.31563404,-0.56181317,5.31563404,4.75546089
83.767945,5,5.35205134,-0.593339148,5.35205134,4.75544829
83.778436,6.244998,5.38976505,0.924788056,5.38976505,4.75543554
83.788928,5.83095189,5.43426358,0.629831975,5.43426358,4.75542263
83.79942,6.08276253,5.47961328,0.776626838,5.47961328,4.75540955
83.809911,5.83095189,5.53486149,0.544141902,5.53486149,4.75539631
83.820403,6.63324958,5.59074496,1.02103115,5.59074496,4.75538291
83.830894,5.74456265,5.66034073,0.290210125,5.66034073,4.75536935
83.841386,5.09901951,5.73199677,-0.795598681,5.73199677,4.75535563
83.851878,5.09901951,5.82136688,-0.849910212,5.82136688,4.75534174
83.862369,5.91607978,5.91684424,-0.0276488575,5.91684424,4.75532769
83.872861,5.47722558,6.03578575,-0.747368835,6.03578575,4.75531347
83.883352,5.91607978,6.16832613,-0.502241324,6.16832613,4.7552991
83.893844,6.78232998,6.3309731,0.671830994,6.3309731,4.75528456
83.904336,6.78232998,6.51986779,0.512310642,6.51986779,4.75526985
83.914827,6.63324958,6.74486481,-0.334088648,6.74486481,4.75525498
83.925319,8,7.01852142,0.99069601,7.01852142,4.75523995
83.93581,6.63324958,7.33363512,-0.836890401,7.33363512,4.75522475
83.946302,8.36660027,7.7384746,0.792543796,7.7384746,4.75520939
83.956794,8,8.18719499,-0.432660365,8.18719499,4.75519386
83.967285,8.94427191,8.79642457,0.384509221,8.79642457,4.75517816
83.977777,9.53939201,9.44064895,0.314234089,9.44064895,4.7551623
83.988268,11.7898261,10.3597458,1.19585965,10.3597458,4.75514628
83.99876,12.5299641,11.280344,1.11786408,11.280344,4.75513009
84.009252,13.453624,12.6426288,0.900552763,12.6426288,4.75511373
84.019743,14.2828569,13.9319734,0.592354197,13.9319734,4.7550972
84.030235,15.7480157,15.8432665,-0.308627204,15.8432665,4.75508051
84.040726,17.5499288,17.6202726,-0.265224014,17.6202726,4.75506365
84.051218,20.2484567,19.9152874,0.577208262,19.9152874,4.75504662
84.06171,21.725561,22.0184235,-0.541167697,22.0184235,4.75502942
84.072201,24.0624188,24.1538508,-0.302377262,24.1538508,4.75501206
84.082693,26.2106848,25.8938378,0.562891668,25.8938378,4.75499453
84.093184,27.8028775,26.9151697,0.942182505,26.9151697,4.75497683
84.103676,28.2842712,27.2270348,1.02822004,27.2270348,4.75495896
84.114168,27.7668868,26.2659131,1.2251423,26.2659131,4.75494092
84.124659,26.3818119,24.6249156,1.32547967,24.6249156,4.75492271
84.135151,24.3926218,21.9750103,1.55486704,21.9750103,4.75490433
84.145642,20.5669638,19.2468644,1.1489558,19.2468644,4.75488579
84.156134,18.761663,16.3519333,1.55233043,16.3519333,4.75486707
84.166626,16.2480768,13.9731688,1.50827983,13.9731688,4.75484818
84.177117,13.1529464,11.8764063,1.12984074,11.8764063,4.75482912
84.187609,12,10.4605267,1.24075511,10.4605267,4.7548099
84.1981,11.8743421,9.28934519,1.60779255,9.28934519,4.7547905
84.208592,9.38083152,8.59005401,0.889256718,8.59005401,4.75477093
84.219084,8.60232527,7.97582312,0.791518886,7.97582312,4.75475118
84.229575,6.8556546,7.59562284,-0.860214064,7.59562284,4.75473127
84.240067,7.34846923,7.22410871,0.352647871,7.22410871,4.75471119
84.250558,7.74596669,6.97480449,0.878158415,6.97480449,4.75469093
84.26105,7.34846923,6.72445575,0.789945235,6.72445575,4.7546705
84.271542,6.164414,6.53963161,-0.612550087,6.53963161,4.7546499
84.282033,6,6.35990406,-0.599920048,6.35990406,4.75462913
84.292525,6.63324958,6.21910775,0.64353852,6.21910775,4.75460818
84.303016,6,6.08576738,-0.292860676,6.08576738,4.75458706
84.313508,6.08276253,5.97627846,0.326318964,5.97627846,4.75456576
84.324,5.83095189,5.87485205,-0.209523644,5.87485205,4.75454429
84.334491,4.79583152,5.7881991,-0.99617648,5.7881991,4.75452265
84.344983,6.32455532,5.70941365,0.784309678,5.70941365,4.75450084
84.355474,5.38516481,5.63975721,-0.504571502,5.63975721,4.75447885
84.365966,5.56776436,5.57743756,-0.0983524081,5.57743756,4.75445668
84.376458,5.47722558,5.52066751,-0.208427296,5.52066751,4.75443434
84.386949,5.29150262,5.47059184,-0.423189338,5.47059184,4.75441183
84.397441,5.56776436,5.42376278,0.379475404,5.42376278,4.75438914
84.407932,5.74456265,5.38295782,0.601335865,5.38295782,4.75436628
84.418424,5.56776436,5.34390669,0.473135995,5.34390669,4.75434324
84.428916,5.91607978,5.31024116,0.778356362,5.31024116,4.75432002
84.439407,5.83095189,5.27735932,0.744038018,5.27735932,4.75429663
84.449899,5.09901951,5.24928017,-0.387634695,5.24928017,4.75427306
84.46039,5.83095189,5.22150995,0.780667627,5.22150995,4.75424932
84.470882,5.19615242,5.19769343,-0.0392557216,5.19769343,4.7542254
84.481374,3.87298335,5.17422649,-1.14072045,5.17422649,4.7542013
84.491865,5.29150262,5.1536702,0.371257894,5.1536702,4.75417703
84.502357,4.69041576,5.13367423,-0.66577659,5.13367423,4.75415258
84.512848,5.74456265,5.11581305,0.792937325,5.11581305,4.75412795
84.52334,5.29150262,5.098644,0.439156714,5.098644,4.75410314
84.533832,4.89897949,5.08302894,-0.429009855,5.08302894,4.75407815
84.544323,4.47213595,5.06818538,-0.772042374,5.06818538,4.75405299
84.554815,4.89897949,5.05445895,-0.394308846,5.05445895,4.75402765
84.565306,4.69041576,5.04154218,-0.592559209,5.04154218,4.75400213
84.575798,5.65685425,5.02941357,0.792111533,5.02941357,4.75397644
84.58629,5.38516481,5.01810601,0.605853775,5.01810601,4.75395056
84.596781,4.58257569,5.0073389,-0.6517386,5.0073389,4.7539245
84.607273,4.79583152,4.99738697,-0.448949268,4.99738697,4.75389827
84.617764,5.56776436,4.98778503,0.761563742,4.98778503,4.75387185
84.628256,5.09901951,4.97898198,0.346464337,4.97898198,4.75384526
84.638748,5.65685425,4.97038277,0.828535746,4.97038277,4.75381849
84.649239,4.89897949,4.96256028,-0.252152328,4.96256028,4.75379153
84.659731,4.79583152,4.95482998,-0.398746108,4.95482998,4.7537644
84.670222,5,4.94784778,0.228368596,4.94784778,4.75373709
84.680714,5.19615242,4.94092081,0.505204524,4.94092081,4.75370959
84.691206,4,4.93461525,-0.966755008,4.93461525,4.75368191
84.701697,4.89897949,4.92839926,-0.171521932,4.92839926,4.75365406
84.712189,5.29150262,4.92267204,0.607314235,4.92267204,4.75362602
84.72268,4.47213595,4.91707306,-0.667036056,4.91707306,4.7535978
84.733172,5.83095189,4.91185555,0.958695124,4.91185555,4.7535694
84.743664,5.29150262,4.90679448,0.620248451,4.90679448,4.75354082
84.754155,5.09901951,4.90202834,0.443836872,4.90202834,4.75351206
84.764647,4.24264069,4.89743907,-0.809196134,4.89743907,4.75348311
84.775138,4.58257569,4.8930732,-0.557223026,4.8930732,4.75345398
84.78563,4.79583152,4.88889901,-0.305069637,4.88889901,4.75342467
84.796122,5.09901951,4.88488927,0.462742087,4.88488927,4.75339518
84.806613,5.19615242,4.88108204,0.561311309,4.88108204,4.7533655
84.817105,4.79583152,4.87739091,-0.285586035,4.87739091,4.75333564
84.827596,4.69041576,4.87390852,-0.428360547,4.87390852,4.7533056
84.838088,5.29150262,4.87050293,0.648844892,4.87050293,4.75327538
84.84858,4.47213595,4.86730911,-0.628627997,4.86730911,4.75324497
84.859071,4.89897949,4.86416046,0.186598565,4.86416046,4.75321438
84.869563,4.89897949,4.86122437,0.19430675,4.86122437,4.7531836
84.880054,4.79583152,4.85830852,-0.249953983,4.85830852,4.75315264
84.890546,5.47722558,4.8556015,0.788431399,4.8556015,4.75312149
84.901038,5.56776436,4.85291223,0.845489284,4.85291223,4.75309016
84.911529,4.58257569,4.85039453,-0.517512156,4.85039453,4.75305865
84.922021,5.29150262,4.84790908,0.666028184,4.84790908,4.75302695
84.932512,4.47213595,4.84556301,-0.611086783,4.84556301,4.75299507
84.943004,3.74165739,4.84326,-1.04957258,4.84326,4.752963
84.953496,4.58257569,4.84106575,-0.508419175,4.84106575,4.75293075
84.963987,4.24264069,4.83892212,-0.772192617,4.83892212,4.75289831
84.974479,5.29150262,4.83686058,0.674271489,4.83686058,4.75286569
84.98497,4.24264069,4.83485396,-0.769553946,4.83485396,4.75283288
84.995462,4.24264069,4.8329076,-0.768288302,4.8329076,4.75279989
85.005954,5,4.8310113,0.411082352,4.8310113,4.7527667
85.016445,5.65685425,4.82915281,0.909780986,4.82915281,4.75273334
85.026937,5,4.82732305,0.415544164,4.82732305,4.75269978
85.037428,6.164414,4.82550772,1.15711118,4.82550772,4.75266605
85.04792,4,4.82366349,-0.907559082,4.82366349,4.75263212
85.058412,5,4.82180943,0.42212625,4.82180943,4.752598
85.068903,4.47213595,4.8197864,-0.589618896,4.8197864,4.7525637
85.079395,4.24264069,4.81773264,-0.758348173,4.81773264,4.75252922
85.089886,4.89897949,4.81518078,0.289480055,4.81518078,4.75249454
85.100378,4.69041576,4.81255166,-0.349479477,4.81255166,4.75245968
85.11087,4.89897949,4.80875816,0.300368655,4.80875816,4.75242463
85.121361,4.58257569,4.80461379,-0.471209184,4.80461379,4.75238939
85.131853,4.89897949,4.79817467,0.317497739,4.79817467,4.75235397
85.142344,4.79583152,4.79045423,0.073330034,4.79045423,4.75231836
85.152836,4.89897949,4.7783443,0.347325757,4.7783443,4.75228255
85.163328,4.69041576,4.77007487,-0.282239461,4.77007487,4.75224656
85.173819,4.79583152,4.77003883,0.160601031,4.77003883,4.75221039
85.184311,5.29150262,4.75217402,0.734389953,4.75217402,4.75217402
85.194802,5.19615242,4.75213747,0.666344473,4.75213747,4.75213747
85.205294,5.38516481,4.75210072,0.795653245,4.75210072,4.75210072
85.215786,4.47213595,4.75206379,-0.529082065,4.75206379,4.75206379
85.226277,4.47213595,4.75202667,-0.529046984,4.75202667,4.75202667
85.236769,4.47213595,4.75198935,-0.529011719,4.75198935,4.75198935
85.24726,5.09901951,4.75195185,0.589124485,4.75195185,4.75195185
[truncated: 398,250 more chars]
