# Supplementary material for: Phase Stability of Iron Nitride Fe4N at High Pressure—Pressure-Dependent Evolution of Phase Equilibria in the Fe–N System
Source: Materials (Basel). 2021 Jul 15;14(14):3963. doi: 10.3390/ma14143963 (PMC8307547; doi:10.3390/ma14143963)
Supplement: Supplementary file 1 [file materials-14-03963-s001.zip › xrd_data/4-600_riet.txt]

'y-axis saved as Sqrt(y)
'x,Yobs,Ycalc,Diff,gamma,epsilon,Bkg
20,11.4891253,0,0,0,0,0
20.010492,11.3578167,0,0,0,0,0
20.020983,10.5830052,0,0,0,0,0
20.031475,11.045361,0,0,0,0,0
20.041966,10.7238053,0,0,0,0,0
20.052458,11.9582607,0,0,0,0,0
20.06295,12.489996,0,0,0,0,0
20.073441,11.045361,0,0,0,0,0
20.083933,11.61895,0,0,0,0,0
20.094424,10.8627805,0,0,0,0,0
20.104916,12,0,0,0,0,0
20.115408,10.8627805,0,0,0,0,0
20.125899,12.083046,0,0,0,0,0
20.136391,11.9163753,0,0,0,0,0
20.146882,11.7898261,0,0,0,0,0
20.157374,11.1355287,0,0,0,0,0
20.167866,11.6619038,0,0,0,0,0
20.178357,10.7238053,0,0,0,0,0
20.188849,10.9087121,0,0,0,0,0
20.19934,10.9087121,0,0,0,0,0
20.209832,11.7898261,0,0,0,0,0
20.220324,10.7238053,0,0,0,0,0
20.230815,10.9087121,0,0,0,0,0
20.241307,10.6301458,0,0,0,0,0
20.251798,11.5758369,0,0,0,0,0
20.26229,12,0,0,0,0,0
20.272782,11.5758369,0,0,0,0,0
20.283273,11.2249722,0,0,0,0,0
20.293765,11.6619038,0,0,0,0,0
20.304256,11.2694277,0,0,0,0,0
20.314748,11.5325626,0,0,0,0,0
20.32524,11.61895,0,0,0,0,0
20.335731,11.5325626,0,0,0,0,0
20.346223,11.2694277,0,0,0,0,0
20.356714,11.045361,0,0,0,0,0
20.367206,10.6770783,0,0,0,0,0
20.377698,11.0905365,0,0,0,0,0
20.388189,11.3137085,0,0,0,0,0
20.398681,11.7046999,0,0,0,0,0
20.409172,11.7898261,0,0,0,0,0
20.419664,11.7046999,0,0,0,0,0
20.430156,10.8166538,0,0,0,0,0
20.440647,11.2694277,0,0,0,0,0
20.451139,10.9087121,0,0,0,0,0
20.46163,11,0,0,0,0,0
20.472122,11.8743421,0,0,0,0,0
20.482614,11.4017543,0,0,0,0,0
20.493105,11.2694277,0,0,0,0,0
20.503597,10.7703296,0,0,0,0,0
20.514088,10.4403065,0,0,0,0,0
20.52458,11.9582607,0,0,0,0,0
20.535072,11.7046999,0,0,0,0,0
20.545563,10.9544512,0,0,0,0,0
20.556055,12.2474487,0,0,0,0,0
20.566546,12,0,0,0,0,0
20.577038,11.4455231,0,0,0,0,0
20.58753,11.5758369,0,0,0,0,0
20.598021,10.7703296,0,0,0,0,0
20.608513,12.1655251,0,0,0,0,0
20.619004,11.7046999,0,0,0,0,0
20.629496,11.3578167,0,0,0,0,0
20.639988,11.5758369,0,0,0,0,0
20.650479,11.61895,0,0,0,0,0
20.660971,10.5356538,0,0,0,0,0
20.671462,11.2249722,0,0,0,0,0
20.681954,11.1803399,0,0,0,0,0
20.692446,11.5325626,0,0,0,0,0
20.702937,11.3137085,0,0,0,0,0
20.713429,11.045361,0,0,0,0,0
20.72392,11.8321596,0,0,0,0,0
20.734412,11.4891253,0,0,0,0,0
20.744904,11.3578167,0,0,0,0,0
20.755395,11.7046999,0,0,0,0,0
20.765887,11.1803399,0,0,0,0,0
20.776378,12.489996,0,0,0,0,0
20.78687,11.9163753,0,0,0,0,0
20.797362,10.6770783,0,0,0,0,0
20.807853,11.3578167,0,0,0,0,0
20.818345,12.1655251,0,0,0,0,0
20.828836,10.8627805,0,0,0,0,0
20.839328,11.8321596,0,0,0,0,0
20.84982,11.0905365,0,0,0,0,0
20.860311,10.5830052,0,0,0,0,0
20.870803,10.3440804,0,0,0,0,0
20.881294,11.9163753,0,0,0,0,0
20.891786,12.1655251,0,0,0,0,0
20.902278,10.9544512,0,0,0,0,0
20.912769,11.2249722,0,0,0,0,0
20.923261,11.1355287,0,0,0,0,0
20.933752,10.9087121,0,0,0,0,0
20.944244,11.7473401,0,0,0,0,0
20.954736,11.2694277,0,0,0,0,0
20.965227,11.045361,0,0,0,0,0
20.975719,11.1355287,0,0,0,0,0
20.98621,12.328828,0,0,0,0,0
20.996702,11.5325626,0,0,0,0,0
21.007194,11.61895,0,0,0,0,0
21.017685,11.8743421,0,0,0,0,0
21.028177,11.2694277,0,0,0,0,0
21.038668,12.1655251,0,0,0,0,0
21.04916,12.2882057,0,0,0,0,0
21.059652,11.7473401,0,0,0,0,0
21.070143,11.2694277,0,0,0,0,0
21.080635,12.0415946,0,0,0,0,0
21.091126,11.6619038,0,0,0,0,0
21.101618,11.9163753,0,0,0,0,0
21.11211,12.0415946,0,0,0,0,0
21.122601,11.3137085,0,0,0,0,0
21.133093,11.4455231,0,0,0,0,0
21.143584,10.8166538,0,0,0,0,0
21.154076,12.083046,0,0,0,0,0
21.164568,11.61895,0,0,0,0,0
21.175059,11.2694277,0,0,0,0,0
21.185551,11.2249722,0,0,0,0,0
21.196042,11.7046999,0,0,0,0,0
21.206534,11.4455231,0,0,0,0,0
21.217026,11,0,0,0,0,0
21.227517,11.1355287,0,0,0,0,0
21.238009,10.5356538,0,0,0,0,0
21.2485,11.5325626,0,0,0,0,0
21.258992,11.1355287,0,0,0,0,0
21.269484,11.5758369,0,0,0,0,0
21.279975,11.4891253,0,0,0,0,0
21.290467,11.4455231,0,0,0,0,0
21.300958,10.7238053,0,0,0,0,0
21.31145,11.0905365,0,0,0,0,0
21.321942,11.9163753,0,0,0,0,0
21.332433,11.9582607,0,0,0,0,0
21.342925,10.9087121,0,0,0,0,0
21.353416,10.9544512,0,0,0,0,0
21.363908,11.7046999,0,0,0,0,0
21.3744,11.7473401,0,0,0,0,0
21.384891,10.9087121,0,0,0,0,0
21.395383,11.1355287,0,0,0,0,0
21.405874,12,0,0,0,0,0
21.416366,11.6619038,0,0,0,0,0
21.426858,11.8743421,0,0,0,0,0
21.437349,10.9544512,0,0,0,0,0
21.447841,12.5299641,0,0,0,0,0
21.458332,10.8627805,0,0,0,0,0
21.468824,10.7238053,0,0,0,0,0
21.479316,11.4455231,0,0,0,0,0
21.489807,11.045361,0,0,0,0,0
21.500299,11.4017543,0,0,0,0,0
21.51079,11.9163753,0,0,0,0,0
21.521282,11.5325626,0,0,0,0,0
21.531774,10.6301458,0,0,0,0,0
21.542265,10.6770783,0,0,0,0,0
21.552757,10.9087121,0,0,0,0,0
21.563248,11.1355287,0,0,0,0,0
21.57374,12.5299641,0,0,0,0,0
21.584232,12.2474487,0,0,0,0,0
21.594723,11.2249722,0,0,0,0,0
21.605215,11.3578167,0,0,0,0,0
21.615706,11.6619038,0,0,0,0,0
21.626198,11.7473401,0,0,0,0,0
21.63669,11.045361,0,0,0,0,0
21.647181,11.2249722,0,0,0,0,0
21.657673,11.9163753,0,0,0,0,0
21.668164,11.4891253,0,0,0,0,0
21.678656,11.2694277,0,0,0,0,0
21.689148,11.3137085,0,0,0,0,0
21.699639,11.7046999,0,0,0,0,0
21.710131,10.9087121,0,0,0,0,0
21.720622,12.5299641,0,0,0,0,0
21.731114,12,0,0,0,0,0
21.741606,11.2249722,0,0,0,0,0
21.752097,12.1243557,0,0,0,0,0
21.762589,12.328828,0,0,0,0,0
21.77308,11.7898261,0,0,0,0,0
21.783572,12.5698051,0,0,0,0,0
21.794064,11.8743421,0,0,0,0,0
21.804555,11.2694277,0,0,0,0,0
21.815047,11.4455231,0,0,0,0,0
21.825538,12,0,0,0,0,0
21.83603,11.8743421,0,0,0,0,0
21.846522,11.7898261,0,0,0,0,0
21.857013,11.3578167,0,0,0,0,0
21.867505,11.9163753,0,0,0,0,0
21.877996,11.7898261,0,0,0,0,0
21.888488,11.5325626,0,0,0,0,0
21.89898,11,0,0,0,0,0
21.909471,11.61895,0,0,0,0,0
21.919963,11.1803399,0,0,0,0,0
21.930454,12.1655251,0,0,0,0,0
21.940946,11.6619038,0,0,0,0,0
21.951438,10.4403065,0,0,0,0,0
21.961929,11.5325626,0,0,0,0,0
21.972421,12.3693169,0,0,0,0,0
21.982912,12,0,0,0,0,0
21.993404,11.5758369,0,0,0,0,0
22.003896,11.3137085,0,0,0,0,0
22.014387,10.8166538,0,0,0,0,0
22.024879,12.2474487,0,0,0,0,0
22.03537,10.7238053,0,0,0,0,0
22.045862,11.2694277,0,0,0,0,0
22.056354,11,0,0,0,0,0
22.066845,11.61895,0,0,0,0,0
22.077337,11.3578167,0,0,0,0,0
22.087828,10.8166538,0,0,0,0,0
22.09832,11.0905365,0,0,0,0,0
22.108812,11.0905365,0,0,0,0,0
22.119303,11.4891253,0,0,0,0,0
22.129795,10.2469508,0,0,0,0,0
22.140286,11,0,0,0,0,0
22.150778,10.9544512,0,0,0,0,0
22.16127,10.6301458,0,0,0,0,0
22.171761,11.045361,0,0,0,0,0
22.182253,12,0,0,0,0,0
22.192744,10.8627805,0,0,0,0,0
22.203236,11.6619038,0,0,0,0,0
22.213728,11.4017543,0,0,0,0,0
22.224219,11.6619038,0,0,0,0,0
22.234711,11.2694277,0,0,0,0,0
22.245202,11.61895,0,0,0,0,0
22.255694,12,0,0,0,0,0
22.266186,10.7703296,0,0,0,0,0
22.276677,11.4017543,0,0,0,0,0
22.287169,11.045361,0,0,0,0,0
22.29766,12.0415946,0,0,0,0,0
22.308152,11.2694277,0,0,0,0,0
22.318644,12.1243557,0,0,0,0,0
22.329135,12.8062485,0,0,0,0,0
22.339627,11.61895,0,0,0,0,0
22.350118,11.5758369,0,0,0,0,0
22.36061,11.61895,0,0,0,0,0
22.371102,11.3578167,0,0,0,0,0
22.381593,10.7703296,0,0,0,0,0
22.392085,11.2249722,0,0,0,0,0
22.402576,11.6619038,0,0,0,0,0
22.413068,11.4017543,0,0,0,0,0
22.42356,10.8627805,0,0,0,0,0
22.434051,11.0905365,0,0,0,0,0
22.444543,11.2694277,0,0,0,0,0
22.455034,11.0905365,0,0,0,0,0
22.465526,11.3137085,0,0,0,0,0
22.476018,10.8166538,0,0,0,0,0
22.486509,11.8321596,0,0,0,0,0
22.497001,11.5325626,0,0,0,0,0
22.507492,11.8321596,0,0,0,0,0
22.517984,10.7238053,0,0,0,0,0
22.528476,11.9163753,0,0,0,0,0
22.538967,11.5758369,0,0,0,0,0
22.549459,11.5325626,0,0,0,0,0
22.55995,12.2065556,0,0,0,0,0
22.570442,10.8627805,0,0,0,0,0
22.580934,11.7473401,0,0,0,0,0
22.591425,12.1243557,0,0,0,0,0
22.601917,11.9582607,0,0,0,0,0
22.612408,12.2065556,0,0,0,0,0
22.6229,11.3137085,0,0,0,0,0
22.633392,11.2249722,0,0,0,0,0
22.643883,11.7046999,0,0,0,0,0
22.654375,11.7046999,0,0,0,0,0
22.664866,11.2249722,0,0,0,0,0
22.675358,12.1243557,0,0,0,0,0
22.68585,10.4880885,0,0,0,0,0
22.696341,10.0995049,0,0,0,0,0
22.706833,11.5758369,0,0,0,0,0
22.717324,10.8166538,0,0,0,0,0
22.727816,11.2694277,0,0,0,0,0
22.738308,10.2469508,0,0,0,0,0
22.748799,11.1803399,0,0,0,0,0
22.759291,11.1355287,0,0,0,0,0
22.769782,11.7473401,0,0,0,0,0
22.780274,11.0905365,0,0,0,0,0
22.790766,12.2882057,0,0,0,0,0
22.801257,10.6770783,0,0,0,0,0
22.811749,12.2882057,0,0,0,0,0
22.82224,11.3137085,0,0,0,0,0
22.832732,11.5325626,0,0,0,0,0
22.843224,11.1803399,0,0,0,0,0
22.853715,12.5698051,0,0,0,0,0
22.864207,11.4891253,0,0,0,0,0
22.874698,10.8627805,0,0,0,0,0
22.88519,10.4880885,0,0,0,0,0
22.895682,11.4455231,0,0,0,0,0
22.906173,11.61895,0,0,0,0,0
22.916665,10.6301458,0,0,0,0,0
22.927156,10.8627805,0,0,0,0,0
22.937648,10.5830052,0,0,0,0,0
22.94814,12.3693169,0,0,0,0,0
22.958631,11.9582607,0,0,0,0,0
22.969123,10.6301458,0,0,0,0,0
22.979614,11.6619038,0,0,0,0,0
22.990106,11.2249722,0,0,0,0,0
23.000598,10.6770783,0,0,0,0,0
23.011089,11.5758369,0,0,0,0,0
23.021581,12.4498996,0,0,0,0,0
23.032072,11.3137085,0,0,0,0,0
23.042564,11.1803399,0,0,0,0,0
23.053056,11.61895,0,0,0,0,0
23.063547,10.6301458,0,0,0,0,0
23.074039,10.6770783,0,0,0,0,0
23.08453,11.4455231,0,0,0,0,0
23.095022,11.8743421,0,0,0,0,0
23.105514,11.5325626,0,0,0,0,0
23.116005,10.7703296,0,0,0,0,0
23.126497,11.4891253,0,0,0,0,0
23.136988,10.4880885,0,0,0,0,0
23.14748,10.4880885,0,0,0,0,0
23.157972,11.4017543,0,0,0,0,0
23.168463,10.7238053,0,0,0,0,0
23.178955,10.8166538,0,0,0,0,0
23.189446,12.083046,0,0,0,0,0
23.199938,11.6619038,0,0,0,0,0
23.21043,11.6619038,0,0,0,0,0
23.220921,11.4017543,0,0,0,0,0
23.231413,11,0,0,0,0,0
23.241904,10.4403065,0,0,0,0,0
23.252396,11.045361,0,0,0,0,0
23.262888,10.8627805,0,0,0,0,0
23.273379,11.045361,0,0,0,0,0
23.283871,10.5356538,0,0,0,0,0
23.294362,10.5356538,0,0,0,0,0
23.304854,11.3578167,0,0,0,0,0
23.315346,11.045361,0,0,0,0,0
23.325837,11.0905365,0,0,0,0,0
23.336329,11,0,0,0,0,0
23.34682,10.7703296,0,0,0,0,0
23.357312,11.3578167,0,0,0,0,0
23.367804,11.9582607,0,0,0,0,0
23.378295,11.0905365,0,0,0,0,0
23.388787,11.045361,0,0,0,0,0
23.399278,11.4455231,0,0,0,0,0
23.40977,11.3137085,0,0,0,0,0
23.420262,10.6301458,0,0,0,0,0
23.430753,10.7238053,0,0,0,0,0
23.441245,11,0,0,0,0,0
23.451736,10.3440804,0,0,0,0,0
23.462228,11.5758369,0,0,0,0,0
23.47272,10.9087121,0,0,0,0,0
23.483211,10.5830052,0,0,0,0,0
23.493703,10.9087121,0,0,0,0,0
23.504194,10.5830052,0,0,0,0,0
23.514686,12.0415946,0,0,0,0,0
23.525178,12.1243557,0,0,0,0,0
23.535669,10.1488916,0,0,0,0,0
23.546161,11.2249722,0,0,0,0,0
23.556652,10.2956301,0,0,0,0,0
23.567144,10.3440804,0,0,0,0,0
23.577636,11.2249722,0,0,0,0,0
23.588127,10.4880885,0,0,0,0,0
23.598619,11.61895,0,0,0,0,0
23.60911,9.59166305,0,0,0,0,0
23.619602,11.7473401,0,0,0,0,0
23.630094,10.1488916,0,0,0,0,0
23.640585,11,0,0,0,0,0
23.651077,10.1488916,0,0,0,0,0
23.661568,10.9087121,0,0,0,0,0
23.67206,10.9087121,0,0,0,0,0
23.682552,11.7046999,0,0,0,0,0
23.693043,10.5356538,0,0,0,0,0
23.703535,10.2469508,0,0,0,0,0
23.714026,10.5830052,0,0,0,0,0
23.724518,11.4017543,0,0,0,0,0
23.73501,10.4880885,0,0,0,0,0
23.745501,10.4403065,0,0,0,0,0
23.755993,10.6770783,0,0,0,0,0
23.766484,10.3440804,0,0,0,0,0
23.776976,10.8627805,0,0,0,0,0
23.787468,11.2694277,0,0,0,0,0
23.797959,10.3440804,0,0,0,0,0
23.808451,11.1803399,0,0,0,0,0
23.818942,10.6301458,0,0,0,0,0
23.829434,11.2694277,0,0,0,0,0
23.839926,10.6770783,0,0,0,0,0
23.850417,10.7238053,0,0,0,0,0
23.860909,11,0,0,0,0,0
23.8714,10.7703296,0,0,0,0,0
23.881892,10.5356538,0,0,0,0,0
23.892384,9.89949494,0,0,0,0,0
23.902875,10.9087121,0,0,0,0,0
23.913367,11.1355287,0,0,0,0,0
23.923858,10.7703296,0,0,0,0,0
23.93435,9.74679434,0,0,0,0,0
23.944842,10.8166538,0,0,0,0,0
23.955333,12,0,0,0,0,0
23.965825,10.3923048,0,0,0,0,0
23.976316,10.4403065,0,0,0,0,0
23.986808,10.7703296,0,0,0,0,0
23.9973,10.6770783,0,0,0,0,0
24.007791,10.8166538,0,0,0,0,0
24.018283,11.1803399,0,0,0,0,0
24.028774,11.1803399,0,0,0,0,0
24.039266,10.6770783,0,0,0,0,0
24.049758,10.9087121,0,0,0,0,0
24.060249,10.8627805,0,0,0,0,0
24.070741,10.7703296,0,0,0,0,0
24.081232,10.9087121,0,0,0,0,0
24.091724,11.1803399,0,0,0,0,0
24.102216,10.8627805,0,0,0,0,0
24.112707,11,0,0,0,0,0
24.123199,11.1803399,0,0,0,0,0
24.13369,10.7703296,0,0,0,0,0
24.144182,10.5830052,0,0,0,0,0
24.154674,10.3440804,0,0,0,0,0
24.165165,10.7238053,0,0,0,0,0
24.175657,11.0905365,0,0,0,0,0
24.186148,10.5830052,0,0,0,0,0
24.19664,10.4403065,0,0,0,0,0
24.207132,9.94987437,0,0,0,0,0
24.217623,9.53939201,0,0,0,0,0
24.228115,10.2469508,0,0,0,0,0
24.238606,10.2956301,0,0,0,0,0
24.249098,10.9544512,0,0,0,0,0
24.25959,11.1355287,0,0,0,0,0
24.270081,10.7703296,0,0,0,0,0
24.280573,10.198039,0,0,0,0,0
24.291064,10.198039,0,0,0,0,0
24.301556,10.3440804,0,0,0,0,0
24.312048,11.4891253,0,0,0,0,0
24.322539,10.198039,0,0,0,0,0
24.333031,10.9544512,0,0,0,0,0
24.343522,11.1803399,0,0,0,0,0
24.354014,11.5325626,0,0,0,0,0
24.364506,9.53939201,0,0,0,0,0
24.374997,10.0498756,0,0,0,0,0
24.385489,10.8166538,0,0,0,0,0
24.39598,10.6770783,0,0,0,0,0
24.406472,10.4880885,0,0,0,0,0
24.416964,10.8627805,0,0,0,0,0
24.427455,11.2694277,0,0,0,0,0
24.437947,10.7703296,0,0,0,0,0
24.448438,11.0905365,0,0,0,0,0
24.45893,11.3578167,0,0,0,0,0
24.469422,10.5356538,0,0,0,0,0
24.479913,11.0905365,0,0,0,0,0
24.490405,10.4403065,0,0,0,0,0
24.500896,10.6770783,0,0,0,0,0
24.511388,10.1488916,0,0,0,0,0
24.52188,10.2469508,0,0,0,0,0
24.532371,10.2956301,0,0,0,0,0
24.542863,10.2956301,0,0,0,0,0
24.553354,11.2249722,0,0,0,0,0
24.563846,11.1355287,0,0,0,0,0
24.574338,10.5830052,0,0,0,0,0
24.584829,9.8488578,0,0,0,0,0
24.595321,10.4880885,0,0,0,0,0
24.605812,10.5356538,0,0,0,0,0
24.616304,10.4880885,0,0,0,0,0
24.626796,10.8166538,0,0,0,0,0
24.637287,9.8488578,0,0,0,0,0
24.647779,10.198039,0,0,0,0,0
24.65827,10.0995049,0,0,0,0,0
24.668762,9.74679434,0,0,0,0,0
24.679254,10.3923048,0,0,0,0,0
24.689745,10.5356538,0,0,0,0,0
24.700237,11.3578167,0,0,0,0,0
24.710728,9.79795897,0,0,0,0,0
24.72122,10.5356538,0,0,0,0,0
24.731712,10.3440804,0,0,0,0,0
24.742203,10.4880885,0,0,0,0,0
24.752695,10.7703296,0,0,0,0,0
24.763186,10.8627805,0,0,0,0,0
24.773678,10.2469508,0,0,0,0,0
24.78417,10.5356538,0,0,0,0,0
24.794661,10.0498756,0,0,0,0,0
24.805153,10.7238053,0,0,0,0,0
24.815644,10.5356538,0,0,0,0,0
24.826136,10.8166538,0,0,0,0,0
24.836628,10.6770783,0,0,0,0,0
24.847119,9.64365076,0,0,0,0,0
24.857611,9.16515139,0,0,0,0,0
24.868102,10.3923048,0,0,0,0,0
24.878594,10,0,0,0,0,0
24.889086,11.1803399,0,0,0,0,0
24.899577,10.0498756,0,0,0,0,0
24.910069,10.4880885,0,0,0,0,0
24.92056,9.74679434,0,0,0,0,0
24.931052,10.9544512,0,0,0,0,0
24.941544,9.79795897,0,0,0,0,0
24.952035,10.3440804,0,0,0,0,0
24.962527,9.94987437,0,0,0,0,0
24.973018,10.0995049,0,0,0,0,0
24.98351,10.3440804,0,0,0,0,0
24.994002,10.8166538,0,0,0,0,0
25.004493,9.8488578,0,0,0,0,0
25.014985,10.1488916,0,0,0,0,0
25.025476,10.6770783,0,0,0,0,0
25.035968,10.3923048,0,0,0,0,0
25.04646,9.05538514,0,0,0,0,0
25.056951,10.2469508,0,0,0,0,0
25.067443,10.198039,0,0,0,0,0
25.077934,9.79795897,0,0,0,0,0
25.088426,10.1488916,0,0,0,0,0
25.098918,10.5830052,0,0,0,0,0
25.109409,9.48683298,0,0,0,0,0
25.119901,9.8488578,0,0,0,0,0
25.130392,9.48683298,0,0,0,0,0
25.140884,10.2469508,0,0,0,0,0
25.151376,10.6770783,0,0,0,0,0
25.161867,10.1488916,0,0,0,0,0
25.172359,9.74679434,0,0,0,0,0
25.18285,10,0,0,0,0,0
25.193342,9.21954446,0,0,0,0,0
25.203834,9.79795897,0,0,0,0,0
25.214325,9.94987437,0,0,0,0,0
25.224817,9.43398113,0,0,0,0,0
25.235308,9.48683298,0,0,0,0,0
25.2458,9.89949494,0,0,0,0,0
25.256292,9.79795897,0,0,0,0,0
25.266783,10.4403065,0,0,0,0,0
25.277275,10.0498756,0,0,0,0,0
25.287766,10.0498756,0,0,0,0,0
25.298258,10.3440804,0,0,0,0,0
25.30875,9.64365076,0,0,0,0,0
25.319241,10.3923048,0,0,0,0,0
25.329733,10.2956301,0,0,0,0,0
25.340224,9.2736185,0,0,0,0,0
25.350716,9.38083152,0,0,0,0,0
25.361208,9.94987437,0,0,0,0,0
25.371699,9.64365076,0,0,0,0,0
25.382191,10.8627805,0,0,0,0,0
25.392682,11.045361,0,0,0,0,0
25.403174,9.8488578,0,0,0,0,0
25.413666,9.16515139,0,0,0,0,0
25.424157,9.48683298,0,0,0,0,0
25.434649,9.94987437,0,0,0,0,0
25.44514,10.7238053,0,0,0,0,0
25.455632,9.64365076,0,0,0,0,0
25.466124,9.74679434,0,0,0,0,0
25.476615,10.198039,0,0,0,0,0
25.487107,10.6301458,0,0,0,0,0
25.497598,9.32737905,0,0,0,0,0
25.50809,9.53939201,0,0,0,0,0
25.518582,9.2736185,0,0,0,0,0
25.529073,10.198039,0,0,0,0,0
25.539565,10.1488916,0,0,0,0,0
25.550056,9.8488578,0,0,0,0,0
25.560548,9.43398113,0,0,0,0,0
25.57104,10.1488916,0,0,0,0,0
25.581531,9.79795897,0,0,0,0,0
25.592023,10.7238053,0,0,0,0,0
25.602514,9.59166305,0,0,0,0,0
25.613006,9.79795897,0,0,0,0,0
25.623498,8.83176087,0,0,0,0,0
25.633989,10.5356538,0,0,0,0,0
25.644481,9.53939201,0,0,0,0,0
25.654972,10.198039,0,0,0,0,0
25.665464,9.05538514,0,0,0,0,0
25.675956,9.8488578,0,0,0,0,0
25.686447,10.4880885,0,0,0,0,0
25.696939,9.21954446,0,0,0,0,0
25.70743,9.94987437,0,0,0,0,0
25.717922,9,0,0,0,0,0
25.728414,9.94987437,0,0,0,0,0
25.738905,9.43398113,0,0,0,0,0
25.749397,9.32737905,0,0,0,0,0
25.759888,9.59166305,0,0,0,0,0
25.77038,9.53939201,0,0,0,0,0
25.780872,11.045361,0,0,0,0,0
25.791363,10.3440804,0,0,0,0,0
25.801855,9.38083152,0,0,0,0,0
25.812346,10.3923048,0,0,0,0,0
25.822838,9.59166305,0,0,0,0,0
25.83333,8.88819442,0,0,0,0,0
25.843821,8.94427191,0,0,0,0,0
25.854313,10.0995049,0,0,0,0,0
25.864804,9.64365076,0,0,0,0,0
25.875296,9.21954446,0,0,0,0,0
25.885788,10.5356538,0,0,0,0,0
25.896279,9.32737905,0,0,0,0,0
25.906771,10.198039,0,0,0,0,0
25.917262,8.54400375,0,0,0,0,0
25.927754,9.38083152,0,0,0,0,0
25.938246,9.69535971,0,0,0,0,0
25.948737,8.94427191,0,0,0,0,0
25.959229,9.79795897,0,0,0,0,0
25.96972,10.1488916,0,0,0,0,0
25.980212,9.8488578,0,0,0,0,0
25.990704,9.74679434,0,0,0,0,0
26.001195,9.8488578,0,0,0,0,0
26.011687,9.53939201,0,0,0,0,0
26.022178,9.8488578,0,0,0,0,0
26.03267,9.94987437,0,0,0,0,0
26.043162,10.198039,0,0,0,0,0
26.053653,9.64365076,0,0,0,0,0
26.064145,9.59166305,0,0,0,0,0
26.074636,10.0498756,0,0,0,0,0
26.085128,9.59166305,0,0,0,0,0
26.09562,10,0,0,0,0,0
26.106111,9.64365076,0,0,0,0,0
26.116603,9.32737905,0,0,0,0,0
26.127094,9.32737905,0,0,0,0,0
26.137586,10.0498756,0,0,0,0,0
26.148078,9.8488578,0,0,0,0,0
26.158569,9.16515139,0,0,0,0,0
26.169061,9.43398113,0,0,0,0,0
26.179552,9.59166305,0,0,0,0,0
26.190044,8.48528137,0,0,0,0,0
26.200536,8.77496439,0,0,0,0,0
26.211027,9.32737905,0,0,0,0,0
26.221519,9.43398113,0,0,0,0,0
26.23201,9.05538514,0,0,0,0,0
26.242502,9.94987437,0,0,0,0,0
26.252994,9.16515139,0,0,0,0,0
26.263485,9.43398113,0,0,0,0,0
26.273977,9.16515139,0,0,0,0,0
26.284468,9.89949494,0,0,0,0,0
26.29496,9.05538514,0,0,0,0,0
26.305452,9.2736185,0,0,0,0,0
26.315943,9.8488578,0,0,0,0,0
26.326435,9.32737905,0,0,0,0,0
26.336926,9.48683298,0,0,0,0,0
26.347418,8.77496439,0,0,0,0,0
26.35791,9.05538514,0,0,0,0,0
26.368401,9.8488578,0,0,0,0,0
26.378893,9.79795897,0,0,0,0,0
26.389384,9.16515139,0,0,0,0,0
26.399876,8.66025404,0,0,0,0,0
26.410368,10.3440804,0,0,0,0,0
26.420859,9.32737905,0,0,0,0,0
26.431351,9.64365076,0,0,0,0,0
26.441842,8.18535277,0,0,0,0,0
26.452334,9.05538514,0,0,0,0,0
26.462826,9.89949494,0,0,0,0,0
26.473317,9.43398113,0,0,0,0,0
26.483809,9.89949494,0,0,0,0,0
26.4943,9.38083152,0,0,0,0,0
26.504792,8.83176087,0,0,0,0,0
26.515284,9.69535971,0,0,0,0,0
26.525775,9.89949494,0,0,0,0,0
26.536267,9.05538514,0,0,0,0,0
26.546758,9.89949494,0,0,0,0,0
26.55725,9.38083152,0,0,0,0,0
26.567742,8.83176087,0,0,0,0,0
26.578233,9.59166305,0,0,0,0,0
26.588725,8.88819442,0,0,0,0,0
26.599216,8.77496439,0,0,0,0,0
26.609708,9.11043358,0,0,0,0,0
26.6202,9.05538514,0,0,0,0,0
26.630691,9.48683298,0,0,0,0,0
26.641183,8.94427191,0,0,0,0,0
26.651674,8.94427191,0,0,0,0,0
26.662166,8.94427191,0,0,0,0,0
26.672658,8.48528137,0,0,0,0,0
26.683149,9.59166305,0,0,0,0,0
26.693641,9.2736185,0,0,0,0,0
26.704132,9.2736185,0,0,0,0,0
26.714624,8.71779789,0,0,0,0,0
26.725116,9,0,0,0,0,0
26.735607,8.60232527,0,0,0,0,0
26.746099,9.48683298,0,0,0,0,0
26.75659,9.2736185,0,0,0,0,0
26.767082,9.48683298,0,0,0,0,0
26.777574,8.94427191,0,0,0,0,0
26.788065,9.16515139,0,0,0,0,0
26.798557,8.42614977,0,0,0,0,0
26.809048,9.64365076,0,0,0,0,0
26.81954,8.94427191,0,0,0,0,0
26.830032,9,0,0,0,0,0
26.840523,9.16515139,0,0,0,0,0
26.851015,9.74679434,0,0,0,0,0
26.861506,8.88819442,0,0,0,0,0
26.871998,8.60232527,0,0,0,0,0
26.88249,9.05538514,0,0,0,0,0
26.892981,8.77496439,0,0,0,0,0
26.903473,9.16515139,0,0,0,0,0
26.913964,8.24621125,0,0,0,0,0
26.924456,9.48683298,0,0,0,0,0
26.934948,8.24621125,0,0,0,0,0
26.945439,9.43398113,0,0,0,0,0
26.955931,8.60232527,0,0,0,0,0
26.966422,9.05538514,0,0,0,0,0
26.976914,8.94427191,0,0,0,0,0
26.987406,9.48683298,0,0,0,0,0
26.997897,8.71779789,0,0,0,0,0
27.008389,8.66025404,0,0,0,0,0
27.01888,9.43398113,0,0,0,0,0
27.029372,9.2736185,0,0,0,0,0
27.039864,8.48528137,0,0,0,0,0
27.050355,8.77496439,0,0,0,0,0
27.060847,8.48528137,0,0,0,0,0
27.071338,8.71779789,0,0,0,0,0
27.08183,9.16515139,0,0,0,0,0
27.092322,8.48528137,0,0,0,0,0
27.102813,8.94427191,0,0,0,0,0
27.113305,8.71779789,0,0,0,0,0
27.123796,8.71779789,0,0,0,0,0
27.134288,9.94987437,0,0,0,0,0
27.14478,8.06225775,0,0,0,0,0
27.155271,8.71779789,0,0,0,0,0
27.165763,8.60232527,0,0,0,0,0
27.176254,9.21954446,0,0,0,0,0
27.186746,9.59166305,0,0,0,0,0
27.197238,9.21954446,0,0,0,0,0
27.207729,9,0,0,0,0,0
27.218221,8.94427191,0,0,0,0,0
27.228712,9,0,0,0,0,0
27.239204,8.1240384,0,0,0,0,0
27.249696,8.06225775,0,0,0,0,0
27.260187,8.66025404,0,0,0,0,0
27.270679,8.71779789,0,0,0,0,0
27.28117,9.8488578,0,0,0,0,0
27.291662,8.60232527,0,0,0,0,0
27.302154,9.69535971,0,0,0,0,0
27.312645,9.16515139,0,0,0,0,0
27.323137,8,0,0,0,0,0
27.333628,8.30662386,0,0,0,0,0
27.34412,8.60232527,0,0,0,0,0
27.354612,9.16515139,0,0,0,0,0
27.365103,8.94427191,0,0,0,0,0
27.375595,8.71779789,0,0,0,0,0
27.386086,8.42614977,0,0,0,0,0
27.396578,8.66025404,0,0,0,0,0
27.40707,9.11043358,0,0,0,0,0
27.417561,8.94427191,0,0,0,0,0
27.428053,9.38083152,0,0,0,0,0
27.438544,9.05538514,0,0,0,0,0
27.449036,9.74679434,0,0,0,0,0
27.459528,8.30662386,0,0,0,0,0
27.470019,8.66025404,0,0,0,0,0
27.480511,8.83176087,0,0,0,0,0
27.491002,8.71779789,0,0,0,0,0
27.501494,8.60232527,0,0,0,0,0
27.511986,8.88819442,0,0,0,0,0
27.522477,7.74596669,0,0,0,0,0
27.532969,9.64365076,0,0,0,0,0
27.54346,8.77496439,0,0,0,0,0
27.553952,8.1240384,0,0,0,0,0
27.564444,8.18535277,0,0,0,0,0
27.574935,9.38083152,0,0,0,0,0
27.585427,8.66025404,0,0,0,0,0
27.595918,8.66025404,0,0,0,0,0
27.60641,7.61577311,0,0,0,0,0
27.616902,8.66025404,0,0,0,0,0
27.627393,8.30662386,0,0,0,0,0
27.637885,8.48528137,0,0,0,0,0
27.648376,8.1240384,0,0,0,0,0
27.658868,8.42614977,0,0,0,0,0
27.66936,9.11043358,0,0,0,0,0
27.679851,8.66025404,0,0,0,0,0
27.690343,9,0,0,0,0,0
27.700834,8.24621125,0,0,0,0,0
27.711326,9.53939201,0,0,0,0,0
27.721818,9,0,0,0,0,0
27.732309,8.30662386,0,0,0,0,0
27.742801,8.60232527,0,0,0,0,0
27.753292,8.18535277,0,0,0,0,0
27.763784,8.30662386,0,0,0,0,0
27.774276,7.81024968,0,0,0,0,0
27.784767,8.1240384,0,0,0,0,0
27.795259,7.68114575,0,0,0,0,0
27.80575,9,0,0,0,0,0
27.816242,8.06225775,0,0,0,0,0
27.826734,8.42614977,0,0,0,0,0
27.837225,8.18535277,0,0,0,0,0
27.847717,8.71779789,0,0,0,0,0
27.858208,8.71779789,0,0,0,0,0
27.8687,8.48528137,0,0,0,0,0
27.879192,9.05538514,0,0,0,0,0
27.889683,8.54400375,0,0,0,0,0
27.900175,8.71779789,0,0,0,0,0
27.910666,8.42614977,0,0,0,0,0
27.921158,8.71779789,0,0,0,0,0
27.93165,7.87400787,0,0,0,0,0
27.942141,8.66025404,0,0,0,0,0
27.952633,8.60232527,0,0,0,0,0
27.963124,8.30662386,0,0,0,0,0
27.973616,8.1240384,0,0,0,0,0
27.984108,7.93725393,0,0,0,0,0
27.994599,8.06225775,0,0,0,0,0
28.005091,8.54400375,0,0,0,0,0
28.015582,8,0,0,0,0,0
28.026074,8.42614977,0,0,0,0,0
28.036566,8.1240384,0,0,0,0,0
28.047057,8.54400375,0,0,0,0,0
28.057549,8.06225775,0,0,0,0,0
28.06804,8.1240384,0,0,0,0,0
28.078532,7.74596669,0,0,0,0,0
28.089024,8.24621125,0,0,0,0,0
28.099515,7.07106781,0,0,0,0,0
28.110007,8.60232527,0,0,0,0,0
28.120498,8.18535277,0,0,0,0,0
28.13099,7.87400787,0,0,0,0,0
28.141482,7.68114575,0,0,0,0,0
28.151973,7.48331477,0,0,0,0,0
28.162465,8.18535277,0,0,0,0,0
28.172956,7.21110255,0,0,0,0,0
28.183448,9.21954446,0,0,0,0,0
28.19394,9.05538514,0,0,0,0,0
28.204431,9.16515139,0,0,0,0,0
28.214923,8.30662386,0,0,0,0,0
28.225414,7.81024968,0,0,0,0,0
28.235906,8.54400375,0,0,0,0,0
28.246398,8,0,0,0,0,0
28.256889,7.93725393,0,0,0,0,0
28.267381,7.87400787,0,0,0,0,0
28.277872,7.07106781,0,0,0,0,0
28.288364,8.42614977,0,0,0,0,0
28.298856,7.48331477,0,0,0,0,0
28.309347,7.93725393,0,0,0,0,0
28.319839,8.42614977,0,0,0,0,0
28.33033,7.61577311,0,0,0,0,0
28.340822,9.43398113,0,0,0,0,0
28.351314,8.24621125,0,0,0,0,0
28.361805,8.94427191,0,0,0,0,0
28.372297,7.74596669,0,0,0,0,0
28.382788,9.59166305,0,0,0,0,0
28.39328,8.30662386,0,0,0,0,0
28.403772,9.32737905,0,0,0,0,0
28.414263,7,0,0,0,0,0
28.424755,7.41619849,0,0,0,0,0
28.435246,8.06225775,0,0,0,0,0
28.445738,8.06225775,0,0,0,0,0
28.45623,7.54983444,0,0,0,0,0
28.466721,7.81024968,0,0,0,0,0
28.477213,9,0,0,0,0,0
28.487704,8.77496439,0,0,0,0,0
28.498196,8.06225775,0,0,0,0,0
28.508688,7.68114575,0,0,0,0,0
28.519179,7.07106781,0,0,0,0,0
28.529671,8.71779789,0,0,0,0,0
28.540162,7.07106781,0,0,0,0,0
28.550654,8.24621125,0,0,0,0,0
28.561146,8.06225775,0,0,0,0,0
28.571637,8.1240384,0,0,0,0,0
28.582129,8,0,0,0,0,0
28.59262,7.48331477,0,0,0,0,0
28.603112,8.77496439,0,0,0,0,0
28.613604,8.30662386,0,0,0,0,0
28.624095,7.68114575,0,0,0,0,0
28.634587,7.61577311,0,0,0,0,0
28.645078,7.48331477,0,0,0,0,0
28.65557,7.61577311,0,0,0,0,0
28.666062,7.68114575,0,0,0,0,0
28.676553,8.06225775,0,0,0,0,0
28.687045,8.71779789,0,0,0,0,0
28.697536,8.1240384,0,0,0,0,0
28.708028,7.74596669,0,0,0,0,0
28.71852,8.18535277,0,0,0,0,0
28.729011,7.93725393,0,0,0,0,0
28.739503,7.07106781,0,0,0,0,0
28.749994,8.66025404,0,0,0,0,0
28.760486,8.83176087,0,0,0,0,0
28.770978,8.54400375,0,0,0,0,0
28.781469,9.32737905,0,0,0,0,0
28.791961,7.61577311,0,0,0,0,0
28.802452,8,0,0,0,0,0
28.812944,7.48331477,0,0,0,0,0
28.823436,7.48331477,0,0,0,0,0
28.833927,7.34846923,0,0,0,0,0
28.844419,7.93725393,0,0,0,0,0
28.85491,6.63324958,0,0,0,0,0
28.865402,7.48331477,0,0,0,0,0
28.875894,8,0,0,0,0,0
28.886385,6.92820323,0,0,0,0,0
28.896877,8.30662386,0,0,0,0,0
28.907368,7.61577311,0,0,0,0,0
28.91786,8.54400375,0,0,0,0,0
28.928352,8.24621125,0,0,0,0,0
28.938843,8.24621125,0,0,0,0,0
28.949335,7.14142843,0,0,0,0,0
28.959826,8.42614977,0,0,0,0,0
28.970318,7.68114575,0,0,0,0,0
28.98081,8.24621125,0,0,0,0,0
28.991301,7.81024968,0,0,0,0,0
29.001793,8.83176087,0,0,0,0,0
29.012284,7.74596669,0,0,0,0,0
29.022776,7.93725393,0,0,0,0,0
29.033268,7.87400787,0,0,0,0,0
29.043759,7.61577311,0,0,0,0,0
29.054251,8.24621125,0,0,0,0,0
29.064742,7.34846923,0,0,0,0,0
29.075234,8.36660027,0,0,0,0,0
29.085726,7.93725393,0,0,0,0,0
29.096217,7.93725393,0,0,0,0,0
29.106709,7.61577311,0,0,0,0,0
29.1172,8.36660027,0,0,0,0,0
29.127692,6.92820323,0,0,0,0,0
29.138184,8.48528137,0,0,0,0,0
29.148675,7.14142843,0,0,0,0,0
29.159167,7.74596669,0,0,0,0,0
29.169658,8.88819442,0,0,0,0,0
29.18015,8.48528137,0,0,0,0,0
29.190642,8.06225775,0,0,0,0,0
29.201133,8.36660027,0,0,0,0,0
29.211625,7.68114575,0,0,0,0,0
29.222116,7.54983444,0,0,0,0,0
29.232608,8.06225775,0,0,0,0,0
29.2431,8,0,0,0,0,0
29.253591,7.81024968,0,0,0,0,0
29.264083,7.87400787,0,0,0,0,0
29.274574,7.74596669,0,0,0,0,0
29.285066,7.74596669,0,0,0,0,0
29.295558,8.30662386,0,0,0,0,0
29.306049,7.81024968,0,0,0,0,0
29.316541,7.61577311,0,0,0,0,0
29.327032,7.81024968,0,0,0,0,0
29.337524,7.41619849,0,0,0,0,0
29.348016,7.21110255,0,0,0,0,0
29.358507,7.34846923,0,0,0,0,0
29.368999,7.81024968,0,0,0,0,0
29.37949,7.74596669,0,0,0,0,0
29.389982,7.81024968,0,0,0,0,0
29.400474,8.1240384,0,0,0,0,0
29.410965,8.42614977,0,0,0,0,0
29.421457,7.81024968,0,0,0,0,0
29.431948,7.74596669,0,0,0,0,0
29.44244,7.93725393,0,0,0,0,0
29.452932,7.34846923,0,0,0,0,0
29.463423,8.06225775,0,0,0,0,0
29.473915,7.54983444,0,0,0,0,0
29.484406,7.34846923,0,0,0,0,0
29.494898,6.8556546,0,0,0,0,0
29.50539,7.28010989,0,0,0,0,0
29.515881,7.93725393,0,0,0,0,0
29.526373,7.74596669,0,0,0,0,0
29.536864,7,0,0,0,0,0
29.547356,7.48331477,0,0,0,0,0
29.557848,7.74596669,0,0,0,0,0
29.568339,8.24621125,0,0,0,0,0
29.578831,7.81024968,0,0,0,0,0
29.589322,6.78232998,0,0,0,0,0
29.599814,6.63324958,0,0,0,0,0
29.610306,7.61577311,0,0,0,0,0
29.620797,7.21110255,0,0,0,0,0
29.631289,8.24621125,0,0,0,0,0
29.64178,7.54983444,0,0,0,0,0
29.652272,6.92820323,0,0,0,0,0
29.662764,6.63324958,0,0,0,0,0
29.673255,8.06225775,0,0,0,0,0
29.683747,7.34846923,0,0,0,0,0
29.694238,7.68114575,0,0,0,0,0
29.70473,7,0,0,0,0,0
29.715222,8.18535277,0,0,0,0,0
29.725713,7.54983444,0,0,0,0,0
29.736205,7,0,0,0,0,0
29.746696,8.36660027,0,0,0,0,0
29.757188,7.74596669,0,0,0,0,0
29.76768,6.55743852,0,0,0,0,0
29.778171,7.14142843,0,0,0,0,0
29.788663,7.61577311,0,0,0,0,0
29.799154,6.8556546,0,0,0,0,0
29.809646,6.8556546,0,0,0,0,0
29.820138,7.34846923,0,0,0,0,0
29.830629,7.81024968,0,0,0,0,0
29.841121,7.41619849,0,0,0,0,0
29.851612,7.28010989,0,0,0,0,0
29.862104,7.28010989,0,0,0,0,0
29.872596,6.92820323,0,0,0,0,0
29.883087,6.8556546,0,0,0,0,0
29.893579,6.92820323,0,0,0,0,0
29.90407,6.63324958,0,0,0,0,0
29.914562,7.14142843,0,0,0,0,0
29.925054,7.14142843,0,0,0,0,0
29.935545,7,0,0,0,0,0
29.946037,7.61577311,0,0,0,0,0
29.956528,6.8556546,0,0,0,0,0
29.96702,7.54983444,0,0,0,0,0
29.977512,7.07106781,0,0,0,0,0
29.988003,6.55743852,0,0,0,0,0
29.998495,6.8556546,7.09794913,-0.492234219,0,7.09794913,7.09793384
30.008986,7.28010989,7.0935657,0.43190762,0,7.0935657,7.09355034
30.019478,6.164414,7.08918709,-0.961651229,0,7.08918709,7.08917166
30.02997,6.4807407,7.08481372,-0.777221344,0,7.08481372,7.08479822
30.040461,7.41619849,7.08044599,0.579441535,0,7.08044599,7.08043043
30.050953,7.14142843,7.07608309,0.255627349,0,7.07608309,7.07606746
30.061444,7.28010989,7.07172582,0.456491037,0,7.07172582,7.07171012
30.071936,6.40312424,7.06737337,-0.815014804,0,7.06737337,7.0673576
30.082428,7.54983444,7.06302613,0.69771649,0,7.06302613,7.0630103
30.092919,6.92820323,7.05868453,-0.361221959,0,7.05868453,7.05866863
30.103411,6.92820323,7.05434774,-0.355168278,0,7.05434774,7.05433176
30.113902,6.55743852,7.05001656,-0.70183904,0,7.05001656,7.05000051
30.124394,7.07106781,7.04569019,0.15930356,0,7.04569019,7.04567407
30.134886,6.8556546,7.04136902,-0.430945958,0,7.04136902,7.04135283
30.145377,7.34846923,7.03705347,0.55804638,0,7.03705347,7.0370372
30.155869,7.41619849,7.0327427,0.619238067,0,7.0327427,7.03272637
30.16636,7.54983444,7.02843755,0.722078172,0,7.02843755,7.02842114
30.176852,6.8556546,7.02413718,-0.410466294,0,7.02413718,7.02412069
30.187344,6.8556546,7.019842,-0.405200445,0,7.019842,7.01982544
30.197835,7,7.01555242,-0.124709347,0,7.01555242,7.01553579
30.208327,7.28010989,7.01126762,0.51850002,0,7.01126762,7.01125091
30.218818,7.41619849,7.00698841,0.639695302,0,7.00698841,7.00697162
30.22931,7.21110255,7.00271397,0.456495983,0,7.00271397,7.00269711
30.239802,8,6.99844471,1.00077734,0,6.99844471,6.99842777
30.250293,6.78232998,6.99418103,-0.460272791,0,6.99418103,6.99416401
30.260785,6.78232998,6.98992211,-0.455622789,0,6.98992211,6.98990502
30.271276,7.41619849,6.98566877,0.656147637,0,6.98566877,6.9856516
30.281768,7.41619849,6.98142018,0.659377209,0,6.98142018,6.98140294
30.29226,7.14142843,6.97717676,0.405279739,0,6.97717676,6.97715944
30.302751,6.63324958,6.9729389,-0.582828726,0,6.9729389,6.9729215
30.313243,6.63324958,6.9687058,-0.579185823,0,6.9687058,6.96868831
30.323734,7.14142843,6.96447825,0.420654466,0,6.96447825,6.96446068
30.334226,6.40312424,6.96025545,-0.746412224,0,6.96025545,6.9602378
30.344718,6.70820393,6.95603779,-0.497829145,0,6.95603779,6.95602006
30.355209,6.70820393,6.95182568,-0.493580538,0,6.95182568,6.95180787
30.365701,7.21110255,6.94761831,0.513307161,0,6.94761831,6.94760042
30.376192,7.81024968,6.94341648,0.931038774,0,6.94341648,6.9433985
30.386684,6.8556546,6.93921938,-0.289075731,0,6.93921938,6.93920132
30.397176,7.07106781,6.93502741,0.368836549,0,6.93502741,6.93500927
30.407667,6,6.93084097,-0.964801002,0,6.93084097,6.93082275
30.418159,6.8556546,6.92665926,-0.266466999,0,6.92665926,6.92664095
30.42865,7.21110255,6.92248307,0.537233171,0,6.92248307,6.92246467
30.439142,7.68114575,6.9183116,0.873403771,0,6.9183116,6.91829312
30.449634,7.48331477,6.91414525,0.754433248,0,6.91414525,6.91412668
30.460125,6.55743852,6.9099844,-0.593755741,0,6.9099844,6.90996575
30.470617,7.41619849,6.90582827,0.714401996,0,6.90582827,6.90580953
30.481108,6.32455532,6.90167765,-0.759685677,0,6.90167765,6.90165882
30.4916,6.63324958,6.89753173,-0.514083796,0,6.89753173,6.89751281
30.502092,7.41619849,6.89339091,0.723054337,0,6.89339091,6.8933719
30.512583,6.70820393,6.88925559,-0.425501651,0,6.88925559,6.88923649
30.523075,6.32455532,6.88512496,-0.748711989,0,6.88512496,6.88510577
30.533566,6.4807407,6.88099982,-0.632660356,0,6.88099982,6.88098054
30.544058,7.48331477,6.87687938,0.778739618,0,6.87687938,6.87686001
30.55455,6.63324958,6.87276402,-0.489402127,0,6.87276402,6.87274456
30.565041,7.87400787,6.86865414,1.00267329,0,6.86865414,6.86863458
30.575533,7.07106781,6.86454894,0.454443472,0,6.86454894,6.86452929
30.586024,7.34846923,6.86044921,0.698584293,0,6.86044921,6.86042947
30.596516,7.61577311,6.85635417,0.871446464,0,6.85635417,6.85633432
30.607008,7.48331477,6.85226419,0.794386923,0,6.85226419,6.85224425
30.617499,7.41619849,6.84817967,0.753670231,0,6.84817967,6.84815964
30.627991,6.63324958,6.84409982,-0.459184323,0,6.84409982,6.84407969
30.638482,6.164414,6.84002543,-0.821955852,0,6.84002543,6.8400052
30.648974,7.48331477,6.8359557,0.804586276,0,6.8359557,6.83593537
30.659466,6.40312424,6.83189103,-0.654802862,0,6.83189103,6.8318706
30.669957,6.78232998,6.82783179,-0.213311525,0,6.82783179,6.82781127
30.680449,5.74456265,6.82377722,-1.03885253,0,6.82377722,6.82375659
30.69094,7.41619849,6.81972807,0.772314971,0,6.81972807,6.81970735
30.701432,7,6.81568359,0.429320876,0,6.81568359,6.81566276
30.711924,6.70820393,6.81164414,-0.321621212,0,6.81164414,6.81162321
30.722415,7.81024968,6.80761011,1.00131891,0,6.80761011,6.80758908
30.732907,6.78232998,6.80358073,-0.14577635,0,6.80358073,6.80355959
30.743398,6.63324958,6.79955676,-0.407807771,0,6.79955676,6.79953552
30.75389,7.14142843,6.79553743,0.588124982,0,6.79553743,6.79551609
30.764382,7.61577311,6.79152313,0.907882137,0,6.79152313,6.79150168
30.774873,6.8556546,6.78751423,0.261037105,0,6.78751423,6.78749268
30.785365,7.68114575,6.78350996,0.947436428,0,6.78350996,6.7834883
30.795856,7.14142843,6.77951109,0.601595659,0,6.77951109,6.77948932
30.806348,6.4807407,6.77551685,-0.542932914,0,6.77551685,6.77549497
30.81684,6.40312424,6.77152761,-0.606962416,0,6.77152761,6.77150563
30.827331,7.61577311,6.76754376,0.920993674,0,6.76754376,6.76752166
30.837823,6.78232998,6.76356453,0.136987065,0,6.76356453,6.76354232
30.848314,6.92820323,6.75959067,0.410624596,0,6.75959067,6.75956835
30.858806,6.70820393,6.75562143,-0.217755593,0,6.75562143,6.755599
30.869298,5.83095189,6.75165718,-0.95953389,0,6.75165718,6.75163464
30.879789,7.21110255,6.7476983,0.680738021,0,6.7476983,6.74767564
30.890281,6,6.74374402,-0.862405949,0,6.74374402,6.74372125
30.900772,6.8556546,6.7397951,0.340381404,0,6.7397951,6.73977221
30.911264,6.40312424,6.73585078,-0.576824536,0,6.73585078,6.73582778
30.921756,7.14142843,6.73191144,0.639935144,0,6.73191144,6.73188832
30.932247,7,6.72797744,0.521557817,0,6.72797744,6.72795421
30.942739,6.8556546,6.72404804,0.362776184,0,6.72404804,6.72402469
30.95323,6.164414,6.72012398,-0.745459572,0,6.72012398,6.7201005
30.963722,6.244998,6.7162045,-0.686444829,0,6.7162045,6.71618091
30.974214,6.63324958,6.71228998,-0.281141252,0,6.71228998,6.71226627
30.984705,6.32455532,6.7083808,-0.6195365,0,6.7083808,6.70835696
30.995197,7.14142843,6.70447619,0.661023632,0,6.70447619,6.70445223
31.005688,6.63324958,6.7005769,-0.25947508,0,6.7005769,6.70055281
31.01618,6.4807407,6.69668218,-0.464695045,0,6.69668218,6.69665797
31.026672,6,6.69279241,-0.832341523,0,6.69279241,6.69276808
31.037163,6.08276253,6.68890795,-0.778553414,0,6.68890795,6.68888349
31.047655,7.68114575,6.68502805,0.998056961,0,6.68502805,6.68500346
31.058146,6.40312424,6.68115346,-0.527284761,0,6.68115346,6.68112874
31.068638,6.4807407,6.67728342,-0.443331392,0,6.67728342,6.67725858
31.07913,7.34846923,6.67341831,0.821614822,0,6.67341831,6.67339334
31.089621,6.08276253,6.66955849,-0.766026086,0,6.66955849,6.66953339
31.100113,6.78232998,6.66570323,0.341506595,0,6.66570323,6.66567799
31.110604,6.244998,6.66185325,-0.645643282,0,6.66185325,6.66182787
31.121096,6.92820323,6.65800781,0.519803253,0,6.65800781,6.6579823
31.131588,6.92820323,6.65416728,0.523484431,0,6.65416728,6.65414164
31.142079,6.92820323,6.65033203,0.527134901,0,6.65033203,6.65030625
31.152571,6.55743852,6.64650131,-0.298433885,0,6.64650131,6.6464754
31.163062,6.63324958,6.64267585,-0.0970890014,0,6.64267585,6.64264981
31.173554,6.70820393,6.63885493,0.263341981,0,6.63885493,6.63882875
31.184046,6.70820393,6.63503891,0.270490346,0,6.63503891,6.63501258
31.194537,6,6.63122813,-0.794498666,0,6.63122813,6.63120166
31.205029,6.164414,6.62742188,-0.680446821,0,6.62742188,6.62739527
31.21552,5.83095189,6.62362087,-0.890319593,0,6.62362087,6.62359412
31.226012,6.78232998,6.61982438,0.403119832,0,6.61982438,6.61979749
31.236504,6.164414,6.61603277,-0.67202587,0,6.61603277,6.61600573
31.246995,6.8556546,6.6122464,0.493364171,0,6.6122464,6.61221921
31.257487,6.4807407,6.60846453,-0.357384706,0,6.60846453,6.60843719
31.267978,6.78232998,6.60468788,0.421476095,0,6.60468788,6.6046604
31.27847,6.78232998,6.60091575,0.425927502,0,6.60091575,6.60088811
31.288962,6.70820393,6.59714847,0.333249853,0,6.59714847,6.59712068
31.299453,6.55743852,6.5933864,-0.189599262,0,6.5933864,6.59335847
31.309945,6.244998,6.58962884,-0.58705267,0,6.58962884,6.58960075
31.320436,5.38516481,6.58587647,-1.0957699,0,6.58587647,6.58584823
31.330928,5.65685425,6.5821286,-0.961911822,0,6.5821286,6.5821002
31.34142,6.8556546,6.57838557,0.526563412,0,6.57838557,6.57835702
31.351911,7,6.57464774,0.652190355,0,6.57464774,6.57461903
31.362403,6.4807407,6.57091439,-0.300289343,0,6.57091439,6.57088552
31.372894,6.4807407,6.56718622,-0.2940162,0,6.56718622,6.56715719
31.383386,6.55743852,6.56346253,-0.0776144953,0,6.56346253,6.56343334
31.393878,7,6.55974367,0.663518145,0,6.55974367,6.55971431
31.404369,6.40312424,6.55602998,-0.391031645,0,6.55602998,6.55600046
31.414861,6.32455532,6.55232076,-0.47724778,0,6.55232076,6.55229108
31.425352,6.4807407,6.54861671,-0.260530255,0,6.54861671,6.54858686
31.435844,6.78232998,6.54491712,0.487250308,0,6.54491712,6.5448871
31.446336,6.32455532,6.54122234,-0.465475046,0,6.54122234,6.54119215
31.456827,6.164414,6.53753271,-0.610834438,0,6.53753271,6.53750236
31.467319,7.41619849,6.53384754,0.939335375,0,6.53384754,6.53381701
31.47781,6.164414,6.53016752,-0.60477559,0,6.53016752,6.53013681
31.488302,6.55743852,6.52649194,0.175916417,0,6.52649194,6.52646106
31.498794,5.47722558,6.52282115,-1.02254368,0,6.52282115,6.5227901
31.509285,6.40312424,6.51915551,-0.340633627,0,6.51915551,6.51912427
31.519777,6.08276253,6.51549429,-0.657823505,0,6.51549429,6.51546288
31.530268,6,6.51183821,-0.715428692,0,6.51183821,6.51180662
31.54076,7.48331477,6.50818656,0.987485803,0,6.50818656,6.50815479
31.551252,8,6.50453969,1.22289015,0,6.50453969,6.50450773
31.561743,6.32455532,6.50089793,-0.419931676,0,6.50089793,6.50086579
31.572235,5.74456265,6.4972606,-0.867581669,0,6.4972606,6.49722827
31.582726,6.92820323,6.49362838,0.659222918,0,6.49362838,6.49359586
31.593218,6.63324958,6.49000057,0.378482514,0,6.49000057,6.48996787
31.60371,6.4807407,6.48637752,-0.0750787553,0,6.48637752,6.48634463
31.614201,6.92820323,6.48275957,0.667415659,0,6.48275957,6.48272649
31.624693,6.70820393,6.47914602,0.478599946,0,6.47914602,6.47911275
31.635184,6.08276253,6.47553757,-0.626717674,0,6.47553757,6.4755041
31.645676,5.56776436,6.47193352,-0.950878099,0,6.47193352,6.47189985
31.656168,6.55743852,6.46833421,0.298503455,0,6.46833421,6.46830035
31.666659,6.08276253,6.46473998,-0.618043244,0,6.46473998,6.46470592
31.677151,6.8556546,6.46115014,0.628095898,0,6.46115014,6.46111587
31.687642,6.244998,6.45756538,-0.461050299,0,6.45756538,6.4575309
31.698134,7.34846923,6.453985,0.945771766,0,6.453985,6.45395032
31.708626,7,6.45040934,0.741343822,0,6.45040934,6.45037445
31.719117,6.32455532,6.44683874,-0.349690464,0,6.44683874,6.44680365
31.729609,5.83095189,6.44327252,-0.782509186,0,6.44327252,6.44323722
31.7401,5.74456265,6.43971135,-0.833755783,0,6.43971135,6.43967584
31.750592,7.14142843,6.43615455,0.839805855,0,6.43615455,6.43611883
31.761084,6.164414,6.43260246,-0.517869154,0,6.43260246,6.43256652
31.771575,7.14142843,6.42905541,0.844021929,0,6.42905541,6.42901925
31.782067,6.63324958,6.42551272,0.45578159,0,6.42551272,6.42547634
31.792558,6.78232998,6.42197507,0.600295691,0,6.42197507,6.42193847
31.80305,5.38516481,6.41844176,-1.01650232,0,6.41844176,6.41840494
31.813542,6.244998,6.41491315,-0.412207659,0,6.41491315,6.4148761
31.824033,6.70820393,6.41138956,0.544806729,0,6.41138956,6.41135228
31.834525,6.164414,6.40787031,-0.493412922,0,6.40787031,6.40783281
31.845016,6.55743852,6.40435608,0.391257514,0,6.40435608,6.40431835
31.855508,5.83095189,6.40084619,-0.754913435,0,6.40084619,6.40080822
31.866,7.07106781,6.39734097,0.820808653,0,6.39734097,6.39730276
31.876491,6,6.39384075,-0.627567324,0,6.39384075,6.39380231
31.886983,6.40312424,6.39034486,0.113045925,0,6.39034486,6.39030618
31.897474,6.4807407,6.38685396,0.30640943,0,6.38685396,6.38681504
31.907966,6.63324958,6.38336739,0.49988218,0,6.38336739,6.38332822
31.918458,6.55743852,6.37988547,0.42137045,0,6.37988547,6.37984606
31.928949,6.164414,6.37640853,-0.460428635,0,6.37640853,6.37636888
31.939441,6.92820323,6.37293591,0.745162614,0,6.37293591,6.372896
31.949932,6.40312424,6.36946826,0.183455658,0,6.36946826,6.3694281
31.960424,6.244998,6.36600492,-0.34786049,0,6.36600492,6.36596451
31.970916,7.14142843,6.36254621,0.882543038,0,6.36254621,6.36250555
31.981407,6.164414,6.35909247,-0.44122383,0,6.35909247,6.35905155
31.991899,7.28010989,6.35564303,0.961491998,0,6.35564303,6.35560184
32.00239,5.91607978,6.35219854,-0.660392879,0,6.35219854,6.35215709
32.012882,5.74456265,6.34875834,-0.77730026,0,6.34875834,6.34871663
32.023374,6.32455532,6.34532276,-0.144109132,0,6.34532276,6.34528078
32.033865,5.56776436,6.34189213,-0.879845306,0,6.34189213,6.34184987
32.044357,6.70820393,6.33846577,0.608060985,0,6.33846577,6.33842324
32.054848,6.164414,6.33504435,-0.413074265,0,6.33504435,6.33500155
32.06534,6.164414,6.33162721,-0.408917114,0,6.33162721,6.33158413
32.075832,7.07106781,6.32821467,0.861889288,0,6.32821467,6.32817131
32.086323,6.244998,6.32480705,-0.282504951,0,6.32480705,6.3247634
32.096815,6.244998,6.32140369,-0.276415801,0,6.32140369,6.32135976
32.107306,6.08276253,6.31800525,-0.485018271,0,6.31800525,6.31796104
32.117798,5.38516481,6.31461108,-0.964077937,0,6.31461108,6.31456657
32.12829,5.83095189,6.31122148,-0.693014853,0,6.31122148,6.31117668
32.138781,6.78232998,6.30783679,0.688834666,0,6.30783679,6.30779169
32.149273,6.08276253,6.30445634,-0.470843726,0,6.30445634,6.30441095
32.159764,6.244998,6.3010808,-0.236818069,6.3010351,6.3010808,6.3010351
32.170256,6.70820393,6.2977925,0.64063362,6.29774649,6.29770949,6.29766349
32.180748,6.63324958,6.2944259,0.58208563,6.29437959,6.29434276,6.29429644
32.191239,6.32455532,6.29106418,0.183005837,6.29101756,6.2909809,6.29093427
32.201731,6,6.28770671,-0.536382984,6.28765977,6.28762328,6.28757634
32.212222,5.56776436,6.2843541,-0.846516235,6.28430684,6.28427053,6.28422327
32.222714,6.08276253,6.28100572,-0.445245094,6.28095815,6.28092201,6.28087444
32.233206,6.78232998,6.27766189,0.710399949,6.277614,6.27757804,6.27753014
32.243697,6.244998,6.27432293,-0.17124523,6.2742747,6.27423893,6.27419071
32.254189,7,6.27098818,0.85382189,6.27093963,6.27090404,6.27085549
32.26468,6.244998,6.26765829,-0.150533343,6.2676094,6.267574,6.26752512
32.275172,6.164414,6.26433261,-0.31609904,6.26428339,6.26424818,6.26419896
32.285664,5.91607978,6.26101145,-0.587308838,6.2609619,6.26092688,6.26087732
32.296155,6.244998,6.25769514,-0.112681611,6.25764524,6.25761043,6.25756053
32.306647,6.244998,6.25438304,-0.0968764135,6.25433279,6.25429818,6.25424793
32.317138,5.47722558,6.25107576,-0.879687552,6.25102517,6.25099076,6.25094016
32.32763,6.4807407,6.24777269,0.482667597,6.24772174,6.24768754,6.24763659
32.338122,7.14142843,6.24447412,0.947076715,6.24442282,6.24438883,6.24433753
32.348613,6.40312424,6.24118038,0.402422486,6.24112872,6.24109494,6.24104328
32.359105,5.83095189,6.23789082,-0.637917651,6.2378388,6.23780524,6.23775321
32.369596,6,6.23460608,-0.484361519,6.23455369,6.23452035,6.23446796
32.380088,7.14142843,6.23132552,0.953993139,6.23127276,6.23123964,6.23118688
32.39058,5.65685425,6.22804945,-0.75577457,6.22799631,6.22796342,6.22791029
32.401071,7.07106781,6.22477818,0.919940015,6.22472467,6.22469201,6.22463849
32.411563,7.28010989,6.22151108,1.02888231,6.22145719,6.22142476,6.22137087
32.422054,6.40312424,6.21824878,0.429971464,6.2181945,6.21816231,6.21810803
32.432546,6.08276253,6.21499064,-0.363631831,6.21493597,6.21490402,6.21484935
32.443038,6.08276253,6.21173697,-0.359130119,6.21168191,6.21165021,6.21159515
32.453529,6.63324958,6.20848809,0.651737289,6.20843263,6.20840118,6.20834572
32.464021,6.78232998,6.20524336,0.759662179,6.2051875,6.2051563,6.20510044
32.474512,5.74456265,6.2020034,-0.676343664,6.20194713,6.20191619,6.20185992
32.485004,6.40312424,6.19876759,0.452058235,6.19871091,6.19868023,6.19862356
32.495496,6.8556546,6.19553624,0.812476686,6.19547915,6.19544873,6.19539164
32.505987,6.244998,6.19230964,0.229539447,6.19225213,6.19222198,6.19216448
32.516479,6.4807407,6.18908719,0.540049546,6.18902926,6.18899938,6.18894145
32.52697,6,6.18586948,-0.431125831,6.18581112,6.18578153,6.18572317
32.537462,6.70820393,6.18265591,0.724946909,6.18259712,6.1825678,6.18250901
32.547954,6.78232998,6.17944678,0.77645554,6.17938755,6.17935852,6.17929929
32.558445,6.244998,6.17624238,0.262212922,6.17618272,6.17615397,6.17609431
32.568937,5.83095189,6.17304211,-0.584884788,6.172982,6.17295355,6.17289344
32.579428,6.244998,6.16984657,0.274137611,6.16978601,6.16975786,6.16969729
32.58992,6.08276253,6.16665514,-0.289642216,6.16659413,6.16656628,6.16650526
32.600412,6.70820393,6.16346814,0.738062189,6.16340666,6.16337912,6.16331764
32.610903,6.63324958,6.16028585,0.687723587,6.16022391,6.16019668,6.16013474
32.621395,6.8556546,6.15710767,0.835791202,6.15704526,6.15701835,6.15695593
32.631886,6.32455532,6.1539342,0.4130631,6.15387131,6.15384472,6.15378183
32.642378,6.63324958,6.15076482,0.694611227,6.15070146,6.1506752,6.15061183
32.65287,6.32455532,6.14759985,0.420660751,6.147536,6.14751007,6.14744622
32.663361,6.40312424,6.14443958,0.508610518,6.14437524,6.14434964,6.1442853
32.673853,6.08276253,6.14128339,-0.241910861,6.14121856,6.14119331,6.14112847
32.684344,6.244998,6.1381319,0.326903806,6.13806656,6.13804166,6.13797632
32.694836,5.29150262,6.13498449,-0.918412689,6.13491864,6.13489409,6.13482824
32.705328,6.63324958,6.13184146,0.708101773,6.1317751,6.13175091,6.13168455
32.715819,6.8556546,6.12870311,0.852614505,6.12863623,6.1286124,6.12854552
32.726311,6.08276253,6.12556883,-0.206896829,6.12550143,6.12547796,6.12541056
32.736802,6.63324958,6.12243922,0.714709986,6.12237128,6.1223482,6.12228026
32.747294,5.65685425,6.11931367,-0.680043693,6.1192452,6.1192225,6.11915403
32.757786,5.74456265,6.11619249,-0.609614507,6.11612348,6.11610116,6.11603215
32.768277,6.32455532,6.11307597,0.459868842,6.11300641,6.11298448,6.11291492
32.778769,6.70820393,6.1099635,0.773460038,6.10989339,6.10987186,6.10980174
32.78926,6.63324958,6.10685568,0.725530081,6.10678501,6.10676388,6.1066932
32.799752,6.92820323,6.10375191,0.907993016,6.10368067,6.10365995,6.10358871
32.810244,6.63324958,6.10065249,0.7297925,6.10058067,6.10056037,6.10048855
32.820735,6.08276253,6.0975577,-0.121635388,6.0974853,6.09746542,6.09739302
32.831227,6.70820393,6.09446695,0.783413673,6.09439396,6.09437451,6.09430153
32.841718,5.19615242,6.09138083,-0.946165104,6.09130725,6.09128823,6.09121465
32.85221,5.38516481,6.08829874,-0.838530818,6.08822456,6.08820599,6.0881318
32.862702,5.47722558,6.08522098,-0.779740599,6.08514619,6.08512806,6.08505327
32.873193,6.164414,6.08214783,0.286820806,6.08207242,6.08205475,6.08197935
32.883685,6.63324958,6.0790787,0.744426542,6.07900268,6.07898547,6.07890944
32.894176,5.38516481,6.07601419,-0.831173495,6.07593753,6.07592079,6.07584413
32.904668,6.78232998,6.07295369,0.842244797,6.07287639,6.07286013,6.07278284
32.91516,6.244998,6.06989749,0.418450125,6.06981955,6.06980378,6.06972583
32.925651,5.65685425,6.06684589,-0.640305897,6.0667673,6.06675201,6.06667342
32.936143,5.65685425,6.0637983,-0.637921664,6.06371904,6.06370426,6.063625
32.946634,6.63324958,6.06075529,0.756633524,6.06067537,6.06066109,6.06058117
32.957126,6.164414,6.05771628,0.326646167,6.05763568,6.05762192,6.05754132
32.967618,5.47722558,6.05468157,-0.759905251,6.05460028,6.05458704,6.05450575
32.978109,6.8556546,6.05165142,0.896662245,6.05156944,6.05155673,6.05147475
32.988601,6,6.04862526,-0.22051137,6.04854258,6.04853041,6.04844773
32.999092,6.40312424,6.04560367,0.597930233,6.04552028,6.04550866,6.04542527
33.009584,6.70820393,6.04258607,0.815854071,6.04250195,6.04249089,6.04240678
33.020076,5.83095189,6.03957273,-0.456750299,6.03948789,6.03947739,6.03939255
33.030567,6.08276253,6.03656394,0.214938563,6.03647836,6.03646844,6.03638286
33.041059,6.40312424,6.03355913,0.607918666,6.03347281,6.03346346,6.03337713
33.05155,6.32455532,6.03055887,0.542214399,6.03047178,6.03046303,6.03037595
33.062042,5.74456265,6.02756257,-0.531977368,6.02747472,6.02746657,6.02737871
33.072534,6.8556546,6.02457052,0.911638132,6.02448189,6.02447435,6.02438572
33.083025,6.08276253,6.021583,0.247344966,6.02149359,6.02148667,6.02139725
33.093517,5.56776436,6.01859944,-0.671442533,6.01850923,6.01850294,6.01841273
33.104008,6.40312424,6.0156204,0.622498063,6.01552939,6.01552373,6.01543272
33.1145,6.63324958,6.01264531,0.787784405,6.01255348,6.01254848,6.01245665
33.124992,6.08276253,6.00967446,0.27034806,6.0095818,6.00957746,6.0094848
33.135483,6.63324958,6.00670811,0.791543725,6.00661462,6.00661095,6.00651745
33.145975,5.56776436,6.00374571,-0.660288834,6.00365136,6.00364837,6.00355403
33.156466,6.244998,6.00078781,0.494176277,6.0006926,6.0006903,6.0005951
33.166958,6.164414,5.99783384,0.408142334,5.99773776,5.99773617,5.99764009
33.17745,5.56776436,5.99488408,-0.65354397,5.99478713,5.99478624,5.99468928
33.187941,6.63324958,5.99193882,0.800818808,5.99184097,5.99184081,5.99174296
33.198433,5.38516481,5.98899748,-0.777066709,5.98889872,5.9888993,5.98880054
33.208924,6.164414,5.98606062,0.422319056,5.98596094,5.98596227,5.98586259
33.219416,5.83095189,5.98312768,-0.390097143,5.98302707,5.98302916,5.98292855
33.229908,6.244998,5.98019893,0.51458631,5.98009738,5.98010024,5.97999869
33.240399,4.89897949,5.97727465,-1.03840992,5.97717214,5.97717579,5.97707328
33.250891,5.09901951,5.97435428,-0.935593269,5.9742508,5.97425525,5.97415177
33.261382,6.8556546,5.97143837,0.940327726,5.97133391,5.97133917,5.9712347
33.271874,6.08276253,5.96852636,0.337988419,5.9684209,5.96842699,5.96832153
33.282366,6.40312424,5.96561853,0.661442146,5.96551206,5.96551898,5.96541251
33.292857,6.244998,5.96271514,0.531302981,5.96260765,5.96261542,5.96250793
33.303349,6.244998,5.95981565,0.534024674,5.95970711,5.95971576,5.95960722
33.31384,5.56776436,5.95692059,-0.623823877,5.95681101,5.95682053,5.95671094
33.324332,5.83095189,5.95402942,-0.35082407,5.95391877,5.95392919,5.95381853
33.334824,6.40312424,5.95114241,0.672295937,5.95103067,5.951042,5.95093026
33.345315,5.38516481,5.94825983,-0.750396575,5.94814699,5.94815924,5.94804641
33.355807,6.70820393,5.94538112,0.873397284,5.94526717,5.94528036,5.94516641
33.366298,6,5.94250683,0.239777341,5.94239175,5.94240589,5.94229081
33.37679,6.32455532,5.9396364,0.620418339,5.93952018,5.9395353,5.93941907
33.387282,5.47722558,5.93677012,-0.67789715,5.93665273,5.93666884,5.93655145
33.397773,6.92820323,5.93390825,0.997143412,5.93378968,5.93380679,5.93368821
33.408265,6.32455532,5.93105023,0.627299843,5.93093046,5.93094859,5.93082882
33.418756,5.19615242,5.92819661,-0.855595808,5.92807563,5.9280948,5.92797381
33.429248,5.56776436,5.92534684,-0.597982006,5.92522463,5.92524486,5.92512264
33.43974,5.56776436,5.9225012,-0.595597879,5.92237773,5.92239903,5.92227556
33.450231,6.244998,5.91965994,0.570384135,5.9195352,5.9195576,5.91943286
33.460723,5.74456265,5.91682252,-0.415042015,5.91669649,5.91672,5.91659397
33.471214,5.91607978,5.91398948,0.0457198058,5.91386215,5.91388678,5.91375945
33.481706,6.78232998,5.91116028,0.933364721,5.91103162,5.9110574,5.91092874
33.492198,5.91607978,5.90833518,0.0880034281,5.90820517,5.90823213,5.90810211
33.502689,5.65685425,5.90551445,-0.498658397,5.90538307,5.90541121,5.90527983
33.513181,7.14142843,5.90269754,1.11298288,5.90256477,5.90259413,5.90246135
33.523672,5.65685425,5.89988499,-0.492981482,5.89975081,5.8997814,5.89964721
33.534164,6.32455532,5.89707626,0.653818826,5.89694065,5.89697249,5.89683687
33.544656,6.08276253,5.89427162,0.434155401,5.89413455,5.89416766,5.89403059
33.555147,5.56776436,5.89147132,-0.568952509,5.89133277,5.89136719,5.89122864
33.565639,5.83095189,5.88867483,-0.240255985,5.88853478,5.88857052,5.88843047
33.57613,4.89897949,5.88588269,-0.993430018,5.88574111,5.88577819,5.88563661
33.586622,6,5.88309434,0.341914696,5.88295122,5.88298966,5.88284653
33.597114,6.164414,5.88031006,0.533014015,5.88016536,5.8802052,5.8800605
33.607605,5.83095189,5.87753011,-0.215819873,5.87738381,5.87742507,5.87727877
33.618097,6,5.87475396,0.353901178,5.87460603,5.87464873,5.8745008
33.628588,5.65685425,5.87198212,-0.463818791,5.87183254,5.87187671,5.87172713
33.63908,5.29150262,5.86921407,-0.760073319,5.86906282,5.86910848,5.86895722
33.649572,6,5.86645007,0.365444835,5.86629711,5.8663443,5.86619133
33.660063,6.63324958,5.86369038,0.877245233,5.86353568,5.86358442,5.86342972
33.670555,6.78232998,5.86093447,0.959893491,5.86077801,5.86082832,5.86067186
33.681046,5.83095189,5.85818286,-0.165018068,5.8580246,5.85807653,5.85791827
33.691538,6.55743852,5.85543502,0.837856495,5.85527494,5.8553285,5.85516842
33.70203,6.40312424,5.85269121,0.741911737,5.85252928,5.85258451,5.85242257
33.712521,6.164414,5.84995169,0.56076939,5.84978788,5.84984481,5.84968099
33.723013,5.83095189,5.84721594,-0.127530567,5.84705021,5.84710887,5.84694313
33.733504,5.29150262,5.84448447,-0.743627492,5.84431678,5.84437721,5.84420952
33.743996,5.83095189,5.84175675,-0.103946425,5.84158708,5.84164931,5.84147963
33.754488,7.07106781,5.83903306,1.10997061,5.83886137,5.83892542,5.83875373
33.764979,6.70820393,5.83631363,0.933750666,5.83613989,5.8362058,5.83603206
33.775471,6.08276253,5.83359795,0.499163884,5.83342212,5.83348993,5.8333141
33.785962,5.74456265,5.83088653,-0.293809267,5.83070857,5.83077833,5.83060037
33.796454,6.4807407,5.82817886,0.807812997,5.82799874,5.82807047,5.82789034
33.806946,6.92820323,5.82547519,1.05010859,5.82529286,5.82536661,5.82518428
33.817437,6.40312424,5.82277577,0.761806059,5.8225912,5.822667,5.82248243
33.827929,5.74456265,5.82008008,-0.274804356,5.81989323,5.81997112,5.81978427
33.83842,6.63324958,5.81738864,0.903250209,5.81719947,5.81727949,5.81709031
33.848912,5.19615242,5.81470093,-0.786478549,5.81450939,5.81459159,5.81440005
33.859404,6.55743852,5.8120172,0.863377855,5.81182325,5.81190767,5.81171372
33.869895,5.19615242,5.80933771,-0.783061486,5.80914131,5.80922799,5.80903158
33.880387,5.56776436,5.80666194,-0.488771501,5.80646304,5.80655203,5.80635312
33.890878,6.40312424,5.8039904,0.77403736,5.80378895,5.80388029,5.80367884
33.90137,6.32455532,5.80132258,0.723348286,5.80111853,5.80121228,5.80100822
33.911862,5.91607978,5.79865872,0.342667567,5.79845203,5.79854823,5.79834153
33.922353,5.65685425,5.79599908,-0.373021226,5.7957897,5.7958884,5.79567901
33.932845,5.74456265,5.79334316,-0.220863101,5.79313102,5.79323227,5.79302014
33.943336,6.4807407,5.79069144,0.830692036,5.79047651,5.79058036,5.79036543
33.953828,4.58257569,5.78804343,-1.09793795,5.78782564,5.78793216,5.78771437
33.96432,6.40312424,5.78539937,0.785954748,5.78517867,5.78528791,5.7850672
33.974811,5.56776436,5.78275952,-0.4636757,5.78253585,5.78264786,5.78242419
33.985303,5.38516481,5.78012336,-0.628457281,5.77989667,5.7800115,5.77978481
33.995794,6.55743852,5.7774914,0.883146151,5.77726163,5.77737935,5.77714957
34.006286,5.56776436,5.77486313,-0.455081061,5.77463021,5.77475089,5.77451796
34.016778,6.78232998,5.77223881,1.00503292,5.77200267,5.77212636,5.77189022
34.027269,5.38516481,5.76961867,-0.620043439,5.76937926,5.76950603,5.76926661
34.037761,5.74456265,5.76700222,-0.149798455,5.76675947,5.76688938,5.76664662
34.048252,6.08276253,5.76438996,0.564245135,5.76414379,5.76427692,5.76403074
34.058744,6.244998,5.76178137,0.695137845,5.76153172,5.76166814,5.76141848
34.069236,5.19615242,5.75917672,-0.750349451,5.75892351,5.75906328,5.75881007
34.079727,5.91607978,5.75657624,0.399378943,5.7563194,5.75646261,5.75620576
34.090219,5.19615242,5.75397944,-0.746878183,5.7537189,5.75386561,5.75360506
34.10071,5.09901951,5.75138681,-0.807692578,5.75112248,5.75127278,5.75100844
34.111202,6.08276253,5.74879786,0.577896764,5.74852966,5.74868362,5.74841542
34.121694,6.55743852,5.74621283,0.900680686,5.74594067,5.74609839,5.74582623
34.132185,5.47722558,5.74363196,-0.516145697,5.74335576,5.74351732,5.74324112
34.142677,6.55743852,5.74105476,0.903539578,5.74077444,5.74093992,5.74065959
34.153168,6.32455532,5.73848172,0.765554442,5.73819718,5.73836667,5.73808213
34.16366,5.83095189,5.73591235,0.308284851,5.7356235,5.7357971,5.73550825
34.174152,6.32455532,5.73334689,0.768900795,5.73305363,5.73323144,5.73293818
34.184643,5.74456265,5.73078558,0.117375735,5.73048782,5.73066993,5.73037216
34.195135,6.4807407,5.72822795,0.867474929,5.72792557,5.72811209,5.72780971
34.205626,6.55743852,5.72567446,0.912011001,5.72536737,5.7255584,5.72525131
34.216118,6.4807407,5.72312464,0.870411432,5.72281273,5.72300837,5.72269646
34.22661,6.63324958,5.72057872,0.955338086,5.72026187,5.72046225,5.7201454
34.237101,5.47722558,5.71803696,-0.490725362,5.71771506,5.71792028,5.71759838
34.247593,5.83095189,5.71549885,0.339783816,5.71517178,5.71538197,5.7150549
34.258084,6.4807407,5.7129649,0.876228167,5.71263253,5.71284781,5.71251544
34.268576,6.55743852,5.7104346,0.920328159,5.71009682,5.71031731,5.70997952
34.279068,6.55743852,5.70790822,0.921699684,5.70756487,5.70779072,5.70744737
34.289559,6.40312424,5.70538597,0.835307286,5.70503694,5.70526827,5.70491923
34.300051,5.47722558,5.7028674,-0.475017707,5.70251254,5.70274948,5.70239462
34.310542,6.32455532,5.70035297,0.790064779,5.69999213,5.70023484,5.699874
34.321034,5.74456265,5.6978422,0.216149132,5.69747525,5.69772387,5.69735691
34.331526,5.29150262,5.69533534,-0.635478338,5.69496211,5.6952168,5.69484356
34.342017,5.47722558,5.69283263,-0.464335066,5.69245296,5.69271388,5.69233421
34.352509,6.78232998,5.69033359,1.04498631,5.68994732,5.69021463,5.68982836
34.363,5.19615242,5.68783869,-0.701203445,5.68744566,5.68771953,5.68732648
34.373492,5.56776436,5.68534748,-0.342903941,5.68494749,5.6852281,5.68482811
34.383984,5.38516481,5.68286017,-0.545614666,5.68245306,5.68274058,5.68233346
34.394475,6.08276253,5.68037702,0.63433864,5.67996259,5.68025722,5.67984278
34.404967,6.55743852,5.67789755,0.937838458,5.67747561,5.67777754,5.67735559
34.415458,6.40312424,5.67542224,0.85305451,5.67499258,5.67530201,5.67487235
34.42595,6.32455532,5.67295062,0.807220355,5.67251303,5.67283018,5.67239259
34.436442,5.65685425,5.67048292,-0.116741918,5.6700372,5.67036227,5.66991653
34.446933,5.47722558,5.6680194,-0.436799523,5.6675653,5.66789853,5.66744443
34.457425,5.65685425,5.66555957,-0.0933023229,5.66509687,5.66543849,5.66497578
34.467916,6.08276253,5.66310392,0.647810626,5.66263238,5.66298263,5.66251107
34.478408,6.40312424,5.66065198,0.861668297,5.66017134,5.66053048,5.66004982
34.4889,5.47722558,5.658204,-0.425415587,5.65771399,5.65808227,5.65759226
34.499391,4.35889894,5.6557602,-1.13879816,5.65526056,5.65563826,5.65513861
34.509883,4.79583152,5.65332013,-0.926006808,5.65281058,5.65319798,5.65268842
34.520374,6,5.65088427,0.590860163,5.65036451,5.6507619,5.65024213
34.530866,5.65685425,5.64845215,0.0916629736,5.64792188,5.64832956,5.64779928
34.541358,5,5.64602402,-0.803756192,5.64548292,5.64590121,5.6453601
34.551849,6,5.64360011,0.596992372,5.64304786,5.64347708,5.64292482
34.562341,5,5.64117997,-0.800737143,5.64061622,5.64105673,5.64049296
34.572832,5,5.63876408,-0.799227177,5.63818847,5.63864062,5.638065
34.583324,5.65685425,5.63635198,0.143186129,5.63576414,5.6362283,5.63564045
34.593816,6.70820393,5.63394392,1.03646515,5.63334346,5.63382002,5.63321954
34.604307,5,5.63154013,-0.794694995,5.63092665,5.63141601,5.63080251
34.614799,6.164414,5.62914018,0.731624099,5.62851325,5.62901584,5.62838889
34.62529,6.32455532,5.62674453,0.835350698,5.62610371,5.62661997,5.62597914
34.635782,5.56776436,5.62435274,-0.237883125,5.62369758,5.62422796,5.62357278
34.646274,5.74456265,5.62196506,0.350139377,5.62129507,5.62184006,5.62117005
34.656765,6.4807407,5.61958173,0.927986511,5.61889641,5.61945651,5.61877117
34.667257,6,5.61720232,0.618706458,5.61650114,5.61707687,5.61637567
34.677748,6,5.61482729,0.620622837,5.61410971,5.61470162,5.61398402
34.68824,5.47722558,5.61245623,-0.367737203,5.61172166,5.61233033,5.61159575
34.698732,5.56776436,5.61008936,-0.20573041,5.60933722,5.60996324,5.60921108
34.709223,5.38516481,5.60784281,-0.471887699,5.60695661,5.60771647,5.60683025
34.719715,5.74456265,5.6054847,0.372931557,5.60457936,5.60535813,5.60445277
34.730206,5.38516481,5.6031311,-0.466868607,5.60220594,5.60300431,5.60207912
34.740698,5.56776436,5.6007816,-0.181706452,5.59983587,5.60065458,5.59970883
34.75119,5.09901951,5.59843644,-0.706694366,5.59746939,5.5983092,5.59734212
34.761681,5.83095189,5.59609589,0.484619445,5.59510671,5.59596842,5.59497922
34.772173,6.164414,5.59375953,0.755416753,5.59274739,5.59363184,5.59261967
34.782664,5.65685425,5.59142786,0.25578583,5.59039185,5.59129993,5.59026391
34.793156,5.09901951,5.58910046,-0.700057819,5.58803967,5.58897231,5.58791149
34.803648,5.65685425,5.58677762,0.264719917,5.58569104,5.58664923,5.58556263
34.814139,5.65685425,5.58445958,0.269062568,5.58334619,5.58433097,5.58321756
34.824631,5.83095189,5.58214598,0.498804485,5.58100468,5.58201714,5.58087581
34.835122,5.56776436,5.5798373,-0.109876924,5.57866694,5.57970823,5.57853784
34.845614,5.56776436,5.57753317,-0.0988372666,5.57633252,5.57740387,5.57620319
34.856106,4,5.57523387,-1.25508321,5.57400164,5.57510434,5.57387208
34.866597,5.74456265,5.57293968,0.414274018,5.57167452,5.57280992,5.57154473
34.877089,6.244998,5.57065026,0.821186786,5.56935071,5.57052027,5.56922068
34.88758,5.47722558,5.56836612,-0.301894916,5.56703064,5.56823589,5.56690039
34.898072,5.83095189,5.5660869,0.514650363,5.56471389,5.56595644,5.5645834
34.908564,5.74456265,5.56381293,0.425146704,5.56240065,5.56368224,5.56226993
34.919055,5.56776436,5.56154452,0.078866002,5.56009114,5.56141359,5.55996019
34.929547,5.65685425,5.55928135,0.312366613,5.55778493,5.55915019,5.55765374
34.940038,5.47722558,5.55702398,-0.282486106,5.55548245,5.55689258,5.55535102
34.95053,6.40312424,5.5547721,0.921060335,5.55318324,5.55464047,5.55305158
34.961022,6.40312424,5.55252607,0.922278789,5.55088754,5.55239421,5.55075564
34.971513,6.164414,5.55028627,0.783663022,5.54859555,5.55015418,5.54846341
34.982005,6,5.54805243,0.672270457,5.54630682,5.5479201,5.54617445
34.992496,5.91607978,5.54582517,0.60848551,5.54402181,5.5456926,5.5438892
35.002988,4.69041576,5.54360425,-0.92368203,5.54174005,5.54347145,5.5416072
35.01348,6.40312424,5.54139012,0.928296354,5.53946177,5.54125708,5.53932869
35.023971,5.56776436,5.53918321,0.169059604,5.53718718,5.53904993,5.53705386
35.034463,5.91607978,5.53698338,0.615708049,5.53491585,5.53684987,5.53478228
35.044954,6.63324958,5.53479133,1.04807359,5.53264819,5.53465758,5.53251438
35.055446,5.38516481,5.53260696,-0.383981969,5.53038377,5.53247297,5.53024973
35.065938,5.56776436,5.53043083,0.193218883,5.52812281,5.53029659,5.52798853
35.076429,6.164414,5.52826352,0.797590423,5.52586552,5.52812905,5.52573099
35.086921,5.91607978,5.52610505,0.624479567,5.52361146,5.52597034,5.52347669
35.097412,6,5.52395631,0.689959196,5.52136106,5.52382136,5.52122604
35.107904,5.91607978,5.5218174,0.627903167,5.51911387,5.5216822,5.51897862
35.118396,6.08276253,5.5196891,0.750382188,5.51687013,5.51955367,5.51673463
35.128887,5.09901951,5.51757227,-0.646956535,5.51463002,5.5174366,5.51449428
35.139379,6,5.51546722,0.696083886,5.51239313,5.51533131,5.51225714
35.14987,5.47722558,5.51337516,-0.190130453,5.51015987,5.51323901,5.51002363
35.160362,5.09901951,5.5112966,-0.642088066,5.50792982,5.5111602,5.50779333
35.170854,5.19615242,5.50923274,-0.559535808,5.50570317,5.5090961,5.50556644
35.181345,6.164414,5.50718494,0.810696653,5.50348015,5.50704806,5.50334317
35.191837,5,5.50515409,-0.710741931,5.50126032,5.50501697,5.50112309
35.202328,5.38516481,5.50314206,-0.343478171,5.4990441,5.50300469,5.49890663
35.21282,5.74456265,5.50115013,0.493368536,5.49683106,5.50101252,5.49669334
35.223312,7.21110255,5.49918041,1.30840442,5.49462141,5.49904256,5.49448344
35.233803,6.92820323,5.49723527,1.19623073,5.49241536,5.49709718,5.49227714
35.244295,6.32455532,5.49531686,0.910625312,5.49021248,5.49517852,5.49007402
35.254786,5.65685425,5.49342844,0.404259578,5.48801319,5.49328986,5.48787447
35.265278,4.79583152,5.49157303,-0.834111207,5.48581706,5.49143421,5.4856781
35.27577,6.244998,5.48975472,0.869047339,5.48362431,5.48961566,5.48348509
35.286261,5.29150262,5.48797828,-0.443255743,5.48143512,5.48783897,5.48129565
35.296753,4.89897949,5.48624875,-0.766334953,5.47924909,5.4861092,5.47910936
35.307244,5.38516481,5.48457283,-0.315290386,5.47706662,5.48443305,5.47692664
35.317736,5.83095189,5.4829578,0.589910244,5.47488729,5.48281777,5.47474706
35.328228,6.4807407,5.48141286,0.999663862,5.47271132,5.4812726,5.47257083
35.338719,5.74456265,5.47994906,0.514406051,5.47053889,5.47980856,5.47039815
35.349211,5.65685425,5.47857934,0.422226141,5.46836959,5.4784386,5.4682286
35.359702,5.47722558,5.47732008,-0.00972141243,5.46620384,5.47717912,5.46606259
35.370194,5.74456265,5.47619092,0.518046063,5.46404121,5.47604973,5.4638997
35.380686,5.38516481,5.47521666,-0.300086406,5.4618819,5.47507524,5.46174014
35.391177,5.91607978,5.47442828,0.664568657,5.45972613,5.47428664,5.4595841
35.401669,5.19615242,5.47386482,-0.52698425,5.45757346,5.47372297,5.45743118
35.41216,6.40312424,5.47357656,0.964130527,5.45542431,5.4734345,5.45528177
35.422652,5,5.47362854,-0.68820676,5.45327827,5.47348628,5.45313547
35.433144,5.19615242,5.47410638,-0.527213391,5.45113553,5.47396393,5.45099247
35.443635,4.12310563,5.47512415,-1.16276332,5.44899629,5.47498152,5.44885297
35.454127,5,5.47683698,-0.690533837,5.44686014,5.47669419,5.44671657
35.464618,5.38516481,5.47945864,-0.307073011,5.44472749,5.47931572,5.44458366
35.47511,5.19615242,5.48329214,-0.535854192,5.44259793,5.48314911,5.44245383
35.485602,6.08276253,5.48877747,0.770704264,5.44047164,5.48863438,5.44032728
35.496093,5.65685425,5.49658595,0.40033523,5.43834884,5.49644286,5.43820422
35.506585,4.89897949,5.50783131,-0.780289578,5.43622911,5.50768831,5.43608422
35.517076,5.65685425,5.52454408,0.363744652,5.43411285,5.5244013,5.4339677
35.527568,6,5.55066609,0.670323733,5.43199965,5.55052378,5.43185423
35.53806,6.08276253,5.59353145,0.699450554,5.42988971,5.59339003,5.42974403
35.548551,5.47722558,5.66493087,-0.433249692,5.42778324,5.66479103,5.42763729
35.559043,5.38516481,5.77946258,-0.627931347,5.42567981,5.77932532,5.42553359
35.569534,6.164414,5.94641995,0.466898331,5.42357983,5.94628635,5.42343335
35.580026,6,6.14807176,-0.384800941,5.42148289,6.14794236,5.42133615
35.590518,6.164414,6.30502861,-0.374986144,5.4193892,6.30490225,5.41924218
35.601009,5.29150262,6.30964433,-1.00903008,5.41729894,6.30951787,5.41715165
35.611501,5.47722558,6.15583784,-0.823779259,5.41521171,6.15570804,5.41506415
35.621992,5.09901951,5.94936048,-0.922139343,5.4131279,5.94922598,5.41298008
35.632484,6.164414,5.77478047,0.624206321,5.41104712,5.77464171,5.41089902
35.642976,6.55743852,5.65275063,0.951150827,5.40896955,5.65260866,5.40882119
35.653467,5,5.57478392,-0.758145051,5.4068954,5.57463976,5.40674676
35.663959,5.65685425,5.52627067,0.361363503,5.40482425,5.52612503,5.40467535
35.67445,5.56776436,5.49513188,0.269504137,5.40275651,5.49498521,5.40260733
35.684942,5.09901951,5.47374965,-0.61215205,5.40069178,5.47360219,5.40054232
35.695434,5.65685425,5.45801791,0.445910687,5.39863023,5.45786981,5.3984805
35.705925,5.38516481,5.44582018,-0.246283112,5.39657208,5.44567153,5.39642208
35.716417,5.38516481,5.43600252,-0.225472195,5.39451691,5.43585339,5.39436664
35.726908,6.63324958,5.42787476,1.09789563,5.39246513,5.42772519,5.39231458
35.7374,5.19615242,5.42098368,-0.474163749,5.39041633,5.4208337,5.3902655
35.747892,5.29150262,5.41502023,-0.351450721,5.3883707,5.41486987,5.38821959
35.758383,6.164414,5.40976579,0.868704908,5.38632844,5.40961506,5.38617705
35.768875,4.89897949,5.405061,-0.711394064,5.38428914,5.40490992,5.38413748
35.779366,5.74456265,5.40079015,0.586321151,5.38225321,5.40063873,5.38210126
35.789858,4.58257569,5.39686511,-0.90237986,5.38022023,5.39671336,5.38006801
35.80035,6,5.39321989,0.778960919,5.37819041,5.39306781,5.37803791
35.810841,5.74456265,5.38980365,0.595616487,5.37616393,5.38965125,5.37601115
35.821333,5.19615242,5.38657582,-0.436375294,5.3741404,5.38642311,5.37398734
35.831824,5,5.38350552,-0.619278227,5.3721202,5.3833525,5.37196686
35.842316,5.29150262,5.38056705,-0.298436646,5.37010294,5.38041373,5.36994932
35.852808,5.83095189,5.37774049,0.673209779,5.36808882,5.37758686,5.36793491
35.863299,5.47722558,5.37500966,0.31971224,5.36607801,5.37485572,5.36592382
35.873791,6.164414,5.3723606,0.889973824,5.36407014,5.37220636,5.36391566
35.884282,5.74456265,5.36978271,0.612192725,5.36206557,5.36962817,5.36191081
35.894774,5.38516481,5.3672663,0.133785288,5.36006392,5.36711146,5.35990887
35.905266,5.74456265,5.36480391,0.616245682,5.35806539,5.36464877,5.35791005
35.915757,5.74456265,5.36238926,0.618201734,5.35607014,5.36223383,5.35591452
35.926249,6.63324958,5.36001643,1.12837634,5.35407781,5.35986069,5.35392191
35.93674,4.12310563,5.35768118,-1.11111456,5.35208877,5.35752515,5.35193257
35.947232,6,5.35537909,0.802882874,5.35010262,5.35522276,5.34994614
35.957724,4.89897949,5.35310695,-0.673889802,5.34811957,5.35295032,5.34796279
35.968215,5.09901951,5.35086201,-0.501839117,5.34613978,5.35070509,5.34598272
35.978707,5.29150262,5.34864129,-0.239036954,5.34416289,5.34848407,5.34400553
35.989198,4.89897949,5.34644297,-0.668927111,5.34218925,5.34628545,5.34203161
35.99969,6.164414,5.34426468,0.90562096,5.3402185,5.34410686,5.34006057
36.010182,5.91607978,5.34210493,0.757611278,5.33825082,5.34194682,5.33809259
36.020673,5.19615242,5.33996243,-0.379222898,5.33628638,5.33980402,5.33612786
36.031165,5.74456265,5.33783543,0.637751687,5.33432481,5.33767672,5.334166
36.041656,6.164414,5.33572317,0.910324573,5.33236648,5.33556417,5.33220738
36.052148,5,5.33362421,-0.577602124,5.33041102,5.33346491,5.33025161
36.06264,5.19615242,5.33153782,-0.367947553,5.3284586,5.33137822,5.3282989
36.073131,5.38516481,5.32946338,0.236011504,5.3265094,5.32930347,5.3263494
36.083623,5.74456265,5.32739974,0.645881499,5.32456305,5.32723953,5.32440276
36.094114,5.19615242,5.32534663,-0.359435956,5.32261992,5.32518612,5.32245933
36.104606,4.69041576,5.32330307,-0.795542148,5.32067963,5.32314226,5.32051874
36.115098,5.91607978,5.32126871,0.771239956,5.31874236,5.3211076,5.31858117
36.125589,5.47722558,5.31924327,0.397469881,5.31680829,5.31908185,5.3166468
36.136081,5.29150262,5.31722591,-0.160384805,5.31487706,5.31706419,5.31471527
36.146572,5.09901951,5.31521662,-0.464970002,5.31294901,5.3150546,5.31278692
36.157064,4.79583152,5.31321465,-0.71929349,5.31102379,5.31305232,5.3108614
36.167556,5.65685425,5.31121987,0.587906782,5.30910156,5.31105724,5.30893887
36.178047,6.164414,5.30923215,0.924760428,5.30718252,5.30906922,5.30701952
36.188539,5.29150262,5.30725086,-0.125491987,5.30526628,5.30708762,5.30510298
36.19903,5.74456265,5.30527611,0.662786946,5.30335322,5.30511257,5.30318961
36.209522,5.83095189,5.3033073,0.726391492,5.30144295,5.30314344,5.30127904
36.220014,5.74456265,5.30134439,0.665746389,5.29953567,5.30118023,5.29937145
36.230505,5.09901951,5.29938739,-0.447624704,5.29763154,5.29922292,5.29746702
36.240997,6.164414,5.29743573,0.931116678,5.29573019,5.29727096,5.29556537
36.251488,5.29150262,5.29548963,-0.063142794,5.293832,5.29532455,5.29366686
36.26198,6,5.29354856,0.840506655,5.29193658,5.29338317,5.29177114
36.272472,4.89897949,5.29161257,-0.626604404,5.29004413,5.29144686,5.28987837
36.282963,5.19615242,5.28968169,-0.305825553,5.2881548,5.28951568,5.28798874
36.293455,5.19615242,5.28775545,-0.302659923,5.28626824,5.28758912,5.28610187
36.303946,4.89897949,5.2858341,-0.621976377,5.28438481,5.28566746,5.28421813
36.314438,5.09901951,5.28391716,-0.429997266,5.28250414,5.28375021,5.28233714
36.32493,5.29150262,5.28200473,0.097457154,5.2806264,5.28183746,5.28045909
36.335421,5.74456265,5.28009688,0.681517255,5.27875177,5.2799293,5.27858415
36.345913,6,5.27819317,0.849592155,5.27687989,5.27802528,5.27671195
36.356404,5.83095189,5.27629389,0.744753657,5.27501111,5.27612567,5.27484286
36.366896,5.38516481,5.27439859,0.332815597,5.27314507,5.27423006,5.2729765
36.377388,5.09901951,5.27250738,-0.416518748,5.27128194,5.27233854,5.27111306
36.387879,5.29150262,5.27062039,0.144506871,5.2694219,5.27045122,5.2692527
36.398371,5.47722558,5.26873718,0.456605296,5.26756459,5.2685677,5.26739507
36.408862,4.79583152,5.26685806,-0.686313729,5.26571035,5.26668826,5.26554052
36.419354,6.244998,5.26498261,0.989957264,5.26385884,5.26481249,5.26368868
36.429846,5.74456265,5.26311097,0.69386719,5.26201021,5.26294053,5.26183974
36.440337,4.89897949,5.26124326,-0.601883519,5.26016465,5.2610725,5.25999386
36.450829,5,5.25937907,-0.509292717,5.2583218,5.25920799,5.25815068
36.46132,5.29150262,5.25751873,0.184347215,5.256482,5.25734732,5.25631056
36.471812,5.83095189,5.25566183,0.758478786,5.2546449,5.2554901,5.25447314
36.482304,5.38516481,5.25380851,0.362431098,5.25281067,5.25363645,5.25263859
36.492795,5.38516481,5.25195891,0.364973833,5.25097948,5.25178653,5.25080707
36.503287,6.164414,5.25011264,0.956191069,5.24915098,5.24993994,5.24897825
36.513778,6.164414,5.24827003,0.957154101,5.24732551,5.248097,5.24715245
36.52427,4.47213595,5.24643068,-0.879940185,5.24550272,5.24625733,5.24532933
36.534762,4.69041576,5.24459475,-0.744431993,5.24368277,5.24442107,5.24350906
36.545253,5.91607978,5.24276238,0.820559202,5.24186585,5.24258837,5.24169181
36.555745,5.38516481,5.24093319,0.379778382,5.24005159,5.24075885,5.23987722
36.566236,5.29150262,5.23915778,0.228789952,5.23829063,5.23893283,5.23806564
36.576728,4.89897949,5.23733529,-0.581683595,5.2364821,5.23710994,5.23625672
36.58722,6.70820393,5.23551608,1.21354351,5.2346764,5.23529034,5.23445062
36.597711,5.47722558,5.2337003,0.493482798,5.2328737,5.23347416,5.23264752
36.608203,4.58257569,5.23188759,-0.805798916,5.23107364,5.23166105,5.23084706
36.618694,4.89897949,5.23007826,-0.57541183,5.22927656,5.22985132,5.22904959
36.629186,5.65685425,5.22827195,0.654661971,5.22748213,5.22804462,5.22725476
36.639678,6,5.22646882,0.879506212,5.2256905,5.22624108,5.22546273
36.650169,4.79583152,5.22466902,-0.654856851,5.22390184,5.22444088,5.22367367
36.660661,4.79583152,5.22287218,-0.653483479,5.22211581,5.22264364,5.22188723
36.671152,5,5.22107863,-0.470189998,5.22033274,5.22084969,5.22010376
36.681644,5.09901951,5.21928802,-0.346797501,5.21855229,5.21905867,5.21832291
36.692136,5,5.21750049,-0.466369482,5.21677462,5.21727074,5.21654483
36.702627,4.58257569,5.21571621,-0.795701272,5.2149999,5.21548605,5.21476971
36.713119,4.89897949,5.21393481,-0.561208807,5.21322779,5.21370424,5.21299719
36.72361,4.24264069,5.21215662,-0.984640003,5.21145862,5.21192565,5.21122761
36.734102,5.47722558,5.21038129,0.516569725,5.20969204,5.21014991,5.20946063
36.744594,5.91607978,5.20860898,0.841112836,5.20792823,5.20837718,5.20769641
36.755085,5.29150262,5.20683983,0.290968705,5.20616735,5.20660763,5.20593511
36.765577,5.09901951,5.20520495,-0.325861062,5.20440904,5.20497233,5.2041764
36.776068,5.74456265,5.20344204,0.735609006,5.20265366,5.20320901,5.2024206
36.78656,5.65685425,5.20168192,0.674664603,5.20090085,5.20144849,5.20066738
36.797052,5.09901951,5.19992476,-0.317655866,5.19915079,5.19969091,5.1989169
36.807543,3.16227766,5.19817071,-1.42684724,5.19740362,5.19793644,5.19716932
36.818035,4.89897949,5.19641942,-0.545380541,5.19565903,5.19618474,5.19542431
36.828526,4.89897949,5.19467121,-0.54377544,5.19391732,5.19443612,5.19368219
36.839018,5.29150262,5.19292575,0.313969539,5.19217818,5.19269024,5.19194263
36.84951,4,5.19118319,-1.09141339,5.19044175,5.19094725,5.19020578
36.860001,5.56776436,5.18944367,0.615077792,5.1887082,5.18920732,5.18847182
36.870493,4.47213595,5.18770687,-0.845914249,5.1869772,5.1874701,5.18674039
36.880984,4.89897949,5.1859731,-0.535717854,5.18524907,5.18573591,5.18501184
36.891476,6.164414,5.18424203,0.990036349,5.18352348,5.18400441,5.18328583
36.901968,4.69041576,5.18251381,-0.701497004,5.18180058,5.18227577,5.18156251
36.912459,5.91607978,5.18078859,0.857491222,5.18008054,5.18055012,5.17984205
36.922951,5.91607978,5.17906604,0.858495048,5.17836303,5.17882715,5.17812411
36.933442,5.38516481,5.17734647,0.455870965,5.17664837,5.17710716,5.17640902
36.943934,5.29150262,5.17562956,0.34040133,5.17493622,5.17538982,5.17469644
36.954426,5.65685425,5.17391545,0.694937984,5.17322675,5.17367528,5.17298654
36.964917,4.47213595,5.1722043,-0.836700871,5.17152011,5.1719637,5.17127948
36.975409,6.63324958,5.17049578,1.20944359,5.16981598,5.17025475,5.16957492
36.9859,5.91607978,5.16879021,0.864459123,5.16811467,5.16854875,5.16787318
36.996392,4.79583152,5.16708724,-0.609307575,5.16641586,5.16684536,5.16617394
37.006884,5,5.16538705,-0.406678065,5.1647197,5.16514473,5.16447735
37.017375,5.09901951,5.16368977,-0.25430348,5.16302636,5.16344702,5.16278358
37.027867,4.89897949,5.16199509,-0.512850469,5.1613355,5.1617519,5.16109228
37.038358,5.09901951,5.16030331,-0.247555644,5.15964745,5.16005969,5.15940379
37.04885,5.56776436,5.15861411,0.63964854,5.15796187,5.15837005,5.15771778
37.059342,5.09901951,5.15692764,-0.240641068,5.15627892,5.15668314,5.15603439
37.069833,5.29150262,5.15524405,0.369132188,5.15459877,5.15499911,5.1543538
37.080325,5.56776436,5.15356302,0.64358476,5.15292107,5.15331764,5.15267567
37.090816,5.29150262,5.15188486,0.373654605,5.15124616,5.15163904,5.15100032
37.101308,5,5.15020924,-0.387568369,5.14957371,5.14996299,5.14932742
37.1118,4.47213595,5.14853632,-0.82243563,5.14790386,5.14828962,5.14765714
37.122291,4.47213595,5.14686625,-0.821419682,5.14623679,5.14661911,5.14598962
37.132783,5.83095189,5.1451987,0.828102162,5.14457215,5.14495112,5.14432454
37.143274,4.79583152,5.14353399,-0.589663014,5.14291028,5.14328596,5.14266222
37.153766,4.47213595,5.1418718,-0.818373901,5.14125084,5.14162332,5.14100234
37.164258,6.244998,5.14021226,1.05108788,5.13959399,5.13996334,5.13934504
37.174749,5,5.13855555,-0.372230505,5.13793989,5.13830618,5.13769049
37.185241,5.38516481,5.13690133,0.498260452,5.13628821,5.13665151,5.13603836
37.195732,5.47722558,5.13524991,0.584786852,5.13463927,5.13499964,5.13438897
37.206224,4,5.13360098,-1.06470699,5.13299274,5.13335026,5.13274199
37.216716,4.89897949,5.13195468,-0.482675043,5.13134878,5.13170351,5.13109758
37.227207,5.09901951,5.13031117,-0.17689448,5.12970754,5.13005955,5.12945589
37.237699,5.83095189,5.12867013,0.838022535,5.12806871,5.12841805,5.1278166
37.24819,5.56776436,5.12703185,0.663876878,5.12643259,5.12677932,5.12618003
37.258682,5.56776436,5.12539604,0.665107754,5.12479887,5.12514305,5.12454585
37.269174,5.65685425,5.12376283,0.730131098,5.12316769,5.12350938,5.12291421
37.279665,4.79583152,5.12213238,-0.571227496,5.12153921,5.12187847,5.12128528
37.290157,4.35889894,5.12050436,-0.872700074,5.11991312,5.12025,5.11965872
37.300648,5.38516481,5.11887909,0.516028792,5.11828972,5.11862427,5.11803486
37.31114,5.65685425,5.11725625,0.734573344,5.11666869,5.11700097,5.11641337
37.321632,5.38516481,5.11563599,0.519161647,5.11505019,5.11538024,5.11479441
37.332123,5.47722558,5.11401846,0.602666672,5.11343436,5.11376225,5.11317812
37.342615,5.29150262,5.11240334,0.423201235,5.1118209,5.11214666,5.1115642
37.353106,5.47722558,5.11079093,0.605338453,5.11021011,5.11053379,5.10995294
37.363598,5.74456265,5.10918093,0.797108346,5.10860168,5.10892332,5.10834404
37.37409,5,5.10757348,-0.327983968,5.10699575,5.10731541,5.10673764
37.384581,6.08276253,5.10596873,0.988328789,5.10539247,5.10571019,5.1051339
37.395073,4.69041576,5.10436637,-0.643389939,5.10379154,5.10410736,5.1035325
37.405564,5,5.1027667,-0.32057246,5.10219325,5.10250722,5.10193374
37.416056,4.79583152,5.10116941,-0.552573874,5.1005973,5.10090945,5.10033732
37.426548,4.89897949,5.09957464,-0.447878507,5.09900384,5.09931421,5.09874338
37.437039,4.79583152,5.09798255,-0.549682659,5.097413,5.09772165,5.09715207
37.447531,5.29150262,5.09639282,0.441712353,5.09582449,5.09613144,5.09556308
37.458022,5,5.09480575,-0.307905427,5.0942386,5.0945439,5.09397672
37.468514,5.19615242,5.09322104,0.320829213,5.09265503,5.09295871,5.09239267
37.479006,5.74456265,5.09163883,0.808037016,5.09107392,5.09137602,5.09081108
37.489497,4.58257569,5.09005926,-0.712378808,5.08949543,5.08979597,5.08923211
37.499989,5.74456265,5.08848204,0.809988031,5.08791923,5.08821827,5.08765543
37.51048,5.29150262,5.08690745,0.452321981,5.08634564,5.0866432,5.08608136
37.520972,5,5.08533519,-0.292121876,5.08477434,5.08507046,5.08450958
37.531464,5,5.08376541,-0.289422544,5.08320549,5.08350019,5.08294024
37.541955,4.79583152,5.08219825,-0.535132437,5.08163922,5.08193255,5.08137349
37.552447,5.29150262,5.08063341,0.459204983,5.08007523,5.08036722,5.07980902
37.562938,5.38516481,5.07907117,0.553257295,5.07851383,5.0788045,5.07824712
37.57343,4.79583152,5.07751125,-0.53073508,5.0769547,5.07724408,5.07668751
37.583922,5.65685425,5.07595378,0.762168271,5.07539799,5.07568612,5.07513031
37.594413,4.69041576,5.0743989,-0.619663732,5.07384385,5.07413076,5.07357568
37.604905,4.35889894,5.07284632,-0.844954067,5.07229197,5.07257768,5.07202331
37.615396,5.19615242,5.07129632,0.353349827,5.07074265,5.07102719,5.07047349
37.625888,4.69041576,5.06974861,-0.615900034,5.06919558,5.06947899,5.06892593
37.63638,5.38516481,5.06820333,0.562993319,5.06765092,5.06793321,5.06738077
37.646871,5.47722558,5.06666062,0.640753429,5.0661088,5.06639,5.06583815
37.657363,5.74456265,5.06512018,0.824283002,5.06456892,5.06484907,5.06429778
37.667854,6.08276253,5.0635823,1.00954456,5.06303158,5.06331069,5.06275994
37.678346,4.79583152,5.06204669,-0.515960429,5.06149647,5.06177458,5.06122433
37.688838,4.12310563,5.06051348,-0.968198251,5.05996374,5.06024087,5.0596911
37.699329,4.58257569,5.05898282,-0.690222516,5.05843353,5.0587097,5.05816039
37.709821,5.38516481,5.0574544,0.572459958,5.05690555,5.05718079,5.05663191
37.720312,4.79583152,5.05592853,-0.509997064,5.05538008,5.05565441,5.05510593
37.730804,5.29150262,5.05440489,0.48692682,5.05385683,5.05413027,5.05358217
37.741296,5,5.05288364,-0.229964438,5.05233593,5.05260851,5.05206077
37.751787,4.58257569,5.05136491,-0.684681838,5.05081754,5.05108927,5.05054187
37.762279,5,5.04984841,-0.223267583,5.04930135,5.04957226,5.04902517
37.77277,4.35889894,5.04833443,-0.830322517,5.04778765,5.04805776,5.04751096
37.783262,5.19615242,5.04682266,0.386432095,5.04627614,5.04654548,5.04599894
37.793754,5.38516481,5.04531325,0.582967886,5.04476698,5.04503556,5.04448926
37.804245,5.83095189,5.04380634,0.887212237,5.04326029,5.04352814,5.04298206
37.814737,4.79583152,5.04230164,-0.496457568,5.04175578,5.04202292,5.04147704
37.825228,5.09901951,5.04079943,0.241288388,5.04025375,5.0405202,5.03997449
37.83572,6.08276253,5.03929941,1.02150042,5.03875389,5.03901966,5.03847411
37.846212,6,5.03780174,0.980917052,5.03725635,5.03752147,5.03697605
37.856703,5,5.03630654,-0.190542741,5.03576126,5.03602575,5.03548044
37.867195,4.47213595,5.03481352,-0.750118368,5.03426834,5.03453221,5.033987
37.877686,5.29150262,5.03332297,0.508113816,5.03277787,5.03304114,5.032496
37.888178,4.35889894,5.0318346,-0.820326555,5.03128955,5.03155224,5.03100716
37.89867,5.47722558,5.03034854,0.668488617,5.02980353,5.03006566,5.02952062
37.909161,4.79583152,5.02886494,-0.482735348,5.02831994,5.02858153,5.0280365
37.919653,6.4807407,5.0273835,1.20555265,5.0268385,5.02709956,5.02655453
37.930144,5.09901951,5.0259045,0.270397871,5.02535948,5.02562004,5.02507499
37.940636,5.19615242,5.02442767,0.41439686,5.0238826,5.02414267,5.02359758
37.951128,5.83095189,5.02295312,0.898887521,5.022408,5.02266759,5.02212244
37.961619,4.12310563,5.021481,-0.947826659,5.02093581,5.02119494,5.02064972
37.972111,5,5.02001103,-0.141460345,5.01946574,5.01972444,5.01917912
37.982602,4,5.01854348,-1.00922915,5.01799808,5.01825635,5.01771092
37.993094,4.79583152,5.01707806,-0.470368512,5.01653253,5.01679039,5.01624484
38.003586,5.83095189,5.01561491,0.902960121,5.01506924,5.01532671,5.01478101
38.014077,4.24264069,5.01415418,-0.878358406,5.01360834,5.01386543,5.01331957
38.024569,5.65685425,5.01269556,0.802594971,5.01214955,5.01240628,5.01186023
38.03506,4.79583152,5.01123934,-0.46412048,5.01069314,5.01094952,5.01040328
38.045552,4.89897949,5.00978524,-0.332874985,5.00923882,5.00949487,5.00894842
38.056044,5.74456265,5.00833339,0.858038028,5.00778674,5.00804248,5.0074958
38.066535,5.83095189,5.00688392,0.907781898,5.00633703,5.00659246,5.00604554
38.077027,6,5.00543656,0.997278017,5.00488941,5.00514455,5.00459737
38.087518,5,5.00399157,-0.0631788424,5.00344414,5.00369901,5.00315156
38.09801,5,5.00254867,-0.0504843654,5.00200096,5.00225557,5.00170782
38.108502,5.29150262,5.001108,0.538882749,5.00055999,5.00081435,5.0002663
38.118993,5.09901951,4.9996697,0.315198054,4.99912136,4.99937549,4.99882712
38.129485,5.29150262,4.99823348,0.541543298,4.9976848,4.99793872,4.99739001
38.139976,3.74165739,4.99679961,-1.1203313,4.99625059,4.99650429,4.99595524
38.150468,4.69041576,4.99536781,-0.552224642,4.99481843,4.99507194,4.99452252
38.16096,6.08276253,4.99393823,1.04346744,4.99338846,4.9936418,4.993092
38.171451,5.56776436,4.99251098,0.758454602,4.99196082,4.99221399,4.9916638
38.181943,5,4.9910858,0.0944150659,4.99053523,4.99078825,4.99023765
38.192434,5.29150262,4.98966294,0.549399382,4.98911195,4.98936483,4.98881381
38.202926,5.56776436,4.98824214,0.761263569,4.98769072,4.98794347,4.98739201
38.213418,4.47213595,4.98682353,-0.717417294,4.98627165,4.98652429,4.98597238
38.223909,5.56776436,4.98540723,0.763123273,4.9848549,4.98510743,4.98455506
38.234401,4.12310563,4.98399298,-0.927840155,4.98344017,4.98369261,4.98313976
38.244892,5,4.98258103,0.131980929,4.98202773,4.98228009,4.98172676
38.255384,5.83095189,4.98117112,0.921835544,4.98061732,4.98086961,4.98031577
38.265876,5.56776436,4.97976338,0.766812221,4.97920906,4.9794613,4.97890694
38.276367,6.40312424,4.97835793,1.19363575,4.97780308,4.97805528,4.97750039
38.286859,4,4.97695451,-0.98841009,4.97639911,4.97665128,4.97609584
38.29735,4.58257569,4.97555337,-0.626879311,4.97499741,4.97524956,4.97469357
38.307842,4.79583152,4.97415424,-0.422282746,4.97359772,4.97384986,4.9732933
38.318334,5,4.97275726,0.165053744,4.97220016,4.9724523,4.97189516
38.328825,5.29150262,4.97136256,0.565809214,4.97080486,4.97105701,4.97049928
38.339317,4.58257569,4.96996985,-0.622409959,4.96941155,4.96966373,4.96910539
38.349808,5,4.96857941,0.177258529,4.96802049,4.96827271,4.96771375
38.3603,5.83095189,4.96719097,0.929387392,4.96663142,4.96688368,4.96632409
38.370792,5.38516481,4.96580465,0.64758023,4.96524446,4.96549678,4.96493655
38.381283,5,4.96442059,0.188625064,4.96385973,4.96411212,4.96355123
38.391775,4.69041576,4.9630385,-0.522132878,4.96247698,4.96272945,4.96216789
38.402266,5,4.96165866,0.195809444,4.96109646,4.96134902,4.96078678
38.412758,3.74165739,4.9602808,-1.10391277,4.95971791,4.95997056,4.95940764
38.42325,4.35889894,4.95890504,-0.774600602,4.95834144,4.95859421,4.95803058
38.433741,5.56776436,4.95753151,0.781174025,4.9569672,4.95722008,4.95665574
38.444233,4.69041576,4.95615994,-0.515503811,4.9555949,4.95584792,4.95528285
38.454724,5.29150262,4.95479059,0.580268927,4.95422482,4.95447798,4.95391217
38.465216,6,4.95342321,1.02302336,4.95285668,4.95310999,4.95254343
38.475708,4.89897949,4.9520579,-0.230387533,4.95149061,4.95174408,4.95117676
38.486199,4.47213595,4.9506948,-0.69177948,4.95012674,4.95038039,4.94981229
38.496691,4.58257569,4.94933365,-0.605605447,4.94876481,4.94901863,4.94844975
38.507182,5.38516481,4.9479747,0.661203528,4.94740506,4.94765907,4.9470894
38.517674,3.87298335,4.94661769,-1.03616328,4.94604724,4.94630145,4.94573097
38.528166,5.29150262,4.94526274,0.588421521,4.94469147,4.94494589,4.94437459
38.538657,4,4.94390997,-0.971550293,4.94333788,4.94359252,4.94302039
38.549149,5.29150262,4.94255913,0.590714389,4.9419862,4.94224107,4.9416681
38.55964,4.89897949,4.94121047,-0.205501794,4.94063669,4.9408918,4.94031797
38.570132,5.83095189,4.93986373,0.943974663,4.93928908,4.93954444,4.93896975
38.580624,3.31662479,4.93851903,-1.27353612,4.93794351,4.93819912,4.93762356
38.591115,4.58257569,4.9371765,-0.595483673,4.93660009,4.93685597,4.93627953
38.601607,3.60555128,4.93583587,-1.15337964,4.93525857,4.93551473,4.93493739
38.612098,5.09901951,4.9344974,0.405613251,4.93391919,4.93417564,4.93359739
38.62259,4.69041576,4.93316083,-0.492691663,4.93258171,4.93283845,4.93225928
38.633082,4.79583152,4.93182629,-0.368774679,4.93124623,4.93150327,4.93092318
38.643573,5.74456265,4.93049388,0.902257592,4.92991289,4.93017025,4.92958922
38.654065,5.91607978,4.92916337,0.993436668,4.92858143,4.9288391,4.92825712
38.664556,4.79583152,4.92783499,-0.363322816,4.92725209,4.9275101,4.92692716
38.675048,5.47722558,4.92650849,0.742103148,4.92592462,4.92618297,4.92559906
38.68554,5.19615242,4.925184,0.520546276,4.92459914,4.92485784,4.92427295
38.696031,4.89897949,4.92386163,-0.157740737,4.92327578,4.92353484,4.92294895
38.706523,4,4.92254112,-0.960490043,4.92195428,4.9222137,4.92162681
38.717014,4.89897949,4.92122274,-0.149141709,4.92063488,4.92089467,4.92030677
38.727506,5.38516481,4.91990621,0.682098672,4.91931733,4.91957751,4.91898859
38.737998,5.38516481,4.91859166,0.683061595,4.91800175,4.91826232,4.91767237
38.748489,5.29150262,4.91727922,0.611738015,4.91668826,4.91694924,4.91635824
38.758981,5.47722558,4.91596863,0.749170837,4.91537662,4.91563801,4.91504595
38.769472,5,4.91466014,0.292129875,4.91406706,4.91432887,4.91373575
38.779964,5.19615242,4.91335348,0.531788436,4.91275933,4.91302156,4.91242737
38.790456,4.79583152,4.91204879,-0.340906538,4.91145355,4.91171622,4.91112095
38.800947,5,4.91074618,0.298753775,4.91014985,4.91041297,4.90981659
38.811439,5,4.9094454,0.300922907,4.90884797,4.90911154,4.90851406
38.82193,5.47722558,4.9081467,0.754373167,4.90754815,4.90781218,4.90721359
38.832422,4.69041576,4.90684982,-0.465224742,4.90625014,4.90651464,4.90591492
38.842914,4.89897949,4.90555488,-0.0810888233,4.90495407,4.90521905,4.90461819
38.853405,5.19615242,4.90426201,0.540268836,4.90366005,4.90392552,4.90332351
38.863897,5.38516481,4.90297094,0.694401802,4.90236783,4.90263379,4.90203063
38.874388,5.47722558,4.90168194,0.758645925,4.90107765,4.90134412,4.9007398
38.88488,5.47722558,4.90039473,0.759493808,4.89978927,4.90005625,4.89945075
38.895372,4.58257569,4.89910945,-0.562613325,4.8985028,4.8987703,4.89816362
38.905863,4.79583152,4.89782621,-0.319366068,4.89721837,4.8974864,4.89687851
38.916355,5.74456265,4.89654476,0.920878865,4.89593571,4.89620428,4.89559519
38.926846,5.19615242,4.89526535,0.548531743,4.89465508,4.8949242,4.89431389
38.937338,4.47213595,4.89398772,-0.649501168,4.89337623,4.8936459,4.89303436
38.94783,4.35889894,4.892712,-0.730625113,4.89209927,4.8923695,4.89175673
38.958321,6.08276253,4.8914383,1.091478,4.89082432,4.89109512,4.8904811
38.968813,5.47722558,4.89016637,0.766197889,4.88955113,4.88982252,4.88920724
38.979304,4.89897949,4.88889646,0.100414286,4.88827995,4.88855193,4.88793538
38.989796,4.69041576,4.88762831,-0.444086197,4.88701053,4.8872831,4.88666527
39.000288,5.56776436,4.88636205,0.825470965,4.88574298,4.88601615,4.88539704
39.010779,4.47213595,4.88509779,-0.642621064,4.88447742,4.88475121,4.8841308
39.021271,5,4.88383528,0.340829455,4.88321361,4.88348801,4.8828663
39.031762,4.89897949,4.88257477,0.12808089,4.88195178,4.88222681,4.88160378
39.042254,4.35889894,4.88131601,-0.722784245,4.88069169,4.88096736,4.880343
39.052746,4.12310563,4.88005911,-0.870030738,4.87943345,4.87970977,4.87908407
39.063237,4.58257569,4.87880419,-0.544268775,4.87817719,4.87845416,4.87782711
39.073729,4.89897949,4.87755102,0.146384662,4.87692265,4.87720029,4.87657188
39.08422,4,4.87629981,-0.936108867,4.87567008,4.87594838,4.87531861
39.094712,5.65685425,4.87505034,0.884196762,4.87441923,4.87469821,4.87406705
39.105204,4.47213595,4.87380271,-0.633771845,4.87317021,4.87344988,4.87281733
39.115695,5.38516481,4.87255704,0.715966318,4.87192314,4.87220351,4.87156956
39.126187,4.89897949,4.87131309,0.166332183,4.87067779,4.87095885,4.8703235
39.136678,3.60555128,4.87007109,-1.1245087,4.86943437,4.86971615,4.86907938
39.14717,4.69041576,4.86883081,-0.42239206,4.86819266,4.86847516,4.86783696
39.157662,5,4.86759236,0.363878612,4.86695276,4.86723599,4.86659635
39.168153,5.29150262,4.86635584,0.652032807,4.8657148,4.86599876,4.86535767
39.178645,4.79583152,4.86512103,-0.263228995,4.86447853,4.86476323,4.86412069
39.189136,5.47722558,4.86388815,0.783158623,4.86324418,4.86352964,4.86288562
39.199628,4.58257569,4.86265696,-0.529227045,4.86201151,4.86229773,4.86165223
39.21012,5.65685425,4.86142758,0.891866956,4.86078064,4.86106763,4.86042064
39.220611,4.79583152,4.86020012,-0.253709679,4.85955169,4.85983945,4.85919097
39.231103,4.79583152,4.85897435,-0.251282366,4.8583244,4.85861295,4.85796296
39.241594,4.69041576,4.85775049,-0.40906568,4.85709902,4.85738837,4.85673685
39.252086,4.47213595,4.85652831,-0.619993831,4.85587531,4.85616545,4.8555124
39.262578,6,4.85530791,1.06990284,4.85465337,4.85494433,4.85428974
39.273069,5.19615242,4.85408942,0.584861527,4.85343332,4.8537251,4.85306896
39.283561,5.19615242,4.85287259,0.585900874,4.85221493,4.85250754,4.85184983
39.294052,5.83095189,4.85165765,0.989592967,4.85099843,4.85129187,4.85063259
39.304544,5.09901951,4.85044438,0.4985731,4.84978357,4.85007785,4.84941699
39.315036,5.29150262,4.84968938,0.664690338,4.84857047,4.84932214,4.84820315
39.325527,5,4.8484806,0.389254932,4.84735924,4.84811262,4.84699118
39.336019,5.38516481,4.84727347,0.733410757,4.84614965,4.84690475,4.84578085
39.34651,4.35889894,4.84606822,-0.697975123,4.84494192,4.84569875,4.84457237
39.357002,5.09901951,4.84486461,0.504137786,4.84373583,4.84449439,4.84336553
39.367494,5.19615242,4.84366275,0.593708408,4.84253147,4.84329179,4.84216042
39.377985,3.87298335,4.84246276,-0.984621456,4.84132897,4.84209104,4.84095716
39.388477,4.69041576,4.8412644,-0.388392375,4.84012808,4.84089193,4.83975552
39.398968,5,4.84006789,0.399915125,4.83892904,4.83969466,4.83855573
39.40946,4.89897949,4.83887301,0.245166213,4.83773161,4.83849903,4.83735754
39.419952,4.69041576,4.83767987,-0.383750062,4.83653591,4.83730512,4.83616107
39.430443,5.29150262,4.83648857,0.674547294,4.83534203,4.83611306,4.83496643
39.440935,4.47213595,4.83529889,-0.602630012,4.83414976,4.83492261,4.83377339
39.451426,4.79583152,4.83411104,-0.195651514,4.83295931,4.83373399,4.83258218
39.461918,5.19615242,4.8329248,0.602683686,4.83177046,4.83254698,4.83139255
39.47241,4.89897949,4.83174027,0.259305248,4.83058331,4.83136169,4.83020463
39.482901,5.29150262,4.83055758,0.678929338,4.82939797,4.83017822,4.82901852
39.493393,5.38516481,4.82937647,0.745512128,4.82821421,4.82899634,4.82783399
39.503884,4.89897949,4.82819719,0.26604942,4.82703227,4.82781628,4.82665126
39.514376,5,4.8270195,0.415909248,4.82585189,4.82663781,4.82547011
39.524868,4.47213595,4.8258435,-0.594733173,4.82467321,4.82546103,4.82429064
39.535359,4.69041576,4.82466931,-0.366406269,4.82349631,4.82428605,4.82311296
39.545851,5.09901951,4.8234967,0.524902667,4.82232098,4.82311266,4.82193684
39.556342,4.47213595,4.82232589,-0.591768484,4.82114744,4.82194106,4.82076251
39.566834,4.47213595,4.82115665,-0.590779739,4.81997546,4.82077103,4.81958974
39.577326,5,4.8199891,0.424276918,4.81880514,4.81960268,4.81841863
39.587817,4.47213595,4.81882333,-0.58880164,4.8176366,4.81843611,4.81724929
39.598309,5.19615242,4.81765912,0.615218096,4.8164696,4.8172711,4.8160815
39.6088,5.83095189,4.81649669,1.00720167,4.81530438,4.81610788,4.81491547
39.619292,4.47213595,4.81533581,-0.58583262,4.81414069,4.8149462,4.81375098
39.629784,5.38516481,4.8141766,0.755637615,4.81297865,4.81378618,4.81258814
39.640275,4.58257569,4.81301916,-0.480045272,4.81181837,4.81262793,4.81142705
39.650767,3.60555128,4.81186326,-1.09832235,4.81065962,4.81147122,4.81026748
39.661258,4.35889894,4.81070912,-0.672168266,4.80950261,4.81031627,4.80910967
39.67175,5.29150262,4.80955652,0.694223379,4.80834713,4.80916286,4.80795337
39.682242,4.47213595,4.80840557,-0.579887584,4.80719328,4.80801109,4.80679871
39.692733,4.47213595,4.80725636,-0.578895849,4.80604117,4.80686106,4.80564577
39.703225,5.38516481,4.80610868,0.760957375,4.80489057,4.80571256,4.80449435
39.713716,5.47722558,4.80496274,0.819916356,4.80374169,4.80456581,4.80334465
39.724208,5.19615242,4.80381833,0.626365784,4.80259433,4.80342056,4.80219646
39.7347,4.89897949,4.80267554,0.310328774,4.80144857,4.80227695,4.80104988
39.745191,5.29150262,4.80153448,0.699977245,4.80030453,4.80113506,4.79990501
39.755683,4.89897949,4.80039493,0.313981776,4.79916199,4.79999468,4.79876164
39.766174,4.24264069,4.79925711,-0.746067301,4.79802116,4.79885602,4.79761997
39.776666,5.38516481,4.79812078,0.766187982,4.79688182,4.79771886,4.79647979
39.787158,5.56776436,4.79698607,0.8779398,4.79574407,4.79658331,4.7953412
39.797649,5.09901951,4.79585307,0.550605524,4.79460802,4.79544946,4.7942043
39.808141,3.74165739,4.79472156,-1.02618915,4.79347344,4.79431711,4.79306889
39.818632,4.69041576,4.79359176,-0.321210215,4.79234056,4.79318646,4.79193516
39.829124,4.24264069,4.79246345,-0.741500343,4.79120915,4.7920573,4.7908029
39.839616,5.09901951,4.79133672,0.554691619,4.79007932,4.79092972,4.78967221
39.850107,4.69041576,4.79021169,-0.315904941,4.78895116,4.78980384,4.7885432
39.860599,5.29150262,4.78908814,0.708812024,4.78782447,4.78867943,4.78741565
39.87109,5.09901951,4.78796627,0.557721475,4.78669945,4.7875567,4.78628977
39.881582,4.79583152,4.78684587,0.0947926732,4.78557588,4.78643544,4.78516534
39.892074,4.47213595,4.78572705,-0.559992047,4.78445387,4.78531575,4.78404247
39.902565,4.69041576,4.7846099,-0.306910638,4.78333353,4.78419774,4.78292125
39.913057,5.74456265,4.78349421,0.98034098,4.78221462,4.78308118,4.78180148
39.923548,5,4.78238019,0.466497385,4.78109737,4.78196629,4.78068336
39.93404,4.35889894,4.78126762,-0.649898976,4.77998156,4.78085285,4.77956667
39.944532,5.74456265,4.78015661,0.982041769,4.77886729,4.77974096,4.77845152
39.955023,4.24264069,4.77904726,-0.732397822,4.77775466,4.77863072,4.77733801
39.965515,4.79583152,4.77793935,0.133761645,4.77664345,4.77752193,4.77622592
39.976006,4.12310563,4.77683309,-0.808534142,4.77553388,4.77641479,4.77511547
39.986498,4.47213595,4.77572826,-0.55099211,4.77442574,4.77530907,4.77400643
39.99699,4.12310563,4.77462497,-0.807167485,4.77331911,4.7742049,4.77289892
40.007481,4.47213595,4.77352333,-0.548987589,4.77221411,4.77310236,4.77179302
40.017973,4.79583152,4.77242311,0.152998089,4.77111052,4.77200124,4.77068854
40.028464,4.69041576,4.77132452,-0.284444653,4.77000854,4.77090176,4.76958566
40.038956,4.69041576,4.77022735,-0.282509456,4.76890797,4.76980369,4.76848419
40.049448,3.87298335,4.76913171,-0.946651129,4.7678089,4.76870714,4.76738422
40.059939,4.89897949,4.76803768,0.361858819,4.76671144,4.76761221,4.76628586
40.070431,5.19615242,4.76694507,0.655139189,4.76561538,4.76651869,4.76518888
40.080922,4.35889894,4.76585407,-0.637930342,4.76452091,4.76542678,4.7640935
40.091414,5,4.76476447,0.485010858,4.76342782,4.76433627,4.7629995
40.101906,5.38516481,4.76367637,0.788345377,4.76233623,4.76324726,4.76190699
40.112397,5.19615242,4.76258989,0.658454659,4.76124622,4.76215985,4.76081606
40.122889,4.89897949,4.76150479,0.370775803,4.76015759,4.76107383,4.75972651
40.13338,5.38516481,4.76042226,0.790406569,4.75907054,4.75999038,4.75863853
40.143872,5.09901951,4.75934015,0.582820179,4.75798485,4.75890734,4.75755192
40.154364,4.79583152,4.75825953,0.193834965,4.75690064,4.75782579,4.75646678
40.164855,4.47213595,4.75718049,-0.533895624,4.755818,4.75674582,4.7553832
40.175347,4.69041576,4.75610283,-0.256294895,4.75473672,4.75566722,4.75430098
40.185838,4.24264069,4.75502675,-0.715811473,4.75365699,4.75459021,4.75322032
40.19633,4.79583152,4.75395204,0.204644767,4.75257863,4.75351456,4.75214101
40.206822,4.69041576,4.7528788,-0.249926075,4.75150171,4.75244037,4.75106315
40.217313,5.38516481,4.75180713,0.795837719,4.75042635,4.75136775,4.74998684
40.227805,4.47213595,4.75073682,-0.52782655,4.74935233,4.75029649,4.74891187
40.238296,4.35889894,4.74966807,-0.625115294,4.74827985,4.74922679,4.74783844
40.248788,5.56776436,4.74860068,0.905076617,4.74720871,4.74815845,4.74676634
40.25928,4.58257569,4.74753474,-0.406151506,4.746139,4.74709155,4.74569568
40.269771,5,4.74647035,0.503517277,4.74507083,4.7460262,4.74462655
40.280263,4.69041576,4.74540731,-0.234502768,4.74400399,4.74496219,4.74355874
40.290754,4.89897949,4.74434581,0.393234887,4.74293867,4.74389972,4.74249245
40.301246,5.65685425,4.74328565,0.955807826,4.74187467,4.74283859,4.74142748
40.311738,4.79583152,4.74222692,0.23152667,4.74081209,4.7417789,4.74036392
40.322229,4.69041576,4.74116973,-0.225286428,4.73975102,4.74072073,4.73930188
40.332721,4.12310563,4.74011387,-0.785498726,4.73869127,4.73966389,4.73824115
40.343212,4.69041576,4.73905954,-0.220553351,4.73763302,4.73860858,4.73718192
40.353704,4.89897949,4.73800653,0.401214351,4.73657608,4.73755458,4.73612399
40.364196,5,4.73695494,0.512879187,4.73552053,4.736502,4.73506746
40.374687,4.47213595,4.73590487,-0.513584375,4.73446649,4.73545094,4.73401242
40.385179,4.79583152,4.73485611,0.246932011,4.73341374,4.73440118,4.73295868
40.39567,4.47213595,4.73380886,-0.511539735,4.73236248,4.73335294,4.73190642
40.406162,4.12310563,4.73276291,-0.780805537,4.73131251,4.73230599,4.73085545
40.416654,4.69041576,4.73171837,-0.203230443,4.73026392,4.73126045,4.72980585
40.427145,5.47722558,4.73067533,0.864031389,4.72921681,4.73021641,4.72875774
40.437637,5.47722558,4.72963359,0.864634017,4.72817098,4.72917366,4.7277109
40.448128,4.24264069,4.72859334,-0.697103045,4.72712662,4.7281324,4.72666553
40.45862,4.24264069,4.72755439,-0.69635745,4.72608353,4.72709242,4.72562143
40.469112,5.19615242,4.72651682,0.685299647,4.72504181,4.72605383,4.72457869
40.479603,4.58257569,4.72548073,-0.378027823,4.72400156,4.72501673,4.72353741
40.490095,5.38516481,4.72444593,0.812846161,4.72296256,4.7239809,4.72249739
40.500586,4.58257569,4.7234126,-0.37528243,4.72192502,4.72294654,4.72145882
40.511078,4.79583152,4.72238054,0.27101841,4.72088874,4.72191346,4.7204215
40.52157,4.69041576,4.72134986,-0.175880937,4.7198538,4.72088174,4.71938553
40.532061,4.69041576,4.72032065,-0.172930302,4.71882032,4.71985149,4.71835101
40.542553,4.79583152,4.7192927,0.276656505,4.71778807,4.7188225,4.71731772
40.553044,5.38516481,4.71826621,0.816638595,4.71675727,4.71779497,4.71628587
40.563536,4.35889894,4.71724099,-0.598616774,4.7157277,4.71676869,4.71525526
40.574028,5.09901951,4.71621711,0.618710272,4.71469947,4.71574377,4.71422597
40.584519,5.38516481,4.71519469,0.818517023,4.71367266,4.7147203,4.71319812
40.595011,4.58257569,4.71417352,-0.362764144,4.71264709,4.71369807,4.71217148
40.605502,5.47722558,4.71315379,0.874111998,4.71162294,4.71267728,4.71114627
40.615994,4,4.71213531,-0.843881098,4.71060001,4.71165773,4.71012227
40.626486,3.87298335,4.71111816,-0.915497033,4.70957839,4.71063952,4.70909959
40.636977,3.87298335,4.71010245,-0.914942134,4.70855819,4.70962274,4.70807832
40.647469,4,4.70908798,-0.842073619,4.7075392,4.70860719,4.70705825
40.65796,5,4.70807493,0.540300904,4.70652161,4.70759307,4.70603959
40.668452,5.29150262,4.70706312,0.764486433,4.70550524,4.70658017,4.70502213
40.678944,4.89897949,4.70605262,0.439234405,4.70449016,4.70556859,4.70400597
40.689435,4.58257569,4.70504355,-0.34995407,4.70347648,4.70455843,4.7029912
40.699927,4.79583152,4.70403569,0.30297827,4.70246399,4.70354948,4.70197762
40.710418,4.47213595,4.70302925,-0.48051357,4.70145289,4.70254194,4.70096543
40.72091,5,4.70202402,0.545871765,4.70044298,4.70153562,4.69995442
40.731402,5.19615242,4.7010201,0.703656399,4.69943436,4.70053059,4.69894469
40.741893,5.19615242,4.70001757,0.704368404,4.69842712,4.69952697,4.69793634
40.752385,4.35889894,4.69901626,-0.583195779,4.69742105,4.69852454,4.69692917
40.762876,3.74165739,4.69801634,-0.977936068,4.69641636,4.69752351,4.69592336
40.773368,5.09901951,4.69701762,0.634036193,4.69541284,4.69652368,4.69491873
40.78386,4.69041576,4.69602019,-0.074862761,4.69441059,4.69552513,4.69391536
40.794351,3.46410162,4.69502415,-1.10946948,4.6934097,4.69452797,4.69291334
40.804843,5.91607978,4.6940293,1.10546392,4.69240997,4.69353199,4.69191249
40.815334,3.60555128,4.69303583,-1.04282527,4.6914116,4.69253739,4.69091299
40.825826,5.19615242,4.69204354,0.710006255,4.69041439,4.69154397,4.68991465
40.836318,5.29150262,4.69105253,0.774887148,4.68941844,4.69055182,4.68891755
40.846809,4.58257569,4.69006289,-0.327852398,4.68842382,4.68956104,4.68792179
40.857301,4.24264069,4.68907443,-0.668156972,4.68743036,4.68857143,4.68692718
40.867792,4.58257569,4.68808732,-0.324825537,4.68643823,4.68758318,4.68593391
40.878284,5.56776436,4.68710139,0.938436449,4.68544725,4.6865961,4.68494177
40.888776,4.58257569,4.68611673,-0.321777922,4.6844575,4.68561027,4.68395087
40.899267,4.69041576,4.68513341,0.0726797663,4.68346908,4.6846258,4.68296129
40.909759,4.47213595,4.68415126,-0.460451196,4.68248179,4.68364248,4.68197284
40.92025,5.47722558,4.68317045,0.891097706,4.68149583,4.68266051,4.68098571
40.930742,4.69041576,4.6821908,0.0906915415,4.68051099,4.68167969,4.6799997
40.941234,4.12310563,4.6812124,-0.747065443,4.67952738,4.68070012,4.67901491
40.951725,4.35889894,4.68023534,-0.566865411,4.67854507,4.67972187,4.67803142
40.962217,5.47722558,4.67925942,0.893289513,4.67756389,4.67874477,4.67704905
40.972708,4.58257569,4.67828484,-0.309368941,4.67658401,4.677769,4.67606799
40.9832,4.35889894,4.67731139,-0.564280472,4.67560524,4.67679437,4.67508803
40.993692,3.60555128,4.67633918,-1.03478882,4.67462768,4.67582097,4.67410927
41.004183,4.24264069,4.6753683,-0.657820347,4.67365141,4.67484888,4.6731318
41.014675,3.87298335,4.67439854,-0.89521796,4.67267624,4.67387793,4.67215543
41.025166,5.56776436,4.6734301,0.945692476,4.67170236,4.67290828,4.67118035
41.035658,5.29150262,4.67246279,0.786790842,4.67072959,4.67193976,4.67020636
41.04615,5.29150262,4.6714967,0.787404547,4.669758,4.67097246,4.66923356
41.056641,5.29150262,4.67053192,0.788016945,4.66878768,4.67000645,4.66826202
41.067133,4.89897949,4.66956825,0.478968929,4.66781846,4.66904157,4.66729158
41.077624,4.79583152,4.66860589,0.35668703,4.66685051,4.66807798,4.6663224
41.088116,4.89897949,4.66764464,0.480972817,4.66588364,4.66711549,4.6653543
41.098608,4.47213595,4.66668459,-0.441076674,4.66491794,4.66615421,4.66438737
41.109099,4.89897949,4.66572583,0.482963408,4.66395351,4.66519422,4.6634217
41.119591,5.38516481,4.66476818,0.848761819,4.66299015,4.66423533,4.66245709
41.130082,4.35889894,4.66381182,-0.552189166,4.66202805,4.66327772,4.66149374
41.140574,5.74456265,4.66285655,1.040051,4.66106701,4.6623212,4.66053146
41.151066,4.58257569,4.66190248,-0.281650111,4.66010713,4.66136587,4.65957032
41.161557,4.69041576,4.66094968,0.17165686,4.6591485,4.66041182,4.65861043
41.172049,3.46410162,4.66002218,-1.09358153,4.65821514,4.65945885,4.65765159
41.18254,4.69041576,4.65907176,0.17704237,4.65725882,4.65850715,4.65669399
41.193032,5,4.65812242,0.584702981,4.65630355,4.65755653,4.65573743
41.203524,4.58257569,4.65717426,-0.273127384,4.65534942,4.65660708,4.65478202
41.214015,4.47213595,4.65622736,-0.429058748,4.65439653,4.65565889,4.65382783
41.224507,4.89897949,4.65528154,0.493657717,4.65344468,4.65471177,4.65287468
41.234998,4.69041576,4.65433698,0.18994415,4.65249405,4.65376591,4.65192275
41.24549,4.79583152,4.65339349,0.377409637,4.65154446,4.65282111,4.65097185
41.255982,4.69041576,4.65245116,0.194845069,4.65059599,4.65187747,4.65002207
41.266473,4.35889894,4.65151008,-0.540935424,4.64964874,4.65093507,4.64907351
41.276965,4.35889894,4.65057006,-0.540065844,4.64870252,4.64999374,4.64812597
41.287456,5.09901951,4.64963128,0.670364252,4.64775751,4.64905364,4.64717963
41.297948,4.79583152,4.64869357,0.383585656,4.64681352,4.64811459,4.64623432
41.30844,4.89897949,4.647757,0.501220996,4.64587065,4.64717669,4.64529011
41.318931,4.79583152,4.64682166,0.386017953,4.64492897,4.64624002,4.64434709
41.329423,5.09901951,4.64588738,0.6731509,4.6439883,4.6453044,4.64340508
41.339914,4.69041576,4.64495432,0.213216876,4.64304883,4.64436999,4.64246426
41.350406,4.58257569,4.64402231,-0.247884286,4.64211037,4.64343663,4.64152445
41.360898,4.79583152,4.64309144,0.390819761,4.641173,4.6425044,4.64058573
41.371389,5.19615242,4.64216178,0.744305476,4.64023682,4.64157339,4.63964818
41.381881,5.56776436,4.64123316,0.962564907,4.63930164,4.6406434,4.63871163
41.392372,4.58257569,4.64030576,-0.240270809,4.63836763,4.63971463,4.63777626
41.402864,3.60555128,4.63937939,-1.01677338,4.63743462,4.63878689,4.63684187
41.413356,4.35889894,4.63845413,-0.52872979,4.63650269,4.63786026,4.63590856
41.423847,5.29150262,4.63753009,0.808685684,4.63557193,4.63693483,4.63497641
41.434339,4.79583152,4.63660707,0.399029393,4.63464215,4.63601042,4.63404525
41.44483,4.79583152,4.63568525,0.400182806,4.63371353,4.6350872,4.63311524
41.455322,4.89897949,4.63476445,0.514018522,4.6327859,4.63416501,4.6321862
41.465814,4.69041576,4.63384475,0.237846607,4.63185933,4.63324391,4.63125823
41.476305,4.69041576,4.63292625,0.239769705,4.63093391,4.632324,4.63033141
41.486797,4.35889894,4.63200876,-0.522599097,4.63000947,4.6314051,4.62940555
41.497288,4.69041576,4.63109246,0.243563758,4.62908617,4.63048738,4.62848083
41.50778,5.29150262,4.63017716,0.813219197,4.62816383,4.62957066,4.62755707
41.518272,4.69041576,4.62926296,0.247290924,4.62724255,4.62865504,4.62663436
41.528763,4.58257569,4.62834993,-0.213949151,4.6263224,4.62774058,4.62571278
41.539255,5.09901951,4.62743791,0.686717994,4.62540322,4.62682712,4.62479216
41.549746,4.47213595,4.62652706,-0.392926335,4.62448516,4.62591483,4.62387266
41.560238,4.24264069,4.6256172,-0.618850965,4.62356805,4.62500353,4.6229541
41.57073,4.47213595,4.62470843,-0.390605267,4.62265198,4.6240933,4.62203658
41.581221,5,4.62380082,0.613350782,4.62173704,4.62318423,4.62112017
41.591713,5.29150262,4.6228942,0.817684796,4.62082303,4.62227615,4.62020471
41.602204,4.47213595,4.62198873,-0.387108226,4.61991014,4.62136922,4.61929035
41.612696,4.24264069,4.62108425,-0.615177671,4.61899819,4.62046327,4.61837693
41.623188,4.89897949,4.62018084,0.528013866,4.61808726,4.61955838,4.61746452
41.633679,4,4.61927858,-0.786942553,4.61717744,4.61865464,4.61655321
41.644171,4.24264069,4.6183773,-0.612973581,4.61626855,4.61775187,4.61564283
41.654662,5,4.61747716,0.618484309,4.61536075,4.61685024,4.61473354
41.665154,4.79583152,4.61657799,0.423383431,4.61445389,4.61594957,4.61382517
41.675646,5,4.61567988,0.619935575,4.61354803,4.61504996,4.61291781
41.686137,4.89897949,4.61478291,0.533100906,4.61264326,4.61415148,4.61201153
41.696629,5.47722558,4.6138869,0.929160198,4.6117394,4.61325395,4.61110616
41.70712,4.47213595,4.61299203,-0.375307969,4.61083663,4.61235756,4.61020187
41.717612,4.58257569,4.61209811,-0.171820884,4.60993477,4.61146212,4.60929849
41.728104,4.69041576,4.61120524,0.281443637,4.60903391,4.61056772,4.60839609
41.738595,4.69041576,4.61031349,0.28302344,4.60813412,4.60967444,4.60749476
41.749087,3.74165739,4.6094227,-0.931539216,4.60723523,4.6087821,4.60659433
41.759578,5.47722558,4.60853303,0.932036775,4.60633742,4.60789088,4.60569497
41.77007,5.47722558,4.6076443,0.932513418,4.6054405,4.60700061,4.60479649
41.780562,5.19615242,4.60675661,0.767721184,4.60454456,4.60611135,4.60389899
41.791053,5.19615242,4.60587003,0.768298377,4.60364968,4.60522321,4.60300255
41.801545,4.58257569,4.60498439,-0.149695332,4.60275569,4.604336,4.60210699
41.812036,4.79583152,4.60409986,0.437871747,4.60186275,4.6034499,4.60121248
41.822528,4.47213595,4.60321626,-0.362050145,4.6009707,4.60256472,4.60031884
41.83302,4.47213595,4.60233369,-0.36082923,4.60007961,4.60168056,4.59942617
41.843511,4.58257569,4.60145221,-0.137391848,4.59918957,4.6007975,4.59853454
41.854003,4.12310563,4.60057167,-0.690989179,4.59830041,4.59991536,4.59764377
41.864494,4.69041576,4.59969222,0.301203478,4.59741229,4.59903431,4.59675404
41.874986,5.19615242,4.5988137,0.772876911,4.59652503,4.59815418,4.59586518
41.885478,4.12310563,4.59793619,-0.689079506,4.59563873,4.59727505,4.59497726
41.895969,5.38516481,4.59705977,0.887752804,4.59475346,4.59639701,4.59409036
41.906461,4.58257569,4.59618426,-0.116655763,4.59386905,4.59551988,4.59320432
41.916952,4.79583152,4.59531103,0.447795145,4.59298566,4.59464501,4.59231931
41.927444,4.35889894,4.59443753,-0.485323176,4.59210314,4.59376987,4.59143514
41.937936,5.09901951,4.59356502,0.710953227,4.59122155,4.59289572,4.5905519
41.948427,4.89897949,4.59269359,0.553431018,4.59034097,4.59202264,4.58966968
41.958919,4.79583152,4.59182307,0.451672946,4.58946125,4.59115046,4.5887883
41.96941,4.69041576,4.59095363,0.315376178,4.58858254,4.59027936,4.58790792
41.979902,4.69041576,4.59008508,0.31675018,4.58770467,4.58940914,4.58702838
41.990394,5.74456265,4.58921753,1.07486982,4.58682772,4.58853991,4.58614976
42.000885,4.58257569,4.58835104,-0.0759956624,4.58595178,4.58767174,4.58527213
42.011377,4,4.58748544,-0.76647599,4.58507667,4.58680446,4.58439533
42.021868,4.79583152,4.58662091,0.457395464,4.58420256,4.58593824,4.58351953
42.03236,4.24264069,4.58575728,-0.585761547,4.58332928,4.5850729,4.58264455
42.042852,4.79583152,4.58489462,0.459278682,4.58245691,4.58420853,4.58177047
42.053343,5.09901951,4.58403301,0.717625602,4.58158553,4.58334522,4.58089737
42.063835,5.56776436,4.58317229,0.992266129,4.58071498,4.58248278,4.58002509
42.074326,5.65685425,4.58231262,1.036601,4.5798454,4.58162139,4.57915379
42.084818,5,4.58145384,0.646951434,4.57897664,4.58076087,4.5782833
42.09531,5.56776436,4.58059602,0.993563454,4.57810878,4.57990132,4.57741369
42.105801,5,4.57973925,0.648275211,4.57724189,4.5790428,4.57654506
42.116293,4.79583152,4.57888336,0.465776949,4.57637581,4.57818516,4.57567723
42.126784,4.79583152,4.5780285,0.466693712,4.5755107,4.57732854,4.57481036
42.137276,5,4.57717452,0.650250319,4.5746464,4.5764728,4.57394429
42.147768,4.24264069,4.5763215,-0.577651115,4.57378298,4.575618,4.57307909
42.158259,4.12310563,4.57546951,-0.672580019,4.57292052,4.57476424,4.57221485
42.168751,5.09901951,4.57461839,0.724155458,4.57205885,4.57391133,4.5713514
42.179242,5.29150262,4.57376829,0.847192025,4.57119814,4.57305945,4.5704889
42.189734,3.87298335,4.57291907,-0.836621612,4.57033822,4.57220842,4.56962718
42.200226,5,4.57207079,0.654162986,4.56947917,4.57135834,4.56876632
42.210717,4,4.57122353,-0.755793312,4.56862107,4.57050927,4.5679064
42.221209,5.47722558,4.57037713,0.952285903,4.56776375,4.56966106,4.56704726
42.2317,4.12310563,4.56953176,-0.66815128,4.56690737,4.56881386,4.56618906
42.242192,4.35889894,4.56868724,-0.458026522,4.56605177,4.5679675,4.56533162
42.252684,3.60555128,4.56784365,-0.980965024,4.56519703,4.56712208,4.56447504
42.263175,4.58257569,4.56700108,0.124798278,4.56434322,4.56627766,4.56361938
42.273667,4.89897949,4.56615937,0.576905641,4.56349018,4.56543409,4.56276449
42.284158,4.89897949,4.56531866,0.577633817,4.56263807,4.56459153,4.56191051
42.29465,4.58257569,4.5644788,0.1345247,4.56178673,4.5637498,4.5610573
42.305142,4,4.56363987,-0.750759527,4.56093622,4.56290899,4.56020492
42.315633,5.65685425,4.56280194,1.04596955,4.56008664,4.56206918,4.55935345
42.326125,4.24264069,4.56196486,-0.565087754,4.55923782,4.56123021,4.55850273
42.336616,4.58257569,4.56112877,0.146447672,4.55838991,4.56039223,4.55765292
42.347108,4.47213595,4.56029353,-0.296913417,4.55754275,4.55955509,4.55680386
42.3576,4.24264069,4.55945921,-0.562866344,4.55669642,4.55871885,4.55595562
42.368091,4.58257569,4.55862588,0.154757276,4.555851,4.55788361,4.55510828
42.378583,4.69041576,4.55779339,0.364173546,4.55500633,4.55704919,4.55426167
42.389074,4.69041576,4.55696189,0.365313387,4.55416255,4.55621576,4.55341596
42.399566,4.79583152,4.55613122,0.489591974,4.55331952,4.55538315,4.55257098
42.410058,4.58257569,4.55530147,0.165149111,4.5524773,4.55455144,4.55172681
42.420549,4.69041576,4.5544727,0.368704574,4.55163598,4.55372072,4.55088353
42.431041,4.89897949,4.55364476,0.587651877,4.55079539,4.55289081,4.55004097
42.441532,4.12310563,4.5528178,-0.655524351,4.54995569,4.55206189,4.5491993
42.452024,4.79583152,4.55199167,0.493801431,4.54911671,4.55123378,4.54835834
42.462516,4.47213595,4.55116644,-0.281123616,4.54827854,4.55040656,4.54751818
42.473007,4.58257569,4.55034219,0.179536905,4.54744125,4.54958032,4.54667889
42.483499,4.89897949,4.54951877,0.591152026,4.54660468,4.54875489,4.54584031
42.49399,4.89897949,4.54869632,0.59184725,4.54576898,4.54793043,4.5450026
42.504482,4.58257569,4.54787469,0.186282065,4.544934,4.54710678,4.5441656
42.514974,4.35889894,4.54705395,-0.433768381,4.54409982,4.54628402,4.54332938
42.525465,4.47213595,4.54623419,-0.272209908,4.5432665,4.54546222,4.54249403
42.535957,4.69041576,4.54541524,0.380789336,4.54243388,4.54464123,4.54165937
42.546448,5.09901951,4.54459726,0.74459536,4.54160213,4.54382121,4.54082556
42.55694,4.58257569,4.5437801,0.196965982,4.54077108,4.54300198,4.53999245
42.567432,4.89897949,4.54296382,0.596670483,4.53994081,4.54218364,4.53916011
42.577923,4.69041576,4.54214851,0.385054867,4.5391114,4.54136625,4.53832862
42.588415,4.58257569,4.54133401,0.203080495,4.53828268,4.54054967,4.53749781
42.598906,4.35889894,4.54052047,-0.42617077,4.53745481,4.53973404,4.53666785
42.609398,4.47213595,4.53970774,-0.259945729,4.53662764,4.5389192,4.53583857
42.61989,5,4.53889589,0.679046473,4.53580122,4.53810525,4.53501004
42.630381,4.47213595,4.538085,-0.256805459,4.53497565,4.53729224,4.53418235
42.640873,4.69041576,4.53727491,0.391332143,4.53415077,4.53648003,4.53335533
42.651364,4.47213595,4.53646579,-0.253633259,4.53332672,4.53566877,4.53252915
42.661856,4.89897949,4.53565746,0.602761999,4.53250335,4.5348583,4.53170363
42.672348,4.58257569,4.53485001,0.218462091,4.53168073,4.5340487,4.53087886
42.682839,4.58257569,4.53404352,0.220300204,4.53085894,4.53324004,4.5300549
42.693331,4.58257569,4.53323782,0.222121307,4.53003782,4.53243218,4.52923161
42.703822,5.74456265,4.53243308,1.10096756,4.52921753,4.53162526,4.52840914
42.714314,3.74165739,4.53162913,-0.888803546,4.52839791,4.53081913,4.52758732
42.724806,4.35889894,4.53082606,-0.414640945,4.52757902,4.53001386,4.52676624
42.735297,5.09901951,4.53002393,0.754317957,4.52676096,4.52920953,4.52594597
42.745789,4.58257569,4.5292226,0.23098288,4.52594355,4.52840599,4.52512634
42.75628,4.24264069,4.52842222,-0.534585387,4.52512695,4.52760338,4.52430752
42.766772,5,4.52762264,0.687297145,4.52431101,4.52680156,4.52348934
42.777264,4.69041576,4.52682392,0.404464885,4.5234958,4.52600061,4.52267189
42.787755,5.29150262,4.52602614,0.874915126,4.5226814,4.52520058,4.52185522
42.798247,4,4.52522916,-0.724726957,4.52186764,4.52440134,4.5210392
42.808738,5,4.52443312,0.68961357,4.52105468,4.52360304,4.52022397
42.81923,4,4.52363788,-0.723628273,4.52024236,4.52280551,4.51940937
42.829722,4.24264069,4.5228435,-0.529341865,4.51943076,4.52200884,4.51859548
42.840213,5.19615242,4.52205006,0.821037371,4.51861996,4.52121311,4.51778237
42.850705,4.58257569,4.52125741,0.247625293,4.51780979,4.52041815,4.51696989
42.861196,4.35889894,4.5204657,-0.401953675,4.5170004,4.51962413,4.51615819
42.871688,4.69041576,4.51967478,0.413208155,4.51619165,4.51883088,4.51534711
42.88218,4.12310563,4.51888472,-0.629109767,4.51538361,4.51803849,4.51453672
42.892671,4.47213595,4.51809561,-0.214382026,4.51457634,4.51724703,4.5137271
42.903163,5,4.51730728,0.694760909,4.5137697,4.51645635,4.5129181
42.913654,4,4.51651989,-0.718693182,4.51296383,4.5156666,4.51210987
42.924146,4.79583152,4.51573329,0.529243078,4.51215859,4.51487762,4.51130224
42.934638,4.24264069,4.51494755,-0.5218303,4.51135403,4.5140895,4.5104953
42.945129,5.19615242,4.51416275,0.825826662,4.51055025,4.5133023,4.50968911
42.955621,3.60555128,4.51337873,-0.9527998,4.50974708,4.51251588,4.50888353
42.966112,4.24264069,4.51259566,-0.519571911,4.50894467,4.51173039,4.5080787
42.976604,4.58257569,4.51181337,0.266011891,4.50814287,4.51094568,4.50727447
42.987096,4.58257569,4.51103194,0.267476638,4.50734175,4.51016182,4.50647092
42.997587,4.24264069,4.51025145,-0.517311094,4.50654139,4.50937889,4.5056681
43.008079,5.47722558,4.50947175,0.983744794,4.50574163,4.50859673,4.50486588
43.01857,4.12310563,4.50869299,-0.620956815,4.50494262,4.5078155,4.5040644
43.029062,5.56776436,4.50791502,1.02948985,4.50414421,4.50703505,4.50326351
43.039554,4.24264069,4.50713791,-0.514292932,4.50334647,4.50625545,4.50246328
43.050045,3.87298335,4.50636174,-0.795850733,4.50254948,4.50547678,4.50166378
43.060537,5,4.50558635,0.703145538,4.50175307,4.50469889,4.50086486
43.071028,4.47213595,4.50481191,-0.180764915,4.50095741,4.50392193,4.50006666
43.08152,4.35889894,4.50403826,-0.380971539,4.50016233,4.50314575,4.49926905
43.092012,4.35889894,4.50326547,-0.379955954,4.4993679,4.50237042,4.49847208
43.102503,5.38516481,4.50249362,0.939505818,4.49857422,4.50159602,4.49767583
43.112995,3.87298335,4.50172257,-0.792930782,4.49778111,4.50082241,4.49688016
43.123486,4.47213595,4.50095246,-0.169754246,4.49698873,4.50004972,4.49608519
43.133978,3.87298335,4.50018314,-0.791959466,4.49619692,4.49927782,4.4952908
43.14447,5,4.49941469,0.707520534,4.49540576,4.49850678,4.49449704
43.154961,4.47213595,4.49864719,-0.162822711,4.49461533,4.49773667,4.49370398
43.165453,4.24264069,4.49788048,-0.505212625,4.49382546,4.49696734,4.49291149
43.175944,4.58257569,4.49711472,0.292337087,4.4930363,4.49619895,4.4921197
43.186436,4.24264069,4.49634976,-0.503695418,4.49224772,4.49543135,4.49132846
43.196928,5.09901951,4.49558567,0.77681004,4.49145976,4.49466461,4.49053785
43.207419,4.89897949,4.49482254,0.635733395,4.49067252,4.49389881,4.48974794
43.217911,4.69041576,4.4940602,0.443120252,4.48988584,4.4931338,4.48895857
43.228402,5,4.49329882,0.711829461,4.48909986,4.49236973,4.4881699
43.238894,3.60555128,4.49253824,-0.941799855,4.48831443,4.49160645,4.48738176
43.249386,4.89897949,4.49177855,0.638122981,4.48752963,4.49084404,4.48659424
43.259877,5.09901951,4.49101981,0.779743359,4.48674553,4.49008258,4.48580741
43.270369,4.24264069,4.49026188,-0.497615506,4.48596197,4.48932192,4.48502111
43.28086,4,4.48950491,-0.699646274,4.48517911,4.4885622,4.48423549
43.291352,5.09901951,4.48874876,0.781198284,4.48439679,4.48780329,4.48345041
43.301844,5.29150262,4.48799349,0.896386709,4.48361509,4.48704525,4.48266592
43.312335,4.79583152,4.48723919,0.555510876,4.48283407,4.48628817,4.48188211
43.322827,4.12310563,4.48648571,-0.602810158,4.48205359,4.48553189,4.48109882
43.333318,4,4.4857332,-0.696945623,4.48127379,4.48477657,4.48031621
43.34381,4.12310563,4.48498152,-0.601561211,4.48049452,4.48402207,4.47953411
43.354302,4,4.48423073,-0.695866893,4.47971586,4.48326845,4.4787526
43.364793,4,4.48348092,-0.695327925,4.47893787,4.48251579,4.47797176
43.375285,4.35889894,4.48273195,-0.351899141,4.47816041,4.48176396,4.47719143
43.385776,4.79583152,4.48198395,0.560221001,4.47738362,4.48101309,4.47641176
43.396268,5.29150262,4.4812368,0.900147668,4.47660735,4.48026305,4.47563259
43.40676,4.58257569,4.48049056,0.319507652,4.47583167,4.47951391,4.47485401
43.417251,6,4.4797453,1.23298609,4.47505666,4.47876574,4.47407608
43.427743,4.35889894,4.4790009,-0.346557285,4.47428216,4.47801842,4.47329865
43.438234,3.87298335,4.47825748,-0.777993661,4.47350833,4.47727207,4.47252186
43.448726,4.24264069,4.47751493,-0.484638256,4.472735,4.47652656,4.47174558
43.459218,4.69041576,4.4767733,0.462214734,4.47196226,4.47578197,4.47096986
43.469709,3.74165739,4.47603268,-0.856956994,4.47119017,4.47503837,4.47019478
43.480201,4.24264069,4.47529292,-0.482340369,4.47041859,4.47429562,4.4694202
43.490692,4.35889894,4.47455417,-0.340081209,4.46964765,4.47355387,4.46864625
43.501184,4.79583152,4.4738163,0.567463853,4.46887722,4.47281298,4.46787279
43.511676,4.12310563,4.47307938,-0.591585792,4.46810736,4.47207302,4.46709988
43.522167,4.35889894,4.47234347,-0.336815276,4.46733814,4.47133407,4.46632761
43.532659,3.60555128,4.47160846,-0.930621933,4.46656942,4.470596,4.46555581
43.54315,4.89897949,4.47087447,0.654297341,4.46580133,4.46985894,4.46478464
43.553642,4.12310563,4.47014139,-0.589097412,4.46503374,4.46912276,4.46401395
43.564134,4.79583152,4.46940927,0.57133375,4.46426671,4.46838755,4.4632438
43.574625,4.24264069,4.4686782,-0.475434022,4.46350031,4.46765336,4.46247428
43.585117,4.47213595,4.46794803,0.0647141408,4.46273439,4.46692006,4.46170522
43.595608,5.09901951,4.46721893,0.794858846,4.4619691,4.46618781,4.46093677
43.6061,5.65685425,4.46649074,1.09103781,4.4612043,4.46545647,4.4601688
43.616592,4.24264069,4.46576355,-0.472358833,4.46044004,4.4647261,4.45940135
43.627083,4.47213595,4.46503744,0.0842527032,4.45967641,4.4639968,4.45863452
43.637575,4.89897949,4.46431226,0.659292975,4.45891325,4.46326841,4.45786814
43.648066,4.69041576,4.46358816,0.476264209,4.45815071,4.4625411,4.45710237
43.658558,4.58257569,4.46286502,0.345992306,4.45738864,4.46181472,4.45633705
43.66905,4.69041576,4.4621429,0.477779089,4.45662712,4.46108935,4.45557226
43.679541,4.35889894,4.46142189,-0.320192041,4.4558662,4.46036508,4.45480807
43.690033,5.19615242,4.46070184,0.857584153,4.45510575,4.45964175,4.45404432
43.700524,4.58257569,4.45998292,0.350132517,4.4543459,4.45891953,4.45328117
43.711016,3.31662479,4.45926497,-1.06894349,4.45358652,4.45819828,4.45251846
43.721508,4,4.45854809,-0.677161793,4.45282767,4.45747807,4.45175627
43.731999,4.89897949,4.45783235,0.664189079,4.45206942,4.45675899,4.45099466
43.742491,4.58257569,4.45711762,0.354200613,4.45131162,4.4560409,4.45023349
43.752982,3.60555128,4.45640404,-0.922416808,4.45055442,4.45532395,4.44947291
43.763474,4,4.45569149,-0.675049251,4.44979768,4.454608,4.44871275
43.773966,4,4.45498004,-0.674522084,4.44904145,4.45389315,4.44795311
43.784457,4.35889894,4.45426977,-0.308821679,4.44828582,4.45317946,4.44719403
43.794949,3.74165739,4.45356056,-0.843743546,4.44753063,4.4524668,4.44643539
43.80544,4,4.45285254,-0.672943192,4.44677603,4.45175533,4.44567732
43.815932,4,4.4521456,-0.672417724,4.44602187,4.45104492,4.44491967
43.826424,4.35889894,4.4514398,-0.304205289,4.44526822,4.45033563,4.44416252
43.836915,5,4.45073524,0.741123987,4.44451515,4.44962756,4.44340593
43.847407,4.89897949,4.45003177,0.670035605,4.44376252,4.44892058,4.44264976
43.857898,4.24264069,4.44932956,-0.454630482,4.44301047,4.44821483,4.44189415
43.86839,5,4.44862848,0.742543954,4.44225885,4.44751019,4.44113895
43.878882,3.87298335,4.4479286,-0.758251443,4.44150773,4.44680674,4.44038424
43.889373,4.89897949,4.44723,0.672123117,4.44075718,4.44610455,4.43963009
43.899865,4,4.44653257,-0.668230925,4.44000706,4.44540351,4.43887634
43.910356,4.79583152,4.44583645,0.591603818,4.4392575,4.44470376,4.43812314
43.920848,4.79583152,4.44514151,0.592190858,4.43850837,4.44400519,4.43737035
43.93134,4.47213595,4.44444785,0.166397441,4.43775973,4.44330786,4.43661803
43.941831,4.12310563,4.44375553,-0.566259574,4.43701166,4.44261187,4.43586625
43.952323,4.89897949,4.44306445,0.675214809,4.436264,4.44191709,4.43511488
43.962814,4.69041576,4.44237474,0.498037167,4.43551689,4.44122367,4.43436404
43.973306,4.24264069,4.4416863,-0.446145277,4.43477021,4.44053149,4.4336136
43.983798,4,4.44099919,-0.664077702,4.434024,4.43984064,4.43286362
43.994289,4,4.44031352,-0.663561238,4.43327835,4.43915119,4.43211418
44.004781,5.29150262,4.43962915,0.922969919,4.4325331,4.43846304,4.43136512
44.015272,4.79583152,4.43894624,0.597398763,4.43178841,4.43777632,4.4306166
44.025764,4,4.43826468,-0.662015618,4.43104411,4.43709094,4.42986846
44.036256,4.58257569,4.43758454,0.380777037,4.4303003,4.43640696,4.42912077
44.046747,4.47213595,4.43690592,0.187696655,4.42955702,4.43572447,4.42837361
44.057239,4.89897949,4.4362287,0.680257882,4.42881414,4.43504337,4.42762683
44.06773,4,4.43555303,-0.659964416,4.42807181,4.4343638,4.42688057
44.078222,4.47213595,4.4348788,0.193021116,4.42732986,4.43368565,4.42613468
44.088714,4.24264069,4.43420611,-0.437681868,4.42658839,4.43300901,4.42538923
44.099205,4.69041576,4.43353502,0.506834035,4.42584744,4.43233397,4.42464431
44.109697,4.24264069,4.43286544,-0.436147632,4.42510689,4.43166041,4.42389975
44.120188,4.58257569,4.43219753,0.38778624,4.42436686,4.4309885,4.42315569
44.13068,4.35889894,4.43153117,-0.269503659,4.42362723,4.43031812,4.42241201
44.141172,4.69041576,4.43086645,0.509459823,4.42288804,4.42964936,4.42166876
44.151663,4.24264069,4.43020346,-0.433085185,4.42214939,4.42898232,4.42092601
44.162155,5.65685425,4.42954211,1.10784121,4.42141111,4.42831688,4.42018363
44.172646,3.60555128,4.42887289,-0.907370717,4.42067335,4.42764356,4.41944174
44.183138,4.69041576,4.42821504,0.512055387,4.41993598,4.42698159,4.41870021
44.19363,4.35889894,4.42755897,-0.262030575,4.41919905,4.42632137,4.41795911
44.204121,5.19615242,4.42690476,0.877067649,4.41846263,4.425663,4.4172185
44.214613,4.47213595,4.42625234,0.214204618,4.41772659,4.42500639,4.41647824
44.225104,4.79583152,4.42560184,0.608465019,4.41699105,4.4243517,4.41573847
44.235596,4.47213595,4.42495319,0.217215936,4.41625589,4.42369882,4.41499904
44.246088,4.47213595,4.42430648,0.218699511,4.41552117,4.42304785,4.41426004
44.256579,4.24264069,4.4236618,-0.425465758,4.41478695,4.4223989,4.41352151
44.267071,4.69041576,4.42301907,0.517104143,4.41405309,4.42175188,4.41278333
44.277562,5,4.42237844,0.760014185,4.41331974,4.42110694,4.41204563
44.288054,4.58257569,4.42173983,0.401043465,4.41258675,4.420464,4.41130827
44.298546,4.89897949,4.42110335,0.691285854,4.41185419,4.41982316,4.41057131
44.309037,4.24264069,4.4204691,-0.42169706,4.41112212,4.41918452,4.40983483
44.319529,3.60555128,4.41983699,-0.90237781,4.41039042,4.41854801,4.40909868
44.33002,4.79583152,4.41920719,0.613697268,4.4096592,4.41791378,4.408363
44.340512,2.82842712,4.41857962,-1.26101249,4.40892834,4.41728177,4.40762765
44.351004,4.24264069,4.4179544,-0.418704805,4.4081979,4.41665208,4.40689269
44.361495,4.79583152,4.41733163,0.615223451,4.40746795,4.41602481,4.4061582
44.371987,5.38516481,4.41671124,0.984100386,4.40673834,4.4153999,4.40542404
44.382478,4.58257569,4.4160934,0.408022421,4.40600922,4.41477752,4.40469033
44.39297,4.47213595,4.41547805,0.238029217,4.40528045,4.41415761,4.40395695
44.403462,3,4.4148653,-1.1894811,4.40455208,4.41354027,4.40322395
44.413953,5,4.41425526,0.765339622,4.4038242,4.41292562,4.40249141
44.424445,4.24264069,4.41364789,-0.413530171,4.40309666,4.41231361,4.40175918
44.434936,5,4.41304335,0.766130959,4.40236959,4.41170442,4.40102741
44.445428,4.69041576,4.4124416,0.527232544,4.40164286,4.41109798,4.40029594
44.45592,3.60555128,4.41184276,-0.897937352,4.40091653,4.41049443,4.39956485
44.466411,4.12310563,4.41124696,-0.536787978,4.40019068,4.40989389,4.39883421
44.476903,4.89897949,4.41065415,0.69880279,4.39946516,4.40929632,4.39810388
44.487394,4.69041576,4.41006451,0.529482056,4.3987401,4.40870191,4.39737399
44.497886,4.69041576,4.40947802,0.530035601,4.39801538,4.40811061,4.3966444
44.508378,5.19615242,4.40889481,0.887275388,4.39729105,4.40752256,4.39591517
44.518869,4.47213595,4.40831501,0.252628076,4.39656718,4.4069379,4.39518639
44.529361,5.09901951,4.4077386,0.831433046,4.39584364,4.40635661,4.3944579
44.539852,4,4.40716578,-0.638095435,4.39512055,4.40577888,4.39372985
44.550344,5.19615242,4.40659654,0.888569574,4.39439779,4.4052047,4.39300209
44.560836,4.89897949,4.40603101,0.702102897,4.39367542,4.40463421,4.39227469
44.571327,4.69041576,4.40546935,0.533803715,4.3929535,4.40406756,4.39154771
44.581819,4,4.40491157,-0.636326621,4.3922319,4.40350476,4.39082103
44.59231,3,4.40435787,-1.18505606,4.39151075,4.40294602,4.39009477
44.602802,4.12310563,4.40380825,-0.529813765,4.39078991,4.40239134,4.38936879
44.613294,3,4.40326289,-1.18459398,4.39006945,4.40184088,4.38864317
44.623785,4.69041576,4.40272196,0.536370952,4.38934944,4.40129483,4.38791796
44.634277,5,4.40218548,0.77318466,4.38862974,4.4007532,4.38719303
44.644768,4.69041576,4.40165368,0.537365869,4.38791048,4.40021623,4.38646852
44.65526,5.47722558,4.4011266,1.0373519,4.38719153,4.39968394,4.38574429
44.665752,4.69041576,4.40060443,0.538341279,4.38647295,4.39915654,4.38502039
44.676243,4.89897949,4.40008736,0.706322963,4.38575481,4.39863421,4.38429691
44.686735,4.47213595,4.39957545,0.269370576,4.38503697,4.39811701,4.3835737
44.697226,4.69041576,4.39906895,0.53976551,4.38431957,4.3976052,4.38285089
44.707718,3.74165739,4.39856795,-0.810500191,4.38360247,4.39709885,4.38212836
44.71821,5.29150262,4.39807265,0.945214249,4.38288573,4.39659818,4.38140615
44.728701,5.09901951,4.39758328,0.837517899,4.38216942,4.39610342,4.38068435
44.739193,5.09901951,4.39710868,0.837801189,4.38146217,4.39561466,4.37996281
44.749684,4,4.39663167,-0.629787006,4.38074659,4.39513219,4.37924166
44.760176,4.47213595,4.3961611,0.275635363,4.3800313,4.39465612,4.37852078
44.770668,3.87298335,4.39569723,-0.722989544,4.37931637,4.39418673,4.37780022
44.781159,5.56776436,4.39524032,1.08283149,4.37860186,4.39372427,4.37708005
44.791651,4.89897949,4.39479052,0.710062646,4.37788764,4.3932689,4.37636014
44.802142,4.24264069,4.39434818,-0.389496456,4.37717384,4.39282095,4.37564062
44.812634,5,4.39391345,0.778515608,4.37646032,4.39238058,4.37492134
44.823126,4.89897949,4.39348665,0.710980192,4.37574716,4.39194812,4.37420239
44.833617,3,4.39306811,-1.18028306,4.37503441,4.39152388,4.37348381
44.844109,4.58257569,4.39265804,0.435795431,4.37432194,4.39110808,4.37276549
44.8546,4.35889894,4.39225682,-0.182641398,4.37360989,4.39070111,4.37204754
44.865092,4.89897949,4.39186472,0.712119911,4.37289811,4.39030322,4.37132984
44.875584,4.35889894,4.3914821,-0.180508053,4.37218668,4.38991479,4.37061244
44.886075,4,4.39110936,-0.625387371,4.37147565,4.3895362,4.36989542
44.896567,4.89897949,4.39074681,0.712904391,4.3707649,4.38916777,4.36917864
44.907058,4.35889894,4.39039491,-0.177471043,4.37005456,4.38880997,4.36846223
44.91755,4.79583152,4.39005401,0.637006679,4.36934448,4.38846313,4.36774605
44.928042,5.19615242,4.38972459,0.898013272,4.36863474,4.38812773,4.36703017
44.938533,4.12310563,4.38940711,-0.516044076,4.36792541,4.38780425,4.36631466
44.949025,4.47213595,4.38910203,0.288156083,4.36721634,4.38749314,4.36559938
44.959516,4.35889894,4.38880989,-0.172947813,4.36650767,4.38719494,4.36488447
44.970008,4.79583152,4.38853118,0.638200861,4.36579927,4.38691014,4.36416978
44.9805,4.35889894,4.38826651,-0.171369665,4.36509119,4.38663933,4.36345538
44.990991,3.46410162,4.38801647,-0.961204899,4.36438351,4.38638315,4.36274134
45.001483,4.47213595,4.38778167,0.290438092,4.36367609,4.38614216,4.36202752
45.011974,4.47213595,4.38756281,0.290814618,4.36296907,4.38591708,4.36131406
45.022466,4.58257569,4.38736056,0.441831564,4.3622623,4.38570858,4.36060081
45.032958,4.58257569,4.38717568,0.442040735,4.36155585,4.38551742,4.35988785
45.043449,4.47213595,4.38700897,0.291765285,4.36084979,4.3853444,4.35917524
45.053941,4.47213595,4.38686123,0.292018357,4.36014399,4.38519032,4.35846284
45.064432,4.79583152,4.38673338,0.639607806,4.35943857,4.3850561,4.35775079
45.074924,4.89897949,4.38662631,0.715788496,4.35873341,4.38494263,4.35703895
45.085416,4,4.38654105,-0.621724255,4.35802856,4.38485093,4.35632738
45.095907,4.12310563,4.38647864,-0.51319881,4.35732409,4.38478207,4.35561616
45.106399,4.24264069,4.3864402,-0.379209065,4.35661987,4.38473713,4.35490514
45.11689,3.60555128,4.38642692,-0.883671686,4.35591603,4.38471733,4.35419447
45.127382,4.79583152,4.38644007,0.639837052,4.35521244,4.38472393,4.35348399
45.137874,3.87298335,4.38648099,-0.7165875,4.35450916,4.38475827,4.35277378
45.148365,4.35889894,4.38655112,-0.166289426,4.35380625,4.38482179,4.35206391
45.158857,4.47213595,4.38665199,0.292376411,4.35310358,4.38491602,4.35135423
45.169348,5.19615242,4.38678523,0.899648374,4.35240129,4.38504259,4.35064489
45.17984,4.89897949,4.38695259,0.715560544,4.35169924,4.38520327,4.34993574
45.190332,4.47213595,4.38715595,0.291513302,4.35099749,4.38539991,4.34922685
45.200823,4.35889894,4.38739727,-0.168814467,4.35029611,4.38563448,4.34851828
45.211315,4.47213595,4.38767873,0.290615256,4.34959497,4.38590917,4.34780991
45.221806,4.12310563,4.38800257,-0.514681404,4.34889419,4.38622622,4.34710186
45.232298,3.74165739,4.38837132,-0.80418526,4.34819365,4.38658815,4.346394
45.24279,4.89897949,4.38878758,0.714277189,4.34749341,4.38699757,4.34568638
45.253281,4.69041576,4.38925416,0.548781925,4.34679353,4.38745728,4.34497909
45.263773,3.31662479,4.38977419,-1.03592924,4.34609388,4.38797043,4.34427198
45.274264,4,4.39035087,-0.62478066,4.34539459,4.38854021,4.34356519
45.284756,4.58257569,4.39098787,0.437707466,4.34469553,4.38917028,4.34285857
45.295248,5.09901951,4.39168896,0.841029458,4.34399677,4.38986443,4.3421522
45.305739,4.12310563,4.39245823,-0.518991915,4.34329836,4.39062675,4.34144614
45.316231,4,4.39330031,-0.627136595,4.34260018,4.39146186,4.34074025
45.326722,4.24264069,4.3942199,-0.389331755,4.34190235,4.39237448,4.34003468
45.337214,4.79583152,4.39522247,0.632936851,4.34120474,4.39337005,4.33932927
45.347706,3.46410162,4.39631366,-0.965511287,4.34050743,4.39445425,4.3386241
45.358197,4.79583152,4.39749962,0.631135411,4.33981046,4.39563321,4.33791924
45.368689,4.58257569,4.39878736,0.428705415,4.33911372,4.39691396,4.33721454
45.37918,5,4.40018409,0.774477832,4.33841732,4.39830369,4.33651014
45.389672,3.87298335,4.40169817,-0.727127792,4.33772115,4.39981078,4.33580591
45.400164,4.69041576,4.40333838,0.535796024,4.33702525,4.40144401,4.3351019
45.410655,4.12310563,4.40511429,-0.531044883,4.33632971,4.40321296,4.33439819
45.421147,4.47213595,4.40703694,0.255145081,4.33563437,4.40512866,4.33369465
45.431638,5.09901951,4.40911775,0.83060325,4.33493938,4.40720255,4.33299139
45.44213,3.74165739,4.4113701,-0.818359769,4.33424461,4.409448,4.33228829
45.452622,4.24264069,4.41380813,-0.413723876,4.33355011,4.41187918,4.33158542
45.463113,4.79583152,4.41644748,0.615941594,4.33285596,4.41451171,4.33088283
45.473605,4.47213595,4.41930621,0.229847223,4.33216201,4.41736368,4.33018039
45.484096,4.47213595,4.42240336,0.223008069,4.33146841,4.42045413,4.32947824
45.494588,4.47213595,4.42576126,0.215347853,4.33077501,4.42380541,4.32877624
45.50508,3.87298335,4.42940394,-0.745936054,4.33008188,4.42744155,4.32807446
45.515571,4,4.43335822,-0.658299493,4.32938909,4.43138938,4.32737295
45.526063,5,4.43765532,0.749896449,4.32869651,4.43568014,4.32667159
45.536554,4,4.44232872,-0.665077978,4.32800426,4.44034733,4.32597051
45.547046,4.79583152,4.44741795,0.590265684,4.32731222,4.44543049,4.32526957
45.557538,4.47213595,4.45296631,0.138454496,4.32662044,4.45097294,4.32456884
45.568029,4.24264069,4.4590228,-0.465168913,4.325929,4.45702372,4.32386839
45.578521,4.35889894,4.46564494,-0.326720064,4.32523776,4.46364036,4.32316807
45.589012,3.31662479,4.47289587,-1.07530046,4.32454685,4.47088602,4.32246802
45.599504,4.35889894,4.48085063,-0.349215812,4.32385613,4.47883579,4.32176811
45.609996,4.12310563,4.4895933,-0.605382253,4.32316568,4.48757379,4.3210684
45.620487,4.35889894,4.4992207,-0.374595459,4.32247556,4.49719688,4.32036895
45.630979,4.58257569,4.50984778,0.269681135,4.32178564,4.50782006,4.31966964
45.64147,5.29150262,4.52160422,0.877438545,4.32109604,4.51957306,4.31897059
45.651962,4.89897949,4.53464593,0.603600494,4.32040664,4.53261187,4.31827167
45.662454,4.24264069,4.54915235,-0.553634951,4.3197175,4.547116,4.31757294
45.672945,4.89897949,4.56533473,0.577619907,4.31902868,4.56329679,4.31687447
45.683437,4.89897949,4.58344823,0.561721687,4.31834005,4.58140952,4.31617612
45.693928,4.12310563,4.60379014,-0.693314156,4.31765175,4.6017516,4.31547804
45.70442,4.89897949,4.62672446,0.521780627,4.31696364,4.62468715,4.31478007
45.714912,4.12310563,4.65268403,-0.72772138,4.31627578,4.65064922,4.31408229
45.725403,4.79583152,4.68219353,0.337102341,4.31558824,4.68016266,4.31338476
45.735895,5.29150262,4.71590291,0.758682882,4.3149009,4.71387767,4.31268735
45.746386,4.47213595,4.7545996,-0.531473088,4.31421387,4.75258198,4.31199019
45.756878,4.12310563,4.7992751,-0.822295247,4.31352703,4.79726742,4.31129315
45.76737,4.69041576,4.85115846,-0.400927297,4.31284044,4.84916344,4.31059628
45.777861,5,4.91180278,0.296980165,4.31215417,4.90982363,4.30989966
45.788353,5,4.98322336,0.129524685,4.31146808,4.98126388,4.30920316
45.798844,5.29150262,5.06806345,0.472693529,4.31078231,5.06612817,4.30850689
45.809336,4.79583152,5.1700588,-0.611741187,4.31009672,5.1681532,4.30781073
45.819828,5.56776436,5.29488446,0.522379079,4.30941139,5.29301543,4.30711475
45.830319,4.24264069,5.45204552,-1.09972943,4.30872636,5.4502222,4.306419
45.840811,6,5.65834977,0.58450854,4.30804152,5.65658501,4.30572336
45.851302,5.38516481,5.94259911,-0.74661523,4.30735699,5.94091117,4.30502795
45.861794,6.164414,6.3493279,-0.430016161,4.30667265,6.34774094,4.30433265
45.872286,7.48331477,6.93504872,0.740449897,4.30598855,6.9335892,4.30363751
45.882777,7.87400787,7.7517872,0.349600742,4.30530476,7.75047551,4.3029426
45.893269,9.8488578,8.8215854,1.01354448,4.30462115,8.82042753,4.30224779
45.90376,11.1355287,10.1147329,1.0103444,4.30393784,10.1137185,4.30155321
45.914252,12.2065556,11.5407469,0.815971006,4.30325472,11.5398537,4.30085873
45.924744,14.1421356,12.9352376,1.09858912,4.30257184,12.934437,4.3001644
45.935235,15.2970585,14.0321758,1.12467006,4.30188927,14.0314344,4.2994703
45.945727,15.3622915,14.4948879,0.931345029,4.30120688,14.4941669,4.29877629
45.956218,13.8564065,14.136205,-0.528959866,4.30052479,14.1354622,4.2980825
45.96671,12.2065556,13.1089984,-0.949969879,4.29984288,13.1081936,4.29738881
45.977202,12,11.7417353,0.508197528,4.29916121,11.7408326,4.29669526
45.987693,9.48683298,10.3111103,-0.907897224,4.29847985,10.3100776,4.29600193
45.998185,9.69535971,8.99327068,0.837907533,4.29779866,8.99208101,4.29530869
46.008676,8.36660027,7.88870553,0.691299307,4.29711778,7.88734287,4.29461567
46.019168,6.244998,7.03506774,-0.888858675,4.29643707,7.03353247,4.29392272
46.02966,6.244998,6.41717951,-0.414947605,4.2957566,6.41548839,4.29322993
46.040151,5.83095189,5.98617515,-0.39398382,4.29507644,5.98435361,4.29253734
46.050643,5.29150262,5.68519393,-0.627448249,4.29439645,5.68326678,4.29184483
46.061134,5.38516481,5.4678293,-0.287514334,4.29371676,5.46581593,4.29115254
46.071626,5.38516481,5.30308968,0.286487561,4.29303724,5.30100379,4.29046032
46.082118,4.89897949,5.17272666,-0.523208539,4.29235796,5.17057789,4.28976824
46.092609,4.79583152,5.06636588,-0.520129176,4.29167899,5.06416141,4.28907636
46.103101,4.69041576,4.9778529,-0.536131649,4.29100019,4.97559836,4.28838456
46.113592,4.89897949,4.90325312,-0.0653730563,4.29032168,4.90095316,4.28769296
46.124084,4,4.83976523,-0.916387054,4.28964335,4.83742376,4.28700143
46.134576,4.47213595,4.78531107,-0.559620511,4.28896526,4.78293139,4.28631003
46.145067,4.89897949,4.73827904,0.400874599,4.28828747,4.73586398,4.28561883
46.155559,4,4.69738503,-0.835095823,4.28760985,4.69493699,4.2849277
46.16605,3.74165739,4.66162051,-0.959147082,4.28693253,4.65914155,4.28423677
46.176542,4,4.63015951,-0.793825868,4.28625538,4.62765139,4.2835459
46.187034,4.58257569,4.60234144,-0.140590709,4.28557846,4.59980568,4.28285515
46.197525,4.24264069,4.5776255,-0.578778722,4.28490185,4.57506339,4.2821646
46.208017,4.47213595,4.55555968,-0.288831657,4.28422541,4.55297235,4.28147411
46.218508,3.74165739,4.53577809,-0.891134506,4.28354927,4.53316652,4.28078381
46.229,4.58257569,4.51796805,0.254180337,4.2828733,4.51533306,4.28009357
46.239492,4.35889894,4.50187275,-0.378118771,4.28219756,4.49921507,4.27940345
46.249983,4.47213595,4.48727531,-0.123042081,4.28152212,4.48459557,4.27871352
46.260475,4,4.47398789,-0.688467782,4.28084686,4.47128662,4.27802364
46.270966,4.12310563,4.46185563,-0.582022339,4.28017189,4.45913331,4.27733394
46.281458,4.35889894,4.45074137,-0.303055156,4.2794971,4.4479984,4.2766443
46.29195,4.12310563,4.44053055,-0.563404757,4.27882254,4.43776728,4.27595477
46.302441,4.58257569,4.43112409,0.389167837,4.27814828,4.42834082,4.27526543
46.312933,4.69041576,4.42243355,0.51766998,4.2774742,4.41963054,4.27457613
46.323424,4.47213595,4.41438534,0.240313575,4.27680041,4.4115628,4.27388701
46.333916,4.58257569,4.40691214,0.419122365,4.2761268,4.40407025,4.27319793
46.344408,4.79583152,4.39995719,0.629185455,4.27545342,4.3970961,4.27250897
46.354899,4.24264069,4.39347051,-0.388368149,4.27478034,4.39059036,4.27182018
46.365391,4.12310563,4.38740623,-0.514101748,4.27410744,4.38450712,4.27113143
46.375882,5,4.38172614,0.786303926,4.27343484,4.37880815,4.27044285
46.386374,4.47213595,4.37639415,0.309421721,4.27276241,4.37345734,4.26975431
46.396866,4.79583152,4.37137978,0.651499608,4.27209021,4.36842419,4.26906588
46.407357,4.12310563,4.36665578,-0.493508005,4.27141832,4.36368143,4.26837762
46.417849,4.58257569,4.36219646,0.469445663,4.27074661,4.35920338,4.26768939
46.42834,3.87298335,4.35798055,-0.696417408,4.2700752,4.35496873,4.26700133
46.438832,4,4.35398732,-0.594968337,4.26940396,4.35095675,4.2663133
46.449324,4.79583152,4.35019929,0.667556914,4.26873296,4.34714994,4.26562538
46.459815,4.35889894,4.34660065,0.110897653,4.26806226,4.3435325,4.26493761
46.470307,4.35889894,4.34317613,0.125390642,4.26739175,4.34008912,4.26424987
46.480798,3.87298335,4.33991318,-0.683322646,4.26672153,4.33680727,4.2635623
46.49129,4.79583152,4.33679921,0.677519235,4.2660515,4.33367433,4.26287475
46.501782,4.58257569,4.33382365,0.498750483,4.2653817,4.33067973,4.2621873
46.512273,4.47213595,4.33097688,0.375711431,4.26471222,4.32781385,4.2615
46.522765,4.58257569,4.32824931,0.504307832,4.26404291,4.32506708,4.26081273
46.533256,4.24264069,4.32563323,-0.288084256,4.26337391,4.32243172,4.26012562
46.543748,4.69041576,4.32312059,0.606048817,4.26270509,4.31989971,4.25943852
46.55424,4.47213595,4.32070475,0.389141622,4.26203651,4.3174644,4.25875152
46.564731,5,4.3183796,0.825603055,4.26136825,4.31511966,4.25806466
46.575223,5,4.31613885,0.826958977,4.26070017,4.31285922,4.25737783
46.585714,4.12310563,4.3139776,-0.436888968,4.2600324,4.31067815,4.25669114
46.596206,4,4.31189048,-0.558471561,4.25936481,4.30857111,4.25600447
46.606698,3.74165739,4.30987318,-0.753800897,4.25869747,4.30653375,4.25531788
46.617189,5.09901951,4.30792167,0.889436814,4.25803045,4.30456206,4.25463144
46.627681,4.79583152,4.30603169,0.69985701,4.25736361,4.30265176,4.25394501
46.638172,4.35889894,4.30420001,0.233878023,4.25669709,4.30079963,4.25325873
46.648664,4.47213595,4.30242296,0.411962371,4.25603076,4.29900198,4.25257246
46.659156,5.29150262,4.30069762,0.995391885,4.25536468,4.29725589,4.25188626
46.669647,4.35889894,4.29902128,0.244699131,4.25469892,4.29555866,4.2512002
46.680139,5,4.29739095,0.83821778,4.25403336,4.29390729,4.25051416
46.69063,4.79583152,4.29580447,0.707125908,4.25336811,4.29229961,4.24982825
46.701122,4.47213595,4.29425923,0.421754345,4.25270306,4.290733,4.24914235
46.711614,5,4.29275321,0.840979659,4.25203827,4.28920546,4.24845651
46.722105,4.69041576,4.29128456,0.631768309,4.2513738,4.28771512,4.24777082
46.732597,4.35889894,4.28985112,0.262769529,4.25070953,4.28625981,4.24708512
46.743088,4.69041576,4.2884514,0.634006592,4.25004559,4.28483805,4.24639956
46.75358,4.12310563,4.2870835,-0.40494182,4.24938185,4.28344794,4.245714
46.764072,4.35889894,4.28574603,0.270467959,4.24871837,4.28208807,4.24502851
46.774563,4.24264069,4.28443766,-0.204443074,4.24805523,4.28075712,4.24434314
46.785055,3.87298335,4.2831568,-0.640447852,4.24739229,4.27945349,4.24365777
46.795546,4.79583152,4.28190243,0.716888481,4.24672968,4.27817617,4.24297254
46.806038,5.09901951,4.28067313,0.904624998,4.24606729,4.27692372,4.24228729
46.81653,4.79583152,4.2794679,0.718584461,4.24540516,4.27569514,4.24160211
46.827021,5.19615242,4.2782858,0.958053558,4.24474338,4.2744895,4.24091705
46.837513,4.35889894,4.27712564,0.285960326,4.24408181,4.27330558,4.24023198
46.848004,4.79583152,4.27598669,0.721002656,4.24342058,4.27214268,4.23954704
46.858496,4.47213595,4.27486788,0.444148703,4.24275956,4.27099971,4.23886208
46.868988,4.47213595,4.2737685,0.445384615,4.24209883,4.26987594,4.23817719
46.879479,4.79583152,4.27268787,0.723286704,4.24143845,4.26877071,4.23749241
46.889971,4.35889894,4.27162505,0.295421548,4.24077829,4.26768308,4.23680761
46.900462,5.29150262,4.27057957,1.01040737,4.24011848,4.26661256,4.23612294
46.910954,4.79583152,4.26955058,0.725452237,4.2394589,4.26555829,4.23543825
46.921446,4.58257569,4.26853755,0.56039106,4.23879961,4.26451977,4.23475361
46.931937,4.24264069,4.26754003,-0.157795248,4.23814067,4.26349652,4.23406909
46.942429,4.47213595,4.26655726,0.453407872,4.23748198,4.26248778,4.23338454
46.95292,4.12310563,4.26558892,-0.377469591,4.23682364,4.26149323,4.23270011
46.963412,4.58257569,4.26463434,0.563862888,4.23616554,4.2605122,4.23201566
46.973904,3.60555128,4.26369315,-0.81125944,4.23550774,4.25954431,4.23133126
46.984395,3.87298335,4.26276502,-0.624324974,4.23485031,4.25858923,4.23064696
46.994887,4.69041576,4.26184935,0.654649839,4.23419313,4.25764635,4.22996265
47.005378,4.69041576,4.26094593,0.655339478,4.23353632,4.25671546,4.22927843
47.01587,3.74165739,4.26005422,-0.719997802,4.23287976,4.25579603,4.2285942
47.026362,4.58257569,4.25917397,0.568684204,4.23222352,4.25488778,4.22791
47.036853,4.12310563,4.25830493,-0.367694586,4.23156766,4.25399048,4.22722591
47.047345,3.46410162,4.25744664,-0.890699176,4.23091205,4.25310364,4.22654179
47.057836,5.19615242,4.25659895,0.969305663,4.23025684,4.25222715,4.22585778
47.068328,4.12310563,4.25576145,-0.364219472,4.22960188,4.25136054,4.22517373
47.07882,3.74165739,4.25493395,-0.716433221,4.22894726,4.25050366,4.22448972
47.089311,5,4.25411628,0.863645597,4.22829304,4.24965632,4.22380581
47.099803,4.47213595,4.25330807,0.467790427,4.22763909,4.24881814,4.22312187
47.110294,3.74165739,4.25250925,-0.714739019,4.22698554,4.24798906,4.22243802
47.120786,5,4.25171947,0.865032097,4.22633227,4.24716871,4.22175414
47.131278,4.47213595,4.25093862,0.470316212,4.22567935,4.24635698,4.22107029
47.141769,5.47722558,4.25016658,1.10772695,4.22502683,4.24555376,4.22038653
47.152261,4.24264069,4.24940306,-0.0822336339,4.22437461,4.24475873,4.21970274
47.162752,4.89897949,4.24864803,0.806431307,4.22372281,4.24397189,4.21901904
47.173244,5.09901951,4.24790122,0.922560728,4.22307131,4.24319292,4.2183353
47.183736,4.79583152,4.24716255,0.740721926,4.22242017,4.24242178,4.21765159
47.194227,4.58257569,4.24643198,0.579779022,4.22176946,4.2416584,4.21696797
47.204719,5.09901951,4.24570925,0.923747943,4.22111907,4.24090252,4.2162843
47.21521,5,4.24499439,0.868910586,4.22046911,4.24015417,4.21560073
47.225702,4.24264069,4.24428718,-0.0405769611,4.21981946,4.23941311,4.21491711
47.236194,4.58257569,4.24358758,0.582226857,4.2191702,4.23867932,4.21423351
47.246685,4,4.24289559,-0.492844391,4.2185214,4.23795278,4.21354999
47.257177,4.69041576,4.24221101,0.669480955,4.21787292,4.23723328,4.21286643
47.267668,4.35889894,4.2415339,0.342585817,4.2172249,4.23652088,4.21218295
47.27816,4.89897949,4.24086408,0.811243124,4.21657723,4.2358154,4.21149943
47.288652,4.35889894,4.24020157,0.344524859,4.21592996,4.23511684,4.21081592
47.299143,3.87298335,4.23954638,-0.605444492,4.21528316,4.23442522,4.21013249
47.309635,3.46410162,4.23889837,-0.880225398,4.21463672,4.23374039,4.20944901
47.320126,4.58257569,4.23825762,0.586786223,4.21399076,4.23306243,4.20876561
47.330618,4.47213595,4.23762401,0.48426433,4.21334517,4.2323912,4.20808216
47.34111,4.35889894,4.23699759,0.349143748,4.21270001,4.23172674,4.20739872
47.351601,4.79583152,4.2363784,0.747965991,4.21205534,4.23106911,4.20671535
47.362093,5,4.23576634,0.874204588,4.21141106,4.23041818,4.20603193
47.372584,4.69041576,4.23516153,0.674725298,4.21076729,4.22977408,4.20534859
47.383076,4.58257569,4.23456388,0.589925259,4.21012391,4.2291367,4.20466519
47.393568,3.60555128,4.23397348,-0.792730851,4.20948099,4.22850613,4.20398179
47.404059,4,4.2333904,-0.48310496,4.2088386,4.22788244,4.20329847
47.414551,4.12310563,4.23281459,-0.331223433,4.20819662,4.22726555,4.20261508
47.425042,4.24264069,4.23224619,0.101953396,4.20755518,4.22665563,4.20193177
47.435534,4.79583152,4.23168516,0.751096772,4.20691417,4.2260526,4.2012484
47.446026,5.29150262,4.23113162,1.02974318,4.20627364,4.22545658,4.20056502
47.456517,4.58257569,4.23058567,0.593287469,4.20563367,4.22486769,4.19988172
47.467009,4.12310563,4.23004731,-0.327019399,4.20499415,4.22428589,4.19919835
47.4775,4.47213595,4.22951672,0.492563938,4.2043552,4.22371136,4.19851505
47.487992,4.89897949,4.22899389,0.818526477,4.20371671,4.22314409,4.19783168
47.498484,4.58257569,4.22847898,0.595060262,4.20307874,4.22258422,4.19714831
47.508975,4,4.22797214,-0.477464285,4.20244137,4.22203191,4.196465
47.519467,4.47213595,4.22747341,0.494633753,4.20180448,4.22148717,4.19578163
47.529958,4.89897949,4.22698299,0.819753923,4.2011682,4.22095023,4.19509831
47.54045,4.79583152,4.22650095,0.754539977,4.20053242,4.2204211,4.19441493
47.550942,4.35889894,4.22602746,0.364515405,4.1998972,4.21989998,4.19373154
47.561433,4.89897949,4.22556275,0.820619729,4.19926262,4.21938707,4.19304821
47.571925,4.35889894,4.22510687,0.365775985,4.19862856,4.21888244,4.19236481
47.582416,4.79583152,4.22466011,0.755758834,4.19799515,4.21838633,4.19168146
47.592908,4.58257569,4.22422256,0.598626041,4.19736228,4.21789885,4.19099804
47.6034,4.12310563,4.22379447,-0.317315048,4.19673002,4.21742023,4.19031462
47.613891,4.58257569,4.22337608,0.599332639,4.19609844,4.21695072,4.18963124
47.624383,4.79583152,4.22296755,0.756877777,4.19546742,4.21649044,4.18894779
47.634874,4.35889894,4.2225692,0.369228582,4.19483711,4.21603972,4.18826439
47.645366,5.38516481,4.22218119,1.07841718,4.19420738,4.2155987,4.18758092
47.655858,4.47213595,4.22180383,0.500332017,4.19357831,4.21516768,4.18689743
47.666349,3.60555128,4.22143743,-0.784784147,4.19294997,4.21474698,4.18621399
47.676841,4.89897949,4.22108223,0.823345163,4.19232224,4.2143368,4.18553047
47.687332,3.74165739,4.22073859,-0.692156924,4.19169527,4.21393752,4.184847
47.697824,4,4.22040679,-0.469475018,4.19106894,4.21354938,4.18416344
47.708316,4.69041576,4.22008721,0.685805041,4.19044332,4.21317275,4.18347987
47.718807,4.58257569,4.21978022,0.602325053,4.18981849,4.21280803,4.18279635
47.729299,4.12310563,4.21948618,-0.310452175,4.18919433,4.21245551,4.18211274
47.73979,4.24264069,4.21920553,0.153085465,4.18857099,4.21211566,4.18142918
47.750282,5.29150262,4.21893865,1.03564665,4.18794834,4.21178883,4.18074553
47.760774,3.60555128,4.21868601,-0.783029206,4.18732647,4.2114755,4.18006186
47.771265,4.35889894,4.21844813,0.374767684,4.18670544,4.21117614,4.17937823
47.781757,3.87298335,4.21822544,-0.587573054,4.18608516,4.2108912,4.17869451
47.792248,4.24264069,4.21801853,0.156914499,4.18546575,4.21062125,4.17801083
47.80274,4.58257569,4.2178279,0.603943533,4.18484711,4.21036677,4.17732707
47.813232,6,4.21765418,1.33504525,4.18422931,4.21012837,4.17664328
47.823723,5.19615242,4.21749799,0.989269647,4.18361243,4.20990667,4.17595952
47.834215,4.47213595,4.21735996,0.504753404,4.18299637,4.20970229,4.17527568
47.844706,4.89897949,4.2172408,0.825674684,4.18238125,4.20951592,4.17459187
47.855198,4.89897949,4.21714123,0.825734978,4.18176698,4.20934826,4.17390797
47.86569,3.87298335,4.21706203,-0.586582206,4.18115363,4.20920009,4.17322404
47.876181,4.12310563,4.21700402,-0.306428452,4.18054127,4.2090722,4.17254014
47.886673,4,4.21696806,-0.4657983,4.17992981,4.20896544,4.17185615
47.897164,4.35889894,4.21695505,0.376754415,4.17931938,4.20888071,4.17117219
47.907656,3.60555128,4.21696598,-0.781930116,4.17870989,4.20881896,4.17048813
47.918148,4.12310563,4.21700186,-0.306424932,4.1781014,4.2087812,4.16980404
47.928639,4.79583152,4.21706378,0.760767862,4.17749399,4.20876851,4.16911998
47.939131,5.09901951,4.2171529,0.939077533,4.17688757,4.20878201,4.16843582
47.949622,4.47213595,4.21727042,0.504842089,4.17628228,4.20882291,4.1677517
47.960114,4.79583152,4.21741766,0.760535246,4.17567802,4.2088925,4.16706747
47.970606,3.74165739,4.217596,-0.689883041,4.17507486,4.20899215,4.1663832
47.981097,4.24264069,4.21780687,0.157587506,4.17447289,4.20912327,4.16569896
47.991589,3.46410162,4.21805187,-0.868303087,4.173872,4.20928745,4.16501462
48.00208,3.87298335,4.21833261,-0.587664245,4.17327235,4.20948628,4.1643303
48.012572,3.74165739,4.21865092,-0.690647184,4.17267384,4.20972156,4.16364588
48.023064,4.79583152,4.21900865,0.75948856,4.17207654,4.20999514,4.16296142
48.033555,4.47213595,4.21940777,0.502720778,4.17148055,4.21030898,4.16227698
48.044047,4.47213595,4.21985051,0.502280246,4.17088576,4.21066526,4.16159244
48.054538,4.12310563,4.22033907,-0.311822771,4.17029232,4.21106619,4.16090791
48.06503,4.79583152,4.22087599,0.758258226,4.16970014,4.21151429,4.16022328
48.075522,5,4.22146385,0.882346955,4.16910931,4.21201211,4.15953861
48.086013,4.47213595,4.22210541,0.500030547,4.1685199,4.21256241,4.15885395
48.096505,4.35889894,4.22280379,0.368910765,4.16793184,4.21316829,4.15816919
48.106996,5.29150262,4.2235621,1.03341208,4.16734526,4.21383284,4.15748444
48.117488,4.47213595,4.22438397,0.497746911,4.16676009,4.21455965,4.15679959
48.12798,5.19615242,4.22530325,0.98531679,4.16620703,4.21535239,4.15611468
48.138471,4.79583152,4.22626349,0.754697314,4.16562493,4.21621498,4.15542979
48.148963,4.47213595,4.2272994,0.494809617,4.16504434,4.2171519,4.15474479
48.159454,4.12310563,4.22841546,-0.324514769,4.16446538,4.21816764,4.1540598
48.169946,4.58257569,4.22961694,0.594103318,4.16388798,4.21926744,4.1533747
48.180438,3.74165739,4.23090921,-0.699465384,4.16331224,4.22045666,4.15268955
48.190929,4.47213595,4.23229805,0.489732484,4.16273824,4.22174108,4.15200441
48.201421,3.87298335,4.23379014,-0.600671951,4.1621659,4.22312735,4.15131915
48.211912,4.89897949,4.23539217,0.814608691,4.16159539,4.22462217,4.15063391
48.222404,5,4.23711201,0.873434595,4.16102661,4.22623338,4.14994854
48.232896,2.82842712,4.23895776,-1.18765763,4.16045968,4.2279691,4.14926313
48.243387,3.74165739,4.24093823,-0.706598077,4.15989468,4.22983811,4.14857772
48.253879,4.58257569,4.24306359,0.582676672,4.15933154,4.23185059,4.14789219
48.26437,4.12310563,4.24534418,-0.349626301,4.15877042,4.23401687,4.14720667
48.274862,4.89897949,4.24779216,0.806961784,4.15821126,4.23634914,4.14652103
48.285354,4.35889894,4.25042024,0.329361055,4.15765415,4.23886008,4.14583533
48.295845,4.47213595,4.25324229,0.467860736,4.1570992,4.2415636,4.14514964
48.306337,4.47213595,4.25627443,0.464609,4.15654633,4.24447582,4.14446382
48.316828,4.47213595,4.25953329,0.461088566,4.15599572,4.2476134,4.14377801
48.32732,4.47213595,4.26303847,0.457271783,4.1554473,4.25099596,4.14309208
48.337812,4.79583152,4.26681071,0.727338171,4.15490118,4.25464427,4.14240608
48.348303,4.35889894,4.27087293,0.296691781,4.15435747,4.25858132,4.14172009
48.358795,4.35889894,4.27525184,0.289218095,4.15381611,4.26283383,4.14103397
48.369286,4,4.27997549,-0.529127097,4.15327728,4.26742994,4.14034785
48.379778,5,4.28507703,0.845531176,4.15274091,4.27240287,4.1396616
48.39027,4.89897949,4.29059216,0.779991878,4.15220713,4.27778839,4.13897529
48.400761,5.74456265,4.29656081,1.20332948,4.15167604,4.28362656,4.13828898
48.411253,4.12310563,4.3030297,-0.424174578,4.15114762,4.2899642,4.13760254
48.421744,3.74165739,4.31004904,-0.753917539,4.15062202,4.29685169,4.1369161
48.432236,5.65685425,4.31767836,1.15722767,4.15009922,4.30434869,4.13622953
48.442728,4.24264069,4.32598305,-0.288690765,4.14957933,4.31252081,4.13554289
48.453219,3.31662479,4.33503738,-1.0091643,4.14906247,4.32144257,4.13485625
48.463711,4.79583152,4.3449289,0.671492834,4.14854863,4.33120175,4.13416947
48.474202,3.87298335,4.35575407,-0.694817041,4.14803798,4.34189516,4.1334827
48.484694,5,4.36762802,0.795218196,4.14753049,4.35363829,4.13279578
48.495186,4.58257569,4.38068032,0.449327691,4.1470263,4.36656112,4.1321088
48.505677,5.09901951,4.39506081,0.839022469,4.14652554,4.38081403,4.13142181
48.516169,3.46410162,4.41094819,-0.973060418,4.14602821,4.39657629,4.13073468
48.52666,4.35889894,4.42854511,-0.263905594,4.14553448,4.41405125,4.13004755
48.537152,4.35889894,4.44809631,-0.298659282,4.14504435,4.43348446,4.12936028
48.547644,4.47213595,4.46988505,0.0474437138,4.14455797,4.45516013,4.12867294
48.558135,5.29150262,4.49424657,0.892891957,4.14407548,4.47941465,4.12798559
48.568627,4.24264069,4.52158793,-0.528154566,4.1435969,4.50665638,4.12729809
48.579118,4.35889894,4.55238631,-0.439871988,4.14312241,4.53736408,4.12661059
48.58961,4.58257569,4.58722916,-0.0682163079,4.14265204,4.57212703,4.12592295
48.600102,4.47213595,4.62681958,-0.393298388,4.14218595,4.61165054,4.12523523
48.610593,4.58257569,4.6720153,-0.299064542,4.14172428,4.65679493,4.12454751
48.621085,5.29150262,4.72388635,0.753403126,4.14126709,4.70863329,4.12385963
48.631576,5.38516481,4.78374313,0.775513818,4.14081457,4.76847966,4.12317175
48.642068,5.09901951,4.85326561,0.495735723,4.14036677,4.8380184,4.12248372
48.65256,4.69041576,4.93462063,-0.494170893,4.13992387,4.91942173,4.12179562
48.663051,5.83095189,5.03077778,0.89452452,4.13948605,5.01566619,4.1211075
48.673543,5.19615242,5.14617732,0.223551125,4.13905336,5.1312019,4.12041923
48.684034,4.79583152,5.28795289,-0.701513627,4.13862603,5.27317774,4.11973095
48.694526,5.38516481,5.46836328,-0.288441459,4.13820414,5.45387704,4.11904252
48.705018,6.164414,5.70818598,0.675446537,4.13778788,5.69411436,4.11835401
48.715509,6.32455532,6.04022307,0.533228142,4.13737746,6.02673805,4.11766549
48.726001,5.74456265,6.50963464,-0.874683937,4.13697297,6.49694511,4.11697681
48.736492,7.74596669,7.16606399,0.761513432,4.13657466,7.15437286,4.11628812
48.746984,9.05538514,8.04726783,1.00405045,4.13618264,8.03670767,4.11559928
48.757476,8.06225775,9.15937169,-1.04743207,4.13579713,9.14995951,4.11491035
48.767967,10.1488916,10.4645777,-0.561859531,4.13541837,10.4562192,4.11422141
48.778459,12.2474487,11.8775356,0.608204806,4.1350465,11.8700628,4.11353231
48.78895,13.6381817,13.2581975,0.616428551,4.13468178,13.2514032,4.11284319
48.799442,16.1245155,14.3987205,1.31369516,4.13432437,14.3923703,4.11215393
48.809934,17.0880075,15.0401997,1.43101636,4.13397454,15.0340281,4.11146457
48.820425,16.2172747,14.9908909,1.10742214,4.13363255,14.9846043,4.11077519
48.830917,15.0332964,14.268641,0.874445773,4.13329858,14.261934,4.11008566
48.841408,13.190906,13.083759,0.327333155,4.13297296,13.0763305,4.1093961
48.8519,9.94987437,11.6899224,-1.31910881,4.13265588,11.6814772,4.10870639
48.862392,9.43398113,10.2851851,-0.92260716,4.13234765,10.2754336,4.10801659
48.872883,8.88819442,9.00172309,-0.336940165,4.1320486,8.99040189,4.10732677
48.883375,8.18535277,7.91849233,0.516585369,4.13175895,7.90541298,4.10663679
48.893866,7.48331477,7.06730232,0.644990271,4.13147909,7.0524068,4.10594678
48.904358,5.83095189,6.4368934,-0.778422449,4.13120927,6.4202678,4.10525662
48.91485,6.92820323,5.98718544,0.970060715,4.13094986,5.9690123,4.10456636
48.925341,6.164414,5.66845878,0.704240886,4.13070124,5.6489407,4.10387608
48.935833,6.55743852,5.43701457,1.0585008,4.13046373,5.41632064,4.10318564
48.946324,5.29150262,5.26177507,0.172416785,4.13023775,5.24002669,4.10249517
48.956816,6.40312424,5.12322791,1.13132503,4.13002365,5.10050677,4.10180454
48.967308,5.83095189,5.00996672,0.906082324,4.12982189,4.98632853,4.10111381
48.977799,4.89897949,4.9152853,-0.127694214,4.1296329,4.89076997,4.10042306
48.988291,5.19615242,4.83497509,0.60098031,4.12945711,4.80961243,4.09973214
48.998782,5.56776436,4.76619931,0.895301657,4.12929502,4.74001237,4.0990412
49.009274,5,4.70684945,0.541433794,4.12914709,4.67985571,4.09835009
49.019766,5.74456265,4.65531563,1.04366997,4.12901385,4.62752812,4.09765888
49.030257,5.74456265,4.61031964,1.06500845,4.12889587,4.58174748,4.09696764
49.040749,5.09901951,4.57082063,0.726772928,4.12879367,4.54146926,4.09627624
49.05124,5.47722558,4.53598707,0.970174472,4.12870787,4.50585895,4.0955848
49.061732,6.08276253,4.50512489,1.25604046,4.12863908,4.47421949,4.0948932
49.072224,4.79583152,4.47767072,0.564057448,4.12858794,4.445985,4.0942015
49.082715,5.56776436,4.45315637,1.05574997,4.12855514,4.42068505,4.09350977
49.093207,4.58257569,4.43118457,0.389090119,4.12854139,4.39792006,4.09281787
49.103698,4,4.41143014,-0.641428204,4.12854743,4.37736298,4.09212593
49.11419,5.38516481,4.39361138,0.995767758,4.12857405,4.3587301,4.09143383
49.124682,5.56776436,4.37749466,1.09099482,4.12862206,4.34178609,4.09074162
49.135173,4.12310563,4.36288067,-0.489668304,4.12869233,4.32633001,4.09004938
49.145665,5,4.34959499,0.806476913,4.12878577,4.31218565,4.08935697
49.156156,4.58257569,4.33749276,0.495058515,4.12890332,4.29920672,4.08866452
49.166648,4,4.32644459,-0.571353293,4.129046,4.28726208,4.08797191
49.17714,4.69041576,4.31634168,0.611615957,4.12921486,4.27624149,4.08727918
49.187631,3.74165739,4.30708939,-0.751952131,4.12941097,4.26604883,4.08658642
49.198123,4.12310563,4.29860278,-0.418923806,4.12963556,4.25659742,4.08589349
49.208614,4.24264069,4.29081081,-0.219476938,4.1298898,4.24781484,4.08520052
49.219106,3.87298335,4.28364836,-0.640831503,4.13017505,4.23963417,4.08450737
49.229598,4.47213595,4.27706031,0.441673681,4.13049264,4.23199874,4.08381412
49.240089,4,4.27099805,-0.520574728,4.13084398,4.22485835,4.08312083
49.250581,4.24264069,4.26541704,-0.150918376,4.13123068,4.21816653,4.08242737
49.261072,4.79583152,4.26028008,0.731813805,4.13165426,4.21188447,4.08173386
49.271564,4.24264069,4.2555523,-0.113629299,4.13211651,4.20597522,4.08104018
49.282056,5.19615242,4.25120425,0.97208445,4.1326192,4.20040746,4.08034639
49.292547,4.47213595,4.2472097,0.47426391,4.13316417,4.19515306,4.07965256
49.303039,5.19615242,4.24354436,0.976016424,4.13375356,4.19018533,4.07895855
49.31353,3.87298335,4.24018808,-0.6059742,4.13438939,4.18548213,4.0782645
49.324022,5.19615242,4.23712174,0.979301121,4.13507406,4.1810217,4.07757027
49.334514,4.12310563,4.23432935,-0.333502211,4.13580991,4.1767857,4.07687593
49.345005,5,4.23179674,0.876472054,4.13659945,4.17275744,4.07618155
49.355497,4.47213595,4.22951076,0.492569995,4.13744552,4.16892071,4.07548698
49.365988,4.47213595,4.22746075,0.494646546,4.13835088,4.16526221,4.07479238
49.37648,3.87298335,4.22563669,-0.593846226,4.13931878,4.16176845,4.07409759
49.386972,4.12310563,4.22403044,-0.317686668,4.14035241,4.15842814,4.07340269
49.397463,3.87298335,4.22263504,-0.591313536,4.14145517,4.15523094,4.07270774
49.407955,4.79583152,4.22144426,0.757883413,4.14263101,4.15216651,4.07201262
49.418446,4.69041576,4.2204534,0.685538006,4.14388368,4.14922652,4.07131744
49.428938,4.89897949,4.2196584,0.82420937,4.14521768,4.14640224,4.07062209
49.43943,5.09901951,4.21905641,0.938063484,4.14663747,4.14368644,4.06992662
49.449921,4.35889894,4.21864545,0.374504333,4.14814778,4.14107247,4.0692311
49.460413,4.12310563,4.21842429,-0.308737215,4.14975411,4.13855344,4.0685354
49.470904,4.58257569,4.21839273,0.60347574,4.15146178,4.13612399,4.06783965
49.481396,5.09901951,4.21855133,0.93833266,4.15327713,4.13377823,4.06714371
49.491888,4.35889894,4.21890157,0.37416223,4.15520647,4.13151138,4.06644766
49.502379,3.87298335,4.21944567,-0.588610505,4.15725656,4.129319,4.06575156
49.512871,4.89897949,4.22018692,0.823888683,4.1594353,4.1271964,4.06505528
49.523362,4.12310563,4.22112923,-0.313087221,4.16175033,4.12513997,4.06435894
49.533854,3.87298335,4.22227776,-0.591011351,4.16421083,4.12314564,4.06366242
49.544346,4.35889894,4.22363836,0.367777895,4.16682599,4.12121015,4.06296578
49.554837,4.69041576,4.2252178,0.682054219,4.16960573,4.11933048,4.06226908
49.565329,3.46410162,4.22702437,-0.873454498,4.17256162,4.1175033,4.06157221
49.57582,5.38516481,4.22906684,1.07521996,4.17570504,4.11572615,4.06087527
49.586312,3.74165739,4.23135591,-0.699784623,4.17904957,4.11399613,4.06017815
49.596804,3.74165739,4.23390299,-0.701602169,4.18260904,4.11231096,4.05948092
49.607295,4.89897949,4.2367208,0.813792775,4.18639843,4.11066854,4.05878362
49.617787,4.47213595,4.23982441,0.48198708,4.1904352,4.10906644,4.05808614
49.628278,3,4.24322937,-1.11500196,4.19473683,4.10750298,4.0573886
49.63877,3.87298335,4.24695432,-0.611531663,4.19932411,4.10597599,4.05669088
49.649262,5,4.25101892,0.86543693,4.20421851,4.10448389,4.05599303
49.659753,5.29150262,4.25544489,1.01786921,4.20944344,4.10302518,4.05529512
49.670245,5.83095189,4.26025768,1.2532734,4.21502623,4.10159804,4.05459703
49.680736,4.89897949,4.26548366,0.795924507,4.22099471,4.1002013,4.05389888
49.691228,3.87298335,4.27115416,-0.631007774,4.2273819,4.09883333,4.05320054
49.70172,3.87298335,4.27730235,-0.635860833,4.23422243,4.097493,4.05250207
49.712211,4.47213595,4.283965,0.433786767,4.24155443,4.09617921,4.05180355
49.722703,3.87298335,4.29118507,-0.646685178,4.2494224,4.09489059,4.05110484
49.733194,4.47213595,4.29900758,0.416086982,4.2578726,4.09362631,4.05040606
49.743686,3.87298335,4.30748586,-0.659168049,4.26695981,4.09238513,4.0497071
49.754178,5,4.3166771,0.826633473,4.27674246,4.09116621,4.04900801
49.764669,4.89897949,4.32664512,0.756527836,4.28728563,4.08996877,4.04830886
49.775161,3.74165739,4.33746455,-0.771885462,4.29866534,4.08879173,4.04760951
49.785652,4.89897949,4.349215,0.741461051,4.31096238,4.08763451,4.04691011
49.796144,4.12310563,4.36199072,-0.488758732,4.32427241,4.08649613,4.04621051
49.806636,3.46410162,4.37589449,-0.954878461,4.33869947,4.085376,4.04551079
49.817127,5,4.39104225,0.780357449,4.35436079,4.08427352,4.044811
49.827619,4.58257569,4.40757018,0.418336602,4.37139403,4.08318785,4.04411102
49.83811,4.69041576,4.42562674,0.514576544,4.38994899,4.08211859,4.04341098
49.848602,3.60555128,4.44538883,-0.916426514,4.41020417,4.08106496,4.04271074
49.859094,4.58257569,4.46705427,0.339884434,4.43235889,4.0800265,4.04201037
49.869585,4.24264069,4.49085239,-0.498208491,4.45664417,4.07900281,4.04130994
49.880077,4.89897949,4.51706144,0.617995183,4.48334018,4.07799319,4.04060931
49.890568,4.24264069,4.54600758,-0.550787517,4.51277509,4.07699737,4.03990862
49.90106,4.24264069,4.57811305,-0.579199757,4.54537372,4.07601471,4.03920774
49.911552,4.35889894,4.613926,-0.505002033,4.58168732,4.0750449,4.03850672
49.922043,4.69041576,4.6542134,0.19026918,4.62248707,4.07408762,4.03780564
49.932535,4.89897949,4.70012245,0.445933893,4.66892646,4.07314232,4.03710436
49.943026,4.35889894,4.75339492,-0.628089143,4.72275639,4.07220881,4.03640301
49.953518,4.12310563,4.81678404,-0.832873588,4.78674424,4.07128658,4.03570147
49.96401,5.09901951,4.8945709,0.452159944,4.86519186,4.07037539,4.03499979
49.974501,5.47722558,4.99329791,0.6956491,4.96467097,4.06947501,4.03429805
49.984993,5.56776436,5.1226247,0.667187875,5.09487955,4.068585,4.03359611
49.995484,5.29150262,5.2959396,-0.0666106097,5.26924902,4.06770523,4.03289411
50.005976,5.19615242,5.53063036,-0.578340673,5.50520613,4.06683528,4.0321919
50.016468,5.83095189,5.84709059,-0.127038183,5.82316271,4.06597498,4.03148956
50.026959,5.83095189,6.2664681,-0.659936518,6.24424799,4.06512418,4.03078715
50.037451,6.8556546,6.80737001,0.219737551,6.78700787,4.06428248,4.03008454
50.047942,7.14142843,7.48173364,-0.583356844,7.46328559,4.06344984,4.02938187
50.058434,7.28010989,8.29226413,-1.00605876,8.27568544,4.0626259,4.02867899
50.068926,8.71779789,9.23046384,-0.71600695,9.21562522,4.06181054,4.02797598
50.079417,10.4880885,10.2767473,0.459718581,10.2634649,4.06100367,4.0272729
50.089909,10.9544512,11.4018022,-0.668843067,11.389868,4.06020494,4.02656962
50.1004,13.114877,12.5673807,0.739929995,12.5565844,4.05941435,4.02586626
50.110892,14.2126704,13.7289123,0.695527177,13.7190553,4.05863161,4.02516271
50.121384,13.1529464,14.8364459,-1.29749739,14.8273463,4.05785663,4.02445902
50.131875,14.2828569,15.8367065,-1.24653505,15.8281997,4.05708936,4.02375526
50.142367,16.583124,16.6753229,-0.303642854,16.6672591,4.05632952,4.02305129
50.152858,16.2172747,17.2994527,-1.04027785,17.2916927,4.05557714,4.02234726
50.16335,17.175564,17.6640818,-0.698940466,17.6564928,4.05483194,4.02164302
50.173842,17.0587221,17.7396372,-0.825175767,17.7320895,4.05409392,4.02093864
50.184333,17.3205081,17.5195581,-0.446150224,17.511923,4.05336302,4.02023419
50.194825,17.6068169,17.0220327,0.764711803,17.0141803,4.05263901,4.01952954
50.205316,16.643317,16.2853717,0.598285319,16.2771684,4.05192196,4.01882482
50.215808,15.2970585,15.3592819,-0.24944603,15.3505867,4.05121164,4.01811989
50.2263,14.4222051,14.2980971,0.352289594,14.2887574,4.05050804,4.01741482
50.236791,12.328828,13.1561722,-0.909584603,13.1460204,4.04981116,4.01670968
50.247283,11.5758369,11.9850726,-0.639715296,11.9739248,4.0491208,4.01600433
50.257774,11.3137085,10.8326091,0.693613304,10.8202681,4.04843705,4.01529891
50.268266,9.32737905,9.74029858,-0.642588147,9.72656245,4.04775971,4.01459328
50.278758,8.48528137,8.74235178,-0.507021106,8.72703156,4.0470888,4.01388752
50.289249,8.1240384,7.8636317,0.510300601,7.84657765,4.04642434,4.01318168
50.299741,7,7.11812979,-0.343700141,7.09926112,4.04576617,4.01247563
50.310232,6.164414,6.50892533,-0.586950875,6.48825502,4.04511439,4.01176951
50.320724,5.56776436,6.02838348,-0.678689262,6.00602257,4.04446883,4.01106318
50.331216,5.19615242,5.66085562,-0.681691426,5.63699299,4.04382954,4.01035671
50.341707,5.38516481,5.38600887,-0.0290527141,5.3608719,4.04319656,4.00965016
50.352199,4.69041576,5.18258204,-0.701545638,5.15639541,4.04256976,4.00894341
50.36269,5,5.0314888,-0.177450845,5.00444666,4.04194924,4.00823658
50.373182,5.38516481,4.91723972,0.684050498,4.88949403,4.04133489,4.00752954
50.383674,5.47722558,4.82835277,0.805526415,4.80001492,4.04072675,4.00682236
50.394165,4,4.75681869,-0.869953271,4.72796713,4.0401249,4.00611511
50.404657,4.12310563,4.69729504,-0.757752873,4.66798402,4.03952922,4.00540764
50.415148,4.35889894,4.6463554,-0.536149655,4.61662283,4.03893984,4.0047001
50.42564,4.47213595,4.6018005,-0.360089634,4.57167344,4.03835666,4.00399235
50.436132,5.65685425,4.56222866,1.04624356,4.53172719,4.03777976,4.00328445
50.446623,4.69041576,4.52671214,0.404603046,4.49585174,4.03720922,4.00257648
50.457115,4.47213595,4.49459797,-0.149873344,4.46339089,4.03664497,4.0018683
50.467606,4.58257569,4.46541677,0.34228486,4.43387294,4.03608713,4.00116004
50.478098,5.29150262,4.43879367,0.923422414,4.40692115,4.03553564,4.00045157
50.48859,4.12310563,4.41443137,-0.539745999,4.38223674,4.0349906,3.99974295
50.499081,4.12310563,4.39208031,-0.518627694,4.35956886,4.03445211,3.99903426
50.509573,4.24264069,4.3715212,-0.358999326,4.33869703,4.0339201,3.99832535
50.520064,5.19615242,4.35257157,0.91846658,4.31943778,4.03339474,3.99761637
50.530556,4.69041576,4.33506521,0.596112869,4.30162395,4.03287599,3.99690718
50.541048,5.19615242,4.31886121,0.93663825,4.2851138,4.03236395,3.99619783
50.551539,5.19615242,4.30383521,0.944625437,4.26978222,4.03185875,3.99548842
50.562031,4.47213595,4.28987325,0.426922369,4.2555145,4.03136035,3.99477878
50.572522,4.79583152,4.27687949,0.720383254,4.24221422,4.03086894,3.99406907
50.583014,4.89897949,4.26476406,0.796376436,4.22979084,4.0303845,3.99335915
50.593506,4.24264069,4.25345032,-0.103969365,4.2181672,4.02990715,3.99264908
50.603997,4.69041576,4.24286971,0.668988826,4.20727428,4.02943705,3.99193893
50.614489,5.09901951,4.23301825,0.930591888,4.19704738,4.02903739,3.99122856
50.62498,4.69041576,4.22372196,0.683149909,4.18743225,4.02858203,3.99051812
50.635472,4.24264069,4.214989,0.166287957,4.17837664,4.02813413,3.98980746
50.645964,3.74165739,4.20677523,-0.681995483,4.16983601,4.02769383,3.98909666
50.656455,4.89897949,4.19904072,0.836623431,4.16177012,4.02726129,3.98838577
50.666947,4.35889894,4.19174735,0.408841767,4.15414041,4.02683655,3.98767467
50.677438,4.47213595,4.1848633,0.535978227,4.14691478,4.02641981,3.98696349
50.68793,4.24264069,4.17835717,0.253541951,4.14006143,4.02601114,3.98625209
50.698422,4.35889894,4.1722023,0.432084064,4.13355344,4.0256107,3.98554055
50.708913,4.47213595,4.16637439,0.552957105,4.12736619,4.02521869,3.98482893
50.719405,5.19615242,4.16084971,1.01749826,4.12147561,4.02483516,3.98411708
50.729896,4.47213595,4.15560866,0.562607587,4.11586185,4.02446036,3.98340516
50.740388,5.19615242,4.15063139,1.02250723,4.11050473,4.02409438,3.98269302
50.75088,4.12310563,4.14590118,-0.15098197,4.10538724,4.02373742,3.98198074
50.761371,4.12310563,4.14140264,-0.135266449,4.10049376,4.02338969,3.98126837
50.771863,4.47213595,4.13712044,0.578805247,4.0958086,4.0230513,3.98055578
50.782354,4.35889894,4.13304211,0.475243978,4.09131908,4.02272252,3.97984312
50.792846,4.12310563,4.12915465,-0.077775462,4.08701184,4.02240347,3.97913023
50.803338,4.58257569,4.12544722,0.676112765,4.0828758,4.0220944,3.9784172
50.813829,4.24264069,4.12190981,0.347463496,4.07890068,4.02179555,3.97770408
50.824321,4.79583152,4.11853219,0.822981975,4.0750759,4.02150708,3.97699075
50.834812,4,4.11530622,-0.339567689,4.07139309,4.02122928,3.97627733
50.845304,4.12310563,4.11222315,0.104319128,4.06784314,4.02096234,3.9755637
50.855796,4.69041576,4.10927578,0.762325376,4.06441857,4.02070653,3.97484992
50.866287,3.87298335,4.10645744,-0.483191571,4.06111245,4.02046213,3.97413605
50.876779,4.35889894,4.10376117,0.505111646,4.0579174,4.02022937,3.97342196
50.88727,3.74165739,4.10118153,-0.59960332,4.05482778,4.02000856,3.9727078
50.897762,4.24264069,4.09871253,0.379378651,4.05183715,4.01979996,3.97199341
50.908254,4.35889894,4.09634931,0.512395974,4.04894037,4.01960388,3.97127887
50.918745,4.47213595,4.09408736,0.614856567,4.04613263,4.01942067,3.97056425
50.929237,4.24264069,4.09192186,0.388225223,4.04340865,4.01925059,3.96984941
50.939728,4,4.08984917,-0.299748515,4.04076453,4.01909403,3.96913448
50.95022,5.19615242,4.08786513,1.05275225,4.03819562,4.0189513,3.96841934
50.960712,3.74165739,4.08596644,-0.586778543,4.03569828,4.01882278,3.96770405
50.971203,5,4.08415005,0.957000495,4.03326913,4.01870886,3.96698867
50.981695,4,4.08241262,-0.287075978,4.03090428,4.0186099,3.96627307
50.992186,3.87298335,4.0807517,-0.455816136,4.02860098,4.01852633,3.96555738
51.002678,3.46410162,4.07916442,-0.784259397,4.02635581,4.01845856,3.96484148
51.01317,3.31662479,4.07764857,-0.872366769,4.02416614,4.01840704,3.96412543
51.023661,4.79583152,4.07620211,0.84830974,4.02202953,4.01837221,3.96340929
51.034153,4.58257569,4.07482275,0.712567852,4.01994308,4.01835456,3.96269293
51.044644,3.31662479,4.07350891,-0.869990873,4.01790481,4.01835457,3.96197648
51.055136,4.47213595,4.07225865,0.632358529,4.01591213,4.01837275,3.96125982
51.065628,3.46410162,4.07107054,-0.779082101,4.01396314,4.01840964,3.960543
51.076119,4.89897949,4.06994327,0.910514256,4.01205604,4.01846579,3.9598261
51.086611,4.58257569,4.06887537,0.716728904,4.01018859,4.01854179,3.95910897
51.097102,3.74165739,4.06786588,-0.571146645,4.0083594,4.01863821,3.95839176
51.107594,4.47213595,4.06691356,0.636570806,4.00656645,4.01875569,3.95767433
51.118086,4.58257569,4.06601761,0.718719753,4.00480833,4.01889489,3.95695675
51.128577,4.35889894,4.06517729,0.541960935,4.00308371,4.01905646,3.95623908
51.139069,4.24264069,4.06439173,0.422195398,4.00139085,4.01924114,3.95552119
51.14956,4.24264069,4.06366049,0.423060509,3.99972872,4.01944961,3.95480321
51.160052,4.24264069,4.06298293,0.423860539,3.99809575,4.0196827,3.95408502
51.170544,3.87298335,4.06235871,-0.435172802,3.99649087,4.01994117,3.95336666
51.181035,4,4.06178758,-0.248571081,3.9949131,4.02022582,3.95264823
51.191527,4.24264069,4.06126921,0.425877297,3.99336104,4.02053759,3.95192957
51.202018,2.23606798,4.06080358,-1.35082775,3.99183396,4.02087731,3.95121082
51.21251,4.35889894,4.06039056,0.546359208,3.99033057,4.02124599,3.95049185
51.223002,4.58257569,4.06003025,0.72287305,3.9888501,4.02164458,3.94977273
51.233493,4.89897949,4.05972281,0.91610953,3.98739178,4.02207408,3.94905353
51.243985,4.79583152,4.05946843,0.858116013,3.98595448,4.02253563,3.94833409
51.254476,3.74165739,4.05926746,-0.563569052,3.98453769,4.02303028,3.94761458
51.264968,4.12310563,4.05912028,0.252953252,3.98314034,4.02355928,3.94689484
51.27546,4.24264069,4.05902739,0.42850122,3.98176186,4.02412383,3.94617495
51.285951,4.35889894,4.05898939,0.547639987,3.98040165,4.02472514,3.94545497
51.296443,3.87298335,4.05900694,-0.431304526,3.9790588,4.02536467,3.94473476
51.306934,4.12310563,4.05908081,0.253031258,3.97773292,4.02604371,3.94401447
51.317426,3.46410162,4.05921187,-0.771433897,3.97642315,4.02676386,3.94329396
51.327918,4.35889894,4.05940109,0.547263972,3.97512903,4.0275266,3.94257329
51.338409,4.79583152,4.05964949,0.858010511,3.97385013,4.02833347,3.94185254
51.348901,4.35889894,4.05995828,0.546754665,3.97258567,4.02918631,3.94113156
51.359392,4.24264069,4.06032867,0.42698011,3.97133538,4.03008674,3.9404105
51.369884,4.89897949,4.06076212,0.915542117,3.97009853,4.0310368,3.93968921
51.380376,3.60555128,4.06126007,-0.675062066,3.96887478,4.03203837,3.93896777
51.390867,4.24264069,4.06182408,0.425225365,3.96766379,4.03309339,3.93824624
51.401359,4.35889894,4.06245598,0.544465757,3.9664649,4.03420424,3.93752448
51.41185,4.24264069,4.06315752,0.423654534,3.96527794,4.03537296,3.93680264
51.422342,3.46410162,4.06393083,-0.774486419,3.96410228,4.03660219,3.93608058
51.432834,3.74165739,4.06477797,-0.568436962,3.96293765,4.03789432,3.93535836
51.443325,5,4.06570113,0.966591368,3.9617838,4.03925186,3.93463605
51.453817,3.87298335,4.06670293,-0.440135867,3.96064017,4.04067787,3.93391352
51.464308,4.24264069,4.06778577,0.418156567,3.95950664,4.04217502,3.9331909
51.4748,4.47213595,4.06895265,0.63496717,3.95838267,4.04374669,3.93246806
51.485292,4.58257569,4.07020641,0.715799753,3.95726806,4.04539602,3.93174506
51.495783,4.35889894,4.07155007,0.536049319,3.95616262,4.04712627,3.93102198
51.506275,4.69041576,4.07298725,0.785766193,3.95506585,4.04894145,3.93029867
51.516766,2.64575131,4.07452124,-1.19531164,3.95397769,4.05084504,3.92957527
51.527258,4.89897949,4.07615614,0.907096105,3.95289767,4.05284149,3.92885165
51.53775,4.12310563,4.07789586,0.212625879,3.95182564,4.05493494,3.92812787
51.548241,3.87298335,4.07974453,-0.454709997,3.95076145,4.05712972,3.92740401
51.558733,4.79583152,4.08170709,0.845058834,3.94970467,4.05943111,3.92667992
51.569224,3.46410162,4.08378806,-0.787201653,3.94865527,4.06184379,3.92595574
51.579716,4.69041576,4.08599304,0.777446279,3.94761283,4.06437365,3.92523134
51.590208,4.12310563,4.0883274,0.186489207,3.94657725,4.06702624,3.92450678
51.600699,4.24264069,4.0907968,0.389671506,3.94554841,4.06980743,3.92378214
51.611191,3.46410162,4.09340804,-0.793288361,3.94452593,4.07272426,3.92305727
51.621682,3.31662479,4.09616733,-0.882917063,3.94350982,4.0757831,3.92233231
51.632174,4.35889894,4.0990824,0.50972203,3.94249969,4.07899193,3.92160713
51.642666,3.60555128,4.10216065,-0.704705166,3.94149548,4.08235832,3.92088179
51.653157,3.87298335,4.10540996,-0.482106431,3.9404971,4.08589029,3.92015637
51.663649,3.87298335,4.10883972,-0.485650463,3.9395042,4.08959749,3.91943072
51.67414,3.46410162,4.11245864,-0.805206199,3.93851682,4.09348874,3.91870498
51.684632,3.87298335,4.11627745,-0.493248525,3.93753461,4.097575,3.91797902
51.695124,4.24264069,4.12030657,0.349762941,3.93655752,4.10186682,3.9172529
51.705615,4.35889894,4.12455709,0.484088679,3.93558551,4.10637545,3.9165267
51.716107,4.47213595,4.12904221,0.585742047,3.93461824,4.11111428,3.91580027
51.726598,4.47213595,4.13377432,0.581688609,3.93365577,4.11609583,3.91507375
51.73709,4.69041576,4.1387686,0.742729531,3.93269779,4.12133548,3.914347
51.747582,4.24264069,4.14403997,0.314007519,3.93174426,4.12684826,3.9136201
51.758073,4.89897949,4.14960437,0.865664554,3.93079516,4.13265028,3.91289312
51.768565,3.31662479,4.15548069,-0.915890766,3.92985019,4.13876059,3.9121659
51.779056,4.35889894,4.16168698,0.444085536,3.92890942,4.14519737,3.91143861
51.789548,3.87298335,4.16824518,-0.543380013,3.92797256,4.15198274,3.91071108
51.80004,4.35889894,4.17517712,0.428627838,3.92703958,4.15913865,3.9099834
51.810531,3.87298335,4.1825063,-0.556347872,3.92611049,4.16668873,3.90925563
51.821023,4,4.19026041,-0.436188507,3.925185,4.17466087,3.90852764
51.831514,4.79583152,4.19846643,0.772893971,3.92426319,4.18308214,3.90779956
51.842006,3.74165739,4.20715688,-0.682275234,3.9233448,4.19198525,3.90707125
51.852498,4.12310563,4.21636461,-0.305383344,3.92242982,4.2014032,3.90634279
51.862989,4.58257569,4.22612525,0.597034706,3.92151825,4.21137173,3.90561424
51.873481,4.58257569,4.23648061,0.588298467,3.92060984,4.22193284,3.90488547
51.883972,4,4.24747221,-0.497465783,3.91970468,4.23312818,3.9041566
51.894464,4.35889894,4.25914979,0.315830887,3.91880251,4.24500769,3.90342752
51.904956,4.24264069,4.27156446,-0.170069905,3.91790334,4.2576226,3.90269827
51.915447,4.24264069,4.28477202,-0.205259184,3.91700718,4.27102887,3.90196894
51.925939,3.87298335,4.2988378,-0.652575244,3.9161138,4.28529204,3.90123939
51.93643,3.46410162,4.31382806,-0.921806075,3.91522328,4.30047851,3.90050975
51.946922,4.47213595,4.32982176,0.377245533,3.9143354,4.31666747,3.89977988
51.957414,4.35889894,4.34690144,0.109533126,3.91345016,4.33394159,3.89904986
51.967905,4.69041576,4.36515804,0.5703137,3.9125676,4.35239203,3.89831975
51.978397,3.46410162,4.38469795,-0.959477114,3.91168747,4.37212539,3.89758941
51.988888,4.24264069,4.40563142,-0.403721112,3.9108099,4.39325212,3.89685899
51.99938,3.87298335,4.42808947,-0.745054445,3.90993464,4.41590348,3.89612834
52.009872,4.58257569,4.45221158,0.361059712,3.90906172,4.44021918,3.89539754
52.020363,5,4.47815312,0.722389704,3.90819118,4.46635481,3.89466665
52.030855,4.24264069,4.50609604,-0.513279024,3.9073228,4.49449264,3.89393553
52.041346,4,4.53623336,-0.732279561,3.90645667,4.52482588,3.89320433
52.051838,4,4.56879426,-0.7541845,3.9055926,4.55758409,3.89247291
52.06233,5.56776436,4.60402778,0.98170086,3.90473061,4.59301657,3.89174132
52.072821,4.35889894,4.64221485,-0.532274282,3.90387074,4.63140456,3.89100966
52.083313,4.24264069,4.68368598,-0.66411241,3.90301277,4.67307894,3.89027776
52.093804,5,4.72880033,0.520768342,3.90215682,4.71839922,3.88954578
52.104296,4.79583152,4.77798595,0.133587334,3.90130268,4.76779384,3.88881358
52.114788,4.47213595,4.83171836,-0.5996519,3.9004504,4.82173874,3.88808122
52.125279,5,4.89054249,0.330843628,3.89960001,4.88077925,3.88734877
52.135771,4.79583152,4.95510502,-0.399090841,3.89875131,4.94556253,3.8866161
52.146262,5.83095189,5.02612772,0.897119931,3.89790442,5.01681078,3.88588334
52.156754,5.29150262,5.10447794,0.432463501,3.89705913,5.09539189,3.88515036
52.167246,5.38516481,5.19114425,0.440477641,3.8962155,5.18229492,3.88441723
52.177737,5.09901951,5.28728253,-0.433892866,3.89537356,5.27867624,3.883684
52.188229,5.65685425,5.39428434,0.512415759,3.89453312,5.38592799,3.88295056
52.19872,4.58257569,5.51375252,-0.964975037,3.89369431,5.5056535,3.88221702
52.209212,5.83095189,5.64764703,0.428141174,3.89285692,5.63981332,3.88148327
52.219704,5.65685425,5.79828878,-0.376077819,3.89202101,5.79072886,3.88074935
52.230195,5.65685425,5.96852139,-0.558271569,3.89118662,5.96124429,3.88001536
52.240687,6.78232998,6.16201424,0.78760126,3.89035357,6.15502971,3.87928114
52.251178,6.8556546,6.38362384,0.687044944,3.88952198,6.37694266,3.87854683
52.26167,6.70820393,6.6405451,0.260113123,3.88869165,6.63418002,3.8778123
52.272162,6.40312424,6.94406909,-0.73548953,3.88786265,6.93803648,3.87707761
52.282653,7.87400787,7.31288707,0.749079974,3.88703502,7.30720944,3.87634284
52.293145,8.42614977,7.77782665,0.80518515,3.88620858,7.77253539,3.87560784
52.303636,8.36660027,8.38604523,-0.139445191,3.88538346,8.38118064,3.87487277
52.314128,9.32737905,9.20209806,0.353950555,3.88455946,9.19770338,3.87413746
52.32462,10.5356538,10.2992803,0.486182577,3.88373665,10.2953876,3.873402
52.335111,12.2882057,11.7407932,0.739873293,3.88291508,11.7374078,3.87266646
52.345603,13.3790882,13.5567557,-0.421506259,3.88209457,13.5538487,3.87193069
52.356094,14.832397,15.7251759,-0.944869795,3.88127525,15.7226909,3.87119484
52.366586,16.9115345,18.1669776,-1.12046557,3.88045693,18.1648446,3.87045877
52.377078,19.4679223,20.7449811,-1.13007025,3.87963968,20.7431287,3.86972254
52.387569,21.9317122,23.2606852,-1.1528109,3.87882356,23.2590468,3.86898623
52.398061,23.9582971,25.4388691,-1.21678757,3.87800837,25.4373833,3.86824969
52.408552,24.8193473,26.9231035,-1.45043311,3.87719426,26.921711,3.86751307
52.419044,26.3628527,27.3679161,-1.00252854,3.87638105,27.3665574,3.86677623
52.429536,25.6709953,26.6434745,-0.9861436,3.8755688,26.64209,3.86603923
52.440027,23.0217289,24.9456839,-1.38706706,3.87475757,24.944217,3.86530215
52.450519,21.2367606,22.6442283,-1.18636744,3.87394717,22.6426251,3.86456485
52.46101,19.8494332,20.0838281,-0.484143479,3.87313776,20.0820347,3.86382746
52.471502,16.9410743,17.519283,-0.760400352,3.87232914,17.5172432,3.86308985
52.481994,14.8660687,15.1322519,-0.515929434,3.8715214,15.1299086,3.86235209
52.492485,12.6095202,13.04538,-0.660196786,3.87071457,13.0426827,3.86161424
52.502977,10.9087121,11.3232655,-0.643858216,3.86990849,11.3201818,3.86087617
52.513468,10.198039,9.973585,0.473765793,3.8691033,9.97011048,3.86013802
52.52396,9.89949494,8.95522863,0.971733661,3.86829883,8.95138814,3.85939965
52.534452,8.06225775,8.19955583,-0.370537557,3.86749514,8.19539278,3.85866112
52.544943,7.61577311,7.6336399,-0.133666711,3.86669229,7.62920146,3.85792251
52.555435,6.70820393,7.196773,-0.698977161,3.86589011,7.19209992,3.85718368
52.565926,5.74456265,6.84629074,-1.04963236,3.86508873,6.84141449,3.85644476
52.576418,6.78232998,6.55503255,0.476757206,3.864288,6.54997678,3.85570563
52.58691,6.32455532,6.30670326,0.13361159,3.86348797,6.30148651,3.85496634
52.597401,6.08276253,6.09141044,-0.0929941223,3.86268871,6.08604819,3.85422697
52.607893,4.79583152,5.90273318,-1.05209394,3.86189004,5.89723913,3.85348738
52.618384,5.56776436,5.73623116,-0.410447076,3.86109211,5.73061782,3.8527477
52.628876,4.79583152,5.58848749,-0.890312287,3.86029475,5.58276643,3.85200781
52.639368,4.79583152,5.4568188,-0.813011237,3.85949803,5.4510008,3.85126776
52.649859,5.56776436,5.33902084,0.478271388,3.85870201,5.33311592,3.85052763
52.660351,5,5.2332274,-0.482936228,3.85790652,5.22724482,3.84978729
52.670842,5,5.13790662,-0.37135781,3.85711171,5.13185497,3.84904685
52.681334,3.60555128,5.05172853,-1.2025711,3.8563174,5.04561571,3.8483062
52.691826,4.35889894,4.97358558,-0.78401954,3.85552367,4.96741887,3.8475654
52.702317,4.47213595,4.90252964,-0.656043969,3.85473058,4.89631575,3.84682452
52.712809,4.24264069,4.83772861,-0.771419419,3.85393797,4.83147367,3.84608341
52.7233,3.74165739,4.77848839,-1.01824899,3.85314597,4.77219805,3.84534223
52.733792,4.79583152,4.7241872,0.267664572,3.85235443,4.71786663,3.84460082
52.744284,3.87298335,4.67430008,-0.895162964,3.8515634,4.66795401,3.84385927
52.754775,4.12310563,4.62836859,-0.710818516,3.85077297,4.62200135,3.84311763
52.765267,4.47213595,4.58597987,-0.337407639,3.84998295,4.57959542,3.84237578
52.775758,3,4.54678697,-1.24369891,3.84919351,4.54038894,3.84163384
52.78625,4,4.51047047,-0.714472161,3.84840446,4.50406215,3.84089169
52.796742,4,4.47675856,-0.690477049,3.84761589,4.47034298,3.84014938
52.807233,4.89897949,4.44541016,0.673475553,3.84682786,4.43899009,3.839407
52.817725,4.35889894,4.41620313,-0.239382929,3.8460402,4.40978108,3.83866439
52.828216,4.35889894,4.38895038,-0.173353511,3.84525306,4.38252865,3.83792171
52.838708,3.74165739,4.36347522,-0.788554267,3.84446629,4.3570559,3.83717881
52.8492,4.24264069,4.33962678,-0.311425907,3.84367994,4.3332118,3.83643576
52.859691,4.12310563,4.3172696,-0.44064041,3.84289408,4.31086068,3.83569263
52.870183,3.16227766,4.29627608,-1.06489362,3.84210856,4.28987482,3.83494928
52.880674,3.74165739,4.27653908,-0.731356066,3.84132352,4.27014691,3.83420585
52.891166,4.24264069,4.25795481,-0.12375026,3.84053879,4.25157305,3.8334622
52.901658,4.12310563,4.24043471,-0.342533338,3.83975446,4.23406456,3.83271841
52.912149,3.87298335,4.22389842,-0.592380852,3.83897058,4.21754095,3.83197454
52.922641,3.31662479,4.20826866,-0.944268958,3.83818699,4.20192485,3.83123045
52.933132,3.87298335,4.19348094,-0.566125073,3.83740385,4.18715169,3.83048628
52.943624,4.35889894,4.17947123,0.423589089,3.83662098,4.17315733,3.82974189
52.954116,4.47213595,4.16618505,0.553128287,3.83583847,4.15988724,3.82899736
52.964607,4.35889894,4.15357259,0.453129512,3.83505638,4.14729151,3.82825275
52.975099,4.35889894,4.14158489,0.466169553,3.83427456,4.13532114,3.82750792
52.98559,4.12310563,4.13018156,-0.0841185627,3.83349313,4.12393565,3.82676301
52.996082,4.35889894,4.11932138,0.489466615,3.83271196,4.11309379,3.82601789
53.006574,4.35889894,4.10896956,0.499929375,3.83193111,4.10276072,3.82527262
53.017065,3.87298335,4.09909405,-0.475510995,3.83115064,4.09290431,3.82452728
53.027557,4.58257569,4.08966267,0.702077648,3.83037041,4.08349237,3.82378171
53.038048,4.12310563,4.0806497,0.20604835,3.82959055,4.07449912,3.82303608
53.04854,3.87298335,4.07202678,-0.446142845,3.82881091,4.06589617,3.82229022
53.059032,4.35889894,4.06377144,0.543256384,3.82803156,4.05766102,3.82154422
53.069523,5,4.05586243,0.971667418,3.82725256,4.04977238,3.82079814
53.080015,4.24264069,4.04827792,0.440865925,3.82647377,4.0422084,3.82005185
53.090506,4.58257569,4.04100053,0.735917906,3.82569533,4.03495166,3.81930548
53.100998,4.58257569,4.03401145,0.740651229,3.82491708,4.02798334,3.8185589
53.11149,5.09901951,4.02729522,1.03524118,3.8241391,4.02128794,3.81781217
53.121981,4.35889894,4.02083742,0.581430585,3.82336144,4.01485103,3.81706536
53.132473,4.58257569,4.01462294,0.753626406,3.82258397,4.00865749,3.81631835
53.142964,3.46410162,4.00864002,-0.737928452,3.82180681,4.00269552,3.81557125
53.153456,4.89897949,4.00287554,0.946627668,3.82102983,3.99695201,3.81482394
53.163948,3.46410162,3.99731896,-0.730217327,3.82025308,3.99141638,3.81407649
53.174439,4.58257569,3.99196043,0.768514976,3.81947664,3.98607878,3.81332897
53.184931,3.74165739,3.98678936,-0.495108044,3.81870036,3.98092861,3.81258123
53.195422,4.79583152,3.98179787,0.902238136,3.81792437,3.97595797,3.81183341
53.205914,3,3.97697681,-0.988421375,3.81714853,3.9711577,3.81108538
53.216406,3.87298335,3.97231911,-0.315175766,3.81637291,3.96652072,3.81033721
53.226897,3.31662479,3.96781823,-0.806965573,3.81559757,3.96204048,3.80958897
53.237389,4.24264069,3.96346697,0.528368922,3.81482237,3.95770978,3.80884051
53.24788,3.87298335,3.95926039,-0.293729537,3.81404744,3.95352367,3.80809198
53.258372,4.12310563,3.9551925,0.409772037,3.81327264,3.94947617,3.80734323
53.268864,5.56776436,3.95125912,1.2714186,3.81249804,3.94556305,3.80659435
53.279355,4.69041576,3.94745658,0.861950801,3.81172371,3.94178068,3.80584539
53.289847,3.87298335,3.9437808,-0.266077904,3.81094949,3.93812496,3.80509622
53.300338,3.74165739,3.94022976,-0.445614607,3.81017552,3.93459388,3.80434698
53.31083,3.31662479,3.93680084,-0.787512572,3.80940167,3.93118479,3.80359752
53.321322,3,3.93349321,-0.966174523,3.808628,3.92789688,3.80284792
53.331813,3.87298335,3.93030693,-0.239423449,3.80785457,3.92473022,3.80209826
53.342305,4.35889894,3.92724228,0.657005834,3.80708124,3.92168507,3.80134838
53.352796,4.58257569,3.92430196,0.811340702,3.80630816,3.91876415,3.80059843
53.363288,4.24264069,3.92148915,0.566702334,3.80553516,3.91597065,3.79984826
53.37378,3,3.91880983,-0.958545686,3.80476233,3.91331055,3.79909796
53.384271,3.87298335,3.91627252,-0.208060498,3.80398973,3.91079237,3.79834759
53.394763,3.46410162,3.91388861,-0.670661608,3.80321721,3.90842755,3.79759701
53.405254,3.74165739,3.91167589,-0.412333005,3.80244492,3.90623388,3.79684636
53.415746,3.87298335,3.90966042,-0.191512599,3.80167271,3.90423747,3.79609549
53.426238,4.35889894,3.90788519,0.671575576,3.80090064,3.90248136,3.79534449
53.436729,4.24264069,3.90642302,0.579842796,3.80012879,3.90103847,3.79459342
53.447221,4.24264069,3.90539993,0.580724338,3.79935701,3.90003501,3.79384214
53.457712,3.87298335,3.90503245,-0.179022637,3.79858544,3.89968778,3.79309079
53.468204,4.24264069,3.90567453,0.580487857,3.79781394,3.90035122,3.79233923
53.478696,4.69041576,3.90786454,0.884619251,3.79704257,3.90256441,3.79158753
53.489187,4.69041576,3.91234369,0.882083934,3.7962714,3.90706954,3.79083576
53.499679,3.46410162,3.92001158,-0.675211051,3.79550029,3.91476735,3.79008379
53.51017,4.47213595,3.93177318,0.735093722,3.79472938,3.92656393,3.78933175
53.520662,3.46410162,3.94828251,-0.695831082,3.79395852,3.94311401,3.78857949
53.531154,4.79583152,3.9695825,0.908982413,3.79318778,3.96446035,3.7878271
53.541645,4,3.99469673,0.0728235542,3.79241724,3.98962503,3.78707465
53.552137,4.79583152,4.02117178,0.880147569,3.79164673,4.01615136,3.78632199
53.562628,5.29150262,4.04464104,1.11662956,3.79087642,4.03966728,3.78556926
53.57312,4.58257569,4.05919216,0.723452512,3.79010615,4.05425344,3.78481632
53.583612,3.74165739,4.05966805,-0.563924346,3.78933598,4.05474687,3.78406325
53.594103,3.87298335,4.04514221,-0.414920315,3.788566,4.04022011,3.78331011
53.604595,4.47213595,4.01970735,0.672628131,3.78779606,4.01477071,3.78255676
53.615086,4.12310563,3.98945909,0.365576985,3.78702629,3.98450151,3.78180335
53.625578,4.58257569,3.95938932,0.789421547,3.78625655,3.95441047,3.78104973
53.63607,4,3.93252913,0.259751548,3.78548691,3.92753254,3.78029598
53.646561,4,3.91026844,0.299552264,3.78471745,3.90525954,3.77954216
53.657053,3.46410162,3.89283612,-0.654778213,3.78394801,3.88782077,3.77878813
53.667544,4,3.87973551,0.346791716,3.78317873,3.87471902,3.77803405
53.678036,3.60555128,3.87010255,-0.514345486,3.78240948,3.86508921,3.77727975
53.688528,4.24264069,3.86301141,0.616140632,3.78164032,3.85800429,3.77652533
53.699019,4,3.8576569,0.377283849,3.78087133,3.85265806,3.77577083
53.709511,4.24264069,3.85343091,0.623866791,3.78010235,3.84844162,3.77501614
53.720002,4.24264069,3.84992289,0.626672004,3.77933353,3.84494385,3.77426138
53.730494,3.74165739,3.84687472,-0.32437222,3.77856473,3.84190635,3.77350642
53.740986,4.35889894,3.84413376,0.71747138,3.77779601,3.83917624,3.77275132
53.751477,4.89897949,3.84161085,1.02828431,3.77702744,3.83666427,3.77199616
53.761969,4.47213595,3.83925213,0.795539955,3.77625889,3.83431649,3.7712408
53.77246,4,3.83702422,0.403702585,3.77549048,3.83209949,3.77048538
53.782952,4.12310563,3.83490359,0.53684452,3.77472209,3.8299897,3.76972975
53.793444,4.24264069,3.83287352,0.640130585,3.77395377,3.82797039,3.76897399
53.803935,4.79583152,3.83092118,0.982298498,3.7731856,3.82602872,3.76821817
53.814427,3.74165739,3.82903587,-0.29559852,3.77241743,3.82415396,3.76746215
53.824918,4.35889894,3.82720957,0.729170333,3.77164941,3.82233808,3.76670607
53.83541,4.47213595,3.82543507,0.80417715,3.77088139,3.82057388,3.76594978
53.845902,2.64575131,3.82370684,-1.0853366,3.77011344,3.81885582,3.76519336
53.856393,4.12310563,3.8220203,0.548712425,3.76934563,3.8171793,3.76443689
53.866885,4.12310563,3.8203711,0.550213162,3.76857782,3.81553998,3.76368021
53.877376,3.60555128,3.81875615,-0.461741134,3.76781015,3.81393475,3.76292348
53.887868,4.12310563,3.81717222,0.553112469,3.76704248,3.8123604,3.76216654
53.89836,4,3.81561695,0.429398471,3.76627487,3.81081456,3.76140947
53.908851,4.69041576,3.8140883,0.936123633,3.7655074,3.80929517,3.76065235
53.919343,4,3.81258408,0.432915606,3.76473992,3.80780006,3.75989502
53.929834,4.24264069,3.81110289,0.656915369,3.76397257,3.80632782,3.75913764
53.940326,4.12310563,3.80964297,0.559877362,3.76320522,3.8048767,3.75838006
53.950818,4.24264069,3.80820314,0.659118764,3.76243793,3.80344551,3.75762235
53.961309,2.82842712,3.80678238,-0.989118421,3.76167077,3.80203321,3.75686458
53.971801,3.87298335,3.80537934,0.2600077,3.76090359,3.80063849,3.75610661
53.982292,4.47213595,3.80399336,0.817399902,3.76013655,3.79926066,3.75534859
53.992784,4,3.80262329,0.444270985,3.7593695,3.79789859,3.75459037
54.003276,4.24264069,3.8012685,0.664358479,3.7586025,3.79655162,3.75383202
54.013767,4.12310563,3.79992839,0.568486797,3.75783563,3.79521918,3.75307361
54.024259,4.47213595,3.79860205,0.820691117,3.75706875,3.79390035,3.75231501
54.03475,4.12310563,3.79728912,0.570803386,3.75630199,3.79259476,3.75155635
54.045242,3.46410162,3.79598881,-0.576096512,3.75553522,3.79130163,3.7507975
54.055734,3.46410162,3.79470071,-0.574977474,3.7547685,3.79002056,3.75003851
54.066225,3.31662479,3.79342447,-0.690506831,3.75400191,3.78875118,3.74927948
54.076717,3.46410162,3.79215941,-0.572763295,3.75323529,3.78749282,3.74852025
54.087208,4.47213595,3.79090533,0.825366963,3.75246881,3.78624528,3.74776096
54.0977,4.79583152,3.78966162,1.00308021,3.7517023,3.78500794,3.74700148
54.108192,3.60555128,3.78842802,-0.427640912,3.75093584,3.78378057,3.74624187
54.118683,3.74165739,3.78720432,-0.213417271,3.75016951,3.78256292,3.74548221
54.129175,4.47213595,3.78598994,0.828339313,3.74940315,3.78135443,3.74472236
54.139666,4.79583152,3.78478481,1.00550819,3.74863692,3.78015504,3.74396245
54.150158,4,3.7835884,0.465200597,3.74787067,3.77896421,3.74320235
54.16065,4.12310563,3.78240057,0.583699455,3.74710446,3.77778179,3.74244212
54.171141,4.69041576,3.78122116,0.953516965,3.74633838,3.77660764,3.74168185
54.181633,4.89897949,3.78004969,1.05779478,3.74557227,3.77544126,3.74092138
54.192124,3.31662479,3.77888615,-0.67989805,3.74480629,3.77428266,3.74016086
54.202616,4.69041576,3.77773009,0.955345836,3.74404028,3.77313139,3.73940014
54.213108,2.44948974,3.77658142,-1.15199465,3.74327431,3.77198734,3.7386393
54.223599,4.58257569,3.77544002,0.898407297,3.74250847,3.7708504,3.73787842
54.234091,3.16227766,3.7743055,-0.782322079,3.74174261,3.76972018,3.73711734
54.244582,4,3.77317786,0.476258478,3.74097686,3.76859669,3.73635621
54.255074,4.24264069,3.77205673,0.685991225,3.74021109,3.76747954,3.73559489
54.265566,4.24264069,3.77094202,0.686803221,3.73944536,3.76636867,3.73483344
54.276057,3.87298335,3.76983369,0.321169203,3.73867976,3.76526401,3.73407195
54.286549,3.16227766,3.76873136,-0.778751369,3.73791413,3.76416519,3.73331027
54.29704,3.74165739,3.76763508,-0.161175959,3.73714862,3.76307227,3.73254854
54.307532,4,3.7665445,0.483172334,3.73638308,3.76198489,3.73178662
54.318024,3.87298335,3.76545957,0.327908177,3.73561759,3.76090301,3.73102458
54.328515,3.31662479,3.76438028,-0.66914534,3.73485222,3.7598266,3.73026249
54.339007,3.74165739,3.76330627,-0.147135579,3.73408682,3.75875532,3.72950022
54.349498,3.87298335,3.76223762,0.33278481,3.73332154,3.75768924,3.72873789
54.35999,4.35889894,3.76117415,0.773126633,3.73255624,3.75662819,3.72797538
54.370482,4.35889894,3.76011556,0.77381095,3.73179098,3.75557185,3.72721275
54.380973,4.58257569,3.75906196,0.907476574,3.73102585,3.75452036,3.72645007
54.391465,3.60555128,3.75801306,-0.390463549,3.73026068,3.7534734,3.72568721
54.401956,4.47213595,3.75696894,0.845675481,3.72949564,3.75243106,3.7249243
54.412448,3.87298335,3.75592929,0.342131635,3.72873057,3.75139305,3.7241612
54.42294,4.35889894,3.75489412,0.777177471,3.72796555,3.75035935,3.72339799
54.433431,4.12310563,3.75386343,0.607653022,3.72720065,3.74932998,3.72263473
54.443923,3.31662479,3.75283692,-0.660463575,3.72643573,3.74830463,3.72187128
54.454414,3.87298335,3.75181471,0.348092861,3.72567093,3.74728341,3.72110779
54.464906,4.35889894,3.75079649,0.77980924,3.7249061,3.74626604,3.72034412
54.475398,4.79583152,3.7497823,1.02276548,3.72414132,3.74525253,3.71958033
54.485889,3.60555128,3.74877213,-0.378445307,3.72337666,3.74424289,3.71881649
54.496381,3,3.74776571,-0.864734473,3.72261198,3.74323684,3.71805247
54.506872,4.89897949,3.74676316,1.0734134,3.72184742,3.7422345,3.71728841
54.517364,3.16227766,3.74576421,-0.763862913,3.72108284,3.74123561,3.71652417
54.527856,4.12310563,3.74476888,0.615090843,3.72031832,3.74024017,3.71575981
54.538347,3.16227766,3.74377719,-0.762561166,3.71955391,3.73924822,3.71499541
54.548839,4.12310563,3.74278889,0.616698256,3.71878948,3.73825949,3.71423082
54.55933,4.12310563,3.74180408,0.617496187,3.71802518,3.73727411,3.7134662
54.569822,3.87298335,3.74082253,0.363539289,3.71726086,3.73629182,3.71270139
54.580314,4.24264069,3.73984426,0.709081399,3.71649659,3.73531264,3.71193647
54.590805,4.47213595,3.73886929,0.856309912,3.71573244,3.73433661,3.71117151
54.601297,3.60555128,3.73789738,-0.363794047,3.71496828,3.73336349,3.71040637
54.611788,3.60555128,3.73692867,-0.362460192,3.71420424,3.73239339,3.70964118
54.62228,4.12310563,3.73596289,0.62220795,3.71344019,3.73142608,3.70887582
54.632772,3.60555128,3.7350001,-0.359789975,3.71267619,3.73046158,3.70811035
54.643263,3.16227766,3.73404033,-0.756149898,3.71191232,3.72949994,3.70734483
54.653755,3.46410162,3.73308334,-0.518634479,3.71114844,3.72854092,3.70657914
54.664246,3.87298335,3.73212926,0.375305324,3.71038468,3.72758466,3.70581341
54.674738,3.87298335,3.73117786,0.376570688,3.70962091,3.72663091,3.7050475
54.68523,4.58257569,3.73022919,0.92322614,3.7088572,3.72567971,3.70428148
54.695721,5.38516481,3.72928328,1.2868106,3.70809363,3.72473112,3.70351542
54.706213,3.74165739,3.72833991,0.11540137,3.70733004,3.72378491,3.70274919
54.716704,3,3.72739921,-0.852877022,3.70656658,3.7228412,3.70198292
54.727196,4.24264069,3.72646097,0.718456484,3.70580311,3.72189978,3.70121647
54.737688,2,3.72552522,-1.31359249,3.70503971,3.72096069,3.70044991
54.748179,4.35889894,3.72459202,0.796433882,3.70427644,3.72002398,3.69968332
54.758671,3.87298335,3.72366114,0.386422318,3.70351317,3.71908942,3.69891655
54.769162,4,3.72273272,0.526561749,3.70275003,3.71815716,3.69814974
54.779654,3.87298335,3.72180656,0.38881459,3.70198688,3.71722699,3.69738276
54.790146,3.46410162,3.7208827,-0.506735712,3.70122381,3.71629894,3.69661567
54.800637,4.58257569,3.71996118,0.928770429,3.70046087,3.71537307,3.69584855
54.811129,4.47213595,3.71904181,0.867809968,3.69969793,3.71444918,3.69508126
54.82162,3.31662479,3.71812472,-0.633640224,3.69893514,3.71352739,3.69431393
54.832112,3.60555128,3.71720971,-0.334153308,3.69817234,3.71260751,3.69354642
54.842604,4.89897949,3.71629682,1.08751214,3.69740961,3.71168958,3.69277881
54.853095,4,3.71538612,0.533492158,3.69664704,3.71077366,3.69201117
54.863587,4,3.71447739,0.534343154,3.69588446,3.70985955,3.69124336
54.874078,3.60555128,3.71357079,-0.328663227,3.69512203,3.70894738,3.69047551
54.88457,3.60555128,3.71266611,-0.327284031,3.69435961,3.70803696,3.68970749
54.895062,4.24264069,3.71176341,0.728613255,3.69359726,3.70712834,3.68893937
54.905553,2.82842712,3.71086275,-0.939380447,3.69283506,3.70622158,3.68817121
54.916045,4.24264069,3.70996392,0.729847082,3.69207288,3.70531648,3.68740289
54.926536,4.79583152,3.70906709,1.04247995,3.69131085,3.70441319,3.68663453
54.937028,3.46410162,3.70817204,-0.494034839,3.69054882,3.7035115,3.68586601
54.94752,3.46410162,3.70727884,-0.493130028,3.68978689,3.70261148,3.68509738
54.958011,3.46410162,3.70638755,-0.492225495,3.68902511,3.7017132,3.68432872
54.968503,2.82842712,3.70549799,-0.936520615,3.68826334,3.70081644,3.68355989
54.978994,3.16227766,3.70461029,-0.736432365,3.68750174,3.69992137,3.68279104
54.989486,3.46410162,3.70372427,-0.489512666,3.68674015,3.69902779,3.68202201
54.999978,3.87298335,3.70283998,0.412484377,3.68597866,3.69813576,3.68125289
55.010469,4,3.70195751,0.54593268,3.68521733,3.69724535,3.68048374
55.020961,3.31662479,3.70107665,-0.620041822,3.68445602,3.69635637,3.67971442
55.031452,3.60555128,3.70019756,-0.307646367,3.68369488,3.69546896,3.67894507
55.041944,3.87298335,3.69932006,0.416729277,3.68293377,3.69458295,3.67817555
55.052436,4.12310563,3.6984442,0.651660514,3.68217275,3.69369839,3.67740594
55.062927,4,3.69757006,0.549936305,3.68141191,3.69281535,3.6766363
55.073419,3.16227766,3.69669746,-0.731040215,3.6806511,3.69193365,3.6758665
55.08391,3.74165739,3.69582654,0.214081406,3.67989046,3.69105344,3.67509667
55.094402,3.31662479,3.69495713,-0.61508726,3.67912986,3.69017454,3.67432667
55.104894,4.35889894,3.69408929,0.815358602,3.67836937,3.68929701,3.67355658
55.115385,4.24264069,3.69322311,0.741227078,3.67760905,3.68842093,3.67278646
55.125877,4.12310563,3.69235839,0.656313367,3.67684878,3.68754611,3.67201618
55.136368,3.31662479,3.6914953,-0.612266695,3.67608869,3.68667272,3.67124588
55.14686,3.87298335,3.69063365,0.427024231,3.67532865,3.68580056,3.67047541
55.157352,4.58257569,3.68977353,0.94488209,3.67456872,3.68492972,3.66970484
55.167843,3.60555128,3.688915,-0.288727777,3.67380898,3.68406027,3.66893426
55.178335,4.69041576,3.6880579,1.00117823,3.67304929,3.68319203,3.66816351
55.188826,3.46410162,3.68720238,-0.472335438,3.6722898,3.68232516,3.66739274
55.199318,4.24264069,3.68634827,0.74585013,3.67153035,3.68145948,3.6666218
55.20981,4,3.68549565,0.560806875,3.67077104,3.68059507,3.66585078
55.220301,4.79583152,3.68464459,1.05412852,3.67001193,3.67973201,3.66507973
55.230793,3.60555128,3.68379493,-0.27972068,3.66925287,3.67887013,3.66430852
55.241284,4.24264069,3.68294684,0.748126896,3.66849402,3.67800959,3.6635373
55.251776,4,3.68210013,0.563826097,3.66773524,3.67715021,3.66276591
55.262268,4.79583152,3.68125491,1.05573511,3.66697659,3.67629209,3.66199443
55.272759,4.35889894,3.68041124,0.823703652,3.66621816,3.6754353,3.66122293
55.283251,4.35889894,3.67956897,0.824214762,3.66545979,3.67457968,3.66045127
55.293742,4.24264069,3.67872826,0.750941026,3.66470165,3.67372539,3.6596796
55.304234,4.24264069,3.67788896,0.751499649,3.66394358,3.67287227,3.65890776
55.314726,3.60555128,3.67705116,-0.26739462,3.66318566,3.67202041,3.65813584
55.325217,3.87298335,3.67621493,0.443585857,3.66242796,3.67116989,3.6573639
55.335709,4.47213595,3.67538014,0.892611796,3.66167035,3.67032056,3.6565918
55.3462,3.31662479,3.67454694,-0.598265953,3.66091297,3.66947259,3.65581969
55.356692,4,3.6737152,0.571213449,3.66015567,3.66862582,3.65504742
55.367184,3.31662479,3.672885,-0.596875369,3.65939854,3.66778035,3.65427506
55.377675,3.60555128,3.67205644,-0.257885947,3.65864165,3.66693627,3.65350268
55.388167,4.58257569,3.67122938,0.954644603,3.65788486,3.66609344,3.65273015
55.398658,3.16227766,3.67040399,-0.712829808,3.6571283,3.66525203,3.65195761
55.40915,3.74165739,3.66958015,0.268472034,3.65637186,3.6644119,3.65118491
55.419642,3.16227766,3.66875796,-0.711674292,3.65561559,3.66357316,3.65041212
55.430133,3.31662479,3.66793751,-0.592716393,3.65485957,3.66273591,3.64963933
55.440625,4.24264069,3.66711869,0.75863166,3.65410366,3.66190002,3.64886637
55.451116,3.74165739,3.66630168,0.274509931,3.65334801,3.66106567,3.64809341
55.461608,4.79583152,3.66548637,1.06317691,3.65259249,3.66023275,3.64732029
55.4721,3.60555128,3.66467287,-0.243149327,3.65183715,3.65940136,3.64654709
55.482591,4,3.6638613,0.579774694,3.65108208,3.65857164,3.64577388
55.493083,4.24264069,3.66305156,0.761307508,3.65032714,3.65774346,3.64500051
55.503574,4.12310563,3.66224386,0.678868003,3.64957248,3.65691704,3.64422714
55.514066,4,3.6614381,0.581860726,3.64881795,3.65609226,3.64345361
55.524558,3.60555128,3.66063441,-0.234697965,3.64806364,3.65526929,3.64268
55.535049,4,3.65983295,0.583238415,3.6473096,3.65444824,3.64190638
55.545541,4.79583152,3.65903364,1.06620724,3.64655572,3.65362905,3.64113261
55.556032,3.87298335,3.65823672,0.463407627,3.64580212,3.65281195,3.64035883
55.566524,4,3.65744212,0.585284444,3.64504869,3.65199688,3.6395849
55.577016,4.12310563,3.65665003,0.682975549,3.64429548,3.651184,3.63881089
55.587507,3.31662479,3.65586062,-0.582439549,3.64354257,3.65037351,3.63803688
55.597999,4.47213595,3.65507387,0.903914864,3.64278983,3.64956536,3.63726272
55.60849,3.46410162,3.65429007,-0.436106014,3.6420374,3.64875985,3.63648855
55.618982,2.64575131,3.65350921,-1.00387146,3.64128515,3.64795696,3.63571423
55.629474,3.46410162,3.65273153,-0.434315455,3.64053314,3.64715692,3.63493983
55.639965,3.16227766,3.65195728,-0.69977112,3.63978146,3.64636,3.63416543
55.650457,4.35889894,3.65118652,0.841256457,3.63902997,3.64556623,3.63339088
55.660948,4.24264069,3.6504196,0.76955902,3.63827881,3.64477598,3.63261633
55.67144,4.12310563,3.64965663,0.688076298,3.63752785,3.64398934,3.63184163
55.681932,3.60555128,3.64889796,-0.208198662,3.63677716,3.64320665,3.63106685
55.692423,4.12310563,3.64814395,0.689174636,3.63602681,3.64242829,3.63029208
55.702915,4.35889894,3.64739479,0.843507055,3.63527668,3.64165443,3.62951715
55.713406,4,3.64665101,0.594431651,3.6345269,3.6408856,3.62874223
55.723898,4.35889894,3.64591289,0.844385018,3.63377734,3.64012207,3.62796716
55.73439,4.24264069,3.64518096,0.772955193,3.63302808,3.63936437,3.62719201
55.744881,4.24264069,3.64445582,0.773424116,3.63227919,3.63861312,3.62641687
55.755373,3.46410162,3.64373795,-0.423835267,3.63153054,3.63786875,3.62564158
55.765864,3.60555128,3.64302815,-0.193589442,3.63078226,3.63713209,3.62486629
55.776356,3.46410162,3.64232705,-0.422167548,3.63003424,3.63640376,3.62409085
55.786848,3.31662479,3.64163561,-0.570097203,3.62928653,3.63568471,3.62331535
55.797339,3.60555128,3.64095488,-0.188158465,3.62853923,3.634976,3.62253985
55.807831,3.31662479,3.64028589,-0.568912205,3.62779218,3.63427863,3.6217642
55.818322,3.87298335,3.63963007,0.483066536,3.62704555,3.63359406,3.62098856
55.828814,4.47213595,3.63898882,0.912768938,3.62629919,3.63292366,3.62021277
55.839306,4,3.63836397,0.601361814,3.62555318,3.63226928,3.61943692
55.849797,3.87298335,3.63775762,0.485000747,3.6248076,3.63163301,3.61866107
55.860289,3.87298335,3.63717206,0.485604044,3.62406232,3.63101712,3.61788508
55.87078,3.16227766,3.6366102,-0.688718044,3.62331747,3.63042456,3.61710909
55.881272,4.47213595,3.63607527,0.914363539,3.62257293,3.62985852,3.61633297
55.891764,4.35889894,3.63557126,0.850486731,3.62182878,3.62932301,3.61555677
55.902255,3.87298335,3.63510292,0.487729872,3.62108508,3.62882277,3.61478059
55.912747,3.46410162,3.63467579,-0.41300627,3.62034171,3.62836338,3.61400426
55.923238,3.31662479,3.6342968,-0.563623996,3.61959882,3.62795173,3.61322794
55.93373,4.35889894,3.63397418,0.851425134,3.61885626,3.62759609,3.61245148
55.944222,4,3.63371825,0.60521215,3.61811413,3.62730678,3.61167496
55.954713,3.46410162,3.63354191,-0.411631256,3.61737249,3.62709672,3.61089844
55.965205,4.69041576,3.63346175,1.02808268,3.61663121,3.62698254,3.61012179
55.975696,4.12310563,3.63350029,0.699718041,3.61589044,3.62698677,3.60934515
55.986188,3,3.63368982,-0.796046366,3.61515006,3.62714177,3.60856837
55.99668,4,3.63408005,0.604913173,3.61441012,3.62749734,3.60779152
56.007171,4.24264069,3.63475189,0.779672235,3.61367073,3.62813453,3.60701469
56.017663,3.31662479,3.63584115,-0.564992357,3.61293174,3.6291894,3.60623772
56.028154,5.09901951,3.63757359,1.20890278,3.61219329,3.63088812,3.60546076
56.038646,3.74165739,3.64031255,0.318347037,3.61145527,3.63359473,3.60468367
56.049138,4,3.64460649,0.596148898,3.61071775,3.63785871,3.60390652
56.059629,4.58257569,3.65121819,0.965068652,3.60998081,3.64444429,3.60312938
56.070121,3.74165739,3.66110123,0.283824164,3.60924431,3.65430683,3.60235211
56.080612,3.87298335,3.6752851,0.444632704,3.60850841,3.66847775,3.60157485
56.091104,3.87298335,3.69465969,0.422283863,3.60777298,3.68784851,3.60079745
56.101596,3,3.71964996,-0.848321851,3.60703809,3.71284474,3.60002
56.112087,3.46410162,3.74984843,-0.534552915,3.60630383,3.74305797,3.59924256
56.122579,4.24264069,3.78363719,0.677497965,3.60557007,3.77686712,3.59846499
56.13307,3.74165739,3.81776154,-0.275869815,3.60483695,3.8110115,3.59768744
56.143562,3.74165739,3.84709343,-0.324709167,3.60410435,3.84035408,3.59690976
56.154054,4.58257569,3.86523383,0.846960369,3.60337235,3.8584849,3.59613202
56.164545,3.46410162,3.86697822,-0.634725612,3.60264103,3.86019049,3.59535429
56.175037,3.87298335,3.85152284,0.146494057,3.60191026,3.84466519,3.59457644
56.185528,3.16227766,3.82309293,-0.812905451,3.60118018,3.81614062,3.5937986
56.19602,3.31662479,3.788124,-0.686657998,3.60045069,3.78106276,3.59302064
56.206512,4.35889894,3.75226655,0.778866097,3.59972185,3.74509197,3.59224262
56.217003,3.74165739,3.71928879,0.149561363,3.59899374,3.71200367,3.59146462
56.227495,3.74165739,3.69121408,0.224595865,3.59826625,3.68382558,3.59068649
56.237986,3.16227766,3.66874906,-0.711668039,3.59753952,3.66126634,3.58990838
56.248478,3.31662479,3.6516555,-0.578818377,3.59681343,3.64408785,3.58913015
56.25897,3.46410162,3.63914059,-0.41837659,3.59608806,3.63149611,3.58835186
56.269461,3.31662479,3.63018509,-0.559964548,3.59536349,3.62247008,3.58757359
56.279953,3.31662479,3.62379475,-0.554229162,3.5946396,3.61601361,3.5867952
56.290444,3.60555128,3.61914821,-0.116605911,3.59391653,3.61130371,3.58601683
56.300936,3.16227766,3.61563749,-0.673320006,3.59319418,3.60773114,3.58523834
56.311428,4.47213595,3.61285327,0.926975018,3.59247262,3.60488575,3.58445979
56.321919,3.87298335,3.61053722,0.512294957,3.59175193,3.60250865,3.58368127
56.332411,3.31662479,3.60853281,-0.540285132,3.591032,3.60044296,3.58290263
56.342902,3.74165739,3.60674753,0.367300768,3.59031297,3.59859597,3.58212401
56.353394,4.24264069,3.60512469,0.798445991,3.58959473,3.59691084,3.58134526
56.363886,4.12310563,3.60362847,0.720747636,3.58887736,3.59535168,3.58056647
56.374377,3.87298335,3.60223442,0.520335393,3.58816094,3.59389398,3.57978771
56.384869,3.60555128,3.60092435,0.0680215153,3.58744536,3.59251946,3.57900882
56.39536,3.31662479,3.59968474,-0.53203379,3.58673078,3.59121459,3.57822996
56.405852,4.24264069,3.59850449,0.80258096,3.58601707,3.5899682,3.57745097
56.416344,4,3.59737492,0.634527449,3.58530431,3.58877158,3.57667195
56.426835,4.12310563,3.59628894,0.72582139,3.58459261,3.58761764,3.57589295
56.437327,2.82842712,3.59524041,-0.875678758,3.58388183,3.58650017,3.57511383
56.447818,3.46410162,3.59422462,-0.360725659,3.58317215,3.58541445,3.57433474
56.45831,3.60555128,3.59323724,0.110968646,3.58246343,3.58435611,3.57355553
56.468802,3.46410162,3.5922749,-0.358012969,3.58175578,3.58332176,3.57277627
56.479293,3.46410162,3.59133477,-0.356697573,3.58104927,3.58230854,3.57199705
56.489785,4,3.59041419,0.639988917,3.5803438,3.58131376,3.57121771
56.500276,3.31662479,3.58951119,-0.5223853,3.57963952,3.58033544,3.5704384
56.510768,3.46410162,3.5886238,-0.352877011,3.57893633,3.57937155,3.56965897
56.52126,3.74165739,3.58775053,0.392309641,3.57823431,3.5784206,3.5688795
56.531751,3.16227766,3.58689012,-0.651622941,3.57753356,3.5774813,3.56810007
56.542243,3.87298335,3.58604122,0.535669791,3.57683396,3.57655227,3.56732052
56.552734,3.31662479,3.58520299,-0.518245305,3.57613567,3.57563264,3.566541
56.563226,3.46410162,3.58437437,-0.34680362,3.5754386,3.57472133,3.56576137
56.573718,3.60555128,3.58355466,0.148312547,3.57474282,3.57381761,3.5649817
56.584209,3.60555128,3.58274328,0.151023173,3.57404844,3.57292086,3.56420206
56.594701,4.24264069,3.58193945,0.812835306,3.57335535,3.57203028,3.56342231
56.605192,4,3.58114282,0.647191766,3.57266371,3.57114549,3.56264259
56.615684,3.46410162,3.58035276,-0.340956217,3.57197342,3.57026583,3.56186277
56.626176,2.64575131,3.57956894,-0.966342396,3.57128458,3.56939094,3.5610829
56.636667,3.74165739,3.57879107,0.403566993,3.57059727,3.56852051,3.56030308
56.647159,3.87298335,3.57801868,0.543106492,3.56991142,3.56765401,3.55952314
56.65765,3.74165739,3.57725165,0.405469777,3.56922716,3.56679131,3.55874324
56.668142,4.12310563,3.57648956,0.739334882,3.56854442,3.56593194,3.55796323
56.678634,4,3.57573227,0.651358373,3.56786329,3.56507573,3.55718318
56.689125,3.74165739,3.57497966,0.408261841,3.56718387,3.56422254,3.55640317
56.699617,3.31662479,3.5742314,-0.507549612,3.56650606,3.56337199,3.55562306
56.710108,2.82842712,3.57348749,-0.863168791,3.56583004,3.56252404,3.55484298
56.7206,3.74165739,3.57274764,0.410986305,3.56515571,3.56167837,3.5540628
56.731092,4,3.57201182,0.654208055,3.56448318,3.5608349,3.55328258
56.741583,5,3.57127998,1.19529077,3.56381255,3.55999356,3.5525024
56.752075,3.46410162,3.5705519,-0.326267201,3.56314374,3.55915406,3.55172212
56.762566,3.60555128,3.56982764,0.189006984,3.56247691,3.55831643,3.55094188
56.773058,3.74165739,3.56910698,0.41539187,3.56181199,3.55748042,3.55016154
56.78355,2.82842712,3.56838995,-0.860210919,3.56114908,3.55664599,3.54938116
56.794041,3.16227766,3.56767656,-0.636709433,3.56048829,3.55581313,3.54860083
56.804533,3.87298335,3.56696664,0.553187765,3.55982954,3.5549816,3.54782039
56.815024,2.82842712,3.5662603,-0.858972161,3.55917301,3.55415148,3.54704
56.825516,3.60555128,3.56555737,0.199984765,3.55851863,3.55332253,3.5462595
56.836008,3.74165739,3.56485791,0.420475301,3.5578665,3.55249476,3.54547898
56.846499,3.74165739,3.56416197,0.421302049,3.55721675,3.5516682,3.5446985
56.856991,4,3.56346942,0.660704609,3.55656931,3.55084262,3.54391792
56.867482,3.46410162,3.56278039,-0.314131782,3.55592435,3.55001813,3.54313739
56.877974,4,3.56209476,0.661744088,3.55528181,3.54919451,3.54235675
56.888466,3.74165739,3.56141261,0.424552444,3.55464181,3.54837182,3.54157609
56.898957,3.60555128,3.56073402,0.211700872,3.55400449,3.54755006,3.54079548
56.909449,3.16227766,3.56005888,-0.630698991,3.55336977,3.54672906,3.54001476
56.91994,3.31662479,3.55938735,-0.492709404,3.55273784,3.54590893,3.5392341
56.930432,4.12310563,3.55871933,0.751256477,3.55210866,3.54508947,3.53845334
56.940924,3,3.55805493,-0.747030742,3.55148235,3.54427074,3.53767255
56.951415,3.60555128,3.55739425,0.219447101,3.55085905,3.54345277,3.53689181
56.961907,3.87298335,3.5567372,0.56235767,3.55023871,3.54263538,3.53611098
56.972398,4.47213595,3.55608396,0.957106052,3.54962152,3.54181871,3.5353302
56.98289,3,3.55543446,-0.745274757,3.54900746,3.54100257,3.53454932
56.993382,3.31662479,3.55478882,-0.488020527,3.54839664,3.54018701,3.53376842
57.003873,3.74165739,3.55414717,0.433024502,3.54778923,3.53937209,3.53298757
57.014365,3.16227766,3.55350943,-0.625485231,3.54718519,3.53855764,3.53220663
57.024856,2.82842712,3.55287582,-0.851145517,3.54658473,3.53774378,3.53142574
57.035348,4.12310563,3.55224626,0.755552356,3.54598782,3.53693035,3.53064475
57.04584,3.46410162,3.55162092,-0.295836614,3.54539461,3.5361174,3.52986375
57.056331,4,3.55099992,0.670074685,3.54480527,3.535305,3.5290828
57.066823,4,3.55038323,0.67053469,3.54421978,3.53449296,3.52830176
57.077314,3.74165739,3.54977106,0.438048313,3.54363836,3.53368145,3.52752077
57.087806,3.31662479,3.54916339,-0.482222566,3.54306101,3.53287027,3.5267397
57.098298,3.16227766,3.54856038,-0.621516468,3.54248789,3.53205951,3.5259586
57.108789,3.60555128,3.54796218,0.239977274,3.54191918,3.53124922,3.52517756
57.119281,3.74165739,3.5473688,0.440781795,3.54135489,3.53043923,3.52439644
57.129772,3.31662479,3.54678044,-0.479745406,3.54079525,3.5296297,3.52361537
57.140264,3.74165739,3.54619713,0.44210887,3.54024028,3.52882044,3.52283421
57.150756,3.16227766,3.54561904,-0.619145689,3.53969017,3.52801154,3.52205303
57.161247,3.74165739,3.54504636,0.443408424,3.53914512,3.52720306,3.52127192
57.171739,3.31662479,3.5444791,-0.477340869,3.53860515,3.52639483,3.52049071
57.18223,4.35889894,3.54391751,0.902763222,3.53807053,3.52558701,3.51970957
57.192722,3.31662479,3.54317858,-0.475976668,3.5375413,3.5245954,3.51892834
57.203214,2.64575131,3.54262893,-0.94703623,3.53701767,3.52378841,3.5181471
57.213705,4.24264069,3.54208541,0.836991803,3.53649986,3.52298181,3.51736592
57.224197,3.87298335,3.54154807,0.575704157,3.53598794,3.52217542,3.51658465
57.234688,3.60555128,3.54101719,0.254035606,3.53548219,3.52136938,3.51580345
57.24518,4.12310563,3.54049283,0.763290764,3.53498269,3.52056355,3.51502216
57.255672,4,3.53997525,0.678251245,3.53448968,3.51975799,3.51424086
57.266163,3.60555128,3.53946467,0.257073151,3.53400341,3.51895277,3.51345963
57.276655,3.60555128,3.5389612,0.258050529,3.53352399,3.51814774,3.51267831
57.287146,4,3.53846514,0.679363568,3.53305173,3.51734304,3.51189706
57.297638,4.12310563,3.53797662,0.764937257,3.53258675,3.5165385,3.51111573
57.30813,3.16227766,3.5374959,-0.612550602,3.53212934,3.51573421,3.51033438
57.318621,2.82842712,3.53702327,-0.84178153,3.53167977,3.51493024,3.50955311
57.329113,4.47213595,3.53655888,0.967252335,3.53123821,3.51412643,3.50877175
57.339604,3.87298335,3.53610307,0.580413888,3.53080501,3.51332292,3.50799046
57.350096,4.12310563,3.53565601,0.766452615,3.53038035,3.51251956,3.50720909
57.360588,4.47213595,3.53521804,0.9679452,3.52996455,3.51171642,3.50642771
57.371079,3.16227766,3.53478948,-0.610337464,3.52955794,3.51091358,3.50564641
57.381571,3.31662479,3.53437054,-0.466632353,3.52916075,3.51011088,3.50486502
57.392062,3.87298335,3.53396162,0.582255719,3.52877338,3.50930846,3.50408371
57.402554,3.16227766,3.53356297,-0.609331857,3.52839607,3.50850617,3.50330231
57.413046,3.31662479,3.53317496,-0.465349519,3.52802921,3.50770409,3.50252092
57.423537,2.82842712,3.53279799,-0.839268055,3.5276732,3.50690229,3.50173959
57.434029,3.60555128,3.53243236,0.2704051,3.52732833,3.5061006,3.50095819
57.44452,4,3.53207851,0.68404787,3.52699507,3.50529919,3.50017686
57.455012,4.47213595,3.53173679,0.969741801,3.52667376,3.5044979,3.49939546
57.465504,3.46410162,3.53140766,-0.259434084,3.52636486,3.50369679,3.49861405
57.475995,2.82842712,3.53109158,-0.83825083,3.52606883,3.50289595,3.49783272
57.486487,3.74165739,3.53078895,0.459204131,3.5257861,3.50209522,3.49705132
57.496978,3.87298335,3.53050032,0.585220492,3.52551718,3.50129475,3.49626999
57.50747,4.24264069,3.53022614,0.844046534,3.52526255,3.50049438,3.49548858
57.517962,4.47213595,3.52996695,0.970653907,3.52502276,3.4996942,3.49470718
57.528453,3.74165739,3.52972334,0.460362956,3.52479839,3.49889426,3.49392586
57.538945,3,3.52949583,-0.727664642,3.52458997,3.49809442,3.49314446
57.549436,3.74165739,3.52928508,0.460838697,3.52439815,3.49729484,3.49236314
57.559928,4,3.52909169,0.686227596,3.52422354,3.49649534,3.49158175
57.57042,3,3.52891633,-0.72726634,3.52406682,3.49569602,3.49080036
57.580911,3.16227766,3.52875972,-0.605377621,3.52392871,3.49489694,3.49001905
57.591403,4.12310563,3.52862257,0.77102727,3.52380991,3.49409795,3.48923767
57.601894,3.31662479,3.52850568,-0.460305209,3.52371123,3.49329921,3.48845638
57.612386,3.31662479,3.52840982,-0.460201071,3.52363346,3.49250055,3.48767501
57.622878,3.87298335,3.52833586,0.587066854,3.52357745,3.49170205,3.48689365
57.633369,3.87298335,3.52828469,0.587110428,3.52354411,3.49090379,3.48611237
57.643861,2.82842712,3.52825726,-0.836558504,3.52353437,3.49010561,3.48533103
57.654352,3.60555128,3.52825454,0.278022906,3.52354922,3.48930767,3.48454976
57.664844,3.60555128,3.52827758,0.277981459,3.52358972,3.48850981,3.48376843
57.675336,3.60555128,3.52832749,0.277891683,3.52365695,3.48771211,3.48298711
57.685827,3.16227766,3.5284054,-0.6050849,3.52375208,3.48691464,3.48220588
57.696319,3.87298335,3.52851254,0.586916351,3.52387633,3.48611725,3.48142458
57.70681,4,3.52865019,0.686549202,3.52403097,3.48532009,3.48064336
57.717302,4.24264069,3.52881973,0.844879256,3.52421739,3.484523,3.47986208
57.727794,3.31662479,3.52902257,-0.460866338,3.52443701,3.48372607,3.47908081
57.738285,3.60555128,3.52926021,0.276208374,3.52469133,3.48292937,3.47829963
57.748777,3.87298335,3.52953429,0.586045267,3.52498199,3.48213274,3.47751838
57.759268,4.12310563,3.52984645,0.770233193,3.52531063,3.48133634,3.47673722
57.76976,4.35889894,3.53019855,0.910329825,3.52567912,3.48054001,3.475956
57.780252,3.31662479,3.53059246,-0.462566393,3.52608932,3.47974383,3.4751748
57.790743,3.87298335,3.53103014,0.584767655,3.5265432,3.47894788,3.47439368
57.801235,3.87298335,3.53151381,0.584353949,3.527043,3.478152,3.47361251
57.811726,4,3.53204564,0.684071894,3.52759087,3.47735634,3.47283142
57.822218,3.60555128,3.53262815,0.270042819,3.52818935,3.47656076,3.47205027
57.83271,3.60555128,3.53326384,0.268863229,3.52884092,3.47576532,3.47126914
57.843201,4,3.53395535,0.682674626,3.52954825,3.47497011,3.47048811
57.853693,3.31662479,3.53470573,-0.466991366,3.53031437,3.47417497,3.46970701
57.864184,2.64575131,3.53551789,-0.943274391,3.53114222,3.47338006,3.46892601
57.874676,3.46410162,3.53639528,-0.268874812,3.53203524,3.47258521,3.46814495
57.885168,4.12310563,3.53734133,0.7653524,3.53299685,3.47179051,3.46736391
57.895659,3,3.53835967,-0.733729973,3.53403071,3.47099604,3.46658296
57.906151,3.46410162,3.5394545,-0.274504801,3.53514101,3.47020164,3.46580196
57.916642,4.24264069,3.54062987,0.837860859,3.5363318,3.46940746,3.46502105
57.927134,3.31662479,3.54189057,-0.474621727,3.5376079,3.46861335,3.46424009
57.937626,3.46410162,3.5432414,-0.281317939,3.53897408,3.46781939,3.46345915
57.948117,2.64575131,3.54468744,-0.948122423,3.54043545,3.46702566,3.4626783
57.958609,3.46410162,3.5462346,-0.286588537,3.54199792,3.466232,3.46189741
57.9691,2,3.54788863,-1.24414173,3.54366724,3.46543856,3.46111661
57.979592,3.87298335,3.54965634,0.56861851,3.54545023,3.4646452,3.46033575
57.990084,4.12310563,3.55154455,0.756016587,3.54735372,3.46385198,3.45955493
58.000575,3.87298335,3.55356058,0.565174988,3.54938504,3.463059,3.4587742
58.011067,2.82842712,3.55571294,-0.852810537,3.55155269,3.46226608,3.45799342
58.021558,2.82842712,3.55800995,-0.854156209,3.55386503,3.4614734,3.45721274
58.03205,3.60555128,3.56046152,0.212343491,3.55633195,3.46068079,3.45643201
58.042542,3.46410162,3.56307764,-0.31460455,3.55896346,3.45988833,3.45565131
58.053033,3.60555128,3.5658691,0.199203843,3.56177037,3.45909611,3.45487071
58.063525,3.74165739,3.56884846,0.415702927,3.56476524,3.45830396,3.45409006
58.074016,3.60555128,3.57202817,0.183093169,3.56796052,3.45751205,3.45330951
58.084508,3.46410162,3.57542301,-0.333648615,3.57137103,3.45672021,3.45252892
58.095,4.58257569,3.57904816,1.00176221,3.57501195,3.45592853,3.45174836
58.105491,2.82842712,3.58292014,-0.868615571,3.5788998,3.45513709,3.4509679
58.115983,4.24264069,3.58705819,0.809680493,3.58305387,3.45434573,3.45018739
58.126474,3.60555128,3.5914819,0.11861439,3.58749375,3.45355461,3.44940699
58.136966,3.46410162,3.5962147,-0.363473641,3.59224288,3.45276358,3.44862654
58.147458,4.69041576,3.60128129,1.04361605,3.597326,3.4519727,3.44784613
58.157949,4.12310563,3.60670933,0.718607191,3.60277078,3.45118207,3.44706582
58.168441,3.31662479,3.61253188,-0.543973425,3.60861031,3.45039153,3.44628547
58.178932,4.24264069,3.61878455,0.789845639,3.61488025,3.44960124,3.44550523
58.189424,2.82842712,3.62551144,-0.892795787,3.62162472,3.44881104,3.44472495
58.199916,3.46410162,3.63276276,-0.41068375,3.62889397,3.44802101,3.44394469
58.210407,3.60555128,3.64059901,-0.187210392,3.63674856,3.44723123,3.44316455
58.220899,3.74165739,3.64909705,0.304237301,3.64526543,3.44644155,3.44238437
58.23139,3.16227766,3.65834939,-0.704323599,3.65453716,3.44565213,3.4416043
58.241882,4,3.66847747,0.575779932,3.66468529,3.44486281,3.44082419
58.252374,3.31662479,3.67963433,-0.602502732,3.67586301,3.44407367,3.44004411
58.262865,3.46410162,3.69201864,-0.477406564,3.68826915,3.44328479,3.43926415
58.273357,3.46410162,3.70589422,-0.491724111,3.70216778,3.44249603,3.43848415
58.283848,3.87298335,3.72160073,0.389079187,3.71789885,3.44170753,3.43770426
58.29434,3.31662479,3.73958971,-0.650357528,3.73591427,3.44091915,3.43692433
58.304832,2.64575131,3.76044416,-1.05579015,3.75679755,3.44013097,3.43614444
58.315323,3.31662479,3.78491752,-0.684319173,3.78130274,3.43934306,3.43536467
58.325815,3.87298335,3.81398242,0.242901056,3.81040322,3.43855528,3.43458486
58.336306,3.60555128,3.84885407,-0.49325733,3.84531511,3.43776778,3.43380517
58.346798,5,3.89105456,1.05306479,3.88756156,3.43698041,3.43302544
58.35729,2.82842712,3.94242089,-1.05545903,3.93898074,3.43619326,3.43224575
58.367781,4.47213595,4.00512538,0.68338172,4.00174616,3.4354064,3.43146618
58.378273,5.47722558,4.08168516,1.18132994,4.07837611,3.43461969,3.43068658
58.388764,4.58257569,4.17485944,0.638526627,4.17163074,3.43383328,3.4299071
58.399256,4.24264069,4.28761181,-0.212063962,4.28447419,3.43304703,3.42912758
58.409748,4.35889894,4.42289308,-0.252970616,4.41985726,3.43226101,3.42834811
58.420239,4.89897949,4.58345962,0.561711552,4.58053564,3.43147532,3.42756875
58.430731,4.79583152,4.77170284,0.155334109,4.76889934,3.43068979,3.42678937
58.441222,5.29150262,4.98929097,0.549737801,4.9866145,3.42990459,3.42601011
58.451714,5.56776436,5.23711041,0.575025176,5.23456498,3.42911957,3.42523081
58.462206,5.65685425,5.51495087,0.376700653,5.5125377,3.42833482,3.42445157
58.472697,5.91607978,5.82145511,0.307611233,5.81917256,3.42755063,3.42367244
58.483189,6.63324958,6.15418655,0.692143792,6.15203075,3.42676644,3.42289329
58.49368,6.32455532,6.50943243,-0.429973384,6.50739731,3.4259826,3.42211426
58.504172,6.70820393,6.88254066,-0.417536493,6.8806186,3.42519898,3.4213352
58.514664,7.34846923,7.26778714,0.284045931,7.26596944,3.42441567,3.4205562
58.525155,7.74596669,7.65860917,0.295563055,7.65688645,3.42363274,3.41977731
58.535647,7.54983444,8.04786769,-0.705714713,8.04623029,3.42285007,3.4189984
58.546138,8.42614977,8.42773221,-0.039779914,8.4261704,3.42206779,3.41821962
58.55663,9.21954446,8.79013057,0.655296791,8.78863475,3.42128579,3.41744081
58.567122,9.2736185,9.12665645,0.383356292,9.1252172,3.42050414,3.41666206
58.577613,9.32737905,9.42888217,-0.318595535,9.42749032,3.41972292,3.41588343
58.588105,10.2956301,9.68867496,0.779073281,9.68732154,3.41894202,3.41510478
58.598596,10.7238053,9.89834406,0.908548972,9.89702028,3.41816157,3.41432626
58.609088,11,10.0512496,0.974038178,10.0499468,3.41738146,3.41354771
58.61958,11.5758369,10.1421602,1.1973624,10.1408698,3.41660177,3.41276922
58.630071,10.9087121,10.1678185,0.860751764,10.1665319,3.41582259,3.41199086
58.640563,11.1355287,10.1272668,1.00412247,10.1259755,3.41504379,3.41121248
58.651054,10.3440804,10.0219728,0.567545271,10.0206682,3.41426553,3.41043423
58.661546,11.5325626,9.8556149,1.29497015,9.85428844,3.41348769,3.40965596
58.672038,10.4880885,9.63376281,0.924297391,9.6324058,3.41271036,3.40887774
58.682529,10.7238053,9.36336534,1.16637899,9.36196895,3.41193364,3.40809966
58.693021,11,9.05215846,1.39565094,9.05071368,3.41115741,3.40732156
58.703512,11.3137085,8.70845567,1.61407956,8.70695327,3.41038183,3.4065436
58.714004,10.1488916,8.34059689,1.34472848,8.33902737,3.40960678,3.40576562
58.724496,9.8488578,7.95694258,1.37546909,7.95529624,3.40883238,3.40498769
58.734987,9.43398113,7.5655967,1.3668886,7.56386371,3.40805872,3.40420991
58.745479,8.1240384,7.17413121,0.974631824,7.17230179,3.40728568,3.4034321
58.75597,8.88819442,6.78969081,1.44862128,6.78775548,3.40651346,3.40265444
58.766462,7.54983444,6.41855695,1.06361529,6.41650688,3.40574195,3.40187675
58.776954,7.41619849,6.06625665,1.16186998,6.06408409,3.40497125,3.40109914
58.787445,6.8556546,5.73732055,1.05751315,5.73501932,3.40420149,3.40032165
58.797937,6.63324958,5.43510039,1.09460001,5.43266634,3.40343257,3.39954416
58.808428,6.164414,5.16190706,1.00125268,5.15933846,3.40266468,3.3987668
58.81892,6.55743852,4.91878228,1.28010009,4.91608005,3.40189775,3.39798944
58.829412,5.91607978,4.70572623,1.10016069,4.70289395,3.40113189,3.39721213
58.839903,5.38516481,4.52172869,0.929212633,4.51877233,3.40036726,3.39643497
58.850395,5.74456265,4.36490911,1.17458654,4.36183649,3.39960378,3.3956578
58.860886,5.38516481,4.23284295,1.07346255,4.22966313,3.39884167,3.39488077
58.871378,5,4.12268635,0.936650227,4.11940885,3.39808087,3.39410373
58.88187,4.69041576,4.03148781,0.811743772,4.02812198,3.39732155,3.39332675
58.892361,4.58257569,3.95633753,0.791352114,3.95289202,3.39656389,3.39254992
58.902853,4.12310563,3.89449894,0.478128316,3.89098133,3.39580785,3.39177308
58.913344,3.74165739,3.84354403,-0.319196878,3.83996063,3.39505369,3.39099639
58.923836,4.69041576,3.80135434,0.942900538,3.79771013,3.39430142,3.39021969
58.934328,3.60555128,3.76616262,-0.400763455,3.76246131,3.39355124,3.38944306
58.944819,3.46410162,3.73651869,-0.521935889,3.7327628,3.3928034,3.38866657
58.955311,4.12310563,3.71125055,0.641759357,3.70744155,3.39205793,3.38789008
58.965802,3.31662479,3.68944123,-0.61058696,3.68557966,3.39131518,3.38711374
58.976294,4.69041576,3.67036844,1.00997392,3.66645403,3.39057521,3.38633739
58.986786,3,3.65348003,-0.808381115,3.64951178,3.38983836,3.38556112
58.997277,3.46410162,3.63835264,-0.417433858,3.63432895,3.38910496,3.38478499
59.007769,4,3.62465945,0.612650434,3.62057808,3.38837519,3.38400886
59.01826,3.46410162,3.61215574,-0.384778022,3.60801394,3.38764951,3.38323288
59.028752,4.35889894,3.60065005,0.870774879,3.59644449,3.38692818,3.3824569
59.039244,3.16227766,3.58999786,-0.654003213,3.58572465,3.3862117,3.38168099
59.049735,3.74165739,3.5800867,0.401958567,3.57574139,3.38550063,3.38090523
59.060227,4,3.57082539,0.655114198,3.56640289,3.38479537,3.38012948
59.070718,3.31662479,3.56214416,-0.495499108,3.55763871,3.38409668,3.37935387
59.08121,3.87298335,3.55398319,0.564800987,3.54938829,3.38340515,3.37857827
59.091702,3.87298335,3.54629513,0.571566458,3.54160341,3.38272166,3.37780275
59.102193,3.87298335,3.53904007,0.577878256,3.53424324,3.38204719,3.37702737
59.112685,3.46410162,3.53218202,-0.26092221,3.52727069,3.38138268,3.376252
59.123176,4,3.52569231,0.688699997,3.52065588,3.38072951,3.37547679
59.133668,3.46410162,3.51954364,-0.235461296,3.51437004,3.38008896,3.37470158
59.14416,3.46410162,3.51371368,-0.22273765,3.50838921,3.37946277,3.37392645
59.154651,3.46410162,3.50818275,-0.209955083,3.50269181,3.37885294,3.37315147
59.165143,3.74165739,3.50293208,0.488595242,3.49725675,3.37826164,3.37237651
59.175634,3.46410162,3.49794711,-0.183971464,3.49206687,3.37769167,3.37160169
59.186126,3.74165739,3.49321346,0.498441494,3.48710457,3.37714612,3.37082689
59.196618,3.31662479,3.48872015,-0.414843782,3.48235515,3.37662887,3.37005217
59.207109,3.31662479,3.48445814,-0.409674683,3.47780504,3.37614457,3.3692776
59.217601,2.82842712,3.48041927,-0.807460309,3.47344056,3.37569871,3.36850305
59.228092,2.64575131,3.47659929,-0.911508629,3.4692507,3.37529828,3.36772865
59.238584,3.16227766,3.47299516,-0.557420401,3.46522374,3.37495198,3.36695426
59.249076,3.60555128,3.46960852,0.36870416,3.46135001,3.37467138,3.36617996
59.259567,3.60555128,3.46644611,0.372968049,3.45762052,3.3744726,3.36540582
59.270059,3.60555128,3.46352207,0.376867621,3.45402593,3.37437942,3.36463169
59.28055,4.24264069,3.46086558,0.884180469,3.45055891,3.37442923,3.36385773
59.291042,3.74165739,3.45852824,0.532098816,3.44721137,3.37468277,3.36308377
59.301534,3.31662479,3.4566008,-0.374133681,3.44397673,3.37523944,3.36230991
59.312025,3.16227766,3.45523329,-0.541253758,3.44084887,3.37625855,3.3615362
59.322517,3,3.45465999,-0.674284799,3.43782122,3.37798543,3.36076251
59.333008,2.82842712,3.45522391,-0.791704985,3.43488878,3.38077466,3.35998899
59.3435,3,3.45738725,-0.676304112,3.43204581,3.38510218,3.35921548
59.353992,3.46410162,3.46171369,0.048866409,3.42928775,3.39154541,3.35844206
59.364483,3.31662479,3.4688054,-0.390103329,3.42661031,3.40071941,3.35766881
59.374975,3.31662479,3.47919111,-0.403195134,3.42400876,3.41316314,3.35689557
59.385466,2.64575131,3.49316048,-0.920548299,3.42147963,3.4291698,3.3561225
59.395958,4.24264069,3.51058653,0.855601634,3.41901874,3.44860821,3.35534945
59.40645,4.35889894,3.53072824,0.91003885,3.41662286,3.47072234,3.35457649
59.416941,3.87298335,3.55204262,0.566516307,3.41428894,3.49394292,3.3538037
59.427433,3.16227766,3.5720187,-0.640110181,3.41201348,3.51572156,3.35303093
59.437924,3.74165739,3.58720294,0.393006934,3.40979405,3.53255791,3.35225833
59.448416,3.60555128,3.5939507,0.107705968,3.40762751,3.54076448,3.35148575
59.458908,4.35889894,3.59002154,0.876856546,3.40551155,3.53808213,3.35071327
59.469399,3.16227766,3.57592752,-0.643156172,3.40344397,3.52504343,3.34994095
59.479891,3.31662479,3.55456622,-0.487792407,3.40142211,3.50459689,3.34916866
59.490382,3.60555128,3.52961945,0.275557305,3.39944425,3.48048152,3.34839654
59.500874,3.31662479,3.50422624,-0.433129833,3.39750801,3.45588344,3.34762445
59.511366,3.74165739,3.48055996,0.510976935,3.39561168,3.43300747,3.34685245
59.521857,2.82842712,3.45987934,-0.794639674,3.39375366,3.41313005,3.34608063
59.532349,4.35889894,3.44270144,0.957182063,3.3919319,3.3967753,3.34530883
59.54284,3.16227766,3.42900188,-0.516453498,3.39014516,3.38391767,3.34453721
59.553332,3.74165739,3.41838967,0.568566374,3.38839159,3.37416046,3.34376561
59.563824,3.46410162,3.41029699,0.23195823,3.38666993,3.36692769,3.34299412
59.574315,2.23606798,3.40412111,-1.08076507,3.38497899,3.36160839,3.3422228
59.584807,3.31662479,3.39932113,-0.28756972,3.38331717,3.35765503,3.34145151
59.595298,3.60555128,3.39546849,0.458347891,3.38168356,3.35463381,3.34068039
59.60579,3.31662479,3.39224983,-0.275000077,3.38007671,3.35222829,3.3399093
59.616282,3.31662479,3.38945371,-0.26986834,3.37849567,3.3502251,3.33913832
59.626773,3.46410162,3.38694425,0.277772148,3.37693956,3.34848746,3.33836752
59.637265,2.82842712,3.38463645,-0.745794425,3.37540708,3.34693038,3.33759675
59.647756,3.46410162,3.38247877,0.285697118,3.3738976,3.34550242,3.33682615
59.658248,2.82842712,3.3804382,-0.742974479,3.37240992,3.34417115,3.33605559
59.66874,4.24264069,3.37849354,0.929595153,3.37094335,3.34291586,3.33528514
59.679231,2.82842712,3.37663,-0.740407235,3.36949722,3.34172231,3.33451487
59.689723,3.74165739,3.3748361,0.605657734,3.36807047,3.34057977,3.33374463
59.700214,3.60555128,3.37310347,0.482128407,3.36666265,3.33948037,3.33297457
59.710706,3.60555128,3.37142476,0.483866214,3.36527278,3.33841746,3.33220455
59.721198,2.64575131,3.3697943,-0.850907154,3.36390034,3.33738592,3.33143463
59.731689,3.60555128,3.36820732,0.48717959,3.36254481,3.33638152,3.3306649
59.742181,4.12310563,3.36665938,0.869739182,3.36120534,3.33540045,3.32989521
59.752672,3,3.36514721,-0.604274115,3.35988158,3.33443989,3.3291257
59.763164,3.46410162,3.36366744,0.316913521,3.35857274,3.3334971,3.32835623
59.773656,3.60555128,3.36221755,0.493288686,3.35727842,3.33257,3.32758687
59.784147,3.31662479,3.36079535,-0.210167928,3.35599822,3.33165684,3.3268177
59.794639,4.58257569,3.35939852,1.10597341,3.35473142,3.33075585,3.32604856
59.80513,3.46410162,3.35802552,0.325693259,3.3534778,3.32986584,3.32527961
59.815622,3.16227766,3.35667447,-0.44090454,3.35223667,3.32898547,3.32451071
59.826114,3.74165739,3.35534409,0.621541067,3.35100773,3.3281138,3.32374192
59.836605,3.60555128,3.3540332,0.501515778,3.34979068,3.32725002,3.32297331
59.847097,3.87298335,3.35279987,0.721237465,3.34858491,3.32645313,3.32220475
59.857588,4,3.35152442,0.805279812,3.34739027,3.3256028,3.32143638
59.86808,4,3.35026508,0.806061364,3.34620618,3.32475813,3.32066805
59.878572,3.60555128,3.34902108,0.506488101,3.34503239,3.32391868,3.31989984
59.889063,3.31662479,3.34779175,-0.176541672,3.34386871,3.32308407,3.31913182
59.899555,3.87298335,3.34657614,0.725539255,3.34271457,3.32225371,3.31836385
59.910046,2.82842712,3.34537379,-0.718990032,3.34156991,3.3214274,3.31759606
59.920538,3.46410162,3.34418387,0.346291416,3.34043421,3.32060464,3.31682833
59.93103,3.16227766,3.34300592,-0.42512146,3.3393073,3.31978522,3.31606071
59.941521,2.82842712,3.34183951,-0.716528005,3.33818902,3.31896896,3.31529329
59.952013,3.74165739,3.34068393,0.633224652,3.33707889,3.31815545,3.31452591
59.962504,3.31662479,3.33953893,-0.151374187,3.33597687,3.31734465,3.31375873
59.972996,3.87298335,3.33840388,0.731149414,3.33488252,3.3165362,3.3129916
59.983488,3.87298335,3.33727847,0.731918627,3.33379572,3.31573,3.31222459
59.993979,4,3.33616243,0.814762278,3.33271633,3.31492598,3.31145778
60.004471,3.87298335,3.33505519,0.733435855,3.33164394,3.31412383,3.31069101
60.014962,3.31662479,3.33395663,-0.131650454,3.33057855,3.31332358,3.30992445
60.025454,3.46410162,3.33286622,0.362264256,3.32951977,3.31252496,3.30915794
60.035946,3.31662479,3.33178377,-0.123121824,3.32846749,3.31172794,3.30839155
60.046437,2.64575131,3.3307091,-0.827621767,3.32742163,3.31093248,3.30762536
60.056929,3,3.32964173,-0.574144348,3.32638182,3.31013836,3.30685922
60.06742,3,3.32858162,-0.573220393,3.32534809,3.30934563,3.30609329
60.077912,4.58257569,3.32752832,1.12028897,3.32432007,3.30855408,3.30532741
60.088404,3.31662479,3.3264817,-0.0992819951,3.3232977,3.30776369,3.30456165
60.098895,3.31662479,3.32544165,-0.0938981589,3.32228092,3.3069745,3.3037961
60.109387,3.31662479,3.32440776,-0.0882211528,3.3212694,3.30618628,3.3030306
60.119878,3,3.32338003,-0.568665127,3.32026318,3.30539913,3.30226531
60.13037,3,3.32235806,-0.567765854,3.31926193,3.30461285,3.30150008
60.140862,3.74165739,3.32134179,0.648317511,3.31826561,3.30382748,3.30073497
60.151353,3.46410162,3.32033113,0.379170782,3.31727419,3.30304303,3.29997007
60.161845,3.46410162,3.31932573,0.380494264,3.31628735,3.30225932,3.29920523
60.172336,4.12310563,3.31832562,0.897095317,3.31530517,3.30147647,3.29844059
60.182828,3.74165739,3.31733045,0.651403819,3.31432733,3.30069428,3.29767601
60.19332,2.82842712,3.31634018,-0.698507737,3.31335383,3.29991281,3.29691157
60.203811,4,3.31535477,0.827432916,3.31238463,3.29913209,3.29614733
60.214303,3.16227766,3.31437389,-0.389995161,3.31141946,3.29835195,3.29538316
60.224794,3.60555128,3.31339759,0.540512427,3.31045839,3.29757251,3.29461919
60.235286,3.60555128,3.31242558,0.54141084,3.30950114,3.2967936,3.29385528
60.245778,3,3.31145782,-0.558084062,3.30854771,3.29601527,3.29309151
60.256269,3.87298335,3.31049429,0.749992701,3.3075981,3.29523757,3.29232795
60.266761,3.16227766,3.30953471,-0.38374086,3.30665203,3.29446034,3.29156446
60.277252,3.74165739,3.30857914,0.65808681,3.30570959,3.29368371,3.29080117
60.287744,3.60555128,3.3076273,0.545824125,3.30477054,3.2929075,3.29003795
60.298236,3,3.30667919,-0.553786229,3.30383486,3.29213178,3.28927487
60.308727,4,3.3057348,0.833225782,3.30290258,3.29135661,3.28851201
60.319219,4,3.30479385,0.833790229,3.30197344,3.29058182,3.2877492
60.32971,3,3.30385645,-0.55123176,3.30104753,3.28980754,3.28698662
60.340202,4.24264069,3.30292233,0.969390715,3.30012462,3.28903363,3.2862241
60.350694,3.87298335,3.30199149,0.755640032,3.29920472,3.28826013,3.28546172
60.361185,2.64575131,3.30106394,-0.809513824,3.29828785,3.28748712,3.28469955
60.371677,3.60555128,3.30013943,0.552640788,3.29737377,3.28671443,3.28393746
60.382168,4.24264069,3.29921807,0.971299448,3.29646259,3.2859422,3.28317558
60.39266,3.31662479,3.2982996,0.135370571,3.29555408,3.28517028,3.28241377
60.403152,2.82842712,3.29738404,-0.684804291,3.29464825,3.28439872,3.28165211
60.413643,1.73205081,3.29647142,-1.25076801,3.29374515,3.2836276,3.28089066
60.424135,2.82842712,3.29556149,-0.683472283,3.29284454,3.28285676,3.28012929
60.434626,2.82842712,3.29465436,-0.682808346,3.29194653,3.28208634,3.27936814
60.445118,3.31662479,3.29374981,0.15124478,3.29105091,3.28131619,3.27860705
60.45561,2.23606798,3.29284785,-1.02799799,3.2901577,3.28054637,3.27784612
60.466101,3,3.29194852,-0.540322609,3.28926694,3.27977695,3.27708541
60.476593,3,3.29105159,-0.539491977,3.28837841,3.27900777,3.27632477
60.487084,3.87298335,3.29015718,0.763430524,3.28749224,3.27823898,3.27556435
60.497576,3.16227766,3.28926506,-0.356352922,3.28660821,3.27747043,3.27480401
60.508068,3,3.28837528,-0.537005846,3.28572635,3.27670219,3.27404382
60.518559,3.31662479,3.28748786,0.17069544,3.28484671,3.27593431,3.27328385
60.529051,3.16227766,3.28660258,-0.352597397,3.28396908,3.27516666,3.27252395
60.539542,3.31662479,3.28571958,0.17579877,3.28309358,3.27439937,3.27176429
60.550034,3,3.28483864,-0.533702763,3.28222001,3.2736323,3.2710047
60.560526,3.87298335,3.28395979,0.767478698,3.28134841,3.27286551,3.27024526
60.571017,3.16227766,3.28308309,-0.347570756,3.28047882,3.27209907,3.26948605
60.581509,3,3.28220832,-0.531232829,3.27961105,3.27133283,3.26872692
60.592,3,3.28133561,-0.530410789,3.27874522,3.27056694,3.26796802
60.602492,3.16227766,3.28046475,-0.343783487,3.27788113,3.26980125,3.2672092
60.612984,3,3.27959579,-0.528768178,3.27701883,3.26903582,3.26645053
60.623475,3.74165739,3.27872877,0.680388577,3.27615836,3.26827073,3.26569209
60.633967,3.31662479,3.2778635,0.196878869,3.27529954,3.26750583,3.26493373
60.644458,3,3.27700011,-0.526307996,3.27444249,3.26674126,3.26417561
60.65495,4.12310563,3.27613839,0.920308229,3.27358703,3.26597687,3.26341757
60.665442,2.82842712,3.2752784,-0.66846935,3.27273319,3.26521274,3.26265968
60.675933,4.12310563,3.27442018,0.921241252,3.27188104,3.26444893,3.26190203
60.686425,3.16227766,3.27356355,-0.333595394,3.27103038,3.2636853,3.26114446
60.696916,3.16227766,3.27270863,-0.332311553,3.27018135,3.26292199,3.26038713
60.707408,3.46410162,3.27185523,0.438459101,3.26933375,3.26215886,3.25962988
60.7179,3,3.27100341,-0.520579879,3.26848765,3.26139597,3.25887279
60.728391,3.60555128,3.27015322,0.579135612,3.2676431,3.26063339,3.25811594
60.738883,4.24264069,3.26930447,0.986578036,3.2667999,3.25987099,3.25735917
60.749374,3.74165739,3.26845729,0.687895413,3.26595821,3.25910889,3.25660264
60.759866,3.74165739,3.2676115,0.688509906,3.26511783,3.25834697,3.2558462
60.770358,3,3.26676715,-0.516495063,3.26427881,3.25758528,3.25508992
60.780849,3.74165739,3.2659243,0.689734068,3.26344123,3.2568239,3.25433388
60.791341,3.31662479,3.26508277,0.22702868,3.26260489,3.25606268,3.25357793
60.801832,3.60555128,3.26424269,0.584216216,3.26176994,3.25530176,3.25282222
60.812324,2.82842712,3.26340388,-0.659527673,3.26093619,3.25454101,3.2520666
60.822816,3.16227766,3.26256639,-0.316683963,3.2601037,3.25378049,3.25131114
60.833307,3.60555128,3.26173029,0.5863625,3.25927253,3.25302027,3.25055593
60.843799,3.16227766,3.2608954,-0.314034617,3.25844251,3.25226021,3.24980081
60.85429,3,3.26006185,-0.509962598,3.25761377,3.25150046,3.24904593
60.864782,3.46410162,3.25922947,0.452628046,3.25678614,3.25074085,3.24829114
60.875274,3.87298335,3.25818875,0.784088385,3.25595967,3.24977138,3.24753652
60.885765,3.46410162,3.25735919,0.454689374,3.25513443,3.24901262,3.24678215
60.896257,3.46410162,3.25653073,0.455599476,3.25431025,3.24825402,3.24602787
60.906748,3.46410162,3.25570353,0.456506396,3.25348726,3.24749571,3.24527383
60.91724,3.46410162,3.25487739,0.457410345,3.25266528,3.24673755,3.24451989
60.927732,3.74165739,3.25405239,0.698287187,3.25184439,3.24597962,3.24376613
60.938223,3.16227766,3.25322859,-0.301580712,3.25102465,3.24522198,3.2430126
60.948715,3.46410162,3.2524058,0.460104131,3.25020588,3.24446449,3.24225918
60.959206,3.31662479,3.25158419,0.255030596,3.24938822,3.2437073,3.241506
60.969698,3.74165739,3.25076356,0.700638159,3.24857151,3.24295026,3.24075293
60.98019,3.74165739,3.24994398,0.701222791,3.2477558,3.24219344,3.24000002
60.990681,3.60555128,3.24912553,0.597014027,3.24694116,3.24143692,3.23924737
61.001173,2.82842712,3.24830802,-0.64798217,3.24612743,3.24068054,3.23849481
61.011664,3,3.2474916,-0.497485272,3.24531473,3.23992446,3.23774251
61.022156,3.74165739,3.24667609,0.70354907,3.24450292,3.23916852,3.2369903
61.032648,2.44948974,3.24586157,-0.892396677,3.24369204,3.2384128,3.23623828
61.043139,2.82842712,3.2450481,-0.645461831,3.24288217,3.23765738,3.2354865
61.053631,3.16227766,3.24423551,-0.286282807,3.24207313,3.23690211,3.23473483
61.064122,3.60555128,3.24342393,0.601770174,3.24126508,3.23614712,3.23398341
61.074614,3.31662479,3.24261322,0.272050684,3.24045784,3.23539229,3.2332321
61.085106,2.64575131,3.24180342,-0.772044109,3.23965148,3.23463767,3.23248096
61.095597,4.24264069,3.2409946,1.0008227,3.23884606,3.23388335,3.23173008
61.106089,3.31662479,3.24018661,0.276474557,3.23804143,3.23312917,3.2309793
61.11658,1.73205081,3.23937958,-1.22773318,3.23723771,3.23237529,3.23022878
61.127072,2.64575131,3.23857334,-0.769949369,3.23643476,3.23162155,3.22947837
61.137564,2.64575131,3.23776797,-0.769426188,3.23563264,3.23086803,3.22872814
61.148055,3.60555128,3.23696353,0.607114281,3.23483141,3.23011481,3.22797816
61.158547,2.44948974,3.23615985,-0.886944251,3.2340309,3.22936173,3.2272283
61.169038,4.24264069,3.23535708,1.0036352,3.23323127,3.22860894,3.22647869
61.17953,3.60555128,3.23455506,0.609094591,3.23243235,3.2278563,3.22572919
61.190022,2.23606798,3.23375384,-0.998842263,3.23163421,3.22710388,3.22497988
61.200513,3,3.23295351,-0.482652579,3.23083692,3.22635175,3.22423082
61.211005,2.82842712,3.2321539,-0.635394974,3.23004031,3.22559977,3.22348188
61.221496,3.31662479,3.23135514,0.292009668,3.22924452,3.22484808,3.2227332
61.231988,3.31662479,3.23055709,0.293372971,3.22844941,3.22409654,3.22198463
61.24248,3.31662479,3.2297598,0.294728667,3.22765503,3.22334522,3.22123625
61.252971,3,3.22896335,-0.478501151,3.22686145,3.22259419,3.22048813
61.263463,2.44948974,3.22816757,-0.882427238,3.22606851,3.22184331,3.21974012
61.273954,3.60555128,3.22737261,0.614962325,3.22527636,3.22109272,3.21899238
61.284446,3,3.22657831,-0.476002429,3.22448484,3.22034228,3.21824475
61.294938,3.16227766,3.22578474,-0.252006107,3.22369402,3.21959206,3.21749732
61.305429,4.24264069,3.22499196,1.00878577,3.22290396,3.21884214,3.21675014
61.315921,3.87298335,3.22419981,0.805471,3.2221145,3.21809236,3.21600309
61.326412,2.82842712,3.22340845,-0.628475397,3.2213258,3.21734288,3.2152563
61.336904,3.46410162,3.22261771,0.491410124,3.22053769,3.21659354,3.21450963
61.347396,3.87298335,3.22182765,0.806942188,3.21975024,3.21584443,3.21376315
61.357887,3.74165739,3.22103836,0.721539347,3.21896351,3.21509561,3.21301693
61.368379,3.74165739,3.22024966,0.722085676,3.21817737,3.21434695,3.21227084
61.37887,2.82842712,3.21946171,-0.625327585,3.21739194,3.21359858,3.21152502
61.389362,3,3.21867435,-0.467626296,3.21660706,3.21285035,3.21077932
61.399854,4.24264069,3.21788765,1.01230086,3.21582282,3.21210236,3.21003381
61.410345,2.64575131,3.21710167,-0.755877212,3.21503928,3.21135465,3.20928857
61.420837,3.16227766,3.21631626,-0.232462045,3.21425628,3.2106071,3.20854346
61.431328,4.12310563,3.21553157,0.952666813,3.21347397,3.20985985,3.20779861
61.44182,3.31662479,3.21474743,0.319182328,3.21269219,3.20911274,3.20705389
61.452312,3.16227766,3.21396392,-0.22734613,3.21191101,3.20836587,3.20630937
61.462803,3.60555128,3.21318111,0.626394576,3.2111305,3.20761928,3.20556512
61.473295,3.31662479,3.21239884,0.322840442,3.21035051,3.20687286,3.204821
61.483786,3.46410162,3.21161725,0.502478219,3.20957118,3.20612672,3.20407714
61.494278,4,3.2108362,0.888348918,3.20879235,3.20538075,3.20333342
61.50477,3.31662479,3.21005575,0.326449145,3.2080141,3.204635,3.2025899
61.515261,2.23606798,3.20927596,-0.986513044,3.2072365,3.20388954,3.20184665
61.525753,3,3.2084967,-0.456614384,3.20645938,3.20314425,3.20110353
61.536244,2.44948974,3.20771809,-0.870763082,3.20568291,3.20239925,3.20036068
61.546736,3.60555128,3.20693999,0.631356704,3.20490691,3.20165441,3.19961797
61.557228,3.31662479,3.20616246,0.332358732,3.20413147,3.20090979,3.19887546
61.567719,3.16227766,3.20538559,-0.207624481,3.20335665,3.20016547,3.19813322
61.578211,2.64575131,3.2046092,-0.747567983,3.20258229,3.19942132,3.19739112
61.588702,3.31662479,3.20383345,0.335844216,3.20180856,3.19867746,3.1966493
61.599194,3,3.20305819,-0.450619784,3.20103528,3.19793376,3.1959076
61.609686,2.82842712,3.20228348,-0.611437942,3.20026253,3.19719029,3.19516612
61.620177,3.31662479,3.2015094,0.339286595,3.19949039,3.19644712,3.19442491
61.630669,3.74165739,3.20073579,0.735473726,3.1987187,3.19570411,3.19368384
61.64116,3.74165739,3.19996279,0.735999047,3.19794759,3.1949614,3.19294305
61.651652,3.87298335,3.19919026,0.820849004,3.19717694,3.19421885,3.19220239
61.662144,3.31662479,3.19841826,0.34381176,3.19640679,3.19347654,3.19146195
61.672635,2.64575131,3.19764687,-0.742896737,3.19563722,3.19273452,3.19072178
61.683127,3.60555128,3.19687594,0.639277201,3.19486809,3.19199267,3.18998175
61.693618,3,3.1961056,-0.442838115,3.19409953,3.19125112,3.18924201
61.70411,3.31662479,3.1953357,0.348265829,3.1933314,3.19050974,3.1885024
61.714602,2.44948974,3.19456633,-0.863178188,3.19256376,3.18976859,3.18776301
61.725093,2.44948974,3.19379754,-0.862732748,3.19179669,3.18902774,3.1870239
61.735585,3,3.19302919,-0.439350868,3.19103003,3.18828705,3.18628493
61.746076,3,3.19226141,-0.43847624,3.19026394,3.18754668,3.18554624
61.756568,2.44948974,3.19149407,-0.861396731,3.18949825,3.18680646,3.1848077
61.76706,4.12310563,3.19072723,0.965597429,3.18873304,3.18606648,3.18406937
61.777551,3.16227766,3.18996096,-0.166382994,3.18796838,3.18532681,3.18333133
61.788043,2.44948974,3.18919511,-0.860061259,3.18720412,3.18458731,3.18259343
61.798534,3,3.18842983,-0.434085048,3.1864404,3.18384811,3.18185582
61.809026,4,3.18766496,0.90129631,3.18567708,3.18310908,3.18111835
61.819518,3.46410162,3.18690058,0.526498847,3.18491423,3.18237028,3.1803811
61.830009,3.60555128,3.18613675,0.647622206,3.18415191,3.1816318,3.17964414
61.840501,3.74165739,3.18537334,0.745844522,3.18338997,3.18089348,3.17890733
61.850992,2.82842712,3.18461047,-0.596810978,3.18262857,3.18015548,3.1781708
61.861484,3.46410162,3.183848,0.529389849,3.18186755,3.17941764,3.17743442
61.871976,3.60555128,3.18308601,0.64997328,3.18110698,3.17868004,3.17669827
61.882467,2.64575131,3.18232456,-0.732511605,3.18034693,3.17794275,3.1759624
61.892959,2.64575131,3.18156351,-0.731991938,3.17958726,3.17720564,3.17522668
61.90345,3.46410162,3.18080299,0.532258042,3.17882811,3.17646883,3.17449126
61.913942,3.46410162,3.18004287,0.532971621,3.17806933,3.1757322,3.17375598
61.924434,2.64575131,3.1792832,-0.730432673,3.17731099,3.17499581,3.17302093
61.934925,3.31662479,3.17852407,0.371619057,3.17655316,3.17425973,3.17228617
61.945417,3.60555128,3.17776532,0.654053483,3.17579569,3.17352383,3.17155157
61.955908,2.82842712,3.17700709,-0.590406612,3.17503873,3.17278824,3.17081725
61.9664,3.16227766,3.17624925,-0.118201473,3.17428213,3.17205282,3.1700831
61.976892,3,3.17549185,-0.418917479,3.17352596,3.17131765,3.16934916
61.987383,3.16227766,3.17473498,-0.111612361,3.17277029,3.17058279,3.16861553
61.997875,3.31662479,3.17397848,0.377685467,3.17201497,3.16984811,3.16788204
62.008366,2.82842712,3.17322249,-0.587192786,3.17126015,3.16911374,3.16714886
62.018858,3,3.17246688,-0.415291316,3.17050568,3.16837956,3.16641583
62.02935,3.46410162,3.1717117,0.540730906,3.16975164,3.16764561,3.16568303
62.039841,3.31662479,3.17095704,0.381664452,3.16899808,3.16691199,3.16495053
62.050333,3.60555128,3.17020274,0.659809473,3.16824487,3.16617854,3.16421818
62.060824,4.12310563,3.16944894,0.976553473,3.16749214,3.16544541,3.16348614
62.071316,3.87298335,3.16869551,0.839218589,3.16673976,3.16471247,3.16275425
62.081808,3.16227766,3.1679425,-0.0752651556,3.16598779,3.16397977,3.1620226
62.092299,3.74165739,3.16719,0.757936267,3.1652363,3.16324739,3.16129124
62.102791,4,3.16643786,0.912996245,3.16448514,3.16251519,3.16056005
62.113282,4.12310563,3.16568621,0.978478113,3.16373447,3.16178331,3.15982916
62.123774,3.74165739,3.16493491,0.759422461,3.16298413,3.16105161,3.15909843
62.134266,3.31662479,3.16418404,0.390436615,3.16223419,3.16032016,3.15836793
62.144757,3.16227766,3.16343366,-0.034000013,3.16148473,3.15958904,3.15763774
62.155249,3.74165739,3.16268363,0.760903251,3.1607356,3.1588581,3.15690771
62.16574,3.16227766,3.16193409,0.0185356683,3.15998694,3.15812748,3.15617798
62.176232,2,3.16118489,-1.07758289,3.1592386,3.15739705,3.15544842
62.186724,2.64575131,3.16043611,-0.717415363,3.15849067,3.15666687,3.1547191
62.197215,2.64575131,3.15968782,-0.716893653,3.1577432,3.15593702,3.15399008
62.207707,3.60555128,3.15893987,0.668289913,3.15699605,3.15520735,3.15326123
62.218198,3.31662479,3.1581924,0.398035667,3.15624937,3.154478,3.15253268
62.22869,3.46410162,3.15744527,0.553765607,3.155503,3.15374885,3.1518043
62.239182,2.64575131,3.15669855,-0.714805733,3.15475703,3.15301995,3.15107616
62.249673,3.46410162,3.1559523,0.55511198,3.15401152,3.15229137,3.15034833
62.260165,2.64575131,3.1552064,-0.713761226,3.15326632,3.15156299,3.14962067
62.270656,3.87298335,3.15446097,0.847656993,3.15252159,3.15083493,3.14889332
62.281148,3,3.15371587,-0.392066157,3.15177717,3.15010706,3.14816613
62.29164,2.64575131,3.15297118,-0.7121937,3.15103313,3.14937945,3.14743919
62.302131,3.31662479,3.15222696,0.405460026,3.15028955,3.14865217,3.14671256
62.312623,3.46410162,3.15148307,0.559123017,3.14954627,3.14792509,3.1459861
62.323114,3,3.15073965,-0.388252042,3.14880346,3.14719833,3.14525996
62.333606,3.46410162,3.14999656,0.560450764,3.14806095,3.14647176,3.14453398
62.344098,3,3.14925386,-0.386333875,3.14731882,3.14574546,3.14380825
62.354589,3.16227766,3.14851164,0.117328695,3.14657714,3.14501949,3.14308284
62.365081,3.31662479,3.14776974,0.410919765,3.14583576,3.14429371,3.14235759
62.375572,3.74165739,3.1470283,0.771121965,3.14509484,3.14356826,3.14163267
62.386064,2.64575131,3.14628719,-0.707485604,3.14435422,3.14284301,3.14090791
62.396556,4,3.14554647,0.924366554,3.14361397,3.14211802,3.14018341
62.407047,3.16227766,3.14480622,0.132179583,3.14287417,3.14139337,3.13945922
62.417539,3.74165739,3.14406628,0.773040169,3.14213467,3.14066891,3.13873521
62.42803,3.46410162,3.14332681,0.566369848,3.14139561,3.13994479,3.13801151
62.438522,3,3.14258766,-0.377607808,3.14065686,3.13922087,3.137288
62.449014,3.31662479,3.14184889,0.418062075,3.13991847,3.13849721,3.13656473
62.459505,2.64575131,3.14111059,-0.703817643,3.13918053,3.13777389,3.13584178
62.469997,3.16227766,3.1403726,0.148003594,3.13844288,3.13705077,3.13511901
62.480488,2.64575131,3.13963506,-0.702768634,3.13770567,3.13632799,3.13439656
62.49098,3.16227766,3.13889785,0.152904587,3.13696876,3.1356054,3.13367429
62.501472,3.46410162,3.13816102,0.570912076,3.13623222,3.13488309,3.13295227
62.511963,3.31662479,3.13742464,0.423320388,3.13549611,3.13416111,3.13223058
62.522455,2.64575131,3.13668858,-0.700669156,3.1347603,3.13343934,3.13150906
62.532946,3.46410162,3.13595297,0.572842603,3.13402492,3.13271791,3.13078787
62.543438,3.60555128,3.13521767,0.685808724,3.13328984,3.13199668,3.13006686
62.55393,3,3.13448275,-0.366718904,3.13255512,3.13127572,3.12934611
62.564421,3,3.13374829,-0.365716134,3.13182083,3.13055511,3.12862568
62.574913,3.16227766,3.13301414,0.171065842,3.13108684,3.1298347,3.12790544
62.585404,3.31662479,3.13228043,0.429353416,3.13035327,3.12911463,3.12718552
62.595896,3.60555128,3.13154704,0.688479654,3.12962,3.12839477,3.12646578
62.606388,3,3.13081403,-0.361682218,3.12888709,3.12767518,3.12574631
62.616879,3.31662479,3.13008146,0.431906621,3.12815461,3.12695594,3.12502716
62.627371,2.64575131,3.1293492,-0.69541203,3.12742242,3.1262369,3.12430819
62.637862,3.16227766,3.12861739,0.183467348,3.12669065,3.12551821,3.12358956
62.648354,2.44948974,3.12788589,-0.823648072,3.12595918,3.12479973,3.12287111
62.658846,3.87298335,3.12715476,0.863613678,3.12522806,3.12408152,3.12215293
62.669337,2.82842712,3.12642408,-0.545890974,3.12449737,3.12336367,3.12143507
62.679829,2.23606798,3.12569371,-0.943199729,3.12376697,3.12264602,3.1207174
62.69032,3.16227766,3.12496377,0.193168024,3.12303699,3.12192872,3.12000006
62.700812,3.60555128,3.12423415,0.693770226,3.1223073,3.12121163,3.11928292
62.711304,3.46410162,3.1235049,0.583606646,3.12157797,3.12049483,3.11856603
62.721795,3.31662479,3.12277609,0.440282523,3.12084906,3.11977837,3.11784948
62.732287,3.74165739,3.12204759,0.787152971,3.12012043,3.11906212,3.11713312
62.742778,4.47213595,3.12131953,1.16224629,3.11939223,3.11834623,3.11641709
62.75327,3.31662479,3.12059177,0.442756166,3.11866431,3.11763055,3.11570126
62.763762,1.73205081,3.11986438,-1.178055,3.11793675,3.11691515,3.11498569
62.774253,3,3.11913744,-0.345162916,3.11720961,3.11620011,3.11427046
62.784745,2.64575131,3.1184108,-0.687502353,3.11648275,3.11548528,3.11355542
62.795236,3.16227766,3.1176846,0.211170698,3.11575632,3.1147708,3.11284072
62.805728,3.31662479,3.1169587,0.44684012,3.11503016,3.11405654,3.11212621
62.81622,2.82842712,3.11623317,-0.536475577,3.11430436,3.11334257,3.11141197
62.826711,3.31662479,3.11550808,0.448460376,3.11357898,3.11262895,3.11069807
62.837203,3.60555128,3.11478329,0.700548343,3.11285388,3.11191555,3.10998436
62.847694,3.46410162,3.11405895,0.591644039,3.11212921,3.11120251,3.10927099
62.858186,3.31662479,3.1133349,0.450876802,3.11140481,3.11048968,3.10855783
62.868678,2.64575131,3.11261122,-0.683271477,3.11068076,3.10977715,3.10784493
62.879169,3,3.11188798,-0.334496611,3.10995714,3.10906497,3.10713237
62.889661,1.41421356,3.11116504,-1.3026709,3.10923379,3.10835301,3.10642001
62.900152,4.24264069,3.11044254,1.064048,3.10851086,3.10764142,3.10570799
62.910644,3.31662479,3.10972034,0.454867507,3.10778821,3.10693004,3.10499618
62.921136,2.82842712,3.10899851,-0.529689895,3.10706592,3.10621896,3.10428463
62.931627,3,3.10827711,-0.329054879,3.10634404,3.10550823,3.10357343
62.942119,2.82842712,3.10755602,-0.528326502,3.10562243,3.10479773,3.10286243
62.95261,3.31662479,3.10683536,0.458027763,3.10490125,3.1040876,3.10215178
62.963102,3.74165739,3.106115,0.797209125,3.10418035,3.10337768,3.10144132
62.973594,4.47213595,3.10539501,1.16907696,3.10345979,3.10266807,3.10073115
62.984085,3.31662479,3.10467545,0.460379561,3.10273965,3.10195881,3.10002132
62.994577,3.31662479,3.10395619,0.461160056,3.10201979,3.10124978,3.09931169
63.005068,3.16227766,3.10323737,0.242982074,3.10130034,3.10054112,3.09860241
63.01556,3.16227766,3.10251885,0.244456152,3.10058118,3.09983269,3.09789333
63.026052,3,3.10180069,-0.319062211,3.09986236,3.09912455,3.09718454
63.036543,3,3.10108298,-0.317935489,3.09914396,3.09841677,3.09647609
63.047035,3.46410162,3.10036555,0.603105348,3.09842583,3.09770923,3.09576785
63.057526,2.44948974,3.09964857,-0.806324269,3.09770812,3.09700206,3.09505995
63.068018,3.46410162,3.09893188,0.604292754,3.09699069,3.09629511,3.09435227
63.07851,3.31662479,3.09821556,0.467342731,3.09627361,3.09558847,3.09364487
63.089001,3.16227766,3.09749968,0.254515192,3.09555694,3.09488219,3.09293781
63.099493,3.31662479,3.09678409,0.46887173,3.09484055,3.09417615,3.09223097
63.109984,3,3.09606894,-0.309949898,3.09412457,3.09347048,3.09152447
63.120476,3,3.09535409,-0.30879457,3.09340887,3.09276504,3.09081819
63.130968,3.46410162,3.0946396,0.607833871,3.09269352,3.0920599,3.0901122
63.141459,2.82842712,3.09392555,-0.515265393,3.09197858,3.09135514,3.08940655
63.151951,3.16227766,3.0932118,0.262803849,3.09126392,3.09065061,3.08870112
63.162442,2.64575131,3.09249848,-0.668391478,3.09054967,3.08994645,3.08799604
63.172934,3.74165739,3.09178546,0.806146343,3.0898357,3.08924253,3.08729117
63.183426,3.60555128,3.09107281,0.717271544,3.08912208,3.08853892,3.08658659
63.193917,2.64575131,3.09036059,-0.666790281,3.08840887,3.08783568,3.08588236
63.204409,2.82842712,3.08964867,-0.511098373,3.08769594,3.08713268,3.08517836
63.2149,3.16227766,3.08893719,0.27081446,3.08698342,3.08643006,3.0844747
63.225392,3.16227766,3.088226,0.27212434,3.08627118,3.08572767,3.08377126
63.235884,3.60555128,3.08751519,0.71974724,3.08555929,3.0850256,3.08306812
63.246375,3.31662479,3.0868048,0.479395439,3.0848478,3.0843239,3.08236532
63.256867,3.31662479,3.08609472,0.480135471,3.0841366,3.08362244,3.08166275
63.267358,3,3.08538507,-0.292207241,3.08342581,3.08292136,3.08096053
63.27785,3,3.08467572,-0.290990932,3.0827153,3.08222052,3.08025854
63.288342,2.44948974,3.08396674,-0.796540645,3.08200513,3.08152,3.07955683
63.298833,2,3.08325819,-1.0407969,3.08129538,3.08081985,3.07885548
63.309325,2.82842712,3.08254995,-0.504105965,3.08058591,3.08011995,3.07815436
63.319816,2.23606798,3.08184214,-0.919659807,3.07987684,3.07942043,3.07745359
63.330308,2.64575131,3.08113463,-0.659835825,3.07916806,3.07872116,3.07675305
63.3408,2.23606798,3.08042748,-0.918890367,3.07845962,3.0780222,3.0760528
63.351291,2.82842712,3.07972078,-0.501291983,3.0777516,3.07732363,3.07535291
63.361783,3.31662479,3.07901437,0.487452992,3.07704385,3.0766253,3.07465325
63.372274,3.87298335,3.0783084,0.891445425,3.07633652,3.07592736,3.07395395
63.382766,3.46410162,3.07760273,0.621690344,3.07562947,3.07522966,3.07325487
63.393258,4.12310563,3.07689743,1.02284319,3.07492276,3.07453228,3.07255609
63.403749,4.12310563,3.07619257,1.0231877,3.07421646,3.07383529,3.07185767
63.414241,2.82842712,3.075488,-0.497052188,3.07351045,3.07313855,3.07115948
63.424732,3.46410162,3.07478388,0.623953315,3.07280484,3.0724422,3.07046166
63.435224,3.16227766,3.07408005,0.296980822,3.07209952,3.0717461,3.06976406
63.445716,3.46410162,3.0733766,0.62508001,3.07139454,3.07105032,3.06906676
63.456207,2.64575131,3.07267358,-0.653392889,3.07068998,3.07035492,3.06836983
63.466699,3.31662479,3.07197086,0.494625037,3.0699857,3.06965978,3.06767312
63.47719,3.16227766,3.07126859,0.301677104,3.06928183,3.06896503,3.06697678
63.487682,2.82842712,3.07056661,-0.492076707,3.06857824,3.06827054,3.06628068
63.498174,3.31662479,3.06986501,0.496749217,3.06787499,3.06757637,3.06558487
63.508665,2.64575131,3.06916384,-0.650701566,3.06717216,3.06688259,3.06488943
63.519157,3.60555128,3.06846298,0.732863083,3.06646961,3.06618907,3.06419423
63.529648,3.16227766,3.06776255,0.307433095,3.06576748,3.06549594,3.06349939
63.54014,1.41421356,3.06706243,-1.2856317,3.06506562,3.06480307,3.06280479
63.550632,3.31662479,3.06636268,0.500262038,3.06436411,3.06411053,3.06211049
63.561123,3.87298335,3.06566337,0.898509862,3.06366302,3.06341838,3.06141656
63.571615,3.46410162,3.06496437,0.631773097,3.06296221,3.06272649,3.06072287
63.582106,3.60555128,3.0642658,0.735721055,3.06226181,3.062035,3.06002954
63.592598,3.16227766,3.06356754,0.31418166,3.06156169,3.06134377,3.05933646
63.60309,3.74165739,3.06286966,0.82388575,3.06086192,3.06065286,3.05864367
63.613581,3.31662479,3.06217221,0.504432928,3.06016257,3.05996236,3.05795126
63.624073,2.82842712,3.06147507,-0.482750398,3.0594635,3.05927212,3.05725909
63.634564,3,3.06077837,-0.246532698,3.05876484,3.05858227,3.05656729
63.645056,2.23606798,3.06008198,-0.90775217,3.05806646,3.0578927,3.05587574
63.655548,3.31662479,3.05938596,0.507187174,3.05736844,3.05720345,3.05518449
63.666039,3.60555128,3.05869038,0.739500434,3.05667083,3.05651461,3.05449361
63.676531,4,3.05799511,0.970569361,3.0559735,3.05582603,3.05380297
63.687022,3.31662479,3.05730029,0.509239141,3.05527658,3.05513785,3.05311271
63.697514,3,3.05660577,-0.23791967,3.05457995,3.05444994,3.0524227
63.708006,2.44948974,3.05591163,-0.778730945,3.05388367,3.05376237,3.05173299
63.718497,3,3.05521793,-0.23498495,3.05318781,3.0530752,3.05104366
63.728989,3.46410162,3.05452454,0.639982092,3.05249223,3.0523883,3.05035457
63.73948,3.46410162,3.05383159,0.640523244,3.05179706,3.05170181,3.04966586
63.749972,2.64575131,3.05313895,-0.638269255,3.05110218,3.05101559,3.0489774
63.760464,2.82842712,3.05244669,-0.473307056,3.05040765,3.0503297,3.04828924
63.770955,3.60555128,3.05175507,0.744174847,3.04971354,3.04964442,3.04760147
63.781447,3.74165739,3.05106357,0.831019745,3.04901971,3.04895921,3.04691394
63.791938,3.31662479,3.05037251,0.515996395,3.0483263,3.04827442,3.0462268
63.80243,2.64575131,3.04968176,-0.635555233,3.04763317,3.0475899,3.0455399
63.812922,3.31662479,3.0489914,0.517332961,3.0469404,3.04690572,3.04485331
63.823413,3.31662479,3.04830148,0.517999338,3.04624804,3.04622195,3.04416711
63.833905,3,3.04761187,-0.218201439,3.04555597,3.04553845,3.04348115
63.844396,2.82842712,3.04692271,-0.467435109,3.04486432,3.04485537,3.04279558
63.854888,2.82842712,3.04623386,-0.46669769,3.04417295,3.04417257,3.04211026
63.86538,2.64575131,3.04554539,-0.632292718,3.04348193,3.04349011,3.04142525
63.875871,3.46410162,3.04485737,0.647490727,3.04279134,3.04280806,3.04074063
63.886363,2.23606798,3.04416967,-0.898944766,3.04210103,3.04212629,3.04005626
63.896854,2.82842712,3.04348241,-0.463740541,3.04141114,3.04144494,3.03937228
63.907346,3.31662479,3.04279547,0.52328703,3.04072153,3.04076387,3.03868854
63.917838,3.31662479,3.04210892,0.523942623,3.04003228,3.04008315,3.03800513
63.928329,3.16227766,3.04142281,0.34764184,3.03934345,3.03940284,3.0373221
63.938821,3.16227766,3.04073702,0.34862679,3.03865491,3.03872282,3.03663933
63.949312,2.44948974,3.04005168,-0.768480279,3.03796679,3.03804321,3.03595694
63.959804,4.79583152,3.03936666,1.32531689,3.03727896,3.03736389,3.03527481
63.970296,2.82842712,3.03868202,-0.458535603,3.03659148,3.03668492,3.034593
63.980787,3.46410162,3.03799784,0.65276625,3.03590442,3.03600637,3.03391158
63.991279,2.44948974,3.03731397,-0.766696961,3.03521765,3.03532811,3.03323042
64.00177,3,3.03663056,-0.191391116,3.0345313,3.03465027,3.03254964
64.012262,3.60555128,3.03594747,0.754721014,3.03384525,3.03397271,3.03186912
64.022754,3.16227766,3.03526476,0.356388691,3.03315954,3.03329551,3.03118893
64.033245,3,3.03458251,-0.185963727,3.03247426,3.03261873,3.03050912
64.043737,3.31662479,3.03390058,0.531718171,3.03178927,3.03194225,3.02982958
64.054228,3,3.0332191,-0.182261077,3.03110471,3.03126618,3.02915043
64.06472,3.46410162,3.03253795,0.656935056,3.03042043,3.03059041,3.02847154
64.075212,3,3.03185718,-0.178485806,3.02973651,3.029915,3.02779297
64.085703,3.31662479,3.03117687,0.534273261,3.02905301,3.02924001,3.0271148
64.096195,3,3.03049689,-0.174633585,3.02836981,3.02856532,3.02643689
64.106686,2.82842712,3.02981736,-0.448765234,3.02768703,3.02789106,3.02575937
64.117178,2.64575131,3.02913816,-0.619182402,3.02700454,3.02721709,3.02508211
64.12767,2.23606798,3.02845935,-0.890163675,3.02632241,3.02654348,3.02440519
64.138161,3.87298335,3.02778099,0.919348875,3.0256407,3.0258703,3.02372866
64.148653,2.64575131,3.02710297,-0.617536764,3.02495929,3.02519742,3.02305239
64.159144,4,3.0264254,0.986698841,3.0242783,3.02452496,3.02237652
64.169636,4.35889894,3.02574816,1.15462149,3.02359761,3.02385281,3.02170091
64.180128,3.46410162,3.02507131,0.662593619,3.02291727,3.02318103,3.02102564
64.190619,3,3.02439492,-0.156188744,3.02223736,3.02250967,3.02035076
64.201111,2,3.02371887,-1.01178993,3.02155775,3.02183862,3.01967615
64.211602,3.60555128,3.02304327,0.76322212,3.02087856,3.021168,3.01900194
64.222094,3.31662479,3.02236801,0.542454408,3.02019967,3.02049768,3.018328
64.232586,2.64575131,3.02169314,-0.613140952,3.01952113,3.01982773,3.01765439
64.243077,3.87298335,3.02101873,0.923019293,3.01884303,3.01915822,3.01698117
64.253569,3,3.02034466,-0.142634697,3.01816522,3.01848901,3.01630823
64.26406,2.64575131,3.01967105,-0.611489767,3.01748783,3.01782024,3.01563569
64.274552,3.31662479,3.01899777,0.545552034,3.01681075,3.01715178,3.01496342
64.285044,3.46410162,3.01832489,0.667665129,3.01613402,3.01648369,3.01429148
64.295535,2.44948974,3.01765248,-0.753765703,3.01545773,3.01581604,3.01361995
64.306027,3.60555128,3.01702354,0.767155611,3.01478173,3.01519187,3.01294869
64.316518,3.31662479,3.01635197,0.547971549,3.01410616,3.014525,3.01227783
64.32701,3.16227766,3.01568074,0.382879777,3.01343089,3.01385845,3.01160724
64.337502,3.46410162,3.0150099,0.670143053,3.01275598,3.01319228,3.01093699
64.347993,3.46410162,3.01433954,0.670643034,3.0120815,3.01252654,3.01026715
64.358485,3.60555128,3.01366951,0.769338525,3.01140732,3.01186112,3.00959758
64.368976,2.82842712,3.01299995,-0.429619394,3.01073357,3.01119615,3.00892841
64.379468,3.46410162,3.01233073,0.672139037,3.01006013,3.01053149,3.00825952
64.38996,3.74165739,3.01166191,0.854397725,3.00938704,3.00986721,3.00759098
64.400451,2.64575131,3.01099357,-0.60435276,3.00871439,3.00920337,3.00692283
64.410943,3.60555128,3.01032557,0.771508722,3.00804203,3.00853985,3.00625497
64.421434,3.46410162,3.00965803,0.674124307,3.00737011,3.00787678,3.00558751
64.431926,3.46410162,3.00899084,0.674618981,3.00669849,3.00721403,3.00492032
64.442418,3.16227766,3.00832406,0.392369209,3.00602724,3.00655167,3.00425349
64.452909,2.64575131,3.00765775,-0.601586605,3.00535642,3.00588975,3.00358705
64.463401,4.12310563,3.00699179,1.05646289,3.0046859,3.00522815,3.0029209
64.473892,3.16227766,3.0063263,0.394906773,3.00401581,3.004567,3.00225516
64.484384,2.44948974,3.00566116,-0.745769009,3.00334603,3.00390618,3.0015897
64.494876,3.16227766,3.00499643,0.396586983,3.00267661,3.00324575,3.00092458
64.505367,3.31662479,3.00433222,0.558831431,3.00200763,3.00258582,3.00025987
64.515859,3,3.00366831,-0.0605666077,3.00133895,3.00192616,2.99959545
64.52635,3.74165739,3.00300488,0.859448954,3.00067071,3.00126696,2.99893144
64.536842,2.82842712,3.0023418,-0.417030784,3.00000277,3.00060809,2.99826771
64.547334,2.82842712,3.00167913,-0.416235519,2.9993352,2.99994961,2.99760432
64.557825,2.82842712,3.00101694,-0.415439307,2.99866806,2.99929158,2.99694135
64.568317,3.31662479,3.00035511,0.562378596,2.99800123,2.99863389,2.99627866
64.578808,3,2.99969375,0.017500086,2.99733484,2.99797665,2.99561639
64.5893,3.31662479,2.99903274,0.563553057,2.99666875,2.99731974,2.9949544
64.599792,3.31662479,2.99837216,0.564138843,2.99600304,2.99666324,2.99429276
64.610283,2.23606798,2.99771205,-0.87272222,2.99533776,2.99600719,2.99363154
64.620775,2.64575131,2.9970523,-0.592706496,2.99467278,2.99535147,2.9929706
64.631266,3.16227766,2.99639303,0.407289364,2.99400825,2.99469622,2.99231008
64.641758,3,2.99573412,0.065313667,2.99334402,2.9940413,2.99164985
64.65225,2.64575131,2.99507564,-0.591036653,2.99268017,2.99338679,2.99098997
64.662741,3.60555128,2.99441763,0.781750371,2.99201675,2.99273274,2.9903305
64.673233,3.16227766,2.99375999,0.41050904,2.99135364,2.99207902,2.98967132
64.683724,3.60555128,2.99310283,0.782590854,2.99069097,2.99142578,2.98901256
64.694216,2.82842712,2.99244603,-0.404992479,2.99002861,2.99077287,2.9883541
64.704708,2.82842712,2.99178966,-0.404181316,2.98936663,2.99012037,2.98769598
64.715199,2.44948974,2.99113378,-0.735964696,2.98870508,2.98946834,2.98703829
64.725691,2.64575131,2.99047826,-0.58713452,2.98804384,2.98881665,2.98638088
64.736182,3.87298335,2.98982322,0.939765994,2.98738305,2.98816543,2.9857239
64.746674,3.46410162,2.98916856,0.689153871,2.98672256,2.98751456,2.98506721
64.757166,2.82842712,2.98851432,-0.400108978,2.98606245,2.98686409,2.98441087
64.767657,3.46410162,2.98786057,0.690102197,2.98540279,2.9862141,2.98375496
64.778149,3.31662479,2.98720719,0.573949123,2.98474343,2.98556446,2.98309934
64.78864,2.82842712,2.98655431,-0.397652088,2.98408452,2.98491529,2.98244414
64.799132,3.16227766,2.98590179,0.419971271,2.98342592,2.98426647,2.98178924
64.809624,3,2.98524971,0.121450783,2.98276769,2.98361806,2.98113469
64.820115,2.64575131,2.98459812,-0.582105495,2.98210991,2.98297013,2.98048057
64.830607,3.46410162,2.9839469,0.692931969,2.98145245,2.98232256,2.97982674
64.841098,3.46410162,2.98329618,0.693401352,2.98079542,2.98167546,2.97917334
64.85159,3.46410162,2.98264583,0.693870148,2.98013871,2.98102872,2.97852024
64.862082,3,2.98199592,0.134179273,2.97948238,2.98038239,2.97786749
64.872573,2.64575131,2.98134651,-0.579305791,2.9788265,2.97973655,2.97721518
64.883065,3.60555128,2.98069748,0.790476945,2.97817093,2.97909107,2.97656316
64.893556,3.87298335,2.98004894,0.944952065,2.9775158,2.97844607,2.97591156
64.904048,2.44948974,2.97940078,-0.727949889,2.97686099,2.97780142,2.97526027
64.91454,3,2.97875307,0.145763275,2.97620657,2.97715721,2.97460934
64.925031,4,2.97810585,1.0108878,2.97555258,2.97651347,2.97395883
64.935523,2.64575131,2.97745902,-0.575940718,2.97489892,2.9758701,2.97330863
64.946014,3.46410162,2.97681269,0.698060829,2.9742457,2.97522722,2.97265886
64.956506,3,2.97616675,0.154380216,2.9735928,2.97458471,2.97200939
64.966998,3.31662479,2.97552125,0.584040702,2.97294028,2.97394262,2.97136028
64.977489,2.82842712,2.97487626,-0.382686727,2.97228821,2.97330102,2.9707116
64.987981,3.46410162,2.97423165,0.699907113,2.97163646,2.97265979,2.97006323
64.998472,2.44948974,2.97358755,-0.723945997,2.97098515,2.97201905,2.96941528
65.008964,2.82842712,2.97294384,-0.380153539,2.97033417,2.97137869,2.96876764
65.019456,2.23606798,2.97230058,-0.858039975,2.96968357,2.97073875,2.96812037
65.029947,3.46410162,2.97165783,0.701743393,2.96903342,2.97009931,2.96747353
65.040439,3.60555128,2.97101547,0.79657756,2.96838359,2.96946025,2.96682699
65.05093,3.31662479,2.97037362,0.58843111,2.96773421,2.96882168,2.96618089
65.061422,3.46410162,2.96973217,0.703114109,2.96708515,2.96818349,2.96553509
65.071914,3.74165739,2.96909117,0.878957463,2.96643648,2.96754574,2.96488967
65.082405,2.44948974,2.96845068,-0.720389436,2.96578826,2.96690849,2.96424467
65.092897,3.74165739,2.96781059,0.879685622,2.96514036,2.96627161,2.96359999
65.103388,3.60555128,2.96717102,0.798987016,2.96449291,2.96563524,2.96295574
65.11388,2.82842712,2.96653185,-0.371624443,2.96384578,2.96499926,2.9623118
65.124372,3.87298335,2.96589314,0.952412835,2.96319904,2.96436371,2.96166823
65.134863,3.16227766,2.96525495,0.443872408,2.96255276,2.96372867,2.96102509
65.145355,3.46410162,2.96461715,0.706742146,2.9619068,2.96309402,2.96038227
65.155846,2.82842712,2.96397989,-0.368174905,2.96126129,2.96245987,2.95973988
65.166338,3,2.96334302,0.191460128,2.9606161,2.96182612,2.9590978
65.17683,2.82842712,2.96270662,-0.366441664,2.95997131,2.96119281,2.9584561
65.187321,3.46410162,2.96207074,0.708541369,2.95932697,2.96056001,2.95781483
65.197813,3,2.96143527,0.196379037,2.95868296,2.9599276,2.95717388
65.208304,3.31662479,2.96080033,0.596510232,2.95803939,2.95929571,2.95653337
65.218796,3.16227766,2.9601658,0.449568526,2.95739616,2.95866421,2.95589317
65.229288,3,2.95953174,0.201167248,2.95675332,2.95803317,2.95525334
65.239779,3,2.95889821,0.202735771,2.95611093,2.95740264,2.95461396
65.250271,3,2.95826509,0.204291243,2.95546887,2.95677251,2.95397489
65.260762,2.44948974,2.9576325,-0.712841329,2.95482727,2.9561429,2.95333626
65.271254,3.87298335,2.95700033,0.957070016,2.954186,2.95551369,2.95269794
65.281746,3.46410162,2.95636864,0.712553843,2.95354512,2.95488495,2.95206001
65.292237,2.82842712,2.95573748,-0.356805762,2.95290469,2.95425672,2.95142251
65.302729,3,2.95510674,0.211880306,2.9522646,2.9536289,2.95078534
65.31322,3.74165739,2.95447653,0.88723213,2.95162496,2.9530016,2.9501486
65.323712,2.82842712,2.95384675,-0.354146338,2.95098565,2.95237471,2.94951218
65.334204,3.60555128,2.95321745,0.807671853,2.95034674,2.95174829,2.94887615
65.344695,3.16227766,2.9525887,0.457918074,2.94970828,2.9511224,2.94824055
65.355187,2.64575131,2.95196037,-0.553361594,2.94907016,2.95049692,2.94760528
65.365678,3.31662479,2.95133258,0.604394087,2.9484325,2.94987197,2.94697045
65.37617,3,2.95070522,0.222024283,2.94779517,2.94924743,2.94633594
65.386662,2.44948974,2.95007835,-0.707522864,2.94715824,2.94862337,2.94570182
65.397153,3,2.94945202,0.224828775,2.94652176,2.94799984,2.94506814
65.407645,3.60555128,2.94882613,0.810385801,2.94588562,2.94737673,2.94443478
65.418136,2.82842712,2.94820079,-0.346083319,2.94524994,2.94675416,2.94380186
65.428628,2.44948974,2.94757588,-0.705752179,2.94461459,2.94613202,2.94316927
65.43912,3.16227766,2.94695147,0.464032534,2.94397964,2.94551035,2.94253707
65.449611,2.64575131,2.94632761,-0.548248392,2.94334516,2.94488922,2.94190531
65.460103,2.44948974,2.94570419,-0.704424906,2.942711,2.94426852,2.94127387
65.470594,2.64575131,2.94508133,-0.547110608,2.94207731,2.94364837,2.94064289
65.481086,2.64575131,2.94445891,-0.546541487,2.94144396,2.94302864,2.94001223
65.491578,3.16227766,2.94383699,0.46737637,2.94081101,2.9424094,2.93938195
65.502069,2.64575131,2.94321563,-0.545402897,2.94017852,2.94179071,2.93875213
65.512561,3.31662479,2.94259472,0.611579979,2.93954636,2.94117246,2.93812263
65.523052,2.64575131,2.9412221,-0.543572245,2.93891467,2.93980211,2.93749358
65.533544,2.64575131,2.94060324,-0.5430027,2.93828332,2.93918589,2.93686485
65.544036,2.64575131,2.9399849,-0.542433023,2.93765237,2.93857017,2.93623652
65.554527,3.60555128,2.93936712,0.816201054,2.93702189,2.937955,2.93560864
65.565019,2.64575131,2.93874979,-0.541293335,2.93639174,2.93734026,2.93498109
65.57551,2.64575131,2.93813303,-0.540723325,2.93576206,2.93672609,2.93435398
65.586002,3.16227766,2.93751672,0.474089591,2.93513272,2.93611235,2.93372721
65.596494,3,2.93690093,0.251195286,2.93450378,2.93549912,2.93310083
65.606985,3.31662479,2.93628571,0.616716368,2.93387531,2.93488645,2.9324749
65.617477,3.60555128,2.93567095,0.818462169,2.93324718,2.93427423,2.9318493
65.627968,2.82842712,2.93505677,-0.326541955,2.93261951,2.93366258,2.93122416
65.63846,3.16227766,2.93444306,0.477320233,2.93199219,2.93305137,2.93059934
65.648952,4.12310563,2.93382986,1.09053921,2.93136527,2.93244068,2.92997492
65.659443,3.31662479,2.93321725,0.619199114,2.93073882,2.93183056,2.92935096
65.669935,2.44948974,2.9326051,-0.695065004,2.93011271,2.93122089,2.92872733
65.680426,3.31662479,2.93199354,0.620186461,2.92948707,2.9306118,2.92810415
65.690918,3.60555128,2.93138246,0.82107784,2.92886178,2.93000317,2.92748131
65.70141,2.82842712,2.9307719,-0.319913698,2.92823689,2.92939506,2.92685886
65.711901,2.23606798,2.93016193,-0.833123014,2.92761247,2.92878753,2.92623687
65.722393,3.46410162,2.92955245,0.731128696,2.9269884,2.92818046,2.92561521
65.732884,2.82842712,2.92894355,-0.317043257,2.92636479,2.92757398,2.92499401
65.743376,2.64575131,2.92833514,-0.531586143,2.92574153,2.92696797,2.92437315
65.753868,3.31662479,2.92772727,0.623616489,2.92511868,2.92636248,2.92375268
65.764359,2.64575131,2.92711999,-0.530441969,2.9244963,2.92575759,2.92313268
65.774851,3.31662479,2.92651321,0.624589131,2.92387427,2.92515317,2.92251301
65.785342,3.16227766,2.92590703,0.486179632,2.9232527,2.92454935,2.92189379
65.795834,3.16227766,2.92530133,0.486802142,2.92263149,2.92394601,2.92127492
65.806326,4,2.92469619,1.03696857,2.92201069,2.9233432,2.92065645
65.816817,3.60555128,2.92409166,0.825505671,2.92139035,2.922741,2.92003844
65.827309,2.82842712,2.92348763,-0.308318835,2.92077037,2.92213928,2.91942076
65.8378,3.16227766,2.92288421,0.489278501,2.92015085,2.92153816,2.91880355
65.848292,2.44948974,2.92228129,-0.687598391,2.91953169,2.92093754,2.91818668
65.858784,3.16227766,2.92167893,0.490508643,2.91891294,2.92033746,2.9175702
65.869275,2.64575131,2.92107719,-0.524715049,2.91829467,2.919738,2.91695419
65.879767,3,2.92047596,0.282000064,2.91767674,2.91913903,2.91633853
65.890258,3.46410162,2.91987536,0.737716922,2.91705929,2.91854068,2.91572332
65.90075,3.16227766,2.91927527,0.492952731,2.91644219,2.91794283,2.91510846
65.911242,2.44948974,2.91867574,-0.684971533,2.9158255,2.91734554,2.914494
65.921733,2,2.91807685,-0.958163271,2.91520929,2.91674888,2.91388
65.932225,2.44948974,2.91747848,-0.684097026,2.91459343,2.91615272,2.91326635
65.942716,3.46410162,2.91688075,0.739743783,2.91397804,2.91555719,2.91265316
65.953208,2.23606798,2.91628354,-0.824751819,2.91336301,2.91496217,2.91204032
65.9637,3.31662479,2.91568691,0.633196554,2.9127484,2.91436773,2.91142788
65.974191,2.64575131,2.91509093,-0.518979402,2.91213426,2.91377392,2.91081591
65.984683,3.60555128,2.91449548,0.831297658,2.91152047,2.91318063,2.91020428
65.995174,3.16227766,2.91390068,0.498374341,2.91090717,2.91258799,2.90959312
66.005666,2,2.91330641,-0.95567066,2.91029421,2.91199586,2.90898231
66.016158,3.46410162,2.91271274,0.742555636,2.90968168,2.91140433,2.90837191
66.026649,2.82842712,2.91211973,-0.28929674,2.90906962,2.91081344,2.90776197
66.037141,3.31662479,2.91152726,0.636472725,2.90845792,2.91022309,2.90715238
66.047632,3.46410162,2.91093545,0.743751412,2.9078467,2.90963339,2.90654325
66.058124,2.82842712,2.9103442,-0.286211586,2.90723583,2.90904423,2.90593448
66.068616,3.60555128,2.90975355,0.834144906,2.90662538,2.90845568,2.90532611
66.079107,2.64575131,2.90916357,-0.513237043,2.90601542,2.90786778,2.90471822
66.089599,3.74165739,2.90857416,0.912733932,2.90540581,2.90728043,2.90411067
66.10009,2.23606798,2.90798541,-0.819705701,2.90479668,2.90669375,2.90350359
66.110582,3,2.90739724,0.30430702,2.90418791,2.90610763,2.90289687
66.121074,3.60555128,2.90680969,0.835907644,2.90357956,2.90552212,2.90229055
66.131565,4,2.90622282,1.04583803,2.90297169,2.90493728,2.90168471
66.142057,3.87298335,2.90563653,0.98353791,2.90236418,2.90435302,2.90107922
66.152548,2.82842712,2.90505092,-0.276810038,2.90175715,2.90376943,2.9004742
66.16304,2.44948974,2.9044659,-0.674519205,2.90115048,2.90318641,2.89986953
66.173532,3,2.90388152,0.310029806,2.90054424,2.90260403,2.89926528
66.184023,2.44948974,2.90329784,-0.6736528,2.89993847,2.90202234,2.8986615
66.194515,2.82842712,2.90271475,-0.272557559,2.89933307,2.90144123,2.89805807
66.205006,2.82842712,2.90213236,-0.271487089,2.89872815,2.90086082,2.89745511
66.215498,2.44948974,2.90155058,-0.672354695,2.8981236,2.900281,2.89685251
66.22599,3.60555128,2.90096945,0.839393725,2.89751947,2.89970182,2.89625033
66.236481,3.31662479,2.90038904,0.645163352,2.89691582,2.89912336,2.89564862
66.246973,3.46410162,2.89980924,0.751193968,2.89631253,2.8985455,2.89504727
66.257464,2,2.89923016,-0.948277469,2.89570973,2.89796835,2.89444639
66.267956,2.64575131,2.8986517,-0.502892022,2.8951073,2.89739181,2.89384586
66.278448,2.82842712,2.89807391,-0.263906774,2.89450529,2.89681593,2.89324576
66.288939,3.31662479,2.89749686,0.647400905,2.89390376,2.89624079,2.89264613
66.299431,3.31662479,2.89692044,0.647845934,2.8933026,2.89566626,2.89204686
66.309922,2.64575131,2.89634476,-0.500593093,2.89270193,2.89509247,2.89144806
66.320414,2.64575131,2.89576971,-0.500018401,2.89210162,2.8945193,2.89084963
66.330906,2.82842712,2.89519536,-0.25839551,2.89150174,2.89394683,2.89025161
66.341397,3.46410162,2.89462177,0.754638884,2.89090235,2.8933751,2.88965407
66.351889,2.82842712,2.89404883,-0.256167331,2.89030332,2.89280401,2.88905689
66.36238,3.16227766,2.89347664,0.518460235,2.88970478,2.89223368,2.88846019
66.372872,3.74165739,2.89290512,0.921277518,2.88910661,2.89166399,2.88786385
66.383364,3.87298335,2.89233432,0.990277249,2.88850887,2.89109502,2.88726793
66.393855,3.87298335,2.89176429,0.990565021,2.88791161,2.89052681,2.88667249
66.404347,2,2.89119493,-0.944031211,2.88731473,2.88995927,2.88607741
66.414838,2.23606798,2.89062635,-0.809047821,2.88671833,2.8893925,2.88548281
66.42533,3.46410162,2.89005846,0.757656355,2.88612231,2.88882641,2.88488858
66.435822,2.82842712,2.88949131,-0.24711169,2.88552671,2.88826105,2.88429476
66.446313,3.16227766,2.88892496,0.522831426,2.8849316,2.88769649,2.88370143
66.456805,3.31662479,2.8883593,0.654419961,2.88433687,2.88713261,2.88310846
66.467296,2.82842712,2.88779446,-0.243654128,2.88374262,2.88656953,2.88251598
66.477788,4,2.88723032,1.05487899,2.88314875,2.88600716,2.88192386
66.48828,3,2.88666695,0.336649749,2.88255531,2.88544554,2.88133216
66.498771,3.31662479,2.8861044,0.656140528,2.88196236,2.88488474,2.88074094
66.509263,3.60555128,2.88554257,0.848533266,2.88136978,2.88432465,2.88015009
66.519754,3.60555128,2.88498158,0.848863765,2.88077769,2.88376539,2.87955973
66.530246,2.64575131,2.88442133,-0.488538654,2.88018598,2.88320686,2.87896973
66.540738,2.64575131,2.88386187,-0.487965732,2.8795947,2.88264912,2.87838016
66.551229,3.74165739,2.88330326,0.926474031,2.87900391,2.88209222,2.87779107
66.561721,3.16227766,2.8827454,0.528708104,2.8784135,2.88153607,2.87720235
66.572212,3.46410162,2.88218841,0.762832358,2.87782358,2.88098077,2.87661411
66.582704,3,2.88163218,0.344046245,2.87723404,2.88042623,2.87602624
66.593196,2.44948974,2.88107678,-0.656952841,2.87664493,2.87987251,2.8754388
66.603687,2.82842712,2.88052226,-0.228243582,2.87605631,2.87931966,2.87485185
66.614179,2.44948974,2.87996852,-0.656108816,2.87546808,2.87876759,2.87426527
66.62467,3.87298335,2.87941568,0.996778644,2.87488033,2.87821641,2.87367917
66.635162,3.46410162,2.87886364,0.765008481,2.87429296,2.87766602,2.87309344
66.645654,3,2.87831245,0.348837421,2.87370603,2.87711648,2.87250815
66.656145,3,2.87776219,0.349625249,2.8731196,2.87656786,2.87192334
66.666637,3.16227766,2.87721274,0.533914717,2.87253354,2.87602004,2.8713389
66.677128,3,2.87666422,0.351191947,2.87194798,2.87547314,2.87075495
66.68762,3.16227766,2.87611653,0.534940304,2.87136279,2.87492708,2.87017137
66.698112,2.23606798,2.87556974,-0.799688541,2.87077805,2.8743819,2.86958823
66.708603,4.24264069,2.875024,1.16945145,2.8701938,2.87383776,2.86900557
66.719095,3.16227766,2.87447902,0.53646868,2.86960993,2.87329438,2.86842328
66.729586,2.44948974,2.873935,-0.651494637,2.86902656,2.87275196,2.86784149
66.740078,3.60555128,2.87339187,0.85566314,2.86844357,2.8722104,2.86726007
66.75057,2,2.87284966,-0.934264236,2.86786102,2.87166978,2.86667908
66.761061,2.23606798,2.87230845,-0.797646837,2.86727897,2.87113014,2.86609859
66.771553,3,2.87176814,0.35809476,2.8666973,2.8705914,2.86551847
66.782044,3,2.8712324,0.358842023,2.86611612,2.87005721,2.86493884
66.792536,2.23606798,2.87069402,-0.796634198,2.86553533,2.86952039,2.86435958
66.803028,3.46410162,2.87015662,0.770678269,2.86495499,2.86898453,2.86378077
66.813519,2.82842712,2.86962026,-0.202960917,2.86437513,2.86844971,2.86320244
66.824011,3,2.86908484,0.361821998,2.86379567,2.86791582,2.86262449
66.834502,2.82842712,2.86855048,-0.200308159,2.8632167,2.86738299,2.86204703
66.844994,3.16227766,2.86801709,0.542457896,2.86263812,2.86685112,2.86146996
66.855486,3.31662479,2.86748473,0.670179129,2.86205998,2.86632027,2.86089332
66.865977,3.16227766,2.86695345,0.543437403,2.86148234,2.8657905,2.86031717
66.876469,2.64575131,2.86642317,-0.469757233,2.86090509,2.86526172,2.8597414
66.88696,3.31662479,2.865894,0.671364871,2.86032833,2.86473405,2.85916612
66.897452,3.74165739,2.86536585,0.936104448,2.85975197,2.86420739,2.85859123
66.907944,2.64575131,2.86483878,-0.468067806,2.85917605,2.8636818,2.85801677
66.918435,3.46410162,2.86431286,0.774460301,2.85860062,2.86315735,2.85744281
66.928927,3.31662479,2.86378799,0.672931499,2.85802559,2.86263395,2.85686923
66.939418,2.23606798,2.86326429,-0.791957264,2.85745106,2.86211172,2.85629614
66.94991,4.35889894,2.86274166,1.22317508,2.85687692,2.86159055,2.85572344
66.960402,2.44948974,2.86222018,-0.642441,2.85630322,2.86107052,2.85515118
66.970893,3.60555128,2.86169991,0.862468185,2.85573002,2.86055169,2.85457941
66.981385,2.82842712,2.86118075,-0.18097962,2.85515722,2.86003398,2.85400803
66.991876,3.31662479,2.86066282,0.675249561,2.85458492,2.85951749,2.85343714
67.002368,3,2.86014604,0.373970532,2.854013,2.85900213,2.85286664
67.01286,2.82842712,2.85963047,-0.176644688,2.85344154,2.85848799,2.85229658
67.023351,3.31662479,2.85911617,0.676393833,2.85287058,2.85797511,2.85172701
67.033843,3.31662479,2.85860145,0.676774219,2.85230001,2.85746179,2.85115783
67.044334,3,2.85808964,0.376709909,2.85172994,2.85695139,2.85058915
67.054826,3.60555128,2.85757906,0.864853868,2.85116027,2.85644221,2.85002086
67.065318,3.46410162,2.85706976,0.779122488,2.85059104,2.85593431,2.84945301
67.075809,2.82842712,2.85656182,-0.167733992,2.85002232,2.85542775,2.84888565
67.086301,3.16227766,2.85605514,0.553373763,2.84945399,2.85492246,2.84831869
67.096792,3.46410162,2.85554984,0.780097284,2.84888617,2.85441854,2.84775222
67.107284,3.87298335,2.85504585,1.00892889,2.84831874,2.85391592,2.84718614
67.117776,3,2.85454323,0.381387953,2.84775176,2.85341466,2.84662051
67.128267,3.16227766,2.85404204,0.555189713,2.84718529,2.85291484,2.84605537
67.138759,2.82842712,2.85354221,-0.158477411,2.84661921,2.85241637,2.84549063
67.14925,3.87298335,2.85304386,1.00992053,2.84605364,2.85191936,2.84492638
67.159742,3.60555128,2.8525469,0.867758246,2.84548847,2.85142375,2.84436253
67.170234,3,2.85205141,0.38464086,2.84492374,2.8509296,2.84379912
67.180725,2.64575131,2.85155745,-0.453658613,2.84435953,2.85043697,2.84323621
67.191217,2.82842712,2.85106509,-0.150459186,2.84379571,2.84994594,2.8426737
67.201708,3,2.85057416,0.386556381,2.84323239,2.84945634,2.84211168
67.2122,3.60555128,2.85008474,0.869175779,2.84266948,2.84896824,2.84155006
67.222692,3.31662479,2.84959689,0.683394397,2.84210702,2.8484817,2.84098889
67.233183,3.74165739,2.84911068,0.944746902,2.84154506,2.8479968,2.84042821
67.243675,3.46410162,2.84862604,0.784522514,2.84098351,2.84751346,2.83986793
67.254166,3.16227766,2.84814309,0.56047709,2.84042246,2.84703181,2.83930816
67.264658,3.74165739,2.84766177,0.945513417,2.83986181,2.84655178,2.83874878
67.27515,2.44948974,2.84718213,-0.630628567,2.83930162,2.84607343,2.83818984
67.285641,3.16227766,2.84670426,0.561759197,2.83874194,2.84559685,2.83763141
67.296133,3,2.8462281,0.392137605,2.83818265,2.84512196,2.83707338
67.306624,3.16227766,2.84575375,0.562604575,2.83762388,2.84464889,2.83651585
67.317116,2.82842712,2.84528116,-0.129823104,2.83706551,2.84417757,2.83595871
67.327608,3.46410162,2.84481041,0.786950576,2.83650759,2.84370807,2.83540203
67.338099,3.16227766,2.84434155,0.563858232,2.83595018,2.84324048,2.83484585
67.348591,2.64575131,2.84387455,-0.445110368,2.83539318,2.84277473,2.83429007
67.359082,3.16227766,2.84340951,0.564684111,2.83483668,2.84231094,2.83373479
67.369574,2.82842712,2.84294639,-0.120495916,2.83428059,2.84184906,2.83317991
67.380066,2.23606798,2.84248526,-0.778727987,2.83372496,2.84138917,2.83262548
67.390557,2.64575131,2.84202619,-0.443029204,2.83316984,2.84093133,2.83207156
67.401049,2.82842712,2.84156913,-0.114638598,2.83261512,2.84047551,2.83151804
67.41154,3.16227766,2.84111422,0.566712841,2.83206091,2.84002182,2.83096502
67.422032,2.82842712,2.84066139,-0.110608601,2.83150711,2.83957021,2.8304124
67.432524,3,2.84021073,0.399736504,2.83095376,2.83912077,2.82986024
67.443015,2.44948974,2.83976232,-0.624717997,2.83040093,2.83867357,2.82930858
67.453507,2.23606798,2.83931611,-0.776690503,2.82984851,2.83822858,2.82875733
67.463998,2,2.83887224,-0.915899691,2.82929659,2.83778591,2.82820658
67.47449,3.60555128,2.83843066,0.87585422,2.82874509,2.83734552,2.82765623
67.484982,3.16227766,2.83799146,0.569461329,2.82819404,2.83690751,2.82710634
67.495473,2.64575131,2.83755471,-0.437953651,2.82764351,2.83647196,2.82655696
67.505965,3,2.83712039,0.403583457,2.82709338,2.83603883,2.82600798
67.516456,2.64575131,2.83668863,-0.43696375,2.82654377,2.83560825,2.8254595
67.526948,2.82842712,2.83625939,-0.0885000874,2.82599456,2.83518018,2.82491143
67.53744,2.64575131,2.83583276,-0.435983318,2.82544582,2.83475473,2.82436382
67.547931,3.16227766,2.83540885,0.571724422,2.82489759,2.83433198,2.82381672
67.558423,2.44948974,2.83498761,-0.620884742,2.82434977,2.83391191,2.82327002
67.568914,2.44948974,2.83456918,-0.620547691,2.82380247,2.83349464,2.82272383
67.579406,3.16227766,2.83415355,0.572821188,2.82325557,2.83308017,2.82217805
67.589898,3.31662479,2.8337408,0.694898544,2.82270914,2.83266858,2.82163272
67.600389,2.64575131,2.83333105,-0.433104768,2.82216322,2.83225997,2.8210879
67.610881,3.16227766,2.83292427,0.573893185,2.82161772,2.83185434,2.82054349
67.621372,3.46410162,2.83252666,0.794716905,2.82107273,2.83145786,2.81999959
67.631864,3.16227766,2.8321261,0.574588165,2.82052815,2.83105845,2.8194561
67.642356,3.31662479,2.83172876,0.696344765,2.81998403,2.83066224,2.81891307
67.652847,3.46410162,2.83133474,0.795466454,2.81944043,2.83026935,2.81837055
67.663339,2.64575131,2.83094403,-0.430340237,2.81889725,2.82987977,2.81782843
67.67383,3,2.83055679,0.411634799,2.81835458,2.82949365,2.81728683
67.684322,2.82842712,2.83017302,-0.0417839607,2.81781232,2.829111,2.81674564
67.694814,2,2.82979284,-0.910929659,2.81727053,2.82873194,2.8162049
67.705305,3.16227766,2.82941637,0.576941324,2.81672925,2.82835657,2.81566468
67.715797,2,2.82904361,-0.910518321,2.81618839,2.82798493,2.81512487
67.726288,2.64575131,2.82867474,-0.427695482,2.81564805,2.82761715,2.81458557
67.73678,2.82842712,2.82830976,0.010833539,2.81510812,2.82725328,2.81404669
67.747272,3.16227766,2.82794881,0.578211768,2.81456866,2.82689343,2.81350826
67.757763,2.23606798,2.82759202,-0.769106004,2.81402972,2.82653773,2.81297035
67.768255,2.44948974,2.82723943,-0.614613444,2.81349119,2.82618623,2.81243285
67.778746,3.46410162,2.8268912,0.798254607,2.81295319,2.82583909,2.81189586
67.789238,2.82842712,2.82654737,0.0433561071,2.81241559,2.82549635,2.81135929
67.79973,3.46410162,2.8262081,0.798682363,2.81187847,2.82515816,2.81082318
67.810221,2.82842712,2.82587352,0.0505331783,2.81134186,2.82482466,2.81028758
67.820713,3.16227766,2.8255437,0.580287825,2.81080568,2.82449592,2.8097524
67.831204,3.16227766,2.82521882,0.580567689,2.81027001,2.82417211,2.80921773
67.841696,3.31662479,2.82489894,0.701231665,2.80973476,2.8238533,2.80868347
67.852188,3,2.82458424,0.418826649,2.80919998,2.82353967,2.80814968
67.862679,2.23606798,2.82427487,-0.766946474,2.80866572,2.82323136,2.80761641
67.873171,3.31662479,2.82397093,0.701893057,2.80813187,2.82292848,2.80708355
67.883662,3,2.82367261,0.419913551,2.80759855,2.82263122,2.8065512
67.894154,3.60555128,2.82338002,0.884404466,2.80706565,2.82233969,2.80601927
67.904646,3.16227766,2.82309334,0.582395334,2.80653322,2.82205406,2.80548781
67.915137,3.31662479,2.82281276,0.702717604,2.80600131,2.82177454,2.80495687
67.925629,3.46410162,2.8225384,0.800976411,2.80546982,2.82150123,2.80442634
67.93612,3.60555128,2.8222705,0.885031509,2.80493885,2.82123438,2.80389632
67.946612,2.64575131,2.82200919,-0.419830772,2.8044083,2.82097411,2.80336673
67.957104,3.31662479,2.82175468,0.70347005,2.80387823,2.82072065,2.8028376
67.967595,2.44948974,2.8215072,-0.609932336,2.80334867,2.82047421,2.80230899
67.978087,3.87298335,2.8212669,1.02553227,2.80281954,2.82023495,2.8017808
67.988578,3.31662479,2.82103406,0.703982051,2.80229093,2.82000315,2.80125312
67.99907,2.44948974,2.82080885,-0.609359588,2.80176274,2.81977898,2.80072587
68.009562,2.82842712,2.82059153,0.0885189154,2.80123503,2.81956269,2.80019908
68.020053,2.23606798,2.82038235,-0.764404589,2.80070784,2.81935455,2.79967281
68.030545,2.82842712,2.82018154,0.0908051882,2.80018107,2.81915477,2.79914696
68.041036,2.82842712,2.8199894,0.0918570963,2.79965483,2.81896366,2.79862163
68.051528,3,2.81980616,0.424492451,2.79912901,2.81878145,2.79809672
68.06202,3.31662479,2.81963213,0.704977065,2.79860366,2.81860844,2.79757228
68.072511,3,2.81946762,0.424891018,2.79807884,2.81844497,2.79704836
68.083003,2.64575131,2.81931292,-0.41660726,2.79755444,2.81829129,2.79652486
68.093494,3.31662479,2.81916838,0.705305901,2.79703056,2.81814777,2.79600188
68.103986,3.16227766,2.8190343,0.585869745,2.79650712,2.81801472,2.79547932
68.114478,3.16227766,2.81891107,0.585974908,2.79598414,2.81789251,2.79495723
68.124969,3,2.81879905,0.425677047,2.7954617,2.81778152,2.79443567
68.135461,3,2.81869862,0.425794998,2.79493967,2.81768211,2.79391452
68.145952,3,2.8186102,0.425898819,2.79441818,2.81759471,2.7933939
68.156444,3.46410162,2.81853418,0.80347211,2.79389711,2.81751973,2.7928737
68.166936,2,2.81847104,-0.904693891,2.79337651,2.8174576,2.79235397
68.177427,3.46410162,2.81842122,0.803542404,2.79285645,2.81740881,2.79183477
68.187919,1.73205081,2.81820005,-1.04218484,2.79214992,2.81737383,2.79131599
68.19841,2.44948974,2.81817857,-0.607197522,2.79163099,2.81735316,2.79079773
68.208902,1.73205081,2.81817194,-1.04217136,2.79111249,2.81734734,2.79027989
68.219394,3.16227766,2.81818072,0.58659777,2.79059446,2.81735693,2.78976253
68.229885,3.16227766,2.81820548,0.586576662,2.79007696,2.81738251,2.78924569
68.240377,3,2.81824685,0.426325171,2.78955989,2.81742469,2.78872928
68.250868,4.47213595,2.81830546,1.28601341,2.78904335,2.81748412,2.78821339
68.26136,3.16227766,2.81838199,0.586426181,2.78852723,2.81756147,2.78769792
68.271852,3.31662479,2.81847716,0.705795741,2.7880116,2.81765746,2.78718293
68.282343,3.16227766,2.8185917,0.586247355,2.78749649,2.81777282,2.78666847
68.292835,2,2.81872641,-0.904835017,2.78698181,2.81790835,2.78615443
68.303326,2.64575131,2.81888209,-0.416089869,2.78646766,2.81806485,2.78564091
68.313818,3,2.81908966,0.425335561,2.78595394,2.81827326,2.78512783
68.32431,3.16227766,2.81929,0.585651481,2.7854407,2.81847443,2.78461521
68.334801,3,2.81951406,0.424836367,2.78492798,2.81869932,2.78410313
68.345293,3.46410162,2.81976289,0.80270712,2.7844157,2.81894899,2.78359147
68.355784,2.82842712,2.82003753,0.0915947383,2.78390395,2.81922447,2.78308033
68.366276,2,2.82033915,-0.905725758,2.78339263,2.81952693,2.78256963
68.376768,3.16227766,2.82066893,0.584473039,2.78288179,2.81985756,2.7820594
68.387259,3.31662479,2.82102809,0.703986291,2.78237148,2.82021758,2.78154969
68.397751,3.87298335,2.82141805,1.02545858,2.7818616,2.82060839,2.78104042
68.408242,3.31662479,2.82184014,0.703409304,2.78135225,2.82103134,2.78053167
68.418734,2.82842712,2.82229594,0.0783018595,2.78084333,2.82148801,2.78002336
68.429226,3,2.82278701,0.420966737,2.7803349,2.82197995,2.77951552
68.439717,1.73205081,2.82331496,-1.04463589,2.77982699,2.82250879,2.7790082
68.450209,3,2.82388169,0.419664519,2.77931952,2.82307641,2.77850132
68.4607,2.82842712,2.82448899,0.0627545855,2.77881258,2.8236846,2.77799497
68.471192,3.31662479,2.82513897,0.701060493,2.77830608,2.82433549,2.77748904
68.481684,4,2.82583374,1.08358952,2.77780005,2.82503117,2.7769836
68.492175,3.60555128,2.82657549,0.882596048,2.77729456,2.82577384,2.77647868
68.502667,2.64575131,2.82736679,-0.426163675,2.7767895,2.82656607,2.7759742
68.513158,2.64575131,2.82821007,-0.427151914,2.77628498,2.82741029,2.77547024
68.52365,2.23606798,2.82910825,-0.770091078,2.77578089,2.82830942,2.77496671
68.534142,2.44948974,2.83006418,-0.616907156,2.77527728,2.82926632,2.77446367
68.544633,2,2.83108093,-0.911636405,2.77477421,2.83028406,2.77396115
68.555125,2.82842712,2.83216203,-0.0611138322,2.77427157,2.83136614,2.77345907
68.565616,2.64575131,2.83331086,-0.433081452,2.77376946,2.83251598,2.77295752
68.576108,3.31662479,2.83453149,0.69432939,2.77326779,2.83373763,2.7724564
68.5866,2.44948974,2.83582795,-0.621561102,2.77276661,2.83503513,2.77195576
68.597091,3.31662479,2.83720452,0.692401816,2.77226596,2.83641276,2.77145565
68.607583,3.46410162,2.83866621,0.79084474,2.77176574,2.83787553,2.77095597
68.618074,2.23606798,2.84021786,-0.777270794,2.77126606,2.83942828,2.77045683
68.628566,3,2.84186526,0.397661585,2.77076682,2.8410768,2.76995812
68.639058,3.46410162,2.84361419,0.787710242,2.77026806,2.84282687,2.76945989
68.649549,3.16227766,2.84547085,0.562855943,2.76976984,2.8446847,2.76896219
68.660041,3.46410162,2.84744248,0.78527647,2.76927205,2.84665753,2.76846493
68.670532,3.16227766,2.84953617,0.559232952,2.7687748,2.84875244,2.7679682
68.681024,3.31662479,2.85176036,0.681809672,2.76827799,2.85097789,2.76747191
68.691516,2.23606798,2.85412361,-0.786165143,2.76778166,2.85334242,2.7669761
68.702007,2.82842712,2.85663514,-0.167952413,2.76728587,2.85585527,2.76648082
68.712499,2.82842712,2.85930571,-0.175723041,2.76679052,2.85852721,2.76598597
68.72299,2.64575131,2.86214601,-0.465182438,2.7662957,2.86136891,2.76549166
68.733482,2.82842712,2.86516876,-0.191681077,2.76580132,2.8643931,2.76499779
68.743974,2.64575131,2.86838698,-0.471842845,2.76530743,2.86761281,2.7645044
68.754465,3,2.87181485,0.358029535,2.76481408,2.87104222,2.76401154
68.764957,3.16227766,2.87546889,0.535545306,2.76432117,2.87469785,2.76351912
68.775448,3.31662479,2.87936577,0.661255641,2.76382879,2.87859638,2.76302723
68.78594,2.64575131,2.8835253,-0.487620742,2.76333685,2.88275763,2.76253578
68.796432,3,2.88796807,0.334711707,2.7628454,2.88720218,2.76204482
68.806923,3.31662479,2.89271668,0.651082259,2.76235449,2.89195264,2.76155439
68.817415,3.31662479,2.89779744,0.647168716,2.76186402,2.89703534,2.7610644
68.827906,3.16227766,2.90323747,0.508959914,2.76137409,2.90247738,2.76057494
68.838398,2.64575131,2.90906885,-0.51314475,2.7608846,2.90831086,2.76008592
68.84889,3.46410162,2.91532553,0.740794229,2.7603956,2.91456975,2.75959739
68.859381,3.74165739,2.92204511,0.905324405,2.75990713,2.92129164,2.75910939
68.869873,2.44948974,2.92927145,-0.692662762,2.75941911,2.92852041,2.75862183
68.880364,3.87298335,2.93705066,0.967436142,2.75893162,2.93630218,2.75813481
68.890856,4.12310563,2.94543731,1.08520427,2.75844458,2.94469152,2.75764822
68.901348,4,2.95449018,1.02250175,2.75795803,2.95374723,2.75716213
68.911839,3.31662479,2.96427509,0.593590512,2.75747202,2.96353515,2.75667656
68.922331,2.64575131,2.9748691,-0.573687887,2.75698645,2.97413234,2.75619144
68.932822,3.46410162,2.98635504,0.69119214,2.75650142,2.98562165,2.75570686
68.943314,3.16227766,2.99883108,0.404285275,2.75601683,2.99810128,2.75522271
68.953806,2.23606798,3.0124051,-0.881099951,2.75553274,3.01167912,2.75473906
68.964297,2.44948974,3.02719964,-0.760072297,2.75504918,3.02647773,2.75425594
68.974789,3.46410162,3.0433591,0.648646683,2.75456607,3.04264154,2.75377326
68.98528,4.24264069,3.0610429,1.08701324,2.75408349,3.06033001,2.75329112
68.995772,2.44948974,3.0804421,-0.794325097,2.75360136,3.07973421,2.75280942
69.006264,3.74165739,3.10177406,0.799927073,2.75311973,3.10107154,2.75232821
69.016755,3.87298335,3.12529583,0.864689259,2.75263863,3.12459909,2.75184754
69.027247,3.46410162,3.15132636,0.559263135,2.75215798,3.15063586,2.75136731
69.037738,3.74165739,3.18025519,0.749267775,2.75167787,3.17957145,2.75088761
69.04823,3.46410162,3.21260446,0.501494919,2.7511982,3.21192809,2.75040836
69.058722,4.58257569,3.24908164,1.15477013,2.75071903,3.24841333,2.7499296
69.069213,3.31662479,3.2907018,0.161006183,2.7502404,3.2900424,2.74945138
69.079705,4.35889894,3.33898094,1.0099099,2.74976221,3.33833152,2.7489736
69.090196,4,3.39616809,0.777066223,2.74928457,3.39553004,2.74849636
69.100688,4.12310563,3.46562834,0.810849729,2.74880737,3.46500352,2.74801956
69.11118,3.31662479,3.55220859,-0.485369756,2.74833066,3.55159941,2.74754326
69.121671,3.60555128,3.66264372,-0.238940253,2.7478545,3.66205331,2.74706749
69.132163,4.12310563,3.80562485,0.563454325,2.74737879,3.80505701,2.74659216
69.142654,4.12310563,3.99163845,0.362584024,2.74690361,3.99109744,2.74611738
69.153146,4.47213595,4.23202383,0.490012375,2.74642888,4.23151389,2.74564304
69.163638,5,4.53730647,0.680215795,2.74595465,4.53683116,2.74516919
69.174129,5.47722558,4.91524197,0.749655656,2.74548096,4.9148035,2.74469588
69.184621,5.56776436,5.36909333,0.445725287,2.74500772,5.36869219,2.74422302
69.195112,6.4807407,5.89613393,0.76459582,2.74453502,5.89576889,2.7437507
69.205604,6.78232998,6.48758137,0.542907554,2.74406277,6.48724982,2.74327882
69.216096,7.68114575,7.12856856,0.743355358,2.74359101,7.12826702,2.74280744
69.226587,8,7.79893245,0.448405563,2.7431198,7.79865701,2.74233659
69.237079,10,8.47404253,1.23529651,2.74264903,8.47378919,2.74186619
69.24757,11.4455231,9.12456752,1.52346829,2.74217881,9.1243324,2.74139633
69.258062,12.0415946,9.71671022,1.52475715,2.74170904,9.71648956,2.74092692
69.268554,12.9614814,10.2117687,1.65822576,2.74123976,10.2115589,2.74045801
69.279045,13.4164079,10.5686618,1.6875266,2.74077103,10.5684592,2.73998963
69.289537,14.4222051,10.7508871,1.91606837,2.74030275,10.750688,2.7395217
69.300028,13.3416641,10.7369283,1.61391939,2.73983501,10.7367291,2.73905431
69.31052,13.4907376,10.5285645,1.72109646,2.73936772,10.5283615,2.73858737
69.321012,11.8321596,10.1500397,1.29696565,2.73890093,10.1498292,2.73812092
69.331503,11.1803399,9.63911735,1.24145984,2.73843468,9.63889588,2.73765501
69.341995,11,9.03660503,1.40121196,2.73796888,9.03636894,2.73718956
69.352486,8.54400375,8.38059199,0.404242198,2.73750363,8.38033757,2.73672464
69.362978,8.66025404,7.70417657,0.977792139,2.73703883,7.70389997,2.73626017
69.37347,7.87400787,7.03599354,0.915431227,2.73657452,7.03569086,2.7357962
69.383961,7.87400787,6.40022975,1.21399264,2.73611076,6.3998972,2.73533277
69.394453,6.92820323,5.81616191,1.0545337,2.73564746,5.81579617,2.73486979
69.404944,5.91607978,5.29793358,0.786222743,2.73518469,5.2975323,2.73440735
69.415436,5.74456265,4.8534819,0.943970734,2.73472238,4.85304413,2.73394536
69.425928,4.35889894,4.48468473,-0.354662926,2.73426057,4.48421123,2.73348387
69.436419,4.89897949,4.18769147,0.84337893,2.7337993,4.18718467,2.73302291
69.446911,4.24264069,3.95419999,0.537066754,2.73333848,3.95366357,2.73256241
69.457402,4.89897949,3.77353697,1.06086876,2.73287821,3.77297518,2.73210245
69.467894,4.12310563,3.63442032,0.699060304,2.73241839,3.63383736,2.73164295
69.478386,3.46410162,3.52659965,-0.24999607,2.73195908,3.5259992,2.73118394
69.488877,3.46410162,3.44161901,0.14994199,2.7315003,3.44100408,2.73072547
69.499369,3.46410162,3.37301425,0.301806835,2.73104198,3.37238716,2.73026745
69.50986,2,3.31616882,-1.14724401,2.73058421,3.31553133,2.72980997
69.520352,3.74165739,3.26788322,0.68831255,2.73012689,3.26723667,2.72935295
69.530844,3.46410162,3.22602043,0.487935632,2.72967007,3.22536585,2.72889643
69.541335,2.82842712,3.18915179,-0.600603584,2.72921379,3.18848999,2.72844044
69.551827,2.82842712,3.15629974,-0.572601619,2.72875798,3.15563142,2.72798491
69.562318,2.64575131,3.12679122,-0.693570407,2.7283027,3.12611695,2.72752992
69.57281,2,3.10012319,-1.04886758,2.72784788,3.09944349,2.72707539
69.583302,3.87298335,3.07591666,0.892785913,2.72739356,3.07523197,2.72662135
69.593793,3.60555128,3.05386766,0.742754074,2.72693979,3.05317839,2.72616786
69.604285,2.64575131,3.03371882,-0.622870377,2.72648647,3.03302533,2.72571482
69.614776,3.16227766,3.01525979,0.383429093,2.7260337,3.01456242,2.72526232
69.625268,2,2.99830312,-0.999151198,2.72558139,2.99760217,2.72481028
69.63576,1,2.98269121,-1.40808068,2.72512957,2.98198695,2.72435874
69.646251,3.46410162,2.96828636,0.704141505,2.7246783,2.96757904,2.72390774
69.656743,3.16227766,2.95496402,0.455317079,2.72422749,2.95425388,2.72345719
69.667234,2.44948974,2.94261969,-0.702232121,2.72377723,2.94190694,2.72300719
69.677726,2.44948974,2.93115662,-0.694022245,2.72332742,2.93044143,2.72255764
69.688218,3.46410162,2.92049252,0.737298509,2.72287812,2.91977508,2.72210859
69.698709,2.44948974,2.91055431,-0.679017355,2.72242936,2.90983478,2.72166009
69.709201,2.23606798,2.90127431,-0.81560182,2.72198105,2.90055283,2.72121204
69.719692,3.31662479,2.89259569,0.651175171,2.7215333,2.8918724,2.72076453
69.730184,2.44948974,2.88446447,-0.659526137,2.721086,2.88373949,2.72031748
69.740676,3.16227766,2.87683467,0.534268652,2.72063921,2.87610812,2.71987094
69.751167,3.16227766,2.86966494,0.540936889,2.72019296,2.86893693,2.71942493
69.761659,3.46410162,2.86291617,0.775361493,2.71974717,2.86218679,2.71897938
69.77215,2.82842712,2.85655565,-0.167715595,2.71930192,2.85582499,2.71853438
69.782642,3.74165739,2.85055147,0.943984065,2.71885714,2.84981962,2.71808983
69.793134,2.64575131,2.84487654,-0.446234496,2.71841286,2.84414357,2.71764578
69.803625,3.60555128,2.83950621,0.875240003,2.71796912,2.8387722,2.71720228
69.814117,3.16227766,2.83441668,0.57259146,2.71752585,2.83368169,2.71675923
69.824608,2.82842712,2.8295882,-0.0340745122,2.71708312,2.82885229,2.71631673
69.8351,4,2.82500098,1.08397372,2.71664085,2.82426422,2.71587469
69.845592,3.74165739,2.8206383,0.959697393,2.71619908,2.81990073,2.71543315
69.856083,2.64575131,2.81648484,-0.413199135,2.71575786,2.81574651,2.71499215
69.866575,2.44948974,2.81252543,-0.602524426,2.71531711,2.81178639,2.71455161
69.877066,3.31662479,2.80874767,0.712654981,2.7148769,2.80800797,2.71411161
69.887558,2.82842712,2.80513877,0.152605231,2.71443715,2.80439844,2.71367208
69.89805,2.64575131,2.801688,-0.394888201,2.7139979,2.80094709,2.71323304
69.908541,1.73205081,2.79839571,-1.03263977,2.7135592,2.79765425,2.71279455
69.919033,3.46410162,2.79523142,0.817844849,2.71312096,2.79448944,2.71235652
69.929524,3.16227766,2.79219728,0.60834232,2.71268327,2.79145481,2.71191904
69.940016,3.31662479,2.78928472,0.726181842,2.71224604,2.7885418,2.71148201
69.950508,2.82842712,2.78648664,0.204793759,2.71180932,2.78574328,2.71104549
69.960999,2.64575131,2.78380759,-0.371559256,2.71137314,2.78306383,2.71060951
69.971491,2.23606798,2.78121844,-0.73834305,2.71093743,2.78047429,2.71017399
69.981982,2.64575131,2.77872492,-0.364655471,2.71050226,2.77798042,2.70973901
69.992474,2.64575131,2.77632111,-0.361344438,2.71006755,2.77557627,2.7093045
70.002966,3.16227766,2.77400217,0.623117554,2.70963336,2.77325701,2.70887049
70.013457,2.64575131,2.77176359,-0.354982081,2.7091997,2.77101813,2.70843702
70.023949,3.16227766,2.76960053,0.626639552,2.70876651,2.76885479,2.70800401
70.03444,2.82842712,2.76750932,0.246815333,2.70833387,2.7667633,2.70757155
70.044932,2.82842712,2.76548571,0.250881268,2.70790169,2.76473945,2.70713955
70.055424,2.82842712,2.76352635,0.254756297,2.70747002,2.76277986,2.70670806
70.065915,2.23606798,2.76162807,-0.724955237,2.70703889,2.76088135,2.70627711
70.076407,1.73205081,2.75978738,-1.01377343,2.70660823,2.75904045,2.70584662
70.086898,2.82842712,2.7580017,0.265377882,2.70617811,2.75725458,2.70541668
70.09739,2.64575131,2.75626796,-0.33244044,2.70574846,2.75552064,2.70498719
70.107882,3,2.75458374,0.495395056,2.70531932,2.75383625,2.70455822
70.118373,2.82842712,2.75294679,0.274736852,2.70489072,2.75219914,2.70412978
70.128865,2.64575131,2.75135452,-0.324966475,2.70446259,2.75060671,2.70370181
70.139356,3.46410162,2.74980511,0.845160638,2.704035,2.74905716,2.70327439
70.149848,2.64575131,2.74829625,-0.320226393,2.70360788,2.74754816,2.70284743
70.16034,4.24264069,2.74682621,1.22303494,2.70318127,2.74607799,2.70242097
70.170831,2.82842712,2.74539333,0.288155843,2.7027552,2.74464499,2.70199505
70.181323,3,2.74399568,0.505968699,2.7023296,2.74324722,2.70156961
70.191814,2.82842712,2.74263192,0.292908192,2.70190455,2.74188335,2.7011447
70.202306,2.64575131,2.7413003,-0.309109997,2.70147996,2.74055164,2.70072026
70.212798,2.23606798,2.73999955,-0.709881379,2.70105588,2.73925079,2.70029633
70.223289,2.23606798,2.73872845,-0.708985523,2.70063235,2.7379796,2.69987293
70.233781,3,2.73748549,0.512361697,2.70020928,2.73673656,2.69945001
70.244272,2.64575131,2.73626972,-0.300862778,2.69978676,2.73552071,2.69902763
70.254764,3.31662479,2.73507978,0.762590987,2.69936471,2.73433069,2.69860571
70.265256,2.82842712,2.73391488,0.307428432,2.69894316,2.73316573,2.6981843
70.275747,3.16227766,2.73277377,0.655365464,2.69852217,2.73202455,2.69776343
70.286239,3,2.73165543,0.518019852,2.69810163,2.73090615,2.69734303
70.29673,3,2.73055917,0.519076897,2.69768165,2.72980984,2.69692318
70.307222,2,2.72948392,-0.854098307,2.69726213,2.72873452,2.69650379
70.317714,2.64575131,2.72842894,-0.28753718,2.69684313,2.7276795,2.6960849
70.328205,3.87298335,2.72739356,1.07032228,2.69642466,2.72664407,2.69566656
70.338697,2.23606798,2.72637683,-0.700220573,2.69600667,2.72562729,2.69524869
70.349188,2.82842712,2.72537823,0.321012294,2.69558923,2.72462865,2.69483136
70.35968,2.44948974,2.72439691,-0.5243159,2.69517225,2.72364728,2.6944145
70.370172,3.31662479,2.7234323,0.770189905,2.69475578,2.72268264,2.69399814
70.380663,2.82842712,2.72248389,0.325489217,2.69433985,2.7217342,2.69358233
70.391155,3.16227766,2.72155092,0.663872532,2.6939244,2.72080119,2.69316698
70.401646,3,2.720633,0.528551793,2.69350949,2.71988324,2.69275218
70.412138,3,2.71972742,0.529407762,2.69309505,2.71897763,2.69233785
70.42263,3.46410162,2.71883778,0.863286647,2.69268112,2.71808796,2.69192402
70.433121,3.31662479,2.71796166,0.77373324,2.69226774,2.71721182,2.69151074
70.443613,3.46410162,2.71709844,0.864293452,2.69185483,2.71634857,2.69109792
70.454104,3.16227766,2.71624784,0.667854639,2.69144246,2.71549795,2.69068565
70.464596,2.82842712,2.71540927,0.33618128,2.69103057,2.71465935,2.69027385
70.475088,2.64575131,2.71458241,-0.26235682,2.69061918,2.71383247,2.68986256
70.485579,3,2.71376695,0.535007522,2.69020834,2.71301699,2.68945181
70.496071,2.82842712,2.71296237,0.339801058,2.68979797,2.71221238,2.68904152
70.506562,3.31662479,2.71216845,0.777467902,2.68938814,2.71141845,2.68863178
70.517054,4.12310563,2.71138472,1.18815862,2.68897879,2.7106347,2.68822252
70.527546,3.31662479,2.71061104,0.778468848,2.68856994,2.709861,2.68781375
70.538037,2.82842712,2.709847,0.344354653,2.68816165,2.70909694,2.68740553
70.548529,3.46410162,2.70909213,0.868912816,2.68775382,2.70834206,2.68699778
70.55902,3,2.70834637,0.540049652,2.68734654,2.70759628,2.68659058
70.569512,3.60555128,2.7076093,0.947598004,2.68693973,2.70685919,2.68618384
70.580004,3.60555128,2.70688071,0.947982363,2.68653343,2.70613059,2.68577762
70.590495,2.64575131,2.70616044,-0.245782682,2.68612767,2.70541029,2.68537193
70.600987,3,2.70544809,0.542726371,2.68572239,2.70469792,2.68496672
70.611478,2.82842712,2.70474356,0.35168674,2.68531766,2.70399338,2.68456205
70.62197,3.31662479,2.7040465,0.782673806,2.68491339,2.70329631,2.68415785
70.632462,2.64575131,2.70335676,-0.240011357,2.68450964,2.70260655,2.68375415
70.642953,3.60555128,2.7026742,0.950198442,2.68410643,2.70192397,2.68335101
70.653445,2.64575131,2.70199847,-0.237164842,2.68370369,2.70124822,2.68294833
70.663936,3,2.70132953,0.54650752,2.6833015,2.70057926,2.68254619
70.674428,3,2.70066705,0.547113285,2.68289979,2.69991677,2.68214453
70.68492,3.31662479,2.70001093,0.785247644,2.68249858,2.69926062,2.68174337
70.695411,2.82842712,2.69936104,0.359257681,2.68209792,2.69861072,2.68134276
70.705903,2.44948974,2.69871711,-0.499226769,2.68169773,2.69796677,2.68094262
70.716394,2.64575131,2.69807909,-0.228752661,2.68129809,2.69732873,2.68054303
70.726886,2.44948974,2.69744671,-0.497952777,2.68089891,2.69669633,2.6801439
70.737378,2,2.69681988,-0.834757379,2.68050025,2.69606948,2.67974528
70.747869,2.82842712,2.69619852,0.363632514,2.68010214,2.69544809,2.67934721
70.758361,2.82842712,2.69558237,0.364478748,2.6797045,2.69483192,2.6789496
70.768852,3.46410162,2.69497141,0.877000687,2.67930741,2.69422094,2.67855254
70.779344,2,2.6943654,-0.833285906,2.67891078,2.6936149,2.67815596
70.789836,2.82842712,2.69376428,0.36696437,2.67851467,2.69301375,2.67775988
70.800327,2.64575131,2.69316797,-0.217753668,2.67811911,2.69241742,2.67736434
70.810819,3.16227766,2.69257626,0.685347652,2.67772402,2.69182568,2.67696928
70.82131,2.44948974,2.69198913,-0.492442271,2.67732947,2.69123853,2.67657476
70.831802,3,2.69140638,0.555512033,2.6769354,2.69065575,2.67618071
70.842294,3.16227766,2.69082795,0.686621954,2.67654184,2.69007729,2.67578717
70.852785,2.44948974,2.6902538,-0.490677142,2.67614882,2.68950311,2.67539417
70.863277,2.64575131,2.68968372,-0.209600589,2.67575628,2.688933,2.67500165
70.873768,3.16227766,2.68911772,0.687866224,2.67536428,2.68836697,2.67460967
70.88426,2.44948974,2.6885556,-0.488943617,2.67497276,2.68780482,2.67421816
70.894752,2.44948974,2.68799734,-0.488372394,2.67458175,2.68724652,2.67382716
70.905243,2.64575131,2.68744289,-0.204185156,2.67419128,2.68669204,2.67343671
70.915735,3,2.68689207,0.55956048,2.67380129,2.68614118,2.67304672
70.926226,2.64575131,2.6863449,-0.201478512,2.67341184,2.68559398,2.67265728
70.936718,3.31662479,2.68580121,0.794244033,2.67302287,2.68505024,2.67226832
70.94721,2.82842712,2.68526096,0.378373052,2.67263441,2.68450995,2.67187986
70.957701,2.82842712,2.68472414,0.37908177,2.6722465,2.68397309,2.67149194
70.968193,2.64575131,2.68419057,-0.196059322,2.67185905,2.68343948,2.6711045
70.978684,3.46410162,2.68366029,0.883425904,2.67147216,2.68290916,2.6707176
70.989176,2.23606798,2.68313313,-0.668629305,2.67108574,2.68238195,2.67033118
70.999668,2.82842712,2.68260907,0.381861305,2.67069983,2.68185785,2.66994526
71.010159,3.46410162,2.6820881,0.884315278,2.67031446,2.68133684,2.66955988
71.020651,3.87298335,2.68157007,1.09151879,2.66992957,2.68081876,2.66917498
71.031142,3.60555128,2.68105502,0.961507286,2.66954523,2.68030365,2.66879063
71.041634,2.82842712,2.68054278,0.384557342,2.66916136,2.67979136,2.66840674
71.052126,2.64575131,2.68003335,-0.185154086,2.668778,2.67928188,2.66802337
71.062617,3.16227766,2.67952672,0.694802803,2.66839519,2.67877521,2.66764054
71.073109,2.44948974,2.67902276,-0.479096042,2.66801285,2.67827119,2.66725818
71.0836,3.74165739,2.6785215,1.03108481,2.66763106,2.67776987,2.66687636
71.094092,3.46410162,2.6780228,0.88661086,2.66724974,2.67727111,2.66649502
71.104584,3,2.67752665,0.567867366,2.66686893,2.67677491,2.66611419
71.115075,2.64575131,2.67703307,-0.176866503,2.66648867,2.67628127,2.6657339
71.125567,2.23606798,2.67654191,-0.6636821,2.66610888,2.67579005,2.66535408
71.136058,3.46410162,2.67605322,0.887720902,2.66572964,2.67530129,2.66497481
71.14655,2.23606798,2.67556686,-0.662947118,2.66535088,2.67481487,2.66459601
71.157042,2,2.67508284,-0.82163425,2.66497262,2.67433079,2.66421772
71.167533,3,2.67460117,0.570437402,2.66459491,2.67384905,2.66383997
71.178025,2.64575131,2.67412171,-0.168435162,2.66421768,2.67336953,2.66346269
71.188516,2.44948974,2.67364453,-0.473449876,2.66384099,2.67289227,2.66308596
71.199008,2.82842712,2.67316948,0.394027464,2.66346478,2.67241715,2.66270971
71.2095,3.31662479,2.67269659,0.802451371,2.66308907,2.67194419,2.66233396
71.219991,3.16227766,2.67222585,0.700037004,2.66271391,2.67147338,2.66195875
71.230483,3,2.67175716,0.572924816,2.66233923,2.67100461,2.66158402
71.240974,3,2.67129055,0.573331884,2.66196509,2.67053793,2.66120983
71.251466,3.16227766,2.67082592,0.701036191,2.66159143,2.67007322,2.66083612
71.261958,3.60555128,2.67036327,0.967051189,2.66121828,2.66961049,2.66046291
71.272449,2.82842712,2.66990263,0.398151352,2.66084567,2.66914976,2.66009025
71.282941,3.46410162,2.66944386,0.891435783,2.66047354,2.66869091,2.65971806
71.293432,2.23606798,2.66898703,-0.657965848,2.66010196,2.66823401,2.65934641
71.303924,2.23606798,2.66853203,-0.657619994,2.65973085,2.66777892,2.65897524
71.314416,2,2.66807888,-0.817360921,2.65936024,2.66732567,2.65860457
71.324907,3,2.66762757,0.576517498,2.65899019,2.66687428,2.65823445
71.335399,3.16227766,2.66717802,0.703633173,2.65862061,2.66642464,2.6578648
71.34589,2.82842712,2.66673027,0.402115476,2.65825158,2.6659768,2.6574957
71.356382,3.60555128,2.66628422,0.969157913,2.65788302,2.66553065,2.65712707
71.366874,3.16227766,2.66583988,0.704583411,2.65751497,2.66508622,2.65675895
71.377365,2.82842712,2.66539727,0.403769552,2.65714746,2.66464352,2.65639137
71.387857,2.82842712,2.6649563,0.404315259,2.65678044,2.66420244,2.65602426
71.398348,3.16227766,2.66451701,0.705521547,2.65641395,2.66376305,2.6556577
71.40884,2.82842712,2.6640793,0.405398352,2.65604794,2.66332525,2.65529161
71.419332,3.31662479,2.6636432,0.808072764,2.65568245,2.66288904,2.65492603
71.429823,2.44948974,2.66320872,-0.462297501,2.65531749,2.66245446,2.65456099
71.440315,3,2.66277577,0.58071011,2.65495301,2.6620214,2.65419643
71.450806,4.12310563,2.6623444,1.20861955,2.65458908,2.66158993,2.65383241
71.461298,2.64575131,2.66191451,-0.127134583,2.65422562,2.66115993,2.65346886
71.47179,2.82842712,2.66148613,0.408584129,2.65386268,2.66073145,2.65310582
71.482281,2.82842712,2.66105928,0.409106147,2.65350027,2.66030448,2.65274332
71.492773,2.44948974,2.66063387,-0.459504214,2.65313835,2.65987895,2.6523813
71.503264,3.16227766,2.66020994,0.708567371,2.65277696,2.65945491,2.65201982
71.513756,3.31662479,2.65978741,0.810455044,2.65241605,2.65903227,2.65165881
71.524248,3.31662479,2.6593663,0.8107148,2.65205566,2.65861104,2.65129831
71.534739,3,2.65894664,0.583997739,2.6516958,2.65819126,2.65093835
71.545231,3,2.65852833,0.584355776,2.65133643,2.65777282,2.65057887
71.555722,2.64575131,2.65811143,-0.111176057,2.65097759,2.6573558,2.65021993
71.566214,3.16227766,2.65769585,0.710339224,2.65061923,2.65694009,2.64986146
71.576706,3,2.65728161,0.585421548,2.65026138,2.65652573,2.6495035
71.587197,1.73205081,2.65686875,-0.961674549,2.64990408,2.65611274,2.64914609
71.597689,3,2.65645716,0.586125278,2.64954725,2.65570102,2.64878914
71.60818,3.60555128,2.65604692,0.974425144,2.64919097,2.65529065,2.64843274
71.618672,3.31662479,2.65563792,0.813010988,2.64883516,2.65488152,2.64807681
71.629164,2,2.65523021,-0.809462914,2.64847985,2.65447368,2.64772139
71.639655,3.16227766,2.6548238,0.712357957,2.6481251,2.65406713,2.64736651
71.650147,2.23606798,2.65441861,-0.646800301,2.64777082,2.6536618,2.64701211
71.660638,2.82842712,2.65401469,0.417627143,2.64741708,2.65325775,2.64665825
71.67113,1.41421356,2.65361197,-1.11328272,2.64706382,2.65285489,2.64630486
71.681622,3.16227766,2.65321047,0.713489444,2.64671106,2.65245324,2.64595198
71.692113,3.16227766,2.65281022,0.713769879,2.64635885,2.65205285,2.64559963
71.702605,3.31662479,2.65241113,0.814993046,2.64600712,2.65165361,2.64524777
71.713096,3.31662479,2.65201326,0.815237101,2.64565593,2.65125559,2.64489644
71.723588,4,2.65161653,1.16119915,2.64530521,2.65085872,2.64454559
71.73408,3.16227766,2.65122097,0.714882289,2.64495501,2.65046301,2.64419524
71.744571,2.64575131,2.65082661,-0.0712411385,2.64460534,2.65006849,2.64384544
71.755063,3.60555128,2.65043336,0.977301343,2.64425615,2.64967509,2.64349611
71.765554,3,2.65004129,0.591573082,2.64390751,2.64928286,2.64314732
71.776046,2.23606798,2.64965031,-0.643103673,2.64355934,2.64889173,2.642799
71.786538,3,2.64926046,0.592232675,2.64321168,2.64850172,2.6424512
71.797029,4.47213595,2.64887176,1.35028301,2.64286456,2.64811286,2.64210393
71.807521,3.60555128,2.64848413,0.978298087,2.64251791,2.64772506,2.64175713
71.818012,2.23606798,2.64809764,-0.641895363,2.64217181,2.64733841,2.64141088
71.828504,3.16227766,2.6477122,0.717332184,2.64182619,2.6469528,2.6410651
71.838996,2.64575131,2.64732784,-0.0397055892,2.64148107,2.64656828,2.64071982
71.849487,3,2.64694461,0.594184645,2.64113649,2.64618488,2.64037509
71.859979,3.87298335,2.6465624,1.10743891,2.64079239,2.6458025,2.64003083
71.87047,3.16227766,2.6461813,0.718398467,2.64044883,2.64542123,2.63968711
71.880962,3,2.64580122,0.595146013,2.64010575,2.64504098,2.63934386
71.891454,3.46410162,2.6454222,0.904809051,2.63976318,2.64466177,2.63900112
71.901945,3,2.64504425,0.595781627,2.63942114,2.64428365,2.63865892
71.912437,3,2.64466731,0.596097883,2.63907958,2.64390654,2.63831719
71.922928,3,2.64429145,0.596413072,2.63873857,2.64353049,2.637976
71.93342,3,2.64391657,0.596727262,2.63839802,2.64315543,2.63763529
71.943912,3.46410162,2.64354273,0.905847055,2.63805799,2.6427814,2.63729508
71.954403,4,2.64316994,1.16483049,2.6377185,2.64240843,2.63695541
71.964895,2.64575131,2.64279813,0.0543431854,2.63737948,2.64203643,2.63661622
71.975386,2.23606798,2.64242737,-0.637463246,2.637041,2.64166548,2.63627756
71.985878,3.60555128,2.64205758,0.981577147,2.636703,2.6412955,2.63593938
71.99637,2.64575131,2.6416888,0.0637378609,2.63636551,2.64092653,2.6356017
72.006861,3.16227766,2.64132105,0.721773241,2.63602855,2.64055858,2.63526456
72.017353,2.82842712,2.64095426,0.432981363,2.63569207,2.6401916,2.63492789
72.027844,2.64575131,2.64058851,0.0718526379,2.63535614,2.63982565,2.63459176
72.038336,2.23606798,2.64022371,-0.635732439,2.63502067,2.63946066,2.63425611
72.048828,3.16227766,2.6398599,0.722784723,2.63468572,2.63909665,2.63392096
72.059319,2.23606798,2.63949712,-0.635160721,2.6343513,2.63873366,2.63358635
72.069811,3.31662479,2.63913528,0.823097507,2.63401736,2.63837162,2.63325221
72.080302,2.64575131,2.63877447,0.0835275047,2.63368396,2.6380106,2.63291861
72.090794,1.73205081,2.6384146,-0.952031402,2.63335103,2.63765052,2.63258548
72.101286,3.16227766,2.63805571,0.724031732,2.63301861,2.63729143,2.63225286
72.111777,2.23606798,2.63769784,-0.63374274,2.63268673,2.63693334,2.63192078
72.122269,2.82842712,2.63734091,0.43713409,2.63235532,2.6365762,2.63158916
72.13276,3.31662479,2.636985,0.824402688,2.63202445,2.63622008,2.63125809
72.143252,2.82842712,2.63663003,0.437946449,2.63169406,2.63586489,2.63092749
72.153744,3.31662479,2.63627605,0.824832555,2.63136418,2.63551069,2.63059739
72.164235,3.16227766,2.63592308,0.725502988,2.63103483,2.6351575,2.63026783
72.174727,2.82842712,2.63557105,0.439153813,2.63070596,2.63480526,2.62993874
72.185218,2.82842712,2.63522005,0.439553269,2.63037762,2.63445403,2.62961019
72.19571,2.23606798,2.63487,-0.631507735,2.63004976,2.63410375,2.62928211
72.206202,2.44948974,2.63452093,-0.430152521,2.62972241,2.63375446,2.62895454
72.216693,3.87298335,2.6341729,1.11301862,2.62939559,2.6334062,2.6286275
72.227185,2.23606798,2.63382582,-0.63068046,2.62906925,2.63305889,2.62830094
72.237676,2.23606798,2.63347978,-0.630406059,2.62874345,2.63271262,2.62797491
72.248168,3.16227766,2.6331347,0.727422132,2.62841812,2.63236731,2.62764935
72.25866,2.64575131,2.63279064,0.113844959,2.6280933,2.63202301,2.6273243
72.269151,3.31662479,2.63244762,0.827150031,2.62776901,2.63167976,2.62699978
72.279643,3.16227766,2.63210558,0.728129162,2.6274452,2.63133749,2.62667574
72.290134,3.46410162,2.63176461,0.912325054,2.62712192,2.63099627,2.62635223
72.300626,3.16227766,2.63142464,0.728596612,2.62679912,2.63065606,2.62602919
72.311118,2.64575131,2.63108571,0.121101629,2.62647683,2.63031689,2.62570666
72.321609,2.82842712,2.63074786,0.444611366,2.62615507,2.62997879,2.62538466
72.332101,2.64575131,2.63041104,0.123855856,2.62583379,2.62964173,2.62506313
72.342592,1.73205081,2.63007532,-0.947641553,2.62551304,2.62930576,2.62474214
72.353084,3,2.62974065,0.608489398,2.62519276,2.62897084,2.62442162
72.363576,2.44948974,2.62940708,-0.424166638,2.62487299,2.62863702,2.6241016
72.374067,3.16227766,2.62907465,0.730207515,2.62455376,2.62830433,2.62378212
72.384559,3.16227766,2.6287433,0.730434362,2.624235,2.62797274,2.62346311
72.39505,2.44948974,2.62841313,-0.422993364,2.62391678,2.62764231,2.62314463
72.405542,3.16227766,2.62808408,0.730885478,2.62359902,2.627313,2.62282663
72.416034,2.64575131,2.6277562,0.13414585,2.62328178,2.62698486,2.62250912
72.426525,2.82842712,2.62742955,0.448327531,2.62296507,2.62665795,2.62219215
72.437017,2.82842712,2.62710408,0.448690366,2.62264883,2.62633222,2.62187566
72.447508,3,2.62677988,0.610917442,2.62233313,2.62600775,2.62155969
72.458,3.16227766,2.62645691,0.73199778,2.6220179,2.62568452,2.6212442
72.468492,2,2.62613523,-0.791287072,2.62170317,2.62536257,2.62092921
72.478983,3.16227766,2.6258149,0.732436183,2.62138898,2.62504197,2.62061475
72.489475,3,2.62549589,0.611967412,2.62107526,2.62472269,2.62030076
72.499966,3.31662479,2.62517829,0.831532622,2.62076208,2.62440482,2.61998731
72.510458,2.44948974,2.62486208,-0.418774806,2.62044937,2.62408834,2.61967432
72.52095,3,2.62454733,0.612741925,2.62013716,2.62377331,2.61936184
72.531441,2.64575131,2.62423412,0.146687399,2.61982549,2.62345982,2.61904989
72.541933,3.46410162,2.62392242,0.916612891,2.61951429,2.62314785,2.61873841
72.552424,2.82842712,2.62361236,0.452564657,2.61920362,2.6228375,2.61842746
72.562916,2.64575131,2.62330391,0.149824557,2.61889343,2.62252878,2.61811699
72.573408,2.23606798,2.62299718,-0.622036339,2.61858374,2.62222177,2.61780701
72.583899,4,2.62269226,1.17358755,2.61827458,2.62191656,2.61749757
72.594391,2.82842712,2.62238916,0.453914054,2.61796589,2.62161317,2.61718859
72.604882,3,2.622088,0.614745474,2.61765774,2.62131173,2.61688015
72.615374,2.64575131,2.62178883,0.154798209,2.61735006,2.62101226,2.61657218
72.625866,3.46410162,2.62149174,0.917937836,2.61704288,2.62071489,2.6162647
72.636357,1.73205081,2.62119688,-0.942945426,2.61673623,2.62041974,2.61595776
72.646849,2.44948974,2.6209043,-0.414022409,2.61643006,2.62012686,2.61565129
72.65734,3,2.62061416,0.615943052,2.61612441,2.61983643,2.61534535
72.667832,2.23606798,2.62032654,-0.619885923,2.61581924,2.61954851,2.61503988
72.678324,3.16227766,2.6200416,0.736366796,2.61551457,2.61926328,2.61473491
72.688815,2.44948974,2.61975954,-0.412637609,2.61521043,2.61898092,2.61443046
72.699307,2.44948974,2.61948046,-0.412299309,2.61490677,2.61870155,2.61412649
72.709798,2.23606798,2.61920462,-0.618980321,2.61460363,2.6184254,2.61382305
72.72029,3,2.61893215,0.617306933,2.61430097,2.61815264,2.61352008
72.730782,2.82842712,2.61866332,0.457999782,2.61399881,2.61788351,2.6132176
72.741273,2.23606798,2.61839842,-0.618328746,2.61369718,2.6176183,2.61291566
72.751765,2.64575131,2.61813766,0.166173563,2.61339601,2.61735724,2.61261418
72.762256,2.82842712,2.61788141,0.458852603,2.61309538,2.61710069,2.61231323
72.772748,3,2.61762998,0.618360749,2.61279523,2.61684896,2.61201275
72.78324,3,2.61738378,0.618559792,2.61249557,2.61660245,2.61171277
72.793731,3,2.61714327,0.618754174,2.61219644,2.61636164,2.61141332
72.804223,3.31662479,2.6169089,0.836490223,2.61189778,2.61612696,2.61111434
72.814714,2.44948974,2.61668125,-0.408890584,2.61159965,2.61589901,2.61081588
72.825206,2.44948974,2.61646092,-0.408621066,2.61130199,2.61567837,2.6105179
72.835698,2.82842712,2.61624862,0.460628379,2.61100483,2.61546577,2.61022041
72.846189,2.82842712,2.61604518,0.460849159,2.6107082,2.61526202,2.60992345
72.856681,3,2.61585146,0.619797178,2.61041205,2.615068,2.60962695
72.867172,2.64575131,2.61566854,0.17344386,2.61011641,2.61488478,2.60933099
72.877664,3,2.61549757,0.620082598,2.60982125,2.61471351,2.60903549
72.888156,2.44948974,2.61533995,-0.407247108,2.60952659,2.61455559,2.60874049
72.898647,2.82842712,2.61519728,0.46176817,2.60923246,2.61441263,2.60844601
72.909139,3.16227766,2.61507142,0.7397339,2.6089388,2.61428647,2.60815201
72.91963,2.64575131,2.61496462,0.175461357,2.60864566,2.61417939,2.60785853
72.930122,3.31662479,2.61487963,0.837702313,2.60835299,2.61409411,2.60756551
72.940614,2.23606798,2.6148199,-0.615428245,2.60806083,2.61403411,2.607273
72.951105,3.46410162,2.61479001,0.921581037,2.60776919,2.61400394,2.60698101
72.961597,2.82842712,2.61479615,0.462202307,2.60747801,2.61400983,2.60668948
72.972088,2.44948974,2.61484717,-0.406641641,2.60718737,2.61406059,2.60639848
72.98258,2.44948974,2.61495595,-0.406775373,2.6068972,2.61416914,2.60610795
72.993072,1.73205081,2.61514161,-0.939729109,2.60660752,2.61435458,2.60581792
73.003563,3.60555128,2.61543251,0.995047118,2.60631837,2.6146453,2.6055284
73.014055,2.82842712,2.61587046,0.461038679,2.60602968,2.61508311,2.60523936
73.024546,3.16227766,2.61651556,0.738757135,2.60574153,2.61572812,2.60495084
73.035038,3.31662479,2.6174522,0.836165411,2.60545384,2.61666477,2.60466279
73.04553,3.16227766,2.61879431,0.737213232,2.60516665,2.61800701,2.60437523
73.056021,4,2.62068944,1.17444053,2.60487998,2.61990242,2.60408819
73.066513,2.64575131,2.62332017,0.149770279,2.60459379,2.62253367,2.60380162
73.077004,3.31662479,2.62689812,0.830497846,2.60430811,2.6261124,2.60351558
73.087496,1.41421356,2.63165351,-1.10337661,2.60402291,2.63086892,2.60323
73.097988,3,2.63781197,0.601820599,2.6037382,2.63702893,2.60294491
73.108479,3.31662479,2.64556477,0.819182529,2.60345402,2.64478374,2.60266035
73.118971,2.23606798,2.65503459,-0.647276299,2.6031703,2.65425605,2.60237625
73.129462,2.23606798,2.6662302,-0.655867538,2.60288711,2.66545465,2.60209268
73.139954,2.23606798,2.67901532,-0.665542896,2.60260438,2.67824318,2.60180957
73.150446,3.16227766,2.69306905,0.684988037,2.60232216,2.69230065,2.60152695
73.160937,3.31662479,2.70786265,0.78023211,2.60204045,2.70709816,2.60124486
73.171429,1.41421356,2.72264538,-1.14386705,2.60175921,2.72188475,2.60096323
73.18192,3.16227766,2.73642908,0.652570749,2.60147849,2.73567199,2.60068212
73.192412,3.16227766,2.74803366,0.643617898,2.60119825,2.74727948,2.60040148
73.202904,2.64575131,2.756205,-0.332345732,2.60091849,2.75545276,2.60012133
73.213395,2.44948974,2.75987792,-0.55712492,2.60063926,2.75912639,2.5998417
73.223887,2.44948974,2.75849966,-0.555886607,2.6003605,2.75774746,2.59956253
73.234378,2.82842712,2.75223171,0.276035175,2.60008225,2.75147749,2.59928389
73.24487,2.64575131,2.74188437,-0.31005332,2.59980448,2.74112701,2.59900571
73.255362,2.64575131,2.72863772,-0.287900006,2.59952719,2.72787638,2.59872802
73.265853,1.41421356,2.71373428,-1.13996523,2.59925043,2.71296844,2.59845085
73.276345,2.23606798,2.69827522,-0.67985825,2.59897413,2.69750468,2.59817414
73.286836,3.16227766,2.68314991,0.692190542,2.59869836,2.68237471,2.59789796
73.297328,2.44948974,2.66901107,-0.468531028,2.59842305,2.66823144,2.59762224
73.30782,3,2.6562971,0.5862618,2.59814824,2.65551342,2.59734701
73.318311,2.64575131,2.64524887,0.0224152798,2.59787394,2.64446158,2.59707229
73.328803,2.23606798,2.63593554,-0.632350824,2.59760011,2.63514514,2.59679804
73.339294,3.60555128,2.62829719,0.988561623,2.5973268,2.62750416,2.59652431
73.349786,2.23606798,2.62217682,-0.621376571,2.59705395,2.6213816,2.59625104
73.360278,2.44948974,2.61736526,-0.409726147,2.5967816,2.61656824,2.59597826
73.370769,2.64575131,2.61363267,0.179216736,2.59650977,2.61283418,2.595706
73.381261,2.82842712,2.61075446,0.46655403,2.5962384,2.60995474,2.5954342
73.391752,2.44948974,2.60853101,-0.398799785,2.59596754,2.60773027,2.59516292
73.402244,2.23606798,2.60679417,-0.608872888,2.59569716,2.60599254,2.5948921
73.412736,2.44948974,2.60541112,-0.394868816,2.59542726,2.60460872,2.59462177
73.423227,3.16227766,2.60428115,0.746991641,2.59515789,2.60347805,2.59435196
73.433719,3.31662479,2.60333058,0.844567471,2.59488898,2.60252683,2.59408261
73.44421,2.82842712,2.60250781,0.475309706,2.59462058,2.60170345,2.59381377
73.454702,3.31662479,2.60177706,0.845486681,2.59435265,2.60097212,2.5935454
73.465194,3.31662479,2.60111432,0.845878518,2.59408521,2.60030881,2.59327752
73.475685,2.64575131,2.60050342,0.212715506,2.59381828,2.59969736,2.59301014
73.486177,2.23606798,2.59993325,-0.603212464,2.59355182,2.59912665,2.59274324
73.496668,2.44948974,2.59939631,-0.387177694,2.59328588,2.59858917,2.59247684
73.50716,3.31662479,2.59888705,0.847194042,2.5930204,2.59807938,2.59221091
73.517652,2.23606798,2.59840146,-0.60194143,2.59275541,2.59759328,2.59194546
73.528143,1.73205081,2.59793647,-0.930529773,2.59249093,2.59712776,2.59168053
73.538635,3.60555128,2.59748945,1.00402282,2.59222692,2.59668023,2.59141606
73.549126,2.44948974,2.59705842,-0.384146681,2.59196342,2.59624869,2.5911521
73.559618,2.82842712,2.59664153,0.481441167,2.59170039,2.59583129,2.59088861
73.57011,2.82842712,2.59623733,0.481860765,2.59143784,2.59542658,2.5906256
73.580601,2.82842712,2.59584456,0.482268147,2.59117581,2.59503331,2.5903631
73.591093,3,2.59546202,0.636033003,2.59091424,2.59465026,2.59010106
73.601584,2.23606798,2.5950888,-0.59918346,2.59065318,2.59427654,2.58983953
73.612076,2.44948974,2.59472396,-0.381096071,2.59039259,2.59391119,2.58957847
73.622568,2.23606798,2.59436678,-0.598580655,2.59013249,2.59355351,2.58931789
73.633059,1.41421356,2.59401662,-1.0861874,2.58987289,2.59320285,2.58905782
73.643551,2,2.59367282,-0.770501668,2.58961376,2.59285854,2.58879821
73.654042,2.23606798,2.59333492,-0.59771811,2.58935514,2.59252014,2.58853911
73.664534,2.82842712,2.59300237,0.485205884,2.58909699,2.59218709,2.58828047
73.675026,2.44948974,2.59267481,-0.378398024,2.58883932,2.59185902,2.58802232
73.685517,3.31662479,2.59235187,0.851042256,2.58858216,2.59153557,2.58776467
73.696009,3,2.59203316,0.63872282,2.58832546,2.59121636,2.58750749
73.7065,2.23606798,2.59171844,-0.596364369,2.58806927,2.59090113,2.58725081
73.716992,2.23606798,2.59140737,-0.59610351,2.58781355,2.59058955,2.58699459
73.727484,2.64575131,2.59109974,0.233776747,2.58755831,2.59028141,2.58673886
73.737975,2.23606798,2.59079536,-0.595589945,2.58730358,2.58997652,2.58648363
73.748467,1.41421356,2.59049396,-1.08456461,2.58704931,2.58967461,2.58622886
73.758958,2.64575131,2.59019542,0.235702973,2.58679555,2.58937555,2.5859746
73.76945,2.44948974,2.58989951,-0.374712918,2.58654225,2.58907913,2.5857208
73.779942,2,2.58960612,-0.767858137,2.58628944,2.58878522,2.58546749
73.790433,2.23606798,2.58931512,-0.594345983,2.58603713,2.58849371,2.58521467
73.800925,2.64575131,2.58902635,0.238170029,2.58578529,2.58820441,2.58496232
73.811416,2.64575131,2.58873973,0.238770982,2.58553395,2.58791727,2.58471047
73.821908,3.31662479,2.58845511,0.853328591,2.58528307,2.58763213,2.58445908
73.8324,2.23606798,2.58817241,-0.593383882,2.58503268,2.5873489,2.58420817
73.842891,2.82842712,2.58789158,0.490444237,2.58478279,2.58706754,2.58395777
73.853383,2,2.58761247,-0.766558848,2.58453337,2.58678791,2.58370783
73.863874,1.73205081,2.58733506,-0.924815796,2.58428445,2.58650997,2.58345839
73.874366,3.46410162,2.58705924,0.936505406,2.58403599,2.58623362,2.5832094
73.884858,3.16227766,2.58678496,0.758612353,2.58378801,2.58595881,2.5829609
73.895349,3.60555128,2.58651218,1.00947466,2.58354054,2.5856855,2.5827129
73.905841,2.64575131,2.58624081,0.243947745,2.58329353,2.58541359,2.58246536
73.916332,3.60555128,2.58597083,1.00974276,2.58304702,2.58514307,2.58221832
73.926824,2,2.58570216,-0.765311806,2.58280097,2.58487386,2.58197174
73.937316,2.64575131,2.58543477,0.245594266,2.5825554,2.58460592,2.58172563
73.947807,3,2.58516864,0.644074032,2.58231034,2.58433925,2.58148003
73.958299,4.24264069,2.58490369,1.28753136,2.58206573,2.58407376,2.58123489
73.96879,2.44948974,2.58463993,-0.367627784,2.58182163,2.58380945,2.58099025
73.979282,2.64575131,2.58437728,0.247737832,2.58157799,2.58354625,2.58074606
73.989774,2.23606798,2.58411573,-0.589955717,2.58133483,2.58328415,2.58050235
74.000265,2.64575131,2.58385527,0.248789151,2.58109217,2.58302314,2.58025914
74.010757,2.82842712,2.58359583,0.494804297,2.58084996,2.58276314,2.58001639
74.021248,2.82842712,2.58333744,0.495065335,2.58060826,2.58250419,2.57977414
74.03174,2.82842712,2.58308001,0.495325257,2.58036702,2.58224621,2.57953234
74.042232,3.60555128,2.58282356,1.01130001,2.58012626,2.5819892,2.57929102
74.052723,2.82842712,2.58256809,0.495841748,2.579886,2.58173316,2.5790502
74.063215,2.64575131,2.58231352,0.251868608,2.57964619,2.58147802,2.57880983
74.073706,2.23606798,2.58205988,-0.588210765,2.57940689,2.58122382,2.57856997
74.084198,2.64575131,2.58180712,0.252871889,2.57916804,2.58097049,2.57833055
74.09469,2.23606798,2.58155523,-0.587781641,2.57892967,2.58071804,2.57809162
74.105181,2.23606798,2.58130424,-0.58756809,2.5786918,2.58046647,2.57785318
74.115673,2.44948974,2.58105407,-0.362717965,2.57845439,2.58021572,2.5776152
74.126164,2.44948974,2.58080475,-0.362374128,2.57821747,2.57996583,2.57737771
74.136656,2.82842712,2.58055624,0.497866336,2.57798102,2.57971673,2.57714067
74.147148,4,2.58030853,1.19150806,2.57774503,2.57946845,2.57690411
74.157639,3,2.58006165,0.648026505,2.57750955,2.57922098,2.57666805
74.168131,2.44948974,2.57981553,-0.361006631,2.57727453,2.57897428,2.57643244
74.178622,2.44948974,2.57957021,-0.360666703,2.57704,2.57872837,2.57619733
74.189114,3.46410162,2.57932564,0.94062531,2.57680592,2.57848321,2.57596267
74.199606,3.60555128,2.57908183,1.01314828,2.57657232,2.57823881,2.57572848
74.210097,2.44948974,2.57883879,-0.359651289,2.57633922,2.57799518,2.57549479
74.220589,3.60555128,2.57859647,1.01338778,2.57610657,2.57775226,2.57526155
74.23108,3,2.57835492,0.649342039,2.57587443,2.57751011,2.5750288
74.241572,3.16227766,2.57811406,0.764305958,2.57564273,2.57726866,2.57479651
74.252064,2.64575131,2.57787393,0.260532873,2.57541151,2.57702792,2.57456469
74.262555,2.44948974,2.57763454,-0.357973182,2.57518078,2.57678793,2.57433336
74.273047,2.23606798,2.57739584,-0.584232711,2.57495051,2.57654862,2.57410248
74.283538,3.60555128,2.57715786,1.01409734,2.57472073,2.57631004,2.5738721
74.29403,2.64575131,2.57692057,0.262356143,2.57449141,2.57607213,2.57364217
74.304522,2.82842712,2.57668396,0.501740133,2.57426256,2.57583491,2.57341271
74.315013,3.74165739,2.57644808,1.07944861,2.5740342,2.57559841,2.57318374
74.325505,3.46410162,2.57621285,0.942278496,2.5738063,2.57536257,2.57295522
74.335996,2.23606798,2.57597833,-0.583018316,2.57357889,2.57512743,2.57272719
74.346488,3,2.57574448,0.651349003,2.57335193,2.57489295,2.57249961
74.35698,3,2.57551129,0.651527978,2.57312544,2.57465915,2.5722725
74.367471,2.64575131,2.57527881,0.265466573,2.57289945,2.57442604,2.57204589
74.377963,2.82842712,2.57504698,0.503368801,2.57267391,2.57419358,2.57181972
74.388454,1.73205081,2.57481583,-0.918022345,2.57244886,2.5739618,2.57159404
74.398946,2.44948974,2.57458534,-0.353688555,2.57222426,2.57373068,2.57136881
74.409438,3.16227766,2.57435551,0.766760819,2.57200013,2.57350021,2.57114405
74.419929,2.64575131,2.57412637,0.267628373,2.5717765,2.57327043,2.57091978
74.430421,2.23606798,2.57389787,-0.581231355,2.57155331,2.57304129,2.57069596
74.440912,2.44948974,2.57367005,-0.352392265,2.57133062,2.57281284,2.57047263
74.451404,2.82842712,2.57344288,0.504959648,2.57110837,2.57258502,2.57024974
74.461896,2.82842712,2.57321637,0.505183883,2.5708866,2.57235787,2.57002732
74.472387,2.44948974,2.57299054,-0.351426808,2.57066532,2.5721314,2.56980539
74.482879,1.73205081,2.57276536,-0.916904877,2.57044448,2.57190556,2.56958391
74.49337,3,2.57254086,0.653803591,2.57022414,2.57168042,2.56936291
74.503862,2.23606798,2.57231701,-0.579869843,2.57000424,2.57145591,2.56914236
74.514354,3.31662479,2.57209383,0.862862077,2.56978481,2.57123207,2.56892228
74.524845,2.82842712,2.57187133,0.50651337,2.56956587,2.57100891,2.56870268
74.535337,3.31662479,2.57164948,0.86311952,2.56934738,2.57078641,2.56848353
74.545828,3,2.57142833,0.654653853,2.56912938,2.57056459,2.56826487
74.55632,3.31662479,2.57120784,0.863375326,2.56891183,2.57034343,2.56804665
74.566812,3.16227766,2.57098802,0.768953601,2.56869474,2.57012294,2.56782889
74.577303,2,2.57076891,-0.755492492,2.56847814,2.56990316,2.56761162
74.587795,3.60555128,2.57055046,1.0173499,2.56826198,2.56968404,2.5673948
74.598286,2.82842712,2.57033273,0.50802992,2.56804632,2.56946563,2.56717846
74.608778,2.64575131,2.57011567,0.275019352,2.5678311,2.5692479,2.56696256
74.61927,3.31662479,2.56989931,0.86413279,2.56761635,2.56903086,2.56674713
74.629761,2.23606798,2.56968369,-0.577594761,2.56740208,2.56881456,2.56653218
74.640253,3.31662479,2.56946876,0.86438188,2.56718826,2.56859894,2.56631767
74.650744,2.64575131,2.56925457,0.276580446,2.56697492,2.56838407,2.56610365
74.661236,3,2.56904109,0.656474606,2.56676203,2.56816991,2.56589007
74.671728,3.16227766,2.56882836,0.770356609,2.5665496,2.56795648,2.56567695
74.682219,2.64575131,2.56861639,0.277731744,2.56633766,2.56774382,2.56546432
74.692711,2.82842712,2.56840516,0.509923485,2.56612616,2.5675319,2.56525213
74.703202,2.64575131,2.56819473,0.278489821,2.56591515,2.56732077,2.56504041
74.713694,2.44948974,2.56798506,-0.344231491,2.56570458,2.5671104,2.56482915
74.724186,3.16227766,2.56777619,0.771039213,2.56549448,2.56690083,2.56461834
74.734677,2.44948974,2.56756815,-0.343625395,2.56528485,2.56669209,2.56440801
74.745169,2.23606798,2.56735957,-0.575579357,2.56507568,2.5664828,2.56419812
74.75566,2.64575131,2.56715321,0.280353522,2.56486698,2.56627573,2.56398872
74.766152,1.73205081,2.5669477,-0.913726925,2.56465873,2.56606951,2.56377975
74.776644,2.64575131,2.56674308,0.281084036,2.56445093,2.56586417,2.56357125
74.787135,3.31662479,2.56653938,0.866074714,2.56424363,2.56565976,2.56336322
74.797627,2.44948974,2.5663366,-0.341828693,2.56403676,2.56545626,2.56315563
74.808118,2.44948974,2.5661348,-0.341533388,2.56383037,2.56525374,2.56294852
74.81861,3.16227766,2.56593397,0.772232925,2.56362443,2.56505219,2.56274185
74.829102,3.16227766,2.56573416,0.772362283,2.56341894,2.56485166,2.56253564
74.839593,3.31662479,2.56553544,0.866654114,2.56321394,2.56465221,2.56232991
74.850085,3.16227766,2.56533779,0.772618841,2.56300938,2.56445383,2.56212462
74.860576,2.44948974,2.5651413,-0.340075806,2.56280529,2.56425661,2.5619198
74.871068,2.64575131,2.56494597,0.284262796,2.56260165,2.56406055,2.56171542
74.88156,2.23606798,2.56475189,-0.573309612,2.56239847,2.56386573,2.5615115
74.892051,2.82842712,2.56455911,0.513680844,2.56219576,2.56367222,2.56130805
74.902543,2.44948974,2.56436768,-0.338936478,2.5619935,2.56348004,2.56110504
74.913034,2.64575131,2.56417769,0.285610968,2.56179171,2.56328931,2.56090251
74.923526,3.16227766,2.56398917,0.773491102,2.56159037,2.56310005,2.56070041
74.934018,2.44948974,2.56380225,-0.338101324,2.56138948,2.56291238,2.56049877
74.944509,3,2.56361702,0.660592903,2.56118907,2.5627264,2.56029761
74.955001,2.64575131,2.56343355,0.286910721,2.56098909,2.56254218,2.56009688
74.965492,3,2.563252,0.660869128,2.56078959,2.56235988,2.55989662
74.975984,2.82842712,2.56307245,0.515125881,2.56059054,2.56217958,2.5596968
74.986476,2.44948974,2.56289508,-0.336757086,2.56039193,2.56200145,2.55949743
74.996967,3.16227766,2.56272005,0.774311053,2.56019381,2.56182567,2.55929854
75.007459,2.82842712,2.56254753,0.515635139,2.55999612,2.56165238,2.55910008
75.01795,2.44948974,2.56237774,-0.335988089,2.5597989,2.56148183,2.55890209
75.028442,1.73205081,2.56221089,-0.911131208,2.55960213,2.56131422,2.55870454
75.038934,2.64575131,2.56204725,0.289316542,2.5594058,2.56114982,2.55850744
75.049425,2.44948974,2.56188715,-0.335257218,2.55920996,2.56098894,2.55831081
75.059917,2.44948974,2.56173088,-0.335024092,2.55901454,2.56083192,2.55811462
75.070408,2.64575131,2.56157889,0.290124832,2.5588196,2.56067916,2.5579189
75.0809,2.44948974,2.5614316,-0.33457713,2.5586251,2.56053109,2.55772361
75.091392,3,2.56128956,0.662352206,2.55843105,2.56038828,2.55752877
75.101883,2.82842712,2.56115342,0.516985207,2.55823747,2.56025137,2.5573344
75.112375,2.82842712,2.56102396,0.517110402,2.55804433,2.56012114,2.55714046
75.122866,3.60555128,2.56090219,1.02208076,2.55785166,2.5599986,2.55694699
75.133358,3.16227766,2.56078941,0.775556734,2.55765942,2.55988505,2.55675395
75.14385,3.16227766,2.56068742,0.775622483,2.55746764,2.55978229,2.55656137
75.154341,3.16227766,2.56059876,0.775679636,2.55727633,2.55969286,2.55636925
75.164833,3.31662479,2.56052706,0.869538801,2.55708545,2.5596204,2.55617756
75.175324,3,2.56047769,0.662964786,2.55689504,2.55957027,2.55598634
75.185816,2.23606798,2.56045848,-0.569552894,2.55670506,2.5595503,2.55579555
75.196308,2.23606798,2.5604808,-0.569572493,2.55651554,2.55957188,2.55560521
75.206799,3.31662479,2.56056087,0.869519363,2.55632648,2.55965123,2.55541533
75.217291,3.16227766,2.56072119,0.775600713,2.55613785,2.55981086,2.55522589
75.227782,3,2.56099204,0.66257676,2.5559497,2.56008104,2.55503691
75.238274,3,2.56141269,0.662259245,2.55576197,2.56050109,2.55484835
75.248766,3.16227766,2.56203188,0.774755306,2.5555747,2.56111973,2.55466025
75.259257,3.31662479,2.56290702,0.868169205,2.55538789,2.56199443,2.55447261
75.269749,3.16227766,2.56410222,0.773418027,2.55520152,2.56318928,2.5542854
75.28024,2.44948974,2.56568309,-0.340871453,2.55501561,2.56476995,2.55409865
75.290732,3.16227766,2.56771095,0.771081521,2.55483013,2.56679776,2.55391233
75.301224,3,2.57023308,0.655566108,2.5546451,2.56932001,2.55372646
75.311715,3,2.57327282,0.653243586,2.55446053,2.57236006,2.55354105
75.322207,3.31662479,2.57682007,0.860119018,2.5542764,2.57590779,2.55335606
75.332698,2.23606798,2.58081937,-0.587155339,2.55409273,2.57990773,2.55317154
75.34319,3.60555128,2.58516407,1.01014217,2.55390948,2.58425319,2.55298745
75.353682,1,2.58968696,-1.26082789,2.55372669,2.58877688,2.5528038
75.364173,2.82842712,2.59415635,0.484015258,2.55354436,2.59324707,2.55262061
75.374665,3,2.59827719,0.633816066,2.55336246,2.59736857,2.55243784
75.385156,2.82842712,2.60170058,0.476158107,2.55318102,2.60079237,2.55225554
75.395648,2.23606798,2.60406588,-0.606628303,2.55300001,2.6031577,2.55207366
75.40614,2.23606798,2.60507093,-0.607456131,2.55281944,2.60416231,2.55189222
75.416631,2.64575131,2.60456074,0.202954606,2.55263934,2.60365115,2.55171124
75.427123,3.16227766,2.60258044,0.748129146,2.55245966,2.60166937,2.55153069
75.437614,3.31662479,2.59935877,0.84691559,2.55228044,2.59844577,2.5513506
75.448106,2.82842712,2.59523222,0.482902579,2.55210166,2.59431697,2.55117093
75.458598,2.82842712,2.59056232,0.487713855,2.55192331,2.58964461,2.5509917
75.469089,2,2.58567731,-0.765295572,2.55174543,2.58475705,2.55081292
75.479581,2.82842712,2.58084469,0.497576565,2.55156797,2.57992189,2.55063457
75.490072,2.44948974,2.57626862,-0.35606021,2.55139097,2.57534336,2.55045668
75.500564,3.31662479,2.57208903,0.862864856,2.55121439,2.57116144,2.55027921
75.511056,2.64575131,2.56839052,0.278138075,2.55103826,2.56746077,2.55010218
75.521547,3.46410162,2.56520833,0.948099829,2.55086259,2.56427659,2.54992561
75.532039,2.23606798,2.5625367,-0.571374416,2.55068734,2.56160315,2.54974945
75.54253,3.31662479,2.56034123,0.86964565,2.55051255,2.55940604,2.54957376
75.553022,3.46410162,2.55856723,0.951595703,2.55033818,2.55763055,2.54939848
75.563514,2.64575131,2.55715101,0.297658023,2.55016426,2.55621297,2.54922364
75.574005,2.23606798,2.55602705,-0.565649247,2.54999079,2.55508774,2.54904925
75.584497,1.41421356,2.55513358,-1.06813857,2.54981774,2.55419308,2.54887529
75.594988,2.64575131,2.55441688,0.302215868,2.54964515,2.55347527,2.54870178
75.60548,2.82842712,2.55383215,0.524018106,2.54947298,2.55288946,2.54852868
75.615972,2.82842712,2.55334414,0.524483536,2.54930125,2.55240041,2.54835603
75.626463,2.44948974,2.55292609,-0.321615217,2.54912998,2.55198134,2.54818382
75.636955,2.82842712,2.55255825,0.525232214,2.54895913,2.55161249,2.54801204
75.647446,3.60555128,2.55222668,1.02631603,2.54878873,2.55127993,2.5478407
75.657938,2.82842712,2.55192159,0.525837933,2.54861876,2.55097385,2.54766979
75.66843,3,2.55163632,0.669599641,2.54844922,2.5506876,2.5474993
75.678921,3.16227766,2.55136633,0.781608168,2.54828013,2.55041662,2.54732927
75.689413,3.87298335,2.55110845,1.14972818,2.54811147,2.55015776,2.54715966
75.699904,3,2.55086053,0.670178682,2.54794325,2.54990887,2.5469905
75.710396,3.16227766,2.55062097,0.782084833,2.54777546,2.54966832,2.54682175
75.720888,3.31662479,2.55038862,0.875349169,2.5476081,2.54943499,2.54665343
75.731379,3.46410162,2.5501626,0.956001578,2.5474412,2.54920799,2.54648557
75.741871,2.64575131,2.54994213,0.309530576,2.54727471,2.54898654,2.54631812
75.752362,3,2.54972667,0.671024088,2.54710868,2.54877009,2.54615111
75.762854,2.23606798,2.54951567,-0.559863995,2.54694306,2.54855811,2.54598453
75.773346,2.64575131,2.54930872,0.310552078,2.54677788,2.54835017,2.54581837
75.783837,2,2.54910546,-0.741016505,2.54661314,2.54814592,2.54565266
75.794329,2.82842712,2.54890553,0.528698015,2.54644883,2.547945,2.54548737
75.80482,3.46410162,2.54870869,0.956761686,2.54628496,2.54774716,2.54532252
75.815312,2.44948974,2.54851464,-0.314682223,2.54612151,2.54755212,2.54515808
75.825804,3,2.54832319,0.672069052,2.54595849,2.54735967,2.54499408
75.836295,2.23606798,2.54813415,-0.558628832,2.54579592,2.54716963,2.54483052
75.846787,2.23606798,2.54794731,-0.558461579,2.54563377,2.54698179,2.54466737
75.857278,2.44948974,2.54776256,-0.313484955,2.54547206,2.54679603,2.54450466
75.86777,3.46410162,2.54757972,0.957351503,2.54531077,2.54661218,2.54434237
75.878262,2.64575131,2.54739867,0.313612242,2.54514991,2.54643012,2.54418051
75.888753,3.46410162,2.54721934,0.9575397,2.5449895,2.54624978,2.54401909
75.899245,3,2.54704158,0.67302186,2.5448295,2.546071,2.54385808
75.909736,2.82842712,2.54686533,0.530623967,2.54466995,2.54589373,2.54369751
75.920228,3,2.54669049,0.673282641,2.54451081,2.54571786,2.54353735
75.93072,3.46410162,2.54651698,0.957906379,2.5443521,2.54554334,2.54337762
75.941211,2.23606798,2.54634477,-0.557024952,2.54419383,2.5453701,2.54321833
75.951703,2.23606798,2.54617376,-0.556871428,2.54403598,2.54519806,2.54305945
75.962194,2,2.54600393,-0.738920788,2.54387857,2.54502719,2.54290102
75.972686,2.44948974,2.54583519,-0.310395629,2.54372157,2.54485742,2.54274299
75.983178,2.82842712,2.54566751,0.531751458,2.543565,2.5446887,2.54258538
75.993669,3.31662479,2.54550087,0.878136618,2.54340888,2.54452102,2.54242821
76.004161,3.31662479,2.5453352,0.878230945,2.54325316,2.5443543,2.54227146
76.014652,2,2.54517049,-0.738356611,2.54309789,2.54418854,2.54211514
76.025144,3.16227766,2.54500667,0.785665952,2.54294302,2.54402367,2.54195922
76.035636,3.87298335,2.54484374,1.15244939,2.54278859,2.54385969,2.54180374
76.046127,2.82842712,2.54468169,0.532677611,2.54263459,2.54369657,2.54164868
76.056619,1.73205081,2.54452045,-0.901370977,2.542481,2.54353427,2.54149404
76.06711,2.23606798,2.54436003,-0.555240534,2.54232786,2.54337279,2.54133983
76.077602,3.16227766,2.54420038,0.78617891,2.54217512,2.54321208,2.54118603
76.088094,2.82842712,2.5440415,0.533278186,2.54202281,2.54305212,2.54103265
76.098585,3,2.54388338,0.675364063,2.54187094,2.54289293,2.5408797
76.109077,3.74165739,2.54372598,1.09450053,2.54171947,2.54273445,2.54072716
76.119568,3,2.5435693,0.675596548,2.54156844,2.5425767,2.54057505
76.13006,1.73205081,2.54341331,-0.90075663,2.54141782,2.54241962,2.54042335
76.140552,2.44948974,2.54325801,-0.306216044,2.54126763,2.54226323,2.54027207
76.151043,2.64575131,2.54310339,0.320387143,2.54111787,2.54210752,2.54012122
76.161535,2.23606798,2.54294942,-0.553968807,2.54096852,2.54195245,2.53997077
76.172026,2.82842712,2.54279611,0.534444589,2.5408196,2.54179805,2.53982076
76.182518,2.64575131,2.54264342,0.321104174,2.54067109,2.54164426,2.53967115
76.19301,3.31662479,2.54249136,0.879848525,2.540523,2.5414911,2.53952196
76.203501,3.46410162,2.54233994,0.960084203,2.54037535,2.54133857,2.5393732
76.213993,3.87298335,2.54218911,1.15360055,2.5402281,2.54118663,2.53922484
76.224484,3.16227766,2.5420389,0.787552386,2.54008128,2.5410353,2.53907691
76.234976,2,2.54188927,-0.736131285,2.53993487,2.54088456,2.53892939
76.245468,3.60555128,2.54174023,1.03141216,2.53978888,2.54073439,2.53878228
76.255959,1.41421356,2.54159178,-1.06178068,2.53964332,2.54058482,2.53863559
76.266451,2.64575131,2.54144389,0.32296659,2.53949817,2.54043581,2.53848931
76.276942,2.82842712,2.54129659,0.535845627,2.53935345,2.54028737,2.53834346
76.287434,3,2.54114983,0.677384799,2.53920913,2.54013948,2.53819801
76.297926,2.64575131,2.54100364,0.323647451,2.53906523,2.53999215,2.53805297
76.308417,2.23606798,2.54085801,-0.552077922,2.53892176,2.53984538,2.53790836
76.318909,2.64575131,2.54071292,0.324096276,2.53877869,2.53969914,2.53776415
76.3294,2.23606798,2.54056838,-0.55181555,2.53863606,2.53955346,2.53762036
76.339892,1.73205081,2.54042437,-0.899095969,2.53849382,2.53940829,2.53747697
76.350384,2.82842712,2.5402809,0.536792538,2.538352,2.53926366,2.537334
76.360875,2.64575131,2.54013797,0.324982066,2.53821061,2.53911958,2.53719145
76.371367,3.16227766,2.53999556,0.788848594,2.53806963,2.538976,2.5370493
76.381858,3.74165739,2.53985368,1.09626808,2.53792906,2.53883296,2.53690757
76.39235,3.46410162,2.53971232,0.96145166,2.5377889,2.53869043,2.53676624
76.402842,3.31662479,2.53957148,0.881506275,2.53764916,2.53854841,2.53662532
76.413333,2,2.53943116,-0.734459778,2.53750984,2.53840692,2.53648482
76.423825,2.82842712,2.53929135,0.537713466,2.53737092,2.53826593,2.53634472
76.434316,3.60555128,2.53915207,1.03266607,2.53723242,2.53812546,2.53620504
76.444808,3,2.53901328,0.678960029,2.53709433,2.53798548,2.53606576
76.4553,2.44948974,2.538875,-0.298973669,2.53695665,2.53784601,2.53592688
76.465791,2.64575131,2.53873724,0.32713006,2.53681939,2.53770705,2.53578843
76.476283,3.46410162,2.53859996,0.962029964,2.53668253,2.53756858,2.53565037
76.486774,1.73205081,2.53846321,-0.898004677,2.53654609,2.53743062,2.53551273
76.497266,3.16227766,2.53832694,0.789905515,2.53641006,2.53729315,2.53537549
76.507758,2,2.53819117,-0.733615136,2.53627443,2.53715617,2.53523865
76.518249,2.64575131,2.53805591,0.328169778,2.53613922,2.53701969,2.53510223
76.528741,3.46410162,2.53792113,0.962382712,2.53600442,2.5368837,2.5349662
76.539232,3.16227766,2.53778686,0.790247302,2.53587003,2.53674821,2.53483059
76.549724,2.64575131,2.53765307,0.328782964,2.53573604,2.53661319,2.53469537
76.560216,2,2.53751978,-0.733157403,2.53560246,2.53647867,2.53456056
76.570707,3.16227766,2.53738699,0.790500268,2.5354693,2.53634464,2.53442617
76.581199,3,2.53725467,0.68025387,2.53533653,2.53621109,2.53429216
76.59169,3.31662479,2.53712286,0.882894065,2.53520419,2.53607804,2.53415858
76.602182,2.82842712,2.53699153,0.539847755,2.53507224,2.53594546,2.53402538
76.612674,2.64575131,2.53686068,0.329985805,2.53494069,2.53581337,2.53389258
76.623165,3.16227766,2.53673033,0.790915499,2.53480957,2.53568177,2.53376021
76.633657,2.23606798,2.53660046,-0.548208431,2.53467883,2.53555064,2.53362822
76.644148,2,2.53647109,-0.732441867,2.53454852,2.53542001,2.53349664
76.65464,3,2.53634219,0.680924233,2.5344186,2.53528984,2.53336545
76.665132,2.82842712,2.53621378,0.540567617,2.53428908,2.53516016,2.53323467
76.675623,2.23606798,2.53608586,-0.547738883,2.53415998,2.53503098,2.53310429
76.686115,3.60555128,2.53595842,1.03421122,2.53403127,2.53490226,2.53297431
76.696606,2.44948974,2.53583148,-0.293839639,2.53390298,2.53477403,2.53284474
76.707098,2.64575131,2.53570501,0.33173228,2.53377508,2.53464628,2.53271555
76.71759,3,2.53557902,0.681484395,2.53364759,2.53451901,2.53258676
76.728081,2.44948974,2.53545353,-0.29319582,2.5335205,2.53439223,2.53245839
76.738573,2.82842712,2.53532852,0.541385821,2.53339381,2.53426592,2.5323304
76.749064,1.41421356,2.535204,-1.05876836,2.53326753,2.5341401,2.53220282
76.759556,3.46410162,2.53507996,0.963857695,2.53314164,2.53401475,2.53207562
76.770048,2.23606798,2.5349564,-0.546706892,2.53301616,2.53388989,2.53194882
76.780539,2.64575131,2.53483335,0.333043488,2.53289108,2.53376552,2.53182244
76.791031,2.23606798,2.53471077,-0.546482194,2.53276639,2.53364162,2.53169643
76.801522,2.23606798,2.53458868,-0.546370485,2.53264212,2.53351822,2.53157084
76.812014,2.82842712,2.53446708,0.542180823,2.53251823,2.53339529,2.53144562
76.822506,2.44948974,2.53434597,-0.291300914,2.53239475,2.53327285,2.53132081
76.832997,2,2.53422535,-0.730907212,2.53227167,2.5331509,2.53119639
76.843489,2,2.53410522,-0.730825026,2.53214898,2.53302943,2.53107237
76.85398,2.64575131,2.53398559,0.334313808,2.5320267,2.53290846,2.53094874
76.864472,2.23606798,2.53386644,-0.545709139,2.53190481,2.53278797,2.5308255
76.874964,2.44948974,2.53374779,-0.290272364,2.53178332,2.53266797,2.53070266
76.885455,3,2.53362964,0.682913141,2.53166223,2.53254847,2.53058021
76.895947,2.44948974,2.53351198,-0.289865896,2.53154153,2.53242945,2.53045815
76.906438,2.64575131,2.53339483,0.335196184,2.53142123,2.53231094,2.53033649
76.91693,1.73205081,2.53327817,-0.895113043,2.53130133,2.53219291,2.53021522
76.927422,3.60555128,2.53316201,1.0355623,2.53118181,2.53207537,2.53009433
76.937913,3.31662479,2.53304636,0.885199656,2.53106271,2.53195835,2.52997385
76.948405,3.16227766,2.53293121,0.793313591,2.53094398,2.53184182,2.52985374
76.958896,2.64575131,2.53281657,0.336057643,2.53082567,2.5317258,2.52973404
76.969388,3,2.53270243,0.683591666,2.53070773,2.53161028,2.52961472
76.97988,3.31662479,2.53258881,0.885458063,2.53059019,2.53149526,2.52949578
76.990371,2.44948974,2.53247571,-0.288072848,2.53047306,2.53138076,2.52937725
77.000863,3.31662479,2.53236311,0.8855855,2.5303563,2.53126677,2.52925909
77.011354,3.16227766,2.53225105,0.793742158,2.53023995,2.53115329,2.52914133
77.021846,2.64575131,2.53213949,0.337063526,2.53012399,2.53104033,2.52902395
77.032338,2.64575131,2.53202846,0.337228191,2.53000841,2.53092788,2.52890696
77.042829,2,2.53191796,-0.729327063,2.52989324,2.53081597,2.52879036
77.053321,3.60555128,2.53180799,1.03621585,2.52977844,2.53070457,2.52867414
77.063812,2.82842712,2.53169856,0.544727972,2.52966405,2.53059372,2.52855832
77.074304,2,2.53158966,-0.729101953,2.52955004,2.53048338,2.52844287
77.084796,2.23606798,2.5314813,-0.543519382,2.52943642,2.53037358,2.52832781
77.095287,2.64575131,2.53137349,0.338197902,2.52932319,2.53026434,2.52821314
77.105779,2.64575131,2.53126622,0.338356452,2.52921035,2.53015563,2.52809885
77.11627,2.64575131,2.53115952,0.338514095,2.52909791,2.53004747,2.52798495
77.126762,2.44948974,2.53105336,-0.285593453,2.52898584,2.52993986,2.52787143
77.137254,2.82842712,2.53094777,0.54541668,2.52887416,2.52983281,2.52775829
77.147745,2.64575131,2.53084276,0.338981644,2.52876289,2.52972633,2.52764554
77.158237,1.41421356,2.5307383,-1.05665734,2.52865198,2.52962041,2.52753317
77.168728,3.16227766,2.53063444,0.794759849,2.52854148,2.52951508,2.52742119
77.17922,2.64575131,2.53053116,0.339440945,2.52843135,2.52941031,2.52730958
77.189712,2.64575131,2.53042846,0.339592183,2.52832161,2.52930614,2.52719835
77.200203,3.31662479,2.53032637,0.886734694,2.52821226,2.52920256,2.52708751
77.210695,2.23606798,2.53022488,-0.542362335,2.52810329,2.52909958,2.52697705
77.221186,3,2.53012401,0.68547501,2.52799472,2.52899721,2.52686697
77.231678,3,2.53002375,0.685548138,2.52788652,2.52889545,2.52675727
77.24217,2,2.52992412,-0.727958871,2.5277787,2.52879432,2.52664794
77.252661,3,2.52982513,0.685692983,2.52767128,2.52869382,2.526539
77.263153,3,2.52972678,0.685764694,2.52756423,2.52859396,2.52643044
77.273644,3.46410162,2.5296291,0.966681186,2.52745758,2.52849476,2.52632226
77.284136,3.74165739,2.52953207,1.10096563,2.52735129,2.5283962,2.52621445
77.294628,2.44948974,2.52943572,-0.282747201,2.52724539,2.52829833,2.52610701
77.305119,2.82842712,2.52934007,0.546888523,2.52713989,2.52820114,2.52599996
77.315611,2.44948974,2.52924511,-0.282409919,2.52703475,2.52810464,2.52589328
77.326102,1.41421356,2.52915086,-1.05590591,2.52693001,2.52800885,2.52578699
77.336594,2.82842712,2.52905734,0.547146952,2.52682563,2.52791378,2.52568106
77.347086,2.44948974,2.52896455,-0.281912771,2.52672164,2.52781944,2.52557551
77.357577,2.64575131,2.52887253,0.341875385,2.52661804,2.52772586,2.52547034
77.368069,3.16227766,2.52878127,0.795924863,2.5265148,2.52763304,2.52536554
77.37856,1.73205081,2.52869081,-0.892546919,2.52641196,2.52754101,2.52526112
77.389052,2.64575131,2.52860114,0.342272065,2.52630949,2.52744977,2.52515707
77.399544,2,2.5285123,-0.726988517,2.52620739,2.52735936,2.52505339
77.410035,2.64575131,2.52842432,0.342530283,2.52610568,2.52726979,2.52495009
77.420527,2,2.52833719,-0.726868067,2.52600434,2.52718107,2.52484716
77.431018,3.16227766,2.52825095,0.79625794,2.52590339,2.52709325,2.52474461
77.44151,3.16227766,2.52816563,0.796311518,2.52580281,2.52700633,2.52464242
77.452002,2.44948974,2.52808124,-0.280341748,2.5257026,2.52692034,2.5245406
77.462493,2.44948974,2.52799782,-0.280192937,2.52560277,2.52683532,2.52443916
77.472985,2.64575131,2.5279154,0.343272358,2.52550332,2.52675128,2.52433809
77.483476,2.64575131,2.52783401,0.343390889,2.52540425,2.52666827,2.52423739
77.493968,3.46410162,2.52775367,0.967650735,2.52530554,2.52658632,2.52413705
77.50446,2.64575131,2.52767443,0.343623169,2.52520721,2.52650545,2.52403709
77.514951,2.64575131,2.52759633,0.343736791,2.52510927,2.52642572,2.5239375
77.525443,2,2.5275194,-0.726305306,2.52501168,2.52634715,2.52383827
77.535934,2.44948974,2.52744369,-0.279202344,2.52491448,2.52626981,2.52373942
77.546426,3,2.52736924,0.687481458,2.52481765,2.52619371,2.52364093
77.556918,3,2.52729611,0.687534644,2.52472119,2.52611893,2.5235428
77.567409,3,2.52722436,0.687586824,2.52462511,2.52604552,2.52344506
77.577901,3.16227766,2.52715403,0.796946443,2.52452939,2.52597353,2.52334766
77.588392,2.44948974,2.52708519,-0.278559599,2.52443405,2.52590303,2.52325065
77.598884,2.82842712,2.52701791,0.549007482,2.52433908,2.52583408,2.52315399
77.609376,2.44948974,2.52695226,-0.278320883,2.52424447,2.52576675,2.5230577
77.619867,3.16227766,2.52688832,0.797113129,2.52415025,2.52570114,2.52296178
77.630359,2.44948974,2.52682617,-0.278094276,2.52405638,2.5256373,2.52286621
77.64085,3,2.52676591,0.687920119,2.5239629,2.52557536,2.52277102
77.651342,3.16227766,2.52670763,0.797226461,2.52386978,2.52551538,2.52267619
77.661834,2.82842712,2.52665144,0.549341134,2.52377702,2.5254575,2.52258171
77.672325,2.64575131,2.52659747,0.345186676,2.52368464,2.52540182,2.52248761
77.682817,2.23606798,2.52654583,-0.538959971,2.52359262,2.52534847,2.52239387
77.693308,2.23606798,2.52649666,-0.53891436,2.52350098,2.5252976,2.52230049
77.7038,2,2.52645012,-0.725568827,2.5234097,2.52524934,2.52220747
77.714292,3.31662479,2.52640637,0.888942304,2.52331878,2.52520386,2.5221148
77.724783,2.82842712,2.52636559,0.549601249,2.52322824,2.52516136,2.52202251
77.735275,3,2.52632798,0.688238348,2.52313806,2.52512202,2.52193057
77.745766,3,2.52629375,0.688263214,2.52304825,2.52508605,2.521839
77.756258,2.82842712,2.52626314,0.549694449,2.5229588,2.5250537,2.52174778
77.76675,3.31662479,2.52623641,0.889037896,2.52286971,2.52502523,2.52165692
77.777241,2.23606798,2.52621385,-0.538651907,2.52278099,2.52500093,2.52156642
77.787733,1.73205081,2.52619579,-0.891148124,2.52269264,2.52498112,2.52147628
77.798224,2.82842712,2.52618256,0.549767737,2.52260465,2.52496614,2.5213865
77.808716,3.16227766,2.52617456,0.797560716,2.52251702,2.52495638,2.52129707
77.819208,2.23606798,2.52617223,-0.538613272,2.52242975,2.52495229,2.521208
77.829699,2.23606798,2.52617605,-0.538616815,2.52234285,2.52495435,2.52111929
77.840191,2.44948974,2.52618656,-0.276941895,2.52225631,2.52496309,2.52103093
77.850682,2,2.52620435,-0.72539944,2.52217014,2.52497911,2.52094294
77.861174,2,2.52623011,-0.725417194,2.52208432,2.5250031,2.52085529
77.871666,2.23606798,2.52626459,-0.538698997,2.52199886,2.52503581,2.520768
77.882157,2.44948974,2.52630864,-0.277162229,2.52191377,2.52507809,2.52068107
77.892649,1.41421356,2.52636325,-1.05458508,2.52182903,2.52513093,2.52059449
77.90314,3.16227766,2.5264295,0.797400876,2.52174466,2.5251954,2.52050827
77.913632,2.23606798,2.52650867,-0.538925498,2.52166064,2.52527279,2.52042239
77.924124,2,2.5266022,-0.725673618,2.52157698,2.52536455,2.52033687
77.934615,1.41421356,2.52671178,-1.05475031,2.52149369,2.52547236,2.5202517
77.945107,2,2.52683946,-0.725837074,2.52141075,2.52559827,2.52016688
77.955598,2.44948974,2.52698766,-0.278384479,2.52132817,2.52574471,2.52008243
77.96609,2.44948974,2.52715951,-0.278692958,2.52124595,2.52591479,2.51999831
77.976582,3.31662479,2.52735898,0.88840633,2.52116408,2.52611252,2.51991454
77.987073,3.60555128,2.52759144,1.03824845,2.52108257,2.52634323,2.51983114
77.997565,3.31662479,2.52786436,0.888121857,2.52100141,2.52661442,2.51974807
78.008056,1.41421356,2.52818825,-1.05544999,2.52092062,2.5269366,2.51966537
78.018548,2.23606798,2.52857834,-0.540842273,2.52084017,2.52732502,2.519583
78.02904,3,2.52905649,0.686253238,2.52076008,2.52780152,2.51950098
78.039531,3.16227766,2.52965398,0.795376442,2.52068036,2.52839742,2.51941932
78.050023,2.64575131,2.53041519,0.339611727,2.52060098,2.52915711,2.519338
78.060514,3.16227766,2.53140119,0.794277326,2.52052196,2.53014171,2.51925704
78.071006,3.74165739,2.53269471,1.09952839,2.52044328,2.53143397,2.51917641
78.081498,1.41421356,2.53440341,-1.05839022,2.52036496,2.53314161,2.51909613
78.091989,3,2.53666273,0.680688822,2.520287,2.53540014,2.5190162
78.102481,3,2.53963707,0.678500504,2.52020939,2.53837404,2.51893661
78.112972,2.82842712,2.54351434,0.533772219,2.52013213,2.54225132,2.51885738
78.123464,2.82842712,2.54849993,0.529081466,2.52005522,2.54723745,2.51877848
78.133956,2.82842712,2.55479923,0.523094536,2.51997866,2.55353794,2.51869993
78.144447,3.16227766,2.56259742,0.774390238,2.51990245,2.56133804,2.51862173
78.154939,2.44948974,2.57203631,-0.350066522,2.5198266,2.57077963,2.51854386
78.16543,3.16227766,2.5831791,0.760985255,2.51975109,2.58192592,2.51846635
78.175922,1.73205081,2.59598894,-0.929482725,2.51967593,2.59474002,2.51838917
78.186414,2.82842712,2.61029537,0.467045774,2.51960112,2.60905138,2.51831233
78.196905,2.64575131,2.62577657,0.141332025,2.51952667,2.624538,2.51823584
78.207397,2.44948974,2.64195003,-0.438702959,2.51945255,2.64071714,2.51815969
78.217888,1.41421356,2.65815308,-1.11532037,2.51937879,2.65692581,2.51808388
78.22838,1.41421356,2.67355416,-1.12220346,2.51930537,2.67233206,2.51800841
78.238872,2.82842712,2.68716112,0.375853697,2.5192323,2.68594332,2.51793328
78.249363,3.60555128,2.69789286,0.952711089,2.51915959,2.696678,2.51785849
78.259855,3,2.70472513,0.543392001,2.51908721,2.70351145,2.51778404
78.270346,2.23606798,2.70690441,-0.686175221,2.51901518,2.7056898,2.51770993
78.280838,3.46410162,2.70416617,0.871742766,2.5189435,2.70294842,2.51763616
78.29133,3,2.69682092,0.550617001,2.51887215,2.69559793,2.51756272
78.301821,2.64575131,2.68565546,-0.199760224,2.51880116,2.68442544,2.51748963
78.312313,3.16227766,2.67170709,0.700407429,2.51873051,2.6704687,2.51741686
78.322804,2.82842712,2.65605689,0.415174945,2.51866021,2.65480922,2.51734444
78.333296,2.82842712,2.63968133,0.434448836,2.51859024,2.63842393,2.51727236
78.343788,3.16227766,2.62340206,0.734081467,2.51852062,2.62213484,2.5172006
78.354279,2.64575131,2.60786492,0.194644273,2.51845135,2.60658811,2.51712919
78.364771,3,2.59353786,0.637543832,2.51838241,2.59225195,2.51705811
78.375262,2,2.58072998,-0.762056412,2.51831383,2.57943561,2.51698736
78.385754,3.16227766,2.56959616,0.769858105,2.51824557,2.5682941,2.51691695
78.396246,2.44948974,2.56016653,-0.332681205,2.51817766,2.55885757,2.51684687
78.406737,2.64575131,2.55236868,0.305585726,2.5181101,2.55105361,2.51677713
78.417229,2.82842712,2.54605571,0.531386316,2.51804286,2.54473526,2.51670771
78.42772,3,2.54103973,0.677466065,2.51797598,2.53971453,2.51663864
78.438212,2.64575131,2.53711322,0.329602924,2.51790943,2.53578383,2.51656989
78.448704,3.16227766,2.53407278,0.792593769,2.51784322,2.53273963,2.51650147
78.459195,3.46410162,2.53173168,0.965593047,2.51777735,2.53039514,2.51643339
78.469687,2,2.5299279,-0.727961471,2.51771181,2.52858823,2.51636563
78.480178,2.64575131,2.5285285,0.342378169,2.51764662,2.5271859,2.51629821
78.49067,2.23606798,2.52742783,-0.539777591,2.51758176,2.52608244,2.51623111
78.501162,3.31662479,2.52654555,0.888864014,2.51751724,2.5251975,2.51616435
78.511653,2.64575131,2.52582221,0.346307815,2.51745306,2.52447156,2.51609792
78.522145,2.64575131,2.52521473,0.347183783,2.51738921,2.52386154,2.51603181
78.532636,2.44948974,2.5246929,-0.274231948,2.5173257,2.5233372,2.51596603
78.543128,3.31662479,2.52423549,0.890162514,2.51726252,2.52287731,2.51590058
78.55362,2.23606798,2.52382788,-0.536432571,2.51719968,2.52246723,2.51583545
78.564111,1.73205081,2.52345991,-0.889611769,2.51713718,2.52209681,2.51577066
78.574603,2.64575131,2.5231243,0.3501814,2.517075,2.52175876,2.51570618
78.585094,3,2.5228159,0.690785132,2.51701317,2.52144793,2.51564204
78.595586,2.64575131,2.52253076,0.351027844,2.51695166,2.52116036,2.51557822
78.606078,3.87298335,2.5222659,1.1622037,2.51689049,2.52089307,2.51551472
78.616569,2.82842712,2.52201893,0.553541505,2.51682965,2.52064366,2.51545155
78.627061,2.23606798,2.52178781,-0.534527668,2.51676914,2.52041011,2.5153887
78.637552,2.82842712,2.52157091,0.553946043,2.51670897,2.52019079,2.51532618
78.648044,2.44948974,2.52136675,-0.268098884,2.51664913,2.5199842,2.51526398
78.658536,2.64575131,2.52117413,0.352954934,2.51658961,2.51978914,2.5152021
78.669027,1.73205081,2.52099195,-0.888223587,2.51653044,2.51960453,2.51514055
78.679519,3,2.52081923,0.692228843,2.51647158,2.51942937,2.51507932
78.69001,2,2.52065515,-0.721564379,2.51641306,2.51926285,2.51501841
78.700502,3.87298335,2.52049894,1.16296363,2.51635487,2.51910419,2.51495782
78.710994,3,2.52034993,0.692567736,2.51629701,2.51895273,2.51489755
78.721485,2.82842712,2.52020755,0.555175266,2.51623947,2.51880789,2.5148376
78.731977,3,2.52007123,0.692768916,2.51618227,2.5186691,2.51477797
78.742468,2.23606798,2.51994052,-0.532796905,2.51612539,2.51853592,2.51471866
78.75296,2.64575131,2.51981496,0.354875115,2.51606884,2.51840789,2.51465967
78.763452,2.44948974,2.51969419,-0.264961216,2.51601261,2.51828463,2.514601
78.773943,2,2.51957785,-0.72081749,2.51595672,2.51816581,2.51454265
78.784435,3.60555128,2.51946562,1.04215433,2.51590115,2.51805109,2.51448461
78.794926,2.82842712,2.51935723,0.555940551,2.51584591,2.51794019,2.51442689
78.805418,3.16227766,2.51925239,0.801888564,2.51579099,2.51783284,2.51436948
78.81591,2.64575131,2.51915089,0.355809535,2.51573639,2.51772882,2.5143124
78.826401,2.23606798,2.51905251,-0.531962901,2.51568212,2.51762792,2.51425563
78.836893,3.31662479,2.51895704,0.893122475,2.51562818,2.51752992,2.51419917
78.847384,2.44948974,2.51886431,-0.26339053,2.51557456,2.51743466,2.51414303
78.857876,3.60555128,2.51877416,1.04248603,2.51552126,2.51734196,2.5140872
78.868368,3.31662479,2.51868643,0.893273954,2.51546828,2.51725168,2.51403169
78.878859,2,2.518601,-0.720139572,2.51541563,2.51716368,2.51397649
78.889351,2.23606798,2.51851772,-0.531460015,2.5153633,2.51707783,2.5139216
78.899842,2.64575131,2.5184365,0.356812012,2.5153113,2.51699403,2.51386703
78.910334,3,2.5183572,0.694004897,2.51525961,2.51691215,2.51381277
78.920826,3,2.51827974,0.694060701,2.51520824,2.51683209,2.51375882
78.931317,3,2.51820404,0.694115238,2.5151572,2.51675378,2.51370519
78.941809,2.82842712,2.51812998,0.557043213,2.51510647,2.51667712,2.51365186
78.9523,3.16227766,2.51805752,0.802633254,2.51505607,2.51660203,2.51359884
78.962792,2.23606798,2.51798656,-0.530960057,2.51500598,2.51652844,2.51354614
78.973284,2.44948974,2.51791704,-0.26158612,2.51495622,2.51645628,2.51349374
78.983775,2,2.51784891,-0.719617195,2.51490677,2.5163855,2.51344165
78.994267,2.64575131,2.51778209,0.35772786,2.51485764,2.51631603,2.51338987
79.004758,2.23606798,2.51771654,-0.530705724,2.51480883,2.51624781,2.5133384
79.01525,3,2.51765221,0.69451263,2.51476033,2.5161808,2.51328724
79.025742,2,2.51758904,-0.719436612,2.51471216,2.51611495,2.51323638
79.036233,2.44948974,2.517527,-0.260839527,2.5146643,2.51605022,2.51318584
79.046725,3.74165739,2.51746604,1.10643181,2.51461675,2.51598656,2.51313559
79.057216,2.23606798,2.51740613,-0.530413191,2.51456953,2.51592394,2.51308566
79.067708,2.64575131,2.51734722,0.358335161,2.51452261,2.51586231,2.51303603
79.0782,3.16227766,2.51728929,0.803111679,2.51447601,2.51580164,2.5129867
79.088691,3.16227766,2.51723231,0.803147156,2.51442973,2.51574192,2.51293768
79.099183,2.23606798,2.51717623,-0.530196426,2.51438376,2.51568309,2.51288896
79.109674,2.82842712,2.51712104,0.557948102,2.51433811,2.51562514,2.51284055
79.120166,3,2.51706671,0.694934021,2.51429277,2.51556804,2.51279244
79.130658,2.64575131,2.51701321,0.358800927,2.51424774,2.51551176,2.51274463
79.141149,2.44948974,2.51696052,-0.259751377,2.51420302,2.51545628,2.51269713
79.151641,3,2.51690862,0.695047755,2.51415862,2.51540158,2.51264993
79.162132,3,2.51685749,0.695084535,2.51411453,2.51534764,2.51260303
79.172624,2,2.5168071,-0.718892971,2.51407075,2.51529443,2.51255643
79.183116,3,2.51675745,0.695156496,2.51402727,2.51524195,2.51251013
79.193607,2.44948974,2.51670851,-0.259265817,2.51398412,2.51519017,2.51246413
79.204099,2.44948974,2.51666026,-0.259172751,2.51394127,2.51513907,2.51241843
79.21459,2.44948974,2.51661269,-0.259080972,2.51389873,2.51508864,2.51237303
79.225082,2.44948974,2.51656579,-0.258990437,2.5138565,2.51503887,2.51232793
79.235574,3,2.51651954,0.695327595,2.51381458,2.51498973,2.51228313
79.246065,2.64575131,2.51647393,0.359551645,2.51377297,2.51494123,2.51223863
79.256557,2.82842712,2.51642894,0.558567981,2.51373167,2.51489334,2.51219442
79.267048,2.23606798,2.51638456,-0.529449323,2.51369067,2.51484605,2.51215051
79.27754,1.73205081,2.51634079,-0.88560148,2.51364998,2.51479935,2.5121069
79.288032,2.64575131,2.51629761,0.359796756,2.5136096,2.51475323,2.51206358
79.298523,2.44948974,2.51625501,-0.258389752,2.51356953,2.51470769,2.51202056
79.309015,3,2.51621298,0.695548003,2.51352976,2.5146627,2.51197783
79.319506,3.31662479,2.51617151,0.894680547,2.5134903,2.51461827,2.5119354
79.329998,3.46410162,2.51613059,0.973638034,2.51345114,2.51457438,2.51189327
79.34049,3,2.51609022,0.69563624,2.51341229,2.51453101,2.51185142
79.350981,2.23606798,2.51605039,-0.529133644,2.51337375,2.51448818,2.51180988
79.361473,2.82842712,2.51601108,0.558941894,2.5133355,2.51444587,2.51176862
79.371964,3.46410162,2.5159723,0.973719319,2.51329757,2.51440406,2.51172766
79.382456,2,2.51593403,-0.718285482,2.51325993,2.51436276,2.51168698
79.392948,2.82842712,2.51589627,0.55904459,2.5132226,2.51432195,2.5116466
79.403439,3.74165739,2.51585902,1.10715779,2.51318557,2.51428164,2.51160652
79.413931,2.23606798,2.51582225,-0.528918021,2.51314885,2.51424181,2.51156672
79.424422,2,2.51578598,-0.718182414,2.51311242,2.51420246,2.51152721
79.434914,3.16227766,2.51575019,0.80406932,2.5130763,2.51416357,2.511488
79.445406,2.82842712,2.51571488,0.559206801,2.51304048,2.51412516,2.51144907
79.455897,3.87298335,2.51568004,1.16503361,2.51300496,2.51408721,2.51141043
79.466389,3.74165739,2.51564568,1.10725413,2.51296974,2.51404972,2.51137208
79.47688,2.64575131,2.51561178,0.360748576,2.51293482,2.51401268,2.51133402
79.487372,3,2.51557833,0.696004071,2.5129002,2.51397609,2.51129624
79.497864,2.64575131,2.51554534,0.360840638,2.51286587,2.51393994,2.51125875
79.508355,2.64575131,2.51551281,0.360885715,2.51283185,2.51390423,2.51122155
79.518847,2.64575131,2.51548072,0.36093017,2.51279813,2.51386896,2.51118464
79.529338,3.31662479,2.51544908,0.895084191,2.5127647,2.51383412,2.51114801
79.53983,4,2.51541788,1.21843429,2.51273157,2.5137997,2.51111167
79.550322,2.82842712,2.51538711,0.55949979,2.51269874,2.51376571,2.51107561
79.560813,2.82842712,2.51535678,0.559526895,2.51266621,2.51373215,2.51103984
79.571305,2.44948974,2.51532688,-0.256587475,2.51263397,2.513699,2.51100435
79.581796,2.64575131,2.5152974,0.361184038,2.51260203,2.51366627,2.51096914
79.592288,2.82842712,2.51526835,0.559605911,2.51257038,2.51363394,2.51093422
79.60278,3,2.51523972,0.696247285,2.51253903,2.51360203,2.51089958
79.613271,2.64575131,2.51521151,0.361302922,2.51250798,2.51357052,2.51086522
79.623763,2.82842712,2.51518371,0.559681527,2.51247721,2.51353942,2.51083114
79.634254,3,2.51515633,0.696307164,2.51244675,2.51350871,2.51079735
79.644746,2.23606798,2.51512936,-0.52826261,2.51241657,2.51347841,2.51076383
79.655238,2.44948974,2.5151028,-0.256150457,2.51238669,2.5134485,2.5107306
79.665729,2.23606798,2.51507665,-0.528212711,2.51235711,2.51341898,2.51069765
79.676221,2.82842712,2.51505089,0.55980017,2.51232781,2.51338986,2.51066497
79.686712,2.44948974,2.51502555,-0.255999617,2.51229881,2.51336112,2.51063258
79.697204,2,2.5150006,-0.717635421,2.5122701,2.51333277,2.51060046
79.707696,2,2.51497605,-0.717618315,2.51224168,2.51330481,2.51056862
79.718187,3.16227766,2.51495189,0.804565576,2.51221355,2.51327723,2.51053706
79.728679,3,2.51492813,0.696471009,2.51218571,2.51325003,2.51050578
79.73917,3.16227766,2.51490477,0.804594862,2.51215817,2.51322321,2.51047477
79.749662,3.16227766,2.51488179,0.80460914,2.51213091,2.51319677,2.51044404
79.760154,3,2.51485921,0.696520491,2.51210394,2.5131707,2.51041359
79.770645,3,2.51483701,0.696536425,2.51207727,2.51314501,2.51038341
79.781137,2.44948974,2.5148152,-0.255588447,2.51205088,2.51311969,2.5103535
79.791628,2.44948974,2.51479377,-0.25554653,2.51202478,2.51309475,2.51032388
79.80212,2.82842712,2.51477273,0.560048566,2.51199896,2.51307017,2.51029452
79.812612,2.82842712,2.51475207,0.560067011,2.51197344,2.51304596,2.51026544
79.823103,3,2.51473179,0.696611951,2.5119482,2.51302212,2.51023663
79.833595,2.82842712,2.51471189,0.560102879,2.51192325,2.51299864,2.51020809
79.844086,2,2.51469237,-0.717420637,2.51189858,2.51297553,2.51017983
79.854578,3,2.51467323,0.696653985,2.51187421,2.51295278,2.51015184
79.86507,3.16227766,2.51465446,0.804750397,2.51185011,2.51293039,2.51012412
79.875561,2.82842712,2.51463607,0.560170561,2.51182631,2.51290837,2.51009667
79.886053,2.44948974,2.51461805,-0.255202481,2.51180278,2.5128867,2.51006949
79.896544,2.82842712,2.51460041,0.560202391,2.51177955,2.51286539,2.51004258
79.907036,3.31662479,2.51458313,0.895567785,2.51175659,2.51284444,2.51001594
79.917528,2.64575131,2.51456623,0.362194809,2.51173392,2.51282385,2.50998957
79.928019,2.82842712,2.5145497,0.560247644,2.51171153,2.51280361,2.50996347
79.938511,2.23606798,2.51453354,-0.527698363,2.51168943,2.51278373,2.50993763
79.949002,3,2.51451775,0.696765564,2.51166761,2.5127642,2.50991207
79.959494,2.82842712,2.51450232,0.560289925,2.51164607,2.51274502,2.50988677
79.969986,3.16227766,2.51448727,0.804854268,2.51162481,2.5127262,2.50986174
79.980477,2.44948974,2.51447258,-0.254917309,2.51160384,2.51270773,2.50983697
79.990969,3,2.51445825,0.696808258,2.51158315,2.5126896,2.50981247
80.00146,2.44948974,2.51444429,-0.254861825,2.51156274,2.51267183,2.50978824
80.011952,1.73205081,2.5144307,-0.884522407,2.5115426,2.51265441,2.50976427
80.022444,3,2.51441746,0.696837524,2.51152275,2.51263733,2.50974056
80.032935,2.82842712,2.5144046,0.56037713,2.51150318,2.51262061,2.50971713
80.043427,2,2.51439209,-0.71721133,2.51148389,2.51260423,2.50969395
80.053918,3,2.51437995,0.696864443,2.51146487,2.51258819,2.50967104
80.06441,3.60555128,2.51436817,1.0445971,2.51144614,2.5125725,2.50964838
80.074902,2.82842712,2.51435674,0.560419825,2.51142768,2.51255716,2.50962599
80.085393,2.64575131,2.51434568,0.362499139,2.5114095,2.51254216,2.50960387
80.095885,1.41421356,2.51433498,-1.04886673,2.5113916,2.51252751,2.509582
80.106376,2.82842712,2.51432464,0.560448463,2.51137397,2.5125132,2.5095604
80.116868,2.82842712,2.51431466,0.560457368,2.51135663,2.51249923,2.50953905
80.12736,3.87298335,2.51430504,1.16562357,2.51133955,2.5124856,2.50951797
80.137851,3.60555128,2.51429578,1.04463175,2.51132276,2.51247232,2.50949714
80.148343,3.60555128,2.51428687,1.04463601,2.51130624,2.51245938,2.50947658
80.158834,2.44948974,2.51427833,-0.254536014,2.51129,2.51244678,2.50945627
80.169326,3,2.51427014,0.696943229,2.51127403,2.51243452,2.50943622
80.179818,2,2.5142623,-0.717120842,2.51125833,2.5124226,2.50941643
80.190309,2.82842712,2.51425483,0.560510747,2.51124291,2.51241103,2.5093969
80.200801,1.73205081,2.51424771,-0.884418962,2.51122777,2.51239979,2.50937762
80.211292,2,2.51424095,-0.717105953,2.51121289,2.51238889,2.5093586
80.221784,2,2.51423454,-0.717101486,2.51119829,2.51237833,2.50933984
80.232276,2.64575131,2.51422849,0.362660749,2.51118397,2.51236811,2.50932133
80.242767,2,2.5142228,-0.717093299,2.51116991,2.51235823,2.50930307
80.253259,2.23606798,2.51421746,-0.52739879,2.51115613,2.51234868,2.50928507
80.26375,2.23606798,2.51421248,-0.527394068,2.51114262,2.51233948,2.50926733
80.274242,2.82842712,2.51420785,0.560552648,2.51112938,2.51233061,2.50924983
80.284734,2.44948974,2.51420358,-0.254389151,2.51111641,2.51232208,2.50923259
80.295225,2.64575131,2.51419967,0.362700486,2.51110371,2.51231389,2.50921561
80.305717,2.82842712,2.51419611,0.560563124,2.51109128,2.51230604,2.50919887
80.316208,2.64575131,2.5141929,0.362709811,2.51107913,2.51229852,2.50918239
80.3267,2.82842712,2.51419005,0.560568524,2.51106724,2.51229134,2.50916616
80.337192,2.44948974,2.51418756,-0.254357658,2.51105562,2.5122845,2.50915018
80.347683,2.44948974,2.51418542,-0.254353455,2.51104427,2.51227799,2.50913445
80.358175,3.31662479,2.51418364,0.895790796,2.51103319,2.51227182,2.50911897
80.368666,2.23606798,2.51418221,-0.527365371,2.51102238,2.51226599,2.50910374
80.379158,3.74165739,2.51418114,1.10791527,2.51101183,2.51226049,2.50908876
80.38965,2.64575131,2.51418042,0.362727018,2.51100155,2.51225534,2.50907403
80.400141,2,2.51418006,-0.717063498,2.51099154,2.51225051,2.50905954
80.410633,2.82842712,2.51418005,0.560577444,2.5109818,2.51224603,2.50904531
80.421124,2.44948974,2.5141804,-0.254343589,2.51097232,2.51224188,2.50903132
80.431616,2,2.51418111,-0.71706423,2.51096311,2.51223807,2.50901758
80.442108,2.44948974,2.51418217,-0.254347063,2.51095416,2.51223459,2.50900408
80.452599,2.44948974,2.51418359,-0.25434985,2.51094548,2.51223145,2.50899083
80.463091,2,2.51418536,-0.717067196,2.51093707,2.51222865,2.50897782
80.473582,2.82842712,2.51418749,0.560570808,2.51092892,2.51222619,2.50896506
80.484074,2.23606798,2.51418998,-0.527372737,2.51092103,2.51222406,2.50895255
80.494566,2.23606798,2.51419283,-0.527375434,2.51091341,2.51222227,2.50894028
80.505057,2.23606798,2.51419603,-0.52737847,2.51090605,2.51222081,2.50892825
80.515549,2.44948974,2.51419959,-0.254381297,2.51089896,2.5122197,2.50891646
80.52604,3.16227766,2.5142035,0.805030531,2.51089213,2.51221892,2.50890492
80.536532,2.82842712,2.51420778,0.560552715,2.51088556,2.51221848,2.50889362
80.547024,2.44948974,2.51421241,-0.254406505,2.51087925,2.51221838,2.50888256
80.557515,3.31662479,2.5142174,0.89577195,2.5108732,2.51221861,2.50887175
80.568007,3,2.51422276,0.696977219,2.51086742,2.51221919,2.50886117
80.578498,2.44948974,2.51422847,-0.254438053,2.5108619,2.5122201,2.50885084
80.58899,1.73205081,2.51423454,-0.884411516,2.51085664,2.51222135,2.50884074
80.599482,2.82842712,2.51424097,0.560523111,2.51085164,2.51222294,2.50883089
80.609973,2.44948974,2.51424776,-0.254475962,2.5108469,2.51222487,2.50882127
80.620465,2.64575131,2.51425491,0.362624325,2.51084242,2.51222714,2.50881189
80.630956,2,2.51426242,-0.717120927,2.5108382,2.51222975,2.50880275
80.641448,3,2.5142703,0.696943112,2.51083424,2.5122327,2.50879385
80.65194,2.44948974,2.51427854,-0.254536431,2.51083053,2.51223599,2.50878518
80.662431,1.41421356,2.51428714,-1.04884392,2.51082709,2.51223963,2.50877675
80.672923,2.64575131,2.5142961,0.362567522,2.51082391,2.5122436,2.50876856
80.683414,3.31662479,2.51430543,0.895722814,2.51082098,2.51224791,2.50876061
80.693906,1.41421356,2.51431512,-1.04885726,2.51081831,2.51225257,2.50875288
80.704398,2.23606798,2.51422053,-0.527401703,2.5107111,2.51225757,2.5087454
80.714889,3.16227766,2.51423106,0.805013418,2.51070905,2.51226292,2.50873815
80.725381,2.82842712,2.51424195,0.560522236,2.51070725,2.51226861,2.50873113
80.735872,2.44948974,2.5142532,-0.254486661,2.51070571,2.51227464,2.50872435
80.746364,2.82842712,2.51426483,0.560501826,2.51070442,2.51228102,2.5087178
80.756856,3,2.51427682,0.696938433,2.51070339,2.51228774,2.50871148
80.767347,1.73205081,2.51428918,-0.884442409,2.51070262,2.51229481,2.50870539
80.777839,3.31662479,2.51430191,0.895724777,2.51070209,2.51230223,2.50869954
80.78833,2.23606798,2.51431501,-0.527491267,2.51070183,2.51230999,2.50869391
80.798822,2.44948974,2.51432849,-0.254634531,2.51070182,2.5123181,2.50868852
80.809314,2.64575131,2.51434233,0.362503764,2.51070206,2.51232656,2.50868336
80.819805,2.44948974,2.51435655,-0.254689627,2.51070256,2.51233536,2.50867843
80.830297,3.16227766,2.51437114,0.804926406,2.51070331,2.51234452,2.50867373
80.840788,2.44948974,2.51438611,-0.254747645,2.51070431,2.51235403,2.50866925
80.85128,2.44948974,2.51440145,-0.254777754,2.51070557,2.51236389,2.50866501
80.861772,2,2.51441716,-0.717228809,2.51070708,2.5123741,2.50866099
80.872263,1.73205081,2.51443326,-0.884523855,2.51070884,2.51238467,2.5086572
80.882755,2.64575131,2.51444973,0.362355599,2.51071085,2.51239558,2.50865364
80.893246,3.60555128,2.51446658,1.04455,2.51071311,2.51240686,2.50865031
80.903738,2.23606798,2.51448381,-0.527651245,2.51071563,2.51241849,2.5086472
80.91423,2.82842712,2.51450143,0.560290725,2.5107184,2.51243047,2.50864432
80.924721,2.82842712,2.51451942,0.560274667,2.51072142,2.51244281,2.50864166
80.935213,3.31662479,2.5145378,0.895593093,2.51072468,2.51245551,2.50863923
80.945704,3.46410162,2.51455656,0.974446022,2.5107282,2.51246857,2.50863702
80.956196,3,2.51457571,0.696723967,2.51073197,2.51248199,2.50863504
80.966688,3.46410162,2.51459525,0.974426172,2.51073599,2.51249577,2.50863328
80.977179,2.82842712,2.51461517,0.56018921,2.51074025,2.51250991,2.50863174
80.987671,3.74165739,2.51463549,1.10771021,2.51074477,2.51252442,2.50863042
80.998162,2.44948974,2.51465619,-0.2552772,2.51074953,2.51253929,2.50862933
81.008654,3.16227766,2.51467729,0.804736213,2.51075455,2.51255452,2.50862846
81.019146,2.44948974,2.51469878,-0.2553606,2.51075981,2.51257012,2.50862781
81.029637,2.64575131,2.51472066,0.361981559,2.51076532,2.51258609,2.50862738
81.040129,2.23606798,2.51474294,-0.527896738,2.51077107,2.51260243,2.50862718
81.05062,3,2.51476562,0.696587668,2.51077708,2.51261914,2.50862719
81.061112,1.73205081,2.5147887,-0.884724754,2.51078333,2.51263623,2.50862742
81.071604,2.44948974,2.51481218,-0.25558254,2.51078983,2.51265368,2.50862787
81.082095,3.46410162,2.51483606,0.974302601,2.51079657,2.51267151,2.50862854
81.092587,2,2.51486034,-0.717537694,2.51080356,2.51268972,2.50862943
81.103078,2.64575131,2.51488503,0.361754447,2.5108108,2.5127083,2.50863053
81.11357,2.64575131,2.51491013,0.361719756,2.51081828,2.51272727,2.50863185
81.124062,1.73205081,2.51493564,-0.884807792,2.51082601,2.51274661,2.50863339
81.134553,3.16227766,2.51496155,0.804559573,2.51083398,2.51276634,2.50863515
81.145045,3.16227766,2.51498788,0.804543209,2.51084219,2.51278645,2.50863712
81.155536,3.60555128,2.51501463,1.04428763,2.51085065,2.51280695,2.50863931
81.166028,2.44948974,2.51504179,-0.256031342,2.51085936,2.51282783,2.50864171
81.17652,2,2.51506937,-0.717683337,2.51086831,2.51284911,2.50864433
81.187011,2.82842712,2.51509737,0.559758656,2.5108775,2.51287077,2.50864716
81.197503,2.23606798,2.5151258,-0.528259236,2.51088694,2.51289283,2.5086502
81.207994,3,2.51515465,0.696308376,2.51089662,2.51291528,2.50865346
81.218486,2.44948974,2.51518392,-0.25630876,2.51090654,2.51293814,2.50865693
81.228978,3,2.51521363,0.696266019,2.51091671,2.51296139,2.50866061
81.239469,2.23606798,2.51524377,-0.528370883,2.51092711,2.51298504,2.5086645
81.249961,2.82842712,2.51527434,0.559600556,2.51093776,2.5130091,2.50866861
81.260452,2.44948974,2.51530535,-0.256545529,2.51094866,2.51303356,2.50867292
81.270944,3,2.5153368,0.696177562,2.51095979,2.51305844,2.50867745
81.281436,2,2.5153687,-0.717891841,2.51097116,2.51308372,2.50868219
81.291927,2.23606798,2.51540103,-0.528519682,2.51098278,2.51310942,2.50868713
81.302419,2.82842712,2.51543382,0.559458047,2.51099464,2.51313553,2.50869229
81.31291,2,2.51546705,-0.717960342,2.51100673,2.51316207,2.50869765
81.323402,3,2.51550074,0.696059807,2.51101907,2.51318902,2.50870322
81.333894,3.60555128,2.51553489,1.0440385,2.51103165,2.5132164,2.508709
81.344385,2.82842712,2.5155695,0.559336773,2.51104447,2.51324421,2.50871499
81.354877,1.73205081,2.51560457,-0.885185723,2.51105753,2.51327245,2.50872118
81.365368,2,2.51564011,-0.718080851,2.51107082,2.51330112,2.50872758
81.37586,2.23606798,2.51567612,-0.52877986,2.51108436,2.51333024,2.50873419
81.386352,2.82842712,2.5157126,0.559208836,2.51109814,2.51335979,2.508741
81.396843,2.23606798,2.51574956,-0.528849301,2.51111215,2.51338979,2.50874801
81.407335,2,2.515787,-0.718183127,2.51112641,2.51342023,2.50875524
81.417826,2.44948974,2.51582493,-0.257556183,2.5111409,2.51345113,2.50876266
81.428318,2,2.51586335,-0.718236277,2.51115563,2.51348248,2.50877029
81.43881,2.44948974,2.51590226,-0.257706268,2.5111706,2.51351429,2.50877812
81.449301,2,2.51594167,-0.718290799,2.5111858,2.51354657,2.50878616
81.459793,2.44948974,2.51598159,-0.257860125,2.51120124,2.51357931,2.50879439
81.470284,2.23606798,2.51602201,-0.529106822,2.51121692,2.51361253,2.50880283
81.480776,2.44948974,2.51606294,-0.258017828,2.51123284,2.51364623,2.50881147
81.491268,2.82842712,2.5161044,0.558858415,2.511249,2.51368041,2.50882031
81.501759,2.44948974,2.51614637,-0.258179447,2.51126539,2.51371507,2.50882936
81.512251,3,2.51618888,0.695565327,2.51128201,2.51375023,2.5088386
81.522742,3,2.51623191,0.69553439,2.51129888,2.51378589,2.50884804
81.533234,1.73205081,2.51627549,-0.885564614,2.51131598,2.51382205,2.50885768
81.543726,3,2.51631962,0.695471336,2.51133331,2.51385872,2.50886752
81.554217,2.44948974,2.5163643,-0.258601148,2.51135088,2.5138959,2.50887756
81.564709,2.23606798,2.51640954,-0.529472907,2.51136869,2.51393362,2.50888779
81.5752,2.23606798,2.51645534,-0.529516158,2.51138673,2.51397185,2.50889823
81.585692,2.82842712,2.51650172,0.558502825,2.51140501,2.51401063,2.50890886
81.596184,2.82842712,2.51654868,0.558460781,2.51142352,2.51404995,2.50891968
81.606675,2.44948974,2.51659623,-0.259049192,2.51144226,2.51408982,2.5089307
81.617167,3,2.51664437,0.695237819,2.51146125,2.51413024,2.50894192
81.627658,3.16227766,2.51669312,0.803482754,2.51148046,2.51417124,2.50895333
81.63815,2.44948974,2.51674249,-0.259331352,2.51149991,2.51421281,2.50896494
81.648642,3.31662479,2.51679249,0.894333441,2.51151959,2.51425497,2.50897674
81.659133,2.64575131,2.51684311,0.359037885,2.51153951,2.51429772,2.50898874
81.669625,2.44948974,2.51689438,-0.25962403,2.51155966,2.51434108,2.50900093
81.680116,3.16227766,2.5169463,0.803325189,2.51158004,2.51438505,2.50901331
81.690608,2.82842712,2.51699889,0.558057551,2.51160066,2.51442965,2.50902589
81.7011,1.73205081,2.51705217,-0.886003024,2.51162151,2.51447488,2.50903865
81.711591,1.73205081,2.51710612,-0.886033473,2.5116426,2.51452077,2.50905161
81.722083,1.73205081,2.51716079,-0.886064321,2.51166391,2.51456732,2.50906476
81.732574,2,2.51721617,-0.719177424,2.51168546,2.51461454,2.5090781
81.743066,2.44948974,2.51727228,-0.260350804,2.51170724,2.51466246,2.50909163
81.753558,3.16227766,2.51732915,0.803086865,2.51172926,2.51471108,2.50910535
81.764049,2.82842712,2.51738677,0.55770992,2.5117515,2.51476042,2.50911926
81.774541,3.46410162,2.51744518,0.972962711,2.51177398,2.51481051,2.50913335
81.785032,3.16227766,2.51750438,0.802977757,2.51179669,2.51486134,2.50914764
81.795524,2.64575131,2.51756441,0.358031986,2.51181964,2.51491296,2.50916211
81.806016,2.23606798,2.51762527,-0.530619728,2.51184281,2.51496537,2.50917678
81.816507,2.82842712,2.51768699,0.557440697,2.51186621,2.51501859,2.50919162
81.826999,2,2.5177496,-0.719548194,2.51188985,2.51507266,2.50920666
[truncated: 419,759 more chars]
