# Supplementary material for: Phase Stability of Iron Nitride Fe4N at High Pressure—Pressure-Dependent Evolution of Phase Equilibria in the Fe–N System
Source: Materials (Basel). 2021 Jul 15;14(14):3963. doi: 10.3390/ma14143963 (PMC8307547; doi:10.3390/ma14143963)
Supplement: Supplementary file 1 [file materials-14-03963-s001.zip › xrd_data/4-1000_pawley.txt]

'y-axis saved as Sqrt(y)
'x,Yobs,Ycalc,Diff,test,epsilon,Bkg
20,10.3440804,0,0,0,0,0
20.010492,11.1355287,0,0,0,0,0
20.020983,10.7238053,0,0,0,0,0
20.031475,11.4017543,0,0,0,0,0
20.041966,10.6770783,0,0,0,0,0
20.052458,11.7898261,0,0,0,0,0
20.06295,11.1803399,0,0,0,0,0
20.073441,11.3137085,0,0,0,0,0
20.083933,11.2249722,0,0,0,0,0
20.094424,10.7703296,0,0,0,0,0
20.104916,11.2694277,0,0,0,0,0
20.115408,11.1803399,0,0,0,0,0
20.125899,11.4017543,0,0,0,0,0
20.136391,12.0415946,0,0,0,0,0
20.146882,10.198039,0,0,0,0,0
20.157374,11.4017543,0,0,0,0,0
20.167866,11.3578167,0,0,0,0,0
20.178357,11.4891253,0,0,0,0,0
20.188849,11.2694277,0,0,0,0,0
20.19934,11.2249722,0,0,0,0,0
20.209832,11.1355287,0,0,0,0,0
20.220324,10.9087121,0,0,0,0,0
20.230815,11.6619038,0,0,0,0,0
20.241307,11.1803399,0,0,0,0,0
20.251798,12.3693169,0,0,0,0,0
20.26229,11.045361,0,0,0,0,0
20.272782,11.4455231,0,0,0,0,0
20.283273,10.6301458,0,0,0,0,0
20.293765,11.045361,0,0,0,0,0
20.304256,11.61895,0,0,0,0,0
20.314748,11.4455231,0,0,0,0,0
20.32524,11.4891253,0,0,0,0,0
20.335731,11.6619038,0,0,0,0,0
20.346223,11.045361,0,0,0,0,0
20.356714,10.198039,0,0,0,0,0
20.367206,11.5758369,0,0,0,0,0
20.377698,12.083046,0,0,0,0,0
20.388189,12.4498996,0,0,0,0,0
20.398681,11.1355287,0,0,0,0,0
20.409172,11.4017543,0,0,0,0,0
20.419664,11.7898261,0,0,0,0,0
20.430156,12.083046,0,0,0,0,0
20.440647,11.7473401,0,0,0,0,0
20.451139,10.9544512,0,0,0,0,0
20.46163,12,0,0,0,0,0
20.472122,11.61895,0,0,0,0,0
20.482614,11.7046999,0,0,0,0,0
20.493105,10.9087121,0,0,0,0,0
20.503597,10.8166538,0,0,0,0,0
20.514088,12.083046,0,0,0,0,0
20.52458,11.5325626,0,0,0,0,0
20.535072,11.4017543,0,0,0,0,0
20.545563,11,0,0,0,0,0
20.556055,11.1355287,0,0,0,0,0
20.566546,11.4891253,0,0,0,0,0
20.577038,10.6770783,0,0,0,0,0
20.58753,10.3440804,0,0,0,0,0
20.598021,11.5325626,0,0,0,0,0
20.608513,11.3137085,0,0,0,0,0
20.619004,11.2249722,0,0,0,0,0
20.629496,11.2249722,0,0,0,0,0
20.639988,12.6491106,0,0,0,0,0
20.650479,10.9544512,0,0,0,0,0
20.660971,10.6770783,0,0,0,0,0
20.671462,10.8166538,0,0,0,0,0
20.681954,11.7046999,0,0,0,0,0
20.692446,11.61895,0,0,0,0,0
20.702937,11.5758369,0,0,0,0,0
20.713429,11.0905365,0,0,0,0,0
20.72392,11.4455231,0,0,0,0,0
20.734412,11.4891253,0,0,0,0,0
20.744904,12.0415946,0,0,0,0,0
20.755395,11.61895,0,0,0,0,0
20.765887,11.2249722,0,0,0,0,0
20.776378,11.5325626,0,0,0,0,0
20.78687,10.5356538,0,0,0,0,0
20.797362,12.2065556,0,0,0,0,0
20.807853,11.9163753,0,0,0,0,0
20.818345,11,0,0,0,0,0
20.828836,11.7046999,0,0,0,0,0
20.839328,11.9163753,0,0,0,0,0
20.84982,10.4880885,0,0,0,0,0
20.860311,11.5325626,0,0,0,0,0
20.870803,10.9544512,0,0,0,0,0
20.881294,11.61895,0,0,0,0,0
20.891786,11.1803399,0,0,0,0,0
20.902278,11,0,0,0,0,0
20.912769,11.1803399,0,0,0,0,0
20.923261,11.5325626,0,0,0,0,0
20.933752,12.4498996,0,0,0,0,0
20.944244,11.6619038,0,0,0,0,0
20.954736,11.61895,0,0,0,0,0
20.965227,11.9582607,0,0,0,0,0
20.975719,11.7473401,0,0,0,0,0
20.98621,12.2882057,0,0,0,0,0
20.996702,11.1355287,0,0,0,0,0
21.007194,11.2694277,0,0,0,0,0
21.017685,11.3578167,0,0,0,0,0
21.028177,11.4891253,0,0,0,0,0
21.038668,12.328828,0,0,0,0,0
21.04916,12.2065556,0,0,0,0,0
21.059652,11.7473401,0,0,0,0,0
21.070143,12.489996,0,0,0,0,0
21.080635,11.4891253,0,0,0,0,0
21.091126,11.7898261,0,0,0,0,0
21.101618,11.7046999,0,0,0,0,0
21.11211,11.0905365,0,0,0,0,0
21.122601,11.3137085,0,0,0,0,0
21.133093,11.8743421,0,0,0,0,0
21.143584,11.7473401,0,0,0,0,0
21.154076,10.6770783,0,0,0,0,0
21.164568,10.7703296,0,0,0,0,0
21.175059,12.5698051,0,0,0,0,0
21.185551,11.61895,0,0,0,0,0
21.196042,11.9582607,0,0,0,0,0
21.206534,11.61895,0,0,0,0,0
21.217026,10.7703296,0,0,0,0,0
21.227517,11.4891253,0,0,0,0,0
21.238009,10.9087121,0,0,0,0,0
21.2485,10.6770783,0,0,0,0,0
21.258992,12.083046,0,0,0,0,0
21.269484,11,0,0,0,0,0
21.279975,12.6491106,0,0,0,0,0
21.290467,11.7898261,0,0,0,0,0
21.300958,10.7703296,0,0,0,0,0
21.31145,10.8627805,0,0,0,0,0
21.321942,11.61895,0,0,0,0,0
21.332433,10.5356538,0,0,0,0,0
21.342925,12.1655251,0,0,0,0,0
21.353416,11.3137085,0,0,0,0,0
21.363908,11.4891253,0,0,0,0,0
21.3744,11.7046999,0,0,0,0,0
21.384891,10.9544512,0,0,0,0,0
21.395383,10.8627805,0,0,0,0,0
21.405874,10.9087121,0,0,0,0,0
21.416366,10.7238053,0,0,0,0,0
21.426858,12.083046,0,0,0,0,0
21.437349,10.5830052,0,0,0,0,0
21.447841,11.1355287,0,0,0,0,0
21.458332,11.61895,0,0,0,0,0
21.468824,11.7473401,0,0,0,0,0
21.479316,11.2694277,0,0,0,0,0
21.489807,11.4891253,0,0,0,0,0
21.500299,11.7046999,0,0,0,0,0
21.51079,11.7898261,0,0,0,0,0
21.521282,11.4891253,0,0,0,0,0
21.531774,11.7046999,0,0,0,0,0
21.542265,11.4455231,0,0,0,0,0
21.552757,11.1355287,0,0,0,0,0
21.563248,11.9582607,0,0,0,0,0
21.57374,11.9582607,0,0,0,0,0
21.584232,12.3693169,0,0,0,0,0
21.594723,11.4891253,0,0,0,0,0
21.605215,11.1803399,0,0,0,0,0
21.615706,12.1243557,0,0,0,0,0
21.626198,11.2694277,0,0,0,0,0
21.63669,12.4096736,0,0,0,0,0
21.647181,10.7238053,0,0,0,0,0
21.657673,11.5325626,0,0,0,0,0
21.668164,12.083046,0,0,0,0,0
21.678656,11.6619038,0,0,0,0,0
21.689148,10.9087121,0,0,0,0,0
21.699639,12.7671453,0,0,0,0,0
21.710131,12.4096736,0,0,0,0,0
21.720622,11,0,0,0,0,0
21.731114,11.2249722,0,0,0,0,0
21.741606,11.3578167,0,0,0,0,0
21.752097,11.9163753,0,0,0,0,0
21.762589,11.9163753,0,0,0,0,0
21.77308,11.3578167,0,0,0,0,0
21.783572,11.3578167,0,0,0,0,0
21.794064,10.9544512,0,0,0,0,0
21.804555,11.1355287,0,0,0,0,0
21.815047,11.61895,0,0,0,0,0
21.825538,11.61895,0,0,0,0,0
21.83603,12.2474487,0,0,0,0,0
21.846522,12,0,0,0,0,0
21.857013,11.7046999,0,0,0,0,0
21.867505,12.083046,0,0,0,0,0
21.877996,11.7898261,0,0,0,0,0
21.888488,11.3578167,0,0,0,0,0
21.89898,11.1803399,0,0,0,0,0
21.909471,11.3578167,0,0,0,0,0
21.919963,11.8321596,0,0,0,0,0
21.930454,13.4164079,0,0,0,0,0
21.940946,11.3137085,0,0,0,0,0
21.951438,11.3137085,0,0,0,0,0
21.961929,11,0,0,0,0,0
21.972421,12.0415946,0,0,0,0,0
21.982912,12,0,0,0,0,0
21.993404,11.6619038,0,0,0,0,0
22.003896,10.4403065,0,0,0,0,0
22.014387,11.5325626,0,0,0,0,0
22.024879,11.2694277,0,0,0,0,0
22.03537,10.8627805,0,0,0,0,0
22.045862,11.2694277,0,0,0,0,0
22.056354,11.5325626,0,0,0,0,0
22.066845,10.7238053,0,0,0,0,0
22.077337,11.7898261,0,0,0,0,0
22.087828,11.9582607,0,0,0,0,0
22.09832,12.0415946,0,0,0,0,0
22.108812,11.9582607,0,0,0,0,0
22.119303,12.1655251,0,0,0,0,0
22.129795,12.2065556,0,0,0,0,0
22.140286,11.0905365,0,0,0,0,0
22.150778,10.4403065,0,0,0,0,0
22.16127,11,0,0,0,0,0
22.171761,10.3923048,0,0,0,0,0
22.182253,11.8743421,0,0,0,0,0
22.192744,11.4891253,0,0,0,0,0
22.203236,11.7898261,0,0,0,0,0
22.213728,11.61895,0,0,0,0,0
22.224219,11.3578167,0,0,0,0,0
22.234711,10.9087121,0,0,0,0,0
22.245202,11.5758369,0,0,0,0,0
22.255694,11.0905365,0,0,0,0,0
22.266186,10.9087121,0,0,0,0,0
22.276677,11.8743421,0,0,0,0,0
22.287169,12.8062485,0,0,0,0,0
22.29766,11.6619038,0,0,0,0,0
22.308152,12,0,0,0,0,0
22.318644,11.6619038,0,0,0,0,0
22.329135,12.6491106,0,0,0,0,0
22.339627,10.6301458,0,0,0,0,0
22.350118,11.9582607,0,0,0,0,0
22.36061,11.2694277,0,0,0,0,0
22.371102,11.9163753,0,0,0,0,0
22.381593,11.4891253,0,0,0,0,0
22.392085,12.4096736,0,0,0,0,0
22.402576,12.0415946,0,0,0,0,0
22.413068,11.1803399,0,0,0,0,0
22.42356,10.9544512,0,0,0,0,0
22.434051,12.0415946,0,0,0,0,0
22.444543,11.3137085,0,0,0,0,0
22.455034,10.9087121,0,0,0,0,0
22.465526,11.2249722,0,0,0,0,0
22.476018,11.5758369,0,0,0,0,0
22.486509,11.3578167,0,0,0,0,0
22.497001,12.0415946,0,0,0,0,0
22.507492,11.3137085,0,0,0,0,0
22.517984,11.8743421,0,0,0,0,0
22.528476,11.8321596,0,0,0,0,0
22.538967,11.4455231,0,0,0,0,0
22.549459,11.2249722,0,0,0,0,0
22.55995,11.2694277,0,0,0,0,0
22.570442,10.4880885,0,0,0,0,0
22.580934,10.4880885,0,0,0,0,0
22.591425,11,0,0,0,0,0
22.601917,10.6301458,0,0,0,0,0
22.612408,11.1355287,0,0,0,0,0
22.6229,11.0905365,0,0,0,0,0
22.633392,10.7703296,0,0,0,0,0
22.643883,11.5758369,0,0,0,0,0
22.654375,11.5325626,0,0,0,0,0
22.664866,11,0,0,0,0,0
22.675358,11.8321596,0,0,0,0,0
22.68585,10.8627805,0,0,0,0,0
22.696341,11.2249722,0,0,0,0,0
22.706833,12,0,0,0,0,0
22.717324,12.3693169,0,0,0,0,0
22.727816,10.7703296,0,0,0,0,0
22.738308,11.0905365,0,0,0,0,0
22.748799,10.2956301,0,0,0,0,0
22.759291,11.9582607,0,0,0,0,0
22.769782,12.2065556,0,0,0,0,0
22.780274,10.9087121,0,0,0,0,0
22.790766,11.7473401,0,0,0,0,0
22.801257,11.045361,0,0,0,0,0
22.811749,11.0905365,0,0,0,0,0
22.82224,11.8743421,0,0,0,0,0
22.832732,11.5325626,0,0,0,0,0
22.843224,10.9087121,0,0,0,0,0
22.853715,11.7473401,0,0,0,0,0
22.864207,10.8627805,0,0,0,0,0
22.874698,11.3578167,0,0,0,0,0
22.88519,10.5356538,0,0,0,0,0
22.895682,10.198039,0,0,0,0,0
22.906173,11.5325626,0,0,0,0,0
22.916665,11.3578167,0,0,0,0,0
22.927156,10.6770783,0,0,0,0,0
22.937648,12.2065556,0,0,0,0,0
22.94814,11.2249722,0,0,0,0,0
22.958631,11,0,0,0,0,0
22.969123,11.2694277,0,0,0,0,0
22.979614,10.198039,0,0,0,0,0
22.990106,11,0,0,0,0,0
23.000598,10.3923048,0,0,0,0,0
23.011089,11,0,0,0,0,0
23.021581,11.1803399,0,0,0,0,0
23.032072,11.1803399,0,0,0,0,0
23.042564,11.5325626,0,0,0,0,0
23.053056,11.2694277,0,0,0,0,0
23.063547,11.1355287,0,0,0,0,0
23.074039,11.1355287,0,0,0,0,0
23.08453,11.1803399,0,0,0,0,0
23.095022,11.2249722,0,0,0,0,0
23.105514,11.7046999,0,0,0,0,0
23.116005,11,0,0,0,0,0
23.126497,11.8321596,0,0,0,0,0
23.136988,10.9544512,0,0,0,0,0
23.14748,11.1803399,0,0,0,0,0
23.157972,11.2249722,0,0,0,0,0
23.168463,11.8743421,0,0,0,0,0
23.178955,11.4017543,0,0,0,0,0
23.189446,10.7703296,0,0,0,0,0
23.199938,11.3578167,0,0,0,0,0
23.21043,10.9544512,0,0,0,0,0
23.220921,11.5758369,0,0,0,0,0
23.231413,10.9544512,0,0,0,0,0
23.241904,11.3137085,0,0,0,0,0
23.252396,10.9544512,0,0,0,0,0
23.262888,10.8627805,0,0,0,0,0
23.273379,11,0,0,0,0,0
23.283871,11,0,0,0,0,0
23.294362,10.5356538,0,0,0,0,0
23.304854,10.3923048,0,0,0,0,0
23.315346,11.7046999,0,0,0,0,0
23.325837,11.2249722,0,0,0,0,0
23.336329,10.5830052,0,0,0,0,0
23.34682,9.94987437,0,0,0,0,0
23.357312,11.4017543,0,0,0,0,0
23.367804,11.2249722,0,0,0,0,0
23.378295,11.5325626,0,0,0,0,0
23.388787,11.4017543,0,0,0,0,0
23.399278,11.7898261,0,0,0,0,0
23.40977,10.5356538,0,0,0,0,0
23.420262,10.7238053,0,0,0,0,0
23.430753,11.045361,0,0,0,0,0
23.441245,11.045361,0,0,0,0,0
23.451736,10.7238053,0,0,0,0,0
23.462228,11.4455231,0,0,0,0,0
23.47272,11.045361,0,0,0,0,0
23.483211,11.3137085,0,0,0,0,0
23.493703,10.9087121,0,0,0,0,0
23.504194,11.4017543,0,0,0,0,0
23.514686,11.1355287,0,0,0,0,0
23.525178,11.2694277,0,0,0,0,0
23.535669,11.4017543,0,0,0,0,0
23.546161,9.8488578,0,0,0,0,0
23.556652,11.3578167,0,0,0,0,0
23.567144,12.1655251,0,0,0,0,0
23.577636,11.0905365,0,0,0,0,0
23.588127,10.9087121,0,0,0,0,0
23.598619,10.8166538,0,0,0,0,0
23.60911,11.0905365,0,0,0,0,0
23.619602,10.9544512,0,0,0,0,0
23.630094,11.045361,0,0,0,0,0
23.640585,11.61895,0,0,0,0,0
23.651077,11.4891253,0,0,0,0,0
23.661568,10.9544512,0,0,0,0,0
23.67206,11.5758369,0,0,0,0,0
23.682552,11.1803399,0,0,0,0,0
23.693043,11.045361,0,0,0,0,0
23.703535,11.5758369,0,0,0,0,0
23.714026,11.4891253,0,0,0,0,0
23.724518,11.1803399,0,0,0,0,0
23.73501,11.5758369,0,0,0,0,0
23.745501,11.1355287,0,0,0,0,0
23.755993,10.7703296,0,0,0,0,0
23.766484,10.8627805,0,0,0,0,0
23.776976,11.3578167,0,0,0,0,0
23.787468,10.4880885,0,0,0,0,0
23.797959,10.6770783,0,0,0,0,0
23.808451,10.4880885,0,0,0,0,0
23.818942,10.9544512,0,0,0,0,0
23.829434,10.9544512,0,0,0,0,0
23.839926,11.5325626,0,0,0,0,0
23.850417,10.9087121,0,0,0,0,0
23.860909,12,0,0,0,0,0
23.8714,11.1355287,0,0,0,0,0
23.881892,11.045361,0,0,0,0,0
23.892384,10.9087121,0,0,0,0,0
23.902875,11.4891253,0,0,0,0,0
23.913367,10.3923048,0,0,0,0,0
23.923858,10.0995049,0,0,0,0,0
23.93435,12.1243557,0,0,0,0,0
23.944842,11.2249722,0,0,0,0,0
23.955333,11.61895,0,0,0,0,0
23.965825,10,0,0,0,0,0
23.976316,10.6301458,0,0,0,0,0
23.986808,11.2694277,0,0,0,0,0
23.9973,10.8166538,0,0,0,0,0
24.007791,10.6301458,0,0,0,0,0
24.018283,10.6301458,0,0,0,0,0
24.028774,10.3923048,0,0,0,0,0
24.039266,10.9544512,0,0,0,0,0
24.049758,10.5356538,0,0,0,0,0
24.060249,11.4891253,0,0,0,0,0
24.070741,10.4403065,0,0,0,0,0
24.081232,10.8627805,0,0,0,0,0
24.091724,11.045361,0,0,0,0,0
24.102216,11.61895,0,0,0,0,0
24.112707,10.7703296,0,0,0,0,0
24.123199,9.94987437,0,0,0,0,0
24.13369,10.2469508,0,0,0,0,0
24.144182,10.5830052,0,0,0,0,0
24.154674,11.3137085,0,0,0,0,0
24.165165,11.045361,0,0,0,0,0
24.175657,10.9087121,0,0,0,0,0
24.186148,10.4403065,0,0,0,0,0
24.19664,11.2249722,0,0,0,0,0
24.207132,10.8166538,0,0,0,0,0
24.217623,10.0995049,0,0,0,0,0
24.228115,11.4455231,0,0,0,0,0
24.238606,11.2694277,0,0,0,0,0
24.249098,10.9087121,0,0,0,0,0
24.25959,10.5830052,0,0,0,0,0
24.270081,10.3923048,0,0,0,0,0
24.280573,11.2694277,0,0,0,0,0
24.291064,11.0905365,0,0,0,0,0
24.301556,10.8166538,0,0,0,0,0
24.312048,10.8627805,0,0,0,0,0
24.322539,10,0,0,0,0,0
24.333031,10.8166538,0,0,0,0,0
24.343522,11.7473401,0,0,0,0,0
24.354014,10.1488916,0,0,0,0,0
24.364506,10.2469508,0,0,0,0,0
24.374997,10.5830052,0,0,0,0,0
24.385489,11.0905365,0,0,0,0,0
24.39598,11.4891253,0,0,0,0,0
24.406472,11.1803399,0,0,0,0,0
24.416964,10.6301458,0,0,0,0,0
24.427455,11.045361,0,0,0,0,0
24.437947,10.9087121,0,0,0,0,0
24.448438,10.8627805,0,0,0,0,0
24.45893,11.4891253,0,0,0,0,0
24.469422,10.1488916,0,0,0,0,0
24.479913,11.0905365,0,0,0,0,0
24.490405,11.5325626,0,0,0,0,0
24.500896,10.8166538,0,0,0,0,0
24.511388,11.4455231,0,0,0,0,0
24.52188,10.8166538,0,0,0,0,0
24.532371,10.9087121,0,0,0,0,0
24.542863,10.5356538,0,0,0,0,0
24.553354,11.2694277,0,0,0,0,0
24.563846,11,0,0,0,0,0
24.574338,10.2956301,0,0,0,0,0
24.584829,11.5325626,0,0,0,0,0
24.595321,10.1488916,0,0,0,0,0
24.605812,9.79795897,0,0,0,0,0
24.616304,10.4880885,0,0,0,0,0
24.626796,9.43398113,0,0,0,0,0
24.637287,11.2249722,0,0,0,0,0
24.647779,10.198039,0,0,0,0,0
24.65827,9.53939201,0,0,0,0,0
24.668762,10.7703296,0,0,0,0,0
24.679254,9.69535971,0,0,0,0,0
24.689745,10.6301458,0,0,0,0,0
24.700237,10.3440804,0,0,0,0,0
24.710728,10.7703296,0,0,0,0,0
24.72122,10.6301458,0,0,0,0,0
24.731712,10.6301458,0,0,0,0,0
24.742203,10.9087121,0,0,0,0,0
24.752695,10.5830052,0,0,0,0,0
24.763186,10.8166538,0,0,0,0,0
24.773678,10.5830052,0,0,0,0,0
24.78417,11.0905365,0,0,0,0,0
24.794661,11.1803399,0,0,0,0,0
24.805153,11.1803399,0,0,0,0,0
24.815644,10.1488916,0,0,0,0,0
24.826136,9.89949494,0,0,0,0,0
24.836628,9.79795897,0,0,0,0,0
24.847119,10.9544512,0,0,0,0,0
24.857611,10.5830052,0,0,0,0,0
24.868102,9.2736185,0,0,0,0,0
24.878594,9.89949494,0,0,0,0,0
24.889086,11.1803399,0,0,0,0,0
24.899577,9.69535971,0,0,0,0,0
24.910069,11,0,0,0,0,0
24.92056,10.6301458,0,0,0,0,0
24.931052,11,0,0,0,0,0
24.941544,10,0,0,0,0,0
24.952035,9.94987437,0,0,0,0,0
24.962527,10.3923048,0,0,0,0,0
24.973018,10.2469508,0,0,0,0,0
24.98351,10.9087121,0,0,0,0,0
24.994002,10.5356538,0,0,0,0,0
25.004493,10.6770783,0,0,0,0,0
25.014985,9.79795897,0,0,0,0,0
25.025476,10.9544512,0,0,0,0,0
25.035968,10.7703296,0,0,0,0,0
25.04646,9.79795897,0,0,0,0,0
25.056951,10.7703296,0,0,0,0,0
25.067443,9.89949494,0,0,0,0,0
25.077934,9.74679434,0,0,0,0,0
25.088426,10.4403065,0,0,0,0,0
25.098918,9.8488578,0,0,0,0,0
25.109409,10.3440804,0,0,0,0,0
25.119901,10.6301458,0,0,0,0,0
25.130392,10.4880885,0,0,0,0,0
25.140884,9.53939201,0,0,0,0,0
25.151376,9.89949494,0,0,0,0,0
25.161867,10.198039,0,0,0,0,0
25.172359,9.74679434,0,0,0,0,0
25.18285,10.2469508,0,0,0,0,0
25.193342,10.6301458,0,0,0,0,0
25.203834,10.2956301,0,0,0,0,0
25.214325,10.4880885,0,0,0,0,0
25.224817,11.2249722,0,0,0,0,0
25.235308,10.3923048,0,0,0,0,0
25.2458,9.38083152,0,0,0,0,0
25.256292,10.2956301,0,0,0,0,0
25.266783,9.64365076,0,0,0,0,0
25.277275,9.38083152,0,0,0,0,0
25.287766,10.6770783,0,0,0,0,0
25.298258,9.59166305,0,0,0,0,0
25.30875,10.3440804,0,0,0,0,0
25.319241,10.198039,0,0,0,0,0
25.329733,10.2469508,0,0,0,0,0
25.340224,11.6619038,0,0,0,0,0
25.350716,10.0498756,0,0,0,0,0
25.361208,10.1488916,0,0,0,0,0
25.371699,10.5830052,0,0,0,0,0
25.382191,10.4403065,0,0,0,0,0
25.392682,10.5356538,0,0,0,0,0
25.403174,9.21954446,0,0,0,0,0
25.413666,10.4880885,0,0,0,0,0
25.424157,10,0,0,0,0,0
25.434649,10.6301458,0,0,0,0,0
25.44514,10.4880885,0,0,0,0,0
25.455632,10.198039,0,0,0,0,0
25.466124,10,0,0,0,0,0
25.476615,10.4403065,0,0,0,0,0
25.487107,10.5356538,0,0,0,0,0
25.497598,9.48683298,0,0,0,0,0
25.50809,10.6301458,0,0,0,0,0
25.518582,10.8166538,0,0,0,0,0
25.529073,9.53939201,0,0,0,0,0
25.539565,10.1488916,0,0,0,0,0
25.550056,10.1488916,0,0,0,0,0
25.560548,9.43398113,0,0,0,0,0
25.57104,9.32737905,0,0,0,0,0
25.581531,10.2956301,0,0,0,0,0
25.592023,9.64365076,0,0,0,0,0
25.602514,9.8488578,0,0,0,0,0
25.613006,9.38083152,0,0,0,0,0
25.623498,10.2469508,0,0,0,0,0
25.633989,9.32737905,0,0,0,0,0
25.644481,10,0,0,0,0,0
25.654972,9.89949494,0,0,0,0,0
25.665464,10.4880885,0,0,0,0,0
25.675956,10.198039,0,0,0,0,0
25.686447,10.1488916,0,0,0,0,0
25.696939,9.64365076,0,0,0,0,0
25.70743,10.6301458,0,0,0,0,0
25.717922,8.83176087,0,0,0,0,0
25.728414,10.3923048,0,0,0,0,0
25.738905,9.94987437,0,0,0,0,0
25.749397,10.2956301,0,0,0,0,0
25.759888,8.88819442,0,0,0,0,0
25.77038,10.0498756,0,0,0,0,0
25.780872,9.69535971,0,0,0,0,0
25.791363,9.69535971,0,0,0,0,0
25.801855,9.69535971,0,0,0,0,0
25.812346,10.3440804,0,0,0,0,0
25.822838,10.7703296,0,0,0,0,0
25.83333,10.0498756,0,0,0,0,0
25.843821,9.21954446,0,0,0,0,0
25.854313,10.6301458,0,0,0,0,0
25.864804,9.69535971,0,0,0,0,0
25.875296,9.79795897,0,0,0,0,0
25.885788,9.59166305,0,0,0,0,0
25.896279,10.4880885,0,0,0,0,0
25.906771,9.89949494,0,0,0,0,0
25.917262,10.1488916,0,0,0,0,0
25.927754,9.59166305,0,0,0,0,0
25.938246,11.045361,0,0,0,0,0
25.948737,8.88819442,0,0,0,0,0
25.959229,9.32737905,0,0,0,0,0
25.96972,10,0,0,0,0,0
25.980212,9.16515139,0,0,0,0,0
25.990704,9.21954446,0,0,0,0,0
26.001195,8.77496439,0,0,0,0,0
26.011687,9.94987437,0,0,0,0,0
26.022178,9.79795897,0,0,0,0,0
26.03267,10.0498756,0,0,0,0,0
26.043162,9.43398113,0,0,0,0,0
26.053653,9.43398113,0,0,0,0,0
26.064145,9.8488578,0,0,0,0,0
26.074636,10.0498756,0,0,0,0,0
26.085128,9.53939201,0,0,0,0,0
26.09562,9.74679434,0,0,0,0,0
26.106111,9.94987437,0,0,0,0,0
26.116603,9.32737905,0,0,0,0,0
26.127094,9.32737905,0,0,0,0,0
26.137586,10.0995049,0,0,0,0,0
26.148078,10.198039,0,0,0,0,0
26.158569,9.94987437,0,0,0,0,0
26.169061,10.2956301,0,0,0,0,0
26.179552,9.69535971,0,0,0,0,0
26.190044,10.2469508,0,0,0,0,0
26.200536,9.53939201,0,0,0,0,0
26.211027,8.71779789,0,0,0,0,0
26.221519,9.48683298,0,0,0,0,0
26.23201,10.198039,0,0,0,0,0
26.242502,10.2956301,0,0,0,0,0
26.252994,9.8488578,0,0,0,0,0
26.263485,9.8488578,0,0,0,0,0
26.273977,9.53939201,0,0,0,0,0
26.284468,9.11043358,0,0,0,0,0
26.29496,9.59166305,0,0,0,0,0
26.305452,8.71779789,0,0,0,0,0
26.315943,8.83176087,0,0,0,0,0
26.326435,8.94427191,0,0,0,0,0
26.336926,9.16515139,0,0,0,0,0
26.347418,9.59166305,0,0,0,0,0
26.35791,10.4880885,0,0,0,0,0
26.368401,9.69535971,0,0,0,0,0
26.378893,9.21954446,0,0,0,0,0
26.389384,9.38083152,0,0,0,0,0
26.399876,9.11043358,0,0,0,0,0
26.410368,8.71779789,0,0,0,0,0
26.420859,9.2736185,0,0,0,0,0
26.431351,10.1488916,0,0,0,0,0
26.441842,9.59166305,0,0,0,0,0
26.452334,9,0,0,0,0,0
26.462826,8.88819442,0,0,0,0,0
26.473317,8.66025404,0,0,0,0,0
26.483809,9,0,0,0,0,0
26.4943,9.21954446,0,0,0,0,0
26.504792,8.88819442,0,0,0,0,0
26.515284,9.53939201,0,0,0,0,0
26.525775,9.38083152,0,0,0,0,0
26.536267,9.05538514,0,0,0,0,0
26.546758,9.74679434,0,0,0,0,0
26.55725,8.66025404,0,0,0,0,0
26.567742,9,0,0,0,0,0
26.578233,8.88819442,0,0,0,0,0
26.588725,10,0,0,0,0,0
26.599216,9.16515139,0,0,0,0,0
26.609708,9.53939201,0,0,0,0,0
26.6202,10.0498756,0,0,0,0,0
26.630691,9.48683298,0,0,0,0,0
26.641183,9.59166305,0,0,0,0,0
26.651674,9.32737905,0,0,0,0,0
26.662166,8.66025404,0,0,0,0,0
26.672658,9.69535971,0,0,0,0,0
26.683149,9.43398113,0,0,0,0,0
26.693641,9.69535971,0,0,0,0,0
26.704132,9.32737905,0,0,0,0,0
26.714624,10.1488916,0,0,0,0,0
26.725116,9.05538514,0,0,0,0,0
26.735607,8.66025404,0,0,0,0,0
26.746099,10.1488916,0,0,0,0,0
26.75659,9.11043358,0,0,0,0,0
26.767082,8.83176087,0,0,0,0,0
26.777574,8.48528137,0,0,0,0,0
26.788065,9.32737905,0,0,0,0,0
26.798557,9,0,0,0,0,0
26.809048,8.94427191,0,0,0,0,0
26.81954,8.88819442,0,0,0,0,0
26.830032,9.94987437,0,0,0,0,0
26.840523,9.21954446,0,0,0,0,0
26.851015,10.198039,0,0,0,0,0
26.861506,9.89949494,0,0,0,0,0
26.871998,9.38083152,0,0,0,0,0
26.88249,9.05538514,0,0,0,0,0
26.892981,9.74679434,0,0,0,0,0
26.903473,9.53939201,0,0,0,0,0
26.913964,10,0,0,0,0,0
26.924456,9.43398113,0,0,0,0,0
26.934948,9.16515139,0,0,0,0,0
26.945439,8.60232527,0,0,0,0,0
26.955931,10.2469508,0,0,0,0,0
26.966422,9,0,0,0,0,0
26.976914,8.94427191,0,0,0,0,0
26.987406,9.74679434,0,0,0,0,0
26.997897,9,0,0,0,0,0
27.008389,9.69535971,0,0,0,0,0
27.01888,8.18535277,0,0,0,0,0
27.029372,9.8488578,0,0,0,0,0
27.039864,9.64365076,0,0,0,0,0
27.050355,8.71779789,0,0,0,0,0
27.060847,9.64365076,0,0,0,0,0
27.071338,9.64365076,0,0,0,0,0
27.08183,9.38083152,0,0,0,0,0
27.092322,9.43398113,0,0,0,0,0
27.102813,8.88819442,0,0,0,0,0
27.113305,9.16515139,0,0,0,0,0
27.123796,9.38083152,0,0,0,0,0
27.134288,8.94427191,0,0,0,0,0
27.14478,8.36660027,0,0,0,0,0
27.155271,9.21954446,0,0,0,0,0
27.165763,8.94427191,0,0,0,0,0
27.176254,8.60232527,0,0,0,0,0
27.186746,8.83176087,0,0,0,0,0
27.197238,9.74679434,0,0,0,0,0
27.207729,8.77496439,0,0,0,0,0
27.218221,8.94427191,0,0,0,0,0
27.228712,8.42614977,0,0,0,0,0
27.239204,9.38083152,0,0,0,0,0
27.249696,9.94987437,0,0,0,0,0
27.260187,8.66025404,0,0,0,0,0
27.270679,8.66025404,0,0,0,0,0
27.28117,8.60232527,0,0,0,0,0
27.291662,8.83176087,0,0,0,0,0
27.302154,9.43398113,0,0,0,0,0
27.312645,9.32737905,0,0,0,0,0
27.323137,8.77496439,0,0,0,0,0
27.333628,8.48528137,0,0,0,0,0
27.34412,8.42614977,0,0,0,0,0
27.354612,8.30662386,0,0,0,0,0
27.365103,9.16515139,0,0,0,0,0
27.375595,9.16515139,0,0,0,0,0
27.386086,8.60232527,0,0,0,0,0
27.396578,9,0,0,0,0,0
27.40707,9.21954446,0,0,0,0,0
27.417561,8.30662386,0,0,0,0,0
27.428053,9.11043358,0,0,0,0,0
27.438544,9.2736185,0,0,0,0,0
27.449036,8.36660027,0,0,0,0,0
27.459528,9,0,0,0,0,0
27.470019,9.05538514,0,0,0,0,0
27.480511,9.69535971,0,0,0,0,0
27.491002,8.60232527,0,0,0,0,0
27.501494,8.24621125,0,0,0,0,0
27.511986,8.48528137,0,0,0,0,0
27.522477,9,0,0,0,0,0
27.532969,9.21954446,0,0,0,0,0
27.54346,8.83176087,0,0,0,0,0
27.553952,9.2736185,0,0,0,0,0
27.564444,9.38083152,0,0,0,0,0
27.574935,8.54400375,0,0,0,0,0
27.585427,8.54400375,0,0,0,0,0
27.595918,8.48528137,0,0,0,0,0
27.60641,8.60232527,0,0,0,0,0
27.616902,8.60232527,0,0,0,0,0
27.627393,8.88819442,0,0,0,0,0
27.637885,7.21110255,0,0,0,0,0
27.648376,8.83176087,0,0,0,0,0
27.658868,9.43398113,0,0,0,0,0
27.66936,8.71779789,0,0,0,0,0
27.679851,8.42614977,0,0,0,0,0
27.690343,8.36660027,0,0,0,0,0
27.700834,8.24621125,0,0,0,0,0
27.711326,9.32737905,0,0,0,0,0
27.721818,8.77496439,0,0,0,0,0
27.732309,8.71779789,0,0,0,0,0
27.742801,8.24621125,0,0,0,0,0
27.753292,7.81024968,0,0,0,0,0
27.763784,8.42614977,0,0,0,0,0
27.774276,9.32737905,0,0,0,0,0
27.784767,8.18535277,0,0,0,0,0
27.795259,8.71779789,0,0,0,0,0
27.80575,7.07106781,0,0,0,0,0
27.816242,9.11043358,0,0,0,0,0
27.826734,8.06225775,0,0,0,0,0
27.837225,8.88819442,0,0,0,0,0
27.847717,9.16515139,0,0,0,0,0
27.858208,9.38083152,0,0,0,0,0
27.8687,7.87400787,0,0,0,0,0
27.879192,8.1240384,0,0,0,0,0
27.889683,8.60232527,0,0,0,0,0
27.900175,8.42614977,0,0,0,0,0
27.910666,8.42614977,0,0,0,0,0
27.921158,8.66025404,0,0,0,0,0
27.93165,7.41619849,0,0,0,0,0
27.942141,7.68114575,0,0,0,0,0
27.952633,7.54983444,0,0,0,0,0
27.963124,8.36660027,0,0,0,0,0
27.973616,8.36660027,0,0,0,0,0
27.984108,9.05538514,0,0,0,0,0
27.994599,8.83176087,0,0,0,0,0
28.005091,7.61577311,0,0,0,0,0
28.015582,9.11043358,0,0,0,0,0
28.026074,8.48528137,0,0,0,0,0
28.036566,8.30662386,0,0,0,0,0
28.047057,8.30662386,0,0,0,0,0
28.057549,8.24621125,0,0,0,0,0
28.06804,8.24621125,0,0,0,0,0
28.078532,7.93725393,0,0,0,0,0
28.089024,8.77496439,0,0,0,0,0
28.099515,9.05538514,0,0,0,0,0
28.110007,8.54400375,0,0,0,0,0
28.120498,8.88819442,0,0,0,0,0
28.13099,8.88819442,0,0,0,0,0
28.141482,7.68114575,0,0,0,0,0
28.151973,8.42614977,0,0,0,0,0
28.162465,8.06225775,0,0,0,0,0
28.172956,7.74596669,0,0,0,0,0
28.183448,8.18535277,0,0,0,0,0
28.19394,8.30662386,0,0,0,0,0
28.204431,8,0,0,0,0,0
28.214923,7.87400787,0,0,0,0,0
28.225414,7.87400787,0,0,0,0,0
28.235906,8.48528137,0,0,0,0,0
28.246398,8.30662386,0,0,0,0,0
28.256889,8.66025404,0,0,0,0,0
28.267381,8.48528137,0,0,0,0,0
28.277872,8.42614977,0,0,0,0,0
28.288364,8.1240384,0,0,0,0,0
28.298856,8.1240384,0,0,0,0,0
28.309347,6.70820393,0,0,0,0,0
28.319839,8.1240384,0,0,0,0,0
28.33033,7.93725393,0,0,0,0,0
28.340822,8.24621125,0,0,0,0,0
28.351314,7.68114575,0,0,0,0,0
28.361805,8.1240384,0,0,0,0,0
28.372297,8.18535277,0,0,0,0,0
28.382788,8.83176087,0,0,0,0,0
28.39328,8.36660027,0,0,0,0,0
28.403772,8.48528137,0,0,0,0,0
28.414263,7.81024968,0,0,0,0,0
28.424755,7.74596669,0,0,0,0,0
28.435246,8.60232527,0,0,0,0,0
28.445738,7.54983444,0,0,0,0,0
28.45623,8,0,0,0,0,0
28.466721,8.60232527,0,0,0,0,0
28.477213,7.74596669,0,0,0,0,0
28.487704,7.93725393,0,0,0,0,0
28.498196,7.93725393,0,0,0,0,0
28.508688,7.61577311,0,0,0,0,0
28.519179,8.54400375,0,0,0,0,0
28.529671,7.48331477,0,0,0,0,0
28.540162,6.70820393,0,0,0,0,0
28.550654,8.42614977,0,0,0,0,0
28.561146,8,0,0,0,0,0
28.571637,7,0,0,0,0,0
28.582129,8,0,0,0,0,0
28.59262,7.87400787,0,0,0,0,0
28.603112,8.06225775,0,0,0,0,0
28.613604,8.88819442,0,0,0,0,0
28.624095,7.34846923,0,0,0,0,0
28.634587,8.42614977,0,0,0,0,0
28.645078,8.24621125,0,0,0,0,0
28.65557,7.68114575,0,0,0,0,0
28.666062,8.06225775,0,0,0,0,0
28.676553,7.14142843,0,0,0,0,0
28.687045,8.18535277,0,0,0,0,0
28.697536,7.54983444,0,0,0,0,0
28.708028,7.74596669,0,0,0,0,0
28.71852,7.61577311,0,0,0,0,0
28.729011,7.87400787,0,0,0,0,0
28.739503,8.71779789,0,0,0,0,0
28.749994,7.81024968,0,0,0,0,0
28.760486,8.42614977,0,0,0,0,0
28.770978,8.30662386,0,0,0,0,0
28.781469,8.48528137,0,0,0,0,0
28.791961,7.93725393,0,0,0,0,0
28.802452,8.1240384,0,0,0,0,0
28.812944,7.34846923,0,0,0,0,0
28.823436,7.68114575,0,0,0,0,0
28.833927,7.54983444,0,0,0,0,0
28.844419,7.87400787,0,0,0,0,0
28.85491,8.42614977,0,0,0,0,0
28.865402,7.74596669,0,0,0,0,0
28.875894,7.28010989,0,0,0,0,0
28.886385,7.61577311,0,0,0,0,0
28.896877,6.70820393,0,0,0,0,0
28.907368,7.28010989,0,0,0,0,0
28.91786,8.1240384,0,0,0,0,0
28.928352,7.41619849,0,0,0,0,0
28.938843,7.48331477,0,0,0,0,0
28.949335,8,0,0,0,0,0
28.959826,7.81024968,0,0,0,0,0
28.970318,7.61577311,0,0,0,0,0
28.98081,7.34846923,0,0,0,0,0
28.991301,7.68114575,0,0,0,0,0
29.001793,7.61577311,0,0,0,0,0
29.012284,8,0,0,0,0,0
29.022776,7.74596669,0,0,0,0,0
29.033268,8,0,0,0,0,0
29.043759,7.74596669,0,0,0,0,0
29.054251,7.34846923,0,0,0,0,0
29.064742,9,0,0,0,0,0
29.075234,7.48331477,0,0,0,0,0
29.085726,7,0,0,0,0,0
29.096217,7.87400787,0,0,0,0,0
29.106709,7.81024968,0,0,0,0,0
29.1172,7.41619849,0,0,0,0,0
29.127692,7.87400787,0,0,0,0,0
29.138184,8.24621125,0,0,0,0,0
29.148675,8.60232527,0,0,0,0,0
29.159167,7.74596669,0,0,0,0,0
29.169658,7.87400787,0,0,0,0,0
29.18015,7.93725393,0,0,0,0,0
29.190642,7,0,0,0,0,0
29.201133,8.06225775,0,0,0,0,0
29.211625,7.68114575,0,0,0,0,0
29.222116,7.54983444,0,0,0,0,0
29.232608,6.63324958,0,0,0,0,0
29.2431,8,0,0,0,0,0
29.253591,7.81024968,0,0,0,0,0
29.264083,7.81024968,0,0,0,0,0
29.274574,6.4807407,0,0,0,0,0
29.285066,7.81024968,0,0,0,0,0
29.295558,7.07106781,0,0,0,0,0
29.306049,7.61577311,0,0,0,0,0
29.316541,7.87400787,0,0,0,0,0
29.327032,6.8556546,0,0,0,0,0
29.337524,7.74596669,0,0,0,0,0
29.348016,7,0,0,0,0,0
29.358507,7.48331477,0,0,0,0,0
29.368999,8,0,0,0,0,0
29.37949,7.28010989,0,0,0,0,0
29.389982,7.74596669,0,0,0,0,0
29.400474,7.74596669,0,0,0,0,0
29.410965,7.07106781,0,0,0,0,0
29.421457,6.63324958,0,0,0,0,0
29.431948,6.92820323,0,0,0,0,0
29.44244,7.41619849,0,0,0,0,0
29.452932,8.1240384,0,0,0,0,0
29.463423,7.48331477,0,0,0,0,0
29.473915,7.48331477,0,0,0,0,0
29.484406,7.81024968,0,0,0,0,0
29.494898,7.93725393,0,0,0,0,0
29.50539,7.41619849,0,0,0,0,0
29.515881,7.28010989,0,0,0,0,0
29.526373,8.18535277,0,0,0,0,0
29.536864,7.21110255,0,0,0,0,0
29.547356,7.68114575,0,0,0,0,0
29.557848,7.81024968,0,0,0,0,0
29.568339,6.55743852,0,0,0,0,0
29.578831,7.28010989,0,0,0,0,0
29.589322,7.14142843,0,0,0,0,0
29.599814,7.34846923,0,0,0,0,0
29.610306,8.30662386,0,0,0,0,0
29.620797,7.41619849,0,0,0,0,0
29.631289,7.14142843,0,0,0,0,0
29.64178,8.36660027,0,0,0,0,0
29.652272,7.54983444,0,0,0,0,0
29.662764,7.61577311,0,0,0,0,0
29.673255,6.92820323,0,0,0,0,0
29.683747,7.48331477,0,0,0,0,0
29.694238,7.48331477,0,0,0,0,0
29.70473,7.81024968,0,0,0,0,0
29.715222,7.28010989,0,0,0,0,0
29.725713,7.34846923,0,0,0,0,0
29.736205,7.07106781,0,0,0,0,0
29.746696,7.81024968,0,0,0,0,0
29.757188,6.92820323,0,0,0,0,0
29.76768,7.54983444,0,0,0,0,0
29.778171,7.48331477,0,0,0,0,0
29.788663,6.92820323,0,0,0,0,0
29.799154,7.41619849,0,0,0,0,0
29.809646,7.61577311,0,0,0,0,0
29.820138,7.81024968,0,0,0,0,0
29.830629,8.06225775,0,0,0,0,0
29.841121,7,0,0,0,0,0
29.851612,6.92820323,0,0,0,0,0
29.862104,7.34846923,0,0,0,0,0
29.872596,7.28010989,0,0,0,0,0
29.883087,8.42614977,0,0,0,0,0
29.893579,7.14142843,0,0,0,0,0
29.90407,7.07106781,0,0,0,0,0
29.914562,7.41619849,0,0,0,0,0
29.925054,7.81024968,0,0,0,0,0
29.935545,7.41619849,0,0,0,0,0
29.946037,7.14142843,0,0,0,0,0
29.956528,7.41619849,0,0,0,0,0
29.96702,7.54983444,0,0,0,0,0
29.977512,7,0,0,0,0,0
29.988003,6.8556546,0,0,0,0,0
29.998495,6.244998,7.27005426,-1.01245062,7.27456807,0,7.27005426
30.008986,7.34846923,7.2651802,0.288598384,7.26961145,0,7.2651802
30.019478,7.28010989,7.26031192,0.140705273,7.26466113,0,7.26031192
30.02997,6.63324958,7.25544986,-0.788796729,7.25971757,0,7.25544986
30.040461,6.70820393,7.2505945,-0.736471699,7.25478125,0,7.2505945
30.050953,7.34846923,7.24574489,0.320506374,7.24985122,0,7.24574489
30.061444,7.87400787,7.24090197,0.795679522,7.24492841,0,7.24090197
30.071936,7.21110255,7.23606481,-0.157994491,7.24001188,0,7.23606481
30.082428,6.8556546,7.23123386,-0.61284522,7.23510209,0,7.23123386
30.092919,6.78232998,7.22640959,-0.666392982,7.23019951,0,7.22640959
30.103411,7,7.22159107,-0.470734603,7.2253032,0,7.22159107
30.113902,7.34846923,7.21677921,0.362891195,7.22041409,0,7.21677921
30.124394,7.54983444,7.2119731,0.581258409,7.21553124,0,7.2119731
30.134886,7.34846923,7.20717319,0.375893658,7.21065512,0,7.20717319
30.145377,8,7.20237993,0.893095778,7.20578617,0,7.20237993
30.155869,6.92820323,7.19759241,-0.519027151,7.20092348,0,7.19759241
30.16636,6.78232998,7.19281155,-0.64068835,7.19606796,0,7.19281155
30.176852,7.54983444,7.18803641,0.601496488,7.19121868,0,7.18803641
30.187344,7.28010989,7.18326746,0.31119516,7.18637611,0,7.18326746
30.197835,7.14142843,7.17850515,-0.192553168,7.18154069,0,7.17850515
30.208327,6.4807407,7.17374857,-0.832470941,7.1767115,0,7.17374857
30.218818,7.28010989,7.16899861,0.333333582,7.17188946,0,7.16899861
30.22931,6.08276253,7.16425438,-1.039948,7.16707365,0,7.16425438
30.239802,7.21110255,7.15951632,0.227126026,7.16226451,0,7.15951632
30.250293,6.78232998,7.15478488,-0.610290828,7.15746251,0,7.15478488
30.260785,6.8556546,7.15005915,-0.542590592,7.15266672,0,7.15005915
30.271276,7,7.14534004,-0.381234884,7.14787805,0,7.14534004
30.281768,7.54983444,7.14062663,0.639693523,7.14309559,0,7.14062663
30.29226,7.81024968,7.13591938,0.821176164,7.13831978,0,7.13591938
30.302751,7.34846923,7.13121874,0.466101374,7.13355108,0,7.13121874
30.313243,6.78232998,7.12652379,-0.58668033,7.12878858,0,7.12652379
30.323734,6.70820393,7.12183544,-0.643141905,7.12403317,0,7.12183544
30.334226,6.8556546,7.11715279,-0.511368937,7.11928394,0,7.11715279
30.344718,7.14142843,7.11247628,0.170153314,7.11454135,0,7.11247628
30.355209,7,7.10780635,-0.328338773,7.10980585,0,7.10780635
30.365701,7.54983444,7.10314211,0.66835045,7.10507651,0,7.10314211
30.376192,7.74596669,7.09848445,0.804662813,7.10035425,0,7.09848445
30.386684,6.8556546,7.09383247,-0.488034703,7.09563816,0,7.09383247
30.397176,6.92820323,7.08918662,-0.401227354,7.09092867,0,7.08918662
30.407667,7,7.08454733,-0.290770241,7.08622625,0,7.08454733
30.418159,7,7.07991372,-0.282690155,7.08152997,0,7.07991372
30.42865,7.81024968,7.07528667,0.857299833,7.07684075,0,7.07528667
30.439142,7,7.07066529,-0.265829441,7.07215766,0,7.07066529
30.449634,7.61577311,7.06605002,0.741433128,7.06748117,0,7.06605002
30.460125,7.07106781,7.0614413,0.0981147909,7.06281171,0,7.0614413
30.470617,6.70820393,7.05683824,-0.59045263,7.05814839,0,7.05683824
30.481108,7.34846923,7.05224172,0.544267863,7.05349208,0,7.05224172
30.4916,7.48331477,7.04765086,0.660048416,7.0488419,0,7.04765086
30.502092,7.14142843,7.0430661,0.313627696,7.04419829,0,7.0430661
30.512583,6.4807407,7.03848786,-0.746824719,7.03956168,0,7.03848786
30.523075,6.4807407,7.03391527,-0.743757067,7.03493119,0,7.03391527
30.533566,7.74596669,7.02934921,0.846532625,7.03030769,0,7.02934921
30.544058,6.78232998,7.02478879,-0.492401062,7.0256903,0,7.02478879
30.55455,7.14142843,7.02023445,0.348129258,7.02107945,0,7.02023445
30.565041,7.34846923,7.01568662,0.576873133,7.01647558,0,7.01568662
30.575533,7.21110255,7.01114442,0.447166777,7.0118778,0,7.01114442
30.586024,6.8556546,7.00660873,-0.388528162,7.00728699,0,7.00660873
30.596516,6.8556546,7.00207867,-0.382653988,7.00270227,0,7.00207867
30.607008,7.14142843,6.99755468,0.379306932,6.99812408,0,6.99755468
30.617499,7.21110255,6.99303717,0.466974706,6.99355283,0,6.99303717
30.627991,7.28010989,6.98852529,0.539985735,6.98898766,0,6.98852529
30.638482,7,6.9840199,0.126412431,6.98442942,0,6.9840199
30.648974,6.92820323,6.97952012,-0.226532315,6.97987726,0,6.97952012
30.659466,6.92820323,6.97502639,-0.216386597,6.97533159,0,6.97502639
30.669957,7.07106781,6.97053913,0.317062584,6.97079285,0,6.97053913
30.680449,5.56776436,6.96605748,-1.18249445,6.96626017,0,6.96605748
30.69094,6.63324958,6.9615823,-0.573003243,6.9617344,0,6.9615823
30.701432,7.54983444,6.95711272,0.769884223,6.95721467,0,6.95711272
30.711924,7.54983444,6.95264917,0.772777629,6.95270142,0,6.95264917
30.722415,7.48331477,6.94819208,0.731520812,6.94819507,0,6.94819208
30.732907,6.70820393,6.94374058,-0.485321177,6.94369476,0,6.94374058
30.743398,6.55743852,6.93929552,-0.61794579,6.93920133,0,6.93929552
30.75389,7.21110255,6.93485606,0.52559156,6.93471393,0,6.93485606
30.764382,7.07106781,6.93042262,0.375026926,6.93023298,0,6.93042262
30.774873,6.164414,6.9259956,-0.872686426,6.9257589,0,6.9259956
30.785365,6.55743852,6.92157417,-0.603436531,6.92129084,0,6.92157417
30.795856,6.92820323,6.91715917,0.105090743,6.91682963,0,6.91715917
30.806348,7.41619849,6.91274974,0.709541223,6.91237444,0,6.91274974
30.81684,6.70820393,6.90834631,-0.447372751,6.90792567,0,6.90834631
30.827331,7.74596669,6.90394929,0.91761506,6.90348375,0,6.90394929
30.837823,7.21110255,6.89955785,0.558161897,6.89904782,0,6.89955785
30.848314,7.14142843,6.89517281,0.496241495,6.89461872,0,6.89517281
30.858806,6.70820393,6.89079333,-0.427304808,6.89019561,0,6.89079333
30.869298,6.164414,6.88641984,-0.849709264,6.8857789,0,6.88641984
30.879789,5.83095189,6.88205273,-1.02523209,6.88136902,0,6.88205273
30.890281,7.21110255,6.87769119,0.577417841,6.8769651,0,6.87769119
30.900772,7.07106781,6.87333603,0.444670423,6.87256799,0,6.87333603
30.911264,7.28010989,6.86898642,0.641189107,6.86817685,0,6.86898642
30.921756,7.07106781,6.86464277,0.454340225,6.86379209,0,6.86464277
30.932247,7.07106781,6.8603055,0.459088568,6.85941411,0,6.8603055
30.942739,6.63324958,6.85597377,-0.471936634,6.85504209,0,6.85597377
30.95323,7,6.8516484,0.385164378,6.85067685,0,6.8516484
30.963722,5.91607978,6.84732857,-0.965012327,6.84631756,0,6.84732857
30.974214,6.32455532,6.84301469,-0.720041228,6.84196462,0,6.84301469
30.984705,7.34846923,6.83870716,0.713976237,6.83761844,0,6.83870716
30.995197,6.55743852,6.83440516,-0.526276197,6.83327819,0,6.83440516
31.005688,7,6.8301095,0.412177748,6.8289447,0,6.8301095
31.01618,6.55743852,6.82581937,-0.518054867,6.82461713,0,6.82581937
31.026672,7.41619849,6.82153516,0.771144165,6.82029589,0,6.82153516
31.037163,6.244998,6.81725729,-0.756478218,6.81598139,0,6.81725729
31.047655,7.87400787,6.81298493,1.03005968,6.8116728,0,6.81298493
31.058146,6.70820393,6.8087189,-0.317040955,6.80737093,0,6.8087189
31.068638,6.08276253,6.80445837,-0.849526835,6.80307496,0,6.80445837
31.07913,7.41619849,6.80020376,0.784853316,6.7987853,0,6.80020376
31.089621,7,6.79595546,0.4517129,6.79450236,0,6.79595546
31.100113,6.8556546,6.79171265,0.252867451,6.79022529,0,6.79171265
31.110604,6,6.78747615,-0.887398532,6.78595493,0,6.78747615
31.121096,7.14142843,6.78324515,0.598484153,6.78169045,0,6.78324515
31.131588,6.55743852,6.77902004,-0.470724453,6.77743225,0,6.77902004
31.142079,7.28010989,6.77480121,0.71085067,6.77318073,0,6.77480121
31.152571,6.55743852,6.77058788,-0.461681009,6.76893507,0,6.77058788
31.163062,6.8556546,6.76638083,0.298787173,6.76469609,0,6.76638083
31.173554,6.55743852,6.76217925,-0.452482847,6.76046297,0,6.76217925
31.184046,6.92820323,6.75798355,0.412576876,6.7562361,0,6.75798355
31.194537,5.74456265,6.75379412,-1.00460514,6.75201589,0,6.75379412
31.205029,6.164414,6.74961017,-0.764981152,6.74780152,0,6.74961017
31.21552,6.63324958,6.74543247,-0.334937143,6.7435938,0,6.74543247
31.226012,6.40312424,6.74126024,-0.581494626,6.73939191,0,6.74126024
31.236504,6.55743852,6.73709386,-0.423857687,6.73519625,0,6.73709386
31.246995,7.21110255,6.73293374,0.691497514,6.73100722,0,6.73293374
31.257487,6.4807407,6.72877907,-0.498034507,6.72682402,0,6.72877907
31.267978,6.08276253,6.72463064,-0.801166718,6.72264743,0,6.72463064
31.27847,6.63324958,6.72048766,-0.295360929,6.71847665,0,6.72048766
31.288962,6.55743852,6.71635052,-0.398637673,6.71431208,0,6.71635052
31.299453,6.4807407,6.71221961,-0.48112255,6.71015411,0,6.71221961
31.309945,6.244998,6.70809413,-0.680511672,6.70600194,0,6.70809413
31.320436,6.63324958,6.70397488,-0.265942288,6.70185636,0,6.70397488
31.330928,7.14142843,6.69986106,0.664505355,6.69771657,0,6.69986106
31.34142,6.63324958,6.69575306,-0.250006965,6.69358296,0,6.69575306
31.351911,7.14142843,6.69165127,0.670654274,6.68945592,0,6.69165127
31.362403,7.81024968,6.68755491,1.05957292,6.68533466,0,6.68755491
31.372894,6.55743852,6.68346474,-0.355001709,6.68121996,0,6.68346474
31.383386,7.14142843,6.67937999,0.679741452,6.67711103,0,6.67937999
31.393878,6.40312424,6.67530104,-0.521705666,6.67300826,0,6.67530104
31.404369,6.70820393,6.67122828,0.192290547,6.66891203,0,6.67122828
31.414861,6,6.66716092,-0.816799194,6.66482155,0,6.66716092
31.425352,6.92820323,6.66309975,0.514882007,6.66073761,0,6.66309975
31.435844,7.07106781,6.65904397,0.64189083,6.65665941,0,6.65904397
31.446336,6.40312424,6.65499398,-0.501866263,6.65258735,0,6.65499398
31.456827,6.63324958,6.65095016,-0.133043519,6.6485218,0,6.65095016
31.467319,6.40312424,6.64691172,-0.493748405,6.64446198,0,6.64691172
31.47781,6.244998,6.64287945,-0.630778448,6.64040867,0,6.64287945
31.488302,5.47722558,6.63885256,-1.077788,6.63636108,0,6.63885256
31.498794,6.63324958,6.63483143,-0.0397724661,6.63231959,0,6.63483143
31.509285,7,6.63081645,0.607604767,6.6282846,0,6.63081645
31.519777,7,6.62680684,0.610895376,6.62425531,0,6.62680684
31.530268,7.41619849,6.62280337,0.890727298,6.6202325,0,6.62280337
31.54076,6.78232998,6.61880526,0.404381897,6.61621539,0,6.61880526
31.551252,6.40312424,6.61481291,-0.46009637,6.61220435,0,6.61481291
31.561743,6.32455532,6.61082667,-0.535043318,6.60819978,0,6.61082667
31.572235,6.63324958,6.6068458,0.162492413,6.6042009,0,6.6068458
31.582726,7.14142843,6.60287103,0.733864698,6.60020846,0,6.60287103
31.593218,7.54983444,6.59890162,0.975157839,6.5962217,0,6.59890162
31.60371,5.91607978,6.59493794,-0.82392849,6.59224099,0,6.59493794
31.614201,6.4807407,6.59098036,-0.332023583,6.58826671,0,6.59098036
31.624693,7.07106781,6.58702812,0.695729613,6.5842981,0,6.58702812
31.635184,6.8556546,6.58308197,0.522084889,6.5803359,6.58308197,6.58308197
31.645676,6.70820393,6.57914378,0.359249431,6.57637936,6.57914378,6.57914116
31.656168,7.21110255,6.57520869,0.797429534,6.57242885,6.57520869,6.57520605
31.666659,5.74456265,6.57127968,-0.909239809,6.56848474,6.57127968,6.57127702
31.677151,6.70820393,6.56735599,0.375297138,6.56454627,6.56735599,6.56735332
31.687642,6.32455532,6.56343837,-0.48875664,6.56061419,6.56343837,6.56343569
31.698134,4.69041576,6.55952608,-1.36715409,6.55668774,6.55952608,6.55952338
31.708626,7,6.55561947,0.666618731,6.55276729,6.55561947,6.55561675
31.719117,7.14142843,6.55171891,0.767925461,6.54885321,6.55171891,6.55171619
31.729609,7.07106781,6.54782367,0.723356165,6.54494476,6.54782367,6.54782093
31.7401,7,6.54393447,0.675326236,6.54104266,6.54393447,6.54393172
31.750592,6.4807407,6.54005058,-0.243536203,6.53714617,6.54005058,6.54004781
31.761084,6.40312424,6.53617236,-0.364757615,6.53325566,6.53617236,6.53616956
31.771575,6.92820323,6.53230016,0.629208285,6.52937148,6.53230016,6.53229736
31.782067,7.34846923,6.52843326,0.905558371,6.52549291,6.52843326,6.52843044
31.792558,6.244998,6.52457239,-0.528747948,6.52162066,6.52457239,6.52456955
31.80305,5.83095189,6.5207168,-0.830520865,6.517754,6.5207168,6.52071395
31.813542,6.70820393,6.51686686,0.437420931,6.51389329,6.51686686,6.51686399
31.824033,5.83095189,6.51302293,-0.825875922,6.51003889,6.51302293,6.51302004
31.834525,6.78232998,6.50918428,0.522633432,6.50619006,6.50918428,6.50918137
31.845016,6.08276253,6.50535163,-0.650068533,6.50234754,6.50535163,6.50534871
31.855508,6.92820323,6.50152424,0.653206695,6.49851057,6.50152424,6.5015213
31.866,6.55743852,6.49770249,0.244409564,6.49467953,6.49770249,6.49769953
31.876491,6.8556546,6.49388672,0.601471426,6.49085477,6.49388672,6.49388375
31.886983,7.74596669,6.49007622,1.12066519,6.48703556,6.49007622,6.49007323
31.897474,6.40312424,6.48627169,-0.288352996,6.48322262,6.48627169,6.48626868
31.907966,6.32455532,6.48247241,-0.397387832,6.47941522,6.48247241,6.48246938
31.918458,6.92820323,6.47867874,0.670465875,6.47561372,6.47867874,6.4786757
31.928949,6.55743852,6.47489104,0.287310784,6.47181847,6.47489104,6.47488798
31.939441,7.07106781,6.47110857,0.774570356,6.46802874,6.47110857,6.47110549
31.949932,6.8556546,6.46733207,0.623155303,6.46424526,6.46733207,6.46732897
31.960424,6.32455532,6.4635608,-0.37283438,6.46046729,6.4635608,6.46355768
31.970916,6,6.45979511,-0.678081935,6.45669519,6.45979511,6.45979198
31.981407,6.8556546,6.45603537,0.632154436,6.45292931,6.45603537,6.45603222
31.991899,6.70820393,6.45228085,0.505888409,6.44916893,6.45228085,6.45227768
32.00239,6.70820393,6.44853226,0.509579893,6.44541477,6.44853226,6.44852907
32.012882,7.14142843,6.44478889,0.834649348,6.44166609,6.44478889,6.44478568
32.023374,7.34846923,6.44105109,0.952584976,6.43792326,6.44105109,6.44104786
32.033865,6.32455532,6.43731921,-0.33580335,6.43418662,6.43731921,6.43731596
32.044357,7.14142843,6.43359253,0.841329838,6.43045546,6.43359253,6.43358926
32.054848,6.164414,6.42987177,-0.515225934,6.42673048,6.42987177,6.42986848
32.06534,5.74456265,6.4261562,-0.825586791,6.42301097,6.4261562,6.42615289
32.075832,6.78232998,6.42244617,0.599903167,6.41929727,6.42244617,6.42244284
32.086323,7,6.41874205,0.762402749,6.41558974,6.41874205,6.4187387
32.096815,6.63324958,6.41504311,0.467125756,6.41188766,6.41504311,6.41503974
32.107306,5.91607978,6.41135006,-0.703754413,6.40819173,6.41135006,6.41134666
32.117798,6.70820393,6.40766218,0.548216881,6.40450124,6.40766218,6.40765877
32.12829,6.244998,6.40397984,-0.398725269,6.40081654,6.40397984,6.4039764
32.138781,7.14142843,6.40030337,0.860886208,6.39713798,6.40030337,6.40029991
32.149273,6.164414,6.39663206,-0.481890089,6.39346484,6.39663206,6.39662858
32.159764,7.21110255,6.39296662,0.904508668,6.38979783,6.39296662,6.39296312
32.170256,6.164414,6.38930634,-0.474228149,6.38613623,6.38930634,6.38930282
32.180748,6.78232998,6.38565157,0.629824116,6.38248039,6.38565157,6.38564802
32.191239,6.164414,6.38200264,-0.466463974,6.37883066,6.38200264,6.38199908
32.201731,7.14142843,6.37835887,0.873538529,6.37518633,6.37835887,6.37835528
32.212222,6.244998,6.37472093,-0.360170702,6.37154809,6.37472093,6.37471732
32.222714,7,6.37108814,0.793039633,6.36791525,6.37108814,6.37108451
32.233206,6.4807407,6.36746083,0.336570742,6.36428814,6.36746083,6.36745718
32.243697,6.244998,6.36383935,-0.344733744,6.3606671,6.36383935,6.36383567
32.254189,6.40312424,6.360223,0.207126133,6.35705144,6.360223,6.3602193
32.26468,6.78232998,6.35661247,0.652470317,6.35344184,6.35661247,6.35660874
32.275172,7.07106781,6.35300706,0.847384655,6.34983761,6.35300706,6.35300331
32.285664,5.65685425,6.34940711,-0.832197611,6.34623909,6.34940711,6.34940334
32.296155,6.63324958,6.34581297,0.536131152,6.34264661,6.34581297,6.34580917
32.306647,7.07106781,6.34222394,0.853723536,6.33905948,6.34222394,6.34222011
32.317138,5.19615242,6.3386407,-1.06887243,6.33547839,6.3386407,6.33863685
32.32763,6.63324958,6.33506256,0.546065031,6.33190263,6.33506256,6.33505869
32.338122,7.07106781,6.33148987,0.859987175,6.32833256,6.33148987,6.33148597
32.348613,6.92820323,6.32792296,0.774777564,6.3247685,6.32792296,6.32791903
32.359105,5.29150262,6.32436114,-1.01629647,6.32120977,6.32436114,6.32435719
32.369596,6.63324958,6.32080508,0.558967349,6.31765703,6.32080508,6.32080111
32.380088,6.8556546,6.31725412,0.733757783,6.31410962,6.31725412,6.31725012
32.39058,6.55743852,6.31370857,0.493690139,6.31056786,6.31370857,6.31370454
32.401071,6.8556546,6.31016878,0.738570119,6.30703208,6.31016878,6.31016472
32.411563,5.91607978,6.30663406,-0.624943421,6.3035016,6.30663406,6.30662998
32.422054,6.8556546,6.30310509,0.743336742,6.29997709,6.30310509,6.30310098
32.432546,6.63324958,6.29958118,0.577640371,6.29645788,6.29958118,6.29957705
32.443038,7.28010989,6.29606268,0.991991539,6.29294429,6.29606268,6.29605851
32.453529,6.70820393,6.2925499,0.644712366,6.28943665,6.2925499,6.29254571
32.464021,6.8556546,6.28904217,0.752736624,6.28593428,6.28904217,6.28903795
32.474512,6.70820393,6.28554017,0.650125958,6.28243786,6.28554017,6.28553592
32.485004,5.83095189,6.28204322,-0.671633323,6.27894671,6.28204322,6.28203894
32.495496,6.4807407,6.27855164,0.449654379,6.27546114,6.27855164,6.27854733
32.505987,8.18535277,6.27506576,1.38213133,6.27198151,6.27506576,6.27506143
32.516479,6.164414,6.27158493,-0.327369705,6.26850712,6.27158493,6.27158056
32.52697,7.28010989,6.26810978,1.00598216,6.26503864,6.26810978,6.26810539
32.537462,5.47722558,6.26463967,-0.887363564,6.2615754,6.26463967,6.26463524
32.547954,5.83095189,6.26117491,-0.655913879,6.25811773,6.26117491,6.26117046
32.558445,5.65685425,6.25771583,-0.775152619,6.25466595,6.25771583,6.25771135
32.568937,6.70820393,6.25426177,0.673752301,6.2512194,6.25426177,6.25425725
32.579428,6.08276253,6.25081338,-0.409940053,6.24777872,6.25081338,6.25080883
32.58992,6.92820323,6.24736999,0.825126194,6.24434326,6.24736999,6.24736541
32.600412,6.08276253,6.24393194,-0.401459105,6.24091334,6.24393194,6.24392733
32.610903,6.244998,6.24049955,0.0670704905,6.23748928,6.24049955,6.2404949
32.621395,6.244998,6.23707215,0.0890272393,6.23407042,6.23707215,6.23706747
32.631886,6.4807407,6.2336504,0.497081787,6.23065741,6.2336504,6.23364569
32.642378,7,6.23023363,0.877363305,6.22724958,6.23023363,6.23022889
32.65287,6.4807407,6.22682218,0.503903285,6.22384727,6.22682218,6.2268174
32.663361,6.244998,6.22341635,0.146906923,6.22045078,6.22341635,6.22341154
32.673853,6.63324958,6.22001551,0.64283285,6.21705947,6.22001551,6.22001066
32.684344,6.08276253,6.21662028,-0.365865756,6.21367398,6.21662028,6.2166154
32.694836,6.08276253,6.21323002,-0.361202844,6.21029365,6.21323002,6.21322511
32.705328,6.40312424,6.20984506,0.439635283,6.2069188,6.20984506,6.2098401
32.715819,7.14142843,6.20646569,0.966934712,6.20354975,6.20646569,6.20646071
32.726311,6.244998,6.20309128,0.204711294,6.20018584,6.20309128,6.20308626
32.736802,7.28010989,6.19972247,1.03941686,6.19682773,6.19972247,6.19971741
32.747294,6.164414,6.19635861,-0.178730543,6.19347474,6.19635861,6.19635351
32.757786,6.8556546,6.19300001,0.814035987,6.19012722,6.19300001,6.19299488
32.768277,6.8556546,6.189647,0.81609289,6.18678546,6.189647,6.18964183
32.778769,6.244998,6.18629891,0.242278939,6.18344882,6.18629891,6.18629371
32.78926,5.56776436,6.1829564,-0.784341788,6.18011793,6.1829564,6.18295116
32.799752,6.40312424,6.17961882,0.472763595,6.17679216,6.17961882,6.17961354
32.810244,6.164414,6.17628648,-0.108960903,6.17347181,6.17628648,6.17628116
32.820735,6.40312424,6.1729597,0.479754668,6.17015719,6.1729597,6.17295433
32.831227,6.4807407,6.16963783,0.557765964,6.16684768,6.16963783,6.16963242
32.841718,6.63324958,6.1663215,0.683321357,6.16354388,6.1663215,6.16631606
32.85221,6.164414,6.16301009,0.0374688617,6.16024517,6.16301009,6.1630046
32.862702,5.91607978,6.15970389,-0.493582929,6.15695185,6.15970389,6.15969836
32.873193,7.61577311,6.15640322,1.20804382,6.15366424,6.15640322,6.15639766
32.883685,6,6.15310745,-0.391289474,6.1503817,6.15310745,6.15310184
32.894176,6.244998,6.1498172,0.308513855,6.14710484,6.1498172,6.14981155
32.904668,6.08276253,6.14653183,-0.252525849,6.14383305,6.14653183,6.14652614
32.91516,6.55743852,6.14325167,0.643573507,6.14056662,6.14325167,6.14324593
32.925651,5.91607978,6.139977,-0.473177787,6.13730587,6.139977,6.13997122
32.936143,6.55743852,6.13670721,0.648638045,6.13405016,6.13670721,6.13670138
32.946634,6.8556546,6.13344291,0.849830387,6.1308001,6.13344291,6.13343704
32.957126,5.83095189,6.13018348,-0.547020648,6.12755508,6.13018348,6.13017757
32.967618,7,6.12692923,0.934382562,6.1243154,6.12692923,6.12692326
32.978109,5.91607978,6.12368045,-0.455632161,6.12108136,6.12368045,6.12367444
32.988601,6.55743852,6.12043652,0.661061268,6.11785233,6.12043652,6.12043047
32.999092,6.08276253,6.11719807,-0.185568146,6.11462893,6.11719807,6.11719196
33.009584,5,6.11396446,-1.05544515,6.11141054,6.11396446,6.1139583
33.020076,6.164414,6.11073599,0.23168515,6.10819745,6.11073599,6.11072979
33.030567,6,6.10751298,-0.327891727,6.10498998,6.10751298,6.10750673
33.041059,5.91607978,6.10429481,-0.433837556,6.10178749,6.10429481,6.10428851
33.05155,5.74456265,6.10108207,-0.597092477,6.0985906,6.10108207,6.10107572
33.062042,6.32455532,6.09787416,0.476110447,6.09539868,6.09787416,6.09786776
33.072534,6,6.09467138,-0.307687144,6.09221205,6.09467138,6.09466492
33.083025,5.38516481,6.09147402,-0.840422045,6.08903099,6.09147402,6.09146751
33.093517,6.78232998,6.08828147,0.833095738,6.0858549,6.08828147,6.08827492
33.104008,5.83095189,6.08509434,-0.50412543,6.08268436,6.08509434,6.08508773
33.1145,6.40312424,6.08191202,0.566755874,6.07951879,6.08191202,6.08190535
33.124992,6.244998,6.07873479,0.407753855,6.07635846,6.07873479,6.07872807
33.135483,6.40312424,6.07556297,0.572329687,6.07320367,6.07556297,6.07555619
33.145975,6.63324958,6.07239593,0.748901628,6.07005382,6.07239593,6.0723891
33.156466,6.244998,6.06923429,0.419241829,6.0669095,6.06923429,6.0692274
33.166958,6.08276253,6.06607742,0.12917084,6.06377011,6.06607742,6.06607048
33.17745,6,6.06292564,-0.250849836,6.06063594,6.06292564,6.06291864
33.187941,6.8556546,6.05977923,0.892118474,6.05750728,6.05977923,6.05977217
33.198433,6,6.05663759,-0.237986528,6.05438353,6.05663759,6.05663047
33.208924,5.83095189,6.05350131,-0.471751432,6.05126527,6.05350131,6.05349413
33.219416,6.40312424,6.05036979,0.593931349,6.04815192,6.05036979,6.05036255
33.229908,6.244998,6.04724333,0.444696157,6.04504376,6.04724333,6.04723602
33.240399,6.63324958,6.04412221,0.767546331,6.04194107,6.04412221,6.04411485
33.250891,5.91607978,6.04100584,-0.353448806,6.03884327,6.04100584,6.04099841
33.261382,5.91607978,6.03789481,-0.349020093,6.03575094,6.03789481,6.03788732
33.271874,6.4807407,6.03478851,0.667796514,6.03266347,6.03478851,6.03478096
33.282366,6.63324958,6.03168725,0.775604493,6.02958117,6.03168725,6.03167963
33.292857,7.07106781,6.02859131,1.02101739,6.02650431,6.02859131,6.02858362
33.303349,6.244998,6.02550009,0.468506037,6.02343231,6.02550009,6.02549234
33.31384,5.47722558,6.02241418,-0.738368885,6.02036575,6.02241418,6.02240636
33.324332,7.28010989,6.01933299,1.12284322,6.01730402,6.01933299,6.0193251
33.334824,6,6.01625681,-0.127502199,6.01424743,6.01625681,6.01624885
33.345315,6,6.01318592,-0.114829965,6.01119626,6.01318592,6.01317789
33.355807,6.244998,6.01011973,0.484642408,6.00814991,6.01011973,6.01011163
33.366298,5.83095189,6.00705883,-0.41965097,6.00510896,6.00705883,6.00705066
33.37679,6.244998,6.00400262,0.490912798,6.00207283,6.00400262,6.00399438
33.387282,6.78232998,6.0009514,0.883956213,5.9990418,6.0009514,6.00094308
33.397773,6.4807407,5.99790544,0.694863483,5.99601615,5.99790544,5.99789704
33.408265,7.48331477,5.99486416,1.22002074,5.99299531,5.99486416,5.99485569
33.418756,6.40312424,5.99182814,0.641323707,5.98997983,5.99182814,5.99181959
33.429248,4.58257569,5.98879679,-1.18584194,5.98696914,5.98879679,5.98878816
33.43974,6.164414,5.9857704,0.422662516,5.98396353,5.9857704,5.9857617
33.450231,5.91607978,5.98274925,-0.258204312,5.98096326,5.98274925,5.98274046
33.460723,5.56776436,5.97973276,-0.641847642,5.97796776,5.97973276,5.97972389
33.471214,5.91607978,5.9767215,-0.246255383,5.97497761,5.9767215,5.97671255
33.481706,6.32455532,5.97371489,0.592317849,5.97199221,5.97371489,5.97370585
33.492198,5.38516481,5.97071321,-0.765211343,5.96901186,5.97071321,5.97070409
33.502689,5.47722558,5.96771674,-0.700350746,5.96603682,5.96771674,5.96770754
33.513181,5.91607978,5.96472491,-0.220556411,5.96306653,5.96472491,5.96471562
33.523672,6,5.96173829,0.195606013,5.96010154,5.96173829,5.96172891
33.534164,5.29150262,5.95875629,-0.816855965,5.95714128,5.95875629,5.95874682
33.544656,5.91607978,5.9557792,-0.199247125,5.95418604,5.9557792,5.95576964
33.555147,6.164414,5.9528073,0.46000729,5.95123608,5.9528073,5.95279765
33.565639,6.164414,5.94984001,0.463221325,5.94829084,5.94984001,5.94983027
33.57613,5.74456265,5.94687789,-0.449794672,5.94535087,5.94687789,5.94686806
33.586622,6.63324958,5.94392038,0.830258512,5.94241561,5.94392038,5.94391045
33.597114,5.09901951,5.94096776,-0.917577379,5.93948532,5.94096776,5.94095773
33.607605,5.74456265,5.93802029,-0.439838205,5.93656029,5.93802029,5.93801017
33.618097,5.74456265,5.93507742,-0.436479979,5.93363995,5.93507742,5.93506719
33.628588,5.83095189,5.93213969,-0.318100294,5.93072485,5.93213969,5.93212937
33.63908,6.164414,5.92920655,0.484981912,5.92781442,5.92920655,5.92919612
33.649572,6.08276253,5.92627826,0.395580925,5.92490895,5.92627826,5.92626773
33.660063,6.55743852,5.92335511,0.796293549,5.92200869,5.92335511,5.92334447
33.670555,7.07106781,5.92043652,1.07267483,5.9191131,5.92043652,5.92042578
33.681046,6.40312424,5.91752306,0.696850902,5.91622271,5.91752306,5.91751221
33.691538,5.83095189,5.91461415,-0.28924429,5.91333697,5.91461415,5.91460319
33.70203,5.65685425,5.91171008,-0.50483248,5.91045615,5.91171008,5.91169901
33.712521,6.164414,5.90881112,0.505571842,5.90758052,5.90881112,5.90879993
33.723013,6.63324958,5.90591669,0.852838136,5.90470952,5.90591669,5.90590539
33.733504,5.74456265,5.90302737,-0.398076273,5.90184369,5.90302737,5.90301595
33.743996,5.83095189,5.90014258,-0.263041214,5.89898249,5.90014258,5.90013104
33.754488,5.83095189,5.89726259,-0.257508635,5.89612617,5.89726259,5.89725093
33.764979,6.70820393,5.89438769,0.902117646,5.89327501,5.89438769,5.8943759
33.775471,6.70820393,5.8915173,0.90370716,5.89042846,5.8915173,5.8915054
33.785962,5.74456265,5.88865198,-0.379591013,5.88758704,5.88865198,5.88863995
33.796454,6,5.88579118,0.337947955,5.88475022,5.88579118,5.88577902
33.806946,5.29150262,5.88293516,-0.769046511,5.88191826,5.88293516,5.88292287
33.817437,6.63324958,5.88008419,0.867851021,5.87909141,5.88008419,5.88007177
33.827929,5.83095189,5.87723771,-0.215141393,5.87626915,5.87723771,5.87722516
33.83842,5.47722558,5.87439628,-0.630214808,5.87345199,5.87439628,5.87438359
33.848912,6.244998,5.87155934,0.61109628,5.8706394,5.87155934,5.87154651
33.859404,5.91607978,5.86872715,0.217606605,5.86783163,5.86872715,5.86871418
33.869895,6.40312424,5.86589998,0.732955834,5.86502895,5.86589998,5.86588687
33.880387,6.164414,5.86307729,0.548941443,5.86223082,5.86307729,5.86306404
33.890878,5.65685425,5.86025962,-0.451004841,5.85943777,5.86025962,5.86024621
33.90137,5.83095189,5.85744641,-0.162771344,5.85664925,5.85744641,5.85743285
33.911862,5.74456265,5.85463793,-0.331775947,5.85386553,5.85463793,5.85462422
33.922353,6.40312424,5.85183444,0.742488921,5.85108686,5.85183444,5.85182058
33.932845,6,5.84903541,0.388541623,5.84831272,5.84903541,5.84902139
33.943336,5.29150262,5.84624136,-0.744807851,5.84554361,5.84624136,5.84622718
33.953828,5.91607978,5.84345175,0.269495885,5.84277901,5.84345175,5.84343741
33.96432,5.83095189,5.84066685,-0.0985644778,5.84001918,5.84066685,5.84065235
33.974811,5.56776436,5.83788692,-0.519733156,5.83726438,5.83788692,5.83787225
33.985303,5.74456265,5.83511141,-0.300913219,5.83451406,5.83511141,5.83509657
33.995794,6.40312424,5.83234086,0.755502068,5.83176875,5.83234086,5.83232585
34.006286,5.56776436,5.82957473,-0.511674086,5.82902792,5.82957473,5.82955954
34.016778,6.164414,5.82681328,0.581034181,5.82629183,5.82681328,5.82679791
34.027269,5.19615242,5.82405677,-0.792404158,5.82356072,5.82405677,5.82404122
34.037761,5.83095189,5.82130467,0.0982203014,5.82083408,5.82130467,5.82128893
34.048252,6.40312424,5.81855749,0.764569649,5.81811241,5.81855749,5.81854156
34.058744,5.74456265,5.81581471,-0.266930817,5.81539519,5.81581471,5.81579859
34.069236,6.70820393,5.81307658,0.946111702,5.81268268,5.81307658,5.81306026
34.079727,5.38516481,5.81034336,-0.652057173,5.80997513,5.81034336,5.81032685
34.090219,5.19615242,5.80761453,-0.781960425,5.807272,5.80761453,5.80759781
34.10071,5.65685425,5.80489059,-0.384754914,5.80457382,5.80489059,5.80487367
34.111202,6.164414,5.80217103,0.601866241,5.80188006,5.80217103,5.80215389
34.121694,5.83095189,5.7994561,0.177470553,5.79919098,5.7994561,5.79943875
34.132185,5.65685425,5.79674605,-0.374021117,5.79650682,5.79674605,5.79672848
34.142677,5.56776436,5.79404035,-0.475684759,5.79382706,5.79404035,5.79402256
34.153168,5.19615242,5.79133953,-0.771483706,5.79115221,5.79133953,5.79132151
34.16366,5.74456265,5.78864306,-0.209953357,5.78848175,5.78864306,5.78862481
34.174152,5.91607978,5.78595119,0.360733411,5.78581594,5.78595119,5.78593271
34.184643,4.79583152,5.78326417,-0.993696458,5.78315502,5.78326417,5.78324545
34.195135,6.164414,5.78058149,0.619542178,5.78049847,5.78058149,5.78056253
34.205626,6.40312424,5.77790365,0.790708912,5.7778468,5.77790365,5.77788444
34.216118,5.83095189,5.77523014,0.236054553,5.77519949,5.77523014,5.77521068
34.22661,5.74456265,5.77256121,-0.167327707,5.77255679,5.77256121,5.77254148
34.237101,5.56776436,5.7698971,-0.449591743,5.76991895,5.7698971,5.76987711
34.247593,5.74456265,5.7672373,-0.150581055,5.76728546,5.7672373,5.76721704
34.258084,5.19615242,5.76458232,-0.753942899,5.76465681,5.76458232,5.76456179
34.268576,4.79583152,5.76193164,-0.982903919,5.76203249,5.76193164,5.76191083
34.279068,5.29150262,5.75928551,-0.683946551,5.75941275,5.75928551,5.75926441
34.289559,6.244998,5.75664417,0.698823171,5.75679784,5.75664417,5.75662279
34.300051,5.09901951,5.75400713,-0.809313052,5.75418725,5.75400713,5.75398545
34.310542,5.38516481,5.75137487,-0.605152926,5.75158146,5.75137487,5.75135289
34.321034,6.55743852,5.74874689,0.899272835,5.74897998,5.74874689,5.7487246
34.331526,5,5.74612344,-0.86378437,5.74638305,5.74612344,5.74610083
34.342017,6.32455532,5.74350475,0.76226673,5.74379091,5.74350475,5.74348182
34.352509,6,5.74089033,0.50902816,5.74120305,5.74089033,5.74086707
34.363,5.29150262,5.73828067,-0.668414578,5.73861998,5.73828067,5.73825708
34.373492,5.09901951,5.73567526,-0.797907105,5.73604118,5.73567526,5.73565133
34.383984,5.91607978,5.73307435,0.427791338,5.73346689,5.73307435,5.73305007
34.394475,6.244998,5.73047819,0.717300363,5.73089737,5.73047819,5.73045354
34.404967,6.40312424,5.72788626,0.821728651,5.7283321,5.72788626,5.72786125
34.415458,6.08276253,5.72529907,0.597882484,5.72577158,5.72529907,5.72527369
34.42595,6.8556546,5.7227161,1.06439584,5.7232153,5.7227161,5.72269034
34.436442,5.74456265,5.72013761,0.156285111,5.72066351,5.72013761,5.72011146
34.446933,5.47722558,5.71756383,-0.49024306,5.71811644,5.71756383,5.71753728
34.457425,5.47722558,5.71499427,-0.487615317,5.7155736,5.71499427,5.71496732
34.467916,5.83095189,5.71242941,0.34427094,5.71303548,5.71242941,5.71240204
34.478408,6.08276253,5.70986876,0.610650281,5.71050157,5.70986876,5.70984096
34.4889,5.65685425,5.70731256,-0.22462928,5.70797211,5.70731256,5.70728433
34.499391,5.09901951,5.70476105,-0.778293989,5.70544735,5.70476105,5.70473236
34.509883,6.32455532,5.70221372,0.788886302,5.70292678,5.70221372,5.70218458
34.520374,5.29150262,5.69967108,-0.638880625,5.70041089,5.69967108,5.69964147
34.530866,5.91607978,5.69713261,0.46791791,5.69789919,5.69713261,5.69710253
34.541358,4.89897949,5.69459857,-0.891974823,5.69539192,5.69459857,5.694568
34.551849,5.29150262,5.69206919,-0.632903283,5.6928893,5.69206919,5.69203811
34.562341,5.91607978,5.68954398,0.475957779,5.69039085,5.68954398,5.68951239
34.572832,5.56776436,5.68702341,-0.345339033,5.68789704,5.68702341,5.68699129
34.583324,6.08276253,5.68450701,0.631074895,5.6854074,5.68450701,5.68447435
34.593816,6,5.681995,0.56391932,5.68292214,5.681995,5.68196179
34.604307,6.244998,5.67948762,0.752004238,5.68044151,5.67948762,5.67945385
34.614799,5.56776436,5.6769844,-0.330484544,5.67796502,5.6769844,5.67695004
34.62529,6.244998,5.67448579,0.755322587,5.67549314,5.67448579,5.67445084
34.635782,5.38516481,5.67199132,-0.535561866,5.67302539,5.67199132,5.67195575
34.646274,6.08276253,5.66950122,0.642854033,5.670562,5.66950122,5.66946503
34.656765,5.65685425,5.66701573,-0.100804166,5.6681032,5.66701573,5.66697889
34.667257,5.56776436,5.66453436,-0.311078766,5.66564851,5.66453436,5.66449686
34.677748,5.65685425,5.66205759,-0.0721341639,5.6631984,5.66205759,5.66201941
34.68824,5.65685425,5.65958493,-0.0522559042,5.66075238,5.65958493,5.65954606
34.698732,6.32455532,5.65711662,0.816969217,5.6583107,5.65711662,5.65707703
34.709223,5.09901951,5.65465289,-0.745408192,5.65587357,5.65465289,5.65461256
34.719715,5.74456265,5.65219326,0.303923329,5.65344053,5.65219326,5.65215218
34.730206,6.244998,5.64973819,0.771530818,5.65101203,5.64973819,5.64969634
34.740698,4.89897949,5.64728723,-0.865047826,5.6485876,5.64728723,5.64724457
34.75119,5.09901951,5.64484058,-0.738797043,5.64616746,5.64484058,5.64479711
34.761681,5.47722558,5.64239849,-0.406414712,5.64375185,5.64239849,5.64235417
34.772173,5,5.63996048,-0.799975302,5.64134029,5.63996048,5.6399153
34.782664,5.47722558,5.63752702,-0.400376624,5.63893324,5.63752702,5.63748093
34.793156,5.47722558,5.63509762,-0.397331156,5.63653024,5.63509762,5.63505062
34.803648,6.40312424,5.63267253,0.877753785,5.6341315,5.63267253,5.63262458
34.814139,6,5.63025197,0.608069103,5.63173724,5.63025197,5.63020304
34.824631,5.83095189,5.62783546,0.450684404,5.62934701,5.62783546,5.62778553
34.835122,6.164414,5.62542348,0.734159741,5.62696126,5.62542348,5.62537251
34.845614,5.09901951,5.62301555,-0.723875703,5.62457952,5.62301555,5.6229635
34.856106,6.244998,5.6206119,0.790181057,5.62220201,5.6206119,5.62055875
34.866597,5.56776436,5.61821275,-0.22460718,5.61982896,5.61821275,5.61815846
34.877089,5.56776436,5.61581764,-0.219210586,5.6174599,5.61581764,5.61576219
34.88758,5.38516481,5.61342703,-0.477767964,5.61509528,5.61342703,5.61337036
34.898072,5.65685425,5.61104046,0.214041558,5.61273465,5.61104046,5.61098254
34.908564,5.74456265,5.60865815,0.368652274,5.61037822,5.60865815,5.60859893
34.919055,6.40312424,5.60628032,0.892661145,5.60802621,5.60628032,5.60621976
34.929547,5.56776436,5.60390651,-0.190110886,5.60567816,5.60390651,5.60384458
34.940038,4.79583152,5.60153718,-0.897611084,5.60333452,5.60153718,5.60147382
34.95053,6.244998,5.59917187,0.80363308,5.60099484,5.59917187,5.59910703
34.961022,6.244998,5.5968108,0.805100736,5.59865933,5.5968108,5.59674443
34.971513,5.29150262,5.5944542,-0.550410371,5.5963282,5.5944542,5.59438624
34.982005,5.74456265,5.59210161,0.390462598,5.59400101,5.59210161,5.59203201
34.992496,5.38516481,5.58975347,-0.452314783,5.59167819,5.58975347,5.58968217
35.002988,5.83095189,5.58740934,0.493500308,5.5893593,5.58740934,5.58733628
35.01348,5.38516481,5.58506944,-0.44710696,5.58704455,5.58506944,5.58499455
35.023971,6.08276253,5.58273399,0.707126963,5.58473415,5.58273399,5.5826572
35.034463,6.70820393,5.58040254,1.06197994,5.58242766,5.58040254,5.58032378
35.044954,5.47722558,5.57807553,-0.317568818,5.5801255,5.57807553,5.57799473
35.055446,5.65685425,5.57575252,0.284783653,5.57782725,5.57575252,5.5756696
35.065938,6.40312424,5.57343373,0.910873486,5.57553309,5.57343373,5.5733486
35.076429,5,5.57111938,-0.755724406,5.57324326,5.57111938,5.57103195
35.086921,5.74456265,5.56880902,0.4192298,5.57095731,5.56880902,5.56871921
35.097412,6.70820393,5.5665031,1.06850402,5.56867566,5.5665031,5.5664108
35.107904,5.56776436,5.56420118,0.059692422,5.56639788,5.56420118,5.56410629
35.118396,6.32455532,5.56190347,0.873299405,5.56412417,5.56190347,5.56180588
35.128887,5.91607978,5.5596102,0.597050739,5.56185475,5.5596102,5.55950979
35.139379,5.56776436,5.55732093,0.102193135,5.55958918,5.55732093,5.55721758
35.14987,4.79583152,5.55503609,-0.871323458,5.55732788,5.55503609,5.55492967
35.160362,5.56776436,5.55275526,0.122511644,5.55507041,5.55275526,5.55264564
35.170854,5.65685425,5.55047865,0.326152719,5.55281699,5.55047865,5.55036568
35.181345,4.79583152,5.54820649,-0.867395508,5.55056782,5.54820649,5.54809001
35.191837,4.89897949,5.54593834,-0.804337527,5.54832247,5.54593834,5.5458182
35.202328,5.74456265,5.54367465,0.448205308,5.54608136,5.54367465,5.54355066
35.21282,6.32455532,5.54141498,0.884952169,5.54384405,5.54141498,5.54128696
35.223312,5.19615242,5.53915956,-0.585668111,5.54161075,5.53915956,5.53902731
35.233803,5,5.53690861,-0.732740479,5.53938168,5.53690861,5.53677192
35.244295,5.38516481,5.53466171,-0.386648293,5.53715639,5.53466171,5.53452036
35.254786,5,5.5324193,-0.729670678,5.53493531,5.5324193,5.53227304
35.265278,4.89897949,5.53018096,-0.794481889,5.532718,5.53018096,5.53002954
35.27577,4.58257569,5.52794692,-0.972302022,5.53050468,5.52794692,5.52779006
35.286261,5.09901951,5.5257174,-0.653221162,5.52829554,5.5257174,5.52555481
35.296753,4.69041576,5.523492,-0.912730103,5.52609016,5.523492,5.52332336
35.307244,5.38516481,5.52127116,-0.368925944,5.52388895,5.52127116,5.52109612
35.317736,5.65685425,5.51905447,0.371213922,5.52169148,5.51905447,5.51887268
35.328228,4.89897949,5.51684218,-0.786042424,5.51949797,5.51684218,5.51665323
35.338719,5.83095189,5.51463451,0.562421003,5.51730861,5.51463451,5.51443798
35.349211,5.83095189,5.51243108,0.564376486,5.51512297,5.51243108,5.51222649
35.359702,5.91607978,5.51023233,0.637061576,5.51294148,5.51023233,5.5100192
35.370194,5.65685425,5.50803789,0.385767235,5.5107637,5.50803789,5.50781567
35.380686,5.83095189,5.50584801,0.570178822,5.50858984,5.50584801,5.50561611
35.391177,5.65685425,5.50366293,0.391396625,5.50642009,5.50366293,5.50342071
35.401669,6.63324958,5.5014823,1.06384551,5.50425405,5.5014823,5.50122906
35.41216,5.91607978,5.4993066,0.645579729,5.50209211,5.4993066,5.49904157
35.422652,6.08276253,5.49713546,0.765262745,5.49993385,5.49713546,5.49685781
35.433144,5.83095189,5.49496918,0.579640157,5.49777949,5.49496918,5.49467799
35.443635,5.56776436,5.49280805,0.273781502,5.4956292,5.49280805,5.4925023
35.454127,5.74456265,5.49065175,0.503895718,5.49348259,5.49065175,5.49033034
35.464618,5.29150262,5.48850081,-0.443844774,5.49134005,5.48850081,5.48816251
35.47511,5.83095189,5.48635493,0.587023822,5.48920116,5.48635493,5.48599838
35.485602,6.164414,5.48421447,0.824742103,5.48706613,5.48421447,5.48383816
35.496093,5.47722558,5.48207979,-0.0696722207,5.48493515,5.48207979,5.48168205
35.506585,5.29150262,5.47995069,-0.434106054,5.48280781,5.47995069,5.47952963
35.517076,5.74456265,5.47782778,0.516463812,5.48068451,5.47782778,5.47738131
35.527568,5.09901951,5.47571091,-0.613751901,5.47856483,5.47571091,5.47523668
35.53806,6.244998,5.47360058,0.87829233,5.47644898,5.47360058,5.47309592
35.548551,5,5.47149734,-0.686656639,5.47433714,5.47149734,5.47095924
35.559043,4.69041576,5.46940119,-0.882601511,5.47222892,5.46940119,5.46882623
35.569534,4.89897949,5.467313,-0.753878977,5.47012469,5.467313,5.46669728
35.580026,5.47722558,5.46523294,0.109510902,5.46802407,5.46523294,5.46457199
35.590518,5,5.46316188,-0.680559975,5.46592724,5.46316188,5.46245055
35.601009,5.29150262,5.46110082,-0.411823021,5.46383439,5.46110082,5.46033316
35.611501,5.47722558,5.45905035,0.134815535,5.46174512,5.45905035,5.4582194
35.621992,5.74456265,5.45701202,0.536237472,5.45965982,5.45701202,5.45610969
35.632484,4.89897949,5.4549869,-0.745659046,5.45757809,5.4549869,5.4540036
35.642976,6.164414,5.45297695,0.843467278,5.45550012,5.45297695,5.45190133
35.653467,5.65685425,5.4509846,0.453728612,5.4534261,5.4509846,5.44980309
35.663959,5.38516481,5.44901223,-0.252680477,5.45135563,5.44901223,5.44770845
35.67445,6.63324958,5.44706378,1.08912158,5.4492891,5.44706378,5.44561783
35.684942,5.19615242,5.44514342,-0.498989972,5.4472261,5.44514342,5.4435308
35.695434,5.74456265,5.44325728,0.548912898,5.44516684,5.44325728,5.44144757
35.705925,5.56776436,5.44141339,0.355458825,5.44311149,5.44141339,5.43936832
35.716417,5.65685425,5.43962195,0.466081856,5.44105966,5.43962195,5.43729267
35.726908,5.38516481,5.43789777,-0.229636589,5.43901174,5.43789777,5.43522098
35.7374,5.56776436,5.43626072,0.362634303,5.43696732,5.43626072,5.43315287
35.747892,5.19615242,5.43473993,-0.488454199,5.4349266,5.43473993,5.43108853
35.758383,5.38516481,5.43337808,-0.219575211,5.43288976,5.43337808,5.42902815
35.768875,4.69041576,5.43223963,-0.861291977,5.43085642,5.43223963,5.42697132
35.779366,6,5.43142678,0.754037943,5.42882694,5.43142678,5.42491844
35.789858,5.19615242,5.43110762,-0.48472177,5.42680095,5.43110762,5.42286911
35.80035,6,5.43157522,0.753939504,5.42477862,5.43157522,5.42082351
35.810841,5.47722558,5.43338783,0.209374646,5.42276014,5.43338783,5.41878184
35.821333,5.29150262,5.43797385,-0.382715596,5.42074512,5.43797385,5.4167437
35.831824,6.08276253,5.45152916,0.794501962,5.41873394,5.45152916,5.41470948
35.842316,6.32455532,5.5008503,0.907581964,5.4167262,5.5008503,5.41267878
35.852808,5.83095189,5.64675662,0.429179772,5.41472211,5.64675662,5.41065179
35.863299,5.19615242,5.88957336,-0.832719002,5.41272182,5.88957336,5.40862869
35.873791,6.08276253,6.00559794,0.277785144,5.41072497,6.00559794,5.4066091
35.884282,6.32455532,5.8047359,0.720985033,5.40873193,5.8047359,5.40459339
35.894774,5.65685425,5.56822493,0.297706768,5.4067423,5.56822493,5.40258118
35.905266,5.56776436,5.459698,0.328734487,5.40475628,5.459698,5.40057265
35.915757,6.40312424,5.42692543,0.988027738,5.40277404,5.42692543,5.39856798
35.926249,5.09901951,5.41477967,-0.561925401,5.4007952,5.41477967,5.39656679
35.93674,6,5.40756706,0.769696654,5.39882013,5.40756706,5.39456945
35.947232,5.74456265,5.40231856,0.585016316,5.39684845,5.40231856,5.39257559
35.957724,5.38516481,5.3981515,-0.113959188,5.39488035,5.3981515,5.39058537
35.968215,5.83095189,5.39464035,0.660538829,5.39291599,5.39464035,5.38859899
35.978707,6.244998,5.39154917,0.92382294,5.39095501,5.39154917,5.38661606
35.989198,4.35889894,5.38874011,-1.0148109,5.38899776,5.38874011,5.38463695
35.99969,5.19615242,5.38612704,-0.435860777,5.38704387,5.38612704,5.38266128
36.010182,4.89897949,5.38365509,-0.696186471,5.38509353,5.38365509,5.38068924
36.020673,6.4807407,5.38128768,1.04854805,5.3831469,5.38128768,5.378721
36.031165,4.58257569,5.37899908,-0.892425563,5.38120361,5.37899908,5.37675618
36.041656,5.91607978,5.37677188,0.734375861,5.37926403,5.37677188,5.37479516
36.052148,5.65685425,5.37459278,0.531282853,5.37732778,5.37459278,5.37283755
36.06264,5.74456265,5.37245252,0.610008298,5.37539504,5.37245252,5.37088353
36.073131,6.32455532,5.37034421,0.976837301,5.37346598,5.37034421,5.36893329
36.083623,5,5.36826203,-0.606845969,5.37154023,5.36826203,5.36698644
36.094114,5,5.36620222,-0.605146443,5.36961816,5.36620222,5.36504336
36.104606,5.19615242,5.36416112,-0.40988864,5.36769939,5.36416112,5.36310366
36.115098,5.56776436,5.36213635,0.453462247,5.36578409,5.36213635,5.36116753
36.125589,5.91607978,5.36012605,0.745623052,5.36387245,5.36012605,5.35923514
36.136081,4.89897949,5.35812816,-0.677605099,5.36196409,5.35812816,5.35730613
36.146572,6,5.3561417,0.802407812,5.36005937,5.3561417,5.35538084
36.157064,4.35889894,5.3541652,-0.997630321,5.35815791,5.3541652,5.35345891
36.167556,5.56776436,5.35219791,0.46429134,5.35625991,5.35219791,5.35154052
36.178047,5.91607978,5.35023926,0.752223716,5.35436552,5.35023926,5.34962584
36.188539,5.83095189,5.34828823,0.694739996,5.35247439,5.34828823,5.34771451
36.19903,5.47722558,5.34634465,0.361774693,5.35058687,5.34634465,5.34580687
36.209522,4.89897949,5.34440768,-0.667404068,5.34870258,5.34440768,5.34390257
36.220014,6.32455532,5.34247711,0.990998593,5.34682171,5.34247711,5.34200178
36.230505,5.09901951,5.34055279,-0.491460354,5.34494443,5.34055279,5.34010466
36.240997,5.56776436,5.33863407,0.478675564,5.34307037,5.33863407,5.33821087
36.251488,6,5.33672105,0.814419397,5.34119988,5.33672105,5.33632074
36.26198,5.74456265,5.33481314,0.640116791,5.33933261,5.33481314,5.33443392
36.272472,4.89897949,5.33291034,-0.658734285,5.33746872,5.33291034,5.33255058
36.282963,5.91607978,5.33101267,0.764896802,5.33560838,5.33101267,5.33067089
36.293455,5.29150262,5.3291196,-0.193950958,5.33375124,5.3291196,5.32879448
36.303946,5.56776436,5.32723136,0.490441638,5.33189764,5.32723136,5.32692172
36.314438,5.56776436,5.32534749,0.492358482,5.33004722,5.32534749,5.32505224
36.32493,5.74456265,5.32346805,0.648918021,5.32820015,5.32346805,5.3231862
36.335421,6,5.32159313,0.823654583,5.32635661,5.32159313,5.32132379
36.345913,5.38516481,5.31972229,0.255817359,5.32451623,5.31972229,5.31946464
36.356404,5.19615242,5.3178558,-0.348860115,5.32267936,5.3178558,5.3176091
36.366896,5.19615242,5.31599325,-0.346180346,5.32084564,5.31599325,5.31575681
36.377388,5.74456265,5.31413476,0.656070034,5.31901524,5.31413476,5.31390794
36.387879,4.79583152,5.31228043,-0.718643798,5.31718833,5.31228043,5.31206266
36.398371,5,5.31042987,-0.557162339,5.31536455,5.31042987,5.31022061
36.408862,5.56776436,5.30858338,0.509098201,5.31354426,5.30858338,5.30838215
36.419354,5.09901951,5.30674057,-0.45576426,5.31172708,5.30674057,5.3065469
36.429846,5.74456265,5.30490158,0.66306943,5.3099132,5.30490158,5.30471505
36.440337,5,5.30306653,-0.550514789,5.30810277,5.30306653,5.30288677
36.450829,5.19615242,5.30123506,-0.324164518,5.30629545,5.30123506,5.30106168
36.46132,6.63324958,5.29940747,1.15492083,5.30449157,5.29940747,5.29924015
36.471812,6,5.29758339,0.838102985,5.30269078,5.29758339,5.29742181
36.482304,4.47213595,5.29576296,-0.907538984,5.30089326,5.29576296,5.29560684
36.492795,5.09901951,5.29394634,-0.441505184,5.29909916,5.29394634,5.29379539
36.503287,5.09901951,5.29213315,-0.439446971,5.29730813,5.29213315,5.29198713
36.513778,5.38516481,5.29032372,0.307962796,5.29552052,5.29032372,5.29018238
36.52427,4.47213595,5.28851768,-0.90353845,5.29373597,5.28851768,5.2883808
36.534762,5.09901951,5.28671519,-0.433238591,5.29195465,5.28671519,5.28658256
36.545253,5.74456265,5.28491639,0.677972163,5.29017672,5.28491639,5.28478782
36.555745,5.74456265,5.28312093,0.679295014,5.28840184,5.28312093,5.28299623
36.566236,5.56776436,5.28132913,0.535196443,5.28663033,5.28132913,5.28120812
36.576728,5.56776436,5.27954063,0.53686472,5.28486187,5.27954063,5.27942316
36.58722,6,5.2777556,0.849849634,5.2830966,5.2777556,5.27764151
36.597711,5,5.27597418,-0.525332445,5.28133469,5.27597418,5.27586332
36.608203,6.164414,5.27419602,0.943513638,5.27957579,5.27419602,5.27408826
36.618694,6.164414,5.27242144,0.944453577,5.27782025,5.27242144,5.27231666
36.629186,6.244998,5.27065011,0.987090619,5.27606771,5.27065011,5.27054817
36.639678,5.56776436,5.26888216,0.546701198,5.27431834,5.26888216,5.26878296
36.650169,4.69041576,5.26711777,-0.759408986,5.27257229,5.26711777,5.26702119
36.660661,5.91607978,5.26535657,0.806674166,5.27082923,5.26535657,5.26526251
36.671152,6.164414,5.2635989,0.949112796,5.26908949,5.2635989,5.26350726
36.681644,5,5.26184441,-0.511707352,5.26735273,5.26184441,5.2617551
36.692136,4.89897949,5.26009326,-0.60092743,5.2656191,5.26009326,5.26000619
36.702627,5.19615242,5.2583456,-0.249385605,5.26388877,5.2583456,5.25826069
36.713119,5.19615242,5.25660109,-0.245863113,5.26216139,5.25660109,5.25651826
36.72361,5.38516481,5.25486006,0.360977493,5.2604373,5.25486006,5.25477922
36.734102,4.79583152,5.25312215,-0.676232674,5.25871616,5.25312215,5.25304324
36.744594,5.29150262,5.25138754,0.200287509,5.25699812,5.25138754,5.25131049
36.755085,6.164414,5.24965636,0.956429631,5.25528335,5.24965636,5.24958111
36.765577,4.89897949,5.2479283,-0.590718895,5.25357151,5.2479283,5.24785478
36.776068,5.19615242,5.24620366,-0.223721335,5.25186292,5.24620366,5.24613181
36.78656,5.29150262,5.24448211,0.216842142,5.25015724,5.24448211,5.24441187
36.797052,5.74456265,5.2427638,0.708377614,5.24845464,5.2427638,5.24269513
36.807543,6,5.2410489,0.871177997,5.24675528,5.2410489,5.24098173
36.818035,5.56776436,5.23933706,0.573085774,5.24505881,5.23933706,5.23927135
36.828526,5.09901951,5.2376286,-0.372302417,5.24336557,5.2376286,5.23756431
36.839018,5.09901951,5.2359232,-0.37000498,5.24167521,5.2359232,5.23586027
36.84951,5.91607978,5.234221,0.825747409,5.2399879,5.234221,5.2341594
36.860001,4.58257569,5.23252216,-0.806192574,5.23830379,5.23252216,5.23246184
36.870493,5.19615242,5.23082635,-0.186209365,5.23662255,5.23082635,5.23076727
36.880984,5.56776436,5.22913388,0.581919649,5.2349445,5.22913388,5.22907601
36.891476,4.79583152,5.22744443,-0.656972534,5.23326931,5.22744443,5.22738772
36.901968,4.89897949,5.22575815,-0.571645577,5.23159713,5.22575815,5.22570257
36.912459,5.47722558,5.22407519,0.503140521,5.22992812,5.22407519,5.22402071
36.922951,5.56776436,5.22239523,0.587681153,5.22826196,5.22239523,5.22234181
36.933442,5.56776436,5.22071857,0.58910593,5.22659895,5.22071857,5.22066618
36.943934,5.09901951,5.21904489,-0.346446785,5.22493877,5.21904489,5.21899351
36.954426,4.89897949,5.21737434,-0.564264883,5.22328158,5.21737434,5.21732394
36.964917,5.74456265,5.21570709,0.72722456,5.22162753,5.21570709,5.21565763
36.975409,5.38516481,5.21404279,0.413668973,5.21997629,5.21404279,5.21399425
36.9859,5.56776436,5.21238176,0.596139749,5.21832817,5.21238176,5.21233412
36.996392,5.19615242,5.21072368,-0.120711482,5.21668286,5.21072368,5.21067691
37.006884,4.58257569,5.20906871,-0.791513116,5.2150405,5.20906871,5.20902278
37.017375,4.89897949,5.20741698,-0.555371493,5.21340124,5.20741698,5.20737188
37.027867,5.29150262,5.20576818,0.292804437,5.21176478,5.20576818,5.20572388
37.038358,5.74456265,5.20412262,0.735146259,5.2101314,5.20412262,5.2040791
37.04885,5.56776436,5.20247998,0.604387609,5.2085008,5.20247998,5.20243722
37.059342,5.47722558,5.20084041,0.525723472,5.20687313,5.20084041,5.20079838
37.069833,5.38516481,5.19920405,0.431231677,5.20524852,5.19920405,5.19916274
37.080325,5.65685425,5.19757059,0.6777047,5.20362668,5.19757059,5.19752998
37.090816,5.29150262,5.19594033,0.309131508,5.2020079,5.19594033,5.19590041
37.101308,4.69041576,5.19431296,-0.709857171,5.20039186,5.19431296,5.19427371
37.1118,4.47213595,5.19268863,-0.848853742,5.19877872,5.19268863,5.19265002
37.122291,5,5.19106748,-0.437112664,5.19716862,5.19106748,5.19102951
37.132783,4.12310563,5.1894492,-1.03263913,5.19556124,5.1894492,5.18941185
37.143274,4.89897949,5.18783409,-0.537451956,5.1939569,5.18783409,5.18779734
37.153766,4,5.18622184,-1.08913812,5.19235528,5.18622184,5.18618567
37.164258,4.47213595,5.18461259,-0.84408331,5.19075652,5.18461259,5.184577
37.174749,5.47722558,5.18300649,0.542419655,5.18916077,5.18300649,5.18297146
37.185241,5.47722558,5.18140324,0.543895522,5.18756773,5.18140324,5.18136875
37.195732,4.89897949,5.17980312,-0.52992795,5.18597768,5.17980312,5.17976917
37.206224,3.87298335,5.17820583,-1.14246334,5.18439032,5.17820583,5.1781724
37.216716,5.38516481,5.17661151,0.456676359,5.18280579,5.17661151,5.17657859
37.227207,5.56776436,5.17502031,0.626692947,5.18122425,5.17502031,5.17498789
37.237699,5.29150262,5.17343193,0.343614167,5.17964538,5.17343193,5.17339999
37.24819,5.56776436,5.17184665,0.629219927,5.17806947,5.17184665,5.17181519
37.258682,5.65685425,5.17026417,0.697560093,5.17649623,5.17026417,5.17023317
37.269174,4.79583152,5.16868463,-0.610616988,5.17492579,5.16868463,5.16865409
37.279665,5.56776436,5.16710818,0.632974077,5.1733583,5.16710818,5.16707808
37.290157,5.47722558,5.16553451,0.558292989,5.17179346,5.16553451,5.16550485
37.300648,4.69041576,5.16396392,-0.688148358,5.17023155,5.16396392,5.16393468
37.31114,5.74456265,5.1623961,0.762998392,5.16867228,5.1623961,5.16236728
37.321632,6.08276253,5.16083119,0.960172555,5.16711578,5.16083119,5.16080278
37.332123,5.74456265,5.15926934,0.765044641,5.1655622,5.15926934,5.15924133
37.342615,5.65685425,5.15771025,0.70650124,5.16401123,5.15771025,5.15768262
37.353106,5.56776436,5.1561542,0.64156852,5.16246317,5.1561542,5.15612695
37.363598,6.32455532,5.15460089,1.08164432,5.16091772,5.15460089,5.15457402
37.37409,5.47722558,5.15305046,0.569363779,5.15937501,5.15305046,5.15302396
37.384581,5.47722558,5.15150306,0.570721045,5.15783519,5.15150306,5.15147692
37.395073,4.47213595,5.14995839,-0.823299724,5.15629795,5.14995839,5.14993259
37.405564,5.91607978,5.14841673,0.876163827,5.1547636,5.14841673,5.14839128
37.416056,5.65685425,5.14687779,0.714126364,5.15323181,5.14687779,5.14685267
37.426548,4.79583152,5.1453417,-0.591193853,5.15170275,5.1453417,5.14531691
37.437039,5.38516481,5.1438086,0.49128017,5.15017654,5.1438086,5.14378414
37.447531,5.19615242,5.1422782,0.232108203,5.1486529,5.1422782,5.14225406
37.458022,6.164414,5.14075079,1.01176243,5.14713209,5.14075079,5.14072696
37.468514,5.38516481,5.13922606,0.495922114,5.14561384,5.13922606,5.13920254
37.479006,5.09901951,5.13770416,-0.196684138,5.14409827,5.13770416,5.13768094
37.489497,4.69041576,5.13618523,-0.667659695,5.14258553,5.13618523,5.1361623
37.499989,4.58257569,5.13466896,-0.74302979,5.14107532,5.13466896,5.13464632
37.51048,4.79583152,5.13315565,-0.580796115,5.13956793,5.13315565,5.13313329
37.520972,4.89897949,5.131645,-0.482354135,5.13806306,5.131645,5.13162291
37.531464,5.65685425,5.13013714,0.725752787,5.13656084,5.13013714,5.13011533
37.541955,4.79583152,5.12863222,-0.576888808,5.13506143,5.12863222,5.12861067
37.552447,4.79583152,5.12712994,-0.575585283,5.13356451,5.12712994,5.12710866
37.562938,4.35889894,5.12563059,-0.875632139,5.13207038,5.12563059,5.12560956
37.57343,5.74456265,5.12413386,0.787673019,5.13057874,5.12413386,5.12411309
37.583922,6,5.12263991,0.93667502,5.12908974,5.12263991,5.12261938
37.594413,4.47213595,5.12114886,-0.805613369,5.1276035,5.12114886,5.12112857
37.604905,6.08276253,5.11966042,0.981377659,5.12611973,5.11966042,5.11964038
37.615396,4,5.11817488,-1.05743788,5.12463872,5.11817488,5.11815507
37.625888,5.83095189,5.11669194,0.845139015,5.12316017,5.11669194,5.11667236
37.63638,5,5.11521174,-0.339428552,5.12168423,5.11521174,5.11519239
37.646871,5.29150262,5.11373442,0.421625667,5.12021102,5.11373442,5.11371529
37.657363,5.91607978,5.11225968,0.896560148,5.11874026,5.11225968,5.11224077
37.667854,4.47213595,5.11078781,-0.799156966,5.11727222,5.11078781,5.11076911
37.678346,4.69041576,5.10931852,-0.647226975,5.11580662,5.10931852,5.10930003
37.688838,4.89897949,5.10785193,-0.457025654,5.11434359,5.10785193,5.10783366
37.699329,5.38516481,5.1063882,0.527993003,5.11288327,5.1063882,5.10637012
37.709821,5.38516481,5.10492702,0.529374903,5.11142537,5.10492702,5.10490915
37.720312,4.35889894,5.10346868,-0.862884542,5.10997017,5.10346868,5.103451
37.730804,5.29150262,5.10201288,0.435304192,5.10851737,5.10201288,5.1019954
37.741296,4.89897949,5.10055977,-0.448976934,5.10706712,5.10055977,5.10054248
37.751787,5.83095189,5.09910948,0.855477887,5.10561954,5.09910948,5.09909238
37.762279,5.29150262,5.09766172,0.440273669,5.10417436,5.09766172,5.0976448
37.77277,5.09901951,5.09621676,0.0529410128,5.10273184,5.09621676,5.09620002
37.783262,5.38516481,5.09477433,0.538878908,5.1012917,5.09477433,5.09475777
37.793754,5.29150262,5.09333455,0.445160724,5.09985408,5.09333455,5.09331817
37.804245,5.29150262,5.09189756,0.446771823,5.09841911,5.09189756,5.09188135
37.814737,5.29150262,5.09046308,0.448374337,5.0969865,5.09046308,5.09044704
37.825228,5.29150262,5.08903137,0.449968061,5.09555653,5.08903137,5.08901549
37.83572,5.65685425,5.08760215,0.75448797,5.09412891,5.08760215,5.08758644
37.846212,5.29150262,5.08617557,0.453130286,5.09270378,5.08617557,5.08616002
37.856703,4.89897949,5.08475174,-0.431013052,5.09128126,5.08475174,5.08473635
37.867195,5.65685425,5.08333039,0.757313582,5.08986109,5.08333039,5.08331516
37.877686,5.19615242,5.08191178,0.337995027,5.08844352,5.08191178,5.08189671
37.888178,5.74456265,5.08049565,0.81490306,5.08702828,5.08049565,5.08048073
37.89867,4.69041576,5.07908212,-0.623431115,5.08561549,5.07908212,5.07906734
37.909161,5.56776436,5.07767131,0.700066464,5.0842053,5.07767131,5.07765668
37.919653,4.79583152,5.07626295,-0.52955777,5.08279741,5.07626295,5.07624847
37.930144,5.38516481,5.07485732,0.557052502,5.08139211,5.07485732,5.07484298
37.940636,5.65685425,5.07345412,0.763806341,5.0799891,5.07345412,5.07343993
37.951128,5.74456265,5.0720535,0.82006655,5.07858852,5.0720535,5.07203944
37.961619,4.47213595,5.07065558,-0.773640499,5.0771905,5.07065558,5.07064166
37.972111,5.29150262,5.06926008,0.471426074,5.07579477,5.06926008,5.06924629
37.982602,5.56776436,5.06786727,0.707034012,5.07440158,5.06786727,5.06785362
37.993094,6.4807407,5.06647688,1.18922825,5.07301067,5.06647688,5.06646336
38.003586,4.89897949,5.06508903,-0.407565381,5.07162216,5.06508903,5.06507563
38.014077,4.69041576,5.06370385,-0.610973065,5.07023618,5.06370385,5.06369058
38.024569,4.69041576,5.06232107,-0.609840394,5.06885246,5.06232107,5.06230793
38.03506,5.47722558,5.06094095,0.645201232,5.06747125,5.06094095,5.06092793
38.045552,6.164414,5.05956321,1.05111883,5.06609229,5.05956321,5.05955032
38.056044,5.38516481,5.058188,0.57181886,5.06471571,5.058188,5.05817523
38.066535,4.58257569,5.05681542,-0.688650659,5.06334163,5.05681542,5.05680277
38.077027,4.24264069,5.05544522,-0.90155673,5.06196977,5.05544522,5.05543269
38.087518,5.38516481,5.05407765,0.575401732,5.06060041,5.05407765,5.05406523
38.09801,5,5.05271245,-0.229591915,5.05923327,5.05271245,5.05270014
38.108502,5,5.05134973,-0.226604786,5.05786847,5.05134973,5.05133753
38.118993,4.79583152,5.04998962,-0.504140952,5.05650615,5.04998962,5.04997754
38.129485,4.89897949,5.04863186,-0.386849298,5.05514603,5.04863186,5.04861989
38.139976,5.65685425,5.04727671,0.78075447,5.05378836,5.04727671,5.04726484
38.150468,5.38516481,5.04592389,0.58244392,5.0524329,5.04592389,5.04591212
38.16096,5.19615242,5.04457353,0.389331342,5.05107975,5.04457353,5.04456187
38.171451,5.56776436,5.04322575,0.724250378,5.04972905,5.04322575,5.0432142
38.181943,4.89897949,5.0418803,-0.37802224,5.04838052,5.0418803,5.04186884
38.192434,5.83095189,5.04053742,0.889052572,5.04703442,5.04053742,5.04052606
38.202926,5.47722558,5.03919685,0.661837387,5.0456905,5.03919685,5.03918559
38.213418,4.58257569,5.03785871,-0.674746632,5.04434886,5.03785871,5.03784755
38.223909,5.91607978,5.03652313,0.937846817,5.04300964,5.03652313,5.03651207
38.234401,5,5.03518985,-0.187589566,5.04167257,5.03518985,5.03517888
38.244892,5.83095189,5.0338591,0.892800533,5.0403379,5.0338591,5.03384823
38.255384,4.79583152,5.03253065,-0.486517342,5.03900538,5.03253065,5.03251987
38.265876,5.65685425,5.0312046,0.790980185,5.03767511,5.0312046,5.03119391
38.276367,4,5.02988107,-1.01483056,5.03634724,5.02988107,5.02987047
38.286859,5,5.02855982,-0.16899651,5.03502149,5.02855982,5.02854931
38.29735,5.56776436,5.02724108,0.735202884,5.03369811,5.02724108,5.02723066
38.307842,4.35889894,5.0259246,-0.816716389,5.03237685,5.0259246,5.02591427
38.318334,4.58257569,5.0246105,-0.664856984,5.03105783,5.0246105,5.02460025
38.328825,3.87298335,5.0232989,-1.07252765,5.02974116,5.0232989,5.02328874
38.339317,5.29150262,5.02198955,0.519146489,5.02842659,5.02198955,5.02197946
38.349808,5.09901951,5.02068268,0.279887188,5.02711437,5.02068268,5.02067268
38.3603,5.29150262,5.01937804,0.521655618,5.02580424,5.01937804,5.01936812
38.370792,5.83095189,5.01807575,0.90159644,5.02449632,5.01807575,5.01806592
38.381283,4.69041576,5.01677594,-0.571279424,5.02319072,5.01677594,5.01676618
38.391775,4.79583152,5.01547834,-0.468664934,5.0218872,5.01547834,5.01546867
38.402266,6.32455532,5.01418321,1.14471486,5.020586,5.01418321,5.01417361
38.412758,4.89897949,5.01289028,-0.337506729,5.01928687,5.01289028,5.01288075
38.42325,5.83095189,5.01159967,0.905180767,5.01798991,5.01159967,5.01159023
38.433741,4,5.01031151,-1.00514253,5.01669526,5.01031151,5.01030214
38.444233,4.35889894,5.00902554,-0.806304285,5.01540265,5.00902554,5.00901624
38.454724,4.79583152,5.007742,-0.460337356,5.01411233,5.007742,5.00773278
38.465216,4.79583152,5.00646065,-0.458943488,5.01282406,5.00646065,5.00645149
38.475708,5.38516481,5.00518159,0.616427787,5.01153793,5.00518159,5.00517251
38.486199,5.19615242,5.00390495,0.438460346,5.01025408,5.00390495,5.00389593
38.496691,5.09901951,5.00263047,0.310465848,5.00897226,5.00263047,5.00262153
38.507182,4.89897949,5.0013584,-0.319967048,5.00769269,5.0013584,5.00134952
38.517674,5.83095189,5.00008848,0.911517095,5.00641514,5.00008848,5.00007967
38.528166,4.79583152,4.99882083,-0.450543351,5.00513972,4.99882083,4.9988121
38.538657,4.58257569,4.99755558,-0.644189321,5.00386654,4.99755558,4.9975469
38.549149,5.29150262,4.99629246,0.543332461,5.00259536,4.99629246,4.99628385
38.55964,4.58257569,4.99503172,-0.642227391,5.00132641,4.99503172,4.99502318
38.570132,5.29150262,4.99377311,0.545645962,5.00005945,4.99377311,4.99376463
38.580624,5.38516481,4.99251674,0.626616364,4.99879459,4.99251674,4.99250833
38.591115,5.38516481,4.99126273,0.627616183,4.99753195,4.99126273,4.99125438
38.601607,5.09901951,4.99001084,0.330164613,4.99627129,4.99001084,4.99000255
38.612098,5.74456265,4.9887613,0.869368361,4.99501283,4.9887613,4.98875307
38.62259,4.79583152,4.98751386,-0.437815415,4.99375633,4.98751386,4.98750569
38.633082,5.19615242,4.98626864,0.458130747,4.9925019,4.98626864,4.98626053
38.643573,5.38516481,4.98502575,0.632565453,4.99124967,4.98502575,4.98501771
38.654065,5.29150262,4.98378496,0.554723053,4.98999938,4.98378496,4.98377697
38.664556,5.19615242,4.98254648,0.462175229,4.98875128,4.98254648,4.98253855
38.675048,5.47722558,4.98131008,0.704212675,4.98750511,4.98131008,4.98130221
38.68554,5.65685425,4.98007588,0.822665406,4.98626099,4.98007588,4.98006806
38.696031,5.38516481,4.97884398,0.637432999,4.98501903,4.97884398,4.97883622
38.706523,5.09901951,4.97761414,0.348432734,4.98377899,4.97761414,4.97760644
38.717014,4.35889894,4.9763866,-0.785803829,4.98254111,4.9763866,4.97637895
38.727506,5.09901951,4.97516111,0.35193522,4.98130514,4.97516111,4.97515352
38.737998,4.79583152,4.97393779,-0.422026385,4.98007119,4.97393779,4.97393025
38.748489,5.19615242,4.97271675,0.472689828,4.97883937,4.97271675,4.97270926
38.758981,4.35889894,4.97149774,-0.782686911,4.97760946,4.97149774,4.97149031
38.769472,5.38516481,4.97028101,0.644114742,4.97638167,4.97028101,4.97027362
38.779964,5.74456265,4.9690663,0.880622705,4.97515576,4.9690663,4.96905896
38.790456,5.38516481,4.96785373,0.645996191,4.97393186,4.96785373,4.96784644
38.800947,5,4.96664341,0.182637867,4.97271006,4.96664341,4.96663618
38.811439,5.09901951,4.96543511,0.365492009,4.97149013,4.96543511,4.96542792
38.82193,5.19615242,4.96422904,0.481584243,4.9702723,4.96422904,4.96422191
38.832422,4.79583152,4.96302498,-0.408892964,4.96905634,4.96302498,4.96301789
38.842914,5.47722558,4.96182303,0.717915415,4.96784234,4.96182303,4.96181599
38.853405,5.38516481,4.96062331,0.651568491,4.96663043,4.96062331,4.96061632
38.863897,4.69041576,4.95942557,-0.51866156,4.96542037,4.95942557,4.95941863
38.874388,4.79583152,4.95823005,-0.402987008,4.96421238,4.95823005,4.95822316
38.88488,6.164414,4.95703651,1.09880731,4.96300622,4.95703651,4.95702966
38.895372,5.19615242,4.95584505,0.490211555,4.96180201,4.95584505,4.95583825
38.905863,5,4.9546558,0.212941786,4.96059986,4.9546558,4.95464904
38.916355,5,4.9534685,0.215711609,4.95939952,4.9534685,4.95346179
38.926846,5.29150262,4.95228339,0.582425299,4.95820124,4.95228339,4.95227672
38.937338,4.24264069,4.95110024,-0.841700393,4.95700476,4.95110024,4.95109361
38.94783,4.24264069,4.94991915,-0.84099849,4.95581021,4.94991915,4.94991257
38.958321,5.19615242,4.94874023,0.497405466,4.95461769,4.94874023,4.94873369
38.968813,6.32455532,4.94756324,1.17345306,4.95342696,4.94756324,4.94755675
38.979304,5.38516481,4.94638842,0.662401983,4.95223826,4.94638842,4.94638197
38.989796,4.79583152,4.94521553,-0.386502267,4.95105134,4.94521553,4.94520911
39.000288,4.89897949,4.94404467,-0.212285616,4.94986631,4.94404467,4.9440383
39.010779,5.38516481,4.94287595,0.665048008,4.94868329,4.94287595,4.94286963
39.021271,4.79583152,4.94170916,-0.381939304,4.94750205,4.94170916,4.94170287
39.031762,5.47722558,4.94054449,0.732585208,4.94632279,4.94054449,4.94053824
39.042254,5,4.93938173,0.246207786,4.9451453,4.93938173,4.93937552
39.052746,4.58257569,4.93822098,-0.596360026,4.94396969,4.93822098,4.93821481
39.063237,5.09901951,4.93706234,0.402439029,4.94279604,4.93706234,4.93705621
39.073729,5.19615242,4.9359056,0.510143926,4.94162415,4.9359056,4.93589951
39.08422,5,4.93475096,0.255438917,4.94045422,4.93475096,4.93474491
39.094712,5,4.9335982,0.257685462,4.93928604,4.9335982,4.93359219
39.105204,4.35889894,4.93244743,-0.757329841,4.9381197,4.93244743,4.93244145
39.115695,5.29150262,4.93129875,0.60016987,4.93695531,4.93129875,4.93129281
39.126187,4.89897949,4.93015193,-0.176557211,4.93579264,4.93015193,4.93014603
39.136678,5.83095189,4.9290072,0.94970769,4.93463192,4.9290072,4.92900133
39.14717,3.60555128,4.92786432,-1.14991871,4.93347291,4.92786432,4.92785849
39.157662,4.89897949,4.9267234,-0.166565046,4.93231572,4.9267234,4.92671761
39.168153,5.09901951,4.92558454,0.416455242,4.93116046,4.92558454,4.92557879
39.178645,4.79583152,4.92444753,-0.35863074,4.9300069,4.92444753,4.92444181
39.189136,5,4.92331257,0.276924952,4.92885526,4.92331257,4.92330688
39.199628,4.12310563,4.92217944,-0.893909289,4.92770531,4.92217944,4.92217379
39.21012,5.38516481,4.92104825,0.681261005,4.92655715,4.92104825,4.92104263
39.220611,4,4.9199191,-0.959124129,4.92541089,4.9199191,4.91991351
39.231103,4.89897949,4.91879176,-0.140756073,4.92426631,4.91879176,4.9187862
39.241594,5.09901951,4.91766645,0.425855687,4.92312362,4.91766645,4.91766093
39.252086,5.09901951,4.91654295,0.427172762,4.9219826,4.91654295,4.91653746
39.262578,4.47213595,4.91542135,-0.665796815,4.92084335,4.91542135,4.9154159
39.273069,5.19615242,4.91430177,0.530896082,4.91970598,4.91430177,4.91429635
39.283561,4.58257569,4.91318399,-0.574985471,4.91857025,4.91318399,4.9131786
39.294052,5,4.9120682,0.296532964,4.9174364,4.9120682,4.91206284
39.304544,5.19615242,4.9109542,0.534039533,4.91630419,4.9109542,4.91094887
39.315036,4.47213595,4.90984208,-0.661593628,4.91517372,4.90984208,4.90983679
39.325527,4.69041576,4.90873195,-0.467243185,4.91404511,4.90873195,4.90872669
39.336019,5,4.90762359,0.303934873,4.91291812,4.90762359,4.90761836
39.34651,5.09901951,4.90651721,0.438750847,4.91179297,4.90651721,4.906512
39.357002,5.19615242,4.90541258,0.539202967,4.91066945,4.90541258,4.90540741
39.367494,5.09901951,4.90430982,0.441259215,4.90954765,4.90430982,4.90430468
39.377985,5.19615242,4.90320901,0.541242467,4.90842767,4.90320901,4.9032039
39.388477,5.19615242,4.90210996,0.542256827,4.9073093,4.90210996,4.90210487
39.398968,5,4.90101285,0.314622237,4.90619275,4.90101285,4.90100779
39.40946,6,4.89991748,1.04884819,4.90507779,4.89991748,4.89991245
39.419952,5.74456265,4.89882394,0.919640531,4.90396453,4.89882394,4.89881894
39.430443,5.09901951,4.89773234,0.448650393,4.90285307,4.89773234,4.89772737
39.440935,4.58257569,4.89664246,-0.560416598,4.9017432,4.89664246,4.89663752
39.451426,5.09901951,4.8955545,0.451070959,4.90063511,4.8955545,4.89554959
39.461918,6,4.89446826,1.05144269,4.8995286,4.89446826,4.89446337
39.47241,5.09901951,4.89338383,0.453470708,4.89842377,4.89338383,4.89337897
39.482901,3.46410162,4.89230131,-1.19507309,4.89732071,4.89230131,4.89229648
39.493393,4.79583152,4.89122049,-0.308851035,4.89621921,4.89122049,4.89121568
39.503884,5.38516481,4.89014156,0.703578884,4.89511947,4.89014156,4.89013678
39.514376,5.74456265,4.88906433,0.924931522,4.89402129,4.88906433,4.88905957
39.524868,5.47722558,4.88798888,0.767617546,4.89292476,4.88798888,4.88798415
39.535359,4,4.88691531,-0.941761814,4.89182998,4.88691531,4.88691061
39.545851,4.47213595,4.88584343,-0.643200956,4.89073674,4.88584343,4.88583875
39.556342,5.47722558,4.88477341,0.769709143,4.88964524,4.88477341,4.88476876
39.566834,5.19615242,4.88370506,0.558969911,4.88855527,4.88370506,4.88370044
39.577326,5.74456265,4.88263847,0.928398714,4.88746692,4.88263847,4.88263388
39.587817,5.09901951,4.88157375,0.466310805,4.8863803,4.88157375,4.88156917
39.598309,5.29150262,4.88051067,0.64108654,4.8852952,4.88051067,4.88050612
39.6088,4.69041576,4.87944944,-0.434780041,4.88421181,4.87944944,4.87944492
39.619292,5.29150262,4.87838986,0.642738487,4.88312993,4.87838986,4.87838536
39.629784,5.91607978,4.87733201,1.01918976,4.88204966,4.87733201,4.87732754
39.640275,5.09901951,4.876276,0.471957109,4.88097108,4.876276,4.87627155
39.650767,5.56776436,4.87522162,0.832191532,4.879894,4.87522162,4.87521719
39.661258,5.38516481,4.87416906,0.714839667,4.87881862,4.87416906,4.87416465
39.67175,4.79583152,4.87311812,-0.278004665,4.87774471,4.87311812,4.87311374
39.682242,4.69041576,4.87206889,-0.426207849,4.87667239,4.87206889,4.87206453
39.692733,5.56776436,4.87102147,0.834711261,4.87560174,4.87102147,4.87101714
39.703225,4.58257569,4.86997566,-0.536096976,4.87453257,4.86997566,4.86997135
39.713716,5.65685425,4.86893165,0.887650043,4.87346506,4.86893165,4.86892736
39.724208,5.19615242,4.86788923,0.572942569,4.87239902,4.86788923,4.86788497
39.7347,5.19615242,4.86684851,0.573850079,4.87133453,4.86684851,4.86684426
39.745191,4.58257569,4.86580957,-0.532197214,4.8702717,4.86580957,4.86580535
39.755683,3.60555128,4.86477221,-1.12215014,4.86921032,4.86477221,4.86476801
39.766174,5,4.86373663,0.36913869,4.86815058,4.86373663,4.86373245
39.776666,5.47722558,4.86270262,0.783915147,4.86709228,4.86270262,4.86269846
39.787158,4.58257569,4.86167027,-0.528294026,4.86603552,4.86167027,4.86166614
39.797649,4.24264069,4.86063969,-0.786129126,4.86498038,4.86063969,4.86063558
39.808141,4.24264069,4.85961067,-0.785474366,4.86392667,4.85961067,4.85960657
39.818632,4.35889894,4.85858339,-0.706883618,4.86287459,4.85858339,4.85857932
39.829124,5.09901951,4.85755767,0.491387672,4.86182392,4.85755767,4.85755362
39.839616,5.83095189,4.85653359,0.987126286,4.86077476,4.85653359,4.85652956
39.850107,4.35889894,4.85551125,-0.704707246,4.85972722,4.85551125,4.85550724
39.860599,5.83095189,4.85449044,0.988160643,4.85868107,4.85449044,4.85448645
39.87109,5,4.85347136,0.382790598,4.85763652,4.85347136,4.85346739
39.881582,5.09901951,4.8524538,0.496553833,4.85659337,4.8524538,4.85244985
39.892074,5.91607978,4.85143787,1.03181486,4.85555171,4.85143787,4.85143394
39.902565,5,4.85042365,0.386751019,4.85451164,4.85042365,4.85041974
39.913057,4.69041576,4.84941094,-0.398741999,4.85347294,4.84941094,4.84940705
39.923548,4.69041576,4.84839994,-0.397472233,4.85243582,4.84839994,4.84839606
39.93404,5.65685425,4.84739044,0.89970207,4.85140008,4.84739044,4.84738658
39.944532,5.65685425,4.84638253,0.900262028,4.8503658,4.84638253,4.8463787
39.955023,5.56776436,4.84537631,0.849934143,4.84933308,4.84537631,4.8453725
39.965515,5.47722558,4.84437159,0.795521203,4.84830172,4.84437159,4.84436779
39.976006,4.89897949,4.84336854,0.235819724,4.84727192,4.84336854,4.84336476
39.986498,4.35889894,4.84236698,-0.695318658,4.84624347,4.84236698,4.84236322
39.99699,5.38516481,4.84136699,0.737426484,4.84521646,4.84136699,4.84136325
40.007481,5.47722558,4.84036866,0.798033153,4.84419099,4.84036866,4.84036494
40.017973,5.56776436,4.8393718,0.853459172,4.84316686,4.8393718,4.8393681
40.028464,4.58257569,4.8383766,-0.50576764,4.84214426,4.8383766,4.83837291
40.038956,4.79583152,4.83738286,-0.203841445,4.84112299,4.83738286,4.83737919
40.049448,4.69041576,4.83639067,-0.382066625,4.84010314,4.83639067,4.83638701
40.059939,4.79583152,4.83540011,-0.198918551,4.83908481,4.83540011,4.83539648
40.070431,4.24264069,4.83441101,-0.769266092,4.8380678,4.83441101,4.83440739
40.080922,4.79583152,4.83342353,-0.19388659,4.83705229,4.83342353,4.83341993
40.091414,4.58257569,4.8324375,-0.499861782,4.83603809,4.8324375,4.83243391
40.101906,4.79583152,4.83145299,-0.188736494,4.8350253,4.83145299,4.83144942
40.112397,4.58257569,4.83046655,-0.497886384,4.834014,4.83046655,4.83046655
40.122889,5.38516481,4.8294851,0.745439274,4.83300399,4.8294851,4.8294851
40.13338,6,4.82850525,1.08235611,4.83199547,4.82850525,4.82850525
40.143872,5.29150262,4.82752682,0.681157689,4.83098823,4.82752682,4.82752682
40.154364,5,4.8265499,0.416473407,4.82998238,4.8265499,4.8265499
40.164855,4.24264069,4.82557457,-0.763501071,4.828978,4.82557457,4.82557457
40.175347,4.79583152,4.82460064,-0.169614626,4.82797489,4.82460064,4.82460064
40.185838,5.09901951,4.8236283,0.524777298,4.82697324,4.8236283,4.8236283
40.19633,4.24264069,4.82265735,-0.761588252,4.82597287,4.82265735,4.82265735
40.206822,4.79583152,4.82168789,-0.160799136,4.82497385,4.82168789,4.82168789
40.217313,5.09901951,4.82071999,0.527541018,4.82397628,4.82071999,4.82071999
40.227805,4.24264069,4.81975347,-0.759679396,4.82297996,4.81975347,4.81975347
40.238296,4.69041576,4.81891592,-0.35846919,4.82198508,4.81891592,4.81878852
40.248788,4.69041576,4.8179528,-0.357123291,4.82099145,4.8179528,4.81782493
40.25928,5,4.81699115,0.427795334,4.81999916,4.81699115,4.81686281
40.269771,4.47213595,4.81603105,-0.586425693,4.81900829,4.81603105,4.81590223
40.280263,4.35889894,4.81507231,-0.675406072,4.81801866,4.81507231,4.81494302
40.290754,4.35889894,4.8141151,-0.674697088,4.81703045,4.8141151,4.81398534
40.301246,4.35889894,4.81315926,-0.673988362,4.81604346,4.81315926,4.81302901
40.311738,4.35889894,4.81220485,-0.673279959,4.81505778,4.81220485,4.81207412
40.322229,4.47213595,4.81125196,-0.582336681,4.81407352,4.81125196,4.81112075
40.332721,5.65685425,4.81030042,0.920083597,4.81309046,4.81030042,4.81016872
40.343212,4.79583152,4.8093504,-0.116270699,4.8121088,4.8093504,4.8092182
40.353704,5.19615242,4.80840171,0.622696328,4.81112835,4.80840171,4.80826902
40.364196,5.47722558,4.80745443,0.818395469,4.81014919,4.80745443,4.80732125
40.374687,4.69041576,4.80650866,-0.340724083,4.80917142,4.80650866,4.80637498
40.385179,5.29150262,4.80556421,0.69709283,4.80819483,4.80556421,4.80543002
40.39567,4.24264069,4.80462125,-0.74965363,4.80721963,4.80462125,4.80448656
40.406162,5.65685425,4.80367961,0.923674534,4.80624561,4.80367961,4.80354441
40.416654,5,4.80273935,0.444140344,4.80527286,4.80273935,4.80260365
40.427145,4.69041576,4.80180059,-0.333743653,4.80430147,4.80180059,4.80166437
40.437637,4.58257569,4.80086311,-0.467212393,4.80333126,4.80086311,4.80072638
40.448128,5.38516481,4.79992712,0.765008295,4.8023624,4.79992712,4.79978987
40.45862,4.47213595,4.79899241,-0.57171361,4.8013947,4.79899241,4.79885464
40.469112,4,4.79805907,-0.89334152,4.80042826,4.79805907,4.79792078
40.479603,4.79583152,4.7971272,-0.0359954474,4.79946316,4.7971272,4.79698837
40.490095,4.69041576,4.7961966,-0.32523966,4.79849921,4.7961966,4.79605725
40.500586,4.79583152,4.79526745,0.0237502851,4.7975366,4.79526745,4.79512757
40.511078,4.58257569,4.79433957,-0.460178087,4.79657513,4.79433957,4.79419915
40.52157,5.19615242,4.79341304,0.63461751,4.79561489,4.79341304,4.79327208
40.532061,4.35889894,4.79248795,-0.658474756,4.79465597,4.79248795,4.79234645
40.542553,4.24264069,4.79156411,-0.740893667,4.79369818,4.79156411,4.79142207
40.553044,4.35889894,4.79064171,-0.657071353,4.79274171,4.79064171,4.79049912
40.563536,4.24264069,4.78972055,-0.73964847,4.79178636,4.78972055,4.78957741
40.574028,4.58257569,4.78880072,-0.454120054,4.79083222,4.78880072,4.78865703
40.584519,5.29150262,4.78788231,0.709662114,4.78987938,4.78788231,4.78773806
40.595011,4.35889894,4.78696513,-0.65426767,4.78892766,4.78696513,4.78682032
40.605502,5.91607978,4.78604936,1.06302889,4.78797722,4.78604936,4.78590399
40.615994,4.58257569,4.78513481,-0.45006568,4.78702789,4.78513481,4.78498888
40.626486,5.38516481,4.78422158,0.775205283,4.78607976,4.78422158,4.78407508
40.636977,4.79583152,4.78330973,0.111900799,4.7851329,4.78330973,4.78316266
40.647469,5,4.78239911,0.466477108,4.78418713,4.78239911,4.78225146
40.65796,4.69041576,4.78148986,-0.301784865,4.78324264,4.78148986,4.78134164
40.668452,4.35889894,4.78058183,-0.649371146,4.78229923,4.78058183,4.78043302
40.678944,5.29150262,4.77967508,0.715421233,4.78135699,4.77967508,4.77952569
40.689435,5.09901951,4.77876971,0.565906183,4.78041601,4.77876971,4.77861973
40.699927,4.79583152,4.77786552,0.134037308,4.7794761,4.77786552,4.77771495
40.710418,4.35889894,4.7769627,-0.646578503,4.77853745,4.7769627,4.77681154
40.72091,4.89897949,4.77606107,0.350597225,4.77759986,4.77606107,4.77590931
40.731402,5.09901951,4.77516071,0.56908594,4.77666342,4.77516071,4.77500834
40.741893,5.19615242,4.77426169,0.649531163,4.77572822,4.77426169,4.77410872
40.752385,5.47722558,4.77336385,0.838964674,4.77479408,4.77336385,4.77321027
40.762876,5.38516481,4.77246735,0.782749932,4.77386116,4.77246735,4.77231316
40.773368,4.47213595,4.77157202,-0.547207512,4.77292929,4.77157202,4.77141721
40.78386,4.47213595,4.77067793,-0.546389948,4.77199856,4.77067793,4.77052251
40.794351,4.69041576,4.76978517,-0.281725775,4.77106904,4.76978517,4.76962913
40.804843,4.35889894,4.76889357,-0.640308226,4.77014056,4.76889357,4.7687369
40.815334,5.47722558,4.76800328,0.842153366,4.76921328,4.76800328,4.76784598
40.825826,4.47213595,4.76711414,-0.543118946,4.76828704,4.76711414,4.76695621
40.836318,3.16227766,4.76622623,-1.26647091,4.7673619,4.76622623,4.76606766
40.846809,5,4.76533963,0.484417559,4.76643797,4.76533963,4.76518042
40.857301,4.58257569,4.76445416,-0.426472113,4.76551505,4.76445416,4.7642943
40.867792,4.24264069,4.76356999,-0.72175432,4.76459332,4.76356999,4.76340948
40.878284,4.35889894,4.76268694,-0.63544315,4.7636726,4.76268694,4.76252578
40.888776,4.79583152,4.7618051,0.184462524,4.76275298,4.7618051,4.76164329
40.899267,4.89897949,4.76092455,0.37155745,4.76183453,4.76092455,4.76076207
40.909759,4.12310563,4.76004511,-0.798084884,4.76091708,4.76004511,4.75988197
40.92025,4.35889894,4.75916695,-0.632667371,4.7600008,4.75916695,4.75900314
40.930742,4.58257569,4.75828989,-0.419182772,4.75908551,4.75828989,4.75812541
40.941234,4.79583152,4.75741402,0.19600383,4.7581713,4.75741402,4.75724887
40.951725,4.69041576,4.75653942,-0.257145209,4.75725824,4.75653942,4.75637359
40.962217,5.09901951,4.75566591,0.585963826,4.75634616,4.75566591,4.75549939
40.972708,3.87298335,4.75479366,-0.939047555,4.75543524,4.75479366,4.75462645
40.9832,4.89897949,4.75392249,0.380863486,4.75452528,4.75392249,4.7537546
40.993692,3.87298335,4.75305249,-0.938120006,4.75361638,4.75305249,4.7528839
41.004183,5.09901951,4.75218374,0.588927651,4.75270862,4.75218374,4.75201445
41.014675,5.47722558,4.75131606,0.852003239,4.75180182,4.75131606,4.75114606
41.025166,5.29150262,4.75044961,0.735563057,4.75089615,4.75044961,4.75027891
41.035658,5.29150262,4.74958424,0.736151062,4.74999144,4.74958424,4.74941282
41.04615,4.79583152,4.74872,0.217051879,4.74908776,4.74872,4.74854787
41.056641,4.47213595,4.747857,-0.525091462,4.7481852,4.747857,4.74768414
41.067133,4.12310563,4.74699505,-0.789866712,4.74728358,4.74699505,4.74682147
41.077624,4.47213595,4.74613431,-0.523448525,4.74638308,4.74613431,4.74596
41.088116,4.69041576,4.74527463,-0.234219697,4.74548351,4.74527463,4.74509958
41.098608,4.24264069,4.74441607,-0.708361051,4.74458496,4.74441607,4.74424028
41.109099,3.74165739,4.74355871,-1.00095021,4.74368751,4.74355871,4.74338218
41.119591,4.79583152,4.74270239,0.230497581,4.74279098,4.74270239,4.74252511
41.130082,5.09901951,4.74184726,0.597638896,4.74189555,4.74184726,4.74166924
41.140574,5,4.74099317,0.508927138,4.74100103,4.74099317,4.74081438
41.151066,6,4.74014018,1.12243477,4.74010752,4.74014018,4.73996063
41.161557,4.58257569,4.73928837,-0.395869521,4.73921508,4.73928837,4.73910806
41.172049,4.89897949,4.73843758,0.400676804,4.73832355,4.73843758,4.7382565
41.18254,4.79583152,4.73758797,0.241337008,4.7374331,4.73758797,4.73740611
41.193032,5.09901951,4.73673937,0.601897121,4.73654355,4.73673937,4.73655673
41.203524,5,4.73589185,0.513914532,4.73565497,4.73589185,4.73570842
41.214015,4.58257569,4.7350455,-0.390473823,4.73476746,4.7350455,4.73486128
41.224507,4.79583152,4.73420015,0.248256672,4.73388084,4.73420015,4.73401513
41.234998,4.69041576,4.73335595,-0.20722015,4.73299528,4.73335595,4.73317013
41.24549,4.69041576,4.73251274,-0.205175495,4.73211059,4.73251274,4.73232612
41.255982,3.87298335,4.7316706,-0.926653796,4.73122687,4.7316706,4.73148317
41.266473,5.09901951,4.73082961,0.606786539,4.73034419,4.73082961,4.73064136
41.276965,4.24264069,4.72998959,-0.698103794,4.72946239,4.72998959,4.72980052
41.287456,4.79583152,4.72915072,0.258226273,4.72858162,4.72915072,4.72896082
41.297948,4.79583152,4.72831281,0.259843636,4.72770172,4.72831281,4.72812208
41.30844,3.87298335,4.72747595,-0.924387691,4.72682276,4.72747595,4.72728438
41.318931,4.24264069,4.72664022,-0.695700747,4.72594483,4.72664022,4.72644781
41.329423,4.24264069,4.72580544,-0.695100537,4.72506775,4.72580544,4.72561219
41.339914,4.89897949,4.72497179,0.4171423,4.72419169,4.72497179,4.72477768
41.350406,4.79583152,4.72413909,0.267754436,4.72331647,4.72413909,4.72394412
41.360898,4,4.72330741,-0.850474816,4.72244219,4.72330741,4.72311158
41.371389,5.09901951,4.72247684,0.613630727,4.72156891,4.72247684,4.72228014
41.381881,4.35889894,4.72164722,-0.602285876,4.72069647,4.72164722,4.72144964
41.392372,4.89897949,4.72081869,0.422090978,4.71982502,4.72081869,4.72062023
41.402864,4.89897949,4.7199911,0.42307019,4.71895441,4.7199911,4.71979175
41.413356,5.83095189,4.71916452,1.05441329,4.71808471,4.71916452,4.71896428
41.423847,4.35889894,4.71833902,-0.599533217,4.717216,4.71833902,4.71813788
41.434339,5.47722558,4.71751445,0.871614091,4.71634811,4.71751445,4.71731241
41.44483,5.47722558,4.71669096,0.872086359,4.71548141,4.71669096,4.71648801
41.455322,5.09901951,4.71586838,0.618992029,4.71461531,4.71586838,4.71566451
41.465814,5.29150262,4.7150468,0.75924688,4.71375011,4.7150468,4.71484201
41.476305,4.69041576,4.71422628,-0.154306581,4.71288587,4.71422628,4.71402056
41.486797,4.35889894,4.71340667,-0.595405514,4.71202244,4.71340667,4.71320002
41.497288,4.35889894,4.71258812,-0.594717727,4.71115998,4.71258812,4.71238052
41.50778,5.09901951,4.71177047,0.622293377,4.71029831,4.71177047,4.71156193
41.518272,5.19615242,4.71095379,0.696562011,4.70943751,4.71095379,4.71074429
41.528763,4.58257569,4.71013816,-0.357158874,4.70857767,4.71013816,4.7099277
41.539255,3.31662479,4.70932341,-1.18012653,4.70771862,4.70932341,4.70911199
41.549746,4.89897949,4.70850971,0.436428429,4.70686051,4.70850971,4.70829732
41.560238,5.29150262,4.70769689,0.76407181,4.70600318,4.70769689,4.70748352
41.57073,4.79583152,4.70688503,0.298238994,4.70514671,4.70688503,4.70667067
41.581221,4.58257569,4.70607419,-0.351423525,4.70429118,4.70607419,4.70585884
41.591713,4.79583152,4.70526422,0.300944014,4.70343641,4.70526422,4.70504788
41.602204,4.24264069,4.70445528,-0.679569417,4.70258258,4.70445528,4.70423793
41.612696,4.47213595,4.7036472,-0.481156154,4.70172951,4.7036472,4.70342884
41.623188,5.19615242,4.70284006,0.702361991,4.70087727,4.70284006,4.70262067
41.633679,4.35889894,4.70203392,-0.585777245,4.70002596,4.70203392,4.70181351
41.644171,5,4.70122864,0.546599813,4.6991754,4.70122864,4.7010072
41.654662,4.58257569,4.70042437,-0.343290946,4.69832576,4.70042437,4.70020189
41.665154,4.79583152,4.69962094,0.310178311,4.69747686,4.69962094,4.69939741
41.675646,4.69041576,4.69881843,-0.0916660697,4.69662878,4.69881843,4.69859384
41.686137,4.47213595,4.69801691,-0.47526935,4.69578161,4.69801691,4.69779126
41.696629,4.35889894,4.69721623,-0.581650482,4.69493517,4.69721623,4.69698951
41.70712,4.35889894,4.69641653,-0.580962637,4.69408963,4.69641653,4.69618874
41.717612,3.87298335,4.69561766,-0.906991904,4.69324481,4.69561766,4.69538878
41.728104,5.19615242,4.69481969,0.708048536,4.69240081,4.69481969,4.69458973
41.738595,5.56776436,4.6940227,0.934741495,4.69155769,4.6940227,4.69379163
41.749087,4.58257569,4.69322653,-0.332642195,4.69071529,4.69322653,4.69299435
41.759578,5.74456265,4.69243132,1.02573453,4.68987377,4.69243132,4.69219803
41.77007,4.69041576,4.69163692,-0.0349451148,4.68903297,4.69163692,4.69140251
41.780562,5.29150262,4.69084341,0.775022073,4.68819295,4.69084341,4.69060787
41.791053,5.19615242,4.69005085,0.71140816,4.6873538,4.69005085,4.68981417
41.801545,5.09901951,4.6892591,0.640125313,4.68651536,4.6892591,4.68902127
41.812036,4.69041576,4.68846829,0.0441301286,4.68567778,4.68846829,4.68822931
41.822528,4.47213595,4.68767828,-0.464265361,4.6848409,4.68767828,4.68743814
41.83302,3.87298335,4.68688914,-0.902167274,4.68400479,4.68688914,4.68664782
41.843511,4.35889894,4.68610093,-0.572015722,4.68316954,4.68610093,4.68585844
41.854003,4.47213595,4.68531351,-0.461711547,4.68233497,4.68531351,4.68506983
41.864494,4.47213595,4.68452702,-0.460859048,4.68150125,4.68452702,4.68428214
41.874986,4.35889894,4.6837413,-0.569949437,4.68066821,4.6837413,4.68349522
41.885478,4.12310563,4.68295644,-0.748231792,4.67983593,4.68295644,4.68270915
41.895969,4.24264069,4.6821725,-0.662971953,4.67900448,4.6821725,4.68192398
41.906461,4.89897949,4.68138932,0.466465608,4.67817371,4.68138932,4.68113958
41.916952,4.35889894,4.68060706,-0.567193192,4.67734376,4.68060706,4.68035607
41.927444,3.46410162,4.67982556,-1.10259872,4.67651449,4.67982556,4.67957333
41.937936,4.58257569,4.67904489,-0.31059491,4.67568595,4.67904489,4.6787914
41.948427,4.47213595,4.67826513,-0.454014508,4.67485824,4.67826513,4.67801037
41.958919,5.56776436,4.67748611,0.943545573,4.67403118,4.67748611,4.67723008
41.96941,3.87298335,4.676708,-0.896506917,4.67320494,4.676708,4.67645067
41.979902,4.89897949,4.67593063,0.472280489,4.67237934,4.67593063,4.67567201
41.990394,5,4.67515407,0.569952569,4.67155448,4.67515407,4.67489415
42.000885,5,4.6743784,0.570632633,4.67073041,4.6743784,4.67411716
42.011377,4.35889894,4.67360346,-0.56098531,4.66990699,4.67360346,4.6733409
42.021868,4.58257569,4.67282941,-0.300422553,4.66908437,4.67282941,4.67256551
42.03236,4.58257569,4.67205608,-0.299132716,4.66826238,4.67205608,4.67179084
42.042852,3.60555128,4.67128355,-1.0323431,4.6674411,4.67128355,4.67101695
42.053343,5.38516481,4.67051189,0.845371469,4.66662061,4.67051189,4.67024393
42.063835,5.29150262,4.66974094,0.78851866,4.66580075,4.66974094,4.66947161
42.074326,4.12310563,4.66897086,-0.738826934,4.66498167,4.66897086,4.66870015
42.084818,5.38516481,4.6682015,0.84673686,4.66416321,4.6682015,4.66792938
42.09531,4.24264069,4.66743291,-0.651760865,4.66334544,4.66743291,4.66715939
42.105801,5.56776436,4.66666518,0.949262442,4.66252845,4.66666518,4.66639024
42.116293,5.47722558,4.66589815,0.900737157,4.66171207,4.66589815,4.66562179
42.126784,5.09901951,4.66513196,0.658701411,4.66089645,4.66513196,4.66485416
42.137276,5.09901951,4.66436648,0.659282214,4.66008144,4.66436648,4.66408723
42.147768,5.47722558,4.66360175,0.902010988,4.65926711,4.66360175,4.66332104
42.158259,5.38516481,4.66283787,0.849898194,4.65845353,4.66283787,4.66255569
42.168751,5,4.66207467,0.581313456,4.65764056,4.66207467,4.661791
42.179242,4.35889894,4.6613123,-0.549921223,4.65682833,4.6613123,4.66102714
42.189734,3.46410162,4.6605506,-1.09382311,4.65601669,4.6605506,4.66026394
42.200226,4.35889894,4.65978966,-0.548535067,4.65520572,4.65978966,4.65950148
42.210717,5.83095189,4.65902954,1.08255363,4.65439549,4.65902954,4.65873983
42.221209,4.47213595,4.65827009,-0.431432656,4.65358584,4.65827009,4.65797884
42.2317,4.58257569,4.65769627,-0.274081326,4.65277693,4.65769627,4.65721865
42.242192,4.24264069,4.65693888,-0.643659999,4.65196859,4.65693888,4.65645911
42.252684,4.58257569,4.65618223,-0.271305248,4.65116091,4.65618223,4.6557003
42.263175,5.19615242,4.65542639,0.73534076,4.65035395,4.65542639,4.65494227
42.273667,3.87298335,4.6546712,-0.884131131,4.64954755,4.6546712,4.65418489
42.284158,5.19615242,4.65391682,0.736366489,4.64874188,4.65391682,4.65342829
42.29465,4.79583152,4.65316308,0.37771476,4.64793677,4.65316308,4.65267233
42.305142,5.29150262,4.65241007,0.799432644,4.64713229,4.65241007,4.65191707
42.315633,4.89897949,4.65165785,0.497314426,4.64632852,4.65165785,4.65116259
42.326125,5.38516481,4.65090627,0.856888873,4.64552531,4.65090627,4.65040873
42.336616,3.87298335,4.65015547,-0.881573664,4.6447228,4.65015547,4.64965564
42.347108,5.29150262,4.64940531,0.801309747,4.64392084,4.64940531,4.64890317
42.3576,4.89897949,4.64865586,0.500323523,4.6431195,4.64865586,4.6481514
42.368091,4.12310563,4.64790718,-0.724431883,4.64231886,4.64790718,4.64740037
42.378583,4.12310563,4.64715913,-0.723915396,4.64151875,4.64715913,4.64664996
42.389074,4.35889894,4.64641184,-0.536202293,4.64071933,4.64641184,4.64590031
42.399566,4.58257569,4.64566518,-0.251176206,4.63992045,4.64566518,4.64515125
42.410058,4.58257569,4.64491921,-0.249686835,4.63912218,4.64491921,4.64440287
42.420549,4.79583152,4.644174,0.389432312,4.63832458,4.644174,4.64365523
42.431041,5.38516481,4.6434294,0.861240622,4.63752751,4.6434294,4.64290819
42.441532,4.47213595,4.64268555,-0.412976509,4.63673112,4.64268555,4.64216188
42.452024,3.87298335,4.64194231,-0.876903054,4.63593524,4.64194231,4.64141616
42.462516,4.12310563,4.64119975,-0.719787554,4.63513996,4.64119975,4.64067109
42.473007,5.38516481,4.64045793,0.862964008,4.63434534,4.64045793,4.63992676
42.483499,4.89897949,4.63971671,0.509178533,4.63355123,4.63971671,4.639183
42.49399,4.35889894,4.63897622,-0.529223279,4.63275779,4.63897622,4.63843996
42.504482,4.69041576,4.63823633,0.22842817,4.63196485,4.63823633,4.63769749
42.514974,4.24264069,4.6374971,-0.628376013,4.63117249,4.6374971,4.63695567
42.525465,4.58257569,4.6367586,-0.232772212,4.63038078,4.6367586,4.63621455
42.535957,4.69041576,4.63602068,0.233227529,4.62958956,4.63602068,4.635474
42.546448,5,4.63528348,0.60391764,4.628799,4.63528348,4.63473415
42.55694,4.47213595,4.63454687,-0.403002371,4.62800892,4.63454687,4.63399486
42.567432,4.24264069,4.6338109,-0.625436014,4.62721941,4.6338109,4.6332562
42.577923,4.79583152,4.63307564,0.40343015,4.62643054,4.63307564,4.63251823
42.588415,4.79583152,4.63234095,0.404339675,4.62564215,4.63234095,4.63178081
42.598906,5.47722558,4.63160697,0.919575231,4.62485439,4.63160697,4.63104407
42.609398,5.19615242,4.63087356,0.751850296,4.62406711,4.63087356,4.63030788
42.61989,3.74165739,4.63014077,-0.942593966,4.62328038,4.63014077,4.6295723
42.630381,4.69041576,4.62940869,0.246996099,4.62249428,4.62940869,4.6288374
42.640873,5.29150262,4.62867716,0.814140936,4.62170864,4.62867716,4.62810303
42.651364,4,4.62794632,-0.792430643,4.62092362,4.62794632,4.62736933
42.661856,4,4.62721604,-0.791969721,4.62013907,4.62721604,4.62663616
42.672348,3.60555128,4.62648637,-1.01041333,4.61935506,4.62648637,4.62590359
42.682839,5.38516481,4.62575739,0.871439853,4.61857165,4.62575739,4.62517168
42.693331,4.12310563,4.62502895,-0.708465472,4.6177887,4.62502895,4.62444028
42.703822,4.47213595,4.62430119,-0.390083624,4.61700635,4.62430119,4.62370955
42.714314,4,4.62357397,-0.789666996,4.61622446,4.62357397,4.62297932
42.724806,4,4.62284735,-0.789206782,4.61544309,4.62284735,4.62224968
42.735297,4,4.6221214,-0.788746725,4.61466232,4.6221214,4.62152068
42.745789,5.19615242,4.62139598,0.758126934,4.61388199,4.62139598,4.62079219
42.75628,4.79583152,4.62067122,0.418521569,4.61310225,4.62067122,4.62006434
42.766772,5.19615242,4.61994699,0.759081969,4.61232294,4.61994699,4.61933699
42.777264,4.79583152,4.61922335,0.420247757,4.61154415,4.61922335,4.6186102
42.787755,5,4.61850036,0.61765657,4.61076594,4.61850036,4.61788404
42.798247,3.31662479,4.61777789,-1.14068098,4.60998817,4.61777789,4.61715837
42.808738,4.47213595,4.61705607,-0.380683751,4.60921096,4.61705607,4.61643333
42.81923,4.79583152,4.61633477,0.423670576,4.60843419,4.61633477,4.61570877
42.829722,3.87298335,4.61561404,-0.861760227,4.60765791,4.61561404,4.61498477
42.840213,4,4.61489395,-0.784151738,4.6068822,4.61489395,4.61426138
42.850705,4.35889894,4.61417436,-0.505247879,4.60610691,4.61417436,4.61353846
42.861196,4.24264069,4.61345542,-0.608945588,4.60533218,4.61345542,4.61281616
42.871688,4.69041576,4.61273697,0.278709155,4.60455786,4.61273697,4.61209432
42.88218,5.09901951,4.61201908,0.697854163,4.60378403,4.61201908,4.61137302
42.892671,5.38516481,4.61130182,0.879694823,4.60301075,4.61130182,4.61065232
42.903163,5.09901951,4.61058506,0.698880859,4.60223788,4.61058506,4.60993209
42.913654,3.87298335,4.60986892,-0.858420393,4.60146556,4.60986892,4.60921244
42.924146,4.89897949,4.60915326,0.53835511,4.60069364,4.60915326,4.60849326
42.934638,4.24264069,4.60843816,-0.604811929,4.59992219,4.60843816,4.60777459
42.945129,4.12310563,4.60772367,-0.69614513,4.59915128,4.60772367,4.60705652
42.955621,4.24264069,4.60700966,-0.603629828,4.59838077,4.60700966,4.60633888
42.966112,3.87298335,4.60629626,-0.856336914,4.59761079,4.60629626,4.60562183
42.976604,4.35889894,4.60558333,-0.49667332,4.5968412,4.60558333,4.60490522
42.987096,5.09901951,4.60487094,0.70295702,4.59607207,4.60487094,4.60418912
42.997587,3.60555128,4.60415916,-0.999303699,4.59530347,4.60415916,4.60347359
43.008079,4.47213595,4.60344784,-0.362369816,4.59453525,4.60344784,4.60275849
43.01857,4.47213595,4.60273712,-0.36138783,4.59376755,4.60273712,4.60204396
43.029062,4.12310563,4.60202686,-0.692041353,4.59300023,4.60202686,4.60132986
43.039554,4,4.60131713,-0.775446405,4.59223335,4.60131713,4.60061625
43.050045,5.19615242,4.60060798,0.771715257,4.59146699,4.60060798,4.59990319
43.060537,3.46410162,4.5998993,-1.06573809,4.590701,4.5998993,4.59919056
43.071028,4,4.5991912,-0.774074412,4.58993552,4.5991912,4.59847848
43.08152,4.24264069,4.59848354,-0.596525654,4.58917041,4.59848354,4.59776681
43.092012,4.35889894,4.5977764,-0.48875092,4.58840572,4.5977764,4.59705562
43.102503,4.69041576,4.59706985,0.305525635,4.58764155,4.59706985,4.59634497
43.112995,4,4.59636373,-0.7722459,4.58687772,4.59636373,4.59563473
43.123486,4.24264069,4.59565819,-0.594152758,4.5861144,4.59565819,4.59492502
43.133978,4.35889894,4.59495308,-0.485854031,4.58535143,4.59495308,4.59421572
43.14447,4.35889894,4.59424848,-0.485128372,4.58458888,4.59424848,4.59350688
43.154961,5.29150262,4.59354445,0.835438912,4.58382682,4.59354445,4.59279857
43.165453,4.12310563,4.59284084,-0.68537232,4.5830651,4.59284084,4.59209065
43.175944,4,4.5921378,-0.769504907,4.58230388,4.5921378,4.59138325
43.186436,4,4.59143519,-0.769048235,4.58154299,4.59143519,4.59067625
43.196928,4.24264069,4.59073307,-0.589993541,4.58078251,4.59073307,4.58996969
43.207419,5.19615242,4.5900315,0.778537683,4.58002251,4.5900315,4.58926365
43.217911,4.89897949,4.58933035,0.556461259,4.57926284,4.58933035,4.58855798
43.228402,4,4.58862976,-0.767222104,4.57850364,4.58862976,4.58785283
43.238894,5,4.58792958,0.641927116,4.57774478,4.58792958,4.58714804
43.249386,4.79583152,4.58722988,0.45672929,4.57698631,4.58722988,4.5864437
43.259877,4.47213595,4.58653073,-0.33822296,4.57622831,4.58653073,4.58573986
43.270369,5,4.58583198,0.64355887,4.57547063,4.58583198,4.58503638
43.28086,4.35889894,4.58513378,-0.475641498,4.57471341,4.58513378,4.5843334
43.291352,5,4.58443598,0.644642552,4.57395651,4.58443598,4.58363078
43.301844,4.24264069,4.58373865,-0.584035927,4.57319999,4.58373865,4.58292858
43.312335,4.12310563,4.58304186,-0.678185986,4.57244393,4.58304186,4.58222687
43.322827,4.24264069,4.58234546,-0.582841982,4.57168818,4.58234546,4.58152551
43.333318,3.87298335,4.5816496,-0.841823172,4.57093288,4.5816496,4.58082463
43.34381,4.24264069,4.58095413,-0.58164718,4.57017788,4.58095413,4.5801241
43.354302,4.89897949,4.58025912,0.564553244,4.56942325,4.58025912,4.57942398
43.364793,4.69041576,4.57956464,0.332943125,4.56866907,4.57956464,4.57872434
43.375285,5.38516481,4.57887054,0.897938899,4.56791519,4.57887054,4.57802503
43.385776,4.24264069,4.57817696,-0.579254933,4.56716175,4.57817696,4.57732619
43.396268,3.16227766,4.57748378,-1.18962436,4.5664086,4.57748378,4.57662769
43.40676,4.89897949,4.57679104,0.567616463,4.56565581,4.57679104,4.57592958
43.417251,4.58257569,4.57609881,0.0804790883,4.56490346,4.57609881,4.57523194
43.427743,4.24264069,4.57540697,-0.576858977,4.56415139,4.57540697,4.57453462
43.438234,4.35889894,4.57471563,-0.464560749,4.56339974,4.57471563,4.57383776
43.448726,4,4.57402468,-0.757644161,4.56264838,4.57402468,4.57314121
43.459218,4.58257569,4.57333416,0.0961329081,4.56189738,4.57333416,4.57244505
43.469709,4.79583152,4.57264415,0.472427112,4.56114679,4.57264415,4.57174934
43.480201,4.47213595,4.57195451,-0.315940742,4.56039647,4.57195451,4.57105395
43.490692,4.35889894,4.57126537,-0.460832318,4.55964658,4.57126537,4.57035899
43.501184,4.79583152,4.5705766,0.474610287,4.55889695,4.5705766,4.56966434
43.511676,4.89897949,4.56988826,0.573664732,4.55814766,4.56988826,4.56897007
43.522167,4.35889894,4.56920042,-0.458586388,4.55739879,4.56920042,4.56827623
43.532659,4.58257569,4.56851294,0.118586486,4.55665017,4.56851294,4.56758269
43.54315,4.47213595,4.56782595,-0.309338002,4.55590197,4.56782595,4.56688958
43.553642,4.47213595,4.56713933,-0.308226173,4.55515402,4.56713933,4.56619676
43.564134,4.24264069,4.56645313,-0.5690452,4.5544064,4.56645313,4.56550431
43.574625,4,4.56576741,-0.752175121,4.55365918,4.56576741,4.56481227
43.585117,4.58257569,4.56508205,0.132263525,4.55291221,4.56508205,4.56412053
43.595608,4.47213595,4.56439718,-0.303745331,4.55216564,4.56439718,4.5634292
43.6061,4.47213595,4.56371266,-0.302616433,4.55141931,4.56371266,4.56273815
43.616592,4.89897949,4.56302856,0.579612741,4.55067331,4.56302856,4.56204745
43.627083,4.58257569,4.56234493,0.142234886,4.54992769,4.56234493,4.56135716
43.637575,4.89897949,4.56166166,0.580790693,4.54918231,4.56166166,4.56066715
43.648066,4.12310563,4.56097886,-0.661719905,4.54843732,4.56097886,4.55997754
43.658558,4.35889894,4.56029641,-0.448773286,4.54769256,4.56029641,4.5592882
43.66905,3.74165739,4.55961436,-0.904409739,4.54694811,4.55961436,4.55859919
43.679541,5.19615242,4.55893279,0.798260377,4.54620404,4.55893279,4.55791058
43.690033,4.58257569,4.55825157,0.15596195,4.5454602,4.55825157,4.55722224
43.700524,4.24264069,4.55757081,-0.561186351,4.54471674,4.55757081,4.55653428
43.711016,4.69041576,4.55689039,0.365411233,4.5439735,4.55689039,4.55584659
43.721508,5.56776436,4.55621038,1.0057604,4.54323055,4.55621038,4.55515922
43.731999,4.89897949,4.55553083,0.586044927,4.54248798,4.55553083,4.55447223
43.742491,4.35889894,4.55485162,-0.442665421,4.54174562,4.55485162,4.55378549
43.752982,4.24264069,4.55417287,-0.558150683,4.54100363,4.55417287,4.55309913
43.763474,4,4.55349446,-0.743972083,4.54026185,4.55349446,4.55241302
43.773966,4,4.55281645,-0.743516272,4.53952036,4.55281645,4.55172721
43.784457,4,4.55213889,-0.743060492,4.53877923,4.55213889,4.55104178
43.794949,4.69041576,4.55146167,0.372765458,4.53803831,4.55146167,4.55035659
43.80544,4.24264069,4.55078491,-0.555107399,4.53729773,4.55078491,4.54967177
43.815932,4.58257569,4.55010848,0.180186613,4.53655737,4.55010848,4.54898718
43.826424,4,4.54943244,-0.741237102,4.53581728,4.54943244,4.54830289
43.836915,4.58257569,4.54875686,0.183898983,4.53507754,4.54875686,4.54761896
43.847407,5.56776436,4.5480816,1.00979342,4.534338,4.5480816,4.54693525
43.857898,4.12310563,4.54740681,-0.65138405,4.5335988,4.54740681,4.54625191
43.86839,4.12310563,4.54673233,-0.650866121,4.53285979,4.54673233,4.54556878
43.878882,4.89897949,4.54605825,0.594071743,4.53212105,4.54605825,4.54488594
43.889373,4.12310563,4.54538462,-0.649829973,4.53138265,4.54538462,4.54420345
43.899865,5.56776436,4.54471131,1.01146085,4.53064444,4.54471131,4.54352117
43.910356,4.47213595,4.54403846,-0.268146424,4.52990656,4.54403846,4.54283924
43.920848,4.47213595,4.54336593,-0.266889443,4.52916886,4.54336593,4.54215752
43.93134,4.69041576,4.54269379,0.384346163,4.52843143,4.54269379,4.54147607
43.941831,5.38516481,4.54202209,0.918228029,4.52769431,4.54202209,4.54079496
43.952323,4.24264069,4.54135072,-0.546543719,4.52695738,4.54135072,4.54011405
43.962814,4.12310563,4.5406798,-0.646199798,4.52622077,4.5406798,4.53943348
43.973306,3.60555128,4.54000921,-0.966673643,4.52548434,4.54000921,4.5387531
43.983798,4.89897949,4.53933899,0.599700334,4.52474815,4.53933899,4.53807299
43.994289,5.29150262,4.53866923,0.86765972,4.52401228,4.53866923,4.5373932
44.004781,4.47213595,4.53799979,-0.256639506,4.52327658,4.53799979,4.53671361
44.015272,2.82842712,4.5373308,-1.30725043,4.52254119,4.5373308,4.53603433
44.025764,4.89897949,4.53666213,0.601928032,4.52180597,4.53666213,4.53535525
44.036256,4.69041576,4.53599385,0.392965539,4.52107098,4.53599385,4.53467641
44.046747,4.12310563,4.53532601,-0.642043912,4.5203363,4.53532601,4.53399789
44.057239,3.74165739,4.5346585,-0.890506099,4.51960178,4.5346585,4.53331955
44.06773,3.74165739,4.53399144,-0.890131479,4.51886757,4.53399144,4.53264152
44.078222,5.09901951,4.5333247,0.752126862,4.51813351,4.5333247,4.53196366
44.088714,4,4.53265835,-0.729834464,4.51739968,4.53265835,4.53128605
44.099205,4,4.53199244,-0.729378122,4.51666614,4.53199244,4.53060873
44.109697,4.58257569,4.53132687,0.226382037,4.51593276,4.53132687,4.52993159
44.120188,3.87298335,4.53066174,-0.810973735,4.51519966,4.53066174,4.52925475
44.13068,4.12310563,4.52999695,-0.637880334,4.51446672,4.52999695,4.52857807
44.141172,5.09901951,4.52933254,0.754776109,4.513734,4.52933254,4.52790162
44.151663,4.35889894,4.52866859,-0.412031119,4.51300156,4.52866859,4.52722546
44.162155,4.58257569,4.52800496,0.233603794,4.51226926,4.52800496,4.52654946
44.172646,4.35889894,4.52734179,-0.410417898,4.51153725,4.52734179,4.52587374
44.183138,3.60555128,4.52667896,-0.95975397,4.51080537,4.52667896,4.52519819
44.19363,4.89897949,4.52601652,0.610706942,4.51007371,4.52601652,4.52452285
44.204121,4.35889894,4.52535454,-0.407989696,4.50934232,4.52535454,4.52384778
44.214613,4.89897949,4.52469289,0.611789666,4.50861107,4.52469289,4.52317287
44.225104,4.58257569,4.52403171,0.241958651,4.50788008,4.52403171,4.52249823
44.235596,4.58257569,4.52337086,0.243320435,4.50714923,4.52337086,4.52182374
44.246088,4.79583152,4.52271042,0.522609898,4.50641858,4.52271042,4.52114946
44.256579,5.47722558,4.52205044,0.977330615,4.5056882,4.52205044,4.52047544
44.267071,4.12310563,4.52139081,-0.631098397,4.50495794,4.52139081,4.51980156
44.277562,5.09901951,4.52073165,0.760452406,4.50422795,4.52073165,4.51912794
44.288054,4,4.52007284,-0.721160758,4.50349807,4.52007284,4.51845446
44.298546,3.60555128,4.51941444,-0.955961905,4.50276839,4.51941444,4.51778118
44.309037,5.47722558,4.51875652,0.979014329,4.50203897,4.51875652,4.51710815
44.319529,5.09901951,4.51809895,0.762181449,4.50130966,4.51809895,4.51643525
44.33002,4.58257569,4.51744187,0.255213298,4.50058061,4.51744187,4.5157626
44.340512,3.87298335,4.51678514,-0.802372605,4.49985167,4.51678514,4.51509008
44.351004,4.69041576,4.51612885,0.417476842,4.49912291,4.51612885,4.51441774
44.361495,4.69041576,4.51547304,0.418261545,4.4983944,4.51547304,4.51374565
44.371987,5,4.5148176,0.696550355,4.497666,4.5148176,4.51307368
44.382478,4.89897949,4.51416266,0.620336056,4.49693784,4.51416266,4.51240195
44.39297,4,4.5135081,-0.716594794,4.49620979,4.5135081,4.51173033
44.403462,4,4.51285398,-0.71613824,4.49548192,4.51285398,4.51105889
44.413953,5.19615242,4.51220037,0.82701394,4.49475428,4.51220037,4.51038768
44.424445,3.74165739,4.51154714,-0.877433617,4.49402674,4.51154714,4.50971658
44.434936,4.24264069,4.51089443,-0.51793218,4.49329944,4.51089443,4.50904572
44.445428,4.69041576,4.51024212,0.424468659,4.49257224,4.51024212,4.50837495
44.45592,3.60555128,4.50959027,-0.95080965,4.4918452,4.50959027,4.50770435
44.466411,4.47213595,4.50893895,-0.191841054,4.49111839,4.50893895,4.50703398
44.476903,4.12310563,4.50828803,-0.620630654,4.49039167,4.50828803,4.50636371
44.487394,4.24264069,4.50763766,-0.514778569,4.48966518,4.50763766,4.50569365
44.497886,5.09901951,4.50698771,0.769436029,4.48893878,4.50698771,4.50502369
44.508378,4.89897949,4.50633825,0.626610915,4.48821254,4.50633825,4.50435388
44.518869,4.58257569,4.50568934,0.27728389,4.48748652,4.50568934,4.50368429
44.529361,4.58257569,4.50504087,0.278450761,4.48676058,4.50504087,4.50301479
44.539852,4,4.50439297,-0.710206284,4.48603486,4.50439297,4.5023455
44.550344,4.79583152,4.50374551,0.540449822,4.48530922,4.50374551,4.50167629
44.560836,4.58257569,4.50309858,0.281916858,4.48458373,4.50309858,4.50100722
44.571327,4.35889894,4.50245223,-0.37888427,4.48385846,4.50245223,4.50033836
44.581819,4.58257569,4.50180636,0.284199465,4.48313326,4.50180636,4.49966958
44.59231,4.69041576,4.50116109,0.435034106,4.48240827,4.50116109,4.499001
44.602802,4.35889894,4.5005163,-0.376320817,4.48168335,4.5005163,4.49833249
44.613294,4.47213595,4.49987207,-0.166541637,4.48095857,4.49987207,4.49766412
44.623785,5,4.49922847,0.707652126,4.480234,4.49922847,4.49699594
44.634277,5.29150262,4.49858538,0.890459007,4.4795095,4.49858538,4.49632783
44.644768,3.74165739,4.49794293,-0.869646793,4.4787852,4.49794293,4.49565991
44.65526,5,4.49730102,0.709012682,4.47806096,4.49730102,4.49499205
44.665752,5.29150262,4.4966597,0.891539634,4.47733686,4.4966597,4.49432432
44.676243,4.69041576,4.49601906,0.440904408,4.47661295,4.49601906,4.49365678
44.686735,4.35889894,4.49537899,-0.369432053,4.4758891,4.49537899,4.49298929
44.697226,3.87298335,4.4947396,-0.788515223,4.47516545,4.4947396,4.49232199
44.707718,4.24264069,4.4941008,-0.501457992,4.47444186,4.4941008,4.49165473
44.71821,4.79583152,4.49346266,0.549880768,4.47371838,4.49346266,4.4909876
44.728701,5,4.49282525,0.712162022,4.4729951,4.49282525,4.49032064
44.739193,4.12310563,4.49218847,-0.607521885,4.47227187,4.49218847,4.48965372
44.749684,4.47213595,4.49155243,-0.13934303,4.47154883,4.49155243,4.48898698
44.760176,4.35889894,4.49091705,-0.363342964,4.47082584,4.49091705,4.48832029
44.770668,4.58257569,4.4902824,0.303798122,4.47010296,4.4902824,4.4876537
44.781159,4.79583152,4.48964854,0.553338038,4.46938027,4.48964854,4.48698727
44.791651,5,4.48901538,0.714831884,4.46865762,4.48901538,4.48632089
44.802142,4.89897949,4.48838305,0.640777995,4.46793515,4.48838305,4.48565467
44.812634,3.46410162,4.48775144,-1.01175582,4.46721272,4.48775144,4.48498848
44.823126,5.09901951,4.49054631,0.780046924,4.4664904,4.49054631,4.48432239
44.833617,5,4.48992587,0.714194741,4.46576825,4.48992587,4.48365646
44.844109,4.47213595,4.48930626,-0.131035492,4.46504615,4.48930626,4.48299055
44.8546,5.19615242,4.4886876,0.841109282,4.46432421,4.4886876,4.4823248
44.865092,3.60555128,4.4880698,-0.939424572,4.46360231,4.4880698,4.48165907
44.875584,4.79583152,4.48745295,0.555318443,4.46288051,4.48745295,4.48099344
44.886075,4.69041576,4.48683712,0.451196894,4.46215887,4.48683712,4.48032795
44.896567,4.24264069,4.48622222,-0.493539804,4.46143727,4.48622222,4.47966247
44.907058,4.89897949,4.4856084,0.642939412,4.46071583,4.4856084,4.47899715
44.91755,4.47213595,4.48499555,-0.113400163,4.45999442,4.48499555,4.47833184
44.928042,4.35889894,4.48438377,-0.354238375,4.4592731,4.48438377,4.47766661
44.938533,4.12310563,4.48377314,-0.600556003,4.45855194,4.48377314,4.47700151
44.949025,4.89897949,4.48316357,0.644837899,4.45783081,4.48316357,4.47633643
44.959516,4,4.48255521,-0.694661938,4.45710983,4.48255521,4.47567149
44.970008,4.47213595,4.48194797,-0.0990556173,4.45638887,4.48194797,4.47500655
44.9805,4.12310563,4.48134195,-0.598528463,4.455668,4.48134195,4.47434168
44.990991,4.58257569,4.48073723,0.3191214,4.45494728,4.48073723,4.47367694
45.001483,3.87298335,4.48013373,-0.779198554,4.45422658,4.48013373,4.4730122
45.011974,4.79583152,4.47953161,0.562405467,4.45350603,4.47953161,4.47234759
45.022466,4.79583152,4.4789308,0.562939365,4.45278549,4.4789308,4.47168297
45.032958,4.58257569,4.47833137,0.322868893,4.45206503,4.47833137,4.47101842
45.043449,4.79583152,4.47773345,0.564001841,4.45134472,4.47773345,4.47035399
45.053941,4.47213595,4.47713694,-0.070717675,4.45062441,4.47713694,4.46968955
45.064432,5.29150262,4.47654203,0.90275168,4.44990425,4.47654203,4.46902523
45.074924,4.69041576,4.47594863,0.463105964,4.4491841,4.47594863,4.46836089
45.085416,4.79583152,4.47535685,0.566104826,4.44846401,4.47535685,4.46769661
45.095907,4.58257569,4.4747668,0.328342643,4.44774407,4.4747668,4.46703244
45.106399,4.58257569,4.47417843,0.329237396,4.44702413,4.47417843,4.46636826
45.11689,4.35889894,4.4735919,-0.338663489,4.44630433,4.4735919,4.46570419
45.127382,4.89897949,4.47300716,0.652665553,4.44558452,4.47300716,4.46504009
45.137874,4.58257569,4.47242433,0.331890596,4.44486478,4.47242433,4.46437604
45.148365,4.69041576,4.47184352,0.467517101,4.44414518,4.47184352,4.46371209
45.158857,4.79583152,4.4712647,0.569707667,4.44342557,4.4712647,4.46304812
45.169348,5.29150262,4.47068804,0.90598818,4.44270609,4.47068804,4.46238425
45.17984,4.89897949,4.47011351,0.654878594,4.4419866,4.47011351,4.46172035
45.190332,4.79583152,4.46954125,0.571218238,4.44126717,4.46954125,4.46105649
45.200823,4.24264069,4.46897138,-0.475742258,4.44054787,4.46897138,4.46039272
45.211315,4.89897949,4.46840389,0.65618259,4.43982856,4.46840389,4.45972892
45.221806,5.29150262,4.46783898,0.907559166,4.43910937,4.46783898,4.45906521
45.232298,4.47213595,4.46727663,0.0697088577,4.43839017,4.46727663,4.45840146
45.24279,5,4.46671699,0.730262285,4.43767102,4.46671699,4.45773774
45.253281,4.89897949,4.46616023,0.657890001,4.43695199,4.46616023,4.45707411
45.263773,4.89897949,4.46560635,0.658310822,4.43623295,4.46560635,4.45641044
45.274264,5,4.46505556,0.731398961,4.43551402,4.46505556,4.45574685
45.284756,4.58257569,4.46450789,0.343609963,4.43479507,4.46450789,4.45508322
45.295248,3.60555128,4.46396351,-0.92650539,4.43407617,4.46396351,4.4544196
45.305739,4.24264069,4.46342262,-0.469874381,4.43335738,4.46342262,4.45375606
45.316231,4.24264069,4.46288525,-0.46930221,4.43263857,4.46288525,4.45309247
45.326722,4.79583152,4.46235166,0.577477156,4.43191987,4.46235166,4.45242896
45.337214,4.35889894,4.4618219,-0.320816072,4.43120114,4.4618219,4.4517654
45.347706,5.19615242,4.46129618,0.857237562,4.43048246,4.46129618,4.45110185
45.358197,4.58257569,4.46077475,0.348999919,4.42976388,4.46077475,4.45043836
45.368689,4,4.46025768,-0.678422939,4.42904528,4.46025768,4.44977482
45.37918,5.47722558,4.45974528,1.00870228,4.42832677,4.45974528,4.44911135
45.389672,4.79583152,4.45923765,0.580167111,4.42760824,4.45923765,4.44844782
45.400164,4.79583152,4.45873506,0.580600089,4.42688974,4.45873506,4.44778429
45.410655,4.35889894,4.4582378,-0.315180673,4.42617135,4.4582378,4.44712082
45.421147,4.47213595,4.45774602,0.119958043,4.42545292,4.45774602,4.44645728
45.431638,4,4.45726009,-0.67621009,4.42473458,4.45726009,4.44579381
45.44213,4,4.45678018,-0.675855146,4.42401621,4.45678018,4.44513027
45.452622,5.47722558,4.45630664,1.01040533,4.42329787,4.45630664,4.44446672
45.463113,4,4.45583985,-0.675159127,4.42257963,4.45583985,4.44380322
45.473605,4.58257569,4.45538004,0.356645005,4.42186134,4.45538004,4.44313965
45.484096,4.24264069,4.45492766,-0.4607461,4.42114315,4.45492766,4.44247614
45.494588,4.35889894,4.45448301,-0.309166725,4.42042492,4.45448301,4.44181255
45.50508,4.12310563,4.45404654,-0.575274644,4.41970671,4.45404654,4.44114894
45.515571,4.69041576,4.45361874,0.486617942,4.41898859,4.45361874,4.44048538
45.526063,4.35889894,4.45319998,-0.307084738,4.41827042,4.45319998,4.43982174
45.536554,4.69041576,4.45279085,0.487467858,4.41755234,4.45279085,4.43915815
45.547046,5.09901951,4.4523918,0.804131654,4.41683421,4.4523918,4.43849447
45.557538,5.09901951,4.45200344,0.804373093,4.4161161,4.45200344,4.43783077
45.568029,4.69041576,4.45162643,0.488660752,4.41539808,4.45162643,4.43716711
45.578521,4.89897949,4.45126135,0.669117431,4.41468,4.45126135,4.43650336
45.589012,4.35889894,4.45090898,-0.303331559,4.41396201,4.45090898,4.43583965
45.599504,4.12310563,4.45057001,-0.57224504,4.41324396,4.45057001,4.43517584
45.609996,4.58257569,4.45024531,0.363772442,4.41252593,4.45024531,4.43451201
45.620487,4.47213595,4.44993577,0.148997259,4.41180797,4.44993577,4.43384821
45.630979,5,4.44964231,0.741860966,4.41108996,4.44964231,4.43318431
45.64147,4.79583152,4.449366,0.588613222,4.41037203,4.449366,4.43252044
45.651962,4.69041576,4.44910791,0.491230954,4.40965403,4.44910791,4.43185647
45.662454,5.91607978,4.44886928,1.21128465,4.40893605,4.44886928,4.43119247
45.672945,4.79583152,4.44865143,0.589219905,4.40821814,4.44865143,4.43052849
45.683437,5.09901951,4.44845575,0.806575333,4.40750016,4.44845575,4.42986441
45.693928,3.74165739,4.44828382,-0.840610749,4.40678226,4.44828382,4.42920035
45.70442,3.87298335,4.4481373,-0.758389049,4.4060643,4.4481373,4.42853618
45.714912,3.74165739,4.44801803,-0.840452644,4.40534634,4.44801803,4.42787197
45.725403,4.24264069,4.44792805,-0.453086483,4.40462845,4.44792805,4.42720778
45.735895,4.47213595,4.44786952,0.155776882,4.40391049,4.44786952,4.42654348
45.746386,5,4.44784486,0.743071423,4.4031926,4.44784486,4.42587919
45.756878,5.19615242,4.44785671,0.865040873,4.40247464,4.44785671,4.42521479
45.76737,3.46410162,4.44790798,-0.991870135,4.40175668,4.44790798,4.42455034
45.777861,4,4.44800185,-0.669329405,4.40103878,4.44800185,4.42388589
45.788353,4.89897949,4.44814188,0.671444419,4.40032081,4.44814188,4.42322133
45.798844,4.12310563,4.44833193,-0.570286162,4.39960291,4.44833193,4.42255678
45.809336,4.24264069,4.44857638,-0.453801376,4.39888493,4.44857638,4.42189211
45.819828,4.58257569,4.44888,0.365644225,4.39816694,4.44888,4.42122738
45.830319,4.58257569,4.4492481,0.365140516,4.39744902,4.4492481,4.42056265
45.840811,4.24264069,4.44968671,-0.455023104,4.39673101,4.44968671,4.4198978
45.851302,4.69041576,4.45020242,0.49011564,4.39601307,4.45020242,4.41923294
45.861794,3.87298335,4.45080279,-0.760144355,4.39529505,4.45080279,4.41856797
45.872286,5.38516481,4.45149617,0.966265306,4.39457702,4.45149617,4.41790292
45.882777,5,4.45229194,0.74007301,4.39385904,4.45229194,4.41723787
45.893269,4.89897949,4.45320095,0.667666484,4.39314099,4.45320095,4.41657269
45.90376,5.65685425,4.45423515,1.09663991,4.39242299,4.45423515,4.41590751
45.914252,4.35889894,4.45540853,-0.310659924,4.3917049,4.45540853,4.41524219
45.924744,5.38516481,4.45673673,0.963549727,4.3909868,4.45673673,4.4145768
45.935235,5.29150262,4.45823762,0.912833501,4.39026875,4.45823762,4.41391139
45.945727,4.24264069,4.45993221,-0.466145383,4.38955062,4.45993221,4.41324585
45.956218,4.69041576,4.46184406,0.478091725,4.38883254,4.46184406,4.4125803
45.96671,3.87298335,4.46400126,-0.768776893,4.38811437,4.46400126,4.41191461
45.977202,3.87298335,4.46643586,-0.770358695,4.38739618,4.46643586,4.41124883
45.987693,3.31662479,4.46918532,-1.07357372,4.38667804,4.46918532,4.41058304
45.998185,4.69041576,4.47229445,0.467034589,4.38595981,4.47229445,4.40991711
46.008676,5,4.47581502,0.724006199,4.38524163,4.47581502,4.40925115
46.019168,5,4.4798099,0.721242054,4.38452336,4.4798099,4.40858505
46.02966,4.12310563,4.48435312,-0.601038681,4.38380506,4.48435312,4.40791886
46.040151,5,4.48953362,0.7144693,4.38308681,4.48953362,4.40725265
46.050643,5.19615242,4.49546072,0.837073295,4.38236847,4.49546072,4.40658629
46.061134,4.58257569,4.50226553,0.283390489,4.38165016,4.50226553,4.4059199
46.071626,5.19615242,4.51011199,0.828275578,4.38093177,4.51011199,4.40525336
46.082118,5.09901951,4.5192014,0.761457885,4.38021334,4.5192014,4.40458672
46.092609,4.47213595,4.52978559,-0.240103388,4.37949496,4.52978559,4.40392006
46.103101,5.09901951,4.54218657,0.746212399,4.37877648,4.54218657,4.40325324
46.113592,5.38516481,4.55681148,0.91013918,4.37805804,4.55681148,4.40258638
46.124084,4.79583152,4.57419356,0.470784415,4.3773395,4.57419356,4.40191937
46.134576,5.38516481,4.59502801,0.888896395,4.37662094,4.59502801,4.40125225
46.145067,5.65685425,4.6202401,1.0181425,4.37590241,4.6202401,4.4005851
46.155559,5.19615242,4.65109085,0.738282853,4.37518378,4.65109085,4.39991779
46.16605,5.09901951,4.68930628,0.640088461,4.37446518,4.68930628,4.39925043
46.176542,5.47722558,4.73732957,0.86017208,4.37374649,4.73732957,4.39858291
46.187034,5.09901951,4.79866192,0.548048893,4.37302776,4.79866192,4.39791529
46.197525,6.244998,4.87847801,1.16898246,4.37230906,4.87847801,4.39724762
46.208017,6.63324958,4.98489505,1.2838826,4.37159026,4.98489505,4.39657978
46.218508,7.48331477,5.13303734,1.53306146,4.3708715,5.13303734,4.3959119
46.229,8.36660027,5.36384247,1.73284673,4.37015263,5.36384247,4.39524384
46.239492,9.48683298,5.81118789,1.9171972,4.36943372,5.81118789,4.39457568
46.249983,11.6619038,6.81326512,2.20196246,4.36871485,6.81326512,4.39390746
46.260475,12.4498996,8.80099292,1.91021116,4.36799587,8.80099292,4.39323907
46.270966,14.6969385,11.7727402,1.71002874,4.36727692,11.7727402,4.39257063
46.281458,16.4012195,14.9934733,1.18648478,4.36655786,14.9934733,4.39190201
46.29195,16.3707055,17.1348801,-0.87417079,4.36583876,17.1348801,4.39123327
46.302441,15.6204994,16.9898373,-1.17018713,4.36511969,16.9898373,4.39056447
46.312933,12.7279221,14.6693015,-1.39333392,4.36440051,14.6693015,4.3898955
46.323424,10.4880885,11.4344149,-0.972793118,4.36368136,11.4344149,4.38922647
46.333916,9,8.55179957,0.669477732,4.3629621,8.55179957,4.38855725
46.344408,7.21110255,6.67706356,0.730779718,4.3622428,6.67706356,4.38788791
46.354899,6,5.7472158,0.502776488,4.36152353,5.7472158,4.38721851
46.365391,5.83095189,5.32858577,0.708777907,4.36080414,5.32858577,4.38654892
46.375882,5.65685425,5.10733996,0.741292312,4.36008478,5.10733996,4.38587926
46.386374,5.19615242,4.9629194,0.482942044,4.3593653,4.9629194,4.38520942
46.396866,4.35889894,4.85827805,-0.706667607,4.35864579,4.85827805,4.38453945
46.407357,5.38516481,4.77925742,0.778400531,4.35792629,4.77925742,4.38386941
46.417849,4.24264069,4.71810927,-0.689542301,4.35720668,4.71810927,4.38319918
46.42834,3.87298335,4.66986715,-0.892683486,4.3564871,4.66986715,4.38252887
46.438832,4.35889894,4.63114551,-0.521772523,4.3557674,4.63114551,4.38185838
46.449324,4.47213595,4.59959656,-0.357016259,4.35504765,4.59959656,4.38118774
46.459815,4.47213595,4.57354616,-0.318449685,4.35432793,4.57354616,4.38051704
46.470307,4.47213595,4.55177106,-0.282196925,4.35360809,4.55177106,4.37984613
46.480798,4.89897949,4.53337427,0.604652972,4.35288827,4.53337427,4.37917516
46.49129,4.12310563,4.51767466,-0.628147305,4.35216834,4.51767466,4.37850397
46.501782,3.74165739,4.50415719,-0.873212348,4.35144836,4.50415719,4.37783265
46.512273,4.58257569,4.49242328,0.300253916,4.3507284,4.49242328,4.37716126
46.522765,4.47213595,4.48215805,-0.100110403,4.35000832,4.48215805,4.37648965
46.533256,5.19615242,4.47311615,0.850315394,4.34928826,4.47311615,4.37581797
46.543748,4.12310563,4.46509822,-0.584801325,4.34856808,4.46509822,4.37514607
46.55424,4.89897949,4.4579457,0.664103742,4.34784786,4.4579457,4.37447404
46.564731,5,4.45152948,0.740587956,4.34712765,4.45152948,4.37380192
46.575223,4.79583152,4.44574193,0.59168369,4.34640732,4.44574193,4.37312958
46.585714,4.79583152,4.4404963,0.596100011,4.34568701,4.4404963,4.37245717
46.596206,4.24264069,4.43571846,-0.439406164,4.34496659,4.43571846,4.37178454
46.606698,4,4.43134774,-0.656770691,4.34424611,4.43134774,4.37111176
46.617189,4.89897949,4.42733294,0.686765275,4.34352565,4.42733294,4.37043889
46.627681,4,4.42362964,-0.650868376,4.34280507,4.42362964,4.3697658
46.638172,4.24264069,4.42020138,-0.421379511,4.34208451,4.42020138,4.36909262
46.648664,4.79583152,4.41701569,0.615480163,4.34136383,4.41701569,4.36841923
46.659156,4.58257569,4.41404558,0.410524196,4.3406431,4.41404558,4.36774568
46.669647,5.19615242,4.41126769,0.885937206,4.33992238,4.41126769,4.36707203
46.680139,4.47213595,4.40866103,0.251942306,4.33920155,4.40866103,4.36639817
46.69063,4.69041576,4.40620829,0.533111126,4.33848073,4.40620829,4.3657242
46.701122,4.58257569,4.40389343,0.422708245,4.33775979,4.40389343,4.36505002
46.711614,4.79583152,4.40170307,0.627796505,4.3370388,4.40170307,4.36437567
46.722105,4.12310563,4.39962539,-0.52585147,4.33631782,4.39962539,4.36370122
46.732597,4.47213595,4.39764942,0.27292222,4.33559673,4.39764942,4.36302655
46.743088,5,4.39576615,0.777324803,4.33487565,4.39576615,4.36235177
46.75358,4.89897949,4.39396692,0.710642363,4.33415445,4.39396692,4.36167677
46.764072,3.74165739,4.3922445,-0.806589805,4.3334332,4.3922445,4.3610016
46.774563,4.69041576,4.39059245,0.547561241,4.33271197,4.39059245,4.36032632
46.785055,4.12310563,4.38900453,-0.515653864,4.33199061,4.38900453,4.35965082
46.795546,4.47213595,4.38747576,0.290964246,4.33126927,4.38747576,4.35897521
46.806038,5.56776436,4.38600108,1.08708936,4.33054782,4.38600108,4.35829936
46.81653,5,4.38457635,0.784489423,4.32982631,4.38457635,4.35762334
46.827021,5.38516481,4.38319781,1.00098301,4.32910481,4.38319781,4.35694722
46.837513,3.74165739,4.38186171,-0.800127694,4.3283832,4.38186171,4.35627085
46.848004,5,4.38056513,0.787041847,4.3276616,4.38056513,4.35559438
46.858496,4.35889894,4.37930493,-0.142849539,4.32693989,4.37930493,4.35491766
46.868988,4.58257569,4.37807862,0.452213523,4.32621812,4.37807862,4.35424077
46.879479,4.47213595,4.37688393,0.308629275,4.32549637,4.37688393,4.35356377
46.889971,4,4.37571843,-0.612958749,4.32477451,4.37571843,4.35288652
46.900462,4.69041576,4.37458036,0.561992349,4.32405266,4.37458036,4.35220916
46.910954,4.58257569,4.37346768,0.4572833,4.32333069,4.37346768,4.35153156
46.921446,4.58257569,4.37237882,0.458472328,4.32260867,4.37237882,4.35085377
46.931937,4.47213595,4.37131235,0.317527334,4.32188667,4.37131235,4.35017587
46.942429,4.47213595,4.37026664,0.319169722,4.32116456,4.37026664,4.34949771
46.95292,5.38516481,4.36924061,1.00793065,4.32044246,4.36924061,4.34881944
46.963412,4.35889894,4.36823284,-0.0966120942,4.31972025,4.36823284,4.34814092
46.973904,5,4.36724234,0.795460661,4.31899799,4.36724234,4.34746221
46.984395,4.69041576,4.36626816,0.569339616,4.31827575,4.36626816,4.34678338
46.994887,4,4.36530918,-0.604408127,4.31755339,4.36530918,4.3461043
47.005378,4.47213595,4.36436471,0.328285312,4.31683106,4.36436471,4.3454251
47.01587,4.47213595,4.36343374,0.329700187,4.31610861,4.36343374,4.34474564
47.026362,5.56776436,4.36251562,1.09783821,4.31538611,4.36251562,4.34406599
47.036853,5.09901951,4.36160972,0.858725679,4.31466364,4.36160972,4.34338621
47.047345,5.47722558,4.36071523,1.05665053,4.31394105,4.36071523,4.34270618
47.057836,4,4.35983169,-0.599859728,4.31321849,4.35983169,4.34202601
47.068328,4,4.35895839,-0.599131364,4.31249582,4.35895839,4.34134559
47.07882,3.87298335,4.35809487,-0.696499481,4.3117731,4.35809487,4.34066498
47.089311,4.79583152,4.35724073,0.662261877,4.31105041,4.35724073,4.33998423
47.099803,4.47213595,4.35639533,0.340206733,4.31032761,4.35639533,4.33930322
47.110294,4.12310563,4.35555842,-0.482133584,4.30960484,4.35555842,4.33862208
47.120786,4.89897949,4.35472942,0.737733059,4.30888196,4.35472942,4.33794067
47.131278,3.74165739,4.35390804,-0.782464475,4.30815904,4.35390804,4.33725907
47.141769,4.47213595,4.35309401,0.345024562,4.30743615,4.35309401,4.33657733
47.152261,4,4.35228683,-0.593537555,4.30671315,4.35228683,4.33589532
47.162752,4,4.35148635,-0.592862844,4.30599018,4.35148635,4.33521318
47.173244,4.24264069,4.35069213,-0.328711792,4.30526711,4.35069213,4.33453076
47.183736,4.47213595,4.34990397,0.349616919,4.304544,4.34990397,4.33384815
47.194227,4,4.34912168,-0.590865192,4.30382093,4.34912168,4.33316539
47.204719,4.58257569,4.34834487,0.483973992,4.30309775,4.34834487,4.33248237
47.21521,5.91607978,4.34757347,1.25240022,4.30237461,4.34757347,4.3317992
47.225702,4.79583152,4.34680711,0.670092841,4.30165137,4.34680711,4.33111576
47.236194,5.29150262,4.34604566,0.972346111,4.3009281,4.34604566,4.33043212
47.246685,3.46410162,4.34528901,-0.938715825,4.30020487,4.34528901,4.32974833
47.257177,4.89897949,4.34453684,0.744609055,4.29948154,4.34453684,4.32906426
47.267668,4.35889894,4.34378911,0.122922046,4.29875825,4.34378911,4.32838005
47.27816,4.12310563,4.34304554,-0.468977515,4.29803487,4.34304554,4.32769557
47.288652,4.69041576,4.34230603,0.59000825,4.29731147,4.34230603,4.32701087
47.299143,4.35889894,4.34157051,0.131637496,4.2965881,4.34157051,4.32632602
47.309635,4.79583152,4.34083873,0.674531539,4.29586465,4.34083873,4.3256409
47.320126,5,4.34011068,0.81233572,4.29514124,4.34011068,4.32495562
47.330618,4.24264069,4.33938611,-0.311039264,4.29441775,4.33938611,4.32427006
47.34111,4.35889894,4.33866498,0.142246121,4.29369424,4.33866498,4.32358429
47.351601,4.89897949,4.33794726,0.749020843,4.29297078,4.33794726,4.32289837
47.362093,4.12310563,4.33723271,-0.462738675,4.29224723,4.33723271,4.32221216
47.372584,4.47213595,4.33652136,0.368258866,4.29152374,4.33652136,4.3215258
47.383076,3.74165739,4.33581301,-0.770814906,4.29080017,4.33581301,4.32083916
47.393568,3.87298335,4.33510762,-0.679797232,4.29007659,4.33510762,4.3201523
47.404059,5,4.3344052,0.815839934,4.28935307,4.3344052,4.31946528
47.414551,4.47213595,4.33370554,0.372062386,4.28862947,4.33370554,4.31877797
47.425042,4.58257569,4.33300869,0.499566816,4.28790593,4.33300869,4.31809051
47.435534,3.74165739,4.33231447,-0.76854218,4.28718232,4.33231447,4.31740276
47.446026,3.87298335,4.33162288,-0.677229305,4.28645871,4.33162288,4.31671478
47.456517,4.79583152,4.33093393,0.681833996,4.28573517,4.33093393,4.31602664
47.467009,5.19615242,4.33024743,0.930540162,4.28501156,4.33024743,4.31533822
47.4775,4.79583152,4.32956347,0.682838234,4.28428802,4.32956347,4.31464963
47.487992,4.12310563,4.32888187,-0.453625666,4.28356442,4.32888187,4.31396075
47.498484,4.12310563,4.32820266,-0.452876397,4.28284083,4.32820266,4.31327164
47.508975,3.74165739,4.32752585,-0.76542045,4.28211732,4.32752585,4.31258237
47.519467,4,4.32685129,-0.571709097,4.28139375,4.32685129,4.31189281
47.529958,4.69041576,4.32617907,0.603520247,4.28067026,4.32617907,4.31120308
47.54045,4.79583152,4.32550903,0.68580062,4.27994672,4.32550903,4.31051306
47.550942,4.89897949,4.32484121,0.757719125,4.2792232,4.32484121,4.3098228
47.561433,4.35889894,4.32417565,0.186341875,4.27849977,4.32417565,4.30913238
47.571925,5.29150262,4.32351219,0.983865046,4.2777763,4.32351219,4.30844166
47.582416,4.24264069,4.32285095,-0.283214167,4.27705292,4.32285095,4.30775077
47.592908,4.89897949,4.32219178,0.759465407,4.2763295,4.32219178,4.30705958
47.6034,4.35889894,4.32153473,0.193298248,4.27560611,4.32153473,4.30636815
47.613891,3.46410162,4.32087985,-0.92562316,4.27488283,4.32087985,4.30567656
47.624383,4,4.320227,-0.565886033,4.27415951,4.320227,4.30498466
47.634874,3.74165739,4.31957631,-0.760209787,4.27343631,4.31957631,4.3042926
47.645366,4.89897949,4.31892845,0.761610813,4.27271308,4.31892845,4.30360022
47.655858,4.24264069,4.31828186,-0.27502941,4.27198989,4.31828186,4.30290762
47.666349,4.47213595,4.31763741,0.393063026,4.27126682,4.31763741,4.30221483
47.676841,4.79583152,4.31699498,0.69198016,4.27054374,4.31699498,4.30152174
47.687332,5.29150262,4.31635469,0.987495786,4.26982078,4.31635469,4.30082848
47.697824,4.79583152,4.31571644,0.692903375,4.26909781,4.31571644,4.30013491
47.708316,5,4.31508028,0.82759877,4.2683749,4.31508028,4.2994411
47.718807,5.65685425,4.31444628,1.15862331,4.26765213,4.31444628,4.29874711
47.729299,4.58257569,4.31381435,0.518421978,4.26692936,4.31381435,4.29805281
47.73979,5.38516481,4.31318461,1.03536477,4.26620673,4.31318461,4.29735834
47.750282,4.69041576,4.31255695,0.614702209,4.26548411,4.31255695,4.29666355
47.760774,3.31662479,4.31193147,-0.99765058,4.26476157,4.31193147,4.29596852
47.771265,5.19615242,4.31130824,0.940661569,4.26403919,4.31130824,4.29527331
47.781757,5,4.31068715,0.830248665,4.26331682,4.31068715,4.29457779
47.792248,5.29150262,4.31006837,0.990673635,4.26259462,4.31006837,4.29388209
47.80274,4,4.30945179,-0.556283916,4.26187244,4.30945179,4.29318607
47.813232,3.31662479,4.30883752,-0.996098752,4.26115037,4.30883752,4.2924898
47.823723,3.74165739,4.30822562,-0.752707271,4.26042847,4.30822562,4.29179335
47.834215,4.35889894,4.30761604,0.226457293,4.25970662,4.30761604,4.29109659
47.844706,5.83095189,4.30700891,1.23448085,4.25898495,4.30700891,4.29039964
47.855198,3.60555128,4.30640417,-0.837169576,4.25826333,4.30640417,4.28970237
47.86569,5.29150262,4.30580192,0.992824607,4.25754183,4.30580192,4.28900485
47.876181,5.09901951,4.30520226,0.890964226,4.25682054,4.30520226,4.28830715
47.886673,4.89897949,4.30460512,0.770956783,4.25609931,4.30460512,4.28760913
47.897164,4.35889894,4.30401068,0.234282449,4.25537829,4.30401068,4.28691092
47.907656,5.29150262,4.30341886,0.994024023,4.25465735,4.30341886,4.28621239
47.918148,4.12310563,4.3028298,-0.423938877,4.25393656,4.3028298,4.2855136
47.928639,3.74165739,4.3022436,-0.748723052,4.253216,4.3022436,4.28481463
47.939131,4.69041576,4.30166021,0.623502644,4.25249553,4.30166021,4.28411534
47.949622,4.12310563,4.30107983,-0.421869887,4.2517753,4.30107983,4.28341585
47.960114,4.35889894,4.3005024,0.241653765,4.25105518,4.3005024,4.28271604
47.970606,5.09901951,4.29992807,0.89391915,4.25033524,4.29992807,4.28201597
47.981097,4,4.29935696,-0.54713523,4.24961556,4.29935696,4.28131572
47.991589,3.87298335,4.29878905,-0.652537897,4.248896,4.29878905,4.28061513
48.00208,5.09901951,4.29822455,0.894871482,4.24817671,4.29822455,4.27991436
48.012572,4.24264069,4.29766342,-0.234569253,4.24745757,4.29766342,4.27921325
48.023064,5.19615242,4.29710584,0.948180672,4.24673864,4.29710584,4.27851189
48.033555,4.35889894,4.29655194,0.249693817,4.24602,4.29655194,4.27781033
48.044047,4.58257569,4.29600174,0.535326024,4.24530153,4.29600174,4.27710845
48.054538,4.24264069,4.29545546,-0.229814649,4.24458336,4.29545546,4.27640637
48.06503,5.29150262,4.29491311,0.998293301,4.24386537,4.29491311,4.27570396
48.075522,4.24264069,4.29437486,-0.227451481,4.24314763,4.29437486,4.27500128
48.086013,5.56776436,4.29384091,1.12868217,4.24243023,4.29384091,4.27429841
48.096505,3.46410162,4.29331129,-0.910609507,4.24171303,4.29331129,4.27359521
48.106996,5.09901951,4.29278624,0.897904933,4.24099618,4.29278624,4.27289181
48.117488,4.24264069,4.29226583,-0.222767017,4.24027955,4.29226583,4.27218808
48.12798,4.47213595,4.29175026,0.424718371,4.23956322,4.29175026,4.27148408
48.138471,4.47213595,4.29123975,0.425318944,4.23884727,4.29123975,4.27077988
48.148963,3.87298335,4.29073439,-0.64633663,4.23813156,4.29073439,4.27007535
48.159454,4.58257569,4.29023445,0.540685904,4.23741625,4.29023445,4.26937062
48.169946,5.19615242,4.28974004,0.95205692,4.23670121,4.28974004,4.26866555
48.180438,4,4.28925143,-0.537820998,4.23598652,4.28925143,4.26796022
48.190929,4.35889894,4.28876886,0.264820846,4.23527226,4.28876886,4.26725468
48.201421,4.89897949,4.28829249,0.781464645,4.2345583,4.28829249,4.2665488
48.211912,3.87298335,4.28782265,-0.644080203,4.23384479,4.28782265,4.26584273
48.222404,4.35889894,4.28735951,0.267468561,4.23313161,4.28735951,4.26513631
48.232896,5,4.28690338,0.844450482,4.23241883,4.28690338,4.26442962
48.243387,5.09901951,4.2864546,0.901423826,4.23170654,4.2864546,4.26372273
48.253879,4.89897949,4.28601338,0.782921522,4.23099461,4.28601338,4.2630155
48.26437,4.24264069,4.28558012,-0.207218312,4.23028319,4.28558012,4.26230807
48.274862,4.24264069,4.28515508,-0.206190178,4.22957216,4.28515508,4.26160029
48.285354,4.79583152,4.28473866,0.714907593,4.2288616,4.28473866,4.26089224
48.295845,3.46410162,4.28433127,-0.905665312,4.2281516,4.28433127,4.26018398
48.306337,5,4.28393325,0.846207276,4.22744202,4.28393325,4.25947538
48.316828,4.24264069,4.28354508,-0.202248338,4.22673303,4.28354508,4.25876658
48.32732,4,4.28316714,-0.532134515,4.2260245,4.28316714,4.25805743
48.337812,4.12310563,4.28279995,-0.399617728,4.22531652,4.28279995,4.257348
48.348303,4.89897949,4.28244405,0.785197703,4.22460916,4.28244405,4.25663837
48.358795,3.31662479,4.28209991,-0.982585932,4.22390232,4.28209991,4.25592839
48.369286,4.69041576,4.28176815,0.639255514,4.22319614,4.28176815,4.2552182
48.379778,4.35889894,4.28144932,0.278297717,4.2224905,4.28144932,4.25450766
48.39027,3.60555128,4.28114411,-0.821944545,4.2217855,4.28114411,4.25379685
48.400761,4,4.28085322,-0.529955867,4.22108121,4.28085322,4.25308583
48.411253,4.69041576,4.28057733,0.640186245,4.22037753,4.28057733,4.25237446
48.421744,4,4.28031727,-0.529449974,4.2196746,4.28031727,4.25166287
48.432236,3.87298335,4.28007383,-0.638036432,4.21897231,4.28007383,4.25095094
48.442728,5,4.27984792,0.848617744,4.21827076,4.27984792,4.25023873
48.453219,4.58257569,4.27964052,0.550395475,4.21757002,4.27964052,4.2495263
48.463711,4.89897949,4.27945258,0.787100312,4.21686999,4.27945258,4.24881353
48.474202,3.74165739,4.27928526,-0.733231116,4.21617082,4.27928526,4.24810054
48.484694,4.35889894,4.27913967,0.282416848,4.21547241,4.27913967,4.2473872
48.495186,5,4.27901709,0.849107127,4.21477484,4.27901709,4.24667358
48.505677,5.09901951,4.27891887,0.905594084,4.21407821,4.27891887,4.24595974
48.516169,5,4.27884644,0.849207607,4.2133824,4.27884644,4.24524556
48.52666,4.58257569,4.27880137,0.551157258,4.21268759,4.27880137,4.24453115
48.537152,4.24264069,4.27878533,-0.190117454,4.21199366,4.27878533,4.24381639
48.547644,4.24264069,4.27880014,-0.190156385,4.2113007,4.27880014,4.24310135
48.558135,4.35889894,4.27884773,0.282933227,4.21060882,4.27884773,4.24238609
48.568627,4.12310563,4.27893024,-0.394746264,4.20991791,4.27893024,4.24167048
48.579118,3.60555128,4.27904993,-0.820669635,4.20922813,4.27904993,4.24095465
48.58961,4.12310563,4.27920929,-0.395099566,4.20853939,4.27920929,4.24023846
48.600102,4,4.27941102,-0.528593434,4.20785178,4.27941102,4.23952199
48.610593,4.89897949,4.279658,0.786969814,4.2071654,4.279658,4.2388053
48.621085,4.35889894,4.27995346,0.280972398,4.20648016,4.27995346,4.23808825
48.631576,5,4.2803008,0.848350872,4.20579622,4.2803008,4.23737098
48.642068,5.09901951,4.28070387,0.904608005,4.20511349,4.28070387,4.23665336
48.65256,4.69041576,4.28116678,0.639725709,4.20443208,4.28116678,4.23593545
48.663051,3.74165739,4.28169398,-0.734871821,4.20375208,4.28169398,4.23521731
48.673543,4.69041576,4.28229054,0.638846786,4.20307342,4.28229054,4.23449882
48.684034,4,4.2829618,-0.531941536,4.20239625,4.2829618,4.23378011
48.694526,5.09901951,4.28371387,0.902942771,4.20172051,4.28371387,4.23306104
48.705018,4.24264069,4.28455329,-0.204725684,4.20104629,4.28455329,4.23234167
48.715509,4.12310563,4.28548728,-0.402966075,4.20037371,4.28548728,4.23162209
48.726001,4.35889894,4.28652409,0.26902574,4.19970268,4.28652409,4.23090214
48.736492,4,4.28767248,-0.53635108,4.1990334,4.28767248,4.23018197
48.746984,4.58257569,4.28894262,0.541879206,4.19836578,4.28894262,4.22946144
48.757476,4.58257569,4.2903455,0.5405832,4.19769993,4.2903455,4.22874062
48.767967,5,4.29189334,0.841490737,4.19703599,4.29189334,4.22801958
48.778459,4.24264069,4.2936003,-0.225742361,4.19637387,4.2936003,4.22729817
48.78895,4.35889894,4.2954816,0.251828003,4.19571377,4.2954816,4.22657654
48.799442,5,4.2975551,0.83811986,4.19505563,4.2975551,4.22585454
48.809934,4.58257569,4.29984037,0.53172862,4.19439956,4.29984037,4.22513225
48.820425,4.69041576,4.30235949,0.622941624,4.19374569,4.30235949,4.22440974
48.830917,4.35889894,4.30513832,0.231863378,4.19309398,4.30513832,4.22368686
48.841408,4.35889894,4.30820517,0.225152767,4.19244462,4.30820517,4.22296375
48.8519,5.65685425,4.31159365,1.1598537,4.19179756,4.31159365,4.22224028
48.862392,5.09901951,4.31534131,0.885256009,4.19115293,4.31534131,4.22151652
48.872883,5.19615242,4.31949127,0.936301847,4.19051087,4.31949127,4.22079252
48.883375,5.83095189,4.32409467,1.22754113,4.18987136,4.32409467,4.22006816
48.893866,5.09901951,4.32920901,0.877388455,4.18923459,4.32920901,4.21934358
48.904358,5.29150262,4.33490335,0.978058929,4.18860053,4.33490335,4.21861863
48.91485,5.74456265,4.34125695,1.18461204,4.18796934,4.34125695,4.21789338
48.925341,4.89897949,4.34836292,0.742035421,4.18734117,4.34836292,4.2171679
48.935833,4.89897949,4.35633365,0.736644985,4.186716,4.35633365,4.21644205
48.946324,5,4.36529968,0.796680814,4.18609405,4.36529968,4.21571598
48.956816,5.29150262,4.37542089,0.957121588,4.18547532,4.37542089,4.21498953
48.967308,5.56776436,4.38688698,1.08668182,4.18485997,4.38688698,4.21426279
48.977799,6.8556546,4.39992774,1.56707589,4.18424819,4.39992774,4.21353582
48.988291,6.32455532,4.41482815,1.38192878,4.18363996,4.41482815,4.21280848
48.998782,5.19615242,4.43193318,0.874196343,4.18303555,4.43193318,4.21208091
49.009274,4.89897949,4.45167838,0.66880573,4.18243495,4.45167838,4.21135297
49.019766,6.32455532,4.4746042,1.36012908,4.18183838,4.4746042,4.21062473
49.030257,5.91607978,4.50139418,1.18940557,4.18124602,4.50139418,4.20989626
49.040749,5.91607978,4.53293217,1.17607296,4.18065791,4.53293217,4.20916741
49.05124,7.14142843,4.57034979,1.60345834,4.18007432,4.57034979,4.20843834
49.061732,6.4807407,4.61514728,1.36586728,4.17949529,4.61514728,4.2077089
49.072224,6.63324958,4.66930729,1.40140725,4.17892106,4.66930729,4.20697915
49.082715,6.40312424,4.73550504,1.29136331,4.17835186,4.73550504,4.20624917
49.093207,7,4.81744027,1.47734889,4.17778775,4.81744027,4.20551882
49.103698,6.70820393,4.92029487,1.33712717,4.17722904,4.92029487,4.20478824
49.11419,7.54983444,5.05190489,1.58048396,4.17667582,5.05190489,4.20405728
49.124682,7.61577311,5.22638,1.54576619,4.17612835,5.22638,4.20332602
49.135173,9.16515139,5.47831136,1.92011459,4.17558691,5.47831136,4.20259453
49.145665,8.42614977,5.90677424,1.58725408,4.17505163,5.90677424,4.20186266
49.156156,10,6.75250846,1.80207978,4.17452284,6.75250846,4.20113056
49.166648,11.7898261,8.39057737,1.84370517,4.1740007,8.39057737,4.20039809
49.17714,14.106736,11.0583144,1.74597295,4.17348553,11.0583144,4.19966531
49.187631,14.7986486,14.5372649,0.511257,4.17297765,14.5372649,4.1989323
49.198123,16.7332005,18.1149741,-1.17548865,4.17247727,18.1149741,4.19819891
49.208614,18.973666,20.7132579,-1.31893592,4.1719848,20.7132579,4.19746529
49.219106,19.9248588,21.2419816,-1.14765967,4.17150046,21.2419816,4.19673129
49.229598,19.3907194,19.3889996,0.0414713051,4.17102466,19.3889996,4.19599699
49.240089,16.881943,16.0335565,0.921078997,4.17055781,16.0335565,4.19526245
49.250581,12.489996,12.3718061,0.343787564,4.17010022,12.3718061,4.19452753
49.261072,10.6301458,9.29950661,1.15353336,4.16965241,9.29950661,4.19379238
49.271564,8.54400375,7.25462509,1.1355081,4.16921473,7.25462509,4.19305686
49.282056,6.08276253,6.14987815,-0.25906682,4.16878771,6.14987815,4.19232102
49.292547,6.164414,5.60362086,0.748861233,4.16837193,5.60362086,4.19158495
49.303039,5.65685425,5.30297296,0.594879222,4.16796787,5.30297296,4.19084851
49.31353,5.38516481,5.10422436,0.530038161,4.16757622,5.10422436,4.19011182
49.324022,5.47722558,4.95699979,0.721266794,4.16719757,4.95699979,4.18937476
49.334514,4.58257569,4.84268678,-0.510010863,4.16683271,4.84268678,4.18863739
49.345005,5.09901951,4.7519221,0.589149736,4.16648247,4.7519221,4.18789979
49.355497,3.60555128,4.67869608,-1.03592703,4.16614767,4.67869608,4.1871618
49.365988,5,4.61882802,0.61739127,4.16582937,4.61882802,4.18642358
49.37648,4,4.56927749,-0.754504795,4.16552858,4.56927749,4.18568498
49.386972,4.47213595,4.52782087,-0.235976511,4.16524657,4.52782087,4.18494607
49.397463,4.35889894,4.49279426,-0.365917085,4.16498471,4.49279426,4.18420692
49.407955,4.47213595,4.46292712,0.0959626517,4.16474449,4.46292712,4.1834674
49.418446,4.58257569,4.43725366,0.381211273,4.16452764,4.43725366,4.18272763
49.428938,4.69041576,4.41501355,0.524787774,4.16433605,4.41501355,4.18198749
49.43943,4,4.39561502,-0.628979347,4.16417192,4.39561502,4.18124703
49.449921,4.58257569,4.37858728,0.451650764,4.16403768,4.37858728,4.18050634
49.460413,3.87298335,4.36354837,-0.700403475,4.16393608,4.36354837,4.17976526
49.470904,4.24264069,4.35019456,-0.327954068,4.16387021,4.35019456,4.17902395
49.481396,3.87298335,4.33827324,-0.682121609,4.16384359,4.33827324,4.17828226
49.491888,3.60555128,4.32758009,-0.849722784,4.16386016,4.32758009,4.17754025
49.502379,3.87298335,4.31794571,-0.667054995,4.16392436,4.31794571,4.17679801
49.512871,4.89897949,4.30922646,0.767953793,4.1640412,4.30922646,4.17605539
49.523362,5.19615242,4.301305,0.945963755,4.16421628,4.301305,4.17531252
49.533854,4.35889894,4.29407953,0.254596576,4.16445593,4.29407953,4.17456928
49.544346,4.24264069,4.28746574,-0.211719272,4.16476718,4.28746574,4.17382572
49.554837,4.35889894,4.28139166,0.278401302,4.16515785,4.28139166,4.17308192
49.565329,4.24264069,4.27579406,-0.182080673,4.16563677,4.27579406,4.17233774
49.57582,4.12310563,4.27062057,-0.384076744,4.16621356,4.27062057,4.17159333
49.586312,5.29150262,4.26582407,1.01275789,4.16689908,4.26582407,4.17084852
49.596804,4.12310563,4.26136503,-0.371832497,4.16770513,4.26136503,4.17010341
49.607295,4.12310563,4.25720895,-0.366201214,4.16864464,4.25720895,4.16935806
49.617787,3.31662479,4.2533246,-0.967832529,4.16973205,4.2533246,4.16861232
49.628278,4.24264069,4.24968597,-0.0839361577,4.17098268,4.24968597,4.16786634
49.63877,5.56776436,4.24626887,1.14956317,4.17241365,4.24626887,4.16711998
49.649262,4,4.24305292,-0.493003974,4.17404309,4.24305292,4.16637331
49.659753,3.74165739,4.24002001,-0.705948031,4.17589043,4.24002001,4.16562639
49.670245,3.46410162,4.23715327,-0.879233561,4.17797703,4.23715327,4.16487909
49.680736,5.56776436,4.23443873,1.1546972,4.18032483,4.23443873,4.16413155
49.691228,5,4.23186292,0.876434298,4.18295798,4.23186292,4.16338363
49.70172,4.47213595,4.22941452,0.492667673,4.18590118,4.22941452,4.16263539
49.712211,3.74165739,4.22708335,-0.696725168,4.18918016,4.22708335,4.16188691
49.722703,5.19615242,4.22485962,0.98554188,4.19282266,4.22485962,4.16113805
49.733194,3.60555128,4.22273536,-0.785610645,4.19685589,4.22273536,4.16038895
49.743686,3.31662479,4.22070256,-0.950830045,4.20130922,4.22070256,4.15963946
49.754178,4.58257569,4.21875457,0.603175866,4.20621129,4.21875457,4.15888966
49.764669,4.58257569,4.21688533,0.604723378,4.2115907,4.21688533,4.15813961
49.775161,4.47213595,4.21508885,0.506998136,4.21747748,4.21508885,4.15738918
49.785652,4.89897949,4.21336032,0.828021236,4.22389895,4.21336032,4.15663851
49.796144,4.35889894,4.21169474,0.383671995,4.23088395,4.21169474,4.15588746
49.806636,4.24264069,4.21008802,0.180423571,4.23845817,4.21008802,4.15513608
49.817127,4.35889894,4.2085364,0.387766099,4.24664534,4.2085364,4.15438447
49.827619,4.12310563,4.207036,-0.289707401,4.25546944,4.207036,4.15363247
49.83811,4.47213595,4.20558386,0.516286836,4.26494846,4.20558386,4.15288023
49.848602,4.35889894,4.20417668,0.393347506,4.27510083,4.20417668,4.15212761
49.859094,4.12310563,4.20281186,-0.282322925,4.2859386,4.20281186,4.15137467
49.869585,4.58257569,4.20148697,0.617323839,4.29746946,4.20148697,4.15062148
49.880077,4.47213595,4.20019943,0.52147533,4.30969992,4.20019943,4.14986792
49.890568,4.35889894,4.19894733,0.399939509,4.32262682,4.19894733,4.1491141
49.90106,4.69041576,4.19772844,0.701916891,4.33624644,4.19772844,4.14835991
49.911552,3.87298335,4.19654103,-0.568821311,4.35054543,4.19654103,4.14760539
49.922043,4.79583152,4.19538352,0.774885803,4.36550396,4.19538352,4.14685064
49.932535,4.35889894,4.1942541,0.405764522,4.38109996,4.1942541,4.1460955
49.943026,5.38516481,4.19315152,1.09179361,4.39729859,4.19315152,4.14534012
49.953518,3.87298335,4.19207424,-0.564881305,4.41406395,4.19207424,4.14458434
49.96401,4.24264069,4.19102107,0.227199503,4.43134809,4.19102107,4.14382826
49.974501,4,4.18999096,-0.435879529,4.44909519,4.18999096,4.14307193
49.984993,3.87298335,4.18898262,-0.562138129,4.46724675,4.18898262,4.14231522
49.995484,4.47213595,4.18799523,0.533048525,4.48572931,4.18799523,4.14155826
50.005976,4.58257569,4.18702764,0.628926111,4.50446826,4.18702764,4.14080091
50.016468,4.69041576,4.18607909,0.710166653,4.52337524,4.18607909,4.14004325
50.026959,5.19615242,4.18514882,1.00548675,4.54235332,4.18514882,4.13928535
50.037451,5.83095189,4.18423591,1.28324432,4.56130233,4.18423591,4.13852706
50.047942,4.35889894,4.1833398,0.418997781,4.58010618,4.1833398,4.13776853
50.058434,4.79583152,4.18245967,0.783180603,4.59864722,4.18245967,4.13700961
50.068926,5.74456265,4.18159496,1.25018706,4.61679396,4.18159496,4.13625037
50.079417,6.244998,4.18074518,1.43675078,4.63440703,4.18074518,4.1354909
50.089909,4.69041576,4.17990963,0.714497119,4.65134467,4.17990963,4.13473103
50.1004,5.74456265,4.17908794,1.25118932,4.66745248,4.17908794,4.13397092
50.110892,5.09901951,4.17827948,0.959551996,4.68257771,4.17827948,4.13321043
50.121384,5.09901951,4.17748389,0.95996647,4.69656079,4.17748389,4.13244962
50.131875,5.83095189,4.17670082,1.28617692,4.70924317,4.17670082,4.13168856
50.142367,5.19615242,4.17592973,1.01006073,4.72047376,4.17592973,4.13092712
50.152858,5.65685425,4.17517041,1.21724436,4.73010518,4.17517041,4.13016544
50.16335,5.38516481,4.17442236,1.10033742,4.73800626,4.17442236,4.12940337
50.173842,5.09901951,4.17368534,0.961942918,4.74406007,4.17368534,4.12864098
50.184333,5.65685425,4.17295911,1.21815235,4.74817169,4.17295911,4.12787835
50.194825,4.24264069,4.17224326,0.265325136,4.75027217,4.17224326,4.12711534
50.205316,5.47722558,4.17153766,1.14266702,4.75031971,4.17153766,4.12635208
50.215808,5.56776436,4.17084194,1.18191473,4.74830256,4.17084194,4.12558843
50.2263,5.19615242,4.17015593,1.01291485,4.74423939,4.17015593,4.12482447
50.236791,6.08276253,4.16947949,1.38321475,4.73817921,4.16947949,4.12406026
50.247283,4.35889894,4.16881228,0.43598929,4.7301964,4.16881228,4.12329567
50.257774,5.74456265,4.16815426,1.25555103,4.72039238,4.16815426,4.12253083
50.268266,5.47722558,4.16750512,1.14443019,4.70888517,4.16750512,4.12176561
50.278758,4.79583152,4.16686477,0.793074239,4.69581146,4.16686477,4.12100007
50.289249,4.89897949,4.16623313,0.856006048,4.68131982,4.16623313,4.12023429
50.299741,4,4.16560994,-0.406952007,4.66556148,4.16560994,4.11946812
50.310232,6,4.16499518,1.3546235,4.64869669,4.16499518,4.11870171
50.320724,4.89897949,4.16438864,0.857082753,4.63087919,4.16438864,4.11793491
50.331216,5.19615242,4.16379026,1.01605224,4.61226481,4.16379026,4.1171678
50.341707,4.47213595,4.16320001,0.555820065,4.59300472,4.16320001,4.11640044
50.352199,4.58257569,4.16261768,0.648041673,4.57323809,4.16261768,4.1156327
50.36269,4,4.16204332,-0.402546046,4.55310412,4.16204332,4.11486471
50.373182,4.89897949,4.16147674,0.858779803,4.53272631,4.16147674,4.11409634
50.383674,4.24264069,4.16091792,0.285871933,4.51222548,4.16091792,4.11332765
50.394165,3.87298335,4.16036689,-0.536081655,4.49171386,4.16036689,4.11255872
50.404657,4.35889894,4.15982347,0.446178747,4.47128921,4.15982347,4.11178941
50.415148,4.35889894,4.15928774,0.446778701,4.45104856,4.15928774,4.11101985
50.42564,4.24264069,4.15875955,0.289622402,4.43107276,4.15875955,4.1102499
50.436132,3.46410162,4.15823894,-0.833149042,4.4114402,4.15823894,4.10947964
50.446623,4.58257569,4.15772593,0.651805003,4.39222099,4.15772593,4.10870914
50.457115,4.69041576,4.15722042,0.730202261,4.37347193,4.15722042,4.10793825
50.467606,4,4.15672248,-0.395881903,4.3552492,4.15672248,4.10716712
50.478098,3.87298335,4.15623203,-0.532211126,4.33759446,4.15623203,4.1063956
50.48859,5.09901951,4.15574911,0.971221088,4.32054725,4.15574911,4.10562377
50.499081,4.12310563,4.15527378,-0.179354838,4.30413976,4.15527378,4.10485169
50.509573,3.16227766,4.15480597,-0.996257151,4.28839279,4.15480597,4.10407923
50.520064,4.69041576,4.15434578,0.732167999,4.27332668,4.15434578,4.10330653
50.530556,5.56776436,4.15389315,1.18906316,4.25894979,4.15389315,4.10253344
50.541048,4.24264069,4.15344816,0.298651171,4.24526899,4.15344816,4.10176004
50.551539,4.12310563,4.15301089,-0.172931388,4.23228549,4.15301089,4.1009864
50.562031,4.24264069,4.15258129,0.300098979,4.21999192,4.15258129,4.10021237
50.572522,4,4.15215949,-0.390076262,4.20838117,4.15215949,4.0994381
50.583014,5.19615242,4.15174546,1.02196231,4.19743761,4.15174546,4.09866344
50.593506,5.09901951,4.15133931,0.973488679,4.18714534,4.15133931,4.09788847
50.603997,4.12310563,4.15094112,-0.166839713,4.17748518,4.15094112,4.09711326
50.614489,4.89897949,4.15055088,0.865117681,4.16843266,4.15055088,4.09633766
50.62498,4.12310563,4.15016876,-0.164508755,4.15996472,4.15016876,4.09556183
50.635472,4.24264069,4.14979473,0.304706338,4.15205336,4.14979473,4.0947856
50.645964,4.35889894,4.14942894,0.457678933,4.14467173,4.14942894,4.09400907
50.656455,4.69041576,4.14907148,0.735761018,4.13779194,4.14907148,4.09323229
50.666947,4.12310563,4.1487224,-0.1600524,4.13138379,4.1487224,4.09245513
50.677438,4.35889894,4.14838184,0.458821433,4.12541939,4.14838184,4.09167773
50.68793,3.87298335,4.14804984,-0.524467819,4.11986877,4.14804984,4.09089994
50.698422,4.12310563,4.14772654,-0.156910541,4.11470405,4.14772654,4.09012184
50.708913,4.12310563,4.14741209,-0.155905301,4.10989793,4.14741209,4.0893435
50.719405,4.47213595,4.14710653,0.570113519,4.10542264,4.14710653,4.08856478
50.729896,4.58257569,4.14681005,0.660125479,4.10125316,4.14681005,4.08778581
50.740388,4.35889894,4.14652271,0.460842962,4.09736406,4.14652271,4.08700646
50.75088,4.58257569,4.14624467,0.660553573,4.0937323,4.14624467,4.0862268
50.761371,4.58257569,4.1459761,0.660756833,4.09033608,4.1459761,4.08544691
50.771863,4.24264069,4.14571709,0.311325553,4.08715404,4.14571709,4.08466662
50.782354,4.69041576,4.14546782,0.73820589,4.08416741,4.14546782,4.0838861
50.792846,4.12310563,4.14522842,-0.148737322,4.08135764,4.14522842,4.08310519
50.803338,4.35889894,4.14499905,0.462493129,4.07870839,4.14499905,4.08232397
50.813829,4,4.1447799,-0.380499545,4.07620459,4.1447799,4.08154252
50.824321,4.35889894,4.14457111,0.462955541,4.07383173,4.14457111,4.08076068
50.834812,3.87298335,4.14437288,-0.52095061,4.07157746,4.14437288,4.0799786
50.845304,3.87298335,4.14418537,-0.520770605,4.0694297,4.14418537,4.07919614
50.855796,4.35889894,4.14400877,0.463562477,4.06737812,4.14400877,4.07841337
50.866287,4.35889894,4.14384331,0.463740917,4.06541335,4.14384331,4.07763036
50.876779,4.89897949,4.14368914,0.869074421,4.06352644,4.14368914,4.07684696
50.88727,4.47213595,4.1435465,0.573227227,4.06171003,4.1435465,4.07606333
50.897762,3.87298335,4.14341559,-0.520031002,4.05995688,4.14341559,4.07527932
50.908254,3.74165739,4.14329664,-0.633750148,4.05826098,4.14329664,4.07449499
50.918745,4,4.14318988,-0.378404387,4.05661698,4.14318988,4.07371044
50.929237,3.87298335,4.14309554,-0.519723187,4.05501969,4.14309554,4.07292549
50.939728,3.60555128,4.14301387,-0.733118404,4.05346504,4.14301387,4.07214031
50.95022,4.69041576,4.14294511,0.739912594,4.05194889,4.14294511,4.07135475
50.960712,4.58257569,4.14288954,0.663088348,4.05046795,4.14288954,4.07056888
50.971203,3.87298335,4.14284741,-0.519484422,4.04901932,4.14284741,4.06978278
50.981695,4.58257569,4.14281901,0.66314153,4.04760003,4.14281901,4.06899629
50.992186,4.89897949,4.14280461,0.869583162,4.04620797,4.14280461,4.06820956
51.002678,3.74165739,4.14280452,-0.633361769,4.04484076,4.14280452,4.06742246
51.01317,4.89897949,4.14281903,0.869574869,4.04349665,4.14281903,4.06663504
51.023661,3.87298335,4.14284846,-0.519485437,4.04217408,4.14284846,4.0658474
51.034153,3.46410162,4.14289314,-0.823888056,4.04087132,4.14289314,4.06505936
51.044644,4.12310563,4.14295339,-0.140882111,4.03958729,4.14295339,4.0642711
51.055136,4.24264069,4.14302957,0.315612285,4.03832054,4.14302957,4.06348245
51.065628,4.35889894,4.14312203,0.464517939,4.03707013,4.14312203,4.0626935
51.076119,4,4.14323111,-0.378458866,4.0358352,4.14323111,4.06190432
51.086611,4.12310563,4.14335723,-0.142308129,4.03461466,4.14335723,4.06111475
51.097102,4.58257569,4.14350074,0.662627312,4.03340794,4.14350074,4.06032495
51.107594,4.58257569,4.14366208,0.662505561,4.03221408,4.14366208,4.05953477
51.118086,5.83095189,4.14384164,1.29888808,4.03103255,4.14384164,4.05874428
51.128577,3.87298335,4.14403984,-0.52063086,4.02986284,4.14403984,4.05795356
51.139069,3.87298335,4.14425716,-0.52083953,4.02870418,4.14425716,4.05716246
51.14956,3.87298335,4.14449402,-0.521066862,4.02755627,4.14449402,4.05637113
51.160052,4.58257569,4.14475093,0.661683285,4.0264184,4.14475093,4.05557941
51.170544,4.69041576,4.14502834,0.7385035,4.02529025,4.14502834,4.0547874
51.181035,4.12310563,4.14532674,-0.149067476,4.0241715,4.14532674,4.05399515
51.191527,3.16227766,4.14564669,-0.991649652,4.02306155,4.14564669,4.05320252
51.202018,4.79583152,4.14598868,0.806128304,4.02196024,4.14598868,4.05240966
51.21251,4,4.14635332,-0.38256152,4.02086701,4.14635332,4.05161642
51.223002,4.35889894,4.14674114,0.460605908,4.01978164,4.14674114,4.05082288
51.233493,5,4.14715271,0.923497317,4.01870393,4.14715271,4.05002911
51.243985,3.87298335,4.1475887,-0.524028005,4.01763337,4.1475887,4.04923495
51.254476,4.35889894,4.14804966,0.459183279,4.01656989,4.14804966,4.04844057
51.264968,4.24264069,4.14853634,0.306764327,4.01551303,4.14853634,4.04764582
51.27546,4.12310563,4.14904935,-0.161070565,4.01446264,4.14904935,4.04685075
51.285951,3.60555128,4.14958936,-0.737589372,4.01341856,4.14958936,4.04605546
51.296443,3.60555128,4.15015717,-0.737974182,4.01238038,4.15015717,4.04525979
51.306934,3.46410162,4.15075343,-0.828644562,4.01134808,4.15075343,4.0444639
51.317426,4.89897949,4.15137901,0.864638928,4.01032125,4.15137901,4.04366762
51.327918,4.79583152,4.15203466,0.802369528,4.00929979,4.15203466,4.04287104
51.338409,4.69041576,4.15272115,0.733276627,4.0082836,4.15272115,4.04207424
51.348901,5.09901951,4.15343944,0.972409416,4.00727231,4.15343944,4.04127706
51.359392,4.47213595,4.1541903,0.563866703,4.00626594,4.1541903,4.04047965
51.369884,4.89897949,4.15497477,0.862557081,4.00526412,4.15497477,4.03968187
51.380376,4.35889894,4.15579373,0.450671954,4.0042668,4.15579373,4.03888378
51.390867,4.58257569,4.1566481,0.652631288,4.00327391,4.1566481,4.03808547
51.401359,4.69041576,4.15753903,0.729984059,4.00228512,4.15753903,4.03728678
51.41185,3.16227766,4.15846743,-0.998093068,4.00130046,4.15846743,4.03648787
51.422342,3.87298335,4.15943456,-0.535211373,4.00031963,4.15943456,4.03568858
51.432834,3.46410162,4.16044147,-0.834469802,3.99934258,4.16044147,4.03488899
51.443325,4.58257569,4.16148923,0.648911757,3.99836928,4.16148923,4.03408918
51.453817,4.69041576,4.16257926,0.726523574,3.99739942,4.16257926,4.03328899
51.464308,5.19615242,4.16371262,1.01609045,3.99643307,4.16371262,4.03248858
51.4748,4.79583152,4.16489084,0.794317746,3.99546994,4.16489084,4.03168779
51.485292,3.60555128,4.16611518,-0.748708159,3.99451,4.16611518,4.0308867
51.495783,3.87298335,4.16738694,-0.542589709,3.99355326,4.16738694,4.03008539
51.506275,4.12310563,4.16870782,-0.213546698,3.99259942,4.16870782,4.02928371
51.516766,3.74165739,4.1700791,-0.654539316,3.99164857,4.1700791,4.02848181
51.527258,4,4.17150264,-0.414128774,3.99070044,4.17150264,4.02767953
51.53775,4.58257569,4.17297996,0.63999667,3.98975504,4.17297996,4.02687695
51.548241,3.87298335,4.17451262,-0.549116815,3.98881235,4.17451262,4.02607415
51.558733,4.12310563,4.17610271,-0.230210962,3.98787213,4.17610271,4.02527098
51.569224,3.60555128,4.17775179,-0.756439365,3.98693447,4.17775179,4.02446759
51.579716,5.19615242,4.17946209,1.00831063,3.98599912,4.17946209,4.02366383
51.590208,4.58257569,4.18123549,0.63351417,3.9850661,4.18123549,4.02285977
51.600699,4.89897949,4.18307391,0.846112037,3.98413541,4.18307391,4.02205549
51.611191,4.24264069,4.18497987,0.240126676,3.98320681,4.18497987,4.02125083
51.621682,3.87298335,4.18695529,-0.560331998,3.98228042,4.18695529,4.02044596
51.632174,3.87298335,4.18900293,-0.562156195,3.981356,4.18900293,4.01964072
51.642666,3.31662479,4.19112508,-0.935147201,3.98043356,4.19112508,4.01883518
51.653157,4.47213595,4.1933241,0.528026374,3.97951314,4.1933241,4.01802943
51.663649,4.79583152,4.19560311,0.774744092,3.97859451,4.19560311,4.0172233
51.67414,3,4.1979645,-1.09451565,3.97767778,4.1979645,4.01641695
51.684632,3.74165739,4.20041163,-0.677313994,3.97676273,4.20041163,4.01561024
51.695124,3.74165739,4.20294737,-0.679183323,3.97584938,4.20294737,4.01480323
51.705615,4.12310563,4.20557467,-0.287174245,3.97493779,4.20557467,4.01399601
51.716107,3.74165739,4.20829738,-0.683110525,3.97402772,4.20829738,4.01318841
51.726598,4,4.21111848,-0.459476307,3.9731193,4.21111848,4.0123806
51.73709,3.31662479,4.21404217,-0.94732116,3.97221232,4.21404217,4.01157242
51.747582,3.74165739,4.21707204,-0.68950319,3.97130681,4.21707204,4.01076395
51.758073,3.87298335,4.22021179,-0.589260931,3.97040282,4.22021179,4.00995526
51.768565,3.87298335,4.22346623,-0.592015951,3.96950013,4.22346623,4.00914621
51.779056,4.12310563,4.22683916,-0.322076903,3.96859889,4.22683916,4.00833694
51.789548,4.58257569,4.23033582,0.593498,3.96769887,4.23033582,4.0075273
51.80004,4.58257569,4.23396076,0.590436228,3.96680012,4.23396076,4.00671738
51.810531,5.47722558,4.23771869,1.11333143,3.9659027,4.23771869,4.00590723
51.821023,3.87298335,4.24161567,-0.607150991,3.9650064,4.24161567,4.00509673
51.831514,4.58257569,4.24565657,0.580447352,3.96411135,4.24565657,4.00428601
51.842006,4.35889894,4.24984802,0.330228592,3.96321736,4.24984802,4.00347492
51.852498,4,4.25419585,-0.504178392,3.96232447,4.25419585,4.00266354
51.862989,5.19615242,4.25870614,0.968218099,3.96143273,4.25870614,4.00185196
51.873481,4.58257569,4.26338656,0.564968257,3.96054196,4.26338656,4.00104
51.883972,4.35889894,4.26824346,0.301090483,3.95965229,4.26824346,4.00022784
51.894464,4.24264069,4.27328534,-0.175056131,3.95876352,4.27328534,3.99941531
51.904956,3.74165739,4.27851973,-0.732708906,3.95787571,4.27851973,3.99860249
51.915447,3.46410162,4.28395455,-0.905457306,3.95698891,4.28395455,3.99778947
51.925939,4,4.28959971,-0.538144691,3.95610294,4.28959971,3.99697608
51.93643,4.12310563,4.29546353,-0.415160095,3.95521793,4.29546353,3.99616248
51.946922,4.24264069,4.30155702,-0.242726867,3.95433369,4.30155702,3.99534852
51.957414,4.12310563,4.3078901,-0.429865651,3.95345029,4.3078901,3.99453427
51.967905,4.47213595,4.31447322,0.397067669,3.95256779,4.31447322,3.99371981
51.978397,4.89897949,4.32131931,0.76003959,3.95168598,4.32131931,3.99290499
51.988888,4.24264069,4.32843947,-0.292914286,3.95080503,4.32843947,3.99208996
51.99938,3.74165739,4.33584815,-0.770837701,3.94992474,4.33584815,3.99127457
52.009872,4.24264069,4.3435586,-0.317675805,3.94904517,4.3435586,3.9904589
52.020363,3.31662479,4.35158481,-1.01732985,3.9481664,4.35158481,3.98964302
52.030855,3.74165739,4.3599439,-0.786311972,3.94728822,4.3599439,3.98882678
52.041346,3.87298335,4.36865094,-0.704036639,3.9464108,4.36865094,3.98801033
52.051838,4.79583152,4.37772518,0.646611434,3.94553394,4.37772518,3.98719353
52.06233,4.24264069,4.38718459,-0.380189305,3.94465771,4.38718459,3.98637644
52.072821,4.58257569,4.39704821,0.430729011,3.94378218,4.39704821,3.98555914
52.083313,5,4.40733914,0.7698447,3.94290717,4.40733914,3.98474149
52.093804,4.58257569,4.4180781,0.405583037,3.94203282,4.4180781,3.98392363
52.104296,4.35889894,4.42929125,-0.265315489,3.94115895,4.42929125,3.98310542
52.114788,4.58257569,4.44100341,0.376260923,3.94028563,4.44100341,3.98228692
52.125279,4.58257569,4.45324095,0.359631396,3.93941292,4.45324095,3.98146822
52.135771,4.24264069,4.46603561,-0.472646718,3.93854066,4.46603561,3.98064916
52.146262,3.60555128,4.47941648,-0.934807577,3.93766898,4.47941648,3.9798299
52.156754,4.24264069,4.49341981,-0.50077852,3.93679771,4.49341981,3.97901029
52.167246,5.19615242,4.50808054,0.829500981,3.93592693,4.50808054,3.97819039
52.177737,5.29150262,4.52343601,0.876394098,3.93505669,4.52343601,3.9773703
52.188229,3.87298335,4.53953073,-0.816423531,3.93418682,4.53953073,3.97654984
52.19872,4.69041576,4.55640648,0.366072782,3.93331747,4.55640648,3.97572919
52.209212,4.12310563,4.57411459,-0.671572007,3.93244847,4.57411459,3.97490818
52.219704,4.79583152,4.59270542,0.450695137,3.93157988,4.59270542,3.9740869
52.230195,4.24264069,4.61223306,-0.607941094,3.93071178,4.61223306,3.97326541
52.240687,5.09901951,4.63276156,0.68283084,3.929844,4.63276156,3.97244358
52.251178,3.46410162,4.65435234,-1.09098612,3.92897667,4.65435234,3.97162154
52.26167,4.47213595,4.67708003,-0.452707493,3.92810964,4.67708003,3.97079915
52.272162,5,4.70101916,0.546791408,3.92724297,4.70101916,3.96997648
52.282653,4.47213595,4.72625025,-0.504097509,3.92637674,4.72625025,3.96915362
52.293145,3.60555128,4.75286808,-1.07112875,3.92551076,4.75286808,3.96833041
52.303636,4.12310563,4.78096559,-0.811085668,3.9246452,4.78096559,3.96750699
52.314128,4.89897949,4.81065462,0.297194989,3.92377988,4.81065462,3.96668323
52.32462,4.24264069,4.8420489,-0.77421458,3.92291487,4.8420489,3.96585919
52.335111,4.24264069,4.87527219,-0.795381357,3.92205025,4.87527219,3.96503496
52.345603,4.24264069,4.91046947,-0.817207918,3.92118585,4.91046947,3.96421038
52.356094,5.29150262,4.94766219,0.586379089,3.92032181,4.94766219,3.9633856
52.366586,4.69041576,4.98727357,-0.54484659,3.91945797,4.98727357,3.96256047
52.377078,4,5.02935817,-1.0145729,3.91859441,5.02935817,3.96173508
52.387569,4.24264069,5.07411355,-0.911851339,3.91773119,5.07411355,3.96090948
52.398061,4.47213595,5.12177063,-0.805999178,3.91686814,5.12177063,3.96008354
52.408552,5.91607978,5.17256657,0.86227212,3.91600543,5.17256657,3.95925741
52.419044,3.74165739,5.22678323,-1.21865739,3.91514287,5.22678323,3.95843093
52.429536,5,5.28471842,-0.533590126,3.91428055,5.28471842,3.95760418
52.440027,4.69041576,5.34670255,-0.810115293,3.91341854,5.34670255,3.95677724
52.450519,5.74456265,5.41312198,0.57570884,3.91255667,5.41312198,3.95594995
52.46101,5.19615242,5.48438344,-0.536871505,3.91169509,5.48438344,3.95512247
52.471502,5.65685425,5.56096961,0.309652455,3.91083364,5.56096961,3.95429464
52.481994,5.29150262,5.6434018,-0.593210908,3.90997239,5.6434018,3.95346655
52.492485,5.56776436,5.73226619,-0.405588246,3.90911142,5.73226619,3.95263827
52.502977,6.4807407,5.82825126,0.807768181,3.90825056,5.82825126,3.95180964
52.513468,5.74456265,5.93210168,-0.433057766,3.90738996,5.93210168,3.95098083
52.52396,6,6.04470417,-0.211433602,3.90652946,6.04470417,3.95015167
52.534452,5.38516481,6.16704095,-0.884237606,3.90566913,6.16704095,3.94932224
52.544943,7.14142843,6.30023645,0.917165185,3.90480905,6.30023645,3.94849263
52.555435,6.40312424,6.44562483,-0.206156729,3.90394904,6.44562483,3.94766267
52.565926,6.08276253,6.60469521,-0.722449084,3.90308928,6.60469521,3.94683253
52.576418,7.14142843,6.7792395,0.601821344,3.90222959,6.7792395,3.94600205
52.58691,7.28010989,6.97130532,0.555701868,3.90137004,6.97130532,3.9451713
52.597401,7.07106781,7.18329688,-0.335006079,3.90051072,7.18329688,3.94434037
52.607893,7.61577311,7.41812146,0.444580304,3.89965145,7.41812146,3.9435091
52.618384,7,7.67915439,-0.824108237,3.89879239,7.67915439,3.94267764
52.628876,8.48528137,7.97054575,0.717450783,3.89793338,7.97054575,3.94184584
52.639368,8.71779789,8.29723837,0.648505605,3.8970745,8.29723837,3.94101379
52.649859,9.53939201,8.6652586,0.934951025,3.89621581,8.6652586,3.94018154
52.660351,9.43398113,9.08214282,0.593159599,3.89535716,9.08214282,3.93934896
52.670842,9.94987437,9.55712179,0.626699754,3.8944987,9.55712179,3.9385162
52.681334,11.9163753,10.1020109,1.34698344,3.89364027,10.1020109,3.9376831
52.691826,13.1529464,10.7317786,1.55601025,3.89278194,10.7317786,3.93684974
52.702317,14.3874946,11.4660631,1.70921955,3.89192379,11.4660631,3.9360162
52.712809,15.9687194,12.3327886,1.90681169,3.89106565,12.3327886,3.93518233
52.7233,17.9443584,13.3790638,2.13665501,3.89020769,13.3790638,3.93434827
52.733792,20.0748599,14.7113367,2.31592816,3.88934973,14.7113367,3.93351388
52.744284,22.7815715,16.6050042,2.48527008,3.88849186,16.6050042,3.93267923
52.754775,26.1342687,19.6969022,2.53719658,3.88763415,19.6969022,3.9318444
52.765267,31.22499,25.0471928,2.48551749,3.88677644,25.0471928,3.93100924
52.775758,38.0788655,33.673888,2.09880382,3.88591889,33.673888,3.9301739
52.78625,46.2060602,45.7735915,0.657623513,3.88506132,45.7735915,3.92933822
52.796742,55.0817574,60.3055533,-2.28556249,3.88420382,60.3055533,3.92850229
52.807233,69.1086102,75.0650218,-2.44057608,3.88334647,75.0650218,3.92766619
52.817725,83.8689454,86.9384372,-1.75199653,3.88248911,86.9384372,3.92682975
52.828216,94.2443632,92.287021,1.39905047,3.88163188,92.287021,3.92599314
52.838708,97.8774744,88.9379627,2.98990163,3.88077462,88.9379627,3.9251562
52.8492,83.0903123,78.4020664,2.16523577,3.87991743,78.4020664,3.924319
52.859691,65.4828222,64.1320497,1.16222739,3.87906036,64.1320497,3.92348163
52.870183,46.1085675,49.3819576,-1.80925125,3.87820326,49.3819576,3.92264393
52.880674,34.9284984,36.5824807,-1.28607243,3.87734629,36.5824807,3.92180605
52.891166,26.2106848,27.0562947,-0.919570484,3.87648928,27.0562947,3.92096785
52.901658,20.4205779,20.9110132,-0.700310868,3.87563232,20.9110132,3.9201294
52.912149,15.5563492,17.305415,-1.32252251,3.87477547,17.305415,3.91929077
52.922641,13.5277493,15.1505878,-1.27390682,3.87391858,15.1505878,3.91845182
52.933132,12.1655251,13.6954117,-1.23688585,3.8730618,13.6954117,3.91761269
52.943624,11.61895,12.5831592,-0.981941507,3.87220497,12.5831592,3.91677324
52.954116,9.94987437,11.6729105,-1.3126447,3.87134818,11.6729105,3.91593354
52.964607,9.64365076,10.9056066,-1.1233681,3.87049149,10.9056066,3.91509367
52.975099,8.48528137,10.2492505,-1.32814499,3.86963474,10.2492505,3.91425348
52.98559,8.06225775,9.68247552,-1.27287775,3.86877811,9.68247552,3.91341312
52.996082,8.24621125,9.1890657,-0.971006928,3.86792141,9.1890657,3.91257243
53.006574,7.74596669,8.75657786,-1.00529159,3.86706473,8.75657786,3.91173149
53.017065,5.74456265,8.37516628,-1.62191357,3.86620815,8.37516628,3.9108904
53.027557,6.164414,8.0368472,-1.36836881,3.8653515,8.0368472,3.91004897
53.038048,5.47722558,7.73529364,-1.50268695,3.86449495,7.73529364,3.90920738
53.04854,5.47722558,7.4652193,-1.40996231,3.86363833,7.4652193,3.90836547
53.059032,5.56776436,7.22234777,-1.28630611,3.86278172,7.22234777,3.90752331
53.069523,5.47722558,7.00311838,-1.23527034,3.8619252,7.00311838,3.90668099
53.080015,5.74456265,6.8044879,-1.02952671,3.86106861,6.8044879,3.90583835
53.090506,5.38516481,6.62396646,-1.11301467,3.8602121,6.62396646,3.90499555
53.100998,5.29150262,6.45937078,-1.08067949,3.85935551,6.45937078,3.90415242
53.11149,5.09901951,6.30888594,-1.09993928,3.85849893,6.30888594,3.90330906
53.121981,5.47722558,6.1709507,-0.832901628,3.85764243,6.1709507,3.90246553
53.132473,5.56776436,6.04417939,-0.690228242,3.85678585,6.04417939,3.90162168
53.142964,5.29150262,5.92741958,-0.797444013,3.85592934,5.92741958,3.90077767
53.153456,4.79583152,5.81962275,-1.01182569,3.85507275,5.81962275,3.89993335
53.163948,5.09901951,5.71990424,-0.78796239,3.85421616,5.71990424,3.89908878
53.174439,4,5.62748582,-1.27572952,3.85335964,5.62748582,3.89824406
53.184931,4.47213595,5.54165617,-1.0341761,3.85250303,5.54165617,3.89739902
53.195422,4.89897949,5.46181965,-0.750226741,3.8516465,5.46181965,3.89655382
53.205914,5,5.38741748,-0.622428693,3.85078987,5.38741748,3.89570831
53.216406,3.16227766,5.31797479,-1.46822925,3.84993324,5.31797479,3.89486255
53.226897,5,5.25306704,-0.503057694,3.84907667,5.25306704,3.89401665
53.237389,4.69041576,5.19229646,-0.708435391,3.84822,5.19229646,3.89317043
53.24788,3.60555128,5.13532984,-1.23684217,3.84736341,5.13532984,3.89232405
53.258372,3.60555128,5.0818459,-1.21502865,3.84650671,5.0818459,3.89147736
53.268864,3.87298335,5.03157109,-1.07637714,3.84565,5.03157109,3.89063043
53.279355,4.89897949,4.98425781,-0.292024534,3.84479335,4.98425781,3.88978335
53.289847,4.58257569,4.93966887,-0.597572737,3.8439366,4.93966887,3.88893596
53.300338,4.12310563,4.89760641,-0.880057264,3.84307992,4.89760641,3.88808842
53.31083,4.35889894,4.85787469,-0.706382157,3.84222313,4.85787469,3.88724056
53.321322,4.35889894,4.82030734,-0.679270491,3.84136632,4.82030734,3.88639248
53.331813,3.60555128,4.7847523,-1.08591023,3.84050957,4.7847523,3.88554424
53.342305,3.74165739,4.75106079,-1.0046907,3.83965271,4.75106079,3.88469569
53.352796,5,4.71910974,0.529990807,3.83879591,4.71910974,3.883847
53.363288,5.09901951,4.68877424,0.640503919,3.837939,4.68877424,3.88299799
53.37378,4.12310563,4.65994863,-0.732695713,3.83708207,4.65994863,3.88214876
53.384271,4.47213595,4.63253557,-0.400499211,3.83622519,4.63253557,3.88129937
53.394763,4.12310563,4.60643786,-0.695220996,3.8353682,4.60643786,3.88044968
53.405254,4.24264069,4.58157597,-0.58218149,3.83451126,4.58157597,3.87959984
53.415746,4.69041576,4.55786711,0.364072312,3.83365421,4.55786711,3.8787497
53.426238,4.12310563,4.53524175,-0.641978292,3.83279714,4.53524175,3.87789933
53.436729,4.89897949,4.51363542,0.620760876,3.83194011,4.51363542,3.87704881
53.447221,4.35889894,4.49298238,-0.36617405,3.83108297,4.49298238,3.87619799
53.457712,4,4.47322963,-0.687916875,3.83022588,4.47322963,3.87534702
53.468204,4.58257569,4.45432048,0.358127377,3.82936868,4.45432048,3.87449575
53.478696,4.24264069,4.43620781,-0.439962633,3.82851144,4.43620781,3.87364426
53.489187,4.24264069,4.41884765,-0.419770134,3.82765425,4.41884765,3.87279262
53.499679,4.12310563,4.40219424,-0.528288382,3.82679695,4.40219424,3.87194068
53.51017,4.58257569,4.3862113,0.443130224,3.82593969,4.3862113,3.8710886
53.520662,4.89897949,4.37085893,0.726719035,3.82508231,4.37085893,3.87023622
53.531154,4.35889894,4.35610437,0.0528637546,3.8242249,4.35610437,3.86938361
53.541645,4,4.34191689,-0.584736599,3.82336753,4.34191689,3.86853087
53.552137,4.79583152,4.3282638,0.683789242,3.82251004,4.3282638,3.86767782
53.562628,4.69041576,4.3151197,0.61261412,3.8216526,4.3151197,3.86682464
53.57312,3.87298335,4.30245583,-0.6553415,3.82079504,4.30245583,3.86597116
53.583612,3.87298335,4.29024889,-0.645960948,3.81993744,4.29024889,3.86511746
53.594103,5.09901951,4.27847696,0.905838038,3.81907988,4.27847696,3.86426362
53.604595,3.74165739,4.26711614,-0.724885338,3.8182222,4.26711614,3.86340948
53.615086,3.46410162,4.25614831,-0.889970054,3.81736456,4.25614831,3.86255521
53.625578,5.19615242,4.24555228,0.974987252,3.8165068,4.24555228,3.86170064
53.63607,4.12310563,4.23531117,-0.33497096,3.815649,4.23531117,3.86084586
53.646561,3.87298335,4.22540903,-0.593654513,3.81479124,4.22540903,3.85999094
53.657053,4.69041576,4.21582804,0.688903276,3.81393336,4.21582804,3.85913572
53.667544,4.12310563,4.20655505,-0.288876147,3.81307552,4.20655505,3.85828037
53.678036,4.35889894,4.19757416,0.401652569,3.81221755,4.19757416,3.85742473
53.688528,3.87298335,4.18887291,-0.562040538,3.81135954,4.18887291,3.85656888
53.699019,4.12310563,4.18043952,-0.239444977,3.81050157,4.18043952,3.85571289
53.709511,4.69041576,4.17226046,0.719830048,3.80964348,4.17226046,3.85485661
53.720002,4,4.16432605,-0.405371501,3.80878542,4.16432605,3.8540002
53.730494,4.47213595,4.15662413,0.561704394,3.80792724,4.15662413,3.8531435
53.740986,3.46410162,4.14914539,-0.827673712,3.80706902,4.14914539,3.85228659
53.751477,3.60555128,4.14188098,-0.732345343,3.80621083,4.14188098,3.85142955
53.761969,3.87298335,4.13482046,-0.511700219,3.80535252,4.13482046,3.85057222
53.77246,4.47213595,4.12795662,0.586667991,3.80449424,4.12795662,3.84971476
53.782952,4.35889894,4.12128002,0.487461719,3.80363584,4.12128002,3.84885702
53.793444,3.60555128,4.11478359,-0.713605153,3.80277739,4.11478359,3.84799906
53.803935,4,4.10846062,-0.329333596,3.80191898,4.10846062,3.84714098
53.814427,4.79583152,4.10230292,0.832783648,3.80106045,4.10230292,3.84628262
53.824918,4.12310563,4.09630506,0.163708775,3.80020195,4.09630506,3.84542413
53.83541,4.69041576,4.0904596,0.77456837,3.79934332,4.0904596,3.84456535
53.845902,3.74165739,4.08476113,-0.58575058,3.79848464,4.08476113,3.84370636
53.856393,3.74165739,4.07920447,-0.580988026,3.79762601,4.07920447,3.84284726
53.866885,4,4.07378314,-0.271630515,3.79676724,4.07378314,3.84198787
53.877376,4.35889894,4.06849299,0.538893267,3.79590851,4.06849299,3.84112836
53.887868,4,4.06332809,-0.251650721,3.79504966,4.06332809,3.84026856
53.89836,3.74165739,4.05828424,-0.562696054,3.79419075,4.05828424,3.83940856
53.908851,4.24264069,4.05335742,0.435066967,3.79333189,4.05335742,3.83854844
53.919343,3.60555128,4.04854242,-0.665575796,3.79247289,4.04854242,3.83768804
53.929834,3.87298335,4.04383605,-0.41334333,3.79161393,4.04383605,3.83682753
53.940326,3.46410162,4.03923353,-0.758374521,3.79075484,4.03923353,3.83596673
53.950818,4.69041576,4.03473157,0.809743288,3.78989571,4.03473157,3.83510573
53.961309,4.47213595,4.03032701,0.664687099,3.78903661,4.03032701,3.83424461
53.971801,5.38516481,4.02601562,1.16582554,3.78817738,4.02601562,3.83338322
53.982292,4.89897949,4.02179494,0.936581309,3.78731819,4.02179494,3.83252171
53.992784,3.31662479,4.01766104,-0.837279076,3.78645887,4.01766104,3.83165992
54.003276,3.87298335,4.01361135,-0.375004003,3.7855995,4.01361135,3.83079793
54.013767,4.12310563,4.00964337,0.336841591,3.78474017,4.00964337,3.82993583
54.024259,4.12310563,4.0057536,0.342566826,3.78388071,4.0057536,3.82907346
54.03475,2.23606798,4.00194015,-1.32886123,3.78302129,4.00194015,3.82821097
54.045242,4.24264069,3.99819976,0.494409671,3.78216173,3.99819976,3.82734821
54.055734,4.12310563,3.9945304,0.358573873,3.78130213,3.9945304,3.82648525
54.066225,4,3.99093008,0.0952361222,3.78044257,3.99093008,3.82562218
54.076717,5.09901951,3.98739588,1.05433564,3.77958288,3.98739588,3.82475884
54.087208,4.58257569,3.98392634,0.77372434,3.77872322,3.98392634,3.82389539
54.0977,4,3.98051874,0.139575275,3.77786344,3.98051874,3.82303166
54.108192,3,3.97717145,-0.988519827,3.7770036,3.97717145,3.82216775
54.118683,3.60555128,3.97388287,-0.606903285,3.77614381,3.97388287,3.82130372
54.129175,4.12310563,3.97065057,0.39045494,3.77528389,3.97065057,3.82043943
54.139666,2.82842712,3.96747339,-1.0672611,3.774424,3.96747339,3.81957503
54.150158,4.12310563,3.96434906,0.398442681,3.77356398,3.96434906,3.81871036
54.16065,3.60555128,3.96127624,-0.596426835,3.77270392,3.96127624,3.8178455
54.171141,4.58257569,3.95825368,0.790140501,3.7718439,3.95825368,3.81698054
54.181633,4,3.95527929,0.211472715,3.77098375,3.95527929,3.81611531
54.192124,3.74165739,3.95235219,-0.459015035,3.77012363,3.95235219,3.81524997
54.202616,4,3.94947043,0.224787844,3.76926339,3.94947043,3.81438437
54.213108,5,3.94663294,1.02633672,3.7684031,3.94663294,3.81351858
54.223599,4.35889894,3.9438387,0.644251694,3.76754285,3.9438387,3.81265269
54.234091,3.87298335,3.94108592,-0.260964708,3.76668247,3.94108592,3.81178654
54.244582,4.89897949,3.93837394,0.980104864,3.76582213,3.93837394,3.81092029
54.255074,4.12310563,3.93570107,0.432902481,3.76496167,3.93570107,3.81005377
54.265566,3.87298335,3.93306645,-0.245118546,3.76410116,3.93306645,3.80918707
54.276057,3.46410162,3.93046925,-0.682911145,3.76324068,3.93046925,3.80832027
54.286549,4,3.92790793,0.26849967,3.76238008,3.92790793,3.80745321
54.29704,4.79583152,3.92538197,0.932978859,3.76151952,3.92538197,3.80658605
54.307532,3.74165739,3.92288992,-0.42571415,3.76065884,3.92288992,3.80571863
54.318024,4.89897949,3.92043109,0.98921605,3.75979811,3.92043109,3.80485103
54.328515,3.16227766,3.9180048,-0.869325679,3.75893742,3.9180048,3.80398334
54.339007,4,3.9156097,0.290500089,3.7580766,3.9156097,3.80311538
54.349498,4.24264069,3.91324541,0.573929681,3.75721582,3.91324541,3.80224733
54.35999,4,3.91091066,0.298478381,3.75635492,3.91091066,3.80137903
54.370482,3.31662479,3.90860488,-0.769402422,3.75549398,3.90860488,3.80051054
54.380973,3.87298335,3.90632752,-0.182603876,3.75463307,3.90632752,3.79964197
54.391465,4.89897949,3.90407741,0.997447779,3.75377204,3.90407741,3.79877314
54.401956,4,3.90185427,0.313282195,3.75291105,3.90185427,3.79790421
54.412448,3.46410162,3.89965696,-0.65996617,3.75204994,3.89965696,3.79703504
54.42294,4,3.89748504,0.320179574,3.75118879,3.89748504,3.79616569
54.433431,4.12310563,3.89533806,0.477250006,3.75032768,3.89533806,3.79529625
54.443923,4.58257569,3.89321497,0.830277497,3.74946644,3.89321497,3.79442655
54.454414,4,3.89111558,0.329976391,3.74860525,3.89111558,3.79355677
54.464906,4.12310563,3.88903889,0.483804438,3.74774393,3.88903889,3.79268674
54.475398,4,3.88698453,0.336177731,3.74688258,3.88698453,3.79181653
54.485889,4.69041576,3.88495214,0.897476248,3.74602126,3.88495214,3.79094624
54.496381,3.87298335,3.8829408,-0.0997870279,3.74515983,3.8829408,3.7900757
54.506872,4.12310563,3.88095036,0.492092745,3.74429844,3.88095036,3.78920508
54.517364,3.60555128,3.87897994,-0.522904064,3.74343692,3.87897994,3.7883342
54.527856,3.46410162,3.87702923,-0.642594444,3.74257537,3.87702923,3.78746316
54.538347,3.74165739,3.87509796,-0.365295189,3.74171386,3.87509796,3.78659203
54.548839,3.87298335,3.87318529,-0.0142105965,3.74085224,3.87318529,3.78572066
54.55933,4.12310563,3.87129113,0.501811218,3.73999065,3.87129113,3.78484921
54.569822,4.12310563,3.86941469,0.503677416,3.73912895,3.86941469,3.78397751
54.580314,3.74165739,3.86755572,-0.354821555,3.73826721,3.86755572,3.78310564
54.590805,3.31662479,3.865714,-0.741005541,3.73740551,3.865714,3.7822337
54.601297,4.24264069,3.86388878,0.615428234,3.7365437,3.86388878,3.78136151
54.611788,3.74165739,3.86208001,-0.347019623,3.73568193,3.86208001,3.78048924
54.62228,4.47213595,3.86028697,0.782207764,3.73482004,3.86028697,3.77961673
54.632772,3.60555128,3.85850948,-0.502949502,3.73395812,3.85850948,3.77874406
54.643263,3.16227766,3.85674734,-0.833348476,3.73309625,3.85674734,3.77787132
54.653755,4.12310563,3.85499988,0.517789284,3.73223425,3.85499988,3.77699833
54.664246,4.12310563,3.8532671,0.519459843,3.73137231,3.8532671,3.77612526
54.674738,4.24264069,3.85154833,0.625373773,3.73051025,3.85154833,3.77525196
54.68523,4.12310563,3.84984343,0.522744865,3.72964815,3.84984343,3.7743785
54.695721,4,3.84815225,0.389676464,3.7287861,3.84815225,3.77350496
54.706213,4.58257569,3.84647417,0.857963589,3.72792394,3.84647417,3.77263119
54.716704,4.58257569,3.84480922,0.858933334,3.72706183,3.84480922,3.77175734
54.727196,3.74165739,3.8431568,-0.318589721,3.7261996,3.8431568,3.77088326
54.737688,3.87298335,3.84151678,0.177388172,3.72533734,3.84151678,3.77000902
54.748179,4.35889894,3.83988907,0.720423402,3.72447513,3.83988907,3.76913472
54.758671,3.87298335,3.83827307,0.186306933,3.72361281,3.83827307,3.76826017
54.769162,3.74165739,3.83666886,-0.308239311,3.72275053,3.83666886,3.76738556
54.779654,3.74165739,3.83507587,-0.305644378,3.72188815,3.83507587,3.76651072
54.790146,3.46410162,3.83349402,-0.607776611,3.72102573,3.83349402,3.76563572
54.800637,4.35889894,3.83192323,0.72593093,3.72016337,3.83192323,3.76476066
54.811129,3.46410162,3.83036296,-0.605195293,3.71930089,3.83036296,3.76388536
54.82162,4,3.82881329,0.413747162,3.71843847,3.82881329,3.76301
54.832112,4.58257569,3.8272737,0.86908112,3.71757594,3.8272737,3.76213441
54.842604,4.12310563,3.82574414,0.545308612,3.71671337,3.82574414,3.76125867
54.853095,3.74165739,3.82422455,-0.287345019,3.71585086,3.82422455,3.76038287
54.863587,3,3.82271442,-0.907036064,3.71498825,3.82271442,3.75950684
54.874078,4.24264069,3.82121386,0.649173956,3.71412568,3.82121386,3.75863074
54.88457,3.16227766,3.81972239,-0.810829655,3.71326301,3.81972239,3.75775442
54.895062,3.74165739,3.81823996,-0.276735569,3.71240031,3.81823996,3.75687796
54.905553,4.69041576,3.81676654,0.934692046,3.71153767,3.81676654,3.75600143
54.916045,3.74165739,3.81530166,-0.271374786,3.71067491,3.81530166,3.75512468
54.926536,2.82842712,3.81384544,-0.992682382,3.70981222,3.81384544,3.75424787
54.937028,4.58257569,3.81239742,0.877598015,3.70894942,3.81239742,3.75337083
54.94752,4.47213595,3.81095758,0.813128755,3.70808659,3.81095758,3.75249365
54.958011,3.87298335,3.80952591,0.251907603,3.70722382,3.80952591,3.75161642
54.968503,3.87298335,3.80810196,0.254718254,3.70636095,3.80810196,3.75073896
54.978994,3.74165739,3.80668586,-0.255006803,3.70549813,3.80668586,3.74986145
54.989486,4.47213595,3.80527718,0.816614212,3.70463521,3.80527718,3.74898371
54.999978,4.69041576,3.80387593,0.94156244,3.70377227,3.80387593,3.74810584
55.010469,3.87298335,3.80248209,0.265520731,3.70290938,3.80248209,3.74722792
55.020961,4.47213595,3.80109525,0.819170742,3.7020464,3.80109525,3.74634977
55.031452,3.60555128,3.79971555,-0.440640751,3.70118347,3.79971555,3.74547157
55.041944,3.87298335,3.79834258,0.273204617,3.70032044,3.79834258,3.74459316
55.052436,4,3.79697636,0.450581444,3.69945739,3.79697636,3.74371461
55.062927,3.31662479,3.79561689,-0.692092549,3.6985944,3.79561689,3.742836
55.073419,4.24264069,3.79426378,0.669609521,3.69773131,3.79426378,3.74195719
55.08391,3.87298335,3.79291717,0.282959679,3.69686829,3.79291717,3.74107832
55.094402,3.46410162,3.79157668,-0.572254374,3.69600516,3.79157668,3.74019924
55.104894,4.24264069,3.79024234,0.672605638,3.69514202,3.79024234,3.73932003
55.115385,4.47213595,3.78891416,0.826572319,3.69427894,3.78891416,3.73844077
55.125877,4.79583152,3.78759176,1.00411143,3.69341576,3.78759176,3.7375613
55.136368,4.24264069,3.78627531,0.675548206,3.69255264,3.78627531,3.73668178
55.14686,4.12310563,3.78496444,0.581499088,3.69168943,3.78496444,3.73580205
55.157352,4.47213595,3.78365917,0.829745013,3.6908262,3.78365917,3.73492219
55.167843,3.74165739,3.78235953,-0.201747724,3.68996304,3.78235953,3.73404229
55.178335,3.46410162,3.78106518,-0.56299517,3.68909978,3.78106518,3.73316218
55.188826,3.87298335,3.77977626,0.305298361,3.68823659,3.77977626,3.73228203
55.199318,3.46410162,3.77849243,-0.560705643,3.6873733,3.77849243,3.73140166
55.20981,4.58257569,3.77721374,0.897419611,3.68651,3.77721374,3.73052118
55.220301,4.24264069,3.7759402,0.683154806,3.68564677,3.7759402,3.72964065
55.230793,3.74165739,3.77467149,-0.181697833,3.68478344,3.77467149,3.72875992
55.241284,4.47213595,3.77340777,0.835899629,3.68392018,3.77340777,3.72787914
55.251776,4.12310563,3.7721487,0.592416175,3.68305683,3.7721487,3.72699817
55.262268,3.60555128,3.77089434,-0.406623981,3.68219347,3.77089434,3.72611707
55.272759,3.16227766,3.76964471,-0.779337572,3.68133018,3.76964471,3.72523593
55.283251,4.35889894,3.76839951,0.768439612,3.68046679,3.76839951,3.7243546
55.293742,3.46410162,3.76715888,-0.550506375,3.67960348,3.76715888,3.72347322
55.304234,3.60555128,3.76592253,-0.400463802,3.67874008,3.76592253,3.72259165
55.314726,4.58257569,3.7646905,0.904370057,3.67787667,3.7646905,3.72170995
55.325217,4.35889894,3.76346282,0.771645077,3.67701333,3.76346282,3.72082823
55.335709,3.16227766,3.7622392,-0.774571843,3.6761499,3.7622392,3.7199463
55.3462,4.12310563,3.7610198,0.601735677,3.67528655,3.7610198,3.71906434
55.356692,4.58257569,3.75980432,0.907067458,3.67442311,3.75980432,3.71818218
55.367184,3.87298335,3.75859281,0.338216694,3.67355966,3.75859281,3.71729991
55.377675,3.16227766,3.75738533,-0.771432219,3.67269629,3.75738533,3.71641761
55.388167,3.60555128,3.75618157,-0.388111189,3.67183283,3.75618157,3.71553511
55.398658,3.60555128,3.75498171,-0.386562327,3.67096945,3.75498171,3.71465258
55.40915,3.87298335,3.75378545,0.34525048,3.67010598,3.75378545,3.71376986
55.419642,4.47213595,3.75259286,0.848258862,3.66924251,3.75259286,3.71288703
55.430133,3.74165739,3.75140398,-0.0987248401,3.66837911,3.75140398,3.71200417
55.440625,3.87298335,3.75021854,0.350378095,3.66751563,3.75021854,3.71112111
55.451116,3.60555128,3.7490367,-0.378794694,3.66665224,3.7490367,3.71023804
55.461608,4,3.74785818,0.502137254,3.66578875,3.74785818,3.70935477
55.4721,2.82842712,3.74668304,-0.958256709,3.66492527,3.74668304,3.70847139
55.482591,4.58257569,3.74551135,0.914912204,3.66406187,3.74551135,3.70758799
55.493083,3.46410162,3.74434283,-0.52937814,3.66319838,3.74434283,3.7067044
55.503574,3.60555128,3.74317765,-0.370980285,3.66233498,3.74317765,3.70582078
55.514066,4.24264069,3.74201553,0.707548693,3.6614715,3.74201553,3.70493698
55.524558,3.74165739,3.74085655,0.0282990013,3.66060801,3.74085655,3.70405308
55.535049,3.87298335,3.73970077,0.365078865,3.65974461,3.73970077,3.70316915
55.545541,3.87298335,3.73854791,0.366654377,3.65888114,3.73854791,3.70228504
55.556032,3.87298335,3.73739816,0.368218934,3.65801774,3.73739816,3.70140091
55.566524,3.74165739,3.73625125,0.0735264117,3.65715427,3.73625125,3.7005166
55.577016,4.24264069,3.73510725,0.712413809,3.6562908,3.73510725,3.69963218
55.587507,4,3.73396622,0.515784621,3.65542742,3.73396622,3.69874775
55.597999,4.69041576,3.73282791,0.978564176,3.65456396,3.73282791,3.69786314
55.60849,3.87298335,3.73169249,0.375886756,3.65370059,3.73169249,3.69697851
55.618982,3.60555128,3.73055971,-0.353565319,3.65283714,3.73055971,3.6960937
55.629474,3.31662479,3.72942963,-0.642498905,3.6519737,3.72942963,3.69520879
55.639965,3.87298335,3.72830233,0.380369576,3.65111035,3.72830233,3.69432387
55.650457,4.12310563,3.72717756,0.629228155,3.65024693,3.72717756,3.69343877
55.660948,4.12310563,3.72605548,0.630119151,3.64938359,3.72605548,3.69255366
55.67144,4.12310563,3.72493586,0.631006946,3.64852018,3.72493586,3.69166837
55.681932,4.58257569,3.72381877,0.926691388,3.64765678,3.72381877,3.69078299
55.692423,4.24264069,3.72270427,0.721066167,3.64679348,3.72270427,3.6898976
55.702915,3.74165739,3.72159213,0.141651889,3.6459301,3.72159213,3.68901203
55.713406,4.24264069,3.72048252,0.722605124,3.64506681,3.72048252,3.68812645
55.723898,3,3.71937521,-0.848159895,3.64420346,3.71937521,3.6872407
55.73439,4,3.71827026,0.530782197,3.64334011,3.71827026,3.68635486
55.744881,3.87298335,3.71716775,0.394734837,3.64247686,3.71716775,3.68546902
55.755373,3.87298335,3.71606745,0.396126106,3.64161355,3.71606745,3.684583
55.765864,4.79583152,3.71496954,1.03964512,3.64075032,3.71496954,3.68369697
55.776356,4.79583152,3.71387378,1.04017198,3.63988703,3.71387378,3.68281078
55.786848,3.87298335,3.71278024,0.400253798,3.63902376,3.71278024,3.6819245
55.797339,4,3.71168902,0.536945977,3.63816058,3.71168902,3.68103821
55.807831,4.24264069,3.71059987,0.729411283,3.63729734,3.71059987,3.68015176
55.818322,4.12310563,3.70951298,0.643111692,3.63643419,3.70951298,3.67926531
55.828814,3.87298335,3.70842812,0.405654076,3.63557099,3.70842812,3.67837869
55.839306,4,3.70734537,0.540975629,3.63470779,3.70734537,3.67749198
55.849797,3.60555128,3.70626482,-0.317353967,3.6338447,3.70626482,3.67660528
55.860289,4.47213595,3.70518623,0.875756657,3.63298155,3.70518623,3.67571841
55.87078,3.74165739,3.7041098,0.193771986,3.6321185,3.7041098,3.67483154
55.881272,3.60555128,3.70303531,-0.312224333,3.63125538,3.70303531,3.67394451
55.891764,3.46410162,3.70196283,-0.487710179,3.63039229,3.70196283,3.6730574
55.902255,3.31662479,3.70089246,-0.619893276,3.6295293,3.70089246,3.6721703
55.912747,2.82842712,3.69982398,-0.933486399,3.62866625,3.69982398,3.67128303
55.923238,4.89897949,3.69875758,1.0955464,3.6278033,3.69875758,3.67039577
55.93373,5.09901951,3.69769304,1.18377636,3.6269403,3.69769304,3.66950835
55.944222,4.79583152,3.69663045,1.04842791,3.62607732,3.69663045,3.66862085
55.954713,5,3.69556991,1.1421165,3.62521444,3.69556991,3.66773336
55.965205,4.47213595,3.69451121,0.881830339,3.62435151,3.69451121,3.66684572
55.975696,3.87298335,3.69345454,0.423708399,3.62348868,3.69345454,3.66595808
55.986188,3.87298335,3.6923997,0.42495135,3.6226258,3.6923997,3.66507028
55.99668,3.87298335,3.69134678,0.426188416,3.62176295,3.69134678,3.66418242
56.007171,4,3.69029589,0.556510655,3.62090021,3.69029589,3.66329456
56.017663,2.82842712,3.68924683,-0.927803699,3.62003741,3.68924683,3.66240655
56.028154,3.16227766,3.6881998,-0.725204895,3.61917472,3.6881998,3.66151855
56.038646,4.12310563,3.68715461,0.660265867,3.61831198,3.68715461,3.6606304
56.049138,3.31662479,3.68611137,-0.607854078,3.61744927,3.68611137,3.65974218
56.059629,3.60555128,3.68507019,-0.281990989,3.61658667,3.68507019,3.65885398
56.070121,3.16227766,3.6840309,-0.722324882,3.61572402,3.6840309,3.65796562
56.080612,3.31662479,3.6829937,-0.605284153,3.61486148,3.6829937,3.65707729
56.091104,4.12310563,3.68195842,0.664189132,3.6139989,3.68195842,3.6561888
56.101596,3.31662479,3.6809252,-0.603573037,3.61313634,3.6809252,3.65530024
56.112087,4,3.67989417,0.565778963,3.61227391,3.67989417,3.65441171
56.122579,3.46410162,3.67886516,-0.463425877,3.61141142,3.67886516,3.65352303
56.13307,3.87298335,3.67783842,0.441752105,3.61054905,3.67783842,3.65263437
56.143562,4.24264069,3.67681382,0.752214643,3.60968664,3.67681382,3.65174556
56.154054,3.74165739,3.6757915,0.256643496,3.60882426,3.6757915,3.65085669
56.164545,4.24264069,3.67477165,0.75357086,3.607962,3.67477165,3.64996784
56.175037,3.74165739,3.67375413,0.260582526,3.60709969,3.67375413,3.64907885
56.185528,4.12310563,3.67273926,0.671093414,3.60623751,3.67273926,3.64818988
56.19602,3.46410162,3.67172692,-0.455659203,3.60537528,3.67172692,3.64730077
56.206512,4.12310563,3.67071736,0.672598144,3.60451309,3.67071736,3.6464116
56.217003,3.46410162,3.66947736,-0.453184003,3.60365102,3.66947736,3.64552246
56.227495,3.31662479,3.66847441,-0.593169132,3.60278891,3.66847441,3.64463318
56.237986,4.12310563,3.66747481,0.675004305,3.60192693,3.66747481,3.64374392
56.248478,3.60555128,3.6664786,-0.246834602,3.6010649,3.6664786,3.64285453
56.25897,4.35889894,3.6654861,0.832714143,3.60020292,3.6654861,3.64196508
56.269461,4.12310563,3.6644977,0.677205966,3.59934106,3.6644977,3.64107566
56.279953,4.35889894,3.66351356,0.833897706,3.59847916,3.66351356,3.64018611
56.290444,3.87298335,3.66253424,0.458747324,3.59761739,3.66253424,3.63929658
56.300936,4.12310563,3.66156001,0.679371484,3.59675559,3.66156001,3.63840692
56.311428,2.23606798,3.6605915,-1.19353405,3.59589383,3.6605915,3.63751721
56.321919,4.24264069,3.65962944,0.763551735,3.5950322,3.65962944,3.63662753
56.332411,4.12310563,3.65867436,0.681491939,3.59417053,3.65867436,3.63573772
56.342902,3.87298335,3.65772735,0.463956887,3.59330899,3.65772735,3.63484795
56.353394,3.60555128,3.65678928,-0.226358132,3.59244742,3.65678928,3.63395804
56.363886,3.31662479,3.6558615,-0.582440307,3.5915859,3.6558615,3.63306809
56.374377,4.35889894,3.65494564,0.839019251,3.59072451,3.65494564,3.63217817
56.384869,3.60555128,3.65404339,-0.220209259,3.5898631,3.65404339,3.63128812
56.39536,3.74165739,3.65315723,0.297489765,3.58900181,3.65315723,3.63039811
56.405852,3.87298335,3.65228981,0.469780302,3.58814049,3.65228981,3.62950798
56.416344,3,3.65144479,-0.807121298,3.58727923,3.65144479,3.6286178
56.426835,4.24264069,3.6506267,0.76942445,3.5864181,3.6506267,3.62772766
56.437327,3.16227766,3.6498411,-0.698257429,3.58555695,3.6498411,3.62683739
56.447818,3.31662479,3.64909546,-0.576602701,3.58469593,3.64909546,3.62594717
56.45831,3.60555128,3.64839925,-0.206997529,3.58383489,3.64839925,3.62505682
56.468802,4.47213595,3.64776524,0.907948628,3.5829739,3.64776524,3.62416643
56.479293,3.46410162,3.64721073,-0.427912505,3.58211305,3.64721073,3.62327609
56.489785,3.16227766,3.64676013,-0.696047753,3.58125218,3.64676013,3.62238562
56.500276,3.16227766,3.64645239,-0.695826652,3.58039145,3.64645239,3.6214952
56.510768,3.60555128,3.6463617,-0.20201589,3.5795307,3.6463617,3.62060466
56.52126,4.24264069,3.64665968,0.77199806,3.57867,3.64665968,3.61971408
56.531751,3.87298335,3.64777323,0.474563082,3.57780945,3.64777323,3.61882355
56.542243,3.60555128,3.65070853,-0.212502355,3.57694888,3.65070853,3.61793291
56.552734,4.24264069,3.65752216,0.764930409,3.57608846,3.65752216,3.61704231
56.563226,3.31662479,3.67164258,-0.595833694,3.57522801,3.67164258,3.61615159
56.573718,3.60555128,3.69731655,-0.302927839,3.57436763,3.69731655,3.61526084
56.584209,3.87298335,3.73748327,0.368103351,3.5735074,3.73748327,3.61437015
56.594701,3.60555128,3.79041953,-0.429963086,3.57264715,3.79041953,3.61347934
56.605192,3.74165739,3.84687769,-0.324376793,3.57178705,3.84687769,3.61258858
56.615684,4.24264069,3.89007478,0.593772605,3.57092693,3.89007478,3.61169771
56.626176,4,3.90148941,0.313863962,3.57006689,3.90148941,3.6108068
56.636667,4.12310563,3.87452962,0.498573976,3.56920699,3.87452962,3.60991596
56.647159,3.31662479,3.82176789,-0.710734196,3.56834708,3.82176789,3.609025
56.65765,3.60555128,3.7627784,-0.396518762,3.56748733,3.7627784,3.6081341
56.668142,3.74165739,3.71189439,0.172519562,3.56662756,3.71189439,3.60724309
56.678634,3.74165739,3.67533266,0.257535872,3.56576787,3.67533266,3.60635206
56.689125,4.24264069,3.65261477,0.768131442,3.56490833,3.65261477,3.60546108
56.699617,4.24264069,3.63987681,0.776378691,3.56404878,3.63987681,3.60457
56.710108,4.69041576,3.63297336,1.02832018,3.56318939,3.63297336,3.60367898
56.7206,3.16227766,3.62897817,-0.683154819,3.56233,3.62897817,3.60278785
56.731092,4.35889894,3.62629705,0.855921662,3.56147068,3.62629705,3.6018967
56.741583,4.24264069,3.62420684,0.786405654,3.56061152,3.62420684,3.60100561
56.752075,3.60555128,3.62241407,-0.12985683,3.55975236,3.62241407,3.60011442
56.762566,3.46410162,3.62080079,-0.395852467,3.55889336,3.62080079,3.59922329
56.773058,3.31662479,3.6193118,-0.550169978,3.55803435,3.6193118,3.59833206
56.78355,5.29150262,3.61791575,1.29367186,3.55717543,3.61791575,3.59744082
56.794041,4,3.61659168,0.619199743,3.55631668,3.61659168,3.59654964
56.804533,3.16227766,3.61532408,-0.673087228,3.55545792,3.61532408,3.59565835
56.815024,3.60555128,3.61410182,-0.0924691307,3.55459933,3.61410182,3.59476714
56.825516,5.19615242,3.61291602,1.25826722,3.55374074,3.61291602,3.59387583
56.836008,3.46410162,3.61176013,-0.384263603,3.55288225,3.61176013,3.5929845
56.846499,3.60555128,3.61062907,-0.0712586276,3.55202391,3.61062907,3.59209325
56.856991,3.87298335,3.6095185,0.513288264,3.55116559,3.6095185,3.5912019
56.867482,3.31662479,3.60842538,-0.540185701,3.55030744,3.60842538,3.59031062
56.877974,2.82842712,3.60734686,-0.882564294,3.54944929,3.60734686,3.58941924
56.888466,3.87298335,3.6062809,0.516432425,3.54859124,3.6062809,3.58852786
56.898957,3.74165739,3.60522585,0.369366403,3.54773336,3.60522585,3.58763655
56.909449,3.74165739,3.60418006,0.370779345,3.54687549,3.60418006,3.58674514
56.91994,4.58257569,3.60314255,0.98966315,3.5460178,3.60314255,3.58585381
56.930432,4.35889894,3.60211209,0.869934971,3.54516012,3.60211209,3.58496239
56.940924,4.12310563,3.60108795,0.722507906,3.54430254,3.60108795,3.58407097
56.951415,3.60555128,3.60006951,0.0740389331,3.54344514,3.60006951,3.58317962
56.961907,3.31662479,3.59905597,-0.531442544,3.54258776,3.59905597,3.58228818
56.972398,4,3.59804699,0.63399764,3.54173055,3.59804699,3.58139682
56.98289,4,3.59704195,0.634789772,3.54087337,3.59704195,3.58050537
56.993382,4.12310563,3.59604054,0.725992485,3.54001629,3.59604054,3.57961392
57.003873,3.87298335,3.59504253,0.52720093,3.5391594,3.59504253,3.57872256
57.014365,3.46410162,3.59404743,-0.360479978,3.53830253,3.59404743,3.5778311
57.024856,3.74165739,3.59305518,0.385489564,3.53744585,3.59305518,3.57693973
57.035348,4.24264069,3.59206537,0.806582491,3.53658919,3.59206537,3.57604828
57.04584,3.60555128,3.5910779,0.12030536,3.53573265,3.5910779,3.57515683
57.056331,4.12310563,3.59009267,0.730077362,3.53487629,3.59009267,3.57426546
57.066823,3.31662479,3.58910936,-0.522000543,3.53401997,3.58910936,3.57337401
57.077314,3.87298335,3.588128,0.533718413,3.53316384,3.588128,3.57248265
57.087806,3.74165739,3.5871483,0.393076443,3.53230774,3.5871483,3.57159121
57.098298,3.74165739,3.58617022,0.394318605,3.53145176,3.58617022,3.57069977
57.108789,2.64575131,3.58519378,-0.969248404,3.53059598,3.58519378,3.56980842
57.119281,2.64575131,3.58421869,-0.968745258,3.52974023,3.58421869,3.56891699
57.129772,2.82842712,3.58324505,-0.868802582,3.52888469,3.58324505,3.56802566
57.140264,4.35889894,3.58227262,0.881264051,3.52802919,3.58227262,3.56713425
57.150756,4,3.58130141,0.647069233,3.52717381,3.58130141,3.56624284
57.161247,3.16227766,3.58033146,-0.646570799,3.52631864,3.58033146,3.56535153
57.171739,4.24264069,3.57936253,0.814418908,3.52546352,3.57936253,3.56446014
57.18223,3.46410162,3.57839475,-0.338072684,3.5246086,3.57839475,3.56356885
57.192722,3.46410162,3.57742791,-0.336639704,3.52375374,3.57742791,3.56267749
57.203214,3.16227766,3.57646203,-0.643571574,3.522899,3.57646203,3.56178614
57.213705,3.16227766,3.57549719,-0.642821534,3.52204449,3.57549719,3.56089489
57.224197,3,3.57453315,-0.757979649,3.52119002,3.57453315,3.56000356
57.234688,4.12310563,3.57357007,0.741306652,3.52033578,3.57357007,3.55911233
57.24518,3.46410162,3.57260774,-0.329402686,3.51948159,3.57260774,3.55822104
57.255672,3.87298335,3.57164623,0.548941817,3.51862755,3.57164623,3.55732976
57.266163,3.74165739,3.57068559,0.413487365,3.51777373,3.57068559,3.55643858
57.276655,3.31662479,3.56972561,-0.503091268,3.51691998,3.56972561,3.55554733
57.287146,4.79583152,3.56876647,1.10772968,3.51606646,3.56876647,3.55465619
57.297638,2.64575131,3.56780796,-0.960237807,3.515213,3.56780796,3.55376498
57.30813,2.44948974,3.56685014,-1.05705269,3.5143597,3.56685014,3.55287379
57.318621,3.16227766,3.56589309,-0.635307352,3.51350664,3.56589309,3.55198271
57.329113,3.16227766,3.56493662,-0.634554139,3.51265365,3.56493662,3.55109156
57.339604,3.46410162,3.56398088,-0.316036807,3.5118009,3.56398088,3.55020052
57.350096,3.46410162,3.56302568,-0.314521965,3.51094824,3.56302568,3.54930941
57.360588,3.60555128,3.5620711,0.208519,3.51009574,3.5620711,3.54841833
57.371079,3.60555128,3.56111722,0.210793876,3.50924348,3.56111722,3.54752736
57.381571,3.87298335,3.56016383,0.559302702,3.50839132,3.56016383,3.54663633
57.392062,3.87298335,3.55921112,0.560153753,3.50753942,3.55921112,3.54574541
57.402554,3.74165739,3.55825888,0.428250515,3.50668761,3.55825888,3.54485443
57.413046,2.64575131,3.5573072,-0.954754363,3.50583598,3.5573072,3.54396348
57.423537,3.31662479,3.55635616,-0.489623706,3.50498461,3.55635616,3.54307264
57.434029,2.82842712,3.55540557,-0.85263031,3.50413335,3.55540557,3.54218174
57.44452,3.60555128,3.5544556,0.226043532,3.50328236,3.5544556,3.54129096
57.455012,3.46410162,3.55350605,-0.299005748,3.50243149,3.55350605,3.54040013
57.465504,3.74165739,3.55255702,0.43485672,3.50158081,3.55255702,3.53950932
57.475995,4.12310563,3.55160858,0.755974235,3.50073041,3.55160858,3.53861863
57.486487,4,3.55066055,0.670327868,3.49988014,3.55066055,3.53772789
57.496978,2.64575131,3.5497131,-0.95076905,3.49903015,3.5497131,3.53683727
57.50747,4.12310563,3.54876604,0.757851958,3.4981803,3.54876604,3.5359466
57.517962,2.23606798,3.54781945,-1.14531719,3.49733067,3.54781945,3.53505596
57.528453,3.46410162,3.54687343,-0.287700904,3.49648134,3.54687343,3.53416544
57.538945,4.24264069,3.54592777,0.834693305,3.49563215,3.54592777,3.53327487
57.549436,3.16227766,3.54498267,-0.618631561,3.49478328,3.54498267,3.53238443
57.559928,4.12310563,3.54403793,0.76096498,3.49393457,3.54403793,3.53149394
57.57042,3,3.54309363,-0.736948864,3.49308609,3.54309363,3.53060349
57.580911,3.46410162,3.54214986,-0.279371166,3.49223795,3.54214986,3.52971316
57.591403,3.16227766,3.54120645,-0.615571917,3.49138998,3.54120645,3.52882278
57.601894,4.69041576,3.54026355,1.0724515,3.49054235,3.54026355,3.52793253
57.612386,3.31662479,3.53932099,-0.47190698,3.4896949,3.53932099,3.52704224
57.622878,4,3.53837885,0.679427074,3.48884773,3.53837885,3.52615199
57.633369,3.74165739,3.53743722,0.451907254,3.48800091,3.53743722,3.52526187
57.643861,3.87298335,3.53649592,0.580075366,3.4871543,3.53649592,3.52437171
57.654352,4.47213595,3.53555511,0.96777107,3.48630807,3.53555511,3.52348168
57.664844,3.87298335,3.53461462,0.581694701,3.48546206,3.53461462,3.52259161
57.675336,3.74165739,3.53367453,0.45605137,3.48461636,3.53367453,3.52170158
57.685827,3.46410162,3.53273494,-0.26197962,3.48377105,3.53273494,3.52081169
57.696319,3.60555128,3.53179564,0.27157988,3.482926,3.53179564,3.51992176
57.70681,3.46410162,3.53085683,-0.258370311,3.48208136,3.53085683,3.51903196
57.717302,3.16227766,3.52991832,-0.606333786,3.48123698,3.52991832,3.51814213
57.727794,3.74165739,3.52898019,0.461169376,3.48039297,3.52898019,3.51725235
57.738285,2.82842712,3.52804254,-0.83643016,3.4795494,3.52804254,3.5163627
57.748777,3.60555128,3.52710517,0.280082316,3.47870613,3.52710517,3.51547302
57.759268,3.31662479,3.52616827,-0.457759195,3.47786334,3.52616827,3.51458348
57.76976,2.23606798,3.52523165,-1.13541344,3.47702086,3.52523165,3.5136939
57.780252,4,3.52429541,0.689713413,3.47617881,3.52429541,3.51280438
57.790743,4,3.52335962,0.690391469,3.47533727,3.52335962,3.511915
57.801235,3.60555128,3.52242411,0.288317827,3.4744961,3.52242411,3.51102559
57.811726,2.64575131,3.52148904,-0.935808599,3.47365548,3.52148904,3.51013632
57.822218,4,3.52055425,0.692420209,3.47281526,3.52055425,3.50924702
57.83271,3.16227766,3.51961982,-0.59778103,3.47197555,3.51961982,3.50835778
57.843201,3.74165739,3.51868583,0.47219864,3.47113645,3.51868583,3.50746868
57.853693,4.35889894,3.51775211,0.917140576,3.47029783,3.51775211,3.50657956
57.864184,3.31662479,3.51681882,-0.447430476,3.46945987,3.51681882,3.50569058
57.874676,4.69041576,3.5158858,1.08375734,3.46862247,3.5158858,3.50480158
57.885168,3.74165739,3.51495312,0.47613472,3.46778573,3.51495312,3.50391264
57.895659,3.74165739,3.51402087,0.477112689,3.4669498,3.51402087,3.50302384
57.906151,3.46410162,3.51315523,-0.221480504,3.46611458,3.51315523,3.50213503
57.916642,3.46410162,3.5122238,-0.21936769,3.46528031,3.5122238,3.50124636
57.927134,3.87298335,3.51129262,0.60140729,3.46444696,3.51129262,3.50035768
57.937626,4.12310563,3.51036177,0.782779568,3.46361472,3.51036177,3.49946905
57.948117,3.60555128,3.50943135,0.31003213,3.46278386,3.50943135,3.49858058
57.958609,3.60555128,3.50850118,0.311528646,3.46195445,3.50850118,3.4976921
57.9691,4,3.50757142,0.701732555,3.46112694,3.50757142,3.49680376
57.979592,3.31662479,3.50664191,-0.435909528,3.46030155,3.50664191,3.49591541
57.990084,3.46410162,3.50571272,-0.203988001,3.45947886,3.50571272,3.49502712
58.000575,2.82842712,3.50478395,-0.822409157,3.45865959,3.50478395,3.494139
58.011067,3.87298335,3.50385541,0.607558998,3.4578444,3.50385541,3.49325085
58.021558,3.46410162,3.50292729,-0.197042306,3.45703451,3.50292729,3.49236287
58.03205,3.16227766,3.50199939,-0.582856529,3.45623112,3.50199939,3.49147487
58.042542,3.31662479,3.50107182,-0.429472969,3.45543602,3.50107182,3.49058694
58.053033,3.31662479,3.50014466,-0.428392187,3.45465148,3.50014466,3.48969917
58.063525,4,3.49921772,0.707659721,3.45388011,3.49921772,3.4888114
58.074016,3.87298335,3.49829119,0.612121033,3.45312548,3.49829119,3.48792378
58.084508,3.74165739,3.49736488,0.494259554,3.45239178,3.49736488,3.48703615
58.095,3.60555128,3.49643889,0.330321645,3.45168439,3.49643889,3.4861486
58.105491,3.60555128,3.49551329,0.331719736,3.45100997,3.49551329,3.48526122
58.115983,4,3.49458792,0.710923399,3.45037642,3.49458792,3.48437382
58.126474,4.69041576,3.49366295,1.09396198,3.44979366,3.49366295,3.48348659
58.136966,3.31662479,3.49273819,-0.419658671,3.44927341,3.49273819,3.48259936
58.147458,4.12310563,3.49181374,0.794538787,3.44882994,3.49181374,3.48171221
58.157949,3.60555128,3.49088969,0.338617171,3.44848021,3.49088969,3.48082522
58.168441,3.60555128,3.48996585,0.339978568,3.44824424,3.48996585,3.47993823
58.178932,4.12310563,3.4890424,0.796280871,3.44814564,3.4890424,3.47905141
58.189424,3.74165739,3.48811917,0.503525788,3.44821191,3.48811917,3.47816458
58.199916,2.82842712,3.48719623,-0.811645926,3.44847493,3.48719623,3.47727785
58.210407,4,3.48627369,0.716747034,3.44897123,3.48627369,3.47639128
58.220899,4,3.48535136,0.717390162,3.44974258,3.48535136,3.47550471
58.23139,3.16227766,3.48442941,-0.567584132,3.45083589,3.48442941,3.47461831
58.241882,3.46410162,3.48350767,-0.13930561,3.452304,3.48350767,3.47373192
58.252374,3,3.48258622,-0.694684263,3.45420517,3.48258622,3.47284562
58.262865,3,3.48166516,-0.694021011,3.45660316,3.48166516,3.47195949
58.273357,3.31662479,3.48074431,-0.405116674,3.45956783,3.48074431,3.47107336
58.283848,2.64575131,3.47982384,-0.913275711,3.46317308,3.47982384,3.47018741
58.29434,4.24264069,3.47890357,0.873920546,3.46749839,3.47890357,3.46930147
58.304832,3.87298335,3.47798359,0.628490061,3.4726257,3.47798359,3.46841562
58.315323,2.82842712,3.47706399,-0.80537995,3.47863892,3.47706399,3.46752994
58.325815,2.82842712,3.47614459,-0.804808963,3.48562442,3.47614459,3.46664428
58.336306,3.46410162,3.47522557,-0.105470162,3.49366511,3.47522557,3.46575879
58.346798,4.47213595,3.47430675,0.998914013,3.5028436,3.47430675,3.46487332
58.35729,3.46410162,3.47338822,-0.0963670115,3.51323487,3.47338822,3.46398794
58.367781,3.46410162,3.47247006,-0.091479186,3.52490543,3.47247006,3.46310275
58.378273,2.82842712,3.4715521,-0.801950728,3.53791449,3.4715521,3.46221756
58.388764,4.24264069,3.47063451,0.878638822,3.55230309,3.47063451,3.46133256
58.399256,3.74165739,3.46971712,0.521478927,3.5681012,3.46971712,3.46044757
58.409748,4.58257569,3.46880001,1.05535572,3.58531587,3.46880001,3.45956269
58.420239,4.35889894,3.46788327,0.943936266,3.60393219,3.46788327,3.45867799
58.430731,4.47213595,3.46696673,1.00258128,3.62391711,3.46696673,3.4577933
58.441222,3.74165739,3.46605055,0.524982699,3.64520502,3.46605055,3.4569088
58.451714,3.87298335,3.46513457,0.638630389,3.66771169,3.46513457,3.45602433
58.462206,3.74165739,3.46421887,0.526724324,3.69131988,3.46421887,3.45513995
58.472697,4.24264069,3.46330354,0.88280074,3.7158849,3.46330354,3.45425576
58.483189,3.87298335,3.4623884,0.64077683,3.74124289,3.4623884,3.4533716
58.49368,4.47213595,3.46147363,1.00531703,3.7671957,3.46147363,3.45248762
58.504172,4.24264069,3.46055904,0.884353801,3.79353219,3.46055904,3.45160367
58.514664,4.89897949,3.45964474,1.19972278,3.82001378,3.45964474,3.45071983
58.525155,5.09901951,3.4587308,1.28073757,3.84638515,3.4587308,3.44983617
58.535647,4.58257569,3.45781704,1.06054639,3.87238555,3.45781704,3.44895255
58.546138,4.58257569,3.45690365,1.06097693,3.89773551,3.45690365,3.44806911
58.55663,4.58257569,3.45599045,1.0614072,3.92216098,3.45599045,3.44718571
58.567122,4.79583152,3.45507753,1.15790932,3.94538087,3.45507753,3.44630241
58.577613,4.24264069,3.45416496,0.887961555,3.96711963,3.45416496,3.44541931
58.588105,3.87298335,3.45325259,0.647866312,3.98711768,3.45325259,3.44453624
58.598596,3.46410162,3.45234057,0.108448345,4.00512197,3.45234057,3.44365337
58.609088,4,3.45142874,0.740655965,4.02090579,3.45142874,3.44277053
58.61958,3.46410162,3.45051719,0.116552261,4.03426044,3.45051719,3.4418878
58.630071,4.35889894,3.44960599,0.953568537,4.04500556,3.44960599,3.44100527
58.640563,4.24264069,3.44869498,0.891036313,4.05299482,3.44869498,3.44012278
58.651054,4.12310563,3.44778432,0.821779351,4.05811242,3.44778432,3.43924049
58.661546,4,3.44687385,0.743724509,4.06028171,3.44687385,3.43835823
58.672038,4.47213595,3.44596366,1.01300163,4.0594628,3.44596366,3.43747609
58.682529,4,3.44505382,0.744947101,4.05565614,3.44505382,3.43659416
58.693021,5.38516481,3.44414416,1.39320517,4.04890024,3.44414416,3.43571226
58.703512,3.74165739,3.44323486,0.546280629,4.03927389,3.44323486,3.43483056
58.714004,4.24264069,3.44232574,0.894603232,4.02688941,3.44232574,3.43394891
58.724496,4,3.4414169,0.747384173,4.01189574,3.4414169,3.43306738
58.734987,4.47213595,3.44050841,1.01569068,3.99447384,3.44050841,3.43218605
58.745479,4.12310563,3.4396001,0.826743932,3.97482689,3.4396001,3.43130477
58.75597,4.47213595,3.43869214,1.01658439,3.95318838,3.43869214,3.4304237
58.766462,3.31662479,3.43778437,-0.348079847,3.92980302,3.43778437,3.42954267
58.776954,3.60555128,3.43687687,0.410699902,3.90493607,3.43687687,3.42866176
58.787445,3.31662479,3.43596972,-0.34546335,3.87886322,3.43596972,3.42778107
58.797937,3.60555128,3.43506275,0.412902564,3.85185766,3.43506275,3.42690042
58.808428,3.74165739,3.43415613,0.554527956,3.82420304,3.43415613,3.42601998
58.81892,3.16227766,3.4332497,-0.520549747,3.79616833,3.4332497,3.42513959
58.829412,2.23606798,3.43234353,-1.09374382,3.76802169,3.43234353,3.42425933
58.839903,3,3.43143772,-0.656839187,3.74001848,3.43143772,3.42337929
58.850395,4,3.43053208,0.75463098,3.71238939,3.43053208,3.42249929
58.860886,4.24264069,3.4296268,0.901672825,3.68535582,3.4296268,3.42161951
58.871378,4.12310563,3.4287217,0.83329702,3.65910611,3.4287217,3.42073978
58.88187,3,3.42781687,-0.654077111,3.63381168,3.42781687,3.41986019
58.892361,3.74165739,3.42691238,0.561021392,3.6096174,3.42691238,3.41898081
58.902853,3.87298335,3.42600808,0.668562087,3.58663436,3.42600808,3.41810149
58.913344,2.64575131,3.42510413,-0.882809617,3.56495566,3.42510413,3.41722239
58.923836,4.12310563,3.42420036,0.836005543,3.54463949,3.42420036,3.41634334
58.934328,4,3.42329685,0.759409737,3.5257251,3.42329685,3.41546443
58.944819,4,3.4223937,0.760004147,3.50822769,3.4223937,3.41458574
58.955311,3.87298335,3.42149072,0.671932009,3.49213608,3.42149072,3.41370711
58.965802,4.24264069,3.4205881,0.906671159,3.47742658,3.4205881,3.4128287
58.976294,2.82842712,3.41968565,-0.768933369,3.4640533,3.41968565,3.41195035
58.986786,4.35889894,3.41878347,0.969595521,3.45196109,3.41878347,3.41107214
58.997277,4.12310563,3.41788164,0.839776152,3.44108356,3.41788164,3.41019416
59.007769,4.12310563,3.41697999,0.840312821,3.43134322,3.41697999,3.40931624
59.01826,3.31662479,3.41607869,-0.31536312,3.42266104,3.41607869,3.40843855
59.028752,3.60555128,3.41517757,0.436318358,3.41495127,3.41517757,3.40756092
59.039244,3.31662479,3.41427671,-0.31249307,3.40812962,3.41427671,3.40668343
59.049735,4.47213595,3.4133762,1.02896052,3.40211216,3.4133762,3.40580618
59.060227,3.60555128,3.41247587,0.43940346,3.39681548,3.41247587,3.40492899
59.070718,2.64575131,3.4115759,-0.875114042,3.39216176,3.4115759,3.40405203
59.08121,2.82842712,3.4106761,-0.763052406,3.38807559,3.4106761,3.40317513
59.091702,3.46410162,3.40977656,0.233077348,3.38448795,3.40977656,3.40229839
59.102193,3,3.40887738,-0.639435205,3.38133501,3.40887738,3.40142188
59.112685,2.23606798,3.40797838,-1.0825481,3.37855771,3.40797838,3.40054544
59.123176,3.16227766,3.40707972,-0.494774758,3.37610385,3.40707972,3.39966923
59.133668,4.12310563,3.40618125,0.846713871,3.37392579,3.40618125,3.3987931
59.14416,2.82842712,3.40528303,-0.759510309,3.37198199,3.40528303,3.39791711
59.154651,3.46410162,3.40438517,0.244369478,3.37023591,3.40438517,3.39704137
59.165143,3.60555128,3.40348749,0.449515054,3.36865527,3.40348749,3.39616569
59.175634,3.16227766,3.40259016,-0.490216788,3.36721276,3.40259016,3.39529026
59.186126,3.46410162,3.40169301,0.249817149,3.36588445,3.40169301,3.3944149
59.196618,3,3.40079612,-0.633084607,3.36465034,3.40079612,3.3935397
59.207109,3,3.39989958,-0.63237614,3.36349353,3.39989958,3.39266473
59.217601,3.87298335,3.39900322,0.688462142,3.36239954,3.39900322,3.39178985
59.228092,3.60555128,3.39810722,0.455460271,3.36135669,3.39810722,3.39091521
59.238584,4,3.39721139,0.776394623,3.36035495,3.39721139,3.39004064
59.249076,3.74165739,3.39631583,0.587657689,3.35938634,3.39631583,3.38916624
59.259567,3.74165739,3.39542062,0.588418874,3.35844435,3.39542062,3.38829208
59.270059,3.46410162,3.39452558,0.263772689,3.35752344,3.39452558,3.387418
59.28055,3.60555128,3.3936309,0.4603481,3.35661946,3.3936309,3.38654416
59.291042,3.60555128,3.3927364,0.461318625,3.35572877,3.3927364,3.38567041
59.301534,3,3.39184217,-0.625972976,3.3548487,3.39184217,3.38479683
59.312025,3.87298335,3.39094828,0.69428745,3.35397712,3.39094828,3.38392349
59.322517,3.31662479,3.39005458,-0.270979315,3.35311215,3.39005458,3.38305023
59.333008,3.87298335,3.38916123,0.695573231,3.35225259,3.38916123,3.38217723
59.3435,3.74165739,3.38826806,0.594465584,3.3513972,3.38826806,3.38130431
59.353992,3.74165739,3.38737515,0.595216125,3.35054526,3.38737515,3.38043156
59.364483,4,3.3864826,0.783273517,3.34969619,3.3864826,3.37955907
59.374975,4.12310563,3.38559023,0.858787168,3.34884933,3.38559023,3.37868666
59.385466,3.87298335,3.38469821,0.698774026,3.34800447,3.38469821,3.3778145
59.395958,4,3.38380637,0.78498002,3.34716114,3.38380637,3.37694244
59.40645,3,3.3829148,-0.618801097,3.3463192,3.3829148,3.37607054
59.416941,3,3.38202358,-0.61808056,3.34547855,3.38202358,3.37519891
59.427433,3.46410162,3.38113254,0.288043526,3.3446389,3.38113254,3.37432736
59.437924,3.74165739,3.38024186,0.60117845,3.3438003,3.38024186,3.37345607
59.448416,3,3.37935136,-0.615915057,3.3429625,3.37935136,3.37258488
59.458908,3,3.37846112,-0.615191941,3.34212552,3.37846112,3.37171386
59.469399,4.12310563,3.37757124,0.863443328,3.34128939,3.37757124,3.3708431
59.479891,3.46410162,3.37668155,0.295668848,3.34045389,3.37668155,3.36997244
59.490382,3.74165739,3.3757922,0.604867905,3.33961917,3.3757922,3.36910204
59.500874,3.60555128,3.37490305,0.480258504,3.33878501,3.37490305,3.36823173
59.511366,3.87298335,3.37401415,0.706377513,3.33795149,3.37401415,3.36736161
59.521857,3.60555128,3.37312562,0.482105442,3.33711865,3.37312562,3.36649175
59.532349,4.24264069,3.37223727,0.932954136,3.33628632,3.37223727,3.36562199
59.54284,3,3.37134927,-0.609384336,3.33545463,3.37134927,3.36475249
59.553332,3.16227766,3.37046146,-0.456271625,3.33462342,3.37046146,3.3638831
59.563824,3,3.36957391,-0.607925912,3.33379275,3.36957391,3.36301388
59.574315,2.64575131,3.36868673,-0.850256088,3.33296267,3.36868673,3.36214494
59.584807,3.74165739,3.36779972,0.611439009,3.33213303,3.36779972,3.3612761
59.595298,2.64575131,3.36691308,-0.84921244,3.33130397,3.36691308,3.36040753
59.60579,3,3.36602662,-0.605001338,3.33047531,3.36602662,3.35953906
59.616282,3.46410162,3.36514043,0.314580968,3.32964714,3.36514043,3.35867078
59.626773,3.16227766,3.3642546,-0.449418443,3.32881951,3.3642546,3.35780277
59.637265,3.87298335,3.36336895,0.713872814,3.32799226,3.36336895,3.35693487
59.647756,3.31662479,3.36248366,-0.214146848,3.32716553,3.36248366,3.35606725
59.658248,3.87298335,3.36159856,0.715111729,3.32633917,3.36159856,3.35519973
59.66874,2.44948974,3.36071373,-0.954580531,3.32551325,3.36071373,3.3543324
59.679231,3.74165739,3.35982926,0.617922427,3.32468782,3.35982926,3.35346534
59.689723,3.16227766,3.35894498,-0.443471892,3.32386274,3.35894498,3.3525984
59.700214,3.60555128,3.35806105,0.497483891,3.32303815,3.35806105,3.35173174
59.710706,3.16227766,3.35717732,-0.441474413,3.32221389,3.35717732,3.35086518
59.721198,4,3.35629386,0.802312996,3.32139002,3.35629386,3.34999882
59.731689,4,3.35541075,0.802863156,3.32056663,3.35541075,3.34913274
59.742181,3,3.35452784,-0.595422404,3.31974355,3.35452784,3.34826678
59.752672,4.47213595,3.35364528,1.05758719,3.31892093,3.35364528,3.3474011
59.763164,3,3.35276292,-0.593938483,3.31809862,3.35276292,3.34653553
59.773656,3.46410162,3.35188083,0.334993704,3.31727667,3.35188083,3.34567016
59.784147,3.74165739,3.35099911,0.625026625,3.31645517,3.35099911,3.34480507
59.794639,3.31662479,3.35011757,-0.183010324,3.31563397,3.35011757,3.3439401
59.80513,2.82842712,3.34923639,-0.721671164,3.3148132,3.34923639,3.34307542
59.815622,3,3.34835541,-0.590216409,3.31399271,3.34835541,3.34221085
59.826114,4,3.3474747,0.807790379,3.31317257,3.3474747,3.34134649
59.836605,2.64575131,3.34659436,-0.837163692,3.31235287,3.34659436,3.34048241
59.847097,2.64575131,3.34571421,-0.836637852,3.31153343,3.34571421,3.33961846
59.857588,3.74165739,3.34483442,0.629938862,3.31071442,3.34483442,3.33875479
59.86808,3.74165739,3.34395482,0.630636635,3.30989566,3.34395482,3.33789125
59.878572,2.64575131,3.3430755,-0.835059395,3.30907725,3.3430755,3.33702792
59.889063,4,3.34219655,0.811050831,3.30825925,3.34219655,3.33616487
59.899555,3.31662479,3.34131779,-0.157140067,3.30744151,3.34131779,3.33530195
59.910046,2.64575131,3.3404394,-0.833479504,3.30662418,3.3404394,3.33443932
59.920538,2.64575131,3.3395612,-0.832952511,3.3058071,3.3395612,3.33357682
59.93103,3.31662479,3.33868328,-0.148520997,3.30499034,3.33868328,3.33271453
59.941521,2.82842712,3.33780572,-0.713707641,3.30417399,3.33780572,3.33185253
59.952013,3.60555128,3.33692836,0.518288444,3.30335788,3.33692836,3.33099067
59.962504,3.74165739,3.33605137,0.636872055,3.30254217,3.33605137,3.3301291
59.972996,3.60555128,3.33517458,0.519977594,3.3017267,3.33517458,3.32926766
59.983488,3,3.33429806,-0.578185147,3.30091155,3.33429806,3.32840643
59.993979,3.31662479,3.33342192,-0.129603734,3.30009679,3.33342192,3.3275455
60.004471,3.31662479,3.33254597,-0.12617916,3.29928227,3.33254597,3.3266847
60.014962,3.74165739,3.33167039,0.64030227,3.29846813,3.33167039,3.32582421
60.025454,5.09901951,3.33079501,1.32974603,3.29765424,3.33079501,3.32496385
60.035946,3.31662479,3.32991991,-0.115304474,3.29684065,3.32991991,3.3241037
60.046437,3,3.32904518,-0.573624601,3.29602745,3.32904518,3.32324386
60.056929,4.24264069,3.32817065,0.956279265,3.29521448,3.32817065,3.32238415
60.06742,3.31662479,3.3272965,-0.103303943,3.29440189,3.3272965,3.32152475
60.077912,3.87298335,3.32642254,0.73929751,3.29358953,3.32642254,3.32066549
60.088404,3.31662479,3.32554887,-0.0944673227,3.29277748,3.32554887,3.31980644
60.098895,3.87298335,3.32467556,0.740478078,3.2919658,3.32467556,3.31894771
60.109387,3.31662479,3.32380246,-0.08472115,3.29115436,3.32380246,3.31808911
60.119878,4.12310563,3.32292973,0.894525512,3.29034329,3.32292973,3.31723082
60.13037,2.44948974,3.32205721,-0.934113198,3.28953244,3.32205721,3.31637267
60.140862,3.16227766,3.32118497,-0.3986318,3.2887219,3.32118497,3.31551475
60.151353,4.12310563,3.32031311,0.895986897,3.28791173,3.32031311,3.31465713
60.161845,3,3.31944145,-0.565191512,3.28710179,3.31944145,3.31379966
60.172336,4.12310563,3.31857016,0.896959012,3.28629222,3.31857016,3.31294251
60.182828,3.16227766,3.31769907,-0.394235227,3.28548287,3.31769907,3.31208549
60.19332,4.24264069,3.31682828,0.96219146,3.28467382,3.31682828,3.31122871
60.203811,3.46410162,3.31595786,0.38489447,3.28386514,3.31595786,3.31037224
60.214303,2.82842712,3.31508765,-0.697610583,3.28305668,3.31508765,3.30951591
60.224794,3.60555128,3.31421781,0.53975315,3.2822486,3.31421781,3.3086599
60.235286,3.31662479,3.31334818,0.0572416622,3.28144073,3.31334818,3.30780404
60.245778,3.31662479,3.31247884,0.0643890185,3.28063316,3.31247884,3.30694842
60.256269,3.31662479,3.31160988,0.0708160185,3.27982596,3.31160988,3.30609311
60.266761,1.73205081,3.31074113,-1.25645944,3.27901898,3.31074113,3.30523795
60.277252,4.47213595,3.30987275,1.07808312,3.27821237,3.30987275,3.30438311
60.287744,4,3.30900459,0.83126134,3.27740597,3.30900459,3.30352842
60.298236,3,3.30813671,-0.555100633,3.27659988,3.30813671,3.30267397
60.308727,3.16227766,3.30726922,-0.380777569,3.27579415,3.30726922,3.30181983
60.319219,4,3.30640193,0.832825351,3.27498863,3.30640193,3.30096586
60.32971,3.74165739,3.30553503,0.660395607,3.27418349,3.30553503,3.3001122
60.340202,3.74165739,3.30466834,0.661051474,3.27337856,3.30466834,3.29925871
60.350694,3.60555128,3.30380194,0.549317154,3.27257393,3.30380194,3.29840545
60.361185,3.46410162,3.30293592,0.401454472,3.27176967,3.30293592,3.29755252
60.371677,3.74165739,3.30207012,0.663013776,3.27096562,3.30207012,3.29669974
60.382168,4,3.3012047,0.835939773,3.27016194,3.3012047,3.29584729
60.39266,1.73205081,3.30033949,-1.25231333,3.26935848,3.30033949,3.294995
60.403152,3.74165739,3.29947458,0.664968276,3.26855531,3.29947458,3.29414296
60.413643,3.60555128,3.29861005,0.554022765,3.26775251,3.29861005,3.29329124
60.424135,3.31662479,3.29774574,0.137401058,3.26694993,3.29774574,3.29243969
60.434626,3.60555128,3.29688181,0.555580296,3.26614771,3.29688181,3.29158846
60.445118,3,3.2960181,-0.544075453,3.26534572,3.2960181,3.2907374
60.45561,3.31662479,3.29515469,0.1465268,3.26454401,3.29515469,3.28988659
60.466101,3.31662479,3.29429166,0.149442735,3.26374267,3.29429166,3.2890361
60.476593,3.16227766,3.29342885,-0.362148023,3.26294155,3.29342885,3.28818579
60.487084,3.46410162,3.29256643,0.414168069,3.2621408,3.29256643,3.2873358
60.497576,3.31662479,3.29170422,0.1578625,3.26134027,3.29170422,3.28648599
60.508068,4.24264069,3.29084232,0.975601541,3.26054003,3.29084232,3.28563643
60.518559,3.31662479,3.2899808,0.163229858,3.25974016,3.2899808,3.2847872
60.529051,4.24264069,3.28911951,0.97648409,3.25894051,3.28911951,3.28393814
60.539542,3,3.2882586,-0.536897198,3.25814122,3.2882586,3.28308941
60.550034,3.60555128,3.28739792,0.564050849,3.25734216,3.28739792,3.28224086
60.560526,2,3.28653754,-1.13425638,3.25654338,3.28653754,3.28139257
60.571017,3.46410162,3.28567754,0.422402738,3.25574498,3.28567754,3.28054461
60.581509,4,3.28481777,0.845684472,3.2549468,3.28481777,3.27969682
60.592,2.44948974,3.28395839,-0.913492557,3.25414899,3.28395839,3.27884938
60.602492,2.64575131,3.28309924,-0.798340734,3.25335139,3.28309924,3.27800211
60.612984,4,3.28224039,0.847206946,3.25255409,3.28224039,3.2771551
60.623475,4.24264069,3.28138193,0.980438042,3.25175716,3.28138193,3.27630843
60.633967,3.16227766,3.2805237,-0.343869223,3.25096046,3.2805237,3.27546194
60.644458,3,3.27966586,-0.528834438,3.25016412,3.27966586,3.27461579
60.65495,2.82842712,3.27880825,-0.671104407,3.249368,3.27880825,3.27376982
60.665442,3,3.27795095,-0.527210535,3.24857218,3.27795095,3.27292411
60.675933,3.31662479,3.27709404,0.198823422,3.24777673,3.27709404,3.27207875
60.686425,3,3.27623736,-0.525582873,3.2469815,3.27623736,3.27123357
60.696916,2.82842712,3.27538107,-0.668546141,3.24618665,3.27538107,3.27038874
60.707408,2.82842712,3.27452501,-0.667905596,3.24539201,3.27452501,3.26954409
60.7179,4.47213595,3.27366926,1.09474503,3.24459768,3.27366926,3.26869971
60.728391,3.60555128,3.27281391,0.576833912,3.24380372,3.27281391,3.26785567
60.738883,3.16227766,3.27195879,-0.331181422,3.24300998,3.27195879,3.26701182
60.749374,4.12310563,3.27110407,0.923039303,3.24221661,3.27110407,3.26616832
60.759866,3.46410162,3.27024958,0.440286311,3.24142347,3.27024958,3.26532501
60.770358,3.46410162,3.2693954,0.441255268,3.24063062,3.2693954,3.26448196
60.780849,3.31662479,3.26854162,0.219278742,3.23983815,3.26854162,3.26363927
60.791341,3.46410162,3.26768808,0.443185668,3.23904591,3.26768808,3.26279677
60.801832,3.16227766,3.26683493,-0.323353168,3.23825404,3.26683493,3.26195462
60.812324,3.31662479,3.26598202,0.225039487,3.23746239,3.26598202,3.26111266
60.822816,3.87298335,3.26512943,0.779649871,3.23667105,3.26512943,3.26027098
60.833307,2.82842712,3.26427723,-0.660189446,3.23588008,3.26427723,3.25942965
60.843799,4,3.25871903,0.860976755,3.23508934,3.25871903,3.25858851
60.85429,2,3.25787855,-1.12155185,3.23429897,3.25787855,3.25774773
60.864782,3.31662479,3.25703827,0.24410351,3.23350883,3.25703827,3.25690715
60.875274,3.87298335,3.25619826,0.78535666,3.232719,3.25619826,3.25606684
60.885765,3.74165739,3.25535862,0.697351252,3.23192954,3.25535862,3.25522689
60.896257,2.82842712,3.25451917,-0.652757266,3.23114031,3.25451917,3.25438714
60.906748,3.87298335,3.25368009,0.786958232,3.23035146,3.25368009,3.25354774
60.91724,4.12310563,3.2528412,0.93287964,3.22956284,3.2528412,3.25270855
60.927732,3.74165739,3.2520026,0.699753375,3.22877452,3.2520026,3.25186963
60.938223,4.24264069,3.25116436,0.995729043,3.22798658,3.25116436,3.25103108
60.948715,2.44948974,3.25032632,-0.894894731,3.22719887,3.25032632,3.25019273
60.959206,3.46410162,3.24948865,0.463263387,3.22641154,3.24948865,3.24935474
60.969698,4.24264069,3.24865118,0.996990224,3.22562444,3.24865118,3.24851696
60.98019,3.87298335,3.247814,0.790676513,3.22483765,3.247814,3.24767946
60.990681,3.31662479,3.24697718,0.263908336,3.22405124,3.24697718,3.24684232
61.001173,3.60555128,3.24614057,0.59950872,3.22326506,3.24614057,3.24600539
61.011664,4.35889894,3.24530433,1.05526993,3.22247927,3.24530433,3.24516882
61.022156,3.46410162,3.24446829,0.468650534,3.22169371,3.24446829,3.24433247
61.032648,2.82842712,3.24363255,-0.644364354,3.22090845,3.24363255,3.24349639
61.043139,3.31662479,3.24279717,0.271712387,3.22012358,3.24279717,3.24266069
61.053631,2.23606798,3.241962,-1.00294268,3.21933894,3.241962,3.2418252
61.064122,3.16227766,3.24112721,-0.280801615,3.21855469,3.24112721,3.24099007
61.074614,2.64575131,3.24029262,-0.771065051,3.21777067,3.24029262,3.24015516
61.085106,2.23606798,3.23945833,-1.00169374,3.21698696,3.23945833,3.23932054
61.095597,2.64575131,3.23862442,-0.769982535,3.21620364,3.23862442,3.23848628
61.106089,3.60555128,3.23779071,0.606432654,3.21542055,3.23779071,3.23765225
61.11658,3.46410162,3.23695738,0.47659651,3.21463785,3.23695738,3.23681858
61.127072,3.46410162,3.23612427,0.477469735,3.21385538,3.23612427,3.23598513
61.137564,3.46410162,3.23529145,0.478341055,3.21307323,3.23529145,3.23515197
61.148055,2.82842712,3.23445901,-0.637206311,3.21229147,3.23445901,3.23431919
61.158547,3.31662479,3.23362678,0.288093745,3.21150994,3.23362678,3.23348662
61.169038,3.60555128,3.23279494,0.610537744,3.2107288,3.23279494,3.23265443
61.17953,3.31662479,3.23196331,0.290966456,3.20994791,3.23196331,3.23182246
61.190022,3.16227766,3.23113198,-0.262401076,3.20916732,3.23113198,3.23099079
61.200513,4.35889894,3.23030104,1.06235489,3.20838713,3.23030104,3.23015949
61.211005,4.24264069,3.22947031,1.00656365,3.20760717,3.22947031,3.22932842
61.221496,2.82842712,3.22863997,-0.632623776,3.20682761,3.22863997,3.22849772
61.231988,3.60555128,3.22780985,0.614606728,3.20604829,3.22780985,3.22766725
61.24248,3,3.22698003,-0.476424209,3.20526928,3.22698003,3.22683707
61.252971,3.16227766,3.22615059,-0.252730946,3.20449066,3.22615059,3.22600728
61.263463,3.46410162,3.22532138,0.488651444,3.20371229,3.22532138,3.22517772
61.273954,3.46410162,3.22449256,0.489498784,3.20293431,3.22449256,3.22434853
61.284446,3,3.22366396,-0.472931239,3.20215658,3.22366396,3.22351957
61.294938,3.16227766,3.22283566,-0.24608536,3.20137916,3.22283566,3.22269092
61.305429,3.31662479,3.22200776,0.307598816,3.20060214,3.22200776,3.22186265
61.315921,3.74165739,3.22118008,0.72144113,3.19982536,3.22118008,3.22103461
61.326412,2.82842712,3.22035279,-0.62603967,3.19904897,3.22035279,3.22020695
61.336904,3.16227766,3.21952573,-0.239265698,3.19827283,3.21952573,3.21937952
61.347396,2.82842712,3.21869899,-0.624717425,3.19749702,3.21869899,3.21855241
61.357887,3.16227766,3.21787263,-0.235785851,3.19672159,3.21787263,3.21772568
61.368379,3.60555128,3.2170465,0.623301511,3.19594642,3.2170465,3.21689918
61.37887,3.46410162,3.21622077,0.497876338,3.19517164,3.21622077,3.21607307
61.389362,3.87298335,3.21539527,0.810918047,3.19439711,3.21539527,3.21524719
61.399854,4.12310563,3.21457008,0.95317131,3.19362291,3.21457008,3.21442163
61.410345,3.60555128,3.21374529,0.625944078,3.1928491,3.21374529,3.21359645
61.420837,3,3.21292073,-0.461433342,3.19207554,3.21292073,3.21277152
61.431328,2,3.21209657,-1.10095257,3.19130238,3.21209657,3.21194697
61.44182,3.31662479,3.21127264,0.324579958,3.19052947,3.21127264,3.21112266
61.452312,2.64575131,3.21044903,-0.75146372,3.18975688,3.21044903,3.21029867
61.462803,4.24264069,3.20962582,1.01637339,3.1889847,3.20962582,3.20947507
61.473295,3.46410162,3.20880285,0.505270981,3.18821277,3.20880285,3.20865171
61.483786,3.31662479,3.20798028,0.329612671,3.18744123,3.20798028,3.20782874
61.494278,3.31662479,3.20715795,0.330857741,3.18666996,3.20715795,3.20700602
61.50477,3.16227766,3.20633593,-0.209900629,3.185899,3.20633593,3.20618361
61.515261,3.74165739,3.20551432,0.732217907,3.18512846,3.20551432,3.20536161
61.525753,3.87298335,3.20469296,0.8174903,3.18435816,3.20469296,3.20453984
61.536244,2.82842712,3.20387199,-0.612735558,3.18358827,3.20387199,3.20371848
61.546736,2.44948974,3.20305127,-0.868079215,3.18281863,3.20305127,3.20289735
61.557228,3.87298335,3.20223087,0.818994797,3.18204933,3.20223087,3.20207655
61.567719,3,3.20141088,-0.44878823,3.18128042,3.20141088,3.20125615
61.578211,3.16227766,3.20059113,-0.195738264,3.18051178,3.20059113,3.200436
61.588702,2.82842712,3.19977179,-0.609380555,3.17974354,3.19977179,3.19961625
61.599194,3.31662479,3.19895269,0.34303367,3.17897556,3.19895269,3.19879675
61.609686,3.46410162,3.19813393,0.515720554,3.1782079,3.19813393,3.19797757
61.620177,3,3.19731557,-0.444202168,3.17744066,3.19731557,3.1971588
61.630669,3.16227766,3.19649746,-0.184985937,3.17667368,3.19649746,3.19634027
61.64116,3.16227766,3.19567976,-0.182762402,3.1759071,3.19567976,3.19552215
61.651652,2.82842712,3.19486231,-0.605338899,3.17514078,3.19486231,3.19470429
61.662144,3.31662479,3.19404519,0.350113697,3.1743748,3.19404519,3.19388675
61.672635,3.60555128,3.19322848,0.64212366,3.17360922,3.19322848,3.19306962
61.683127,3.31662479,3.19241203,0.35243831,3.17284391,3.19241203,3.19225274
61.693618,2.23606798,3.19159599,-0.977511129,3.172079,3.19159599,3.19143627
61.70411,3.46410162,3.1907802,0.522801507,3.17131436,3.1907802,3.19062006
61.714602,3.16227766,3.18996475,-0.166394372,3.17055006,3.18996475,3.18980418
61.725093,3.16227766,3.18914971,-0.163926959,3.16978616,3.18914971,3.18898871
61.735585,3.31662479,3.18833493,0.358175743,3.16902253,3.18833493,3.18817349
61.746076,3.46410162,3.18752056,0.52590974,3.16825932,3.18752056,3.18735869
61.756568,3.16227766,3.18670645,-0.156297132,3.16749636,3.18670645,3.18654415
61.76706,3.31662479,3.18589268,0.36156895,3.16673375,3.18589268,3.18572994
61.777551,4.12310563,3.18507933,0.968517575,3.16597155,3.18507933,3.18491615
61.788043,3.46410162,3.18426624,0.528994683,3.16520961,3.18426624,3.18410261
61.798534,2.64575131,3.18345357,-0.733281839,3.16444809,3.18345357,3.18328949
61.809026,2.82842712,3.18264116,-0.595158829,3.16368683,3.18264116,3.18247664
61.819518,2.64575131,3.18182909,-0.732173324,3.16292592,3.18182909,3.18166412
61.830009,3.46410162,3.18101744,0.532056555,3.16216542,3.18101744,3.18085202
61.840501,3.74165739,3.18020605,0.749300563,3.16140519,3.18020605,3.18004018
61.850992,3.60555128,3.17939509,0.652806392,3.16064538,3.17939509,3.17922877
61.861484,3,3.17858439,-0.422592467,3.15988583,3.17858439,3.17841761
61.871976,2.44948974,3.17777404,-0.853395745,3.15912663,3.17777404,3.1776068
61.882467,2.64575131,3.17696411,-0.728843468,3.15836785,3.17696411,3.17679641
61.892959,3.60555128,3.17615445,0.655283774,3.15760934,3.17615445,3.17598629
61.90345,2.82842712,3.17534521,-0.58899753,3.15685124,3.17534521,3.17517659
61.913942,3.31662479,3.17453625,0.376946338,3.15609342,3.17453625,3.17436716
61.924434,3.60555128,3.17372763,0.657132898,3.15533594,3.17372763,3.17355807
61.934925,3.16227766,3.17291944,-0.103158992,3.15457889,3.17291944,3.17274941
61.945417,3.31662479,3.17211152,0.380149013,3.1538221,3.17211152,3.17194102
61.955908,3.74165739,3.17130403,0.755217427,3.15306574,3.17130403,3.17113305
61.9664,3.16227766,3.17049681,-0.0906595084,3.15230965,3.17049681,3.17032535
61.976892,4,3.16968994,0.91121351,3.15155391,3.16968994,3.16951801
61.987383,4.12310563,3.1688835,0.976842937,3.1507996,3.1688835,3.16871109
61.997875,4.12310563,3.16807734,0.977255487,3.15004456,3.16807734,3.16790445
62.008366,2.44948974,3.16727161,-0.84722008,3.14928993,3.16727161,3.16709823
62.018858,2.23606798,3.16646615,-0.964571498,3.14853559,3.16646615,3.16629229
62.02935,3.60555128,3.16566105,0.663242205,3.1477816,3.16566105,3.1654867
62.039841,3.31662479,3.16485639,0.389574646,3.14702803,3.16485639,3.16468154
62.050333,4,3.164052,0.914301921,3.14627473,3.164052,3.16387666
62.060824,3.31662479,3.16324804,0.391633434,3.14552187,3.16324804,3.16307221
62.071316,3.74165739,3.16244437,0.761060455,3.14476928,3.16244437,3.16226804
62.081808,3.16227766,3.16164105,0.0252310372,3.14401704,3.16164105,3.16146422
62.092299,3,3.16083818,-0.40104635,3.14326523,3.16083818,3.16066084
62.102791,3.31662479,3.16003558,0.395713548,3.1425137,3.16003558,3.15985774
62.113282,3.46410162,3.15923342,0.552148709,3.1417626,3.15923342,3.15905508
62.123774,3.16227766,3.15843154,0.0620170732,3.14101178,3.15843154,3.15825269
62.134266,2.64575131,3.15763003,-0.715456999,3.14026131,3.15763003,3.15745067
62.144757,2.23606798,3.15682895,-0.959562909,3.13951127,3.15682895,3.15664908
62.155249,3.46410162,3.15602816,0.555043648,3.13876152,3.15602816,3.15584777
62.16574,3.31662479,3.15522782,0.401742424,3.13801219,3.15522782,3.15504691
62.176232,3.74165739,3.15442775,0.766309097,3.13726315,3.15442775,3.15424633
62.186724,3.46410162,3.15362806,0.557201541,3.13651446,3.15362806,3.15344611
62.197215,3.16227766,3.1528288,0.0972052318,3.1357662,3.1528288,3.15264633
62.207707,3.31662479,3.15202984,0.405703034,3.13501823,3.15202984,3.15184684
62.218198,2.44948974,3.15123132,-0.83770017,3.13427069,3.15123132,3.15104779
62.22869,3.74165739,3.15043309,0.768911113,3.13352344,3.15043309,3.15024903
62.239182,3.31662479,3.14963522,0.408643568,3.13277654,3.14963522,3.14945063
62.249673,4.24264069,3.14883781,1.04585031,3.13203008,3.14883781,3.14865268
62.260165,3,3.14804068,-0.384760554,3.13128391,3.14804068,3.14785502
62.270656,3.46410162,3.14724401,0.562901065,3.13053816,3.14724401,3.1470578
62.281148,3.31662479,3.14644762,0.412525353,3.12979271,3.14644762,3.14626087
62.29164,2.82842712,3.14565161,-0.563226852,3.12904762,3.14565161,3.14546431
62.302131,4.12310563,3.14485605,0.989065001,3.12830296,3.14485605,3.1446682
62.312623,3.74165739,3.14406078,0.773043727,3.12755859,3.14406078,3.14387239
62.323114,3.46410162,3.14326597,0.566423561,3.12681466,3.14326597,3.14307702
62.333606,3.16227766,3.14247145,0.140734551,3.12607102,3.14247145,3.14228194
62.344098,3.16227766,3.1416773,0.143528248,3.12532774,3.1416773,3.14148724
62.354589,4.12310563,3.14088361,0.991071146,3.1245849,3.14088361,3.14069299
62.365081,3.31662479,3.14009022,0.420160177,3.12384235,3.14009022,3.13989903
62.375572,3.31662479,3.13929728,0.421102736,3.12310023,3.13929728,3.13910552
62.386064,3.46410162,3.13850464,0.570611057,3.12235841,3.13850464,3.13831232
62.396556,2.64575131,3.13771238,-0.701399362,3.12161696,3.13771238,3.13751949
62.407047,3.16227766,3.13692057,0.159239097,3.12087594,3.13692057,3.13672711
62.417539,3.16227766,3.13612907,0.161705265,3.12013522,3.13612907,3.13593503
62.42803,3.60555128,3.13533802,0.685720975,3.11939494,3.13533802,3.1351434
62.438522,3,3.13454728,-0.366806867,3.11865495,3.13454728,3.13435208
62.449014,2.82842712,3.13375692,-0.55256655,3.11791534,3.13375692,3.13356114
62.459505,3.46410162,3.13296701,0.575442961,3.11717616,3.13296701,3.13277065
62.469997,3.46410162,3.13217742,0.57612863,3.11643728,3.13217742,3.13198046
62.480488,3,3.13138828,-0.362475211,3.11569884,3.13138828,3.13119073
62.49098,2.23606798,3.13059945,-0.945796739,3.1149607,3.13059945,3.13040131
62.501472,2.82842712,3.129811,-0.548984407,3.11422292,3.129811,3.12961227
62.511963,3.74165739,3.12902302,0.782709631,3.11348559,3.12902302,3.12882368
62.522455,4.24264069,3.12823535,1.05565399,3.11274856,3.12823535,3.12803541
62.532946,3.46410162,3.12744813,0.580218478,3.11201198,3.12744813,3.12724759
62.543438,2.82842712,3.12666123,-0.546108146,3.11127569,3.12666123,3.12646008
62.55393,3.31662479,3.12587472,0.436749437,3.11053978,3.12587472,3.12567296
62.564421,4.12310563,3.12508867,0.999007986,3.1098043,3.12508867,3.12488629
62.574913,3.16227766,3.12430293,0.19487105,3.10906914,3.12430293,3.12409994
62.585404,3,3.12351766,-0.351450797,3.10833441,3.12351766,3.12331405
62.595896,2.64575131,3.12273271,-0.690638398,3.10759999,3.12273271,3.12252848
62.606388,4.24264069,3.12194814,1.05862767,3.10686595,3.12194814,3.12174329
62.616879,3,3.12116404,-0.348086259,3.10613234,3.12116404,3.12095856
62.627371,3.31662479,3.12038026,0.442994952,3.10539905,3.12038026,3.12017415
62.637862,3,3.11959695,-0.345827918,3.1046662,3.11959695,3.1193902
62.648354,2.82842712,3.11881395,-0.538875523,3.10393365,3.11881395,3.11860657
62.658846,2.64575131,3.11803135,-0.68722634,3.10320149,3.11803135,3.11782333
62.669337,3.46410162,3.11724922,0.588941757,3.10246977,3.11724922,3.11704056
62.679829,3.46410162,3.11646741,0.589605126,3.10173835,3.11646741,3.1162581
62.69032,3.46410162,3.11568607,0.59026735,3.10100739,3.11568607,3.11547611
62.700812,3.87298335,3.11490505,0.870676917,3.10027673,3.11490505,3.11469445
62.711304,4,3.11412443,0.94120963,3.09954645,3.11412443,3.11391317
62.721795,3.31662479,3.11334428,0.450866396,3.09881663,3.11334428,3.11313237
62.732287,3.31662479,3.11256446,0.451730375,3.09808711,3.11256446,3.11235188
62.742778,2.64575131,3.11178511,-0.68266668,3.09735804,3.11178511,3.11157187
62.75327,2.44948974,3.11100608,-0.813336547,3.09662928,3.11100608,3.11079218
62.763762,4.12310563,3.11022746,1.00641849,3.0959009,3.11022746,3.11001288
62.774253,3.46410162,3.10944931,0.595526916,3.09517297,3.10944931,3.10923406
62.784745,3,3.10867148,-0.329653583,3.09444536,3.10867148,3.10845556
62.795236,3,3.10789414,-0.328472432,3.09371819,3.10789414,3.10767754
62.805728,3,3.10711712,-0.327287521,3.09299134,3.10711712,3.10689984
62.81622,3.74165739,3.10634051,0.797067675,3.09226488,3.10634051,3.10612254
62.826711,3.46410162,3.10556437,0.598779795,3.09153886,3.10556437,3.10534572
62.837203,2,3.10478857,-1.05108923,3.09081316,3.10478857,3.10456922
62.847694,4,3.10401324,0.946565771,3.09008791,3.10401324,3.1037932
62.858186,3.60555128,3.10323825,0.708740451,3.08936298,3.10323825,3.10301751
62.868678,3.31662479,3.10246366,0.462775462,3.08863843,3.10246366,3.10224222
62.879169,2.64575131,3.10168956,-0.675231994,3.08791434,3.10168956,3.10146741
62.889661,3.46410162,3.10091579,0.60264901,3.08719057,3.10091579,3.10069293
62.900152,3.31662479,3.1001425,0.465276578,3.08646724,3.1001425,3.09991893
62.910644,3.87298335,3.09936954,0.879553184,3.08574424,3.09936954,3.09914526
62.921136,3.31662479,3.098597,0.466934462,3.08502163,3.098597,3.098372
62.931627,3,3.09782494,-0.312769786,3.08429947,3.09782494,3.09759922
62.942119,2.82842712,3.09705322,-0.518291512,3.08357763,3.09705322,3.09682677
62.95261,3.46410162,3.09628198,0.606481356,3.08285624,3.09628198,3.09605481
62.963102,2.23606798,3.09551108,-0.927061542,3.08213518,3.09551108,3.09528318
62.973594,2.64575131,3.0947406,-0.670066627,3.0814145,3.0947406,3.09451196
62.984085,2.82842712,3.0939706,-0.515309103,3.08069429,3.0939706,3.09374122
62.994577,3.74165739,3.09320094,0.805267936,3.07997439,3.09320094,3.09297082
63.005068,3.46410162,3.09243177,0.609647313,3.07925496,3.09243177,3.0922009
63.01556,3.31662479,3.09166294,0.474301433,3.07853584,3.09166294,3.09143133
63.026052,3.16227766,3.09089453,0.267176218,3.07781712,3.09089453,3.09066216
63.036543,3.46410162,3.09012661,0.611534961,3.07709886,3.09012661,3.08989348
63.047035,4.24264069,3.08935903,1.07390952,3.07638092,3.08935903,3.08912515
63.057526,2.23606798,3.08859194,-0.923322242,3.07566344,3.08859194,3.08835729
63.068018,2.44948974,3.0878252,-0.798958983,3.07494628,3.0878252,3.08758979
63.07851,3.74165739,3.08705888,0.809072624,3.07422952,3.08705888,3.08682269
63.089001,2.82842712,3.08629305,-0.507805003,3.07351322,3.08629305,3.08605609
63.099493,3.87298335,3.08552756,0.887387054,3.07279725,3.08552756,3.08528982
63.109984,2.64575131,3.08476257,-0.66257925,3.07208174,3.08476257,3.08452405
63.120476,2,3.08399793,-1.04115221,3.07136655,3.08399793,3.08375863
63.130968,3,3.08323371,-0.288502536,3.07065176,3.08323371,3.08299362
63.141459,3,3.08246999,-0.287175887,3.06993744,3.08246999,3.0822291
63.151951,3.74165739,3.08170662,0.812373541,3.06922344,3.08170662,3.08146493
63.162442,3,3.08094374,-0.284506136,3.06850991,3.08094374,3.08070125
63.172934,3,3.08018122,-0.28316288,3.0677967,3.08018122,3.07993792
63.183426,2.44948974,3.07941912,-0.793680902,3.06708389,3.07941912,3.07917501
63.193917,3.46410162,3.07865752,0.620841444,3.06637155,3.07865752,3.0784126
63.204409,3.16227766,3.07789627,0.290484751,3.06565954,3.07789627,3.07765053
63.2149,3,3.07713552,-0.277732824,3.06494799,3.07713552,3.07688897
63.225392,3.16227766,3.07637513,0.293091336,3.06423678,3.07637513,3.07612775
63.235884,3.31662479,3.07561516,0.490927313,3.06352596,3.07561516,3.07536695
63.246375,3.31662479,3.0748557,0.491700203,3.06281561,3.0748557,3.07460666
63.256867,3.60555128,3.07409659,0.729009384,3.06210559,3.07409659,3.07384671
63.267358,2.44948974,3.07333799,-0.789840646,3.06139604,3.07333799,3.07308727
63.27785,2.82842712,3.07257974,-0.494118021,3.06068683,3.07257974,3.07232817
63.288342,2.82842712,3.07182193,-0.493350589,3.05997801,3.07182193,3.07156951
63.298833,4.12310563,3.07106462,1.0256905,3.05926967,3.07106462,3.07081134
63.309325,2.82842712,3.07030767,-0.491813523,3.05856165,3.07030767,3.07005353
63.319816,2.82842712,3.06955122,-0.491043883,3.05785411,3.06955122,3.06929622
63.330308,3.87298335,3.06879514,0.896765416,3.0571469,3.06879514,3.06853927
63.3408,2.82842712,3.06803948,-0.489502155,3.0564401,3.06803948,3.06778275
63.351291,3.16227766,3.06728434,0.308209862,3.05573377,3.06728434,3.06702673
63.361783,3,3.06652956,-0.257933248,3.05502777,3.06652956,3.06627107
63.372274,3.31662479,3.06577529,0.500848782,3.05432224,3.06577529,3.06551591
63.382766,2.82842712,3.06502138,-0.486409555,3.05361705,3.06502138,3.06476112
63.393258,3,3.06426791,-0.253511161,3.05291227,3.06426791,3.06400675
63.403749,3.60555128,3.06351495,0.736231165,3.05220796,3.06351495,3.06325289
63.414241,2.44948974,3.06276235,-0.783117238,3.05150398,3.06276235,3.06249939
63.424732,3.16227766,3.06201027,0.316650269,3.05080048,3.06201027,3.0617464
63.435224,2.82842712,3.06125855,-0.482526088,3.05009732,3.06125855,3.06099377
63.445716,4.58257569,3.06050727,1.23372137,3.04939457,3.06050727,3.06024158
63.456207,3.74165739,3.05975651,0.825772897,3.04869229,3.05975651,3.0594899
63.466699,3.16227766,3.05900611,0.321358905,3.04799035,3.05900611,3.05873857
63.47719,4.12310563,3.05825623,1.0319154,3.04728889,3.05825623,3.05798776
63.487682,2.64575131,3.05750672,-0.641681705,3.04658776,3.05750672,3.05723732
63.498174,4,3.05675765,0.971206644,3.04588705,3.05675765,3.05648731
63.508665,2.82842712,3.0560091,-0.477055528,3.04518681,3.0560091,3.05573781
63.519157,3.46410162,3.05526092,0.639406517,3.04448692,3.05526092,3.05498868
63.529648,3,3.05451326,-0.233480744,3.0437875,3.05451326,3.05424006
63.54014,3,3.05376597,-0.231874897,3.04308842,3.05376597,3.05349182
63.550632,3,3.05301912,-0.230258819,3.04238975,3.05301912,3.05274401
63.561123,3.87298335,3.0522728,0.905930764,3.04169157,3.0522728,3.05199671
63.571615,3,3.05152685,-0.226995258,3.04099372,3.05152685,3.05124979
63.582106,3.46410162,3.05078142,0.642899837,3.04029636,3.05078142,3.05050338
63.592598,3,3.05003636,-0.223688088,3.03959934,3.05003636,3.04975734
63.60309,2.82842712,3.04929176,-0.469962371,3.03890273,3.04929176,3.04901174
63.613581,3,3.04854767,-0.220335357,3.0382066,3.04854767,3.04826666
63.624073,2.82842712,3.04780396,-0.468376813,3.03751082,3.04780396,3.04752196
63.634564,2.23606798,3.04706078,-0.900551387,3.03681552,3.04706078,3.04677777
63.645056,2.82842712,3.04631797,-0.466787799,3.03612057,3.04631797,3.04603395
63.655548,3,3.04557562,-0.213484474,3.03542603,3.04557562,3.04529058
63.666039,3.31662479,3.04483379,0.521335784,3.03473197,3.04483379,3.04454773
63.676531,2.64575131,3.04409234,-0.63114264,3.03403826,3.04409234,3.04380526
63.687022,3.46410162,3.04335142,0.6486526,3.03334503,3.04335142,3.04306331
63.697514,3,3.04261088,-0.206424027,3.03265215,3.04261088,3.04232173
63.708006,3,3.04187079,-0.204623541,3.03195968,3.04187079,3.0415806
63.718497,2.44948974,3.04113123,-0.769182352,3.0312677,3.04113123,3.04083999
63.728989,2.64575131,3.04039206,-0.628204384,3.03057607,3.04039206,3.04009976
63.73948,3.46410162,3.03965341,0.651496895,3.02988492,3.03965341,3.03936006
63.749972,3.31662479,3.03891515,0.526981633,3.02919413,3.03891515,3.03862073
63.760464,4.24264069,3.03817734,1.09748045,3.02850375,3.03817734,3.03788186
63.770955,3.46410162,3.03744007,0.653193345,3.02781385,3.03744007,3.03714351
63.781447,3.31662479,3.03670318,0.529076184,3.02712431,3.03670318,3.03640554
63.791938,2.82842712,3.03596682,-0.455565252,3.02643526,3.03596682,3.03566809
63.80243,2.64575131,3.03523086,-0.624082963,3.02574655,3.03523086,3.03493103
63.812922,3.74165739,3.03449535,0.840929272,3.02505827,3.03449535,3.03419442
63.823413,3.74165739,3.03376037,0.841366161,3.02437047,3.03376037,3.03345834
63.833905,3.60555128,3.03302578,0.756654143,3.02368303,3.03302578,3.03272265
63.844396,3.16227766,3.03229173,0.360535615,3.02299607,3.03229173,3.03198748
63.854888,3,3.03155807,-0.177645909,3.02230947,3.03155807,3.03125269
63.86538,3,3.03082487,-0.175570131,3.02162328,3.03082487,3.03051837
63.875871,3.16227766,3.03009221,0.363573175,3.02093759,3.03009221,3.02978457
63.886363,3,3.02935994,-0.171347415,3.02025225,3.02935994,3.02905116
63.896854,2.82842712,3.0286282,-0.447438349,3.0195674,3.0286282,3.02831827
63.907346,3.46410162,3.02789686,0.660457988,3.01888291,3.02789686,3.02758578
63.917838,2.82842712,3.02716599,-0.445801372,3.01819884,3.02716599,3.02685375
63.928329,3.74165739,3.02643565,0.845707832,3.01751526,3.02643565,3.02612225
63.938821,3,3.02570571,-0.160330004,3.01683204,3.02570571,3.02539113
63.949312,3.16227766,3.02497631,0.370541972,3.01614931,3.02497631,3.02466055
63.959804,2,3.0242473,-1.01205104,3.01546693,3.0242473,3.02393036
63.970296,2.44948974,3.02351877,-0.757647032,3.01478499,3.02351877,3.02320064
63.980787,3.16227766,3.02279077,0.373479435,3.01410353,3.02279077,3.02247144
63.991279,3.60555128,3.02206318,0.763863928,3.01342243,3.02206318,3.02174264
64.00177,2.64575131,3.02133612,-0.612849744,3.01274182,3.02133612,3.02101437
64.012262,3,3.02060946,-0.143559969,3.01206158,3.02060946,3.0202865
64.022754,3.16227766,3.01988328,0.377351796,3.01138176,3.01988328,3.0195591
64.033245,3,3.01915764,-0.138411128,3.01070243,3.01915764,3.01883222
64.043737,2.23606798,3.0184324,-0.884513666,3.01002346,3.0184324,3.01810575
64.054228,3.31662479,3.01770771,0.546733101,3.00934499,3.01770771,3.01737981
64.06472,3.16227766,3.01698342,0.381174821,3.00866688,3.01698342,3.01665426
64.075212,2.23606798,3.0162596,-0.883284565,3.0079892,3.0162596,3.01592919
64.085703,3.31662479,3.01553633,0.548715284,3.00731201,3.01553633,3.01520465
64.096195,2.23606798,3.01481346,-0.882465571,3.00663518,3.01481346,3.01448051
64.106686,3.31662479,3.01409114,0.55003059,3.00595885,3.01409114,3.01375691
64.117178,3.31662479,3.01336923,0.550686448,3.00528288,3.01336923,3.01303371
64.12767,3.31662479,3.01264779,0.551341092,3.00460735,3.01264779,3.01231098
64.138161,2.44948974,3.0119269,-0.749958104,3.00393231,3.0119269,3.01158879
64.148653,1.73205081,3.01120642,-1.13099762,3.00325763,3.01120642,3.010867
64.159144,3,3.01048649,-0.102403556,3.00258345,3.01048649,3.01014575
64.169636,3,3.00976697,-0.0988279635,3.00190964,3.00976697,3.00942491
64.180128,3.60555128,3.00904792,0.772336294,3.00123625,3.00904792,3.00870453
64.190619,3.46410162,3.00832943,0.675109016,3.00056337,3.00832943,3.0079847
64.201111,3.87298335,3.00761135,0.930253726,2.99989085,3.00761135,3.00726527
64.211602,2.44948974,3.00689382,-0.746594989,2.99921883,3.00689382,3.00654639
64.222094,2.44948974,3.0061767,-0.746114576,2.99854717,3.0061767,3.00582791
64.232586,3.46410162,3.00546007,0.677230792,2.99787595,3.00546007,3.00510991
64.243077,3,3.00474399,-0.0688766115,2.99720523,3.00474399,3.00439245
64.253569,2.82842712,3.00402832,-0.419047964,2.99653488,3.00402832,3.0036754
64.26406,3.16227766,3.00331321,0.398703466,2.99586502,3.00331321,3.00295889
64.274552,3.74165739,3.00259851,0.859685337,2.99519554,3.00259851,3.00224279
64.285044,2.23606798,3.0018843,-0.875109318,2.99452649,3.0018843,3.00152717
64.295535,2.64575131,3.00117064,-0.596170552,2.99385794,3.00117064,3.00081209
64.306027,3.16227766,3.0004574,0.402268892,2.99318976,3.0004574,3.00009743
64.316518,3,2.99974471,0.0159776819,2.99252208,2.99974471,2.99938331
64.32701,2.44948974,2.99903245,-0.741311477,2.99185477,2.99903245,2.9986696
64.337502,2.64575131,2.99832067,-0.593775514,2.9911879,2.99832067,2.99795637
64.347993,2.82842712,2.99760945,-0.411317793,2.99052152,2.99760945,2.9972437
64.358485,3,2.99689865,0.0556897417,2.98985553,2.99689865,2.99653143
64.368976,3.16227766,2.99618841,0.407540487,2.98919003,2.99618841,2.99581971
64.379468,1.41421356,2.99547859,-1.25748361,2.98852491,2.99547859,2.99510841
64.38996,3.46410162,2.99476926,0.685078353,2.98786022,2.99476926,2.99439759
64.400451,3.31662479,2.9940605,0.56794744,2.98719604,2.9940605,2.99368732
64.410943,3.74165739,2.99335215,0.865046377,2.98653223,2.99335215,2.99297746
64.421434,3,2.99264437,0.0857649849,2.98586892,2.99264437,2.99226816
64.431926,2.44948974,2.99193701,-0.736510194,2.98520599,2.99193701,2.99155927
64.442418,2.82842712,2.99123014,-0.403488561,2.9845435,2.99123014,2.99085087
64.452909,3,2.99052384,0.0973455707,2.98388151,2.99052384,2.99014302
64.463401,3,2.98981796,0.100906077,2.9832199,2.98981796,2.98943558
64.473892,2.82842712,2.98911265,-0.40085599,2.98255879,2.98911265,2.98872871
64.484384,2.82842712,2.98840776,-0.399975799,2.98189806,2.98840776,2.98802225
64.494876,3.31662479,2.98770338,0.573516708,2.98123777,2.98770338,2.98731627
64.505367,3.16227766,2.98699955,0.418662286,2.98057798,2.98699955,2.98661085
64.515859,3.60555128,2.98629616,0.786927646,2.97991857,2.98629616,2.98590586
64.52635,3.16227766,2.98559333,0.420338356,2.97925967,2.98559333,2.98520141
64.536842,3.60555128,2.98489093,0.787819997,2.97860115,2.98489093,2.98449739
64.547334,3,2.98418903,0.125741684,2.97794306,2.98418903,2.98379386
64.557825,2.64575131,2.9834877,-0.581150914,2.97728549,2.9834877,2.98309089
64.568317,3.16227766,2.9827868,0.423663621,2.97662829,2.9827868,2.98238834
64.578808,3.31662479,2.98208646,0.578392882,2.9759716,2.98208646,2.98168634
64.5893,3.60555128,2.98138657,0.790040954,2.9753153,2.98138657,2.98098477
64.599792,4,2.98068717,1.00961024,2.97465943,2.98068717,2.98028369
64.610283,2.44948974,2.97998834,-0.728353349,2.97400407,2.97998834,2.97958317
64.620775,2.64575131,2.97928995,-0.577528044,2.9733491,2.97928995,2.97888308
64.631266,3,2.97859213,0.146314278,2.97269463,2.97859213,2.97818355
64.641758,2.44948974,2.97789475,-0.726914717,2.97204054,2.97789475,2.97748444
64.65225,3.60555128,2.97719787,0.792687458,2.9713869,2.97719787,2.97678582
64.662741,3.31662479,2.97650156,0.583200848,2.97073377,2.97650156,2.97608777
64.673233,3.60555128,2.97580569,0.793565109,2.97008102,2.97580569,2.97539015
64.683724,2.82842712,2.9751104,-0.382992521,2.96942878,2.9751104,2.97469308
64.694216,3.46410162,2.97441554,0.699775732,2.96877692,2.97441554,2.97399645
64.704708,2.82842712,2.97372119,-0.381174587,2.96812552,2.97372119,2.97330031
64.715199,3.16227766,2.97302742,0.435029016,2.96747462,2.97302742,2.97260474
64.725691,3.16227766,2.97233408,0.435825169,2.9668241,2.97233408,2.97190959
64.736182,3.31662479,2.97164132,0.587352932,2.9661741,2.97164132,2.97121501
64.746674,2,2.97094901,-0.985367448,2.96552448,2.97094901,2.97052086
64.757166,2.64575131,2.9702572,-0.569654186,2.96487531,2.9702572,2.96982721
64.767657,4,2.96956597,1.01510296,2.96422664,2.96956597,2.96913413
64.778149,3.16227766,2.96887519,0.439775478,2.96357837,2.96887519,2.96844148
64.78864,2.64575131,2.96818498,-0.567832432,2.96293061,2.96818498,2.96774939
64.799132,3,2.96749522,0.180290817,2.96228323,2.96749522,2.96705774
64.809624,3.87298335,2.96680597,0.951933492,2.96163631,2.96680597,2.96636658
64.820115,2.64575131,2.9661173,-0.566008827,2.96098989,2.9661173,2.965676
64.830607,2.44948974,2.96542908,-0.718289175,2.96034387,2.96542908,2.96498585
64.841098,3.87298335,2.96474144,0.953017265,2.95969836,2.96474144,2.96429626
64.85159,3.74165739,2.96405425,0.881818088,2.95905323,2.96405425,2.96360712
64.862082,3.74165739,2.96336757,0.882207356,2.95840856,2.96336757,2.96291847
64.872573,2.82842712,2.96268147,-0.36640735,2.9577644,2.96268147,2.9622304
64.883065,3.16227766,2.96199582,0.447528586,2.95712063,2.96199582,2.96154276
64.893556,2.82842712,2.96131076,-0.364532078,2.95647737,2.96131076,2.9608557
64.904048,3.46410162,2.96062615,0.709560052,2.95583451,2.96062615,2.96016907
64.91454,2.64575131,2.95994205,-0.560527201,2.95519209,2.95994205,2.95948294
64.925031,3.16227766,2.95925854,0.450576427,2.95455019,2.95925854,2.95879739
64.935523,3.16227766,2.95857549,0.451333772,2.95390869,2.95857549,2.95811228
64.946014,2.44948974,2.95789301,-0.713024033,2.95326769,2.95789301,2.95742774
64.956506,4,2.957211,1.02117041,2.95262709,2.957211,2.95674364
64.966998,3,2.9565295,0.208495804,2.95198694,2.9565295,2.95606004
64.977489,2.64575131,2.95584859,-0.556863788,2.95134731,2.95584859,2.95537702
64.987981,2.23606798,2.95516813,-0.847997734,2.95070807,2.95516813,2.95469445
64.998472,2,2.95448827,-0.976979154,2.95006935,2.95448827,2.95401244
65.008964,2.82842712,2.95380886,-0.354092831,2.94943102,2.95380886,2.95333088
65.019456,3.74165739,2.95312997,0.887990662,2.94879315,2.95312997,2.95264983
65.029947,3.31662479,2.95245167,0.603467577,2.94815579,2.95245167,2.95196935
65.040439,3,2.95177384,0.219604563,2.94751882,2.95177384,2.95128932
65.05093,2,2.95109659,-0.97524181,2.94688238,2.95109659,2.95060986
65.061422,3.31662479,2.9504198,0.605148735,2.94624632,2.9504198,2.94993085
65.071914,3.31662479,2.94974354,0.605707234,2.94561073,2.94974354,2.94925235
65.082405,4,2.94906787,1.02514981,2.94497565,2.94906787,2.94857442
65.092897,2.44948974,2.94839266,-0.706330599,2.94434097,2.94839266,2.94789695
65.103388,3,2.94771804,0.228652484,2.94370681,2.94771804,2.94722005
65.11388,3,2.94704389,0.230121949,2.94307304,2.94704389,2.9465436
65.124372,3,2.94637026,0.231580948,2.94243973,2.94637026,2.94586766
65.134863,3.46410162,2.94569723,0.720003043,2.94180694,2.94569723,2.9451923
65.145355,2.44948974,2.94502467,-0.703942416,2.94117455,2.94502467,2.94451738
65.155846,3.31662479,2.9443527,0.610141044,2.94054267,2.9443527,2.94384305
65.166338,1.73205081,2.94368119,-1.10074083,2.9399112,2.94368119,2.94316917
65.17683,2.82842712,2.94301022,-0.338501249,2.93928018,2.94301022,2.9424958
65.187321,3.87298335,2.94233984,0.964698659,2.93864968,2.94233984,2.94182302
65.197813,2.23606798,2.94166993,-0.840001165,2.93801958,2.94166993,2.94115068
65.208304,3.31662479,2.94100062,0.612881854,2.93739,2.94100062,2.94047893
65.218796,3.16227766,2.94033178,0.471111323,2.93676082,2.94033178,2.93980762
65.229288,3.31662479,2.93966347,0.613971756,2.93613211,2.93966347,2.93913684
65.239779,2.82842712,2.93899576,-0.33251863,2.93550391,2.93899576,2.93846664
65.250271,3.31662479,2.93832853,0.615057936,2.93487611,2.93832853,2.93779689
65.260762,3.46410162,2.93766189,0.725561664,2.93424883,2.93766189,2.93712772
65.271254,2.82842712,2.93699572,-0.329497491,2.93362196,2.93699572,2.93645901
65.281746,3,2.93633009,0.252328968,2.93299554,2.93633009,2.93579081
65.292237,3.31662479,2.93566506,0.617219351,2.93236965,2.93566506,2.9351232
65.302729,3.31662479,2.93500051,0.617757461,2.93174416,2.93500051,2.93445605
65.31322,3.31662479,2.93433656,0.618294616,2.93111919,2.93433656,2.93378948
65.323712,2.64575131,2.93367308,-0.536583424,2.93049463,2.93367308,2.93312337
65.334204,3,2.93301015,0.258823985,2.92987052,2.93301015,2.93245778
65.344695,2,2.93234781,-0.965581592,2.92924694,2.93234781,2.93179277
65.355187,3.16227766,2.93168596,0.48019965,2.92862377,2.93168596,2.93112822
65.365678,3.74165739,2.9310247,0.900351421,2.92800111,2.9310247,2.93046426
65.37617,3.16227766,2.93036393,0.481574219,2.92737886,2.93036393,2.92980076
65.386662,2,2.9297037,-0.96421144,2.92675707,2.9297037,2.92913778
65.397153,3.16227766,2.92904408,0.482942629,2.92613581,2.92904408,2.92847538
65.407645,3.31662479,2.92838493,0.623088963,2.92551495,2.92838493,2.92781345
65.418136,3,2.9277264,0.268837503,2.92489462,2.9277264,2.9271521
65.428628,3.16227766,2.92706834,0.484983833,2.92427469,2.92706834,2.92649122
65.43912,3,2.92641083,0.271273234,2.92365522,2.92641083,2.92583086
65.449611,2.44948974,2.92575393,-0.690118967,2.92303628,2.92575393,2.92517109
65.460103,2.82842712,2.92509751,-0.310918621,2.92241775,2.92509751,2.92451178
65.470594,2.64575131,2.92444171,-0.527911351,2.92179974,2.92444171,2.92385306
65.481086,2.44948974,2.92378638,-0.688691977,2.92118214,2.92378638,2.9231948
65.491578,3.74165739,2.92313161,0.904724145,2.920565,2.92313161,2.92253707
65.502069,3,2.92247744,0.278428728,2.91994839,2.92247744,2.92187993
65.512561,3.31662479,2.92182377,0.628331938,2.91933219,2.92182377,2.92122325
65.523052,3,2.9211707,0.280765558,2.91871651,2.9211707,2.92056717
65.533544,3.16227766,2.92051812,0.491690488,2.91810124,2.92051812,2.91991155
65.544036,2.82842712,2.9198661,-0.302388779,2.91748644,2.9198661,2.91925646
65.554527,2.44948974,2.91921469,-0.685364825,2.91687217,2.91921469,2.91860196
65.565019,3.31662479,2.91856376,0.630920777,2.9162583,2.91856376,2.91794793
65.57551,3.16227766,2.91791346,0.494332079,2.91564496,2.91791346,2.91729449
65.586002,4.35889894,2.91726364,1.20068118,2.91503203,2.91726364,2.91664151
65.596494,2.64575131,2.91661438,-0.520445065,2.91441957,2.91661438,2.91598907
65.606985,2.44948974,2.91596573,-0.682990474,2.91380763,2.91596573,2.91533722
65.617477,3,2.91531637,0.291004527,2.91319611,2.91531637,2.91468584
65.627968,3.60555128,2.91466883,0.831193385,2.91258511,2.91466883,2.91403505
65.63846,3,2.91402179,0.293220406,2.91197452,2.91402179,2.91338473
65.648952,3.46410162,2.91337531,0.742109361,2.9113644,2.91337531,2.91273495
65.659443,3.31662479,2.91272945,0.635527609,2.91075481,2.91272945,2.91208576
65.669935,2.64575131,2.91208408,-0.516074386,2.91014563,2.91208408,2.91143704
65.680426,3.60555128,2.91143934,0.833133806,2.90953698,2.91143934,2.91078891
65.690918,3.46410162,2.91079509,0.743845768,2.90892875,2.91079509,2.91014126
65.70141,2.82842712,2.9101514,-0.285874579,2.90832098,2.9101514,2.90949414
65.711901,4.12310563,2.90950833,1.10163392,2.90771374,2.90950833,2.90884762
65.722393,4.12310563,2.90886577,1.10192552,2.90710691,2.90886577,2.90820157
65.732884,2.23606798,2.90822382,-0.819851111,2.90650062,2.90822382,2.90755611
65.743376,3.31662479,2.90758238,0.639564236,2.90589473,2.90758238,2.90691113
65.753868,2.82842712,2.9069415,-0.280204164,2.90528932,2.9069415,2.90626668
65.764359,3.16227766,2.90630124,0.50594112,2.90468444,2.90630124,2.90562284
65.774851,2.64575131,2.90566149,-0.509813867,2.90407997,2.90566149,2.90497946
65.785342,2.82842712,2.90502236,-0.276758448,2.90347603,2.90502236,2.90433669
65.795834,2.44948974,2.90438374,-0.6744583,2.90287251,2.90438374,2.90369439
65.806326,2.23606798,2.90374568,-0.81711548,2.90226946,2.90374568,2.90305263
65.816817,2.82842712,2.90310826,-0.273278487,2.90166693,2.90310826,2.90241146
65.827309,3.46410162,2.90247133,0.749419963,2.90106483,2.90247133,2.90177078
65.8378,3.31662479,2.90183504,0.64404173,2.90046325,2.90183504,2.90113069
65.848292,2.82842712,2.90119925,-0.269763099,2.89986209,2.90119925,2.90049108
65.858784,1.73205081,2.90056404,-1.0809779,2.89926141,2.90056404,2.89985201
65.869275,3.60555128,2.89992945,0.84001299,2.89866125,2.89992945,2.89921354
65.879767,3.87298335,2.89929538,0.986756287,2.89806151,2.89929538,2.89857555
65.890258,2.64575131,2.89866193,-0.502902197,2.89746231,2.89866193,2.89793816
65.90075,4.24264069,2.898029,1.15957393,2.89686352,2.898029,2.89730125
65.911242,3.60555128,2.89739664,0.841519244,2.8962652,2.89739664,2.89666487
65.921733,2.23606798,2.89676491,-0.812832659,2.89566742,2.89676491,2.8960291
65.932225,3.31662479,2.8961337,0.648452847,2.89507005,2.8961337,2.89539382
65.942716,2.44948974,2.89550312,-0.667842327,2.89447322,2.89550312,2.89475913
65.953208,3,2.89487305,0.324232859,2.8938768,2.89487305,2.89412492
65.9637,2.44948974,2.89424356,-0.66689866,2.89328086,2.89424356,2.89349126
65.974191,2.82842712,2.89361471,-0.255318602,2.89268545,2.89361471,2.8928582
65.984683,3.16227766,2.89298638,0.518932829,2.89209046,2.89298638,2.89222562
65.995174,2.82842712,2.89235868,-0.252846905,2.89149601,2.89235868,2.89159365
66.005666,2.23606798,2.8917315,-0.809730527,2.89090197,2.8917315,2.89096216
66.016158,3,2.89110491,0.329992567,2.89030841,2.89110491,2.89033121
66.026649,2.44948974,2.89047895,-0.66407018,2.88971538,2.89047895,2.88970086
66.037141,3,2.88985351,0.33188325,2.88912277,2.88985351,2.889071
66.047632,3,2.88922871,0.332823209,2.8885307,2.88922871,2.88844175
66.058124,2.64575131,2.88860444,-0.492801305,2.88793905,2.88860444,2.88781298
66.068616,2.64575131,2.88798075,-0.492168096,2.88734787,2.88798075,2.88718476
66.079107,2,2.8873577,-0.941996654,2.88675723,2.8873577,2.88655714
66.089599,2.44948974,2.88673517,-0.661245363,2.88616701,2.88673517,2.88593
66.10009,3,2.88611329,0.337471045,2.88557732,2.88611329,2.88530348
66.110582,3.46410162,2.88549194,0.760663969,2.88498806,2.88549194,2.88467744
66.121074,3.87298335,2.88487117,0.994038315,2.88439927,2.88487117,2.88405194
66.131565,2.64575131,2.88425105,-0.488364355,2.88381102,2.88425105,2.88342706
66.142057,2.64575131,2.88363146,-0.487729589,2.88322319,2.88363146,2.88280266
66.152548,3.16227766,2.88301252,0.528455429,2.88263589,2.88301252,2.88217887
66.16304,3.46410162,2.88239411,0.762697521,2.88204902,2.88239411,2.88155557
66.173532,3,2.88177628,0.343836758,2.88146262,2.88177628,2.88093281
66.184023,2.44948974,2.88115911,-0.657015501,2.88087677,2.88115911,2.88031066
66.194515,3.16227766,2.88054247,0.530787329,2.88029133,2.88054247,2.87968901
66.205006,3.46410162,2.87992648,0.764313504,2.87970643,2.87992648,2.87906796
66.215498,3.87298335,2.87931103,0.996831138,2.87912195,2.87931103,2.8784474
66.22599,3,2.87869617,0.348286994,2.87853796,2.87869617,2.87782739
66.236481,3,2.87808196,0.349167633,2.8779545,2.87808196,2.87720799
66.246973,2.44948974,2.8774683,-0.654200697,2.87737146,2.8774683,2.87658908
66.257464,3.60555128,2.87685528,0.853636922,2.87678896,2.87685528,2.87597078
66.267956,3.60555128,2.87624281,0.85399559,2.87620689,2.87624281,2.87535298
66.278448,2.82842712,2.87563093,-0.217264369,2.87562529,2.87563093,2.87473572
66.288939,3.46410162,2.87501971,0.767516712,2.87504424,2.87501971,2.87411908
66.299431,3.16227766,2.87440903,0.5365339,2.8744636,2.87440903,2.87350292
66.309922,4.24264069,2.87379902,1.16997507,2.87388351,2.87379902,2.87288738
66.320414,3.16227766,2.87318954,0.537669154,2.87330384,2.87318954,2.87227233
66.330906,3.16227766,2.87258067,0.53823507,2.87272465,2.87258067,2.87165784
66.341397,2.64575131,2.87197246,-0.47562711,2.872146,2.87197246,2.87104396
66.351889,2.44948974,2.87136479,-0.649519092,2.87156777,2.87136479,2.87043057
66.36238,2.82842712,2.87075779,-0.205744181,2.87099008,2.87075779,2.86981779
66.372872,3.87298335,2.87015134,1.001415,2.87041282,2.87015134,2.86920551
66.383364,1.73205081,2.86954549,-1.06653396,2.86983604,2.86954549,2.86859378
66.393855,3.87298335,2.86894031,1.00201948,2.8692598,2.86894031,2.86798266
66.404347,3.46410162,2.86833568,0.771858751,2.86868399,2.86833568,2.86737204
66.414838,3.16227766,2.86773172,0.542720867,2.86810871,2.86773172,2.86676204
66.42533,3.60555128,2.86712831,0.859315404,2.86753386,2.86712831,2.86615253
66.435822,2.82842712,2.86652551,-0.195188087,2.8669595,2.86652551,2.86554357
66.446313,2.82842712,2.86592339,-0.193639515,2.86638567,2.86592339,2.86493523
66.456805,2.64575131,2.86532182,-0.468583508,2.86581227,2.86532182,2.86432739
66.467296,3.16227766,2.86472092,0.545487621,2.86523941,2.86472092,2.86372016
66.477788,3.31662479,2.86412057,0.672684336,2.86466698,2.86412057,2.86311343
66.48828,4,2.86352085,1.06605776,2.86409503,2.86352085,2.86250726
66.498771,2.64575131,2.8629218,-0.466015545,2.86352362,2.8629218,2.8619017
66.509263,2.82842712,2.86232331,-0.184109168,2.86295264,2.86232331,2.86129664
66.519754,2.82842712,2.8617255,-0.182478419,2.8623822,2.8617255,2.86069219
66.530246,2.44948974,2.86112825,-0.641590607,2.86181219,2.86112825,2.86008825
66.540738,3.46410162,2.86053162,0.776897672,2.86124266,2.86053162,2.85948486
66.551229,3.46410162,2.85993568,0.77728112,2.86067368,2.85993568,2.85888209
66.561721,3.46410162,2.85934029,0.777664015,2.86010512,2.85934029,2.85827982
66.572212,2.64575131,2.8587456,-0.461513038,2.8595371,2.8587456,2.85767817
66.582704,2.82842712,2.85815147,-0.172407486,2.85896951,2.85815147,2.85707702
66.593196,3.31662479,2.85755796,0.677544705,2.85840241,2.85755796,2.85647642
66.603687,2.82842712,2.85696515,-0.168932,2.85783585,2.85696515,2.85587645
66.614179,2.64575131,2.8563729,-0.458935278,2.85726972,2.8563729,2.85527697
66.62467,3,2.85578134,0.379761317,2.85670412,2.85578134,2.85467812
66.635162,3.16227766,2.85519036,0.554154582,2.85613896,2.85519036,2.85407976
66.645654,3.31662479,2.85460001,0.679724048,2.85557429,2.85460001,2.85348197
66.656145,3,2.85401035,0.382085921,2.85501015,2.85401035,2.85288479
66.666637,2.82842712,2.85342127,-0.15809536,2.85444645,2.85342127,2.85228812
66.677128,3,2.85283288,0.383623671,2.85388329,2.85283288,2.85169207
66.68762,3,2.85224507,0.384389032,2.85332056,2.85224507,2.85109652
66.698112,2.82842712,2.8516579,-0.152416466,2.85275832,2.8516579,2.85050153
66.708603,3,2.85107143,0.385912643,2.85219661,2.85107143,2.84990716
66.719095,3.60555128,2.85048555,0.868945182,2.85163534,2.85048555,2.8493133
66.729586,3,2.84990036,0.387426951,2.85107461,2.84990036,2.84872005
66.740078,3.31662479,2.84931576,0.683600053,2.85051432,2.84931576,2.84812731
66.75057,1.41421356,2.8487318,-1.19771376,2.84995451,2.8487318,2.84753514
66.761061,4,2.84814855,1.07324342,2.84939524,2.84814855,2.84694358
66.771553,2,2.84756589,-0.920633419,2.84883641,2.84756589,2.84635253
66.782044,2.44948974,2.84698394,-0.630471406,2.84827811,2.84698394,2.8457621
66.792536,2.44948974,2.84640258,-0.630010186,2.84772025,2.84640258,2.84517218
66.803028,3,2.84582187,0.39265523,2.84716288,2.84582187,2.84458282
66.813519,3,2.84524187,0.393393095,2.84660605,2.84524187,2.84399408
66.824011,2.64575131,2.84466247,-0.445994578,2.84604966,2.84466247,2.84340585
66.834502,2.64575131,2.84408379,-0.445345346,2.8454938,2.84408379,2.84281824
66.844994,3.46410162,2.8435057,0.7877791,2.84493838,2.8435057,2.84223114
66.855486,3.46410162,2.84292828,0.788145503,2.84438345,2.84292828,2.8416446
66.865977,3.16227766,2.84235157,0.56562009,2.84382906,2.84235157,2.84105869
66.876469,3.16227766,2.84177547,0.566129125,2.84327511,2.84177547,2.84047328
66.88696,3.16227766,2.84120009,0.566637068,2.84272169,2.84120009,2.8398885
66.897452,2.44948974,2.84062532,-0.625408332,2.84216872,2.84062532,2.83930422
66.907944,3,2.84005122,0.399935967,2.84161623,2.84005122,2.83872052
66.918435,3,2.83947784,0.400652162,2.84106428,2.83947784,2.83813743
66.928927,1.73205081,2.83890508,-1.05207142,2.84051277,2.83890508,2.83755486
66.939418,2,2.83833305,-0.915605291,2.83996181,2.83833305,2.8369729
66.94991,2.23606798,2.83776163,-0.77568915,2.83941128,2.83776163,2.83639146
66.960402,3.16227766,2.8371909,0.570163805,2.83886123,2.8371909,2.83581059
66.970893,2.82842712,2.83662089,-0.090519418,2.83831173,2.83662089,2.83523034
66.981385,2.82842712,2.83605151,-0.0873177203,2.83776267,2.83605151,2.8346506
66.991876,3.46410162,2.83548286,0.792854811,2.83721415,2.83548286,2.83407148
67.002368,3.60555128,2.83491485,0.877859002,2.83666607,2.83491485,2.83349288
67.01286,4.35889894,2.83434752,1.23472727,2.83611848,2.83434752,2.83291484
67.023351,3.31662479,2.83378093,0.694869672,2.83557142,2.83378093,2.83233743
67.033843,2.82842712,2.83321497,-0.0691942924,2.83502481,2.83321497,2.83176053
67.044334,2.64575131,2.83264977,-0.432317539,2.83447874,2.83264977,2.83118426
67.054826,3.46410162,2.8320852,0.794994603,2.83393311,2.8320852,2.8306085
67.065318,3.16227766,2.83152132,0.575114195,2.83338797,2.83152132,2.83003331
67.075809,1.41421356,2.8309582,-1.19027082,2.83284337,2.8309582,2.82945874
67.086301,3.16227766,2.83039572,0.576091953,2.83229921,2.83039572,2.82888469
67.096792,2.44948974,2.829834,-0.616720566,2.83175559,2.829834,2.82831126
67.107284,2.44948974,2.82927293,-0.616265515,2.83121241,2.82927293,2.82773835
67.117776,3.31662479,2.82871256,0.698507142,2.83066972,2.82871256,2.827166
67.128267,2.44948974,2.82815296,-0.61535617,2.83012758,2.82815296,2.82659428
67.138759,2.64575131,2.82759401,-0.426430182,2.82958587,2.82759401,2.82602308
67.14925,3.46410162,2.82703583,0.798164008,2.82904471,2.82703583,2.82545251
67.159742,2.64575131,2.82647831,-0.425119985,2.82850399,2.82647831,2.82488245
67.170234,3.31662479,2.82592151,0.700502161,2.82796376,2.82592151,2.82431296
67.180725,3.31662479,2.82536549,0.700898927,2.82742407,2.82536549,2.82374409
67.191217,3.74165739,2.82481013,0.957521414,2.82688482,2.82481013,2.82317575
67.201708,2,2.82425555,-0.907885207,2.82634611,2.82425555,2.82260803
67.2122,3.74165739,2.82370164,0.958100069,2.82580785,2.82370164,2.82204082
67.222692,3,2.82314847,0.420537191,2.82527007,2.82314847,2.82147419
67.233183,3.16227766,2.82259608,0.582822079,2.82473284,2.82259608,2.82090819
67.243675,2.64575131,2.82204438,-0.419872682,2.82419605,2.82204438,2.8203427
67.254166,3.16227766,2.82149347,0.583767242,2.82365981,2.82149347,2.81977784
67.264658,3,2.82094324,0.423150985,2.823124,2.82094324,2.8192135
67.27515,3,2.82039377,0.423799757,2.82258869,2.82039377,2.81864973
67.285641,3.60555128,2.81984509,0.886400693,2.82205392,2.81984509,2.81808658
67.296133,3.46410162,2.81929711,0.802997203,2.82151959,2.81929711,2.81752396
67.306624,3.74165739,2.81874993,0.960680725,2.82098581,2.81874993,2.81696197
67.317116,3.31662479,2.81820346,0.705989609,2.82045246,2.81820346,2.81640049
67.327608,3.60555128,2.81765775,0.887633665,2.81991961,2.81765775,2.81583959
67.338099,3.16227766,2.81711286,0.587507279,2.81938731,2.81711286,2.81527931
67.348591,3.60555128,2.81656868,0.888246924,2.81885544,2.81656868,2.81471956
67.359082,3.16227766,2.81602532,0.588432104,2.81832412,2.81602532,2.81416043
67.369574,3.46410162,2.81548268,0.805368818,2.81779324,2.81548268,2.81360182
67.380066,2.23606798,2.81494082,-0.760836937,2.81726285,2.81494082,2.81304379
67.390557,2.64575131,2.81439979,-0.410668337,2.81673301,2.81439979,2.81248639
67.401049,3,2.8138595,0.431440031,2.81620361,2.8138595,2.81192951
67.41154,3,2.81332004,0.43206476,2.81567476,2.81332004,2.81137325
67.422032,3,2.81278133,0.432687731,2.81514634,2.81278133,2.81081752
67.432524,3.31662479,2.81224341,0.710198129,2.81461842,2.81224341,2.81026236
67.443015,3.16227766,2.81170634,0.592090637,2.81409105,2.81170634,2.80970783
67.453507,3.16227766,2.81117002,0.592543365,2.81356411,2.81117002,2.80915383
67.463998,3.60555128,2.81063456,0.891581019,2.81303772,2.81063456,2.80860045
67.47449,2.82842712,2.81009987,0.135378209,2.81251178,2.81009987,2.80804759
67.484982,2.44948974,2.80956598,-0.600063531,2.81198633,2.80956598,2.80749532
67.495473,3,2.80903297,0.436997741,2.81146142,2.80903297,2.80694367
67.505965,3,2.80850074,0.437606286,2.81093695,2.80850074,2.80639254
67.516456,2.82842712,2.80796938,0.143030563,2.81041303,2.80796938,2.80584204
67.526948,2.64575131,2.80743881,-0.402103842,2.80988956,2.80743881,2.80529207
67.53744,3.46410162,2.80690908,0.810674125,2.80936657,2.80690908,2.80474267
67.547931,3.46410162,2.80638024,0.811000232,2.80884413,2.80638024,2.80419391
67.558423,2.23606798,2.8058522,-0.754840528,2.80832214,2.8058522,2.80364566
67.568914,3.46410162,2.80532506,0.811650511,2.80780069,2.80532506,2.80309805
67.579406,2.64575131,2.80479874,-0.398807505,2.80727968,2.80479874,2.80255096
67.589898,4.24264069,2.80427327,1.19931956,2.80675917,2.80427327,2.80200445
67.600389,2.82842712,2.80374873,0.157093578,2.8062392,2.80374873,2.80145857
67.610881,3.31662479,2.80322502,0.716519207,2.80571968,2.80322502,2.80091321
67.621372,3,2.80270223,0.444182136,2.8052007,2.80270223,2.80036849
67.631864,3.74165739,2.80218028,0.969266272,2.80468217,2.80218028,2.79982429
67.642356,3.31662479,2.80165923,0.717611012,2.80416413,2.80165923,2.79928066
67.652847,3.60555128,2.80113912,0.89689027,2.80364663,2.80113912,2.79873767
67.663339,2.44948974,2.80061987,-0.592562338,2.80312958,2.80061987,2.79819521
67.67383,3.31662479,2.80010158,0.718695494,2.80261308,2.80010158,2.79765337
67.684322,3,2.79958416,0.447678283,2.80209702,2.79958416,2.79711206
67.694814,3.31662479,2.79906766,0.719414437,2.80158145,2.79906766,2.79657133
67.705305,3,2.79855214,0.448829431,2.80106643,2.79855214,2.79603123
67.715797,2.64575131,2.79803752,-0.39023865,2.80055185,2.79803752,2.79549166
67.726288,2,2.79752388,-0.893041927,2.80003782,2.79752388,2.79495272
67.73678,3.16227766,2.79701116,0.60437282,2.79952424,2.79701116,2.7944143
67.747272,3.46410162,2.79649939,0.817069292,2.79901115,2.79649939,2.79387647
67.757763,2.44948974,2.79598864,-0.588641567,2.7984986,2.79598864,2.79333927
67.768255,3,2.79547881,0.452240187,2.7979865,2.79547881,2.79280259
67.778746,2.64575131,2.79497002,-0.386288379,2.79747494,2.79497002,2.79226654
67.789238,2.64575131,2.79446218,-0.385630477,2.79696383,2.79446218,2.79173103
67.79973,2.64575131,2.79395533,-0.384972751,2.79645322,2.79395533,2.79119609
67.810221,2.64575131,2.79344954,-0.384315275,2.79594315,2.79344954,2.79066179
67.820713,4.35889894,2.79294472,1.25138093,2.79543352,2.79294472,2.79012801
67.831204,3,2.79244098,0.455586456,2.79492444,2.79244098,2.78959486
67.841696,3.16227766,2.79193823,0.608555202,2.79441581,2.79193823,2.78906225
67.852188,3,2.79143652,0.456687509,2.79390767,2.79143652,2.78853021
67.862679,2.82842712,2.79093592,0.193626468,2.79340008,2.79093592,2.78799881
67.873171,2.64575131,2.79043633,-0.380374841,2.79289293,2.79043633,2.78746793
67.883662,2.23606798,2.78993787,-0.744224356,2.79238632,2.78993787,2.78693769
67.894154,3.31662479,2.78944045,0.726074612,2.79188017,2.78944045,2.78640797
67.904646,3.46410162,2.78894413,0.821679676,2.79137451,2.78894413,2.78587884
67.915137,3,2.78844896,0.459946781,2.79086939,2.78844896,2.78535034
67.925629,3.46410162,2.78795487,0.82228143,2.79036472,2.78795487,2.78482237
67.93612,3,2.78746195,0.46101849,2.7898606,2.78746195,2.78429503
67.946612,3,2.78697014,0.461551583,2.78935692,2.78697014,2.78376822
67.957104,3.31662479,2.78647948,0.728110784,2.78885374,2.78647948,2.783242
67.967595,2.44948974,2.78599003,-0.580086452,2.7883511,2.78599003,2.7827164
67.978087,3,2.78550173,0.463139582,2.78784891,2.78550173,2.78219134
67.988578,2,2.78501466,-0.886010533,2.78734726,2.78501466,2.7816669
67.99907,3.16227766,2.78452876,0.614612802,2.78684606,2.78452876,2.781143
68.009562,3,2.78404409,0.464710567,2.78634536,2.78404409,2.78061968
68.020053,3.87298335,2.7835607,1.04375411,2.7858452,2.7835607,2.780097
68.030545,3.46410162,2.78307852,0.825241237,2.78534549,2.78307852,2.77957484
68.041036,2.64575131,2.78259765,-0.369927475,2.78484632,2.78259765,2.77905332
68.051528,2.44948974,2.78211802,-0.576739349,2.7843476,2.78211802,2.77853233
68.06202,2.82842712,2.78163969,0.216304025,2.78384938,2.78163969,2.77801192
68.072511,3.87298335,2.78116273,1.0449022,2.7833517,2.78116273,2.77749214
68.083003,3.16227766,2.78068706,0.617730201,2.78285447,2.78068706,2.7769729
68.093494,2.64575131,2.78021279,-0.366689889,2.78235778,2.78021279,2.77645429
68.103986,3.46410162,2.77973984,0.827261613,2.78186154,2.77973984,2.77593621
68.114478,3,2.77926828,0.46982094,2.7813658,2.77926828,2.77541871
68.124969,3,2.77879818,0.470320972,2.7808706,2.77879818,2.77490185
68.135461,3,2.77832947,0.470819001,2.78037585,2.77832947,2.77438552
68.145952,2.64575131,2.77786225,-0.363470682,2.77988164,2.77786225,2.77386982
68.156444,2.44948974,2.77739646,-0.572631394,2.77938788,2.77739646,2.77335465
68.166936,3,2.77693216,0.472300585,2.77889462,2.77693216,2.77284007
68.177427,3.31662479,2.77646942,0.734952632,2.7784019,2.77646942,2.77232612
68.187919,4.35889894,2.77600818,1.25812987,2.77790963,2.77600818,2.7718127
68.19841,3,2.77554854,0.473763081,2.7774179,2.77554854,2.77129992
68.208902,3.87298335,2.77509045,1.04780384,2.77692662,2.77509045,2.77078767
68.219394,2.64575131,2.77463398,-0.359002321,2.77643584,2.77463398,2.770276
68.229885,2.82842712,2.77417919,0.232911871,2.7759456,2.77417919,2.76976497
68.240377,2.64575131,2.77372602,-0.357735525,2.77545581,2.77372602,2.76925447
68.250868,3,2.77327459,0.47615692,2.77496656,2.77327459,2.7687446
68.26136,3,2.77282484,0.476628955,2.77447777,2.77282484,2.76823527
68.271852,2.82842712,2.77237685,0.236749402,2.77398947,2.77237685,2.76772652
68.282343,3.31662479,2.77193068,0.73803395,2.77350171,2.77193068,2.7672184
68.292835,3.31662479,2.77148629,0.738334953,2.7730144,2.77148629,2.76671082
68.303326,3.87298335,2.77104379,1.04973309,2.77252763,2.77104379,2.76620387
68.313818,2.64575131,2.77060313,-0.353343768,2.77204131,2.77060313,2.76569745
68.32431,2,2.77016439,-0.877590104,2.77155549,2.77016439,2.76519162
68.334801,3.31662479,2.76972765,0.739524944,2.77107022,2.76972765,2.76468642
68.345293,3,2.76929286,0.480319834,2.77058539,2.76929286,2.76418176
68.355784,3.31662479,2.76886014,0.740111242,2.7701011,2.76886014,2.76367773
68.366276,3.31662479,2.76842945,0.740402146,2.76961727,2.76842945,2.76317424
68.376768,2.82842712,2.76800088,0.245817503,2.76913393,2.76800088,2.76267132
68.387259,2.64575131,2.7675745,-0.349031795,2.76865113,2.7675745,2.76216904
68.397751,2.82842712,2.76715029,0.247541582,2.76816878,2.76715029,2.7616673
68.408242,3.60555128,2.76672836,0.91587276,2.76768698,2.76672836,2.76116619
68.418734,2.64575131,2.76630869,-0.347213738,2.76720562,2.76630869,2.76066562
68.429226,3.16227766,2.76589136,0.629592166,2.76672476,2.76589136,2.76016563
68.439717,3.16227766,2.76547647,0.629921572,2.76624444,2.76547647,2.75966627
68.450209,3,2.76506399,0.484701978,2.76576458,2.76506399,2.75916745
68.4607,2.82842712,2.76465406,0.252533302,2.76528525,2.76465406,2.75866926
68.471192,3.16227766,2.76424664,0.630896995,2.76480638,2.76424664,2.7581716
68.481684,3.31662479,2.76384185,0.743493739,2.764328,2.76384185,2.75767454
68.492175,3.60555128,2.76343978,0.917666332,2.76385016,2.76343978,2.7571781
68.502667,3.16227766,2.76304042,0.631852232,2.76337277,2.76304042,2.7566822
68.513158,2.23606798,2.76264394,-0.72565554,2.76289593,2.76264394,2.75618693
68.52365,2.82842712,2.76225028,0.257248614,2.76241953,2.76225028,2.7556922
68.534142,2.64575131,2.76185956,-0.340746611,2.76194363,2.76185956,2.75519805
68.544633,3.60555128,2.76147192,0.918737915,2.76146828,2.76147192,2.75470454
68.555125,3,2.76108734,0.488786925,2.76099337,2.76108734,2.75421156
68.565616,3.87298335,2.76070599,1.05464561,2.760519,2.76070599,2.75371922
68.576108,1.41421356,2.76032787,-1.16022166,2.76004509,2.76032787,2.75322741
68.5866,2,2.75995311,-0.871752895,2.75957167,2.75995311,2.75273619
68.597091,2.82842712,2.75958183,0.262383865,2.75909879,2.75958183,2.7522456
68.607583,2.23606798,2.75921406,-0.723288383,2.75862636,2.75921406,2.75175554
68.618074,2,2.75884997,-0.871119951,2.75815447,2.75884997,2.75126612
68.628566,3.16227766,2.75848958,0.635443212,2.75768304,2.75848958,2.75077724
68.639058,3.16227766,2.75813305,0.63572369,2.7572121,2.75813305,2.75028894
68.649549,2.23606798,2.75778051,-0.722296708,2.7567417,2.75778051,2.74980127
68.660041,2.23606798,2.75743202,-0.722055427,2.75627175,2.75743202,2.74931414
68.670532,3.46410162,2.75708776,0.840841162,2.75580234,2.75708776,2.74882764
68.681024,3.16227766,2.75674779,0.636812276,2.75533338,2.75674779,2.74834168
68.691516,2,2.75641227,-0.869719652,2.75486492,2.75641227,2.74785631
68.702007,2.64575131,2.75608139,-0.332159717,2.754397,2.75608139,2.74737156
68.712499,2.44948974,2.75575521,-0.553412566,2.75392952,2.75575521,2.74688736
68.72299,2.82842712,2.75543395,0.270172482,2.75346259,2.75543395,2.74640378
68.733482,3.87298335,2.75511771,1.05729165,2.75299611,2.75511771,2.74592075
68.743974,2.64575131,2.75480669,-0.330235334,2.75253013,2.75480669,2.7454383
68.754465,2.44948974,2.75450107,-0.552278309,2.75206468,2.75450107,2.74495648
68.764957,2,2.75420099,-0.868447462,2.75159969,2.75420099,2.74447519
68.775448,2.82842712,2.7539067,0.272984299,2.75113523,2.7539067,2.74399454
68.78594,2.64575131,2.75361832,-0.328431138,2.75067123,2.75361832,2.74351443
68.796432,2.64575131,2.75333611,-0.328001217,2.75020772,2.75333611,2.7430349
68.806923,3.46410162,2.7530603,0.843232659,2.74974475,2.7530603,2.74255601
68.817415,2,2.75279107,-0.86763533,2.74928223,2.75279107,2.74207765
68.827906,3.31662479,2.7525287,0.751063305,2.74882025,2.7525287,2.74159992
68.838398,3.16227766,2.75227341,0.640315741,2.74835872,2.75227341,2.74112274
68.84889,2.23606798,2.75202548,-0.718301819,2.74789769,2.75202548,2.74064613
68.859381,2.64575131,2.75178521,-0.325628471,2.7474372,2.75178521,2.74017016
68.869873,2.82842712,2.75155285,0.277262102,2.74697715,2.75155285,2.73969473
68.880364,3.16227766,2.75132875,0.641052969,2.74651765,2.75132875,2.73921992
68.890856,3.16227766,2.75111319,0.641221076,2.7460586,2.75111319,2.73874566
68.901348,2,2.75090654,-0.866548635,2.74560004,2.75090654,2.73827198
68.911839,2.82842712,2.75070916,0.278779413,2.74514202,2.75070916,2.73779893
68.922331,3.16227766,2.75052141,0.641682356,2.74468445,2.75052141,2.73732642
68.932822,3,2.75034372,0.499656158,2.74422742,2.75034372,2.73685454
68.943314,2,2.75017648,-0.866127289,2.74377084,2.75017648,2.7363832
68.953806,2.64575131,2.75002015,-0.322906858,2.74331475,2.75002015,2.73591244
68.964297,3,2.74987521,0.50012477,2.7428592,2.74987521,2.73544232
68.974789,2.23606798,2.74974215,-0.716710659,2.74240411,2.74974215,2.73497273
68.98528,3.87298335,2.7496215,1.05988766,2.74194955,2.7496215,2.73450377
68.995772,3.31662479,2.74951381,0.753067715,2.74149544,2.74951381,2.73403535
69.006264,3.46410162,2.74941967,0.845388633,2.74104183,2.74941967,2.73356752
69.016755,3,2.74933974,0.500659826,2.74058875,2.74933974,2.73310032
69.027247,2.82842712,2.74927465,0.281340499,2.74013613,2.74927465,2.73263365
69.037738,2.82842712,2.74922512,0.2814285,2.73968404,2.74922512,2.73216762
69.04823,3,2.74919191,0.50080744,2.7392324,2.74919191,2.73170212
69.058722,2.64575131,2.74917581,-0.321596789,2.73878126,2.74917581,2.73123721
69.069213,3.74165739,2.74917767,0.996232764,2.73833065,2.74917767,2.73077293
69.079705,2.82842712,2.7491984,0.281475981,2.7378805,2.7491984,2.73030918
69.090196,3,2.74923896,0.500760463,2.73743088,2.74923896,2.72984607
69.100688,2.64575131,2.74930039,-0.321790426,2.73698171,2.74930039,2.72938349
69.11118,2.64575131,2.74938379,-0.321919982,2.73653304,2.74938379,2.7289215
69.121671,2.82842712,2.74949031,0.280956958,2.7360849,2.74949031,2.72846014
69.132163,4,2.74962125,1.11820336,2.73563721,2.74962125,2.72799932
69.142654,3.16227766,2.74977791,0.642261436,2.73519006,2.74977791,2.72753912
69.153146,2.82842712,2.74996177,0.280116684,2.73474336,2.74996177,2.72707947
69.163638,3,2.75017436,0.49982561,2.73429716,2.75017436,2.7266204
69.174129,3.16227766,2.75041732,0.641763464,2.73385149,2.75041732,2.72616196
69.184621,3.16227766,2.75069247,0.641549056,2.73340627,2.75069247,2.72570405
69.195112,3.60555128,2.75100168,0.924418516,2.73296158,2.75100168,2.72524678
69.205604,2.82842712,2.75134708,0.277632929,2.73251735,2.75134708,2.72479004
69.216096,3,2.75173086,0.498266129,2.73207361,2.75173086,2.72433389
69.226587,3.87298335,2.75215539,1.05869162,2.73163041,2.75215539,2.72387837
69.237079,2.64575131,2.75262334,-0.32691288,2.73118765,2.75262334,2.72342338
69.24757,3.46410162,2.75313743,0.84318692,2.73074543,2.75313743,2.72296903
69.258062,2,2.7537008,-0.868159435,2.73030366,2.7537008,2.72251521
69.268554,2.44948974,2.75431671,-0.55211137,2.72986239,2.75431671,2.72206198
69.279045,3.31662479,2.75498866,0.749423866,2.72942165,2.75498866,2.72160937
69.289537,2.82842712,2.75572068,0.269641324,2.72898135,2.75572068,2.7211573
69.300028,3.87298335,2.75651687,1.05662977,2.7285416,2.75651687,2.72070586
69.31052,2.64575131,2.75738201,-0.334111813,2.72810229,2.75738201,2.72025496
69.321012,3.31662479,2.75832108,0.747197237,2.72766348,2.75832108,2.71980464
69.331503,3.60555128,2.75933949,0.919897704,2.7272252,2.75933949,2.71935495
69.341995,2.44948974,2.76044349,-0.557632269,2.72678737,2.76044349,2.7189058
69.352486,3.16227766,2.76163951,0.632959833,2.72635007,2.76163951,2.71845727
69.362978,2.82842712,2.76293507,0.255914153,2.72591323,2.76293507,2.71800928
69.37347,4.24264069,2.7643381,1.21585467,2.72547687,2.7643381,2.71756188
69.383961,1.41421356,2.76585731,-1.16260214,2.72504105,2.76585731,2.7171151
69.394453,2.23606798,2.76750278,-0.728995751,2.72460568,2.76750278,2.71666887
69.404944,3.31662479,2.76928505,0.739824126,2.72417085,2.76928505,2.71622325
69.415436,3,2.7712165,0.478313186,2.72373646,2.7712165,2.71577818
69.425928,4.47213595,2.77331033,1.30339005,2.72330257,2.77331033,2.71533369
69.436419,3.74165739,2.77558126,0.982891717,2.7228692,2.77558126,2.71488982
69.446911,3.46410162,2.77804637,0.82828452,2.72243629,2.77804637,2.7144465
69.457402,3.60555128,2.78072385,0.908200101,2.72200391,2.78072385,2.7140038
69.467894,2.44948974,2.78363516,-0.578053128,2.72157198,2.78363516,2.71356163
69.478386,3.16227766,2.78680363,0.612759356,2.72114054,2.78680363,2.71312005
69.488877,2.64575131,2.79025553,-0.380137104,2.72070963,2.79025553,2.7126791
69.499369,3.87298335,2.79402162,1.03873082,2.72027918,2.79402162,2.71223868
69.50986,3,2.79813538,0.449293465,2.71984925,2.79813538,2.71179889
69.520352,3.74165739,2.80263651,0.969030895,2.71941978,2.80263651,2.71135964
69.530844,3.46410162,2.80756911,0.810266932,2.71899079,2.80756911,2.71092097
69.541335,3.60555128,2.81298364,0.890262678,2.71856234,2.81298364,2.71048292
69.551827,3.46410162,2.81893977,0.803219676,2.71813433,2.81893977,2.71004541
69.562318,3.46410162,2.8255041,0.799122969,2.71770686,2.8255041,2.70960853
69.57281,3.74165739,2.8327564,0.953362987,2.71727984,2.8327564,2.70917218
69.583302,3.16227766,2.84078753,0.567000998,2.7168533,2.84078753,2.70873642
69.593793,3.31662479,2.8497035,0.683316392,2.7164273,2.8497035,2.70830127
69.604285,3.60555128,2.85963159,0.863666418,2.71600175,2.85963159,2.70786667
69.614776,3.74165739,2.87071815,0.933241253,2.71557672,2.87071815,2.70743269
69.625268,3.46410162,2.88314115,0.762207624,2.71515215,2.88314115,2.70699925
69.63576,4,2.89710942,1.05018597,2.71472806,2.89710942,2.70656639
69.646251,3.60555128,2.91287306,0.832272924,2.71430451,2.91287306,2.70613415
69.656743,3.87298335,2.93073887,0.970692784,2.7138814,2.93073887,2.70570245
69.667234,4.24264069,2.95107277,1.1364717,2.71345883,2.95107277,2.70527138
69.677726,5.09901951,2.9743321,1.45763075,2.7130367,2.9743321,2.70484084
69.688218,4.47213595,3.00108109,1.21287051,2.71261506,3.00108109,2.70441088
69.698709,3.87298335,3.03204697,0.917025829,2.71219396,3.03204697,2.70398154
69.709201,4,3.0682423,0.96527597,2.7117733,3.0682423,2.70355274
69.719692,5.19615242,3.1112074,1.44393387,2.71135316,3.1112074,2.70312457
69.730184,5.74456265,3.16365827,1.60651934,2.71093348,3.16365827,2.70269693
69.740676,5.83095189,3.23080486,1.61249714,2.71051429,3.23080486,2.70226987
69.751167,6,3.32291634,1.63617959,2.71009562,3.32291634,2.70184343
69.761659,6.08276253,3.45932482,1.61970297,2.70967741,3.45932482,2.70141753
69.77215,6.164414,3.67252489,1.57857186,2.70925972,3.67252489,2.70099225
69.782642,6.92820323,4.00867225,1.70866351,2.70884248,4.00867225,2.70056751
69.793134,7.34846923,4.51855057,1.68223621,2.70842573,4.51855057,2.70014334
69.803625,8.24621125,5.23912861,1.73409418,2.7080095,5.23912861,2.6997198
69.814117,9.2736185,6.17554139,1.76013554,2.70759372,6.17554139,2.6992968
69.824608,9.11043358,7.29268358,1.34823959,2.70717847,7.29268358,2.69887441
69.8351,10.4880885,8.51880558,1.4033114,2.70676367,8.51880558,2.69845256
69.845592,11.1355287,9.75273379,1.17592302,2.70634936,9.75273379,2.69803129
69.856083,12,10.8720304,1.06205912,2.70593557,10.8720304,2.69761064
69.866575,12.083046,11.7400028,0.585698914,2.70552223,11.7400028,2.69719053
69.877066,11.8321596,12.2209629,-0.62354097,2.70510942,12.2209629,2.69677103
69.887558,11.7046999,12.222886,-0.719851424,2.70469706,12.222886,2.69635208
69.89805,10.6770783,11.7452408,-1.03351948,2.70428518,11.7452408,2.6959337
69.908541,9.43398113,10.8796469,-1.20235842,2.70387383,10.8796469,2.69551594
69.919033,8.83176087,9.7613432,-0.964148503,2.70346292,9.7613432,2.69509871
69.929524,8.06225775,8.52750275,-0.682088706,2.70305254,8.52750275,2.69468211
69.940016,6.32455532,7.30032975,-0.987812955,2.70264261,7.30032975,2.69426604
69.950508,5.09901951,6.18118491,-1.04027179,2.70223316,6.18118491,2.69385055
69.960999,5.19615242,5.24236861,-0.214979506,2.70182424,5.24236861,2.69343567
69.971491,4.24264069,4.51897661,-0.525676634,2.70141577,4.51897661,2.69302134
69.981982,3.74165739,4.00651312,-0.514641367,2.70100782,4.00651312,2.69260761
69.992474,2.82842712,3.66810498,-0.916339378,2.70060032,3.66810498,2.69219443
70.002966,4.69041576,3.45308352,1.11235437,2.70019331,3.45308352,2.69178182
70.013457,2.64575131,3.31525692,-0.818233224,2.69978681,3.31525692,2.69136983
70.023949,2.82842712,3.2219449,-0.62730995,2.69938077,3.2219449,2.69095838
70.03444,4,3.15374554,0.919920897,2.69897525,3.15374554,2.69054754
70.044932,2.44948974,3.10030219,-0.806729475,2.69857017,3.10030219,2.69013723
70.055424,3.60555128,3.05637481,0.741064413,2.69816559,3.05637481,2.68972751
70.065915,2.23606798,3.0192432,-0.884971878,2.69776152,3.0192432,2.68931839
70.076407,3,2.98734627,0.112488798,2.6973579,2.98734627,2.68890982
70.086898,3.87298335,2.95968052,0.955668784,2.6969548,2.95968052,2.68850186
70.09739,3.16227766,2.93550879,0.47620255,2.69655215,2.93550879,2.68809443
70.107882,2.44948974,2.91426684,-0.681745623,2.69614999,2.91426684,2.68768758
70.118373,2.23606798,2.89550209,-0.812055484,2.69574834,2.89550209,2.68728135
70.128865,2.82842712,2.878841,-0.224530336,2.69534715,2.878841,2.68687565
70.139356,2.44948974,2.86398244,-0.643811074,2.69494647,2.86398244,2.68647056
70.149848,2.44948974,2.85067147,-0.633389084,2.69454624,2.85067147,2.68606601
70.16034,2.82842712,2.83869938,-0.101352158,2.6941465,2.83869938,2.68566203
70.170831,3.74165739,2.82789092,0.955911327,2.69374727,2.82789092,2.68525867
70.181323,3.16227766,2.8180955,0.586670405,2.69334849,2.8180955,2.68485584
70.191814,4,2.80918914,1.0912428,2.69295023,2.80918914,2.68445362
70.202306,2,2.80106303,-0.895021245,2.69255242,2.80106303,2.68405194
70.212798,3,2.79362641,0.454283605,2.69215509,2.79362641,2.68365083
70.223289,3,2.78680118,0.461734579,2.69175828,2.78680118,2.68325034
70.233781,3.46410162,2.78051816,0.826791062,2.69136192,2.78051816,2.68285037
70.244272,3,2.77471974,0.474636977,2.69096608,2.77471974,2.68245102
70.254764,2.82842712,2.76935372,0.243050207,2.69057068,2.76935372,2.68205221
70.265256,3.31662479,2.76437608,0.743134382,2.69017576,2.76437608,2.68165397
70.275747,2.44948974,2.75974821,-0.557008496,2.68978137,2.75974821,2.68125634
70.286239,3.16227766,2.75543494,0.637842235,2.68938741,2.75543494,2.68085924
70.29673,2.64575131,2.75140691,-0.325047077,2.68899398,2.75140691,2.68046275
70.307222,2.82842712,2.74763667,0.284236622,2.68860099,2.74763667,2.6800668
70.317714,2.82842712,2.74410095,0.290389688,2.68820849,2.74410095,2.67967142
70.328205,2.82842712,2.74077907,0.296054148,2.6878165,2.74077907,2.67927665
70.338697,3.74165739,2.73765166,1.00200086,2.68742495,2.73765166,2.67888241
70.349188,2.64575131,2.7347026,-0.298247029,2.68703393,2.7347026,2.67848878
70.35968,3.31662479,2.73191638,0.764662288,2.68664335,2.73191638,2.67809568
70.370172,2.23606798,2.72927984,-0.702290437,2.68625324,2.72927984,2.67770316
70.380663,3,2.72678114,0.522703419,2.68586366,2.72678114,2.67731124
70.391155,3,2.72440891,0.5249677,2.68547452,2.72440891,2.67691986
70.401646,3,2.72215379,0.527111191,2.6850859,2.72215379,2.67652908
70.412138,3,2.72000645,0.52914417,2.68469772,2.72000645,2.67613884
70.42263,2.64575131,2.71795903,-0.268714944,2.68431002,2.71795903,2.67574917
70.433121,3.60555128,2.7160044,0.943157925,2.68392284,2.7160044,2.67536011
70.443613,2.64575131,2.71413553,-0.261503758,2.6835361,2.71413553,2.67497157
70.454104,3.16227766,2.71234668,0.670768946,2.68314988,2.71234668,2.67458365
70.464596,3.31662479,2.71063198,0.778455399,2.6827641,2.71063198,2.67419626
70.475088,3.16227766,2.70898653,0.673268987,2.6823788,2.70898653,2.67380943
70.485579,2.64575131,2.70740583,-0.248303285,2.68199401,2.70740583,2.67342321
70.496071,2.64575131,2.70588533,-0.245222377,2.68160967,2.70588533,2.67303753
70.506562,2.23606798,2.70442139,-0.684363508,2.68122584,2.70442139,2.67265245
70.517054,3.16227766,2.70307891,0.677642049,2.68084246,2.70307891,2.6722679
70.527546,3.87298335,2.70171732,1.08225045,2.68045955,2.70171732,2.67188392
70.538037,2.44948974,2.70040231,-0.500911738,2.68007716,2.70040231,2.67150054
70.548529,3.31662479,2.69913082,0.785807846,2.67969521,2.69913082,2.6711177
70.55902,2.82842712,2.69790047,0.361284722,2.67931377,2.69790047,2.67073546
70.569512,2.23606798,2.69670863,-0.678705129,2.67893278,2.69670863,2.67035375
70.580004,1.73205081,2.69555316,-0.981581559,2.67855226,2.69555316,2.6699726
70.590495,3.16227766,2.69443211,0.683992363,2.67817226,2.69443211,2.66959207
70.600987,3.16227766,2.69334332,0.684787807,2.6777927,2.69334332,2.66921206
70.611478,3.31662479,2.69228521,0.790151617,2.67741365,2.69228521,2.66883265
70.62197,2.23606798,2.69125592,-0.674676175,2.67703505,2.69125592,2.66845378
70.632462,2.82842712,2.69025399,0.371716477,2.67665692,2.69025399,2.66807547
70.642953,2.44948974,2.68927805,-0.489681847,2.6762793,2.68927805,2.66769776
70.653445,2.82842712,2.68832659,0.374300064,2.67590212,2.68832659,2.66732058
70.663936,2.64575131,2.6873985,-0.20407643,2.67552546,2.6873985,2.66694401
70.674428,3.31662479,2.68649244,0.793808765,2.67514924,2.68649244,2.66656796
70.68492,3,2.68560738,0.560707253,2.67477349,2.68560738,2.66619248
70.695411,2.44948974,2.68474237,-0.485028477,2.67439825,2.68474237,2.6658176
70.705903,1,2.68389627,-1.29765029,2.67402346,2.68389627,2.66544325
70.716394,3.16227766,2.68306834,0.692249466,2.67364917,2.68306834,2.6650695
70.726886,2,2.68225755,-0.825988834,2.67327533,2.68225755,2.66469628
70.737378,2.82842712,2.68146319,0.383358749,2.67290196,2.68146319,2.66432363
70.747869,3.60555128,2.68068458,0.961699901,2.6725291,2.68068458,2.66395157
70.758361,2.64575131,2.67992084,-0.184850013,2.67215668,2.67992084,2.66358004
70.768852,3,2.67917146,0.566417288,2.67178477,2.67917146,2.66320911
70.779344,2,2.67843565,-0.823672055,2.6714133,2.67843565,2.66283871
70.789836,3.31662479,2.67771291,0.799319637,2.6710423,2.67771291,2.66246887
70.800327,2.82842712,2.67700272,0.389132884,2.67067181,2.67700272,2.66209963
70.810819,2.64575131,2.67630443,-0.174794509,2.67030177,2.67630443,2.66173091
70.82131,2.64575131,2.67561766,-0.172818844,2.66993223,2.67561766,2.6613628
70.831802,2.82842712,2.67494182,0.391772012,2.66956313,2.67494182,2.66099521
70.842294,3.16227766,2.6742765,0.698570797,2.6691945,2.6742765,2.66062818
70.852785,3,2.67362136,0.571295581,2.66882638,2.67362136,2.66026175
70.863277,2.82842712,2.67297586,0.394273083,2.6684587,2.67297586,2.65989585
70.873768,2.23606798,2.67233975,-0.66050872,2.66809153,2.67233975,2.65953054
70.88426,2.64575131,2.67171253,-0.161124866,2.66772479,2.67171253,2.65916576
70.894752,3.31662479,2.67109394,0.803449346,2.66735853,2.67109394,2.65880154
70.905243,2.64575131,2.67048369,-0.157265323,2.66699277,2.67048369,2.65843791
70.915735,3,2.66988137,0.57455951,2.66662745,2.66988137,2.65807482
70.926226,3,2.66928679,0.575076699,2.66626264,2.66928679,2.65771231
70.936718,2.44948974,2.66869956,-0.46819848,2.66589827,2.66869956,2.65735033
70.94721,2.64575131,2.66811947,-0.149559878,2.66553437,2.66811947,2.65698891
70.957701,3,2.66754632,0.576587966,2.66517097,2.66754632,2.65662809
70.968193,3.46410162,2.66697975,0.892816812,2.66480801,2.66697975,2.65626779
70.978684,2.82842712,2.66641966,0.40250151,2.66444556,2.66641966,2.65590808
70.989176,2.44948974,2.6658657,-0.465162295,2.66408354,2.6658657,2.6555489
70.999668,2.82842712,2.66531773,0.403868038,2.66372199,2.66531773,2.65519028
71.010159,3.46410162,2.6647756,0.894050344,2.66336095,2.6647756,2.65483225
71.020651,3.31662479,2.664239,0.807704021,2.66300034,2.664239,2.65447474
71.031142,2.44948974,2.66370787,-0.462837046,2.66264024,2.66370787,2.65411782
71.041634,3.87298335,2.66318193,1.09990973,2.66228058,2.66318193,2.65376143
71.052126,2.82842712,2.66266106,0.407143793,2.66192138,2.66266106,2.6534056
71.062617,2.82842712,2.66214515,0.407776874,2.66156269,2.66214515,2.65305036
71.073109,3.16227766,2.66163395,0.70756181,2.66120443,2.66163395,2.65269564
71.0836,2.64575131,2.66112741,-0.124000389,2.66084668,2.66112741,2.65234151
71.094092,3.31662479,2.6606253,0.809937956,2.66048936,2.6606253,2.6519879
71.104584,2.64575131,2.66012753,-0.119900866,2.66013251,2.66012753,2.65163485
71.115075,2.82842712,2.65963402,0.410844378,2.65977616,2.65963402,2.65128239
71.125567,2.64575131,2.65914456,-0.115729201,2.65942025,2.65914456,2.65093045
71.136058,2.23606798,2.65865912,-0.650070103,2.65906484,2.65865912,2.6505791
71.14655,3.16227766,2.65817749,0.71000012,2.65870986,2.65817749,2.65022827
71.157042,3.46410162,2.65769962,0.897998885,2.65835535,2.65769962,2.649878
71.167533,2.44948974,2.65722544,-0.455780316,2.65800134,2.65722544,2.64952831
71.178025,2.64575131,2.65675477,-0.104897356,2.65764777,2.65675477,2.64917915
71.188516,2.23606798,2.65628759,-0.648243485,2.65729469,2.65628759,2.64883057
71.199008,2.44948974,2.65582374,-0.45424002,2.65694205,2.65582374,2.64848251
71.2095,3.16227766,2.65536316,0.711979285,2.65658988,2.65536316,2.64813501
71.219991,2,2.65490581,-0.809262511,2.65623821,2.65490581,2.64778809
71.230483,2,2.65445153,-0.808981786,2.65588697,2.65445153,2.6474417
71.240974,2.82842712,2.65400032,0.41764435,2.65553623,2.65400032,2.64709589
71.251466,3,2.65355202,0.588598315,2.65518592,2.65355202,2.64675059
71.261958,2.44948974,2.65310661,-0.451239256,2.65483608,2.65310661,2.64640586
71.272449,3,2.65266405,0.589352147,2.65448674,2.65266405,2.6460617
71.282941,2.23606798,2.65222419,-0.645101706,2.65413783,2.65222419,2.64571807
71.293432,4,2.65178705,1.16112573,2.65378941,2.65178705,2.64537502
71.303924,3.31662479,2.65135249,0.815642264,2.65344143,2.65135249,2.64503248
71.314416,3.74165739,2.65092048,1.0443835,2.65309392,2.65092048,2.6446905
71.324907,1.41421356,2.65049102,-1.11188014,2.6527469,2.65049102,2.64434911
71.335399,3.16227766,2.65006395,0.71569107,2.65240031,2.65006395,2.64400823
71.34589,2.82842712,2.64963932,0.422833072,2.65205422,2.64963932,2.64366793
71.356382,2.82842712,2.64921698,0.423332193,2.65170856,2.64921698,2.64332815
71.366874,3.16227766,2.64879693,0.7165757,2.65136337,2.64879693,2.64298892
71.377365,3,2.64837915,0.592976263,2.65101867,2.64837915,2.64265027
71.387857,2.64575131,2.64796353,-0.0470341945,2.6506744,2.64796353,2.64231214
71.398348,3,2.64755009,0.593674922,2.65033063,2.64755009,2.64197459
71.40884,3.46410162,2.64713871,0.903860004,2.64998729,2.64713871,2.64163756
71.419332,2.64575131,2.64672939,-0.0312742545,2.64964441,2.64672939,2.64130107
71.429823,3.16227766,2.64632213,0.718300447,2.64930203,2.64632213,2.64096517
71.440315,3.16227766,2.64591681,0.718582531,2.64896007,2.64591681,2.64062978
71.450806,1.41421356,2.64551346,-1.10963954,2.64861861,2.64551346,2.64029497
71.461298,3,2.64511199,0.59572478,2.64827758,2.64511199,2.63996067
71.47179,3.74165739,2.64471238,1.04735143,2.64793701,2.64471238,2.63962692
71.482281,3,2.64431464,0.596393631,2.64759694,2.64431464,2.63929375
71.492773,2.64575131,2.64391866,0.0428094837,2.64725729,2.64391866,2.6389611
71.503264,3.16227766,2.64352449,0.720245218,2.64691814,2.64352449,2.63862902
71.513756,3.60555128,2.64313201,0.981029696,2.64657942,2.64313201,2.63829746
71.524248,3.31662479,2.64274124,0.820904105,2.64624115,2.64274124,2.63796644
71.534739,2.23606798,2.64235218,-0.637404272,2.64590338,2.64235218,2.637636
71.545231,3.16227766,2.64196474,0.721327196,2.64556604,2.64196474,2.63730607
71.555722,3.46410162,2.64157895,0.906930355,2.64522919,2.64157895,2.63697672
71.566214,2.44948974,2.64119471,-0.437841258,2.64489276,2.64119471,2.63664788
71.576706,2.82842712,2.64081204,0.433145569,2.6445568,2.64081204,2.63631958
71.587197,2.82842712,2.64043095,0.433585257,2.64422133,2.64043095,2.63599186
71.597689,3.46410162,2.64005134,0.90777215,2.64388628,2.64005134,2.63566466
71.60818,3.46410162,2.63967326,0.907980374,2.64355172,2.63967326,2.63533802
71.618672,3.46410162,2.63929661,0.90818776,2.6432176,2.63929661,2.6350119
71.629164,3,2.63892141,0.600898156,2.64288393,2.63892141,2.63468632
71.639655,2.64575131,2.63854767,0.0848742889,2.64255075,2.63854767,2.63436132
71.650147,3.31662479,2.6381753,0.823680457,2.64221799,2.6381753,2.63403682
71.660638,3.46410162,2.63780434,0.90900895,2.64188573,2.63780434,2.6337129
71.67113,2.64575131,2.63743472,0.0911953394,2.64155389,2.63743472,2.63338949
71.681622,2.82842712,2.63706644,0.437447919,2.64122251,2.63706644,2.63306662
71.692113,2.82842712,2.63669953,0.437867101,2.64089161,2.63669953,2.63274432
71.702605,3.74165739,2.63633388,1.05134367,2.64056115,2.63633388,2.63242253
71.713096,3,2.63596956,0.603349349,2.64023117,2.63596956,2.63210131
71.723588,3.31662479,2.63560648,0.825238334,2.63990161,2.63560648,2.63178061
71.73408,3.46410162,2.63524466,0.910415816,2.63957251,2.63524466,2.63146044
71.744571,3.74165739,2.63488411,1.05203293,2.6392439,2.63488411,2.63114084
71.755063,2.82842712,2.63452474,0.440343481,2.63891572,2.63452474,2.63082175
71.765554,2.82842712,2.63416662,0.44074993,2.63858802,2.63416662,2.63050322
71.776046,2.82842712,2.63380966,0.441154691,2.63826074,2.63380966,2.63018521
71.786538,2.64575131,2.63345388,0.110893774,2.63793392,2.63345388,2.62986774
71.797029,2.44948974,2.6330993,-0.428496856,2.63760758,2.6330993,2.62955083
71.807521,3.46410162,2.63274583,0.911787137,2.63728167,2.63274583,2.62923443
71.818012,3.60555128,2.63239354,0.986487577,2.63695624,2.63239354,2.62891859
71.828504,3.87298335,2.63204233,1.11397532,2.63663124,2.63204233,2.62860327
71.838996,3.16227766,2.63169223,0.72841295,2.63630669,2.63169223,2.62828848
71.849487,2.82842712,2.63134327,0.443941272,2.63598262,2.63134327,2.62797425
71.859979,3.31662479,2.63099536,0.828027432,2.63565898,2.63099536,2.62766054
71.87047,3.46410162,2.63064856,0.912936501,2.63533582,2.63064856,2.62734738
71.880962,3.16227766,2.63030279,0.729366076,2.63501308,2.63030279,2.62703474
71.891454,3.74165739,2.62995807,1.05437153,2.6346908,2.62995807,2.62672262
71.901945,3.60555128,2.62961442,0.987895164,2.634369,2.62961442,2.62641108
71.912437,3.60555128,2.62927177,0.988068573,2.63404762,2.62927177,2.62610003
71.922928,2.44948974,2.62893017,-0.423604097,2.63372672,2.62893017,2.62578955
71.93342,3.46410162,2.62858955,0.914063489,2.63340624,2.62858955,2.62547958
71.943912,3.87298335,2.62824993,1.11567621,2.63308622,2.62824993,2.62517014
71.954403,3.31662479,2.62791133,0.829887617,2.63276668,2.62791133,2.62486126
71.964895,3.16227766,2.62757368,0.731234557,2.63244755,2.62757368,2.62455288
71.975386,3,2.62723704,0.610543172,2.63212891,2.62723704,2.62424507
71.985878,3.46410162,2.62690132,0.914986501,2.63181069,2.62690132,2.62393776
71.99637,3,2.62656655,0.611092011,2.63149292,2.62656655,2.62363098
72.006861,2.82842712,2.62623277,0.449660269,2.63117563,2.62623277,2.62332476
72.017353,3.16227766,2.62589988,0.732378165,2.63085876,2.62589988,2.62301904
72.027844,3,2.62556796,0.611908522,2.63054237,2.62556796,2.62271388
72.038336,3.16227766,2.62523693,0.732830631,2.63022639,2.62523693,2.62240923
72.048828,3.16227766,2.6249068,0.733055834,2.62991087,2.6249068,2.6221051
72.059319,3.31662479,2.62457762,0.831893726,2.62959583,2.62457762,2.62180153
72.069811,4,2.6242493,1.172924,2.6292812,2.6242493,2.62149847
72.080302,2.23606798,2.6239219,-0.622779192,2.62896705,2.6239219,2.62119596
72.090794,2.64575131,2.62359535,0.148848781,2.62865332,2.62359535,2.62089395
72.101286,4,2.62326968,1.17334152,2.62834004,2.62326968,2.62059247
72.111777,3.46410162,2.62294491,0.917145957,2.62802724,2.62294491,2.62029154
72.122269,3.74165739,2.62262097,1.05784518,2.62771485,2.62262097,2.61999112
72.13276,2.23606798,2.62229791,-0.621474003,2.62740294,2.62229791,2.61969125
72.143252,2.82842712,2.62197568,0.454369284,2.62709144,2.62197568,2.61939188
72.153744,3.46410162,2.62165429,0.917849295,2.6267804,2.62165429,2.61909304
72.164235,1.41421356,2.62133376,-1.09869022,2.62646983,2.62133376,2.61879475
72.174727,2.64575131,2.62101404,0.157280872,2.62615967,2.62101404,2.61849696
72.185218,2.23606798,2.62069517,-0.620183193,2.62585,2.62069517,2.61819972
72.19571,3.60555128,2.62037709,0.992559411,2.62554073,2.62037709,2.61790298
72.206202,2.44948974,2.62005983,-0.413001311,2.62523192,2.62005983,2.61760677
72.216693,2.44948974,2.6197434,-0.412618051,2.62492357,2.6197434,2.61731111
72.227185,2.44948974,2.61942775,-0.412235373,2.62461565,2.61942775,2.61701594
72.237676,3.16227766,2.61911292,0.736997111,2.62430819,2.61911292,2.61672133
72.248168,2.23606798,2.61879886,-0.618652469,2.62400115,2.61879886,2.61642721
72.25866,3.60555128,2.61848558,0.9935118,2.62369456,2.61848558,2.61613362
72.269151,3.16227766,2.61817312,0.737634425,2.62338844,2.61817312,2.61584058
72.279643,3.16227766,2.6178614,0.737845689,2.62308273,2.6178614,2.61554803
72.290134,2.64575131,2.61755049,0.167931011,2.6227775,2.61755049,2.61525603
72.300626,2.82842712,2.61724031,0.459550664,2.62247268,2.61724031,2.61496453
72.311118,3.46410162,2.6169309,0.920418771,2.6221683,2.6169309,2.61467355
72.321609,3,2.61662228,0.619175032,2.62186439,2.61662228,2.61438311
72.332101,2.64575131,2.61631438,0.171571934,2.6215609,2.61631438,2.61409317
72.342592,1.73205081,2.61600727,-0.940189586,2.62125788,2.61600727,2.61380378
72.353084,3.74165739,2.61570087,1.06111098,2.62095527,2.61570087,2.61351488
72.363576,3.16227766,2.61539521,0.739515011,2.6206531,2.61539521,2.6132265
72.374067,3,2.61509032,0.620410898,2.6203514,2.61509032,2.61293867
72.384559,3.60555128,2.61478613,0.995371862,2.62005012,2.61478613,2.61265133
72.39505,1.73205081,2.61448271,-0.939378464,2.6197493,2.61448271,2.61236454
72.405542,2.44948974,2.61417998,-0.405820446,2.6194489,2.61417998,2.61207823
72.416034,2.82842712,2.61387797,0.46319451,2.61914893,2.61387797,2.61179245
72.426525,3.16227766,2.61357671,0.74074351,2.61884944,2.61357671,2.61150721
72.437017,2.64575131,2.61327614,0.180208688,2.61855036,2.61327614,2.61122246
72.447508,3.31662479,2.61297631,0.838837578,2.61825174,2.61297631,2.61093825
72.458,2.23606798,2.61267716,-0.613684918,2.61795353,2.61267716,2.61065454
72.468492,2.82842712,2.61237871,0.464810087,2.61765577,2.61237871,2.61037134
72.478983,2.64575131,2.61208099,0.183494744,2.61735847,2.61208099,2.61008868
72.489475,1.41421356,2.61178394,-1.09433559,2.61706158,2.61178394,2.60980651
72.499966,2.82842712,2.61148762,0.465767655,2.61676516,2.61148762,2.60952489
72.510458,3.60555128,2.61119195,0.997175672,2.61646914,2.61119195,2.60924375
72.52095,1.41421356,2.61089698,-1.09393026,2.61617357,2.61089698,2.60896313
72.531441,2,2.61060272,-0.781410725,2.61587846,2.61060272,2.60868304
72.541933,2.82842712,2.61030912,0.467031058,2.61558375,2.61030912,2.60840345
72.552424,2.64575131,2.61001622,0.189037283,2.61528952,2.61001622,2.60812439
72.562916,3,2.60972397,0.624720764,2.61499569,2.60972397,2.60784582
72.573408,2.44948974,2.60943239,-0.399928302,2.6147023,2.60943239,2.60756777
72.583899,3,2.60914151,0.625186763,2.61440937,2.60914151,2.60729025
72.594391,3.74165739,2.60885127,1.06433365,2.61411685,2.60885127,2.60701322
72.604882,3.31662479,2.60856173,0.841464832,2.6138248,2.60856173,2.60673672
72.615374,3.16227766,2.60827282,0.744315016,2.61353315,2.60827282,2.60646072
72.625866,3.87298335,2.60798457,1.12472165,2.61324193,2.60798457,2.60618522
72.636357,1.73205081,2.607697,-0.935759687,2.61295118,2.607697,2.60591026
72.646849,3.16227766,2.60741006,0.744894356,2.61266083,2.60741006,2.60563578
72.65734,2.82842712,2.6071238,0.470428874,2.61237095,2.6071238,2.60536184
72.667832,2.23606798,2.60683816,-0.608909011,2.61208147,2.60683816,2.60508838
72.678324,2.82842712,2.60655317,0.471034983,2.61179243,2.60655317,2.60481543
72.688815,2.82842712,2.60626885,0.471336689,2.61150385,2.60626885,2.60454301
72.699307,2.44948974,2.60598515,-0.395594999,2.61121567,2.60598515,2.60427108
72.709798,3.46410162,2.60570211,0.92649852,2.61092795,2.60570211,2.60399968
72.72029,2.82842712,2.60541968,0.472236639,2.61064064,2.60541968,2.60372876
72.730782,3.46410162,2.60513789,0.926802959,2.61035376,2.60513789,2.60345835
72.741273,3.60555128,2.60485676,1.0003472,2.61006734,2.60485676,2.60318847
72.751765,3.31662479,2.60457623,0.843829699,2.60978133,2.60457623,2.60291908
72.762256,3.31662479,2.60429636,0.843995517,2.60949577,2.60429636,2.60265021
72.772748,2.64575131,2.60401708,0.204289565,2.60921062,2.60401708,2.60238182
72.78324,2.44948974,2.60373844,-0.392745075,2.60892589,2.60373844,2.60211394
72.793731,3,2.60346044,0.629713874,2.60864163,2.60346044,2.60184659
72.804223,2.64575131,2.60318303,0.206320818,2.60835777,2.60318303,2.60157972
72.814714,2.64575131,2.60290627,0.206990437,2.60807436,2.60290627,2.60131338
72.825206,2.64575131,2.6026301,0.207656477,2.60779136,2.6026301,2.60104751
72.835698,3.16227766,2.60235454,0.748280107,2.60750879,2.60235454,2.60078215
72.846189,1.73205081,2.60207962,-0.932753352,2.60722667,2.60207962,2.60051732
72.856681,2.64575131,2.60180529,0.209633065,2.60694496,2.60180529,2.60025297
72.867172,2,2.60153159,-0.775584676,2.6066637,2.60153159,2.59998914
72.877664,3.31662479,2.60125847,0.845793308,2.60638285,2.60125847,2.59972579
72.888156,2.44948974,2.60098596,-0.389225145,2.60610242,2.60098596,2.59946294
72.898647,2.82842712,2.60071407,0.47719289,2.60582244,2.60071407,2.59920061
72.909139,3.46410162,2.60044276,0.929332478,2.60554287,2.60044276,2.59893876
72.91963,2.44948974,2.60017208,-0.388178223,2.60526375,2.60017208,2.59867744
72.930122,2.82842712,2.59990196,0.478043054,2.60498503,2.59990196,2.59841659
72.940614,3,2.59963245,0.632746042,2.60470674,2.59963245,2.59815624
72.951105,2.23606798,2.59936355,-0.602740053,2.6044289,2.59936355,2.59789642
72.961597,3.31662479,2.59909522,0.847071173,2.60415146,2.59909522,2.59763706
72.972088,3.16227766,2.59882751,0.750633169,2.60387447,2.59882751,2.59737824
72.98258,1.73205081,2.59856036,-0.930864946,2.60359788,2.59856036,2.59711988
72.993072,2,2.59829379,-0.773494534,2.60332172,2.59829379,2.59686202
73.003563,2.44948974,2.59802784,-0.385406409,2.60304601,2.59802784,2.59660468
73.014055,3.31662479,2.59776245,0.847857499,2.60277069,2.59776245,2.59634782
73.024546,3.46410162,2.59749767,0.93091565,2.60249583,2.59749767,2.59609148
73.035038,3.16227766,2.59723344,0.751694232,2.60222137,2.59723344,2.5958356
73.04553,2.23606798,2.59696979,-0.600751044,2.60194733,2.59696979,2.59558023
73.056021,3.60555128,2.59670675,1.00441253,2.60167374,2.59670675,2.59532537
73.066513,3.74165739,2.59644426,1.07014631,2.60140054,2.59644426,2.59507098
73.077004,2.44948974,2.59618237,-0.383004733,2.6011278,2.59618237,2.59481711
73.087496,2.44948974,2.59592103,-0.382663407,2.60085545,2.59592103,2.59456371
73.097988,2.44948974,2.59566026,-0.382322525,2.60058352,2.59566026,2.59431081
73.108479,3.31662479,2.59540008,0.849249497,2.60031205,2.59540008,2.59405842
73.118971,2.82842712,2.59514045,0.482997589,2.60004096,2.59514045,2.5938065
73.129462,1.41421356,2.59488142,-1.08658541,2.59977033,2.59488142,2.59355509
73.139954,3.16227766,2.59462292,0.753428653,2.59950009,2.59462292,2.59330415
73.150446,2.64575131,2.594365,0.226685496,2.59923027,2.594365,2.59305371
73.160937,3.16227766,2.59410766,0.753770524,2.5989609,2.59410766,2.59280378
73.171429,2.44948974,2.59385086,-0.379948831,2.59869193,2.59385086,2.59255432
73.18192,3.31662479,2.59359464,0.850311794,2.5984234,2.59359464,2.59230537
73.192412,2.23606798,2.59333896,-0.597721496,2.59815526,2.59333896,2.59205688
73.202904,2.23606798,2.59308384,-0.597508048,2.59788754,2.59308384,2.59180889
73.213395,3.16227766,2.59282931,0.754618018,2.59762027,2.59282931,2.59156141
73.223887,2.64575131,2.5925753,0.230599238,2.59735339,2.5925753,2.59131439
73.234378,3,2.59232188,0.638496768,2.59708696,2.59232188,2.59106788
73.24487,3,2.59206898,0.638694778,2.59682092,2.59206898,2.59082184
73.255362,2.64575131,2.59181664,0.232238397,2.59655529,2.59181664,2.59057629
73.265853,2.44948974,2.59156487,-0.376928545,2.59629011,2.59156487,2.59033125
73.276345,3.16227766,2.59131363,0.755621619,2.59602533,2.59131363,2.59008667
73.286836,2.64575131,2.59106296,0.233855402,2.59576098,2.59106296,2.5898426
73.297328,2.82842712,2.59081282,0.487456979,2.59549703,2.59081282,2.58959899
73.30782,2.82842712,2.59056322,0.487712931,2.59523349,2.59056322,2.58935587
73.318311,2.23606798,2.59031419,-0.595185867,2.59497039,2.59031419,2.58911325
73.328803,3,2.59006569,0.640261128,2.59470769,2.59006569,2.5888711
73.339294,2.64575131,2.58981775,0.236502776,2.59444543,2.58981775,2.58862945
73.349786,2.64575131,2.58957033,0.237025281,2.59418355,2.58957033,2.58838826
73.360278,3.31662479,2.58932345,0.852819643,2.59392209,2.58932345,2.58814756
73.370769,3.31662479,2.58907713,0.852964043,2.59366108,2.58907713,2.58790736
73.381261,2.23606798,2.58883133,-0.593938847,2.59340045,2.58883133,2.58766762
73.391752,2.82842712,2.58858609,0.489735676,2.59314026,2.58858609,2.58742839
73.402244,2.64575131,2.58834137,0.239603724,2.59288046,2.58834137,2.58718962
73.412736,2.64575131,2.58809718,0.240112754,2.59262107,2.58809718,2.58695132
73.423227,3.87298335,2.58785354,1.13363566,2.59236212,2.58785354,2.58671353
73.433719,3.16227766,2.58761042,0.758068095,2.59210356,2.58761042,2.5864762
73.44421,1.73205081,2.58736786,-0.924833525,2.59184544,2.58736786,2.58623937
73.454702,3,2.5871258,0.642552877,2.59158771,2.5871258,2.586003
73.465194,3.31662479,2.58688427,0.85424851,2.59133038,2.58688427,2.5857671
73.475685,3.16227766,2.5866433,0.758705714,2.5910735,2.5866433,2.58553171
73.486177,3.16227766,2.58640283,0.758864171,2.590817,2.58640283,2.58529677
73.496668,2.23606798,2.58616291,-0.591688208,2.59056094,2.58616291,2.58506233
73.50716,2.82842712,2.5859235,0.492446572,2.59030526,2.5859235,2.58482835
73.517652,3.31662479,2.58568461,0.854950397,2.59004999,2.58568461,2.58459485
73.528143,2.23606798,2.58544627,-0.591082304,2.58979516,2.58544627,2.58436184
73.538635,3.31662479,2.58520843,0.855228837,2.58954072,2.58520843,2.58412928
73.549126,3.46410162,2.58497113,0.937619584,2.58928671,2.58497113,2.58389723
73.559618,2.82842712,2.58473434,0.493652499,2.58903308,2.58473434,2.58366563
73.57011,3.16227766,2.58449806,0.760118149,2.58877986,2.58449806,2.5834345
73.580601,2.44948974,2.58426233,-0.367113857,2.58852708,2.58426233,2.58320387
73.591093,2.64575131,2.58402709,0.248443597,2.58827468,2.58402709,2.58297369
73.601584,3.16227766,2.58379239,0.760582189,2.58802272,2.58379239,2.582744
73.612076,2.82842712,2.58355819,0.494842331,2.58777113,2.58355819,2.58251477
73.622568,2.23606798,2.58332451,-0.589284761,2.58751996,2.58332451,2.58228601
73.633059,3,2.58309136,0.64568463,2.58726921,2.58309136,2.58205774
73.643551,2.44948974,2.5828587,-0.365197152,2.58701885,2.5828587,2.58182992
73.654042,2.23606798,2.58262658,-0.588692283,2.58676892,2.58262658,2.5816026
73.664534,2.44948974,2.58239495,-0.364561667,2.58651938,2.58239495,2.58137572
73.675026,2.44948974,2.58216383,-0.364244548,2.58627024,2.58216383,2.58114932
73.685517,2.64575131,2.58193325,0.252622372,2.58602153,2.58193325,2.58092341
73.696009,3,2.58170315,0.646758726,2.5857732,2.58170315,2.58069794
73.7065,2.64575131,2.58147358,0.253530526,2.5855253,2.58147358,2.58047297
73.716992,2.64575131,2.5812445,0.253981905,2.58527778,2.5812445,2.58024844
73.727484,3.31662479,2.58101593,0.857676431,2.58503066,2.58101593,2.58002438
73.737975,2.82842712,2.58078789,0.49763364,2.58478398,2.58078789,2.57980081
73.748467,3.16227766,2.58056032,0.762703964,2.58453767,2.58056032,2.57957769
73.758958,2.82842712,2.58033329,0.498090188,2.58429179,2.58033329,2.57935505
73.76945,3,2.58010674,0.647991715,2.58404629,2.58010674,2.57913286
73.779942,2.44948974,2.57988069,-0.361096864,2.5838012,2.57988069,2.57891114
73.790433,3.87298335,2.57965516,1.13724588,2.58355653,2.57965516,2.5786899
73.800925,2.23606798,2.57943012,-0.585971108,2.58331224,2.57943012,2.5784691
73.811416,2.44948974,2.57920559,-0.360160868,2.58306837,2.57920559,2.5782488
73.821908,1.73205081,2.57898155,-0.920288401,2.58282489,2.57898155,2.57802893
73.8324,3,2.578758,0.649031584,2.5825818,2.578758,2.57780953
73.842891,3,2.57853498,0.649203377,2.58233914,2.57853498,2.57759061
73.853383,2.64575131,2.57831243,0.25968998,2.58209686,2.57831243,2.57737214
73.863874,2.82842712,2.57809039,0.500336619,2.581855,2.57809039,2.57715415
73.874366,2.64575131,2.57786883,0.260542657,2.58161352,2.57786883,2.5769366
73.884858,2.23606798,2.57764777,-0.584448282,2.58137244,2.57764777,2.57671951
73.895349,2.64575131,2.57742722,0.261388765,2.58113178,2.57742722,2.5765029
73.905841,3.16227766,2.57720715,0.76489902,2.5808915,2.57720715,2.57628674
73.916332,3,2.57698759,0.650394044,2.58065164,2.57698759,2.57607105
73.926824,2.64575131,2.5767685,0.262645796,2.58041216,2.5767685,2.57585581
73.937316,2.23606798,2.5765499,-0.583508286,2.58017307,2.5765499,2.57564102
73.947807,2.44948974,2.57633181,-0.356148939,2.57993441,2.57633181,2.57542671
73.958299,2.23606798,2.57611419,-0.583134815,2.57969612,2.57611419,2.57521284
73.96879,2.64575131,2.57589708,0.264299509,2.57945825,2.57589708,2.57499945
73.979282,2.64575131,2.57568044,0.264709034,2.57922075,2.57568044,2.5747865
73.989774,3.16227766,2.57546428,0.766037451,2.57898366,2.57546428,2.574574
74.000265,2.23606798,2.57524864,-0.582392186,2.57874698,2.57524864,2.57436198
74.010757,3,2.57503345,0.651894583,2.57851067,2.57503345,2.5741504
74.021248,3,2.57481878,0.652059218,2.57827479,2.57481878,2.57393929
74.03174,2.82842712,2.57460456,0.50380806,2.57803928,2.57460456,2.57372862
74.042232,2,2.57439083,-0.757885766,2.57780416,2.57439083,2.5735184
74.052723,2.44948974,2.57417761,-0.35311169,2.57756946,2.57417761,2.57330866
74.063215,2.64575131,2.57396484,0.267929967,2.57733513,2.57396484,2.57309935
74.073706,2.82842712,2.57375258,0.504652894,2.57710122,2.57375258,2.57289051
74.084198,2,2.57354078,-0.757324752,2.57686768,2.57354078,2.57268211
74.09469,3,2.57332946,0.653200231,2.57663454,2.57332946,2.57247416
74.105181,3.46410162,2.57311864,0.943918947,2.57640181,2.57311864,2.57226668
74.115673,2.64575131,2.57290827,0.269894496,2.57616945,2.57290827,2.57205964
74.126164,1.41421356,2.57269841,-1.07632934,2.57593751,2.57269841,2.57185306
74.136656,3.46410162,2.572489,0.944252412,2.57570593,2.572489,2.57164692
74.147148,2.23606798,2.57228007,-0.579837984,2.57547475,2.57228007,2.57144122
74.157639,3.60555128,2.57207163,1.01660201,2.57524399,2.57207163,2.571236
74.168131,2.64575131,2.57186365,0.271822853,2.57501359,2.57186365,2.57103121
74.178622,3.31662479,2.57165616,0.863115653,2.5747836,2.57165616,2.57082688
74.189114,2.64575131,2.57144913,0.272584269,2.57455399,2.57144913,2.57062298
74.199606,1.41421356,2.57124257,-1.07565283,2.57432477,2.57124257,2.57041954
74.210097,2.82842712,2.5710365,0.507336797,2.57409595,2.5710365,2.57021655
74.220589,2.64575131,2.57083088,0.273715962,2.57386751,2.57083088,2.570014
74.23108,3,2.57062576,0.655266543,2.57363948,2.57062576,2.56981191
74.241572,3,2.57042108,0.655422701,2.57341181,2.57042108,2.56961025
74.252064,3,2.57021688,0.655578464,2.57318454,2.57021688,2.56940904
74.262555,2.23606798,2.57001316,-0.577879903,2.57295767,2.57001316,2.56920829
74.273047,2.44948974,2.56980989,-0.346871949,2.57273117,2.56980989,2.56900796
74.283538,2.23606798,2.56960711,-0.57752847,2.57250508,2.56960711,2.5688081
74.29403,2.64575131,2.56940478,0.276308766,2.57227936,2.56940478,2.56860867
74.304522,2.64575131,2.56920291,0.276673818,2.57205403,2.56920291,2.56840967
74.315013,2,2.56900153,-0.754321899,2.5718291,2.56900153,2.56821114
74.325505,2.44948974,2.56880059,-0.345414023,2.57160454,2.56880059,2.56801304
74.335996,2.44948974,2.56860014,-0.345123736,2.57138039,2.56860014,2.56781539
74.346488,2.44948974,2.56840013,-0.34483385,2.5711566,2.56840013,2.56761817
74.35698,3.31662479,2.56820058,0.865115142,2.57093319,2.56820058,2.56742139
74.367471,2.64575131,2.56800152,0.278836503,2.5707102,2.56800152,2.56722506
74.377963,2,2.56780289,-0.753526969,2.57048757,2.56780289,2.56702916
74.388454,2.82842712,2.56760475,0.510707719,2.57026534,2.56760475,2.56683372
74.398946,3.46410162,2.56740705,0.946939579,2.57004348,2.56740705,2.5666387
74.409438,3,2.56720981,0.657867914,2.569822,2.56720981,2.56644412
74.419929,2.23606798,2.56701391,-0.575279001,2.56960093,2.56701391,2.56624999
74.430421,2.44948974,2.56681758,-0.342531518,2.56938022,2.56681758,2.56605628
74.440912,2.44948974,2.56662174,-0.342245518,2.56915991,2.56662174,2.56586303
74.451404,3.31662479,2.56642633,0.866139978,2.56893997,2.56642633,2.5656702
74.461896,2.82842712,2.56623138,0.512050532,2.56872041,2.56623138,2.5654778
74.472387,3,2.5660369,0.658758757,2.56850125,2.5660369,2.56528586
74.482879,2.44948974,2.56584286,-0.341105726,2.56828245,2.56584286,2.56509434
74.49337,3.31662479,2.56564929,0.866588426,2.56806406,2.56564929,2.56490327
74.503862,2.82842712,2.56545616,0.512806948,2.56784602,2.56545616,2.56471261
74.514354,3,2.56526348,0.659345525,2.56762837,2.56526348,2.56452239
74.524845,2.23606798,2.56507127,-0.573588087,2.56741112,2.56507127,2.56433263
74.535337,2,2.5648795,-0.751584657,2.56719423,2.5648795,2.56414327
74.545828,2.82842712,2.56468819,0.51355519,2.56697773,2.56468819,2.56395437
74.55632,2.64575131,2.56449732,0.285050859,2.5667616,2.56449732,2.56376588
74.566812,1.73205081,2.5643069,-0.912280707,2.56654585,2.5643069,2.56357783
74.577303,3.31662479,2.56411694,0.867472102,2.5663305,2.56411694,2.56339022
74.587795,3.16227766,2.56392742,0.773531022,2.5661155,2.56392742,2.56320303
74.598286,2.44948974,2.56373836,-0.33800683,2.56590091,2.56373836,2.56301628
74.608778,2.44948974,2.56354973,-0.337727685,2.56568667,2.56354973,2.56282995
74.61927,2,2.56336155,-0.750574147,2.56547281,2.56336155,2.56264405
74.629761,2.64575131,2.56317383,0.287362971,2.56525935,2.56317383,2.56245859
74.640253,3.16227766,2.56298654,0.774138951,2.56504624,2.56298654,2.56227354
74.650744,2.64575131,2.56279972,0.288013181,2.56483353,2.56279972,2.56208894
74.661236,3,2.56261332,0.661352161,2.56462118,2.56261332,2.56190475
74.671728,3.87298335,2.56242736,1.14479517,2.5644092,2.56242736,2.56172099
74.682219,2.82842712,2.56224187,0.515931444,2.56419762,2.56224187,2.56153767
74.692711,2.44948974,2.5620568,-0.335510145,2.5639864,2.5620568,2.56135476
74.703202,3,2.56187219,0.661912237,2.56377557,2.56187219,2.56117229
74.713694,2.64575131,2.561688,0.289936728,2.56356509,2.561688,2.56099023
74.724186,2.82842712,2.56150426,0.516645783,2.56335499,2.56150426,2.5608086
74.734677,3.74165739,2.56132097,1.08643289,2.56314529,2.56132097,2.5606274
74.745169,1.73205081,2.56113811,-0.910542311,2.56293594,2.56113811,2.56044662
74.75566,3.16227766,2.5609557,0.775449522,2.56272698,2.5609557,2.56026627
74.766152,3.60555128,2.56077371,1.02214361,2.56251837,2.56077371,2.56008633
74.776644,2.64575131,2.56059216,0.291820404,2.56231014,2.56059216,2.55990681
74.787135,2.64575131,2.56041107,0.292130525,2.5621023,2.56041107,2.55972773
74.797627,3,2.56023039,0.663151271,2.56189481,2.56023039,2.55954906
74.808118,2.82842712,2.56005017,0.518051112,2.56168772,2.56005017,2.55937082
74.81861,2.82842712,2.55987037,0.518224622,2.56148097,2.55987037,2.55919299
74.829102,2,2.559691,-0.748124987,2.5612746,2.559691,2.55901557
74.839593,3.16227766,2.55951208,0.776379792,2.56106862,2.55951208,2.5588386
74.850085,2.64575131,2.55933358,0.293968932,2.56086299,2.55933358,2.55866202
74.860576,2.44948974,2.55915553,-0.331158246,2.56065775,2.55915553,2.55848588
74.871068,2.44948974,2.55897789,-0.330889934,2.56045286,2.55897789,2.55831014
74.88156,2.44948974,2.55880069,-0.330622058,2.56024833,2.55880069,2.55813482
74.892051,2.82842712,2.55862393,0.519425829,2.5600442,2.55862393,2.55795993
74.902543,2.44948974,2.55844759,-0.330087637,2.55984042,2.55844759,2.55778545
74.913034,2.64575131,2.5582717,0.29576953,2.55963702,2.5582717,2.55761139
74.923526,2.44948974,2.55809621,-0.32955496,2.55943398,2.55809621,2.55743774
74.934018,3.87298335,2.55792116,1.14676161,2.5592313,2.55792116,2.5572645
74.944509,2,2.55774655,-0.746824313,2.55902901,2.55774655,2.55709169
74.955001,2.44948974,2.55757236,-0.328759205,2.55882707,2.55757236,2.55691928
74.965492,1,2.5573986,-1.24795777,2.55862551,2.5573986,2.5567473
74.975984,3,2.55722526,0.665413208,2.5584243,2.55722526,2.55657571
74.986476,2.44948974,2.55705235,-0.32796738,2.55822346,2.55705235,2.55640454
74.996967,3.31662479,2.55687987,0.871633478,2.558023,2.55687987,2.5562338
75.007459,3,2.5567078,0.665801919,2.55782289,2.5567078,2.55606345
75.01795,2.64575131,2.55653618,0.298689023,2.55762316,2.55653618,2.55589353
75.028442,2.82842712,2.55636496,0.521595786,2.55742378,2.55636496,2.555724
75.038934,3.16227766,2.55619417,0.778513644,2.55722476,2.55619417,2.55555489
75.049425,2.23606798,2.55602381,-0.565646384,2.55702613,2.55602381,2.5553862
75.059917,2,2.55585386,-0.745556074,2.55682784,2.55585386,2.55521791
75.070408,2.44948974,2.55568435,-0.325875135,2.55662994,2.55568435,2.55505003
75.0809,3.31662479,2.55551524,0.872415929,2.55643238,2.55551524,2.55488256
75.091392,2.23606798,2.55534655,-0.565047407,2.55623518,2.55534655,2.55471549
75.101883,2.82842712,2.5551783,0.522732079,2.55603836,2.5551783,2.55454884
75.112375,2.64575131,2.55501045,0.301232239,2.55584189,2.55501045,2.55438258
75.122866,2.23606798,2.55484303,-0.56460168,2.5556458,2.55484303,2.55421675
75.133358,3.16227766,2.55467602,0.779488061,2.55545005,2.55467602,2.55405131
75.14385,2.64575131,2.55450943,0.302062715,2.55525466,2.55450943,2.55388627
75.154341,3.46410162,2.55434326,0.953812534,2.55505965,2.55434326,2.55372165
75.164833,2.64575131,2.5541775,0.302611646,2.55486499,2.5541775,2.55355742
75.175324,3.31662479,2.55401217,0.873276942,2.5546707,2.55401217,2.55339361
75.185816,3.16227766,2.55384724,0.780019499,2.55447675,2.55384724,2.55323019
75.196308,2.23606798,2.55368273,-0.563573196,2.55428317,2.55368273,2.55306717
75.206799,3.16227766,2.55351864,0.780230108,2.55408996,2.55351864,2.55290457
75.217291,2.64575131,2.55335495,0.303967698,2.55389709,2.55335495,2.55274236
75.227782,2.82842712,2.55319169,0.524628855,2.5537046,2.55319169,2.55258057
75.238274,3.87298335,2.55302883,1.14889274,2.55351245,2.55302883,2.55241915
75.248766,2.82842712,2.55286637,0.524938808,2.55332066,2.55286637,2.55225814
75.259257,3.31662479,2.55270435,0.874025425,2.55312924,2.55270435,2.55209755
75.269749,2.23606798,2.55254272,-0.562560877,2.55293816,2.55254272,2.55193734
75.28024,2.44948974,2.55238151,-0.32076747,2.55274746,2.55238151,2.55177754
75.290732,2.64575131,2.5522207,0.305827744,2.5525571,2.5522207,2.55161813
75.301224,3,2.5520603,0.669282974,2.55236709,2.5520603,2.55145912
75.311715,3,2.55190032,0.669402478,2.55217746,2.55190032,2.55130052
75.322207,2.44948974,2.55174074,-0.319767093,2.55198816,2.55174074,2.5511423
75.332698,2.82842712,2.55158157,0.526161146,2.55179924,2.55158157,2.55098449
75.34319,2.64575131,2.5514228,0.307129467,2.55161065,2.5514228,2.55082706
75.353682,1.73205081,2.55126444,-0.905104209,2.55142242,2.55126444,2.55067003
75.364173,3.16227766,2.55110649,0.781774372,2.55123457,2.55110649,2.55051341
75.374665,2.64575131,2.55094894,0.307899943,2.55104704,2.55094894,2.55035717
75.385156,2,2.5507918,-0.742153489,2.55085989,2.5507918,2.55020134
75.395648,2.82842712,2.55063505,0.527059836,2.55067308,2.55063505,2.55004589
75.40614,2.64575131,2.55047871,0.308662599,2.55048662,2.55047871,2.54989083
75.416631,3,2.55032279,0.67057976,2.55030053,2.55032279,2.54973618
75.427123,2.64575131,2.55016725,0.309166725,2.55011477,2.55016725,2.5495819
75.437614,2.23606798,2.55001213,-0.560307191,2.54992938,2.55001213,2.54942804
75.448106,2.64575131,2.54985739,0.309667436,2.54974433,2.54985739,2.54927454
75.458598,1.73205081,2.54970306,-0.904241255,2.54955963,2.54970306,2.54912144
75.469089,2.64575131,2.54954913,0.310164757,2.54937529,2.54954913,2.54896875
75.479581,3.31662479,2.5493956,0.875916201,2.54919129,2.5493956,2.54881643
75.490072,2,2.54924248,-0.741108951,2.54900766,2.54924248,2.54866451
75.500564,3.31662479,2.54908974,0.876090778,2.54882436,2.54908974,2.54851297
75.511056,3.60555128,2.5489374,1.02791725,2.54864141,2.5489374,2.54836182
75.521547,3,2.54878547,0.67172504,2.54845883,2.54878547,2.54821106
75.532039,2.64575131,2.54863392,0.311636627,2.54827657,2.54863392,2.54806069
75.54253,2.82842712,2.54848279,0.529097663,2.54809469,2.54848279,2.54791071
75.553022,3,2.54833203,0.672062472,2.54791313,2.54833203,2.5477611
75.563514,3.16227766,2.54818167,0.783642767,2.54773193,2.54818167,2.54761188
75.574005,3.46410162,2.54803172,0.957115402,2.54755109,2.54803172,2.54746306
75.584497,2.64575131,2.54788215,0.312840469,2.54737057,2.54788215,2.54731462
75.594988,2.64575131,2.54773299,0.313078781,2.54719043,2.54773299,2.54716656
75.60548,2.44948974,2.5475842,-0.313200352,2.54701061,2.5475842,2.54701888
75.615972,2.82842712,2.54743581,0.530086138,2.54683114,2.54743581,2.54687159
75.626463,3.16227766,2.54728782,0.784212877,2.54665203,2.54728782,2.54672469
75.636955,3,2.54714021,0.672948576,2.54647325,2.54714021,2.54657815
75.647446,3.46410162,2.54699301,0.957657875,2.54629483,2.54699301,2.54643202
75.657938,2.64575131,2.54684618,0.314491861,2.54611674,2.54684618,2.54628625
75.66843,2.82842712,2.54669974,0.530779977,2.54593899,2.54669974,2.54614086
75.678921,2.23606798,2.5465537,-0.557212461,2.54576161,2.5465537,2.54599587
75.689413,2.23606798,2.54640804,-0.55708174,2.54558455,2.54640804,2.54585124
75.699904,2.44948974,2.54626278,-0.311083654,2.54540786,2.54626278,2.54570701
75.710396,2.82842712,2.5461179,0.531327798,2.54523149,2.5461179,2.54556314
75.720888,2.82842712,2.5459734,0.53146376,2.54505546,2.5459734,2.54541965
75.731379,2.44948974,2.5458293,-0.310386137,2.54487979,2.5458293,2.54527655
75.741871,1.73205081,2.54568557,-0.902017052,2.54470445,2.54568557,2.54513381
75.752362,2.82842712,2.54554224,0.531869236,2.54452947,2.54554224,2.54499147
75.762854,2.64575131,2.54539928,0.316783883,2.54435481,2.54539928,2.54484949
75.773346,3.31662479,2.54525671,0.878275629,2.54418049,2.54525671,2.54470788
75.783837,2.23606798,2.54511453,-0.555919558,2.54400653,2.54511453,2.54456666
75.794329,3,2.54497273,0.674557095,2.54383289,2.54497273,2.54442581
75.80482,2.44948974,2.54483131,-0.308774306,2.54365962,2.54483131,2.54428534
75.815312,2.44948974,2.54469027,-0.30854583,2.54348666,2.54469027,2.54414523
75.825804,3.31662479,2.54454961,0.878678086,2.54331404,2.54454961,2.5440055
75.836295,3.31662479,2.54440934,0.8787579,2.54314178,2.54440934,2.54386615
75.846787,2.82842712,2.54426944,0.533064424,2.54296985,2.54426944,2.54372716
75.857278,1.73205081,2.54412994,-0.901154332,2.54279826,2.54412994,2.54358856
75.86777,2.44948974,2.5439908,-0.307410238,2.542627,2.5439908,2.54345032
75.878262,2.64575131,2.54385204,0.31921666,2.54245608,2.54385204,2.54331244
75.888753,2.44948974,2.54371366,-0.306959153,2.54228551,2.54371366,2.54317495
75.899245,2.44948974,2.54357566,-0.306734275,2.54211526,2.54357566,2.54303782
75.909736,3,2.54343804,0.675693686,2.54194537,2.54343804,2.54290107
75.920228,2.82842712,2.54330079,0.533972223,2.54177579,2.54330079,2.54276468
75.93072,2.44948974,2.54316391,-0.306062364,2.54160655,2.54316391,2.54262865
75.941211,3,2.54302743,0.675997466,2.54143767,2.54302743,2.542493
75.951703,3.16227766,2.5428913,0.78701103,2.5412691,2.5428913,2.54235771
75.962194,1.73205081,2.54275556,-0.900391444,2.54110088,2.54275556,2.5422228
75.972686,2.44948974,2.54262018,-0.305172804,2.54093299,2.54262018,2.54208825
75.983178,1.73205081,2.54248518,-0.900241285,2.54076542,2.54248518,2.54195406
75.993669,2.44948974,2.54235056,-0.304730729,2.54059821,2.54235056,2.54182024
76.004161,3.60555128,2.5422163,1.03118135,2.54043132,2.5422163,2.54168678
76.014652,2.44948974,2.54208243,-0.304290459,2.54026477,2.54208243,2.5415537
76.025144,2.44948974,2.54194891,-0.30407099,2.54009854,2.54194891,2.54142097
76.035636,2.23606798,2.54181576,-0.552944651,2.53993265,2.54181576,2.5412886
76.046127,1.41421356,2.541683,-1.06182364,2.5397671,2.541683,2.54115661
76.056619,3.16227766,2.5415506,0.787862338,2.53960187,2.5415506,2.54102496
76.06711,2.82842712,2.54141857,0.535731792,2.53943699,2.54141857,2.5408937
76.077602,3,2.5412869,0.677283616,2.53927242,2.5412869,2.54076278
76.088094,3.16227766,2.5411556,0.788112972,2.53910819,2.5411556,2.54063222
76.098585,3.16227766,2.54102468,0.788196027,2.5389443,2.54102468,2.54050203
76.109077,3.60555128,2.54089412,1.03182225,2.53878072,2.54089412,2.5403722
76.119568,3.16227766,2.54076393,0.78836142,2.53861749,2.54076393,2.54024273
76.13006,2.44948974,2.5406341,-0.301901234,2.53845458,2.5406341,2.54011361
76.140552,2,2.54050463,-0.7351902,2.53829199,2.54050463,2.53998485
76.151043,2.44948974,2.54037554,-0.301472712,2.53812975,2.54037554,2.53985646
76.161535,1.73205081,2.5402468,-0.898997215,2.53796783,2.5402468,2.53972841
76.172026,2.82842712,2.54011844,0.53694384,2.53780624,2.54011844,2.53960074
76.182518,2.44948974,2.53999043,-0.300833314,2.53764497,2.53999043,2.53947341
76.19301,3.31662479,2.53986278,0.881341031,2.53748403,2.53986278,2.53934643
76.203501,3.46410162,2.5397355,0.961439605,2.53732343,2.5397355,2.53921982
76.213993,3,2.53960858,0.678521498,2.53716314,2.53960858,2.53909356
76.224484,3.87298335,2.53948202,1.15477328,2.5370032,2.53948202,2.53896766
76.234976,2,2.53935582,-0.734408484,2.53684356,2.53935582,2.5388421
76.245468,2.82842712,2.53922998,0.537770534,2.53668425,2.53922998,2.5387169
76.255959,2.64575131,2.53910451,0.326568225,2.53652528,2.53910451,2.53859206
76.266451,2.64575131,2.53897938,0.326759744,2.53636663,2.53897938,2.53846757
76.276942,2.64575131,2.53885463,0.326950584,2.53620831,2.53885463,2.53834343
76.287434,3.16227766,2.53873022,0.789650202,2.5360503,2.53873022,2.53821964
76.297926,2,2.53860617,-0.733897927,2.53589262,2.53860617,2.5380962
76.308417,2.23606798,2.53848248,-0.549922274,2.53573528,2.53848248,2.53797312
76.318909,2.64575131,2.53835915,0.327707436,2.53557824,2.53835915,2.53785037
76.3294,2,2.53823618,-0.733645812,2.53542154,2.53823618,2.53772799
76.339892,3,2.53811355,0.679622284,2.53526515,2.53811355,2.53760595
76.350384,2.23606798,2.53799128,-0.549475479,2.53510909,2.53799128,2.53748426
76.360875,2,2.53786937,-0.733395782,2.53495336,2.53786937,2.53736292
76.371367,2.23606798,2.53774781,-0.549253887,2.53479794,2.53774781,2.53724192
76.381858,2.82842712,2.53762661,0.539259227,2.53464285,2.53762661,2.53712128
76.39235,2.82842712,2.53750575,0.539371274,2.53448807,2.53750575,2.53700097
76.402842,3.16227766,2.53738525,0.790501368,2.53433362,2.53738525,2.53688101
76.413333,2,2.53726511,-0.732983701,2.53417949,2.53726511,2.53676141
76.423825,2.23606798,2.5371453,-0.548705135,2.53402568,2.5371453,2.53664214
76.434316,2.64575131,2.53702586,0.329735423,2.5338722,2.53702586,2.53652323
76.444808,3,2.53690676,0.680509544,2.53371902,2.53690676,2.53640465
76.4553,2.64575131,2.53678801,0.3300959,2.53356616,2.53678801,2.53628641
76.465791,2.44948974,2.53666962,-0.29526238,2.53341364,2.53666962,2.53616853
76.476283,3.31662479,2.53655156,0.883217544,2.53326142,2.53655156,2.53605098
76.486774,3.16227766,2.53643387,0.791102898,2.53310953,2.53643387,2.53593378
76.497266,3,2.53631651,0.680943091,2.53295795,2.53631651,2.53581691
76.507758,2.64575131,2.53619949,0.330986128,2.53280668,2.53619949,2.53570039
76.518249,1.73205081,2.53608284,-0.896678332,2.53265575,2.53608284,2.53558421
76.528741,2.44948974,2.53596652,-0.29406934,2.53250512,2.53596652,2.53546836
76.539232,2.44948974,2.53585056,-0.293872103,2.53235482,2.53585056,2.53535287
76.549724,3.31662479,2.53573493,0.883679729,2.53220482,2.53573493,2.5352377
76.560216,3.31662479,2.53561964,0.883744957,2.53205514,2.53561964,2.53512287
76.570707,1.73205081,2.53550471,-0.896355902,2.53190579,2.53550471,2.53500839
76.581199,2,2.53539011,-0.731703569,2.53175673,2.53539011,2.53489424
76.59169,3.60555128,2.53527587,1.03454116,2.53160801,2.53527587,2.53478043
76.602182,2.23606798,2.53516196,-0.546894851,2.53145959,2.53516196,2.53466695
76.612674,2.64575131,2.53504838,0.332720494,2.53131148,2.53504838,2.53455381
76.623165,3,2.53493516,0.681956623,2.5311637,2.53493516,2.53444101
76.633657,3.31662479,2.53482228,0.884195971,2.53101622,2.53482228,2.53432854
76.644148,2.64575131,2.53470974,0.333229011,2.53086907,2.53470974,2.53421641
76.65464,2,2.53459753,-0.731161766,2.53072222,2.53459753,2.5341046
76.665132,3.87298335,2.53448566,1.15693461,2.53057568,2.53448566,2.53399313
76.675623,1.41421356,2.53437414,-1.05837639,2.53042946,2.53437414,2.53388201
76.686115,2.82842712,2.53426294,0.542369045,2.53028355,2.53426294,2.5337712
76.696606,2.23606798,2.5341521,-0.545970807,2.53013796,2.5341521,2.53366074
76.707098,3.31662479,2.53404158,0.884637332,2.52999266,2.53404158,2.5335506
76.71759,3.16227766,2.5339314,0.792682951,2.52984768,2.5339314,2.53344079
76.728081,2,2.53382156,-0.730630935,2.52970302,2.53382156,2.53333132
76.738573,2.23606798,2.53371205,-0.545567664,2.52955866,2.53371205,2.53322217
76.749064,2.23606798,2.53360289,-0.545467608,2.52941463,2.53360289,2.53311335
76.759556,2.44948974,2.53349405,-0.289834962,2.52927088,2.53349405,2.53300486
76.770048,3.46410162,2.53338554,0.964736271,2.52912745,2.53338554,2.5328967
76.780539,3.16227766,2.53327738,0.79309538,2.52898434,2.53327738,2.53278888
76.791031,2.44948974,2.53316954,-0.289274604,2.52884153,2.53316954,2.53268137
76.801522,3.16227766,2.53306204,0.793231125,2.52869903,2.53306204,2.5325742
76.812014,2.64575131,2.53295487,0.335851819,2.52855683,2.53295487,2.53246734
76.822506,2.64575131,2.53284802,0.336010846,2.52841494,2.53284802,2.53236082
76.832997,2.23606798,2.53274152,-0.544677466,2.52827337,2.53274152,2.53225462
76.843489,3,2.53263534,0.683640741,2.5281321,2.53263534,2.53214875
76.85398,2.44948974,2.53252949,-0.288166188,2.52799114,2.53252949,2.53204321
76.864472,2.23606798,2.53242397,-0.544385887,2.52785047,2.53242397,2.53193798
76.874964,2.44948974,2.53231878,-0.287800338,2.52771012,2.53231878,2.53183307
76.885455,2.23606798,2.53221392,-0.544192929,2.52757008,2.53221392,2.5317285
76.895947,3,2.53210938,0.684025304,2.52743033,2.53210938,2.53162424
76.906438,3.46410162,2.53200518,0.965451414,2.5272909,2.53200518,2.53152031
76.91693,3,2.5319013,0.68417739,2.52715176,2.5319013,2.5314167
76.927422,2.82842712,2.53179774,0.544636928,2.52701293,2.53179774,2.5313134
76.937913,1.73205081,2.53169452,-0.894227998,2.52687441,2.53169452,2.53121044
76.948405,3.31662479,2.53159161,0.88602098,2.52673619,2.53159161,2.53110779
76.958896,2.44948974,2.53148904,-0.286355199,2.52659828,2.53148904,2.53100546
76.969388,2.23606798,2.53138679,-0.543432432,2.52646066,2.53138679,2.53090345
76.97988,2.82842712,2.53128485,0.545107579,2.52632334,2.53128485,2.53080175
76.990371,2.44948974,2.53118325,-0.285820765,2.52618634,2.53118325,2.53070038
77.000863,2.64575131,2.53108197,0.338628625,2.52604963,2.53108197,2.53059932
77.011354,2.23606798,2.53098101,-0.543058959,2.52591323,2.53098101,2.53049859
77.021846,3,2.53088037,0.684923085,2.52577712,2.53088037,2.53039816
77.032338,2.44948974,2.53078005,-0.285114544,2.52564131,2.53078005,2.53029805
77.042829,3.60555128,2.53068005,1.03675996,2.52550582,2.53068005,2.53019826
77.053321,2.23606798,2.53058037,-0.542689964,2.52537061,2.53058037,2.53009878
77.063812,2.64575131,2.53048102,0.339514783,2.52523571,2.53048102,2.52999963
77.074304,3.87298335,2.53038198,1.15870676,2.5251011,2.53038198,2.52990078
77.084796,3.74165739,2.53028326,1.10062443,2.5249668,2.53028326,2.52980224
77.095287,2.44948974,2.53018486,-0.284068867,2.5248328,2.53018486,2.52970403
77.105779,1.73205081,2.53008678,-0.89332859,2.52469909,2.53008678,2.52960611
77.11627,3.16227766,2.52998902,0.795165796,2.52456569,2.52998902,2.52950852
77.126762,2.44948974,2.52989156,-0.28355215,2.52443257,2.52989156,2.52941124
77.137254,2.23606798,2.52979443,-0.541965359,2.52429975,2.52979443,2.52931426
77.147745,3.31662479,2.52969762,0.887089158,2.52416724,2.52969762,2.5292176
77.158237,2.23606798,2.52960111,-0.541786982,2.52403502,2.52960111,2.52912125
77.168728,2.64575131,2.52950493,0.340949235,2.52390311,2.52950493,2.52902521
77.17922,1.41421356,2.52940905,-1.05602817,2.52377148,2.52940905,2.52892947
77.189712,2.64575131,2.52931349,0.341229864,2.52364014,2.52931349,2.52883404
77.200203,2.23606798,2.52921825,-0.541433535,2.52350911,2.52921825,2.52873893
77.210695,3.31662479,2.52912331,0.887412799,2.52337837,2.52912331,2.52864412
77.221186,2.44948974,2.5290287,-0.282026516,2.52324793,2.5290287,2.52854962
77.231678,3,2.52893439,0.686342199,2.52311778,2.52893439,2.52845543
77.24217,2.44948974,2.52884038,-0.281692458,2.52298792,2.52884038,2.52836153
77.252661,1.73205081,2.5287467,-0.892578229,2.52285837,2.5287467,2.52826796
77.263153,2.64575131,2.52865332,0.342195835,2.52272909,2.52865332,2.52817467
77.273644,2.44948974,2.52856026,-0.281194802,2.52260013,2.52856026,2.52808171
77.284136,3,2.5284675,0.686682242,2.52247144,2.5284675,2.52798904
77.294628,2.23606798,2.52837505,-0.540654296,2.52234305,2.52837505,2.52789667
77.305119,2.64575131,2.52828291,0.342736636,2.52221496,2.52828291,2.52780461
77.315611,2.64575131,2.52819107,0.342870586,2.52208715,2.52819107,2.52771285
77.326102,2.64575131,2.52809955,0.343004023,2.52195964,2.52809955,2.5276214
77.336594,2.82842712,2.52800833,0.548104731,2.52183242,2.52800833,2.52753024
77.347086,3.16227766,2.52791741,0.796467355,2.52170548,2.52791741,2.52743938
77.357577,3.31662479,2.52782681,0.888142996,2.52157885,2.52782681,2.52734883
77.368069,2.44948974,2.5277365,-0.279726226,2.5214525,2.5277365,2.52725858
77.37856,3.16227766,2.52764651,0.796637401,2.52132644,2.52764651,2.52716863
77.389052,2,2.52755682,-0.726331065,2.52120067,2.52755682,2.52707897
77.399544,3,2.52746742,0.68741005,2.52107518,2.52746742,2.52698962
77.410035,2.23606798,2.52737834,-0.539731752,2.52095,2.52737834,2.52690056
77.420527,2.82842712,2.52728955,0.54876003,2.52082509,2.52728955,2.5268118
77.431018,3.60555128,2.52720108,1.03843642,2.52070049,2.52720108,2.52672335
77.44151,1.73205081,2.5271129,-0.891662542,2.52057615,2.5271129,2.52663518
77.452002,2.23606798,2.52702501,-0.539404335,2.52045211,2.52702501,2.52654731
77.462493,2.64575131,2.52693744,0.344693877,2.52032837,2.52693744,2.52645974
77.472985,2.44948974,2.52685016,-0.278137411,2.5202049,2.52685016,2.52637246
77.483476,3.16227766,2.52676319,0.797191614,2.52008173,2.52676319,2.52628549
77.493968,2.82842712,2.52667651,0.549318319,2.51995883,2.52667651,2.5261988
77.50446,2.82842712,2.52659013,0.54939694,2.51983622,2.52659013,2.5261124
77.514951,3.16227766,2.52650405,0.79735413,2.51971391,2.52650405,2.5260263
77.525443,2.23606798,2.52641826,-0.538841616,2.51959187,2.52641826,2.52594049
77.535934,3.16227766,2.52633278,0.79746152,2.51947013,2.52633278,2.52585498
77.546426,2.82842712,2.52624759,0.549708588,2.51934866,2.52624759,2.52576976
77.556918,2.44948974,2.5261627,-0.276898816,2.51922747,2.5261627,2.52568482
77.567409,2.82842712,2.52607811,0.549862727,2.51910659,2.52607811,2.52560019
77.577901,3,2.5259938,0.688481081,2.51898597,2.5259938,2.52551584
77.588392,2.23606798,2.5259098,-0.538369597,2.51886565,2.5259098,2.52543178
77.598884,2,2.52582609,-0.725138666,2.5187456,2.52582609,2.52534801
77.609376,2.82842712,2.52574266,0.550167665,2.51862583,2.52574266,2.52526453
77.619867,2.82842712,2.52565955,0.5502432,2.51850636,2.52565955,2.52518134
77.630359,2,2.52557671,-0.724966697,2.51838715,2.52557671,2.52509843
77.64085,3.16227766,2.52549418,0.797987145,2.51826825,2.52549418,2.52501582
77.651342,2.64575131,2.52541193,0.346899674,2.51814961,2.52541193,2.52493349
77.661834,2,2.52532997,-0.724796502,2.51803125,2.52532997,2.52485144
77.672325,2.82842712,2.52524831,0.550616759,2.51791318,2.52524831,2.52476969
77.682817,3.31662479,2.52516693,0.889639173,2.51779538,2.52516693,2.52468821
77.693308,3,2.52508585,0.68914015,2.51767788,2.52508585,2.52460703
77.7038,2.44948974,2.52500506,-0.274800497,2.51756064,2.52500506,2.52452613
77.714292,2.23606798,2.52492455,-0.537453784,2.51744369,2.52492455,2.52444551
77.724783,3.16227766,2.52484434,0.798394216,2.51732702,2.52484434,2.52436518
77.735275,1.73205081,2.5247644,-0.890344651,2.51721062,2.5247644,2.52428513
77.745766,2.44948974,2.52468477,-0.274217114,2.51709451,2.52468477,2.52420536
77.756258,2.44948974,2.52460541,-0.274072379,2.51697867,2.52460541,2.52412588
77.76675,2,2.52452634,-0.724241908,2.5168631,2.52452634,2.52404667
77.777241,3.60555128,2.52444757,1.03976137,2.51674783,2.52444757,2.52396775
77.787733,3.31662479,2.52436907,0.89008748,2.51663282,2.52436907,2.52388911
77.798224,2.82842712,2.5244169,0.551371219,2.5165181,2.5244169,2.52381075
77.808716,2.44948974,2.52433913,-0.273586165,2.51640364,2.52433913,2.52373267
77.819208,2.82842712,2.52426165,0.551511994,2.51628946,2.52426165,2.52365486
77.829699,2.44948974,2.52418445,-0.273303324,2.51617557,2.52418445,2.52357734
77.840191,2.23606798,2.52410753,-0.536693164,2.51606194,2.52410753,2.52350009
77.850682,3.16227766,2.5240309,0.798903473,2.5159486,2.5240309,2.52342313
77.861174,2.64575131,2.52395455,0.348993931,2.51583552,2.52395455,2.52334644
77.871666,2.82842712,2.52387848,0.551859266,2.51572271,2.52387848,2.52327002
77.882157,1.73205081,2.52380269,-0.889804408,2.5156102,2.52380269,2.52319389
77.892649,3.16227766,2.52372718,0.799093534,2.51549794,2.52372718,2.52311803
77.90314,3,2.52365196,0.690179713,2.51538597,2.52365196,2.52304245
77.913632,2.64575131,2.52357702,0.349534398,2.51527426,2.52357702,2.52296714
77.924124,3,2.52350235,0.690288094,2.51516283,2.52350235,2.5228921
77.934615,2.23606798,2.52342797,-0.536059687,2.51505168,2.52342797,2.52281734
77.945107,2.64575131,2.52335386,0.349853477,2.51494079,2.52335386,2.52274285
77.955598,2.44948974,2.52328003,-0.271643679,2.51483018,2.52328003,2.52266864
77.96609,2.44948974,2.52320648,-0.271508259,2.51471983,2.52320648,2.5225947
77.976582,3.31662479,2.5231332,0.890781449,2.51460976,2.5231332,2.52252102
77.987073,2.64575131,2.52306021,0.350272897,2.51449997,2.52306021,2.52244763
77.997565,1.73205081,2.52298749,-0.889346208,2.51439044,2.52298749,2.5223745
78.008056,2,2.52291505,-0.723128651,2.51428118,2.52291505,2.52230165
78.018548,2,2.52284287,-0.723078747,2.51417219,2.52284287,2.52222906
78.02904,2.64575131,2.52277098,0.350685519,2.51406347,2.52277098,2.52215674
78.039531,2.64575131,2.52269936,0.350787611,2.51395503,2.52269936,2.5220847
78.050023,1.73205081,2.52262802,-0.889144087,2.51384685,2.52262802,2.52201292
78.060514,3.16227766,2.52255695,0.799825426,2.51373894,2.52255695,2.52194141
78.071006,2.64575131,2.52248615,0.35109139,2.5136313,2.52248615,2.52187017
78.081498,3.16227766,2.52241562,0.799913771,2.51352392,2.52241562,2.52179919
78.091989,2.44948974,2.52234537,-0.269917814,2.51341682,2.52234537,2.52172848
78.102481,2.64575131,2.52227538,0.351391415,2.51330998,2.52227538,2.52165804
78.112972,3,2.52220568,0.691226679,2.51320341,2.52220568,2.52158787
78.123464,3.16227766,2.52213624,0.800088385,2.51309711,2.52213624,2.52151795
78.133956,3.16227766,2.52206706,0.800131612,2.51299106,2.52206706,2.52144831
78.144447,3.31662479,2.52199817,0.89141832,2.5128853,2.52199817,2.52137893
78.154939,2.64575131,2.52192954,0.351883184,2.51277979,2.52192954,2.52130981
78.16543,2,2.52186118,-0.722399598,2.51267456,2.52186118,2.52124096
78.175922,1.41421356,2.52179308,-1.05241604,2.51256958,2.52179308,2.52117237
78.186414,2.82842712,2.52172526,0.553806707,2.51246487,2.52172526,2.52110404
78.196905,3,2.5216577,0.691622944,2.51236043,2.5216577,2.52103598
78.207397,1.73205081,2.52159041,-0.88856041,2.51225625,2.52159041,2.52096817
78.217888,3,2.52152339,0.691720037,2.51215234,2.52152339,2.52090063
78.22838,1.73205081,2.52145663,-0.888485129,2.51204868,2.52145663,2.52083335
78.238872,2.44948974,2.52139014,-0.268142489,2.51194529,2.52139014,2.52076632
78.249363,3,2.52132391,0.69186421,2.51184217,2.52132391,2.52069956
78.259855,2.23606798,2.52125795,-0.534031809,2.51173931,2.52125795,2.52063306
78.270346,2.44948974,2.52119226,-0.267773252,2.51163671,2.52119226,2.52056682
78.280838,3,2.52112682,0.692006632,2.51153437,2.52112682,2.52050083
78.29133,2.64575131,2.52106165,0.353114234,2.51143229,2.52106165,2.5204351
78.301821,2,2.52099675,-0.721801043,2.51133049,2.52099675,2.52036963
78.312313,2.82842712,2.5209321,0.55452234,2.51122893,2.5209321,2.52030441
78.322804,2.44948974,2.52086772,-0.267166572,2.51112764,2.52086772,2.52023946
78.333296,2.82842712,2.5208036,0.554638196,2.51102661,2.5208036,2.52017476
78.343788,3.60555128,2.52073973,1.04154287,2.51092584,2.52073973,2.52011031
78.354279,3,2.52067614,0.69233219,2.51082533,2.52067614,2.52004612
78.364771,1.73205081,2.5206128,-0.888010129,2.51072508,2.5206128,2.51998218
78.375262,2.82842712,2.52054972,0.554867014,2.51062509,2.52054972,2.51991851
78.385754,2.23606798,2.5204869,-0.533309405,2.51052535,2.5204869,2.51985507
78.396246,3,2.52042434,0.692514018,2.51042588,2.52042434,2.5197919
78.406737,3.31662479,2.52036204,0.892335561,2.51032667,2.52036204,2.51972898
78.417229,2,2.52029999,-0.72131823,2.51022771,2.52029999,2.51966631
78.42772,2.23606798,2.5202382,-0.533076193,2.51012901,2.5202382,2.51960389
78.438212,3,2.52017667,0.692692809,2.51003057,2.52017667,2.51954172
78.448704,3.31662479,2.5201154,0.89247375,2.50993238,2.5201154,2.5194798
78.459195,2.44948974,2.52005438,-0.265640055,2.50983446,2.52005438,2.51941814
78.469687,3.16227766,2.51999362,0.801426256,2.50973678,2.51999362,2.51935672
78.480178,3,2.51993311,0.692868592,2.50963937,2.51993311,2.51929556
78.49067,2.44948974,2.51987286,-0.265298165,2.50954221,2.51987286,2.51923464
78.501162,2.23606798,2.51981286,-0.532677089,2.5094453,2.51981286,2.51917397
78.511653,3.46410162,2.51975312,0.97177595,2.50934866,2.51975312,2.51911355
78.522145,2,2.51969363,-0.720897791,2.50925227,2.51969363,2.51905337
78.532636,2,2.51963439,-0.720856706,2.50915613,2.51963439,2.51899345
78.543128,2.44948974,2.5195754,-0.264736966,2.50906025,2.5195754,2.51893377
78.55362,1.41421356,2.51951667,-1.05133397,2.50896461,2.51951667,2.51887433
78.564111,2.44948974,2.51945819,-0.264515496,2.50886924,2.51945819,2.51881514
78.574603,2.23606798,2.51939996,-0.532289377,2.50877412,2.51939996,2.5187562
78.585094,2.44948974,2.51934198,-0.264295741,2.50867925,2.51934198,2.5186975
78.595586,3,2.51928425,0.693336679,2.50858463,2.51928425,2.51863905
78.606078,2.64575131,2.51922677,0.355702885,2.50849026,2.51922677,2.51858084
78.616569,3,2.51916954,0.693419396,2.50839616,2.51916954,2.51852287
78.627061,2.23606798,2.51911256,-0.532019343,2.50830229,2.51911256,2.51846515
78.637552,3.16227766,2.51905583,0.802011117,2.50820869,2.51905583,2.51840767
78.648044,3,2.51899934,0.693542109,2.50811533,2.51899934,2.51835043
78.658536,1.41421356,2.5189431,-1.05106115,2.50802222,2.5189431,2.51829343
78.669027,2.44948974,2.51888712,-0.263433813,2.50792937,2.51888712,2.51823668
78.679519,2.64575131,2.51883137,0.356258248,2.50783676,2.51883137,2.51818016
78.69001,2.82842712,2.51877588,0.556463158,2.50774441,2.51877588,2.51812388
78.700502,2.64575131,2.51872063,0.356413644,2.5076523,2.51872063,2.51806785
78.710994,3,2.51866562,0.693782662,2.50756044,2.51866562,2.51801205
78.721485,2.64575131,2.51861086,0.356567596,2.50746884,2.51861086,2.51795649
78.731977,2.64575131,2.51855634,0.356644036,2.50737748,2.51855634,2.51790117
78.742468,2,2.51850207,-0.720070881,2.50728638,2.51850207,2.51784609
78.75296,2.44948974,2.51844804,-0.262599127,2.50719551,2.51844804,2.51779125
78.763452,1.73205081,2.51839426,-0.886760086,2.5071049,2.51839426,2.51773664
78.773943,2.82842712,2.51834072,0.556854026,2.50701454,2.51834072,2.51768227
78.784435,3,2.51828742,0.694055173,2.50692442,2.51828742,2.51762813
78.794926,2.64575131,2.51823436,0.357095154,2.50683455,2.51823436,2.51757424
78.805418,2.23606798,2.51818154,-0.53114364,2.50674492,2.51818154,2.51752057
78.81591,2.64575131,2.51812897,0.357242696,2.50665554,2.51812897,2.51746714
78.826401,2.44948974,2.51807664,-0.261890994,2.50656641,2.51807664,2.51741395
78.836893,2,2.51802454,-0.719739216,2.50647752,2.51802454,2.51736098
78.847384,2,2.51797269,-0.719703194,2.50638889,2.51797269,2.51730826
78.857876,1.41421356,2.51792107,-1.05057485,2.50630049,2.51792107,2.51725576
78.868368,2.82842712,2.51786969,0.5572768,2.50621234,2.51786969,2.5172035
78.878859,2.44948974,2.51781856,-0.261397811,2.50612443,2.51781856,2.51715147
78.889351,3,2.51776766,0.694429509,2.50603677,2.51776766,2.51709967
78.899842,2,2.517717,-0.719525537,2.50594936,2.517717,2.5170481
78.910334,2.82842712,2.51766657,0.557459015,2.50586218,2.51766657,2.51699676
78.920826,3.16227766,2.51761638,0.802908014,2.50577525,2.51761638,2.51694566
78.931317,3.31662479,2.51756643,0.893900642,2.50568856,2.51756643,2.51689478
78.941809,1.73205081,2.51751672,-0.886265145,2.50560211,2.51751672,2.51684413
78.9523,2.44948974,2.51746724,-0.260724941,2.50551592,2.51746724,2.51679371
78.962792,2.44948974,2.51741799,-0.260630482,2.50542995,2.51741799,2.51674352
78.973284,2.82842712,2.51736898,0.55772587,2.50534423,2.51736898,2.51669356
78.983775,2,2.51732021,-0.719249752,2.50525876,2.51732021,2.51664382
78.994267,2.44948974,2.51727166,-0.260349608,2.50517352,2.51727166,2.51659431
79.004758,2.44948974,2.51722336,-0.26025682,2.50508853,2.51722336,2.51654503
79.01525,3.16227766,2.51717528,0.803182658,2.50500377,2.51717528,2.51649598
79.025742,3.16227766,2.51712743,0.803212443,2.50491926,2.51712743,2.51644714
79.036233,2.44948974,2.51707982,-0.259980925,2.50483499,2.51707982,2.51639854
79.046725,2.64575131,2.51703244,0.358774119,2.50475095,2.51703244,2.51635016
79.057216,3.31662479,2.5169853,0.894225639,2.50466716,2.5169853,2.51630201
79.067708,2.44948974,2.51693838,-0.259708751,2.5045836,2.51693838,2.51625407
79.0782,1.73205081,2.51689169,-0.885912457,2.50450028,2.51689169,2.51620636
79.088691,2.44948974,2.51684524,-0.259529368,2.50441721,2.51684524,2.51615888
79.099183,2.64575131,2.51679901,0.359099296,2.50433437,2.51679901,2.51611161
79.109674,2.23606798,2.51675301,-0.529797163,2.50425177,2.51675301,2.51606458
79.120166,2.44948974,2.51670724,-0.259263376,2.5041694,2.51670724,2.51601775
79.130658,3.16227766,2.5166617,0.80350231,2.50408727,2.5166617,2.51597115
79.141149,2.44948974,2.51661639,-0.259088104,2.50400539,2.51661639,2.51592478
79.151641,2.64575131,2.5165713,0.359416207,2.50392373,2.5165713,2.51587862
79.162132,3.16227766,2.51652645,0.80358647,2.50384232,2.51652645,2.51583269
79.172624,2.44948974,2.51648181,-0.258828264,2.50376114,2.51648181,2.51578697
79.183116,3.16227766,2.51643741,0.803641869,2.50368019,2.51643741,2.51574147
79.193607,2,2.51639323,-0.718605059,2.50359948,2.51639323,2.51569619
79.204099,2.23606798,2.51634928,-0.529415997,2.50351901,2.51634928,2.51565113
79.21459,2,2.51630555,-0.718544049,2.50343877,2.51630555,2.51560628
79.225082,2.23606798,2.51626204,-0.529333607,2.50335877,2.51626204,2.51556166
79.235574,2.64575131,2.51621876,0.359906303,2.50327899,2.51621876,2.51551724
79.246065,3.16227766,2.51617571,0.803804671,2.50319946,2.51617571,2.51547305
79.256557,1.73205081,2.51613288,-0.885484088,2.50312016,2.51613288,2.51542907
79.267048,2.23606798,2.51609027,-0.529171328,2.50304109,2.51609027,2.51538531
79.27754,2.44948974,2.51604788,-0.257988645,2.50296226,2.51604788,2.51534177
79.288032,3.31662479,2.51600572,0.894773196,2.50288365,2.51600572,2.51529843
79.298523,3.31662479,2.51596378,0.894796631,2.50280529,2.51596378,2.51525531
79.309015,2.64575131,2.51592206,0.360318267,2.50272715,2.51592206,2.51521241
79.319506,2.64575131,2.51588056,0.360375846,2.50264925,2.51588056,2.51516972
79.329998,3.16227766,2.51583928,0.804013917,2.50257157,2.51583928,2.51512724
79.34049,3.31662479,2.51579822,0.894889138,2.50249413,2.51579822,2.51508497
79.350981,3.16227766,2.51575739,0.804064845,2.50241692,2.51575739,2.51504292
79.361473,3,2.51571676,0.695904616,2.50233994,2.51571676,2.51500108
79.371964,2.64575131,2.51567637,0.360659041,2.50226319,2.51567637,2.51495945
79.382456,2.44948974,2.51563618,-0.257189506,2.50218667,2.51563618,2.51491802
79.392948,2.82842712,2.51559622,0.559312885,2.50211038,2.51559622,2.51487681
79.403439,2.44948974,2.51555648,-0.257034503,2.50203433,2.51555648,2.51483581
79.413931,2.44948974,2.51551695,-0.256957598,2.50195849,2.51551695,2.51479502
79.424422,3.31662479,2.51547764,0.895068237,2.5018829,2.51547764,2.51475444
79.434914,2,2.51543855,-0.71794049,2.50180752,2.51543855,2.51471407
79.445406,3.31662479,2.51539967,0.895111793,2.50173238,2.51539967,2.5146739
79.455897,3,2.51536101,0.696160175,2.50165747,2.51536101,2.51463394
79.466389,2.64575131,2.51532256,0.361149204,2.50158278,2.51532256,2.51459419
79.47688,3.46410162,2.51528434,0.974072523,2.50150832,2.51528434,2.51455465
79.487372,2.23606798,2.51524632,-0.528373297,2.50143409,2.51524632,2.51451531
79.497864,3,2.51520852,0.696269692,2.50136008,2.51520852,2.51447618
79.508355,3.16227766,2.51517093,0.804429443,2.50128631,2.51517093,2.51443725
79.518847,3.16227766,2.51513356,0.804452673,2.50121276,2.51513356,2.51439853
79.529338,2.44948974,2.5150964,-0.256137964,2.50113944,2.5150964,2.51436002
79.53983,2.64575131,2.51505945,0.361513292,2.50106633,2.51505945,2.5143217
79.550322,2.44948974,2.51502271,-0.255994086,2.50099346,2.51502271,2.5142836
79.560813,2.44948974,2.51498619,-0.255922746,2.50092081,2.51498619,2.51424569
79.571305,2.64575131,2.51494988,0.361664801,2.50084839,2.51494988,2.51420799
79.581796,2.64575131,2.51491379,0.361714702,2.5007762,2.51491379,2.51417049
79.592288,2.64575131,2.5148779,0.361764309,2.50070422,2.5148779,2.51413319
79.60278,2.64575131,2.51484222,0.361813618,2.50063247,2.51484222,2.5140961
79.613271,3.16227766,2.51480675,0.80465577,2.50056095,2.51480675,2.51405921
79.623763,3.46410162,2.51477149,0.974335734,2.50048964,2.51477149,2.51402251
79.634254,2.44948974,2.51473645,-0.255434343,2.50041857,2.51473645,2.51398602
79.644746,3.46410162,2.51470161,0.974371597,2.50034771,2.51470161,2.51394973
79.655238,2.44948974,2.51466697,-0.255298319,2.50027708,2.51466697,2.51391363
79.665729,2,2.51463255,-0.717378948,2.50020667,2.51463255,2.51387774
79.676221,2.64575131,2.51459834,0.362150482,2.50013648,2.51459834,2.51384204
79.686712,3.16227766,2.51456434,0.80480639,2.50006652,2.51456434,2.51380655
79.697204,2.82842712,2.51453053,0.56026475,2.49999678,2.51453053,2.51377125
79.707696,2.64575131,2.51449694,0.362290449,2.49992725,2.51449694,2.51373614
79.718187,2.82842712,2.51446356,0.560324519,2.49985795,2.51446356,2.51370124
79.728679,2,2.51443038,-0.71723802,2.49978887,2.51443038,2.51366653
79.73917,2.44948974,2.51439741,-0.254769823,2.49972002,2.51439741,2.51363202
79.749662,1.73205081,2.51436464,-0.884485064,2.49965137,2.51436464,2.5135977
79.760154,2.23606798,2.51433207,-0.527507435,2.49958295,2.51433207,2.51356358
79.770645,3.31662479,2.51429971,0.895726005,2.49951476,2.51429971,2.51352966
79.781137,3,2.51426756,0.696945077,2.49944677,2.51426756,2.51349593
79.791628,2.44948974,2.51423561,-0.254452095,2.49937902,2.51423561,2.51346239
79.80212,2,2.51420386,-0.717080096,2.49931147,2.51420386,2.51342905
79.812612,0,2.51417232,-1.58561418,2.49924415,2.51417232,2.5133959
79.823103,2.64575131,2.51414098,0.362781381,2.49917704,2.51414098,2.51336294
79.833595,2,2.51410984,-0.717014534,2.49911016,2.51410984,2.51333017
79.844086,2.64575131,2.51407891,0.362866922,2.49904349,2.51407891,2.5132976
79.854578,3.16227766,2.51404817,0.805127001,2.49897704,2.51404817,2.51326522
79.86507,3.31662479,2.51401764,0.895883447,2.4989108,2.51401764,2.51323303
79.875561,2.23606798,2.51398731,-0.527180551,2.49884478,2.51398731,2.51320103
79.886053,3.87298335,2.51395718,1.16577278,2.49877898,2.51395718,2.51316922
79.896544,1.73205081,2.51392725,-0.884237775,2.4987134,2.51392725,2.51313761
79.907036,3.31662479,2.51389752,0.895950484,2.49864803,2.51389752,2.51310618
79.917528,2.23606798,2.51386799,-0.527067369,2.49858287,2.51386799,2.51307494
79.928019,2.82842712,2.51383866,0.560881864,2.49851794,2.51383866,2.51304389
79.938511,2.44948974,2.51380953,-0.253613454,2.49845322,2.51380953,2.51301302
79.949002,3.31662479,2.5137806,0.896015734,2.49838871,2.5137806,2.51298235
79.959494,2.44948974,2.51375186,-0.253499738,2.49832442,2.51375186,2.51295186
79.969986,3.31662479,2.51372332,0.896047693,2.49826034,2.51372332,2.51292156
79.980477,3.74165739,2.51369499,1.10813465,2.49819648,2.51369499,2.51289145
79.990969,2.82842712,2.51366684,0.56103501,2.49813283,2.51366684,2.51286152
80.00146,2.82842712,2.5136389,0.561059912,2.4980694,2.5136389,2.51283178
80.011952,3.31662479,2.51361115,0.896110283,2.49800617,2.51361115,2.51280222
80.022444,2.64575131,2.5135836,0.363548777,2.49794316,2.5135836,2.51277285
80.032935,2.23606798,2.51355624,-0.52677155,2.49788036,2.51355624,2.51274367
80.043427,3.16227766,2.51352908,0.805449301,2.49781778,2.51352908,2.51271467
80.053918,2.82842712,2.51350212,0.561181793,2.49775541,2.51350212,2.51268585
80.06441,2.64575131,2.51347535,0.363697624,2.49769325,2.51347535,2.51265721
80.074902,2.82842712,2.51344877,0.561229322,2.4976313,2.51344877,2.51262876
80.085393,3.31662479,2.51342239,0.896215597,2.49756956,2.51342239,2.5126005
80.095885,3.16227766,2.51339621,0.805531783,2.49750804,2.51339621,2.51257241
80.106376,1.73205081,2.51337021,-0.883922738,2.49744672,2.51337021,2.51254451
80.116868,2.44948974,2.51334441,-0.252694818,2.49738562,2.51334441,2.51251678
80.12736,3.60555128,2.51331881,1.04509926,2.49732472,2.51331881,2.51248924
80.137851,3.16227766,2.51329339,0.805595597,2.49726404,2.51329339,2.51246188
80.148343,3.16227766,2.51326817,0.805611252,2.49720357,2.51326817,2.5124347
80.158834,2.44948974,2.51324314,-0.252494357,2.4971433,2.51324314,2.5124077
80.169326,3.74165739,2.5132183,1.10834971,2.49708325,2.5132183,2.51238087
80.179818,2.82842712,2.51319366,0.561456559,2.4970234,2.51319366,2.51235423
80.190309,2.23606798,2.5131692,-0.526404052,2.49696376,2.5131692,2.51232777
80.200801,2.23606798,2.51314494,-0.526381003,2.49690433,2.51314494,2.51230148
80.211292,3,2.51312086,0.69776725,2.49684512,2.51312086,2.51227537
80.221784,2.44948974,2.51309698,-0.252204753,2.4967861,2.51309698,2.51224944
80.232276,2.44948974,2.51307329,-0.252157773,2.49672729,2.51307329,2.51222369
80.242767,3.46410162,2.51304978,0.975218864,2.4966687,2.51304978,2.51219811
80.253259,3.16227766,2.51302647,0.805761252,2.49661031,2.51302647,2.51217271
80.26375,2.82842712,2.51300334,0.561626018,2.49655213,2.51300334,2.51214749
80.274242,2.82842712,2.5129804,0.56164644,2.49649415,2.5129804,2.51212244
80.284734,2.44948974,2.51295765,-0.25192838,2.49643637,2.51295765,2.51209756
80.295225,2.23606798,2.51293509,-0.526181635,2.49637881,2.51293509,2.51207287
80.305717,2.23606798,2.51291272,-0.526160373,2.49632145,2.51291272,2.51204834
80.316208,2.44948974,2.51289053,-0.251795131,2.4962643,2.51289053,2.51202399
80.3267,2.82842712,2.51286853,0.561746023,2.49620735,2.51286853,2.51199981
80.337192,1.73205081,2.51284672,-0.883626567,2.4961506,2.51284672,2.51197581
80.347683,2.82842712,2.51282509,0.561784685,2.49609407,2.51282509,2.51195197
80.358175,2.44948974,2.51280365,-0.251622552,2.49603773,2.51280365,2.51192831
80.368666,2.44948974,2.5127824,-0.251580317,2.49598161,2.5127824,2.51190483
80.379158,2.64575131,2.51276133,0.364677915,2.49592568,2.51276133,2.51188151
80.38965,3,2.51274045,0.698039794,2.49586995,2.51274045,2.51185837
80.400141,2.23606798,2.51271975,-0.525976968,2.49581444,2.51271975,2.51183539
80.410633,2.23606798,2.51269923,-0.525957467,2.49575912,2.51269923,2.51181259
80.421124,1.73205081,2.51267891,-0.883531606,2.49570401,2.51267891,2.51178996
80.431616,3,2.51265876,0.698098302,2.4956491,2.51265876,2.51176749
80.442108,2.82842712,2.5126388,0.561950465,2.49559439,2.5126388,2.5117452
80.452599,2.64575131,2.51261902,0.364872975,2.49553989,2.51261902,2.51172307
80.463091,3.31662479,2.51259943,0.896674613,2.49548558,2.51259943,2.51170111
80.473582,2.44948974,2.51258002,-0.251177777,2.49543148,2.51258002,2.51167933
80.484074,2.64575131,2.51256079,0.364952766,2.49537758,2.51256079,2.5116577
80.494566,1.73205081,2.51254174,-0.88345398,2.49532388,2.51254174,2.51163625
80.505057,2.82842712,2.51252288,0.562053595,2.49527038,2.51252288,2.51161496
80.515549,2.44948974,2.5125042,-0.251026803,2.49521708,2.5125042,2.51159384
80.52604,2.64575131,2.5124857,0.365055628,2.49516398,2.5124857,2.51157289
80.536532,2.64575131,2.51246738,0.365080718,2.49511108,2.51246738,2.5115521
80.547024,2.82842712,2.51244924,0.5621191,2.49505838,2.51244924,2.51153147
80.557515,2,2.51243129,-0.71584306,2.49500589,2.51243129,2.51151102
80.568007,2.64575131,2.51241351,0.365154489,2.49495359,2.51241351,2.51149072
80.578498,2.44948974,2.51239592,-0.25081103,2.49490149,2.51239592,2.51147059
80.58899,3.46410162,2.5123785,0.975562974,2.49484958,2.5123785,2.51145063
80.599482,3.16227766,2.51236126,0.806173925,2.49479788,2.51236126,2.51143082
80.609973,3.74165739,2.51234421,1.10874396,2.49474638,2.51234421,2.51141119
80.620465,2,2.51232733,-0.715770445,2.49469507,2.51232733,2.51139171
80.630956,3.74165739,2.51231063,1.10875911,2.49464396,2.51231063,2.5113724
80.641448,3.60555128,2.51229411,1.04558938,2.49459305,2.51229411,2.51135324
80.65194,2.64575131,2.51227777,0.365340304,2.49454233,2.51227777,2.51133425
80.662431,3,2.51226161,0.698382695,2.49449181,2.51226161,2.51131542
80.672923,2.44948974,2.51224563,-0.250511246,2.49444149,2.51224563,2.51129676
80.683414,2,2.51222982,-0.715702328,2.49439137,2.51222982,2.51127825
80.693906,3,2.51221419,0.698416643,2.49434144,2.51221419,2.5112599
80.704398,3.46410162,2.51219874,0.9756551,2.4942917,2.51219874,2.51124171
80.714889,3.46410162,2.51218347,0.975662927,2.49424217,2.51218347,2.51122369
80.725381,2,2.51216837,-0.715659395,2.49419283,2.51216837,2.51120582
80.735872,2.82842712,2.51215345,0.562382144,2.49414368,2.51215345,2.51118811
80.746364,3.16227766,2.5121387,0.806311947,2.49409473,2.5121387,2.51117055
80.756856,2.44948974,2.51212414,-0.250268641,2.49404597,2.51212414,2.51115316
80.767347,3.60555128,2.51210974,1.04567755,2.49399741,2.51210974,2.51113592
80.777839,3.16227766,2.51209553,0.806338721,2.49394904,2.51209553,2.51111884
80.78833,3.87298335,2.51208149,1.16657698,2.49390087,2.51208149,2.51110192
80.798822,2.64575131,2.51206762,0.365627805,2.49385289,2.51206762,2.51108515
80.809314,3.74165739,2.51205393,1.10887486,2.4938051,2.51205393,2.51106854
80.819805,3,2.51204041,0.698541042,2.49375751,2.51204041,2.51105209
80.830297,2.44948974,2.51202707,-0.250074645,2.4937101,2.51202707,2.51103578
80.840788,2.44948974,2.5120139,-0.250048318,2.4936629,2.5120139,2.51101964
80.85128,2.44948974,2.51200091,-0.250022335,2.49361588,2.51200091,2.51100365
80.861772,2.44948974,2.51198809,-0.249996697,2.49356905,2.51198809,2.51098781
80.872263,3,2.51197545,0.698587542,2.49352242,2.51197545,2.51097213
80.882755,2.82842712,2.51196297,0.562551465,2.49347598,2.51196297,2.5109566
80.893246,2.64575131,2.51195068,0.36578769,2.49342974,2.51195068,2.51094123
80.903738,2.44948974,2.51193855,-0.249897595,2.49338368,2.51193855,2.510926
80.91423,2.82842712,2.5119266,0.562583795,2.49333781,2.5119266,2.51091093
80.924721,2.44948974,2.51191482,-0.249850108,2.49329213,2.51191482,2.51089602
80.935213,2.82842712,2.51190321,0.56260458,2.49324665,2.51190321,2.51088125
80.945704,2.82842712,2.51189178,0.562614741,2.49320135,2.51189178,2.51086663
80.956196,2.64575131,2.51188051,0.365883583,2.49315625,2.51188051,2.51085217
80.966688,2.44948974,2.51186942,-0.249759245,2.49311133,2.51186942,2.51083785
80.977179,3.31662479,2.51185851,0.897087669,2.4930666,2.51185851,2.51082369
80.987671,2.82842712,2.51184776,0.562653861,2.49302206,2.51184776,2.51080968
80.998162,3,2.51183718,0.698686494,2.49297772,2.51183718,2.51079581
81.008654,2.64575131,2.51182678,0.36595701,2.49293356,2.51182678,2.5107821
81.019146,3.16227766,2.51181654,0.806511696,2.49288958,2.51181654,2.51076853
81.029637,2.64575131,2.51180648,0.365984739,2.4928458,2.51180648,2.51075511
81.040129,3.16227766,2.51179659,0.806524067,2.49280221,2.51179659,2.51074184
81.05062,3,2.51178687,0.698722499,2.4927588,2.51178687,2.51072872
81.061112,2,2.51177732,-0.715386132,2.49271558,2.51177732,2.51071575
81.071604,2,2.51176794,-0.715379576,2.49267255,2.51176794,2.51070292
81.082095,3,2.51175873,0.698742637,2.4926297,2.51175873,2.51069024
81.092587,2.44948974,2.51174969,-0.249519426,2.49258704,2.51174969,2.5106777
81.103078,2.82842712,2.51174082,0.562748886,2.49254457,2.51174082,2.51066532
81.11357,2,2.51173212,-0.715354538,2.49250229,2.51173212,2.51065307
81.124062,3.31662479,2.51172358,0.897162865,2.49246019,2.51172358,2.51064097
81.134553,2.82842712,2.51171522,0.562771626,2.49241827,2.51171522,2.51062902
81.145045,2,2.51170703,-0.715337003,2.49237654,2.51170703,2.51061721
81.155536,2.44948974,2.511699,-0.249417846,2.492335,2.511699,2.51060555
81.166028,1.73205081,2.51169115,-0.882972447,2.49229364,2.51169115,2.51059403
81.17652,2,2.51168346,-0.715320532,2.49225247,2.51168346,2.51058265
81.187011,2,2.51167595,-0.715315277,2.49221148,2.51167595,2.51057142
81.197503,2.82842712,2.5116686,0.562813049,2.49217068,2.5116686,2.51056033
81.207994,2.44948974,2.51166142,-0.249342483,2.49213006,2.51166142,2.51054938
81.218486,2.44948974,2.5116544,-0.24932842,2.49208962,2.5116544,2.51053857
81.228978,2.23606798,2.51164756,-0.524956743,2.49204937,2.51164756,2.51052791
81.239469,1.73205081,2.51164088,-0.882943983,2.4920093,2.51164088,2.51051738
81.249961,2.23606798,2.51163438,-0.524944186,2.49196942,2.51163438,2.510507
81.260452,3,2.51162804,0.69883615,2.49192971,2.51162804,2.51049676
81.270944,2.82842712,2.51162186,0.562854565,2.49189019,2.51162186,2.51048666
81.281436,2.23606798,2.51161586,-0.524926548,2.49185085,2.51161586,2.5104767
81.291927,3.16227766,2.51161002,0.80663972,2.4918117,2.51161002,2.51046688
81.302419,3,2.51160435,0.698853095,2.49177273,2.51160435,2.51045719
81.31291,3.46410162,2.51159885,0.975962482,2.49173394,2.51159885,2.51044765
81.323402,3.31662479,2.51159351,0.897235352,2.49169533,2.51159351,2.51043825
81.333894,2.82842712,2.51158835,0.562884338,2.4916569,2.51158835,2.51042898
81.344385,3.31662479,2.51158335,0.897241018,2.49161865,2.51158335,2.51041985
81.354877,2,2.51157851,-0.715247169,2.49158058,2.51157851,2.51041086
81.365368,2.64575131,2.51157385,0.366302423,2.4915427,2.51157385,2.51040201
81.37586,2.44948974,2.51156935,-0.249157788,2.49150499,2.51156935,2.51039329
81.386352,2.82842712,2.51156501,0.562905065,2.49146746,2.51156501,2.51038471
81.396843,2.23606798,2.51156085,-0.524874146,2.49143012,2.51156085,2.51037627
81.407335,2.82842712,2.51155685,0.562912317,2.49139295,2.51155685,2.51036796
81.417826,2.44948974,2.51155302,-0.249125014,2.49135597,2.51155302,2.51035979
81.428318,3.16227766,2.51154935,0.806677328,2.49131916,2.51154935,2.51035175
81.43881,2.82842712,2.51154585,0.562922086,2.49128253,2.51154585,2.51034385
81.449301,3.87298335,2.51154252,1.16680797,2.49124608,2.51154252,2.51033609
81.459793,2.44948974,2.51153935,-0.249097587,2.49120981,2.51153935,2.51032845
81.470284,2,2.51153635,-0.715217695,2.49117372,2.51153635,2.51032096
81.480776,2.82842712,2.51153352,0.562933039,2.4911378,2.51153352,2.51031359
81.491268,3.31662479,2.51153085,0.897270271,2.49110207,2.51153085,2.51030636
81.501759,3.31662479,2.51152835,0.897271664,2.49106651,2.51152835,2.51029926
81.512251,2.23606798,2.51152602,-0.524840966,2.49103113,2.51152602,2.51029229
81.522742,3.31662479,2.51152385,0.897274173,2.49099592,2.51152385,2.51028546
81.533234,3.74165739,2.51152185,1.10911475,2.4909609,2.51152185,2.51027876
81.543726,3,2.51152001,0.698913433,2.49092604,2.51152001,2.51027219
81.554217,1.73205081,2.51151835,-0.882874588,2.49089137,2.51151835,2.51026575
81.564709,2.64575131,2.51151684,0.366380222,2.49085687,2.51151684,2.51025944
81.5752,2.82842712,2.51151551,0.562949035,2.49082255,2.51151551,2.51025326
81.585692,2.44948974,2.51151434,-0.249047379,2.4907884,2.51151434,2.51024722
81.596184,2.82842712,2.51151334,0.562950963,2.49075443,2.51151334,2.5102413
81.606675,2.44948974,2.5115125,-0.249043689,2.49072064,2.5115125,2.51023551
81.617167,3.46410162,2.51151183,0.976007061,2.49068702,2.51151183,2.51022985
81.627658,3.16227766,2.51151133,0.806700892,2.49065358,2.51151133,2.51022433
81.63815,1.73205081,2.51151099,-0.882870425,2.4906203,2.51151099,2.51021893
81.648642,2.23606798,2.51151083,-0.524826493,2.49058721,2.51151083,2.51021365
81.659133,2.64575131,2.51151082,0.366388438,2.49055429,2.51151082,2.51020851
81.669625,2.64575131,2.51151099,0.366388214,2.49052154,2.51151099,2.51020349
81.680116,2.44948974,2.51151132,-0.249041315,2.49048897,2.51151132,2.51019861
81.690608,3.60555128,2.51151182,1.04596341,2.49045656,2.51151182,2.51019384
81.7011,2.44948974,2.51151248,-0.249043652,2.49042434,2.51151248,2.51018921
81.711591,2.23606798,2.51151332,-0.524828866,2.49039228,2.51151332,2.5101847
81.722083,3.31662479,2.51151432,0.897279485,2.4903604,2.51151432,2.51018032
81.732574,2.82842712,2.51151548,0.562949057,2.4903287,2.51151548,2.51017606
81.743066,2.44948974,2.51151682,-0.249052356,2.49029716,2.51151682,2.51017193
81.753558,2.44948974,2.51151832,-0.249055372,2.4902658,2.51151832,2.51016792
81.764049,2.64575131,2.51151999,0.366375927,2.49023461,2.51151999,2.51016404
81.774541,3.46410162,2.51152183,0.976001939,2.49020359,2.51152183,2.51016029
81.785032,3.31662479,2.51152384,0.89727418,2.49017274,2.51152384,2.51015665
81.795524,2.44948974,2.51152601,-0.249070807,2.49014206,2.51152601,2.51015315
81.806016,2.82842712,2.51152835,0.562937627,2.49011155,2.51152835,2.51014976
81.816507,3.46410162,2.51153086,0.975997311,2.49008122,2.51153086,2.5101465
[truncated: 419,911 more chars]
