# Supplementary material for: Phase Stability of Iron Nitride Fe4N at High Pressure—Pressure-Dependent Evolution of Phase Equilibria in the Fe–N System
Source: Materials (Basel). 2021 Jul 15;14(14):3963. doi: 10.3390/ma14143963 (PMC8307547; doi:10.3390/ma14143963)
Supplement: Supplementary file 1 [file materials-14-03963-s001.zip › xrd_data/4.5-400_riet.txt]

'y-axis saved as Sqrt(y)
'x,Yobs,Ycalc,Diff,fe4n,gamma,epsilon,alpha,Bkg
20,11.3137085,0,0,0,0,0,0,0
20.010492,11.6619038,0,0,0,0,0,0,0
20.020983,11.9582607,0,0,0,0,0,0,0
20.031475,11.7898261,0,0,0,0,0,0,0
20.041966,11.2694277,0,0,0,0,0,0,0
20.052458,12.3693169,0,0,0,0,0,0,0
20.06295,11.6619038,0,0,0,0,0,0,0
20.073441,11.6619038,0,0,0,0,0,0,0
20.083933,11.9582607,0,0,0,0,0,0,0
20.094424,10.198039,0,0,0,0,0,0,0
20.104916,11.9163753,0,0,0,0,0,0,0
20.115408,11,0,0,0,0,0,0,0
20.125899,11.3137085,0,0,0,0,0,0,0
20.136391,11.2694277,0,0,0,0,0,0,0
20.146882,11.61895,0,0,0,0,0,0,0
20.157374,11.4891253,0,0,0,0,0,0,0
20.167866,10.9544512,0,0,0,0,0,0,0
20.178357,11.61895,0,0,0,0,0,0,0
20.188849,11.1355287,0,0,0,0,0,0,0
20.19934,12,0,0,0,0,0,0,0
20.209832,11.3137085,0,0,0,0,0,0,0
20.220324,11.4017543,0,0,0,0,0,0,0
20.230815,12.4096736,0,0,0,0,0,0,0
20.241307,12.1243557,0,0,0,0,0,0,0
20.251798,12.1655251,0,0,0,0,0,0,0
20.26229,11.0905365,0,0,0,0,0,0,0
20.272782,11.5758369,0,0,0,0,0,0,0
20.283273,12.2065556,0,0,0,0,0,0,0
20.293765,11.3578167,0,0,0,0,0,0,0
20.304256,11.9163753,0,0,0,0,0,0,0
20.314748,12.083046,0,0,0,0,0,0,0
20.32524,12.2882057,0,0,0,0,0,0,0
20.335731,12.2065556,0,0,0,0,0,0,0
20.346223,11.2694277,0,0,0,0,0,0,0
20.356714,11.7473401,0,0,0,0,0,0,0
20.367206,11.0905365,0,0,0,0,0,0,0
20.377698,12.4096736,0,0,0,0,0,0,0
20.388189,11.0905365,0,0,0,0,0,0,0
20.398681,11.3137085,0,0,0,0,0,0,0
20.409172,10.4880885,0,0,0,0,0,0,0
20.419664,12.1243557,0,0,0,0,0,0,0
20.430156,11.61895,0,0,0,0,0,0,0
20.440647,12.1243557,0,0,0,0,0,0,0
20.451139,11,0,0,0,0,0,0,0
20.46163,12.3693169,0,0,0,0,0,0,0
20.472122,11,0,0,0,0,0,0,0
20.482614,11.5758369,0,0,0,0,0,0,0
20.493105,11.5758369,0,0,0,0,0,0,0
20.503597,12.0415946,0,0,0,0,0,0,0
20.514088,11.0905365,0,0,0,0,0,0,0
20.52458,11.5758369,0,0,0,0,0,0,0
20.535072,10.2956301,0,0,0,0,0,0,0
20.545563,11.0905365,0,0,0,0,0,0,0
20.556055,10.9544512,0,0,0,0,0,0,0
20.566546,11.1355287,0,0,0,0,0,0,0
20.577038,11.9163753,0,0,0,0,0,0,0
20.58753,12.0415946,0,0,0,0,0,0,0
20.598021,11.2249722,0,0,0,0,0,0,0
20.608513,11.5325626,0,0,0,0,0,0,0
20.619004,12.2065556,0,0,0,0,0,0,0
20.629496,11.1355287,0,0,0,0,0,0,0
20.639988,12.2065556,0,0,0,0,0,0,0
20.650479,11.3578167,0,0,0,0,0,0,0
20.660971,11.4891253,0,0,0,0,0,0,0
20.671462,11.61895,0,0,0,0,0,0,0
20.681954,12,0,0,0,0,0,0,0
20.692446,11.2249722,0,0,0,0,0,0,0
20.702937,10.7238053,0,0,0,0,0,0,0
20.713429,11.4455231,0,0,0,0,0,0,0
20.72392,11.3578167,0,0,0,0,0,0,0
20.734412,11.7046999,0,0,0,0,0,0,0
20.744904,11.3578167,0,0,0,0,0,0,0
20.755395,11.4891253,0,0,0,0,0,0,0
20.765887,11.8321596,0,0,0,0,0,0,0
20.776378,10.9087121,0,0,0,0,0,0,0
20.78687,11.6619038,0,0,0,0,0,0,0
20.797362,12.2065556,0,0,0,0,0,0,0
20.807853,12.2065556,0,0,0,0,0,0,0
20.818345,12.489996,0,0,0,0,0,0,0
20.828836,11.4891253,0,0,0,0,0,0,0
20.839328,11.1803399,0,0,0,0,0,0,0
20.84982,10.5356538,0,0,0,0,0,0,0
20.860311,11.61895,0,0,0,0,0,0,0
20.870803,11.4891253,0,0,0,0,0,0,0
20.881294,12.0415946,0,0,0,0,0,0,0
20.891786,11.7898261,0,0,0,0,0,0,0
20.902278,11.5325626,0,0,0,0,0,0,0
20.912769,11.045361,0,0,0,0,0,0,0
20.923261,11.7473401,0,0,0,0,0,0,0
20.933752,11.6619038,0,0,0,0,0,0,0
20.944244,11.4455231,0,0,0,0,0,0,0
20.954736,11.7898261,0,0,0,0,0,0,0
20.965227,10.7238053,0,0,0,0,0,0,0
20.975719,11.8321596,0,0,0,0,0,0,0
20.98621,10.9087121,0,0,0,0,0,0,0
20.996702,11.5758369,0,0,0,0,0,0,0
21.007194,11.045361,0,0,0,0,0,0,0
21.017685,11.2249722,0,0,0,0,0,0,0
21.028177,10.7238053,0,0,0,0,0,0,0
21.038668,11.9582607,0,0,0,0,0,0,0
21.04916,11,0,0,0,0,0,0,0
21.059652,11.7046999,0,0,0,0,0,0,0
21.070143,11.4891253,0,0,0,0,0,0,0
21.080635,11.8321596,0,0,0,0,0,0,0
21.091126,11.5325626,0,0,0,0,0,0,0
21.101618,11.8743421,0,0,0,0,0,0,0
21.11211,11.2694277,0,0,0,0,0,0,0
21.122601,12.4096736,0,0,0,0,0,0,0
21.133093,11.4455231,0,0,0,0,0,0,0
21.143584,12.489996,0,0,0,0,0,0,0
21.154076,11.4017543,0,0,0,0,0,0,0
21.164568,11.3137085,0,0,0,0,0,0,0
21.175059,11.7898261,0,0,0,0,0,0,0
21.185551,11.4017543,0,0,0,0,0,0,0
21.196042,11.3578167,0,0,0,0,0,0,0
21.206534,10.7703296,0,0,0,0,0,0,0
21.217026,12,0,0,0,0,0,0,0
21.227517,11.4455231,0,0,0,0,0,0,0
21.238009,11.6619038,0,0,0,0,0,0,0
21.2485,11.7898261,0,0,0,0,0,0,0
21.258992,12.1655251,0,0,0,0,0,0,0
21.269484,11.3137085,0,0,0,0,0,0,0
21.279975,11,0,0,0,0,0,0,0
21.290467,10.9544512,0,0,0,0,0,0,0
21.300958,11.61895,0,0,0,0,0,0,0
21.31145,11.3578167,0,0,0,0,0,0,0
21.321942,11.3137085,0,0,0,0,0,0,0
21.332433,12.1243557,0,0,0,0,0,0,0
21.342925,11.8321596,0,0,0,0,0,0,0
21.353416,12.083046,0,0,0,0,0,0,0
21.363908,11.6619038,0,0,0,0,0,0,0
21.3744,12.6885775,0,0,0,0,0,0,0
21.384891,12.2474487,0,0,0,0,0,0,0
21.395383,11.4017543,0,0,0,0,0,0,0
21.405874,12.6885775,0,0,0,0,0,0,0
21.416366,11.3137085,0,0,0,0,0,0,0
21.426858,11.4455231,0,0,0,0,0,0,0
21.437349,11.61895,0,0,0,0,0,0,0
21.447841,11.9163753,0,0,0,0,0,0,0
21.458332,12.328828,0,0,0,0,0,0,0
21.468824,11.8743421,0,0,0,0,0,0,0
21.479316,11.9582607,0,0,0,0,0,0,0
21.489807,11.1803399,0,0,0,0,0,0,0
21.500299,11.7473401,0,0,0,0,0,0,0
21.51079,12.2882057,0,0,0,0,0,0,0
21.521282,11.9163753,0,0,0,0,0,0,0
21.531774,11.7046999,0,0,0,0,0,0,0
21.542265,9.94987437,0,0,0,0,0,0,0
21.552757,11,0,0,0,0,0,0,0
21.563248,11.4891253,0,0,0,0,0,0,0
21.57374,12.5299641,0,0,0,0,0,0,0
21.584232,11.3137085,0,0,0,0,0,0,0
21.594723,11.1803399,0,0,0,0,0,0,0
21.605215,11.5758369,0,0,0,0,0,0,0
21.615706,11.6619038,0,0,0,0,0,0,0
21.626198,11.2249722,0,0,0,0,0,0,0
21.63669,11.5325626,0,0,0,0,0,0,0
21.647181,11.4455231,0,0,0,0,0,0,0
21.657673,11.9582607,0,0,0,0,0,0,0
21.668164,12.1655251,0,0,0,0,0,0,0
21.678656,11.7473401,0,0,0,0,0,0,0
21.689148,11.8743421,0,0,0,0,0,0,0
21.699639,11.5758369,0,0,0,0,0,0,0
21.710131,11.5758369,0,0,0,0,0,0,0
21.720622,11.8743421,0,0,0,0,0,0,0
21.731114,11,0,0,0,0,0,0,0
21.741606,11.5758369,0,0,0,0,0,0,0
21.752097,11.4891253,0,0,0,0,0,0,0
21.762589,12.1243557,0,0,0,0,0,0,0
21.77308,11.4455231,0,0,0,0,0,0,0
21.783572,11.4455231,0,0,0,0,0,0,0
21.794064,12,0,0,0,0,0,0,0
21.804555,12.5299641,0,0,0,0,0,0,0
21.815047,11.1355287,0,0,0,0,0,0,0
21.825538,11.4017543,0,0,0,0,0,0,0
21.83603,12.2474487,0,0,0,0,0,0,0
21.846522,11.2694277,0,0,0,0,0,0,0
21.857013,11.7898261,0,0,0,0,0,0,0
21.867505,12.5299641,0,0,0,0,0,0,0
21.877996,11,0,0,0,0,0,0,0
21.888488,11.7046999,0,0,0,0,0,0,0
21.89898,11.2694277,0,0,0,0,0,0,0
21.909471,12.1243557,0,0,0,0,0,0,0
21.919963,11.8743421,0,0,0,0,0,0,0
21.930454,11.7898261,0,0,0,0,0,0,0
21.940946,11.2694277,0,0,0,0,0,0,0
21.951438,12.2474487,0,0,0,0,0,0,0
21.961929,12.1243557,0,0,0,0,0,0,0
21.972421,11.4017543,0,0,0,0,0,0,0
21.982912,11.0905365,0,0,0,0,0,0,0
21.993404,12.2065556,0,0,0,0,0,0,0
22.003896,11.6619038,0,0,0,0,0,0,0
22.014387,11.2694277,0,0,0,0,0,0,0
22.024879,12.1655251,0,0,0,0,0,0,0
22.03537,11.9582607,0,0,0,0,0,0,0
22.045862,11,0,0,0,0,0,0,0
22.056354,12.083046,0,0,0,0,0,0,0
22.066845,11.4455231,0,0,0,0,0,0,0
22.077337,11.0905365,0,0,0,0,0,0,0
22.087828,11.4017543,0,0,0,0,0,0,0
22.09832,10.9544512,0,0,0,0,0,0,0
22.108812,11.61895,0,0,0,0,0,0,0
22.119303,11.7473401,0,0,0,0,0,0,0
22.129795,11.61895,0,0,0,0,0,0,0
22.140286,10.4403065,0,0,0,0,0,0,0
22.150778,11.5758369,0,0,0,0,0,0,0
22.16127,11.7473401,0,0,0,0,0,0,0
22.171761,12.1243557,0,0,0,0,0,0,0
22.182253,11.61895,0,0,0,0,0,0,0
22.192744,10.4880885,0,0,0,0,0,0,0
22.203236,11.0905365,0,0,0,0,0,0,0
22.213728,11.7046999,0,0,0,0,0,0,0
22.224219,11.8321596,0,0,0,0,0,0,0
22.234711,11.7898261,0,0,0,0,0,0,0
22.245202,11.4455231,0,0,0,0,0,0,0
22.255694,11.0905365,0,0,0,0,0,0,0
22.266186,12.1655251,0,0,0,0,0,0,0
22.276677,10.9544512,0,0,0,0,0,0,0
22.287169,11.61895,0,0,0,0,0,0,0
22.29766,12.1655251,0,0,0,0,0,0,0
22.308152,12.083046,0,0,0,0,0,0,0
22.318644,12.1655251,0,0,0,0,0,0,0
22.329135,11.3578167,0,0,0,0,0,0,0
22.339627,12.2474487,0,0,0,0,0,0,0
22.350118,12.0415946,0,0,0,0,0,0,0
22.36061,11.9163753,0,0,0,0,0,0,0
22.371102,11.0905365,0,0,0,0,0,0,0
22.381593,11.8743421,0,0,0,0,0,0,0
22.392085,10.8627805,0,0,0,0,0,0,0
22.402576,11.4017543,0,0,0,0,0,0,0
22.413068,11.7473401,0,0,0,0,0,0,0
22.42356,10.8627805,0,0,0,0,0,0,0
22.434051,11.5325626,0,0,0,0,0,0,0
22.444543,11.4891253,0,0,0,0,0,0,0
22.455034,11.7046999,0,0,0,0,0,0,0
22.465526,11.4017543,0,0,0,0,0,0,0
22.476018,11.3137085,0,0,0,0,0,0,0
22.486509,11.4017543,0,0,0,0,0,0,0
22.497001,10.9544512,0,0,0,0,0,0,0
22.507492,11.9582607,0,0,0,0,0,0,0
22.517984,11.5758369,0,0,0,0,0,0,0
22.528476,11.4455231,0,0,0,0,0,0,0
22.538967,11.7898261,0,0,0,0,0,0,0
22.549459,12.2065556,0,0,0,0,0,0,0
22.55995,11.9163753,0,0,0,0,0,0,0
22.570442,11.5325626,0,0,0,0,0,0,0
22.580934,10.2956301,0,0,0,0,0,0,0
22.591425,11.7473401,0,0,0,0,0,0,0
22.601917,10.8166538,0,0,0,0,0,0,0
22.612408,11.5758369,0,0,0,0,0,0,0
22.6229,11.3578167,0,0,0,0,0,0,0
22.633392,11.3578167,0,0,0,0,0,0,0
22.643883,10.8627805,0,0,0,0,0,0,0
22.654375,11.045361,0,0,0,0,0,0,0
22.664866,12.4498996,0,0,0,0,0,0,0
22.675358,12.6095202,0,0,0,0,0,0,0
22.68585,11.4017543,0,0,0,0,0,0,0
22.696341,12.0415946,0,0,0,0,0,0,0
22.706833,11,0,0,0,0,0,0,0
22.717324,11.1803399,0,0,0,0,0,0,0
22.727816,11.4017543,0,0,0,0,0,0,0
22.738308,12.2882057,0,0,0,0,0,0,0
22.748799,11.1355287,0,0,0,0,0,0,0
22.759291,10.7703296,0,0,0,0,0,0,0
22.769782,12.2882057,0,0,0,0,0,0,0
22.780274,10.7703296,0,0,0,0,0,0,0
22.790766,11.6619038,0,0,0,0,0,0,0
22.801257,11.8321596,0,0,0,0,0,0,0
22.811749,11.2694277,0,0,0,0,0,0,0
22.82224,11.8321596,0,0,0,0,0,0,0
22.832732,10.9087121,0,0,0,0,0,0,0
22.843224,11.4017543,0,0,0,0,0,0,0
22.853715,11.61895,0,0,0,0,0,0,0
22.864207,11.7898261,0,0,0,0,0,0,0
22.874698,10.8627805,0,0,0,0,0,0,0
22.88519,11.5325626,0,0,0,0,0,0,0
22.895682,11,0,0,0,0,0,0,0
22.906173,10.198039,0,0,0,0,0,0,0
22.916665,11.7473401,0,0,0,0,0,0,0
22.927156,11.61895,0,0,0,0,0,0,0
22.937648,11,0,0,0,0,0,0,0
22.94814,11.5758369,0,0,0,0,0,0,0
22.958631,12.0415946,0,0,0,0,0,0,0
22.969123,11.045361,0,0,0,0,0,0,0
22.979614,10.1488916,0,0,0,0,0,0,0
22.990106,11.1803399,0,0,0,0,0,0,0
23.000598,11.4455231,0,0,0,0,0,0,0
23.011089,11.7898261,0,0,0,0,0,0,0
23.021581,10.8627805,0,0,0,0,0,0,0
23.032072,11.5758369,0,0,0,0,0,0,0
23.042564,12.7279221,0,0,0,0,0,0,0
23.053056,10.7703296,0,0,0,0,0,0,0
23.063547,11.4017543,0,0,0,0,0,0,0
23.074039,11.5325626,0,0,0,0,0,0,0
23.08453,11.7046999,0,0,0,0,0,0,0
23.095022,10.8627805,0,0,0,0,0,0,0
23.105514,11.4891253,0,0,0,0,0,0,0
23.116005,11.9163753,0,0,0,0,0,0,0
23.126497,11.4017543,0,0,0,0,0,0,0
23.136988,11.2249722,0,0,0,0,0,0,0
23.14748,12.0415946,0,0,0,0,0,0,0
23.157972,11.8321596,0,0,0,0,0,0,0
23.168463,11,0,0,0,0,0,0,0
23.178955,11.61895,0,0,0,0,0,0,0
23.189446,11.4017543,0,0,0,0,0,0,0
23.199938,11.4017543,0,0,0,0,0,0,0
23.21043,11.61895,0,0,0,0,0,0,0
23.220921,11.8743421,0,0,0,0,0,0,0
23.231413,11.4017543,0,0,0,0,0,0,0
23.241904,11.2249722,0,0,0,0,0,0,0
23.252396,10.8627805,0,0,0,0,0,0,0
23.262888,10.9544512,0,0,0,0,0,0,0
23.273379,11.8321596,0,0,0,0,0,0,0
23.283871,11.8321596,0,0,0,0,0,0,0
23.294362,11.3137085,0,0,0,0,0,0,0
23.304854,11.61895,0,0,0,0,0,0,0
23.315346,11.3578167,0,0,0,0,0,0,0
23.325837,11.4891253,0,0,0,0,0,0,0
23.336329,11.5325626,0,0,0,0,0,0,0
23.34682,11.8321596,0,0,0,0,0,0,0
23.357312,11.4017543,0,0,0,0,0,0,0
23.367804,11.1803399,0,0,0,0,0,0,0
23.378295,11.7046999,0,0,0,0,0,0,0
23.388787,11.4455231,0,0,0,0,0,0,0
23.399278,11.6619038,0,0,0,0,0,0,0
23.40977,11.5325626,0,0,0,0,0,0,0
23.420262,11.1803399,0,0,0,0,0,0,0
23.430753,11.3137085,0,0,0,0,0,0,0
23.441245,11.0905365,0,0,0,0,0,0,0
23.451736,11.8321596,0,0,0,0,0,0,0
23.462228,11.5758369,0,0,0,0,0,0,0
23.47272,9.8488578,0,0,0,0,0,0,0
23.483211,10.4880885,0,0,0,0,0,0,0
23.493703,11.5758369,0,0,0,0,0,0,0
23.504194,11.3578167,0,0,0,0,0,0,0
23.514686,10.1488916,0,0,0,0,0,0,0
23.525178,12,0,0,0,0,0,0,0
23.535669,12.2882057,0,0,0,0,0,0,0
23.546161,12,0,0,0,0,0,0,0
23.556652,11.2694277,0,0,0,0,0,0,0
23.567144,10.9544512,0,0,0,0,0,0,0
23.577636,12.083046,0,0,0,0,0,0,0
23.588127,10.7238053,0,0,0,0,0,0,0
23.598619,10.5830052,0,0,0,0,0,0,0
23.60911,11.61895,0,0,0,0,0,0,0
23.619602,11.2694277,0,0,0,0,0,0,0
23.630094,10.8166538,0,0,0,0,0,0,0
23.640585,11.7898261,0,0,0,0,0,0,0
23.651077,10.5830052,0,0,0,0,0,0,0
23.661568,10.6770783,0,0,0,0,0,0,0
23.67206,10.7238053,0,0,0,0,0,0,0
23.682552,11.61895,0,0,0,0,0,0,0
23.693043,10.3923048,0,0,0,0,0,0,0
23.703535,12,0,0,0,0,0,0,0
23.714026,11.045361,0,0,0,0,0,0,0
23.724518,11.3578167,0,0,0,0,0,0,0
23.73501,11.4017543,0,0,0,0,0,0,0
23.745501,10.8166538,0,0,0,0,0,0,0
23.755993,11.2694277,0,0,0,0,0,0,0
23.766484,10.9087121,0,0,0,0,0,0,0
23.776976,10.7238053,0,0,0,0,0,0,0
23.787468,11.2694277,0,0,0,0,0,0,0
23.797959,11.5758369,0,0,0,0,0,0,0
23.808451,11.6619038,0,0,0,0,0,0,0
23.818942,10.9087121,0,0,0,0,0,0,0
23.829434,11.5325626,0,0,0,0,0,0,0
23.839926,10.6770783,0,0,0,0,0,0,0
23.850417,11,0,0,0,0,0,0,0
23.860909,11.2249722,0,0,0,0,0,0,0
23.8714,11.4017543,0,0,0,0,0,0,0
23.881892,10.0995049,0,0,0,0,0,0,0
23.892384,10.7238053,0,0,0,0,0,0,0
23.902875,10.2956301,0,0,0,0,0,0,0
23.913367,10.6770783,0,0,0,0,0,0,0
23.923858,10.5356538,0,0,0,0,0,0,0
23.93435,10.0995049,0,0,0,0,0,0,0
23.944842,11.7046999,0,0,0,0,0,0,0
23.955333,11.0905365,0,0,0,0,0,0,0
23.965825,11,0,0,0,0,0,0,0
23.976316,10.8627805,0,0,0,0,0,0,0
23.986808,11.2694277,0,0,0,0,0,0,0
23.9973,10.4880885,0,0,0,0,0,0,0
24.007791,11.8743421,0,0,0,0,0,0,0
24.018283,10,0,0,0,0,0,0,0
24.028774,10.4880885,0,0,0,0,0,0,0
24.039266,11,0,0,0,0,0,0,0
24.049758,11.1355287,0,0,0,0,0,0,0
24.060249,10.8627805,0,0,0,0,0,0,0
24.070741,10.6301458,0,0,0,0,0,0,0
24.081232,10.4403065,0,0,0,0,0,0,0
24.091724,11.7898261,0,0,0,0,0,0,0
24.102216,10.5356538,0,0,0,0,0,0,0
24.112707,11,0,0,0,0,0,0,0
24.123199,11.3137085,0,0,0,0,0,0,0
24.13369,11.4891253,0,0,0,0,0,0,0
24.144182,10.9544512,0,0,0,0,0,0,0
24.154674,11.1355287,0,0,0,0,0,0,0
24.165165,10.8166538,0,0,0,0,0,0,0
24.175657,10.8166538,0,0,0,0,0,0,0
24.186148,11.1355287,0,0,0,0,0,0,0
24.19664,10.8166538,0,0,0,0,0,0,0
24.207132,11.3137085,0,0,0,0,0,0,0
24.217623,11.3578167,0,0,0,0,0,0,0
24.228115,10.5356538,0,0,0,0,0,0,0
24.238606,11.1803399,0,0,0,0,0,0,0
24.249098,11.1803399,0,0,0,0,0,0,0
24.25959,10.9544512,0,0,0,0,0,0,0
24.270081,11,0,0,0,0,0,0,0
24.280573,10.7703296,0,0,0,0,0,0,0
24.291064,10.7703296,0,0,0,0,0,0,0
24.301556,11.4017543,0,0,0,0,0,0,0
24.312048,10.8166538,0,0,0,0,0,0,0
24.322539,9.79795897,0,0,0,0,0,0,0
24.333031,11.4891253,0,0,0,0,0,0,0
24.343522,11.1355287,0,0,0,0,0,0,0
24.354014,11.1803399,0,0,0,0,0,0,0
24.364506,10.3440804,0,0,0,0,0,0,0
24.374997,11.5325626,0,0,0,0,0,0,0
24.385489,10.0995049,0,0,0,0,0,0,0
24.39598,10.7238053,0,0,0,0,0,0,0
24.406472,10.2956301,0,0,0,0,0,0,0
24.416964,9.64365076,0,0,0,0,0,0,0
24.427455,9.79795897,0,0,0,0,0,0,0
24.437947,11.0905365,0,0,0,0,0,0,0
24.448438,11.9163753,0,0,0,0,0,0,0
24.45893,10.5830052,0,0,0,0,0,0,0
24.469422,9.79795897,0,0,0,0,0,0,0
24.479913,11.045361,0,0,0,0,0,0,0
24.490405,10.8627805,0,0,0,0,0,0,0
24.500896,10.5356538,0,0,0,0,0,0,0
24.511388,11.4017543,0,0,0,0,0,0,0
24.52188,10.8166538,0,0,0,0,0,0,0
24.532371,11.4891253,0,0,0,0,0,0,0
24.542863,11.0905365,0,0,0,0,0,0,0
24.553354,10.0498756,0,0,0,0,0,0,0
24.563846,10.0995049,0,0,0,0,0,0,0
24.574338,11,0,0,0,0,0,0,0
24.584829,11,0,0,0,0,0,0,0
24.595321,11.045361,0,0,0,0,0,0,0
24.605812,11.1803399,0,0,0,0,0,0,0
24.616304,10.5830052,0,0,0,0,0,0,0
24.626796,11.5325626,0,0,0,0,0,0,0
24.637287,10.4880885,0,0,0,0,0,0,0
24.647779,10.6301458,0,0,0,0,0,0,0
24.65827,11.0905365,0,0,0,0,0,0,0
24.668762,10.2469508,0,0,0,0,0,0,0
24.679254,10.198039,0,0,0,0,0,0,0
24.689745,10.0498756,0,0,0,0,0,0,0
24.700237,10.8627805,0,0,0,0,0,0,0
24.710728,10.2956301,0,0,0,0,0,0,0
24.72122,11.3578167,0,0,0,0,0,0,0
24.731712,10.6301458,0,0,0,0,0,0,0
24.742203,10.6301458,0,0,0,0,0,0,0
24.752695,10.7703296,0,0,0,0,0,0,0
24.763186,10.1488916,0,0,0,0,0,0,0
24.773678,11.1803399,0,0,0,0,0,0,0
24.78417,10.8627805,0,0,0,0,0,0,0
24.794661,10.7703296,0,0,0,0,0,0,0
24.805153,9.74679434,0,0,0,0,0,0,0
24.815644,10.0498756,0,0,0,0,0,0,0
24.826136,9.53939201,0,0,0,0,0,0,0
24.836628,10.8627805,0,0,0,0,0,0,0
24.847119,10.198039,0,0,0,0,0,0,0
24.857611,10.7238053,0,0,0,0,0,0,0
24.868102,11.1355287,0,0,0,0,0,0,0
24.878594,10.4403065,0,0,0,0,0,0,0
24.889086,10.4880885,0,0,0,0,0,0,0
24.899577,10.5356538,0,0,0,0,0,0,0
24.910069,11.4017543,0,0,0,0,0,0,0
24.92056,10.5830052,0,0,0,0,0,0,0
24.931052,10.8166538,0,0,0,0,0,0,0
24.941544,10.3440804,0,0,0,0,0,0,0
24.952035,10.5830052,0,0,0,0,0,0,0
24.962527,10.0498756,0,0,0,0,0,0,0
24.973018,10.6301458,0,0,0,0,0,0,0
24.98351,10.9087121,0,0,0,0,0,0,0
24.994002,10.6770783,0,0,0,0,0,0,0
25.004493,10.8166538,0,0,0,0,0,0,0
25.014985,10.1488916,0,0,0,0,0,0,0
25.025476,10.3440804,0,0,0,0,0,0,0
25.035968,10.3923048,0,0,0,0,0,0,0
25.04646,10.6301458,0,0,0,0,0,0,0
25.056951,10.8627805,0,0,0,0,0,0,0
25.067443,10,0,0,0,0,0,0,0
25.077934,11.3578167,0,0,0,0,0,0,0
25.088426,10.3923048,0,0,0,0,0,0,0
25.098918,10.5356538,0,0,0,0,0,0,0
25.109409,10.6770783,0,0,0,0,0,0,0
25.119901,11.045361,0,0,0,0,0,0,0
25.130392,9.69535971,0,0,0,0,0,0,0
25.140884,10.4880885,0,0,0,0,0,0,0
25.151376,10.5830052,0,0,0,0,0,0,0
25.161867,10.9087121,0,0,0,0,0,0,0
25.172359,10.4880885,0,0,0,0,0,0,0
25.18285,11.0905365,0,0,0,0,0,0,0
25.193342,10.7238053,0,0,0,0,0,0,0
25.203834,10.4880885,0,0,0,0,0,0,0
25.214325,10.2469508,0,0,0,0,0,0,0
25.224817,9.89949494,0,0,0,0,0,0,0
25.235308,10.0995049,0,0,0,0,0,0,0
25.2458,10.1488916,0,0,0,0,0,0,0
25.256292,10.8166538,0,0,0,0,0,0,0
25.266783,11.0905365,0,0,0,0,0,0,0
25.277275,9.94987437,0,0,0,0,0,0,0
25.287766,10.3923048,0,0,0,0,0,0,0
25.298258,10.7238053,0,0,0,0,0,0,0
25.30875,10.7703296,0,0,0,0,0,0,0
25.319241,9.79795897,0,0,0,0,0,0,0
25.329733,9.79795897,0,0,0,0,0,0,0
25.340224,10.3440804,0,0,0,0,0,0,0
25.350716,10.5356538,0,0,0,0,0,0,0
25.361208,10.2956301,0,0,0,0,0,0,0
25.371699,10.9544512,0,0,0,0,0,0,0
25.382191,10.6770783,0,0,0,0,0,0,0
25.392682,10.6770783,0,0,0,0,0,0,0
25.403174,10.8166538,0,0,0,0,0,0,0
25.413666,10.9087121,0,0,0,0,0,0,0
25.424157,9.69535971,0,0,0,0,0,0,0
25.434649,11.3578167,0,0,0,0,0,0,0
25.44514,10.2956301,0,0,0,0,0,0,0
25.455632,10.2956301,0,0,0,0,0,0,0
25.466124,9.05538514,0,0,0,0,0,0,0
25.476615,10.5356538,0,0,0,0,0,0,0
25.487107,10.5356538,0,0,0,0,0,0,0
25.497598,10.198039,0,0,0,0,0,0,0
25.50809,9.21954446,0,0,0,0,0,0,0
25.518582,10.4880885,0,0,0,0,0,0,0
25.529073,10.4880885,0,0,0,0,0,0,0
25.539565,10.6770783,0,0,0,0,0,0,0
25.550056,10,0,0,0,0,0,0,0
25.560548,10,0,0,0,0,0,0,0
25.57104,10.3440804,0,0,0,0,0,0,0
25.581531,9.64365076,0,0,0,0,0,0,0
25.592023,9.79795897,0,0,0,0,0,0,0
25.602514,9.11043358,0,0,0,0,0,0,0
25.613006,10.3923048,0,0,0,0,0,0,0
25.623498,10.198039,0,0,0,0,0,0,0
25.633989,10.2469508,0,0,0,0,0,0,0
25.644481,10,0,0,0,0,0,0,0
25.654972,9.64365076,0,0,0,0,0,0,0
25.665464,9.8488578,0,0,0,0,0,0,0
25.675956,9.59166305,0,0,0,0,0,0,0
25.686447,10.5830052,0,0,0,0,0,0,0
25.696939,10.6301458,0,0,0,0,0,0,0
25.70743,10.4880885,0,0,0,0,0,0,0
25.717922,10.5356538,0,0,0,0,0,0,0
25.728414,9.94987437,0,0,0,0,0,0,0
25.738905,10.0498756,0,0,0,0,0,0,0
25.749397,8.77496439,0,0,0,0,0,0,0
25.759888,9.43398113,0,0,0,0,0,0,0
25.77038,9.69535971,0,0,0,0,0,0,0
25.780872,10.6770783,0,0,0,0,0,0,0
25.791363,10.2469508,0,0,0,0,0,0,0
25.801855,10.198039,0,0,0,0,0,0,0
25.812346,10.3923048,0,0,0,0,0,0,0
25.822838,9.8488578,0,0,0,0,0,0,0
25.83333,10.2469508,0,0,0,0,0,0,0
25.843821,9.79795897,0,0,0,0,0,0,0
25.854313,10.4403065,0,0,0,0,0,0,0
25.864804,10.8166538,0,0,0,0,0,0,0
25.875296,9.89949494,0,0,0,0,0,0,0
25.885788,10.8627805,0,0,0,0,0,0,0
25.896279,9,0,0,0,0,0,0,0
25.906771,9.94987437,0,0,0,0,0,0,0
25.917262,9.94987437,0,0,0,0,0,0,0
25.927754,10.198039,0,0,0,0,0,0,0
25.938246,9.69535971,0,0,0,0,0,0,0
25.948737,10.198039,0,0,0,0,0,0,0
25.959229,9.69535971,0,0,0,0,0,0,0
25.96972,9.2736185,0,0,0,0,0,0,0
25.980212,9.59166305,0,0,0,0,0,0,0
25.990704,9.32737905,0,0,0,0,0,0,0
26.001195,9.89949494,0,0,0,0,0,0,0
26.011687,8.94427191,0,0,0,0,0,0,0
26.022178,10.4880885,0,0,0,0,0,0,0
26.03267,9.21954446,0,0,0,0,0,0,0
26.043162,10.3923048,0,0,0,0,0,0,0
26.053653,9.89949494,0,0,0,0,0,0,0
26.064145,9.38083152,0,0,0,0,0,0,0
26.074636,9.43398113,0,0,0,0,0,0,0
26.085128,10.8627805,0,0,0,0,0,0,0
26.09562,10.3923048,0,0,0,0,0,0,0
26.106111,9.48683298,0,0,0,0,0,0,0
26.116603,9.8488578,0,0,0,0,0,0,0
26.127094,8.83176087,0,0,0,0,0,0,0
26.137586,10.1488916,0,0,0,0,0,0,0
26.148078,9.21954446,0,0,0,0,0,0,0
26.158569,9,0,0,0,0,0,0,0
26.169061,9.69535971,0,0,0,0,0,0,0
26.179552,9.8488578,0,0,0,0,0,0,0
26.190044,9.32737905,0,0,0,0,0,0,0
26.200536,9.64365076,0,0,0,0,0,0,0
26.211027,9.89949494,0,0,0,0,0,0,0
26.221519,9.74679434,0,0,0,0,0,0,0
26.23201,8.88819442,0,0,0,0,0,0,0
26.242502,10.2956301,0,0,0,0,0,0,0
26.252994,9.8488578,0,0,0,0,0,0,0
26.263485,9.74679434,0,0,0,0,0,0,0
26.273977,9.2736185,0,0,0,0,0,0,0
26.284468,10.0995049,0,0,0,0,0,0,0
26.29496,9.8488578,0,0,0,0,0,0,0
26.305452,10.5356538,0,0,0,0,0,0,0
26.315943,9.11043358,0,0,0,0,0,0,0
26.326435,8.48528137,0,0,0,0,0,0,0
26.336926,10.2956301,0,0,0,0,0,0,0
26.347418,10.7703296,0,0,0,0,0,0,0
26.35791,9,0,0,0,0,0,0,0
26.368401,9.05538514,0,0,0,0,0,0,0
26.378893,9.89949494,0,0,0,0,0,0,0
26.389384,9.48683298,0,0,0,0,0,0,0
26.399876,10.2956301,0,0,0,0,0,0,0
26.410368,9.59166305,0,0,0,0,0,0,0
26.420859,10.4403065,0,0,0,0,0,0,0
26.431351,8.36660027,0,0,0,0,0,0,0
26.441842,9.16515139,0,0,0,0,0,0,0
26.452334,9.53939201,0,0,0,0,0,0,0
26.462826,10.3923048,0,0,0,0,0,0,0
26.473317,9.53939201,0,0,0,0,0,0,0
26.483809,9.11043358,0,0,0,0,0,0,0
26.4943,9.21954446,0,0,0,0,0,0,0
26.504792,9.38083152,0,0,0,0,0,0,0
26.515284,9.16515139,0,0,0,0,0,0,0
26.525775,8.83176087,0,0,0,0,0,0,0
26.536267,9.89949494,0,0,0,0,0,0,0
26.546758,9.05538514,0,0,0,0,0,0,0
26.55725,9.59166305,0,0,0,0,0,0,0
26.567742,9.8488578,0,0,0,0,0,0,0
26.578233,10.0498756,0,0,0,0,0,0,0
26.588725,9.32737905,0,0,0,0,0,0,0
26.599216,9.21954446,0,0,0,0,0,0,0
26.609708,9.21954446,0,0,0,0,0,0,0
26.6202,9.48683298,0,0,0,0,0,0,0
26.630691,7.93725393,0,0,0,0,0,0,0
26.641183,9.89949494,0,0,0,0,0,0,0
26.651674,9.43398113,0,0,0,0,0,0,0
26.662166,9.38083152,0,0,0,0,0,0,0
26.672658,9.21954446,0,0,0,0,0,0,0
26.683149,8.88819442,0,0,0,0,0,0,0
26.693641,8.88819442,0,0,0,0,0,0,0
26.704132,9.59166305,0,0,0,0,0,0,0
26.714624,9.38083152,0,0,0,0,0,0,0
26.725116,8.71779789,0,0,0,0,0,0,0
26.735607,9.59166305,0,0,0,0,0,0,0
26.746099,9.48683298,0,0,0,0,0,0,0
26.75659,8.42614977,0,0,0,0,0,0,0
26.767082,10.3923048,0,0,0,0,0,0,0
26.777574,9.8488578,0,0,0,0,0,0,0
26.788065,9.79795897,0,0,0,0,0,0,0
26.798557,9.11043358,0,0,0,0,0,0,0
26.809048,9.59166305,0,0,0,0,0,0,0
26.81954,9.53939201,0,0,0,0,0,0,0
26.830032,9.21954446,0,0,0,0,0,0,0
26.840523,8.94427191,0,0,0,0,0,0,0
26.851015,10.198039,0,0,0,0,0,0,0
26.861506,9.8488578,0,0,0,0,0,0,0
26.871998,9.32737905,0,0,0,0,0,0,0
26.88249,8.94427191,0,0,0,0,0,0,0
26.892981,9.16515139,0,0,0,0,0,0,0
26.903473,8.48528137,0,0,0,0,0,0,0
26.913964,9.64365076,0,0,0,0,0,0,0
26.924456,9.59166305,0,0,0,0,0,0,0
26.934948,8.88819442,0,0,0,0,0,0,0
26.945439,9.05538514,0,0,0,0,0,0,0
26.955931,9.69535971,0,0,0,0,0,0,0
26.966422,9.48683298,0,0,0,0,0,0,0
26.976914,8.60232527,0,0,0,0,0,0,0
26.987406,9.43398113,0,0,0,0,0,0,0
26.997897,9.16515139,0,0,0,0,0,0,0
27.008389,8.94427191,0,0,0,0,0,0,0
27.01888,9.21954446,0,0,0,0,0,0,0
27.029372,9.21954446,0,0,0,0,0,0,0
27.039864,9.59166305,0,0,0,0,0,0,0
27.050355,9.11043358,0,0,0,0,0,0,0
27.060847,8.94427191,0,0,0,0,0,0,0
27.071338,9,0,0,0,0,0,0,0
27.08183,9,0,0,0,0,0,0,0
27.092322,8.66025404,0,0,0,0,0,0,0
27.102813,8.60232527,0,0,0,0,0,0,0
27.113305,8.88819442,0,0,0,0,0,0,0
27.123796,8.54400375,0,0,0,0,0,0,0
27.134288,8.77496439,0,0,0,0,0,0,0
27.14478,8.88819442,0,0,0,0,0,0,0
27.155271,9.53939201,0,0,0,0,0,0,0
27.165763,8.88819442,0,0,0,0,0,0,0
27.176254,9.53939201,0,0,0,0,0,0,0
27.186746,9.59166305,0,0,0,0,0,0,0
27.197238,9.53939201,0,0,0,0,0,0,0
27.207729,9.79795897,0,0,0,0,0,0,0
27.218221,8.54400375,0,0,0,0,0,0,0
27.228712,10,0,0,0,0,0,0,0
27.239204,8.71779789,0,0,0,0,0,0,0
27.249696,9.21954446,0,0,0,0,0,0,0
27.260187,9.53939201,0,0,0,0,0,0,0
27.270679,9.53939201,0,0,0,0,0,0,0
27.28117,9.05538514,0,0,0,0,0,0,0
27.291662,8.71779789,0,0,0,0,0,0,0
27.302154,9.16515139,0,0,0,0,0,0,0
27.312645,9.16515139,0,0,0,0,0,0,0
27.323137,7.74596669,0,0,0,0,0,0,0
27.333628,9.32737905,0,0,0,0,0,0,0
27.34412,8.77496439,0,0,0,0,0,0,0
27.354612,9.69535971,0,0,0,0,0,0,0
27.365103,9.2736185,0,0,0,0,0,0,0
27.375595,9.05538514,0,0,0,0,0,0,0
27.386086,8.36660027,0,0,0,0,0,0,0
27.396578,9.2736185,0,0,0,0,0,0,0
27.40707,9.43398113,0,0,0,0,0,0,0
27.417561,9.43398113,0,0,0,0,0,0,0
27.428053,8.83176087,0,0,0,0,0,0,0
27.438544,9.43398113,0,0,0,0,0,0,0
27.449036,9,0,0,0,0,0,0,0
27.459528,9.53939201,0,0,0,0,0,0,0
27.470019,9.32737905,0,0,0,0,0,0,0
27.480511,8.83176087,0,0,0,0,0,0,0
27.491002,9,0,0,0,0,0,0,0
27.501494,8.77496439,0,0,0,0,0,0,0
27.511986,8.48528137,0,0,0,0,0,0,0
27.522477,9.64365076,0,0,0,0,0,0,0
27.532969,8.42614977,0,0,0,0,0,0,0
27.54346,8.88819442,0,0,0,0,0,0,0
27.553952,9.32737905,0,0,0,0,0,0,0
27.564444,8.83176087,0,0,0,0,0,0,0
27.574935,9.53939201,0,0,0,0,0,0,0
27.585427,8.30662386,0,0,0,0,0,0,0
27.595918,8.48528137,0,0,0,0,0,0,0
27.60641,10.0498756,0,0,0,0,0,0,0
27.616902,8.18535277,0,0,0,0,0,0,0
27.627393,9.21954446,0,0,0,0,0,0,0
27.637885,9.05538514,0,0,0,0,0,0,0
27.648376,9,0,0,0,0,0,0,0
27.658868,7.93725393,0,0,0,0,0,0,0
27.66936,8.77496439,0,0,0,0,0,0,0
27.679851,9.11043358,0,0,0,0,0,0,0
27.690343,8.71779789,0,0,0,0,0,0,0
27.700834,8.06225775,0,0,0,0,0,0,0
27.711326,9.2736185,0,0,0,0,0,0,0
27.721818,8.54400375,0,0,0,0,0,0,0
27.732309,9.2736185,0,0,0,0,0,0,0
27.742801,8.66025404,0,0,0,0,0,0,0
27.753292,8.06225775,0,0,0,0,0,0,0
27.763784,8.71779789,0,0,0,0,0,0,0
27.774276,9.05538514,0,0,0,0,0,0,0
27.784767,8.48528137,0,0,0,0,0,0,0
27.795259,8.42614977,0,0,0,0,0,0,0
27.80575,9.05538514,0,0,0,0,0,0,0
27.816242,9,0,0,0,0,0,0,0
27.826734,9.11043358,0,0,0,0,0,0,0
27.837225,9.32737905,0,0,0,0,0,0,0
27.847717,8.83176087,0,0,0,0,0,0,0
27.858208,8.77496439,0,0,0,0,0,0,0
27.8687,8,0,0,0,0,0,0,0
27.879192,8.48528137,0,0,0,0,0,0,0
27.889683,8.83176087,0,0,0,0,0,0,0
27.900175,8.30662386,0,0,0,0,0,0,0
27.910666,8.36660027,0,0,0,0,0,0,0
27.921158,8.66025404,0,0,0,0,0,0,0
27.93165,8.24621125,0,0,0,0,0,0,0
27.942141,8.36660027,0,0,0,0,0,0,0
27.952633,8.60232527,0,0,0,0,0,0,0
27.963124,7.81024968,0,0,0,0,0,0,0
27.973616,8.60232527,0,0,0,0,0,0,0
27.984108,8.30662386,0,0,0,0,0,0,0
27.994599,9.74679434,0,0,0,0,0,0,0
28.005091,8.77496439,0,0,0,0,0,0,0
28.015582,8.30662386,0,0,0,0,0,0,0
28.026074,8.06225775,0,0,0,0,0,0,0
28.036566,6.8556546,0,0,0,0,0,0,0
28.047057,8.60232527,0,0,0,0,0,0,0
28.057549,8.66025404,0,0,0,0,0,0,0
28.06804,8.94427191,0,0,0,0,0,0,0
28.078532,8,0,0,0,0,0,0,0
28.089024,9,0,0,0,0,0,0,0
28.099515,8.06225775,0,0,0,0,0,0,0
28.110007,8.60232527,0,0,0,0,0,0,0
28.120498,8.18535277,0,0,0,0,0,0,0
28.13099,8.60232527,0,0,0,0,0,0,0
28.141482,7.93725393,0,0,0,0,0,0,0
28.151973,8.71779789,0,0,0,0,0,0,0
28.162465,8.83176087,0,0,0,0,0,0,0
28.172956,8.66025404,0,0,0,0,0,0,0
28.183448,7.68114575,0,0,0,0,0,0,0
28.19394,8.1240384,0,0,0,0,0,0,0
28.204431,8.77496439,0,0,0,0,0,0,0
28.214923,8.1240384,0,0,0,0,0,0,0
28.225414,8.36660027,0,0,0,0,0,0,0
28.235906,8.24621125,0,0,0,0,0,0,0
28.246398,8.06225775,0,0,0,0,0,0,0
28.256889,7.68114575,0,0,0,0,0,0,0
28.267381,8.54400375,0,0,0,0,0,0,0
28.277872,9.21954446,0,0,0,0,0,0,0
28.288364,8.36660027,0,0,0,0,0,0,0
28.298856,7.41619849,0,0,0,0,0,0,0
28.309347,8.66025404,0,0,0,0,0,0,0
28.319839,8.66025404,0,0,0,0,0,0,0
28.33033,8.66025404,0,0,0,0,0,0,0
28.340822,8.77496439,0,0,0,0,0,0,0
28.351314,9.05538514,0,0,0,0,0,0,0
28.361805,8.48528137,0,0,0,0,0,0,0
28.372297,7.54983444,0,0,0,0,0,0,0
28.382788,8.06225775,0,0,0,0,0,0,0
28.39328,8.77496439,0,0,0,0,0,0,0
28.403772,8.71779789,0,0,0,0,0,0,0
28.414263,9.05538514,0,0,0,0,0,0,0
28.424755,8.30662386,0,0,0,0,0,0,0
28.435246,8.24621125,0,0,0,0,0,0,0
28.445738,7.87400787,0,0,0,0,0,0,0
28.45623,8.60232527,0,0,0,0,0,0,0
28.466721,8.18535277,0,0,0,0,0,0,0
28.477213,8.24621125,0,0,0,0,0,0,0
28.487704,8.48528137,0,0,0,0,0,0,0
28.498196,8.71779789,0,0,0,0,0,0,0
28.508688,7.28010989,0,0,0,0,0,0,0
28.519179,8.18535277,0,0,0,0,0,0,0
28.529671,8.60232527,0,0,0,0,0,0,0
28.540162,8.77496439,0,0,0,0,0,0,0
28.550654,7.87400787,0,0,0,0,0,0,0
28.561146,7.41619849,0,0,0,0,0,0,0
28.571637,7.81024968,0,0,0,0,0,0,0
28.582129,7.41619849,0,0,0,0,0,0,0
28.59262,8.88819442,0,0,0,0,0,0,0
28.603112,7.87400787,0,0,0,0,0,0,0
28.613604,8.36660027,0,0,0,0,0,0,0
28.624095,8.18535277,0,0,0,0,0,0,0
28.634587,8.66025404,0,0,0,0,0,0,0
28.645078,8.83176087,0,0,0,0,0,0,0
28.65557,8.24621125,0,0,0,0,0,0,0
28.666062,8.06225775,0,0,0,0,0,0,0
28.676553,7.68114575,0,0,0,0,0,0,0
28.687045,8.42614977,0,0,0,0,0,0,0
28.697536,7.54983444,0,0,0,0,0,0,0
28.708028,8.06225775,0,0,0,0,0,0,0
28.71852,8.77496439,0,0,0,0,0,0,0
28.729011,8.77496439,0,0,0,0,0,0,0
28.739503,7.14142843,0,0,0,0,0,0,0
28.749994,7,0,0,0,0,0,0,0
28.760486,7.81024968,0,0,0,0,0,0,0
28.770978,7.54983444,0,0,0,0,0,0,0
28.781469,8.54400375,0,0,0,0,0,0,0
28.791961,7.28010989,0,0,0,0,0,0,0
28.802452,8.48528137,0,0,0,0,0,0,0
28.812944,8.83176087,0,0,0,0,0,0,0
28.823436,8.48528137,0,0,0,0,0,0,0
28.833927,8.42614977,0,0,0,0,0,0,0
28.844419,7.93725393,0,0,0,0,0,0,0
28.85491,7.93725393,0,0,0,0,0,0,0
28.865402,8.36660027,0,0,0,0,0,0,0
28.875894,8.24621125,0,0,0,0,0,0,0
28.886385,7.41619849,0,0,0,0,0,0,0
28.896877,7.87400787,0,0,0,0,0,0,0
28.907368,8.88819442,0,0,0,0,0,0,0
28.91786,7.68114575,0,0,0,0,0,0,0
28.928352,8.36660027,0,0,0,0,0,0,0
28.938843,8.18535277,0,0,0,0,0,0,0
28.949335,7.34846923,0,0,0,0,0,0,0
28.959826,8.24621125,0,0,0,0,0,0,0
28.970318,8.71779789,0,0,0,0,0,0,0
28.98081,7.14142843,0,0,0,0,0,0,0
28.991301,7.61577311,0,0,0,0,0,0,0
29.001793,7.28010989,0,0,0,0,0,0,0
29.012284,8.06225775,0,0,0,0,0,0,0
29.022776,8.18535277,0,0,0,0,0,0,0
29.033268,7.41619849,0,0,0,0,0,0,0
29.043759,7.54983444,0,0,0,0,0,0,0
29.054251,8.18535277,0,0,0,0,0,0,0
29.064742,8.24621125,0,0,0,0,0,0,0
29.075234,8.1240384,0,0,0,0,0,0,0
29.085726,6.08276253,0,0,0,0,0,0,0
29.096217,8,0,0,0,0,0,0,0
29.106709,7.54983444,0,0,0,0,0,0,0
29.1172,8.06225775,0,0,0,0,0,0,0
29.127692,7.87400787,0,0,0,0,0,0,0
29.138184,8.54400375,0,0,0,0,0,0,0
29.148675,8.42614977,0,0,0,0,0,0,0
29.159167,7.93725393,0,0,0,0,0,0,0
29.169658,8.18535277,0,0,0,0,0,0,0
29.18015,8.1240384,0,0,0,0,0,0,0
29.190642,7.74596669,0,0,0,0,0,0,0
29.201133,7.61577311,0,0,0,0,0,0,0
29.211625,8.1240384,0,0,0,0,0,0,0
29.222116,8.24621125,0,0,0,0,0,0,0
29.232608,7.68114575,0,0,0,0,0,0,0
29.2431,7.07106781,0,0,0,0,0,0,0
29.253591,7.54983444,0,0,0,0,0,0,0
29.264083,7.28010989,0,0,0,0,0,0,0
29.274574,8.48528137,0,0,0,0,0,0,0
29.285066,7,0,0,0,0,0,0,0
29.295558,8,0,0,0,0,0,0,0
29.306049,7.61577311,0,0,0,0,0,0,0
29.316541,7.81024968,0,0,0,0,0,0,0
29.327032,7.81024968,0,0,0,0,0,0,0
29.337524,7.81024968,0,0,0,0,0,0,0
29.348016,6.92820323,0,0,0,0,0,0,0
29.358507,6.92820323,0,0,0,0,0,0,0
29.368999,8,0,0,0,0,0,0,0
29.37949,7.14142843,0,0,0,0,0,0,0
29.389982,6.32455532,0,0,0,0,0,0,0
29.400474,7.81024968,0,0,0,0,0,0,0
29.410965,7.28010989,0,0,0,0,0,0,0
29.421457,8.54400375,0,0,0,0,0,0,0
29.431948,7.61577311,0,0,0,0,0,0,0
29.44244,7,0,0,0,0,0,0,0
29.452932,7.21110255,0,0,0,0,0,0,0
29.463423,7.61577311,0,0,0,0,0,0,0
29.473915,7.74596669,0,0,0,0,0,0,0
29.484406,8.54400375,0,0,0,0,0,0,0
29.494898,7.81024968,0,0,0,0,0,0,0
29.50539,7.61577311,0,0,0,0,0,0,0
29.515881,8,0,0,0,0,0,0,0
29.526373,8.06225775,0,0,0,0,0,0,0
29.536864,8,0,0,0,0,0,0,0
29.547356,8.06225775,0,0,0,0,0,0,0
29.557848,6.8556546,0,0,0,0,0,0,0
29.568339,7.68114575,0,0,0,0,0,0,0
29.578831,7.93725393,0,0,0,0,0,0,0
29.589322,7.81024968,0,0,0,0,0,0,0
29.599814,7.61577311,0,0,0,0,0,0,0
29.610306,7.61577311,0,0,0,0,0,0,0
29.620797,7.41619849,0,0,0,0,0,0,0
29.631289,7.21110255,0,0,0,0,0,0,0
29.64178,7.54983444,0,0,0,0,0,0,0
29.652272,8,0,0,0,0,0,0,0
29.662764,7.28010989,0,0,0,0,0,0,0
29.673255,7.61577311,0,0,0,0,0,0,0
29.683747,5.91607978,0,0,0,0,0,0,0
29.694238,6.70820393,0,0,0,0,0,0,0
29.70473,7.68114575,0,0,0,0,0,0,0
29.715222,6.8556546,0,0,0,0,0,0,0
29.725713,8.18535277,0,0,0,0,0,0,0
29.736205,7.21110255,0,0,0,0,0,0,0
29.746696,7.61577311,0,0,0,0,0,0,0
29.757188,7.21110255,0,0,0,0,0,0,0
29.76768,7.41619849,0,0,0,0,0,0,0
29.778171,7.41619849,0,0,0,0,0,0,0
29.788663,7.28010989,0,0,0,0,0,0,0
29.799154,6.63324958,0,0,0,0,0,0,0
29.809646,8.1240384,0,0,0,0,0,0,0
29.820138,6.63324958,0,0,0,0,0,0,0
29.830629,6.8556546,0,0,0,0,0,0,0
29.841121,7.68114575,0,0,0,0,0,0,0
29.851612,8.30662386,0,0,0,0,0,0,0
29.862104,7.54983444,0,0,0,0,0,0,0
29.872596,7.48331477,0,0,0,0,0,0,0
29.883087,7.93725393,0,0,0,0,0,0,0
29.893579,7.93725393,0,0,0,0,0,0,0
29.90407,7.74596669,0,0,0,0,0,0,0
29.914562,7.21110255,0,0,0,0,0,0,0
29.925054,7.54983444,0,0,0,0,0,0,0
29.935545,7.28010989,0,0,0,0,0,0,0
29.946037,7.81024968,0,0,0,0,0,0,0
29.956528,7.34846923,0,0,0,0,0,0,0
29.96702,7.48331477,0,0,0,0,0,0,0
29.977512,8.06225775,0,0,0,0,0,0,0
29.988003,7.34846923,0,0,0,0,0,0,0
29.998495,7.34846923,7.42524272,-0.277080299,7.42511431,7.42503612,7.42505915,0,7.42498343
30.008986,6.70820393,7.41984728,-0.843589564,7.41971859,7.41964023,7.41966337,0,7.41958745
30.019478,7,7.4144594,-0.643785214,7.41433042,7.41425189,7.41427515,0,7.41419903
30.02997,8.60232527,7.40907958,1.09235786,7.40895031,7.40887161,7.40889499,0,7.40881866
30.040461,7.93725393,7.40370833,0.73044206,7.40357877,7.4034999,7.40352339,0,7.40344686
30.050953,8,7.39834462,0.775664479,7.39821476,7.39813573,7.39815934,0,7.3980826
30.061444,7,7.39298946,-0.626888711,7.39285931,7.3927801,7.39280383,0,7.39272689
30.071936,6.92820323,7.38764182,-0.677818996,7.38751138,7.38743201,7.38745585,0,7.38737871
30.082428,8.24621125,7.38230222,0.929467069,7.38217149,7.38209194,7.38211591,0,7.38203856
30.092919,6,7.37697115,-1.17344414,7.37684012,7.37676041,7.37678449,0,7.37670693
30.103411,7.48331477,7.37164759,0.334166399,7.37151627,7.37143638,7.37146058,0,7.37138282
30.113902,7.34846923,7.36633255,-0.133653745,7.36620093,7.36612087,7.3661452,0,7.36606722
30.124394,8.24621125,7.36102501,0.940843366,7.3608931,7.36081286,7.36083731,0,7.36075913
30.134886,6.55743852,7.35572547,-0.893469052,7.35559326,7.35551285,7.35553742,0,7.35545903
30.145377,7.81024968,7.35043443,0.678096783,7.35030192,7.35022133,7.35024603,0,7.35016742
30.155869,6.70820393,7.34515087,-0.798089555,7.34501806,7.3449373,7.34496212,0,7.3448833
30.16636,7.41619849,7.3398758,0.276265619,7.33974268,7.33966175,7.33968669,0,7.33960766
30.176852,7.07106781,7.33460819,-0.513361841,7.33447477,7.33439367,7.33441874,0,7.33433949
30.187344,6.78232998,7.32934856,-0.739607041,7.32921484,7.32913356,7.32915875,0,7.32907929
30.197835,6.164414,7.32409739,-1.07688597,7.32396336,7.3238819,7.32390723,0,7.32382755
30.208327,7.34846923,7.31885367,0.172091714,7.31871934,7.31863771,7.31866316,0,7.31858327
30.218818,7.07106781,7.3136184,-0.492494255,7.31348377,7.31340196,7.31342754,0,7.31334743
30.22931,7,7.30839058,-0.555329254,7.30825564,7.30817365,7.30819936,0,7.30811903
30.239802,6.63324958,7.3031707,-0.818487089,7.30303544,7.30295328,7.30297912,0,7.30289857
30.250293,7,7.29795924,-0.545856426,7.29782367,7.29774133,7.2977673,0,7.29768654
30.260785,7.07106781,7.29275521,-0.47083691,7.29261933,7.29253681,7.29256292,0,7.29248193
30.271276,6.70820393,7.28755959,-0.761154162,7.28742341,7.28734071,7.28736694,0,7.28728573
30.281768,7.68114575,7.28237139,0.631485833,7.28223489,7.28215202,7.28217838,0,7.28209695
30.29226,6.8556546,7.2771911,-0.64925842,7.27705428,7.27697123,7.27699773,0,7.27691607
30.302751,7.81024968,7.27201919,0.73364193,7.27188207,7.27179883,7.27182547,0,7.27174358
30.313243,7.68114575,7.26685469,0.643654454,7.26671725,7.26663383,7.2666606,0,7.2665785
30.323734,7.54983444,7.26169857,0.536782887,7.26156081,7.26147721,7.26150412,0,7.26142178
30.334226,7.81024968,7.25654983,0.744110102,7.25641175,7.25632798,7.25635502,0,7.25627246
30.344718,6.55743852,7.25140897,-0.833048886,7.25127057,7.25118661,7.2512138,0,7.251131
30.355209,6.70820393,7.24627646,-0.733534275,7.24613775,7.24605361,7.24608093,0,7.24599791
30.365701,5.91607978,7.24115133,-1.15111752,7.24101229,7.24092797,7.24095543,0,7.24087218
30.376192,7.14142843,7.23603454,-0.307581065,7.23589518,7.23581067,7.23583827,0,7.23575479
30.386684,7.41619849,7.23092511,0.430433941,7.23078542,7.23070073,7.23072848,0,7.23064476
30.397176,8.1240384,7.22582352,0.947741992,7.22568351,7.22559864,7.22562652,0,7.22554257
30.407667,6.40312424,7.22073025,-0.904215691,7.22058991,7.22050486,7.22053289,0,7.2204487
30.418159,7.28010989,7.21564433,0.25390069,7.21550366,7.21541842,7.21544659,0,7.21536217
30.42865,7,7.21056671,-0.458875486,7.21042572,7.21034029,7.21036861,0,7.21028395
30.439142,6.244998,7.20549643,-0.980050217,7.2053551,7.20526949,7.20529795,0,7.20521306
30.449634,7.28010989,7.20043395,0.282269267,7.20029229,7.2002065,7.20023511,0,7.20014997
30.460125,7.28010989,7.19537976,0.291084403,7.19523777,7.19515179,7.19518055,0,7.19509517
30.470617,6.164414,7.19033288,-1.01287654,7.19019056,7.19010439,7.1901333,0,7.19004768
30.481108,7.14142843,7.18529428,-0.209441759,7.18515162,7.18506527,7.18509432,0,7.18500846
30.4916,7.41619849,7.18026298,0.485731931,7.18011999,7.18003344,7.18006265,0,7.17997655
30.502092,7.28010989,7.17523945,0.32383705,7.17509613,7.17500939,7.17503875,0,7.17495241
30.512583,6.164414,7.17022418,-1.00290088,7.17008051,7.16999359,7.1700231,0,7.16993651
30.523075,6.55743852,7.16521619,-0.779600967,7.16507219,7.16498508,7.16501474,0,7.1649279
30.533566,7.21110255,7.16021644,0.225579503,7.16007209,7.15998479,7.16001461,0,7.15992752
30.544058,7.48331477,7.15522396,0.572792121,7.15507927,7.15499178,7.15502175,0,7.15493442
30.55455,8.06225775,7.15023923,0.954996608,7.15009419,7.15000651,7.15003664,0,7.14994906
30.565041,7.93725393,7.14526271,0.889938889,7.14511733,7.14502946,7.14505974,0,7.14497191
30.575533,7.48331477,7.14029344,0.585680228,7.14014772,7.14005966,7.1400901,0,7.14000202
30.586024,7.74596669,7.13533238,0.781430939,7.13518631,7.13509806,7.13512866,0,7.13504032
30.596516,7.81024968,7.13037856,0.824542972,7.13023214,7.1301437,7.13017446,0,7.13008587
30.607008,7.48331477,7.12543246,0.598232661,7.12528569,7.12519705,7.12522797,0,7.12513913
30.617499,7.07106781,7.12049453,-0.222321202,7.12034741,7.12025858,7.12028966,0,7.12020056
30.627991,6.4807407,7.11556383,-0.796757887,7.11541636,7.11532733,7.11535858,0,7.11526922
30.638482,6.78232998,7.11064129,-0.572984562,7.11049347,7.11040425,7.11043566,0,7.11034604
30.648974,6.78232998,7.10572597,-0.568679161,7.10557779,7.10548838,7.10551995,0,7.10543007
30.659466,7.41619849,7.10081833,0.561587176,7.10066979,7.10058018,7.10061193,0,7.10052179
30.669957,7.07106781,7.09591883,-0.157642057,7.09576994,7.09568013,7.09571204,0,7.09562164
30.680449,6.70820393,7.09102653,-0.618726593,7.09087728,7.09078728,7.09081936,0,7.09072869
30.69094,7.28010989,7.08614235,0.440417455,7.08599274,7.08590254,7.08593479,0,7.08584386
30.701432,7.07106781,7.08126537,-0.100982946,7.08111539,7.081025,7.08105742,0,7.08096622
30.711924,7.74596669,7.07639603,0.818272977,7.07624569,7.0761551,7.07618769,0,7.07609622
30.722415,7.21110255,7.07153479,0.373587687,7.07138409,7.0712933,7.07132606,0,7.07123433
30.732907,7.28010989,7.06668073,0.461983943,7.06652966,7.06643867,7.06647161,0,7.0663796
30.743398,8.06225775,7.06183475,1.00021148,7.06168331,7.06159213,7.06162524,0,7.06153296
30.75389,6.92820323,7.05699593,-0.358876999,7.05684412,7.05675274,7.05678603,0,7.05669348
30.764382,7.21110255,7.05216473,0.39867007,7.05201255,7.05192096,7.05195443,0,7.05186161
30.774873,6.70820393,7.04734159,-0.582355267,7.04718904,7.04709726,7.0471309,0,7.0470378
30.785365,6.78232998,7.04252559,-0.510093727,7.04237267,7.04228068,7.04231451,0,7.04222113
30.795856,7.07106781,7.03771765,0.182620269,7.03756435,7.03747216,7.03750617,0,7.03741252
30.806348,5.91607978,7.03291683,-1.05680512,7.03276316,7.03267077,7.03270496,0,7.03261103
30.81684,6.78232998,7.0281236,-0.495775773,7.02796955,7.02787696,7.02791133,0,7.02781711
30.827331,7.34846923,7.0233384,0.570202448,7.02318397,7.02309117,7.02312573,0,7.02303123
30.837823,7,7.0185603,-0.136236208,7.01840549,7.0183125,7.01834724,0,7.01825246
30.848314,6.70820393,7.01379023,-0.552798603,7.01363503,7.01354183,7.01357676,0,7.0134817
30.858806,7.41619849,7.00902725,0.638099708,7.00887167,7.00877827,7.00881338,0,7.00871803
30.869298,6.78232998,7.00427182,-0.471107033,7.00411585,7.00402225,7.00405755,0,7.00396191
30.879789,6.78232998,6.99952438,-0.4660412,6.99936803,6.99927422,6.99930971,0,6.99921379
30.890281,6.70820393,6.99478403,-0.535331762,6.99462729,6.99453327,6.99456895,0,6.99447274
30.900772,6.92820323,6.99005165,-0.248693427,6.98989452,6.98980029,6.98983617,0,6.98973967
30.911264,7.34846923,6.98532634,0.602613379,6.98516882,6.98507439,6.98511046,0,6.98501366
30.921756,7.21110255,6.98060855,0.480097908,6.98045063,6.98035599,6.98039226,0,6.98029517
30.932247,7.61577311,6.97589871,0.799921492,6.9757404,6.97564555,6.97568202,0,6.97558463
30.942739,6.63324958,6.97119593,-0.581331529,6.97103722,6.97094216,6.97097883,0,6.97088114
30.95323,7.68114575,6.96650108,0.845366586,6.96634197,6.96624671,6.96628358,0,6.96618559
30.963722,7.54983444,6.96181328,0.766825376,6.96165377,6.9615583,6.96159536,0,6.96149707
30.974214,6.55743852,6.95713295,-0.632213911,6.95697304,6.95687736,6.95691463,0,6.95681604
30.984705,6.8556546,6.95246055,-0.311136542,6.95230023,6.95220434,6.95224181,0,6.95214292
30.995197,7.61577311,6.94779516,0.817299175,6.94763444,6.94753834,6.94757602,0,6.94747682
31.005688,6.70820393,6.94313768,-0.48469965,6.94297656,6.94288024,6.94291813,0,6.94281862
31.01618,7.41619849,6.93848721,0.691166604,6.93832568,6.93822915,6.93826724,0,6.93816743
31.026672,6.32455532,6.93384419,-0.780569579,6.93368224,6.9335855,6.93362381,0,6.93352368
31.037163,7,6.92920905,0.266065696,6.92904669,6.92894973,6.92898825,0,6.92888781
31.047655,6.164414,6.92458089,-0.871875502,6.92441812,6.92432095,6.92435968,0,6.92425893
31.058146,7.07106781,6.91996061,0.3887251,6.91979742,6.91970004,6.91973898,0,6.91963791
31.068638,7.61577311,6.9153473,0.836914454,6.91518369,6.9150861,6.91512526,0,6.91502387
31.07913,6.55743852,6.91074141,-0.59439287,6.91057738,6.91047957,6.91051895,0,6.91041724
31.089621,6.4807407,6.90614336,-0.652228994,6.90597891,6.90588089,6.90592048,0,6.90581845
31.100113,7.28010989,6.90155227,0.615270362,6.9013874,6.90128916,6.90132897,0,6.90122662
31.110604,7.28010989,6.89696901,0.618983747,6.89680371,6.89670526,6.89674529,0,6.89664262
31.121096,6.63324958,6.8923927,-0.509061016,6.89222697,6.8921283,6.89216856,0,6.89206556
31.131588,7.21110255,6.88782377,0.568576103,6.88765761,6.88755872,6.8875992,0,6.88749588
31.142079,6.63324958,6.88326264,-0.500013058,6.88309605,6.88299694,6.88303765,0,6.882934
31.152571,6.92820323,6.87870844,0.22247424,6.87854142,6.8784421,6.87848303,0,6.87837905
31.163062,7.87400787,6.87416204,0.999922915,6.87399458,6.87389504,6.8739362,0,6.87383189
31.173554,6.92820323,6.86962255,0.242034462,6.86945466,6.86935489,6.86939629,0,6.86929164
31.184046,6.8556546,6.86509041,-0.0971380765,6.86492208,6.86482209,6.86486372,0,6.86475874
31.194537,6.70820393,6.86056603,-0.39033588,6.86039726,6.86029705,6.86033892,0,6.8602336
31.205029,7.41619849,6.85604856,0.748431647,6.85587934,6.85577891,6.85582102,0,6.85571535
31.21552,7.74596669,6.85153883,0.945741962,6.85136917,6.85126852,6.85131087,0,6.85120486
31.226012,6.8556546,6.847036,0.0928364245,6.84686589,6.84676502,6.8468076,0,6.84670125
31.236504,6.78232998,6.84254047,-0.24537826,6.84236992,6.84226882,6.84231164,0,6.84220495
31.246995,7.34846923,6.83805268,0.714434426,6.83788167,6.83778035,6.83782342,0,6.83771638
31.257487,6.55743852,6.83357175,-0.525483804,6.83340029,6.83329875,6.83334206,0,6.83323467
31.267978,7.14142843,6.82909854,0.55886482,6.82892663,6.82882486,6.82886842,0,6.82876068
31.27847,7,6.82463219,0.418769404,6.82445981,6.82435782,6.82440163,0,6.82429353
31.288962,7.68114575,6.82017311,0.927886114,6.82000027,6.81989805,6.81994211,0,6.81983366
31.299453,6.8556546,6.81572172,0.199832131,6.81554842,6.81544598,6.81549029,0,6.81538148
31.309945,7.28010989,6.81127717,0.684713604,6.81110341,6.81100074,6.8110453,0,6.81093614
31.320436,7.28010989,6.8068403,0.687945922,6.80666607,6.80656317,6.80660799,0,6.80649846
31.330928,6.70820393,6.80241025,-0.306930476,6.80223555,6.80213242,6.80217751,0,6.80206761
31.34142,6.63324958,6.79798744,-0.405879122,6.79781227,6.79770892,6.79775426,0,6.797644
31.351911,7.87400787,6.79357229,1.03944003,6.79339665,6.79329306,6.79333867,0,6.79322804
31.362403,6.32455532,6.78916394,-0.681622052,6.78898783,6.78888401,6.78892988,0,6.78881888
31.372894,7,6.78476323,0.463936165,6.78458664,6.78448259,6.78452873,0,6.78441736
31.383386,7.28010989,6.78036932,0.706923312,6.78019225,6.78008797,6.78013437,0,6.78002263
31.393878,7,6.77598261,0.473304752,6.77580505,6.77570054,6.77574722,0,6.7756351
31.404369,7.48331477,6.77160352,0.843629809,6.77142548,6.77132073,6.77136768,0,6.77125518
31.414861,6.78232998,6.76734079,0.12243037,6.76705267,6.7669477,6.76710451,0,6.76688204
31.425352,6.244998,6.76297625,-0.719707063,6.76268746,6.76258226,6.76273953,0,6.76251649
31.435844,7.48331477,6.75861848,0.851290955,6.75832902,6.75822357,6.75838131,0,6.7581577
31.446336,6.63324958,6.75426788,-0.34787685,6.75397774,6.75387206,6.75403026,0,6.75380608
31.456827,6.55743852,6.74992486,-0.438732649,6.74963403,6.74952812,6.74968679,0,6.74946203
31.467319,6.63324958,6.74558858,-0.335170109,6.74529707,6.74519092,6.74535006,0,6.74512473
31.47781,7.68114575,6.74125987,0.969477117,6.74096766,6.74086128,6.74102089,0,6.74079498
31.488302,6.70820393,6.73693788,-0.16951091,6.73664499,6.73653837,6.73669845,0,6.73647196
31.498794,7.07106781,6.73262303,0.581760071,6.73232944,6.73222258,6.73238315,0,6.73215607
31.509285,6.55743852,6.72831572,-0.413372952,6.72802144,6.72791434,6.72807539,0,6.72784772
31.519777,5.74456265,6.72401512,-0.989672914,6.72372014,6.7236128,6.72377433,0,6.72354607
31.530268,6.08276253,6.71972205,-0.798097436,6.71942636,6.71931879,6.7194808,0,6.71925194
31.54076,7,6.71543567,0.533445712,6.71513928,6.71503146,6.71519397,0,6.71496451
31.551252,7.21110255,6.7111564,0.707068705,6.71085929,6.71075124,6.71091423,0,6.71068418
31.561743,6.55743852,6.70688462,-0.386582589,6.70658681,6.70647851,6.706642,0,6.70641134
31.572235,5.47722558,6.70261953,-1.10697514,6.702321,6.70221246,6.70237645,0,6.70214518
31.582726,7,6.69836192,0.549215879,6.69806267,6.69795389,6.69811838,0,6.6978865
31.593218,6.4807407,6.69411097,-0.461920206,6.69381101,6.69370198,6.69386697,0,6.69363449
31.60371,6.63324958,6.6898671,-0.237944356,6.6895664,6.68945714,6.68962263,0,6.68938953
31.614201,6.92820323,6.68563068,0.492516546,6.68532926,6.68521975,6.68538575,0,6.68515203
31.624693,6.55743852,6.68140091,-0.35208293,6.68109876,6.68098901,6.68115552,0,6.68092118
31.635184,8.06225775,6.67717859,1.17689386,6.67687571,6.6767657,6.67693273,0,6.67669777
31.645676,7.81024968,6.67296291,1.06643648,6.67265928,6.67254903,6.67271658,0,6.67248099
31.656168,7.28010989,6.66875425,0.781892346,6.66844988,6.66833939,6.66850745,0,6.66827123
31.666659,6.4807407,6.66455301,-0.428733385,6.6642479,6.66413716,6.66430575,0,6.6640689
31.677151,7.07106781,6.6603584,0.640866146,6.66005254,6.65994155,6.66011066,0,6.65987317
31.687642,7.21110255,6.65617118,0.744937156,6.65586457,6.65575334,6.65592298,0,6.65568485
31.698134,6.55743852,6.65199057,-0.307493172,6.65168321,6.65157172,6.6517419,0,6.65150312
31.708626,6.8556546,6.64781696,0.455892137,6.64750884,6.6473971,6.64756781,0,6.64732839
31.719117,7,6.64365073,0.596949973,6.64334185,6.64322986,6.64340111,0,6.64316103
31.729609,7.21110255,6.63949108,0.756049912,6.63918143,6.63906919,6.63924098,0,6.63900026
31.7401,6.8556546,6.6353388,0.469378097,6.63502838,6.63491589,6.63508823,0,6.63484685
31.750592,7.54983444,6.6311931,0.958457789,6.6308819,6.63076916,6.63094205,0,6.6307
31.761084,7.48331477,6.62705435,0.925343407,6.62674238,6.62662938,6.62680282,0,6.62656011
31.771575,7.21110255,6.62292295,0.766928683,6.62261019,6.62249694,6.62267094,0,6.62242755
31.782067,6.92820323,6.61879809,0.55624198,6.61848455,6.61837104,6.6185456,0,6.61830155
31.792558,6.164414,6.61468056,-0.671019047,6.61436624,6.61425248,6.6144276,0,6.61418287
31.80305,6.8556546,6.61056957,0.495060628,6.61025446,6.61014044,6.61031612,0,6.61007072
31.813542,6.244998,6.60646551,-0.601221681,6.60614959,6.60603532,6.60621158,0,6.60596549
31.824033,6.63324958,6.60236875,0.175729431,6.60205204,6.6019375,6.60211433,0,6.60186756
31.834525,7,6.5982785,0.633815032,6.59796099,6.5978462,6.5980236,0,6.59777614
31.845016,6.4807407,6.59419555,-0.3368306,6.59387723,6.59376218,6.59394016,0,6.59369201
31.855508,5.91607978,6.5901191,-0.820998977,6.58979997,6.58968466,6.58986323,0,6.58961437
31.866,6.8556546,6.58604954,0.519235071,6.58572959,6.58561403,6.58579318,0,6.58554362
31.876491,7.48331477,6.58198725,0.949382709,6.58166648,6.58155065,6.58173039,0,6.58148013
31.886983,7.07106781,6.57793144,0.702236696,6.57760984,6.57749376,6.57767409,0,6.57742312
31.897474,6,6.57388288,-0.757550576,6.57356046,6.57344411,6.57362504,0,6.57337336
31.907966,6.4807407,6.56984079,-0.29849638,6.56951754,6.56940092,6.56958246,0,6.56933006
31.918458,6.4807407,6.56580555,-0.291658792,6.56548146,6.56536459,6.56554673,0,6.56529361
31.928949,6.92820323,6.56177754,0.60533106,6.56145261,6.56133547,6.56151823,0,6.56126438
31.939441,6.8556546,6.55775598,0.545800899,6.55743021,6.5573128,6.55749617,0,6.5572416
31.949932,6.32455532,6.55374163,-0.478734072,6.55341501,6.55329734,6.55348133,0,6.55322602
31.960424,6.08276253,6.54973372,-0.683352905,6.54940625,6.54928831,6.54947292,0,6.54921687
31.970916,6.244998,6.54573263,-0.548392769,6.54540429,6.54528609,6.54547133,0,6.54521454
31.981407,7.14142843,6.54173872,0.774396351,6.54140952,6.54129106,6.54147692,0,6.54121938
31.991899,6.8556546,6.53775123,0.563829202,6.53742117,6.53730243,6.53748893,0,6.53723064
32.00239,6,6.53377091,-0.730596273,6.53343998,6.53332097,6.53350811,0,6.53324907
32.012882,7.07106781,6.529797,0.73571109,6.52946519,6.52934591,6.5295337,0,6.52927389
32.023374,6.40312424,6.52582987,-0.350293637,6.52549718,6.52537763,6.52556606,0,6.52530549
32.033865,6.40312424,6.52186988,-0.344594902,6.5215363,6.52141649,6.52160557,0,6.52134423
32.044357,6.4807407,6.51791628,-0.192809713,6.51758181,6.51746172,6.51765146,0,6.51738935
32.054848,7.68114575,6.51396982,1.08035917,6.51363445,6.51351409,6.51370449,0,6.5134416
32.06534,7,6.51002972,0.699978772,6.50969345,6.50957282,6.50976388,0,6.50950021
32.075832,6.8556546,6.50609636,0.591234501,6.50575919,6.50563828,6.50583002,0,6.50556556
32.086323,6.78232998,6.50217012,0.529301299,6.50183203,6.50171085,6.50190326,0,6.50163801
32.096815,6.40312424,6.49825022,-0.30842501,6.49791122,6.49778976,6.49798286,0,6.4977168
32.107306,6.78232998,6.49433742,0.536649384,6.4939975,6.49387576,6.49406954,0,6.49380268
32.117798,6.32455532,6.49043096,-0.40727833,6.49009011,6.48996809,6.49016256,0,6.4898949
32.12829,6.70820393,6.4865312,0.470821338,6.48618941,6.48606713,6.48626229,0,6.48599381
32.138781,5.65685425,6.48263851,-0.908726725,6.48229579,6.48217322,6.48236909,0,6.48209978
32.149273,5.65685425,6.47875214,-0.906585842,6.47840847,6.47828563,6.4784822,0,6.47821207
32.159764,6.4807407,6.47487282,0.0766020819,6.4745282,6.47440508,6.47460236,0,6.4743314
32.170256,6.4807407,6.47099981,0.0986959607,6.47065424,6.47053083,6.47072883,0,6.47045704
32.180748,6.55743852,6.46713346,0.30050801,6.46678693,6.46666324,6.46686196,0,6.46658933
32.191239,5.91607978,6.46327414,-0.739725868,6.46292665,6.46280268,6.46300212,0,6.46272864
32.201731,6.4807407,6.45942111,0.146012285,6.45907264,6.45894839,6.45914857,0,6.45887424
32.212222,6.4807407,6.45557509,0.158636714,6.45522565,6.45510111,6.45530202,0,6.45502684
32.222714,7,6.45173534,0.740448956,6.45138491,6.45126009,6.45146175,0,6.4511857
32.233206,6.55743852,6.44790227,0.330962611,6.44755086,6.4474257,6.44762811,0,6.44735119
32.243697,6.78232998,6.44407615,0.581595939,6.44372373,6.44359829,6.44380145,0,6.44352366
32.254189,6.244998,6.44025627,-0.441880381,6.43990285,6.43977713,6.43998105,0,6.43970237
32.26468,6.55743852,6.43644337,0.347843584,6.43608894,6.43596293,6.43616761,0,6.43588805
32.275172,6.55743852,6.4326367,0.353273017,6.43228126,6.43215496,6.43236041,0,6.43207996
32.285664,6.32455532,6.42883663,-0.322926164,6.42848017,6.42835358,6.42855981,0,6.42827846
32.296155,6,6.4250435,-0.651953606,6.42468602,6.42455913,6.42476615,0,6.42448389
32.306647,6.63324958,6.4212566,0.460426956,6.42089808,6.4207709,6.42097871,0,6.42069554
32.317138,5.74456265,6.41747663,-0.820313342,6.41711706,6.4169896,6.4171982,0,6.41691411
32.32763,5.74456265,6.41370286,-0.818009908,6.41334224,6.41321449,6.4134239,0,6.41313888
32.338122,7.28010989,6.40993564,0.932831306,6.40957398,6.40944593,6.40965615,0,6.4093702
32.348613,6.92820323,6.40617534,0.722514975,6.40581261,6.40568427,6.40589531,0,6.40560842
32.359105,5.47722558,6.40242122,-0.961870909,6.40205743,6.40192879,6.40214065,0,6.40185281
32.369596,7.48331477,6.39867399,1.04146089,6.39830912,6.39818019,6.39839288,0,6.39810409
32.380088,7.07106781,6.39493294,0.822274209,6.39456698,6.39443775,6.39465128,0,6.39436153
32.39058,6.244998,6.3911984,-0.38236161,6.39083136,6.39070183,6.3909162,0,6.39062548
32.401071,6.70820393,6.38747073,0.566333119,6.38710259,6.38697277,6.38718798,0,6.3868963
32.411563,7.34846923,6.38374921,0.982201617,6.38337997,6.38324984,6.38346592,0,6.38317325
32.422054,6.78232998,6.38003454,0.63426764,6.37966419,6.37953376,6.3797507,0,6.37945705
32.432546,7.21110255,6.37632601,0.913661062,6.37595453,6.37582381,6.37604162,0,6.37574697
32.443038,5.29150262,6.37262397,-1.03976985,6.37225136,6.37212034,6.37233902,0,6.37204337
32.453529,6.244998,6.36892875,-0.352037992,6.368555,6.36842368,6.36864325,0,6.36834659
32.464021,6.78232998,6.36523964,0.645825317,6.36486476,6.36473313,6.3649536,0,6.36465591
32.474512,6.32455532,6.36155735,-0.192359117,6.36118131,6.36104938,6.36127075,0,6.36097204
32.485004,6.70820393,6.35788116,0.591880708,6.35750396,6.35737172,6.35759401,0,6.35729426
32.495496,6.32455532,6.35421142,-0.172209453,6.35383305,6.35370051,6.35392371,0,6.35362291
32.505987,6.164414,6.35054846,-0.431433027,6.35016891,6.35003607,6.35026019,0,6.34995835
32.516479,5.91607978,6.34689158,-0.656362553,6.34651085,6.3463777,6.34660276,0,6.34629985
32.52697,6,6.34324148,-0.585868143,6.34285955,6.34272609,6.34295209,0,6.34264812
32.537462,7.54983444,6.33959745,1.10010772,6.33921432,6.33908054,6.3393075,0,6.33900245
32.547954,6.78232998,6.33595982,0.668109395,6.33557548,6.33544139,6.33566931,0,6.33536317
32.558445,6.4807407,6.33232894,0.385242468,6.33194337,6.33180898,6.33203786,0,6.33173063
32.568937,5.65685425,6.32870411,-0.819664479,6.32831731,6.32818261,6.32841247,0,6.32810413
32.579428,6.63324958,6.32508601,0.555124828,6.32469797,6.32456295,6.3247938,0,6.32448435
32.58992,7.21110255,6.32147394,0.943201258,6.32108465,6.32094932,6.32118116,0,6.32087059
32.600412,6.78232998,6.31786824,0.6815143,6.3174777,6.31734205,6.3175749,0,6.3172632
32.610903,6,6.31426925,-0.560597229,6.31387744,6.31374148,6.31397534,0,6.31366249
32.621395,6.32455532,6.31067779,0.117802948,6.31028318,6.31014691,6.3103833,0,6.3100678
32.631886,6.40312424,6.3070915,0.309891488,6.30669561,6.30655902,6.30679644,0,6.30647978
32.642378,5.91607978,6.30351122,-0.622439906,6.30311402,6.30297712,6.30321559,0,6.30289775
32.65287,5.65685425,6.29993727,-0.801924573,6.29953876,6.29940154,6.29964106,0,6.29932204
32.663361,6.63324958,6.29636999,0.580413295,6.29597016,6.29583261,6.2960732,0,6.29575298
32.673853,5.38516481,6.29280868,-0.952703457,6.29240752,6.29226965,6.29251132,0,6.2921899
32.684344,6.32455532,6.28925403,0.187886377,6.28885152,6.28871333,6.28895609,0,6.28863345
32.694836,6.08276253,6.28570534,-0.450491743,6.28530148,6.28516297,6.28540682,0,6.28508295
32.705328,6.8556546,6.28216295,0.757292316,6.28175772,6.28161889,6.28186384,0,6.28153874
32.715819,6.244998,6.27862718,-0.183382619,6.27822057,6.27808142,6.27832749,0,6.27800114
32.726311,6.55743852,6.27509736,0.531357848,6.27468936,6.27454988,6.27479709,0,6.27446948
32.736802,6.63324958,6.27157415,0.601394571,6.27116475,6.27102494,6.27127329,0,6.27094441
32.747294,6.55743852,6.26805687,0.537942055,6.26764606,6.26750592,6.26775542,0,6.26742526
32.757786,5.29150262,6.26454585,-0.986429535,6.26413361,6.26399315,6.26424381,0,6.26391235
32.768277,6.4807407,6.26104141,0.468720903,6.26062773,6.26048694,6.26073879,0,6.26040602
32.778769,6.08276253,6.25754289,-0.418067407,6.25712776,6.25698664,6.25723967,0,6.25690558
32.78926,6.63324958,6.25405093,0.615791076,6.25363434,6.25349289,6.25374712,0,6.2534117
32.799752,6.55743852,6.25056487,0.553961779,6.2501468,6.25000502,6.25026047,0,6.2499237
32.810244,6.78232998,6.24708503,0.731604367,6.24666548,6.24652336,6.24678003,0,6.24644191
32.820735,6,6.24361174,-0.493570402,6.24319068,6.24304823,6.24330614,0,6.24296665
32.831227,6.55743852,6.24014432,0.563288735,6.23972175,6.23957897,6.23983813,0,6.23949725
32.841718,6.244998,6.23668344,0.0911842145,6.23625933,6.23611621,6.23637664,0,6.23603436
32.85221,5.65685425,6.23322841,-0.7591931,6.23280276,6.23265931,6.23292101,0,6.23257732
32.862702,7.07106781,6.22977957,0.917217663,6.22935236,6.22920857,6.22947157,0,6.22912645
32.873193,6.78232998,6.22633723,0.745649213,6.22590845,6.22576432,6.22602863,0,6.22568207
32.883685,6.63324958,6.22290074,0.640584764,6.22247037,6.2223259,6.22259153,0,6.22224352
32.894176,6.164414,6.21947073,-0.234641709,6.21903876,6.21889395,6.21916092,0,6.21881144
32.904668,6.32455532,6.21604656,0.329406685,6.21561296,6.21546782,6.21573613,0,6.21538517
32.91516,5.74456265,6.21262853,-0.684153403,6.2121933,6.21204781,6.21231749,0,6.21196503
32.925651,6.4807407,6.20921696,0.521079398,6.20878008,6.20863425,6.20890531,0,6.20855133
32.936143,6.08276253,6.2058112,-0.350782938,6.20537266,6.20522648,6.20549894,0,6.20514343
32.946634,6.164414,6.20241189,-0.194930466,6.20197167,6.20182514,6.20209902,0,6.20174196
32.957126,5.83095189,6.19901837,-0.606684825,6.19857645,6.19842958,6.19870488,0,6.19834626
32.967618,6.164414,6.19563096,-0.176683225,6.19518733,6.19504011,6.19531686,0,6.19495665
32.978109,6.40312424,6.19224998,0.45921047,6.19180461,6.19165705,6.19193526,0,6.19157346
32.988601,5.38516481,6.18887477,-0.896498726,6.18842765,6.18827974,6.18855943,0,6.18819601
32.999092,7.21110255,6.18550597,1.01271742,6.18505708,6.18490882,6.18519,0,6.18482495
33.009584,5.65685425,6.18214293,-0.724768017,6.18169225,6.18154363,6.18182634,0,6.18145964
33.020076,6.63324958,6.17878596,0.674139172,6.17833348,6.17818451,6.17846874,0,6.17810037
33.030567,6.78232998,6.17543537,0.779034409,6.17498107,6.17483174,6.17511753,0,6.17474748
33.041059,6.63324958,6.17209053,0.679086927,6.17163438,6.1714847,6.17177206,0,6.17140029
33.05155,6.40312424,6.16875205,0.484120016,6.16829404,6.168144,6.16843295,0,6.16805946
33.062042,6.244998,6.16541929,0.282096978,6.1649594,6.16480901,6.16509957,0,6.16472433
33.072534,6.32455532,6.16209258,0.403066675,6.16163078,6.16148003,6.16177222,0,6.16139521
33.083025,6.40312424,6.1587722,0.49431977,6.15830848,6.15815737,6.15845121,0,6.15807242
33.093517,6.92820323,6.15545753,0.879059553,6.15499187,6.1548404,6.15513591,0,6.15475531
33.104008,6.08276253,6.15214919,-0.263413482,6.15168156,6.15152973,6.15182693,0,6.1514445
33.1145,6.8556546,6.14884654,0.840718774,6.14837692,6.14822473,6.14852364,0,6.14813937
33.124992,5.83095189,6.14554989,-0.560890361,6.14507826,6.14492571,6.14522635,0,6.1448402
33.135483,6.78232998,6.14225955,0.800044022,6.14178588,6.14163296,6.14193536,0,6.14154732
33.145975,5.91607978,6.13897487,-0.472117663,6.13849915,6.13834587,6.13865005,0,6.13826008
33.156466,6.63324958,6.13569648,0.705374437,6.13521868,6.13506503,6.13537102,0,6.13497911
33.166958,6.244998,6.13242375,0.335520856,6.13194385,6.13178983,6.13209764,0,6.13170377
33.17745,5.56776436,6.12915699,-0.749261385,6.12867495,6.12852056,6.12883022,0,6.12843436
33.187941,5.19615242,6.12589648,-0.964232368,6.12541229,6.12525754,6.12556907,0,6.1251712
33.198433,6.164414,6.12264162,0.20438294,6.12215524,6.12200012,6.12231356,0,6.12191364
33.208924,6.78232998,6.119393,0.814209422,6.11890442,6.11874892,6.11906429,0,6.1186623
33.219416,7.34846923,6.11615001,1.11009874,6.11565919,6.11550332,6.11582064,0,6.11541656
33.229908,5.38516481,6.11291337,-0.853081805,6.1124203,6.11226362,6.11258292,0,6.11217672
33.240399,6,6.10968253,-0.331183532,6.10918717,6.10903012,6.10935142,0,6.10894307
33.250891,5.65685425,6.10645729,-0.670524455,6.10595962,6.10580218,6.10612552,0,6.105715
33.261382,5,6.10323827,-1.0503515,6.10273824,6.10258043,6.10290583,0,6.10249311
33.271874,5.83095189,6.10002483,-0.518722404,6.09952243,6.09936424,6.09969173,0,6.09927677
33.282366,6.244998,6.09681728,0.38494249,6.09631248,6.0961539,6.09648352,0,6.0960663
33.292857,5.65685425,6.09361592,-0.660879464,6.09310868,6.09294972,6.09328149,0,6.09286198
33.303349,6.08276253,6.09042012,-0.0875076761,6.08991042,6.08975108,6.09008503,0,6.08966319
33.31384,6.08276253,6.0872305,-0.0668428954,6.0867183,6.08655858,6.08689474,0,6.08647054
33.324332,6.164414,6.08404644,0.283491736,6.0835317,6.08337159,6.08371001,0,6.08328342
33.334824,5.19615242,6.08086823,-0.940593326,6.08035092,6.08019043,6.08053112,0,6.08010211
33.345315,6.244998,6.07769617,0.409025467,6.07717626,6.07701538,6.07735839,0,6.07692692
33.355807,6.55743852,6.07452964,0.694916458,6.0740071,6.07384583,6.07419119,0,6.07375722
33.366298,5.91607978,6.07136925,-0.394067843,6.07084404,6.07068238,6.07103012,0,6.07059363
33.37679,6.164414,6.06821438,0.310160641,6.06768646,6.06752441,6.06787457,0,6.06743552
33.387282,6.244998,6.06506533,0.424184711,6.06453466,6.06437222,6.06472484,0,6.06428318
33.397773,6.164414,6.06192239,0.320143114,6.06138894,6.0612261,6.06158122,0,6.06113692
33.408265,6.244998,6.05878495,0.431524095,6.05824868,6.05808545,6.0584431,0,6.05799612
33.418756,6.08276253,6.05565361,0.164647856,6.05511448,6.05495085,6.05531107,0,6.05486138
33.429248,6,6.05252777,-0.229189365,6.05198572,6.0518217,6.05218454,0,6.05173208
33.43974,6.55743852,6.0494077,0.712762811,6.04886271,6.04869829,6.04906378,0,6.04860853
33.450231,6.70820393,6.04629371,0.813578653,6.04574573,6.0455809,6.0459491,0,6.045491
33.460723,7.68114575,6.04318519,1.27982833,6.04263418,6.04246895,6.04283989,0,6.0423789
33.471214,6.164414,6.04008273,0.352606406,6.03952864,6.03936301,6.03973673,0,6.03927281
33.481706,5.65685425,6.03698572,-0.61654803,6.03642851,6.03626248,6.03663903,0,6.03617213
33.492198,6.08276253,6.03389447,0.221061213,6.03333409,6.03316765,6.03354708,0,6.03307716
33.502689,5.83095189,6.03080925,-0.447054089,6.03024565,6.0300788,6.03046116,0,6.02998817
33.513181,6,6.02772948,-0.166521704,6.0271626,6.02699535,6.02738069,0,6.02690457
33.523672,6.63324958,6.02465572,0.780124257,6.02408553,6.02391787,6.02430623,0,6.02382693
33.534164,5.29150262,6.0215874,-0.854449985,6.02101383,6.02084576,6.0212372,0,6.02075468
33.544656,5.91607978,6.01852479,-0.320070315,6.0179478,6.01777931,6.01817388,0,6.01768809
33.555147,6.8556546,6.01546818,0.916616834,6.01488771,6.01471881,6.01511657,0,6.01462744
33.565639,6.8556546,6.01241698,0.918279706,6.01183297,6.01166366,6.01206466,0,6.01157214
33.57613,5.29150262,6.00937177,-0.84727159,6.00878417,6.00861444,6.00901873,0,6.00852277
33.586622,6.63324958,6.00633196,0.791781299,6.0057407,6.00557056,6.0059782,0,6.00547874
33.597114,6.55743852,6.00329783,0.744406272,6.00270286,6.0025323,6.00294336,6.00244033,6.00244033
33.607605,5.19615242,6.0003754,-0.896784799,5.99967092,5.99949994,5.99991447,5.99951357,5.99940782
33.618097,6.244998,5.99735279,0.49763964,5.9966443,5.99647289,5.99689097,5.99648655,5.99638063
33.628588,6.32455532,5.99433613,0.574647016,5.99362357,5.99345174,5.99387342,5.99346542,5.99335932
33.63908,6.63324958,5.99132484,0.801202061,5.99060813,5.99043588,5.99086123,5.99044958,5.99034331
33.649572,6.55743852,5.9883192,0.754399975,5.98759829,5.98742561,5.9878547,5.98743933,5.98733289
33.660063,7,5.9853195,1.00731351,5.9845943,5.98442119,5.98485409,5.98443494,5.98432833
33.670555,6.244998,5.98232514,0.512516198,5.98159559,5.98142206,5.98185884,5.98143583,5.98132904
33.681046,5.91607978,5.97933671,-0.251509302,5.97860273,5.97842877,5.9788695,5.97844256,5.9783356
33.691538,5.83095189,5.97635362,-0.381315784,5.97561513,5.97544074,5.9758855,5.97545456,5.97534742
33.70203,5.65685425,5.97337615,-0.562602795,5.97263308,5.97245826,5.97290713,5.9724721,5.97236478
33.712521,5.65685425,5.97040459,-0.559955657,5.96965685,5.96948159,5.96993465,5.96949545,5.96938797
33.723013,6.08276253,5.96743835,0.339594146,5.96668586,5.96651016,5.96696749,5.96652405,5.96641639
33.733504,5.29150262,5.96447799,-0.820350761,5.96372067,5.96354454,5.96400623,5.96355845,5.96345061
33.743996,7.34846923,5.96152296,1.17768683,5.96076072,5.96058414,5.96105027,5.96059808,5.96049006
33.754488,6.92820323,5.95857352,0.984697778,5.95780626,5.95762925,5.95809991,5.95764321,5.95753502
33.764979,6.32455532,5.95562994,0.607392276,5.95485758,5.95468013,5.95515541,5.95469411,5.95458575
33.775471,6.4807407,5.95269167,0.726669818,5.95191411,5.95173622,5.95221622,5.95175022,5.95164168
33.785962,7.34846923,5.94975926,1.18267069,5.9489764,5.94879806,5.94928288,5.94881209,5.94870337
33.796454,6.4807407,5.94683214,0.730690464,5.94604388,5.9458651,5.94635483,5.94587915,5.94577025
33.806946,6.40312424,5.9439106,0.67765304,5.94311683,5.94293759,5.94343235,5.94295167,5.9428426
33.817437,5.38516481,5.94099489,-0.745540126,5.94019551,5.94001583,5.94051571,5.94002992,5.93992067
33.827929,5.83095189,5.93808446,-0.327311114,5.93727936,5.93709922,5.93760435,5.93711334,5.93700392
33.83842,5.38516481,5.93517986,-0.74163,5.93436892,5.93418834,5.93469881,5.93420248,5.93409288
33.848912,6,5.93228054,0.260229629,5.93146364,5.93128261,5.93179855,5.93129677,5.93118699
33.859404,5.56776436,5.92938676,-0.60135048,5.92856379,5.9283823,5.92890383,5.92839648,5.92828653
33.869895,5.74456265,5.9264988,-0.426539745,5.92566963,5.92548768,5.92601492,5.92550189,5.92539175
33.880387,6.4807407,5.9236161,0.746407796,5.9227806,5.92259819,5.92313127,5.92261242,5.92250211
33.890878,5.29150262,5.92073921,-0.793244342,5.91989724,5.91971438,5.92025343,5.91972863,5.91961814
33.90137,7.34846923,5.91786757,1.19607761,5.91701901,5.91683568,5.91738084,5.91684996,5.91673928
33.911862,6.63324958,5.91500146,0.847495204,5.91414615,5.91396236,5.91451377,5.91397667,5.91386581
33.922353,6.78232998,5.91214114,0.932839128,5.91127895,5.91109469,5.9116525,5.91110902,5.91099799
33.932845,5.91607978,5.90928607,0.0824239536,5.90841684,5.90823212,5.90879647,5.90824647,5.90813525
33.943336,6.63324958,5.90643679,0.852533159,5.90556037,5.90537518,5.90594623,5.90538955,5.90527815
33.953828,6.78232998,5.90359275,0.937409851,5.90270897,5.90252331,5.90310122,5.90253771,5.90242613
33.96432,6,5.90075423,0.315032974,5.89986292,5.89967679,5.90026173,5.89969122,5.89957945
33.974811,6.164414,5.89792148,0.516229143,5.89702248,5.89683588,5.89742801,5.89685032,5.89673838
33.985303,5,5.89509396,-0.946094055,5.8941871,5.89400002,5.89459952,5.89401449,5.89390236
33.995794,5.65685425,5.89227222,-0.485198899,5.8913573,5.89116975,5.8917768,5.89118424,5.89107193
34.006286,6.4807407,5.88945571,0.768950573,5.88853255,5.88834452,5.88895932,5.88835904,5.88824655
34.016778,6.70820393,5.88664471,0.906399041,5.8857131,5.88552459,5.88614734,5.88553913,5.88542646
34.027269,5.83095189,5.88383947,-0.229972996,5.88289922,5.88271023,5.88334112,5.88272479,5.88261194
34.037761,6.32455532,5.88103947,0.665969857,5.88009036,5.87990089,5.88054013,5.87991547,5.87980243
34.048252,6.32455532,5.87824523,0.668064435,5.87728705,5.87709709,5.8777449,5.8771117,5.87699848
34.058744,6.55743852,5.87545623,0.825822196,5.87448874,5.87429829,5.87495491,5.87431293,5.87419952
34.069236,5.56776436,5.87267272,-0.552185075,5.8716957,5.87150476,5.87217041,5.87151942,5.87140583
34.079727,6.4807407,5.86989498,0.781566196,5.86890818,5.86871675,5.86939167,5.86873144,5.86861766
34.090219,5.56776436,5.86712248,-0.547136284,5.86612564,5.86593373,5.86661817,5.86594843,5.86583447
34.10071,6.32455532,5.86435574,0.678380116,5.86334861,5.8631562,5.86385044,5.86317093,5.86305679
34.111202,5.74456265,5.86159424,-0.342098812,5.86057655,5.86038364,5.86108794,5.8603984,5.86028407
34.121694,6.4807407,5.85883826,0.788607915,5.85780971,5.85761631,5.85833094,5.85763109,5.85751657
34.132185,5.65685425,5.85608804,-0.446356125,5.85504835,5.85485445,5.85557972,5.85486925,5.85475455
34.142677,5.56776436,5.85334308,-0.534395652,5.85229194,5.85209754,5.85283375,5.85211237,5.85199748
34.153168,5.19615242,5.85060389,-0.808981748,5.84954099,5.84934609,5.85009355,5.84936094,5.84924586
34.16366,6.40312424,5.84786997,0.745153856,5.84679497,5.84659957,5.84735861,5.84661444,5.84649918
34.174152,5.38516481,5.84514157,-0.67821587,5.84405414,5.84385823,5.84462919,5.84387313,5.84375767
34.184643,5.47722558,5.84241897,-0.604312333,5.84131874,5.84112232,5.84190557,5.84113725,5.84102161
34.195135,6.92820323,5.83970165,1.04331279,5.83858826,5.83839133,5.83918723,5.83840628,5.83829045
34.205626,5.74456265,5.83699014,-0.304018897,5.83586319,5.83566575,5.83647469,5.83568072,5.83556471
34.216118,6.244998,5.83428392,0.640869783,5.83314302,5.83294506,5.83376744,5.83296006,5.83284386
34.22661,4.79583152,5.83158327,-1.01771889,5.83042799,5.83022952,5.83106576,5.83024454,5.83012815
34.237101,5.65685425,5.82888845,-0.414770059,5.82771836,5.82751937,5.8283699,5.82753442,5.82741783
34.247593,5.19615242,5.82619896,-0.79375471,5.8250136,5.82481409,5.82567938,5.82482916,5.82471239
34.258084,6.55743852,5.82351533,0.856693175,5.82231422,5.82211419,5.8229947,5.82212928,5.82201232
34.268576,6.63324958,5.82083705,0.901339298,5.81961969,5.81941914,5.82031538,5.81943426,5.8193171
34.279068,6.164414,5.8181644,0.588429778,5.81693027,5.81672919,5.81764168,5.81674433,5.81662699
34.289559,5.83095189,5.81549764,0.12431513,5.8142462,5.8140446,5.81497388,5.81405976,5.81394223
34.300051,6.63324958,5.81283629,0.905766685,5.81156697,5.81136483,5.81231148,5.81138002,5.8112623
34.310542,6.4807407,5.81018087,0.818877174,5.80889307,5.8086904,5.809655,5.80870562,5.8085877
34.321034,6.244998,5.8075309,0.661412959,5.80622399,5.80602079,5.80700397,5.80603603,5.80591792
34.331526,6.244998,5.80488664,0.663408893,5.80355997,5.80335624,5.80435865,5.8033715,5.8032532
34.342017,5.83095189,5.80224838,0.16942113,5.80090127,5.800697,5.80171932,5.80071229,5.8005938
34.352509,6.32455532,5.79961563,0.724527219,5.79824736,5.79804255,5.79908551,5.79805786,5.79793918
34.363,6.164414,5.79698893,0.606155983,5.79559875,5.79539339,5.79645774,5.79540873,5.79528986
34.373492,5,5.7943678,-0.891273135,5.79295491,5.79274902,5.79383554,5.79276438,5.79264531
34.383984,4.79583152,5.79175253,-0.99795842,5.7903161,5.79010966,5.7912192,5.79012505,5.79000579
34.394475,5.91607978,5.7891434,0.356281323,5.78768256,5.78747558,5.78860899,5.78749099,5.78737153
34.404967,5.83095189,5.78653995,0.210741412,5.78505378,5.78484625,5.78600446,5.78486168,5.78474203
34.415458,5.83095189,5.78394272,0.216815995,5.78243025,5.78222216,5.78340614,5.78223763,5.78211778
34.42595,6.63324958,5.78135125,0.922983386,5.77981147,5.77960282,5.78081359,5.77961831,5.77949827
34.436442,5.38516481,5.77876584,-0.62737631,5.77719767,5.77698846,5.77822709,5.77700398,5.77688374
34.446933,6.32455532,5.77618679,0.740519096,5.77458909,5.77437933,5.77564695,5.77439487,5.77427443
34.457425,6.08276253,5.77361366,0.556011578,5.77198524,5.77177492,5.77307272,5.77179048,5.77166985
34.467916,6.4807407,5.77104699,0.842433207,5.76938659,5.76917571,5.77050495,5.76919129,5.76907047
34.478408,5.83095189,5.76848637,0.249931047,5.76679265,5.7665812,5.76794323,5.76659682,5.76647579
34.4889,5.47722558,5.7659321,-0.537314178,5.76420366,5.76399164,5.76538786,5.76400728,5.76388606
34.499391,6.164414,5.76338451,0.633268895,5.76161985,5.76140726,5.76283916,5.76142292,5.76130151
34.509883,5.65685425,5.76084319,-0.322473159,5.75904072,5.75882757,5.76029673,5.75884325,5.75872164
34.520374,5,5.75830871,-0.870809225,5.75646676,5.75625303,5.75776113,5.75626874,5.75614693
34.530866,5.56776436,5.75578068,-0.433608482,5.75389747,5.75368316,5.75523199,5.7536989,5.75357689
34.541358,5.74456265,5.75325945,-0.0932566422,5.75133309,5.7511182,5.75270964,5.75113396,5.75101175
34.551849,6,5.75074537,0.499254078,5.74877384,5.74855837,5.75019443,5.74857416,5.74845175
34.562341,5.74456265,5.74823807,-0.0606252892,5.74621924,5.74600319,5.74768601,5.746019,5.7458964
34.572832,5.19615242,5.74573818,-0.741340513,5.74366977,5.74345313,5.74518499,5.74346897,5.74334616
34.583324,5.65685425,5.74324535,-0.29392363,5.74112493,5.7409077,5.74269103,5.74092356,5.74080056
34.593816,6,5.74076074,0.509155439,5.73858495,5.73836713,5.74020529,5.73838302,5.73825982
34.604307,6.164414,5.73828324,0.652786923,5.73605007,5.73583166,5.73772664,5.73584757,5.73572417
34.614799,5.83095189,5.73581331,0.308445433,5.7335198,5.7333008,5.73525558,5.73331673,5.73319313
34.62529,5.65685425,5.73335163,-0.276581605,5.73099461,5.73077501,5.73279276,5.73079097,5.73066717
34.635782,6.4807407,5.73089796,0.865934605,5.72847402,5.72825382,5.73033793,5.72826981,5.7281458
34.646274,5.74456265,5.72845276,0.12692472,5.72595825,5.72573745,5.72789159,5.72575346,5.72562925
34.656765,5.38516481,5.72601654,-0.583825087,5.72344754,5.72322613,5.72545421,5.72324217,5.72311776
34.667257,5.74456265,5.72358912,0.144822405,5.7209414,5.72071938,5.72302563,5.72073545,5.72061083
34.677748,6.32455532,5.72117128,0.776777988,5.7184403,5.71821767,5.72060663,5.71823376,5.71810894
34.68824,5.65685425,5.71876291,-0.248814511,5.71594376,5.71572051,5.7181971,5.71573663,5.71561161
34.698732,5.29150262,5.71636463,-0.6518144,5.713452,5.71322814,5.71579766,5.71324428,5.71311906
34.709223,5.47722558,5.7139771,-0.486571195,5.71096526,5.71074078,5.71340896,5.71075694,5.71063152
34.719715,6.08276253,5.71160034,0.609230822,5.70848305,5.70825795,5.71103103,5.70827414,5.70814851
34.730206,5.65685425,5.70931959,-0.229053136,5.70609016,5.70578011,5.70866482,5.70579633,5.70567049
34.740698,6.63324958,5.70696655,0.962435988,5.70361759,5.70330679,5.70631049,5.70332303,5.70319699
34.75119,5.56776436,5.70462625,-0.369948499,5.70114976,5.70083822,5.7039689,5.70085448,5.70072824
34.761681,7,5.70229965,1.13916652,5.6986869,5.69837461,5.70164099,5.6983909,5.69826445
34.772173,5.19615242,5.69998709,-0.709813118,5.69622855,5.6959155,5.69932713,5.69593182,5.69580516
34.782664,5.74456265,5.69768991,0.216501113,5.69377514,5.69346134,5.69702865,5.69347768,5.69335082
34.793156,6.08276253,5.69540871,0.622377556,5.69132622,5.69101166,5.69474614,5.69102803,5.69090095
34.803648,6.63324958,5.69314482,0.969589995,5.688882,5.68856668,5.69248094,5.68858307,5.68845579
34.814139,5.65685425,5.69089975,-0.184514233,5.68644272,5.68612663,5.69023456,5.68614305,5.68601556
34.824631,5.83095189,5.68867452,0.377196731,5.68400789,5.68369103,5.68800802,5.68370748,5.68357979
34.835122,5.29150262,5.6864712,-0.628465253,5.68157798,5.68126035,5.68580338,5.68127682,5.68114892
34.845614,6,5.68429123,0.561879678,5.67915251,5.67883411,5.68362209,5.6788506,5.6787225
34.856106,5.29150262,5.68213696,-0.625007469,5.67673171,5.67641253,5.6814665,5.67642905,5.67630073
34.866597,5.19615242,5.68001103,-0.695599459,5.6743158,5.67399583,5.67933925,5.67401238,5.67388386
34.877089,6,5.67791584,0.567524592,5.6719043,5.67158356,5.67724274,5.67160013,5.6714714
34.88758,6.244998,5.67585501,0.754415662,5.66949769,5.66917615,5.67518059,5.66919275,5.66906381
34.898072,5.09901951,5.67383188,-0.758163814,5.66709547,5.66677315,5.67315614,5.66678977,5.66666062
34.908564,5.56776436,5.671851,-0.322624605,5.66469788,5.66437477,5.67117394,5.66439142,5.66426205
34.919055,5.74456265,5.6699176,0.27321245,5.66230515,5.66198123,5.66923922,5.66199791,5.66186833
34.929547,5.56776436,5.66803729,-0.316659004,5.65991679,5.65959208,5.66735759,5.65960878,5.65947899
34.940038,5.29150262,5.66621746,-0.612139555,5.65753326,5.65720775,5.66553644,5.65722448,5.65709448
34.95053,5.56776436,5.66446622,-0.310969216,5.65515411,5.65482778,5.66378389,5.65484454,5.65471433
34.961022,5.65685425,5.662794,-0.077069746,5.65277954,5.6524524,5.66211037,5.65246919,5.65233876
34.971513,6.4807407,5.66121362,0.905277347,5.65040977,5.65008183,5.66052869,5.65009864,5.649968
34.982005,5,5.65974085,-0.81224433,5.64804435,5.64771559,5.65905463,5.64773243,5.64760158
34.992496,5.83095189,5.65839676,0.415397558,5.64568372,5.64535414,5.65770926,5.645371,5.64523994
35.002988,6.164414,5.65720877,0.712183424,5.64332742,5.64299702,5.65652001,5.64301391,5.64288263
35.01348,4.79583152,5.65621453,-0.927568329,5.64097567,5.64064444,5.65552452,5.64066136,5.64052987
35.023971,5.56776436,5.65546557,-0.296143894,5.63862868,5.63829663,5.65477434,5.63831357,5.63818186
35.034463,4.69041576,5.65503258,-0.982149082,5.63628601,5.63595311,5.65434016,5.63597008,5.63583816
35.044954,6.164414,5.65501209,0.713723975,5.63394807,5.63361435,5.65431853,5.63363134,5.63349921
35.055446,6.4807407,5.65553309,0.908409386,5.63161443,5.63127987,5.65483845,5.63129689,5.63116454
35.065938,5.38516481,5.65676299,-0.521150821,5.6292853,5.62894989,5.65606736,5.62896694,5.62883437
35.076429,6.32455532,5.65891075,0.815870435,5.6269609,5.62662464,5.65821424,5.62664171,5.62650893
35.086921,5.56776436,5.66222652,-0.307346966,5.62464076,5.62430365,5.66152927,5.62432075,5.62418775
35.097412,5.83095189,5.6669909,0.404920974,5.62232533,5.62198736,5.66629308,5.62200449,5.62187127
35.107904,6,5.67350028,0.571401539,5.62001415,5.61967533,5.67280211,5.61969248,5.61955905
35.118396,5.56776436,5.6820353,-0.338039845,5.61770744,5.61736776,5.68133701,5.61738494,5.61725129
35.128887,6.08276253,5.69282139,0.624452673,5.61540542,5.61506487,5.69212326,5.61508207,5.6149482
35.139379,5.56776436,5.70597777,-0.371770632,5.61310762,5.6127662,5.70528009,5.61278343,5.61264935
35.14987,6.32455532,5.72142976,0.776611587,5.61081449,5.6104722,5.72073281,5.61048946,5.61035515
35.160362,5.74456265,5.73880008,0.0759115564,5.60852558,5.60818241,5.73810407,5.6081997,5.60806517
35.170854,5.83095189,5.75722455,0.271527791,5.6062411,5.60589705,5.75652961,5.60591436,5.60577962
35.181345,5.83095189,5.77515442,0.236214893,5.60396126,5.60361633,5.77446046,5.60363366,5.6034987
35.191837,5.65685425,5.79026954,-0.365260581,5.60168561,5.60133979,5.78957623,5.60135715,5.60122197
35.202328,5.91607978,5.79976572,0.341048483,5.59941459,5.59906787,5.79907237,5.59908526,5.59894986
35.21282,5.38516481,5.8012495,-0.645046272,5.59714775,5.59680014,5.80055516,5.59681755,5.59668193
35.223312,6.32455532,5.79386142,0.728487409,5.59488529,5.59453678,5.79316501,5.59455422,5.59441838
35.233803,6,5.77876326,0.470358101,5.59262744,5.59227802,5.77806385,5.59229549,5.59215942
35.244295,5.19615242,5.75849662,-0.749896126,5.59037374,5.59002342,5.75779356,5.59004091,5.58990462
35.254786,5.74456265,5.73584277,0.0933802578,5.58812463,5.58777339,5.73513573,5.58779091,5.5876544
35.265278,5.83095189,5.7130023,0.343437899,5.58587966,5.5855275,5.71229122,5.58554505,5.58540832
35.27577,5.91607978,5.69139759,0.47400653,5.58363904,5.58328596,5.69068259,5.58330354,5.58316658
35.286261,4.24264069,5.67179668,-1.19547313,5.58140297,5.58104897,5.67107797,5.58106657,5.58092939
35.296753,6.08276253,5.65451415,0.654406895,5.57917103,5.5788161,5.653792,5.57883373,5.57869632
35.307244,5.38516481,5.63958772,-0.504403526,5.57694363,5.57658776,5.63886242,5.57660542,5.57646779
35.317736,5.38516481,5.62687649,-0.491641827,5.57472034,5.57436353,5.62614829,5.57438121,5.57424336
35.328228,5.09901951,5.61614438,-0.719113943,5.57250135,5.5721436,5.61541352,5.57216131,5.57202323
35.338719,5.56776436,5.60710765,-0.198351414,5.57028717,5.56992819,5.60637406,5.56994592,5.56980762
35.349211,5.65685425,5.59947009,0.239549912,5.56807679,5.56771685,5.59873423,5.56773461,5.56759608
35.359702,5.47722558,5.5929566,-0.340192633,5.5658709,5.56551001,5.5922186,5.5655278,5.56538904
35.370194,6.40312424,5.58732278,0.903217279,5.56366909,5.56330723,5.58658275,5.56332505,5.56318606
35.380686,4.69041576,5.58236698,-0.944431693,5.56147154,5.56110872,5.581625,5.56112657,5.56098736
35.391177,5.56776436,5.57792885,-0.100819061,5.55927847,5.55891468,5.57718497,5.55893255,5.55879311
35.401669,6.78232998,5.57388443,1.09929321,5.55708945,5.55672469,5.5731387,5.55674258,5.55660292
35.41216,5.74456265,5.57014273,0.417636103,5.55490489,5.55453914,5.56939519,5.55455707,5.55441717
35.422652,6.244998,5.5666359,0.8236274,5.55272436,5.55235762,5.56588657,5.55237558,5.55223545
35.433144,4.89897949,5.5633155,-0.815068103,5.55054806,5.55018034,5.5625644,5.55019832,5.55005796
35.443635,4.69041576,5.56014621,-0.932593398,5.54837619,5.54800748,5.55939334,5.54802548,5.5478849
35.454127,5.19615242,5.55710111,-0.600790055,5.54620834,5.54583862,5.5563465,5.54585666,5.54571584
35.464618,5.29150262,5.5541609,-0.512501983,5.5440449,5.54367418,5.55340455,5.54369224,5.5435512
35.47511,5.56776436,5.55130962,0.12827603,5.54188545,5.54151373,5.55055153,5.54153182,5.54139054
35.485602,6.244998,5.54853531,0.8345434,5.53973021,5.53935746,5.54777549,5.53937558,5.53923407
35.496093,6,5.54582829,0.673922627,5.53757935,5.53720559,5.54506673,5.53722373,5.53708199
35.506585,5.65685425,5.54317985,0.337156348,5.53543247,5.53505768,5.54241655,5.53507585,5.53493388
35.517076,6.244998,5.5405836,0.839293989,5.53328996,5.53291414,5.53981858,5.53293234,5.53279014
35.527568,5.19615242,5.53803324,-0.584705755,5.53115141,5.53077456,5.53726649,5.53079278,5.53065035
35.53806,6.08276253,5.53552406,0.73975568,5.52901702,5.52863913,5.53475557,5.52865738,5.52851471
35.548551,6.4807407,5.53305204,0.973493017,5.52688697,5.52650804,5.53228182,5.52652632,5.52638342
35.559043,5.19615242,5.53061304,-0.578325706,5.52476087,5.52438088,5.52984108,5.52439919,5.52425605
35.569534,6.32455532,5.52820435,0.892384989,5.5226391,5.52225805,5.52743064,5.52227639,5.52213302
35.580026,5.09901951,5.52582275,-0.653301796,5.52052125,5.52013914,5.52504729,5.5201575,5.5200139
35.590518,5.56776436,5.52346606,0.210471621,5.51840752,5.51802434,5.52268885,5.51804273,5.51789889
35.601009,5.65685425,5.52113239,0.368404476,5.51629809,5.51591385,5.52035343,5.51593226,5.51578819
35.611501,5.47722558,5.51881945,-0.203945768,5.51419257,5.51380725,5.51803873,5.51382569,5.51368138
35.621992,6,5.51652605,0.695322914,5.51209135,5.51170493,5.51574356,5.51172341,5.51157886
35.632484,5.29150262,5.5142503,-0.471961518,5.509994,5.5096065,5.51346604,5.509625,5.50948022
35.642976,5.91607978,5.51199114,0.635679667,5.50790074,5.50751214,5.51120511,5.50753067,5.50738565
35.653467,6.244998,5.50974766,0.857467395,5.50581174,5.50542204,5.50895985,5.5054406,5.50529534
35.663959,4.69041576,5.50751842,-0.903937308,5.50372661,5.5033358,5.50672882,5.50335439,5.50320889
35.67445,6,5.50530292,0.703347054,5.50164574,5.50125381,5.50451153,5.50127242,5.50112669
35.684942,5.19615242,5.50309995,-0.55402845,5.49956871,5.49917566,5.50230675,5.4991943,5.49904833
35.695434,6,5.50090897,0.706463748,5.49749572,5.49710155,5.50011398,5.49712021,5.496974
35.705925,5.74456265,5.49872955,0.495815583,5.49542696,5.49503165,5.49793275,5.49505035,5.49490389
35.716417,6.164414,5.49656068,0.817222931,5.49336202,5.49296558,5.49576206,5.4929843,5.49283761
35.726908,4.79583152,5.49440224,-0.835805431,5.4913013,5.49090371,5.49360179,5.49092246,5.49077553
35.7374,5.09901951,5.49225333,-0.62708358,5.48924439,5.48884565,5.49145105,5.48886443,5.48871725
35.747892,4,5.49011372,-1.22070214,5.48719149,5.48679159,5.4893096,5.48681039,5.48666298
35.758383,5.56776436,5.48798321,0.282455581,5.48514277,5.4847417,5.48717724,5.48476054,5.48461288
35.768875,5.74456265,5.48586103,0.50862719,5.48309784,5.4826956,5.48505321,5.48271446,5.48256656
35.779366,5.65685425,5.48374725,0.41606129,5.48105709,5.48065367,5.48293757,5.48067256,5.48052441
35.789858,5.56776436,5.48164117,0.293467527,5.47902011,5.47861551,5.48082962,5.47863442,5.47848603
35.80035,5.09901951,5.47954271,-0.616865626,5.47698709,5.4765813,5.47872929,5.47660024,5.47645161
35.810841,5,5.47745182,-0.690978884,5.47495822,5.47455123,5.47663651,5.4745702,5.47442133
35.821333,6.164414,5.47536785,0.830088039,5.47293311,5.47252491,5.47455065,5.47254391,5.47239479
35.831824,4.89897949,5.47329099,-0.757833431,5.47091213,5.47050272,5.47247189,5.47052174,5.47037238
35.842316,5.29150262,5.47122065,-0.423931635,5.46889488,5.46848425,5.47039964,5.46850331,5.4683537
35.852808,5.38516481,5.46915684,-0.28981379,5.46688157,5.46646971,5.46833391,5.46648879,5.46633894
35.863299,5.65685425,5.46709958,0.435608389,5.46487236,5.46445926,5.46627473,5.46447837,5.46432827
35.873791,5.29150262,5.46504833,-0.41658817,5.46286687,5.46245253,5.46422154,5.46247167,5.46232132
35.884282,6.55743852,5.46300332,1.04615257,5.46086547,5.46044988,5.46217459,5.46046905,5.46031845
35.894774,5.56776436,5.46096403,0.326803199,5.45886777,5.45845093,5.46013336,5.45847012,5.45831928
35.905266,6.164414,5.45893054,0.839930632,5.45687397,5.45645586,5.4580979,5.45647508,5.45632399
35.915757,5.56776436,5.45690291,0.33295864,5.45488423,5.45446484,5.45606831,5.45448409,5.45433275
35.926249,5,5.45488065,-0.674448401,5.45289817,5.4524775,5.45404407,5.45249678,5.45234519
35.93674,5.83095189,5.45286511,0.614887616,5.45091616,5.45049421,5.45202655,5.45051352,5.45036168
35.947232,5.19615242,5.45085368,-0.504679357,5.44893783,5.44851457,5.45001312,5.44853391,5.44838182
35.957724,5.56776436,5.44884751,0.344843229,5.44696334,5.44653878,5.44800495,5.44655814,5.4464058
35.968215,5.47722558,5.44684672,0.174295303,5.44499288,5.444567,5.44600215,5.4445864,5.44443381
35.978707,5.56776436,5.44485085,0.350590232,5.44302606,5.44259887,5.44400425,5.44261829,5.44246545
35.989198,6.244998,5.44286021,0.895621456,5.44106326,5.44063474,5.44201157,5.44065418,5.44050109
35.99969,5.65685425,5.44087433,0.464736396,5.43910409,5.43867423,5.44002366,5.4386937,5.43854036
36.010182,5.38516481,5.43889335,-0.231794193,5.43714873,5.43671752,5.43804063,5.43673702,5.43658343
36.020673,6.32455532,5.4369174,0.942145381,5.43519736,5.43476479,5.43606261,5.43478433,5.43463048
36.031165,5.38516481,5.43494603,-0.223117069,5.4332496,5.43281567,5.43408917,5.43283523,5.43268113
36.041656,5.91607978,5.43297957,0.695054106,5.43130581,5.43087051,5.43212063,5.4308901,5.43073574
36.052148,4.69041576,5.43101759,-0.860582263,5.42936562,5.42892893,5.43015656,5.42894855,5.42879394
36.06264,5.19615242,5.42906023,-0.482605225,5.4274292,5.42699112,5.42819709,5.42701077,5.4268559
36.073131,5,5.42710761,-0.653534708,5.42549674,5.42505725,5.42624236,5.42507693,5.42492181
36.083623,5.09901951,5.42515934,-0.571086532,5.42356784,5.42312695,5.42429196,5.42314665,5.42299127
36.094114,6.08276253,5.42321573,0.812124866,5.42164288,5.42120057,5.42234622,5.4212203,5.42106467
36.104606,5.09901951,5.42127638,-0.567676724,5.41972148,5.41927774,5.42040472,5.4192975,5.41914161
36.115098,5.47722558,5.41934142,0.240591257,5.41780382,5.41735863,5.41846761,5.41737842,5.41722227
36.125589,5.47722558,5.41741101,0.244570155,5.41589007,5.41544343,5.41653503,5.41546324,5.41530684
36.136081,5.74456265,5.41548475,0.573653115,5.41397985,5.41353175,5.41460659,5.4135516,5.41339494
36.146572,5.09901951,5.41356296,-0.560841731,5.41207353,5.41162396,5.41268261,5.41164384,5.41148692
36.157064,5.83095189,5.41164525,0.647538914,5.41017074,5.40971969,5.41076269,5.40973959,5.40958241
36.167556,5.29150262,5.40973177,-0.343844654,5.40827164,5.4078191,5.408847,5.40783903,5.40768159
36.178047,5.38516481,5.40782267,-0.150525283,5.40637642,5.40592237,5.40693567,5.40594233,5.40578463
36.188539,5.83095189,5.40591756,0.651946577,5.4044847,5.40402914,5.40502832,5.40404913,5.40389117
36.19903,5.38516481,5.40401677,-0.137302444,5.40259683,5.40213975,5.40312528,5.40215977,5.40200155
36.209522,5.65685425,5.40211992,0.50471213,5.40071246,5.40025384,5.40122616,5.40027388,5.4001154
36.220014,5.65685425,5.40022715,0.50658375,5.39883174,5.39837158,5.39933113,5.39839165,5.39823291
36.230505,4.79583152,5.39833864,-0.776213318,5.39695486,5.39649314,5.39744032,5.39651324,5.39635423
36.240997,5.47722558,5.39645399,0.284203431,5.39508145,5.39461815,5.39555337,5.39463829,5.39447902
36.251488,4.58257569,5.39457353,-0.901109225,5.39321185,5.39274698,5.3936706,5.39276714,5.39260761
36.26198,5.56776436,5.39269689,0.418410647,5.39134571,5.39087924,5.39179163,5.39089943,5.39073964
36.272472,5.19615242,5.39082423,-0.441216285,5.38948319,5.38901512,5.38991663,5.38903534,5.38887528
36.282963,5.47722558,5.3889557,0.297102458,5.38762447,5.38715478,5.38804575,5.38717503,5.3870147
36.293455,5.74456265,5.38709093,0.597889382,5.38576918,5.38529786,5.38617861,5.38531814,5.38515755
36.303946,5.38516481,5.38523025,-0.00808997292,5.38391767,5.38344471,5.38431555,5.38346501,5.38330416
36.314438,4.89897949,5.3833733,-0.695984059,5.38206958,5.38159496,5.38245619,5.38161529,5.38145417
36.32493,5,5.38152021,-0.617673226,5.38022507,5.37974879,5.3806007,5.37976915,5.37960776
36.335421,5.83095189,5.37967117,0.671774312,5.37838432,5.37790636,5.37874923,5.37792675,5.3777651
36.345913,5.56776436,5.37782579,0.435819426,5.37654697,5.37606732,5.37690141,5.37608774,5.37592581
36.356404,5.65685425,5.37598441,0.529971542,5.37471336,5.374232,5.37505758,5.37425245,5.37409026
36.366896,4.89897949,5.37414667,-0.689323716,5.37288314,5.37240005,5.37321737,5.37242053,5.37225807
36.377388,4.58257569,5.37231272,-0.888671495,5.37105646,5.37057164,5.37138093,5.37059215,5.37042942
36.387879,6.40312424,5.37048272,1.0161897,5.36923351,5.36874694,5.36954843,5.36876747,5.36860448
36.398371,6.4807407,5.36865632,1.05455412,5.36741391,5.36692558,5.36771951,5.36694615,5.36678288
36.408862,6.164414,5.36683383,0.893073443,5.36559803,5.36510792,5.36589449,5.36512851,5.36496497
36.419354,5.19615242,5.3650149,-0.410928797,5.36378548,5.36329358,5.36407301,5.36331421,5.3631504
36.429846,6.70820393,5.36319969,1.15974318,5.36197646,5.36148275,5.36225524,5.3615034,5.36133932
36.440337,6.164414,5.36138836,0.896116982,5.36017111,5.35967559,5.36044133,5.35969627,5.35953191
36.450829,5.19615242,5.35958054,-0.404262442,5.3583691,5.35787173,5.35863092,5.35789244,5.35772781
36.46132,5.38516481,5.35777658,0.165493887,5.35657075,5.35607153,5.35682434,5.35609227,5.35592737
36.471812,4.58257569,5.35597611,-0.87943187,5.35477571,5.35427462,5.35502123,5.35429539,5.35413022
36.482304,5.47722558,5.35417929,0.350779538,5.35298415,5.35248118,5.35322176,5.35250198,5.35233653
36.492795,5.47722558,5.35238628,0.353326044,5.35119624,5.35069137,5.35142609,5.35071219,5.35054647
36.503287,5.83095189,5.35059673,0.693076595,5.34941162,5.34890483,5.34963385,5.34892568,5.34875968
36.513778,5.65685425,5.34881096,0.555016476,5.34763063,5.3471219,5.34784538,5.34714279,5.34697651
36.52427,5.83095189,5.34702862,0.695645937,5.34585292,5.34534224,5.34606032,5.34536315,5.3451966
36.534762,5.09901951,5.34524988,-0.496216048,5.34407865,5.343566,5.34427883,5.34358695,5.34342012
36.545253,5,5.34347488,-0.586067303,5.34230799,5.34179336,5.34250108,5.34181433,5.34164722
36.555745,4.35889894,5.34170329,-0.991364889,5.34054059,5.34002395,5.3407267,5.34004495,5.33987757
36.566236,5.56776436,5.33993542,0.477314307,5.33877678,5.33825812,5.33895603,5.33827915,5.33811148
36.576728,6.164414,5.33817092,0.908979143,5.33701621,5.33649551,5.33718872,5.33651657,5.33634863
36.58722,5.91607978,5.33640996,0.761360507,5.33525906,5.3347363,5.33542492,5.33475738,5.33458916
36.597711,5.65685425,5.33465269,0.567628009,5.33350547,5.33298063,5.33366479,5.33300175,5.33283325
36.608203,4.12310563,5.33289877,-1.09990597,5.33175511,5.33122817,5.33190798,5.33124932,5.33108054
36.618694,5.47722558,5.33114852,0.382200282,5.3300083,5.32947925,5.33015483,5.32950042,5.32933136
36.629186,5.09901951,5.32940159,-0.479981334,5.32826471,5.32773351,5.32840498,5.32775472,5.32758538
36.639678,5.91607978,5.32765815,0.767086456,5.32652449,5.32599113,5.32665859,5.32601237,5.32584274
36.650169,6.4807407,5.32591835,1.07462661,5.3247878,5.32425227,5.32491582,5.32427353,5.32410362
36.660661,5.83095189,5.32418184,0.711877837,5.3230543,5.32251657,5.32317632,5.32253786,5.32236767
36.671152,4.69041576,5.32244895,-0.795005152,5.32132433,5.32078437,5.32144042,5.32080569,5.32063522
36.681644,5.09901951,5.32071934,-0.470850112,5.31959753,5.31905533,5.31970777,5.31907668,5.31890592
36.692136,5.38516481,5.31899317,0.257238493,5.31787407,5.3173296,5.31797853,5.31735098,5.31717994
36.702627,4.69041576,5.31727058,-0.791741636,5.31615411,5.31560735,5.31625286,5.31562876,5.31545743
36.713119,5.38516481,5.31555124,0.26384383,5.3144373,5.31388824,5.31453041,5.31390968,5.31373806
36.72361,6,5.31383547,0.828350486,5.31272398,5.31217258,5.31281151,5.31219405,5.31202215
36.734102,6.08276253,5.31212294,0.877860804,5.31101381,5.31046005,5.31109581,5.31048154,5.31030936
36.744594,6.164414,5.31041407,0.924121166,5.30930694,5.30875079,5.30938376,5.30877232,5.30859984
36.755085,5,5.30870847,-0.555615397,5.30760352,5.30704497,5.30767494,5.30706653,5.30689377
36.765577,4.58257569,5.30700607,-0.851134758,5.30590324,5.30534226,5.3059693,5.30536384,5.30519079
36.776068,5.38516481,5.3053072,0.28259089,5.3042064,5.30364296,5.30426716,5.30366457,5.30349123
36.78656,6.40312424,5.30361151,1.04857652,5.30251268,5.30194675,5.30256818,5.3019684,5.30179477
36.797052,5.29150262,5.30191917,-0.102061491,5.30082223,5.30025379,5.30087252,5.30027546,5.30010154
36.807543,5.65685425,5.30023033,0.597179976,5.2991352,5.29856422,5.29918032,5.29858592,5.29841171
36.818035,6,5.29854465,0.837529315,5.29745126,5.29687772,5.29749126,5.29689945,5.29672495
36.828526,5.38516481,5.29686245,0.297157132,5.29577074,5.2951946,5.29580565,5.29521636,5.29504157
36.839018,6.08276253,5.29518339,0.887456554,5.2940933,5.29351454,5.29412316,5.29353633,5.29336124
36.84951,4.79583152,5.29350765,-0.705461638,5.29241909,5.29183768,5.29244394,5.2918595,5.29168412
36.860001,5.83095189,5.29183535,0.734245562,5.29074828,5.29016419,5.29076814,5.29018604,5.29001036
36.870493,5.09901951,5.29016618,-0.437203232,5.28908053,5.28849372,5.28909544,5.2885156,5.28833964
36.880984,4.58257569,5.28850045,-0.840193282,5.28741615,5.28682661,5.28742614,5.28684851,5.28667225
36.891476,4.89897949,5.28683782,-0.622782736,5.28575482,5.28516251,5.28575992,5.28518445,5.28500789
36.901968,5.19615242,5.28517846,-0.298372314,5.2840967,5.28350158,5.28409692,5.28352355,5.2833467
36.912459,5.38516481,5.28352251,0.31881389,5.28244194,5.28184397,5.2824373,5.28186597,5.28168882
36.922951,5.56776436,5.28186965,0.534691233,5.2807902,5.28018937,5.28078074,5.2802114,5.28003395
36.933442,4.79583152,5.28022018,-0.695980358,5.27914181,5.27853807,5.27912754,5.27856013,5.27838238
36.943934,5,5.27857379,-0.527800898,5.27749643,5.27688976,5.27747737,5.27691184,5.2767338
36.954426,5.83095189,5.27693062,0.744326056,5.27585423,5.27524458,5.27583039,5.27526669,5.27508835
36.964917,4.89897949,5.27529082,-0.6134422,5.27421535,5.27360268,5.27418674,5.27362483,5.27344619
36.975409,5.09901951,5.27365407,-0.417892997,5.27257947,5.27196376,5.2725461,5.27198593,5.27180699
36.9859,4.89897949,5.27202068,-0.610770983,5.27094689,5.2703281,5.27090878,5.2703503,5.27017106
36.996392,5.09901951,5.27039033,-0.413969578,5.26931731,5.26869539,5.26927446,5.26871762,5.26853808
37.006884,5.47722558,5.26876316,0.456576848,5.26769086,5.26706578,5.26764329,5.26708805,5.2669082
37.017375,5.65685425,5.26713932,0.624271517,5.26606771,5.26543942,5.26601541,5.26546172,5.26528157
37.027867,5.83095189,5.2655185,0.751953051,5.26444752,5.263816,5.2643905,5.26383832,5.26365787
37.038358,5.56776436,5.263901,0.551238024,5.26283061,5.2621958,5.26276886,5.26221815,5.2620374
37.04885,5.47722558,5.26228651,0.463615216,5.26121666,5.26057852,5.26115019,5.2606009,5.26041985
37.059342,4.79583152,5.26067516,-0.681794423,5.25960581,5.25896431,5.25953461,5.25898672,5.25880536
37.069833,5.47722558,5.25906711,0.46707437,5.25799822,5.2573533,5.25792229,5.25737575,5.25719408
37.080325,4.47213595,5.25746204,-0.886186259,5.25639358,5.2557452,5.25631291,5.25576767,5.2555857
37.090816,5.09901951,5.25586025,-0.396031237,5.25479217,5.25414029,5.25470676,5.25416279,5.25398051
37.101308,5.29150262,5.25426144,0.19297975,5.2531937,5.25253826,5.25310353,5.25256079,5.25237821
37.1118,4.58257569,5.25266574,-0.818590278,5.2515983,5.25093926,5.25150337,5.25096182,5.25077893
37.122291,6.08276253,5.2510733,0.911969973,5.25000613,5.24934344,5.24990641,5.24936603,5.24918283
37.132783,5.65685425,5.24948381,0.63825578,5.24841687,5.24775048,5.24831236,5.2477731,5.24758959
37.143274,5.47722558,5.24789757,0.478882039,5.24683082,5.24616068,5.24672149,5.24618333,5.24599951
37.153766,5.56776436,5.24631426,0.566965695,5.24524767,5.24457373,5.24513352,5.24459641,5.24441228
37.164258,5.56776436,5.24473404,0.568357563,5.24366757,5.24298977,5.24354857,5.24301248,5.24282804
37.174749,4.89897949,5.24315705,-0.586666484,5.24209067,5.24140895,5.24196678,5.24143169,5.24124694
37.185241,5,5.24158297,-0.49151091,5.24051665,5.23983096,5.24038787,5.23985373,5.23966867
37.195732,5.83095189,5.24001211,0.768726077,5.23894581,5.23825609,5.2388121,5.23827889,5.23809352
37.206224,5.19615242,5.23844416,-0.205649553,5.23737784,5.23668404,5.23723918,5.23670687,5.23652118
37.216716,5.19615242,5.23687926,-0.201808913,5.2358129,5.23511495,5.23566925,5.23513781,5.23495181
37.227207,4.79583152,5.23531755,-0.662937426,5.23425112,5.23354896,5.23410245,5.23357185,5.23338553
37.237699,5.65685425,5.23375874,0.650457925,5.23269219,5.23198576,5.23253848,5.23200868,5.23182205
37.24819,4.35889894,5.2322031,-0.934507442,5.23113642,5.23042566,5.23097762,5.2304486,5.23026166
37.258682,5.74456265,5.23065035,0.716876767,5.2295835,5.22886833,5.22941958,5.22889131,5.22870405
37.269174,5.09901951,5.22910061,-0.360667576,5.22803357,5.22731393,5.22786448,5.22733693,5.22714936
37.279665,5.74456265,5.22755404,0.719033103,5.22648678,5.22576259,5.22631248,5.22578563,5.22559773
37.290157,5,5.22601034,-0.475405445,5.22494282,5.22421402,5.22476327,5.22423709,5.22404887
37.300648,5.65685425,5.22446978,0.657559479,5.22340198,5.2226685,5.22321713,5.22269159,5.22250306
37.31114,5.56776436,5.22293208,0.58722422,5.22186397,5.22112573,5.22167377,5.22114885,5.22096
37.321632,5.29150262,5.22139737,0.264773966,5.22032892,5.21958584,5.22013332,5.219609,5.21941982
37.332123,5.38516481,5.21986579,0.406569813,5.21879699,5.21804899,5.21859593,5.21807217,5.21788268
37.342615,5,5.21833706,-0.46726551,5.21726786,5.21651486,5.21706129,5.21653808,5.21634826
37.353106,5.19615242,5.21681144,-0.143732458,5.21574183,5.21498375,5.21552969,5.215007,5.21481686
37.363598,6.32455532,5.21528866,1.05321729,5.2142186,5.21345536,5.21400083,5.21347863,5.21328818
37.37409,4.89897949,5.21376884,-0.561060915,5.21269832,5.21192982,5.21247485,5.21195312,5.21176234
37.384581,4.58257569,5.21225212,-0.793521537,5.21118111,5.21040728,5.21095189,5.21043061,5.21023951
37.395073,5.09901951,5.21073823,-0.334243493,5.2096667,5.20888743,5.20943164,5.20891079,5.20871936
37.405564,5.19615242,5.20922742,-0.114345976,5.20815536,5.20737056,5.2079144,5.20739395,5.2072022
37.416056,5.38516481,5.20771943,0.42124266,5.2066468,5.20585638,5.20639986,5.2058798,5.20568772
37.426548,5.47722558,5.20621438,0.520587359,5.20514116,5.20434501,5.20488816,5.20436846,5.20417606
37.437039,5.19615242,5.20471241,-0.092520183,5.20363858,5.2028366,5.20337945,5.20286008,5.20266735
37.447531,4.79583152,5.20321323,-0.638264605,5.20213877,5.20133086,5.20187341,5.20135437,5.20116131
37.458022,5.38516481,5.20171713,0.428307928,5.20064201,5.19982806,5.20037035,5.1998516,5.19965821
37.468514,5.56776436,5.20022381,0.606251232,5.19914802,5.19832791,5.19886995,5.19835148,5.19815777
37.479006,4.79583152,5.19873341,-0.63474553,5.19765692,5.19683055,5.19737236,5.19685415,5.1966601
37.489497,5.29150262,5.19724608,0.30701229,5.19616887,5.19533611,5.19587771,5.19535974,5.19516536
37.499989,6.164414,5.19576151,0.984201447,5.19468356,5.19384431,5.19438571,5.19386796,5.19367326
37.51048,4.89897949,5.19428001,-0.543415606,5.19320129,5.19235541,5.19289664,5.1923791,5.19218405
37.520972,5.19615242,5.19280127,0.0578891755,5.19172177,5.19086913,5.19141021,5.19089284,5.19069747
37.531464,5.19615242,5.19132543,0.0694765579,5.19024512,5.1893856,5.18992655,5.18940934,5.18921364
37.541955,5,5.18985264,-0.435720825,5.18877151,5.18790496,5.18844579,5.18792873,5.18773269
37.552447,5.29150262,5.1883826,0.321123059,5.18730063,5.18642691,5.18696765,5.18645072,5.18625435
37.562938,4.58257569,5.18691561,-0.777393022,5.18583276,5.18495175,5.18549241,5.18497558,5.18477887
37.57343,5.38516481,5.18545136,0.446893104,5.18436763,5.18347916,5.18401976,5.18350303,5.18330598
37.583922,4.89897949,5.18399001,-0.533863768,5.18290538,5.1820093,5.18254985,5.18203319,5.18183581
37.594413,5.47722558,5.18253168,0.542857156,5.18144613,5.18054229,5.18108282,5.18056621,5.18036849
37.604905,4.79583152,5.18107611,-0.620680741,5.17998961,5.17907784,5.17961836,5.1791018,5.17890374
37.615396,5.19615242,5.17962355,0.128564656,5.17853609,5.17761624,5.17815676,5.17764022,5.17744182
37.625888,4.69041576,5.17817374,-0.698396723,5.17708531,5.17615718,5.17669773,5.1761812,5.17598246
37.63638,5.65685425,5.17672682,0.692912284,5.17563738,5.17470082,5.1752414,5.17472486,5.17452578
37.646871,4.47213595,5.17528291,-0.838538582,5.17419246,5.17324727,5.17378791,5.17327134,5.17307192
37.657363,5.91607978,5.17384174,0.86153238,5.17275026,5.17179625,5.17233697,5.17182035,5.1716206
37.667854,5.29150262,5.17240359,0.345107274,5.17131106,5.17034804,5.17088884,5.17037217,5.17017207
37.678346,5.19615242,5.17096818,0.158695432,5.16987458,5.16890235,5.16944326,5.16892651,5.16872607
37.688838,4.79583152,5.16953565,-0.611313446,5.16844096,5.16745931,5.16800034,5.1674835,5.16728272
37.699329,4.79583152,5.16810614,-0.610143109,5.16701034,5.16601906,5.16656021,5.16604328,5.16584215
37.709821,4.89897949,5.16667936,-0.517397216,5.16558245,5.16458131,5.16512261,5.16460556,5.16440408
37.720312,5.83095189,5.16525561,0.815902131,5.16415755,5.16314632,5.16368779,5.1631706,5.16296878
37.730804,4.79583152,5.1638346,-0.606632568,5.16273539,5.16171383,5.16225548,5.16173814,5.16153597
37.741296,5.91607978,5.16241647,0.868137845,5.16131609,5.16028396,5.16082579,5.1603083,5.16010578
37.751787,5.19615242,5.16100135,0.18748618,5.15989979,5.15885683,5.15939888,5.1588812,5.15867834
37.762279,5.74456265,5.159589,0.764835702,5.15848622,5.15743218,5.15797444,5.15745658,5.15725337
37.77277,5.09901951,5.15817966,-0.243228588,5.15707567,5.15601026,5.15655276,5.15603469,5.15583113
37.783262,6.08276253,5.15677308,0.962283456,5.15566785,5.1545908,5.15513354,5.15461525,5.15441135
37.793754,5.56776436,5.1553694,0.642179854,5.15426292,5.15317392,5.15371693,5.15319841,5.15299415
37.804245,5.74456265,5.15396875,0.768501072,5.152861,5.15175976,5.15230305,5.15178428,5.15157967
37.814737,5,5.15257087,-0.390603212,5.15146184,5.15034804,5.15089161,5.15037259,5.15016762
37.825228,5.09901951,5.15117603,-0.228378015,5.1500657,5.14893902,5.1494829,5.1489636,5.14875828
37.83572,6.244998,5.14978397,1.04652474,5.14867233,5.14753243,5.14807662,5.14755703,5.14735136
37.846212,5.19615242,5.14839484,0.218535085,5.14728187,5.14612839,5.14667291,5.14615302,5.145947
37.856703,5.09901951,5.14700876,-0.219064488,5.14589445,5.14472703,5.14527189,5.14475169,5.14454531
37.867195,6,5.14562549,0.924323812,5.14450982,5.14332808,5.14387329,5.14335277,5.14314603
37.877686,5,5.14424529,-0.379796381,5.14312824,5.14193179,5.14247737,5.14195651,5.14174942
37.888178,4.79583152,5.14286791,-0.589097946,5.14174948,5.1405379,5.14108386,5.14056265,5.1403552
37.89867,5.09901951,5.1414935,-0.20609217,5.14037366,5.13914653,5.13969289,5.13917131,5.13896351
37.909161,4.58257569,5.14012218,-0.746690355,5.13900093,5.13775781,5.13830457,5.13778262,5.13757446
37.919653,5,5.13875372,-0.372496604,5.13763103,5.13637147,5.13691864,5.13639631,5.13618778
37.930144,5.19615242,5.13738838,0.24241295,5.13626425,5.13498776,5.13553536,5.13501262,5.13480374
37.940636,4.12310563,5.13602593,-1.00643942,5.13490033,5.13360641,5.13415445,5.13363131,5.13342206
37.951128,5,5.13466649,-0.366969336,5.13353942,5.13222755,5.13277604,5.13225248,5.13204287
37.961619,5.09901951,5.13331023,-0.18517752,5.13218167,5.1308513,5.13140026,5.13087626,5.13066629
37.972111,5,5.13195689,-0.363258706,5.13082683,5.1294774,5.13002684,5.12950239,5.12929206
37.982602,5.29150262,5.13060675,0.401118278,5.12947517,5.1281061,5.12865603,5.12813112,5.12792042
37.993094,5.47722558,5.12925957,0.58988643,5.12812647,5.12673714,5.12728756,5.12676218,5.12655112
38.003586,5.09901951,5.12791551,-0.169988234,5.12678086,5.12537063,5.12592156,5.1253957,5.12518427
38.014077,5.29150262,5.12657471,0.406113171,5.12543851,5.1240067,5.12455815,5.1240318,5.12382001
38.024569,4.69041576,5.12523695,-0.659409726,5.12409917,5.12264508,5.12319707,5.12267022,5.12245805
38.03506,4.79583152,5.12390249,-0.572774796,5.12276313,5.12128603,5.12183857,5.1213112,5.12109867
38.045552,5.47722558,5.12257112,0.59552872,5.12143016,5.11992929,5.12048238,5.11995448,5.11974158
38.056044,5,5.12124299,-0.348199637,5.12010042,5.11857497,5.11912862,5.11860019,5.11838692
38.066535,5.65685425,5.11991826,0.732759165,5.11877406,5.11722319,5.11777742,5.11724844,5.1170348
38.077027,4.35889894,5.1185967,-0.871606424,5.11745087,5.1158737,5.11642852,5.11589898,5.11568497
38.087518,5,5.11727862,-0.342459658,5.11613114,5.11452675,5.11508216,5.11455205,5.11433767
38.09801,5.47722558,5.11596379,0.60105057,5.11481464,5.11318206,5.11373809,5.1132074,5.11299264
38.108502,5.29150262,5.11465238,0.420535661,5.11350156,5.11183977,5.11239642,5.11186514,5.11165001
38.118993,4.24264069,5.11334456,-0.933115147,5.11219206,5.11049999,5.11105727,5.11052539,5.11030989
38.129485,4.79583152,5.11204014,-0.562324296,5.11088593,5.10916247,5.10972039,5.10918789,5.10897202
38.139976,4.89897949,5.1107394,-0.460173788,5.10958348,5.10782745,5.10838602,5.1078529,5.10763665
38.150468,5.09901951,5.10944216,-0.102091361,5.10828451,5.10649467,5.1070539,5.10652015,5.10630352
38.16096,5.47722558,5.1081486,0.607517059,5.10698921,5.10516425,5.10572415,5.10518976,5.10497275
38.171451,5.09901951,5.1068589,-0.0885403207,5.10569777,5.10383631,5.1043969,5.10386185,5.10364446
38.181943,5.09901951,5.10557289,-0.0809529452,5.10440999,5.10251059,5.10307188,5.10253616,5.1023184
38.192434,5.29150262,5.10429089,0.432679712,5.10312621,5.10118735,5.10174934,5.10121294,5.1009948
38.202926,5.47722558,5.10301272,0.611729393,5.10184626,5.09986631,5.10042901,5.09989194,5.09967341
38.213418,5.19615242,5.10173861,0.307268315,5.10057034,5.09854761,5.09911103,5.09857326,5.09835435
38.223909,5.19615242,5.10046874,0.309327786,5.09929867,5.09723135,5.09779551,5.09725703,5.09703774
38.234401,5.56776436,5.09920299,0.684515426,5.09803109,5.09591729,5.09648219,5.095943,5.09572333
38.244892,5.56776436,5.0979417,0.685436108,5.09676797,5.09460566,5.09517132,5.0946314,5.09441134
38.255384,5.83095189,5.09668475,0.856893896,5.09550916,5.09329622,5.09386264,5.09332198,5.09310154
38.265876,4,5.09543236,-1.04662905,5.09425492,5.09198907,5.09255626,5.09201487,5.09179404
38.276367,5.09901951,5.0941848,0.0695320726,5.09300549,5.09068434,5.09125232,5.09071017,5.09048895
38.286859,5.09901951,5.09294198,0.0779585614,5.09176078,5.08938178,5.08995054,5.08940763,5.08918603
38.29735,5.09901951,5.09170427,0.0855292021,5.09052118,5.08808161,5.08865119,5.0881075,5.08788551
38.307842,5.19615242,5.09047161,0.325085848,5.08928661,5.0867836,5.08735399,5.08680951,5.08658713
38.318334,6.4807407,5.08924431,1.17961705,5.08805739,5.08548786,5.08605907,5.0855138,5.08529103
38.328825,5.19615242,5.08802267,0.328830889,5.08683382,5.0841945,5.08476654,5.08422047,5.08399731
38.339317,5.47722558,5.08680667,0.624835099,5.08561589,5.08290328,5.08347616,5.08292928,5.08270572
38.349808,4.47213595,5.08559679,-0.783237405,5.08440405,5.08161443,5.08218816,5.08164045,5.08141651
38.3603,4.69041576,5.08439303,-0.62767609,5.08319833,5.0803277,5.08090229,5.08035375,5.08012941
38.370792,4.89897949,5.08319581,-0.429204291,5.08199913,5.07904321,5.07961867,5.07906929,5.07884456
38.381283,4.58257569,5.08200553,-0.706703501,5.08080687,5.07776107,5.07833741,5.07778718,5.07756205
38.391775,4.24264069,5.08082232,-0.915522603,5.07962167,5.07648103,5.07705826,5.07650717,5.07628165
38.402266,5.09901951,5.07964679,0.13918594,5.07844413,5.07520334,5.07578146,5.07522951,5.07500359
38.412758,3.87298335,5.07847914,-1.09795072,5.07727446,5.07392774,5.07450677,5.07395393,5.07372762
38.42325,4.24264069,5.07731998,-0.913607845,5.07611328,5.07265434,5.07323429,5.07268057,5.07245385
38.433741,5.91607978,5.07617002,0.916465911,5.07496128,5.07138327,5.07196414,5.07140952,5.07118241
38.444233,5.56776436,5.07502972,0.701950602,5.07381893,5.07011427,5.07069608,5.07014055,5.06991304
38.454724,4.79583152,5.07390014,-0.527322116,5.07268729,5.06884758,5.06943033,5.06887389,5.06864597
38.465216,5.09901951,5.07278211,0.161979637,5.0715672,5.06758296,5.06816666,5.06760929,5.06738097
38.475708,4.89897949,5.07167706,-0.415568981,5.07046008,5.06632051,5.06690517,5.06634687,5.06611815
38.486199,5,5.07058679,-0.265681751,5.06936772,5.06506035,5.06564599,5.06508674,5.06485762
38.496691,4.58257569,5.0695133,-0.697809144,5.06829213,5.06380224,5.06438885,5.06382866,5.06359913
38.507182,5.19615242,5.06845968,0.357341213,5.06723642,5.0625464,5.06313401,5.06257285,5.06234291
38.517674,6.55743852,5.06742958,1.22065923,5.06620421,5.0612926,5.06188121,5.06131908,5.06108873
38.528166,5.38516481,5.06642818,0.564567646,5.0652007,5.06004095,5.06063056,5.06006745,5.0598367
38.538657,5,5.06546231,-0.255856031,5.06423271,5.05879155,5.05938218,5.05881808,5.05858692
38.549149,6.08276253,5.06454066,1.0090698,5.06330895,5.05754418,5.05813583,5.05757073,5.05733916
38.55964,4.79583152,5.06367506,-0.51753602,5.06244123,5.05629905,5.05689174,5.05632563,5.05609365
38.570132,5.09901951,5.06288046,0.190102738,5.06164452,5.05505592,5.05564965,5.05508253,5.05485014
38.580624,5,5.06217646,-0.249352086,5.06093842,5.05381491,5.0544097,5.05384155,5.05360875
38.591115,5.56776436,5.06158793,0.711460775,5.06034781,5.05257613,5.05317198,5.0526028,5.05236958
38.601607,4.69041576,5.06114597,-0.608876182,5.05990379,5.05133934,5.05193626,5.05136603,5.05113241
38.612098,5.74456265,5.06088939,0.826845363,5.05964519,5.05010476,5.05070277,5.05013149,5.04989744
38.62259,4.47213595,5.06086554,-0.767287158,5.05961935,5.04887216,5.04947125,5.04889891,5.04866446
38.633082,4,5.06113149,-1.03011237,5.05988339,5.04764165,5.04824184,5.04766843,5.04743355
38.643573,4.79583152,5.06175472,-0.515677411,5.06050477,5.04641334,5.04701463,5.04644014,5.04620485
38.654065,4.89897949,5.06281387,-0.404764604,5.06156218,5.04518699,5.0457894,5.04521382,5.04497811
38.664556,4.89897949,5.06439827,-0.406717085,5.06314496,5.04396282,5.04456635,5.04398968,5.04375354
38.675048,5,5.06660809,-0.258085441,5.0653533,5.0427406,5.04334527,5.04276748,5.04253093
38.68554,5,5.06955197,-0.263727079,5.06829587,5.04152043,5.04212625,5.04154735,5.04131037
38.696031,5.74456265,5.0733447,0.819278919,5.07208749,5.04030244,5.0409094,5.04032938,5.04009199
38.706523,5.29150262,5.0781051,0.4619497,5.07684701,5.03908638,5.0396945,5.03911334,5.03887553
38.717014,5.56776436,5.08394864,0.695568636,5.08268993,5.03787247,5.03848176,5.03789946,5.03766122
38.727506,5.29150262,5.09098533,0.44779157,5.0897263,5.03666048,5.03727095,5.0366875,5.03644883
38.737998,5.56776436,5.09930944,0.684437671,5.09805038,5.03545052,5.03606218,5.03547757,5.03523848
38.748489,5.29150262,5.1089931,0.427211327,5.10773434,5.0342427,5.03485556,5.03426977,5.03403025
38.758981,5.47722558,5.12008188,0.597615006,5.11882375,5.03303678,5.03365084,5.03306388,5.03282393
38.769472,4.47213595,5.13258021,-0.812677215,5.13132305,5.03183299,5.03244827,5.03186012,5.03161974
38.779964,5.29150262,5.14645268,0.380854223,5.1451968,5.03063109,5.03124759,5.03065824,5.03041743
38.790456,4.58257569,5.16160996,-0.760943013,5.16035566,5.02943119,5.03004892,5.02945837,5.02921713
38.800947,4.89897949,5.17790729,-0.528136157,5.17665482,5.02823339,5.02885237,5.0282606,5.02801893
38.811439,5.65685425,5.19514707,0.679490384,5.19389664,5.02703747,5.0276577,5.02706471,5.0268226
38.82193,5.38516481,5.21306743,0.414846212,5.21181917,5.02584365,5.02646513,5.02587091,5.02562837
38.832422,5,5.23135705,-0.480995898,5.23011104,5.02465169,5.02527444,5.02467898,5.02443601
38.842914,5.47722558,5.24964745,0.477051494,5.24840365,5.0234617,5.02408573,5.02348902,5.02324561
38.853405,5.19615242,5.26752428,-0.267155127,5.26628257,5.0222738,5.02289911,5.02230113,5.02205729
38.863897,4.79583152,5.28454111,-0.699077669,5.28330126,5.02108773,5.02171434,5.0211151,5.02087081
38.874388,5.74456265,5.30021905,0.66659103,5.29898072,5.01990374,5.02053165,5.01993113,5.01968641
38.88488,4.79583152,5.31407495,-0.719891258,5.3128377,5.01872158,5.0193508,5.01874899,5.01850383
38.895372,5.47722558,5.32563111,0.389351345,5.3243944,5.01754136,5.01817191,5.0175688,5.0173232
38.905863,5,5.33444716,-0.578314069,5.33321034,5.01636319,5.01699507,5.01639066,5.01614462
38.916355,5.47722558,5.34015312,0.370232974,5.33891545,5.01518684,5.01582006,5.01521434,5.01496785
38.926846,5.91607978,5.34247689,0.757365762,5.34123757,5.01401253,5.0146471,5.01404005,5.01379312
38.937338,5.56776436,5.34127648,0.475907435,5.34003469,5.01284003,5.01347595,5.01286757,5.0126202
38.94783,6,5.33655365,0.81452216,5.33530857,5.01166944,5.01230673,5.01169701,5.01144919
38.958321,5.56776436,5.32845572,0.489191821,5.32720653,5.01050087,5.01113954,5.01052847,5.0102802
38.968813,5.47722558,5.31725511,0.399963079,5.31600105,5.00933409,5.00997415,5.00936172,5.009113
38.979304,5.65685425,5.30332722,0.594581392,5.30206762,5.00816933,5.00881077,5.00819697,5.00794781
38.989796,5.47722558,5.2871094,0.436023132,5.28584367,5.00700634,5.00764919,5.00703401,5.00678439
39.000288,5.09901951,5.26907847,-0.412382049,5.26780611,5.00584524,5.0064895,5.00587293,5.00562287
39.010779,5.65685425,5.24972139,0.638069636,5.24844204,5.00468613,5.00533182,5.00471385,5.00446333
39.021271,4.89897949,5.2295088,-0.574916789,5.22822217,5.00352878,5.0041759,5.00355653,5.00330556
39.031762,4.69041576,5.20889296,-0.72005361,5.2075989,5.00237342,5.00302198,5.00240119,5.00214976
39.042254,4.69041576,5.1882812,-0.705595806,5.18697963,5.0012198,5.00186981,5.0012476,5.00099572
39.052746,5,5.16804105,-0.409928098,5.16673198,5.00006805,5.00071952,5.00009587,4.99984353
39.063237,5.29150262,5.14848794,0.378172827,5.14717149,4.99891826,4.9995712,4.99894611,4.99869331
39.073729,5.38516481,5.12987574,0.505261389,5.12855209,4.99777021,4.99842462,4.99779808,4.99754482
39.08422,6.08276253,5.11240774,0.985065881,5.11107712,4.9966241,4.99728001,4.996652,4.99639829
39.094712,4.47213595,5.09622296,-0.789991773,5.09488564,4.99547973,4.99613713,4.99550765,4.99525348
39.105204,5.09901951,5.08141063,0.132698472,5.08006692,4.99433719,4.99499609,4.99436513,4.99411049
39.115695,4.69041576,5.06800918,-0.614486302,5.06665941,4.99319657,4.993857,4.99322455,4.99296945
39.126187,5.19615242,5.05600902,0.374357315,5.05465353,4.99205768,4.99271962,4.99208567,4.99183011
39.136678,5.29150262,5.04536841,0.496119151,5.04400752,4.9909207,4.99158418,4.99094872,4.99069269
39.14717,5.09901951,5.03601194,0.251013095,5.03464596,4.98978542,4.99045045,4.98981347,4.98955697
39.157662,4.89897949,5.02784581,-0.35897956,5.02647504,4.98865195,4.98931853,4.98868002,4.98842306
39.168153,4.89897949,5.02076168,-0.34897306,5.01938638,4.98752038,4.98818852,4.98754847,4.98729105
39.178645,5.29150262,5.01464185,0.526175607,5.01326227,4.9863905,4.98706021,4.98641862,4.98616072
39.189136,4.58257569,5.00936949,-0.653294569,5.00798583,4.98526251,4.98593381,4.98529065,4.98503228
39.199628,5.19615242,5.00482853,0.437405867,5.00344098,4.9841362,4.98480909,4.98416436,4.98390552
39.21012,4.89897949,5.00091092,-0.319267028,4.99951964,4.98301166,4.98368615,4.98303985,4.98278053
39.220611,5.56776436,4.99751726,0.755147076,4.99612237,4.981889,4.9825651,4.98191721,4.98165742
39.231103,4.35889894,4.99455754,-0.797282007,4.99315915,4.980768,4.98144572,4.98079623,4.98053597
39.241594,5.65685425,4.99195399,0.815414163,4.99055218,4.97964887,4.98032822,4.97967712,4.97941638
39.252086,4.89897949,4.98963873,-0.301096738,4.98823356,4.97853138,4.97921237,4.97855966,4.97829844
39.262578,5.29150262,4.98755512,0.551314339,4.98614664,4.97741564,4.97809828,4.97744394,4.97718225
39.273069,4.79583152,4.98565609,-0.435688607,4.98424434,4.97630175,4.97698605,4.97633008,4.97606791
39.283561,4.47213595,4.98390263,-0.715378696,4.98248765,4.9751895,4.97587547,4.97521785,4.97495519
39.294052,5.09901951,4.98226398,0.341695087,4.98084577,4.97407908,4.97476673,4.97410745,4.97384432
39.304544,5.19615242,4.98071507,0.464152293,4.97929364,4.97297028,4.97365963,4.97299868,4.97273506
39.315036,5,4.97923663,0.144094993,4.977812,4.97186321,4.97255425,4.97189163,4.97162753
39.325527,5.56776436,4.97781371,0.768082455,4.97638586,4.97075796,4.97145071,4.9707864,4.97052181
39.336019,4.24264069,4.97643441,-0.856617607,4.97500336,4.96965432,4.97034879,4.96968278,4.96941771
39.34651,5.47722558,4.97509016,0.708615141,4.97365589,4.96855249,4.96924869,4.96858097,4.96831541
39.357002,5.38516481,4.97377397,0.641397567,4.97233648,4.96745225,4.96815019,4.96748076,4.96721471
39.367494,4.47213595,4.9724809,-0.707350652,4.97104018,4.96635371,4.9670534,4.96638224,4.9661157
39.377985,4.89897949,4.97120724,-0.268752217,4.96976329,4.96525696,4.96595842,4.96528552,4.96501849
39.388477,5.09901951,4.96994985,0.359262673,4.96850264,4.9641618,4.96486502,4.96419038,4.96392285
39.398968,5,4.96870675,0.176898988,4.96725629,4.96306842,4.96377342,4.96309702,4.962829
39.40946,4.58257569,4.96747601,-0.62040335,4.96602228,4.96197661,4.96268341,4.96200523,4.96173672
39.419952,5.74456265,4.96625643,0.882216649,4.96479942,4.96088647,4.96159507,4.96091511,4.9606461
39.430443,5,4.96504707,0.186957034,4.96358676,4.9597981,4.96050851,4.95982676,4.95955726
39.440935,5.74456265,4.96384684,0.883581239,4.96238323,4.95871128,4.95942352,4.95873997,4.95846996
39.451426,5,4.96265528,0.193247831,4.96118835,4.95762622,4.95834029,4.95765493,4.95738442
39.461918,4.79583152,4.96147155,-0.406988979,4.96000129,4.95654271,4.95725862,4.95657143,4.95630043
39.47241,4.69041576,4.96029527,-0.519499292,4.95882167,4.95546084,4.9561786,4.95548958,4.95521808
39.482901,5,4.95912611,0.202172925,4.95764915,4.95438071,4.95510034,4.95440948,4.95413747
39.493393,3.74165739,4.95796344,-1.10286266,4.95648311,4.95330211,4.95402362,4.9533309,4.95305839
39.503884,5.38516481,4.95680713,0.654490397,4.95532342,4.95222524,4.95294864,4.95225405,4.95198103
39.514376,4.12310563,4.95565664,-0.912442336,4.95416953,4.95114989,4.95187519,4.95117872,4.9509052
39.524868,5.09901951,4.9545118,0.380141705,4.95302128,4.95007616,4.95080336,4.95010501,4.94983098
39.535359,5.74456265,4.95337244,0.889488734,4.9518785,4.94900414,4.94973327,4.94903301,4.94875847
39.545851,5.29150262,4.9522381,0.582464177,4.95074072,4.94793363,4.94866469,4.94796252,4.94768747
39.556342,5.56776436,4.95110879,0.785274205,4.94960795,4.94686482,4.94759782,4.94689374,4.94661817
39.566834,4.69041576,4.94998406,-0.509478457,4.94847976,4.94579751,4.94653246,4.94582644,4.94555037
39.577326,5,4.94886384,0.226133064,4.94735605,4.94473179,4.9454687,4.94476074,4.94448415
39.587817,5.65685425,4.94774805,0.842084436,4.94623677,4.94366776,4.94440665,4.94369673,4.94341963
39.598309,3.16227766,4.94663632,-1.33579889,4.94512153,4.94260521,4.94334608,4.9426342,4.94235658
39.6088,3.74165739,4.94552871,-1.0972107,4.9440104,4.94154433,4.94228721,4.94157334,4.9412952
39.619292,4.69041576,4.94442486,-0.503993154,4.942903,4.94048493,4.94122981,4.94051396,4.9402353
39.629784,5.38516481,4.94332474,0.664710515,4.94179933,4.93942709,4.940174,4.93945614,4.93917696
39.640275,5.19615242,4.94222833,0.503908814,4.94069935,4.93837091,4.93911985,4.93839999,4.93812029
39.650767,4.89897949,4.94113531,-0.205318831,4.93960274,4.9373162,4.93806718,4.93734529,4.93706506
39.661258,5.38516481,4.94004577,0.667172418,4.93850961,4.93626313,4.93701616,4.93629224,4.93601149
39.67175,5.47722558,4.93895941,0.733666248,4.93741963,4.93521151,4.93596661,4.93524063,4.93495936
39.682242,5.29150262,4.93787624,0.594664937,4.93633283,4.93416143,4.93491861,4.93419057,4.93390877
39.692733,5.83095189,4.93679626,0.945598032,4.9352492,4.93311298,4.93387226,4.93314215,4.93285982
39.703225,4.79583152,4.93571918,-0.37401559,4.93416847,4.93206597,4.93282734,4.93209515,4.93181229
39.713716,4.47213595,4.93464515,-0.680080283,4.93309075,4.93102058,4.93178407,4.93104978,4.93076639
39.724208,5.09901951,4.93357386,0.406750111,4.93201577,4.92997662,4.93074223,4.93000584,4.92972192
39.7347,5.47722558,4.93250536,0.738051633,4.93094356,4.92893417,4.92970192,4.92896341,4.92867895
39.745191,5.29150262,4.93143968,0.600052446,4.92987416,4.92789333,4.92866323,4.92792259,4.9276376
39.755683,4.69041576,4.93037656,-0.48985794,4.92880729,4.9268539,4.92762597,4.92688317,4.92659765
39.766174,5.47722558,4.92931614,0.74020905,4.92774311,4.92581607,4.92659031,4.92584536,4.9255593
39.776666,4.69041576,4.92825815,-0.487690881,4.92668136,4.92477963,4.92555606,4.92480894,4.92452234
39.787158,5.47722558,4.92720266,0.741635297,4.92562207,4.92374469,4.92452332,4.92377402,4.92348688
39.797649,4.89897949,4.92615013,-0.164835218,4.92456531,4.92271133,4.92349261,4.92274068,4.92245299
39.808141,5.83095189,4.92509947,0.951762797,4.92351082,4.92167936,4.92246286,4.92170872,4.9214205
39.818632,5.47722558,4.92405126,0.743756895,4.92245877,4.92064896,4.9214347,4.92067834,4.92038957
39.829124,5,4.92300525,0.277479288,4.9214089,4.91961994,4.92040792,4.91964933,4.91936002
39.839616,5.56776436,4.9219615,0.803618608,4.92036127,4.91859238,4.91938263,4.91862179,4.91833193
39.850107,5.38516481,4.92092007,0.681355073,4.91931596,4.91756638,4.91835891,4.91759581,4.9173054
39.860599,4.89897949,4.91988073,-0.144572641,4.91827271,4.91654174,4.91733656,4.91657119,4.91628023
39.87109,5.09901951,4.91884365,0.424471277,4.9172317,4.91551865,4.91631577,4.91554812,4.9152566
39.881582,4.89897949,4.91780858,-0.137219156,4.91619269,4.91449692,4.91529635,4.91452639,4.91423433
39.892074,4.89897949,4.9167756,-0.133402092,4.91515575,4.91347662,4.91427838,4.91350611,4.9132135
39.902565,4.58257569,4.91574478,-0.577208008,4.91412095,4.91245786,4.91326196,4.91248737,4.91219419
39.913057,4.89897949,4.91471588,-0.125444802,4.91308806,4.91144043,4.91224689,4.91146996,4.91117623
39.923548,5.65685425,4.91368909,0.862070278,4.91205724,4.91042454,4.91123336,4.91045407,4.91015979
39.93404,4.79583152,4.91266416,-0.341807897,4.91102829,4.90940996,4.91022117,4.90943952,4.90914467
39.944532,3.74165739,4.91164118,-1.08165789,4.91000126,4.90839681,4.90921041,4.90842638,4.90813097
39.955023,4.69041576,4.91062023,-0.469259488,4.90897624,4.90738516,4.90820117,4.90741475,4.90711878
39.965515,5,4.90960107,0.300664147,4.90795299,4.90637483,4.90719327,4.90640443,4.9061079
39.976006,4.58257569,4.90858389,-0.570971271,4.90693171,4.905366,4.90618687,4.90539561,4.90509852
39.986498,4.89897949,4.90756846,-0.0926767254,4.90591216,4.90435847,4.90518179,4.9043881,4.90409044
39.99699,3.74165739,4.90655487,-1.07930417,4.90489442,4.90335234,4.90417812,4.90338198,4.90308375
40.007481,5.19615242,4.90554318,0.539081848,4.90387858,4.90234769,4.90317596,4.90237735,4.90207855
40.017973,5.47722558,4.9045332,0.756764414,4.90286441,4.90134434,4.90217509,4.90137401,4.90107463
40.028464,5.09901951,4.90352508,0.442147523,4.9018521,4.90034245,4.90117571,4.90037214,4.90007219
40.038956,4.79583152,4.90251863,-0.326629917,4.90084143,4.89934185,4.90017763,4.89937155,4.89907103
40.049448,4.24264069,4.90151391,-0.811710061,4.89983248,4.89834262,4.89918094,4.89837233,4.89807124
40.059939,4.79583152,4.90051101,-0.323542097,4.89882533,4.89734485,4.89818572,4.89737458,4.8970729
40.070431,5.91607978,4.89950972,1.00825099,4.89781976,4.89634835,4.89719178,4.89637809,4.89607584
40.080922,5.65685425,4.89851022,0.870829506,4.89681597,4.8953533,4.89619931,4.89538305,4.89508022
40.091414,5.09901951,4.8975123,0.44889555,4.89581373,4.89435951,4.89520811,4.89438927,4.89408586
40.101906,5,4.89651604,0.321689234,4.89481314,4.89336706,4.89421828,4.89339684,4.89309284
40.112397,5.38516481,4.89552152,0.699745162,4.89381427,4.89237606,4.89322989,4.89240584,4.89210126
40.122889,4.89897949,4.89452853,0.0667154757,4.89281691,4.89138629,4.89224277,4.89141609,4.89111093
40.13338,5.56776436,4.89353726,0.821113332,4.89182125,4.89039796,4.89125709,4.89042777,4.89012202
40.143872,4.47213595,4.8925475,-0.648391505,4.89082707,4.88941086,4.89027266,4.88944068,4.88913434
40.154364,3.74165739,4.89155933,-1.07233481,4.88983447,4.88842508,4.88928956,4.88845491,4.88814798
40.164855,4.47213595,4.89057284,-0.646866975,4.88884353,4.88744072,4.8883079,4.88747056,4.88716304
40.175347,5.56776436,4.88958782,0.82351475,4.88785404,4.88645758,4.88732748,4.88648743,4.88617932
40.185838,4.89897949,4.88860445,0.101857919,4.88686617,4.88547584,4.88634847,4.88550571,4.885197
40.19633,4.89897949,4.88762253,0.106569006,4.88587974,4.88449532,4.8853707,4.88452519,4.88421589
40.206822,5.09901951,4.88664215,0.460844187,4.88489482,4.88351609,4.88439424,4.88354598,4.88323608
40.217313,4.79583152,4.88566338,-0.299719634,4.8839115,4.88253826,4.88341918,4.88256816,4.88225766
40.227805,5.09901951,4.88468603,0.462961638,4.88292957,4.88156163,4.88244534,4.88159153,4.88128043
40.238296,4.58257569,4.88371028,-0.548757312,4.88194922,4.88058638,4.8814729,4.88061629,4.88030459
40.248788,5.56776436,4.88273593,0.827664445,4.88097025,4.87961231,4.88050167,4.87964224,4.87932993
40.25928,5.47722558,4.88176306,0.771662177,4.87999274,4.87863953,4.87953173,4.87866947,4.87835655
40.269771,5.29150262,4.8807919,0.640867162,4.87901677,4.87766812,4.87856332,4.87769806,4.87738454
40.280263,4.47213595,4.87982197,-0.638502947,4.87804215,4.87669788,4.87759596,4.87672783,4.8764137
40.290754,5.19615242,4.87885358,0.563292857,4.87706905,4.87572899,4.87662998,4.87575895,4.87544421
40.301246,4.47213595,4.87788655,-0.63698555,4.87609729,4.87476128,4.87566517,4.87479125,4.8744759
40.311738,4.35889894,4.87692095,-0.719737454,4.87512694,4.87379482,4.87470165,4.8738248,4.87350883
40.322229,5.38516481,4.87595687,0.713588074,4.87415809,4.87282971,4.87373948,4.8728597,4.87254311
40.332721,5.83095189,4.87499412,0.977730934,4.87319054,4.87186575,4.87277848,4.87189574,4.87157855
40.343212,5.19615242,4.87403287,0.567555773,4.87222447,4.87090313,4.87181884,4.87093313,4.87061531
40.353704,4.24264069,4.87307293,-0.793997633,4.87125969,4.86994165,4.87086036,4.86997166,4.86965322
40.364196,3.60555128,4.87211439,-1.12541686,4.87029628,4.86898141,4.86990313,4.86901142,4.86869236
40.374687,5.09901951,4.87115732,0.477349131,4.86933433,4.86802249,4.86894725,4.86805251,4.86773283
40.385179,4.89897949,4.87020154,0.169640628,4.86837364,4.8670647,4.86799251,4.86709473,4.86677442
40.39567,4.47213595,4.86924723,-0.630167655,4.86741439,4.86610822,4.8670391,4.86613826,4.86581732
40.406162,4.89897949,4.86829419,0.175172198,4.86645639,4.86515287,4.86608684,4.86518291,4.86486135
40.416654,4.89897949,4.8673425,0.177867883,4.86549972,4.86419873,4.86513581,4.86422878,4.86390659
40.427145,5.19615242,4.86639226,0.574247478,4.86454447,4.86324589,4.86418609,4.86327594,4.86295312
40.437637,5,4.86544326,0.366819759,4.86359044,4.86229416,4.8632375,4.86232422,4.86200076
40.448128,4.35889894,4.8644957,-0.711053271,4.86263782,4.86134372,4.86229023,4.86137378,4.86104969
40.45862,4.12310563,4.86354937,-0.860490408,4.86168641,4.86039439,4.86134407,4.86042445,4.86009972
40.469112,5.38516481,4.86260436,0.722883425,4.8607363,4.85944624,4.86039913,4.85947631,4.85915094
40.479603,4.69041576,4.86166076,-0.413817592,4.85978757,4.85849937,4.85945548,4.85852945,4.85820344
40.490095,4.79583152,4.86071838,-0.254728979,4.85884004,4.85755359,4.85851293,4.85758367,4.85725702
40.500586,5.19615242,4.85977738,0.579978481,4.85789387,4.85660908,4.85757168,4.85663916,4.85631187
40.511078,4.69041576,4.8588376,-0.410392299,4.85694888,4.85566565,4.85663153,4.85569574,4.8553678
40.52157,4.24264069,4.8578991,-0.7843841,4.85600515,4.85472339,4.85569257,4.85475348,4.85442489
40.532061,4.58257569,4.85696198,-0.523818942,4.85506277,4.85378238,4.85475488,4.85381247,4.85348324
40.542553,5.83095189,4.85602604,0.987383336,4.85412155,4.85284245,4.85381828,4.85287254,4.85254266
40.553044,4.58257569,4.85509147,-0.522030431,4.85318167,4.85190375,4.85288294,4.85193385,4.85160331
40.563536,6.08276253,4.85415807,1.10842432,4.85224294,4.85096612,4.85194869,4.85099622,4.85066503
40.574028,5.38516481,4.85322592,0.729341404,4.85130544,4.85002964,4.8510156,4.85005974,4.84972789
40.584519,4.89897949,4.85229512,0.216065641,4.85036925,4.84909439,4.85008377,4.84912449,4.84879199
40.595011,5,4.85136548,0.385531473,4.8494342,4.84816019,4.84915301,4.84819029,4.84785713
40.605502,5.09901951,4.85043717,0.498580326,4.84850045,4.84722721,4.84822349,4.84725731,4.84692349
40.615994,4.24264069,4.84951001,-0.779018178,4.84756782,4.84629527,4.84729503,4.84632537,4.84599088
40.626486,5,4.84858408,0.389121992,4.84663639,4.84536445,4.84636772,4.84539456,4.84505941
40.636977,4.69041576,4.84765945,-0.396539651,4.84570625,4.84443485,4.84544165,4.84446495,4.84412914
40.647469,5.09901951,4.84673597,0.502278357,4.84477721,4.84350628,4.84451662,4.84353638,4.8431999
40.65796,5.65685425,4.84581378,0.900577854,4.84384945,4.8425789,4.84359282,4.84260901,4.84227185
40.668452,4.69041576,4.84489271,-0.39303556,4.84292277,4.84165255,4.84267005,4.84168265,4.84134483
40.678944,4.47213595,4.84397285,-0.6097843,4.84199728,4.8407273,4.84174842,4.8407574,4.8404189
40.689435,4.47213595,4.84305427,-0.609030635,4.84107304,4.83980324,4.840828,4.83983334,4.83949417
40.699927,6,4.8421368,1.07604052,4.84014987,4.83888019,4.8399086,4.83891029,4.83857044
40.710418,5.56776436,4.8412206,0.852375366,4.83922796,4.83795832,4.83899041,4.83798842,4.83764789
40.72091,4.79583152,4.8403055,-0.210888531,4.83830711,4.83703745,4.83807325,4.83706754,4.83672633
40.731402,4.35889894,4.83939157,-0.693175755,4.8373874,4.83611767,4.83715719,4.83614775,4.83580586
40.741893,4.69041576,4.8384789,-0.384789741,4.83646893,4.83519905,4.83624232,4.83522913,4.83488655
40.752385,5.38516481,4.83756732,0.739998302,4.83555151,4.83428142,4.83532846,4.8343115,4.83396823
40.762876,5,4.83665698,0.404157168,4.83463531,4.83336494,4.83441579,4.83339502,4.83305107
40.773368,4.79583152,4.83574772,-0.199790378,4.83372014,4.83244945,4.83350412,4.83247952,4.83213488
40.78386,4.69041576,4.83483961,-0.380031375,4.8328061,4.83153502,4.83259354,4.83156509,4.83121976
40.794351,5.74456265,4.83393273,0.954269311,4.83189327,4.83062174,4.83168412,4.8306518,4.83030577
40.804843,5.38516481,4.83302691,0.743059823,4.83098146,4.82970942,4.8307757,4.82973948,4.82939276
40.815334,5.29150262,4.83212231,0.677776004,4.83007084,4.82879825,4.82986845,4.8288283,4.82848088
40.825826,4.89897949,4.83121876,0.2603089,4.82916124,4.82788803,4.82896217,4.82791808,4.82756996
40.836318,5,4.83031634,0.411926762,4.82825274,4.82697886,4.82805697,4.8270089,4.82666007
40.846809,5.38516481,4.82941513,0.745486199,4.82734541,4.82607081,4.82715292,4.82610084,4.82575132
40.857301,5,4.82851496,0.414107523,4.82643909,4.82516371,4.82624984,4.82519374,4.8248435
40.867792,4.12310563,4.82761599,-0.839351154,4.82553394,4.82425773,4.8253479,4.82428775,4.82393681
40.878284,4.35889894,4.82671804,-0.683973021,4.82462978,4.82335269,4.82444694,4.8233827,4.82303105
40.888776,5.47722558,4.8258212,0.807096264,4.82372669,4.82244867,4.82354702,4.82247867,4.82212631
40.899267,5.29150262,4.82492554,0.683064478,4.82282476,4.82154575,4.82264823,4.82157575,4.82122267
40.909759,4.47213595,4.8240309,-0.593207337,4.8219238,4.82064377,4.82175039,4.82067376,4.82031997
40.92025,4.24264069,4.82313744,-0.761903372,4.821024,4.81974288,4.82085368,4.81977286,4.81941835
40.930742,4.24264069,4.82224498,-0.761317469,4.82012516,4.81884291,4.81995792,4.81887288,4.81851765
40.941234,4.79583152,4.8213536,-0.159756308,4.81922737,4.81794395,4.81906319,4.81797391,4.81761796
40.951725,4.89897949,4.82046339,0.280207234,4.81833071,4.81704607,4.81816957,4.81707602,4.81671934
40.962217,5,4.81957417,0.424765614,4.81743501,4.8161491,4.81727689,4.81617904,4.81582164
40.972708,4.89897949,4.81868611,0.283360856,4.81654043,4.8152532,4.81638532,4.81528313,4.81492501
40.9832,4.79583152,4.81779903,-0.148214401,4.8156468,4.81435821,4.81549467,4.81438813,4.81402927
40.993692,5.47722558,4.81691302,0.812596184,4.8147542,4.8134642,4.81460504,4.81349411,4.81313452
41.004183,5.09901951,4.81602815,0.53196933,4.8138627,4.81257126,4.8137165,4.81260115,4.81224083
41.014675,4.35889894,4.81514424,-0.675459326,4.81297214,4.8116792,4.81282887,4.81170908,4.81134803
41.025166,5.09901951,4.81426148,0.533627243,4.81208268,4.8107882,4.81194234,4.81081807,4.81045628
41.035658,5,4.81337968,0.431995744,4.81119414,4.80989809,4.81105672,4.80992794,4.80956541
41.04615,4.89897949,4.81249892,0.294075786,4.81030661,4.80900894,4.81017209,4.80903878,4.8086755
41.056641,4.58257569,4.81161928,-0.478584984,4.80942017,4.80812083,4.80928853,4.80815066,4.80778664
41.067133,4.89897949,4.8107406,0.297050314,4.80853464,4.8072336,4.80840588,4.80726341,4.80689864
41.077624,5.47722558,4.80986303,0.816922609,4.80765019,4.8063474,4.80752429,4.80637719,4.80601168
41.088116,4.12310563,4.8089864,-0.828179192,4.80676664,4.80546206,4.8066436,4.80549184,4.80512558
41.098608,5.29150262,4.8081108,0.695263853,4.80588408,4.80457767,4.80576389,4.80460744,4.80424042
41.109099,4.35889894,4.8072363,-0.669579983,4.80500258,4.80369431,4.80488523,4.80372405,4.80335629
41.119591,5,4.80636273,0.440042352,4.80412197,4.80281179,4.80400746,4.80284152,4.802473
41.130082,4.35889894,4.80549026,-0.668274878,4.80324242,4.8019303,4.80313073,4.80196001,4.80159073
41.140574,4.58257569,4.8046283,-0.471224585,4.80236376,4.80104965,4.80225489,4.80108895,4.8007093
41.151066,4.79583152,4.80375777,-0.0890294582,4.80148606,4.80016992,4.80138,4.80020921,4.79982879
41.161557,4.24264069,4.80288831,-0.748496912,4.8006094,4.7992912,4.80050615,4.79933048,4.79894929
41.172049,4.24264069,4.80201977,-0.747916498,4.79973361,4.79841331,4.79963317,4.79845258,4.79807061
41.18254,4.89897949,4.80115231,0.312773361,4.79885886,4.79753643,4.79876121,4.79757568,4.79719294
41.193032,5.09901951,4.80028575,0.546565422,4.79798498,4.79666036,4.79789012,4.79669961,4.79631608
41.203524,4.47213595,4.79942018,-0.572087603,4.79711203,4.79578521,4.79701998,4.79582444,4.79544013
41.214015,4.58257569,4.79855567,-0.464736461,4.79624011,4.79491104,4.79615085,4.79495026,4.79456517
41.224507,4.69041576,4.79769206,-0.327530612,4.79536905,4.79403769,4.79528257,4.79407689,4.79369101
41.234998,4.69041576,4.79682951,-0.3262112,4.79449899,4.79316531,4.79441531,4.7932045,4.79281784
41.24549,5.83095189,4.79596784,1.01734166,4.79362979,4.79229374,4.79354889,4.79233292,4.79194547
41.255982,5.09901951,4.79510714,0.551282478,4.7927615,4.79142307,4.79268339,4.79146222,4.79107398
41.266473,5.19615242,4.79424749,0.633959724,4.79189422,4.79055335,4.7918189,4.7905925,4.79020346
41.276965,4.47213595,4.79338872,-0.566791639,4.79102777,4.78968444,4.79095524,4.78972357,4.78933373
41.287456,5.19615242,4.79253098,0.635312082,4.79016232,4.78881649,4.79009258,4.7888556,4.78846496
41.297948,4.69041576,4.79167412,-0.318211186,4.78929769,4.78794932,4.78923075,4.78798841,4.78759698
41.30844,5.47722558,4.79081821,0.828497055,4.78843397,4.78708303,4.78836982,4.7871221,4.78672986
41.318931,4.58257569,4.78996332,-0.455398315,4.78757123,4.78621768,4.78750988,4.78625674,4.78586369
41.329423,4.47213595,4.7891093,-0.563003856,4.7867093,4.78535312,4.78665076,4.78539215,4.7849983
41.339914,5.29150262,4.78825629,0.709398568,4.78584835,4.78448949,4.78579262,4.78452851,4.78413384
41.350406,5.91607978,4.78740415,1.06239147,4.78498821,4.78362664,4.78493529,4.78366563,4.78327015
41.360898,4.69041576,4.78655293,-0.31005995,4.78412895,4.78276463,4.78407886,4.78280361,4.78240732
41.371389,4.24264069,4.78570273,-0.736927433,4.78327065,4.78190356,4.78322339,4.78194252,4.78154541
41.381881,5.38516481,4.78485337,0.774797674,4.78241315,4.78104325,4.78236872,4.78108219,4.78068425
41.392372,5.09901951,4.78400502,0.561261523,4.78155661,4.78018386,4.78151502,4.78022278,4.77982402
41.402864,5,4.7831575,0.465663504,4.78070085,4.77932523,4.78066211,4.77936412,4.77896454
41.413356,4.24264069,4.7823109,-0.734622499,4.77984596,4.77846743,4.77981008,4.7785063,4.77810589
41.423847,5.56776436,4.7814653,0.886735059,4.77899202,4.77761054,4.778959,4.77764939,4.77724815
41.434339,5.19615242,4.78062052,0.644617639,4.77813885,4.7767544,4.77810871,4.77679322,4.77639115
41.44483,3.74165739,4.77977673,-1.01888142,4.77728662,4.77589916,4.77725937,4.77593795,4.77553505
41.455322,6,4.77893377,1.10501866,4.77643516,4.77504466,4.77641081,4.77508343,4.77467968
41.465814,4.47213595,4.77809171,-0.553132671,4.77558455,4.77419097,4.7755631,4.77422971,4.77382513
41.476305,5.19615242,4.77725062,0.647226238,4.77473487,4.77333817,4.77471634,4.77337689,4.77297147
41.486797,4.35889894,4.77641035,-0.646151224,4.77388594,4.77248611,4.77387034,4.7725248,4.77211853
41.497288,4.35889894,4.77557105,-0.645501435,4.77303793,4.77163493,4.77302528,4.77167359,4.77126648
41.50778,5,4.77473255,0.474623478,4.77219068,4.77078447,4.77218098,4.7708231,4.77041514
41.518272,4.47213595,4.77389495,-0.549325942,4.77134425,4.7699348,4.77133753,4.76997341,4.76956459
41.528763,5,4.7730583,0.476383984,4.77049874,4.76908601,4.770495,4.76912459,4.76871492
41.539255,4.79583152,4.77222245,0.153652432,4.76965396,4.76823794,4.76965323,4.76827648,4.76786596
41.549746,4.24264069,4.77138756,-0.72714983,4.76881009,4.76739073,4.76881237,4.76742924,4.76701786
41.560238,5.09901951,4.77055346,0.573119576,4.76796695,4.76654422,4.76797226,4.7665827,4.76617046
41.57073,4.79583152,4.76972024,0.16158987,4.76712463,4.76569849,4.76713299,4.76573695,4.76532383
41.581221,4.89897949,4.76888796,0.360682033,4.76628319,4.76485362,4.76629462,4.76489204,4.76447807
41.591713,4.35889894,4.76805646,-0.639654217,4.76544248,4.76400945,4.76545699,4.76404783,4.76363299
41.602204,5.38516481,4.7672259,0.7860909,4.76460265,4.76316612,4.76462026,4.76320448,4.76278876
41.612696,5.56776436,4.76639613,0.89519173,4.76376354,4.76232348,4.76378427,4.7623618,4.76194521
41.623188,4.58257569,4.76556721,-0.427775073,4.76292522,4.76148161,4.7629491,4.76151989,4.76110242
41.633679,4.89897949,4.76473922,0.366388136,4.76208778,4.76064057,4.76211481,4.76067882,4.76026047
41.644171,5.09901951,4.763912,0.578884714,4.76125105,4.75980021,4.76128126,4.75983842,4.75941919
41.654662,4.12310563,4.76308571,-0.799987552,4.76041518,4.75896068,4.76044859,4.75899886,4.75857874
41.665154,5.19615242,4.76226018,0.658704972,4.75958001,4.75812182,4.75961665,4.75815996,4.75773896
41.675646,5.19615242,4.7614355,0.659330664,4.75874562,4.75728371,4.7587855,4.75732181,4.75689992
41.686137,5.65685425,4.76061173,0.94670086,4.75791208,4.75644642,4.75795523,4.75648449,4.7560617
41.696629,4.89897949,4.75978872,0.373082785,4.75707924,4.75560979,4.75712568,4.75564782,4.75522413
41.70712,5,4.75896662,0.490951501,4.75624724,4.75477398,4.756297,4.75481196,4.75438738
41.717612,4.35889894,4.75814528,-0.631859427,4.75541593,4.75393882,4.75546903,4.75397676,4.75355128
41.728104,5.19615242,4.75732476,0.662440685,4.75458538,4.75310439,4.75464185,4.75314229,4.7527159
41.738595,4.89897949,4.75650515,0.377457729,4.75375567,4.75227076,4.75381552,4.75230862,4.75188133
41.749087,5.65685425,4.75568628,0.949298673,4.75292663,4.75143778,4.75298991,4.7514756,4.75104739
41.759578,5.56776436,4.75486831,0.901607483,4.75209843,4.7506056,4.75216515,4.75064337,4.75021425
41.77007,5.91607978,4.75405108,1.07797435,4.75127089,4.74977405,4.75134108,4.74981178,4.74938175
41.780562,4.47213595,4.75323466,-0.530187428,4.7504441,4.74894322,4.75051779,4.7489809,4.74854995
41.791053,4,4.75241914,-0.86742097,4.74961813,4.74811317,4.74969535,4.74815081,4.74771894
41.801545,5,4.75160435,0.498393071,4.74879282,4.74728376,4.7488736,4.74732134,4.74688855
41.812036,4.79583152,4.75079044,0.212228848,4.74796832,4.74645512,4.74805269,4.74649266,4.74605894
41.822528,4.79583152,4.74997726,0.214136086,4.74714448,4.7456271,4.74723247,4.7456646,4.74522995
41.83302,5.65685425,4.74916488,0.95272733,4.74632136,4.74479978,4.74641301,4.74483723,4.74440165
41.843511,4.58257569,4.74835339,-0.407158065,4.74549905,4.74397324,4.74559438,4.74401063,4.74357412
41.854003,4.12310563,4.74754261,-0.790213251,4.74467739,4.7431473,4.74477643,4.74318465,4.7427472
41.864494,5.09901951,4.7467327,0.59353754,4.74385652,4.74232213,4.74395931,4.74235942,4.74192104
41.874986,5.65685425,4.74592351,0.954426915,4.74303629,4.74149756,4.74314287,4.74153481,4.74109548
41.885478,5.38516481,4.74511512,0.800031057,4.74221677,4.74067368,4.74232717,4.74071087,4.74027059
41.895969,4.79583152,4.74430758,0.226988855,4.74139804,4.73985055,4.7415123,4.73988768,4.73944646
41.906461,4.89897949,4.74350076,0.394307906,4.74057994,4.73902801,4.74069809,4.73906509,4.73862292
41.916952,3.46410162,4.7426948,-1.13074895,4.73976262,4.73820623,4.7398847,4.73824325,4.73780013
41.927444,4,4.74188954,-0.861330101,4.73894592,4.73738503,4.73907197,4.737422,4.73697792
41.937936,4.69041576,4.74108507,-0.225098435,4.73812993,4.7365645,4.73825998,4.73660141,4.73615637
41.948427,4.79583152,4.74028144,0.235690646,4.7373147,4.73574471,4.7374488,4.73578156,4.73533555
41.958919,5.29150262,4.73947852,0.742983245,4.73650008,4.73492549,4.73663827,4.73496229,4.73451532
41.96941,4.69041576,4.73867645,-0.219683148,4.73568624,4.73410701,4.73582855,4.73414375,4.73369581
41.979902,3.87298335,4.73787507,-0.929995548,4.734873,4.7332891,4.73501948,4.73332578,4.73287687
41.990394,4.47213595,4.73707446,-0.51472177,4.73406044,4.73247184,4.73421113,4.73250846,4.73205857
42.000885,5.56776436,4.73627469,0.911860556,4.73324864,4.73165531,4.73340359,4.73169186,4.731241
42.011377,4.89897949,4.73547561,0.404356123,4.73243744,4.73083934,4.73259669,4.73087583,4.73042398
42.021868,6,4.73467737,1.1248656,4.73162698,4.73002408,4.73179058,4.73006051,4.72960768
42.03236,4.79583152,4.73387982,0.248900994,4.73081712,4.72920939,4.73098511,4.72924575,4.72879193
42.042852,4.24264069,4.73308302,-0.700315884,4.73000793,4.72839532,4.73018036,4.72843162,4.72797681
42.053343,5.29150262,4.73228706,0.747807168,4.72919948,4.72758197,4.72937639,4.7276182,4.7271624
42.063835,5,4.73149178,0.518177788,4.72839161,4.72676916,4.72857306,4.72680532,4.72634853
42.074326,4.12310563,4.73069733,-0.779481688,4.72758448,4.72595705,4.72777051,4.72599315,4.72553535
42.084818,5.38516481,4.72990355,0.809482092,4.72677793,4.72514549,4.72696859,4.72518152,4.72472272
42.09531,4.58257569,4.72911052,-0.382798678,4.72597203,4.72433454,4.72616738,4.7243705,4.7239107
42.105801,5.38516481,4.72831832,0.810460664,4.72516685,4.72352429,4.72536694,4.72356018,4.72309936
42.116293,4.58257569,4.72752679,-0.380724429,4.72436225,4.72271457,4.72456713,4.72275038,4.72228856
42.126784,4.89897949,4.72673607,0.415022183,4.72355836,4.72190553,4.72376809,4.72194128,4.72147844
42.137276,4.79583152,4.72594603,0.26435865,4.72275504,4.72109703,4.72296967,4.7211327,4.72066884
42.147768,5.09901951,4.72515672,0.611443203,4.72195236,4.72028912,4.72217194,4.72032472,4.71985984
42.158259,4,4.72436823,-0.851098251,4.72115039,4.7194819,4.72137499,4.71951741,4.71905151
42.168751,4.69041576,4.72358041,-0.182111632,4.72034898,4.71867519,4.72057864,4.71871063,4.7182437
42.179242,4.89897949,4.72279339,0.419745274,4.71954827,4.71786915,4.71978307,4.71790451,4.71743655
42.189734,4.24264069,4.72200703,-0.692362873,4.71874811,4.71706362,4.7189881,4.71709891,4.71662991
42.200226,5,4.72122141,0.527994875,4.71794857,4.71625868,4.71819382,4.71629389,4.71582386
42.210717,5.09901951,4.7204366,0.615290921,4.71714973,4.71545441,4.7174003,4.71548953,4.71501846
42.221209,4.35889894,4.71965244,-0.600627582,4.71635144,4.71465063,4.71660738,4.71468568,4.71421356
42.2317,4.69041576,4.71886908,-0.168681119,4.71555383,4.71384751,4.71581522,4.71388248,4.71340931
42.242192,4.35889894,4.71808638,-0.599322478,4.71475676,4.7130449,4.71502366,4.71307977,4.71260556
42.252684,5.09901951,4.7173044,0.617830976,4.7139603,4.71224285,4.71423278,4.71227764,4.71180238
42.263175,4,4.71652322,-0.846476946,4.71316453,4.71144145,4.71344265,4.71147615,4.71099983
42.273667,5,4.71574269,0.533157864,4.71236928,4.71064054,4.71265312,4.71067516,4.71019777
42.284158,4.58257569,4.71496296,-0.363850607,4.71157471,4.70984026,4.71186434,4.7098748,4.70939635
42.29465,5.19615242,4.71418387,0.694239547,4.71078066,4.70904048,4.71107615,4.70907492,4.70859541
42.305142,4.69041576,4.71340551,-0.151623708,4.70998721,4.70824125,4.71028863,4.7082756,4.70779502
42.315633,5.74456265,4.71262794,1.01584187,4.70919442,4.70744265,4.70950186,4.70747691,4.70699525
42.326125,4.47213595,4.71185101,-0.489607039,4.70840216,4.70664453,4.70871567,4.7066787,4.70619596
42.336616,4.79583152,4.71107487,0.29112996,4.70761055,4.70584703,4.70793023,4.70588111,4.70539729
42.347108,4.79583152,4.71029937,0.2924588,4.70681946,4.70505,4.70714538,4.70508398,4.70459908
42.3576,4.12310563,4.70952459,-0.765779973,4.70602895,4.70425352,4.70636118,4.70428741,4.70380142
42.368091,4.69041576,4.7087506,-0.135406198,4.70523909,4.70345765,4.70557773,4.70349144,4.70300436
42.378583,4.58257569,4.70797724,-0.354120811,4.70444974,4.70266225,4.70479486,4.70269594,4.70220776
42.389074,4.89897949,4.70720467,0.43792101,4.70366103,4.70186745,4.70401273,4.70190104,4.70141177
42.399566,5.29150262,4.70643274,0.764898607,4.70287282,4.70107311,4.70323118,4.7011066,4.70061623
42.410058,4.47213595,4.70566152,-0.483244831,4.70208519,4.7002793,4.70245028,4.70031269,4.69982121
42.420549,4.69041576,4.70489108,-0.12031344,4.70129819,4.69948609,4.70167012,4.69951938,4.69902679
42.431041,4.79583152,4.70412128,0.30283699,4.70051168,4.69869333,4.70089054,4.69872652,4.69823282
42.441532,5,4.70335226,0.54465378,4.69972581,4.69790117,4.70011168,4.69793425,4.69743943
42.452024,5.47722558,4.70258387,0.88013732,4.69894043,4.69710945,4.69933341,4.69714242,4.69664648
42.462516,4.69041576,4.70181619,-0.106772818,4.6981556,4.69631824,4.69855578,4.6963511,4.69585404
42.473007,4.79583152,4.7010493,0.307867225,4.6973714,4.69552762,4.69777889,4.69556037,4.69506219
42.483499,5.29150262,4.70028303,0.768908053,4.69658767,4.69473744,4.69700257,4.69477008,4.69427076
42.49399,4.69041576,4.69951754,-0.0954032558,4.69580457,4.69394783,4.69622697,4.69398036,4.69347991
42.504482,5.19615242,4.69875269,0.705265721,4.69502195,4.69315866,4.69545195,4.69319107,4.69268949
42.514974,4.47213595,4.69798854,-0.475239498,4.69423986,4.69236998,4.69467758,4.69240229,4.69189956
42.525465,4.89897949,4.69722516,0.449170705,4.69345839,4.69158188,4.69390393,4.69161407,4.6911102
42.535957,4.58257569,4.69646242,-0.337471077,4.69267739,4.6907942,4.69313085,4.69082627,4.69032125
42.546448,4.47213595,4.69570046,-0.472826083,4.691897,4.69000709,4.69235849,4.69003904,4.68953287
42.55694,4.35889894,4.69493913,-0.579689731,4.69111707,4.68922039,4.69158671,4.68925223,4.6887449
42.567432,4.47213595,4.6941785,-0.471213906,4.69033766,4.68843418,4.69081557,4.6884659,4.68795741
42.577923,4.47213595,4.69341865,-0.470406946,4.68955887,4.68764854,4.69004516,4.68768013,4.68717047
42.588415,5,4.69265943,0.554383053,4.68878052,4.68686329,4.68927531,4.68689476,4.68638394
42.598906,5.09901951,4.69190099,0.638058402,4.68800278,4.6860786,4.68850619,4.68610995,4.68559795
42.609398,3.87298335,4.69114318,-0.904521881,4.68722548,4.68529432,4.68773763,4.68532553,4.68481236
42.61989,3.46410162,4.69038607,-1.10737729,4.6864487,4.6845105,4.68696972,4.68454159,4.68402724
42.630381,4.79583152,4.68962975,0.32588614,4.68567251,4.68372724,4.68620253,4.6837582,4.68324266
42.640873,4.47213595,4.68887405,-0.465551391,4.68489676,4.68294436,4.68543591,4.68297519,4.68245847
42.651364,5.38516481,4.68811914,0.83489261,4.6841216,4.68216203,4.68467001,4.68219273,4.68167482
42.661856,4.69041576,4.68736486,0.0552349954,4.68334688,4.68138009,4.68390468,4.68141065,4.68089155
42.672348,4.79583152,4.68661128,0.33048486,4.68257266,4.6805986,4.68314,4.68062903,4.68010873
42.682839,4.58257569,4.68585849,-0.3213764,4.68179903,4.67981765,4.68237603,4.67984794,4.67932644
42.693331,5.29150262,4.68510633,0.778714515,4.68102582,4.67903708,4.68161264,4.67906724,4.67854452
42.703822,4.12310563,4.68435495,-0.749165751,4.68025319,4.67825704,4.68084997,4.67828705,4.67776313
42.714314,4.69041576,4.68360421,0.0825321198,4.67948098,4.67747737,4.68008787,4.67750724,4.67698211
42.724806,3.60555128,4.68285418,-1.03793203,4.67870927,4.67669815,4.67932641,4.67672788,4.67620153
42.735297,5.38516481,4.68210493,0.838486656,4.67793812,4.67591945,4.67856568,4.67594904,4.67542146
42.745789,5.19615242,4.68135633,0.717492922,4.6771674,4.67514112,4.67780552,4.67517056,4.67464175
42.75628,4.58257569,4.68060851,-0.313101926,4.67639724,4.6743633,4.67704609,4.67439259,4.67386256
42.766772,4.58257569,4.67986134,-0.311906462,4.67562749,4.67358584,4.67628723,4.67361499,4.67308372
42.777264,4.79583152,4.67911488,0.34163818,4.67485822,4.67280882,4.67552902,4.67283782,4.6723053
42.787755,4.12310563,4.67836921,-0.745160105,4.67408952,4.67203231,4.67477154,4.67206115,4.67152739
42.798247,4.79583152,4.67762419,0.34381294,4.67332122,4.67125615,4.67401463,4.67128483,4.67074983
42.808738,5,4.67687996,0.568436491,4.67255347,4.67048049,4.67325846,4.67050902,4.66997277
42.81923,3.60555128,4.67613638,-1.03469082,4.67178612,4.66970518,4.67250286,4.66973355,4.66919604
42.829722,5.09901951,4.67539352,0.65086557,4.67101925,4.66893029,4.67174792,4.66895851,4.66841974
42.840213,5,4.67465147,0.570393315,4.67025293,4.6681559,4.67099371,4.66818395,4.66764392
42.850705,5.38516481,4.67391007,0.8433592,4.669487,4.66738185,4.67024009,4.66740974,4.66686844
42.861196,4.79583152,4.67316947,0.350231433,4.66872161,4.66660828,4.6694872,4.66663601,4.66609344
42.871688,4.58257569,4.67242953,-0.29975629,4.66795661,4.66583506,4.6687349,4.66586262,4.66531877
42.88218,4.12310563,4.67169032,-0.740665038,4.66719208,4.66506224,4.66798326,4.66508964,4.6645445
42.892671,5,4.67095193,0.57362712,4.66642808,4.66428991,4.66723236,4.66431713,4.66377071
42.903163,4.58257569,4.6702142,-0.296038011,4.66566447,4.6635179,4.66648206,4.66354496,4.66299724
42.913654,4.24264069,4.66947728,-0.653327326,4.66490139,4.66274637,4.6657325,4.66277325,4.66222425
42.924146,4.12310563,4.66874104,-0.738671384,4.66413869,4.66197516,4.66498354,4.66200187,4.66145157
42.934638,5.19615242,4.66800554,0.726737146,4.66337645,4.66120436,4.66423525,4.66123089,4.66067928
42.945129,3.87298335,4.66727087,-0.891228097,4.66261473,4.66043402,4.66348771,4.66046037,4.65990745
42.955621,4.79583152,4.66653687,0.359575653,4.66185338,4.65966399,4.66274078,4.65969017,4.65913594
42.966112,4.35889894,4.66580371,-0.553989857,4.66109256,4.65889444,4.6619946,4.65892043,4.65836488
42.976604,5.19615242,4.66507123,0.728753179,4.6603321,4.65812519,4.66124903,4.658151,4.65759413
42.987096,4.89897949,4.66433951,0.484396506,4.65957209,4.65735633,4.66050415,4.65738195,4.65682376
42.997587,4.47213595,4.66360863,-0.437575907,4.6588126,4.65658792,4.65976003,4.65661336,4.65605384
43.008079,5.47722558,4.66287845,0.902411839,4.65805347,4.65581982,4.65901653,4.65584507,4.65528421
43.01857,4.58257569,4.66214911,-0.282087602,4.65729485,4.65505218,4.6582738,4.65507723,4.65451503
43.029062,4.35889894,4.66142048,-0.550019578,4.65653659,4.65428483,4.6575317,4.65430969,4.65374615
43.039554,4.35889894,4.66069263,-0.549357522,4.65577877,4.65351785,4.6567903,4.65354252,4.65297763
43.050045,4.35889894,4.65996564,-0.548695446,4.65502145,4.65275132,4.65604968,4.65277579,4.65220955
43.060537,4.89897949,4.65923936,0.489632642,4.65426449,4.65198509,4.6553097,4.65200936,4.65144175
43.071028,5.29150262,4.65851395,0.795605852,4.65350802,4.65121929,4.6545705,4.65124336,4.65067439
43.08152,4.89897949,4.65778927,0.491111205,4.65275191,4.65045378,4.65383195,4.65047764,4.64990731
43.092012,4.47213595,4.65706539,-0.430034229,4.65199623,4.64968863,4.65309412,4.64971229,4.64914058
43.102503,5.09901951,4.65634239,0.665339853,4.65124104,4.64892391,4.65235709,4.64894737,4.64837428
43.112995,5,4.65562014,0.586838871,4.6504862,4.64815948,4.65162073,4.64818272,4.64760826
43.123486,5,4.65489877,0.58745317,4.64973184,4.64739547,4.65088517,4.6474185,4.64684265
43.133978,5.19615242,4.65417816,0.736189011,4.64897784,4.64663174,4.65015028,4.64665456,4.64607732
43.14447,4.47213595,4.65345838,-0.425819714,4.64822424,4.64586836,4.64941613,4.64589096,4.64531232
43.154961,4.47213595,4.65273951,-0.424974769,4.64747114,4.6451054,4.64868281,4.64512778,4.64454774
43.165453,4.24264069,4.65202141,-0.639828666,4.64671837,4.64434271,4.64795018,4.64436487,4.64378343
43.175944,4.79583152,4.65130423,0.380167461,4.64596608,4.64358044,4.64721837,4.64360238,4.64301952
43.186436,4.12310563,4.65058783,-0.726279701,4.64521413,4.64281843,4.64648727,4.64284014,4.64225587
43.196928,5,4.6498723,0.591715899,4.64446259,4.64205676,4.64575694,4.64207824,4.64149255
43.207419,4.47213595,4.6491577,-0.42073952,4.64371152,4.64129549,4.64502746,4.64131675,4.64072963
43.217911,4.69041576,4.64844391,0.204870323,4.64296078,4.64053449,4.64429871,4.64055552,4.63996697
43.228402,4.47213595,4.64773107,-0.419040713,4.64221051,4.63977389,4.64357081,4.63979468,4.6392047
43.238894,4.69041576,4.64701906,0.208318744,4.64146058,4.63901355,4.64284365,4.6390341,4.63844268
43.249386,4.69041576,4.64630795,0.210018601,4.64071104,4.63825353,4.64211729,4.63827385,4.63768097
43.259877,5,4.64559781,0.595316883,4.63996196,4.63749391,4.64139182,4.63751398,4.63691966
43.270369,5,4.64488852,0.59591231,4.63921321,4.63673454,4.64066711,4.63675437,4.63615859
43.28086,5.65685425,4.64418022,1.00631706,4.63846493,4.63597555,4.63994329,4.63599514,4.6353979
43.291352,5,4.64347279,0.597098995,4.63771696,4.63521682,4.63922025,4.63523615,4.63463745
43.301844,5.38516481,4.6427663,0.861625502,4.63696939,4.6344584,4.63849806,4.63447748,4.6338773
43.312335,5.09901951,4.64206083,0.67598719,4.63622227,4.63370036,4.63777679,4.63371919,4.63311753
43.322827,5.56776436,4.64135626,0.962500963,4.63547547,4.63294256,4.63705632,4.63296114,4.632358
43.333318,4,4.64065273,-0.80040785,4.63472912,4.63218514,4.63633679,4.63220346,4.63159883
43.34381,4.35889894,4.63995011,-0.530142589,4.63398309,4.63142796,4.63561809,4.63144602,4.6308399
43.354302,4.12310563,4.63924848,-0.718430831,4.63323743,4.63067108,4.63490028,4.63068887,4.63008125
43.364793,5,4.63854793,0.601208838,4.63249223,4.62991457,4.63418344,4.6299321,4.62932298
43.375285,4.35889894,4.63784833,-0.528156595,4.63174734,4.62915829,4.63346745,4.62917555,4.62856492
43.385776,4.47213595,4.63714983,-0.406218994,4.63100289,4.62840238,4.63275246,4.62841937,4.62780722
43.396268,4.47213595,4.63645229,-0.405359519,4.63025875,4.62764669,4.63203834,4.62766341,4.62704974
43.40676,4.35889894,4.63575582,-0.526171905,4.62951499,4.6268913,4.63132517,4.62690774,4.62629255
43.417251,4.47213595,4.63506047,-0.403639094,4.62877166,4.62613627,4.63061304,4.62615243,4.6255357
43.427743,5.56776436,4.63436614,0.966125365,4.62802864,4.62538145,4.62990181,4.62539733,4.62477907
43.438234,4.47213595,4.63367297,-0.40191668,4.62728606,4.624627,4.62919164,4.62464259,4.62402279
43.448726,4.79583152,4.63298085,0.403547616,4.62654378,4.62387275,4.62848241,4.62388806,4.62326671
43.459218,4.79583152,4.63228984,0.404402871,4.62580186,4.62311879,4.62777419,4.6231338,4.62251091
43.469709,4.58257569,4.63160004,-0.221414425,4.62506038,4.62236518,4.62706708,4.6223799,4.62175544
43.480201,4.24264069,4.63091133,-0.623113669,4.6243192,4.62161178,4.62636094,4.6216262,4.62100018
43.490692,5,4.63022386,0.608092215,4.62357845,4.62085873,4.62565593,4.62087285,4.62024526
43.501184,4.35889894,4.62953751,-0.520229338,4.62283799,4.62010587,4.62495194,4.62011969,4.61949053
43.511676,5.56776436,4.62885236,0.968974717,4.62209789,4.61935329,4.62424903,4.61936681,4.61873606
43.522167,5,4.6281685,0.609779875,4.62135822,4.61860105,4.62354731,4.61861426,4.61798192
43.532659,5.38516481,4.62748582,0.870447577,4.62061884,4.61784901,4.62284665,4.6178619,4.61722798
43.54315,4.12310563,4.62680447,-0.709717438,4.61987988,4.6170973,4.6221472,4.61710988,4.61647436
43.553642,4.69041576,4.62612433,0.253557552,4.61914121,4.61634579,4.62144886,4.61635805,4.61572092
43.564134,3.60555128,4.62544549,-1.00989812,4.6184029,4.61559453,4.6207517,4.61560648,4.61496774
43.574625,4.58257569,4.62476804,-0.205407746,4.61766501,4.61484361,4.62005581,4.61485523,4.61421488
43.585117,4.69041576,4.62409186,0.257534261,4.6169274,4.61409288,4.61936108,4.61410417,4.61346219
43.595608,4,4.62341712,-0.78956768,4.61619021,4.61334247,4.61866767,4.61335343,4.61270983
43.6061,4.79583152,4.6227437,0.416038242,4.6154533,4.61259224,4.61797546,4.61260287,4.61195763
43.616592,4.79583152,4.6220717,0.416845082,4.61471674,4.61184226,4.61728455,4.61185256,4.61120568
43.627083,4.69041576,4.6214012,0.262706225,4.6139806,4.61109261,4.61659501,4.61110256,4.61045404
43.637575,5.83095189,4.6207321,1.1000999,4.61324473,4.61034313,4.61590676,4.61035274,4.60970256
43.648066,3.87298335,4.62006455,-0.864338593,4.61250928,4.60959397,4.61521993,4.60960323,4.6089514
43.658558,3.87298335,4.61939845,-0.863953187,4.61177411,4.60884498,4.61453444,4.60885389,4.60820039
43.66905,4,4.61873391,-0.786596406,4.61103927,4.60809623,4.61385036,4.60810479,4.60744962
43.679541,4.79583152,4.618071,0.421616565,4.61030485,4.60734779,4.6131678,4.607356,4.60669915
43.690033,4.79583152,4.61740963,0.422400161,4.6095707,4.60659951,4.61248665,4.60660736,4.60594884
43.700524,5.09901951,4.61674996,0.694456303,4.60883696,4.60585155,4.61180708,4.60585903,4.60519882
43.711016,5.38516481,4.61609189,0.876968023,4.60810349,4.60510375,4.61112898,4.60511086,4.60444895
43.721508,4.35889894,4.61543553,-0.506494411,4.60737036,4.60435617,4.61045245,4.60436292,4.60369931
43.731999,5.38516481,4.61478097,0.877715123,4.60663764,4.6036089,4.60977759,4.60361528,4.60294996
43.742491,4.12310563,4.61412812,-0.70072997,4.60590518,4.60286179,4.6091043,4.60286779,4.60220075
43.752982,4.69041576,4.61347713,0.277378127,4.60517313,4.60211497,4.60843276,4.60212059,4.60145183
43.763474,5.09901951,4.61282794,0.69727439,4.60444134,4.6013683,4.60776286,4.60137354,4.60070305
43.773966,5.56776436,4.61218063,0.977539633,4.60370989,4.60062186,4.60709471,4.60062671,4.59995449
43.784457,4.58257569,4.61153531,-0.17017525,4.60297884,4.59987571,4.60642842,4.59988016,4.5992062
43.794949,4.35889894,4.6108919,-0.501989001,4.60224805,4.5991297,4.6057639,4.59913376,4.59845806
43.80544,5.09901951,4.61025057,0.699120123,4.60151766,4.59838398,4.60510132,4.59838764,4.59771019
43.815932,4.58257569,4.60961123,-0.164424869,4.60078754,4.59763841,4.60444059,4.59764167,4.59696245
43.826424,4,4.60897401,-0.780367866,4.60005774,4.59689305,4.60378183,4.5968959,4.59621491
43.836915,4.47213595,4.608339,-0.369056963,4.59932834,4.59614797,4.60312514,4.5961504,4.59546765
43.847407,4.69041576,4.60770613,0.287592812,4.59859921,4.59540302,4.60247046,4.59540505,4.59472051
43.857898,5.47722558,4.60707559,0.932818301,4.59787047,4.59465836,4.60181795,4.59465996,4.59397364
43.86839,4.89897949,4.60644731,0.540862441,4.59714198,4.59391382,4.60116755,4.59391501,4.59322689
43.878882,4.12310563,4.60582139,-0.694777493,4.59641383,4.5931695,4.60051937,4.59317025,4.59248033
43.889373,4.58257569,4.60519796,-0.150407013,4.59568607,4.59242544,4.59987353,4.59242576,4.59173404
43.899865,4.35889894,4.60457697,-0.495659185,4.59495856,4.59168151,4.59922998,4.5916814,4.59098786
43.910356,4.69041576,4.60395859,0.294035999,4.59423145,4.59093785,4.59858888,4.5909373,4.59024194
43.920848,5.47722558,4.60334277,0.934816988,4.59350459,4.59019432,4.5979502,4.59019332,4.58949614
43.93134,5.19615242,4.60272964,0.770339392,4.59277806,4.58945098,4.59731404,4.58944954,4.58875051
43.941831,4.79583152,4.60211933,0.440127471,4.59205192,4.5887079,4.59668055,4.58870601,4.58800514
43.952323,5,4.6015118,0.63125922,4.59132603,4.58796494,4.59604968,4.58796259,4.58725988
43.962814,4.69041576,4.60090723,0.299179763,4.59060054,4.58722224,4.59542162,4.58721943,4.58651486
43.973306,4.79583152,4.60030559,0.44218314,4.5898753,4.58647966,4.59479632,4.58647638,4.58576995
43.983798,5.38516481,4.59970703,0.886260557,4.58915037,4.58573726,4.59417394,4.58573352,4.58502522
43.994289,3.87298335,4.59911169,-0.852131644,4.58842584,4.58499511,4.59355462,4.5849909,4.58428072
44.004781,3.31662479,4.59851953,-1.13220791,4.58770156,4.58425308,4.59293831,4.58424839,4.58353632
44.015272,4.58257569,4.59793078,-0.123915617,4.58697767,4.5835113,4.59232525,4.58350612,4.58279217
44.025764,3.74165739,4.5973454,-0.925034062,4.58625403,4.58276962,4.59171539,4.58276396,4.5820481
44.036256,4.89897949,4.59676357,0.54974168,4.58553071,4.58202812,4.59110891,4.58202196,4.5813042
44.046747,4.24264069,4.59618544,-0.594596294,4.58480778,4.58128687,4.59050597,4.58128021,4.58056054
44.057239,4.47213595,4.59561101,-0.351390175,4.5840851,4.58054571,4.58990654,4.58053856,4.57981696
44.06773,3.87298335,4.59504051,-0.849739466,4.58336281,4.5798048,4.58931088,4.57979714,4.57907362
44.078222,4.35889894,4.59447394,-0.485360684,4.58264076,4.57906399,4.58871897,4.57905582,4.57833036
44.088714,4.24264069,4.59391148,-0.592681024,4.58191904,4.57832334,4.588131,4.57831465,4.57758725
44.099205,4.69041576,4.59335333,0.311548444,4.5811977,4.57758293,4.58754715,4.57757372,4.57684437
44.109697,4.35889894,4.5927995,-0.483632666,4.58047661,4.57684261,4.58696745,4.57683288,4.57610157
44.120188,4.12310563,4.59225024,-0.684941325,4.57975591,4.57610253,4.58639214,4.57609227,4.57535899
44.13068,4.24264069,4.59170561,-0.590817164,4.57903546,4.57536254,4.58582127,4.57535174,4.57461648
44.141172,4.69041576,4.5911658,0.315039619,4.57831532,4.5746227,4.58525504,4.57461136,4.57387413
44.151663,4.69041576,4.59063103,0.315887218,4.57759558,4.5738831,4.58469366,4.57387121,4.57313198
44.162155,4.79583152,4.59010136,0.453574869,4.57687608,4.57314358,4.5841372,4.57313114,4.57238991
44.172646,4.47213595,4.58957708,-0.342696842,4.57615697,4.57240428,4.58358594,4.57239128,4.57164805
44.183138,4.47213595,4.58905827,-0.341939049,4.57543811,4.57166506,4.58303995,4.57165151,4.57090626
44.19363,4.69041576,4.58854517,0.319171727,4.57471957,4.570926,4.58249948,4.57091188,4.57016461
44.204121,4.47213595,4.58803803,-0.340443941,4.57400141,4.57018715,4.58196479,4.57017246,4.56942316
44.214613,5.09901951,4.58753698,0.715180074,4.57328351,4.56944838,4.58143598,4.56943311,4.56868178
44.225104,4.24264069,4.58704232,-0.586857419,4.57256599,4.56870983,4.58091337,4.56869398,4.5679406
44.235596,4.35889894,4.5865542,-0.477132323,4.57184873,4.56797135,4.5803971,4.56795491,4.56719948
44.246088,4.12310563,4.58607291,-0.680416991,4.57113178,4.56723301,4.57988745,4.56721598,4.56645849
44.256579,4.24264069,4.58559875,-0.585626216,4.57041522,4.56649489,4.57938475,4.56647725,4.56571769
44.267071,4.89897949,4.58513191,0.560221007,4.56969891,4.56575683,4.57888914,4.56573859,4.56497695
44.277562,4.89897949,4.58467471,0.560628908,4.568983,4.56501898,4.57840299,4.56500013,4.5642364
44.288054,4.79583152,4.58422346,0.460008768,4.56826733,4.5642812,4.57792256,4.56426173,4.56349591
44.298546,5.09901951,4.58378046,0.717801545,4.56755199,4.56354355,4.57745018,4.56352346,4.56275553
44.309037,5.47722558,4.58334608,0.945452004,4.56683704,4.56280611,4.57698622,4.56278538,4.56201535
44.319529,4.24264069,4.58292061,-0.583335168,4.56612234,4.56206872,4.57653094,4.56204736,4.56127521
44.33002,5,4.58250447,0.646138942,4.56540803,4.56133154,4.57608479,4.56130954,4.56053525
44.340512,4.24264069,4.58209798,-0.582629635,4.56469398,4.56059441,4.57564807,4.56057176,4.55979534
44.351004,4.79583152,4.58170159,0.462741761,4.56398025,4.55985741,4.57522123,4.55983411,4.55905554
44.361495,5.56776436,4.58131576,0.993201192,4.56326692,4.5591206,4.57480474,4.55909664,4.55831592
44.371987,4.89897949,4.58094087,0.563949127,4.56255384,4.55838385,4.57439896,4.55835922,4.55757634
44.382478,4.24264069,4.58057747,-0.581323306,4.56184116,4.55764729,4.57400446,4.55762199,4.55683694
44.39297,4.79583152,4.58022601,0.464333408,4.56112874,4.55691078,4.57362167,4.5568848,4.55609757
44.403462,5.09901951,4.57988705,0.720508478,4.56041665,4.55617439,4.57325115,4.55614773,4.55535831
44.413953,5.19615242,4.57956118,0.785233238,4.55970495,4.55543819,4.57289351,4.55541083,4.55461921
44.424445,4.69041576,4.57924896,0.333416858,4.55899351,4.55470203,4.57254927,4.55467398,4.55388015
44.434936,4.79583152,4.57895107,0.465704259,4.55828247,4.55396605,4.57221914,4.5539373,4.55314126
44.445428,5.19615242,4.57866812,0.785801692,4.5575717,4.55323012,4.57190373,4.55320066,4.55240239
44.45592,4.12310563,4.57840088,-0.674755697,4.55686126,4.5524943,4.57160378,4.55246412,4.55166362
44.466411,4.47213595,4.57815011,-0.325598146,4.55615122,4.55175866,4.57132008,4.55172775,4.55092501
44.476903,4.89897949,4.57791658,0.566624134,4.55544145,4.55102306,4.57105338,4.55099142,4.55018642
44.487394,4.79583152,4.57770118,0.467044258,4.55473208,4.55028764,4.57080459,4.55025526,4.549448
44.497886,4.12310563,4.5775048,-0.674091373,4.55402298,4.54955225,4.57057457,4.54951912,4.54870959
44.508378,4,4.57732843,-0.759821315,4.55331422,4.54881696,4.57036432,4.54878308,4.54797127
44.518869,4.79583152,4.57717311,0.467609249,4.55260587,4.54808185,4.57017489,4.54804721,4.54723311
44.529361,5.38516481,4.57703993,0.898957663,4.55189779,4.54734677,4.57000734,4.54731136,4.54649496
44.539852,4.24264069,4.57693008,-0.578177648,4.55119012,4.54661186,4.5698629,4.54657568,4.54575697
44.550344,4.47213595,4.57684481,-0.323587471,4.55048273,4.54587697,4.56974279,4.54584001,4.54501898
44.560836,3.74165739,4.57678547,-0.913853425,4.54977568,4.54514218,4.56964838,4.54510443,4.54428108
44.571327,4.58257569,4.57675351,0.0763032263,4.54906905,4.54440756,4.56958111,4.54436901,4.54354332
44.581819,4.58257569,4.57675047,0.0763231348,4.5483627,4.54367296,4.56954251,4.54363361,4.54280558
44.59231,4.12310563,4.57677801,-0.673552067,4.54765676,4.54293853,4.56953425,4.54289836,4.54206797
44.602802,5.47722558,4.57683791,0.948887594,4.54695111,4.54220411,4.56955811,4.54216313,4.54133037
44.613294,4.47213595,4.57693207,-0.323722287,4.54624582,4.54146979,4.56961599,4.54142798,4.54059284
44.623785,4.79583152,4.57706255,0.467727457,4.54554095,4.54073562,4.56970995,4.54069297,4.53985545
44.634277,5.19615242,4.57723157,0.786715232,4.54483636,4.54000147,4.56984221,4.53995798,4.53911806
44.644768,3.74165739,4.57744148,-0.914212281,4.54413221,4.53926748,4.57001513,4.53922313,4.53838081
44.65526,5.74456265,4.5776949,1.08021653,4.54342834,4.5385335,4.57023132,4.53848829,4.53764355
44.665752,5.29150262,4.57799459,0.844694048,4.54272484,4.5377996,4.57049354,4.53775353,4.53690636
44.676243,4.69041576,4.57834351,0.334771941,4.54202178,4.53706586,4.57080477,4.53701891,4.5361693
44.686735,4.47213595,4.57874498,-0.32651037,4.54131901,4.53633212,4.57116831,4.53628428,4.53543224
44.697226,3.31662479,4.57920245,-1.12364481,4.54061668,4.53559853,4.57158764,4.5355498,4.5346953
44.707718,5.09901951,4.57971983,0.720624511,4.53991465,4.53486495,4.57206666,4.53481532,4.53395835
44.71821,4.69041576,4.58030124,0.331835085,4.539213,4.53413145,4.57260948,4.53408091,4.53322146
44.728701,3.60555128,4.58095114,-0.98762334,4.53851179,4.53339809,4.5732206,4.53334663,4.53248469
44.739193,4.58257569,4.58167458,0.0300185865,4.5378109,4.53266474,4.57390504,4.53261235,4.53174791
44.749684,4.89897949,4.58247681,0.562585701,4.53711045,4.53193152,4.57466809,4.5318782,4.53101125
44.760176,4.79583152,4.58336387,0.460942135,4.53641032,4.53119831,4.57551577,4.53114404,4.53027457
44.770668,3.87298335,4.58434212,-0.843420878,4.53571057,4.53046517,4.57645446,4.53040994,4.52953795
44.781159,4.12310563,4.58541853,-0.679935957,4.53501128,4.52973216,4.57749115,4.52967597,4.52880144
44.791651,4.69041576,4.58660105,0.322202904,4.53431232,4.52899916,4.57863379,4.52894199,4.5280649
44.802142,4,4.58789799,-0.766745065,4.53361382,4.52826628,4.57989071,4.52820813,4.52732848
44.812634,4.24264069,4.58931901,-0.588793958,4.53291565,4.52753341,4.58127158,4.52747427,4.52659204
44.823126,4.69041576,4.59087438,0.315501795,4.53221788,4.52680059,4.58278668,4.52674045,4.52585564
44.833617,4.47213595,4.59257542,-0.347043893,4.53152058,4.52606791,4.58444737,4.52600675,4.52511935
44.844109,4.79583152,4.59443519,0.448772033,4.53082362,4.52533522,4.58626672,4.52527304,4.52438303
44.8546,4.79583152,4.59646748,0.446502004,4.53012714,4.52460265,4.58825856,4.52453945,4.52364682
44.865092,3.87298335,4.59868843,-0.851883259,4.52943101,4.52387008,4.59043903,4.52380583,4.52291057
44.875584,4.24264069,4.60111542,-0.598727596,4.52873529,4.52313756,4.59282555,4.52307226,4.52217436
44.886075,3.87298335,4.60376784,-0.854859339,4.52804006,4.52240517,4.59543756,4.52233881,4.52143826
44.896567,5.38516481,4.60666817,0.882324562,4.52734519,4.52167276,4.59829759,4.52160533,4.52070212
44.907058,4.69041576,4.60984063,0.28385759,4.52665081,4.52094048,4.60142987,4.52087197,4.51996607
44.91755,5.09901951,4.61331363,0.696926026,4.5259568,4.52020818,4.60486289,4.52013857,4.51922999
44.928042,4.12310563,4.61711835,-0.702860385,4.52526322,4.51947593,4.60862788,4.51940522,4.51849394
44.938533,4.24264069,4.62129,-0.615344877,4.52457014,4.5187438,4.61276014,4.51867197,4.51775799
44.949025,4.79583152,4.62586981,0.412264133,4.52387745,4.51801164,4.61730094,4.51793869,4.51702199
44.959516,4.69041576,4.63090299,0.243952399,4.52318526,4.51727961,4.6222956,4.51720552,4.51628608
44.970008,4.58257569,4.63644311,-0.232093549,4.52249347,4.51654755,4.62779781,4.51647232,4.51555013
44.9805,3.87298335,4.64255012,-0.87724955,4.52180212,4.51581554,4.63386761,4.51573915,4.5148142
44.990991,4.47213595,4.64929288,-0.420900132,4.52111131,4.51508363,4.640574,4.51500608,4.51407836
45.001483,4.58257569,4.65675298,-0.272355072,4.52042089,4.51435171,4.64799875,4.51427297,4.51334247
45.011974,4.12310563,4.66502251,-0.736150045,4.519731,4.51361989,4.65623411,4.51353996,4.51260667
45.022466,5.56776436,4.67421242,0.945278763,4.51904153,4.51288805,4.66539124,4.51280691,4.51187081
45.032958,5.19615242,4.68445139,0.715332812,4.51835253,4.51215624,4.67559909,4.51207389,4.51113497
45.043449,5.09901951,4.69589326,0.634922245,4.51766408,4.51142454,4.68701177,4.51134096,4.51039922
45.053941,4.35889894,4.70872871,-0.591464084,4.51697605,4.51069281,4.69982035,4.51060799,4.5096634
45.064432,5,4.72318977,0.526127581,4.51628858,4.50996118,4.71425729,4.50987512,4.50892767
45.074924,4,4.73957715,-0.859986716,4.51560155,4.50922952,4.73062385,4.50914219,4.50819188
45.085416,5.29150262,4.75827773,0.730222494,4.51491502,4.5084979,4.74930764,4.50840929,4.50745609
45.095907,5.09901951,4.77980486,0.564990846,4.51422906,4.50776637,4.77082294,4.50767648,4.50672039
45.106399,4.89897949,4.80485566,0.30679606,4.51354355,4.50703481,4.79586813,4.50694362,4.50598462
45.11689,5.38516481,4.83436117,0.74216146,4.51285863,4.50630335,4.82537589,4.50621084,4.50524892
45.127382,5.29150262,4.86957957,0.649556045,4.51217417,4.50557185,4.86060655,4.50547801,4.50451316
45.137874,4.79583152,4.91215537,-0.341062813,4.51149024,4.50484037,4.90320739,4.5047452,4.5037774
45.148365,5.29150262,4.96418519,0.572116624,4.51080692,4.50410899,4.95527834,4.50401247,4.50304171
45.158857,4.89897949,5.02825358,-0.359547066,4.51012407,4.50337757,5.01940775,4.50327968,4.50230595
45.169348,5.47722558,5.10734516,0.608177947,4.50944184,4.50264625,5.0985842,4.50254698,4.50157026
45.17984,4.89897949,5.20473467,-0.552951344,4.5087601,4.50191488,5.19608604,4.50181421,4.5008345
45.190332,4.89897949,5.32366745,-0.651680878,4.50807893,4.50118353,5.31516113,4.50108146,4.50009873
45.200823,5.38516481,5.46698466,-0.286041694,4.50739839,4.50045227,5.45865132,4.50034878,4.49936303
45.211315,5.83095189,5.63670279,0.440736998,4.50671836,4.49972097,5.6285714,4.49961604,4.49862725
45.221806,4.79583152,5.8334148,-1.01861832,4.50603898,4.49898975,5.82550986,4.49888338,4.49789153
45.232298,6.8556546,6.05587805,0.894302269,4.50536013,4.49825849,6.04821705,4.49815065,4.49715574
45.24279,6.164414,6.30027986,-0.368599858,4.50468188,4.49752724,6.29287094,4.49741793,4.49641993
45.253281,6.164414,6.55943591,-0.628507681,4.5040043,4.49679608,6.55227594,4.49668527,4.49568418
45.263773,7.54983444,6.82169122,0.853313081,4.50332727,4.49606487,6.81476397,4.49595255,4.49494835
45.274264,7.34846923,7.06948261,0.52819184,4.50265093,4.49533374,7.06275666,4.4952199,4.49421258
45.284756,7.61577311,7.27927067,0.580088298,4.50197515,4.49460256,7.27269779,4.49448718,4.49347672
45.295248,6.70820393,7.42414542,-0.846133254,4.50130001,4.49387138,7.41766035,4.49375446,4.49274085
45.305739,6.92820323,7.48105261,-0.743538419,4.50062558,4.4931403,7.47457626,4.4930218,4.49200502
45.316231,7.81024968,7.43984502,0.608608787,4.49995174,4.49240915,7.43329146,4.49228907,4.49126911
45.326722,7.54983444,7.30795372,0.491813703,4.49927863,4.49167808,7.30123928,4.49155641,4.49053325
45.337214,7.28010989,7.106799,0.41630624,4.49860613,4.49094696,7.09985018,4.49082367,4.4897973
45.347706,6.55743852,6.86308447,-0.552852557,4.49793431,4.49021584,6.85584243,4.49009092,4.48906132
45.358197,7.48331477,6.60117168,0.93922473,4.49726324,4.4894848,6.59359344,4.48935823,4.4883254
45.368689,6.63324958,6.33955526,0.541935719,4.49659282,4.48875369,6.33161282,4.48862546,4.48758937
45.37918,5.65685425,6.09091292,-0.658831294,4.49592316,4.48802267,6.08259209,4.48789275,4.4868534
45.389672,5.47722558,5.86307528,-0.621168019,4.49525416,4.48729157,5.85437422,4.48715996,4.48611732
45.400164,4.79583152,5.66040912,-0.929826646,4.4945859,4.48656049,5.65133696,4.48642716,4.48538122
45.410655,6,5.48462538,0.717895965,4.49391843,4.48582947,5.47520035,4.48569442,4.48464516
45.421147,5,5.33538065,-0.579120582,4.49325166,4.48509839,5.32562747,4.48496158,4.483909
45.431638,6.244998,5.2109372,1.0168878,4.49258571,4.48436738,5.20088439,4.48422881,4.48317287
45.44213,5.38516481,5.10854799,0.525943739,4.49192047,4.4836363,5.09822495,4.48349594,4.48243665
45.452622,4.47213595,5.0250284,-0.743567377,4.49125601,4.48290522,5.01446319,4.48276306,4.48170039
45.463113,4.35889894,4.95711189,-0.773442268,4.49059241,4.48217421,4.94632964,4.48203023,4.48096416
45.473605,5,4.90173323,0.313475311,4.48992956,4.48144312,4.89075531,4.48129731,4.48022783
45.484096,4.35889894,4.85625128,-0.705232116,4.48926759,4.48071211,4.84509521,4.48056444,4.47949154
45.494588,4.89897949,4.81847196,0.283738485,4.48860639,4.47998102,4.80715168,4.47983147,4.47875513
45.50508,5.09901951,4.78667595,0.558877059,4.48794603,4.47924993,4.7752024,4.47909849,4.47801869
45.515571,4.47213595,4.75954692,-0.536107235,4.48728659,4.4785189,4.74792861,4.47836555,4.47728227
45.526063,5.29150262,4.73609153,0.745259075,4.48662796,4.4777878,4.72433503,4.47763251,4.47654574
45.536554,4.69041576,4.71558186,-0.158638264,4.48597027,4.47705676,4.70369234,4.47689952,4.47580924
45.547046,5,4.69746961,0.55002763,4.48531343,4.47632564,4.68545112,4.47616643,4.47507263
45.557538,5,4.68134833,0.564492399,4.48465749,4.47559452,4.66920412,4.47543331,4.47433597
45.568029,4.69041576,4.66690676,0.153326444,4.48400254,4.47486345,4.65463941,4.47470023,4.47359934
45.578521,4.47213595,4.65389733,-0.426334813,4.48334846,4.47413231,4.64150891,4.47396706,4.47286259
45.589012,5.19615242,4.64212657,0.744329126,4.48269541,4.47340123,4.62961877,4.47323392,4.47212586
45.599504,4.79583152,4.63143171,0.405462473,4.48204326,4.47267006,4.61880582,4.47250068,4.47138901
45.609996,4.79583152,4.62168031,0.417314281,4.4813921,4.47193889,4.60893737,4.47176741,4.47065212
45.620487,4,4.61276045,-0.78279017,4.480742,4.47120777,4.59990123,4.47103417,4.46991524
45.630979,4.58257569,4.6045742,-0.148318932,4.48009286,4.47047657,4.59159925,4.47030083,4.46917824
45.64147,4.69041576,4.5970406,0.3055735,4.47944481,4.46974542,4.58395028,4.46956752,4.46844125
45.651962,5.09901951,4.59008679,0.713395208,4.47879775,4.46901419,4.57688128,4.46883411,4.46770415
45.662454,5.19615242,4.58365161,0.782624313,4.47815177,4.46828295,4.57033093,4.46810066,4.46696698
45.672945,4,4.57768162,-0.760053697,4.47750693,4.46755176,4.56424569,4.46736724,4.46622983
45.683437,5.47722558,4.57212845,0.951365925,4.47686313,4.46682048,4.55857702,4.46663371,4.46549255
45.693928,5,4.56695177,0.658064001,4.47622052,4.46608926,4.5532845,4.46590021,4.46475529
45.70442,4.89897949,4.5621141,0.580401052,4.47557899,4.46535795,4.54833054,4.4651666,4.46401789
45.714912,3.87298335,4.5575838,-0.827405859,4.47493862,4.46462662,4.5436834,4.46443295,4.46328044
45.725403,4.58257569,4.55333278,0.171005589,4.4742995,4.46389534,4.53931493,4.46369932,4.46254299
45.735895,4.12310563,4.54933495,-0.652862407,4.47366151,4.46316397,4.53519892,4.46296558,4.46180541
45.746386,4.12310563,4.54556859,-0.649971513,4.47302481,4.46243265,4.53131363,4.46223187,4.46106783
45.756878,4,4.54201294,-0.736215278,4.47238929,4.46170124,4.52763816,4.46149804,4.46033013
45.76737,4.89897949,4.53865042,0.600274155,4.47175504,4.46096981,4.52415493,4.46076416,4.45959235
45.777861,4.24264069,4.5354653,-0.541132712,4.47112214,4.46023842,4.52084812,4.46003031,4.45885458
45.788353,4.69041576,4.53244252,0.397458478,4.47049049,4.45950695,4.51770261,4.45929633,4.45811667
45.798844,4.58257569,4.52956969,0.230230322,4.46986023,4.45877552,4.51470597,4.45856238,4.45737877
45.809336,4.12310563,4.52683457,-0.635396681,4.46923127,4.458044,4.51184587,4.45782831,4.45664072
45.819828,4.47213595,4.52422685,-0.228234309,4.46860369,4.45731245,4.50911199,4.45709419,4.45590261
45.830319,3.31662479,4.52173722,-1.09777613,4.46797758,4.45658095,4.50649496,4.45636008,4.45516449
45.840811,3.31662479,4.51935651,-1.09669126,4.46735284,4.45584935,4.50398555,4.45562586,4.45442623
45.851302,5.29150262,4.51707731,0.880014379,4.46672962,4.4551178,4.50157631,4.45489165,4.45368797
45.861794,4.47213595,4.51489201,-0.206775377,4.46610783,4.45438615,4.49925958,4.45415731,4.45294956
45.872286,5,4.5127943,0.698001219,4.46548755,4.45365447,4.497029,4.45342292,4.45221107
45.882777,3.74165739,4.5107784,-0.876995449,4.46486886,4.45292284,4.49487878,4.45268855,4.45147259
45.893269,4.24264069,4.50883849,-0.515943604,4.4642517,4.45219111,4.49280301,4.45195405,4.45073395
45.90376,4.58257569,4.50696994,0.274965004,4.46363618,4.45145942,4.49079706,4.45121956,4.4499953
45.914252,4.69041576,4.50516783,0.430404384,4.46302224,4.45072763,4.48885592,4.45048494,4.44925651
45.924744,5,4.50342813,0.704678557,4.46240996,4.44999582,4.48697555,4.44975026,4.44851764
45.935235,4.89897949,4.50174716,0.630263697,4.46179943,4.44926404,4.48515223,4.44901559,4.44777875
45.945727,4,4.50012103,-0.707192359,4.46119057,4.44853216,4.48338201,4.4482808,4.44703972
45.956218,5,4.4985468,0.708133603,4.46058352,4.44780033,4.48166193,4.44754601,4.44630067
45.96671,4.47213595,4.49702114,-0.157750393,4.4599782,4.44706839,4.47998858,4.44681109,4.44556146
45.977202,4.58257569,4.49554143,0.295015709,4.45937471,4.44633642,4.47835932,4.4460761,4.44482218
45.987693,5.74456265,4.49410522,1.11823854,4.45877314,4.44560449,4.47677167,4.44534113,4.44408287
45.998185,4.69041576,4.49270986,0.44464132,4.45817341,4.44487246,4.4752229,4.44460601,4.44334341
46.008676,5.09901951,4.49135341,0.779529413,4.45757567,4.44414046,4.47371107,4.44387091,4.44260394
46.019168,4.24264069,4.49007341,-0.497426099,4.45701999,4.44340837,4.4722338,4.44313566,4.4418643
46.02966,5.09901951,4.48878845,0.781172878,4.45642621,4.44267624,4.47078928,4.44240035,4.44112458
46.040151,4.12310563,4.48753669,-0.603681259,4.45583454,4.44194414,4.46937585,4.44166505,4.44038484
46.050643,4.12310563,4.48631625,-0.602669585,4.4552449,4.44121194,4.46799155,4.4409296,4.43964493
46.061134,4.79583152,4.48512586,0.557409781,4.45465746,4.44047978,4.46663508,4.44019415,4.438905
46.071626,4.89897949,4.48396386,0.644217064,4.45407215,4.43974752,4.46530472,4.43945857,4.43816492
46.082118,4.12310563,4.48282905,-0.59976948,4.45348906,4.43901522,4.46399923,4.43872291,4.43742473
46.092609,4.35889894,4.48172032,-0.350458808,4.45290829,4.43828295,4.46271745,4.43798726,4.43668453
46.103101,5.19615242,4.4806363,0.845881862,4.45232979,4.43755058,4.46145794,4.43725146,4.43594415
46.113592,4.58257569,4.47957613,0.320935448,4.45175371,4.43681825,4.46021983,4.43651566,4.43520375
46.124084,4,4.47853862,-0.691764861,4.45117998,4.43608581,4.45900183,4.43577972,4.43446319
46.134576,4.69041576,4.47752294,0.461403096,4.45060873,4.43535333,4.45780307,4.4350437,4.43372253
46.145067,3.60555128,4.47652832,-0.933261508,4.45004004,4.43462089,4.45662274,4.43430768,4.43298183
46.155559,4.58257569,4.47555375,0.327142089,4.44947387,4.43388834,4.45545975,4.43357151,4.43224097
46.16605,5.09901951,4.47459866,0.790203043,4.44891038,4.43315583,4.45431351,4.43283534,4.43150008
46.176542,4.12310563,4.47366218,-0.592078162,4.44834952,4.43242321,4.45318303,4.43209902,4.43075902
46.187034,5.29150262,4.47274371,0.904852976,4.44779139,4.43169055,4.4520677,4.43136262,4.43001785
46.197525,5,4.47184275,0.726744283,4.44723612,4.43095792,4.45096694,4.43062622,4.42927666
46.208017,4.24264069,4.47095853,-0.477826161,4.44668366,4.43022519,4.44987991,4.42988966,4.42853528
46.218508,3.87298335,4.47009069,-0.772727209,4.44613416,4.42949249,4.44880621,4.4291531,4.42779388
46.229,4.89897949,4.46923855,0.655546285,4.4455876,4.42875969,4.44774507,4.42841639,4.4270523
46.239492,4.24264069,4.46840175,-0.4751432,4.4450441,4.42802684,4.44669604,4.42767959,4.42631061
46.249983,5.19615242,4.46757991,0.853564594,4.44450376,4.42729403,4.44565872,4.42694279,4.42556889
46.260475,4.69041576,4.46677247,0.472909392,4.44396657,4.42656111,4.44463244,4.42620583,4.42482698
46.270966,4.47213595,4.4659792,0.0784649804,4.44343268,4.42582823,4.44361693,4.42546887,4.42408504
46.281458,3.60555128,4.46519961,-0.927172223,4.44290208,4.42509523,4.44261158,4.42473175,4.42334292
46.29195,4.69041576,4.46443343,0.475375987,4.44237489,4.4243622,4.44161607,4.42399454,4.42260069
46.302441,4.79583152,4.46368044,0.5763255,4.44185123,4.4236292,4.44063011,4.42325732,4.42185842
46.312933,4.58257569,4.46294021,0.345883629,4.44133109,4.4228961,4.43965316,4.42251995,4.42111597
46.323424,4.47213595,4.46221262,0.0996159326,4.44081465,4.42216302,4.43868504,4.42178256,4.42037348
46.333916,4.89897949,4.46149729,0.661424367,4.44030189,4.42142984,4.43772526,4.42104501,4.4196308
46.344408,3.87298335,4.46079407,-0.766688156,4.43979296,4.42069662,4.43677359,4.42030738,4.418888
46.354899,5.19615242,4.46010283,0.857933327,4.43928798,4.41996344,4.43582982,4.41956973,4.41814517
46.365391,4.24264069,4.45942324,-0.465599133,4.43878696,4.41923014,4.43489351,4.41883193,4.41740214
46.375882,4.47213595,4.45875527,0.115674917,4.43829008,4.41849688,4.43396456,4.4180941,4.41665908
46.386374,4.58257569,4.45809863,0.352813067,4.43779735,4.41776351,4.43304254,4.41735612,4.41591582
46.396866,5.65685425,4.45745327,1.09517167,4.43730891,4.4170301,4.43212731,4.41661805,4.41517244
46.407357,4.12310563,4.4568191,-0.577679388,4.43682492,4.41629673,4.43121872,4.41587995,4.41442902
46.417849,4.35889894,4.45619591,-0.311924618,4.43634538,4.41556325,4.43031639,4.4151417,4.41368541
46.42834,4,4.45558372,-0.674969423,4.43587051,4.4148298,4.42942028,4.41440343,4.41294175
46.438832,5.09901951,4.45498234,0.802519269,4.43540031,4.41409625,4.42853002,4.41366499,4.4121979
46.449324,5,4.45439175,0.738652999,4.43493496,4.41336266,4.42764552,4.41292646,4.41145392
46.459815,4.58257569,4.45381195,0.358836651,4.43447462,4.41262911,4.42676668,4.41218791,4.41070989
46.470307,5.19615242,4.4532428,0.86192205,4.43401932,4.41189544,4.42589317,4.4114492,4.40996567
46.480798,5,4.45268437,0.73980783,4.43356929,4.41116182,4.425025,4.41071046,4.4092214
46.49129,5,4.45213654,0.740177989,4.43312455,4.41042808,4.42416185,4.40997156,4.40847693
46.501782,5.29150262,4.45159936,0.916462364,4.43268529,4.40969432,4.42330366,4.40923257,4.40773234
46.512273,4.89897949,4.45107287,0.669258257,4.4322517,4.40896058,4.42245037,4.40849355,4.40698769
46.522765,4.47213595,4.450557,0.146897777,4.43182384,4.40822675,4.4216017,4.40775436,4.40624285
46.533256,4.47213595,4.45005187,0.148607165,4.43140192,4.40749295,4.42075767,4.40701515,4.40549794
46.543748,5,4.44955741,0.74191818,4.43098604,4.40675904,4.41991802,4.40627577,4.40475284
46.55424,4.47213595,4.44907374,0.151862484,4.43057639,4.4060251,4.4190827,4.40553629,4.40400761
46.564731,4.24264069,4.44860095,-0.453828452,4.43017316,4.4052912,4.4182517,4.40479679,4.40326232
46.575223,4.35889894,4.44813902,-0.298730782,4.42977645,4.4045572,4.41742476,4.40405712,4.40251683
46.585714,5.19615242,4.44768813,0.865138309,4.42938652,4.40382323,4.41660194,4.40331742,4.40177128
46.596206,5.38516481,4.44724827,0.968460911,4.42900346,4.40308916,4.41578299,4.40257755,4.40102553
46.606698,4.58257569,4.4468196,0.368450946,4.42862751,4.40235507,4.4149679,4.40183759,4.40027965
46.617189,4.79583152,4.44640226,0.591125424,4.42825889,4.40162101,4.41415668,4.40109759,4.3995337
46.627681,5,4.4459963,0.74431425,4.42789772,4.40088685,4.41334909,4.40035742,4.39878755
46.638172,4.35889894,4.44560193,-0.29445371,4.42754428,4.40015273,4.41254521,4.39961722,4.39804134
46.648664,5.09901951,4.44521923,0.808579177,4.42719873,4.39941851,4.41174483,4.39887686,4.39729492
46.659156,5.19615242,4.44484838,0.866777964,4.4268613,4.39868426,4.41094795,4.39813639,4.39654836
46.669647,5.09901951,4.4444896,0.80903023,4.42653227,4.39795005,4.41015459,4.39739588,4.39580174
46.680139,4.89897949,4.44414299,0.67441567,4.4262118,4.39721575,4.40936455,4.39665521,4.39505492
46.69063,5.38516481,4.44380881,0.970235021,4.4259002,4.39648149,4.40857792,4.39591451,4.39430802
46.701122,4.35889894,4.4434872,-0.29084061,4.42559766,4.39574714,4.4077945,4.39517363,4.39356092
46.711614,5.19615242,4.44317842,0.867740748,4.42530448,4.39501275,4.40701433,4.39443264,4.39281368
46.722105,4.58257569,4.44288271,0.373755249,4.42502095,4.39427842,4.40623743,4.39369163,4.39206637
46.732597,5.09901951,4.44260026,0.810197045,4.4247473,4.39354399,4.40546362,4.39295044,4.39131884
46.743088,3.74165739,4.44233139,-0.837062723,4.42448387,4.39280961,4.404693,4.39220921,4.39057125
46.75358,3.87298335,4.4420763,-0.754382501,4.42423091,4.39207513,4.4039254,4.39146782,4.38982345
46.764072,4.58257569,4.44183532,0.375153804,4.42398876,4.39134063,4.40316087,4.39072631,4.3890755
46.774563,5.09901951,4.44160875,0.81080871,4.42375777,4.39060618,4.40239944,4.38998477,4.38832749
46.785055,4.79583152,4.44139687,0.59534415,4.42353823,4.38987165,4.40164095,4.38924306,4.38757925
46.795546,4.69041576,4.44120004,0.499215105,4.42333053,4.38913716,4.40088553,4.38850131,4.38683095
46.806038,3.46410162,4.44101857,-0.988391094,4.42313499,4.38840259,4.400133,4.38775938,4.38608243
46.81653,3.46410162,4.44085284,-0.988307253,4.42295201,4.38766799,4.39938343,4.38701734,4.38533377
46.827021,3.87298335,4.44070324,-0.753471895,4.422782,4.38693345,4.39863687,4.38627527,4.38458503
46.837513,3.74165739,4.44057014,-0.83601002,4.42262533,4.38619883,4.39789318,4.38553302,4.38383607
46.848004,4.69041576,4.44045397,0.499961783,4.42248244,4.38546426,4.39715248,4.38479074,4.38308704
46.858496,3.87298335,4.44035515,-0.75324087,4.42235375,4.38472961,4.39641463,4.38404827,4.38233779
46.868988,5.29150262,4.44027414,0.922620442,4.42223974,4.38399495,4.3956797,4.3833057,4.38158839
46.879479,4.79583152,4.44021142,0.596338917,4.42214088,4.38326035,4.39494775,4.38256309,4.38083891
46.889971,4.35889894,4.44016747,-0.285076347,4.42205764,4.38252566,4.39421866,4.3818203,4.38008922
46.900462,5.19615242,4.44014281,0.869488132,4.42199056,4.38179104,4.39349257,4.38107747,4.37933944
46.910954,4.79583152,4.44013799,0.596400485,4.42194015,4.38105634,4.39276935,4.38033446,4.37858944
46.921446,5.09901951,4.44015356,0.811705583,4.42190698,4.38032163,4.39204907,4.37959135,4.3778393
46.931937,4.24264069,4.44019012,-0.444465335,4.42189163,4.37958699,4.39133182,4.37884819,4.37708907
46.942429,4.79583152,4.44024829,0.596308,4.4218947,4.37885228,4.39061749,4.37810485,4.37633862
46.95292,5.09901951,4.44032871,0.811597686,4.42191681,4.37811763,4.38990622,4.37736147,4.37558808
46.963412,4.35889894,4.44043206,-0.285540043,4.42195863,4.37738291,4.3891979,4.37661792,4.37483733
46.973904,4.24264069,4.44055904,-0.44488016,4.42202083,4.37664819,4.38849263,4.37587425,4.37408642
46.984395,5.29150262,4.44071038,0.922383997,4.42210412,4.37591355,4.3877905,4.37513054,4.37333542
46.994887,4.69041576,4.44088688,0.499528657,4.42220927,4.37517883,4.3870914,4.37438665,4.3725842
47.005378,4.24264069,4.44108931,-0.445475723,4.42233702,4.37444419,4.38639552,4.37364271,4.3718329
47.01587,5.74456265,4.44131854,1.14159717,4.42248821,4.37370949,4.38570274,4.3728986,4.37108137
47.026362,4.58257569,4.44157546,0.375499981,4.42266369,4.3729748,4.38501318,4.37215437,4.37032968
47.036853,4.47213595,4.44186095,0.173997147,4.4228643,4.37224018,4.38432694,4.37141011,4.36957791
47.047345,4.89897949,4.44217603,0.675872366,4.42309103,4.37150551,4.38364394,4.37066566,4.3688259
47.057836,4.12310563,4.44252166,-0.565169035,4.4233448,4.37077092,4.38296437,4.36992117,4.36807382
47.068328,5.19615242,4.44289897,0.867901752,4.42362666,4.37003627,4.38228814,4.36917649,4.3673215
47.07882,5.47722558,4.44330904,1.01681687,4.42393766,4.36930164,4.38161538,4.36843171,4.36656902
47.089311,4.35889894,4.44375298,-0.29129716,4.42427887,4.3685671,4.38094621,4.36768688,4.36581645
47.099803,4,4.44423211,-0.666507394,4.42465153,4.36783251,4.38028057,4.36694186,4.36506365
47.110294,5.09901951,4.44474761,0.808870759,4.42505678,4.36709801,4.37961865,4.36619681,4.36431077
47.120786,4.47213595,4.44530093,0.163814006,4.42549599,4.36636347,4.37896041,4.36545157,4.36355765
47.131278,4.35889894,4.44589342,-0.294948268,4.42597045,4.36562895,4.37830597,4.36470622,4.36280436
47.141769,4.12310563,4.44652652,-0.568701061,4.42648153,4.36489452,4.37765549,4.36396083,4.36205099
47.152261,4.47213595,4.44721311,0.157869718,4.42704208,4.36416006,4.37700893,4.36321525,4.36129739
47.162752,4.79583152,4.44793226,0.589829858,4.427631,4.3634257,4.3763665,4.36246963,4.36054369
47.173244,5.29150262,4.44869705,0.918044429,4.42826132,4.3626913,4.37572817,4.36172382,4.35978975
47.183736,4.89897949,4.44950921,0.670425445,4.4289347,4.36195694,4.37509411,4.3609779,4.35903566
47.194227,5.09901951,4.45037056,0.805387456,4.42965287,4.36122269,4.37446448,4.36023194,4.35828146
47.204719,4.89897949,4.45128326,0.669101057,4.43041789,4.36048841,4.37383928,4.35948579,4.35752704
47.21521,4.35889894,4.45224925,-0.305532823,4.4312316,4.35975425,4.37321874,4.35873961,4.35677252
47.225702,4.79583152,4.45327092,0.585286769,4.43209627,4.35902006,4.37260286,4.35799323,4.35601776
47.236194,4.58257569,4.45435053,0.358085419,4.43301406,4.35828591,4.37199184,4.35724674,4.35526283
47.246685,4.69041576,4.45549042,0.484690969,4.43398722,4.35755189,4.37138587,4.35650021,4.35450781
47.257177,5.56776436,4.45669343,1.0540735,4.43501841,4.35681785,4.37078498,4.3557535,4.35375255
47.267668,3.16227766,4.45796205,-1.13828133,4.43611007,4.35608394,4.37018943,4.35500674,4.35299719
47.27816,4.89897949,4.45929944,0.663083742,4.43726516,4.35535002,4.36959928,4.35425979,4.35224159
47.288652,4.79583152,4.46070853,0.578898083,4.43848651,4.35461616,4.36901474,4.35351273,4.35148583
47.299143,4.69041576,4.46219244,0.477727245,4.43977709,4.35388243,4.36843605,4.35276563,4.35072996
47.309635,4.47213595,4.46375486,0.0915483237,4.44114042,4.3531487,4.36786327,4.35201835,4.34997386
47.320126,5.09901951,4.46539913,0.796002752,4.44257971,4.35241511,4.36729673,4.35127102,4.34921765
47.330618,4.47213595,4.46712941,0.0707569559,4.44409892,4.35168152,4.3667365,4.3505235,4.34846121
47.34111,4.79583152,4.46894961,0.571735873,4.44570182,4.35094801,4.36618286,4.34977588,4.34770459
47.351601,4.24264069,4.47086389,-0.477727124,4.44739238,4.35021465,4.36563609,4.3490282,4.34694787
47.362093,4.89897949,4.47287718,0.652765119,4.44917532,4.3494813,4.36509632,4.34828035,4.34619091
47.372584,4.69041576,4.47499399,0.464135507,4.45105499,4.34874811,4.3645639,4.34753245,4.34543385
47.383076,3.60555128,4.47721989,-0.933631946,4.45303671,4.34801494,4.36403901,4.34678437,4.34467654
47.393568,4.35889894,4.47956019,-0.347363272,4.45512559,4.34728186,4.36352195,4.34603617,4.34391906
47.404059,4.89897949,4.48202052,0.645723597,4.45732708,4.34654894,4.36301308,4.34528793,4.34316148
47.414551,3.87298335,4.4846076,-0.782064098,4.45964759,4.34581606,4.36251261,4.34453951,4.34240365
47.425042,5.56776436,4.4873276,1.0394406,4.4620931,4.34508334,4.36202095,4.34379104,4.34164572
47.435534,5.47722558,4.49018812,0.993497585,4.46467092,4.34435067,4.36153835,4.34304239,4.34088754
47.446026,4.89897949,4.49319652,0.637010961,4.46738814,4.34361811,4.36106523,4.34229363,4.34012918
47.456517,5.09901951,4.4963606,0.776311095,4.47025232,4.34288573,4.360602,4.34154482,4.33937073
47.467009,4.58257569,4.499718,0.28785013,4.47327237,4.3421534,4.36017826,4.34079583,4.33861202
47.4775,4.47213595,4.50322062,-0.176308445,4.47645671,4.34142126,4.35973599,4.3400468,4.33785321
47.487992,4.89897949,4.50690745,0.626156557,4.47981555,4.34068918,4.35930479,4.33929759,4.33709415
47.498484,4.47213595,4.51078884,-0.196603358,4.48335894,4.33995724,4.35888519,4.33854826,4.33633491
47.508975,4.47213595,4.51487584,-0.206736263,4.48709763,4.33922549,4.35847772,4.3377989,4.33557557
47.519467,5,4.51918153,0.693410752,4.49104427,4.33849382,4.35808284,4.33704934,4.33481597
47.529958,5.19615242,4.52371834,0.820020779,4.49521097,4.33776236,4.35770117,4.33629975,4.33405627
47.54045,4.24264069,4.52850139,-0.534659423,4.49961237,4.33703098,4.35733325,4.33554998,4.33329632
47.550942,4.69041576,4.53354561,0.396068365,4.50426305,4.33629976,4.35697972,4.33480009,4.33253619
47.561433,4.79583152,4.53886709,0.506916595,4.50917868,4.33556876,4.3566413,4.33405017,4.33177595
47.571925,4.35889894,4.54448473,-0.430796688,4.51437765,4.33483786,4.35631863,4.33330006,4.33101546
47.582416,5.09901951,4.55041686,0.740677161,4.5198779,4.3341072,4.35601251,4.33254992,4.33025486
47.592908,3.87298335,4.55668556,-0.826862873,4.52570094,4.33337664,4.35572367,4.33179959,4.32949401
47.6034,4.89897949,4.56331304,0.579367283,4.53186851,4.33264626,4.35545301,4.33104915,4.32873298
47.613891,4.35889894,4.57032332,-0.459809065,4.53840416,4.33191613,4.35520144,4.33029867,4.32797183
47.624383,4.89897949,4.57774455,0.566775915,4.54533538,4.33118612,4.35496988,4.32954801,4.32721044
47.634874,5.56776436,4.58560454,0.991039768,4.55268954,4.33045638,4.35475938,4.32879732,4.32644893
47.645366,5,4.5939366,0.63723104,4.56049925,4.32972677,4.354571,4.32804644,4.32568717
47.655858,4.69041576,4.60277476,0.296042225,4.56879798,4.32899737,4.35440591,4.32729546,4.32492522
47.666349,4.89897949,4.6121561,0.535558949,4.57762224,4.32826825,4.35426537,4.32654443,4.32416316
47.676841,4.89897949,4.62212393,0.526170655,4.58701459,4.32753928,4.35415068,4.32579323,4.32340085
47.687332,4.79583152,4.63272196,0.403868248,4.5970182,4.32681061,4.35406327,4.325042,4.32263843
47.697824,5.09901951,4.64400222,0.6745497,4.6076843,4.3260821,4.35400464,4.32429058,4.32187574
47.708316,4.69041576,4.65601878,0.185464226,4.61906635,4.32535383,4.35397643,4.32353906,4.32111288
47.718807,5.09901951,4.66883107,0.655887521,4.63122312,4.32462587,4.35398037,4.3227875,4.3203499
47.729299,5,4.68250841,0.563463922,4.64422311,4.32389809,4.35401833,4.32203576,4.31958666
47.73979,5.29150262,4.69712224,0.770960688,4.65813718,4.32317064,4.35409231,4.32128399,4.31882331
47.750282,4.47213595,4.71275726,-0.490531655,4.67304921,4.32244339,4.35420449,4.32053205,4.3180597
47.760774,4.79583152,4.72950349,0.257542302,4.68904824,4.32171642,4.35435754,4.31977999,4.3172959
47.771265,5.09901951,4.74745971,0.592924783,4.70623316,4.32098979,4.35455321,4.31902791,4.31653199
47.781757,4.24264069,4.76674237,-0.723948674,4.72471926,4.32026338,4.35479462,4.31827565,4.31576782
47.792248,4.12310563,4.78747378,-0.815087822,4.74462844,4.31953734,4.35508462,4.31752336,4.31500354
47.80274,5.65685425,4.80979875,0.920356181,4.76610481,4.31881153,4.35542642,4.31677089,4.31423899
47.813232,5.09901951,4.83387351,0.514923299,4.78930422,4.31808604,4.35582341,4.31601832,4.31347426
47.823723,3.87298335,4.85987339,-0.993423395,4.81440175,4.31736093,4.35627925,4.31526572,4.31270941
47.834215,5,4.8880037,0.334658478,4.84160233,4.31663609,4.35679802,4.31451294,4.3119443
47.844706,5.38516481,4.9184861,0.683138866,4.87112773,4.31591165,4.35738399,4.31376014,4.31117907
47.855198,4.58257569,4.95158396,-0.607460501,4.90324131,4.31518749,4.35804201,4.31300717,4.31041358
47.86569,4.89897949,4.98758921,-0.29767385,4.93823555,4.31446369,4.3587772,4.31225409,4.3096479
47.876181,5.29150262,5.02683785,0.514455798,4.97644733,4.31374032,4.35959511,4.31150099,4.30888211
47.886673,5.09901951,5.06973436,0.171129042,5.01828221,4.31301725,4.36050206,4.31074771,4.30811605
47.897164,5.38516481,5.11674511,0.518092363,5.06420872,4.31229464,4.36150461,4.30999441,4.30734987
47.907656,5.56776436,5.16846234,0.631903491,5.11482188,4.31157236,4.36261034,4.30924094,4.30658343
47.918148,6.08276253,5.22562882,0.92581516,5.17086914,4.31085048,4.36382727,4.30848738,4.3058168
47.928639,5,5.28923799,-0.537808503,5.23335119,4.31012909,4.3651642,4.30773379,4.30505005
47.939131,4.89897949,5.36069811,-0.6794988,5.30368729,4.30940805,4.36663119,4.30698003,4.30428304
47.949622,6.164414,5.44201419,0.849941063,5.38390035,4.30868752,4.36823881,4.30622624,4.30351591
47.960114,5.29150262,5.53616986,-0.494638491,5.47700118,4.30796737,4.36999935,4.30547229,4.30274851
47.970606,5.29150262,5.6475271,-0.596677868,5.58739326,4.30724768,4.37192595,4.30471825,4.30198092
47.981097,6.63324958,5.7823939,0.922418387,5.72144411,4.30652853,4.37403315,4.30396419,4.30121321
47.991589,5.65685425,5.94964484,-0.54110128,5.88810797,4.3058098,4.37633773,4.30320996,4.30044523
48.00208,6.32455532,6.16106524,0.404339062,6.0992674,4.30509163,4.37885754,4.30245571,4.29967713
48.012572,6.32455532,6.43149247,-0.327012454,6.36986183,4.3043739,4.38161348,4.3017013,4.29890877
48.023064,6.4807407,6.77799122,-0.545206861,6.71703984,4.3036567,4.38462819,4.3009468,4.29814021
48.033555,7.28010989,7.21824088,0.248734827,7.1585164,4.30294009,4.38792702,4.30019228,4.29737154
48.044047,8.66025404,7.76820633,0.944482773,7.71022031,4.30222397,4.39153948,4.2994376,4.29660259
48.054538,8.48528137,8.43903282,0.215054773,8.38318459,4.30150848,4.39549749,4.2986829,4.29583352
48.06503,10.0995049,9.23496648,0.929805604,9.18148923,4.30079349,4.39983868,4.29792805,4.29506419
48.075522,10.0995049,10.1514353,-0.227882449,10.1003773,4.3000791,4.40460453,4.29717311,4.29429466
48.086013,11.045361,11.1747326,-0.359682676,11.1259724,4.29936539,4.40984214,4.29641815,4.29352501
48.096505,11.5325626,12.2827976,-0.866161053,12.2360794,4.29865222,4.41560686,4.29566304,4.29275509
48.106996,12.6885775,13.4455136,-0.870020749,13.4004849,4.29793977,4.42195985,4.29490792,4.29198505
48.117488,14.5602198,14.6264914,-0.257432743,14.5827329,4.29722789,4.42897386,4.29415264,4.29121473
48.12798,16.6132477,15.7829395,0.911212484,15.7399815,4.29651669,4.43673094,4.29339728,4.29044423
48.138471,16.3707055,16.8659,-0.703700527,16.823223,4.29580625,4.44532606,4.29264191,4.2896736
48.148963,18.1934054,17.8201192,0.610971515,17.7771391,4.29509644,4.45487272,4.29188639,4.28890269
48.159454,19.5959179,18.5842569,1.00581363,18.5402955,4.29438742,4.46550076,4.29113086,4.28813167
48.169946,19.3132079,19.0970601,0.464916996,19.0513057,4.29367908,4.47736889,4.29037518,4.28736038
48.180438,19.0262976,19.3089485,-0.531649272,19.2604131,4.29297149,4.49066536,4.28961943,4.28658888
48.190929,19.8997487,19.1975963,0.837945371,19.1450746,4.29226475,4.50562144,4.28886367,4.28581727
48.201421,19.2353841,18.776226,0.677612017,18.7182494,4.29155875,4.52253242,4.28810776,4.28504538
48.211912,18.1383571,18.0885329,0.223213452,18.0233049,4.29085363,4.54177131,4.28735185,4.28427337
48.222404,17.4068952,17.1941673,0.461224381,17.1194524,4.29014928,4.56383592,4.2865958,4.28350108
48.232896,16.4620776,16.155665,0.553545541,16.0686213,4.28944579,4.58938413,4.28583968,4.2827286
48.243387,15.1657509,15.0312506,0.366742801,14.9281865,4.28874325,4.61929924,4.28508355,4.281956
48.253879,13.6381817,13.8726443,-0.484213359,13.7486787,4.28804155,4.6547737,4.28432729,4.28118312
48.26437,12.6491106,12.7261688,-0.277593572,12.5747991,4.28734085,4.69736729,4.28357102,4.28041011
48.274862,11.7898261,11.6322197,0.396996795,11.4447645,4.28664103,4.74910328,4.28281462,4.27963683
48.285354,9.8488578,10.6257337,-0.88140565,10.3907153,4.28594219,4.81247805,4.28205816,4.27886336
48.295845,10.2956301,9.73490774,0.748813995,9.4374429,4.28524442,4.89043886,4.2813017,4.27808976
48.306337,9.48683298,8.97978982,0.712069634,8.60113196,4.2845476,4.98628449,4.2805451,4.27731588
48.316828,9.16515139,8.37185783,0.890670289,7.88936696,4.28385191,5.10336622,4.27978851,4.27654188
48.32732,8.30662386,7.91296796,0.627420039,7.30056115,4.28315723,5.24479605,4.27903179,4.2757676
48.337812,7.93725393,7.59643703,0.583795262,6.82566736,4.28246366,5.41291855,4.27827501,4.27499313
48.348303,7.87400787,7.40853463,0.682255993,6.45008564,4.2817713,5.60882206,4.27751825,4.27421852
48.358795,8.06225775,7.3309407,0.855170772,6.15635399,4.28108003,5.83186291,4.27676135,4.27344365
48.369286,7.28010989,7.34315722,-0.251092269,5.92704653,4.28039003,6.07891572,4.27600447,4.27266864
48.379778,7.28010989,7.42367311,-0.378897374,5.74645733,4.27970119,6.34372022,4.27524747,4.27189336
48.39027,6.78232998,7.54981539,-0.876062443,5.60179058,4.27901361,6.61557049,4.27449041,4.27111788
48.400761,8.77496439,7.69642074,1.03852956,5.48326071,4.27832738,6.87803253,4.27373337,4.27034228
48.411253,6.8556546,7.83471208,-0.989473334,5.38374529,4.27764242,7.10837825,4.27297621,4.2695664
48.421744,7.74596669,7.93331679,-0.432839577,5.29831186,4.27695889,7.27934665,4.27221907,4.26879039
48.432236,7.61577311,7.96366181,-0.589820909,5.22356287,4.27627668,7.36547386,4.27146182,4.2680141
48.442728,7.41619849,7.90822837,-0.701448417,5.15721339,4.27559591,7.35197518,4.27070451,4.26723761
48.453219,7.93725393,7.76669922,0.412982705,5.09769356,4.27491668,7.24125979,4.26994724,4.266461
48.463711,6.40312424,7.5547291,-1.07312854,5.04387845,4.2742389,7.05168806,4.26918985,4.2656841
48.474202,6.4807407,7.29652043,-0.903205254,4.99495969,4.27356272,6.80992152,4.26843249,4.26490708
48.484694,7.14142843,7.01632835,0.353694898,4.95029717,4.27288808,6.54226316,4.26767502,4.26412979
48.495186,6.40312424,6.73373155,-0.574984623,4.90939006,4.27221507,6.26985976,4.26691752,4.26335229
48.505677,5.29150262,6.462436,-1.08209675,4.87182231,4.27154381,6.00756578,4.26616005,4.26257466
48.516169,6.63324958,6.21103489,0.649780495,4.83723017,4.2708742,5.76479564,4.26540247,4.26179675
48.52666,6.244998,5.98443509,0.510453626,4.80531287,4.27020643,5.54701847,4.26464493,4.26101872
48.537152,6.244998,5.78467376,0.678471989,4.77579592,4.26954042,5.35662755,4.26388729,4.26024041
48.547644,4.89897949,5.61179951,-0.844286693,4.74844704,4.26887627,5.19384372,4.26312962,4.25946189
48.558135,4.69041576,5.46435498,-0.879738156,4.72306085,4.26821411,5.05722789,4.26237199,4.25868325
48.568627,4.89897949,5.33984136,-0.663974304,4.69944849,4.26755385,4.94418501,4.26161427,4.25790433
48.579118,5.29150262,5.23526986,0.237134488,4.67745133,4.26689568,4.85155117,4.2608566,4.25712528
48.58961,5.09901951,5.14745689,-0.220084924,4.65691975,4.26623953,4.77594091,4.26009883,4.25634595
48.600102,4.79583152,5.07340051,-0.526848167,4.63772631,4.26558553,4.71415082,4.25934105,4.25556642
48.610593,4.35889894,5.0104349,-0.807177771,4.6197568,4.26493378,4.66334043,4.25858331,4.25478675
48.621085,5.09901951,4.956307,0.377773092,4.60290382,4.26428423,4.62112318,4.25782549,4.25400681
48.631576,4.24264069,4.90922677,-0.816447233,4.58707742,4.26363706,4.58560952,4.25706773,4.25322674
48.642068,4.35889894,4.86778284,-0.713360987,4.5721906,4.26299223,4.55532734,4.25630989,4.25244639
48.65256,3.60555128,4.83091032,-1.10695937,4.55816931,4.26234985,4.52917484,4.25555203,4.25166583
48.663051,5.09901951,4.79780371,0.54883131,4.54494648,4.26171006,4.50632987,4.25479425,4.25088515
48.673543,4.58257569,4.76784448,-0.430428609,4.53245773,4.26107281,4.48617406,4.25403638,4.25010419
48.684034,5.38516481,4.74056967,0.802866823,4.52064948,4.26043829,4.4682498,4.25327858,4.24932309
48.694526,4.12310563,4.71560809,-0.769741818,4.50946856,4.25980646,4.45220055,4.25252071,4.24854172
48.705018,4.58257569,4.69267038,-0.331805187,4.4988699,4.25917746,4.43775209,4.25176285,4.24776014
48.715509,5.29150262,4.67151991,0.78738981,4.48881231,4.25855144,4.42468478,4.25100505,4.24697843
48.726001,4.69041576,4.65195377,0.196117289,4.4792554,4.25792835,4.41281571,4.2502472,4.24619644
48.736492,4.47213595,4.63380725,-0.402083692,4.47016591,4.2573084,4.40199722,4.24948942,4.24541432
48.746984,5.19615242,4.61693221,0.761065181,4.46150993,4.25669158,4.3921008,4.24873158,4.24463192
48.757476,5.47722558,4.60120511,0.935959649,4.45325891,4.25607803,4.3830199,4.24797376,4.24384932
48.767967,5.29150262,4.58651788,0.839633697,4.44538657,4.2554679,4.3746629,4.24721602,4.24306658
48.778459,4.47213595,4.57277162,-0.317231242,4.43786656,4.25486119,4.36694847,4.24645824,4.24228357
48.78895,4.69041576,4.55988427,0.361291417,4.43067748,4.2542581,4.35980894,4.24570054,4.24150042
48.799442,4.69041576,4.54777836,0.377673669,4.42379689,4.25365865,4.35318271,4.2449428,4.24071699
48.809934,4.12310563,4.53638853,-0.642870827,4.41720609,4.25306298,4.34701784,4.24418508,4.23993336
48.820425,4.58257569,4.52565639,0.238577673,4.41088774,4.25247129,4.34126873,4.24342747,4.23914959
48.830917,4.89897949,4.5155268,0.619235562,4.40482405,4.25188357,4.33589367,4.24266981,4.23836555
48.841408,5.74456265,4.50595415,1.11292789,4.39900084,4.25130007,4.3308579,4.24191226,4.23758137
48.8519,3.87298335,4.49689383,-0.789880047,4.39340277,4.2507208,4.32612878,4.24115468,4.23679691
48.862392,5.83095189,4.48830827,1.158725,4.38801722,4.25014595,4.32167871,4.24039714,4.23601225
48.872883,5.38516481,4.48016343,0.951315603,4.38283244,4.24957571,4.3174831,4.23963972,4.23522746
48.883375,5,4.47242626,0.726342718,4.37783603,4.24901013,4.31351889,4.23888227,4.23444238
48.893866,5.83095189,4.46506968,1.16870964,4.37301836,4.24844945,4.30976694,4.23812494,4.23365717
48.904358,5.47722558,4.4580663,1.00953418,4.36836863,4.24789374,4.30620871,4.23736759,4.23287168
48.91485,5.47722558,4.45139322,1.01283382,4.36387812,4.2473432,4.30282857,4.2366103,4.23208599
48.925341,5.47722558,4.44502944,1.01597054,4.35953865,4.24679806,4.29961243,4.23585314,4.23130016
48.935833,4.89897949,4.43895402,0.678251774,4.35534136,4.24625838,4.29654672,4.23509597,4.23051405
48.946324,5.19615242,4.43315007,0.873500061,4.35127957,4.24572446,4.2936203,4.23433894,4.22972781
48.956816,4.47213595,4.42759992,0.211035637,4.34734548,4.24519637,4.29082202,4.23358191,4.22894129
48.967308,5.09901951,4.42228893,0.822636364,4.34353291,4.24467438,4.28814256,4.23282494,4.22815456
48.977799,5.09901951,4.41720359,0.825721455,4.33983607,4.24415873,4.28557343,4.23206813,4.2273677
48.988291,4.89897949,4.41233006,0.697602627,4.33624846,4.24364953,4.2831062,4.23131133,4.22658056
48.998782,5.19615242,4.4076574,0.887972424,4.33276535,4.24314711,4.28073412,4.23055467,4.22579329
49.009274,4.47213595,4.40317374,0.262606572,4.329381,4.24265161,4.27845012,4.22979804,4.22500573
49.019766,5.47722558,4.39886943,1.03843928,4.32609093,4.2421633,4.27624841,4.22904149,4.22421797
49.030257,4.47213595,4.39473549,0.278209395,4.32289097,4.2416825,4.27412366,4.22828512,4.22343008
49.040749,4.12310563,4.39076244,-0.5173556,4.31977625,4.24120936,4.2720704,4.22752876,4.2226419
49.05124,3.74165739,4.38694303,-0.803296732,4.31674339,4.24074426,4.27008437,4.22677259,4.22185359
49.061732,4,4.38326906,-0.619087277,4.31378802,4.24028739,4.26816092,4.22601644,4.221065
49.072224,4.12310563,4.379734,-0.506585008,4.3109069,4.2398391,4.26629631,4.22526041,4.22027621
49.082715,4.79583152,4.37633175,0.647688025,4.30809694,4.23939973,4.26448709,4.22450456,4.21948728
49.093207,4.79583152,4.37305606,0.650211863,4.30535444,4.23896952,4.26272992,4.22374876,4.21869807
49.103698,4.69041576,4.3699013,0.566139967,4.30267691,4.2385489,4.26102133,4.22299316,4.21790873
49.11419,5,4.36686208,0.795699641,4.30006104,4.23813815,4.25935848,4.22223761,4.2171191
49.124682,3.74165739,4.36393393,-0.78884507,4.29750438,4.23773767,4.2577389,4.22148219,4.21632927
49.135173,4.35889894,4.36111267,-0.0470502784,4.29500465,4.23734789,4.25616029,4.22072698,4.21553931
49.145665,4.35889894,4.35839363,0.0224791144,4.29255896,4.23696913,4.25462006,4.21997183,4.21474906
49.156156,4.12310563,4.3557735,-0.482356586,4.2901655,4.23660191,4.25311639,4.21921691,4.21395868
49.166648,4.12310563,4.35324822,-0.47973179,4.28782165,4.23624659,4.25164704,4.21846206,4.21316802
49.17714,4.35889894,4.35081473,0.0899122553,4.2855256,4.23590367,4.25021031,4.21770737,4.21237715
49.187631,4.24264069,4.34847021,-0.325314492,4.28327561,4.23557368,4.24880463,4.21695291,4.21158616
49.198123,5.56776436,4.34621136,1.10523889,4.2810694,4.23525706,4.24742816,4.21619854,4.21079488
49.208614,4.69041576,4.34403602,0.588540349,4.27890564,4.23495442,4.24607966,4.21544441,4.21000346
49.219106,4.35889894,4.34194134,0.13022135,4.27678223,4.23466626,4.24475749,4.21469038,4.20921177
49.229598,4.58257569,4.33992534,0.492595534,4.27469781,4.2343932,4.2434605,4.21393654,4.20841987
49.240089,5.47722558,4.33798614,1.0673516,4.27265104,4.23413589,4.24218758,4.21318295,4.20762783
49.250581,4.47213595,4.33612153,0.368801331,4.2706401,4.23389493,4.24093738,4.21242948,4.20683552
49.261072,4.24264069,4.33433018,-0.30280273,4.268664,4.23367106,4.23970906,4.21167628,4.20604307
49.271564,4.79583152,4.33261021,0.680603637,4.26672105,4.23346497,4.2385014,4.2109232,4.20525034
49.282056,4.12310563,4.33096043,-0.455910965,4.26481019,4.23327743,4.23731358,4.21017034,4.2044574
49.292547,4.79583152,4.32937978,0.682972728,4.26293041,4.23310927,4.23614484,4.20941776,4.20366433
49.303039,5,4.32786686,0.819837263,4.26108022,4.23296129,4.23499414,4.20866532,4.20287098
49.31353,3.60555128,4.32642106,-0.849040505,4.25925888,4.23283443,4.23386092,4.20791318,4.2020775
49.324022,4.12310563,4.32504129,-0.449372522,4.25746501,4.23272959,4.23274424,4.20716121,4.20128374
49.334514,5.74456265,4.32372706,1.19198808,4.25569779,4.23264778,4.23164353,4.20640947,4.20048976
49.345005,4.35889894,4.32247796,0.190842819,4.25395644,4.23259006,4.23055826,4.20565804,4.19969566
49.355497,5.47722558,4.32129339,1.07514287,4.25223972,4.23255752,4.2294876,4.20490679,4.19890128
49.365988,3.74165739,4.32017332,-0.760602346,4.2505471,4.23255134,4.22843121,4.20415587,4.19810676
49.37648,3.74165739,4.31911743,-0.759907915,4.24887742,4.23257276,4.22738834,4.20340514,4.19731196
49.386972,4.24264069,4.31812586,-0.274745647,4.24723005,4.2326231,4.22635858,4.20265468,4.19651696
49.397463,4.35889894,4.31719886,0.204205975,4.24560439,4.23270373,4.22534156,4.20190457,4.19572182
49.407955,4.24264069,4.31633657,-0.271469858,4.24399939,4.23281615,4.22433665,4.20115468,4.19492641
49.418446,4.24264069,4.31553959,-0.269997975,4.24241466,4.23296189,4.22334359,4.20040514,4.19413086
49.428938,4.58257569,4.31480837,0.517462386,4.24084923,4.23314264,4.22236182,4.19965583,4.19333503
49.43943,4.58257569,4.31414374,0.518104198,4.23930261,4.23336015,4.22139105,4.19890683,4.19253899
49.449921,5,4.31354663,0.828524814,4.23777433,4.23361626,4.22043102,4.19815821,4.19174282
49.460413,3.87298335,4.31301801,-0.663351088,4.2362635,4.23391302,4.2194812,4.19740984,4.19094637
49.470904,4.47213595,4.31255921,0.399470587,4.23476985,4.23425248,4.21854147,4.19666187,4.19014979
49.481396,5.19615242,4.31217153,0.940202583,4.23329255,4.23463697,4.21761135,4.19591416,4.18935293
49.491888,5.74456265,4.31185661,1.19695699,4.23183121,4.23506886,4.21669064,4.1951668,4.18855586
49.502379,3.60555128,4.31161626,-0.840276732,4.23038546,4.23555067,4.21577918,4.19441987,4.18775866
49.512871,4.24264069,4.31145242,-0.262319907,4.22895455,4.23608522,4.21487653,4.19367322,4.18696118
49.523362,4.58257569,4.31136732,0.520776702,4.22753829,4.23667534,4.21398264,4.19292702,4.18616357
49.533854,4.47213595,4.31136338,0.400964552,4.22613595,4.23732428,4.21309711,4.19218112,4.18536568
49.544346,3,4.3114433,-1.14518265,4.22474724,4.23803532,4.21221982,4.19143561,4.18456758
49.554837,4.35889894,4.31160999,0.217460236,4.22337188,4.23881197,4.21135066,4.19069057,4.18376936
49.565329,4.89897949,4.31186671,0.766232844,4.22200921,4.23965823,4.21048927,4.18994587,4.18297085
49.57582,4.35889894,4.31221695,0.216060161,4.22065909,4.24057806,4.20963565,4.18920165,4.18217221
49.586312,4.24264069,4.31266462,-0.26462035,4.2193209,4.24157606,4.20878948,4.18845778,4.18137329
49.596804,4.24264069,4.31321389,-0.265656173,4.21799442,4.24265692,4.20795068,4.18771435,4.18057416
49.607295,3.60555128,4.31386929,-0.841616308,4.21667943,4.24382564,4.20711919,4.18697144,4.17977491
49.617787,4.58257569,4.31463593,0.517628989,4.21537533,4.24508796,4.20629471,4.18622891,4.17897537
49.628278,4.69041576,4.3155191,0.61228805,4.21408207,4.24644961,4.20547728,4.18548692,4.17817571
49.63877,5.38516481,4.31652492,1.0337504,4.21279909,4.24791726,4.20466664,4.18474533,4.17737576
49.649262,4.69041576,4.31765975,0.610537477,4.2115262,4.24949774,4.20386274,4.18400423,4.17657561
49.659753,4.12310563,4.31893051,-0.442521055,4.21026325,4.25119839,4.20306556,4.18326369,4.17577533
49.670245,4.47213595,4.32034511,0.389603449,4.20900972,4.25302767,4.20227486,4.1825236,4.17497477
49.680736,4.69041576,4.32191164,0.6070454,4.20776557,4.25499407,4.20149071,4.1817841,4.17417408
49.691228,4.79583152,4.32363954,0.687162267,4.20653032,4.25710753,4.20071288,4.18104506,4.17337311
49.70172,3.60555128,4.32553864,-0.848520695,4.20530382,4.25937831,4.19994137,4.18030656,4.17257194
49.712211,4.35889894,4.32761966,0.176859506,4.20408596,4.26181754,4.19917619,4.17956869,4.17177063
49.722703,5.38516481,4.32989494,1.02726329,4.20287627,4.26443807,4.19841713,4.17883132,4.17096905
49.733194,4.89897949,4.33237717,0.752729908,4.20167476,4.26725299,4.19766429,4.1780946,4.17016734
49.743686,4.69041576,4.33508129,0.59609938,4.20048097,4.27027775,4.19691748,4.1773584,4.16936535
49.754178,4.47213595,4.33802304,0.366214307,4.19929482,4.2735285,4.19617673,4.17662281,4.16856315
49.764669,4.35889894,4.34121982,0.13296285,4.1981162,4.27702312,4.19544208,4.17588792,4.16776083
49.775161,4.35889894,4.34469206,0.119192641,4.1969447,4.28078255,4.19471335,4.17515358,4.16695822
49.785652,4,4.34846394,-0.590308345,4.19578035,4.28482887,4.19399334,4.17441997,4.16615549
49.796144,4.24264069,4.35255636,-0.331535329,4.19462275,4.28918873,4.19327654,4.17368695,4.16535248
49.806636,4.47213595,4.35700069,0.339315872,4.19347181,4.29389146,4.19256568,4.17295461,4.16454927
49.817127,4.58257569,4.36183045,0.469835343,4.1923275,4.29897119,4.19186082,4.17222303,4.16374593
49.827619,4.47213595,4.36708678,0.324112908,4.1911894,4.30446984,4.19116183,4.17149209,4.16294231
49.83811,4.89897949,4.37281713,0.725370493,4.19005758,4.3104356,4.19046883,4.17076194,4.16213856
49.848602,4.24264069,4.37908186,-0.369379445,4.18893167,4.31692983,4.18978171,4.17003246,4.16133453
49.859094,4,4.38595402,-0.62125198,4.18781163,4.32402667,4.18910054,4.16930373,4.1605303
49.869585,5.09901951,4.39352537,0.839936991,4.1866974,4.33181923,4.18842541,4.16857585,4.15972595
49.880077,5.19615242,4.40191471,0.891200153,4.18558863,4.34042805,4.1877562,4.16784868,4.15892131
49.890568,5,4.4112703,0.767287233,4.1844854,4.35000344,4.18709307,4.16712239,4.15811655
49.90106,3.60555128,4.42178563,-0.903456893,4.18338736,4.36074154,4.18643593,4.16639686,4.15731151
49.911552,4.69041576,4.43370484,0.506666474,4.18229449,4.37288977,4.18578487,4.16567217,4.15650627
49.922043,3.87298335,4.44733806,-0.757861938,4.18120675,4.38676234,4.18513999,4.1649484,4.1557009
49.932535,5.38516481,4.46308086,0.960252021,4.18012383,4.40275994,4.18450123,4.16422545,4.15489525
49.943026,4.47213595,4.48142075,-0.0963576404,4.17904581,4.42137621,4.18386874,4.16350346,4.15408948
49.953518,3.60555128,4.50296537,-0.947319425,4.17797236,4.44322625,4.18324248,4.16278232,4.15328343
49.96401,5.29150262,4.5284455,0.873531408,4.17690348,4.46904953,4.18262254,4.16206212,4.15247718
49.974501,5.38516481,4.55872935,0.909084953,4.17583916,4.49972411,4.18200907,4.16134295,4.1516708
49.984993,5.38516481,4.59483707,0.889003791,4.17477908,4.53628111,4.18140201,4.16062469,4.15086415
49.995484,5.74456265,4.63791385,1.05197376,4.17372336,4.57987716,4.18080155,4.15990749,4.15005737
50.005976,5.19615242,4.68923937,0.711978266,4.17267168,4.63180348,4.18020766,4.15919125,4.14925031
50.016468,5.09901951,4.75016678,0.590637569,4.17162405,4.69342371,4.17962048,4.15847606,4.14844306
50.026959,4.58257569,4.82207912,-0.489390872,4.17058048,4.76612937,4.17904015,4.157762,4.14763568
50.037451,5.65685425,4.90634486,0.866319449,4.16954067,4.85129452,4.17846666,4.15704897,4.14682802
50.047942,4.79583152,5.00418356,-0.456455951,4.16850474,4.95013982,4.17790023,4.15633711,4.14602024
50.058434,4.79583152,5.11663699,-0.566396916,4.16747239,5.06370351,4.17734084,4.15562633,4.14521218
50.068926,5,5.24441233,-0.494380758,4.16644364,5.19268361,4.17678867,4.15491672,4.14440392
50.079417,5,5.38781528,-0.622748171,4.16541851,5.33737145,4.17624388,4.15420836,4.14359554
50.089909,5.19615242,5.54672466,-0.592091411,4.16439673,5.49762741,4.17570649,4.15350116,4.14278688
50.1004,5.29150262,5.72044267,-0.65493515,4.1633784,5.67273153,4.17517674,4.15279526,4.1419781
50.110892,5,5.90778938,-0.95277982,4.16236327,5.86148043,4.17465466,4.15209057,4.14116904
50.121384,6.244998,6.10698842,0.371496401,4.16135134,6.06207357,4.17414044,4.15138718,4.14035978
50.131875,6.63324958,6.31572783,0.56349068,4.16034266,6.27217578,4.17363428,4.15068519,4.1395504
50.142367,6.40312424,6.53125152,-0.357948711,4.15933695,6.48900996,4.17313623,4.14998448,4.13874075
50.152858,7.07106781,6.75024602,0.566411324,4.15833434,6.70924346,4.17264656,4.14928523,4.13793097
50.16335,6.55743852,6.96902253,-0.641548134,4.15733457,6.92917111,4.17216534,4.14858734,4.13712092
50.173842,7.07106781,7.18337853,-0.335127915,4.15633768,7.14457573,4.17169279,4.1478909,4.13631067
50.184333,8.77496439,7.38866231,1.1774133,4.15534369,7.3507925,4.17122915,4.147196,4.13550029
50.194825,8,7.57984293,0.648195237,4.15435235,7.5427785,4.17077451,4.14650256,4.13468965
50.205316,8.36660027,7.75144098,0.784320905,4.1533638,7.71504234,4.17032915,4.14581073,4.13387888
50.215808,7.28010989,7.89784109,-0.785958781,4.15237779,7.86195708,4.16989321,4.14512043,4.13306784
50.2263,7.61577311,8.01349335,-0.63065065,4.15139435,7.97796104,4.16946729,4.14443175,4.1322566
50.236791,8.66025404,8.09345831,0.752858371,4.15041352,8.05810446,4.16905096,4.14374479,4.13144523
50.247283,8.83176087,8.1340019,0.835319677,4.14943507,8.09864414,4.16864471,4.14305946,4.1306336
50.257774,8.54400375,8.13309321,0.641023037,4.14845913,8.09754286,4.16824888,4.14237594,4.12982184
50.268266,8,8.09076403,-0.301270697,4.14748546,8.05482934,4.16786365,4.14169412,4.12900982
50.278758,7.61577311,8.00909353,-0.627152633,4.1465141,7.97258309,4.1674893,4.14101412,4.12819759
50.289249,7.74596669,7.89188664,-0.381994699,4.14554509,7.85461231,4.16712615,4.14033604,4.12738525
50.299741,7.54983444,7.74407642,-0.440728923,4.14457822,7.70585515,4.16677443,4.1396598,4.12657263
50.310232,7.93725393,7.57122742,0.60500125,4.1436136,7.53188271,4.16643448,4.13898557,4.12575989
50.320724,7.93725393,7.37894714,0.747199298,4.14265103,7.33830928,4.16610657,4.13831326,4.12494688
50.331216,7.61577311,7.17268026,0.665652193,4.14169053,7.13058714,4.16579103,4.13764298,4.12413367
50.341707,7.28010989,6.95750098,0.567986718,4.14073217,6.91379894,4.16548824,4.13697486,4.12332035
50.352199,6.40312424,6.73798322,-0.578670014,4.13977571,6.69252806,4.16519849,4.1363088,4.12250675
50.36269,6,6.51833361,-0.719953893,4.1388213,6.4709934,4.16492218,4.13564498,4.12169304
50.373182,5.91607978,6.30222571,-0.621406414,4.13786872,6.25288307,4.16465966,4.13498333,4.12087905
50.383674,5.65685425,6.09293951,-0.66036752,4.13691802,6.04149554,4.16441133,4.13432397,4.12006487
50.394165,5.83095189,5.89327613,-0.249648232,4.13596925,5.83965406,4.16417762,4.13366702,4.11925057
50.404657,5,5.70547619,-0.839926298,4.13502219,5.64962387,4.16395893,4.13301239,4.118436
50.415148,5.09901951,5.53132364,-0.657498383,4.13407699,5.47321673,4.16375572,4.13236028,4.11762132
50.42564,5.09901951,5.37198717,-0.522463069,4.13313344,5.31162906,4.16356843,4.13171061,4.11680636
50.436132,5.09901951,5.22814213,-0.359336359,4.13219158,5.16556374,4.16339755,4.13106352,4.11599121
50.446623,5.65685425,5.09994034,0.746266647,4.13125148,5.03519736,4.16324359,4.13041912,4.11517594
50.457115,5.29150262,4.98703123,0.551789264,4.13031291,4.92019907,4.16310706,4.12977736,4.1143604
50.467606,4.35889894,4.88871659,-0.727885736,4.12937604,4.8198856,4.16298851,4.12913842,4.11354475
50.478098,4.47213595,4.80395237,-0.576035078,4.12844065,4.73322088,4.16288849,4.12850224,4.11272882
50.48859,4.12310563,4.73151259,-0.780004463,4.12750679,4.65898143,4.1628076,4.12786897,4.1119127
50.499081,5.19615242,4.67004893,0.725329919,4.12657453,4.595816,4.16274646,4.12723873,4.11109647
50.509573,4.35889894,4.6181619,-0.50917871,4.12564366,4.54231737,4.1627057,4.12661147,4.11027997
50.520064,5.65685425,4.57450813,1.04035865,4.12471433,4.49713208,4.162686,4.12598738,4.10946336
50.530556,4.89897949,4.53781168,0.600972385,4.12378633,4.45897169,4.16268806,4.12536643,4.10864647
50.541048,4.69041576,4.50692891,0.428353654,4.12285973,4.42667983,4.16271259,4.12474876,4.10782939
50.551539,4.24264069,4.48085173,-0.488068683,4.12193458,4.39923583,4.16276037,4.12413451,4.1070122
50.562031,4.89897949,4.45870792,0.663529627,4.12101069,4.37575525,4.16283219,4.12352364,4.10619475
50.572522,4.69041576,4.43977317,0.500642179,4.1200882,4.3555032,4.16292888,4.12291635,4.10537717
50.583014,4.24264069,4.4234431,-0.425208675,4.11916692,4.33786551,4.16305131,4.12231263,4.10455933
50.593506,5.74456265,4.40923216,1.15556501,4.1182469,4.32234848,4.16320039,4.12171262,4.1037413
50.603997,4.12310563,4.39675117,-0.523111408,4.11732821,4.30855605,4.16337705,4.12111647,4.10292316
50.614489,4.47213595,4.38568876,0.294019037,4.11641065,4.29617065,4.16358231,4.12052417,4.10210475
50.62498,4.24264069,4.37580432,-0.364915922,4.11549438,4.2849469,4.16381718,4.11993594,4.10128623
50.635472,5,4.36690625,0.795671885,4.1145792,4.2746887,4.1640828,4.11935175,4.10046744
50.645964,5,4.35884754,0.800719962,4.11366517,4.2652455,4.16438027,4.11877179,4.09964846
50.656455,5.38516481,4.35151319,1.01668659,4.11275236,4.25649927,4.16471076,4.11819621,4.09882937
50.666947,3.74165739,4.34481097,-0.776629629,4.11184057,4.24835466,4.16507559,4.11762501,4.09801001
50.677438,4.69041576,4.33867017,0.593081435,4.11092995,4.24073868,4.16547599,4.11705843,4.09719055
50.68793,3.60555128,4.33303195,-0.852924778,4.11002032,4.23358977,4.16591343,4.11649648,4.09637081
50.698422,4.79583152,4.32785005,0.684091717,4.10911175,4.22685953,4.16638931,4.11593934,4.09555089
50.708913,3,4.32308623,-1.15025486,4.10820429,4.22050765,4.1669051,4.11538719,4.09473086
50.719405,3.46410162,4.31870726,-0.924448831,4.10729775,4.21449836,4.16746249,4.11484006,4.09391057
50.729896,4.12310563,4.31468649,-0.437699516,4.1063923,4.20880314,4.16806304,4.11429819,4.09309016
50.740388,5.09901951,4.31099958,0.887704869,4.10548773,4.20339507,4.16870865,4.11376162,4.09226949
50.75088,4.79583152,4.30762643,0.698716747,4.10458413,4.19825194,4.16940109,4.11323055,4.09144863
50.761371,4.12310563,4.30454941,-0.425962182,4.10368155,4.19335393,4.17014225,4.11270518,4.09062767
50.771863,4.12310563,4.30175364,-0.42266773,4.10277981,4.18868192,4.17093585,4.11218557,4.08980644
50.782354,4.47213595,4.29922279,0.415828288,4.10187907,4.18422038,4.17178085,4.11167199,4.0889851
50.792846,4.58257569,4.29694557,0.53444375,4.10097913,4.17995357,4.17268121,4.11116449,4.0881635
50.803338,4.58257569,4.29491138,0.536343471,4.10008006,4.17586834,4.17363926,4.11066332,4.08734171
50.813829,5.29150262,4.29311079,0.999195594,4.09918195,4.17195266,4.17465742,4.11016868,4.08651982
50.824321,4.35889894,4.29153507,0.259545514,4.09828459,4.16819442,4.17573859,4.10968068,4.08569766
50.834812,4,4.29017719,-0.538680977,4.09738815,4.1645839,4.17688536,4.1091996,4.0848754
50.845304,4.24264069,4.28903058,-0.21538312,4.09649244,4.16111082,4.17810095,4.10872555,4.08405287
50.855796,4,4.28808993,-0.536740099,4.09559753,4.15776671,4.17938842,4.10825878,4.08323016
50.866287,4.69041576,4.28735079,0.634873983,4.0947035,4.15454372,4.18075095,4.10779954,4.08240734
50.876779,4,4.28680926,-0.535545762,4.09381015,4.15143372,4.18219237,4.10734799,4.08158427
50.88727,3.31662479,4.2864625,-0.984803388,4.09291765,4.14843034,4.18371614,4.10690442,4.08076108
50.897762,4.69041576,4.28630822,0.63569453,4.09202582,4.14552659,4.18532652,4.10646899,4.07993764
50.908254,4.69041576,4.28634503,0.635665582,4.09113472,4.14271679,4.18702765,4.10604199,4.07911401
50.918745,4.24264069,4.28657192,-0.20959778,4.09024442,4.13999566,4.1888237,4.10562372,4.07829028
50.929237,5,4.28698886,0.844399869,4.08935475,4.13735755,4.19071983,4.10521437,4.07746629
50.939728,4.35889894,4.28759628,0.267025577,4.08846586,4.1347982,4.19272072,4.10481428,4.07664219
50.95022,4.58257569,4.28839547,0.542383835,4.08757758,4.13231267,4.19483214,4.10442367,4.07581784
50.960712,3.60555128,4.28938818,-0.826944316,4.08668997,4.12989709,4.19705961,4.10404287,4.0749933
50.971203,4.79583152,4.29057674,0.71081276,4.0858031,4.12754781,4.199409,4.10367223,4.07416866
50.981695,4.89897949,4.29196453,0.779111646,4.08491681,4.1252608,4.20188725,4.10331199,4.07334376
50.992186,4.12310563,4.29355505,-0.412855213,4.08403124,4.12303313,4.20450081,4.10296256,4.07251876
51.002678,4.58257569,4.29535311,0.535931507,4.08314621,4.12086124,4.20725759,4.10262422,4.0716935
51.01317,4.24264069,4.29736376,-0.233929637,4.08226181,4.11874243,4.21016525,4.10229735,4.07086806
51.023661,5.47722558,4.2995927,1.08518795,4.0813781,4.11667412,4.21323194,4.10198236,4.07004252
51.034153,4,4.30204705,-0.549588076,4.0804949,4.11465336,4.21646731,4.10167958,4.06921672
51.044644,3.60555128,4.30473386,-0.836171382,4.07961238,4.11267812,4.21988044,4.10138948,4.06839082
51.055136,4.69041576,4.30766198,0.618670977,4.07873036,4.11074576,4.22348239,4.10111242,4.06756466
51.065628,3.46410162,4.31084044,-0.920184124,4.0778489,4.10885434,4.22728401,4.10084886,4.06673833
51.076119,4.58257569,4.31427908,0.517973567,4.07696809,4.10700204,4.23129689,4.10059928,4.06591189
51.086611,4.35889894,4.31798981,0.202260055,4.07608775,4.10518663,4.23553473,4.10036412,4.0650852
51.097102,4.79583152,4.32198424,0.688365661,4.07520804,4.10340669,4.2400106,4.10014391,4.06425841
51.107594,4.69041576,4.32627664,0.603439408,4.07432878,4.1016602,4.24474034,4.09993913,4.06343136
51.118086,5.38516481,4.33088141,1.02678303,4.07345004,4.09994578,4.24973968,4.09975034,4.06260414
51.128577,4.79583152,4.33581421,0.67824576,4.07257191,4.09826211,4.25502556,4.09957812,4.06177681
51.139069,5.47722558,4.34109364,1.0658949,4.0716942,4.09660746,4.26061788,4.09942302,4.06094924
51.14956,3.74165739,4.34673792,-0.777869228,4.07081707,4.09498083,4.26653596,4.09928568,4.06012156
51.160052,4,4.3527692,-0.593943771,4.06994036,4.09338067,4.27280311,4.09916672,4.05929363
51.170544,4.24264069,4.35920992,-0.341422366,4.06906413,4.09180596,4.2794428,4.09906682,4.05846553
51.181035,4,4.36608447,-0.605049149,4.06818846,4.09025573,4.28648042,4.09898669,4.05763732
51.191527,5.29150262,4.37342164,0.958165427,4.06731318,4.08872862,4.29394576,4.09892704,4.05680887
51.202018,4.47213595,4.38124997,0.301473031,4.06643845,4.08722394,4.3018683,4.09888865,4.05598032
51.21251,4,4.38960382,-0.624182522,4.06556409,4.08574045,4.31028334,4.09887231,4.05515151
51.223002,5.29150262,4.39851842,0.944978412,4.06469018,4.08427739,4.319227,4.09887886,4.05432253
51.233493,5.47722558,4.40803225,1.03401805,4.06381679,4.08283405,4.32873868,4.09890918,4.05349346
51.243985,3.74165739,4.41819044,-0.822516295,4.06294376,4.08140936,4.33886444,4.0989642,4.05266413
51.254476,3.74165739,4.42903859,-0.829084555,4.06207124,4.0800028,4.34965079,4.09904485,4.05183471
51.264968,4.47213595,4.44063116,0.177495898,4.06119906,4.0786134,4.36115316,4.09915218,4.05100504
51.27546,5,4.45302484,0.739577689,4.0603273,4.07724058,4.37342923,4.09928723,4.05017519
51.285951,4.69041576,4.46628197,0.473427706,4.05945603,4.07588382,4.38654238,4.0994511,4.04934525
51.296443,4.47213595,4.48047553,-0.0913212614,4.05858508,4.07454224,4.40056671,4.09964499,4.04851506
51.306934,5.09901951,4.49568067,0.776748896,4.05771461,4.07321549,4.41557855,4.09987009,4.04768478
51.317426,4,4.51200403,-0.715544569,4.05684445,4.07190275,4.43168614,4.10012773,4.04685425
51.327918,4.12310563,4.52950575,-0.637495194,4.05597468,4.0706036,4.44895039,4.10041926,4.04602355
51.338409,4.79583152,4.54830811,0.497517251,4.05510537,4.06931766,4.46749548,4.10074606,4.04519275
51.348901,4.58257569,4.56853409,0.118497277,4.05423635,4.06804418,4.48744604,4.1011097,4.04436171
51.359392,4.69041576,4.59031301,0.31639018,4.05336779,4.06678295,4.50893334,4.1015117,4.04353057
51.369884,4.58257569,4.61379851,-0.176699793,4.05249951,4.06553326,4.53211309,4.10195379,4.04269919
51.380376,4.89897949,4.63915619,0.509728648,4.05163158,4.06429482,4.55715329,4.10243771,4.04186764
51.390867,4.35889894,4.6665719,-0.554682751,4.0507641,4.06306732,4.58424249,4.10296526,4.04103599
51.401359,5,4.69626384,0.551122632,4.04989688,4.06185015,4.61360186,4.10353849,4.0402041
51.41185,4.35889894,4.72846675,-0.607920891,4.04903009,4.06064316,4.64546957,4.10415936,4.03937212
51.422342,4.69041576,4.76345985,-0.270266698,4.04816356,4.05944577,4.68012864,4.10483019,4.03853989
51.432834,4.89897949,4.80155039,0.312136343,4.04729737,4.05825775,4.71789069,4.10555321,4.0377075
51.443325,3.31662479,4.84308818,-1.23550127,4.04643158,4.05707889,4.75911046,4.10633081,4.03687502
51.453817,4.12310563,4.88848721,-0.874860896,4.04556604,4.05590864,4.80420747,4.10716573,4.03604229
51.464308,5,4.93820584,0.248584303,4.04470091,4.05474693,4.85364645,4.10806053,4.03520947
51.4748,4.58257569,4.9927965,-0.640484819,4.04383601,4.05359325,4.907987,4.10901832,4.03437641
51.485292,4.69041576,5.0528906,-0.602058836,4.04297143,4.05244744,4.96786887,4.11004208,4.03354318
51.495783,4.69041576,5.11923758,-0.654844879,4.04210723,4.05130933,5.03405113,4.11113498,4.03270986
51.506275,5.29150262,5.19276661,0.314222877,4.04124327,4.05017847,5.10747439,4.11230072,4.0318763
51.516766,5.29150262,5.27459629,0.13002436,4.04037968,4.04905482,5.18927102,4.11354277,4.03104266
51.527258,4.35889894,5.36617905,-1.00363345,4.03951631,4.04793793,5.28091051,4.11486529,4.03020877
51.53775,4.58257569,5.46936462,-0.941694711,4.03865323,4.04682768,5.38426398,4.11627237,4.02937471
51.548241,5.38516481,5.58657735,-0.448790083,4.03779053,4.04572398,5.50178272,4.11776832,4.02854057
51.558733,5.47722558,5.72105069,-0.493786504,4.03692803,4.04462639,5.63673399,4.11935818,4.02770619
51.569224,6.164414,5.87694579,0.536160619,4.0360659,4.04353494,5.79331949,4.12104673,4.02687173
51.579716,6.164414,6.05964125,0.3236862,4.03520397,4.04244922,5.97696414,4.1228397,4.02603702
51.590208,6.32455532,6.27569964,0.221033219,4.03434231,4.04136914,6.19427782,4.12474275,4.02520215
51.600699,6.70820393,6.53277795,0.418838848,4.03348101,4.04029465,6.4529581,4.12676187,4.02436719
51.611191,6.63324958,6.83932154,-0.453951491,4.03261989,4.03922535,6.7614743,4.12890409,4.023532
51.621682,7.87400787,7.20363676,0.81876194,4.03175913,4.0381613,7.12812772,4.13117612,4.02269672
51.632174,7.48331477,7.63315638,-0.387093801,4.03089855,4.03710213,7.56031143,4.13358602,4.0218612
51.642666,7.54983444,8.13305491,-0.763688727,4.03003823,4.03604779,8.06312361,4.13614177,4.02102553
51.653157,8.18535277,8.70524394,-0.721034789,4.02917825,4.03499824,8.63837171,4.13885193,4.02018977
51.663649,9.79795897,9.34763414,0.671062465,4.02831844,4.03395313,9.28384902,4.14172648,4.01935377
51.67414,10.3923048,10.0527897,0.582679305,4.02745897,4.03291253,9.99199998,4.14477509,4.01851769
51.684632,11.4017543,10.8071995,0.771073786,4.02659966,4.03187611,10.7492018,4.14800933,4.01768137
51.695124,12.6095202,11.5886226,1.01039479,4.0257406,4.03084384,11.5331068,4.15144081,4.01684489
51.705615,11.2694277,12.3628663,-1.04567616,4.02488187,4.02981569,12.3094125,4.15508201,4.01600833
51.716107,13.56466,13.0801421,0.69607316,4.0240233,4.02879137,13.0282062,4.15894749,4.01517154
51.726598,14.3527001,13.6737283,0.823997478,4.02316506,4.02777093,13.6226172,4.16305157,4.01433466
51.73709,13.8564065,14.0687475,-0.460804812,4.02230696,4.0267541,14.0176006,4.16741131,4.01349755
51.747582,13.56466,14.2028787,-0.798885956,4.02144911,4.02574084,14.1506713,4.17204406,4.01266028
51.758073,14,14.0525311,-0.229196538,4.02059157,4.02473117,13.9981111,4.17696857,4.01182294
51.768565,14,13.6444002,0.596321875,4.01973417,4.02372478,13.5865445,4.18220672,4.01098536
51.779056,12.7671453,13.0427224,-0.524954327,4.01887709,4.02272177,12.9801885,4.18778036,4.0101477
51.789548,12.4498996,12.3226851,0.356671424,4.01802016,4.02172187,12.2542352,4.19371547,4.0093098
51.80004,11.9163753,11.5502648,0.605070641,4.01716344,4.02072508,11.4746676,4.20003877,4.00847175
51.810531,10.6301458,10.7744881,-0.379923997,4.01630704,4.0197314,10.6905107,4.20677947,4.00763363
51.821023,9.94987437,10.0284793,-0.280365684,4.01545077,4.01874057,9.93488527,4.21397152,4.00679527
51.831514,10.1488916,9.3339136,0.9027613,4.0145948,4.01775269,9.22948433,4.22164949,4.00595683
51.842006,9.05538514,8.70386424,0.592891975,4.01373897,4.01676749,8.58743139,4.22985435,4.00511817
51.852498,8,8.14532588,-0.381216322,4.01288336,4.01578501,8.01581908,4.23862894,4.00427934
51.862989,7,7.66020883,-0.812532356,4.01202804,4.01480524,7.51669462,4.24802042,4.00344045
51.873481,7.87400787,7.24615247,0.792373275,4.01117285,4.01382795,7.08784724,4.25808368,4.00260132
51.883972,6.164414,6.89777423,-0.856364538,4.01031795,4.01285325,6.72403512,4.26887572,4.00176212
51.894464,6.32455532,6.60749796,-0.531923531,4.00946319,4.01188088,6.4177739,4.28046391,4.00092269
51.904956,6.244998,6.3669227,-0.34917718,4.00860863,4.01091087,6.16069705,4.29291997,4.0000831
51.915447,6.63324958,6.16770737,0.682306538,4.00775436,4.00994326,5.94443402,4.3063236,3.99924345
51.925939,6,6.00224363,-0.0473670117,4.00690021,4.0089778,5.76128764,4.32076778,3.99840356
51.93643,5.74456265,5.86414747,-0.345810393,4.00604635,4.00801461,5.60475163,4.33635106,3.9975636
51.946922,6.32455532,5.74824053,0.759153995,4.00519261,4.00705346,5.46949317,4.35318993,3.99672341
51.957414,6.63324958,5.65055083,0.991311633,4.00433907,4.00609439,5.35137494,4.37141075,3.99588308
51.967905,5.56776436,5.56808468,-0.0178975439,4.00348582,4.00513742,5.24722719,4.39115557,3.99504267
51.978397,6.164414,5.49860345,0.815972155,4.00263268,4.00418233,5.15461806,4.41259081,3.99420203
51.988888,5.74456265,5.44048838,0.551429298,4.00177982,4.00322925,5.07173052,4.43589688,3.99336133
51.99938,5,5.39251328,-0.626508804,4.00092708,4.00227795,4.99711121,4.46128794,3.99252039
52.009872,5.91607978,5.35380963,0.749846752,4.00007454,4.00132847,4.92964781,4.4890016,3.99167931
52.020363,5.29150262,5.32374592,-0.179564188,3.99922227,4.00038086,4.86843345,4.5193106,3.99083816
52.030855,5.09901951,5.30188197,-0.450402553,3.99837012,3.9994349,4.8127025,4.55254072,3.98999678
52.041346,5,5.2879604,-0.536619418,3.99751824,3.99849071,4.76182965,4.58906358,3.98915534
52.051838,5,5.28188588,-0.53092926,3.99666648,3.99754808,4.71526298,4.62934311,3.98831367
52.06233,5.29150262,5.28375225,0.0880362118,3.99581491,3.99660706,4.6725393,4.6739496,3.98747185
52.072821,5.65685425,5.29388315,0.602470828,3.99496361,3.9956677,4.63325551,4.72363242,3.98662997
52.083313,5.09901951,5.31293274,-0.462507541,3.99411242,3.99472978,4.59704949,4.77944609,3.98578787
52.093804,5.65685425,5.34204372,0.561079785,3.99326151,3.99379344,4.56361671,4.84290065,3.98494569
52.104296,4.12310563,5.38313603,-1.12251076,3.9924107,3.99285847,4.53267735,4.91629585,3.9841033
52.114788,4.89897949,5.43930776,-0.735070248,3.99156009,3.99192492,4.50399309,5.00311876,3.98326076
52.125279,5.65685425,5.51542101,0.376076109,3.99070975,3.99099285,4.47735269,5.10865506,3.98241815
52.135771,5.19615242,5.61885581,-0.650156433,3.98985951,3.99006205,4.45256189,5.24075236,3.98157532
52.146262,4.89897949,5.76020704,-0.928023464,3.98900955,3.98913266,4.42945693,5.41047244,3.98073243
52.156754,6.63324958,5.95387177,0.824243778,3.98815969,3.98820447,4.40788361,5.63262955,3.97988932
52.167246,6.244998,6.21781949,0.164859049,3.98731003,3.98727754,4.38771021,5.92542637,3.97904607
52.177737,6.63324958,6.57234115,0.246796331,3.98646063,3.98635193,4.36881865,6.30908179,3.97820275
52.188229,7.28010989,7.03760626,0.492446574,3.98561134,3.98542743,4.35109804,6.80332838,3.97735921
52.19872,7.74596669,7.62991446,0.340664405,3.98476232,3.9845042,4.33445519,7.42371319,3.97651561
52.209212,8.77496439,8.35850245,0.645338625,3.98391341,3.98358203,4.31880021,8.1786267,3.97567179
52.219704,9.2736185,9.22265446,0.225752153,3.98306469,3.98266097,4.30405691,9.06663253,3.97482783
52.230195,9.53939201,10.2107535,-0.819366515,3.98221624,3.9817411,4.29015546,10.0756829,3.97398381
52.240687,11.4891253,11.3009273,0.433817898,3.98136789,3.98082222,4.27702902,11.1837945,3.97313957
52.251178,11.7473401,12.4615848,-0.845129975,3.98051982,3.97990446,4.26462222,12.3595026,3.97229528
52.26167,13.0384048,13.6536915,-0.78440211,3.97967185,3.97898764,4.25288007,13.5640494,3.97145076
52.272162,14.7986486,14.8313298,-0.180779354,3.97882408,3.97807182,4.24175605,14.7518436,3.9706061
52.282653,14.7986486,15.9427364,-1.06962042,3.97797657,3.97715705,4.23120768,15.8714419,3.96976139
52.293145,17.0880075,16.9308042,0.396488722,3.97712918,3.97624316,4.22119333,16.8660157,3.96891646
52.303636,17.7482393,17.7332356,0.122489608,3.97628205,3.97533028,4.21167885,17.6734861,3.96807148
52.314128,18.0277564,18.2877255,-0.509871666,3.97543504,3.97441823,4.20262947,18.2317135,3.96722627
52.32462,18.627936,18.5420955,0.292985544,3.97458822,3.97350707,4.19401604,18.488644,3.96638093
52.335111,19.4422221,18.4694106,0.986312069,3.97374167,3.97259687,4.18581186,18.4174476,3.96553554
52.345603,18,18.0775072,-0.278401236,3.97289523,3.97168743,4.17799023,18.026058,3.96468993
52.356094,17.7763888,17.4058576,0.608712765,3.97204907,3.97077891,4.17052972,17.3540337,3.96384427
52.366586,16.0623784,16.5121358,-0.670639538,3.97120302,3.96987112,4.16340789,16.459113,3.96299839
52.377078,15.7797338,15.4590909,0.566253432,3.97035716,3.96896412,4.15660637,15.4040792,3.96215237
52.387569,15.0665192,14.3067286,0.871659689,3.96951158,3.96805799,4.15010831,14.2489445,3.96130631
52.398061,12.5698051,13.1093843,-0.734560562,3.96866612,3.96715253,4.14389658,13.0480343,3.96046003
52.408552,11.5758369,11.9161168,-0.583335127,3.96782093,3.96624791,4.137958,11.8504025,3.9596137
52.419044,11.0905365,10.7694321,0.566660775,3.96697586,3.96534393,4.13227839,10.6985796,3.95876715
52.429536,10.1488916,9.70515289,0.666137129,3.966131,3.96444066,4.12685731,9.62847132,3.95792047
52.440027,8.42614977,8.7506737,-0.569670019,3.96528641,3.96353817,4.1216636,8.66766094,3.95707375
52.450519,7.68114575,7.9234125,-0.492206002,3.96444194,3.96263629,4.1166977,7.83384778,3.95622681
52.46101,8.54400375,7.23061836,1.14603027,3.96359775,3.96173515,4.11195261,7.13465651,3.95537982
52.471502,7.14142843,6.66891909,0.687393144,3.96275369,3.96083458,4.10742071,6.56711004,3.95453262
52.481994,6.4807407,6.22642238,0.504299829,3.96190983,3.95993466,4.10309696,6.11964059,3.95368529
52.492485,6.40312424,5.88532865,0.719580149,3.96106626,3.95903544,4.09897756,5.77462131,3.95283791
52.502977,6,5.62536888,0.612071172,3.96022281,3.95813675,4.09505884,5.51178186,3.95199032
52.513468,5.38516481,5.42715512,-0.204915389,3.95937965,3.95723875,4.09134016,5.31160129,3.95114268
52.52396,5.56776436,5.27401565,0.541985901,3.95853663,3.95634124,4.08782096,5.15720859,3.95029484
52.534452,5.65685425,5.1529766,0.709843399,3.95769381,3.95544431,4.08450359,5.03542549,3.94944686
52.544943,6.08276253,5.05457797,1.01399436,3.95685128,3.95454803,4.08139233,4.93661538,3.94859884
52.555435,4.58257569,4.97225465,-0.624242705,3.95600889,3.95365222,4.07849304,4.85407493,3.94775062
52.565926,5.09901951,4.90165804,0.444253843,3.9551668,3.95275703,4.07581572,4.78335234,3.94690235
52.576418,5.29150262,4.83991767,0.672000706,3.95432484,3.95186228,4.07337311,4.7214995,3.94605387
52.58691,4.47213595,4.78517289,-0.559497039,3.9534831,3.95096804,4.07118378,4.66659391,3.94520526
52.597401,5.38516481,4.73618514,0.805592743,3.95264166,3.9500744,4.06927307,4.61734228,3.94435661
52.607893,5.74456265,4.6920913,1.02590026,3.95180037,3.94918117,4.06767531,4.57282632,3.94350776
52.618384,4.79583152,4.65229256,0.378865358,3.95095937,3.94828851,4.06643888,4.53238518,3.94265886
52.628876,4,4.61633779,-0.785071838,3.95011853,3.94739624,4.06563018,4.49549161,3.94180976
52.639368,4.58257569,4.58390763,-0.0364957244,3.94927791,3.94650443,4.0653412,4.4617291,3.94096053
52.649859,3.74165739,4.55479154,-0.901739515,3.9484376,3.94561317,4.0657099,4.43074897,3.94011126
52.660351,3,4.52882536,-1.23645678,3.94759744,3.94472227,4.06687685,4.4022452,3.93926179
52.670842,3.46410162,4.50597785,-1.02072339,3.9467576,3.94383189,4.06907181,4.37596381,3.93841228
52.681334,4.69041576,4.48627702,0.451817152,3.94591792,3.94294185,4.07256166,4.35167337,3.93756256
52.691826,5.19615242,4.46983953,0.852239924,3.94507847,3.94205223,4.07766903,4.32917799,3.93671272
52.702317,3.31662479,4.45684536,-1.06781111,3.94423934,3.94116311,4.08475696,4.30830473,3.93586285
52.712809,5.19615242,4.447515,0.86523836,3.94340038,3.9402743,4.09421258,4.28889513,3.93501277
52.7233,4.79583152,4.44208283,0.594767766,3.94256174,3.93938598,4.10640744,4.27081611,3.93416265
52.733792,5.19615242,4.4407421,0.869143444,3.94172326,3.93849795,4.12165645,4.25394262,3.93331234
52.744284,4.35889894,4.44357962,-0.29099945,3.94088504,3.93761031,4.14013884,4.23816825,3.9324619
52.754775,5,4.45046956,0.741303206,3.94004715,3.93672312,4.16179468,4.22339781,3.93161143
52.765267,4.58257569,4.46091731,0.348795617,3.93920944,3.93583621,4.18616788,4.20954206,3.93076075
52.775758,5.65685425,4.47381563,1.08767579,3.93837206,3.93494974,4.21214535,4.19652627,3.92991004
52.78625,4,4.4871666,-0.697973209,3.93753487,3.93406354,4.23768319,4.18427839,3.92905914
52.796742,4.79583152,4.49791764,0.545814876,3.93669794,3.93317768,4.25963704,4.17273711,3.92820811
52.807233,4.24264069,4.50231165,-0.509579197,3.93586135,3.93229223,4.27414471,4.16184702,3.92735705
52.817725,4.47213595,4.49702191,-0.157752821,3.93502496,3.93140704,4.27782159,4.15155502,3.92650579
52.828216,4.47213595,4.48067354,-0.0923990404,3.93418891,3.93052225,4.26933603,4.14181694,3.9256545
52.838708,4.47213595,4.45456248,0.132564991,3.93335306,3.92963769,4.25014731,4.13258905,3.92480302
52.8492,3.74165739,4.42191132,-0.824775083,3.93251749,3.92875344,4.2237042,4.12383429,3.92395141
52.859691,4.35889894,4.3863476,-0.165676362,3.93168228,3.92786958,4.1938527,4.11551886,3.92309978
52.870183,4.89897949,4.35077867,0.740405845,3.93084728,3.92698593,4.16366741,4.10760963,3.92224795
52.880674,3.46410162,4.31709027,-0.923573849,3.93001264,3.92610265,4.13513942,4.10007936,3.92139609
52.891166,3.60555128,4.28627878,-0.825062122,3.92917821,3.92521958,4.10932589,4.0929003,3.92054403
52.901658,4.69041576,4.25875056,0.657012326,3.92834408,3.92433679,4.0866619,4.08604911,3.91969186
52.912149,4.35889894,4.23453866,0.352647536,3.92751033,3.92345436,4.06719112,4.07950432,3.91883967
52.922641,4,4.21344935,-0.462005785,3.9266768,3.92257212,4.05072158,4.07324443,3.91798727
52.933132,4.58257569,4.19517421,0.622415842,3.92584366,3.92169022,4.03693964,4.067252,3.91713485
52.943624,4,4.17934051,-0.423486142,3.92501074,3.9208085,4.02546707,4.06150874,3.91628224
52.954116,4.12310563,4.16556947,-0.206067561,3.92417814,3.91992703,4.01591841,4.05599942,3.91542952
52.964607,4.24264069,4.15350242,0.298560327,3.92334593,3.91904589,4.00792976,4.05070996,3.91457677
52.975099,3.74165739,4.14281808,-0.633372475,3.92251397,3.91816492,4.00117774,4.04562587,3.91372383
52.98559,3.74165739,4.13324924,-0.625773007,3.9216824,3.91728427,3.99539368,4.04073566,3.91287086
52.996082,3.87298335,4.12457609,-0.501590218,3.92085109,3.91640377,3.99035973,4.03602685,3.9120177
53.006574,4,4.11662841,-0.341509013,3.92002012,3.9155235,3.98590815,4.03148922,3.91116443
53.017065,4.89897949,4.10927548,0.888652919,3.91918955,3.91464355,3.98191194,4.02711324,3.91031114
53.027557,4.35889894,4.10241631,0.506441142,3.91835926,3.91376373,3.9782756,4.02288885,3.90945766
53.038048,4.58257569,4.09597681,0.697566405,3.91752938,3.91288421,3.97492969,4.01880828,3.90860415
53.04854,4.69041576,4.08989816,0.774930706,3.91669978,3.91200482,3.97182151,4.01486276,3.90775046
53.059032,5.09901951,4.08413629,1.00741413,3.91587053,3.91112564,3.9689122,4.01104525,3.90689666
53.069523,4.69041576,4.07865621,0.782150594,3.91504173,3.91024675,3.96617195,4.00734914,3.90604284
53.080015,3.46410162,4.07342802,-0.780593621,3.91421321,3.90936798,3.96357667,4.00376726,3.90518883
53.090506,4.12310563,4.06842871,0.233830948,3.91338513,3.90848949,3.9611079,4.00029422,3.9043348
53.100998,3.16227766,4.06363702,-0.949399471,3.91255736,3.90761111,3.95874968,3.99692371,3.90348059
53.11149,3.46410162,4.0590359,-0.771319834,3.91172996,3.90673292,3.95648935,3.99365076,3.90262627
53.121981,5,4.05461054,0.972311402,3.91090303,3.905855,3.95431624,3.9904707,3.90177193
53.132473,4.69041576,4.05034668,0.800043172,3.91007641,3.90497718,3.95222067,3.98737827,3.9009174
53.142964,3.46410162,4.04623328,-0.762975535,3.90925026,3.90409963,3.9501951,3.98436969,3.90006286
53.153456,3.60555128,4.04225898,-0.660838639,3.90842444,3.90322217,3.94823229,3.98144029,3.89920813
53.163948,4.35889894,4.03841471,0.566113267,3.90759902,3.90234488,3.94632648,3.9785865,3.89835331
53.174439,4.35889894,4.03469231,0.569391459,3.9067741,3.90146785,3.94447265,3.97580495,3.89749846
53.184931,4,4.03108337,-0.176304766,3.90594951,3.9005909,3.94266591,3.97309171,3.89664343
53.195422,4.12310563,4.02758161,0.309069596,3.90512543,3.8997142,3.94090261,3.97044408,3.89578839
53.205914,4.58257569,4.02418002,0.747258776,3.9043017,3.89883757,3.93917888,3.96785853,3.89493316
53.216406,4.47213595,4.02087313,0.671760986,3.9034784,3.89796111,3.93749176,3.96533246,3.89407783
53.226897,4.24264069,4.01765596,0.474325554,3.90265563,3.89708488,3.93583862,3.9628634,3.89322249
53.237389,4.24264069,4.014523,0.477616673,3.90183323,3.89620872,3.93421668,3.96044834,3.89236697
53.24788,4.47213595,4.01147038,0.678723491,3.90101136,3.8953328,3.93262401,3.95808534,3.89151144
53.258372,4.79583152,4.00849336,0.887320777,3.90018987,3.89445694,3.93105832,3.95577166,3.89065572
53.268864,5,4.00558841,0.997201878,3.89936886,3.89358122,3.92951796,3.9535054,3.88979991
53.279355,3.60555128,4.00275225,-0.630238823,3.8985484,3.89270573,3.92800146,3.95128472,3.88894409
53.289847,3.74165739,3.99998103,-0.508255488,3.89772834,3.8918303,3.92650705,3.94910727,3.88808809
53.300338,4.58257569,3.9972722,0.765051305,3.89690885,3.89095508,3.92503367,3.94697165,3.88723207
53.31083,4.69041576,3.99462236,0.834142313,3.89608978,3.89007992,3.92357983,3.9448757,3.88637588
53.321322,4.79583152,3.99202911,0.896550285,3.89527122,3.88920489,3.92214455,3.94281799,3.8855196
53.331813,4,3.98949017,0.102517466,3.89445324,3.88833007,3.92072694,3.94079715,3.8846633
53.342305,3.87298335,3.9870027,-0.337667521,3.89363571,3.8874553,3.9193258,3.93881132,3.88380683
53.352796,4.47213595,3.98456497,0.698262831,3.89281878,3.88658073,3.91794054,3.93685946,3.88295035
53.363288,4.24264069,3.98217444,0.510358936,3.89200231,3.88570621,3.91657009,3.93493987,3.8820937
53.37378,4.24264069,3.97982939,0.512651239,3.89118639,3.8848318,3.91521385,3.93305145,3.88123695
53.384271,4.12310563,3.9775282,0.381546098,3.8903711,3.8839576,3.91387127,3.93119317,3.8803802
53.394763,4.69041576,3.97526869,0.845663688,3.88955628,3.88308344,3.91254147,3.92936353,3.87952327
53.405254,4.35889894,3.97304964,0.62116769,3.88874212,3.88220947,3.91122411,3.92756177,3.87866634
53.415746,4.35889894,3.9708691,0.622920418,3.88792846,3.88133553,3.90991839,3.9257865,3.87780923
53.426238,3.87298335,3.96872579,-0.30942276,3.88711538,3.8804617,3.90862393,3.9240369,3.87695203
53.436729,4.12310563,3.96661854,0.395584491,3.88630298,3.87958807,3.90734038,3.92231217,3.87609483
53.447221,4.69041576,3.96454561,0.851980134,3.88549111,3.87871445,3.90606704,3.92061109,3.87523746
53.457712,4.47213595,3.96250616,0.713883599,3.88467992,3.87784103,3.90480375,3.9189331,3.87438008
53.468204,3.46410162,3.96049861,-0.704554466,3.88386929,3.87696763,3.90354986,3.91727705,3.87352253
53.478696,3.87298335,3.95852203,-0.292469963,3.88305929,3.87609433,3.90230513,3.91564233,3.8726649
53.489187,4,3.95657552,0.20838542,3.88225002,3.87522122,3.90106934,3.91402831,3.87180726
53.499679,4,3.95465769,0.212937336,3.88144132,3.87434812,3.89984191,3.91243398,3.87094946
53.51017,3.16227766,3.95276794,-0.889095204,3.88063336,3.87347521,3.89862277,3.91085894,3.87009165
53.520662,3.31662479,3.95090498,-0.796417096,3.87982601,3.8726023,3.8974114,3.90930222,3.86923368
53.531154,3.87298335,3.94906811,-0.275834659,3.87901934,3.87172949,3.89620763,3.90776336,3.86837562
53.541645,3.74165739,3.94725664,-0.453430543,3.87821344,3.87085686,3.89501133,3.90624188,3.86751756
53.552137,2.82842712,3.94546944,-1.05690223,3.87740818,3.86998423,3.89382201,3.9047369,3.86665933
53.562628,4.12310563,3.94370608,0.423555834,3.87660372,3.86911178,3.89263966,3.90324817,3.86580111
53.57312,3.60555128,3.94196548,-0.580012245,3.87579991,3.86823934,3.89146383,3.90177487,3.86494271
53.583612,4.47213595,3.94024711,0.7293071,3.87499685,3.86736698,3.89029443,3.90031661,3.86408424
53.594103,4.24264069,3.93855046,0.551443769,3.87419463,3.86649479,3.88913136,3.89887305,3.86322577
53.604595,4,3.93687456,0.251247775,3.87339309,3.8656226,3.88797421,3.89744344,3.86236714
53.615086,4.24264069,3.93521911,0.554456109,3.87259242,3.86475058,3.886823,3.8960276,3.8615085
53.625578,4.24264069,3.93358321,0.555929378,3.87179246,3.86387856,3.88567735,3.89462483,3.86064971
53.63607,4,3.93196646,0.260832397,3.87099332,3.86300662,3.8845372,3.89323483,3.85979084
53.646561,3.74165739,3.93036846,-0.434408879,3.87019507,3.86213485,3.88340249,3.89185735,3.85893197
53.657053,4.58257569,3.92878839,0.80857115,3.86939758,3.86126307,3.88227285,3.89049173,3.85807293
53.667544,4.24264069,3.92722605,0.561617873,3.86860102,3.86039145,3.88114836,3.88913786,3.85721391
53.678036,4.12310563,3.92568067,0.444325282,3.86780525,3.85951982,3.88002864,3.88779513,3.85635472
53.688528,4.69041576,3.92415193,0.875364967,3.86701036,3.85864827,3.87891369,3.88646332,3.85549546
53.699019,3.87298335,3.92263955,-0.222836721,3.86621644,3.85777688,3.87780346,3.88514222,3.8546362
53.709511,3.87298335,3.9211428,-0.219452634,3.86542335,3.85690548,3.87669763,3.88383128,3.85377679
53.720002,4.58257569,3.91966158,0.81419538,3.86463127,3.85603424,3.87559628,3.88253042,3.85291738
53.730494,3.60555128,3.9181952,-0.559145706,3.86384005,3.85516298,3.8744991,3.88123911,3.85205782
53.740986,4.12310563,3.91674343,0.454271062,3.86304979,3.8542918,3.87340606,3.87995719,3.85119818
53.751477,4,3.91530605,0.291022254,3.86226058,3.85342077,3.87231718,3.8786845,3.85033855
53.761969,3.87298335,3.91388244,-0.202235232,3.86147229,3.85254973,3.87123213,3.87742054,3.84947876
53.77246,3.74165739,3.91247253,-0.413297886,3.86068508,3.85167883,3.87015103,3.87616529,3.84861898
53.782952,5,3.91107574,1.04351534,3.85989882,3.85080793,3.86907358,3.87491827,3.84775905
53.793444,4.69041576,3.9096919,0.883585799,3.85911361,3.84993708,3.86799978,3.87367936,3.84689905
53.803935,3.46410162,3.90832083,-0.666497722,3.85832954,3.84906639,3.86692965,3.87244845,3.84603905
53.814427,4.47213595,3.90696199,0.751780527,3.85754647,3.84819568,3.8658629,3.87122509,3.84517891
53.824918,4.12310563,3.90561537,0.466358501,3.85676459,3.84732512,3.86479965,3.87000929,3.84431877
53.83541,3.87298335,3.90428045,-0.176909876,3.85598375,3.84645454,3.86373962,3.86880062,3.84345849
53.845902,4.24264069,3.9029571,0.582823807,3.85520405,3.84558403,3.86268283,3.86759899,3.84259813
53.856393,3.87298335,3.90164519,-0.169298105,3.85442558,3.84471366,3.8616293,3.86640433,3.84173779
53.866885,4.89897949,3.90034426,0.999317381,3.85364823,3.84384326,3.86057876,3.86521623,3.8408773
53.877376,4.35889894,3.89905431,0.678118451,3.85287216,3.84297302,3.85953135,3.86403472,3.84001682
53.887868,4.35889894,3.89777488,0.67906116,3.85209724,3.84210275,3.8584868,3.86285941,3.83915619
53.89836,3.46410162,3.8965059,-0.657574546,3.85132357,3.84123254,3.85744513,3.86169025,3.8382955
53.908851,4.35889894,3.89524727,0.680919727,3.85055125,3.84036247,3.85640639,3.86052719,3.83743482
53.919343,3.87298335,3.89399856,-0.14496626,3.84978015,3.83949238,3.85537032,3.85936984,3.83657399
53.929834,5.09901951,3.89275983,1.09829854,3.84901044,3.83862243,3.85433705,3.85821828,3.83571318
53.940326,3.31662479,3.89153066,-0.758225474,3.84824201,3.83775246,3.85330633,3.85707214,3.83485223
53.950818,4.35889894,3.890311,0.684534841,3.84747495,3.83688255,3.8522782,3.85593138,3.8339912
53.961309,4.12310563,3.88910079,0.483740466,3.84670935,3.83601277,3.85125271,3.85479598,3.8331302
53.971801,3.46410162,3.88789965,-0.650997719,3.84594511,3.83514297,3.85022961,3.85366559,3.83226905
53.982292,4.35889894,3.88670765,0.687161769,3.84518239,3.83427331,3.84920904,3.85254029,3.83140792
53.992784,4.24264069,3.88552442,0.597592059,3.84442107,3.83340362,3.84819076,3.85141975,3.83054665
54.003276,4.24264069,3.88434993,0.598573934,3.84366126,3.83253399,3.84717482,3.85030394,3.82968532
54.013767,4.69041576,3.88318417,0.89846068,3.84290306,3.8316645,3.84616127,3.84919287,3.828824
54.024259,3.74165739,3.88202677,-0.37465902,3.84214635,3.83079498,3.84514986,3.84808619,3.82796254
54.03475,3.60555128,3.88087783,-0.524715694,3.8413913,3.82992559,3.84414076,3.84698402,3.82710111
54.045242,3.74165739,3.87973703,-0.371590692,3.84063781,3.82905618,3.84313372,3.84588604,3.82623953
54.055734,4.24264069,3.87860435,0.60335424,3.83988598,3.82818682,3.8421288,3.84479224,3.82537789
54.066225,3.87298335,3.87747979,-0.0670555283,3.8391359,3.8273176,3.84112606,3.84370264,3.82451628
54.076717,4.35889894,3.87636304,0.694648045,3.83838748,3.82644835,3.84012526,3.84261691,3.82365453
54.087208,4.58257569,3.87525421,0.841024072,3.83764089,3.82557924,3.83912656,3.84153519,3.8227928
54.0977,4,3.87415299,0.354749225,3.83689602,3.82471009,3.83812973,3.84045717,3.82193093
54.108192,5.09901951,3.8730594,1.10723083,3.83615298,3.823841,3.83713483,3.83938285,3.821069
54.118683,3.87298335,3.87197347,0.031778626,3.83541187,3.82297205,3.83614193,3.83831227,3.8202071
54.129175,3.74165739,3.87089489,-0.359496182,3.83467259,3.82210306,3.83515079,3.83724512,3.81934507
54.139666,5.09901951,3.86982381,1.10869099,3.83393533,3.82123421,3.83416158,3.83618154,3.81848305
54.150158,3.46410162,3.86875995,-0.636127605,3.83319997,3.82036533,3.83317408,3.83512124,3.81762091
54.16065,3.60555128,3.86770333,-0.512007867,3.83246664,3.8194965,3.83218835,3.83406423,3.81675871
54.171141,4.47213595,3.866654,0.778127207,3.83173544,3.81862781,3.83120444,3.83301056,3.81589653
54.181633,4.12310563,3.8656117,0.507438589,3.83100627,3.81775908,3.83022216,3.83195994,3.81503422
54.192124,4.69041576,3.86457657,0.908756945,3.83027932,3.81689049,3.82924166,3.83091251,3.81417195
54.202616,4.47213595,3.86354837,0.78012024,3.8295545,3.81602187,3.82826271,3.82986799,3.81330953
54.213108,4.35889894,3.86252713,0.704536595,3.82883191,3.8151533,3.8272854,3.82882642,3.81244707
54.223599,4.12310563,3.86151292,0.511461344,3.82811168,3.81428486,3.82630978,3.82778783,3.81158464
54.234091,4.58257569,3.8605055,0.849747137,3.82739372,3.8134164,3.82533566,3.82675196,3.81072207
54.244582,4,3.85950502,0.374826594,3.82667821,3.81254806,3.82436318,3.82571895,3.80985953
54.255074,3.46410162,3.85851127,-0.628020428,3.82596506,3.8116797,3.82339214,3.82468854,3.80899687
54.265566,4.12310563,3.85752431,0.515345821,3.8252544,3.81081139,3.82242261,3.82366077,3.80813415
54.276057,3.87298335,3.85654421,0.128215214,3.82454635,3.80994321,3.82145467,3.82263568,3.80727147
54.286549,4.58257569,3.85557075,0.852645851,3.82384083,3.809075,3.8204881,3.82161302,3.80640866
54.29704,4.35889894,3.8546041,0.710137197,3.82313803,3.80820692,3.81952307,3.82059293,3.80554588
54.307532,4.35889894,3.85364408,0.71081282,3.82243787,3.80733882,3.81855938,3.81957517,3.80468298
54.318024,4.35889894,3.85269075,0.711483094,3.82174048,3.80647076,3.8175971,3.81855978,3.80382003
54.328515,3.87298335,3.8517442,0.14573656,3.82104599,3.80560284,3.81663631,3.8175468,3.80295711
54.339007,4.12310563,3.85080425,0.521825044,3.82035432,3.80473489,3.8156768,3.81653601,3.80209407
54.349498,3.31662479,3.84987107,-0.73023714,3.81966568,3.80386708,3.81471873,3.81552753,3.80123106
54.35999,3.31662479,3.84894449,-0.729602428,3.81898,3.80299923,3.81376192,3.81452114,3.80036793
54.370482,3.74165739,3.84802461,-0.326139886,3.81829741,3.80213143,3.81280644,3.81351688,3.79950475
54.380973,2.64575131,3.84711153,-1.09606579,3.81761805,3.80126377,3.81185235,3.81251481,3.79864161
54.391465,4.24264069,3.84620507,0.629631332,3.81694186,3.80039608,3.81089948,3.81151469,3.79777835
54.401956,4.89897949,3.84530545,1.02648626,3.81626904,3.79952853,3.80994798,3.81051668,3.79691513
54.412448,3.74165739,3.8444125,-0.32055438,3.81559955,3.79866095,3.80899766,3.80952054,3.79605178
54.42294,3.74165739,3.84352634,-0.319169154,3.81493351,3.79779342,3.8080486,3.80852633,3.79518839
54.433431,4.58257569,3.84264708,0.860191036,3.81427109,3.79692602,3.80710088,3.8075341,3.79432505
54.443923,4,3.84177458,0.397775586,3.81361223,3.7960586,3.80615431,3.80654363,3.79346158
54.454414,3.60555128,3.84090906,-0.485136875,3.81295714,3.79519131,3.80520906,3.80555507,3.79259815
54.464906,4.79583152,3.84005039,0.977640595,3.8123058,3.79432399,3.80426493,3.8045682,3.7917346
54.475398,3.74165739,3.8391987,-0.312316039,3.81165834,3.79345673,3.80332201,3.80358307,3.79087102
54.485889,4.12310563,3.83835411,0.533621137,3.81101493,3.79258961,3.80238039,3.80259975,3.79000747
54.496381,4.35889894,3.83751652,0.722068157,3.81037554,3.79172245,3.80143987,3.80161801,3.78914381
54.506872,4.24264069,3.83668615,0.637145615,3.80974039,3.79085544,3.80050062,3.80063802,3.78828019
54.517364,3.46410162,3.83586291,-0.609722308,3.80910946,3.78998839,3.79956247,3.79965954,3.78741646
54.527856,4.24264069,3.83504694,0.638430695,3.80848292,3.78912141,3.79862549,3.79868266,3.78655269
54.538347,4.35889894,3.83423838,0.724334564,3.80786093,3.78825456,3.79768977,3.79770742,3.78568896
54.548839,3.46410162,3.83343717,-0.607729839,3.80724349,3.78738768,3.79675514,3.79673361,3.78482512
54.55933,4.24264069,3.83264354,0.640310195,3.80663082,3.78652095,3.79582175,3.79576139,3.78396132
54.569822,3.74165739,3.83185742,-0.300333211,3.80602294,3.78565419,3.79488945,3.79479055,3.78309741
54.580314,3.60555128,3.83107899,-0.474897582,3.80542001,3.78478748,3.7939583,3.79382115,3.78223347
54.590805,4.24264069,3.83030841,0.642131046,3.80482223,3.78392092,3.7930284,3.79285326,3.78136957
54.601297,3.74165739,3.82954563,-0.296459521,3.80422961,3.78305433,3.79209958,3.79188666,3.78050556
54.611788,4.24264069,3.82879093,0.643311559,3.8036424,3.78218789,3.79117201,3.79092152,3.77964161
54.62228,3.60555128,3.82804425,-0.47169161,3.80306062,3.78132142,3.79024552,3.78995763,3.77877753
54.632772,4.24264069,3.8273058,0.644464805,3.80248447,3.78045501,3.7893202,3.78899506,3.77791343
54.643263,4.12310563,3.82657578,0.544545543,3.80191416,3.77958874,3.78839614,3.78803387,3.77704938
54.653755,4.89897949,3.82585417,1.03591762,3.80134973,3.77872245,3.78747317,3.78707385,3.77618521
54.664246,3.87298335,3.82514126,0.218728349,3.80079143,3.7778563,3.78655148,3.78611517,3.7753211
54.674738,3.60555128,3.82443705,-0.467852298,3.80023934,3.77699013,3.7856309,3.78515763,3.77445688
54.68523,4.47213595,3.82374177,0.805229276,3.79969367,3.77612402,3.78471152,3.78420128,3.77359263
54.695721,3.46410162,3.82305564,-0.599127722,3.79915464,3.77525806,3.78379344,3.78324621,3.77272844
54.706213,4.24264069,3.82237871,0.648276158,3.79862233,3.77439208,3.7828765,3.78229221,3.77186414
54.716704,4.12310563,3.82171128,0.548993944,3.79809703,3.77352624,3.78196089,3.78133944,3.77099989
54.727196,4.24264069,3.8210534,0.649297535,3.79757884,3.77266039,3.78104645,3.7803877,3.77013553
54.737688,3.87298335,3.82040534,0.229298956,3.79706799,3.77179459,3.78013328,3.77943707,3.76927115
54.748179,4.35889894,3.81976735,0.734255809,3.79656474,3.77092895,3.77922149,3.7784876,3.76840682
54.758671,4.12310563,3.81913954,0.551331198,3.79606921,3.77006329,3.77831092,3.77753911,3.76754239
54.769162,3,3.81852223,-0.904722184,3.79558172,3.76919778,3.77740177,3.77659176,3.76667802
54.779654,2.64575131,3.81791555,-1.08266534,3.7951024,3.76833225,3.7764939,3.77564534,3.76581354
54.790146,4.35889894,3.8173198,0.735920608,3.79463153,3.76746678,3.77558741,3.77469994,3.76494904
54.800637,3.87298335,3.81673529,0.237166726,3.79416939,3.76660147,3.77468242,3.77375562,3.7640846
54.811129,3.60555128,3.81616217,-0.458923627,3.79371617,3.76573615,3.77377878,3.77281219,3.76322005
54.82162,3.60555128,3.81560083,-0.458311636,3.7932722,3.76487097,3.77287672,3.77186981,3.76235557
54.832112,4.35889894,3.81505146,0.73746016,3.79283767,3.76400579,3.77197608,3.77092829,3.76149098
54.842604,4.79583152,3.8145144,0.990614516,3.7924129,3.76314067,3.771077,3.7699877,3.76062637
54.853095,4.12310563,3.81399004,0.555981638,3.79199824,3.7622757,3.77017961,3.76904811,3.75976183
54.863587,3.46410162,3.81347861,-0.591081208,3.7915939,3.76141073,3.76928378,3.76810933,3.75889718
54.874078,3.74165739,3.81298055,-0.26706396,3.79120028,3.76054591,3.76838974,3.76717154,3.7580326
54.88457,2.82842712,3.81249612,-0.99200252,3.79081762,3.75968108,3.76749737,3.76623452,3.75716792
54.895062,4.24264069,3.81202578,0.656212549,3.79044632,3.75881632,3.76660682,3.76529836,3.75630322
54.905553,4.89897949,3.81156995,1.04278931,3.79008674,3.75795172,3.76571823,3.76436314,3.75543858
54.916045,3.46410162,3.81112897,-0.589090278,3.7897392,3.75708712,3.76483151,3.76342866,3.75457385
54.926536,3.60555128,3.81070337,-0.452937186,3.78940414,3.75622267,3.7639469,3.76249508,3.75370918
54.937028,3.46410162,3.81029353,-0.588380754,3.78908189,3.75535821,3.76306432,3.76156222,3.75284441
54.94752,4.24264069,3.80989997,0.657830311,3.7887729,3.75449384,3.76218394,3.76063016,3.75197963
54.958011,4.24264069,3.80952324,0.65811659,3.78847763,3.75362962,3.76130595,3.75969896,3.75111492
54.968503,3.46410162,3.80916381,-0.587419944,3.78819646,3.7527654,3.76043027,3.75876845,3.75025011
54.978994,3.87298335,3.80882229,0.25330032,3.78792991,3.75190134,3.7595572,3.75783878,3.74938537
54.989486,4.24264069,3.80849923,0.658894115,3.78767841,3.75103728,3.75868669,3.75690977,3.74852054
54.999978,3.87298335,3.80819528,0.254535008,3.78744251,3.7501733,3.75781896,3.75598149,3.74765569
55.010469,4.12310563,3.80791111,0.561421873,3.78722273,3.74930949,3.75695424,3.75505403,3.74679092
55.020961,3.74165739,3.80764736,-0.256885134,3.78701959,3.74844568,3.75609252,3.75412719,3.74592605
55.031452,4.79583152,3.80740481,0.994196515,3.78683369,3.74758203,3.75523415,3.75320114,3.74506125
55.041944,3.31662479,3.80718419,-0.700399455,3.7866656,3.74671839,3.75437915,3.75227569,3.74419636
55.052436,3.74165739,3.80698632,-0.255595251,3.78651595,3.74585483,3.7535278,3.75135092,3.74333146
55.062927,4.24264069,3.80681208,0.660173165,3.78638541,3.74499144,3.75268043,3.75042691,3.74246664
55.073419,5.38516481,3.80666234,1.25638468,3.78627462,3.74412805,3.75183712,3.74950348,3.74160172
55.08391,4,3.8065381,0.439843043,3.78618432,3.74326484,3.7509983,3.74858079,3.74073688
55.094402,3.74165739,3.80644034,-0.254524949,3.78611522,3.74240163,3.7501641,3.74765865,3.73987195
55.104894,4,3.80637015,0.440033914,3.7860681,3.74153852,3.74933496,3.74673715,3.73900701
55.115385,4.47213595,3.80632632,0.815971587,3.78604378,3.74067557,3.74850888,3.74581635,3.73814215
55.125877,4.12310563,3.80631482,0.562841726,3.78604309,3.73981264,3.74769094,3.74489609,3.7372772
55.136368,3.87298335,3.80633456,0.25816427,3.78606692,3.73894989,3.74687933,3.74397652,3.73641232
55.14686,4.35889894,3.80638693,0.743311515,3.78611619,3.73808714,3.74607439,3.74305746,3.73554736
55.157352,3.74165739,3.80647344,-0.254589966,3.78619188,3.73722449,3.74527673,3.74213899,3.7346824
55.167843,3.87298335,3.80659564,0.25765812,3.78629499,3.73636202,3.74448703,3.74122119,3.73381751
55.178335,3.87298335,3.80675527,0.257348162,3.7864266,3.73549957,3.74370581,3.74030388,3.73295254
55.188826,4.24264069,3.80695413,0.660065571,3.7865878,3.73463729,3.74293398,3.73938722,3.73208765
55.199318,4.12310563,3.80719423,0.56205996,3.78677979,3.73377503,3.74217222,3.73847104,3.73122267
55.20981,4.35889894,3.80747768,0.742577449,3.7870038,3.73291288,3.74142156,3.7375554,3.7303577
55.220301,4.12310563,3.80780674,0.561514809,3.78726107,3.73205091,3.74068311,3.73664039,3.7294928
55.230793,3.87298335,3.80818399,0.254557171,3.78755302,3.73118895,3.73995792,3.73572584,3.72862782
55.241284,3.46410162,3.80861206,-0.586950123,3.78788102,3.73032719,3.73924748,3.7348119,3.72776293
55.251776,3.46410162,3.809094,-0.58736052,3.78824663,3.72946545,3.73855317,3.73389839,3.72689795
55.262268,4.24264069,3.80963299,0.658033202,3.7886514,3.72860381,3.7378768,3.7329854,3.72603298
55.272759,3.46410162,3.81023255,-0.588328931,3.78909693,3.72774237,3.73722038,3.73207301,3.72516808
55.283251,4.24264069,3.81089668,0.657072297,3.78958507,3.72688095,3.73658605,3.73116103,3.72430311
55.293742,3.60555128,3.81162961,-0.453958511,3.79011757,3.72601972,3.73597651,3.73024963,3.72343823
55.304234,3.87298335,3.81243625,0.246063192,3.79069646,3.72515853,3.73539461,3.72933863,3.72257326
55.314726,3.60555128,3.81332191,-0.455818642,3.79132375,3.72429744,3.73484384,3.72842812,3.7217083
55.325217,4,3.81429248,0.430937958,3.79200154,3.72343656,3.73432822,3.72751817,3.72084343
55.335709,4,3.81535489,0.429703518,3.79273224,3.7225757,3.7338523,3.72660861,3.71997847
55.3462,3.87298335,3.81651658,0.237627377,3.79351812,3.72171505,3.73342159,3.7256996,3.71911361
55.356692,3.46410162,3.81778647,-0.594714096,3.79436189,3.72085443,3.7330424,3.72479096,3.71824867
55.367184,4.12310563,3.81917446,0.551299521,3.79526618,3.71999393,3.73272234,3.72388277,3.71738374
55.377675,4.69041576,3.82069199,0.932589817,3.79623375,3.71913363,3.73247049,3.72297512,3.71651889
55.388167,4,3.82235295,0.421481973,3.79726781,3.71827337,3.73229779,3.72206783,3.71565397
55.398658,4.24264069,3.82417321,0.646890621,3.79837139,3.71741332,3.73221776,3.72116106,3.71478915
55.40915,4.24264069,3.82617281,0.645343224,3.79954809,3.71655331,3.73224726,3.72025463,3.71392425
55.419642,4.24264069,3.82837601,0.643633965,3.80080143,3.71569343,3.73240789,3.71934863,3.71305935
55.430133,4,3.83081358,0.411322766,3.80213513,3.71483376,3.73272784,3.71844314,3.71219456
55.440625,3.74165739,3.83352625,-0.303098768,3.80355352,3.71397414,3.73324466,3.71753798,3.71132968
55.451116,3.87298335,3.83656654,0.190831891,3.80506067,3.71311472,3.73400876,3.71663332,3.71046491
55.461608,4.47213595,3.84000541,0.795066378,3.80666149,3.71225536,3.73508847,3.71572898,3.70960006
55.4721,3.16227766,3.84393577,-0.825625887,3.80836078,3.71139614,3.73657528,3.71482504,3.70873522
55.482591,4,3.84847876,0.389257294,3.81016359,3.71053713,3.73858975,3.71392158,3.70787048
55.493083,3.74165739,3.85379029,-0.33486251,3.81207589,3.70967818,3.74128748,3.71301844,3.70700567
55.503574,4.58257569,3.86006068,0.850008834,3.81410329,3.70881944,3.74486072,3.71211576,3.70614096
55.514066,4,3.86751759,0.363981328,3.81625257,3.70796077,3.74953935,3.71121339,3.70527617
55.524558,3.60555128,3.87641523,-0.520445916,3.81853038,3.70710224,3.7555818,3.7103114,3.70441141
55.535049,4.24264069,3.88702081,0.596338724,3.82094382,3.70624393,3.76326039,3.70940987,3.70354674
55.545541,4.47213595,3.89959376,0.756665179,3.82350118,3.70538569,3.77283884,3.70850862,3.702682
55.556032,3.87298335,3.91434032,-0.203364137,3.8262104,3.70452768,3.78452749,3.70760783,3.70181736
55.566524,3.60555128,3.93136266,-0.570798897,3.82908102,3.70366974,3.79842783,3.70670732,3.70095266
55.577016,3.87298335,3.95055064,-0.278509048,3.83212252,3.70281194,3.81442229,3.70580716,3.70008797
55.587507,3.74165739,3.97142548,-0.479341312,3.835345,3.70195438,3.83201052,3.70490745,3.69922339
55.597999,4.35889894,3.99292663,0.60495646,3.83876034,3.7010969,3.85008579,3.70400801,3.69835874
55.60849,3.87298335,4.01320673,-0.374464123,3.84238,3.70023965,3.86672269,3.703109,3.69749419
55.618982,4.47213595,4.02973544,0.66513195,3.84621774,3.69938248,3.87927779,3.70221025,3.69662958
55.629474,4.47213595,4.03994886,0.657409381,3.85028737,3.69852547,3.88506251,3.70131184,3.69576499
55.639965,4.89897949,4.04238679,0.925522931,3.85460372,3.6976687,3.88252159,3.70041386,3.69490051
55.650457,3.87298335,4.03749881,-0.405605062,3.85918416,3.69681202,3.87207446,3.69951612,3.69403596
55.660948,3.87298335,4.02738958,-0.392945583,3.86404574,3.69595559,3.85586517,3.6986188,3.69317152
55.67144,5.29150262,4.01475687,1.12993175,3.86920885,3.69509924,3.83666321,3.69772173,3.69230702
55.681932,3.46410162,4.00191981,-0.73336089,3.87469416,3.69424306,3.81685796,3.69682497,3.69144254
55.692423,4.24264069,3.99042058,0.502215203,3.88052409,3.69338714,3.79803813,3.69592863,3.69057816
55.702915,3.31662479,3.9810842,-0.815143798,3.88672484,3.69253131,3.78104627,3.69503252,3.68971373
55.713406,5.19615242,3.97424678,1.10539841,3.89332252,3.69167574,3.766217,3.69413681,3.68884941
55.723898,3.87298335,3.96994758,-0.311390813,3.90034827,3.69082027,3.75356924,3.69324133,3.68798503
55.73439,4.89897949,3.96806859,0.964837238,3.90783415,3.68996498,3.74295544,3.69234615,3.68712067
55.744881,4.47213595,3.96841387,0.709733816,3.91581554,3.68910995,3.73414127,3.69145137,3.68625642
55.755373,3.74165739,3.97075973,-0.478646361,3.92433247,3.68825503,3.7268563,3.69055681,3.68539212
55.765864,4.69041576,3.97488864,0.845888362,3.93342686,3.68740038,3.72083311,3.68966263,3.68452793
55.776356,4.58257569,3.98060961,0.775864732,3.94314797,3.68654584,3.71582248,3.68876867,3.68366368
55.786848,3.87298335,3.98776776,-0.338798488,3.95354735,3.6856915,3.71160973,3.687875,3.68279946
55.797339,4.79583152,3.99624946,0.894193526,3.96468177,3.68483743,3.70801712,3.68698171,3.68193535
55.807831,4.12310563,4.00598515,0.342228695,3.97661742,3.68398347,3.70490251,3.68608862,3.68107119
55.818322,4.12310563,4.01693997,0.325830712,3.98942295,3.6831298,3.70215762,3.68519591,3.68020714
55.828814,4.69041576,4.02911673,0.813202946,4.00317969,3.68227626,3.69969994,3.6843034,3.67934304
55.839306,4.24264069,4.04254406,0.447321617,4.01797419,3.68142291,3.69746887,3.68341117,3.67847897
55.849797,4.58257569,4.05727519,0.724776175,4.03390264,3.68056986,3.69541949,3.6825193,3.67761502
55.860289,4,4.0733901,-0.270906081,4.05107748,3.67971694,3.69351776,3.68162763,3.67675101
55.87078,4.12310563,4.09098366,0.179226025,4.06961783,3.67886432,3.69173861,3.68073632,3.67588713
55.881272,4,4.1101779,-0.331930564,4.08966491,3.67801183,3.69006205,3.6798452,3.67502319
55.891764,3.87298335,4.13111134,-0.508062979,4.11137221,3.67715956,3.68847276,3.67895435,3.67415928
55.902255,4.12310563,4.15394537,-0.17561247,4.1349133,3.67630759,3.68695841,3.67806385,3.6732955
55.912747,4.58257569,4.17887522,0.635374283,4.16049367,3.67545577,3.68550852,3.67717353,3.67243166
55.923238,5.19615242,4.20611937,0.995004046,4.18834022,3.67460426,3.68411489,3.67628356,3.67156794
55.93373,4.24264069,4.23594776,0.0818102846,4.21873029,3.6737529,3.68277015,3.67539377,3.67070418
55.944222,3.46410162,4.26867747,-0.896981527,4.25198726,3.67290178,3.68146842,3.67450424,3.66984045
55.954713,4,4.30470135,-0.551997595,4.28850958,3.67205097,3.6802047,3.67361506,3.66897685
55.965205,4.12310563,4.34453477,-0.470562582,4.32881795,3.67120033,3.67897437,3.67272604,3.6681132
55.975696,4.58257569,4.38884464,0.440148903,4.37358411,3.67035001,3.67777389,3.67183737,3.66724967
55.986188,5.91607978,4.43856395,1.21553109,4.42374618,3.66949985,3.67659977,3.67094886,3.66638609
55.99668,4.58257569,4.494984,0.295958947,4.48060074,3.66864995,3.67544931,3.6700606,3.66552256
56.007171,5,4.55993317,0.663375331,4.54598218,3.66780039,3.67432016,3.66917268,3.66465915
56.017663,5.83095189,4.63601925,1.09312975,4.62250537,3.666951,3.67320994,3.66828492,3.66379569
56.028154,5.09901951,4.72684237,0.610063226,4.71377855,3.66610196,3.67211699,3.66739749,3.66293236
56.038646,5,4.83732782,0.403326396,4.82473629,3.66525309,3.67103945,3.66651022,3.66206899
56.049138,5.09901951,4.97387989,0.353750796,4.96179248,3.6644045,3.66997595,3.66562319,3.66120566
56.059629,5.19615242,5.14445232,0.227376567,5.13290945,3.66355627,3.66892531,3.66473648,3.66034246
56.070121,5.65685425,5.35838614,0.546322349,5.34743392,3.66270822,3.66788619,3.66384993,3.65947921
56.080612,5.19615242,5.62566524,-0.655372276,5.61534979,3.66186054,3.66685775,3.6629637,3.6586161
56.091104,7,5.95608082,1.02172363,5.94644133,3.66101307,3.6658389,3.66207762,3.65775294
56.101596,5.56776436,6.35775399,-0.888813606,6.34881525,3.66016588,3.66482892,3.66119177,3.65688983
56.112087,7,6.835847,0.405157994,6.82761407,3.65931906,3.66382718,3.66030624,3.65602685
56.122579,7.93725393,7.39164649,0.738652451,7.38410317,3.65847246,3.66283283,3.65942086,3.65516383
56.13307,7.61577311,8.02155806,-0.637012525,8.01466866,3.65762625,3.66184548,3.65853579,3.65430094
56.143562,8.66025404,8.71739447,-0.239040648,8.71110868,3.65678025,3.66086441,3.65765086,3.65343802
56.154054,8.54400375,9.46618347,-0.960301895,9.46044183,3.65593457,3.65988923,3.65676616,3.65257514
56.164545,10.0995049,10.2507768,-0.388936795,10.2455157,3.65508928,3.6589196,3.65588177,3.6517124
56.175037,11.3137085,11.050535,0.513004393,11.045691,3.65424423,3.65795495,3.65499752,3.65084962
56.185528,12.1243557,11.8410057,0.532306231,11.8365174,3.65339959,3.65699509,3.65411358,3.64998697
56.19602,13,12.5944111,0.636858648,12.5902201,3.65255519,3.65603952,3.65322977,3.64912429
56.206512,13.6381817,13.2787693,0.599510169,13.2748204,3.65171112,3.65508804,3.65234618,3.64826166
56.217003,13.4164079,13.8582629,-0.664721798,13.8545031,3.65086748,3.65414046,3.65146289,3.64739916
56.227495,14,14.2952367,-0.543356838,14.2916139,3.65002409,3.65319635,3.65057974,3.64653663
56.237986,15.3297097,14.5548607,0.88025506,14.5513234,3.64918114,3.65225567,3.64969689,3.64567424
56.248478,14.6969385,14.6132113,0.289356465,14.6097078,3.64833845,3.65131803,3.64881417,3.64481181
56.25897,13,14.4643458,-1.21010156,14.4608254,3.64749613,3.65038333,3.64793166,3.64394944
56.269461,14.1421356,14.1225341,0.140005436,14.1189472,3.64665425,3.64945147,3.64704945,3.64308721
56.279953,12.3693169,13.6174095,-1.11718066,13.6137081,3.64581266,3.64852212,3.64616736,3.64222495
56.290444,12.2474487,12.986117,-0.859458132,12.9822544,3.64497152,3.6475953,3.64528557,3.64136282
56.300936,12.083046,12.2659647,-0.427690045,12.2618943,3.64413069,3.64667071,3.64440391,3.64050067
56.311428,10.8627805,11.4912366,-0.792752264,11.4869111,3.64329024,3.64574829,3.64352245,3.63963858
56.321919,10.3440804,10.6921328,-0.589959664,10.6875039,3.64245027,3.64482802,3.64264128,3.63877662
56.332411,9.21954446,9.89478132,-0.821727971,9.88979996,3.64161061,3.64390962,3.64176024,3.63791464
56.342902,8.06225775,9.12207285,-1.02947321,9.1166909,3.64077144,3.64299315,3.64087949,3.63705279
56.353394,7.41619849,8.39305698,-0.988361522,8.38722977,3.6399326,3.64207834,3.63999885,3.63619093
56.363886,7.48331477,7.72311013,-0.489689044,7.71680052,3.63909418,3.6411652,3.63911842,3.63532912
56.374377,7.21110255,7.12323196,0.296429748,7.11641489,3.63825626,3.64025373,3.63823828,3.63446745
56.384869,6.08276253,6.59953209,-0.718866858,6.59219873,3.6374187,3.63934368,3.63735825,3.63360576
56.39536,5.38516481,6.1535061,-0.876550791,6.14566649,3.63658165,3.63843515,3.63647851,3.63274422
56.405852,5.74456265,5.78202707,-0.193557285,5.77370954,3.63574497,3.6375279,3.63559888,3.63188265
56.416344,5.56776436,5.47849545,0.298779039,5.46974312,3.63490874,3.63662196,3.63471945,3.63102114
56.426835,5.19615242,5.23392476,-0.194351061,5.22478953,3.63407305,3.63571734,3.6338403,3.63015978
56.437327,4.69041576,5.03826112,-0.589784163,5.02879707,3.63323775,3.63481384,3.63296127,3.6292984
56.447818,4.89897949,4.8817235,0.131362029,4.87198163,3.632403,3.63391155,3.63208251,3.62843716
56.45831,5.38516481,4.75550762,0.793509414,4.74553236,3.63156866,3.63301028,3.63120387,3.62757591
56.468802,4.35889894,4.65232737,-0.541690341,4.64215548,3.63073481,3.63211005,3.63032542,3.62671472
56.479293,4.69041576,4.56645305,0.352083387,4.55611378,3.62990153,3.63121091,3.62944725,3.62585367
56.489785,4.58257569,4.49355811,0.298358156,4.48307426,3.62906869,3.63031266,3.62856919,3.62499261
56.500276,4.24264069,4.43052099,-0.433451613,4.4199103,3.62823644,3.62941541,3.62769141,3.6241317
56.510768,4.79583152,4.37509832,0.648639503,4.36437468,3.62740463,3.62851897,3.62681373,3.62327077
56.52126,5.09901951,4.32572146,0.879373669,4.31489598,3.62657336,3.62762339,3.62593625,3.62240991
56.531751,4,4.28127877,-0.530357207,4.27036053,3.62574272,3.62672873,3.62505903,3.62154919
56.542243,3.74165739,4.24095823,-0.706612232,4.22995488,3.62491254,3.62583477,3.62418193,3.62068847
56.552734,4,4.20417169,-0.451853616,4.19308978,3.62408301,3.62494167,3.6233051,3.61982789
56.563226,4.58257569,4.17045524,0.641966085,4.15930048,3.62325397,3.62404923,3.62242837,3.6189673
56.573718,4.69041576,4.13944881,0.742271478,4.12822626,3.62242551,3.62315751,3.62155183,3.61810678
56.584209,4,4.1108762,-0.332980781,4.09957034,3.62159772,3.62226657,3.62069827,3.61724642
56.594701,3.60555128,4.08444032,-0.692018095,4.07307502,3.62077046,3.62137621,3.61982212,3.61638604
56.605192,4.12310563,4.05994944,0.251308954,4.04852829,3.61994389,3.6204866,3.61894624,3.61552581
56.615684,4.12310563,4.03721038,0.293078911,4.0257366,3.61911786,3.61959753,3.61807046,3.61466558
56.626176,4.24264069,4.0160597,0.476005239,4.00453616,3.61829247,3.61870907,3.61719487,3.61380542
56.636667,3.60555128,3.99635252,-0.625140979,3.98478177,3.61746781,3.61782129,3.61631954,3.61294541
56.647159,4.12310563,3.9779549,0.380986522,3.96633922,3.61664372,3.61693401,3.61544432,3.61208539
56.65765,4.24264069,3.96075416,0.530929873,3.94909556,3.61582039,3.61604737,3.61456936,3.61122553
56.668142,4,3.94464332,0.235280001,3.93294358,3.61499766,3.61516119,3.6136945,3.61036567
56.678634,4,3.92953109,0.2654598,3.91779176,3.61417563,3.61427554,3.61281983,3.60950587
56.689125,4.24264069,3.91533529,0.57210611,3.90355773,3.61335438,3.6133905,3.61194541,3.60864624
56.699617,3.16227766,3.90197817,-0.860058436,3.89016356,3.61253378,3.61250588,3.6110711,3.6077866
56.710108,4.69041576,3.8893946,0.894997852,3.87754394,3.611714,3.61162183,3.61019705,3.60692712
56.7206,3.46410162,3.87752113,-0.642977071,3.86563527,3.61089488,3.61073818,3.6093231,3.60606763
56.731092,3.87298335,3.86630369,0.0817291518,3.85438334,3.61007654,3.609855,3.60844933,3.60520822
56.741583,3,3.85569318,-0.925036852,3.84373891,3.60925905,3.60897236,3.60757582,3.60434897
56.752075,2.64575131,3.84564215,-1.09539529,3.83365441,3.60844227,3.60809008,3.60670241,3.60348972
56.762566,3.87298335,3.83611116,0.192021322,3.82409029,3.60762639,3.60720833,3.60582926,3.60263063
56.773058,4.24264069,3.8270608,0.644654862,3.81500702,3.60681125,3.60632692,3.6049562,3.60177154
56.78355,4.69041576,3.81845765,0.933786971,3.8063711,3.60599696,3.60544593,3.60408333,3.60091253
56.794041,3.74165739,3.81027113,-0.261942246,3.79815185,3.6051836,3.60456544,3.60321071,3.60005368
56.804533,3.31662479,3.80247101,-0.697026697,3.79031894,3.60437104,3.60368526,3.60233819,3.59919484
56.815024,3.74165739,3.79503249,-0.231030523,3.78284751,3.60355946,3.60280556,3.60146593,3.59833615
56.825516,3.60555128,3.78793009,-0.427058322,3.77571198,3.6027487,3.60192617,3.60059376,3.59747747
56.836008,3.87298335,3.78114238,0.303052751,3.76889087,3.60193888,3.60104716,3.59972177,3.59661887
56.846499,3.60555128,3.7746496,-0.411215669,3.76236434,3.60113009,3.60016861,3.59885004,3.59576044
56.856991,2.82842712,3.7684318,-0.969538382,3.75611237,3.60032219,3.59929034,3.5979784,3.59490201
56.867482,3.60555128,3.76247285,-0.396133284,3.75011878,3.59951536,3.59841252,3.59710702,3.59404374
56.877974,3.31662479,3.7567557,-0.663423625,3.74436644,3.59870946,3.59753497,3.59623573,3.59318548
56.888466,3.60555128,3.75126615,-0.381726183,3.73884113,3.59790459,3.59665776,3.59536462,3.59232731
56.898957,3.16227766,3.74599107,-0.764011394,3.73352962,3.59710086,3.59578099,3.59449377,3.5914693
56.909449,3.31662479,3.74091682,-0.651377025,3.72841824,3.59629812,3.59490448,3.593623,3.5906113
56.91994,3.74165739,3.73603264,0.0749982931,3.72349619,3.59549656,3.59402838,3.5927525,3.58975347
56.930432,4.35889894,3.73132675,0.792194544,3.71875162,3.59469605,3.59315253,3.59188208,3.58889565
56.940924,4,3.7267895,0.522695416,3.71417483,3.59389668,3.59227701,3.59101184,3.58803791
56.951415,4.47213595,3.72241191,0.865866066,3.70975682,3.59309857,3.59140189,3.59014186,3.58718035
56.961907,4.69041576,3.71818441,0.986017927,3.70548793,3.59230158,3.59052701,3.58927196,3.5863228
56.972398,4.24264069,3.71409964,0.727008287,3.7013608,3.59150589,3.58965252,3.58840233,3.58546541
56.98289,4.12310563,3.71014923,0.642616831,3.69736699,3.59071138,3.58877826,3.58753278,3.58460804
56.993382,5.09901951,3.70632649,1.18012416,3.69349976,3.58991815,3.58790431,3.5866634,3.58375076
57.003873,3.60555128,3.70262513,-0.311566769,3.68975279,3.58912631,3.58703074,3.58579428,3.58289365
57.014365,3.60555128,3.69903825,-0.305756392,3.68611912,3.58833573,3.5861574,3.58492526,3.58203655
57.024856,4.12310563,3.69556073,0.653869173,3.68259362,3.5875466,3.58528443,3.58405648,3.58117963
57.035348,4,3.69218649,0.554809434,3.67917013,3.5867588,3.58441168,3.5831878,3.58032272
57.04584,2.82842712,3.68891078,-0.92762258,3.67584386,3.58597244,3.58353921,3.58231928,3.5794659
57.056331,4.35889894,3.68572911,0.820469278,3.67261029,3.58518762,3.58266712,3.58145103,3.57860926
57.066823,3.31662479,3.68263641,-0.604988939,3.6694643,3.58440423,3.58179524,3.58058286,3.57775263
57.077314,3.60555128,3.67962905,-0.272172329,3.66640222,3.58362246,3.58092372,3.57971494,3.57689619
57.087806,3.60555128,3.67670252,-0.266741914,3.66341949,3.58284219,3.5800524,3.57884712,3.57603975
57.098298,3.60555128,3.67385339,-0.261346738,3.66051262,3.58206354,3.57918136,3.57797946,3.57518342
57.108789,3.74165739,3.67107842,0.265667023,3.65767835,3.58128662,3.57831069,3.57711206,3.57432726
57.119281,3.31662479,3.66837379,-0.593084309,3.65491279,3.58051133,3.57744021,3.57624475,3.57347112
57.129772,3.74165739,3.66573691,0.275536712,3.65221331,3.57973784,3.57657008,3.57537769,3.57261516
57.140264,4.24264069,3.66316435,0.761233428,3.64957644,3.57896607,3.57570015,3.57451072,3.57175922
57.150756,3.74165739,3.66065363,0.284611595,3.64699963,3.57819612,3.57483049,3.57364393,3.57090337
57.161247,3.60555128,3.65820235,-0.229458218,3.64448045,3.57742812,3.57396119,3.57277738,3.57004771
57.171739,3.16227766,3.6558076,-0.702516864,3.64201592,3.57666197,3.57309207,3.57191092,3.56919207
57.18223,3.60555128,3.65346752,-0.218897804,3.63960414,3.57589787,3.5722233,3.57104472,3.56833661
57.192722,3,3.65117948,-0.806956923,3.6372424,3.57513571,3.57135472,3.57017861,3.56748118
57.203214,3.60555128,3.64894161,-0.208303472,3.63492881,3.57437563,3.5704864,3.56931266,3.56662584
57.213705,3.31662479,3.64675218,-0.574567131,3.63266156,3.57361775,3.56961843,3.56844697,3.56577069
57.224197,4.12310563,3.64460891,0.691734571,3.6304383,3.57286198,3.56875064,3.56758137,3.56491556
57.234688,3.31662479,3.64251046,-0.570863964,3.62825766,3.57210853,3.5678832,3.56671602,3.56406062
57.24518,3.46410162,3.64045476,-0.419944222,3.62611748,3.57135732,3.56701595,3.56585076,3.5632057
57.255672,4,3.63844046,0.601298209,3.62401635,3.57060847,3.56614895,3.56498567,3.56235089
57.266163,3.60555128,3.63646625,-0.175826555,3.6219529,3.56986213,3.5652823,3.56412083,3.56149626
57.276655,3.87298335,3.63453035,0.488316493,3.61992526,3.56911821,3.56441583,3.56325609,3.56064166
57.287146,3.74165739,3.63263178,0.330190252,3.61793242,3.56837694,3.56354971,3.56239159,3.55978724
57.297638,3.74165739,3.63076894,0.332999173,3.61597266,3.56763823,3.56268376,3.56152718,3.55893286
57.30813,3.46410162,3.62894079,-0.406003912,3.61404489,3.56690224,3.56181808,3.56066295,3.55807858
57.318621,3.16227766,3.62714638,-0.68181282,3.61214808,3.56616912,3.56095274,3.55979896,3.55722449
57.329113,3,3.62538429,-0.790812426,3.61028071,3.5654388,3.56008759,3.55893507,3.55637042
57.339604,4.24264069,3.62365384,0.786757169,3.60844204,3.5647115,3.55922277,3.55807143,3.55551655
57.350096,4.12310563,3.62195374,0.707920818,3.60663066,3.56398718,3.55835814,3.55720787,3.55466271
57.360588,3.16227766,3.62028324,-0.676761094,3.60484576,3.56326599,3.55749378,3.55634449,3.55380898
57.371079,3.46410162,3.61864163,-0.393115774,3.60308652,3.56254809,3.55662975,3.55548136,3.55295544
57.381571,4.35889894,3.61702778,0.861319432,3.60135172,3.56183345,3.55576592,3.55461832,3.55210193
57.392062,4,3.61544123,0.620128029,3.5996408,3.56112229,3.55490243,3.55375553,3.55124862
57.402554,4,3.61388094,0.621384789,3.5979526,3.5604146,3.55403912,3.55289283,3.55039533
57.413046,3.87298335,3.61234639,0.510526159,3.59628648,3.55971054,3.55317608,3.55203031,3.54954216
57.423537,3.74165739,3.61083705,0.361690938,3.59464185,3.55901029,3.5523134,3.55116803,3.54868919
57.434029,2.64575131,3.60935204,-0.981631666,3.59301765,3.55831383,3.5514509,3.55030585,3.54783625
57.44452,4.12310563,3.60789105,0.717784491,3.59141349,3.55762143,3.55058875,3.54944392,3.5469835
57.455012,3.46410162,3.60645327,-0.37729518,3.5898284,3.55693308,3.5497268,3.54858208,3.54613079
57.465504,2.82842712,3.60503832,-0.881255467,3.58826189,3.55624897,3.54886512,3.54772041,3.5452782
57.475995,4,3.60364587,0.629566622,3.5867135,3.5555693,3.5480038,3.54685899,3.5444258
57.486487,4.24264069,3.6022752,0.800228399,3.58518232,3.55489409,3.54714267,3.54599766,3.54357344
57.496978,4.35889894,3.60092615,0.870616331,3.5836681,3.55422361,3.54628191,3.54513659,3.54272128
57.50747,4,3.59959808,0.632773195,3.58217,3.5535579,3.54542134,3.54427561,3.54186916
57.517962,3.46410162,3.59829077,-0.366318384,3.58068764,3.55289717,3.54456107,3.5434148,3.54101715
57.528453,3.46410162,3.59700401,-0.364557805,3.57922067,3.55224167,3.54370116,3.54255424,3.54016535
57.538945,3.46410162,3.59573724,-0.362816243,3.57776832,3.55159143,3.54284145,3.54169378,3.53931358
57.549436,3.74165739,3.59449044,0.383623448,3.57633041,3.55094677,3.54198213,3.54083357,3.53846202
57.559928,3.31662479,3.59326311,-0.52596418,3.57490622,3.55030775,3.54112301,3.53997345,3.53761049
57.57042,4.12310563,3.59205515,0.7287321,3.57349546,3.54967464,3.5402642,3.5391135,3.53675909
57.580911,3.46410162,3.59086648,-0.356040535,3.57209786,3.5490477,3.53940577,3.53825381,3.53590789
57.591403,4.58257569,3.58969669,0.996433142,3.57071276,3.54842704,3.53854756,3.5373942,3.53505673
57.601894,3.16227766,3.58854586,-0.652892179,3.56934003,3.547813,3.53768974,3.53653486,3.53420578
57.612386,3.31662479,3.58741364,-0.520373762,3.56797907,3.54720569,3.53683216,3.5356756,3.53335487
57.622878,2.64575131,3.58630005,-0.969818923,3.56662963,3.54660544,3.53597489,3.53481652,3.53250408
57.633369,4.24264069,3.58520512,0.810824004,3.56529152,3.54601255,3.53511803,3.5339577,3.5316535
57.643861,4.47213595,3.58412859,0.942341428,3.56396416,3.54542719,3.53426141,3.53309896,3.53080297
57.654352,4,3.58307063,0.645700678,3.56264748,3.54484976,3.53340521,3.53224048,3.52995264
57.664844,3.46410162,3.58203106,-0.343408567,3.56134092,3.54428044,3.53254926,3.5313821,3.52910235
57.675336,3.74165739,3.58100999,0.400808427,3.56004433,3.5437196,3.53169365,3.53052389,3.5282522
57.685827,4.35889894,3.58000758,0.882548222,3.55875755,3.54316764,3.53083848,3.52966593,3.52740225
57.696319,4.12310563,3.57902371,0.737619085,3.55748005,3.54262478,3.52998358,3.52880807,3.52655235
57.70681,3.31662479,3.57805868,-0.511306063,3.55621182,3.5420915,3.52912912,3.52795046,3.52570265
57.717302,3.74165739,3.57711244,0.405641402,3.55495238,3.54156808,3.52827495,3.52709295,3.52485301
57.727794,4.24264069,3.57618524,0.816367224,3.55370158,3.54105497,3.52742116,3.52623561,3.5240035
57.738285,4.12310563,3.57527737,0.740154212,3.55245933,3.54055264,3.52656783,3.52537853,3.52315419
57.748777,3.16227766,3.57438887,-0.641958881,3.55122514,3.54006143,3.52571482,3.52452155,3.52230494
57.759268,4,3.57352016,0.653054242,3.54999905,3.53958192,3.52486229,3.52366482,3.5214559
57.76976,4.35889894,3.57267137,0.886694748,3.5487806,3.5391145,3.52401009,3.52280818,3.52060691
57.780252,3.87298335,3.5718429,0.548762652,3.54756971,3.53865973,3.52315831,3.52195172,3.51975806
57.790743,3.60555128,3.57103518,0.185785079,3.5463663,3.5382182,3.52230705,3.52109552,3.51890941
57.801235,3.46410162,3.57024845,-0.325801841,3.54516993,3.53779041,3.52145615,3.52023942,3.51806082
57.811726,4.24264069,3.5694833,0.82046169,3.54398066,3.53737704,3.5206058,3.51938357,3.51721245
57.822218,3.87298335,3.56874005,0.551582539,3.54279809,3.53697867,3.51975583,3.51852782,3.51636412
57.83271,2.44948974,3.56801928,-1.05760557,3.54162214,3.536596,3.51890634,3.51767225,3.51551594
57.843201,4.12310563,3.56732163,0.745509219,3.54045277,3.53622978,3.51805743,3.51681693,3.51466797
57.853693,3,3.56664757,-0.752759965,3.53928959,3.53588072,3.51720896,3.51596171,3.51382005
57.864184,3.60555128,3.56599787,0.198880377,3.53813267,3.53554966,3.5163611,3.51510675,3.51297235
57.874676,4.24264069,3.56537314,0.822962663,3.53698163,3.53523742,3.51551371,3.51425189,3.51212471
57.885168,3.31662479,3.56477421,-0.498145985,3.53583643,3.53494492,3.51466689,3.51339721,3.51127721
57.895659,3.60555128,3.56420195,0.203345326,3.53469705,3.53467313,3.51382074,3.51254278,3.51042992
57.906151,3.74165739,3.56365715,0.421900748,3.53356312,3.53442302,3.51297511,3.51168846,3.5095827
57.916642,3.74165739,3.56314085,0.422512172,3.53243473,3.53419571,3.51213021,3.51083439,3.50873569
57.927134,3.31662479,3.562654,-0.496013317,3.53131154,3.5339923,3.51128588,3.50998042,3.50788875
57.937626,3,3.56219775,-0.749798476,3.53019353,3.53381402,3.51044224,3.50912663,3.50704194
57.948117,3.60555128,3.56177334,0.209231771,3.52908068,3.53366217,3.5095994,3.50827311,3.50619535
57.958609,2.82842712,3.56138196,-0.856127815,3.52797266,3.53353812,3.50875723,3.50741968,3.50534883
57.9691,2.64575131,3.56102506,-0.956699405,3.52686956,3.53344333,3.50791591,3.50656651,3.50450253
57.979592,4.24264069,3.56070405,0.825794547,3.52577107,3.53337936,3.50707534,3.50571345,3.50365629
57.990084,4,3.56042056,0.663007875,3.52467719,3.53334789,3.50623562,3.50486056,3.50281019
58.000575,3.60555128,3.56017631,0.213014014,3.52358791,3.53335068,3.50539688,3.50400793,3.50196432
58.011067,3.46410162,3.55997308,-0.309631176,3.52250293,3.53338965,3.504559,3.50315541,3.50111852
58.021558,3.31662479,3.5598129,-0.493141061,3.52142234,3.53346682,3.5037222,3.50230315,3.50027293
58.03205,4.24264069,3.55969785,0.826403558,3.52034586,3.53358438,3.50288636,3.50145099,3.49942741
58.042542,3.87298335,3.55963023,0.559779527,3.51927349,3.53374466,3.50205163,3.50059901,3.49858204
58.053033,3.87298335,3.5596125,0.559795359,3.51820524,3.53395014,3.50121815,3.4997473,3.4977369
58.063525,3.74165739,3.55964732,0.426626383,3.51714082,3.53420354,3.50038583,3.49889568,3.49689182
58.074016,3.87298335,3.55973752,0.55968368,3.51608035,3.53450772,3.49955489,3.49804434,3.49604697
58.084508,4,3.55988623,0.66341071,3.51502355,3.53486582,3.49872527,3.49719309,3.49520218
58.095,3.74165739,3.56009676,0.426099312,3.51397043,3.53528117,3.49789713,3.49634203,3.49435755
58.105491,2.44948974,3.56037271,-1.05398433,3.51292101,3.53575735,3.49707065,3.49549123,3.49351314
58.115983,4.24264069,3.56071803,0.825786082,3.51187503,3.53629834,3.49624577,3.49464053,3.49266881
58.126474,2.82842712,3.56113693,-0.855984699,3.5108326,3.53690829,3.49542277,3.49379011,3.4918247
58.136966,4,3.5616341,0.662092061,3.50979346,3.53759191,3.49460163,3.49293978,3.49098067
58.147458,3.16227766,3.56221458,-0.632405664,3.50875764,3.53835418,3.49378255,3.49208964,3.49013678
58.157949,4.12310563,3.56288387,0.748479631,3.50772516,3.53920051,3.49296578,3.49123977,3.48929313
58.168441,3.60555128,3.5636482,0.204702396,3.50669576,3.54013712,3.49215133,3.49039,3.48844955
58.178932,4,3.56451426,0.659913434,3.50566958,3.54117057,3.49133955,3.48954049,3.4876062
58.189424,4.35889894,3.5654898,0.89073517,3.50464636,3.54230855,3.4905305,3.4886911,3.48676293
58.199916,4.35889894,3.56658335,0.890121114,3.50362613,3.54355943,3.48972448,3.48784188,3.48591981
58.210407,2.82842712,3.56780458,-0.859870604,3.50260893,3.54493276,3.48892185,3.48699294,3.48507692
58.220899,4.24264069,3.56916504,0.820655623,3.50159451,3.54643992,3.48812273,3.4861441,3.48423411
58.23139,3.46410162,3.57067767,-0.326459887,3.500583,3.54809366,3.48732761,3.48529554,3.48339153
58.241882,3.60555128,3.5723584,0.18218911,3.49957417,3.54990971,3.48653671,3.48444707,3.48254903
58.252374,3.31662479,3.57422583,-0.507544124,3.49856804,3.55190641,3.48575051,3.4835988,3.48170669
58.262865,4.12310563,3.57630245,0.739461411,3.49756468,3.55410597,3.48496957,3.4827508,3.48086459
58.273357,3.60555128,3.57861641,0.164118443,3.49656383,3.55653627,3.48419427,3.4819029,3.48002256
58.283848,3.74165739,3.58120156,0.400569381,3.49556563,3.5592308,3.48342536,3.48105527,3.47918077
58.29434,3.87298335,3.58410084,0.537477908,3.49456985,3.56223216,3.48266337,3.48020775,3.47833905
58.304832,3.74165739,3.58736692,0.392798249,3.49357654,3.56559259,3.48190917,3.47936043,3.4774975
58.315323,3.74165739,3.59106528,0.388061986,3.49258574,3.56937715,3.48116374,3.47851337,3.47665619
58.325815,4,3.59527846,0.63617729,3.49159722,3.57366791,3.48042796,3.47766642,3.47581495
58.336306,3.46410162,3.60010712,-0.368789244,3.49061113,3.57856502,3.47970317,3.47681974,3.47497396
58.346798,4.79583152,3.60567717,1.09094196,3.48962724,3.58419385,3.47899064,3.47597318,3.47413305
58.35729,3.46410162,3.61214118,-0.384759097,3.48864559,3.59070638,3.47829204,3.4751268,3.4732923
58.367781,3.87298335,3.61968401,0.503288525,3.48766625,3.59828679,3.47760933,3.4742807,3.47245179
58.378273,2.82842712,3.62852977,-0.894484569,3.48668898,3.60715846,3.47694463,3.4734347,3.47161137
58.388764,4.12310563,3.6389412,0.695819245,3.48571394,3.61758327,3.47630068,3.47258898,3.47077119
58.399256,3.60555128,3.65122969,-0.213725083,3.4847409,3.62987155,3.4756805,3.47174338,3.46993109
58.409748,2.64575131,3.66575153,-1.0099506,3.48376991,3.6443783,3.47508792,3.47089796,3.46909116
58.420239,4,3.68291048,0.563107024,3.48280104,3.66150559,3.47452753,3.47005282,3.46825147
58.430731,4.47213595,3.70316122,0.876912047,3.48183407,3.6817058,3.47400482,3.46920779,3.46741187
58.441222,3.74165739,3.7269931,0.12109618,3.48086914,3.70546514,3.47352681,3.46836304,3.46657251
58.451714,4.12310563,3.754936,0.606769825,3.47990604,3.73330902,3.47310223,3.4675184,3.46573325
58.462206,4.35889894,3.78753361,0.755887117,3.47894483,3.76577474,3.47274247,3.46667395,3.46489414
58.472697,3.87298335,3.82533098,0.218294219,3.47798557,3.8033983,3.47246251,3.46582978,3.46405529
58.483189,4.24264069,3.86886572,0.611371383,3.47702804,3.84670426,3.47228228,3.46498573,3.46321652
58.49368,4.58257569,3.91861915,0.814835286,3.4760724,3.8961558,3.47222862,3.46414195,3.462378
58.504172,4.69041576,3.97502139,0.845809887,3.47511843,3.952158,3.4723375,3.46329829,3.46153957
58.514664,4.79583152,4.03839468,0.870308477,3.47416621,4.0149999,3.47265661,3.46245482,3.46070132
58.525155,4.12310563,4.10893752,0.119029849,3.47321578,4.08483754,3.47324764,3.46161163,3.45986331
58.535647,4.24264069,4.18672267,0.236469914,3.47226695,4.16169137,3.47418836,3.46076856,3.45902539
58.546138,4.58257569,4.27163006,0.557624993,3.47131986,4.24538082,3.47557249,3.45992576,3.45818772
58.55663,4.58257569,4.36338674,0.468176206,3.47037432,4.33556625,3.47750852,3.45908308,3.45735015
58.567122,3.60555128,4.46150207,-0.925176086,3.46943037,4.43168992,3.48011365,3.4582406,3.45651274
58.577613,4.79583152,4.56527897,0.480158883,3.4684881,4.53299518,3.48350323,3.4573984,3.45567559
58.588105,4.79583152,4.67383611,0.349278411,3.4675473,4.63856124,3.48777233,3.45655632,3.45483854
58.598596,5.09901951,4.78602367,0.559460316,3.46660811,4.74724434,3.49295621,3.45571451,3.45400173
58.609088,5.29150262,4.90047102,0.625325195,3.46567035,4.8577648,3.49896645,3.45487283,3.45316502
58.61958,5.09901951,5.01545895,0.289068438,3.46473407,4.96864579,3.50547984,3.45403134,3.45232849
58.630071,6.08276253,5.12888793,0.976665038,3.46379934,5.07825028,3.51181335,3.45319014,3.45149221
58.640563,5.74456265,5.23831219,0.711512792,3.46286596,5.18481876,3.51688719,3.45234906,3.45065603
58.651054,5,5.34104033,-0.583986583,3.4619341,5.2864042,3.51944908,3.45150825,3.44982011
58.661546,4.79583152,5.43458057,-0.799217775,3.46100355,5.38096808,3.51861819,3.45066757,3.44898428
58.672038,5.38516481,5.5168922,-0.362942679,3.46007437,5.46634289,3.51439328,3.44982709,3.44814863
58.682529,6.63324958,5.58642614,1.0231439,3.45914665,5.54032614,3.50765488,3.44898689,3.44731323
58.693021,5.74456265,5.64188561,0.320432581,3.45822017,5.60079805,3.49965166,3.44814682,3.44647794
58.703512,5.91607978,5.68198509,0.483833329,3.45729511,5.64581029,3.49146541,3.44730702,3.4456429
58.714004,5.74456265,5.70554503,0.197528783,3.45637126,5.67380006,3.48377715,3.44646735,3.44480797
58.724496,6,5.71166809,0.536965463,3.45544869,5.68371514,3.47691126,3.44562789,3.44397321
58.734987,7.07106781,5.69997385,1.17093721,3.45452748,5.67515911,3.4709587,3.44478871,3.44313872
58.745479,5.19615242,5.67071036,-0.688881659,3.45360743,5.64843285,3.46588316,3.44394965,3.44230432
58.75597,6.32455532,5.62476366,0.836535508,3.4526887,5.60450059,3.46159196,3.44311087,3.44147019
58.766462,5.47722558,5.56354729,-0.293805578,3.45177109,5.54486051,3.45796909,3.44227223,3.44063616
58.776954,6.08276253,5.48887433,0.77064142,3.45085469,5.47140533,3.45489805,3.44143378,3.43980231
58.787445,5.38516481,5.40279136,-0.132765047,3.44993955,5.3862525,3.45227101,3.44059562,3.43896873
58.797937,5.38516481,5.30740839,0.278848382,3.4490255,5.29157259,3.44999365,3.43975759,3.43813525
58.808428,6.4807407,5.20485251,1.12955221,3.44811268,5.18954218,3.44798878,3.43891985,3.43730204
58.81892,6.08276253,5.09713241,0.992789063,3.44720092,5.08220982,3.44619422,3.43808223,3.43646892
58.829412,5.29150262,4.98616687,0.552571942,3.44629027,4.97152542,3.44456247,3.43724482,3.435636
58.839903,6,4.87373946,1.06125423,3.44538083,4.85929679,3.44305767,3.43640769,3.43480334
58.850395,5.19615242,4.76145504,0.659315844,3.44447238,4.74714769,3.44165265,3.4355707,3.43397079
58.860886,5.83095189,4.65080804,1.08634426,3.44356511,4.63658737,3.4403277,3.43473399,3.4331385
58.871378,4.69041576,4.5430887,0.383832068,3.44265881,4.52891797,3.43906759,3.43389741,3.43230632
58.88187,4.69041576,4.43944894,0.500965884,3.44175357,4.42530119,3.43786108,3.43306104,3.43147433
58.892361,4.89897949,4.34085883,0.747074733,3.44084945,4.32671528,3.43669946,3.43222496,3.43064261
58.902853,4.58257569,4.2480706,0.578364157,3.43994628,4.23391943,3.43557557,3.43138902,3.42981099
58.913344,4.89897949,4.16168013,0.858661374,3.4390442,4.1475154,3.43448402,3.43055336,3.42897965
58.923836,3.87298335,4.08205386,-0.45724229,3.43814304,4.06787452,3.43342006,3.42971783,3.42814842
58.934328,5.19615242,4.00939616,1.08938343,3.43724288,3.99520515,3.43238003,3.42888251,3.42731737
58.944819,4.35889894,3.94373312,0.644333625,3.43634377,3.92953645,3.43136087,3.42804748,3.4264866
58.955311,4.35889894,3.88491427,0.688465449,3.43544555,3.87072014,3.43035975,3.42721259,3.42565594
58.965802,5,3.83268033,1.08042569,3.43454837,3.81849835,3.42937463,3.42637799,3.42482555
58.976294,4.24264069,3.78664253,0.675276355,3.43365205,3.77248295,3.42840343,3.42554352,3.42399527
58.986786,4.79583152,3.74634912,1.02444248,3.43275667,3.73222227,3.42744462,3.42470926,3.42316519
58.997277,3.74165739,3.71129474,0.174248815,3.43186229,3.69721047,3.42649689,3.4238753,3.42233538
59.007769,4,3.68093789,0.564855829,3.43096874,3.66690528,3.42555885,3.42304147,3.42150569
59.01826,4.12310563,3.65474713,0.684367219,3.43007618,3.64077421,3.42462966,3.42220793,3.42067626
59.028752,3.46410162,3.63219447,-0.409991289,3.42918443,3.6182881,3.42370822,3.42137453,3.41984696
59.039244,4.24264069,3.6127891,0.793631894,3.42829356,3.59895495,3.42279384,3.42054135,3.41901785
59.049735,3.60555128,3.59607775,0.0973320191,3.42740365,3.58232029,3.42188592,3.41970846,3.41818901
59.060227,3.87298335,3.58164692,0.539755891,3.42651452,3.56796956,3.42098367,3.4188757,3.4173603
59.070718,3.46410162,3.5691368,-0.324091329,3.42562633,3.55554196,3.42008674,3.41804324,3.41653186
59.08121,3.46410162,3.55822935,-0.306802434,3.4247389,3.54471862,3.41919448,3.41721092,3.41570353
59.091702,4.89897949,3.54865564,1.16203436,3.42385231,3.5352299,3.41830656,3.41637882,3.41487541
59.102193,3.31662479,3.54018813,-0.472824846,3.42296663,3.52684766,3.4174227,3.41554701,3.41404756
59.112685,3.87298335,3.5326345,0.583394248,3.42208169,3.51937915,3.4165424,3.41471534,3.41321984
59.123176,3.60555128,3.52583887,0.282333861,3.42119764,3.5126681,3.41566553,3.41388397,3.41239239
59.133668,3.31662479,3.51967105,-0.450606548,3.42031431,3.50658408,3.41479166,3.41305273,3.41156506
59.14416,3.46410162,3.51402712,-0.223440158,3.41943177,3.50102294,3.41392063,3.41222172,3.41073794
59.154651,4,3.50882306,0.700840164,3.41855011,3.49590055,3.41305233,3.41139101,3.40991109
59.165143,3.16227766,3.50398991,-0.584561588,3.41766914,3.49114785,3.41218639,3.41056043,3.40908437
59.175634,3.74165739,3.49947407,0.492121247,3.41678903,3.48671118,3.41132279,3.40973016,3.40825793
59.186126,3.31662479,3.49523085,-0.422618096,3.4159096,3.48254586,3.41046124,3.40890002,3.40743161
59.196618,4.35889894,3.49122544,0.931489938,3.41503093,3.47861706,3.40960165,3.40807011,3.4066055
59.207109,3.60555128,3.48742966,0.343688251,3.41415309,3.4748966,3.40874399,3.4072405,3.40577967
59.217601,3.16227766,3.4838195,-0.567046596,3.41327591,3.47136052,3.40788798,3.40641103,3.40495396
59.228092,4.24264069,3.48037651,0.87307742,3.41239955,3.46799036,3.40703367,3.40558186,3.40412854
59.238584,3.74165739,3.47708405,0.514366929,3.41152383,3.46476956,3.4061808,3.40475283,3.40330325
59.249076,3.74165739,3.47392902,0.517424741,3.41064884,3.46168504,3.40532937,3.40392403,3.40247816
59.259567,3,3.47090023,-0.686221704,3.40977464,3.45872562,3.40447937,3.40309553,3.40165335
59.270059,3.60555128,3.46798713,0.370896401,3.40890107,3.45588083,3.40363057,3.40226718,3.40082868
59.28055,3.87298335,3.46518161,0.638593561,3.40802829,3.45314256,3.40278306,3.40143912,3.40000429
59.291042,4,3.46247541,0.733160688,3.40715612,3.4505026,3.40193662,3.40061122,3.39918003
59.301534,4.12310563,3.45986191,0.814397761,3.40628465,3.44795438,3.40109127,3.39978354,3.39835597
59.312025,4.58257569,3.45733517,1.06077355,3.40541394,3.44549195,3.40024704,3.39895616,3.39753221
59.322517,3,3.45488905,-0.674454633,3.40454382,3.44310925,3.39940371,3.39812893,3.39670857
59.333008,3.31662479,3.45252676,-0.368648841,3.40367447,3.44080162,3.39856141,3.39730999,3.39588523
59.3435,4.24264069,3.45022742,0.890175974,3.4028057,3.43856395,3.39771992,3.39648322,3.39506201
59.353992,3,3.44799479,-0.669324131,3.40193759,3.43639214,3.3968793,3.39565667,3.39423901
59.364483,3.87298335,3.44582508,0.653573456,3.40107022,3.43428245,3.39603958,3.39483043,3.3934163
59.374975,3.60555128,3.44371418,0.40228981,3.40020341,3.43223078,3.39520057,3.39400434,3.39259372
59.385466,2.82842712,3.44165908,-0.783091283,3.39933734,3.43023415,3.39436241,3.39317856,3.39177143
59.395958,4.12310563,3.43965621,0.826709997,3.39847183,3.428289,3.39352489,3.39235292,3.39094928
59.40645,3,3.43770281,-0.661591118,3.39760695,3.42639261,3.39268808,3.39152752,3.39012733
59.416941,3.31662479,3.43579632,-0.345212298,3.39674278,3.42454242,3.39185203,3.39070243,3.38930569
59.427433,3.87298335,3.43393382,0.662608122,3.39587916,3.42273554,3.39101656,3.38987748,3.38848417
59.437924,3.87298335,3.43211329,0.663980463,3.39501624,3.42096995,3.3901818,3.38905285,3.38766295
59.448416,3.16227766,3.43033215,-0.517739788,3.39415386,3.41924311,3.38934757,3.38822836,3.38684187
59.458908,3.74165739,3.42858849,0.559525599,3.39329209,3.41755311,3.38851394,3.38740411,3.38602101
59.469399,2.82842712,3.42688054,-0.773597707,3.392431,3.41589819,3.38768097,3.38658017,3.38520043
59.479891,3.16227766,3.42520614,-0.512765522,3.39157044,3.41427623,3.38684847,3.38575638,3.38438
59.490382,4.24264069,3.42356392,0.905028602,3.39071056,3.41268584,3.3860166,3.3849329,3.38355986
59.500874,3.74165739,3.42195195,0.565425001,3.38985119,3.41112513,3.38518519,3.38410958,3.38273987
59.511366,3.46410162,3.42036891,0.209123651,3.38899242,3.40959278,3.38435429,3.38328649,3.38192009
59.521857,4.12310563,3.41881354,0.839221121,3.38813431,3.40808753,3.38352397,3.38246371,3.38110061
59.532349,3.31662479,3.4172842,-0.317268669,3.3872767,3.40660778,3.38269406,3.38164109,3.38028126
59.54284,3.74165739,3.41577995,0.570856753,3.38641974,3.40515259,3.38186472,3.38081878,3.37946222
59.553332,3.60555128,3.41429934,0.4373236,3.38556329,3.40372051,3.38103576,3.37999663,3.37864332
59.563824,4.12310563,3.41284141,0.842771744,3.3847074,3.4023106,3.38020726,3.37917471,3.37782464
59.574315,3.87298335,3.41140526,0.679395382,3.38385216,3.40092196,3.3793793,3.37835311,3.37700626
59.584807,3.87298335,3.40998963,0.680436414,3.3829974,3.39955336,3.37855169,3.37753166,3.37618803
59.595298,3.31662479,3.40859388,-0.303264058,3.38214328,3.39820414,3.3777246,3.37671053,3.37537009
59.60579,4.24264069,3.40721686,0.914015223,3.38128963,3.39687318,3.37689785,3.37588956,3.3745523
59.616282,3,3.40585789,-0.637069767,3.38043654,3.39555981,3.37607152,3.37506882,3.37373473
59.626773,3.46410162,3.40451631,0.24410101,3.37958408,3.39426337,3.37524568,3.37424841,3.37291747
59.637265,3.60555128,3.40319114,0.449844567,3.37873208,3.39298289,3.37442016,3.37342815,3.37210035
59.647756,3.74165739,3.40188193,0.582902612,3.3778807,3.39171792,3.37359512,3.37260821,3.37128353
59.658248,3.31662479,3.40058778,-0.289763671,3.37702978,3.39046758,3.3727704,3.37178842,3.37046686
59.66874,3.60555128,3.39930817,0.454139959,3.37617939,3.38923136,3.37194606,3.37096888,3.36965042
59.679231,2.64575131,3.39804265,-0.867347302,3.37532962,3.3880088,3.37112217,3.37014966,3.36883428
59.689723,3,3.39679041,-0.629913019,3.3744803,3.38679911,3.37029859,3.3693306,3.36801829
59.700214,4.24264069,3.39555116,0.920374669,3.37363158,3.38560199,3.36947545,3.36851186,3.36720261
59.710706,4.24264069,3.39432414,0.921041011,3.3727833,3.38441673,3.3686526,3.36769328,3.36638707
59.721198,2.44948974,3.39310901,-0.971400674,3.37193555,3.38324294,3.36783012,3.36687494,3.36557177
59.731689,3.60555128,3.39190542,0.462218407,3.37108839,3.38208031,3.36700807,3.36605692,3.36475677
59.742181,3,3.3907127,-0.625070158,3.37024166,3.38092817,3.36618629,3.36523907,3.36394192
59.752672,3.16227766,3.38953067,-0.476710619,3.36939553,3.37978635,3.36536495,3.36442154,3.36312738
59.763164,3.31662479,3.38835872,-0.267831899,3.36854982,3.37865422,3.36454387,3.36360417,3.36231299
59.773656,3.46410162,3.38719657,0.277317593,3.36770463,3.37753154,3.36372314,3.36278705,3.36149884
59.784147,3.16227766,3.38604398,-0.47303945,3.36686001,3.37641806,3.36290282,3.36197025,3.36068499
59.794639,3.31662479,3.3849004,-0.261296011,3.36601581,3.37531323,3.36208277,3.36115361,3.35987129
59.80513,3.31662479,3.38376571,-0.259115642,3.3651722,3.37421695,3.36126313,3.3603373,3.35905791
59.815622,3.87298335,3.38263939,0.700245642,3.36432899,3.37312869,3.36044374,3.35952116,3.35824468
59.826114,2.82842712,3.38152125,-0.743702981,3.36348628,3.37204827,3.35962468,3.35870526,3.35743169
59.836605,3.60555128,3.38041112,0.474489365,3.36264414,3.37097552,3.35880603,3.35788969,3.356619
59.847097,3.16227766,3.37930851,-0.465865702,3.36180241,3.36990998,3.35798763,3.35707428,3.35580648
59.857588,3.74165739,3.37821338,0.60286317,3.36096125,3.36885158,3.35716962,3.3562592,3.35499426
59.86808,3.74165739,3.37712528,0.603764944,3.36012048,3.36779988,3.35635186,3.35544429,3.3541822
59.878572,3.46410162,3.37604407,0.296744921,3.3592802,3.36675476,3.35553442,3.35462963,3.35337038
59.889063,3.74165739,3.37496962,0.60554749,3.35844048,3.3657161,3.35471737,3.35381529,3.35255887
59.899555,3.46410162,3.37390153,0.300333292,3.35760116,3.36468347,3.35390057,3.35300113,3.35174752
59.910046,4.24264069,3.37283978,0.932631174,3.35676238,3.36365689,3.35308415,3.35218729,3.35093649
59.920538,2.82842712,3.37178398,-0.737127433,3.35592401,3.36263595,3.35226797,3.35137362,3.35012562
59.93103,2.82842712,3.37073403,-0.736414902,3.3550861,3.36162057,3.3514521,3.3505602,3.34931498
59.941521,3.46410162,3.36968986,0.307264955,3.35424874,3.36061068,3.35063661,3.34974712,3.34850466
59.952013,3.46410162,3.36865109,0.308950676,3.35341177,3.3596059,3.34982136,3.3489342,3.3476945
59.962504,3.74165739,3.36761776,0.611587791,3.35257534,3.35860626,3.34900649,3.34812161,3.34688466
59.972996,3.46410162,3.3665895,0.312269295,3.35173929,3.35761142,3.34819185,3.3473092,3.34607498
59.983488,2,3.36556626,-1.16857446,3.35090371,3.35662132,3.34737751,3.34649704,3.34526555
59.993979,4.12310563,3.364548,0.870952139,3.35006866,3.35563592,3.34656356,3.34568521,3.34445643
60.004471,4,3.36353436,0.797787965,3.34923399,3.35465487,3.34574983,3.34487356,3.34364747
60.014962,3.87298335,3.36252542,0.714463384,3.34839985,3.35367825,3.34493648,3.34406223,3.34283884
60.025454,3.87298335,3.36158592,0.715120565,3.34763144,3.35270573,3.34412335,3.34325109,3.34203037
60.035946,3.74165739,3.36058574,0.617310012,3.34679818,3.35173729,3.34331053,3.34244019,3.34122214
60.046437,3.87298335,3.35958986,0.716514819,3.34596545,3.35077289,3.34249808,3.34162963,3.34041423
60.056929,3,3.35859799,-0.598830517,3.34513308,3.34981225,3.34168585,3.34081925,3.33960649
60.06742,3,3.3576102,-0.598005183,3.34430125,3.34885543,3.34087399,3.3400092,3.33879907
60.077912,3.46410162,3.35662619,0.327834442,3.34346977,3.34790215,3.34006236,3.33919933,3.33799182
60.088404,4.58257569,3.35564596,1.1076686,3.34263875,3.34695239,3.33925102,3.33838971,3.33718482
60.098895,3.60555128,3.3546695,0.500880995,3.34180824,3.34600616,3.33844006,3.33758043,3.33637814
60.109387,3.46410162,3.35369653,0.332272608,3.34097809,3.34506317,3.33762931,3.33677133,3.33557162
60.119878,3.31662479,3.35272713,-0.190006162,3.34014846,3.34412352,3.33681894,3.33596256,3.33476543
60.13037,2.44948974,3.35176104,-0.949879622,3.33931919,3.34318694,3.33600878,3.33515398,3.33395941
60.140862,3.74165739,3.35079826,0.625187277,3.33849036,3.34225343,3.33519891,3.33434565,3.33315364
60.151353,3,3.34983879,-0.591471715,3.33766204,3.34132301,3.33438942,3.33353766,3.3323482
60.161845,3.31662479,3.34888238,-0.179603977,3.33683407,3.34039541,3.33358014,3.33272985,3.33154292
60.172336,3.31662479,3.34792913,-0.176930317,3.33600661,3.33947075,3.33277123,3.33192238,3.33073798
60.182828,3.31662479,3.34697878,-0.174223959,3.33517951,3.33854876,3.33196254,3.33111509,3.3299332
60.19332,3,3.34603135,-0.588244295,3.33435283,3.33762948,3.33115414,3.33030806,3.32912868
60.203811,3,3.34508686,-0.587440945,3.33352666,3.33671291,3.33034611,3.32950137,3.32832448
60.214303,3.31662479,3.34414507,-0.165892376,3.33270084,3.33579882,3.32953829,3.32869487,3.32752046
60.224794,3.74165739,3.34320609,0.63122999,3.33187552,3.33488732,3.32873084,3.3278887,3.32671676
60.235286,3.74165739,3.34226967,0.631971296,3.33105055,3.33397818,3.3279236,3.32708272,3.32591324
60.245778,3.31662479,3.34133584,-0.157197499,3.330226,3.33307142,3.32711666,3.326277,3.32510998
60.256269,3.60555128,3.34040465,0.514923907,3.32940195,3.33216708,3.32631008,3.32547162,3.32430704
60.266761,4,3.33947584,0.812726377,3.32857824,3.33126492,3.32550372,3.32466643,3.32350428
60.277252,3,3.33854954,-0.581850101,3.32775503,3.33036507,3.32469772,3.32386158,3.32270185
60.287744,2.82842712,3.33762553,-0.713581391,3.32693216,3.3294673,3.32389194,3.32305692,3.3218996
60.298236,3.74165739,3.33670383,0.636359611,3.32610971,3.32857164,3.32308645,3.32225252,3.3210976
60.308727,3.31662479,3.33578449,-0.138418581,3.32528775,3.32767815,3.32228132,3.32144846,3.32029594
60.319219,3,3.33486729,-0.578677189,3.32446613,3.32678659,3.32147641,3.32064459,3.31949445
60.32971,3.46410162,3.33395235,0.360762066,3.323645,3.3258971,3.32067186,3.31984107,3.3186933
60.340202,3.31662479,3.33303945,-0.12811969,3.3228242,3.32500945,3.31986753,3.31903773,3.31789233
60.350694,3,3.33212863,-0.57630602,3.32200382,3.32412371,3.31906348,3.31823467,3.31709161
60.361185,3.46410162,3.33121994,0.364529386,3.32118393,3.3232399,3.3182598,3.31743194,3.31629123
60.371677,3.31662479,3.33031317,-0.116997348,3.32036436,3.32235782,3.31745634,3.31662941,3.31549103
60.382168,2.82842712,3.32940845,-0.707800339,3.31954529,3.3214776,3.31665324,3.31582722,3.31469117
60.39266,3.46410162,3.32850556,0.368233701,3.31872654,3.32059903,3.31585036,3.31502523,3.31389149
60.403152,3.46410162,3.32760455,0.369455087,3.31790821,3.31972217,3.31504776,3.3142235,3.31309207
60.413643,3.16227766,3.32670549,-0.40549701,3.31709035,3.31884705,3.31424554,3.31342212,3.31229298
60.424135,3.31662479,3.32580814,-0.0958298166,3.31627283,3.31797349,3.31344352,3.31262093,3.31149408
60.434626,3.31662479,3.32491267,-0.0910377798,3.31545579,3.31710162,3.31264187,3.31182009,3.31069552
60.445118,3.31662479,3.32401885,-0.0859887288,3.31463907,3.31623123,3.31184044,3.31101945,3.30989714
60.45561,3.31662479,3.32312675,-0.0806347278,3.31382276,3.31536238,3.3110393,3.31021907,3.30909903
60.466101,3.31662479,3.32223641,-0.0749107764,3.31300692,3.31449513,3.31023852,3.30941905,3.30830125
60.476593,4,3.32134765,0.823803589,3.31219141,3.31362927,3.30943795,3.30861922,3.30750366
60.487084,3.74165739,3.32046059,0.648996765,3.31137638,3.31276494,3.30863776,3.30781973,3.30670641
60.497576,2.82842712,3.31957503,-0.700819456,3.31056167,3.31190197,3.30783778,3.30702045,3.30590935
60.508068,3.31662479,3.31869105,-0.0454561121,3.30974737,3.31104038,3.30703809,3.30622144,3.30511255
60.518559,4,3.31780869,0.825948736,3.30893353,3.31018026,3.30623876,3.30542277,3.30431609
60.529051,3,3.31692775,-0.562963366,3.30812002,3.3093214,3.30543965,3.30462431,3.30351982
60.539542,3.31662479,3.31604839,0.0240083868,3.30730698,3.30846395,3.30464091,3.3038262,3.3027239
60.550034,3.31662479,3.3151704,0.0381364376,3.30649427,3.30760772,3.30384239,3.30302828,3.30192816
60.560526,4.12310563,3.31429386,0.89933963,3.30568194,3.30675277,3.30304415,3.30223064,3.30113269
60.571017,3,3.31341881,-0.559838196,3.30487009,3.30589915,3.30224629,3.30143336,3.30033756
60.581509,3.74165739,3.31254507,0.655066654,3.30405856,3.30504669,3.30144864,3.30063627,3.29954263
60.592,3.46410162,3.31167278,0.390421359,3.3032475,3.30419552,3.30065136,3.29983953,3.29874804
60.602492,3.16227766,3.31080175,-0.385388238,3.30243676,3.30334546,3.29985429,3.299043,3.29795364
60.612984,2.82842712,3.30993206,-0.693905565,3.30162641,3.30249658,3.29905752,3.29824675,3.29715951
60.623475,3.60555128,3.30906375,0.54450668,3.30081653,3.30164894,3.29826111,3.29745084,3.29636573
60.633967,4.89897949,3.30819665,1.2612624,3.30000696,3.30080235,3.29746493,3.29665515,3.29557214
60.644458,3.87298335,3.30733089,0.752098698,3.29919786,3.29995695,3.29666911,3.2958598,3.29477889
60.65495,2.44948974,3.30646631,-0.925730287,3.29838908,3.29911258,3.29587351,3.29506466,3.29398584
60.665442,4.47213595,3.30560295,1.08006157,3.29758068,3.29826929,3.29507821,3.2942698,3.29319307
60.675933,3.87298335,3.30474089,0.753818585,3.29677276,3.29742715,3.29428327,3.29347529,3.29240064
60.686425,3.46410162,3.30387994,0.400277001,3.29596514,3.29658597,3.29348855,3.29268099,3.2916084
60.696916,3.16227766,3.30302025,-0.375156751,3.29515799,3.29574591,3.29269421,3.29188705,3.29081652
60.707408,3.74165739,3.30216164,0.662944756,3.29435116,3.29490679,3.29190008,3.29109331,3.29002483
60.7179,2.82842712,3.30130417,-0.687660562,3.29354471,3.29406867,3.29110625,3.29029985,3.28923342
60.728391,3.31662479,3.30044792,0.127188327,3.29273873,3.29323162,3.29031279,3.28950675,3.28844235
60.738883,3.16227766,3.2995927,-0.370560439,3.29193305,3.29239547,3.28951954,3.28871386,3.28765149
60.749374,2.82842712,3.29873866,-0.685792633,3.29112784,3.29156036,3.28872667,3.28792133,3.28686097
60.759866,2.44948974,3.29788563,-0.92108408,3.29032294,3.29072611,3.28793402,3.287129,3.28607066
60.770358,3.46410162,3.29703366,0.408739469,3.28951843,3.2898928,3.28714167,3.28633696,3.28528062
60.780849,3.16227766,3.29618284,-0.365930561,3.28871438,3.28906049,3.28634969,3.28554528,3.28449093
60.791341,2.44948974,3.29533297,-0.919697358,3.28791064,3.28822901,3.28555793,3.2847538,3.28370144
60.801832,2.82842712,3.29448422,-0.682683747,3.28710736,3.28739851,3.28476655,3.28396269,3.28291231
60.812324,3,3.29363641,-0.541882284,3.28630439,3.28656882,3.28397538,3.28317179,3.28212338
60.822816,2.23606798,3.2927896,-1.02796966,3.2855018,3.28573999,3.28318452,3.28238117,3.28133473
60.833307,3.87298335,3.29194387,0.762259455,3.28469967,3.28491211,3.28239402,3.28159092,3.28054643
60.843799,3,3.29109904,-0.539535947,3.28389786,3.284085,3.28160375,3.28080087,3.27975833
60.85429,3.16227766,3.29025526,-0.357739566,3.2830965,3.28325881,3.28081386,3.28001119,3.27897059
60.864782,4.12310563,3.28941236,0.913068054,3.28229545,3.28243338,3.28002419,3.27922173,3.27818306
60.875274,3.46410162,3.2885704,0.418964454,3.28149478,3.28160876,3.27923482,3.27843255,3.2773958
60.885765,3.31662479,3.28772947,0.16998625,3.28069457,3.28078503,3.27844582,3.27764373,3.2766089
60.896257,2.82842712,3.28688938,-0.677098406,3.27989467,3.27996203,3.27765705,3.27685513,3.27582221
60.906748,2.64575131,3.28605028,-0.800186836,3.27909522,3.2791399,3.27686865,3.27606689,3.27503587
60.91724,3,3.28521202,-0.534052449,3.27829609,3.27831847,3.27608048,3.27527886,3.27424974
60.927732,4,3.28437465,0.845946422,3.27749733,3.27749781,3.27529261,3.27449113,3.2734639
60.938223,4.35889894,3.28353825,1.03699599,3.27669903,3.276678,3.27450512,3.27370376,3.27267841
60.948715,4.35889894,3.28270265,1.03739881,3.27590104,3.27585886,3.27371785,3.27291661,3.27189313
60.959206,3,3.281868,-0.530912419,3.27510351,3.27504055,3.27293097,3.27212982,3.27110821
60.969698,2.64575131,3.28103413,-0.797046306,3.27430628,3.2742229,3.2721443,3.27134325,3.2703235
60.98019,2.44948974,3.28020111,-0.911433686,3.27350944,3.27340599,3.27135795,3.27055698,3.26953907
60.990681,2.44948974,3.27936901,-0.910977095,3.27271305,3.27258988,3.27057196,3.26977107,3.26875501
61.001173,2.44948974,3.27853767,-0.910520691,3.27191696,3.2717744,3.26978621,3.26898537,3.26797115
61.011664,2.44948974,3.27770724,-0.910064556,3.27112134,3.27095971,3.26900084,3.26820005,3.26718766
61.022156,3.87298335,3.27687755,0.772078882,3.27032601,3.27014565,3.26821569,3.26741495,3.26640438
61.032648,3,3.27604867,-0.525403337,3.26953107,3.26933229,3.26743085,3.26663014,3.26562138
61.043139,3.46410162,3.27522067,0.434604354,3.26873659,3.26851968,3.26664639,3.2658457,3.26483875
61.053631,3.60555128,3.27439339,0.575463189,3.26794241,3.26770769,3.26586217,3.26506148,3.26405633
61.064122,3.16227766,3.27356698,-0.333600547,3.26714869,3.26689644,3.26507832,3.26427763,3.26327427
61.074614,2.44948974,3.27274128,-0.907332099,3.26635527,3.26608579,3.2642947,3.263494,3.26249243
61.085106,3,3.27191635,-0.521455994,3.26556223,3.2652758,3.26351139,3.26271066,3.26171088
61.095597,2,3.27109228,-1.12742728,3.26476965,3.26446655,3.26272846,3.2619277,3.26092969
61.106089,3.16227766,3.27026888,-0.328620179,3.26397738,3.26365786,3.26194576,3.26114497,3.26014872
61.11658,3,3.26944632,-0.519082195,3.26318556,3.26284991,3.26116344,3.2603626,3.25936811
61.127072,3.60555128,3.26862444,0.580453991,3.26239404,3.26204251,3.26038136,3.25958046,3.25858772
61.137564,4,3.2678033,0.85568493,3.26160291,3.26123574,3.25959958,3.25879861,3.25780762
61.148055,3.74165739,3.26698298,0.688966189,3.26081223,3.26042969,3.25881819,3.25801714,3.25702789
61.158547,3.74165739,3.26616331,0.689560785,3.26002186,3.25962417,3.25803703,3.25723589,3.25624838
61.169038,3.16227766,3.26534445,-0.321040168,3.25923195,3.25881936,3.25725626,3.25645502,3.25546923
61.17953,2.82842712,3.26452623,-0.660378004,3.25844234,3.25801508,3.25647572,3.25567437,3.2546903
61.190022,3.87298335,3.26370873,0.780560448,3.25765311,3.2572114,3.25569549,3.25489403,3.25391167
61.200513,4.12310563,3.26289202,0.927477009,3.25686434,3.25640841,3.25491565,3.25411406,3.2531334
61.211005,3,3.26207594,-0.511933533,3.25607587,3.25560594,3.25413604,3.25333431,3.25235536
61.221496,3.31662479,3.26126064,0.235295877,3.25528786,3.25480414,3.25335681,3.25255494,3.25157768
61.231988,3.16227766,3.26044596,-0.313318205,3.25450016,3.25400285,3.25257783,3.2517758,3.25080023
61.24248,2.23606798,3.25963197,-1.01171339,3.25371284,3.25320215,3.25179915,3.25099697,3.25002307
61.252971,3.60555128,3.25881874,0.588839989,3.25292598,3.2524021,3.25102087,3.2502185,3.24924628
61.263463,3,3.25800612,-0.507943031,3.25213942,3.25160256,3.25024282,3.24944027,3.24846972
61.273954,3.16227766,3.25719426,-0.308085376,3.25135332,3.25080366,3.24946516,3.24866242,3.24769353
61.284446,2.82842712,3.25638299,-0.654183359,3.25056753,3.25000526,3.24868773,3.24788479,3.24691756
61.294938,2.82842712,3.2555724,-0.653563517,3.24978212,3.24920742,3.24791062,3.24710748,3.24614188
61.305429,3.16227766,3.25476254,-0.30411327,3.24899717,3.24841021,3.2471339,3.24633053,3.24536659
61.315921,4.24264069,3.25395327,0.994327619,3.24821252,3.24761349,3.24635742,3.24555383,3.24459151
61.326412,3,3.25314474,-0.503134911,3.24742834,3.2468174,3.24558133,3.2447775,3.24381681
61.336904,2.44948974,3.25233678,-0.89601732,3.24664446,3.24602178,3.24480548,3.2440014,3.24304234
61.347396,3.74165739,3.25152947,0.70009136,3.24586097,3.24522671,3.24402994,3.24322561,3.24226816
61.357887,3.74165739,3.25072289,0.700667178,3.24507794,3.24443225,3.2432548,3.2424502,3.24149436
61.368379,3.60555128,3.24991688,0.596350903,3.24429521,3.24363826,3.2424799,3.24167502,3.24072079
61.37887,3.87298335,3.24911158,0.789855538,3.24351295,3.24284489,3.24170538,3.24090023,3.2399476
61.389362,3.60555128,3.24830684,0.597699289,3.24273099,3.24205197,3.24093111,3.24012567,3.23917463
61.399854,3.31662479,3.24750273,0.262910749,3.24194942,3.24125958,3.24015716,3.23935142,3.23840196
61.410345,4,3.24669933,0.867928956,3.24116832,3.24046779,3.2393836,3.23857755,3.23762967
61.420837,4.47213595,3.24589648,1.10735698,3.24038752,3.23967645,3.23861029,3.23780392,3.23685761
61.431328,3.46410162,3.24509433,0.467982145,3.23960718,3.2388857,3.23783737,3.23703067,3.23608593
61.44182,3.16227766,3.24429272,-0.286382718,3.23882716,3.2380954,3.23706469,3.23625765,3.23531448
61.452312,3.46410162,3.24349173,0.469691262,3.23804752,3.23730562,3.23629233,3.23548495,3.23454333
61.462803,4,3.24269144,0.870234774,3.23726835,3.23651642,3.23552037,3.23471263,3.23377256
61.473295,2.23606798,3.24189168,-1.00290762,3.23648949,3.23572765,3.23474865,3.23394055,3.23300203
61.483786,2.64575131,3.2410926,-0.771583626,3.23571109,3.23493947,3.23397733,3.23316886,3.23223187
61.494278,3.16227766,3.24029406,-0.279314158,3.23493301,3.23415172,3.23320625,3.2323974,3.23146195
61.50477,3.46410162,3.23949612,0.473925621,3.23415532,3.23336447,3.2324355,3.23162626,3.23069233
61.515261,3.31662479,3.23869886,0.279152164,3.23337809,3.2325778,3.23166514,3.2308555,3.2299231
61.525753,3.31662479,3.23790212,0.2805756,3.23260118,3.23179154,3.23089503,3.23008499,3.22915409
61.536244,3.46410162,3.23710606,0.476440505,3.23182473,3.23100586,3.23012531,3.22931486,3.22838547
61.546736,3.16227766,3.23631052,-0.272089794,3.2310486,3.23022059,3.22935585,3.22854497,3.22761709
61.557228,3.31662479,3.23551557,0.284796813,3.23027286,3.22943582,3.22858671,3.22777539,3.22684901
61.567719,4.12310563,3.23472128,0.942541428,3.22949759,3.22865161,3.22781796,3.22700621,3.22608132
61.578211,3.31662479,3.23392751,0.287571345,3.22872264,3.2278678,3.22704947,3.22623727,3.22531386
61.588702,3.16227766,3.2331344,-0.266189301,3.22794816,3.22708456,3.22628138,3.22546871,3.22454679
61.599194,2.44948974,3.23234181,-0.884789276,3.227174,3.22630173,3.22551353,3.2247004,3.22377995
61.609686,3.31662479,3.23154979,0.291676187,3.22640023,3.22551937,3.22474602,3.22393241,3.22301342
61.620177,3.46410162,3.23075843,0.483056084,3.22562693,3.22473757,3.2239789,3.2231648,3.22224728
61.630669,3.16227766,3.22996758,-0.260172869,3.22485396,3.22395616,3.22321203,3.22239744,3.22148138
61.64116,4.35889894,3.22917738,1.06288361,3.22408146,3.22317531,3.22244557,3.22163047,3.22071587
61.651652,3.46410162,3.22838769,0.48550379,3.22330928,3.22239485,3.22167936,3.22086375,3.21995059
61.662144,3.74165739,3.22759856,0.716978956,3.2225375,3.22161486,3.22091347,3.22009734,3.21918563
61.672635,3.60555128,3.22681009,0.61541952,3.22176619,3.22083542,3.22014799,3.21933133,3.21842105
61.683127,3.46410162,3.22602211,0.487933911,3.22099521,3.22005637,3.21938276,3.21856556,3.21765671
61.693618,3.16227766,3.22523478,-0.250912583,3.22022471,3.21927786,3.21861793,3.21780019,3.21689276
61.70411,3,3.22444795,-0.47375938,3.21945454,3.21849973,3.21785336,3.21703506,3.21612906
61.714602,3,3.22366168,-0.472928836,3.21868476,3.21772207,3.21708912,3.21627026,3.21536566
61.725093,3.46410162,3.22287606,0.491147182,3.21791547,3.21694494,3.21632529,3.21550584,3.21460266
61.735585,4.79583152,3.22209093,1.25448818,3.21714651,3.2161682,3.21556171,3.21474168,3.2138399
61.746076,3.74165739,3.22130644,0.721353554,3.21637802,3.21539199,3.21479853,3.21397791,3.21307753
61.756568,3,3.22052244,-0.469598165,3.21560988,3.21461616,3.21403561,3.21321439,3.21231541
61.76706,2.82842712,3.219739,-0.625549258,3.21484214,3.21384078,3.21327302,3.21245119,3.2115536
61.777551,3.31662479,3.2189562,0.312519746,3.21407488,3.21306593,3.21251084,3.21168839,3.21079218
61.788043,3.60555128,3.21817389,0.622396489,3.21330796,3.21229146,3.21174892,3.21092584,3.210031
61.798534,3.16227766,3.21739221,-0.234764882,3.21254152,3.21151751,3.2109874,3.21016369,3.20927022
61.809026,1.73205081,3.21661102,-1.2184253,3.21177542,3.21074394,3.21022614,3.20940179,3.20850969
61.819518,3.60555128,3.21583039,0.624276289,3.21100974,3.20997081,3.20946522,3.20864021,3.20774947
61.830009,3.16227766,3.2150504,-0.229723172,3.21024454,3.2091982,3.20870471,3.20787903,3.20698965
61.840501,3.74165739,3.21427089,0.726213812,3.20947969,3.20842596,3.20794445,3.2071181,3.20623007
61.850992,2.64575131,3.21349201,-0.753485699,3.20871533,3.20765424,3.2071846,3.20635757,3.20547089
61.861484,3.31662479,3.21271362,0.32235256,3.20795131,3.20688289,3.20642502,3.20559729,3.20471195
61.871976,3.60555128,3.21193578,0.627387832,3.20718772,3.20611198,3.20566577,3.20483735,3.20395334
61.882467,2.23606798,3.21115858,-0.987466762,3.20642462,3.20534159,3.20490693,3.2040778,3.20319512
61.892959,3.74165739,3.21038187,0.728886493,3.20566186,3.20457155,3.20414835,3.2033185,3.20243715
61.90345,2.64575131,3.20960578,-0.750902438,3.20489961,3.20380203,3.20339019,3.20255961,3.20167958
61.913942,3.87298335,3.20883018,0.814955927,3.20413771,3.20303288,3.20263228,3.20180097,3.20092226
61.924434,3.16227766,3.20805514,-0.213956729,3.20337624,3.20226416,3.20187472,3.20104266,3.20016526
61.934925,3.16227766,3.20728073,-0.212139279,3.20261527,3.20149594,3.20111756,3.20028475,3.19940866
61.945417,2.82842712,3.20650681,-0.614881847,3.20185466,3.20072809,3.20036068,3.19952709,3.19865231
61.955908,3.46410162,3.20573352,0.508299217,3.20109455,3.19996074,3.1996042,3.19876984,3.19789635
61.9664,2.82842712,3.20496072,-0.613623331,3.20033481,3.19919375,3.19884799,3.19801285,3.19714065
61.976892,3.74165739,3.20418847,0.733122714,3.19957551,3.19842719,3.19809212,3.19725619,3.19638527
61.987383,2.44948974,3.20341686,-0.868289768,3.19881671,3.19766114,3.19733666,3.19649993,3.1956303
61.997875,3.31662479,3.20264574,0.33760783,3.19805828,3.19689543,3.19658147,3.19574393,3.19487557
62.008366,3.87298335,3.20187526,0.81921187,3.19730037,3.19613023,3.1958267,3.19498833,3.19412125
62.018858,3.46410162,3.20110526,0.512831699,3.19654283,3.19536539,3.19507219,3.19423299,3.19336718
62.02935,2.44948974,3.20033583,-0.866513756,3.19578574,3.19460097,3.19431803,3.19347799,3.19261344
62.039841,4.58257569,3.19956704,1.17601388,3.19502917,3.19383705,3.19356427,3.19272339,3.1918601
62.050333,3.31662479,3.19879874,0.343257993,3.19427297,3.19307348,3.19281079,3.19196905,3.19110701
62.060824,2.44948974,3.19803108,-0.865182836,3.19351731,3.19231041,3.19205773,3.19121512,3.19035433
62.071316,4.12310563,3.19726392,0.962206686,3.19276203,3.19154768,3.19130494,3.19046145,3.1896019
62.081808,4.12310563,3.19649733,0.962604955,3.1920072,3.19078538,3.19055249,3.18970811,3.1888498
62.092299,4,3.19573138,0.896810248,3.19125292,3.19002358,3.18980045,3.18895518,3.18809811
62.102791,2,3.19496593,-1.09314497,3.19049902,3.18926212,3.18904869,3.18820251,3.18734667
62.113282,3.16227766,3.19420113,-0.178671405,3.18974566,3.18850115,3.18829735,3.18745025,3.18659564
62.123774,3.31662479,3.19343684,0.350981416,3.1889927,3.18774053,3.18754628,3.18669826,3.18584486
62.134266,3.31662479,3.19267312,0.352067708,3.18824022,3.18698034,3.18679556,3.1859466,3.18509442
62.144757,3,3.19191006,-0.438075401,3.18748828,3.18622063,3.18604525,3.18519535,3.18434438
62.155249,2.82842712,3.1911475,-0.602262716,3.18673675,3.18546126,3.18529522,3.18444436,3.1835946
62.16574,3.31662479,3.19038561,0.355301534,3.18598577,3.18470239,3.18454561,3.18369378,3.18284522
62.176232,3.74165739,3.18962423,0.742989337,3.18523521,3.18394386,3.18379627,3.18294347,3.18209611
62.186724,2.64575131,3.18886344,-0.736961419,3.18448514,3.18318574,3.18304729,3.1821935,3.18134733
62.197215,2.64575131,3.18810332,-0.736445525,3.18373564,3.18242811,3.18229872,3.18144394,3.18059896
62.207707,3.60555128,3.18734372,0.646689687,3.18298656,3.18167083,3.18155043,3.18069464,3.17985085
62.218198,3.31662479,3.1865848,0.360610583,3.18223805,3.18091403,3.18080256,3.17994576,3.17910314
62.22869,2.82842712,3.1858264,-0.597828802,3.18148998,3.18015757,3.18005497,3.17919714,3.1783557
62.239182,2.44948974,3.18506861,-0.857658947,3.18074242,3.17940153,3.17930773,3.17844886,3.17760859
62.249673,3.74165739,3.1843115,0.746556015,3.17999544,3.17864596,3.17856091,3.177701,3.1768619
62.260165,3.31662479,3.18355494,0.36478741,3.17924891,3.17789074,3.17781437,3.1769534,3.17611546
62.270656,2.64575131,3.18279906,-0.732835416,3.17850298,3.17713601,3.17706825,3.17620622,3.17536944
62.281148,4,3.18204373,0.904409349,3.1777575,3.17638161,3.17632242,3.17545931,3.17462368
62.29164,3.16227766,3.18128903,-0.137881714,3.17701256,3.17562762,3.17557693,3.17471274,3.17387826
62.302131,2.64575131,3.18053503,-0.731289078,3.17626823,3.17487411,3.17483187,3.17396658,3.17313324
62.312623,4,3.17978159,0.905659103,3.17552437,3.17412095,3.1740871,3.17322069,3.1723885
62.323114,4,3.17902886,0.906074576,3.17478114,3.17336826,3.17334274,3.17247522,3.17164416
62.333606,3.46410162,3.17827671,0.534625947,3.17403839,3.17261591,3.17259867,3.17173002,3.17090009
62.344098,3.31662479,3.17752521,0.372960561,3.1732962,3.17186397,3.17185496,3.17098517,3.17015637
62.354589,2.64575131,3.17677444,-0.728713336,3.17255466,3.17111251,3.17111167,3.17024073,3.16941305
62.365081,3.46410162,3.17602425,0.536728386,3.17181362,3.17036138,3.17036866,3.16949656,3.16867
62.375572,3,3.17527481,-0.418658349,3.17107323,3.16961073,3.16962608,3.16875281,3.16792736
62.386064,3.60555128,3.17452598,0.656525171,3.17033336,3.16886042,3.16888379,3.16800933,3.167185
62.396556,3.74165739,3.17377782,0.753577844,3.1695941,3.16811051,3.16814185,3.1672662,3.16644297
62.407047,3.74165739,3.17303043,0.754073578,3.16885551,3.16736109,3.16740034,3.16652348,3.16570136
62.417539,3.87298335,3.17228366,0.837078066,3.16811746,3.16661199,3.16665912,3.16578105,3.16496002
62.42803,2.82842712,3.17153767,-0.585756385,3.16738011,3.16586338,3.16591833,3.16503902,3.16421909
62.438522,2,3.17079232,-1.08203157,3.16664332,3.16511509,3.16517782,3.16429728,3.16347844
62.449014,3.16227766,3.17004769,-0.0881477903,3.16590717,3.16436722,3.16443767,3.16355588,3.16273812
62.459505,2.82842712,3.16930387,-0.583846509,3.16517175,3.16361982,3.16369795,3.1628149,3.16199823
62.469997,3.31662479,3.16856072,0.384790946,3.16443692,3.16287275,3.16295852,3.1620742,3.1612586
62.480488,2.44948974,3.16781839,-0.84754271,3.16370283,3.16212615,3.16221952,3.16133392,3.16051939
62.49098,3.60555128,3.16707675,0.662174089,3.16296935,3.16137989,3.16148081,3.16059391,3.15978046
62.501472,3.46410162,3.16633589,0.545679144,3.16223658,3.16063404,3.16074246,3.15985426,3.15904187
62.511963,2.82842712,3.16559588,-0.580662341,3.16150458,3.15988865,3.16000455,3.15911503,3.1583037
62.522455,3.60555128,3.1648566,0.663848385,3.16077323,3.1591436,3.15926692,3.15837607,3.1575658
62.532946,2.82842712,3.1641182,-0.579388534,3.16004269,3.15839903,3.15852973,3.15763754,3.15682832
62.543438,3.60555128,3.16338055,0.664959189,3.15931283,3.15765478,3.15779283,3.15689928,3.15609111
62.55393,3.16227766,3.16264375,-0.0191333615,3.15858373,3.15691094,3.15705629,3.15616138,3.15535426
62.564421,3.16227766,3.16190786,0.0192301173,3.15785548,3.15616757,3.15632018,3.1554239,3.15461782
62.574913,3.60555128,3.16117278,0.666617204,3.15712796,3.15542453,3.15558437,3.1546867,3.15388165
62.585404,3.46410162,3.16043865,0.551056225,3.15640132,3.15468196,3.15484899,3.15394992,3.15314591
62.595896,2,3.15970536,-1.07689617,3.15567545,3.15393973,3.15411391,3.15321343,3.15241045
62.606388,3.31662479,3.15897299,0.397053904,3.15495042,3.1531979,3.15337919,3.15247729,3.15167533
62.616879,2.64575131,3.15824163,-0.71588429,3.15422633,3.15245653,3.15264491,3.15174157,3.15094063
62.627371,3.60555128,3.15751116,0.669357987,3.15350307,3.1517155,3.15191093,3.15100614,3.15020622
62.637862,3.31662479,3.15678175,0.399803755,3.15278079,3.15097494,3.15117738,3.15027113,3.14947222
62.648354,3.16227766,3.15605327,0.0788947974,3.15205938,3.15023471,3.15044412,3.1495364,3.14873851
62.658846,3.16227766,3.15532583,0.0833776643,3.15133893,3.14949488,3.14971124,3.14880203,3.14800514
62.669337,2.23606798,3.1545995,-0.958400505,3.15061954,3.14875553,3.14897879,3.14806809,3.1472722
62.679829,2.82842712,3.1538742,-0.570479687,3.14990109,3.1480165,3.14824664,3.14733443,3.14653954
62.69032,3.31662479,3.15315007,0.40432007,3.14918376,3.14727794,3.14751493,3.14660119,3.1458073
62.700812,2.64575131,3.15242702,-0.711811566,3.14846743,3.14653971,3.14678351,3.14586824,3.14507534
62.711304,2.44948974,3.15170513,-0.83798293,3.14775221,3.14580188,3.14605247,3.14513565,3.14434374
62.721795,3.16227766,3.15098453,0.106269152,3.14703819,3.14506453,3.14532187,3.14440349,3.14361256
62.732287,3.46410162,3.15026509,0.56021114,3.14632529,3.1443275,3.14459156,3.14367161,3.14288166
62.742778,3.31662479,3.14954701,0.408751493,3.14561366,3.14359094,3.1438617,3.14294016,3.14215118
62.75327,2.64575131,3.14883017,-0.709280524,3.14490322,3.14285471,3.14313214,3.142209,3.141421
62.763762,2.44948974,3.1481147,-0.835837877,3.14419408,3.14211888,3.14240295,3.1414782,3.14069116
62.774253,2.64575131,3.1474007,-0.708272115,3.14348636,3.14138352,3.1416742,3.14074782,3.13996175
62.784745,4.69041576,3.14668809,1.24246838,3.14277995,3.14064849,3.14094576,3.14001774,3.13923263
62.795236,4.35889894,3.14597705,1.10132733,3.14207505,3.13991393,3.14021775,3.13928808,3.13850393
62.805728,3,3.1452675,-0.381139735,3.14137159,3.13917969,3.13949005,3.13855872,3.13777552
62.81622,3.74165739,3.14455957,0.77272105,3.14066967,3.13844586,3.13876273,3.13782971,3.13704746
62.826711,3.46410162,3.14385338,0.565904796,3.13996944,3.1377125,3.13803585,3.13710114,3.13631983
62.837203,3,3.14314886,-0.378350187,3.13927083,3.13697946,3.13730927,3.13637285,3.13559249
62.847694,3.16227766,3.14244623,0.140824108,3.13857403,3.13624689,3.13658314,3.135645,3.13486558
62.858186,2.64575131,3.14174542,-0.70426849,3.13787899,3.13551466,3.13585731,3.13491744,3.13413895
62.868678,3.31662479,3.14104657,0.419020551,3.13718586,3.13478282,3.13513186,3.13419024,3.13341268
62.879169,3.46410162,3.14034984,0.568991896,3.13649479,3.13405145,3.13440686,3.13346347,3.13268684
62.889661,3.16227766,3.13965518,0.150407711,3.13580573,3.13332041,3.13368216,3.132737,3.13196129
62.900152,4.24264069,3.13896283,1.05056073,3.13511892,3.13258983,3.13295791,3.13201096,3.13123617
62.910644,2.82842712,3.13827275,-0.556637791,3.13443432,3.13185959,3.13223397,3.13128521,3.13051134
62.921136,3.87298335,3.13758514,0.85755362,3.13375213,3.13112974,3.1315104,3.13055983,3.12978687
62.931627,3.16227766,3.13690016,0.159303181,3.13307252,3.13040037,3.13078729,3.12983488,3.12906283
62.942119,3.31662479,3.13621782,0.42474342,3.13239549,3.12967132,3.13006448,3.12911022,3.12833908
62.95261,3.16227766,3.13553839,0.163521479,3.13172131,3.12894274,3.12934212,3.128386,3.12761577
62.963102,3.46410162,3.13486188,0.573794154,3.13105001,3.12821449,3.12862007,3.12766207,3.12689274
62.973594,3.46410162,3.13418854,0.574380604,3.1303818,3.12748664,3.12789841,3.12693851,3.12617008
62.984085,3,3.13351858,-0.365401949,3.12971694,3.12675926,3.12717719,3.12621539,3.12544784
62.994577,3.31662479,3.13285209,0.428687187,3.12905547,3.1260322,3.12645629,3.12549256,3.1247259
63.005068,2.64575131,3.13218937,-0.697451119,3.12839774,3.12530562,3.12573583,3.12477017,3.1240044
63.01556,3.16227766,3.13153054,0.175348559,3.12774384,3.12457936,3.12501569,3.12404807,3.12328319
63.026052,3.60555128,3.1308759,0.688966893,3.12709406,3.1238535,3.12429593,3.12332635,3.12256234
63.036543,3.16227766,3.13022576,0.179030454,3.12644874,3.12312811,3.12357663,3.12260505,3.12184192
63.047035,3.46410162,3.12958028,0.578378191,3.12580804,3.12240305,3.12285764,3.12188406,3.1211218
63.057526,3.46410162,3.12893991,0.578931522,3.12517238,3.12167846,3.1221391,3.12116351,3.12040212
63.068018,3,3.12830485,-0.358196658,3.12454199,3.1209542,3.12142087,3.12044325,3.11968273
63.07851,3.16227766,3.12767553,0.186016488,3.12391729,3.12023034,3.12070304,3.11972337,3.1189637
63.089001,3.16227766,3.12705241,0.187683904,3.12329874,3.11950694,3.11998565,3.11900392,3.11824511
63.099493,2.44948974,3.12643583,-0.822767334,3.12268668,3.11878388,3.11926859,3.11828477,3.11752682
63.109984,4.12310563,3.12582638,0.998638696,3.12208171,3.11806128,3.11855197,3.11756606,3.11680896
63.120476,3.31662479,3.12522449,0.437493195,3.12148425,3.11733901,3.11783568,3.11684765,3.1160914
63.130968,3.74165739,3.12463083,0.78551038,3.12089496,3.11661714,3.11711977,3.11612962,3.11537421
63.141459,2.64575131,3.12404612,-0.691588611,3.12031459,3.11589574,3.11640432,3.11541202,3.11465746
63.151951,3.16227766,3.12347101,0.196994034,3.11974377,3.11517467,3.11568919,3.11469473,3.113941
63.162442,4.35889894,3.12290649,1.11175197,3.11918351,3.11445407,3.11497452,3.11397787,3.11322498
63.172934,3,3.12235348,-0.34979062,3.1186347,3.1137338,3.11426016,3.11326132,3.11250926
63.183426,3.46410162,3.12181322,0.585054183,3.11809861,3.11301393,3.1135462,3.11254515,3.11179391
63.193917,4.12310563,3.12128721,1.0009088,3.11757673,3.11229453,3.11283269,3.11182941,3.111079
63.204409,3,3.12077712,-0.347530033,3.11707074,3.11157546,3.11211951,3.11111398,3.11036439
63.2149,3.31662479,3.12028528,0.443102146,3.11658296,3.11085685,3.11140678,3.11039899,3.10965022
63.225392,3.31662479,3.1198144,0.443633173,3.11611611,3.11013858,3.11069438,3.1096843,3.10893635
63.235884,3.87298335,3.11936817,0.868110119,3.11567389,3.10942071,3.10998237,3.10896999,3.10822285
63.246375,3.60555128,3.11895136,0.697567141,3.11526107,3.10870331,3.10927082,3.10825612,3.10750979
63.256867,2.64575131,3.1185701,-0.687618198,3.11488379,3.10798623,3.10855959,3.10754256,3.10679704
63.267358,2.82842712,3.11823259,-0.53833583,3.11455025,3.10726963,3.10784883,3.10682944,3.10608472
63.27785,2.82842712,3.11794944,-0.538072776,3.11427109,3.10655336,3.10713839,3.10611663,3.10537271
63.288342,2.44948974,3.11773456,-0.817462423,3.11406022,3.10583749,3.10642835,3.10540419,3.10466107
63.298833,3.74165739,3.11760589,0.789969301,3.11393561,3.10512208,3.10571877,3.1046922,3.10394987
63.309325,3.16227766,3.11758634,0.211403208,3.1139202,3.10440701,3.10500951,3.10398052,3.10323898
63.319816,3.87298335,3.11770483,0.869067613,3.11404293,3.10369241,3.10430072,3.10326928,3.10252852
63.330308,2.64575131,3.11799732,-0.687201578,3.11433982,3.10297814,3.10359226,3.10255835,3.10181838
63.3408,2.64575131,3.11850774,-0.687572852,3.11485483,3.10226427,3.10288419,3.1018478,3.10110861
63.351291,3.46410162,3.1192887,0.587207728,3.11564065,3.10155087,3.10217659,3.10113769,3.10039928
63.361783,3.74165739,3.12040231,0.788197358,3.11675945,3.10083781,3.10146931,3.10042789,3.09969025
63.372274,3.16227766,3.12191952,0.200893364,3.11828226,3.10012521,3.10076251,3.09971854,3.09898167
63.382766,3,3.12392035,-0.352023217,3.1202892,3.09941294,3.10005603,3.0990095,3.0982734
63.393258,3,3.12649144,-0.355656357,3.12286701,3.09870108,3.09934995,3.09830084,3.09756551
63.403749,3.46410162,3.12972379,0.578254122,3.12610676,3.09798969,3.09864434,3.09759263,3.09685806
63.414241,2,3.1337103,-1.06475833,3.13010149,3.09727863,3.09793907,3.09688473,3.09615091
63.424732,3.31662479,3.13853881,0.422002348,3.1349391,3.09656804,3.09723425,3.09617728,3.09544422
63.435224,3.46410162,3.1442895,0.565519331,3.14069988,3.09585778,3.09652978,3.09547014,3.09473783
63.445716,3.46410162,3.15102536,0.559532173,3.14744685,3.09514793,3.0958257,3.09476338,3.09403182
63.456207,3.31662479,3.15878618,0.397289076,3.15521984,3.09443854,3.0951221,3.09405706,3.09332625
63.466699,3.16227766,3.16758417,-0.0728457727,3.16403105,3.09372949,3.09441882,3.09335107,3.092621
63.47719,4,3.1773917,0.906977563,3.17385281,3.09302091,3.09371602,3.09264552,3.09191619
63.487682,2.82842712,3.18814218,-0.599762498,3.18461843,3.09231267,3.09301356,3.09194028,3.09121169
63.498174,2.23606798,3.1997187,-0.981657129,3.19621083,3.09160483,3.09231149,3.09123543,3.09050758
63.508665,3.46410162,3.21195285,0.502144168,3.20846142,3.09089746,3.0916099,3.09053103,3.0898039
63.519157,3.16227766,3.22462612,-0.24969674,3.22115143,3.09019042,3.09090865,3.08982695,3.08910055
63.529648,3.60555128,3.2374602,0.606705094,3.23400224,3.08948385,3.09020787,3.08912331,3.08839764
63.54014,2.44948974,3.25012656,-0.894783111,3.24668496,3.08877762,3.08950743,3.08841999,3.08769504
63.550632,2.64575131,3.2622401,-0.785167998,3.25881411,3.0880718,3.08880739,3.08771706,3.08699282
63.561123,3.60555128,3.27336975,0.576351909,3.26995819,3.08736644,3.08810783,3.08701457,3.08629106
63.571615,3.46410162,3.28305598,0.425494578,3.27965719,3.08666142,3.08740861,3.08631241,3.0855896
63.582106,4,3.29083042,0.842122071,3.28744231,3.08595687,3.08670986,3.08561069,3.0848886
63.592598,2.82842712,3.29626351,-0.683985664,3.29288359,3.08525266,3.08601145,3.0849093,3.08418791
63.60309,3.16227766,3.29901028,-0.369773742,3.29563572,3.08454885,3.08531345,3.08420829,3.08348761
63.613581,4.12310563,3.29886448,0.907877274,3.29549226,3.08384551,3.08461593,3.08350773,3.08278775
63.624073,3.16227766,3.29579214,-0.365396337,3.29241923,3.08314251,3.08391875,3.08280749,3.08208821
63.634564,3.60555128,3.28993868,0.561794085,3.28656216,3.08243999,3.08322205,3.08210771,3.08138912
63.645056,4.47213595,3.28160098,1.09111639,3.27821824,3.0817378,3.08252569,3.08140824,3.08069035
63.655548,3.16227766,3.27118412,-0.330009781,3.26779291,3.08103601,3.08182975,3.08070916,3.07999196
63.666039,2.64575131,3.25914759,-0.783196196,3.25574613,3.0803347,3.08113428,3.08001054,3.07929402
63.676531,2.82842712,3.24595571,-0.646164522,3.24254265,3.07963372,3.08043916,3.07931224,3.0785964
63.687022,3.31662479,3.23205433,0.29081001,3.22862877,3.07893322,3.07974452,3.07861439,3.07789924
63.697514,3.74165739,3.21784234,0.723750678,3.2144038,3.07823305,3.07905022,3.07791686,3.07720239
63.708006,3.31662479,3.20367187,0.336084692,3.20022022,3.07753329,3.07835634,3.07721973,3.07650593
63.718497,3.31662479,3.18984068,0.35606756,3.18637613,3.07683401,3.07766294,3.07652305,3.07580992
63.728989,2.82842712,3.17658766,-0.590051296,3.17311067,3.07613506,3.07696988,3.07582669,3.07511423
63.73948,4.24264069,3.16410264,1.03852686,3.16061392,3.07543659,3.07627731,3.07513078,3.07441899
63.749972,3.16227766,3.15251853,0.0987882866,3.14901893,3.07473845,3.07558509,3.07443521,3.07372408
63.760464,3.16227766,3.14192285,0.142670283,3.13841334,3.07404072,3.07489329,3.07374002,3.07302955
63.770955,3.31662479,3.13235817,0.429262883,3.12883979,3.07334347,3.07420197,3.07304529,3.07233548
63.781447,2.82842712,3.12382544,-0.543505577,3.12029926,3.07264655,3.073511,3.07235088,3.07164173
63.791938,1.41421356,3.11629645,-1.30463899,3.11276351,3.07195011,3.07282051,3.07165693,3.07094843
63.80243,3.31662479,3.10971443,0.454874004,3.10617573,3.07125401,3.07213038,3.0709633,3.07025546
63.812922,2.82842712,3.10400626,-0.52495632,3.10046272,3.07055832,3.07144066,3.07027007,3.06956287
63.823413,2.82842712,3.0990867,-0.520249532,3.09553915,3.0698631,3.07075144,3.0695773,3.06887074
63.833905,3.31662479,3.0948634,0.470915476,3.09131258,3.06916822,3.07006256,3.06888485,3.06817893
63.844396,3.60555128,3.09124504,0.717151474,3.08769158,3.06847381,3.06937418,3.06819286,3.06748758
63.854888,3.31662479,3.0881421,0.477998626,3.08458655,3.06777975,3.06868615,3.0675012,3.06679656
63.86538,3.46410162,3.08547232,0.615328605,3.08191511,3.0670861,3.06799854,3.06680993,3.06610592
63.875871,3.46410162,3.08316134,0.617203594,3.07960283,3.06639292,3.06731142,3.06611912,3.06541574
63.886363,2.82842712,3.08114322,-0.502708762,3.0775837,3.06570008,3.06662465,3.06542864,3.06472589
63.896854,4,3.07936217,0.95949874,3.07580185,3.06500772,3.06593838,3.06473862,3.0640365
63.907346,2.82842712,3.07777064,-0.499343088,3.07420971,3.0643157,3.06525246,3.06404893,3.06334743
63.917838,2.44948974,3.07632995,-0.79173241,3.07276851,3.06362408,3.06456697,3.06335963,3.06265875
63.928329,3.16227766,3.07500874,0.295413138,3.07144688,3.06293295,3.06388197,3.0626708,3.06197053
63.938821,1.73205081,3.07378168,-1.15833107,3.07021945,3.06224216,3.06319733,3.06198229,3.06128264
63.949312,3.46410162,3.07262928,0.625677498,3.06906673,3.06155184,3.06251319,3.06129425,3.06059521
63.959804,3.31662479,3.07153603,0.4950644,3.06797316,3.06086187,3.0618294,3.06060653,3.0599081
63.970296,3.60555128,3.07049024,0.731478667,3.06692706,3.0601723,3.06114604,3.05991922,3.05922139
63.980787,2.44948974,3.06948298,-0.787396491,3.06591948,3.05948321,3.06046318,3.05923236,3.05853514
63.991279,4,3.06850719,0.965138752,3.06494335,3.05879447,3.05978068,3.05854584,3.05784921
64.00177,3.46410162,3.06755782,0.629717231,3.06399362,3.05810621,3.05909867,3.05785978,3.05716375
64.012262,3.87298335,3.06663069,0.897971414,3.0630661,3.05741828,3.05841703,3.05717405,3.05647862
64.022754,3.16227766,3.06572277,0.310732828,3.06215776,3.05673077,3.05773582,3.05648872,3.05579388
64.033245,3.31662479,3.06483174,0.501789849,3.06126627,3.05604374,3.05705511,3.05580385,3.0551096
64.043737,3,3.0639555,-0.252894237,3.06038954,3.05535705,3.05637476,3.05511932,3.05442566
64.054228,3.74165739,3.06309265,0.823750408,3.05952616,3.05467084,3.05569491,3.05443525,3.05374217
64.06472,2.82842712,3.06224176,-0.48354383,3.0586747,3.05398498,3.05501543,3.05375152,3.05305902
64.075212,4,3.06140182,0.968812768,3.05783414,3.05329952,3.05433638,3.05306818,3.05237626
64.085703,3.46410162,3.06057199,0.635239818,3.05700365,3.05261455,3.05365783,3.05238531,3.05169397
64.096195,2.82842712,3.0597513,-0.480961722,3.05618226,3.05192992,3.05297965,3.05170277,3.05101201
64.106686,2.82842712,3.05893921,-0.480116744,3.05536942,3.05124577,3.05230197,3.0510207,3.05033051
64.117178,3,3.05813494,-0.241111873,3.05456435,3.05056196,3.05162467,3.05033897,3.04964934
64.12767,2.64575131,3.05733798,-0.641550211,3.05376655,3.04987857,3.0509478,3.04965764,3.04896857
64.138161,1.73205081,3.05654793,-1.15086799,3.05297561,3.04919566,3.05027143,3.04897677,3.04828827
64.148653,2.82842712,3.05576416,-0.476798734,3.05219089,3.04851309,3.04959543,3.04829624,3.0476083
64.159144,2.82842712,3.0549864,-0.475982433,3.05141215,3.04783101,3.04891994,3.04761617,3.04692879
64.169636,2,3.05421413,-1.0267493,3.05063884,3.04714927,3.04824483,3.04693645,3.04624962
64.180128,3.16227766,3.05344707,0.329894815,3.04987068,3.04646794,3.04757015,3.04625712,3.04557085
64.190619,3,3.05268498,-0.22953208,3.04910745,3.0457871,3.04689598,3.04557826,3.04489254
64.201111,3.74165739,3.05192741,0.830499837,3.04834868,3.0451066,3.04622218,3.04489974,3.04421457
64.211602,3,3.05117424,-0.22621724,3.04759426,3.04442659,3.0455489,3.04422169,3.04353706
64.222094,3.46410162,3.05042508,0.643176907,3.0468438,3.04374692,3.04487599,3.04354398,3.0428599
64.232586,3.16227766,3.04967978,0.335556079,3.04609714,3.04306767,3.04420352,3.04286667,3.04218313
64.243077,2.44948974,3.04893819,-0.77424056,3.04535414,3.04238889,3.04353156,3.04218984,3.04150683
64.253569,3.16227766,3.04819997,0.337753883,3.04461446,3.04171047,3.04285998,3.04151334,3.04083086
64.26406,3,3.0474651,-0.217864866,3.04387807,3.04103253,3.04218892,3.04083731,3.04015536
64.274552,3.46410162,3.04673326,0.646040523,3.04314465,3.04035494,3.04151823,3.04016162,3.0394802
64.285044,3.16227766,3.04600436,0.340988707,3.04241412,3.03967776,3.04084799,3.03948633,3.03880545
64.295535,3.31662479,3.04527834,0.520909254,3.04168641,3.03900107,3.04017826,3.03881152,3.03813116
64.306027,2.64575131,3.04455492,-0.631508994,3.04096124,3.03832472,3.03950892,3.03813705,3.03745721
64.316518,4.24264069,3.04383412,1.09490026,3.04023863,3.03764886,3.03884009,3.03746304,3.03678373
64.32701,3.60555128,3.04311568,0.749957065,3.03951833,3.03697335,3.03817164,3.03678938,3.03611058
64.337502,3.31662479,3.04239956,0.523665187,3.03880029,3.03629825,3.03750364,3.03611613,3.03543785
64.347993,2.82842712,3.04168574,-0.461799325,3.03808449,3.03562364,3.03683616,3.03544335,3.03476558
64.358485,3,3.04097399,-0.202420319,3.03737069,3.03494938,3.03616907,3.03477091,3.03409365
64.368976,2.64575131,3.04026434,-0.628102723,3.03665894,3.0342756,3.03550249,3.03409894,3.03342219
64.379468,3.16227766,3.0395566,0.350315665,3.03594903,3.03360218,3.03483631,3.03342732,3.03275107
64.38996,4.47213595,3.03885074,1.19719891,3.03524095,3.03292917,3.03417057,3.03275611,3.03208036
64.400451,3,3.03814676,-0.195311959,3.03453469,3.03225665,3.03350536,3.03208536,3.03141011
64.410943,3.31662479,3.03744447,0.528375171,3.03383005,3.03158447,3.03284053,3.03141497,3.03074021
64.421434,2.64575131,3.03674393,-0.625294027,3.03312711,3.03091279,3.03217623,3.03074504,3.03007078
64.431926,3.16227766,3.03604496,0.355292421,3.03242566,3.03024145,3.03151232,3.03007546,3.0294017
64.442418,2.82842712,3.03534755,-0.454885073,3.03172572,3.02957054,3.03084887,3.02940629,3.02873302
64.452909,3.87298335,3.03465174,0.915604503,3.03102731,3.0289001,3.03018594,3.0287376,3.02806481
64.463401,3,3.03395733,-0.18427516,3.03033024,3.02823003,3.0295234,3.02806925,3.02739694
64.473892,2.82842712,3.03326442,-0.452589546,3.0296346,3.02756043,3.02886139,3.02740137,3.02672955
64.484384,3,3.03257283,-0.180479438,3.02894021,3.02689119,3.02819978,3.02673384,3.0260625
64.494876,3.46410162,3.03188258,0.657433676,3.0282471,3.02622237,3.02753862,3.02606673,3.02539586
64.505367,2.82842712,3.0311937,-0.450296096,3.0275553,3.02555404,3.026878,3.02540008,3.02472969
64.515859,3.16227766,3.03050602,0.363003631,3.02686463,3.02488606,3.02621777,3.02473379,3.02406387
64.52635,3,3.02981965,-0.17268367,3.0261752,3.02421857,3.02555807,3.02406797,3.02339852
64.536842,2.82842712,3.02913441,-0.448003671,3.02548684,3.02355143,3.02489877,3.0234025,3.02273352
64.547334,3,3.02845035,-0.168672321,3.02479958,3.02288471,3.02423994,3.02273744,3.02206893
64.557825,2.82842712,3.0277675,-0.446475502,3.02411347,3.02221848,3.02358164,3.02207286,3.02140481
64.568317,2.82842712,3.0270857,-0.445711312,3.02342834,3.0215526,3.02292374,3.02140863,3.02074104
64.578808,3.16227766,3.02640505,0.368609015,3.02274429,3.02088721,3.02226637,3.02074487,3.02007774
64.5893,3.60555128,3.02572541,0.761462975,3.02206118,3.02022218,3.02160941,3.02008146,3.01941479
64.599792,3.46410162,3.02504682,0.662612103,3.02137904,3.01955757,3.02095292,3.01941847,3.01875225
64.610283,2.82842712,3.02436931,-0.442653569,3.02069792,3.01889345,3.02029696,3.01875596,3.01809018
64.620775,3.31662479,3.02369274,0.541231979,3.02001766,3.01822968,3.01964141,3.01809379,3.01742847
64.631266,2.44948974,3.02301721,-0.757315963,3.01933838,3.0175664,3.0189864,3.01743211,3.01676723
64.641758,2.44948974,3.02234259,-0.756870426,3.01865992,3.01690348,3.01833179,3.01677077,3.01610634
64.65225,3.31662479,3.02166891,0.543098411,3.01798234,3.01624098,3.01767767,3.01610985,3.01544586
64.662741,3.46410162,3.02099622,0.66566162,3.01730567,3.01557897,3.01702407,3.01544941,3.01478586
64.673233,2.64575131,3.02032439,-0.612023755,3.01662978,3.01491732,3.0163709,3.01478932,3.01412621
64.683724,3.16227766,3.01965352,0.377656119,3.01595478,3.01425616,3.01571826,3.01412971,3.01346703
64.694216,2.23606798,3.01898347,-0.884825117,3.01528053,3.01359535,3.01506604,3.01347046,3.01280821
64.704708,2.23606798,3.01831429,-0.884446894,3.01460707,3.01293497,3.0144143,3.01281162,3.0121498
64.715199,3.31662479,3.01764603,0.546789505,3.01393445,3.01227508,3.0137631,3.01215326,3.01149186
64.725691,3.16227766,3.01697855,0.3811812,3.01326254,3.01161554,3.01311232,3.01149525,3.01083428
64.736182,3,3.01631198,-0.127718344,3.01259145,3.0109565,3.01246208,3.01083773,3.01017718
64.746674,2.64575131,3.01564616,-0.608189812,3.01192103,3.01029782,3.01181226,3.01018055,3.00952043
64.757166,2.64575131,3.01498115,-0.607642858,3.01125136,3.00963956,3.01116293,3.0095238,3.00886409
64.767657,2.44948974,3.01431702,-0.751549914,3.01058246,3.00898179,3.01051414,3.00886753,3.00820823
64.778149,3.60555128,3.01365361,0.76934886,3.00991422,3.00832438,3.00986578,3.00821161,3.00755273
64.78864,3,3.01299105,-0.113978271,3.00924674,3.00766746,3.00921797,3.00755617,3.0068977
64.799132,1.41421356,3.0123292,-1.26416598,3.00857989,3.0070109,3.00857058,3.00690109,3.00624303
64.809624,3.16227766,3.01166812,0.388084453,3.00791372,3.00635477,3.00792368,3.00624643,3.00558878
64.820115,2.23606798,3.01100786,-0.880306698,3.0072483,3.00569913,3.00727734,3.00559225,3.004935
64.830607,3,3.01034829,-0.101726549,3.00658348,3.00504385,3.00663142,3.00493843,3.00428158
64.841098,2.44948974,3.00968953,-0.748464954,3.00591938,3.00438906,3.00598606,3.00428509,3.00362864
64.85159,3.74165739,3.00903145,0.855935711,3.00525587,3.00373464,3.00534113,3.00363211,3.00297605
64.862082,3.74165739,3.00837409,0.856319621,3.004593,3.00308064,3.00469669,3.00297955,3.00232389
64.872573,3.46410162,3.00771753,0.675562052,3.00393084,3.00242713,3.00405281,3.00232747,3.0016722
64.883065,2.64575131,3.00706162,-0.601090935,3.00326924,3.00177399,3.00340937,3.00167575,3.00102087
64.893556,3.46410162,3.00640649,0.676531685,3.00260833,3.00112133,3.00276649,3.00102451,3.00037002
64.904048,3,3.00575201,-0.0758420231,3.00194798,3.00046905,3.00212404,3.00037364,2.99971953
64.91454,3,3.00509824,-0.0714019307,3.00128824,2.99981718,3.00148209,2.99972318,2.99906945
64.925031,3.87298335,3.00444522,0.931953929,3.00062918,2.99916581,3.00084071,2.99907321,2.99841986
64.935523,2.82842712,3.00379284,-0.418766899,2.99997065,2.99851481,3.00019976,2.9984236,2.99777063
64.946014,2.82842712,3.00314121,-0.417988143,2.99931278,2.9978643,2.99955939,2.99777447,2.99712188
64.956506,2.82842712,3.00249021,-0.417208683,2.99865544,2.99721415,2.99891945,2.9971257,2.99647348
64.966998,3,3.00183989,-0.0428939518,2.99799869,2.99656443,2.99828002,2.99647736,2.99582551
64.977489,3,3.00119031,-0.0345009285,2.99734259,2.99591521,2.99764116,2.9958295,2.99517802
64.987981,3.87298335,3.00054135,0.934046034,2.996687,2.99526635,2.99700275,2.995182,2.99453089
64.998472,2.64575131,2.99989312,-0.595098154,2.99603205,2.99461798,2.99636491,2.99453499,2.99388424
65.008964,2,2.99924551,-0.999622682,2.99537761,2.99396998,2.99572752,2.99388834,2.99323796
65.019456,4.24264069,2.99859855,1.11536637,2.99472373,2.99332241,2.99509064,2.99324212,2.99259209
65.029947,3.46410162,2.99795233,0.682751262,2.99407048,2.99267533,2.99445434,2.99259638,2.99194671
65.040439,3.46410162,2.9973067,0.68322391,2.99341772,2.99202862,2.99381849,2.991951,2.99130169
65.05093,2.64575131,2.9966618,-0.592376983,2.99276559,2.9913824,2.99318321,2.99130611,2.99065715
65.061422,2.64575131,2.99601749,-0.591832901,2.99211394,2.99073656,2.9925484,2.99066159,2.99001298
65.071914,3.74165739,2.99537384,0.863877043,2.99146285,2.99009114,2.9919141,2.99001749,2.98936923
65.082405,3.16227766,2.9947309,0.409324756,2.99081236,2.98944621,2.99128039,2.98937388,2.98872596
65.092897,2.23606798,2.99408856,-0.870643773,2.99016235,2.98880166,2.99064714,2.98873063,2.98808305
65.103388,3,2.99344692,0.0809510918,2.98951295,2.9881576,2.99001447,2.98808787,2.98744064
65.11388,3,2.99280587,0.084818207,2.98886402,2.98751391,2.98938226,2.98744547,2.98679858
65.124372,3.31662479,2.99216547,0.569613308,2.98821563,2.98687065,2.98875058,2.9868035,2.98615695
65.134863,2.82842712,2.99152577,-0.403854738,2.98756783,2.98622788,2.98811949,2.98616202,2.9855158
65.145355,4.58257569,2.99088666,1.26162159,2.9869205,2.98558549,2.98748887,2.9855209,2.98487502
65.155846,3.60555128,2.99024825,0.784412533,2.98627376,2.98494359,2.98685884,2.98488028,2.98423472
65.166338,3.31662479,2.98961043,0.571851698,2.98562749,2.98430206,2.98622929,2.98424002,2.98359479
65.17683,2.44948974,2.98897324,-0.734495403,2.98498173,2.98366096,2.98560026,2.98360018,2.98295528
65.187321,3,2.98833675,0.107996509,2.98433656,2.98302036,2.98497184,2.98296084,2.98231626
65.197813,3.31662479,2.98770085,0.573518912,2.98369185,2.98238013,2.98434389,2.98232187,2.98167761
65.208304,3.16227766,2.98706564,0.418583348,2.98304772,2.9817404,2.98371654,2.98168338,2.98103944
65.218796,3.16227766,2.98643101,0.41934073,2.98240404,2.98110103,2.98308966,2.98104526,2.98040164
65.229288,3.31662479,2.98579702,0.575176294,2.98176087,2.9804621,2.98246334,2.98040757,2.97976427
65.239779,3.16227766,2.98516373,0.42084906,2.98111828,2.97982367,2.98183761,2.97977037,2.97912738
65.250271,3,2.98453101,0.124374384,2.98047613,2.97918561,2.98121237,2.97913354,2.97849086
65.260762,2.64575131,2.98389899,-0.581504672,2.97983456,2.97854805,2.98058774,2.9784972,2.97785483
65.271254,2.64575131,2.98326755,-0.58096148,2.97919343,2.97791086,2.9799636,2.97786123,2.97721916
65.281746,2.64575131,2.98263675,-0.58041833,2.9785528,2.9772741,2.97934001,2.97722569,2.97658393
65.292237,3.46410162,2.98200664,0.694330594,2.97791274,2.97663784,2.97871703,2.97659064,2.97594918
65.302729,2.44948974,2.98137711,-0.729306087,2.97727312,2.97600196,2.97809455,2.97595596,2.9753148
65.31322,2.44948974,2.98074828,-0.728874842,2.97663407,2.97536657,2.97747268,2.97532178,2.97468091
65.323712,3.74165739,2.98012002,0.872661082,2.97599545,2.97473155,2.97685131,2.97468796,2.97404739
65.334204,2,2.97949241,-0.989693087,2.97535733,2.97409698,2.9762305,2.97405458,2.97341429
65.344695,3.31662479,2.97886549,0.581170631,2.97471977,2.9734629,2.97561032,2.97342168,2.97278169
65.355187,3.46410162,2.97823915,0.697038353,2.97408264,2.97282919,2.97499064,2.97278916,2.97214946
65.365678,3.16227766,2.97761351,0.429725669,2.97344607,2.97219598,2.97437158,2.97215713,2.97151772
65.37617,2.44948974,2.97698845,-0.726291063,2.97280993,2.97156315,2.97375303,2.97152548,2.97088634
65.386662,2.64575131,2.97636403,-0.574989323,2.97217429,2.97093076,2.97313506,2.97089425,2.9702554
65.397153,3.16227766,2.97574032,0.431899693,2.9715392,2.97029886,2.97251771,2.97026352,2.96962495
65.407645,4.24264069,2.97511718,1.12584346,2.97090453,2.96966734,2.97190088,2.96963316,2.96899487
65.418136,3.46410162,2.97449475,0.699719132,2.97027042,2.96903631,2.97128469,2.9690033,2.96836528
65.428628,3,2.97387291,0.161638779,2.96963673,2.96840567,2.97066902,2.96837381,2.96773606
65.43912,2.44948974,2.97325171,-0.723714006,2.96900353,2.96777546,2.97005392,2.96774475,2.96710727
65.449611,2.64575131,2.97263121,-0.571734117,2.96837088,2.96714575,2.96943947,2.96711618,2.96647898
65.460103,3.16227766,2.97201131,0.436195317,2.96773866,2.96651642,2.96882555,2.966488,2.96585105
65.470594,3,2.97139211,0.169138674,2.96710698,2.96588759,2.96821227,2.9658603,2.96522362
65.481086,3.46410162,2.9707735,0.7023732,2.96647572,2.96525913,2.96759953,2.96523298,2.96459656
65.491578,3.46410162,2.97015555,0.702812966,2.96584495,2.96463112,2.96698738,2.9646061,2.96396994
65.502069,3.60555128,2.96953831,0.797504212,2.96521472,2.9640036,2.96637588,2.9639797,2.9633438
65.512561,2.64575131,2.96892166,-0.568480739,2.96458492,2.96337647,2.96576492,2.96335369,2.96271805
65.523052,3,2.96830573,0.178028842,2.96395565,2.96274983,2.96515462,2.96272817,2.96209278
65.533544,2.44948974,2.9676904,-0.719861554,2.96332681,2.96212357,2.96454487,2.96210303,2.96146789
65.544036,3.16227766,2.96707573,0.441816626,2.96269844,2.96149775,2.96393572,2.96147832,2.96084343
65.554527,1.41421356,2.96646178,-1.24589254,2.96207062,2.96087243,2.96332724,2.96085411,2.96021946
65.565019,3,2.96584843,0.184801432,2.96144321,2.9602475,2.96271931,2.96023027,2.95959587
65.57551,4.12310563,2.96523581,1.07604359,2.96081634,2.95962306,2.96211205,2.95960694,2.95897278
65.586002,4,2.96462379,1.01753438,2.96018989,2.958999,2.96150535,2.95898398,2.95835005
65.596494,2.64575131,2.96401245,-0.564146379,2.95956392,2.95837539,2.96089927,2.95836145,2.95772777
65.606985,2.44948974,2.96340183,-0.716876621,2.95893848,2.95775227,2.96029386,2.95773942,2.95710598
65.617477,4,2.96279183,1.01843417,2.95831346,2.95712954,2.95968903,2.95711778,2.95648456
65.627968,2.44948974,2.96218257,-0.716025714,2.95768898,2.9565073,2.95908488,2.95649662,2.95586364
65.63846,2.23606798,2.96157392,-0.851766366,2.95706491,2.95588545,2.95848131,2.95587585,2.9552431
65.648952,2,2.96096595,-0.98028871,2.95644132,2.95526404,2.95787836,2.95525552,2.95462299
65.659443,3.46410162,2.96035873,0.709748467,2.95581826,2.95464313,2.95727612,2.95463568,2.95400338
65.669935,3.74165739,2.95975213,0.884254067,2.95519561,2.95402261,2.95667445,2.95401622,2.95338414
65.680426,4.24264069,2.95914628,1.13291412,2.9545735,2.95340258,2.95607349,2.95339726,2.9527654
65.690918,2.82842712,2.95854106,-0.360713092,2.9539518,2.95278294,2.95547312,2.95277868,2.95214704
65.70141,2.64575131,2.95793653,-0.558735378,2.95333058,2.95216374,2.95487339,2.95216054,2.95152912
65.711901,3.31662479,2.95733276,0.599409734,2.95270989,2.95154505,2.95427438,2.9515429,2.95091169
65.722393,3.60555128,2.95672963,0.805494659,2.95208961,2.95092673,2.95367597,2.95092564,2.95029464
65.732884,3.16227766,2.95612726,0.454037885,2.95146986,2.95030892,2.95307827,2.95030888,2.94967809
65.743376,3,2.95552553,0.210889699,2.95085052,2.9496915,2.95248119,2.9496925,2.94906191
65.753868,2.44948974,2.95492452,-0.710939362,2.95023165,2.94907452,2.95188477,2.94907656,2.94844618
65.764359,3.31662479,2.95432427,0.601914047,2.94961332,2.94845804,2.95128907,2.94846112,2.94783094
65.774851,3.16227766,2.95372468,0.456676012,2.94899539,2.94784194,2.950694,2.94784606,2.94721608
65.785342,2.64575131,2.95312586,-0.554413703,2.948378,2.94722635,2.95009966,2.9472315,2.94660172
65.795834,3.31662479,2.95252771,0.603404571,2.94776102,2.94661114,2.94950595,2.94661732,2.94598774
65.806326,2,2.95193029,-0.975669148,2.9471445,2.94599638,2.94891293,2.94600359,2.9453742
65.816817,3.16227766,2.95133365,0.459286419,2.94652852,2.94538212,2.94832065,2.94539035,2.94476116
65.827309,3.46410162,2.95073768,0.716494198,2.94591294,2.94476825,2.94772901,2.9447775,2.9441485
65.8378,3.16227766,2.9501425,0.460581323,2.94529789,2.94415488,2.94713813,2.94416515,2.94353633
65.848292,2.82842712,2.94954801,-0.348024265,2.94468326,2.9435419,2.9465479,2.94355318,2.94292455
65.858784,3.46410162,2.94895427,0.717737661,2.94406909,2.94292936,2.94595837,2.94294166,2.94231321
65.869275,3,2.94836132,0.227241453,2.94345545,2.94231733,2.94536961,2.94233064,2.94170237
65.879767,3.74165739,2.94776907,0.891004104,2.94284222,2.94170568,2.94478152,2.94172,2.94109191
65.890258,4,2.94717764,1.02607132,2.94222951,2.94109454,2.9441942,2.94110986,2.94048195
65.90075,2.44948974,2.94658691,-0.705051177,2.94161722,2.94048378,2.94360755,2.94050011,2.93987237
65.911242,3.46410162,2.94599694,0.719794886,2.94100539,2.93987348,2.94302163,2.9398908,2.93926323
65.921733,2.82842712,2.94540779,-0.34202437,2.94039409,2.93926367,2.94243651,2.93928199,2.9386546
65.932225,3.46410162,2.94481937,0.72061241,2.9397832,2.93865426,2.94185207,2.93867357,2.93804634
65.942716,3.60555128,2.94423178,0.813215529,2.93917284,2.93804535,2.94126843,2.93806565,2.93743859
65.953208,3.60555128,2.94364492,0.813576277,2.93856288,2.93743683,2.94068549,2.93745812,2.93683122
65.9637,2.82842712,2.94305884,-0.33857306,2.93795339,2.93682875,2.9401033,2.93685103,2.93622429
65.974191,3.74165739,2.94247362,0.893970789,2.93734443,2.93622119,2.93952194,2.93624444,2.93561787
65.984683,2.44948974,2.94188913,-0.701711757,2.93673587,2.93561401,2.93894128,2.93563824,2.93501183
65.995174,2.64575131,2.9412585,-0.543605727,2.93612784,2.93500733,2.9383144,2.93503255,2.93440629
66.005666,3.31662479,2.94067567,0.613146902,2.93552022,2.93440105,2.93773533,2.93442724,2.93380113
66.016158,2.82842712,2.94009365,-0.334165415,2.93491306,2.93379521,2.93715706,2.93382238,2.93319642
66.026649,2.82842712,2.93951251,-0.33329474,2.93430643,2.93318988,2.93657962,2.93321802,2.93259221
66.037141,2.82842712,2.93893214,-0.332422944,2.93370021,2.93258494,2.93600293,2.93261405,2.93198838
66.047632,3.31662479,2.93835266,0.61503832,2.93309451,2.93198051,2.9354271,2.93201058,2.93138506
66.058124,2.64575131,2.93777396,-0.540391196,2.93248922,2.93137647,2.93485202,2.9314075,2.93078212
66.068616,2,2.9371961,-0.968088891,2.9318844,2.93077288,2.93427776,2.93080487,2.93017963
66.079107,2.64575131,2.93661915,-0.539321648,2.9312801,2.93016979,2.93370438,2.93020274,2.92957764
66.089599,3.16227766,2.936043,0.475641311,2.93067621,2.92956709,2.93313177,2.929601,2.92897604
66.10009,3.31662479,2.93546777,0.617379151,2.93007284,2.92896491,2.93256005,2.92899977,2.92837494
66.110582,3.60555128,2.93489336,0.818937063,2.92946988,2.92836311,2.93198912,2.92839892,2.92777422
66.121074,4,2.93431983,1.03231786,2.92886739,2.92776176,2.93141904,2.92779853,2.92717396
66.131565,3.31662479,2.93374723,0.618771007,2.92826542,2.92716092,2.93084988,2.92719863,2.92657419
66.142057,2.82842712,2.93317547,-0.323648494,2.92766386,2.92656048,2.93028152,2.92659913,2.92597482
66.152548,3.16227766,2.93260467,0.479242102,2.92706282,2.92596054,2.9297141,2.92600014,2.92537594
66.16304,2.82842712,2.93203472,-0.32188133,2.92646219,2.92536099,2.9291475,2.92540153,2.92477746
66.173532,3.31662479,2.93146568,0.620611885,2.92586203,2.9247619,2.92858179,2.92480338,2.92417942
66.184023,3.31662479,2.93089762,0.621069378,2.92526239,2.92416331,2.92801703,2.92420573,2.92358188
66.194515,3.74165739,2.93033044,0.900736894,2.92466316,2.92356512,2.92745312,2.92360847,2.92298474
66.205006,2.44948974,2.92976425,-0.6930184,2.92406445,2.92296743,2.92689018,2.92301171,2.9223881
66.215498,2.44948974,2.92919895,-0.692610429,2.92346615,2.92237014,2.92632811,2.92241535,2.92179185
66.22599,3.16227766,2.92863461,0.483366373,2.92286832,2.9217733,2.92576697,2.92181944,2.92119604
66.236481,2.82842712,2.92807129,-0.31566464,2.92227101,2.92117697,2.92520683,2.92122404,2.92060074
66.246973,2.64575131,2.92750889,-0.530808421,2.9216741,2.92058103,2.92464759,2.92062902,2.92000583
66.257464,2.23606798,2.92694753,-0.831191646,2.92107772,2.9199856,2.92408935,2.92003452,2.91941143
66.267956,3.31662479,2.92638711,0.624690068,2.92048175,2.91939057,2.92353204,2.91944041,2.91881742
66.278448,3.46410162,2.92582769,0.733671536,2.91988625,2.91879599,2.9229757,2.91884674,2.91822385
66.288939,3.16227766,2.92526934,0.486835001,2.91929126,2.91820192,2.92242041,2.91825359,2.91763079
66.299431,3.87298335,2.92471196,0.973792269,2.91869669,2.91760824,2.92186607,2.91766083,2.91703812
66.309922,2.64575131,2.92415567,-0.52764037,2.91810264,2.91701507,2.92131279,2.91706858,2.91644596
66.320414,3.74165739,2.92360037,0.904465044,2.917509,2.9164223,2.92076048,2.91647672,2.91585419
66.330906,1.73205081,2.92304613,-1.09132732,2.91691582,2.91582998,2.92020921,2.91588531,2.91526286
66.341397,2.64575131,2.92249301,-0.526062445,2.91632317,2.91523818,2.91965903,2.91529441,2.91467205
66.351889,4,2.92194091,1.03829624,2.91573093,2.91464677,2.91910986,2.91470391,2.91408162
66.36238,2.82842712,2.92138996,-0.304898076,2.9151392,2.91405586,2.91856181,2.91411391,2.91349171
66.372872,2.64575131,2.92084006,-0.524489038,2.91454789,2.91346536,2.91801479,2.91352431,2.91290218
66.383364,3,2.92029128,0.282327329,2.91395705,2.91287531,2.91746887,2.91293516,2.91231311
66.393855,3.46410162,2.91974368,0.737806165,2.91336672,2.91228577,2.9169241,2.91234652,2.91172454
66.404347,3.74165739,2.91919717,0.906895926,2.91277681,2.91169663,2.91638041,2.91175828,2.91113637
66.414838,4,2.91865186,1.0398789,2.91218742,2.911108,2.9158379,2.91117054,2.9105487
66.42533,3.46410162,2.91810768,0.738914025,2.91159844,2.91051976,2.91529649,2.9105832,2.90996143
66.435822,3.60555128,2.91756468,0.829449575,2.91100993,2.90993198,2.91475624,2.90999632,2.90937461
66.446313,2,2.91702293,-0.95761314,2.91042193,2.90934471,2.91421722,2.90940994,2.90878829
66.456805,2.23606798,2.91648234,-0.82487233,2.90983435,2.90875785,2.91367934,2.90882396,2.90820237
66.467296,2.44948974,2.91594303,-0.682973855,2.90924729,2.90817149,2.91314273,2.90823849,2.90761696
66.477788,3,2.91540491,0.290852342,2.90866064,2.90758553,2.91260728,2.90765342,2.90703194
66.48828,2.82842712,2.91486806,-0.294008395,2.90807446,2.90700002,2.91207308,2.9070688,2.90644738
66.498771,3,2.91433254,0.292690048,2.9074888,2.90641503,2.91154019,2.90648469,2.90586332
66.509263,3.16227766,2.91379825,0.498477086,2.90690355,2.90583044,2.91100852,2.90590098,2.90527966
66.519754,3.16227766,2.91326534,0.499011347,2.90631883,2.90524636,2.91047819,2.90531779,2.9046965
66.530246,2.44948974,2.9127337,-0.680620271,2.90573451,2.90466268,2.90994912,2.90473498,2.90411375
66.540738,3.60555128,2.91220341,0.832675129,2.90515066,2.90407945,2.90942138,2.90415264,2.90353144
66.551229,3,2.91167453,0.297196008,2.90456734,2.90349674,2.90889504,2.9035708,2.90294965
66.561721,2.82842712,2.911147,-0.287610625,2.90398442,2.90291443,2.90837002,2.90298937,2.90236825
66.572212,3.16227766,2.91062092,0.501654008,2.90340203,2.90233263,2.90784644,2.90240844,2.90178736
66.582704,2.64575131,2.91009621,-0.514144827,2.90282005,2.90175123,2.90732421,2.90182792,2.90120686
66.593196,3,2.90957296,0.300710889,2.90223854,2.90117028,2.90680342,2.90124785,2.90062682
66.603687,3.16227766,2.90905123,0.503216089,2.90165755,2.90058985,2.90628412,2.90066829,2.90004729
66.614179,3,2.90853094,0.302438528,2.90107697,2.90000983,2.90576625,2.90008913,2.89946816
66.62467,3,2.90801221,0.303294888,2.90049692,2.89943031,2.90524993,2.89951048,2.89888954
66.635162,3,2.90749497,0.304146389,2.89991728,2.8988512,2.90473507,2.89893224,2.89831131
66.645654,3.46410162,2.9069793,0.746406266,2.8993381,2.89827254,2.90422177,2.89835445,2.89773354
66.656145,2.82842712,2.90646527,-0.279353075,2.89875945,2.8976944,2.90371008,2.89777717,2.89715628
66.666637,3,2.90595279,0.30667117,2.89818121,2.89711666,2.90319994,2.8972003,2.89657942
66.677128,3.46410162,2.90544201,0.747435351,2.89760349,2.89653943,2.90269146,2.89662393,2.89600307
66.68762,3,2.90493285,0.308329617,2.89702619,2.89596261,2.90218459,2.89604797,2.89542712
66.698112,2.44948974,2.90442538,-0.674489166,2.89644935,2.89538624,2.9016794,2.89547247,2.89485162
66.708603,3.74165739,2.90391968,0.915280124,2.89587304,2.89481039,2.90117596,2.89489747,2.89427663
66.719095,2.64575131,2.90341569,-0.50760652,2.89529714,2.89423494,2.90067422,2.89432288,2.89370205
66.729586,3.60555128,2.90291353,0.838234899,2.89472177,2.89366001,2.90017428,2.89374881,2.89312797
66.740078,3.87298335,2.90241314,0.985175217,2.89414681,2.89308548,2.89967609,2.89317513,2.8925543
66.75057,3.74165739,2.90191459,0.91637481,2.89357231,2.8925114,2.89917974,2.89260192,2.89198108
66.761061,3.16227766,2.90141798,0.510744244,2.89299834,2.89193785,2.8986853,2.89202921,2.89140837
66.771553,3,2.90092323,0.314764629,2.89242479,2.89136469,2.8981927,2.89145691,2.89083606
66.782044,2.82842712,2.90043048,-0.268334405,2.89185175,2.89079205,2.89770209,2.89088513,2.89026426
66.792536,3.16227766,2.89993967,0.512189412,2.89127914,2.89021982,2.89721341,2.89031374,2.88969287
66.803028,3.60555128,2.89945088,0.840297802,2.89070699,2.88964804,2.89672673,2.88974282,2.88912193
66.813519,3.46410162,2.8989642,0.751756218,2.89013536,2.88907678,2.89624214,2.88917241,2.8885515
66.824011,3,2.89847958,0.318622687,2.88956415,2.88850593,2.89575959,2.8886024,2.88798148
66.834502,2.82842712,2.89799715,-0.26376131,2.88899346,2.88793559,2.89527922,2.88803291,2.88741196
66.844994,3.46410162,2.89751686,0.752718241,2.88842319,2.88736565,2.89480097,2.88746383,2.88684285
66.855486,2.82842712,2.89703881,-0.261938317,2.88785339,2.88679618,2.89432494,2.8868952,2.8862742
66.865977,4,2.89656307,1.05044606,2.88728411,2.88622722,2.89385121,2.88632708,2.88570606
66.876469,3,2.89608961,0.322351345,2.88671525,2.88565866,2.89337974,2.88575938,2.88513832
66.88696,2.44948974,2.89561857,-0.667928756,2.88614691,2.88509063,2.89291068,2.88519218,2.88457109
66.897452,3,2.8951499,0.323805654,2.88557899,2.884523,2.89244397,2.8846254,2.88400427
66.907944,2.64575131,2.8946837,-0.498931249,2.88501153,2.88395583,2.89197972,2.88405907,2.8834379
66.918435,2.82842712,2.89422008,-0.256501368,2.8844446,2.88338917,2.89151803,2.88349326,2.88287205
66.928927,2.82842712,2.89375899,-0.255600981,2.88387809,2.88282292,2.89105885,2.88292785,2.8823066
66.939418,2.82842712,2.89330058,-0.254702674,2.8833121,2.88225719,2.89060234,2.88236296,2.88174167
66.94991,2.82842712,2.89284482,-0.253806412,2.88274653,2.88169187,2.89014847,2.88179848,2.88117714
66.960402,2.82842712,2.89239182,-0.252912423,2.88218143,2.881127,2.88969734,2.88123445,2.88061306
66.970893,2.82842712,2.89194168,-0.252020942,2.88161686,2.88056266,2.88924906,2.88067094,2.8800495
66.981385,3.87298335,2.89149438,0.990701249,2.8810527,2.87999872,2.8888036,2.88010784,2.87948635
66.991876,3.60555128,2.89105008,0.845281726,2.88048906,2.87943529,2.88836112,2.87954526,2.87892371
67.002368,2.64575131,2.89060875,-0.49483072,2.87992585,2.87887228,2.88792161,2.87898308,2.87836147
67.01286,3.74165739,2.89017052,0.92276046,2.8793631,2.87830973,2.88748517,2.87842137,2.8777997
67.023351,3.46410162,2.8897355,0.75786946,2.87880088,2.87774769,2.88705193,2.87786017,2.87723843
67.033843,2.64575131,2.88930368,-0.493510249,2.87823908,2.87718606,2.88662187,2.87729937,2.87667758
67.044334,3.16227766,2.88887522,0.52287899,2.8776778,2.87662495,2.88619517,2.8767391,2.87611723
67.054826,3,2.88845013,0.333990818,2.87711694,2.87606425,2.88577182,2.87617923,2.87555729
67.065318,3.16227766,2.88802854,0.523688,2.87655655,2.87550401,2.88535195,2.87561983,2.87499782
67.075809,3,2.88761057,0.335245333,2.87599669,2.87494429,2.88493569,2.87506094,2.87443885
67.086301,2.44948974,2.88719623,-0.661593898,2.87543725,2.87438498,2.88452305,2.87450246,2.8738803
67.096792,3.31662479,2.8867857,0.655621147,2.87487833,2.87382618,2.8841142,2.8739445,2.87332226
67.107284,2.82842712,2.88637901,-0.240731968,2.87431983,2.8732678,2.88370918,2.87338695,2.87276462
67.117776,3.46410162,2.88597628,0.760345535,2.8737618,2.87270988,2.88330811,2.87282986,2.87220745
67.128267,3.31662479,2.88557768,0.656541783,2.8732043,2.87215247,2.88291115,2.87227328,2.87165079
67.138759,3,2.88518323,0.338846238,2.87264722,2.87159548,2.88251832,2.87171712,2.87109454
67.14925,2.82842712,2.88479312,-0.237415239,2.87209066,2.871039,2.88212983,2.87116148,2.8705388
67.159742,2.44948974,2.8844074,-0.659482875,2.87153453,2.87048293,2.88174572,2.87060624,2.86998347
67.170234,2.82842712,2.88402624,-0.235794648,2.87097886,2.86992733,2.88136615,2.87005147,2.8694286
67.180725,2,2.88364979,-0.940026486,2.87042373,2.86937225,2.88099128,2.86949722,2.86887425
67.191217,3.60555128,2.88327813,0.849866546,2.86986901,2.86881758,2.88062118,2.86894337,2.8683203
67.201708,2.82842712,2.88291146,-0.233418793,2.86931482,2.86826342,2.88025606,2.86839005,2.86776688
67.2122,4,2.88254985,1.05709515,2.86876105,2.86770968,2.87989599,2.86783713,2.86721386
67.222692,3.16227766,2.8821935,0.529229776,2.86820776,2.8671564,2.87954117,2.86728469,2.8666613
67.233183,3.16227766,2.8818426,0.529561193,2.86765499,2.86660364,2.87919178,2.86673275,2.86610925
67.243675,3.31662479,2.88149725,0.659641981,2.86710264,2.86605129,2.87884793,2.86618123,2.86555762
67.254166,2.64575131,2.88115767,-0.485186937,2.86655082,2.86549946,2.87850985,2.86563023,2.8650065
67.264658,3.16227766,2.880824,0.530522065,2.86599942,2.86494804,2.87817765,2.86507964,2.8644558
67.27515,2.82842712,2.88049644,-0.228187019,2.8654485,2.86439709,2.87785156,2.86452952,2.86390555
67.285641,2.64575131,2.88017522,-0.484173433,2.8648981,2.86384665,2.8775318,2.86397991,2.86335582
67.296133,3.16227766,2.87986049,0.531429364,2.86434812,2.86329663,2.87721852,2.86343072,2.8628065
67.306624,2.64575131,2.87955252,-0.483529942,2.86379868,2.86274713,2.87691197,2.86288204,2.8622577
67.317116,3.16227766,2.87925146,0.532002069,2.86324965,2.86219804,2.87661234,2.86233378,2.86170931
67.327608,3.16227766,2.87895758,0.532278196,2.8627011,2.86164942,2.87631988,2.86178599,2.86116138
67.338099,3.46410162,2.87867115,0.765134276,2.86215308,2.86110131,2.87603485,2.86123871,2.86061396
67.348591,2.82842712,2.87839237,-0.223529081,2.86160548,2.86055362,2.87575747,2.86069185,2.86006696
67.359082,2.82842712,2.87812156,-0.222922487,2.86105841,2.86000645,2.87548803,2.8601455,2.85952048
67.369574,4,2.87785894,1.0593116,2.86051176,2.85945969,2.87522678,2.85959957,2.8589744
67.380066,3,2.87760482,0.349850231,2.85996558,2.8589134,2.87497403,2.85905411,2.85842879
67.390557,2.82842712,2.87735953,-0.221206701,2.85941994,2.85836762,2.8747301,2.85850916,2.8578837
67.401049,3.16227766,2.87712334,0.533998422,2.85887472,2.85782227,2.87449526,2.85796463,2.85733902
67.41154,3.16227766,2.87689664,0.53421065,2.85833003,2.85727743,2.87426989,2.85742062,2.85679485
67.422032,3.16227766,2.87667972,0.534413638,2.85778576,2.856733,2.8740543,2.85687702,2.8562511
67.432524,3.16227766,2.87647298,0.534607032,2.85724197,2.85618904,2.87384888,2.85633389,2.85570781
67.443015,2.82842712,2.87627681,-0.21874572,2.8566987,2.8556456,2.87365403,2.85579128,2.85516504
67.453507,1.73205081,2.87609159,-1.06959842,2.85615587,2.85510258,2.87347011,2.85524909,2.85462269
67.463998,3,2.87591777,0.352253079,2.85561356,2.85456008,2.87329758,2.85470741,2.85408084
67.47449,3.16227766,2.87575576,0.535277406,2.85507167,2.85401799,2.87313686,2.85416615,2.85353942
67.484982,4.12310563,2.87560605,1.11691521,2.85453027,2.85347637,2.87298844,2.85362536,2.85299845
67.495473,3.31662479,2.87546914,0.664195492,2.85398939,2.85293527,2.87285281,2.85308509,2.85245801
67.505965,2.82842712,2.87534552,-0.216606554,2.85344894,2.85239458,2.87273047,2.85254523,2.85191798
67.516456,1.41421356,2.87523577,-1.20872752,2.85290902,2.85185442,2.87262199,2.85200589,2.85137846
67.526948,2.82842712,2.87514044,-0.216132632,2.85236952,2.85131467,2.87252792,2.85146697,2.85083936
67.53744,3,2.87506014,0.353468331,2.8518305,2.85077539,2.87244888,2.85092852,2.85030073
67.547931,2.44948974,2.87499552,-0.652308036,2.85129201,2.85023663,2.87238551,2.85039059,2.84976261
67.558423,2.82842712,2.87494723,-0.215685209,2.85075395,2.84969828,2.87233848,2.84985308,2.84922491
67.568914,3.46410162,2.87491601,0.767584264,2.85021642,2.84916046,2.87230851,2.84931608,2.84868772
67.579406,2.44948974,2.8749026,-0.652236808,2.84967932,2.84862305,2.87229635,2.84877951,2.84815095
67.589898,3.60555128,2.87490779,0.854776866,2.8491427,2.84808611,2.87230278,2.8482434,2.84761465
67.600389,2.64575131,2.87493242,-0.478728635,2.8486066,2.84754969,2.87232866,2.84770781,2.84707886
67.610881,3.31662479,2.87497739,0.664565576,2.84807093,2.84701369,2.87237488,2.84717265,2.84654349
67.621372,2.64575131,2.87504363,-0.478844771,2.8475358,2.84647821,2.87244237,2.846638,2.84600864
67.631864,3.31662479,2.87513215,0.664449128,2.84700109,2.84594315,2.87253214,2.84610377,2.8454742
67.642356,2.82842712,2.875244,-0.216372086,2.84646687,2.84540855,2.87264525,2.84557001,2.84494023
67.652847,2.64575131,2.87538031,-0.479196199,2.84593317,2.84487448,2.87278282,2.84503677,2.84440678
67.663339,3,2.87554228,0.352785662,2.8453999,2.84434083,2.87294605,2.84450394,2.84387374
67.67383,3.74165739,2.87573115,0.930551577,2.84486717,2.84380769,2.87313619,2.84397164,2.84334123
67.684322,3.16227766,2.87594831,0.535097515,2.84433486,2.84327497,2.87335462,2.84343976,2.84280912
67.694814,2.23606798,2.87619518,-0.800079496,2.84380303,2.84274273,2.87360277,2.84290835,2.84227749
67.705305,2.64575131,2.87647325,-0.48033524,2.84327174,2.842211,2.87388214,2.84237746,2.84174637
67.715797,2.64575131,2.87678422,-0.48065883,2.84274088,2.84167969,2.87419441,2.84184699,2.84121568
67.726288,3.16227766,2.87712976,0.533992414,2.84221054,2.84114891,2.87454127,2.84131704,2.8406855
67.73678,3,2.8775118,0.34998315,2.84168064,2.84061854,2.87492463,2.84078751,2.84015573
67.747272,2.82842712,2.87793227,-0.222497528,2.84115122,2.84008864,2.87534646,2.84025845,2.83962644
67.757763,2.82842712,2.87839328,-0.223531101,2.84062234,2.83955927,2.87580882,2.83972991,2.83909766
67.768255,3.74165739,2.87889716,0.92884887,2.84009388,2.83903031,2.87631408,2.83920179,2.8385693
67.778746,3.74165739,2.87944627,0.92855324,2.83956596,2.83850187,2.87686459,2.8386742,2.83804146
67.789238,2.44948974,2.8800433,-0.656165804,2.83903847,2.83797386,2.87746305,2.83814702,2.83751404
67.79973,3.46410162,2.88069103,0.763813189,2.83851146,2.83744631,2.87811223,2.83762032,2.83698708
67.810221,3.60555128,2.88139238,0.850975262,2.83798498,2.83691929,2.87881505,2.83709413,2.83646065
67.820713,2.82842712,2.88215073,-0.231783523,2.83745894,2.83639268,2.87957491,2.83656837,2.83593463
67.831204,3,2.88296941,0.342097334,2.83693343,2.8358666,2.88039514,2.83604313,2.83540913
67.841696,2.82842712,2.88385235,-0.235425635,2.83640836,2.83534094,2.88127966,2.83551831,2.83488405
67.852188,3,2.88453068,0.339807767,2.83560621,2.83481575,2.88223245,2.83499397,2.83435944
67.862679,3.31662479,2.88555476,0.656559239,2.8350824,2.83429108,2.8832578,2.83447014,2.83383535
67.873171,3.16227766,2.88665628,0.524996552,2.83455902,2.83376683,2.88436064,2.83394674,2.83331168
67.883662,3.46410162,2.88784018,0.759118856,2.83403617,2.8332431,2.8855459,2.83342385,2.83278852
67.894154,3.74165739,2.88911223,0.923333717,2.83351376,2.83271979,2.88681937,2.83290139,2.83226579
67.904646,2.82842712,2.89047838,-0.249100884,2.83299183,2.83219696,2.88818697,2.83237941,2.83174353
67.915137,2.82842712,2.89194502,-0.252027577,2.83247044,2.83167464,2.88965514,2.83185794,2.83122178
67.925629,2.82842712,2.8935196,-0.25513227,2.83194948,2.83115275,2.89123131,2.8313369,2.83070045
67.93612,3,2.89520959,0.323713472,2.83142906,2.83063138,2.89292295,2.83081638,2.83017965
67.946612,3.16227766,2.8970238,0.515028015,2.83090907,2.83011043,2.8947389,2.83029628,2.82965926
67.957104,2.82842712,2.89897138,-0.265601689,2.83038957,2.82958995,2.89668829,2.82977666,2.82913935
67.967595,4.12310563,2.90106229,1.10546069,2.8298706,2.82907,2.8987811,2.82925755,2.82861995
67.978087,2.23606798,2.90330806,-0.816847649,2.82935207,2.82855046,2.90102887,2.82873887,2.82810097
67.988578,3.46410162,2.90572052,0.74724902,2.82883408,2.82803145,2.90344344,2.82822072,2.82758251
67.99907,3.31662479,2.90831358,0.638992337,2.82831652,2.82751286,2.90603873,2.82770298,2.82706448
68.009562,2.82842712,2.91110188,-0.287532188,2.82779945,2.82699475,2.90882938,2.82718572,2.82654691
68.020053,2.82842712,2.91410151,-0.292701869,2.82728292,2.82647715,2.9118315,2.82666899,2.82602987
68.030545,3.16227766,2.91733115,0.494920716,2.82676682,2.82595998,2.91506378,2.82615267,2.82551324
68.041036,3.16227766,2.92081026,0.491393323,2.82625126,2.82544333,2.91854571,2.82563688,2.82499714
68.051528,3.16227766,2.92456181,0.487561124,2.82573614,2.8249271,2.92230025,2.82512151,2.82448145
68.06202,3.60555128,2.92861028,0.82276424,2.82522151,2.82441135,2.92635192,2.82460662,2.82396624
68.072511,3.31662479,2.9329829,0.619388316,2.82470741,2.82389611,2.93072795,2.82409225,2.82345154
68.083003,3,2.93771141,0.249576828,2.82419376,2.8233813,2.9354601,2.8235783,2.82293727
68.093494,3.16227766,2.9428295,0.468452943,2.82368064,2.82286702,2.94058211,2.82306488,2.82242352
68.103986,3.46410162,2.948377,0.71813969,2.82316796,2.82235315,2.94613382,2.82255188,2.82191019
68.114478,3.16227766,2.95439717,0.455939134,2.82265578,2.82183976,2.95215851,2.82203936,2.82139733
68.124969,3.31662479,2.96093868,0.596394259,2.82214413,2.82132689,2.95870491,2.82152736,2.82088499
68.135461,3.46410162,2.96805856,0.704303244,2.82163292,2.82081445,2.96583005,2.82101578,2.82037308
68.145952,2.64575131,2.97581872,-0.574514937,2.82112225,2.82030252,2.97359592,2.82050473,2.81986168
68.156444,3.31662479,2.98429261,0.57648259,2.82061203,2.81979103,2.98207599,2.8199941,2.8193507
68.166936,3.31662479,2.99356165,0.568386439,2.82010229,2.81928,2.99135173,2.81948395,2.8188402
68.177427,4.47213595,3.00371882,1.21178263,2.8195931,2.8187695,3.0015162,2.81897432,2.81833022
68.187919,3.31662479,3.01487404,0.549318441,2.81908435,2.81825942,3.01267937,2.81846512,2.81782066
68.19841,3.31662479,3.0271498,0.538028796,2.81857614,2.81774986,3.02496381,2.81795644,2.81731162
68.208902,3.87298335,3.04069298,0.912299493,2.81806837,2.81724073,3.03851648,2.81744818,2.81680301
68.219394,3,3.05567133,-0.235947736,2.8175611,2.81673207,3.05350523,2.81694041,2.81629486
68.229885,3.31662479,3.07228223,0.49431019,2.81705437,2.81622394,3.07012754,2.81643315,2.81578724
68.240377,3.46410162,3.09076604,0.611011929,2.81654808,2.81571623,3.08862393,2.81592632,2.81528004
68.250868,4.35889894,3.11140631,1.1169121,2.81604233,2.81520904,3.10927808,2.81542002,2.81477336
68.26136,4,3.13456021,0.930290163,2.81553704,2.81470228,3.13244735,2.81491414,2.8142671
68.271852,3.16227766,3.1606689,0.0401093222,2.81503223,2.81419599,3.15857312,2.81440873,2.81376132
68.282343,3,3.19029442,-0.436227487,2.81452797,2.81369022,3.1882177,2.81390386,2.81325606
68.292835,4,3.2241723,0.880810819,2.81402416,2.81318488,3.22211699,2.8133994,2.81275122
68.303326,2.44948974,3.2632449,-0.902083784,2.81352089,2.81268007,3.26121376,2.81289547,2.8122469
68.313818,2.44948974,3.30874862,-0.926962179,2.81301807,2.81217567,3.30674498,2.81239197,2.811743
68.32431,3.31662479,3.36225093,-0.213602761,2.81251574,2.81167176,3.3602787,2.81188895,2.81123958
68.334801,3,3.4257044,-0.652460263,2.81201396,2.81116836,3.42376822,2.81138645,2.81073668
68.345293,4,3.50147858,0.706060494,2.81151263,2.81066539,3.49958382,2.81088437,2.81023421
68.355784,3.87298335,3.59226611,0.529827552,2.81101185,2.81016295,3.59041874,2.81038282,2.80973225
68.366276,3.87298335,3.70100805,0.41469904,2.81051152,2.80966093,3.69921446,2.8098817,2.80923072
68.376768,4.79583152,3.83061334,0.98245518,2.81001168,2.80915938,3.82887993,2.80938105,2.80872966
68.387259,3.46410162,3.98366547,-0.720807779,2.8095124,2.80865836,3.98199815,2.80888093,2.80822912
68.397751,4.69041576,4.1621032,0.726851125,2.80901356,2.80815776,4.16050685,2.80838124,2.80772901
68.408242,5.56776436,4.36670567,1.09592824,2.80851528,2.80765769,4.36518361,2.80788207,2.80722942
68.418734,4.47213595,4.59676447,-0.353027646,2.80801744,2.80715804,4.5953181,2.80738333,2.80673026
68.429226,5.47722558,4.84936077,0.792379205,2.80752011,2.80665887,4.84798924,2.80688507,2.80623156
68.439717,4.79583152,5.11853432,-0.568069362,2.80702333,2.80616022,5.11723443,2.80638733,2.80573339
68.450209,6.244998,5.39408935,0.922447096,2.806527,2.805662,5.39285538,2.80589001,2.80523564
68.4607,6.40312424,5.65993373,0.862084977,2.80603123,2.8051643,5.65875724,2.80539323,2.80473842
68.471192,5.83095189,5.89356328,-0.250222675,2.8055359,2.80466703,5.89243295,2.80489687,2.80424162
68.481684,6.32455532,6.0678034,0.506706937,2.80504109,2.80417023,6.06670504,2.80440099,2.80374529
68.492175,6.70820393,6.1570537,0.742394927,2.80454682,2.80367396,6.15597077,2.80390563,2.80324949
68.502667,5.47722558,6.14625819,-0.817944141,2.80405302,2.80317811,6.14517283,2.8034107,2.80275411
68.513158,6.40312424,6.03734242,0.604798991,2.80355977,2.80268279,6.03623693,2.8029163,2.80225925
68.52365,5.56776436,5.84827782,-0.52963521,2.80306697,2.80218789,5.847136,2.80242233,2.80176482
68.534142,5.56776436,5.60558599,-0.194477825,2.80257469,2.80169347,5.6043941,2.80192883,2.80127087
68.544633,5.56776436,5.33573224,0.481697123,2.80208296,2.80119958,5.33447939,2.80143586,2.80077743
68.555125,5.65685425,5.05985552,0.772656927,2.80159169,2.80070611,5.05853361,2.80094332,2.80028442
68.565616,4.89897949,4.7927443,0.325937392,2.80110097,2.80021316,4.79134789,2.8004513,2.79979193
68.576108,5.19615242,4.54360489,0.807804145,2.80061072,2.79972064,4.54213101,2.79995972,2.79929987
68.5866,5.47722558,4.317709,1.07680851,2.80012098,2.7992286,4.31615704,2.79946861,2.79880828
68.597091,5.09901951,4.11749662,0.990718375,2.7996318,2.79873708,4.11586815,2.79897802,2.79831721
68.607583,5.09901951,3.94333364,1.07502831,2.79914309,2.79824599,3.94163213,2.79848787,2.79782658
68.618074,5.29150262,3.79419909,1.22364355,2.79865493,2.79775542,3.7924295,2.79799824,2.79733646
68.628566,4.58257569,3.6679963,0.956336444,2.79816724,2.79726528,3.66616455,2.79750904,2.79684677
68.639058,4.89897949,3.56206147,1.15625171,2.79768007,2.79677562,3.56017391,2.79702032,2.79635755
68.649549,3.87298335,3.47347149,0.632069499,2.79719346,2.79628648,3.47153438,2.79653213,2.79586885
68.660041,3.87298335,3.39932096,0.688231344,2.79670732,2.79579777,3.39734011,2.79604436,2.79538059
68.670532,3.16227766,3.33698499,-0.41798006,2.79622174,2.79530958,3.33496559,2.79555712,2.79489284
68.681024,3.87298335,3.2841752,0.767338351,2.79573663,2.79482182,3.28212173,2.79507031,2.79440552
68.691516,3,3.23902093,-0.488897669,2.79525205,2.79433453,3.23693716,2.79458398,2.79391868
68.702007,3.16227766,3.2000284,-0.194295504,2.79476803,2.79384777,3.19791751,2.79409817,2.79343235
68.712499,4,3.16602232,0.913223782,2.79428448,2.79336144,3.16388696,2.7936128,2.79294646
68.72299,3,3.136109,-0.368929534,2.7938015,2.79287563,3.13395142,2.79312795,2.79246108
68.733482,3,3.10958952,-0.331043074,2.793319,2.79239025,3.10741161,2.79264353,2.79197614
68.743974,3.87298335,3.08592928,0.887160677,2.79283703,2.79190535,3.0837327,2.79215959,2.79149167
68.754465,3.60555128,3.06470735,0.735420914,2.79235562,2.79142097,3.06249352,2.79167618,2.79100772
68.764957,4.12310563,3.04558119,1.03803875,2.7918747,2.79093702,3.04335134,2.7911932,2.7905242
68.775448,3.46410162,3.02827853,0.660168985,2.79139435,2.7904536,3.02603376,2.79071074,2.7900412
68.78594,4.12310563,3.01256724,1.05382085,2.79091448,2.7899706,3.01030854,2.79022872,2.78955863
68.796432,3.87298335,2.99825669,0.935268229,2.79043514,2.78948808,2.9959849,2.78974717,2.78907653
68.806923,3.31662479,2.98518446,0.575708543,2.78995638,2.78900608,2.98290036,2.78926615,2.78859495
68.817415,2.82842712,2.97320781,-0.380500568,2.78947811,2.78852451,2.97091206,2.78878556,2.78811381
68.827906,3.31662479,2.96220797,0.595329169,2.78900042,2.78804347,2.9599012,2.78830549,2.78763318
68.838398,2.44948974,2.95207783,-0.708934471,2.78852322,2.78756285,2.94976056,2.78782586,2.78715299
68.84889,2.64575131,2.94272697,-0.544954736,2.78804655,2.78708272,2.9403997,2.78734671,2.78667327
68.859381,3.16227766,2.93407622,0.477704345,2.78757047,2.7866031,2.93173937,2.78686808,2.78619407
68.869873,3.16227766,2.92605374,0.486028726,2.78709488,2.78612392,2.92370769,2.78638989,2.7857153
68.880364,3.46410162,2.91859935,0.738581252,2.78661988,2.78564526,2.91624444,2.78591222,2.78523705
68.890856,3.31662479,2.91165716,0.636370667,2.78614537,2.78516703,2.9092937,2.78543499,2.78475923
68.901348,2.64575131,2.90517974,-0.509341172,2.78567141,2.78468927,2.90280799,2.78495823,2.78428188
68.911839,3.74165739,2.8991249,0.917895685,2.78519805,2.78421204,2.8967451,2.784482,2.78380506
68.922331,2.82842712,2.89345348,-0.255002662,2.78472518,2.78373524,2.89106584,2.7840062,2.78332867
68.932822,3,2.88813271,0.334465679,2.78425291,2.78325896,2.88573741,2.78353093,2.78285279
68.943314,3.46410162,2.8831313,0.762214086,2.78378115,2.78278312,2.88072851,2.78305609,2.78237735
68.953806,2.64575131,2.87842268,-0.482360211,2.78330994,2.78230775,2.87601253,2.78258173,2.78190239
68.964297,3.31662479,2.87398295,0.665313339,2.78283933,2.7818329,2.87156556,2.7821079,2.78142794
68.974789,3.60555128,2.86978939,0.857765638,2.78236924,2.78135849,2.86736486,2.78163449,2.78095392
68.98528,2.64575131,2.86582309,-0.469118081,2.78189975,2.78088459,2.86339151,2.78116162,2.78048043
68.995772,3.16227766,2.8620655,0.547916197,2.78143078,2.78041113,2.85962694,2.78068918,2.78000736
69.006264,3.60555128,2.85850093,0.864320744,2.78096237,2.77993815,2.85605544,2.78021722,2.77953478
69.016755,3.16227766,2.85511509,0.554222489,2.78049457,2.77946569,2.85266273,2.77974578,2.77906271
69.027247,3.16227766,2.85189411,0.55712077,2.7800273,2.77899366,2.84943489,2.77927478,2.77859107
69.037738,2.64575131,2.84882655,-0.450638699,2.77956065,2.77852215,2.8463605,2.7788043,2.77811996
69.04823,3.16227766,2.84585085,0.562518271,2.77909452,2.77805107,2.84337794,2.77833426,2.77764927
69.058722,2.64575131,2.84305733,-0.444191417,2.77862898,2.77758047,2.84057758,2.7778647,2.77717906
69.069213,3.46410162,2.84038706,0.789756008,2.77816405,2.7771104,2.83790048,2.77739566,2.77670937
69.079705,2.23606798,2.83783118,-0.775733979,2.77769967,2.77664075,2.83533774,2.77692706,2.77624011
69.090196,3.60555128,2.83538251,0.877592599,2.77723592,2.77617163,2.83288218,2.77645898,2.77577138
69.100688,3.46410162,2.83303352,0.794397944,2.77677271,2.77570294,2.83052626,2.77599134,2.77530307
69.11118,3.46410162,2.830778,0.795816323,2.77631009,2.77523473,2.82826376,2.77552418,2.77483524
69.121671,3.74165739,2.82861018,0.955535039,2.77584811,2.77476704,2.82608892,2.77505754,2.77436793
69.132163,2.82842712,2.82652416,0.0436229678,2.77538669,2.77429978,2.82399581,2.77459134,2.77390105
69.142654,3,2.82451529,0.418908957,2.77492592,2.77383305,2.82197977,2.77412566,2.7734347
69.153146,3.16227766,2.82257849,0.582837175,2.7744657,2.77336675,2.82003573,2.77366042,2.77296877
69.163638,3.16227766,2.82070964,0.584438211,2.7740061,2.77290092,2.81815956,2.77319566,2.77250332
69.174129,2.82842712,2.8189049,0.097581897,2.77354716,2.77243562,2.81634741,2.77273143,2.77203839
69.184621,2.82842712,2.81716021,0.106145715,2.77308879,2.77197075,2.81459521,2.77226763,2.77157389
69.195112,3.31662479,2.81547247,0.707921128,2.77263109,2.7715064,2.81289984,2.77180435,2.77110992
69.205604,3.16227766,2.81383814,0.590287658,2.77217397,2.77104249,2.81125778,2.77134151,2.77064637
69.216096,3.74165739,2.81225442,0.964055478,2.77171748,2.77057905,2.80966621,2.77087915,2.7701833
69.226587,2.64575131,2.81071869,-0.406161758,2.77126167,2.77011613,2.80812249,2.77041732,2.76972076
69.237079,2,2.80922805,-0.899571039,2.77080647,2.76965365,2.80662375,2.76995592,2.76925864
69.24757,3,2.80778041,0.438428545,2.77035195,2.76919169,2.80516785,2.76949505,2.76879704
69.258062,3.46410162,2.80637323,0.811004553,2.76989804,2.76873016,2.80375226,2.76903462,2.76833588
69.268554,2.23606798,2.80500456,-0.754278846,2.76944479,2.76826911,2.80237503,2.76857466,2.76787519
69.279045,3.46410162,2.80367255,0.812667869,2.76899225,2.76780858,2.8010343,2.76811523,2.76741502
69.289537,2.82842712,2.80237512,0.161406325,2.76854033,2.76734849,2.79972798,2.76765624,2.76695529
69.300028,2.64575131,2.8011108,-0.394156686,2.76808914,2.76688891,2.79845459,2.76719777,2.76649607
69.31052,4,2.79987774,1.09550092,2.76763859,2.76642977,2.79721226,2.76673974,2.76603729
69.321012,2.82842712,2.79867454,0.172489371,2.76718872,2.76597111,2.79599961,2.76628219,2.76557899
69.331503,3,2.7974999,0.450000109,2.7667396,2.76551297,2.79481531,2.76582516,2.7651212
69.341995,3.16227766,2.79635226,0.604917678,2.76629114,2.76505527,2.7936578,2.76536857,2.76466385
69.352486,3.46410162,2.79523059,0.817845354,2.76584344,2.76459808,2.79252603,2.76491251,2.76420701
69.362978,4,2.7941335,1.09811953,2.76539641,2.76414133,2.79141862,2.76445688,2.76375061
69.37347,3.16227766,2.79305998,0.60763285,2.76495012,2.76368505,2.79033453,2.76400174,2.76329469
69.383961,1.73205081,2.79200909,-1.02954275,2.76450461,2.7632293,2.78927283,2.76354712,2.76283928
69.394453,3.16227766,2.79097965,0.609342276,2.7640598,2.76277398,2.78823232,2.76309293,2.76238431
69.404944,3,2.78997092,0.458289292,2.7636158,2.76231919,2.78721225,2.76263927,2.76192986
69.415436,3.16227766,2.78898185,0.610979389,2.76317252,2.76186482,2.78621155,2.76218605,2.76147584
69.425928,1.73205081,2.78801169,-1.02759957,2.76273002,2.76141094,2.78522947,2.76173331,2.7610223
69.436419,1.73205081,2.78705976,-1.02713629,2.76228836,2.76095757,2.78426532,2.7612811,2.76056928
69.446911,2.64575131,2.78612514,-0.37466496,2.76184745,2.76050464,2.78331816,2.76082932,2.76011669
69.457402,2.82842712,2.78520732,0.207893734,2.76140741,2.76005223,2.78238746,2.76037807,2.75966462
69.467894,3.31662479,2.78430546,0.729602175,2.76096815,2.75960026,2.78147238,2.75992725,2.75921298
69.478386,3.16227766,2.78341902,0.615514939,2.76052973,2.75914876,2.78057237,2.75947692,2.75876182
69.488877,3.16227766,2.7825475,0.616222491,2.76009222,2.75869778,2.7796869,2.75902711,2.75831118
69.499369,3.16227766,2.78169018,0.616917726,2.75965553,2.75824724,2.77881524,2.75857774,2.75786098
69.50986,3.16227766,2.78084669,0.617600981,2.75921977,2.75779722,2.77795701,2.75812889,2.75741129
69.520352,3.60555128,2.78001637,0.908589515,2.75878487,2.75734763,2.77711152,2.75768049,2.75696204
69.530844,3.16227766,2.77919883,0.618933626,2.7583509,2.75689853,2.77627837,2.75723256,2.75651326
69.541335,3,2.77839369,0.470750791,2.75791791,2.75644994,2.77545718,2.75678516,2.756065
69.551827,3.60555128,2.77760039,0.909918067,2.75748583,2.75600178,2.77464733,2.75633819,2.75561718
69.562318,2.82842712,2.77681866,0.22717497,2.75705478,2.75555415,2.77384856,2.75589175,2.75516987
69.57281,3.31662479,2.77604798,0.73523929,2.75662468,2.75510695,2.77306032,2.75544575,2.754723
69.583302,4,2.77528806,1.10666704,2.75619561,2.75466023,2.7722823,2.75500024,2.75427661
69.593793,3.16227766,2.77453863,0.622686943,2.75576763,2.75421403,2.7715142,2.75455524,2.75383073
69.604285,3.16227766,2.77379923,0.623280379,2.75534068,2.75376827,2.77075553,2.75411069,2.75338529
69.614776,2.23606798,2.77306969,-0.732804006,2.75491487,2.75332302,2.77000611,2.75366666,2.75294036
69.625268,3.60555128,2.77234958,0.912798825,2.75449014,2.75287821,2.76926547,2.75322306,2.75249588
69.63576,3.74165739,2.7716387,0.984895266,2.75406657,2.75243388,2.76853338,2.75277995,2.75205186
69.646251,2.82842712,2.77093686,0.239771277,2.75364423,2.75199007,2.76780962,2.75233737,2.75160837
69.656743,2.23606798,2.77024368,-0.730873246,2.75322307,2.75154669,2.76709377,2.75189522,2.75116531
69.667234,3.46410162,2.76955906,0.833392197,2.75280321,2.75110383,2.76638572,2.7514536,2.75072277
69.677726,2,2.76888266,-0.876859545,2.7523846,2.75066141,2.76568506,2.75101241,2.75028066
69.688218,2.64575131,2.76821434,-0.349947183,2.75196732,2.75021947,2.76499164,2.75057171,2.74983903
69.698709,2.44948974,2.76755398,-0.563971837,2.75155146,2.74977804,2.76430527,2.75013154,2.74939792
69.709201,2.82842712,2.76690126,0.248044078,2.75113697,2.74933705,2.76362561,2.7496918,2.74895724
69.719692,4.12310563,2.76625615,1.16483882,2.75072399,2.74889658,2.76295257,2.74925258,2.74851708
69.730184,3.60555128,2.76561838,0.916478529,2.75031249,2.74845655,2.76228583,2.74881381,2.74807736
69.740676,3,2.76498786,0.484780505,2.74990256,2.74801699,2.76162525,2.74837552,2.74763811
69.751167,3.16227766,2.76436453,0.630803563,2.74949429,2.74757796,2.76097071,2.74793775,2.74719938
69.761659,2.82842712,2.76374813,0.254320649,2.74908766,2.74713935,2.7603219,2.74750042,2.74676109
69.77215,2.82842712,2.76313869,0.255516011,2.74868283,2.74670127,2.75967877,2.74706362,2.74632331
69.782642,2,2.762536,-0.873233071,2.74827977,2.74626363,2.75904105,2.74662725,2.74588597
69.793134,2.44948974,2.76194001,-0.558972512,2.74787861,2.74582646,2.75840862,2.74619137,2.7454491
69.803625,2.64575131,2.76135072,-0.339999138,2.74747945,2.74538981,2.7577814,2.74575601,2.74501275
69.814117,2.23606798,2.76076796,-0.724361775,2.74708231,2.74495359,2.75715913,2.74532109,2.74457684
69.824608,3.74165739,2.76019177,0.990689463,2.74668736,2.7445179,2.75654177,2.7448867,2.74414144
69.8351,3.31662479,2.75962202,0.746326182,2.7462946,2.74408264,2.75592908,2.74445274,2.74370648
69.845592,3,2.75905873,0.490857691,2.74590418,2.74364786,2.75532099,2.74401927,2.743272
69.856083,3.31662479,2.75850193,0.747076206,2.74551626,2.74321359,2.75471742,2.74358632,2.74283803
69.866575,2.23606798,2.75795153,-0.722415081,2.74513087,2.74277976,2.75411815,2.74315382,2.7424045
69.877066,1.73205081,2.75740763,-1.01259904,2.74474821,2.74234646,2.75352317,2.74272183,2.74197149
[truncated: 620,661 more chars]
