# Supplementary material for: Phase Stability of Iron Nitride Fe4N at High Pressure—Pressure-Dependent Evolution of Phase Equilibria in the Fe–N System
Source: Materials (Basel). 2021 Jul 15;14(14):3963. doi: 10.3390/ma14143963 (PMC8307547; doi:10.3390/ma14143963)
Supplement: Supplementary file 1 [file materials-14-03963-s001.zip › xrd_data/5-300_riet.txt]

'y-axis saved as Sqrt(y)
'x,Yobs,Ycalc,Diff,fe4n,alpha,epsilon,Bkg
20,7.61577311,0,0,0,0,0,0
20.010492,7.21110255,0,0,0,0,0,0
20.020983,7.68114575,0,0,0,0,0,0
20.031475,7.81024968,0,0,0,0,0,0
20.041966,7.68114575,0,0,0,0,0,0
20.052458,7.74596669,0,0,0,0,0,0
20.06295,6.78232998,0,0,0,0,0,0
20.073441,8.18535277,0,0,0,0,0,0
20.083933,7.48331477,0,0,0,0,0,0
20.094424,6.92820323,0,0,0,0,0,0
20.104916,7,0,0,0,0,0,0
20.115408,7.34846923,0,0,0,0,0,0
20.125899,7.07106781,0,0,0,0,0,0
20.136391,8.54400375,0,0,0,0,0,0
20.146882,7.21110255,0,0,0,0,0,0
20.157374,7.74596669,0,0,0,0,0,0
20.167866,8.1240384,0,0,0,0,0,0
20.178357,8.83176087,0,0,0,0,0,0
20.188849,7.14142843,0,0,0,0,0,0
20.19934,7,0,0,0,0,0,0
20.209832,8.54400375,0,0,0,0,0,0
20.220324,7.21110255,0,0,0,0,0,0
20.230815,7.34846923,0,0,0,0,0,0
20.241307,8.36660027,0,0,0,0,0,0
20.251798,8.30662386,0,0,0,0,0,0
20.26229,7.74596669,0,0,0,0,0,0
20.272782,8.24621125,0,0,0,0,0,0
20.283273,7.81024968,0,0,0,0,0,0
20.293765,7.28010989,0,0,0,0,0,0
20.304256,7.54983444,0,0,0,0,0,0
20.314748,8.42614977,0,0,0,0,0,0
20.32524,7.14142843,0,0,0,0,0,0
20.335731,8.30662386,0,0,0,0,0,0
20.346223,8.1240384,0,0,0,0,0,0
20.356714,7.34846923,0,0,0,0,0,0
20.367206,7.28010989,0,0,0,0,0,0
20.377698,8.24621125,0,0,0,0,0,0
20.388189,8.36660027,0,0,0,0,0,0
20.398681,8.42614977,0,0,0,0,0,0
20.409172,7.28010989,0,0,0,0,0,0
20.419664,8.06225775,0,0,0,0,0,0
20.430156,8.30662386,0,0,0,0,0,0
20.440647,8.18535277,0,0,0,0,0,0
20.451139,7.61577311,0,0,0,0,0,0
20.46163,7.34846923,0,0,0,0,0,0
20.472122,7.21110255,0,0,0,0,0,0
20.482614,8.18535277,0,0,0,0,0,0
20.493105,7.93725393,0,0,0,0,0,0
20.503597,7.54983444,0,0,0,0,0,0
20.514088,7.93725393,0,0,0,0,0,0
20.52458,7.07106781,0,0,0,0,0,0
20.535072,6.78232998,0,0,0,0,0,0
20.545563,7.41619849,0,0,0,0,0,0
20.556055,8.60232527,0,0,0,0,0,0
20.566546,7.74596669,0,0,0,0,0,0
20.577038,7.68114575,0,0,0,0,0,0
20.58753,7.87400787,0,0,0,0,0,0
20.598021,7.81024968,0,0,0,0,0,0
20.608513,7.48331477,0,0,0,0,0,0
20.619004,7.74596669,0,0,0,0,0,0
20.629496,7.87400787,0,0,0,0,0,0
20.639988,7.34846923,0,0,0,0,0,0
20.650479,7.93725393,0,0,0,0,0,0
20.660971,7.61577311,0,0,0,0,0,0
20.671462,7.28010989,0,0,0,0,0,0
20.681954,8.30662386,0,0,0,0,0,0
20.692446,7.21110255,0,0,0,0,0,0
20.702937,7.34846923,0,0,0,0,0,0
20.713429,7.68114575,0,0,0,0,0,0
20.72392,6.4807407,0,0,0,0,0,0
20.734412,7.07106781,0,0,0,0,0,0
20.744904,6.8556546,0,0,0,0,0,0
20.755395,7.61577311,0,0,0,0,0,0
20.765887,7.74596669,0,0,0,0,0,0
20.776378,8.06225775,0,0,0,0,0,0
20.78687,8.24621125,0,0,0,0,0,0
20.797362,7.41619849,0,0,0,0,0,0
20.807853,7.93725393,0,0,0,0,0,0
20.818345,7.81024968,0,0,0,0,0,0
20.828836,8.24621125,0,0,0,0,0,0
20.839328,7.34846923,0,0,0,0,0,0
20.84982,7.54983444,0,0,0,0,0,0
20.860311,7.41619849,0,0,0,0,0,0
20.870803,6.78232998,0,0,0,0,0,0
20.881294,7.87400787,0,0,0,0,0,0
20.891786,7.68114575,0,0,0,0,0,0
20.902278,6.08276253,0,0,0,0,0,0
20.912769,7.34846923,0,0,0,0,0,0
20.923261,7.54983444,0,0,0,0,0,0
20.933752,7.41619849,0,0,0,0,0,0
20.944244,7.68114575,0,0,0,0,0,0
20.954736,6.78232998,0,0,0,0,0,0
20.965227,7.87400787,0,0,0,0,0,0
20.975719,8.88819442,0,0,0,0,0,0
20.98621,7.87400787,0,0,0,0,0,0
20.996702,7.07106781,0,0,0,0,0,0
21.007194,6.70820393,0,0,0,0,0,0
21.017685,6.63324958,0,0,0,0,0,0
21.028177,7.34846923,0,0,0,0,0,0
21.038668,7,0,0,0,0,0,0
21.04916,8,0,0,0,0,0,0
21.059652,8,0,0,0,0,0,0
21.070143,7.41619849,0,0,0,0,0,0
21.080635,6.70820393,0,0,0,0,0,0
21.091126,7.21110255,0,0,0,0,0,0
21.101618,7.34846923,0,0,0,0,0,0
21.11211,7.14142843,0,0,0,0,0,0
21.122601,7.41619849,0,0,0,0,0,0
21.133093,7.61577311,0,0,0,0,0,0
21.143584,6.78232998,0,0,0,0,0,0
21.154076,6.55743852,0,0,0,0,0,0
21.164568,7.34846923,0,0,0,0,0,0
21.175059,6.63324958,0,0,0,0,0,0
21.185551,7.93725393,0,0,0,0,0,0
21.196042,7.07106781,0,0,0,0,0,0
21.206534,7.28010989,0,0,0,0,0,0
21.217026,8.06225775,0,0,0,0,0,0
21.227517,6.92820323,0,0,0,0,0,0
21.238009,7.41619849,0,0,0,0,0,0
21.2485,7.34846923,0,0,0,0,0,0
21.258992,8.36660027,0,0,0,0,0,0
21.269484,7.07106781,0,0,0,0,0,0
21.279975,8.30662386,0,0,0,0,0,0
21.290467,6.55743852,0,0,0,0,0,0
21.300958,6.92820323,0,0,0,0,0,0
21.31145,7,0,0,0,0,0,0
21.321942,7.74596669,0,0,0,0,0,0
21.332433,7.07106781,0,0,0,0,0,0
21.342925,7.21110255,0,0,0,0,0,0
21.353416,6.244998,0,0,0,0,0,0
21.363908,6.8556546,0,0,0,0,0,0
21.3744,6.78232998,0,0,0,0,0,0
21.384891,7.74596669,0,0,0,0,0,0
21.395383,7.87400787,0,0,0,0,0,0
21.405874,7.61577311,0,0,0,0,0,0
21.416366,8.36660027,0,0,0,0,0,0
21.426858,7.07106781,0,0,0,0,0,0
21.437349,7.54983444,0,0,0,0,0,0
21.447841,6.92820323,0,0,0,0,0,0
21.458332,6.4807407,0,0,0,0,0,0
21.468824,7.48331477,0,0,0,0,0,0
21.479316,7.34846923,0,0,0,0,0,0
21.489807,8.54400375,0,0,0,0,0,0
21.500299,7,0,0,0,0,0,0
21.51079,7.07106781,0,0,0,0,0,0
21.521282,7.93725393,0,0,0,0,0,0
21.531774,6.92820323,0,0,0,0,0,0
21.542265,7.74596669,0,0,0,0,0,0
21.552757,6.63324958,0,0,0,0,0,0
21.563248,7.28010989,0,0,0,0,0,0
21.57374,6.63324958,0,0,0,0,0,0
21.584232,7.87400787,0,0,0,0,0,0
21.594723,7.34846923,0,0,0,0,0,0
21.605215,7.14142843,0,0,0,0,0,0
21.615706,8.24621125,0,0,0,0,0,0
21.626198,7.54983444,0,0,0,0,0,0
21.63669,7.28010989,0,0,0,0,0,0
21.647181,7.21110255,0,0,0,0,0,0
21.657673,6.244998,0,0,0,0,0,0
21.668164,8,0,0,0,0,0,0
21.678656,7.61577311,0,0,0,0,0,0
21.689148,7.54983444,0,0,0,0,0,0
21.699639,8.06225775,0,0,0,0,0,0
21.710131,6.55743852,0,0,0,0,0,0
21.720622,7.93725393,0,0,0,0,0,0
21.731114,6.70820393,0,0,0,0,0,0
21.741606,6.70820393,0,0,0,0,0,0
21.752097,8.24621125,0,0,0,0,0,0
21.762589,8.1240384,0,0,0,0,0,0
21.77308,7.41619849,0,0,0,0,0,0
21.783572,7.07106781,0,0,0,0,0,0
21.794064,7.34846923,0,0,0,0,0,0
21.804555,7.21110255,0,0,0,0,0,0
21.815047,7.68114575,0,0,0,0,0,0
21.825538,7,0,0,0,0,0,0
21.83603,7.14142843,0,0,0,0,0,0
21.846522,7.34846923,0,0,0,0,0,0
21.857013,6.70820393,0,0,0,0,0,0
21.867505,7.74596669,0,0,0,0,0,0
21.877996,7.54983444,0,0,0,0,0,0
21.888488,7.34846923,0,0,0,0,0,0
21.89898,7.28010989,0,0,0,0,0,0
21.909471,7.68114575,0,0,0,0,0,0
21.919963,7.68114575,0,0,0,0,0,0
21.930454,7.07106781,0,0,0,0,0,0
21.940946,6.92820323,0,0,0,0,0,0
21.951438,7.14142843,0,0,0,0,0,0
21.961929,7.68114575,0,0,0,0,0,0
21.972421,6.4807407,0,0,0,0,0,0
21.982912,6.70820393,0,0,0,0,0,0
21.993404,7.21110255,0,0,0,0,0,0
22.003896,7.28010989,0,0,0,0,0,0
22.014387,7,0,0,0,0,0,0
22.024879,6.8556546,0,0,0,0,0,0
22.03537,8.1240384,0,0,0,0,0,0
22.045862,6.40312424,0,0,0,0,0,0
22.056354,7,0,0,0,0,0,0
22.066845,6.32455532,0,0,0,0,0,0
22.077337,8.06225775,0,0,0,0,0,0
22.087828,7.81024968,0,0,0,0,0,0
22.09832,6.78232998,0,0,0,0,0,0
22.108812,7.87400787,0,0,0,0,0,0
22.119303,7.74596669,0,0,0,0,0,0
22.129795,8.30662386,0,0,0,0,0,0
22.140286,7.34846923,0,0,0,0,0,0
22.150778,6.4807407,0,0,0,0,0,0
22.16127,7.48331477,0,0,0,0,0,0
22.171761,6.78232998,0,0,0,0,0,0
22.182253,7.34846923,0,0,0,0,0,0
22.192744,7.54983444,0,0,0,0,0,0
22.203236,6.55743852,0,0,0,0,0,0
22.213728,7.54983444,0,0,0,0,0,0
22.224219,6.92820323,0,0,0,0,0,0
22.234711,7.34846923,0,0,0,0,0,0
22.245202,6.92820323,0,0,0,0,0,0
22.255694,7.74596669,0,0,0,0,0,0
22.266186,7.81024968,0,0,0,0,0,0
22.276677,6.70820393,0,0,0,0,0,0
22.287169,6.63324958,0,0,0,0,0,0
22.29766,7.14142843,0,0,0,0,0,0
22.308152,6.8556546,0,0,0,0,0,0
22.318644,6.78232998,0,0,0,0,0,0
22.329135,7.21110255,0,0,0,0,0,0
22.339627,7.34846923,0,0,0,0,0,0
22.350118,6.78232998,0,0,0,0,0,0
22.36061,7.54983444,0,0,0,0,0,0
22.371102,7,0,0,0,0,0,0
22.381593,7.07106781,0,0,0,0,0,0
22.392085,7.48331477,0,0,0,0,0,0
22.402576,7.48331477,0,0,0,0,0,0
22.413068,7.54983444,0,0,0,0,0,0
22.42356,6.70820393,0,0,0,0,0,0
22.434051,7.54983444,0,0,0,0,0,0
22.444543,6.63324958,0,0,0,0,0,0
22.455034,7.74596669,0,0,0,0,0,0
22.465526,7.14142843,0,0,0,0,0,0
22.476018,7.14142843,0,0,0,0,0,0
22.486509,7,0,0,0,0,0,0
22.497001,6.70820393,0,0,0,0,0,0
22.507492,7.81024968,0,0,0,0,0,0
22.517984,6.8556546,0,0,0,0,0,0
22.528476,6.70820393,0,0,0,0,0,0
22.538967,6.92820323,0,0,0,0,0,0
22.549459,6.63324958,0,0,0,0,0,0
22.55995,7.74596669,0,0,0,0,0,0
22.570442,7.93725393,0,0,0,0,0,0
22.580934,6.164414,0,0,0,0,0,0
22.591425,6.78232998,0,0,0,0,0,0
22.601917,7.74596669,0,0,0,0,0,0
22.612408,6.78232998,0,0,0,0,0,0
22.6229,7.93725393,0,0,0,0,0,0
22.633392,7.28010989,0,0,0,0,0,0
22.643883,8.1240384,0,0,0,0,0,0
22.654375,8,0,0,0,0,0,0
22.664866,7.61577311,0,0,0,0,0,0
22.675358,7.14142843,0,0,0,0,0,0
22.68585,7.41619849,0,0,0,0,0,0
22.696341,7.61577311,0,0,0,0,0,0
22.706833,7.07106781,0,0,0,0,0,0
22.717324,7.48331477,0,0,0,0,0,0
22.727816,6.40312424,0,0,0,0,0,0
22.738308,7.54983444,0,0,0,0,0,0
22.748799,6.32455532,0,0,0,0,0,0
22.759291,8.18535277,0,0,0,0,0,0
22.769782,7.28010989,0,0,0,0,0,0
22.780274,7.21110255,0,0,0,0,0,0
22.790766,7.34846923,0,0,0,0,0,0
22.801257,7,0,0,0,0,0,0
22.811749,7.41619849,0,0,0,0,0,0
22.82224,7.14142843,0,0,0,0,0,0
22.832732,6.70820393,0,0,0,0,0,0
22.843224,6.63324958,0,0,0,0,0,0
22.853715,7.21110255,0,0,0,0,0,0
22.864207,7.14142843,0,0,0,0,0,0
22.874698,7.28010989,0,0,0,0,0,0
22.88519,7.28010989,0,0,0,0,0,0
22.895682,6.164414,0,0,0,0,0,0
22.906173,7.14142843,0,0,0,0,0,0
22.916665,7.28010989,0,0,0,0,0,0
22.927156,7.21110255,0,0,0,0,0,0
22.937648,7.34846923,0,0,0,0,0,0
22.94814,7.74596669,0,0,0,0,0,0
22.958631,6.70820393,0,0,0,0,0,0
22.969123,7.54983444,0,0,0,0,0,0
22.979614,7.14142843,0,0,0,0,0,0
22.990106,7.34846923,0,0,0,0,0,0
23.000598,7.93725393,0,0,0,0,0,0
23.011089,7.48331477,0,0,0,0,0,0
23.021581,6.244998,0,0,0,0,0,0
23.032072,6.244998,0,0,0,0,0,0
23.042564,7,0,0,0,0,0,0
23.053056,6.92820323,0,0,0,0,0,0
23.063547,7.07106781,0,0,0,0,0,0
23.074039,7.48331477,0,0,0,0,0,0
23.08453,7,0,0,0,0,0,0
23.095022,6.40312424,0,0,0,0,0,0
23.105514,7.07106781,0,0,0,0,0,0
23.116005,6.40312424,0,0,0,0,0,0
23.126497,7.14142843,0,0,0,0,0,0
23.136988,6.40312424,0,0,0,0,0,0
23.14748,6.8556546,0,0,0,0,0,0
23.157972,7.14142843,0,0,0,0,0,0
23.168463,7.21110255,0,0,0,0,0,0
23.178955,7.41619849,0,0,0,0,0,0
23.189446,6.78232998,0,0,0,0,0,0
23.199938,7.28010989,0,0,0,0,0,0
23.21043,6.08276253,0,0,0,0,0,0
23.220921,7.74596669,0,0,0,0,0,0
23.231413,5.83095189,0,0,0,0,0,0
23.241904,6.70820393,0,0,0,0,0,0
23.252396,6.63324958,0,0,0,0,0,0
23.262888,6.32455532,0,0,0,0,0,0
23.273379,6.40312424,0,0,0,0,0,0
23.283871,6.70820393,0,0,0,0,0,0
23.294362,7.93725393,0,0,0,0,0,0
23.304854,6.244998,0,0,0,0,0,0
23.315346,6.92820323,0,0,0,0,0,0
23.325837,6,0,0,0,0,0,0
23.336329,7.68114575,0,0,0,0,0,0
23.34682,7,0,0,0,0,0,0
23.357312,5.47722558,0,0,0,0,0,0
23.367804,6.8556546,0,0,0,0,0,0
23.378295,6.40312424,0,0,0,0,0,0
23.388787,6.4807407,0,0,0,0,0,0
23.399278,7.74596669,0,0,0,0,0,0
23.40977,6.8556546,0,0,0,0,0,0
23.420262,6.70820393,0,0,0,0,0,0
23.430753,7.21110255,0,0,0,0,0,0
23.441245,7.07106781,0,0,0,0,0,0
23.451736,6.78232998,0,0,0,0,0,0
23.462228,7.54983444,0,0,0,0,0,0
23.47272,6.40312424,0,0,0,0,0,0
23.483211,6,0,0,0,0,0,0
23.493703,6.78232998,0,0,0,0,0,0
23.504194,6.92820323,0,0,0,0,0,0
23.514686,7.28010989,0,0,0,0,0,0
23.525178,6.4807407,0,0,0,0,0,0
23.535669,7.28010989,0,0,0,0,0,0
23.546161,6.55743852,0,0,0,0,0,0
23.556652,6.8556546,0,0,0,0,0,0
23.567144,8,0,0,0,0,0,0
23.577636,7.41619849,0,0,0,0,0,0
23.588127,6.4807407,0,0,0,0,0,0
23.598619,6,0,0,0,0,0,0
23.60911,6.63324958,0,0,0,0,0,0
23.619602,7.21110255,0,0,0,0,0,0
23.630094,7.07106781,0,0,0,0,0,0
23.640585,6.8556546,0,0,0,0,0,0
23.651077,6.4807407,0,0,0,0,0,0
23.661568,7,0,0,0,0,0,0
23.67206,7.07106781,0,0,0,0,0,0
23.682552,7.07106781,0,0,0,0,0,0
23.693043,6.55743852,0,0,0,0,0,0
23.703535,7,0,0,0,0,0,0
23.714026,6,0,0,0,0,0,0
23.724518,7.34846923,0,0,0,0,0,0
23.73501,7.14142843,0,0,0,0,0,0
23.745501,7.21110255,0,0,0,0,0,0
23.755993,7.41619849,0,0,0,0,0,0
23.766484,7.07106781,0,0,0,0,0,0
23.776976,6.32455532,0,0,0,0,0,0
23.787468,6.63324958,0,0,0,0,0,0
23.797959,7,0,0,0,0,0,0
23.808451,7,0,0,0,0,0,0
23.818942,6.8556546,0,0,0,0,0,0
23.829434,7,0,0,0,0,0,0
23.839926,6.08276253,0,0,0,0,0,0
23.850417,6.40312424,0,0,0,0,0,0
23.860909,6.78232998,0,0,0,0,0,0
23.8714,7.14142843,0,0,0,0,0,0
23.881892,7.14142843,0,0,0,0,0,0
23.892384,6.40312424,0,0,0,0,0,0
23.902875,7.14142843,0,0,0,0,0,0
23.913367,6.244998,0,0,0,0,0,0
23.923858,6.40312424,0,0,0,0,0,0
23.93435,6.70820393,0,0,0,0,0,0
23.944842,6.55743852,0,0,0,0,0,0
23.955333,7.34846923,0,0,0,0,0,0
23.965825,5.91607978,0,0,0,0,0,0
23.976316,7.07106781,0,0,0,0,0,0
23.986808,6.63324958,0,0,0,0,0,0
23.9973,6.164414,0,0,0,0,0,0
24.007791,6.32455532,0,0,0,0,0,0
24.018283,7.54983444,0,0,0,0,0,0
24.028774,6.63324958,0,0,0,0,0,0
24.039266,6.78232998,0,0,0,0,0,0
24.049758,6.92820323,0,0,0,0,0,0
24.060249,6.78232998,0,0,0,0,0,0
24.070741,6.244998,0,0,0,0,0,0
24.081232,6.70820393,0,0,0,0,0,0
24.091724,6.08276253,0,0,0,0,0,0
24.102216,6.78232998,0,0,0,0,0,0
24.112707,7.41619849,0,0,0,0,0,0
24.123199,6.70820393,0,0,0,0,0,0
24.13369,6.32455532,0,0,0,0,0,0
24.144182,6.40312424,0,0,0,0,0,0
24.154674,7.07106781,0,0,0,0,0,0
24.165165,7.28010989,0,0,0,0,0,0
24.175657,7.28010989,0,0,0,0,0,0
24.186148,7.14142843,0,0,0,0,0,0
24.19664,6.63324958,0,0,0,0,0,0
24.207132,7.28010989,0,0,0,0,0,0
24.217623,7.41619849,0,0,0,0,0,0
24.228115,6.8556546,0,0,0,0,0,0
24.238606,6.70820393,0,0,0,0,0,0
24.249098,7.21110255,0,0,0,0,0,0
24.25959,7,0,0,0,0,0,0
24.270081,7.07106781,0,0,0,0,0,0
24.280573,7.21110255,0,0,0,0,0,0
24.291064,7.48331477,0,0,0,0,0,0
24.301556,7.87400787,0,0,0,0,0,0
24.312048,6.78232998,0,0,0,0,0,0
24.322539,6.4807407,0,0,0,0,0,0
24.333031,7,0,0,0,0,0,0
24.343522,7.28010989,0,0,0,0,0,0
24.354014,7.28010989,0,0,0,0,0,0
24.364506,7.28010989,0,0,0,0,0,0
24.374997,6.244998,0,0,0,0,0,0
24.385489,7.28010989,0,0,0,0,0,0
24.39598,7.48331477,0,0,0,0,0,0
24.406472,6.244998,0,0,0,0,0,0
24.416964,7.34846923,0,0,0,0,0,0
24.427455,6.70820393,0,0,0,0,0,0
24.437947,5.91607978,0,0,0,0,0,0
24.448438,5.83095189,0,0,0,0,0,0
24.45893,6.70820393,0,0,0,0,0,0
24.469422,6.70820393,0,0,0,0,0,0
24.479913,7.14142843,0,0,0,0,0,0
24.490405,6.244998,0,0,0,0,0,0
24.500896,7.61577311,0,0,0,0,0,0
24.511388,6.70820393,0,0,0,0,0,0
24.52188,6.40312424,0,0,0,0,0,0
24.532371,6.40312424,0,0,0,0,0,0
24.542863,5.74456265,0,0,0,0,0,0
24.553354,6.164414,0,0,0,0,0,0
24.563846,7.61577311,0,0,0,0,0,0
24.574338,7.21110255,0,0,0,0,0,0
24.584829,6.78232998,0,0,0,0,0,0
24.595321,7.28010989,0,0,0,0,0,0
24.605812,6.70820393,0,0,0,0,0,0
24.616304,6.78232998,0,0,0,0,0,0
24.626796,7.41619849,0,0,0,0,0,0
24.637287,6.08276253,0,0,0,0,0,0
24.647779,6.32455532,0,0,0,0,0,0
24.65827,6.08276253,0,0,0,0,0,0
24.668762,7.07106781,0,0,0,0,0,0
24.679254,6.92820323,0,0,0,0,0,0
24.689745,6.4807407,0,0,0,0,0,0
24.700237,6.164414,0,0,0,0,0,0
24.710728,6.40312424,0,0,0,0,0,0
24.72122,5.83095189,0,0,0,0,0,0
24.731712,7,0,0,0,0,0,0
24.742203,6.08276253,0,0,0,0,0,0
24.752695,7.28010989,0,0,0,0,0,0
24.763186,8,0,0,0,0,0,0
24.773678,7.07106781,0,0,0,0,0,0
24.78417,6.40312424,0,0,0,0,0,0
24.794661,6.32455532,0,0,0,0,0,0
24.805153,5.91607978,0,0,0,0,0,0
24.815644,6.164414,0,0,0,0,0,0
24.826136,7.07106781,0,0,0,0,0,0
24.836628,6.92820323,0,0,0,0,0,0
24.847119,7.28010989,0,0,0,0,0,0
24.857611,7.07106781,0,0,0,0,0,0
24.868102,6.4807407,0,0,0,0,0,0
24.878594,8,0,0,0,0,0,0
24.889086,6.8556546,0,0,0,0,0,0
24.899577,6.63324958,0,0,0,0,0,0
24.910069,7.41619849,0,0,0,0,0,0
24.92056,6.164414,0,0,0,0,0,0
24.931052,5.91607978,0,0,0,0,0,0
24.941544,6.40312424,0,0,0,0,0,0
24.952035,6.08276253,0,0,0,0,0,0
24.962527,6.92820323,0,0,0,0,0,0
24.973018,7.61577311,0,0,0,0,0,0
24.98351,7.21110255,0,0,0,0,0,0
24.994002,6,0,0,0,0,0,0
25.004493,5.91607978,0,0,0,0,0,0
25.014985,6.78232998,0,0,0,0,0,0
25.025476,6,0,0,0,0,0,0
25.035968,6.4807407,0,0,0,0,0,0
25.04646,6.08276253,0,0,0,0,0,0
25.056951,8,0,0,0,0,0,0
25.067443,6.40312424,0,0,0,0,0,0
25.077934,6.244998,0,0,0,0,0,0
25.088426,6.63324958,0,0,0,0,0,0
25.098918,6.4807407,0,0,0,0,0,0
25.109409,5.83095189,0,0,0,0,0,0
25.119901,7.14142843,0,0,0,0,0,0
25.130392,6.8556546,0,0,0,0,0,0
25.140884,6.70820393,0,0,0,0,0,0
25.151376,6.40312424,0,0,0,0,0,0
25.161867,7.14142843,0,0,0,0,0,0
25.172359,7,0,0,0,0,0,0
25.18285,7.07106781,0,0,0,0,0,0
25.193342,6.164414,0,0,0,0,0,0
25.203834,6.164414,0,0,0,0,0,0
25.214325,6.55743852,0,0,0,0,0,0
25.224817,6.40312424,0,0,0,0,0,0
25.235308,6.32455532,0,0,0,0,0,0
25.2458,7.34846923,0,0,0,0,0,0
25.256292,4.58257569,0,0,0,0,0,0
25.266783,6.4807407,0,0,0,0,0,0
25.277275,6.78232998,0,0,0,0,0,0
25.287766,6.78232998,0,0,0,0,0,0
25.298258,6.70820393,0,0,0,0,0,0
25.30875,6.8556546,0,0,0,0,0,0
25.319241,6.40312424,0,0,0,0,0,0
25.329733,6.55743852,0,0,0,0,0,0
25.340224,6.8556546,0,0,0,0,0,0
25.350716,6.32455532,0,0,0,0,0,0
25.361208,6.78232998,0,0,0,0,0,0
25.371699,5.91607978,0,0,0,0,0,0
25.382191,7.07106781,0,0,0,0,0,0
25.392682,6,0,0,0,0,0,0
25.403174,6.08276253,0,0,0,0,0,0
25.413666,5.29150262,0,0,0,0,0,0
25.424157,6.164414,0,0,0,0,0,0
25.434649,6.244998,0,0,0,0,0,0
25.44514,6.78232998,0,0,0,0,0,0
25.455632,6.32455532,0,0,0,0,0,0
25.466124,6.4807407,0,0,0,0,0,0
25.476615,6.78232998,0,0,0,0,0,0
25.487107,6.4807407,0,0,0,0,0,0
25.497598,6.55743852,0,0,0,0,0,0
25.50809,6.32455532,0,0,0,0,0,0
25.518582,6,0,0,0,0,0,0
25.529073,6.8556546,0,0,0,0,0,0
25.539565,5.83095189,0,0,0,0,0,0
25.550056,7.07106781,0,0,0,0,0,0
25.560548,6.244998,0,0,0,0,0,0
25.57104,6.40312424,0,0,0,0,0,0
25.581531,6.70820393,0,0,0,0,0,0
25.592023,5.83095189,0,0,0,0,0,0
25.602514,6.92820323,0,0,0,0,0,0
25.613006,6.32455532,0,0,0,0,0,0
25.623498,6.8556546,0,0,0,0,0,0
25.633989,7.07106781,0,0,0,0,0,0
25.644481,6.78232998,0,0,0,0,0,0
25.654972,6.4807407,0,0,0,0,0,0
25.665464,6.8556546,0,0,0,0,0,0
25.675956,6.32455532,0,0,0,0,0,0
25.686447,6.4807407,0,0,0,0,0,0
25.696939,5.65685425,0,0,0,0,0,0
25.70743,6.55743852,0,0,0,0,0,0
25.717922,6.78232998,0,0,0,0,0,0
25.728414,6.70820393,0,0,0,0,0,0
25.738905,7.07106781,0,0,0,0,0,0
25.749397,5.74456265,0,0,0,0,0,0
25.759888,6.32455532,0,0,0,0,0,0
25.77038,7.41619849,0,0,0,0,0,0
25.780872,6.4807407,0,0,0,0,0,0
25.791363,5.74456265,0,0,0,0,0,0
25.801855,6.55743852,0,0,0,0,0,0
25.812346,6.55743852,0,0,0,0,0,0
25.822838,6.244998,0,0,0,0,0,0
25.83333,6.08276253,0,0,0,0,0,0
25.843821,6.63324958,0,0,0,0,0,0
25.854313,6.164414,0,0,0,0,0,0
25.864804,6.70820393,0,0,0,0,0,0
25.875296,6.63324958,0,0,0,0,0,0
25.885788,6.40312424,0,0,0,0,0,0
25.896279,6.8556546,0,0,0,0,0,0
25.906771,5.47722558,0,0,0,0,0,0
25.917262,6.63324958,0,0,0,0,0,0
25.927754,6.32455532,0,0,0,0,0,0
25.938246,7.68114575,0,0,0,0,0,0
25.948737,7.34846923,0,0,0,0,0,0
25.959229,6.78232998,0,0,0,0,0,0
25.96972,6.63324958,0,0,0,0,0,0
25.980212,6.70820393,0,0,0,0,0,0
25.990704,5.19615242,0,0,0,0,0,0
26.001195,6.4807407,0,0,0,0,0,0
26.011687,5.65685425,0,0,0,0,0,0
26.022178,5.74456265,0,0,0,0,0,0
26.03267,5.65685425,0,0,0,0,0,0
26.043162,6.40312424,0,0,0,0,0,0
26.053653,5.74456265,0,0,0,0,0,0
26.064145,7,0,0,0,0,0,0
26.074636,6.244998,0,0,0,0,0,0
26.085128,6.70820393,0,0,0,0,0,0
26.09562,7.74596669,0,0,0,0,0,0
26.106111,7,0,0,0,0,0,0
26.116603,6.55743852,0,0,0,0,0,0
26.127094,6,0,0,0,0,0,0
26.137586,7.21110255,0,0,0,0,0,0
26.148078,6.92820323,0,0,0,0,0,0
26.158569,6.70820393,0,0,0,0,0,0
26.169061,6.55743852,0,0,0,0,0,0
26.179552,6.244998,0,0,0,0,0,0
26.190044,6.55743852,0,0,0,0,0,0
26.200536,5.91607978,0,0,0,0,0,0
26.211027,6.70820393,0,0,0,0,0,0
26.221519,6.32455532,0,0,0,0,0,0
26.23201,6.70820393,0,0,0,0,0,0
26.242502,6.8556546,0,0,0,0,0,0
26.252994,6.40312424,0,0,0,0,0,0
26.263485,6.78232998,0,0,0,0,0,0
26.273977,6.8556546,0,0,0,0,0,0
26.284468,6.78232998,0,0,0,0,0,0
26.29496,6.92820323,0,0,0,0,0,0
26.305452,6.164414,0,0,0,0,0,0
26.315943,6.40312424,0,0,0,0,0,0
26.326435,6.4807407,0,0,0,0,0,0
26.336926,6.32455532,0,0,0,0,0,0
26.347418,7,0,0,0,0,0,0
26.35791,6.70820393,0,0,0,0,0,0
26.368401,7.07106781,0,0,0,0,0,0
26.378893,6.8556546,0,0,0,0,0,0
26.389384,5.56776436,0,0,0,0,0,0
26.399876,6.08276253,0,0,0,0,0,0
26.410368,5.38516481,0,0,0,0,0,0
26.420859,6.32455532,0,0,0,0,0,0
26.431351,5.91607978,0,0,0,0,0,0
26.441842,6.32455532,0,0,0,0,0,0
26.452334,5.91607978,0,0,0,0,0,0
26.462826,6.08276253,0,0,0,0,0,0
26.473317,6.63324958,0,0,0,0,0,0
26.483809,6.92820323,0,0,0,0,0,0
26.4943,6.4807407,0,0,0,0,0,0
26.504792,7.41619849,0,0,0,0,0,0
26.515284,6.63324958,0,0,0,0,0,0
26.525775,6.244998,0,0,0,0,0,0
26.536267,6.8556546,0,0,0,0,0,0
26.546758,6.08276253,0,0,0,0,0,0
26.55725,6.63324958,0,0,0,0,0,0
26.567742,6.4807407,0,0,0,0,0,0
26.578233,6.92820323,0,0,0,0,0,0
26.588725,6.32455532,0,0,0,0,0,0
26.599216,7.41619849,0,0,0,0,0,0
26.609708,6.4807407,0,0,0,0,0,0
26.6202,6.08276253,0,0,0,0,0,0
26.630691,7,0,0,0,0,0,0
26.641183,6,0,0,0,0,0,0
26.651674,6.70820393,0,0,0,0,0,0
26.662166,4.69041576,0,0,0,0,0,0
26.672658,6.70820393,0,0,0,0,0,0
26.683149,5.65685425,0,0,0,0,0,0
26.693641,6.78232998,0,0,0,0,0,0
26.704132,6.40312424,0,0,0,0,0,0
26.714624,7.07106781,0,0,0,0,0,0
26.725116,6.92820323,0,0,0,0,0,0
26.735607,6.8556546,0,0,0,0,0,0
26.746099,6.40312424,0,0,0,0,0,0
26.75659,5.65685425,0,0,0,0,0,0
26.767082,6.32455532,0,0,0,0,0,0
26.777574,6.32455532,0,0,0,0,0,0
26.788065,6.55743852,0,0,0,0,0,0
26.798557,6.164414,0,0,0,0,0,0
26.809048,6,0,0,0,0,0,0
26.81954,5.91607978,0,0,0,0,0,0
26.830032,6.55743852,0,0,0,0,0,0
26.840523,5.56776436,0,0,0,0,0,0
26.851015,7,0,0,0,0,0,0
26.861506,5.91607978,0,0,0,0,0,0
26.871998,6.78232998,0,0,0,0,0,0
26.88249,6.55743852,0,0,0,0,0,0
26.892981,7,0,0,0,0,0,0
26.903473,5.56776436,0,0,0,0,0,0
26.913964,5.29150262,0,0,0,0,0,0
26.924456,7.07106781,0,0,0,0,0,0
26.934948,6.55743852,0,0,0,0,0,0
26.945439,6.164414,0,0,0,0,0,0
26.955931,6.8556546,0,0,0,0,0,0
26.966422,5.56776436,0,0,0,0,0,0
26.976914,5.19615242,0,0,0,0,0,0
26.987406,6.32455532,0,0,0,0,0,0
26.997897,5.83095189,0,0,0,0,0,0
27.008389,6.55743852,0,0,0,0,0,0
27.01888,5.91607978,0,0,0,0,0,0
27.029372,6.32455532,0,0,0,0,0,0
27.039864,6.32455532,0,0,0,0,0,0
27.050355,6.70820393,0,0,0,0,0,0
27.060847,5.83095189,0,0,0,0,0,0
27.071338,6.32455532,0,0,0,0,0,0
27.08183,6.32455532,0,0,0,0,0,0
27.092322,5.91607978,0,0,0,0,0,0
27.102813,7,0,0,0,0,0,0
27.113305,6.40312424,0,0,0,0,0,0
27.123796,6.244998,0,0,0,0,0,0
27.134288,6.164414,0,0,0,0,0,0
27.14478,5.83095189,0,0,0,0,0,0
27.155271,6.55743852,0,0,0,0,0,0
27.165763,7.28010989,0,0,0,0,0,0
27.176254,6.55743852,0,0,0,0,0,0
27.186746,6.244998,0,0,0,0,0,0
27.197238,6.32455532,0,0,0,0,0,0
27.207729,6.32455532,0,0,0,0,0,0
27.218221,6.78232998,0,0,0,0,0,0
27.228712,6.78232998,0,0,0,0,0,0
27.239204,7.14142843,0,0,0,0,0,0
27.249696,6.63324958,0,0,0,0,0,0
27.260187,5.74456265,0,0,0,0,0,0
27.270679,6.55743852,0,0,0,0,0,0
27.28117,7.81024968,0,0,0,0,0,0
27.291662,6.70820393,0,0,0,0,0,0
27.302154,5.91607978,0,0,0,0,0,0
27.312645,6.32455532,0,0,0,0,0,0
27.323137,6.92820323,0,0,0,0,0,0
27.333628,6.8556546,0,0,0,0,0,0
27.34412,6.164414,0,0,0,0,0,0
27.354612,6.32455532,0,0,0,0,0,0
27.365103,5.56776436,0,0,0,0,0,0
27.375595,6.8556546,0,0,0,0,0,0
27.386086,6.32455532,0,0,0,0,0,0
27.396578,6.40312424,0,0,0,0,0,0
27.40707,7.41619849,0,0,0,0,0,0
27.417561,6.4807407,0,0,0,0,0,0
27.428053,6.08276253,0,0,0,0,0,0
27.438544,5.83095189,0,0,0,0,0,0
27.449036,6.164414,0,0,0,0,0,0
27.459528,6.244998,0,0,0,0,0,0
27.470019,6.70820393,0,0,0,0,0,0
27.480511,6.40312424,0,0,0,0,0,0
27.491002,6.4807407,0,0,0,0,0,0
27.501494,6.4807407,0,0,0,0,0,0
27.511986,6,0,0,0,0,0,0
27.522477,6.78232998,0,0,0,0,0,0
27.532969,6,0,0,0,0,0,0
27.54346,6.32455532,0,0,0,0,0,0
27.553952,6.55743852,0,0,0,0,0,0
27.564444,6.8556546,0,0,0,0,0,0
27.574935,6.164414,0,0,0,0,0,0
27.585427,6.4807407,0,0,0,0,0,0
27.595918,5.29150262,0,0,0,0,0,0
27.60641,6.244998,0,0,0,0,0,0
27.616902,6.08276253,0,0,0,0,0,0
27.627393,7.07106781,0,0,0,0,0,0
27.637885,5.74456265,0,0,0,0,0,0
27.648376,6.164414,0,0,0,0,0,0
27.658868,6.40312424,0,0,0,0,0,0
27.66936,6.244998,0,0,0,0,0,0
27.679851,6.244998,0,0,0,0,0,0
27.690343,6.08276253,0,0,0,0,0,0
27.700834,6.164414,0,0,0,0,0,0
27.711326,5.65685425,0,0,0,0,0,0
27.721818,5.74456265,0,0,0,0,0,0
27.732309,6.08276253,0,0,0,0,0,0
27.742801,6.32455532,0,0,0,0,0,0
27.753292,6.08276253,0,0,0,0,0,0
27.763784,6.40312424,0,0,0,0,0,0
27.774276,5.09901951,0,0,0,0,0,0
27.784767,6.244998,0,0,0,0,0,0
27.795259,6.164414,0,0,0,0,0,0
27.80575,7.81024968,0,0,0,0,0,0
27.816242,5.38516481,0,0,0,0,0,0
27.826734,6.4807407,0,0,0,0,0,0
27.837225,6.08276253,0,0,0,0,0,0
27.847717,7,0,0,0,0,0,0
27.858208,6.08276253,0,0,0,0,0,0
27.8687,7.68114575,0,0,0,0,0,0
27.879192,6.08276253,0,0,0,0,0,0
27.889683,6.63324958,0,0,0,0,0,0
27.900175,6.164414,0,0,0,0,0,0
27.910666,6.164414,0,0,0,0,0,0
27.921158,6.164414,0,0,0,0,0,0
27.93165,5.83095189,0,0,0,0,0,0
27.942141,6.8556546,0,0,0,0,0,0
27.952633,5.47722558,0,0,0,0,0,0
27.963124,6.164414,0,0,0,0,0,0
27.973616,6.40312424,0,0,0,0,0,0
27.984108,6,0,0,0,0,0,0
27.994599,5.83095189,0,0,0,0,0,0
28.005091,5.91607978,0,0,0,0,0,0
28.015582,5.91607978,0,0,0,0,0,0
28.026074,6.70820393,0,0,0,0,0,0
28.036566,6.70820393,0,0,0,0,0,0
28.047057,6.63324958,0,0,0,0,0,0
28.057549,6.70820393,0,0,0,0,0,0
28.06804,6.08276253,0,0,0,0,0,0
28.078532,6.4807407,0,0,0,0,0,0
28.089024,6.32455532,0,0,0,0,0,0
28.099515,6.08276253,0,0,0,0,0,0
28.110007,5.91607978,0,0,0,0,0,0
28.120498,6.08276253,0,0,0,0,0,0
28.13099,6.8556546,0,0,0,0,0,0
28.141482,6.55743852,0,0,0,0,0,0
28.151973,6.164414,0,0,0,0,0,0
28.162465,5.38516481,0,0,0,0,0,0
28.172956,7.28010989,0,0,0,0,0,0
28.183448,6.78232998,0,0,0,0,0,0
28.19394,5.91607978,0,0,0,0,0,0
28.204431,6.55743852,0,0,0,0,0,0
28.214923,6.164414,0,0,0,0,0,0
28.225414,5.38516481,0,0,0,0,0,0
28.235906,5.09901951,0,0,0,0,0,0
28.246398,6.08276253,0,0,0,0,0,0
28.256889,6.08276253,0,0,0,0,0,0
28.267381,6.78232998,0,0,0,0,0,0
28.277872,5.56776436,0,0,0,0,0,0
28.288364,5.83095189,0,0,0,0,0,0
28.298856,6.40312424,0,0,0,0,0,0
28.309347,5.56776436,0,0,0,0,0,0
28.319839,6,0,0,0,0,0,0
28.33033,6.55743852,0,0,0,0,0,0
28.340822,6.164414,0,0,0,0,0,0
28.351314,6.32455532,0,0,0,0,0,0
28.361805,6.244998,0,0,0,0,0,0
28.372297,6.55743852,0,0,0,0,0,0
28.382788,6.40312424,0,0,0,0,0,0
28.39328,6.164414,0,0,0,0,0,0
28.403772,6.70820393,0,0,0,0,0,0
28.414263,6.164414,0,0,0,0,0,0
28.424755,6.40312424,0,0,0,0,0,0
28.435246,6.40312424,0,0,0,0,0,0
28.445738,5.19615242,0,0,0,0,0,0
28.45623,5.83095189,0,0,0,0,0,0
28.466721,5.83095189,0,0,0,0,0,0
28.477213,6.78232998,0,0,0,0,0,0
28.487704,6.32455532,0,0,0,0,0,0
28.498196,5.19615242,0,0,0,0,0,0
28.508688,5.65685425,0,0,0,0,0,0
28.519179,6.8556546,0,0,0,0,0,0
28.529671,6.40312424,0,0,0,0,0,0
28.540162,6.08276253,0,0,0,0,0,0
28.550654,6.55743852,0,0,0,0,0,0
28.561146,5.74456265,0,0,0,0,0,0
28.571637,6.244998,0,0,0,0,0,0
28.582129,6,0,0,0,0,0,0
28.59262,6.164414,0,0,0,0,0,0
28.603112,5.56776436,0,0,0,0,0,0
28.613604,6,0,0,0,0,0,0
28.624095,5.74456265,0,0,0,0,0,0
28.634587,5.74456265,0,0,0,0,0,0
28.645078,5.83095189,0,0,0,0,0,0
28.65557,5.91607978,0,0,0,0,0,0
28.666062,5.29150262,0,0,0,0,0,0
28.676553,6.32455532,0,0,0,0,0,0
28.687045,6.70820393,0,0,0,0,0,0
28.697536,6.32455532,0,0,0,0,0,0
28.708028,6.4807407,0,0,0,0,0,0
28.71852,7.28010989,0,0,0,0,0,0
28.729011,5.47722558,0,0,0,0,0,0
28.739503,5.47722558,0,0,0,0,0,0
28.749994,6.40312424,0,0,0,0,0,0
28.760486,6.244998,0,0,0,0,0,0
28.770978,6.55743852,0,0,0,0,0,0
28.781469,5.83095189,0,0,0,0,0,0
28.791961,5.56776436,0,0,0,0,0,0
28.802452,5.74456265,0,0,0,0,0,0
28.812944,5.74456265,0,0,0,0,0,0
28.823436,5.83095189,0,0,0,0,0,0
28.833927,5.38516481,0,0,0,0,0,0
28.844419,6.70820393,0,0,0,0,0,0
28.85491,5.47722558,0,0,0,0,0,0
28.865402,6.08276253,0,0,0,0,0,0
28.875894,6.164414,0,0,0,0,0,0
28.886385,5.56776436,0,0,0,0,0,0
28.896877,5.47722558,0,0,0,0,0,0
28.907368,6.244998,0,0,0,0,0,0
28.91786,6.4807407,0,0,0,0,0,0
28.928352,6.40312424,0,0,0,0,0,0
28.938843,5.74456265,0,0,0,0,0,0
28.949335,5.83095189,0,0,0,0,0,0
28.959826,6,0,0,0,0,0,0
28.970318,6.08276253,0,0,0,0,0,0
28.98081,5.65685425,0,0,0,0,0,0
28.991301,6.92820323,0,0,0,0,0,0
29.001793,6.244998,0,0,0,0,0,0
29.012284,5.19615242,0,0,0,0,0,0
29.022776,6.244998,0,0,0,0,0,0
29.033268,5.91607978,0,0,0,0,0,0
29.043759,6.63324958,0,0,0,0,0,0
29.054251,5.09901951,0,0,0,0,0,0
29.064742,5.83095189,0,0,0,0,0,0
29.075234,6.8556546,0,0,0,0,0,0
29.085726,5.47722558,0,0,0,0,0,0
29.096217,7.28010989,0,0,0,0,0,0
29.106709,6.40312424,0,0,0,0,0,0
29.1172,5.56776436,0,0,0,0,0,0
29.127692,6.244998,0,0,0,0,0,0
29.138184,5.91607978,0,0,0,0,0,0
29.148675,5.83095189,0,0,0,0,0,0
29.159167,5.91607978,0,0,0,0,0,0
29.169658,6.4807407,0,0,0,0,0,0
29.18015,6,0,0,0,0,0,0
29.190642,6.63324958,0,0,0,0,0,0
29.201133,6.08276253,0,0,0,0,0,0
29.211625,5.74456265,0,0,0,0,0,0
29.222116,5.38516481,0,0,0,0,0,0
29.232608,7.28010989,0,0,0,0,0,0
29.2431,5.74456265,0,0,0,0,0,0
29.253591,6.164414,0,0,0,0,0,0
29.264083,6.40312424,0,0,0,0,0,0
29.274574,5.91607978,0,0,0,0,0,0
29.285066,5.65685425,0,0,0,0,0,0
29.295558,5.83095189,0,0,0,0,0,0
29.306049,6.4807407,0,0,0,0,0,0
29.316541,5.91607978,0,0,0,0,0,0
29.327032,6.4807407,0,0,0,0,0,0
29.337524,5.91607978,0,0,0,0,0,0
29.348016,6.55743852,0,0,0,0,0,0
29.358507,5.83095189,0,0,0,0,0,0
29.368999,6.70820393,0,0,0,0,0,0
29.37949,6.08276253,0,0,0,0,0,0
29.389982,6.55743852,0,0,0,0,0,0
29.400474,6.244998,0,0,0,0,0,0
29.410965,6.164414,0,0,0,0,0,0
29.421457,5.47722558,0,0,0,0,0,0
29.431948,6.08276253,0,0,0,0,0,0
29.44244,7.14142843,0,0,0,0,0,0
29.452932,5.29150262,0,0,0,0,0,0
29.463423,6.08276253,0,0,0,0,0,0
29.473915,6.244998,0,0,0,0,0,0
29.484406,6.55743852,0,0,0,0,0,0
29.494898,6.78232998,0,0,0,0,0,0
29.50539,5.74456265,0,0,0,0,0,0
29.515881,5.74456265,0,0,0,0,0,0
29.526373,6.63324958,0,0,0,0,0,0
29.536864,5,0,0,0,0,0,0
29.547356,6.08276253,0,0,0,0,0,0
29.557848,6.4807407,0,0,0,0,0,0
29.568339,7.14142843,0,0,0,0,0,0
29.578831,6.244998,0,0,0,0,0,0
29.589322,6.244998,0,0,0,0,0,0
29.599814,5.83095189,0,0,0,0,0,0
29.610306,6.40312424,0,0,0,0,0,0
29.620797,7,0,0,0,0,0,0
29.631289,6.70820393,0,0,0,0,0,0
29.64178,6.08276253,0,0,0,0,0,0
29.652272,6,0,0,0,0,0,0
29.662764,6.32455532,0,0,0,0,0,0
29.673255,6.40312424,0,0,0,0,0,0
29.683747,5.83095189,0,0,0,0,0,0
29.694238,5.38516481,0,0,0,0,0,0
29.70473,5.83095189,0,0,0,0,0,0
29.715222,6.08276253,0,0,0,0,0,0
29.725713,5,0,0,0,0,0,0
29.736205,5.38516481,0,0,0,0,0,0
29.746696,6.78232998,0,0,0,0,0,0
29.757188,5.83095189,0,0,0,0,0,0
29.76768,6.32455532,0,0,0,0,0,0
29.778171,6.8556546,0,0,0,0,0,0
29.788663,4.89897949,0,0,0,0,0,0
29.799154,5.56776436,0,0,0,0,0,0
29.809646,5.74456265,0,0,0,0,0,0
29.820138,5.83095189,0,0,0,0,0,0
29.830629,6.55743852,0,0,0,0,0,0
29.841121,6.78232998,0,0,0,0,0,0
29.851612,6.63324958,0,0,0,0,0,0
29.862104,5.38516481,0,0,0,0,0,0
29.872596,6.164414,0,0,0,0,0,0
29.883087,5.38516481,0,0,0,0,0,0
29.893579,5.09901951,0,0,0,0,0,0
29.90407,6.32455532,0,0,0,0,0,0
29.914562,7.07106781,0,0,0,0,0,0
29.925054,5.29150262,0,0,0,0,0,0
29.935545,6.164414,0,0,0,0,0,0
29.946037,6,0,0,0,0,0,0
29.956528,6.08276253,0,0,0,0,0,0
29.96702,6.32455532,0,0,0,0,0,0
29.977512,6.40312424,0,0,0,0,0,0
29.988003,6.244998,0,0,0,0,0,0
29.998495,6.32455532,5.97576847,0.590581794,5.97559122,5.97384537,5.97388368,5.97377587
30.008986,6.08276253,5.97929215,0.321668122,5.97911473,5.97736814,5.97740658,5.97729862
30.019478,6.244998,5.98279388,0.512058709,5.98261628,5.98086894,5.98090751,5.9807994
30.02997,6,5.9862734,0.117160562,5.98609563,5.98434753,5.98438623,5.98427796
30.040461,5.56776436,5.98973049,-0.6495892,5.98955254,5.98780367,5.9878425,5.98773408
30.050953,5.65685425,5.9931659,-0.579923828,5.99298776,5.99123812,5.99127708,5.9911685
30.061444,6.32455532,5.99657905,0.572692124,5.99640073,5.99465031,5.9946894,5.99458067
30.071936,5.38516481,5.9999707,-0.784095589,5.9997922,5.99804098,5.99808021,5.99797132
30.082428,5.91607978,6.00334061,-0.29539943,6.00316192,6.0014099,6.00144927,6.00134021
30.092919,6.92820323,6.00668854,0.959955566,6.00650967,6.00475684,6.00479634,6.00468712
30.103411,5.74456265,6.01001523,-0.515220912,6.00983617,6.00808252,6.00812216,6.00801279
30.113902,4.47213595,6.01332014,-1.24144439,6.01314089,6.01138641,6.01142619,6.01131665
30.124394,6.244998,6.01660398,0.477905872,6.01642453,6.01466922,6.01470914,6.01459943
30.134886,5.65685425,6.01986651,-0.602504992,6.01968688,6.01793072,6.01797078,6.01786091
30.145377,7.07106781,6.02310754,1.02369931,6.02292771,6.0211707,6.0212109,6.02110085
30.155869,5.91607978,6.02632774,-0.332036082,6.02614772,6.02438985,6.02443019,6.02431998
30.16636,6,6.02952661,-0.171833087,6.02934639,6.02758765,6.02762813,6.02751775
30.176852,5.09901951,6.03270483,-0.966273935,6.03252441,6.0307648,6.03080542,6.03069487
30.187344,5.29150262,6.03586219,-0.862762752,6.03568157,6.03392107,6.03396184,6.03385111
30.197835,6.08276253,6.03899847,0.209198622,6.03881764,6.03705625,6.03709716,6.03698627
30.208327,5.74456265,6.04211435,-0.545483,6.04193332,6.04017103,6.04021209,6.04010101
30.218818,6.32455532,6.04520933,0.528531924,6.04502809,6.04326489,6.04330609,6.04319485
30.22931,5.74456265,6.04828407,-0.551109266,6.04810263,6.04633851,6.04637986,6.04626844
30.239802,6.40312424,6.05133837,0.593115394,6.05115672,6.04939167,6.04943317,6.04932157
30.250293,5.56776436,6.05437201,-0.697572685,6.05419016,6.05242417,6.05246582,6.05235404
30.260785,6,6.05738567,-0.239553062,6.0572036,6.05543667,6.05547848,6.05536651
30.271276,5.74456265,6.06037884,-0.561975262,6.06019656,6.05842868,6.05847064,6.05835849
30.281768,5.19615242,6.06335218,-0.931235608,6.06316969,6.06140085,6.06144295,6.06133063
30.29226,6.164414,6.06630548,0.313222797,6.06612277,6.06435296,6.06439523,6.06428271
30.302751,5.91607978,6.06923855,-0.391355037,6.06905562,6.06728484,6.06732725,6.06721455
30.313243,5.91607978,6.07215202,-0.395059784,6.07196887,6.0701971,6.07023968,6.07012679
30.323734,5.74456265,6.07504541,-0.574876304,6.07486204,6.07308928,6.07313201,6.07301894
30.334226,7.07106781,6.07791936,0.996568336,6.07773577,6.07596201,6.0760049,6.07589163
30.344718,6.55743852,6.08094395,0.690285864,6.08058986,6.07881509,6.07902847,6.07874468
30.355209,6.78232998,6.08377852,0.835793913,6.08342411,6.08164833,6.08186196,6.08157788
30.365701,6.08276253,6.08659387,-0.0618978385,6.08623915,6.08446234,6.08467622,6.08439186
30.376192,6.92820323,6.08938955,0.915867718,6.08903451,6.08725667,6.0874708,6.08718616
30.386684,5.65685425,6.09216617,-0.659781722,6.0918108,6.09003192,6.09024631,6.08996138
30.397176,6.08276253,6.09492353,-0.11027693,6.09456784,6.09278791,6.09300256,6.09271733
30.407667,6.164414,6.09766145,0.258365147,6.09730544,6.09552445,6.09573936,6.09545384
30.418159,7.07106781,6.10038053,0.985234631,6.10002419,6.09824214,6.0984573,6.09817149
30.42865,5.74456265,6.10308033,-0.598763462,6.10272365,6.10094053,6.10115596,6.10086985
30.439142,5.47722558,6.10576143,-0.792802532,6.10540441,6.10362022,6.10383591,6.1035495
30.449634,5.74456265,6.10842365,-0.603208922,6.1080663,6.10628101,6.10649697,6.10621026
30.460125,6.40312424,6.11106681,0.540423375,6.11070912,6.10892274,6.10913897,6.10885195
30.470617,5.74456265,6.1136915,-0.60755975,6.11333346,6.11154598,6.11176247,6.11147515
30.481108,5.83095189,6.11629727,-0.53417729,6.1159389,6.1141503,6.11436707,6.11407944
30.4916,5.83095189,6.11888471,-0.536593716,6.11852599,6.11673627,6.11695331,6.11666538
30.502092,6.55743852,6.12145363,0.660291519,6.12109456,6.11930372,6.11952104,6.11923279
30.512583,5.83095189,6.12400387,-0.541342755,6.12364445,6.12185247,6.12207007,6.1217815
30.523075,6.32455532,6.12653599,0.444993635,6.12617621,6.12438309,6.12460096,6.12431208
30.533566,6.4807407,6.12904956,0.593035531,6.12868943,6.12689516,6.12711331,6.12682411
30.544058,6.70820393,6.13154514,0.759380531,6.13118465,6.12938922,6.12960766,6.12931814
30.55455,6.40312424,6.13402257,0.518750105,6.13366171,6.13186512,6.13208384,6.131794
30.565041,5.83095189,6.13648167,-0.552747477,6.13612045,6.13432269,6.13454169,6.13425153
30.575533,4.79583152,6.13892299,-1.15891823,6.13856141,6.13676246,6.13698175,6.13669126
30.586024,7.21110255,6.14134612,1.0342903,6.14098417,6.13918404,6.13940362,6.1391128
30.596516,5.74456265,6.14375161,-0.631814028,6.14338929,6.14158796,6.14180784,6.14151668
30.607008,6.92820323,6.14613929,0.884343792,6.14577659,6.14397406,6.14419423,6.14390274
30.617499,6.08276253,6.14850899,-0.256410732,6.14814592,6.14634217,6.14656264,6.14627082
30.627991,6.32455532,6.15086125,0.416766206,6.1504978,6.14869283,6.1489136,6.14862143
30.638482,6.08276253,6.15319567,-0.265392435,6.15283185,6.15102565,6.15124672,6.15095421
30.648974,6.164414,6.15551278,0.0943462844,6.15514857,6.15334114,6.15356251,6.15326966
30.659466,5.91607978,6.15781241,-0.491663126,6.15744782,6.15563914,6.15586081,6.15556762
30.669957,5.74456265,6.16009442,-0.64461754,6.15972943,6.1579195,6.15814148,6.15784794
30.680449,6.70820393,6.1623593,0.738812988,6.16199392,6.16018274,6.16040503,6.16011114
30.69094,6.32455532,6.16460669,0.39993578,6.16424092,6.16242847,6.16265107,6.16235683
30.701432,5.56776436,6.16683709,-0.773997884,6.16647092,6.16465719,6.16488011,6.16458551
30.711924,6.55743852,6.16905034,0.623207981,6.16868377,6.16686876,6.16709199,6.16679704
30.722415,5.38516481,6.1712463,-0.886612367,6.17087933,6.16906303,6.16928657,6.16899126
30.732907,6.32455532,6.17342545,0.388754257,6.17305808,6.17124048,6.17146434,6.17116867
30.743398,5.83095189,6.17558744,-0.587056682,6.17521967,6.17340077,6.17362495,6.17332891
30.75389,5.83095189,6.17773275,-0.588881023,6.17736457,6.17554436,6.17576886,6.17547246
30.764382,7.21110255,6.17986124,1.01550052,6.17949264,6.17767111,6.17789594,6.17759917
30.774873,5.83095189,6.18197277,-0.592470144,6.18160375,6.1797809,6.18000605,6.17970891
30.785365,6.92820323,6.18406779,0.862632852,6.18369836,6.18187417,6.18209966,6.18180214
30.795856,6.164414,6.18614599,-0.147417715,6.18577614,6.1839506,6.18417642,6.18387853
30.806348,5.83095189,6.1882078,-0.597708883,6.18783753,6.18601065,6.1862368,6.18593853
30.81684,5.09901951,6.19025311,-1.04462127,6.18988241,6.18805417,6.18828065,6.18798201
30.827331,7.28010989,6.19228177,1.04298999,6.19191065,6.19008104,6.19030786,6.19000883
30.837823,5.91607978,6.19429424,-0.52746038,6.19392268,6.1920917,6.19231886,6.19201945
30.848314,5.29150262,6.19629018,-0.951203218,6.1959182,6.19408584,6.19431334,6.19401354
30.858806,6.63324958,6.19827006,0.659529775,6.19789763,6.19606389,6.19629173,6.19599154
30.869298,6.55743852,6.20023372,0.597666131,6.19986086,6.19802572,6.19825391,6.19795332
30.879789,7.28010989,6.20218105,1.03823352,6.20180775,6.1999712,6.20019975,6.19989876
30.890281,5.91607978,6.20411249,-0.536686782,6.20373874,6.20190078,6.20212968,6.20182829
30.900772,6.55743852,6.20602771,0.592799136,6.20565351,6.20381414,6.20404339,6.20374161
30.911264,6.08276253,6.20792715,-0.353786116,6.2075525,6.2057117,6.2059413,6.20563912
30.921756,6.164414,6.20981068,-0.213064949,6.20943558,6.20759334,6.20782331,6.20752072
30.932247,5.65685425,6.21167818,-0.74486504,6.21130262,6.20945895,6.20968927,6.20938627
30.942739,5.47722558,6.21353006,-0.858081867,6.21315405,6.21130893,6.21153961,6.21123621
30.95323,6.32455532,6.21536604,0.330438005,6.21498957,6.21314299,6.21337404,6.21307022
30.963722,6.70820393,6.21718653,0.700726342,6.21680959,6.21496155,6.21519296,6.21488873
30.974214,7,6.21899139,0.883746916,6.21861398,6.21676447,6.21699626,6.2166916
30.984705,5.56776436,6.22078052,-0.808094151,6.22040264,6.21855165,6.21878381,6.21847874
30.995197,6.08276253,6.22255432,-0.373887401,6.22217597,6.22032349,6.22055603,6.22025053
31.005688,5.91607978,6.2243125,-0.555187105,6.22393368,6.22207971,6.22231262,6.22200669
31.01618,6.244998,6.22605547,0.137631867,6.22567616,6.22382069,6.22405398,6.22374763
31.026672,6.08276253,6.2277831,-0.38081566,6.22740331,6.22554633,6.22578,6.22547322
31.037163,5.47722558,6.22949529,-0.867334832,6.22911502,6.22725652,6.22749058,6.22718335
31.047655,7.41619849,6.23119242,1.08857984,6.23081166,6.22895164,6.22918608,6.22887842
31.058146,6.08276253,6.23287422,-0.387442501,6.23249297,6.23063142,6.23086626,6.23055815
31.068638,5.91607978,6.23454108,-0.564323749,6.23415933,6.23229625,6.23253147,6.23222293
31.07913,6.63324958,6.23619287,0.630124358,6.23581064,6.233946,6.23418162,6.23387263
31.089621,7.28010989,6.23782952,1.02092134,6.23744678,6.23558059,6.2358166,6.23550717
31.100113,6,6.23945137,-0.489337682,6.23906813,6.23720038,6.23743679,6.2371269
31.110604,6.4807407,6.24105817,0.48957382,6.24067442,6.23880511,6.23904192,6.23873158
31.121096,6.32455532,6.24265029,0.286190543,6.24226604,6.24039514,6.24063236,6.24032156
31.131588,6.164414,6.24422763,-0.282513056,6.24384286,6.24197038,6.24220801,6.24189675
31.142079,6.78232998,6.24579009,0.732488838,6.2454048,6.24353073,6.24376877,6.24345705
31.152571,6,6.24733801,-0.497330889,6.24695221,6.24507654,6.24531499,6.2450028
31.163062,5,6.24887117,-1.11752905,6.24848484,6.24660757,6.24684644,6.24653378
31.173554,5.91607978,6.2503899,-0.578195572,6.25000305,6.24812416,6.24836345,6.24805032
31.184046,6.40312424,6.25189411,0.388883174,6.25150673,6.24962622,6.24986593,6.24955232
31.194537,5.47722558,6.25338372,-0.880998378,6.2529958,6.25111367,6.2513538,6.25103971
31.205029,5.91607978,6.25485905,-0.582047476,6.2544706,6.25258682,6.25282738,6.25251282
31.21552,6.4807407,6.25631988,0.473730748,6.25593089,6.25404547,6.25428646,6.25397141
31.226012,5.91607978,6.25776653,-0.584539776,6.257377,6.25548993,6.25573135,6.25541582
31.236504,6.55743852,6.25919893,0.546113171,6.25880886,6.25692013,6.25716198,6.25684595
31.246995,5.56776436,6.26061698,-0.83237769,6.26022636,6.25833596,6.25857826,6.25826173
31.257487,6.244998,6.26202101,-0.13047227,6.26162984,6.25973777,6.2599805,6.25966348
31.267978,6.164414,6.2634108,-0.314637568,6.26301907,6.26112532,6.2613685,6.26105098
31.27847,5.09901951,6.26478667,-1.07970698,6.26439438,6.26249894,6.26274256,6.26242454
31.288962,7.54983444,6.26614853,1.13299863,6.26575568,6.26385854,6.26410261,6.26378409
31.299453,6.55743852,6.2674963,0.538462831,6.26710289,6.26520404,6.26544857,6.26512953
31.309945,6.164414,6.2688303,-0.323135109,6.26843631,6.26653576,6.26678074,6.26646119
31.320436,5.83095189,6.27015032,-0.66272047,6.26975576,6.26785348,6.26809892,6.26777886
31.330928,6.4807407,6.27145665,0.457475735,6.27106151,6.26915751,6.26940342,6.26908283
31.34142,5.29150262,6.27274923,-0.990578923,6.27235351,6.27044777,6.27069414,6.27037303
31.351911,5.91607978,6.27402797,-0.598287712,6.27363167,6.27172419,6.27197103,6.27164939
31.362403,6,6.27529318,-0.524683882,6.27489629,6.27298706,6.27323437,6.2729122
31.372894,5.47722558,6.27654465,-0.894046462,6.27614717,6.27423619,6.27448397,6.27416127
31.383386,6.63324958,6.27778268,0.596210449,6.27738461,6.27547186,6.27572012,6.27539689
31.393878,6.4807407,6.2790072,0.449147528,6.27860852,6.276694,6.27694274,6.27661897
31.404369,5.38516481,6.28021813,-0.946072578,6.27981885,6.27790255,6.27815178,6.27782746
31.414861,6.63324958,6.28141576,0.593155817,6.28101587,6.27909778,6.2793475,6.27902264
31.425352,6.55743852,6.2825999,0.524250535,6.28219941,6.28027952,6.28052973,6.28020431
31.435844,6.8556546,6.28377083,0.75622997,6.28336973,6.28144804,6.28169874,6.28137277
31.446336,6.08276253,6.28492849,-0.449628686,6.28452676,6.28260326,6.28285446,6.28252793
31.456827,7.14142843,6.2860728,0.924854382,6.28567045,6.28374513,6.28399684,6.28366975
31.467319,5.38516481,6.28720404,-0.949757459,6.28680107,6.28487392,6.28512613,6.28479847
31.47781,6.70820393,6.28832203,0.647982946,6.28791843,6.28598945,6.28624217,6.28591394
31.488302,6.08276253,6.28942704,-0.45460369,6.28902281,6.28709199,6.28734522,6.28701642
31.498794,5.56776436,6.29051901,-0.850149779,6.29011414,6.28818147,6.28843521,6.28810584
31.509285,6.70820393,6.29159787,0.645450276,6.29119236,6.28925783,6.28951209,6.28918214
31.519777,6.4807407,6.29266389,0.433678235,6.29225772,6.29032134,6.29057612,6.29024558
31.530268,6.55743852,6.29371689,0.513538345,6.29331008,6.29137182,6.29162713,6.291296
31.54076,6.55743852,6.29475714,0.512524524,6.29434967,6.29240953,6.29266537,6.29233365
31.551252,7.21110255,6.29578456,0.956722524,6.29537644,6.29343441,6.29369078,6.29335847
31.561743,6.63324958,6.29679912,0.580043499,6.29639033,6.29444641,6.29470332,6.2943704
31.572235,6.8556546,6.29780105,0.746895946,6.29739159,6.29544576,6.29570322,6.2953697
31.582726,6,6.2987902,-0.546617048,6.29838007,6.29643233,6.29669033,6.2963562
31.593218,5.74456265,6.2997668,-0.74512023,6.299356,6.29740635,6.29766489,6.29733015
31.60371,6.78232998,6.30073082,0.693973463,6.30031933,6.29836775,6.29862685,6.29829149
31.614201,5.74456265,6.30168219,-0.746404408,6.30127002,6.2993165,6.29957616,6.29924018
31.624693,5.47722558,6.30262114,-0.908512834,6.30220828,6.30025283,6.30051305,6.30017644
31.635184,6.4807407,6.30354755,0.420943165,6.303134,6.30117659,6.30143738,6.30110014
31.645676,6.32455532,6.30446163,0.141752227,6.30404738,6.30208802,6.30234937,6.3020115
31.656168,6.8556546,6.30536333,0.741816199,6.30494837,6.30298705,6.30324898,6.30291047
31.666659,6,6.30625261,-0.55340095,6.30583695,6.30387365,6.30413616,6.303797
31.677151,6.4807407,6.30712969,0.416666542,6.30671332,6.30474804,6.30501113,6.30467133
31.687642,7.41619849,6.30799444,1.05271271,6.30757735,6.30561009,6.30587376,6.30553331
31.698134,7.07106781,6.30884707,0.873052541,6.30842926,6.30646,6.30672426,6.30638315
31.708626,6.244998,6.30968754,-0.254341393,6.309269,6.30729774,6.3075626,6.30722083
31.719117,5.83095189,6.31051581,-0.692505538,6.31009654,6.30812327,6.30838873,6.30804629
31.729609,6.164414,6.31133209,-0.383298952,6.31091208,6.30893679,6.30920285,6.30885974
31.7401,6.08276253,6.31213625,-0.478929769,6.3117155,6.30973818,6.31000485,6.30966107
31.750592,7.41619849,6.3129285,1.0503666,6.312507,6.31052765,6.31079493,6.31045047
31.761084,7.28010989,6.3137088,0.983057013,6.31328655,6.31130515,6.31157305,6.3112279
31.771575,6.63324958,6.31447711,0.564599387,6.31405411,6.31207066,6.31233918,6.31199334
31.782067,6.4807407,6.31523363,0.406825595,6.31480986,6.31282436,6.31309351,6.31274698
31.792558,6.63324958,6.31597826,0.56326843,6.31555372,6.31356615,6.31383593,6.3134887
31.80305,6.55743852,6.31671116,0.490639746,6.31628586,6.31429621,6.31456662,6.31421869
31.813542,6,6.31743233,-0.56341133,6.31700624,6.31501451,6.31528557,6.31493692
31.824033,6.70820393,6.31814172,0.62454961,6.31771485,6.31572103,6.31599273,6.31564337
31.834525,6.244998,6.31883951,-0.271737952,6.31841185,6.31641594,6.31668829,6.31633821
31.845016,6.92820323,6.31952562,0.780177935,6.31909717,6.31709914,6.31737215,6.31702135
31.855508,5.83095189,6.32020021,-0.699462876,6.31977096,6.31777082,6.31804449,6.31769295
31.866,6.70820393,6.32086326,0.622366996,6.3204332,6.31843094,6.31870527,6.318353
31.876491,6,6.32151474,-0.567022695,6.32108387,6.31907948,6.31935448,6.31900147
31.886983,6.40312424,6.32215482,0.284551262,6.32172313,6.31971661,6.31999229,6.31963853
31.897474,6.4807407,6.32278341,0.397438403,6.32235091,6.32034223,6.3206186,6.32026409
31.907966,6.8556546,6.32340069,0.729557341,6.32296735,6.32095652,6.32123357,6.32087831
31.918458,7.21110255,6.32400662,0.941857705,6.32357244,6.32155946,6.3218372,6.32148117
31.928949,6.164414,6.32460118,-0.400233904,6.32416617,6.32215101,6.32242945,6.32207265
31.939441,6.32455532,6.32518454,-0.0250841933,6.32474868,6.32273134,6.32301049,6.32265291
31.949932,6.55743852,6.32575661,0.481333474,6.3253199,6.32330038,6.32358023,6.32322188
31.960424,6.40312424,6.32631755,0.277140193,6.32587998,6.32385827,6.32413883,6.32377969
31.970916,5.56776436,6.32686734,-0.871265159,6.32642891,6.32440499,6.32468628,6.32432634
31.981407,7.14142843,6.32740597,0.902231934,6.32696666,6.32494053,6.32522255,6.32486181
31.991899,6.55743852,6.32793357,0.479066754,6.32749339,6.32546504,6.32574779,6.32538625
32.00239,6.63324958,6.32845009,0.552086489,6.32800902,6.32597845,6.32626193,6.32589958
32.012882,6.32455532,6.32895566,-0.0663350579,6.3285137,6.3264809,6.32676512,6.32640196
32.023374,7.54983444,6.32945027,1.10470999,6.32900742,6.32697237,6.32725734,6.32689335
32.033865,6,6.32993391,-0.574398742,6.32949016,6.32745286,6.32773859,6.32737377
32.044357,5.65685425,6.33040672,-0.820702425,6.32996205,6.32792249,6.32820899,6.32784333
32.054848,6.8556546,6.33086863,0.724421125,6.33042305,6.32838122,6.32866849,6.32830198
32.06534,6.92820323,6.33131978,0.772582324,6.33087327,6.32882917,6.32911721,6.32874986
32.075832,6.4807407,6.33176016,0.385979972,6.33131272,6.32926633,6.32955515,6.32918694
32.086323,6.244998,6.33218976,-0.295282511,6.33174138,6.3296927,6.32998231,6.32961324
32.096815,6.55743852,6.3326087,0.474162231,6.33215938,6.3301084,6.3303988,6.33002886
32.107306,6.40312424,6.33301694,0.264777817,6.33256667,6.33051338,6.33080459,6.33043377
32.117798,6.55743852,6.3334146,0.473311656,6.33296336,6.33090776,6.33119977,6.33082807
32.12829,5.91607978,6.33380167,-0.646314076,6.33334946,6.33129153,6.33158436,6.33121177
32.138781,6.164414,6.33417815,-0.412024446,6.33372497,6.3316647,6.33195836,6.33158486
32.149273,6.55743852,6.33454415,0.472116911,6.33408998,6.33202738,6.33232186,6.33194746
32.159764,6.40312424,6.33489963,0.261198402,6.33444448,6.33237952,6.33267484,6.33229953
32.170256,5.29150262,6.33524471,-1.02163696,6.33478856,6.33272124,6.33301741,6.33264117
32.180748,6.164414,6.33557937,-0.41372137,6.33512222,6.33305254,6.33334955,6.33297239
32.191239,5.65685425,6.33590364,-0.824044531,6.33544547,6.33337341,6.33367129,6.33329318
32.201731,6.08276253,6.3362176,-0.503443211,6.3357584,6.33368397,6.33398271,6.33360366
32.212222,6,6.33652122,-0.580104495,6.336061,6.33398417,6.33428379,6.33390379
32.222714,6.32455532,6.33681462,-0.110721702,6.33635335,6.33427412,6.33457462,6.33419366
32.233206,7.07106781,6.33709778,0.856720513,6.33663547,6.33455383,6.33485521,6.33447328
32.243697,7.07106781,6.33737071,0.856561205,6.33690735,6.33482329,6.33512558,6.33474267
32.254189,6.164414,6.33763352,-0.416196484,6.33716909,6.3350826,6.3353858,6.3350019
32.26468,6.8556546,6.33788617,0.719561277,6.33742067,6.33533175,6.33563586,6.33525097
32.275172,6.63324958,6.33812876,0.543250242,6.33766217,6.33557081,6.33587584,6.33548995
32.285664,5.91607978,6.33836128,-0.649831903,6.33789361,6.3357998,6.33610576,6.33571886
32.296155,6.70820393,6.33858377,0.607963948,6.338115,6.33601872,6.33632562,6.3359377
32.306647,5.56776436,6.33879629,-0.878084237,6.33832641,6.33622767,6.33653551,6.33614657
32.317138,5.91607978,6.33899884,-0.650322268,6.33852784,6.33642662,6.33673542,6.33634544
32.32763,6,6.33919148,-0.582401478,6.33871936,6.33661565,6.33692542,6.33653439
32.338122,6.70820393,6.33937424,0.607313503,6.33890098,6.33679478,6.33710552,6.33671343
32.348613,5.83095189,6.33954713,-0.713158634,6.33907272,6.33696402,6.33727575,6.33688259
32.359105,6.164414,6.33971022,-0.418683914,6.33923466,6.33712344,6.33743616,6.33704193
32.369596,5.47722558,6.33986351,-0.928783042,6.33938678,6.33727304,6.33758677,6.33719146
32.380088,6.78232998,6.34000707,0.665073615,6.33952916,6.33741289,6.33772763,6.33733122
32.39058,6.244998,6.34014091,-0.30845244,6.33966181,6.337543,6.33785877,6.33746125
32.401071,7,6.34026505,0.812240699,6.33978475,6.3376634,6.3379802,6.33758157
32.411563,6.4807407,6.34037955,0.374648033,6.33989805,6.33777414,6.33809198,6.33769222
32.422054,6.63324958,6.34048442,0.541077773,6.3400017,6.33787523,6.33819412,6.33779323
32.432546,5.74456265,6.34057972,-0.772021422,6.34009577,6.33796673,6.33828668,6.33788464
32.443038,6.70820393,6.34066547,0.606249505,6.34018028,6.33804865,6.33836968,6.33796648
32.453529,5.91607978,6.34074169,-0.651660883,6.34025525,6.33812103,6.33844314,6.33803878
32.464021,6.55743852,6.34080843,0.465435381,6.34032073,6.33818391,6.33850711,6.33810157
32.474512,7.21110255,6.34086571,0.932864856,6.34037673,6.3382373,6.33856161,6.33815488
32.485004,7.48331477,6.34091358,1.0688317,6.34042331,6.33828126,6.33860669,6.33819876
32.495496,6.55743852,6.34095205,0.465281071,6.34046049,6.33831581,6.33864237,6.33823322
32.505987,6.32455532,6.34098116,-0.128163346,6.34048829,6.33834098,6.33866868,6.3382583
32.516479,6.08276253,6.34100096,-0.508171649,6.34050676,6.33835681,6.33868565,6.33827404
32.52697,7,6.34101145,0.811781096,6.34051592,6.33836332,6.33869333,6.33828047
32.537462,5.83095189,6.34101269,-0.714185406,6.34051581,6.33836054,6.33869173,6.33827761
32.547954,6.4807407,6.34100469,0.373812792,6.34050646,6.33834852,6.33868089,6.3382655
32.558445,6.32455532,6.3409875,-0.128188082,6.3404879,6.33832727,6.33866085,6.33824417
32.568937,6.63324958,6.34096115,0.540637064,6.34046015,6.33829684,6.33863162,6.33821364
32.579428,6.8556546,6.34092566,0.717446126,6.34042326,6.33825725,6.33859326,6.33817397
32.58992,6.244998,6.34088106,-0.309649899,6.34037725,6.33820853,6.33854578,6.33812516
32.600412,6.4807407,6.34082739,0.374049877,6.34032216,6.33815072,6.33848922,6.33806726
32.610903,6.8556546,6.34076468,0.717558303,6.34025801,6.33808384,6.33842361,6.3380003
32.621395,6.78232998,6.34069296,0.664557765,6.34018483,6.33800793,6.33834898,6.3379243
32.631886,6.78232998,6.34061227,0.664618475,6.34010267,6.33792302,6.33826536,6.3378393
32.642378,6.08276253,6.34052262,-0.507700784,6.34001154,6.33782914,6.33817278,6.33774532
32.65287,6.63324958,6.34042405,0.541133563,6.33991147,6.3377263,6.33807127,6.3376424
32.663361,6.8556546,6.3403166,0.717870461,6.33980251,6.33761457,6.33796088,6.33753058
32.673853,7.21110255,6.34020029,0.933221443,6.33968467,6.33749395,6.3378416,6.33740987
32.684344,6.244998,6.34007526,-0.308346013,6.339558,6.33736448,6.3377136,6.33728032
32.694836,6.55743852,6.33994133,0.466365947,6.3394225,6.33722619,6.33757669,6.33714193
32.705328,6.55743852,6.33979863,0.466518914,6.33927823,6.3370791,6.337431,6.33699475
32.715819,6.8556546,6.33964721,0.718336547,6.33912521,6.33692327,6.33727658,6.33683883
32.726311,6.92820323,6.33948706,0.767278415,6.33896346,6.33675869,6.33711343,6.33667416
32.736802,5.83095189,6.33931826,-0.712998155,6.33879303,6.33658542,6.33694161,6.3365008
32.747294,6.63324958,6.3391408,0.542317968,6.33861393,6.33640346,6.33676111,6.33631875
32.757786,6.32455532,6.33895472,-0.119997518,6.33842619,6.33621287,6.33657199,6.33612806
32.768277,6.4807407,6.33876008,0.376803157,6.33822986,6.33601367,6.3363743,6.33592878
32.778769,6.40312424,6.33855686,0.254101119,6.33802494,6.33580588,6.33616802,6.33572089
32.78926,6.70820393,6.33834513,0.608160177,6.3378115,6.33558955,6.33595322,6.33550447
32.799752,5.38516481,6.33812489,-0.976196743,6.33758952,6.33536467,6.3357299,6.3352795
32.810244,7.48331477,6.33789617,1.07024231,6.33735905,6.3351313,6.33549809,6.33504603
32.820735,6.40312424,6.33765905,0.255861665,6.33712015,6.33488948,6.33525786,6.33480412
32.831227,7.48331477,6.33741348,1.07046779,6.33687279,6.3346392,6.33500919,6.33455375
32.841718,6.164414,6.33715957,-0.415626713,6.33661706,6.33438053,6.33475215,6.33429499
32.85221,6.4807407,6.33689727,0.379266956,6.33635293,6.33411346,6.33448672,6.33402782
32.862702,5.56776436,6.33662666,-0.876847932,6.33608046,6.33383803,6.33421297,6.3337523
32.873193,6.32455532,6.33634778,-0.108593071,6.3357997,6.33355431,6.33393093,6.33346848
32.883685,6.8556546,6.3360606,0.720828689,6.33551063,6.33326226,6.33364059,6.33317633
32.894176,6.92820323,6.33576522,0.769699949,6.33521333,6.33296197,6.33334204,6.33287595
32.904668,6.92820323,6.3354616,0.769897156,6.33490776,6.33265341,6.33303523,6.3325673
32.91516,6.8556546,6.3351498,0.721460185,6.334594,6.33233664,6.33272024,6.33225044
32.925651,7,6.33482988,0.81557962,6.33427209,6.33201172,6.33239712,6.33192542
32.936143,6.55743852,6.33450181,0.472161743,6.33394201,6.33167861,6.33206583,6.33159221
32.946634,5.56776436,6.33416568,-0.875443497,6.33360383,6.33133741,6.33172647,6.33125091
32.957126,6.4807407,6.33382145,0.38330047,6.33325754,6.33098807,6.331379,6.33090147
32.967618,8.06225775,6.33346918,1.31483405,6.33290318,6.33063066,6.33102349,6.33054396
32.978109,6.63324958,6.33310893,0.547850934,6.33254082,6.33026523,6.33065999,6.33017844
32.988601,5.74456265,6.33274067,-0.766927654,6.33217042,6.32989176,6.33028846,6.32980487
32.999092,6.4807407,6.3323645,0.385196318,6.33179208,6.32951033,6.329909,6.32942334
33.009584,6.32455532,6.33198035,-0.0861686379,6.33140574,6.3291209,6.32952157,6.32903381
33.020076,6.32455532,6.33158832,-0.0838629534,6.33101148,6.32872353,6.32912623,6.32863635
33.030567,6.40312424,6.33118844,0.268208489,6.33060936,6.32831829,6.32872304,6.32823101
33.041059,7.41619849,6.33078069,1.04183386,6.33019933,6.32790513,6.32831197,6.32781775
33.05155,7,6.33036516,0.818312189,6.32978149,6.32748416,6.32789311,6.32739668
33.062042,6.164414,6.32994181,-0.406851082,6.32935579,6.32705531,6.3274664,6.32696774
33.072534,6.08276253,6.32951069,-0.496737515,6.32892231,6.32661867,6.32703193,6.326531
33.083025,6,6.32907188,-0.573647871,6.3284811,6.32617429,6.32658976,6.32608652
33.093517,6.55743852,6.32862532,0.478344228,6.32803211,6.32572212,6.32613982,6.32563425
33.104008,6.08276253,6.32817113,-0.495387324,6.32757545,6.32526228,6.32568224,6.3251743
33.1145,6.244998,6.32770924,-0.28759563,6.32711106,6.32479469,6.32521696,6.32470661
33.124992,6.32455532,6.32723973,-0.0518113151,6.32663902,6.32431943,6.32474403,6.32423126
33.135483,5.83095189,6.32676267,-0.70413832,6.32615938,6.32383658,6.32426355,6.3237483
33.145975,6,6.32627799,-0.571207483,6.3256721,6.32334606,6.32377543,6.32325769
33.156466,7.28010989,6.32578581,0.976895121,6.32517728,6.32284801,6.32327981,6.32275952
33.166958,6.4807407,6.32528607,0.394277349,6.32467486,6.32234233,6.32277662,6.32225375
33.17745,7.54983444,6.32477884,1.1068223,6.32416491,6.32182912,6.32226592,6.32174044
33.187941,7.61577311,6.32426419,1.13644574,6.32364751,6.32130845,6.32174779,6.32121966
33.198433,6.78232998,6.32374206,0.6771912,6.32312259,6.32078024,6.32122217,6.32069134
33.208924,7,6.32321257,0.822670912,6.32259026,6.32024461,6.32068918,6.32015562
33.219416,6.4807407,6.32267565,0.397573959,6.32205046,6.3197015,6.32014874,6.31961241
33.229908,6.164414,6.32213136,-0.39713645,6.32150326,6.31915098,6.31960094,6.31906178
33.240399,6.55743852,6.3215798,0.485652883,6.32094873,6.31859313,6.31904584,6.31850383
33.250891,6.164414,6.32102088,-0.395735873,6.32038681,6.31802787,6.31848338,6.31793846
33.261382,6.4807407,6.32045474,0.400357286,6.31981761,6.31745532,6.31791367,6.31736581
33.271874,6.4807407,6.31988129,0.401072816,6.31924107,6.31687541,6.31733666,6.31678579
33.282366,5.83095189,6.31930062,-0.698819524,6.31865725,6.31628822,6.3167524,6.3161985
33.292857,7.21110255,6.31871281,0.944663827,6.31806624,6.31569382,6.31616099,6.31560399
33.303349,6.164414,6.31811776,-0.392050707,6.31746795,6.31509214,6.31556234,6.3150022
33.31384,6.08276253,6.31751563,-0.484513256,6.31686252,6.3144833,6.31495659,6.31439326
33.324332,5.65685425,6.31690631,-0.812435882,6.31624985,6.31386722,6.31434365,6.31377707
33.334824,5.19615242,6.3162899,-1.05836548,6.31563004,6.31324398,6.3137236,6.31315373
33.345315,6.55743852,6.31566649,0.491703201,6.31500317,6.31261367,6.31309653,6.3125233
33.355807,6.4807407,6.31503597,0.40706846,6.31436914,6.31197618,6.31246234,6.31188571
33.366298,6.78232998,6.31439849,0.684055181,6.31372809,6.31133167,6.31182119,6.3112411
33.37679,6.78232998,6.31375396,0.684526127,6.31307993,6.31068004,6.31117298,6.31058936
33.387282,5.29150262,6.31310247,-1.01074223,6.31242475,6.31002137,6.31051778,6.30993058
33.397773,6.244998,6.3124441,-0.25970388,6.31176263,6.30935575,6.3098557,6.30926485
33.408265,6.63324958,6.31177876,0.56698397,6.31109347,6.30868308,6.30918663,6.30859207
33.418756,6.55743852,6.31110659,0.496318379,6.31041742,6.30800351,6.30851073,6.30791239
33.429248,5.91607978,6.3104275,-0.627971109,6.30973438,6.30731694,6.30782788,6.30722571
33.43974,6.55743852,6.30974157,0.497691628,6.30904443,6.30662344,6.30713819,6.30653211
33.450231,6.4807407,6.30904889,0.414357098,6.30834767,6.30592313,6.30644174,6.30583168
33.460723,6.244998,6.30834937,-0.251696983,6.30764399,6.30521587,6.30573843,6.30512432
33.471214,6.08276253,6.30764315,-0.474215799,6.30693354,6.30450185,6.30502842,6.30441018
33.481706,6.78232998,6.30693014,0.689492454,6.30621621,6.30378093,6.30431159,6.30368915
33.492198,6.4807407,6.30621042,0.417768216,6.3054921,6.30305321,6.30358805,6.30296132
33.502689,6.08276253,6.30548408,-0.471933842,6.3047613,6.30231879,6.30285788,6.30222679
33.513181,7.48331477,6.30475102,1.08561676,6.30402369,6.30157755,6.30212097,6.30148544
33.523672,6.32455532,6.3040114,0.143331493,6.30327943,6.30082966,6.30137749,6.30073744
33.534164,7.14142843,6.30326511,0.915512599,6.30252842,6.30007499,6.30062732,6.29998266
33.544656,6.92820323,6.30251224,0.791006316,6.30177073,6.29931364,6.29987056,6.29922119
33.555147,6.70820393,6.30175289,0.637535133,6.30100648,6.29854571,6.29910731,6.29845315
33.565639,6.244998,6.30098694,-0.236619819,6.30023553,6.29777107,6.29833745,6.2976784
33.57613,6,6.30021456,-0.547918388,6.29945805,6.29698989,6.29756115,6.29689711
33.586622,5.56776436,6.29943563,-0.855377853,6.29867393,6.29620206,6.29677828,6.29610916
33.597114,6.63324958,6.29865026,0.578445609,6.29788325,6.29540765,6.29598896,6.29531464
33.607605,5.74456265,6.29785854,-0.743838618,6.29708612,6.29460679,6.29519327,6.29451366
33.618097,6.63324958,6.29706034,0.579818281,6.29628241,6.29379932,6.2943911,6.29370608
33.628588,6.40312424,6.29625585,0.326907303,6.29547229,6.29298544,6.29358262,6.29289209
33.63908,6.55743852,6.29544494,0.511853086,6.29465564,6.29216501,6.2927677,6.29207154
33.649572,5.91607978,6.29462771,-0.615262489,6.29383255,6.29133813,6.29194646,6.29124454
33.660063,6.8556546,6.29380427,0.749566761,6.29300312,6.2905049,6.29111899,6.2904112
33.670555,7.14142843,6.29297448,0.921115598,6.29216721,6.28966518,6.29028516,6.28957136
33.681046,5.29150262,6.29213854,-1.00031791,6.29132502,6.28881916,6.28944515,6.28872523
33.691538,6.32455532,6.2912963,0.182370567,6.2904764,6.2879667,6.28859884,6.28787265
33.70203,5.91607978,6.29044787,-0.611856264,6.28962146,6.28710791,6.28774633,6.28701374
33.712521,6.4807407,6.28959337,0.437203994,6.28876029,6.28624287,6.28688773,6.28614859
33.723013,5.83095189,6.28873265,-0.676594969,6.28789276,6.28537146,6.2860229,6.28527706
33.733504,6.40312424,6.2878659,0.339497177,6.28701906,6.28449387,6.28515204,6.28439935
33.743996,6.70820393,6.286993,0.649007652,6.28613903,6.28360994,6.28427499,6.2835153
33.754488,6.63324958,6.28611404,0.589182091,6.28525279,6.28271978,6.28339189,6.28262502
33.764979,6.55743852,6.28522915,0.521736883,6.28436044,6.2818235,6.28250283,6.28172862
33.775471,6.78232998,6.28433817,0.705685348,6.28346184,6.28092095,6.28160767,6.28082595
33.785962,5.91607978,6.28344131,-0.606103563,6.28255717,6.28001232,6.28070662,6.27991721
33.796454,6.244998,6.28253842,-0.193753519,6.28164629,6.27909747,6.27979952,6.27900224
33.806946,6.08276253,6.28162962,-0.445945169,6.28072931,6.2781765,6.2788865,6.27808115
33.817437,6.70820393,6.28071503,0.653826358,6.27980632,6.27724952,6.27796767,6.27715405
33.827929,7.21110255,6.27979448,0.965043038,6.27887719,6.27631638,6.27704288,6.27622078
33.83842,6.55743852,6.2788682,0.527797613,6.27794211,6.27537727,6.27611234,6.27528155
33.848912,6.4807407,6.27793604,0.450338385,6.27700092,6.27443204,6.27517589,6.2743362
33.859404,6.55743852,6.2769981,0.52956626,6.27605373,6.2734808,6.27423367,6.27338484
33.869895,6.164414,6.27605451,-0.334126491,6.27510066,6.27252366,6.27328577,6.27242758
33.880387,6.4807407,6.27510513,0.453470582,6.27414154,6.27156046,6.27233207,6.27146425
33.890878,5.83095189,6.27415016,-0.665731373,6.27317657,6.2705914,6.27137276,6.27049507
33.90137,6.4807407,6.27318944,0.455577936,6.27220561,6.26961632,6.2704077,6.26951988
33.911862,6.70820393,6.27222311,0.660288437,6.27122875,6.26863534,6.26943701,6.26853877
33.922353,6.92820323,6.27125129,0.81052572,6.27024611,6.26764857,6.2684608,6.26755188
33.932845,6.244998,6.27027382,-0.158983707,6.26925754,6.26665584,6.26747894,6.26655902
33.943336,6.40312424,6.26929092,0.365832365,6.26826322,6.26565737,6.26649163,6.26556042
33.953828,7.28010989,6.26830244,1.0058864,6.26726301,6.26465297,6.26549873,6.26455591
33.96432,5.74456265,6.2673085,-0.723011655,6.26625701,6.26364278,6.26450036,6.26354559
33.974811,6.40312424,6.26630924,0.369885119,6.26524534,6.2626269,6.26349664,6.26252958
33.985303,6,6.26530449,-0.515077169,6.26422783,6.26160516,6.26248743,6.26150772
33.995794,6.40312424,6.26429449,0.372598643,6.26320469,6.26057779,6.26147295,6.26048022
34.006286,5.83095189,6.26327908,-0.657515917,6.26217575,6.2595446,6.26045304,6.25944691
34.016778,6.40312424,6.26225838,0.375321002,6.26114113,6.25850571,6.25942783,6.25840789
34.027269,6.32455532,6.26123255,0.251640168,6.26010094,6.25746124,6.25839747,6.25736329
34.037761,5.91607978,6.26020141,-0.586618808,6.25905501,6.25641101,6.25736179,6.25631294
34.048252,6.164414,6.25916521,-0.307816832,6.25800356,6.25535525,6.25632103,6.25525705
34.058744,5.83095189,6.25812378,-0.653583877,6.25694641,6.25429377,6.25527503,6.25419545
34.069236,6.92820323,6.25707727,0.819222778,6.25588367,6.2532267,6.25422393,6.25312825
34.079727,5.47722558,6.25602582,-0.882496598,6.25481548,6.25215415,6.25316788,6.25205557
34.090219,7.48331477,6.25496927,1.10830749,6.25374164,6.25107594,6.25210671,6.25097723
34.10071,6.92820323,6.25390787,0.821154891,6.25266239,6.2499923,6.25104068,6.24989346
34.111202,5.29150262,6.25284147,-0.980478887,6.25157753,6.24890304,6.24996963,6.24880408
34.121694,6.92820323,6.2517702,0.822455485,6.25048719,6.24780829,6.2488937,6.24770919
34.132185,6.55743852,6.25069423,0.553845006,6.2493915,6.24670816,6.24781304,6.24660893
34.142677,6.8556546,6.2496134,0.77848648,6.24829025,6.24560247,6.24672751,6.24550311
34.153168,5.56776436,6.24852796,-0.825083997,6.2471837,6.24449145,6.24563736,6.24439196
34.16366,6.92820323,6.24743777,0.82508512,6.24607163,6.24337491,6.24454244,6.24327529
34.174152,6.32455532,6.24634299,0.279664678,6.24495419,6.24225297,6.24344291,6.24215322
34.184643,6.4807407,6.24524377,0.485280256,6.24383149,6.24112576,6.24233894,6.24102588
34.195135,6.78232998,6.24413997,0.733614346,6.24270334,6.23999308,6.24123036,6.23989307
34.205626,6.4807407,6.24303187,0.487553921,6.24156997,6.23885518,6.24011747,6.23875503
34.216118,6,6.24191932,-0.491852946,6.2404312,6.23771184,6.2390001,6.23761156
34.22661,5.74456265,6.24080249,-0.704442934,6.23928714,6.23656321,6.23787845,6.2364628
34.237101,6.78232998,6.23968157,0.736646734,6.23813793,6.2354094,6.23675269,6.23530886
34.247593,6.32455532,6.23855642,0.293255691,6.23698336,6.23425023,6.23562268,6.23414955
34.258084,6.32455532,6.23742733,0.295174507,6.23582367,6.23308592,6.23448871,6.23298511
34.268576,7.07106781,6.23629417,0.913659476,6.23465867,6.23191628,6.23335067,6.23181534
34.279068,6.164414,6.23515715,-0.265975833,6.23348848,6.23074143,6.23220873,6.23064036
34.289559,6.32455532,6.23401645,0.300896774,6.23231324,6.22956152,6.23106311,6.2294603
34.300051,6.70820393,6.23287197,0.689443226,6.23113273,6.22837632,6.22991369,6.22827497
34.310542,5.91607978,6.23172403,-0.561822254,6.22994721,6.22718609,6.22876079,6.22708461
34.321034,6.92820323,6.23057252,0.835242908,6.22875647,6.22599062,6.2276043,6.22588901
34.331526,6.244998,6.22941766,0.124821223,6.22756063,6.22479005,6.22644446,6.22468829
34.342017,6.8556546,6.2282597,0.792082634,6.22635983,6.22358449,6.22528149,6.2234826
34.352509,7.28010989,6.22709855,1.02616341,6.22515387,6.22237375,6.22411532,6.22227173
34.363,7,6.2259349,0.879809694,6.22394298,6.22115808,6.22294663,6.22105591
34.373492,6.78232998,6.22476803,0.746700712,6.22272696,6.21993725,6.2217747,6.21983495
34.383984,7.48331477,6.22359854,1.12237081,6.22150595,6.21871141,6.22060013,6.21860897
34.394475,6.4807407,6.22242671,0.50824599,6.22028007,6.21748069,6.21942321,6.21737811
34.404967,6.08276253,6.22125252,-0.372142433,6.21904912,6.21624488,6.21824391,6.21614216
34.415458,5.83095189,6.22007639,-0.623798442,6.21781334,6.21500422,6.21706266,6.21490136
34.42595,5.38516481,6.21889832,-0.913090089,6.21657252,6.2137585,6.21587944,6.21365551
34.436442,5.65685425,6.21771865,-0.748908808,6.21532679,6.21250786,6.21469462,6.21240473
34.446933,6.244998,6.21653776,0.168701612,6.2140763,6.21125244,6.21350855,6.21114917
34.457425,7.48331477,6.21535571,1.12603688,6.21282082,6.20999201,6.21232131,6.2098886
34.467916,6.55743852,6.21417301,0.585888652,6.21156061,6.20872683,6.2111334,6.20862328
34.478408,6.32455532,6.21298978,0.33401428,6.21029545,6.20745668,6.20994494,6.20735299
34.4889,6.70820393,6.21180649,0.704554784,6.20902548,6.2061817,6.20875641,6.20607787
34.499391,6.70820393,6.21062364,0.705393711,6.20775083,6.20490203,6.20756831,6.20479806
34.509883,5.56776436,6.20944145,-0.801047496,6.20647128,6.20361744,6.20638084,6.20351333
34.520374,5.83095189,6.20826062,-0.614254606,6.2051871,6.2023282,6.20519471,6.20222394
34.530866,6.32455532,6.20708143,0.342744644,6.20389805,6.20103408,6.20401022,6.20092967
34.541358,6.55743852,6.20590458,0.592902977,6.20260428,6.19973521,6.20282805,6.19963066
34.551849,6.4807407,6.20473083,0.525366414,6.20130593,6.19843174,6.20164896,6.19832705
34.562341,6.4807407,6.20356065,0.526478917,6.20000277,6.19712345,6.20047342,6.19701861
34.572832,5.83095189,6.20239505,-0.609461363,6.19869507,6.19581059,6.19930246,6.19570561
34.583324,6.55743852,6.20123468,0.596828151,6.19738259,6.19449293,6.19813671,6.19438781
34.593816,6.78232998,6.20008064,0.763052648,6.19606547,6.19317062,6.19697727,6.19306535
34.604307,6,6.19893412,-0.446020317,6.19474387,6.1918438,6.19582534,6.19173839
34.614799,5,6.19779614,-1.09443873,6.19341754,6.19051224,6.19468193,6.19040668
34.62529,6.4807407,6.1966683,0.532984427,6.19208676,6.18917621,6.19354865,6.1890705
34.635782,6.78232998,6.19555194,0.766014387,6.19075128,6.18783546,6.19242685,6.18772961
34.646274,6.244998,6.19444895,0.224831156,6.18941127,6.18649015,6.19131839,6.18638416
34.656765,6,6.19336144,-0.439728829,6.18806685,6.18514043,6.19022542,6.18503428
34.667257,6.55743852,6.19229151,0.604273954,6.18671779,6.18378604,6.18915001,6.18367975
34.677748,6.40312424,6.191242,0.460306681,6.18536438,6.18242727,6.188095,6.18232083
34.68824,6.40312424,6.19021572,0.461420111,6.18400635,6.18106387,6.18706323,6.18095728
34.698732,6.55743852,6.18921627,0.606813193,6.18264387,6.17969599,6.18605829,6.17958926
34.709223,6.40312424,6.1882478,0.463547666,6.18127708,6.17832379,6.18508431,6.17821691
34.719715,6.8556546,6.18731482,0.81752051,6.17990573,6.17694701,6.18414583,6.17683998
34.730206,6.92820323,6.18642301,0.861266637,6.17853011,6.17556593,6.18324853,6.17545875
34.740698,7.54983444,6.18557867,1.1680136,6.17714997,6.17418031,6.1823987,6.17407298
34.75119,7.14142843,6.18478953,0.97807919,6.17576545,6.1727903,6.18160407,6.17268282
34.761681,6.244998,6.1840647,0.246846705,6.17437672,6.17139604,6.18087378,6.17128841
34.772173,6.164414,6.18341488,-0.137843672,6.17298351,6.1699973,6.18021851,6.16988952
34.782664,6.63324958,6.18285321,0.671115764,6.17158612,6.16859434,6.17965142,6.16848641
34.793156,7,6.1823954,0.904214909,6.17018428,6.16718693,6.17918822,6.16707884
34.803648,6.78232998,6.18206097,0.774770296,6.16877816,6.1657752,6.17884845,6.16566696
34.814139,6.4807407,6.18187441,0.546686644,6.16736791,6.16435932,6.17865661,6.16425093
34.824631,6.92820323,6.1818674,0.863907302,6.16595327,6.16293903,6.1786444,6.16283048
34.835122,7,6.18208298,0.904387647,6.16453452,6.16151461,6.17885488,6.16140592
34.845614,6.244998,6.18258277,0.24983039,6.16311142,6.16008582,6.17934969,6.15997697
34.856106,6,6.18345976,-0.428322023,6.16168412,6.1586528,6.18022188,6.1585438
34.866597,6.40312424,6.18485961,0.467188002,6.16025277,6.15721571,6.18161719,6.15710655
34.877089,6.32455532,6.1870144,0.370865102,6.15881711,6.15577429,6.18376782,6.15566498
34.88758,5.65685425,6.19028773,-0.730365303,6.15737743,6.15432883,6.18703757,6.15421936
34.898072,6.63324958,6.19523153,0.661829322,6.15593348,6.15287907,6.19197865,6.15276945
34.908564,6.08276253,6.20263576,-0.34622714,6.15448542,6.15142517,6.19938144,6.15131539
34.919055,6.164414,6.21355124,-0.221669207,6.15303338,6.14996728,6.21029729,6.14985735
34.929547,6.164414,6.22925422,-0.25463743,6.15157712,6.14850515,6.22600314,6.14839506
34.940038,7.21110255,6.25110443,0.979794937,6.15011693,6.14703905,6.24785937,6.14692881
34.95053,7.07106781,6.28030967,0.889245828,6.14865254,6.14556874,6.27707437,6.14545834
34.961022,6.70820393,6.31756719,0.625009391,6.14718412,6.14409437,6.31434566,6.14398381
34.971513,7,6.362651,0.798341406,6.14571181,6.14261609,6.35944699,6.14250537
34.982005,5.47722558,6.41395482,-0.967847741,6.14423536,6.14113364,6.41077118,6.14102276
34.992496,6.164414,6.46788935,-0.550885966,6.14275506,6.13964732,6.464727,6.13953628
35.002988,7,6.51829261,0.694051433,6.14127065,6.13815686,6.51514949,6.13804566
35.01348,6.8556546,6.55638428,0.547056044,6.13978228,6.13666242,6.55325421,6.13655106
35.023971,6.32455532,6.57294527,-0.498387349,6.1382901,6.13516415,6.56981785,6.13505263
35.034463,7,6.56297241,0.661080625,6.13679387,6.13366179,6.55983498,6.13355011
35.044954,6.244998,6.52899832,-0.532916807,6.13529386,6.13215564,6.52583925,6.1320438
35.055446,6.244998,6.47924365,-0.48398931,6.13378982,6.13064543,6.47605494,6.13053343
35.065938,6.70820393,6.42293776,0.534103148,6.1322819,6.12913131,6.41971565,6.12901915
35.076429,6.55743852,6.36724031,0.436117206,6.13077027,6.12761346,6.36398449,6.12750113
35.086921,6.244998,6.31662078,-0.267624332,6.12925464,6.12609158,6.3133333,6.1259791
35.097412,6.08276253,6.27337931,-0.436596813,6.12773533,6.124566,6.27006352,6.12445335
35.107904,6.55743852,6.23820432,0.565008146,6.12621207,6.12303643,6.23486415,6.12292362
35.118396,6.63324958,6.21070577,0.650033703,6.124685,6.12150303,6.20734507,6.12139006
35.128887,6.244998,6.18983467,0.23486874,6.1231543,6.11996597,6.18645688,6.11985284
35.139379,6.32455532,6.17425619,0.387684319,6.12161968,6.11842498,6.17086406,6.11831167
35.14987,7.07106781,6.16265004,0.953109526,6.12008146,6.11688035,6.15924568,6.11676688
35.160362,6.244998,6.1538726,0.301869834,6.11853936,6.11533181,6.15045752,6.11521818
35.170854,7.28010989,6.14703814,1.06445843,6.11699354,6.11377952,6.14361336,6.11366573
35.181345,6.40312424,6.14151101,0.511481407,6.11544416,6.11222365,6.13807722,6.11210969
35.191837,6.164414,6.13686141,0.165989739,6.11389094,6.11066392,6.13341906,6.11054979
35.202328,6.32455532,6.13281378,0.437883025,6.1123342,6.10910063,6.12936318,6.10898633
35.21282,5.83095189,6.1291928,-0.546114373,6.11077365,6.10753351,6.12573416,6.10741904
35.223312,6.4807407,6.12588845,0.595694759,6.10920947,6.10596271,6.1224219,6.10584808
35.233803,6,6.12282905,-0.350469761,6.1076418,6.10438842,6.11935471,6.10427361
35.244295,5.65685425,6.11996483,-0.680522285,6.10607037,6.10281032,6.11648277,6.10269535
35.254786,6.55743852,6.11726083,0.663458889,6.10449549,6.10122876,6.11377111,6.10111362
35.265278,6.164414,6.11468959,0.22298971,6.10291689,6.09964343,6.11119227,6.09952812
35.27577,6.08276253,6.11223021,-0.171661515,6.10133471,6.09805451,6.1087253,6.09793903
35.286261,6.32455532,6.10986581,0.463345993,6.09974914,6.09646215,6.10635336,6.09634651
35.296753,6.40312424,6.10758196,0.543638005,6.09815988,6.09486608,6.10406196,6.09475027
35.307244,6.4807407,6.1053675,0.612677077,6.09656725,6.09326662,6.10183998,6.09315063
35.317736,5.83095189,6.10321233,-0.521785817,6.09497097,6.09166346,6.09967729,6.0915473
35.328228,6.40312424,6.10110856,0.549559533,6.09337119,6.09005678,6.09756598,6.08994045
35.338719,6.08276253,6.0990495,-0.127620398,6.09176809,6.08844675,6.09549939,6.08833024
35.349211,6.32455532,6.09702893,0.476997265,6.09016138,6.08683307,6.09347128,6.08671639
35.359702,7.07106781,6.09504227,0.98794005,6.08855137,6.08521607,6.09147707,6.08509922
35.370194,5.91607978,6.09308488,-0.420719733,6.08693778,6.08359546,6.08951211,6.08347843
35.380686,7,6.09115327,0.953334531,6.08532078,6.08197139,6.08757292,6.08185419
35.391177,6.244998,6.08924447,0.394656221,6.08370053,6.08034405,6.08565651,6.08022668
35.401669,6.32455532,6.08735534,0.487031804,6.08207673,6.07871313,6.08375977,6.07859559
35.41216,6,6.08548387,-0.292376246,6.08044973,6.07707897,6.08188065,6.07696125
35.422652,6.8556546,6.08362759,0.878650673,6.07881921,6.07544126,6.08001671,6.07532336
35.433144,6.8556546,6.08178487,0.879698661,6.07718535,6.07380017,6.07816629,6.0736821
35.443635,6.63324958,6.07995424,0.743838248,6.07554831,6.07215588,6.07632794,6.07203763
35.454127,7,6.07813395,0.960138556,6.07390781,6.07050809,6.07449991,6.07038967
35.464618,6.244998,6.07632309,0.410700513,6.07226417,6.06885712,6.07268127,6.06873852
35.47511,6.244998,6.07452018,0.41288959,6.07061709,6.06720268,6.07087056,6.0670839
35.485602,6.08276253,6.07272443,0.100190335,6.06896674,6.06554494,6.06906697,6.06542598
35.496093,5.65685425,6.0709351,-0.643491143,6.06731329,6.06388406,6.06726979,6.06376492
35.506585,6.63324958,6.06915108,0.751064914,6.06565644,6.06221975,6.06547787,6.06210044
35.517076,6.55743852,6.06737199,0.700047526,6.06399653,6.06055234,6.06369085,6.06043285
35.527568,6.55743852,6.06559686,0.701314243,6.06233325,6.05888153,6.06190776,6.05876185
35.53806,6.70820393,6.06382529,0.802731985,6.06066678,6.05720748,6.0601282,6.05708762
35.548551,5.65685425,6.06205695,-0.636555336,6.05899728,6.05553037,6.05835183,6.05541033
35.559043,6.32455532,6.06029102,0.514066439,6.05732445,6.0538499,6.05657784,6.05372968
35.569534,6.08276253,6.05852743,0.155676279,6.05564863,6.0521664,6.05480616,6.052046
35.580026,5.56776436,6.05676546,-0.699286133,6.05396952,6.05047956,6.05303606,6.05035898
35.590518,7.21110255,6.05500494,1.0752198,6.05228727,6.04878956,6.05126737,6.04866879
35.601009,5.74456265,6.05324573,-0.555592549,6.05060208,6.04709657,6.04949995,6.04697562
35.611501,7.21110255,6.0514872,1.07685438,6.04891363,6.04540029,6.04773319,6.04527915
35.621992,6.08276253,6.04972944,0.181750074,6.04722227,6.04370104,6.04596715,6.04357973
35.632484,5.65685425,6.04797188,-0.625393977,6.04552767,6.04199853,6.04420126,6.04187703
35.642976,7.28010989,6.04621446,1.11080846,6.04383002,6.04029293,6.04243549,6.04017124
35.653467,5.65685425,6.04445717,-0.622577639,6.04212949,6.03858441,6.0406698,6.03846254
35.663959,6.78232998,6.04269948,0.860017734,6.04042577,6.03687266,6.03890368,6.0367506
35.67445,6.08276253,6.04094158,0.204501724,6.03871921,6.03515802,6.0371373,6.03503578
35.684942,6.70820393,6.03918296,0.817937019,6.03700948,6.03344018,6.03537018,6.03331775
35.695434,7.07106781,6.03742368,1.01668291,6.03529678,6.03171932,6.03360234,6.0315967
35.705925,6.63324958,6.03566376,0.773036749,6.03358126,6.02999561,6.03183382,6.0298728
35.716417,6.70820393,6.03390277,0.821158429,6.03186263,6.02826873,6.03006418,6.02814574
35.726908,5.65685425,6.03214092,-0.612606453,6.03014122,6.02653904,6.02829365,6.02641586
35.7374,6.55743852,6.03037778,0.725989494,6.02841672,6.02480621,6.02652179,6.02468285
35.747892,6,6.02861343,-0.16915506,6.02668931,6.02307043,6.02474867,6.02294687
35.758383,5.74456265,6.02684797,-0.531305301,6.02495916,6.02133187,6.02297439,6.02120812
35.768875,5.56776436,6.02508097,-0.676251883,6.02322596,6.01959021,6.02119854,6.01946627
35.779366,6,6.02331271,-0.152685002,6.02149005,6.0178458,6.01942138,6.01772167
35.789858,6.55743852,6.02154278,0.732049003,6.01975112,6.01609832,6.0176425,6.015974
35.80035,6.164414,6.0197713,0.380319217,6.01800935,6.01434795,6.01586202,6.01422344
35.810841,5,6.01799837,-1.00895905,6.01626491,6.01259487,6.01408005,6.01247017
35.821333,5.91607978,6.01622362,-0.316455104,6.01451749,6.01083876,6.01229621,6.01071387
35.831824,6.4807407,6.01444733,0.682856773,6.01276743,6.00907997,6.01051079,6.00895488
35.842316,5.65685425,6.01266912,-0.596502196,6.01101441,6.00731817,6.0087234,6.00719289
35.852808,6.8556546,6.01088913,0.91911124,6.00925862,6.00555355,6.00693418,6.00542808
35.863299,5.83095189,6.00910749,-0.422084815,6.00750024,6.00378629,6.00514326,6.00366062
35.873791,6.08276253,6.00732382,0.274661079,6.00573893,6.00201606,6.00335026,6.00189019
35.884282,6.55743852,6.00553845,0.742899777,6.00397506,6.00024321,6.00155551,6.00011715
35.894774,5.56776436,6.00375099,-0.660292835,6.0022083,5.99846742,5.99975862,5.99834117
35.905266,6.164414,6.0019616,0.403053845,6.00043883,5.99668888,5.99795975,5.99656242
35.915757,6.244998,6.00017043,0.494800537,5.99866684,5.99490776,5.99615905,5.99478111
35.926249,5.47722558,5.99837711,-0.721908257,5.99689199,5.99312373,5.99435614,5.99299688
35.93674,6.4807407,5.99658196,0.69581516,5.99511465,5.99133716,5.99255136,5.99121011
35.947232,5.65685425,5.99478463,-0.581317801,5.99333448,5.9895477,5.99074434,5.98942046
35.957724,6.08276253,5.99298528,0.299628518,5.99155167,5.98775556,5.98893525,5.98762811
35.968215,6.70820393,5.99118406,0.84677026,5.98976641,5.9859609,5.98712423,5.98583326
35.978707,6.164414,5.98938061,0.418369918,5.98797836,5.9841634,5.98531093,5.98403556
35.989198,6.55743852,5.98757528,0.75489287,5.98618788,5.98236342,5.98349568,5.98223538
35.99969,6.70820393,5.9857677,0.849962489,5.98439464,5.98056062,5.98167814,5.98043238
36.010182,6.08276253,5.98395804,0.314331816,5.98259883,5.9787552,5.97985845,5.97862675
36.020673,6.32455532,5.98214646,0.58515712,5.98080062,5.97694732,5.9780368,5.97681868
36.031165,7.21110255,5.98033262,1.10940071,5.9789997,5.97513667,5.97621282,5.97500783
36.041656,6.40312424,5.97851686,0.651619045,5.97719642,5.9733236,5.97438686,5.97319455
36.052148,6.08276253,5.97669882,0.325674246,5.97539044,5.97150778,5.97255856,5.97137853
36.06264,5.38516481,5.97487867,-0.767928291,5.97358195,5.96968939,5.97072809,5.96955993
36.073131,5.83095189,5.97305658,-0.376967756,5.97177115,5.96786862,5.96889563,5.96773896
36.083623,6.08276253,5.97123222,0.333961546,5.96995768,5.96604513,5.96706082,5.96591526
36.094114,6.92820323,5.96940591,0.979181965,5.96814193,5.96421929,5.96522401,5.96408922
36.104606,5.19615242,5.96757732,-0.878307974,5.96632354,5.96239075,5.96338485,5.96226047
36.115098,5.83095189,5.96574662,-0.367144005,5.96450271,5.96055971,5.96154352,5.96042923
36.125589,5.83095189,5.96391398,-0.364639659,5.96267963,5.95872635,5.95970019,5.95859566
36.136081,6.92820323,5.96207905,0.982916161,5.96085396,5.95689034,5.9578545,5.95675944
36.146572,6.164414,5.96024219,0.451853747,5.95902606,5.95505203,5.95600682,5.95492093
36.157064,5.65685425,5.95840306,-0.549134599,5.95719559,5.95321109,5.95415679,5.95307978
36.167556,5.38516481,5.95656182,-0.75590807,5.95536275,5.95136771,5.95230459,5.95123619
36.178047,7.07106781,5.95471865,1.05657426,5.95352772,5.94952207,5.9504504,5.94939034
36.188539,6.32455532,5.95287322,0.609657364,5.95169016,5.94767384,5.94859386,5.9475419
36.19903,5.74456265,5.95102587,-0.454382242,5.94985045,5.94582338,5.94673534,5.94569123
36.209522,5.65685425,5.94917626,-0.540668111,5.94800823,5.94397034,5.94487449,5.94383798
36.220014,6.32455532,5.94732456,0.614191143,5.9461637,5.94211492,5.94301148,5.94198235
36.230505,6.244998,5.94547097,0.54729063,5.94431705,5.94025731,5.9411465,5.94012453
36.240997,6.40312424,5.94361512,0.677871017,5.94246793,5.93839717,5.9392792,5.93826417
36.251488,6.40312424,5.94175739,0.679239904,5.94061672,5.93653485,5.93740993,5.93640164
36.26198,6.92820323,5.93989742,0.994135709,5.93876308,5.93467003,5.93553836,5.9345366
36.272472,5.65685425,5.9380354,-0.530265172,5.93690718,5.93280288,5.93366465,5.93266924
36.282963,6.55743852,5.93617151,0.788204929,5.93504924,5.93093359,5.931789,5.93079974
36.293455,5.47722558,5.93430541,-0.676076795,5.93318889,5.92906183,5.92991105,5.92892777
36.303946,6.244998,5.93243745,0.55907115,5.93132651,5.92718797,5.92803116,5.92705369
36.314438,6.32455532,5.93056728,0.627684663,5.92946176,5.92531165,5.926149,5.92517715
36.32493,6.55743852,5.9286951,0.792933427,5.92759483,5.92343306,5.92426473,5.92329835
36.335421,5.09901951,5.92682109,-0.909836018,5.9257259,5.92155241,5.92237855,5.92141748
36.345913,5.47722558,5.9249449,-0.669118321,5.92385465,5.91966933,5.92049011,5.91953419
36.356404,5.83095189,5.9230669,-0.303504535,5.92198142,5.91778421,5.91859977,5.91764885
36.366896,6.55743852,5.92118673,0.797653932,5.92010589,5.91589669,5.91670717,5.91576111
36.377388,5.74456265,5.91930458,-0.418021456,5.91822824,5.91400697,5.91481252,5.91387117
36.387879,6.78232998,5.91742065,0.930005017,5.91634867,5.91211524,5.91291599,5.91197921
36.398371,6,5.91553458,0.290629352,5.91446682,5.91022114,5.91101722,5.9100849
36.408862,6.08276253,5.91364674,0.411236905,5.91258308,5.90832506,5.9091166,5.90818859
36.419354,6.4807407,5.91175678,0.754310229,5.91069709,5.90642664,5.90721377,5.90628995
36.429846,6.70820393,5.90986488,0.893498208,5.90880904,5.90452607,5.90530891,5.90438916
36.440337,6.08276253,5.90797125,0.418080471,5.90691914,5.90262355,5.90340221,5.90248642
36.450829,5.47722558,5.90607552,-0.654866359,5.90502703,5.90071872,5.90149332,5.90058137
36.46132,6.40312424,5.90417807,0.706361213,5.90313308,5.89881197,5.89958262,5.89867439
36.471812,6.244998,5.90227855,0.585422452,5.90123695,5.89690293,5.89766974,5.89676513
36.482304,6.55743852,5.90037715,0.810593227,5.89933884,5.89499181,5.89575488,5.89485378
36.492795,6.164414,5.89847405,0.515693664,5.89743892,5.89307879,5.89383822,5.89294054
36.503287,5.19615242,5.89656891,-0.836908886,5.89553687,5.89116352,5.89191942,5.89102505
36.513778,5.65685425,5.89466209,-0.487655457,5.89363304,5.88924638,5.88999884,5.88910768
36.52427,5.91607978,5.89275326,0.152730238,5.8917271,5.88732702,5.88807613,5.88718809
36.534762,5.38516481,5.89084259,-0.711110246,5.88981923,5.88540562,5.88615148,5.88526646
36.545253,6.55743852,5.88893028,0.817623534,5.88790963,5.88348239,5.88422508,5.883343
36.555745,5.65685425,5.88701598,-0.479751739,5.88599795,5.88155696,5.88229658,5.88141735
36.566236,6.08276253,5.88510006,0.444592474,5.88408457,5.87962972,5.88036634,5.87948988
36.576728,5.91607978,5.88318217,0.181376985,5.88216913,5.87770031,5.87843402,5.87756024
36.58722,5.29150262,5.8812625,-0.767958255,5.88025184,5.87576893,5.87649981,5.87562863
36.597711,6.70820393,5.87934125,0.910418959,5.87833288,5.87383576,5.87456389,5.87369523
36.608203,5.29150262,5.87741806,-0.765451132,5.8764119,5.87190046,5.87262591,5.8717597
36.618694,6.40312424,5.8754933,0.726382085,5.87448928,5.8699634,5.87068625,5.86982241
36.629186,6.244998,5.87356663,0.609451694,5.87256468,5.86802423,5.86874454,5.867883
36.639678,6.4807407,5.87163824,0.780450166,5.87063828,5.86608313,5.86680099,5.86594167
36.650169,5.65685425,5.86970831,-0.4613611,5.86871028,5.86414031,5.86485578,5.86399862
36.660661,6.70820393,5.86777651,0.916748289,5.86678033,5.86219541,5.86290855,5.86205348
36.671152,6.08276253,5.8658432,0.465745998,5.86484881,5.86024881,5.86095969,5.86010665
36.681644,5.56776436,5.86390802,-0.544190831,5.86291536,5.85830015,5.85900884,5.85815775
36.692136,6.08276253,5.86197118,0.469884396,5.86098018,5.85634962,5.85705618,5.85620698
36.702627,5.74456265,5.86003288,-0.33980911,5.85904347,5.85439742,5.85510191,5.85425455
36.713119,5,5.85809274,-0.926332955,5.85710488,5.8524432,5.85314568,5.85230009
36.72361,5.91607978,5.85615117,0.244803223,5.85516477,5.85048733,5.85118786,5.85034398
36.734102,5.19615242,5.85420778,-0.811206115,5.85322281,5.84852945,5.84922808,5.84838586
36.744594,5.65685425,5.85226279,-0.442050388,5.85127919,5.84656976,5.84726656,5.84642593
36.755085,6.55743852,5.8503164,0.84090554,5.8493341,5.84460846,5.84530347,5.84446439
36.765577,6.08276253,5.84836823,0.484142847,5.84738718,5.84264518,5.84333846,5.84250088
36.776068,6.244998,5.84641869,0.631331381,5.84543884,5.84068031,5.84137192,5.84053577
36.78656,5.19615242,5.84446739,-0.805180086,5.84348869,5.83871349,5.83940347,5.8385687
36.797052,4.89897949,5.84251456,-0.971357335,5.84153695,5.83674491,5.83743331,5.83659988
36.807543,6.8556546,5.84056038,1.00751885,5.83958381,5.83477477,5.83546164,5.8346295
36.818035,6.4807407,5.83860449,0.80133402,5.83762892,5.83280271,5.8334881,5.8326572
36.828526,5.83095189,5.83664728,-0.0754677562,5.83567266,5.83082911,5.83151307,5.83068336
36.839018,6.92820323,5.83468839,1.0457126,5.83371467,5.82885362,5.82953618,5.82870761
36.84951,6.164414,5.83272801,0.575921861,5.83175516,5.82687641,5.82755764,5.82673017
36.860001,5.38516481,5.83076636,-0.667533933,5.82979431,5.82489771,5.82557763,5.82475121
36.870493,6.32455532,5.82880306,0.704096769,5.82783178,5.82291713,5.8235958,5.82277039
36.880984,6.40312424,5.82683851,0.759134857,5.82586795,5.82093507,5.82161252,5.82078808
36.891476,4.79583152,5.82487234,-1.01441649,5.82390246,5.81895116,5.81962744,5.81880392
36.901968,5.29150262,5.82290475,-0.728973337,5.82193552,5.81696559,5.81764074,5.81681811
36.912459,5.19615242,5.82093594,-0.79043249,5.81996731,5.81497858,5.81565264,5.81483085
36.922951,5.91607978,5.81896556,0.311631545,5.81799749,5.81298975,5.81366275,5.81284177
36.933442,6.08276253,5.81699399,0.515527435,5.81602644,5.81099948,5.81167147,5.81085126
36.943934,6.4807407,5.81502087,0.815916556,5.8140538,5.80900742,5.80967843,5.80885895
36.954426,6.244998,5.8130464,0.657230246,5.81207977,5.80701376,5.80768383,5.80686503
36.964917,5.83095189,5.81107079,0.141000389,5.81010456,5.8050187,5.80568786,5.80486972
36.975409,5.74456265,5.80909366,-0.254029548,5.8081278,5.80302188,5.80369017,5.80287264
36.9859,6.40312424,5.80711541,0.772016079,5.80614989,5.80102367,5.80169112,5.80087419
36.996392,5.29150262,5.80513568,-0.716681981,5.80417046,5.79902372,5.79969037,5.79887398
37.006884,5.38516481,5.80315468,-0.64652136,5.80218971,5.79702222,5.7976881,5.79687223
37.017375,6.4807407,5.80117259,0.82435921,5.80020786,5.79501937,5.79568452,5.79486912
37.027867,6.40312424,5.79918907,0.777132658,5.79822453,5.7930148,5.79367925,5.7928643
37.038358,6.63324958,5.7972045,0.914355008,5.79624013,5.79100891,5.79167269,5.79085816
37.04885,5,5.79521852,-0.891750256,5.79425428,5.78900132,5.78966446,5.78885031
37.059342,6.08276253,5.79323133,0.538081032,5.79226719,5.78699224,5.78765476,5.78684097
37.069833,5.83095189,5.79124315,0.199270542,5.79027907,5.78498186,5.7856438,5.78483033
37.080325,5.47722558,5.78925359,-0.558594681,5.78828956,5.78296981,5.7836312,5.78281802
37.090816,5.09901951,5.78726307,-0.829604457,5.78629904,5.78095649,5.78161736,5.78080444
37.101308,6.08276253,5.78527121,0.54542765,5.78430716,5.77894152,5.77960189,5.77878921
37.1118,5.91607978,5.78327822,0.364419488,5.78231412,5.7769251,5.77758501,5.77677253
37.122291,4.35889894,5.78128431,-1.19263799,5.78032013,5.77490744,5.77556691,5.77475461
37.132783,4.89897949,5.77928911,-0.938248166,5.77832482,5.77288816,5.77354722,5.77273507
37.143274,6.32455532,5.77729301,0.739771793,5.77632859,5.77086765,5.77152633,5.7707143
37.153766,5.83095189,5.77529567,0.235915722,5.77433108,5.76884555,5.76950387,5.76869193
37.164258,6.244998,5.77329727,0.686804723,5.77233249,5.76682205,5.76748004,5.76666817
37.174749,6.08276253,5.77129803,0.558090045,5.77033303,5.76479735,5.76545504,5.76464321
37.185241,5.65685425,5.76929759,-0.335325721,5.76833235,5.76277109,5.76342849,5.76261668
37.195732,4.89897949,5.76729634,-0.931835206,5.76633082,5.76074365,5.7614008,5.76058898
37.206224,6.70820393,5.76529391,0.971035539,5.76432811,5.75871466,5.75937158,5.75855972
37.216716,5.38516481,5.76329053,-0.61491928,5.7623244,5.75668433,5.75734103,5.75652912
37.227207,5.91607978,5.76128639,0.393437918,5.76031991,5.75465285,5.75530937,5.75449737
37.237699,5.47722558,5.75928113,-0.531089026,5.75831429,5.75261984,5.7532762,5.7524641
37.24819,5.83095189,5.75727515,0.2714346,5.75630792,5.75058572,5.75124194,5.75042971
37.258682,5.74456265,5.75526809,-0.103467135,5.75430044,5.74855009,5.74920619,5.74839381
37.269174,6.40312424,5.75326016,0.806141472,5.75229207,5.74651316,5.74716917,5.74635661
37.279665,6.70820393,5.75125157,0.978239418,5.75028302,5.74447514,5.74513108,5.74431832
37.290157,5.74456265,5.74924196,-0.0684055033,5.74827291,5.74243564,5.74309153,5.74227855
37.300648,4.89897949,5.74723172,-0.921006101,5.74626217,5.74039507,5.74105093,5.7402377
37.31114,5.56776436,5.7452205,-0.421255432,5.74425042,5.73835305,5.73900889,5.73819541
37.321632,5.38516481,5.74320851,-0.59836753,5.74223787,5.73630977,5.73696563,5.73615185
37.332123,6.32455532,5.74119595,0.763779658,5.74022474,5.73426545,5.73492134,5.73410726
37.342615,6.164414,5.73918248,0.652097788,5.73821067,5.7322197,5.73287564,5.73206123
37.353106,6.78232998,5.73716849,1.0223314,5.73619606,5.73017292,5.73082894,5.73001418
37.363598,5.29150262,5.73515361,-0.66607131,5.73418055,5.72812473,5.72878084,5.72796572
37.37409,6.08276253,5.73313808,0.5912905,5.73216435,5.72607535,5.72673157,5.72591605
37.384581,6.78232998,5.73112209,1.0252843,5.73014768,5.72402496,5.72468131,5.72386539
37.395073,5.74456265,5.72910529,0.124327621,5.72813019,5.72197319,5.72262969,5.72181334
37.405564,5.83095189,5.72708809,0.322279083,5.72611226,5.71992045,5.72057712,5.71976032
37.416056,6,5.72507012,0.52433756,5.72409356,5.71786634,5.7185232,5.71770593
37.426548,5.56776436,5.72305161,-0.394065031,5.72207429,5.71581108,5.71646814,5.71565039
37.437039,6.08276253,5.72103277,0.601439738,5.72005467,5.71375487,5.71441215,5.71359389
37.447531,5.83095189,5.71901324,0.33457234,5.71803435,5.71169732,5.71235484,5.71153606
37.458022,5.74456265,5.71699344,0.166039774,5.71601373,5.70963884,5.71029662,5.7094773
37.468514,5.09901951,5.714973,-0.784827043,5.71399246,5.70757905,5.7082371,5.70741723
37.479006,5.38516481,5.71295215,-0.572527153,5.71197075,5.70551814,5.70617649,5.70535604
37.489497,6,5.7109311,0.53765128,5.70994883,5.70345634,5.70411499,5.70329394
37.499989,5.83095189,5.7089095,0.349345661,5.70792635,5.70139324,5.70205222,5.70123056
37.51048,4.69041576,5.70688777,-1.00820237,5.70590371,5.69932926,5.69998858,5.6991663
37.520972,5.83095189,5.70486555,0.355086391,5.70388056,5.69726401,5.69792369,5.69710076
37.531464,5.29150262,5.70284306,-0.641358277,5.70185713,5.6951977,5.69585776,5.69503416
37.541955,6.40312424,5.70082053,0.838035623,5.69983364,5.69313053,5.69379098,5.6929667
37.552447,5.74456265,5.69879761,0.213927647,5.69780974,5.69106211,5.69172297,5.690898
37.562938,6.4807407,5.69677471,0.885418539,5.69578585,5.68899286,5.68965414,5.68882845
37.57343,5,5.69475149,-0.833517538,5.69376162,5.68692238,5.6875841,5.68675769
37.583922,5.09901951,5.69272816,-0.770524919,5.69173727,5.68485089,5.68551306,5.6846859
37.594413,5.47722558,5.69070498,-0.462038311,5.68971304,5.68277858,5.68344122,5.6826133
37.604905,5.65685425,5.68868157,-0.178402138,5.68768857,5.68070508,5.6813682,5.6805395
37.615396,5.56776436,5.68665838,-0.344810114,5.6856643,5.67863078,5.6792944,5.67846491
37.625888,6.4807407,5.68463505,0.892247528,5.68363988,5.6765553,5.67721944,5.67638914
37.63638,5.56776436,5.68261181,-0.338891503,5.68161554,5.67447885,5.67514352,5.6743124
37.646871,6.08276253,5.68058891,0.634171598,5.67959152,5.67240164,5.67306685,5.67223488
37.657363,5.83095189,5.67856601,0.390366351,5.67756747,5.67032327,5.67098903,5.67015622
37.667854,5.65685425,5.67654352,-0.140318469,5.67554383,5.66824415,5.66891049,5.6680768
37.678346,5.74456265,5.67452112,0.264653592,5.67352026,5.6661639,5.66683082,5.66599625
37.688838,5.65685425,5.67249905,-0.125079173,5.671497,5.66408272,5.66475024,5.66391477
37.699329,5.29150262,5.67047754,-0.615609391,5.6694743,5.66200081,5.66266895,5.66183257
37.709821,5.65685425,5.66845628,-0.107712706,5.66745181,5.6599178,5.66058656,5.65974925
37.720312,4.24264069,5.66643568,-1.19322881,5.66542999,5.65783408,5.65850349,5.65766524
37.730804,5.38516481,5.66441544,-0.528441699,5.6634085,5.65574928,5.65641934,5.65558013
37.741296,5.38516481,5.66239579,-0.526527282,5.66138759,5.65366358,5.65433431,5.65349413
37.751787,5.91607978,5.66037699,0.505670641,5.65936751,5.65157721,5.65224862,5.65140746
37.762279,5.56776436,5.65835871,-0.300988951,5.65734795,5.64948978,5.65016188,5.64931972
37.77277,4.58257569,5.65634141,-1.03622667,5.65532935,5.64740168,5.6480745,5.64723132
37.783262,4.79583152,5.65432478,-0.92654911,5.65331139,5.64531254,5.64598608,5.64514187
37.793754,4.24264069,5.65230906,-1.18729456,5.65129434,5.64322256,5.64389683,5.64305158
37.804245,4.89897949,5.65029453,-0.866784314,5.64927847,5.64113194,5.64180695,5.64096065
37.814737,5.91607978,5.64828088,0.517492898,5.64726346,5.6390403,5.63971607,5.6388687
37.825228,5.65685425,5.64626858,0.102886701,5.64524978,5.63694804,5.63762459,5.63677614
37.83572,5.65685425,5.64425731,0.112236088,5.64323713,5.63485478,5.63553211,5.63468257
37.846212,6.164414,5.64224736,0.722610988,5.64122578,5.63276072,5.63343885,5.6325882
37.856703,5.29150262,5.64023902,-0.590539071,5.63921602,5.63066607,5.63134501,5.63049323
37.867195,5.74456265,5.63823198,0.32608383,5.63720755,5.62857044,5.6292502,5.62839729
37.877686,4.79583152,5.63622674,-0.916730722,5.63520087,5.62647423,5.62715483,5.62630078
37.888178,5.83095189,5.63422301,0.443541301,5.63319569,5.62437707,5.62505851,5.62420329
37.89867,6.08276253,5.63222109,0.671223838,5.6311923,5.62227915,5.62296145,5.62210506
37.909161,6.78232998,5.63022129,1.07336326,5.62919101,5.62018068,5.62086385,5.62000627
37.919653,5.91607978,5.62822333,0.536522556,5.62719156,5.61808127,5.61876533,5.61790655
37.930144,5.83095189,5.62622773,0.452464544,5.62519446,5.61598133,5.61666629,5.6158063
37.940636,6.40312424,5.62423423,0.882547451,5.62319944,5.61388047,5.61456634,5.61370512
37.951128,5.47722558,5.62224317,-0.380811757,5.62120684,5.6117789,5.61246568,5.61160323
37.961619,5.65685425,5.62025487,0.191309655,5.61921699,5.60967682,5.61036454,5.60950083
37.972111,6.4807407,5.6182691,0.928693493,5.61722966,5.60757385,5.6082625,5.60739754
37.982602,5.91607978,5.61628639,0.547533916,5.61524539,5.60547039,5.60616,5.60529375
37.993094,4.89897949,5.61430655,-0.845770102,5.61326397,5.60336604,5.60405662,5.60318909
38.003586,5.65685425,5.61232993,0.211007867,5.61128575,5.60126103,5.60195258,5.60108375
38.014077,6.164414,5.6103569,0.74435012,5.60931111,5.59915555,5.5998481,5.59897795
38.024569,6.244998,5.60838729,0.797878883,5.60733988,5.59704922,5.59774276,5.5968713
38.03506,6.244998,5.60642166,0.799109713,5.60537263,5.59494244,5.595637,5.59476419
38.045552,5.19615242,5.60445988,-0.6389894,5.60340919,5.59283483,5.5935304,5.59265625
38.056044,6.40312424,5.60250234,0.894774775,5.60145,5.59072658,5.59142319,5.59054767
38.066535,5.65685425,5.60054948,0.237286252,5.59949548,5.58861791,5.58931556,5.58843868
38.077027,5.47722558,5.59860119,-0.348390035,5.59754551,5.58650842,5.58720714,5.58632886
38.087518,5.47722558,5.59665811,-0.34559012,5.59560073,5.58439854,5.58509832,5.58421865
38.09801,5.47722558,5.59472014,-0.342774809,5.59366107,5.58228785,5.58298871,5.58210763
38.108502,5.74456265,5.5927878,0.389582915,5.59172701,5.58017657,5.58087852,5.57999602
38.118993,5,5.59086158,-0.768675209,5.58979906,5.57806491,5.57876796,5.57788403
38.129485,6.08276253,5.58894145,0.702724039,5.5878772,5.57595248,5.57665664,5.57577126
38.139976,5.65685425,5.58702817,0.264246254,5.58596217,5.57383968,5.57454497,5.57365813
38.150468,5.09901951,5.58512174,-0.697210315,5.58405398,5.57172613,5.57243254,5.57154424
38.16096,5.56776436,5.58322277,-0.124331824,5.58215324,5.56961202,5.57031958,5.5694298
38.171451,5.19615242,5.58133187,-0.620628272,5.58026057,5.56749758,5.56820629,5.56731502
38.181943,6,5.57944918,0.6484989,5.57837608,5.5653824,5.56609228,5.5651995
38.192434,5.38516481,5.57757554,-0.438646473,5.57650063,5.56326689,5.56397795,5.56308366
38.202926,5.74456265,5.57571113,0.410915456,5.57463442,5.56115067,5.56186292,5.5609671
38.213418,6.8556546,5.57385673,1.13216512,5.5727782,5.55903394,5.55974738,5.55885003
38.223909,5.56776436,5.57201312,-0.0651824768,5.57093275,5.5569169,5.55763156,5.55673265
38.234401,5.19615242,5.57018061,-0.611578438,5.5690984,5.55479918,5.55551505,5.55461459
38.244892,6.08276253,5.56836026,0.717218423,5.5672762,5.55268117,5.55339827,5.55249623
38.255384,5.56776436,5.5665525,0.0348117828,5.56546658,5.55056247,5.55128082,5.5503772
38.265876,6,5.56475832,0.65972849,5.56367053,5.54844331,5.54916291,5.54825769
38.276367,6,5.56297877,0.661075812,5.5618891,5.54632389,5.54704475,5.54613792
38.286859,5.65685425,5.56121447,0.309256819,5.56012291,5.54420381,5.54492595,5.5440175
38.29735,5.56776436,5.55946678,0.0910910616,5.55837332,5.54208349,5.54280691,5.54189683
38.307842,4.69041576,5.55773648,-0.931300555,5.55664112,5.53996252,5.54068724,5.53977552
38.318334,5.74456265,5.55602495,0.434209282,5.55492767,5.53784113,5.53856715,5.53765377
38.328825,5.65685425,5.55433363,0.320188413,5.55323443,5.53571951,5.53644684,5.5355318
38.339317,6.32455532,5.55266362,0.878573674,5.55156249,5.53359728,5.53432594,5.53340922
38.349808,5.83095189,5.55101676,0.529088962,5.5499137,5.53147483,5.53220483,5.53128643
38.3603,4.89897949,5.54939441,-0.80648306,5.5482894,5.52935179,5.53008313,5.52916303
38.370792,5.09901951,5.54779852,-0.669909704,5.54669157,5.52722836,5.52796106,5.52703924
38.381283,4.79583152,5.54623123,-0.866256141,5.54512231,5.52510474,5.5258388,5.52491527
38.391775,5.47722558,5.54469436,-0.259747545,5.54358349,5.52298054,5.52371598,5.52279072
38.402266,6.32455532,5.54319058,0.883948382,5.54207774,5.52085617,5.52159301,5.520666
38.412758,6.08276253,5.54172216,0.735554465,5.54060735,5.51873124,5.51946948,5.51854071
38.42325,5.19615242,5.54029207,-0.586634171,5.53917529,5.51660596,5.5173456,5.51641507
38.433741,4.89897949,5.53890355,-0.799952542,5.53778479,5.51448053,5.51522159,5.51428928
38.444233,5.83095189,5.53755975,0.541656851,5.536439,5.51235456,5.51309705,5.51216295
38.454724,5.91607978,5.53626469,0.616291402,5.53514196,5.51022846,5.51097239,5.51003649
38.465216,5.83095189,5.5350223,0.543994117,5.53389758,5.50810183,5.50884721,5.5079095
38.475708,5,5.53383732,-0.730641716,5.53271062,5.50597488,5.50672173,5.50578219
38.486199,5.91607978,5.532715,0.619164588,5.53158632,5.50384783,5.50459615,5.50365477
38.496691,5,5.53166084,-0.729150766,5.53053018,5.50172028,5.50247008,5.50152685
38.507182,5.56776436,5.53068144,0.192569273,5.52954881,5.49959263,5.50034392,5.49939884
38.517674,5.09901951,5.52978374,-0.656326314,5.52864915,5.49746449,5.49821729,5.49727034
38.528166,5.19615242,5.52897587,-0.576908524,5.52783931,5.49533608,5.49609039,5.49514155
38.538657,5.91607978,5.52826687,0.622746269,5.52712836,5.49320759,5.49396342,5.4930127
38.549149,6.55743852,5.52766671,1.01477673,5.52652626,5.49107863,5.491836,5.49088337
38.55964,5.74456265,5.5271869,0.466235724,5.52604452,5.48894963,5.48970854,5.488754
38.570132,5,5.52684014,-0.725837542,5.52569585,5.48682016,5.48758063,5.48662416
38.580624,5.38516481,5.52664092,-0.37613311,5.52549474,5.48469046,5.48545249,5.48449409
38.591115,5.74456265,5.52660551,0.466858802,5.52545746,5.48256072,5.48332433,5.48236398
38.601607,6.55743852,5.52675214,1.01522726,5.52560226,5.48043055,5.48119575,5.48023343
38.612098,6.32455532,5.52710134,0.893002786,5.52594965,5.47830037,5.47906716,5.47810287
38.62259,5.47722558,5.52767618,-0.224612126,5.52652272,5.47616976,5.47693817,5.47597189
38.633082,5.09901951,5.52850238,-0.65534942,5.52734718,5.47403895,5.47480897,5.47384071
38.643573,4.79583152,5.52960851,-0.856607838,5.52845164,5.47190815,5.4726798,5.47170952
38.654065,5.56776436,5.53102664,0.191670864,5.52986815,5.46977695,5.47055024,5.46957794
38.664556,5.74456265,5.53279175,0.460185722,5.53163169,5.46764577,5.4684207,5.46744638
38.675048,4.79583152,5.53494288,-0.85971586,5.53378134,5.4655142,5.4662908,5.46531444
38.68554,5.29150262,5.53752225,-0.496003656,5.53635929,5.46338247,5.46416074,5.46318232
38.696031,5.47722558,5.54057543,-0.251693978,5.53941116,5.46125078,5.46203072,5.46105024
38.706523,5.19615242,5.5441522,-0.58991506,5.54298671,5.45911872,5.45990036,5.45891781
38.717014,5.47722558,5.54830397,-0.26660532,5.54713738,5.45698672,5.45777007,5.45678542
38.727506,5,5.55308556,-0.743697222,5.55191798,5.45485438,5.45563944,5.45465269
38.737998,6.164414,5.55855124,0.778371866,5.55738282,5.4527219,5.45350868,5.45251983
38.748489,6,5.56475337,0.659732238,5.56358425,5.4505895,5.45137801,5.45038704
38.758981,5.83095189,5.571741,0.509127581,5.57057133,5.44845677,5.44924703,5.44825392
38.769472,5.65685425,5.57955084,0.278034912,5.57838079,5.44632414,5.44711615,5.4461209
38.779964,4.89897949,5.58820551,-0.83019638,5.58703525,5.44419119,5.44498497,5.44398756
38.790456,5,5.59769944,-0.773110241,5.59652913,5.44205814,5.4428537,5.44185412
38.800947,5.83095189,5.60798848,0.472190015,5.60681828,5.43992521,5.44072255,5.43972079
38.811439,5.09901951,5.61897829,-0.721081669,5.61780833,5.43779198,5.43859113,5.43758717
38.82193,6.164414,5.63050061,0.730693775,5.62933099,5.43565888,5.43645984,5.43545367
38.832422,4.47213595,5.64230459,-1.08174333,5.64113536,5.43352551,5.43432828,5.4333199
38.842914,6.40312424,5.65403618,0.865498734,5.65286731,5.43139207,5.43219667,5.43118607
38.853405,5.91607978,5.66523738,0.500841698,5.66406875,5.42925877,5.43006522,5.42905237
38.863897,4.69041576,5.67536153,-0.992444342,5.67419291,5.42712522,5.42793352,5.42691842
38.874388,5.91607978,5.68379971,0.48195443,5.68263074,5.42499183,5.425802,5.42478463
38.88488,5.83095189,5.68994607,0.375507429,5.68877626,5.4228582,5.42367024,5.4226506
38.895372,5.91607978,5.69326722,0.472030254,5.692096,5.42072454,5.42153847,5.42051654
38.905863,6.63324958,5.69338572,0.969465761,5.69221241,5.41859106,5.41940688,5.41838265
38.916355,5.74456265,5.6901426,0.23328105,5.68896649,5.41645736,5.41727509,5.41624855
38.926846,5.83095189,5.6836254,0.38383134,5.6824458,5.41432385,5.4151435,5.41411464
38.937338,5.38516481,5.67415056,-0.537573951,5.67296684,5.41219014,5.41301172,5.41198051
38.94783,5.47722558,5.66221132,-0.430099696,5.66102294,5.41005643,5.41087995,5.4098464
38.958321,5.29150262,5.64840037,-0.597409195,5.6472069,5.40792293,5.4087484,5.40771249
38.968813,5.47722558,5.63332659,-0.395096212,5.63212773,5.40578925,5.40661668,5.4055784
38.979304,5.19615242,5.61756091,-0.649159833,5.61635646,5.40365579,5.4044852,5.40344453
38.989796,5.29150262,5.60158484,-0.556850261,5.60037472,5.40152216,5.40235356,5.40131049
39.000288,5.38516481,5.58578288,-0.447904093,5.58456709,5.39938857,5.40022197,5.39917648
39.010779,4.79583152,5.57043802,-0.880117321,5.56921661,5.39725523,5.39809063,5.39704272
39.021271,5.91607978,5.55573812,0.600284648,5.55451119,5.39512173,5.39595915,5.39490881
39.031762,5.56776436,5.54180223,0.161127689,5.54056991,5.3929885,5.39382795,5.39277516
39.042254,5.56776436,5.52868614,0.197682137,5.52744857,5.39085512,5.39169662,5.39064136
39.052746,4.58257569,5.51640747,-0.966349715,5.51516481,5.38872182,5.38956536,5.38850764
39.063237,5.74456265,5.50495411,0.489498247,5.50370652,5.38658879,5.38743441,5.38637419
39.073729,4.79583152,5.49429128,-0.835739046,5.49303889,5.38445565,5.38530334,5.38424063
39.08422,5.29150262,5.48437664,-0.439174247,5.48311961,5.38232279,5.38317258,5.38210735
39.094712,5.29150262,5.47515742,-0.428549648,5.47389588,5.38018984,5.38104172,5.37997397
39.105204,5.56776436,5.4665811,0.318093169,5.46531516,5.37805698,5.37891098,5.37784069
39.115695,4.79583152,5.45859476,-0.814102717,5.45732453,5.37592444,5.37678056,5.37570773
39.126187,6.92820323,5.45114469,1.21534297,5.44987029,5.37379181,5.37465007,5.37357467
39.136678,5.47722558,5.44418276,0.181776836,5.44290426,5.37165951,5.37251991,5.37144194
39.14717,6.08276253,5.43766111,0.803182059,5.43637861,5.36952713,5.3703897,5.36930914
39.157662,5.29150262,5.4315374,-0.374212207,5.43025096,5.36739489,5.36825963,5.36717647
39.168153,5.47722558,5.42577263,0.226832424,5.42448232,5.365263,5.36612992,5.36504414
39.178645,5.29150262,5.42032963,-0.358924794,5.41903551,5.36313105,5.36400016,5.36291176
39.189136,5.29150262,5.41517679,-0.351673387,5.41387891,5.36099946,5.36187078,5.36077973
39.199628,5.65685425,5.41028363,0.496558773,5.40898204,5.35886783,5.35974137,5.35864766
39.21012,5.74456265,5.40562417,0.582184226,5.40431889,5.35673636,5.35761213,5.35651576
39.220611,4.12310563,5.40117511,-1.13051735,5.39986618,5.35460527,5.35548329,5.35438424
39.231103,5.91607978,5.39691438,0.720531336,5.39560183,5.35247416,5.35335444,5.35225269
39.241594,6.08276253,5.39282393,0.830625427,5.39150778,5.35034344,5.35122598,5.35012153
39.252086,5.56776436,5.38888618,0.422939932,5.38756645,5.34821271,5.34909754,5.34799036
39.262578,5.29150262,5.38508659,-0.305914962,5.3837633,5.34608218,5.3469693,5.34585939
39.273069,5.65685425,5.38141224,0.524825691,5.38008541,5.34395206,5.34484148,5.34372882
39.283561,4.89897949,5.37785066,-0.692005186,5.37652029,5.34182195,5.34271369,5.34159826
39.294052,5.29150262,5.37439207,-0.28790527,5.37305817,5.33969226,5.34058633,5.33946813
39.304544,5.29150262,5.37102648,-0.281999755,5.36968906,5.33756259,5.338459,5.33733801
39.315036,5.56776436,5.36774597,0.447234163,5.36640503,5.33543315,5.33633192,5.33520812
39.325527,4.79583152,5.36454343,-0.7541299,5.36319897,5.33330416,5.33420529,5.33307868
39.336019,6,5.36141165,0.799117229,5.36006368,5.3311752,5.33207872,5.33094927
39.34651,5.56776436,5.35834534,0.457623236,5.35699385,5.32904669,5.32995261,5.32882031
39.357002,5.74456265,5.35533858,0.623878244,5.35398358,5.32691824,5.32782656,5.32669141
39.367494,5.29150262,5.35238692,-0.246747447,5.3510284,5.32479005,5.32570079,5.32456276
39.377985,5,5.34948634,-0.591173695,5.34812429,5.32266233,5.32357551,5.32243459
39.388477,5.74456265,5.34663239,0.630817138,5.34526681,5.32053468,5.3214503,5.32030648
39.398968,6.08276253,5.3438221,0.859616445,5.34245299,5.31840752,5.3193256,5.31817886
39.40946,5.56776436,5.34105175,0.476143479,5.33967911,5.31628044,5.31720099,5.31605132
39.419952,4.79583152,5.33831871,-0.736537297,5.33694252,5.31415365,5.31507669,5.31392407
39.430443,5.19615242,5.3356206,-0.373454387,5.33424086,5.31202736,5.3129529,5.31179732
39.440935,5.19615242,5.33295449,-0.369867635,5.33157118,5.30990117,5.31082923,5.30967067
39.451426,4.79583152,5.33031869,-0.731086289,5.3289318,5.3077755,5.30870608,5.30754453
39.461918,5.38516481,5.32771067,0.239695936,5.3263202,5.30564994,5.30658306,5.30541851
39.47241,5.47722558,5.32512883,0.389995821,5.32373478,5.30352471,5.30446038,5.30329281
39.482901,4.58257569,5.32257174,-0.860230226,5.32117408,5.3014,5.30233824,5.30116763
39.493393,5,5.32003732,-0.565718413,5.31863605,5.29927543,5.30021625,5.29904259
39.503884,6.08276253,5.31752464,0.874778768,5.31611974,5.2971514,5.29809482,5.29691809
39.514376,4.69041576,5.31503188,-0.790326588,5.31362334,5.29502752,5.29597354,5.29479374
39.524868,5.74456265,5.31255806,0.657270562,5.31114587,5.29290399,5.29385264,5.29266973
39.535359,4.69041576,5.31010228,-0.787201701,5.30868644,5.29078102,5.2917323,5.29054629
39.545851,5.83095189,5.30766303,0.723387078,5.30624351,5.28865821,5.28961214,5.288423
39.556342,4.69041576,5.30523981,-0.784107166,5.30381661,5.28653597,5.28749257,5.28630029
39.566834,5.56776436,5.30283125,0.514716534,5.30140435,5.28441391,5.28537319,5.28417775
39.577326,5.09901951,5.30043676,-0.44879533,5.29900614,5.28229223,5.2832542,5.28205559
39.587817,4.58257569,5.29805579,-0.845860564,5.29662144,5.28017114,5.28113582,5.27993402
39.598309,5.65685425,5.29568716,0.600971786,5.29424907,5.27805024,5.27901765,5.27781264
39.6088,5.29150262,5.29333066,-0.0427555745,5.29188882,5.27592995,5.27690009,5.27569186
39.619292,5.65685425,5.29101913,0.604843054,5.2895396,5.27380985,5.27481676,5.27357128
39.629784,5.65685425,5.28868442,0.606769995,5.28720107,5.27169017,5.27269989,5.27145111
39.640275,5.29150262,5.28636009,0.0717114189,5.2848729,5.26957111,5.27058365,5.26933156
39.650767,5.56776436,5.2840452,0.532652952,5.28255414,5.26745227,5.26846764,5.26721223
39.661258,5.56776436,5.28173969,0.534812741,5.28024477,5.26533406,5.26635228,5.26509353
39.67175,5.38516481,5.27944271,0.325149346,5.2779439,5.26321608,5.26423717,5.26297506
39.682242,5.83095189,5.27715405,0.744175952,5.27565133,5.26109854,5.26212251,5.26085703
39.692733,5.29150262,5.27487354,0.12895381,5.2733669,5.25898165,5.26000851,5.25873964
39.703225,4.89897949,5.27260038,-0.611245364,5.27108981,5.25686501,5.25789478,5.2566225
39.713716,5.09901951,5.27033467,-0.413902353,5.26882015,5.25474903,5.25578173,5.25450603
39.724208,4.47213595,5.26807566,-0.892154528,5.26655716,5.25263331,5.25366895,5.25238981
39.7347,4.89897949,5.26582325,-0.605676291,5.26430077,5.25051806,5.25155666,5.25027405
39.745191,6,5.26357739,0.858150689,5.26205091,5.24840348,5.24944505,5.24815898
39.755683,5,5.26133738,-0.511211682,5.25980688,5.24628919,5.24733375,5.24604418
39.766174,4.79583152,5.2591034,-0.680640784,5.25756886,5.24417558,5.24522314,5.24393006
39.776666,5,5.25687478,-0.506828159,5.25533619,5.24206225,5.24311284,5.24181624
39.787158,5.74456265,5.25465152,0.699936514,5.25310885,5.23994943,5.24100305,5.2397029
39.797649,5.29150262,5.25243362,0.197658797,5.25088686,5.23783731,5.23889399,5.23759028
39.808141,5.38516481,5.25022046,0.367347716,5.24866959,5.2357255,5.23678524,5.23547795
39.818632,5.74456265,5.24801228,0.704663301,5.24645728,5.2336144,5.23467723,5.23336634
39.829124,5.74456265,5.24580848,0.706225297,5.24424934,5.23150362,5.23256955,5.23125505
39.839616,5,5.2436091,-0.493567724,5.2420458,5.22939336,5.23046241,5.22914428
39.850107,5.47722558,5.2414142,0.485604136,5.23984671,5.22728383,5.22835602,5.22703423
39.860599,5.65685425,5.23922321,0.646243793,5.23765152,5.22517464,5.22624998,5.22492453
39.87109,5.47722558,5.23703641,0.490090977,5.23546051,5.22306619,5.2241447,5.22281556
39.881582,6.08276253,5.23485325,0.920819896,5.23327311,5.22095809,5.22203979,5.22070693
39.892074,4.24264069,5.23267381,-0.995004083,5.23108941,5.21885054,5.21993544,5.21859886
39.902565,4.58257569,5.23049822,-0.804936347,5.22890951,5.21674374,5.2178319,5.21649154
39.913057,5,5.22832587,-0.477834568,5.22673287,5.21463731,5.2157287,5.21438459
39.923548,5.29150262,5.22615712,0.255627657,5.2245598,5.21253165,5.2136263,5.2122784
39.93404,5.19615242,5.22399145,-0.166850307,5.22238979,5.21042636,5.21152428,5.21017258
39.944532,5.09901951,5.22182896,-0.350441788,5.22022295,5.20832165,5.20942286,5.20806734
39.955023,5.29150262,5.21966977,0.268016507,5.21805939,5.20621772,5.20732224,5.20596289
39.965515,5.09901951,5.21751339,-0.344229398,5.21589861,5.20411419,5.20522203,5.20385882
39.976006,6,5.21536014,0.885798994,5.21374094,5.20201145,5.20312264,5.20175554
39.986498,5.19615242,5.21320954,-0.13060289,5.2115859,5.19990911,5.20102366,5.19965267
39.99699,5.19615242,5.21106171,-0.122103584,5.20943362,5.19780737,5.1989253,5.1975504
40.007481,5.29150262,5.20891679,0.287377512,5.20728422,5.19570645,5.19682778,5.19544893
40.017973,5.09901951,5.2067743,-0.328260243,5.20513723,5.19360594,5.19473069,5.19334789
40.028464,5.47722558,5.20463459,0.522102465,5.202993,5.19150625,5.19263444,5.19124766
40.038956,5.83095189,5.20249719,0.79275135,5.20085106,5.18940699,5.19053863,5.18914786
40.049448,4.79583152,5.20036225,-0.636027299,5.19871156,5.18730837,5.18844348,5.18704869
40.059939,5.29150262,5.19822991,0.305405816,5.19657464,5.18521058,5.18634918,5.18495035
40.070431,5,5.19609972,-0.442831476,5.19443984,5.18311323,5.18425534,5.18285246
40.080922,5.29150262,5.19397202,0.312298892,5.19230752,5.18101673,5.18216238,5.18075541
40.091414,5.83095189,5.19184638,0.79944075,5.19017723,5.17892069,5.18006988,5.17865881
40.101906,4.79583152,5.18972295,-0.627607697,5.18804912,5.1768253,5.17797806,5.17656288
40.112397,4.79583152,5.18760187,-0.62591561,5.18592336,5.17473077,5.17588713,5.1744678
40.122889,4.24264069,5.18548272,-0.971000534,5.18379949,5.17263672,5.17379668,5.17237319
40.13338,5.56776436,5.18336586,0.619998793,5.18167789,5.17054353,5.17170712,5.17027945
40.143872,5.83095189,5.18125084,0.806040356,5.17955811,5.16845083,5.16961807,5.16818619
40.154364,4.89897949,5.17913783,-0.529299864,5.17744032,5.16635881,5.16752972,5.16609361
40.164855,5,5.177027,-0.420745768,5.17532468,5.16426768,5.16544228,5.16400192
40.175347,4.69041576,5.17491791,-0.69606189,5.17321076,5.16217705,5.16335535,5.16191072
40.185838,4.89897949,5.17281094,-0.523289077,5.17109894,5.16008731,5.16126934,5.15982042
40.19633,5.38516481,5.17070566,0.463097345,5.16898878,5.15799808,5.15918386,5.15773062
40.206822,5,5.16860223,-0.410612015,5.16688045,5.15590955,5.15709911,5.15564153
40.217313,5.47722558,5.16650083,0.557426898,5.16477412,5.15382195,5.15501529,5.15355335
40.227805,5.65685425,5.16440103,0.701750108,5.16266938,5.15173486,5.15293202,5.15146569
40.238296,5.38516481,5.16230322,0.47208218,5.1605666,5.14964869,5.15084969,5.14937895
40.248788,5.65685425,5.16020697,0.704732063,5.15846535,5.14756306,5.14876791,5.14729274
40.25928,4.58257569,5.15811245,-0.758641388,5.15636581,5.14547816,5.14668688,5.14520727
40.269771,5.29150262,5.15601985,0.368079849,5.15426816,5.14339419,5.14460682,5.14312273
40.280263,4.69041576,5.15392874,-0.680817876,5.15217198,5.14131078,5.14252733,5.14103873
40.290754,4.79583152,5.15183951,-0.596664046,5.15007766,5.13922831,5.1404488,5.13895568
40.301246,5.56776436,5.14975173,0.646538961,5.14798476,5.1371464,5.13837085,5.13687319
40.311738,5.29150262,5.1476656,0.379258513,5.14589348,5.13506524,5.13629369,5.13479145
40.322229,5,5.14558129,-0.381551168,5.143804,5.13298505,5.13421751,5.13271067
40.332721,4.24264069,5.14349839,-0.949135242,5.14171591,5.13090543,5.13214192,5.13063047
40.343212,5.29150262,5.14141729,0.387408484,5.13962958,5.12882678,5.13006733,5.12855123
40.353704,5.47722558,5.13933756,0.581281353,5.1375446,5.12674872,5.12799334,5.12647257
40.364196,4.12310563,5.1372594,-1.00705202,5.13546117,5.12467143,5.12592015,5.12439469
40.374687,5.47722558,5.135183,0.584844063,5.13337946,5.12259513,5.12384798,5.1223178
40.385179,5,5.13310793,-0.364839599,5.13129907,5.12051943,5.12177643,5.1202415
40.39567,4.58257569,5.1310346,-0.740580111,5.12922038,5.11844473,5.11970589,5.1181662
40.406162,5.47722558,5.12896258,0.590138116,5.12714298,5.11637063,5.11763599,5.1160915
40.416654,5.91607978,5.12689207,0.888362376,5.12506706,5.11429733,5.11556692,5.11401761
40.427145,5.19615242,5.12482326,0.267075202,5.12299281,5.11222505,5.11349888,5.11194472
40.437637,6.08276253,5.12275574,0.979799363,5.12091983,5.11015339,5.11143149,5.10987245
40.448128,5.47722558,5.12068989,0.597106089,5.11884849,5.10808274,5.10936513,5.1078012
40.45862,4.69041576,5.11862532,-0.654377234,5.1167784,5.10601273,5.10729944,5.10573058
40.469112,5.56776436,5.11656222,0.671715822,5.11470974,5.10394355,5.1052346,5.10366079
40.479603,4.69041576,5.11450076,-0.651218092,5.11264271,5.1018754,5.10317082,5.10159203
40.490095,5.83095189,5.11244056,0.847650478,5.11057691,5.09980789,5.10110771,5.09952391
40.500586,5.09901951,5.110382,-0.106594951,5.10851271,5.09774143,5.09904566,5.09745683
40.511078,4.79583152,5.10832467,-0.559010867,5.10644972,5.09567562,5.0969843,5.0953904
40.52157,5.19615242,5.10626878,0.299806013,5.10438813,5.09361066,5.09492382,5.09332483
40.532061,5.47722558,5.1042145,0.610746325,5.10232813,5.09154677,5.09286442,5.09126031
40.542553,4.35889894,5.10216145,-0.862126734,5.10026933,5.08948354,5.09080571,5.08919646
40.553044,4.58257569,5.10011001,-0.719398576,5.09821211,5.08742137,5.08874809,5.08713367
40.563536,5.38516481,5.09805978,0.535821828,5.09615606,5.08535988,5.08669118,5.08507156
40.574028,5,5.09601095,-0.309856337,5.0941014,5.08329927,5.08463518,5.08301032
40.584519,4.79583152,5.09396372,-0.546014832,5.09204829,5.08123974,5.08258028,5.08095016
40.595011,5.56776436,5.09191769,0.689816404,5.08999636,5.0791809,5.0805261,5.07889069
40.605502,5.47722558,5.08987325,0.622376352,5.08794599,5.07712315,5.07847303,5.0768323
40.615994,5.38516481,5.08783001,0.545284146,5.08589678,5.0750661,5.07642069,5.07477462
40.626486,4.12310563,5.08578815,-0.981163862,5.08384892,5.07300995,5.07436929,5.07271783
40.636977,6.08276253,5.08374787,0.999507209,5.08180261,5.0709549,5.07231901,5.07066214
40.647469,5,5.08170878,-0.285847474,5.07975746,5.06890057,5.07026947,5.06860717
40.65796,5.38516481,5.07967126,0.552714706,5.07771385,5.06684734,5.06822107,5.0665533
40.668452,4.47213595,5.07763493,-0.778138144,5.07567139,5.06479484,5.06617343,5.06450015
40.678944,5.19615242,5.07559997,0.347206646,5.07363027,5.06274326,5.06412674,5.06244793
40.689435,5.29150262,5.07356658,0.466836209,5.07159069,5.06069281,5.0620812,5.06039683
40.699927,5.65685425,5.07153436,0.765062014,5.06955225,5.05864309,5.06003643,5.05834646
40.710418,4.89897949,5.06950372,-0.412945797,5.06751535,5.05659451,5.05799282,5.05629722
40.72091,5.56776436,5.06747425,0.707311895,5.06547958,5.05454667,5.05594998,5.05424873
40.731402,5.65685425,5.06544614,0.769030627,5.06344516,5.05249977,5.05390813,5.05220118
40.741893,3.87298335,5.06341961,-1.09107115,5.06141226,5.05045403,5.05186744,5.05015477
40.752385,5.19615242,5.06139424,0.367094241,5.0593805,5.04840904,5.04982755,5.04810912
40.762876,6.08276253,5.05937044,1.01162844,5.05735026,5.0463652,5.04778885,5.04606463
40.773368,4.12310563,5.05734781,-0.966562042,5.05532117,5.04432213,5.04575094,5.0440209
40.78386,5.09901951,5.05532655,0.209028631,5.05329341,5.04228004,5.04371403,5.04197813
40.794351,5,5.05330684,-0.230882747,5.05126717,5.0402391,5.04167832,5.03993653
40.804843,4.69041576,5.05128832,-0.60072669,5.04924207,5.03819895,5.03964343,5.03789571
40.815334,4.47213595,5.04927135,-0.759694276,5.04721849,5.03615998,5.03760974,5.03585606
40.825826,5.74456265,5.04725556,0.835049154,5.04519606,5.03412179,5.03557688,5.03381721
40.836318,4.79583152,5.04524114,-0.499409263,5.04317496,5.03208459,5.03354504,5.03177933
40.846809,4.89897949,5.04322828,-0.379800987,5.04115538,5.03004859,5.03151442,5.02974265
40.857301,4.47213595,5.04121659,-0.754374336,5.03913694,5.02801338,5.02948464,5.02770676
40.867792,4.69041576,5.03920647,-0.590585061,5.03712003,5.02597937,5.02745608,5.02567207
40.878284,5.19615242,5.03719754,0.398691468,5.03510426,5.02394617,5.02542838,5.02363819
40.888776,5.09901951,5.03518997,0.252645092,5.03308982,5.02191399,5.02340171,5.02160532
40.899267,5.19615242,5.03318397,0.40369351,5.03107691,5.01988301,5.0213763,5.01957365
40.909759,4.89897949,5.03117916,-0.36359273,5.02906515,5.01785286,5.01935174,5.01754281
40.92025,4.69041576,5.02917591,-0.582031059,5.02705492,5.01582392,5.01732843,5.01551318
40.930742,5.19615242,5.02717386,0.411070025,5.02504583,5.01379582,5.015306,5.01348439
40.941234,5.56776436,5.02517318,0.736607889,5.02303809,5.01176875,5.01328463,5.01145662
40.951725,5.29150262,5.02317408,0.518004386,5.02103188,5.00974291,5.01126453,5.00943008
40.962217,5.19615242,5.02117617,0.41830163,5.01902682,5.00771791,5.00924531,5.00740438
40.972708,5.74456265,5.01917984,0.851694083,5.0170233,5.00569415,5.00722736,5.00537992
40.9832,4.58257569,5.0171847,-0.65924882,5.01502094,5.00367125,5.00521031,5.00335632
40.993692,5.29150262,5.01519096,0.52565356,5.01301992,5.00164939,5.00319434,5.00133376
41.004183,5.38516481,5.0131988,0.609890164,5.01102045,4.99962879,5.00117967,4.99931245
41.014675,6,5.01120784,0.99438029,5.00902213,4.99760906,4.9991659,4.997292
41.025166,5.19615242,5.00921847,0.432358596,5.00702536,4.99559058,4.99715342,4.99527281
41.035658,6.08276253,5.00723031,1.0370787,5.00502976,4.99357298,4.99514186,4.99325449
41.04615,5.38516481,5.00524355,0.616377531,5.00303551,4.99155644,4.99313141,4.99123724
41.056641,4.12310563,5.00325838,-0.938164567,5.00104282,4.98954118,4.99112227,4.98922126
41.067133,5.47722558,5.00127443,0.689892124,4.99905129,4.98752681,4.98911406,4.98720617
41.077624,5.65685425,4.99929208,0.81090207,4.99706133,4.98551371,4.98710717,4.98519235
41.088116,4.79583152,4.99731096,-0.448864603,4.99507254,4.98350151,4.98510121,4.98317942
41.098608,5.09901951,4.99533124,0.322006631,4.99308511,4.98149041,4.98309639,4.98116759
41.109099,5.65685425,4.99335314,0.814555776,4.99109925,4.97948059,4.9810929,4.97915704
41.119591,4.47213595,4.99137626,-0.720583311,4.98911458,4.97747168,4.97909036,4.97714739
41.130082,5.38516481,4.989401,0.629097613,4.98713147,4.97546406,4.97708916,4.97513904
41.140574,5.65685425,4.98742698,0.818185354,4.98514955,4.97345736,4.97508892,4.97313161
41.151066,5.29150262,4.98545438,0.55321627,4.98316901,4.97145178,4.97308983,4.97112528
41.161557,5.74456265,4.98348341,0.872398556,4.98119004,4.9694475,4.97109209,4.96912027
41.172049,6,4.98151368,1.00920083,4.97921228,4.96744415,4.96909533,4.96711617
41.18254,4.69041576,4.97954558,-0.53770793,4.97723609,4.96544211,4.96709993,4.96511339
41.193032,5.74456265,4.97757873,0.875776179,4.9752611,4.96344102,4.96510551,4.96311155
41.203524,6.08276253,4.97561333,1.05221158,4.97328752,4.96144105,4.96311226,4.96111083
41.214015,4.24264069,4.97364956,-0.854990571,4.97131551,4.95944241,4.96112039,4.95911144
41.224507,4.79583152,4.97168706,-0.419351331,4.96934472,4.95744472,4.95912951,4.95711299
41.234998,5,4.9697262,0.17399367,4.96737553,4.95544836,4.95714002,4.95511588
41.24549,4.89897949,4.96776867,-0.262276921,4.96540755,4.95345296,4.95515359,4.95311972
41.255982,5.19615242,4.96581054,0.479939452,4.96344098,4.95145871,4.9531663,4.95112471
41.266473,5,4.96385407,0.190120822,4.96147601,4.94946581,4.9511804,4.94913104
41.276965,5.09901951,4.96189888,0.370298029,4.95951227,4.94747387,4.94919551,4.94713833
41.287456,5.29150262,4.95994535,0.575810098,4.95755014,4.94548329,4.94721203,4.94514698
41.297948,5.74456265,4.95799319,0.886887511,4.95558924,4.94349368,4.94522966,4.9431566
41.30844,4.12310563,4.95604243,-0.912653715,4.95362977,4.94150524,4.94324842,4.94116739
41.318931,4.69041576,4.95409334,-0.513495452,4.95167192,4.93951816,4.9412686,4.93917954
41.329423,5.09901951,4.95214555,0.38324139,4.9497153,4.93753208,4.93928982,4.93719267
41.339914,4.89897949,4.95019944,-0.226318256,4.94776031,4.93554736,4.93731246,4.93520717
41.350406,4.69041576,4.94825464,-0.507778374,4.94580658,4.93356364,4.93533615,4.93322267
41.360898,4.12310563,4.94631133,-0.907306843,4.94385428,4.9315811,4.93336108,4.93123935
41.371389,4.79583152,4.94436972,-0.385406532,4.94190362,4.92959995,4.93138744,4.92925741
41.381881,4.35889894,4.94242942,-0.763891668,4.93995421,4.9276198,4.92941487,4.92727647
41.392372,4.24264069,4.94049083,-0.835374251,4.93800645,4.92564104,4.92744373,4.92529692
41.402864,5.29150262,4.93855356,0.594095164,4.93605996,4.9236633,4.92547367,4.92331838
41.413356,4.58257569,4.93661781,-0.595014381,4.93411492,4.92168676,4.92350487,4.92134105
41.423847,5.56776436,4.93468377,0.79566362,4.93217153,4.91971162,4.92153752,4.91936511
41.434339,5,4.93275107,0.259323994,4.93022942,4.91773751,4.91957125,4.91739019
41.44483,4.12310563,4.93082008,-0.898729356,4.92828897,4.9157648,4.91760645,4.91541668
41.455322,4.89897949,4.92889045,-0.172947858,4.9263498,4.91379313,4.91564274,4.9134442
41.465814,5.56776436,4.92696235,0.8005011,4.92441211,4.91182268,4.91368031,4.91147294
41.476305,4.58257569,4.92503598,-0.585201068,4.92247608,4.90985364,4.91171936,4.90950309
41.486797,5.19615242,4.92311098,0.522533675,4.92054135,4.90788565,4.90975951,4.90753429
41.497288,5.09901951,4.92118771,0.42170108,4.9186083,4.90591909,4.90780114,4.9055669
41.50778,5.09901951,4.91926582,0.423973698,4.91667655,4.90395357,4.90584389,4.90360056
41.518272,4.89897949,4.91734548,-0.135521202,4.91474629,4.9019893,4.90388794,4.90163547
41.528763,5.29150262,4.91542689,0.613250135,4.91281772,4.90002645,4.90193349,4.8996718
41.539255,5,4.91350969,0.294092344,4.91089046,4.89806468,4.89998016,4.8977092
41.549746,4.35889894,4.91159425,-0.743434802,4.90896489,4.89610434,4.89802833,4.89574803
41.560238,4.35889894,4.9096802,-0.742146384,4.90704065,4.89414507,4.89607764,4.89378792
41.57073,5.65685425,4.90776773,0.865497844,4.90511792,4.89218706,4.89412827,4.89182908
41.581221,5.74456265,4.90585703,0.915808721,4.90319689,4.8902305,4.89218042,4.88987168
41.591713,5.38516481,4.90394774,0.693698106,4.90127719,4.88827502,4.89023372,4.88791536
41.602204,5.19615242,4.90204023,0.542321113,4.89935921,4.88632099,4.88828854,4.88596049
41.612696,5.09901951,4.90013414,0.445965664,4.89744256,4.88436805,4.88634451,4.88400671
41.623188,4.69041576,4.89822965,-0.455866091,4.89552745,4.88241639,4.88440183,4.8820542
41.633679,3.87298335,4.89632696,-1.01160447,4.89361406,4.8804662,4.88246069,4.88010315
41.644171,5.47722558,4.89442569,0.76341331,4.89170202,4.8785171,4.88052071,4.8781532
41.654662,4.79583152,4.89252623,-0.310957724,4.88979171,4.87656948,4.87858228,4.87620472
41.665154,5,4.89062821,0.330714063,4.88788276,4.87462296,4.87664502,4.87425734
41.675646,5.29150262,4.88873182,0.634642267,4.88597537,4.87267774,4.87470913,4.87231126
41.686137,4.69041576,4.88683724,-0.443194626,4.88406971,4.87073399,4.8727748,4.87036665
41.696629,4,4.88494411,-0.940714683,4.88216542,4.86879136,4.87084165,4.86842315
41.70712,4.58257569,4.88305282,-0.548157934,4.88026288,4.86685022,4.86891007,4.86648114
41.717612,5.19615242,4.88116298,0.561239199,4.87836173,4.86491021,4.86697969,4.86454025
41.728104,5.38516481,4.8792748,0.711259448,4.87646215,4.8629715,4.8650507,4.86260067
41.738595,4.79583152,4.87738846,-0.285581754,4.87456432,4.86103429,4.86312328,4.86066258
41.749087,4,4.8755036,-0.935683494,4.87266788,4.85909821,4.86119707,4.85872562
41.759578,4.69041576,4.87362059,-0.42802433,4.87077322,4.85716364,4.85927245,4.85679017
41.77007,5.19615242,4.87173907,0.569572961,4.86887995,4.85523021,4.85734904,4.85485585
41.780562,6.32455532,4.86985922,1.20610783,4.86698828,4.8532981,4.85542705,4.85292285
41.791053,5.29150262,4.86798124,0.650785207,4.86509838,4.85136751,4.85350665,4.85099136
41.801545,4.24264069,4.86610476,-0.789597412,4.8632099,4.84943806,4.85158748,4.84906102
41.812036,5,4.86423015,0.368469599,4.8613232,4.84751014,4.84966992,4.8471322
41.822528,3.74165739,4.86235707,-1.05863104,4.85943793,4.84558337,4.8477536,4.84520453
41.83302,5.19615242,4.86048568,0.579367535,4.85755427,4.84365794,4.84583871,4.8432782
41.843511,4.35889894,4.85861618,-0.706906811,4.8556724,4.84173404,4.84392543,4.84135339
41.854003,5.19615242,4.85674822,0.582584076,4.85379197,4.83981131,4.84201341,4.83942975
41.864494,4.69041576,4.85488215,-0.405544557,4.85191334,4.83789011,4.84010302,4.83750764
41.874986,5.38516481,4.85301762,0.729484191,4.85003616,4.83597009,4.83819388,4.8355867
41.885478,5.38516481,4.85115483,0.730759866,4.84816062,4.83405142,4.8362862,4.83366711
41.895969,4.58257569,4.84929394,-0.516447718,4.84628688,4.83213429,4.83438016,4.83174907
41.906461,5.09901951,4.84743462,0.501582394,4.84441461,4.83021835,4.83247539,4.8298322
41.916952,4,4.84557721,-0.919552724,4.84254415,4.82830396,4.83057226,4.82791689
41.927444,4.58257569,4.84372138,-0.511024153,4.84067517,4.82639076,4.82867042,4.82600275
41.937936,5.09901951,4.8418673,0.507101775,4.83880784,4.82447893,4.82677006,4.82408999
41.948427,4.47213595,4.84001516,-0.606530468,4.83694234,4.82256866,4.82487135,4.82217878
41.958919,3.16227766,4.83816461,-1.29456053,4.83507833,4.82065958,4.82297393,4.82026877
41.96941,5.65685425,4.83631601,0.905835658,4.83321615,4.81875207,4.82107819,4.81836032
41.979902,5.56776436,4.83446901,0.856326664,4.83135547,4.81684577,4.81918375,4.81645307
41.990394,4.89897949,4.83262379,0.257595998,4.82949646,4.81494085,4.8172908,4.8145472
42.000885,4.58257569,4.83078053,-0.498201601,4.8276393,4.81303751,4.81539954,4.81264291
42.011377,4.12310563,4.82893889,-0.840138837,4.82578365,4.81113538,4.81350959,4.81073982
42.021868,5.29150262,4.82709923,0.681471493,4.82392986,4.80923483,4.81162133,4.80883831
42.03236,5.09901951,4.82526119,0.523219191,4.82207759,4.80733549,4.8097344,4.80693802
42.042852,5.09901951,4.82342497,0.524970996,4.820227,4.80543757,4.80784899,4.80503913
42.053343,4.79583152,4.82159073,-0.160496763,4.8183783,4.80354122,4.80596527,4.80314182
42.063835,3.60555128,4.81975815,-1.10191056,4.81653112,4.80164611,4.8040829,4.80124574
42.074326,5.09901951,4.81792756,0.530181053,4.81468582,4.79975259,4.80220223,4.79935125
42.084818,5.38516481,4.81609864,0.754364744,4.81284205,4.79786031,4.80032292,4.79745798
42.09531,4.89897949,4.81427156,0.291046266,4.81100001,4.79596944,4.79844515,4.79556614
42.105801,4.47213595,4.81244649,-0.583361412,4.80915986,4.79408018,4.79656909,4.79367589
42.116293,4.79583152,4.81062311,-0.121620647,4.80732125,4.79219216,4.79469441,4.79178688
42.126784,5.09901951,4.80880175,0.538718632,4.80548455,4.79030574,4.79282145,4.78989948
42.137276,5.56776436,4.80698208,0.872228341,4.80364941,4.78842058,4.79094987,4.78801332
42.147768,4.89897949,4.80516429,0.306292665,4.80181601,4.78653684,4.78907984,4.7861286
42.158259,4.69041576,4.80334854,-0.336054732,4.79998453,4.78465473,4.78721156,4.78424548
42.168751,4.35889894,4.80153451,-0.665308622,4.79815461,4.78277387,4.78534467,4.78236362
42.179242,4.89897949,4.79972253,0.315050718,4.79632662,4.78089463,4.78347953,4.78048337
42.189734,5,4.79791228,0.449541681,4.79450021,4.77901666,4.78161579,4.77860439
42.200226,5,4.79610392,0.451548531,4.79267556,4.77714013,4.77975364,4.77672685
42.210717,4.89897949,4.79429765,0.323545722,4.79085285,4.77526523,4.77789325,4.77485094
42.221209,5.09901951,4.79249312,0.553648258,4.78903174,4.7733916,4.77603427,4.77297629
42.2317,5.29150262,4.79069068,0.707680677,4.78721257,4.77151961,4.77417706,4.77110328
42.242192,3.74165739,4.78889,-1.02334384,4.785395,4.7696489,4.77232128,4.76923154
42.252684,4.79583152,4.78709125,0.0934894411,4.78357922,4.76777964,4.77046711,4.76736126
42.263175,5,4.78529461,0.463363131,4.7817654,4.76591203,4.76861472,4.76549261
42.273667,4,4.78349975,-0.88515521,4.7799532,4.76404571,4.76676378,4.76362526
42.284158,5,4.78170701,0.467218358,4.77814296,4.76218103,4.76491463,4.76175954
42.29465,4.89897949,4.77991606,0.34505569,4.77633435,4.76031764,4.76306693,4.75989511
42.305142,3.74165739,4.77812707,-1.01807155,4.77452755,4.75845573,4.76122085,4.75803215
42.315633,5.65685425,4.77634024,0.938357082,4.77272273,4.75659548,4.75937659,4.75617085
42.326125,5.19615242,4.77455521,0.649305179,4.77091955,4.75473652,4.7575338,4.75431084
42.336616,4.69041576,4.77277234,-0.286978358,4.76911836,4.75287922,4.75569282,4.75245249
42.347108,4.47213595,4.77099129,-0.54667663,4.76731882,4.75102324,4.75385332,4.75059544
42.3576,4.58257569,4.76921225,-0.432014531,4.76552111,4.74916873,4.75201548,4.74873987
42.368091,5,4.76743539,0.482249535,4.76372541,4.7473159,4.75017947,4.74688597
42.378583,5.38516481,4.76566037,0.787086043,4.76193137,4.74546438,4.74834495,4.74503338
42.389074,3.60555128,4.76388754,-1.07626032,4.76013935,4.74361453,4.74651228,4.74318246
42.399566,5.47722558,4.76211658,0.845641173,4.758349,4.741766,4.74468111,4.74133285
42.410058,4.79583152,4.76034766,0.188371616,4.7565605,4.73991897,4.74285162,4.73948475
42.420549,4.47213595,4.75858095,-0.535205562,4.75477403,4.73807362,4.74102399,4.73763831
42.431041,4.79583152,4.75681612,0.197523161,4.75298925,4.73622961,4.73919787,4.7357932
42.441532,4.69041576,4.75505411,-0.254240726,4.75120651,4.73438727,4.73737421,4.73394978
42.452024,5.09901951,4.75329341,0.587984779,4.74942546,4.73254627,4.7355515,4.73210768
42.462516,4.12310563,4.7515348,-0.792735246,4.74764629,4.73070678,4.7337305,4.73026709
42.473007,4.79583152,4.74977843,0.21459984,4.74586918,4.72886898,4.73191139,4.72842819
42.483499,5.09901951,4.74802399,0.592448749,4.74409377,4.72703252,4.73009382,4.72659062
42.49399,5.09901951,4.74627182,0.593925662,4.74232043,4.72519776,4.72827815,4.72475475
42.504482,3.60555128,4.74452159,-1.06722552,4.74054881,4.72336435,4.72646403,4.72292023
42.514974,5.83095189,4.74277348,1.04315791,4.73877909,4.72153246,4.72465166,4.72108722
42.525465,4.24264069,4.74102766,-0.705965275,4.73701145,4.71970227,4.7228412,4.71925591
42.535957,3.60555128,4.7392838,-1.06476877,4.73524554,4.71787344,4.72103231,4.71742596
42.546448,4.47213595,4.73754226,-0.51517599,4.73348172,4.71604632,4.71922535,4.7155977
42.55694,4.58257569,4.73580269,-0.391442203,4.73171965,4.71422055,4.71741998,4.71377081
42.567432,5.19615242,4.73406529,0.679769911,4.72995951,4.71239633,4.71561638,4.71194544
42.577923,4.12310563,4.73233022,-0.780528408,4.72820146,4.71057382,4.71381472,4.71012179
42.588415,4.47213595,4.73059716,-0.508390802,4.72644518,4.70875267,4.71201467,4.7082995
42.598906,4.58257569,4.72886645,-0.382479751,4.724691,4.70693325,4.71021657,4.70647893
42.609398,4.35889894,4.72713778,-0.606826856,4.7229386,4.70511519,4.70842009,4.70465972
42.61989,4.89897949,4.7254113,0.41661515,4.72118815,4.70329869,4.70662541,4.70284206
42.630381,4.79583152,4.7236872,0.268596944,4.71943982,4.70148391,4.70483271,4.70102612
42.640873,4,4.72196517,-0.849685333,4.71769329,4.69967051,4.70304165,4.69921156
42.651364,4.69041576,4.72024552,-0.172712948,4.71594888,4.69785884,4.70125257,4.69739873
42.661856,4.69041576,4.71852796,-0.16766692,4.71420628,4.69604856,4.69946515,4.69558727
42.672348,4.58257569,4.71681264,-0.366383605,4.71246566,4.69423984,4.69767956,4.69377737
42.682839,4.89897949,4.71509975,0.428812005,4.71072718,4.69243285,4.69589598,4.6919692
42.693331,3.74165739,4.71338897,-0.985764465,4.70899052,4.69062726,4.69411408,4.69016243
42.703822,4.47213595,4.71168063,-0.48943301,4.70725601,4.6888234,4.69233419,4.68835738
42.714314,4.89897949,4.70997441,0.434747134,4.70552334,4.68702095,4.690556,4.68655374
42.724806,4.24264069,4.7082705,-0.682370733,4.70379267,4.68522006,4.68877967,4.68475166
42.735297,5.29150262,4.70656907,0.764809489,4.70206417,4.68342092,4.68700539,4.68295132
42.745789,5.38516481,4.70486979,0.824799985,4.70033751,4.68162319,4.68523281,4.68115238
42.75628,5.56776436,4.70317301,0.929834045,4.69861304,4.67982721,4.6834623,4.67935519
42.766772,5,4.70147841,0.546371292,4.69689043,4.67803264,4.68169352,4.6775594
42.777264,4.35889894,4.69978617,-0.583855482,4.69516984,4.67623965,4.67992664,4.6757652
42.787755,5.09901951,4.69809645,0.633184856,4.69345145,4.67444841,4.67816184,4.67397274
42.798247,4.58257569,4.69640895,-0.337391844,4.69173493,4.6726586,4.67639879,4.6721817
42.808738,4.47213595,4.694724,-0.471792376,4.69002062,4.67087054,4.67463785,4.67039241
42.81923,3.46410162,4.69304129,-1.10857552,4.6883082,4.66908391,4.67287867,4.66860455
42.829722,3.31662479,4.69136099,-1.17249145,4.68659784,4.66729887,4.67112144,4.66681827
42.840213,4.12310563,4.68968328,-0.752713528,4.68488969,4.66551559,4.66936633,4.66503375
42.850705,5.29150262,4.68800784,0.776849263,4.68318345,4.66373375,4.66761302,4.66325066
42.861196,5.19615242,4.68633502,0.714014989,4.68147945,4.66195367,4.66586184,4.66146933
42.871688,4.12310563,4.68466449,-0.749372316,4.67977736,4.66017503,4.66411249,4.65968944
42.88218,5.38516481,4.68299644,0.83795487,4.67807735,4.65839799,4.66236512,4.65791114
42.892671,4.58257569,4.68133104,-0.314253633,4.67637959,4.65662273,4.66061992,4.65613461
42.903163,4.12310563,4.67966798,-0.746031068,4.67468377,4.65484891,4.65887657,4.65435952
42.913654,4.89897949,4.67800759,0.470076477,4.6729902,4.65307687,4.6571354,4.65258621
42.924146,4.58257569,4.67634957,-0.306225207,4.67129858,4.65130627,4.6553961,4.65081433
42.934638,4.89897949,4.6746941,0.473587785,4.66960907,4.64953729,4.65365883,4.64904407
42.945129,4.35889894,4.67304133,-0.560484066,4.66792184,4.64777009,4.65192378,4.64727559
42.955621,5.19615242,4.67139098,0.724404197,4.66623658,4.64600435,4.65019063,4.64550855
42.966112,4.47213595,4.66974337,-0.444530559,4.6645536,4.64424039,4.64845972,4.6437433
42.976604,5.47722558,4.66809821,0.899515074,4.6628726,4.64247789,4.64673072,4.6419795
42.987096,4.89897949,4.66645566,0.482207242,4.66119373,4.64071701,4.64500382,4.64021732
42.997587,4.69041576,4.6648159,0.159999572,4.65951718,4.63895793,4.64327919,4.63845693
43.008079,4.47213595,4.66317862,-0.437084279,4.65784262,4.63720031,4.64155651,4.63669799
43.01857,4.47213595,4.66154416,-0.435210534,4.65617037,4.63544449,4.63983613,4.63494085
43.029062,4.79583152,4.65991223,0.368672341,4.65450013,4.63369013,4.63811772,4.63318517
43.039554,4.12310563,4.65828299,-0.731558174,4.65283207,4.63193741,4.63640146,4.63143113
43.050045,5.09901951,4.65665661,0.665103677,4.65116633,4.6301865,4.63468754,4.62967888
43.060537,4.35889894,4.65503281,-0.544181834,4.64950263,4.62843705,4.63297563,4.6279281
43.071028,5.29150262,4.65341191,0.798805803,4.64784127,4.62668941,4.63126607,4.62617912
43.08152,4.69041576,4.65179362,0.196525166,4.64618195,4.62494325,4.62955856,4.62443161
43.092012,3.46410162,4.65017811,-1.08907139,4.64452483,4.62319874,4.62785327,4.62268574
43.102503,4.24264069,4.64856555,-0.637122333,4.64287007,4.62145603,4.62615038,4.62094168
43.112995,3.87298335,4.64695566,-0.879756965,4.64121738,4.61971481,4.62444958,4.6191991
43.123486,4.58257569,4.64534877,-0.250545546,4.63956706,4.61797541,4.62275119,4.61745833
43.133978,4.35889894,4.64374457,-0.533709312,4.63791881,4.61623749,4.62105493,4.61571904
43.14447,4.79583152,4.64214326,0.392030949,4.6362728,4.61450122,4.61936096,4.6139814
43.154961,4.35889894,4.64054499,-0.530703355,4.63462918,4.61276678,4.61766946,4.61224557
43.165453,4.58257569,4.6389495,-0.237431683,4.63298766,4.61103382,4.61598013,4.61051123
43.175944,4.69041576,4.6373571,0.230344663,4.63134854,4.6093027,4.6142933,4.60877872
43.186436,4.35889894,4.6357675,-0.526183011,4.62971153,4.60757307,4.61260867,4.60704769
43.196928,4.47213595,4.6341809,-0.402548063,4.62807679,4.6058451,4.61092642,4.60531832
43.207419,4.69041576,4.63259745,0.240454379,4.62644447,4.60411896,4.60924672,4.60359078
43.217911,4.12310563,4.63101689,-0.712678932,4.62481428,4.60239432,4.60756928,4.60186473
43.228402,5,4.62943952,0.608736787,4.62318654,4.60067152,4.60589444,4.60014051
43.238894,4.79583152,4.62786509,0.409837077,4.62156093,4.59895022,4.60422188,4.59841779
43.249386,4.47213595,4.62629377,-0.392629358,4.61993762,4.59723059,4.6025518,4.59669674
43.259877,4.12310563,4.62472572,-0.708251436,4.61831678,4.5955128,4.60088437,4.59497752
43.270369,4.89897949,4.62316068,0.525184541,4.6166981,4.59379652,4.5992193,4.5932598
43.28086,5.83095189,4.62159898,1.09970583,4.61508189,4.59208209,4.59755692,4.59154392
43.291352,5,4.62004033,0.616408686,4.61346786,4.59036917,4.59589694,4.58982956
43.301844,4.12310563,4.61848493,-0.70383187,4.61185616,4.58865792,4.59423954,4.58811686
43.312335,4,4.61693294,-0.785450786,4.61024696,4.58694853,4.5925849,4.58640601
43.322827,4.89897949,4.6153841,0.532536749,4.60863996,4.58524065,4.59093273,4.58469667
43.333318,3.31662479,4.61383873,-1.138953,4.60703547,4.58353462,4.58928338,4.58298918
43.34381,3.74165739,4.61229658,-0.933080484,4.6054332,4.58183012,4.58763654,4.5812832
43.354302,5,4.61075781,0.623892768,4.60383329,4.58012731,4.58599241,4.57957891
43.364793,4.47213595,4.60922262,-0.370252164,4.60223592,4.57842634,4.58435117,4.57787646
43.375285,4.69041576,4.60769074,0.287619581,4.60064079,4.57672691,4.58271254,4.57617554
43.385776,4.58257569,4.60616249,-0.15357993,4.5990482,4.57502934,4.58107685,4.57447647
43.396268,4.35889894,4.60463762,-0.495720365,4.59745786,4.57333329,4.57944382,4.57277893
43.40676,4.69041576,4.60311632,0.295464784,4.59586994,4.57163895,4.57781364,4.57108308
43.417251,4.12310563,4.60159876,-0.691731984,4.59428458,4.56994646,4.57618649,4.56938908
43.427743,4.58257569,4.6000847,-0.132321595,4.5927015,4.56825551,4.5745621,4.56769661
43.438234,4.24264069,4.59857446,-0.596601852,4.59112101,4.56656643,4.57294081,4.56600601
43.448726,4.79583152,4.59706779,0.445829266,4.58954281,4.56487888,4.57132235,4.56431694
43.459218,5,4.59556488,0.635952135,4.58796705,4.56319304,4.56970691,4.56262956
43.469709,4.12310563,4.59406592,-0.68626547,4.58639391,4.56150907,4.56809467,4.56094405
43.480201,4.47213595,4.59257066,-0.347037041,4.58482308,4.55982665,4.56648536,4.55926008
43.490692,4.35889894,4.59107944,-0.481851115,4.58325488,4.55814609,4.56487934,4.55757798
43.501184,3.74165739,4.58959202,-0.92083366,4.58168901,4.55646709,4.56327634,4.55589742
43.511676,4.35889894,4.58810858,-0.478758431,4.58012563,4.5547898,4.56167655,4.55421856
43.522167,5.19615242,4.58662932,0.780719606,4.5785649,4.55311438,4.56008016,4.55254158
43.532659,3.46410162,4.58515401,-1.05879762,4.57700653,4.55144051,4.55848692,4.55086614
43.54315,5.56776436,4.58368298,0.992008762,4.57545083,4.54976853,4.55689718,4.54919258
43.553642,4.58257569,4.58221676,0.0189455379,4.5738975,4.5480981,4.55531144,4.54752056
43.564134,4.79583152,4.58075404,0.463764469,4.57234671,4.54642939,4.55372839,4.54585026
43.574625,3.60555128,4.57929577,-0.986784928,4.5707986,4.54476256,4.55214897,4.54418184
43.585117,4.35889894,4.57784173,-0.467913225,4.5692529,4.5430973,4.55057296,4.54251497
43.595608,5.65685425,4.57639226,1.03945274,4.56770991,4.54143391,4.54900069,4.54084998
43.6061,3.87298335,4.57494715,-0.8378328,4.56616934,4.5397721,4.54743194,4.53918655
43.616592,5.19615242,4.5735066,0.7890791,4.56463135,4.53811201,4.5458669,4.53752484
43.627083,4.58257569,4.57207081,0.102493323,4.5630961,4.5364538,4.54430579,4.53586501
43.637575,4.69041576,4.57063959,0.346086933,4.56156329,4.53479717,4.54274838,4.53420674
43.648066,4.69041576,4.56921329,0.348141458,4.56003324,4.53314243,4.54119501,4.53255036
43.658558,4.69041576,4.56779169,0.350177198,4.55850566,4.53148926,4.53964548,4.53089555
43.66905,3.74165739,4.56637502,-0.908139656,4.5569807,4.52983783,4.53809999,4.52924246
43.679541,5.09901951,4.5649635,0.730791362,4.55545852,4.52818828,4.53655877,4.52759126
43.690033,4.69041576,4.56355693,0.356172469,4.55393884,4.52654032,4.5350216,4.52594163
43.700524,4.89897949,4.56215568,0.580365234,4.55242196,4.52489425,4.53348886,4.52429389
43.711016,4.79583152,4.56075956,0.4848422,4.5509076,4.52324976,4.53196032,4.52264773
43.721508,4.47213595,4.55936881,-0.295352092,4.54939592,4.52160702,4.53043623,4.5210033
43.731999,3.87298335,4.55798366,-0.827647455,4.54788706,4.51996617,4.52891682,4.51936076
43.742491,4.79583152,4.55660393,0.489108982,4.54638075,4.51832691,4.52740189,4.5177198
43.752982,4,4.55523,-0.745137568,4.54487729,4.51668954,4.52589182,4.51608074
43.763474,3.87298335,4.55387258,-0.825160128,4.5433764,4.51506474,4.52438644,4.51444326
43.773966,3.46410162,4.55251019,-1.04326822,4.54187824,4.51343072,4.52288598,4.51280752
43.784457,4.24264069,4.55115394,-0.555439691,4.54038296,4.5117986,4.52139071,4.51117367
43.794949,4.24264069,4.54980368,-0.554222873,4.53889028,4.51016808,4.51990044,4.50954142
43.80544,4.58257569,4.54845981,0.184704866,4.53740049,4.50853947,4.51841559,4.50791106
43.815932,4.89897949,4.54712219,0.593175599,4.53591334,4.50691245,4.51693599,4.50628229
43.826424,5.09901951,4.54579111,0.743793256,4.53442896,4.50528718,4.51546192,4.50465527
43.836915,4.24264069,4.54446681,-0.549387047,4.53294752,4.50366383,4.51399364,4.50303015
43.847407,4.79583152,4.54314921,0.502675152,4.53146873,4.50204207,4.51253103,4.50140662
43.857898,4.24264069,4.54183872,-0.546989971,4.5299929,4.50042222,4.5110745,4.499785
43.86839,3.46410162,4.54053523,-1.03751319,4.52851975,4.49880398,4.50962394,4.49816497
43.878882,4.89897949,4.53923905,0.599783656,4.52704943,4.4971875,4.50817964,4.4965467
43.889373,5.19615242,4.53795048,0.811296457,4.5255821,4.49557292,4.50674191,4.49493033
43.899865,4.79583152,4.53666946,0.509079623,4.52411749,4.49395996,4.50531066,4.49331557
43.910356,5.09901951,4.53539643,0.750748352,4.52265589,4.49234891,4.50388633,4.49170271
43.920848,4.24264069,4.53413134,-0.539898741,4.52119704,4.49073948,4.50246886,4.49009145
43.93134,5,4.53287453,0.683465778,4.51974107,4.4891318,4.50105857,4.48848195
43.941831,5.56776436,4.53162634,1.01790865,4.51828816,4.48752605,4.49965583,4.48687437
43.952323,5.19615242,4.53038677,0.815944638,4.51683802,4.48592191,4.49826058,4.48526839
43.962814,4.35889894,4.52915629,-0.412622528,4.51539095,4.48431969,4.49687333,4.48366432
43.973306,4.47213595,4.52793493,-0.236218076,4.51394669,4.48271908,4.49549405,4.48206187
43.983798,4.12310563,4.52672308,-0.635308942,4.51250539,4.48112025,4.49412315,4.48046117
43.994289,5,4.52552112,0.688824276,4.5110672,4.47952334,4.49276101,4.47886239
44.004781,4,4.52432912,-0.724105738,4.50963185,4.47792804,4.49140767,4.47726523
44.015272,4.35889894,4.52314763,-0.405276056,4.50819963,4.47633468,4.49006369,4.47566998
44.025764,4.58257569,4.52197673,0.246168564,4.50677028,4.47474293,4.48872912,4.47407635
44.036256,4.69041576,4.5208169,0.411823822,4.50534396,4.47315296,4.48740444,4.47248448
44.046747,3.60555128,4.5196686,-0.956094828,4.50392081,4.47156492,4.48609012,4.47089453
44.057239,4.89897949,4.51853198,0.616804267,4.50250058,4.46997851,4.48478627,4.46930621
44.06773,4.58257569,4.51740768,0.255280273,4.50108355,4.46839402,4.48349355,4.4677198
44.078222,4,4.51629589,-0.718537327,4.49966946,4.46681116,4.48221211,4.46613502
44.088714,3.74165739,4.51519717,-0.879511106,4.49825846,4.46523008,4.48094252,4.46455201
44.099205,4.79583152,4.5141121,0.530772476,4.4968507,4.46365094,4.47968537,4.46297092
44.109697,4.47213595,4.51304097,-0.202249876,4.49544593,4.46207342,4.47844089,4.46139145
44.120188,3.87298335,4.5119845,-0.799375477,4.49404443,4.46049784,4.47720986,4.45981392
44.13068,4.47213595,4.51094305,-0.196995176,4.49264595,4.45892389,4.47599257,4.458238
44.141172,4.35889894,4.50991732,-0.388610833,4.49125064,4.45735173,4.47478974,4.45666387
44.151663,4,4.50890803,-0.713377898,4.48985864,4.4557815,4.47360208,4.45509166
44.162155,5.09901951,4.50791563,0.768832804,4.48846971,4.45421291,4.47243004,4.45352108
44.172646,4.35889894,4.50694104,-0.384762385,4.48708412,4.45264626,4.47127453,4.45195244
44.183138,4.47213595,4.5059848,-0.183980549,4.48570163,4.45108125,4.47013606,4.45038542
44.19363,4.35889894,4.5050478,-0.382294206,4.48432238,4.44951802,4.46901554,4.44882018
44.204121,5,4.50413098,0.704179676,4.48294652,4.44795674,4.46791392,4.44725688
44.214613,4,4.50323506,-0.709390629,4.48157381,4.44639709,4.46683186,4.44569521
44.225104,2.44948974,4.50236117,-1.4327845,4.48020453,4.44483939,4.46577053,4.44413547
44.235596,3.74165739,4.50151016,-0.871695344,4.47883843,4.44328333,4.46473075,4.44257737
44.246088,4.69041576,4.5006832,0.435583008,4.47747565,4.44172907,4.4637137,4.44102105
44.256579,5,4.49988154,0.70719054,4.47611635,4.44017675,4.46272063,4.43946667
44.267071,3.87298335,4.49910626,-0.791279291,4.47476028,4.43862608,4.4617526,4.43791393
44.277562,4.47213595,4.49835885,-0.161934845,4.47340773,4.43707735,4.46081112,4.43636313
44.288054,4.35889894,4.49764058,-0.37248039,4.47205844,4.43553027,4.45989744,4.43481396
44.298546,3.46410162,4.49695307,-1.016293,4.47071256,4.43398498,4.45901318,4.43326659
44.309037,5.09901951,4.49629801,0.776351404,4.46937025,4.43244165,4.45816005,4.43172115
44.319529,4.12310563,4.49567704,-0.610386286,4.46803127,4.43089996,4.45733968,4.43017736
44.33002,4.24264069,4.49509219,-0.502445518,4.46669588,4.42936023,4.4565541,4.4286355
44.340512,4.58257569,4.49454537,0.296699051,4.46536386,4.42782215,4.45580522,4.42709529
44.351004,4.47213595,4.49403885,-0.147996275,4.46403535,4.42628586,4.45509533,4.42555688
44.361495,5,4.49357506,0.711635399,4.46271049,4.42475153,4.45442687,4.4240204
44.371987,4.79583152,4.49315647,0.550159119,4.46138906,4.42321886,4.4538023,4.42248557
44.382478,4.69041576,4.49278594,0.444555757,4.46007132,4.42168813,4.45322452,4.42095269
44.39297,4.12310563,4.49246641,-0.607750596,4.45875704,4.42015907,4.45269646,4.41942145
44.403462,4.79583152,4.4922012,0.551026612,4.45744638,4.41863181,4.45222146,4.41789201
44.413953,5,4.49199385,0.7127455,4.45613947,4.4171065,4.45180312,4.41636452
44.424445,4.47213595,4.4918482,-0.140400313,4.45483609,4.41558285,4.45144524,4.41483867
44.434936,5,4.49176848,0.712903585,4.45353651,4.41406116,4.45115213,4.41331477
44.445428,4.47213595,4.49175925,-0.140083168,4.4522405,4.41254113,4.45092834,4.41179253
44.45592,5.19615242,4.49182554,0.839241852,4.4509482,4.41102291,4.45077895,4.41027208
44.466411,4.24264069,4.4919728,-0.499331671,4.44965977,4.40950664,4.4507095,4.40875358
44.476903,4.58257569,4.49220709,0.300613714,4.44837497,4.40799204,4.45072602,4.40723673
44.487394,5.56776436,4.49253494,1.0369327,4.44709409,4.40647939,4.45083516,4.40572184
44.497886,3.87298335,4.49296368,-0.787388298,4.44581688,4.40496841,4.45104424,4.4042086
44.508378,4.69041576,4.49350126,0.443750492,4.44454351,4.40345925,4.45136134,4.40269716
44.518869,4.12310563,4.49415644,-0.609139409,4.44327412,4.40195203,4.4517953,4.40118767
44.529361,4.47213595,4.49493911,-0.151007125,4.44200848,4.40044649,4.45235604,4.39967984
44.539852,3.60555128,4.4958599,-0.943561672,4.44074687,4.39894291,4.45305436,4.39817396
44.550344,4,4.49693101,-0.704933338,4.43948906,4.397441,4.45390252,4.39666974
44.560836,3.74165739,4.4981657,-0.869774865,4.43823521,4.3959409,4.45491393,4.39516733
44.571327,4.24264069,4.49957872,-0.506890556,4.43698545,4.39444276,4.45610352,4.39366686
44.581819,4.69041576,4.50118699,0.435004337,4.43573958,4.3929463,4.45748831,4.39216806
44.59231,3.74165739,4.50300883,-0.872554552,4.43449786,4.3914518,4.45908687,4.39067121
44.602802,5.09901951,4.50506556,0.770684083,4.43326008,4.38995897,4.46092069,4.38917602
44.613294,4.35889894,4.50738059,-0.385333157,4.43202638,4.38846795,4.46301344,4.38768265
44.623785,3.87298335,4.50998029,-0.798120885,4.43079691,4.3869789,4.4653918,4.38619122
44.634277,4.69041576,4.51289534,0.421331721,4.42957146,4.38549153,4.46808671,4.38470146
44.644768,4.69041576,4.51615942,0.417440225,4.42835029,4.38400612,4.47113227,4.38321365
44.65526,4.35889894,4.51981217,-0.401139912,4.42713321,4.38252238,4.47456849,4.38172751
44.665752,4.69041576,4.5238979,0.408065994,4.42592034,4.38104047,4.47844018,4.38024318
44.676243,5.29150262,4.52846729,0.873518937,4.42471185,4.37956052,4.48279857,4.3787608
44.686735,3.74165739,4.53358004,-0.889900362,4.42350752,4.37808225,4.48770399,4.3772801
44.697226,3.16227766,4.53930317,-1.1734673,4.42230763,4.37660594,4.49322421,4.37580134
44.707718,4.12310563,4.54571669,-0.650085429,4.42111196,4.37513131,4.49944005,4.37432426
44.71821,4.79583152,4.55291224,0.492868423,4.41992066,4.37365851,4.50644417,4.37284899
44.728701,4.12310563,4.56099743,-0.66173394,4.41873389,4.37218767,4.51434535,4.37137568
44.739193,5.09901951,4.57010281,0.727266601,4.41755144,4.37071852,4.52327548,4.36990403
44.749684,5,4.58038256,0.647778853,4.41637357,4.36925133,4.53339044,4.36843434
44.760176,5,4.59203159,0.638724046,4.4152001,4.36778582,4.54488714,4.36696633
44.770668,4.79583152,4.60529512,0.436504753,4.41403116,4.36632214,4.55801336,4.36550013
44.781159,4.47213595,4.62049733,-0.385177065,4.4128669,4.36486042,4.57309666,4.36403588
44.791651,4.79583152,4.63808888,0.397168283,4.41170714,4.3634004,4.59059227,4.36257331
44.802142,4,4.65870231,-0.811604777,4.41055213,4.36194233,4.61113914,4.3611127
44.812634,4.58257569,4.68326358,-0.317313551,4.40940168,4.36048596,4.6356724,4.35965376
44.823126,4.58257569,4.71311425,-0.361301191,4.40825594,4.35903141,4.66554674,4.35819664
44.833617,5.74456265,4.75018515,0.997184787,4.40711506,4.35757883,4.70271145,4.35674147
44.844109,5.09901951,4.79719586,0.549384798,4.40597886,4.35612794,4.749911,4.35528798
44.8546,4.79583152,4.85778635,-0.248907265,4.40484759,4.35467901,4.81081701,4.35383645
44.865092,3.74165739,4.93661199,-1.09313979,4.40372107,4.35323177,4.89012167,4.35238659
44.875584,4.79583152,5.03916456,-0.493287983,4.40259945,4.35178637,4.99335414,4.35093856
44.886075,5.91607978,5.17134473,0.86298033,4.40148288,4.35034293,5.12644524,4.34949248
44.896567,5.65685425,5.33874402,0.564012611,4.40037118,4.34890118,5.2949999,4.34804808
44.907058,5.47722558,5.54551706,-0.261326389,4.39926461,4.3474614,5.50316007,4.34660563
44.91755,5.47722558,5.79340281,-0.562296396,4.39816299,4.34602332,5.75262334,4.34516487
44.928042,6.164414,6.08064466,0.289429338,4.39706647,4.34458706,6.04156595,4.34372593
44.938533,6.63324958,6.40139327,0.481514602,4.39597521,4.34315277,6.36405596,4.34228894
44.949025,7.54983444,6.74542383,0.896889403,4.39488903,4.34172018,6.70978238,4.34085364
44.959516,8.18535277,7.09749963,1.04300199,4.39380818,4.34028955,7.0634251,4.33942029
44.970008,8.24621125,7.43695604,0.899586133,4.39273251,4.33886062,7.40424171,4.33798862
44.9805,7.48331477,7.73694146,-0.50361363,4.39166217,4.33743352,7.70530474,4.33655878
44.990991,8.30662386,7.96585629,0.583753007,4.39059729,4.33600839,7.93493999,4.33513089
45.001483,8.06225775,8.09296442,-0.175233203,4.38953773,4.33458496,8.06234442,4.33370468
45.011974,7.87400787,8.0980371,-0.473317255,4.38848374,4.33316349,8.06724346,4.33228044
45.022466,7.34846923,7.98006031,-0.794727047,4.38743516,4.33174372,7.94861192,4.33085787
45.032958,7.74596669,7.75771492,-0.108389221,4.38639214,4.33033565,7.72515046,4.32943713
45.043449,7.21110255,7.46129597,-0.500193379,4.38535483,4.3289197,7.4272162,4.32801835
45.053941,6.55743852,7.1225879,-0.751764177,4.38432308,4.32750544,7.08665104,4.32660125
45.064432,6.08276253,6.76899909,-0.828393966,4.38329715,4.32609315,6.73093178,4.3251861
45.074924,7,6.42171772,0.760448733,4.38227688,4.32468256,6.38132027,4.32377265
45.085416,6.164414,6.09641194,0.260772052,4.38126244,4.3232738,6.05356846,4.32236101
45.095907,6.32455532,5.80382086,0.721619331,4.38025396,4.32186701,5.75850832,4.32095133
45.106399,5.56776436,5.55011528,0.132849858,4.37925132,4.32046193,5.50240452,4.31954334
45.11689,5.65685425,5.33745734,0.565152111,4.37825477,4.31905881,5.28750287,4.3181373
45.127382,6,5.16441403,0.914103916,4.37726416,4.31765739,5.11242919,4.31673295
45.137874,5,5.02702552,-0.164394414,4.37627965,4.31625781,4.97325185,4.31533043
45.148365,5.47722558,4.91983079,0.746588768,4.3753014,4.31486019,4.86450777,4.31392986
45.158857,6.08276253,4.83689912,1.11618252,4.37432927,4.31346428,4.78024155,4.31253098
45.169348,5.47722558,4.77269156,0.839365248,4.37336352,4.31207034,4.71487849,4.31113405
45.17984,5.09901951,4.72246341,0.613641673,4.37240402,4.3106781,4.66363542,4.30973881
45.190332,4.69041576,4.6824782,0.0890929948,4.37145093,4.30928769,4.62274146,4.3083454
45.200823,4.79583152,4.64994314,0.381953379,4.37050439,4.30789925,4.58937588,4.30695394
45.211315,4.89897949,4.62285179,0.525478543,4.36956431,4.30651252,4.56151091,4.30556416
45.221806,5.19615242,4.59981797,0.772226942,4.36863092,4.30512775,4.53774529,4.30417635
45.232298,5.29150262,4.57988207,0.843576053,4.36770411,4.30374469,4.51710853,4.30279022
45.24279,4.89897949,4.56238833,0.580164767,4.36678405,4.30236347,4.4989375,4.30140592
45.253281,4.79583152,4.54687627,0.498954163,4.36587088,4.30098421,4.48276649,4.30002357
45.263773,5.19615242,4.53300774,0.814336961,4.36496451,4.29960665,4.46825338,4.29864291
45.274264,4.58257569,4.52053348,0.249082739,4.36406518,4.29823107,4.45514613,4.2972642
45.284756,5.19615242,4.50925418,0.828793247,4.36317279,4.29685719,4.44324298,4.29588718
45.295248,5.47722558,4.49901223,0.989046684,4.36228751,4.29548514,4.43238453,4.29451199
45.305739,4.12310563,4.48967737,-0.605451689,4.36140949,4.29411506,4.42243899,4.29313875
45.316231,5.83095189,4.48113776,1.16181502,4.36053865,4.29274669,4.41329306,4.2917672
45.326722,4.69041576,4.47330157,0.465955138,4.35967523,4.29138028,4.40485383,4.2903976
45.337214,4.35889894,4.4660873,-0.327396335,4.35881915,4.29001559,4.39703868,4.28902969
45.347706,4.47213595,4.45942686,0.112734642,4.35797057,4.28865272,4.38977866,4.28766361
45.358197,4.89897949,4.45326119,0.667621368,4.35712966,4.28729182,4.38301399,4.28629948
45.368689,4.35889894,4.4475374,-0.297722118,4.35629634,4.28593263,4.37669092,4.28493704
45.37918,5.09901951,4.44221146,0.810436951,4.35547086,4.28457541,4.37076491,4.28357654
45.389672,4.12310563,4.43724291,-0.560479512,4.35465314,4.28321989,4.3651948,4.28221775
45.400164,4.79583152,4.43259765,0.602688868,4.35384337,4.28186621,4.35994603,4.28086077
45.410655,4.12310563,4.42824563,-0.55239479,4.35304171,4.28051449,4.35498814,4.27950574
45.421147,4.58257569,4.42415914,0.398015775,4.35224809,4.27916448,4.35029286,4.2781524
45.431638,4.24264069,4.42031517,-0.421514508,4.35146277,4.27781644,4.3458369,4.27680102
45.44213,3.74165739,4.41669189,-0.821604832,4.35068569,4.2764701,4.34159795,4.27545132
45.452622,4.35889894,4.4132709,-0.233177946,4.34991703,4.2751256,4.33755732,4.27410345
45.463113,3.46410162,4.41003576,-0.972591458,4.34915696,4.27378306,4.33369832,4.27275752
45.473605,5,4.4069709,0.770083826,4.34840544,4.27244223,4.33000496,4.27141328
45.484096,5.19615242,4.40406351,0.889993771,4.34766272,4.27110336,4.32646426,4.270071
45.494588,5,4.40130101,0.773756416,4.34692876,4.2697662,4.32306326,4.2687304
45.50508,4.58257569,4.39867298,0.428838798,4.34620374,4.26843088,4.31979136,4.26739162
45.515571,5.09901951,4.39616969,0.838361392,4.34548785,4.26709751,4.31663863,4.26605479
45.526063,4.35889894,4.39378198,-0.18677001,4.34478106,4.26576586,4.31359557,4.26471966
45.536554,4.35889894,4.39150235,-0.180564137,4.34408361,4.26443617,4.31065458,4.26338646
45.547046,5.19615242,4.38932317,0.898236748,4.3433955,4.26310818,4.30780767,4.26205496
45.557538,4.47213595,4.38723812,0.291372336,4.34271692,4.26178204,4.3050484,4.26072528
45.568029,4.89897949,4.38524145,0.716755216,4.34204804,4.26045785,4.30237086,4.25939754
45.578521,3.31662479,4.38332737,-1.03281295,4.34138887,4.25913537,4.29976896,4.25807149
45.589012,5.29150262,4.38149134,0.953945113,4.34073966,4.25781485,4.29723806,4.25674739
45.599504,4.79583152,4.37972852,0.645060465,4.34010041,4.25649604,4.29477301,4.25542497
45.609996,4.47213595,4.37803498,0.306758825,4.33947133,4.25517906,4.29236976,4.25410438
45.620487,4.79583152,4.37640712,0.647629834,4.3388526,4.25386404,4.29002458,4.25278572
45.630979,4.47213595,4.37484121,0.311921052,4.33824425,4.25255073,4.28773343,4.25146876
45.64147,4.89897949,4.3733344,0.72501385,4.33764653,4.25123938,4.2854934,4.25015373
45.651962,3.74165739,4.37188353,-0.793867836,4.33705948,4.24992973,4.283301,4.2488404
45.662454,4.12310563,4.37048609,-0.497373564,4.33648329,4.24862192,4.28115362,4.24752888
45.672945,4.79583152,4.36913978,0.65321646,4.33591817,4.24731607,4.27904885,4.24621931
45.683437,3.87298335,4.36784212,-0.70346199,4.33536417,4.24601192,4.27698386,4.24491142
45.693928,4.47213595,4.3665913,0.324876375,4.33482155,4.24470973,4.27495681,4.24360547
45.70442,2.23606798,4.36538519,-1.45921802,4.33429037,4.24340925,4.27296524,4.24230121
45.714912,4.58257569,4.36422219,0.467283106,4.33377083,4.2421106,4.27100743,4.24099876
45.725403,5.09901951,4.36310081,0.857857044,4.33326316,4.2408139,4.26908176,4.23969825
45.735895,5,4.36201935,0.798736911,4.33276743,4.23951891,4.2671862,4.23839943
45.746386,3.87298335,4.36097667,-0.69856519,4.3322839,4.23822588,4.26531958,4.23710255
45.756878,4.79583152,4.35997133,0.660197083,4.33181266,4.23693455,4.26348009,4.23580735
45.76737,5,4.3590023,0.800623323,4.33135395,4.23564506,4.26166658,4.23451397
45.777861,3.87298335,4.35806859,-0.696480611,4.33090798,4.23435751,4.25987794,4.23322252
45.788353,4.79583152,4.35716907,0.662315979,4.33047486,4.23307168,4.25811268,4.23193275
45.798844,5.09901951,4.35630302,0.861810011,4.33005486,4.23178779,4.25637004,4.23064492
45.809336,5.19615242,4.35546946,0.916887648,4.32964811,4.23050562,4.25464865,4.22935878
45.819828,4.12310563,4.35466774,-0.481209013,4.32925484,4.22922527,4.25294772,4.22807445
45.830319,3.87298335,4.35389724,-0.693479554,4.3288753,4.22794687,4.25126652,4.22679204
45.840811,4.47213595,4.35315719,0.344932984,4.32850962,4.22667018,4.24960388,4.22551133
45.851302,3.87298335,4.35244717,-0.692433266,4.3281581,4.22539544,4.24795932,4.22423254
45.861794,4.58257569,4.35176654,0.480426017,4.32782088,4.2241224,4.2463318,4.22295544
45.872286,4.24264069,4.35111489,-0.329354214,4.32749822,4.22285119,4.24472076,4.22168015
45.882777,3.74165739,4.35049186,-0.780278457,4.32719038,4.22158193,4.24312569,4.22040679
45.893269,4.24264069,4.34989696,-0.327500035,4.32689754,4.22031438,4.24154569,4.2191351
45.90376,4.69041576,4.34932997,0.584025503,4.32662,4.21904877,4.23998046,4.21786535
45.914252,4.79583152,4.34879049,0.668611272,4.32635794,4.21778486,4.23842917,4.21659728
45.924744,5.09901951,4.34827831,0.866453232,4.32611165,4.21652278,4.23689143,4.21533102
45.935235,5.29150262,4.34779325,0.971447049,4.32588141,4.21526265,4.23536691,4.21406668
45.945727,3.60555128,4.34733503,-0.861268691,4.32566743,4.21400422,4.23385486,4.21280402
45.956218,4.58257569,4.34690358,0.485460724,4.32547003,4.21274774,4.23235513,4.21154329
45.96671,4.89897949,4.34649868,0.743290525,4.32528944,4.21149296,4.23086703,4.21028424
45.977202,4.47213595,4.34612028,0.35498687,4.32512597,4.21024,4.2293903,4.20902699
45.987693,4.35889894,4.34576832,0.114588915,4.32497991,4.20898899,4.22792472,4.20777166
45.998185,4.79583152,4.34544271,0.671110135,4.32485155,4.20773967,4.22646967,4.20651801
46.008676,4.47213595,4.34514347,0.356360046,4.32474119,4.2064923,4.22502508,4.20526628
46.019168,4.12310563,4.34487056,-0.470919242,4.32464914,4.20524664,4.22359038,4.20401624
46.02966,4.58257569,4.34462402,0.487802904,4.32457572,4.20400279,4.22216541,4.20276799
46.040151,4.79583152,4.34440393,0.671883616,4.32452126,4.20276088,4.22075003,4.20152166
46.050643,5,4.34421032,0.809808425,4.32448609,4.20152068,4.21934369,4.20027701
46.061134,4.89897949,4.3440433,0.744940389,4.32447054,4.20028241,4.21794642,4.19903427
46.071626,4.69041576,4.34390298,0.588653363,4.32447498,4.19904585,4.21655771,4.19779321
46.082118,4.24264069,4.34378949,-0.318038994,4.32449975,4.1978111,4.21517748,4.19655395
46.092609,4.79583152,4.343703,0.672405031,4.32454523,4.19657829,4.21380562,4.19531661
46.103101,4.58257569,4.34364366,0.488806743,4.32461178,4.19534718,4.21244169,4.19408094
46.113592,5.09901951,4.34361169,0.869142005,4.3246998,4.19411801,4.21108575,4.19284718
46.124084,3.74165739,4.34360728,-0.7758543,4.32480968,4.19289053,4.20973736,4.19161509
46.134576,4.47213595,4.34363068,0.358476326,4.32494183,4.19166487,4.20839647,4.1903848
46.145067,4.47213595,4.34368212,0.358404566,4.32509664,4.19044115,4.20706305,4.18915642
46.155559,4.35889894,4.34379252,0.122908212,4.32527458,4.18921912,4.2057683,4.18792972
46.16605,5.09901951,4.3439009,0.86897561,4.32547604,4.18799903,4.20444913,4.18670492
46.176542,3.87298335,4.34403822,-0.686334372,4.3257015,4.18678063,4.20313671,4.1854818
46.187034,4.12310563,4.34420477,-0.470211813,4.32595142,4.18556405,4.20183106,4.18426046
46.197525,4.35889894,4.3444009,0.120407834,4.32622622,4.18434939,4.20053217,4.18304103
46.208017,4.69041576,4.34462699,0.588038071,4.32652646,4.18313644,4.19923966,4.18182327
46.218508,4.24264069,4.34488338,-0.319754111,4.32685256,4.18192541,4.19795368,4.18060742
46.229,3.87298335,4.34517052,-0.687158771,4.3272051,4.18071608,4.19667387,4.17939323
46.239492,4.58257569,4.34548882,0.48691568,4.32758457,4.17950856,4.19540025,4.17818084
46.249983,4.12310563,4.34583866,-0.471946004,4.32799146,4.17830297,4.19413284,4.17697034
46.260475,4.47213595,4.34622057,0.354845577,4.32842641,4.17709907,4.19287132,4.17576151
46.270966,5,4.34663496,0.808309988,4.32888989,4.17589709,4.19161582,4.17455458
46.281458,4.69041576,4.34708241,0.585946544,4.32938257,4.17469681,4.19036605,4.17334932
46.29195,4.69041576,4.34756338,0.585535975,4.32990502,4.17349834,4.18912203,4.17214584
46.302441,3.31662479,4.34807837,-1.01560503,4.33045777,4.17230179,4.18788381,4.17094426
46.312933,4.58257569,4.34862803,0.483681364,4.33104158,4.17110694,4.18665109,4.16974434
46.323424,4.69041576,4.34921284,0.584125775,4.33165696,4.169914,4.18542404,4.16854632
46.333916,4.79583152,4.3498335,0.667830832,4.33230471,4.16872276,4.18420236,4.16734997
46.344408,5.47722558,4.35049059,1.06147774,4.33298545,4.16753333,4.18298612,4.16615539
46.354899,4.47213595,4.35118468,0.347780497,4.33369981,4.16634581,4.18177537,4.1649627
46.365391,4.79583152,4.35191657,0.666269429,4.33444865,4.16515998,4.18056984,4.16377168
46.375882,5.29150262,4.35268681,0.968925079,4.33523256,4.16397607,4.17936972,4.16258254
46.386374,3.60555128,4.35349627,-0.864838133,4.33605246,4.16279385,4.17817473,4.16139507
46.396866,4.24264069,4.35434561,-0.334222867,4.33690906,4.16161343,4.17698494,4.16020937
46.407357,4.69041576,4.35523551,0.578947535,4.33780307,4.16043493,4.17580043,4.15902556
46.417849,4.47213595,4.35616693,0.340542245,4.33873551,4.15925812,4.17462095,4.15784341
46.42834,4.47213595,4.35714052,0.339109772,4.33970703,4.15808322,4.17344669,4.15666314
46.438832,4.24264069,4.3581573,-0.339877343,4.34071871,4.15691,4.1722774,4.15548453
46.449324,4.35889894,4.35921805,-0.0178635345,4.34177136,4.15573859,4.17111316,4.15430769
46.459815,5.29150262,4.36032357,0.964976191,4.34286581,4.15456909,4.16995407,4.15313274
46.470307,4.79583152,4.36147501,0.659057289,4.34400322,4.15340127,4.16879989,4.15195944
46.480798,4.89897949,4.36267311,0.732329417,4.34518435,4.15223536,4.16765082,4.15078801
46.49129,4,4.36391909,-0.60325707,4.34641046,4.15107114,4.16650663,4.14961825
46.501782,4.12310563,4.36521387,-0.492044966,4.34768248,4.14990872,4.16536742,4.14845025
46.512273,4.12310563,4.36655839,-0.493409322,4.34900136,4.1487482,4.16423329,4.14728412
46.522765,4.58257569,4.36795398,0.463272827,4.35036846,4.14758936,4.16310402,4.14611965
46.533256,4.69041576,4.36940153,0.566581175,4.35178466,4.14643243,4.16197982,4.14495705
46.543748,5.38516481,4.37090251,1.0071059,4.35325146,4.14527718,4.16086048,4.14379611
46.55424,4.24264069,4.37245798,-0.360301666,4.35476991,4.14412373,4.15974611,4.14263692
46.564731,4.12310563,4.37406902,-0.500962464,4.35634111,4.14297217,4.15863682,4.14147961
46.575223,5.65685425,4.37573722,1.1318644,4.35796665,4.1418223,4.1575324,4.14032395
46.585714,4.69041576,4.37746361,0.559421264,4.35964756,4.14067433,4.15643308,4.13917015
46.596206,4.35889894,4.37924989,-0.14265673,4.36138553,4.13952804,4.15533866,4.138018
46.606698,4.12310563,4.38109732,-0.507928825,4.36318183,4.13838354,4.15424926,4.13686761
46.617189,4.47213595,4.38300719,0.298544409,4.36503775,4.13724093,4.153165,4.13571908
46.627681,4.24264069,4.38498139,-0.377280664,4.36695516,4.13610001,4.1520857,4.1345722
46.638172,3.74165739,4.38702111,-0.803345331,4.36893525,4.13496098,4.15101159,4.13342718
46.648664,4.69041576,4.38912836,0.54889653,4.37098001,4.13382363,4.14994248,4.13228381
46.659156,5,4.39130464,0.780189313,4.37309094,4.13268806,4.14887851,4.13114218
46.669647,4.12310563,4.39355146,-0.520044071,4.37526953,4.13155439,4.14781982,4.13000242
46.680139,4.24264069,4.39587105,-0.391446503,4.37751799,4.13042239,4.14676623,4.1288643
46.69063,4.47213595,4.39826483,0.271792426,4.37983774,4.12929228,4.14571798,4.12772803
46.701122,4.89897949,4.40073517,0.70586423,4.3822311,4.12816385,4.14467491,4.12659341
46.711614,4.47213595,4.40328384,0.262396857,4.38469983,4.1270372,4.14363717,4.12546053
46.722105,4.24264069,4.40591265,-0.404069256,4.38724573,4.12591244,4.1426049,4.1243295
46.732597,3.74165739,4.40862422,-0.816680373,4.38987137,4.12478936,4.14157796,4.12320011
46.743088,4.24264069,4.41142024,-0.410827887,4.39257844,4.12366815,4.14055658,4.12207257
46.75358,4.58257569,4.41430353,0.410209909,4.39536969,4.12254863,4.13954063,4.12094667
46.764072,5.19615242,4.41727618,0.882539656,4.39824722,4.12143087,4.13853028,4.11982251
46.774563,5.19615242,4.42034035,0.880801946,4.40121314,4.12031501,4.13752567,4.1187002
46.785055,4.69041576,4.42349917,0.516639714,4.40427051,4.11920081,4.13652668,4.11757952
46.795546,4.24264069,4.42675464,-0.429085023,4.40742136,4.1180885,4.13553357,4.11646068
46.806038,5.09901951,4.43011012,0.81786881,4.41066894,4.11697785,4.13454623,4.11534348
46.81653,3.87298335,4.43356813,-0.748722097,4.41401575,4.11586898,4.13356482,4.11422801
46.827021,3.46410162,4.43713123,-0.986422637,4.41746433,4.11476198,4.13258952,4.11311438
46.837513,4.79583152,4.44080315,0.595842574,4.42101832,4.11365666,4.13162023,4.11200238
46.848004,4.69041576,4.44458633,0.495811889,4.42468014,4.11255321,4.13065723,4.11089223
46.858496,4.79583152,4.44848475,0.589361328,4.4284537,4.11145143,4.12970042,4.10978369
46.868988,4.69041576,4.45250144,0.487764615,4.43234197,4.11035142,4.12874999,4.10867689
46.879479,4.47213595,4.45663952,0.124484668,4.43634804,4.10925328,4.12780615,4.10757192
46.889971,5.38516481,4.46090342,0.961385139,4.44047624,4.1081568,4.12686881,4.10646858
46.900462,4.58257569,4.46529612,0.342461054,4.44472951,4.1070622,4.12593827,4.10536707
46.910954,4.69041576,4.46982238,0.469673693,4.44911253,4.10596926,4.12501446,4.10426718
46.921446,4.24264069,4.47448588,-0.481503056,4.45362891,4.10487809,4.12409762,4.10316901
46.931937,4.24264069,4.4792904,-0.486466563,4.45828238,4.10378878,4.12318794,4.10207267
46.942429,4,4.48424127,-0.695874463,4.46307816,4.10270114,4.1222854,4.10097796
46.95292,4.79583152,4.48934213,0.553614843,4.46801983,4.10161537,4.1213903,4.09988507
46.963412,5.29150262,4.49459871,0.892694746,4.47311303,4.10053125,4.12050263,4.09879379
46.973904,5.38516481,4.50001551,0.940823733,4.47836217,4.0994489,4.11962263,4.09770423
46.984395,5,4.50559715,0.703137859,4.4837718,4.09836841,4.11875055,4.0966165
46.994887,4,4.51135005,-0.715087445,4.48934821,4.09728957,4.11788639,4.09553038
47.005378,4.58257569,4.51727873,0.255532709,4.49509586,4.0962126,4.11703049,4.09444608
47.01587,5.47722558,4.52339012,0.976645002,4.50102155,4.09513729,4.11618288,4.09336339
47.026362,4.79583152,4.52968973,0.515889325,4.50713069,4.09406373,4.11534384,4.09228242
47.036853,4.35889894,4.53618327,-0.421051449,4.5134289,4.09299204,4.11451365,4.09120326
47.047345,4.79583152,4.54287854,0.502944316,4.51992384,4.09192199,4.11369237,4.09012571
47.057836,4,4.54978115,-0.741472284,4.52662102,4.09085381,4.11288038,4.08904997
47.068328,4.24264069,4.55689955,-0.560587966,4.53352875,4.08978728,4.11207776,4.08797583
47.07882,5.19615242,4.56424059,0.794928824,4.54065374,4.0887225,4.11128485,4.08690341
47.089311,4.24264069,4.57181132,-0.573733939,4.54800295,4.08765957,4.11050196,4.08583279
47.099803,4.58257569,4.57962131,0.0543542713,4.55558576,4.0865983,4.10972923,4.08476378
47.110294,5.09901951,4.58767758,0.715081768,4.5634091,4.08553888,4.10896708,4.08369657
47.120786,4,4.59599052,-0.772004221,4.57148315,4.08448111,4.10821567,4.08263097
47.131278,4,4.60456865,-0.777540128,4.5798163,4.08342508,4.10747539,4.08156706
47.141769,5.38516481,4.61342082,0.878489604,4.58841727,4.08237091,4.10674663,4.08050496
47.152261,4.79583152,4.62255883,0.41626037,4.59729762,4.08131838,4.1060296,4.07944445
47.162752,4.58257569,4.63199154,-0.22229676,4.60646611,4.0802677,4.10532479,4.07838574
47.173244,4.69041576,4.64173183,0.220644349,4.61593537,4.07921867,4.10463246,4.07732863
47.183736,4.79583152,4.65179042,0.379527474,4.62571596,4.07817138,4.10395307,4.07627322
47.194227,4.47213595,4.66217847,-0.43593866,4.63581887,4.07712594,4.10328711,4.07521959
47.204719,4.89897949,4.67291066,0.475466956,4.64625851,4.07608214,4.10263488,4.07416756
47.21521,5,4.68399831,0.56214028,4.65704605,4.07504018,4.10199698,4.07311733
47.225702,4.35889894,4.69545747,-0.580136643,4.66819727,4.07399986,4.10137377,4.07206868
47.236194,4.79583152,4.70730178,0.29753948,4.67972559,4.07296129,4.10076584,4.07102172
47.246685,5.19615242,4.71954545,0.69036727,4.69164502,4.07192455,4.10017377,4.06997655
47.257177,4.69041576,4.73220692,-0.204428874,4.70397368,4.07088945,4.09959802,4.06893296
47.267668,4.47213595,4.74530075,-0.522651698,4.71672592,4.0698562,4.09903931,4.06789116
47.27816,4.89897949,4.75884719,0.374342483,4.72992167,4.06882457,4.09849817,4.06685094
47.288652,4.79583152,4.77286373,0.151551288,4.74357817,4.06779469,4.09797532,4.0658124
47.299143,5,4.78736864,0.461119679,4.75771342,4.06676664,4.09747151,4.06477565
47.309635,5.09901951,4.80238532,0.544641348,4.77235044,4.06574023,4.09698739,4.06374047
47.320126,6.08276253,4.81793268,1.12464654,4.78750791,4.06471564,4.09652385,4.06270707
47.330618,5.83095189,4.83403654,0.998456488,4.80321121,4.0636927,4.09608163,4.06167525
47.34111,4.69041576,4.85071956,-0.40037957,4.81948271,4.06267148,4.09566166,4.06064511
47.351601,5.56776436,4.86800549,0.836515912,4.83634584,4.0616521,4.09526492,4.05961674
47.362093,4.89897949,4.88592434,0.114259117,4.85383013,4.06063434,4.09489231,4.05858994
47.372584,5,4.90450096,0.309029188,4.87196013,4.05961842,4.09454496,4.05756491
47.383076,4.58257569,4.92376861,-0.58411721,4.8907686,4.05860412,4.09422392,4.05654145
47.393568,4.58257569,4.943757,-0.600983619,4.91028486,4.05759155,4.09393041,4.05551967
47.404059,4.58257569,4.96449735,-0.617998106,4.93053972,4.05658081,4.0936657,4.05449964
47.414551,5.19615242,4.98602861,0.458392645,4.95157156,4.0555717,4.09343108,4.05348119
47.425042,4.79583152,5.00838378,-0.461033904,4.97341301,4.0545644,4.09322801,4.0524645
47.435534,4.35889894,5.03160627,-0.820187375,4.99610684,4.05355874,4.09305798,4.05144937
47.446026,4.47213595,5.0557355,-0.763936871,5.01969199,4.0525548,4.0929226,4.0504359
47.456517,5.74456265,5.08081298,0.814708331,5.04420946,4.05155267,4.0928236,4.04942419
47.467009,5.29150262,5.10688994,0.429665783,5.06970977,4.05055218,4.0927628,4.04841405
47.4775,4.24264069,5.13401077,-0.944123979,5.09623682,4.0495535,4.09274217,4.04740566
47.487992,5,5.16223286,-0.402781399,5.12384722,4.04855644,4.09276378,4.04639882
47.498484,5.09901951,5.19160917,-0.304285484,5.15259332,4.0475611,4.09282988,4.04539364
47.508975,4.79583152,5.2221957,-0.652965678,5.18253047,4.04656758,4.09294285,4.04439022
47.519467,5.29150262,5.25406074,0.19349905,5.21372607,4.04557567,4.09310528,4.04338834
47.529958,5,5.28727079,-0.535976485,5.24624001,4.04458558,4.09332757,4.04238822
47.54045,4.24264069,5.32189086,-1.03886966,5.28014829,4.04359711,4.09359734,4.04138964
47.550942,5.65685425,5.3579992,0.546676363,5.31552238,4.04261036,4.09392543,4.04039271
47.561433,6,5.39567244,0.777385077,5.35243804,4.04162541,4.09431521,4.03939753
47.571925,4.69041576,5.4350031,-0.862894747,5.39098669,4.04064208,4.09477043,4.03840389
47.582416,5.09901951,5.47607502,-0.614048456,5.43125129,4.03966056,4.09529496,4.03741199
47.592908,5,5.5189932,-0.720411826,5.47333563,4.03868065,4.09589318,4.03642164
47.6034,4.47213595,5.56385789,-1.04485498,5.51733888,4.03770246,4.09656966,4.03543293
47.613891,5.56776436,5.61077581,-0.207392013,5.56336666,4.03672607,4.09732932,4.03444595
47.624383,6,5.6598747,0.583202625,5.61154526,4.03575129,4.09817769,4.03346052
47.634874,5.83095189,5.71127282,0.345946643,5.66199176,4.03477832,4.0991205,4.03247681
47.645366,5.56776436,5.76511635,-0.444243166,5.71485075,4.03380696,4.10016427,4.03149464
47.655858,5.38516481,5.82154721,-0.660592464,5.7702627,4.0328373,4.10131584,4.03051411
47.666349,5.56776436,5.88071715,-0.559421832,5.82837785,4.03186944,4.10258261,4.0295353
47.676841,6.08276253,5.94280636,0.374107161,5.88937448,4.0309032,4.10397303,4.02855803
47.687332,5.65685425,6.00798522,-0.592563055,5.95342134,4.02993875,4.10549579,4.02758248
47.697824,7.14142843,6.07646174,1.03197223,6.02072424,4.02897591,4.10716098,4.02660846
47.708316,5.83095189,6.14844096,-0.563461684,6.09148627,4.02801478,4.10897917,4.02563607
47.718807,6.40312424,6.22414305,0.423061681,6.16592543,4.02705543,4.11096192,4.02466539
47.729299,5.74456265,6.30382717,-0.747839902,6.24429822,4.0260977,4.11312253,4.02369624
47.73979,5.83095189,6.38774271,-0.746184169,6.32685169,4.02514176,4.11547477,4.02272881
47.750282,5.38516481,6.47619017,-1.0445216,6.41388323,4.02418742,4.11803477,4.0217629
47.760774,5.83095189,6.56946904,-0.859370204,6.50568937,4.02323478,4.12081959,4.02079861
47.771265,7.07106781,6.6679007,0.634954418,6.60258831,4.02228393,4.12384805,4.01983603
47.781757,6.164414,6.77185936,-0.779387809,6.70495026,4.02133469,4.12714193,4.01887497
47.792248,7.14142843,6.88170827,0.509627475,6.81313475,4.02038723,4.13072412,4.01791561
47.80274,6.70820393,6.99787833,-0.538214086,6.92756787,4.01944138,4.13462152,4.01695778
47.813232,6.8556546,7.12079935,-0.514922086,7.04867459,4.01849722,4.13886301,4.01600155
47.823723,6.4807407,7.25092866,-0.877603532,7.17690683,4.01755484,4.14348077,4.01504702
47.834215,6.78232998,7.38879063,-0.778755836,7.31278234,4.01661407,4.14851229,4.01409401
47.844706,6.78232998,7.5348907,-0.867502573,7.4567998,4.01567508,4.15399768,4.01314269
47.855198,7.48331477,7.68981712,-0.454425294,7.60953897,4.01473769,4.15998424,4.01219289
47.86569,7.07106781,7.85414704,-0.884917639,7.77156789,4.01380199,4.16652369,4.01124469
47.876181,7.34846923,8.02848086,-0.82462818,7.94347655,4.01286807,4.17367441,4.01029817
47.886673,8.18535277,8.21349096,-0.167744421,8.12592446,4.01193574,4.18150484,4.00935317
47.897164,7.41619849,8.40980113,-0.99679619,8.31952154,4.0110052,4.19008983,4.00840985
47.907656,7.93725393,8.61811617,-0.825143767,8.52495521,4.01007625,4.19951826,4.00746804
47.918148,7.68114575,8.83908716,-1.07607686,8.74285698,4.00914899,4.20988936,4.00652782
47.928639,9,9.0733465,-0.27082559,8.97383605,4.00822351,4.22131717,4.00558929
47.939131,8.88819442,9.32155918,-0.658304459,9.21852855,4.00729962,4.23393742,4.00465225
47.949622,8.77496439,9.58424293,-0.899599103,9.47741865,4.0063775,4.24790367,4.0037169
47.960114,8.24621125,9.86191918,-1.271105,9.75098464,4.00545698,4.26340321,4.00278304
47.970606,10,10.1549042,-0.393578721,10.0394895,4.00453814,4.28065695,4.00185076
47.981097,10.2956301,10.4633222,-0.40950224,10.3429879,4.00362107,4.29993677,4.00092016
47.991589,10.6301458,10.7871314,-0.396214092,10.6613429,4.0027056,4.32159425,3.99999105
48.00208,10.198039,11.125841,-0.963224774,10.9939342,4.00179189,4.34608225,3.99906362
48.012572,11.045361,11.4786585,-0.65825337,11.3397823,4.00087978,4.37402669,3.99813767
48.023064,10.4403065,11.84417,-1.18484747,11.6972059,3.99996935,4.40629228,3.9972133
48.033555,11.4017543,12.2203202,-0.904746368,12.0637623,3.99906068,4.44410346,3.99629059
48.044047,11.4891253,12.6044195,-1.05607489,12.4362012,3.99815361,4.48921041,3.99536937
48.054538,12.0415946,12.9928104,-0.975302929,12.810076,3.9972483,4.54404429,3.99444981
48.06503,12.6885775,13.3811105,-0.832185669,13.1799062,3.99634457,4.61194244,3.99353173
48.075522,13.4907376,13.7639788,-0.522724782,13.5388804,3.99544253,4.69725669,3.99261522
48.086013,14.5945195,14.1353448,0.677624355,13.8790221,3.99454225,4.80538159,3.99170037
48.096505,14.4913767,14.4887579,0.0511743681,14.1914914,3.99364356,4.94259546,3.990787
48.106996,14.9331845,14.817518,0.340097751,14.4667518,3.99274662,5.11547809,3.98987527
48.117488,14.832397,15.1154526,-0.532029738,14.6953939,3.99185128,5.33020766,3.98896502
48.12798,16.4012195,15.3772538,1.01191187,14.8686759,3.99095761,5.59140911,3.98805633
48.138471,16.0934769,15.5991277,0.703099709,14.9794411,3.9900657,5.90112073,3.98714929
48.148963,16.4620776,15.7792141,0.826355551,15.0228891,3.98917537,6.25804771,3.98624372
48.159454,16.5227116,15.9174628,0.777977407,14.9970551,3.9882868,6.65683069,3.98533979
48.169946,17.2046505,16.0153591,1.09054637,14.9030935,3.98739982,7.08813488,3.98443733
48.180438,16.583124,16.0748089,0.712962146,14.7451215,3.98651451,7.53828245,3.98353641
48.190929,16.3095064,16.0966202,0.461396006,14.5297656,3.98563096,7.98903209,3.98263714
48.201421,16.1554944,16.0784499,0.277568921,14.2653616,3.98474899,8.41702328,3.98173933
48.211912,15,16.0128258,-1.00639248,13.961287,3.98386877,8.79295566,3.98084315
48.222404,15.5563492,15.8865787,-0.574655976,13.6270085,3.98299014,9.0831597,3.97994843
48.232896,17,15.6835526,1.1473654,13.2716397,3.98211318,9.25450918,3.97905525
48.243387,15.0996689,15.3911006,-0.539844185,12.9034281,3.98123797,9.28379444,3.9781637
48.253879,15.3622915,15.0072343,0.595866749,12.5293877,3.98036434,9.16654982,3.97727361
48.26437,15.2970585,14.5436759,0.867976186,12.1554551,3.97949246,8.91909958,3.97638514
48.274862,14.1774469,14.0218298,0.394483266,11.7862312,3.97862217,8.57182612,3.97549812
48.285354,13.6747943,13.4662501,0.456666407,11.425335,3.97775354,8.15930029,3.97461264
48.295845,12.8840987,12.8992545,-0.123108783,11.0754332,3.97688667,7.71303826,3.97372877
48.306337,12.5299641,12.3386238,0.437424568,10.7382945,3.97602137,7.2587147,3.97284635
48.316828,12.6095202,11.7979031,0.900897947,10.4151749,3.97515782,6.816582,3.97196554
48.32732,11.6619038,11.2865323,0.612675659,10.1066895,3.97429586,6.40192647,3.97108618
48.337812,11.3578167,10.810738,0.739647658,9.8131535,3.97343556,6.02586041,3.97020834
48.348303,10.1488916,10.3737763,-0.474220103,9.53457741,3.97257701,5.69533971,3.96933211
48.358795,10.0498756,9.97623857,0.271361484,9.27066993,3.97172004,5.41320256,3.96845732
48.369286,9.74679434,9.61683717,0.36049573,9.02108782,3.97086481,5.17872688,3.96758413
48.379778,9.74679434,9.29268928,0.673873181,8.78527719,3.97001117,4.98814638,3.96671238
48.39027,9.59166305,9.00017324,0.769083746,8.56268584,3.96915919,4.83581562,3.96584215
48.400761,9.79795897,8.73535603,1.03082634,8.35271241,3.96830896,4.71520884,3.96497351
48.411253,9.11043358,8.49434776,0.784911345,8.15467193,3.9674603,4.61982749,3.96410631
48.421744,9.16515139,8.27374087,0.944145393,7.96795311,3.9666134,4.54390174,3.9632407
48.432236,9.05538514,8.07054922,0.992388993,7.79187452,3.96576807,4.48263262,3.96237651
48.442728,9.21954446,7.88238099,1.15635785,7.62582415,3.9649244,4.43230124,3.96151384
48.453219,8.71779789,7.70731914,1.00522572,7.46920619,3.96408248,4.3901387,3.96065275
48.463711,8.54400375,7.54379577,1.00010398,7.32140368,3.96324214,4.35414022,3.95979309
48.474202,8.71779789,7.39062069,1.15203177,7.18188657,3.96240355,4.32290071,3.95893501
48.484694,7,7.24677536,-0.496764891,7.05009737,3.96156653,4.29542072,3.95807835
48.495186,8.06225775,7.11145649,0.975090384,6.92554962,3.96073118,4.27099697,3.95722318
48.505677,7.28010989,6.98398098,0.544177281,6.80778386,3.95989757,4.2491177,3.9563696
48.516169,7.41619849,6.86371968,0.743289182,6.69633601,3.95906554,4.22939336,3.95551743
48.52666,7.41619849,6.75016045,0.816111532,6.5908156,3.95823525,4.21152812,3.95466684
48.537152,6.55743852,6.64279992,-0.292166721,6.49081752,3.95740655,4.19527831,3.95381765
48.547644,7.61577311,6.54121279,1.03661001,6.39599437,3.95657951,4.18044763,3.95296996
48.558135,6.92820323,6.44500975,0.695121199,6.30602189,3.95575421,4.16687086,3.95212383
48.568627,6.78232998,6.35380727,0.654616465,6.22057354,3.95493049,4.15440366,3.95127911
48.579118,7.48331477,6.2672882,1.10273595,6.13937923,3.95410852,4.14292632,3.95043596
48.58961,5.56776436,6.18512789,-0.785724841,6.06215716,3.95328813,4.13233098,3.94959421
48.600102,6.63324958,6.10705155,0.725395083,5.98866876,3.9524694,4.12252667,3.94875393
48.610593,7.07106781,6.03280511,1.01895177,5.91869184,3.95165241,4.1134337,3.94791522
48.621085,5.83095189,5.96213336,-0.362189816,5.85200054,3.95083701,4.10497974,3.9470779
48.631576,6.8556546,5.8948277,0.98021778,5.78841085,3.95002335,4.09710423,3.94624214
48.642068,7.34846923,5.83066962,1.2319901,5.72772746,3.94921128,4.0897508,3.94540777
48.65256,6.70820393,5.76947563,0.968879921,5.66978663,3.94840087,4.08287167,3.94457488
48.663051,6.164414,5.71107513,0.673304444,5.61443548,3.94759221,4.07642431,3.94374353
48.673543,6.55743852,5.65529346,0.949813172,5.56151606,3.94678513,4.07036917,3.94291357
48.684034,6.55743852,5.60198979,0.97747058,5.51090151,3.9459798,4.06467321,3.94208515
48.694526,5.74456265,5.55101302,0.439942753,5.46245414,3.94517605,4.05930504,3.94125812
48.705018,5.91607978,5.50223687,0.643306238,5.41605961,3.94437397,4.05423732,3.94043256
48.715509,5.65685425,5.45554373,0.448676412,5.37161064,3.94357364,4.04944616,3.93960853
48.726001,6.164414,5.41081062,0.868103324,5.32899438,3.94277489,4.04490852,3.93878588
48.736492,6.55743852,5.36793984,1.09064141,5.28812159,3.94197789,4.04060533,3.93796476
48.746984,6,5.32682373,0.820473202,5.24889301,3.94118248,4.03651776,3.93714502
48.757476,5.47722558,5.28737354,0.435720129,5.21122709,3.94038875,4.03262992,3.93632674
48.767967,5.47722558,5.24950588,0.47719985,5.17504698,3.93959676,4.02892736,3.93550998
48.778459,5.19615242,5.21313191,-0.130305363,5.14027034,3.93880636,4.02539596,3.93469459
48.78895,5.91607978,5.17818226,0.859009618,5.10683314,3.93801771,4.02202418,3.93388073
48.799442,5.91607978,5.14457848,0.878351471,5.0746624,3.93723066,4.01880024,3.93306823
48.809934,6,5.11225667,0.942201321,5.04369888,3.93644528,4.01571432,3.93225718
48.820425,5.19615242,5.08115652,0.339110465,5.01388653,3.93566165,4.01275739,3.93144764
48.830917,6,5.05121252,0.974057227,4.98516419,3.93487962,4.0099204,3.93063947
48.841408,6.164414,5.02237448,1.06866249,4.95748517,3.93409934,4.00719609,3.92983281
48.8519,5.56776436,4.99458414,0.757086665,4.93079491,3.93332066,4.00457679,3.92902751
48.862392,5.09901951,4.96779467,0.362249703,4.9050497,3.93254366,4.00205618,3.92822365
48.872883,4.12310563,4.94196168,-0.904906653,4.88020805,3.93176842,3.99962844,3.92742129
48.883375,5.09901951,4.91703603,0.426595221,4.85622379,3.93099478,3.99728752,3.92662028
48.893866,5.47722558,4.89298085,0.764359026,4.83306246,3.93022289,3.99502872,3.92582078
48.904358,5.38516481,4.86975214,0.717922464,4.81068262,3.92945262,3.99284686,3.92502263
48.91485,5.38516481,4.84731505,0.733382407,4.78905157,3.92868403,3.99073776,3.9242259
48.925341,5.19615242,4.82563646,0.608700221,4.76813823,3.92791719,3.98869754,3.92343067
48.935833,5.29150262,4.80467893,0.697727523,4.74790723,3.92715197,3.98672202,3.92263678
48.946324,4.79583152,4.78441499,0.106848173,4.72833282,3.92638851,3.9848081,3.92184439
48.956816,5.38516481,4.76481094,0.787625463,4.7093831,3.92562667,3.98295215,3.92105333
48.967308,4.89897949,4.74584049,0.391329775,4.69103332,3.92486652,3.98115135,3.92026369
48.977799,5.74456265,4.72747861,1.00850584,4.67325989,3.92410813,3.97940302,3.91947554
48.988291,5.19615242,4.70969636,0.69746402,4.65603538,3.92335136,3.97770424,3.91868872
48.998782,5.74456265,4.69247307,1.02571418,4.63934033,3.92259636,3.97605289,3.91790339
49.009274,5.29150262,4.67578254,0.784678328,4.62314986,3.92184299,3.97444636,3.91711939
49.019766,4.47213595,4.65960474,-0.432976652,4.60744504,3.92109132,3.97288271,3.91633679
49.030257,4.89897949,4.64392049,0.505033657,4.59220777,3.92034141,3.97136008,3.91555566
49.040749,4.79583152,4.62870716,0.408808462,4.57741649,3.91959314,3.96987634,3.91477587
49.05124,5.47722558,4.61394903,0.929126767,4.56305635,3.91884665,3.96843002,3.91399754
49.061732,5.29150262,4.59962548,0.831791525,4.54910775,3.91810179,3.96701924,3.91322054
49.072224,6.08276253,4.58572107,1.22353646,4.53555603,3.91735864,3.96564261,3.91244493
49.082715,5.19615242,4.57222098,0.78989331,4.52238714,3.91661727,3.96429883,3.91167079
49.093207,4.58257569,4.55913147,0.15311507,4.50958399,3.91587754,3.96301412,3.91089797
49.103698,4.89897949,4.54639217,0.593790632,4.49713513,3.9151396,3.96173187,3.9101266
49.11419,5.38516481,4.53401081,0.922580076,4.48502491,3.91440331,3.96047846,3.90935655
49.124682,4.47213595,4.52197535,-0.22324738,4.4732419,3.91366873,3.95925289,3.90858788
49.135173,4.47213595,4.51027422,-0.195290209,4.46177511,3.91293595,3.95805426,3.90782067
49.145665,5.56776436,4.49889309,1.03386231,4.4506108,3.91220482,3.95688134,3.90705477
49.156156,5.47722558,4.48782259,0.994687378,4.43974009,3.91147549,3.95573345,3.90629032
49.166648,4.47213595,4.47704958,-0.0700972785,4.42915037,3.91074782,3.95460951,3.90552717
49.17714,5.09901951,4.4665646,0.795270341,4.41883263,3.91002189,3.95350881,3.90476539
49.187631,4.89897949,4.45635853,0.665297641,4.40877819,3.90929776,3.9524307,3.90400506
49.198123,4.58257569,4.44641981,0.368993075,4.3989759,3.9085753,3.95137424,3.90324603
49.208614,5.38516481,4.43674111,0.97387047,4.38941885,3.90785465,3.95033897,3.90248844
49.219106,4.24264069,4.42731179,-0.429733763,4.38009675,3.90713567,3.94932405,3.90173214
49.229598,3.87298335,4.41812436,-0.73833665,4.37100244,3.90641845,3.94832899,3.90097721
49.240089,5.19615242,4.40917158,0.887119409,4.36212902,3.90570304,3.94735331,3.90022371
49.250581,4.47213595,4.40044401,0.267753511,4.35346738,3.90498932,3.94639629,3.8994715
49.261072,5,4.39193594,0.779784626,4.34501206,3.90427742,3.94545762,3.89872072
49.271564,5.29150262,4.38363862,0.952818974,4.3367546,3.90356722,3.94453665,3.89797122
49.282056,5,4.37554611,0.790223951,4.3286893,3.90285879,3.94363303,3.89722308
49.292547,4.69041576,4.36765262,0.568122473,4.32081062,3.90215219,3.94274642,3.89647636
49.303039,4.58257569,4.35995039,0.471831863,4.31311101,3.90144729,3.94187628,3.89573092
49.31353,4.79583152,4.35243491,0.665880331,4.30558618,3.90074424,3.9410224,3.8949869
49.324022,4.24264069,4.34509899,-0.320091082,4.29822911,3.9000429,3.94018428,3.89424416
49.334514,5.29150262,4.33793784,0.976506418,4.29103521,3.89934335,3.93936167,3.89350276
49.345005,4.79583152,4.33094682,0.681824537,4.284,3.89864566,3.93855435,3.89276277
49.355497,5.83095189,4.32411952,1.22753101,4.2771172,3.89794969,3.93776189,3.89202405
49.365988,5.38516481,4.31745236,1.03330172,4.2703834,3.89725558,3.93698417,3.89128674
49.37648,5.29150262,4.31093937,0.99023394,4.26379274,3.89656321,3.93622081,3.89055069
49.386972,4.89897949,4.30457693,0.770975069,4.25734148,3.89587265,3.9354719,3.88981598
49.397463,5,4.29836092,0.837638993,4.251026,3.89518396,3.9347369,3.88908267
49.407955,5.74456265,4.29228603,1.2051044,4.24484103,3.89449702,3.9340155,3.88835062
49.418446,4.47213595,4.28634953,0.43102949,4.23878384,3.89381198,3.93330779,3.88761997
49.428938,5,4.28054644,0.848206084,4.2328495,3.89312869,3.93261345,3.88689057
49.43943,3.87298335,4.27487363,-0.633948171,4.22703496,3.89244724,3.9319324,3.88616249
49.449921,4.47213595,4.26932807,0.450341961,4.22133727,3.89176768,3.93126456,3.88543581
49.460413,4.24264069,4.26390529,-0.145823876,4.21575196,3.89108991,3.93060969,3.88471038
49.470904,5.09901951,4.25860303,0.916742321,4.21027685,3.89041405,3.92996778,3.88398633
49.481396,5.09901951,4.25341711,0.919566419,4.20490777,3.88973998,3.92933863,3.88326353
49.491888,4.24264069,4.24834501,-0.0755269766,4.1996422,3.88906777,3.92872219,3.88254205
49.502379,5.56776436,4.24338426,1.15081714,4.19447774,3.88839749,3.92811845,3.88182194
49.512871,5.09901951,4.2385311,0.927625147,4.18941057,3.88772902,3.92752723,3.88110308
49.523362,5.74456265,4.23378374,1.22913746,4.18443895,3.8870625,3.92694858,3.88038558
49.533854,4.79583152,4.22913867,0.752790049,4.1795593,3.88639779,3.92638234,3.87966933
49.544346,4.69041576,4.22459382,0.682511493,4.17476957,3.88573498,3.92582854,3.87895438
49.554837,4.35889894,4.22014721,0.372493933,4.17006777,3.88507414,3.9252872,3.8782408
49.565329,4.12310563,4.21579566,-0.304450382,4.16545062,3.88441513,3.92475821,3.87752845
49.57582,4,4.21153776,-0.459932342,4.16091673,3.88375811,3.92424165,3.87681746
49.586312,4.12310563,4.20737054,-0.290284193,4.15646301,3.88310294,3.92373743,3.8761077
49.596804,5.56776436,4.20329234,1.16810617,4.15208779,3.8824497,3.92324562,3.87539923
49.607295,4.58257569,4.19930154,0.619091398,4.14778939,3.88179846,3.92276628,3.87469212
49.617787,4.58257569,4.19539545,0.622238091,4.14356501,3.88114911,3.92229936,3.87398623
49.628278,4.24264069,4.19157299,0.225981633,4.13941352,3.88050177,3.92184498,3.8732817
49.63877,4.69041576,4.18783164,0.708931678,4.13533226,3.87985633,3.92140312,3.87257838
49.649262,4.24264069,4.18417006,0.241807011,4.13131981,3.87921286,3.92097387,3.87187634
49.659753,4.12310563,4.18058695,-0.239752627,4.12737482,3.87857143,3.92055734,3.87117565
49.670245,3.87298335,4.17708004,-0.551449634,4.12349482,3.87793193,3.92015354,3.87047617
49.680736,4.47213595,4.1736485,0.546340052,4.11967892,3.87729449,3.91976262,3.86977804
49.691228,4.35889894,4.17029021,0.434291071,4.11592481,3.87665899,3.91938461,3.86908111
49.70172,3.87298335,4.1670041,-0.542236803,4.11223131,3.87602551,3.91901966,3.86838545
49.712211,4.47213595,4.16378913,0.555289858,4.10859727,3.87539412,3.91866791,3.86769113
49.722703,4.79583152,4.1606434,0.796986902,4.10502056,3.8747647,3.91832942,3.86699801
49.733194,4.35889894,4.15756628,0.448701081,4.10150046,3.8741374,3.91800439,3.86630622
49.743686,4.58257569,4.154556,0.654232139,4.09803495,3.87351209,3.9176929,3.86561563
49.754178,5.47722558,4.15161173,1.15135305,4.09462303,3.87288885,3.91739514,3.8649263
49.764669,4.47213595,4.14873264,0.568685602,4.09126377,3.87226775,3.91711131,3.86423829
49.775161,5.29150262,4.14591716,1.07032026,4.08795526,3.87164868,3.91684151,3.86355148
49.785652,5.56776436,4.14316484,1.19356588,4.08469696,3.87103178,3.91658599,3.86286598
49.796144,4.47213595,4.14047421,0.575900813,4.08148707,3.87041694,3.91634489,3.86218168
49.806636,4.69041576,4.13784463,0.743351283,4.07832477,3.86980422,3.91611845,3.86149862
49.817127,5,4.1352755,0.929905643,4.07520927,3.8691937,3.9159069,3.86081688
49.827619,5.09901951,4.1327655,0.982982203,4.0721389,3.86858528,3.91571043,3.86013632
49.83811,3.87298335,4.13031436,-0.507278042,4.06911321,3.86797908,3.91552932,3.85945706
49.848602,4.79583152,4.12792087,0.81725801,4.06613062,3.86737501,3.91536378,3.85877899
49.859094,4.58257569,4.12558458,0.676011179,4.06319045,3.86677313,3.9152141,3.85810215
49.869585,4.12310563,4.12330506,-0.0141222641,4.06029202,3.86617352,3.91508057,3.85742662
49.880077,4.35889894,4.12108127,0.487665533,4.05743387,3.86557608,3.91496344,3.85675226
49.890568,4.69041576,4.11891306,0.755977976,4.05461564,3.86498093,3.91486305,3.85607919
49.90106,4.35889894,4.11679948,0.492036035,4.05183592,3.86438798,3.91477969,3.8554073
49.911552,4.69041576,4.11474026,0.758732826,4.04909415,3.8637973,3.91471369,3.85473663
49.922043,4.12310563,4.11273512,0.101835694,4.04638975,3.86320897,3.91466542,3.85406725
49.932535,4,4.11078326,-0.332841192,4.04372141,3.86262288,3.91463522,3.85339904
49.943026,4.35889894,4.10888468,0.500014266,4.04108886,3.86203917,3.91462347,3.85273211
49.953518,5.74456265,4.10703866,1.27965776,4.03849085,3.86145774,3.91463057,3.85206634
49.96401,4.35889894,4.10524509,0.503640595,4.03592689,3.86087867,3.91465691,3.85140178
49.974501,4.89897949,4.10350386,0.8918944,4.03339651,3.86030203,3.91470292,3.85073851
49.984993,4.79583152,4.10181441,0.833076897,4.03089854,3.85972772,3.91476906,3.85007639
49.995484,4.47213595,4.10017685,0.609884502,4.02843276,3.85915588,3.91485576,3.84941554
50.005976,4,4.09859072,-0.313991591,4.02599805,3.85858642,3.91496354,3.84875585
50.016468,4.12310563,4.09705605,0.161398801,4.02359401,3.85801941,3.91509288,3.84809735
50.026959,4.69041576,4.09557291,0.771260562,4.02122023,3.85745493,3.91524429,3.84744013
50.037451,4.47213595,4.09414095,0.614812986,4.01887566,3.85689289,3.91541834,3.84678405
50.047942,5.09901951,4.09276044,1.00312465,4.01656016,3.85633342,3.91561557,3.84612923
50.058434,4.35889894,4.09143116,0.517172877,4.01427269,3.85577644,3.91583659,3.84547555
50.068926,4.69041576,4.0901533,0.774766068,4.01201293,3.85522202,3.91608202,3.84482307
50.079417,4,4.08892709,-0.298206452,4.00978053,3.85467023,3.91635246,3.84417185
50.089909,4.58257569,4.08775244,0.703436745,4.00757455,3.854121,3.91664862,3.84352175
50.1004,4.79583152,4.08662977,0.842141171,4.00539487,3.85357446,3.91697116,3.84287291
50.110892,4.47213595,4.0855591,0.621753049,4.00324059,3.85303053,3.91732084,3.8422252
50.121384,4.58257569,4.08454081,0.705715866,4.0011114,3.85248928,3.91769841,3.84157867
50.131875,3.87298335,4.08357531,-0.458903006,3.99900704,3.8519508,3.91810459,3.84093339
50.142367,3.74165739,4.08266279,-0.583956679,3.99692663,3.85141501,3.91854029,3.84028922
50.152858,4.69041576,4.08180382,0.780135846,3.99487012,3.85088203,3.91900628,3.8396463
50.16335,4.35889894,4.0809987,0.527162442,3.99283665,3.85035181,3.91950354,3.8390045
50.173842,4,4.08024803,-0.283280828,3.990826,3.84982441,3.92003295,3.83836387
50.184333,4.47213595,4.07955241,0.626564874,3.98883793,3.84929991,3.92059542,3.83772448
50.194825,4.35889894,4.07891234,0.529137604,3.98687164,3.84877826,3.92119208,3.8370862
50.205316,4.79583152,4.07832859,0.847055449,3.98492712,3.84825958,3.92182385,3.83644915
50.215808,4.47213595,4.07780177,0.627960339,3.98300358,3.8477438,3.92249197,3.8358132
50.2263,4.24264069,4.07733277,0.406580758,3.98110084,3.84723101,3.92319759,3.83517842
50.236791,4.47213595,4.07692235,0.628660165,3.9792187,3.8467213,3.92394169,3.83454487
50.247283,4,4.07657138,-0.276715344,3.97735642,3.84621459,3.92472575,3.83391241
50.257774,4.79583152,4.07628089,0.848263302,3.97551402,3.84571103,3.92555092,3.83328118
50.268266,4.89897949,4.07605186,0.907153585,3.97369079,3.84521055,3.92641873,3.83265103
50.278758,5,4.07588541,0.961308792,3.97188656,3.84471324,3.92733052,3.83202205
50.289249,4.12310563,4.07578271,0.217538299,3.97010117,3.8442192,3.92828771,3.83139427
50.299741,4,4.07574501,-0.275218111,3.96833396,3.84372836,3.92929204,3.83076759
50.310232,4.12310563,4.07577362,0.217559196,3.96658494,3.84324086,3.93034495,3.83014211
50.320724,4.35889894,4.07586997,0.532004675,3.96485348,3.84275665,3.93144836,3.82951772
50.331216,4.79583152,4.07603555,0.848407907,3.96313942,3.84227583,3.93260397,3.82889448
50.341707,5.09901951,4.07627192,1.01130984,3.96144265,3.84179847,3.93381353,3.82827243
50.352199,4.24264069,4.07658081,0.407504452,3.95976255,3.84132455,3.93507926,3.82765146
50.36269,3.74165739,4.07696395,-0.579056611,3.95809915,3.8408542,3.93640296,3.82703169
50.373182,5.47722558,4.07742329,1.1831324,3.95645187,3.84038737,3.93778707,3.826413
50.383674,4.58257569,4.07796081,0.7103625,3.95482058,3.83992417,3.93923373,3.82579544
50.394165,4,4.07857857,-0.280318694,3.95320518,3.83946469,3.94074518,3.82517906
50.404657,5.19615242,4.07927892,1.05682236,3.95160511,3.83900889,3.94232421,3.82456376
50.415148,3.31662479,4.0800641,-0.873750144,3.95002041,3.83855693,3.94397316,3.82394964
50.42564,4,4.08093678,-0.284493904,3.94845054,3.83810876,3.9456951,3.82333659
50.436132,4.47213595,4.08189954,0.624689056,3.94689541,3.8376645,3.94749279,3.82272466
50.446623,5.19615242,4.08295508,1.05508168,3.94535493,3.83722424,3.9493691,3.82211391
50.457115,5,4.08410659,0.957023205,3.94382857,3.83678796,3.95132761,3.82150421
50.467606,4.69041576,4.08535899,0.777853949,3.9423164,3.83635581,3.95337342,3.82089569
50.478098,3.74165739,4.08671184,-0.587413361,3.9408179,3.83592777,3.95550633,3.82028823
50.48859,4.35889894,4.08817081,0.520315417,3.93933302,3.83550396,3.95773225,3.81968187
50.499081,5,4.08973477,0.954078207,3.93786167,3.83508448,3.96005006,3.81907669
50.509573,4,4.09141664,-0.302351844,3.93640337,3.83466932,3.96247334,3.81847255
50.520064,5.29150262,4.09321606,1.09466276,3.9349582,3.83425865,3.9650017,3.81786957
50.530556,5.09901951,4.09513782,1.00193897,3.93352567,3.83385244,3.96764029,3.81726764
50.541048,3.87298335,4.09718644,-0.473500892,3.93210574,3.83345084,3.9703938,3.81666681
50.551539,5.56776436,4.0993667,1.21177459,3.93069835,3.83305394,3.97326718,3.81606714
50.562031,4.24264069,4.1016843,0.375441592,3.92930304,3.83266177,3.97626649,3.8154685
50.572522,4.24264069,4.10414439,0.372150904,3.9279199,3.83227448,3.979397,3.81487101
50.583014,4.24264069,4.1067534,0.368628925,3.92654848,3.83189209,3.98266549,3.81427456
50.593506,4.89897949,4.10951742,0.888516778,3.92518875,3.83151472,3.98607823,3.8136792
50.603997,3.87298335,4.11244287,-0.489346021,3.92384067,3.83114251,3.98964184,3.81308498
50.614489,5.47722558,4.11554233,1.16691184,3.92250379,3.83077548,3.9933694,3.81249179
50.62498,4.89897949,4.11881304,0.883270315,3.92117823,3.83041381,3.99725798,3.81189974
50.635472,4.47213595,4.12226857,0.591495886,3.91986356,3.83005752,4.0013217,3.81130871
50.645964,5,4.12591723,0.934923937,3.91855976,3.82970677,4.00556906,3.81071876
50.656455,4,4.1297678,-0.360232986,3.91726679,3.82936169,4.01000904,3.81012995
50.666947,5,4.13383079,0.93068212,3.91598425,3.82902233,4.01465255,3.80954215
50.677438,4.79583152,4.13811584,0.810996723,3.91471225,3.82868888,4.0195094,3.80895548
50.68793,4.24264069,4.14263489,0.316236929,3.91345039,3.82836139,4.02459195,3.80836982
50.698422,4.24264069,4.1474198,0.308578825,3.91219865,3.82804003,4.02993287,3.80778523
50.708913,5.56776436,4.15244203,1.1896732,3.91095702,3.82772495,4.03550273,3.80720176
50.719405,4,4.15773654,-0.397160592,3.90972512,3.82741622,4.04133749,3.8066193
50.729896,5.47722558,4.16331684,1.14625858,3.90850305,3.82711405,4.04745093,3.80603796
50.740388,3.31662479,4.16919963,-0.923349792,3.90729045,3.82681852,4.05386017,3.80545762
50.75088,4.47213595,4.1754011,0.544733746,3.90608731,3.8265298,4.06058177,3.80487834
50.761371,3.87298335,4.18193858,-0.555837418,3.9048936,3.82624809,4.06763337,3.80430016
50.771863,4.58257569,4.18883262,0.627489505,3.90370899,3.82597348,4.07503605,3.80372299
50.782354,4.47213595,4.19610264,0.525388731,3.90253358,3.8257062,4.08280957,3.80314692
50.792846,4.89897949,4.20377237,0.833790811,3.90136703,3.82544635,4.09097823,3.80257184
50.803338,4.47213595,4.2118652,0.510167375,3.90020932,3.82519414,4.09956585,3.8019978
50.813829,4.24264069,4.22042465,0.149050439,3.89906046,3.82494979,4.10861692,3.80142487
50.824321,5.38516481,4.22944382,1.07504464,3.89792011,3.82471342,4.1181242,3.80085292
50.834812,4.47213595,4.23896915,0.482873484,3.89678839,3.82448529,4.12813512,3.80028207
50.845304,4.58257569,4.24903551,0.577529377,3.89566496,3.82426555,4.13868528,3.7997122
50.855796,3.46410162,4.25967751,-0.891950611,3.89454984,3.82405443,4.14980991,3.79914336
50.866287,4.35889894,4.27093252,0.296591342,3.89344302,3.82385217,4.16154706,3.79857561
50.876779,4,4.2828445,-0.531831267,3.89234419,3.82365896,4.17394156,3.79800884
50.88727,4.47213595,4.29545658,0.420332459,3.89125347,3.82347507,4.18703726,3.79744315
50.897762,4.89897949,4.30882063,0.768217976,3.89017053,3.8233007,4.20088703,3.79687843
50.908254,4.58257569,4.32298936,0.509496159,3.8890954,3.82313613,4.21554447,3.79631474
50.918745,4.24264069,4.3380201,-0.30883558,3.88802808,3.82298164,4.23106792,3.79575212
50.929237,4.79583152,4.35398,0.664719128,3.88696828,3.82283746,4.2475257,3.79519047
50.939728,4.89897949,4.37093632,0.726665785,3.8859161,3.8227039,4.26498619,3.79462989
50.95022,4.79583152,4.38896939,0.637857457,3.88487126,3.82258124,4.28353109,3.79407027
50.960712,4.35889894,4.40816223,-0.221953343,3.88383377,3.82246979,4.30324478,3.79351166
50.971203,3.31662479,4.42860583,-1.05450512,3.88280364,3.82236987,4.32421969,3.79295412
50.981695,4.79583152,4.45040652,0.587728683,3.88178059,3.8222818,4.34656388,3.79239753
50.992186,5.29150262,4.47367303,0.904339315,3.88076474,3.82220593,4.37038771,3.791842
51.002678,4.69041576,4.49853458,0.438042436,3.8797558,3.82214261,4.39582244,3.79128743
51.01317,4.35889894,4.52512712,-0.407710893,3.87875381,3.82209221,4.42300596,3.79073386
51.023661,4.58257569,4.55360087,0.170219919,3.87775876,3.82205512,4.4520907,3.79018134
51.034153,4.24264069,4.58413137,-0.584372042,3.87677041,3.82203174,4.48325467,3.78962976
51.044644,4.69041576,4.61690194,0.271134324,3.87578885,3.82202249,4.51668366,3.78907923
51.055136,4.79583152,4.65212988,0.379079999,3.87481384,3.82202779,4.55259788,3.78852965
51.065628,4.47213595,4.69004802,-0.46681052,3.87384538,3.82204811,4.59123311,3.78798105
51.076119,4.24264069,4.73091653,-0.698767371,3.87288351,3.82208392,4.63285269,3.7874335
51.086611,4.12310563,4.77504018,-0.807424646,3.87192797,3.8221357,4.67776504,3.78688688
51.097102,4.79583152,4.82274534,-0.164054305,3.87097886,3.82220398,4.72630013,3.7863413
51.107594,5.09901951,4.87442083,0.473918439,3.87003595,3.82228929,4.77885105,3.78579665
51.118086,4.79583152,4.93049587,-0.366966413,3.86909926,3.82239219,4.8358514,3.78525298
51.128577,5.29150262,4.99146502,0.547756883,3.86816881,3.82251325,4.89780056,3.78471034
51.139069,5.56776436,5.05792724,0.714028797,3.86724436,3.8226531,4.96530329,3.78416863
51.14956,4.69041576,5.13057357,-0.663443904,3.86632602,3.82281237,5.03905692,3.78362794
51.160052,4.79583152,5.21028572,-0.643781175,3.86541356,3.82299174,5.11995134,3.78308817
51.170544,4.24264069,5.29816136,-1.02738536,3.864507,3.82319189,5.20909423,3.78254937
51.181035,4.79583152,5.3956416,-0.774474063,3.86360637,3.82341354,5.30793993,3.78201159
51.191527,5.83095189,5.50470304,0.571181979,3.86271145,3.82365748,5.41848332,3.78147473
51.202018,5.74456265,5.62800931,0.341399084,3.86182234,3.82392448,5.54341196,3.78093887
51.21251,6.164414,5.76927916,0.628597518,3.86093881,3.82421542,5.68647674,3.78040393
51.223002,5,5.93353249,-0.966194852,3.86006091,3.82453114,5.8527372,3.77986995
51.233493,6.55743852,6.12743452,0.655746907,3.85918865,3.82487255,6.04890425,3.77933697
51.243985,5.83095189,6.35957983,-0.727068039,3.85832182,3.82524066,6.28361959,3.7788049
51.254476,6.08276253,6.64032929,-0.746703928,3.85746053,3.82563643,6.56728129,3.77827383
51.264968,7.48331477,6.98158866,0.708326277,3.85660456,3.82606097,6.91181114,3.77774366
51.27546,7,7.39573176,-0.629072144,3.85575395,3.82651538,7.32956259,3.77721444
51.285951,8.30662386,7.89428697,0.642134641,3.85490872,3.82700078,7.83200026,3.77668622
51.296443,8.1240384,8.48647352,-0.602025843,3.85406868,3.82751848,8.42824072,3.77615888
51.306934,9.16515139,9.17723096,-0.109907101,3.85323392,3.82806969,9.12309383,3.77563254
51.317426,10,9.96643726,0.183201362,3.85240425,3.82865588,9.91630549,3.77510709
51.327918,11.3578167,10.8477529,0.714187489,3.85157969,3.82927842,10.801419,3.77458258
51.338409,10.9087121,11.8086036,-0.948626114,3.85076028,3.82993876,11.7657714,3.77405905
51.348901,13.1529464,12.8306257,0.567732942,3.84994582,3.83063862,12.7909435,3.77353641
51.359392,14.525839,13.8890734,0.79797596,3.84913642,3.83137955,13.8521594,3.77301474
51.369884,14.6969385,14.9532084,-0.50623108,3.84833189,3.83216344,14.9186704,3.77249396
51.380376,15.5241747,15.9844397,-0.678428323,3.84753225,3.83299211,15.9518825,3.7719741
51.390867,16.643317,16.9350038,-0.5400804,3.84673755,3.83386745,16.9040283,3.77145521
51.401359,18.547237,17.7475713,0.894240269,3.84594758,3.83479169,17.7177674,3.7709372
51.41185,18.1659021,18.3580216,-0.438314407,3.84516247,3.83576687,18.3289583,3.77042015
51.422342,18.3303028,18.7063659,-0.613239853,3.84438202,3.8367955,18.6775856,3.76990398
51.432834,18.8414437,18.7524943,0.298243779,3.84360626,3.83787997,18.7235145,3.76938872
51.443325,18.6547581,18.4906377,0.405117768,3.84283524,3.83902278,18.4609597,3.76887442
51.453817,17.691806,17.9515386,-0.509639676,3.84206877,3.84022691,17.9206583,3.76836098
51.464308,17.2916165,17.191395,0.316577753,3.84130696,3.84149507,17.1588083,3.76784851
51.4748,14.8660687,16.2745943,-1.18681321,3.84054963,3.84283063,16.2397939,3.76733689
51.485292,16.2480768,15.2614657,0.993283018,3.83979681,3.84423678,15.2239317,3.76682617
51.495783,13.6014705,14.2028182,-0.775466109,3.83904854,3.8457169,14.1620087,3.76631641
51.506275,13.453624,13.1394844,0.560481595,3.83830466,3.84727501,13.0948293,3.7658075
51.516766,12.489996,12.1046589,0.620755247,3.83756525,3.84891481,12.0555662,3.76529953
51.527258,10.9087121,11.1245027,-0.464532694,3.83683015,3.85064085,11.0703742,3.76479242
51.53775,9.48683298,10.2194288,-0.855918096,3.83609941,3.8524575,10.1596918,3.76428619
51.548241,8.1240384,9.40379081,-1.13126142,3.83537305,3.85436942,9.33794009,3.76378091
51.558733,8.77496439,8.6855284,0.299058503,3.83465091,3.85638211,8.61316856,3.76327647
51.569224,8.48528137,8.06672768,0.646957262,3.83393309,3.85850071,7.98761201,3.76277297
51.579716,8.18535277,7.54363384,0.801073609,3.83321943,3.8607315,7.45767714,3.7622703
51.590208,7.41619849,7.10817707,0.554996773,3.83250997,3.8630806,7.0154445,3.76176852
51.600699,6.32455532,6.74930662,-0.651729469,3.83180474,3.86555454,6.64997513,3.76126766
51.611191,6.164414,6.4546051,-0.538693879,3.83110358,3.86816101,6.34890929,3.76076764
51.621682,5.65685425,6.21198102,-0.745068296,3.83040661,3.8709073,6.10016467,3.76026854
51.632174,5.47722558,6.01049151,-0.730250595,3.82971365,3.8738023,5.89276693,3.75977027
51.642666,5.74456265,5.84105177,-0.310626979,3.82902476,3.87685473,5.71757969,3.75927287
51.653157,5.91607978,5.6964703,0.4686251,3.82833996,3.88007395,5.56735242,3.75877638
51.663649,6.164414,5.57125525,0.770168001,3.8276591,3.88347101,5.43653491,3.75828072
51.67414,5.38516481,5.46139984,-0.276106917,3.82698229,3.8870565,5.32107108,3.75778598
51.684632,5.09901951,5.36395512,-0.514718954,3.82630937,3.89084324,5.21796867,3.75729205
51.695124,4.89897949,5.27680633,-0.614676212,3.82564039,3.89484404,5.12507831,3.75679898
51.705615,5.09901951,5.19839879,-0.315244781,3.82497538,3.89907271,5.04081612,3.75630682
51.716107,5.19615242,5.12754356,0.261932931,3.82431419,3.90354544,4.96396582,3.75581547
51.726598,4.69041576,5.06334415,-0.610678634,3.82365693,3.9082781,4.89360766,3.75532502
51.73709,6.08276253,5.00506108,1.03812401,3.82300345,3.91328975,4.8289773,3.75483538
51.747582,4.69041576,4.9521025,-0.511553265,3.82235379,3.91859969,4.76945948,3.75434659
51.758073,5.29150262,4.90397004,0.622521152,3.82170799,3.92422892,4.71453155,3.75385869
51.768565,4.69041576,4.86022561,-0.412079903,3.82106591,3.93020193,4.66372788,3.7533716
51.779056,4.89897949,4.82050771,0.280128149,3.82042764,3.93654325,4.61666026,3.75288539
51.789548,4,4.78448853,-0.885713573,3.81979306,3.94328208,4.57296942,3.75239999
51.80004,4.69041576,4.75189398,-0.247948028,3.81916219,3.95044856,4.53234944,3.75191542
51.810531,5,4.72248566,0.526796302,3.81853508,3.95807566,4.49452755,3.75143174
51.821023,5.19615242,4.69604977,0.707179364,3.81791159,3.96620181,4.45925019,3.75094885
51.831514,4.58257569,4.67241251,-0.299727898,3.81729182,3.97486624,4.42630356,3.75046684
51.842006,4.35889894,4.65141726,-0.540849625,3.81667564,3.98411547,4.39548379,3.74998561
51.852498,3.60555128,4.63293864,-1.01360119,3.81606308,3.99399832,4.36661645,3.74950522
51.862989,4.79583152,4.61687302,0.423034868,3.81545419,4.00456865,4.33954411,3.7490257
51.873481,4.12310563,4.60313361,-0.692840519,3.81484884,4.01588925,4.31411746,3.74854696
51.883972,4,4.59165956,-0.7691941,3.81424712,4.02802552,4.29021102,3.74806908
51.894464,4.69041576,4.58240483,0.328650169,3.81364891,4.04105482,4.26770235,3.74759199
51.904956,5,4.57534599,0.651654824,3.81305424,4.05505982,4.24648685,3.74711571
51.915447,4.12310563,4.57047806,-0.668859057,3.81246316,4.0701326,4.22646922,3.7466403
51.925939,4.24264069,4.56781426,-0.570239928,3.81187553,4.08638069,4.20755738,3.74616566
51.93643,5,4.56738954,0.6577313,3.81129147,4.10391859,4.18967444,3.74569187
51.946922,4.35889894,4.56925946,-0.458650754,3.81071083,4.12288178,4.1727436,3.74521885
51.957414,4.35889894,4.57350277,-0.463253522,3.81013368,4.143418,4.15669953,3.74474664
51.967905,4.89897949,4.58022235,0.564585806,3.80956003,4.16569429,4.14148223,3.74427528
51.978397,5.19615242,4.58955095,0.778846243,3.80898978,4.18990738,4.12703258,3.74380468
51.988888,4.58257569,4.60165048,-0.138111482,3.80842302,4.21627358,4.11330172,3.74333493
51.99938,5.19615242,4.61672442,0.761201682,3.80785963,4.24505301,4.10023965,3.74286593
52.009872,4.12310563,4.63501895,-0.71548118,3.80729965,4.27654176,4.08780407,3.74239773
52.020363,5,4.6568363,0.585801756,3.80674312,4.3110904,4.07595591,3.74193038
52.030855,6.244998,4.68255861,1.24997576,3.80618993,4.34913188,4.06465589,3.74146377
52.041346,4.69041576,4.71265648,-0.149133222,3.80564018,4.39118301,4.05387194,3.740998
52.051838,4.58257569,4.74774039,-0.406404595,3.80509373,4.43790633,4.04357042,3.74053297
52.06233,5.38516481,4.7885864,0.772384883,3.80455065,4.4901292,4.03372311,3.74006874
52.072821,4.79583152,4.83619843,-0.200915166,3.80401096,4.54891095,4.02430379,3.73960533
52.083313,4.79583152,4.89189203,-0.309936288,3.80347457,4.61563066,4.01528555,3.73914266
52.093804,4.79583152,4.95733902,-0.401879954,3.80294155,4.6920247,4.00664677,3.73868082
52.104296,5.19615242,5.03468356,0.401831884,3.80241181,4.78030964,3.99836415,3.73821971
52.114788,5.47722558,5.12656133,0.592169104,3.80188538,4.88319058,3.99041837,3.73775938
52.125279,5.09901951,5.23612956,-0.370283744,3.8013623,5.00388761,3.98279134,3.73729987
52.135771,5.91607978,5.36705341,0.740963137,3.80084248,5.14611564,3.97546416,3.73684109
52.146262,5.91607978,5.52329206,0.626727792,3.80032599,5.31385198,3.96842188,3.73638312
52.156754,4.89897949,5.70894576,-0.899981265,3.79981274,5.51118088,3.96164796,3.73592588
52.167246,6.92820323,5.92781603,1.00019358,3.79930277,5.74183948,3.95512884,3.7354694
52.177737,6.164414,6.1830156,-0.136387671,3.79879611,6.0088314,3.9488518,3.73501374
52.188229,7.21110255,6.47661222,0.857024115,3.79829268,6.31408269,3.9428032,3.73455879
52.19872,6,6.809054,-0.89947429,3.79779255,6.65787583,3.93697253,3.73410465
52.209212,6.8556546,7.17902558,-0.568657175,3.79729562,7.03873298,3.93134776,3.73365122
52.219704,7.48331477,7.58291287,-0.315591665,3.79680195,7.45288963,3.92591921,3.73319855
52.230195,8.36660027,8.01446087,0.593413343,3.79631157,7.89396497,3.92067776,3.73274668
52.240687,9.8488578,8.46425875,1.17668987,3.79582438,8.35245021,3.91561342,3.73229551
52.251178,9.48683298,8.91846579,0.753901316,3.79534048,8.81442218,3.91071867,3.73184514
52.26167,9.21954446,9.35790346,-0.371966394,3.79485976,9.26063197,3.90598469,3.73139548
52.272162,9.21954446,9.75688807,-0.733037254,3.79438227,9.66532438,3.9014045,3.73094656
52.282653,9.59166305,10.0841692,-0.701787861,3.79390806,9.99717863,3.89697158,3.73049843
52.293145,10.0498756,10.3070564,-0.507129985,3.79343702,10.2234467,3.89267859,3.73005099
52.303636,10.7703296,10.398792,0.609538842,3.79296925,10.317343,3.88852028,3.72960434
52.314128,10.2469508,10.3471889,-0.316604107,3.79250466,10.2667038,3.8844902,3.72915839
52.32462,10.198039,10.1589448,0.197722727,3.79204329,10.0783055,3.88058345,3.72871317
52.335111,10.3440804,9.85713824,0.697812436,3.79158517,9.77535108,3.87679542,3.72826873
52.345603,9.74679434,9.47332984,0.522938334,3.79113023,9.3895476,3.87312069,3.72782497
52.356094,8.71779789,9.03961891,-0.567292716,3.79067855,8.95314244,3.86955548,3.72738199
52.366586,8.54400375,8.5832894,-0.198206087,3.79023004,8.49355539,3.8660948,3.72693969
52.377078,8.54400375,8.12545565,0.646952928,3.78978475,8.03202454,3.86273472,3.72649812
52.387569,6.92820323,7.68144212,-0.867893362,3.78934271,7.5839912,3.85947128,3.72605732
52.398061,6.63324958,7.26183735,-0.792835272,3.78890385,7.16015993,3.85629952,3.72561719
52.408552,6.8556546,6.87387761,-0.134992631,3.78846825,6.76788977,3.85321547,3.72517783
52.419044,7.48331477,6.52186207,0.980536945,3.78803583,6.41160568,3.85021367,3.72473914
52.429536,7.14142843,6.20790253,0.966191439,3.78760663,6.09354531,3.84728914,3.72430116
52.440027,5.29150262,5.93213469,-0.800394947,3.78718069,5.81395889,3.84443649,3.72386394
52.450519,6,5.69298576,0.554088658,3.78675793,5.5713646,3.8416495,3.7234274
52.46101,5.56776436,5.48774261,0.282881162,3.78633845,5.36311082,3.83892372,3.7229916
52.471502,5.19615242,5.31278019,-0.341508073,3.78592215,5.185598,3.83625512,3.72255646
52.481994,4.58257569,5.16413899,-0.762602971,3.78550909,5.03486089,3.83364227,3.72212204
52.492485,5.74456265,5.03782134,0.840679073,3.78509931,4.9068709,3.83108516,3.72168835
52.502977,3.46410162,4.93004556,-1.21076172,3.78469273,4.79779948,3.82858365,3.72125533
52.513468,4.69041576,4.83750644,-0.383524024,3.78428944,4.70428895,3.82613848,3.72082305
52.52396,4.69041576,4.75736542,-0.258746315,3.78388936,4.62344839,3.82374903,3.72039142
52.534452,4.47213595,4.68732359,-0.463883211,3.78349254,4.55293169,3.82141487,3.71996048
52.544943,5.19615242,4.62554398,0.755386289,3.78309902,4.49086143,3.81913519,3.71953029
52.555435,5.19615242,4.57056813,0.790938866,3.78270873,4.43574574,3.81690818,3.71910074
52.565926,5.29150262,4.52128122,0.877622584,3.78232175,4.38644298,3.81473271,3.71867192
52.576418,4.69041576,4.47679665,0.462189471,3.78193802,4.34204522,3.81260665,3.71824374
52.58691,3.87298335,4.43643129,-0.750631697,3.78155758,4.30185235,3.8105284,3.71781625
52.597401,4.24264069,4.39964094,-0.396232578,3.78118047,4.26530654,3.8084963,3.71738949
52.607893,4.79583152,4.3659751,0.655634371,3.78080662,4.23194622,3.80650815,3.71696336
52.618384,3.87298335,4.33507495,-0.679773197,3.78043613,4.20140335,3.80456255,3.71653796
52.628876,4.24264069,4.30662786,-0.252956866,3.78006892,4.17335759,3.80265741,3.71611319
52.639368,4,4.28037594,-0.529505371,3.77970504,4.14754435,3.80079133,3.71568909
52.649859,5.29150262,4.25609643,1.01754911,3.77934454,4.12373504,3.79896297,3.71526571
52.660351,4,4.23358881,-0.483310267,3.77898734,4.10172413,3.79717059,3.71484296
52.670842,4.58257569,4.21268595,0.608185615,3.77863355,4.08133992,3.79541321,3.71442092
52.681334,3.74165739,4.19323259,-0.671993458,3.77828308,4.06242325,3.79368929,3.7139995
52.691826,4.89897949,4.17509708,0.850812789,3.777936,4.04483891,3.79199785,3.71357875
52.702317,4.89897949,4.15816224,0.860707412,3.77759235,4.02846651,3.79033797,3.7131587
52.712809,4,4.14231899,-0.377251894,3.77725206,4.01319431,3.78870832,3.71273927
52.7233,4.35889894,4.12747602,0.481064362,3.77691522,3.99892843,3.78710824,3.71232054
52.733792,4.69041576,4.11354594,0.759519464,3.77658178,3.98557939,3.7855365,3.71190243
52.744284,4.69041576,4.10045446,0.768089385,3.77625178,3.9730709,3.78399237,3.71148497
52.754775,4.24264069,4.0881346,0.393072621,3.77592527,3.96133425,3.78247517,3.71106821
52.765267,3.87298335,4.07652265,-0.451153299,3.77560219,3.95030429,3.78098378,3.71065205
52.775758,3.87298335,4.0655655,-0.438841827,3.77528263,3.9399265,3.77951771,3.71023659
52.78625,4,4.05521098,-0.234970177,3.77496653,3.93014763,3.77807595,3.70982173
52.796742,4.79583152,4.04541488,0.866265921,3.77465395,3.92092238,3.77665791,3.70940751
52.807233,4.47213595,4.03613692,0.660302229,3.77434493,3.91220953,3.77526303,3.70899398
52.817725,4.79583152,4.02733794,0.876637657,3.77403942,3.9039692,3.77389038,3.70858105
52.828216,3.87298335,4.01898561,-0.382102429,3.77373751,3.89616828,3.77253959,3.7081688
52.838708,3.87298335,4.01104729,-0.371569562,3.77343914,3.88877362,3.77120978,3.70775714
52.8492,3.60555128,4.00349544,-0.63082816,3.77314437,3.8817571,3.76990048,3.70734612
52.859691,3.87298335,3.99630483,-0.351171587,3.77285324,3.87509298,3.76861124,3.70693577
52.870183,4.58257569,3.9894503,0.770146344,3.77256572,3.86875581,3.76734128,3.70652601
52.880674,4.47213595,3.98291139,0.699445895,3.77228188,3.86272468,3.76609028,3.70611693
52.891166,3.60555128,3.97666682,-0.609192534,3.77200168,3.8569781,3.76485751,3.70570842
52.901658,3.60555128,3.9706988,-0.604274376,3.77172518,3.85149801,3.76364258,3.70530055
52.912149,4,3.9649909,0.187107201,3.77145241,3.84626772,3.76244513,3.70489333
52.922641,3.60555128,3.95952636,-0.594958051,3.77118335,3.84127037,3.76126448,3.7044867
52.933132,3.60555128,3.95429178,-0.590542553,3.77091807,3.83649235,3.76010038,3.70408073
52.943624,3,3.94927279,-0.974306311,3.77065655,3.83191923,3.75895221,3.70367533
52.954116,3.87298335,3.94445751,-0.267346528,3.77039883,3.82753901,3.75781963,3.70327055
52.964607,3.74165739,3.93983491,-0.445171347,3.77014495,3.82334055,3.75670237,3.70286642
52.975099,3.31662479,3.93539346,-0.786618504,3.7698949,3.81931233,3.75559982,3.70246286
52.98559,5,3.93112412,1.03386454,3.76964874,3.81544521,3.7545118,3.70205996
52.996082,3.46410162,3.92701686,-0.680378751,3.76940646,3.81172921,3.75343776,3.70165762
53.006574,3.46410162,3.92306355,-0.677467296,3.7691681,3.80815615,3.75237743,3.70125588
53.017065,3.31662479,3.91925657,-0.776293618,3.76893372,3.80471838,3.75133058,3.70085479
53.027557,4.24264069,3.91558775,0.571885426,3.76870329,3.80140779,3.75029668,3.70045426
53.038048,4.58257569,3.91205084,0.818855823,3.76847688,3.79821812,3.7492756,3.70005437
53.04854,3.16227766,3.90863867,-0.863921876,3.76825449,3.79514227,3.74826684,3.69965504
53.059032,4,3.90534552,0.307659687,3.76803616,3.79217452,3.74727019,3.6992563
53.069523,3.87298335,3.902166,-0.170829302,3.76782194,3.78930949,3.74628546,3.69885819
53.080015,5.09901951,3.89909417,1.09541104,3.76761182,3.78654135,3.74531219,3.69846064
53.090506,4,3.89612564,0.322295455,3.76740587,3.78386569,3.74435027,3.69806372
53.100998,3.31662479,3.89325514,-0.759361806,3.76720409,3.78127736,3.74339927,3.69766735
53.11149,4.12310563,3.89047857,0.482314272,3.76700652,3.77877226,3.74245902,3.69727156
53.121981,3.60555128,3.88779203,-0.531263361,3.76681322,3.77634655,3.74152935,3.69687639
53.132473,3.31662479,3.88519113,-0.754033383,3.76662419,3.77399592,3.74060986,3.69648177
53.142964,4.12310563,3.8826727,0.490339601,3.76643949,3.77171723,3.73970047,3.69608777
53.153456,3.46410162,3.88023281,-0.645082314,3.76625913,3.76950663,3.7388008,3.69569431
53.163948,4.58257569,3.87786844,0.839468435,3.76608315,3.76736117,3.73791069,3.69530142
53.174439,3.31662479,3.87557675,-0.747630901,3.76591162,3.76527802,3.73703004,3.69490915
53.184931,4.12310563,3.87335441,0.499751151,3.76574453,3.76325395,3.73615845,3.69451741
53.195422,4.24264069,3.87119911,0.609460071,3.76558197,3.76128668,3.7352959,3.69412628
53.205914,4.12310563,3.86910785,0.503981923,3.76542392,3.75937329,3.73444201,3.69373568
53.216406,3.46410162,3.86707839,-0.63480452,3.76527046,3.7575116,3.7335967,3.69334564
53.226897,4,3.86510863,0.367275612,3.76512164,3.75569952,3.73275984,3.69295621
53.237389,4.47213595,3.86319598,0.780346063,3.76497746,3.75393457,3.7319311,3.69256731
53.24788,3.46410162,3.86133875,-0.630267507,3.76483801,3.75221507,3.73111046,3.692179
53.258372,4,3.85953461,0.374787122,3.76470329,3.75053878,3.7302976,3.69179122
53.268864,3.60555128,3.8577819,-0.502225671,3.76457337,3.74890405,3.72949243,3.69140399
53.279355,4.35889894,3.856079,0.709097977,3.7644483,3.74730932,3.72869486,3.69101736
53.289847,4.24264069,3.85442392,0.623070433,3.76432811,3.74575265,3.72790459,3.69063124
53.300338,3.87298335,3.85281539,0.142013933,3.76421286,3.74423279,3.72712161,3.69024571
53.31083,4,3.85125158,0.385679162,3.76410259,3.742748,3.72634563,3.68986069
53.321322,4.69041576,3.84973123,0.916888503,3.76399735,3.74129701,3.72557658,3.68947622
53.331813,4.35889894,3.84825311,0.714594873,3.7638972,3.73987864,3.72481439,3.68909234
53.342305,3.16227766,3.84681564,-0.827368106,3.76380217,3.73849135,3.72405877,3.68870896
53.352796,4.12310563,3.84541787,0.526960865,3.76371235,3.73713422,3.72330975,3.68832616
53.363288,3.87298335,3.84405836,0.170073467,3.76362775,3.73580584,3.72256705,3.68794386
53.37378,4.35889894,3.84273613,0.718444717,3.76354846,3.73450525,3.72183061,3.6875621
53.384271,3.87298335,3.84145025,0.177575621,3.76347452,3.73323155,3.72110038,3.68718092
53.394763,4.35889894,3.84019944,0.720207955,3.76340599,3.73198349,3.7203761,3.68680023
53.405254,4.35889894,3.83898301,0.721051964,3.76334293,3.73076038,3.71965779,3.68642012
53.415746,4.24264069,3.83779979,0.636271087,3.76328539,3.72956108,3.71894521,3.68604049
53.426238,4.47213595,3.83664904,0.797174334,3.76323345,3.72838485,3.71823832,3.6856614
53.436729,3,3.83553002,-0.914073311,3.76318716,3.72723099,3.71753706,3.68528287
53.447221,4,3.83444173,0.406888517,3.76314658,3.72609849,3.7168412,3.68490483
53.457712,3.74165739,3.83338364,-0.302863418,3.76311178,3.72498681,3.71615078,3.68452735
53.468204,4.69041576,3.83235481,0.926315796,3.76308283,3.72389504,3.71546556,3.68415035
53.478696,4.47213595,3.83135466,0.800488162,3.7630598,3.7228226,3.71478551,3.68377388
53.489187,4.24264069,3.83038263,0.642073248,3.76304274,3.72176892,3.7141106,3.68339796
53.499679,4.89897949,3.82943792,1.03418643,3.76303174,3.72073319,3.71344061,3.68302252
53.51017,2.82842712,3.82852011,-1.00004649,3.76302687,3.719715,3.71277557,3.68264763
53.520662,4.12310563,3.82762847,0.543578108,3.7630282,3.71871358,3.71211527,3.68227321
53.531154,4.58257569,3.82676253,0.869375155,3.7630358,3.71772848,3.71145969,3.68189931
53.541645,3.60555128,3.82592188,-0.469436479,3.76304975,3.71675926,3.71080881,3.68152595
53.552137,3.87298335,3.82510586,0.218809237,3.76307014,3.71580524,3.71016242,3.68115306
53.562628,4.47213595,3.82431417,0.804873771,3.76309703,3.7148661,3.70952056,3.68078071
53.57312,4.12310563,3.8235462,0.547320221,3.76313052,3.71394121,3.70888304,3.68040883
53.583612,3.87298335,3.82280162,0.224012777,3.76317068,3.7130302,3.70824983,3.68003746
53.594103,4.12310563,3.8220801,0.548657935,3.76321759,3.71213273,3.70762093,3.67966661
53.604595,4.35889894,3.82138111,0.733156079,3.76327136,3.71124822,3.70699614,3.67929623
53.615086,4,3.82070443,0.42343308,3.76333206,3.71037645,3.7063755,3.67892638
53.625578,4.79583152,3.82004958,0.987816754,3.7633998,3.70951685,3.70575884,3.67855699
53.63607,4.35889894,3.81941632,0.73449481,3.76347465,3.70866915,3.70514615,3.67818809
53.646561,3.87298335,3.81880438,0.232763759,3.76355671,3.70783308,3.7045374,3.67781972
53.657053,4.24264069,3.81821336,0.651480874,3.76364609,3.70700814,3.70393244,3.6774518
53.667544,4.24264069,3.81764309,0.651918395,3.76374288,3.70619416,3.7033313,3.67708441
53.678036,3.87298335,3.81709322,0.236410937,3.76384718,3.70539066,3.7027338,3.67671746
53.688528,3.46410162,3.81656353,-0.593685032,3.7639591,3.70459743,3.70213996,3.67635099
53.699019,4.24264069,3.81605386,0.653136146,3.76407872,3.70381425,3.70154976,3.67598505
53.709511,4.47213595,3.81556389,0.810291347,3.76420619,3.70304068,3.70096303,3.67561954
53.720002,3.74165739,3.8150935,-0.270990986,3.76434158,3.70227661,3.70037983,3.67525455
53.730494,4.12310563,3.81464242,0.55539464,3.76448503,3.70152162,3.6998,3.67489001
53.740986,4.58257569,3.81421051,0.876564421,3.76463666,3.70077554,3.69922353,3.67452593
53.751477,4.79583152,3.81379765,0.990976224,3.76479654,3.7000382,3.69865042,3.67416236
53.761969,4.12310563,3.81340359,0.556508789,3.76496485,3.69930922,3.69808052,3.67379923
53.77246,4.89897949,3.81302828,1.04208982,3.76514166,3.69858852,3.69751388,3.67343661
53.782952,4.69041576,3.81267152,0.936880058,3.76532715,3.69787573,3.69695035,3.67307441
53.793444,4.58257569,3.81233321,0.877634599,3.76552141,3.69717072,3.69638993,3.67271268
53.803935,4.35889894,3.81201327,0.739517189,3.76572456,3.69647335,3.69583263,3.67235145
53.814427,4.58257569,3.81171156,0.87798869,3.76593678,3.69578328,3.69527829,3.67199065
53.824918,4.24264069,3.81142802,0.656667848,3.76615816,3.69510047,3.69472698,3.67163033
53.83541,4.12310563,3.81116255,0.558518645,3.76638888,3.6944246,3.69417854,3.67127045
53.845902,3.74165739,3.81091508,-0.263168574,3.76662907,3.69375555,3.69363298,3.67091102
53.856393,3.60555128,3.8106856,-0.452917565,3.76687884,3.69309322,3.69309032,3.67055208
53.866885,3.31662479,3.81047399,-0.70274405,3.7671384,3.69243732,3.6925504,3.67019356
53.877376,3.60555128,3.81028027,-0.452469879,3.76740784,3.6917878,3.6920133,3.66983552
53.887868,4.12310563,3.81010436,0.559465161,3.76768738,3.69114439,3.69147886,3.6694779
53.89836,3.87298335,3.80994626,0.251071865,3.76797716,3.69050701,3.6909471,3.66912072
53.908851,4.47213595,3.80980598,0.813836575,3.7682773,3.68987556,3.69041803,3.66876403
53.919343,4.47213595,3.80968349,0.81391183,3.76858803,3.68924978,3.68989152,3.66840775
53.929834,3.87298335,3.80957881,0.251802583,3.76890946,3.68862966,3.68936762,3.66805194
53.940326,4,3.80949193,0.4364723,3.76924184,3.68801494,3.6888462,3.66769654
53.950818,4.24264069,3.8094229,0.65819282,3.7695853,3.68740557,3.68832728,3.66734158
53.961309,3,3.80937174,-0.899650901,3.76994,3.68680146,3.68781087,3.66698708
53.971801,4.69041576,3.8093385,0.938657158,3.7703062,3.68620239,3.68729684,3.66663299
53.982292,4,3.80932322,0.436665527,3.77068402,3.68560835,3.68678524,3.66627937
53.992784,4.47213595,3.80932596,0.814131438,3.77107372,3.68501911,3.68627596,3.66592615
54.003276,4.24264069,3.80934679,0.658250637,3.77147547,3.68443463,3.68576901,3.66557336
54.013767,4.35889894,3.80938577,0.741291556,3.77188945,3.68385485,3.6852644,3.66522102
54.024259,3.60555128,3.80944301,-0.451543724,3.77231593,3.68327955,3.68476202,3.66486909
54.03475,4,3.80951858,0.436441774,3.77275506,3.68270876,3.68426191,3.6645176
54.045242,4.58257569,3.80961259,0.879183201,3.77320714,3.68214225,3.68376397,3.66416651
54.055734,4.69041576,3.80972516,0.938451171,3.77367236,3.68157999,3.6832682,3.66381585
54.066225,4.35889894,3.80985638,0.740974064,3.77415089,3.68102194,3.68277463,3.66346563
54.076717,3.46410162,3.81000641,-0.588136711,3.77464308,3.68046791,3.68228314,3.6631158
54.087208,4.35889894,3.81017535,0.740758798,3.77514907,3.67991791,3.68179379,3.66276642
54.0977,4.12310563,3.81036338,0.559233625,3.77566921,3.67937176,3.68130645,3.66241742
54.108192,3.31662479,3.81057064,-0.702812811,3.77620371,3.67882942,3.68082117,3.66206883
54.118683,3.74165739,3.81079727,-0.262944632,3.77675278,3.67829087,3.68033794,3.66172069
54.129175,4.12310563,3.81104348,0.558625229,3.77731678,3.67775593,3.67985666,3.66137292
54.139666,4.89897949,3.81130941,1.04291422,3.77789589,3.67722463,3.67937739,3.6610256
54.150158,3.46410162,3.8115953,-0.589485948,3.7784905,3.67669678,3.67890002,3.66067865
54.16065,3.46410162,3.81190132,-0.589745459,3.77910085,3.67617237,3.67842456,3.6603321
54.171141,3.46410162,3.81222766,-0.590022068,3.77972718,3.67565138,3.67795105,3.65998599
54.181633,3.74165739,3.81257458,-0.266302828,3.7803699,3.67513365,3.67747937,3.65964024
54.192124,3.60555128,3.81294226,-0.455402009,3.7810292,3.6746192,3.67700958,3.65929493
54.202616,3.16227766,3.81333101,-0.806878772,3.78170554,3.67410788,3.67654157,3.65894999
54.213108,3.31662479,3.81374104,-0.705064714,3.78239918,3.67359967,3.67607537,3.65860544
54.223599,4.12310563,3.81417257,0.55581747,3.78311038,3.67309455,3.67561101,3.65826131
54.234091,4.12310563,3.81462594,0.555409473,3.78383963,3.67259238,3.67514836,3.65791755
54.244582,4.47213595,3.81510136,0.810576702,3.78458715,3.6720932,3.67468751,3.65757421
54.255074,3.31662479,3.81559922,-0.706381218,3.78535344,3.67159684,3.67422833,3.65723123
54.265566,3.31662479,3.81611975,-0.706749577,3.7861388,3.67110331,3.67377087,3.65688863
54.276057,4.69041576,3.81666324,0.9347473,3.78694353,3.6706126,3.67331513,3.65654645
54.286549,3.46410162,3.81723012,-0.594246162,3.7877682,3.67012456,3.67286102,3.65620463
54.29704,4.47213595,3.8178206,0.808897618,3.78861303,3.66963924,3.67240861,3.65586322
54.307532,3.60555128,3.81843516,-0.461393417,3.78947862,3.66915649,3.67195779,3.65552216
54.318024,4,3.81907411,0.425353843,3.7903653,3.66867631,3.67150858,3.65518147
54.328515,4,3.81973775,0.424573017,3.79127342,3.6681987,3.67106102,3.6548412
54.339007,4.24264069,3.82042662,0.649780017,3.79220361,3.66772353,3.670615,3.65450127
54.349498,4.47213595,3.82114097,0.806842604,3.79315615,3.66725084,3.67017059,3.65416175
54.35999,4.79583152,3.82188136,0.986889133,3.7941317,3.6667805,3.66972769,3.65382257
54.370482,4.12310563,3.82264817,0.548139997,3.79513065,3.66631251,3.66928633,3.65348376
54.380973,4.79583152,3.82344175,0.986098255,3.7961534,3.66584687,3.66884653,3.65314535
54.391465,4.47213595,3.82426273,0.804905721,3.79720067,3.66538345,3.66840819,3.65280728
54.401956,4.35889894,3.82511143,0.730607632,3.79827278,3.66492231,3.6679714,3.6524696
54.412448,4,3.8259885,0.417146855,3.79937049,3.66446331,3.66753604,3.65213226
54.42294,4,3.82689438,0.41605964,3.80049425,3.66400647,3.66710214,3.65179528
54.433431,3.74165739,3.82782949,-0.293550856,3.80164452,3.66355179,3.66666975,3.65145869
54.443923,3.60555128,3.82879458,-0.472486296,3.80282211,3.66309914,3.66623875,3.65112243
54.454414,4,3.82979,0.412565142,3.80402742,3.66264859,3.66580922,3.65078656
54.464906,3.60555128,3.83081655,-0.474621192,3.80526128,3.6622,3.66538107,3.65045102
54.475398,5.38516481,3.83187474,1.24631058,3.80652426,3.66175339,3.66495433,3.65011583
54.485889,3.60555128,3.83296508,-0.476879233,3.80781688,3.66130877,3.66452903,3.64978102
54.496381,3.31662479,3.83408841,-0.719349444,3.80914006,3.66086603,3.66410507,3.64944654
54.506872,5.09901951,3.83524519,1.12417718,3.81049425,3.6604252,3.66368253,3.64911243
54.517364,3.87298335,3.83643632,0.191172773,3.81188043,3.65998619,3.66326132,3.64877865
54.527856,3.60555128,3.83766239,-0.481779115,3.81329922,3.659549,3.66284146,3.6484452
54.538347,4.47213595,3.83892402,0.795746147,3.81475125,3.65911365,3.662423,3.64811214
54.548839,3.74165739,3.84022221,-0.31395035,3.81623759,3.65868002,3.66200584,3.64777939
54.55933,4,3.84155748,0.398048387,3.81775875,3.65824817,3.66159005,3.64744701
54.569822,4.47213595,3.8429309,0.793224468,3.81931588,3.65781798,3.66117556,3.64711494
54.580314,4,3.84434317,0.394533688,3.82090968,3.65738949,3.66076239,3.64678321
54.590805,4.12310563,3.84579501,0.526602897,3.82254091,3.65696269,3.66035058,3.64645185
54.601297,3.31662479,3.8472876,-0.728466065,3.82421077,3.65653748,3.65994004,3.64612079
54.611788,4,3.84882156,0.388816723,3.82591991,3.65611391,3.65953086,3.64579009
54.62228,4.12310563,3.85039813,0.522214034,3.82766962,3.65569189,3.65912294,3.6454597
54.632772,3.87298335,3.85201815,0.144793626,3.82946075,3.65527143,3.65871633,3.64512964
54.643263,4,3.85368248,0.382514727,3.83129416,3.65485255,3.65831106,3.64479994
54.653755,3,3.85539248,-0.924874308,3.83317127,3.65443513,3.65790705,3.64447054
54.664246,3.87298335,3.85714892,0.125834927,3.83509284,3.65401925,3.65750439,3.64414149
54.674738,3.31662479,3.85895323,-0.736429523,3.83706036,3.65360479,3.657103,3.64381273
54.68523,4.35889894,3.86080643,0.705756697,3.83907484,3.65319178,3.65670291,3.6434843
54.695721,4.35889894,3.86270952,0.704407143,3.84113729,3.65278024,3.65630418,3.64315622
54.706213,5.09901951,3.86466411,1.11101548,3.84324936,3.65237006,3.65590673,3.64282843
54.716704,5.09901951,3.86667111,1.11011189,3.84541195,3.6519613,3.65551063,3.64250099
54.727196,4.89897949,3.86873223,1.01501097,3.84762681,3.65155387,3.65511584,3.64217384
54.737688,3.74165739,3.87084865,-0.35943186,3.84989513,3.65114778,3.65472239,3.641847
54.748179,4,3.87302159,0.356340297,3.85221811,3.65074306,3.65433033,3.6415205
54.758671,4.58257569,3.87525294,0.841024823,3.85459767,3.65033961,3.6539396,3.64119429
54.769162,3.74165739,3.8775438,-0.368627744,3.8570349,3.64993748,3.65355029,3.64086841
54.779654,2.64575131,3.87989618,-1.11092073,3.85953183,3.64953658,3.65316235,3.64054282
54.790146,4,3.88231151,0.343057562,3.86208988,3.64913694,3.65277583,3.64021753
54.800637,4.79583152,3.88479125,0.9544843,3.8647105,3.64873857,3.6523908,3.63989258
54.811129,3.87298335,3.88733762,-0.119809303,3.86739593,3.64834138,3.6520072,3.6395679
54.82162,4.24264069,3.88995196,0.593876016,3.87014747,3.64794544,3.65162515,3.63924356
54.832112,2.82842712,3.89263668,-1.03160533,3.87296754,3.64755064,3.65124459,3.63891948
54.842604,4.47213595,3.89539347,0.759435636,3.8758578,3.64715701,3.65086562,3.63859571
54.853095,4.58257569,3.89822411,0.827255452,3.87882001,3.64676457,3.6504883,3.63827226
54.863587,3.87298335,3.90113125,-0.167773374,3.8818568,3.64637323,3.65011262,3.63794908
54.874078,4.69041576,3.90411653,0.88673515,3.88496977,3.64598305,3.64973869,3.63762623
54.88457,4,3.9071828,0.304659155,3.88816174,3.64559394,3.64936652,3.63730364
54.895062,4.35889894,3.91033214,0.669751298,3.89143475,3.64520593,3.6489962,3.63698134
54.905553,4.47213595,3.91356672,0.747374898,3.89479089,3.64481904,3.64862785,3.63665936
54.916045,4.24264069,3.91688969,0.570746,3.89823329,3.64443317,3.64826149,3.63633764
54.926536,4,3.9203031,0.282306388,3.9017639,3.64404839,3.64789727,3.63601624
54.937028,4.58257569,3.92381037,0.811643595,3.90538606,3.64366461,3.64753525,3.6356951
54.94752,3.46410162,3.92741406,-0.680670584,3.90910226,3.64328186,3.64717559,3.63537424
54.958011,3.31662479,3.93111683,-0.783895425,3.91291502,3.64290015,3.64681845,3.63505369
54.968503,4.47213595,3.93492251,0.732948461,3.91682807,3.64251941,3.64646392,3.6347334
54.978994,4,3.93883366,0.247318306,3.9208438,3.64213968,3.64611227,3.63441341
54.989486,4.47213595,3.94285442,0.727517377,3.92496622,3.6417609,3.64576362,3.63409367
54.999978,3.87298335,3.94698801,-0.272037978,3.92919834,3.64138308,3.64541823,3.63377421
55.010469,4.47213595,3.95123774,0.721732784,3.93354325,3.64100624,3.64507642,3.63345506
55.020961,3.46410162,3.95560833,-0.701075399,3.93800542,3.6406303,3.64473842,3.63313615
55.031452,5,3.96010304,1.01975338,3.94258781,3.64025533,3.64440464,3.63281754
55.041944,4.12310563,3.96472702,0.397968099,3.94729524,3.63988123,3.64407544,3.63249918
55.052436,3.74165739,3.96948437,-0.477312247,3.95213138,3.63950804,3.64375133,3.63218108
55.062927,4.12310563,3.9743794,0.385650396,3.95710005,3.63913577,3.64343292,3.63186328
55.073419,4.24264069,3.97941809,0.513052232,3.96220664,3.63876435,3.64312085,3.63154572
55.08391,3.74165739,3.98460491,-0.492897075,3.96745483,3.63839384,3.64281608,3.63122846
55.094402,3,3.98994665,-0.994960629,3.97285045,3.63802415,3.64251965,3.63091142
55.104894,4.79583152,3.99544917,0.894640906,3.97839805,3.63765531,3.64223311,3.63059465
55.115385,4.58257569,4.00111895,0.762533112,3.98410234,3.63728734,3.64195846,3.63027818
55.125877,3.60555128,4.00696494,-0.633572146,3.98996989,3.63692017,3.64169839,3.62996193
55.136368,4.24264069,4.0129951,0.479213509,3.99600529,3.63655386,3.64145672,3.62964597
55.14686,3.87298335,4.01922113,-0.382410486,4.00221567,3.63618832,3.6412386,3.62933023
55.157352,4.12310563,4.02565497,0.312170872,4.00860668,3.63582358,3.64105115,3.62901475
55.167843,4.24264069,4.03231094,0.458617207,4.01518421,3.63545967,3.64090391,3.62869956
55.178335,4.24264069,4.03920815,0.451034958,4.02195628,3.6350965,3.64080939,3.62838458
55.188826,3.87298335,4.04636652,-0.416393047,4.02892872,3.63473414,3.64078362,3.62806989
55.199318,3.31662479,4.05381217,-0.858596169,4.03611026,3.63437251,3.64084637,3.62775542
55.20981,4.69041576,4.06157279,0.792996196,4.04350802,3.63401164,3.64102117,3.62744119
55.220301,4.79583152,4.06967893,0.852145877,4.05112937,3.63365154,3.64133464,3.62712725
55.230793,4.47213595,4.07816531,0.627670809,4.05898426,3.63329215,3.64181545,3.62681351
55.241284,4.24264069,4.0870637,0.394432484,4.06708007,3.63293352,3.6424921,3.62650005
55.251776,3.46410162,4.09640685,-0.795176231,4.07542765,3.63257558,3.64339055,3.62618681
55.262268,4.12310563,4.10621981,0.129945426,4.08403599,3.63221836,3.64453051,3.6258738
55.272759,3.31662479,4.11651885,-0.894367967,4.09291445,3.63186187,3.64592158,3.62556106
55.283251,4.47213595,4.12731086,0.587218097,4.10207541,3.63150605,3.64755946,3.62524853
55.293742,5,4.13858248,0.92812581,4.11152837,3.63115094,3.64942025,3.62493627
55.304234,4.58257569,4.15030352,0.65747409,4.12128688,3.63079649,3.65145615,3.62462422
55.314726,4.58257569,4.16241414,0.648198698,4.13136242,3.63044271,3.65358761,3.62431239
55.325217,4.69041576,4.17482188,0.718048659,4.14176698,3.63008963,3.65569657,3.62400083
55.335709,4.47213595,4.1874016,0.533605059,4.15251612,3.62973718,3.65762228,3.62368947
55.3462,5.56776436,4.19999254,1.16951777,4.16362216,3.62938541,3.65916535,3.62337837
55.356692,5.74456265,4.21243107,1.23779303,4.1751022,3.62903425,3.66011521,3.62306747
55.367184,4.47213595,4.22458589,0.497544037,4.18697106,3.62868373,3.66029879,3.6227568
55.377675,5.47722558,4.23641043,1.11391882,4.19924419,3.62833387,3.65963801,3.62244638
55.388167,4.58257569,4.24797078,0.578450439,4.21194142,3.62798461,3.65817899,3.62213615
55.398658,5,4.25942042,0.860569335,4.2250788,3.62763599,3.65607416,3.62182618
55.40915,4.79583152,4.27096245,0.72447848,4.23867821,3.62728795,3.65352863,3.6215164
55.419642,4.79583152,4.28279534,0.716265444,4.25275891,3.62694052,3.65074758,3.62120684
55.430133,5.09901951,4.2950884,0.89662206,4.26734107,3.62659372,3.64790354,3.62089752
55.440625,5.29150262,4.30797731,0.991728447,4.28245019,3.62624747,3.64512536,3.6205884
55.451116,3.31662479,4.32155891,-1.00246402,4.29810743,3.62590184,3.6425029,3.62027952
55.461608,4.89897949,4.33590728,0.750381375,4.31434106,3.62555676,3.64009187,3.61997082
55.4721,4.69041576,4.35107139,0.582532723,4.33117641,3.62521225,3.63792251,3.61966234
55.482591,4.24264069,4.36708383,-0.352764999,4.34864008,3.62486834,3.63600445,3.6193541
55.493083,4.79583152,4.38397018,0.641764246,4.36676524,3.62452495,3.63433119,3.61904604
55.503574,4.89897949,4.40174232,0.705150455,4.3855801,3.62418215,3.63288577,3.61873822
55.514066,4,4.42041472,-0.648393955,4.4051216,3.62383987,3.63164346,3.61843058
55.524558,4.47213595,4.43999615,0.179275773,4.42542344,3.62349813,3.63057635,3.61812314
55.535049,5.09901951,4.46049688,0.799076111,4.44652107,3.62315696,3.62965574,3.61781594
55.545541,6.164414,4.48193674,1.29710341,4.46845818,3.62281629,3.6288541,3.61750891
55.556032,4.47213595,4.5043328,-0.179434797,4.49127274,3.62247618,3.62814715,3.61720211
55.566524,5.56776436,4.52771609,1.01982757,4.51501369,3.62213655,3.6275139,3.61689549
55.577016,4.24264069,4.55211748,-0.556306383,4.53972631,3.62179744,3.62693738,3.61658907
55.587507,4.58257569,4.57757345,0.0707265402,4.56545844,3.62145888,3.62640416,3.61628287
55.597999,4.58257569,4.60413349,-0.146825727,4.5922683,3.62112078,3.62590379,3.61597684
55.60849,5.56776436,4.63184288,0.967430349,4.62020763,3.62078321,3.62542865,3.61567103
55.618982,5.56776436,4.66076237,0.952366525,4.64934198,3.62044611,3.62497294,3.61536539
55.629474,5.09901951,4.69095009,0.638803118,4.67973296,3.6201095,3.62453256,3.61505995
55.639965,5.19615242,4.72246879,0.688246783,4.71144581,3.6197734,3.62410455,3.61475472
55.650457,5,4.75539515,0.494575426,4.74455912,3.61943775,3.62368664,3.61444966
55.660948,5.83095189,4.78979901,1.020369,4.77914408,3.6191026,3.62327726,3.61414481
55.67144,5.38516481,4.82576816,0.74792824,4.8152896,3.6187679,3.62287513,3.61384013
55.681932,5.83095189,4.86338649,0.983649027,4.85308037,3.61843365,3.62247931,3.61353562
55.692423,5.47722558,4.90274325,0.757946123,4.89260631,3.6180999,3.62208909,3.61323134
55.702915,6.08276253,4.94394512,1.06715388,4.93397469,3.61776657,3.62170376,3.61292721
55.713406,5,4.98709052,0.113619886,4.97728436,3.61743373,3.62132289,3.61262329
55.723898,5.91607978,5.03230081,0.940095194,5.02265713,3.61710129,3.62094596,3.61231952
55.73439,6,5.0796931,0.959326272,5.07021044,3.6167693,3.62057262,3.61201593
55.744881,6.32455532,5.12939196,1.09323527,5.12006914,3.61643778,3.62020259,3.61171255
55.755373,6,5.1815447,0.904685191,5.17238085,3.61610666,3.61983549,3.61140932
55.765864,5.65685425,5.23628909,0.648509955,5.22728354,3.615776,3.61947116,3.61110629
55.776356,5.19615242,5.29379277,-0.312474562,5.28494509,3.61544573,3.6191093,3.61080341
55.786848,5.74456265,5.35421894,0.624774928,5.34552884,3.61511588,3.61874973,3.6105007
55.797339,3.87298335,5.41774097,-1.24288279,5.40920835,3.61478647,3.61839233,3.6101982
55.807831,5.65685425,5.4845621,0.415080896,5.47618698,3.61445745,3.61803687,3.60989583
55.818322,5.83095189,5.55487394,0.525431208,5.54665644,3.61412887,3.61768327,3.60959367
55.828814,6.244998,5.6289069,0.78491471,5.62084726,3.61380065,3.61733134,3.60929164
55.839306,6.164414,5.70688585,0.676408272,5.69898439,3.61347284,3.61698101,3.60898978
55.849797,7.14142843,5.78904866,1.16291864,5.78130572,3.61314545,3.6166322,3.60868812
55.860289,5.09901951,5.8756711,-0.881278382,5.86808709,3.61281842,3.61628475,3.60838659
55.87078,7.34846923,5.9670127,1.17535379,5.95958804,3.61249181,3.61593866,3.60808526
55.881272,6.63324958,6.06338125,0.75489624,6.05611637,3.61216555,3.61559377,3.60778406
55.891764,7.07106781,6.16507427,0.951836929,6.15796958,3.61183968,3.61525005,3.60748301
55.902255,6.8556546,6.27240163,0.763710004,6.26545749,3.6115142,3.61490747,3.60718216
55.912747,7.21110255,6.38571633,0.90850769,6.37893307,3.61118907,3.61456592,3.60688144
55.923238,7.28010989,6.50534162,0.880209221,6.49871946,3.61086434,3.6142254,3.6065809
55.93373,7.21110255,6.63165225,0.761216327,6.62519135,3.61053994,3.61388579,3.60628049
55.944222,7.28010989,6.76499438,0.71771548,6.75869472,3.61021591,3.6135471,3.60598024
55.954713,7.34846923,6.90571024,0.665401371,6.89957167,3.60989226,3.61320931,3.60568016
55.965205,7.14142843,7.05417271,0.295390795,7.0481949,3.60956893,3.61287232,3.60538022
55.975696,6.8556546,7.21068232,-0.595842022,7.20486471,3.60924599,3.61253615,3.60508045
55.986188,8.1240384,7.37556441,0.865143915,7.36990622,3.60892336,3.61220073,3.6047808
55.99668,7.74596669,7.5490529,0.4437497,7.54355304,3.60860108,3.61186603,3.6044813
56.007171,7.61577311,7.73130894,-0.339905623,7.72596601,3.60827916,3.61153208,3.60418197
56.017663,8.88819442,7.92244876,0.982723594,7.91726101,3.60795755,3.61119878,3.60388277
56.028154,8.1240384,8.12239073,0.0405915832,8.11735599,3.60763631,3.61086618,3.60358374
56.038646,9,8.33095762,0.81795011,8.3260733,3.60731536,3.61053418,3.60328482
56.049138,7.48331477,8.54770186,-1.03169137,8.54296487,3.60699474,3.6102028,3.60298604
56.059629,8.77496439,8.77190344,0.055325797,8.76731011,3.60667448,3.60987204,3.60268744
56.070121,9.43398113,9.00257531,0.656814908,8.99812143,3.6063545,3.60954184,3.60238895
56.080612,9.79795897,9.23825053,0.748136643,9.23393124,3.60603488,3.60921224,3.60209062
56.091104,9.38083152,9.47708876,-0.310253513,9.47289852,3.60571553,3.60888315,3.6017924
56.101596,10.6301458,9.71666374,0.955762559,9.7125963,3.6053965,3.60855459,3.60149432
56.112087,9.16515139,9.95398505,-0.888163082,9.95003339,3.6050778,3.60822659,3.60119641
56.122579,10.6301458,10.18555,0.666780182,10.1817064,3.60475938,3.60789905,3.6008986
56.13307,11.61895,10.4072125,1.10078949,10.4034684,3.60444129,3.60757205,3.60060095
56.143562,11.7473401,10.6144401,1.06437775,10.6107861,3.60412347,3.60724549,3.6003034
56.154054,11.2694277,10.8023121,0.683458541,10.7987383,3.60380594,3.60691941,3.60000599
56.164545,12.0415946,10.9658134,1.03719871,10.962309,3.60348874,3.60659382,3.59970873
56.175037,12.0415946,11.1001649,0.970272978,11.0967188,3.6031718,3.60626865,3.59941157
56.185528,12.5299641,11.2010471,1.1527866,11.1976476,3.60285517,3.60594394,3.59911457
56.19602,12,11.2650484,0.85729319,11.2616834,3.6025388,3.60561964,3.59881767
56.206512,12.1655251,11.2898811,0.935758471,11.2865387,3.60222271,3.60529576,3.59852089
56.217003,11.2694277,11.2746425,-0.0722140608,11.2713105,3.60190692,3.60497233,3.59822426
56.227495,12.4096736,11.2198847,1.09077446,11.2165513,3.60159138,3.60464928,3.59792773
56.237986,11.6619038,11.1275703,0.730981174,11.1242242,3.60127615,3.60432665,3.59763134
56.248478,10.9087121,11.000858,-0.30355536,10.9974882,3.60096115,3.60400438,3.59733505
56.25897,9.69535971,10.8438635,-1.07168268,10.8404599,3.60064642,3.6036825,3.59703888
56.269461,10.5830052,10.6613171,-0.279842502,10.6578703,3.60033199,3.60336103,3.59674285
56.279953,10.0995049,10.4581626,-0.598880307,10.454664,3.60001778,3.60303991,3.59644691
56.290444,9.32737905,10.2393782,-0.95498648,10.2358204,3.59970387,3.60271917,3.59615112
56.300936,8.30662386,10.0095894,-1.30497722,10.0059655,3.59939018,3.60239877,3.59585541
56.311428,8.60232527,9.77304075,-1.08199607,9.769345,3.59907675,3.60207873,3.59555981
56.321919,8.77496439,9.53344102,-0.870905639,9.52966849,3.5987636,3.60175906,3.59526436
56.332411,8.42614977,9.29385267,-0.931505714,9.28999926,3.59845066,3.60143971,3.59496899
56.342902,7.87400787,9.0568603,-1.08759019,9.05292272,3.598138,3.60112072,3.59467375
56.353394,7.87400787,8.82442529,-0.974893539,8.82040093,3.59782556,3.60080204,3.5943786
56.363886,6.92820323,8.59810267,-1.29224589,8.59398961,3.59751336,3.60048369,3.59408355
56.374377,6.78232998,8.37903434,-1.26360768,8.37483128,3.59720142,3.6001657,3.59378864
56.384869,7.81024968,8.16795284,-0.59808291,8.16365899,3.59688969,3.599848,3.59349381
56.39536,6.92820323,7.9653909,-1.01842411,7.96100597,3.59657823,3.59953064,3.59319911
56.405852,7,7.77157285,-0.878392196,7.76709697,3.59626696,3.59921357,3.59290448
56.416344,5.74456265,7.58660377,-1.35721816,7.58203746,3.59595593,3.59889681,3.59260995
56.426835,6.244998,7.41044761,-1.07955992,7.40579173,3.59564515,3.59858038,3.59231556
56.437327,6.4807407,7.24291352,-0.873025098,7.2381692,3.59533457,3.59826422,3.59202124
56.447818,6.08276253,7.08380236,-1.00051978,7.07897099,3.59502423,3.59794839,3.59172704
56.45831,6.70820393,6.9327978,-0.473913358,6.92788097,3.59471409,3.59763283,3.59143291
56.468802,6.32455532,6.78959512,-0.68193827,6.78459461,3.59440416,3.59731755,3.59113888
56.479293,6.4807407,6.65386485,-0.416081906,6.64878259,3.59409448,3.5970026,3.59084497
56.489785,5.74456265,6.52522699,-0.883552117,6.52006502,3.59378498,3.5966879,3.59055113
56.500276,6.70820393,6.40335034,0.552135488,6.39811081,3.59347572,3.59637351,3.59025741
56.510768,6.32455532,6.28785764,0.191566378,6.28254278,3.59316664,3.59605937,3.58996376
56.52126,5.74456265,6.17841513,-0.658674796,6.17302722,3.59285777,3.5957455,3.58967019
56.531751,5.29150262,6.07469716,-0.884982792,6.06923854,3.59254912,3.59543194,3.58937675
56.542243,5.65685425,5.97636062,-0.565248947,5.97083363,3.59224065,3.59511862,3.58908336
56.552734,5.29150262,5.88311591,-0.769164021,5.87752293,3.59193241,3.5948056,3.58879009
56.563226,6,5.79465076,0.453154759,5.78899415,3.59162434,3.59449281,3.58849688
56.573718,4.89897949,5.71069556,-0.900952868,5.70497768,3.59131646,3.59418028,3.58820375
56.584209,4.89897949,5.63099402,-0.855578482,5.62521724,3.5910088,3.59386805,3.58791074
56.594701,5.38516481,5.55528172,-0.41245231,5.54944833,3.59070131,3.59355604,3.58761779
56.605192,5.09901951,5.48333902,-0.619935086,5.47745135,3.59039403,3.59324432,3.58732494
56.615684,5.38516481,5.41493153,-0.172530351,5.40899181,3.59008691,3.59293282,3.58703215
56.626176,4.58257569,5.34985941,-0.875947326,5.34386988,3.58977997,3.59262158,3.58673943
56.636667,5.74456265,5.28793431,0.675742801,5.28189713,3.58947324,3.59231061,3.58644683
56.647159,5.47722558,5.22896206,0.498260493,5.22287935,3.58916667,3.59199986,3.58615428
56.65765,5.56776436,5.17278345,0.628475067,5.16665731,3.5888603,3.59168939,3.58586183
56.668142,5.56776436,5.11922766,0.669728826,5.1130601,3.58855408,3.59137913,3.58556943
56.678634,5.65685425,5.06815048,0.767270338,5.06194347,3.58824804,3.59106911,3.5852771
56.689125,4.69041576,5.01941622,-0.573585616,5.01317168,3.5879422,3.59075937,3.58498488
56.699617,4.69041576,4.97288401,-0.531477424,4.9666038,3.58763649,3.59044983,3.5846927
56.710108,3.60555128,4.92843983,-1.15016892,4.92212575,3.58733099,3.59014056,3.58440062
56.7206,5.38516481,4.88595973,0.706544461,4.87961353,3.58702562,3.58983149,3.58410858
56.731092,4.47213595,4.84534008,-0.61090435,4.83896345,3.58672042,3.58952266,3.58381662
56.741583,4.69041576,4.80648329,-0.340686843,4.80007787,3.58641541,3.58921409,3.58352475
56.752075,5.09901951,4.76928687,0.574223517,4.76285424,3.58611053,3.58890573,3.58323292
56.762566,4.47213595,4.73366901,-0.511403023,4.7272107,3.58580583,3.58859762,3.58294119
56.773058,4.89897949,4.69953926,0.446587306,4.69305675,3.58550127,3.58828971,3.58264949
56.78355,3.60555128,4.66682275,-1.03018031,4.66031745,3.58519686,3.58798203,3.58235786
56.794041,4.35889894,4.63544883,-0.525880106,4.62892211,3.58489263,3.58767461,3.58206633
56.804533,4.69041576,4.60534226,0.291673614,4.59879544,3.58458853,3.58736738,3.58177482
56.815024,5.09901951,4.57644391,0.722893909,4.56987825,3.5842846,3.58706041,3.58148341
56.825516,5.29150262,4.54868708,0.861867473,4.5421038,3.5839808,3.58675363,3.58119203
56.836008,4.24264069,4.52201716,-0.528560755,4.51541742,3.58367714,3.58644707,3.58090071
56.846499,4.69041576,4.4963825,0.44049207,4.48976744,3.58337365,3.58614077,3.58060947
56.856991,4.79583152,4.47172722,0.569301592,4.46509791,3.58307027,3.58583466,3.58031827
56.867482,3.74165739,4.44800816,-0.840446767,4.44136564,3.58276707,3.5855288,3.58002715
56.877974,3.87298335,4.42517552,-0.743096343,4.41852078,3.58246398,3.58522313,3.57973606
56.888466,3.16227766,4.40318905,-1.11396202,4.39652304,3.58216102,3.58491768,3.57944503
56.898957,3.87298335,4.38201055,-0.713461426,4.37533418,3.58185822,3.58461249,3.57915407
56.909449,4.47213595,4.36159802,0.332472461,4.35491216,3.58155554,3.58430748,3.57886314
56.91994,3.46410162,4.34191958,-0.936919403,4.33522507,3.58125301,3.58400272,3.57857229
56.930432,5,4.32293762,0.822838003,4.31623525,3.58095058,3.58369815,3.57828147
56.940924,4.12310563,4.3046221,-0.426047503,4.29791263,3.58064829,3.5833938,3.57799069
56.951415,4,4.28694447,-0.535671982,4.28022863,3.58034614,3.58308971,3.5777
56.961907,4.89897949,4.26987273,0.793162501,4.2631512,3.5800441,3.5827858,3.57740932
56.972398,4.12310563,4.25338312,-0.360939743,4.24665657,3.57974221,3.58248214,3.57711871
56.98289,3.60555128,4.23744685,-0.794918594,4.2307159,3.57944041,3.58217867,3.57682813
56.993382,4,4.22204125,-0.471212532,4.21530651,3.57913873,3.58187543,3.57653759
57.003873,4.12310563,4.20714475,-0.289895025,4.20040679,3.5788372,3.58157243,3.57624712
57.014365,4.12310563,4.19273267,-0.263869375,4.18599202,3.57853575,3.58126963,3.57595667
57.024856,4.24264069,4.17878712,0.25269264,4.17204429,3.57823445,3.58096709,3.57566629
57.035348,3.46410162,4.16528577,-0.837367396,4.15854125,3.57793324,3.58066474,3.57537592
57.04584,4.58257569,4.15221137,0.65602159,4.14546561,3.57763214,3.58036261,3.5750856
57.056331,4.24264069,4.13954742,0.321081406,4.13280086,3.57733118,3.58006074,3.57479534
57.066823,4,4.12727467,-0.35675575,4.12052772,3.5770303,3.57975907,3.57450509
57.077314,3.74165739,4.1153795,-0.611328153,4.10863254,3.57672955,3.57945766,3.57421491
57.087806,4.47213595,4.10384442,0.606870275,4.09709782,3.57642888,3.57915646,3.57392473
57.098298,4.79583152,4.09265615,0.838555526,4.08591023,3.57612832,3.57885549,3.57363459
57.108789,4.24264069,4.08180195,0.401047048,4.07505703,3.57582789,3.57855478,3.57334452
57.119281,4,4.07126663,-0.266958107,4.06452301,3.57552753,3.57825428,3.57305445
57.129772,3.74165739,4.06103974,-0.565139235,4.05429769,3.5752273,3.57795406,3.57276444
57.140264,4.24264069,4.05110743,0.437645133,4.04436719,3.57492714,3.57765405,3.57247444
57.150756,4.47213595,4.04145935,0.656259558,4.03472117,3.57462708,3.57735428,3.57218446
57.161247,4.35889894,4.03208559,0.571675918,4.02534967,3.57432715,3.57705479,3.57189455
57.171739,4,4.02297404,-0.151571884,4.01624058,3.57402727,3.57675553,3.57160464
57.18223,4.24264069,4.01411661,0.478041925,4.00738577,3.57372752,3.57645656,3.57131478
57.192722,3.60555128,4.0055022,-0.632416733,3.99877415,3.57342783,3.57615781,3.57102492
57.203214,4.47213595,3.99712271,0.689212043,3.99039758,3.57312823,3.57585933,3.57073509
57.213705,3.87298335,3.98897035,-0.340568652,3.98224825,3.57282875,3.57556115,3.57044532
57.224197,3.74165739,3.98103536,-0.489262682,3.97431639,3.57252933,3.57526321,3.57015554
57.234688,4.12310563,3.97331143,0.38703255,3.96659568,3.57223002,3.57496559,3.56986581
57.24518,4.35889894,3.9657896,0.626984327,3.95907712,3.57193077,3.57466821,3.56957608
57.255672,4,3.95846345,0.203805182,3.95175429,3.5716316,3.57437113,3.56928637
57.266163,4,3.95132681,0.22062002,3.944621,3.57133254,3.57407437,3.56899671
57.276655,4.24264069,3.94437174,0.546140042,3.93766929,3.57103353,3.57377789,3.56870704
57.287146,4.58257569,3.93759331,0.803107955,3.93089421,3.57073462,3.57348175,3.56841742
57.297638,3,3.93098418,-0.964875217,3.92428841,3.57043577,3.57318589,3.56812779
57.30813,4.35889894,3.92453927,0.659059691,3.91784677,3.57013699,3.57289036,3.56783818
57.318621,4.12310563,3.91825362,0.45260579,3.91156434,3.56983832,3.57259519,3.56754861
57.329113,4.12310563,3.91212075,0.459330899,3.90543461,3.56953969,3.57230034,3.56725903
57.339604,3.87298335,3.90613674,-0.182080746,3.89945364,3.56924115,3.57200587,3.5669695
57.350096,4.47213595,3.90029558,0.756201279,3.8936154,3.56894267,3.57171173,3.56667995
57.360588,4.24264069,3.89459317,0.589955525,3.88791576,3.56864425,3.57141797,3.56639041
57.371079,4,3.88902554,0.333128296,3.88235076,3.56834592,3.57112462,3.56610092
57.381571,4.12310563,3.88358732,0.489406076,3.87691499,3.56804764,3.57083164,3.5658114
57.392062,4.35889894,3.87827541,0.693270172,3.87160534,3.56774945,3.5705391,3.56552193
57.402554,4.47213595,3.87308482,0.773983935,3.86641678,3.56745129,3.57024695,3.56523244
57.413046,4,3.86801225,0.363301184,3.861346,3.5671532,3.56995525,3.56494296
57.423537,4.12310563,3.86305449,0.509952093,3.85638978,3.5668552,3.56966403,3.56465352
57.434029,4.47213595,3.85820706,0.783536148,3.85154359,3.56655722,3.56937325,3.56436405
57.44452,3.74165739,3.8534675,-0.334380195,3.84680497,3.56625934,3.569083,3.56407462
57.455012,3.31662479,3.84883164,-0.729525086,3.84216971,3.56596148,3.56879322,3.56378517
57.465504,4,3.8442968,0.394592447,3.83763511,3.56566368,3.56850398,3.56349572
57.475995,4.24264069,3.83986038,0.634649752,3.83319853,3.56536597,3.56821532,3.56320631
57.486487,3.87298335,3.83551862,0.193558062,3.82885621,3.56506828,3.56792721,3.56291687
57.496978,5,3.83126957,1.08107837,3.82460613,3.56477067,3.56763974,3.56262746
57.50747,4.24264069,3.82710971,0.644616926,3.82044477,3.56447308,3.56735286,3.56233802
57.517962,4.24264069,3.82303686,0.647768344,3.81636992,3.56417555,3.56706664,3.56204859
57.528453,3.31662479,3.81904891,-0.708818822,3.81237941,3.56387809,3.56678114,3.56175918
57.538945,4.12310563,3.8151427,0.554944075,3.80847005,3.56358065,3.56649634,3.56146974
57.549436,4.12310563,3.81131665,0.558380669,3.80464023,3.56328328,3.56621233,3.56118033
57.559928,3.46410162,3.80756782,-0.586059896,3.80088695,3.56298593,3.56592909,3.5608909
57.57042,4,3.80389441,0.442838106,3.79720839,3.56268863,3.56564669,3.56060145
57.580911,3.87298335,3.80029472,0.269608289,3.79360278,3.5623914,3.5653652,3.56031203
57.591403,3,3.79676605,-0.892617528,3.79006739,3.56209418,3.56508461,3.56002258
57.601894,4.12310563,3.79330718,0.574280811,3.78660092,3.56179703,3.56480504,3.55973315
57.612386,4.24264069,3.78991558,0.672848499,3.78320081,3.56149989,3.56452649,3.55944369
57.622878,4.47213595,3.78658983,0.827977126,3.77986556,3.56120279,3.56424903,3.55915422
57.633369,3.74165739,3.78332853,-0.204135106,3.77659369,3.56090575,3.56397277,3.55886477
57.643861,3.87298335,3.7801294,0.304719462,3.77338288,3.56060873,3.56369773,3.55857528
57.654352,4.24264069,3.77699147,0.682384948,3.77023207,3.56031176,3.56342402,3.55828581
57.664844,3.46410162,3.77391263,-0.556606695,3.76713905,3.5600148,3.56315169,3.55799631
57.675336,2.64575131,3.77089172,-1.06072636,3.76410259,3.55971788,3.56288084,3.55770679
57.685827,2.82842712,3.76792761,-0.969278332,3.76112146,3.55942101,3.5626116,3.55741729
57.696319,3.46410162,3.7650184,-0.548558822,3.75819364,3.55912415,3.56234404,3.55712775
57.70681,3.60555128,3.76216335,-0.395742432,3.75531828,3.55882734,3.5620783,3.55683822
57.717302,3.74165739,3.75936068,-0.133053727,3.75249348,3.55853053,3.56181448,3.55654865
57.727794,4,3.75660949,0.493346233,3.7497182,3.55823375,3.56155274,3.55625906
57.738285,3.31662479,3.75390892,-0.661274625,3.74699143,3.55793703,3.56129324,3.55596949
57.748777,4,3.75125737,0.498741045,3.7443114,3.5576403,3.56103611,3.55567987
57.759268,3.46410162,3.74865434,-0.533434833,3.74167744,3.55734362,3.56078159,3.55539026
57.76976,3.87298335,3.74609836,0.356209188,3.73908788,3.55704694,3.56052981,3.55510061
57.780252,3.74165739,3.74358879,-0.0439477155,3.73654186,3.55675028,3.56028104,3.55481094
57.790743,3.16227766,3.741125,-0.760820179,3.73403853,3.55645367,3.56003552,3.55452128
57.801235,4.58257569,3.73870575,0.918623942,3.73157635,3.55615705,3.5597935,3.55423157
57.811726,3.46410162,3.73633075,-0.521755818,3.72915477,3.55586047,3.5595553,3.55394186
57.822218,3.87298335,3.73399889,0.372806196,3.72677235,3.55556389,3.55932122,3.55365211
57.83271,4,3.73170979,0.517967387,3.72442834,3.55526732,3.55909165,3.55336233
57.843201,3.74165739,3.72946313,0.110427619,3.72212205,3.5549708,3.55886702,3.55307256
57.853693,3.87298335,3.72725802,0.381739865,3.71985213,3.55467426,3.55864774,3.55278273
57.864184,3.46410162,3.72509451,-0.510874637,3.71761812,3.55437776,3.55843436,3.55249291
57.874676,3,3.72297188,-0.850277533,3.71541876,3.55408125,3.55822742,3.55220304
57.885168,3.74165739,3.72089015,0.144108421,3.71325343,3.55378475,3.55802759,3.55191314
57.895659,4.69041576,3.71884941,0.985680654,3.71112153,3.55348829,3.5578356,3.55162324
57.906151,3.16227766,3.71684929,-0.744695662,3.70902188,3.5531918,3.55765225,3.55133328
57.916642,4.12310563,3.71489033,0.638917284,3.70695411,3.55289536,3.55747851,3.55104333
57.927134,4,3.71297246,0.535749511,3.70491711,3.55259889,3.55731542,3.55075331
57.937626,3.46410162,3.71109637,-0.496985666,3.70291035,3.55230243,3.55716425,3.55046327
57.948117,3.16227766,3.70926293,-0.739584527,3.70093333,3.55200601,3.55702645,3.55017323
57.958609,4,3.70747281,0.540857831,3.698985,3.55170956,3.55690373,3.54988312
57.9691,3.46410162,3.70572769,-0.491554755,3.69706507,3.55141314,3.5567982,3.54959301
57.979592,3.74165739,3.70402912,0.193980078,3.69517254,3.5511167,3.55671241,3.54930285
57.990084,4.12310563,3.70237978,0.648633827,3.69330698,3.55082025,3.55664963,3.54901264
58.000575,4.79583152,3.70078333,1.0464455,3.69146796,3.55052384,3.55661411,3.54872243
58.011067,3,3.69924428,-0.836208278,3.68965453,3.5502274,3.55661142,3.54843216
58.021558,4.58257569,3.69776962,0.940641308,3.68786649,3.54993098,3.55664907,3.54814189
58.03205,3.74165739,3.69636835,0.212812199,3.68610293,3.54963454,3.55673727,3.54785154
58.042542,4.69041576,3.69505342,0.997678476,3.68436348,3.54933809,3.5568898,3.54756116
58.053033,4,3.69384237,0.55331513,3.68264779,3.54904166,3.55712522,3.54727077
58.063525,3.74165739,3.69275836,0.221131236,3.68095501,3.54874521,3.55746831,3.54698032
58.074016,3.16227766,3.69183234,-0.727705077,3.67928498,3.54844877,3.55795127,3.54668985
58.084508,4.24264069,3.69110349,0.742655504,3.67763688,3.5481523,3.55861539,3.54639932
58.095,3.46410162,3.6906209,-0.475940425,3.67601042,3.54785582,3.55951171,3.54610874
58.105491,3.74165739,3.69044353,0.226304797,3.67440527,3.54755936,3.56070144,3.54581816
58.115983,3.31662479,3.69063956,-0.611567471,3.6728207,3.54726286,3.56225564,3.5455275
58.126474,3.46410162,3.69128444,-0.476636996,3.67125656,3.54696638,3.56425223,3.54523683
58.136966,3.87298335,3.69245734,0.424883517,3.66971214,3.54666986,3.5667734,3.54494609
58.147458,4.58257569,3.69423535,0.942518087,3.66818716,3.54637333,3.56989865,3.5446553
58.157949,3.74165739,3.69668616,0.212064209,3.66668139,3.54607681,3.57369764,3.5443645
58.168441,3.87298335,3.69986035,0.416080516,3.66519412,3.54578026,3.57822257,3.54407363
58.178932,4,3.70377971,0.544261232,3.66372527,3.54548371,3.58349532,3.54378273
58.189424,3.46410162,3.70842905,-0.494294892,3.66227418,3.54518712,3.58949996,3.54349177
58.199916,3.16227766,3.71374209,-0.742606512,3.66084063,3.54489051,3.59616749,3.54320075
58.210407,4,3.71958914,0.529538342,3.6594244,3.54459392,3.60336357,3.54290972
58.220899,3,3.72576369,-0.851917654,3.65802487,3.54429727,3.61087513,3.54261861
58.23139,3.60555128,3.73196149,-0.355542144,3.65664198,3.54400064,3.61838824,3.54232748
58.241882,4.58257569,3.73777261,0.919131704,3.65527513,3.54370396,3.62548093,3.54203627
58.252374,3.16227766,3.74268321,-0.761843519,3.65392414,3.54340726,3.63162451,3.54174502
58.262865,4.12310563,3.74612384,0.613988427,3.65258881,3.54311056,3.6362337,3.54145374
58.273357,4.58257569,3.74757002,0.913786448,3.65126859,3.54281381,3.63877053,3.54116238
58.283848,3.60555128,3.74667625,-0.375666044,3.64996344,3.54251707,3.63888134,3.54087099
58.29434,4.79583152,3.74338722,1.02588708,3.6486728,3.54222027,3.63651165,3.54057953
58.304832,3.16227766,3.73795745,-0.758735652,3.64739654,3.54192345,3.63192525,3.54028801
58.315323,4.12310563,3.73086674,0.626289776,3.64613448,3.54162663,3.62561729,3.53999647
58.325815,3.31662479,3.72268125,-0.637225593,3.64488612,3.54132976,3.61817151,3.53970484
58.336306,3.74165739,3.71394149,0.166480908,3.64365143,3.54103289,3.61014448,3.53941319
58.346798,2.44948974,3.70509245,-1.12053679,3.64242991,3.54073596,3.60199452,3.53912145
58.35729,4.47213595,3.69647261,0.880717519,3.64122145,3.540439,3.5940699,3.53882965
58.367781,3.46410162,3.68832005,-0.473517093,3.64002589,3.54014204,3.58661548,3.53853783
58.378273,2.82842712,3.68078673,-0.923233233,3.63884278,3.53984502,3.57978768,3.53824592
58.388764,4.35889894,3.6739597,0.827610561,3.6376721,3.539548,3.57367574,3.53795399
58.399256,4.12310563,3.66786927,0.674712057,3.63651341,3.53925091,3.56831086,3.53766196
58.409748,4,3.66250547,0.580942794,3.63536659,3.5389538,3.56368256,3.53736987
58.420239,3.74165739,3.65782678,0.289535158,3.63423153,3.53865668,3.55974789,3.53707776
58.430731,3.87298335,3.65376916,0.468203143,3.6331078,3.53835949,3.55644106,3.53678555
58.441222,3.46410162,3.65025813,-0.431458587,3.6319954,3.5380623,3.55368526,3.53649331
58.451714,4.24264069,3.64721345,0.771639318,3.63089392,3.53776504,3.55139812,3.53620099
58.462206,3.46410162,3.64455771,-0.424801241,3.62980327,3.53746775,3.5495,3.53590859
58.472697,2.82842712,3.64221948,-0.902104402,3.62872335,3.53717044,3.54791745,3.53561617
58.483189,2.82842712,3.64013541,-0.900948545,3.62765376,3.53687307,3.5465856,3.53532365
58.49368,3.31662479,3.63825283,-0.567122594,3.62659453,3.53657569,3.5454503,3.5350311
58.504172,4.47213595,3.63652813,0.914115871,3.62554527,3.53627824,3.54446701,3.53473845
58.514664,4,3.63492726,0.604212497,3.62450589,3.53598075,3.54360081,3.53444574
58.525155,4.24264069,3.63342391,0.780523397,3.62347633,3.53568325,3.54282476,3.53415299
58.535647,3.60555128,3.63199779,-0.162623849,3.62245622,3.53538568,3.5421183,3.53386014
58.546138,3.31662479,3.63063421,-0.560365435,3.62144558,3.53508809,3.54146638,3.53356726
58.55663,4.12310563,3.62932183,0.702697511,3.62044405,3.53479043,3.54085763,3.53327428
58.567122,3.46410162,3.62805258,-0.404908585,3.61945158,3.53449272,3.54028385,3.53298124
58.577613,4.12310563,3.62682043,0.70447512,3.61846811,3.534195,3.53973895,3.53268815
58.588105,2.82842712,3.62562052,-0.892856872,3.61749327,3.5338972,3.5392182,3.53239496
58.598596,3.60555128,3.62444948,-0.13747074,3.61652713,3.53359939,3.53871816,3.53210174
58.609088,2.23606798,3.62330425,-1.17780995,3.61556934,3.5333015,3.53823598,3.53180841
58.61958,3.31662479,3.62218264,-0.552772874,3.61461985,3.53300356,3.53776947,3.53151501
58.630071,2.44948974,3.62108283,-1.08240154,3.61367861,3.5327056,3.53731685,3.53122157
58.640563,4.35889894,3.62000298,0.859590579,3.6127453,3.53240757,3.53687649,3.53092803
58.651054,4.35889894,3.6189419,0.860207561,3.61181997,3.53210951,3.53644717,3.53063445
58.661546,3.87298335,3.61789815,0.505059601,3.61090231,3.53181137,3.53602768,3.53034076
58.672038,3.31662479,3.61687075,-0.547947041,3.60999227,3.53151318,3.53561708,3.530047
58.682529,3.60555128,3.61585884,-0.101526175,3.60908982,3.53121497,3.53521455,3.5297532
58.693021,2.64575131,3.61486136,-0.984433873,3.60819465,3.53091668,3.53481925,3.52945929
58.703512,3.46410162,3.61387773,-0.38700919,3.60730683,3.53061836,3.53443059,3.52916533
58.714004,3.60555128,3.61290706,-0.0857658488,3.60642605,3.53031996,3.53404789,3.52887127
58.724496,4.12310563,3.6119488,0.714952321,3.60555228,3.5300215,3.53367066,3.52857714
58.734987,3.46410162,3.61100249,-0.383276493,3.6046855,3.52972302,3.53329845,3.52828295
58.745479,4.12310563,3.61006739,0.716266872,3.60382543,3.52942445,3.53293078,3.52798866
58.75597,3.31662479,3.60914322,-0.540849734,3.60297212,3.52912586,3.53256732,3.52769432
58.766462,4.12310563,3.60822936,0.717548788,3.60212529,3.52882717,3.53220767,3.52739988
58.776954,3.74165739,3.60732549,0.366513166,3.60128493,3.52852843,3.53185155,3.52710535
58.787445,2.82842712,3.60643131,-0.882045453,3.60045102,3.52822966,3.53149871,3.52681077
58.797937,3.87298335,3.6055463,0.517143154,3.59962328,3.5279308,3.53114883,3.52651609
58.808428,3.31662479,3.60467033,-0.536698738,3.59880178,3.52763191,3.53080175,3.52622135
58.81892,3.46410162,3.6038029,-0.373766354,3.59798626,3.52733294,3.5304572,3.5259265
58.829412,3.87298335,3.60294384,0.519653257,3.59717671,3.5270339,3.530115,3.52563158
58.839903,3,3.60209295,-0.775946489,3.59637311,3.52673482,3.52977504,3.52533659
58.850395,4.47213595,3.60124984,0.933212793,3.59557521,3.52643566,3.52943707,3.5250415
58.860886,3.16227766,3.60041442,-0.661919,3.59478307,3.52613646,3.52910103,3.52474635
58.871378,4,3.59958633,0.632782481,3.59399646,3.52583716,3.52876671,3.52445109
58.88187,3.46410162,3.59876544,-0.366965698,3.59321537,3.52553781,3.52843402,3.52415575
58.892361,3,3.59795163,-0.77327332,3.59243977,3.52523842,3.52810289,3.52386035
58.902853,4,3.59714456,0.634708941,3.59166945,3.52493893,3.52777315,3.52356484
58.913344,4.12310563,3.59634422,0.725783307,3.59090446,3.5246394,3.52744477,3.52326927
58.923836,3.87298335,3.59555028,0.526719153,3.59014458,3.52433978,3.52711759,3.52297358
58.934328,3.74165739,3.59476267,0.383268468,3.5893898,3.52404009,3.52679158,3.52267781
58.944819,2.82842712,3.59398131,-0.874959531,3.58864012,3.52374037,3.52646667,3.52238198
58.955311,3.87298335,3.5932059,0.528939925,3.58789531,3.52344054,3.52614275,3.52208604
58.965802,4,3.59243647,0.638407027,3.58715545,3.52314068,3.52581981,3.52179003
58.976294,3.16227766,3.59167272,-0.65528243,3.58642032,3.52284071,3.52549773,3.52149391
58.986786,4.24264069,3.59091462,0.807295526,3.58568991,3.52254068,3.52517649,3.5211977
58.997277,4.12310563,3.59016211,0.730029806,3.58496423,3.5222406,3.52485606,3.52090143
59.007769,3.87298335,3.58941493,0.532511427,3.58424307,3.52194042,3.52453634,3.52060504
59.01826,2.64575131,3.58867311,-0.971041604,3.5835265,3.5216402,3.52421734,3.52030859
59.028752,3.74165739,3.58793641,0.392072674,3.58281431,3.52133988,3.52389896,3.52001202
59.039244,3.74165739,3.58720478,0.393004583,3.58210651,3.52103949,3.52358119,3.51971535
59.049735,2.44948974,3.58647822,-1.06629662,3.58140309,3.52073905,3.52326403,3.51941863
59.060227,2.23606798,3.58575646,-1.16176094,3.58070387,3.5204385,3.52294738,3.51912178
59.070718,4.35889894,3.58503958,0.879692769,3.5800089,3.52013791,3.52263127,3.51882488
59.08121,3.31662479,3.58432732,-0.517399778,3.57931801,3.51983722,3.52231561,3.51852784
59.091702,3.46410162,3.58361968,-0.345713854,3.57863119,3.51953645,3.52200041,3.51823072
59.102193,3.60555128,3.58291665,0.150448092,3.57794845,3.51923563,3.52168565,3.51793353
59.112685,3.87298335,3.58221799,0.539226624,3.5772696,3.51893471,3.52137127,3.51763622
59.123176,2.82842712,3.58152378,-0.867811416,3.57659472,3.51863373,3.5210573,3.51733884
59.133668,4.35889894,3.58083379,0.882080015,3.57592361,3.51833265,3.52074365,3.51704134
59.14416,3,3.58014802,-0.761674487,3.5752563,3.51803149,3.52043034,3.51674374
59.154651,3.74165739,3.57946647,0.402729334,3.57459278,3.51773028,3.52011738,3.51644608
59.165143,4.35889894,3.57878893,0.883238369,3.57393288,3.51742896,3.51980468,3.51614829
59.175634,3.87298335,3.57811546,0.543017393,3.57327667,3.51712759,3.5194923,3.51585043
59.186126,3.16227766,3.57744586,-0.644335474,3.57262397,3.51682611,3.51918014,3.51555244
59.196618,3.87298335,3.57678015,0.544245533,3.57197481,3.51652455,3.51886824,3.51525436
59.207109,3.87298335,3.5761183,0.54485323,3.57132918,3.51622294,3.5185566,3.51495621
59.217601,4.47213595,3.57546015,0.946929673,3.57068692,3.51592121,3.51824516,3.51465793
59.228092,3.16227766,3.57480575,-0.642283494,3.5700481,3.51561943,3.51793394,3.51435958
59.238584,2.44948974,3.57415491,-1.06050232,3.56941255,3.51531754,3.5176229,3.51406111
59.249076,3.60555128,3.57350765,0.179007325,3.56878029,3.51501556,3.51731204,3.51376253
59.259567,4.12310563,3.57286397,0.741782754,3.56815134,3.51471353,3.51700137,3.51346388
59.270059,4.47213595,3.57222369,0.948637055,3.56752551,3.51441139,3.51669085,3.5131651
59.28055,3.16227766,3.57158688,-0.639772789,3.5669029,3.51410918,3.5163805,3.51286625
59.291042,3.46410162,3.57095337,-0.326881864,3.56628334,3.51380687,3.51607026,3.51256727
59.301534,3.60555128,3.57032316,0.187691546,3.56566685,3.51350446,3.51576015,3.51226819
59.312025,3.60555128,3.56969627,0.189354193,3.56505344,3.513202,3.5154502,3.51196903
59.322517,2.82842712,3.56907252,-0.860607572,3.56444295,3.51289942,3.51514034,3.51166975
59.333008,4.35889894,3.56845199,0.889070838,3.56383546,3.51259679,3.51483061,3.51137039
59.3435,4.58257569,3.56783451,1.00734363,3.56323082,3.51229403,3.51452095,3.51107089
59.353992,3.74165739,3.5672201,0.417656904,3.56262904,3.51199119,3.51421138,3.5107713
59.364483,3,3.56660876,-0.752734192,3.56203014,3.51168828,3.51390193,3.51047162
59.374975,4,3.56600035,0.6587865,3.56143398,3.51138526,3.51359253,3.51017182
59.385466,3.31662479,3.56539492,-0.498768615,3.56084062,3.51108218,3.51328323,3.50987194
59.395958,3,3.56479233,-0.751526666,3.56024991,3.51077897,3.51297396,3.50957192
59.40645,3.16227766,3.56419259,-0.633967606,3.55966188,3.51047568,3.51266476,3.5092718
59.416941,3.60555128,3.56359571,0.204830583,3.55907655,3.51017232,3.51235564,3.5089716
59.427433,4.24264069,3.56300154,0.824402296,3.55849376,3.50986884,3.51204655,3.50867126
59.437924,3.60555128,3.56241016,0.207704393,3.5579136,3.5095653,3.51173753,3.50837085
59.448416,3.74165739,3.56182141,0.424070717,3.55733593,3.50926163,3.51142851,3.5080703
59.458908,4.24264069,3.56123532,0.825472814,3.55676075,3.50895787,3.51111954,3.50776965
59.469399,3.46410162,3.5606519,-0.310725417,3.55618811,3.50865405,3.51081062,3.50746891
59.479891,3.87298335,3.560071,0.559385684,3.55561784,3.5083501,3.5105017,3.50716804
59.490382,2.64575131,3.55949271,-0.955898214,3.55505004,3.50804609,3.51019283,3.50686709
59.500874,4,3.55891686,0.664140901,3.55448456,3.50774195,3.50988396,3.506566
59.511366,3.46410162,3.5583435,-0.306988404,3.55392142,3.50743772,3.50957509,3.5062648
59.521857,3.46410162,3.55777262,-0.306057198,3.55336064,3.50713342,3.50926627,3.50596352
59.532349,3.46410162,3.55720411,-0.305127007,3.5528021,3.50682899,3.50895742,3.5056621
59.54284,3.60555128,3.55663802,0.221163421,3.55224587,3.5065245,3.50864861,3.5053606
59.553332,3.16227766,3.55607422,-0.627532117,3.5516918,3.50621988,3.50833977,3.50505896
59.563824,3.16227766,3.55551273,-0.627084581,3.55113994,3.50591516,3.50803093,3.50475721
59.574315,2,3.55495358,-1.24697778,3.55059029,3.50561038,3.50772211,3.50445538
59.584807,3.74165739,3.55439663,0.432736362,3.55004273,3.50530546,3.50741325,3.5041534
59.595298,3.60555128,3.55384195,0.227396849,3.54949734,3.50500048,3.50710441,3.50385134
59.60579,3.74165739,3.55328941,0.434013799,3.54895398,3.50469536,3.50679553,3.50354914
59.616282,3.16227766,3.55273903,-0.624869084,3.54841268,3.50439015,3.50648663,3.50324683
59.626773,2.64575131,3.55219084,-0.95207118,3.54787347,3.50408486,3.50617774,3.50294444
59.637265,3.31662479,3.55164471,-0.48478853,3.54733621,3.50377945,3.5058688,3.5026419
59.647756,3.31662479,3.55110071,-0.484227133,3.54680099,3.50347396,3.50555986,3.50233927
59.658248,3.31662479,3.55055871,-0.483667153,3.54626767,3.50316835,3.50525087,3.50203651
59.66874,3,3.55001873,-0.741632477,3.54573629,3.50286263,3.50494185,3.50173363
59.679231,3.74165739,3.54948081,0.438379493,3.54520686,3.50255684,3.50463283,3.50143066
59.689723,4,3.54894481,0.671606427,3.54467927,3.50225091,3.50432374,3.50112755
59.700214,3.46410162,3.54841081,-0.290360453,3.54415359,3.50194491,3.50401465,3.50082435
59.710706,3.60555128,3.54787868,0.240151189,3.5436297,3.50163878,3.5037055,3.50052101
59.721198,3.31662479,3.54734846,-0.480337034,3.54310763,3.50133255,3.5033963,3.50021755
59.731689,3.87298335,3.54682016,0.571106985,3.5425874,3.50102624,3.50308709,3.49991401
59.742181,3.60555128,3.54629366,0.243428868,3.54206889,3.5007198,3.50277781,3.49961032
59.752672,3.46410162,3.54576904,-0.285775138,3.54155217,3.50041328,3.50246852,3.49930654
59.763164,2.82842712,3.54524618,-0.846651675,3.54103714,3.50010663,3.50215915,3.49900262
59.773656,2.82842712,3.54472511,-0.846343892,3.54052381,3.49979987,3.50184973,3.49869857
59.784147,3.74165739,3.54420584,0.444355201,3.54001222,3.49949303,3.50154029,3.49839444
59.794639,3.16227766,3.54368827,-0.617584494,3.53950225,3.49918606,3.50123077,3.49809016
59.80513,4,3.54317246,0.675890183,3.53899396,3.49887901,3.50092123,3.4977858
59.815622,3.74165739,3.5426583,0.446093136,3.53848725,3.49857183,3.5006116,3.49748128
59.826114,3.46410162,3.54214582,-0.279363926,3.53798215,3.49826453,3.50030192,3.49717665
59.836605,4.58257569,3.54163504,1.02026499,3.53747868,3.49795716,3.49999221,3.49687192
59.847097,3,3.54112585,-0.735612567,3.53697673,3.49764965,3.49968242,3.49656705
59.857588,3.16227766,3.54061832,-0.615094026,3.53647638,3.49734207,3.49937259,3.49626209
59.86808,2.44948974,3.54011234,-1.04432878,3.53597751,3.49703434,3.49906268,3.49595697
59.878572,3.74165739,3.53960794,0.449499109,3.53548014,3.4967265,3.4987527,3.49565174
59.889063,2.64575131,3.53910514,-0.945173968,3.53498432,3.49641859,3.49844269,3.49534641
59.899555,3.46410162,3.53860383,-0.272950946,3.53448992,3.49611053,3.49813258,3.49504094
59.910046,3,3.5381041,-0.733555789,3.53399703,3.4958024,3.49782244,3.49473537
59.920538,3.60555128,3.53760581,0.260663507,3.53350553,3.49549412,3.4975122,3.49442965
59.93103,4.24264069,3.53710901,0.839959329,3.53301545,3.49518574,3.49720189,3.49412381
59.941521,3.74165739,3.53661373,0.452817469,3.53252683,3.49487727,3.49689155,3.49381788
59.952013,3.31662479,3.53611984,-0.468502991,3.53203955,3.49456866,3.4965811,3.4935118
59.962504,3.60555128,3.53562744,0.264431158,3.53155368,3.49425997,3.49627062,3.49320562
59.972996,3.74165739,3.5351364,0.4544458,3.53106913,3.49395113,3.49596003,3.49289929
59.983488,4.24264069,3.53464676,0.841423748,3.53058592,3.49364219,3.49564937,3.49259284
59.993979,3.31662479,3.53415855,-0.46640515,3.53010408,3.49333316,3.49533867,3.49228629
60.004471,3.74165739,3.53367166,0.456054517,3.5296235,3.49302399,3.49502786,3.49197959
60.014962,3,3.53318617,-0.730195981,3.52914426,3.49271473,3.494717,3.4916728
60.025454,3.87298335,3.53270196,0.583336422,3.52866626,3.49240533,3.49440604,3.49136585
60.035946,3.60555128,3.53221908,0.270799184,3.52818952,3.49209582,3.494095,3.49105878
60.046437,4,3.53173754,0.684297056,3.52771407,3.49178622,3.49378391,3.49075161
60.056929,4.24264069,3.53125724,0.8434355,3.52723982,3.49147648,3.49347272,3.49044429
60.06742,2.82842712,3.53077827,-0.838063926,3.52676683,3.49116666,3.49316147,3.49013687
60.077912,3.87298335,3.53030051,0.585391186,3.526295,3.49085668,3.49285011,3.4898293
60.088404,3.60555128,3.52982399,0.275185917,3.52582436,3.4905466,3.49253867,3.4895216
60.098895,4.24264069,3.52934874,0.844566127,3.52535495,3.49023642,3.49222718,3.48921381
60.109387,3.87298335,3.52887467,0.586607769,3.52488666,3.4899261,3.49191558,3.48890586
60.119878,3.87298335,3.52840185,0.587010647,3.52441957,3.4896157,3.49160392,3.48859781
60.13037,2.23606798,3.52793017,-1.13660116,3.52395357,3.48930515,3.49129215,3.48828961
60.140862,3,3.52745966,-0.726264181,3.5234887,3.48899448,3.49098029,3.48798128
60.151353,3.46410162,3.52699036,-0.250776287,3.52302498,3.48868372,3.49066838,3.48767285
60.161845,2.23606798,3.52652217,-1.1359816,3.52256232,3.48837282,3.49035635,3.48736427
60.172336,3.31662479,3.52605515,-0.457635622,3.5221008,3.48806183,3.49004427,3.48705559
60.182828,3.87298335,3.52558922,0.589401501,3.5216403,3.48775069,3.48973206,3.48674675
60.19332,4.35889894,3.52512439,0.913112562,3.52118088,3.48743943,3.48941977,3.48643779
60.203811,4,3.52466071,0.68944854,3.52072254,3.48712808,3.48910742,3.48612872
60.214303,4.12310563,3.52419807,0.773891178,3.5202652,3.48681659,3.48879495,3.4858195
60.224794,3.60555128,3.52373655,0.286032736,3.51980894,3.486505,3.48848242,3.48551018
60.235286,4.79583152,3.52327605,1.12807601,3.51935365,3.48619327,3.48816977,3.4852007
60.245778,3.60555128,3.52281659,0.287636371,3.51889936,3.48588142,3.48785703,3.48489109
60.256269,4.12310563,3.52235822,0.775078965,3.51844611,3.48556947,3.48754422,3.48458138
60.266761,3.46410162,3.52190084,-0.240414689,3.5179938,3.48525738,3.4872313,3.48427152
60.277252,3.46410162,3.52144451,-0.23946377,3.51754251,3.4849452,3.48691831,3.48396155
60.287744,3.16227766,3.52098915,-0.598925278,3.51709214,3.48463287,3.48660519,3.48365143
60.298236,4.12310563,3.52053478,0.77625437,3.51664272,3.48432041,3.48629199,3.48334117
60.308727,3.74165739,3.52008144,0.470718546,3.51619428,3.48400787,3.48597872,3.48303081
60.319219,3.31662479,3.51962902,-0.450559912,3.51574673,3.48369517,3.48566532,3.4827203
60.32971,3.31662479,3.51917762,-0.450058693,3.51530014,3.48338238,3.48535186,3.48240968
60.340202,3.16227766,3.51872712,-0.597033885,3.51485442,3.48306944,3.48503827,3.4820989
60.350694,3.74165739,3.51827756,0.472630746,3.51440961,3.48275638,3.48472459,3.481788
60.361185,3.16227766,3.51782898,-0.596281246,3.51396572,3.48244322,3.48441084,3.48147699
60.371677,3.46410162,3.51738128,-0.23082389,3.51352267,3.48212992,3.48409696,3.48116582
60.382168,2.82842712,3.51693454,-0.829763468,3.51308054,3.48181652,3.48378302,3.48085455
60.39266,2.44948974,3.51648865,-1.03295639,3.51263923,3.48150296,3.48346895,3.48054311
60.403152,4,3.51604366,0.695669708,3.51219877,3.48118929,3.48315477,3.48023155
60.413643,5.09901951,3.51559959,1.25834015,3.5117592,3.48087552,3.48284053,3.47991988
60.424135,2.64575131,3.51515636,-0.932418922,3.51132042,3.4805616,3.48252616,3.47960805
60.434626,3.87298335,3.51471403,0.598556027,3.5108825,3.48024758,3.48221173,3.47929612
60.445118,3.74165739,3.51427252,0.476848897,3.51044536,3.47993341,3.48189716,3.47898403
60.45561,3.60555128,3.51383185,0.30285215,3.51000904,3.47961912,3.48158249,3.4786718
60.466101,4.24264069,3.51339207,0.85396055,3.50957355,3.47930473,3.48126775,3.47835947
60.476593,3.16227766,3.51295307,-0.592178528,3.50913881,3.47899019,3.48095288,3.47804698
60.487084,4.24264069,3.51251494,0.854473962,3.5087049,3.47867555,3.48063793,3.47773438
60.497576,3.60555128,3.51207757,0.305734693,3.50827172,3.47836075,3.48032286,3.47742162
60.508068,3,3.51164102,-0.71529086,3.5078393,3.47804584,3.48000768,3.47710873
60.518559,3.74165739,3.5112053,0.480054259,3.50740769,3.47773082,3.47969243,3.47679574
60.529051,3.60555128,3.51077032,0.307865153,3.50697679,3.47741565,3.47937705,3.47648258
60.539542,3.60555128,3.51033617,0.308569446,3.50654667,3.47710039,3.4790616,3.47616931
60.550034,3.60555128,3.50990275,0.309270953,3.50611725,3.47678497,3.47874601,3.47585589
60.560526,3,3.5094701,-0.713771741,3.50568855,3.47646942,3.47843032,3.47554233
60.571017,3,3.50903824,-0.71346916,3.50526062,3.47615378,3.47811455,3.47522866
60.581509,3.31662479,3.50860709,-0.438157853,3.50483335,3.47583797,3.47779865,3.47491483
60.592,4,3.50817673,0.701301126,3.50440684,3.47552208,3.47748267,3.4746009
60.602492,3.74165739,3.50774706,0.483642767,3.50398098,3.47520602,3.47716656,3.4742868
60.612984,3.87298335,3.50731812,0.604702595,3.50355582,3.47488984,3.47685035,3.47397256
60.623475,3.87298335,3.50688994,0.605056534,3.50313137,3.47457357,3.47653406,3.47365822
60.633967,4,3.50646243,0.702522293,3.50270757,3.47425713,3.47621763,3.47334372
60.644458,4,3.50603567,0.702825962,3.50228448,3.4739406,3.47590113,3.47302911
60.65495,2.82842712,3.50560956,-0.822910955,3.50186201,3.47362391,3.47558449,3.47271433
60.665442,3.46410162,3.50518416,-0.202688284,3.5014402,3.47330709,3.47526774,3.47239942
60.675933,3.31662479,3.50475947,-0.433744952,3.50101908,3.47299017,3.47495092,3.47208441
60.686425,3,3.50433543,-0.710165777,3.50059857,3.4726731,3.47463396,3.47176922
60.696916,2.23606798,3.5039121,-1.12598585,3.50017874,3.47235592,3.47431692,3.47145394
60.707408,3,3.5034894,-0.709569869,3.49975949,3.47203859,3.47399974,3.47113848
60.7179,3.46410162,3.50306736,-0.197397424,3.49934088,3.47172113,3.47368246,3.47082289
60.728391,3.74165739,3.50264601,0.488887897,3.49892292,3.47140357,3.4733651,3.4705072
60.738883,2.82842712,3.50222527,-0.820852086,3.49850554,3.47108585,3.4730476,3.47019133
60.749374,3.31662479,3.50180522,-0.430325954,3.4980888,3.47076803,3.47273003,3.46987536
60.759866,3.74165739,3.50138576,0.490175101,3.49767263,3.47045006,3.47241231,3.46955923
60.770358,2.82842712,3.50096693,-0.820085242,3.49725706,3.47013195,3.47209448,3.46924295
60.780849,3.87298335,3.50054876,0.610274185,3.49684211,3.46981374,3.47177658,3.46892657
60.791341,3.74165739,3.50013118,0.491453158,3.49642772,3.46949538,3.47145854,3.46861003
60.801832,4.35889894,3.49971425,0.926922162,3.49601394,3.46917691,3.47114042,3.46829337
60.812324,3.87298335,3.49929789,0.611298175,3.4956007,3.46885828,3.47082215,3.46797655
60.822816,3.74165739,3.49888213,0.492722294,3.49518802,3.46853953,3.47050378,3.46765959
60.833307,2.82842712,3.49846701,-0.818559638,3.49477595,3.46822067,3.47018533,3.46734253
60.843799,3.46410162,3.49805244,-0.184257487,3.4943644,3.46790166,3.46986674,3.4670253
60.85429,3.46410162,3.49763849,-0.18313077,3.49395345,3.46758254,3.46954807,3.46670796
60.864782,3.60555128,3.49722509,0.32912943,3.493543,3.46726326,3.46922925,3.46639045
60.875274,4.35889894,3.49681227,0.928486226,3.4931331,3.46694385,3.46891033,3.4660728
60.885765,4.35889894,3.49640006,0.92870818,3.49272378,3.46662434,3.46859133,3.46575505
60.896257,3.31662479,3.49598838,-0.423513384,3.49231495,3.46630467,3.46827218,3.46543713
60.906748,3.87298335,3.4955773,0.614333827,3.49190669,3.4659849,3.46795295,3.4651191
60.91724,3.60555128,3.49516673,0.332241693,3.49149892,3.46566497,3.46763359,3.4648009
60.927732,2.82842712,3.49475672,-0.816290144,3.49109166,3.4653449,3.46731411,3.46448256
60.938223,3.60555128,3.4943473,0.333472597,3.49068497,3.46502473,3.46699455,3.46416412
60.948715,3.46410162,3.49393839,-0.172733238,3.49027875,3.46470441,3.46667485,3.46384551
60.959206,4,3.49353005,0.711667022,3.48987307,3.46438398,3.46635506,3.46352679
60.969698,3.74165739,3.49312221,0.498533025,3.48946786,3.46406339,3.46603514,3.4632079
60.98019,4,3.4927149,0.712239495,3.48906315,3.46374266,3.4657151,3.46288887
60.990681,2.82842712,3.49230816,-0.814788951,3.48865897,3.46342184,3.46539498,3.46256973
61.001173,4.24264069,3.4919019,0.866451836,3.48825524,3.46310085,3.46507472,3.46225043
61.011664,5.09901951,3.4914962,1.26788143,3.48785204,3.46277976,3.46475437,3.46193101
61.022156,2.64575131,3.49109098,-0.919423553,3.48744929,3.46245851,3.46443389,3.46161143
61.032648,3.31662479,3.49068627,-0.417206759,3.48704702,3.46213712,3.46411329,3.46129171
61.043139,3.31662479,3.49028211,-0.416722108,3.48664526,3.46181564,3.46379261,3.46097188
61.053631,3.16227766,3.48987841,-0.572364174,3.48624393,3.46149399,3.46347178,3.46065188
61.064122,2.82842712,3.48947525,-0.81304866,3.48584311,3.46117224,3.46315088,3.46033177
61.074614,3.87298335,3.48907255,0.619605357,3.48544272,3.46085032,3.46282982,3.46001149
61.085106,3.87298335,3.48867034,0.619929839,3.48504279,3.46052827,3.46250866,3.45969108
61.095597,3.87298335,3.48826866,0.620253725,3.48464336,3.46020612,3.46218742,3.45937055
61.106089,4,3.48786743,0.715634381,3.48424435,3.45988381,3.46186603,3.45904985
61.11658,4.12310563,3.48746673,0.797269653,3.48384582,3.45956139,3.46154455,3.45872905
61.127072,3.87298335,3.48706646,0.62122209,3.48344771,3.45923881,3.46122294,3.45840808
61.137564,3.16227766,3.48666667,-0.569551589,3.48305005,3.4589161,3.46090121,3.45808696
61.148055,3.87298335,3.4862674,0.621864895,3.48265286,3.45859328,3.46057939,3.45776574
61.158547,3.46410162,3.48586856,-0.14753624,3.48225608,3.4582703,3.46025744,3.45744435
61.169038,3.74165739,3.48547022,0.50614935,3.48185977,3.45794722,3.4599354,3.45712284
61.17953,4.12310563,3.48507232,0.798769873,3.48146386,3.45762397,3.45961321,3.45680117
61.190022,2.82842712,3.48467487,-0.810091198,3.48106838,3.45730059,3.45929092,3.45647936
61.200513,3,3.48427793,-0.695900804,3.48067337,3.4569771,3.45896854,3.45615744
61.211005,2,3.4838814,-1.21814671,3.48027875,3.45665346,3.45864601,3.45583535
61.221496,3.16227766,3.48348537,-0.566751898,3.47988459,3.4563297,3.4583234,3.45551315
61.231988,3.46410162,3.48308976,-0.137797472,3.47949082,3.45600579,3.45800065,3.45519078
61.24248,3.74165739,3.48269459,0.50888387,3.47909747,3.45568174,3.45767779,3.45486827
61.252971,3.87298335,3.48229992,0.625046742,3.47870457,3.45535759,3.45735484,3.45454565
61.263463,3.16227766,3.48190565,-0.565356513,3.47831205,3.45503327,3.45703174,3.45422286
61.273954,3.74165739,3.48151186,0.510044632,3.47791998,3.45470885,3.45670857,3.45389996
61.284446,3.46410162,3.48111848,-0.130448697,3.47752828,3.45438426,3.45638524,3.45357689
61.294938,3.31662479,3.48072554,-0.405093502,3.47713699,3.45405954,3.45606181,3.45325368
61.305429,3.46410162,3.48033307,-0.127402729,3.47674615,3.45373472,3.45573829,3.45293036
61.315921,3.16227766,3.479941,-0.56361631,3.47635568,3.45340973,3.45541463,3.45260687
61.326412,2.82842712,3.47954941,-0.806921487,3.47596565,3.45308464,3.45509088,3.45228327
61.336904,3.46410162,3.47915821,-0.122705333,3.47557598,3.45275938,3.45476699,3.4519595
61.347396,3.60555128,3.47876745,0.356067166,3.47518672,3.45243399,3.45444298,3.45163559
61.357887,4.12310563,3.47837715,0.802949858,3.47479789,3.45210849,3.45411889,3.45131157
61.368379,3.46410162,3.47798725,-0.11783731,3.47440943,3.45178283,3.45379466,3.45098738
61.37887,3,3.47759781,-0.691084515,3.47402139,3.45145707,3.45347034,3.45066308
61.389362,3.60555128,3.47720876,0.358249241,3.47363372,3.45113114,3.45314588,3.45033861
61.399854,3,3.47682013,-0.690521638,3.47324644,3.45080507,3.45282131,3.450014
61.410345,3.87298335,3.47643197,0.629723254,3.4728596,3.45047891,3.45249665,3.44968929
61.420837,3.46410162,3.47604419,-0.109282109,3.47247311,3.45015257,3.45217185,3.4493644
61.431328,4.12310563,3.47565688,0.804641999,3.47208705,3.44982614,3.45184696,3.4490394
61.44182,3.87298335,3.47526995,0.630645223,3.47170134,3.44949953,3.45152193,3.44871423
61.452312,3,3.47488344,-0.689117871,3.47131602,3.4491728,3.45119679,3.44838892
61.462803,2.82842712,3.47449739,-0.803784962,3.47093113,3.44884596,3.45087156,3.4480635
61.473295,3.60555128,3.47411172,0.362545931,3.4705466,3.44851895,3.45054619,3.44773791
61.483786,4.24264069,3.47372651,0.876877513,3.47016249,3.44819184,3.45022073,3.44741221
61.494278,3.60555128,3.47334169,0.363606364,3.46977873,3.44786456,3.44989513,3.44708634
61.50477,3.60555128,3.47295728,0.364134582,3.46939536,3.44753715,3.44956942,3.44676033
61.515261,3.46410162,3.47257333,-0.0920419292,3.46901242,3.44720964,3.44924363,3.44643421
61.525753,4.35889894,3.47218977,0.941652366,3.46862983,3.44688196,3.44891769,3.44610792
61.536244,3.74165739,3.47180666,0.519471588,3.46824767,3.44655418,3.44859166,3.44578152
61.546736,2.64575131,3.47142393,-0.908665296,3.46786585,3.44622623,3.4482655,3.44545495
61.557228,3.60555128,3.47104163,0.366755572,3.46748443,3.44589814,3.44793922,3.44512824
61.567719,3.31662479,3.47065978,-0.392472915,3.46710344,3.44556996,3.44761286,3.44480142
61.578211,2.82842712,3.47027832,-0.80115616,3.4667228,3.4452416,3.44728635,3.44447443
61.588702,3.31662479,3.46989732,-0.391500352,3.46634259,3.44491315,3.44695976,3.44414734
61.599194,3,3.4695167,-0.685212887,3.46596273,3.44458452,3.44663303,3.44382007
61.609686,3.46410162,3.46913651,-0.070956993,3.46558327,3.44425577,3.44630618,3.44349266
61.620177,3.60555128,3.46875678,0.369857397,3.46520424,3.44392691,3.44597926,3.44316514
61.630669,4,3.46837744,0.729124514,3.46482556,3.44359788,3.44565219,3.44283745
61.64116,4.58257569,3.46799857,1.05573535,3.46444732,3.44326875,3.44532503,3.44250966
61.651652,3.46410162,3.46762009,-0.0593167284,3.46406945,3.44293945,3.44499774,3.44218169
61.662144,3,3.46724204,-0.683551052,3.46369197,3.44261002,3.44467033,3.44185358
61.672635,3.46410162,3.46686446,-0.0525627803,3.46331493,3.44228049,3.44434284,3.44152537
61.683127,3.60555128,3.46648728,0.372912852,3.46293826,3.44195079,3.44401521,3.44119698
61.693618,3.16227766,3.46611057,-0.551210407,3.46256203,3.44162099,3.44368749,3.44086848
61.70411,3.74165739,3.46573427,0.525283845,3.46218617,3.44129102,3.44335963,3.44053982
61.714602,4,3.46535841,0.7311919,3.46181073,3.44096091,3.44303166,3.44021102
61.725093,2.23606798,3.46498302,-1.10856441,3.46143573,3.44063071,3.44270361,3.4398821
61.735585,3.74165739,3.46460805,0.526354761,3.46106111,3.44030033,3.44237542,3.43955302
61.746076,3.46410162,3.46423357,-0.0114869844,3.46068694,3.43996986,3.44204715,3.43922383
61.756568,3.60555128,3.4638595,0.376419684,3.46031316,3.43963922,3.44171873,3.43889447
61.76706,3,3.46348588,-0.680797976,3.45993981,3.43930844,3.4413902,3.43856497
61.777551,3.87298335,3.46311277,0.640211356,3.45956691,3.43897756,3.44106159,3.43823536
61.788043,2.64575131,3.46274008,-0.903874308,3.45919442,3.43864652,3.44073284,3.43790558
61.798534,3.74165739,3.46236789,0.528478476,3.45882239,3.43831537,3.44040401,3.43757569
61.809026,2.23606798,3.46199613,-1.1072164,3.45845077,3.43798406,3.44007504,3.43724564
61.819518,3.31662479,3.46162485,-0.38078874,3.45807959,3.43765261,3.43974596,3.43691544
61.830009,2.82842712,3.46125409,-0.795504221,3.45770889,3.43732106,3.4394168,3.43658514
61.840501,2.82842712,3.46088378,-0.795271432,3.45733861,3.43698935,3.43908749,3.43625467
61.850992,3,3.46051398,-0.678611806,3.45696882,3.43665753,3.43875811,3.43592409
61.861484,2.44948974,3.46014465,-1.00531334,3.45659945,3.43632555,3.43842858,3.43559334
61.871976,3.46410162,3.45977582,0.0657708085,3.45623056,3.43599343,3.43809895,3.43526245
61.882467,3.31662479,3.45940752,-0.377866022,3.45586217,3.43566121,3.43776923,3.43493145
61.892959,4.47213595,3.4590397,1.00652683,3.45549422,3.43532883,3.43743938,3.43460029
61.90345,4.24264069,3.45867243,0.885419818,3.45512679,3.43499634,3.43710945,3.43426902
61.913942,3.31662479,3.45830565,-0.376405183,3.45475982,3.43466369,3.43677937,3.43393757
61.924434,3,3.4579394,-0.676712199,3.45439334,3.4343309,3.43644919,3.43360599
61.934925,4.12310563,3.45757372,0.815801389,3.4540274,3.43399801,3.43611893,3.43327431
61.945417,3.60555128,3.45720855,0.385152863,3.45366194,3.43366496,3.43578853,3.43294245
61.955908,2.82842712,3.45684396,-0.792727466,3.45329703,3.4333318,3.43545805,3.43261049
61.9664,3.46410162,3.4564799,0.0873024479,3.45293261,3.43299848,3.43512744,3.43227836
61.976892,4,3.4561164,0.737484643,3.45256873,3.43266503,3.43479671,3.43194609
61.987383,3.46410162,3.45575351,0.0913679402,3.45220542,3.43233148,3.43446591,3.43161371
61.997875,4.58257569,3.45539118,1.06168946,3.45184263,3.43199776,3.43413497,3.43128117
62.008366,3.60555128,3.45502947,0.387971401,3.45148043,3.43166394,3.43380395,3.43094852
62.018858,3.74165739,3.45466833,0.535713599,3.45111877,3.43132995,3.43347279,3.4306157
62.02935,3.87298335,3.4543078,0.647051427,3.45075769,3.43099583,3.43314152,3.43028274
62.039841,3.46410162,3.45394793,0.100765514,3.45039723,3.43066161,3.43281018,3.42994968
62.050333,4.79583152,3.45358865,1.15855206,3.45003734,3.43032723,3.43247871,3.42961645
62.060824,3,3.45323006,-0.673223635,3.44967809,3.42999274,3.43214715,3.42928311
62.071316,3.87298335,3.45287209,0.648159898,3.44931943,3.42965809,3.43181546,3.42894961
62.081808,3.74165739,3.45251479,0.537719811,3.44896141,3.42932331,3.43148366,3.42861597
62.092299,2.82842712,3.45215821,-0.789766473,3.44860407,3.42898842,3.43115179,3.42828222
62.102791,3.16227766,3.45180228,-0.538074924,3.44824736,3.42865338,3.43081978,3.4279483
62.113282,3.74165739,3.4514471,0.53871169,3.44789136,3.42831823,3.43048769,3.42761429
62.123774,3.60555128,3.45109261,0.393012297,3.44753601,3.42798292,3.43015547,3.4272801
62.134266,3.87298335,3.45073886,0.649803424,3.44718136,3.42764747,3.42982314,3.42694577
62.144757,3.87298335,3.45038589,0.650074963,3.44682747,3.42731193,3.42949074,3.42661134
62.155249,3.60555128,3.45003366,0.394357222,3.44647428,3.42697622,3.42915821,3.42627675
62.16574,4.47213595,3.44968225,1.01116453,3.44612187,3.42664041,3.4288256,3.42594205
62.176232,3.74165739,3.4493316,0.540671604,3.4457702,3.42630444,3.42849285,3.42560718
62.186724,4.12310563,3.44898178,0.82105045,3.44541932,3.42596834,3.42816,3.42527218
62.197215,3.60555128,3.44863284,0.396129319,3.44506928,3.42563213,3.42782708,3.42493707
62.207707,3.46410162,3.44828472,0.125765241,3.44472002,3.42529577,3.42749402,3.42460179
62.218198,4,3.44793751,0.743009075,3.44437165,3.4249593,3.42716089,3.42426642
62.22869,3,3.44759118,-0.669022555,3.44402411,3.42462267,3.42682763,3.42393087
62.239182,4.12310563,3.44724577,0.822106962,3.44367747,3.42428591,3.42649426,3.42359519
62.249673,3.60555128,3.44690134,0.398308848,3.44333176,3.42394905,3.42616083,3.42325941
62.260165,3.31662479,3.44655785,-0.360462279,3.44298696,3.42361203,3.42582726,3.42292346
62.270656,3.46410162,3.44621538,0.13373942,3.44264316,3.42327491,3.42549362,3.4225874
62.281148,3.60555128,3.44587391,0.399596503,3.44230031,3.42293762,3.42515984,3.42225118
62.29164,3.87298335,3.44553349,0.653796496,3.44195847,3.42260021,3.42482597,3.42191483
62.302131,3.16227766,3.44519418,-0.531898972,3.44161771,3.4222627,3.42449202,3.42157837
62.312623,3.31662479,3.44485594,-0.358093774,3.44127799,3.42192502,3.42415794,3.42124175
62.323114,3.31662479,3.44451888,-0.357622828,3.4409394,3.42158725,3.4238238,3.42090502
62.333606,3.16227766,3.44418295,-0.530947542,3.44060192,3.42124931,3.42348952,3.42056813
62.344098,3.60555128,3.44384823,0.402123169,3.4402656,3.42091125,3.42315514,3.42023111
62.354589,4.12310563,3.44351478,0.824372999,3.43993053,3.42057308,3.42282069,3.41989398
62.365081,2.82842712,3.44318258,-0.784063426,3.43959666,3.42023476,3.42248612,3.41955669
62.375572,4.35889894,3.44285172,0.957103558,3.4392641,3.41989633,3.42215147,3.41921929
62.386064,3.87298335,3.44252219,0.656095388,3.43893282,3.41955775,3.4218167,3.41888174
62.396556,3.87298335,3.44219405,0.656345409,3.43860291,3.41921904,3.42148182,3.41854404
62.407047,3.46410162,3.44186738,0.149111475,3.43827443,3.41888022,3.42114688,3.41820625
62.417539,3.74165739,3.44154217,0.547827726,3.43794737,3.41854125,3.42081181,3.41786829
62.42803,3.74165739,3.44121852,0.54812304,3.43762183,3.41820218,3.42047668,3.41753023
62.438522,3.74165739,3.44089642,0.54841678,3.43729781,3.41786295,3.42014141,3.41719201
62.449014,3.60555128,3.44057596,0.406171537,3.43697538,3.41752359,3.41980605,3.41685366
62.459505,3.31662479,3.44025721,-0.351614025,3.43665464,3.41718414,3.41947063,3.4165152
62.469997,3.31662479,3.43994018,-0.351162915,3.43633557,3.41684452,3.41913507,3.41617658
62.480488,3.74165739,3.43962499,0.549574743,3.43601831,3.41650481,3.41879945,3.41583786
62.49098,3.46410162,3.43931163,0.157448353,3.43570284,3.41616494,3.41846371,3.41549898
62.501472,3.87298335,3.43900021,0.658773967,3.43538927,3.41582494,3.41812787,3.41515996
62.511963,2.82842712,3.43869081,-0.781193758,3.43507769,3.41548484,3.41779197,3.41482085
62.522455,4,3.43838346,0.749410794,3.43476811,3.41514459,3.41745594,3.41448157
62.532946,3.60555128,3.43807829,0.409234636,3.43446068,3.41480424,3.41711985,3.41414219
62.543438,1.73205081,3.43777531,-1.30603388,3.4341554,3.41446372,3.41678363,3.41380265
62.55393,3.46410162,3.43747465,0.163177722,3.43385239,3.41412309,3.41644732,3.41346298
62.564421,2.44948974,3.43717641,-0.993824261,3.43355178,3.41378235,3.41611095,3.41312321
62.574913,2.82842712,3.43688062,-0.780034293,3.43325358,3.41344146,3.41577445,3.41278328
62.585404,3.16227766,3.43658745,-0.523745924,3.43295796,3.41310047,3.41543789,3.41244325
62.595896,3,3.43629694,-0.660527774,3.43266495,3.41275933,3.41510121,3.41210306
62.606388,3.60555128,3.43600922,0.411754852,3.4323747,3.41241806,3.41476444,3.41176273
62.616879,4,3.43572442,0.751182785,3.43208733,3.41207669,3.41442761,3.41142231
62.627371,3.74165739,3.43544262,0.553366755,3.43180292,3.41173517,3.41409066,3.41108173
62.637862,3,3.43516399,-0.659669605,3.43152165,3.41139355,3.41375365,3.41074105
62.648354,3.46410162,3.4348886,0.170918149,3.43124357,3.41105177,3.41341651,3.41040021
62.658846,3.74165739,3.43461662,0.55411259,3.43096887,3.41070987,3.41307929,3.41005924
62.669337,3.74165739,3.43434823,0.554354723,3.43069771,3.41036787,3.41274201,3.40971818
62.679829,3.31662479,3.43408351,-0.342722514,3.43043019,3.41002572,3.41240461,3.40937695
62.69032,2.82842712,3.43382269,-0.778071696,3.43016653,3.40968347,3.41206715,3.40903562
62.700812,2.44948974,3.43356588,-0.992006116,3.42990683,3.40934107,3.41172957,3.40869414
62.711304,3.46410162,3.43331328,0.175466043,3.42965132,3.40899854,3.41139191,3.40835253
62.721795,3.60555128,3.43306512,0.415314527,3.4294002,3.40865592,3.41105419,3.40801082
62.732287,3.16227766,3.43282154,-0.520138325,3.42915362,3.40831314,3.41071635,3.40766895
62.742778,3,3.4325828,-0.657710269,3.42891184,3.40797028,3.41037846,3.40732699
62.75327,2.64575131,3.43234908,-0.886903472,3.42867504,3.40762725,3.41004045,3.40698486
62.763762,3.31662479,3.43212064,-0.339846806,3.42844349,3.4072841,3.40970235,3.40664261
62.774253,3.74165739,3.43189776,0.556560534,3.42821745,3.40694086,3.40936421,3.40630027
62.784745,3.16227766,3.43168066,-0.519040457,3.42799716,3.40659746,3.40902594,3.40595776
62.795236,3.46410162,3.43146966,0.180643179,3.42778293,3.40625397,3.40868763,3.40561516
62.805728,4,3.43126502,0.754145196,3.42757502,3.40591033,3.4083492,3.4052724
62.81622,3.74165739,3.4310671,0.557306281,3.42737378,3.40556656,3.40801068,3.40492952
62.826711,3.46410162,3.43087623,0.182278313,3.42717957,3.4052227,3.40767212,3.40458654
62.837203,3.74165739,3.43069276,0.557642027,3.42699271,3.40487869,3.40733344,3.4042434
62.847694,3.74165739,3.43051709,0.557799512,3.42681362,3.40453459,3.40699471,3.40390017
62.858186,3.46410162,3.43034961,0.183717185,3.42664267,3.40419033,3.40665587,3.40355678
62.868678,2.82842712,3.43019077,-0.775734263,3.42648033,3.40384595,3.40631695,3.40321327
62.879169,3.46410162,3.43004105,0.184555041,3.42632707,3.40350148,3.40597798,3.40286967
62.889661,3.46410162,3.42990092,0.184934292,3.42618337,3.40315686,3.40563889,3.4025259
62.900152,3.31662479,3.42977094,-0.336372043,3.42604978,3.40281215,3.40529977,3.40218205
62.910644,3.60555128,3.42965165,0.41940389,3.42592684,3.40246728,3.40496053,3.40183804
62.921136,2.64575131,3.42954368,-0.885320487,3.42581518,3.4021223,3.40462121,3.4014939
62.931627,3.74165739,3.42944767,0.558757294,3.42571545,3.40177722,3.40428185,3.40114967
62.942119,3.74165739,3.42936432,0.558831874,3.42562835,3.40143199,3.40394237,3.40080529
62.95261,4.35889894,3.42929439,0.964160025,3.42555462,3.40108668,3.40360286,3.40046081
62.963102,4.35889894,3.42923866,0.964188925,3.42549507,3.40074121,3.40326323,3.40011618
62.973594,3.60555128,3.42919801,0.419944362,3.42545056,3.40039562,3.40292353,3.39977142
62.984085,2.82842712,3.42917336,-0.775078213,3.42542202,3.40004994,3.40258379,3.39942658
62.994577,3.31662479,3.42916571,-0.335471187,3.42541045,3.39970411,3.40224394,3.39908158
63.005068,3.16227766,3.42917613,-0.516622169,3.42541691,3.39935819,3.40190405,3.39873649
63.01556,3.87298335,3.42920577,0.666166327,3.42544258,3.39901212,3.40156405,3.39839124
63.026052,3.16227766,3.42925589,-0.516699362,3.42548869,3.39866594,3.40122398,3.39804587
63.036543,3.60555128,3.42932782,0.419789777,3.42555658,3.39831966,3.40088387,3.39770042
63.047035,3.60555128,3.42942302,0.419676371,3.42564771,3.39797324,3.40054366,3.3973548
63.057526,4.35889894,3.42954304,0.96403107,3.42576365,3.39762673,3.40020341,3.39700911
63.068018,3.74165739,3.42968959,0.558540772,3.42590609,3.39728007,3.39986306,3.39666325
63.07851,3.46410162,3.4298645,0.185032748,3.42607686,3.39693329,3.39952263,3.39631728
63.089001,3,3.43006971,-0.655797003,3.42627792,3.39658642,3.39918217,3.39597121
63.099493,2.23606798,3.4303074,-1.09281262,3.42651145,3.39623941,3.39884161,3.395625
63.109984,3.16227766,3.43057985,-0.517978944,3.42677971,3.39589231,3.39850101,3.39527869
63.120476,3.60555128,3.43088959,0.417925451,3.42708527,3.39554506,3.39816031,3.39493224
63.130968,3,3.43123932,-0.656688148,3.42743079,3.39519769,3.39781955,3.39458566
63.141459,3.60555128,3.43163193,0.417036388,3.42781919,3.39485024,3.39747875,3.394239
63.151951,3.60555128,3.43207064,0.416510065,3.42825369,3.39450264,3.39713785,3.39389218
63.162442,2.64575131,3.43255881,-0.887021701,3.42873765,3.39415496,3.39679692,3.39354528
63.172934,4,3.43310022,0.752927476,3.42927485,3.39380713,3.3964559,3.39319822
63.183426,4.24264069,3.43369881,0.89941196,3.42986925,3.39345918,3.39611481,3.39285105
63.193917,4.12310563,3.43435884,0.829907697,3.43052509,3.39311115,3.39577369,3.39250379
63.204409,2.82842712,3.43508506,-0.77888249,3.43124715,3.39276297,3.39543247,3.39215639
63.2149,3.46410162,3.43588232,0.167986,3.43204027,3.39241471,3.39509123,3.39180889
63.225392,3.46410162,3.43675613,0.165364715,3.43290997,3.3920663,3.39474989,3.39146125
63.235884,3.46410162,3.43771214,0.162448375,3.43386191,3.39171778,3.39440849,3.39111349
63.246375,4,3.43875638,0.749161945,3.43490211,3.39136918,3.39406707,3.39076564
63.256867,3.31662479,3.43989555,-0.351099354,3.4360373,3.39102042,3.39372555,3.39041764
63.267358,3.31662479,3.44113631,-0.352861905,3.43727415,3.39067159,3.39338401,3.39006956
63.27785,3.46410162,3.44248616,0.14702194,3.43862014,3.39032261,3.39304237,3.38972133
63.288342,2.82842712,3.44395255,-0.784554287,3.44008275,3.38997352,3.39270068,3.38937299
63.298833,3.74165739,3.44554316,0.544163787,3.44166965,3.38962435,3.39235897,3.38902456
63.309325,3.46410162,3.44726628,0.129751038,3.44338917,3.38927503,3.39201717,3.38867598
63.319816,3.16227766,3.44912965,-0.535585648,3.44524903,3.38892563,3.39167534,3.38832732
63.330308,3.16227766,3.45114151,-0.53746056,3.4472575,3.38857609,3.39133343,3.38797851
63.3408,3.60555128,3.45330926,0.390182027,3.44942196,3.38822643,3.39099146,3.38762959
63.351291,4.12310563,3.45563952,0.816985986,3.45174907,3.3878767,3.39064948,3.38728059
63.361783,3.87298335,3.45813852,0.644084486,3.45424505,3.38752682,3.39030741,3.38693144
63.372274,4,3.46080997,0.734295603,3.45691361,3.38717686,3.38996532,3.3865822
63.382766,3.87298335,3.46365633,0.639786693,3.45975722,3.38682676,3.38962315,3.38623282
63.393258,4.47213595,3.46667635,1.00272609,3.46277463,3.38647655,3.38928093,3.38588333
63.403749,4.47213595,3.46986479,1.00113494,3.46596059,3.38612626,3.38893869,3.38553375
63.414241,3,3.4732124,-0.687904354,3.46930583,3.38577582,3.38859638,3.38518403
63.424732,3.46410162,3.47670258,-0.112254009,3.47279375,3.38542531,3.38825404,3.38483423
63.435224,3.46410162,3.4803127,-0.127322775,3.47640168,3.38507466,3.38791163,3.38448429
63.445716,3.46410162,3.48401064,-0.141099329,3.48009746,3.38472389,3.38756917,3.38413423
63.456207,3.16227766,3.4877546,-0.57050586,3.48383926,3.38437305,3.3872267,3.38378409
63.466699,3.60555128,3.49149353,0.337724356,3.48757597,3.38402207,3.38688416,3.38343381
63.47719,3.74165739,3.49516439,0.496480614,3.49124446,3.38367101,3.3865416,3.38308345
63.487682,2.64575131,3.49869543,-0.923549737,3.49477291,3.38331981,3.38619897,3.38273295
63.498174,3.74165739,3.50200529,0.489542745,3.49807987,3.38296851,3.38585629,3.38238233
63.508665,4,3.50500672,0.703557587,3.501078,3.38261712,3.38551361,3.38203164
63.519157,3.31662479,3.5076112,-0.437019922,3.50367866,3.3822656,3.38517086,3.3816808
63.529648,4.79583152,3.50973184,1.13406335,3.50579487,3.381914,3.3848281,3.38132989
63.54014,3.46410162,3.51129089,-0.217230929,3.5073488,3.38156226,3.38448526,3.38097883
63.550632,2.82842712,3.51222392,-0.826920066,3.50827594,3.38121042,3.38414239,3.38062767
63.561123,3.46410162,3.51248575,-0.219963931,3.50853105,3.3808585,3.38379952,3.38027642
63.571615,3.31662479,3.51205412,-0.442073901,3.50809186,3.38050644,3.38345658,3.37992504
63.582106,4,3.51093163,0.699334235,3.50696094,3.38015431,3.38311364,3.37957358
63.592598,3.60555128,3.50914515,0.310493363,3.5051652,3.37980204,3.38277063,3.37922198
63.60309,3,3.50674405,-0.711859573,3.50275407,3.37944966,3.38242758,3.37887027
63.613581,3.46410162,3.50379601,-0.19923453,3.49979528,3.37909721,3.38208454,3.37851848
63.624073,4.24264069,3.50038063,0.861545154,3.49636852,3.37874462,3.38174144,3.37816656
63.634564,3.16227766,3.49658579,-0.578193853,3.49256176,3.37839197,3.38139833,3.37781456
63.645056,4,3.49249967,0.712390575,3.48846328,3.37803917,3.38105517,3.37746242
63.655548,3.60555128,3.48820852,0.342553288,3.48415943,3.37768627,3.38071198,3.37711017
63.666039,2.82842712,3.48379212,-0.809546168,3.47973007,3.3773333,3.38036879,3.37675785
63.676531,3.60555128,3.47932004,0.355290359,3.47524485,3.37698019,3.38002555,3.37640539
63.687022,3.31662479,3.47485329,-0.39777946,3.47076487,3.37662701,3.37968231,3.37605286
63.697514,3.87298335,3.47044065,0.634462528,3.46633893,3.3762737,3.37933901,3.37570019
63.708006,3.87298335,3.46608037,0.637889471,3.46200695,3.37592028,3.37895304,3.37534742
63.718497,3.74165739,3.46188605,0.528934155,3.45779937,3.37556679,3.37860978,3.37499457
63.728989,3.46410162,3.45783705,0.0791489846,3.45373718,3.37521317,3.37826646,3.37464158
63.73948,3.16227766,3.45394886,-0.540065919,3.44983586,3.37485948,3.37792315,3.37428853
63.749972,4.24264069,3.45022956,0.890174776,3.44610353,3.37450566,3.3775798,3.37393533
63.760464,3.46410162,3.44668365,0.13197712,3.44254469,3.37415173,3.37723642,3.37358203
63.770955,3.31662479,3.4433119,-0.355931323,3.4391601,3.37379773,3.37689306,3.37322867
63.781447,3.16227766,3.44011124,-0.52709921,3.4359467,3.37344361,3.37654966,3.37287516
63.791938,3.31662479,3.43707781,-0.347063416,3.43290062,3.37308941,3.37620627,3.37252159
63.80243,3.74165739,3.43420505,0.554483848,3.4300153,3.37273508,3.37586283,3.37216788
63.812922,3,3.4314863,-0.656876168,3.42728406,3.37238065,3.37551938,3.37181406
63.823413,3,3.42891421,-0.654915424,3.42469956,3.37202616,3.37517595,3.37146018
63.833905,3.74165739,3.42648039,0.561406271,3.42225339,3.37167153,3.37483248,3.37110617
63.844396,3.31662479,3.42417728,-0.327951969,3.41993799,3.37131683,3.37448904,3.37075208
63.854888,3.31662479,3.42199653,-0.324610137,3.41774498,3.37096201,3.37414555,3.37039787
63.86538,4.24264069,3.4199306,0.907033673,3.41566683,3.37060708,3.37380206,3.37004355
63.875871,3.46410162,3.41797221,0.214777577,3.41369624,3.3702521,3.37345859,3.36968916
63.886363,3.31662479,3.41611382,-0.315418815,3.41182568,3.36989698,3.37311509,3.36933464
63.896854,3,3.41434901,-0.64369947,3.4100487,3.36954179,3.37277161,3.36898005
63.907346,3,3.41267103,-0.64239476,3.40835855,3.36918648,3.37242811,3.36862533
63.917838,3.46410162,3.41107403,0.23027719,3.40674938,3.36883107,3.3720846,3.36827052
63.928329,4.12310563,3.40955252,0.844720727,3.40521568,3.36847559,3.37174112,3.36791563
63.938821,2.64575131,3.40810094,-0.873126352,3.40375189,3.36811999,3.37139761,3.36756062
63.949312,3.31662479,3.40671466,-0.300149747,3.40235337,3.36776432,3.37105414,3.36720554
63.959804,3.74165739,3.40538887,0.579886645,3.40101531,3.36740852,3.37071064,3.36685032
63.970296,3.16227766,3.40411945,-0.491774129,3.39973359,3.36705263,3.37036715,3.36649501
63.980787,3.87298335,3.40290262,0.685624335,3.3985044,3.36669668,3.3700237,3.36613964
63.991279,3,3.40173449,-0.633825284,3.39732387,3.3663406,3.36968022,3.36578414
64.00177,4.24264069,3.40061193,0.917621248,3.39618885,3.36598446,3.36933678,3.36542857
64.012262,3.87298335,3.39953162,0.688078286,3.39509602,3.36562819,3.36899333,3.36507287
64.022754,3.16227766,3.39849078,-0.486017611,3.3940426,3.36527183,3.36864988,3.36471708
64.033245,3.31662479,3.39748685,-0.284362547,3.39302602,3.3649154,3.36830648,3.36436123
64.043737,3.46410162,3.39651718,0.259970071,3.39204363,3.36455885,3.36796307,3.36400524
64.054228,3,3.39557968,-0.628951252,3.39109333,3.36420225,3.3676197,3.3636492
64.06472,2.64575131,3.39467207,-0.865402078,3.39017285,3.36384551,3.36727632,3.36329302
64.075212,3.46410162,3.3937925,0.265158667,3.38928032,3.36348869,3.36693296,3.36293675
64.085703,2.82842712,3.39293925,-0.751340216,3.38841402,3.3631318,3.36658965,3.36258043
64.096195,4.12310563,3.39211049,0.854982537,3.38757213,3.36277479,3.36624633,3.36222397
64.106686,3.16227766,3.39130484,-0.478567843,3.38675326,3.36241772,3.36590307,3.36186745
64.117178,4.24264069,3.39052073,0.92310344,3.38595583,3.36206053,3.3655598,3.36151081
64.12767,3.87298335,3.3897569,0.695144913,3.38517858,3.36170325,3.36521656,3.36115408
64.138161,3.31662479,3.3890122,-0.269049082,3.38442037,3.36134591,3.36487338,3.36079728
64.148653,3.74165739,3.38828535,0.594451037,3.38367991,3.36098845,3.36453019,3.36044036
64.159144,3.74165739,3.38757544,0.595047854,3.38295627,3.36063093,3.36418708,3.36008339
64.169636,4,3.38688134,0.78301894,3.38224834,3.36027329,3.36384396,3.35972628
64.180128,3.46410162,3.38620221,0.279104644,3.38155528,3.35991556,3.36350087,3.35936909
64.190619,3.16227766,3.38553727,-0.472503556,3.38087628,3.35955777,3.36315786,3.35901184
64.201111,3.74165739,3.38488559,0.597303769,3.38021044,3.35919987,3.36281485,3.35865446
64.211602,4.12310563,3.38424657,0.859569109,3.37955714,3.35884191,3.36247192,3.35829703
64.222094,3.46410162,3.38361939,0.283693886,3.37891556,3.35848382,3.36212899,3.35793948
64.232586,3.31662479,3.38300348,-0.25764062,3.37828512,3.35812566,3.3617861,3.35758183
64.243077,3.31662479,3.38239829,-0.256463438,3.37766528,3.35776743,3.3614433,3.35722413
64.253569,3.74165739,3.38180314,0.59987853,3.37705536,3.35740909,3.36110051,3.35686631
64.26406,4.12310563,3.38121762,0.861329208,3.37645495,3.3570507,3.3607578,3.35650844
64.274552,3.31662479,3.38064114,-0.253014519,3.37586344,3.35669218,3.3604151,3.35615044
64.285044,3.16227766,3.38007328,-0.466685783,3.37528043,3.35633358,3.36007246,3.35579235
64.295535,4,3.37951367,0.787709545,3.37470553,3.35597493,3.35972991,3.35543421
64.306027,3.87298335,3.3789618,0.70286666,3.37413823,3.35561616,3.35938738,3.35507595
64.316518,3.87298335,3.3784174,0.703253829,3.37357827,3.35525734,3.35904493,3.35471764
64.32701,3.74165739,3.37787999,0.603139613,3.37302516,3.3548984,3.35870252,3.35435921
64.337502,2.82842712,3.37734931,-0.740892829,3.37247864,3.35453938,3.35836017,3.35400069
64.347993,3.16227766,3.37682508,-0.463192636,3.37193842,3.35418031,3.35801791,3.35364212
64.358485,3.87298335,3.3763069,0.704752753,3.37140412,3.35382112,3.35767569,3.35328343
64.368976,4.12310563,3.3757946,0.864471528,3.37087554,3.35346188,3.35733356,3.35292469
64.379468,3.74165739,3.37528782,0.605284701,3.37035233,3.35310253,3.35699148,3.35256583
64.38996,3.74165739,3.37478635,0.605698803,3.36983428,3.35274309,3.35664946,3.35220689
64.400451,3,3.37429,-0.611792451,3.36932121,3.35238361,3.35630755,3.3518479
64.410943,3.16227766,3.37379847,-0.459913916,3.36881279,3.35202401,3.35596569,3.35148879
64.421434,3.46410162,3.37331163,0.30131376,3.36830892,3.35166436,3.35562393,3.35112963
64.431926,2.64575131,3.3728292,-0.852688625,3.36780928,3.3513046,3.35528222,3.35077035
64.442418,3.74165739,3.37235103,0.60770581,3.36731376,3.35094476,3.3549406,3.35041099
64.452909,3.46410162,3.371877,0.303685056,3.3668222,3.35058488,3.35459909,3.35005159
64.463401,3.31662479,3.37140684,-0.234055665,3.36633436,3.35022488,3.35425763,3.34969207
64.473892,3.74165739,3.37094049,0.60886525,3.36585015,3.34986483,3.3539163,3.3493325
64.484384,3.74165739,3.37047771,0.609245167,3.36536935,3.34950467,3.35357502,3.34897281
64.494876,2.82842712,3.3700184,-0.735928854,3.36489184,3.34914444,3.35323384,3.34861305
64.505367,2.64575131,3.36956247,-0.850770921,3.36441754,3.34878415,3.35289278,3.34825324
64.515859,3,3.3691097,-0.607543993,3.36394623,3.34842376,3.3525518,3.34789331
64.52635,2.82842712,3.36866007,-0.735005403,3.36347787,3.34806333,3.35221094,3.34753334
64.536842,4.24264069,3.36821336,0.935108191,3.36301226,3.34770278,3.35187015,3.34717326
64.547334,2.82842712,3.36776951,-0.734399338,3.36254933,3.34734216,3.35152947,3.3468131
64.557825,3.16227766,3.36732847,-0.452825361,3.36208902,3.34698149,3.35118893,3.34645289
64.568317,3.16227766,3.36689004,-0.452341,3.36163113,3.34662071,3.35084847,3.34609257
64.578808,3.87298335,3.36645422,0.711708596,3.36117567,3.3462599,3.35050816,3.34573221
64.5893,2.82842712,3.36602084,-0.733207823,3.36072245,3.34589897,3.35016792,3.34537174
64.599792,3.46410162,3.36558984,0.313865849,3.36027143,3.34553797,3.34982781,3.34501119
64.610283,3.31662479,3.3651612,-0.220309811,3.35982257,3.34517693,3.34948784,3.3446506
64.620775,3,3.36473476,-0.603932741,3.35937569,3.34481577,3.34914797,3.34428989
64.631266,3.46410162,3.36431051,0.315897301,3.35893083,3.34445459,3.34880826,3.34392915
64.641758,2.82842712,3.36388832,-0.731752137,3.3584878,3.34409329,3.34846864,3.3435683
64.65225,3.31662479,3.36346814,-0.216433256,3.3580466,3.34373192,3.34812916,3.34320737
64.662741,3.16227766,3.36304998,-0.448076238,3.35760719,3.34337051,3.34778984,3.3428464
64.673233,3.60555128,3.36263367,0.492866724,3.35716943,3.34300899,3.34745063,3.34248532
64.683724,3.46410162,3.36221924,0.319190183,3.35673334,3.34264744,3.34711159,3.3421242
64.694216,3.46410162,3.36180657,0.319835972,3.35629878,3.34228578,3.34677266,3.34176298
64.704708,2.82842712,3.36139563,-0.730046918,3.35586574,3.34192405,3.34643388,3.34140168
64.715199,3,3.36098641,-0.600821448,3.3554342,3.34156228,3.34609528,3.34104034
64.725691,3.60555128,3.3605788,0.494946945,3.35500404,3.34120041,3.3457568,3.3406789
64.736182,3.31662479,3.36017281,-0.208681631,3.35457528,3.34083851,3.34541851,3.34031742
64.746674,3.16227766,3.35976834,-0.444399236,3.35414781,3.34047649,3.34508035,3.33995583
64.757166,4.47213595,3.35936538,1.05487941,3.3537216,3.34011441,3.34474234,3.33959417
64.767657,3.87298335,3.35896392,0.716951481,3.35329667,3.3397523,3.34440454,3.33923248
64.778149,3.31662479,3.35856386,-0.204790294,3.3528729,3.33939008,3.34406687,3.33887068
64.78864,3,3.35816522,-0.598469066,3.35245031,3.33902783,3.3437294,3.33850884
64.799132,3.46410162,3.35776791,0.326088488,3.3520288,3.33866548,3.34339208,3.33814691
64.809624,4.35889894,3.35737193,1.00076321,3.35160838,3.33830306,3.34305494,3.3377849
64.820115,4,3.35697728,0.801886973,3.35118903,3.3379406,3.34271801,3.33742285
64.830607,3.60555128,3.35658386,0.498966345,3.35077066,3.33757805,3.34238124,3.33706071
64.841098,3.60555128,3.35619172,0.499359148,3.3503533,3.33721546,3.34204468,3.33669853
64.85159,3,3.35580074,-0.596490356,3.34993686,3.33685278,3.34170829,3.33633625
64.862082,2.23606798,3.35541096,-1.05799007,3.34952134,3.33649002,3.3413721,3.3359739
64.872573,4.58257569,3.35502236,1.10795006,3.34910674,3.33612724,3.34103613,3.33561151
64.883065,4.79583152,3.35463487,1.2004985,3.34869298,3.33576436,3.34070035,3.33524903
64.893556,2.23606798,3.35424852,-1.05744056,3.34828009,3.33540145,3.3403648,3.33488652
64.904048,2.82842712,3.35386323,-0.724869718,3.34786797,3.33503844,3.34002943,3.3345239
64.91454,3.74165739,3.35347901,0.623039625,3.34745664,3.33467536,3.33969427,3.33416122
64.925031,3.16227766,3.35309588,-0.436827447,3.34704611,3.33431226,3.33935937,3.33379851
64.935523,3.74165739,3.35271374,0.623653466,3.34663629,3.33394906,3.33902467,3.3334357
64.946014,3.16227766,3.35233265,-0.435952971,3.34622723,3.33358584,3.33869022,3.33307286
64.956506,3.87298335,3.35195253,0.721824647,3.34581883,3.33322251,3.33835597,3.33270992
64.966998,3.87298335,3.35157338,0.722087229,3.34541111,3.33285913,3.33802197,3.33234692
64.977489,3.87298335,3.35119524,0.722349023,3.34500409,3.33249571,3.33768823,3.33198389
64.987981,3.16227766,3.35081801,-0.434212327,3.34459768,3.33213221,3.33735471,3.33162076
64.998472,3.87298335,3.35044175,0.722870388,3.34419192,3.33176867,3.33702147,3.33125761
65.008964,3.46410162,3.35006638,0.337691037,3.34378673,3.33140505,3.33668846,3.33089436
65.019456,4,3.34969192,0.806416815,3.34338214,3.33104136,3.3363557,3.33053104
65.029947,3.60555128,3.3493184,0.506194507,3.34297815,3.33067765,3.33602324,3.3301677
65.040439,3.16227766,3.34894573,-0.432050999,3.34257469,3.33031384,3.33569102,3.32980427
65.05093,3.31662479,3.34857397,-0.17874333,3.3421718,3.32995001,3.33535911,3.32944081
65.061422,3.16227766,3.34820304,-0.431190657,3.34176941,3.32958609,3.33502744,3.32907725
65.071914,3.46410162,3.34783297,0.340981877,3.34136753,3.32922211,3.33469605,3.32871364
65.082405,3.60555128,3.34746379,0.508023114,3.34096619,3.32885811,3.33436499,3.32835
65.092897,3.60555128,3.34709541,0.508385545,3.3405653,3.32849402,3.33403419,3.32798627
65.103388,2.64575131,3.3467279,-0.837243449,3.34016492,3.3281299,3.33370372,3.32762251
65.11388,3.60555128,3.34636118,0.509107151,3.33976496,3.3277657,3.33337353,3.32725867
65.124372,3.87298335,3.34599528,0.725939434,3.33936546,3.32740144,3.33304365,3.32689476
65.134863,3.46410162,3.34563023,0.344196722,3.33896643,3.32703716,3.33271411,3.32653083
65.145355,4.24264069,3.34526595,0.947298652,3.33856779,3.32667278,3.33238487,3.32616681
65.155846,3.60555128,3.34490251,0.510537726,3.33816961,3.32630839,3.33205598,3.32580277
65.166338,3.87298335,3.34453982,0.72694121,3.3377718,3.32594391,3.3317274,3.32543864
65.17683,3,3.34417793,-0.586666798,3.33737438,3.32557938,3.33139915,3.32507445
65.187321,3.87298335,3.34381686,0.727438302,3.33697739,3.32521483,3.33107128,3.32471025
65.197813,3.60555128,3.34345654,0.511951885,3.33658074,3.32485019,3.33074374,3.32434595
65.208304,3.74165739,3.34309704,0.631316362,3.3361845,3.32448553,3.33041658,3.32398164
65.218796,3.74165739,3.34273828,0.631600435,3.33578857,3.32412079,3.33008975,3.32361723
65.229288,4.24264069,3.34238029,0.948820529,3.335393,3.323756,3.3297633,3.32325277
65.239779,3.87298335,3.34202311,0.728670182,3.33499781,3.32339119,3.32943725,3.3228883
65.250271,4,3.34166667,0.811377427,3.33460292,3.32302629,3.32911156,3.32252374
65.260762,3.60555128,3.34131103,0.514043034,3.33420839,3.32266138,3.32878628,3.32215916
65.271254,3,3.34095613,-0.583914491,3.33381414,3.32229638,3.32846138,3.32179449
65.281746,3.46410162,3.340602,0.351425122,3.33342021,3.32193133,3.32813688,3.32142977
65.292237,3.74165739,3.34024867,0.633568244,3.33302662,3.32156627,3.32781282,3.32106504
65.302729,3.46410162,3.33989607,0.352428072,3.33263329,3.32120113,3.32748915,3.32070022
65.31322,3.74165739,3.33954427,0.634123895,3.33224029,3.32083597,3.32716594,3.32033538
65.323712,3.46410162,3.33919321,0.353423828,3.33184753,3.32047073,3.32684313,3.31997046
65.334204,3.31662479,3.33884292,-0.149057479,3.33145506,3.32010545,3.32652076,3.3196055
65.344695,3.46410162,3.33849344,0.354412441,3.3310629,3.31974015,3.32619888,3.31924051
65.355187,3.31662479,3.33814469,-0.146696627,3.33067096,3.31937477,3.32587741,3.31887545
65.365678,3.46410162,3.33779675,0.355393954,3.33027933,3.31900937,3.32555645,3.31851037
65.37617,3.31662479,3.33744956,-0.144307895,3.32988791,3.3186439,3.32523593,3.31814521
65.386662,3.16227766,3.33710315,-0.418121376,3.32949675,3.31827838,3.32491589,3.31778
65.397153,3.74165739,3.33675755,0.636317405,3.32910586,3.31791285,3.32459638,3.31741478
65.407645,4,3.3364127,0.814608678,3.32871518,3.31754725,3.32427733,3.31704948
65.418136,3.87298335,3.33606868,0.732744613,3.32832478,3.31718163,3.32395882,3.31668417
65.428628,3,3.33572542,-0.579418171,3.32793456,3.31681594,3.3236408,3.31631878
65.43912,3.46410162,3.33538295,0.358773833,3.32754457,3.3164502,3.3233233,3.31595334
65.449611,2.44948974,3.33504132,-0.941037501,3.32715485,3.31608445,3.32300637,3.3155879
65.460103,2.64575131,3.33470047,-0.830029611,3.3267653,3.31571863,3.32268996,3.31522237
65.470594,3.46410162,3.33436045,0.360196003,3.326376,3.3153528,3.32237413,3.31485684
65.481086,3.87298335,3.33402123,0.734140394,3.32598687,3.31498689,3.32205884,3.31449122
65.491578,3.46410162,3.33368282,0.361135419,3.32559795,3.31462094,3.32174412,3.31412557
65.502069,4.12310563,3.33334528,0.888684615,3.32520926,3.31425499,3.32143002,3.3137599
65.512561,3.46410162,3.33300854,0.362067775,3.32482074,3.31388896,3.32111649,3.31339417
65.523052,3.46410162,3.33267268,0.362531294,3.32443245,3.31352293,3.32080359,3.31302842
65.533544,4,3.33233763,0.817106096,3.32404431,3.31315682,3.32049128,3.3126626
65.544036,2.64575131,3.33200343,-0.828403358,3.32365635,3.31279067,3.3201796,3.31229673
65.554527,3.46410162,3.33167014,0.36391136,3.32326862,3.31242452,3.31986859,3.31193086
65.565019,3,3.33133768,-0.575619388,3.32288103,3.3120583,3.31955821,3.31156492
65.57551,3.16227766,3.33100613,-0.410765715,3.32249365,3.31169207,3.31924851,3.31119897
65.586002,3.60555128,3.33067544,0.524286021,3.32210641,3.31132577,3.31893947,3.31083295
65.596494,3.16227766,3.33034565,-0.409960963,3.32171934,3.31095944,3.31863111,3.31046689
65.606985,4.58257569,3.3300168,1.11917778,3.32133248,3.3105931,3.31832348,3.31010083
65.617477,4.35889894,3.32968883,1.01449993,3.32094574,3.31022669,3.31801654,3.30973469
65.627968,2.82842712,3.32936181,-0.707767397,3.3205592,3.30986028,3.31771035,3.30936855
65.63846,3.16227766,3.3290357,-0.40836019,3.32017279,3.30949381,3.31740488,3.30900234
65.648952,3,3.32871054,-0.573332838,3.31978653,3.30912729,3.31710016,3.3086361
65.659443,3.74165739,3.32838637,0.642861584,3.31940047,3.30876078,3.31679623,3.30826985
65.669935,4.12310563,3.32806313,0.891651552,3.31901452,3.3083942,3.31649306,3.30790353
65.680426,2.82842712,3.32774091,-0.706621388,3.31862875,3.30802762,3.31619072,3.30753721
65.690918,4.35889894,3.32741965,1.01561769,3.3182431,3.30766097,3.31588915,3.30717082
65.70141,3.60555128,3.32709939,0.527685403,3.31785759,3.30729429,3.31558842,3.3068044
65.711901,2.82842712,3.32678018,-0.705941256,3.31747226,3.30692762,3.31528855,3.30643798
65.722393,3.74165739,3.32646197,0.64435659,3.31708703,3.30656087,3.31498951,3.30607149
65.732884,3.31662479,3.32614484,-0.0975707294,3.31670199,3.30619413,3.31469138,3.305705
65.743376,3.31662479,3.32582873,-0.0959371721,3.31631704,3.30582733,3.31439411,3.30533845
65.753868,3.60555128,3.3255137,0.529185768,3.31593222,3.30546049,3.31409774,3.30497186
65.764359,3.87298335,3.32519978,0.740124019,3.31554758,3.30509366,3.31380233,3.30460528
65.774851,3.46410162,3.32488694,0.37311483,3.31516303,3.30472677,3.31350783,3.30423863
65.785342,3.60555128,3.32457524,0.530071723,3.31477864,3.30435988,3.31321432,3.30387199
65.795834,3,3.32426465,-0.569442406,3.31439435,3.30399292,3.31292176,3.30350527
65.806326,3.60555128,3.32395522,0.530656254,3.31401018,3.30362594,3.31263019,3.30313853
65.816817,3.60555128,3.32364697,0.530946609,3.31362617,3.30325897,3.31233967,3.3027718
65.827309,2.82842712,3.32333989,-0.703500365,3.31324225,3.30289193,3.31205016,3.302405
65.8378,3.31662479,3.32303404,-0.0800577702,3.31285849,3.30252491,3.31176173,3.30203821
65.848292,3.60555128,3.32272938,0.53181002,3.31247481,3.30215782,3.31147435,3.30167135
65.858784,3.87298335,3.32242596,0.741995543,3.31209125,3.3017907,3.31118807,3.30130447
65.869275,3.74165739,3.32212383,0.6477141,3.31170784,3.3014236,3.31090293,3.3009376
65.879767,3.60555128,3.32182296,0.532661544,3.31132451,3.30105643,3.31061891,3.30057066
65.890258,3.46410162,3.32152341,0.377595294,3.31094133,3.30068928,3.31033607,3.30020373
65.90075,3,3.32122516,-0.566767286,3.31055823,3.30032207,3.3100544,3.29983674
65.911242,2.82842712,3.32092825,-0.701784243,3.31017523,3.29995483,3.30977393,3.29946973
65.921733,3.31662479,3.32063273,-0.0633083267,3.30979239,3.2995876,3.30949473,3.29910273
65.932225,4.12310563,3.32033858,0.89597268,3.30940962,3.29922032,3.30921675,3.29873566
65.942716,2.64575131,3.32004587,-0.821154407,3.30902699,3.29885305,3.30894009,3.29836861
65.953208,2.64575131,3.31975457,-0.820977014,3.30864443,3.29848572,3.30866471,3.2980015
65.9637,3.60555128,3.31946473,0.534870589,3.30826198,3.29811837,3.30839066,3.29763437
65.974191,1.73205081,3.3191764,-1.25981173,3.30787967,3.29775104,3.30811801,3.29726724
65.984683,2.82842712,3.31888956,-0.700330236,3.30749743,3.29738365,3.30784671,3.29690006
65.995174,3.87298335,3.31860429,0.744566352,3.30711532,3.29701627,3.30757687,3.2965329
66.005666,3.31662479,3.31832056,-0.0411797629,3.30673328,3.29664884,3.30730844,3.29616568
66.016158,3.74165739,3.31803843,0.650860167,3.30635134,3.29628139,3.30704149,3.29579843
66.026649,3,3.31775795,-0.563700229,3.30596954,3.29591396,3.30677608,3.2954312
66.037141,3.46410162,3.31747909,0.382913202,3.3055878,3.29554647,3.30651218,3.29506392
66.047632,2.82842712,3.31720195,-0.699124331,3.3052062,3.295179,3.30624987,3.29469665
66.058124,2.23606798,3.31692651,-1.03964346,3.30482465,3.29481148,3.30598915,3.29432933
66.068616,3.46410162,3.31665281,0.383990637,3.30444321,3.29444394,3.30573006,3.29396199
66.079107,3,3.31638092,-0.562477481,3.30406189,3.29407642,3.30547267,3.29359467
66.089599,3.46410162,3.31611082,0.384695721,3.30368064,3.29370885,3.30521697,3.29322729
66.10009,3.87298335,3.3158426,0.746418615,3.30329951,3.2933413,3.30496303,3.29285993
66.110582,3.31662479,3.31557624,0.0323813273,3.30291844,3.29297369,3.30471085,3.29249252
66.121074,4.24264069,3.31531181,0.962979168,3.30253747,3.29260608,3.30446049,3.29212509
66.131565,3.60555128,3.31504937,0.538982291,3.30215662,3.29223848,3.30421201,3.29175768
66.142057,3.16227766,3.3147889,-0.390526875,3.30177583,3.29187084,3.30396541,3.29139022
66.152548,4.47213595,3.3145305,1.07592075,3.30139516,3.29150321,3.30372078,3.29102279
66.16304,3,3.31427416,-0.56060161,3.30101455,3.29113554,3.3034781,3.2906553
66.173532,3.16227766,3.31401995,-0.389541132,3.30063403,3.29076786,3.30323745,3.29028779
66.184023,3.74165739,3.31376794,0.654132593,3.30025364,3.2904002,3.3029989,3.28992031
66.194515,3.60555128,3.31351811,0.540400929,3.2998733,3.29003249,3.30276244,3.28955278
66.205006,3.87298335,3.31327057,0.748139542,3.29949308,3.28966481,3.30252817,3.28918528
66.215498,3.31662479,3.31302532,0.0599956173,3.29911292,3.28929708,3.30229609,3.28881772
66.22599,3.60555128,3.31278242,0.541081192,3.29873284,3.28892934,3.30206627,3.28845016
66.236481,3.87298335,3.31254195,0.748626338,3.29835289,3.28856163,3.30183879,3.28808261
66.246973,4.35889894,3.31230392,1.02303227,3.29797298,3.28819387,3.30161366,3.28771503
66.257464,2.64575131,3.31206843,-0.816282498,3.2975932,3.28782614,3.30139096,3.28734746
66.267956,4.47213595,3.31183548,1.07717245,3.29721347,3.28745836,3.30117073,3.28697985
66.278448,3.74165739,3.31160515,0.655783681,3.29683383,3.28709058,3.30095303,3.28661224
66.288939,3.60555128,3.31137753,0.542377866,3.2964543,3.28672283,3.30073794,3.28624464
66.299431,3.60555128,3.31115262,0.542585158,3.29607483,3.28635503,3.30052548,3.28587701
66.309922,3,3.31093054,-0.55761146,3.29569547,3.28598726,3.30031576,3.2855094
66.320414,2.82842712,3.3107113,-0.69446683,3.29531616,3.28561945,3.3001088,3.28514175
66.330906,3.31662479,3.310495,0.0782930022,3.29493694,3.28525164,3.29990469,3.28477409
66.341397,3.31662479,3.31028171,0.079643478,3.29455784,3.28488385,3.29970351,3.28440646
66.351889,3.46410162,3.31007146,0.392466753,3.29417878,3.28451603,3.29950529,3.28403878
66.36238,3.87298335,3.30986438,0.750412533,3.29379985,3.28414823,3.29931015,3.28367114
66.372872,3.46410162,3.30966048,0.392989994,3.29342096,3.2837804,3.29911812,3.28330346
66.383364,2.64575131,3.30945987,-0.814683103,3.29304215,3.28341257,3.2989293,3.28293577
66.393855,3,3.30926264,-0.556113875,3.29266346,3.28304476,3.29874377,3.28256811
66.404347,3.74165739,3.30906884,0.657714641,3.29228482,3.28267692,3.2985616,3.28220042
66.414838,3.46410162,3.30887858,0.393983548,3.2919063,3.28230911,3.29838289,3.28183275
66.42533,2.82842712,3.30869191,-0.693011391,3.29152782,3.28194127,3.2982077,3.28146505
66.435822,3.31662479,3.30850895,0.0900879792,3.29114942,3.28157343,3.29803613,3.28109734
66.446313,3,3.30832979,-0.555274515,3.29077114,3.28120562,3.2978683,3.28072967
66.456805,4.12310563,3.30815449,0.902746439,3.29039291,3.28083777,3.29770425,3.28036196
66.467296,3.31662479,3.30798319,0.0929601819,3.2900148,3.28046996,3.29754413,3.27999428
66.477788,3.46410162,3.30781596,0.395329806,3.28963673,3.28010212,3.29738801,3.27962657
66.48828,3.74165739,3.30765291,0.658790164,3.28925874,3.27973427,3.29723599,3.27925886
66.498771,3.31662479,3.30749416,0.0955543447,3.28888087,3.27936647,3.2970882,3.27889119
66.509263,3.74165739,3.30733979,0.659027766,3.28850304,3.27899863,3.29694473,3.27852347
66.519754,3,3.30718995,-0.554247191,3.28812533,3.27863083,3.29680572,3.2781558
66.530246,3.46410162,3.30704472,0.396304044,3.28774767,3.278263,3.29667125,3.27778809
66.540738,4.24264069,3.30690424,0.967334713,3.28737009,3.27789517,3.29654146,3.27742039
66.551229,3.74165739,3.30676865,0.659460948,3.28699262,3.27752738,3.29641649,3.27705272
66.561721,3.60555128,3.30663804,0.546729581,3.2866152,3.27715956,3.29629645,3.27668502
66.572212,3.60555128,3.30651258,0.546844303,3.2862379,3.27679178,3.29618149,3.27631736
66.582704,3,3.30639239,-0.553527225,3.28586064,3.27642398,3.29607172,3.27594966
66.593196,3.60555128,3.30627761,0.547059106,3.28548346,3.27605617,3.29596732,3.27558197
66.603687,3.16227766,3.30616841,-0.379329336,3.2851064,3.27568841,3.29586842,3.27521433
66.614179,3,3.30606491,-0.553231332,3.28472939,3.27532062,3.29577517,3.27484665
66.62467,4.35889894,3.30596729,1.02612458,3.28435249,3.27495288,3.29568774,3.27447901
66.635162,3.87298335,3.30587571,0.753065494,3.28397564,3.2745851,3.29560629,3.27411134
66.645654,3.87298335,3.30579033,0.753122177,3.28359886,3.27421734,3.29553098,3.27374368
66.656145,3.87298335,3.30571135,0.753174614,3.28322221,3.27384962,3.29546201,3.27337607
66.666637,2.23606798,3.30563892,-1.03420063,3.2828456,3.27348187,3.29539954,3.27300842
66.677128,3.60555128,3.30557325,0.547702495,3.28246911,3.27311417,3.29534377,3.27264082
66.68762,3,3.30551453,-0.552733687,3.28209267,3.27274644,3.2952949,3.27227319
66.698112,3.74165739,3.30546296,0.660450172,3.2817163,3.27237873,3.29525312,3.27190557
66.708603,3.31662479,3.30541875,0.105858582,3.28134006,3.27201106,3.29521865,3.271538
66.719095,4.24264069,3.30538212,0.968121153,3.28096386,3.27164337,3.29519171,3.2711704
66.729586,3.60555128,3.3053533,0.547903254,3.28058778,3.27127572,3.29517252,3.27080285
66.740078,3.60555128,3.30533252,0.54792222,3.28021174,3.27090805,3.29516133,3.27043527
66.75057,3,3.30532002,-0.552557705,3.27983579,3.2705404,3.29515837,3.27006771
66.761061,3.46410162,3.30531606,0.398479058,3.27945996,3.27017279,3.2951639,3.26970019
66.771553,3.16227766,3.30532089,-0.378210568,3.27908417,3.26980517,3.29517818,3.26933265
66.782044,2.82842712,3.3053348,-0.690585026,3.27870851,3.26943759,3.29520149,3.26896515
66.792536,4,3.30535807,0.833451816,3.27833289,3.26906999,3.29523411,3.26859764
66.803028,3.74165739,3.30539099,0.660504653,3.27795735,3.26870241,3.29527634,3.26823013
66.813519,3.31662479,3.30543386,0.105787178,3.27758193,3.26833488,3.29532848,3.26786268
66.824011,3.16227766,3.30548702,-0.378430123,3.27720657,3.26796733,3.29539087,3.26749521
66.834502,3.60555128,3.30555078,0.547723013,3.27683132,3.26759984,3.29546381,3.26712779
66.844994,2.82842712,3.3056255,-0.690795462,3.27645612,3.26723232,3.29554768,3.26676035
66.855486,3.31662479,3.30571153,0.104466553,3.276081,3.26686483,3.29564283,3.26639292
66.865977,3.46410162,3.30580924,0.397859738,3.27570601,3.26649738,3.29574962,3.26602555
66.876469,2.64575131,3.30591905,-0.812507069,3.27533106,3.26612992,3.29586846,3.26565816
66.88696,3.46410162,3.30604133,0.397567967,3.27495624,3.26576252,3.29599975,3.26529082
66.897452,3.60555128,3.30617653,0.547151485,3.27458146,3.2653951,3.29614392,3.26492346
66.907944,3.31662479,3.30632508,0.101487469,3.27420677,3.2650277,3.29630143,3.26455613
66.918435,3,3.30648744,-0.553613077,3.27383221,3.26466036,3.2964727,3.26418884
66.928927,4,3.30666411,0.832667937,3.27345769,3.264293,3.29665825,3.26382155
66.939418,2.82842712,3.30685556,-0.691685212,3.2730833,3.2639257,3.29685857,3.2634543
66.94991,3,3.30706235,-0.554132069,3.27270896,3.26355838,3.2970742,3.26308704
66.960402,3,3.30728502,-0.554332948,3.2723347,3.26319109,3.29730568,3.26271981
66.970893,4.24264069,3.30752411,0.967014259,3.27196057,3.26282386,3.29755357,3.26235263
66.981385,3.16227766,3.30778027,-0.381448047,3.27158649,3.26245662,3.29781851,3.26198543
66.991876,3.46410162,3.30805408,0.395028518,3.27121254,3.26208943,3.29810108,3.2616183
67.002368,3.46410162,3.30834625,0.394658538,3.27083864,3.26172223,3.298402,3.26125115
67.01286,2.82842712,3.30865744,-0.692986521,3.27046482,3.26135506,3.29872192,3.26088403
67.023351,3.87298335,3.30898834,0.750996011,3.27009114,3.26098795,3.29906154,3.26051696
67.033843,3.60555128,3.30933976,0.544253174,3.2697175,3.26062084,3.29942167,3.26014988
67.044334,3.74165739,3.30971242,0.657225199,3.269344,3.26025378,3.29980304,3.25978287
67.054826,2.82842712,3.31010724,-0.694031782,3.26897054,3.25988671,3.30020656,3.25941584
67.065318,4.24264069,3.31052503,0.965461368,3.26859718,3.25951968,3.30063306,3.25904884
67.075809,4,3.31096668,0.830080308,3.26822395,3.2591527,3.30108341,3.2586819
67.086301,4,3.31143322,0.829799238,3.26785077,3.25878572,3.30155866,3.25831495
67.096792,3.31662479,3.31192558,0.0685508074,3.26747772,3.2584188,3.30205973,3.25794807
67.107284,3.16227766,3.31244489,-0.387514171,3.26710473,3.25805188,3.30258778,3.25758117
67.117776,4.35889894,3.31299224,1.0226958,3.26673183,3.25768499,3.30314386,3.25721431
67.128267,3.74165739,3.31356873,0.654284844,3.26635905,3.25731816,3.30372911,3.25684751
67.138759,3.46410162,3.31417571,0.387202672,3.26598634,3.25695133,3.30434486,3.2564807
67.14925,3.46410162,3.31481435,0.386377103,3.26561376,3.25658456,3.30499231,3.25611396
67.159742,3.16227766,3.31548615,-0.391418559,3.26524123,3.25621779,3.30567293,3.25574721
67.170234,3.87298335,3.31619248,0.746184201,3.2648688,3.25585106,3.30638813,3.25538049
67.180725,4.12310563,3.31693481,0.897870158,3.26449651,3.25548439,3.30713935,3.25501384
67.191217,4.12310563,3.31771486,0.897435663,3.26412427,3.25511772,3.30792834,3.25464719
67.201708,3.31662479,3.31853418,-0.0436966072,3.26375216,3.25475112,3.30875665,3.2542806
67.2122,4,3.31939473,0.824988042,3.26338012,3.25438451,3.30962623,3.25391401
67.222692,3.87298335,3.32029831,0.743427892,3.26300817,3.25401794,3.3105389,3.25354745
67.233183,3.31662479,3.32124684,-0.0679856927,3.26263636,3.25365145,3.31149658,3.25318096
67.243675,4.12310563,3.32224262,0.894909497,3.26226461,3.25328495,3.31250157,3.25281447
67.254166,3.46410162,3.32328769,0.375251814,3.261893,3.25291852,3.31355593,3.25244805
67.264658,3.31662479,3.32438464,-0.0880899965,3.26152144,3.2525521,3.31466225,3.25208163
67.27515,3.16227766,3.32553588,-0.404052254,3.26114999,3.25218571,3.31582295,3.25171525
67.285641,3.60555128,3.32674399,0.528022052,3.26077868,3.2518194,3.3170406,3.25134893
67.296133,3.74165739,3.32801202,0.643152677,3.26040743,3.25145309,3.31831828,3.25098262
67.306624,3.46410162,3.32934276,0.367095157,3.26003632,3.25108685,3.31965878,3.25061638
67.317116,3.31662479,3.33073967,-0.118806063,3.25966527,3.25072062,3.32106556,3.25025014
67.327608,3.46410162,3.33220605,0.363174296,3.25929433,3.25035442,3.32254194,3.24988394
67.338099,2.82842712,3.33374538,-0.710857405,3.25892353,3.2499883,3.32409141,3.24951781
67.348591,3.31662479,3.33536183,-0.136883306,3.25855279,3.24962219,3.32571815,3.24915169
67.359082,3.46410162,3.33705924,0.356430045,3.2581822,3.24925615,3.327426,3.24878563
67.369574,3.60555128,3.33884234,0.516438706,3.25781167,3.24889012,3.32921972,3.24841959
67.380066,3.46410162,3.34071569,0.351263326,3.25744125,3.24852413,3.33110386,3.24805358
67.390557,3.60555128,3.34268415,0.512705692,3.25707098,3.24815822,3.33308331,3.24768765
67.401049,4,3.34475348,0.809472988,3.25670077,3.24779232,3.33516384,3.24732173
67.41154,3.87298335,3.34692908,0.725295988,3.25633071,3.24742649,3.33735086,3.24695588
67.422032,3.46410162,3.34921754,0.338945529,3.25596072,3.24706067,3.339651,3.24659004
67.432524,3,3.35162533,-0.592980042,3.25559083,3.2466949,3.34207071,3.24622425
67.443015,3,3.35415933,-0.595112873,3.2552211,3.24632921,3.34461691,3.24585853
67.453507,2.64575131,3.3568277,-0.843253456,3.25485144,3.24596353,3.34729777,3.24549282
67.463998,2.44948974,3.3596382,-0.954017008,3.25448192,3.24559793,3.35012108,3.24512718
67.47449,3.31662479,3.36260024,-0.214418863,3.25411248,3.24523234,3.35309627,3.24476156
67.484982,3.74165739,3.36572317,0.613134748,3.25374316,3.24486679,3.35623271,3.24439599
67.495473,3.31662479,3.36901701,-0.228893471,3.25337398,3.24450133,3.35954046,3.24403049
67.505965,3.31662479,3.37249358,-0.236365803,3.25300488,3.24413589,3.36303136,3.243665
67.516456,3.60555128,3.37616432,0.478943582,3.25263593,3.24377052,3.36671686,3.2432996
67.526948,3.31662479,3.38004302,-0.251829771,3.25226705,3.24340517,3.37061082,3.24293421
67.53744,4.12310563,3.38414356,0.859629027,3.2518983,3.24303987,3.37472712,3.24256886
67.547931,3.31662479,3.38848093,-0.268059955,3.2515297,3.24267465,3.37908081,3.2422036
67.558423,3.31662479,3.39307271,-0.27649217,3.25116117,3.24230945,3.3836895,3.24183835
67.568914,3.74165739,3.39793627,0.586277342,3.25079281,3.24194433,3.38857061,3.24147318
67.579406,3.46410162,3.40309239,0.247000454,3.25042452,3.24157923,3.39374497,3.24110803
67.589898,3.74165739,3.40856231,0.577143893,3.25005636,3.24121419,3.39923386,3.24074293
67.600389,3.74165739,3.41436915,0.572091109,3.24968835,3.24084922,3.40506046,3.24037792
67.610881,3.16227766,3.42053992,-0.508195095,3.24932042,3.24048428,3.41125184,3.24001292
67.621372,4.12310563,3.42710184,0.834268416,3.24895266,3.24011943,3.4178353,3.239648
67.631864,3.31662479,3.43408733,-0.34272809,3.24858498,3.23975459,3.42484332,3.23928311
67.642356,3.74165739,3.4415301,0.547838738,3.24821742,3.23938981,3.43230968,3.23891826
67.652847,3.46410162,3.44946719,0.120972835,3.24785003,3.23902511,3.4402715,3.2385535
67.663339,3.87298335,3.45794191,0.644237098,3.24748272,3.23866044,3.44877221,3.23818877
67.67383,2.64575131,3.46699906,-0.906227205,3.24711558,3.23829586,3.45785669,3.23782412
67.684322,3,3.47669211,-0.69042893,3.24674852,3.2379313,3.46757852,3.23745948
67.694814,4.24264069,3.48707829,0.869230924,3.2463816,3.23756679,3.47799506,3.23709491
67.705305,3,3.49822217,-0.705848545,3.24601484,3.23720238,3.48917102,3.23673042
67.715797,4.47213595,3.51020087,0.980782895,3.24564817,3.23683799,3.50118367,3.23636596
67.726288,3.60555128,3.52309889,0.287145242,3.24528167,3.23647369,3.51411769,3.23600158
67.73678,2.82842712,3.53702056,-0.841779922,3.24491527,3.23610942,3.52807763,3.23563723
67.747272,2.82842712,3.55208642,-0.850681664,3.244549,3.2357452,3.54318425,3.23527293
67.757763,4,3.56844275,0.65693017,3.24418289,3.23538108,3.55958414,3.23490873
67.768255,4.24264069,3.58627553,0.81016366,3.24381689,3.23501699,3.57746365,3.23454455
67.778746,3.87298335,3.60581092,0.516887244,3.24345106,3.23465299,3.59704938,3.23418046
67.789238,4.24264069,3.6273442,0.784408368,3.24308533,3.23428901,3.61863719,3.2338164
67.79973,3.46410162,3.65124667,-0.432602648,3.24271973,3.2339251,3.6425991,3.2334524
67.810221,3.16227766,3.67799405,-0.718133964,3.24235431,3.23356129,3.66941174,3.23308849
67.820713,4.24264069,3.70820304,0.731052425,3.241989,3.2331975,3.69969294,3.23272461
67.831204,3.74165739,3.74264374,-0.0314063322,3.24162386,3.23283381,3.73421417,3.23236082
67.841696,3.60555128,3.78229444,-0.420408333,3.24125882,3.23247014,3.77395538,3.23199706
67.852188,4,3.8283483,0.414308704,3.24089393,3.23210655,3.82011162,3.23163336
67.862679,3.16227766,3.88223993,-0.848505904,3.24052922,3.23174305,3.87411959,3.23126976
67.873171,2.82842712,3.94566677,-1.05699558,3.24016462,3.23137958,3.9376789,3.23090618
67.883662,3.74165739,4.02053057,-0.528084449,3.2398002,3.23101621,4.01269329,3.23054271
67.894154,4.79583152,4.10893313,0.828793337,3.23943589,3.23065287,4.10126624,3.23017926
67.904646,4.58257569,4.21304004,0.607894441,3.23907173,3.2302896,4.2055643,3.22981588
67.915137,4.79583152,4.33496816,0.678869181,3.23870775,3.22992643,4.32770429,3.2294526
67.925629,4.12310563,4.47666891,-0.594611875,3.23834389,3.22956329,4.46963648,3.22908935
67.93612,4.69041576,4.63966904,0.225270324,3.23798022,3.22920026,4.63288509,3.22872619
67.946612,4.79583152,4.82500577,-0.170804711,3.23761667,3.22883725,4.81848371,3.22836307
67.957104,4.35889894,5.03297478,-0.821021218,3.23725327,3.22847432,5.02672342,3.22800002
67.967595,5.74456265,5.26305606,0.693906756,3.23689006,3.22811149,5.25707905,3.22763707
67.978087,5.47722558,5.51392472,-0.191570211,3.23652697,3.2277487,5.50822061,3.22727415
67.988578,5.91607978,5.78327344,0.364426045,3.23616408,3.22738601,5.77783583,3.22691134
67.99907,6.78232998,6.06800956,0.84517479,3.23580131,3.22702335,6.06282783,3.22654855
68.009562,6.32455532,6.36409533,-0.198846691,3.2354387,3.22666077,6.3591553,3.22618584
68.020053,7.68114575,6.66661324,1.00724004,3.23507629,3.2262983,6.66189792,3.22582323
68.030545,8.1240384,6.9698066,1.0743518,3.23471401,3.22593586,6.96529685,3.22546066
68.041036,8.1240384,7.26677514,0.925885123,3.23435193,3.22557353,7.26245005,3.22509819
68.051528,8.06225775,7.54957513,0.716018587,3.23398999,3.22521123,7.54541234,3.22473576
68.06202,7.81024968,7.80895257,0.0360153548,3.23362821,3.22484902,7.80492828,3.2243734
68.072511,8.48528137,8.03458829,0.671336787,3.23326663,3.22448691,8.03067718,3.22401115
68.083003,8.42614977,8.21571615,0.458730446,3.23290519,3.22412484,8.21189137,3.22364894
68.093494,8.94427191,8.342083,0.776008318,3.23254396,3.22376287,8.33831621,3.22328683
68.103986,9.21954446,8.40562447,0.902175144,3.23218287,3.22340095,8.40188615,3.22292476
68.114478,8.94427191,8.40192338,0.736443162,3.23182196,3.22303911,8.39818336,3.22256276
68.124969,8.77496439,8.33121808,0.66614286,3.23146126,3.22267738,8.32744621,3.22220088
68.135461,8.18535277,8.19839714,-0.114211941,3.2311007,3.22231569,8.19456399,3.22183903
68.145952,7.93725393,8.01184278,-0.273109589,3.23074036,3.22195411,8.00792015,3.2214773
68.156444,8.30662386,7.78185646,0.72440831,3.23038016,3.22159257,7.77781761,3.2211156
68.166936,9,7.51924003,1.21686481,3.23002016,3.22123112,7.51505974,3.22075399
68.177427,8.54400375,7.23421544,1.14445983,3.22966037,3.22086978,7.22987001,3.22039248
68.187919,7.41619849,6.93581887,0.693094236,3.22930074,3.22050848,6.93128594,3.22003102
68.19841,6.78232998,6.63197551,0.387755688,3.22894133,3.22014729,6.62723426,3.21966967
68.208902,6,6.32935373,-0.573893486,3.22858208,3.21978616,6.32438504,3.21930836
68.219394,5.74456265,6.03369446,-0.537709783,3.22822302,3.2194251,6.02848142,3.21894713
68.229885,6.40312424,5.74981899,0.808273,3.22786419,3.21906416,5.74434757,3.21858602
68.240377,5.38516481,5.48159584,-0.31053347,3.22750553,3.21870326,5.47585554,3.21822495
68.250868,5.19615242,5.23213047,-0.189678809,3.2271471,3.21834249,5.22611518,3.21786399
68.26136,5,5.00354634,-0.0595511508,3.22678884,3.21798176,4.99725478,3.21750308
68.271852,5.29150262,4.79715015,0.703102033,3.22643078,3.21762111,4.79058628,3.21714226
68.282343,4.24264069,4.61337514,-0.60887967,3.22607297,3.21726059,4.60654803,3.21678154
68.292835,5.09901951,4.45180595,0.804495843,3.22571532,3.21690011,4.44472914,3.21642088
68.303326,4.47213595,4.31141115,0.400904983,3.22535793,3.21653975,4.30410182,3.21606033
68.313818,4.58257569,4.19057088,0.626102878,3.22500071,3.21617945,4.18304857,3.21569984
68.32431,3.60555128,4.08734873,-0.694116315,3.22464371,3.21581922,4.07963412,3.21533942
68.334801,3.87298335,3.99961696,-0.355856169,3.22428696,3.21545912,3.99173065,3.21497912
68.345293,3.60555128,3.92519374,-0.56536932,3.22393039,3.21509908,3.91715531,3.21461888
68.355784,4.35889894,3.86202225,0.704894813,3.22357408,3.21473915,3.85384961,3.21425875
68.366276,3.60555128,3.8081988,-0.450163884,3.22321797,3.21437928,3.7999078,3.21389868
68.376768,4.47213595,3.76206739,0.842655664,3.22286208,3.21401949,3.75367174,3.21353869
68.387259,3.74165739,3.72221641,0.13943089,3.22250645,3.21365983,3.71372777,3.21317882
68.397751,4,3.68746539,0.559047952,3.22215103,3.21330022,3.67889349,3.212819
68.408242,4.58257569,3.65686977,0.962136128,3.22179587,3.21294074,3.64822275,3.21245931
68.418734,3.46410162,3.62966515,-0.40689499,3.22144092,3.21258131,3.62094978,3.21209967
68.429226,4.24264069,3.60525714,0.798363044,3.22108621,3.21222197,3.59647908,3.21174012
68.439717,4.12310563,3.58318064,0.734795879,3.22073178,3.21186276,3.57434465,3.21138069
68.450209,3.74165739,3.56306721,0.422599313,3.22037757,3.21150361,3.55417734,3.21102131
68.4607,3.31662479,3.54463587,-0.477505056,3.22002363,3.21114458,3.53569561,3.21066206
68.471192,3.60555128,3.52765865,0.279092508,3.21966992,3.21078561,3.51867104,3.21030287
68.481684,3.46410162,3.51195833,-0.218761778,3.21931647,3.21042673,3.50292605,3.20994376
68.492175,3.74165739,3.49739124,0.494232888,3.21896331,3.21006799,3.48831668,3.20958479
68.502667,3.87298335,3.4838351,0.623817482,3.21861037,3.2097093,3.47472039,3.20922587
68.513158,2.82842712,3.47119227,-0.801726354,3.21825774,3.20935074,3.46203936,3.20886707
68.52365,3.31662479,3.45937488,-0.377822827,3.21790535,3.20899224,3.45018551,3.20850834
68.534142,3.46410162,3.44831018,0.125663979,3.21755323,3.20863383,3.43908595,3.20814969
68.544633,3.60555128,3.4379343,0.409410519,3.21720142,3.20827556,3.42867667,3.20779118
68.555125,3.31662479,3.4281879,-0.334010639,3.21684986,3.20791735,3.4188982,3.20743272
68.565616,2.64575131,3.41902166,-0.879357916,3.21649862,3.20755927,3.40970111,3.2070744
68.576108,3.16227766,3.41038791,-0.498106667,3.21614763,3.20720125,3.40103763,3.20671613
68.5866,3.74165739,3.40224617,0.582590091,3.21579694,3.20684333,3.39286718,3.20635796
68.597091,4,3.3945597,0.778100443,3.21544658,3.20648554,3.38515293,3.20599992
68.607583,3.74165739,3.38729306,0.59528508,3.21509649,3.20612782,3.37785935,3.20564195
68.618074,3.31662479,3.38041675,-0.252570702,3.21474674,3.20577023,3.37095689,3.2052841
68.628566,3.46410162,3.37390131,0.30033365,3.21439726,3.20541271,3.36441601,3.20492632
68.639058,3.74165739,3.36772173,0.611502783,3.2140481,3.20505529,3.35821163,3.20456863
68.649549,3,3.36185508,-0.60154391,3.21369929,3.204698,3.35232075,3.20421108
68.660041,4.24264069,3.35627873,0.941467982,3.21335078,3.20434078,3.34672071,3.20385359
68.670532,3.60555128,3.35097404,0.504556474,3.21300263,3.20398369,3.34139281,3.20349624
68.681024,3.74165739,3.34592191,0.629075093,3.21265478,3.20362667,3.3363179,3.20313895
68.691516,3,3.34110624,-0.584043012,3.21230727,3.20326976,3.33147982,3.20278176
68.702007,4.12310563,3.33651214,0.886901058,3.21196013,3.20291298,3.32686366,3.20242471
68.712499,2.23606798,3.33212464,-1.04692725,3.21161332,3.20255628,3.32245439,3.20206772
68.72299,3.60555128,3.32793157,0.526896298,3.2112669,3.20219971,3.31823982,3.20171087
68.733482,3.46410162,3.32392011,0.374408204,3.2109208,3.20184321,3.31420708,3.20135409
68.743974,2.44948974,3.32007957,-0.933054035,3.21057507,3.20148681,3.31034546,3.20099741
68.754465,3.16227766,3.31640002,-0.392584201,3.21022976,3.20113056,3.30664498,3.20064087
68.764957,3.74165739,3.31287121,0.654817669,3.20988478,3.20077438,3.30309538,3.20028439
68.775448,3.60555128,3.30948499,0.544119738,3.20954023,3.20041834,3.29968847,3.19992806
68.78594,3.87298335,3.3062325,0.752828561,3.20919604,3.20006237,3.29641537,3.19957179
68.796432,3.60555128,3.30310646,0.549949829,3.20885225,3.19970651,3.29326876,3.19921563
68.806923,3.46410162,3.30010005,0.404971073,3.2085089,3.19935079,3.2902418,3.19885961
68.817415,2.82842712,3.29720608,-0.68467434,3.20816594,3.19899514,3.28732729,3.19850366
68.827906,4.24264069,3.29441895,0.973766778,3.20782342,3.19863964,3.28451959,3.19814786
68.838398,4.12310563,3.29173239,0.911796708,3.20748131,3.19828422,3.28181242,3.19779212
68.84889,3.46410162,3.2891413,0.418282574,3.20713963,3.1979289,3.27920065,3.19743649
68.859381,3,3.28664091,-0.535388561,3.20679843,3.19757373,3.27667949,3.19708101
68.869873,3.16227766,3.28422605,-0.349211097,3.20645766,3.19721863,3.27424375,3.1967256
68.880364,2.64575131,3.28189279,-0.797584781,3.20611738,3.19686369,3.27188948,3.19637033
68.890856,3.16227766,3.27963659,-0.342576889,3.20577754,3.19650881,3.26961212,3.19601513
68.901348,3.46410162,3.2774538,0.432027566,3.20543818,3.19615405,3.267408,3.19566005
68.911839,3.31662479,3.27534101,0.203184097,3.20509934,3.19579944,3.26527371,3.19530511
68.922331,3.16227766,3.27329444,-0.333191799,3.20476097,3.19544491,3.26320541,3.19495025
68.932822,4,3.27131126,0.85363267,3.20442315,3.19509052,3.26120031,3.19459553
68.943314,2.64575131,3.26938812,-0.78970679,3.20408581,3.19473622,3.25925498,3.19424089
68.953806,3.31662479,3.26752239,0.221590624,3.203749,3.19438203,3.25736681,3.19388636
68.964297,3.16227766,3.26571156,-0.321611414,3.20341277,3.19402799,3.25553327,3.19353198
68.974789,4,3.26395281,0.857931929,3.20307706,3.19367403,3.2537515,3.19317768
68.98528,3.16227766,3.26224409,-0.316174687,3.20274195,3.19332022,3.25201946,3.19282352
68.995772,3,3.26058287,-0.510473186,3.20240739,3.19296649,3.25033459,3.19246945
69.006264,3.74165739,3.25896721,0.694759076,3.20207341,3.19261288,3.24869492,3.19211549
69.016755,2.82842712,3.25739528,-0.654956602,3.20174007,3.19225942,3.24709862,3.19176167
69.027247,4,3.25586489,0.862632664,3.20140732,3.19190605,3.24554348,3.19140794
69.037738,3.46410162,3.25437457,0.457959655,3.20107522,3.19155283,3.244028,3.19105436
69.04823,2.23606798,3.25292236,-1.00839198,3.20074374,3.19119969,3.24255022,3.19070086
69.058722,2.44948974,3.25150682,-0.895554063,3.20041293,3.19084667,3.24110866,3.19034748
69.069213,3.31662479,3.25012658,0.25787247,3.20008281,3.19049381,3.23970194,3.18999425
69.079705,3.87298335,3.24877995,0.790065439,3.19975336,3.19014103,3.23832835,3.1896411
69.090196,3.60555128,3.24746584,0.598402405,3.19942465,3.18978841,3.23698679,3.18928811
69.100688,4,3.24618272,0.868226516,3.19909663,3.18943588,3.23567569,3.1889352
69.11118,3,3.2449295,-0.49490353,3.19876935,3.18908346,3.23439396,3.18858241
69.121671,2.82842712,3.24370516,-0.644420698,3.19844286,3.18873121,3.23314055,3.18822977
69.132163,3.60555128,3.24250836,0.602530423,3.19811713,3.18837904,3.2319141,3.18787722
69.142654,2.64575131,3.2413383,-0.771742829,3.19779222,3.18802703,3.23071378,3.18752482
69.153146,4.12310563,3.24019377,0.939633892,3.1974681,3.18767511,3.22953836,3.18717251
69.163638,3.31662479,3.23907395,0.278479516,3.19714482,3.18732331,3.228387,3.18682032
69.174129,4.12310563,3.23797804,0.940812193,3.19682244,3.18697167,3.22725889,3.18646828
69.184621,3.46410162,3.236905,0.476651459,3.19650091,3.18662013,3.22615293,3.18611634
69.195112,3.31662479,3.23585422,0.28420163,3.19618032,3.18626874,3.22506852,3.18576455
69.205604,3.60555128,3.23482475,0.608873164,3.19586063,3.18591745,3.22400466,3.18541285
69.216096,3.31662479,3.23381594,0.287765274,3.1955419,3.18556628,3.22296069,3.18506128
69.226587,3.46410162,3.2328272,0.480909984,3.19522419,3.18521527,3.22193599,3.18470986
69.237079,3,3.23185769,-0.481516034,3.19490747,3.18486436,3.22092967,3.18435853
69.24757,3.46410162,3.23090696,0.482902324,3.19459181,3.18451361,3.21994128,3.18400736
69.258062,2.82842712,3.22997423,-0.633677447,3.1942772,3.18416295,3.21896998,3.18365629
69.268554,2.64575131,3.22905903,-0.763745846,3.19396368,3.18381242,3.21801529,3.18330534
69.279045,2.82842712,3.22816089,-0.632245023,3.19365134,3.18346206,3.2170767,3.18295455
69.289537,2,3.22727914,-1.10782631,3.19334013,3.18311179,3.2161535,3.18260385
69.300028,3.74165739,3.22641345,0.717804945,3.19303016,3.18276168,3.21524533,3.18225331
69.31052,4.24264069,3.22556318,1.00850261,3.19272139,3.18241168,3.21435151,3.18190287
69.321012,2.23606798,3.22472798,-0.994313836,3.1924139,3.1820618,3.21347166,3.18155256
69.331503,4,3.22390751,0.88096112,3.19210777,3.18171209,3.21260538,3.18120241
69.341995,3.16227766,3.22310119,-0.246624274,3.19180296,3.18136248,3.21175207,3.18085235
69.352486,3.87298335,3.22230882,0.806643992,3.19149958,3.18101303,3.21091146,3.18050246
69.362978,4,3.22152986,0.882309547,3.19119762,3.18066369,3.210083,3.18015266
69.37347,3,3.22076406,-0.469855366,3.19089715,3.18031447,3.20926637,3.179803
69.383961,3.60555128,3.22001117,0.620918762,3.19059825,3.17996543,3.20846126,3.1794535
69.394453,4,3.21927072,0.883588866,3.19030093,3.17961648,3.20766717,3.17910409
69.404944,4.12310563,3.21854256,0.951085203,3.19000527,3.17926771,3.20688389,3.17875486
69.415436,3.31662479,3.21782629,0.31432229,3.18971129,3.17891904,3.20611096,3.17840572
69.425928,3.16227766,3.2171217,-0.234188054,3.18941908,3.1785705,3.20534812,3.17805671
69.436419,3.31662479,3.21642863,0.316537771,3.18912871,3.17822213,3.20459513,3.17770787
69.446911,3.74165739,3.2157467,0.725196998,3.1888402,3.17787387,3.20385156,3.17735914
69.457402,3.87298335,3.21507583,0.811114983,3.18855368,3.17752578,3.20311727,3.17701056
69.467894,2.64575131,3.21441569,-0.754098387,3.18826915,3.17717779,3.20239183,3.17666209
69.478386,3.46410162,3.21376615,0.500335356,3.18798673,3.17682994,3.20167507,3.17631376
69.488877,3.60555128,3.21312709,0.626437694,3.1877065,3.17648226,3.20096678,3.17596559
69.499369,3.46410162,3.21249824,0.501600815,3.1874285,3.17613469,3.2002666,3.17561753
69.50986,3.31662479,3.21187955,0.323643687,3.18715288,3.17578729,3.19957442,3.17526964
69.520352,4,3.21127079,0.888104281,3.18687965,3.17544,3.19888988,3.17492185
69.530844,3.60555128,3.21067187,0.628394309,3.18660895,3.17509285,3.19821283,3.1745742
69.541335,3.31662479,3.21008274,0.326407794,3.1863409,3.17474587,3.19754312,3.17422672
69.551827,3.31662479,3.2095032,0.327294352,3.18607555,3.174399,3.19688042,3.17387934
69.562318,3.74165739,3.20893326,0.729879531,3.18581306,3.17405231,3.19622467,3.17353213
69.57281,3.87298335,3.20837274,0.815236535,3.1855535,3.17370573,3.19557554,3.17318504
69.583302,3.74165739,3.20782163,0.730640647,3.18529701,3.17335929,3.19493292,3.17283808
69.593793,3.74165739,3.20727994,0.731011248,3.18504373,3.17301302,3.1942967,3.17249129
69.604285,3.31662479,3.20674753,0.331477397,3.18479377,3.17266687,3.19366657,3.17214461
69.614776,3,3.20622446,-0.454119438,3.1845473,3.17232089,3.19304251,3.17179811
69.625268,3.87298335,3.20571065,0.816867615,3.18430443,3.17197503,3.19242422,3.17145171
69.63576,2.82842712,3.20520612,-0.613823263,3.18406534,3.17162931,3.19181162,3.17110546
69.646251,4.35889894,3.20471096,1.07433141,3.18383021,3.17128377,3.19120462,3.17075938
69.656743,4.12310563,3.2042251,0.958582561,3.18359918,3.17093835,3.19060295,3.17041341
69.667234,2.64575131,3.20374867,-0.74699221,3.18337247,3.1705931,3.1900066,3.17006762
69.677726,2.82842712,3.20328165,-0.612253648,3.18315024,3.17024797,3.18941531,3.16972194
69.688218,3.46410162,3.20282417,0.511153058,3.18293272,3.16990298,3.18882902,3.1693764
69.698709,3.87298335,3.20237634,0.818905979,3.18272015,3.16955818,3.18824766,3.16903104
69.709201,3.87298335,3.20193821,0.819173445,3.18251272,3.16921349,3.18767098,3.16868579
69.719692,2.64575131,3.20150998,-0.745492236,3.18231071,3.16886898,3.18709899,3.16834072
69.730184,3.16227766,3.20109173,-0.197012856,3.18211435,3.1685246,3.18653146,3.16799577
69.740676,2.23606798,3.20068364,-0.982148495,3.18192393,3.16818036,3.18596834,3.16765096
69.751167,3.60555128,3.20028596,0.636604518,3.18173977,3.1678363,3.18540958,3.16730632
69.761659,4,3.19989882,0.894483752,3.18156215,3.16749236,3.18485495,3.16696181
69.77215,2.82842712,3.19952251,-0.609175992,3.18139143,3.16714861,3.18430448,3.16661747
69.782642,4.35889894,3.19915724,1.07691304,3.18122793,3.16680497,3.18375796,3.16627325
69.793134,3.87298335,3.19880331,0.821084672,3.18107206,3.16646149,3.18321534,3.16592918
69.803625,3.60555128,3.19846107,0.638036212,3.18092422,3.16611819,3.1826766,3.16558529
69.814117,3.60555128,3.19813079,0.638294981,3.18078482,3.16577502,3.18214153,3.16524151
69.824608,3.60555128,3.19781292,0.638543936,3.18065435,3.16543203,3.18161015,3.16489792
69.8351,4,3.19750778,0.895819298,3.18053327,3.16508916,3.18108229,3.16455445
69.845592,3.74165739,3.19721587,0.737862803,3.18042211,3.16474644,3.1805579,3.16421113
69.856083,3.31662479,3.19693768,0.345958251,3.18032145,3.16440391,3.18003697,3.16386799
69.866575,2.64575131,3.19667368,-0.742241448,3.18023187,3.16406151,3.17951931,3.16352497
69.877066,3,3.19642449,-0.443198022,3.18015402,3.1637193,3.17900495,3.16318213
69.887558,3.16227766,3.19619067,-0.184154849,3.18008858,3.1633772,3.17849373,3.16283941
69.89805,3.74165739,3.19597291,0.738704591,3.18003629,3.16303527,3.17798562,3.16249685
69.908541,3.60555128,3.19577196,0.640140075,3.17999794,3.16269352,3.17748061,3.16215447
69.919033,3.16227766,3.19558855,-0.182512701,3.17997438,3.1623519,3.17697853,3.16181222
69.929524,3.31662479,3.19542355,0.348139683,3.17996651,3.16201048,3.17647941,3.16147015
69.940016,3.46410162,3.19527785,0.518482172,3.17997531,3.16166917,3.1759831,3.1611282
69.950508,3.74165739,3.19515245,0.739259723,3.18000182,3.16132803,3.17548959,3.16078641
69.960999,3.60555128,3.19504841,0.640704975,3.18004717,3.16098708,3.17499886,3.16044481
69.971491,2.82842712,3.19496686,-0.605425254,3.18011257,3.16064625,3.17451077,3.16010333
69.981982,3.16227766,3.19490906,-0.180641623,3.1801993,3.16030562,3.17402535,3.15976204
69.992474,2.82842712,3.19487631,-0.605350464,3.18030876,3.15996512,3.17354246,3.15942087
70.002966,2.64575131,3.19487006,-0.741025472,3.18044243,3.15962478,3.17306209,3.15907986
70.013457,4.12310563,3.19489185,0.963438515,3.1806019,3.15928463,3.17258424,3.15873904
70.023949,2.64575131,3.19494335,-0.741074919,3.18078892,3.15894461,3.17210877,3.15839835
70.03444,3.60555128,3.19502632,0.640722216,3.18100527,3.15860479,3.17163571,3.15805784
70.044932,3.46410162,3.19514269,0.518612498,3.18125298,3.1582651,3.17116494,3.15771747
70.055424,3.16227766,3.19529452,-0.181705414,3.18153412,3.15792557,3.17069645,3.15737725
70.065915,3.60555128,3.19548398,0.640364974,3.18185091,3.15758624,3.17023025,3.15703723
70.076407,2.82842712,3.19571345,-0.606041522,3.18220582,3.15724704,3.1697662,3.15669733
70.086898,4,3.19598541,0.896668605,3.18260133,3.15690804,3.16930435,3.15635763
70.09739,3.46410162,3.19630259,0.517493022,3.18304025,3.15656917,3.16884457,3.15601805
70.107882,3.74165739,3.1966678,0.738234101,3.18352544,3.15623047,3.16838687,3.15567864
70.118373,4.12310563,3.19708402,0.962300161,3.1840599,3.15589197,3.16793125,3.15533942
70.128865,3.16227766,3.19755454,-0.187821391,3.18464698,3.1555536,3.16747759,3.15500033
70.139356,2.44948974,3.1980826,-0.865212611,3.18528998,3.15521543,3.16702594,3.15466144
70.149848,3.16227766,3.19867186,-0.190772637,3.18599258,3.1548774,3.16657617,3.15432268
70.16034,3.74165739,3.19932593,0.736431569,3.18675846,3.15453953,3.16612829,3.15398408
70.170831,3.60555128,3.20004856,0.636790949,3.18759139,3.15420187,3.16568233,3.15364568
70.181323,3,3.20084381,-0.448156006,3.18849549,3.15386434,3.16523814,3.15330741
70.191814,4.24264069,3.20171549,1.02025742,3.1894746,3.15352701,3.1647958,3.15296933
70.202306,3.60555128,3.20266778,0.634731038,3.19053295,3.15318982,3.16435519,3.15263139
70.212798,3.87298335,3.20370454,0.81809462,3.19167443,3.1528528,3.16391631,3.15229362
70.223289,3.46410162,3.20482943,0.509187766,3.19290275,3.15251599,3.16347918,3.15195604
70.233781,3.74165739,3.2060462,0.731854621,3.19422168,3.15217931,3.16304368,3.1516186
70.244272,2.44948974,3.20735771,-0.870556126,3.19563411,3.15184284,3.16260988,3.15128136
70.254764,3.31662479,3.20876671,0.328417538,3.19714284,3.15150651,3.16217766,3.15094426
70.265256,3,3.21027476,-0.458557255,3.19874944,3.15117035,3.16174705,3.15060732
70.275747,3.60555128,3.21188226,0.627430486,3.20045434,3.1508344,3.16131804,3.15027058
70.286239,2.82842712,3.21358868,-0.62061385,3.20225702,3.15049858,3.16089054,3.14993398
70.29673,4,3.21539103,0.885781558,3.20415449,3.15016298,3.1604646,3.14959758
70.307222,3.31662479,3.2172848,0.315182474,3.20614226,3.14982751,3.16004013,3.14926132
70.317714,2.64575131,3.21926226,-0.757305054,3.20821258,3.14949222,3.15961713,3.14892523
70.328205,3.87298335,3.22131247,0.807261342,3.21035449,3.14915714,3.15919562,3.14858934
70.338697,3.87298335,3.22342142,0.805954044,3.21255396,3.1488222,3.15877551,3.14825359
70.349188,2.82842712,3.22557017,-0.630192867,3.21479199,3.14848747,3.15835685,3.14791804
70.35968,3,3.22773607,-0.477217008,3.21704589,3.14815289,3.15793954,3.14758263
70.370172,3,3.22989112,-0.47946962,3.21928758,3.14781848,3.1575236,3.1472474
70.380663,3.46410162,3.23200254,0.481766616,3.2214842,3.14748428,3.15710905,3.14691236
70.391155,2.44948974,3.23403372,-0.885744874,3.22359906,3.14715023,3.15669579,3.14657747
70.401646,3.74165739,3.23594341,0.711135692,3.22559078,3.14681639,3.15628388,3.14624279
70.412138,4.12310563,3.23768836,0.940966133,3.22741602,3.14648269,3.15587323,3.14590825
70.42263,3.16227766,3.2392235,-0.277391126,3.22902959,3.14614918,3.15546386,3.14557388
70.433121,2.64575131,3.24050446,-0.771202403,3.23038703,3.14581587,3.15505579,3.14523972
70.443613,3.87298335,3.24149009,0.794665502,3.2314471,3.14548272,3.15464892,3.1449057
70.454104,3.16227766,3.24214393,-0.282606203,3.23217325,3.14514977,3.15424332,3.14457189
70.464596,3.46410162,3.24243724,0.470812462,3.23253671,3.14481698,3.1538389,3.14423822
70.475088,2.64575131,3.24235036,-0.772398247,3.2325178,3.14448437,3.15343567,3.14390473
70.485579,4.12310563,3.24187442,0.938739155,3.23210764,3.14415197,3.15303366,3.14357145
70.496071,3.60555128,3.24101171,0.60377112,3.23130858,3.14381972,3.15263279,3.14323831
70.506562,3.87298335,3.23977584,0.795743369,3.2301343,3.14348768,3.15223311,3.14290538
70.517054,3.87298335,3.23819021,0.796739066,3.22860831,3.1431558,3.15183453,3.1425726
70.527546,2.64575131,3.23628707,-0.768463245,3.22676299,3.1428241,3.15143708,3.14224
70.538037,4.24264069,3.23410526,1.00425865,3.2246373,3.14249262,3.15104078,3.1419076
70.548529,3.46410162,3.23168713,0.482093854,3.22227376,3.14216129,3.15064555,3.14157536
70.55902,4.47213595,3.22907779,1.11492518,3.21971761,3.14183018,3.15025146,3.14124332
70.569512,3,3.22632118,-0.475732255,3.21701295,3.14149922,3.1498584,3.14091144
70.580004,4,3.22346005,0.881215044,3.21420267,3.14116845,3.14946642,3.14057973
70.590495,4.12310563,3.22053393,0.950037733,3.21132642,3.14083789,3.14907554,3.14024824
70.600987,3.31662479,3.2175774,0.314717948,3.20841889,3.14050749,3.14868567,3.1399169
70.611478,3.16227766,3.21462153,-0.22878782,3.20551124,3.14017731,3.14829688,3.13958576
70.62197,3.60555128,3.21169148,0.627582504,3.20262872,3.13984729,3.14790909,3.13925478
70.632462,2.64575131,3.20880862,-0.75037145,3.19979277,3.13951745,3.14752232,3.13892399
70.642953,3.46410162,3.20598997,0.508046892,3.19702044,3.13918784,3.14713661,3.1385934
70.653445,3.16227766,3.20324777,-0.202410755,3.19432403,3.13885838,3.14675187,3.13826297
70.663936,3.60555128,3.2005919,0.636364186,3.19171343,3.13852914,3.14636817,3.13793276
70.674428,3.87298335,3.19802821,0.821556533,3.18919453,3.13820006,3.14598543,3.13760269
70.68492,2.82842712,3.19556086,-0.605915618,3.1867715,3.13787117,3.14560368,3.13727281
70.695411,2.82842712,3.19319194,-0.603957626,3.18444642,3.1375425,3.14522295,3.13694315
70.705903,3.87298335,3.19092121,0.82587053,3.18221907,3.137214,3.14484317,3.13661364
70.716394,3.31662479,3.18874807,0.357598547,3.18008883,3.13688571,3.14446439,3.13628435
70.726886,4.24264069,3.18667005,1.02760432,3.17805324,3.13655759,3.14408655,3.13595521
70.737378,3.87298335,3.18468461,0.829637714,3.17610974,3.13622966,3.14370968,3.13562626
70.747869,3.60555128,3.18278863,0.650202,3.1742552,3.13590195,3.14333382,3.13529752
70.758361,4.58257569,3.18097812,1.18389086,3.17248562,3.13557441,3.14295888,3.13496895
70.768852,4.12310563,3.17924956,0.971522552,3.17079747,3.13524709,3.14258493,3.13464059
70.779344,3.60555128,3.17759864,0.654180887,3.16918644,3.13491993,3.14221192,3.13431239
70.789836,4,3.17602155,0.907732589,3.16764868,3.13459297,3.14183986,3.13398437
70.800327,3.87298335,3.17451445,0.835744518,3.16618035,3.13426623,3.14146881,3.13365658
70.810819,3.16227766,3.17307317,-0.103901437,3.16477727,3.13393966,3.14109868,3.13332894
70.82131,3.74165739,3.17169422,0.754959049,3.16343592,3.13361332,3.14072956,3.13300153
70.831802,2.82842712,3.17037371,-0.584761989,3.16215241,3.13328714,3.14036137,3.13267427
70.842294,3.46410162,3.16910829,0.543132876,3.16092337,3.13296116,3.13999415,3.13234721
70.852785,3,3.16789478,-0.409749659,3.1597456,3.1326354,3.13962795,3.13202036
70.863277,3.31662479,3.16672981,0.387162737,3.15861571,3.13230981,3.1392627,3.13169368
70.873768,3,3.16561062,-0.406952848,3.15753093,3.13198446,3.13889848,3.13136722
70.88426,2.23606798,3.16453422,-0.96356953,3.15648826,3.13165927,3.13853523,3.13104092
70.894752,4,3.16349808,0.914604791,3.15548514,3.13133427,3.13817299,3.13071481
70.905243,3.16227766,3.16249983,-0.0149052991,3.15451918,3.13100951,3.13781181,3.13038893
70.915735,3.16227766,3.16153697,0.027215621,3.15358787,3.13068492,3.13745164,3.1300632
70.926226,3.16227766,3.16060753,0.0408672528,3.15268921,3.13036056,3.13709255,3.12973771
70.936718,3.46410162,3.15970931,0.551717599,3.15182098,3.13003637,3.1367345,3.12941237
70.94721,3.16227766,3.15884051,0.0586271915,3.15098136,3.12971238,3.13637754,3.12908723
70.957701,3.31662479,3.15799947,0.398277938,3.15016865,3.12938862,3.13602172,3.12876231
70.968193,2.82842712,3.1571844,-0.573373589,3.14938104,3.12906503,3.13566701,3.12843756
70.978684,3.31662479,3.15639392,0.400288482,3.14861712,3.12874168,3.13531349,3.12811304
70.989176,3.31662479,3.15562648,0.401245944,3.14787532,3.1284185,3.13496112,3.12778868
70.999668,3.74165739,3.15488085,0.766013405,3.14715435,3.12809552,3.13460997,3.12746452
71.010159,3.46410162,3.15415588,0.556727705,3.14645303,3.12777278,3.13426012,3.12714058
71.020651,3,3.1534503,-0.391727328,3.14577006,3.12745021,3.13391153,3.12681681
71.031142,2.64575131,3.15276321,-0.712047681,3.14510447,3.12712787,3.13356431,3.12649327
71.041634,4.35889894,3.15209352,1.09854696,3.14445514,3.12680571,3.13321845,3.12616989
71.052126,3.60555128,3.1514404,0.673877494,3.14382118,3.12648376,3.13287403,3.12584671
71.062617,3.74165739,3.15080309,0.768670471,3.14320176,3.12616204,3.13253114,3.12552377
71.073109,2.64575131,3.15018073,-0.710231946,3.14259595,3.1258405,3.13218979,3.12520099
71.0836,2.64575131,3.14957273,-0.709803789,3.1420031,3.12551919,3.13185012,3.12487844
71.094092,2.82842712,3.14897835,-0.566172436,3.14142239,3.12519806,3.13151213,3.12455606
71.104584,3.87298335,3.14839708,0.851226331,3.14085319,3.12487714,3.13117596,3.12423387
71.115075,3,3.14782845,-0.38448465,3.14029494,3.12455646,3.13084173,3.12391192
71.125567,4.24264069,3.14727188,1.04659869,3.13974696,3.12423595,3.13050951,3.12359014
71.136058,3.16227766,3.14672706,0.124702033,3.13920881,3.12391569,3.13017947,3.1232686
71.14655,4,3.14619354,0.924016481,3.13867986,3.1235956,3.12985171,3.12294722
71.157042,3.87298335,3.14567106,0.852826058,3.13815971,3.12327572,3.12952643,3.12262604
71.167533,3,3.14515942,-0.380997924,3.13764794,3.12295608,3.12920385,3.1223051
71.178025,3.87298335,3.14465833,0.8534196,3.13714405,3.12263663,3.12888415,3.12198433
71.188516,3.60555128,3.14416779,0.679252155,3.13664775,3.12231741,3.12856766,3.12166379
71.199008,2.23606798,3.14368765,-0.952690756,3.13615856,3.12199838,3.12825467,3.12134343
71.2095,3.87298335,3.14321806,0.854263008,3.13567618,3.12167956,3.12794563,3.12102327
71.219991,2.82842712,3.14275924,-0.56065329,3.13520036,3.12136098,3.12764108,3.12070334
71.230483,3.74165739,3.14231145,0.774174357,3.13473067,3.12104258,3.12734162,3.12038359
71.240974,2.44948974,3.14187534,-0.832097106,3.13426693,3.12072442,3.12704815,3.12006407
71.251466,3.60555128,3.1414516,0.681248613,3.13380878,3.12040645,3.12676168,3.11974473
71.261958,3.60555128,3.1410414,0.681549614,3.13335601,3.1200887,3.12648361,3.11942559
71.272449,3.31662479,3.14064625,0.419497961,3.13290843,3.11977118,3.12621569,3.11910669
71.282941,3,3.14026804,-0.374523756,3.13246571,3.11945386,3.12596008,3.11878797
71.293432,3.16227766,3.13990937,0.149560314,3.13202773,3.11913677,3.12571956,3.11846948
71.303924,3.16227766,3.13957335,0.15067949,3.1315942,3.11881988,3.12549749,3.11815117
71.314416,3.16227766,3.13926395,0.151702701,3.13116499,3.1185032,3.12529804,3.11783307
71.324907,2.23606798,3.13898596,-0.950219965,3.13073993,3.11818676,3.12512619,3.1175152
71.335399,3.60555128,3.13874497,0.683232252,3.1303188,3.11787051,3.12498773,3.11719751
71.34589,4.35889894,3.13854754,1.10469516,3.12990149,3.11755451,3.12488941,3.11688006
71.356382,2.82842712,3.138401,-0.556752976,3.12948779,3.1172387,3.12483875,3.11656279
71.366874,3.74165739,3.13831344,0.776752181,3.12907758,3.11692311,3.124844,3.11624573
71.377365,3.46410162,3.1382934,0.570796127,3.12867077,3.11660776,3.12491387,3.11592891
71.387857,3.74165739,3.13834961,0.776728895,3.12826715,3.11629261,3.12505727,3.11561227
71.398348,3.74165739,3.13849056,0.776638156,3.12786667,3.1159777,3.12528283,3.11529587
71.40884,3.46410162,3.13872404,0.570418776,3.12746914,3.11566298,3.1255985,3.11497965
71.419332,3.31662479,3.13905645,0.421388585,3.12707449,3.11534849,3.1260108,3.11466364
71.429823,3.46410162,3.13949221,0.569745039,3.12668264,3.11503424,3.12652427,3.11434787
71.440315,2.64575131,3.14003314,-0.703051795,3.12629342,3.11472018,3.12714084,3.11403228
71.450806,2.82842712,3.14067747,-0.558793649,3.12590681,3.11440638,3.12785882,3.11371694
71.461298,3,3.14141942,-0.376057734,3.12552265,3.11409277,3.1286725,3.11340178
71.47179,3,3.14224797,-0.377157746,3.12514089,3.11377938,3.12957088,3.11308683
71.482281,3.87298335,3.143146,0.854305181,3.12476147,3.11346625,3.13053687,3.11277212
71.492773,3.46410162,3.14408956,0.565696078,3.12438424,3.1131533,3.13154649,3.1124576
71.503264,3.31662479,3.14504603,0.414220668,3.12400922,3.11284061,3.13256706,3.11214332
71.513756,3.87298335,3.14597386,0.852648511,3.12363624,3.11252812,3.13355695,3.11182923
71.524248,2.23606798,3.14682171,-0.954334185,3.12326528,3.11221585,3.13446469,3.11151535
71.534739,3.16227766,3.14753011,0.121439482,3.12289631,3.11190383,3.13523064,3.11120171
71.545231,2.23606798,3.14803571,-0.954970014,3.12252919,3.11159201,3.13579128,3.11088826
71.555722,2.82842712,3.14827805,-0.565553648,3.12216394,3.11128045,3.13608599,3.11057506
71.566214,3.74165739,3.14820958,0.770355638,3.12180044,3.11096908,3.1360671,3.11026204
71.576706,3.46410162,3.14780465,0.562402852,3.12143865,3.11065794,3.13570894,3.10994924
71.587197,4.12310563,3.14706541,0.987947475,3.12107856,3.11034705,3.13501373,3.10963668
71.597689,3.46410162,3.14602095,0.563986402,3.12072006,3.11003637,3.13401074,3.10932431
71.60818,3.46410162,3.14472143,0.565137316,3.12036316,3.10972594,3.13275036,3.10901219
71.618672,3,3.14322776,-0.378454432,3.12000776,3.10941571,3.1312938,3.10870026
71.629164,3,3.14160309,-0.376301862,3.11965384,3.10910571,3.12970451,3.10838854
71.639655,3,3.13990578,-0.374039809,3.11930139,3.10879596,3.12804108,3.10807707
71.650147,3.31662479,3.13818522,0.422421085,3.11895031,3.10848642,3.12635316,3.1077658
71.660638,4.35889894,3.13648192,1.1056297,3.11860062,3.10817714,3.12468144,3.10745477
71.67113,3.60555128,3.1348266,0.68609378,3.11825223,3.10786806,3.1230568,3.10714393
71.681622,3.31662479,3.13324238,0.428231727,3.11790513,3.1075592,3.12150246,3.10683331
71.692113,4.47213595,3.13174538,1.15775238,3.11755932,3.10725061,3.12003464,3.10652294
71.702605,3.87298335,3.13034542,0.861764425,3.1172147,3.10694223,3.11866323,3.10621276
71.713096,3.46410162,3.12904793,0.578838224,3.11687131,3.1066341,3.1173937,3.10590283
71.723588,2.44948974,3.12785369,-0.823628524,3.11652905,3.10632617,3.11622688,3.10559309
71.73408,3.31662479,3.12676056,0.435734133,3.11618792,3.10601848,3.11516063,3.10528357
71.744571,3,3.12576374,-0.354631841,3.11584793,3.10571106,3.11419016,3.10497431
71.755063,3.60555128,3.12485628,0.69332171,3.115509,3.10540383,3.11330852,3.10466524
71.765554,3.31662479,3.12403032,0.438855861,3.11517115,3.10509687,3.11250784,3.10435641
71.776046,3.31662479,3.12327701,0.43971329,3.1148343,3.10479012,3.11177927,3.10404779
71.786538,3,3.12258755,-0.350125056,3.11449846,3.1044836,3.11111399,3.10373938
71.797029,3.87298335,3.12195335,0.866619869,3.11416363,3.10417735,3.1105034,3.10343123
71.807521,2.64575131,3.12136613,-0.689648331,3.11382974,3.1038713,3.10993922,3.10312328
71.818012,3,3.1208186,-0.347589695,3.11349683,3.10356552,3.10941413,3.10281557
71.828504,3.31662479,3.12030405,0.443080968,3.1131648,3.10325994,3.10892145,3.10250806
71.838996,3,3.11981683,-0.346145673,3.11283368,3.10295461,3.1084555,3.10220078
71.849487,3.16227766,3.11935213,0.207184767,3.11250347,3.10264954,3.10801149,3.10189375
71.859979,3,3.11890583,-0.344827254,3.1121741,3.10234467,3.10758529,3.10158692
71.87047,3.60555128,3.11847471,0.697908709,3.11184561,3.10204008,3.10717367,3.10128034
71.880962,3.16227766,3.118056,0.210289472,3.11151792,3.1017357,3.1067739,3.10097396
71.891454,4.12310563,3.1176476,1.0027253,3.11119105,3.10143155,3.10638388,3.1006678
71.901945,4.35889894,3.11724787,1.11429398,3.11086501,3.10112768,3.10600196,3.1003619
71.912437,3.46410162,3.11685539,0.589276016,3.11053973,3.10082401,3.10562675,3.1000562
71.922928,2,3.11646919,-1.05663106,3.11021525,3.10052062,3.10525728,3.09975076
71.93342,3.16227766,3.11608837,0.214916944,3.10989149,3.10021744,3.10489266,3.09944551
71.943912,4.24264069,3.11571231,1.06156883,3.10956848,3.0999145,3.10453229,3.0991405
71.954403,3.74165739,3.11534053,0.791401833,3.10924624,3.09961183,3.1041757,3.09883573
71.964895,3.87298335,3.11497253,0.870638166,3.10892468,3.09930937,3.1038224,3.09853117
71.975386,3,3.11460804,-0.3385381,3.10860386,3.09900719,3.10347213,3.09822687
71.985878,3.46410162,3.11424671,0.591485335,3.1082837,3.09870522,3.10312455,3.09792277
71.99637,4.24264069,3.11388833,1.06242758,3.10796423,3.09840349,3.10277945,3.0976189
72.006861,3.16227766,3.11353272,0.220782574,3.10764546,3.09810204,3.10243668,3.09731528
72.017353,2.64575131,3.11317962,-0.683687292,3.10732733,3.0978008,3.10209599,3.09701187
72.027844,3.31662479,3.11282896,0.451437511,3.10700987,3.09749983,3.1017573,3.09670872
72.038336,3.60555128,3.11248052,0.702189968,3.10669303,3.09719909,3.10142041,3.09640577
72.048828,3.16227766,3.11213421,0.223927321,3.10637683,3.09689859,3.10108524,3.09610305
72.059319,3,3.11178995,-0.334350045,3.10606127,3.09659836,3.10075172,3.09580059
72.069811,2.44948974,3.11144757,-0.813607906,3.10574631,3.09629835,3.10041968,3.09549833
72.080302,4.24264069,3.11110703,1.06373571,3.10543198,3.09599862,3.10008911,3.09519634
72.090794,2.64575131,3.1107682,-0.681921467,3.10511821,3.0956991,3.09975986,3.09489454
72.101286,2.64575131,3.11043102,-0.681674193,3.10480504,3.09539984,3.0994319,3.09459299
72.111777,4.12310563,3.11009545,1.00648407,3.10449248,3.09510085,3.09910519,3.09429169
72.122269,3.16227766,3.10976137,0.229164339,3.10418047,3.09480208,3.09877961,3.0939906
72.13276,2,3.10942877,-1.05329425,3.10386905,3.09450359,3.09845517,3.09368977
72.143252,3.46410162,3.10909754,0.595822181,3.10355817,3.09420532,3.09813177,3.09338914
72.153744,3.87298335,3.10876767,0.874194304,3.10324783,3.09390731,3.09780938,3.09308875
72.164235,3.87298335,3.10843912,0.874382197,3.10293808,3.09360957,3.09748799,3.09278863
72.174727,4.12310563,3.1081118,1.00746902,3.10262883,3.09331205,3.09716752,3.09248871
72.185218,2.64575131,3.10778573,-0.679731137,3.10232015,3.09301481,3.09684798,3.09218905
72.19571,3.31662479,3.10746081,0.45734449,3.10201197,3.0927178,3.09652928,3.0918896
72.206202,3.31662479,3.10713703,0.457698329,3.10170432,3.09242104,3.09621143,3.09159039
72.216693,3.46410162,3.10681439,0.597735076,3.1013972,3.09212456,3.09589442,3.09129144
72.227185,3.60555128,3.10649281,0.706440702,3.10109058,3.0918283,3.09557818,3.0909927
72.237676,2.64575131,3.10617231,-0.678543291,3.10078448,3.09153233,3.09526274,3.09069422
72.248168,2.82842712,3.10585281,-0.526712142,3.10047886,3.09123658,3.09494801,3.09039595
72.25866,2.82842712,3.1055343,-0.526409707,3.10017374,3.09094109,3.09463401,3.09009793
72.269151,3.31662479,3.10521681,0.459791231,3.09986913,3.09064588,3.09432075,3.08980016
72.279643,4.12310563,3.10490025,1.00906163,3.09956499,3.0903509,3.09400816,3.08950261
72.290134,2.23606798,3.10458466,-0.931942423,3.09926135,3.09005621,3.09369628,3.08920532
72.300626,2.64575131,3.10426995,-0.677140046,3.09895816,3.08976174,3.09338503,3.08890824
72.311118,3.46410162,3.10395615,0.600121207,3.09865545,3.08946752,3.09307443,3.08861141
72.321609,2.44948974,3.10364327,-0.808797579,3.09835324,3.0891736,3.09276451,3.08831484
72.332101,3.31662479,3.10333122,0.461837166,3.09805146,3.0888799,3.09245518,3.08801848
72.342592,2.44948974,3.10302006,-0.808412222,3.09775017,3.08858649,3.0921465,3.08772239
72.353084,3.60555128,3.10270972,0.709113219,3.09744931,3.08829331,3.0918384,3.08742651
72.363576,3.16227766,3.1024002,0.244698704,3.09714891,3.08800039,3.09153089,3.08713087
72.374067,2.44948974,3.10209154,-0.807837728,3.09684898,3.08770776,3.09122401,3.0868355
72.384559,4.35889894,3.10178365,1.12121153,3.09654947,3.08741536,3.09091769,3.08654034
72.39505,2.44948974,3.10147659,-0.807457024,3.09625044,3.08712325,3.09061197,3.08624545
72.405542,3,3.10117029,-0.318072768,3.09595181,3.08683137,3.09030679,3.08595078
72.416034,3.16227766,3.10086476,0.247816259,3.09565363,3.08653975,3.09000218,3.08565635
72.426525,3.60555128,3.10056004,0.710627355,3.09535591,3.08624842,3.08969815,3.08536219
72.437017,3.74165739,3.10025605,0.800875359,3.09505859,3.08595733,3.08939466,3.08506824
72.447508,3,3.09995284,-0.316153191,3.09476172,3.08566652,3.08909174,3.08477456
72.458,3.31662479,3.09965035,0.465805149,3.09446525,3.08537596,3.08878934,3.0844811
72.468492,3.60555128,3.09934861,0.71147921,3.09416921,3.08508565,3.08848749,3.08418788
72.478983,3.74165739,3.09904763,0.801629439,3.09387361,3.08479564,3.0881862,3.08389493
72.489475,3.31662479,3.09874735,0.466773433,3.09357841,3.08450587,3.08788543,3.0836022
72.499966,2.23606798,3.09844783,-0.928644094,3.09328365,3.08421639,3.08758522,3.08330974
72.510458,3.60555128,3.098149,0.712321748,3.09298927,3.08392714,3.08728551,3.0830175
72.52095,3.16227766,3.09785089,0.253824285,3.0926953,3.08363817,3.08698634,3.0827255
72.531441,2,3.0972198,-1.0474826,3.09240177,3.08334948,3.08635282,3.08243378
72.541933,3.46410162,3.09692341,0.605952309,3.09210861,3.08306104,3.08605501,3.08214227
72.552424,3.46410162,3.09662776,0.606196215,3.09181589,3.08277289,3.08575776,3.08185104
72.562916,4,3.09633279,0.950614122,3.09152354,3.08248498,3.085461,3.08156002
72.573408,4.35889894,3.09603852,1.12377063,3.09123159,3.08219734,3.08516478,3.08126925
72.583899,4.12310563,3.09574498,1.01358801,3.09094006,3.08191,3.08486911,3.08097875
72.594391,3.16227766,3.09545211,0.258506378,3.09064891,3.0816229,3.08457394,3.08068848
72.604882,4,3.09515997,0.951230797,3.09035817,3.0813361,3.08427933,3.08039847
72.615374,2.64575131,3.0948685,-0.67016206,3.0900678,3.08104954,3.08398523,3.08010869
72.625866,2.44948974,3.09457772,-0.803173693,3.08977782,3.08076325,3.08369165,3.07981916
72.636357,2.23606798,3.09428767,-0.926401477,3.08948825,3.08047726,3.08339864,3.0795299
72.646849,3.46410162,3.09399829,0.608361177,3.08919904,3.08019151,3.08310614,3.07924086
72.65734,3.31662479,3.09370964,0.472138912,3.08891025,3.07990607,3.0828142,3.07895209
72.667832,4.12310563,3.09342165,1.01473345,3.08862181,3.07962086,3.08252278,3.07866355
72.678324,3.31662479,3.09313437,0.472747733,3.08833375,3.07933594,3.0822319,3.07837526
72.688815,3.60555128,3.09284782,0.71603314,3.08804611,3.07905131,3.08194159,3.07808724
72.699307,3.87298335,3.09256194,0.883414629,3.08775881,3.07876693,3.08165181,3.07779944
72.709798,3,3.09227679,-0.303770956,3.08747192,3.07848286,3.08136261,3.07751193
72.72029,3.16227766,3.09199233,0.265113808,3.08718537,3.07819903,3.08107394,3.07722463
72.730782,3,3.09170858,-0.302834238,3.08689921,3.07791548,3.08078583,3.07693759
72.741273,3.46410162,3.09142556,0.61047199,3.08661344,3.07763223,3.08049832,3.07665082
72.751765,3.46410162,3.09114324,0.610703178,3.08632802,3.07734923,3.08021135,3.07636427
72.762256,3.16227766,3.09086167,0.2672377,3.08604299,3.07706653,3.07992498,3.07607801
72.772748,3.16227766,3.0905808,0.267762694,3.08575831,3.07678409,3.07963917,3.07579197
72.78324,2.82842712,3.09030066,-0.511735805,3.085474,3.07650193,3.07935395,3.07550618
72.793731,3.74165739,3.09002128,0.807239807,3.08519009,3.07622007,3.07906934,3.07522066
72.804223,3.31662479,3.08974262,0.4763215,3.08490651,3.07593846,3.07878532,3.07493538
72.814714,3,3.08946473,-0.299106555,3.08462332,3.07565716,3.07850193,3.07465037
72.825206,3.60555128,3.08918757,0.718584514,3.08434048,3.07537612,3.07821913,3.07436559
72.835698,3.16227766,3.08891117,0.270862485,3.08405799,3.07509535,3.07793695,3.07408106
72.846189,3,3.08863557,-0.297717268,3.0837759,3.0748149,3.07765543,3.07379681
72.856681,3.16227766,3.08836072,0.271876701,3.08349414,3.07453469,3.07737453,3.07351279
72.867172,2.23606798,3.08808668,-0.923048591,3.08321277,3.0742548,3.0770943,3.07322905
72.877664,3,3.08781341,-0.296333271,3.08293173,3.07397517,3.07681471,3.07294553
72.888156,3.60555128,3.08754094,0.719729349,3.08265105,3.07369582,3.07653578,3.07266227
72.898647,3,3.08726931,-0.295413796,3.08237076,3.07341678,3.07625757,3.07237929
72.909139,2.82842712,3.08699848,-0.508499121,3.0820908,3.073138,3.07598003,3.07209654
72.91963,2.64575131,3.08672851,-0.664061144,3.08181122,3.07285953,3.07570321,3.07181407
72.930122,3.46410162,3.08645937,0.614526034,3.08153197,3.07258132,3.07542709,3.07153183
72.940614,2.23606798,3.08619108,-0.922021207,3.08125307,3.0723034,3.0751517,3.07124985
72.951105,3,3.0859237,-0.293127446,3.08097456,3.07202579,3.07487708,3.07096814
72.961597,3.74165739,3.08565718,0.809938398,3.08069637,3.07174844,3.0746032,3.07068667
72.972088,4,3.08539159,0.956351616,3.08041857,3.07147141,3.07433011,3.07040548
72.98258,3.87298335,3.08512689,0.887612786,3.08014109,3.07119463,3.0740578,3.07012451
72.993072,4.24264069,3.08486313,1.07600072,3.07986396,3.07091815,3.0737863,3.06984381
73.003563,3.46410162,3.08460035,0.616036744,3.07958721,3.07064199,3.07351565,3.06956339
73.014055,2.23606798,3.08433851,-0.921016033,3.07931078,3.07036609,3.07324582,3.06928319
73.024546,3,3.0840777,-0.289961541,3.07903473,3.0700905,3.07297689,3.06900329
73.035038,3,3.08381787,-0.289513158,3.07875901,3.06981519,3.07270883,3.06872361
73.04553,3,3.08355908,-0.289065871,3.07848363,3.06954016,3.07244167,3.06844419
73.056021,2.82842712,3.08330137,-0.504850717,3.07820863,3.06926545,3.07217548,3.06816506
73.066513,2.82842712,3.08304473,-0.504596473,3.07793395,3.06899102,3.07191023,3.06788616
73.077004,3.16227766,3.08278921,0.281936954,3.07765964,3.0687169,3.07164599,3.06760754
73.087496,2.82842712,3.08253482,-0.504090956,3.07738566,3.06844305,3.07138274,3.06732915
73.097988,3.60555128,3.08228159,0.723373823,3.07711202,3.06816949,3.07112054,3.06705103
73.108479,3.16227766,3.08202958,0.283280919,3.07683875,3.06789626,3.07085944,3.06677319
73.118971,4,3.08177878,0.958238601,3.07656581,3.0676233,3.07059943,3.06649558
73.129462,3.60555128,3.08152927,0.723893639,3.07629323,3.06735066,3.0703406,3.06621826
73.139954,3.60555128,3.08128105,0.724065072,3.07602098,3.06707829,3.07008292,3.06594117
73.150446,3.74165739,3.08103416,0.812787318,3.07574907,3.06680622,3.06982646,3.06566434
73.160937,3,3.08078868,-0.284233503,3.07547753,3.06653448,3.0695713,3.0653878
73.171429,2.44948974,3.08054461,-0.794389621,3.07520631,3.06626301,3.06931742,3.0651115
73.18192,3.60555128,3.08030204,0.724740807,3.07493545,3.06599187,3.06906492,3.06483548
73.192412,3.16227766,3.08006097,0.286734537,3.07466492,3.065721,3.06881381,3.0645597
73.202904,3.16227766,3.07982147,0.287151857,3.07439473,3.06545043,3.06856416,3.06428417
73.213395,3.16227766,3.07958363,0.287565691,3.07412491,3.06518019,3.06831605,3.06400894
73.223887,3.74165739,3.07934747,0.813824256,3.0738554,3.06491023,3.06806949,3.06373394
73.234378,3.16227766,3.07911308,0.288382699,3.07358626,3.0646406,3.06782459,3.06345923
73.24487,3.74165739,3.07888049,0.814111105,3.07331744,3.06437125,3.06758138,3.06318476
73.255362,3.46410162,3.07864981,0.620847652,3.07304896,3.0641022,3.06733996,3.06291054
73.265853,3.46410162,3.07842112,0.621031801,3.07278085,3.06383349,3.06710041,3.06263662
73.276345,3.60555128,3.07819446,0.726193372,3.07251305,3.06356505,3.06686279,3.06236293
73.286836,2.23606798,3.07796997,-0.917552176,3.07224562,3.06329695,3.06662721,3.06208954
73.297328,3,3.0777477,-0.278832747,3.07197851,3.06302913,3.06639374,3.06181638
73.30782,2.64575131,3.07752777,-0.657096993,3.07171174,3.06276161,3.0661625,3.06154348
73.318311,3.16227766,3.07731031,0.291491603,3.07144533,3.06249444,3.06593361,3.06127088
73.328803,3.31662479,3.07709538,0.489417414,3.07117924,3.06222754,3.06570715,3.06099851
73.339294,3.74165739,3.07688317,0.815336872,3.07091351,3.06196099,3.06548328,3.06072643
73.349786,2.64575131,3.07667376,-0.656446835,3.0706481,3.06169472,3.0652621,3.06045459
73.360278,3.60555128,3.07646731,0.727381582,3.07038302,3.06142876,3.06504377,3.06018302
73.370769,3.31662479,3.076264,0.490266042,3.07011832,3.06116314,3.06482847,3.05991173
73.381261,2.82842712,3.07606395,-0.497631216,3.06985393,3.06089781,3.06461633,3.05964069
73.391752,3,3.07586739,-0.27544035,3.0695899,3.06063281,3.06440755,3.05936994
73.402244,3.60555128,3.07567446,0.727926381,3.06932618,3.06036811,3.0642023,3.05909942
73.412736,3.31662479,3.0754854,0.49105946,3.06906281,3.06010373,3.06400081,3.05882918
73.423227,3.46410162,3.07530044,0.62353923,3.0687998,3.05983968,3.06380331,3.05855922
73.433719,3.74165739,3.07511981,0.816417527,3.06853711,3.05957593,3.06361003,3.05828951
73.44421,4.12310563,3.07494379,1.02379775,3.06827477,3.05931252,3.06342125,3.05802008
73.454702,4.12310563,3.07477265,1.02388133,3.06801276,3.05904941,3.06323724,3.0577509
73.465194,2.44948974,3.0746067,-0.790643382,3.06775108,3.05878661,3.06305833,3.05748199
73.475685,3.16227766,3.07444631,0.296363536,3.06748976,3.05852416,3.06288487,3.05721336
73.486177,2.64575131,3.07429183,-0.65463006,3.06722876,3.05826201,3.06271721,3.05694498
73.496668,3.31662479,3.07414367,0.492423719,3.06696813,3.0580002,3.06255577,3.0566769
73.50716,2,3.07400226,-1.03634081,3.0667078,3.0577387,3.06240098,3.05640905
73.517652,3.31662479,3.07386811,0.492703445,3.06644782,3.05747751,3.06225334,3.05614147
73.528143,2.64575131,3.07374174,-0.654209775,3.0661882,3.05721668,3.0621134,3.05587419
73.538635,2.64575131,3.07362373,-0.654119579,3.06592889,3.05695615,3.06198172,3.05560715
73.549126,2.23606798,3.07351476,-0.915121183,3.06566995,3.05669597,3.06185898,3.0553404
73.559618,2.64575131,3.07341551,-0.653960395,3.06541132,3.05643609,3.06174587,3.0550739
73.57011,3.31662479,3.07332681,0.493252455,3.06515303,3.05617654,3.06164322,3.05480766
73.580601,2.64575131,3.07324955,-0.653833498,3.0648951,3.05591735,3.06155194,3.05454172
73.591093,3,3.07318476,-0.270526825,3.06463749,3.05565846,3.06147303,3.05427603
73.601584,3.16227766,3.07313361,0.29857001,3.06438024,3.05539992,3.06140768,3.05401062
73.612076,3.16227766,3.07309743,0.298630589,3.06412331,3.05514169,3.06135724,3.05374547
73.622568,2.82842712,3.07307781,-0.494621763,3.06386671,3.0548838,3.06132329,3.05348058
73.633059,2.64575131,3.07307663,-0.653701242,3.06361048,3.05462627,3.06130771,3.05321599
73.643551,2.64575131,3.07309612,-0.653716156,3.06335456,3.05436904,3.06131276,3.05295164
73.654042,3.87298335,3.07313906,0.894340143,3.063099,3.05411218,3.06134121,3.05268759
73.664534,2.82842712,3.07320883,-0.49475419,3.06284376,3.05385563,3.06139647,3.05242378
73.675026,3.16227766,3.0733097,0.298274971,3.06258886,3.05359941,3.06148281,3.05216025
73.685517,3,3.07344699,-0.271011047,3.06233432,3.05334356,3.06160558,3.05189701
73.696009,3.31662479,3.07362747,0.492947588,3.0620801,3.05308803,3.06177157,3.05163402
73.7065,3,3.07385962,-0.271771268,3.06182624,3.05283286,3.06198931,3.05137132
73.716992,3.87298335,3.07415425,0.893772398,3.06157269,3.052578,3.06226962,3.05110888
73.727484,4.12310563,3.07452479,1.02400236,3.06131949,3.05232349,3.06262601,3.0508467
73.737975,3.16227766,3.07498793,0.295448362,3.06106665,3.05206935,3.06307523,3.05058482
73.748467,3.46410162,3.07556436,0.623327569,3.06081412,3.05181553,3.06363804,3.05032318
73.758958,3.74165739,3.07627896,0.815707316,3.06056196,3.05156208,3.06433943,3.05006185
73.76945,3,3.0771618,-0.277780135,3.06031011,3.05130896,3.06520958,3.04980076
73.779942,4,3.07824801,0.96007916,3.06005861,3.05105618,3.06628376,3.04953995
73.790433,3.87298335,3.07957803,0.890733023,3.05980746,3.05080378,3.06760257,3.04927943
73.800925,3.46410162,3.08119801,0.618792057,3.05955664,3.0505517,3.06921233,3.04901916
73.811416,3.60555128,3.08315817,0.722767671,3.05930617,3.0503,3.07116348,3.04875919
73.821908,3.16227766,3.08551317,0.277064058,3.05905603,3.05004863,3.07351088,3.04849947
73.8324,3.16227766,3.08831917,0.271953097,3.05880622,3.04979761,3.07631091,3.04824002
73.842891,3.74165739,3.09163214,0.806241434,3.05855678,3.04954697,3.07961974,3.04798087
73.853383,4,3.09550629,0.95104874,3.05830765,3.04929666,3.08349181,3.04772197
73.863874,3.46410162,3.09998845,0.603417906,3.05805889,3.04904674,3.08797411,3.04746337
73.874366,3,3.10511747,-0.324218245,3.05781045,3.04879715,3.09310564,3.04720501
73.884858,3.16227766,3.11091736,0.226628119,3.05756235,3.04854792,3.09891047,3.04694694
73.895349,3.16227766,3.11739414,0.21185731,3.05731461,3.04829908,3.10539466,3.04668916
73.905841,4,3.12453388,0.935663467,3.05706719,3.04805058,3.11254417,3.04643163
73.916332,3,3.13229361,-0.363721881,3.05682014,3.04780246,3.12031585,3.0461744
73.926824,3.31662479,3.14060236,0.419550267,3.0565734,3.04755469,3.12863846,3.04591743
73.937316,3.16227766,3.1493509,0.113695904,3.05632701,3.04730728,3.13740229,3.04566072
73.947807,2.64575131,3.15838815,-0.715986617,3.05608098,3.04706027,3.14645569,3.04540432
73.958299,3.16227766,3.16751785,-0.0723891485,3.05583527,3.0468136,3.15560165,3.04514817
73.96879,3.16227766,3.17648701,-0.119202962,3.05558992,3.04656733,3.16458622,3.04489232
73.979282,3,3.18499026,-0.430104943,3.0553449,3.0463214,3.17310289,3.04463672
73.989774,3.60555128,3.1926689,0.642559236,3.05510022,3.04607586,3.18079165,3.0443814
74.000265,3.46410162,3.19913161,0.514752369,3.0548559,3.0458307,3.18725974,3.04412638
74.010757,3.31662479,3.20399053,0.335610288,3.0546119,3.04558591,3.19211789,3.04387161
74.021248,3.46410162,3.20690835,0.507142254,3.05436827,3.04534151,3.19502759,3.04361714
74.03174,3.74165739,3.20765772,0.730752805,3.05412496,3.04509748,3.19576062,3.04336293
74.042232,3.16227766,3.20616408,-0.209490855,3.053882,3.04485382,3.19424212,3.04310899
74.052723,3.46410162,3.20252285,0.511447718,3.0536394,3.04461057,3.1905678,3.04285535
74.063215,3.31662479,3.19697739,0.345900857,3.05339712,3.04436768,3.18498185,3.04260197
74.073706,2.82842712,3.1898752,-0.60120552,3.05315521,3.0441252,3.17783296,3.04234889
74.084198,2.82842712,3.1816067,-0.594289132,3.05291361,3.04388309,3.16951293,3.04209606
74.09469,3,3.17256087,-0.415404465,3.05267237,3.04364137,3.16041215,3.04184351
74.105181,3.74165739,3.16309073,0.760635693,3.05243149,3.04340006,3.15088493,3.04159126
74.115673,2.82842712,3.15349445,-0.57014676,3.05219093,3.04315912,3.14123055,3.04133927
74.126164,3.31662479,3.14401807,0.415459647,3.05195075,3.0429186,3.13169602,3.04108757
74.136656,3.60555128,3.13485136,0.686075738,3.05171088,3.04267845,3.12247184,3.04083614
74.147148,2.44948974,3.1261398,-0.822587415,3.05147136,3.04243871,3.11370412,3.04058498
74.157639,3,3.11798782,-0.343493548,3.05123221,3.04219938,3.10549773,3.04033412
74.168131,3.46410162,3.11046232,0.594675793,3.05099338,3.04196044,3.09791988,3.04008352
74.178622,3.16227766,3.10360276,0.242229029,3.05075492,3.04172192,3.09101024,3.03983322
74.189114,3.31662479,3.09742023,0.468192868,3.05051678,3.04148379,3.08478,3.03958318
74.199606,3.31662479,3.09190631,0.474044811,3.05027899,3.04124606,3.07922074,3.03933342
74.210097,2.64575131,3.08703513,-0.664291971,3.05004158,3.04100877,3.07430653,3.03908396
74.220589,3,3.08276649,-0.287691666,3.04980448,3.04077186,3.06999702,3.03883476
74.23108,3.60555128,3.07905266,0.725602243,3.04956775,3.0405354,3.06624433,3.03858586
74.241572,3.87298335,3.07583891,0.892829456,3.04933135,3.04029933,3.06299353,3.03833721
74.252064,2.82842712,3.07306914,-0.494612995,3.0490953,3.04006367,3.06018829,3.03808885
74.262555,4.58257569,3.07068735,1.22958869,3.04885962,3.03982846,3.0577724,3.03784079
74.273047,3.87298335,3.06863924,0.896852332,3.04862426,3.03959365,3.05569135,3.03759299
74.283538,2,3.06687515,-1.03289649,3.04838928,3.03935929,3.05389528,3.03734549
74.29403,3.74165739,3.06534952,0.822379392,3.04815462,3.03912533,3.05233843,3.03709825
74.304522,4.12310563,3.06402259,1.0291176,3.04792031,3.0388918,3.05098088,3.03685129
74.315013,3,3.06285994,-0.250718852,3.04768637,3.03865873,3.04978808,3.03660463
74.325505,2.82842712,3.06183208,-0.483120026,3.04745276,3.03842607,3.0487304,3.03635823
74.335996,3.60555128,3.06091479,0.737994911,3.04721952,3.03819386,3.04778353,3.03611214
74.346488,3.31662479,3.06008781,0.506494794,3.04698661,3.03796208,3.04692712,3.03586631
74.35698,3.60555128,3.05933496,0.739064484,3.04675405,3.03773074,3.04614492,3.03562075
74.367471,3.46410162,3.05864321,0.636756157,3.04652186,3.03749986,3.04542383,3.0353755
74.377963,3.46410162,3.058002,0.637259454,3.04629,3.03726941,3.04475327,3.03513051
74.388454,2.82842712,3.05740319,-0.478514437,3.04605852,3.03703943,3.04412504,3.03488583
74.398946,3.46410162,3.05684012,0.638170424,3.04582736,3.03680988,3.04353247,3.0346414
74.409438,3.31662479,3.05630768,0.510212808,3.04559655,3.03658078,3.0429704,3.03439726
74.419929,3.31662479,3.05580178,0.510708338,3.04536612,3.03635217,3.04243474,3.03415342
74.430421,3.60555128,3.05531904,0.741776407,3.04513602,3.03612399,3.04192208,3.03390984
74.440912,3,3.05485686,-0.234215408,3.04490629,3.0358963,3.04142983,3.03366657
74.451404,3.31662479,3.05441296,0.512066234,3.0446769,3.03566906,3.04095567,3.03342355
74.461896,3,3.05398557,-0.232347955,3.04444785,3.03544228,3.04049784,3.03318082
74.472387,2.82842712,3.05357319,-0.474495585,3.04421919,3.035216,3.0400548,3.0329384
74.482879,3.31662479,3.05317441,0.51327418,3.04399085,3.03499017,3.03962517,3.03269623
74.49337,3.74165739,3.05278817,0.829981455,3.04376289,3.03476485,3.03920787,3.03245437
74.503862,3.60555128,3.05241341,0.743732391,3.04353526,3.03453998,3.03880181,3.03221278
74.514354,3.74165739,3.05204927,0.83042647,3.04330798,3.0343156,3.03840615,3.03197146
74.524845,3.60555128,3.05169499,0.744215212,3.04308109,3.03409174,3.03802012,3.03173045
74.535337,2.82842712,3.05134982,-0.472146898,3.04285452,3.03386834,3.03764294,3.03148971
74.545828,2.82842712,3.05101317,-0.471790252,3.04262833,3.03364546,3.03727405,3.03124927
74.55632,3.16227766,3.0506844,0.334055771,3.04240248,3.03342306,3.03691278,3.03100909
74.566812,3.74165739,3.05036303,0.831441131,3.04217698,3.03320116,3.03655864,3.03076919
74.577303,3.31662479,3.05004861,0.516310156,3.04195186,3.03297979,3.03621119,3.0305296
74.587795,3.31662479,3.04974065,0.516608303,3.04172708,3.0327589,3.03586993,3.03029028
74.598286,4.24264069,3.04943881,1.0923378,3.04150267,3.03253856,3.0355345,3.03005126
74.608778,3.31662479,3.04914267,0.517186739,3.0412786,3.03231871,3.0352045,3.0298125
74.61927,3.31662479,3.04885192,0.517467745,3.04105488,3.03209938,3.0348796,3.02957403
74.629761,2.23606798,3.0485663,-0.901386888,3.04083155,3.0318806,3.03455953,3.02933586
74.640253,3.74165739,3.04828546,0.832689572,3.04060855,3.03166234,3.03424394,3.02909796
74.650744,3.16227766,3.04800921,0.338036166,3.04038593,3.03144462,3.03393264,3.02886037
74.661236,3.31662479,3.04773725,0.518543671,3.04016365,3.03122743,3.03362532,3.02862303
74.671728,3.46410162,3.0474694,0.64547054,3.03994172,3.03101078,3.03332178,3.02838598
74.682219,2.44948974,3.04720547,-0.773120771,3.03972018,3.0307947,3.03302186,3.02814925
74.692711,3.31662479,3.04694523,0.519306805,3.03949898,3.03057915,3.03272529,3.02791277
74.703202,2.82842712,3.04668857,-0.467184591,3.03927815,3.03036418,3.03243197,3.0276766
74.713694,3.46410162,3.04643526,0.646271113,3.03905767,3.03014975,3.03214167,3.02744069
74.724186,3.31662479,3.0461852,0.520038063,3.03883755,3.02993589,3.03185427,3.02720507
74.734677,3,3.04593827,-0.214332153,3.0386178,3.02972262,3.03156965,3.02696976
74.745169,2,3.0456943,-1.02259195,3.0383984,3.02950991,3.03128763,3.02673472
74.75566,2.82842712,3.04545321,-0.465860587,3.03817938,3.0292978,3.03100814,3.02649998
74.766152,3.31662479,3.04521486,0.520970183,3.0379607,3.02908626,3.03073102,3.0262655
74.776644,3.31662479,3.04497916,0.521196341,3.03774239,3.02887531,3.03045618,3.02603131
74.787135,3.87298335,3.04474606,0.910075431,3.03752445,3.02866499,3.03018355,3.02579743
74.797627,2.82842712,3.0445154,-0.464852966,3.03730686,3.02845524,3.02991299,3.02556382
[truncated: 539,325 more chars]
