# Supplementary material for: Phase Stability of Iron Nitride Fe4N at High Pressure—Pressure-Dependent Evolution of Phase Equilibria in the Fe–N System
Source: Materials (Basel). 2021 Jul 15;14(14):3963. doi: 10.3390/ma14143963 (PMC8307547; doi:10.3390/ma14143963)
Supplement: Supplementary file 1 [file materials-14-03963-s001.zip › xrd_data/5-350_riet.txt]

'y-axis saved as Sqrt(y)
'x,Yobs,Ycalc,Diff,fe4n,alpha,epsilon,gamma,Bkg
20,8.24621125,0,0,0,0,0,0,0
20.010492,8,0,0,0,0,0,0,0
20.020983,7.14142843,0,0,0,0,0,0,0
20.031475,6.70820393,0,0,0,0,0,0,0
20.041966,7.48331477,0,0,0,0,0,0,0
20.052458,6.78232998,0,0,0,0,0,0,0
20.06295,7.87400787,0,0,0,0,0,0,0
20.073441,7.07106781,0,0,0,0,0,0,0
20.083933,7.34846923,0,0,0,0,0,0,0
20.094424,7.07106781,0,0,0,0,0,0,0
20.104916,7.81024968,0,0,0,0,0,0,0
20.115408,7.28010989,0,0,0,0,0,0,0
20.125899,6.92820323,0,0,0,0,0,0,0
20.136391,7.34846923,0,0,0,0,0,0,0
20.146882,7.34846923,0,0,0,0,0,0,0
20.157374,7.41619849,0,0,0,0,0,0,0
20.167866,7.87400787,0,0,0,0,0,0,0
20.178357,6.8556546,0,0,0,0,0,0,0
20.188849,6.244998,0,0,0,0,0,0,0
20.19934,6.70820393,0,0,0,0,0,0,0
20.209832,7.28010989,0,0,0,0,0,0,0
20.220324,7,0,0,0,0,0,0,0
20.230815,7.07106781,0,0,0,0,0,0,0
20.241307,7.87400787,0,0,0,0,0,0,0
20.251798,7.48331477,0,0,0,0,0,0,0
20.26229,6.55743852,0,0,0,0,0,0,0
20.272782,6.70820393,0,0,0,0,0,0,0
20.283273,8.24621125,0,0,0,0,0,0,0
20.293765,7.07106781,0,0,0,0,0,0,0
20.304256,7.87400787,0,0,0,0,0,0,0
20.314748,6.55743852,0,0,0,0,0,0,0
20.32524,7.07106781,0,0,0,0,0,0,0
20.335731,7.41619849,0,0,0,0,0,0,0
20.346223,7.93725393,0,0,0,0,0,0,0
20.356714,7.74596669,0,0,0,0,0,0,0
20.367206,6.164414,0,0,0,0,0,0,0
20.377698,7.21110255,0,0,0,0,0,0,0
20.388189,7.74596669,0,0,0,0,0,0,0
20.398681,8,0,0,0,0,0,0,0
20.409172,7.28010989,0,0,0,0,0,0,0
20.419664,7,0,0,0,0,0,0,0
20.430156,7.41619849,0,0,0,0,0,0,0
20.440647,6.92820323,0,0,0,0,0,0,0
20.451139,6.8556546,0,0,0,0,0,0,0
20.46163,7.41619849,0,0,0,0,0,0,0
20.472122,6.4807407,0,0,0,0,0,0,0
20.482614,7.54983444,0,0,0,0,0,0,0
20.493105,6.4807407,0,0,0,0,0,0,0
20.503597,7.28010989,0,0,0,0,0,0,0
20.514088,7.68114575,0,0,0,0,0,0,0
20.52458,7.87400787,0,0,0,0,0,0,0
20.535072,8.24621125,0,0,0,0,0,0,0
20.545563,7,0,0,0,0,0,0,0
20.556055,7.54983444,0,0,0,0,0,0,0
20.566546,6.8556546,0,0,0,0,0,0,0
20.577038,7.28010989,0,0,0,0,0,0,0
20.58753,7.28010989,0,0,0,0,0,0,0
20.598021,7.68114575,0,0,0,0,0,0,0
20.608513,7.14142843,0,0,0,0,0,0,0
20.619004,8.18535277,0,0,0,0,0,0,0
20.629496,7.41619849,0,0,0,0,0,0,0
20.639988,6.244998,0,0,0,0,0,0,0
20.650479,6.70820393,0,0,0,0,0,0,0
20.660971,6.4807407,0,0,0,0,0,0,0
20.671462,7.48331477,0,0,0,0,0,0,0
20.681954,8.24621125,0,0,0,0,0,0,0
20.692446,6.70820393,0,0,0,0,0,0,0
20.702937,6.63324958,0,0,0,0,0,0,0
20.713429,7.93725393,0,0,0,0,0,0,0
20.72392,7.54983444,0,0,0,0,0,0,0
20.734412,7.28010989,0,0,0,0,0,0,0
20.744904,7.28010989,0,0,0,0,0,0,0
20.755395,7.34846923,0,0,0,0,0,0,0
20.765887,6.8556546,0,0,0,0,0,0,0
20.776378,7.41619849,0,0,0,0,0,0,0
20.78687,7.81024968,0,0,0,0,0,0,0
20.797362,7.54983444,0,0,0,0,0,0,0
20.807853,6.8556546,0,0,0,0,0,0,0
20.818345,7.48331477,0,0,0,0,0,0,0
20.828836,6,0,0,0,0,0,0,0
20.839328,8,0,0,0,0,0,0,0
20.84982,6.70820393,0,0,0,0,0,0,0
20.860311,7.54983444,0,0,0,0,0,0,0
20.870803,7.81024968,0,0,0,0,0,0,0
20.881294,7.41619849,0,0,0,0,0,0,0
20.891786,7.54983444,0,0,0,0,0,0,0
20.902278,7.61577311,0,0,0,0,0,0,0
20.912769,6.63324958,0,0,0,0,0,0,0
20.923261,8.06225775,0,0,0,0,0,0,0
20.933752,6.8556546,0,0,0,0,0,0,0
20.944244,6.32455532,0,0,0,0,0,0,0
20.954736,7.21110255,0,0,0,0,0,0,0
20.965227,6.92820323,0,0,0,0,0,0,0
20.975719,7.68114575,0,0,0,0,0,0,0
20.98621,7.07106781,0,0,0,0,0,0,0
20.996702,6.55743852,0,0,0,0,0,0,0
21.007194,8.1240384,0,0,0,0,0,0,0
21.017685,7.41619849,0,0,0,0,0,0,0
21.028177,7.14142843,0,0,0,0,0,0,0
21.038668,7.81024968,0,0,0,0,0,0,0
21.04916,7,0,0,0,0,0,0,0
21.059652,7.41619849,0,0,0,0,0,0,0
21.070143,7,0,0,0,0,0,0,0
21.080635,6.4807407,0,0,0,0,0,0,0
21.091126,7.21110255,0,0,0,0,0,0,0
21.101618,7.41619849,0,0,0,0,0,0,0
21.11211,6.8556546,0,0,0,0,0,0,0
21.122601,7.34846923,0,0,0,0,0,0,0
21.133093,7.93725393,0,0,0,0,0,0,0
21.143584,7.07106781,0,0,0,0,0,0,0
21.154076,6.63324958,0,0,0,0,0,0,0
21.164568,7.41619849,0,0,0,0,0,0,0
21.175059,7.48331477,0,0,0,0,0,0,0
21.185551,7.28010989,0,0,0,0,0,0,0
21.196042,7.14142843,0,0,0,0,0,0,0
21.206534,7.61577311,0,0,0,0,0,0,0
21.217026,7,0,0,0,0,0,0,0
21.227517,6.78232998,0,0,0,0,0,0,0
21.238009,7.21110255,0,0,0,0,0,0,0
21.2485,6.55743852,0,0,0,0,0,0,0
21.258992,8.06225775,0,0,0,0,0,0,0
21.269484,7.54983444,0,0,0,0,0,0,0
21.279975,7.21110255,0,0,0,0,0,0,0
21.290467,7.28010989,0,0,0,0,0,0,0
21.300958,7.54983444,0,0,0,0,0,0,0
21.31145,7.34846923,0,0,0,0,0,0,0
21.321942,7,0,0,0,0,0,0,0
21.332433,7.21110255,0,0,0,0,0,0,0
21.342925,7.81024968,0,0,0,0,0,0,0
21.353416,7.48331477,0,0,0,0,0,0,0
21.363908,6.55743852,0,0,0,0,0,0,0
21.3744,7.21110255,0,0,0,0,0,0,0
21.384891,8.06225775,0,0,0,0,0,0,0
21.395383,7.87400787,0,0,0,0,0,0,0
21.405874,7.61577311,0,0,0,0,0,0,0
21.416366,7.07106781,0,0,0,0,0,0,0
21.426858,8.06225775,0,0,0,0,0,0,0
21.437349,6.63324958,0,0,0,0,0,0,0
21.447841,6.164414,0,0,0,0,0,0,0
21.458332,7.41619849,0,0,0,0,0,0,0
21.468824,7.87400787,0,0,0,0,0,0,0
21.479316,7.41619849,0,0,0,0,0,0,0
21.489807,7.21110255,0,0,0,0,0,0,0
21.500299,7.93725393,0,0,0,0,0,0,0
21.51079,6.55743852,0,0,0,0,0,0,0
21.521282,6.8556546,0,0,0,0,0,0,0
21.531774,7.34846923,0,0,0,0,0,0,0
21.542265,6.244998,0,0,0,0,0,0,0
21.552757,6.32455532,0,0,0,0,0,0,0
21.563248,7.34846923,0,0,0,0,0,0,0
21.57374,6.40312424,0,0,0,0,0,0,0
21.584232,7.68114575,0,0,0,0,0,0,0
21.594723,7,0,0,0,0,0,0,0
21.605215,7.07106781,0,0,0,0,0,0,0
21.615706,6.78232998,0,0,0,0,0,0,0
21.626198,6.55743852,0,0,0,0,0,0,0
21.63669,6.70820393,0,0,0,0,0,0,0
21.647181,6.8556546,0,0,0,0,0,0,0
21.657673,7.48331477,0,0,0,0,0,0,0
21.668164,7.54983444,0,0,0,0,0,0,0
21.678656,6.8556546,0,0,0,0,0,0,0
21.689148,6.63324958,0,0,0,0,0,0,0
21.699639,7.28010989,0,0,0,0,0,0,0
21.710131,6.40312424,0,0,0,0,0,0,0
21.720622,6.78232998,0,0,0,0,0,0,0
21.731114,6.164414,0,0,0,0,0,0,0
21.741606,6.4807407,0,0,0,0,0,0,0
21.752097,6.08276253,0,0,0,0,0,0,0
21.762589,5.83095189,0,0,0,0,0,0,0
21.77308,7.07106781,0,0,0,0,0,0,0
21.783572,5.19615242,0,0,0,0,0,0,0
21.794064,6.70820393,0,0,0,0,0,0,0
21.804555,7.41619849,0,0,0,0,0,0,0
21.815047,7.48331477,0,0,0,0,0,0,0
21.825538,6.55743852,0,0,0,0,0,0,0
21.83603,7.93725393,0,0,0,0,0,0,0
21.846522,7.54983444,0,0,0,0,0,0,0
21.857013,6.4807407,0,0,0,0,0,0,0
21.867505,7.07106781,0,0,0,0,0,0,0
21.877996,7.28010989,0,0,0,0,0,0,0
21.888488,7,0,0,0,0,0,0,0
21.89898,7.34846923,0,0,0,0,0,0,0
21.909471,7.41619849,0,0,0,0,0,0,0
21.919963,7.61577311,0,0,0,0,0,0,0
21.930454,7.74596669,0,0,0,0,0,0,0
21.940946,6.63324958,0,0,0,0,0,0,0
21.951438,7.61577311,0,0,0,0,0,0,0
21.961929,7.74596669,0,0,0,0,0,0,0
21.972421,6.8556546,0,0,0,0,0,0,0
21.982912,6.4807407,0,0,0,0,0,0,0
21.993404,6.4807407,0,0,0,0,0,0,0
22.003896,7.68114575,0,0,0,0,0,0,0
22.014387,7.41619849,0,0,0,0,0,0,0
22.024879,6.78232998,0,0,0,0,0,0,0
22.03537,7.07106781,0,0,0,0,0,0,0
22.045862,7.48331477,0,0,0,0,0,0,0
22.056354,6.70820393,0,0,0,0,0,0,0
22.066845,6.92820323,0,0,0,0,0,0,0
22.077337,7.21110255,0,0,0,0,0,0,0
22.087828,6.4807407,0,0,0,0,0,0,0
22.09832,8,0,0,0,0,0,0,0
22.108812,7.21110255,0,0,0,0,0,0,0
22.119303,7.21110255,0,0,0,0,0,0,0
22.129795,6.4807407,0,0,0,0,0,0,0
22.140286,7.21110255,0,0,0,0,0,0,0
22.150778,6.92820323,0,0,0,0,0,0,0
22.16127,7.07106781,0,0,0,0,0,0,0
22.171761,7.21110255,0,0,0,0,0,0,0
22.182253,7,0,0,0,0,0,0,0
22.192744,7.87400787,0,0,0,0,0,0,0
22.203236,7.07106781,0,0,0,0,0,0,0
22.213728,7.41619849,0,0,0,0,0,0,0
22.224219,6.78232998,0,0,0,0,0,0,0
22.234711,7.07106781,0,0,0,0,0,0,0
22.245202,6.92820323,0,0,0,0,0,0,0
22.255694,6.40312424,0,0,0,0,0,0,0
22.266186,7.14142843,0,0,0,0,0,0,0
22.276677,7.48331477,0,0,0,0,0,0,0
22.287169,6.40312424,0,0,0,0,0,0,0
22.29766,7.34846923,0,0,0,0,0,0,0
22.308152,7.68114575,0,0,0,0,0,0,0
22.318644,6.40312424,0,0,0,0,0,0,0
22.329135,5.65685425,0,0,0,0,0,0,0
22.339627,7.41619849,0,0,0,0,0,0,0
22.350118,7.14142843,0,0,0,0,0,0,0
22.36061,7.61577311,0,0,0,0,0,0,0
22.371102,7.34846923,0,0,0,0,0,0,0
22.381593,6.244998,0,0,0,0,0,0,0
22.392085,7.41619849,0,0,0,0,0,0,0
22.402576,8.06225775,0,0,0,0,0,0,0
22.413068,7.34846923,0,0,0,0,0,0,0
22.42356,7.21110255,0,0,0,0,0,0,0
22.434051,7,0,0,0,0,0,0,0
22.444543,7.61577311,0,0,0,0,0,0,0
22.455034,7.14142843,0,0,0,0,0,0,0
22.465526,7.07106781,0,0,0,0,0,0,0
22.476018,7.61577311,0,0,0,0,0,0,0
22.486509,7.48331477,0,0,0,0,0,0,0
22.497001,6.40312424,0,0,0,0,0,0,0
22.507492,6.70820393,0,0,0,0,0,0,0
22.517984,7.14142843,0,0,0,0,0,0,0
22.528476,6.32455532,0,0,0,0,0,0,0
22.538967,7.48331477,0,0,0,0,0,0,0
22.549459,6.55743852,0,0,0,0,0,0,0
22.55995,7.07106781,0,0,0,0,0,0,0
22.570442,6.70820393,0,0,0,0,0,0,0
22.580934,6.164414,0,0,0,0,0,0,0
22.591425,7.21110255,0,0,0,0,0,0,0
22.601917,6.55743852,0,0,0,0,0,0,0
22.612408,7.28010989,0,0,0,0,0,0,0
22.6229,6.4807407,0,0,0,0,0,0,0
22.633392,6.78232998,0,0,0,0,0,0,0
22.643883,6.244998,0,0,0,0,0,0,0
22.654375,6.92820323,0,0,0,0,0,0,0
22.664866,7.21110255,0,0,0,0,0,0,0
22.675358,6.8556546,0,0,0,0,0,0,0
22.68585,6.78232998,0,0,0,0,0,0,0
22.696341,7.07106781,0,0,0,0,0,0,0
22.706833,7.41619849,0,0,0,0,0,0,0
22.717324,7.21110255,0,0,0,0,0,0,0
22.727816,7.68114575,0,0,0,0,0,0,0
22.738308,6.63324958,0,0,0,0,0,0,0
22.748799,6.78232998,0,0,0,0,0,0,0
22.759291,6.78232998,0,0,0,0,0,0,0
22.769782,6.8556546,0,0,0,0,0,0,0
22.780274,6.8556546,0,0,0,0,0,0,0
22.790766,7.41619849,0,0,0,0,0,0,0
22.801257,6.63324958,0,0,0,0,0,0,0
22.811749,6.92820323,0,0,0,0,0,0,0
22.82224,6,0,0,0,0,0,0,0
22.832732,7.34846923,0,0,0,0,0,0,0
22.843224,7.21110255,0,0,0,0,0,0,0
22.853715,7.68114575,0,0,0,0,0,0,0
22.864207,7.34846923,0,0,0,0,0,0,0
22.874698,7.07106781,0,0,0,0,0,0,0
22.88519,6.32455532,0,0,0,0,0,0,0
22.895682,7.34846923,0,0,0,0,0,0,0
22.906173,6.70820393,0,0,0,0,0,0,0
22.916665,6.63324958,0,0,0,0,0,0,0
22.927156,6.244998,0,0,0,0,0,0,0
22.937648,7.93725393,0,0,0,0,0,0,0
22.94814,6.4807407,0,0,0,0,0,0,0
22.958631,7.34846923,0,0,0,0,0,0,0
22.969123,7,0,0,0,0,0,0,0
22.979614,7.14142843,0,0,0,0,0,0,0
22.990106,7.61577311,0,0,0,0,0,0,0
23.000598,6.63324958,0,0,0,0,0,0,0
23.011089,7,0,0,0,0,0,0,0
23.021581,6.78232998,0,0,0,0,0,0,0
23.032072,7.41619849,0,0,0,0,0,0,0
23.042564,7.07106781,0,0,0,0,0,0,0
23.053056,6.92820323,0,0,0,0,0,0,0
23.063547,6.4807407,0,0,0,0,0,0,0
23.074039,6.70820393,0,0,0,0,0,0,0
23.08453,6.8556546,0,0,0,0,0,0,0
23.095022,6.55743852,0,0,0,0,0,0,0
23.105514,6.70820393,0,0,0,0,0,0,0
23.116005,7.48331477,0,0,0,0,0,0,0
23.126497,7.28010989,0,0,0,0,0,0,0
23.136988,6.63324958,0,0,0,0,0,0,0
23.14748,7.68114575,0,0,0,0,0,0,0
23.157972,6.63324958,0,0,0,0,0,0,0
23.168463,7.14142843,0,0,0,0,0,0,0
23.178955,5.65685425,0,0,0,0,0,0,0
23.189446,7.61577311,0,0,0,0,0,0,0
23.199938,7.14142843,0,0,0,0,0,0,0
23.21043,6.63324958,0,0,0,0,0,0,0
23.220921,6.40312424,0,0,0,0,0,0,0
23.231413,6.63324958,0,0,0,0,0,0,0
23.241904,6.92820323,0,0,0,0,0,0,0
23.252396,7.07106781,0,0,0,0,0,0,0
23.262888,6.63324958,0,0,0,0,0,0,0
23.273379,6.244998,0,0,0,0,0,0,0
23.283871,6.55743852,0,0,0,0,0,0,0
23.294362,6.78232998,0,0,0,0,0,0,0
23.304854,7.68114575,0,0,0,0,0,0,0
23.315346,6.63324958,0,0,0,0,0,0,0
23.325837,7.21110255,0,0,0,0,0,0,0
23.336329,7.41619849,0,0,0,0,0,0,0
23.34682,6.70820393,0,0,0,0,0,0,0
23.357312,6.63324958,0,0,0,0,0,0,0
23.367804,6.40312424,0,0,0,0,0,0,0
23.378295,6.78232998,0,0,0,0,0,0,0
23.388787,7.61577311,0,0,0,0,0,0,0
23.399278,7.34846923,0,0,0,0,0,0,0
23.40977,6.32455532,0,0,0,0,0,0,0
23.420262,7.14142843,0,0,0,0,0,0,0
23.430753,6.8556546,0,0,0,0,0,0,0
23.441245,7.21110255,0,0,0,0,0,0,0
23.451736,6.78232998,0,0,0,0,0,0,0
23.462228,6.4807407,0,0,0,0,0,0,0
23.47272,6.70820393,0,0,0,0,0,0,0
23.483211,7.07106781,0,0,0,0,0,0,0
23.493703,6.63324958,0,0,0,0,0,0,0
23.504194,6.78232998,0,0,0,0,0,0,0
23.514686,6.63324958,0,0,0,0,0,0,0
23.525178,6.08276253,0,0,0,0,0,0,0
23.535669,6.4807407,0,0,0,0,0,0,0
23.546161,7.21110255,0,0,0,0,0,0,0
23.556652,6.8556546,0,0,0,0,0,0,0
23.567144,7.41619849,0,0,0,0,0,0,0
23.577636,6.70820393,0,0,0,0,0,0,0
23.588127,7.28010989,0,0,0,0,0,0,0
23.598619,6.08276253,0,0,0,0,0,0,0
23.60911,6.70820393,0,0,0,0,0,0,0
23.619602,7.34846923,0,0,0,0,0,0,0
23.630094,6.40312424,0,0,0,0,0,0,0
23.640585,6.92820323,0,0,0,0,0,0,0
23.651077,6.4807407,0,0,0,0,0,0,0
23.661568,5.91607978,0,0,0,0,0,0,0
23.67206,6.78232998,0,0,0,0,0,0,0
23.682552,7,0,0,0,0,0,0,0
23.693043,7.21110255,0,0,0,0,0,0,0
23.703535,6.92820323,0,0,0,0,0,0,0
23.714026,6.78232998,0,0,0,0,0,0,0
23.724518,6.32455532,0,0,0,0,0,0,0
23.73501,6.55743852,0,0,0,0,0,0,0
23.745501,6.55743852,0,0,0,0,0,0,0
23.755993,6.40312424,0,0,0,0,0,0,0
23.766484,6.92820323,0,0,0,0,0,0,0
23.776976,6.92820323,0,0,0,0,0,0,0
23.787468,7.07106781,0,0,0,0,0,0,0
23.797959,5.38516481,0,0,0,0,0,0,0
23.808451,6,0,0,0,0,0,0,0
23.818942,6.78232998,0,0,0,0,0,0,0
23.829434,6.4807407,0,0,0,0,0,0,0
23.839926,6.92820323,0,0,0,0,0,0,0
23.850417,6.55743852,0,0,0,0,0,0,0
23.860909,7,0,0,0,0,0,0,0
23.8714,7.21110255,0,0,0,0,0,0,0
23.881892,6.40312424,0,0,0,0,0,0,0
23.892384,7.21110255,0,0,0,0,0,0,0
23.902875,7.21110255,0,0,0,0,0,0,0
23.913367,6.40312424,0,0,0,0,0,0,0
23.923858,6.63324958,0,0,0,0,0,0,0
23.93435,6.164414,0,0,0,0,0,0,0
23.944842,6.92820323,0,0,0,0,0,0,0
23.955333,6,0,0,0,0,0,0,0
23.965825,7.28010989,0,0,0,0,0,0,0
23.976316,5.91607978,0,0,0,0,0,0,0
23.986808,7.07106781,0,0,0,0,0,0,0
23.9973,7.41619849,0,0,0,0,0,0,0
24.007791,7,0,0,0,0,0,0,0
24.018283,6.92820323,0,0,0,0,0,0,0
24.028774,6.78232998,0,0,0,0,0,0,0
24.039266,6.92820323,0,0,0,0,0,0,0
24.049758,5.83095189,0,0,0,0,0,0,0
24.060249,5.91607978,0,0,0,0,0,0,0
24.070741,6.244998,0,0,0,0,0,0,0
24.081232,7.07106781,0,0,0,0,0,0,0
24.091724,6.78232998,0,0,0,0,0,0,0
24.102216,7.14142843,0,0,0,0,0,0,0
24.112707,6.55743852,0,0,0,0,0,0,0
24.123199,6.78232998,0,0,0,0,0,0,0
24.13369,6.92820323,0,0,0,0,0,0,0
24.144182,6.92820323,0,0,0,0,0,0,0
24.154674,7.14142843,0,0,0,0,0,0,0
24.165165,7.48331477,0,0,0,0,0,0,0
24.175657,7.14142843,0,0,0,0,0,0,0
24.186148,5.83095189,0,0,0,0,0,0,0
24.19664,6.32455532,0,0,0,0,0,0,0
24.207132,6.8556546,0,0,0,0,0,0,0
24.217623,7.07106781,0,0,0,0,0,0,0
24.228115,7,0,0,0,0,0,0,0
24.238606,6.08276253,0,0,0,0,0,0,0
24.249098,7.21110255,0,0,0,0,0,0,0
24.25959,6.244998,0,0,0,0,0,0,0
24.270081,7.21110255,0,0,0,0,0,0,0
24.280573,6.4807407,0,0,0,0,0,0,0
24.291064,6.70820393,0,0,0,0,0,0,0
24.301556,6.78232998,0,0,0,0,0,0,0
24.312048,6.8556546,0,0,0,0,0,0,0
24.322539,6.70820393,0,0,0,0,0,0,0
24.333031,6.32455532,0,0,0,0,0,0,0
24.343522,6.8556546,0,0,0,0,0,0,0
24.354014,6.55743852,0,0,0,0,0,0,0
24.364506,7,0,0,0,0,0,0,0
24.374997,6.164414,0,0,0,0,0,0,0
24.385489,6.4807407,0,0,0,0,0,0,0
24.39598,7.41619849,0,0,0,0,0,0,0
24.406472,6.32455532,0,0,0,0,0,0,0
24.416964,6.92820323,0,0,0,0,0,0,0
24.427455,7.07106781,0,0,0,0,0,0,0
24.437947,6.78232998,0,0,0,0,0,0,0
24.448438,6.92820323,0,0,0,0,0,0,0
24.45893,6.70820393,0,0,0,0,0,0,0
24.469422,7,0,0,0,0,0,0,0
24.479913,6.55743852,0,0,0,0,0,0,0
24.490405,6.70820393,0,0,0,0,0,0,0
24.500896,6.55743852,0,0,0,0,0,0,0
24.511388,5.56776436,0,0,0,0,0,0,0
24.52188,6.92820323,0,0,0,0,0,0,0
24.532371,5.83095189,0,0,0,0,0,0,0
24.542863,7.28010989,0,0,0,0,0,0,0
24.553354,7.34846923,0,0,0,0,0,0,0
24.563846,6.78232998,0,0,0,0,0,0,0
24.574338,6.40312424,0,0,0,0,0,0,0
24.584829,6,0,0,0,0,0,0,0
24.595321,6.78232998,0,0,0,0,0,0,0
24.605812,7.07106781,0,0,0,0,0,0,0
24.616304,7.34846923,0,0,0,0,0,0,0
24.626796,5.83095189,0,0,0,0,0,0,0
24.637287,6.92820323,0,0,0,0,0,0,0
24.647779,5.83095189,0,0,0,0,0,0,0
24.65827,6.70820393,0,0,0,0,0,0,0
24.668762,6.55743852,0,0,0,0,0,0,0
24.679254,7.48331477,0,0,0,0,0,0,0
24.689745,6.4807407,0,0,0,0,0,0,0
24.700237,5.47722558,0,0,0,0,0,0,0
24.710728,6,0,0,0,0,0,0,0
24.72122,6.32455532,0,0,0,0,0,0,0
24.731712,6.63324958,0,0,0,0,0,0,0
24.742203,7,0,0,0,0,0,0,0
24.752695,7.21110255,0,0,0,0,0,0,0
24.763186,6.40312424,0,0,0,0,0,0,0
24.773678,6.63324958,0,0,0,0,0,0,0
24.78417,7,0,0,0,0,0,0,0
24.794661,6.32455532,0,0,0,0,0,0,0
24.805153,6.244998,0,0,0,0,0,0,0
24.815644,6.63324958,0,0,0,0,0,0,0
24.826136,6.32455532,0,0,0,0,0,0,0
24.836628,7.48331477,0,0,0,0,0,0,0
24.847119,6.40312424,0,0,0,0,0,0,0
24.857611,6.32455532,0,0,0,0,0,0,0
24.868102,6.63324958,0,0,0,0,0,0,0
24.878594,6.70820393,0,0,0,0,0,0,0
24.889086,6.8556546,0,0,0,0,0,0,0
24.899577,6.55743852,0,0,0,0,0,0,0
24.910069,7.21110255,0,0,0,0,0,0,0
24.92056,7.34846923,0,0,0,0,0,0,0
24.931052,6.4807407,0,0,0,0,0,0,0
24.941544,6.4807407,0,0,0,0,0,0,0
24.952035,6.92820323,0,0,0,0,0,0,0
24.962527,6,0,0,0,0,0,0,0
24.973018,7.21110255,0,0,0,0,0,0,0
24.98351,6.4807407,0,0,0,0,0,0,0
24.994002,6.70820393,0,0,0,0,0,0,0
25.004493,6.08276253,0,0,0,0,0,0,0
25.014985,7.54983444,0,0,0,0,0,0,0
25.025476,6,0,0,0,0,0,0,0
25.035968,6.32455532,0,0,0,0,0,0,0
25.04646,5.74456265,0,0,0,0,0,0,0
25.056951,6.55743852,0,0,0,0,0,0,0
25.067443,6.4807407,0,0,0,0,0,0,0
25.077934,7,0,0,0,0,0,0,0
25.088426,6.4807407,0,0,0,0,0,0,0
25.098918,6.92820323,0,0,0,0,0,0,0
25.109409,6.63324958,0,0,0,0,0,0,0
25.119901,6.40312424,0,0,0,0,0,0,0
25.130392,7,0,0,0,0,0,0,0
25.140884,6.244998,0,0,0,0,0,0,0
25.151376,6.92820323,0,0,0,0,0,0,0
25.161867,6,0,0,0,0,0,0,0
25.172359,6.8556546,0,0,0,0,0,0,0
25.18285,6.164414,0,0,0,0,0,0,0
25.193342,6.78232998,0,0,0,0,0,0,0
25.203834,7.14142843,0,0,0,0,0,0,0
25.214325,5,0,0,0,0,0,0,0
25.224817,6.164414,0,0,0,0,0,0,0
25.235308,6,0,0,0,0,0,0,0
25.2458,6.244998,0,0,0,0,0,0,0
25.256292,6.92820323,0,0,0,0,0,0,0
25.266783,5.91607978,0,0,0,0,0,0,0
25.277275,5.74456265,0,0,0,0,0,0,0
25.287766,6.32455532,0,0,0,0,0,0,0
25.298258,6.8556546,0,0,0,0,0,0,0
25.30875,6.08276253,0,0,0,0,0,0,0
25.319241,6.4807407,0,0,0,0,0,0,0
25.329733,6.244998,0,0,0,0,0,0,0
25.340224,6.55743852,0,0,0,0,0,0,0
25.350716,6.40312424,0,0,0,0,0,0,0
25.361208,6.78232998,0,0,0,0,0,0,0
25.371699,5.83095189,0,0,0,0,0,0,0
25.382191,6.63324958,0,0,0,0,0,0,0
25.392682,5.91607978,0,0,0,0,0,0,0
25.403174,6.55743852,0,0,0,0,0,0,0
25.413666,6.92820323,0,0,0,0,0,0,0
25.424157,6.70820393,0,0,0,0,0,0,0
25.434649,6.08276253,0,0,0,0,0,0,0
25.44514,7,0,0,0,0,0,0,0
25.455632,6.63324958,0,0,0,0,0,0,0
25.466124,6.40312424,0,0,0,0,0,0,0
25.476615,5.83095189,0,0,0,0,0,0,0
25.487107,6.244998,0,0,0,0,0,0,0
25.497598,6.244998,0,0,0,0,0,0,0
25.50809,6.55743852,0,0,0,0,0,0,0
25.518582,6.164414,0,0,0,0,0,0,0
25.529073,6.08276253,0,0,0,0,0,0,0
25.539565,6.244998,0,0,0,0,0,0,0
25.550056,7.14142843,0,0,0,0,0,0,0
25.560548,6,0,0,0,0,0,0,0
25.57104,6.40312424,0,0,0,0,0,0,0
25.581531,5.74456265,0,0,0,0,0,0,0
25.592023,6.78232998,0,0,0,0,0,0,0
25.602514,7,0,0,0,0,0,0,0
25.613006,6.55743852,0,0,0,0,0,0,0
25.623498,6.55743852,0,0,0,0,0,0,0
25.633989,6.78232998,0,0,0,0,0,0,0
25.644481,7,0,0,0,0,0,0,0
25.654972,6.32455532,0,0,0,0,0,0,0
25.665464,6.164414,0,0,0,0,0,0,0
25.675956,5.74456265,0,0,0,0,0,0,0
25.686447,6.244998,0,0,0,0,0,0,0
25.696939,6.63324958,0,0,0,0,0,0,0
25.70743,6.55743852,0,0,0,0,0,0,0
25.717922,6.70820393,0,0,0,0,0,0,0
25.728414,7.21110255,0,0,0,0,0,0,0
25.738905,5.83095189,0,0,0,0,0,0,0
25.749397,5.74456265,0,0,0,0,0,0,0
25.759888,6.32455532,0,0,0,0,0,0,0
25.77038,6.164414,0,0,0,0,0,0,0
25.780872,6.08276253,0,0,0,0,0,0,0
25.791363,6.40312424,0,0,0,0,0,0,0
25.801855,7.07106781,0,0,0,0,0,0,0
25.812346,6.164414,0,0,0,0,0,0,0
25.822838,5.56776436,0,0,0,0,0,0,0
25.83333,5.91607978,0,0,0,0,0,0,0
25.843821,5.91607978,0,0,0,0,0,0,0
25.854313,7.07106781,0,0,0,0,0,0,0
25.864804,6.244998,0,0,0,0,0,0,0
25.875296,7,0,0,0,0,0,0,0
25.885788,6.40312424,0,0,0,0,0,0,0
25.896279,6.92820323,0,0,0,0,0,0,0
25.906771,5.74456265,0,0,0,0,0,0,0
25.917262,6,0,0,0,0,0,0,0
25.927754,6.164414,0,0,0,0,0,0,0
25.938246,5.91607978,0,0,0,0,0,0,0
25.948737,6,0,0,0,0,0,0,0
25.959229,6.40312424,0,0,0,0,0,0,0
25.96972,5.91607978,0,0,0,0,0,0,0
25.980212,5.83095189,0,0,0,0,0,0,0
25.990704,6.4807407,0,0,0,0,0,0,0
26.001195,6.164414,0,0,0,0,0,0,0
26.011687,6.32455532,0,0,0,0,0,0,0
26.022178,5.91607978,0,0,0,0,0,0,0
26.03267,6.08276253,0,0,0,0,0,0,0
26.043162,6.32455532,0,0,0,0,0,0,0
26.053653,5.83095189,0,0,0,0,0,0,0
26.064145,5.74456265,0,0,0,0,0,0,0
26.074636,6.32455532,0,0,0,0,0,0,0
26.085128,6.92820323,0,0,0,0,0,0,0
26.09562,6.78232998,0,0,0,0,0,0,0
26.106111,6.78232998,0,0,0,0,0,0,0
26.116603,6.70820393,0,0,0,0,0,0,0
26.127094,6.244998,0,0,0,0,0,0,0
26.137586,6.8556546,0,0,0,0,0,0,0
26.148078,6.8556546,0,0,0,0,0,0,0
26.158569,7,0,0,0,0,0,0,0
26.169061,7.07106781,0,0,0,0,0,0,0
26.179552,6.40312424,0,0,0,0,0,0,0
26.190044,5.91607978,0,0,0,0,0,0,0
26.200536,5.56776436,0,0,0,0,0,0,0
26.211027,5.74456265,0,0,0,0,0,0,0
26.221519,6.70820393,0,0,0,0,0,0,0
26.23201,5.91607978,0,0,0,0,0,0,0
26.242502,5.74456265,0,0,0,0,0,0,0
26.252994,6.164414,0,0,0,0,0,0,0
26.263485,5.91607978,0,0,0,0,0,0,0
26.273977,6.78232998,0,0,0,0,0,0,0
26.284468,7.34846923,0,0,0,0,0,0,0
26.29496,5.91607978,0,0,0,0,0,0,0
26.305452,6.164414,0,0,0,0,0,0,0
26.315943,6.55743852,0,0,0,0,0,0,0
26.326435,6.244998,0,0,0,0,0,0,0
26.336926,6.244998,0,0,0,0,0,0,0
26.347418,7.34846923,0,0,0,0,0,0,0
26.35791,6.40312424,0,0,0,0,0,0,0
26.368401,6.55743852,0,0,0,0,0,0,0
26.378893,6.08276253,0,0,0,0,0,0,0
26.389384,6.08276253,0,0,0,0,0,0,0
26.399876,5.91607978,0,0,0,0,0,0,0
26.410368,5.65685425,0,0,0,0,0,0,0
26.420859,6.40312424,0,0,0,0,0,0,0
26.431351,5.83095189,0,0,0,0,0,0,0
26.441842,5.65685425,0,0,0,0,0,0,0
26.452334,5.47722558,0,0,0,0,0,0,0
26.462826,6.08276253,0,0,0,0,0,0,0
26.473317,6.63324958,0,0,0,0,0,0,0
26.483809,6.40312424,0,0,0,0,0,0,0
26.4943,6.40312424,0,0,0,0,0,0,0
26.504792,6.55743852,0,0,0,0,0,0,0
26.515284,6.40312424,0,0,0,0,0,0,0
26.525775,6,0,0,0,0,0,0,0
26.536267,7.21110255,0,0,0,0,0,0,0
26.546758,6.244998,0,0,0,0,0,0,0
26.55725,6.70820393,0,0,0,0,0,0,0
26.567742,6.164414,0,0,0,0,0,0,0
26.578233,6.55743852,0,0,0,0,0,0,0
26.588725,5.83095189,0,0,0,0,0,0,0
26.599216,6.08276253,0,0,0,0,0,0,0
26.609708,6.63324958,0,0,0,0,0,0,0
26.6202,6.32455532,0,0,0,0,0,0,0
26.630691,6.70820393,0,0,0,0,0,0,0
26.641183,5.56776436,0,0,0,0,0,0,0
26.651674,7.07106781,0,0,0,0,0,0,0
26.662166,6.32455532,0,0,0,0,0,0,0
26.672658,5.65685425,0,0,0,0,0,0,0
26.683149,6.40312424,0,0,0,0,0,0,0
26.693641,4.79583152,0,0,0,0,0,0,0
26.704132,6.32455532,0,0,0,0,0,0,0
26.714624,6.40312424,0,0,0,0,0,0,0
26.725116,6,0,0,0,0,0,0,0
26.735607,7.14142843,0,0,0,0,0,0,0
26.746099,5.56776436,0,0,0,0,0,0,0
26.75659,6.164414,0,0,0,0,0,0,0
26.767082,6.78232998,0,0,0,0,0,0,0
26.777574,6.164414,0,0,0,0,0,0,0
26.788065,4.89897949,0,0,0,0,0,0,0
26.798557,7,0,0,0,0,0,0,0
26.809048,5.83095189,0,0,0,0,0,0,0
26.81954,6.4807407,0,0,0,0,0,0,0
26.830032,6.164414,0,0,0,0,0,0,0
26.840523,5.83095189,0,0,0,0,0,0,0
26.851015,6,0,0,0,0,0,0,0
26.861506,6.55743852,0,0,0,0,0,0,0
26.871998,5.47722558,0,0,0,0,0,0,0
26.88249,6.78232998,0,0,0,0,0,0,0
26.892981,5.91607978,0,0,0,0,0,0,0
26.903473,6.8556546,0,0,0,0,0,0,0
26.913964,6.4807407,0,0,0,0,0,0,0
26.924456,6.70820393,0,0,0,0,0,0,0
26.934948,5.91607978,0,0,0,0,0,0,0
26.945439,5.38516481,0,0,0,0,0,0,0
26.955931,6.4807407,0,0,0,0,0,0,0
26.966422,6.63324958,0,0,0,0,0,0,0
26.976914,6.4807407,0,0,0,0,0,0,0
26.987406,5.91607978,0,0,0,0,0,0,0
26.997897,5.83095189,0,0,0,0,0,0,0
27.008389,6.08276253,0,0,0,0,0,0,0
27.01888,5.47722558,0,0,0,0,0,0,0
27.029372,5.74456265,0,0,0,0,0,0,0
27.039864,6.78232998,0,0,0,0,0,0,0
27.050355,5.83095189,0,0,0,0,0,0,0
27.060847,5.83095189,0,0,0,0,0,0,0
27.071338,6.55743852,0,0,0,0,0,0,0
27.08183,6.40312424,0,0,0,0,0,0,0
27.092322,6.4807407,0,0,0,0,0,0,0
27.102813,6.08276253,0,0,0,0,0,0,0
27.113305,5.65685425,0,0,0,0,0,0,0
27.123796,6.244998,0,0,0,0,0,0,0
27.134288,6,0,0,0,0,0,0,0
27.14478,6.78232998,0,0,0,0,0,0,0
27.155271,5.47722558,0,0,0,0,0,0,0
27.165763,6.32455532,0,0,0,0,0,0,0
27.176254,6.40312424,0,0,0,0,0,0,0
27.186746,6.244998,0,0,0,0,0,0,0
27.197238,5.38516481,0,0,0,0,0,0,0
27.207729,5.74456265,0,0,0,0,0,0,0
27.218221,6.92820323,0,0,0,0,0,0,0
27.228712,6.164414,0,0,0,0,0,0,0
27.239204,5.74456265,0,0,0,0,0,0,0
27.249696,5,0,0,0,0,0,0,0
27.260187,6.4807407,0,0,0,0,0,0,0
27.270679,6.32455532,0,0,0,0,0,0,0
27.28117,6.4807407,0,0,0,0,0,0,0
27.291662,6.244998,0,0,0,0,0,0,0
27.302154,6.164414,0,0,0,0,0,0,0
27.312645,6.164414,0,0,0,0,0,0,0
27.323137,6.244998,0,0,0,0,0,0,0
27.333628,6.08276253,0,0,0,0,0,0,0
27.34412,5.65685425,0,0,0,0,0,0,0
27.354612,5.29150262,0,0,0,0,0,0,0
27.365103,5.91607978,0,0,0,0,0,0,0
27.375595,5,0,0,0,0,0,0,0
27.386086,5.38516481,0,0,0,0,0,0,0
27.396578,5.56776436,0,0,0,0,0,0,0
27.40707,6,0,0,0,0,0,0,0
27.417561,5.38516481,0,0,0,0,0,0,0
27.428053,5.38516481,0,0,0,0,0,0,0
27.438544,6.164414,0,0,0,0,0,0,0
27.449036,5.29150262,0,0,0,0,0,0,0
27.459528,6.32455532,0,0,0,0,0,0,0
27.470019,6.40312424,0,0,0,0,0,0,0
27.480511,5.65685425,0,0,0,0,0,0,0
27.491002,5.38516481,0,0,0,0,0,0,0
27.501494,6.164414,0,0,0,0,0,0,0
27.511986,7.07106781,0,0,0,0,0,0,0
27.522477,5.19615242,0,0,0,0,0,0,0
27.532969,5.91607978,0,0,0,0,0,0,0
27.54346,6.78232998,0,0,0,0,0,0,0
27.553952,5.74456265,0,0,0,0,0,0,0
27.564444,6.08276253,0,0,0,0,0,0,0
27.574935,5,0,0,0,0,0,0,0
27.585427,6.70820393,0,0,0,0,0,0,0
27.595918,5.91607978,0,0,0,0,0,0,0
27.60641,6.244998,0,0,0,0,0,0,0
27.616902,7,0,0,0,0,0,0,0
27.627393,6,0,0,0,0,0,0,0
27.637885,6.32455532,0,0,0,0,0,0,0
27.648376,7,0,0,0,0,0,0,0
27.658868,6.244998,0,0,0,0,0,0,0
27.66936,6.55743852,0,0,0,0,0,0,0
27.679851,6.164414,0,0,0,0,0,0,0
27.690343,6,0,0,0,0,0,0,0
27.700834,5.65685425,0,0,0,0,0,0,0
27.711326,6.244998,0,0,0,0,0,0,0
27.721818,6.08276253,0,0,0,0,0,0,0
27.732309,5.47722558,0,0,0,0,0,0,0
27.742801,5.38516481,0,0,0,0,0,0,0
27.753292,6.55743852,0,0,0,0,0,0,0
27.763784,5.38516481,0,0,0,0,0,0,0
27.774276,6.63324958,0,0,0,0,0,0,0
27.784767,6.63324958,0,0,0,0,0,0,0
27.795259,6.55743852,0,0,0,0,0,0,0
27.80575,6.78232998,0,0,0,0,0,0,0
27.816242,6.244998,0,0,0,0,0,0,0
27.826734,6.40312424,0,0,0,0,0,0,0
27.837225,5.91607978,0,0,0,0,0,0,0
27.847717,6.32455532,0,0,0,0,0,0,0
27.858208,5.91607978,0,0,0,0,0,0,0
27.8687,5.91607978,0,0,0,0,0,0,0
27.879192,6,0,0,0,0,0,0,0
27.889683,5.56776436,0,0,0,0,0,0,0
27.900175,5.56776436,0,0,0,0,0,0,0
27.910666,6.164414,0,0,0,0,0,0,0
27.921158,5.74456265,0,0,0,0,0,0,0
27.93165,6.40312424,0,0,0,0,0,0,0
27.942141,6.55743852,0,0,0,0,0,0,0
27.952633,5.09901951,0,0,0,0,0,0,0
27.963124,6.63324958,0,0,0,0,0,0,0
27.973616,5.09901951,0,0,0,0,0,0,0
27.984108,5.56776436,0,0,0,0,0,0,0
27.994599,5.65685425,0,0,0,0,0,0,0
28.005091,6.164414,0,0,0,0,0,0,0
28.015582,5.83095189,0,0,0,0,0,0,0
28.026074,5.74456265,0,0,0,0,0,0,0
28.036566,6.70820393,0,0,0,0,0,0,0
28.047057,6.40312424,0,0,0,0,0,0,0
28.057549,5.56776436,0,0,0,0,0,0,0
28.06804,5.65685425,0,0,0,0,0,0,0
28.078532,6.4807407,0,0,0,0,0,0,0
28.089024,5.83095189,0,0,0,0,0,0,0
28.099515,5.47722558,0,0,0,0,0,0,0
28.110007,6,0,0,0,0,0,0,0
28.120498,6.164414,0,0,0,0,0,0,0
28.13099,6.78232998,0,0,0,0,0,0,0
28.141482,5.83095189,0,0,0,0,0,0,0
28.151973,6.40312424,0,0,0,0,0,0,0
28.162465,5.09901951,0,0,0,0,0,0,0
28.172956,5.56776436,0,0,0,0,0,0,0
28.183448,6.244998,0,0,0,0,0,0,0
28.19394,5.74456265,0,0,0,0,0,0,0
28.204431,5.74456265,0,0,0,0,0,0,0
28.214923,5,0,0,0,0,0,0,0
28.225414,6.164414,0,0,0,0,0,0,0
28.235906,6.40312424,0,0,0,0,0,0,0
28.246398,6.244998,0,0,0,0,0,0,0
28.256889,5.65685425,0,0,0,0,0,0,0
28.267381,5.19615242,0,0,0,0,0,0,0
28.277872,6.8556546,0,0,0,0,0,0,0
28.288364,6.40312424,0,0,0,0,0,0,0
28.298856,7.68114575,0,0,0,0,0,0,0
28.309347,6.4807407,0,0,0,0,0,0,0
28.319839,5.91607978,0,0,0,0,0,0,0
28.33033,5.47722558,0,0,0,0,0,0,0
28.340822,6.244998,0,0,0,0,0,0,0
28.351314,5.65685425,0,0,0,0,0,0,0
28.361805,6.32455532,0,0,0,0,0,0,0
28.372297,6.78232998,0,0,0,0,0,0,0
28.382788,6.32455532,0,0,0,0,0,0,0
28.39328,7,0,0,0,0,0,0,0
28.403772,6.40312424,0,0,0,0,0,0,0
28.414263,5.83095189,0,0,0,0,0,0,0
28.424755,6.40312424,0,0,0,0,0,0,0
28.435246,6.08276253,0,0,0,0,0,0,0
28.445738,6,0,0,0,0,0,0,0
28.45623,6.32455532,0,0,0,0,0,0,0
28.466721,5.91607978,0,0,0,0,0,0,0
28.477213,6.164414,0,0,0,0,0,0,0
28.487704,6.63324958,0,0,0,0,0,0,0
28.498196,5.83095189,0,0,0,0,0,0,0
28.508688,6.4807407,0,0,0,0,0,0,0
28.519179,6.40312424,0,0,0,0,0,0,0
28.529671,6.08276253,0,0,0,0,0,0,0
28.540162,5.65685425,0,0,0,0,0,0,0
28.550654,5.19615242,0,0,0,0,0,0,0
28.561146,6.244998,0,0,0,0,0,0,0
28.571637,5.38516481,0,0,0,0,0,0,0
28.582129,6.164414,0,0,0,0,0,0,0
28.59262,6.55743852,0,0,0,0,0,0,0
28.603112,6,0,0,0,0,0,0,0
28.613604,6.32455532,0,0,0,0,0,0,0
28.624095,5.74456265,0,0,0,0,0,0,0
28.634587,6,0,0,0,0,0,0,0
28.645078,6.92820323,0,0,0,0,0,0,0
28.65557,6.32455532,0,0,0,0,0,0,0
28.666062,5.65685425,0,0,0,0,0,0,0
28.676553,6.32455532,0,0,0,0,0,0,0
28.687045,6.08276253,0,0,0,0,0,0,0
28.697536,6,0,0,0,0,0,0,0
28.708028,6.32455532,0,0,0,0,0,0,0
28.71852,5.74456265,0,0,0,0,0,0,0
28.729011,6.164414,0,0,0,0,0,0,0
28.739503,4.89897949,0,0,0,0,0,0,0
28.749994,6.70820393,0,0,0,0,0,0,0
28.760486,6.244998,0,0,0,0,0,0,0
28.770978,6.40312424,0,0,0,0,0,0,0
28.781469,5.47722558,0,0,0,0,0,0,0
28.791961,6.70820393,0,0,0,0,0,0,0
28.802452,6.32455532,0,0,0,0,0,0,0
28.812944,5.56776436,0,0,0,0,0,0,0
28.823436,5.56776436,0,0,0,0,0,0,0
28.833927,7,0,0,0,0,0,0,0
28.844419,5.56776436,0,0,0,0,0,0,0
28.85491,6.244998,0,0,0,0,0,0,0
28.865402,6.32455532,0,0,0,0,0,0,0
28.875894,7.07106781,0,0,0,0,0,0,0
28.886385,6.08276253,0,0,0,0,0,0,0
28.896877,6.4807407,0,0,0,0,0,0,0
28.907368,7.41619849,0,0,0,0,0,0,0
28.91786,6,0,0,0,0,0,0,0
28.928352,5.56776436,0,0,0,0,0,0,0
28.938843,5.09901951,0,0,0,0,0,0,0
28.949335,6.164414,0,0,0,0,0,0,0
28.959826,6.55743852,0,0,0,0,0,0,0
28.970318,5.65685425,0,0,0,0,0,0,0
28.98081,6.55743852,0,0,0,0,0,0,0
28.991301,7.28010989,0,0,0,0,0,0,0
29.001793,6.8556546,0,0,0,0,0,0,0
29.012284,5.74456265,0,0,0,0,0,0,0
29.022776,4.69041576,0,0,0,0,0,0,0
29.033268,5.29150262,0,0,0,0,0,0,0
29.043759,6.78232998,0,0,0,0,0,0,0
29.054251,6,0,0,0,0,0,0,0
29.064742,5.91607978,0,0,0,0,0,0,0
29.075234,5.74456265,0,0,0,0,0,0,0
29.085726,6.78232998,0,0,0,0,0,0,0
29.096217,5.29150262,0,0,0,0,0,0,0
29.106709,6.164414,0,0,0,0,0,0,0
29.1172,6.164414,0,0,0,0,0,0,0
29.127692,7,0,0,0,0,0,0,0
29.138184,6.244998,0,0,0,0,0,0,0
29.148675,6.32455532,0,0,0,0,0,0,0
29.159167,6.70820393,0,0,0,0,0,0,0
29.169658,6.4807407,0,0,0,0,0,0,0
29.18015,4.89897949,0,0,0,0,0,0,0
29.190642,6.40312424,0,0,0,0,0,0,0
29.201133,6.40312424,0,0,0,0,0,0,0
29.211625,7.07106781,0,0,0,0,0,0,0
29.222116,6.32455532,0,0,0,0,0,0,0
29.232608,5.83095189,0,0,0,0,0,0,0
29.2431,6,0,0,0,0,0,0,0
29.253591,5.47722558,0,0,0,0,0,0,0
29.264083,6.164414,0,0,0,0,0,0,0
29.274574,5,0,0,0,0,0,0,0
29.285066,5.56776436,0,0,0,0,0,0,0
29.295558,5.74456265,0,0,0,0,0,0,0
29.306049,6,0,0,0,0,0,0,0
29.316541,6.244998,0,0,0,0,0,0,0
29.327032,6.08276253,0,0,0,0,0,0,0
29.337524,6.164414,0,0,0,0,0,0,0
29.348016,6.08276253,0,0,0,0,0,0,0
29.358507,6.08276253,0,0,0,0,0,0,0
29.368999,5.56776436,0,0,0,0,0,0,0
29.37949,5.91607978,0,0,0,0,0,0,0
29.389982,6.55743852,0,0,0,0,0,0,0
29.400474,6,0,0,0,0,0,0,0
29.410965,6.244998,0,0,0,0,0,0,0
29.421457,6.70820393,0,0,0,0,0,0,0
29.431948,5.83095189,0,0,0,0,0,0,0
29.44244,5.65685425,0,0,0,0,0,0,0
29.452932,5.74456265,0,0,0,0,0,0,0
29.463423,6.32455532,0,0,0,0,0,0,0
29.473915,6.08276253,0,0,0,0,0,0,0
29.484406,6.164414,0,0,0,0,0,0,0
29.494898,7.48331477,0,0,0,0,0,0,0
29.50539,6.32455532,0,0,0,0,0,0,0
29.515881,5.65685425,0,0,0,0,0,0,0
29.526373,5.65685425,0,0,0,0,0,0,0
29.536864,5.65685425,0,0,0,0,0,0,0
29.547356,5.47722558,0,0,0,0,0,0,0
29.557848,6.40312424,0,0,0,0,0,0,0
29.568339,6.244998,0,0,0,0,0,0,0
29.578831,6.40312424,0,0,0,0,0,0,0
29.589322,6.08276253,0,0,0,0,0,0,0
29.599814,5.65685425,0,0,0,0,0,0,0
29.610306,6.92820323,0,0,0,0,0,0,0
29.620797,5.56776436,0,0,0,0,0,0,0
29.631289,5.47722558,0,0,0,0,0,0,0
29.64178,5.65685425,0,0,0,0,0,0,0
29.652272,6.08276253,0,0,0,0,0,0,0
29.662764,5.83095189,0,0,0,0,0,0,0
29.673255,6,0,0,0,0,0,0,0
29.683747,6.32455532,0,0,0,0,0,0,0
29.694238,6.164414,0,0,0,0,0,0,0
29.70473,6.40312424,0,0,0,0,0,0,0
29.715222,4.69041576,0,0,0,0,0,0,0
29.725713,6.164414,0,0,0,0,0,0,0
29.736205,6.40312424,0,0,0,0,0,0,0
29.746696,6.08276253,0,0,0,0,0,0,0
29.757188,6.55743852,0,0,0,0,0,0,0
29.76768,5.56776436,0,0,0,0,0,0,0
29.778171,6.244998,0,0,0,0,0,0,0
29.788663,5.56776436,0,0,0,0,0,0,0
29.799154,6.32455532,0,0,0,0,0,0,0
29.809646,6.63324958,0,0,0,0,0,0,0
29.820138,5.91607978,0,0,0,0,0,0,0
29.830629,6.63324958,0,0,0,0,0,0,0
29.841121,6.40312424,0,0,0,0,0,0,0
29.851612,5,0,0,0,0,0,0,0
29.862104,6.63324958,0,0,0,0,0,0,0
29.872596,6.244998,0,0,0,0,0,0,0
29.883087,6,0,0,0,0,0,0,0
29.893579,6.244998,0,0,0,0,0,0,0
29.90407,5.56776436,0,0,0,0,0,0,0
29.914562,6.40312424,0,0,0,0,0,0,0
29.925054,6.55743852,0,0,0,0,0,0,0
29.935545,6.08276253,0,0,0,0,0,0,0
29.946037,6.32455532,0,0,0,0,0,0,0
29.956528,6.40312424,0,0,0,0,0,0,0
29.96702,6.70820393,0,0,0,0,0,0,0
29.977512,6.55743852,0,0,0,0,0,0,0
29.988003,6.55743852,0,0,0,0,0,0,0
29.998495,6.4807407,6.22116011,0.509490522,6.22104935,0,6.22089725,6.22084876,6.22081762
30.008986,5.91607978,6.2228492,-0.553867686,6.22273823,0,6.2225861,6.22253744,6.22250628
30.019478,7.28010989,6.22452536,1.02741644,6.22441418,0,6.22426202,6.22421319,6.22418201
30.02997,6.4807407,6.22618847,0.504531693,6.22607709,0,6.22592489,6.22587589,6.22584469
30.040461,5.38516481,6.22783842,-0.917972557,6.22772683,0,6.2275746,6.22752543,6.22749421
30.050953,7.21110255,6.22947557,0.9907709,6.22936377,0,6.2292115,6.22916216,6.22913093
30.061444,6.32455532,6.23109966,0.305705193,6.23098763,0,6.23083534,6.23078582,6.23075457
30.071936,6.78232998,6.23271102,0.741362909,6.23259878,0,6.23244646,6.23239677,6.23236549
30.082428,6.4807407,6.23430956,0.496418315,6.2341971,0,6.23404475,6.23399488,6.23396358
30.092919,6.164414,6.23589515,-0.26735959,6.23578248,0,6.2356301,6.23558005,6.23554874
30.103411,5.74456265,6.23746816,-0.702072299,6.23735527,0,6.23720285,6.23715263,6.23712129
30.113902,6,6.23902832,-0.488905224,6.23891521,0,6.23876276,6.23871236,6.238681
30.124394,6.78232998,6.24057597,0.736039413,6.24046264,0,6.24031016,6.24025957,6.2402282
30.134886,5.56776436,6.242111,-0.821186115,6.24199745,0,6.24184494,6.24179417,6.24176278
30.145377,6.08276253,6.24363331,-0.401087001,6.24351954,0,6.243367,6.24331605,6.24328463
30.155869,6.08276253,6.24514324,-0.402964899,6.24502924,0,6.24487667,6.24482554,6.2447941
30.16636,5.47722558,6.24664054,-0.877163018,6.24652631,0,6.24637371,6.24632239,6.24629094
30.176852,5.56776436,6.24812552,-0.824840083,6.24801107,0,6.24785845,6.24780694,6.24777546
30.187344,4.79583152,6.24959811,-1.20572243,6.24948342,0,6.24933077,6.24927908,6.24924758
30.197835,5.74456265,6.25105818,-0.711684999,6.25094327,0,6.25079059,6.25073871,6.25070719
30.208327,6.55743852,6.25250608,0.552206889,6.25239093,0,6.25223822,6.25218615,6.25215461
30.218818,6.55743852,6.25394155,0.550905597,6.25382616,0,6.25367343,6.25362117,6.25358961
30.22931,6.32455532,6.25536491,0.263040695,6.2552493,0,6.25509654,6.25504408,6.2550125
30.239802,6.08276253,6.25677608,-0.417149308,6.25666022,0,6.25650744,6.25645479,6.25642318
30.250293,5.83095189,6.25817494,-0.653623016,6.25805885,0,6.25790604,6.2578532,6.25782157
30.260785,6.8556546,6.25956182,0.77207045,6.25944549,0,6.25929265,6.25923961,6.25920796
30.271276,6.4807407,6.26093649,0.46883282,6.26081991,0,6.26066705,6.26061382,6.26058215
30.281768,6.32455532,6.26229924,0.249511684,6.26218243,0,6.26202954,6.2619761,6.26194441
30.29226,6.40312424,6.26364999,0.37346251,6.26353293,0,6.26338002,6.26332639,6.26329468
30.302751,6.55743852,6.26498865,0.540786346,6.26487135,0,6.26471842,6.26466458,6.26463284
30.313243,6.164414,6.26631552,-0.319220166,6.26619797,0,6.26604501,6.26599097,6.26595922
30.323734,5.65685425,6.26763037,-0.781521672,6.26751258,0,6.2673596,6.26730535,6.26727357
30.334226,6.4807407,6.26893351,0.460225151,6.26881546,0,6.26866246,6.26860801,6.26857621
30.344718,6.244998,6.27022484,-0.158829591,6.27010654,0,6.26995352,6.26989886,6.26986704
30.355209,6.244998,6.27150428,-0.162807489,6.27138573,0,6.27123268,6.27117782,6.27114598
30.365701,7,6.27277211,0.852776577,6.27265331,0,6.27250024,6.27244517,6.2724133
30.376192,6.08276253,6.27402813,-0.437339229,6.27390908,0,6.27375598,6.27370071,6.27366882
30.386684,5.19615242,6.27527262,-1.0388071,6.27515331,0,6.2750002,6.27494471,6.27491279
30.397176,6.78232998,6.2765055,0.711213391,6.27638593,0,6.27623279,6.27617709,6.27614516
30.407667,6,6.27772668,-0.526997798,6.27760685,0,6.2774537,6.27739778,6.27736582
30.418159,6.55743852,6.27893644,0.527732968,6.27881635,0,6.27866318,6.27860705,6.27857506
30.42865,6.32455532,6.28013458,0.210762273,6.28001423,0,6.27986104,6.27980469,6.27977269
30.439142,5.83095189,6.28132138,-0.671095735,6.28120076,0,6.28104756,6.28099099,6.28095896
30.449634,5.74456265,6.28249675,-0.733439912,6.28237587,0,6.28222264,6.28216586,6.2821338
30.460125,6.63324958,6.28366062,0.591260483,6.28353947,0,6.28338623,6.28332922,6.28329715
30.470617,6.92820323,6.28481325,0.802115939,6.28469183,0,6.28453857,6.28448134,6.28444924
30.481108,5.65685425,6.28595446,-0.793158375,6.28583276,0,6.28567949,6.28562204,6.28558992
30.4916,6.63324958,6.2870845,0.588357957,6.28696253,0,6.28680924,6.28675156,6.28671942
30.502092,6.32455532,6.28820329,0.190662083,6.28808105,0,6.28792775,6.28786984,6.28783767
30.512583,7.28010989,6.28931078,0.995388926,6.28918826,0,6.28903495,6.28897681,6.28894462
30.523075,6.08276253,6.29047765,-0.455757738,6.29035485,0,6.29013108,6.29007271,6.29004049
30.533566,5.83095189,6.29156288,-0.678683271,6.29143981,0,6.29121597,6.29115738,6.29112513
30.544058,6.32455532,6.29263712,0.178656663,6.29251376,0,6.29228987,6.29223104,6.29219878
30.55455,5.38516481,6.2937003,-0.95317128,6.29357666,0,6.29335271,6.29329365,6.29326136
30.565041,6.08276253,6.29475235,-0.460423521,6.29462843,0,6.29440442,6.29434513,6.29431281
30.575533,6.244998,6.29579351,-0.225378607,6.29566931,0,6.29544525,6.29538571,6.29535337
30.586024,6.164414,6.29682363,-0.363881335,6.29669913,0,6.29647502,6.29641524,6.29638288
30.596516,6.92820323,6.29784292,0.793952333,6.29771814,0,6.29749397,6.29743395,6.29740156
30.607008,6.78232998,6.29885133,0.69532629,6.29872626,0,6.29850203,6.29844178,6.29840936
30.617499,6.08276253,6.2998488,-0.465925179,6.29972343,0,6.29949915,6.29943865,6.29940621
30.627991,6.63324958,6.30083555,0.576553577,6.30070989,0,6.30048556,6.30042481,6.30039235
30.638482,6.08276253,6.30181143,-0.468026605,6.30168547,0,6.30146109,6.30140009,6.30136761
30.648974,6.40312424,6.30277666,0.316776852,6.3026504,0,6.30242597,6.30236472,6.30233221
30.659466,6,6.30373118,-0.551118122,6.30360462,0,6.30338014,6.30331864,6.3032861
30.669957,6.55743852,6.30467494,0.502755988,6.30454808,0,6.30432354,6.30426179,6.30422923
30.680449,5.29150262,6.30560815,-1.00702807,6.30548098,0,6.30525639,6.30519439,6.3051618
30.69094,6.244998,6.30653066,-0.248057781,6.30640318,0,6.30617855,6.30611629,6.30608368
30.701432,6,6.30744269,-0.554475148,6.3073149,0,6.30709022,6.30702771,6.30699507
30.711924,6.55743852,6.30834418,0.499093521,6.30821609,0,6.30799135,6.30792858,6.30789592
30.722415,6.55743852,6.30923508,0.498200202,6.30910667,0,6.3088819,6.30881886,6.30878617
30.732907,6.40312424,6.3101156,0.304973175,6.30998688,0,6.30976205,6.30969875,6.30966604
30.743398,7.54983444,6.3109856,1.11303587,6.31085656,0,6.31063169,6.31056812,6.31053538
30.75389,6.55743852,6.31184527,0.495573659,6.31171591,0,6.311491,6.31142717,6.3113944
30.764382,5.74456265,6.31269458,-0.75374527,6.3125649,0,6.31233994,6.31227584,6.31224305
30.774873,6.4807407,6.31353347,0.408909809,6.31340347,0,6.31317846,6.31311409,6.31308127
30.785365,5.65685425,6.31436213,-0.810868597,6.31423181,0,6.31400676,6.31394212,6.31390927
30.795856,6.92820323,6.31518045,0.782957716,6.31504979,0,6.31482471,6.31475979,6.31472692
30.806348,6.55743852,6.3159886,0.491375543,6.31585762,0,6.31563249,6.3155673,6.3155344
30.81684,6.70820393,6.31678655,0.625633586,6.31665524,0,6.31643007,6.3163646,6.31633168
30.827331,6.164414,6.31757425,-0.391356929,6.3174426,0,6.3172174,6.31715165,6.3171187
30.837823,6.08276253,6.31835188,-0.485375476,6.3182199,0,6.31799466,6.31792863,6.31789565
30.848314,6.55743852,6.31911934,0.488179464,6.31898702,0,6.31876173,6.31869542,6.31866242
30.858806,4.58257569,6.31987678,-1.31806718,6.31974413,0,6.31951881,6.31945221,6.31941918
30.869298,6.55743852,6.32062419,0.486635731,6.32049119,0,6.32026584,6.32019895,6.32016589
30.879789,6.40312424,6.32136151,0.285941823,6.32122817,0,6.32100278,6.3209356,6.32090252
30.890281,5.38516481,6.32208892,-0.967948405,6.32195523,0,6.32172981,6.32166234,6.32162923
30.900772,6.32455532,6.32280632,0.0418210897,6.32267228,0,6.32244682,6.32237906,6.32234592
30.911264,6.8556546,6.32351386,0.729479772,6.32337947,0,6.32315399,6.32308593,6.32305276
30.921756,6.40312424,6.32421152,0.280914073,6.32407678,0,6.32385126,6.3237829,6.32374971
30.932247,5.56776436,6.32489926,-0.870134988,6.32476416,0,6.32453861,6.32446996,6.32443673
30.942739,7,6.32557724,0.821232463,6.32544179,0,6.32521621,6.32514725,6.325114
30.95323,6.244998,6.32624537,-0.28503924,6.32610955,0,6.32588395,6.32581468,6.3257814
30.963722,6.244998,6.32690379,-0.286191887,6.32676762,0,6.32654199,6.32647241,6.32643911
30.974214,5.74456265,6.32755249,-0.763537717,6.32741595,0,6.32719029,6.32712041,6.32708708
30.984705,5.74456265,6.32819143,-0.763956008,6.32805452,0,6.32782884,6.32775865,6.32772528
30.995197,5.91607978,6.32882076,-0.6424492,6.32868348,0,6.32845777,6.32838727,6.32835388
31.005688,6.70820393,6.32944039,0.615437684,6.32930274,0,6.32907701,6.32900619,6.32897277
31.01618,6.78232998,6.33005047,0.672517293,6.32991245,0,6.3296867,6.32961556,6.32958211
31.026672,6.08276253,6.33065098,-0.497883971,6.33051258,0,6.33028681,6.33021535,6.33018187
31.037163,6.92820323,6.33124188,0.772632739,6.3311031,0,6.33087731,6.33080553,6.33077203
31.047655,6.55743852,6.33182332,0.474989686,6.33168416,0,6.33145835,6.33138625,6.33135271
31.058146,6.63324958,6.33239522,0.548501922,6.33225567,0,6.33202985,6.33195742,6.33192386
31.068638,5.91607978,6.33295772,-0.645660852,6.33281778,0,6.33259195,6.33251918,6.33248559
31.07913,6.164414,6.33351079,-0.411213796,6.33337046,0,6.33314461,6.33307152,6.3330379
31.089621,6.164414,6.33405441,-0.411874261,6.33391369,0,6.33368783,6.3336144,6.33358075
31.100113,7,6.33458871,0.815727458,6.3344476,0,6.33422173,6.33414796,6.33411428
31.110604,6.164414,6.33511363,-0.413158114,6.33497212,0,6.33474624,6.33467212,6.33463842
31.121096,6.40312424,6.33562929,0.259797903,6.33548737,0,6.33526148,6.33518703,6.3351533
31.131588,7.41619849,6.33613566,1.03926071,6.33599335,0,6.33576745,6.33569265,6.33565889
31.142079,6.4807407,6.33663274,0.379615536,6.33649002,0,6.33626412,6.33618897,6.33615518
31.152571,6.55743852,6.33712065,0.469380311,6.33697751,0,6.33675161,6.33667611,6.33664229
31.163062,6.4807407,6.33759932,0.378340301,6.33745577,0,6.33722986,6.33715401,6.33712016
31.173554,6.244998,6.33806886,-0.305075181,6.3379249,0,6.337699,6.33762279,6.33758891
31.184046,5.65685425,6.33852928,-0.825636136,6.3383849,0,6.33815899,6.33808243,6.33804852
31.194537,6.40312424,6.33898054,0.253266054,6.33883574,0,6.33860984,6.33853291,6.33849897
31.205029,6.08276253,6.33942277,-0.506616466,6.33927755,0,6.33905165,6.33897436,6.33894039
31.21552,6.55743852,6.33985591,0.466457512,6.33971026,0,6.33948437,6.33940671,6.33937271
31.226012,6.92820323,6.34028007,0.766761472,6.34013399,0,6.33990811,6.33983008,6.33979605
31.236504,7.74596669,6.34069524,1.18544146,6.34054873,0,6.34032285,6.34024445,6.34021039
31.246995,5.83095189,6.34110141,-0.714247516,6.34095446,0,6.34072859,6.34064982,6.34061573
31.257487,5.91607978,6.34149868,-0.652241438,6.34135129,0,6.34112544,6.34104628,6.34101216
31.267978,6.40312424,6.341887,0.247461588,6.34173917,0,6.34151333,6.3414338,6.34139964
31.27847,6.244998,6.34226648,-0.311878954,6.3421182,0,6.34189238,6.34181246,6.34177828
31.288962,7.41619849,6.34263711,1.03612807,6.34248838,0,6.34226258,6.34218227,6.34214806
31.299453,6.55743852,6.34299888,0.463076287,6.3428497,0,6.34262392,6.34254322,6.34250897
31.309945,5.83095189,6.34335188,-0.715821198,6.34320225,0,6.34297649,6.3428954,6.34286112
31.320436,6.4807407,6.34369609,0.37019537,6.34354599,0,6.34332026,6.34323877,6.34320446
31.330928,6.63324958,6.34403158,0.537789921,6.34388103,0,6.34365532,6.34357343,6.34353909
31.34142,6.32455532,6.34435836,-0.140723277,6.34420734,0,6.34398166,6.34389937,6.343865
31.351911,7,6.34467642,0.809520584,6.34452494,0,6.34429928,6.34421659,6.34418219
31.362403,6.63324958,6.34498586,0.53690197,6.3448339,0,6.34460827,6.34452517,6.34449074
31.372894,5.47722558,6.34528663,-0.93169794,6.34513419,0,6.3449086,6.34482509,6.34479062
31.383386,7.14142843,6.34557882,0.892104035,6.34542591,0,6.34520035,6.34511642,6.34508193
31.393878,7.34846923,6.34586243,1.00130255,6.34570904,0,6.34548352,6.34539917,6.34536464
31.404369,5.65685425,6.34613747,-0.830230822,6.34598359,0,6.34575811,6.34567334,6.34563878
31.414861,5.47722558,6.346404,-0.932297393,6.34624963,0,6.3460242,6.345939,6.34590441
31.425352,6.8556546,6.34666202,0.713437163,6.34650715,0,6.34628176,6.34619613,6.34616151
31.435844,6.32455532,6.34691158,-0.149520094,6.34675622,0,6.34653088,6.34644481,6.34641016
31.446336,6.78232998,6.3471527,0.659679685,6.34699683,0,6.34677154,6.34668504,6.34665036
31.456827,5.83095189,6.34738537,-0.718633061,6.347229,0,6.34700377,6.34691682,6.34688211
31.467319,6.63324958,6.34760968,0.534452903,6.3474528,0,6.34722761,6.34714023,6.34710548
31.47781,5.83095189,6.34782559,-0.718939286,6.3476682,0,6.34744308,6.34735524,6.34732046
31.488302,6,6.34803319,-0.589943376,6.34787528,0,6.34765021,6.34756193,6.34752712
31.498794,6.55743852,6.34823247,0.457390486,6.34807404,0,6.34784903,6.3477603,6.34772545
31.509285,6.92820323,6.34842344,0.761432722,6.34826449,0,6.34803955,6.34795035,6.34791547
31.519777,6,6.34860617,-0.5904288,6.34844669,0,6.34822181,6.34813215,6.34809724
31.530268,6,6.34878064,-0.590576532,6.34862063,0,6.34839582,6.3483057,6.34827075
31.54076,7.07106781,6.34894692,0.849776967,6.34878637,0,6.34856164,6.34847104,6.34843606
31.551252,6.4807407,6.34910501,0.36281633,6.34894392,0,6.34871926,6.34862819,6.34859318
31.561743,5.65685425,6.34925492,-0.832106168,6.3490933,0,6.34886871,6.34877716,6.34874212
31.572235,6.164414,6.34939672,-0.430096171,6.34923454,0,6.34901004,6.34891801,6.34888293
31.582726,6.32455532,6.34953039,-0.158035031,6.34936766,0,6.34914324,6.34905072,6.34901561
31.593218,5.91607978,6.34965599,-0.658465039,6.3494927,0,6.34926837,6.34917536,6.34914021
31.60371,6.164414,6.34977353,-0.430534003,6.34960968,0,6.34938543,6.34929193,6.34925675
31.614201,6.4807407,6.34988303,0.361742551,6.34971861,0,6.34949445,6.34940045,6.34936524
31.624693,6.63324958,6.34998452,0.532226512,6.34981953,0,6.34959547,6.34950097,6.34946572
31.635184,6.32455532,6.35007802,-0.159758262,6.34991246,0,6.3496885,6.34959348,6.3495582
31.645676,6.40312424,6.35016357,0.23013184,6.34999743,0,6.34977357,6.34967804,6.34964273
31.656168,5.91607978,6.35024119,-0.658909255,6.35007446,0,6.3498507,6.34975466,6.34971931
31.666659,6.78232998,6.35031089,0.657281595,6.35014357,0,6.34991992,6.34982336,6.34978798
31.677151,6.55743852,6.35037271,0.455044851,6.3502048,0,6.34998126,6.34988417,6.34984875
31.687642,6.92820323,6.35042666,0.760116155,6.35025815,0,6.35003472,6.34993711,6.34990166
31.698134,5.83095189,6.35047278,-0.720777975,6.35030367,0,6.35008036,6.34998221,6.34994672
31.708626,5.74456265,6.35051109,-0.778426905,6.35034137,0,6.35011818,6.35001949,6.34998397
31.719117,7.28010989,6.35054161,0.964141213,6.35037128,0,6.35014821,6.35004897,6.35001342
31.729609,6.63324958,6.35056437,0.531681495,6.35039342,0,6.35017048,6.35007069,6.3500351
31.7401,7.21110255,6.35057939,0.927643878,6.35040781,0,6.350185,6.35008466,6.35004904
31.750592,6.8556546,6.35058669,0.710681301,6.35041448,0,6.35019181,6.35009091,6.35005525
31.761084,6.63324958,6.3505863,0.531660871,6.35041346,0,6.35019092,6.35008946,6.35005377
31.771575,6.32455532,6.35057824,-0.161316219,6.35040476,0,6.35018237,6.35008034,6.35004461
31.782067,7.41619849,6.35056254,1.03229644,6.35038842,0,6.35016617,6.35006357,6.3500278
31.792558,5.47722558,6.35053922,-0.934512519,6.35036445,0,6.35014235,6.35003917,6.35000337
31.80305,6.63324958,6.35050831,0.531734213,6.35033288,0,6.35011093,6.35000717,6.34997133
31.813542,6.08276253,6.3505559,-0.517487552,6.35029373,0,6.35015803,6.34996758,6.34993171
31.824033,6,6.35050997,-0.592038827,6.35024703,0,6.3501116,6.34992045,6.34988454
31.834525,6.40312424,6.35045652,0.229494485,6.35019279,0,6.35005764,6.34986578,6.34982984
31.845016,6,6.35039557,-0.5919422,6.35013105,0,6.34999618,6.3498036,6.34976763
31.855508,6.08276253,6.35032713,-0.517266473,6.35006182,0,6.34992723,6.34973394,6.34969792
31.866,5.91607978,6.35025124,-0.658916885,6.34998513,0,6.34985083,6.34965681,6.34962076
31.876491,6.8556546,6.35016793,0.710975857,6.34990101,0,6.34976701,6.34957225,6.34953616
31.886983,6.78232998,6.3500772,0.657459339,6.34980947,0,6.34967576,6.34948026,6.34944414
31.897474,6.78232998,6.34997909,0.657533946,6.34971054,0,6.34957714,6.34938089,6.34934473
31.907966,6.8556546,6.34987361,0.711182808,6.34960424,0,6.34947114,6.34927414,6.34923795
31.918458,6.32455532,6.34976079,-0.158762319,6.34949059,0,6.3493578,6.34916004,6.34912381
31.928949,6.08276253,6.34964067,-0.516602496,6.34936962,0,6.34923716,6.34903863,6.34900236
31.939441,6.244998,6.34951324,-0.323288168,6.34924134,0,6.34910921,6.34890991,6.3488736
31.949932,6.08276253,6.34937855,-0.516348737,6.3491058,0,6.34897399,6.34877391,6.34873757
31.960424,7.21110255,6.3492366,0.928367359,6.34896299,0,6.34883152,6.34863065,6.34859427
31.970916,6,6.34908742,-0.590836203,6.34881295,0,6.34868181,6.34848015,6.34844374
31.981407,6.164414,6.34893105,-0.429554478,6.34865571,0,6.34852492,6.34832246,6.34828601
31.991899,6.4807407,6.34876749,0.363281171,6.34849126,0,6.34836082,6.34815756,6.34812107
32.00239,6.4807407,6.34859678,0.363516046,6.34831967,0,6.34818958,6.34798551,6.34794898
32.012882,6.8556546,6.34841892,0.7122048,6.34814091,0,6.34801119,6.3478063,6.34776973
32.023374,5.91607978,6.34823395,-0.657384337,6.34795504,0,6.34782568,6.34761996,6.34758336
32.033865,6.8556546,6.3480419,0.712469437,6.34776208,0,6.3476331,6.34742654,6.3473899
32.044357,6.244998,6.34784277,-0.320694195,6.34756203,0,6.34743342,6.34722602,6.34718935
32.054848,5.47722558,6.3476366,-0.932958212,6.34735494,0,6.34722672,6.34701847,6.34698175
32.06534,6.63324958,6.34742339,0.534627152,6.34714079,0,6.34701297,6.34680386,6.34676711
32.075832,7.81024968,6.34720317,1.20956459,6.34691963,0,6.34679221,6.34658224,6.34654544
32.086323,6.70820393,6.346976,0.601022408,6.34669151,0,6.34656449,6.34635364,6.34631681
32.096815,6.40312424,6.34674184,0.237449781,6.34645639,0,6.34632978,6.34611806,6.34608119
32.107306,6,6.34650076,-0.588643155,6.34621435,0,6.34608816,6.34587555,6.34583864
32.117798,6.70820393,6.34625275,0.601623789,6.34596537,0,6.3458396,6.34562608,6.34558914
32.12829,6.32455532,6.34599784,-0.146432641,6.34570947,0,6.34558413,6.34536972,6.34533273
32.138781,6.70820393,6.34573608,0.602053033,6.34544672,0,6.34532182,6.34510649,6.34506947
32.149273,6.4807407,6.34546744,0.36779513,6.34517709,0,6.34505263,6.34483638,6.34479932
32.159764,7.21110255,6.345192,0.93054315,6.34490064,0,6.34477663,6.34455945,6.34452235
32.170256,5.47722558,6.34490972,-0.931495649,6.34461734,0,6.34449379,6.34427567,6.34423853
32.180748,6.63324958,6.34462065,0.537241966,6.34432725,0,6.34420416,6.3439851,6.34394792
32.191239,6.63324958,6.34432484,0.537517198,6.3440304,0,6.34390779,6.34368777,6.34365055
32.201731,6.63324958,6.34402226,0.537798587,6.34372678,0,6.34360465,6.34338366,6.3433464
32.212222,6.4807407,6.34371298,0.370172548,6.34341645,0,6.34329481,6.34307284,6.34303555
32.222714,6.70820393,6.34339697,0.603992517,6.34309937,0,6.34297823,6.34275528,6.34271795
32.233206,5.65685425,6.34307428,-0.828383985,6.34277561,0,6.34265496,6.34243103,6.34239365
32.243697,6.08276253,6.34274495,-0.509884713,6.3424452,0,6.34232507,6.34210013,6.34206271
32.254189,6.78232998,6.34240895,0.66326543,6.34210811,0,6.3419885,6.34176255,6.34172509
32.26468,6.78232998,6.34206637,0.663523638,6.34176442,0,6.34164534,6.34141836,6.34138087
32.275172,5.65685425,6.34171715,-0.827564436,6.34141409,0,6.34129554,6.34106754,6.34103
32.285664,6.4807407,6.34136135,0.373335441,6.34105717,0,6.34093917,6.34071012,6.34067255
32.296155,6.70820393,6.34099902,0.605974346,6.34069371,0,6.34057627,6.34034617,6.34030855
32.306647,6.40312424,6.34063013,0.249988218,6.34032368,0,6.34020679,6.33997563,6.33993797
32.317138,6.78232998,6.34025475,0.664887383,6.33994715,0,6.33983083,6.3395986,6.3395609
32.32763,7.07106781,6.33987284,0.855099392,6.33956407,0,6.33944834,6.33921502,6.33917728
32.338122,6.55743852,6.33948445,0.466855513,6.33917451,0,6.33905936,6.33882495,6.33878718
32.348613,7,6.33908965,0.81296393,6.33877852,0,6.33866397,6.33842845,6.33839064
32.359105,6.40312424,6.33868837,0.253842212,6.33837604,0,6.3382621,6.33802547,6.33798761
32.369596,7.07106781,6.33828071,0.856029847,6.33796717,0,6.33785385,6.3376161,6.3375782
32.380088,5.65685425,6.33786662,-0.825234737,6.33755186,0,6.33743917,6.33720027,6.33716233
32.39058,6.32455532,6.33744615,-0.113537808,6.33713016,0,6.33701811,6.33677806,6.33674008
32.401071,6.55743852,6.33701937,0.469488181,6.33670214,0,6.33659073,6.33634952,6.3363115
32.411563,6.244998,6.33658621,-0.302635451,6.33626772,0,6.33615697,6.33591459,6.33587653
32.422054,6.164414,6.33614678,-0.414406539,6.33582702,0,6.33571694,6.33547337,6.33543527
32.432546,6.78232998,6.33570101,0.668303052,6.33537997,0,6.33527057,6.3350258,6.33498766
32.443038,6.244998,6.33524897,-0.300417992,6.33492663,0,6.33481792,6.33457194,6.33453375
32.453529,6.4807407,6.33479071,0.382034013,6.33446707,0,6.33435906,6.33411186,6.33407363
32.464021,6.32455532,6.33432617,-0.0988476258,6.33400121,0,6.33389391,6.33364548,6.3336072
32.474512,6.4807407,6.33385546,0.383256095,6.33352917,0,6.3334226,6.33317291,6.33313459
32.485004,6.55743852,6.33337851,0.473349777,6.33305087,0,6.33294503,6.33269409,6.33265573
32.495496,5.74456265,6.33289538,-0.767028512,6.33256638,0,6.33246129,6.33220907,6.33217067
32.505987,6.08276253,6.33240614,-0.499643487,6.33207577,0,6.33197144,6.33171792,6.33167948
32.516479,7.28010989,6.33191072,0.97375519,6.33157896,0,6.33147539,6.33122058,6.33118209
32.52697,5.91607978,6.33140922,-0.644460581,6.33107606,0,6.33097328,6.33071715,6.33067862
32.537462,6.40312424,6.33090158,0.268742734,6.330567,0,6.33046502,6.33020755,6.33016898
32.547954,7.07106781,6.33038786,0.860627652,6.33005184,0,6.32995067,6.32969186,6.32965325
32.558445,6.164414,6.32986812,-0.406760517,6.32953066,0,6.32943031,6.32917014,6.32913148
32.568937,6.55743852,6.32934229,0.477594211,6.32900337,0,6.32890386,6.32864231,6.32860361
32.579428,6.8556546,6.3288105,0.725840275,6.3284701,0,6.32837143,6.32810849,6.32806975
32.58992,5.29150262,6.32827264,-1.01821904,6.32793075,0,6.32783295,6.32756861,6.32752982
32.600412,6.244998,6.32772881,-0.287629636,6.32738541,0,6.32728848,6.32702271,6.32698389
32.610903,6.55743852,6.32717906,0.479853591,6.32683413,0,6.3267381,6.32647089,6.32643202
32.621395,6.55743852,6.32662331,0.480432323,6.32627684,0,6.32618171,6.32591305,6.32587414
32.631886,7.28010989,6.32606168,0.976753912,6.32571366,0,6.32561945,6.32534932,6.32531036
32.642378,6.244998,6.3254941,-0.283718349,6.3251445,0,6.32505123,6.32477961,6.32474061
32.65287,6.78232998,6.32492063,0.676320455,6.32456943,0,6.32447711,6.32420399,6.32416494
32.663361,6.4807407,6.32434133,0.395473594,6.32398853,0,6.32389718,6.32362254,6.32358344
32.673853,6.63324958,6.32375614,0.556321349,6.32340171,0,6.32331133,6.32303515,6.32299602
32.684344,6.08276253,6.32316516,-0.490308711,6.32280909,0,6.32271971,6.32244197,6.32240279
32.694836,6.55743852,6.32256832,0.484634097,6.32221058,0,6.32212222,6.3218429,6.32180368
32.705328,5.38516481,6.32196567,-0.967884739,6.32160625,0,6.32151892,6.32123802,6.32119875
32.715819,7.41619849,6.32135731,1.04634658,6.32099619,0,6.32090991,6.32062739,6.32058808
32.726311,6.164414,6.32074313,-0.395384788,6.32038029,0,6.32029508,6.32001092,6.31997157
32.736802,6.70820393,6.32012327,0.622961202,6.31975869,0,6.31967456,6.31938876,6.31934935
32.747294,6.164414,6.31949763,-0.393806589,6.31913129,0,6.31904826,6.31876078,6.31872134
32.757786,5.83095189,6.31886629,-0.698508691,6.31849816,0,6.31841625,6.31812709,6.31808759
32.768277,6.244998,6.31822932,-0.270612857,6.31785939,0,6.31777862,6.31748774,6.3174482
32.778769,6.164414,6.31758662,-0.391372733,6.31721487,0,6.31713525,6.31684265,6.31680306
32.78926,6.164414,6.31693833,-0.390543635,6.31656474,0,6.3164863,6.31619194,6.31615231
32.799752,6.8556546,6.31628436,0.734418303,6.3159089,0,6.31583165,6.31553552,6.31549585
32.810244,6.08276253,6.31562477,-0.482558014,6.31524742,0,6.31517139,6.31487346,6.31483374
32.820735,7.48331477,6.31495965,1.08090477,6.31458039,0,6.3145056,6.31420585,6.31416608
32.831227,6.08276253,6.31428889,-0.481171857,6.3139077,0,6.31383416,6.31353257,6.31349276
32.841718,6.164414,6.31361263,-0.386262384,6.31322949,0,6.31315723,6.31285378,6.31281392
32.85221,6.4807407,6.31293077,0.409646097,6.31254565,0,6.31247469,6.31216935,6.31212945
32.862702,6.92820323,6.31224339,0.784831088,6.31185626,0,6.31178663,6.31147937,6.31143942
32.873193,6.32455532,6.31155057,0.114038352,6.31116142,0,6.31109313,6.31078394,6.31074394
32.883685,5.83095189,6.3108522,-0.692748373,6.31046099,0,6.31039407,6.31008292,6.31004287
32.894176,5.91607978,6.31014843,-0.627748874,6.30975514,0,6.30968961,6.30937647,6.30933638
32.904668,6.32455532,6.30943914,0.122947869,6.30904374,0,6.30897963,6.30866448,6.30862434
32.91516,7.61577311,6.30872442,1.1432623,6.30832689,0,6.30826422,6.30794703,6.30790684
32.925651,6.4807407,6.30800435,0.415615625,6.30760466,0,6.30754345,6.3072242,6.30718397
32.936143,6.78232998,6.30727882,0.689239557,6.30687694,0,6.30681722,6.30649587,6.3064556
32.946634,6.55743852,6.30654797,0.500889762,6.30614388,0,6.30608568,6.30576221,6.30572189
32.957126,6.63324958,6.30581169,0.572221885,6.30540537,0,6.3053487,6.30502309,6.30498271
32.967618,6.63324958,6.30507007,0.572869537,6.30466147,0,6.30460638,6.30427859,6.30423817
32.978109,6.40312424,6.3043232,0.314326326,6.3039123,0,6.3038588,6.3035288,6.30348833
32.988601,6.244998,6.30357094,-0.242018478,6.30315771,0,6.30310583,6.3027736,6.30273309
32.999092,7,6.30281347,0.834976966,6.30239787,0,6.30234765,6.30201315,6.30197259
33.009584,5.56776436,6.30205064,-0.85690506,6.30163266,0,6.30158412,6.30124732,6.30120671
33.020076,6.244998,6.30128257,-0.237243689,6.30086215,0,6.30081532,6.30047619,6.30043554
33.030567,6.92820323,6.30050932,0.79227136,6.30008645,0,6.30004136,6.29969987,6.29965917
33.041059,5.91607978,6.29973078,-0.619395673,6.29930542,0,6.29926211,6.29891822,6.29887747
33.05155,6.244998,6.29894711,-0.232269488,6.29851923,0,6.29847772,6.2981314,6.2980906
33.062042,6.4807407,6.29815818,0.427296754,6.29772774,0,6.29768806,6.29733929,6.29729844
33.072534,7.07106781,6.29736408,0.879604303,6.29693105,0,6.29689324,6.29654197,6.29650107
33.083025,5.65685425,6.2965649,-0.799819139,6.29612924,0,6.29609333,6.29573953,6.29569858
33.093517,6.08276253,6.29576052,-0.461517048,6.29532219,0,6.29528821,6.29493184,6.29489085
33.104008,5.29150262,6.29495109,-1.00172275,6.29451005,0,6.29447805,6.29411908,6.29407803
33.1145,5.65685425,6.29413648,-0.798299586,6.29369271,0,6.29366271,6.29330109,6.29326
33.124992,6.70820393,6.29331679,0.644117337,6.29287024,0,6.29284228,6.29247799,6.29243684
33.135483,7.28010989,6.29249211,0.993789605,6.29204274,0,6.29201687,6.29164985,6.29160865
33.145975,6,6.2916623,-0.540057685,6.29121007,0,6.29118632,6.29081654,6.2907753
33.156466,6.63324958,6.29082754,0.585168383,6.29037241,0,6.29035082,6.28997824,6.28993694
33.166958,6.32455532,6.28998769,0.18592372,6.28952962,0,6.28951022,6.28913479,6.28909345
33.17745,6.70820393,6.28914284,0.647349283,6.28868178,0,6.28866462,6.28828631,6.28824492
33.187941,6.70820393,6.28829309,0.648005282,6.287829,0,6.28781412,6.28743287,6.28739143
33.198433,6,6.28743829,-0.536132717,6.28697113,0,6.28695857,6.28657435,6.28653286
33.208924,6.08276253,6.28657863,-0.451459964,6.28610835,0,6.28609815,6.28571092,6.28566937
33.219416,6.4807407,6.28571396,0.441618322,6.28524051,0,6.28523272,6.28484242,6.28480083
33.229908,6,6.28484437,-0.533708132,6.28436771,0,6.28436237,6.28396896,6.28392732
33.240399,5.83095189,6.28396997,-0.673066176,6.28349005,0,6.28348721,6.28309064,6.28304894
33.250891,6.40312424,6.28309061,0.346458694,6.28260737,0,6.28260709,6.2822073,6.28216556
33.261382,6.244998,6.28220647,-0.192894981,6.28171987,0,6.28172218,6.28131913,6.28127734
33.271874,6.40312424,6.2813174,0.349008357,6.28082739,0,6.28083235,6.28042598,6.28038414
33.282366,6.63324958,6.28042351,0.593991643,6.27993002,0,6.27993768,6.27952795,6.27948605
33.292857,6.40312424,6.27952489,0.351566993,6.27902788,0,6.27903828,6.27862513,6.27858318
33.303349,6.92820323,6.27862139,0.805966404,6.2781208,0,6.278134,6.27771738,6.27767538
33.31384,7.48331477,6.27771319,1.0979989,6.27720897,0,6.27722503,6.27680487,6.27676282
33.324332,6.78232998,6.27680015,0.711006209,6.27629224,0,6.27631121,6.27588746,6.27584536
33.334824,6.92820323,6.27588237,0.807663828,6.2753707,0,6.27539265,6.27496524,6.27492309
33.345315,8,6.27495995,1.3134078,6.27444447,0,6.27446944,6.27403833,6.27399612
33.355807,6.164414,6.27403273,-0.33108719,6.27351338,0,6.27354143,6.27310655,6.27306429
33.366298,6.40312424,6.27310091,0.360587479,6.27257761,0,6.27260881,6.2721701,6.27212779
33.37679,7.14142843,6.27216432,0.932343343,6.27163702,0,6.27167143,6.27122881,6.27118645
33.387282,6.40312424,6.27122307,0.363182001,6.2706917,0,6.27072939,6.2702828,6.27024039
33.397773,6.244998,6.27027727,-0.158994573,6.26974176,0,6.26978279,6.26933217,6.26928971
33.408265,5.83095189,6.26932676,-0.662098832,6.26878704,0,6.26883147,6.26837675,6.26833423
33.418756,6.55743852,6.26837173,0.537649327,6.26782773,0,6.26787564,6.26741674,6.26737417
33.429248,6.4807407,6.26741201,0.461875185,6.26686366,0,6.26691512,6.26645197,6.26640935
33.43974,6.164414,6.26644772,-0.319427174,6.26589494,0,6.26595002,6.26548255,6.26543987
33.450231,6.92820323,6.26547897,0.814078781,6.26492169,0,6.26498045,6.26450858,6.26446586
33.460723,6.4807407,6.26450558,0.465010878,6.26394371,0,6.26400625,6.26352991,6.26348712
33.471214,6.32455532,6.26352776,0.247037559,6.26296123,0,6.26302762,6.26254671,6.26250388
33.481706,5.74456265,6.26254535,-0.719710151,6.26197407,0,6.26204438,6.26155884,6.26151595
33.492198,5.83095189,6.26155844,-0.656206177,6.26098233,0,6.26105665,6.26056638,6.26052344
33.502689,6.78232998,6.26056716,0.72233152,6.25998613,0,6.26006454,6.25956946,6.25952647
33.513181,7.54983444,6.25957132,1.13589749,6.25898529,0,6.25906788,6.2585679,6.25852485
33.523672,7.54983444,6.25857115,1.13633766,6.25798001,0,6.25806688,6.2575619,6.2575188
33.534164,6.08276253,6.25756646,-0.418095593,6.25697013,0,6.25706135,6.25655129,6.25650813
33.544656,6.63324958,6.25655736,0.613752574,6.25595574,0,6.25605142,6.25553618,6.25549297
33.555147,6.70820393,6.25554397,0.672800089,6.25493697,0,6.25503719,6.25451667,6.25447341
33.565639,5.74456265,6.25452612,-0.714117269,6.25391363,0,6.2540185,6.2534926,6.25344928
33.57613,6.40312424,6.25350401,0.386807734,6.25288593,0,6.25299555,6.25246417,6.25242079
33.586622,6.63324958,6.25247748,0.617067342,6.25185369,0,6.25196817,6.25143119,6.25138776
33.597114,6.244998,6.25144662,-0.0803033184,6.25081703,0,6.25093646,6.25039379,6.2503503
33.607605,6.55743852,6.25041157,0.554100134,6.24977605,0,6.24990056,6.24935207,6.24930853
33.618097,6.55743852,6.24937213,0.555037291,6.24873058,0,6.24886026,6.24830585,6.24826226
33.628588,5.29150262,6.24832853,-0.978174783,6.24768082,0,6.24781581,6.24725535,6.2472117
33.63908,6.78232998,6.24728058,0.731470711,6.2466266,0,6.246767,6.24620037,6.24615667
33.649572,6.55743852,6.24622841,0.557862096,6.24556802,0,6.24571396,6.24514104,6.24509728
33.660063,6.78232998,6.24517212,0.732910542,6.2445052,0,6.24465681,6.24407747,6.24403365
33.670555,6.70820393,6.24411154,0.681243268,6.24343796,0,6.24359536,6.24300947,6.2429656
33.681046,7.07106781,6.24304689,0.909956549,6.24236651,0,6.24252984,6.24193726,6.24189333
33.691538,6.70820393,6.24197798,0.682807405,6.24129066,0,6.24146005,6.24086065,6.24081666
33.70203,6.164414,6.24090493,-0.276569934,6.24021053,0,6.24038613,6.23977975,6.23973571
33.712521,6.32455532,6.23982787,0.291079808,6.23912623,0,6.23930818,6.23869468,6.23865059
33.723013,6.32455532,6.2387466,0.292931262,6.23803757,0,6.23822603,6.23760526,6.2375611
33.733504,6.40312424,6.23766135,0.4067713,6.23694478,0,6.23713989,6.23651169,6.23646748
33.743996,6.78232998,6.23657193,0.738754392,6.23584766,0,6.23604959,6.2354138,6.23536953
33.754488,6.08276253,6.23547847,-0.390788867,6.23474633,0,6.23495524,6.23431169,6.23426736
33.764979,6.92820323,6.23438109,0.83295987,6.23364091,0,6.23385696,6.23320548,6.2331611
33.775471,6.78232998,6.23327959,0.740979346,6.23253119,0,6.23275457,6.23209498,6.23205054
33.785962,7,6.23217421,0.876256689,6.23141742,0,6.23164829,6.23098042,6.23093592
33.796454,5.91607978,6.23106476,-0.561235228,6.23029938,0,6.23053793,6.22986159,6.22981704
33.806946,6.4807407,6.22995137,0.500788711,6.2291772,0,6.22942363,6.22873862,6.22869401
33.817437,6.32455532,6.22883415,0.309388389,6.228051,0,6.2283055,6.22761162,6.22756695
33.827929,5.65685425,6.22771291,-0.755551891,6.22692057,0,6.22718335,6.2264804,6.22643567
33.83842,6.244998,6.22658789,0.135683839,6.22578616,0,6.22605742,6.22534519,6.2253004
33.848912,6.40312424,6.2254589,0.421503658,6.22464755,0,6.22492751,6.22420577,6.22416093
33.859404,6.70820393,6.22432607,0.695613302,6.22350486,0,6.22379375,6.22306228,6.22301738
33.869895,6.92820323,6.22318951,0.83965095,6.22235823,0,6.22265627,6.22191484,6.22186988
33.880387,6.08276253,6.22204905,-0.373211086,6.22120744,0,6.22151488,6.22076324,6.22071822
33.890878,6.32455532,6.2209049,0.321947846,6.22005273,0,6.22036981,6.21960772,6.21956264
33.90137,5.91607978,6.21975689,-0.551069062,6.2188939,0,6.21922086,6.21844806,6.21840293
33.911862,5.91607978,6.21860515,-0.550023056,6.21773105,0,6.21806817,6.2172844,6.2172392
33.922353,6.32455532,6.21744979,0.327269812,6.21656433,0,6.21691188,6.21611685,6.2160716
33.932845,5.65685425,6.21629063,-0.7479548,6.21539352,0,6.21575178,6.21494521,6.2148999
33.943336,5.65685425,6.21512792,-0.747177132,6.21421885,0,6.21458811,6.21376972,6.21372435
33.953828,5.83095189,6.21396144,-0.618877652,6.21304013,0,6.21342069,6.21259016,6.21254473
33.96432,6,6.21279135,-0.461293125,6.21185746,0,6.21224964,6.21140666,6.21136117
33.974811,6.244998,6.21161777,0.182702579,6.21067099,0,6.2110751,6.21021935,6.21017379
33.985303,6.08276253,6.2104405,-0.357320543,6.20948049,0,6.20989688,6.209028,6.20898239
33.995794,6.244998,6.2092598,0.189045491,6.2082862,0,6.20871522,6.20783288,6.2077872
34.006286,6.55743852,6.20807547,0.591069418,6.20708792,0,6.20752992,6.20663375,6.20658801
34.016778,6.32455532,6.20688764,0.34302723,6.20588577,0,6.20634112,6.20543074,6.20538495
34.027269,6,6.20569646,-0.453537715,6.20467987,0,6.20514896,6.20422399,6.20417814
34.037761,5.38516481,6.20450172,-0.905172314,6.20347001,0,6.20395325,6.20301328,6.20296737
34.048252,6.55743852,6.20330369,0.595092287,6.20225644,0,6.20275424,6.20179885,6.20175288
34.058744,6.8556546,6.20210217,0.808425898,6.20103894,0,6.20155173,6.20058048,6.20053445
34.069236,6.08276253,6.20089729,-0.343707373,6.19981762,0,6.20034587,6.19935831,6.19931221
34.079727,6.244998,6.1996892,0.212858625,6.19859264,0,6.19913679,6.19813245,6.19808629
34.090219,6.164414,6.19847771,-0.184563571,6.19736375,0,6.19792431,6.19690269,6.19685647
34.10071,5.65685425,6.19726308,-0.735125047,6.19613122,0,6.19670868,6.19566929,6.195623
34.111202,7.07106781,6.19604511,0.935426479,6.19489482,0,6.19548971,6.194432,6.19438566
34.121694,6.32455532,6.19482395,0.360182408,6.19365467,0,6.19426755,6.19319098,6.19314457
34.132185,6.4807407,6.19359976,0.535855338,6.19241092,0,6.19304235,6.19194634,6.19189987
34.142677,6.32455532,6.19237232,0.363569797,6.19116333,0,6.1918139,6.19069787,6.19065134
34.153168,6.164414,6.19114193,-0.163486775,6.18991216,0,6.1905825,6.18944581,6.18939921
34.16366,6.08276253,6.18990838,-0.3273314,6.18865719,6.18814328,6.18934792,6.18818993,6.18814328
34.174152,6.55743852,6.18871333,0.607227464,6.18739853,6.18692518,6.18811035,6.18693038,6.18688366
34.184643,7.07106781,6.18747399,0.939996712,6.18613633,6.18566208,6.18686993,6.18566728,6.1856205
34.195135,5.91607978,6.18623162,-0.519761329,6.18487036,6.1843952,6.18562648,6.18440041,6.18435356
34.205626,6.32455532,6.1849865,0.373589106,6.18360088,6.1831248,6.18438027,6.18313001,6.18308311
34.216118,5.74456265,6.18373844,-0.662703395,6.18232764,6.18185065,6.18313111,6.18185587,6.1818089
34.22661,6,6.1824876,-0.42718567,6.1810508,6.18057288,6.18187917,6.18057811,6.18053107
34.237101,6.32455532,6.18123415,0.378577822,6.17977047,6.17929163,6.18062463,6.17929686,6.17924977
34.247593,6.40312424,6.17997792,0.472383656,6.17848643,6.17800666,6.17936729,6.17801191,6.17796474
34.258084,6.32455532,6.17871919,0.381884971,6.17719895,6.17671824,6.17810746,6.17672349,6.17667627
34.268576,7.41619849,6.17745778,1.11298729,6.17590777,6.17542614,6.17684494,6.17543139,6.1753841
34.279068,7,6.17619388,0.907637662,6.17461305,6.17413047,6.17557992,6.17413573,6.17408838
34.289559,7.28010989,6.17492766,1.05127648,6.17331491,6.17283139,6.17431258,6.17283666,6.17278924
34.300051,6,6.17365895,-0.416724064,6.17201312,6.17152866,6.17304275,6.17153393,6.17148645
34.310542,6.32455532,6.17238806,0.390086223,6.17070794,6.17022253,6.17177073,6.17022781,6.17018026
34.321034,6.70820393,6.17111482,0.732863635,6.16939914,6.16891277,6.17049637,6.16891806,6.16887045
34.331526,6.164414,6.16983944,-0.0736575752,6.16808684,6.16759952,6.16921985,6.16760482,6.16755714
34.342017,6.4807407,6.16856211,0.55872944,6.1667712,6.16628292,6.16794139,6.16628822,6.16624048
34.352509,6.78232998,6.16728268,0.784249518,6.16545197,6.16496272,6.16666081,6.16496803,6.16492022
34.363,6.32455532,6.16600147,0.398188206,6.16412941,6.1636392,6.16537846,6.16364451,6.16359664
34.373492,6.164414,6.16471835,-0.0174454925,6.16280328,6.1623121,6.16409419,6.16231742,6.16226948
34.383984,4.47213595,6.16343353,-1.30049897,6.16147373,6.16098157,6.16280821,6.1609869,6.1609389
34.394475,5.47722558,6.16214724,-0.827599942,6.16014089,6.15964776,6.16152076,6.15965309,6.15960502
34.404967,6.08276253,6.16085935,-0.279458085,6.15880452,6.1583104,6.16023172,6.15831574,6.15826761
34.415458,6,6.15957023,-0.399462427,6.15746488,6.15696978,6.15894143,6.15697513,6.15692692
34.42595,5.56776436,6.15827976,-0.768449996,6.15612174,6.15562565,6.15764979,6.155631,6.15558273
34.436442,7.07106781,6.1569882,0.95607511,6.15477523,6.15427814,6.15635705,6.1542835,6.15423517
34.446933,6.92820323,6.15569581,0.878924013,6.15342549,6.15292741,6.15506349,6.15293278,6.15288438
34.457425,6.244998,6.15440251,0.300990844,6.15207228,6.1515732,6.15376901,6.15157857,6.15153011
34.467916,5.91607978,6.15310871,-0.486856165,6.15071587,6.15021579,6.15247402,6.15022117,6.15017263
34.478408,6.32455532,6.15181434,0.415621203,6.14935601,6.14885492,6.15117846,6.1488603,6.1488117
34.4889,6.78232998,6.15051971,0.794864942,6.14799285,6.14749074,6.14988263,6.14749613,6.14744746
34.499391,5.74456265,6.14922515,-0.636130886,6.14662652,6.14612339,6.14858688,6.14612879,6.14608005
34.509883,6.244998,6.14793064,0.311556353,6.14525677,6.14475262,6.14729116,6.14475803,6.14470922
34.520374,6.08276253,6.14663665,-0.252733303,6.14388388,6.14337871,6.14599597,6.14338412,6.14333525
34.530866,7.48331477,6.1453432,1.15670721,6.1425076,6.1420014,6.14470132,6.14200682,6.14195788
34.541358,5.74456265,6.14405069,-0.632050668,6.14112807,6.14062084,6.14340759,6.14062627,6.14057726
34.551849,6.32455532,6.14275954,0.426375166,6.13974544,6.13923717,6.14211522,6.1392426,6.13919353
34.562341,7,6.14146982,0.926569039,6.13835945,6.13785014,6.14082427,6.13785558,6.13780643
34.572832,6.4807407,6.14018212,0.583573966,6.13697038,6.13646002,6.13953535,6.13646547,6.13641625
34.583324,5.65685425,6.1388966,-0.694292695,6.13557798,6.13506656,6.1382486,6.13507202,6.13502274
34.593816,5.65685425,6.13761377,-0.693368243,6.13418238,6.13366991,6.13696454,6.13367538,6.13362603
34.604307,6.08276253,6.13633422,-0.231455585,6.13278374,6.13227022,6.13568375,6.13227569,6.13222626
34.614799,6.08276253,6.13505819,-0.228682442,6.1313818,6.13086721,6.13440647,6.13087269,6.1308232
34.62529,7,6.13378647,0.930705933,6.12997684,6.12946118,6.1331335,6.12946667,6.12941711
34.635782,5.91607978,6.1325194,-0.465230709,6.1285686,6.12805187,6.13186518,6.12805736,6.12800773
34.646274,5.19615242,6.13125775,-0.967008442,6.12715722,6.12663942,6.13060228,6.12664492,6.12659522
34.656765,6.32455532,6.13000236,0.441081584,6.12574286,6.12522398,6.12934563,6.12522949,6.12517972
34.667257,6.70820393,6.12875377,0.761216241,6.12432526,6.12380529,6.12809578,6.12381081,6.12376097
34.677748,6.08276253,6.12751308,-0.211543265,6.12290469,6.12238364,6.12685383,6.12238916,6.12233925
34.68824,5,6.12628103,-1.06126388,6.1214809,6.12095875,6.12562051,6.12096428,6.1209143
34.698732,5.74456265,6.12505879,-0.616843695,6.12005404,6.11953079,6.124397,6.11953633,6.11948627
34.709223,6.55743852,6.12384766,0.658476167,6.11862424,6.11809989,6.1231846,6.11810544,6.11805532
34.719715,5.74456265,6.12264873,-0.614887049,6.11719126,6.1166658,6.12198438,6.11667136,6.11662116
34.730206,6.08276253,6.12146369,-0.196726112,6.11575537,6.11522881,6.12079807,6.11523436,6.1151841
34.740698,7,6.12029397,0.937926451,6.11431632,6.11378863,6.11962706,6.1137942,6.11374386
34.75119,5.56776436,6.11914153,-0.742547754,6.11287425,6.11234544,6.11847333,6.11235101,6.11230061
34.761681,6.244998,6.11800855,0.356355792,6.1114293,6.11089937,6.11733906,6.11090495,6.11085447
34.772173,5.29150262,6.11689716,-0.908512265,6.10998122,6.10945016,6.11622638,6.10945575,6.1094052
34.782664,6.63324958,6.11581023,0.719332575,6.1085303,6.1079981,6.11513815,6.1080037,6.10795307
34.793156,6.40312424,6.11475057,0.537004342,6.10707626,6.10654292,6.1140772,6.10654852,6.10649783
34.803648,5.91607978,6.11372177,-0.44456944,6.10561925,6.10508477,6.1130471,6.10509038,6.10503962
34.814139,6.32455532,6.11272791,0.460247116,6.10415944,6.10362381,6.11205194,6.10362943,6.10357858
34.824631,7.41619849,6.1117735,1.14211426,6.10269654,6.10215976,6.11109623,6.10216538,6.10211447
34.835122,4.69041576,6.11086431,-1.19182572,6.10123085,6.10069291,6.11018574,6.10069854,6.10064756
34.845614,6.32455532,6.11000702,0.463193588,6.09976211,6.099223,6.10932716,6.09922864,6.09917758
34.856106,5.56776436,6.1092104,-0.735830171,6.09829045,6.09775017,6.10852924,6.09775582,6.09770469
34.866597,5.65685425,6.10848597,-0.672035507,6.09681604,6.09627459,6.10780352,6.09628024,6.09622904
34.877089,6.08276253,6.10784932,-0.158388098,6.0953386,6.09479597,6.10716558,6.09480163,6.09475035
34.88758,5.74456265,6.10732298,-0.602295883,6.09385843,6.09331461,6.10663795,6.09332028,6.09326893
34.898072,6.78232998,6.10693964,0.821821356,6.09237525,6.09183024,6.10625335,6.09183592,6.09178449
34.908564,6.08276253,6.10674808,-0.154872703,6.09088922,6.09034301,6.10606054,6.0903487,6.0902972
34.919055,5.38516481,6.10682078,-0.849503371,6.08940048,6.08885308,6.10613201,6.08885877,6.0888072
34.929547,7.21110255,6.10726475,1.05063685,6.08790877,6.08736016,6.10657479,6.08736587,6.08731422
34.940038,6.78232998,6.10823518,0.821032765,6.08641439,6.08586457,6.10754409,6.08587028,6.08581855
34.95053,5.56776436,6.10995228,-0.73633411,6.08491705,6.08436601,6.10926013,6.08437173,6.08431993
34.961022,6.92820323,6.11271874,0.903041799,6.0834169,6.08286465,6.11202565,6.08287037,6.0828185
34.971513,4.79583152,6.11693637,-1.14939325,6.08191412,6.08136063,6.1162425,6.08136637,6.08131442
34.982005,5.83095189,6.12311957,-0.540525368,6.08040841,6.07985369,6.12242514,6.07985943,6.07980741
34.992496,5.83095189,6.13189343,-0.548581388,6.07890007,6.07834412,6.13119873,6.07834987,6.07829777
35.002988,6.55743852,6.14398323,0.643004892,6.07738884,6.07683164,6.14328863,6.0768374,6.07678522
35.01348,6.40312424,6.16017112,0.492902746,6.07587486,6.07531641,6.15947707,6.07532218,6.07526992
35.023971,5.91607978,6.18123185,-0.514929188,6.07435829,6.07379858,6.1805389,6.07380436,6.07375203
35.034463,6.164414,6.20784861,-0.208409712,6.07283884,6.07227788,6.20715736,6.07228366,6.07223126
35.044954,6.40312424,6.24048466,0.403285969,6.07131683,6.0707546,6.23979577,6.07076039,6.07070791
35.055446,5.91607978,6.27928086,-0.602661658,6.06979197,6.06922846,6.27859495,6.06923426,6.0691817
35.065938,6.32455532,6.32391902,0.025225016,6.06826441,6.06769963,6.32323669,6.06770544,6.0676528
35.076429,6.92820323,6.37353545,0.744760218,6.06673431,6.06616825,6.37285718,6.06617407,6.06612135
35.086921,6.63324958,6.42667919,0.454500158,6.0652014,6.06463405,6.42600528,6.06463987,6.06458708
35.097412,6.244998,6.48125874,-0.486066604,6.06366597,6.06309732,6.48058926,6.06310315,6.06305029
35.107904,5.83095189,6.53460063,-0.83883773,6.06212774,6.06155779,6.53393538,6.06156363,6.06151069
35.118396,6.55743852,6.58348201,-0.16137994,6.06058687,6.06001561,6.58282046,6.06002146,6.05996844
35.128887,6.55743852,6.62431499,-0.258604837,6.05904352,6.05847094,6.62365628,6.0584768,6.0584237
35.139379,6.63324958,6.65350813,-0.142332545,6.05749739,6.0569235,6.65285109,6.05692936,6.05687618
35.14987,6.63324958,6.66803136,-0.186498727,6.0559488,6.05537358,6.66737451,6.05537946,6.0553262
35.160362,7,6.66614668,0.577800414,6.05439747,6.05382092,6.66548841,6.0538268,6.05377346
35.170854,6.32455532,6.64789628,-0.568630774,6.05284354,6.05226565,6.64723495,6.05227154,6.05221813
35.181345,6.164414,6.61509764,-0.671329755,6.05128718,6.05070795,6.61443177,6.05071385,6.05066035
35.191837,6.4807407,6.57080588,-0.300108611,6.04972811,6.04914752,6.57013424,6.04915343,6.04909986
35.202328,5.83095189,6.51863057,-0.829263938,6.04816662,6.04758468,6.51795227,6.04759059,6.04753694
35.21282,6.92820323,6.4621279,0.6826971,6.04660244,6.04601913,6.46144236,6.04602505,6.04597132
35.223312,6,6.40449452,-0.635998833,6.04503571,6.04445103,6.40380148,6.04445697,6.04440315
35.233803,6.32455532,6.34839288,-0.154394164,6.04346661,6.04288055,6.34769238,6.04288649,6.0428326
35.244295,6.63324958,6.29586799,0.580845584,6.04189483,6.04130739,6.29516028,6.04131334,6.04125937
35.254786,6.32455532,6.24836608,0.276023992,6.0403207,6.03973187,6.24765162,6.03973783,6.03968378
35.265278,6.08276253,6.20671535,-0.352069345,6.03874392,6.03815369,6.20599471,6.03815966,6.03810552
35.27577,6.244998,6.17121818,0.271624405,6.03716465,6.03657301,6.17049198,6.03657899,6.03652478
35.286261,5.47722558,6.14172891,-0.815170741,6.03558305,6.03499,6.14099781,6.03499599,6.0349417
35.296753,5.83095189,6.11776471,-0.53554908,6.03399883,6.03340437,6.11702932,6.03341036,6.03335599
35.307244,5.38516481,6.09864657,-0.844678499,6.03241231,6.03181642,6.09790743,6.03182242,6.03176796
35.317736,6.8556546,6.08359317,0.878670261,6.03082318,6.03022586,6.08285075,6.03023187,6.03017733
35.328228,5.83095189,6.07182569,-0.49078895,6.02923161,6.02863285,6.07108037,6.02863887,6.02858425
35.338719,6.4807407,6.06262488,0.646618758,6.02763777,6.02703756,6.06187697,6.02704359,6.02698889
35.349211,6,6.05536713,-0.235302209,6.02604136,6.02543969,6.05461684,6.02544573,6.02539095
35.359702,7.28010989,6.04954479,1.10930839,6.02444269,6.02383956,6.0487923,6.02384561,6.02379074
35.370194,7,6.04475864,0.977364497,6.02284146,6.02223687,6.04400406,6.02224293,6.02218798
35.380686,6.4807407,6.04071004,0.663348065,6.02123785,6.02063178,6.03995346,6.02063785,6.02058282
35.391177,6.8556546,6.03718205,0.904694726,6.01963201,6.01902446,6.03642352,6.01903053,6.01897542
35.401669,6,6.03402083,-0.184447368,6.01802365,6.0174146,6.03326038,6.01742069,6.01736549
35.41216,5.47722558,6.03112152,-0.744241862,6.01641308,6.01580253,6.03035918,6.01580863,6.01575335
35.422652,5.38516481,6.02841216,-0.802027028,6.01480001,6.01418795,6.02764795,6.01419406,6.01413869
35.433144,6.08276253,6.02584505,0.238573846,6.01318459,6.01257103,6.02507897,6.01257714,6.01252169
35.443635,7,6.02338811,0.988236759,6.011567,6.01095191,6.02262017,6.01095803,6.0109025
35.454127,5.38516481,6.02101878,-0.797404522,6.00994694,6.00933031,6.02024899,6.00933644,6.00928083
35.464618,6,6.018722,-0.136828361,6.00832471,6.00770655,6.01795035,6.00771269,6.00765699
35.47511,5.56776436,6.01648603,-0.669866903,6.00670003,6.00608032,6.01571252,6.00608647,6.00603069
35.485602,6.244998,6.01430251,0.480307704,6.00507306,6.0044518,6.01352714,6.00445796,6.00440209
35.496093,6.08276253,6.01216486,0.265702227,6.00344396,6.00282113,6.01138763,6.0028273,6.00277135
35.506585,6.40312424,6.01006713,0.626942665,6.00181243,6.00118803,6.00928804,6.00119421,6.00113817
35.517076,5.91607978,6.00800509,-0.30319187,6.00017879,5.99955282,6.00722413,5.999559,5.99950288
35.527568,5.56776436,6.00597438,-0.661974333,5.99854275,5.99791518,6.00519154,5.99792138,5.99786517
35.53806,6.08276253,6.00397176,0.280696932,5.99690446,5.99627529,6.00318704,5.9962815,5.9962252
35.548551,6.32455532,6.00199443,0.56794444,5.99526408,5.99463332,6.00120783,5.99463953,5.99458315
35.559043,7.21110255,6.00003939,1.10048315,5.99362133,5.99298895,5.99925089,5.99299517,5.9929387
35.569534,5.29150262,5.99810468,-0.840596253,5.99197652,5.99134251,5.99731429,5.99134875,5.99129219
35.580026,5.83095189,5.9961879,-0.406492313,5.99032935,5.98969371,5.99539559,5.98969995,5.98964331
35.590518,6.08276253,5.99428739,0.297447709,5.98867997,5.98804269,5.99349317,5.98804895,5.98799222
35.601009,7.07106781,5.99240172,1.03858851,5.98702857,5.98638964,5.99160559,5.9863959,5.98633909
35.611501,5.83095189,5.99052909,-0.399471145,5.98537483,5.98473424,5.98973102,5.98474051,5.98468361
35.621992,7,5.98866855,1.00564976,5.98371908,5.98307682,5.98786855,5.98308311,5.98302612
35.632484,6.08276253,5.98681859,0.309748182,5.98206102,5.98141708,5.98601664,5.98142337,5.98136629
35.642976,7.34846923,5.98497835,1.16768612,5.9804008,5.97975517,5.98417445,5.97976147,5.97970431
35.653467,6,5.98314706,0.129818881,5.9787386,5.97809127,5.98234119,5.97809759,5.97804033
35.663959,6.164414,5.98132352,0.427890736,5.97707411,5.97642508,5.98051568,5.9764314,5.97637406
35.67445,6.164414,5.97950732,0.430007768,5.97540765,5.97475691,5.9786975,5.97476324,5.97470581
35.684942,7.21110255,5.97769742,1.11058774,5.97373893,5.97308645,5.97688561,5.97309279,5.97303528
35.695434,5.56776436,5.97589337,-0.638849754,5.9720681,5.97141389,5.97507956,5.97142024,5.97136263
35.705925,5.65685425,5.97409477,-0.563241082,5.97039533,5.96973937,5.97327894,5.96974574,5.96968804
35.716417,5.74456265,5.97230074,-0.47721913,5.96872032,5.96806261,5.9714829,5.96806898,5.96801119
35.726908,6.164414,5.97051118,0.440343983,5.96704339,5.96638391,5.96969131,5.9663903,5.96633242
35.7374,5.65685425,5.9687253,-0.558454159,5.96536424,5.96470298,5.96790339,5.96470937,5.96465141
35.747892,6.32455532,5.96694287,0.598007062,5.96368303,5.96301998,5.96611891,5.96302638,5.96296833
35.758383,6.4807407,5.96516372,0.718036892,5.96199993,5.96133508,5.9643377,5.9613415,5.96128335
35.768875,5.65685425,5.96338717,-0.55365415,5.96031463,5.95964797,5.96255907,5.9596544,5.95959616
35.779366,7.14142843,5.96161325,1.08619298,5.95862746,5.95795898,5.96078307,5.95796542,5.95790709
35.789858,6,5.95984135,0.20039623,5.9569381,5.9562678,5.95900908,5.95627424,5.95621582
35.80035,5.19615242,5.95807139,-0.872879696,5.95524674,5.95457459,5.95723701,5.95458105,5.95452254
35.810841,5.56776436,5.95630329,-0.623328906,5.95355353,5.95287953,5.9554668,5.952886,5.9528274
35.821333,6.164414,5.9545365,0.458123891,5.95185817,5.95118231,5.95369788,5.95118878,5.95113009
35.831824,5.56776436,5.95277117,-0.620489167,5.95016098,5.94948324,5.95193041,5.94948973,5.94943094
35.842316,5.47722558,5.95100676,-0.688317651,5.94846166,5.94778203,5.95016385,5.94778853,5.94772965
35.852808,7.48331477,5.94924329,1.2385764,5.94676036,5.94607884,5.94839821,5.94608534,5.94602637
35.863299,6.164414,5.94748074,0.465760945,5.94505728,5.94437384,5.9466335,5.94438036,5.94432129
35.873791,6.244998,5.94571866,0.547064291,5.94335208,5.94266672,5.94486923,5.94267324,5.94261409
35.884282,6.32455532,5.94395723,0.616926323,5.9416451,5.9409578,5.9431056,5.94096434,5.94090509
35.894774,6.63324958,5.942196,0.831296325,5.93993602,5.93924678,5.94134216,5.93925333,5.93919399
35.905266,5.83095189,5.94043502,-0.330882339,5.93822503,5.93753383,5.93957895,5.93754039,5.93748095
35.915757,5.47722558,5.93867434,-0.679300203,5.93651228,5.93581911,5.93781603,5.93582568,5.93576615
35.926249,5.47722558,5.93691354,-0.678002922,5.93479747,5.93410231,5.93605298,5.93410889,5.93404927
35.93674,5.56776436,5.93515285,-0.606125801,5.93308092,5.93238377,5.93429003,5.93239036,5.93233064
35.947232,6.244998,5.93339249,0.558216363,5.93136296,5.93066316,5.93252676,5.93066976,5.93060995
35.957724,6.08276253,5.93163128,0.388756033,5.92964248,5.92894066,5.93076325,5.92894727,5.92888736
35.968215,6.40312424,5.92986994,0.687934808,5.9279203,5.92721644,5.92899961,5.92722306,5.92716306
35.978707,6.244998,5.92810807,0.562929776,5.92619609,5.92549018,5.92723542,5.92549682,5.92543672
35.989198,5.83095189,5.92634593,-0.308859255,5.9244702,5.92376222,5.92547095,5.92376887,5.92370868
35.99969,6.32455532,5.92458315,0.632433533,5.9227423,5.92203224,5.92370582,5.9220389,5.92197861
36.010182,5.47722558,5.92281981,-0.667528455,5.92101256,5.92030041,5.92194012,5.92030708,5.9202467
36.020673,5.91607978,5.92105605,-0.0705426667,5.91928116,5.91856691,5.92017398,5.91857359,5.91851311
36.031165,6.164414,5.91929147,0.495098504,5.91754778,5.91683141,5.91840702,5.9168381,5.91677752
36.041656,6.70820393,5.91752638,0.889200516,5.91581276,5.91509425,5.91663951,5.91510095,5.91504028
36.052148,5.38516481,5.91576037,-0.728419911,5.91407577,5.91335511,5.91487109,5.91336182,5.91330105
36.06264,5.47722558,5.9139936,-0.660884274,5.91233699,5.91161417,5.91310188,5.91162089,5.91156002
36.073131,6.40312424,5.91222618,0.700641175,5.91059659,5.90987159,5.91133201,5.90987832,5.90981736
36.083623,4.79583152,5.91045775,-1.0557586,5.90885425,5.90812706,5.90956111,5.9081338,5.90807274
36.094114,6.92820323,5.90868861,1.00971017,5.90711031,5.90638091,5.90778949,5.90638767,5.90632651
36.104606,6.4807407,5.9069184,0.757510593,5.90536445,5.90463283,5.90601678,5.9046396,5.90457834
36.115098,5.65685425,5.90514725,-0.498290078,5.90361685,5.90288298,5.90424312,5.90288976,5.90282841
36.125589,6.164414,5.90337531,0.510919456,5.90186766,5.90113154,5.90246865,5.90113833,5.90107688
36.136081,6.244998,5.90160222,0.585999811,5.90011659,5.89937819,5.90069301,5.89938499,5.89932344
36.146572,5.09901951,5.89982829,-0.894879197,5.89836395,5.89762327,5.89891651,5.89763008,5.89756843
36.157064,7.28010989,5.89805316,1.17560909,5.89660943,5.89586645,5.8971388,5.89587327,5.89581152
36.167556,5.74456265,5.89627699,-0.389505255,5.89485321,5.8941079,5.89536003,5.89411474,5.89405289
36.178047,6.32455532,5.89449992,0.655786092,5.89309546,5.89234781,5.89358035,5.89235466,5.89229271
36.188539,6.4807407,5.8927216,0.766824032,5.89133585,5.89058585,5.89179939,5.89059271,5.89053066
36.19903,5.47722558,5.89094236,-0.643208193,5.88957474,5.88882236,5.89001749,5.88882923,5.88876708
36.209522,6.32455532,5.88916183,0.659843537,5.88781178,5.88705701,5.88823429,5.88706389,5.88700164
36.220014,5.47722558,5.88738018,-0.640433135,5.88604715,5.88528998,5.88644995,5.88529687,5.88523452
36.230505,6.164414,5.88559756,0.528030724,5.88428104,5.88352144,5.88466463,5.88352835,5.8834659
36.240997,5.19615242,5.88381362,-0.829253398,5.88251312,5.88175107,5.88287796,5.88175799,5.88169544
36.251488,7.28010989,5.8820287,1.18240483,5.88074373,5.87997921,5.88109029,5.87998615,5.87992349
36.26198,5.65685425,5.88024244,-0.472639594,5.87897254,5.87820554,5.87930127,5.87821248,5.87814973
36.272472,5.38516481,5.878455,-0.702346204,5.87719972,5.87643023,5.87751104,5.87643718,5.87637433
36.282963,5.47722558,5.87666655,-0.632013427,5.87542547,5.87465345,5.87571979,5.87466042,5.87459746
36.293455,5.38516481,5.87487673,-0.699794204,5.87364944,5.87287488,5.87392715,5.87288186,5.8728188
36.303946,6.164414,5.8730859,0.539748189,5.87187198,5.87109486,5.87213347,5.87110185,5.87103869
36.314438,5.83095189,5.87129368,-0.200852653,5.87009277,5.86931307,5.87033839,5.86932007,5.8692568
36.32493,6,5.86950026,0.361247475,5.86831197,5.86752967,5.86854208,5.86753669,5.86747332
36.335421,5.74456265,5.8677058,-0.350917586,5.86652978,5.86574485,5.8667447,5.86575188,5.86568841
36.345913,6.63324958,5.86590995,0.875979242,5.86474585,5.86395828,5.86494592,5.86396532,5.86390175
36.356404,6.164414,5.86411305,0.547997222,5.86296054,5.86217031,5.86314607,5.86217736,5.86211368
36.366896,5.09901951,5.86231475,-0.873667694,5.86117351,5.86038059,5.8613448,5.86038766,5.86032387
36.377388,5.19615242,5.86051523,-0.815084541,5.85938494,5.85858932,5.85954228,5.85859639,5.8585325
36.387879,6.244998,5.85871465,0.621516971,5.85759501,5.85679666,5.85773868,5.85680375,5.85673976
36.398371,6.164414,5.85691267,0.554528024,5.8558034,5.85500229,5.85593366,5.85500939,5.85494529
36.408862,5.83095189,5.85510964,-0.155427604,5.85401043,5.85320655,5.85412755,5.85321367,5.85314946
36.419354,6.40312424,5.85330519,0.741497839,5.8522158,5.85140911,5.85232002,5.85141624,5.85135193
36.429846,5,5.85149952,-0.922767315,5.85041966,5.84961016,5.85051123,5.8496173,5.84955288
36.440337,6.08276253,5.84969278,0.48277298,5.84862221,5.84780986,5.84870135,5.84781701,5.84775249
36.450829,6.32455532,5.84788464,0.690413413,5.84682311,5.84600788,5.84689004,5.84601505,5.84595042
36.46132,5.91607978,5.84607544,0.264583342,5.8450227,5.84420458,5.84507765,5.84421176,5.84414703
36.471812,6.63324958,5.84426483,0.888248134,5.84322066,5.84239962,5.84326383,5.84240682,5.84234197
36.482304,6.164414,5.842453,0.567416078,5.84141717,5.84059318,5.84144875,5.84060039,5.84053544
36.492795,6.08276253,5.8406401,0.492059372,5.83961239,5.83878544,5.83963259,5.83879265,5.8387276
36.503287,6.164414,5.83882581,0.570603357,5.83780601,5.83697605,5.837815,5.83698328,5.83691812
36.513778,5.56776436,5.83701047,-0.518889297,5.83599837,5.83516538,5.83599633,5.83517263,5.83510736
36.52427,6.32455532,5.83519372,0.69954385,5.83418913,5.83335309,5.83417624,5.83336035,5.83329497
36.534762,5.38516481,5.83337576,-0.669485586,5.83237847,5.83153936,5.83235489,5.83154663,5.83148114
36.545253,5.47722558,5.83155675,-0.595257231,5.83056658,5.82972436,5.83053247,5.82973165,5.82966605
36.555745,6.08276253,5.82973635,0.503017082,5.82875312,5.82790776,5.82870863,5.82791506,5.82784935
36.566236,5.09901951,5.8279149,-0.853753706,5.82693844,5.82608992,5.82688373,5.82609723,5.82603141
36.576728,5.65685425,5.82609208,-0.411385256,5.82512221,5.82427049,5.8250574,5.82427781,5.82421189
36.58722,6.55743852,5.82426805,0.856253747,5.8233046,5.82244966,5.82322984,5.82245699,5.82239096
36.597711,5.56776436,5.82244298,-0.504656932,5.82148579,5.8206276,5.82140122,5.82063495,5.8205688
36.608203,5.47722558,5.82061654,-0.585995706,5.81966546,5.81880398,5.81957119,5.81881134,5.81874509
36.618694,5.91607978,5.81878908,0.311914573,5.81784394,5.81697915,5.81774011,5.81698653,5.81692016
36.629186,6.32455532,5.81696025,0.712457063,5.81602091,5.81515277,5.81590763,5.81516016,5.81509369
36.639678,6.32455532,5.81513024,0.713740208,5.81419655,5.81332503,5.81407392,5.81333243,5.81326584
36.650169,6,5.81329921,0.432088871,5.81237103,5.8114961,5.81223917,5.81150352,5.81143682
36.660661,6.244998,5.81146682,0.658430842,5.81054403,5.80966565,5.81040303,5.80967308,5.80960626
36.671152,6.32455532,5.80963344,0.717580575,5.80871588,5.80783402,5.80856586,5.80784147,5.80777454
36.681644,5.47722558,5.80779871,-0.574954896,5.80688626,5.80600089,5.8067273,5.80600835,5.80594131
36.692136,6,5.80596281,0.440496528,5.80505535,5.80416642,5.80488754,5.80417389,5.80410674
36.702627,5.65685425,5.80412592,-0.383759916,5.80322332,5.80233081,5.80304676,5.8023383,5.80227103
36.713119,6.164414,5.8022877,0.601769308,5.80138984,5.80049371,5.80120461,5.80050121,5.80043383
36.72361,4.79583152,5.80044851,-1.00230583,5.79955526,5.79865547,5.79936144,5.79866299,5.7985955
36.734102,6.4807407,5.79860799,0.825913259,5.79771925,5.79681576,5.79751691,5.79682329,5.79675569
36.744594,5.29150262,5.79676633,-0.710819037,5.79588199,5.79497476,5.7956712,5.79498231,5.79491459
36.755085,6.8556546,5.7949237,1.02991791,5.79404365,5.79313265,5.79382448,5.79314021,5.79307238
36.765577,5.38516481,5.79307977,-0.638682209,5.7922039,5.79128909,5.79197642,5.79129666,5.79122871
36.776068,5.83095189,5.79123489,0.199291256,5.7903631,5.78944443,5.79012737,5.78945202,5.78938395
36.78656,5.56776436,5.78938871,-0.470769953,5.7885209,5.78759834,5.78827698,5.78760594,5.78753776
36.797052,6,5.78754142,0.460932296,5.78667748,5.78575098,5.78642543,5.7857586,5.7856903
36.807543,6.244998,5.78569319,0.677720302,5.78483304,5.78390256,5.7845729,5.78391019,5.78384178
36.818035,5.38516481,5.78384368,-0.631410229,5.78298722,5.78205272,5.78271905,5.78206036,5.78199183
36.828526,6.4807407,5.78199326,0.835911145,5.78114039,5.78020182,5.78086424,5.78020947,5.78014083
36.839018,5.74456265,5.78052153,-0.189628265,5.7792922,5.77834952,5.77938815,5.77835719,5.77828843
36.84951,6,5.7786694,0.470457859,5.77744283,5.77649599,5.77753154,5.77650368,5.7764348
36.860001,6,5.77681638,0.472423139,5.77559248,5.77464144,5.77567399,5.77464914,5.77458014
36.870493,5.83095189,5.7749621,0.236621619,5.7737408,5.7727855,5.77381514,5.77279321,5.7727241
36.880984,5.65685425,5.77310694,-0.34095849,5.77188814,5.77092854,5.77195535,5.77093627,5.77086704
36.891476,5.91607978,5.77125054,0.380564373,5.77003416,5.76907021,5.77009428,5.76907796,5.76900861
36.901968,5.83095189,5.76939309,0.248110473,5.76817905,5.7672107,5.7682321,5.76721846,5.76714899
36.912459,5.47722558,5.76753476,-0.53880348,5.766323,5.76535019,5.76636899,5.76535796,5.76528838
36.922951,6.32455532,5.76567522,0.747582836,5.76446564,5.76348833,5.76450462,5.76349612,5.76342642
36.933442,5.91607978,5.76381483,0.390211427,5.76260736,5.76162549,5.76263933,5.7616333,5.76156347
36.943934,5.83095189,5.76195322,0.262675985,5.7607478,5.75976132,5.76077279,5.75976914,5.75969919
36.954426,5.83095189,5.7600906,0.266197853,5.75888715,5.757896,5.75890516,5.75790383,5.75783377
36.964917,6.08276253,5.75822714,0.56968008,5.75702559,5.75602971,5.75703665,5.75603756,5.75596738
36.975409,6.4807407,5.75636249,0.851104111,5.75516278,5.75416211,5.75516688,5.75416998,5.75409967
36.9859,5.56776436,5.75449702,-0.432125744,5.75329908,5.75229357,5.75329624,5.75230145,5.75223102
36.996392,5.38516481,5.75263038,-0.606189387,5.75143414,5.75042373,5.75142436,5.75043162,5.75036107
37.006884,6.8556546,5.75076275,1.05113836,5.74956815,5.74855277,5.74955144,5.74856068,5.74849001
37.017375,6.4807407,5.74889432,0.855480202,5.74770129,5.74668089,5.74767764,5.74668881,5.74661802
37.027867,5.91607978,5.74702474,0.411163035,5.74583322,5.74480772,5.74580263,5.74481567,5.74474475
37.038358,5.83095189,5.74515437,0.29291214,5.74396431,5.74293365,5.74392677,5.74294161,5.74287057
37.04885,6.32455532,5.74328287,0.762412259,5.74209419,5.74105831,5.7420497,5.74106629,5.74099513
37.059342,5.91607978,5.74141041,0.417934652,5.74022307,5.7391819,5.74017162,5.73918989,5.7391186
37.069833,6.08276253,5.73953719,0.585854371,5.73835113,5.73730459,5.73829269,5.73731259,5.73724119
37.080325,6.32455532,5.73766285,0.766089076,5.73647801,5.73542604,5.73641258,5.73543406,5.73536253
37.090816,6.08276253,5.73578776,0.589045645,5.73460409,5.73354661,5.73453164,5.73355464,5.73348299
37.101308,5.91607978,5.73391157,0.426811686,5.73272901,5.73166595,5.73264953,5.731674,5.73160222
37.1118,5.47722558,5.73203446,-0.504785982,5.73085296,5.72978424,5.73076642,5.72979231,5.72972041
37.122291,5.56776436,5.73015663,-0.402979238,5.72897614,5.72790168,5.72888251,5.72790977,5.72783774
37.132783,5.74456265,5.72827772,0.127612417,5.72709819,5.72601791,5.72699744,5.72602602,5.72595386
37.143274,6.4807407,5.72639809,0.868528989,5.72521947,5.7241333,5.72511157,5.72414142,5.72406914
37.153766,6.244998,5.72451741,0.72144341,5.72333964,5.72224749,5.72322456,5.72225563,5.72218322
37.164258,6.8556546,5.72263584,1.06443354,5.72145889,5.72036067,5.72133659,5.72036882,5.72029629
37.174749,5.91607978,5.72075359,0.441957233,5.71957739,5.71847303,5.71944783,5.7184812,5.71840853
37.185241,5.09901951,5.71887029,-0.787306027,5.71769482,5.71658421,5.71755795,5.7165924,5.71651961
37.195732,5.56776436,5.71698633,-0.386292591,5.71581152,5.71469458,5.71566731,5.71470278,5.71462987
37.206224,5.91607978,5.71510134,0.448306195,5.71392716,5.71280379,5.71377554,5.71281201,5.71273897
37.216716,5.74456265,5.71321551,0.17705122,5.71204191,5.71091203,5.71188284,5.71092026,5.71084709
37.227207,5.83095189,5.71132904,0.345865375,5.71015598,5.70901947,5.7099894,5.70902772,5.70895442
37.237699,6.4807407,5.70944156,0.878236378,5.708269,5.70712578,5.70809485,5.70713404,5.70706061
37.24819,5.65685425,5.70755346,-0.225164846,5.70638135,5.7052313,5.70619957,5.70523959,5.70516603
37.258682,5.83095189,5.70566437,0.35395978,5.70449267,5.7033357,5.70430321,5.703344,5.70327031
37.269174,6.164414,5.70377449,0.678704293,5.70260316,5.70143915,5.70240593,5.70144747,5.70137365
37.279665,6.55743852,5.701884,0.924961906,5.700713,5.69954185,5.70050795,5.69955019,5.69947624
37.290157,6.244998,5.69999255,0.738244842,5.69882185,5.69764344,5.69860889,5.69765179,5.69757771
37.300648,5.83095189,5.69810052,0.364487828,5.69693007,5.69574429,5.69670913,5.69575266,5.69567845
37.31114,5.91607978,5.69620754,0.468905362,5.69503731,5.69384404,5.6948083,5.69385243,5.69377808
37.321632,5.65685425,5.69431382,-0.193544752,5.69314376,5.69194288,5.69290661,5.69195128,5.69187681
37.332123,6.244998,5.69241954,0.743356215,5.69124962,5.690041,5.69100423,5.69004942,5.68997481
37.342615,6,5.69052434,0.556305367,5.68935452,5.68813804,5.6891008,5.68814648,5.68807174
37.353106,5.56776436,5.6886286,-0.347655341,5.68745885,5.68623437,5.6871967,5.68624283,5.68616796
37.363598,5.38516481,5.68673196,-0.549151307,5.68556225,5.68432964,5.68529158,5.68433811,5.68426311
37.37409,5.19615242,5.68483463,-0.699058084,5.68366491,5.68242403,5.68338561,5.68243252,5.68235738
37.384581,5.56776436,5.68293678,-0.339370613,5.68176703,5.68051773,5.68147898,5.68052624,5.68045097
37.395073,5.65685425,5.68103806,-0.155511447,5.67986824,5.67861039,5.67957134,5.67861891,5.67854351
37.405564,6.164414,5.67913885,0.696616935,5.67796893,5.67670237,5.67766306,5.67671091,5.67663537
37.416056,5.83095189,5.67723879,0.392062624,5.67606873,5.67479332,5.67575378,5.67480188,5.6747262
37.426548,4.89897949,5.67533808,-0.881112137,5.67416786,5.67288342,5.67384368,5.672892,5.67281619
37.437039,5.91607978,5.67343691,0.492587934,5.67226648,5.67097287,5.67193296,5.67098146,5.67090552
37.447531,5.38516481,5.67153492,-0.535135604,5.67036426,5.6690613,5.67002125,5.66906991,5.66899383
37.458022,5.83095189,5.66963249,0.401645867,5.66846157,5.66714909,5.66810894,5.66715772,5.6670815
37.468514,6.164414,5.66772927,0.704758636,5.66655805,5.66523588,5.66619565,5.66524453,5.66516817
37.479006,6.08276253,5.66582544,0.645706657,5.6646539,5.66332185,5.66428157,5.66333052,5.66325403
37.489497,5.29150262,5.66392121,-0.610261082,5.66274932,5.66140721,5.66236691,5.66141589,5.66133926
37.499989,5.56776436,5.66201622,-0.307004647,5.66084394,5.65949158,5.66045129,5.65950028,5.65942351
37.51048,5.65685425,5.66011084,-0.0570665098,5.65893815,5.65757533,5.65853508,5.65758406,5.65750715
37.520972,5.38516481,5.65820472,-0.522532211,5.65703159,5.65565812,5.65661794,5.65566686,5.65558982
37.531464,5.91607978,5.65629806,0.50968787,5.65512446,5.65374013,5.65470004,5.65374889,5.65367171
37.541955,6.63324958,5.65439105,0.989372798,5.65321695,5.65182154,5.65278157,5.65183032,5.651753
37.552447,5.74456265,5.65248334,0.303445731,5.65130871,5.64990201,5.65086218,5.64991081,5.64983335
37.562938,6.32455532,5.6505753,0.820962863,5.64940012,5.64798189,5.64894224,5.64799071,5.64791311
37.57343,4.89897949,5.64866659,-0.865844732,5.64749083,5.64606084,5.64702138,5.64606967,5.64599193
37.583922,5.29150262,5.64675739,-0.596032525,5.64558103,5.64413903,5.64509981,5.64414789,5.64407001
37.594413,5.83095189,5.64484791,0.431397706,5.64367092,5.64221667,5.64317769,5.64222554,5.64214752
37.604905,5.83095189,5.6429378,0.43360592,5.64176015,5.64029338,5.64125468,5.64030228,5.64022411
37.615396,5.74456265,5.64102743,0.321768888,5.63984909,5.63836955,5.63933115,5.63837846,5.63830016
37.625888,5.83095189,5.63911645,0.437990233,5.6379374,5.63644481,5.63740673,5.63645374,5.63637529
37.63638,5.38516481,5.63720506,-0.502036109,5.63602528,5.63451935,5.63548162,5.6345283,5.63444971
37.646871,5.65685425,5.63529346,0.146835931,5.63411291,5.63259336,5.63355601,5.63260233,5.6325236
37.657363,5.29150262,5.63338129,-0.584703918,5.63219996,5.63066648,5.63162953,5.63067547,5.6305966
37.667854,5,5.63146895,-0.794650204,5.63028681,5.62873909,5.62970255,5.62874809,5.62866908
37.678346,5.91607978,5.62955607,0.535279099,5.6283731,5.62681081,5.62777472,5.62681984,5.62674068
37.688838,6.244998,5.62764286,0.785719504,5.62645903,5.62488185,5.62584623,5.6248909,5.62481159
37.699329,6,5.62572952,0.611776496,5.62454481,5.62295239,5.62391726,5.62296146,5.622882
37.709821,6.164414,5.6238157,0.735253905,5.62263008,5.62102207,5.62198745,5.62103116,5.62095156
37.720312,6.08276253,5.62190178,0.678867255,5.62071524,5.61909126,5.62005718,5.61910037,5.61902063
37.730804,5.74456265,5.61998742,0.352952159,5.61879993,5.61715961,5.61812608,5.61716874,5.61708885
37.741296,6.08276253,5.61807282,0.681681532,5.61688435,5.6152273,5.61619435,5.61523644,5.61515641
37.751787,5.83095189,5.61615818,0.463458431,5.61496872,5.61329452,5.61426217,5.61330369,5.6132235
37.762279,5.83095189,5.61424315,0.465519861,5.61305267,5.61136091,5.61232918,5.6113701,5.61128977
37.77277,4.79583152,5.61232813,-0.903602019,5.61113661,5.60942684,5.61039576,5.60943605,5.60935558
37.783262,6.32455532,5.61041277,0.845069555,5.60922019,5.60749196,5.60846154,5.60750119,5.60742056
37.793754,5,5.60849727,-0.780062349,5.6073036,5.60555645,5.60652671,5.6055657,5.60548493
37.804245,6.70820393,5.60658184,1.04958187,5.60538707,5.6036205,5.60459147,5.60362977,5.60354885
37.814737,6.4807407,5.60466614,0.935988549,5.60347024,5.60168375,5.60265544,5.60169304,5.60161197
37.825228,4.69041576,5.60275055,-0.955162181,5.60155351,5.59974658,5.60071901,5.59975589,5.59967467
37.83572,6.164414,5.60083475,0.75071916,5.59963653,5.59780862,5.59878181,5.59781795,5.59773658
37.846212,5.74456265,5.59891893,0.381632962,5.59771953,5.59587006,5.59684404,5.59587941,5.59579789
37.856703,5.56776436,5.59700331,-0.170993995,5.5958027,5.59393109,5.59490588,5.59394046,5.59385879
37.867195,5.65685425,5.59508755,0.248529068,5.59388571,5.59199135,5.59296696,5.59200074,5.59191892
37.877686,5.56776436,5.59317205,-0.159397892,5.59196896,5.59005121,5.59102767,5.59006063,5.58997865
37.888178,5.83095189,5.59125647,0.489586991,5.59005211,5.58811032,5.58908764,5.58811976,5.58803763
37.89867,5.83095189,5.58934103,0.491539279,5.58813538,5.58616886,5.58714705,5.58617831,5.58609603
37.909161,5.56776436,5.58742595,-0.140219767,5.58621899,5.58422702,5.58520611,5.58423649,5.58415406
37.919653,5.74456265,5.58551088,0.398812942,5.58430259,5.58228443,5.58326445,5.58229393,5.58221135
37.930144,6.40312424,5.58359625,0.905277853,5.58238661,5.58034148,5.58132244,5.580351,5.58026826
37.940636,5.74456265,5.58168171,0.403585105,5.5804707,5.5783978,5.57937971,5.57840734,5.57832445
37.951128,6.40312424,5.57976749,0.907390073,5.5785551,5.57645358,5.57743647,5.57646315,5.5763801
37.961619,5.65685425,5.57785382,0.281070145,5.57664002,5.57450901,5.57549289,5.5745186,5.5744354
37.972111,6.4807407,5.57594038,0.951209924,5.57472515,5.57256373,5.57354862,5.57257334,5.57248998
37.982602,5.56776436,5.57402757,-0.0791404206,5.5728109,5.57061811,5.57160403,5.57062774,5.57054423
37.993094,6.40312424,5.57211508,0.911597037,5.57089695,5.56867179,5.56965875,5.56868144,5.56859777
38.003586,5.74456265,5.57020314,0.417563773,5.56898353,5.56672496,5.56771298,5.56673463,5.56665081
38.014077,6.40312424,5.56829199,0.913691548,5.56707088,5.56477781,5.56576691,5.5647875,5.56470352
38.024569,6,5.56638132,0.658497288,5.56515869,5.56282997,5.56382017,5.56283969,5.56275555
38.03506,5.91607978,5.56447155,0.592965623,5.56324739,5.56088183,5.56187315,5.56089157,5.56080727
38.045552,6.4807407,5.56256238,0.958216214,5.56133667,5.55893301,5.55992546,5.55894277,5.55885831
38.056044,6.244998,5.56065406,0.827250829,5.55942678,5.55698371,5.55797731,5.55699349,5.55690888
38.066535,5.09901951,5.55874684,-0.678031952,5.55751797,5.55503411,5.55602888,5.55504392,5.55495915
38.077027,6.164414,5.55684043,0.779470061,5.55560994,5.55308386,5.55407982,5.5530937,5.55300876
38.087518,6.32455532,5.55493526,0.877279921,5.55370315,5.55113334,5.55213049,5.55114319,5.5510581
38.09801,5.56776436,5.55303106,0.121380816,5.55179731,5.54918216,5.55018053,5.54919204,5.54910678
38.108502,5,5.55112809,-0.74238002,5.54989269,5.54723053,5.54823013,5.54724043,5.54715502
38.118993,5.38516481,5.54922663,-0.405045463,5.54798955,5.54527864,5.54627949,5.54528856,5.54520299
38.129485,5.47722558,5.54732642,-0.264765633,5.54608764,5.54332612,5.54432824,5.54333606,5.54325033
38.139976,4.89897949,5.5454279,-0.80402016,5.54418742,5.54137335,5.54237675,5.54138332,5.54129741
38.150468,5.83095189,5.54353084,0.536116639,5.54228863,5.53941996,5.54042465,5.53942995,5.53934388
38.16096,5.65685425,5.54163554,0.339438818,5.54039158,5.53746614,5.53847215,5.53747615,5.53738993
38.171451,5.83095189,5.53974229,0.539638404,5.53849657,5.53551209,5.53651943,5.53552213,5.53543574
38.181943,4.58257569,5.53785086,-0.977381793,5.53660337,5.53355743,5.53456612,5.5335675,5.53348094
38.192434,5.91607978,5.53596177,0.616537114,5.53471249,5.53160256,5.53261261,5.53161264,5.53152592
38.202926,5.74456265,5.5340748,0.458789549,5.5328237,5.52964709,5.53065852,5.5296572,5.52957032
38.213418,6.08276253,5.53219028,0.742005556,5.53093737,5.52769122,5.52870405,5.52770136,5.52761431
38.223909,5.47722558,5.53030859,-0.230397509,5.52905383,5.52573515,5.52674938,5.52574531,5.52565809
38.234401,5.38516481,5.52842953,-0.378503267,5.52717291,5.5237785,5.52479416,5.52378868,5.5237013
38.244892,5.65685425,5.52655367,0.360971713,5.52529518,5.52182166,5.52283876,5.52183186,5.52174431
38.255384,6,5.52468087,0.689433922,5.52342049,5.51986425,5.5208828,5.51987448,5.51978676
38.265876,6.08276253,5.52281153,0.748298739,5.52154924,5.51790647,5.5189265,5.51791672,5.51782884
38.276367,4.79583152,5.52094607,-0.851536583,5.51968187,5.51594851,5.51697002,5.51595879,5.51587074
38.286859,5.74456265,5.51908442,0.474845473,5.51781829,5.51399,5.51501302,5.51400031,5.51391209
38.29735,6.244998,5.51722722,0.853094826,5.51595913,5.51203133,5.51305586,5.51204166,5.51195327
38.307842,5.91607978,5.51537441,0.633012931,5.51410436,5.51007212,5.51109818,5.51008247,5.50999391
38.318334,5.74456265,5.51352653,0.480662169,5.51225449,5.50811256,5.50914017,5.50812294,5.50803421
38.328825,6.40312424,5.5116841,0.944161077,5.51041007,5.50615285,5.50718203,5.50616325,5.50607435
38.339317,5.91607978,5.50984718,0.637363794,5.50857114,5.50419262,5.50522338,5.50420305,5.50411398
38.349808,5.38516481,5.50801655,-0.350502123,5.50673848,5.50223225,5.5032646,5.5022427,5.50215346
38.3603,5.83095189,5.50619232,0.569876803,5.50491222,5.50027137,5.50130532,5.50028185,5.50019243
38.370792,6.08276253,5.5043752,0.760517802,5.50309305,5.49831017,5.49934575,5.49832067,5.49823109
38.381283,6.55743852,5.50256592,1.02706991,5.50128169,5.49634884,5.49738606,5.49635937,5.49626961
38.391775,5.38516481,5.50076473,-0.339999886,5.49947842,5.49438702,5.49542589,5.49439758,5.49430765
38.402266,5.09901951,5.49897266,-0.632418491,5.49768426,5.49242509,5.49346562,5.49243567,5.49234556
38.412758,5.56776436,5.49719011,0.265658152,5.4958996,5.49046267,5.49150488,5.49047328,5.490383
38.42325,5.19615242,5.49541806,-0.547051764,5.49412542,5.48849996,5.48954387,5.48851059,5.48842014
38.433741,5.09901951,5.49365756,-0.628202235,5.4923628,5.48653715,5.48758277,5.48654781,5.48645718
38.444233,6.63324958,5.49190928,1.06833529,5.49061237,5.48457387,5.48562122,5.48458456,5.48449375
38.454724,5.83095189,5.49017464,0.583761302,5.48887556,5.4826105,5.48365959,5.48262122,5.48253023
38.465216,5.83095189,5.48845451,0.58523276,5.48715327,5.48064668,5.48169752,5.48065742,5.48056626
38.475708,6.78232998,5.48675041,1.13823529,5.48544698,5.47868259,5.4797352,5.47869336,5.47860202
38.486199,5.09901951,5.48506399,-0.621324779,5.48375837,5.47671843,5.47777282,5.47672922,5.4766377
38.496691,5,5.4833966,-0.695267289,5.48208878,5.47475382,5.47581002,5.47476464,5.47467295
38.507182,5.38516481,5.48175042,-0.310782261,5.48044038,5.47278916,5.47384716,5.4728,5.47270813
38.517674,6.40312424,5.48012722,0.960727337,5.47881495,5.47082406,5.47188389,5.47083493,5.47074288
38.528166,5.38516481,5.47852951,-0.305556379,5.477215,5.46885872,5.46992039,5.46886962,5.46877738
38.538657,5.91607978,5.47696007,0.662661087,5.47564332,5.46689333,5.46795686,5.46690426,5.46681185
38.549149,5.38516481,5.47542159,-0.300427658,5.47410259,5.46492753,5.46599293,5.46493848,5.46484589
38.55964,5.29150262,5.47391798,-0.427101108,5.47259647,5.46296169,5.46402922,5.46297267,5.46287989
38.570132,5.65685425,5.47245229,0.429420488,5.47112852,5.46099544,5.46206488,5.46100645,5.46091349
38.580624,6,5.47102929,0.727303724,5.46970325,5.45902898,5.46010033,5.45904002,5.45894688
38.591115,5.65685425,5.46965409,0.432666334,5.46832578,5.4570625,5.45813578,5.45707356,5.45698024
38.601607,5.91607978,5.46833216,0.669139464,5.46700157,5.45509563,5.45617084,5.45510672,5.45501321
38.612098,5.38516481,5.46707033,-0.286191418,5.46573747,5.45312874,5.45420592,5.45313986,5.45304617
38.62259,5,5.46587601,-0.682551101,5.46454087,5.45116148,5.45224062,5.45117262,5.45107875
38.633082,6.55743852,5.46475816,1.04531353,5.46342076,5.44919402,5.45027515,5.4492052,5.44911114
38.643573,5.56776436,5.46372724,0.322547862,5.46238758,5.44722657,5.4483097,5.44723778,5.44714353
38.654065,5.91607978,5.46279525,0.673264091,5.46145333,5.44525876,5.4463439,5.44526999,5.44517556
38.664556,6.40312424,5.46197676,0.970127556,5.46063261,5.44329095,5.44437812,5.44330221,5.4432076
38.675048,5.56776436,5.46128882,0.326305902,5.45994245,5.44132279,5.442412,5.44133408,5.44123928
38.68554,6,5.46075211,0.734334998,5.45940354,5.43935447,5.44044574,5.43936579,5.4392708
38.696031,4.89897949,5.46039152,-0.749274342,5.45904079,5.43738618,5.43847951,5.43739752,5.43730234
38.706523,6.40312424,5.46023718,0.971023716,5.45888431,5.43541754,5.43651296,5.43542892,5.43533355
38.717014,6.08276253,5.4603258,0.788946597,5.45897084,5.43344895,5.43454646,5.43346035,5.43336479
38.727506,5.38516481,5.46070216,-0.274840595,5.45934518,5.43148002,5.43257965,5.43149145,5.4313957
38.737998,5.29150262,5.46142071,-0.412211222,5.46006178,5.42951095,5.43061271,5.42952241,5.42942648
38.748489,5.65685425,5.46254734,0.44080258,5.46118653,5.42754194,5.42864583,5.42755343,5.4274573
38.758981,5.47722558,5.46416182,0.1142968,5.46279926,5.42557261,5.42667866,5.42558413,5.42548781
38.769472,5.91607978,5.46635876,0.670612426,5.46499458,5.42360334,5.42471156,5.42361489,5.42351838
38.779964,5.65685425,5.4692507,0.433132256,5.46788505,5.42163377,5.42274417,5.42164535,5.42154864
38.790456,5,5.47296771,-0.687726481,5.4716008,5.41966408,5.42077668,5.41967569,5.41957879
38.800947,5.91607978,5.4776577,0.66213449,5.47628975,5.41769447,5.41880929,5.41770611,5.41760902
38.811439,5.91607978,5.48348607,0.657718564,5.48211736,5.41572457,5.41684161,5.41573624,5.41563895
38.82193,4.89897949,5.49062581,-0.769185493,5.48925664,5.41375475,5.41487404,5.41376645,5.41366898
38.832422,5.83095189,5.49924887,0.575936646,5.49787962,5.41178466,5.41290619,5.41179639,5.41169871
38.842914,5.19615242,5.50949502,-0.559770131,5.50812607,5.40981447,5.41093828,5.40982623,5.40972836
38.853405,5.47722558,5.52142592,-0.210238776,5.52005766,5.40784438,5.40897047,5.40785618,5.40775811
38.863897,5.19615242,5.53495132,-0.582064343,5.53358415,5.40587403,5.40700242,5.40588585,5.40578759
38.874388,5.74456265,5.5497058,0.441425919,5.54833999,5.40390379,5.40503449,5.40391564,5.40381718
38.88488,5.29150262,5.56492104,-0.522894275,5.56355669,5.40193329,5.40306632,5.40194517,5.40184651
38.895372,5.65685425,5.57930814,0.278471029,5.57794501,5.39996272,5.40109809,5.39997464,5.39987578
38.905863,5.83095189,5.5910954,0.489751467,5.58973285,5.39799228,5.39913,5.39800423,5.39790517
38.916355,4.69041576,5.5983292,-0.952844917,5.5969661,5.39602159,5.39716169,5.39603357,5.39593432
38.926846,5.65685425,5.59944163,0.239609314,5.59807649,5.39405105,5.39519352,5.39406306,5.3939636
38.937338,5.29150262,5.59386098,-0.549871222,5.59249215,5.39208026,5.39322514,5.3920923,5.39199265
38.94783,5.65685425,5.58226279,0.273114377,5.58088875,5.39010943,5.39125673,5.39012151,5.39002165
38.958321,6.164414,5.56627763,0.77339277,5.56489727,5.38813876,5.38928848,5.38815086,5.3880508
38.968813,6.244998,5.54786258,0.834946359,5.54647525,5.38616786,5.38732002,5.38618,5.38607973
38.979304,5.47722558,5.52875628,-0.22700375,5.52736174,5.38419712,5.38535174,5.38420929,5.38410882
38.989796,5.91607978,5.51019313,0.63709234,5.50879146,5.38222617,5.38338326,5.38223837,5.3821377
39.000288,5.29150262,5.49290228,-0.448775735,5.49149373,5.3802552,5.38141478,5.38026744,5.38016656
39.010779,4.79583152,5.47721692,-0.825460719,5.47580186,5.3782844,5.37944648,5.37829667,5.37819559
39.021271,5.47722558,5.46320853,0.118393623,5.46178733,5.37631341,5.377478,5.37632571,5.37622442
39.031762,5.65685425,5.45080762,0.453923598,5.44938067,5.3743426,5.37550972,5.37435493,5.37425344
39.042254,6,5.43986828,0.748419479,5.43843593,5.3723716,5.37354127,5.37238397,5.37228227
39.052746,5.56776436,5.43022115,0.370868186,5.4287837,5.3704006,5.37157283,5.37041301,5.3703111
39.063237,5.47722558,5.42169423,0.235650891,5.42025194,5.3684298,5.36960461,5.36844224,5.36834012
39.073729,4.89897949,5.41412372,-0.717735492,5.41267682,5.36645883,5.36763622,5.3664713,5.36636897
39.08422,5,5.40736487,-0.638251417,5.40591355,5.36448806,5.36566806,5.36450056,5.36439803
39.094712,5.56776436,5.40128839,0.408014667,5.39983282,5.36251713,5.36369974,5.36252967,5.36242692
39.105204,4.24264069,5.39578487,-1.07384551,5.39432516,5.36054622,5.36173147,5.36055879,5.36045584
39.115695,5.74456265,5.39076152,0.594811843,5.38929779,5.35857554,5.35976343,5.35858814,5.35848497
39.126187,5.56776436,5.3861394,0.426174805,5.38467174,5.3566047,5.35779526,5.35661733,5.35651396
39.136678,5,5.38185462,-0.617943868,5.38038311,5.35463409,5.35582732,5.35464676,5.35454317
39.14717,5.29150262,5.37785301,-0.293854372,5.37637769,5.35266333,5.35385926,5.35267604,5.35257224
39.157662,5.65685425,5.3740911,0.53175478,5.37261203,5.35069263,5.35189127,5.35070537,5.35060135
39.168153,6.32455532,5.37053321,0.976740557,5.36905041,5.34872217,5.34992353,5.34873494,5.34863071
39.178645,4.58257569,5.36714906,-0.885761459,5.36566257,5.34675158,5.34795568,5.34676439,5.34665994
39.189136,5.29150262,5.36391488,-0.26909525,5.36242472,5.34478124,5.3459881,5.34479408,5.34468942
39.199628,5.47722558,5.36080982,0.341197538,5.359316,5.34281078,5.34402041,5.34282366,5.34271878
39.21012,5,5.3578173,-0.598178314,5.35631984,5.34084039,5.3420528,5.34085331,5.34074821
39.220611,5.38516481,5.3549234,0.173900568,5.35342232,5.33887026,5.34008548,5.33888322,5.3387779
39.231103,5.29150262,5.35211559,-0.246197013,5.35061089,5.33690003,5.33811806,5.33691302,5.33680749
39.241594,5.74456265,5.34938419,0.628632208,5.34787587,5.33493007,5.33615094,5.3349431,5.33483735
39.252086,6.08276253,5.34671995,0.857929237,5.34520801,5.33296002,5.33418373,5.33297308,5.33286711
39.262578,5,5.34411561,-0.586613682,5.34260004,5.33099006,5.33221663,5.33100316,5.33089697
39.273069,5.19615242,5.3415649,-0.381329876,5.3400457,5.32902038,5.33024984,5.32903352,5.32892711
39.283561,5.74456265,5.33906168,0.636789581,5.33753885,5.32705062,5.32828297,5.32706379,5.32695716
39.294052,5.56776436,5.33660149,0.480793999,5.33507503,5.32508116,5.32631642,5.32509437,5.32498751
39.304544,5.56776436,5.33417957,0.483306108,5.33264947,5.32311162,5.3243498,5.32312486,5.32301779
39.315036,6.08276253,5.33179235,0.866585358,5.33025859,5.32114219,5.32238332,5.32115548,5.32104818
39.325527,5.56776436,5.32943672,0.488188127,5.3278993,5.31917308,5.32041716,5.3191864,5.31907887
39.336019,6.244998,5.32710928,0.958065093,5.32556819,5.3172039,5.31845095,5.31721726,5.31710951
39.34651,6.08276253,5.32480786,0.870605921,5.3232631,5.31523504,5.31648508,5.31524843,5.31514046
39.357002,5.38516481,5.32252971,0.25027004,5.32098126,5.31326612,5.31451917,5.31327955,5.31317135
39.367494,5.19615242,5.32027299,-0.352307491,5.31872083,5.31129734,5.31255341,5.31131081,5.31120238
39.377985,6.08276253,5.31803606,0.874486404,5.31648018,5.30932889,5.310588,5.3093424,5.30923375
39.388477,5.29150262,5.31581685,-0.155930195,5.31425724,5.3073604,5.30862257,5.30737395,5.30726507
39.398968,5.74456265,5.3136143,0.656466563,5.31205094,5.30539225,5.30665748,5.30540584,5.30529672
39.40946,4.89897949,5.31142667,-0.642220508,5.30985955,5.30342407,5.30469239,5.30343769,5.30332835
39.419952,6.40312424,5.30925297,1.04588301,5.30768208,5.30145604,5.30272746,5.3014697,5.30136013
39.430443,4.89897949,5.30709232,-0.638837098,5.30551765,5.29948837,5.30076291,5.29950207,5.29939227
39.440935,5.09901951,5.30494335,-0.453788321,5.30336488,5.29752068,5.29879835,5.29753442,5.29742438
39.451426,6,5.30280558,0.834981687,5.30122329,5.29555334,5.29683417,5.29556712,5.29545685
39.461918,5.91607978,5.3006778,0.784475608,5.29909168,5.293586,5.29487,5.29359981,5.29348932
39.47241,5.19615242,5.29855949,-0.320011049,5.29696952,5.29161883,5.29290602,5.29163269,5.29152196
39.482901,5.74456265,5.29645019,0.669412023,5.29485635,5.28965204,5.29094243,5.28966594,5.28955497
39.493393,5.47722558,5.29434889,0.427640838,5.29275117,5.28768525,5.28897886,5.28769919,5.28758798
39.503884,5.83095189,5.29225544,0.733959438,5.29065382,5.28571884,5.28701568,5.28573281,5.28562138
39.514376,5.47722558,5.29016894,0.432500449,5.2885634,5.28375244,5.28505254,5.28376645,5.28365478
39.524868,5.09901951,5.28808912,-0.434821352,5.28647965,5.28178624,5.28308961,5.28180029,5.28168838
39.535359,5,5.28601577,-0.534804419,5.28440235,5.27982043,5.28112709,5.27983453,5.27972238
39.545851,5.65685425,5.28394809,0.610660428,5.2823307,5.27785464,5.27916461,5.27786879,5.2777564
39.556342,5.47722558,5.28188613,0.441972224,5.28026475,5.27588926,5.27720255,5.27590344,5.27579082
39.566834,5.19615242,5.27982916,-0.289269315,5.27820378,5.27392391,5.27524054,5.27393813,5.27382526
39.577326,5.56776436,5.27777708,0.538504676,5.27614768,5.27195878,5.27327876,5.27197304,5.27185993
39.587817,5.09901951,5.2757298,-0.420369221,5.27409636,5.26999406,5.27131742,5.27000837,5.26989502
39.598309,5.47722558,5.27368667,0.451152864,5.27204917,5.26802939,5.26935614,5.26804374,5.26793014
39.6088,5.19615242,5.27164784,-0.274764303,5.27000627,5.26606514,5.2673953,5.26607953,5.26596569
39.619292,5.09901951,5.26961272,-0.4130293,5.26796705,5.26410094,5.26543453,5.26411537,5.26400129
39.629784,4.58257569,5.26758127,-0.827650638,5.26593149,5.26213698,5.26347402,5.26215145,5.26203713
39.640275,4.47213595,5.26555352,-0.890739896,5.2638996,5.26017345,5.26151396,5.26018797,5.2600734
39.650767,6.164414,5.26352889,0.949149682,5.26187082,5.25820999,5.25955398,5.25822455,5.25810974
39.661258,5.65685425,5.2615076,0.628765975,5.25984536,5.25624698,5.25759446,5.25626158,5.25614652
39.67175,5.65685425,5.25948912,0.630369042,5.25782269,5.25428403,5.25563503,5.25429867,5.25418336
39.682242,5.47722558,5.2574735,0.468777212,5.25580286,5.25232134,5.25367589,5.25233603,5.25222048
39.692733,5.56776436,5.2554608,0.558841269,5.25378593,5.25035911,5.25171721,5.25037385,5.25025804
39.703225,5.56776436,5.25345051,0.560637008,5.25177139,5.24839697,5.24975864,5.24841174,5.24829569
39.713716,4.89897949,5.2514429,-0.593686291,5.24975951,5.24643528,5.24780055,5.2464501,5.2463338
39.724208,4.79583152,5.24943747,-0.673502748,5.2477498,5.24447369,5.24584257,5.24448856,5.244372
39.7347,6,5.24743433,0.867505428,5.24574235,5.24251238,5.24388489,5.24252729,5.24241048
39.745191,4.69041576,5.24543357,-0.744995172,5.24373725,5.24055155,5.2419277,5.2405665,5.24044944
39.755683,5.65685425,5.24343471,0.642977092,5.24173405,5.23859081,5.23997064,5.23860581,5.23848849
39.766174,5,5.24143806,-0.491363466,5.23973302,5.23663056,5.23801407,5.23664561,5.23652803
39.776666,4.58257569,5.23944315,-0.8104736,5.23773373,5.23467043,5.23605764,5.23468551,5.23456769
39.787158,4.89897949,5.23745011,-0.581782286,5.23573628,5.23271059,5.23410153,5.23272572,5.23260764
39.797649,4.47213595,5.23545906,-0.873683644,5.2337408,5.23075125,5.23214593,5.23076643,5.23064809
39.808141,5.19615242,5.23346956,-0.193176439,5.23174684,5.22879203,5.23019048,5.22880725,5.22868866
39.818632,5.47722558,5.23148192,0.495725384,5.22975472,5.22683331,5.22823554,5.22684858,5.22672973
39.829124,4.89897949,5.22949571,-0.574905403,5.22776402,5.22487473,5.22628076,5.22489004,5.22477093
39.839616,5.65685425,5.22751106,0.655242845,5.22577485,5.22291646,5.22432632,5.22293183,5.22281245
39.850107,5.38516481,5.22552812,0.399545596,5.22378738,5.22095871,5.22237241,5.22097412,5.22085449
39.860599,5.38516481,5.22354646,0.402017839,5.22180116,5.2190011,5.22041867,5.21901656,5.21889666
39.87109,4.24264069,5.22156642,-0.989406758,5.21981653,5.21704402,5.21846546,5.21705952,5.21693936
39.881582,4.89897949,5.21958757,-0.566222646,5.21783308,5.21508708,5.21651243,5.21510263,5.21498221
39.892074,5.74456265,5.21761007,0.725914995,5.21585095,5.21313049,5.21455976,5.21314609,5.2130254
39.902565,5.74456265,5.21563406,0.727274766,5.21387029,5.21117443,5.21260764,5.21119007,5.21106912
39.913057,5.29150262,5.21365914,0.279004449,5.2118907,5.20921853,5.21065571,5.20923422,5.209113
39.923548,4.24264069,5.21168565,-0.984400813,5.20991252,5.20726317,5.20870433,5.20727891,5.20715742
39.93404,5.47722558,5.20971318,0.517216005,5.20793533,5.20530798,5.20675315,5.20532377,5.20520201
39.944532,5.56776436,5.20774189,0.600018726,5.20595931,5.20335315,5.20480234,5.20336899,5.20324696
39.955023,5.19615242,5.20577195,-0.0980791708,5.2039846,5.20139887,5.20285211,5.20141476,5.20129247
39.965515,4.79583152,5.20380294,-0.638726403,5.20201081,5.19944477,5.20090209,5.19946071,5.19933815
39.976006,5.38516481,5.20183523,0.428170034,5.20003829,5.19749123,5.19895264,5.19750722,5.19738439
39.986498,5.19615242,5.19986841,-0.0609588935,5.19806664,5.19553789,5.1970034,5.19555392,5.19543082
39.99699,5.38516481,5.19790265,0.432737978,5.19609603,5.19358492,5.19505456,5.193601,5.19347763
40.007481,5.65685425,5.19593812,0.678908045,5.19412662,5.19163252,5.19310632,5.19164865,5.191525
40.017973,4.89897949,5.19397441,-0.543134356,5.19215802,5.18968032,5.19115829,5.1896965,5.18957258
40.028464,4.89897949,5.1920119,-0.541324686,5.19019058,5.1877287,5.18921087,5.18774493,5.18762073
40.038956,5.09901951,5.19005018,-0.301712895,5.18822392,5.18577728,5.18726368,5.18579357,5.1856691
40.049448,6,5.18808944,0.901060799,5.18625819,5.18382627,5.1853169,5.18384261,5.18371785
40.059939,5.09901951,5.18612983,-0.295144564,5.18429359,5.18187584,5.18337074,5.18189223,5.1817672
40.070431,4.79583152,5.18417097,-0.623168874,5.18232971,5.17992563,5.18142482,5.17994207,5.17981677
40.080922,4.89897949,5.18221322,-0.532197084,5.18036692,5.17797602,5.17947951,5.17799251,5.17786692
40.091414,4.79583152,5.1802562,-0.6200199,5.17840483,5.17602664,5.17753446,5.17604318,5.17591731
40.101906,5.29150262,5.17830008,0.336455859,5.17644361,5.17407767,5.17558984,5.17409426,5.17396811
40.112397,5.83095189,5.17634503,0.809077788,5.17448344,5.1721293,5.17364586,5.17214595,5.17201952
40.122889,5.91607978,5.17439067,0.861213744,5.17252394,5.17018118,5.17170213,5.17019788,5.17007117
40.13338,5.29150262,5.17243736,0.34505834,5.17056546,5.16823367,5.16975904,5.16825042,5.16812342
40.143872,5.65685425,5.17048473,0.697401979,5.16860763,5.1662864,5.16781622,5.16630321,5.16617593
40.154364,4,5.16853294,-1.08098702,5.16665063,5.16433957,5.16587386,5.16435643,5.16422886
40.164855,6.164414,5.16658218,0.998915323,5.16469462,5.16239336,5.16393215,5.16241028,5.16228242
40.175347,5,5.16463253,-0.405749341,5.16273969,5.16044741,5.16199071,5.16046438,5.16033624
40.185838,5,5.16268342,-0.40334033,5.16078529,5.1585021,5.16004993,5.15851912,5.15839068
40.19633,4.79583152,5.16073495,-0.604072367,5.15883149,5.15655704,5.15810944,5.15657412,5.15644539
40.206822,5.09901951,5.15878728,-0.244474477,5.15687848,5.15461244,5.15616943,5.15462957,5.15450056
40.217313,4.47213595,5.15684061,-0.827468824,5.15492643,5.15266848,5.15423008,5.15268566,5.15255636
40.227805,5.38516481,5.15489455,0.479864835,5.15297496,5.15072479,5.15229103,5.15074203,5.15061243
40.238296,4.58257569,5.15294946,-0.755230937,5.15102445,5.14878175,5.15035266,5.14879905,5.14866916
40.248788,4.24264069,5.15100498,-0.953081473,5.14907451,5.146839,5.14841459,5.14685635,5.14672617
40.25928,5.47722558,5.14906128,0.572856258,5.14712532,5.14489671,5.14647702,5.14491412,5.14478364
40.269771,5,5.14711855,-0.383560357,5.14517708,5.14295509,5.14454013,5.14297255,5.14284178
40.280263,4.47213595,5.1451764,-0.820390423,5.14322939,5.14101375,5.14260355,5.14103127,5.1409002
40.290754,5.09901951,5.14323521,-0.21027529,5.14128264,5.13907309,5.14066768,5.13909066,5.13895929
40.301246,5.83095189,5.1412946,0.830456075,5.13933643,5.13713272,5.13873212,5.13715035,5.13701869
40.311738,5.19615242,5.13935476,0.238322608,5.13739096,5.13519284,5.13679708,5.13521053,5.13507856
40.322229,5.47722558,5.13741586,0.582932001,5.13544641,5.13325364,5.13486274,5.13327139,5.13313912
40.332721,5.29150262,5.13547753,0.395000116,5.13350241,5.13131475,5.13292874,5.13133255,5.13119998
40.343212,5.09901951,5.13354014,-0.185797282,5.13155931,5.12937654,5.13099545,5.1293944,5.12926153
40.353704,5.09901951,5.13160332,-0.180509865,5.12961676,5.12743865,5.1290625,5.12745657,5.12732339
40.364196,4.89897949,5.12966726,-0.480299668,5.12767493,5.12550126,5.12713009,5.12551924,5.12538576
40.374687,4.35889894,5.12773212,-0.876831328,5.125734,5.12356457,5.12519839,5.12358261,5.12344882
40.385179,4.47213595,5.12579755,-0.808493411,5.1237936,5.1216282,5.12326705,5.1216463,5.12151221
40.39567,4.47213595,5.12386391,-0.807296694,5.12185411,5.11969254,5.12133644,5.1197107,5.1195763
40.406162,5.09901951,5.12193083,-0.151364831,5.11991514,5.11775721,5.11940618,5.11777543,5.11764072
40.416654,5.56776436,5.11999849,0.669153104,5.11797689,5.1158224,5.11747648,5.11584068,5.11570566
40.427145,5,5.11806707,-0.343608896,5.11603953,5.11388831,5.11554752,5.11390665,5.11377131
40.437637,4.35889894,5.11613622,-0.870193814,5.11410271,5.11195456,5.11361893,5.11197296,5.11183731
40.448128,4.79583152,5.11420629,-0.564247075,5.11216677,5.11002152,5.11169108,5.11003998,5.10990403
40.45862,4.79583152,5.11227691,-0.562534787,5.11023136,5.10808884,5.10976362,5.10810736,5.10797109
40.469112,5.83095189,5.11034827,0.848883751,5.10829666,5.1061567,5.10783672,5.10617528,5.1060387
40.479603,5.56776436,5.10842056,0.677749071,5.10636285,5.10422528,5.10591058,5.10424393,5.10410703
40.490095,5,5.1064934,-0.326333267,5.10442956,5.10229423,5.10398483,5.10231294,5.10217572
40.500586,4.58257569,5.10456716,-0.722489772,5.10249717,5.10036391,5.10205985,5.10038268,5.10024514
40.511078,5.65685425,5.10264148,0.744454676,5.1005653,5.09843396,5.10013526,5.09845279,5.09831494
40.52157,5.29150262,5.10071654,0.436790659,5.09863414,5.09650457,5.09821125,5.09652346,5.09638529
40.532061,5.29150262,5.09879252,0.438987583,5.09670386,5.09457591,5.09628802,5.09459487,5.09445638
40.542553,4.69041576,5.09686906,-0.637536902,5.09477411,5.09264764,5.0943652,5.09266667,5.09252785
40.553044,5,5.09494652,-0.308133936,5.09284526,5.09072012,5.09244316,5.09073921,5.09060007
40.563536,4.69041576,5.09302454,-0.634514603,5.09091692,5.08879299,5.09052154,5.08881214,5.08867267
40.574028,4.58257569,5.0911033,-0.713111216,5.0889893,5.08686642,5.08860052,5.08688564,5.08674585
40.584519,4.69041576,5.08918299,-0.631480187,5.08706257,5.08494062,5.08668028,5.0849599,5.08481978
40.595011,5.09901951,5.08726323,0.108426388,5.08513636,5.08301521,5.08476048,5.08303456,5.08289411
40.605502,5.65685425,5.0853444,0.755982702,5.08321105,5.08109057,5.08284147,5.08110998,5.08096921
40.615994,5.09901951,5.08342614,0.124873436,5.08128626,5.07916633,5.0809229,5.07918581,5.07904471
40.626486,4.79583152,5.08150862,-0.534487695,5.07936219,5.07724268,5.07900495,5.07726223,5.07712079
40.636977,5.65685425,5.07959203,0.759777744,5.07743901,5.07531981,5.0770878,5.07533942,5.07519765
40.647469,5.29150262,5.07767601,0.462413902,5.07551636,5.07339735,5.0751711,5.07341702,5.07327492
40.65796,5.91607978,5.07576091,0.91668908,5.07359461,5.07147567,5.07325521,5.07149541,5.07135298
40.668452,4.89897949,5.07384639,-0.418170904,5.0716734,5.06955441,5.07133978,5.06957422,5.06943145
40.678944,6.32455532,5.07193262,1.11920628,5.0697529,5.06763375,5.06942498,5.06765363,5.06751052
40.689435,6.08276253,5.07001978,1.0063512,5.0678333,5.06571389,5.06751101,5.06573383,5.06559039
40.699927,5.29150262,5.06810752,0.472646907,5.06591424,5.06379445,5.0655975,5.06381447,5.06367068
40.710418,4.79583152,5.0661962,-0.519966035,5.06399608,5.06187581,5.06368482,5.0618959,5.06175178
40.72091,5.47722558,5.06428545,0.642604171,5.06207846,5.05995761,5.06177261,5.05997776,5.0598333
40.731402,5,5.06237547,-0.249750814,5.06016157,5.05804003,5.05986105,5.05806025,5.05791545
40.741893,5,5.06046643,-0.245899223,5.05824558,5.05612325,5.05795034,5.05614355,5.0559984
40.752385,5.19615242,5.05855797,0.370937265,5.05633014,5.05420692,5.0560401,5.05422729,5.05408179
40.762876,4.79583152,5.05665046,-0.510704349,5.0544156,5.05229141,5.05413072,5.05231184,5.052166
40.773368,5.09901951,5.05474353,0.210418594,5.05250162,5.05037634,5.05222182,5.05039684,5.05025066
40.78386,4.89897949,5.05283737,-0.392247225,5.05058836,5.04846191,5.05031359,5.04848249,5.04833595
40.794351,5.38516481,5.05093217,0.578128567,5.04867603,5.0465483,5.04840622,5.04656895,5.04642207
40.804843,4.79583152,5.04902769,-0.503186016,5.04676437,5.04463516,5.04649934,5.04465588,5.04450865
40.815334,4.79583152,5.04712403,-0.501290845,5.04485351,5.04272284,5.04459333,5.04274363,5.04259605
40.825826,5,5.04522097,-0.212652238,5.04294319,5.04081099,5.04268783,5.04083185,5.04068392
40.836318,4.35889894,5.04331869,-0.827296652,5.04103362,5.03889979,5.04078301,5.03892073,5.03877244
40.846809,5,5.04141738,-0.203512597,5.03912497,5.03698943,5.03887907,5.03701044,5.0368618
40.857301,4,5.03951666,-1.0195669,5.03721689,5.03507955,5.03697564,5.03510063,5.03495163
40.867792,5.29150262,5.03761691,0.503870725,5.03530973,5.0331705,5.03507309,5.03319166,5.03304231
40.878284,5.65685425,5.03571777,0.788122119,5.03340314,5.03126195,5.03317106,5.03128318,5.03113346
40.888776,5.29150262,5.03381942,0.507625056,5.03149729,5.02935405,5.03126974,5.02937536,5.02922529
40.899267,5.19615242,5.03192205,0.405253469,5.02959238,5.02744702,5.02936931,5.0274684,5.02731796
40.909759,5.38516481,5.03002529,0.595935836,5.02768804,5.02554047,5.02746941,5.02556193,5.02541113
40.92025,4.24264069,5.0281295,-0.886278069,5.02578464,5.02363478,5.02557041,5.02365632,5.02350515
40.930742,5.29150262,5.02623434,0.515042021,5.02388182,5.02172959,5.02367194,5.0217512,5.02159967
40.941234,4.58257569,5.02433998,-0.664653505,5.02197975,5.01982508,5.0217742,5.01984677,5.01969488
40.951725,4.58257569,5.0224466,-0.663227641,5.02007863,5.01792144,5.01987736,5.01794321,5.01779095
40.962217,3.87298335,5.02055385,-1.07124717,5.01817809,5.01601831,5.01798108,5.01604015,5.01588752
40.972708,4.47213595,5.01866209,-0.739274058,5.01627849,5.01411605,5.0160857,5.01413797,5.01398497
40.9832,5,5.01677096,-0.129502738,5.01437949,5.0122143,5.01419088,5.0122363,5.01208293
40.993692,4.12310563,5.01488064,-0.944338403,5.01248125,5.01031325,5.0122968,5.01033533,5.01018159
41.004183,4.69041576,5.01299133,-0.567957365,5.01058397,5.00841308,5.01040364,5.00843524,5.00828112
41.014675,5.29150262,5.01110265,0.529528065,5.00868728,5.00651344,5.00851105,5.00653567,5.00638118
41.025166,5.09901951,5.00921498,0.299674053,5.00679155,5.00461468,5.00661938,5.004637,5.00448213
41.035658,5.09901951,5.00732795,0.302806157,5.00489641,5.00271645,5.00472829,5.00273885,5.0025836
41.04615,5.29150262,5.00544174,0.534846595,5.00300206,5.00081893,5.00283795,5.00084141,5.00068578
41.056641,5.19615242,5.00355655,0.438857464,5.00110867,4.99892231,5.00094856,4.99894487,4.99878886
41.067133,4.89897949,5.00167201,-0.320456742,4.99921589,4.99702622,4.99905974,4.99704886,4.99689248
41.077624,5.19615242,4.99978848,0.443129709,4.99732407,4.99513104,4.99717187,4.99515376,4.99499699
41.088116,4.58257569,4.99790562,-0.644460955,4.99543287,4.9932364,4.99528459,4.99325921,4.99310205
41.098608,4.24264069,4.99602359,-0.867976327,4.99354246,4.99134249,4.99339807,4.99136538,4.99120784
41.109099,5.19615242,4.99414259,0.449455041,4.99165302,4.98944948,4.99151252,4.98947246,4.98931453
41.119591,4.69041576,4.99226225,-0.549405581,4.9897642,4.98755703,4.98962756,4.98758009,4.98742178
41.130082,5.19615242,4.99038294,0.453618207,4.98787636,4.9856655,4.98774356,4.98568864,4.98552994
41.140574,4.24264069,4.98850431,-0.863633963,4.98598915,4.98377452,4.98586017,4.98379775,4.98363865
41.151066,4.69041576,4.98662653,-0.544252486,4.98410273,4.98188428,4.98397757,4.98190759,4.98174811
41.161557,4.58257569,4.98474978,-0.634171971,4.98221731,4.97999497,4.98209593,4.98001837,4.97985849
41.172049,4.35889894,4.98287372,-0.789920741,4.98033251,4.97810622,4.98021492,4.97812971,4.97796943
41.18254,4.89897949,4.9809987,-0.286389965,4.97844871,4.97621841,4.97833488,4.97624198,4.97608131
41.193032,5.38516481,4.97912436,0.637213029,4.97656553,4.97433116,4.97645546,4.97435482,4.97419375
41.203524,5.47722558,4.9772509,0.707088876,4.97468318,4.97244468,4.97457684,4.97246842,4.97230695
41.214015,4.47213595,4.97537848,-0.709395887,4.97280182,4.97055912,4.97269921,4.97058296,4.97042109
41.224507,5.29150262,4.97350676,0.563911219,4.97092111,4.96867415,4.97082221,4.96869807,4.9685358
41.234998,5,4.97163609,0.168415874,4.96904139,4.96679013,4.96894621,4.96681413,4.96665146
41.24549,4.58257569,4.96976613,-0.622246281,4.96716233,4.96490669,4.96707084,4.96493078,4.9647677
41.255982,5.65685425,4.96789705,0.830034458,4.96528409,4.96302401,4.9651963,4.9630482,4.96288472
41.266473,4.58257569,4.96602903,-0.619236091,4.96340686,4.96114229,4.96332275,4.96116657,4.96100268
41.276965,5.19615242,4.96416173,0.481654126,4.96153029,4.95926117,4.96144985,4.95928554,4.95912123
41.287456,5.09901951,4.96229549,0.369762119,4.95965473,4.957381,4.95957797,4.95740546,4.95724075
41.297948,4.47213595,4.96042997,-0.698780376,4.95777983,4.95550143,4.95770673,4.95552598,4.95536086
41.30844,5,4.95856535,0.203555039,4.95590577,4.95362265,4.95583634,4.95364729,4.95348175
41.318931,4.89897949,4.9567018,-0.24025469,4.95403274,4.95174483,4.95396696,4.95176956,4.95160361
41.329423,3.60555128,4.95483898,-1.16158844,4.95216037,4.94986762,4.95209824,4.94989244,4.94972607
41.339914,5.29150262,4.95297725,0.581829334,4.95028902,4.94799138,4.95023055,4.9480163,4.94784951
41.350406,4.89897949,4.95111625,-0.228334754,4.94841835,4.94611575,4.94836353,4.94614076,4.94597355
41.360898,5.56776436,4.94925616,0.786452928,4.94654853,4.94424092,4.94649736,4.94426603,4.9440984
41.371389,5.38516481,4.94739716,0.661640121,4.94467975,4.94236707,4.94463223,4.94239227,4.94222422
41.381881,5.29150262,4.9455389,0.588186808,4.94281164,4.94049384,4.94276778,4.94051914,4.94035066
41.392372,5.74456265,4.94368174,0.894919496,4.94094458,4.93862159,4.94090436,4.93864698,4.93847808
41.402864,5.19615242,4.94182533,0.504308527,4.9390782,4.93674997,4.93904164,4.93677546,4.93660613
41.413356,4.69041576,4.93996985,-0.49955389,4.93721268,4.93487916,4.93717978,4.93490475,4.93473499
41.423847,4.69041576,4.93811547,-0.497694398,4.93534821,4.93300934,4.93531897,4.93303503,4.93286484
41.434339,5.29150262,4.93626185,0.596020778,4.93348443,4.93114016,4.93345886,4.93116595,4.93099533
41.44483,4.89897949,4.93440935,-0.188228223,4.9316217,4.92927198,4.9315998,4.92929786,4.92912681
41.455322,5.19615242,4.93255761,0.513414857,4.92975967,4.92740443,4.92974145,4.92743041,4.92725893
41.465814,4.12310563,4.93070681,-0.898666335,4.92789852,4.92553771,4.92788398,4.92556379,4.92539187
41.476305,4.89897949,4.92885713,-0.172851512,4.92603843,4.92367199,4.92602758,4.92369818,4.92352581
41.486797,5,4.92700823,0.270169897,4.92417904,4.92180693,4.92417189,4.92183321,4.92166041
41.497288,4.58257569,4.92516045,-0.585307403,4.92232071,4.91994287,4.92231727,4.91996925,4.91979601
41.50778,5.74456265,4.92331345,0.906228002,4.92046309,4.91807946,4.92046337,4.91810595,4.91793226
41.518272,4.58257569,4.92146742,-0.582144072,4.91860637,4.9162169,4.91861038,4.91624348,4.91606935
41.528763,4.69041576,4.91962252,-0.478755423,4.91675071,4.91435534,4.91675846,4.91438203,4.91420746
41.539255,4.79583152,4.9177784,-0.349208935,4.91489577,4.91249445,4.91490727,4.91252125,4.91234622
41.549746,4.35889894,4.91593544,-0.746348773,4.91304191,4.91063459,4.91305717,4.91066148,4.91048601
41.560238,3.87298335,4.91409326,-1.02034794,4.91118877,4.90877539,4.9112078,4.90880239,4.90862646
41.57073,5.38516481,4.91225206,0.687686515,4.90933653,4.90691704,4.90935935,4.90694414,4.90676777
41.581221,5.09901951,4.91041202,0.434289645,4.90748538,4.90505971,4.907512,4.90508693,4.9049101
41.591713,4.24264069,4.90857278,-0.816046623,4.90563496,4.90320307,4.90566539,4.90323039,4.9030531
41.602204,4.35889894,4.9067347,-0.740159275,4.90378562,4.90134745,4.90381989,4.90137488,4.90119714
41.612696,4.89897949,4.90489743,-0.0769281539,4.90193702,4.89949252,4.90197514,4.89952006,4.89934185
41.623188,4.79583152,4.90306115,-0.327459347,4.90008933,4.89763845,4.90013132,4.89766609,4.89748743
41.633679,5.09901951,4.90122604,0.444739786,4.89824274,4.89578542,4.89828861,4.89581317,4.89563405
41.644171,5.29150262,4.89939175,0.626187572,4.89639689,4.89393308,4.89644666,4.89396094,4.89378135
41.654662,4.12310563,4.89755863,-0.880030117,4.89455214,4.89208179,4.89460584,4.89210975,4.8919297
41.665154,3.46410162,4.89572635,-1.19650522,4.89270815,4.89023119,4.89276578,4.89025926,4.89007874
41.675646,5.56776436,4.89389507,0.820895423,4.89086507,4.88838146,4.89092667,4.88840965,4.88822865
41.686137,4,4.89206497,-0.944491912,4.88902311,4.88653278,4.88908869,4.88656108,4.88637962
41.696629,4.89897949,4.89023572,0.0935081242,4.8871819,4.88468481,4.88725149,4.88471322,4.88453129
41.70712,4.69041576,4.88840765,-0.444962797,4.8853418,4.8828379,4.88541542,4.88286642,4.88268401
41.717612,5.19615242,4.88658043,0.556391941,4.88350247,4.88099169,4.88358013,4.88102033,4.88083744
41.728104,4.89897949,4.88475423,0.119269664,4.88166407,4.87914637,4.88174582,4.87917512,4.87899175
41.738595,5.74456265,4.88292924,0.928242108,4.87982679,4.87730211,4.87991264,4.87733097,4.87714713
41.749087,4.79583152,4.88110509,-0.292016389,4.87799028,4.87545856,4.87808026,4.87548754,4.87530321
41.759578,5.47722558,4.87928216,0.77326801,4.8761549,4.87361609,4.87624903,4.87364519,4.87346037
41.77007,4.79583152,4.87746009,-0.285707131,4.87432029,4.87177433,4.8744186,4.87180355,4.87161825
41.780562,5.29150262,4.87563906,0.644874845,4.87248663,4.86993348,4.87258916,4.86996281,4.86977702
41.791053,4.79583152,4.87381924,-0.27926281,4.87065411,4.86809369,4.87076087,4.86812314,4.86793687
41.801545,5,4.8720003,0.35777046,4.86882236,4.86625464,4.8689334,4.86628421,4.86609744
41.812036,5,4.87018258,0.360301847,4.86699175,4.86441667,4.86710709,4.86444635,4.86425909
41.822528,4.89897949,4.86836574,0.174967843,4.86516193,4.86257942,4.8652816,4.86260923,4.86242147
41.83302,4.79583152,4.86654996,-0.265929378,4.86333307,4.86074309,4.86345711,4.86077301,4.86058477
41.843511,4.47213595,4.86473541,-0.626577571,4.86150536,4.85890784,4.86163379,4.85893789,4.85874914
41.854003,4.89897949,4.86292175,0.189888746,4.85967844,4.85707334,4.8598113,4.85710351,4.85691426
41.864494,5.29150262,4.86110933,0.656043666,4.85785266,4.85523992,4.85798999,4.85527021,4.85508046
41.874986,3,4.85929781,-1.36356071,4.85602769,4.85340725,4.85616952,4.85343767,4.85324741
41.885478,5,4.85748736,0.377508459,4.8542037,4.8515755,4.85435007,4.85160604,4.85141528
41.895969,5.47722558,4.85567817,0.78838278,4.85238086,4.84974485,4.8525318,4.84977551,4.84958425
41.906461,4.47213595,4.85386988,-0.617846198,4.85055882,4.84791496,4.85071439,4.84794574,4.84775396
41.916952,5.09901951,4.85206285,0.496947347,4.84873795,4.84608616,4.84889817,4.84611707,4.84592478
41.927444,4.79583152,4.85025673,-0.233292113,4.84691789,4.84425812,4.8470828,4.84428916,4.84409635
41.937936,5.38516481,4.84845171,0.732607055,4.84509882,4.84243101,4.84526846,4.84246217,4.84226886
41.948427,4.35889894,4.84664795,-0.6983903,4.84328091,4.84060501,4.84345533,4.8406363,4.84044247
41.958919,5.83095189,4.84484513,0.993029088,4.84146383,4.83877978,4.84164307,4.8388112,4.83861684
41.96941,5.47722558,4.84304357,0.796355451,4.83964791,4.83695566,4.83983202,4.83698721,4.83679233
41.979902,4.89897949,4.84124295,0.24028428,4.83783282,4.8351323,4.83802184,4.83516398,4.83496858
41.990394,5.09901951,4.83944344,0.509486088,4.83601874,4.83330989,4.83621271,4.8333417,4.83314578
42.000885,4.58257569,4.83764521,-0.505044077,4.83420583,4.83148861,4.8344048,4.83152055,4.83132409
42.011377,4.79583152,4.83584793,-0.200041024,4.83239375,4.82966809,4.83259778,4.82970017,4.82950318
42.021868,4.47213595,4.83405195,-0.601594541,4.83058286,4.8278487,4.83079198,4.82788091,4.8276834
42.03236,5.38516481,4.83225691,0.743577767,4.8287728,4.82603009,4.82898708,4.82606243,4.82586439
42.042852,4.69041576,4.83046301,-0.374228869,4.82696376,4.82421244,4.82718324,4.82424491,4.82404633
42.053343,4.79583152,4.8286704,-0.181215008,4.82515591,4.82239592,4.82538064,4.82242853,4.8222294
42.063835,4.79583152,4.82687876,-0.176202271,4.82334891,4.82058018,4.82357894,4.82061292,4.82041326
42.074326,4.47213595,4.82508844,-0.594098039,4.8215431,4.81876558,4.82177849,4.81879846,4.81859826
42.084818,4.35889894,4.82329908,-0.681469101,4.81973814,4.81695177,4.81997894,4.81698479,4.81678404
42.09531,4.89897949,4.82151087,0.278331843,4.8179342,4.81513892,4.81818048,4.81517208,4.81497079
42.105801,5.09901951,4.81972398,0.528484182,4.81613147,4.81332722,4.81638327,4.81336052,4.81315868
42.116293,3.46410162,4.81793808,-1.16354478,4.8143296,4.81151631,4.81458699,4.81154975,4.81134736
42.126784,5.56776436,4.81615351,0.866954934,4.81252893,4.80970656,4.81279197,4.80974013,4.80953719
42.137276,4.35889894,4.81436992,-0.674885902,4.81072912,4.8078976,4.81099787,4.80793132,4.80772782
42.147768,4.47213595,4.81258751,-0.583482265,4.80893036,4.80608962,4.80920488,4.80612348,4.80591942
42.158259,4.89897949,4.81080643,0.296939476,4.8071328,4.80428279,4.80741316,4.80431679,4.80411218
42.168751,4.24264069,4.80902636,-0.752585992,4.80533612,4.80247677,4.80562237,4.80251092,4.80230574
42.179242,4.47213595,4.80724764,-0.578888318,4.80354066,4.80067191,4.80383287,4.8007062,4.80050046
42.189734,5.47722558,4.80546993,0.819607007,4.80174607,4.79886786,4.80204432,4.79890229,4.79869599
42.200226,4.58257569,4.80369341,-0.470231551,4.79995253,4.79706479,4.80025688,4.79709938,4.79689251
42.210717,3.87298335,4.80191824,-0.963812687,4.79816021,4.79526289,4.79847074,4.79529762,4.79509018
42.221209,4.35889894,4.8001441,-0.66426287,4.79636878,4.79346181,4.79668555,4.79349669,4.79328868
42.2317,5.47722558,4.79837133,0.823926115,4.79457858,4.7916619,4.79490166,4.79169693,4.79148834
42.242192,5.09901951,4.7965996,0.549927193,4.79278927,4.78986281,4.79311874,4.78989799,4.78968882
42.252684,5.09901951,4.79482907,0.55153463,4.79100102,4.78806472,4.79133695,4.78810004,4.7878903
42.263175,4.12310563,4.79305992,-0.818507355,4.789214,4.7862678,4.78955648,4.78630328,4.78609295
42.273667,5.38516481,4.79129181,0.770631556,4.78742788,4.78447171,4.78777698,4.78450734,4.78429643
42.284158,4,4.7895251,-0.888552247,4.78564301,4.78267679,4.7859988,4.78271258,4.78250108
42.29465,3.74165739,4.78775944,-1.0227913,4.78385903,4.78088272,4.78422161,4.78091865,4.78070657
42.305142,5.38516481,4.785995,0.774060594,4.78207613,4.77908965,4.78244557,4.77912574,4.77891306
42.315633,3.74165739,4.78423197,-1.02106542,4.78029447,4.77729776,4.78067087,4.77733401,4.77712074
42.326125,4.69041576,4.78247001,-0.303404432,4.77851372,4.77550671,4.77889716,4.77554312,4.77532925
42.336616,3.87298335,4.78070946,-0.952746613,4.77673423,4.77371685,4.77712479,4.77375341,4.77353895
42.347108,4.69041576,4.77894998,-0.297547005,4.77495564,4.77192784,4.77535342,4.77196456,4.7717495
42.3576,4.69041576,4.77719175,-0.294577655,4.77317815,4.77013984,4.77358323,4.77017672,4.76996106
42.368091,4.35889894,4.77543495,-0.645396009,4.77140191,4.76835303,4.77181439,4.76839007,4.76817381
42.378583,5.19615242,4.77367924,0.649979371,4.76962659,4.76656708,4.77004657,4.76660428,4.76638741
42.389074,4,4.77192496,-0.878592602,4.76785254,4.76478232,4.7682801,4.76481969,4.7646022
42.399566,5.91607978,4.77017178,1.07047093,4.76607941,4.76299842,4.76651467,4.76303595,4.76281785
42.410058,4.69041576,4.76841987,-0.279292167,4.76430738,4.76121555,4.76475043,4.76125324,4.76103453
42.420549,5.09901951,4.76666941,0.576498136,4.76253662,4.75943387,4.76298756,4.75947173,4.7592524
42.431041,4.35889894,4.76492007,-0.637197868,4.7607668,4.75765306,4.76122573,4.75769108,4.75747114
42.441532,5.91607978,4.76317218,1.07373535,4.75899825,4.75587346,4.75946528,4.75591165,4.75569108
42.452024,3.60555128,4.76142541,-1.07511587,4.75723063,4.75409472,4.75770588,4.75413307,4.75391188
42.462516,4.79583152,4.75967994,0.190135699,4.75546413,4.75231702,4.7559477,4.75235554,4.75213372
42.473007,4.58257569,4.75793594,-0.418760365,4.75369891,4.75054052,4.75419091,4.75057922,4.75035677
42.483499,4.47213595,4.75619308,-0.532970095,4.75193463,4.74876491,4.75243518,4.74880377,4.74858069
42.49399,4,4.75445169,-0.868591788,4.75017164,4.7469905,4.75068085,4.74702954,4.74680582
42.504482,4.35889894,4.75271146,-0.627544834,4.7484096,4.74521697,4.74892759,4.74525618,4.74503183
42.514974,3.74165739,4.75097255,-1.00464679,4.74664868,4.74344449,4.74717558,4.74348388,4.74325888
42.525465,5.09901951,4.74923513,0.591425717,4.74488905,4.74167323,4.74542498,4.74171279,4.74148715
42.535957,3.74165739,4.74749888,-1.0029165,4.74313039,4.73990285,4.74367547,4.73994259,4.7397163
42.546448,4,4.74576414,-0.863576364,4.74137301,4.7381337,4.74192738,4.73817361,4.73794668
42.55694,4.24264069,4.74403057,-0.708088891,4.73961661,4.73636543,4.74018038,4.73640552,4.73617793
42.567432,4.58257569,4.74229834,-0.39965316,4.73786133,4.73459821,4.73843465,4.73463848,4.73441025
42.577923,4.69041576,4.74056764,-0.223946153,4.73610736,4.73283223,4.73669036,4.73287268,4.73264379
42.588415,3.60555128,4.73883813,-1.06455946,4.73435436,4.73106714,4.73494718,4.73110777,4.73087822
42.598906,4.24264069,4.73711015,-0.703185226,4.73260266,4.72930328,4.73320545,4.72934409,4.72911388
42.609398,4.79583152,4.73538337,0.245862053,4.73085195,4.72754031,4.73146484,4.72758131,4.72735043
42.61989,4.79583152,4.73365798,0.249346242,4.72910237,4.72577842,4.72972552,4.7258196,4.72558806
42.630381,4,4.73193412,-0.855531485,4.72735412,4.72401775,4.72798766,4.72405912,4.72382691
42.640873,5,4.73021149,0.519411695,4.72560684,4.722258,4.72625094,4.72229955,4.72206667
42.651364,5.56776436,4.72849042,0.916118958,4.72386088,4.72049948,4.72451569,4.72054122,4.72030766
42.661856,5.38516481,4.72677058,0.811414954,4.72211592,4.71874186,4.72278159,4.7187838,4.71854956
42.672348,4.35889894,4.72505215,-0.605105944,4.7203721,4.71698533,4.7210488,4.71702745,4.71679253
42.682839,4.35889894,4.72333529,-0.603685634,4.71862962,4.71523004,4.71931751,4.71527235,4.71503675
42.693331,4,4.72161968,-0.849482009,4.71688813,4.71347566,4.71758738,4.71351816,4.71328188
42.703822,4.35889894,4.71990567,-0.600838349,4.71514797,4.71172253,4.71585875,4.71176522,4.71152825
42.714314,4.12310563,4.71819291,-0.771419009,4.71340881,4.70997031,4.71413129,4.7100132,4.70977554
42.724806,5.47722558,4.7164816,0.872206385,4.71167082,4.70821918,4.71240519,4.70826227,4.70802391
42.735297,5.09901951,4.71477189,0.619877106,4.70993416,4.7064693,4.71068059,4.70651259,4.70627353
42.745789,4.58257569,4.71306346,-0.361230906,4.70819851,4.70472035,4.70895719,4.70476383,4.70452407
42.75628,4.79583152,4.71135666,0.290645604,4.70646421,4.70297265,4.70723532,4.70301633,4.70277587
42.766772,4.79583152,4.70965115,0.29356494,4.70473091,4.70122587,4.70551466,4.70126976,4.70102858
42.777264,3.31662479,4.70794711,-1.17954327,4.7029988,4.69948019,4.70379537,4.69952428,4.6992824
42.787755,4.24264069,4.70624471,-0.680884737,4.70126803,4.69773577,4.70207763,4.69778006,4.69753747
42.798247,5,4.70454363,0.543558981,4.69953829,4.69599228,4.70036111,4.69603678,4.69579347
42.808738,4.35889894,4.70284421,-0.586468468,4.6978099,4.69425006,4.69864615,4.69429476,4.69405073
42.81923,4.79583152,4.70114612,0.30770994,4.69608253,4.69250877,4.69693243,4.69255368,4.69230893
42.829722,4.47213595,4.69944953,-0.476774133,4.69435635,4.69076858,4.69522012,4.6908137,4.69056822
42.840213,5.09901951,4.69775462,0.633454732,4.69263153,4.68902967,4.69350939,4.68907499,4.68882879
42.850705,4.47213595,4.69606106,-0.473207253,4.69090775,4.68729169,4.69179992,4.68733722,4.68709029
42.861196,5.38516481,4.69436919,0.831141152,4.68918533,4.68555498,4.69009203,4.68560073,4.68535306
42.871688,3.74165739,4.6926787,-0.975203215,4.68746394,4.68381922,4.68838542,4.68386518,4.68361678
42.88218,5.09901951,4.69098975,0.638772078,4.68574376,4.68208457,4.68668026,4.68213075,4.6818816
42.892671,5,4.68930251,0.557402453,4.68402495,4.6803512,4.6849767,4.68039759,4.6801477
42.903163,4,4.68761666,-0.829226545,4.68230719,4.67861877,4.68327445,4.67866538,4.67841474
42.913654,4.69041576,4.68593255,0.0669567998,4.68059079,4.67688763,4.68157381,4.67693445,4.67668307
42.924146,4.35889894,4.68424985,-0.570395391,4.67887545,4.67515744,4.67987449,4.67520448,4.67495234
42.934638,4.24264069,4.68256873,-0.663270715,4.67716133,4.67342836,4.67817665,4.67347563,4.67322273
42.945129,5.19615242,4.68088936,0.717818264,4.67544858,4.67170057,4.67648046,4.67174806,4.67149441
42.955621,3.87298335,4.67921144,-0.89790205,4.6737369,4.66997374,4.67478561,4.67002146,4.66976704
42.966112,4,4.67753528,-0.823125314,4.67202659,4.6682482,4.67309242,4.66829614,4.66804095
42.976604,4.79583152,4.67586059,0.34636821,4.67031735,4.66652362,4.67140058,4.66657178,4.66631583
42.987096,4.69041576,4.67418752,0.127390117,4.66860934,4.66480016,4.66971026,4.66484856,4.66459183
42.997587,5.19615242,4.67251625,0.723627098,4.66690272,4.663078,4.66802164,4.66312663,4.66286912
43.008079,5.38516481,4.67084646,0.845173559,4.66519717,4.66135681,4.66633439,4.66140566,4.66114738
43.01857,4.89897949,4.66917849,0.479375627,4.66349302,4.65963691,4.66464884,4.65968599,4.65942693
43.029062,4.12310563,4.66751203,-0.737839012,4.66178994,4.65791798,4.6629647,4.6579673,4.65770744
43.039554,4.79583152,4.66584725,0.36053332,4.6600881,4.65620018,4.66128212,4.65624974,4.65598909
43.050045,4.58257569,4.66418431,-0.285672214,4.65838766,4.65448368,4.65960127,4.65453348,4.65427204
43.060537,4.47213595,4.66252291,-0.436333534,4.65668831,4.65276816,4.65792185,4.65281819,4.65255596
43.071028,4.69041576,4.66086337,0.171908077,4.65499037,4.65105394,4.65624419,4.65110422,4.65084118
43.08152,4.47213595,4.6592054,-0.432515252,4.65329351,4.6493407,4.65456797,4.64939122,4.64912738
43.092012,5.38516481,4.65754915,0.853003901,4.6515979,4.64762861,4.65289336,4.64767936,4.64741472
43.102503,5,4.65589481,0.586604802,4.64990371,4.64591782,4.65122054,4.64596882,4.64570336
43.112995,5.56776436,4.65424205,0.95578361,4.64821061,4.64420801,4.64954919,4.64425926,4.64399298
43.123486,4.12310563,4.65259122,-0.727657609,4.64651894,4.64249951,4.64787965,4.64255101,4.64228392
43.133978,4.69041576,4.65094201,0.198680022,4.64482836,4.640792,4.6462116,4.64084374,4.64057583
43.14447,4.24264069,4.64929458,-0.637694203,4.64313904,4.63908564,4.64454523,4.63913763,4.6388689
43.154961,4.24264069,4.64764911,-0.636402724,4.64145116,4.6373806,4.64288069,4.63743284,4.63716328
43.165453,5.47722558,4.6460053,0.911712824,4.63976437,4.63567654,4.64121768,4.63572904,4.63545864
43.175944,5.47722558,4.64436347,0.912612789,4.63807903,4.6339738,4.63955654,4.63402656,4.63375532
43.186436,4.89897949,4.64272332,0.506217505,4.63639479,4.63227206,4.63789695,4.63232507,4.632053
43.196928,4.79583152,4.64108503,0.393378311,4.63471183,4.63057147,4.63623909,4.63062474,4.63035183
43.207419,4.12310563,4.63944875,-0.718570197,4.6330303,4.62887221,4.63458313,4.62892574,4.62865197
43.217911,4.35889894,4.6378142,-0.528124284,4.6313499,4.62717394,4.63292877,4.62722773,4.62695312
43.228402,5.09901951,4.6361817,0.680321844,4.62967094,4.625477,4.63127633,4.62553106,4.62525559
43.238894,5.19615242,4.63455096,0.749400739,4.6279931,4.62378106,4.62962551,4.62383538,4.62355905
43.249386,5.09901951,4.63292213,0.68271325,4.62631655,4.62208629,4.62797649,4.62214088,4.62186368
43.259877,4.35889894,4.6312954,-0.521916141,4.62464146,4.62039284,4.62632943,4.6204477,4.62016964
43.270369,4.69041576,4.62967047,0.246465592,4.62296749,4.6187004,4.62468404,4.61875553,4.6184766
43.28086,4.47213595,4.62804767,-0.394856571,4.62129498,4.6170093,4.62304065,4.61706469,4.61678489
43.291352,5.09901951,4.62642669,0.687453868,4.61962361,4.6153192,4.62139895,4.61537487,4.61509419
43.301844,4.89897949,4.62480772,0.523614134,4.61795353,4.61363027,4.61975912,4.61368622,4.61340465
43.312335,4.58257569,4.62319093,-0.201532217,4.61628492,4.61194268,4.61812133,4.6119989,4.61171645
43.322827,4.24264069,4.62157602,-0.615577234,4.61461746,4.6102561,4.61648529,4.61031261,4.61002927
43.333318,4.24264069,4.61996332,-0.614265928,4.61295146,4.60857086,4.61485132,4.60862765,4.60834341
43.34381,5.65685425,4.61835254,1.01906904,4.61128661,4.60688664,4.61321913,4.60694371,4.60665857
43.354302,5.29150262,4.61674385,0.821437017,4.60962308,4.6052036,4.61158889,4.60526095,4.60497491
43.364793,4.58257569,4.61513743,-0.180448696,4.60796101,4.6035219,4.60996078,4.60357954,4.60329259
43.375285,4.89897949,4.61353298,0.534271937,4.60630011,4.60184122,4.60833451,4.60189915,4.60161129
43.385776,4.47213595,4.61193084,-0.373891548,4.60464069,4.60016188,4.6067104,4.6002201,4.59993133
43.396268,4.79583152,4.61033073,0.430698035,4.60298243,4.59848357,4.60508816,4.59854208,4.59825239
43.40676,4.35889894,4.6087328,-0.49983383,4.60132549,4.59680645,4.60346797,4.59686525,4.59657464
43.417251,4.35889894,4.60713724,-0.498235187,4.59967004,4.59513067,4.60185,4.59518977,4.59489823
43.427743,4.35889894,4.60554377,-0.496633497,4.59801576,4.59345592,4.60023397,4.59351532,4.59322285
43.438234,3.31662479,4.60395272,-1.13460474,4.59636298,4.59178253,4.5986202,4.59184222,4.59154881
43.448726,4.58257569,4.60236379,-0.140670165,4.59471137,4.59011016,4.59700842,4.59017016,4.58987581
43.459218,4.58257569,4.60077717,-0.134912855,4.5930611,4.58843899,4.59539879,4.58849929,4.588204
43.469709,5.65685425,4.59919304,1.02842657,4.59141232,4.58676917,4.59379149,4.58682978,4.58653353
43.480201,5.56776436,4.59761112,0.984963577,4.58976474,4.58510039,4.59218624,4.5851613,4.58486411
43.490692,4.89897949,4.59603173,0.550406904,4.58811865,4.58343296,4.59058338,4.58349419,4.58319603
43.501184,4.12310563,4.5944546,-0.686548593,4.58647376,4.58176658,4.58898262,4.58182811,4.58152899
43.511676,5.56776436,4.59287996,0.987362345,4.58483022,4.58010139,4.58738419,4.58016324,4.57986315
43.522167,5,4.59130789,0.639290318,4.58318818,4.57843756,4.58578817,4.57849973,4.57819867
43.532659,3.87298335,4.58973816,-0.846613736,4.58154735,4.57677478,4.58419433,4.57683726,4.57653523
43.54315,5.09901951,4.58817111,0.714736595,4.57990804,4.57511336,4.58260301,4.57517616,4.57487315
43.553642,4.35889894,4.58660647,-0.477187099,4.57826992,4.57345298,4.58101393,4.57351611,4.57321211
43.564134,4.35889894,4.58504442,-0.475547552,4.57663318,4.57179381,4.57942728,4.57185726,4.57155227
43.574625,4.47213595,4.58348513,-0.333690244,4.57499795,4.57013601,4.57784322,4.57019979,4.5698938
43.585117,3.87298335,4.58192836,-0.841988724,4.57336394,4.56847926,4.57626151,4.56854336,4.56823638
43.595608,4.12310563,4.58037442,-0.676216527,4.57173146,4.56682387,4.57468246,4.56688831,4.56658032
43.6061,3.16227766,4.57882305,-1.19018713,4.5701002,4.56516954,4.57310582,4.56523431,4.56492531
43.616592,4.35889894,4.57727445,-0.467306655,4.56847031,4.56351642,4.57153177,4.56358152,4.56327152
43.627083,5.56776436,4.5757288,0.996009821,4.56684196,4.56186467,4.5699605,4.56193011,4.56161909
43.637575,4.47213595,4.57418584,-0.319452469,4.56521484,4.56021398,4.56839173,4.56027976,4.55996771
43.648066,3.74165739,4.5726459,-0.911585712,4.56358926,4.55856466,4.56682582,4.55863078,4.55831771
43.658558,4.69041576,4.57110873,0.345408496,4.56196492,4.55691641,4.5652625,4.55698287,4.55666876
43.66905,4.79583152,4.56957453,0.475664794,4.56034196,4.55526937,4.56370196,4.55533618,4.55502103
43.679541,4.89897949,4.56804348,0.575270379,4.55872056,4.55362371,4.5621444,4.55369086,4.55337468
43.690033,4.47213595,4.56651533,-0.307212264,4.5571004,4.55197911,4.56058955,4.55204662,4.55172938
43.700524,4.35889894,4.56499043,-0.453973,4.55548179,4.55033589,4.55903777,4.55040375,4.55008546
43.711016,4.12310563,4.56346853,-0.663598449,4.55386443,4.54869373,4.5574888,4.54876195,4.54844261
43.721508,4.89897949,4.56194982,0.580542558,4.55224848,4.54705281,4.55594284,4.54712138,4.54680097
43.731999,4,4.56043451,-0.748621742,4.55063409,4.54541326,4.55440008,4.5454822,4.54516072
43.742491,4.35889894,4.55892236,-0.447239773,4.54902096,4.54377478,4.55286029,4.54384409,4.54352153
43.752982,4.24264069,4.5574137,-0.561046359,4.54740939,4.54213769,4.55132381,4.54220736,4.54188373
43.763474,5.19615242,4.55590832,0.800152549,4.54579909,4.54050167,4.5497904,4.54057171,4.540247
43.773966,5.29150262,4.55440641,0.858543076,4.54419021,4.53886689,4.54826027,4.53893729,4.53861149
43.784457,4.69041576,4.55290817,0.370820153,4.54258291,4.53723348,4.54673362,4.53730426,4.53697737
43.794949,4.89897949,4.55141339,0.589547363,4.54097688,4.53560116,4.54521022,4.53567231,4.53534432
43.80544,5.19615242,4.54992241,0.803884325,4.53937243,4.53397022,4.54369042,4.53404176,4.53371266
43.815932,5.19615242,4.54843502,0.804808921,4.53776926,4.53234037,4.542174,4.53241228,4.53208207
43.826424,5,4.54695143,0.673088826,4.53616753,4.53071175,4.54066118,4.53078405,4.53045272
43.836915,3.87298335,4.54547185,-0.820053966,4.53456739,4.52908452,4.53915217,4.5291572,4.52882476
43.847407,5.09901951,4.54399608,0.744998948,4.53296854,4.52745838,4.53764676,4.52753145,4.52719788
43.857898,4.47213595,4.54252447,-0.265308344,4.53137128,4.52583363,4.5361453,4.52590709,4.52557239
43.86839,4.35889894,4.54105683,-0.426799586,4.52977532,4.52420996,4.53464759,4.52428382,4.52394798
43.878882,4.89897949,4.53959338,0.599488206,4.52818081,4.52258754,4.53315385,4.52266179,4.52232481
43.889373,4.12310563,4.53813434,-0.644227221,4.52658791,4.52096652,4.53166432,4.52104117,4.52070303
43.899865,3.74165739,4.53667953,-0.891640141,4.52499631,4.51934658,4.53017879,4.51942163,4.51908235
43.910356,5.09901951,4.53522932,0.750859639,4.52340632,4.51772804,4.52869765,4.5178035,4.51746305
43.920848,4,4.53378352,-0.730604902,4.52181764,4.5161106,4.5272207,4.51618646,4.51584485
43.93134,4.47213595,4.53234239,-0.245369992,4.52023043,4.5144944,4.52574818,4.51457068,4.51422789
43.941831,4.47213595,4.53090615,-0.242425657,4.51864485,4.5128796,4.52428034,4.51295629,4.51261233
43.952323,4.47213595,4.52947466,-0.239455009,4.51706058,4.5112659,4.52281701,4.51134301,4.51099786
43.962814,4.69041576,4.52804828,0.402948481,4.51547794,4.5096536,4.52135857,4.50973113,4.50938479
43.973306,4.47213595,4.52662687,-0.233432902,4.51389663,4.5080424,4.51990487,4.50812035,4.50777282
43.983798,4.35889894,4.5252107,-0.40781338,4.51231681,4.50643245,4.51845616,4.50651083,4.5061621
43.994289,5,4.52380001,0.690072454,4.51073862,4.50482391,4.51701271,4.50490271,4.50455277
44.004781,5.09901951,4.52239468,0.759358175,4.50916176,4.50321647,4.51557437,4.5032957,4.50294455
44.015272,4.69041576,4.52099511,0.411607404,4.50758656,4.50161044,4.51414156,4.50169011,4.50133773
44.025764,3.16227766,4.51960117,-1.16504228,4.5060127,4.50000551,4.51271414,4.50008561,4.49973202
44.036256,4.24264069,4.51821317,-0.524949981,4.50444033,4.49840184,4.5112924,4.49848238,4.49812755
44.046747,4.58257569,4.51683138,0.256406546,4.50286963,4.49679958,4.50987664,4.49688056,4.4965245
44.057239,2.64575131,4.5154557,-1.36737134,4.50130028,4.49519843,4.50846673,4.49527986,4.49492255
44.06773,4.35889894,4.51408658,-0.393938615,4.49973258,4.49359868,4.50706313,4.49368057,4.49332201
44.078222,4.35889894,4.51272392,-0.392205271,4.49816626,4.49200005,4.50566574,4.49208239,4.49172257
44.088714,4.12310563,4.51136805,-0.62310707,4.49660145,4.49040268,4.50427488,4.49048547,4.49012439
44.099205,4.47213595,4.51001929,-0.194636408,4.49503831,4.48880673,4.50289088,4.48888998,4.48852763
44.109697,4.35889894,4.50867758,-0.387012456,4.49347655,4.48721189,4.50151367,4.4872956,4.48693197
44.120188,5.56776436,4.50734341,1.02976743,4.49191646,4.48561846,4.50014373,4.48570264,4.48533773
44.13068,4,4.50601674,-0.711348535,4.49035776,4.48402615,4.49878103,4.48411079,4.4837446
44.141172,4.24264069,4.50469793,-0.511915266,4.48880059,4.48243511,4.49742592,4.48252022,4.48215273
44.151663,4.58257569,4.50338735,0.281404241,4.48724511,4.48084548,4.49607878,4.48093107,4.48056228
44.162155,4.79583152,4.50208501,0.541983867,4.48569103,4.47925697,4.4947396,4.47934305,4.47897294
44.172646,4.79583152,4.50079144,0.543175927,4.48413864,4.47766989,4.49340892,4.47775644,4.47738502
44.183138,4,4.49950666,-0.706757849,4.48258766,4.47608392,4.49208675,4.47617096,4.47579822
44.19363,4.79583152,4.4982311,0.545527656,4.48103823,4.47449923,4.49077353,4.47458676,4.47421268
44.204121,4.35889894,4.4969652,-0.371572675,4.4794905,4.47291596,4.48946968,4.47300398,4.47262857
44.214613,4.58257569,4.49570903,0.294731507,4.4779442,4.47133381,4.48817529,4.47142233,4.47104558
44.225104,5.19615242,4.4944632,0.837668922,4.4763996,4.46975309,4.48689095,4.46984211,4.469464
44.235596,4.89897949,4.49322782,0.636986395,4.47485643,4.46817349,4.48561676,4.46826301,4.46788355
44.246088,4,4.49200339,-0.701429536,4.47331484,4.46659517,4.48435325,4.4666852,4.46630437
44.256579,4.35889894,4.49079044,-0.363168693,4.47177497,4.46501828,4.48310092,4.46510881,4.46472662
44.267071,4.12310563,4.48958916,-0.605378837,4.47023653,4.46344251,4.48185996,4.46353356,4.46314999
44.277562,4.12310563,4.48840023,-0.604396063,4.46869983,4.46186817,4.48063106,4.46195974,4.46157478
44.288054,4.47213595,4.48722388,-0.122832928,4.46716458,4.46029497,4.47941445,4.46038706,4.46000071
44.298546,5.38516481,4.48606074,0.94821098,4.46563092,4.45872304,4.47821074,4.45881566,4.4584279
44.309037,4.79583152,4.48491145,0.557602078,4.46409901,4.45715255,4.47702057,4.45724569,4.45685653
44.319529,4.35889894,4.48377633,-0.353379942,4.46256855,4.45558318,4.47584427,4.45567686,4.45528629
44.33002,4.58257569,4.48265619,0.316100465,4.46103985,4.45401526,4.47468265,4.45410947,4.45371747
44.340512,4.24264069,4.48155145,-0.488784984,4.45951262,4.45244846,4.47353612,4.45254322,4.45214979
44.351004,4.79583152,4.48046287,0.561576939,4.457987,4.45088295,4.47240543,4.45097825,4.45058339
44.361495,4.69041576,4.47939124,0.459374049,4.45646316,4.44931888,4.47129139,4.44941473,4.44901842
44.371987,5,4.47833712,0.722262336,4.45494079,4.44775594,4.47019453,4.44785235,4.44745458
44.382478,4.47213595,4.47730148,-0.071871565,4.4534202,4.44619444,4.46911585,4.4462914,4.44589217
44.39297,4.79583152,4.47628496,0.565284499,4.4519011,4.44463408,4.46805596,4.4447316,4.44433091
44.403462,4.79583152,4.47528855,0.566165149,4.45038364,4.44307501,4.46701586,4.4431731,4.44277092
44.413953,4.89897949,4.47431328,0.651664182,4.44886798,4.44151738,4.46599659,4.44161603,4.44121237
44.424445,4.79583152,4.47335997,0.567865785,4.44735381,4.43996088,4.46499895,4.44006012,4.43965496
44.434936,4.89897949,4.47242988,0.653107653,4.44584145,4.43840583,4.4640242,4.43850564,4.43809899
44.445428,4.58257569,4.47152396,0.333244261,4.4443306,4.43685193,4.4630733,4.43695232,4.43654416
44.45592,4,4.47064351,-0.686034631,4.44282142,4.43529931,4.46214755,4.43540029,4.43499061
44.466411,4.24264069,4.46978993,-0.476601763,4.44131405,4.43374814,4.46124833,4.43384971,4.43343851
44.476903,5.47722558,4.46896442,1.00412208,4.43980821,4.43219812,4.46037686,4.43230028,4.43188754
44.487394,5.29150262,4.46816863,0.907377534,4.4383042,4.43064954,4.45953478,4.4307523,4.43033802
44.497886,4.24264069,4.467404,-0.474092094,4.43680173,4.4291021,4.45872353,4.42920547,4.42878964
44.508378,4.24264069,4.4666723,-0.47331978,4.43530095,4.42755597,4.45794488,4.42765994,4.42724256
44.518869,4.79583152,4.46597542,0.574331002,4.433802,4.42601128,4.45720072,4.42611586,4.42569691
44.529361,4.89897949,4.46531519,0.658531921,4.43230462,4.42446774,4.45649288,4.42457294,4.42415241
44.539852,5.56776436,4.46469384,1.05027164,4.43080908,4.42292564,4.4558236,4.42303147,4.42260936
44.550344,4.58257569,4.46411351,0.344183357,4.42931512,4.4213847,4.45519501,4.42149116,4.42106745
44.560836,5,4.4635767,0.732409241,4.42782287,4.41984507,4.45460961,4.41995215,4.41952684
44.571327,4.69041576,4.46308609,0.476791012,4.42633248,4.41830687,4.45407009,4.4184146,4.41798768
44.581819,3.46410162,4.46264442,-0.999271135,4.42484369,4.41676984,4.45357919,4.4168782,4.41644966
44.59231,4.12310563,4.46225483,-0.58236518,4.42335677,4.41523425,4.45314006,4.41534326,4.4149131
44.602802,4,4.46192057,-0.679647388,4.42187144,4.41369982,4.45275594,4.41380949,4.41337768
44.613294,3.46410162,4.46164528,-0.998771077,4.42038787,4.4121667,4.45243048,4.41227702,4.41184357
44.623785,5,4.46143286,0.733871338,4.41890619,4.41063503,4.45216759,4.410746,4.4103109
44.634277,4.24264069,4.46128751,-0.46759686,4.41742612,4.40910451,4.45197147,4.40921616,4.40877939
44.644768,4.35889894,4.46121385,-0.319867021,4.41594796,4.40757545,4.45184676,4.40768777,4.40724932
44.65526,4.58257569,4.4612169,0.348365899,4.41447143,4.40604755,4.45179846,4.40616054,4.40572041
44.665752,3.87298335,4.46130211,-0.767019399,4.41299668,4.40452096,4.45183205,4.40463463,4.40419281
44.676243,4.24264069,4.46147543,-0.467797759,4.41152385,4.40299582,4.4519535,4.40311018,4.40266666
44.686735,4.58257569,4.46174344,0.347609344,4.41005266,4.40147185,4.45216937,4.4015869,4.40114166
44.697226,4.35889894,4.46211323,-0.321269796,4.40858342,4.39994933,4.45248679,4.40006508,4.39961812
44.707718,4.47213595,4.46259272,0.0976895032,4.40711584,4.39842798,4.45291369,4.39854443,4.39809574
44.71821,4.69041576,4.46319051,0.4766815,4.40565006,4.39690794,4.45345868,4.39702509,4.39657466
44.728701,4.69041576,4.46391602,0.475919886,4.40418624,4.39538935,4.45413121,4.39550722,4.39505504
44.739193,4.89897949,4.46477989,0.658938235,4.40272411,4.39387193,4.45494192,4.39399052,4.39353658
44.749684,4.69041576,4.46579352,0.473943292,4.40126394,4.39235597,4.45590226,4.39247528,4.39201957
44.760176,4.24264069,4.46696994,-0.473634088,4.39980547,4.39084118,4.45702528,4.39096122,4.39050373
44.770668,4.69041576,4.46832329,0.471266874,4.39834885,4.38932771,4.45832515,4.38944848,4.38898919
44.781159,5.38516481,4.46986925,0.9567108,4.39689421,4.38781569,4.45981759,4.38793721,4.38747612
44.791651,4,4.47162576,-0.686750145,4.3954413,4.38630484,4.46152057,4.38642711,4.3859642
44.802142,3.46410162,4.47361217,-1.00474403,4.39399039,4.38479546,4.4634535,4.38491847,4.38445375
44.812634,4.12310563,4.47585093,-0.593923653,4.39254121,4.38328725,4.46563887,4.38341102,4.38294446
44.823126,4,4.47836661,-0.691640521,4.39109391,4.38178035,4.46810131,4.38190489,4.38143649
44.833617,4.69041576,4.48118677,0.457415558,4.38964864,4.38027492,4.47086846,4.38040023,4.37992997
44.844109,4.35889894,4.48434337,-0.354181348,4.38820513,4.37877066,4.47397235,4.37889675,4.37842462
44.8546,4.58257569,4.48787133,0.30774074,4.38676366,4.37726786,4.47744798,4.37739473,4.37692074
44.865092,5,4.49181166,0.712873301,4.38532397,4.37576625,4.48133646,4.3758939,4.37541802
44.875584,5.56776436,4.49620989,1.03515916,4.3838862,4.37426595,4.48568345,4.3743944,4.37391662
44.886075,4.58257569,4.50111786,0.285408183,4.38245049,4.37276711,4.49054091,4.37289637,4.37241668
44.896567,4.69041576,4.5065965,0.42874148,4.38101658,4.37126946,4.49596991,4.37139952,4.37091791
44.907058,4,4.5127136,-0.716040225,4.37958475,4.36977327,4.50203843,4.36990414,4.3694206
44.91755,4.47213595,4.51954985,-0.217747326,4.37815474,4.36827826,4.50882734,4.36840995,4.36792447
44.928042,4.47213595,4.52719682,-0.234650517,4.3767267,4.36678457,4.51642844,4.36691709,4.36642965
44.938533,4.24264069,4.53576107,-0.541405932,4.37530076,4.36529235,4.52494857,4.3654257,4.3649363
44.949025,4.89897949,4.5453707,0.594650136,4.37387667,4.36380131,4.53451614,4.3639355,4.36344412
44.959516,4,4.55617447,-0.745771056,4.3724547,4.36231174,4.54528027,4.36244678,4.36195341
44.970008,4.47213595,4.56835782,-0.310196497,4.3710346,4.36082335,4.55742685,4.36095924,4.36046387
44.9805,4.58257569,4.5821497,0.0206397621,4.3696165,4.35933629,4.57118538,4.35947304,4.35897566
44.990991,3.87298335,4.59784915,-0.851390514,4.36820056,4.35785069,4.58685564,4.35798831,4.35748891
45.001483,4,4.61587286,-0.784775676,4.36678651,4.35636628,4.60485526,4.35650478,4.35600333
45.011974,4.79583152,4.63681534,0.39876833,4.36537463,4.35488334,4.62578016,4.35502272,4.35451923
45.022466,4.35889894,4.66158173,-0.550166146,4.36396467,4.35340159,4.65053756,4.35354185,4.3530363
45.032958,4.58257569,4.69155781,-0.330124387,4.36255677,4.35192117,4.68051639,4.35206232,4.3515547
45.043449,4.58257569,4.72888029,-0.382497832,4.36115106,4.35044221,4.71785812,4.35058427,4.35007456
45.053941,4.24264069,4.77680198,-0.730863386,4.35974731,4.34896444,4.76582256,4.34910741,4.3485956
45.064432,5.47722558,4.84006302,0.79822463,4.35834577,4.34748815,4.82915959,4.34763203,4.34711812
45.074924,5.29150262,4.92528819,0.605156539,4.3569462,4.34601304,4.91450651,4.34615785,4.34564181
45.085416,4.69041576,5.04107558,-0.592165365,4.35554875,4.34453927,5.03047564,4.34468501,4.34416683
45.095907,5.29150262,5.19766395,0.306330978,4.35415355,4.34306697,5.18731894,4.34321365,4.34269332
45.106399,5.09901951,5.40596756,-0.554028924,4.35276035,4.34159586,5.39595874,4.34174348,4.34122099
45.11689,4.79583152,5.67568239,-0.938003663,4.35136942,4.34012622,5.66608926,4.3402748,4.33975013
45.127382,5.65685425,6.01324901,-0.596988077,4.34998053,4.33865777,6.00413732,4.33880732,4.33828046
45.137874,5.74456265,6.41958389,-0.821596762,4.3485938,4.33719066,6.41099493,4.33734118,4.33681212
45.148365,6.40312424,6.8887889,-0.696896452,4.34720938,4.33572502,6.88073409,4.33587652,4.33534524
45.158857,6.70820393,7.40800625,-0.83654188,4.34582703,4.33426058,7.40046814,4.33441306,4.33387955
45.169348,8.30662386,7.95759788,0.590784209,4.34444701,4.33279761,7.95053532,4.33295108,4.33241534
45.17984,7.41619849,8.51237023,-1.04698221,4.34306908,4.33133584,8.50572531,4.33149031,4.33095231
45.190332,8.48528137,9.04174734,-0.745966465,4.34169338,4.3298754,9.03545084,4.33003088,4.32949061
45.200823,10.1488916,9.51014992,0.79921314,4.34032006,4.32841644,9.50412446,4.32857294,4.32803038
45.211315,11.7046999,9.87811107,1.35151354,4.33894886,4.32695867,9.87227197,4.3271162,4.32657134
45.221806,10.3440804,10.1063792,0.487546169,4.33758006,4.32550238,10.1006343,4.32566095,4.32511377
45.232298,10.8627805,10.165601,0.834972768,4.33621342,4.32404729,10.1598517,4.3242069,4.3236574
45.24279,9.89949494,10.0471098,-0.384206793,4.33484908,4.32259354,10.0412539,4.3227542,4.32220236
45.253281,10.9087121,9.76702817,1.06849611,4.33348719,4.32114126,9.76096393,4.32130299,4.32074878
45.263773,9.11043358,9.35924717,-0.498812179,4.33212749,4.31969018,9.35287604,4.31985298,4.31929641
45.274264,9.74679434,8.86417643,0.939477468,4.33077026,4.31824058,8.85740386,4.31840446,4.3178455
45.284756,8.30662386,8.32032897,-0.117068832,4.32941526,4.31679218,8.31306452,4.31695715,4.31639579
45.295248,7.14142843,7.76166965,-0.787553951,4.32806264,4.31534513,7.7538289,4.31551119,4.31494741
45.305739,6.8556546,7.21704312,-0.601155986,4.32671253,4.31389954,7.20855249,4.31406671,4.3135005
45.316231,6.63324958,6.70981552,-0.276705508,4.3253647,4.31245517,6.70061964,4.31262345,4.31205479
45.326722,5.74456265,6.25754305,-0.7162265,4.32401941,4.31101227,6.2476137,4.31118168,4.31061055
45.337214,4.69041576,5.87081421,-1.08646144,4.32267644,4.30957057,5.86015656,4.30974111,4.30916751
45.347706,5.65685425,5.553235,0.321899438,4.32133592,4.30813021,5.54188853,4.3083019,4.30772581
45.358197,5.19615242,5.30192461,-0.32522636,4.31999799,4.30669134,5.28995641,4.30686418,4.30628557
45.368689,4.79583152,5.10911352,-0.559715999,4.31866243,4.30525367,5.09660577,4.30542768,4.30484654
45.37918,3.87298335,4.96448513,-1.04474963,4.3173295,4.30381748,4.95152173,4.30399266,4.30340898
45.389672,5.29150262,4.85716632,0.65904196,4.31599897,4.30238249,4.84382235,4.30255886,4.30197262
45.400164,4.58257569,4.77736802,-0.441352835,4.31467098,4.30094885,4.76370454,4.30112641,4.30053759
45.410655,4.58257569,4.71712743,-0.366812946,4.31334568,4.29951669,4.70319065,4.29969545,4.29910404
45.421147,4.24264069,4.67045999,-0.65407897,4.31202283,4.29808573,4.65628312,4.29826571,4.29767169
45.431638,5,4.63316289,0.605670795,4.3107027,4.29665626,4.6187692,4.29683746,4.29624082
45.44213,5.56776436,4.60239327,0.982532998,4.30938507,4.29522799,4.58779884,4.29541043,4.29481114
45.452622,4.58257569,4.57630002,0.0792191346,4.30807007,4.29380107,4.56151611,4.29398476,4.29338281
45.463113,5.19615242,4.55368613,0.801539949,4.30675786,4.29237563,4.53872084,4.29256058,4.29195595
45.473605,4.12310563,4.53376569,-0.640827642,4.3054482,4.2909514,4.51862497,4.29113761,4.29053029
45.484096,4.12310563,4.51601744,-0.62682678,4.30414137,4.28952865,4.50070588,4.28971614,4.28910611
45.494588,3.46410162,4.50006929,-1.01782497,4.30283714,4.28810712,4.48459046,4.2882959,4.28768313
45.50508,5.19615242,4.48564998,0.842913071,4.30153565,4.28668693,4.47000672,4.28687701,4.28626149
45.515571,4.79583152,4.47254863,0.568579712,4.30023705,4.28526822,4.45674324,4.28545961,4.28484132
45.526063,4.35889894,4.46059176,-0.318893118,4.29894112,4.28385072,4.44462601,4.28404343,4.28342236
45.536554,4.35889894,4.44963979,-0.301232217,4.29764812,4.2824347,4.4335151,4.28262875,4.28200488
45.547046,4.35889894,4.43957108,-0.284028412,4.29635784,4.2810199,4.4232885,4.2812153,4.2805886
45.557538,4.12310563,4.43028464,-0.554237327,4.29507042,4.27960645,4.41384492,4.2798032,4.27917366
45.568029,4.79583152,4.42169351,0.611668221,4.293786,4.27819447,4.40509716,4.2783926,4.2777602
45.578521,4.35889894,4.41372029,-0.234139585,4.29250438,4.27678371,4.39696755,4.27698322,4.27634794
45.589012,4.79583152,4.40630065,0.624124087,4.29122581,4.27537444,4.38939158,4.27557534,4.27493716
45.599504,5,4.39937587,0.774999441,4.28995009,4.27396638,4.38231032,4.27416869,4.27352758
45.609996,4.47213595,4.39289651,0.281495015,4.28867735,4.27255967,4.37567418,4.27276339,4.27211935
45.620487,4.35889894,4.38681915,-0.167093393,4.28740775,4.27115444,4.36943958,4.2713596,4.2707126
45.630979,4,4.38110394,-0.617336163,4.28614108,4.26975042,4.36356652,4.26995703,4.26930705
45.64147,4.58257569,4.37571781,0.454816319,4.28487759,4.26834789,4.35802182,4.26855595,4.26790298
45.651962,4.69041576,4.37062954,0.565496434,4.28361709,4.26694658,4.35277412,4.26715611,4.26650012
45.662454,4.24264069,4.36581284,-0.350958899,4.28235972,4.26554662,4.34779702,4.26575763,4.2650986
45.672945,4.47213595,4.36124426,0.333004051,4.28110564,4.26414814,4.343067,4.26436065,4.26369855
45.683437,4.24264069,4.35690168,-0.338025141,4.27985462,4.26275088,4.33856182,4.2629649,4.26229972
45.693928,4.24264069,4.35276692,-0.331852724,4.27860695,4.2613551,4.33426321,4.26157064,4.26090236
45.70442,5,4.34882216,0.806955912,4.27736242,4.25996054,4.33015327,4.26017762,4.25950622
45.714912,4.35889894,4.3450525,0.117670919,4.27612117,4.25856733,4.32621702,4.25878596,4.25811141
45.725403,4.69041576,4.34144452,0.590737879,4.27488337,4.25717561,4.32244099,4.2573958,4.25671809
45.735895,4.47213595,4.33798513,0.366266056,4.2736488,4.25578511,4.31881198,4.25600688,4.25532597
45.746386,3.60555128,4.33466378,-0.853880851,4.27241774,4.25439609,4.31531939,4.25461945,4.25393533
45.756878,4.79583152,4.33146971,0.681440984,4.27119,4.25300829,4.31195237,4.25323326,4.25254591
45.76737,4.58257569,4.32839403,0.504164325,4.26996571,4.25162184,4.30870199,4.25184843,4.25115782
45.777861,4.89897949,4.32542867,0.75733138,4.26874505,4.25023687,4.30556012,4.2504651,4.24977122
45.788353,4,4.32256547,-0.567948472,4.2675278,4.24885313,4.30251852,4.24908301,4.24838582
45.798844,4.24264069,4.31979805,-0.277772136,4.26631425,4.24747087,4.29957076,4.24770242,4.2470019
45.809336,4.69041576,4.31711957,0.610979698,4.2651042,4.24608984,4.29670993,4.24632306,4.2456192
45.819828,4.12310563,4.31452452,-0.437514454,4.26389781,4.24471015,4.29393047,4.24494508,4.24423784
45.830319,4.12310563,4.31200786,-0.434628847,4.26269524,4.24333195,4.29122729,4.24356859,4.24285796
45.840811,4.69041576,4.30956426,0.617131669,4.26149629,4.24195498,4.28859497,4.24219334,4.24147929
45.851302,4.24264069,4.30718975,-0.254065073,4.26030124,4.24057948,4.28602952,4.24081959,4.2401021
45.861794,5.19615242,4.30487979,0.944072368,4.2591099,4.23920521,4.28352631,4.23944708,4.23872612
45.872286,5.29150262,4.30263085,0.99442032,4.25792244,4.2378323,4.28108178,4.23807594,4.23735148
45.882777,3.87298335,4.30043968,-0.653801448,4.25673902,4.23646087,4.27869262,4.2367063,4.23597833
45.893269,4.12310563,4.29830268,-0.418565469,4.25555945,4.23509066,4.27635514,4.23533791,4.23460638
45.90376,5.38516481,4.2962173,1.04352648,4.25438401,4.23372194,4.27406678,4.23397101,4.23323592
45.914252,4.47213595,4.29418044,0.421847737,4.25321252,4.23235444,4.27182433,4.23260535,4.23186667
45.924744,4.12310563,4.29218978,-0.411198437,4.25204516,4.23098829,4.26962544,4.23124107,4.23049876
45.935235,4.89897949,4.29024317,0.780215554,4.25088207,4.22962364,4.26746792,4.22987829,4.22913233
45.945727,5.38516481,4.2883381,1.04729495,4.2497231,4.2282602,4.26534915,4.22851675,4.22776712
45.956218,4,4.28647292,-0.535231649,4.24856851,4.22689825,4.26326747,4.22715671,4.22640338
45.96671,4.79583152,4.28464551,0.714972734,4.24741824,4.22553753,4.26122057,4.22579792,4.22504086
45.977202,4.24264069,4.28285416,-0.20053298,4.24627226,4.22417816,4.25920687,4.2244405,4.22367968
45.987693,4.69041576,4.28109752,0.639779834,4.24513085,4.22282027,4.25722488,4.22308458,4.22231998
45.998185,4.47213595,4.27937378,0.439046897,4.24399383,4.22146362,4.25527269,4.22172991,4.2209615
46.008676,4.69041576,4.27768187,0.642443688,4.24286149,4.22010844,4.25334922,4.22037674,4.21960449
46.019168,4.89897949,4.27602019,0.789277705,4.24173367,4.21875449,4.25145274,4.21902482,4.2182487
46.02966,5,4.27438771,0.851828793,4.24061055,4.2174019,4.24958219,4.21767427,4.21689425
46.040151,4.58257569,4.27278346,0.556589829,4.2394923,4.21605079,4.24773654,4.21632522,4.21554128
46.050643,4.24264069,4.2712061,-0.16901305,4.23837877,4.21470091,4.24591434,4.21497742,4.21418953
46.061134,4.24264069,4.26965496,-0.164360202,4.23727025,4.21335252,4.24411489,4.21363113,4.21283925
46.071626,4.35889894,4.26817204,0.301209069,4.2362101,4.21200535,4.24233689,4.21228608,4.21149019
46.082118,4,4.26667031,-0.516401309,4.23511152,4.21065953,4.24057959,4.21094241,4.21014247
46.092609,5.29150262,4.26519228,1.01306976,4.23401815,4.2093152,4.23884229,4.20960024,4.20879623
46.103101,5.19615242,4.26373694,0.965616636,4.23292988,4.2079721,4.23712385,4.20825933,4.20745121
46.113592,5.09901951,4.26230388,0.914721617,4.23184698,4.20663049,4.23542386,4.20691991,4.20610766
46.124084,4.35889894,4.2608922,0.313060286,4.23076933,4.2052901,4.23374126,4.20558175,4.20476533
46.134576,4.79583152,4.25950146,0.732345592,4.22969711,4.20395106,4.23207555,4.20424497,4.20342435
46.145067,3.46410162,4.25813123,-0.891083394,4.22863051,4.20261352,4.23042626,4.20290969,4.20208484
46.155559,5,4.25678075,0.862101647,4.22756941,4.2012772,4.22879247,4.20157566,4.20074654
46.16605,4.89897949,4.2554498,0.802203018,4.2265141,4.19994236,4.22717394,4.20024314,4.19940972
46.176542,5.47722558,4.2541377,1.10593303,4.22546448,4.19860875,4.22556982,4.19891186,4.19807412
46.187034,5.19615242,4.25284417,0.971240576,4.22442073,4.1972765,4.22397978,4.19758197,4.19673987
46.197525,3.31662479,4.25156894,-0.966925102,4.22338305,4.19594573,4.22240349,4.19625359,4.19540709
46.208017,5.19615242,4.25031145,0.97254356,4.22235135,4.19461619,4.2208402,4.19492645,4.19407552
46.218508,4.89897949,4.2490716,0.806168647,4.22132592,4.19328814,4.2192898,4.19360083,4.19274543
46.229,4.58257569,4.24784887,0.578555811,4.22030666,4.19196131,4.2177516,4.19227646,4.19141656
46.239492,5,4.24664311,0.867961341,4.21929379,4.19063584,4.21622536,4.19095346,4.19008904
46.249983,2.64575131,4.24545419,-1.26479361,4.21828751,4.18931186,4.21471089,4.18963198,4.18876298
46.260475,4.12310563,4.24428167,-0.348103497,4.21728773,4.1879891,4.21320754,4.18831175,4.18743815
46.270966,4,4.24312556,-0.493077643,4.21629477,4.18666782,4.21171531,4.18699303,4.18611478
46.281458,4.79583152,4.24198547,0.744208339,4.21530855,4.18534778,4.21023359,4.18567556,4.18479264
46.29195,4.35889894,4.24086135,0.343565997,4.21432929,4.18402909,4.20876226,4.18435948,4.18347184
46.302441,4.35889894,4.23975316,0.345175005,4.21335721,4.18271189,4.20730119,4.1830449,4.18215251
46.312933,3.60555128,4.23866057,-0.795681652,4.21239225,4.18139591,4.20584985,4.18173158,4.1808344
46.323424,4.47213595,4.23758368,0.484305976,4.21143473,4.18008142,4.20440827,4.18041977,4.17951776
46.333916,4,4.23652219,-0.486335475,4.2104846,4.17876816,4.20297596,4.17910922,4.17820234
46.344408,4.69041576,4.23547615,0.674492112,4.2095421,4.17745625,4.20155284,4.17780005,4.17688827
46.354899,4.24264069,4.23444559,0.0905267937,4.20860745,4.17614583,4.20013885,4.17649239,4.17557566
46.365391,4,4.23343027,-0.483146216,4.20768063,4.17483663,4.19873353,4.17518599,4.17426427
46.375882,4.24264069,4.23243036,0.10104618,4.20676196,4.17352892,4.19733696,4.1738811,4.17295436
46.386374,3.87298335,4.23144566,-0.59871722,4.20585143,4.17222244,4.19594873,4.17257747,4.17164566
46.396866,4.35889894,4.23047626,0.358361103,4.20494929,4.17091731,4.19456879,4.17127522,4.1703383
46.407357,4.12310563,4.22952229,-0.326215667,4.20405579,4.16961367,4.19319714,4.16997449,4.16903242
46.417849,4.35889894,4.22858357,0.360992201,4.20317093,4.16831125,4.19183336,4.16867501,4.16772775
46.42834,3.87298335,4.22766035,-0.595547651,4.20229505,4.16701032,4.19047761,4.16737705,4.16642455
46.438832,5.38516481,4.2267525,1.07629564,4.20142817,4.16571062,4.18912948,4.16608034,4.16512257
46.449324,5.09901951,4.22586017,0.934429955,4.20057055,4.16441227,4.18778899,4.16478503,4.16382194
46.459815,4.35889894,4.22498355,0.365944529,4.19972249,4.16311541,4.18645617,4.16349122,4.16252277
46.470307,3.60555128,4.22412255,-0.78649302,4.198884,4.16181977,4.18513066,4.16219868,4.16122482
46.480798,4.79583152,4.22327745,0.75667303,4.19805546,4.16052561,4.18381263,4.16090765,4.15992833
46.49129,5.38516481,4.22244822,1.07829337,4.19723691,4.15923269,4.18250172,4.15961788,4.15863307
46.501782,5.38516481,4.22163506,1.07867036,4.19642866,4.15794112,4.181198,4.15832951,4.15733914
46.512273,4.58257569,4.22083822,0.601446153,4.19563101,4.15665103,4.1799015,4.15704264,4.15604669
46.522765,5.38516481,4.22005769,1.07940128,4.19484403,4.15536217,4.17861192,4.15575704,4.15475545
46.533256,4.35889894,4.21929381,0.373637709,4.19406811,4.15407479,4.17732944,4.15447295,4.15346567
46.543748,4.58257569,4.2185466,0.603348234,4.19330336,4.15278865,4.17605377,4.15319013,4.15217712
46.55424,4.35889894,4.21781636,0.375609613,4.1925501,4.15150385,4.17478496,4.1519087,4.1508899
46.564731,4.89897949,4.21710336,0.825757907,4.19180866,4.15022054,4.1735231,4.15062878,4.14960415
46.575223,4.47213595,4.2164077,0.50569581,4.19107917,4.14893845,4.17226792,4.14935013,4.14831962
46.585714,4.12310563,4.21572975,-0.304342122,4.19036206,4.14765785,4.17101961,4.14807299,4.14703656
46.596206,3.46410162,4.21506964,-0.866584116,4.18965748,4.14637847,4.1697779,4.14679713,4.14575471
46.606698,4.47213595,4.21442771,0.507649723,4.18896578,4.14510045,4.1685429,4.14552265,4.1444742
46.617189,4.79583152,4.21380431,0.762907083,4.18828736,4.14382391,4.1673147,4.14424969,4.14319515
46.627681,5.38516481,4.21319961,1.08257342,4.18762239,4.14254859,4.16609306,4.142978,4.14191732
46.638172,5.38516481,4.21261404,1.08284383,4.18697133,4.14127476,4.16487819,4.14170782,4.14064095
46.648664,4.35889894,4.21204784,0.383211567,4.1863344,4.14000215,4.16366987,4.14043891,4.1393658
46.659156,4.47213595,4.2115014,0.510523805,4.18571202,4.1387309,4.1624682,4.1391714,4.13809199
46.669647,4.24264069,4.21097514,0.177948159,4.1851046,4.13746113,4.16127331,4.13790541,4.13681964
46.680139,4.12310563,4.21046934,-0.295573538,4.18451241,4.13619258,4.16008498,4.13664068,4.13554851
46.69063,5,4.2099845,0.88882816,4.18393596,4.13492551,4.15890345,4.13537748,4.13427883
46.701122,5.38516481,4.20952095,1.08427112,4.18337553,4.13365968,4.15772852,4.13411554,4.13301038
46.711614,4,4.20907916,-0.457251744,4.18283161,4.13239519,4.15656031,4.13285501,4.13174326
46.722105,3.46410162,4.20865963,-0.862877753,4.18230467,4.13113218,4.15539898,4.13159599,4.1304776
46.732597,4.58257569,4.20826276,0.61181119,4.18179506,4.1298704,4.15424432,4.13033824,4.12921316
46.743088,3.87298335,4.20788913,-0.578710445,4.18130335,4.1286101,4.1530966,4.12908201,4.12795017
46.75358,4.24264069,4.20753916,0.187354002,4.18082993,4.12735102,4.15195564,4.12782706,4.1266884
46.764072,5.19615242,4.20721346,0.994454104,4.18037534,4.1260933,4.1508216,4.12657351,4.12542797
46.774563,4,4.20691259,-0.454876459,4.17994015,4.12483705,4.14969464,4.12532148,4.12416899
46.785055,4.47213595,4.2066371,0.515265809,4.1795248,4.12358203,4.14857459,4.12407072,4.12291123
46.795546,4,4.20638764,-0.45429907,4.17912994,4.12232849,4.14746174,4.12282148,4.12165493
46.806038,4.35889894,4.20616481,0.390812143,4.17875606,4.12107617,4.14635593,4.12157353,4.12039984
46.81653,4.58257569,4.20596929,0.613682655,4.17840382,4.11982521,4.14525735,4.12032697,4.11914609
46.827021,4.35889894,4.20580179,0.39127631,4.17807387,4.11857572,4.14416617,4.11908194,4.11789379
46.837513,4.12310563,4.205663,-0.287327988,4.17776678,4.11732746,4.14308227,4.11783818,4.1166427
46.848004,5.19615242,4.20555369,0.995288268,4.17748329,4.11608067,4.14200595,4.11659595,4.11539307
46.858496,4.24264069,4.20547462,0.192785041,4.17722406,4.11483511,4.14093709,4.115355,4.11414466
46.868988,5,4.20542661,0.891388461,4.17698982,4.1135909,4.13987588,4.11411545,4.11289757
46.879479,4,4.20541053,-0.453222379,4.17678137,4.11234816,4.13882255,4.11287742,4.11165194
46.889971,4.47213595,4.20542723,0.516438497,4.17659945,4.11110665,4.13777699,4.11164068,4.11040753
46.900462,4.69041576,4.20547766,0.696374974,4.1764449,4.10986661,4.13673952,4.11040546,4.10916456
46.910954,5.29150262,4.20556276,1.04208438,4.17631856,4.10862781,4.13571007,4.10917153,4.10792281
46.921446,5,4.20568354,0.891244332,4.17622133,4.10739035,4.13468886,4.10793901,4.10668239
46.931937,4.12310563,4.20584103,-0.287637624,4.17615413,4.10615435,4.13367613,4.106708,4.10544342
46.942429,4.24264069,4.20603634,0.191322632,4.17611792,4.10491959,4.13267183,4.10547829,4.10420567
46.95292,4.69041576,4.20627056,0.695805429,4.17611371,4.1036863,4.13167629,4.1042501,4.10296936
46.963412,4.35889894,4.20654494,0.390325514,4.17614253,4.10245424,4.13068949,4.1030232,4.10173427
46.973904,4,4.20686067,-0.45481938,4.1762055,4.10122352,4.12971169,4.10179771,4.1005005
46.984395,4.89897949,4.20721901,0.831721393,4.17630372,4.09999427,4.12874314,4.10057375,4.09926819
46.994887,4.58257569,4.20762138,0.612335137,4.1764384,4.09876625,4.12778386,4.09935108,4.09803708
47.005378,3.87298335,4.20806909,-0.578865912,4.17661077,4.0975397,4.12683421,4.09812994,4.09680742
47.01587,3.60555128,4.2085637,-0.776538749,4.17682214,4.09631438,4.1258942,4.09691009,4.09557898
47.026362,4.35889894,4.20910671,0.387030015,4.17707386,4.0950904,4.12496415,4.09569165,4.09435186
47.036853,4.69041576,4.20969965,0.693336938,4.1773673,4.09386789,4.12404435,4.09447474,4.09312619
47.047345,4.89897949,4.21034431,0.829840454,4.177704,4.09264661,4.12313485,4.09325913,4.09190172
47.057836,4.79583152,4.21104231,0.76471512,4.17808544,4.09142679,4.12223608,4.09204505,4.0906787
47.068328,4.12310563,4.21179562,-0.297808646,4.17851331,4.0902082,4.1213481,4.09083227,4.0894569
47.07882,5.19615242,4.21260608,0.991739051,4.17898926,4.08899096,4.12047127,4.0896209,4.08823641
47.089311,5.09901951,4.21347561,0.941033421,4.17951502,4.08777518,4.11960594,4.08841106,4.08701737
47.099803,4.24264069,4.21440649,0.168030352,4.18009253,4.08656063,4.11875223,4.08720253,4.08579954
47.110294,4.89897949,4.21540072,0.826788225,4.18072364,4.08534754,4.1179106,4.08599553,4.08458315
47.120786,3.46410162,4.21646079,-0.867386406,4.18141049,4.08413568,4.11708121,4.08478983,4.08336797
47.131278,3.16227766,4.21758903,-1.02728349,4.18215518,4.08292516,4.11626447,4.08358555,4.08215412
47.141769,4.69041576,4.21878786,0.686751704,4.18295986,4.08171611,4.11546079,4.08238281,4.0809417
47.152261,5,4.22006014,0.883142037,4.18382704,4.08050828,4.11467038,4.08118137,4.07973049
47.162752,3.87298335,4.22140843,-0.590275432,4.18475903,4.07930192,4.11389377,4.07998148,4.07852072
47.173244,3.46410162,4.22283591,-0.871053552,4.18575861,4.07809678,4.11313119,4.07878288,4.07731216
47.183736,6,4.22434551,1.33253686,4.18682842,4.07689299,4.11238314,4.07758572,4.07610492
47.194227,3.60555128,4.22594032,-0.787647792,4.18797122,4.07569065,4.11165012,4.07639009,4.07489912
47.204719,5.19615242,4.22762403,0.984138402,4.18919025,4.07448954,4.11093244,4.07519577,4.07369452
47.21521,5.19615242,4.22939988,0.983235749,4.19048847,4.07328989,4.11023071,4.074003,4.07249136
47.225702,4.69041576,4.23127198,0.677601491,4.19186947,4.07209147,4.10954528,4.07281154,4.07128941
47.236194,5,4.2332441,0.875645989,4.19333667,4.07089439,4.10887676,4.07162151,4.07008877
47.246685,4,4.23532022,-0.485098151,4.19489364,4.06969877,4.10822573,4.07043302,4.06888957
47.257177,4.47213595,4.2375051,0.484387089,4.19654461,4.06850437,4.10759266,4.06924585,4.06769158
47.267668,4.89897949,4.23980297,0.811896861,4.19829342,4.06731143,4.10697826,4.06806022,4.06649501
47.27816,4.12310563,4.24221915,-0.345128266,4.20014477,4.06611972,4.10638304,4.06687591,4.06529965
47.288652,5.09901951,4.24475856,0.924262384,4.20210315,4.06492935,4.10580773,4.06569304,4.06410561
47.299143,4.69041576,4.2474264,0.665574462,4.20417324,4.06374043,4.10525307,4.06451172,4.062913
47.309635,4.69041576,4.25022891,0.663465784,4.20636062,4.06255274,4.10471968,4.06333172,4.0617216
47.320126,4.12310563,4.25317166,-0.360646683,4.20867037,4.06136651,4.10420843,4.06215328,4.06053162
47.330618,4.69041576,4.25626162,0.658903744,4.21110873,4.0601815,4.10372003,4.06097616,4.05934284
47.34111,4.35889894,4.25950533,0.315267526,4.21368165,4.05899783,4.10325538,4.05980048,4.05815538
47.351601,3.74165739,4.26290968,-0.721978042,4.21639542,4.05781561,4.10281541,4.05862635,4.05696935
47.362093,3.87298335,4.26648296,-0.627295474,4.21925747,4.05663462,4.10240098,4.05745355,4.05578452
47.372584,4.89897949,4.27023259,0.792935619,4.22227463,4.05545508,4.10201316,4.05628232,4.05460112
47.383076,5,4.2741679,0.851957806,4.22545532,4.05427676,4.10165291,4.05511241,4.05341892
47.393568,4.47213595,4.27829767,0.440270694,4.22880759,4.05309979,4.10132137,4.05394396,4.05223803
47.404059,4.35889894,4.2826312,0.276166145,4.23233995,4.05192426,4.10101974,4.05277706,4.05105856
47.414551,3.74165739,4.28717965,-0.738594791,4.23606253,4.05074996,4.10074918,4.0516115,4.0498803
47.425042,4.58257569,4.29195314,0.539094195,4.2399847,4.04957711,4.10051104,4.05044751,4.04870346
47.435534,5.83095189,4.2969643,1.23854253,4.24411794,4.04840548,4.10030664,4.04928486,4.04752781
47.446026,5.74456265,4.30222516,1.20097356,4.24847337,4.04723519,4.10013744,4.04812366,4.04635348
47.456517,5.19615242,4.30774852,0.942551805,4.25306279,4.04606635,4.100005,4.04696403,4.04518057
47.467009,4.47213595,4.31354963,0.398228987,4.25790019,4.04489873,4.09991089,4.04580575,4.04400886
47.4775,5.09901951,4.31964259,0.882823271,4.26299869,4.04373257,4.09985686,4.04464904,4.04283856
47.487992,5.47722558,4.3260448,1.07293093,4.26837429,4.04256762,4.09984472,4.04349368,4.04166947
47.498484,5.29150262,4.3327731,0.979147345,4.27404264,4.04140401,4.09987638,4.04233979,4.04050168
47.508975,4.89897949,4.33984542,0.747752675,4.28002046,4.04024185,4.0999539,4.04118747,4.03933531
47.519467,4,4.3472831,-0.589307305,4.28632749,4.03908091,4.10007946,4.0400365,4.03817013
47.529958,4.58257569,4.35510615,0.476937673,4.29298249,4.03792141,4.10025534,4.03888712,4.03700638
47.54045,4.47213595,4.3633391,0.329843677,4.30000826,4.03676314,4.10048403,4.0377391,4.03584381
47.550942,4.79583152,4.37200601,0.651018831,4.30742735,4.0356062,4.10076813,4.03659255,4.03468255
47.561433,5,4.38113263,0.786681239,4.31526401,4.03445071,4.10111037,4.03544759,4.03352271
47.571925,4.58257569,4.39074945,0.437979736,4.32354671,4.03329644,4.1015138,4.03430399,4.03236406
47.582416,5,4.40088561,0.774024797,4.33230306,4.03214361,4.10198149,4.03316199,4.03120682
47.592908,3.60555128,4.41157653,-0.897789094,4.34156627,4.030992,4.10251691,4.03202135,4.03005078
47.6034,4.79583152,4.42285744,0.610716038,4.35136975,4.02984173,4.10312362,4.0308822,4.02889604
47.613891,5.09901951,4.43476634,0.815017281,4.36174957,4.0286929,4.1038054,4.02974465,4.02774271
47.624383,4.79583152,4.44734794,0.590324984,4.37274798,4.02754529,4.10456653,4.02860847,4.02659057
47.634874,4.79583152,4.46064585,0.578952221,4.38440666,4.02639912,4.10541125,4.0274739,4.02543984
47.645366,4.47213595,4.47471262,-0.0507608625,4.39677549,4.02525417,4.10634448,4.02634071,4.0242903
47.655858,4.58257569,4.48960141,0.304916852,4.40990535,4.02411055,4.10737122,4.02520901,4.02314206
47.666349,4.79583152,4.5053699,0.538944917,4.42385159,4.02296838,4.10849682,4.02407892,4.02199523
47.676841,5.09901951,4.52208569,0.759561597,4.43867884,4.02182742,4.10972737,4.02295023,4.02084959
47.687332,4.58257569,4.53981613,0.20678385,4.45445208,4.0206879,4.11106894,4.02182315,4.01970535
47.697824,4.69041576,4.55864174,0.363006911,4.47124867,4.0195496,4.11252862,4.02069746,4.0185623
47.708316,3.46410162,4.57864537,-1.05571955,4.48914877,4.01841264,4.11411361,4.01957329,4.01742055
47.718807,4.35889894,4.59991762,-0.490936534,4.50824023,4.01727711,4.11583168,4.01845074,4.0162802
47.729299,4.24264069,4.62256436,-0.616379487,4.52862548,4.0161428,4.11769173,4.01732959,4.01514104
47.73979,5.38516481,4.64669329,0.859343657,4.55040956,4.01500992,4.11970268,4.01621007,4.01400328
47.750282,4.79583152,4.67243249,0.351281986,4.573717,4.01387827,4.12187499,4.01509196,4.0128667
47.760774,5.56776436,4.69991609,0.931583745,4.59867898,4.01274794,4.12421938,4.01397538,4.01173142
47.771265,3.31662479,4.72929199,-1.18855677,4.62544051,4.01161905,4.12674744,4.01286044,4.01059754
47.781757,5.09901951,4.76073287,0.581624144,4.65417064,4.01049138,4.12947257,4.01174692,4.00946485
47.792248,4.12310563,4.79441817,-0.819336648,4.68504628,4.00936514,4.13240828,4.01063504,4.00833355
47.80274,5.91607978,4.83056058,1.04188253,4.71827659,4.00824013,4.13557049,4.00952459,4.00720343
47.813232,5.38516481,4.86938686,0.718176825,4.75408581,4.00711643,4.13897565,4.00841568,4.00607461
47.823723,5,4.91114954,0.29807794,4.79272417,4.00599417,4.14264173,4.00730843,4.00494718
47.834215,5.74456265,4.95614375,0.887929559,4.83448386,4.00487313,4.14658952,4.00620262,4.00382094
47.844706,5.56776436,5.00468281,0.750387605,4.87967691,4.00375353,4.15084029,4.00509846,4.00269608
47.855198,4.69041576,5.05713774,-0.605575739,4.92867218,4.00263514,4.1554191,4.00399576,4.00157241
47.86569,4.47213595,5.11391148,-0.801108937,4.98187202,4.00151807,4.16035226,4.00289462,4.00045003
47.876181,5.19615242,5.17545773,0.143856514,5.03973029,4.00040244,4.16566867,4.00179515,3.99932904
47.886673,4.89897949,5.24230821,-0.585942592,5.10277866,3.99928802,4.17140192,4.00069715,3.99820923
47.897164,5.19615242,5.31503961,-0.344800211,5.17159625,3.99817503,4.17758695,3.99960082,3.9970908
47.907656,5.09901951,5.39433554,-0.543429873,5.24686878,3.99706326,4.18426496,3.99850597,3.99597356
47.918148,4.79583152,5.480952,-0.827720047,5.32935698,3.99595282,4.19147988,3.9974127,3.9948576
47.928639,6.92820323,5.57574968,1.16295036,5.41992792,3.9948438,4.19928048,3.99632112,3.99374303
47.939131,5.65685425,5.67974132,-0.151284734,5.51960136,3.993736,4.20772364,3.99523104,3.99262963
47.949622,6,5.79404618,0.453821357,5.62950737,3.99262962,4.21686968,3.99414265,3.99151763
47.960114,5.91607978,5.91999186,-0.0625465887,5.75098495,3.99152447,4.22678991,3.99305576,3.99040679
47.970606,5.38516481,6.05906752,-0.82091578,5.88553843,3.99042063,4.23756167,3.99197048,3.98929724
47.981097,5.47722558,6.21297909,-0.857760757,6.03489147,3.98931823,4.24927196,3.99088691,3.98818907
47.991589,6.32455532,6.38373041,-0.243259299,6.20106672,3.98821703,4.26202275,3.98980487,3.98708208
48.00208,6.70820393,6.57354882,0.366953825,6.38631435,3.98711727,4.27592455,3.98872454,3.98597647
48.012572,7.74596669,6.78504654,0.980265349,6.5932689,3.98601872,4.29110861,3.98764575,3.98487203
48.023064,6.70820393,7.02112101,-0.559389917,6.82485179,3.98492149,4.30772017,3.98656859,3.98376886
48.033555,6.8556546,7.28500301,-0.655246828,7.0843158,3.98382568,4.32592497,3.98549317,3.98266708
48.044047,7.14142843,7.58031106,-0.662482176,7.37529488,3.98273109,4.34591898,3.9844193,3.98156647
48.054538,7.48331477,7.91077055,-0.653801024,7.70152133,3.98163793,4.36791972,3.98334719,3.98046724
48.06503,8.30662386,8.2802283,0.162467125,8.06682916,3.98054598,4.39218755,3.98227663,3.97936917
48.075522,9.16515139,8.69203691,0.687833177,8.47453026,3.97945535,4.41901754,3.98120775,3.97827238
48.086013,7.93725393,9.14842329,-1.1005314,8.92676516,3.97836614,4.44875328,3.98014063,3.97717697
48.096505,9.43398113,9.64947563,-0.464213854,9.42346526,3.97727814,4.48180809,3.9790751,3.97608272
48.106996,8.77496439,10.1910568,-1.18999682,9.96023658,3.97619157,4.51865968,3.97801136,3.97498985
48.117488,10.6301458,10.7627396,-0.364134366,10.5262464,3.97510621,4.55990194,3.97694921,3.97389814
48.12798,11.3578167,11.3445941,0.114989743,11.1009555,3.97402217,4.60626329,3.97588877,3.97280771
48.138471,11.6619038,11.9050177,-0.493065855,11.6518736,3.97293955,4.65869211,3.97483013,3.97171864
48.148963,13,12.4010516,0.773917584,12.134781,3.97185815,4.71851319,3.97377312,3.97063074
48.159454,12.8840987,12.7831144,0.317780356,12.4983547,3.97077816,4.78763194,3.97271793,3.96954422
48.169946,13.2287566,13.0065283,0.471410961,12.6955145,3.96969939,4.86898896,3.97166438,3.96845885
48.180438,13.0384048,13.0456654,-0.0852088462,12.6972981,3.96862194,4.96713877,3.97061258,3.96737475
48.190929,12.5299641,12.9049675,-0.612375209,12.5033822,3.9675459,5.08912447,3.96956263,3.96629202
48.201421,11.2249722,12.6197832,-1.18102118,12.1420789,3.96647108,5.24552474,3.96851434,3.96521045
48.211912,12.083046,12.2474961,-0.405524505,11.6603455,3.96539768,5.45117503,3.96746792,3.96413024
48.222404,11.4017543,11.8544885,-0.672855307,11.1093697,3.96432549,5.72535922,3.96642318,3.9630512
48.232896,11.5758369,11.506103,0.264071718,10.5337414,3.96325461,6.09021939,3.96538024,3.96197341
48.243387,10.8166538,11.2607767,-0.66642547,9.96621491,3.96218516,6.56740981,3.96433919,3.96089699
48.253879,10.8166538,11.1665694,-0.591536645,9.42739883,3.96111691,7.17347863,3.96329986,3.95982173
48.26437,11.3578167,11.2572754,0.317082539,8.92849819,3.96005009,7.91465105,3.96226245,3.95874783
48.274862,11.8743421,11.5473722,0.571812822,8.47383029,3.95898447,8.78411665,3.96122678,3.95767509
48.285354,11.8321596,12.0281407,-0.442697535,8.06366868,3.95792017,9.76059893,3.96019295,3.95660361
48.295845,11.5758369,12.667451,-1.04480336,7.69590076,3.95685729,10.8094627,3.95916108,3.95553348
48.306337,13.0384048,13.4133862,-0.612357235,7.36713787,3.95579562,11.884547,3.95813098,3.95446451
48.316828,13.6381817,14.1979337,-0.74816573,7.07368204,3.95473536,12.9280234,3.95710285,3.9533969
48.32732,14.8996644,14.9399249,-0.200650131,6.81169453,3.95367632,13.8702135,3.95607653,3.95233044
48.337812,16.1554944,15.5461284,0.780618987,6.57762167,3.95261859,14.6283581,3.95505211,3.95126523
48.348303,15.6524758,15.919326,-0.516575415,6.36820356,3.95156228,15.1140333,3.95402971,3.95020138
48.358795,16.673332,15.9804496,0.83239556,6.18046213,3.95050718,15.2555223,3.95300914,3.94913868
48.369286,15.7480157,15.6989273,0.221559019,6.01183328,3.94945349,15.0286297,3.95199062,3.94807734
48.379778,15.6524758,15.1058016,0.739374222,5.86000235,3.94840101,14.4700512,3.95097397,3.94701714
48.39027,14.4568323,14.2751613,0.426228772,5.72299124,3.94734985,13.6585362,3.94995929,3.94595819
48.400761,14.6628783,13.2927136,1.17054036,5.59907214,3.9463001,12.6832915,3.94894671,3.9449006
48.411253,11.7473401,12.2359319,-0.698993373,5.48670736,3.94525156,11.62431,3.94793604,3.94384415
48.421744,10.4403065,11.1698915,-0.854157457,5.38459979,3.94420444,10.5486649,3.94692749,3.94278905
48.432236,9.94987437,10.1473094,-0.444336661,5.29158105,3.94315853,9.51105119,3.94592089,3.9417351
48.442728,8.66025404,9.20962321,-0.741194422,5.20665872,3.94211393,8.55524229,3.94491634,3.94068239
48.453219,8.30662386,8.38562409,-0.281069786,5.12896382,3.94107074,7.71284665,3.94391398,3.93963103
48.463711,7.34846923,7.69001425,-0.584418536,5.05771479,3.94002876,7.00162141,3.94291361,3.93858081
48.474202,6.40312424,7.12387026,-0.848967622,4.99225268,3.9389882,6.42534734,3.94191545,3.93753194
48.484694,6.92820323,6.67630705,0.501892603,4.93197398,3.93794885,5.97479253,3.94091934,3.93648421
48.495186,5.56776436,6.32894451,-0.872456387,4.87637424,3.93691081,5.63180648,3.93992538,3.93543772
48.505677,5.56776436,6.06050569,-0.701955363,4.82497933,3.93587418,5.37413568,3.93893369,3.93439257
48.516169,6.244998,5.85084451,0.627816442,4.77738267,3.93483877,5.17999317,3.9379441,3.93334856
48.52666,5.47722558,5.68340126,-0.454065728,4.73323309,3.93380476,5.03112257,3.93695683,3.9323059
48.537152,5,5.54573661,-0.738739877,4.69220222,3.93277197,4.91369339,3.9359717,3.93126437
48.547644,5.09901951,5.42923292,-0.574641985,4.65400954,3.93174049,4.81809388,3.93498885,3.93022408
48.558135,4.89897949,5.3281734,-0.655128933,4.61840422,3.93071043,4.73796951,3.93400837,3.92918512
48.568627,5,5.23882804,-0.488700362,4.58515243,3.92968157,4.66921803,3.93303012,3.9281473
48.579118,5.38516481,5.15879522,0.475783128,4.55405713,3.92865412,4.60922506,3.9320543,3.92711082
48.58961,6.08276253,5.08643316,0.998162999,4.52492997,3.92762789,4.55624408,3.93108076,3.92607547
48.600102,5.47722558,5.02059561,0.675744005,4.49760995,3.92660297,4.50907547,3.93010962,3.92504136
48.610593,5.47722558,4.96041961,0.718892182,4.47195169,3.92557946,4.46683531,3.92914099,3.92400858
48.621085,4.89897949,4.90520557,-0.0789055114,4.44781704,3.92455717,4.42882643,3.92817472,3.92297693
48.631576,4.69041576,4.85439646,-0.404945305,4.42509014,3.92353628,4.39449821,3.92721102,3.92194661
48.642068,5.29150262,4.80750342,0.695700515,4.40365761,3.92251661,4.36338118,3.92624975,3.92091742
48.65256,5.19615242,4.76411979,0.657291896,4.38342277,3.92149825,4.33508756,3.92529102,3.91988946
48.663051,5.56776436,4.72389251,0.91862498,4.36429755,3.9204813,4.30928607,3.92433497,3.91886283
48.673543,5.19615242,4.68650299,0.713897353,4.34619659,3.91946556,4.28568562,3.92338144,3.91783733
48.684034,4.89897949,4.65168553,0.497286595,4.32904888,3.91845124,4.26404356,3.92243065,3.91681315
48.694526,5.47722558,4.61919362,0.926300142,4.31278321,3.91743813,4.24414194,3.92148246,3.9157901
48.705018,5.19615242,4.5888186,0.779316252,4.29733918,3.91642633,4.2257968,3.92053699,3.91476827
48.715509,4.58257569,4.56037513,0.148998529,4.28266131,3.91541594,4.20884737,3.91959438,3.91374777
48.726001,5.56776436,4.53369085,1.01689405,4.26869475,3.91440677,4.19314857,3.91865448,3.91272839
48.736492,5.47722558,4.50862179,0.984176706,4.2553944,3.91339901,4.17857868,3.91771752,3.91171033
48.746984,4.58257569,4.48503005,0.312322976,4.24271383,3.91239246,4.16502531,3.91678336,3.9106934
48.757476,4.79583152,4.46279861,0.577090036,4.23061395,3.91138723,4.15239302,3.91585214,3.90967769
48.767967,4.47213595,4.441822,0.174109041,4.21905865,3.91038341,4.14059714,3.91492399,3.90866329
48.778459,4.89897949,4.42199951,0.690637367,4.20801142,3.90938081,4.12955939,3.91399878,3.90765001
48.78895,5,4.40324749,0.772497576,4.1974427,3.90837961,4.11921414,3.91307674,3.90663805
48.799442,4.69041576,4.38548331,0.552206892,4.18732122,3.90737964,4.10949909,3.91215775,3.90562721
48.809934,5.74456265,4.36863698,1.17299858,4.17762092,3.90638098,4.10036124,3.91124194,3.90461759
48.820425,4.79583152,4.35264475,0.665722748,4.16831756,3.90538373,4.091753,3.91032946,3.90360928
48.830917,4.35889894,4.33744417,0.146474486,4.15938611,3.9043877,4.08362933,3.9094202,3.90260208
48.841408,4.69041576,4.3229839,0.606161577,4.15080667,3.90339308,4.07595267,3.90851438,3.9015962
48.8519,4.58257569,4.30921167,0.522842257,4.14255755,3.90239968,4.06868634,3.90761191,3.90059143
48.862392,4.24264069,4.29608349,-0.231176989,4.13462089,3.9014076,4.06179923,3.90671291,3.89958787
48.872883,3.74165739,4.28355889,-0.736139595,4.12698004,3.90041693,4.05526311,3.90581756,3.89858562
48.883375,4,4.2715973,-0.521149976,4.11961734,3.89942749,4.04905063,3.90492575,3.89758448
48.893866,5.19615242,4.2601658,0.967464014,4.11251908,3.89843945,4.0431392,3.90403771,3.89658465
48.904358,4.24264069,4.24922986,-0.0811737445,4.10566981,3.89745264,4.03750613,3.90315336,3.89558593
48.91485,4.24264069,4.23876069,0.062289596,4.09905703,3.89646714,4.03213227,3.90227286,3.89458841
48.925341,4,4.22873161,-0.47825894,4.09266902,3.89548306,4.02700012,3.90139637,3.8935922
48.935833,3.60555128,4.2191152,-0.783303216,4.08649302,3.89450021,4.02209229,3.90052381,3.89259709
48.946324,4.89897949,4.20988964,0.830114357,4.08051941,3.89351877,4.01739465,3.89965544,3.89160329
48.956816,4.58257569,4.20103126,0.617692829,4.0747369,3.89253855,4.01289251,3.89879117,3.89061059
48.967308,5.09901951,4.19252062,0.952102355,4.06913658,3.89155966,4.00857365,3.89793119,3.8896191
48.977799,4.69041576,4.18433956,0.711390331,4.06371002,3.89058218,4.00442681,3.89707567,3.8886289
48.988291,5.38516481,4.17646895,1.09940705,4.05844782,3.88960593,4.00044048,3.89622456,3.88763981
48.998782,4.47213595,4.16889393,0.550674155,4.05334308,3.88863109,3.99660551,3.89537812,3.88665201
49.009274,4.47213595,4.1615978,0.557259505,4.04838741,3.88765749,3.99291206,3.8945363,3.88566532
49.019766,4.89897949,4.15456706,0.862793386,4.04357432,3.88668521,3.98935206,3.8936993,3.88467982
49.030257,4.47213595,4.14778905,0.569514622,4.03889767,3.88571434,3.98591802,3.89286732,3.88369561
49.040749,4.35889894,4.14125008,0.466528519,4.03435035,3.88474471,3.98260208,3.89204033,3.88271251
49.05124,4.79583152,4.13493979,0.812952481,4.02992738,3.8837765,3.97939815,3.8912186,3.88173069
49.061732,4.24264069,4.1288461,0.337334527,4.02562238,3.88280952,3.97629942,3.89040214,3.88074997
49.072224,4.47213595,4.12295947,0.590911572,4.02143056,3.88184387,3.97330041,3.88959114,3.87977045
49.082715,4.12310563,4.11727088,0.0763855318,4.01734736,3.88087964,3.97039601,3.88878584,3.87879221
49.093207,4.47213595,4.11177031,0.600304627,4.01336734,3.87991664,3.96758068,3.88798625,3.87781506
49.103698,4.35889894,4.10645058,0.502442397,4.00948699,3.87895507,3.96485029,3.88719267,3.87683921
49.11419,4.47213595,4.1013025,0.608960966,4.00570107,3.87799474,3.96219997,3.88640512,3.87586444
49.124682,4.35889894,4.09631933,0.512425231,4.00200615,3.87703574,3.95962594,3.88562386,3.87489087
49.135173,4.79583152,4.09149457,0.839247851,3.9983988,3.87607816,3.95712462,3.88484914,3.87391857
49.145665,4.12310563,4.08682078,0.190485822,3.99487478,3.87512183,3.95469201,3.88408102,3.87294737
49.156156,4.58257569,4.08229563,0.707304792,3.99143137,3.87416692,3.95232829,3.88331983,3.87197744
49.166648,4.35889894,4.07790662,0.530087088,3.98806469,3.87321325,3.95002384,3.88256566,3.87100861
49.17714,4.24264069,4.07365169,0.411082718,3.98477204,3.87226093,3.947779,3.88181878,3.87004095
49.187631,4.35889894,4.06952608,0.537933883,3.98155081,3.87131003,3.94559126,3.88107951,3.86907458
49.198123,2.82842712,4.06552421,-1.11224866,3.97839763,3.87036038,3.94345764,3.88034794,3.86810929
49.208614,4.24264069,4.0616423,0.425439054,3.97531047,3.86941216,3.94137614,3.87962448,3.86714527
49.219106,4.35889894,4.05787534,0.548656179,3.97228625,3.86846519,3.9393441,3.87890926,3.86618234
49.229598,4.12310563,4.0542197,0.262461293,3.96932289,3.86751956,3.93735961,3.87820262,3.86522059
49.240089,4.89897949,4.05067191,0.92103614,3.96641838,3.86657537,3.93542084,3.87750492,3.86426011
49.250581,3.60555128,4.04722777,-0.664587462,3.96357002,3.86563243,3.93352555,3.87681636,3.86330071
49.261072,4.12310563,4.04388458,0.281462342,3.96077629,3.86469093,3.93167232,3.87613737,3.86234257
49.271564,3.60555128,4.04063856,-0.659611465,3.95803469,3.86375069,3.92985914,3.87546819,3.86138552
49.282056,4.58257569,4.0374871,0.738301158,3.95534361,3.86281179,3.92808461,3.87480922,3.86042965
49.292547,4.58257569,4.03442771,0.740370171,3.95270151,3.86187434,3.92634742,3.87416093,3.85947503
49.303039,4,4.03145722,-0.177361834,3.95010617,3.86093814,3.92464582,3.87352357,3.8585215
49.31353,4.69041576,4.02857378,0.81353671,3.94755645,3.8600034,3.92297882,3.87289771,3.85756922
49.324022,4.12310563,4.02577458,0.311979234,3.94505031,3.85906991,3.92134487,3.87228366,3.85661803
49.334514,4.24264069,4.02305779,0.468596728,3.9425865,3.85813779,3.91974293,3.87168195,3.855668
49.345005,5,4.0204217,0.98973648,3.9401638,3.85720711,3.91817205,3.87109314,3.85471923
49.355497,4.47213595,4.01786399,0.673997009,3.93778039,3.8562777,3.91663086,3.87051763,3.85377154
49.365988,4.12310563,4.01538346,0.328210547,3.93543542,3.85534975,3.91511868,3.86995609,3.8528251
49.37648,4.58257569,4.01301189,0.754694512,3.93316164,3.85442306,3.91363426,3.869409,3.85187973
49.386972,4.69041576,4.01068058,0.824460538,3.93088918,3.85349775,3.91217687,3.86887703,3.85093553
49.397463,4.47213595,4.00842221,0.680965305,3.92865154,3.85257389,3.91074579,3.86836088,3.84999257
49.407955,4.35889894,4.00623519,0.593854996,3.92644717,3.85165131,3.90933997,3.86786115,3.84905069
49.418446,4.12310563,4.0041189,0.344944523,3.92427544,3.85073019,3.90795889,3.86737867,3.84811006
49.428938,3.46410162,4.00207204,-0.733464675,3.92213492,3.84981036,3.90660161,3.86691413,3.8471705
49.43943,4.69041576,4.00009404,0.830856019,3.92002484,3.8488919,3.90526756,3.86646841,3.84623209
49.449921,4,3.99818439,0.0426100031,3.91794445,3.84797491,3.90395623,3.86604241,3.84529493
49.460413,3.87298335,3.9963422,-0.351224793,3.91589246,3.84705921,3.90266677,3.865637,3.84435884
49.470904,3.87298335,3.99456741,-0.348689061,3.9138684,3.84614498,3.90139885,3.86525324,3.84342399
49.481396,4.47213595,3.99285938,0.692298041,3.91187105,3.84523205,3.90015168,3.86489213,3.8424902
49.491888,4,3.99121812,0.0937116971,3.9098998,3.84432051,3.89892488,3.86455482,3.84155757
49.502379,4.89897949,3.98964373,0.953590977,3.90795407,3.84341044,3.89771808,3.86424255,3.84062618
49.512871,3.87298335,3.9882404,-0.339495299,3.90603274,3.84250168,3.89663741,3.86395653,3.83969585
49.523362,4.89897949,3.98680004,0.955080858,3.90413548,3.84159439,3.89546917,3.86369819,3.83876675
49.533854,4,3.98542696,0.120718832,3.90226124,3.84068842,3.89431939,3.86346895,3.83783872
49.544346,3.31662479,3.98412183,-0.817004921,3.90040953,3.83978385,3.89318781,3.86327039,3.83691183
49.554837,3.74165739,3.98288543,-0.491149712,3.8985799,3.83888077,3.89207417,3.8631042,3.83598618
49.565329,3.74165739,3.98171834,-0.489960159,3.89677139,3.83797901,3.89097791,3.86297215,3.83506159
49.57582,4.24264069,3.9806218,0.511877805,3.89498375,3.83707875,3.88989891,3.86287618,3.83413822
49.586312,3.74165739,3.97959676,-0.487790299,3.89321607,3.83617981,3.88883668,3.86281833,3.83321591
49.596804,4.58257569,3.9786447,0.777129975,3.89146798,3.83528228,3.88779103,3.86280085,3.83229475
49.607295,4.58257569,3.97776724,0.777694317,3.88973911,3.83438626,3.88676178,3.8628261,3.83137481
49.617787,4.12310563,3.97696601,0.382282111,3.88802862,3.83349158,3.8857485,3.86289667,3.83045592
49.628278,4.69041576,3.97624315,0.845087336,3.88633636,3.8325984,3.88475114,3.86301531,3.82953826
49.63877,4.79583152,3.97560078,0.905665912,3.88466151,3.83170657,3.8837693,3.86318503,3.82862165
49.649262,4.24264069,3.97504147,0.517299928,3.88300379,3.83081617,3.88280286,3.86340904,3.82770618
49.659753,4.24264069,3.97456807,0.5177573,3.8813629,3.82992729,3.88185174,3.86369081,3.82679193
49.670245,4.58257569,3.97418358,0.779994945,3.87973812,3.82903976,3.88091557,3.86403417,3.82587872
49.680736,5,3.97389153,1.01297012,3.87812933,3.82815377,3.87999437,3.86444315,3.82496674
49.691228,4.12310563,3.97369567,0.386535841,3.87653583,3.82726913,3.87908783,3.86492226,3.8240558
49.70172,4.35889894,3.97360024,0.620724336,3.87495739,3.82638595,3.8781959,3.8654763,3.82314599
49.712211,4.58257569,3.97360989,0.780362612,3.87339379,3.8255043,3.87731854,3.86611047,3.8222374
49.722703,4.47213595,3.97372975,0.705978898,3.87184436,3.82462403,3.87645548,3.8668306,3.82132985
49.733194,4.24264069,3.97396546,0.518338909,3.87030906,3.82374531,3.87560678,3.8676428,3.82042352
49.743686,4.69041576,3.97432333,0.846222449,3.86878725,3.82286797,3.8747722,3.86855405,3.81951822
49.754178,4.12310563,3.97481022,0.385091421,3.86727875,3.8219921,3.87395174,3.86957175,3.81861406
49.764669,4.24264069,3.9754337,0.516920676,3.8657834,3.8211178,3.87314543,3.87070396,3.8177111
49.775161,3.74165739,3.97620231,-0.484298382,3.8643006,3.82024489,3.87235305,3.87195989,3.81680918
49.785652,4.12310563,3.9771252,0.38207385,3.86283034,3.81937355,3.87157473,3.87334916,3.81590847
49.796144,4.58257569,3.97821286,0.777407766,3.86137205,3.81850362,3.87081027,3.87488291,3.81500879
49.806636,4.12310563,3.97947663,0.378984169,3.8599256,3.81763519,3.87005974,3.87657302,3.81411023
49.817127,3.60555128,3.98092901,-0.612680775,3.85849084,3.81676834,3.86932321,3.87843254,3.81321288
49.827619,4.35889894,3.98258437,0.613444844,3.85706726,3.81590292,3.86860052,3.88047652,3.81231656
49.83811,4.79583152,3.98445803,0.900762727,3.85565486,3.81503909,3.86789183,3.88272085,3.81142145
49.848602,4.58257569,3.98656784,0.772015451,3.85425314,3.8141767,3.86719703,3.88518408,3.81052736
49.859094,4.24264069,3.98893312,0.503693924,3.85286199,3.81331584,3.86651623,3.88788619,3.80963439
49.869585,3.87298335,3.99157546,-0.344372059,3.85148131,3.81245658,3.86584951,3.89084947,3.80874261
49.880077,4.79583152,3.99451998,0.895160065,3.85011062,3.81159878,3.86519682,3.89409988,3.80785187
49.890568,4.35889894,3.99779387,0.600920188,3.84874996,3.81074261,3.86455834,3.89766539,3.80696232
49.90106,3.46410162,4.00142936,-0.733026426,3.84739887,3.8098879,3.86393402,3.90157919,3.80607379
49.911552,4.35889894,4.0054623,0.594505373,3.84605726,3.80903475,3.863324,3.90587813,3.80518638
49.922043,4.12310563,4.00993412,0.336409728,3.84472506,3.80818324,3.86272843,3.91060472,3.80430016
49.932535,3.87298335,4.01489477,-0.376711328,3.84340184,3.80733322,3.86214731,3.91581028,3.80341496
49.943026,4,4.02040169,-0.142834474,3.84208766,3.80648486,3.86158085,3.92155367,3.80253095
49.953518,5,4.02652673,0.986647489,3.84078208,3.805638,3.86102908,3.92790859,3.80164796
49.96401,3.87298335,4.0333567,-0.400466424,3.83948506,3.80479274,3.86049218,3.93496394,3.80076607
49.974501,4.69041576,4.04100045,0.805863085,3.83819654,3.80394915,3.85997035,3.94283124,3.79988537
49.984993,4.24264069,4.04959934,0.439364707,3.83691612,3.80310709,3.85946364,3.95165522,3.79900569
49.995484,4.24264069,4.05933205,0.428145581,3.83564388,3.80226672,3.85897231,3.9616188,3.79812719
50.005976,4.24264069,4.0704348,0.414976975,3.83437941,3.8014279,3.85849646,3.97296374,3.7972497
50.016468,4.12310563,4.08321116,0.199735996,3.8331227,3.80059071,3.85803632,3.98600061,3.79637332
50.026959,5,4.09805331,0.949708738,3.8318737,3.79975524,3.85759212,4.00113057,3.79549811
50.037451,4.58257569,4.11546841,0.683452472,3.83063203,3.79892134,3.857164,4.01887212,3.79462392
50.047942,4.58257569,4.13608835,0.668197084,3.8293978,3.79808917,3.85675227,4.039871,3.7937509
50.058434,4.24264069,4.1607025,0.286248469,3.82817063,3.7972586,3.85635707,4.06493336,3.7928789
50.068926,4.35889894,4.19025487,0.410662966,3.8269505,3.7964297,3.85597871,4.09502248,3.79200798
50.079417,4.79583152,4.225847,0.754973195,3.82573741,3.79560257,3.85561747,4.13126116,3.79113824
50.089909,5.19615242,4.26873221,0.963026588,3.82453099,3.79477706,3.85527357,4.17492505,3.79026951
50.1004,4.47213595,4.3202457,0.389731005,3.82333135,3.79395333,3.85494735,4.22737043,3.78940195
50.110892,4.35889894,4.38177178,-0.151237688,3.82213815,3.79313125,3.85463906,4.2899998,3.7885354
50.121384,4.58257569,4.45461367,0.357717798,3.82095138,3.79231089,3.85434905,4.36412825,3.78766993
50.131875,4.89897949,4.53988733,0.599242986,3.81977105,3.79149236,3.85407767,4.45087493,3.78680562
50.142367,3.74165739,4.63842318,-0.946977188,3.81859681,3.7906755,3.85382523,4.5510632,3.78594232
50.152858,4,4.75057203,-0.866355604,3.81742878,3.78986048,3.85359213,4.66502449,3.78508019
50.16335,5,4.87616688,0.351899304,3.81626665,3.78904716,3.85337871,4.79256175,3.78421906
50.173842,5.29150262,5.01434632,0.526456366,3.81511041,3.78823563,3.85318538,4.93277314,3.783359
50.184333,5,5.16349838,-0.404349325,3.81396007,3.78742598,3.85301259,5.08399879,3.78250011
50.194825,6.244998,5.32122663,0.961130257,3.81281533,3.78661806,3.85286072,5.24378999,3.78164221
50.205316,5.29150262,5.48414231,-0.438907377,3.81167631,3.78581205,3.85273026,5.40870166,3.78078547
50.215808,6.244998,5.64784839,0.772754556,3.81054269,3.78500781,3.85262165,5.57427883,3.77992973
50.2263,5.65685425,5.80667253,-0.387063665,3.8094145,3.78420543,3.8525354,5.73478791,3.77907506
50.236791,7.07106781,5.95362474,1.0570918,3.80829175,3.78340499,3.85247202,5.88317446,3.77822155
50.247283,6.164414,6.08058073,0.289539764,3.80717415,3.78260637,3.85243205,6.01124727,3.77736903
50.257774,7.28010989,6.17881344,1.04942672,3.80606183,3.78180972,3.85241603,6.11021209,3.77651766
50.268266,6.8556546,6.24030892,0.784439722,3.80495449,3.78101491,3.85242454,6.17199469,3.77566728
50.278758,5.91607978,6.25935853,-0.585899943,3.80385216,3.78022204,3.8524582,6.1908414,3.77481797
50.289249,6.63324958,6.23407136,0.631805521,3.80275487,3.7794312,3.85251763,6.16484009,3.77396981
50.299741,6.164414,6.16688962,-0.0497556003,3.80166233,3.77864225,3.85260348,6.0964386,3.77312264
50.310232,5.65685425,6.06394112,-0.638033595,3.80057468,3.77786264,3.85271644,5.99179074,3.77227661
50.320724,6.40312424,5.93342033,0.685349481,3.79949164,3.77707768,3.85285724,5.85914698,3.77143156
50.331216,5.74456265,5.78404841,-0.19871026,3.79841324,3.77629476,3.8530266,5.70728034,3.77058758
50.341707,6.63324958,5.62386981,1.00467894,3.79733952,3.77551395,3.85322529,5.54429433,3.76974474
50.352199,5.65685425,5.45965846,0.444067322,3.79627021,3.77473513,3.85345415,5.37702108,3.76890288
50.36269,5.65685425,5.29692668,0.599939639,3.79520544,3.77395846,3.85371397,5.21103171,3.76806216
50.373182,5.74456265,5.139917,0.777589637,3.79414494,3.77318383,3.85400569,5.05062661,3.76722242
50.383674,5.56776436,4.99186816,0.758878253,3.79308877,3.77241132,3.85433019,4.89910362,3.76638374
50.394165,5.91607978,4.8550996,1.03003892,3.79203695,3.77164103,3.85468841,4.75884056,3.76554619
50.404657,4.79583152,4.73107761,0.254467895,3.79098922,3.77087285,3.85508139,4.63135802,3.76470962
50.415148,4.35889894,4.62058096,-0.511548642,3.78994574,3.77010693,3.85551011,4.51748401,3.76387418
50.42564,5.19615242,4.52369818,0.820033075,3.78890623,3.76934315,3.85597573,4.41734557,3.76303972
50.436132,4.89897949,4.4400023,0.677478549,3.78787076,3.76858162,3.85647934,4.33054315,3.7622063
50.446623,4.79583152,4.36863637,0.65360168,3.78683935,3.76782243,3.85702208,4.25623421,3.76137402
50.457115,4.79583152,4.3084306,0.698141046,3.78581177,3.76706547,3.85760529,4.19325017,3.7605427
50.467606,4.12310563,4.25807261,-0.367378526,3.78478815,3.7663109,3.85823013,4.14027029,3.75971252
50.478098,4.69041576,4.21617917,0.688648381,3.78376825,3.76555861,3.85889809,4.09589421,3.7588833
50.48859,4,4.18142126,-0.425935748,3.78275211,3.7648087,3.85961051,4.05877165,3.75805512
50.499081,4.12310563,4.15257319,-0.171661204,3.7817398,3.76406127,3.86036878,4.02765344,3.75722807
50.509573,4.58257569,4.12854674,0.673816708,3.78073106,3.76331622,3.8611746,4.00142728,3.75640199
50.520064,4.24264069,4.10842409,0.366355837,3.77972604,3.7625737,3.86202942,3.97915365,3.75557702
50.530556,5.09901951,4.09143966,1.00378277,3.7787245,3.76183362,3.86293509,3.9600468,3.75475302
50.541048,4.35889894,4.076981,0.530959454,3.7777265,3.76109608,3.86389329,3.9434774,3.75393005
50.551539,4.35889894,4.06456356,0.54252685,3.77673209,3.76036118,3.86490578,3.92894673,3.75310821
50.562031,4.58257569,4.05380713,0.727164747,3.77574103,3.75962882,3.86597468,3.9160622,3.75228732
50.572522,4.35889894,4.04442231,0.560782162,3.77475347,3.75889917,3.86710182,3.90452491,3.75146754
50.583014,3.16227766,4.03618391,-0.934829531,3.77376919,3.75817214,3.86828954,3.89410099,3.75064873
50.593506,3.87298335,4.02892121,-0.394889681,3.77278824,3.75744783,3.86953996,3.88461293,3.74983094
50.603997,3.87298335,4.02250214,-0.386676606,3.77181067,3.75672635,3.87085529,3.87592289,3.74901427
50.614489,4.12310563,4.01682201,0.326011682,3.77083625,3.75600761,3.87223823,3.86792037,3.74819855
50.62498,4.24264069,4.01179978,0.48045906,3.76986514,3.75529178,3.87369111,3.86051994,3.74738394
50.635472,5.09901951,4.00736844,1.04482107,3.76889712,3.75457878,3.8752169,3.85364957,3.74657028
50.645964,4.35889894,4.00347433,0.596174989,3.76793223,3.75386871,3.87681831,3.84725146,3.74575764
50.656455,4.89897949,4.00007269,0.948106952,3.76697055,3.7531617,3.87849816,3.84127686,3.74494611
50.666947,5.56776436,3.99712499,1.25325152,3.76601184,3.75245765,3.88025992,3.83568249,3.74413553
50.677438,4.58257569,3.99459947,0.766796079,3.76505626,3.75175676,3.88210655,3.83043287,3.74332605
50.68793,4.79583152,3.99246802,0.896305472,3.76410359,3.75105893,3.8840419,3.82549507,3.74251751
50.698422,4.47213595,3.99070711,0.693850738,3.7631539,3.75036429,3.88606945,3.82084141,3.74171
50.708913,4.24264069,3.98929634,0.503333241,3.76220724,3.74967297,3.88819286,3.81644727,3.74090358
50.719405,4.35889894,3.98821782,0.608835876,3.76126339,3.74898488,3.89041661,3.81228956,3.74009811
50.729896,4.24264069,3.98745663,0.505157462,3.76032252,3.74830022,3.89274456,3.80834911,3.73929373
50.740388,4.47213595,3.98699974,0.696517205,3.7593844,3.74761892,3.8951817,3.80460731,3.73849029
50.75088,3.74165739,3.98683634,-0.495155488,3.75844911,3.7469411,3.89773258,3.80104844,3.73768787
50.761371,4.47213595,3.98695734,0.696547643,3.75751669,3.7462669,3.90040202,3.79765828,3.73688653
50.771863,4.35889894,3.98735533,0.609543776,3.75658695,3.74559626,3.90319585,3.79442311,3.73608614
50.782354,5,3.98802433,1.00597001,3.75566003,3.74492937,3.90611919,3.79133165,3.73528683
50.792846,2.82842712,3.98895997,-1.0772803,3.75473573,3.74426619,3.90917859,3.78837257,3.73448845
50.803338,3.31662479,3.99015902,-0.82069131,3.75381411,3.74360684,3.91238011,3.78553639,3.73369109
50.813829,5,3.99161934,1.00418159,3.75289524,3.74295148,3.91573012,3.78281444,3.73289481
50.824321,4.35889894,3.99334046,0.604614329,3.7519789,3.74230005,3.91923639,3.78019812,3.73209946
50.834812,4.24264069,3.99532235,0.497311106,3.75106527,3.74165276,3.92290579,3.77768052,3.73130519
50.845304,4.12310563,3.99756683,0.354314546,3.75015412,3.74100958,3.92674703,3.77525438,3.73051185
50.855796,4.24264069,4.00007618,0.492508387,3.74924553,3.74037066,3.93076829,3.77291377,3.72971951
50.866287,3.60555128,4.00285362,-0.630319238,3.74833956,3.73973616,3.9349782,3.77065319,3.72892825
50.876779,4.24264069,4.00590422,0.486555717,3.74743601,3.73910604,3.93938719,3.76846701,3.72813792
50.88727,4.24264069,4.00923296,0.483122892,3.74653504,3.73848053,3.94400467,3.76635085,3.72734866
50.897762,4.12310563,4.01284707,0.332052039,3.74563644,3.73785961,3.94884244,3.7642999,3.72656033
50.908254,4.24264069,4.0167539,0.475275487,3.74474029,3.73724346,3.95391172,3.76231027,3.72577299
50.918745,4.12310563,4.02096176,0.319599532,3.74384665,3.73663224,3.95922439,3.7603784,3.72498672
50.929237,4.89897949,4.02548133,0.934611233,3.74295532,3.73602594,3.96479476,3.75850046,3.72420137
50.939728,3.87298335,4.03032273,-0.396660289,3.74206645,3.73542482,3.97063592,3.75667357,3.72341709
50.95022,4.69041576,4.03549913,0.809269196,3.74117986,3.73482888,3.97676416,3.75489444,3.72263373
50.960712,4.12310563,4.04102357,0.286499656,3.7402956,3.7342383,3.98319517,3.75316047,3.72185136
50.971203,4.58257569,4.04691033,0.731891635,3.73941375,3.73365328,3.98994569,3.75146926,3.72107005
50.981695,4,4.05317681,-0.230600972,3.73853412,3.73307385,3.99703566,3.74981811,3.72028966
50.992186,4,4.05983961,-0.244621351,3.73765685,3.73250026,4.00448376,3.74820513,3.71951033
51.002678,3.74165739,4.06691943,-0.570317498,3.73678176,3.73193256,4.01231294,3.74662795,3.71873191
51.01317,4.24264069,4.07443687,0.410126592,3.73590891,3.73137097,4.02054564,3.74508481,3.71795447
51.023661,4.89897949,4.08241419,0.903640026,3.73503838,3.73081569,4.02920594,3.74357406,3.7171781
51.034153,4.58257569,4.09087805,0.701211553,3.73416997,3.73026679,4.03832236,3.74209374,3.71640263
51.044644,3.74165739,4.09985416,-0.598495425,3.73330383,3.72972457,4.04792213,3.74064256,3.71562821
51.055136,4.12310563,4.10937397,0.117182163,3.73243979,3.72918909,4.05803838,3.7392188,3.7148547
51.065628,4.58257569,4.11946899,0.680519437,3.7315779,3.72866062,4.06870407,3.73782123,3.71408217
51.076119,3.16227766,4.13017339,-0.983816921,3.73071824,3.7281394,4.07995472,3.73644868,3.7133107
51.086611,4.24264069,4.14152757,0.317982894,3.72986062,3.72762554,4.0918322,3.73509971,3.71254012
51.097102,4,4.1535711,-0.391881485,3.72900519,3.72711936,4.10437731,3.73377344,3.71177059
51.107594,3.87298335,4.16635184,-0.541635016,3.72815178,3.72662099,4.11763926,3.73246856,3.71100196
51.118086,4.79583152,4.17991836,0.784801354,3.72730044,3.72613074,4.13166782,3.7311842,3.71023431
51.128577,3.46410162,4.19432351,-0.854530222,3.72645125,3.72564888,4.146517,3.72991954,3.7094677
51.139069,4.89897949,4.2096294,0.830271089,3.72560403,3.72517559,4.16225016,3.72867348,3.70870198
51.14956,4.24264069,4.22589801,0.129393495,3.72475892,3.72471124,4.17893038,3.72744541,3.70793731
51.160052,3.60555128,4.24320361,-0.798531358,3.72391575,3.72425602,4.19663318,3.72623432,3.70717353
51.170544,3.74165739,4.26162276,-0.721086242,3.72307459,3.72381028,4.21543622,3.72503957,3.70641072
51.181035,4.58257569,4.28123931,0.548941152,3.7222355,3.72337437,4.2354245,3.7238606,3.70564894
51.191527,4.89897949,4.3021514,0.772546497,3.72139831,3.72294854,4.2566974,3.72269651,3.70488806
51.202018,3.87298335,4.32445901,-0.671919387,3.72056317,3.72253321,4.27935603,3.72154691,3.70412821
51.21251,5.09901951,4.34828121,0.866451557,3.7197299,3.72212866,4.30352074,3.72041098,3.70336925
51.223002,4.58257569,4.37374287,0.456982307,3.71889857,3.72173531,4.32931763,3.7192883,3.70261125
51.233493,4.35889894,4.40098184,-0.205141162,3.71806924,3.7213536,4.35688584,3.71817842,3.70185428
51.243985,4.12310563,4.43015933,-0.554124267,3.71724175,3.72098386,4.38638799,3.71708065,3.7010982
51.254476,4.24264069,4.46144311,-0.467763216,3.71641624,3.7206266,4.41799321,3.71599472,3.70034314
51.264968,5.19615242,4.49503236,0.837329127,3.71559255,3.72028221,4.45190222,3.71491997,3.69958897
51.27546,3.74165739,4.53113981,-0.888528235,3.71477073,3.7199512,4.48832932,3.71385608,3.69883575
51.285951,4.79583152,4.57000879,0.475208095,3.71395086,3.71963411,4.52751355,3.71281003,3.69808355
51.296443,4.35889894,4.61190541,-0.502997485,3.71313277,3.71933141,4.56973473,3.71176668,3.69733223
51.306934,4.69041576,4.65713166,0.1824393,3.71231659,3.71904371,4.61529071,3.71073314,3.69658194
51.317426,3.74165739,4.70603892,-0.982029294,3.71150218,3.71877155,4.66453495,3.70970886,3.69583252
51.327918,4,4.75901027,-0.871211952,3.71068958,3.71851557,4.71785264,3.70869362,3.69508405
51.338409,4.89897949,4.81647871,0.287229486,3.70987888,3.71827645,4.77567905,3.70768719,3.69433659
51.348901,5.19615242,4.87895384,0.563203856,3.7090699,3.71805483,4.83852632,3.70668908,3.69359001
51.359392,4.69041576,4.94699181,-0.506533364,3.70826279,3.71785147,4.90695316,3.7056992,3.69284445
51.369884,4.79583152,5.02125546,-0.474788307,3.70745738,3.7176671,4.9816253,3.70471709,3.69209975
51.380376,4.79583152,5.10248406,-0.55376217,3.70665374,3.71750255,5.06328498,3.70374258,3.691356
51.390867,4.12310563,5.19152711,-1.03364476,3.70585194,3.71735868,5.15278485,3.70277552,3.69061326
51.401359,5,5.28939411,-0.537953635,3.70505182,3.71723636,5.25113793,3.70181549,3.68987138
51.41185,5.09901951,5.39721865,-0.546076123,3.70425351,3.71713658,5.3594813,3.70086244,3.68913052
51.422342,5.09901951,5.51636831,-0.646025385,3.70345686,3.71706032,5.47918651,3.69991598,3.68839051
51.432834,5.47722558,5.64842182,-0.413758684,3.70266193,3.71700866,5.61183629,3.69897599,3.68765145
51.443325,5.91607978,5.79526767,0.347580365,3.70186879,3.71698273,5.75932355,3.69804237,3.68691338
51.453817,5.74456265,5.95927845,-0.463374371,3.70107728,3.71698374,5.92402613,3.69711475,3.68617618
51.464308,5.56776436,6.14344214,-0.758734328,3.70028755,3.71701295,6.10893839,3.69619312,3.68543998
51.4748,6,6.35193673,-0.59324256,3.69949942,3.71707172,6.31824769,3.69527714,3.68470464
51.485292,6.55743852,6.5908339,-0.18274401,3.69871298,3.71716148,6.55804,3.69436673,3.68397023
51.495783,6,6.86954811,-0.932495636,3.69792828,3.71728376,6.8377525,3.69346181,3.68323681
51.506275,7.34846923,7.20308076,0.381298392,3.69714517,3.71744021,7.17242124,3.69256207,3.68250425
51.516766,9.11043358,7.61455205,1.22306236,3.69636379,3.71763252,7.58521241,3.69166753,3.68177269
51.527258,9.2736185,8.13794329,1.06568063,3.69558398,3.71786258,8.110157,3.69077788,3.68104198
51.53775,9.48683298,8.81821538,0.817690408,3.69480581,3.71813235,8.79224697,3.68989307,3.68031219
51.548241,10.7238053,9.70731278,1.00821254,3.69402934,3.71844388,9.68340994,3.68901306,3.67958339
51.558733,11.9582607,10.8549145,1.0504029,3.69325443,3.7187995,10.8332425,3.68813755,3.67885544
51.569224,13.8564065,12.2946467,1.24970385,3.6924812,3.71920153,12.2752358,3.6872666,3.67812847
51.579716,14,14.0330011,-0.181662117,3.69170951,3.71965263,14.0157378,3.68639992,3.67740236
51.590208,15.9687194,16.041501,-0.269780518,3.69093942,3.72015551,16.0261611,3.68553749,3.67667716
51.600699,17.7200451,18.2557077,-0.731889719,3.690171,3.72071307,18.2420072,3.68467928,3.67595295
51.611191,21.2367606,20.577298,0.812073023,3.6894041,3.72132859,20.5649355,3.68382503,3.67522957
51.621682,22.0680765,22.8714959,-0.896336663,3.68863884,3.72200536,22.8601761,3.68297481,3.67450718
51.632174,23.8956063,24.9618083,-1.03257058,3.68787509,3.72274717,24.9512452,3.68212835,3.67378563
51.642666,26.2106848,26.622764,-0.641933907,3.68711291,3.72355791,26.6126705,3.68128566,3.673065
51.653157,26.8141754,27.6055907,-0.889615263,3.68635235,3.72444173,27.5956636,3.68044671,3.67234533
51.663649,27.3678644,27.7218712,-0.594984754,3.68559329,3.7254034,27.7117827,3.67961128,3.67162651
51.67414,26.4575131,26.9452525,-0.698383415,3.68483584,3.72644769,26.9346524,3.67877943,3.67090866
51.684632,25.8843582,25.4298331,0.674184764,3.68407986,3.72758015,25.4183538,3.67795094,3.67019164
51.695124,24.2899156,23.4213874,0.9319486,3.68332541,3.72880649,23.4086395,3.6771258,3.66947553
51.705615,20.7123152,21.1574987,-0.667220757,3.68257257,3.73013287,21.1430536,3.67630402,3.66876039
51.716107,18.6010752,18.8271733,-0.475497727,3.68182118,3.73156637,18.8105437,3.67548538,3.66804608
51.726598,16.8522995,16.5748755,0.52671058,3.68107138,3.73311412,16.5555084,3.67466997,3.66733274
51.73709,13.9283883,14.5075106,-0.761000882,3.68032302,3.73478451,14.4848042,3.67385756,3.66662022
51.747582,13.453624,12.6983347,0.869073841,3.67957617,3.7365862,12.6716898,3.67304816,3.66590861
51.758073,11.7898261,11.184866,0.777791847,3.67883089,3.73852857,11.1537663,3.67224181,3.66519795
51.768565,9.8488578,9.96875223,-0.346257741,3.67808703,3.74062253,9.93284453,3.67143827,3.66448813
51.779056,8.77496439,9.02207299,-0.497100198,3.67734474,3.74287914,8.98120521,3.67063766,3.66377926
51.789548,8.77496439,8.29752583,0.690969287,3.67660386,3.74531144,8.25170949,3.66983976,3.66307122
51.80004,7.34846923,7.74249702,-0.627716327,3.67586446,3.74793306,7.69182174,3.66904459,3.66236406
51.810531,6.92820323,7.3095794,-0.617556612,3.67512661,3.75075893,7.25412598,3.66825219,3.66165787
51.821023,7.21110255,6.9619326,0.499169263,3.67439015,3.75380639,6.90172003,3.66746235,3.66095249
51.831514,6.08276253,6.67401204,-0.768927506,3.67365523,3.75709335,6.60898513,3.66667516,3.66024807
51.842006,6.4807407,6.42910641,0.22723179,3.6729217,3.76064093,6.35914141,3.66589045,3.65954446
51.852498,5.47722558,6.21672943,-0.859944098,3.67218963,3.76447153,6.14164901,3.66510823,3.65884174
51.862989,6,6.03018975,-0.173751989,3.67145908,3.76860993,5.94977448,3.66432854,3.65813997
51.873481,5,5.86496827,-0.930036702,3.6707299,3.77308499,5.77896163,3.66355119,3.65743901
51.883972,6.244998,5.71788967,0.726022266,3.67000224,3.7779271,5.6260024,3.66277628,3.656739
51.894464,4.89897949,5.58647973,-0.829156344,3.66927594,3.78317217,5.48838671,3.66200363,3.65603981
51.904956,5.65685425,5.46879318,0.433660086,3.66855108,3.78885891,5.36413227,3.66123328,3.65534148
51.915447,5.38516481,5.36322242,0.148129628,3.66782772,3.79503066,5.25159039,3.66046525,3.65464411
51.925939,4.12310563,5.26839218,-1.07018062,3.66710571,3.80173814,5.14933756,3.65969937,3.65394754
51.93643,4.35889894,5.18317497,-0.907896486,3.66638519,3.8090359,5.05619477,3.65893575,3.65325191
51.946922,4.58257569,5.10658412,-0.723884259,3.66566602,3.81698862,4.97111386,3.6581742,3.65255708
51.957414,4.79583152,5.03780511,-0.49190811,3.66494827,3.82566737,4.89321303,3.65741478,3.65186313
51.967905,4.89897949,4.97614762,-0.277791524,3.66423199,3.83515289,4.82172549,3.65665752,3.65117011
51.978397,4.12310563,4.92101498,-0.893257718,3.66351705,3.84554031,4.7559643,3.65590223,3.6504779
51.988888,4.35889894,4.87193003,-0.716261885,3.66280357,3.85693441,4.69535319,3.65514905,3.64978661
51.99938,5.29150262,4.82848368,0.68045495,3.66209143,3.86946025,4.63936449,3.6543978,3.64909613
52.009872,4.79583152,4.79036087,0.0739638828,3.66138069,3.88325854,4.58754997,3.65364851,3.64840651
52.020363,4.47213595,4.75731947,-0.534025762,3.6606714,3.8984922,4.53951326,3.65290123,3.64771783
52.030855,3.87298335,4.72918087,-0.925309421,3.65996343,3.9153564,4.49489084,3.6521558,3.64702993
52.041346,4.35889894,4.7058505,-0.58902594,3.65925692,3.93407463,4.45337666,3.65141233,3.64634297
52.051838,4.47213595,4.68730168,-0.463859599,3.65855172,3.95492262,4.4146832,3.65067065,3.6456568
52.06233,4.12310563,4.67360271,-0.741954909,3.65784789,3.97823267,4.3785651,3.64993081,3.64497148
52.072821,4.47213595,4.6649304,-0.439083641,3.65714551,4.00442629,4.34480254,3.64919285,3.64428709
52.083313,4.35889894,4.66161062,-0.550192397,3.65644444,4.03407081,4.31318951,3.64845662,3.64360349
52.093804,4.89897949,4.66419262,0.484548101,3.6557448,4.06794014,4.28355278,3.64772222,3.64292081
52.104296,4,4.67356544,-0.820710324,3.65504646,4.1071681,4.25572554,3.6469895,3.64223891
52.114788,4.58257569,4.69114011,-0.329491145,3.65434949,4.15342418,4.22956534,3.64625851,3.64155787
52.125279,5.09901951,4.7191135,0.61636516,3.65365394,4.20920258,4.20494319,3.6455293,3.64087774
52.135771,4.58257569,4.76083148,-0.42220349,3.65295968,4.27820551,4.18173569,3.64480169,3.6401984
52.146262,4.69041576,4.82116171,-0.361588099,3.65226685,4.36569696,4.15983959,3.64407583,3.63951997
52.156754,4.89897949,4.90687855,-0.0888766659,3.6515753,4.47888122,4.13915304,3.64335154,3.63884233
52.167246,4.69041576,5.02673698,-0.57993208,3.65088511,4.62688956,4.11958925,3.64262887,3.63816552
52.177737,5.09901951,5.19111412,-0.303470931,3.65019632,4.82031799,4.10106893,3.64190789,3.63748963
52.188229,5.38516481,5.41102739,-0.160818476,3.64950882,5.07012985,4.08351471,3.64118842,3.63681451
52.19872,5.29150262,5.69623319,-0.636184382,3.64882273,5.38565858,4.06686238,3.6404706,3.6361403
52.209212,6.08276253,6.0532385,0.171825582,3.64813791,5.77268146,4.05104701,3.63975427,3.63546687
52.219704,7.41619849,6.48308884,0.965976007,3.64745444,6.23134748,4.03601358,3.63903947,3.63479428
52.230195,7,6.98013648,0.140937991,3.64677236,6.75516961,4.02171146,3.63832627,3.63412258
52.240687,7.54983444,7.53188116,0.133989817,3.64609156,7.33103928,4.00809018,3.63761451,3.63345166
52.251178,8.18535277,8.1189504,0.257686579,3.64541215,7.93924865,3.9951084,3.63690431,3.63278164
52.26167,8.71779789,8.71595598,0.0429174699,3.64473401,8.55432766,3.98272322,3.63619552,3.63211239
52.272162,9.69535971,9.29098869,0.635901743,3.6440572,9.1444335,3.97089856,3.63548819,3.63144397
52.282653,9.59166305,9.80519996,-0.462100549,3.64338179,9.6708451,3.95960104,3.63478238,3.63077644
52.293145,10.4880885,10.2134206,0.52408771,3.64270763,10.0885188,3.94879666,3.63407794,3.63010969
52.303636,10.4880885,10.4689173,0.138460021,3.64203487,10.3508228,3.93845803,3.63337499,3.62944382
52.314128,10.3923048,10.5356279,-0.378580362,3.64136336,10.421812,3.92855593,3.63267338,3.62877872
52.32462,9.79795897,10.402288,-0.777386051,3.64069318,10.2903977,3.91906606,3.63197316,3.62811444
52.335111,10.4403065,10.0879908,0.593561842,3.64002438,9.97592095,3.90996583,3.63127439,3.62745106
52.345603,9.48683298,9.63322538,-0.382612595,3.63935683,9.51914901,3.90123176,3.63057693,3.62678843
52.356094,9,9.0852361,-0.291952227,3.63869067,8.96758327,3.89284529,3.62988089,3.62612669
52.366586,8.83176087,8.48734225,0.586871893,3.63802576,8.36475923,3.88478606,3.62918613,3.6254657
52.377078,6.8556546,7.87597003,-1.01010664,3.63736217,7.74730712,3.87703741,3.62849271,3.62480554
52.387569,7.21110255,7.28075644,-0.263920241,3.63669995,7.14510458,3.86958381,3.62780067,3.62414625
52.398061,6.92820323,6.72504268,0.450733346,3.63603899,6.58181448,3.86240877,3.62710989,3.62348773
52.408552,5.91607978,6.22622379,-0.556905742,3.6353794,6.07525882,3.85549963,3.62642047,3.62283007
52.419044,5.83095189,5.79491518,0.18983338,3.63472106,5.63655396,3.84884208,3.62573227,3.62217318
52.429536,6.08276253,5.43505348,0.804803731,3.63406403,5.27013867,3.84242472,3.62504535,3.62151709
52.440027,5.19615242,5.14426317,0.227792128,3.63340837,4.97403374,3.83623696,3.62435978,3.62086188
52.450519,5,4.91523667,0.291141419,3.63275396,4.74113743,3.83026735,3.62367539,3.62020742
52.46101,4.35889894,4.73792674,-0.615652331,3.63210093,4.5614001,3.82450756,3.62299232,3.61955383
52.471502,4.47213595,4.60145137,-0.359604528,3.63144913,4.42377316,3.8189479,3.62231043,3.61890098
52.481994,5.19615242,4.49580047,0.83687033,3.63079865,4.31799677,3.81358112,3.62162977,3.61824894
52.492485,4.69041576,4.4126624,0.527023109,3.63014954,4.23549836,3.8084008,3.6209504,3.61759777
52.502977,4,4.34566009,-0.587928647,3.62950167,4.16967411,3.8033999,3.62027217,3.61694735
52.513468,4.69041576,4.290227,0.632604739,3.62885517,4.11578064,3.79857434,3.61959522,3.61629778
52.52396,3.87298335,4.24319789,-0.608452585,3.62820992,4.07052482,3.79391927,3.61891939,3.61564896
52.534452,4.24264069,4.20245883,0.200454133,3.62756598,4.03170263,3.78943259,3.61824476,3.61500094
52.544943,4.12310563,4.16659949,-0.208551832,3.6269234,3.99784028,3.78511401,3.61757137,3.61435378
52.555435,5.38516481,4.13465953,1.11825993,3.62628207,3.96793102,3.78096478,3.61689908,3.61370735
52.565926,3.60555128,4.10598511,-0.707413483,3.62564211,3.9412802,3.77699412,3.61622803,3.61306178
52.576418,3.74165739,4.08009423,-0.581753249,3.62500339,3.91737116,3.7732123,3.61555806,3.61241695
52.58691,4.58257569,4.05664534,0.725210562,3.62436598,3.89581468,3.76964945,3.61488925,3.61177291
52.597401,3.74165739,4.03539131,-0.541972255,3.62372994,3.87630024,3.76635585,3.61422163,3.61112972
52.607893,3.87298335,4.01616405,-0.378392258,3.62309515,3.8585678,3.76341391,3.61355509,3.61048727
52.618384,4.35889894,3.9988851,0.600011533,3.62246173,3.84240549,3.76095175,3.61288974,3.60984567
52.628876,4.69041576,3.98354952,0.840753377,3.62182956,3.82762733,3.7591477,3.61222544,3.60920479
52.639368,4.47213595,3.97022641,0.708455748,3.62119869,3.81407782,3.75822616,3.61156225,3.6085647
52.649859,4.58257569,3.95902388,0.789652973,3.6205692,3.80162241,3.75842967,3.61090023,3.60792546
52.660351,3.31662479,3.95003352,-0.795869794,3.61994096,3.79014115,3.75996704,3.61023925,3.60728694
52.670842,4.35889894,3.94326155,0.644699457,3.6193141,3.77953366,3.76293712,3.60957942,3.60664927
52.681334,3.74165739,3.93852864,-0.443701766,3.61868848,3.76970839,3.76723596,3.60892061,3.60601232
52.691826,4.47213595,3.93536158,0.732648878,3.61806419,3.76058781,3.77244114,3.60826288,3.60537615
52.702317,4.24264069,3.93285303,0.556585718,3.61744126,3.75210358,3.77767341,3.60760629,3.60474082
52.712809,4.58257569,3.92957407,0.808085161,3.6168196,3.7441932,3.78151254,3.6069507,3.60410621
52.7233,4.12310563,3.92382462,0.446409011,3.61619931,3.73680424,3.78225655,3.60629624,3.60347244
52.733792,3.87298335,3.91444398,-0.203618836,3.61558028,3.72988754,3.77876765,3.60564276,3.60283938
52.744284,3.46410162,3.90159764,-0.661434821,3.61496258,3.72340132,3.77127631,3.60499033,3.6022071
52.754775,3.16227766,3.88659516,-0.851068447,3.61434625,3.71730824,3.76118657,3.60433901,3.60157565
52.765267,4.35889894,3.8709967,0.698499997,3.61373119,3.71157333,3.75015021,3.60368867,3.60094492
52.775758,3.87298335,3.85598801,0.130366165,3.61311752,3.70616737,3.73941979,3.60303941,3.60031501
52.78625,3.31662479,3.8422491,-0.724999526,3.61250511,3.70106214,3.72972065,3.60239112,3.59968582
52.796742,3.87298335,3.83006954,0.207156485,3.61189404,3.69623371,3.72136991,3.60174386,3.59905739
52.807233,3.74165739,3.81946683,-0.278943445,3.61128435,3.69166046,3.71440195,3.60109766,3.59842979
52.817725,4.47213595,3.81028625,0.813541456,3.61067594,3.68732161,3.70867354,3.60045242,3.5978029
52.828216,4,3.80229344,0.44464206,3.61006892,3.68319997,3.70395731,3.59980824,3.59717683
52.838708,4.47213595,3.79523468,0.822740102,3.60946319,3.67927845,3.70000681,3.59916501,3.59655147
52.8492,3.74165739,3.78888627,-0.217322072,3.60885879,3.67554263,3.69660489,3.59852276,3.59592686
52.859691,4,3.78307171,0.465755614,3.6082558,3.67197933,3.69358232,3.59788157,3.59530308
52.870183,3.16227766,3.77766204,-0.784464392,3.60765409,3.66857561,3.69081879,3.5972413,3.59468
52.880674,3.31662479,3.77257133,-0.675238133,3.60705379,3.66532089,3.68823625,3.59660207,3.59405773
52.891166,3,3.76774114,-0.876208388,3.60645478,3.66220431,3.6857851,3.59596376,3.59343617
52.901658,3.74165739,3.76313382,-0.146548415,3.60585712,3.65921681,3.68343554,3.59532642,3.59281535
52.912149,3.16227766,3.75872345,-0.772299031,3.60526088,3.65635004,3.68116908,3.59469011,3.59219536
52.922641,3.74165739,3.75448985,-0.113280478,3.60466594,3.65359557,3.67897314,3.5940547,3.59157605
52.933132,5.09901951,3.75041866,1.16129275,3.60407242,3.65094665,3.67683965,3.5934203,3.59095756
52.943624,4.35889894,3.74649658,0.782561409,3.60348021,3.64839611,3.67476184,3.5927868,3.59033976
52.954116,3.87298335,3.74271328,0.360929453,3.60288937,3.64593803,3.67273494,3.59215425,3.58972271
52.964607,3.87298335,3.73905967,0.365955834,3.60229996,3.64356695,3.67075502,3.5915227,3.58910646
52.975099,4,3.73552673,0.514269644,3.60171187,3.64127717,3.66881828,3.59089203,3.58849091
52.98559,3.74165739,3.73210763,0.0977228463,3.60112522,3.63906424,3.66692215,3.59026236,3.58787616
52.996082,2.82842712,3.72879496,-0.948877146,3.60053989,3.63692327,3.66506375,3.58963357,3.58726209
53.006574,4.47213595,3.72558291,0.864033011,3.59995595,3.63485027,3.66324104,3.5890057,3.58664877
53.017065,4.12310563,3.72246617,0.632960867,3.59937346,3.63284156,3.66145225,3.58837881,3.58603624
53.027557,4.24264069,3.71943901,0.723326813,3.59879231,3.63089316,3.6596953,3.58775279,3.5854244
53.038048,2.64575131,3.71649729,-1.03476856,3.59821261,3.62900209,3.65796898,3.58712774,3.58481336
53.04854,3.74165739,3.71363611,0.167395557,3.59763426,3.62716486,3.65627155,3.58650354,3.584203
53.059032,4.24264069,3.71085173,0.729238616,3.59705733,3.62537875,3.65460191,3.58588026,3.58359337
53.069523,4.35889894,3.70814066,0.806695908,3.59648186,3.62364121,3.65295906,3.58525794,3.58298454
53.080015,3.74165739,3.70549892,0.190153809,3.59590776,3.62194937,3.6513416,3.58463646,3.58237638
53.090506,3.46410162,3.70292378,-0.488694343,3.59533513,3.62030118,3.64974886,3.58401594,3.58176901
53.100998,4.35889894,3.70041173,0.811472248,3.59476388,3.61869412,3.64817962,3.58339625,3.58116232
53.11149,3.60555128,3.69796021,-0.303988387,3.59419406,3.61712627,3.64663318,3.58277746,3.58055636
53.121981,3.74165739,3.6955668,0.214687184,3.59362574,3.61559583,3.64510888,3.58215961,3.57995118
53.132473,3.46410162,3.69322856,-0.478672063,3.5930588,3.61410069,3.6436057,3.58154259,3.57934668
53.142964,4.12310563,3.69094361,0.65739031,3.59249337,3.61263941,3.64212321,3.5809265,3.57874296
53.153456,3.87298335,3.68870932,0.429271507,3.59192935,3.61121011,3.64066046,3.58031124,3.57813991
53.163948,4,3.68652386,0.559889404,3.59136678,3.60981141,3.63921697,3.57969685,3.57753758
53.174439,4.12310563,3.68438547,0.662359537,3.59080574,3.60844204,3.63779228,3.57908339,3.57693603
53.184931,3.16227766,3.68229192,-0.721120144,3.59024612,3.60710037,3.63638555,3.57847074,3.57633514
53.195422,4.58257569,3.68024187,0.949912533,3.58968803,3.60578542,3.63499652,3.57785901,3.57573504
53.205914,4.69041576,3.6782333,1.00607279,3.58913138,3.60449574,3.6336244,3.57724808,3.57513559
53.216406,3,3.67626484,-0.822353231,3.58857622,3.60323033,3.63226885,3.57663801,3.57453687
53.226897,3.16227766,3.6743352,-0.715581958,3.58802261,3.60198826,3.63092952,3.57602886,3.57393891
53.237389,4.24264069,3.67244262,0.755114603,3.58747046,3.60076827,3.62960571,3.5754205,3.57334162
53.24788,3.60555128,3.67058615,-0.255019354,3.58691988,3.59956967,3.62829724,3.57481304,3.57274509
53.258372,3.60555128,3.66876416,-0.25142172,3.58637076,3.59839133,3.62700345,3.57420638,3.57214923
53.268864,3.60555128,3.66697564,-0.247839386,3.58582318,3.59723252,3.62572408,3.57360056,3.57155407
53.279355,3,3.66521961,-0.815609964,3.58527719,3.59609253,3.62445887,3.57299563,3.57095968
53.289847,3.87298335,3.66349467,0.457699327,3.58473269,3.5949704,3.62320721,3.57239148,3.57036594
53.300338,3.16227766,3.66180011,-0.706769021,3.5841898,3.59386562,3.62196899,3.57178823,3.56977297
53.31083,3.46410162,3.66013462,-0.442756145,3.58364841,3.5927773,3.62074364,3.57118575,3.56918065
53.321322,4.35889894,3.65849743,0.836899943,3.5831086,3.59170489,3.61953095,3.5705841,3.56858903
53.331813,4.69041576,3.65688779,1.01662577,3.58257042,3.59064787,3.61833072,3.56998333,3.56799817
53.342305,3.31662479,3.65530456,-0.581961998,3.58203378,3.58960546,3.61714242,3.56938333,3.56740796
53.352796,4.24264069,3.6537472,0.767393956,3.58149879,3.58857731,3.61596599,3.5687842,3.56681851
53.363288,3.46410162,3.65221466,-0.433720005,3.58096535,3.58756268,3.61480091,3.56818584,3.5662297
53.37378,3.46410162,3.65070633,-0.431977673,3.58043353,3.58656117,3.61364704,3.56758829,3.56564159
53.384271,3.60555128,3.64922163,-0.208974536,3.57990339,3.5855724,3.61250421,3.56699161,3.56505423
53.394763,4.79583152,3.64775962,1.07148117,3.57937483,3.58459572,3.61137195,3.56639568,3.56446751
53.405254,3.60555128,3.6463199,-0.201912416,3.57884797,3.58363088,3.61025023,3.56580062,3.56388155
53.415746,3.74165739,3.64490159,0.311055945,3.57832272,3.58267728,3.60913861,3.5652063,3.56329622
53.426238,3.31662479,3.64350421,-0.571733699,3.57779914,3.58173462,3.60803694,3.56461279,3.56271159
53.436729,4,3.64212734,0.598224592,3.57727728,3.58080262,3.60694513,3.56402013,3.5621277
53.447221,4.24264069,3.64077015,0.775803159,3.57675707,3.57988072,3.60586274,3.56342822,3.56154445
53.457712,3.74165739,3.63943237,0.319726475,3.5762386,3.57896877,3.60478976,3.56283715,3.56096194
53.468204,3.16227766,3.63811324,-0.689808367,3.57572181,3.57806625,3.6037258,3.56224682,3.56038006
53.478696,4.35889894,3.63681241,0.849756749,3.57520673,3.57717295,3.60267075,3.56165728,3.55979887
53.489187,4.47213595,3.63552953,0.914661919,3.57469345,3.57628865,3.60162452,3.56106858,3.55921843
53.499679,4,3.6342639,0.604761192,3.57418187,3.57541288,3.60058673,3.56048061,3.55863861
53.51017,4.47213595,3.63301534,0.916035271,3.5736721,3.57454555,3.59955739,3.55989348,3.55805952
53.520662,3.87298335,3.63178319,0.491121329,3.57316406,3.57368622,3.59853614,3.55930708,3.55748107
53.531154,3.74165739,3.63056717,0.333301991,3.5726578,3.57283472,3.5975229,3.55872145,3.55690329
53.541645,4,3.62936702,0.60879634,3.57215341,3.57199089,3.5965176,3.55813665,3.55632625
53.552137,4.35889894,3.62818213,0.854819754,3.57165078,3.57115434,3.5955199,3.55755257,3.55574983
53.562628,3.46410162,3.62701238,-0.403622062,3.57115003,3.570325,3.59452981,3.55696932,3.55517415
53.57312,4.12310563,3.62585721,0.705158432,3.57065108,3.56950251,3.59354701,3.55638678,3.55459908
53.583612,4.89897949,3.6247164,1.12883262,3.570154,3.56868674,3.59257145,3.55580501,3.55402469
53.594103,3,3.62358973,-0.789676981,3.56965884,3.56787756,3.59160306,3.55522405,3.55345102
53.604595,3.46410162,3.6224767,-0.397963674,3.56916553,3.56707464,3.59064153,3.55464381,3.55287798
53.615086,4.35889894,3.62137722,0.858790852,3.56867417,3.56627794,3.5896869,3.55406437,3.55230565
53.625578,3.74165739,3.62029079,0.348377087,3.5681847,3.56548715,3.58873886,3.55348564,3.55173395
53.63607,4.12310563,3.61921726,0.709850947,3.56769717,3.56470217,3.58779737,3.55290767,3.55116291
53.646561,3.46410162,3.61815646,-0.392498207,3.56721165,3.56392291,3.5868624,3.5523305,3.55059259
53.657053,4,3.61710793,0.61878273,3.56672806,3.56314907,3.58593364,3.55175403,3.55002288
53.667544,3.74165739,3.61607164,0.354380788,3.56624651,3.56238064,3.58501116,3.55117837,3.54945389
53.678036,2,3.61504716,-1.27084506,3.56576693,3.56161735,3.58409466,3.5506034,3.54888551
53.688528,4.69041576,3.61403435,1.03748803,3.56528939,3.56085912,3.58318413,3.55002917,3.54831779
53.699019,4.35889894,3.6130331,0.863635252,3.56481395,3.56010589,3.58227952,3.54945574,3.54775078
53.709511,3.46410162,3.612043,-0.384631489,3.56434053,3.55935739,3.58138058,3.54888299,3.54718438
53.720002,3.74165739,3.61106404,0.361377011,3.56386926,3.55861364,3.58048735,3.54831104,3.5466187
53.730494,3.60555128,3.61009585,-0.0674134652,3.56340005,3.55787439,3.57959958,3.54773977,3.54605361
53.740986,3.74165739,3.60913833,0.364031672,3.56293298,3.55713958,3.57871724,3.54716924,3.54548918
53.751477,3.74165739,3.60819139,0.36532999,3.56246811,3.55640917,3.57784033,3.54659949,3.54492546
53.761969,4.24264069,3.60725467,0.797111045,3.56200538,3.55568292,3.57696859,3.54603043,3.54436234
53.77246,3.74165739,3.60632819,0.36787117,3.5615449,3.55496087,3.57610208,3.54546214,3.54379993
53.782952,3.87298335,3.60541161,0.517273367,3.5610866,3.55424278,3.57524056,3.54489453,3.54323811
53.793444,4.35889894,3.60450487,0.86855862,3.56063055,3.55352861,3.57438401,3.54432764,3.54267694
53.803935,3.60555128,3.60360789,0.0440837944,3.56017681,3.55281836,3.57353244,3.54376153,3.54211647
53.814427,4.35889894,3.60272038,0.869585283,3.55972533,3.55211178,3.5726856,3.54319608,3.5415566
53.824918,4.35889894,3.60184235,0.870089989,3.55927623,3.55140894,3.57184357,3.54263141,3.54099742
53.83541,3.74165739,3.60097352,0.375078483,3.55882942,3.5507096,3.57100612,3.54206741,3.54043884
53.845902,4.12310563,3.60011383,0.723181717,3.558385,3.55001377,3.57017323,3.54150412,3.5398809
53.856393,4.89897949,3.59926325,1.14005098,3.55794303,3.54932142,3.56934492,3.5409416,3.53932365
53.866885,4.12310563,3.59842149,0.724350837,3.55750344,3.54863235,3.56852095,3.54037973,3.53876699
53.877376,3.74165739,3.59758861,0.379563931,3.55706636,3.54794662,3.56770142,3.53981863,3.53821103
53.887868,3.60555128,3.59676434,0.093738674,3.55663173,3.54726403,3.56688609,3.53925818,3.53765565
53.89836,3.46410162,3.59594865,-0.363107469,3.55619963,3.54658456,3.56607497,3.53869845,3.53710091
53.908851,4,3.59514152,0.636284901,3.55577011,3.54590823,3.56526807,3.53813947,3.53654686
53.919343,3.46410162,3.59434272,-0.360889318,3.55534314,3.54523484,3.56446518,3.53758113,3.53599339
53.929834,4,3.59355228,0.637532522,3.55491883,3.54456445,3.56366637,3.53702356,3.5354406
53.940326,3.16227766,3.59276999,-0.656119144,3.55449713,3.54389688,3.56287145,3.53646663,3.5348884
53.950818,4.24264069,3.59199583,0.806625597,3.55407811,3.54323214,3.56208042,3.5359104,3.53433682
53.961309,3.87298335,3.5912298,0.530804617,3.55366185,3.54257022,3.56129329,3.53535491,3.53378593
53.971801,3.16227766,3.59047168,-0.65436536,3.5532483,3.54191095,3.56050987,3.53480007,3.53323562
53.982292,3.87298335,3.58972155,0.532223449,3.55283758,3.5412544,3.55973023,3.53424598,3.53268598
53.992784,3.74165739,3.58897918,0.390740586,3.55242965,3.54060039,3.55895418,3.53369252,3.53213692
54.003276,3.87298335,3.5882446,0.533609172,3.55202459,3.53994895,3.55818173,3.53313975,3.53158848
54.013767,3.31662479,3.5875178,-0.520473836,3.55162247,3.53930007,3.55741291,3.53258772,3.53104073
54.024259,4.47213595,3.58679861,0.940923667,3.55122326,3.53865359,3.55664752,3.53203633,3.53049354
54.03475,3,3.58608709,-0.765563251,3.55082707,3.53800959,3.55588564,3.53148567,3.52994702
54.045242,2.82842712,3.58538307,-0.870032153,3.55043388,3.5373679,3.5551271,3.53093564,3.52940107
54.055734,3.31662479,3.58468657,-0.517746831,3.55004376,3.53672854,3.55437189,3.53038629,3.52885574
54.066225,3.87298335,3.58399761,0.537573934,3.54965679,3.53609153,3.55362007,3.52983768,3.52831109
54.076717,4.47213595,3.58331602,0.942772471,3.54927294,3.53545671,3.55287142,3.52928969,3.52776699
54.087208,2.64575131,3.5826419,-0.967931086,3.54889234,3.53482415,3.55212605,3.52874243,3.52722357
54.0977,3.46410162,3.58197508,-0.343327051,3.54851497,3.5341937,3.55138378,3.52819579,3.5266807
54.108192,3.31662479,3.5813156,-0.514481106,3.54814089,3.53356538,3.55064462,3.52764982,3.52613845
54.118683,4,3.58066349,0.647561972,3.54777021,3.53293922,3.5499086,3.52710458,3.52559687
54.129175,3.60555128,3.58001861,0.159789432,3.5474029,3.53231505,3.54917555,3.52655996,3.52505584
54.139666,3,3.57938106,-0.76117085,3.54703909,3.53169298,3.54844556,3.52601605,3.52451547
54.150158,3.87298335,3.57875071,0.542432153,3.54667876,3.53107283,3.54771845,3.52547276,3.52397566
54.16065,3,3.57812759,-0.760347017,3.54632199,3.53045465,3.54699425,3.52493014,3.52343646
54.171141,4,3.57751175,0.649990958,3.54596889,3.52983846,3.54627299,3.52438823,3.52289791
54.181633,4.24264069,3.57690308,0.815927449,3.54561944,3.5292241,3.54555449,3.52384693,3.52235992
54.192124,4,3.57630169,0.650921127,3.54527377,3.52861168,3.54483886,3.52330634,3.52182258
54.202616,4.58257569,3.57570745,1.00342825,3.54493188,3.52800103,3.54412592,3.52276637,3.52128579
54.213108,4.47213595,3.57512042,0.947109039,3.54459386,3.5273922,3.5434157,3.52222704,3.52074961
54.223599,3.46410162,3.57454068,-0.332323731,3.5442598,3.5267852,3.54270823,3.52168843,3.52021407
54.234091,4.58257569,3.5739681,1.00429457,3.54392972,3.52617991,3.54200335,3.52115042,3.51967909
54.244582,3.46410162,3.57340283,-0.330607336,3.54360374,3.5255764,3.54130116,3.52061311,3.51914475
54.255074,3.16227766,3.57284475,-0.640755092,3.54328187,3.52497455,3.54060149,3.52007641,3.51861096
54.265566,3.60555128,3.57229394,0.182365932,3.54296422,3.52437437,3.53990437,3.51954035,3.51807776
54.276057,3.31662479,3.57175048,-0.505099684,3.54265089,3.52377591,3.53920983,3.51900499,3.51754521
54.286549,4.24264069,3.57121429,0.819406127,3.54234189,3.52317902,3.53851772,3.51847023,3.51701319
54.29704,3.60555128,3.57068548,0.186723839,3.54203736,3.5225838,3.53782814,3.51793617,3.51648183
54.307532,3.87298335,3.57016401,0.550290233,3.54173733,3.52199011,3.53714091,3.5174027,3.515951
54.318024,3.87298335,3.56964994,0.550757124,3.54144191,3.52139798,3.53645609,3.51686987,3.51542076
54.328515,4.24264069,3.56914336,0.820668829,3.54115121,3.52080746,3.5357737,3.51633774,3.51489116
54.339007,3.31662479,3.56864422,-0.502015372,3.54086527,3.5202184,3.53509359,3.5158062,3.51436209
54.349498,4.24264069,3.56815266,0.821272198,3.54058422,3.51963091,3.53441586,3.51527534,3.51383366
54.35999,3.87298335,3.56766863,0.552552904,3.5403081,3.51904484,3.53374035,3.51474507,3.51330577
54.370482,3.46410162,3.56719224,-0.321077281,3.54003705,3.51846023,3.5330671,3.51421544,3.51277846
54.380973,4.47213595,3.56672356,0.951531603,3.53977118,3.51787713,3.53239614,3.51368649,3.51225178
54.391465,3.31662479,3.56626259,-0.49963767,3.53951054,3.51729539,3.53172733,3.51315813,3.51172563
54.401956,4.24264069,3.56580947,0.822697527,3.53925528,3.51671512,3.53106077,3.51263044,3.51120012
54.412448,3.60555128,3.56536417,0.200467216,3.53900547,3.51613619,3.53039629,3.51210334,3.51067513
54.42294,4.79583152,3.56492682,1.10946145,3.53876123,3.51555863,3.52973395,3.51157687,3.51015072
54.433431,4.47213595,3.56449784,0.952700435,3.53852271,3.51498248,3.5290741,3.51105107,3.50962693
54.443923,2.82842712,3.56407659,-0.857700104,3.53828997,3.51440762,3.52841595,3.51052585,3.50910367
54.454414,3.87298335,3.56366357,0.556165246,3.53806318,3.51383413,3.52775993,3.51000131,3.50858104
54.464906,2.82842712,3.56325876,-0.857223214,3.53784242,3.5132619,3.52710588,3.50947734,3.50805892
54.475398,4,3.56286232,0.661163884,3.53762783,3.51269097,3.52645385,3.50895399,3.50753738
54.485889,4,3.56247436,0.661457209,3.53741957,3.51212136,3.52580388,3.50843131,3.50701646
54.496381,3.74165739,3.56209492,0.423748118,3.53721773,3.51155297,3.52515581,3.50790921,3.50649606
54.506872,3.74165739,3.56172417,0.424185356,3.5370225,3.51098588,3.52450976,3.50738777,3.50597628
54.517364,4,3.56136215,0.6622974,3.53683397,3.51041997,3.52386558,3.5068669,3.50545701
54.527856,3.16227766,3.56100902,-0.631451789,3.53665231,3.50985528,3.5232233,3.50634665,3.50493831
54.538347,4.69041576,3.56066493,1.06289738,3.53647769,3.50929186,3.52258298,3.50582706,3.50442022
54.548839,4.12310563,3.56032993,0.750183775,3.53631023,3.50872957,3.52194447,3.50530803,3.50390265
54.55933,3.60555128,3.56000422,0.213417554,3.53615014,3.50816853,3.52130787,3.50478967,3.50338569
54.569822,3.74165739,3.55968789,0.426578833,3.53599753,3.5076086,3.52067304,3.50427186,3.50286924
54.580314,3.16227766,3.55938109,-0.630161432,3.53585261,3.50704982,3.52004003,3.50375467,3.50235335
54.590805,3.46410162,3.55908401,-0.308192146,3.53571556,3.50649225,3.51940887,3.50323814,3.50183807
54.601297,4.79583152,3.55879676,1.11222065,3.53558654,3.50593575,3.51877942,3.50272216,3.5013233
54.611788,3.60555128,3.55851953,0.216868034,3.53546577,3.50538043,3.5181518,3.50220684,3.50080913
54.62228,4.35889894,3.55825246,0.894788515,3.5353534,3.50482617,3.51752586,3.50169207,3.50029547
54.632772,3.16227766,3.55799574,-0.629061265,3.53524967,3.50427301,3.51690164,3.50117791,3.49978237
54.643263,4.12310563,3.55774957,0.751901625,3.53515478,3.50372098,3.5162792,3.5006644,3.49926986
54.653755,3.46410162,3.55751411,-0.305634574,3.53506894,3.50316999,3.51565838,3.50015145,3.49875786
54.664246,4,3.55728959,0.665364872,3.53499237,3.50262011,3.5150393,3.49963914,3.49824646
54.674738,4.24264069,3.55707617,0.827988234,3.5349253,3.50207124,3.51442182,3.49912738,3.49773556
54.68523,4,3.5568741,0.665677025,3.53486798,3.50152341,3.51380599,3.49861622,3.49722521
54.695721,3.16227766,3.5566836,-0.628017471,3.53482064,3.50097668,3.51319184,3.4981057,3.49671545
54.706213,4.69041576,3.55650489,1.06485251,3.53478354,3.50043092,3.51257925,3.49759574,3.49620619
54.716704,4.69041576,3.55633822,1.06493077,3.53475695,3.49988623,3.51196832,3.49708641,3.49569753
54.727196,3.74165739,3.55618381,0.430666429,3.53474113,3.4993425,3.51135892,3.49657763,3.49518936
54.737688,4.12310563,3.55604195,0.753036301,3.53473636,3.49879976,3.51075109,3.49606944,3.49468174
54.748179,3.74165739,3.55591292,0.430980821,3.53474295,3.49825807,3.51014487,3.49556189,3.4941747
54.758671,3.74165739,3.55579696,0.431115325,3.53476117,3.49771731,3.50954014,3.49505488,3.49366815
54.769162,3.74165739,3.5556944,0.431234259,3.53479136,3.49717758,3.50893699,3.49454851,3.4931622
54.779654,3.60555128,3.55560552,0.223485481,3.53483383,3.49663875,3.50833531,3.49404268,3.49265673
54.790146,3,3.55553063,-0.745339273,3.53488892,3.49610089,3.50773514,3.49353744,3.4921518
54.800637,3.74165739,3.55547008,0.43149427,3.53495696,3.49556402,3.50713651,3.49303283,3.49164746
54.811129,4,3.5554242,0.666765179,3.53503834,3.49502804,3.50653931,3.49252875,3.4911436
54.82162,3.31662479,3.55539334,-0.488639484,3.5351334,3.49449305,3.50594363,3.49202531,3.49064032
54.832112,3.87298335,3.55537786,0.563564976,3.53524255,3.49395893,3.50534936,3.4915224,3.49013753
54.842604,3.60555128,3.55537817,0.223993546,3.53536618,3.49342573,3.50475653,3.49102007,3.48963527
54.853095,3.46410162,3.55539464,-0.302147356,3.5355047,3.49289349,3.50416519,3.49051837,3.48913359
54.863587,4.35889894,3.5554277,0.896365574,3.53565856,3.4923621,3.50357522,3.4900172,3.48863238
54.874078,3.74165739,3.55547778,0.431485354,3.53582818,3.49183165,3.50298673,3.48951666,3.48813176
54.88457,3.16227766,3.55554532,-0.627110566,3.53601405,3.49130205,3.50239958,3.48901665,3.48763161
54.895062,3.16227766,3.5556308,-0.627178716,3.53621665,3.49077332,3.50181383,3.48851721,3.48713199
54.905553,3.60555128,3.55573469,0.223196292,3.53643646,3.49024552,3.50122952,3.48801839,3.48663294
54.916045,4.58257569,3.55585752,1.01327103,3.53667403,3.48971854,3.50064653,3.4875201,3.48613437
54.926536,3.60555128,3.55599978,0.222601652,3.53692986,3.48919247,3.50006497,3.48702243,3.48563637
54.937028,3,3.55616206,-0.745762737,3.53720457,3.4886672,3.49948471,3.48652529,3.48513884
54.94752,4.35889894,3.55634492,0.895853798,3.53749871,3.48814278,3.49890581,3.48602872,3.48464183
54.958011,4.47213595,3.55654892,0.956863122,3.53781287,3.48761925,3.4983283,3.48553276,3.48414539
54.968503,4.79583152,3.55677474,1.11312928,3.53814774,3.48709651,3.49775209,3.48503733,3.48364942
54.978994,3.74165739,3.55702297,0.429691067,3.53850392,3.48657465,3.49717726,3.48454251,3.48315401
54.989486,4.12310563,3.55729435,0.752204279,3.53888216,3.48605356,3.49660371,3.48404821,3.48265907
54.999978,3.60555128,3.55758955,0.219001665,3.53928314,3.48553329,3.49603148,3.48355448,3.48216465
55.010469,3.46410162,3.55790927,-0.306280353,3.53970756,3.48501388,3.49546062,3.48306136,3.48167079
55.020961,3.87298335,3.55825435,0.561007125,3.5401563,3.48449523,3.49489103,3.48256875,3.48117739
55.031452,4.12310563,3.55862552,0.751318908,3.54063007,3.48397742,3.4943228,3.48207676,3.48068455
55.041944,4.12310563,3.5590237,0.751053877,3.5411298,3.48346037,3.49375583,3.48158528,3.48019217
55.052436,3.46410162,3.55944972,-0.308784883,3.54165635,3.4829441,3.49319017,3.48109437,3.4797003
55.062927,3.74165739,3.55990445,0.426324919,3.54221056,3.48242867,3.49262588,3.48060406,3.47920899
55.073419,3.46410162,3.56038894,-0.310301991,3.54279352,3.48191396,3.49206285,3.48011426,3.47871814
55.08391,3.74165739,3.5609041,0.425150904,3.54340611,3.48140008,3.49150119,3.47962508,3.47822784
55.094402,3.46410162,3.56145106,-0.312008732,3.5440495,3.48088692,3.49094079,3.4791364,3.47773799
55.104894,4.24264069,3.56203089,0.824990784,3.54472473,3.48037453,3.49038173,3.47864828,3.47724865
55.115385,3.46410162,3.56264467,-0.313915686,3.54543288,3.47986294,3.48982405,3.47816076,3.47675986
55.125877,3.74165739,3.56329372,0.422331223,3.54617529,3.47935205,3.48926766,3.47767375,3.47627153
55.136368,4,3.56397918,0.660318723,3.54695306,3.47884197,3.48871269,3.47718734,3.47578374
55.14686,3.87298335,3.56470251,0.555230436,3.54776767,3.47833257,3.48815904,3.47670144,3.4752964
55.157352,3.46410162,3.56546502,-0.318376205,3.54862041,3.47782392,3.48760678,3.47621609,3.47480957
55.167843,4.35889894,3.56626811,0.890298174,3.54951264,3.47731606,3.48705599,3.47573134,3.47432327
55.178335,3.31662479,3.56711345,-0.500488417,3.55044605,3.47680887,3.4865066,3.47524709,3.47383743
55.188826,4,3.56800249,0.657265175,3.55142204,3.47630246,3.48595874,3.47476345,3.47335212
55.199318,3.74165739,3.56893711,0.415596293,3.55244247,3.47579672,3.48541236,3.4742803,3.47286727
55.20981,4.47213595,3.569919,0.949851017,3.55350898,3.4752917,3.48486754,3.47379771,3.4723829
55.220301,3.31662479,3.57094994,-0.504306608,3.55462331,3.47478744,3.48432439,3.47331571,3.47189908
55.230793,3.46410162,3.57208297,-0.328605168,3.55578759,3.47428384,3.48383503,3.47283421,3.47141569
55.241284,3.74165739,3.5732183,0.410413313,3.55700363,3.47378099,3.4832954,3.4723533,3.47093285
55.251776,3.46410162,3.57440918,-0.332125834,3.55827379,3.47327879,3.4827576,3.47187289,3.47045044
55.262268,4,3.57565787,0.651415485,3.55960019,3.47277729,3.48222179,3.47139303,3.46996852
55.272759,3.46410162,3.5769667,-0.335953985,3.56098507,3.47227653,3.48168816,3.47091376,3.46948714
55.283251,3,3.57833857,-0.760485745,3.56243116,3.47177642,3.48115678,3.47043499,3.46900619
55.293742,4.12310563,3.57977602,0.737108949,3.56394081,3.47127703,3.48062796,3.4699568,3.46852577
55.304234,4.24264069,3.58128233,0.813239421,3.56551707,3.47077827,3.48010185,3.46947911,3.46804579
55.314726,3.60555128,3.58286056,0.150634378,3.56716271,3.4702802,3.47957882,3.46900197,3.4675663
55.325217,3,3.58451397,-0.764535136,3.56888063,3.46978284,3.4790593,3.46852541,3.46708732
55.335709,4.12310563,3.58624659,0.732706648,3.5706744,3.4692861,3.47854367,3.46804934,3.46660879
55.3462,3.60555128,3.58806208,0.132246713,3.57254711,3.46879008,3.47803266,3.46757387,3.46613077
55.356692,3,3.58996515,-0.76809189,3.57450274,3.46829467,3.47752693,3.46709888,3.46565319
55.367184,3.60555128,3.59196041,0.116579861,3.57654494,3.46779992,3.47702754,3.46662443,3.46517608
55.377675,4,3.59405297,0.637139724,3.57867758,3.46730587,3.47653587,3.46615057,3.4646995
55.388167,4.47213595,3.59624926,0.935888185,3.58090534,3.46681243,3.47605364,3.4656772,3.46422334
55.398658,3.60555128,3.59855589,0.0836383965,3.58323237,3.46631968,3.47558357,3.46520441,3.46374771
55.40915,2.64575131,3.60098201,-0.977359045,3.58566393,3.46582752,3.4751296,3.46473211,3.4632725
55.419642,3.46410162,3.60353895,-0.373413085,3.58820494,3.46533601,3.4746985,3.46426035,3.46279776
55.430133,3.31662479,3.60624293,-0.538161816,3.59086058,3.46484518,3.47430188,3.46378917,3.46232353
55.440625,4.69041576,3.60911916,1.03985413,3.59363714,3.46435494,3.47395939,3.46331847,3.46184973
55.451116,4.24264069,3.61220366,0.794000645,3.59654023,3.46386538,3.47370294,3.46284836,3.46137644
55.461608,4,3.61554821,0.620041766,3.59957697,3.4633764,3.47357921,3.46237874,3.46090357
55.4721,4.24264069,3.6192166,0.789572093,3.60275406,3.46288804,3.47364819,3.46190964,3.46043117
55.482591,3.60555128,3.62327616,-0.133134845,3.60607858,3.46240035,3.4739734,3.46144113,3.45995928
55.493083,3.31662479,3.6277798,-0.557812698,3.60955912,3.46191324,3.47460197,3.4609731,3.45948781
55.503574,4.35889894,3.63273124,0.852154743,3.61320345,3.46142678,3.47553089,3.46050565,3.45901684
55.514066,3.60555128,3.6380357,-0.180234358,3.61702131,3.46094089,3.4766519,3.46003869,3.4585463
55.524558,3.74165739,3.64342115,0.313426609,3.62102203,3.46045561,3.47767121,3.45957225,3.45807621
55.535049,3.46410162,3.64843227,-0.429337459,3.62521553,3.45997098,3.47810075,3.4591064,3.45760662
55.545541,3.87298335,3.65268395,0.469360621,3.62961369,3.45948691,3.47752142,3.45864102,3.45713745
55.556032,3.46410162,3.65622125,-0.438314536,3.63422752,3.45900349,3.47596511,3.45817622,3.45666878
55.566524,3.87298335,3.65948544,0.46205834,3.63907066,3.45852062,3.47387797,3.45771191,3.45620053
55.577016,3.46410162,3.66293771,-0.445910414,3.64415635,3.45803834,3.47173004,3.45724812,3.45573272
55.587507,2.44948974,3.66684842,-1.10333978,3.64949875,3.4575567,3.46979154,3.45678491,3.45526542
55.597999,3.74165739,3.67132247,0.265207308,3.65511473,3.4570756,3.4681564,3.45632218,3.45479853
55.60849,4,3.6763709,0.56888408,3.66102022,3.45659514,3.46682086,3.45586003,3.45433213
55.618982,3.60555128,3.68196478,-0.276429935,3.66723475,3.45611521,3.4657348,3.45539835,3.45386614
55.629474,3.74165739,3.68806233,0.231506067,3.67377758,3.45563586,3.46483458,3.45493721,3.45340059
55.639965,4.58257569,3.69462822,0.942309647,3.68066945,3.45515714,3.46406151,3.45447663,3.45293555
55.650457,3,3.70164403,-0.837641946,3.68793486,3.45467895,3.46337033,3.45401654,3.4524709
55.660948,3.16227766,3.70910458,-0.739477463,3.6955975,3.45420137,3.46273078,3.45355702,3.45200675
55.67144,4.47213595,3.71702075,0.868973648,3.70368605,3.45372432,3.46212401,3.45309798,3.45154299
55.681932,3.87298335,3.72541095,0.384151529,3.71222933,3.45324784,3.46153914,3.45263947,3.45107969
55.692423,3.16227766,3.73430025,-0.756321749,3.72125851,3.45277197,3.46096983,3.45218153,3.45061687
55.702915,3.16227766,3.74372157,-0.762524692,3.73081028,3.45229661,3.46041211,3.45172407,3.45015445
55.713406,3.46410162,3.75370861,-0.538151462,3.7409208,3.45182187,3.45986356,3.45126718,3.44969251
55.723898,4,3.76430308,0.485486267,3.75163356,3.45134763,3.4593223,3.45081077,3.44923097
55.73439,4.35889894,3.77554805,0.763774114,3.76299296,3.45087395,3.45878708,3.45035489,3.44876987
55.744881,4.24264069,3.78749085,0.674647936,3.77504736,3.45040086,3.45825698,3.44989957,3.44830926
55.755373,3.31662479,3.80018734,-0.695386621,3.7878535,3.44992829,3.4577311,3.44944474,3.44784903
55.765864,4.47213595,3.81369394,0.811444398,3.80146845,3.4494563,3.45720895,3.44899048,3.44738929
55.776356,3.60555128,3.82807824,-0.47172764,3.81596043,3.44898482,3.45668994,3.4485367,3.44692994
55.786848,4.35889894,3.84341054,0.71797521,3.83140024,3.44851388,3.45617374,3.44808344,3.44647102
55.797339,4.58257569,3.85976889,0.850180452,3.84786637,3.44804352,3.45566007,3.44763076,3.44601258
55.807831,4.69041576,3.87724352,0.901760631,3.86544948,3.44757366,3.45514857,3.44717855,3.44555453
55.818322,4,3.89592759,0.322602552,3.88424308,3.44710438,3.45463913,3.44672692,3.44509695
55.828814,3.31662479,3.91593171,-0.77414916,3.90435817,3.44663559,3.45413148,3.44627576,3.44463977
55.839306,3.16227766,3.93737322,-0.880395113,3.92591241,3.44616733,3.45362551,3.44582514,3.44418301
55.849797,3.60555128,3.96038225,-0.595676907,3.94903629,3.44569964,3.45312115,3.44537508,3.44372672
55.860289,4.47213595,3.98511048,0.697872106,3.97388181,3.44523244,3.45261818,3.4449255,3.44327081
55.87078,3.31662479,4.01171789,-0.833722435,4.00060928,3.44476581,3.45211662,3.4444765,3.44281538
55.881272,4.24264069,4.04039337,0.449719158,4.02940797,3.44429965,3.4516163,3.44402797,3.44236033
55.891764,4.47213595,4.07134074,0.633083894,4.06048203,3.44383402,3.45111718,3.44357998,3.4419057
55.902255,4.47213595,4.10478829,0.606092126,4.0940601,3.44336895,3.45061927,3.44313255,3.44145154
55.912747,4.12310563,4.14100248,-0.133779137,4.13040906,3.44290436,3.45012241,3.44268561,3.44099776
55.923238,3.31662479,4.18027014,-0.929325214,4.16981608,3.44244032,3.44962666,3.44223924,3.44054444
55.93373,4.69041576,4.22292993,0.683729352,4.21262029,3.44197675,3.44913187,3.44179336,3.4400915
55.944222,5.19615242,4.26935369,0.962703865,4.25919391,3.44151369,3.44863807,3.441348,3.43963898
55.954713,4.24264069,4.31996233,-0.278067688,4.3099583,3.44105118,3.44814526,3.44090322,3.43918692
55.965205,4.58257569,4.37524895,0.455331464,4.36540705,3.44058914,3.44765333,3.44045892,3.43873523
55.975696,4.69041576,4.43575471,0.504639521,4.42608175,3.44012764,3.44716234,3.44001519,3.438284
55.986188,4.69041576,4.50211975,0.433930884,4.49262305,3.4396666,3.44667218,3.43957195,3.43783315
55.99668,4.58257569,4.57505825,0.0867032248,4.5657456,3.43920607,3.44618288,3.43912925,3.43738271
56.007171,4.69041576,4.6553864,0.187161318,4.64626606,3.43874607,3.44569446,3.43868711,3.43693273
56.017663,4.79583152,4.7440629,0.227527189,4.73514363,3.43828653,3.44520681,3.43824547,3.43648311
56.028154,4.69041576,4.84215435,-0.389536379,4.83344531,3.43782752,3.44472002,3.4378044,3.43603395
56.038646,5.09901951,4.95091938,0.3848378,4.94243015,3.43736897,3.44423397,3.43736383,3.43558516
56.049138,6.40312424,5.07176989,1.15384329,5.06351036,3.43691091,3.44374869,3.43692378,3.43513678
56.059629,5.38516481,5.20631352,0.42290813,5.19829377,3.43645337,3.44326423,3.43648432,3.43468885
56.070121,6.70820393,5.35641318,1.16266536,5.3486434,3.43599629,3.44278047,3.43604534,3.43424128
56.080612,5.91607978,5.52411187,0.626073412,5.51660208,3.43553973,3.4422975,3.43560695,3.43379416
56.091104,6.08276253,5.71174084,0.609115497,5.70450075,3.43508361,3.44181522,3.43516905,3.43334741
56.101596,6.92820323,5.92179588,1.00319856,5.91483447,3.43462797,3.44133367,3.43473169,3.43290105
56.112087,6.40312424,6.15690953,0.496200268,6.1502347,3.43417285,3.44085288,3.43429491,3.43245515
56.122579,6.4807407,6.41979012,0.246881706,6.4134082,3.43371817,3.44037275,3.43385863,3.43200961
56.13307,7.21110255,6.71282404,0.705888456,6.70673917,3.43326401,3.43989337,3.43342293,3.4315645
56.143562,7.74596669,7.03784012,0.841502566,7.0320536,3.43281028,3.43941463,3.43298773,3.43111976
56.154054,7.81024968,7.39524427,0.644209133,7.38975365,3.43235702,3.43893659,3.43255308,3.43067542
56.164545,7.74596669,7.7830256,-0.192506895,7.77782374,3.43190428,3.43845927,3.43211901,3.43023152
56.175037,8.30662386,8.19537327,0.333542493,8.19044735,3.43145196,3.43798258,3.43168545,3.42978797
56.185528,9.05538514,8.62054623,0.659423165,8.61587654,3.43100015,3.4375066,3.43125247,3.42934486
56.19602,9.38083152,9.03930117,0.584405977,9.03486027,3.43054876,3.43703124,3.43082,3.42890211
56.206512,9.79795897,9.42373449,0.611738896,9.4194865,3.43009784,3.43655655,3.43038809,3.42845975
56.217003,10.2956301,9.7390514,0.746042049,9.73495211,3.42964742,3.43608254,3.42995676,3.42801782
56.227495,10.198039,9.94924227,0.498795303,9.94524033,3.42919742,3.43560915,3.42952594,3.42757625
56.237986,10.0995049,10.026024,0.271073601,10.0220632,3.42874793,3.43513644,3.42909572,3.42713511
56.248478,9.79795897,9.95823312,-0.400342541,9.95425568,3.42829884,3.43466432,3.42866602,3.42669432
56.25897,9.94987437,9.75579254,0.440547198,9.75174293,3.42785021,3.43419284,3.42823687,3.42625392
56.269461,10,9.44612311,0.744229054,9.44195126,3.42740208,3.43372204,3.42780832,3.42581395
56.279953,9.53939201,9.06497587,0.688778731,9.06063935,3.42695436,3.43325181,3.42738029,3.42537432
56.290444,9.43398113,8.64739213,0.886898528,8.64285725,3.42650713,3.43278226,3.42695287,3.42493513
56.300936,8.60232527,8.22163515,0.617000902,8.21687684,3.42606031,3.43231327,3.42652596,3.42449627
56.311428,8.60232527,7.80759584,0.891475981,7.80259698,3.42561393,3.43184491,3.42609963,3.42405781
56.321919,7.34846923,7.41743645,-0.262616107,7.4121868,3.42516804,3.43137719,3.4256739,3.42361977
56.332411,6.8556546,7.05729723,-0.449046361,7.05179224,3.42472256,3.43091004,3.4252487,3.42318207
56.342902,6.78232998,6.72945216,0.229951774,6.72369187,3.42427755,3.43044354,3.42482412,3.4227448
56.353394,6.8556546,6.43354152,0.649702299,6.42753163,3.42383295,3.42997362,3.42440007,3.42230786
56.363886,5.38516481,6.16790619,-0.88472673,6.161651,3.42338879,3.42950827,3.42397659,3.42187131
56.374377,6.55743852,5.93017252,0.792001266,5.92368035,3.4229451,3.42904357,3.42355374,3.42143517
56.384869,4.69041576,5.71763994,-1.01352069,5.71092046,3.42250181,3.42857941,3.42313142,3.42099937
56.39536,5.74456265,5.52769824,0.465687028,5.52076206,3.422059,3.42811588,3.42270974,3.420564
56.405852,5.65685425,5.3577917,0.546866117,5.35064991,3.42161658,3.4276529,3.42228859,3.42012895
56.416344,4.35889894,5.20562822,-0.92017894,5.19829214,3.42117459,3.4271905,3.42186804,3.41969429
56.426835,5.29150262,5.06913827,0.471555248,5.06161918,3.42073307,3.42672872,3.42144812,3.41926004
56.437327,4.47213595,4.94644282,-0.688699398,4.93875178,3.42029194,3.42626747,3.42102875,3.41882612
56.447818,5.29150262,4.83593482,0.674957627,4.8280826,3.41985128,3.42580684,3.42061002,3.41839261
56.45831,5.29150262,4.7361609,0.745212536,4.72815779,3.419411,3.42534674,3.42019185,3.41795944
56.468802,4.58257569,4.64588193,-0.251607299,4.63773777,3.41897114,3.4248872,3.41977429,3.41752664
56.479293,4.35889894,4.56401431,-0.452896637,4.55573843,3.41853175,3.42442827,3.41935737,3.41709424
56.489785,5.38516481,4.48958985,0.946348224,4.48119102,3.41809274,3.42396987,3.41894103,3.41666218
56.500276,4.69041576,4.42179327,0.518288042,4.41327976,3.4176542,3.42351207,3.41852533,3.41623053
56.510768,4.24264069,4.35988591,-0.342410892,4.35126542,3.41721602,3.42305478,3.41811022,3.4157992
56.52126,3.60555128,4.30324071,-0.835278056,4.29452046,3.41677827,3.42259805,3.41769572,3.41536824
56.531751,4.79583152,4.25130705,0.737919018,4.24249376,3.41634097,3.42214191,3.41728189,3.41493768
56.542243,4.47213595,4.20358695,0.518217136,4.19468686,3.41590405,3.42168628,3.41686864,3.41450745
56.552734,4.35889894,4.15966107,0.446360694,4.15067996,3.41546758,3.42123124,3.41645607,3.41407762
56.563226,4.35889894,4.11914261,0.489649193,4.11008584,3.41503147,3.42077671,3.4160441,3.41364811
56.573718,4.47213595,4.08170212,0.624847047,4.07257466,3.41459578,3.42032272,3.41563276,3.41321897
56.584209,3.74165739,4.04704725,-0.552620906,4.03785369,3.41416054,3.41986932,3.41522211,3.41279023
56.594701,3.74165739,4.01490888,-0.522734632,4.00565345,3.41372567,3.41941641,3.41481207,3.4123618
56.605192,4.89897949,3.98506027,0.955991223,3.97574688,3.41329124,3.41896408,3.41440273,3.41193378
56.615684,4.12310563,3.95728784,0.407207296,3.9479201,3.41285717,3.41851224,3.413994,3.41150607
56.626176,3.16227766,3.9314093,-0.877001505,3.92199051,3.41242351,3.41806094,3.41358593,3.41107872
56.636667,4.47213595,3.90726116,0.751581532,3.89779437,3.41199029,3.41761021,3.41317858,3.41065177
56.647159,4,3.88469012,0.339573084,3.87517815,3.41155743,3.41715996,3.41277185,3.41022513
56.65765,3.16227766,3.86356731,-0.837430388,3.85401272,3.41112501,3.41671029,3.41236585,3.40979889
56.668142,4,3.84376866,0.395261109,3.83417381,3.41069295,3.4162611,3.41196048,3.40937296
56.678634,4.58257569,3.82518823,0.870280109,3.81555528,3.41026128,3.41581243,3.41155581,3.40894738
56.689125,3.46410162,3.80773015,-0.586198378,3.79806109,3.40983005,3.41536433,3.41115188,3.4085222
56.699617,4.47213595,3.79130283,0.825126128,3.78159945,3.40939918,3.4149167,3.4107486,3.40809732
56.710108,3,3.77582962,-0.880811909,3.76609358,3.40896873,3.41446963,3.41034607,3.40767284
56.7206,4,3.76123505,0.488635807,3.75146783,3.40853864,3.41402304,3.40994422,3.40724866
56.731092,3.16227766,3.74745485,-0.76496875,3.73765782,3.40810893,3.41357696,3.40954309,3.40682483
56.741583,4.12310563,3.73443035,0.623438266,3.72460475,3.40767966,3.41313143,3.40914272,3.40640139
56.752075,4.24264069,3.72210443,0.721481989,3.71225135,3.40725073,3.41268638,3.40874305,3.40597826
56.762566,4.24264069,3.71042965,0.729527952,3.70055011,3.40682223,3.41224187,3.40834415,3.40555551
56.773058,3.87298335,3.69935822,0.416683488,3.68945309,3.40639407,3.41179783,3.40794597,3.40513307
56.78355,3.46410162,3.6888496,-0.474075922,3.67891968,3.40596629,3.41135429,3.40754854,3.40471097
56.794041,3.60555128,3.67886653,-0.270767897,3.66891253,3.40553894,3.41091131,3.40715191,3.40428925
56.804533,3.31662479,3.66937201,-0.593925262,3.65939454,3.40511193,3.41046878,3.40675602,3.40386783
56.815024,3.31662479,3.66033566,-0.586268601,3.65033526,3.40468534,3.41002679,3.40636095,3.4034468
56.825516,3.16227766,3.65172608,-0.699605907,3.64170321,3.40425909,3.40958526,3.40596662,3.40302606
56.836008,3.74165739,3.64351686,0.313273881,3.63347189,3.40383321,3.40914423,3.40557309,3.40260566
56.846499,3.46410162,3.63568355,-0.414224493,3.6256168,3.40340775,3.40870374,3.40518041,3.40218565
56.856991,3.74165739,3.62820135,0.336832359,3.61811308,3.40298263,3.40826371,3.4047885,3.40176593
56.867482,3.16227766,3.62105022,-0.677327516,3.61094063,3.40255792,3.40782421,3.40439746,3.40134658
56.877974,4.79583152,3.61420888,1.08702467,3.60407808,3.40213354,3.40738515,3.40400721,3.40092754
56.888466,4.24264069,3.60765959,0.79685701,3.59750767,3.40170953,3.40694659,3.40361781,3.40050882
56.898957,4,3.60138585,0.631358972,3.59121283,3.40128593,3.40650857,3.4032293,3.40009048
56.909449,4.12310563,3.59537056,0.726453761,3.58517642,3.40086266,3.40607099,3.40284162,3.39967244
56.91994,3.46410162,3.58960014,-0.354257706,3.57938481,3.4004398,3.40563394,3.40245485,3.39925476
56.930432,2.44948974,3.58405974,-1.06516196,3.5738231,3.40001727,3.40519733,3.40206893,3.39883738
56.940924,3.16227766,3.57873716,-0.645336736,3.56847904,3.3995951,3.40476121,3.40168392,3.39842033
56.951415,3.31662479,3.57362098,-0.506947916,3.56334117,3.39917333,3.40432562,3.40129985,3.39800364
56.961907,3.60555128,3.56869909,0.191969228,3.55839734,3.39875189,3.40389046,3.40091668,3.39758725
56.972398,3.60555128,3.56396208,0.20393429,3.55363811,3.39833085,3.40345583,3.40053447,3.39717122
56.98289,4,3.55939934,0.663777567,3.54905282,3.39791013,3.40302165,3.40015319,3.39675549
56.993382,4.35889894,3.55500228,0.896602848,3.54463284,3.39748976,3.40258794,3.39977286,3.39634007
57.003873,3.87298335,3.55076281,0.567644728,3.54037005,3.3970698,3.40215475,3.39939356,3.39592502
57.014365,3.74165739,3.54667217,0.441571305,3.53625566,3.39665015,3.401722,3.39901521,3.39551026
57.024856,3.87298335,3.5427237,0.574682209,3.53228296,3.3962309,3.40128977,3.3986379,3.39509586
57.035348,3.16227766,3.53890966,-0.613703514,3.52844418,3.39581197,3.40085798,3.39826159,3.39468174
57.04584,4.35889894,3.53522387,0.907565463,3.5247331,3.39539338,3.40042666,3.39788632,3.39426795
57.056331,3.31662479,3.53166051,-0.463719443,3.52114388,3.39497519,3.39999586,3.39751214,3.39385451
57.066823,3.87298335,3.5282131,0.587171398,3.51766999,3.39455732,3.39956549,3.397139,3.39344136
57.077314,3.16227766,3.52487684,-0.602162087,3.51430662,3.39413983,3.39913564,3.39676699,3.39302856
57.087806,4.24264069,3.52164597,0.849114079,3.51104795,3.39372265,3.39870622,3.39639606,3.39261605
57.098298,4.24264069,3.51851598,0.850955176,3.50788945,3.39330582,3.39827728,3.39602625,3.39220385
57.108789,4.24264069,3.51548259,0.852735654,3.50482682,3.39288937,3.39784885,3.39565763,3.39179201
57.119281,2.64575131,3.51254093,-0.931015372,3.50185514,3.39247323,3.39742086,3.39529015,3.39138044
57.129772,3,3.50968752,-0.713924026,3.49897089,3.39205748,3.39699337,3.39492389,3.39096923
57.140264,4.58257569,3.50691795,1.03713921,3.49616964,3.39164203,3.39656632,3.39455881,3.39055829
57.150756,3.74165739,3.50422891,0.487266332,3.49344804,3.39122692,3.39613975,3.39419497,3.39014767
57.161247,3.87298335,3.50161721,0.609398177,3.49080288,3.39081219,3.39571368,3.39383242,3.3897374
57.171739,3.74165739,3.49907911,0.492522359,3.48823037,3.39039777,3.39528805,3.39347111,3.3893274
57.18223,2.82842712,3.49661205,-0.817425791,3.48572792,3.38998372,3.39486293,3.39311115,3.38891775
57.192722,3.16227766,3.49421264,-0.576137987,3.48329211,3.38956997,3.39443824,3.39275249,3.38850837
57.203214,3.60555128,3.49187838,0.337154108,3.48092039,3.38915656,3.39401403,3.39239518,3.3880993
57.213705,4.12310563,3.48960689,0.795926339,3.47861036,3.38874353,3.39359033,3.3920393,3.38769058
57.224197,3.87298335,3.48739525,0.620957402,3.47635906,3.38833079,3.39316707,3.3916848,3.38728213
57.234688,3.16227766,3.48524156,-0.568299126,3.47416454,3.38791842,3.39274431,3.39133178,3.38687402
57.24518,3.16227766,3.48314317,-0.566449916,3.47202412,3.38750634,3.392322,3.39098019,3.38646618
57.255672,4,3.48109818,0.720348399,3.46993587,3.3870946,3.39190016,3.39063012,3.38605865
57.266163,3.46410162,3.47910479,-0.122487467,3.46789793,3.38668323,3.39147883,3.39028162,3.38565145
57.276655,2.82842712,3.47716071,-0.805439995,3.46590798,3.38627215,3.39105794,3.38993465,3.38524453
57.287146,3.60555128,3.4752645,0.360952596,3.46396454,3.38586144,3.39063757,3.38958933,3.38483794
57.297638,2.64575131,3.47341407,-0.909759729,3.46206548,3.38545101,3.39021764,3.38924562,3.38443162
57.30813,3.60555128,3.47160799,0.365982633,3.4602093,3.38504091,3.38979819,3.38890359,3.3840256
57.318621,2.82842712,3.46984485,-0.800885589,3.45839458,3.38463118,3.38937926,3.38856332,3.38361991
57.329113,2.44948974,3.46812285,-1.00927355,3.45661943,3.38422173,3.38896078,3.38822478,3.38321449
57.339604,3.16227766,3.46644089,-0.551509958,3.45488276,3.38381264,3.38854282,3.38788807,3.3828094
57.350096,2.82842712,3.46479733,-0.797728154,3.45318282,3.38340384,3.38812531,3.38755317,3.38240458
57.360588,3.46410162,3.46319105,0.0301755616,3.45151847,3.38299536,3.38770828,3.38722017,3.38200005
57.371079,3.87298335,3.46162098,0.64137537,3.44988858,3.38258724,3.38729179,3.38688915,3.38159585
57.381571,2.64575131,3.46008567,-0.902404762,3.44829163,3.3821794,3.38687575,3.38656007,3.38119192
57.392062,3.31662479,3.4585843,-0.37677514,3.44672678,3.38177192,3.38646024,3.38623307,3.38078831
57.402554,2.44948974,3.45711554,-1.00380566,3.4451926,3.38136471,3.38604519,3.38590813,3.38038496
57.413046,3.16227766,3.45567854,-0.541664912,3.4436882,3.38095782,3.38563064,3.38558534,3.3799819
57.423537,3.16227766,3.45427247,-0.540365444,3.44221269,3.38055129,3.38521664,3.38526478,3.37957918
57.434029,3.60555128,3.45289617,0.390711023,3.44076483,3.38014503,3.3848031,3.38494646,3.3791767
57.44452,3.16227766,3.45154904,-0.537839544,3.43934395,3.37973912,3.38439011,3.38463049,3.37877456
57.455012,4,3.45022998,0.741464778,3.4379489,3.37933349,3.3839776,3.38431688,3.37837267
57.465504,3.46410162,3.44893836,0.123139156,3.43657895,3.37892817,3.3835656,3.38400572,3.37797106
57.475995,2.44948974,3.44767355,-0.999091493,3.43523341,3.3785232,3.38315416,3.38369712,3.37756978
57.486487,3.31662479,3.44643461,-0.360291293,3.43391124,3.3781185,3.38274322,3.38339108,3.37716875
57.496978,3,3.44522108,-0.667248892,3.43261194,3.37771415,3.38233284,3.38308775,3.37676805
57.50747,3.31662479,3.44403212,-0.356941629,3.43133453,3.37731006,3.38192296,3.38278714,3.37636759
57.517962,4,3.44286722,0.746413279,3.43007844,3.37690628,3.38151362,3.38248936,3.37596742
57.528453,3,3.44172592,-0.664624644,3.42884312,3.37650285,3.38110486,3.38219453,3.37556757
57.538945,2.82842712,3.44060746,-0.782419536,3.4276277,3.37609968,3.38069662,3.38190268,3.37516797
57.549436,3.31662479,3.43951153,-0.35055205,3.42643178,3.37569686,3.38028898,3.38161395,3.37476868
57.559928,3.31662479,3.43843744,-0.349016694,3.42525455,3.3752943,3.37988187,3.38132839,3.37436964
57.57042,3.16227766,3.43738484,-0.524506607,3.42409556,3.37489204,3.37947533,3.38104613,3.37397088
57.580911,3.60555128,3.43635339,0.411336708,3.42295435,3.37449012,3.37906941,3.3807673,3.37357244
57.591403,3.46410162,3.43534248,0.169585186,3.42183019,3.37408846,3.37866405,3.38049196,3.37317425
57.601894,3.16227766,3.43435193,-0.521607388,3.42072277,3.37368714,3.37825932,3.38022027,3.37277636
57.612386,3.74165739,3.43338118,0.555226264,3.41963141,3.37328608,3.37785516,3.3799523,3.37237872
57.622878,3.46410162,3.43243001,0.177965185,3.41855573,3.37288532,3.37745162,3.37968821,3.37198135
57.633369,3.46410162,3.43149818,0.180564207,3.41749539,3.37248489,3.37704875,3.37942815,3.3715843
57.643861,3.87298335,3.43058524,0.665130143,3.41644973,3.37208472,3.37664648,3.3791722,3.37118749
57.654352,3,3.42969109,-0.65550827,3.41541854,3.37168488,3.3762449,3.37892057,3.37079099
57.664844,3,3.42881533,-0.654839924,3.41440122,3.3712853,3.37584395,3.37867336,3.37039472
57.675336,3.87298335,3.42795781,0.667102344,3.41339747,3.37088601,3.37544368,3.37843074,3.36999873
57.685827,2.64575131,3.42711843,-0.883949724,3.41240701,3.37048705,3.37504414,3.37819291,3.36960305
57.696319,3.46410162,3.42629684,0.194434498,3.41142928,3.37008834,3.37464528,3.37796,3.36920761
57.70681,3.87298335,3.42549306,0.668947147,3.41046412,3.36968996,3.37424718,3.37773223,3.36881247
57.717302,3,3.4247068,-0.651695327,3.40951101,3.36929183,3.37384979,3.37750975,3.36841756
57.727794,3.74165739,3.42393803,0.563665998,3.4085697,3.36889399,3.37345316,3.37729278,3.36802293
57.738285,3.31662479,3.42318674,-0.326438275,3.40763997,3.36849648,3.37305736,3.37708156,3.3676286
57.748777,3.16227766,3.42245272,-0.510073581,3.40672133,3.36809921,3.37266233,3.37687627,3.3672345
57.759268,4.12310563,3.42173607,0.837478091,3.40581367,3.36770227,3.37226816,3.37667718,3.3668407
57.76976,3.16227766,3.42103665,-0.508683584,3.40491653,3.36730557,3.37187482,3.3764845,3.36644714
57.780252,3.60555128,3.42035453,0.430344918,3.40402971,3.36690916,3.37148235,3.37629851,3.36605384
57.790743,2.82842712,3.4196898,-0.768936069,3.40315303,3.36651306,3.37109084,3.37611949,3.36566084
57.801235,3.87298335,3.41904241,0.673751391,3.40228606,3.36611721,3.37070023,3.3759477,3.36526807
57.811726,3.74165739,3.41841256,0.568546244,3.40142873,3.36572168,3.37031063,3.37578348,3.3648756
57.822218,3.46410162,3.41780023,0.21517756,3.40058062,3.3653264,3.36992201,3.37562712,3.36448335
57.83271,2.64575131,3.41720564,-0.878324731,3.39974158,3.36493139,3.36953445,3.37547896,3.36409137
57.843201,3.46410162,3.41662901,0.217882086,3.39891147,3.36453669,3.36914801,3.37533938,3.36369969
57.853693,4,3.41607043,0.764152847,3.3980899,3.36414224,3.36876267,3.37520873,3.36330823
57.864184,4,3.41553023,0.764506227,3.39727682,3.3637481,3.36837855,3.37508742,3.36291706
57.874676,4.58257569,3.41500858,1.0805402,3.39647187,3.3633542,3.36799563,3.37497587,3.36252612
57.885168,3.31662479,3.41450583,-0.31285945,3.39567492,3.36296058,3.367614,3.37487452,3.36213544
57.895659,3.74165739,3.41402236,0.572394121,3.39488587,3.36256726,3.36723377,3.37478385,3.36174505
57.906151,2.64575131,3.41355845,-0.876246052,3.39410436,3.36217419,3.36685492,3.37470435,3.36135488
57.916642,3,3.41311462,-0.642739933,3.39333037,3.36178142,3.3664776,3.37463657,3.360965
57.927134,3.31662479,3.41269124,-0.309945876,3.39256357,3.36138888,3.36610181,3.37458104,3.36057534
57.937626,4,3.41228885,0.766623213,3.39180387,3.36099662,3.36572767,3.37453839,3.36018594
57.948117,3.16227766,3.41190805,-0.499630253,3.39105118,3.36060466,3.36535531,3.37450924,3.35979683
57.958609,3,3.41154938,-0.641521143,3.39030518,3.36021294,3.36498476,3.37449426,3.35940793
57.9691,4,3.41121357,0.767324204,3.38956586,3.35982152,3.3646162,3.37449418,3.35901933
57.979592,3.46410162,3.41090128,0.230651985,3.38883293,3.35943033,3.36424968,3.37450976,3.35863094
57.990084,2.64575131,3.41061334,-0.874563907,3.38810632,3.35903941,3.36388536,3.37454181,3.35824279
58.000575,3.74165739,3.41035063,0.575592524,3.38738596,3.35864879,3.36352342,3.37459121,3.35785494
58.011067,3.60555128,3.41011405,0.442082822,3.38667155,3.35825839,3.36316394,3.37465888,3.3574673
58.021558,3.87298335,3.40990466,0.680498849,3.38596311,3.3578683,3.36280717,3.37474581,3.35707995
58.03205,4,3.40972353,0.76829452,3.38526037,3.35747844,3.36245323,3.37485307,3.3566928
58.042542,3.60555128,3.40957189,0.442695594,3.38456328,3.35708883,3.36210237,3.37498179,3.35630591
58.053033,2.64575131,3.40945105,-0.873899158,3.38387176,3.35669953,3.36175483,3.37513317,3.35591929
58.063525,3.16227766,3.40936242,-0.497076215,3.38318558,3.35631045,3.36141083,3.37530855,3.35553289
58.074016,3.46410162,3.40930757,0.23408127,3.38250474,3.35592167,3.3610707,3.37550927,3.35514677
58.084508,3.31662479,3.40928818,-0.304406622,3.38182901,3.3555331,3.3607347,3.37573689,3.35476085
58.095,4.24264069,3.40930609,0.912871622,3.38115833,3.3551448,3.36040321,3.37599299,3.35437518
58.105491,3.31662479,3.40936329,-0.304529967,3.38049267,3.35475679,3.36007665,3.37627928,3.35398979
58.115983,4,3.40946198,0.768464713,3.37983179,3.354369,3.35975541,3.37659769,3.35360461
58.126474,2.64575131,3.40960453,-0.873986969,3.37917571,3.3539815,3.35944005,3.37695016,3.35321971
58.136966,4.24264069,3.40979358,0.912604576,3.37852422,3.35359423,3.35913105,3.37733895,3.352835
58.147458,3.16227766,3.41003195,-0.497749227,3.37787728,3.3532072,3.35882908,3.37776637,3.35245054
58.157949,3.31662479,3.41032276,-0.306101242,3.37723485,3.35282047,3.35853489,3.3782349,3.35206636
58.168441,2.82842712,3.41066949,-0.763048077,3.37659673,3.35243395,3.35824922,3.3787474,3.35168238
58.178932,4,3.41107586,0.767413932,3.37596295,3.35204772,3.35797305,3.37930675,3.35129867
58.189424,3,3.4115461,-0.641518588,3.37533329,3.3516617,3.3577074,3.37991629,3.35091516
58.199916,3.46410162,3.41208478,0.228071998,3.37470774,3.35127594,3.35745349,3.3805795,3.35053189
58.210407,4.24264069,3.41269693,0.911012492,3.37408628,3.35089046,3.35721276,3.38130014,3.3501489
58.220899,3.16227766,3.41338832,-0.501109426,3.3734687,3.35050519,3.35698677,3.38208255,3.3497661
58.23139,4,3.41416511,0.765398515,3.37285504,3.35012021,3.35677744,3.38293113,3.34938357
58.241882,2.64575131,3.41503451,-0.87708791,3.37224512,3.34973544,3.35658695,3.38385109,3.34900125
58.252374,4,3.41600435,0.764196079,3.37163891,3.34935091,3.35641787,3.38484785,3.34861915
58.262865,4.12310563,3.41708345,0.84025126,3.37103641,3.34896667,3.35627326,3.3859274,3.34823733
58.273357,4,3.41828214,0.762704309,3.37043743,3.34858263,3.35615671,3.3870967,3.3478557
58.283848,3.60555128,3.41961176,0.431207051,3.36984201,3.34819888,3.35607252,3.38836305,3.34747433
58.29434,3.87298335,3.42108589,0.672233189,3.36924998,3.34781533,3.35602583,3.38973514,3.34709317
58.304832,2.82842712,3.42271986,-0.770903846,3.36866132,3.34743203,3.3560229,3.39122243,3.34671223
58.315323,3,3.42453162,-0.651560913,3.36807603,3.347049,3.35607129,3.39283567,3.34633156
58.325815,3.87298335,3.42654298,0.668161931,3.36749393,3.34666618,3.35618032,3.39458781,3.34595108
58.336306,3.31662479,3.42877922,-0.334894657,3.36691508,3.34628363,3.35636148,3.39649325,3.34557086
58.346798,3.87298335,3.43127191,0.664613752,3.36633931,3.34590129,3.35662916,3.39856984,3.34519084
58.35729,4,3.43405895,0.752290538,3.36576661,3.34551918,3.35700148,3.40083829,3.34481104
58.367781,2.44948974,3.43718725,-0.993829719,3.36519698,3.34513736,3.35750146,3.40332363,3.3444315
58.378273,3.16227766,3.44071664,-0.527673179,3.36463027,3.34475573,3.35815896,3.40605728,3.34405216
58.388764,4.35889894,3.44472135,0.956126346,3.36406652,3.34437437,3.35901273,3.40907672,3.34367307
58.399256,4.12310563,3.44929808,0.820857811,3.36350557,3.34399321,3.36011443,3.4124296,3.34329418
58.409748,3,3.45457038,-0.674218347,3.36294743,3.34361229,3.3615333,3.41617388,3.3429155
58.420239,4.35889894,3.46069964,0.947733772,3.3623921,3.34323164,3.36336414,3.42038123,3.34253709
58.430731,3,3.46790097,-0.684032871,3.36183942,3.34285119,3.36573953,3.42514141,3.34215886
58.441222,3.74165739,3.47646115,0.514972077,3.36128946,3.34247101,3.36884892,3.43056239,3.34178089
58.451714,2.82842712,3.48677974,-0.811389309,3.36074207,3.34209102,3.37297444,3.43677768,3.3414031
58.462206,4,3.49942772,0.707511325,3.36019724,3.34171126,3.37855383,3.44394593,3.34102553
58.472697,4.12310563,3.51526966,0.779638357,3.359655,3.34133177,3.38630585,3.45225513,3.34064822
58.483189,3.87298335,3.5356829,0.580775726,3.35911518,3.34095247,3.39745852,3.46192778,3.3402711
58.49368,3.87298335,3.5628582,0.556888813,3.35857785,3.34057344,3.41407854,3.47321614,3.33989422
58.504172,3.74165739,3.60012946,0.376201982,3.35804288,3.3401946,3.43942784,3.48640908,3.33951753
58.514664,4.24264069,3.65194088,0.768569977,3.35751026,3.33981599,3.47796934,3.50182015,3.33914105
58.525155,3.16227766,3.7226111,-0.748554232,3.35698002,3.33943764,3.53409537,3.51978642,3.33876483
58.535647,4.24264069,3.81122321,0.656823781,3.356452,3.33905949,3.60673661,3.54066436,3.33838879
58.546138,4.58257569,3.8994554,0.826510917,3.35592628,3.33868159,3.67639333,3.56480585,3.33801299
58.55663,3.74165739,3.94770117,-0.453920461,3.35540271,3.33830388,3.70058703,3.59255756,3.33763738
58.567122,4.47213595,3.9361924,0.732081661,3.35488132,3.3379264,3.65698658,3.62422832,3.33726198
58.577613,4.12310563,3.89911457,0.473276938,3.35436211,3.33754918,3.58056114,3.66007346,3.33688683
58.588105,3.46410162,3.87390865,-0.640161723,3.35384495,3.33717214,3.51098342,3.70028428,3.33651185
58.598596,3.87298335,3.87124195,0.0417300359,3.35332991,3.33679536,3.46010461,3.74494302,3.33613712
58.609088,4,3.88862566,0.333727949,3.35281686,3.33641877,3.4257266,3.79403103,3.33576257
58.61958,3.87298335,3.92114726,-0.219462788,3.3523058,3.33604239,3.40299204,3.84738246,3.33538823
58.630071,4.58257569,3.9645485,0.786147059,3.35179677,3.33566628,3.38775568,3.90467706,3.33501413
58.640563,4.69041576,4.01569747,0.821412372,3.35128962,3.33529034,3.37716992,3.96544092,3.33464021
58.651054,5,4.07230252,0.963170534,3.35078444,3.33491466,3.36948997,4.02899154,3.33426653
58.661546,4.58257569,4.13256098,0.670831359,3.35028108,3.33453917,3.3636932,4.09446231,3.33389302
58.672038,3.74165739,4.19480966,-0.673165859,3.34977958,3.33416389,3.3591773,4.16073853,3.33351972
58.682529,3.16227766,4.25733957,-1.04645206,3.34927994,3.33378886,3.35556883,4.22644932,3.33314667
58.693021,3.74165739,4.3183028,-0.75937172,3.34878205,3.33341401,3.35262237,4.28996681,3.33277378
58.703512,5.19615242,4.37562305,0.905830763,3.34828597,3.33303942,3.35017103,4.34936229,3.33240113
58.714004,5.09901951,4.42705711,0.81973313,3.34779159,3.332665,3.34809631,4.40249545,3.33202866
58.724496,4.69041576,4.47024656,0.469221909,3.34729892,3.33229079,3.34631326,4.44708024,3.33165639
58.734987,5.29150262,4.50291699,0.888023443,3.34680799,3.33191684,3.3447594,4.48089486,3.33128435
58.745479,3.60555128,4.52313852,-0.957907744,3.34631867,3.33154306,3.34338765,4.50204923,3.33091249
58.75597,5.19615242,4.52957923,0.816439337,3.34583104,3.33116953,3.34216276,4.50924246,3.33054086
58.766462,4.47213595,4.52174329,-0.222727036,3.34534498,3.33079617,3.3410572,4.50200485,3.3301694
58.776954,4,4.50004364,-0.707137638,3.34486051,3.33042303,3.3400498,4.480772,3.32979814
58.787445,5.47722558,4.46572964,1.00573154,3.34437765,3.33005013,3.33912389,4.44681368,3.32942712
58.797937,3.87298335,4.4206542,-0.740047872,3.34389629,3.3296774,3.33826597,4.40200143,3.32905626
58.808428,4.69041576,4.36701573,0.568682718,3.34341649,3.32930492,3.33746548,4.34855028,3.32868563
58.81892,3.46410162,4.30706759,-0.918131784,3.34293816,3.32893261,3.33671358,4.28872843,3.32831517
58.829412,4.47213595,4.2429574,0.478725974,3.3424613,3.3285605,3.33600323,4.22469635,3.32794491
58.839903,4.35889894,4.17660496,0.426958997,3.34198595,3.32818864,3.33532865,4.158385,3.32757488
58.850395,4.35889894,4.10963786,0.499260536,3.34151199,3.32781695,3.33468485,4.09143151,3.32720501
58.860886,3.74165739,4.04343499,-0.54934288,3.34103949,3.3274455,3.33406789,4.02522299,3.32683537
58.871378,4.24264069,3.97909509,0.513366922,3.34056834,3.32707422,3.33347427,3.96086523,3.3264659
58.88187,3.74165739,3.91750654,-0.419343712,3.34009858,3.32670314,3.33290114,3.89925265,3.32609661
58.892361,4.58257569,3.85935038,0.850426546,3.33963022,3.3263323,3.33234613,3.84107141,3.32572756
58.902853,3.87298335,3.80510411,0.260536431,3.33916315,3.32596163,3.33180703,3.78680324,3.32535867
58.913344,4,3.75509834,0.494875402,3.33869745,3.32559119,3.33128216,3.73678215,3.32499001
58.923836,3.60555128,3.70949046,-0.322396008,3.33823302,3.32522092,3.33076986,3.69116812,3.3246215
58.934328,3,3.6683179,-0.817507126,3.33776987,3.32485086,3.33026886,3.65000033,3.32425318
58.944819,4.35889894,3.63150009,0.852876813,3.33730803,3.32448102,3.32977803,3.61319922,3.3238851
58.955311,3.31662479,3.59884969,-0.531248438,3.3368474,3.32411135,3.32929627,3.58057784,3.32351716
58.965802,3,3.57011918,-0.755062369,3.33638805,3.32374192,3.32882278,3.55188841,3.32314946
58.976294,4.47213595,3.54499573,0.962881209,3.33592988,3.32337264,3.32835669,3.52681745,3.32278191
58.986786,4.69041576,3.52320207,1.08037664,3.33547291,3.32300357,3.32795981,3.50502772,3.32241454
58.997277,4.24264069,3.50426904,0.859285547,3.33501717,3.32263473,3.32750673,3.48616642,3.32204741
59.007769,4.12310563,3.48789957,0.796998153,3.33456257,3.32226604,3.32705921,3.46987661,3.32168042
59.01826,3.74165739,3.47375921,0.517588812,3.33410916,3.32189759,3.32661687,3.45582247,3.32131366
59.028752,3.74165739,3.46153012,0.529270505,3.33365685,3.3215293,3.3261792,3.4436849,3.32094705
59.039244,3,3.45092769,-0.671511493,3.33320567,3.3211612,3.32574584,3.43317808,3.32058062
59.049735,4.12310563,3.44169852,0.825473868,3.33275564,3.32079333,3.32531651,3.42404754,3.32021442
59.060227,3.60555128,3.43361923,0.414646892,3.33230667,3.32042562,3.32489082,3.41606901,3.31984837
59.070718,2.64575131,3.4265018,-0.883600863,3.33185883,3.32005814,3.32446856,3.40905366,3.31948253
59.08121,2.82842712,3.42018477,-0.769257852,3.33141202,3.31969081,3.3240494,3.40283943,3.31911685
59.091702,3.74165739,3.41453567,0.571945556,3.33096627,3.31932368,3.32363317,3.39729332,3.31875135
59.102193,3.31662479,3.40944523,-0.304664472,3.3305216,3.31895677,3.32321969,3.39230565,3.31838606
59.112685,3.74165739,3.40482283,0.580374496,3.33007792,3.31859001,3.32280871,3.38778552,3.31802093
59.123176,3.31662479,3.40059668,-0.289779042,3.32963531,3.31822348,3.32240012,3.38366089,3.31765601
59.133668,4,3.39670716,0.77671928,3.32919366,3.31785711,3.32199371,3.37987197,3.31729123
59.14416,3,3.39310722,-0.62698263,3.328753,3.31749092,3.32158936,3.37637161,3.31692664
59.154651,4.12310563,3.38975876,0.856356738,3.32831337,3.31712495,3.32118699,3.37312161,3.31656227
59.165143,2.44948974,3.38662992,-0.968060007,3.32787467,3.31675914,3.3207864,3.37009007,3.31619803
59.175634,4,3.38369576,0.78505047,3.32743696,3.31639355,3.32038756,3.36725202,3.31583402
59.186126,3.31662479,3.3809346,-0.253593796,3.32700017,3.3160281,3.3199903,3.36458578,3.31547014
59.196618,3.60555128,3.37832912,0.47667825,3.32656431,3.31566285,3.31959457,3.362074,3.31510644
59.207109,3.46410162,3.37586465,0.297047077,3.32612941,3.31529781,3.31920031,3.35970203,3.31474296
59.217601,3.31662479,3.37352796,-0.238543859,3.32569539,3.31493292,3.31880737,3.35745666,3.31437962
59.228092,2.82842712,3.37130849,-0.736804835,3.32526231,3.31456825,3.31841576,3.35532732,3.31401649
59.238584,3.46410162,3.36919614,0.308067319,3.32483009,3.31420373,3.31802534,3.35330397,3.3136535
59.249076,3.16227766,3.36718262,-0.452664287,3.32439875,3.31383939,3.31763608,3.3513783,3.31329068
59.259567,3.31662479,3.3652605,-0.220535048,3.32396832,3.31347527,3.31724796,3.34954292,3.31292807
59.270059,3.16227766,3.3634226,-0.448491847,3.32353871,3.31311129,3.31686086,3.34779067,3.31256561
59.28055,3.60555128,3.36166313,0.493850331,3.32311,3.31274753,3.3164748,3.34611577,3.31220335
59.291042,3.74165739,3.35997617,0.617803541,3.32268208,3.31238391,3.31608966,3.34451234,3.31184123
59.301534,3.74165739,3.35835684,0.61911271,3.32225501,3.31202047,3.31570544,3.34297551,3.31147928
59.312025,2,3.35680065,-1.16481786,3.32182879,3.31165725,3.31532214,3.34150081,3.31111754
59.322517,3,3.35530308,-0.596073048,3.32140335,3.31129417,3.31493963,3.34008374,3.31075594
59.333008,4,3.35386053,0.80382801,3.32097876,3.3109313,3.31455797,3.33872072,3.31039454
59.3435,3.74165739,3.35246916,0.623849519,3.32055492,3.31056857,3.31417704,3.33740793,3.31003328
59.353992,3.74165739,3.35112585,0.624925229,3.32013187,3.31020602,3.31379685,3.33614227,3.30967219
59.364483,2.23606798,3.34982768,-1.05534814,3.31970964,3.30984368,3.31341742,3.33492083,3.3093113
59.374975,3,3.34857162,-0.590399546,3.31928814,3.30948149,3.31303864,3.33374062,3.30895054
59.385466,3.46410162,3.34735536,0.341681517,3.31886744,3.3091195,3.31266055,3.33259932,3.30858999
59.395958,3.60555128,3.34617626,0.509288738,3.31844746,3.30875765,3.31228307,3.33149432,3.30822957
59.40645,2.64575131,3.34503224,-0.83623019,3.31802822,3.30839597,3.3119062,3.33042357,3.30786932
59.416941,3.31662479,3.34392137,-0.165216779,3.31760976,3.3080345,3.31152997,3.32938513,3.30750927
59.427433,3.46410162,3.34284154,0.348224167,3.31719199,3.30767317,3.31115428,3.32837692,3.30714935
59.437924,3.46410162,3.3417912,0.349729059,3.31677498,3.30731205,3.31077918,3.3273974,3.30678963
59.448416,2.44948974,3.3407685,-0.94407561,3.31635865,3.30695106,3.31040459,3.32644474,3.30643005
59.458908,3,3.33977203,-0.582899671,3.31594302,3.30659024,3.31003052,3.32551754,3.30607062
59.469399,3.46410162,3.33880045,0.353979049,3.31552813,3.30622963,3.30965699,3.32461447,3.3057114
59.479891,3.31662479,3.33785226,-0.145696482,3.3151139,3.30586916,3.30928393,3.32373405,3.3053523
59.490382,3.46410162,3.33692639,0.356616349,3.31470039,3.30550888,3.30891138,3.32287524,3.3049934
59.500874,4.24264069,3.33602153,0.952165508,3.31428752,3.30514875,3.30853926,3.32203671,3.30463464
59.511366,3.16227766,3.33513668,-0.41576318,3.31387532,3.30478877,3.30816759,3.32121749,3.30427603
59.521857,3.16227766,3.33427091,-0.414720691,3.31346382,3.30442901,3.30779641,3.32041665,3.30391762
59.532349,3.46410162,3.33342311,0.361494821,3.31305294,3.30406937,3.30742562,3.31963311,3.30355933
59.54284,2.44948974,3.33259255,-0.9397355,3.31264275,3.30370994,3.30705528,3.31886613,3.30320124
59.553332,3.31662479,3.33177825,-0.123099374,3.31223317,3.30335063,3.30668532,3.31811476,3.30284328
59.563824,3.46410162,3.33097949,0.364859046,3.31182423,3.30299149,3.30631576,3.3173783,3.30248547
59.574315,3.31662479,3.33019563,-0.116493939,3.31141595,3.30263255,3.30594663,3.31665608,3.30212786
59.584807,4.12310563,3.32942581,0.890887092,3.31100826,3.30227375,3.30557785,3.3159473,3.30177037
59.595298,3.31662479,3.32866955,-0.109748613,3.31060123,3.30191513,3.30520947,3.31525144,3.30141308
59.60579,4.47213595,3.32792607,1.06967747,3.31019477,3.30155665,3.30484143,3.31456777,3.3010559
59.616282,4.35889894,3.32719488,1.01572834,3.30978892,3.30119833,3.30447375,3.3138958,3.30069889
59.626773,3,3.32647551,-0.571380351,3.30938371,3.30084021,3.30410645,3.31323504,3.30034206
59.637265,3.74165739,3.32576729,0.644895417,3.30897906,3.30048222,3.30373946,3.31258487,3.29998536
59.647756,3.60555128,3.32506988,0.529604943,3.30857503,3.30012442,3.30337285,3.31194494,3.29962885
59.658248,3.16227766,3.32438269,-0.40262269,3.30817155,3.29976674,3.30300653,3.31131467,3.29927246
59.66874,3.60555128,3.32370536,0.530891628,3.30776865,3.29940923,3.30264053,3.3106937,3.29891622
59.679231,4.24264069,3.32303753,0.958959416,3.30736635,3.29905191,3.3022749,3.31008169,3.29856017
59.689723,3.46410162,3.32237869,0.376461057,3.30696459,3.29869472,3.30190954,3.30947814,3.29820424
59.700214,2.82842712,3.3217286,-0.702354237,3.30656343,3.29833771,3.30154452,3.30888281,3.2978485
59.710706,3,3.32108679,-0.566645203,3.30616278,3.29798084,3.30117978,3.30829524,3.29749287
59.721198,3.87298335,3.32045298,0.743323862,3.30576269,3.29762411,3.30081533,3.30771516,3.2971374
59.731689,3.46410162,3.31982693,0.379835072,3.30536318,3.29726759,3.30045121,3.30714233,3.29678212
59.742181,4.12310563,3.31920822,0.896603259,3.30496417,3.29691118,3.30008735,3.30657634,3.29642695
59.752672,2.82842712,3.31859668,-0.700121102,3.30456574,3.29655496,3.2997238,3.30601703,3.29607196
59.763164,3.60555128,3.31799193,0.536245602,3.3041678,3.29619887,3.29936051,3.30546402,3.2957171
59.773656,3.60555128,3.31739377,0.536803043,3.30377039,3.29584293,3.29899749,3.30491713,3.29536238
59.784147,3.60555128,3.31680201,0.537353949,3.30337353,3.29548717,3.29863477,3.30437617,3.29500784
59.794639,3.87298335,3.31621631,0.746168237,3.30297716,3.29513154,3.2982723,3.3038408,3.29465342
59.80513,3.60555128,3.31563656,0.538437292,3.30258133,3.2947761,3.29791012,3.30331092,3.29429919
59.815622,4,3.31506244,0.827609548,3.30218597,3.29442077,3.29754817,3.30278622,3.29394506
59.826114,3,3.3144938,-0.560797467,3.30179112,3.2940656,3.29718648,3.30226655,3.29359108
59.836605,3.16227766,3.31393051,-0.389426307,3.30139681,3.29371061,3.29682508,3.30175179,3.29323729
59.847097,3.46410162,3.31337228,0.388238767,3.30100295,3.29335574,3.29646389,3.30124166,3.29288361
59.857588,3.87298335,3.31281903,0.748441257,3.30060961,3.29300106,3.29610299,3.30073608,3.2925301
59.86808,3.46410162,3.3122705,0.389655119,3.30021673,3.29264649,3.29574231,3.30023479,3.29217671
59.878572,3.74165739,3.31172659,0.655691085,3.29982432,3.29229207,3.29538186,3.2997377,3.29182347
59.889063,2.82842712,3.31118718,-0.694809368,3.29943243,3.29193784,3.29502169,3.2992447,3.2914704
59.899555,3.74165739,3.31065204,0.656509974,3.29904098,3.29158372,3.29466173,3.29875556,3.29111744
59.910046,2.82842712,3.31012112,-0.694041785,3.29865003,3.29122978,3.29430203,3.29827024,3.29076466
59.920538,4.24264069,3.3095942,0.965943315,3.29825951,3.29087596,3.29394254,3.29778851,3.29041199
59.93103,3.16227766,3.30907119,-0.383136436,3.29786945,3.29052229,3.29358327,3.29731031,3.29005946
59.941521,3.87298335,3.30855202,0.751286447,3.29747989,3.29016879,3.29322427,3.29683556,3.28970711
59.952013,3.74165739,3.30803648,0.658498981,3.29709074,3.28981541,3.29286546,3.29636405,3.28935487
59.962504,3.87298335,3.30752455,0.751969945,3.29670207,3.28946221,3.29250691,3.29589577,3.2890028
59.972996,3.60555128,3.30701603,0.546383793,3.29631382,3.28910912,3.29214854,3.29543052,3.28865084
59.983488,3.16227766,3.30651086,-0.379780458,3.295926,3.28875618,3.2917904,3.29496826,3.28829902
59.993979,3.46410162,3.30600899,0.397608635,3.29553866,3.28840342,3.29143251,3.29450893,3.28794737
60.004471,3.60555128,3.30551023,0.547760024,3.29515172,3.28805076,3.2910748,3.29405235,3.28759583
60.014962,3.16227766,3.30501459,-0.377805411,3.29476525,3.28769828,3.29071733,3.29359853,3.28724446
60.025454,2.64575131,3.30452188,-0.811646824,3.29437917,3.28734592,3.29036005,3.29314728,3.2868932
60.035946,3.46410162,3.30403206,0.40008693,3.29399351,3.28699369,3.29000297,3.29269859,3.28654207
60.046437,3.74165739,3.30354511,0.661900504,3.2936083,3.28664165,3.28964614,3.2922524,3.28619112
60.056929,3.16227766,3.30306085,-0.375210854,3.29322348,3.28628971,3.28928948,3.29180856,3.28584027
60.06742,3.60555128,3.30257929,0.550428912,3.29283911,3.28593794,3.28893306,3.29136709,3.28548959
60.077912,3.46410162,3.30210027,0.402493902,3.29245511,3.28558628,3.28857681,3.29092784,3.28513902
60.088404,3.87298335,3.30162378,0.755883303,3.29207152,3.28523477,3.28822076,3.29049077,3.28478858
60.098895,3.46410162,3.30114978,0.403672929,3.29168837,3.28488343,3.28786494,3.29005586,3.28443831
60.109387,3.74165739,3.30067813,0.664062693,3.29130558,3.28453219,3.28750929,3.28962298,3.28408814
60.119878,3.60555128,3.30020884,0.552577988,3.29092323,3.28418112,3.28715387,3.28919215,3.28373814
60.13037,3.46410162,3.29974178,0.405413166,3.29054123,3.28383017,3.28679861,3.28876323,3.28338824
60.140862,3.60555128,3.29927693,0.553420591,3.29015963,3.28347935,3.28644355,3.2883362,3.28303848
60.151353,3.60555128,3.29881427,0.553838432,3.28977845,3.2831287,3.28608871,3.28791105,3.28268888
60.161845,3,3.29836713,-0.546229922,3.28939762,3.28279168,3.28573404,3.28748765,3.28233938
60.172336,3.87298335,3.29790862,0.758336814,3.28901721,3.28244132,3.28537958,3.28706604,3.28199005
60.182828,3.31662479,3.29745207,0.138465591,3.28863714,3.28209105,3.28502528,3.28664608,3.28164082
60.19332,3.31662479,3.29699747,0.140097551,3.28825745,3.28174093,3.28467117,3.28622777,3.28129171
60.203811,4.12310563,3.29654481,0.909153902,3.28787816,3.28139097,3.28431728,3.28581112,3.28094278
60.214303,3.31662479,3.29609396,0.143285832,3.28749921,3.28104111,3.28396354,3.28539598,3.28059394
60.224794,3.16227766,3.29564497,-0.365194893,3.28712067,3.28069143,3.28361002,3.28498241,3.28024527
60.235286,2.44948974,3.29519771,-0.919623816,3.28674245,3.28034184,3.28325665,3.28457028,3.27989669
60.245778,3.87298335,3.29475217,0.760415133,3.2863646,3.27999239,3.28290346,3.28415961,3.27954824
60.256269,3.31662479,3.29430837,0.149386813,3.28598714,3.2796431,3.28255049,3.28375038,3.27919995
60.266761,3.16227766,3.29386618,-0.362751317,3.28561001,3.27929392,3.28219766,3.28334248,3.27885176
60.277252,3.46410162,3.29342564,0.413129486,3.28523326,3.2789449,3.28184504,3.28293597,3.27850374
60.287744,3.87298335,3.29298665,0.761575145,3.28485683,3.27859598,3.28149257,3.28253073,3.2781558
60.298236,2.82842712,3.29254919,-0.681265049,3.28448075,3.27824719,3.28114028,3.28212676,3.277808
60.308727,4.35889894,3.29211329,1.03285316,3.28410506,3.27789857,3.28078819,3.28172407,3.27746035
60.319219,3.31662479,3.29167883,0.157942912,3.28372967,3.27755004,3.28043625,3.28132256,3.2771128
60.32971,4.35889894,3.29124585,1.033273,3.28335465,3.27720168,3.28008451,3.28092228,3.27676541
60.340202,3.87298335,3.29081425,0.763000062,3.28297995,3.27685341,3.27973291,3.28052311,3.27641811
60.350694,2.82842712,3.29038404,-0.679674122,3.28260558,3.27650527,3.27938148,3.28012507,3.27607094
60.361185,4.12310563,3.28995522,0.912770728,3.28223157,3.2761573,3.27903026,3.27972818,3.27572393
60.371677,3.46410162,3.2895277,0.417820436,3.28185787,3.27580942,3.27867917,3.27933233,3.27537701
60.382168,2.82842712,3.28910152,-0.678729985,3.28148453,3.27546171,3.27832829,3.27893757,3.27503024
60.39266,3.74165739,3.28867657,0.673038493,3.28111149,3.27511408,3.27797754,3.2785438,3.27468357
60.403152,2.82842712,3.28825288,-0.678104533,3.28073876,3.27476659,3.27762696,3.27815104,3.27433702
60.413643,3.46410162,3.28783046,0.419846588,3.2803664,3.27441926,3.27727658,3.2777593,3.27399063
60.424135,3.31662479,3.2874092,0.170925699,3.27999432,3.27407202,3.27692633,3.27736848,3.27364432
60.434626,3.60555128,3.28698915,0.564413076,3.2796226,3.27372494,3.27657628,3.27697865,3.27329818
60.445118,3.46410162,3.28657023,0.421344733,3.27925116,3.27337795,3.27622636,3.2765897,3.27295212
60.45561,3.87298335,3.28615244,0.766048891,3.27888003,3.27303109,3.2758766,3.27620165,3.27260618
60.466101,3.87298335,3.28573581,0.76632078,3.27850925,3.27268438,3.27552704,3.27581452,3.2722604
60.476593,3.46410162,3.28532023,0.42282548,3.27813875,3.27233777,3.27517761,3.27542822,3.27191471
60.487084,3.31662479,3.28490576,0.17809837,3.27776858,3.27199132,3.27482837,3.2750428,3.27156917
60.497576,3.16227766,3.28449231,-0.349592117,3.27739869,3.27164495,3.27447926,3.27465817,3.27122371
60.508068,2.64575131,3.28407989,-0.798954679,3.27702911,3.27129871,3.27413031,3.27427435,3.27087838
60.518559,3.60555128,3.28366853,0.567347114,3.27665986,3.27095263,3.27378155,3.27389137,3.2705332
60.529051,4.35889894,3.28325812,1.03713105,3.27629087,3.27060663,3.27343292,3.27350912,3.2701881
60.539542,3.87298335,3.28284874,0.76820219,3.27592222,3.27026079,3.27308447,3.27312767,3.26984316
60.550034,2.82842712,3.28244028,-0.673804985,3.27555383,3.26991504,3.27273615,3.27274694,3.26949831
60.560526,2.82842712,3.28203277,-0.673502521,3.27518573,3.26956942,3.27238799,3.27236693,3.26915357
60.571017,3.16227766,3.28162623,-0.345468622,3.27481796,3.26922394,3.27204001,3.27198768,3.26880898
60.581509,3.16227766,3.28122056,-0.344880999,3.27445045,3.26887856,3.27169215,3.2716091,3.26846447
60.592,3.16227766,3.28081584,-0.344293736,3.27408326,3.26853332,3.27134449,3.27123125,3.26812012
60.602492,3.74165739,3.28041196,0.679150521,3.27371632,3.26818818,3.27099694,3.27085403,3.26777585
60.612984,3.31662479,3.28000895,0.191352666,3.27334967,3.26784315,3.27064954,3.27047748,3.26743169
60.623475,3,3.27960683,-0.528778624,3.27298333,3.26749828,3.27030233,3.27010162,3.26708769
60.633967,3.60555128,3.27920552,0.571266797,3.27261725,3.26715349,3.26995524,3.26972636,3.26674376
60.644458,3.31662479,3.27880508,0.194472906,3.27225147,3.26680885,3.26960834,3.26935176,3.26639999
60.65495,3.60555128,3.27840541,0.571966661,3.27188594,3.2664643,3.26926155,3.26897775,3.2660563
60.665442,2.82842712,3.27800655,-0.670506844,3.27152069,3.26611987,3.2689149,3.26860434,3.26571272
60.675933,3.74165739,3.27760852,0.681211324,3.27115575,3.26577558,3.26856845,3.26823156,3.26536928
60.686425,3.16227766,3.27721123,-0.339018534,3.27079104,3.26543138,3.2682221,3.26785932,3.26502593
60.696916,2.44948974,3.27681474,-0.909574074,3.27042664,3.26508733,3.26787594,3.2674877,3.26468273
60.707408,3.60555128,3.27641897,0.573700538,3.27006248,3.26474337,3.26752989,3.2671166,3.2643396
60.7179,4,3.27602394,0.850867826,3.26969858,3.26439952,3.26718399,3.26674606,3.26399659
60.728391,3.46410162,3.27562969,0.434133538,3.26933499,3.26405582,3.26683827,3.26637609,3.26365372
60.738883,3.46410162,3.27523612,0.434586585,3.26897162,3.2637122,3.26649266,3.26600662,3.26331093
60.749374,2.82842712,3.27484329,-0.668143824,3.26860856,3.26336872,3.26614723,3.26563772,3.26296829
60.759866,3,3.27445114,-0.523880842,3.26824572,3.26302533,3.26580191,3.26526929,3.26262572
60.770358,3.74165739,3.27405967,0.68381117,3.26788314,3.26268206,3.26545673,3.26490137,3.26228327
60.780849,2.44948974,3.27366892,-0.907843147,3.26752086,3.26233893,3.26511173,3.26453399,3.26194096
60.791341,3,3.27327881,-0.522760759,3.2671588,3.26199588,3.26476684,3.26416706,3.26159872
60.801832,2.64575131,3.2728894,-0.791920506,3.26679703,3.26165297,3.26442213,3.26380064,3.26125663
60.812324,3.46410162,3.2725006,0.437722527,3.26643548,3.26131015,3.26407752,3.26343467,3.26091461
60.822816,2.44948974,3.27211245,-0.906985508,3.26607418,3.26096744,3.26373306,3.26306917,3.26057271
60.833307,3.87298335,3.27172498,0.775408517,3.26571317,3.26062487,3.26338877,3.26270415,3.26023094
60.843799,3.60555128,3.27133809,0.57811174,3.26535238,3.26028238,3.26304459,3.26233956,3.25988925
60.85429,2.82842712,3.27095186,-0.665225328,3.26499187,3.25994004,3.26270058,3.26197544,3.25954771
60.864782,3.31662479,3.27056621,0.214612634,3.26463157,3.25959777,3.26235668,3.26161173,3.25920623
60.875274,4.24264069,3.27018116,0.986133627,3.26427152,3.25925562,3.26201291,3.26124845,3.25886487
60.885765,3.46410162,3.26979674,0.440800269,3.26391175,3.2589136,3.26166932,3.26088563,3.25852364
60.896257,3.74165739,3.26941287,0.687200492,3.26355219,3.25857167,3.26132583,3.2605232,3.25818249
60.906748,3,3.26902962,-0.518680655,3.26319291,3.25822987,3.26098252,3.2601612,3.25784148
60.91724,3.46410162,3.26864691,0.442102596,3.26283383,3.25788816,3.2606393,3.25979958,3.25750054
60.927732,3.87298335,3.26826476,0.777636536,3.262475,3.25754655,3.26029623,3.25943836,3.2571597
60.938223,3.46410162,3.26788321,0.442965462,3.26211644,3.25720508,3.25995332,3.25907757,3.25681901
60.948715,3.31662479,3.26750218,0.221636208,3.26175808,3.25686369,3.25961052,3.25871713,3.25647838
60.959206,3.46410162,3.26712173,0.443824159,3.26139999,3.25652244,3.25926788,3.25835711,3.2561379
60.969698,4.12310563,3.26674178,0.925399287,3.2610421,3.25618126,3.25892535,3.25799743,3.25579748
60.98019,4,3.26636237,0.85652649,3.26068445,3.25584019,3.25858295,3.25763812,3.25545717
60.990681,3.46410162,3.26598352,0.445104587,3.26032707,3.25549926,3.25824071,3.25727921,3.255117
61.001173,2.64575131,3.26560516,-0.787307974,3.25996988,3.2551584,3.25789858,3.25692063,3.2547769
61.011664,2.44948974,3.26522734,-0.903181932,3.25961296,3.25481769,3.25755662,3.25656244,3.25443693
61.022156,4,3.26485001,0.857408884,3.25925623,3.25447704,3.25721475,3.25620457,3.25409704
61.032648,3.74165739,3.26447317,0.690785218,3.25889973,3.2541365,3.25687302,3.25584704,3.25375724
61.043139,3.16227766,3.26409687,-0.319091223,3.2585435,3.2537961,3.25653145,3.25548988,3.25341758
61.053631,3.74165739,3.26372102,0.691329417,3.25818746,3.25345577,3.25618998,3.25513303,3.25307799
61.064122,3.16227766,3.2633457,-0.317912006,3.25783167,3.25311558,3.25584868,3.25477655,3.25273854
61.074614,4,3.26297083,0.858504031,3.25747608,3.25277546,3.25550747,3.25442036,3.25239915
61.085106,3.16227766,3.26259643,-0.316731389,3.25712071,3.25243544,3.25516639,3.25406449,3.25205986
61.095597,3.31662479,3.26222254,0.233242891,3.2567656,3.25209556,3.25482548,3.25370897,3.25172071
61.106089,2.23606798,3.26184923,-1.0128086,3.25641068,3.25175575,3.25448481,3.25335374,3.25138163
61.11658,3.87298335,3.26147628,0.781989175,3.25605601,3.25141607,3.25414415,3.25299885,3.25104267
61.127072,2.82842712,3.26110374,-0.657781586,3.25570153,3.25107647,3.25380359,3.25264423,3.25070379
61.137564,3,3.26073166,-0.510618896,3.25534726,3.25073696,3.25346316,3.25228992,3.250365
61.148055,4,3.26036006,0.860023222,3.25499325,3.2503976,3.25312289,3.25193594,3.25002635
61.158547,3.74165739,3.25998887,0.694023427,3.25463942,3.2500583,3.25278272,3.25158222,3.24968776
61.169038,3.46410162,3.25961816,0.452198474,3.25428585,3.24971913,3.2524427,3.25122883,3.2493493
61.17953,3.31662479,3.25924784,0.239534859,3.25393245,3.24938003,3.25210278,3.25087569,3.24901091
61.190022,3.60555128,3.25887796,0.588789703,3.25357927,3.24904104,3.25176299,3.25052283,3.24867262
61.200513,3,3.25850854,-0.508437354,3.25322633,3.24870217,3.25142335,3.25017029,3.24833446
61.211005,4.12310563,3.25813951,0.930035544,3.25287358,3.24836337,3.25108381,3.249818,3.24799636
61.221496,2.82842712,3.25777094,-0.655243324,3.25252107,3.24802471,3.25074443,3.24946601,3.24765839
61.231988,2.64575131,3.25740275,-0.782081476,3.25216874,3.24768611,3.25040514,3.24911426,3.24732048
61.24248,3.31662479,3.25703497,0.244110272,3.25181662,3.24734761,3.25006597,3.24876278,3.24698268
61.252971,3.16227766,3.25666763,-0.307229505,3.25146475,3.24700925,3.24972697,3.24841159,3.246645
61.263463,3,3.25630066,-0.506261457,3.25111304,3.24667095,3.24938805,3.24806064,3.24630738
61.273954,2.44948974,3.25593413,-0.898022489,3.25076159,3.24633277,3.24904929,3.24770997,3.24596989
61.284446,3.31662479,3.25556797,0.247096787,3.2504103,3.24599467,3.24871062,3.24735953,3.24563247
61.294938,3.31662479,3.2552022,0.247835817,3.25005923,3.24565666,3.24837208,3.24700934,3.24529514
61.305429,3.60555128,3.25483685,0.592211466,3.24970839,3.24531878,3.24803369,3.24665944,3.24495794
61.315921,2.82842712,3.25447187,-0.652721028,3.24935773,3.24498097,3.24769539,3.24630974,3.24462079
61.326412,3.46410162,3.2541073,0.45825137,3.2490073,3.24464329,3.24735724,3.24596033,3.24428378
61.336904,4,3.25374308,0.863861635,3.24865705,3.24430567,3.24701919,3.24561112,3.24394683
61.347396,4.12310563,3.25337923,0.932591224,3.248307,3.24396814,3.24668125,3.24526216,3.24360997
61.357887,3.31662479,3.25301581,0.252208218,3.24795719,3.24363075,3.24634348,3.24491346,3.24327323
61.368379,2.64575131,3.25265272,-0.779038769,3.24760755,3.24329341,3.24600578,3.24456496,3.24293656
61.37887,3.16227766,3.25229003,-0.300020617,3.24725814,3.24295621,3.24566825,3.24421673,3.24260001
61.389362,3.16227766,3.25192768,-0.299416132,3.24690891,3.24261907,3.2453308,3.24386869,3.24226353
61.399854,3.60555128,3.2515657,0.594966873,3.24655987,3.24228202,3.24499347,3.24352089,3.24192713
61.410345,4.12310563,3.25120411,0.933756669,3.24621107,3.2419451,3.24465629,3.24317333,3.24159086
61.420837,3.74165739,3.25084285,0.700581571,3.24586244,3.24160824,3.24431921,3.24282597,3.24125465
61.431328,3.46410162,3.25048198,0.462190041,3.24551404,3.24127151,3.24398227,3.24247886,3.24091856
61.44182,3.74165739,3.25012143,0.70109625,3.2451658,3.24093483,3.24364542,3.24213193,3.24058253
61.452312,3.31662479,3.24976124,0.258579867,3.24481777,3.24059826,3.24330869,3.24178522,3.24024659
61.462803,3.16227766,3.24940144,-0.295167369,3.24446997,3.2402618,3.24297211,3.24143875,3.23991078
61.473295,3.87298335,3.24904194,0.789899615,3.24412234,3.23992541,3.24263561,3.24109247,3.23957502
61.483786,2.64575131,3.24868283,-0.776486653,3.24377493,3.23958914,3.24229927,3.24074642,3.23923938
61.494278,3.16227766,3.24832403,-0.29333662,3.24342769,3.23925293,3.24196301,3.24040055,3.23890381
61.50477,3,3.24796558,-0.49796142,3.24308065,3.23891682,3.24162687,3.24005488,3.23856832
61.515261,3.31662479,3.24760749,0.262711433,3.24273384,3.23858082,3.24129088,3.23970944,3.23823295
61.525753,3.31662479,3.24724972,0.263391485,3.2423872,3.23824489,3.24095497,3.23936418,3.23789764
61.536244,2.82842712,3.24689231,-0.64688885,3.24204078,3.23790908,3.24061922,3.23901915,3.23756245
61.546736,3.31662479,3.2465352,0.264744378,3.24169453,3.23757333,3.24028354,3.23867428,3.23722732
61.557228,3.46410162,3.24617843,0.466822431,3.24134848,3.23723767,3.23994799,3.2383296,3.23689228
61.567719,3.74165739,3.24582203,0.704155778,3.24100266,3.23690213,3.23961258,3.23798515,3.23655735
61.578211,3.31662479,3.24546592,0.266756206,3.240657,3.23656665,3.23927726,3.23764086,3.23622249
61.588702,2.23606798,3.24511017,-1.00451092,3.24031156,3.23623129,3.23894208,3.2372968,3.23588774
61.599194,3,3.24475471,-0.494726909,3.2399663,3.23589599,3.23860699,3.23695288,3.23555304
61.609686,3.31662479,3.24439959,0.268747474,3.23962123,3.23556078,3.23827201,3.23660916,3.23521844
61.620177,2.82842712,3.24404481,-0.644684178,3.23927638,3.23522569,3.23793718,3.23626565,3.23488395
61.630669,4.12310563,3.24369033,0.937771451,3.23893171,3.23489065,3.23760243,3.23592229,3.23454951
61.64116,3.74165739,3.2433362,0.705918679,3.23858726,3.23455574,3.23726782,3.23557914,3.2342152
61.651652,3.74165739,3.24298236,0.706169259,3.23824297,3.23422088,3.2369333,3.23523614,3.23388094
61.662144,3.60555128,3.24262884,0.602430439,3.23789888,3.23388611,3.2365989,3.23489332,3.23354676
61.672635,3.31662479,3.24227567,0.272670349,3.23755503,3.23355146,3.23626464,3.23455071,3.2332127
61.683127,3.31662479,3.24192278,0.273316679,3.23721133,3.23321687,3.23593046,3.23420824,3.2328787
61.693618,3.16227766,3.24157024,-0.281589389,3.23686787,3.23288239,3.23559643,3.23386598,3.23254481
61.70411,3.46410162,3.24121799,0.472105527,3.23652457,3.23254797,3.23526247,3.23352386,3.23221098
61.714602,3.31662479,3.24086604,0.275243071,3.23618146,3.23221364,3.23492863,3.2331819,3.23187723
61.725093,2.82842712,3.24051444,-0.641940277,3.23583859,3.23187942,3.23459494,3.23284015,3.23154359
61.735585,3.46410162,3.24016312,0.473221397,3.23549589,3.23154526,3.23426132,3.23249853,3.23121001
61.746076,3.16227766,3.23981215,-0.278450156,3.23515341,3.23121122,3.23392785,3.23215711,3.23087654
61.756568,3.31662479,3.23946145,0.277782899,3.2348111,3.23087723,3.23359446,3.23181583,3.23054313
61.76706,3.74165739,3.23911106,0.708905018,3.23446899,3.23054333,3.23326119,3.23147471,3.2302098
61.777551,4.35889894,3.23876102,1.05836569,3.23412712,3.23020954,3.23292805,3.23113378,3.22987658
61.788043,3,3.23841125,-0.488273741,3.23378541,3.22987581,3.232595,3.23079298,3.22954342
61.798534,4.47213595,3.23806563,1.11088718,3.23344393,3.22954219,3.23226591,3.23045237,3.22921037
61.809026,2.44948974,3.23771648,-0.887821341,3.23310262,3.22920863,3.23193308,3.23011189,3.22887737
61.819518,3,3.23736763,-0.487203891,3.23276152,3.22887515,3.23160036,3.22977156,3.22854445
61.830009,2.82842712,3.23701913,-0.639212017,3.23242065,3.22854178,3.23126778,3.22943143,3.22821165
61.840501,2,3.2366709,-1.11205706,3.23207995,3.22820847,3.23093528,3.22909141,3.22787889
61.850992,2.64575131,3.236323,-0.768486626,3.23173949,3.22787527,3.23060293,3.22875158,3.22754625
61.861484,2.82842712,3.23597539,-0.638395068,3.2313992,3.22754213,3.23027065,3.22841188,3.22721366
61.871976,3.31662479,3.23562808,0.284599216,3.23105912,3.22720907,3.22993849,3.22807232,3.22688115
61.882467,3.60555128,3.23528111,0.608498291,3.23071928,3.22687612,3.22960646,3.22773294,3.22654875
61.892959,3.31662479,3.23493441,0.285815294,3.23037961,3.22654322,3.22927452,3.22739368,3.2262164
61.90345,3,3.23458805,-0.484342906,3.23004018,3.22621044,3.22894271,3.2270546,3.22588417
61.913942,3,3.23424197,-0.483985503,3.22970093,3.22587771,3.22861098,3.22671564,3.22555198
61.924434,2.82842712,3.23389619,-0.63676453,3.2293619,3.22554506,3.22827937,3.22637682,3.22521987
61.934925,3.16227766,3.23355076,-0.266970216,3.2290231,3.22521252,3.22794789,3.22603818,3.22488787
61.945417,3.16227766,3.2332056,-0.266322994,3.22868449,3.22488004,3.22761649,3.22569964,3.22455593
61.955908,4.12310563,3.23286078,0.943527872,3.22834613,3.22454766,3.22728523,3.22536129,3.22422409
61.9664,3.87298335,3.23251624,0.800291888,3.22800795,3.22421534,3.22695405,3.22502304,3.2238923
61.976892,3,3.23217201,-0.481842308,3.22766999,3.2238831,3.22662297,3.22468493,3.22356059
61.987383,3.74165739,3.23182812,0.714023293,3.22733228,3.22355097,3.22629204,3.22434699,3.22322899
61.997875,3,3.23148452,-0.481128379,3.22699476,3.22321888,3.22596118,3.22400916,3.22289743
62.008366,4,3.23114126,0.876845907,3.22665749,3.22288692,3.22563047,3.2236715,3.22256599
62.018858,3.16227766,3.23079828,-0.261764429,3.22632042,3.22255499,3.22529983,3.22333394,3.22223459
62.02935,3.46410162,3.23045561,0.483369426,3.22598357,3.22222315,3.22496929,3.22299652,3.22190327
62.039841,3.46410162,3.2301133,0.483723389,3.22564698,3.22189142,3.2246389,3.22265927,3.22157206
62.050333,3.16227766,3.22977127,-0.259795322,3.22531059,3.22155974,3.22430858,3.22232211,3.2212409
62.060824,2,3.22942959,-1.10879646,3.22497447,3.22122817,3.22397841,3.22198513,3.22090984
62.071316,3.60555128,3.22908821,0.613565865,3.22463855,3.22089664,3.2236483,3.22164824,3.22057883
62.081808,3.31662479,3.22874714,0.296441647,3.22430286,3.2205652,3.22331831,3.22131148,3.2202479
62.092299,3.74165739,3.22840643,0.71641535,3.22396745,3.22023386,3.22298845,3.22097488,3.21991707
62.102791,3,3.22806602,-0.477562581,3.22363225,3.21990257,3.22265867,3.22063838,3.21958629
62.113282,4,3.22772597,0.878791234,3.22329732,3.21957139,3.22232903,3.22030204,3.21925562
62.123774,3.74165739,3.22738621,0.717127027,3.22296261,3.21924026,3.22199946,3.2199658,3.218925
62.134266,2.64575131,3.22704679,-0.762427362,3.22262815,3.21890921,3.22167,3.21962968,3.21859444
62.144757,3,3.22670774,-0.476138365,3.22229398,3.21857826,3.22134068,3.21929373,3.218264
62.155249,3.74165739,3.226369,0.717835907,3.22196003,3.21824736,3.22101143,3.21895786,3.2179336
62.16574,3.16227766,3.22603063,-0.252493495,3.22162637,3.21791657,3.22068232,3.21862215,3.21760331
62.176232,3.46410162,3.22569257,0.488271492,3.22129294,3.21758582,3.22035329,3.21828653,3.21727306
62.186724,3.16227766,3.22535485,-0.251151733,3.22095978,3.21725515,3.22002436,3.21795104,3.21694288
62.197215,3.46410162,3.22501752,0.48896226,3.22062692,3.21692459,3.21969557,3.2176157,3.21661281
62.207707,3.60555128,3.22468052,0.617147275,3.22029431,3.21659408,3.21936686,3.21728045,3.21628279
62.218198,3,3.2243439,-0.473649552,3.21996201,3.21626367,3.21903828,3.21694535,3.21595287
62.22869,3.31662479,3.22400761,0.304330709,3.21962995,3.2159333,3.21870978,3.21661033,3.21562299
62.239182,3.16227766,3.22367169,-0.247778181,3.21929819,3.21560302,3.21838138,3.21627544,3.21529319
62.249673,3,3.22333617,-0.472584559,3.21896675,3.21527283,3.21805312,3.2159407,3.21496349
62.260165,3.46410162,3.22300099,0.491019988,3.21863557,3.2149427,3.21772493,3.21560604,3.21463383
62.270656,3.46410162,3.22266622,0.49136076,3.21830473,3.21461267,3.21739688,3.21527153,3.21430428
62.281148,3.16227766,3.2223318,-0.245059466,3.21797416,3.21428268,3.21706891,3.21493711,3.21397477
62.29164,2.44948974,3.22199777,-0.878924361,3.2176439,3.21395277,3.21674104,3.2146028,3.21364534
62.302131,2.64575131,3.22166417,-0.758889229,3.217314,3.21362296,3.2164133,3.21426864,3.21331601
62.312623,4,3.22133094,0.882422269,3.21698439,3.2132932,3.21608565,3.21393456,3.21298672
62.323114,4.12310563,3.22099814,0.94979339,3.21665514,3.21296354,3.21575812,3.21360063,3.21265753
62.333606,3.60555128,3.22066573,0.620391448,3.21632619,3.21263393,3.21543068,3.21326677,3.21232839
62.344098,3.46410162,3.22033373,0.493728555,3.21599759,3.21230439,3.21510333,3.21293303,3.21199931
62.354589,3,3.22000219,-0.469043909,3.21566938,3.21197495,3.21477613,3.21259943,3.21167034
62.365081,2.82842712,3.21967105,-0.625494943,3.21534149,3.21164556,3.214449,3.21226592,3.21134142
62.375572,3.60555128,3.21934038,0.621458684,3.215014,3.21131627,3.214122,3.21193254,3.21101259
62.386064,3.31662479,3.21901013,0.312433453,3.21468685,3.21098702,3.21379508,3.21159924,3.21068381
62.396556,2.82842712,3.21868033,-0.624702495,3.21436009,3.21065785,3.21346826,3.21126605,3.21035509
62.407047,4.58257569,3.21835103,1.16800028,3.21403375,3.21032878,3.21314158,3.210933,3.21002648
62.417539,3.60555128,3.21802217,0.622518354,3.21370778,3.20999975,3.21281497,3.21060003,3.20969791
62.42803,2.64575131,3.21769383,-0.756268815,3.21338225,3.20967083,3.2124885,3.2102672,3.20936944
62.438522,3.31662479,3.21736595,0.315053708,3.21305711,3.20934195,3.2121621,3.20993444,3.20904101
62.449014,3.60555128,3.21703857,0.62330787,3.21273241,3.20901314,3.21183581,3.20960179,3.20871265
62.459505,3.46410162,3.21671174,0.497383022,3.21240818,3.20868443,3.21150966,3.20926927,3.20838439
62.469997,3.87298335,3.21638541,0.81030731,3.21208438,3.20835576,3.21118357,3.20893683,3.20805617
62.480488,3.31662479,3.21605964,0.317120082,3.21176108,3.2080272,3.21085763,3.20860453,3.20772806
62.49098,2.82842712,3.2157344,-0.62234016,3.21143823,3.20769868,3.21053175,3.2082723,3.20739998
62.501472,2.82842712,3.21540972,-0.622079251,3.21111587,3.20737022,3.21020599,3.20794017,3.20707197
62.511963,3.16227766,3.21508565,-0.22979989,3.21079405,3.20704187,3.20988035,3.20760817,3.20674406
62.522455,4,3.21476214,0.886136478,3.21047273,3.20671356,3.2095548,3.20727625,3.20641619
62.532946,2.64575131,3.21443928,-0.754114027,3.21015198,3.20638536,3.20922937,3.20694446,3.20608842
62.543438,4.12310563,3.214117,0.953408947,3.20983175,3.20605719,3.20890403,3.20661274,3.20576069
62.55393,3.16227766,3.21379538,-0.226975144,3.2095121,3.20572909,3.20857878,3.20628112,3.20543303
62.564421,3.31662479,3.21347444,0.321170283,3.20919308,3.2054011,3.20825367,3.20594963,3.20510546
62.574913,2.82842712,3.21319545,-0.620296968,3.20887463,3.20507314,3.20797001,3.20561821,3.20477794
62.585404,3,3.21287592,-0.461384789,3.20855685,3.20474528,3.20764514,3.20528693,3.20445051
62.595896,3.74165739,3.21255708,0.727392812,3.20823969,3.20441747,3.20732034,3.20495571,3.20412313
62.606388,3,3.21223899,-0.460694031,3.20792321,3.20408972,3.20699564,3.20462458,3.20379581
62.616879,3.16227766,3.21192169,-0.222809409,3.20760745,3.20376207,3.20667109,3.20429359,3.20346858
62.627371,2.82842712,3.21160516,-0.619013759,3.2072924,3.20343447,3.2063466,3.20396267,3.2031414
62.637862,2.23606798,3.21128947,-0.987533035,3.20697812,3.20310696,3.20602226,3.20363187,3.20281432
62.648354,3.46410162,3.2109746,0.503117294,3.2066646,3.20277949,3.20569798,3.20330114,3.20248727
62.658846,3.60555128,3.21066061,0.628403266,3.20635188,3.20245209,3.20537381,3.2029705,3.20216029
62.669337,2.44948974,3.21034755,-0.872271639,3.20604003,3.20212479,3.20504978,3.20263999,3.20183341
62.679829,3.46410162,3.21003541,0.504049807,3.20572903,3.20179753,3.20472583,3.20230955,3.20150656
62.69032,3.16227766,3.20972426,-0.217822413,3.20541896,3.20147037,3.204402,3.20197923,3.20117981
62.700812,3.31662479,3.2094141,0.327430433,3.20510981,3.20114324,3.20407826,3.20164897,3.2008531
62.711304,3.60555128,3.20910499,0.629639807,3.20480165,3.20081618,3.20375462,3.20131881,3.20052645
62.721795,3.31662479,3.208797,0.328371426,3.20449453,3.20048923,3.20343111,3.20098877,3.20019991
62.732287,3.87298335,3.20849011,0.815164546,3.20418846,3.20016231,3.20310768,3.2006588,3.1998734
62.742778,3.74165739,3.20818448,0.730392295,3.20388353,3.19983548,3.20278444,3.20032895,3.19954698
62.75327,4,3.20788001,0.890011233,3.20357974,3.1995087,3.20246122,3.19999916,3.1992206
62.763762,2.64575131,3.20757681,-0.749550198,3.20327716,3.19918198,3.2021381,3.19966946,3.19889429
62.774253,3.16227766,3.20727498,-0.212125719,3.20297588,3.19885536,3.20181513,3.19933989,3.19856807
62.784745,2.64575131,3.20697452,-0.749148322,3.20267591,3.19852878,3.20149222,3.19901037,3.19824189
62.795236,3.60555128,3.20667555,0.631566093,3.20237736,3.1982023,3.20116946,3.19868098,3.19791581
62.805728,3.31662479,3.20637807,0.332034216,3.20208024,3.19787585,3.20084677,3.19835165,3.19758976
62.81622,3.60555128,3.20608219,0.632035667,3.20178466,3.19754947,3.20052418,3.19802241,3.19726378
62.826711,4.24264069,3.20578802,1.01825963,3.20149071,3.19722319,3.20020174,3.19769328,3.19693789
62.837203,3.60555128,3.20549557,0.632499573,3.20119843,3.19689694,3.19987937,3.19736422,3.19661203
62.847694,3.31662479,3.20520499,0.333796053,3.20090795,3.19657079,3.19955713,3.19703528,3.19628628
62.858186,3.16227766,3.20491631,-0.20649129,3.20061931,3.19624467,3.19923497,3.19670639,3.19596055
62.868678,3.87298335,3.20462967,0.817529003,3.20033265,3.19591863,3.19891292,3.19637759,3.1956349
62.879169,2,3.2043452,-1.09742663,3.20004809,3.19559268,3.19859101,3.19604891,3.19530933
62.889661,3.46410162,3.20406296,0.509939852,3.19976569,3.19526676,3.19826917,3.19572029,3.1949838
62.900152,3,3.20378313,-0.451423443,3.19948564,3.19494094,3.19794747,3.19539178,3.19465837
62.910644,2.82842712,3.20350577,-0.612436646,3.199208,3.19461516,3.19762584,3.19506334,3.19433297
62.921136,3.31662479,3.20323107,0.336739844,3.19893296,3.19428944,3.19730433,3.19473497,3.19400764
62.931627,3.31662479,3.20295919,0.337143287,3.19866068,3.19396382,3.19698295,3.19440673,3.1936824
62.942119,3.31662479,3.20269026,0.337541888,3.19839128,3.19363823,3.19666165,3.19407854,3.19335719
62.95261,4,3.2024245,0.893070823,3.19812499,3.19331274,3.19634048,3.19375046,3.19303208
62.963102,3.31662479,3.20216206,0.338323414,3.19786195,3.19298728,3.1960194,3.19342244,3.192707
62.973594,3.46410162,3.20190316,0.512053181,3.19760239,3.19266189,3.19569842,3.19309451,3.19238198
62.984085,3.74165739,3.20164805,0.734853279,3.19734657,3.1923366,3.19537758,3.19276669,3.19205706
62.994577,3.31662479,3.20139692,0.339452304,3.19709467,3.19201133,3.19505681,3.19243892,3.19173217
63.005068,4,3.2011501,0.893784034,3.196847,3.19168617,3.19473619,3.19211127,3.19140738
63.01556,3.31662479,3.20090782,0.340171979,3.19660382,3.19136104,3.19441565,3.19178368,3.19108261
63.026052,2.64575131,3.2006704,-0.744928918,3.19636545,3.19103597,3.19409521,3.19145616,3.19075792
63.036543,3.60555128,3.20043823,0.636484915,3.19613225,3.190711,3.19377491,3.19112876,3.19043331
63.047035,2.82842712,3.20021161,-0.609741329,3.19590456,3.19038606,3.19345469,3.19080141,3.19010874
63.057526,3.74165739,3.19999101,0.735979876,3.19568281,3.19006121,3.19313461,3.19047417,3.18978426
63.068018,2.64575131,3.19977681,-0.744328894,3.19546742,3.1897364,3.19281461,3.19014699,3.18945981
63.07851,4,3.19956953,0.894667796,3.19525888,3.18941166,3.19249472,3.18981989,3.18913543
63.089001,3.31662479,3.19936972,0.342425271,3.19505776,3.18908701,3.19217497,3.1894929,3.18881114
63.099493,3.60555128,3.19917793,0.637474192,3.1948646,3.18876239,3.1918553,3.18916596,3.18848688
63.109984,3,3.19899483,-0.446088368,3.19468007,3.18843786,3.19153577,3.18883913,3.18816271
63.120476,3.74165739,3.19882111,0.736774239,3.19450487,3.18811337,3.19121632,3.18851235,3.18783858
63.130968,3.46410162,3.19859768,0.515270737,3.19433979,3.18778894,3.19083696,3.18818565,3.1875145
63.141459,3.31662479,3.19844527,0.343772488,3.19418572,3.18746461,3.19051782,3.18785906,3.18719052
63.151951,2.82842712,3.19830485,-0.608175737,3.19404359,3.18714031,3.19019877,3.18753253,3.18686657
63.162442,3.74165739,3.19817754,0.737210859,3.19391452,3.1868161,3.18987986,3.1872061,3.18654272
63.172934,2.64575131,3.1980645,-0.743177761,3.19379967,3.18649192,3.18956102,3.18687972,3.18621889
63.183426,3,3.19796708,-0.444934912,3.1937004,3.18616781,3.1892423,3.18655342,3.18589513
63.193917,4.12310563,3.19788678,0.961882969,3.1936182,3.18584379,3.18892373,3.18622723,3.18557146
63.204409,2.23606798,3.19782527,-0.980692252,3.19355475,3.18551981,3.18860523,3.18590109,3.18524782
63.2149,3,3.19778444,-0.444729628,3.19351194,3.18519591,3.18828688,3.18557506,3.18492427
63.225392,3.60555128,3.19776642,0.638580348,3.19349188,3.18487205,3.18796861,3.18524907,3.18460075
63.235884,2.23606798,3.1977736,-0.980665906,3.19349701,3.18454825,3.18765045,3.18492316,3.1842773
63.246375,3.60555128,3.19780871,0.638547232,3.19353003,3.18422455,3.18733243,3.18459736,3.18395393
63.256867,4.35889894,3.19787486,1.07750828,3.19359406,3.18390087,3.1870145,3.18427161,3.1836306
63.267358,2.82842712,3.19797557,-0.607904963,3.19369263,3.18357729,3.18669671,3.18394597,3.18330735
63.27785,3.46410162,3.19811493,0.515738973,3.19382983,3.18325374,3.18637901,3.18362037,3.18298414
63.288342,3.46410162,3.19829759,0.515561851,3.19401033,3.18293025,3.18606142,3.18329485,3.18266099
63.298833,3,3.19852895,-0.445565875,3.19423951,3.18260686,3.18574397,3.18296943,3.18233793
63.309325,3.60555128,3.19881533,0.637758535,3.19452371,3.1822835,3.18542661,3.18264406,3.1820149
63.319816,3.16227766,3.19916401,-0.192058183,3.19487024,3.18196022,3.1851094,3.1823188,3.18169196
63.330308,3.16227766,3.19958368,-0.193147667,3.19528778,3.18163698,3.18479227,3.18199358,3.18136905
63.3408,3,3.2000845,-0.447308054,3.1957865,3.1813138,3.18447525,3.18166844,3.1810462
63.351291,3.60555128,3.20067844,0.636296187,3.1963784,3.18099072,3.18415838,3.18134341,3.18072344
63.361783,3.60555128,3.20137996,0.635744695,3.19707796,3.18066766,3.1838416,3.18101842,3.18040071
63.372274,3.87298335,3.20220598,0.819009989,3.19790212,3.1803447,3.18352496,3.18069353,3.18007808
63.382766,3.87298335,3.20320984,0.818396914,3.19887142,3.18002177,3.18324143,3.18036869,3.17975547
63.393258,2.64575131,3.20435005,-0.747394633,3.20001004,3.17969889,3.18292502,3.18004392,3.17943292
63.403749,3.16227766,3.20568804,-0.208351579,3.20134664,3.17937611,3.18260875,3.17971926,3.17911046
63.414241,4.12310563,3.20725808,0.956999242,3.20291552,3.17905336,3.18229258,3.17939464,3.17878803
63.424732,2.64575131,3.20909976,-0.750565421,3.20475635,3.1787307,3.18197655,3.17907013,3.1784657
63.435224,2.82842712,3.21125997,-0.618734876,3.20691607,3.17840808,3.18166061,3.17874566,3.17814339
63.445716,2.82842712,3.21379214,-0.620777747,3.20944817,3.17808551,3.18134479,3.17842126,3.17782114
63.456207,3.16227766,3.21675685,-0.233407773,3.21241333,3.17776303,3.18102911,3.17809697,3.17749898
63.466699,3.46410162,3.22022262,0.493841058,3.21588016,3.17744059,3.18071353,3.17777272,3.17717685
63.47719,3.74165739,3.22426241,0.719301732,3.21992169,3.17711823,3.1803981,3.17744857,3.17685481
63.487682,3.87298335,3.22895337,0.802514784,3.2246152,3.17679591,3.18008276,3.17712447,3.1765328
63.498174,3,3.23436829,-0.484115989,3.23003356,3.17647364,3.17976754,3.17680044,3.17621084
63.508665,3.46410162,3.2405657,0.472795848,3.23623537,3.17615147,3.17945247,3.17647651,3.17588898
63.519157,2.82842712,3.2475739,-0.647415458,3.24324895,3.17582933,3.17913749,3.17615262,3.17556715
63.529648,3.60555128,3.25535814,0.591771187,3.25103951,3.17550728,3.17882266,3.17582884,3.1752454
63.54014,3,3.263786,-0.51360101,3.25947444,3.17518525,3.17850793,3.17550509,3.17492369
63.550632,2.64575131,3.27257338,-0.791720952,3.26826925,3.17486329,3.17819332,3.17518142,3.17460203
63.561123,3.16227766,3.28124241,-0.344912668,3.27694544,3.17454142,3.17787886,3.17485785,3.17428046
63.571615,3.46410162,3.28911221,0.418317355,3.28482124,3.17421957,3.1775645,3.17453432,3.17395892
63.582106,3,3.29535233,-0.54346327,3.29106514,3.17389782,3.17725029,3.1742109,3.17363747
63.592598,3.31662479,3.29914217,0.13222186,3.29485549,3.1735761,3.17693617,3.17388751,3.17331605
63.60309,3.31662479,3.29988926,0.129365869,3.29559905,3.17325444,3.17662218,3.17356419,3.17299469
63.613581,3.16227766,3.29742917,-0.367629583,3.29313117,3.17293286,3.17630835,3.17324098,3.17267341
63.624073,3.60555128,3.29208387,0.559881595,3.28777422,3.17261132,3.17599461,3.17291781,3.17235217
63.634564,3.31662479,3.28455031,0.179093502,3.28022599,3.17228986,3.17568103,3.17259473,3.17203101
63.645056,4.24264069,3.27567664,0.983343302,3.27133546,3.17196844,3.17536784,3.1722717,3.17170988
63.655548,4.24264069,3.26625718,0.9881212,3.26189852,3.17164707,3.17505448,3.17194874,3.17138881
63.666039,4.24264069,3.25690919,0.992840118,3.25253297,3.1713258,3.17474128,3.17162587,3.17106783
63.676531,3.16227766,3.2480382,-0.292849004,3.24364488,3.17100455,3.17442818,3.17130305,3.17074687
63.687022,3.31662479,3.23987194,0.277043048,3.23546231,3.1706834,3.17411524,3.17098033,3.17042601
63.697514,3.31662479,3.23250256,0.290038325,3.22807755,3.17036227,3.1738024,3.17065764,3.17010517
63.708006,3.46410162,3.22593908,0.488018988,3.22149965,3.1700412,3.17348969,3.17033503,3.16978439
63.718497,2.82842712,3.220141,-0.625870494,3.21568806,3.16972022,3.17317713,3.17001251,3.1694637
63.728989,2.23606798,3.21504155,-0.989430933,3.21057595,3.16939927,3.17286468,3.16969004,3.16914303
63.73948,2.82842712,3.21056648,-0.618174209,3.20608896,3.16907841,3.17255239,3.16936766,3.16882246
63.749972,2.82842712,3.2066391,-0.614989409,3.20215032,3.16875758,3.1722402,3.16904532,3.16850191
63.760464,3.60555128,3.20318801,0.634321109,3.19868851,3.16843681,3.17192815,3.16872305,3.16818142
63.770955,3.60555128,3.20014794,0.636712917,3.19563821,3.16811612,3.17161626,3.16840088,3.16786102
63.781447,4,3.19746001,0.895845962,3.19294044,3.16779547,3.17130447,3.16807875,3.16754065
63.791938,3.31662479,3.19507367,0.348641818,3.19054458,3.1674749,3.17099285,3.16775671,3.16722036
63.80243,3.31662479,3.19294436,0.35168229,3.18840601,3.16715436,3.17068133,3.16743472,3.1669001
63.812922,3,3.19103452,-0.437074964,3.18648713,3.16683388,3.17036995,3.16711279,3.1665799
63.823413,3.46410162,3.18930887,0.524206777,3.1847526,3.16651349,3.17005873,3.16679096,3.16625979
63.833905,3.16227766,3.18774672,-0.159590292,3.18318171,3.16619313,3.16974762,3.16646916,3.1659397
63.844396,2.64575131,3.1863222,-0.735235262,3.18174855,3.16587286,3.16943668,3.16614747,3.1656197
63.854888,2.82842712,3.18501591,-0.597150556,3.18043369,3.16555262,3.16912585,3.16582581,3.16529973
63.86538,3.74165739,3.18381193,0.746890526,3.17922119,3.16523243,3.16881515,3.16550422,3.16497982
63.875871,3.16227766,3.18269687,-0.142895793,3.17809764,3.16491233,3.16850463,3.16518273,3.16465999
63.886363,3.31662479,3.18165916,0.367376683,3.17705146,3.16459226,3.16819421,3.16486127,3.16434019
63.896854,4.35889894,3.18068941,1.08545361,3.17607323,3.16427228,3.16788397,3.16453992,3.16402048
63.907346,2.44948974,3.17977928,-0.854569797,3.17515461,3.16395233,3.16757384,3.16421859,3.1637008
63.917838,3.31662479,3.17892192,0.371083379,3.17428874,3.16363244,3.16726385,3.16389734,3.16338117
63.928329,3.60555128,3.17811143,0.653788838,3.17346972,3.16331263,3.16695403,3.16357618,3.16306163
63.938821,4.24264069,3.17734254,1.03213282,3.17269225,3.16299286,3.16664432,3.16325506,3.16274212
63.949312,2.23606798,3.17661093,-0.969815937,3.17195202,3.16267317,3.16633479,3.16293404,3.1624227
63.959804,3.31662479,3.1759126,0.375116235,3.17124501,3.16235351,3.16602538,3.16261305,3.1621033
63.970296,2.82842712,3.17524424,-0.588911808,3.17056792,3.1620339,3.16571611,3.16229213,3.16178396
63.980787,3.16227766,3.17460295,-0.111019305,3.16991784,3.16171439,3.16540702,3.1619713,3.1614647
63.991279,2.82842712,3.17398598,-0.587842547,3.16929202,3.1613949,3.16509804,3.16165051,3.16114548
64.00177,2,3.17339117,-1.08323182,3.16868827,3.16107551,3.16478925,3.16132982,3.16082634
64.012262,3.31662479,3.17281635,0.379220833,3.16810445,3.16075614,3.16448057,3.16100916,3.16050723
64.022754,3.46410162,3.17225977,0.540223882,3.16753879,3.16043682,3.16417204,3.16068857,3.16018817
64.033245,2.64575131,3.17171988,-0.725236902,3.16698974,3.1601176,3.16386369,3.16036807,3.1598692
64.043737,2.82842712,3.17119512,-0.585463913,3.16645574,3.1597984,3.16355547,3.16004761,3.15955026
64.054228,3.87298335,3.17068431,0.838032835,3.16593561,3.1594793,3.16324742,3.15972725,3.15923141
64.06472,3,3.17018621,-0.412536318,3.16542809,3.15916022,3.1629395,3.15940692,3.15891258
64.075212,3,3.16969983,-0.411946392,3.1649322,3.15884119,3.16263173,3.15908666,3.15859381
64.085703,3.46410162,3.16922428,0.543026095,3.16444705,3.15852226,3.16232415,3.15876649,3.15827512
64.096195,2.64575131,3.16875862,-0.723192442,3.1639717,3.15820335,3.16201669,3.15844636,3.15795647
64.106686,3.60555128,3.16830219,0.661248128,3.16350548,3.15788454,3.16170942,3.15812632,3.1576379
64.117178,3.16227766,3.16785421,-0.0746762996,3.16304762,3.15756574,3.16140228,3.15780632,3.15731935
64.12767,3.60555128,3.1674141,0.66191931,3.16259752,3.15724701,3.1610953,3.15748638,3.15700087
64.138161,3,3.16698134,-0.408633505,3.16215468,3.15692837,3.1607885,3.15716654,3.15668247
64.148653,3,3.16655533,-0.408111906,3.16171847,3.15660975,3.16048183,3.15684673,3.15636409
64.159144,3.46410162,3.16613567,0.545862568,3.16128852,3.15629122,3.16017536,3.15652701,3.15604581
64.169636,3,3.16572187,-0.407089505,3.16086431,3.15597272,3.15986902,3.15620734,3.15572755
64.180128,2.44948974,3.16531356,-0.846063717,3.1604455,3.15565427,3.15956284,3.15588772,3.15540934
64.190619,2.64575131,3.16491042,-0.720526967,3.16003174,3.15533592,3.15925685,3.1555682,3.15509123
64.201111,2,3.16451206,-1.0791256,3.15962265,3.15501759,3.158951,3.15524872,3.15477314
64.211602,2,3.16411823,-1.07894311,3.15921799,3.15469935,3.15864535,3.15492933,3.15445513
64.222094,3.46410162,3.1637286,0.548062967,3.1588174,3.15438113,3.15833983,3.15460997,3.15413716
64.232586,2.82842712,3.16334294,-0.578719113,3.15842067,3.15406298,3.15803449,3.15429068,3.15381924
64.243077,3.31662479,3.16296104,0.391999676,3.1580276,3.15374491,3.15772934,3.15397148,3.15350141
64.253569,2.64575131,3.16258263,-0.718909815,3.15763788,3.15342687,3.15742433,3.15365232,3.1531836
64.26406,3.16227766,3.16220757,0.0083718509,3.1572514,3.15310891,3.15711952,3.15333325,3.15286588
64.274552,2.23606798,3.1618356,-0.962168191,3.1568679,3.15279099,3.15681486,3.15301421,3.15254819
64.285044,3,3.16146659,-0.401829061,3.15648722,3.15247312,3.15651036,3.15269524,3.15223055
64.295535,2,3.16110041,-1.0775437,3.15610926,3.15215534,3.15620608,3.15237636,3.151913
64.306027,3.46410162,3.16073685,0.55078559,3.15573379,3.15183759,3.15590194,3.15205752,3.15159548
64.316518,4.35889894,3.16037583,1.0947708,3.15536074,3.15151992,3.155598,3.15173877,3.15127804
64.32701,3.60555128,3.16001716,0.667483423,3.1549899,3.15120228,3.15529422,3.15142005,3.15096063
64.337502,2.82842712,3.15966075,-0.575528992,3.15462121,3.1508847,3.15499061,3.1511014,3.15064328
64.347993,3,3.15930652,-0.399132211,3.15425457,3.15056721,3.15468722,3.15078284,3.15032601
64.358485,3,3.15895431,-0.398690749,3.15388981,3.15024975,3.15438398,3.15046432,3.15000877
64.368976,3.60555128,3.15860409,0.668541088,3.15352691,3.14993237,3.15408095,3.15014588,3.14969161
64.379468,3.16227766,3.15825569,0.0634189759,3.1531657,3.14961502,3.15377807,3.14982749,3.14937449
64.38996,2.82842712,3.15790908,-0.574005184,3.15280613,3.14929773,3.15347538,3.14950915,3.14905742
64.400451,2,3.15756419,-1.07590157,3.15244817,3.14898052,3.15317291,3.14919091,3.14874043
64.410943,3.60555128,3.15722089,0.669574777,3.15209165,3.14866334,3.1528706,3.1488727,3.14842347
64.421434,3.60555128,3.15687919,0.669829896,3.15173658,3.14834625,3.1525685,3.14855459,3.1481066
64.431926,2.44948974,3.15653894,-0.840862173,3.15138283,3.14802919,3.15226657,3.1482365,3.14778976
64.442418,3,3.15620012,-0.395221604,3.15103037,3.14771219,3.15196483,3.14791848,3.14747297
64.452909,2.23606798,3.1558627,-0.959059291,3.15067918,3.14739527,3.15166331,3.14760056,3.14715627
64.463401,3.74165739,3.15552657,0.765591806,3.15032912,3.14707838,3.15136196,3.14728267,3.1468396
64.473892,3.31662479,3.15519175,0.401787312,3.14998022,3.14676158,3.15106084,3.14696487,3.14652301
64.484384,3.60555128,3.15485811,0.671336851,3.14963236,3.1464448,3.15075988,3.1466471,3.14620645
64.494876,4.12310563,3.15452565,0.98416461,3.14928553,3.14612809,3.15045912,3.1463294,3.14588994
64.505367,2.82842712,3.15419435,-0.570760218,3.14893971,3.14581146,3.1501586,3.14601179,3.14557352
64.515859,3.60555128,3.15386412,0.672076748,3.14859481,3.14549485,3.14985825,3.14569421,3.14525713
64.52635,3.60555128,3.15353498,0.672321573,3.14825084,3.14517834,3.14955813,3.14537672,3.14494083
64.536842,3.74165739,3.15320683,0.767105312,3.14790771,3.14486185,3.14925819,3.14505927,3.14462455
64.547334,3.16227766,3.15287967,0.0969432475,3.14756541,3.14454542,3.14895845,3.14474188,3.14430833
64.557825,3.46410162,3.1525535,0.558164957,3.14722395,3.14422908,3.14865896,3.14442459,3.14399219
64.568317,3.31662479,3.15222822,0.405458465,3.14688322,3.14391277,3.14835964,3.14410732,3.14367609
64.578808,3.46410162,3.15190388,0.558746572,3.14654326,3.14359654,3.14806057,3.14379015,3.14336007
64.5893,2.82842712,3.15158039,-0.56846571,3.14620398,3.14328034,3.14776168,3.14347302,3.14304407
64.599792,4.24264069,3.15125774,1.04469275,3.14586539,3.1429642,3.14746301,3.14315594,3.14272813
64.610283,2.44948974,3.15093595,-0.837523858,3.1455275,3.14264815,3.14716458,3.14283896,3.14241228
64.620775,3,3.1506282,-0.388108486,3.1451902,3.14233213,3.14687962,3.14252201,3.14209646
64.631266,3.31662479,3.15030801,0.40781955,3.14485355,3.14201619,3.14658164,3.14220515,3.14178072
64.641758,3,3.14998855,-0.387283549,3.14451747,3.14170028,3.14628386,3.14188833,3.14146501
64.65225,3.31662479,3.14966984,0.408601218,3.14418195,3.14138443,3.1459863,3.14157156,3.14114936
64.662741,4.12310563,3.14935188,0.986789615,3.14384702,3.14106866,3.14568899,3.1412549,3.14083379
64.673233,2.23606798,3.14903461,-0.955492873,3.14351259,3.14075292,3.14539189,3.14093826,3.14051825
64.683724,3.46410162,3.14871806,0.561590202,3.14317871,3.14043728,3.14509504,3.14062171,3.1402028
64.694216,3.16227766,3.14840216,0.117794304,3.1428453,3.14012165,3.1447984,3.1403052,3.13988737
64.704708,2.64575131,3.14808693,-0.708756389,3.14251236,3.13980609,3.14450199,3.13998875,3.139572
64.715199,2.64575131,3.14777238,-0.708534453,3.14217993,3.13949062,3.14420585,3.13967239,3.13925672
64.725691,2.82842712,3.14745844,-0.564828574,3.14184792,3.13917517,3.14390992,3.13935607,3.13894147
64.736182,3.46410162,3.14714516,0.562988856,3.14151639,3.13885981,3.14361426,3.13903984,3.1386263
64.746674,4.12310563,3.14683247,0.98806536,3.14118524,3.13854448,3.14331881,3.13872364,3.13831116
64.757166,3.46410162,3.14652038,0.563543461,3.14085451,3.1382292,3.1430236,3.1384075,3.13799607
64.767657,3.46410162,3.14620892,0.563819735,3.14052421,3.13791402,3.14272867,3.13809146,3.13768108
64.778149,3.87298335,3.14589802,0.852692987,3.14019427,3.13759886,3.14243396,3.13777544,3.13736611
64.78864,3.60555128,3.14558772,0.67820613,3.13986474,3.13728379,3.14213953,3.13745952,3.13705122
64.799132,3,3.14527796,-0.381153464,3.13953554,3.13696875,3.14184533,3.13714364,3.13673637
64.809624,3,3.14496877,-0.380747642,3.1392067,3.13665377,3.14155138,3.13682781,3.13642157
64.820115,3.16227766,3.14466015,0.132730952,3.13887825,3.13633887,3.14125771,3.13651208,3.13610686
64.830607,3.74165739,3.14435206,0.772855308,3.13855009,3.136024,3.14096428,3.13619638,3.13579218
64.841098,3.46410162,3.14404453,0.565735876,3.1382223,3.13570922,3.14067114,3.13588077,3.13547758
64.85159,3.16227766,3.14373751,0.136162213,3.1378948,3.13539447,3.14037824,3.13556519,3.13516301
64.862082,3.16227766,3.14343102,0.13728307,3.13756761,3.13507978,3.1400856,3.13524968,3.1348485
64.872573,3.16227766,3.14312508,0.138392857,3.13724076,3.13476518,3.13979327,3.13493426,3.13453407
64.883065,3.46410162,3.14281962,0.566817423,3.13691417,3.1344506,3.13950117,3.13461887,3.13421968
64.893556,3.87298335,3.14251471,0.854674578,3.1365879,3.13413611,3.13920938,3.13430357,3.13390537
64.904048,3.60555128,3.14221028,0.680691557,3.13626189,3.13382165,3.13891785,3.13398831,3.13359109
64.91454,3.60555128,3.14173264,0.681042319,3.13593615,3.13350725,3.13845269,3.13367311,3.13327686
64.925031,3,3.14142944,-0.376071056,3.13561071,3.13319294,3.13816194,3.133358,3.13296273
64.935523,4.12310563,3.14112671,0.990948492,3.1352855,3.13287866,3.13787146,3.13304292,3.13264862
64.946014,3.16227766,3.1408245,0.146468957,3.13496058,3.13256446,3.13758129,3.13272794,3.13233459
64.956506,4.24264069,3.14052327,1.0498178,3.13463588,3.13225029,3.13729189,3.13241299,3.1320206
64.966998,3.60555128,3.14022201,0.682150468,3.13431143,3.13193618,3.13700228,3.1320981,3.13170666
64.977489,3.74165739,3.13992127,0.775716518,3.13398725,3.13162217,3.13671299,3.1317833,3.13139282
64.987981,3,3.13962098,-0.37365891,3.13366327,3.13130817,3.13642398,3.13146853,3.131079
64.998472,3.16227766,3.1393212,0.15151389,3.13333956,3.13099427,3.13613529,3.13115386,3.13076526
65.008964,4.12310563,3.13902187,0.992009957,3.13301604,3.1306804,3.13584689,3.13083922,3.13045156
65.019456,3.74165739,3.13872302,0.776488485,3.13269274,3.13036658,3.13555879,3.13052465,3.13013791
65.029947,2.82842712,3.13842467,-0.556774234,3.13236969,3.13005286,3.13527103,3.13021016,3.12982435
65.040439,2.82842712,3.13812677,-0.556506646,3.13204682,3.12973916,3.13498356,3.12989571,3.12951082
65.05093,3,3.13782937,-0.371253785,3.13172419,3.12942555,3.13469644,3.12958135,3.12919738
65.061422,3.16227766,3.13753242,0.1573062,3.13140174,3.12911197,3.13440961,3.12926702,3.12888396
65.071914,4.79583152,3.13723594,1.28786474,3.13107948,3.12879845,3.13412311,3.12895276,3.12857061
65.082405,3.31662479,3.13693996,0.423892475,3.13075746,3.12848502,3.13383696,3.12863858,3.12825734
65.092897,3.16227766,3.13664442,0.160103829,3.13043559,3.12817162,3.13355112,3.12832444,3.1279441
65.103388,3.16227766,3.13634939,0.161022579,3.13011395,3.1278583,3.13326564,3.1280104,3.12763095
65.11388,2.64575131,3.1360548,-0.700216744,3.12979246,3.12754502,3.13298047,3.12769638,3.12731782
65.124372,4,3.13576068,0.929644727,3.12947116,3.1272318,3.13269564,3.12738243,3.12700476
65.134863,3.46410162,3.13546707,0.57326656,3.12915007,3.12691866,3.13241119,3.12706857,3.12669178
65.145355,2.44948974,3.1351739,-0.828060477,3.12882913,3.12660555,3.13212706,3.12675475,3.12637883
65.155846,3.87298335,3.13488123,0.859128696,3.12850839,3.12629254,3.13184332,3.12644101,3.12606597
65.166338,3,3.13458901,-0.366863751,3.12818779,3.12597955,3.1315599,3.12612731,3.12575314
65.17683,2.23606798,3.13429727,-0.947749594,3.12786736,3.12566662,3.13127685,3.12581367,3.12544037
65.187321,3.87298335,3.13400604,0.859637894,3.12754713,3.12535378,3.13099419,3.12550013,3.12512769
65.197813,2.64575131,3.13371525,-0.69854416,3.12722704,3.12504097,3.13071187,3.12518661,3.12481503
65.208304,3,3.13342498,-0.365273845,3.12690713,3.12472826,3.13042995,3.1248732,3.12450246
65.218796,3.60555128,3.13313517,0.687325331,3.12658736,3.12441557,3.13014839,3.12455981,3.12418993
65.229288,3.46410162,3.13284583,0.575548244,3.12626774,3.12410294,3.1298672,3.12424648,3.12387745
65.239779,3.16227766,3.13255702,0.17239676,3.12594831,3.1237904,3.12958643,3.12393325,3.12356506
65.250271,2.23606798,3.13226866,-0.946678766,3.125629,3.12347789,3.12930603,3.12362006,3.1232527
65.260762,2.23606798,3.13198083,-0.94652673,3.12530987,3.12316546,3.12902605,3.12330695,3.12294043
65.271254,2.82842712,3.13169346,-0.550696229,3.12499086,3.12285307,3.12874644,3.12299388,3.12262818
65.281746,3,3.13140659,-0.36250047,3.124672,3.12254074,3.12846723,3.12268087,3.122316
65.292237,3.46410162,3.13112025,0.577045377,3.12435331,3.1222285,3.12818847,3.12236795,3.12200391
65.302729,2.44948974,3.13083438,-0.825436029,3.12403474,3.12191629,3.12791009,3.12205507,3.12169184
65.31322,2.44948974,3.13054905,-0.825263172,3.12371634,3.12160417,3.12763215,3.12174228,3.12137987
65.323712,2.82842712,3.13026428,-0.549397082,3.12339804,3.12129208,3.1273547,3.12142952,3.12106792
65.334204,3.31662479,3.12997994,0.432024134,3.12307989,3.12098005,3.1270776,3.12111683,3.12075603
65.344695,3,3.12969614,-0.360133505,3.1227619,3.12066811,3.12680095,3.12080423,3.12044424
65.355187,3,3.12941284,-0.359739957,3.12244402,3.12035621,3.12652472,3.12049166,3.12013247
65.365678,3,3.12913008,-0.359346744,3.1221263,3.12004439,3.12624896,3.12017919,3.11982079
65.37617,3.31662479,3.12884783,0.433332392,3.12180868,3.1197326,3.12597363,3.11986675,3.11950914
65.386662,2.44948974,3.12856611,-0.824060897,3.1214912,3.11942087,3.12569875,3.11955437,3.11919755
65.397153,3.46410162,3.12828494,0.579496912,3.12117387,3.11910923,3.12542436,3.11924209,3.11888606
65.407645,2.64575131,3.1280043,-0.694444371,3.12085664,3.11879763,3.12515041,3.11892984,3.11857459
65.418136,3,3.12772422,-0.357385252,3.12053957,3.11848611,3.12487696,3.11861769,3.11826321
65.428628,3,3.12744466,-0.356993925,3.12022259,3.11817463,3.12460396,3.11830556,3.11795186
65.43912,3.60555128,3.12716566,0.69165426,3.11990574,3.11786321,3.12433144,3.11799351,3.11764057
65.449611,3,3.12688724,-0.356212355,3.11958904,3.11755187,3.12405945,3.11768154,3.11732937
65.460103,3.16227766,3.12660936,0.188860529,3.11927243,3.11724057,3.12378792,3.11736961,3.11701821
65.470594,1.73205081,3.12633207,-1.18079688,3.11895597,3.11692936,3.12351693,3.11705777,3.11670713
65.481086,3,3.12605533,-0.355042722,3.11863961,3.11661818,3.12324642,3.11674597,3.11639608
65.491578,3.60555128,3.12577917,0.692655832,3.11832336,3.11630707,3.12297643,3.11643423,3.11608509
65.502069,3.87298335,3.12550362,0.864569096,3.11800726,3.11599604,3.12270698,3.11612258,3.1157742
65.512561,2.44948974,3.12522864,-0.822033391,3.11769125,3.11568504,3.12243804,3.11581097,3.11546333
65.523052,3.74165739,3.12495428,0.785304471,3.11737538,3.11537414,3.12216967,3.11549945,3.11515256
65.533544,4.12310563,3.12468049,0.999212259,3.1170596,3.11506327,3.12190181,3.11518797,3.11484181
65.544036,3.46410162,3.12440731,0.582833,3.11674393,3.11475246,3.1216345,3.11487655,3.11453113
65.554527,3.74165739,3.12413477,0.785826072,3.1164284,3.11444174,3.12136778,3.11456522,3.11422053
65.565019,3.16227766,3.12386283,0.19599702,3.11611296,3.11413105,3.1211016,3.11425393,3.11390997
65.57551,2.23606798,3.12359154,-0.942084689,3.11579765,3.11382045,3.12083602,3.11394274,3.1135995
65.586002,3,3.12332086,-0.351170698,3.11548243,3.11350989,3.12057099,3.11363157,3.11328906
65.596494,3.31662479,3.12305082,0.439970418,3.11516732,3.11319939,3.12030656,3.11332048,3.11297868
65.606985,3,3.12278146,-0.350401852,3.11485235,3.11288898,3.12004275,3.11300947,3.1126684
65.617477,3.60555128,3.12251273,0.695009748,3.11453745,3.1125786,3.11977951,3.1126985,3.11235814
65.627968,2,3.12224468,-1.05936051,3.1142227,3.11226832,3.11951692,3.11238763,3.11204797
65.63846,2.23606798,3.12197729,-0.941227554,3.11390802,3.11195806,3.11925492,3.11207679,3.11173784
65.648952,3.16227766,3.12171057,0.201412741,3.11359344,3.11164787,3.11899356,3.11176601,3.11142777
65.659443,4.24264069,3.12144456,1.05886549,3.11327901,3.11133778,3.11873286,3.11145533,3.11111779
65.669935,3,3.12117923,-0.348108071,3.11296464,3.11102771,3.11847279,3.11114469,3.11080784
65.680426,2.82842712,3.12091462,-0.540821135,3.11265041,3.11071774,3.11821339,3.11083414,3.11049798
65.690918,3.87298335,3.12065071,0.867371107,3.11233626,3.1104078,3.11795465,3.11052362,3.11018816
65.70141,2.82842712,3.12038751,-0.540333591,3.11202221,3.11009792,3.11769657,3.11021317,3.1098784
65.711901,3.31662479,3.12012508,0.443282884,3.11170829,3.10978813,3.11743921,3.10990281,3.10956873
65.722393,3,3.11986335,-0.34621287,3.11139444,3.10947838,3.11718253,3.10959249,3.10925909
65.732884,3.60555128,3.1196024,0.697100332,3.11108073,3.10916872,3.11692657,3.10928227,3.10894954
65.743376,3.16227766,3.11934219,0.207208764,3.11076708,3.10885909,3.11667131,3.10897208,3.10864003
65.753868,2.44948974,3.11909077,-0.818291529,3.11045354,3.10854953,3.11642481,3.10866195,3.10833057
65.764359,3.31662479,3.11883213,0.444738867,3.11014012,3.10824006,3.11617104,3.10835192,3.10802121
65.774851,3.16227766,3.11857426,0.209053586,3.10982678,3.10793062,3.11591799,3.10804193,3.10771189
65.785342,3.16227766,3.11831721,0.209667473,3.10951356,3.10762128,3.11566573,3.10773203,3.10740265
65.795834,3.74165739,3.11806095,0.789681225,3.10920042,3.10731197,3.11541422,3.10742217,3.10709345
65.806326,2.82842712,3.11780551,-0.537939018,3.10888737,3.10700273,3.1151635,3.10711237,3.10678431
65.816817,3.16227766,3.11755093,0.211486949,3.10857445,3.10669357,3.11491359,3.10680267,3.10647527
65.827309,3.46410162,3.11729717,0.588901048,3.10826159,3.10638445,3.11466446,3.106493,3.10616625
65.8378,3.60555128,3.11704429,0.698932746,3.10794887,3.10607543,3.11441619,3.10618343,3.10585733
65.848292,3.74165739,3.11679238,0.790484035,3.10763621,3.10576644,3.11416883,3.1058739,3.10554844
65.858784,3.16227766,3.11654123,0.213860782,3.10732364,3.10545751,3.11392221,3.10556443,3.10523962
65.869275,2.23606798,3.11629099,-0.938202012,3.1070112,3.10514868,3.11367647,3.10525506,3.10493089
65.879767,3.74165739,3.11604231,0.790958327,3.10669883,3.10483988,3.11343224,3.10494572,3.10462219
65.890258,3.60555128,3.11579391,0.699826671,3.10638658,3.10453117,3.11318826,3.10463648,3.10431359
65.90075,3.16227766,3.11554641,0.216174117,3.1060744,3.1042225,3.11294515,3.10432728,3.10400502
65.911242,2.82842712,3.11529986,-0.535605021,3.10576231,3.1039139,3.11270295,3.10401814,3.10369651
65.921733,4.35889894,3.1150543,1.11527783,3.10545035,3.10360538,3.11246171,3.1037091,3.1033881
65.932225,3.60555128,3.11480969,0.700529502,3.10513845,3.10329691,3.11222139,3.1034001,3.10307972
65.942716,3.74165739,3.1145661,0.791890958,3.10482667,3.10298852,3.11198205,3.10309119,3.10277143
65.953208,2.23606798,3.11432349,-0.937152874,3.10451496,3.10268018,3.11174366,3.10278232,3.10246318
65.9637,3.31662479,3.1140819,0.450047656,3.10420334,3.10237189,3.11150626,3.10247352,3.10215499
65.974191,3,3.11384137,-0.337403866,3.10389184,3.10206371,3.1112699,3.10216481,3.1018469
65.984683,3.74165739,3.11360187,0.792499537,3.1035804,3.10175555,3.11103453,3.10185614,3.10153884
65.995174,3.74165739,3.11336347,0.792649935,3.10326909,3.10144749,3.11080022,3.10154757,3.10123088
66.005666,3.16227766,3.11312613,0.22170145,3.10295784,3.10113947,3.11056695,3.10123903,3.10092295
66.016158,3.46410162,3.11288989,0.592631186,3.10264668,3.10083152,3.11033475,3.10093056,3.10061508
66.026649,2.82842712,3.11265497,-0.533130234,3.10233564,3.10052365,3.11010384,3.10062219,3.10030731
66.037141,2.82842712,3.112421,-0.532910757,3.10202467,3.10021583,3.10987385,3.10031386,3.09999958
66.047632,3.60555128,3.11218821,0.702398082,3.10171381,3.0999081,3.10964501,3.10000562,3.09969193
66.058124,3.31662479,3.11195658,0.452402713,3.10140301,3.0996004,3.1094173,3.09969742,3.09938433
66.068616,3.60555128,3.11172614,0.702726928,3.10109231,3.09929277,3.10919076,3.09938929,3.09907679
66.079107,3.74165739,3.11149694,0.793826457,3.10078173,3.09898524,3.10896543,3.09908125,3.09876934
66.089599,3,3.11126896,-0.333570028,3.1004712,3.09867774,3.10874129,3.09877326,3.09846193
66.10009,4.24264069,3.11104226,1.06376615,3.1001608,3.09837034,3.10851841,3.09846536,3.09815461
66.110582,3.74165739,3.11081682,0.794254722,3.09985045,3.09806298,3.10829675,3.0981575,3.09784733
66.121074,3.16227766,3.11059268,0.227343299,3.0995402,3.09775568,3.10807637,3.0978497,3.09754012
66.131565,2.44948974,3.11036989,-0.812945354,3.09923006,3.09744847,3.10785731,3.09754201,3.097233
66.142057,3,3.11014842,-0.331886163,3.09891999,3.09714131,3.10763955,3.09723435,3.09692592
66.152548,2.44948974,3.10992835,-0.81267374,3.09861003,3.09683424,3.10742316,3.09692679,3.09661893
66.16304,3.31662479,3.10970965,0.45487926,3.09830014,3.09652721,3.10720812,3.09661927,3.09631198
66.173532,3,3.10949237,-0.33089631,3.09799033,3.09622024,3.10699447,3.09631182,3.09600509
66.184023,3.46410162,3.10927655,0.595671942,3.09768064,3.09591337,3.10678226,3.09600447,3.0956983
66.194515,2.44948974,3.10906219,-0.812140655,3.09737101,3.09560654,3.10657147,3.09569715,3.09539155
66.205006,3,3.10884934,-0.32992323,3.09706149,3.09529981,3.10636218,3.09538994,3.09508489
66.215498,3.46410162,3.10863799,0.5962077,3.09675204,3.09499311,3.10615437,3.09508276,3.09477827
66.22599,3.31662479,3.1084282,0.456285645,3.09644267,3.09468648,3.10594809,3.09477565,3.09447172
66.236481,3.46410162,3.10822001,0.596558134,3.09613343,3.09437995,3.10574338,3.09446864,3.09416526
66.246973,3.87298335,3.10801341,0.8746256,3.09582424,3.09407345,3.10554024,3.09416167,3.09385884
66.257464,2,3.10780846,-1.0525248,3.09551517,3.09376705,3.10533874,3.0938548,3.09355251
66.267956,3.31662479,3.10760517,0.457186638,3.09520615,3.09346069,3.10513886,3.09354797,3.09324623
66.278448,1.73205081,3.10740358,-1.17275435,3.09489723,3.0931544,3.10494066,3.09324121,3.09294001
66.288939,4,3.10720374,0.944878967,3.09458842,3.09284821,3.1047442,3.09293454,3.09263389
66.299431,4.12310563,3.10700565,1.00801785,3.09427967,3.09254205,3.10454946,3.09262792,3.0923278
66.309922,3.60555128,3.10680938,0.706216609,3.09397104,3.09223599,3.10435651,3.09232139,3.09202181
66.320414,2.82842712,3.10661492,-0.527435111,3.09366246,3.09192997,3.10416536,3.09201491,3.09171586
66.330906,1.41421356,3.10642263,-1.30084936,3.09335397,3.09162402,3.10397636,3.0917085,3.09140998
66.341397,3.31662479,3.10623197,0.458685967,3.0930456,3.09131817,3.10378896,3.09140218,3.09110419
66.351889,4.24264069,3.10604324,1.06611324,3.09273729,3.09101236,3.10360348,3.09109591,3.09079845
66.36238,3.74165739,3.10587068,0.797362346,3.09242909,3.09070664,3.10343414,3.09078973,3.0904928
66.372872,3.60555128,3.10568596,0.707011539,3.09212095,3.09040096,3.10325263,3.0904836,3.09018719
66.383364,3,3.10550331,-0.324812724,3.0918129,3.09009536,3.10307315,3.09017753,3.08988164
66.393855,1.73205081,3.10532277,-1.17186687,3.09150496,3.08978985,3.10289578,3.08987157,3.0895762
66.404347,3.74165739,3.10514437,0.797817656,3.09119709,3.08948438,3.10272052,3.08956565,3.08927079
66.414838,3.60555128,3.10496818,0.707518969,3.09088933,3.08917901,3.10254745,3.08925982,3.08896548
66.42533,3.16227766,3.10479421,0.23975706,3.09058162,3.08887368,3.10237658,3.08895404,3.08866021
66.435822,2.44948974,3.10462253,-0.809402732,3.090274,3.08856841,3.10220797,3.08864833,3.08835501
66.446313,3.46410162,3.10445318,0.599706954,3.0899665,3.08826325,3.10204169,3.08834272,3.08804991
66.456805,3.60555128,3.10428621,0.708000754,3.08965906,3.08795813,3.10187776,3.08803715,3.08774485
66.467296,3.31662479,3.10412168,0.460980599,3.08935173,3.08765311,3.10171625,3.08773169,3.08743988
66.477788,3.16227766,3.10395961,0.241491299,3.08904446,3.08734813,3.10155719,3.08742626,3.08713496
66.48828,3.31662479,3.10309313,0.462094864,3.08873728,3.08704321,3.10069315,3.0871209,3.08683011
66.498771,3.46410162,3.10293717,0.600969592,3.08843021,3.0867384,3.10054015,3.08681565,3.08652535
66.509263,2.82842712,3.10278383,-0.523790709,3.0881232,3.08643363,3.10038977,3.08651044,3.08622063
66.519754,2.64575131,3.10263321,-0.675930398,3.08781631,3.08612896,3.10024209,3.08620533,3.08591601
66.530246,3.46410162,3.10248534,0.601345385,3.08750947,3.08582433,3.10009713,3.08590026,3.08561144
66.540738,3.46410162,3.10234029,0.601465977,3.08720272,3.08551977,3.09995498,3.08559526,3.08530693
66.551229,3.16227766,3.10219814,0.245111236,3.08689609,3.08521531,3.09981571,3.08529037,3.08500252
66.561721,3.16227766,3.10205893,0.245395057,3.08658952,3.08491089,3.09967935,3.08498551,3.08469816
66.572212,3.16227766,3.10192274,0.245672388,3.08628306,3.08460657,3.09954601,3.08468076,3.08439389
66.582704,3.16227766,3.10178962,0.245943163,3.08597665,3.08430229,3.09941572,3.08437605,3.08408966
66.593196,2.44948974,3.10165966,-0.807570378,3.08567034,3.08399809,3.09928857,3.08407142,3.08378551
66.603687,3.60555128,3.10153293,0.709942492,3.08536414,3.08369398,3.09916464,3.08376688,3.08348145
66.614179,2.82842712,3.1014095,-0.52247715,3.085058,3.08338992,3.09904398,3.08346239,3.08317744
66.62467,2.23606798,3.10128945,-0.930172819,3.08475197,3.08308596,3.0989267,3.083158,3.08287352
66.635162,3.60555128,3.10117285,0.710196047,3.084446,3.08278204,3.09881284,3.08285366,3.08256965
66.645654,4.12310563,3.10105979,1.01096283,3.08414012,3.08247819,3.09870251,3.08254939,3.08226585
66.656145,2.64575131,3.10095036,-0.674684405,3.08383435,3.08217445,3.09859579,3.08224522,3.08196214
66.666637,2.44948974,3.10084463,-0.807065601,3.08352865,3.08187074,3.09849276,3.08194109,3.08165848
66.677128,3.31662479,3.1007427,0.46463113,3.08322305,3.08156714,3.09839351,3.08163707,3.08135492
66.68762,3.16227766,3.10064466,0.248259945,3.08291752,3.08126358,3.09829814,3.08133309,3.08105141
66.698112,4.58257569,3.1005506,1.21738453,3.08261207,3.0809601,3.09820673,3.08102918,3.08074796
66.708603,2.82842712,3.10046064,-0.521568318,3.08230674,3.08065671,3.0981194,3.08072538,3.08044462
66.719095,3.60555128,3.10037484,0.710757646,3.08200147,3.08035337,3.09803623,3.08042162,3.08014132
66.729586,2.64575131,3.10029335,-0.674197328,3.08169631,3.08005013,3.09795734,3.08011797,3.07983812
66.740078,3.46410162,3.10021624,0.603229124,3.08139121,3.07974693,3.09788282,3.07981436,3.07953496
66.75057,4.12310563,3.10014364,1.01141583,3.0810862,3.07944381,3.0978128,3.07951082,3.07923188
66.761061,3.74165739,3.10007566,0.800987969,3.08078131,3.07914079,3.09774739,3.07920739,3.07892889
66.771553,3,3.10001242,-0.316247398,3.08047647,3.07883782,3.09768669,3.078904,3.07862595
66.782044,2.82842712,3.09995404,-0.521082445,3.08017175,3.07853494,3.09763085,3.07860071,3.07832311
66.792536,3.60555128,3.09990064,0.711091156,3.07986709,3.07823211,3.09757997,3.07829748,3.07802032
66.803028,2.82842712,3.09985236,-0.520984874,3.07956251,3.07792936,3.0975342,3.07799431,3.0777176
66.813519,4.12310563,3.09980934,1.01158108,3.07925806,3.07762671,3.09749367,3.07769125,3.07741498
66.824011,3.87298335,3.0997717,0.879324538,3.07895366,3.0773241,3.09745852,3.07738824,3.0771124
66.834502,3.16227766,3.0997396,0.2500761,3.07864937,3.07702159,3.09742888,3.07708533,3.07680993
66.844994,3,3.09971319,-0.315773947,3.07834515,3.07671913,3.09740492,3.07678246,3.0765075
66.855486,2.64575131,3.0996926,-0.673751655,3.07804101,3.07641675,3.09738678,3.07647967,3.07620515
66.865977,2.44948974,3.09967802,-0.806342531,3.07773699,3.07611447,3.09737462,3.07617699,3.07590289
66.876469,3.46410162,3.09966959,0.603682052,3.07743303,3.07581223,3.09736862,3.07587435,3.07560069
66.88696,3.46410162,3.0996675,0.603683786,3.07712919,3.0755101,3.09736893,3.07557182,3.07529858
66.897452,4.47213595,3.09967192,1.1715221,3.07682541,3.07520801,3.09737573,3.07526933,3.07499652
66.907944,3.16227766,3.09968258,0.250190095,3.07652171,3.074906,3.09738878,3.07496692,3.07469454
66.918435,2.44948974,3.09970056,-0.806356508,3.07621813,3.0746041,3.09740913,3.07466461,3.07439265
66.928927,3.46410162,3.09972562,0.603635646,3.07591461,3.07430223,3.09743655,3.07436235,3.07409082
66.939418,2.82842712,3.09975796,-0.520894264,3.07561121,3.07400048,3.09747123,3.0740602,3.07378908
66.94991,3.46410162,3.09979779,0.603575866,3.07530787,3.07369877,3.09751339,3.07375809,3.07348739
66.960402,3,3.09984533,-0.315983112,3.07500462,3.07339713,3.09756326,3.07345606,3.07318578
66.970893,4.12310563,3.09990079,1.01153588,3.07470148,3.0730956,3.09762103,3.07315414,3.07288427
66.981385,3.46410162,3.09996444,0.603437801,3.0743984,3.07279412,3.09768698,3.07285226,3.07258281
66.991876,3.74165739,3.10003648,0.801012424,3.07409544,3.07249274,3.09776132,3.07255049,3.07228145
67.002368,3.60555128,3.1001172,0.710938867,3.07379255,3.07219141,3.09784432,3.07224877,3.07198014
67.01286,3.16227766,3.10020685,0.249140137,3.07348974,3.07189016,3.09793624,3.07194712,3.0716789
67.023351,3.74165739,3.10030569,0.800844363,3.07318705,3.07158901,3.09803734,3.07164558,3.07137777
67.033843,3.46410162,3.10041403,0.603065161,3.07288442,3.07128791,3.09814793,3.07134409,3.07107669
67.044334,3.60555128,3.10053213,0.710646992,3.0725819,3.07098691,3.09826828,3.07104271,3.0707757
67.054826,2.82842712,3.10066033,-0.521759716,3.07227945,3.07068596,3.09839871,3.07074137,3.07047477
67.065318,4.47213595,3.10079893,1.171041,3.07197709,3.07038509,3.09853953,3.07044011,3.07017391
67.075809,3.16227766,3.10094825,0.247647762,3.07167484,3.07008433,3.09869107,3.07013896,3.06987316
67.086301,3.16227766,3.10110866,0.24732368,3.07137266,3.06978361,3.09885369,3.06983786,3.06957246
67.096792,3.60555128,3.10128049,0.710120263,3.0710706,3.069483,3.09902772,3.06953687,3.06927186
67.107284,4,3.10146414,0.947911313,3.0707686,3.06918244,3.09921357,3.06923592,3.06897131
67.117776,3.60555128,3.10165999,0.709853,3.07046668,3.06888195,3.09941161,3.06893505,3.06867083
67.128267,3,3.10186843,-0.319168335,3.07016489,3.06858157,3.09962222,3.06863429,3.06837046
67.138759,3,3.1020899,-0.3195151,3.06986316,3.06828125,3.09984587,3.06833358,3.06807014
67.14925,3.60555128,3.10232481,0.709384568,3.06956155,3.06798102,3.10008294,3.06803298,3.06776993
67.159742,3.31662479,3.10257366,0.462656597,3.06925999,3.06768085,3.10033396,3.06773243,3.06746976
67.170234,2.44948974,3.10283691,-0.808298936,3.06895853,3.06738076,3.10059936,3.06743195,3.06716968
67.180725,3.60555128,3.10311503,0.708827375,3.06865719,3.06708077,3.10087962,3.06713159,3.06686969
67.191217,3.46410162,3.10340858,0.600577248,3.06835592,3.06678083,3.10117532,3.06683127,3.06656976
67.201708,3.16227766,3.10371807,0.241990892,3.06805476,3.066481,3.10148695,3.06653106,3.06626994
67.2122,3.16227766,3.10404411,0.241316296,3.06775366,3.06618123,3.10181512,3.06623091,3.06597016
67.222692,3.87298335,3.10438726,0.87669612,3.06745266,3.06588153,3.1021604,3.06593083,3.06567046
67.233183,3.31662479,3.10474811,0.460300637,3.06715177,3.06558193,3.10252339,3.06563086,3.06537087
67.243675,2.82842712,3.10512739,-0.526023063,3.06685095,3.06528239,3.10290478,3.06533095,3.06507133
67.254166,3.87298335,3.10552568,0.87604661,3.06655025,3.06498296,3.1033052,3.06503114,3.06477189
67.264658,4,3.10594379,0.945545458,3.06624962,3.06468358,3.10372542,3.06473138,3.06447251
67.27515,2.64575131,3.1063824,-0.678698087,3.06594907,3.06438427,3.10416616,3.06443171,3.0641732
67.285641,3,3.10684227,-0.326867355,3.06564865,3.06408508,3.10462814,3.06413214,3.06387401
67.296133,4,3.10732428,0.944815178,3.06534829,3.06378594,3.10511227,3.06383263,3.06357486
67.306624,3.74165739,3.1078292,0.79613327,3.06504805,3.0634869,3.10561931,3.06353322,3.06327582
67.317116,3.60555128,3.10835803,0.705119313,3.06474787,3.06318792,3.10615025,3.06323387,3.06297683
67.327608,3.46410162,3.10891165,0.595978155,3.06444779,3.06288902,3.106706,3.06293459,3.06267792
67.338099,3.16227766,3.109491,0.229753471,3.06414783,3.06259022,3.10728747,3.06263543,3.06237912
67.348591,4.24264069,3.11009723,1.06421025,3.06384794,3.06229148,3.10789581,3.06233632,3.06208038
67.359082,3,3.1107313,-0.332763124,3.06354816,3.06199285,3.10853201,3.06203732,3.06178174
67.369574,3.46410162,3.11139448,0.593891518,3.06324845,3.06169427,3.10919732,3.06173838,3.06148315
67.380066,3.16227766,3.11208792,0.224030668,3.06294884,3.06139578,3.1098929,3.06143951,3.06118464
67.390557,3.46410162,3.11281281,0.592696214,3.06264934,3.06109739,3.11061993,3.06114076,3.06088624
67.401049,3.16227766,3.11357063,0.220696684,3.06234992,3.06079905,3.1113799,3.06084206,3.06058789
67.41154,3.46410162,3.11436264,0.591387332,3.06205061,3.06050083,3.11217406,3.06054347,3.06028965
67.422032,3,3.11519046,-0.339397205,3.06175137,3.06020266,3.11300405,3.06024493,3.05999147
67.432524,2.82842712,3.11605559,-0.536310048,3.06145223,3.05990457,3.11387135,3.05994648,3.05969337
67.443015,3.16227766,3.11695959,0.212880422,3.06115321,3.05960659,3.11477753,3.05964813,3.05939537
67.453507,3.46410162,3.11790436,0.588385297,3.06085425,3.05930866,3.11572449,3.05934984,3.05909743
67.463998,3.16227766,3.11889156,0.208293303,3.06055542,3.05901085,3.1167139,3.05905167,3.0587996
67.47449,3.87298335,3.11992333,0.867790308,3.06025665,3.05871309,3.11774789,3.05875354,3.05850182
67.484982,2.44948974,3.12100162,-0.819458282,3.05995798,3.05841541,3.11882842,3.0584555,3.05820412
67.495473,3.16227766,3.1221285,0.200372561,3.05965944,3.05811785,3.11995755,3.05815757,3.05790654
67.505965,3.60555128,3.12330648,0.694438475,3.05936096,3.05782033,3.1211378,3.0578597,3.057609
67.516456,3.16227766,3.12453778,0.194267557,3.05906261,3.05752293,3.12237139,3.05756194,3.05731158
67.526948,3.60555128,3.12582521,0.6926226,3.05876432,3.05722559,3.12366113,3.05726423,3.05701421
67.53744,3,3.12717141,-0.356611001,3.05846613,3.05692833,3.12500966,3.05696661,3.05671693
67.547931,2.44948974,3.12857914,-0.824068804,3.05816807,3.05663117,3.12641975,3.0566691,3.05641975
67.558423,2.82842712,3.13005177,-0.549203644,3.05787007,3.05633408,3.12789477,3.05637165,3.05612263
67.568914,2.64575131,3.1315923,-0.697022948,3.0575722,3.0560371,3.12943772,3.05607431,3.05582562
67.579406,2.82842712,3.13320445,-0.552066416,3.05727439,3.05574017,3.13105231,3.05577702,3.05552867
67.589898,3.31662479,3.13489196,0.426301332,3.05697669,3.05544333,3.1327423,3.05547982,3.0552318
67.600389,3.60555128,3.13665855,0.684757421,3.05667911,3.0551466,3.1345114,3.05518273,3.05493504
67.610881,3.87298335,3.13850878,0.857014914,3.0563816,3.05484992,3.13636419,3.0548857,3.05463834
67.621372,3,3.14044682,-0.374762357,3.05608422,3.05455336,3.13830482,3.05458878,3.05434175
67.631864,3.74165739,3.14247787,0.774066866,3.0557869,3.05425686,3.14033851,3.05429192,3.05404521
67.642356,3,3.14460691,-0.380272147,3.05548969,3.05396044,3.14247022,3.05399515,3.05374876
67.652847,3.60555128,3.14683922,0.677282847,3.0551926,3.05366413,3.14470527,3.05369848,3.05345242
67.663339,3.87298335,3.14918116,0.850765647,3.05489558,3.05336788,3.14705,3.05340188,3.05315613
67.67383,3.87298335,3.15163861,0.849320162,3.05459869,3.05307174,3.14951029,3.05310539,3.05285996
67.684322,3.31662479,3.15421884,0.402996218,3.05430187,3.05277566,3.15209343,3.05280895,3.05256385
67.694814,3.31662479,3.15692892,0.399619658,3.05400515,3.05247967,3.15480648,3.05251261,3.05226782
67.705305,2.23606798,3.15977642,-0.961097517,3.05370855,3.05218379,3.15765702,3.05221637,3.0519719
67.715797,3.60555128,3.16277033,0.665417877,3.05341203,3.05188797,3.16065405,3.0519202,3.05167604
67.726288,3.60555128,3.16591916,0.663047595,3.05311564,3.05159226,3.16380609,3.05162414,3.0513803
67.73678,3.31662479,3.16923335,0.383915931,3.05281932,3.05129661,3.16712356,3.05132814,3.05108461
67.747272,3.60555128,3.17272317,0.657896725,3.0525231,3.05100105,3.17061677,3.05103222,3.05078901
67.757763,3,3.17639972,-0.419999666,3.05222701,3.0507056,3.1742968,3.05073642,3.05049352
67.768255,2.64575131,3.18027608,-0.731112007,3.05193099,3.05041021,3.17817674,3.05044068,3.05019808
67.778746,3.46410162,3.18436491,0.528901414,3.0516351,3.05011494,3.18226928,3.05014505,3.04990277
67.789238,3.74165739,3.18868155,0.743623448,3.05133929,3.04981972,3.18658974,3.04984949,3.04960751
67.79973,2.64575131,3.19324142,-0.739925747,3.05104358,3.0495246,3.19115357,3.04955401,3.04931233
67.810221,4.47213595,3.19806121,1.12874919,3.05074799,3.04922958,3.19597746,3.04925864,3.04901728
67.820713,3.74165739,3.20316056,0.73382343,3.05045248,3.04893463,3.20108105,3.04896334,3.04872228
67.831204,3.60555128,3.20855886,0.63007334,3.05015711,3.04863979,3.20648377,3.04866815,3.04842739
67.841696,3.31662479,3.21427943,0.319914618,3.0498618,3.04834501,3.21220892,3.04837303,3.04813256
67.852188,3.31662479,3.22034609,0.310288092,3.0495666,3.04805032,3.21828036,3.04807799,3.04783782
67.862679,3.60555128,3.22678486,0.615440019,3.04927154,3.04775575,3.22472411,3.04778306,3.0475432
67.873171,2.64575131,3.23362622,-0.766730009,3.04897654,3.04746124,3.23157066,3.0474882,3.04724864
67.883662,2.64575131,3.24090094,-0.771459414,3.04868168,3.04716684,3.23885082,3.04719345,3.04695419
67.894154,2.82842712,3.24864577,-0.648242735,3.0483869,3.0468725,3.24660133,3.04689877,3.0466598
67.904646,3,3.25689896,-0.506852009,3.04809222,3.04657826,3.25486048,3.04660417,3.04636549
67.915137,2.64575131,3.26570262,-0.787369866,3.04779767,3.04628413,3.26367039,3.04630969,3.04607131
67.925629,3.31662479,3.27510601,0.203761586,3.04750321,3.04599006,3.27308036,3.04601528,3.04577718
67.93612,2.82842712,3.28515997,-0.67582013,3.04720887,3.04569611,3.28314124,3.04572098,3.04548317
67.946612,3.31662479,3.29592498,0.143874296,3.04691461,3.04540221,3.29391354,3.04542674,3.04518923
67.957104,3.60555128,3.30746153,0.545975954,3.04662046,3.04510841,3.30545779,3.04513259,3.04489537
67.967595,4,3.31984819,0.824713171,3.04632644,3.04481473,3.31785258,3.04483856,3.04460162
67.978087,3.60555128,3.33316476,0.521906618,3.0460325,3.04452111,3.33117776,3.04454459,3.04430794
67.988578,3.74165739,3.34749935,0.627820067,3.0457387,3.0442276,3.34552148,3.04425074,3.04401438
67.99907,3.87298335,3.36295657,0.714161589,3.04544498,3.04393416,3.36098839,3.04395695,3.04372087
68.009562,3.87298335,3.37964957,0.702377233,3.04515136,3.04364081,3.37769168,3.04366325,3.04342746
68.020053,3,3.3977056,-0.630639044,3.04485788,3.04334758,3.39575867,3.04336967,3.04313416
68.030545,3.31662479,3.41727412,-0.317252786,3.04456448,3.04305441,3.41533887,3.04307615,3.04284093
68.041036,3.31662479,3.43851663,-0.349130119,3.04427122,3.04276136,3.43659385,3.04278276,3.04254781
68.051528,3.16227766,3.46162532,-0.547126727,3.04397804,3.04246837,3.45971586,3.04248942,3.04225475
68.06202,3.60555128,3.48681267,0.344584688,3.04368496,3.04217547,3.48491747,3.04219618,3.04196179
68.072511,4,3.51432166,0.696906261,3.04339203,3.0418827,3.51244175,3.04190306,3.04166894
68.083003,2.82842712,3.5444412,-0.846176152,3.04309917,3.04158998,3.54257769,3.04161,3.04137616
68.093494,3,3.57749535,-0.759931146,3.04280646,3.04129739,3.57564945,3.04131706,3.04108349
68.103986,4.58257569,3.61388062,0.98422308,3.04251383,3.04100486,3.61205369,3.04102418,3.04079089
68.114478,3.31662479,3.65406514,-0.580896162,3.04222131,3.04071242,3.65225866,3.04073139,3.04049838
68.124969,4.24264069,3.69863172,0.737569635,3.04192893,3.0404201,3.69684734,3.04043873,3.04020599
68.135461,4.89897949,3.74835145,1.07267331,3.04163663,3.04012785,3.74659105,3.04014613,3.03991366
68.145952,3.16227766,3.80424732,-0.801230092,3.04134448,3.03983572,3.80251308,3.03985365,3.03962145
68.156444,4.47213595,3.86778672,0.777399018,3.04105241,3.03954365,3.86608124,3.03956124,3.0393293
68.166936,3.60555128,3.94107249,-0.579241927,3.04076045,3.03925167,3.93939896,3.03926892,3.03903725
68.177427,5,4.02717327,0.986319791,3.04046863,3.03895982,4.02553575,3.03897672,3.03874532
68.187919,4,4.13055372,-0.361322176,3.0401769,3.03866803,4.12895738,3.03868458,3.03845345
68.19841,4.89897949,4.25743113,0.800967138,3.03988532,3.03837636,4.25588255,3.03839257,3.0381617
68.208902,6,4.41618404,1.2584975,3.03959382,3.03808475,4.41469129,3.03810062,3.03787001
68.219394,5.29150262,4.61727426,0.821114097,3.03930243,3.03779324,4.61584666,3.03780876,3.03757842
68.229885,6.32455532,4.87271923,1.20492161,3.03901119,3.03750186,4.87136659,3.03751703,3.03728695
68.240377,5.56776436,5.19493374,0.610598574,3.03872004,3.03721053,5.1936651,3.03722536,3.03699554
68.250868,6.4807407,5.59462926,0.941334923,3.03842903,3.03691934,5.59345133,3.03693382,3.03670426
68.26136,6.244998,6.07895139,0.407488175,3.03813811,3.0366282,6.07786736,3.03664234,3.03641304
68.271852,8.1240384,6.6493692,1.21435959,3.03784731,3.03633716,6.6483782,3.03635095,3.03612191
68.282343,8.18535277,7.30067127,0.940575089,3.03755666,3.03604625,7.29976871,3.03605969,3.0358309
68.292835,8.54400375,8.02095431,0.723221564,3.03726609,3.0357554,8.02013281,3.0357685,3.03553997
68.303326,8.36660027,8.79149294,-0.65183792,3.03697568,3.03546467,8.79074343,3.03547742,3.03524915
68.313818,9.79795897,9.5878082,0.458422044,3.03668535,3.03517401,9.58712093,3.03518642,3.0349584
68.32431,10.4880885,10.3792306,0.329936139,3.03639515,3.03488345,10.3785957,3.03489551,3.03466774
68.334801,12.6885775,11.1284572,1.24904779,3.03610509,3.03459301,11.127865,3.03460472,3.03437721
68.345293,12.4096736,11.7906467,0.786782674,3.03581513,3.03430263,11.7900877,3.034314,3.03408674
68.355784,11.5325626,12.3134486,-0.883677527,3.03552532,3.03401238,12.3129133,3.03402341,3.03379639
68.366276,12.328828,12.6433274,-0.560802437,3.0352356,3.0337222,12.642806,3.03373288,3.03350611
68.376768,11.7473401,12.7387041,-0.995672621,3.03494601,3.03343212,12.7381866,3.03344245,3.03321593
68.387259,11.4017543,12.5860691,-1.08826233,3.03465656,3.03314216,12.5855453,3.03315214,3.03292587
68.397751,12.1655251,12.2061287,-0.201503451,3.03436722,3.03285226,12.2055885,3.0328619,3.03263588
68.408242,12.489996,11.6448675,0.919308702,3.03407802,3.0325625,11.6443012,3.03257179,3.03234601
68.418734,11.5325626,10.9567294,0.758836761,3.03378893,3.0322728,10.9561274,3.03228174,3.03205621
68.429226,10.9087121,10.1928082,0.846111038,3.03349996,3.03198319,10.192161,3.03199179,3.0317665
68.439717,9.94987437,9.3963552,0.743988691,3.03321114,3.03169372,9.39565296,3.03170197,3.03147692
68.450209,9.32737905,8.60278815,0.851229056,3.03292243,3.03140431,8.60202096,3.03141222,3.03118741
68.4607,8.24621125,7.84139122,0.636254689,3.03263387,3.03111503,7.84054935,3.03112259,3.03089802
68.471192,6.78232998,7.13526686,-0.594084909,3.03234541,3.03082581,7.13434145,3.03083303,3.0306087
68.481684,6.70820393,6.50158429,0.454554331,3.03205708,3.0305367,6.50056841,3.03054356,3.03031948
68.492175,7,5.95082416,1.02429285,3.03176891,3.03024771,5.94971393,3.03025423,3.03003038
68.502667,6.63324958,5.48641022,1.07090586,3.03148084,3.02995879,5.48520565,3.02996496,3.02974135
68.513158,5.38516481,5.10545872,0.528872471,3.03119293,3.02967,5.10416385,3.02967582,3.02945245
68.52365,5.29150262,4.79975175,0.701249509,3.03090513,3.02938128,4.79837394,3.02938675,3.02916361
68.534142,4.24264069,4.55794528,-0.561519897,3.03061746,3.02909265,4.55649387,3.02909778,3.02887487
68.544633,4.79583152,4.36758599,0.654404719,3.03032995,3.02880416,4.36607076,3.02880893,3.02858626
68.555125,5.19615242,4.21686048,0.989591804,3.03004254,3.02851573,4.21529049,3.02852016,3.02829772
68.565616,4,4.09579034,-0.309500137,3.02975531,3.02822743,4.09417328,3.02823151,3.02800931
68.576108,4.24264069,3.99651793,0.496107605,3.02946818,3.02793921,3.99486001,3.02794294,3.02772096
68.5866,4.12310563,3.91327967,0.458067629,3.02918118,3.02765108,3.91158575,3.02765446,3.02743271
68.597091,3.87298335,3.84200456,0.176007927,3.02889436,3.02736308,3.84027842,3.02736611,3.02714459
68.607583,4.12310563,3.77987263,0.585860899,3.02860764,3.02707515,3.7781173,3.02707783,3.02685654
68.618074,3.46410162,3.72497362,-0.510756304,3.0283211,3.02678735,3.72319154,3.02678968,3.02656862
68.628566,2.44948974,3.67596419,-1.10746307,3.02803466,3.02649962,3.67415743,3.02650161,3.02628077
68.639058,3.46410162,3.63189565,-0.4096267,3.02774837,3.02621199,3.63006599,3.02621363,3.02599302
68.649549,4,3.59206011,0.638701722,3.02746225,3.0259245,3.59020914,3.02592578,3.02570539
68.660041,3.31662479,3.5558963,-0.489153867,3.02717625,3.02563707,3.55402543,3.025638,3.02541784
68.670532,2.64575131,3.52296256,-0.936595562,3.02689041,3.02534977,3.52107309,3.02535035,3.02513041
68.681024,2.82842712,3.49287936,-0.815139399,3.0266047,3.02506255,3.49097245,3.02506278,3.02484306
68.691516,4,3.46533233,0.731209729,3.02631913,3.02477542,3.46340904,3.0247753,3.02455581
68.702007,2.44948974,3.44005017,-0.995269024,3.02603374,3.02448843,3.43811147,3.02448796,3.02426868
68.712499,4,3.41679064,0.763681449,3.02574848,3.02420151,3.41483742,3.02420068,3.02398163
68.72299,2.44948974,3.39535044,-0.972553699,3.02546339,3.02391472,3.3933835,3.02391354,3.0236947
68.733482,3,3.37554345,-0.612816002,3.02517842,3.023628,3.37356354,3.02362647,3.02340785
68.743974,3.46410162,3.35721135,0.326940774,3.02489361,3.02334139,3.35521913,3.0233395,3.0231211
68.754465,3.60555128,3.34021403,0.515108962,3.02460898,3.0230549,3.33821013,3.02305266,3.02283448
68.764957,3,3.324423,-0.569581428,3.02432448,3.02276849,3.32240797,3.0227659,3.02254793
68.775448,3,3.30972993,-0.556533851,3.02404016,3.02248221,3.30770428,3.02247927,3.02226151
68.78594,3.31662479,3.2960331,0.143498056,3.02375597,3.02219601,3.29399731,3.02219271,3.02197517
68.796432,3,3.28324564,-0.532208271,3.02347195,3.02190991,3.28120014,3.02190625,3.02168893
68.806923,3.31662479,3.27128973,0.212920306,3.02318811,3.02162394,3.2692349,3.02161993,3.02140281
68.817415,2.44948974,3.26009249,-0.900334796,3.02290441,3.02133804,3.25802868,3.02133368,3.02111677
68.827906,3.16227766,3.24959256,-0.295490944,3.0226209,3.02105228,3.2475201,3.02104755,3.02083086
68.838398,3.87298335,3.23973095,0.795771572,3.02233753,3.02076659,3.23765014,3.02076151,3.02054503
68.84889,3.46410162,3.23045725,0.483367728,3.02205432,3.02048101,3.22836835,3.02047557,3.0202593
68.859381,3,3.22172583,-0.470877728,3.02177132,3.02019555,3.21962909,3.02018976,3.0199737
68.869873,3.16227766,3.21349308,-0.226308237,3.02148845,3.01991018,3.2113887,3.01990403,3.01968817
68.880364,3.60555128,3.20572247,0.632320176,3.02120579,3.01962493,3.20361067,3.01961842,3.01940277
68.890856,3.87298335,3.19837803,0.821343607,3.02092327,3.01933977,3.19625897,3.0193329,3.01911745
68.901348,3,3.19142908,-0.437526088,3.02064093,3.0190547,3.18930293,3.01904748,3.01883224
68.911839,3.60555128,3.18484761,0.648616729,3.0203588,3.01876977,3.18271452,3.01876219,3.01854715
68.922331,3.46410162,3.17860632,0.5343176,3.02007682,3.01848492,3.1764664,3.01847698,3.01826214
68.932822,3.74165739,3.17268251,0.754304231,3.01979505,3.0182002,3.17053588,3.0181919,3.01797727
68.943314,2.64575131,3.16705329,-0.722012448,3.01951343,3.01791556,3.16490004,3.01790689,3.01769247
68.953806,3.60555128,3.16169921,0.666222231,3.01923201,3.01763102,3.15953944,3.017622,3.01740777
68.964297,3,3.15660242,-0.395730241,3.01895079,3.01734662,3.15443619,3.01733723,3.01712321
68.974789,3,3.15174511,-0.389544751,3.01866975,3.01706229,3.14957248,3.01705254,3.01683872
68.98528,3,3.14711269,-0.383552722,3.01838892,3.0167781,3.14493371,3.01676799,3.01655436
68.995772,2.82842712,3.14269001,-0.560591549,3.01810826,3.01649399,3.14050472,3.01648352,3.01627009
69.006264,3.31662479,3.13846434,0.422090569,3.01782781,3.01620998,3.13627277,3.01619915,3.01598591
69.016755,2.82842712,3.13442389,-0.553169747,3.01754758,3.01592611,3.13222606,3.01591491,3.01570187
69.027247,4.47213595,3.13055666,1.15826564,3.01726752,3.01564232,3.12835258,3.01563075,3.01541791
69.037738,2.64575131,3.12685297,-0.693614921,3.01698771,3.01535866,3.12464263,3.01534673,3.01513408
69.04823,2.82842712,3.12330247,-0.543024261,3.01670807,3.01507508,3.12108587,3.01506279,3.01485033
69.058722,3.46410162,3.11989658,0.586689898,3.01642865,3.01479161,3.1176737,3.01477895,3.01456669
69.069213,2.82842712,3.11662728,-0.536842766,3.01614947,3.01450828,3.1143981,3.01449525,3.01428318
69.079705,3.31662479,3.11348624,0.450708939,3.01587048,3.01422502,3.11125073,3.01421162,3.01399975
69.090196,2.64575131,3.11046687,-0.68170049,3.01559174,3.0139419,3.10822499,3.01392814,3.01371645
69.100688,2.82842712,3.1075619,-0.52833207,3.0153132,3.01365886,3.10531361,3.01364473,3.01343323
69.11118,3.46410162,3.10476539,0.599446602,3.01503489,3.01337593,3.10251062,3.01336143,3.01315012
69.121671,3,3.10207175,-0.319486699,3.01475684,3.01309313,3.09981045,3.01307826,3.01286715
69.132163,2.82842712,3.09947505,-0.520622634,3.014479,3.01281042,3.09720716,3.01279518,3.01258425
69.142654,3,3.09697069,-0.311401177,3.01420143,3.01252784,3.09469613,3.01251223,3.01230149
69.153146,3.16227766,3.09455345,0.260238755,3.01392407,3.01224534,3.09227213,3.01222936,3.01201881
69.163638,3.31662479,3.09221911,0.473714768,3.01364697,3.01196295,3.08993094,3.0119466,3.01173623
69.174129,3.16227766,3.0899637,0.268912546,3.01337014,3.0116807,3.0876686,3.01166397,3.01145379
69.184621,4,3.0877829,0.955100573,3.01309355,3.01139853,3.08548075,3.01138143,3.01117144
69.195112,4,3.08567343,0.956204254,3.01281725,3.0111165,3.08336413,3.01109903,3.01088921
69.205604,2.23606798,3.08363144,-0.920632101,3.01254119,3.01083455,3.08131489,3.0108167,3.01060707
69.216096,2.82842712,3.08165391,-0.503216439,3.0122654,3.01055271,3.07932996,3.01053449,3.01032504
69.226587,3.46410162,3.07973795,0.619970698,3.01198992,3.010271,3.07740649,3.01025241,3.01004314
69.237079,2.64575131,3.07788033,-0.657365211,3.01171469,3.00998938,3.07554121,3.00997041,3.00976133
69.24757,3,3.0760787,-0.275823676,3.01143978,3.0097079,3.07373178,3.00968855,3.00947965
69.258062,2.82842712,3.07433017,-0.495886119,3.01116514,3.0094265,3.0719753,3.00940678,3.00919805
69.268554,3.60555128,3.0726325,0.730012859,3.0108908,3.00914522,3.07026952,3.00912511,3.00891657
69.279045,3.31662479,3.07098359,0.495622039,3.0106168,3.00886407,3.06861232,3.00884358,3.00863522
69.289537,3.74165739,3.06938097,0.819924644,3.01034308,3.008583,3.06700125,3.00856214,3.00835395
69.300028,2.64575131,3.06782292,-0.649670384,3.01006971,3.00830207,3.06543457,3.00828083,3.00807282
69.31052,3.31662479,3.06630724,0.500317451,3.00979665,3.00802123,3.06391006,3.00799961,3.00779177
69.321012,3.46410162,3.06483226,0.631877642,3.00952392,3.0077405,3.06242605,3.0077185,3.00751083
69.331503,3.46410162,3.06339641,0.633012803,3.00925157,3.00745991,3.06098095,3.00743752,3.00723003
69.341995,3.46410162,3.06199778,0.634116577,3.00897954,3.0071794,3.05957287,3.00715663,3.00694932
69.352486,3.60555128,3.06063511,0.73818437,3.0087079,3.00689904,3.05820052,3.00687588,3.00666874
69.362978,2.64575131,3.05930668,-0.643082708,3.00843661,3.00661875,3.05686216,3.00659522,3.00638825
69.37347,2.44948974,3.05801124,-0.780077877,3.0081657,3.00633858,3.05555655,3.00631466,3.00610786
69.383961,3.60555128,3.05674759,0.740812856,3.0078952,3.00605856,3.05428247,3.00603425,3.00582762
69.394453,3.87298335,3.05551425,0.904139978,3.00762508,3.00577861,3.05303843,3.00575392,3.00554746
69.404944,3,3.05431026,-0.233045627,3.00735539,3.00549881,3.05182346,3.00547373,3.00526744
69.415436,2.44948974,3.05313429,-0.776945653,3.00708611,3.00521909,3.05063622,3.00519362,3.0049875
69.425928,3,3.05198537,-0.228003009,3.00681726,3.00493949,3.04947572,3.00491363,3.00470768
69.436419,3.16227766,3.0508626,0.33378895,3.00654888,3.00466003,3.04834105,3.00463378,3.00442799
69.446911,4,3.04976479,0.974800088,3.00628093,3.00438065,3.04723101,3.00435401,3.00414839
69.457402,3,3.04869123,-0.220660903,3.00601349,3.00410142,3.04614488,3.00407438,3.00386893
69.467894,4,3.04764086,0.975888899,3.00574651,3.00382227,3.04508157,3.00379484,3.00358956
69.478386,3.31662479,3.04661292,0.51962666,3.00548003,3.00354324,3.04404033,3.00351542,3.0033103
69.488877,3.87298335,3.04560674,0.909602444,3.00521409,3.00326435,3.04302045,3.00323613,3.00303118
69.499369,3.60555128,3.04462136,0.748952548,3.00494867,3.00298554,3.04202096,3.00295693,3.00275214
69.50986,4.35889894,3.04365624,1.14684031,3.00468382,3.00270688,3.04104131,3.00267788,3.00247325
69.520352,2.82842712,3.04271052,-0.462907549,3.00441952,3.00242831,3.04008061,3.00239891,3.00219444
69.530844,2.64575131,3.04178364,-0.629310999,3.00415581,3.00214985,3.03913829,3.00212005,3.00191575
69.541335,3,3.04087506,-0.202175823,3.00389274,3.00187154,3.03821378,3.00184134,3.00163719
69.551827,3.60555128,3.03998402,0.75204206,3.00363027,3.00159331,3.0373063,3.00156271,3.00135873
69.562318,2.44948974,3.0391101,-0.767867411,3.00336848,3.00131523,3.03641543,3.00128423,3.0010804
69.57281,4,3.03825262,0.980687198,3.00310734,3.00103723,3.03554044,3.00100583,3.00080217
69.583302,2.82842712,3.03741114,-0.457147691,3.00284691,3.00075935,3.03468087,3.00072755,3.00052404
69.593793,2.44948974,3.03658524,-0.766221569,3.00258723,3.00048162,3.03383628,3.00044941,3.00024606
69.604285,4,3.0357743,0.981949949,3.00232828,3.00020397,3.03300602,3.00017136,2.99996817
69.614776,2.23606798,3.03497803,-0.893817684,3.00207015,2.99992647,3.03218977,2.99989346,2.99969042
69.625268,3.74165739,3.03419585,0.841107325,3.0018128,2.99964906,3.03138692,2.99961564,2.99941276
69.63576,3.46410162,3.03342745,0.6562577,3.00155631,2.99937177,3.03059711,2.99933794,2.99913521
69.646251,3.46410162,3.03267249,0.656832645,3.00130072,2.99909462,3.02982,2.99906038,2.99885781
69.656743,3.31662479,3.03193048,0.533567531,3.00104603,2.99881756,3.02905504,2.99878291,2.99858049
69.667234,2.23606798,3.03120121,-0.891702433,3.00079233,2.99854064,3.02830198,2.99850558,2.99830332
69.677726,3.46410162,3.0304842,0.658496327,3.00053961,2.99826382,3.02756031,2.99822835,2.99802624
69.688218,3,3.02977923,-0.172566584,3.00028793,2.99798711,3.02682975,2.99795123,2.99774927
69.698709,2.64575131,3.02908605,-0.619140319,3.00003737,2.99771055,3.02611002,2.99767426,2.99747245
69.709201,2.44948974,3.02840425,-0.760864315,2.99978792,2.99743408,3.02540066,2.99739737,2.99719572
69.719692,2.82842712,3.0277337,-0.446437654,2.9995397,2.99715776,3.02470148,2.99712064,2.99691913
69.730184,2.82842712,3.02707403,-0.445698225,2.9992927,2.99688153,3.02401205,2.99684399,2.99664263
69.740676,2.64575131,3.02642507,-0.616987646,2.99904701,2.99660542,3.02333215,2.99656746,2.99636625
69.751167,3.46410162,3.02578665,0.6620536,2.99880273,2.99632945,3.02266154,2.99629107,2.99609001
69.761659,2.64575131,3.02515845,-0.615960337,2.99855986,2.99605357,3.02199984,2.99601478,2.99581387
69.77215,3.46410162,3.0245404,0.662994127,2.99831853,2.99577785,3.0213469,2.99573863,2.99553786
69.782642,2.44948974,3.02393222,-0.757919833,2.99807877,2.99550221,3.02070235,2.99546257,2.99526195
69.793134,3.60555128,3.02333379,0.763031772,2.99784069,2.9952267,3.02006602,2.99518663,2.99498616
69.803625,3.87298335,3.02274503,0.92208368,2.9976044,2.99495133,3.01943772,2.99491084,2.99471051
69.814117,2.82842712,3.0221657,-0.440157448,2.99736995,2.99467605,3.01881711,2.99463514,2.99443496
69.824608,3.74165739,3.0215958,0.848564429,2.99713749,2.99440093,3.0182041,2.99435959,2.99415955
69.8351,3.87298335,3.0210351,0.923010424,2.99690708,2.99412589,3.01759835,2.99408413,2.99388423
69.845592,2.82842712,3.02048359,-0.438242478,2.99667887,2.99385098,3.01699972,2.99380878,2.99360903
69.856083,2.82842712,3.01994125,-0.43762327,2.99645299,2.99357621,3.01640807,2.99353359,2.99333398
69.866575,3.31662479,3.01940792,0.545175999,2.99622956,2.99330154,3.0158231,2.99325849,2.99305902
69.877066,3.31662479,3.01888367,0.545656598,2.99600875,2.99302702,3.01524474,2.99298353,2.9927842
69.887558,3.31662479,3.01836838,0.546128569,2.99579069,2.99275259,3.01467271,2.99270867,2.99250948
69.89805,2.64575131,3.0178621,-0.610008843,2.99557557,2.99247829,3.01410688,2.99243393,2.99223488
69.908541,3,3.01736491,-0.131775975,2.9953636,2.99220413,3.01354715,2.99215934,2.99196043
69.919033,3.60555128,3.01687675,0.767251281,2.99515493,2.99193007,3.01299326,2.99188484,2.99168606
69.929524,4.35889894,3.01639778,1.15866353,2.99494984,2.99165615,3.01244514,2.99161048,2.99141185
69.940016,2,3.015928,-1.00793254,2.99474852,2.99138234,3.01190256,2.99133623,2.99113773
69.950508,3.46410162,3.01546757,0.669801496,2.99455125,2.99110864,3.01136543,2.99106209,2.99086373
69.960999,3.31662479,3.01501668,0.549188593,2.99435833,2.9908351,3.01083364,2.9907881,2.99058988
69.971491,3.46410162,3.01457541,0.670467153,2.99417003,2.99056165,3.01030697,2.99051421,2.99031612
[truncated: 651,366 more chars]
