# Supplementary material for: Phase Stability of Iron Nitride Fe4N at High Pressure—Pressure-Dependent Evolution of Phase Equilibria in the Fe–N System
Source: Materials (Basel). 2021 Jul 15;14(14):3963. doi: 10.3390/ma14143963 (PMC8307547; doi:10.3390/ma14143963)
Supplement: Supplementary file 1 [file materials-14-03963-s001.zip › xrd_data/5-400_riet.txt]

'y-axis saved as Sqrt(y)
'x,Yobs,Ycalc,Diff,epsilon,gamma,Bkg
20,7.93725393,0,0,0,0,0
20.010492,8.88819442,0,0,0,0,0
20.020983,9.2736185,0,0,0,0,0
20.031475,8.54400375,0,0,0,0,0
20.041966,8.30662386,0,0,0,0,0
20.052458,7.93725393,0,0,0,0,0
20.06295,8.36660027,0,0,0,0,0
20.073441,8.88819442,0,0,0,0,0
20.083933,8.30662386,0,0,0,0,0
20.094424,7,0,0,0,0,0
20.104916,8.30662386,0,0,0,0,0
20.115408,8.1240384,0,0,0,0,0
20.125899,8.24621125,0,0,0,0,0
20.136391,7.74596669,0,0,0,0,0
20.146882,8,0,0,0,0,0
20.157374,7.54983444,0,0,0,0,0
20.167866,8.06225775,0,0,0,0,0
20.178357,8.24621125,0,0,0,0,0
20.188849,8.83176087,0,0,0,0,0
20.19934,8.66025404,0,0,0,0,0
20.209832,8.71779789,0,0,0,0,0
20.220324,7.48331477,0,0,0,0,0
20.230815,8.36660027,0,0,0,0,0
20.241307,6.4807407,0,0,0,0,0
20.251798,8.36660027,0,0,0,0,0
20.26229,8,0,0,0,0,0
20.272782,8.83176087,0,0,0,0,0
20.283273,8.24621125,0,0,0,0,0
20.293765,7.93725393,0,0,0,0,0
20.304256,8.1240384,0,0,0,0,0
20.314748,8.48528137,0,0,0,0,0
20.32524,8.77496439,0,0,0,0,0
20.335731,8.30662386,0,0,0,0,0
20.346223,7.81024968,0,0,0,0,0
20.356714,8,0,0,0,0,0
20.367206,8.24621125,0,0,0,0,0
20.377698,8.1240384,0,0,0,0,0
20.388189,6.70820393,0,0,0,0,0
20.398681,8.06225775,0,0,0,0,0
20.409172,8.36660027,0,0,0,0,0
20.419664,7.87400787,0,0,0,0,0
20.430156,8.1240384,0,0,0,0,0
20.440647,8.66025404,0,0,0,0,0
20.451139,8.06225775,0,0,0,0,0
20.46163,7.81024968,0,0,0,0,0
20.472122,8.1240384,0,0,0,0,0
20.482614,7.87400787,0,0,0,0,0
20.493105,8.24621125,0,0,0,0,0
20.503597,8.36660027,0,0,0,0,0
20.514088,8.42614977,0,0,0,0,0
20.52458,7.81024968,0,0,0,0,0
20.535072,8.77496439,0,0,0,0,0
20.545563,7.61577311,0,0,0,0,0
20.556055,8.77496439,0,0,0,0,0
20.566546,8.24621125,0,0,0,0,0
20.577038,7.48331477,0,0,0,0,0
20.58753,7.41619849,0,0,0,0,0
20.598021,7.41619849,0,0,0,0,0
20.608513,7.48331477,0,0,0,0,0
20.619004,7.61577311,0,0,0,0,0
20.629496,7.81024968,0,0,0,0,0
20.639988,7.48331477,0,0,0,0,0
20.650479,8.48528137,0,0,0,0,0
20.660971,8.42614977,0,0,0,0,0
20.671462,7.41619849,0,0,0,0,0
20.681954,7.87400787,0,0,0,0,0
20.692446,7.54983444,0,0,0,0,0
20.702937,8.48528137,0,0,0,0,0
20.713429,8.48528137,0,0,0,0,0
20.72392,7.48331477,0,0,0,0,0
20.734412,8.48528137,0,0,0,0,0
20.744904,7.28010989,0,0,0,0,0
20.755395,8.48528137,0,0,0,0,0
20.765887,7.41619849,0,0,0,0,0
20.776378,7.74596669,0,0,0,0,0
20.78687,7.34846923,0,0,0,0,0
20.797362,8.1240384,0,0,0,0,0
20.807853,7.81024968,0,0,0,0,0
20.818345,7,0,0,0,0,0
20.828836,8.24621125,0,0,0,0,0
20.839328,8.83176087,0,0,0,0,0
20.84982,8.54400375,0,0,0,0,0
20.860311,7.87400787,0,0,0,0,0
20.870803,8.06225775,0,0,0,0,0
20.881294,7.81024968,0,0,0,0,0
20.891786,8,0,0,0,0,0
20.902278,7.68114575,0,0,0,0,0
20.912769,8.71779789,0,0,0,0,0
20.923261,7.87400787,0,0,0,0,0
20.933752,8.77496439,0,0,0,0,0
20.944244,7.34846923,0,0,0,0,0
20.954736,8,0,0,0,0,0
20.965227,6.70820393,0,0,0,0,0
20.975719,8.1240384,0,0,0,0,0
20.98621,7.21110255,0,0,0,0,0
20.996702,8.1240384,0,0,0,0,0
21.007194,7.87400787,0,0,0,0,0
21.017685,7.68114575,0,0,0,0,0
21.028177,7.54983444,0,0,0,0,0
21.038668,8.88819442,0,0,0,0,0
21.04916,8.30662386,0,0,0,0,0
21.059652,8.06225775,0,0,0,0,0
21.070143,7.48331477,0,0,0,0,0
21.080635,8.18535277,0,0,0,0,0
21.091126,9,0,0,0,0,0
21.101618,8.71779789,0,0,0,0,0
21.11211,7.28010989,0,0,0,0,0
21.122601,7.87400787,0,0,0,0,0
21.133093,8.06225775,0,0,0,0,0
21.143584,8.24621125,0,0,0,0,0
21.154076,8.42614977,0,0,0,0,0
21.164568,8.18535277,0,0,0,0,0
21.175059,8.30662386,0,0,0,0,0
21.185551,8.30662386,0,0,0,0,0
21.196042,8.42614977,0,0,0,0,0
21.206534,7.48331477,0,0,0,0,0
21.217026,7.61577311,0,0,0,0,0
21.227517,7.93725393,0,0,0,0,0
21.238009,7.54983444,0,0,0,0,0
21.2485,8.42614977,0,0,0,0,0
21.258992,7.68114575,0,0,0,0,0
21.269484,8.30662386,0,0,0,0,0
21.279975,8.06225775,0,0,0,0,0
21.290467,7.74596669,0,0,0,0,0
21.300958,8.66025404,0,0,0,0,0
21.31145,8,0,0,0,0,0
21.321942,7.81024968,0,0,0,0,0
21.332433,7.34846923,0,0,0,0,0
21.342925,8.54400375,0,0,0,0,0
21.353416,7.21110255,0,0,0,0,0
21.363908,8.54400375,0,0,0,0,0
21.3744,8,0,0,0,0,0
21.384891,6.92820323,0,0,0,0,0
21.395383,7.68114575,0,0,0,0,0
21.405874,7.54983444,0,0,0,0,0
21.416366,7.48331477,0,0,0,0,0
21.426858,7.21110255,0,0,0,0,0
21.437349,7.34846923,0,0,0,0,0
21.447841,7.81024968,0,0,0,0,0
21.458332,8.18535277,0,0,0,0,0
21.468824,7.21110255,0,0,0,0,0
21.479316,7.74596669,0,0,0,0,0
21.489807,8,0,0,0,0,0
21.500299,7.81024968,0,0,0,0,0
21.51079,7.14142843,0,0,0,0,0
21.521282,6.8556546,0,0,0,0,0
21.531774,6.8556546,0,0,0,0,0
21.542265,7.68114575,0,0,0,0,0
21.552757,9.53939201,0,0,0,0,0
21.563248,7.81024968,0,0,0,0,0
21.57374,7.61577311,0,0,0,0,0
21.584232,7.07106781,0,0,0,0,0
21.594723,8.1240384,0,0,0,0,0
21.605215,8.36660027,0,0,0,0,0
21.615706,8.18535277,0,0,0,0,0
21.626198,8.1240384,0,0,0,0,0
21.63669,7.93725393,0,0,0,0,0
21.647181,7,0,0,0,0,0
21.657673,8.1240384,0,0,0,0,0
21.668164,8.24621125,0,0,0,0,0
21.678656,6.70820393,0,0,0,0,0
21.689148,7.41619849,0,0,0,0,0
21.699639,7.87400787,0,0,0,0,0
21.710131,7.68114575,0,0,0,0,0
21.720622,6.63324958,0,0,0,0,0
21.731114,8.30662386,0,0,0,0,0
21.741606,7.74596669,0,0,0,0,0
21.752097,7.41619849,0,0,0,0,0
21.762589,7.61577311,0,0,0,0,0
21.77308,8,0,0,0,0,0
21.783572,8.30662386,0,0,0,0,0
21.794064,8.18535277,0,0,0,0,0
21.804555,8.83176087,0,0,0,0,0
21.815047,7.34846923,0,0,0,0,0
21.825538,8.48528137,0,0,0,0,0
21.83603,7.87400787,0,0,0,0,0
21.846522,9.11043358,0,0,0,0,0
21.857013,7.54983444,0,0,0,0,0
21.867505,8.66025404,0,0,0,0,0
21.877996,7.14142843,0,0,0,0,0
21.888488,8.1240384,0,0,0,0,0
21.89898,7.14142843,0,0,0,0,0
21.909471,8.30662386,0,0,0,0,0
21.919963,8.60232527,0,0,0,0,0
21.930454,7.68114575,0,0,0,0,0
21.940946,8.1240384,0,0,0,0,0
21.951438,7.68114575,0,0,0,0,0
21.961929,7.54983444,0,0,0,0,0
21.972421,7.61577311,0,0,0,0,0
21.982912,7.61577311,0,0,0,0,0
21.993404,7.68114575,0,0,0,0,0
22.003896,7.87400787,0,0,0,0,0
22.014387,8.06225775,0,0,0,0,0
22.024879,7.14142843,0,0,0,0,0
22.03537,7.07106781,0,0,0,0,0
22.045862,8.30662386,0,0,0,0,0
22.056354,8.1240384,0,0,0,0,0
22.066845,7.87400787,0,0,0,0,0
22.077337,8.48528137,0,0,0,0,0
22.087828,7.61577311,0,0,0,0,0
22.09832,7.21110255,0,0,0,0,0
22.108812,8.24621125,0,0,0,0,0
22.119303,7.61577311,0,0,0,0,0
22.129795,7.34846923,0,0,0,0,0
22.140286,7.93725393,0,0,0,0,0
22.150778,8.30662386,0,0,0,0,0
22.16127,7.48331477,0,0,0,0,0
22.171761,7.07106781,0,0,0,0,0
22.182253,7.81024968,0,0,0,0,0
22.192744,7.14142843,0,0,0,0,0
22.203236,8.36660027,0,0,0,0,0
22.213728,7.61577311,0,0,0,0,0
22.224219,6.4807407,0,0,0,0,0
22.234711,7.48331477,0,0,0,0,0
22.245202,7.54983444,0,0,0,0,0
22.255694,7.87400787,0,0,0,0,0
22.266186,7.81024968,0,0,0,0,0
22.276677,8.36660027,0,0,0,0,0
22.287169,7.14142843,0,0,0,0,0
22.29766,7.54983444,0,0,0,0,0
22.308152,7.54983444,0,0,0,0,0
22.318644,7.87400787,0,0,0,0,0
22.329135,7.34846923,0,0,0,0,0
22.339627,7.93725393,0,0,0,0,0
22.350118,7.21110255,0,0,0,0,0
22.36061,7.14142843,0,0,0,0,0
22.371102,6.78232998,0,0,0,0,0
22.381593,7.21110255,0,0,0,0,0
22.392085,7.87400787,0,0,0,0,0
22.402576,7.54983444,0,0,0,0,0
22.413068,7.21110255,0,0,0,0,0
22.42356,7.93725393,0,0,0,0,0
22.434051,7.87400787,0,0,0,0,0
22.444543,7.48331477,0,0,0,0,0
22.455034,6.78232998,0,0,0,0,0
22.465526,7.81024968,0,0,0,0,0
22.476018,7.41619849,0,0,0,0,0
22.486509,7.14142843,0,0,0,0,0
22.497001,7.93725393,0,0,0,0,0
22.507492,7.14142843,0,0,0,0,0
22.517984,7.41619849,0,0,0,0,0
22.528476,7.81024968,0,0,0,0,0
22.538967,9.21954446,0,0,0,0,0
22.549459,7.87400787,0,0,0,0,0
22.55995,7.34846923,0,0,0,0,0
22.570442,7.93725393,0,0,0,0,0
22.580934,7.54983444,0,0,0,0,0
22.591425,7.28010989,0,0,0,0,0
22.601917,7.28010989,0,0,0,0,0
22.612408,8.06225775,0,0,0,0,0
22.6229,7.34846923,0,0,0,0,0
22.633392,7.41619849,0,0,0,0,0
22.643883,7.14142843,0,0,0,0,0
22.654375,7.28010989,0,0,0,0,0
22.664866,7.34846923,0,0,0,0,0
22.675358,8.1240384,0,0,0,0,0
22.68585,7.41619849,0,0,0,0,0
22.696341,7.74596669,0,0,0,0,0
22.706833,7.54983444,0,0,0,0,0
22.717324,7.21110255,0,0,0,0,0
22.727816,7.28010989,0,0,0,0,0
22.738308,6.92820323,0,0,0,0,0
22.748799,6.8556546,0,0,0,0,0
22.759291,7.48331477,0,0,0,0,0
22.769782,7.28010989,0,0,0,0,0
22.780274,7.61577311,0,0,0,0,0
22.790766,7.93725393,0,0,0,0,0
22.801257,7.87400787,0,0,0,0,0
22.811749,8.1240384,0,0,0,0,0
22.82224,6.8556546,0,0,0,0,0
22.832732,7.74596669,0,0,0,0,0
22.843224,6.8556546,0,0,0,0,0
22.853715,8.06225775,0,0,0,0,0
22.864207,7.61577311,0,0,0,0,0
22.874698,7.41619849,0,0,0,0,0
22.88519,8,0,0,0,0,0
22.895682,7.34846923,0,0,0,0,0
22.906173,7.93725393,0,0,0,0,0
22.916665,8.06225775,0,0,0,0,0
22.927156,7.87400787,0,0,0,0,0
22.937648,7.34846923,0,0,0,0,0
22.94814,8.30662386,0,0,0,0,0
22.958631,6.70820393,0,0,0,0,0
22.969123,7.34846923,0,0,0,0,0
22.979614,8,0,0,0,0,0
22.990106,7.81024968,0,0,0,0,0
23.000598,7.14142843,0,0,0,0,0
23.011089,6.32455532,0,0,0,0,0
23.021581,7.87400787,0,0,0,0,0
23.032072,6.63324958,0,0,0,0,0
23.042564,7.61577311,0,0,0,0,0
23.053056,6.70820393,0,0,0,0,0
23.063547,8.1240384,0,0,0,0,0
23.074039,8.24621125,0,0,0,0,0
23.08453,6.8556546,0,0,0,0,0
23.095022,7.54983444,0,0,0,0,0
23.105514,7.81024968,0,0,0,0,0
23.116005,7.07106781,0,0,0,0,0
23.126497,6.92820323,0,0,0,0,0
23.136988,7,0,0,0,0,0
23.14748,8.30662386,0,0,0,0,0
23.157972,6.4807407,0,0,0,0,0
23.168463,7.68114575,0,0,0,0,0
23.178955,7,0,0,0,0,0
23.189446,8.1240384,0,0,0,0,0
23.199938,7.54983444,0,0,0,0,0
23.21043,7.48331477,0,0,0,0,0
23.220921,8.18535277,0,0,0,0,0
23.231413,7.48331477,0,0,0,0,0
23.241904,8.18535277,0,0,0,0,0
23.252396,6.78232998,0,0,0,0,0
23.262888,7.81024968,0,0,0,0,0
23.273379,7.61577311,0,0,0,0,0
23.283871,7.21110255,0,0,0,0,0
23.294362,7.07106781,0,0,0,0,0
23.304854,7.54983444,0,0,0,0,0
23.315346,6.8556546,0,0,0,0,0
23.325837,8.1240384,0,0,0,0,0
23.336329,6.32455532,0,0,0,0,0
23.34682,7.28010989,0,0,0,0,0
23.357312,7.34846923,0,0,0,0,0
23.367804,7.48331477,0,0,0,0,0
23.378295,7.21110255,0,0,0,0,0
23.388787,6.4807407,0,0,0,0,0
23.399278,7.93725393,0,0,0,0,0
23.40977,7.21110255,0,0,0,0,0
23.420262,7.28010989,0,0,0,0,0
23.430753,7.34846923,0,0,0,0,0
23.441245,7.87400787,0,0,0,0,0
23.451736,7.87400787,0,0,0,0,0
23.462228,7.07106781,0,0,0,0,0
23.47272,7.07106781,0,0,0,0,0
23.483211,6.8556546,0,0,0,0,0
23.493703,6.63324958,0,0,0,0,0
23.504194,7.61577311,0,0,0,0,0
23.514686,7.28010989,0,0,0,0,0
23.525178,7.74596669,0,0,0,0,0
23.535669,7,0,0,0,0,0
23.546161,7.61577311,0,0,0,0,0
23.556652,7.28010989,0,0,0,0,0
23.567144,7.54983444,0,0,0,0,0
23.577636,6.164414,0,0,0,0,0
23.588127,6.78232998,0,0,0,0,0
23.598619,7.61577311,0,0,0,0,0
23.60911,7.81024968,0,0,0,0,0
23.619602,7.34846923,0,0,0,0,0
23.630094,7.28010989,0,0,0,0,0
23.640585,7.28010989,0,0,0,0,0
23.651077,7.74596669,0,0,0,0,0
23.661568,7.28010989,0,0,0,0,0
23.67206,7.54983444,0,0,0,0,0
23.682552,7.41619849,0,0,0,0,0
23.693043,8.18535277,0,0,0,0,0
23.703535,7,0,0,0,0,0
23.714026,8.18535277,0,0,0,0,0
23.724518,7.28010989,0,0,0,0,0
23.73501,6.63324958,0,0,0,0,0
23.745501,7.34846923,0,0,0,0,0
23.755993,7.07106781,0,0,0,0,0
23.766484,7.07106781,0,0,0,0,0
23.776976,7.21110255,0,0,0,0,0
23.787468,6.4807407,0,0,0,0,0
23.797959,6.8556546,0,0,0,0,0
23.808451,8.36660027,0,0,0,0,0
23.818942,7.28010989,0,0,0,0,0
23.829434,7.54983444,0,0,0,0,0
23.839926,7.61577311,0,0,0,0,0
23.850417,7.07106781,0,0,0,0,0
23.860909,7.61577311,0,0,0,0,0
23.8714,7.14142843,0,0,0,0,0
23.881892,6.4807407,0,0,0,0,0
23.892384,7.68114575,0,0,0,0,0
23.902875,7.87400787,0,0,0,0,0
23.913367,7.48331477,0,0,0,0,0
23.923858,6.4807407,0,0,0,0,0
23.93435,7.21110255,0,0,0,0,0
23.944842,7.54983444,0,0,0,0,0
23.955333,7.07106781,0,0,0,0,0
23.965825,7.14142843,0,0,0,0,0
23.976316,6.92820323,0,0,0,0,0
23.986808,7.41619849,0,0,0,0,0
23.9973,7,0,0,0,0,0
24.007791,7.54983444,0,0,0,0,0
24.018283,7,0,0,0,0,0
24.028774,7.21110255,0,0,0,0,0
24.039266,7.34846923,0,0,0,0,0
24.049758,7.07106781,0,0,0,0,0
24.060249,7.28010989,0,0,0,0,0
24.070741,7.28010989,0,0,0,0,0
24.081232,6.55743852,0,0,0,0,0
24.091724,6.32455532,0,0,0,0,0
24.102216,6.70820393,0,0,0,0,0
24.112707,8.1240384,0,0,0,0,0
24.123199,7,0,0,0,0,0
24.13369,8.18535277,0,0,0,0,0
24.144182,7.34846923,0,0,0,0,0
24.154674,7.61577311,0,0,0,0,0
24.165165,7.41619849,0,0,0,0,0
24.175657,7,0,0,0,0,0
24.186148,6.92820323,0,0,0,0,0
24.19664,6.8556546,0,0,0,0,0
24.207132,7.48331477,0,0,0,0,0
24.217623,6.8556546,0,0,0,0,0
24.228115,7.54983444,0,0,0,0,0
24.238606,6.92820323,0,0,0,0,0
24.249098,6.63324958,0,0,0,0,0
24.25959,6.78232998,0,0,0,0,0
24.270081,7.14142843,0,0,0,0,0
24.280573,7.34846923,0,0,0,0,0
24.291064,6.40312424,0,0,0,0,0
24.301556,7,0,0,0,0,0
24.312048,7,0,0,0,0,0
24.322539,7.81024968,0,0,0,0,0
24.333031,6.78232998,0,0,0,0,0
24.343522,7.34846923,0,0,0,0,0
24.354014,7,0,0,0,0,0
24.364506,7,0,0,0,0,0
24.374997,6.63324958,0,0,0,0,0
24.385489,6.78232998,0,0,0,0,0
24.39598,7.68114575,0,0,0,0,0
24.406472,7.87400787,0,0,0,0,0
24.416964,6.70820393,0,0,0,0,0
24.427455,6.92820323,0,0,0,0,0
24.437947,7.74596669,0,0,0,0,0
24.448438,6.92820323,0,0,0,0,0
24.45893,6.78232998,0,0,0,0,0
24.469422,7,0,0,0,0,0
24.479913,6.55743852,0,0,0,0,0
24.490405,6.32455532,0,0,0,0,0
24.500896,6.78232998,0,0,0,0,0
24.511388,6.08276253,0,0,0,0,0
24.52188,7.21110255,0,0,0,0,0
24.532371,7.41619849,0,0,0,0,0
24.542863,6.32455532,0,0,0,0,0
24.553354,6.92820323,0,0,0,0,0
24.563846,7.81024968,0,0,0,0,0
24.574338,6.92820323,0,0,0,0,0
24.584829,7.07106781,0,0,0,0,0
24.595321,6.08276253,0,0,0,0,0
24.605812,6.92820323,0,0,0,0,0
24.616304,7.07106781,0,0,0,0,0
24.626796,6.4807407,0,0,0,0,0
24.637287,7.81024968,0,0,0,0,0
24.647779,7.87400787,0,0,0,0,0
24.65827,6.40312424,0,0,0,0,0
24.668762,5.83095189,0,0,0,0,0
24.679254,6.8556546,0,0,0,0,0
24.689745,7,0,0,0,0,0
24.700237,7.34846923,0,0,0,0,0
24.710728,6.78232998,0,0,0,0,0
24.72122,7.21110255,0,0,0,0,0
24.731712,6.55743852,0,0,0,0,0
24.742203,7.34846923,0,0,0,0,0
24.752695,7.74596669,0,0,0,0,0
24.763186,6.55743852,0,0,0,0,0
24.773678,6.32455532,0,0,0,0,0
24.78417,7.34846923,0,0,0,0,0
24.794661,7.41619849,0,0,0,0,0
24.805153,7.07106781,0,0,0,0,0
24.815644,7.93725393,0,0,0,0,0
24.826136,6.70820393,0,0,0,0,0
24.836628,7.34846923,0,0,0,0,0
24.847119,6.63324958,0,0,0,0,0
24.857611,5.65685425,0,0,0,0,0
24.868102,6.78232998,0,0,0,0,0
24.878594,7.28010989,0,0,0,0,0
24.889086,7.41619849,0,0,0,0,0
24.899577,7.28010989,0,0,0,0,0
24.910069,7.48331477,0,0,0,0,0
24.92056,7.81024968,0,0,0,0,0
24.931052,7.48331477,0,0,0,0,0
24.941544,7.54983444,0,0,0,0,0
24.952035,7.34846923,0,0,0,0,0
24.962527,8.1240384,0,0,0,0,0
24.973018,7.28010989,0,0,0,0,0
24.98351,7.28010989,0,0,0,0,0
24.994002,7.34846923,0,0,0,0,0
25.004493,6.92820323,0,0,0,0,0
25.014985,6.8556546,0,0,0,0,0
25.025476,6.32455532,0,0,0,0,0
25.035968,7.07106781,0,0,0,0,0
25.04646,7,0,0,0,0,0
25.056951,6.32455532,0,0,0,0,0
25.067443,6.78232998,0,0,0,0,0
25.077934,6.92820323,0,0,0,0,0
25.088426,7.21110255,0,0,0,0,0
25.098918,7.61577311,0,0,0,0,0
25.109409,6.92820323,0,0,0,0,0
25.119901,7.93725393,0,0,0,0,0
25.130392,6.55743852,0,0,0,0,0
25.140884,6.08276253,0,0,0,0,0
25.151376,7.21110255,0,0,0,0,0
25.161867,6.92820323,0,0,0,0,0
25.172359,6.40312424,0,0,0,0,0
25.18285,7.34846923,0,0,0,0,0
25.193342,6.78232998,0,0,0,0,0
25.203834,6.63324958,0,0,0,0,0
25.214325,6.8556546,0,0,0,0,0
25.224817,7.14142843,0,0,0,0,0
25.235308,7.28010989,0,0,0,0,0
25.2458,6.164414,0,0,0,0,0
25.256292,6.4807407,0,0,0,0,0
25.266783,7.28010989,0,0,0,0,0
25.277275,6.70820393,0,0,0,0,0
25.287766,7.14142843,0,0,0,0,0
25.298258,6.8556546,0,0,0,0,0
25.30875,6.92820323,0,0,0,0,0
25.319241,6.8556546,0,0,0,0,0
25.329733,6.63324958,0,0,0,0,0
25.340224,7.07106781,0,0,0,0,0
25.350716,6.08276253,0,0,0,0,0
25.361208,6.70820393,0,0,0,0,0
25.371699,7.07106781,0,0,0,0,0
25.382191,6.164414,0,0,0,0,0
25.392682,6.78232998,0,0,0,0,0
25.403174,7.48331477,0,0,0,0,0
25.413666,7.54983444,0,0,0,0,0
25.424157,6.55743852,0,0,0,0,0
25.434649,6.32455532,0,0,0,0,0
25.44514,6.78232998,0,0,0,0,0
25.455632,6.63324958,0,0,0,0,0
25.466124,7.28010989,0,0,0,0,0
25.476615,6.70820393,0,0,0,0,0
25.487107,7.48331477,0,0,0,0,0
25.497598,7.28010989,0,0,0,0,0
25.50809,6.244998,0,0,0,0,0
25.518582,6.164414,0,0,0,0,0
25.529073,6,0,0,0,0,0
25.539565,6.4807407,0,0,0,0,0
25.550056,6.70820393,0,0,0,0,0
25.560548,7.28010989,0,0,0,0,0
25.57104,7.28010989,0,0,0,0,0
25.581531,7.07106781,0,0,0,0,0
25.592023,6.40312424,0,0,0,0,0
25.602514,6.92820323,0,0,0,0,0
25.613006,7.07106781,0,0,0,0,0
25.623498,6.92820323,0,0,0,0,0
25.633989,7.21110255,0,0,0,0,0
25.644481,6.92820323,0,0,0,0,0
25.654972,6,0,0,0,0,0
25.665464,7,0,0,0,0,0
25.675956,6.08276253,0,0,0,0,0
25.686447,6,0,0,0,0,0
25.696939,6.32455532,0,0,0,0,0
25.70743,6.8556546,0,0,0,0,0
25.717922,6.32455532,0,0,0,0,0
25.728414,7.07106781,0,0,0,0,0
25.738905,5.47722558,0,0,0,0,0
25.749397,7.14142843,0,0,0,0,0
25.759888,6.63324958,0,0,0,0,0
25.77038,6.92820323,0,0,0,0,0
25.780872,6.92820323,0,0,0,0,0
25.791363,6.08276253,0,0,0,0,0
25.801855,6.244998,0,0,0,0,0
25.812346,6.40312424,0,0,0,0,0
25.822838,6.164414,0,0,0,0,0
25.83333,6.63324958,0,0,0,0,0
25.843821,7.28010989,0,0,0,0,0
25.854313,6.244998,0,0,0,0,0
25.864804,6.78232998,0,0,0,0,0
25.875296,6.08276253,0,0,0,0,0
25.885788,6.63324958,0,0,0,0,0
25.896279,8.42614977,0,0,0,0,0
25.906771,6,0,0,0,0,0
25.917262,7.14142843,0,0,0,0,0
25.927754,6.92820323,0,0,0,0,0
25.938246,6.78232998,0,0,0,0,0
25.948737,6.78232998,0,0,0,0,0
25.959229,6.164414,0,0,0,0,0
25.96972,6.4807407,0,0,0,0,0
25.980212,7.48331477,0,0,0,0,0
25.990704,6.70820393,0,0,0,0,0
26.001195,7.34846923,0,0,0,0,0
26.011687,7.41619849,0,0,0,0,0
26.022178,6.55743852,0,0,0,0,0
26.03267,6.55743852,0,0,0,0,0
26.043162,6.8556546,0,0,0,0,0
26.053653,5.83095189,0,0,0,0,0
26.064145,7.07106781,0,0,0,0,0
26.074636,6.70820393,0,0,0,0,0
26.085128,7.54983444,0,0,0,0,0
26.09562,7,0,0,0,0,0
26.106111,5.83095189,0,0,0,0,0
26.116603,5.74456265,0,0,0,0,0
26.127094,6.63324958,0,0,0,0,0
26.137586,7.21110255,0,0,0,0,0
26.148078,6.70820393,0,0,0,0,0
26.158569,6.4807407,0,0,0,0,0
26.169061,6.08276253,0,0,0,0,0
26.179552,6.63324958,0,0,0,0,0
26.190044,6,0,0,0,0,0
26.200536,6.78232998,0,0,0,0,0
26.211027,5.91607978,0,0,0,0,0
26.221519,6.8556546,0,0,0,0,0
26.23201,6.92820323,0,0,0,0,0
26.242502,6.32455532,0,0,0,0,0
26.252994,6.92820323,0,0,0,0,0
26.263485,6.70820393,0,0,0,0,0
26.273977,7.54983444,0,0,0,0,0
26.284468,6.63324958,0,0,0,0,0
26.29496,6.164414,0,0,0,0,0
26.305452,5.74456265,0,0,0,0,0
26.315943,6.8556546,0,0,0,0,0
26.326435,6,0,0,0,0,0
26.336926,6.8556546,0,0,0,0,0
26.347418,6,0,0,0,0,0
26.35791,6.4807407,0,0,0,0,0
26.368401,6.55743852,0,0,0,0,0
26.378893,6.32455532,0,0,0,0,0
26.389384,6.244998,0,0,0,0,0
26.399876,5.91607978,0,0,0,0,0
26.410368,6.164414,0,0,0,0,0
26.420859,7,0,0,0,0,0
26.431351,6.4807407,0,0,0,0,0
26.441842,7,0,0,0,0,0
26.452334,6.92820323,0,0,0,0,0
26.462826,5.47722558,0,0,0,0,0
26.473317,6.32455532,0,0,0,0,0
26.483809,6.92820323,0,0,0,0,0
26.4943,6.08276253,0,0,0,0,0
26.504792,5.29150262,0,0,0,0,0
26.515284,6.40312424,0,0,0,0,0
26.525775,5.74456265,0,0,0,0,0
26.536267,6.55743852,0,0,0,0,0
26.546758,7.07106781,0,0,0,0,0
26.55725,6.63324958,0,0,0,0,0
26.567742,6.92820323,0,0,0,0,0
26.578233,7.07106781,0,0,0,0,0
26.588725,6.55743852,0,0,0,0,0
26.599216,6,0,0,0,0,0
26.609708,6.78232998,0,0,0,0,0
26.6202,6.40312424,0,0,0,0,0
26.630691,6.63324958,0,0,0,0,0
26.641183,7.61577311,0,0,0,0,0
26.651674,6.70820393,0,0,0,0,0
26.662166,6.63324958,0,0,0,0,0
26.672658,7.14142843,0,0,0,0,0
26.683149,6.40312424,0,0,0,0,0
26.693641,6.8556546,0,0,0,0,0
26.704132,5.91607978,0,0,0,0,0
26.714624,6.92820323,0,0,0,0,0
26.725116,6.08276253,0,0,0,0,0
26.735607,6.55743852,0,0,0,0,0
26.746099,6.70820393,0,0,0,0,0
26.75659,6.70820393,0,0,0,0,0
26.767082,6.8556546,0,0,0,0,0
26.777574,5.56776436,0,0,0,0,0
26.788065,6.78232998,0,0,0,0,0
26.798557,6.8556546,0,0,0,0,0
26.809048,7.68114575,0,0,0,0,0
26.81954,7.48331477,0,0,0,0,0
26.830032,5.91607978,0,0,0,0,0
26.840523,6.08276253,0,0,0,0,0
26.851015,6.63324958,0,0,0,0,0
26.861506,7.28010989,0,0,0,0,0
26.871998,6.8556546,0,0,0,0,0
26.88249,6.63324958,0,0,0,0,0
26.892981,6.4807407,0,0,0,0,0
26.903473,5.91607978,0,0,0,0,0
26.913964,5.19615242,0,0,0,0,0
26.924456,6.55743852,0,0,0,0,0
26.934948,6.40312424,0,0,0,0,0
26.945439,6.08276253,0,0,0,0,0
26.955931,6.32455532,0,0,0,0,0
26.966422,6.78232998,0,0,0,0,0
26.976914,6.40312424,0,0,0,0,0
26.987406,7.07106781,0,0,0,0,0
26.997897,6.55743852,0,0,0,0,0
27.008389,6.55743852,0,0,0,0,0
27.01888,5.65685425,0,0,0,0,0
27.029372,6,0,0,0,0,0
27.039864,7,0,0,0,0,0
27.050355,6.08276253,0,0,0,0,0
27.060847,6.8556546,0,0,0,0,0
27.071338,5.91607978,0,0,0,0,0
27.08183,6.4807407,0,0,0,0,0
27.092322,6.92820323,0,0,0,0,0
27.102813,6.32455532,0,0,0,0,0
27.113305,6.55743852,0,0,0,0,0
27.123796,6.55743852,0,0,0,0,0
27.134288,6.40312424,0,0,0,0,0
27.14478,6.78232998,0,0,0,0,0
27.155271,7.21110255,0,0,0,0,0
27.165763,6.55743852,0,0,0,0,0
27.176254,7.28010989,0,0,0,0,0
27.186746,5.83095189,0,0,0,0,0
27.197238,6.55743852,0,0,0,0,0
27.207729,5.65685425,0,0,0,0,0
27.218221,6.40312424,0,0,0,0,0
27.228712,6.63324958,0,0,0,0,0
27.239204,6.63324958,0,0,0,0,0
27.249696,5.29150262,0,0,0,0,0
27.260187,6,0,0,0,0,0
27.270679,6.40312424,0,0,0,0,0
27.28117,5.38516481,0,0,0,0,0
27.291662,7,0,0,0,0,0
27.302154,6.32455532,0,0,0,0,0
27.312645,6.32455532,0,0,0,0,0
27.323137,6.8556546,0,0,0,0,0
27.333628,6.32455532,0,0,0,0,0
27.34412,6.63324958,0,0,0,0,0
27.354612,6.244998,0,0,0,0,0
27.365103,6.164414,0,0,0,0,0
27.375595,6.40312424,0,0,0,0,0
27.386086,6.70820393,0,0,0,0,0
27.396578,6.70820393,0,0,0,0,0
27.40707,7.48331477,0,0,0,0,0
27.417561,7,0,0,0,0,0
27.428053,6.4807407,0,0,0,0,0
27.438544,7.41619849,0,0,0,0,0
27.449036,6.8556546,0,0,0,0,0
27.459528,7.34846923,0,0,0,0,0
27.470019,6.78232998,0,0,0,0,0
27.480511,6.92820323,0,0,0,0,0
27.491002,6,0,0,0,0,0
27.501494,6.4807407,0,0,0,0,0
27.511986,6.92820323,0,0,0,0,0
27.522477,6.40312424,0,0,0,0,0
27.532969,6.70820393,0,0,0,0,0
27.54346,6.63324958,0,0,0,0,0
27.553952,5.91607978,0,0,0,0,0
27.564444,6.55743852,0,0,0,0,0
27.574935,6.63324958,0,0,0,0,0
27.585427,6,0,0,0,0,0
27.595918,6.40312424,0,0,0,0,0
27.60641,6,0,0,0,0,0
27.616902,6.8556546,0,0,0,0,0
27.627393,6.55743852,0,0,0,0,0
27.637885,5.56776436,0,0,0,0,0
27.648376,7,0,0,0,0,0
27.658868,6.40312424,0,0,0,0,0
27.66936,6.40312424,0,0,0,0,0
27.679851,6.32455532,0,0,0,0,0
27.690343,6.55743852,0,0,0,0,0
27.700834,6.8556546,0,0,0,0,0
27.711326,6.40312424,0,0,0,0,0
27.721818,6.244998,0,0,0,0,0
27.732309,6.32455532,0,0,0,0,0
27.742801,7.21110255,0,0,0,0,0
27.753292,6.32455532,0,0,0,0,0
27.763784,6.4807407,0,0,0,0,0
27.774276,6.55743852,0,0,0,0,0
27.784767,6.244998,0,0,0,0,0
27.795259,6.164414,0,0,0,0,0
27.80575,5.91607978,0,0,0,0,0
27.816242,6.4807407,0,0,0,0,0
27.826734,6.08276253,0,0,0,0,0
27.837225,6.70820393,0,0,0,0,0
27.847717,5.91607978,0,0,0,0,0
27.858208,5.38516481,0,0,0,0,0
27.8687,5.91607978,0,0,0,0,0
27.879192,6.4807407,0,0,0,0,0
27.889683,6.63324958,0,0,0,0,0
27.900175,7.48331477,0,0,0,0,0
27.910666,6.40312424,0,0,0,0,0
27.921158,5.56776436,0,0,0,0,0
27.93165,5.65685425,0,0,0,0,0
27.942141,6.164414,0,0,0,0,0
27.952633,6.63324958,0,0,0,0,0
27.963124,6.164414,0,0,0,0,0
27.973616,6,0,0,0,0,0
27.984108,5.19615242,0,0,0,0,0
27.994599,6.164414,0,0,0,0,0
28.005091,6.63324958,0,0,0,0,0
28.015582,5.83095189,0,0,0,0,0
28.026074,5.83095189,0,0,0,0,0
28.036566,6.70820393,0,0,0,0,0
28.047057,6.4807407,0,0,0,0,0
28.057549,6.164414,0,0,0,0,0
28.06804,6,0,0,0,0,0
28.078532,6.55743852,0,0,0,0,0
28.089024,6.40312424,0,0,0,0,0
28.099515,6.164414,0,0,0,0,0
28.110007,7.61577311,0,0,0,0,0
28.120498,5.83095189,0,0,0,0,0
28.13099,6.244998,0,0,0,0,0
28.141482,6.164414,0,0,0,0,0
28.151973,5.29150262,0,0,0,0,0
28.162465,6.78232998,0,0,0,0,0
28.172956,6.164414,0,0,0,0,0
28.183448,6.32455532,0,0,0,0,0
28.19394,5.83095189,0,0,0,0,0
28.204431,5.56776436,0,0,0,0,0
28.214923,5.83095189,0,0,0,0,0
28.225414,7,0,0,0,0,0
28.235906,6.70820393,0,0,0,0,0
28.246398,6.08276253,0,0,0,0,0
28.256889,6.78232998,0,0,0,0,0
28.267381,6.08276253,0,0,0,0,0
28.277872,6.32455532,0,0,0,0,0
28.288364,6.63324958,0,0,0,0,0
28.298856,5.83095189,0,0,0,0,0
28.309347,6.32455532,0,0,0,0,0
28.319839,6.08276253,0,0,0,0,0
28.33033,6.32455532,0,0,0,0,0
28.340822,6.78232998,0,0,0,0,0
28.351314,6.8556546,0,0,0,0,0
28.361805,6.244998,0,0,0,0,0
28.372297,6.4807407,0,0,0,0,0
28.382788,6.8556546,0,0,0,0,0
28.39328,5.65685425,0,0,0,0,0
28.403772,6.63324958,0,0,0,0,0
28.414263,6.08276253,0,0,0,0,0
28.424755,5.29150262,0,0,0,0,0
28.435246,6.70820393,0,0,0,0,0
28.445738,5.65685425,0,0,0,0,0
28.45623,6.164414,0,0,0,0,0
28.466721,6.244998,0,0,0,0,0
28.477213,6.70820393,0,0,0,0,0
28.487704,7.07106781,0,0,0,0,0
28.498196,6.63324958,0,0,0,0,0
28.508688,6.08276253,0,0,0,0,0
28.519179,7,0,0,0,0,0
28.529671,7.41619849,0,0,0,0,0
28.540162,6.55743852,0,0,0,0,0
28.550654,6.70820393,0,0,0,0,0
28.561146,6.70820393,0,0,0,0,0
28.571637,7,0,0,0,0,0
28.582129,6.92820323,0,0,0,0,0
28.59262,6.40312424,0,0,0,0,0
28.603112,6.92820323,0,0,0,0,0
28.613604,6.70820393,0,0,0,0,0
28.624095,6.244998,0,0,0,0,0
28.634587,6.63324958,0,0,0,0,0
28.645078,5.56776436,0,0,0,0,0
28.65557,5.65685425,0,0,0,0,0
28.666062,6.4807407,0,0,0,0,0
28.676553,6,0,0,0,0,0
28.687045,6.70820393,0,0,0,0,0
28.697536,6.40312424,0,0,0,0,0
28.708028,6.40312424,0,0,0,0,0
28.71852,6.164414,0,0,0,0,0
28.729011,6.63324958,0,0,0,0,0
28.739503,6.8556546,0,0,0,0,0
28.749994,6.8556546,0,0,0,0,0
28.760486,6.40312424,0,0,0,0,0
28.770978,5.38516481,0,0,0,0,0
28.781469,6.8556546,0,0,0,0,0
28.791961,6.164414,0,0,0,0,0
28.802452,6.08276253,0,0,0,0,0
28.812944,6.32455532,0,0,0,0,0
28.823436,7.07106781,0,0,0,0,0
28.833927,7,0,0,0,0,0
28.844419,7.28010989,0,0,0,0,0
28.85491,6.244998,0,0,0,0,0
28.865402,6.4807407,0,0,0,0,0
28.875894,6.8556546,0,0,0,0,0
28.886385,5.83095189,0,0,0,0,0
28.896877,6.92820323,0,0,0,0,0
28.907368,7,0,0,0,0,0
28.91786,6.32455532,0,0,0,0,0
28.928352,6.244998,0,0,0,0,0
28.938843,7.28010989,0,0,0,0,0
28.949335,6.92820323,0,0,0,0,0
28.959826,4.69041576,0,0,0,0,0
28.970318,6.244998,0,0,0,0,0
28.98081,6.32455532,0,0,0,0,0
28.991301,6.164414,0,0,0,0,0
29.001793,5.56776436,0,0,0,0,0
29.012284,6.92820323,0,0,0,0,0
29.022776,6.92820323,0,0,0,0,0
29.033268,6.32455532,0,0,0,0,0
29.043759,5.47722558,0,0,0,0,0
29.054251,6.92820323,0,0,0,0,0
29.064742,6.55743852,0,0,0,0,0
29.075234,6.70820393,0,0,0,0,0
29.085726,5.74456265,0,0,0,0,0
29.096217,6,0,0,0,0,0
29.106709,6.63324958,0,0,0,0,0
29.1172,6.244998,0,0,0,0,0
29.127692,6.8556546,0,0,0,0,0
29.138184,6.78232998,0,0,0,0,0
29.148675,5.83095189,0,0,0,0,0
29.159167,6.92820323,0,0,0,0,0
29.169658,6.78232998,0,0,0,0,0
29.18015,6.08276253,0,0,0,0,0
29.190642,6.92820323,0,0,0,0,0
29.201133,5.91607978,0,0,0,0,0
29.211625,6.78232998,0,0,0,0,0
29.222116,6.32455532,0,0,0,0,0
29.232608,6.40312424,0,0,0,0,0
29.2431,7,0,0,0,0,0
29.253591,5.74456265,0,0,0,0,0
29.264083,6.08276253,0,0,0,0,0
29.274574,6.55743852,0,0,0,0,0
29.285066,6.244998,0,0,0,0,0
29.295558,6.78232998,0,0,0,0,0
29.306049,6.8556546,0,0,0,0,0
29.316541,6.92820323,0,0,0,0,0
29.327032,6.32455532,0,0,0,0,0
29.337524,6.70820393,0,0,0,0,0
29.348016,6.32455532,0,0,0,0,0
29.358507,6,0,0,0,0,0
29.368999,6.40312424,0,0,0,0,0
29.37949,6.32455532,0,0,0,0,0
29.389982,5.65685425,0,0,0,0,0
29.400474,6.63324958,0,0,0,0,0
29.410965,6.08276253,0,0,0,0,0
29.421457,6.40312424,0,0,0,0,0
29.431948,7.07106781,0,0,0,0,0
29.44244,6.55743852,0,0,0,0,0
29.452932,6,0,0,0,0,0
29.463423,6.55743852,0,0,0,0,0
29.473915,6.63324958,0,0,0,0,0
29.484406,5.91607978,0,0,0,0,0
29.494898,6.55743852,0,0,0,0,0
29.50539,5.91607978,0,0,0,0,0
29.515881,6.08276253,0,0,0,0,0
29.526373,6.92820323,0,0,0,0,0
29.536864,7.21110255,0,0,0,0,0
29.547356,7,0,0,0,0,0
29.557848,7.28010989,0,0,0,0,0
29.568339,7.07106781,0,0,0,0,0
29.578831,5.74456265,0,0,0,0,0
29.589322,6.08276253,0,0,0,0,0
29.599814,6.55743852,0,0,0,0,0
29.610306,5.74456265,0,0,0,0,0
29.620797,6.164414,0,0,0,0,0
29.631289,6,0,0,0,0,0
29.64178,6.55743852,0,0,0,0,0
29.652272,6.70820393,0,0,0,0,0
29.662764,6.70820393,0,0,0,0,0
29.673255,7,0,0,0,0,0
29.683747,6.40312424,0,0,0,0,0
29.694238,7.14142843,0,0,0,0,0
29.70473,6.78232998,0,0,0,0,0
29.715222,6.32455532,0,0,0,0,0
29.725713,6.63324958,0,0,0,0,0
29.736205,7.07106781,0,0,0,0,0
29.746696,6.32455532,0,0,0,0,0
29.757188,6.32455532,0,0,0,0,0
29.76768,7.61577311,0,0,0,0,0
29.778171,6.32455532,0,0,0,0,0
29.788663,6.4807407,0,0,0,0,0
29.799154,6.63324958,0,0,0,0,0
29.809646,6.164414,0,0,0,0,0
29.820138,6.40312424,0,0,0,0,0
29.830629,7.28010989,0,0,0,0,0
29.841121,6.78232998,0,0,0,0,0
29.851612,6.244998,0,0,0,0,0
29.862104,6,0,0,0,0,0
29.872596,6.4807407,0,0,0,0,0
29.883087,6,0,0,0,0,0
29.893579,5.83095189,0,0,0,0,0
29.90407,5.91607978,0,0,0,0,0
29.914562,7.28010989,0,0,0,0,0
29.925054,5.83095189,0,0,0,0,0
29.935545,5.91607978,0,0,0,0,0
29.946037,6.244998,0,0,0,0,0
29.956528,7.07106781,0,0,0,0,0
29.96702,6.63324958,0,0,0,0,0
29.977512,6.32455532,0,0,0,0,0
29.988003,7.34846923,0,0,0,0,0
29.998495,6.40312424,6.3608647,0.205571254,0,0,6.3608647
30.008986,6.70820393,6.36413344,0.586575226,0,0,6.36413344
30.019478,6.32455532,6.36738672,-0.206957492,0,0,6.36738672
30.02997,6.55743852,6.37062431,0.432220096,0,0,6.37062431
30.040461,6,6.37384596,-0.611429444,0,0,6.37384596
30.050953,6.55743852,6.37705236,0.424718923,0,0,6.37705236
30.061444,5.19615242,6.38024296,-1.08815924,0,0,6.38024296
30.071936,7.21110255,6.38341843,0.909771467,0,0,6.38341843
30.082428,5.47722558,6.38657853,-0.9536,0,0,6.38657853
30.092919,6.244998,6.38972304,-0.380427451,0,0,6.38972304
30.103411,6.78232998,6.39285262,0.624081215,0,0,6.39285262
30.113902,6.63324958,6.39596673,0.487116873,0,0,6.39596673
30.124394,7.21110255,6.39906604,0.901130685,0,0,6.39906604
30.134886,6.55743852,6.40215031,0.394066262,0,0,6.40215031
30.145377,6.40312424,6.40521931,-0.0457719084,0,0,6.40521931
30.155869,6.4807407,6.40827369,0.269196977,0,0,6.40827369
30.16636,6.40312424,6.41131293,-0.0904913918,0,0,6.41131293
30.176852,5.47722558,6.41433768,-0.968045506,0,0,6.41433768
30.187344,6.8556546,6.4173477,0.662047504,0,0,6.4173477
30.197835,5.74456265,6.42034278,-0.822058475,0,0,6.42034278
30.208327,6.164414,6.42332355,-0.50883155,0,0,6.42332355
30.218818,5.91607978,6.4262895,-0.714289657,0,0,6.4262895
30.22931,5.74456265,6.42924125,-0.827453084,0,0,6.42924125
30.239802,6.164414,6.43217859,-0.517459748,0,0,6.43217859
30.250293,6.4807407,6.4351013,0.213633792,0,0,6.4351013
30.260785,7.41619849,6.43801,0.989034121,0,0,6.43801
30.271276,6.32455532,6.44090418,-0.341099486,0,0,6.44090418
30.281768,7.21110255,6.44378447,0.875966943,0,0,6.44378447
30.29226,7.07106781,6.44665064,0.790200717,0,0,6.44665064
30.302751,7.68114575,6.44950248,1.10979424,0,0,6.44950248
30.313243,6.70820393,6.4523406,0.505829347,0,0,6.4523406
30.323734,6.70820393,6.45516452,0.503030233,0,0,6.45516452
30.334226,6.55743852,6.45797482,0.315378667,0,0,6.45797482
30.344718,6.63324958,6.4607713,0.415305043,0,0,6.4607713
30.355209,7.07106781,6.46355375,0.779431882,0,0,6.46355375
30.365701,6.78232998,6.46632276,0.562145195,0,0,6.46632276
30.376192,6.63324958,6.46907786,0.405181095,0,0,6.46907786
30.386684,6.78232998,6.47181963,0.55723456,0,0,6.47181963
30.397176,7.21110255,6.47454786,0.858227646,0,0,6.47454786
30.407667,6.70820393,6.47726235,0.480563819,0,0,6.47726235
30.418159,7,6.47996367,0.721135443,0,0,6.47996367
30.42865,6.08276253,6.48265137,-0.632367648,0,0,6.48265137
30.439142,6.78232998,6.48532601,0.544980705,0,0,6.48532601
30.449634,6.244998,6.4879874,-0.492939549,0,0,6.4879874
30.460125,5.83095189,6.49063532,-0.812208981,0,0,6.49063532
30.470617,6,6.49327035,-0.702332081,0,0,6.49327035
30.481108,7.21110255,6.49589204,0.845701197,0,0,6.49589204
30.4916,7,6.49850093,0.708165992,0,0,6.49850093
30.502092,6.08276253,6.50109683,-0.646787679,0,0,6.50109683
30.512583,6.92820323,6.50367956,0.651554814,0,0,6.50367956
30.523075,6,6.50624964,-0.711512223,0,0,6.50624964
30.533566,6.63324958,6.50880666,0.352764682,0,0,6.50880666
30.544058,6.244998,6.51135114,-0.516094125,0,0,6.51135114
30.55455,5.91607978,6.5138829,-0.77317729,0,0,6.5138829
30.565041,7.21110255,6.51640175,0.833487131,0,0,6.51640175
30.575533,6.92820323,6.51890822,0.63976168,0,0,6.51890822
30.586024,7.61577311,6.52140189,1.04612199,0,0,6.52140189
30.596516,5.47722558,6.52388327,-1.0230629,0,0,6.52388327
30.607008,7,6.52635219,0.688220756,0,0,6.52635219
30.617499,6.244998,6.52880846,-0.532738644,0,0,6.52880846
30.627991,6.63324958,6.5312526,0.31936966,0,0,6.5312526
30.638482,6.70820393,6.5336842,0.417755594,0,0,6.5336842
30.648974,6.78232998,6.53610376,0.496211874,0,0,6.53610376
30.659466,6.40312424,6.53851111,-0.367949548,0,0,6.53851111
30.669957,6.92820323,6.54090606,0.622332039,0,0,6.54090606
30.680449,6.4807407,6.54328913,-0.250096851,0,0,6.54328913
30.69094,5.83095189,6.54565991,-0.845404055,0,0,6.54565991
30.701432,7.14142843,6.5480189,0.770330793,0,0,6.5480189
30.711924,6.4807407,6.55036592,-0.26386591,0,0,6.55036592
30.722415,6.55743852,6.55270079,0.0688311809,0,0,6.55270079
30.732907,6.55743852,6.55502402,0.0491376049,0,0,6.55502402
30.743398,6.63324958,6.5573352,0.275525638,0,0,6.5573352
30.75389,7.14142843,6.55963483,0.762753956,0,0,6.55963483
30.764382,6.164414,6.56192273,-0.630482932,0,0,6.56192273
30.774873,6.244998,6.56419873,-0.564978525,0,0,6.56419873
30.785365,7.21110255,6.56646332,0.802894286,0,0,6.56646332
30.795856,7.21110255,6.5687161,0.801490145,0,0,6.5687161
30.806348,6.70820393,6.57095755,0.370467783,0,0,6.57095755
30.81684,6.63324958,6.57318752,0.24507563,0,0,6.57318752
30.827331,6.08276253,6.57540582,-0.701885524,0,0,6.57540582
30.837823,6.78232998,6.57761293,0.452456686,0,0,6.57761293
30.848314,5.56776436,6.57980848,-1.00600403,0,0,6.57980848
30.858806,6,6.58199292,-0.762884606,0,0,6.58199292
30.869298,5.83095189,6.5841661,-0.867879143,0,0,6.5841661
30.879789,7.28010989,6.58632785,0.832935793,0,0,6.58632785
30.890281,6,6.58847864,-0.767123613,0,0,6.58847864
30.900772,5.56776436,6.59061809,-1.01136231,0,0,6.59061809
30.911264,6.92820323,6.59274665,0.579186133,0,0,6.59274665
30.921756,6.70820393,6.59486418,0.336659702,0,0,6.59486418
30.932247,8.30662386,6.5969705,1.30753714,0,0,6.5969705
30.942739,6.63324958,6.59906607,0.184887819,0,0,6.59906607
30.95323,6.32455532,6.60115054,-0.525923205,0,0,6.60115054
30.963722,6.78232998,6.60322433,0.423208755,0,0,6.60322433
30.974214,6.244998,6.6052873,-0.600241039,0,0,6.6052873
30.984705,6.164414,6.6073393,-0.66552633,0,0,6.6073393
30.995197,6.40312424,6.60938075,-0.454154724,0,0,6.60938075
31.005688,6.55743852,6.61141131,-0.232320448,0,0,6.61141131
31.01618,7.21110255,6.61343142,0.773091929,0,0,6.61343142
31.026672,6.78232998,6.61544091,0.408520587,0,0,6.61544091
31.037163,6.08276253,6.61743965,-0.731216191,0,0,6.61743965
31.047655,7.14142843,6.61942805,0.722495938,0,0,6.61942805
31.058146,6,6.62140577,-0.788292949,0,0,6.62140577
31.068638,6.4807407,6.62337325,-0.377667244,0,0,6.62337325
31.07913,6.92820323,6.62533031,0.55033891,0,0,6.62533031
31.089621,7,6.62727684,0.610510575,0,0,6.62727684
31.100113,6,6.62921323,-0.793229618,0,0,6.62921323
31.110604,6.63324958,6.63113915,0.0459393997,0,0,6.63113915
31.121096,7.14142843,6.63305502,0.713003089,0,0,6.63305502
31.131588,6.32455532,6.6349607,-0.557140356,0,0,6.6349607
31.142079,7.41619849,6.63685603,0.882803748,0,0,6.63685603
31.152571,6.78232998,6.63874143,0.378930806,0,0,6.63874143
31.163062,5.91607978,6.64061657,-0.851197265,0,0,6.64061657
31.173554,6.92820323,6.64248185,0.534529121,0,0,6.64248185
31.184046,6.4807407,6.64433713,-0.404470558,0,0,6.64433713
31.194537,6.4807407,6.64618228,-0.406745102,0,0,6.64618228
31.205029,6.08276253,6.64801768,-0.751834522,0,0,6.64801768
31.21552,5.47722558,6.64984302,-1.08287462,0,0,6.64984302
31.226012,6.08276253,6.6516587,-0.754252062,0,0,6.6516587
31.236504,7.81024968,6.65346458,1.07553945,0,0,6.65346458
31.246995,5.91607978,6.65526051,-0.859756204,0,0,6.65526051
31.257487,6.78232998,6.65704689,0.353953513,0,0,6.65704689
31.267978,6.78232998,6.65882342,0.351435011,0,0,6.65882342
31.27847,6.63324958,6.66059046,-0.165350767,0,0,6.66059046
31.288962,6.8556546,6.66234788,0.439666597,0,0,6.66234788
31.299453,6.92820323,6.66409557,0.513914061,0,0,6.66409557
31.309945,6.4807407,6.66583388,-0.430224572,0,0,6.66583388
31.320436,7.93725393,6.66756253,1.12680584,0,0,6.66756253
31.330928,6.8556546,6.66928187,0.431709075,0,0,6.66928187
31.34142,6.70820393,6.67099179,0.192904478,0,0,6.67099179
31.351911,6.70820393,6.67269216,0.188445668,0,0,6.67269216
31.362403,6.32455532,6.67438334,-0.59146261,0,0,6.67438334
31.372894,6.244998,6.67606504,-0.656556958,0,0,6.67606504
31.383386,7.61577311,6.67773762,0.968522323,0,0,6.67773762
31.393878,6.8556546,6.67940095,0.419825738,0,0,6.67940095
31.404369,6.70820393,6.68105492,0.164769584,0,0,6.68105492
31.414861,6.4807407,6.68269987,-0.449398676,0,0,6.68269987
31.425352,6.244998,6.68433553,-0.662825414,0,0,6.68433553
31.435844,6.63324958,6.68596224,-0.229592377,0,0,6.68596224
31.446336,6.55743852,6.68757989,-0.360751109,0,0,6.68757989
31.456827,6.63324958,6.68918835,-0.236513779,0,0,6.68918835
31.467319,7.61577311,6.69078797,0.961761477,0,0,6.69078797
31.47781,7.74596669,6.69237847,1.02644445,0,0,6.69237847
31.488302,6.4807407,6.69396021,-0.461756979,0,0,6.69396021
31.498794,7.28010989,6.69553305,0.764576251,0,0,6.69553305
31.509285,6.92820323,6.69709688,0.480735219,0,0,6.69709688
31.519777,6.8556546,6.69865204,0.396235487,0,0,6.69865204
31.530268,7.21110255,6.70019826,0.714775691,0,0,6.70019826
31.54076,7.21110255,6.70173588,0.713699287,0,0,6.70173588
31.551252,6.4807407,6.70326477,-0.471724576,0,0,6.70326477
31.561743,7.14142843,6.70478484,0.660790127,0,0,6.70478484
31.572235,5.56776436,6.70629639,-1.06702016,0,0,6.70629639
31.582726,7.07106781,6.70779918,0.602717703,0,0,6.70779918
31.593218,6.78232998,6.70929353,0.270252574,0,0,6.70929353
31.60371,7.74596669,6.71077932,1.01744158,0,0,6.71077932
31.614201,6.78232998,6.71225645,0.26471405,0,0,6.71225645
31.624693,6.32455532,6.71372524,-0.623834849,0,0,6.71372524
31.635184,7,6.71518543,0.533680213,0,0,6.71518543
31.645676,7.41619849,6.71663734,0.836397722,0,0,6.71663734
31.656168,7.28010989,6.71808086,0.749685957,0,0,6.71808086
31.666659,6.92820323,6.71951588,0.456823108,0,0,6.71951588
31.677151,6.63324958,6.72094271,-0.296130261,0,0,6.72094271
31.687642,6.92820323,6.72236112,0.453698261,0,0,6.72236112
31.698134,6.8556546,6.7237714,0.36315727,0,0,6.7237714
31.708626,7.48331477,6.72517345,0.870713114,0,0,6.72517345
31.719117,5.91607978,6.72656717,-0.900270727,0,0,6.72656717
31.729609,6.70820393,6.72795285,-0.140530841,0,0,6.72795285
31.7401,6.92820323,6.72933027,0.445951749,0,0,6.72933027
31.750592,7.07106781,6.73069971,0.583410746,0,0,6.73069971
31.761084,6.55743852,6.73206109,-0.417878645,0,0,6.73206109
31.771575,6,6.73341429,-0.856396104,0,0,6.73341429
31.782067,7.21110255,6.73475961,0.690176023,0,0,6.73475961
31.792558,7.21110255,6.73609682,0.689206596,0,0,6.73609682
31.80305,6.40312424,6.73742621,-0.578188526,0,0,6.73742621
31.813542,6.92820323,6.73874768,0.43526492,0,0,6.73874768
31.824033,7.93725393,6.74006114,1.09416306,0,0,6.74006114
31.834525,6.63324958,6.74136686,-0.32881192,0,0,6.74136686
31.845016,6,6.74266463,-0.86177992,0,0,6.74266463
31.855508,7,6.74395473,0.506009163,0,0,6.74395473
31.866,6.08276253,6.74523705,-0.813925379,0,0,6.74523705
31.876491,6.32455532,6.74651152,-0.649581558,0,0,6.74651152
31.886983,7.48331477,6.7477784,0.857634173,0,0,6.7477784
31.897474,7.34846923,6.74903748,0.774229779,0,0,6.74903748
31.907966,6.78232998,6.75028903,0.178999879,0,0,6.75028903
31.918458,7.68114575,6.75153295,0.964164299,0,0,6.75153295
31.928949,6.4807407,6.75276917,-0.521563487,0,0,6.75276917
31.939441,7.34846923,6.75399794,0.771019641,0,0,6.75399794
31.949932,6.244998,6.75521906,-0.714297601,0,0,6.75521906
31.960424,6.32455532,6.75643279,-0.657173853,0,0,6.75643279
31.970916,7.28010989,6.75763905,0.722821445,0,0,6.75763905
31.981407,6.40312424,6.75883774,-0.596417221,0,0,6.75883774
31.991899,7.61577311,6.76002912,0.925064312,0,0,6.76002912
32.00239,5.65685425,6.76121301,-1.05088475,0,0,6.76121301
32.012882,6.63324958,6.76238964,-0.359360621,0,0,6.76238964
32.023374,6.32455532,6.76355893,-0.662573476,0,0,6.76355893
32.033865,6.63324958,6.76472081,-0.362589612,0,0,6.76472081
32.044357,6.78232998,6.76587551,0.128274972,0,0,6.76587551
32.054848,6.70820393,6.76702286,-0.242526139,0,0,6.76702286
32.06534,6.8556546,6.76816309,0.295789637,0,0,6.76816309
32.075832,6.63324958,6.76929612,-0.368844878,0,0,6.76929612
32.086323,7,6.77042188,0.479143109,0,0,6.77042188
32.096815,6,6.7715406,-0.87837384,0,0,6.7715406
32.107306,6.164414,6.7726521,-0.779896211,0,0,6.7726521
32.117798,6.70820393,6.77375662,-0.256032593,0,0,6.77375662
32.12829,6.40312424,6.77485408,-0.609696515,0,0,6.77485408
32.138781,7,6.7759444,0.473345122,0,0,6.7759444
32.149273,6.70820393,6.77702781,-0.262343054,0,0,6.77702781
32.159764,7.14142843,6.77810414,0.602763874,0,0,6.77810414
32.170256,6.40312424,6.77917362,-0.613228654,0,0,6.77917362
32.180748,6.78232998,6.78023617,0.045758204,0,0,6.78023617
32.191239,6.78232998,6.78129172,0.03222213,0,0,6.78129172
32.201731,7.28010989,6.78234049,0.705527745,0,0,6.78234049
32.212222,7.34846923,6.78338231,0.751722632,0,0,6.78338231
32.222714,6.55743852,6.78441741,-0.476423014,0,0,6.78441741
32.233206,7,6.78544571,0.463200051,0,0,6.78544571
32.243697,6.55743852,6.78646714,-0.478569347,0,0,6.78646714
32.254189,7.14142843,6.78748193,0.594934032,0,0,6.78748193
32.26468,7,6.78848989,0.459902282,0,0,6.78848989
32.275172,7,6.78949126,0.458812318,0,0,6.78949126
32.285664,7.14142843,6.79048595,0.592403981,0,0,6.79048595
32.296155,6.40312424,6.79147391,-0.623177078,0,0,6.79147391
32.306647,6,6.79245534,-0.890199606,0,0,6.79245534
32.317138,6.92820323,6.79343008,0.367114626,0,0,6.79343008
32.32763,7.34846923,6.79439835,0.744359376,0,0,6.79439835
32.338122,7.07106781,6.79536007,0.525078798,0,0,6.79536007
32.348613,6.32455532,6.79631518,-0.686847769,0,0,6.79631518
32.359105,6.70820393,6.79726388,-0.298429137,0,0,6.79726388
32.369596,7.48331477,6.79820603,0.827712962,0,0,6.79820603
32.380088,6.40312424,6.79914181,-0.629299274,0,0,6.79914181
32.39058,7.34846923,6.80007118,0.740539027,0,0,6.80007118
32.401071,7.28010989,6.80099406,0.692181936,0,0,6.80099406
32.411563,7.48331477,6.80191065,0.825472061,0,0,6.80191065
32.422054,6.40312424,6.80282081,-0.632215603,0,0,6.80282081
32.432546,5.65685425,6.80372472,-1.07092039,0,0,6.80372472
32.443038,6.70820393,6.80462234,-0.310513131,0,0,6.80462234
32.453529,7,6.80551359,0.441006135,0,0,6.80551359
32.464021,6.78232998,6.80639867,-0.155140864,0,0,6.80639867
32.474512,6.8556546,6.80727744,0.21994809,0,0,6.80727744
32.485004,7.54983444,6.80815008,0.861210981,0,0,6.80815008
32.495496,7.81024968,6.80901654,1.00061638,0,0,6.80901654
32.505987,6.8556546,6.80987676,0.213957574,0,0,6.80987676
32.516479,6.92820323,6.81073092,0.342742341,0,0,6.81073092
32.52697,6.32455532,6.81157888,-0.697870735,0,0,6.81157888
32.537462,6.70820393,6.81242084,-0.322826433,0,0,6.81242084
32.547954,7.34846923,6.81325672,0.731582192,0,0,6.81325672
32.558445,6.78232998,6.81408649,-0.178203542,0,0,6.81408649
32.568937,7.07106781,6.8149103,0.506120054,0,0,6.8149103
32.579428,6.63324958,6.81572804,-0.427174978,0,0,6.81572804
32.58992,6.164414,6.81653988,-0.807543113,0,0,6.81653988
32.600412,6.92820323,6.81734577,0.332952646,0,0,6.81734577
32.610903,7.21110255,6.81814564,0.626862752,0,0,6.81814564
32.621395,7.28010989,6.81893968,0.679095139,0,0,6.81893968
32.631886,6.78232998,6.81972776,-0.193385047,0,0,6.81972776
32.642378,6.4807407,6.82051005,-0.582897373,0,0,6.82051005
32.65287,5.83095189,6.82128649,-0.995155562,0,0,6.82128649
32.663361,7,6.82205703,0.421832864,0,0,6.82205703
32.673853,7,6.82282185,0.420925345,0,0,6.82282185
32.684344,6.8556546,6.82358082,0.179091533,0,0,6.82358082
32.694836,6.70820393,6.82433411,-0.340778778,0,0,6.82433411
32.705328,6.32455532,6.82508166,-0.707478859,0,0,6.82508166
32.715819,7.07106781,6.82582342,0.495221557,0,0,6.82582342
32.726311,6.8556546,6.82655957,0.170572669,0,0,6.82655957
32.736802,7.48331477,6.82728997,0.809953582,0,0,6.82728997
32.747294,7.14142843,6.82801479,0.55983358,0,0,6.82801479
32.757786,7.21110255,6.82873399,0.618359576,0,0,6.82873399
32.768277,7.74596669,6.8294475,0.957350086,0,0,6.8294475
32.778769,6.63324958,6.83015551,-0.443740831,0,0,6.83015551
32.78926,7.28010989,6.83085787,0.670262646,0,0,6.83085787
32.799752,6.8556546,6.83155477,0.155241214,0,0,6.83155477
32.810244,7.28010989,6.83224613,0.669226237,0,0,6.83224613
32.820735,7.68114575,6.83293193,0.920985242,0,0,6.83293193
32.831227,6.55743852,6.83361232,-0.525522398,0,0,6.83361232
32.841718,6.70820393,6.83428717,-0.355082017,0,0,6.83428717
32.85221,6.8556546,6.83495665,0.143867819,0,0,6.83495665
32.862702,6.8556546,6.83562071,0.141541129,0,0,6.83562071
32.873193,6.70820393,6.8362793,-0.357876196,0,0,6.8362793
32.883685,7.68114575,6.83693258,0.918810735,0,0,6.83693258
32.894176,6.08276253,6.83758044,-0.868802571,0,0,6.83758044
32.904668,7.34846923,6.83822301,0.714315206,0,0,6.83822301
32.91516,7.87400787,6.83886027,1.01742204,0,0,6.83886027
32.925651,7.28010989,6.83949217,0.66379042,0,0,6.83949217
32.936143,7.54983444,6.84011884,0.842446195,0,0,6.84011884
32.946634,7.34846923,6.8407402,0.712551071,0,0,6.8407402
32.957126,6.8556546,6.84135637,0.119575191,0,0,6.84135637
32.967618,7.28010989,6.84196733,0.661923381,0,0,6.84196733
32.978109,7.34846923,6.84257302,0.71126381,0,0,6.84257302
32.988601,6.4807407,6.84317359,-0.602023995,0,0,6.84317359
32.999092,6.55743852,6.84376894,-0.535098509,0,0,6.84376894
33.009584,6.32455532,6.8443592,-0.720974257,0,0,6.8443592
33.020076,6.92820323,6.84494434,0.288546171,0,0,6.84494434
33.030567,7.21110255,6.84552431,0.604630661,0,0,6.84552431
33.041059,6.40312424,6.84609926,-0.665563688,0,0,6.84609926
33.05155,7.14142843,6.84666908,0.542917438,0,0,6.84666908
33.062042,6.78232998,6.84723391,-0.2547625,0,0,6.84723391
33.072534,7.93725393,6.84779372,1.04377211,0,0,6.84779372
33.083025,6.55743852,6.84834845,-0.539360666,0,0,6.84834845
33.093517,6.8556546,6.84889825,0.0821970207,0,0,6.84889825
33.104008,6.70820393,6.84944302,-0.375817895,0,0,6.84944302
33.1145,7.21110255,6.84998289,0.600932324,0,0,6.84998289
33.124992,6.244998,6.85051783,-0.778151546,0,0,6.85051783
33.135483,7.48331477,6.85104779,0.795152175,0,0,6.85104779
33.145975,6.70820393,6.85157291,-0.378640958,0,0,6.85157291
33.156466,6.70820393,6.85209309,-0.379327247,0,0,6.85209309
33.166958,6.63324958,6.85260847,-0.468357646,0,0,6.85260847
33.17745,6.55743852,6.85311899,-0.543765085,0,0,6.85311899
33.187941,7.74596669,6.85362464,0.944638581,0,0,6.85362464
33.198433,7.61577311,6.85412554,0.872724224,0,0,6.85412554
33.208924,6.08276253,6.85462159,-0.878555097,0,0,6.85462159
33.219416,6.55743852,6.85511292,-0.545595447,0,0,6.85511292
33.229908,7.28010989,6.85559949,0.651544627,0,0,6.85559949
33.240399,7.74596669,6.85608128,0.943337381,0,0,6.85608128
33.250891,7.48331477,6.85655839,0.791679468,0,0,6.85655839
33.261382,6.70820393,6.85703076,-0.385780803,0,0,6.85703076
33.271874,7.54983444,6.85749849,0.832067273,0,0,6.85749849
33.282366,7.54983444,6.85796155,0.831788967,0,0,6.85796155
33.292857,7.07106781,6.85841992,0.461137609,0,0,6.85841992
33.303349,6.8556546,6.8588737,-0.05673707,0,0,6.8588737
33.31384,5.83095189,6.85932282,-1.01408625,0,0,6.85932282
33.324332,7.28010989,6.85976738,0.648338267,0,0,6.85976738
33.334824,7.28010989,6.86020737,0.647998861,0,0,6.86020737
33.345315,6.08276253,6.86064274,-0.881975177,0,0,6.86064274
33.355807,6.78232998,6.86107362,-0.280612961,0,0,6.86107362
33.366298,6.78232998,6.86149992,-0.281371527,0,0,6.86149992
33.37679,7.28010989,6.86192175,0.646674678,0,0,6.86192175
33.387282,7.54983444,6.86233908,0.829153395,0,0,6.86233908
33.397773,6.63324958,6.8627519,-0.479064001,0,0,6.8627519
33.408265,7.21110255,6.86316029,0.589866308,0,0,6.86316029
33.418756,6.32455532,6.8635642,-0.734172238,0,0,6.8635642
33.429248,6.70820393,6.86396371,-0.394664133,0,0,6.86396371
33.43974,6.55743852,6.86435881,-0.55400387,0,0,6.86435881
33.450231,6.70820393,6.86474948,-0.395658371,0,0,6.86474948
33.460723,6.08276253,6.8651358,-0.884518667,0,0,6.8651358
33.471214,6.92820323,6.86551773,0.250370732,0,0,6.86551773
33.481706,6.32455532,6.86589534,-0.735758125,0,0,6.86589534
33.492198,6.70820393,6.86626862,-0.397573497,0,0,6.86626862
33.502689,6.08276253,6.86663755,-0.885367165,6.86663755,0,6.86663755
33.513181,7.07106781,6.86739393,0.451302432,6.86739393,0,6.86700221
33.523672,6.40312424,6.86775905,-0.681641264,6.86775905,0,6.86736256
33.534164,6.32455532,6.86812003,-0.73726841,6.86812003,0,6.86771867
33.544656,7.28010989,6.86847685,0.64158635,6.86847685,0,6.86807053
33.555147,6.8556546,6.86882949,-0.114781902,6.86882949,0,6.86841812
33.565639,7.34846923,6.86917803,0.692308598,6.86917803,0,6.86876153
33.57613,6.78232998,6.86952244,-0.295283692,6.86952244,0,6.86910069
33.586622,6.40312424,6.86986279,-0.683182667,6.86986279,0,6.8694357
33.597114,7.41619849,6.87019907,0.73891773,6.87019907,0,6.86976654
33.607605,6.70820393,6.87053127,-0.40289867,6.87053127,0,6.87009319
33.618097,7.14142843,6.87085946,0.52016244,6.87085946,0,6.87041572
33.628588,6.32455532,6.87118361,-0.739343148,6.87118361,0,6.8707341
33.63908,6.78232998,6.87150379,-0.298619834,6.87150379,0,6.87104839
33.649572,6.70820393,6.87181999,-0.404494814,6.87181999,0,6.87135859
33.660063,6.63324958,6.87213219,-0.48875619,6.87213219,0,6.87166468
33.670555,6.4807407,6.87244049,-0.62585924,6.87244049,0,6.87196673
33.681046,5.74456265,6.87274483,-1.06215921,6.87274483,0,6.8722647
33.691538,7.34846923,6.87304529,0.689509928,6.87304529,0,6.87255867
33.70203,6.4807407,6.87334186,-0.626578936,6.87334186,0,6.87284861
33.712521,6.78232998,6.87363454,-0.302166434,6.87363454,0,6.87313452
33.723013,5.91607978,6.87392339,-0.978694849,6.87392339,0,6.87341646
33.733504,7.68114575,6.87420838,0.898296924,6.87420838,0,6.8736944
33.743996,7.34846923,6.87448959,0.68846179,6.87448959,0,6.87396841
33.754488,6.40312424,6.87476701,-0.686762526,6.87476701,0,6.87423846
33.764979,7.34846923,6.87504062,0.688061488,6.87504062,0,6.87450456
33.775471,6.8556546,6.8753105,-0.140199494,6.8753105,0,6.87476677
33.785962,7.41619849,6.87557662,0.73526993,6.87557662,0,6.87502505
33.796454,6.55743852,6.87583904,-0.5642699,6.87583904,0,6.87527946
33.806946,6.70820393,6.87609777,-0.409748508,6.87609777,0,6.87553
33.817437,7.14142843,6.8763528,0.514854962,6.8763528,0,6.87577666
33.827929,6.78232998,6.87660419,-0.307041046,6.87660419,0,6.87601949
33.83842,7.14142843,6.87685191,0.514370017,6.87685191,0,6.87625847
33.848912,7.28010989,6.87709605,0.634833714,6.87709605,0,6.87649365
33.859404,7.48331477,6.87733658,0.778446014,6.87733658,0,6.87672503
33.869895,6.8556546,6.87757351,-0.148050355,6.87757351,0,6.8769526
33.880387,7.07106781,6.8778069,0.4396145,6.8778069,0,6.87717641
33.890878,6.70820393,6.87803674,-0.41210776,6.87803674,0,6.87739644
33.90137,7.14142843,6.87826308,0.512996442,6.87826308,0,6.87761275
33.911862,7.34846923,6.87848592,0.685553283,6.87848592,0,6.87782532
33.922353,7.21110255,6.87870528,0.57653905,6.87870528,0,6.87803415
33.932845,7.48331477,6.87892119,0.77742754,6.87892119,0,6.87823929
33.943336,6.164414,6.87913366,-0.845410941,6.87913366,0,6.87844073
33.953828,6.40312424,6.87934274,-0.690085868,6.87934274,0,6.8786385
33.96432,6.08276253,6.87954844,-0.89262865,6.87954844,0,6.87883261
33.974811,7.21110255,6.87975075,0.575631655,6.87975075,0,6.87902305
33.985303,6.244998,6.87994974,-0.796838592,6.87994974,0,6.87920987
33.995794,7,6.8801454,0.346200237,6.8801454,0,6.87939304
34.006286,7.74596669,6.88033778,0.930391806,6.88033778,0,6.87957262
34.016778,7.07106781,6.88052689,0.436509929,6.88052689,0,6.87974861
34.027269,6.78232998,6.88071275,-0.313660268,6.88071275,0,6.87992099
34.037761,6.8556546,6.8808954,-0.158873533,6.8808954,0,6.88008982
34.048252,6.78232998,6.88107484,-0.314236949,6.88107484,0,6.88025507
34.058744,6.92820323,6.88125114,0.216684318,6.88125114,0,6.8804168
34.069236,7.07106781,6.88142429,0.435480793,6.88142429,0,6.88057499
34.079727,7,6.88159432,0.344101271,6.88159432,0,6.88072965
34.090219,7.34846923,6.88176127,0.683160271,6.88176127,0,6.88088082
34.10071,7.61577311,6.88192516,0.856649257,6.88192516,0,6.88102848
34.111202,6.55743852,6.88208603,-0.56977847,6.88208603,0,6.88117267
34.121694,7.21110255,6.8822439,0.573461984,6.8822439,0,6.8813134
34.132185,6.40312424,6.8823988,-0.692296584,6.8823988,0,6.88145065
34.142677,7.28010989,6.88255077,0.630522893,6.88255077,0,6.88158448
34.153168,7.07106781,6.88269983,0.434013807,6.88269983,0,6.88171487
34.16366,6.78232998,6.88284603,-0.317042652,6.88284603,0,6.88184186
34.174152,6.70820393,6.88298939,-0.418073508,6.88298939,0,6.88196544
34.184643,7.28010989,6.88312994,0.630063449,6.88312994,0,6.88208561
34.195135,7.21110255,6.88326774,0.57256861,6.88326774,0,6.88220242
34.205626,6.8556546,6.8834028,-0.166577897,6.8834028,0,6.88231586
34.216118,6.63324958,6.88353518,-0.500285516,6.88353518,0,6.88242595
34.22661,7.28010989,6.88366491,0.629638768,6.88366491,0,6.88253269
34.237101,6.55743852,6.88379203,-0.571273578,6.88379203,0,6.8826361
34.247593,7.21110255,6.88391659,0.572001718,6.88391659,0,6.8827362
34.258084,6.4807407,6.88403861,-0.635057412,6.88403861,0,6.88283299
34.268576,6.55743852,6.88415818,-0.571593961,6.88415818,0,6.88292649
34.279068,7,6.88427532,0.340183305,6.88427532,0,6.88301671
34.289559,6.8556546,6.88439007,-0.169515397,6.88439007,0,6.88310366
34.300051,7.54983444,6.88450251,0.815678815,6.88450251,0,6.88318736
34.310542,7.07106781,6.88461266,0.431804528,6.88461266,0,6.8832678
34.321034,6.8556546,6.88472061,-0.17048757,6.88472061,0,6.88334502
34.331526,7.21110255,6.88482641,0.571205869,6.88482641,0,6.88341902
34.342017,6.4807407,6.8849301,-0.635758914,6.8849301,0,6.8834898
34.352509,7.28010989,6.88503176,0.628552404,6.88503176,0,6.8835574
34.363,5.74456265,6.88513146,-1.06797416,6.88513146,0,6.8836218
34.373492,6.40312424,6.88522927,-0.694337841,6.88522927,0,6.88368303
34.383984,6.244998,6.88532527,-0.800204519,6.88532527,0,6.8837411
34.394475,6.78232998,6.88541952,-0.32107559,6.88541952,0,6.88379602
34.404967,7.87400787,6.88551212,0.994231239,6.88551212,0,6.8838478
34.415458,6.8556546,6.88560314,-0.173056451,6.88560314,0,6.88389645
34.42595,6.244998,6.88569268,-0.800434061,6.88569268,0,6.88394199
34.436442,7,6.88578085,0.337963238,6.88578085,0,6.88398443
34.446933,7,6.88586773,0.337834684,6.88586773,0,6.88402377
34.457425,7.61577311,6.88595344,0.854294836,6.88595344,0,6.88406003
34.467916,7.21110255,6.88603809,0.57014425,6.88603809,0,6.88409321
34.478408,7.54983444,6.8861218,0.814685603,6.8861218,0,6.88412334
34.4889,6.55743852,6.88620471,-0.573381366,6.88620471,0,6.88415043
34.499391,6.63324958,6.88628695,-0.503028198,6.88628695,0,6.88417447
34.509883,7.54983444,6.88636867,0.81453408,6.88636867,0,6.88419549
34.520374,5.47722558,6.88645001,-1.18710759,6.88645001,0,6.8842135
34.530866,7.48331477,6.88653116,0.772517708,6.88653116,0,6.8842285
34.541358,6.92820323,6.8866123,0.203938556,6.8866123,0,6.88424051
34.551849,7.07106781,6.88669359,0.429388197,6.88669359,0,6.88424954
34.562341,7.41619849,6.88677526,0.72761475,6.88677526,0,6.88425559
34.572832,7.54983444,6.88685752,0.814233942,6.88685752,0,6.88425869
34.583324,7,6.88694062,0.336243035,6.88694062,0,6.88425884
34.593816,7.07106781,6.8870248,0.429002339,6.8870248,0,6.88425605
34.604307,7.14142843,6.88711034,0.504299604,6.88711034,0,6.88425034
34.614799,6.08276253,6.88719753,-0.896903007,6.88719753,0,6.8842417
34.62529,6.78232998,6.8872867,-0.323970235,6.8872867,0,6.88423017
34.635782,7.07106781,6.88737819,0.428590275,6.88737819,0,6.88421573
34.646274,6.63324958,6.88747238,-0.504205111,6.88747238,0,6.88419841
34.656765,6.70820393,6.88756966,-0.423515909,6.88756966,0,6.88417822
34.667257,7.14142843,6.8876705,0.503743915,6.8876705,0,6.88415516
34.677748,6.8556546,6.88777536,-0.179222642,6.88777536,0,6.88412926
34.68824,6.4807407,6.88788478,-0.638078432,6.88788478,0,6.8841005
34.698732,7.68114575,6.88799935,0.890587672,6.88799935,0,6.88406892
34.709223,7,6.88811967,0.334485179,6.88811967,0,6.88403451
34.719715,7.54983444,6.88824645,0.813380588,6.88824645,0,6.88399729
34.730206,6.32455532,6.88838045,-0.7508829,6.88838045,0,6.88395727
34.740698,6.63324958,6.88852252,-0.505245424,6.88852252,0,6.88391446
34.75119,7.07106781,6.88867357,0.427076386,6.88867357,0,6.88386887
34.761681,6.55743852,6.88883462,-0.575670127,6.88883462,0,6.88382051
34.772173,6.55743852,6.88900682,-0.575819676,6.88900682,0,6.88376938
34.782664,7.54983444,6.88919141,0.812799498,6.88919141,0,6.88371551
34.793156,6.70820393,6.88938982,-0.425659356,6.88938982,0,6.88365889
34.803648,7.54983444,6.8896036,0.8125459,6.8896036,0,6.88359954
34.814139,6.32455532,6.88983447,-0.751850481,6.88983447,0,6.88353748
34.824631,7.81024968,6.89008444,0.959252438,6.89008444,0,6.8834727
34.835122,6.78232998,6.89035566,-0.328672602,6.89035566,0,6.88340522
34.845614,7.07106781,6.89065068,0.424755378,6.89065068,0,6.88333505
34.856106,8,6.89097228,1.05310385,6.89097228,0,6.8832622
34.866597,6.8556546,6.8913236,-0.188862389,6.8913236,0,6.88318668
34.877089,7.21110255,6.89170835,0.565149719,6.89170835,0,6.88310849
34.88758,6.40312424,6.89213057,-0.699289876,6.89213057,0,6.88302765
34.898072,8.06225775,6.89259508,1.08150944,6.89259508,0,6.88294417
34.908564,7,6.89310729,0.326944501,6.89310729,0,6.88285805
34.919055,7.41619849,6.89367342,0.722858954,6.89367342,0,6.88276932
34.929547,6.40312424,6.89430085,-0.700839934,6.89430085,0,6.88267796
34.940038,6.63324958,6.89499797,-0.511613515,6.89499797,0,6.88258401
34.95053,6.92820323,6.89577494,0.180078578,6.89577494,0,6.88248746
34.961022,7.41619849,6.89664371,0.720801485,6.89664371,0,6.88238832
34.971513,7.81024968,6.89761895,0.95531708,6.89761895,0,6.88228661
34.982005,7.07106781,6.89871975,0.415148244,6.89871975,0,6.88218232
34.992496,7.54983444,6.89997138,0.806140839,6.89997138,0,6.88207549
35.002988,6.78232998,6.90141084,-0.345080943,6.90141084,0,6.8819661
35.01348,6.244998,6.90309438,-0.811231399,6.90309438,0,6.88185417
35.023971,7.48331477,6.90511248,0.760396145,6.90511248,0,6.88173972
35.034463,7.68114575,6.90761499,0.879505972,6.90761499,0,6.88162274
35.044954,6.32455532,6.91084831,-0.765697717,6.91084831,0,6.88150326
35.055446,6.4807407,6.91521409,-0.659145955,6.91521409,0,6.88138126
35.065938,7.14142843,6.92134393,0.469131639,6.92134393,0,6.88125677
35.076429,7.34846923,6.93019237,0.646743272,6.93019237,0,6.88112981
35.086921,7.07106781,6.9431355,0.357676269,6.9431355,0,6.88100036
35.097412,7.34846923,6.96203472,0.62163857,6.96203472,0,6.88086846
35.107904,6.40312424,6.98925151,-0.765589492,6.98925151,0,6.88073408
35.118396,6.244998,7.02752244,-0.884604115,7.02752244,0,6.88059726
35.128887,7,7.07968155,-0.282279199,7.07968155,0,6.88045801
35.139379,6.4807407,7.14821936,-0.816993674,7.14821936,0,6.88031631
35.14987,7.54983444,7.23463572,0.561425609,7.23463572,0,6.88017221
35.160362,6.40312424,7.3388368,-0.967322368,7.3388368,0,6.88002568
35.170854,7.48331477,7.45852408,0.157450595,7.45852408,0,6.87987674
35.181345,7.21110255,7.58889953,-0.614651915,7.58889953,0,6.87972542
35.191837,7.81024968,7.72272268,0.295849615,7.72272268,0,6.8795717
35.202328,8.1240384,7.85056681,0.522945113,7.85056681,0,6.87941561
35.21282,6.78232998,7.96159199,-1.08593831,7.96159199,0,6.87925714
35.223312,8.42614977,8.04459282,0.617702963,8.04459282,0,6.87909631
35.233803,7.54983444,8.08986097,-0.734864974,8.08986097,0,6.87893314
35.244295,8.06225775,8.09151338,-0.171042782,8.09151338,0,6.8787676
35.254786,7.68114575,8.04929926,-0.606756553,8.04929926,0,6.87859975
35.265278,7.41619849,7.9686898,-0.743297591,7.9686898,0,6.87842955
35.27577,8.83176087,7.85917749,0.986196421,7.85917749,0,6.87825703
35.286261,8.48528137,7.73193144,0.867957332,7.73193144,0,6.87808222
35.296753,7.34846923,7.59787175,-0.499402164,7.59787175,0,6.87790509
35.307244,7,7.4665747,-0.683062733,7.4665747,0,6.87772568
35.317736,7.07106781,7.34547136,-0.52383542,7.34547136,0,6.87754396
35.328228,6.78232998,7.23956623,-0.676192463,7.23956623,0,6.87735996
35.338719,6.164414,7.15135236,-0.993447714,7.15135236,0,6.87717372
35.349211,7.34846923,7.0810813,0.517095666,7.0810813,0,6.87698519
35.359702,6.4807407,7.02735948,-0.73933672,7.02735948,0,6.87679442
35.370194,6.08276253,6.98774908,-0.951307809,6.98774908,0,6.8766014
35.380686,6.55743852,6.95942418,-0.63402339,6.95942418,0,6.87640613
35.391177,6.92820323,6.93962613,-0.106877947,6.93962613,0,6.87620865
35.401669,7,6.92595577,0.272110702,6.92595577,0,6.87600893
35.41216,6.78232998,6.91651051,-0.366306602,6.91651051,0,6.87580701
35.422652,7.41619849,6.90987672,0.711562903,6.90987672,0,6.87560287
35.433144,6.8556546,6.90506975,-0.222295191,6.90506975,0,6.87539653
35.443635,6.32455532,6.9014358,-0.759526487,6.9014358,0,6.87518802
35.454127,7.81024968,6.89855796,0.95482549,6.89855796,0,6.87497731
35.464618,6.8556546,6.89618009,-0.201309448,6.89618009,0,6.87476444
35.47511,6.92820323,6.89414627,0.184545275,6.89414627,0,6.87454938
35.485602,7.74596669,6.89236252,0.923907013,6.89236252,0,6.87433217
35.496093,8.71779789,6.8907706,1.35167573,6.8907706,0,6.87411282
35.506585,6.8556546,6.88933231,-0.183514887,6.88933231,0,6.8738913
35.517076,7.28010989,6.88802179,0.626169387,6.88802179,0,6.87366767
35.527568,7,6.8868195,0.336423102,6.8868195,0,6.8734419
35.53806,7.07106781,6.88571055,0.43053137,6.88571055,0,6.87321399
35.548551,6.40312424,6.88468286,-0.693944251,6.88468286,0,6.872984
35.559043,7.14142843,6.88372608,0.507643916,6.88372608,0,6.87275188
35.569534,5.74456265,6.8828318,-1.06689698,6.8828318,0,6.87251768
35.580026,6.70820393,6.8819925,-0.416879561,6.8819925,0,6.87228136
35.590518,7.68114575,6.88120192,0.894395787,6.88120192,0,6.87204297
35.601009,7.68114575,6.88045466,0.894813438,6.88045466,0,6.87180251
35.611501,6.40312424,6.87974579,-0.690377836,6.87974579,0,6.87155997
35.621992,6.70820393,6.8790713,-0.413361064,6.8790713,0,6.87131538
35.632484,6.92820323,6.87842741,0.223104957,6.87842741,0,6.87106872
35.642976,6.92820323,6.87781098,0.224482185,6.87781098,0,6.87082001
35.653467,7.14142843,6.87721925,0.514012823,6.87721925,0,6.87056928
35.663959,7.41619849,6.87664961,0.734539911,6.87664961,0,6.8703165
35.67445,6.92820323,6.87609996,0.228261417,6.87609996,0,6.87006171
35.684942,7.28010989,6.87556823,0.636035895,6.87556823,0,6.86980488
35.695434,7.34846923,6.87505273,0.688052685,6.87505273,0,6.86954604
35.705925,7.34846923,6.87455195,0.688416503,6.87455195,0,6.86928522
35.716417,7.14142843,6.87406438,0.517072572,6.87406438,0,6.86902237
35.726908,6.78232998,6.87358888,-0.302090878,6.87358888,0,6.86875756
35.7374,7.14142843,6.87312422,0.517980893,6.87312422,0,6.86849074
35.747892,7.07106781,6.87266944,0.445419324,6.87266944,0,6.86822195
35.758383,6.92820323,6.87222365,0.236600036,6.87222365,0,6.86795121
35.768875,7.34846923,6.87178596,0.690422532,6.87178596,0,6.86767848
35.779366,7.07106781,6.87135568,0.446891637,6.87135568,0,6.86740382
35.789858,6.8556546,6.87093205,-0.123601997,6.87093205,0,6.86712718
35.80035,8,6.87051451,1.06277255,6.87051451,0,6.8668486
35.810841,6.92820323,6.87010252,0.24104089,6.87010252,0,6.86656812
35.821333,6.8556546,6.86969549,-0.11849426,6.86969549,0,6.86628568
35.831824,5.83095189,6.86929303,-1.01899025,6.86929303,0,6.86600134
35.842316,6.40312424,6.86889463,-0.682473731,6.86889463,0,6.86571506
35.852808,6.92820323,6.86849994,0.24434257,6.86849994,0,6.86542687
35.863299,7.07106781,6.86810863,0.450509912,6.86810863,0,6.8651368
35.873791,7.21110255,6.8677203,0.585988268,6.8677203,0,6.86484482
35.884282,6.8556546,6.86733472,-0.108074587,6.86733472,0,6.86455097
35.894774,6.63324958,6.86695153,-0.48342729,6.86695153,0,6.86425521
35.905266,7.21110255,6.86657051,0.586968522,6.86657051,0,6.86395758
35.915757,5.91607978,6.86619145,-0.974736718,6.86619145,0,6.8636581
35.926249,7,6.86581408,0.366313969,6.86581408,0,6.86335674
35.93674,7.21110255,6.86543824,0.587932231,6.86543824,0,6.86305354
35.947232,8.1240384,6.86506369,1.12204042,6.86506369,0,6.86274847
35.957724,6.4807407,6.86469029,-0.619636658,6.86469029,0,6.86244155
35.968215,6.164414,6.8643179,-0.836602591,6.8643179,0,6.86213283
35.978707,7.21110255,6.86394631,0.589199664,6.86394631,0,6.86182224
35.989198,6.78232998,6.86357544,-0.285035891,6.86357544,0,6.86150987
35.99969,7.54983444,6.8632051,0.828630998,6.8632051,0,6.86119564
36.010182,6.8556546,6.86283521,-0.0847384696,6.86283521,0,6.8608796
36.020673,7.93725393,6.86246568,1.03671995,6.86246568,0,6.86056179
36.031165,6.78232998,6.86209633,-0.282429371,6.86209633,0,6.86024214
36.041656,6.92820323,6.86172715,0.257829556,6.86172715,0,6.85992074
36.052148,7.21110255,6.86135797,0.591392072,6.86135797,0,6.85959751
36.06264,7,6.86098874,0.372842145,6.86098874,0,6.85927251
36.073131,6.92820323,6.86061941,0.259968887,6.86061941,0,6.85894576
36.083623,6.92820323,6.86024984,0.260678708,6.86024984,0,6.85861721
36.094114,7,6.85988004,0.374326012,6.85988004,0,6.85828693
36.104606,6.92820323,6.85950986,0.262094205,6.85950986,0,6.85795487
36.115098,7.28010989,6.85913928,0.648822479,6.85913928,0,6.85762105
36.125589,6.78232998,6.85876828,-0.276474768,6.85876828,0,6.85728552
36.136081,6.78232998,6.85839674,-0.275802018,6.85839674,0,6.85694822
36.146572,7.48331477,6.85802467,0.790752873,6.85802467,0,6.85660922
36.157064,7.14142843,6.85765196,0.532706742,6.85765196,0,6.85626846
36.167556,6.92820323,6.85727859,0.266316798,6.85727859,0,6.85592598
36.178047,7.21110255,6.85690457,0.595145341,6.85690457,0,6.85558181
36.188539,7,6.85652979,0.378774618,6.85652979,0,6.85523591
36.19903,6.244998,6.85615427,-0.781764845,6.85615427,0,6.85488834
36.209522,7.28010989,6.85577792,0.651407685,6.85577792,0,6.85453903
36.220014,6.92820323,6.85540073,0.269819386,6.85540073,0,6.85418803
36.230505,7,6.85502271,0.38075883,6.85502271,0,6.85383538
36.240997,7.14142843,6.85464377,0.53552279,6.85464377,0,6.85348102
36.251488,7.14142843,6.85426394,0.535877304,6.85426394,0,6.85312502
36.26198,7.14142843,6.85388314,0.536232497,6.85388314,0,6.85276731
36.272472,6.55743852,6.85350136,-0.544116569,6.85350136,0,6.85240794
36.282963,6.8556546,6.85311864,0.0503583251,6.85311864,0,6.85204695
36.293455,6.8556546,6.85273487,0.0540345503,6.85273487,0,6.85168427
36.303946,6.4807407,6.8523501,-0.60959774,6.8523501,0,6.85131998
36.314438,7.34846923,6.85196426,0.70463109,6.85196426,0,6.85095401
36.32493,6.55743852,6.85157734,-0.542345663,6.85157734,0,6.85058641
36.335421,6.55743852,6.85118939,-0.541987879,6.85118939,0,6.85021722
36.345913,7.07106781,6.8508003,0.469326663,6.8508003,0,6.84984636
36.356404,7.87400787,6.85041013,1.01173007,6.85041013,0,6.84947392
36.366896,7.14142843,6.85001881,0.539823692,6.85001881,0,6.84909983
36.377388,6.8556546,6.84962635,0.0776418,6.84962635,0,6.84872414
36.387879,6.55743852,6.84923278,-0.540179839,6.84923278,0,6.84834687
36.398371,6.8556546,6.84883802,0.0825625988,6.84883802,0,6.84796798
36.408862,5.65685425,6.84844212,-1.09159877,6.84844212,0,6.84758753
36.419354,7.21110255,6.84804501,0.602542563,6.84804501,0,6.84720545
36.429846,6.70820393,6.84764671,-0.373420378,6.84764671,0,6.8468218
36.440337,7.48331477,6.84724725,0.797538412,6.84724725,0,6.8464366
36.450829,6.164414,6.84684656,-0.826094761,6.84684656,0,6.8460498
36.46132,6.40312424,6.84644469,-0.665823136,6.84644469,0,6.84566147
36.471812,6.32455532,6.84604156,-0.722140042,6.84604156,0,6.84527154
36.482304,6.92820323,6.84563721,0.287343035,6.84563721,0,6.84488006
36.492795,6.70820393,6.84523167,-0.370172578,6.84523167,0,6.84448706
36.503287,7.28010989,6.84482486,0.659761346,6.84482486,0,6.84409249
36.513778,6.32455532,6.84441684,-0.72101423,6.84441684,0,6.84369641
36.52427,6.70820393,6.84400754,-0.368515412,6.84400754,0,6.84329875
36.534762,7.14142843,6.84359699,0.545739347,6.84359699,0,6.84289957
36.545253,6.55743852,6.84318523,-0.534552811,6.84318523,0,6.84249891
36.555745,6.92820323,6.84277218,0.292285912,6.84277218,0,6.84209668
36.566236,6.78232998,6.8423579,-0.245005951,6.8423579,0,6.84169298
36.576728,7.21110255,6.84194232,0.607585575,6.84194232,0,6.84128773
36.58722,7.07106781,6.84152548,0.479105766,6.84152548,0,6.84088097
36.597711,6.63324958,6.84110741,-0.455914273,6.84110741,0,6.84047276
36.608203,6.55743852,6.84068802,-0.532211894,6.84068802,0,6.84006301
36.618694,7.81024968,6.84026741,0.984876776,6.84026741,0,6.83965181
36.629186,7,6.83984549,0.400193096,6.83984549,0,6.83923909
36.639678,6.244998,6.83942229,-0.770989161,6.83942229,0,6.83882489
36.650169,6.70820393,6.83899785,-0.361654416,6.83899785,0,6.83840925
36.660661,7.68114575,6.8385721,0.917918107,6.8385721,0,6.8379921
36.671152,7.41619849,6.83814511,0.760298219,6.83814511,0,6.83757353
36.681644,7.34846923,6.8377168,0.714669457,6.8377168,0,6.83715345
36.692136,6.78232998,6.83728721,-0.234429573,6.83728721,0,6.83673192
36.702627,7.07106781,6.83685638,0.483953955,6.83685638,0,6.83630898
36.713119,8.36660027,6.83642423,1.23700284,6.83642423,0,6.83588455
36.72361,6.8556546,6.83599085,0.140227499,6.83599085,0,6.83545872
36.734102,6.164414,6.83555614,-0.819232653,6.83555614,0,6.83503141
36.744594,8.48528137,6.83512016,1.28458601,6.83512016,0,6.83460267
36.755085,5.47722558,6.83468294,-1.16509972,6.83468294,0,6.83417254
36.765577,6.244998,6.8342444,-0.767623865,6.8342444,0,6.83374095
36.776068,7.48331477,6.83380462,0.805921928,6.83380462,0,6.83330798
36.78656,6.63324958,6.83336352,-0.44734097,6.83336352,0,6.83287355
36.797052,7.74596669,6.83292115,0.955534165,6.83292115,0,6.83243772
36.807543,7.74596669,6.83247755,0.95576626,6.83247755,0,6.83200052
36.818035,6.92820323,6.83203263,0.310113852,6.83203263,0,6.83156188
36.828526,7.61577311,6.83158648,0.885543125,6.83158648,0,6.83112189
36.839018,6.78232998,6.83113902,-0.220927662,6.83113902,0,6.83068046
36.84951,7.54983444,6.83069028,0.848023675,6.83069028,0,6.83023764
36.860001,6,6.83024032,-0.911175242,6.83024032,0,6.82979348
36.870493,6.92820323,6.82978905,0.313710342,6.82978905,0,6.82934791
36.880984,6.70820393,6.82933656,-0.348041128,6.82933656,0,6.828901
36.891476,7,6.82888276,0.413663197,6.82888276,0,6.82845268
36.901968,6.78232998,6.8284277,-0.214703784,6.8284277,0,6.82800299
36.912459,6.92820323,6.82797142,0.31659408,6.82797142,0,6.82755198
36.922951,6.92820323,6.82751384,0.317315919,6.82751384,0,6.82709958
36.933442,7.21110255,6.82705504,0.619715666,6.82705504,0,6.82664587
36.943934,5.83095189,6.82659495,-0.99781915,6.82659495,0,6.82619076
36.954426,7.74596669,6.8261336,0.959079292,6.8261336,0,6.82573431
36.964917,6.63324958,6.82567105,-0.438658718,6.82567105,0,6.82527656
36.975409,7.41619849,6.82481744,0.769013034,6.82481744,0,6.82481744
36.9859,7.28010989,6.82435703,0.675094705,6.82435703,0,6.82435703
36.996392,6.92820323,6.82389525,0.322967468,6.82389525,0,6.82389525
37.006884,7.07106781,6.82343214,0.497630057,6.82343214,0,6.82343214
37.017375,7.41619849,6.82296776,0.770214729,6.82296776,0,6.82296776
37.027867,5.74456265,6.82250202,-1.03823859,6.82250202,0,6.82250202
37.038358,7.07106781,6.82203501,0.499031863,6.82203501,0,6.82203501
37.04885,7.07106781,6.82156665,0.499500908,6.82156665,0,6.82156665
37.059342,7.48331477,6.82109699,0.813767644,6.82109699,0,6.82109699
37.069833,6.8556546,6.82062608,0.187159075,6.82062608,0,6.82062608
37.080325,7.74596669,6.82015383,0.962191698,6.82015383,0,6.82015383
37.090816,6.92820323,6.81968033,0.329428142,6.81968033,0,6.81968033
37.101308,6.164414,6.8192055,-0.809191879,6.8192055,0,6.8192055
37.1118,6.32455532,6.81872939,-0.702975154,6.81872939,0,6.81872939
37.122291,6.92820323,6.81825204,0.331588885,6.81825204,0,6.81825204
37.132783,6.164414,6.81777338,-0.808306484,6.81777338,0,6.81777338
37.143274,6.70820393,6.81729348,-0.330287075,6.81729348,0,6.81729348
37.153766,7.28010989,6.81681228,0.680659686,6.81681228,0,6.81681228
37.164258,6.164414,6.81632981,-0.807413036,6.81632981,0,6.81632981
37.174749,7.68114575,6.81584613,0.930214821,6.81584613,0,6.81584613
37.185241,7.07106781,6.81536115,0.505674459,6.81536115,0,6.81536115
37.195732,6.70820393,6.81487497,-0.326605319,6.81487497,0,6.81487497
37.206224,6.78232998,6.81438749,-0.179046094,6.81438749,0,6.81438749
37.216716,6.78232998,6.81389876,-0.177676052,6.81389876,0,6.81389876
37.227207,6.70820393,6.81340884,-0.324353067,6.81340884,0,6.81340884
37.237699,7.14142843,6.81291764,0.573158603,6.81291764,0,6.81291764
37.24819,6.92820323,6.81242526,0.340261624,6.81242526,0,6.81242526
37.258682,6.4807407,6.81193159,-0.575491873,6.81193159,0,6.81193159
37.269174,7,6.81143671,0.434238751,6.81143671,0,6.81143671
37.279665,7.48331477,6.81094064,0.819984225,6.81094064,0,6.81094064
37.290157,7.14142843,6.81044332,0.575313055,6.81044332,0,6.81044332
37.300648,6.55743852,6.80994482,-0.502500049,6.80994482,0,6.80994482
37.31114,6.4807407,6.80944507,-0.573327457,6.80944507,0,6.80944507
37.321632,7,6.80894411,0.437099403,6.80894411,0,6.80894411
37.332123,6.92820323,6.808442,0.34606536,6.808442,0,6.808442
37.342615,7.14142843,6.80793863,0.577485753,6.80793863,0,6.80793863
37.353106,6.92820323,6.80743412,0.347518499,6.80743412,0,6.80743412
37.363598,7.07106781,6.80692837,0.513944978,6.80692837,0,6.80692837
37.37409,6.55743852,6.80642143,-0.498981869,6.80642143,0,6.80642143
37.384581,7.28010989,6.80591335,0.688619298,6.80591335,0,6.80591335
37.395073,6.70820393,6.80540404,-0.311769322,6.80540404,0,6.80540404
37.405564,7.68114575,6.8048936,0.936083407,6.8048936,0,6.8048936
37.416056,6.164414,6.80438194,-0.799979961,6.80438194,0,6.80438194
37.426548,7.21110255,6.80386911,0.638148451,6.80386911,0,6.80386911
37.437039,7.48331477,6.80335515,0.824596642,6.80335515,0,6.80335515
37.447531,6.40312424,6.80283998,-0.632230769,6.80283998,0,6.80283998
37.458022,7.07106781,6.8023237,0.518405353,6.8023237,0,6.8023237
37.468514,7,6.80180621,0.445189607,6.80180621,0,6.80180621
37.479006,7.34846923,6.80128757,0.739717283,6.80128757,0,6.80128757
37.489497,7.07106781,6.80076782,0.519903825,6.80076782,0,6.80076782
37.499989,7.48331477,6.80024688,0.826479214,6.80024688,0,6.80024688
37.51048,7.54983444,6.79972484,0.866088674,6.79972484,0,6.79972484
37.520972,6.78232998,6.79920161,-0.129890842,6.79920161,0,6.79920161
37.531464,7.21110255,6.79867725,0.642203476,6.79867725,0,6.79867725
37.541955,7.14142843,6.79815179,0.585898144,6.79815179,0,6.79815179
37.552447,6.78232998,6.79762516,-0.123673663,6.79762516,0,6.79762516
37.562938,6.78232998,6.79709744,-0.121521446,6.79709744,0,6.79709744
37.57343,6.70820393,6.79656856,-0.297261877,6.79656856,0,6.79656856
37.583922,8.18535277,6.79603855,1.17869174,6.79603855,0,6.79603855
37.594413,5.91607978,6.79550747,-0.937778056,6.79550747,0,6.79550747
37.604905,7.28010989,6.79497522,0.696516094,6.79497522,0,6.79497522
37.615396,7.68114575,6.79444191,0.941649529,6.79444191,0,6.79444191
37.625888,6.92820323,6.79390744,0.366463894,6.79390744,0,6.79390744
37.63638,6.55743852,6.79337187,-0.485729705,6.79337187,0,6.79337187
37.646871,6.70820393,6.79283524,-0.290914612,6.79283524,0,6.79283524
37.657363,7.68114575,6.79229747,0.942787506,6.79229747,0,6.79229747
37.667854,7.14142843,6.79175864,0.591328831,6.79175864,0,6.79175864
37.678346,7.07106781,6.79121867,0.529007692,6.79121867,0,6.79121867
37.688838,7.14142843,6.79067761,0.592242193,6.79067761,0,6.79067761
37.699329,7.61577311,6.79013552,0.908646019,6.79013552,0,6.79013552
37.709821,7.21110255,6.78959228,0.64923822,6.78959228,0,6.78959228
37.720312,7.07106781,6.78904802,0.531055355,6.78904802,0,6.78904802
37.730804,7.81024968,6.78850263,1.01081504,6.78850263,0,6.78850263
37.741296,6.32455532,6.78795616,-0.680735513,6.78795616,0,6.78795616
37.751787,7.61577311,6.78740867,0.910145284,6.78740867,0,6.78740867
37.762279,7.07106781,6.78686006,0.533111392,6.78686006,0,6.78686006
37.77277,7.07106781,6.78631043,0.533626633,6.78631043,0,6.78631043
37.783262,7.14142843,6.78575968,0.596379698,6.78575968,0,6.78575968
37.793754,6.8556546,6.78520788,0.265418013,6.78520788,0,6.78520788
37.804245,6.70820393,6.78465507,-0.276497984,6.78465507,0,6.78465507
37.814737,7.07106781,6.78410115,0.535692695,6.78410115,0,6.78410115
37.825228,6.78232998,6.78354623,-0.0348747236,6.78354623,0,6.78354623
37.83572,7.14142843,6.78299021,0.598697103,6.78299021,0,6.78299021
37.846212,6.92820323,6.78243314,0.381798496,6.78243314,0,6.78243314
37.856703,6.40312424,6.78187508,-0.615427365,6.78187508,0,6.78187508
37.867195,7.21110255,6.78131592,0.655581136,6.78131592,0,6.78131592
37.877686,7.61577311,6.78075578,0.913792822,6.78075578,0,6.78075578
37.888178,7.68114575,6.78019456,0.949184488,6.78019456,0,6.78019456
37.89867,6.63324958,6.77963229,-0.382599939,6.77963229,0,6.77963229
37.909161,7.07106781,6.77906906,0.540369093,6.77906906,0,6.77906906
37.919653,7,6.77850474,0.470632834,6.77850474,0,6.77850474
37.930144,7,6.77793944,0.471233016,6.77793944,0,6.77793944
37.940636,5.19615242,6.77737308,-1.25746597,6.77737308,0,6.77737308
37.951128,7.28010989,6.77680569,0.709439354,6.77680569,0,6.77680569
37.961619,6.92820323,6.77623734,0.389828023,6.77623734,0,6.77623734
37.972111,7.21110255,6.77566793,0.659874705,6.77566793,0,6.77566793
37.982602,7.14142843,6.77509755,0.605252739,6.77509755,0,6.77509755
37.993094,7.21110255,6.77452611,0.660739312,6.77452611,0,6.77452611
38.003586,6.92820323,6.77395367,0.392746179,6.77395367,0,6.77395367
38.014077,6.70820393,6.77338028,-0.25529658,6.77338028,0,6.77338028
38.024569,6.8556546,6.77280583,0.287834627,6.77280583,0,6.77280583
38.03506,7.07106781,6.77223044,0.546660202,6.77223044,0,6.77223044
38.045552,6.55743852,6.77165399,-0.462834169,6.77165399,0,6.77165399
38.056044,6.164414,6.77107656,-0.778885456,6.77107656,0,6.77107656
38.066535,6.63324958,6.77049818,-0.370470787,6.77049818,0,6.77049818
38.077027,6.92820323,6.76991877,0.397849797,6.76991877,0,6.76991877
38.087518,7.28010989,6.76933842,0.714682773,6.76933842,0,6.76933842
38.09801,5.83095189,6.76875704,-0.9684034,6.76875704,0,6.76875704
38.108502,6.8556546,6.76817467,0.295770056,6.76817467,0,6.76817467
38.118993,5.74456265,6.76759139,-1.01144883,6.76759139,0,6.76759139
38.129485,6.32455532,6.76700707,-0.665170465,6.76700707,0,6.76700707
38.139976,6.8556546,6.76642183,0.298718546,6.76642183,0,6.76642183
38.150468,7.34846923,6.76583557,0.763304435,6.76583557,0,6.76583557
38.16096,6.78232998,6.76524834,0.130696776,6.76524834,0,6.76524834
38.171451,7,6.76466019,0.485118342,6.76466019,0,6.76466019
38.181943,8.30662386,6.76407103,1.2419955,6.76407103,0,6.76407103
38.192434,7,6.76348097,0.486332226,6.76348097,0,6.76348097
38.202926,7.48331477,6.76288988,0.848778469,6.76288988,0,6.76288988
38.213418,6.40312424,6.76229785,-0.599310945,6.76229785,0,6.76229785
38.223909,6.78232998,6.76170491,0.143614321,6.76170491,0,6.76170491
38.234401,6.164414,6.76111097,-0.772461625,6.76111097,0,6.76111097
38.244892,7.48331477,6.76051613,0.850175655,6.76051613,0,6.76051613
38.255384,6.32455532,6.75992029,-0.659821921,6.75992029,0,6.75992029
38.265876,7.48331477,6.7593235,0.850876767,6.7593235,0,6.7593235
38.276367,7.93725393,6.75872583,1.08560034,6.75872583,0,6.75872583
38.286859,7.07106781,6.75812716,0.559410986,6.75812716,0,6.75812716
38.29735,6.63324958,6.75752761,-0.352530893,6.75752761,0,6.75752761
38.307842,6.78232998,6.75692707,0.159382919,6.75692707,0,6.75692707
38.318334,7.07106781,6.75632559,0.561018912,6.75632559,0,6.75632559
38.328825,6.70820393,6.75572324,-0.217989241,6.75572324,0,6.75572324
38.339317,6.32455532,6.7551199,-0.656174203,6.7551199,0,6.7551199
38.349808,7.41619849,6.7545157,0.813438866,6.7545157,0,6.7545157
38.3603,6.32455532,6.75391051,-0.655252004,6.75391051,0,6.75391051
38.370792,5.29150262,6.7533044,-1.20904995,6.7533044,0,6.7533044
38.381283,6.32455532,6.75269742,-0.654325687,6.75269742,0,6.75269742
38.391775,7.21110255,6.75208948,0.677505038,6.75208948,0,6.75208948
38.402266,7.21110255,6.75148067,0.67795419,6.75148067,0,6.75148067
38.412758,7.28010989,6.75087089,0.727488146,6.75087089,0,6.75087089
38.42325,6.92820323,6.7502602,0.421832946,6.7502602,0,6.7502602
38.433741,7.41619849,6.74964865,0.816425033,6.74964865,0,6.74964865
38.444233,7.41619849,6.74903614,0.816800063,6.74903614,0,6.74903614
38.454724,6.63324958,6.74842279,-0.339371782,6.74842279,0,6.74842279
38.465216,6.70820393,6.74780847,-0.199008886,6.74780847,0,6.74780847
38.475708,6.55743852,6.74719325,-0.435608454,6.74719325,0,6.74719325
38.486199,7.48331477,6.74657719,0.858334191,6.74657719,0,6.74657719
38.496691,6.40312424,6.74596017,-0.585521935,6.74596017,0,6.74596017
38.507182,7.68114575,6.74534232,0.967369333,6.74534232,0,6.74534232
38.517674,6.08276253,6.74472352,-0.813609849,6.74472352,0,6.74472352
38.528166,7.87400787,6.74410382,1.06296945,6.74410382,0,6.74410382
38.538657,6.70820393,6.7434833,-0.187828013,6.7434833,0,6.7434833
38.549149,7.81024968,6.74286182,1.03314464,6.74286182,0,6.74286182
38.55964,7.74596669,6.74223952,1.00186185,6.74223952,0,6.74223952
38.570132,6.70820393,6.74161628,-0.182790457,6.74161628,0,6.74161628
38.580624,6.70820393,6.74099216,-0.181075203,6.74099216,0,6.74099216
38.591115,5.56776436,6.74036722,-1.08286789,6.74036722,0,6.74036722
38.601607,7.28010989,6.73974134,0.735097646,6.73974134,0,6.73974134
38.612098,7.61577311,6.73911465,0.936300411,6.73911465,0,6.73911465
38.62259,6.4807407,6.73848702,-0.507687225,6.73848702,0,6.73848702
38.633082,7.41619849,6.73785852,0.823613969,6.73785852,0,6.73785852
38.643573,6.8556546,6.73722921,0.344129907,6.73722921,0,6.73722921
38.654065,5.65685425,6.73659897,-1.03910766,6.73659897,0,6.73659897
38.664556,7.28010989,6.73596793,0.737659789,6.73596793,0,6.73596793
38.675048,7.14142843,6.73533596,0.637253852,6.73533596,0,6.73533596
38.68554,6.8556546,6.73470313,0.347780784,6.73470313,0,6.73470313
38.696031,7.61577311,6.7340695,0.93899074,6.7340695,0,6.7340695
38.706523,6.4807407,6.73343495,-0.502687027,6.73343495,0,6.73343495
38.717014,7.54983444,6.7327996,0.903899793,6.7327996,0,6.7327996
38.727506,6.78232998,6.73216334,0.223979118,6.73216334,0,6.73216334
38.737998,6.78232998,6.73152622,0.225396896,6.73152622,0,6.73152622
38.748489,6.164414,6.73088832,-0.752644879,6.73088832,0,6.73088832
38.758981,6.40312424,6.7302495,-0.571948654,6.7302495,0,6.7302495
38.769472,7.61577311,6.7296099,0.941362422,6.7296099,0,6.7296099
38.779964,6.4807407,6.72896939,-0.498225538,6.72896939,0,6.72896939
38.790456,6.63324958,6.72832803,-0.308347935,6.72832803,0,6.72832803
38.800947,7.74596669,6.72768589,1.009099,6.72768589,0,6.72768589
38.811439,6.55743852,6.72704285,-0.411830462,6.72704285,0,6.72704285
38.82193,7.34846923,6.72639904,0.788714265,6.72639904,0,6.72639904
38.832422,7.41619849,6.72575432,0.8309297,6.72575432,0,6.72575432
38.842914,6.08276253,6.72510877,-0.801465058,6.72510877,0,6.72510877
38.853405,6.40312424,6.72446244,-0.56686701,6.72446244,0,6.72446244
38.863897,7.34846923,6.72381523,0.790350557,6.72381523,0,6.72381523
38.874388,6.63324958,6.72316724,-0.29986273,6.72316724,0,6.72316724
38.88488,6.4807407,6.72251836,-0.491708918,6.72251836,0,6.72251836
38.895372,7.34846923,6.72186865,0.791581061,6.72186865,0,6.72186865
38.905863,6.40312424,6.72121818,-0.563998178,6.72121818,0,6.72121818
38.916355,7.41619849,6.72056682,0.83404536,6.72056682,0,6.72056682
38.926846,6.40312424,6.71991471,-0.562841425,6.71991471,0,6.71991471
38.937338,7.41619849,6.71926171,0.834827395,6.71926171,0,6.71926171
38.94783,6.70820393,6.71860789,-0.101999776,6.71860789,0,6.71860789
38.958321,6.55743852,6.71795331,-0.400642967,6.71795331,0,6.71795331
38.968813,7.54983444,6.71729786,0.912434424,6.71729786,0,6.71729786
38.979304,7,6.71664165,0.532314146,6.71664165,0,6.71664165
38.989796,6.70820393,6.71598457,-0.0882079096,6.71598457,0,6.71598457
39.000288,7.21110255,6.71532667,0.70411354,6.71532667,0,6.71532667
39.010779,6.78232998,6.71466803,0.260119109,6.71466803,0,6.71466803
39.021271,6.78232998,6.71400852,0.261383747,6.71400852,0,6.71400852
39.031762,6.4807407,6.71334826,-0.482294064,6.71334826,0,6.71334826
39.042254,7.07106781,6.71268714,0.598649041,6.71268714,0,6.71268714
39.052746,7.41619849,6.71202521,0.839150332,6.71202521,0,6.71202521
39.063237,6.8556546,6.71136254,0.379857948,6.71136254,0,6.71136254
39.073729,7.07106781,6.71069901,0.600307259,6.71069901,0,6.71069901
39.08422,7.14142843,6.71003474,0.656805672,6.71003474,0,6.71003474
39.094712,7,6.70936961,0.539101468,6.70936961,0,6.70936961
39.105204,6.40312424,6.70870368,-0.552792404,6.70870368,0,6.70870368
39.115695,7.48331477,6.70803702,0.880498582,6.70803702,0,6.70803702
39.126187,5.74456265,6.7073695,-0.98122722,6.7073695,0,6.7073695
39.136678,6.08276253,6.70670126,-0.789897923,6.70670126,0,6.70670126
39.14717,6.4807407,6.70603216,-0.474648777,6.70603216,0,6.70603216
39.157662,6.32455532,6.70536227,-0.617095577,6.70536227,0,6.70536227
39.168153,7.34846923,6.70469166,0.802357508,6.70469166,0,6.70469166
39.178645,7.28010989,6.70402019,0.759005728,6.70402019,0,6.70402019
39.189136,6.55743852,6.70334801,-0.381981001,6.70334801,0,6.70334801
39.199628,6.63324958,6.70267498,-0.263486994,6.70267498,0,6.70267498
39.21012,7.54983444,6.70200116,0.920778624,6.70200116,0,6.70200116
39.220611,6.92820323,6.70132663,0.476315653,6.70132663,0,6.70132663
39.231103,6.63324958,6.70065125,-0.25961832,6.70065125,0,6.70065125
39.241594,6.244998,6.69997516,-0.674519951,6.69997516,0,6.69997516
39.252086,7,6.69929823,0.548362808,6.69929823,0,6.69929823
39.262578,7.21110255,6.69862052,0.715878501,6.69862052,0,6.69862052
39.273069,6.08276253,6.69794211,-0.784333842,6.69794211,0,6.69794211
39.283561,6.08276253,6.69726285,-0.783900708,6.69726285,0,6.69726285
39.294052,7.48331477,6.69658289,0.886979078,6.69658289,0,6.69658289
39.304544,7.41619849,6.69590209,0.848702773,6.69590209,0,6.69590209
39.315036,7.14142843,6.69522052,0.667987953,6.69522052,0,6.69522052
39.325527,6.8556546,6.69453825,0.401393007,6.69453825,0,6.69453825
39.336019,6.92820323,6.69385515,0.484095112,6.69385515,0,6.69385515
39.34651,7.07106781,6.69317135,0.614732837,6.69317135,0,6.69317135
39.357002,6.4807407,6.69248672,-0.460158692,6.69248672,0,6.69248672
39.367494,6.55743852,6.69180133,-0.366555318,6.69180133,0,6.69180133
39.377985,6.4807407,6.69111524,-0.458666041,6.69111524,0,6.69111524
39.388477,6.70820393,6.69042832,0.133325216,6.69042832,0,6.69042832
39.398968,6,6.68974071,-0.830506297,6.68974071,0,6.68974071
39.40946,6.244998,6.68905228,-0.666373978,6.68905228,0,6.68905228
39.419952,7.41619849,6.68836309,0.853132698,6.68836309,0,6.68836309
39.430443,6.40312424,6.68767321,-0.533431316,6.68767321,0,6.68767321
39.440935,7,6.68698251,0.559479663,6.68698251,0,6.68698251
39.451426,7,6.68629112,0.560097207,6.68629112,0,6.68629112
39.461918,7.21110255,6.68559891,0.724916297,6.68559891,0,6.68559891
39.47241,6.92820323,6.68490596,0.493251734,6.68490596,0,6.68490596
39.482901,6.70820393,6.68421232,0.154892268,6.68421232,0,6.68421232
39.493393,7.07106781,6.68351786,0.622535098,6.68351786,0,6.68351786
39.503884,6.164414,6.68282273,-0.720006059,6.68282273,0,6.68282273
39.514376,6.244998,6.68212678,-0.661157153,6.68212678,0,6.68212678
39.524868,6.70820393,6.68143009,0.163627155,6.68143009,0,6.68143009
39.535359,6.55743852,6.68073272,-0.351132727,6.68073272,0,6.68073272
39.545851,6.40312424,6.68003454,-0.52622267,6.68003454,0,6.68003454
39.556342,7,6.67933568,0.566272301,6.67933568,0,6.67933568
39.566834,7.07106781,6.67863602,0.626443767,6.67863602,0,6.67863602
39.577326,6.4807407,6.67793562,-0.444066345,6.67793562,0,6.67793562
39.587817,6,6.67723454,-0.822942613,6.67723454,0,6.67723454
39.598309,7.34846923,6.67653267,0.819717367,6.67653267,0,6.67653267
39.6088,6.244998,6.67583012,-0.656378032,6.67583012,0,6.67583012
39.619292,6.70820393,6.67512677,0.181871281,6.67512677,0,6.67512677
39.629784,7,6.67442269,0.570593825,6.67442269,0,6.67442269
39.640275,7.28010989,6.67371794,0.778711726,6.67371794,0,6.67371794
39.650767,7.74596669,6.67301239,1.03583508,6.67301239,0,6.67301239
39.661258,7.61577311,6.67230618,0.971322258,6.67230618,0,6.67230618
39.67175,6.8556546,6.67159917,0.429016822,6.67159917,0,6.67159917
39.682242,7.68114575,6.67089143,1.00511408,6.67089143,0,6.67089143
39.692733,6.8556546,6.67018303,0.430664105,6.67018303,0,6.67018303
39.703225,6.8556546,6.66947384,0.431486691,6.66947384,0,6.66947384
39.713716,6.70820393,6.66876398,0.198594936,6.66876398,0,6.66876398
39.724208,8.18535277,6.66805334,1.23178709,6.66805334,0,6.66805334
39.7347,6.8556546,6.66734197,0.43395003,6.66734197,0,6.66734197
39.745191,6.32455532,6.66662995,-0.584871463,6.66662995,0,6.66662995
39.755683,6.32455532,6.66591714,-0.584261769,6.66591714,0,6.66591714
39.766174,6.55743852,6.66520367,-0.328276019,6.66520367,0,6.66520367
39.776666,7.21110255,6.66448941,0.739332899,6.66448941,0,6.66448941
39.787158,7.28010989,6.66377444,0.785070346,6.66377444,0,6.66377444
39.797649,6.244998,6.66305882,-0.646576229,6.66305882,0,6.66305882
39.808141,6.4807407,6.66234241,-0.426147523,6.66234241,0,6.66234241
39.818632,6.92820323,6.66162535,0.516311802,6.66162535,0,6.66162535
39.829124,5.65685425,6.66090751,-1.00202458,6.66090751,0,6.66090751
39.839616,7.14142843,6.66018896,0.693714257,6.66018896,0,6.66018896
39.850107,6.32455532,6.65946976,-0.578717926,6.65946976,0,6.65946976
39.860599,6.55743852,6.65874978,-0.318294288,6.65874978,0,6.65874978
39.87109,6.70820393,6.65802915,0.223997273,6.65802915,0,6.65802915
39.881582,6.55743852,6.65730775,-0.316020928,6.65730775,0,6.65730775
39.892074,6.92820323,6.65658564,0.521169447,6.65658564,0,6.65658564
39.902565,5.91607978,6.65586289,-0.860106448,6.65586289,0,6.65586289
39.913057,6.55743852,6.65513936,-0.312571321,6.65513936,0,6.65513936
39.923548,6.55743852,6.65441519,-0.311410762,6.65441519,0,6.65441519
39.93404,5.09901951,6.65369024,-1.24686436,6.65369024,0,6.65369024
39.944532,6.78232998,6.65296459,0.359674004,6.65296459,0,6.65296459
39.955023,6.8556546,6.65223831,0.451016952,6.65223831,0,6.65223831
39.965515,6.244998,6.65151125,-0.637583919,6.65151125,0,6.65151125
39.976006,6.78232998,6.65078356,0.36269329,6.65078356,0,6.65078356
39.986498,7.41619849,6.6500551,0.875296172,6.6500551,0,6.6500551
39.99699,6.32455532,6.64932593,-0.569886492,6.64932593,0,6.64932593
40.007481,6.92820323,6.64859614,0.528778868,6.64859614,0,6.64859614
40.017973,6.4807407,6.64786558,-0.408809096,6.64786558,0,6.64786558
40.028464,6,6.64713438,-0.804446631,6.64713438,0,6.64713438
40.038956,7.54983444,6.64640242,0.950490407,6.64640242,0,6.64640242
40.049448,6.63324958,6.64566976,-0.111445872,6.64566976,0,6.64566976
40.059939,6.8556546,6.64493648,0.459040436,6.64493648,0,6.64493648
40.070431,5.74456265,6.64420243,-0.948493427,6.64420243,0,6.64420243
40.080922,6.63324958,6.64346775,-0.101084976,6.64346775,0,6.64346775
40.091414,6.32455532,6.64273231,-0.564071798,6.64273231,0,6.64273231
40.101906,7,6.64199618,0.598334203,6.64199618,0,6.64199618
40.112397,6.8556546,6.64125943,0.463028264,6.64125943,0,6.64125943
40.122889,6.70820393,6.64052191,0.260157688,6.64052191,0,6.64052191
40.13338,7.61577311,6.63978377,0.987921724,6.63978377,0,6.63978377
40.143872,6.78232998,6.63904487,0.378530195,6.63904487,0,6.63904487
40.154364,6.8556546,6.63830529,0.466207372,6.63830529,0,6.63830529
40.164855,6.55743852,6.63756508,-0.283066347,6.63756508,0,6.63756508
40.175347,6,6.63682412,-0.798012604,6.63682412,0,6.63682412
40.185838,6.78232998,6.63608254,0.382423126,6.63608254,0,6.63608254
40.19633,6.8556546,6.6353402,0.469376611,6.6353402,0,6.6353402
40.206822,5.56776436,6.63459717,-1.03287599,6.63459717,0,6.63459717
40.217313,5.65685425,6.63385353,-0.988432742,6.63385353,0,6.63385353
40.227805,6.244998,6.63310914,-0.622985668,6.63310914,0,6.63310914
40.238296,5.65685425,6.63236413,-0.987679039,6.63236413,0,6.63236413
40.248788,6.8556546,6.63161837,0.473324654,6.63161837,0,6.63161837
40.25928,6.55743852,6.63087193,-0.270985987,6.63087193,0,6.63087193
40.269771,6.32455532,6.63012488,-0.552783462,6.63012488,0,6.63012488
40.280263,6.4807407,6.62937707,-0.385533878,6.62937707,0,6.62937707
40.290754,6.55743852,6.62862865,-0.266814787,6.62862865,0,6.62862865
40.301246,6.70820393,6.62787949,0.283415673,6.62787949,0,6.62787949
40.311738,7.68114575,6.62712964,1.02665286,6.62712964,0,6.62712964
40.322229,6.244998,6.62637919,-0.61756068,6.62637919,0,6.62637919
40.332721,7,6.62562799,0.611859469,6.62562799,0,6.62562799
40.343212,5.65685425,6.62487618,-0.983881057,6.62487618,0,6.62487618
40.353704,7.21110255,6.62412363,0.766145497,6.62412363,0,6.62412363
40.364196,6.32455532,6.6233704,-0.546639806,6.6233704,0,6.6233704
40.374687,6.8556546,6.62261656,0.482740133,6.62261656,0,6.62261656
40.385179,7.34846923,6.62186198,0.852412602,6.62186198,0,6.62186198
40.39567,6.244998,6.6211068,-0.613277102,6.6211068,0,6.6211068
40.406162,5.38516481,6.62035087,-1.11138925,6.62035087,0,6.62035087
40.416654,6.4807407,6.61959427,-0.372630616,6.61959427,0,6.61959427
40.427145,7.41619849,6.61883707,0.892950958,6.61883707,0,6.61883707
40.437637,6.70820393,6.61807913,0.300207931,6.61807913,0,6.61807913
40.448128,6.244998,6.61732059,-0.610182423,6.61732059,0,6.61732059
40.45862,6.8556546,6.6165613,0.488971673,6.6165613,0,6.6165613
40.469112,6.8556546,6.61580135,0.489748151,6.61580135,0,6.61580135
40.479603,6.32455532,6.6150408,-0.538967046,6.6150408,0,6.6150408
40.490095,6.55743852,6.6142795,-0.238413466,6.6142795,0,6.6142795
40.500586,6.8556546,6.61351762,0.492074164,6.61351762,0,6.61351762
40.511078,6.78232998,6.61275499,0.411794844,6.61275499,0,6.61275499
40.52157,6.78232998,6.6119917,0.412720593,6.6119917,0,6.6119917
40.532061,6,6.61122781,-0.781810595,6.61122781,0,6.61122781
40.542553,6.78232998,6.61046318,0.414568212,6.61046318,0,6.61046318
40.553044,6.32455532,6.60969796,-0.533987492,6.60969796,0,6.60969796
40.563536,6,6.60893201,-0.780340955,6.60893201,0,6.60893201
40.574028,6.63324958,6.60816538,0.15837991,6.60816538,0,6.60816538
40.584519,6.4807407,6.60739817,-0.355889696,6.60739817,0,6.60739817
40.595011,7.28010989,6.60663023,0.820658067,6.60663023,0,6.60663023
40.605502,6.92820323,6.60586169,0.567751301,6.60586169,0,6.60586169
40.615994,6.78232998,6.60509242,0.420995919,6.60509242,0,6.60509242
40.626486,6.92820323,6.60432249,0.569105213,6.60432249,0,6.60432249
40.636977,6.55743852,6.60355197,-0.214740405,6.60355197,0,6.60355197
40.647469,6.32455532,6.60278071,-0.527470749,6.60278071,0,6.60278071
40.65796,5.74456265,6.60200887,-0.925983922,6.60200887,0,6.60200887
40.668452,7.14142843,6.6012363,0.73497764,6.6012363,0,6.6012363
40.678944,5.83095189,6.60046306,-0.877217858,6.60046306,0,6.60046306
40.689435,6.8556546,6.59968925,0.505930186,6.59968925,0,6.59968925
40.699927,6.32455532,6.5989147,-0.523793259,6.5989147,0,6.5989147
40.710418,6.4807407,6.59813957,-0.342635182,6.59813957,0,6.59813957
40.72091,6.244998,6.5973637,-0.593603996,6.5973637,0,6.5973637
40.731402,6.70820393,6.59658718,0.33409093,6.59658718,0,6.59658718
40.741893,5.65685425,6.59581008,-0.968997333,6.59581008,0,6.59581008
40.752385,6.244998,6.59503225,-0.591636925,6.59503225,0,6.59503225
40.762876,7.14142843,6.59425384,0.739712506,6.59425384,0,6.59425384
40.773368,6.40312424,6.5934747,-0.436291713,6.5934747,0,6.5934747
40.78386,5.38516481,6.5926949,-1.09887674,6.5926949,0,6.5926949
40.794351,6.70820393,6.59191453,0.341012327,6.59191453,0,6.59191453
40.804843,7,6.59113342,0.639426756,6.59113342,0,6.59113342
40.815334,6.40312424,6.59035174,-0.432697937,6.59035174,0,6.59035174
40.825826,6.55743852,6.58956933,-0.179250692,6.58956933,0,6.58956933
40.836318,6.08276253,6.58878628,-0.71135346,6.58878628,0,6.58878628
40.846809,7.14142843,6.58800264,0.74392593,6.58800264,0,6.58800264
40.857301,6.244998,6.58721828,-0.584995964,6.58721828,0,6.58721828
40.867792,5.65685425,6.58643334,-0.964146819,6.58643334,0,6.58643334
40.878284,7.07106781,6.58564767,0.696720989,6.58564767,0,6.58564767
40.888776,6,6.58486136,-0.764762291,6.58486136,0,6.58486136
40.899267,6.32455532,6.58407447,-0.509430225,6.58407447,0,6.58407447
40.909759,6.92820323,6.58328686,0.587295809,6.58328686,0,6.58328686
40.92025,6.244998,6.58249868,-0.580948086,6.58249868,0,6.58249868
40.930742,7.81024968,6.58170977,1.10839519,6.58170977,0,6.58170977
40.941234,6.164414,6.58092021,-0.645372923,6.58092021,0,6.58092021
40.951725,7.14142843,6.58013008,0.749198468,6.58013008,0,6.58013008
40.962217,6.4807407,6.57933923,-0.314004037,6.57933923,0,6.57933923
40.972708,6.244998,6.57854781,-0.577537716,6.57854781,0,6.57854781
40.9832,6.32455532,6.57775567,-0.50319017,6.57775567,0,6.57775567
40.993692,6.164414,6.57696288,-0.642299677,6.57696288,0,6.57696288
41.004183,6.4807407,6.57616952,-0.308915556,6.57616952,0,6.57616952
41.014675,5.83095189,6.57537544,-0.862799828,6.57537544,0,6.57537544
41.025166,6.32455532,6.57458079,-0.500025468,6.57458079,0,6.57458079
41.035658,6.92820323,6.57378542,0.595330001,6.57378542,0,6.57378542
41.04615,7,6.57298941,0.653460476,6.57298941,0,6.57298941
41.056641,6.244998,6.57219283,-0.572009464,6.57219283,0,6.57219283
41.067133,6.8556546,6.57139552,0.533159522,6.57139552,0,6.57139552
41.077624,7.48331477,6.57059766,0.955362296,6.57059766,0,6.57059766
41.088116,6.164414,6.56979907,-0.636698569,6.56979907,0,6.56979907
41.098608,6.63324958,6.56899984,0.253475321,6.56899984,0,6.56899984
41.109099,6.4807407,6.56820005,-0.29573527,6.56820005,0,6.56820005
41.119591,7.07106781,6.56739954,0.709695904,6.56739954,0,6.56739954
41.130082,6.164414,6.56659846,-0.634180145,6.56659846,0,6.56659846
41.140574,6.164414,6.56579667,-0.63354768,6.56579667,0,6.56579667
41.151066,6.4807407,6.56499423,-0.290264589,6.56499423,0,6.56499423
41.161557,7.48331477,6.56419123,0.95870931,6.56419123,0,6.56419123
41.172049,5.91607978,6.56338752,-0.804554369,6.56338752,0,6.56338752
41.18254,6.4807407,6.56258324,-0.286081352,6.56258324,0,6.56258324
41.193032,6.92820323,6.56177824,0.605330477,6.56177824,0,6.56177824
41.203524,6.70820393,6.56097261,0.383707338,6.56097261,0,6.56097261
41.214015,6.55743852,6.56016642,-0.052229222,6.56016642,0,6.56016642
41.224507,5.91607978,6.55935951,-0.802047207,6.55935951,0,6.55935951
41.234998,6,6.55855203,-0.747363388,6.55855203,0,6.55855203
41.24549,6.40312424,6.55774385,-0.393217002,6.55774385,0,6.55774385
41.255982,7.07106781,6.55693502,0.717030535,6.55693502,0,6.55693502
41.266473,5.83095189,6.55612564,-0.851571339,6.55612564,0,6.55612564
41.276965,6.164414,6.55531554,-0.625221192,6.55531554,0,6.55531554
41.287456,6.8556546,6.55450488,0.548771096,6.55450488,0,6.55450488
41.297948,5.56776436,6.55369351,-0.992939651,6.55369351,0,6.55369351
41.30844,6.32455532,6.55288151,-0.477834895,6.55288151,0,6.55288151
41.318931,6.55743852,6.55206894,0.0732774361,6.55206894,0,6.55206894
41.329423,5.83095189,6.55125566,-0.848707116,6.55125566,0,6.55125566
41.339914,6.8556546,6.55044183,0.552460653,6.55044183,0,6.55044183
41.350406,7.14142843,6.54962728,0.76928613,6.54962728,0,6.54962728
41.360898,6.63324958,6.5488121,0.290581289,6.5488121,0,6.5488121
41.371389,6.40312424,6.54799636,-0.380620701,6.54799636,0,6.54799636
41.381881,7.14142843,6.5471799,0.770875168,6.5471799,0,6.5471799
41.392372,6.70820393,6.5463629,0.402294714,6.5463629,0,6.5463629
41.402864,6.244998,6.54554518,-0.548221832,6.54554518,0,6.54554518
41.413356,5.83095189,6.54472682,-0.844852016,6.54472682,0,6.54472682
41.423847,6.70820393,6.54390791,0.405334451,6.54390791,0,6.54390791
41.434339,6.32455532,6.5430883,-0.467475107,6.5430883,0,6.5430883
41.44483,6.40312424,6.54226812,-0.373019953,6.54226812,0,6.54226812
41.455322,7,6.54144724,0.67716524,6.54144724,0,6.54144724
41.465814,6.92820323,6.54062572,0.622557233,6.54062572,0,6.54062572
41.476305,6.92820323,6.53980365,0.62321712,6.53980365,0,6.53980365
41.486797,6.55743852,6.53898087,0.135858943,6.53898087,0,6.53898087
41.497288,7.68114575,6.53815754,1.06910627,6.53815754,0,6.53815754
41.50778,6.55743852,6.5373335,0.1417922,6.5373335,0,6.5373335
41.518272,6.164414,6.53650882,-0.609995754,6.53650882,0,6.53650882
41.528763,7.07106781,6.5356836,0.731699539,6.5356836,0,6.5356836
41.539255,5,6.53485766,-1.23889372,6.53485766,0,6.53485766
41.549746,6.63324958,6.53403117,0.314989533,6.53403117,0,6.53403117
41.560238,7.07106781,6.53320398,0.733392005,6.53320398,0,6.53320398
41.57073,6.32455532,6.53237615,-0.455873703,6.53237615,0,6.53237615
41.581221,6.55743852,6.53154778,0.160906021,6.53154778,0,6.53154778
41.591713,6,6.53071869,-0.728504421,6.53071869,0,6.53071869
41.602204,6.70820393,6.52988906,0.422273461,6.52988906,0,6.52988906
41.612696,6.244998,6.52905871,-0.532973466,6.52905871,0,6.52905871
41.623188,7.14142843,6.52822774,0.783071317,6.52822774,0,6.52822774
41.633679,6,6.52739622,-0.726220504,6.52739622,0,6.52739622
41.644171,6.164414,6.52656399,-0.601788989,6.52656399,0,6.52656399
41.654662,6.4807407,6.52573121,-0.212109674,6.52573121,0,6.52573121
41.665154,6,6.52489773,-0.724498259,6.52489773,0,6.52489773
41.675646,6.40312424,6.52406361,-0.34776339,6.52406361,0,6.52406361
41.686137,6.8556546,6.52322895,0.576563656,6.52322895,0,6.52322895
41.696629,7,6.52239358,0.691090745,6.52239358,0,6.52239358
41.70712,5.91607978,6.52155767,-0.778124593,6.52155767,0,6.52155767
41.717612,5.74456265,6.52072104,-0.880998522,6.52072104,0,6.52072104
41.728104,6.164414,6.51988379,-0.596212872,6.51988379,0,6.51988379
41.738595,6.08276253,6.51904599,-0.660517573,6.51904599,0,6.51904599
41.749087,6,6.51820749,-0.7198663,6.51820749,0,6.51820749
41.759578,6.78232998,6.51736844,0.514744153,6.51736844,0,6.51736844
41.77007,6,6.51652868,-0.7186993,6.51652868,0,6.51652868
41.780562,7,6.5156883,0.695925067,6.5156883,0,6.5156883
41.791053,6.70820393,6.51484737,0.439723277,6.51484737,0,6.51484737
41.801545,5.65685425,6.51400574,-0.925824761,6.51400574,0,6.51400574
41.812036,7.28010989,6.51316356,0.875754721,6.51316356,0,6.51316356
41.822528,6,6.51232067,-0.715765794,6.51232067,0,6.51232067
41.83302,6.92820323,6.51147716,0.645543236,6.51147716,0,6.51147716
41.843511,6.4807407,6.51063311,-0.172894209,6.51063311,0,6.51063311
41.854003,6.55743852,6.50978834,0.218289211,6.50978834,0,6.50978834
41.864494,6,6.50894304,-0.713402439,6.50894304,0,6.50894304
41.874986,7.07106781,6.50809703,0.75031379,6.50809703,0,6.50809703
41.885478,7.07106781,6.50725039,0.750877765,6.50725039,0,6.50725039
41.895969,6.244998,6.50640322,-0.511278023,6.50640322,0,6.50640322
41.906461,6,6.50555533,-0.711024143,6.50555533,0,6.50555533
41.916952,6.40312424,6.5047069,-0.318720359,6.5047069,0,6.5047069
41.927444,5.91607978,6.50385777,-0.766666805,6.50385777,0,6.50385777
41.937936,6.78232998,6.50300802,0.528509192,6.50300802,0,6.50300802
41.948427,6.40312424,6.50215772,-0.314695856,6.50215772,0,6.50215772
41.958919,6.78232998,6.50130672,0.530116277,6.50130672,0,6.50130672
41.96941,6.08276253,6.50045517,-0.646291452,6.50045517,0,6.50045517
41.979902,6.40312424,6.49960292,-0.310610181,6.49960292,0,6.49960292
41.990394,5.91607978,6.49875005,-0.763328413,6.49875005,0,6.49875005
42.000885,7.14142843,6.49789664,0.802204334,6.49789664,0,6.49789664
42.011377,7.41619849,6.49704252,0.958726223,6.49704252,0,6.49704252
42.021868,6.70820393,6.49618786,0.460452034,6.49618786,0,6.49618786
42.03236,6.4807407,6.49533249,-0.120796502,6.49533249,0,6.49533249
42.042852,6.32455532,6.49447651,-0.412214976,6.49447651,0,6.49447651
42.053343,6.8556546,6.49361998,0.601693128,6.49361998,0,6.49361998
42.063835,6.55743852,6.49276275,0.254314324,6.49276275,0,6.49276275
42.074326,6.32455532,6.49190498,-0.409083925,6.49190498,0,6.49190498
42.084818,6.63324958,6.4910465,0.377098234,6.4910465,0,6.4910465
42.09531,6.78232998,6.49018741,0.540502153,6.49018741,0,6.49018741
42.105801,6.244998,6.48932777,-0.494297249,6.48932777,0,6.48932777
42.116293,6.08276253,6.48846743,-0.636949683,6.48846743,0,6.48846743
42.126784,6.244998,6.48760655,-0.492553094,6.48760655,0,6.48760655
42.137276,5.47722558,6.48674497,-1.00474842,6.48674497,0,6.48674497
42.147768,6.08276253,6.48588276,-0.634917499,6.48588276,0,6.48588276
42.158259,6.40312424,6.48502002,-0.286174386,6.48502002,0,6.48502002
42.168751,5.65685425,6.48415657,-0.909561609,6.48415657,0,6.48415657
42.179242,6,6.48329258,-0.695192479,6.48329258,0,6.48329258
42.189734,6.55743852,6.48242789,0.273880686,6.48242789,0,6.48242789
42.200226,6.08276253,6.48156258,-0.631506179,6.48156258,0,6.48156258
42.210717,6.08276253,6.48069674,-0.630820264,6.48069674,0,6.48069674
42.221209,6.63324958,6.47983018,0.391687881,6.47983018,0,6.47983018
42.2317,6.63324958,6.4789631,0.392793184,6.4789631,0,6.4789631
42.242192,6.8556546,6.4780953,0.61445854,6.4780953,0,6.4780953
42.252684,6.164414,6.47722689,-0.55929678,6.47722689,0,6.47722689
42.263175,5.09901951,6.47635794,-1.17360062,6.47635794,0,6.47635794
42.273667,6.70820393,6.47548829,0.4824061,6.47548829,0,6.47548829
42.284158,6.32455532,6.4746181,-0.387379371,6.4746181,0,6.4746181
42.29465,6.08276253,6.4737472,-0.625287673,6.4737472,0,6.4737472
42.305142,6.78232998,6.47287569,0.55628616,6.47287569,0,6.47287569
42.315633,6.244998,6.47200364,-0.476451092,6.47200364,0,6.47200364
42.326125,7.54983444,6.47113089,1.03860654,6.47113089,0,6.47113089
42.336616,6.78232998,6.4702576,0.558634391,6.4702576,0,6.4702576
42.347108,5.47722558,6.46938361,-0.996071299,6.46938361,0,6.46938361
42.3576,6.244998,6.468509,-0.472769498,6.468509,0,6.468509
42.368091,6.244998,6.46763385,-0.471843037,6.46763385,0,6.46763385
42.378583,5.19615242,6.466758,-1.12721142,6.466758,0,6.466758
42.389074,6.164414,6.46588161,-0.549060663,6.46588161,0,6.46588161
42.399566,6.08276253,6.46500453,-0.618257225,6.46500453,0,6.46500453
42.410058,6.8556546,6.46412682,0.625721809,6.46412682,0,6.46412682
42.420549,6.40312424,6.46324858,-0.245202648,6.46324858,0,6.46324858
42.431041,6.40312424,6.46236963,-0.243403766,6.46236963,0,6.46236963
42.441532,5.65685425,6.46149015,-0.897014995,6.46149015,0,6.46149015
42.452024,5.74456265,6.46060997,-0.846195793,6.46060997,0,6.46060997
42.462516,4.47213595,6.45972917,-1.40982028,6.45972917,0,6.45972917
42.473007,6,6.45884783,-0.677383074,6.45884783,0,6.45884783
42.483499,5.38516481,6.45796579,-1.03576106,6.45796579,0,6.45796579
42.49399,6.40312424,6.45708322,-0.232290723,6.45708322,0,6.45708322
42.504482,6.4807407,6.45619994,0.156654898,6.45619994,0,6.45619994
42.514974,6.40312424,6.45531605,-0.228455269,6.45531605,0,6.45531605
42.525465,6.70820393,6.45443162,0.50375819,6.45443162,0,6.45443162
42.535957,6.92820323,6.45354649,0.688953367,6.45354649,0,6.45354649
42.546448,6.164414,6.45266082,-0.536886227,6.45266082,0,6.45266082
42.55694,6.32455532,6.45177446,-0.356677917,6.45177446,0,6.45177446
42.567432,6,6.45088747,-0.67148155,6.45088747,0,6.45088747
42.577923,6.70820393,6.44999995,0.508137757,6.44999995,0,6.44999995
42.588415,6.08276253,6.44911173,-0.605267876,6.44911173,0,6.44911173
42.598906,6.164414,6.44822298,-0.532737247,6.44822298,0,6.44822298
42.609398,6.08276253,6.44733352,-0.603797144,6.44733352,0,6.44733352
42.61989,7.21110255,6.44644345,0.874447886,6.44644345,0,6.44644345
42.630381,6.32455532,6.44555284,-0.347846976,6.44555284,0,6.44555284
42.640873,6.40312424,6.44466153,-0.203806996,6.44466153,0,6.44466153
42.651364,6.55743852,6.44376969,0.337148095,6.44376969,0,6.44376969
42.661856,6.40312424,6.44287714,-0.199381303,6.44287714,0,6.44287714
42.672348,5.56776436,6.44198398,-0.934997121,6.44198398,0,6.44198398
42.682839,6.70820393,6.44109028,0.516830386,6.44109028,0,6.44109028
42.693331,6.4807407,6.44019589,0.201357423,6.44019589,0,6.44019589
42.703822,6,6.43930096,-0.662797825,6.43930096,0,6.43930096
42.714314,6.08276253,6.43840533,-0.596357942,6.43840533,0,6.43840533
42.724806,5.83095189,6.43750908,-0.77881781,6.43750908,0,6.43750908
42.735297,6.32455532,6.4366123,-0.334749122,6.4366123,0,6.4366123
42.745789,6,6.43571481,-0.660086973,6.43571481,0,6.43571481
42.75628,6.32455532,6.4348168,-0.332056436,6.4348168,0,6.4348168
42.766772,5.91607978,6.43391808,-0.719609822,6.43391808,0,6.43391808
42.777264,6.244998,6.43301874,-0.433613591,6.43301874,0,6.43301874
42.787755,6.08276253,6.43211888,-0.591063743,6.43211888,0,6.43211888
42.798247,5.47722558,6.43121831,-0.976725517,6.43121831,0,6.43121831
42.808738,6.63324958,6.43031721,0.450480155,6.43031721,0,6.43031721
42.81923,6.32455532,6.42941541,-0.323821074,6.42941541,0,6.42941541
42.829722,5.83095189,6.42851299,-0.773020759,6.42851299,0,6.42851299
42.840213,6.164414,6.42761004,-0.513026351,6.42761004,0,6.42761004
42.850705,6.08276253,6.42670639,-0.586467269,6.42670639,0,6.42670639
42.861196,6.164414,6.4258022,-0.511261383,6.4258022,0,6.4258022
42.871688,6.4807407,6.42489732,0.236312038,6.42489732,0,6.42489732
42.88218,5.65685425,6.42399182,-0.875863898,6.42399182,0,6.42399182
42.892671,7,6.42308578,0.759548692,6.42308578,0,6.42308578
42.903163,6.32455532,6.42217905,-0.312447962,6.42217905,0,6.42217905
42.913654,6.4807407,6.42127178,0.24386249,6.42127178,0,6.42127178
42.924146,7.21110255,6.42036382,0.889234915,6.42036382,0,6.42036382
42.934638,6.32455532,6.41945523,-0.308058292,6.41945523,0,6.41945523
42.945129,6.164414,6.41854612,-0.50411518,6.41854612,0,6.41854612
42.955621,6.40312424,6.4176363,-0.120466026,6.4176363,0,6.4176363
42.966112,7.14142843,6.41672595,0.851294587,6.41672595,0,6.41672595
42.976604,5.83095189,6.4158149,-0.764763369,6.4158149,0,6.4158149
42.987096,6.244998,6.41490324,-0.412195634,6.41490324,0,6.41490324
42.997587,6,6.41399104,-0.643421358,6.41399104,0,6.41399104
43.008079,6.63324958,6.41307815,0.46922429,6.41307815,0,6.41307815
43.01857,7.14142843,6.41216472,0.853969384,6.41216472,0,6.41216472
43.029062,6.4807407,6.41125059,0.263609765,6.41125059,0,6.41125059
43.039554,6.164414,6.41033584,-0.495905073,6.41033584,0,6.41033584
43.050045,6.78232998,6.40942057,0.610663093,6.40942057,0,6.40942057
43.060537,6.244998,6.40850459,-0.404359485,6.40850459,0,6.40850459
43.071028,5.83095189,6.40758809,-0.75936565,6.40758809,0,6.40758809
43.08152,7.28010989,6.40667088,0.934579592,6.40667088,0,6.40667088
43.092012,6.32455532,6.40575305,-0.284952154,6.40575305,0,6.40575305
43.102503,6.63324958,6.4048347,0.477927697,6.4048347,0,6.4048347
43.112995,6.70820393,6.40391564,0.551623325,6.40391564,0,6.40391564
43.123486,6.32455532,6.40299606,-0.280072731,6.40299606,0,6.40299606
43.133978,6.244998,6.40207577,-0.396330378,6.40207577,0,6.40207577
43.14447,5.83095189,6.40115486,-0.75511785,6.40115486,0,6.40115486
43.154961,6,6.40023343,-0.632640049,6.40023343,0,6.40023343
43.165453,7.14142843,6.3993113,0.861462206,6.3993113,0,6.3993113
43.175944,6.70820393,6.39838863,0.556610545,6.39838863,0,6.39838863
43.186436,5.91607978,6.39746527,-0.69381949,6.39746527,0,6.39746527
43.196928,6,6.39654129,-0.629715242,6.39654129,0,6.39654129
43.207419,5.74456265,6.39561678,-0.806879254,6.39561678,0,6.39561678
43.217911,6.244998,6.39469156,-0.386902527,6.39469156,0,6.39469156
43.228402,7.07106781,6.39376582,0.822983589,6.39376582,0,6.39376582
43.238894,6.55743852,6.39283938,0.4057082,6.39283938,0,6.39283938
43.249386,6.32455532,6.39191232,-0.259532275,6.39191232,0,6.39191232
43.259877,5.74456265,6.39098474,-0.804003787,6.39098474,0,6.39098474
43.270369,5.47722558,6.39005645,-0.95542183,6.39005645,0,6.39005645
43.28086,5.47722558,6.38912763,-0.95493563,6.38912763,0,6.38912763
43.291352,6.70820393,6.38819811,0.56569057,6.38819811,0,6.38819811
43.301844,6.92820323,6.38726798,0.735483007,6.38726798,0,6.38726798
43.312335,5.56776436,6.38633732,-0.904750216,6.38633732,0,6.38633732
43.322827,6.55743852,6.38540595,0.414768096,6.38540595,0,6.38540595
43.333318,6.40312424,6.38447406,0.136565654,6.38447406,0,6.38447406
43.34381,5.65685425,6.38354146,-0.852459509,6.38354146,0,6.38354146
43.354302,6.78232998,6.38260825,0.632235501,6.38260825,0,6.38260825
43.364793,6.70820393,6.38167452,0.571427523,6.38167452,0,6.38167452
43.375285,5.38516481,6.38074008,-0.997785183,6.38074008,0,6.38074008
43.385776,6.8556546,6.37980511,0.689818446,6.37980511,0,6.37980511
43.396268,6.32455532,6.37886944,-0.233053904,6.37886944,0,6.37886944
43.40676,6.32455532,6.37793316,-0.231036442,6.37793316,0,6.37793316
43.417251,5.91607978,6.37699635,-0.678908362,6.37699635,0,6.37699635
43.427743,7.07106781,6.37605883,0.833671985,6.37605883,0,6.37605883
43.438234,6.164414,6.37512079,-0.459028093,6.37512079,0,6.37512079
43.448726,6.70820393,6.37418205,0.577946263,6.37418205,0,6.37418205
43.459218,6,6.37324269,-0.610935914,6.37324269,0,6.37324269
43.469709,6.8556546,6.37230281,0.695235063,6.37230281,0,6.37230281
43.480201,6,6.37136222,-0.609394962,6.37136222,0,6.37136222
43.490692,6.164414,6.37042111,-0.453880055,6.37042111,0,6.37042111
43.501184,5.56776436,6.36947929,-0.895385351,6.36947929,0,6.36947929
43.511676,6.08276253,6.36853686,-0.534578646,6.36853686,0,6.36853686
43.522167,6.55743852,6.3675939,0.435711627,6.3675939,0,6.3675939
43.532659,6.08276253,6.36665024,-0.532811141,6.36665024,0,6.36665024
43.54315,6.8556546,6.36570606,0.699963244,6.36570606,0,6.36570606
43.553642,6.8556546,6.36476117,0.700637875,6.36476117,0,6.36476117
43.564134,6,6.36381566,-0.603171339,6.36381566,0,6.36381566
43.574625,5.74456265,6.36286964,-0.78632499,6.36286964,0,6.36286964
43.585117,7.34846923,6.3619229,0.993250383,6.3619229,0,6.3619229
43.595608,6.78232998,6.36097565,0.649118121,6.36097565,0,6.36097565
43.6061,6.78232998,6.36002769,0.649847901,6.36002769,0,6.36002769
43.616592,6,6.35907911,-0.599232103,6.35907911,0,6.35907911
43.627083,6.70820393,6.35813001,0.591670447,6.35813001,0,6.35813001
43.637575,6.32455532,6.35718021,-0.180623618,6.35718021,0,6.35718021
43.648066,4.89897949,6.35622989,-1.20716627,6.35622989,0,6.35622989
43.658558,6.08276253,6.35527885,-0.522030961,6.35527885,0,6.35527885
43.66905,5.83095189,6.35432721,-0.723446829,6.35432721,0,6.35432721
43.679541,6.4807407,6.35337504,0.356883255,6.35337504,0,6.35337504
43.690033,7.48331477,6.35242217,1.06343434,6.35242217,0,6.35242217
43.700524,6.244998,6.35146877,-0.326298595,6.35146877,0,6.35146877
43.711016,7,6.35051467,0.805906526,6.35051467,0,6.35051467
43.721508,6.08276253,6.34955996,-0.516524371,6.34955996,0,6.34955996
43.731999,6.4807407,6.34860472,0.363505129,6.34860472,0,6.34860472
43.742491,6.4807407,6.34764878,0.364817654,6.34764878,0,6.34764878
43.752982,6.63324958,6.34669231,0.53531044,6.34669231,0,6.34669231
43.763474,7,6.34573514,0.808866402,6.34573514,0,6.34573514
43.773966,7.07106781,6.34477736,0.85222676,6.34477736,0,6.34477736
43.784457,6.63324958,6.34381906,0.537987477,6.34381906,0,6.34381906
43.794949,7,6.34286005,0.810641693,6.34286005,0,6.34286005
43.80544,5.47722558,6.34190051,-0.929878992,6.34190051,0,6.34190051
43.815932,6.55743852,6.34094028,0.465293721,6.34094028,0,6.34094028
43.826424,5.83095189,6.33997943,-0.713461654,6.33997943,0,6.33997943
43.836915,6.08276253,6.33901805,-0.506216875,6.33901805,0,6.33901805
43.847407,6.70820393,6.33805598,0.608397859,6.33805598,0,6.33805598
43.857898,5.91607978,6.33709338,-0.648855605,6.33709338,0,6.33709338
43.86839,6.4807407,6.33613008,0.380277033,6.33613008,0,6.33613008
43.878882,6.244998,6.33516616,-0.300280139,6.33516616,0,6.33516616
43.889373,6.8556546,6.34469926,0.714811402,6.34469926,0,6.33420172
43.899865,6.40312424,6.34388772,0.243385539,6.34388772,0,6.33323658
43.910356,7,6.34307901,0.810506626,6.34307901,0,6.33227092
43.920848,6.4807407,6.34227308,0.372112372,6.34227308,0,6.33130455
43.93134,6.08276253,6.34147011,-0.508633053,6.34147011,0,6.33033757
43.941831,6,6.34067029,-0.583669673,6.34067029,0,6.32937006
43.952323,6.55743852,6.33987356,0.466438595,6.33987356,0,6.32840186
43.962814,6.32455532,6.3390802,-0.120519222,6.3390802,0,6.32743313
43.973306,6.40312424,6.33829018,0.254625327,6.33829018,0,6.3264637
43.983798,6.08276253,6.33750369,-0.504718893,6.33750369,0,6.32549365
43.994289,6.8556546,6.33672094,0.720370502,6.33672094,0,6.32452309
44.004781,6.4807407,6.33594191,0.380524358,6.33594191,0,6.32355182
44.015272,6,6.33516689,-0.578936,6.33516689,0,6.32258003
44.025764,6.8556546,6.33439588,0.721982495,6.33439588,0,6.32160753
44.036256,6.164414,6.33362909,-0.411357618,6.33362909,0,6.32063442
44.046747,5.74456265,6.33286677,-0.767009856,6.33286677,0,6.31966079
44.057239,6.40312424,6.33210891,0.266487003,6.33210891,0,6.31868646
44.06773,7,6.33135585,0.817706639,6.33135585,0,6.31771161
44.078222,7.07106781,6.33060761,0.860499972,6.33060761,0,6.31673605
44.088714,6.164414,6.32986444,-0.406755997,6.32986444,0,6.31575988
44.099205,6.244998,6.32912662,-0.290049337,6.32912662,0,6.3147832
44.109697,5.91607978,6.32839418,-0.642117123,6.32839418,0,6.3138058
44.120188,5.47722558,6.32766749,-0.922194078,6.32766749,0,6.31282789
44.13068,5.83095189,6.32694662,-0.704268931,6.32694662,0,6.31184928
44.141172,5.65685425,6.32623187,-0.818155009,6.32623187,0,6.31087005
44.151663,6.32455532,6.32552353,-0.0311161048,6.32552353,0,6.3098903
44.162155,6.78232998,6.32482173,0.676393567,6.32482173,0,6.30890985
44.172646,5.74456265,6.32412684,-0.761291135,6.32412684,0,6.30792888
44.183138,5.83095189,6.32343901,-0.701774261,6.32343901,0,6.3069472
44.19363,5.09901951,6.32275858,-1.1062274,6.32275858,0,6.30596492
44.204121,5.83095189,6.32208591,-0.700809544,6.32208591,0,6.30498211
44.214613,5.91607978,6.32142118,-0.636664276,6.32142118,0,6.3039986
44.225104,6.8556546,6.32076484,0.731361579,6.32076484,0,6.30301458
44.235596,6.08276253,6.3201171,-0.487190482,6.3201171,0,6.30202984
44.246088,6.92820323,6.31947836,0.78020822,6.31947836,0,6.3010445
44.256579,5.83095189,6.31884907,-0.698496369,6.31884907,0,6.30005864
44.267071,5.83095189,6.31822949,-0.698052717,6.31822949,0,6.29907207
44.277562,6.55743852,6.31762014,0.489712554,6.31762014,0,6.29808499
44.288054,6.244998,6.31702133,-0.268371628,6.31702133,0,6.29709721
44.298546,6.08276253,6.31643357,-0.48339532,6.31643357,0,6.29610881
44.309037,6,6.31585737,-0.562011898,6.31585737,0,6.29511989
44.319529,6.70820393,6.31529313,0.626825972,6.31529313,0,6.29413027
44.33002,5.38516481,6.31474147,-0.964145562,6.31474147,0,6.29314014
44.340512,5.56776436,6.31420283,-0.863966705,6.31420283,0,6.2921493
44.351004,5.74456265,6.31367783,-0.754397235,6.31367783,0,6.29115785
44.361495,6.63324958,6.31316714,0.565758292,6.31316714,0,6.29016588
44.371987,6.4807407,6.31267127,0.409962712,6.31267127,0,6.28917321
44.382478,6.70820393,6.31219101,0.629295575,6.31219101,0,6.28818003
44.39297,6.92820323,6.31172697,0.785160024,6.31172697,0,6.28718613
44.403462,6.8556546,6.31127993,0.737817505,6.31127993,0,6.28619163
44.413953,5.74456265,6.31085073,-0.752521152,6.31085073,0,6.28519662
44.424445,6.164414,6.31044012,-0.382133634,6.31044012,0,6.2842009
44.434936,5.83095189,6.31004905,-0.692168443,6.31004905,0,6.28320466
44.445428,5.56776436,6.30967838,-0.861344307,6.30967838,0,6.28220772
44.45592,6.244998,6.30932913,-0.253635827,6.30932913,0,6.28121017
44.466411,5.91607978,6.30900238,-0.626835381,6.30900238,0,6.2802121
44.476903,6.8556546,6.30869916,0.739564358,6.30869916,0,6.27921334
44.487394,6.92820323,6.30842071,0.787262676,6.30842071,0,6.27821405
44.497886,6.70820393,6.30816821,0.63248377,6.30816821,0,6.27721406
44.508378,6.40312424,6.30794302,0.308514536,6.30794302,0,6.27621347
44.518869,5.83095189,6.30774655,-0.690503187,6.30774655,0,6.27521236
44.529361,6.55743852,6.30758025,0.499858254,6.30758025,0,6.27421054
44.539852,6.55743852,6.30744575,0.499992775,6.30744575,0,6.27320822
44.550344,5.83095189,6.30734471,-0.690212149,6.30734471,0,6.27220518
44.560836,6.40312424,6.30727894,0.309588921,6.30727894,0,6.27120154
44.571327,6,6.30725037,-0.554301694,6.30725037,0,6.27019739
44.581819,7.28010989,6.30726104,0.986331003,6.30726104,0,6.26919253
44.59231,7.34846923,6.30731315,1.02037056,6.30731315,0,6.26818716
44.602802,6.32455532,6.30740905,0.130943775,6.30740905,0,6.26718109
44.613294,6.40312424,6.30755124,0.309148825,6.30755124,0,6.2661744
44.623785,6.4807407,6.3077424,0.41593064,6.3077424,0,6.26516721
44.634277,6.32455532,6.30798545,0.128724023,6.30798545,0,6.26415931
44.644768,6.63324958,6.30828343,0.570058026,6.30828343,0,6.2631509
44.65526,6,6.30863973,-0.555553532,6.30863973,0,6.26214179
44.665752,5.91607978,6.3090579,-0.626879666,6.3090579,0,6.26113206
44.676243,6.8556546,6.30954175,0.738994487,6.30954175,0,6.26012183
44.686735,6.08276253,6.31009552,-0.476794497,6.31009552,0,6.2591109
44.697226,6.40312424,6.3107236,0.303974732,6.3107236,0,6.25809945
44.707718,6.08276253,6.31143094,-0.478192859,6.31143094,0,6.2570873
44.71821,5.83095189,6.31222273,-0.693736864,6.31222273,0,6.25607454
44.728701,7.21110255,6.31310456,0.947627559,6.31310456,0,6.25506127
44.739193,6.63324958,6.31408275,0.564948521,6.31408275,0,6.2540473
44.749684,6.92820323,6.3151638,0.782968349,6.3151638,0,6.25303282
44.760176,5.47722558,6.31635517,-0.91604017,6.31635517,0,6.25201763
44.770668,6,6.31766468,-0.563617498,6.31766468,0,6.25100184
44.781159,5.91607978,6.31910083,-0.634839387,6.31910083,0,6.24998554
44.791651,7.14142843,6.3206733,0.90595537,6.3206733,0,6.24896853
44.802142,6.55743852,6.32239209,0.484815877,6.32239209,0,6.24795102
44.812634,6.40312424,6.32426882,0.28081207,6.32426882,0,6.2469328
44.823126,7.21110255,6.32631571,0.940631085,6.32631571,0,6.24591398
44.833617,6.32455532,6.32854616,-0.0631731286,6.32854616,0,6.24489465
44.844109,6.63324958,6.33097558,0.549794511,6.33097558,0,6.24387462
44.8546,6.32455532,6.33362002,-0.0952087129,6.33362002,0,6.24285407
44.865092,6.08276253,6.33649825,-0.50372187,6.33649825,0,6.24183283
44.875584,5.29150262,6.33963026,-1.02378105,6.33963026,0,6.24081098
44.886075,7.41619849,6.34303816,1.03593452,6.34303816,0,6.23978862
44.896567,6.78232998,6.34674752,0.659986716,6.34674752,0,6.23876556
44.907058,4.79583152,6.35078545,-1.24697792,6.35078545,0,6.23774199
44.91755,6.08276253,6.35518375,-0.521939863,6.35518375,0,6.23671772
44.928042,6.40312424,6.35997682,0.207719563,6.35997682,0,6.23569285
44.938533,6.164414,6.36520315,-0.448095024,6.36520315,0,6.23466747
44.949025,6.92820323,6.37090762,0.746522345,6.37090762,0,6.23364139
44.959516,6.40312424,6.37713865,0.161200452,6.37713865,0,6.2326148
44.970008,5.83095189,6.38395344,-0.743640736,6.38395344,0,6.23158751
44.9805,6,6.39141499,-0.625631671,6.39141499,0,6.23055961
44.990991,6.164414,6.39959484,-0.484954473,6.39959484,0,6.22953121
45.001483,6.70820393,6.40857714,0.547381763,6.40857714,0,6.22850211
45.011974,6.55743852,6.4184548,0.372805205,6.4184548,0,6.2274725
45.022466,5.74456265,6.42933847,-0.827511828,6.42933847,0,6.22644219
45.032958,6.63324958,6.44135279,0.438060256,6.44135279,0,6.22541128
45.043449,7.21110255,6.45464185,0.869747493,6.45464185,0,6.22437986
45.053941,6.08276253,6.46937719,-0.621783452,6.46937719,0,6.22334775
45.064432,6,6.48575349,-0.696960179,6.48575349,0,6.22231512
45.074924,5.91607978,6.50400541,-0.766763086,6.50400541,0,6.2212818
45.085416,6.08276253,6.52440454,-0.664561518,6.52440454,0,6.22024787
45.095907,7.14142843,6.54727225,0.770815269,6.54727225,0,6.21921345
45.106399,6.244998,6.57299906,-0.57271377,6.57299906,0,6.21817832
45.11689,6.92820323,6.60204589,0.571101862,6.60204589,0,6.21714268
45.127382,7.34846923,6.6349894,0.844677352,6.6349894,0,6.21610635
45.137874,6.244998,6.6725486,-0.653873538,6.6725486,0,6.21506941
45.148365,6.70820393,6.71567601,-0.0864411533,6.71567601,0,6.21403198
45.158857,7.34846923,6.76573975,0.763367197,6.76573975,0,6.21299384
45.169348,6.8556546,6.82482446,0.175585124,6.82482446,0,6.2119552
45.17984,7.41619849,6.89638888,0.720978231,6.89638888,0,6.21091586
45.190332,6.8556546,6.98630343,-0.361453774,6.98630343,0,6.20987592
45.200823,7.28010989,7.10452092,0.419033379,7.10452092,0,6.20883548
45.211315,5.83095189,7.26729263,-1.19847434,7.26729263,0,6.20779434
45.221806,7.74596669,7.4991807,0.496775597,7.4991807,0,6.20675269
45.232298,8.83176087,7.83378925,0.998985296,7.83378925,0,6.20571035
45.24279,7.87400787,8.31070041,-0.660827164,8.31070041,0,6.20466741
45.253281,9.16515139,8.96763226,0.444431239,8.96763226,0,6.20362397
45.263773,9.79795897,9.82924737,-0.176885258,9.82924737,0,6.20257983
45.274264,10.6301458,10.8960681,-0.515676485,10.8960681,0,6.20153519
45.284756,11.9582607,12.1396817,-0.425935356,12.1396817,0,6.20048985
45.295248,13.2287566,13.5029136,-0.523600044,13.5029136,0,6.19944391
45.305739,12.9614814,14.9045557,-1.393942,14.9045557,0,6.19839747
45.316231,15.7797338,16.2442846,-0.681579575,16.2442846,0,6.19735033
45.326722,17.4928557,17.4043349,0.29752435,17.4043349,0,6.1963027
45.337214,18.5202592,18.2556608,0.514391254,18.2556608,0,6.19525437
45.347706,19.3390796,18.6777959,0.813193537,18.6777959,0,6.19420544
45.358197,20.0997512,18.6006284,1.22438672,18.6006284,0,6.19315601
45.368689,18.8679623,18.0383304,0.910841322,18.0383304,0,6.19210588
45.37918,17.2626765,17.081169,0.426037,17.081169,0,6.19105526
45.389672,15.6204994,15.854614,-0.483853945,15.854614,0,6.19000394
45.400164,14.106736,14.4849897,-0.615023372,14.4849897,0,6.18895202
45.410655,12.8840987,13.0849072,-0.448116586,13.0849072,0,6.1878996
45.421147,11.2694277,11.7490893,-0.692576105,11.7490893,0,6.18684649
45.431638,10.6301458,10.5521153,0.279339509,10.5521153,0,6.18579288
45.44213,9.59166305,9.54264712,0.221395399,9.54264712,0,6.18473858
45.452622,8.36660027,8.740586,-0.611543733,8.740586,0,6.18368368
45.463113,7.93725393,8.13754586,-0.447539865,8.13754586,0,6.18262828
45.473605,6.92820323,7.7039483,-0.880763912,7.7039483,0,6.18157219
45.484096,7.28010989,7.40070256,-0.347264561,7.40070256,0,6.1805156
45.494588,7.28010989,7.18948574,0.301038454,7.18948574,0,6.17945832
45.50508,7.21110255,7.03935993,0.414418411,7.03935993,0,6.17840044
45.515571,7.34846923,6.92836298,0.648156035,6.92836298,0,6.17734207
45.526063,6.55743852,6.84229651,-0.533720888,6.84229651,0,6.176283
45.536554,6.78232998,6.77259103,0.0986861148,6.77259103,0,6.17522344
45.547046,7.93725393,6.7141892,1.10592257,6.7141892,0,6.17416319
45.557538,6.63324958,6.66411819,-0.175694659,6.66411819,0,6.17310234
45.568029,5.29150262,6.62054146,-1.15283947,6.62054146,0,6.172041
45.578521,6.4807407,6.58222858,-0.318571626,6.58222858,0,6.17097896
45.589012,6.92820323,6.54830939,0.616355284,6.54830939,0,6.16991643
45.599504,6.40312424,6.51810516,-0.339088367,6.51810516,0,6.16885321
45.609996,6,6.49108196,-0.700772404,6.49108196,0,6.16778939
45.620487,6.8556546,6.46680139,0.62358096,6.46680139,0,6.16672508
45.630979,5.91607978,6.44489212,-0.727194839,6.44489212,0,6.16566008
45.64147,6.70820393,6.42505054,0.532121591,6.42505054,0,6.16459459
45.651962,5.91607978,6.40701264,-0.700666011,6.40701264,0,6.1635284
45.662454,6.164414,6.3905593,-0.475547367,6.3905593,0,6.16246162
45.672945,5.38516481,6.37550314,-0.995157441,6.37550314,0,6.16139436
45.683437,6,6.36167941,-0.601397882,6.36167941,0,6.1603264
45.693928,6.4807407,6.34895144,0.363027902,6.34895144,0,6.15925795
45.70442,7.21110255,6.33719631,0.934829526,6.33719631,0,6.15818881
45.714912,6,6.32631075,-0.57123616,6.32631075,0,6.15711907
45.725403,6.55743852,6.31620466,0.491155641,6.31620466,0,6.15604885
45.735895,5.09901951,6.30679655,-1.0989891,6.30679655,0,6.15497794
45.746386,6.08276253,6.29801848,-0.463956842,6.29801848,0,6.15390654
45.756878,6.63324958,6.28980743,0.586039374,6.28980743,0,6.15283445
45.76737,6.40312424,6.28211015,0.347870785,6.28211015,0,6.15176177
45.777861,6.32455532,6.27487944,0.222880872,6.27487944,0,6.1506886
45.788353,6.8556546,6.26807142,0.766539746,6.26807142,0,6.14961474
45.798844,6.4807407,6.26164962,0.468071654,6.26164962,0,6.14854039
45.809336,4.89897949,6.25557913,-1.16473158,6.25557913,0,6.14746536
45.819828,6.40312424,6.24983044,0.391527519,6.24983044,0,6.14638973
45.830319,5.91607978,6.24437707,-0.572972326,6.24437707,0,6.14531363
45.840811,6.164414,6.23919373,-0.273458822,6.23919373,0,6.14423683
45.851302,6.92820323,6.2342596,0.833032792,6.2342596,0,6.14315954
45.861794,6.32455532,6.22955405,0.308222765,6.22955405,0,6.14208157
45.872286,6.55743852,6.22505977,0.576522983,6.22505977,0,6.14100301
45.882777,6.4807407,6.22076107,0.509881971,6.22076107,0,6.13992397
45.893269,6.63324958,6.21664251,0.645451058,6.21664251,0,6.13884423
45.90376,7.07106781,6.2126916,0.926485948,6.2126916,0,6.13776402
45.914252,6.32455532,6.20889549,0.340087973,6.20889549,0,6.13668311
45.924744,6.08276253,6.20524355,-0.349972878,6.20524355,0,6.13560162
45.935235,6.4807407,6.20172602,0.528218398,6.20172602,0,6.13451965
45.945727,6.32455532,6.19833304,0.355277757,6.19833304,0,6.13343699
45.956218,5.19615242,6.19505679,-0.999452035,6.19505679,0,6.13235385
45.96671,7.07106781,6.19188892,0.937645395,6.19188892,0,6.13127002
45.977202,6.92820323,6.18882263,0.859872434,6.18882263,0,6.13018561
45.987693,5.38516481,6.18585163,-0.894811056,6.18585163,0,6.12910072
45.998185,6.63324958,6.18296934,0.67102924,6.18296934,0,6.12801514
46.008676,7.28010989,6.18017073,1.04877984,6.18017073,0,6.12692908
46.019168,6.40312424,6.17745013,0.475051689,6.17745013,0,6.12584234
46.02966,6,6.17480305,-0.418094549,6.17480305,0,6.12475501
46.040151,6.78232998,6.17222533,0.781091959,6.17222533,0,6.1236672
46.050643,6.4807407,6.1697124,0.557699107,6.1697124,0,6.12257871
46.061134,6.8556546,6.16726095,0.829694913,6.16726095,0,6.12148974
46.071626,5.91607978,6.16486699,-0.498785734,6.16486699,0,6.12040009
46.082118,6.4807407,6.16252748,0.564103903,6.16252748,0,6.11930985
46.092609,6.8556546,6.1602396,0.833915463,6.1602396,0,6.11821914
46.103101,6,6.15800006,-0.397492219,6.15800006,0,6.11712774
46.113592,6.40312424,6.15580665,0.49731035,6.15580665,0,6.11603587
46.124084,6.78232998,6.15365648,0.792889341,6.15365648,0,6.11494331
46.134576,6.63324958,6.15154743,0.694047655,6.15154743,0,6.11385017
46.145067,7.21110255,6.14947756,1.03035188,6.14947756,0,6.11275656
46.155559,6.8556546,6.14744443,0.841552237,6.14744443,0,6.11166227
46.16605,6.4807407,6.14544655,0.579045896,6.14544655,0,6.1105675
46.176542,6.08276253,6.14348175,-0.246412696,6.14348175,0,6.10947205
46.187034,6.32455532,6.14154855,0.427792904,6.14154855,0,6.10837602
46.197525,5.74456265,6.13964557,-0.628556225,6.13964557,0,6.10727951
46.208017,5.83095189,6.13777098,-0.553912526,6.13777098,0,6.10618233
46.218508,6.70820393,6.13592374,0.756492029,6.13592374,0,6.10508467
46.229,5.74456265,6.1341022,-0.62413104,6.1341022,0,6.10398633
46.239492,5.91607978,6.13230531,-0.465000564,6.13230531,0,6.10288742
46.249983,6.32455532,6.13053207,0.440480703,6.13053207,0,6.10178803
46.260475,6.63324958,6.12878106,0.710259475,6.12878106,0,6.10068797
46.270966,5.83095189,6.12705158,-0.544150423,6.12705158,0,6.09958743
46.281458,6.244998,6.12534232,0.345912819,6.12534232,0,6.09848621
46.29195,6.32455532,6.12365253,0.448221807,6.12365253,0,6.09738442
46.302441,6.92820323,6.1219815,0.897898506,6.1219815,0,6.09628216
46.312933,6.32455532,6.12032809,0.451915071,6.12032809,0,6.09517922
46.323424,6.4807407,6.11869182,0.601704972,6.11869182,0,6.09407581
46.333916,6.4807407,6.11707166,0.603049781,6.11707166,0,6.09297172
46.344408,6.8556546,6.11546705,0.86034153,6.11546705,0,6.09186706
46.354899,5.83095189,6.11387748,-0.531907501,6.11387748,0,6.09076193
46.365391,6.63324958,6.11230202,0.721766968,6.11230202,0,6.08965613
46.375882,6.164414,6.11074037,0.231675697,6.11074037,0,6.08854986
46.386374,5.74456265,6.10919167,-0.603845196,6.10919167,0,6.08744291
46.396866,7,6.10765551,0.944639873,6.10765551,0,6.08633539
46.407357,6.244998,6.10613154,0.372647905,6.10613154,0,6.0852274
46.417849,6.4807407,6.10461897,0.613287643,6.10461897,0,6.08411874
46.42834,6.08276253,6.10311762,-0.142671257,6.10311762,0,6.08300961
46.438832,7.07106781,6.10162677,0.984601974,6.10162677,0,6.08189981
46.449324,7.54983444,6.10014613,1.20403003,6.10014613,0,6.08078944
46.459815,6.32455532,6.09867544,0.475268214,6.09867544,0,6.0796786
46.470307,5.83095189,6.09721405,-0.516005963,6.09721405,0,6.07856709
46.480798,6.70820393,6.09576185,0.782586787,6.09576185,0,6.07745512
46.49129,6.40312424,6.09431823,0.555703165,6.09431823,0,6.07634247
46.501782,5.09901951,6.09288299,-0.996927014,6.09288299,0,6.07522926
46.512273,6.8556546,6.09145594,0.874184572,6.09145594,0,6.07411558
46.522765,6.70820393,6.0900365,0.786236244,6.0900365,0,6.07300123
46.533256,6.55743852,6.08862466,0.684699832,6.08862466,0,6.07188642
46.543748,6.40312424,6.08721988,0.5620537,6.08721988,0,6.07077094
46.55424,6.244998,6.085822,0.398968665,6.085822,0,6.0696549
46.564731,6.4807407,6.08443092,0.629531394,6.08443092,0,6.06853839
46.575223,5.91607978,6.08304612,-0.408615151,6.08304612,0,6.06742121
46.585714,6.164414,6.08166764,0.287656676,6.08166764,0,6.06630357
46.596206,6.55743852,6.08029498,0.690755778,6.08029498,0,6.06518527
46.606698,5.83095189,6.07892806,-0.497972054,6.07892806,0,6.0640664
46.617189,6.70820393,6.07756681,0.794126643,6.07756681,0,6.06294707
46.627681,6.92820323,6.07621076,0.923034381,6.07621076,0,6.06182707
46.638172,7.68114575,6.07485999,1.26739329,6.07485999,0,6.06070662
46.648664,5.91607978,6.07351405,-0.396779877,6.07351405,0,6.05958549
46.659156,7.14142843,6.07217291,1.03404812,6.07217291,0,6.05846381
46.669647,6.70820393,6.07083651,0.798352944,6.07083651,0,6.05734167
46.680139,6.40312424,6.06950444,0.577598298,6.06950444,0,6.05621886
46.69063,6.32455532,6.06817681,0.506338338,6.06817681,0,6.0550956
46.701122,6.78232998,6.0668532,0.845858607,6.0668532,0,6.05397167
46.711614,5,6.0655336,-1.03224687,6.0655336,0,6.05284718
46.722105,6.70820393,6.06421801,0.802487338,6.06421801,0,6.05172224
46.732597,6.63324958,6.06290602,0.755210937,6.06290602,0,6.05059663
46.743088,6.08276253,6.06159777,0.14548112,6.06159777,0,6.04947057
46.75358,6.4807407,6.06029289,0.648419469,6.06029289,0,6.04834384
46.764072,6.164414,6.05899138,0.324688506,6.05899138,0,6.04721656
46.774563,6.08276253,6.05769324,0.158332838,6.05769324,0,6.04608883
46.785055,6.32455532,6.05639813,0.517838962,6.05639813,0,6.04496043
46.795546,6,6.05510618,-0.234747055,6.05510618,0,6.04383158
46.806038,6.8556546,6.05381704,0.895453828,6.05381704,0,6.04270207
46.81653,5.19615242,6.05253074,-0.925407112,6.05253074,0,6.041572
46.827021,6.08276253,6.04044149,0.205720782,6.04044149,0,6.04044149
46.837513,6.32455532,6.03931031,0.534083334,6.03931031,0,6.03931031
46.848004,6.244998,6.03817869,0.454773911,6.03817869,0,6.03817869
46.858496,6.8556546,6.0370464,0.904769694,6.0370464,0,6.0370464
46.868988,7.34846923,6.03591356,1.14566822,6.03591356,0,6.03591356
46.879479,6.164414,6.03478028,0.36004684,6.03478028,0,6.03478028
46.889971,6.55743852,6.03364633,0.723734893,6.03364633,0,6.03364633
46.900462,6.78232998,6.03251194,0.865920345,6.03251194,0,6.03251194
46.910954,5.47722558,6.03137689,-0.744413402,6.03137689,0,6.03137689
46.921446,6.70820393,6.03024129,0.823384872,6.03024129,0,6.03024129
46.931937,6.55743852,6.02910524,0.726865383,6.02910524,0,6.02910524
46.942429,6.244998,6.02796854,0.465864211,6.02796854,0,6.02796854
46.95292,6.40312424,6.02683139,0.613427134,6.02683139,0,6.02683139
46.963412,6.08276253,6.02569358,0.238891075,6.02569358,0,6.02569358
46.973904,6.164414,6.02455523,0.373976967,6.02455523,0,6.02455523
46.984395,5.56776436,6.02341644,-0.675020054,6.02341644,0,6.02341644
46.994887,6.08276253,6.02227699,0.245938092,6.02227699,0,6.02227699
47.005378,6,6.02113709,-0.14538602,6.02113709,0,6.02113709
47.01587,5.83095189,6.01999655,-0.434792655,6.01999655,0,6.01999655
47.026362,6.08276253,6.01885545,0.25279849,6.01885545,0,6.01885545
47.036853,5.83095189,6.01771392,-0.432159724,6.01771392,0,6.01771392
47.047345,5.83095189,6.01657174,-0.430836211,6.01657174,0,6.01657174
47.057836,6.78232998,6.01542911,0.875728766,6.01542911,0,6.01542911
47.068328,7.07106781,6.03664036,1.01706807,6.03664036,0,6.01428583
47.07882,6.40312424,6.03584766,0.60603348,6.03584766,0,6.01314201
47.089311,6.92820323,6.03506276,0.945061096,6.03506276,0,6.01199775
47.099803,7.14142843,6.03428576,1.05220847,6.03428576,0,6.01085284
47.110294,6.164414,6.03351708,0.361796794,6.03351708,0,6.0097075
47.120786,6.4807407,6.03275687,0.669315942,6.03275687,0,6.0085615
47.131278,6.40312424,6.03200548,0.609195172,6.03200548,0,6.00741496
47.141769,6.78232998,6.03126329,0.866641038,6.03126329,0,6.00626799
47.152261,6.08276253,6.03053049,0.228543307,6.03053049,0,6.00512037
47.162752,6.40312424,6.02980753,0.610996488,6.02980753,0,6.00397231
47.173244,7.34846923,6.02909463,1.14864033,6.02909463,0,6.00282361
47.183736,6.164414,6.02839221,0.368811327,6.02839221,0,6.00167436
47.194227,6.164414,6.02770071,0.369747602,6.02770071,0,6.00052469
47.204719,6.08276253,6.0270204,0.236097711,6.0270204,0,5.99937437
47.21521,5.74456265,6.02635181,-0.530838168,6.02635181,0,5.99822361
47.225702,5.74456265,6.02569523,-0.530219371,6.02569523,0,5.99707221
47.236194,5.91607978,6.02505117,-0.330108148,6.02505117,0,5.99592028
47.246685,7.34846923,6.02442016,1.15067331,6.02442016,0,5.99476791
47.257177,5.38516481,6.02380256,-0.799148141,6.02380256,0,5.9936149
47.267668,6,6.02319899,-0.152312133,6.02319899,0,5.99246146
47.27816,5.29150262,6.02260986,-0.855048089,6.02260986,0,5.99130738
47.288652,6,6.02203578,-0.148444533,6.02203578,0,5.99015276
47.299143,6.63324958,6.02147738,0.782158677,6.02147738,0,5.98899772
47.309635,6.40312424,6.02093517,0.618214418,6.02093517,0,5.98784204
47.320126,6.63324958,6.02040987,0.782840794,6.02040987,0,5.98668593
47.330618,6.55743852,6.01990205,0.733168788,6.01990205,0,5.98552917
47.34111,6.32455532,6.01941246,0.552397379,6.01941246,0,5.98437189
47.351601,7,6.01894185,0.990483794,6.01894185,0,5.98321418
47.362093,7,6.01849092,0.990711401,6.01849092,0,5.98205583
47.372584,6.244998,6.01806054,0.47637953,6.01806054,0,5.98089706
47.383076,6.244998,6.01765148,0.476808684,6.01765148,0,5.97973765
47.393568,6.8556546,6.01726465,0.915636363,6.01726465,0,5.97857771
47.404059,6.55743852,6.01690102,0.735212555,6.01690102,0,5.97741735
47.414551,6.244998,6.0165615,0.477950307,6.0165615,0,5.97625635
47.425042,6.40312424,6.01624718,0.621994422,6.01624718,0,5.97509494
47.435534,7,6.01595907,0.991988374,6.01595907,0,5.97393288
47.446026,7.14142843,6.01569834,1.06100428,6.01569834,0,5.9727703
47.456517,6.40312424,6.01546621,0.622621896,6.01546621,0,5.9716073
47.467009,5.56776436,6.0152639,-0.668954066,6.0152639,0,5.97044367
47.4775,6.32455532,6.01509278,0.556293571,6.01509278,0,5.96927962
47.487992,6.08276253,6.01495422,0.260400286,6.01495422,0,5.96811493
47.498484,6.63324958,6.01484972,0.786384042,6.01484972,0,5.96694972
47.508975,5.38516481,6.01478084,-0.793483483,6.01478084,0,5.9657841
47.519467,6.4807407,6.01474924,0.682635667,6.01474924,0,5.96461784
47.529958,5.74456265,6.01475667,-0.519801909,6.01475667,0,5.96345117
47.54045,6.08276253,6.01480498,0.260686685,6.01480498,0,5.96228386
47.550942,6.40312424,6.01489614,0.623079526,6.01489614,0,5.96111604
47.561433,6.92820323,6.01503221,0.955599823,6.01503221,0,5.9599478
47.571925,6.40312424,6.01521542,0.622823262,6.01521542,0,5.95877894
47.582416,5.91607978,6.01544808,-0.315227373,6.01544808,0,5.95760966
47.592908,6,6.01573272,-0.125430128,6.01573272,0,5.95643975
47.6034,6.244998,6.01607195,0.478462168,6.01607195,0,5.95526933
47.613891,6.244998,6.01646855,0.478047537,6.01646855,0,5.95409849
47.624383,5.74456265,6.01692558,-0.521884025,6.01692558,0,5.95292703
47.634874,6.08276253,6.01744614,0.255570722,6.01744614,0,5.95175516
47.645366,5.91607978,6.01803371,-0.319302253,6.01803371,0,5.95058266
47.655858,6,6.01869188,-0.13671825,6.01869188,0,5.94940965
47.666349,5.09901951,6.01942443,-0.959377357,6.01942443,0,5.94823623
47.676841,5.83095189,6.02023563,-0.435067507,6.02023563,0,5.94706219
47.687332,6.4807407,6.02112974,0.677946129,6.02112974,0,5.94588774
47.697824,5.38516481,6.02211167,-0.798089511,6.02211167,0,5.94471267
47.708316,6.63324958,6.0231864,0.781065412,6.0231864,0,5.94353708
47.718807,6.55743852,6.02435924,0.730122787,6.02435924,0,5.94236109
47.729299,6.8556546,6.02563625,0.911053427,6.02563625,0,5.94118448
47.73979,6.244998,6.02702345,0.46687744,6.02702345,0,5.94000747
47.750282,6.244998,6.02852786,0.465263515,6.02852786,0,5.93882984
47.760774,5.74456265,6.0301566,-0.534409911,6.0301566,0,5.93765169
47.771265,6.78232998,6.03191732,0.866263624,6.03191732,0,5.93647315
47.781757,6.55743852,6.03381881,0.723615725,6.03381881,0,5.93529398
47.792248,6.92820323,6.03586982,0.944634011,6.03586982,0,5.93411442
47.80274,6.32455532,6.03808062,0.535233313,6.03808062,0,5.93293424
47.813232,6.63324958,6.04046172,0.769927181,6.04046172,0,5.93175356
47.823723,7.34846923,6.04302443,1.14256063,6.04302443,0,5.93057247
47.834215,6.164414,6.04578186,0.344430168,6.04578186,0,5.92939077
47.844706,6.8556546,6.04874714,0.898280278,6.04874714,0,5.92820868
47.855198,6.40312424,6.05193576,0.592611577,6.05193576,0,5.92702596
47.86569,6.08276253,6.05536367,0.165526023,6.05536367,0,5.92584275
47.876181,5.09901951,6.05904823,-0.979810553,6.05904823,0,5.92465914
47.886673,6.164414,6.06300958,0.318440617,6.06300958,5.92347492,5.92347492
47.897164,6.63324958,6.0748926,0.747232884,6.06726816,5.93010115,5.9222903
47.907656,6.32455532,6.07953385,0.494996432,6.07184811,5.92898623,5.92110507
47.918148,6.08276253,6.08452204,-0.0419465645,6.07677465,5.92787174,5.91991934
47.928639,6.40312424,6.08988478,0.559677994,6.08207542,5.92675782,5.91873323
47.939131,7,6.09565417,0.950970995,6.08778254,5.92564426,5.91754649
47.949622,6.78232998,6.10186336,0.824904009,6.09392924,5.92453131,5.91635938
47.960114,5.74456265,6.10855155,-0.603314932,6.10055473,5.92341875,5.91517165
47.970606,6.4807407,6.11576027,0.6041361,6.1077006,5.92230673,5.91398342
47.981097,6.32455532,6.12353552,0.448352317,6.11541292,5.92119536,5.91279481
47.991589,6.4807407,6.13193097,0.590601155,6.12374544,5.92008445,5.91160558
48.00208,5.65685425,6.14100316,-0.6958081,6.13275475,5.91897423,5.91041598
48.012572,6.4807407,6.150819,0.574388104,6.14250788,5.91786452,5.90922576
48.023064,6.40312424,6.16145069,0.491603037,6.1530771,5.91675544,5.90803505
48.033555,7,6.17297919,0.909406848,6.16454352,5.91564712,5.90684396
48.044047,6.164414,6.1854994,-0.145208104,6.17700215,5.91453936,5.90565226
48.054538,7.28010989,6.19911354,1.03970974,6.19055538,5.91343241,5.90446018
48.06503,6.244998,6.21394307,0.176224099,6.20532482,5.91232607,5.9032675
48.075522,5.74456265,6.23012171,-0.696820685,6.2214444,5.91122047,5.90207432
48.086013,5.91607978,6.2478017,-0.575953053,6.23906658,5.91011574,5.90088077
48.096505,7.61577311,6.26716287,1.16129679,6.25837145,5.9090117,5.89968661
48.106996,7.07106781,6.2884038,0.884683001,6.27955788,5.90790859,5.89849207
48.117488,7.34846923,6.31176211,1.01818816,6.30286383,5.90680621,5.89729694
48.12798,6.32455532,6.33750575,-0.113799958,6.32855764,5.9057047,5.89610131
48.138471,6.55743852,6.36594527,0.437599417,6.3569503,5.9046042,5.89490531
48.148963,6.40312424,6.39745198,0.075314375,6.38841363,5.90350451,5.89370871
48.159454,7.21110255,6.43244761,0.88241427,6.42336995,5.90240588,5.89251173
48.169946,7.07106781,6.47144284,0.774354553,6.46233064,5.90130813,5.89131416
48.180438,7.34846923,6.51502961,0.912929143,6.50588841,5.90021139,5.8901161
48.190929,7.93725393,6.56390981,1.17189766,6.55474607,5.8991158,5.88891767
48.201421,7.68114575,6.61893821,1.03063453,6.60975945,5.89802118,5.88771864
48.211912,8.30662386,6.68112037,1.27495235,6.67193532,5.89692777,5.88651924
48.222404,7.68114575,6.7517068,0.964074138,6.74252566,5.8958354,5.88531924
48.232896,7.87400787,6.83222867,1.02067586,6.82306332,5.8947442,5.88411876
48.243387,7.54983444,6.92465492,0.790682943,6.91551935,5.89365431,5.88291792
48.253879,8.66025404,7.03171348,1.27614284,7.02262447,5.89256556,5.88171648
48.26437,8.18535277,7.15741505,1.01387264,7.14839337,5.89147819,5.88051467
48.274862,9.32737905,7.30833041,1.42093231,7.29940326,5.89039204,5.87931228
48.285354,8.30662386,7.49567323,0.900527974,7.48687835,5.88930724,5.8781094
48.295845,8.54400375,7.73884832,0.897304534,7.73024049,5.88822394,5.87690616
48.306337,9.94987437,8.06981246,1.3711535,8.06147073,5.88714198,5.87570232
48.316828,9.43398113,8.53651386,0.947347491,8.52854479,5.88606159,5.87449813
48.32732,11.2249722,9.20167489,1.42242654,9.19420334,5.88498262,5.87329334
48.337812,10.6770783,10.1318882,0.738369856,10.1250302,5.88390521,5.87208808
48.348303,11.045361,11.3778774,-0.57664236,11.3717049,5.88282951,5.87088246
48.358795,12.0415946,12.9537951,-0.955091887,12.948315,5.88175536,5.86967625
48.369286,15.2315462,14.8239825,0.638407205,14.8191417,5.88068302,5.86846968
48.379778,16.1864141,16.9033828,-0.84674008,16.8990911,5.87961232,5.86726253
48.39027,18.8944436,19.0629491,-0.410494133,19.0591016,5.87854342,5.8660549
48.400761,20.6639783,21.1350011,-0.686310999,21.1314924,5.87747647,5.86484692
48.411253,22.2710575,22.9113248,-0.80016709,22.9080521,5.87641132,5.86363835
48.421744,23,24.1435104,-1.06935046,24.1403699,5.87534823,5.86242943
48.432236,24.5560583,24.5952035,-0.197851465,24.5920859,5.87428705,5.86121992
48.442728,24.0208243,24.1610937,-0.374525537,24.157884,5.87322794,5.86000994
48.453219,23.2163735,22.9431846,0.52267483,22.9397659,5.87217106,5.85879962
48.463711,21.725561,21.1762851,0.741131487,21.1725386,5.87111626,5.85758871
48.474202,19.6977156,19.1087216,0.767459468,19.1045217,5.87006381,5.85637745
48.484694,16.643317,16.9493124,-0.553168536,16.9445223,5.86901358,5.85516561
48.495186,14.4913767,14.866354,-0.612353879,14.8608287,5.86796573,5.8539533
48.505677,12.8840987,12.9896011,-0.324811314,12.9832028,5.86692042,5.85274065
48.516169,11.6619038,11.4048855,0.506969678,11.3975115,5.86587753,5.85152741
48.52666,9,10.1491032,-1.07196233,10.1407175,5.86483733,5.85031383
48.537152,9.05538514,9.20924256,-0.392246636,9.19988961,5.86379968,5.84909968
48.547644,8.88819442,8.53558392,0.593810149,8.52537047,5.86276478,5.84788506
48.558135,7.68114575,8.06196576,-0.617106159,8.05102055,5.86173279,5.84667009
48.568627,7.48331477,7.72554435,-0.49216824,7.71398262,5.86070359,5.84545456
48.579118,7.41619849,7.47805325,-0.248706174,7.46596182,5.85967748,5.84423867
48.58961,7,7.2871123,-0.535828606,7.27455042,5.85865433,5.84302222
48.600102,6.63324958,7.13307508,-0.706983382,7.12008212,5.85763433,5.84180531
48.610593,7.14142843,7.0045258,0.370003548,6.99112867,5.85661767,5.84058805
48.621085,6.92820323,6.89477779,0.182826258,6.88099588,5.85560425,5.83937023
48.631576,7.07106781,6.79976042,0.520871764,6.78560875,5.85459436,5.83815206
48.642068,6.32455532,6.71671456,-0.62622619,6.70220514,5.85358791,5.83693333
48.65256,6.32455532,6.64365523,-0.564889286,6.62879794,5.85258509,5.83571414
48.663051,7,6.579042,0.648812761,6.56384499,5.85158611,5.83449462
48.673543,7.34846923,6.52161766,0.909313788,6.50608753,5.85059088,5.83327452
48.684034,5.91607978,6.47037248,-0.744508356,6.45451455,5.84959971,5.83205409
48.694526,6.8556546,6.42444764,0.656663506,6.40826604,5.84861253,5.8308331
48.705018,6.92820323,6.38313855,0.738284959,6.36663635,5.84762955,5.82961165
48.715509,6.92820323,6.34585107,0.763120016,6.32903047,5.84665098,5.82838987
48.726001,6.244998,6.31207209,-0.258986665,6.29493435,5.84567678,5.82716753
48.736492,7.28010989,6.28137862,0.999365431,6.26392433,5.84470725,5.82594486
48.746984,7.41619849,6.25339755,1.07833248,6.23562652,5.84374236,5.82472162
48.757476,6.244998,6.22781735,0.131074984,6.2097288,5.84278233,5.82349794
48.767967,7,6.20436928,0.891981343,6.18596189,5.8418274,5.82227392
48.778459,6.78232998,6.1828145,0.774283855,6.16408632,5.84087754,5.82104935
48.78895,7.28010989,6.16295411,1.0569559,6.14390278,5.8399331,5.81982445
48.799442,6.32455532,6.14460729,0.424202822,6.1252299,5.83899405,5.81859899
48.809934,7.87400787,6.12762153,1.32150912,6.10791479,5.83806065,5.81737309
48.820425,7.07106781,6.11186289,0.979390076,6.0918231,5.83713316,5.81614686
48.830917,6.40312424,6.09720919,0.553095879,6.0768322,5.83621159,5.81492007
48.841408,6.32455532,6.08355833,0.490914439,6.06283968,5.8352963,5.81369297
48.8519,6.08276253,6.07081481,0.10930562,6.04974959,5.83438731,5.8124653
48.862392,7.07106781,6.0588977,1.00606665,6.03748068,5.83348491,5.8112372
48.872883,7.28010989,6.04773488,1.11012387,6.02596053,5.83258938,5.81000878
48.883375,6.63324958,6.03725898,0.772004278,6.01512134,5.83170078,5.8087798
48.893866,6.78232998,6.0274138,0.868859125,6.00490667,5.83081949,5.80755051
48.904358,6.78232998,6.0181453,0.874176576,5.99526203,5.82994559,5.80632066
48.91485,6.63324958,6.00940768,0.789836632,5.98614136,5.82907939,5.80509038
48.925341,7,6.00115966,0.999420001,5.97750307,5.82822123,5.80385978
48.935833,6.4807407,5.99336176,0.698125302,5.96930726,5.8273712,5.80262863
48.946324,6.32455532,5.98598131,0.581871126,5.961521,5.82652973,5.80139717
48.956816,7.21110255,5.97898596,1.11000747,5.95411152,5.82569695,5.80016515
48.967308,5.74456265,5.97234845,-0.477269111,5.94705125,5.82487322,5.79893271
48.977799,6.92820323,5.96604398,0.980897166,5.94031507,5.82405893,5.79769996
48.988291,6.78232998,5.96004824,0.906797519,5.93387824,5.82325423,5.79646666
48.998782,6.55743852,5.95434142,0.776593269,5.92772064,5.8224596,5.79523304
49.009274,7.21110255,5.94890327,1.12347643,5.92182156,5.82167524,5.79399889
49.019766,6.4807407,5.9437169,0.732819076,5.91616378,5.82090157,5.79276431
49.030257,6.32455532,5.93876685,0.621118722,5.91073146,5.82013903,5.79152942
49.040749,5.83095189,5.93403759,-0.321069604,5.90550857,5.81938786,5.79029398
49.05124,6.08276253,5.92951668,0.391466286,5.90048234,5.8186486,5.78905824
49.061732,6.244998,5.92519103,0.565514784,5.89563913,5.81792154,5.78782196
49.072224,6.40312424,5.92104988,0.694315751,5.89096778,5.81720717,5.78658526
49.082715,6.40312424,5.91708332,0.697166352,5.88645795,5.81650602,5.78534826
49.093207,6.70820393,5.91328113,0.891584431,5.88209883,5.81581842,5.78411071
49.103698,6.55743852,5.9096354,0.804862179,5.87788208,5.815145,5.78287287
49.11419,6.55743852,5.90613743,0.807032278,5.87379839,5.81448614,5.78163448
49.124682,6.70820393,5.90278026,0.897453996,5.86984028,5.81384246,5.78039568
49.135173,6.78232998,5.89955746,0.939559748,5.86600082,5.81321456,5.77915658
49.145665,6.32455532,5.89646223,0.654288232,5.86227246,5.81260292,5.77791695
49.156156,6.164414,5.89348947,0.520504112,5.85864963,5.81200826,5.77667701
49.166648,5,5.89063339,-0.943733752,5.85512574,5.81143112,5.77543655
49.17714,6.32455532,5.8878895,0.660806946,5.85169568,5.81087223,5.77419567
49.187631,6.55743852,5.88525365,0.819868816,5.84835467,5.81033233,5.77295449
49.198123,6.244998,5.88272131,0.601894249,5.84509728,5.80981207,5.77171279
49.208614,5.74456265,5.88028931,-0.368411,5.84191971,5.80931232,5.77047079
49.219106,7,5.87795383,1.05926681,5.83881718,5.80883378,5.76922826
49.229598,6,5.87571207,0.352544928,5.83578611,5.80837736,5.76798533
49.240089,6,5.87356149,0.355581933,5.83282312,5.80794399,5.7667421
49.250581,6.244998,5.87149918,0.611145496,5.82992424,5.80753452,5.76549834
49.261072,5.91607978,5.86952333,0.215769449,5.8270868,5.80715,5.7642543
49.271564,6.55743852,5.86763157,0.830546179,5.82430726,5.8067914,5.76300973
49.282056,5.38516481,5.86582235,-0.693294705,5.82158305,5.80645984,5.76176476
49.292547,7,5.86409433,1.06578875,5.81891176,5.80615648,5.7605195
49.303039,5.74456265,5.86244586,-0.343341244,5.81629039,5.80588247,5.75927372
49.31353,6.08276253,5.86087616,0.471048164,5.81371707,5.80563912,5.75802765
49.324022,6.4807407,5.85938404,0.788261798,5.81118908,5.80542772,5.75678106
49.334514,6.244998,5.85796895,0.622116585,5.80870458,5.80524968,5.75553408
49.345005,5.91607978,5.85663053,0.243822171,5.80626183,5.8051065,5.75428681
49.355497,5.83095189,5.8553682,-0.156257188,5.80385848,5.8049997,5.75303902
49.365988,6.40312424,5.85418209,0.740906301,5.80149322,5.80493096,5.75179095
49.37648,6.244998,5.85307203,0.626039909,5.79916395,5.804902,5.75054237
49.386972,6.70820393,5.85203839,0.925292136,5.79686929,5.80491466,5.74929338
49.397463,6.55743852,5.85108172,0.840450359,5.79460799,5.80497087,5.74804413
49.407955,6.32455532,5.85020245,0.688732802,5.79237818,5.8050727,5.74679435
49.418446,7.68114575,5.84940159,1.35341943,5.79017894,5.80522231,5.7455443
49.428938,6.32455532,5.84868,0.689837169,5.7880086,5.80542202,5.74429374
49.43943,6.55743852,5.848039,0.842258582,5.78586615,5.80567426,5.74304279
49.449921,5.91607978,5.84748009,0.261915431,5.78375064,5.8059816,5.74179157
49.460413,6.32455532,5.8470048,0.691050302,5.78166058,5.80634684,5.74053983
49.470904,6.8556546,5.84661511,1.00450958,5.77959534,5.80677283,5.73928782
49.481396,6.164414,5.84631306,0.564004384,5.77755354,5.80726276,5.73803531
49.491888,6.32455532,5.84610104,0.691703894,5.77553443,5.80781989,5.73678241
49.502379,5.91607978,5.8459817,0.264760432,5.77353733,5.80844767,5.73552924
49.512871,6.244998,5.84595788,0.631696224,5.77156099,5.80914998,5.73427556
49.523362,6.70820393,5.84603278,0.92853172,5.769605,5.80993066,5.73302162
49.533854,5.56776436,5.84620988,-0.527679372,5.7676682,5.81079414,5.73176717
49.544346,6,5.846493,0.391799689,5.76575004,5.81174489,5.73051234
49.554837,6.244998,5.84688625,0.630960969,5.76385002,5.81278767,5.72925725
49.565329,5.47722558,5.84739423,-0.608414868,5.76196709,5.81392789,5.72800166
49.57582,6.4807407,5.84802175,0.795436324,5.76010099,5.8151709,5.7267458
49.586312,6.63324958,5.8487743,0.885706094,5.75825073,5.81652291,5.72548945
49.596804,6.244998,5.84965761,0.628760991,5.75641593,5.81799021,5.72423271
49.607295,5.74456265,5.85067791,-0.325753383,5.75459619,5.81957953,5.72297572
49.617787,6.92820323,5.85184223,1.0374782,5.75279063,5.82129856,5.72171823
49.628278,5.38516481,5.85315776,-0.684100105,5.7509991,5.82315493,5.72046049
49.63877,6.32455532,5.85463282,0.685508934,5.74922075,5.82515755,5.71920225
49.649262,6.8556546,5.85627604,0.99968923,5.74745531,5.8273155,5.71794363
49.659753,7.34846923,5.85809674,1.22080813,5.74570248,5.82963851,5.71668476
49.670245,5.91607978,5.86010558,0.236588675,5.7439615,5.83213779,5.7154254
49.680736,5.74456265,5.86231339,-0.343148282,5.7422323,5.83482451,5.71416579
49.691228,6.32455532,5.86473278,0.678102162,5.74051415,5.83771181,5.71290568
49.70172,6,5.86737682,0.364174656,5.73880684,5.84081311,5.71164521
49.712211,6.70820393,5.87025969,0.915392943,5.73711017,5.84414294,5.71038448
49.722703,7.07106781,5.87339769,1.09438116,5.73542346,5.84771808,5.70912327
49.733194,5.65685425,5.87680744,-0.468991672,5.73374671,5.85155541,5.70786181
49.743686,5.74456265,5.88050835,-0.368708159,5.73207928,5.85567483,5.70659987
49.754178,7.28010989,5.88452069,1.18135058,5.73042101,5.86009687,5.70533756
49.764669,6.08276253,5.88886652,0.440336247,5.72877178,5.86484394,5.704075
49.775161,6.55743852,5.89357135,0.814780448,5.72713097,5.86994194,5.70281196
49.785652,5.74456265,5.89866137,-0.392554099,5.72549863,5.87541733,5.70154868
49.796144,6.40312424,5.90416733,0.70636882,5.72387419,5.88130124,5.70028492
49.806636,6.92820323,5.88762631,1.02008672,5.6990208,5.88762631,5.6990208
49.817127,6,5.89442836,0.324917896,5.69775644,5.89442836,5.69775644
49.827619,5,5.90174893,-0.949604616,5.6964916,5.90174893,5.6964916
49.83811,5.09901951,5.90963114,-0.900339727,5.69522652,5.90963114,5.69522652
49.848602,5,5.91812578,-0.958188804,5.69396096,5.91812578,5.69396096
49.859094,5.91607978,5.92728685,-0.105863456,5.69269505,5.92728685,5.69269505
49.869585,6.4807407,5.93717421,0.737269614,5.6914289,5.93717421,5.6914289
49.880077,5.65685425,5.94785751,-0.539447182,5.69016228,5.94785751,5.69016228
49.890568,6.55743852,5.95941044,0.773322756,5.68889543,5.95941044,5.68889543
49.90106,5.65685425,5.97191997,-0.561307156,5.68762811,5.97191997,5.68762811
49.911552,5.65685425,5.98548036,-0.573259202,5.68636043,5.98548036,5.68636043
49.922043,7.07106781,6.00019769,1.03482855,5.68509252,6.00019769,5.68509252
49.932535,6.40312424,6.01619669,0.622035009,5.68382415,6.01619669,5.68382415
49.943026,6.4807407,6.03361371,0.668675548,5.68255554,6.03361371,5.68255554
49.953518,7.07106781,6.05261292,1.00918526,5.68128647,6.05261292,5.68128647
49.96401,6.8556546,6.07338102,0.88446231,5.68001706,6.07338102,5.68001706
49.974501,6.55743852,6.09613993,0.679189664,5.67874741,6.09613993,5.67874741
49.984993,6.164414,6.12116655,0.207960208,5.67747731,6.12116655,5.67747731
49.995484,7,6.14879597,0.922607192,5.67620698,6.14879597,5.67620698
50.005976,6.40312424,6.17946747,0.472923637,5.67493618,6.17946747,5.67493618
50.016468,6.164414,6.21374598,-0.22210802,5.67366505,6.21374598,5.67366505
50.026959,6.32455532,6.25238219,0.268650565,5.67239369,6.25238219,5.67239369
50.037451,7.21110255,6.29639698,0.956402411,5.67112188,6.29639698,5.67112188
50.047942,6.40312424,6.34714633,0.236596512,5.66984985,6.34714633,5.66984985
50.058434,6.164414,6.40646394,-0.491985712,5.66857736,6.40646394,5.66857736
50.068926,6.4807407,6.47674908,0.0631792183,5.66730453,6.47674908,5.66730453
50.079417,6.92820323,6.56108945,0.605899153,5.66603149,6.56108945,5.66603149
50.089909,7.41619849,6.66337011,0.867656832,5.66475799,6.66337011,5.66475799
50.1004,7.48331477,6.78822682,0.833719347,5.66348428,6.78822682,5.66348428
50.110892,7.07106781,6.94102386,0.360616069,5.66221012,6.94102386,5.66221012
50.121384,8.1240384,7.12752916,0.998253098,5.66093562,7.12752916,5.66093562
50.131875,7.61577311,7.35351605,0.512110392,5.65966092,7.35351605,5.65966092
50.142367,8.30662386,7.62426914,0.826047652,5.65838576,7.62426914,5.65838576
50.152858,8.18535277,7.94376731,0.491513444,5.6571104,7.94376731,5.6571104
50.16335,8.24621125,8.31423216,-0.260808178,5.65583459,8.31423216,5.65583459
50.173842,8.48528137,8.73539204,-0.500110658,5.65455845,8.73539204,5.65455845
50.184333,8.48528137,9.2041986,-0.847889869,5.65328211,9.2041986,5.65328211
50.194825,9.53939201,9.71483315,-0.418856943,5.65200532,9.71483315,5.65200532
50.205316,11.045361,10.2583918,0.88711283,5.65072833,10.2583918,5.65072833
50.215808,10.4403065,10.8232965,-0.618861837,5.6494509,10.8232965,5.6494509
50.2263,11.5758369,11.3948669,0.42540568,5.64817314,11.3948669,5.64817314
50.236791,11.1355287,11.9551862,-0.90534939,5.64689519,11.9551862,5.64689519
50.247283,12.7279221,12.4828414,0.495056174,5.64561679,12.4828414,5.64561679
50.257774,13.3041347,12.952386,0.593084092,5.6443382,12.952386,5.6443382
50.268266,13.7477271,13.3356188,0.641956587,5.64305916,13.3356188,5.64305916
50.278758,13.6747943,13.6041276,0.265832088,5.64177981,13.6041276,5.64177981
50.289249,14.106736,13.7345495,0.610070909,5.64050027,13.7345495,5.64050027
50.299741,13.453624,13.7143803,-0.510642986,5.63922029,13.7143803,5.63922029
50.310232,13.0384048,13.5455953,-0.712173082,5.63794012,13.5455953,5.63794012
50.320724,13.6747943,13.2440056,0.656344992,5.63665952,13.2440056,5.63665952
50.331216,12.8840987,12.8347772,0.222084401,5.6353786,12.8347772,5.6353786
50.341707,12.4096736,12.3466137,0.251117349,5.63409749,12.3466137,5.63409749
50.352199,12.2065556,11.8070516,0.632063276,5.63281596,11.8070516,5.63281596
50.36269,10.7238053,11.2405252,-0.718832315,5.63153424,11.2405252,5.63153424
50.373182,11.045361,10.6674422,0.614750993,5.63025208,10.6674422,5.63025208
50.383674,10.6301458,10.1048408,0.724779299,5.62896962,10.1048408,5.62896962
50.394165,10,9.56662488,0.658312325,5.62768698,9.56662488,5.62768698
50.404657,10.198039,9.06363921,1.06508207,5.62640391,9.06363921,5.62640391
50.415148,8.36660027,8.67300579,-0.553539094,5.73001741,8.60406372,5.62512067
50.42564,8.06225775,8.2664816,-0.451911335,5.73037011,8.19299207,5.62383699
50.436132,7,7.91081297,-0.954365218,5.73076059,7.83278031,5.62255302
50.446623,8.06225775,7.60556862,0.675787781,5.73118998,7.52308442,5.62126886
50.457115,7.34846923,7.34796434,0.0224697457,5.7316596,7.26119009,5.61998429
50.467606,6.55743852,7.13363996,-0.759079337,5.73217064,7.0427852,5.61869954
50.478098,6.32455532,6.95712059,-0.795339722,5.73272452,6.86241508,5.61741437
50.48859,6.78232998,6.81261435,-0.174024052,5.73332257,6.71428556,5.61612891
50.499081,6.244998,6.69446555,-0.67042341,5.73396618,6.59272067,5.61484327
50.509573,6.63324958,6.5975041,0.189064765,5.73465695,6.49251836,5.61355722
50.520064,5.91607978,6.51732503,-0.775400055,5.73539631,6.40923868,5.61227099
50.530556,7.54983444,6.45027564,1.04859849,5.73618602,6.33919326,5.61098435
50.541048,5.47722558,6.39347974,-0.957211662,5.7370277,6.27947462,5.60969742
50.551539,6.164414,6.34471747,-0.424621553,5.73792303,6.22783634,5.60841033
50.562031,6.164414,6.3022995,-0.371329371,5.73887399,6.18256667,5.60712282
50.572522,6.78232998,6.26498153,0.719269385,5.73988233,6.14240443,5.60583515
50.583014,5.29150262,6.23182662,-0.969703045,5.74095021,6.1063984,5.60454707
50.593506,6.164414,6.20214587,-0.194246936,5.74207964,6.07384911,5.6032587
50.603997,6.164414,6.17541956,-0.104907363,5.74327265,6.04422831,5.60197017
50.614489,5.47722558,6.1512415,-0.820984728,5.74453173,6.01712203,5.60068124
50.62498,6.55743852,6.12930122,0.65432202,5.74585901,5.99221412,5.59939215
50.635472,6.164414,6.10934063,0.234677159,5.74725722,5.96924038,5.59810265
50.645964,5.91607978,6.09115264,-0.418417087,5.74872879,5.94798891,5.59681287
50.656455,6.164414,6.07456269,0.299752088,5.75027629,5.92828064,5.59552294
50.666947,5.65685425,6.05941707,-0.634478386,5.75190282,5.90995665,5.5942326
50.677438,5.56776436,6.04558849,-0.691248236,5.75361104,5.89288568,5.59294211
50.68793,5.74456265,6.03296059,-0.537026948,5.75540433,5.8769463,5.59165122
50.698422,5.83095189,6.02143492,-0.436443606,5.7572858,5.86203585,5.59036006
50.708913,5.91607978,6.01092436,-0.30796846,5.75925863,5.84806303,5.58906875
50.719405,6.08276253,6.00134897,0.285330611,5.76132674,5.83494267,5.58777704
50.729896,6.08276253,5.99264156,0.300201548,5.76349347,5.8226036,5.58648518
50.740388,4.89897949,5.98473914,-1.04199792,5.76576312,5.8109774,5.58519293
50.75088,5.74456265,5.97758815,-0.482727155,5.76813961,5.80000598,5.58390041
50.761371,6.40312424,5.9711408,0.657254466,5.77062699,5.78963695,5.58260775
50.771863,6.40312424,5.96535286,0.661642935,5.77323024,5.77982016,5.5813147
50.782354,5.83095189,5.9601873,-0.359493265,5.77595363,5.77051404,5.5800215
50.792846,6.164414,5.95560928,0.456951557,5.77880265,5.76167744,5.57872791
50.803338,6.164414,5.95158936,0.461329209,5.78178231,5.75327559,5.57743406
50.813829,5.74456265,5.94810143,-0.451152724,5.78489783,5.74527683,5.57614007
50.824321,5.91607978,5.94512152,-0.170416359,5.78815561,5.73765013,5.5748457
50.834812,5.47722558,5.94262985,-0.682205451,5.79156118,5.7303701,5.57355119
50.845304,5.91607978,5.94060821,-0.156615537,5.79512162,5.72341083,5.57225629
50.855796,6.164414,5.93904156,0.474734072,5.79884344,5.71675061,5.57096114
50.866287,6.244998,5.93791696,0.554148932,5.80273345,5.71036952,5.56966585
50.876779,6.55743852,5.93722321,0.787537503,5.80679996,5.70424755,5.56837018
50.88727,6.40312424,5.93695144,0.682768484,5.81105024,5.6983686,5.56707439
50.897762,5.91607978,5.9370944,-0.144964188,5.81549354,5.69271569,5.56577821
50.908254,6.55743852,5.9376467,0.787268585,5.82013843,5.68727478,5.56448178
50.918745,6,5.93860443,0.247781288,5.82499394,5.68203292,5.56318523
50.929237,5.91607978,5.93996555,-0.154550199,5.83007099,5.67697669,5.56188829
50.939728,6.08276253,5.94172911,0.375544167,5.83537929,5.67209558,5.56059124
50.95022,5.65685425,5.94389623,-0.535762993,5.8409311,5.66737805,5.55929381
50.960712,5.09901951,5.94646904,-0.920570218,5.84673789,5.66281477,5.55799613
50.971203,6.4807407,5.94945093,0.728896266,5.85281178,5.65839703,5.55669833
50.981695,5.47722558,5.95284759,-0.689653549,5.85916741,5.65411556,5.55540016
50.992186,6.55743852,5.95666497,0.775095835,5.86581791,5.64996331,5.55410188
51.002678,5.47722558,5.9609118,-0.69547554,5.8727798,5.64593222,5.55280322
51.01317,7.28010989,5.96559727,1.14652197,5.8800687,5.64201587,5.55150432
51.023661,6,5.9707319,0.171079231,5.8877012,5.63820831,5.55020531
51.034153,5,5.97632924,-0.988093739,5.89569717,5.63450291,5.54890593
51.044644,6.4807407,5.98240246,0.705930758,5.90407481,5.63089487,5.54760644
51.055136,6.8556546,5.98896861,0.930959716,5.91285672,5.62737836,5.54630659
51.065628,5.56776436,5.99604481,-0.654431391,5.9220646,5.62394891,5.5450065
51.076119,5.65685425,6.00364988,-0.588893565,5.93172158,5.62060233,5.5437063
51.086611,6.40312424,6.01180676,0.625553735,5.9418552,5.61733378,5.54240574
51.097102,5,6.02053755,-1.01021659,5.95249115,5.61413991,5.54110508
51.107594,5.38516481,6.02986973,-0.802935194,5.96366102,5.61101642,5.53980405
51.118086,5.19615242,6.03983078,-0.918519655,5.97539559,5.60796012,5.5385028
51.128577,5.91607978,6.0504505,-0.366566112,5.98772782,5.60496803,5.53720144
51.139069,6.244998,6.06176446,0.428057864,6.00069673,5.6020365,5.53589973
51.14956,5.56776436,6.07380715,-0.711366843,6.01433944,5.5991632,5.53459792
51.160052,6.40312424,6.08662062,0.562586538,6.0287011,5.59634484,5.53329576
51.170544,4.79583152,6.10024715,-1.14211016,6.04382645,5.59357915,5.53199337
51.181035,4.12310563,6.11473249,-1.41125011,6.05976364,5.59086395,5.53069088
51.191527,5.47722558,6.13013069,-0.808025439,6.07656934,5.58819643,5.52938804
51.202018,6.55743852,6.14649475,0.641048966,6.09429857,5.58557496,5.52808511
51.21251,6.40312424,6.1638886,0.489117201,6.11301765,5.58299699,5.52678184
51.223002,6.32455532,6.18237712,0.377065246,6.13279337,5.58046084,5.52547834
51.233493,6.244998,6.20203079,0.207285336,6.15369805,5.57796494,5.52417475
51.243985,6,6.22293226,-0.472157025,6.17581646,5.57550707,5.52287082
51.254476,6.164414,6.24516392,-0.284165299,6.19923253,5.57308607,5.5215668
51.264968,6,6.26882431,-0.518482697,6.22404674,5.57069993,5.52026244
51.27546,6.32455532,6.29401475,0.174758595,6.25036196,5.56834742,5.51895786
51.285951,5.83095189,6.32084597,-0.699924333,6.27829037,5.56602737,5.5176532
51.296443,5.19615242,6.34944727,-1.07391566,6.30796303,5.563738,5.51634821
51.306934,5.38516481,6.37994995,-0.997389161,6.33951251,5.5614785,5.51504312
51.317426,6.08276253,6.41251007,-0.57423648,6.37309649,5.55924725,5.51373771
51.327918,6.40312424,6.44729064,-0.210158047,6.40887928,5.55704332,5.51243208
51.338409,6.78232998,6.48447111,0.545764489,6.44704155,5.55486586,5.51112638
51.348901,5.91607978,6.52426072,-0.779859564,6.48779408,5.55271341,5.50982034
51.359392,6.63324958,6.56687622,0.257630279,6.53135468,5.55058541,5.50851423
51.369884,5.65685425,6.61257426,-0.977609336,6.57798145,5.54848052,5.50720779
51.380376,6.40312424,6.66162762,-0.508432282,6.62794829,5.54639806,5.50590114
51.390867,6.08276253,6.71433937,-0.794718087,6.68155939,5.54433738,5.50459442
51.401359,6.55743852,6.77106325,-0.462195552,6.73916985,5.54229729,5.50328738
51.41185,6,6.83217355,-0.912235468,6.80115494,5.54027739,5.50198026
51.422342,6.55743852,6.89811311,-0.583673353,6.86795882,5.53827658,5.50067282
51.432834,6.4807407,6.96936155,-0.699014198,6.94006215,5.53629435,5.49936518
51.443325,6,7.04645802,-1.02296531,7.01800512,5.5343302,5.49805748
51.453817,7,7.13003421,-0.36060257,7.10242067,5.53238313,5.49674945
51.464308,7.54983444,7.22077399,0.573637904,7.19399357,5.5304529,5.49544136
51.4748,6.40312424,7.31948863,-0.957269237,7.29353633,5.52853855,5.49413296
51.485292,6.63324958,7.42707547,-0.890969071,7.40194724,5.52663971,5.49282436
51.495783,7.41619849,7.54455802,-0.358272988,7.52025074,5.52475602,5.4915157
51.506275,7.74596669,7.67314465,0.269855588,7.64965635,5.52288661,5.49020672
51.516766,7.61577311,7.81417749,-0.445426073,7.79150696,5.52103134,5.48889769
51.527258,7.14142843,7.96926134,-0.909853235,7.94740842,5.51918939,5.48758834
51.53775,7.81024968,8.14021874,-0.574429336,8.11918405,5.51736048,5.48627881
51.548241,8.54400375,8.32918056,0.463490217,8.30896544,5.51554435,5.48496922
51.558733,8.18535277,8.53873119,-0.594456409,8.51933792,5.51374025,5.48365933
51.569224,8.36660027,8.77192863,-0.636654037,8.75336019,5.51194811,5.48234938
51.579716,8.48528137,9.03273064,-0.739898143,9.0149914,5.51016721,5.48103912
51.590208,10.5356538,9.32638564,1.09966727,9.30948195,5.50839736,5.47972869
51.600699,9.2736185,9.66053292,-0.622024457,9.64447491,5.50663837,5.4784182
51.611191,10.6301458,10.0472753,0.763459581,10.0320804,5.50488956,5.47710742
51.621682,11.4017543,10.5063475,0.946259359,10.4920453,5.50315095,5.47579658
51.632174,12.2065556,11.0705256,1.0658471,11.0571644,5.50142188,5.47448545
51.642666,11.9582607,11.7916091,0.408229939,11.7792595,5.49970223,5.47317414
51.653157,14.3874946,12.745253,1.28149973,12.7340034,5.49799187,5.47186279
51.663649,15.5884573,14.0293744,1.2486324,14.0193106,5.49629019,5.47055114
51.67414,17.4355958,15.749958,1.29832114,15.7411295,5.49459724,5.46923945
51.684632,18.5741756,17.9964244,0.760099456,17.9888142,5.49291245,5.46792747
51.695124,22.3159136,20.8117703,1.22643522,20.8052877,5.49123573,5.46661532
51.705615,23.194827,24.1714506,-0.988242685,24.1659516,5.489567,5.46530313
51.716107,27.7128129,27.9761061,-0.513121049,27.9714247,5.4879057,5.46399066
51.726598,31.7175031,32.0520481,-0.578398668,32.0480214,5.48625194,5.46267814
51.73709,34.7562944,36.1621632,-1.18569337,36.1586457,5.48460519,5.46136534
51.747582,38.8973007,40.0120944,-1.05583793,40.008961,5.48296538,5.46005238
51.758073,42.2492603,43.2598446,-1.00527818,43.2569877,5.48133249,5.45873938
51.768565,45.2216762,45.5399009,-0.564114047,45.5372254,5.479706,5.4574261
51.779056,46.260134,46.5309754,-0.520424194,46.5283936,5.47808605,5.45611279
51.789548,46.4650406,46.0739331,0.625385881,46.071362,5.47647213,5.4547992
51.80004,44.4297198,44.247381,0.427011412,44.2447409,5.47486424,5.45348545
51.810531,41.9880936,41.3261978,0.813569783,41.3234098,5.47326236,5.45217168
51.821023,37.0540146,37.6673038,-0.783127806,37.6642867,5.47166602,5.45085763
51.831514,33.1058907,33.6244921,-0.720139869,33.6211581,5.47007537,5.44954356
51.842006,28.6705424,29.5092649,-0.915817929,29.505517,5.46848996,5.44822921
51.852498,24.5356883,25.5813807,-1.022591,25.577115,5.46690978,5.44691471
51.862989,21.330729,22.0391668,-0.841687492,22.0342813,5.46533486,5.44560019
51.873481,19.9499373,19.0097169,0.969649667,19.0041273,5.46376476,5.4442854
51.883972,16.9410743,16.546234,0.628363216,16.5398961,5.46219964,5.4429706
51.894464,15.0996689,14.62935,0.685798003,14.6222747,5.46063907,5.44165552
51.904956,13.3416641,13.18546,0.395226635,13.1777111,5.45908308,5.4403403
51.915447,12.3693169,12.112488,0.506782854,12.1041607,5.45753171,5.43902507
51.925939,10.7703296,11.3075374,-0.732944601,11.2987309,5.45598453,5.43770957
51.93643,10.6770783,10.6861362,-0.0951730416,10.6769355,5.45444174,5.43639405
51.946922,10.0995049,10.187505,-0.296648045,10.1779754,5.45290293,5.43507828
51.957414,8.60232527,9.77229257,-1.08165027,9.76248232,5.45136814,5.43376237
51.967905,8.83176087,9.41632891,-0.764570494,9.40627432,5.44983742,5.43244645
51.978397,7.74596669,9.10490103,-1.16573339,9.094631,5.44831037,5.43113027
51.988888,7.41619849,8.82895143,-1.18859284,8.81849045,5.44678719,5.42981409
51.99938,7.54983444,8.58236039,-1.01613284,8.57173018,5.44526751,5.42849765
52.009872,7.81024968,8.3607892,-0.741983503,8.35000967,5.44375136,5.42718108
52.020363,6.8556546,8.16088235,-1.14246564,8.14997196,5.44223882,5.4258645
52.030855,7.34846923,7.97986263,-0.794602667,7.96883853,5.44072951,5.42454768
52.041346,6.78232998,7.81547795,-1.01643887,7.80435614,5.43922363,5.42323085
52.051838,5.83095189,7.66575143,-1.35454772,7.65454676,5.43772083,5.42191378
52.06233,7,7.52903137,-0.727345426,7.51775766,5.43622115,5.42059658
52.072821,5.83095189,7.40388879,-1.25416781,7.39255881,5.43472468,5.41927938
52.083313,5.56776436,7.28904947,-1.31197756,7.27767504,5.43323106,5.41796194
52.093804,5.47722558,7.18344794,-1.30622447,7.17203996,5.43174049,5.4166445
52.104296,6.4807407,7.08611263,-0.778056512,7.07468114,5.43025264,5.41532682
52.114788,5.74456265,6.99622067,-1.11877523,6.98477488,5.42876756,5.41400902
52.125279,5.56776436,6.91304674,-1.15986309,6.90159514,5.42728535,5.41269124
52.135771,5.65685425,6.83592806,-1.08585165,6.82447841,5.42580565,5.41137321
52.146262,6.40312424,6.76430793,-0.600985604,6.75286734,5.42432868,5.41005519
52.156754,5.56776436,6.69766526,-1.06296797,6.68624024,5.42285411,5.40873694
52.167246,5.38516481,6.63555637,-1.11820909,6.62415284,5.42138202,5.40741858
52.177737,6.55743852,6.5775848,-0.14193757,6.56620819,5.41991249,5.40610023
52.188229,6.78232998,6.52338023,0.508871059,6.51203546,5.4184452,5.40478164
52.19872,4.89897949,6.47263175,-1.25445297,6.46132331,5.41698035,5.40346308
52.209212,6.40312424,6.42504098,-0.148043059,6.41377293,5.41551764,5.40214429
52.219704,6.55743852,6.38035356,0.42081464,6.36912959,5.41405714,5.40082539
52.230195,5.74456265,6.33833964,-0.770569264,6.32716308,5.41259894,5.39950651
52.240687,6.40312424,6.29877998,0.323023616,6.28765385,5.41114272,5.3981874
52.251178,6.164414,6.26149138,-0.311572422,6.25041838,5.40968872,5.39686832
52.26167,5.74456265,6.22629359,-0.694068399,6.21527617,5.40823661,5.39554902
52.272162,5.47722558,6.19303329,-0.8460542,6.18207363,5.40678648,5.39422961
52.282653,5.29150262,6.16157062,-0.932774357,6.15067068,5.40533843,5.39291024
52.293145,6,6.13176945,-0.363000626,6.12093097,5.40389215,5.39159064
52.303636,6.32455532,6.10351694,0.470147195,6.09274144,5.40244787,5.39027108
52.314128,5,6.07669922,-1.03764118,6.06598808,5.40100528,5.38895129
52.32462,5.47722558,6.05121994,-0.757624157,6.04057436,5.39956447,5.38763142
52.335111,6.08276253,6.02699053,0.236160972,6.01641154,5.39812554,5.38631157
52.345603,5.91607978,6.00392294,-0.29638346,5.99341145,5.39668819,5.38499152
52.356094,6.32455532,5.98194506,0.585329187,5.97150185,5.39525266,5.3836715
52.366586,5.83095189,5.96098221,-0.360597162,5.95060792,5.39381863,5.38235127
52.377078,5.83095189,5.94097165,-0.331692267,5.93066684,5.39238622,5.38103095
52.387569,5.47722558,5.92185537,-0.666805664,5.91162047,5.39095551,5.37971068
52.398061,5.19615242,5.90357441,-0.841083819,5.8934098,5.38952622,5.37839019
52.408552,5.29150262,5.88608127,-0.771089258,5.87598719,5.38809858,5.37706975
52.419044,6,5.8693253,0.361489555,5.85930197,5.38667229,5.37574911
52.429536,5.91607978,5.85326448,0.250629813,5.84331201,5.38524746,5.37442838
52.440027,5.74456265,5.83785968,-0.305445624,5.82797813,5.38382419,5.3731077
52.450519,5.83095189,5.82307026,0.0887785732,5.81325964,5.38240219,5.37178682
52.46101,6.08276253,5.8088641,0.523353061,5.79912435,5.38098169,5.370466
52.471502,5.74456265,5.79520595,-0.225040664,5.78553696,5.37956241,5.36914497
52.481994,6.08276253,5.78206692,0.548357194,5.77246856,5.37814444,5.36782386
52.492485,5.29150262,5.76942003,-0.691315709,5.75989209,5.37672791,5.36650282
52.502977,5,5.75723659,-0.870193423,5.74777886,5.37531252,5.36518157
52.513468,6.63324958,5.74549447,0.942207572,5.73610668,5.37389851,5.36386039
52.52396,5.29150262,5.73416858,-0.665331462,5.72485043,5.37248559,5.36253901
52.534452,5.19615242,5.72323875,-0.726007113,5.71398994,5.37107387,5.36121756
52.544943,5,5.71268611,-0.844207388,5.70350628,5.36966347,5.35989617
52.555435,6.78232998,5.70249009,1.03915345,5.69337887,5.36825409,5.3585746
52.565926,5.65685425,5.69263533,-0.18915889,5.68359234,5.36684598,5.35725309
52.576418,5.29150262,5.68310384,-0.625780485,5.67412867,5.36543885,5.35593139
52.58691,6.32455532,5.67388155,0.806643521,5.66497379,5.36403283,5.35460963
52.597401,6.08276253,5.66495538,0.646380037,5.65611457,5.36262801,5.35328794
52.607893,5.56776436,5.65631069,-0.297567355,5.6475364,5.36122412,5.35196607
52.618384,4.79583152,5.64793726,-0.923095734,5.63922901,5.3598214,5.35064426
52.628876,5.83095189,5.63982256,0.437183413,5.6311799,5.35841957,5.34932228
52.639368,5.74456265,5.63195752,0.335566869,5.62337997,5.35701874,5.34800024
52.649859,5.38516481,5.62433404,-0.489049311,5.61582111,5.35561903,5.34667827
52.660351,5.38516481,5.61694292,-0.481433389,5.60849413,5.35422016,5.34535613
52.670842,5.65685425,5.60977911,0.21696806,5.60139397,5.35282237,5.34403407
52.681334,6.32455532,5.60283621,0.849540528,5.59451424,5.35142539,5.34271183
52.691826,6.164414,5.59611168,0.753858293,5.58785239,5.35002933,5.34138954
52.702317,6,5.58140828,0.646986648,5.58140828,5.34006734,5.34006734
52.712809,5.09901951,5.57518387,-0.690046635,5.57518387,5.33874496,5.33874496
52.7233,5.65685425,5.56919072,0.296080275,5.56919072,5.33742267,5.33742267
52.733792,5.56776436,5.56345175,0.0656705194,5.56345175,5.33610021,5.33610021
52.744284,6,5.55801767,0.664817513,5.55801767,5.33477771,5.33477771
52.754775,6,5.55298513,0.668591707,5.55298513,5.3334553,5.3334553
52.765267,5.83095189,5.54852138,0.531441925,5.54852138,5.33213272,5.33213272
52.775758,5.83095189,5.54489065,0.534846937,5.54489065,5.33081023,5.33081023
52.78625,5.74456265,5.54245107,0.449568216,5.54245107,5.32948758,5.32948758
52.796742,6.08276253,5.54160882,0.735631507,5.54160882,5.3281649,5.3281649
52.807233,5.56776436,5.54270018,0.158316714,5.54270018,5.32684231,5.32684231
52.817725,5.74456265,5.54581291,0.445813566,5.54581291,5.32551956,5.32551956
52.828216,5.47722558,5.55056692,-0.270816078,5.55056692,5.32419691,5.32419691
52.838708,5.83095189,5.55587822,0.524474669,5.55587822,5.32287411,5.32287411
52.8492,5.09901951,5.55977881,-0.678792531,5.55977881,5.32155128,5.32155128
52.859691,5.29150262,5.55974061,-0.517916967,5.55974061,5.32022855,5.32022855
52.870183,5.29150262,5.55404053,-0.512384529,5.55404053,5.31890566,5.31890566
52.880674,5.83095189,5.5431423,0.536478883,5.5431423,5.31758289,5.31758289
52.891166,5.56776436,5.52924747,0.196257198,5.52924747,5.31625996,5.31625996
52.901658,5.65685425,5.51472942,0.376994465,5.51472942,5.31493701,5.31493701
52.912149,5.91607978,5.50121196,0.644102343,5.50121196,5.31361417,5.31361417
52.922641,5,5.48949074,-0.699636149,5.48949074,5.31229118,5.31229118
52.933132,4.69041576,5.47975032,-0.888445022,5.47975032,5.31096831,5.31096831
52.943624,6.244998,5.47178511,0.879325244,5.47178511,5.30964529,5.30964529
52.954116,5.19615242,5.46521353,-0.518711003,5.46521353,5.30832226,5.30832226
52.964607,5.19615242,5.45963275,-0.513303349,5.45963275,5.30699934,5.30699934
52.975099,5.09901951,5.45470841,-0.596396594,5.45470841,5.30567629,5.30567629
52.98559,5.83095189,5.45020645,0.617045736,5.45020645,5.30435335,5.30435335
52.996082,5.74456265,5.44597834,0.546428685,5.44597834,5.30303027,5.30303027
53.006574,6,5.44193878,0.747034951,5.44193878,5.30170719,5.30170719
53.017065,4.79583152,5.43804016,-0.801379209,5.43804016,5.30038423,5.30038423
53.027557,6.40312424,5.43425439,0.984311863,5.43425439,5.29906114,5.29906114
53.038048,4.58257569,5.4305655,-0.920863618,5.4305655,5.29773817,5.29773817
53.04854,5.83095189,5.42696149,0.635602394,5.42696149,5.29641507,5.29641507
53.059032,5.56776436,5.4234344,0.379907834,5.4234344,5.29509197,5.29509197
53.069523,5.56776436,5.419978,0.384429919,5.419978,5.293769,5.293769
53.080015,5.91607978,5.41658628,0.706748545,5.41658628,5.29244591,5.29244591
53.090506,5.38516481,5.4132554,-0.167602482,5.4132554,5.29112294,5.29112294
53.100998,5.83095189,5.40998091,0.648822766,5.40998091,5.28979985,5.28979985
53.11149,5.29150262,5.40675984,-0.339495539,5.40675984,5.28847677,5.28847677
53.121981,5.74456265,5.40358961,0.583928968,5.40358961,5.28715382,5.28715382
53.132473,5.09901951,5.40046705,-0.549042379,5.40046705,5.28583076,5.28583076
53.142964,4.89897949,5.39739049,-0.705982294,5.39739049,5.28450783,5.28450783
53.153456,5.29150262,5.39435728,-0.320709618,5.39435728,5.28318478,5.28318478
53.163948,4.69041576,5.28248896,-0.769462931,5.28248896,5.28186175,5.28186175
53.174439,5.29150262,5.28112543,0.101868487,5.28112543,5.28053886,5.28053886
53.184931,5.74456265,5.2797656,0.681760254,5.2797656,5.27921585,5.27921585
53.195422,5.38516481,5.27840927,0.326734659,5.27840927,5.27789299,5.27789299
53.205914,5.19615242,5.27705579,-0.284435165,5.27705579,5.27657003,5.27657003
53.216406,5.47722558,5.27570494,0.448910495,5.27570494,5.27524708,5.27524708
53.226897,5.29150262,5.27435658,0.130942896,5.27435658,5.27392428,5.27392428
53.237389,4.79583152,5.27301019,-0.690781201,5.27301019,5.27260137,5.27260137
53.24788,5,5.27166581,-0.521215706,5.27166581,5.27127861,5.27127861
53.258372,5.65685425,5.270323,0.621716373,5.270323,5.26995576,5.26995576
53.268864,6,5.26898172,0.854996071,5.26898172,5.26863292,5.26863292
53.279355,5.38516481,5.26764195,0.342816074,5.26764195,5.26731025,5.26731025
53.289847,5.56776436,5.2663033,0.549054697,5.2663033,5.26598747,5.26598747
53.300338,4.47213595,5.26496593,-0.890410003,5.26496593,5.26466485,5.26466485
53.31083,6.08276253,5.26362947,0.905059701,5.26362947,5.26334214,5.26334214
53.321322,5.47722558,5.26229396,0.463607175,5.26229396,5.26201946,5.26201946
53.331813,5,5.26095946,-0.510841912,5.26095946,5.26069693,5.26069693
53.342305,5,5.25962563,-0.509534721,5.25962563,5.25937432,5.25937432
53.352796,5.65685425,5.25829267,0.631317334,5.25829267,5.25805187,5.25805187
53.363288,5.65685425,5.25696027,0.632371708,5.25696027,5.25672934,5.25672934
53.37378,5.29150262,5.25562851,0.189404637,5.25562851,5.25540684,5.25540684
53.384271,5.56776436,5.25429746,0.559881155,5.25429746,5.25408451,5.25408451
53.394763,5.47722558,5.25296683,0.473559657,5.25296683,5.2527621,5.2527621
53.405254,6.63324958,5.25163683,1.17542024,5.25163683,5.25143985,5.25143985
53.415746,5.19615242,5.25030719,-0.232711776,5.25030719,5.25011753,5.25011753
53.426238,4.58257569,5.248978,-0.816334677,5.248978,5.24879525,5.24879525
53.436729,5.29150262,5.24764935,0.20941172,5.24764935,5.24747314,5.24747314
53.447221,5.38516481,5.24632098,0.372617541,5.24632098,5.24615096,5.24615096
53.457712,5.83095189,5.2449931,0.765479457,5.2449931,5.24482896,5.24482896
53.468204,5.09901951,5.24366544,-0.380323453,5.24366544,5.24350688,5.24350688
53.478696,5.29150262,5.24233812,0.221730693,5.24233812,5.24218485,5.24218485
53.489187,5.47722558,5.24101124,0.486018859,5.24101124,5.240863,5.240863
53.499679,5.56776436,5.23968454,0.572782527,5.23968454,5.23954109,5.23954109
53.51017,5.38516481,5.23835825,0.38315344,5.23835825,5.23821936,5.23821936
53.520662,5.83095189,5.2370321,0.770661917,5.2370321,5.23689756,5.23689756
53.531154,5.91607978,5.23570622,0.824847599,5.23570622,5.23557581,5.23557581
53.541645,4.79583152,5.23438071,-0.662230467,5.23438071,5.23425426,5.23425426
53.552137,5,5.23305532,-0.482758037,5.23305532,5.23293264,5.23293264
53.562628,5.38516481,5.23173029,0.391707185,5.23173029,5.23161122,5.23161122
53.57312,5.65685425,5.23040535,0.65303055,5.23040535,5.23028973,5.23028973
53.583612,5.47722558,5.22908063,0.498141493,5.22908063,5.22896831,5.22896831
53.594103,4.89897949,5.22775624,-0.573390577,5.22775624,5.22764708,5.22764708
53.604595,5.38516481,5.22643193,0.398412952,5.22643193,5.2263258,5.2263258
53.615086,5.29150262,5.22510794,0.257671663,5.22510794,5.22500472,5.22500472
53.625578,5.19615242,5.22378401,-0.166227517,5.22378401,5.22368358,5.22368358
53.63607,5.09901951,5.22246027,-0.351341367,5.22246027,5.22236251,5.22236251
53.646561,5.47722558,5.22113684,0.506052111,5.22113684,5.22104165,5.22104165
53.657053,4.79583152,5.21981345,-0.651138948,5.21981345,5.21972073,5.21972073
53.667544,5.09901951,5.21849037,-0.345645563,5.21849037,5.21840002,5.21840002
53.678036,5.56776436,5.21716733,0.59211235,5.21716733,5.21707926,5.21707926
53.688528,5.47722558,5.21584445,0.511254458,5.21584445,5.21575858,5.21575858
53.699019,5.65685425,5.21452187,0.665080732,5.21452187,5.21443811,5.21443811
53.709511,5.19615242,5.21319932,-0.130563765,5.21319932,5.2131176,5.2131176
53.720002,4.47213595,5.21187705,-0.86008203,5.21187705,5.2117973,5.2117973
53.730494,5.38516481,5.21055482,0.4178636,5.21055482,5.21047696,5.21047696
53.740986,5.74456265,5.20923274,0.731662428,5.20923274,5.2091567,5.2091567
53.751477,5.47722558,5.20791094,0.518955335,5.20791094,5.20783666,5.20783666
53.761969,5.09901951,5.20658916,-0.327978116,5.20658916,5.20651659,5.20651659
53.77246,6.55743852,5.20526766,1.16282882,5.20526766,5.20519673,5.20519673
53.782952,5.38516481,5.20394618,0.425697815,5.20394618,5.20387684,5.20387684
53.793444,5.74456265,5.20262485,0.736164249,5.20262485,5.20255704,5.20255704
53.803935,4.47213595,5.20130379,-0.853913245,5.20130379,5.20123746,5.20123746
53.814427,5.91607978,5.19998274,0.84622517,5.19998274,5.19991786,5.19991786
53.824918,6.08276253,5.19866197,0.940266215,5.19866197,5.19859848,5.19859848
53.83541,5.19615242,5.19734122,-0.0344789879,5.19734122,5.19727907,5.19727907
53.845902,5.83095189,5.19602062,0.796825752,5.19602062,5.19595976,5.19595976
53.856393,5.38516481,5.19470028,0.436422422,5.19470028,5.19464069,5.19464069
53.866885,6,5.19337995,0.898120285,5.19337995,5.19332159,5.19332159
53.877376,6,5.1920599,0.898854882,5.1920599,5.19200272,5.19200272
53.887868,5.29150262,5.19073986,0.317431501,5.19073986,5.19068383,5.19068383
53.89836,5.09901951,5.18941997,-0.300666687,5.18941997,5.18936505,5.18936505
53.908851,4.89897949,5.18810034,-0.537699599,5.18810034,5.1880465,5.1880465
53.919343,5.29150262,5.18678074,0.323607612,5.18678074,5.18672794,5.18672794
53.929834,6.164414,5.18546139,0.98942034,5.18546139,5.18540962,5.18540962
53.940326,4.79583152,5.18414207,-0.623145688,5.18414207,5.18409129,5.18409129
53.950818,5.56776436,5.18282289,0.620436517,5.18282289,5.18277307,5.18277307
53.961309,4.58257569,5.18150398,-0.773904571,5.18150398,5.18145509,5.18145509
53.971801,5.29150262,5.18018509,0.333642826,5.18018509,5.1801371,5.1801371
53.982292,5,5.17886646,-0.422926073,5.17886646,5.17881936,5.17881936
53.992784,5.38516481,5.17754786,0.455650028,5.17754786,5.17750162,5.17750162
54.003276,6.08276253,5.1762294,0.952120334,5.1762294,5.17618399,5.17618399
54.013767,5.38516481,5.17491121,0.45853418,5.17491121,5.17486662,5.17486662
54.024259,5,5.17359305,-0.416644988,5.17359305,5.17354924,5.17354924
54.03475,5.83095189,5.17227515,0.811589023,5.17227515,5.17223211,5.17223211
54.045242,4.47213595,5.17095728,-0.835955337,5.17095728,5.17091499,5.17091499
54.055734,4.79583152,5.16963956,-0.611398424,5.16963956,5.169598,5.169598
54.066225,5.38516481,5.16832211,0.465663721,5.16832211,5.16828126,5.16828126
54.076717,4.58257569,5.16700468,-0.764479552,5.16700468,5.16696452,5.16696452
54.087208,5,5.16564805,-0.40699883,5.16564805,5.16564805,5.16564805
54.0977,5.38516481,5.16433158,0.469928958,5.16433158,5.16433158,5.16433158
54.108192,5.19615242,5.16301525,0.182036182,5.16301525,5.16301525,5.16301525
54.118683,5.19615242,5.16169918,0.185615839,5.16169918,5.16169918,5.16169918
54.129175,4.58257569,5.16038313,-0.760136457,5.16038313,5.16038313,5.16038313
54.139666,5.65685425,5.15906734,0.705540156,5.15906734,5.15906734,5.15906734
54.150158,4.58257569,5.15775156,-0.7584035,5.15775156,5.15775156,5.15775156
54.16065,4.69041576,5.15643593,-0.682656702,5.15643593,5.15643593,5.15643593
54.171141,5.47722558,5.15512057,0.567542954,5.15512057,5.15512057,5.15512057
54.181633,4.69041576,5.15380523,-0.680727162,5.15380523,5.15380523,5.15380523
54.192124,5.29150262,5.15249016,0.372843752,5.15249016,5.15249016,5.15249016
54.202616,5.56776436,5.15117511,0.645437256,5.15117511,5.15117511,5.15117511
54.213108,5.91607978,5.14986021,0.875339688,5.14986021,5.14986021,5.14986021
54.223599,5.56776436,5.14854559,0.647471058,5.14854559,5.14854559,5.14854559
54.234091,5.83095189,5.147231,0.826874172,5.147231,5.147231,5.147231
54.244582,5.56776436,5.14591668,0.649498022,5.14591668,5.14591668,5.14591668
54.255074,5.09901951,5.1446024,-0.213501483,5.1446024,5.1446024,5.1446024
54.265566,4.12310563,5.14328827,-1.01004091,5.14328827,5.14328827,5.14328827
54.276057,5.74456265,5.14197442,0.776265563,5.14197442,5.14197442,5.14197442
54.286549,5,5.14066061,-0.375047477,5.14066061,5.14066061,5.14066061
54.29704,4.47213595,5.13934708,-0.816829927,5.13934708,5.13934708,5.13934708
54.307532,5.29150262,5.13803359,0.391751231,5.13803359,5.13803359,5.13803359
54.318024,4.35889894,5.13672027,-0.881941793,5.13672027,5.13672027,5.13672027
54.328515,5.09901951,5.13540723,-0.190755656,5.13540723,5.13540723,5.13540723
54.339007,4.58257569,5.13409424,-0.742642945,5.13409424,5.13409424,5.13409424
54.349498,4.47213595,5.13278154,-0.812801072,5.13278154,5.13278154,5.13278154
54.35999,5.74456265,5.13146888,0.783003044,5.13146888,5.13146888,5.13146888
54.370482,5,5.13015639,-0.36077194,5.13015639,5.13015639,5.13015639
54.380973,4.69041576,5.1288442,-0.662139292,5.1288442,5.1288442,5.1288442
54.391465,5.56776436,5.12753206,0.66350004,5.12753206,5.12753206,5.12753206
54.401956,5.29150262,5.12622022,0.406549388,5.12622022,5.12622022,5.12622022
54.412448,5.65685425,5.12490843,0.729346162,5.12490843,5.12490843,5.12490843
54.42294,4.47213595,5.12359681,-0.807131251,5.12359681,5.12359681,5.12359681
54.433431,5.91607978,5.1222855,0.890951335,5.1222855,5.1222855,5.1222855
54.443923,6.32455532,5.12097425,1.09707843,5.12097425,5.12097425,5.12097425
54.454414,5,5.1196633,-0.345923833,5.1196633,5.1196633,5.1196633
54.464906,5.56776436,5.11835241,0.670381947,5.11835241,5.11835241,5.11835241
54.475398,5.38516481,5.1170417,0.51780605,5.1170417,5.1170417,5.1170417
54.485889,4.89897949,5.11573131,-0.465566129,5.11573131,5.11573131,5.11573131
54.496381,6.164414,5.11442097,1.02469168,5.11442097,5.11442097,5.11442097
54.506872,4.89897949,5.11311095,-0.462743415,5.11311095,5.11311095,5.11311095
54.517364,5.09901951,5.111801,-0.113055234,5.111801,5.111801,5.111801
54.527856,4.89897949,5.11049124,-0.459904067,5.11049124,5.11049124,5.11049124
54.538347,5.83095189,5.10918179,0.849570541,5.10918179,5.10918179,5.10918179
54.548839,5,5.10787242,-0.328439364,5.10787242,5.10787242,5.10787242
54.55933,5.56776436,5.10656336,0.679117812,5.10656336,5.10656336,5.10656336
54.569822,4.69041576,5.10525438,-0.644079667,5.10525438,5.10525438,5.10525438
54.580314,3.87298335,5.10394559,-1.10948738,5.10394559,5.10394559,5.10394559
54.590805,5.19615242,5.10274738,0.305622394,5.10274738,5.10263713,5.10263713
54.601297,5.47722558,5.10144127,0.613012485,5.10144127,5.10132875,5.10132875
54.611788,4.69041576,5.10013556,-0.640093587,5.10013556,5.10002069,5.10002069
54.62228,5,5.09883,-0.314372397,5.09883,5.09871271,5.09871271
54.632772,5.29150262,5.09752473,0.440429213,5.09752473,5.09740494,5.09740494
54.643263,5.38516481,5.09621987,0.537535989,5.09621987,5.0960975,5.0960975
54.653755,4.69041576,5.09491517,-0.636002683,5.09491517,5.09479015,5.09479015
54.664246,5.09901951,5.0936109,0.073543284,5.0936109,5.09348312,5.09348312
54.674738,5.74456265,5.0923068,0.807623578,5.0923068,5.09217619,5.09217619
54.68523,4.24264069,5.09100301,-0.921065864,5.09100301,5.09086946,5.09086946
54.695721,5,5.08969966,-0.299499017,5.08969966,5.08956308,5.08956308
54.706213,5.09901951,5.0883965,0.103067985,5.0883965,5.08825678,5.08825678
54.716704,6,5.0870938,0.955461252,5.0870938,5.08695083,5.08695083
54.727196,5.09901951,5.0857913,0.115013992,5.0857913,5.08564497,5.08564497
54.737688,5.74456265,5.08448913,0.812449084,5.08448913,5.08433933,5.08433933
54.748179,5.29150262,5.08318744,0.456415581,5.08318744,5.08303403,5.08303403
54.758671,5.65685425,5.08188598,0.758266624,5.08188598,5.08172884,5.08172884
54.769162,6,5.080585,0.958861306,5.080585,5.08042399,5.08042399
54.779654,5.38516481,5.07928426,0.553064686,5.07928426,5.07911924,5.07911924
54.790146,6,5.0779839,0.960216693,5.0779839,5.07781472,5.07781472
54.800637,5.38516481,5.07668406,0.555410436,5.07668406,5.07651055,5.07651055
54.811129,5,5.07538448,-0.274562341,5.07538448,5.07520648,5.07520648
54.82162,5.19615242,5.07408543,0.349380866,5.07408543,5.07390277,5.07390277
54.832112,5.19615242,5.07278668,0.351234598,5.07278668,5.07259917,5.07259917
54.842604,5.19615242,5.07148835,0.353077993,5.07148835,5.0712958,5.0712958
54.853095,5,5.07019059,-0.26493507,5.07019059,5.06999279,5.06999279
54.863587,5.19615242,5.06889316,0.356734167,5.06889316,5.06868989,5.06868989
54.874078,5.91607978,5.06759631,0.921131625,5.06759631,5.06738736,5.06738736
54.88457,4.58257569,5.06629982,-0.695502788,5.06629982,5.06608493,5.06608493
54.895062,5.83095189,5.06500383,0.875184589,5.06500383,5.06478275,5.06478275
54.905553,5.38516481,5.06370847,0.566971195,5.06370847,5.06348094,5.06348094
54.916045,5.38516481,5.06241352,0.568112041,5.06241352,5.06217924,5.06217924
54.926536,4.47213595,5.06111923,-0.767452459,5.06111923,5.06087792,5.06087792
54.937028,5.65685425,5.05982539,0.772676426,5.05982539,5.05957671,5.05957671
54.94752,5.47722558,5.05853214,0.64706525,5.05853214,5.05827575,5.05827575
54.958011,5.29150262,5.05723962,0.484007237,5.05723962,5.05697517,5.05697517
54.968503,5,5.05594761,-0.236532465,5.05594761,5.05567471,5.05567471
54.978994,4.47213595,5.05465638,-0.763230257,5.05465638,5.05437463,5.05437463
54.989486,5.56776436,5.05336572,0.717215897,5.05336572,5.05307468,5.05307468
54.999978,5,5.05207578,-0.22820118,5.05207578,5.05177498,5.05177498
55.010469,4.58257569,5.05078671,-0.684259466,5.05078671,5.05047566,5.05047566
55.020961,4.47213595,5.04949831,-0.759843638,5.04949831,5.04917647,5.04917647
55.031452,5.38516481,5.04821085,0.580477349,5.04821085,5.04787767,5.04787767
55.041944,5.83095189,5.04692415,0.885453415,5.04692415,5.046579,5.046579
55.052436,4.47213595,5.04563835,-0.757299408,5.04563835,5.0452806,5.0452806
55.062927,6.08276253,5.04435364,1.0190235,5.04435364,5.04398258,5.04398258
55.073419,5.09901951,5.04306982,0.236536879,5.04306982,5.0426847,5.0426847
55.08391,5,5.0417872,-0.204419171,5.0417872,5.04138721,5.04138721
55.094402,6.244998,5.04050559,1.09749369,5.04050559,5.04008987,5.04008987
55.104894,4.79583152,5.0392252,-0.493349449,5.0392252,5.03879279,5.03879279
55.115385,4.47213595,5.03794622,-0.752203606,5.03794622,5.03749611,5.03749611
55.125877,4.89897949,5.03666849,-0.371064692,5.03666849,5.03619957,5.03619957
55.136368,5.47722558,5.03539235,0.664705365,5.03539235,5.03490343,5.03490343
55.14686,5.29150262,5.03411767,0.507331209,5.03411767,5.03360745,5.03360745
55.157352,5.83095189,5.03284467,0.89336847,5.03284467,5.03231173,5.03231173
55.167843,4.69041576,5.03157362,-0.584087199,5.03157362,5.03101642,5.03101642
55.178335,4.89897949,5.0303044,-0.362387799,5.0303044,5.02972126,5.02972126
55.188826,5.29150262,5.02903743,0.512313565,5.02903743,5.02842651,5.02842651
55.199318,5.09901951,5.02777265,0.266921086,5.02777265,5.02713191,5.02713191
55.20981,4.79583152,5.02651037,-0.480290374,5.02651037,5.0258376,5.0258376
55.220301,5.47722558,5.02525094,0.672290589,5.02525094,5.02454369,5.02454369
55.230793,6.08276253,5.02399438,1.0289646,5.02399438,5.02324995,5.02324995
55.241284,3.74165739,5.02274122,-1.13184974,5.02274122,5.02195661,5.02195661
55.251776,5,5.02149155,-0.146599979,5.02149155,5.02066344,5.02066344
55.262268,4.69041576,5.02024587,-0.574308378,5.02024587,5.01937056,5.01937056
55.272759,4.69041576,5.01900473,-0.573226803,5.01900473,5.0180781,5.0180781
55.283251,5.47722558,5.01776838,0.677832721,5.01776838,5.0167858,5.0167858
55.293742,5.65685425,5.01653763,0.800197865,5.01653763,5.01549392,5.01549392
55.304234,4.58257569,5.0153129,-0.657827643,5.0153129,5.01420221,5.01420221
55.314726,4.35889894,5.01409509,-0.809441875,5.01409509,5.0129108,5.0129108
55.325217,4.89897949,5.01288521,-0.337499215,5.01288521,5.01161981,5.01161981
55.335709,5.38516481,5.01483994,0.608543233,5.01168407,5.01348572,5.010329
55.3462,5.91607978,5.01366914,0.949952969,5.01049315,5.01221552,5.00903861
55.356692,4.79583152,5.01250999,-0.465487346,5.0093137,5.01094568,5.00774839
55.367184,5,5.01136437,-0.10660382,5.00814761,5.00967634,5.00645849
55.377675,5.56776436,5.01023451,0.746679216,5.00699708,5.00840762,5.00516901
55.388167,4.47213595,5.00912275,-0.732793828,5.00586447,5.00713928,5.00387971
55.398658,5.56776436,5.00803242,0.748152351,5.00475312,5.00587157,5.00259085
55.40915,4.47213595,5.00696716,-0.731321546,5.00366664,5.00460425,5.00130217
55.419642,4.79583152,5.00593181,-0.458366976,5.00260989,5.00333744,5.0000138
55.430133,4.79583152,5.0049324,-0.457275491,5.00158891,5.00207127,4.99872586
55.440625,5.19615242,5.00397623,0.438379056,5.00061098,5.0008055,4.99743812
55.451116,5.83095189,5.00307303,0.909878492,4.99968585,4.99954038,4.99615082
55.461608,4.35889894,5.00223495,-0.802082295,4.99882569,4.99827567,4.9948637
55.4721,5.29150262,5.00147823,0.538539131,4.99804671,4.99701149,4.99357691
55.482591,4.79583152,5.00082437,-0.452761355,4.99737046,4.99574798,4.99229056
55.493083,5.09901951,5.00030254,0.314192572,4.99682611,4.99448488,4.9910044
55.503574,4.89897949,4.99995464,-0.317765873,4.99645559,4.99322245,4.98971869
55.514066,4.47213595,4.99984487,-0.726435759,4.99632316,4.99196046,4.98843318
55.524558,5.47722558,5.00008254,0.690755405,4.99653819,4.99069902,4.98714799
55.535049,5,5.00086957,-0.0294884998,4.99730275,4.98943826,4.98586326
55.545541,4.47213595,5.00258803,-0.728321409,4.99899919,4.98817794,4.98457872
55.556032,4.69041576,5.00592306,-0.561700365,5.00231315,4.98691832,4.98329464
55.566524,5.29150262,5.01197034,0.528708125,5.00834113,4.98565914,4.98201077
55.577016,4.58257569,5.02219632,-0.663038936,5.01855067,4.98440055,4.98072723
55.587507,5.09901951,5.03809741,0.24682403,5.03443926,4.98314266,4.97944414
55.597999,4.12310563,5.06046151,-0.968171411,5.0567954,4.98188524,4.97816126
55.60849,5.29150262,5.08810194,0.45099965,5.08443152,4.98062853,4.97687885
55.618982,4.89897949,5.11589804,-0.465745156,5.11222322,4.97937229,4.97559665
55.629474,4.79583152,5.13362031,-0.581195997,5.12993368,4.97811666,4.97431478
55.639965,4.79583152,5.13145103,-0.579326767,5.12773806,4.97686176,4.97303338
55.650457,4.79583152,5.10998777,-0.560496431,5.10623408,4.97560735,4.9717522
55.660948,4.69041576,5.07945164,-0.623727409,5.07564983,4.97435368,4.97047148
55.67144,4.89897949,5.04964263,-0.3881535,5.04579241,4.97310051,4.96919099
55.681932,4.79583152,5.02529157,-0.479019878,5.02139634,4.97184797,4.96791084
55.692423,5.83095189,5.00737655,0.907510523,5.00344067,4.97059618,4.96663115
55.702915,5.38516481,4.995023,0.624613328,4.99105034,4.9693449,4.9653517
55.713406,5.56776436,4.98672186,0.762261442,4.98271521,4.9680944,4.96407272
55.723898,5.19615242,4.98103023,0.463812669,4.97699132,4.96684442,4.96279396
55.73439,5.38516481,4.97688919,0.638964488,4.97281892,4.9655951,4.96151556
55.744881,4.47213595,4.97364214,-0.708171017,4.96954091,4.96434655,4.96023764
55.755373,5.29150262,4.97092444,0.566196237,4.96679235,4.96309856,4.95895994
55.765864,4.79583152,4.9685441,-0.415587024,4.9643811,4.96185135,4.95768273
55.776356,5.38516481,4.96639597,0.647123507,4.96220192,4.9606047,4.95640575
55.786848,6.08276253,4.96441825,1.05751798,4.96019296,4.95935874,4.95512913
55.797339,5.47722558,4.96257049,0.71739465,4.95831373,4.95811358,4.953853
55.807831,5.19615242,4.96082377,0.485106845,4.95653529,4.956869,4.9525771
55.818322,4.79583152,4.95915744,-0.404136018,4.95483697,4.95562525,4.95130169
55.828814,5.91607978,4.9575554,0.979042585,4.95320264,4.95438208,4.95002652
55.839306,4.12310563,4.95600571,-0.912633601,4.95162035,4.95313962,4.94875172
55.849797,5.65685425,4.95449916,0.838066281,4.95008088,4.95189801,4.94747741
55.860289,5.29150262,4.95302809,0.581785638,4.94857657,4.950657,4.94620335
55.87078,4.79583152,4.95158697,-0.394658649,4.94710187,4.94941685,4.94492978
55.881272,4.89897949,4.95017086,-0.2262551,4.94565182,4.94817732,4.94365646
55.891764,4.89897949,4.94877611,-0.22315158,4.94422278,4.94693853,4.94238351
55.902255,4.35889894,4.94739981,-0.767138098,4.94281182,4.94570062,4.94111106
55.912747,4.89897949,4.94603915,-0.216932399,4.94141613,4.94446335,4.93983886
55.923238,5,4.94469233,0.235175833,4.9400339,4.94322697,4.93856716
55.93373,4.35889894,4.94335735,-0.764498791,4.93866312,4.94199124,4.93729572
55.944222,5.47722558,4.94203288,0.731568652,4.93730246,4.9407563,4.93602466
55.954713,5.19615242,4.94071784,0.505405363,4.93595083,4.93952227,4.9347541
55.965205,4.47213595,4.93941094,-0.683575148,4.93460692,4.93828891,4.9334838
55.975696,4.79583152,4.93811154,-0.377200238,4.93327011,4.93705648,4.93221401
55.986188,5.19615242,4.93681866,0.509248238,4.93193938,4.93582475,4.93094449
55.99668,5.56776436,4.93553175,0.795130561,4.9306142,4.93459383,4.92967535
56.007171,4.58257569,4.9342504,-0.593021676,4.92929415,4.93336387,4.92840672
56.017663,5,4.93297388,0.258894036,4.92797847,4.93213462,4.92713836
56.028154,4.12310563,4.931702,-0.899219873,4.92666699,4.93090633,4.92587051
56.038646,4.69041576,4.93043418,-0.489916744,4.9253591,4.92967879,4.92460293
56.049138,5.19615242,4.92917019,0.51670323,4.92405459,4.9284521,4.92333575
56.059629,5.29150262,4.9279099,0.6029865,4.9227533,4.9272264,4.92206908
56.070121,4.24264069,4.92665281,-0.827050257,4.92145473,4.92600147,4.92080269
56.080612,5.56776436,4.92539895,0.801477017,4.9201589,4.92477754,4.91953682
56.091104,5.65685425,4.92414789,0.855982686,4.91886537,4.92355439,4.91827123
56.101596,5.29150262,4.92289958,0.607126876,4.91757408,4.92233215,4.91700604
56.112087,5.09901951,4.92165398,0.421147871,4.91628501,4.92111094,4.91574137
56.122579,5.74456265,4.92041074,0.907828126,4.91499775,4.91989054,4.91447698
56.13307,4.24264069,4.91916996,-0.822513999,4.91371245,4.91867119,4.91321312
56.143562,5.29150262,4.91793132,0.611204798,4.91242872,4.91745268,4.91194955
56.154054,4.89897949,4.91669482,-0.133098977,4.91114661,4.91623512,4.91068638
56.164545,5,4.91546052,0.290756742,4.90986613,4.91501864,4.90942374
56.175037,5.91607978,4.91422809,1.00092542,4.90858696,4.91380302,4.9081614
56.185528,6.08276253,4.91299771,1.08155667,4.90730926,4.9125885,4.90689958
56.19602,5.09901951,4.91176909,0.432724425,4.90603274,4.91137487,4.90563806
56.206512,4.47213595,4.91054228,-0.662122592,4.90475744,4.91016224,4.90437695
56.217003,6.40312424,4.90931737,1.22221392,4.90348343,4.90895075,4.90311638
56.227495,5.19615242,4.90809407,0.536710679,4.90221042,4.90774018,4.90185611
56.237986,5.38516481,4.90687259,0.691586742,4.90093861,4.90653077,4.90059637
56.248478,5.29150262,4.90565265,0.621168233,4.8996677,4.90532229,4.89933694
56.25897,5.74456265,4.90443435,0.91658513,4.89839778,4.90411488,4.89807793
56.269461,7,4.90321777,1.44802701,4.89712894,4.90290867,4.89681946
56.279953,6.244998,4.90200267,1.15887675,4.89586091,4.90170343,4.89556129
56.290444,5.91607978,4.90078926,1.00761626,4.89459388,4.90049941,4.89430367
56.300936,5,4.89957728,0.31689544,4.8933276,4.89929639,4.89304636
56.311428,6.40312424,4.89836685,1.22668553,4.89206216,4.89809451,4.89178947
56.321919,6.244998,4.89715806,1.16096509,4.89079766,4.89689388,4.89053314
56.332411,5.56776436,4.89595067,0.819642417,4.88953383,4.89569429,4.88927711
56.342902,5.47722558,4.89474492,0.763204206,4.88827089,4.894496,4.88802164
56.353394,4.89897949,4.89354055,0.0737491264,4.88700859,4.89329877,4.88676648
56.363886,6.164414,4.89233769,1.1278636,4.88574703,4.89210274,4.88551176
56.374377,5.38516481,4.89113645,0.702871508,4.88448631,4.89090804,4.88425759
56.384869,5.29150262,4.88993659,0.633692377,4.88322619,4.88971446,4.88300374
56.39536,5.74456265,4.88873835,0.92510772,4.88196687,4.88852224,4.88175046
56.405852,5.47722558,4.8875415,0.767908896,4.88070812,4.88733116,4.88049749
56.416344,6,4.88634616,1.05529799,4.87945005,4.88614136,4.87924496
56.426835,4.47213595,4.88515244,-0.642663586,4.87819275,4.88495297,4.877993
56.437327,4.58257569,4.88396012,-0.548984908,4.87693599,4.88376578,4.87674136
56.447818,5.74456265,4.88276944,0.928328176,4.87567998,4.88258002,4.87549029
56.45831,5,4.88158018,0.344121806,4.87442449,4.8813955,4.87423954
56.468802,6.164414,4.88039246,1.13314674,4.87316963,4.88021234,4.87298925
56.479293,5.29150262,4.8792064,0.642102969,4.87191551,4.87903068,4.87173952
56.489785,5.09901951,4.87802178,0.470103956,4.87066187,4.8778503,4.87049012
56.500276,5.38516481,4.87683885,0.712969813,4.86940896,4.87667145,4.8692413
56.510768,4.79583152,4.87565739,-0.282534718,4.86815653,4.87549392,4.86799281
56.52126,4.79583152,4.87447752,-0.280438942,4.8669047,4.87431786,4.86674478
56.531751,4.89897949,4.87329938,0.160250139,4.86565357,4.87314338,4.86549733
56.542243,5.09901951,4.87212274,0.476336823,4.86440291,4.87197029,4.86425021
56.552734,4.58257569,4.87094786,-0.537002949,4.86315295,4.87079883,4.86300367
56.563226,4.58257569,4.86977452,-0.535909347,4.86190344,4.8696288,4.86175748
56.573718,4.58257569,4.86860286,-0.534815072,4.8606545,4.86846033,4.86051174
56.584209,4.58257569,4.86743299,-0.533720242,4.85940626,4.86729356,4.85926659
56.594701,5,4.86626472,0.365698341,4.85815846,4.86612828,4.85802179
56.605192,4.79583152,4.86509829,-0.26318581,4.85691134,4.86496475,4.85677757
56.615684,4.58257569,4.8639335,-0.530431717,4.85566466,4.86380276,4.8555337
56.626176,4.12310563,4.86277048,-0.860037704,4.85441854,4.86264246,4.8542903
56.636667,4.79583152,4.86160935,-0.256471892,4.85317309,4.86148397,4.85304748
56.647159,4.47213595,4.86044993,-0.62314844,4.85192807,4.8603271,4.85180502
56.65765,4.35889894,4.85929246,-0.707384984,4.85068373,4.8591721,4.85056316
56.668142,5.09901951,4.85813673,0.490798106,4.84943982,4.85801877,4.84932164
56.678634,4.89897949,4.85698289,0.204930706,4.84819645,4.85686726,4.84808061
56.689125,3.74165739,4.8557177,-1.05549055,4.84684017,4.8557177,4.84684017
56.699617,4.79583152,4.85456989,-0.242360002,4.84560009,4.85456989,4.84560009
56.710108,5.29150262,4.8534241,0.661875004,4.8443606,4.8534241,4.8443606
56.7206,4.89897949,4.85228013,0.216100338,4.84312148,4.85228013,4.84312148
56.731092,4.79583152,4.85113812,-0.235173544,4.84188285,4.85113812,4.84188285
56.741583,4.79583152,4.84999821,-0.232737379,4.84064481,4.84999821,4.84064481
56.752075,5.09901951,4.84886022,0.500159268,4.83940714,4.84886022,4.83940714
56.762566,5.09901951,4.8477244,0.501293443,4.83817008,4.8477244,4.83817008
56.773058,5.09901951,4.84659056,0.502423081,4.83693339,4.84659056,4.83693339
56.78355,4.69041576,4.84545885,-0.39375512,4.83569718,4.84545885,4.83569718
56.794041,4.79583152,4.84432942,-0.220222381,4.83446159,4.84432942,4.83446159
56.804533,4.89897949,4.84320208,0.236172402,4.83322636,4.84320208,4.83322636
56.815024,5.09901951,4.84207709,0.506894882,4.83199175,4.84207709,4.83199175
56.825516,4.24264069,4.84095427,-0.773507329,4.83075752,4.84095427,4.83075752
56.836008,4.69041576,4.83983378,-0.386546268,4.82952378,4.83983378,4.82952378
56.846499,4.89897949,4.83871575,0.245486737,4.82829066,4.83871575,4.82829066
56.856991,4.58257569,4.83760002,-0.504999327,4.82705791,4.83760002,4.82705791
56.867482,4.89897949,4.83648684,0.2499853,4.82582579,4.83648684,4.82582579
56.877974,5,4.83537604,0.405738782,4.82459405,4.83537604,4.82459405
56.888466,5,4.83426778,0.407102218,4.82336281,4.83426778,4.82336281
56.898957,4.69041576,4.83316222,-0.37781802,4.82213219,4.83316222,4.82213219
56.909449,4.47213595,4.83205917,-0.599936013,4.82090196,4.83205917,4.82090196
56.91994,5.19615242,4.83095892,0.604312421,4.81967235,4.83095892,4.81967235
56.930432,5.19615242,4.82986129,0.605219902,4.81844313,4.82986129,4.81844313
56.940924,5.56776436,4.82876645,0.859649877,4.81721443,4.82876645,4.81721443
56.951415,5.09901951,4.82767455,0.520907823,4.81598635,4.82767455,4.81598635
56.961907,3.16227766,4.82658545,-1.29008053,4.81475866,4.82658545,4.81475866
56.972398,4.35889894,4.82549939,-0.683081582,4.81353161,4.82549939,4.81353161
56.98289,4.47213595,4.82441624,-0.593532045,4.81230495,4.82441624,4.81230495
56.993382,4.79583152,4.82333617,-0.165845235,4.81107881,4.82333617,4.81107881
57.003873,5.65685425,4.82225932,0.913561672,4.8098533,4.82225932,4.8098533
57.014365,4,4.82118557,-0.906192899,4.8086282,4.82118557,4.8086282
57.024856,4.12310563,4.82011518,-0.834870983,4.80740373,4.82011518,4.80740373
57.035348,4.47213595,4.81904802,-0.588992417,4.80617966,4.81904802,4.80617966
57.04584,4.69041576,4.81798426,-0.357167327,4.80495612,4.81798426,4.80495612
57.056331,4.69041576,4.81692407,-0.355680063,4.80373322,4.81692407,4.80373322
57.066823,5.38516481,4.81586732,0.754518051,4.80251072,4.81586732,4.80251072
57.077314,4.89897949,4.81481429,0.290112389,4.80128887,4.81481429,4.80128887
57.087806,4.89897949,4.81376485,0.291915451,4.80006743,4.81376485,4.80006743
57.098298,4.89897949,4.8127192,0.293701012,4.79884652,4.8127192,4.79884652
57.108789,4.58257569,4.81167751,-0.478645812,4.79762625,4.81167751,4.79762625
57.119281,5.65685425,4.81063966,0.919899226,4.7964064,4.81063966,4.7964064
57.129772,4.89897949,4.80960595,0.298954062,4.7951872,4.80960595,4.7951872
57.140264,5.09901951,4.80857627,0.538927862,4.79396842,4.80857627,4.79396842
57.150756,5.47722558,4.80755081,0.818336582,4.79275017,4.80755081,4.79275017
57.161247,4.47213595,4.80652977,-0.578267944,4.79153257,4.80652977,4.79153257
57.171739,4.24264069,4.80551305,-0.750248199,4.7903154,4.80551305,4.7903154
57.18223,4.79583152,4.80450094,-0.0931097261,4.78909888,4.80450094,4.78909888
57.192722,5,4.80349337,0.443290679,4.78788279,4.80349337,4.78788279
57.203214,5.74456265,4.80249054,0.970603989,4.78666724,4.80249054,4.78666724
57.213705,5.38516481,4.80149266,0.763984388,4.78545234,4.80149266,4.78545234
57.224197,5.09901951,4.80049966,0.546369706,4.78423788,4.80049966,4.78423788
57.234688,4.58257569,4.79951184,-0.465764045,4.78302408,4.79951184,4.78302408
57.24518,5.74456265,4.79852915,0.972642534,4.78181071,4.79852915,4.78181071
57.255672,5.19615242,4.79755181,0.631348253,4.78059788,4.79755181,4.78059788
57.266163,4.47213595,4.79658004,-0.569599935,4.77938573,4.79658004,4.77938573
57.276655,4,4.79561381,-0.891971864,4.778174,4.79561381,4.778174
57.287146,5.74456265,4.79465343,0.974632862,4.77696295,4.79465343,4.77696295
57.297638,5.47722558,4.79369888,0.826756731,4.77575233,4.79369888,4.77575233
57.30813,4.79583152,4.7927504,0.0555078261,4.77454227,4.7927504,4.77454227
57.318621,3.60555128,4.79180825,-1.08915425,4.77333288,4.79180825,4.77333288
57.329113,4.89897949,4.7908724,0.328796423,4.77212394,4.7908724,4.77212394
57.339604,5.83095189,4.78994321,1.02029833,4.77091566,4.78994321,4.77091566
57.350096,5.09901951,4.78902067,0.556775397,4.76970783,4.78902067,4.76970783
57.360588,4,4.78810507,-0.887752819,4.76850057,4.78810507,4.76850057
57.371079,5,4.78719667,0.461306111,4.76729398,4.78719667,4.76729398
57.381571,4.24264069,4.78629551,-0.737329521,4.76608784,4.78629551,4.76608784
57.392062,4.79583152,4.78540196,0.102125238,4.76488237,4.78540196,4.76488237
57.402554,5.09901951,4.78451606,0.560806073,4.76367736,4.78451606,4.76367736
57.413046,4.24264069,4.78363813,-0.735525281,4.76247292,4.78363813,4.76247292
57.423537,4.69041576,4.78276846,-0.303895876,4.76126916,4.78276846,4.76126916
57.434029,4.89897949,4.78190715,0.342158353,4.76006586,4.78190715,4.76006586
57.44452,3.87298335,4.78105459,-0.952927722,4.75886325,4.78105459,4.75886325
57.455012,4.47213595,4.78021089,-0.555044981,4.75766109,4.78021089,4.75766109
57.465504,3.46410162,4.77937639,-1.14685429,4.7564595,4.77937639,4.7564595
57.475995,4.47213595,4.77855145,-0.553548093,4.75525861,4.77855145,4.75525861
57.486487,3.87298335,4.7777362,-0.951184974,4.75405818,4.7777362,4.75405818
57.496978,5.38516481,4.7769311,0.779893392,4.75285844,4.7769311,4.75285844
57.50747,5.83095189,4.77613632,1.02704215,4.75165916,4.77613632,4.75165916
57.517962,5.56776436,4.77535225,0.890175329,4.75046047,4.77535225,4.75046047
57.528453,4.69041576,4.7745793,-0.290109537,4.74926247,4.7745793,4.74926247
57.538945,4.69041576,4.7738177,-0.288793932,4.74806494,4.7738177,4.74806494
57.549436,4.89897949,4.77306794,0.354840174,4.7468681,4.77306794,4.7468681
57.559928,4.47213595,4.77233027,-0.547899913,4.74567174,4.77233027,4.74567174
57.57042,4.69041576,4.77160517,-0.284937553,4.74447597,4.77160517,4.74447597
57.580911,5.19615242,4.77089312,0.652119087,4.7432809,4.77089312,4.7432809
57.591403,4.58257569,4.77019442,-0.433149777,4.7420863,4.77019442,4.7420863
57.601894,4.58257569,4.76950967,-0.43235862,4.74089241,4.76950967,4.74089241
57.612386,4.35889894,4.76883921,-0.640265777,4.739699,4.76883921,4.739699
57.622878,4,4.7681836,-0.876460838,4.73850617,4.7681836,4.73850617
57.633369,4.24264069,4.76754342,-0.724501717,4.73731406,4.76754342,4.73731406
57.643861,4.35889894,4.76691911,-0.63876456,4.73612243,4.76691911,4.73612243
57.654352,5.38516481,4.76631133,0.786672406,4.73493151,4.76631133,4.73493151
57.664844,4.35889894,4.76572059,-0.637825715,4.73374107,4.76572059,4.73374107
57.675336,5.09901951,4.76514755,0.577816553,4.73255124,4.76514755,4.73255124
57.685827,4.58257569,4.76459292,-0.426634764,4.73136211,4.76459292,4.73136211
57.696319,4.89897949,4.7644869,0.366732301,4.73060618,4.76405728,4.73017348
57.70681,4.47213595,4.76398031,-0.540226205,4.72942762,4.76354145,4.72898556
57.717302,5,4.76349447,0.486318339,4.72824986,4.76304609,4.72779813
57.727794,4.24264069,4.76303025,-0.721380319,4.72707302,4.76257203,4.72661131
57.738285,4.35889894,4.76258853,-0.635365707,4.72589723,4.76212014,4.72542521
57.748777,4.89897949,4.76217009,0.369877535,4.72472228,4.76169121,4.7242396
57.759268,4.58257569,4.76177597,-0.423320531,4.72354842,4.76128623,4.72305472
57.76976,4.58257569,4.76140704,-0.422884558,4.72237543,4.76090608,4.72187033
57.780252,5.19615242,4.76106439,0.659612032,4.72120346,4.76055182,4.72068655
57.790743,4.69041576,4.76074911,-0.265204358,4.72003262,4.76022452,4.7195035
57.801235,5.47722558,4.76046229,0.846618738,4.71886272,4.75992526,4.71832096
57.811726,4.79583152,4.76020517,0.188749453,4.717694,4.75965526,4.71713913
57.822218,4,4.75997896,-0.871767724,4.71652626,4.75941571,4.71595782
57.83271,5.56776436,4.75978503,0.898876704,4.71535964,4.75920795,4.71477712
57.843201,3.46410162,4.75962479,-1.13821051,4.71419428,4.75903337,4.71359715
57.853693,4.47213595,4.75949969,-0.536063178,4.71302997,4.75889339,4.7124177
57.864184,4,4.7594113,-0.871442083,4.71186699,4.75878956,4.71123897
57.874676,4.79583152,4.75936128,0.190971829,4.71070512,4.75872351,4.71006076
57.885168,5.56776436,4.75935138,0.899117892,4.70954452,4.75869695,4.70888317
57.895659,4.69041576,4.75938343,-0.262616966,4.70838532,4.7587117,4.70770631
57.906151,4.79583152,4.7594594,0.190714762,4.70722736,4.75876967,4.70652997
57.916642,5,4.75958135,0.490325046,4.70607089,4.75887289,4.70535438
57.927134,4.69041576,4.75975149,-0.263316789,4.70491572,4.75902355,4.70417929
57.937626,4.89897949,4.75997215,0.372836881,4.70376203,4.75922391,4.70300484
57.948117,4.47213595,4.76024575,-0.536758604,4.70260995,4.75947637,4.70183113
57.958609,4.24264069,4.76057499,-0.719676529,4.70145934,4.75978356,4.70065795
57.9691,5.47722558,4.76096259,0.846323218,4.70031045,4.76014815,4.6994855
57.979592,5.19615242,4.76141158,0.659348805,4.69916314,4.76057313,4.69831359
57.990084,5.29150262,4.76192508,0.727720785,4.69801757,4.76106156,4.6971423
58.000575,4.89897949,4.7625064,0.369422635,4.69687393,4.76161668,4.69597177
58.011067,5.38516481,4.76315924,0.788673298,4.69573206,4.76224211,4.69480176
58.021558,4.24264069,4.76388727,-0.721974088,4.69459228,4.76294147,4.69363251
58.03205,4.89897949,4.76469473,0.366448842,4.69345444,4.76371889,4.69246378
58.042542,3.74165739,4.7655859,-1.01189353,4.69231874,4.7645786,4.6912957
58.053033,4.35889894,4.76656535,-0.638487591,4.6911854,4.76552504,4.69012837
58.063525,4.89897949,4.76763824,0.362410332,4.69005431,4.76656329,4.68896158
58.074016,5.19615242,4.7688097,0.653714559,4.6889258,4.76769838,4.68779554
58.084508,5,4.77008569,0.479493811,4.68779978,4.76893613,4.68663004
58.095,4,4.77147223,-0.878334917,4.6866765,4.77028244,4.68546518
58.105491,4.89897949,4.77297576,0.354970035,4.68555622,4.77174363,4.68430109
58.115983,4.69041576,4.77460367,-0.290151528,4.68443888,4.7733269,4.68313754
58.126474,3.87298335,4.77636327,-0.950463003,4.68332489,4.77503943,4.68197475
58.136966,4.89897949,4.7782631,0.347442639,4.68221423,4.77688955,4.6808125
58.147458,4.47213595,4.78031186,-0.555135933,4.68110721,4.77888579,4.6796509
58.157949,4.24264069,4.78251889,-0.734764043,4.68000418,4.78103725,4.67849008
58.168441,4.35889894,4.78489495,-0.652683693,4.67890519,4.78335446,4.67732979
58.178932,4.58257569,4.78745076,-0.452631264,4.67781073,4.78584788,4.67617028
58.189424,4.35889894,4.79019894,-0.656734345,4.67672092,4.78852985,4.67501131
58.199916,5,4.79315244,0.454804973,4.6756362,4.79141298,4.67385301
58.210407,5.29150262,4.79632525,0.703688408,4.67455707,4.79451093,4.67269548
58.220899,4.47213595,4.79973364,-0.572361498,4.67348375,4.79783957,4.67153849
58.23139,5.09901951,4.80339407,0.543714487,4.67241693,4.80141493,4.67038229
58.241882,4.89897949,4.80732609,0.302743123,4.67135693,4.80525607,4.66922664
58.252374,4.47213595,4.81155015,-0.58259265,4.67030446,4.80938292,4.66807165
58.262865,5.65685425,4.81608894,0.916932554,4.66926028,4.81381756,4.66691744
58.273357,4.58257569,4.82096928,-0.488255656,4.66822494,4.81858614,4.66576379
58.283848,4.79583152,4.82621955,-0.174321608,4.66719951,4.82371629,4.66461092
58.29434,4.79583152,4.83187433,-0.189849421,4.66618473,4.82924174,4.66345861
58.304832,4.47213595,4.83797198,-0.604843801,4.6651818,4.83519989,4.66230697
58.315323,5.65685425,4.84455742,0.901275112,4.66419204,4.84163459,4.66115611
58.325815,5.56776436,4.85168618,0.846214029,4.66321669,4.84860012,4.66000582
58.336306,4.89897949,4.8594222,0.19889013,4.66225755,4.85615906,4.65885632
58.346798,4.89897949,4.86784677,0.176444663,4.6613163,4.86439107,4.65770738
58.35729,5.56776436,4.87705745,0.831087787,4.66039518,4.87339194,4.65655912
58.367781,4.89897949,4.88717534,0.108646878,4.65949676,4.8832807,4.65541165
58.378273,5,4.89835492,0.318818248,4.65862377,4.89420942,4.65426474
58.388764,4.35889894,4.91078473,-0.74289016,4.65777978,4.90636395,4.65311863
58.399256,4.47213595,4.92470579,-0.672733108,4.6569686,4.91998214,4.6519731
58.409748,5.29150262,4.94041413,0.592527209,4.65619503,4.93535642,4.65082824
58.420239,5,4.95827587,0.204264861,4.65546471,4.95284876,4.64968418
58.430731,4.47213595,4.97874651,-0.711765799,4.6547842,4.97290975,4.6485407
58.441222,4.47213595,5.00237077,-0.728172243,4.65416165,4.99607856,4.64739801
58.451714,5.29150262,5.02981179,0.511557264,4.65360665,5.02301161,4.6462559
58.462206,5.19615242,5.06184504,0.366479715,4.65313111,5.05447669,4.64511448
58.472697,5.91607978,5.09936922,0.9037204,4.65274959,5.09136336,4.64397386
58.483189,5.65685425,5.14341947,0.716543636,4.65248004,5.13469563,4.64283382
58.49368,5.38516481,5.19512966,0.435930215,4.652345,5.18559416,4.64169459
58.504172,5.91607978,5.25574947,0.81260711,4.65237293,5.24529198,4.64055594
58.514664,6.4807407,5.32657743,1.07431991,4.65260052,5.31506676,4.63941798
58.525155,6.164414,5.40892816,0.869186885,4.65307628,5.39620552,4.63828083
58.535647,6,5.50410815,0.704195887,4.65386782,5.48997521,4.63714427
58.546138,5.74456265,5.61329411,0.362309996,4.65507558,5.59749203,4.63600851
58.55663,5.65685425,5.73755621,-0.284080899,4.65686267,5.71972309,4.63487335
58.567122,5.74456265,5.87774591,-0.364942821,4.65951035,5.85733697,4.63373889
58.577613,6.92820323,6.03451541,0.945350633,4.66351623,6.01065919,4.63260523
58.588105,6.40312424,6.20840087,0.441274703,4.66974308,6.17966629,4.63147217
58.598596,5.74456265,6.39975225,-0.809437832,4.67958708,6.36383072,4.63033993
58.609088,7.21110255,6.60887888,0.776030717,4.69510007,6.56223168,4.62920828
58.61958,7.07106781,6.83579611,0.485048145,4.71889295,6.77342288,4.62807734
58.630071,6.08276253,7.07994261,-0.998589045,4.75366529,6.99549099,4.62694721
58.640563,7,7.33970496,-0.582842143,4.80128116,7.22614402,4.62581768
58.651054,7.74596669,7.61154386,0.366637197,4.8614079,7.46257739,4.62468897
58.661546,8.77496439,7.88942606,0.941030461,4.92997441,7.70166936,4.62356087
58.672038,8,8.16381733,-0.404743539,4.99739401,7.93982731,4.62243347
58.682529,8,8.42155826,-0.649275181,5.04780339,8.1730534,4.6213069
58.693021,8.83176087,8.64889197,0.427631725,5.06357634,8.3969994,4.62018093
58.703512,8.83176087,8.83841967,-0.0816014771,5.03746537,8.60681598,4.61905579
58.714004,8.36660027,8.99250335,-0.791140367,4.97964079,8.79736228,4.61793125
58.724496,9.21954446,9.1168329,0.32048644,4.908433,8.96319354,4.61680744
58.734987,8.94427191,9.21400805,-0.519361278,4.8386808,9.09888209,4.61568444
58.745479,8.83176087,9.28283716,-0.671622138,4.77867179,9.19943176,4.61456207
58.75597,9.43398113,9.32010837,0.337450386,4.73155006,9.26070664,4.61344051
58.766462,9.89949494,9.32240158,0.759666611,4.69703782,9.28000532,4.61231958
58.776954,9.53939201,9.28735059,0.502037277,4.67299358,9.25641245,4.61119936
58.787445,8.83176087,9.21441845,-0.618593227,4.65665801,9.19096735,4.61007998
58.797937,9.2736185,9.10505317,0.410567076,4.64550033,9.08646485,4.60896122
58.808428,9.05538514,8.96248256,0.304799241,4.63760691,8.94711772,4.60784328
58.81892,9,8.79108531,0.457071869,4.63170427,8.77795082,4.60672597
58.829412,8,8.59590706,-0.771950164,4.62702405,8.5843989,4.60560939
58.839903,8.71779789,8.38215199,0.57934955,4.62312718,8.3718892,4.60449365
58.850395,7.74596669,8.15480079,-0.639401357,4.61976512,8.14552883,4.60337852
58.860886,6.92820323,7.91859436,-0.995183968,4.61679355,7.91013212,4.60226424
58.871378,7.34846923,7.67779762,-0.573871403,4.61412069,7.67000999,4.60115058
58.88187,6.70820393,7.43634303,-0.85331067,4.61168449,7.42912581,4.60003766
58.892361,7.28010989,7.19776754,0.286953575,4.60943967,7.19103886,4.59892558
58.902853,7.74596669,6.96514779,0.883639575,4.60735118,6.95884284,4.59781412
58.913344,7.07106781,6.74124525,0.5743018,4.60539236,6.73531231,4.59670351
58.923836,7.07106781,6.528318,0.736715555,4.60354142,6.52271587,4.59559354
58.934328,6.32455532,6.3282453,-0.0607451977,4.60178133,6.32294102,4.5944843
58.944819,5.91607978,6.14244248,-0.475775892,4.60009835,6.13740963,4.59337591
58.955311,5.47722558,5.97180792,-0.703265489,4.59848081,5.9670253,4.59226815
58.965802,6.164414,5.81684409,0.5895506,4.59691968,5.8122944,4.59116124
58.976294,5.29150262,5.67755974,-0.621334947,4.59540694,5.67322874,4.59005497
58.986786,4.89897949,5.55361398,-0.809094863,4.59393631,5.54948957,4.58894945
58.997277,6,5.44432737,0.745434528,4.59250253,5.44039894,4.58784477
59.007769,5.65685425,5.34872949,0.555089865,4.59110078,5.34498751,4.58674074
59.01826,5.19615242,5.26569952,-0.263717834,4.58972747,5.26213503,4.58563756
59.028752,4.12310563,5.19397292,-1.03482718,4.58837905,5.1905774,4.58453502
59.039244,5.65685425,5.13226436,0.724285778,4.58705286,5.12902952,4.58343324
59.049735,5.65685425,5.07930005,0.759969865,4.58574659,5.07621775,4.58233231
59.060227,4.79583152,5.03385353,-0.487874988,4.58445791,5.03091581,4.58123202
59.070718,4.35889894,4.99480919,-0.797439808,4.58318525,4.99200826,4.5801326
59.08121,4.79583152,4.96114983,-0.406593541,4.58192679,4.95847812,4.57903382
59.091702,3.87298335,4.93199145,-1.02908119,4.58068129,4.92944163,4.5779358
59.102193,5.19615242,4.90657177,0.538126982,4.57944765,4.90413679,4.57683864
59.112685,4.47213595,4.88423955,-0.641952955,4.57822458,4.88191271,4.57574213
59.123176,4.47213595,4.86445994,-0.62635771,4.57701137,4.86223486,4.57464649
59.133668,5.29150262,4.8467861,0.666870693,4.57580696,4.8446568,4.5735515
59.14416,5,4.83085924,0.411267263,4.57461074,4.82882005,4.57245727
59.154651,5,4.81638963,0.428497809,4.57342215,4.81443525,4.5713639
59.165143,5.74456265,4.80314134,0.970268678,4.5722404,4.80126684,4.5702712
59.175634,5.09901951,4.79093043,0.555057733,4.57106519,4.78913117,4.56917936
59.186126,4.47213595,4.77960584,-0.554499675,4.56989582,4.77787755,4.56808818
59.196618,4.89897949,4.76904969,0.360457758,4.56873198,4.76738835,4.56699777
59.207109,5.29150262,4.7591671,0.729613269,4.56757341,4.75756897,4.56590822
59.217601,4.58257569,4.74987864,-0.409026822,4.56641955,4.74834026,4.56481935
59.228092,4.79583152,4.74112246,0.233899696,4.5652703,4.7396406,4.56373134
59.238584,4.89897949,4.73284452,0.407596577,4.56412517,4.73141617,4.562644
59.249076,4.58257569,4.72500104,-0.377392822,4.56298401,4.72362339,4.56155743
59.259567,3.74165739,4.71755489,-0.987875249,4.5618467,4.71622533,4.56047174
59.270059,3.87298335,4.71047201,-0.915144065,4.56071281,4.70918808,4.55938671
59.28055,4.89897949,4.70372522,0.441875849,4.55958236,4.70248465,4.55830256
59.291042,4.58257569,4.69728797,-0.338692007,4.55845498,4.69608861,4.55721908
59.301534,4.35889894,4.69113839,-0.576402156,4.5573306,4.68997825,4.55613638
59.312025,4.12310563,4.68525675,-0.749767377,4.55620918,4.68413394,4.55505456
59.322517,5.74456265,4.67962352,1.03195888,4.55509037,4.67853629,4.55397341
59.333008,4.35889894,4.67422308,-0.561537295,4.55397427,4.67316978,4.55289315
59.3435,5,4.66903908,0.575292029,4.55286054,4.66801816,4.55181356
59.353992,5.19615242,4.66405804,0.729447997,4.55174919,4.66306804,4.55073475
59.364483,5.19615242,4.65926752,0.7327243,4.55064023,4.65830705,4.54965683
59.374975,4.12310563,4.65465471,-0.729074128,4.54953335,4.65372249,4.54857958
59.385466,5.38516481,4.65020953,0.857295324,4.54842869,4.64930433,4.54750323
59.395958,3.87298335,4.64592099,-0.879168726,4.54732595,4.64504167,4.54642755
59.40645,4.79583152,4.64178014,0.392493796,4.54622517,4.6409256,4.54535266
59.416941,4.35889894,4.63777865,-0.528090626,4.54512639,4.63694786,4.54427866
59.427433,5.19615242,4.63390769,0.749829802,4.54402934,4.63309968,4.54320535
59.437924,3.74165739,4.6301605,-0.942604429,4.54293417,4.62937435,4.54213292
59.448416,4.47213595,4.62652937,-0.392929277,4.54184062,4.62576421,4.54106118
59.458908,4.79583152,4.62300819,0.415720255,4.54074874,4.62226319,4.53999024
59.469399,4,4.61959124,-0.787141179,4.53965859,4.61886561,4.53892018
59.479891,4.47213595,4.6162722,-0.379652798,4.53856992,4.61556521,4.53785082
59.490382,5.19615242,4.61304647,0.763613746,4.5374829,4.6123574,4.53678235
59.500874,4.69041576,4.6099085,0.283738019,4.53639729,4.60923668,4.53571458
59.511366,4.35889894,4.606854,-0.49795086,4.53531314,4.6061988,4.5346476
59.521857,4.89897949,4.60387897,0.54323155,4.53423054,4.60323977,4.53358152
59.532349,4.12310563,4.60097879,-0.691283709,4.53314924,4.60035502,4.53251613
59.54284,5,4.59815026,0.633916195,4.53206943,4.59754136,4.53145165
59.553332,4.58257569,4.59538928,-0.113197104,4.53099086,4.59479473,4.53038786
59.563824,4.24264069,4.59269281,-0.591652027,4.52991362,4.59211211,4.52932487
59.574315,4.58257569,4.59005797,-0.0865001683,4.52883779,4.58949064,4.52826279
59.584807,4.69041576,4.58748133,0.320833954,4.52776313,4.58692692,4.5272014
59.595298,3.87298335,4.58496062,-0.84378746,4.52668984,4.58441868,4.52614092
59.60579,5,4.58249276,0.646148003,4.52561769,4.58196288,4.52508115
59.616282,4.89897949,4.58007554,0.564715812,4.52454675,4.57955732,4.52402218
59.626773,4.24264069,4.57770688,-0.578849022,4.52347712,4.57719994,4.52296411
59.637265,3.46410162,4.57538415,-1.05417386,4.52240858,4.57488813,4.52190675
59.647756,4.35889894,4.57310574,-0.462824801,4.52134131,4.57262029,4.5208503
59.658248,4.12310563,4.57086928,-0.669151441,4.5202751,4.57039405,4.51979456
59.66874,4,4.56867315,-0.754104201,4.51921003,4.56820784,4.51873962
59.679231,4.79583152,4.56651582,0.478869191,4.51814619,4.56606011,4.5176856
59.689723,3.60555128,4.56394885,-0.97897782,4.51663229,4.56394885,4.51663229
59.700214,6,4.5618729,1.19921937,4.5155799,4.5618729,4.5155799
59.710706,4.79583152,4.55983042,0.485799443,4.51452821,4.55983042,4.51452821
59.721198,4.89897949,4.55782023,0.584088399,4.51347734,4.55782023,4.51347734
59.731689,4.47213595,4.55584119,-0.289318571,4.51242739,4.55584119,4.51242739
59.742181,4.47213595,4.55389169,-0.285929599,4.51137815,4.55389169,4.51137815
59.752672,5,4.55197092,0.669349744,4.51032983,4.55197092,4.51032983
59.763164,4.79583152,4.55007739,0.49573595,4.50928222,4.55007739,4.50928222
59.773656,4,4.54821022,-0.740412197,4.50823544,4.54821022,4.50823544
59.784147,4.58257569,4.54636858,0.190281682,4.50718957,4.54636858,4.50718957
59.794639,4.24264069,4.54455114,-0.549463785,4.50614443,4.54455114,4.50614443
59.80513,5.29150262,4.54275734,0.86530069,4.50510021,4.54275734,4.50510021
59.815622,5.19615242,4.54098596,0.809423536,4.50405671,4.54098596,4.50405671
59.826114,4.24264069,4.53923635,-0.544605969,4.50301403,4.53923635,4.50301403
59.836605,4.89897949,4.53750787,0.601225093,4.50197228,4.53750787,4.50197228
59.847097,4,4.53579945,-0.73198323,4.50093126,4.53579945,4.50093126
59.857588,4.89897949,4.53411068,0.604043708,4.49989116,4.53411068,4.49989116
59.86808,4.35889894,4.53244057,-0.416583273,4.49885178,4.53244057,4.49885178
59.878572,4.89897949,4.5307886,0.606787344,4.49781324,4.5307886,4.49781324
59.889063,5.09901951,4.52915433,0.754894156,4.49677562,4.52915433,4.49677562
59.899555,4.58257569,4.52753682,0.234603649,4.49573874,4.52753682,4.49573874
59.910046,5.19615242,4.52593583,0.818667571,4.49470278,4.52593583,4.49470278
59.920538,4.79583152,4.5243505,0.521038412,4.49366756,4.5243505,4.49366756
59.93103,5.19615242,4.52278045,0.82059245,4.49263317,4.52278045,4.49263317
59.941521,4,4.52122535,-0.721959381,4.49159971,4.52122535,4.49159971
59.952013,4.24264069,4.5196844,-0.526349425,4.49056699,4.5196844,4.49056699
59.962504,4.47213595,4.51815746,-0.214526232,4.4895352,4.51815746,4.4895352
59.972996,4.58257569,4.51664378,0.256772105,4.48850415,4.51664378,4.48850415
59.983488,4.69041576,4.5151431,0.418655782,4.48747393,4.5151431,4.48747393
59.993979,5.65685425,4.51365514,1.06920489,4.48644465,4.51365514,4.48644465
60.004471,3.60555128,4.51217925,-0.95217014,4.48541611,4.51217925,4.48541611
60.014962,4.12310563,4.51071533,-0.622583091,4.48438851,4.51071533,4.48438851
60.025454,4.47213595,4.50926275,-0.192683138,4.48336166,4.50926275,4.48336166
60.035946,3.74165739,4.5078213,-0.875307895,4.48233564,4.5078213,4.48233564
60.046437,4.47213595,4.50639079,-0.185080626,4.48131056,4.50639079,4.48131056
60.056929,5.83095189,4.50497064,1.15151259,4.48028623,4.50497064,4.48028623
60.06742,3.74165739,4.50356082,-0.872870799,4.47926284,4.50356082,4.47926284
60.077912,4.35889894,4.50216076,-0.378499424,4.4782402,4.50216076,4.4782402
60.088404,3.60555128,4.50077032,-0.946160156,4.4772184,4.50077032,4.4772184
60.098895,4.79583152,4.49938936,0.544465027,4.47619754,4.49938936,4.47619754
60.109387,4.24264069,4.49801736,-0.505348071,4.47517744,4.49801736,4.47517744
60.119878,4.47213595,4.49665434,-0.156583462,4.47415828,4.49665434,4.47415828
60.13037,3.60555128,4.49529979,-0.943264814,4.47313987,4.49529979,4.47313987
60.140862,5.09901951,4.49395361,0.777859823,4.47212232,4.49395361,4.47212232
60.151353,5.19615242,4.49261571,0.838770952,4.47110571,4.49261571,4.47110571
60.161845,5.09901951,4.49128563,0.779572888,4.47008985,4.49128563,4.47008985
60.172336,4.89897949,4.4899634,0.639543656,4.46907495,4.4899634,4.46907495
60.182828,4.58257569,4.48864858,0.306475313,4.4680608,4.48864858,4.4680608
60.19332,4.79583152,4.4873411,0.555419142,4.4670475,4.4873411,4.4670475
60.203811,4,4.4860409,-0.697166339,4.46603516,4.4860409,4.46603516
60.214303,4.69041576,4.48474756,0.453506555,4.46502357,4.48474756,4.46502357
60.224794,4.12310563,4.48346116,-0.600296202,4.46401294,4.48346116,4.46401294
60.235286,3.16227766,4.48218127,-1.14887058,4.46300307,4.48218127,4.46300307
60.245778,3.74165739,4.48090786,-0.859796764,4.46199405,4.48090786,4.46199405
60.256269,4,4.47964091,-0.692561121,4.460986,4.47964091,4.460986
60.266761,4.89897949,4.47838001,0.648536411,4.4599787,4.47838001,4.4599787
60.277252,5.19615242,4.47712527,0.84795469,4.45897236,4.47712527,4.45897236
60.287744,4.58257569,4.4758763,0.32664873,4.45796679,4.4758763,4.45796679
60.298236,4.35889894,4.4746331,-0.340197231,4.45696208,4.4746331,4.45696208
60.308727,4.69041576,4.47339565,0.465854175,4.45595833,4.47339565,4.45595833
60.319219,4.24264069,4.47216358,-0.479085479,4.45495534,4.47216358,4.45495534
60.32971,4.69041576,4.47093702,0.468485579,4.45395332,4.47093702,4.45395332
60.340202,4.24264069,4.46971561,-0.476523792,4.45295206,4.46971561,4.45295206
60.350694,4.79583152,4.46849936,0.572129502,4.45195168,4.46849936,4.45195168
60.361185,4.89897949,4.46728826,0.657032134,4.45095225,4.46728826,4.45095225
60.371677,4.58257569,4.46608199,0.341311747,4.4499536,4.46608199,4.4499536
60.382168,4.12310563,4.46488066,-0.584615289,4.44895591,4.46488066,4.44895591
60.39266,3.87298335,4.46368396,-0.7685705,4.44795899,4.46368396,4.44795899
60.403152,4.47213595,4.46249189,0.0982041763,4.44696295,4.46249189,4.44696295
60.413643,4.35889894,4.46130449,-0.320008665,4.44596787,4.46130449,4.44596787
60.424135,3.74165739,4.46012143,-0.84762258,4.44497356,4.46012143,4.44497356
60.434626,4.58257569,4.45894284,0.351614639,4.44398023,4.45894284,4.44398023
60.445118,5.09901951,4.45776843,0.800781548,4.44298767,4.45776843,4.44298767
60.45561,3.87298335,4.45659821,-0.763946898,4.44199599,4.45659821,4.44199599
60.466101,5.47722558,4.45543223,1.01083794,4.44100527,4.45543223,4.44100527
60.476593,4.47213595,4.45427017,0.133662946,4.44001534,4.45427017,4.44001534
60.487084,4.79583152,4.4531122,0.58542235,4.43902638,4.4531122,4.43902638
60.497576,4.47213595,4.451958,0.142049117,4.4380382,4.451958,4.4380382
60.508068,4.24264069,4.45080763,-0.456253162,4.4370509,4.45080763,4.4370509
60.518559,5,4.44966113,0.74184828,4.43606457,4.44966113,4.43606457
60.529051,4.35889894,4.4485182,-0.299364762,4.43507903,4.4485182,4.43507903
60.539542,4.58257569,4.44737901,0.367691017,4.43409446,4.44737901,4.43409446
60.550034,5,4.44624327,0.744148325,4.43311067,4.44624327,4.43311067
60.560526,5.29150262,4.44511103,0.919995431,4.43212777,4.44511103,4.43212777
60.571017,3.87298335,4.44398234,-0.755644751,4.43114585,4.44398234,4.43114585
60.581509,4.47213595,4.44285692,0.17111118,4.43016471,4.44285692,4.43016471
60.592,4.79583152,4.44173494,0.595060154,4.42918456,4.44173494,4.42918456
60.602492,4.47213595,4.44061612,0.177538261,4.42820519,4.44061612,4.42820519
60.612984,4.79583152,4.43950053,0.596934668,4.42722671,4.43950053,4.42722671
60.623475,5.09901951,4.43838821,0.812792291,4.4262492,4.43838821,4.4262492
60.633967,4.89897949,4.4372789,0.67948553,4.4252725,4.4372789,4.4252725
60.644458,4.24264069,4.43617277,-0.439922815,4.42429677,4.43617277,4.42429677
60.65495,5.29150262,4.43506956,0.925436688,4.42332183,4.43506956,4.42332183
60.665442,4.69041576,4.43396933,0.506405403,4.42234779,4.43396933,4.42234779
60.675933,5.56776436,4.43287213,1.06531321,4.42137473,4.43287213,4.42137473
60.686425,4.58257569,4.43177773,0.388327141,4.42040246,4.43177773,4.42040246
60.696916,4.69041576,4.43068627,0.509636624,4.41943118,4.43068627,4.41943118
60.707408,4.47213595,4.42959752,0.206248479,4.4184607,4.42959752,4.4184607
60.7179,4.58257569,4.42851154,0.392510075,4.41749112,4.42851154,4.41749112
60.728391,4.47213595,4.42742839,0.211441647,4.41652251,4.42742839,4.41652251
60.738883,5.38516481,4.42634782,0.979192007,4.41555471,4.42634782,4.41555471
60.749374,4.35889894,4.42527002,-0.257625836,4.4145879,4.42527002,4.4145879
60.759866,4.58257569,4.42419472,0.397971067,4.41362189,4.42419472,4.41362189
60.770358,4,4.42312202,-0.650478299,4.41265677,4.42312202,4.41265677
60.780849,4.58257569,4.42205196,0.40065413,4.41169265,4.42205196,4.41169265
60.791341,4.58257569,4.42098432,0.401984294,4.41072933,4.42098432,4.41072933
60.801832,3.74165739,4.41991927,-0.823566562,4.409767,4.41991927,4.409767
60.812324,4.35889894,4.41885657,-0.244862455,4.40880547,4.41885657,4.40880547
60.822816,4.69041576,4.41779629,0.522129749,4.40784485,4.41779629,4.40784485
60.833307,4.79583152,4.4167385,0.615705307,4.40688522,4.4167385,4.40688522
60.843799,4.69041576,4.41568297,0.524149583,4.4059264,4.41568297,4.4059264
60.85429,4.69041576,4.41462989,0.52515319,4.40496857,4.41462989,4.40496857
60.864782,4.69041576,4.41357901,0.526152786,4.40401155,4.41357901,4.40401155
60.875274,4.79583152,4.41253041,0.61911317,4.40305543,4.41253041,4.40305543
60.885765,5.19615242,4.41148416,0.885815027,4.40210031,4.41148416,4.40210031
60.896257,4.69041576,4.41044004,0.529127315,4.401146,4.41044004,4.401146
60.906748,4.24264069,4.40939823,-0.408359577,4.40019269,4.40939823,4.40019269
60.91724,4.89897949,4.4083585,0.700443421,4.3992402,4.4083585,4.3992402
60.927732,5.09901951,4.40732092,0.831684189,4.39828861,4.40732092,4.39828861
60.938223,4.47213595,4.40628558,0.256613283,4.39733801,4.40628558,4.39733801
60.948715,5.19615242,4.40525225,0.889325687,4.39638824,4.40525225,4.39638824
60.959206,3.60555128,4.4042211,-0.89368329,4.39543946,4.4042211,4.39543946
60.969698,5.47722558,4.40319192,1.03635595,4.3944915,4.40319192,4.3944915
60.98019,4.58257569,4.40216479,0.424748052,4.39354445,4.40216479,4.39354445
60.990681,4.47213595,4.40113978,0.266451079,4.39259841,4.40113978,4.39259841
61.001173,5.47722558,4.40011668,1.03783857,4.39165318,4.40011668,4.39165318
61.011664,4,4.39909566,-0.631740181,4.39070895,4.39909566,4.39070895
61.022156,4.35889894,4.39807651,-0.197933227,4.38976555,4.39807651,4.38976555
61.032648,4.12310563,4.3970593,-0.523405845,4.38882306,4.3970593,4.38882306
61.043139,5.56776436,4.39604413,1.08246027,4.38788157,4.39604413,4.38788157
61.053631,3.74165739,4.39503077,-0.808315149,4.38694091,4.39503077,4.38694091
61.064122,4.12310563,4.3940194,-0.520493778,4.38600125,4.3940194,4.38600125
61.074614,4.47213595,4.39300981,0.281293699,4.38506242,4.39300981,4.38506242
61.085106,4.58257569,4.39200208,0.436547377,4.3841245,4.39200208,4.3841245
61.095597,4.79583152,4.3909963,0.636266632,4.38318759,4.3909963,4.38318759
61.106089,4.24264069,4.38999224,-0.383863981,4.38225151,4.38999224,4.38225151
61.11658,5.09901951,4.3889901,0.842632432,4.38131643,4.3889901,4.38131643
61.127072,4.79583152,4.38798966,0.638624981,4.38038219,4.38798966,4.38038219
61.137564,4,4.386991,-0.622086007,4.37944886,4.386991,4.37944886
61.148055,4,4.38599421,-0.62128432,4.37851654,4.38599421,4.37851654
61.158547,4.12310563,4.38499907,-0.511755262,4.37758505,4.38499907,4.37758505
61.169038,4.69041576,4.38400578,0.553543118,4.37665458,4.38400578,4.37665458
61.17953,3.46410162,4.38301411,-0.958599237,4.37572493,4.38301411,4.37572493
61.190022,5.83095189,4.38202416,1.20371414,4.37479621,4.38202416,4.37479621
61.200513,3.87298335,4.38103601,-0.712778132,4.3738685,4.38103601,4.3738685
61.211005,4.12310563,4.38004945,-0.506896269,4.37294162,4.38004945,4.37294162
61.221496,3.87298335,4.37906467,-0.711393927,4.37201576,4.37906467,4.37201576
61.231988,4.12310563,4.37808145,-0.504951309,4.37109073,4.37808145,4.37109073
61.24248,4.47213595,4.37709989,0.308279206,4.37016663,4.37709989,4.37016663
61.252971,5,4.37612006,0.789860711,4.36924354,4.37612006,4.36924354
61.263463,4.79583152,4.37514177,0.648606011,4.36832129,4.37514177,4.36832129
61.273954,4.47213595,4.37416519,0.313002825,4.36740005,4.37416519,4.36740005
61.284446,4,4.37319012,-0.61089289,4.36647966,4.37319012,4.36647966
61.294938,4,4.37221666,-0.610095612,4.36556019,4.37221666,4.36556019
61.305429,3.74165739,4.37124487,-0.793465489,4.36464174,4.37124487,4.36464174
61.315921,4.58257569,4.37027457,0.460761465,4.36372413,4.37027457,4.36372413
61.326412,5,4.36930592,0.794162499,4.36280754,4.36930592,4.36280754
61.336904,4.35889894,4.36833875,-0.0971586533,4.36189179,4.36833875,4.36189179
61.347396,4.79583152,4.36737312,0.654567342,4.36097697,4.36737312,4.36097697
61.357887,4.69041576,4.36640912,0.569215812,4.36006317,4.36640912,4.36006317
61.368379,3.60555128,4.36544656,-0.871719727,4.35915021,4.36544656,4.35915021
61.37887,4,4.36448561,-0.603726436,4.35823828,4.36448561,4.35823828
61.389362,5,4.36352608,0.797793155,4.35732719,4.36352608,4.35732719
61.399854,5,4.36256806,0.798393351,4.35641703,4.36256806,4.35641703
61.410345,3.46410162,4.36161162,-0.947370045,4.3555079,4.36161162,4.3555079
61.420837,4,4.36065657,-0.600546896,4.35459961,4.36065657,4.35459961
61.431328,5.09901951,4.3597031,0.859835108,4.35369234,4.3597031,4.35369234
61.44182,3.46410162,4.35875101,-0.945859076,4.35278593,4.35875101,4.35278593
61.452312,4.35889894,4.35780038,0.0331446428,4.35188045,4.35780038,4.35188045
61.462803,4.79583152,4.35685129,0.662555833,4.35097599,4.35685129,4.35097599
61.473295,4.24264069,4.35590356,-0.336545506,4.35007239,4.35590356,4.35007239
61.483786,4.79583152,4.35495737,0.66398355,4.34916981,4.35495737,4.34916981
61.494278,4,4.35401252,-0.594989509,4.34826808,4.35401252,4.34826808
61.50477,5,4.35306909,0.804320154,4.34736729,4.35306909,4.34736729
61.515261,4.58257569,4.35212717,0.48005054,4.34646753,4.35212717,4.34646753
61.525753,4.35889894,4.35118658,0.0878200553,4.34556862,4.35118658,4.34556862
61.536244,3.74165739,4.35024748,-0.780121848,4.34467073,4.35024748,4.34467073
61.546736,4.69041576,4.3493097,0.584042859,4.3437737,4.3493097,4.3437737
61.557228,4.69041576,4.34837331,0.584843956,4.34287762,4.34837331,4.34287762
61.567719,4.69041576,4.34743839,0.585642696,4.34198256,4.34743839,4.34198256
61.578211,3.87298335,4.34650477,-0.688128929,4.34108836,4.34650477,4.34108836
61.588702,4.12310563,4.34557261,-0.47166406,4.34019519,4.34557261,4.34019519
61.599194,4.58257569,4.34464173,0.487784748,4.33930287,4.34464173,4.33930287
61.609686,4.58257569,4.34371222,0.48873661,4.3384115,4.34371222,4.3384115
61.620177,4.69041576,4.34278416,0.589602921,4.33752116,4.34278416,4.33752116
61.630669,4.58257569,4.34185735,0.490630555,4.33663168,4.34185735,4.33663168
61.64116,5.65685425,4.34093199,1.14713655,4.33574323,4.34093199,4.33574323
61.651652,4.24264069,4.34000788,-0.31203716,4.33485564,4.34000788,4.33485564
61.662144,4.58257569,4.3390851,0.49344766,4.333969,4.3390851,4.333969
61.672635,4.58257569,4.33816375,0.494380367,4.33308339,4.33816375,4.33308339
61.683127,4.89897949,4.33724363,0.749490396,4.33219864,4.33724363,4.33219864
61.693618,4,4.33632493,-0.579935278,4.33131492,4.33632493,4.33131492
61.70411,4.35889894,4.33540745,0.153269348,4.33043207,4.33540745,4.33043207
61.714602,5.09901951,4.33449129,0.874373048,4.32955017,4.33449129,4.32955017
61.725093,5,4.33357652,0.816347647,4.3286693,4.33357652,4.3286693
61.735585,4.35889894,4.33266297,0.161975233,4.3277893,4.33266297,4.3277893
61.746076,5.83095189,4.3317508,1.22441868,4.32691033,4.3317508,4.32691033
61.756568,5.38516481,4.33083984,1.02680327,4.32603223,4.33083984,4.32603223
61.76706,3.87298335,4.32993017,-0.675978423,4.32515508,4.32993017,4.32515508
61.777551,4.24264069,4.32902188,-0.293906775,4.32427897,4.32902188,4.32427897
61.788043,4.47213595,4.32811478,0.379501219,4.32340372,4.32811478,4.32340372
61.798534,3.74165739,4.32720904,-0.765213471,4.32252951,4.32720904,4.32252951
61.809026,3.60555128,4.3263045,-0.84897186,4.32165617,4.3263045,4.32165617
61.819518,5.38516481,4.32540122,1.0294482,4.32078378,4.32540122,4.32078378
61.830009,4.12310563,4.32449929,-0.448769055,4.31991244,4.32449929,4.31991244
61.840501,4.58257569,4.32359854,0.50889798,4.31904196,4.32359854,4.31904196
61.850992,4.24264069,4.32269914,-0.282946017,4.31817252,4.32269914,4.31817252
61.861484,5,4.3218009,0.823528446,4.31730395,4.3218009,4.31730395
61.871976,4,4.32090391,-0.566483817,4.31643634,4.32090391,4.31643634
61.882467,4.58257569,4.32000826,0.512413341,4.31556976,4.32000826,4.31556976
61.892959,5,4.31911377,0.825158306,4.31470406,4.31911377,4.31470406
61.90345,4.35889894,4.3182206,0.201688718,4.3138394,4.3182206,4.3138394
61.913942,3.46410162,4.31732859,-0.923702861,4.31297562,4.31732859,4.31297562
61.924434,5,4.31643781,0.826778198,4.31211279,4.31643781,4.31211279
61.934925,4.69041576,4.31554835,0.612264167,4.31125101,4.31554835,4.31125101
61.945417,4.47213595,4.31466003,0.396832364,4.3103901,4.31466003,4.3103901
61.955908,4.79583152,4.31377302,0.694304331,4.30953023,4.31377302,4.30953023
61.9664,4.89897949,4.31288715,0.765566678,4.30867124,4.31288715,4.30867124
61.976892,4.35889894,4.31200249,0.216555882,4.3078132,4.31200249,4.3078132
61.987383,4.69041576,4.31111914,0.615870619,4.30695622,4.31111914,4.30695622
61.997875,4.69041576,4.31023692,0.616586445,4.30610011,4.31023692,4.30610011
62.008366,4,4.30935599,-0.556197794,4.30524504,4.30935599,4.30524504
62.018858,4.35889894,4.30847618,0.224550137,4.30439085,4.30847618,4.30439085
62.02935,4.47213595,4.30759758,0.405633303,4.30353762,4.30759758,4.30353762
62.039841,4.89897949,4.30672026,0.769583799,4.30268544,4.30672026,4.30268544
62.050333,4.79583152,4.30584406,0.699991043,4.30183414,4.30584406,4.30183414
62.060824,4.89897949,4.30496914,0.770720664,4.30098388,4.30496914,4.30098388
62.071316,4,4.30409533,-0.551448397,4.30013451,4.30409533,4.30013451
62.081808,4.79583152,4.30322272,0.701860959,4.2992861,4.30322272,4.2992861
62.092299,3.31662479,4.30235137,-0.992837642,4.29843873,4.30235137,4.29843873
62.102791,4.47213595,4.30148113,0.413103889,4.29759225,4.30148113,4.29759225
62.113282,4.24264069,4.30061216,-0.240772656,4.29674682,4.30061216,4.29674682
62.123774,5.56776436,4.29974429,1.12606398,4.29590226,4.29974429,4.29590226
62.134266,4.24264069,4.29887759,-0.237143214,4.29505868,4.29887759,4.29505868
62.144757,4.24264069,4.29801216,-0.235311432,4.29421614,4.29801216,4.29421614
62.155249,3.60555128,4.29714782,-0.831622835,4.29337449,4.29714782,4.29337449
62.16574,3.60555128,4.29628473,-0.831103757,4.29253388,4.29628473,4.29253388
62.176232,4.69041576,4.29542273,0.628484707,4.29169416,4.29542273,4.29169416
62.186724,4.35889894,4.29456191,0.253647469,4.29085541,4.29456191,4.29085541
62.197215,4.47213595,4.29370233,0.422414049,4.2900177,4.29370233,4.2900177
62.207707,4.79583152,4.28918089,0.711793956,4.28918089,4.28918089,4.28918089
62.218198,5.09901951,4.28834512,0.900374586,4.28834512,4.28834512,4.28834512
62.22869,4.12310563,4.28751024,-0.405468389,4.28751024,4.28751024,4.28751024
62.239182,3.74165739,4.28667633,-0.738253983,4.28667633,4.28667633,4.28667633
62.249673,4.79583152,4.28584347,0.714134479,4.28584347,4.28584347,4.28584347
62.260165,4.89897949,4.2850115,0.783561093,4.2850115,4.2850115,4.2850115
62.270656,4,4.28418058,-0.533085901,4.28418058,4.28418058,4.28418058
62.281148,3,4.28335055,-1.13285063,4.28335055,4.28335055,4.28335055
62.29164,4,4.28252149,-0.531527506,4.28252149,4.28252149,4.28252149
62.302131,4,4.28169348,-0.530748038,4.28169348,4.28169348,4.28169348
62.312623,4.47213595,4.28086636,0.437343791,4.28086636,4.28086636,4.28086636
62.323114,4.24264069,4.2800403,-0.193389789,4.2800403,4.2800403,4.2800403
62.333606,4.24264069,4.27921512,-0.191244445,4.27921512,4.27921512,4.27921512
62.344098,4,4.27839092,-0.527627638,4.27839092,4.27839092,4.27839092
62.354589,5,4.27756778,0.849960131,4.27756778,4.27756778,4.27756778
62.365081,4,4.27674552,-0.52606608,4.27674552,4.27674552,4.27674552
62.375572,4.69041576,4.27592432,0.643810098,4.27592432,4.27592432,4.27592432
62.386064,5,4.27510401,0.85140824,4.27510401,4.27510401,4.27510401
62.396556,4.69041576,4.27428467,0.645082231,4.27428467,4.27428467,4.27428467
62.407047,4.35889894,4.27346639,0.292288472,4.27346639,4.27346639,4.27346639
62.417539,3.46410162,4.27264901,-0.899192634,4.27264901,4.27264901,4.27264901
62.42803,4.47213595,4.27183267,0.447552545,4.27183267,4.27183267,4.27183267
62.438522,4.35889894,4.27101724,0.296448486,4.27101724,4.27101724,4.27101724
62.449014,4,4.27020278,-0.519810329,4.27020278,4.27020278,4.27020278
62.459505,4.35889894,4.26938937,0.299181505,4.26938937,4.26938937,4.26938937
62.469997,4.24264069,4.26857686,-0.161047119,4.26857686,4.26857686,4.26857686
62.480488,4.24264069,4.26776541,-0.158507788,4.26776541,4.26776541,4.26776541
62.49098,4.58257569,4.26695485,0.561801429,4.26695485,4.26695485,4.26695485
62.501472,4.89897949,4.26614527,0.795508778,4.26614527,4.26614527,4.26614527
62.511963,3.60555128,4.26533674,-0.812271794,4.26533674,4.26533674,4.26533674
62.522455,4.35889894,4.26452912,0.307196722,4.26452912,4.26452912,4.26452912
62.532946,4.58257569,4.26372255,0.564670832,4.26372255,4.26372255,4.26372255
62.543438,3.60555128,4.26291688,-0.810780858,4.26291688,4.26291688,4.26291688
62.55393,4.58257569,4.26211218,0.566094968,4.26211218,4.26211218,4.26211218
62.564421,4.89897949,4.26130854,0.798543012,4.26130854,4.26130854,4.26130854
62.574913,4.79583152,4.26050581,0.731659562,4.26050581,4.26050581,4.26050581
62.585404,4.35889894,4.25970413,0.314952086,4.25970413,4.25970413,4.25970413
62.595896,4.12310563,4.25890335,-0.368507426,4.25890335,4.25890335,4.25890335
62.606388,4.12310563,4.25810355,-0.367420635,4.25810355,4.25810355,4.25810355
62.616879,4.47213595,4.25730481,0.463498813,4.25730481,4.25730481,4.25730481
62.627371,4.12310563,4.25650696,-0.36524148,4.25650696,4.25650696,4.25650696
62.637862,4.47213595,4.25571018,0.465215837,4.25571018,4.25571018,4.25571018
62.648354,4,4.2549143,-0.504890384,4.2549143,4.2549143,4.2549143
62.658846,4.89897949,4.2541194,0.803031809,4.2541194,4.2541194,4.2541194
62.669337,4.24264069,4.25332556,-0.103367637,4.25332556,4.25332556,4.25332556
62.679829,4.12310563,4.25253262,-0.359759629,4.25253262,4.25253262,4.25253262
62.69032,5,4.25174073,0.865019807,4.25174073,4.25174073,4.25174073
62.700812,3.46410162,4.25094976,-0.887044611,4.25094976,4.25094976,4.25094976
62.711304,4.12310563,4.25015976,-0.356446541,4.25015976,4.25015976,4.25015976
62.721795,3.31662479,4.24937082,-0.965787779,4.24937082,4.24937082,4.24937082
62.732287,5.19615242,4.24858279,0.973431883,4.24858279,4.24858279,4.24858279
62.742778,4.24264069,4.24779582,-0.0717992316,4.24779582,4.24779582,4.24779582
62.75327,4.47213595,4.24700975,0.474474663,4.24700975,4.24700975,4.24700975
62.763762,4,4.24622466,-0.496210302,4.24622466,4.24622466,4.24622466
62.774253,4.12310563,4.24544064,-0.349764221,4.24544064,4.24544064,4.24544064
62.784745,4.58257569,4.24465752,0.581307302,4.24465752,4.24465752,4.24465752
62.795236,4.58257569,4.24387545,0.581979588,4.24387545,4.24387545,4.24387545
62.805728,4,4.2430943,-0.493045941,4.2430943,4.2430943,4.2430943
62.81622,3.87298335,4.24231413,-0.607725911,4.24231413,4.24231413,4.24231413
62.826711,3.74165739,4.24153502,-0.707020247,4.24153502,4.24153502,4.24153502
62.837203,4.89897949,4.24075681,0.811309233,4.24075681,4.24075681,4.24075681
62.847694,4.12310563,4.23997967,-0.341868458,4.23997967,4.23997967,4.23997967
62.858186,3.74165739,4.23920343,-0.70536944,4.23920343,4.23920343,4.23920343
62.868678,3.74165739,4.23842818,-0.70481969,4.23842818,4.23842818,4.23842818
62.879169,4.12310563,4.23765399,-0.338449942,4.23765399,4.23765399,4.23765399
62.889661,3.74165739,4.23688071,-0.703721053,4.23688071,4.23688071,4.23688071
62.900152,3.60555128,4.23610848,-0.794076324,4.23610848,4.23610848,4.23610848
62.910644,2.82842712,4.23533717,-1.18613239,4.23533717,4.23533717,4.23533717
62.921136,4,4.23456684,-0.484321013,4.23456684,4.23456684,4.23456684
62.931627,4.24264069,4.23379757,0.0940378273,4.23379757,4.23379757,4.23379757
62.942119,4.69041576,4.23302922,0.676303588,4.23302922,4.23302922,4.23302922
62.95261,4.79583152,4.23226192,0.750712731,4.23226192,4.23226192,4.23226192
62.963102,4,4.23149553,-0.481139827,4.23149553,4.23149553,4.23149553
62.973594,4.58257569,4.23073013,0.593165713,4.23073013,4.23073013,4.23073013
62.984085,3.87298335,4.22996579,-0.597480079,4.22996579,4.22996579,4.22996579
62.994577,4.35889894,4.22920236,0.360134115,4.22920236,4.22920236,4.22920236
63.005068,3.74165739,4.22843999,-0.697698077,4.22843999,4.22843999,4.22843999
63.01556,4.47213595,4.22767854,0.494426352,4.22767854,4.22767854,4.22767854
63.026052,3.74165739,4.22691807,-0.696606547,4.22691807,4.22691807,4.22691807
63.036543,4.24264069,4.22615866,0.128382358,4.22615866,4.22615866,4.22615866
63.047035,4.89897949,4.22540016,0.820718785,4.22540016,4.22540016,4.22540016
63.057526,4.35889894,4.22464272,0.366409907,4.22464272,4.22464272,4.22464272
63.068018,4.58257569,4.2238862,0.598906916,4.2238862,4.2238862,4.2238862
63.07851,5.09901951,4.22313067,0.935889335,4.22313067,4.22313067,4.22313067
63.089001,4.47213595,4.22237619,0.499759709,4.22237619,4.22237619,4.22237619
63.099493,4,4.22162263,-0.470768125,4.22162263,4.22162263,4.22162263
63.109984,4.24264069,4.22087013,0.147548507,4.22087013,4.22087013,4.22087013
63.120476,4.47213595,4.22011854,0.502013363,4.22011854,4.22011854,4.22011854
63.130968,3.60555128,4.21936794,-0.783464526,4.21936794,4.21936794,4.21936794
63.141459,5.56776436,4.2186184,1.16152743,4.2186184,4.2186184,4.2186184
63.151951,4.12310563,4.21786978,-0.307837863,4.21786978,4.21786978,4.21786978
63.162442,4.69041576,4.21712221,0.687963334,4.21712221,4.21712221,4.21712221
63.172934,5.47722558,4.21637556,1.12287578,4.21637556,4.21637556,4.21637556
63.183426,3.74165739,4.2156299,-0.688456619,4.2156299,4.2156299,4.2156299
63.193917,4.12310563,4.2148853,-0.302951606,4.2148853,4.2148853,4.2148853
63.204409,4.12310563,4.21414162,-0.301721713,4.21414162,4.21414162,4.21414162
63.2149,3.74165739,4.21339899,-0.686834482,4.21339899,4.21339899,4.21339899
63.225392,3.16227766,4.21265728,-1.0248803,4.21265728,4.21265728,4.21265728
63.235884,3.74165739,4.21191657,-0.68575446,4.21191657,4.21191657,4.21191657
63.246375,4.69041576,4.21117691,0.692270795,4.21117691,4.21117691,4.21117691
63.256867,4.58257569,4.21043816,0.610030763,4.21043816,4.21043816,4.21043816
63.267358,3.87298335,4.20970048,-0.580273327,4.20970048,4.20970048,4.20970048
63.27785,3.60555128,4.20896371,-0.776796266,4.20896371,4.20896371,4.20896371
63.288342,4,4.20822794,-0.456319995,4.20822794,4.20822794,4.20822794
63.298833,4.24264069,4.20749322,0.187476577,4.20749322,4.20749322,4.20749322
63.309325,4.47213595,4.20675942,0.515147099,4.20675942,4.20675942,4.20675942
63.319816,5.09901951,4.20602668,0.94498298,4.20602668,4.20602668,4.20602668
63.330308,4.24264069,4.20529486,0.193250686,4.20529486,4.20529486,4.20529486
63.3408,4.24264069,4.20456403,0.195132417,4.20456403,4.20456403,4.20456403
63.351291,4.35889894,4.20383425,0.393782543,4.20383425,4.20383425,4.20383425
63.361783,4.47213595,4.2031054,0.518681556,4.2031054,4.2031054,4.2031054
63.372274,4.79583152,4.2023776,0.770359605,4.2023776,4.2023776,4.2023776
63.382766,4.69041576,4.20165073,0.699117325,4.20165073,4.20165073,4.20165073
63.393258,4,4.20092484,-0.448246403,4.20092484,4.20092484,4.20092484
63.403749,3.60555128,4.20020001,-0.771134705,4.20020001,4.20020001,4.20020001
63.414241,4.24264069,4.1994761,0.207760893,4.1994761,4.1994761,4.1994761
63.424732,4,4.19875325,-0.445817504,4.19875325,4.19875325,4.19875325
63.435224,4.58257569,4.19803132,0.620116424,4.19803132,4.19803132,4.19803132
63.445716,4.12310563,4.19731037,-0.272405485,4.19731037,4.19731037,4.19731037
63.456207,3.60555128,4.19659049,-0.768790748,4.19659049,4.19659049,4.19659049
63.466699,2.44948974,4.19587153,-1.32150739,4.19587153,4.19587153,4.19587153
63.47719,4.58257569,4.19515362,0.622432386,4.19515362,4.19515362,4.19515362
63.487682,4.24264069,4.19443663,0.219554214,4.19443663,4.19443663,4.19443663
63.498174,3.74165739,4.19372064,-0.672356491,4.19372064,4.19372064,4.19372064
63.508665,4.35889894,4.1930057,0.407299944,4.1930057,4.1930057,4.1930057
63.519157,4.12310563,4.19229168,-0.263032423,4.19229168,4.19229168,4.19229168
63.529648,4.12310563,4.19157872,-0.261673641,4.19157872,4.19157872,4.19157872
63.54014,4.89897949,4.19086668,0.841494388,4.19086668,4.19086668,4.19086668
63.550632,4.69041576,4.19015563,0.707290697,4.19015563,4.19015563,4.19015563
63.561123,3.87298335,4.18944564,-0.562549811,4.18944564,4.18944564,4.18944564
63.571615,4.79583152,4.18873656,0.779162986,4.18873656,4.18873656,4.18873656
63.582106,4.58257569,4.18802855,0.62812988,4.18802855,4.18802855,4.18802855
63.592598,3.74165739,4.18732145,-0.667580757,4.18732145,4.18732145,4.18732145
63.60309,5,4.18661535,0.901878402,4.18661535,4.18661535,4.18661535
63.613581,4.69041576,4.1859103,0.710285478,4.1859103,4.1859103,4.1859103
63.624073,5.09901951,4.18520617,0.955935846,4.18520617,4.18520617,4.18520617
63.634564,4.69041576,4.1845031,0.711275375,4.1845031,4.1845031,4.1845031
63.645056,4.47213595,4.18380095,0.536968345,4.18380095,4.18380095,4.18380095
63.655548,3.31662479,4.18309979,-0.930846389,4.18309979,4.18309979,4.18309979
63.666039,4.89897949,4.18239969,0.846510366,4.18239969,4.18239969,4.18239969
63.676531,4.35889894,4.1817005,0.420949452,4.1817005,4.1817005,4.1817005
63.687022,4.58257569,4.18100237,0.633698131,4.18100237,4.18100237,4.18100237
63.697514,4,4.18030517,-0.424623561,4.18030517,4.18030517,4.18030517
63.708006,3.46410162,4.17960895,-0.845876667,4.17960895,4.17960895,4.17960895
63.718497,3.46410162,4.17891379,-0.845465655,4.17891379,4.17891379,4.17891379
63.728989,4,4.17821955,-0.422160571,4.17821955,4.17821955,4.17821955
63.73948,4.24264069,4.17752636,0.255175088,4.17752636,4.17752636,4.17752636
63.749972,4.58257569,4.1768341,0.63697849,4.1768341,4.1768341,4.1768341
63.760464,3.46410162,4.17614282,-0.843825342,4.17614282,4.17614282,4.17614282
63.770955,4.12310563,4.1754526,-0.228794614,4.1754526,4.1754526,4.1754526
63.781447,4.47213595,4.1747633,0.545318855,4.1747633,4.1747633,4.1747633
63.791938,4.47213595,4.17407506,0.545949539,4.17407506,4.17407506,4.17407506
63.80243,4.24264069,4.17338773,0.263159561,4.17338773,4.17338773,4.17338773
63.812922,4.58257569,4.1727014,0.640214259,4.1727014,4.1727014,4.1727014
63.823413,4.69041576,4.17201611,0.719999754,4.17201611,4.17201611,4.17201611
63.833905,4.12310563,4.17133175,-0.219604483,4.17133175,4.17133175,4.17133175
63.844396,4.79583152,4.17064845,0.790685194,4.17064845,4.17064845,4.17064845
63.854888,3.46410162,4.16996606,-0.840157394,4.16996606,4.16996606,4.16996606
63.86538,4,4.16928466,-0.411442176,4.16928466,4.16928466,4.16928466
63.875871,4,4.16860432,-0.410614562,4.16860432,4.16860432,4.16860432
63.886363,4.69041576,4.1679249,0.722835295,4.1679249,4.1679249,4.1679249
63.896854,4.24264069,4.16724652,0.274579976,4.16724652,4.16724652,4.16724652
63.907346,4.12310563,4.16656907,-0.208478893,4.16656907,4.16656907,4.16656907
63.917838,3.46410162,4.16589261,-0.837729668,4.16589261,4.16589261,4.16589261
63.928329,4.35889894,4.1652172,0.44009288,4.1652172,4.1652172,4.1652172
63.938821,3.31662479,4.16454271,-0.920824588,4.16454271,4.16454271,4.16454271
63.949312,3.46410162,4.16386927,-0.836521164,4.16386927,4.16386927,4.16386927
63.959804,4.47213595,4.16319676,0.555822992,4.16319676,4.16319676,4.16319676
63.970296,4.12310563,4.16252523,-0.198543702,4.16252523,4.16252523,4.16252523
63.980787,5,4.16185475,0.915502732,4.16185475,4.16185475,4.16185475
63.991279,3.31662479,4.16118519,-0.918999673,4.16118519,4.16118519,4.16118519
64.00177,4,4.16051668,-0.40064533,4.16051668,4.16051668,4.16051668
64.012262,4.58257569,4.15984909,0.650174285,4.15984909,4.15984909,4.15984909
64.022754,4.47213595,4.15918249,0.559422436,4.15918249,4.15918249,4.15918249
64.033245,4.24264069,4.15851694,0.290040938,4.15851694,4.15851694,4.15851694
64.043737,3.60555128,4.15785231,-0.743169587,4.15785231,4.15785231,4.15785231
64.054228,4.79583152,4.15718873,0.799151296,4.15718873,4.15718873,4.15718873
64.06472,3.46410162,4.15652607,-0.832120456,4.15652607,4.15652607,4.15652607
64.075212,3.16227766,4.15586439,-0.996788209,4.15586439,4.15586439,4.15586439
64.085703,4.24264069,4.15520377,0.295697347,4.15520377,4.15520377,4.15520377
64.096195,4.79583152,4.15454406,0.80080426,4.15454406,4.15454406,4.15454406
64.106686,5.56776436,4.1538854,1.18906642,4.1538854,4.1538854,4.1538854
64.117178,4.69041576,4.15322766,0.732931168,4.15322766,4.15322766,4.15322766
64.12767,4,4.15257091,-0.390603263,4.15257091,4.15257091,4.15257091
64.138161,4,4.1519152,-0.389763007,4.1519152,4.1519152,4.1519152
64.148653,3.31662479,4.15126042,-0.913583945,4.15126042,4.15126042,4.15126042
64.159144,3.31662479,4.15060668,-0.913226086,4.15060668,4.15060668,4.15060668
64.169636,4.47213595,4.14995386,0.56761087,4.14995386,4.14995386,4.14995386
64.180128,3,4.14930202,-1.07205504,4.14930202,4.14930202,4.14930202
64.190619,4.89897949,4.14865123,0.866214903,4.14865123,4.14865123,4.14865123
64.201111,4.24264069,4.14800136,0.30763506,4.14800136,4.14800136,4.14800136
64.211602,3.74165739,4.14735253,-0.636942026,4.14735253,4.14735253,4.14735253
64.222094,4.35889894,4.14670462,0.460645546,4.14670462,4.14670462,4.14670462
64.232586,5.29150262,4.1460577,1.07025461,4.1460577,4.1460577,4.1460577
64.243077,4.35889894,4.14541182,0.462046667,4.14541182,4.14541182,4.14541182
64.253569,3.60555128,4.14476686,-0.734313003,4.14476686,4.14476686,4.14476686
64.26406,3.31662479,4.14412294,-0.909669255,4.14412294,4.14412294,4.14412294
64.274552,4.79583152,4.14347995,0.807682844,4.14347995,4.14347995,4.14347995
64.285044,3.87298335,4.14283793,-0.519475298,4.14283793,4.14283793,4.14283793
64.295535,4.35889894,4.14219696,0.465512606,4.14219696,4.14219696,4.14219696
64.306027,4,4.1415569,-0.376240485,4.1415569,4.1415569,4.1415569
64.316518,4.24264069,4.14091789,0.318940115,4.14091789,4.14091789,4.14091789
64.32701,3.31662479,4.1402798,-0.907554409,4.1402798,4.1402798,4.1402798
64.337502,4.35889894,4.13964268,0.468248076,4.13964268,4.13964268,4.13964268
64.347993,4.89897949,4.13900661,0.871764232,4.13900661,4.13900661,4.13900661
64.358485,4.89897949,4.13837146,0.872128448,4.13837146,4.13837146,4.13837146
64.368976,4.24264069,4.13773734,0.32388786,4.13773734,4.13773734,4.13773734
64.379468,3.46410162,4.13710415,-0.820367315,4.13710415,4.13710415,4.13710415
64.38996,4.47213595,4.13647193,0.579365192,4.13647193,4.13647193,4.13647193
64.400451,4.47213595,4.13584075,0.579909651,4.13584075,4.13584075,4.13584075
64.410943,4.12310563,4.13521049,-0.110022116,4.13521049,4.13521049,4.13521049
64.421434,3.46410162,4.13458127,-0.818828221,4.13458127,4.13458127,4.13458127
64.431926,4.89897949,4.13395297,0.874657944,4.13395297,4.13395297,4.13395297
64.442418,4.79583152,4.13332564,0.813944643,4.13332564,4.13332564,4.13332564
64.452909,3.46410162,4.13269935,-0.81767826,4.13269935,4.13269935,4.13269935
64.463401,4.79583152,4.13207398,0.814713166,4.13207398,4.13207398,4.13207398
64.473892,5.19615242,4.13144965,1.03184436,4.13144965,4.13144965,4.13144965
64.484384,5.19615242,4.13082623,1.0321464,4.13082623,4.13082623,4.13082623
64.494876,4.79583152,4.13020379,0.815860121,4.13020379,4.13020379,4.13020379
64.505367,5.09901951,4.12958238,0.984599987,4.12958238,4.12958238,4.12958238
64.515859,4.89897949,4.12896189,0.877506464,4.12896189,4.12896189,4.12896189
64.52635,4.47213595,4.12834244,0.586339082,4.12834244,4.12834244,4.12834244
64.536842,3.87298335,4.1277239,-0.504718288,4.1277239,4.1277239,4.1277239
64.547334,3.74165739,4.12710633,-0.620845348,4.12710633,4.12710633,4.12710633
64.557825,3.74165739,4.1264898,-0.620348625,4.1264898,4.1264898,4.1264898
64.568317,3.46410162,4.12587419,-0.813494052,4.12587419,4.12587419,4.12587419
64.578808,3.60555128,4.12525961,-0.720907991,4.12525961,4.12525961,4.12525961
64.5893,4.35889894,4.12464594,0.483996904,4.12464594,4.12464594,4.12464594
64.599792,4.58257569,4.12403325,0.677157624,4.12403325,4.12403325,4.12403325
64.610283,4.35889894,4.12342159,0.485260093,4.12342159,4.12342159,4.12342159
64.620775,4.24264069,4.12281084,0.346164481,4.12281084,4.12281084,4.12281084
64.631266,4.47213595,4.12220112,0.591552898,4.12220112,4.12220112,4.12220112
64.641758,4,4.12159232,-0.348700906,4.12159232,4.12159232,4.12159232
64.65225,4.47213595,4.12098449,0.592580343,4.12098449,4.12098449,4.12098449
64.662741,4.58257569,4.12037769,0.679851456,4.12037769,4.12037769,4.12037769
64.673233,3.60555128,4.11977181,-0.717091717,4.11977181,4.11977181,4.11977181
64.683724,4.12310563,4.11916695,0.06275888,4.11916695,4.11916695,4.11916695
64.694216,4.69041576,4.118563,0.756209465,4.118563,4.118563,4.118563
64.704708,3.46410162,4.11796003,-0.808615122,4.11796003,4.11796003,4.11796003
64.715199,4,4.11735808,-0.342575662,4.11735808,4.11735808,4.11735808
64.725691,3.87298335,4.11675705,-0.493734447,4.11675705,4.11675705,4.11675705
64.736182,4.58257569,4.11615704,0.682948498,4.11615704,4.11615704,4.11615704
64.746674,4.12310563,4.11555795,0.0868773671,4.11555795,4.11555795,4.11555795
64.757166,4.58257569,4.11495982,0.683824446,4.11495982,4.11495982,4.11495982
64.767657,4.58257569,4.11436272,0.684260895,4.11436272,4.11436272,4.11436272
64.778149,4.12310563,4.11376653,0.0966389818,4.11376653,4.11376653,4.11376653
64.78864,4.58257569,4.11317137,0.685130883,4.11317137,4.11317137,4.11317137
64.799132,4,4.11257711,-0.335525132,4.11257711,4.11257711,4.11257711
64.809624,4.12310563,4.11198383,0.105459936,4.11198383,4.11198383,4.11198383
64.820115,4,4.11139156,-0.333753748,4.11139156,4.11139156,4.11139156
64.830607,3.60555128,4.11080021,-0.710808649,4.11080021,4.11080021,4.11080021
64.841098,3.74165739,4.11020988,-0.607085244,4.11020988,4.11020988,4.11020988
64.85159,2.44948974,4.10962046,-1.2884606,4.10962046,4.10962046,4.10962046
64.862082,3.60555128,4.109032,-0.709563758,4.109032,4.109032,4.109032
64.872573,4.47213595,4.10844457,0.603068311,4.10844457,4.10844457,4.10844457
64.883065,4,4.10785804,-0.32841748,4.10785804,4.10785804,4.10785804
64.893556,4.24264069,4.10727254,0.367924111,4.10727254,4.10727254,4.10727254
64.904048,4.69041576,4.10668794,0.764020826,4.10668794,4.10668794,4.10668794
64.91454,4.24264069,4.1061043,0.3695083,4.1061043,4.1061043,4.1061043
64.925031,2.82842712,4.10552169,-1.13008609,4.10552169,4.10552169,4.10552169
64.935523,5.38516481,4.10493998,1.13147021,4.10493998,4.10493998,4.10493998
64.946014,3.74165739,4.10435929,-0.602247376,4.10435929,4.10435929,4.10435929
64.956506,4.47213595,4.10377951,0.606923759,4.10377951,4.10377951,4.10377951
64.966998,3.46410162,4.10320068,-0.799436719,4.10320068,4.10320068,4.10320068
64.977489,4.89897949,4.10262288,0.892388149,4.10262288,4.10262288,4.10262288
64.987981,4.79583152,4.10204598,0.8329379,4.10204598,4.10204598,4.10204598
64.998472,5.09901951,4.10147009,0.998773958,4.10147009,4.10147009,4.10147009
65.008964,3.74165739,4.10089511,-0.599364437,4.10089511,4.10089511,4.10089511
65.019456,4.47213595,4.1003211,0.609766233,4.1003211,4.1003211,4.1003211
65.029947,4.58257569,4.09974809,0.694857974,4.09974809,4.09974809,4.09974809
65.040439,3.87298335,4.09917599,-0.475597144,4.09917599,4.09917599,4.09917599
65.05093,3.60555128,4.0986049,-0.702177774,4.0986049,4.0986049,4.0986049
65.061422,4.69041576,4.09803472,0.769662941,4.09803472,4.09803472,4.09803472
65.071914,3.87298335,4.09746549,-0.473795467,4.09746549,4.09746549,4.09746549
65.082405,2.64575131,4.09689728,-1.2046352,4.09689728,4.09689728,4.09689728
65.092897,3.60555128,4.09632996,-0.700555985,4.09632996,4.09632996,4.09632996
65.103388,3.60555128,4.09576366,-0.700151688,4.09576366,4.09576366,4.09576366
65.11388,4.24264069,4.09519826,0.383982324,4.09519826,4.09519826,4.09519826
65.124372,4.24264069,4.09463382,0.384716609,4.09463382,4.09463382,4.09463382
65.134863,4.79583152,4.09407038,0.837711848,4.09407038,4.09407038,4.09407038
65.145355,4.47213595,4.09350785,0.615327642,4.09350785,4.09350785,4.09350785
65.155846,3.74165739,4.09294632,-0.592696326,4.09294632,4.09294632,4.09294632
65.166338,4.47213595,4.0923857,0.6162388,4.0923857,4.0923857,4.0923857
65.17683,4.47213595,4.09182602,0.616692737,4.09182602,4.09182602,4.09182602
65.187321,4.35889894,4.09126736,0.517331215,4.09126736,4.09126736,4.09126736
65.197813,3.74165739,4.09070959,-0.590806402,4.09070959,4.09070959,4.09070959
65.208304,4.47213595,4.09015283,0.618047834,4.09015283,4.09015283,4.09015283
65.218796,4.35889894,4.08959697,0.518943135,4.08959697,4.08959697,4.08959697
65.229288,3.60555128,4.08904205,-0.695335012,4.08904205,4.08904205,4.08904205
65.239779,4.12310563,4.08848815,0.186057729,4.08848815,4.08848815,4.08848815
65.250271,4.24264069,4.08793514,0.393326265,4.08793514,4.08793514,4.08793514
65.260762,4.12310563,4.08738313,0.18900396,4.08738313,4.08738313,4.08738313
65.271254,3.74165739,4.08683202,-0.587515643,4.08683202,4.08683202,4.08683202
65.281746,4.12310563,4.08628186,0.191895205,4.08628186,4.08628186,4.08628186
65.292237,3.31662479,4.08573269,-0.876987973,4.08573269,4.08573269,4.08573269
65.302729,4.35889894,4.08518443,0.523177326,4.08518443,4.08518443,4.08518443
65.31322,3.60555128,4.08463716,-0.692160305,4.08463716,4.08463716,4.08463716
65.323712,3.74165739,4.08409079,-0.585178098,4.08409079,4.08409079,4.08409079
65.334204,4,4.08354537,-0.289042157,4.08354537,4.08354537,4.08354537
65.344695,3.74165739,4.08300094,-0.584246143,4.08300094,4.08300094,4.08300094
65.355187,4.58257569,4.08245741,0.707190416,4.08245741,4.08245741,4.08245741
65.365678,4.69041576,4.08191488,0.780064667,4.08191488,4.08191488,4.08191488
65.37617,4,4.08137323,-0.28525994,4.08137323,4.08137323,4.08137323
65.386662,4.58257569,4.08083254,0.708338309,4.08083254,4.08083254,4.08083254
65.397153,4.35889894,4.08029283,0.527831518,4.08029283,4.08029283,4.08029283
65.407645,3.60555128,4.07975402,-0.688623806,4.07975402,4.07975402,4.07975402
65.418136,4.12310563,4.0792162,0.209498022,4.0792162,4.0792162,4.0792162
65.428628,3.60555128,4.07867928,-0.687843008,4.07867928,4.07867928,4.07867928
65.43912,4.47213595,4.07814329,0.627688347,4.07814329,4.07814329,4.07814329
65.449611,4,4.0776083,-0.278582668,4.0776083,4.0776083,4.0776083
65.460103,4,4.0770742,-0.277622407,4.0770742,4.0770742,4.0770742
65.470594,4.12310563,4.07654109,0.215788174,4.07654109,4.07654109,4.07654109
65.481086,4.35889894,4.07600887,0.531874117,4.07600887,4.07600887,4.07600887
65.491578,4.35889894,4.07547758,0.532373326,4.07547758,4.07547758,4.07547758
65.502069,4.47213595,4.07494729,0.630229057,4.07494729,4.07494729,4.07494729
65.512561,4.24264069,4.07441789,0.410149731,4.07441789,4.07441789,4.07441789
65.523052,5,4.07388947,0.962346368,4.07388947,4.07388947,4.07388947
65.533544,4.24264069,4.07336194,0.411434989,4.07336194,4.07336194,4.07336194
65.544036,4.47213595,4.07283534,0.631902376,4.07283534,4.07283534,4.07283534
65.554527,4.12310563,4.07230973,0.225379438,4.07230973,4.07230973,4.07230973
65.565019,4.47213595,4.07178501,0.632732916,4.07178501,4.07178501,4.07178501
65.57551,5.65685425,4.07126127,1.25920331,4.07126127,4.07126127,4.07126127
65.586002,4.58257569,4.07073842,0.715428035,4.07073842,4.07073842,4.07073842
65.596494,4.79583152,4.0702165,0.851830394,4.0702165,4.0702165,4.0702165
65.606985,4,4.06969557,-0.26399918,4.06969557,4.06969557,4.06969557
65.617477,4.58257569,4.06917551,0.716519491,4.06917551,4.06917551,4.06917551
65.627968,4,4.06865644,-0.262023747,4.06865644,4.06865644,4.06865644
65.63846,3.74165739,4.06813826,-0.571385044,4.06813826,4.06813826,4.06813826
65.648952,4.24264069,4.067621,0.418353545,4.067621,4.067621,4.067621
65.659443,3.74165739,4.06710472,-0.570479916,4.06710472,4.06710472,4.06710472
65.669935,4.58257569,4.06658933,0.718321912,4.06658933,4.06658933,4.06658933
65.680426,4.12310563,4.06607491,0.238811049,4.06607491,4.06607491,4.06607491
65.690918,5,4.06556137,0.966663659,4.06556137,4.06556137,4.06556137
65.70141,2.64575131,4.06504876,-1.19134271,4.06504876,4.06504876,4.06504876
65.711901,4.58257569,4.06453713,0.719748959,4.06453713,4.06453713,4.06453713
65.722393,4.35889894,4.06402638,0.5430217,4.06402638,4.06402638,4.06402638
65.732884,5,4.0635166,0.967720725,4.0635166,4.0635166,4.0635166
65.743376,4.47213595,4.0630077,0.639631344,4.0630077,4.0630077,4.0630077
65.753868,3.87298335,4.06249972,-0.435334788,4.06249972,4.06249972,4.06249972
65.764359,4.35889894,4.06199272,0.544891017,4.06199272,4.06199272,4.06199272
65.774851,5,4.0614866,0.968769014,4.0614866,4.0614866,4.0614866
65.785342,4.12310563,4.06098145,0.249247227,4.06098145,4.06098145,4.06098145
65.795834,4,4.06047717,-0.24592106,4.06047717,4.06047717,4.06047717
65.806326,4.24264069,4.05997381,0.427395454,4.05997381,4.05997381,4.05997381
65.816817,4.12310563,4.05947143,0.252258195,4.05947143,4.05947143,4.05947143
65.827309,3.46410162,4.05896992,-0.77127706,4.05896992,4.05896992,4.05896992
65.8378,4.69041576,4.05846938,0.794950555,4.05846938,4.05846938,4.05846938
65.848292,4.12310563,4.05796971,0.255217397,4.05796971,4.05796971,4.05796971
65.858784,4.47213595,4.05747096,0.643944872,4.05747096,4.05747096,4.05747096
65.869275,4.79583152,4.05697317,0.8595687,4.05697317,4.05697317,4.05697317
65.879767,4.58257569,4.05647626,0.725327121,4.05647626,4.05647626,4.05647626
65.890258,4.69041576,4.05598032,0.79651456,4.05598032,4.05598032,4.05598032
65.90075,4.58257569,4.05548524,0.726009955,4.05548524,4.05548524,4.05548524
65.911242,4.12310563,4.05499108,0.260987634,4.05499108,4.05499108,4.05499108
65.921733,4.58257569,4.05449788,0.726689625,4.05449788,4.05449788,4.05449788
65.932225,4.24264069,4.05400556,0.434321459,4.05400556,4.05400556,4.05400556
65.942716,4.58257569,4.05351419,0.727366141,4.05351419,4.05351419,4.05351419
65.953208,4,4.05302369,-0.230268742,4.05302369,4.05302369,4.05302369
65.9637,3.16227766,4.05253411,-0.943534021,4.05253411,4.05253411,4.05253411
65.974191,5.19615242,4.05204548,1.06962935,4.05204548,4.05204548,4.05204548
65.984683,4.12310563,4.05155773,0.267484391,4.05155773,4.05155773,4.05155773
65.995174,3.87298335,4.05107093,-0.422004242,4.05107093,4.05107093,4.05107093
66.005666,3.87298335,4.05058499,-0.421428101,4.05058499,4.05058499,4.05058499
66.016158,3,4.05009997,-1.02474385,4.05009997,4.05009997,4.05009997
66.026649,3.87298335,4.0496159,-0.420276756,4.0496159,4.0496159,4.0496159
66.037141,3.74165739,4.04913269,-0.554504559,4.04913269,4.04913269,4.04913269
66.047632,4.24264069,4.04865044,0.440443237,4.04865044,4.04865044,4.04865044
66.058124,4.35889894,4.04816905,0.557431511,4.04816905,4.04816905,4.04816905
66.068616,4,4.04768857,-0.218377134,4.04768857,4.04768857,4.04768857
66.079107,4.35889894,4.04720904,0.558291948,4.04720904,4.04720904,4.04720904
66.089599,3.16227766,4.04673038,-0.940453463,4.04673038,4.04673038,4.04673038
66.10009,4.58257569,4.04625266,0.732340792,4.04625266,4.04625266,4.04625266
66.110582,3.74165739,4.0457758,-0.551469324,4.0457758,4.0457758,4.0457758
66.121074,4.47213595,4.04529985,0.653326952,4.04529985,4.04529985,4.04529985
66.131565,3.87298335,4.04482485,-0.414537693,4.04482485,4.04482485,4.04482485
66.142057,3.31662479,4.0443507,-0.853068525,4.0443507,4.0443507,4.0443507
66.152548,4.47213595,4.0438775,0.65441459,4.0438775,4.0438775,4.0438775
66.16304,3.87298335,4.04340516,-0.412821766,4.04340516,4.04340516,4.04340516
66.173532,3.74165739,4.04293371,-0.548886443,4.04293371,4.04293371,4.04293371
66.184023,3.60555128,4.04246322,-0.660993148,4.04246322,4.04246322,4.04246322
66.194515,4.12310563,4.04199358,0.284801773,4.04199358,4.04199358,4.04199358
66.205006,5.29150262,4.04152488,1.11802404,4.04152488,4.04152488,4.04152488
66.215498,4.24264069,4.04105703,0.448980684,4.04105703,4.04105703,4.04105703
66.22599,4.47213595,4.04059009,0.656921509,4.04059009,4.04059009,4.04059009
66.236481,4.47213595,4.04012408,0.657276103,4.04012408,4.04012408,4.04012408
66.246973,3.74165739,4.03965893,-0.545895172,4.03965893,4.03965893,4.03965893
66.257464,4.24264069,4.03919471,0.451049859,4.03919471,4.03919471,4.03919471
66.267956,4.24264069,4.03873135,0.451563217,4.03873135,4.03873135,4.03873135
66.278448,4.47213595,4.03826888,0.65868587,4.03826888,4.03826888,4.03826888
66.288939,4.24264069,4.03780735,0.452585174,4.03780735,4.03780735,4.03780735
66.299431,4.89897949,4.03734666,0.92824179,4.03734666,4.03734666,4.03734666
66.309922,3.87298335,4.03688692,-0.40485006,4.03688692,4.03688692,4.03688692
66.320414,5,4.03642802,0.981617024,4.03642802,4.03642802,4.03642802
66.330906,3.87298335,4.03597001,-0.403716067,4.03597001,4.03597001,4.03597001
66.341397,3.74165739,4.03551293,-0.542084447,4.03551293,4.03551293,4.03551293
66.351889,4.89897949,4.03505671,0.929474465,4.03505671,4.03505671,4.03505671
66.36238,4.69041576,4.03460141,0.809823655,4.03460141,4.03460141,4.03460141
66.372872,5.09901951,4.03414696,1.03192662,4.03414696,4.03414696,4.03414696
66.383364,4,4.03369339,-0.183557592,4.03369339,4.03369339,4.03369339
66.393855,4.58257569,4.03324075,0.741171331,4.03324075,4.03324075,4.03324075
66.404347,3.87298335,4.03278896,-0.399756944,4.03278896,4.03278896,4.03278896
66.414838,3.74165739,4.0323381,-0.539148132,4.0323381,4.0323381,4.0323381
66.42533,3.74165739,4.03188807,-0.538730624,4.03188807,4.03188807,4.03188807
66.435822,4.89897949,4.03143893,0.931418571,4.03143893,4.03143893,4.03143893
66.446313,4.69041576,4.03099072,0.812049901,4.03099072,4.03099072,4.03099072
66.456805,4.12310563,4.03054334,0.304240502,4.03054334,4.03054334,4.03054334
66.467296,3.46410162,4.03009689,-0.752326576,4.03009689,4.03009689,4.03009689
66.477788,4.12310563,4.02965128,0.305703036,4.02965128,4.02965128,4.02965128
66.48828,4.35889894,4.02920655,0.574188468,4.02920655,4.02920655,4.02920655
66.498771,3.74165739,4.02876274,-0.535822124,4.02876274,4.02876274,4.02876274
66.509263,4,4.02831976,-0.168284762,4.02831976,4.02831976,4.02831976
66.519754,4.12310563,4.02787771,0.308590212,4.02787771,4.02787771,4.02787771
66.530246,4.35889894,4.02743649,0.575727763,4.02743649,4.02743649,4.02743649
66.540738,4,4.02699614,-0.164305032,4.02699614,4.02699614,4.02699614
66.551229,4.24264069,4.02655672,0.46484833,4.02655672,4.02655672,4.02655672
66.561721,4.79583152,4.02611812,0.877333117,4.02611812,4.02611812,4.02611812
66.572212,4.58257569,4.02568045,0.746254144,4.02568045,4.02568045,4.02568045
66.582704,4,4.0252436,-0.158882355,4.0252436,4.0252436,4.0252436
66.593196,4.69041576,4.02480763,0.815848105,4.02480763,4.02480763,4.02480763
66.603687,3.46410162,4.02437257,-0.748512495,4.02437257,4.02437257,4.02437257
66.614179,4.58257569,4.02393834,0.747420466,4.02393834,4.02393834,4.02393834
66.62467,4.24264069,4.02350502,0.468119284,4.02350502,4.02350502,4.02350502
66.635162,4.58257569,4.02307253,0.747999439,4.02307253,4.02307253,4.02307253
66.645654,5.09901951,4.02264091,1.03748667,4.02264091,4.02264091,4.02264091
66.656145,3.74165739,4.0222102,-0.529672366,4.0222102,4.0222102,4.0222102
66.666637,4.12310563,4.02178032,0.318316366,4.02178032,4.02178032,4.02178032
66.677128,4.69041576,4.02135134,0.817963582,4.02135134,4.02135134,4.02135134
66.68762,4,4.02092319,-0.144648492,4.02092319,4.02092319,4.02092319
66.698112,3.46410162,4.0204959,-0.745918416,4.0204959,4.0204959,4.0204959
66.708603,5.19615242,4.02006952,1.08447356,4.02006952,4.02006952,4.02006952
66.719095,4.58257569,4.01964396,0.750287771,4.01964396,4.01964396,4.01964396
66.729586,3.31662479,4.0192193,-0.838209108,4.0192193,4.0192193,4.0192193
66.740078,3.87298335,4.01879546,-0.381853529,4.01879546,4.01879546,4.01879546
66.75057,4,4.01837249,-0.135545159,4.01837249,4.01837249,4.01837249
66.761061,4.35889894,4.04526943,0.56002635,4.04526943,4.01795042,4.01795042
66.771553,4.69041576,4.0451812,0.80326494,4.0451812,4.01752916,4.01752916
66.782044,4.35889894,4.0450999,0.560177686,4.0450999,4.01710881,4.01710881
66.792536,4.69041576,4.04502568,0.803361734,4.04502568,4.01668927,4.01668927
66.803028,4.12310563,4.0449587,0.279547722,4.0449587,4.01627059,4.01627059
66.813519,3.87298335,4.04489911,-0.414627254,4.04489911,4.01585281,4.01585281
66.824011,5.19615242,4.04484706,1.07298899,4.04484706,4.01543584,4.01543584
66.834502,5,4.04480274,0.977341938,4.04480274,4.01501977,4.01501977
66.844994,3.87298335,4.0447663,-0.414467067,4.0447663,4.01460451,4.01460451
66.855486,4.69041576,4.04473792,0.803540811,4.04473792,4.0141901,4.0141901
66.865977,5.09901951,4.0447178,1.02679195,4.0447178,4.01377659,4.01377659
66.876469,3.87298335,4.04470612,-0.414394468,4.04470612,4.01336389,4.01336389
66.88696,4.35889894,4.04470307,0.560531775,4.04470307,4.01295208,4.01295208
66.897452,4.24264069,4.04470886,0.444895301,4.04470886,4.01254108,4.01254108
66.907944,5.09901951,4.04472369,1.02678909,4.04472369,4.01213092,4.01213092
66.918435,4.69041576,4.04474777,0.803534683,4.04474777,4.01172166,4.01172166
66.928927,3.46410162,4.04478134,-0.76202344,4.04478134,4.01131321,4.01131321
66.939418,4.24264069,4.04482461,0.444765193,4.04482461,4.01090564,4.01090564
66.94991,4.58257569,4.04487783,0.733278845,4.04487783,4.01049887,4.01049887
66.960402,4.47213595,4.04494124,0.65360134,4.04494124,4.01009296,4.01009296
66.970893,4.89897949,4.04501509,0.924101939,4.04501509,4.00968792,4.00968792
66.981385,4.35889894,4.04509965,0.560177909,4.04509965,4.00928369,4.00928369
66.991876,3.60555128,4.04519518,-0.66305649,4.04519518,4.00888035,4.00888035
67.002368,4.24264069,4.04530198,0.444228214,4.04530198,4.0084778,4.0084778
67.01286,4.69041576,4.04542033,0.803116078,4.04542033,4.0080761,4.0080761
67.023351,3.87298335,4.04555051,-0.415412036,4.04555051,4.00767527,4.00767527
67.033843,4.35889894,4.04569286,0.559648181,4.04569286,4.00727525,4.00727525
67.044334,5,4.04584768,0.97680721,4.04584768,4.0068761,4.0068761
67.054826,4.35889894,4.04601532,0.55936001,4.04601532,4.00647776,4.00647776
67.065318,4.24264069,4.04619613,0.443220663,4.04619613,4.00608025,4.00608025
67.075809,4.69041576,4.04639044,0.802511881,4.04639044,4.00568361,4.00568361
67.086301,4.35889894,4.04659866,0.558838336,4.04659866,4.00528777,4.00528777
67.096792,4.24264069,4.04682113,0.442515035,4.04682113,4.0048928,4.0048928
67.107284,4.79583152,4.0470583,0.865316835,4.0470583,4.00449863,4.00449863
67.117776,4.24264069,4.04731056,0.441961683,4.04731056,4.00410529,4.00410529
67.128267,4.12310563,4.04757831,0.274822332,4.04757831,4.00371283,4.00371283
67.138759,4.24264069,4.04786206,0.441337321,4.04786206,4.00332115,4.00332115
67.14925,5,4.0481622,0.975621749,4.0481622,4.00293034,4.00293034
67.159742,4.35889894,4.04847929,0.557153169,4.04847929,4.00254033,4.00254033
67.170234,3.74165739,4.04881379,-0.554216927,4.04881379,4.00215114,4.00215114
67.180725,4,4.04916619,-0.221734496,4.04916619,4.00176282,4.00176282
67.191217,4.69041576,4.04953709,0.80054898,4.04953709,4.00137528,4.00137528
67.201708,4.89897949,4.04992699,0.921440446,4.04992699,4.00098861,4.00098861
67.2122,4,4.05033655,-0.224358073,4.05033655,4.00060273,4.00060273
67.222692,4.69041576,4.05076633,0.799780865,4.05076633,4.00021767,4.00021767
67.233183,4.47213595,4.05121693,0.648782727,4.05121693,3.99983347,3.99983347
67.243675,3.87298335,4.05168909,-0.422736019,4.05168909,3.99945006,3.99945006
67.254166,4.12310563,4.05218341,0.26631226,4.05218341,3.99906751,3.99906751
67.264658,4.12310563,4.05270069,0.265339285,4.05270069,3.99868574,3.99868574
67.27515,3.74165739,4.05324164,-0.558197323,4.05324164,3.99830479,3.99830479
67.285641,3.31662479,4.05380697,-0.858593142,4.05380697,3.99792469,3.99792469
67.296133,4.58257569,4.05439761,0.726758613,4.05439761,3.99754538,3.99754538
67.306624,4.24264069,4.05501429,0.433158629,4.05501429,3.99716692,3.99716692
67.317116,4.58257569,4.055658,0.725890967,4.055658,3.99678924,3.99678924
67.327608,3.60555128,4.05632961,-0.671400276,4.05632961,3.99641237,3.99641237
67.338099,4.69041576,4.05703,0.795855361,4.05703,3.99603636,3.99603636
67.348591,4,4.05776033,-0.240333785,4.05776033,3.99566112,3.99566112
67.359082,3.46410162,4.05852149,-0.7709863,4.05852149,3.99528674,3.99528674
67.369574,5,4.05931473,0.969889308,4.05931473,3.99491312,3.99491312
67.380066,4,4.06014112,-0.245236871,4.06014112,3.99454032,3.99454032
67.390557,4.12310563,4.06100179,0.249206416,4.06100179,3.99416837,3.99416837
67.401049,4.47213595,4.06189814,0.640498098,4.06189814,3.99379719,3.99379719
67.41154,4.35889894,4.06283133,0.544120955,4.06283133,3.99342685,3.99342685
67.422032,5,4.06380291,0.967572784,4.06380291,3.99305728,3.99305728
67.432524,3.31662479,4.06481423,-0.864979444,4.06481423,3.99268853,3.99268853
67.443015,4.79583152,4.06586671,0.854379783,4.06586671,3.99232061,3.99232061
67.453507,3.87298335,4.06696213,-0.440430231,4.06696213,3.99195346,3.99195346
67.463998,4.58257569,4.06810196,0.717268243,4.06810196,3.99158715,3.99158715
67.47449,4.47213595,4.06928816,0.634702922,4.06928816,3.99122161,3.99122161
67.484982,4.58257569,4.07052245,0.71557896,4.07052245,3.99085687,3.99085687
67.495473,3.87298335,4.07180664,-0.445896061,4.07180664,3.99049296,3.99049296
67.505965,3.74165739,4.07314302,-0.575747887,4.07314302,3.99012983,3.99012983
67.516456,3.87298335,4.07453345,-0.448943315,4.07453345,3.98976752,3.98976752
67.526948,4,4.07598044,-0.275645501,4.07598044,3.98940598,3.98940598
67.53744,3.74165739,4.07748624,-0.579507423,4.07748624,3.98904524,3.98904524
67.547931,5.09901951,4.07905318,1.00993383,4.07905318,3.98868532,3.98868532
67.558423,4,4.08068419,-0.284049623,4.08068419,3.98832617,3.98832617
67.568914,4.47213595,4.08238172,0.624302999,4.08238172,3.98796785,3.98796785
67.579406,3.31662479,4.08414902,-0.876084601,4.08414902,3.98761029,3.98761029
67.589898,4.35889894,4.08598901,0.522407822,4.08598901,3.98725352,3.98725352
67.600389,4.12310563,4.08790477,0.1876189,4.08790477,3.98689758,3.98689758
67.610881,4.35889894,4.08990011,0.518650975,4.08990011,3.98654239,3.98654239
67.621372,4.47213595,4.09197829,0.616569273,4.09197829,3.98618803,3.98618803
67.631864,4.69041576,4.09414355,0.772186643,4.09414355,3.98583442,3.98583442
67.642356,3.74165739,4.09639979,-0.595602551,4.09639979,3.9854816,3.9854816
67.652847,4,4.0987511,-0.314246874,4.0987511,3.9851296,3.9851296
67.663339,4.24264069,4.10120251,0.376082671,4.10120251,3.98477836,3.98477836
67.67383,3.74165739,4.10375843,-0.601748323,4.10375843,3.98442793,3.98442793
67.684322,3.60555128,4.1064245,-0.707723975,4.1064245,3.98407825,3.98407825
67.694814,3.74165739,4.10920597,-0.606257853,4.10920597,3.98372936,3.98372936
67.705305,4.47213595,4.1121084,0.600022961,4.1121084,3.98338129,3.98338129
67.715797,4.24264069,4.11513854,0.357074426,4.11513854,3.98303396,3.98303396
67.726288,3.74165739,4.11830243,-0.613714139,4.11830243,3.98268744,3.98268744
67.73678,3.46410162,4.1216077,-0.810867492,4.1216077,3.98234168,3.98234168
67.747272,4.12310563,4.12506158,-0.0442262086,4.12506158,3.98199669,3.98199669
67.757763,4.24264069,4.12867173,0.33759288,4.12867173,3.98165251,3.98165251
67.768255,3.60555128,4.1324474,-0.725876105,4.1324474,3.98130908,3.98130908
67.778746,4,4.13639701,-0.369319657,4.13639701,3.98096645,3.98096645
67.789238,3.74165739,4.1405311,-0.631564499,4.1405311,3.98062457,3.98062457
67.79973,3.31662479,4.1448598,-0.910074179,4.1448598,3.98028346,3.98028346
67.810221,4.69041576,4.14939391,0.735541876,4.14939391,3.97994316,3.97994316
67.820713,4.24264069,4.15414633,0.297480019,4.15414633,3.9796036,3.9796036
67.831204,5,4.15912911,0.916990128,4.15912911,3.97926484,3.97926484
67.841696,4.35889894,4.16435709,0.441068986,4.16435709,3.97892682,3.97892682
67.852188,4.58257569,4.1698448,0.642441352,4.1698448,3.97858956,3.97858956
67.862679,4.47213595,4.17560781,0.544543981,4.17560781,3.97825311,3.97825311
67.873171,4,4.18166456,-0.426221261,4.18166456,3.9779174,3.9779174
67.883662,4.24264069,4.18803269,0.233683532,4.18803269,3.97758248,3.97758248
67.894154,4.58257569,4.19473366,0.622769649,4.19473366,3.97724829,3.97724829
67.904646,4.69041576,4.2017888,0.699018567,4.2017888,3.97691487,3.97691487
67.915137,4.24264069,4.20922116,0.182810086,4.20922116,3.97658225,3.97658225
67.925629,3.60555128,4.21705786,-0.781988864,4.21705786,3.97625036,3.97625036
67.93612,4.79583152,4.22532538,0.755318571,4.22532538,3.97591925,3.97591925
67.946612,3.74165739,4.23405564,-0.701710948,4.23405564,3.97558888,3.97558888
67.957104,3.87298335,4.24328096,-0.608520837,4.24328096,3.97525927,3.97525927
67.967595,4,4.25303642,-0.503027253,4.25303642,3.97493045,3.97493045
67.978087,4.35889894,4.26336316,0.309088626,4.26336316,3.97460235,3.97460235
67.988578,4.69041576,4.27430224,0.64506862,4.27430224,3.97427505,3.97427505
67.99907,4.12310563,4.2859027,-0.40348119,4.2859027,3.97394846,3.97394846
68.009562,3.87298335,4.29821511,-0.652097968,4.29821511,3.97362263,3.97362263
68.020053,5.09901951,4.3112948,0.887538572,4.3112948,3.97329759,3.97329759
68.030545,4.47213595,4.32520642,0.383313884,4.32520642,3.97297327,3.97297327
68.041036,5.19615242,4.3400159,0.925276457,4.3400159,3.97264973,3.97264973
68.051528,5.19615242,4.35580158,0.916706521,4.35580158,3.97232691,3.97232691
68.06202,4.35889894,4.37264565,-0.117246369,4.37264565,3.97200484,3.97200484
68.072511,4.58257569,4.39063889,0.438105933,4.39063889,3.97168355,3.97168355
68.083003,4.79583152,4.40988718,0.621244188,4.40988718,3.97136298,3.97136298
68.093494,4.47213595,4.43050093,0.204046634,4.43050093,3.97104318,3.97104318
68.103986,4,4.45261084,-0.672763585,4.45261084,3.9707241,3.9707241
68.114478,4.12310563,4.47635666,-0.594349256,4.47635666,3.97040577,3.97040577
68.124969,4.47213595,4.50189423,-0.172505879,4.50189423,3.97008821,3.97008821
68.135461,5,4.52940561,0.685998824,4.52940561,3.96977136,3.96977136
68.145952,4.35889894,4.55908481,-0.447421357,4.55908481,3.96945528,3.96945528
68.156444,4.24264069,4.59116146,-0.590356475,4.59116146,3.96913992,3.96913992
68.166936,4.47213595,4.62588584,-0.39210953,4.62588584,3.96882529,3.96882529
68.177427,4.89897949,4.66354049,0.485220568,4.66354049,3.96851143,3.96851143
68.187919,3.74165739,4.70445718,-0.981223618,4.70445718,3.96819828,3.96819828
68.19841,4.35889894,4.74899853,-0.624579526,4.74899853,3.9678859,3.9678859
68.208902,5,4.79759709,0.449892106,4.79759709,3.96757423,3.96757423
68.219394,5.47722558,4.85073943,0.791508779,4.85073943,3.96726328,3.96726328
68.229885,5,4.90899421,0.301671655,4.90899421,3.96695311,3.96695311
68.240377,4.89897949,4.97305791,-0.272173517,4.97305791,3.96664363,3.96664363
68.250868,5.38516481,5.0437616,0.584297187,5.0437616,3.96633492,3.96633492
68.26136,5.74456265,5.12219527,0.788902641,5.12219527,3.96602691,3.96602691
68.271852,5.83095189,5.20979309,0.788136286,5.20979309,3.96571962,3.96571962
68.282343,5.19615242,5.30856094,-0.335273797,5.30856094,3.9654131,3.9654131
68.292835,4.69041576,5.42143955,-0.854999292,5.42143955,3.96510727,3.96510727
68.303326,6.40312424,5.55272911,0.922168707,5.55272911,3.9648022,3.9648022
68.313818,5.74456265,5.70883545,0.189016391,5.70883545,3.96449783,3.96449783
68.32431,6.164414,5.89897766,0.515205143,5.89897766,3.96419418,3.96419418
68.334801,7,6.13594835,0.929543786,6.13594835,3.96389128,3.96389128
68.345293,7.93725393,6.43654247,1.22503529,6.43654247,3.96358908,3.96358908
68.355784,6.78232998,6.82089473,-0.196379087,6.82089473,3.96328763,3.96328763
68.366276,8.77496439,7.3109044,1.20998347,7.3109044,3.96298687,3.96298687
68.376768,9.53939201,7.92688096,1.26984686,7.92688096,3.96268683,3.96268683
68.387259,10.1488916,8.68364899,1.21047205,8.68364899,3.96238753,3.96238753
68.397751,10.8627805,9.58705588,1.1294798,9.58705588,3.96208893,3.96208893
68.408242,12.2065556,10.6309019,1.25525045,10.6309019,3.96179107,3.96179107
68.418734,12.6885775,11.7965459,0.944474287,11.7965459,3.9614939,3.9614939
68.429226,12.922848,13.0526161,-0.360233462,13.0526161,3.96119744,3.96119744
68.439717,14.2478068,14.3563583,-0.329471487,14.3563583,3.96090172,3.96090172
68.450209,16.1245155,15.6553164,0.68498108,15.6553164,3.96060669,3.96060669
68.4607,17.6351921,16.8874947,0.864694988,16.8874947,3.9603124,3.9603124
68.471192,18.8944436,17.9831987,0.954591491,17.9831987,3.96001879,3.96001879
68.481684,19.2353841,18.8665854,0.607287973,18.8665854,3.95972588,3.95972588
68.492175,20.0997512,19.4631113,0.797897188,19.4631113,3.95943372,3.95943372
68.502667,20.5182845,19.7135272,0.897082704,19.7135272,3.95914223,3.95914223
68.513158,20.5426386,19.5903839,0.975835375,19.5903839,3.95885148,3.95885148
68.52365,20.880613,19.1077782,1.33147844,19.1077782,3.95856141,3.95856141
68.534142,19.3907194,18.3159996,1.03668694,18.3159996,3.95827203,3.95827203
68.544633,18,17.2860362,0.844963781,17.2860362,3.95798339,3.95798339
68.555125,16.6132477,16.0937653,0.720751297,16.0937653,3.95769543,3.95769543
68.565616,15.4272486,14.8115397,0.784671215,14.8115397,3.95740819,3.95740819
68.576108,14.2126704,13.5037207,0.8419915,13.5037207,3.95712162,3.95712162
68.5866,12.8062485,12.2262945,0.761547094,12.2262945,3.95683576,3.95683576
68.597091,11.0905365,11.0255689,0.254887356,11.0255689,3.95655062,3.95655062
68.607583,11.1355287,9.93660238,1.09495495,9.93660238,3.95626614,3.95626614
68.618074,9.64365076,8.98281188,0.812919972,8.98281188,3.9559824,3.9559824
68.628566,8.88819442,8.17445033,0.84483376,8.17445033,3.95569931,3.95569931
68.639058,8.42614977,7.50983758,0.957241971,7.50983758,3.95541693,3.95541693
68.649549,7.74596669,6.97703888,0.876885292,6.97703888,3.95513526,3.95513526
68.660041,7.34846923,6.5571543,0.889558839,6.5571543,3.95485425,3.95485425
68.670532,6.4807407,6.22864781,0.502088526,6.22864781,3.95457396,3.95457396
68.681024,6.32455532,5.97048067,0.595041725,5.97048067,3.95429434,3.95429434
68.691516,5.83095189,5.76465484,0.257482152,5.76465484,3.9540154,3.9540154
68.702007,5.74456265,5.59700739,0.384129224,5.59700739,3.95373718,3.95373718
68.712499,6.08276253,5.45708476,0.790997957,5.45708476,3.95345962,3.95345962
68.72299,5.74456265,5.33761387,0.637925366,5.33761387,3.95318277,3.95318277
68.733482,4.79583152,5.23359553,-0.661637369,5.23359553,3.95290657,3.95290657
68.743974,4.12310563,5.14168119,-1.00924505,5.14168119,3.95263106,3.95263106
68.754465,4.79583152,5.05958063,-0.513565094,5.05958063,3.95235626,3.95235626
68.764957,5.65685425,4.9856588,0.819265186,4.9856588,3.95208211,3.95208211
68.775448,5.19615242,4.91874041,0.526699171,4.91874041,3.95180867,3.95180867
68.78594,5.09901951,4.85789592,0.49104337,4.85789592,3.95153588,3.95153588
68.796432,5.65685425,4.80239666,0.924368751,4.80239666,3.95126377,3.95126377
68.806923,5.38516481,4.75163734,0.795944386,4.75163734,3.95099236,3.95099236
68.817415,4.79583152,4.70509038,0.301232711,4.70509038,3.9507216,3.9507216
68.827906,5,4.66231899,0.581103266,4.66231899,3.95045154,3.95045154
68.838398,4.79583152,4.62292678,0.415818156,4.62292678,3.95018212,3.95018212
68.84889,2.64575131,4.58657826,-1.39313565,4.58657826,3.94991338,3.94991338
68.859381,5.09901951,4.5529776,0.738946489,4.5529776,3.94964534,3.94964534
68.869873,4.69041576,4.52185428,0.410562393,4.52185428,3.94937794,3.94937794
68.880364,4.12310563,4.4929807,-0.608173554,4.4929807,3.94911124,3.94911124
68.890856,4.58257569,4.46614374,0.341221268,4.46614374,3.94884517,3.94884517
68.901348,3.60555128,4.44116171,-0.914117297,4.44116171,3.94857978,3.94857978
68.911839,4.24264069,4.41787212,-0.418606534,4.41787212,3.94831507,3.94831507
68.922331,4.12310563,4.39612325,-0.522510887,4.39612325,3.94805101,3.94805101
68.932822,4.12310563,4.37578754,-0.502674758,4.37578754,3.94778763,3.94778763
68.943314,4.12310563,4.35674269,-0.48336018,4.35674269,3.9475249,3.9475249
68.953806,3.31662479,4.33888433,-1.01106852,4.33888433,3.94726282,3.94726282
68.964297,4.58257569,4.32211815,0.510350413,4.32211815,3.94700143,3.94700143
68.974789,4.12310563,4.30635433,-0.428075579,4.30635433,3.94674067,3.94674067
68.98528,5.74456265,4.29151765,1.20542316,4.29151765,3.94648059,3.94648059
68.995772,4,4.2775343,-0.526815247,4.2775343,3.94622115,3.94622115
69.006264,4.24264069,4.26434142,-0.147311675,4.26434142,3.94596237,3.94596237
69.016755,4.12310563,4.25188164,-0.358853753,4.25188164,3.94570426,3.94570426
69.027247,4.47213595,4.24009929,0.481701839,4.24009929,3.94544678,3.94544678
69.037738,3.74165739,4.22894808,-0.698062099,4.22894808,3.94518998,3.94518998
69.04823,3.87298335,4.21838148,-0.587705823,4.21838148,3.94493381,3.94493381
69.058722,3,4.20836002,-1.0992543,4.20836002,3.94467829,3.94467829
69.069213,4.47213595,4.19884742,0.522770057,4.19884742,3.94442344,3.94442344
69.079705,3.31662479,4.18980776,-0.934442599,4.18980776,3.94416921,3.94416921
69.090196,4.58257569,4.18121148,0.63353312,4.18121148,3.94391566,3.94391566
69.100688,3.46410162,4.17302812,-0.841977735,4.17302812,3.94366273,3.94366273
69.11118,4,4.16523202,-0.406487421,4.16523202,3.94341044,3.94341044
69.121671,3.46410162,4.15779944,-0.832885241,4.15779944,3.94315883,3.94315883
69.132163,4.69041576,4.15070637,0.734649162,4.15070637,3.94290783,3.94290783
69.142654,4.12310563,4.14393333,-0.144318081,4.14393333,3.94265749,3.94265749
69.153146,3.46410162,4.13745973,-0.82058401,4.13745973,3.94240778,3.94240778
69.163638,4.24264069,4.13126836,0.333724923,4.13126836,3.9421587,3.9421587
69.174129,5.47722558,4.12534321,1.16270476,4.12534321,3.94191029,3.94191029
69.184621,3.87298335,4.11966776,-0.496673345,4.11966776,3.94166248,3.94166248
69.195112,4,4.11422881,-0.337977522,4.11422881,3.94141534,3.94141534
69.205604,3.46410162,4.10901201,-0.803063135,4.10901201,3.94116881,3.94116881
69.216096,4,4.10400554,-0.3224989,4.10400554,3.94092292,3.94092292
69.226587,4,4.09919831,-0.31495763,4.09919831,3.94067768,3.94067768
69.237079,3.60555128,4.09457863,-0.69930491,4.09457863,3.94043305,3.94043305
69.24757,5.38516481,4.09013736,1.13799273,4.09013736,3.94018907,3.94018907
69.258062,4.58257569,4.08586426,0.704777581,4.08586426,3.9399457,3.9399457
69.268554,4.69041576,4.08175097,0.780169716,4.08175097,3.93970296,3.93970296
69.279045,4.35889894,4.07778967,0.530197387,4.07778967,3.93946087,3.93946087
69.289537,4.12310563,4.0739719,0.221661292,4.0739719,3.93921938,3.93921938
69.300028,4.58257569,4.07029116,0.715740548,4.07029116,3.93897854,3.93897854
69.31052,4.58257569,4.06673999,0.71821703,4.06673999,3.93873831,3.93873831
69.321012,3.74165739,4.06331239,-0.567146369,4.06331239,3.93849869,3.93849869
69.331503,5.09901951,4.06000269,1.01932175,4.06000269,3.93825972,3.93825972
69.341995,4.35889894,4.05680465,0.549631055,4.05680465,3.93802135,3.93802135
69.352486,3,4.05371358,-1.02650552,4.05371358,3.93778362,3.93778362
69.362978,4.24264069,4.05072392,0.438083061,4.05072392,3.93754648,3.93754648
69.37347,4,4.04783127,-0.218703619,4.04783127,3.93730996,3.93730996
69.383961,4.35889894,4.04503148,0.560238754,4.04503148,3.93707409,3.93707409
69.394453,5.19615242,4.04231983,1.074166,4.04231983,3.9368388,3.9368388
69.404944,4.12310563,4.03969291,0.288812602,4.03969291,3.93660415,3.93660415
69.415436,4.58257569,4.03714647,0.738531803,4.03714647,3.93637009,3.93637009
69.425928,4.79583152,4.03467726,0.872441553,4.03467726,3.93613665,3.93613665
69.436419,4.79583152,4.03228217,0.873813111,4.03228217,3.93590383,3.93590383
69.446911,3.87298335,4.02995759,-0.396199749,4.02995759,3.93567161,3.93567161
69.457402,3.46410162,4.02770097,-0.750732546,4.02770097,3.93544001,3.93544001
69.467894,3.74165739,4.02550906,-0.53277732,4.02550906,3.935209,3.935209
69.478386,4.35889894,4.02337939,0.579240498,4.02337939,3.9349786,3.9349786
69.488877,3.60555128,4.02130961,-0.644793247,4.02130961,3.93474882,3.93474882
69.499369,5,4.0192969,0.990304548,4.0192969,3.93451963,3.93451963
69.50986,4,4.01733937,-0.131679029,4.01733937,3.93429106,3.93429106
69.520352,4.12310563,4.01543444,0.328132873,4.01543444,3.93406307,3.93406307
69.530844,4.35889894,4.01358025,0.587638234,4.01358025,3.93383568,3.93383568
69.541335,3.74165739,4.01177499,-0.519728389,4.01177499,3.93360891,3.93360891
69.551827,3.87298335,4.01001643,-0.370179797,4.01001643,3.93338272,3.93338272
69.562318,4.35889894,4.00830313,0.592111319,4.00830313,3.93315715,3.93315715
69.57281,3.60555128,4.00663306,-0.63331018,4.00663306,3.93293215,3.93293215
69.583302,3.60555128,4.00500476,-0.632023329,4.00500476,3.93270774,3.93270774
69.593793,5.47722558,4.00341685,1.21400524,4.00341685,3.93248396,3.93248396
69.604285,3.31662479,4.00186753,-0.8277939,4.00186753,3.93226074,3.93226074
69.614776,4.35889894,4.00035571,0.598784799,4.00035571,3.93203814,3.93203814
69.625268,3.87298335,3.99887974,-0.354818821,3.99887974,3.9318161,3.9318161
69.63576,4.35889894,3.9974385,0.601215804,3.9974385,3.93159466,3.93159466
69.646251,4.35889894,3.99603089,0.602385303,3.99603089,3.93137382,3.93137382
69.656743,3.46410162,3.99465547,-0.72839128,3.99465547,3.93115355,3.93115355
69.667234,4.35889894,3.99331139,0.604638367,3.99331139,3.93093389,3.93093389
69.677726,4.35889894,3.99199731,0.605724055,3.99199731,3.93071479,3.93071479
69.688218,4.24264069,3.99071235,0.501924633,3.99071235,3.93049628,3.93049628
69.698709,3.87298335,3.98945564,-0.341280372,3.98945564,3.93027837,3.93027837
69.709201,4.89897949,3.988226,0.954334055,3.988226,3.93006102,3.93006102
69.719692,3.87298335,3.98702276,-0.337697227,3.98702276,3.92984427,3.92984427
69.730184,4.47213595,3.98584484,0.697345762,3.98584484,3.92962807,3.92962807
69.740676,4.69041576,3.98469153,0.840073944,3.98469153,3.92941246,3.92941246
69.751167,4.47213595,3.98356213,0.698980561,3.98356213,3.92919745,3.92919745
69.761659,3.46410162,3.98245567,-0.719968095,3.98245567,3.92898299,3.92898299
69.77215,4.24264069,3.98137164,0.511144839,3.98137164,3.92876912,3.92876912
69.782642,3.31662479,3.98030912,-0.814668235,3.98030912,3.92855581,3.92855581
69.793134,4.12310563,3.97926755,0.379259902,3.97926755,3.92834307,3.92834307
69.803625,4,3.97824638,0.147491083,3.97824638,3.92813092,3.92813092
69.814117,4.35889894,3.97724479,0.61778164,3.97724479,3.92791932,3.92791932
69.824608,3.16227766,3.97626237,-0.902211014,3.97626237,3.92770831,3.92770831
69.8351,4.35889894,3.97529837,0.619354963,3.97529837,3.92749785,3.92749785
69.845592,4.58257569,3.97435233,0.779886764,3.97435233,3.92728795,3.92728795
69.856083,4.69041576,3.9734238,0.846753777,3.9734238,3.92707864,3.92707864
69.866575,4.24264069,3.9725121,0.519738963,3.9725121,3.92686988,3.92686988
69.877066,4.24264069,3.9716169,0.520599449,3.9716169,3.9266617,3.9266617
69.887558,4.69041576,3.97073757,0.848338489,3.97073757,3.92645406,3.92645406
69.89805,4.47213595,3.96987373,0.708704612,3.96987373,3.92624698,3.92624698
69.908541,4.12310563,3.96902502,0.392531024,3.96902502,3.92604048,3.92604048
69.919033,3.87298335,3.96819086,-0.308557151,3.96819086,3.92583452,3.92583452
69.929524,5,3.967371,1.01618355,3.967371,3.92562914,3.92562914
69.940016,3.74165739,3.96656489,-0.474244137,3.96656489,3.92542429,3.92542429
69.950508,4,3.96577222,0.185007504,3.96577222,3.92522,3.92522
69.960999,3.87298335,3.96499271,-0.303330458,3.96499271,3.92501628,3.92501628
69.971491,3.60555128,3.96422585,-0.598894464,3.96422585,3.9248131,3.9248131
69.981982,4.58257569,3.96347145,0.786831775,3.96347145,3.92461049,3.92461049
69.992474,4,3.96272904,0.193056894,3.96272904,3.9244084,3.9244084
70.002966,4.12310563,3.96199836,0.401381701,3.96199836,3.92420687,3.92420687
70.013457,3.87298335,3.96127917,-0.29714614,3.96127917,3.92400591,3.92400591
70.023949,4.12310563,3.96057106,0.403155762,3.96057106,3.92380547,3.92380547
70.03444,4.12310563,3.95987385,0.404019521,3.95987385,3.9236056,3.9236056
70.044932,4,3.95918715,0.202021907,3.95918715,3.92340626,3.92340626
70.055424,3.74165739,3.95851075,-0.465675165,3.95851075,3.92320746,3.92320746
70.065915,3.46410162,3.95784445,-0.702668366,3.95784445,3.92300922,3.92300922
70.076407,3.87298335,3.95718787,-0.290180164,3.95718787,3.9228115,3.9228115
70.086898,4.47213595,3.95654091,0.718049473,3.95654091,3.92261434,3.92261434
70.09739,4.24264069,3.95590319,0.535478752,3.95590319,3.9224177,3.9224177
70.107882,3.60555128,3.95527456,-0.591374067,3.95527456,3.9222216,3.9222216
70.118373,3.46410162,3.95465485,-0.700395059,3.95465485,3.92202606,3.92202606
70.128865,4,3.95404374,0.21437412,3.95404374,3.92183103,3.92183103
70.139356,4.69041576,3.95344112,0.85847227,3.95344112,3.92163656,3.92163656
70.149848,4.24264069,3.95284669,0.538325177,3.95284669,3.9214426,3.9214426
70.16034,4.58257569,3.95226031,0.793924041,3.95226031,3.92124918,3.92124918
70.170831,4.89897949,3.95168185,0.973292164,3.95168185,3.9210563,3.9210563
70.181323,4.24264069,3.95111101,0.539934881,3.95111101,3.92086394,3.92086394
70.191814,4.24264069,3.95054773,0.540456249,3.95054773,3.92067212,3.92067212
70.202306,4,3.94999173,0.223625298,3.94999173,3.92048081,3.92048081
70.212798,4.69041576,3.94944289,0.860797811,3.94944289,3.92029003,3.92029003
70.223289,3.60555128,3.94890111,-0.585960606,3.94890111,3.92009979,3.92009979
70.233781,3.46410162,3.94836612,-0.69589116,3.94836612,3.91991006,3.91991006
70.244272,4.58257569,3.94783788,0.796704345,3.94783788,3.91972087,3.91972087
70.254764,4.58257569,3.94731614,0.797031714,3.94731614,3.91953218,3.91953218
70.265256,4.24264069,3.91934402,0.568591832,3.91934402,3.91934402,3.91934402
70.275747,4,3.91915639,0.284330112,3.91915639,3.91915639,3.91915639
70.286239,4.12310563,3.91896926,0.451814526,3.91896926,3.91896926,3.91896926
70.29673,4.35889894,3.91878267,0.663412599,3.91878267,3.91878267,3.91878267
70.307222,4.69041576,3.91859657,0.878532405,3.91859657,3.91859657,3.91859657
70.317714,3.74165739,3.91843645,-0.420451018,3.91843645,3.91841099,3.91841099
70.328205,3.60555128,3.91825169,-0.559196225,3.91825169,3.91822595,3.91822595
70.338697,4,3.91806744,0.286238637,3.91806744,3.91804139,3.91804139
70.349188,3.74165739,3.91788373,-0.41979321,3.91788373,3.91785737,3.91785737
70.35968,5.09901951,3.91770051,1.086885,3.91770051,3.91767384,3.91767384
70.370172,3.74165739,3.9175178,-0.419357148,3.9175178,3.91749082,3.91749082
70.380663,4.12310563,3.91733563,0.453618775,3.91733563,3.91730832,3.91730832
70.391155,3.16227766,3.91715396,-0.868836173,3.91715396,3.91712632,3.91712632
70.401646,3.87298335,3.91697281,-0.209736649,3.91697281,3.91694484,3.91694484
70.412138,3.87298335,3.91679215,-0.209305538,3.91679215,3.91676384,3.91676384
70.42263,4.24264069,3.91661201,0.570989209,3.91661201,3.91658335,3.91658335
70.433121,3.60555128,3.91643239,-0.55756714,3.91643239,3.91640338,3.91640338
70.443613,5.29150262,3.91625326,1.17271026,3.91625326,3.91622389,3.91622389
70.454104,3.60555128,3.91607466,-0.557246251,3.91607466,3.91604492,3.91604492
70.464596,3.74165739,3.91589654,-0.417419643,3.91589654,3.91586643,3.91586643
70.475088,4.89897949,3.91571893,0.991594953,3.91571893,3.91568844,3.91568844
70.485579,4.24264069,3.91554185,0.571925556,3.91554185,3.91551096,3.91551096
70.496071,4.58257569,3.91536524,0.816829513,3.91536524,3.91533396,3.91533396
70.506562,4.69041576,3.91518916,0.880469535,3.91518916,3.91515747,3.91515747
70.517054,4.69041576,3.91501356,0.88056925,3.91501356,3.91498146,3.91498146
70.527546,3.74165739,3.91483846,-0.416150296,3.91483846,3.91480594,3.91480594
70.538037,4.69041576,3.91466387,0.880767784,3.91466387,3.91463093,3.91463093
70.548529,3.87298335,3.91448977,-0.203731248,3.91448977,3.91445639,3.91445639
70.55902,4.12310563,3.91431618,0.45693484,3.91431618,3.91428236,3.91428236
70.569512,4.47213595,3.91414307,0.746989215,3.91414307,3.91410879,3.91410879
70.580004,4.89897949,3.91397045,0.992476212,3.91397045,3.91393571,3.91393571
70.590495,3.60555128,3.91379835,-0.555200031,3.91379835,3.91376314,3.91376314
70.600987,4.35889894,3.91362672,0.66728721,3.91362672,3.91359103,3.91359103
70.611478,4.35889894,3.91345561,0.667415416,3.91345561,3.91341942,3.91341942
70.62197,4.24264069,3.91328496,0.57389522,3.91328496,3.91324828,3.91324828
70.632462,3.31662479,3.91311481,-0.772327665,3.91311481,3.91307761,3.91307761
70.642953,3.16227766,3.91294517,-0.866410703,3.91294517,3.91290745,3.91290745
70.653445,3.60555128,3.912776,-0.554278558,3.912776,3.91273774,3.91273774
70.663936,3.74165739,3.91260733,-0.41346093,3.91260733,3.91256853,3.91256853
70.674428,3.31662479,3.91243913,-0.77189011,3.91243913,3.91239977,3.91239977
70.68492,4.12310563,3.91227142,0.459166858,3.91227142,3.91223149,3.91223149
70.695411,4.12310563,3.91210421,0.459348899,3.91210421,3.9120637,3.9120637
70.705903,3.87298335,3.91193748,-0.197368007,3.91193748,3.91189637,3.91189637
70.716394,3.87298335,3.91177124,-0.196946419,3.91177124,3.91172953,3.91172953
70.726886,3.31662479,3.91160547,-0.771349906,3.91160547,3.91156313,3.91156313
70.737378,4.89897949,3.91144018,0.993750122,3.91144018,3.91139721,3.91139721
70.747869,4.69041576,3.91127539,0.882689283,3.91127539,3.91123177,3.91123177
70.758361,4.24264069,3.91111107,0.57578609,3.91111107,3.91106678,3.91106678
70.768852,4.79583152,3.91094724,0.940682883,3.91094724,3.91090228,3.91090228
70.779344,3.87298335,3.91078387,-0.194423578,3.91078387,3.91073822,3.91073822
70.789836,4.58257569,3.91062099,0.819728434,3.91062099,3.91057462,3.91057462
70.800327,3.74165739,3.9104586,-0.410854247,3.9104586,3.9104115,3.9104115
70.810819,3.74165739,3.91029667,-0.410657137,3.91029667,3.91024883,3.91024883
70.82131,3.74165739,3.91013524,-0.410460533,3.91013524,3.91008663,3.91008663
70.831802,4,3.90997426,0.300042893,3.90997426,3.90992488,3.90992488
70.842294,3.31662479,3.90981377,-0.770187623,3.90981377,3.90976358,3.90976358
70.852785,3.46410162,3.90965376,-0.667496924,3.90965376,3.90960275,3.90960275
70.863277,4.47213595,3.90949421,0.750094489,3.90949421,3.90944236,3.90944236
70.873768,4.58257569,3.90933516,0.820512364,3.90933516,3.90928245,3.90928245
70.88426,4.79583152,3.90917656,0.941623579,3.90917656,3.90912297,3.90912297
70.894752,4.12310563,3.90901844,0.46269557,3.90901844,3.90896394,3.90896394
70.905243,4.69041576,3.9088608,0.884055971,3.9088608,3.90880537,3.90880537
70.915735,3.31662479,3.90870362,-0.76946659,3.90870362,3.90864725,3.90864725
70.926226,4.79583152,3.90854693,0.941957849,3.90854693,3.90848958,3.90848958
70.936718,4.12310563,3.9083907,0.463373418,3.9083907,3.90833235,3.90833235
70.94721,3.87298335,3.90823494,-0.187754082,3.90823494,3.90817556,3.90817556
70.957701,4.58257569,3.90807967,0.82127707,3.90807967,3.90801923,3.90801923
70.968193,4.69041576,3.90792485,0.884585161,3.90792485,3.90786333,3.90786333
70.978684,3.74165739,3.90777052,-0.407569793,3.90777052,3.90770788,3.90770788
70.989176,4.79583152,3.90761665,0.942451523,3.90761665,3.90755287,3.90755287
70.999668,3.87298335,3.90746325,-0.185687647,3.90746325,3.90739829,3.90739829
71.010159,4.69041576,3.90731033,0.884932442,3.90731033,3.90724417,3.90724417
71.020651,4.47213595,3.90715788,0.751650238,3.90715788,3.90709047,3.90709047
71.031142,3.16227766,3.9070059,-0.862976386,3.9070059,3.90693722,3.90693722
71.041634,4.12310563,3.90685439,0.465028211,3.90685439,3.90678439,3.90678439
71.052126,4.12310563,3.90670335,0.465190584,3.90670335,3.90663199,3.90663199
71.062617,4.58257569,3.90655279,0.82220612,3.90655279,3.90648005,3.90648005
71.073109,4.47213595,3.90640269,0.752152419,3.90640269,3.90632852,3.90632852
71.0836,3.87298335,3.90625308,-0.18239994,3.90625308,3.90617743,3.90617743
71.094092,3.74165739,3.90610393,-0.405520096,3.90610393,3.90602676,3.90602676
71.104584,3.74165739,3.90595526,-0.40533674,3.90595526,3.90587652,3.90587652
71.115075,4.47213595,3.90580707,0.752548258,3.90580707,3.90572672,3.90572672
71.125567,3.60555128,3.90565935,-0.547821207,3.90565935,3.90557734,3.90557734
71.136058,3.87298335,3.90551212,-0.180357343,3.90551212,3.90542839,3.90542839
71.14655,3,3.90536535,-0.951506883,3.90536535,3.90527985,3.90527985
71.157042,4.79583152,3.90521906,0.943722663,3.90521906,3.90513173,3.90513173
71.167533,4.47213595,3.90507326,0.753035651,3.90507326,3.90498405,3.90498405
71.178025,3.74165739,3.90492794,-0.404067507,3.90492794,3.90483678,3.90483678
71.188516,4.69041576,3.90478311,0.886359212,3.90478311,3.90468994,3.90468994
71.199008,3.60555128,3.90463875,-0.546888904,3.90463875,3.9045435,3.9045435
71.2095,4.24264069,3.90449488,0.581503061,3.90449488,3.90439748,3.90439748
71.219991,4.35889894,3.90435151,0.674201331,3.90435151,3.90425189,3.90425189
71.230483,4.24264069,3.90420862,0.581749147,3.90420862,3.9041067,3.9041067
71.240974,3.60555128,3.90406623,-0.546365224,3.90406623,3.90396194,3.90396194
71.251466,4.58257569,3.90392433,0.823802987,3.90392433,3.90381758,3.90381758
71.261958,4.24264069,3.90378293,0.582114899,3.90378293,3.90367363,3.90367363
71.272449,5.29150262,3.90364204,1.17807495,3.90364204,3.9035301,3.9035301
71.282941,5.19615242,3.90350165,1.13694801,3.90350165,3.90338696,3.90338696
71.293432,4,3.90336178,0.310866886,3.90336178,3.90324425,3.90324425
71.303924,4.12310563,3.90322241,0.46891707,3.90322241,3.90310193,3.90310193
71.314416,3.74165739,3.90308355,-0.401778753,3.90308355,3.90296002,3.90296002
71.324907,4.35889894,3.90294523,0.675243445,3.90294523,3.90281852,3.90281852
71.335399,4.69041576,3.90280743,0.887473004,3.90280743,3.90267742,3.90267742
71.34589,3.60555128,3.90267017,-0.545086133,3.90267017,3.90253673,3.90253673
71.356382,4.69041576,3.90253343,0.887627359,3.90253343,3.90239642,3.90239642
71.366874,3.46410162,3.90239724,-0.662038991,3.90239724,3.90225652,3.90225652
71.377365,4.89897949,3.90226161,0.998357587,3.90226161,3.90211703,3.90211703
71.387857,3.74165739,3.90212653,-0.400586002,3.90212653,3.90197792,3.90197792
71.398348,4.69041576,3.90199203,0.887932279,3.90199203,3.90183922,3.90183922
71.40884,4.24264069,3.90185809,0.583765878,3.90185809,3.90170091,3.90170091
71.419332,4.79583152,3.90172473,0.945572204,3.90172473,3.90156298,3.90156298
71.429823,4.12310563,3.90159198,0.470652363,3.90159198,3.90142547,3.90142547
71.440315,5,3.90145982,1.04811267,3.90145982,3.90128833,3.90128833
71.450806,4.12310563,3.90132829,0.47093241,3.90132829,3.9011516,3.9011516
71.461298,4.12310563,3.90119738,0.471071383,3.90119738,3.90101524,3.90101524
71.47179,4.12310563,3.90106711,0.471209634,3.90106711,3.90087927,3.90087927
71.482281,4.35889894,3.90093751,0.676728481,3.90093751,3.9007437,3.9007437
71.492773,4,3.90080857,0.314946714,3.90080857,3.9006085,3.9006085
71.503264,3.74165739,3.90068033,-0.398776811,3.90068033,3.9004737,3.9004737
71.513756,4.58257569,3.9005528,0.825846777,3.9005528,3.90033927,3.90033927
71.524248,4.24264069,3.90042599,0.584991194,3.90042599,3.90020523,3.90020523
71.534739,3.87298335,3.90029995,-0.165277357,3.90029995,3.90007158,3.90007158
71.545231,4.89897949,3.90017468,0.999402225,3.90017468,3.89993829,3.89993829
71.555722,4.24264069,3.90005023,0.585312277,3.90005023,3.8998054,3.8998054
71.566214,4.12310563,3.8999266,0.472418279,3.8999266,3.89967287,3.89967287
71.576706,4.35889894,3.89980383,0.677565576,3.89980383,3.89954072,3.89954072
71.587197,4,3.89968199,0.31673019,3.89968199,3.89940896,3.89940896
71.597689,4.35889894,3.89956107,0.677744696,3.89956107,3.89927756,3.89927756
71.60818,4,3.89944115,0.31711015,3.89944115,3.89914655,3.89914655
71.618672,4.47213595,3.89932226,0.756844568,3.89932226,3.8990159,3.8990159
71.629164,3.74165739,3.89920444,-0.396921977,3.89920444,3.89888561,3.89888561
71.639655,4.35889894,3.89908778,0.678093769,3.89908778,3.89875571,3.89875571
71.650147,5,3.89897232,1.04929866,3.89897232,3.89862617,3.89862617
71.660638,5.47722558,3.89885814,1.25633094,3.89885814,3.898497,3.898497
71.67113,4.24264069,3.89874531,0.586425935,3.89874531,3.89836819,3.89836819
71.681622,3.87298335,3.89863392,-0.160157957,3.89863392,3.89823975,3.89823975
71.692113,4.12310563,3.89852407,0.47390036,3.89852407,3.89811168,3.89811168
71.702605,3.74165739,3.89841587,-0.395927369,3.89841587,3.89798397,3.89798397
71.713096,5,3.89830944,1.04961448,3.89830944,3.89785662,3.89785662
71.723588,4.69041576,3.89820491,0.890062275,3.89820491,3.89772963,3.89772963
71.73408,3.74165739,3.89810243,-0.395531342,3.89810243,3.897603,3.897603
71.744571,3.74165739,3.89800219,-0.39540461,3.89800219,3.89747673,3.89747673
71.755063,4.69041576,3.89790437,0.890231087,3.89790437,3.89735082,3.89735082
71.765554,5.19615242,3.89780921,1.13944865,3.89780921,3.89722527,3.89722527
71.776046,3.87298335,3.89771693,-0.157269145,3.89771693,3.89710006,3.89710006
71.786538,4.12310563,3.89762784,0.474845011,3.89762784,3.89697521,3.89697521
71.797029,3.46410162,3.89754227,-0.658362104,3.89754227,3.89685072,3.89685072
71.807521,4.24264069,3.89746059,0.587520292,3.89746059,3.89672657,3.89672657
71.818012,4.47213595,3.89738325,0.758124467,3.89738325,3.89660279,3.89660279
71.828504,4.89897949,3.89731073,1.00083403,3.89731073,3.89647934,3.89647934
71.838996,4.69041576,3.89724363,0.890602118,3.89724363,3.89635624,3.89635624
71.849487,4.24264069,3.89718264,0.587756797,3.89718264,3.89623351,3.89623351
71.859979,3.74165739,3.89712855,-0.394298318,3.89712855,3.8961111,3.8961111
71.87047,3.74165739,3.89708234,-0.394239718,3.89708234,3.89598905,3.89598905
71.880962,3.31662479,3.89704517,-0.761853252,3.89704517,3.89586734,3.89586734
71.891454,5.38516481,3.89701847,1.21989604,3.89701847,3.89574596,3.89574596
71.901945,3.74165739,3.89700409,-0.394140467,3.89700409,3.89562495,3.89562495
71.912437,3.87298335,3.89700449,-0.154987572,3.89700449,3.89550426,3.89550426
71.922928,4.79583152,3.89702309,0.94805508,3.89702309,3.89538392,3.89538392
71.93342,4.58257569,3.89706485,0.82795582,3.89706485,3.8952639,3.8952639
71.943912,4.35889894,3.89713722,0.679530514,3.89713722,3.89514423,3.89514423
71.954403,4.47213595,3.89725144,0.758211393,3.89725144,3.8950249,3.8950249
71.964895,4,3.89742451,0.32027409,3.89742451,3.8949059,3.8949059
71.975386,3.87298335,3.89768151,-0.1571565,3.89768151,3.89478724,3.89478724
71.985878,3.74165739,3.89805852,-0.395475825,3.89805852,3.8946689,3.8946689
71.99637,3.87298335,3.89860496,-0.160067515,3.89860496,3.89455089,3.89455089
72.006861,3.16227766,3.8993852,-0.85854967,3.8993852,3.89443323,3.89443323
72.017353,4.24264069,3.90047824,0.584946532,3.90047824,3.89431588,3.89431588
72.027844,4.12310563,3.901973,0.470247411,3.901973,3.89419888,3.89419888
72.038336,4.24264069,3.90396071,0.581962181,3.90396071,3.89408219,3.89408219
72.048828,4.89897949,3.90652057,0.996222325,3.90652057,3.89396582,3.89396582
72.059319,3.74165739,3.90970242,-0.409932965,3.90970242,3.89384979,3.89384979
72.069811,4.35889894,3.91350791,0.66737623,3.91350791,3.89373408,3.89373408
72.080302,4,3.91786717,0.286588251,3.91786717,3.8936187,3.8936187
72.090794,4.47213595,3.92262129,0.741292562,3.92262129,3.89350362,3.89350362
72.101286,4.69041576,3.92749932,0.87345088,3.92749932,3.89338887,3.89338887
72.111777,3.87298335,3.93210431,-0.243148024,3.93210431,3.89327445,3.89327445
72.122269,4.35889894,3.93592258,0.650366329,3.93592258,3.89316034,3.89316034
72.13276,4.69041576,3.93839109,0.867193558,3.93839109,3.89304655,3.89304655
72.143252,3.87298335,3.93905809,-0.257050084,3.93905809,3.89293307,3.89293307
72.153744,4.89897949,3.93777049,0.980412668,3.93777049,3.89281991,3.89281991
72.164235,3,3.93475208,-0.966825774,3.93475208,3.89270707,3.89270707
72.174727,4.35889894,3.93049399,0.654526509,3.93049399,3.89259453,3.89259453
72.185218,4.24264069,3.92556237,0.563097079,3.92556237,3.89248231,3.89248231
72.19571,3.31662479,3.92045115,-0.777062649,3.92045115,3.89237039,3.89237039
72.206202,4,3.91553118,0.290635194,3.91553118,3.89225878,3.89225878
72.216693,4.58257569,3.91104876,0.819467469,3.91104876,3.8921475,3.8921475
72.227185,4,3.90714219,0.304725798,3.90714219,3.8920365,3.8920365
72.237676,4.47213595,3.90386486,0.75383758,3.90386486,3.89192583,3.89192583
72.248168,3.74165739,3.90120314,-0.399431786,3.90120314,3.89181545,3.89181545
72.25866,4,3.89909931,0.31764869,3.89909931,3.89170537,3.89170537
72.269151,4.79583152,3.89747022,0.947819235,3.89747022,3.8915956,3.8915956
72.279643,4.35889894,3.89622389,0.680202217,3.89622389,3.89148613,3.89148613
72.290134,4.79583152,3.89527281,0.948977718,3.89527281,3.89137697,3.89137697
72.300626,4.35889894,3.89454068,0.681438379,3.89454068,3.89126809,3.89126809
72.311118,4.12310563,3.89396622,0.478685083,3.89396622,3.89115952,3.89115952
72.321609,4.79583152,3.89350297,0.949909759,3.89350297,3.89105125,3.89105125
72.332101,4.47213595,3.89311737,0.760932705,3.89311737,3.89094327,3.89094327
72.342592,4.58257569,3.89278632,0.830535595,3.89278632,3.89083559,3.89083559
72.353084,4.47213595,3.89249418,0.761342086,3.89249418,3.8907282,3.8907282
72.363576,4,3.8922533,0.328247928,3.8922533,3.8906211,3.8906211
72.374067,3.60555128,3.89201193,-0.535220197,3.89201193,3.8905143,3.8905143
72.384559,3,3.89178785,-0.944345195,3.89178785,3.89040778,3.89040778
72.39505,3.60555128,3.89157791,-0.534814579,3.89157791,3.89030157,3.89030157
72.405542,3.74165739,3.89137978,-0.386939783,3.89137978,3.89019563,3.89019563
72.416034,2.44948974,3.89119174,-1.20070896,3.89119174,3.89008997,3.89008997
72.426525,5,3.89101244,1.05308478,3.89101244,3.88998462,3.88998462
72.437017,4.35889894,3.89084071,0.684147812,3.89084071,3.88987954,3.88987954
72.447508,3.60555128,3.89067568,-0.533970412,3.89067568,3.88977475,3.88977475
72.458,3.46410162,3.89051651,-0.653004516,3.89051651,3.88967024,3.88967024
72.468492,4,3.89036258,0.331115425,3.89036258,3.889566,3.889566
72.478983,4,3.89021331,0.33134075,3.89021331,3.88946206,3.88946206
72.489475,3.46410162,3.89006819,-0.652661148,3.89006819,3.88935839,3.88935839
72.499966,3.87298335,3.88992683,-0.130167121,3.88992683,3.88925501,3.88925501
72.510458,3,3.88978882,-0.943286181,3.88978882,3.88915189,3.88915189
72.52095,4,3.88965386,0.33218389,3.88965386,3.88904905,3.88904905
72.531441,3.74165739,3.88952169,-0.384531274,3.88952169,3.8889465,3.8889465
72.541933,4,3.88939202,0.332577781,3.88939202,3.88884421,3.88884421
72.552424,4.35889894,3.88926467,0.685298677,3.88926467,3.8887422,3.8887422
72.562916,4.47213595,3.88913941,0.763542102,3.88913941,3.88864045,3.88864045
72.573408,3.46410162,3.8890161,-0.65185465,3.8890161,3.88853898,3.88853898
72.583899,2.64575131,3.88889459,-1.11496335,3.88889459,3.88843779,3.88843779
72.594391,4.24264069,3.88877471,0.594866349,3.88877471,3.88833685,3.88833685
72.604882,3.87298335,3.88865639,-0.125192015,3.88865639,3.8882362,3.8882362
72.615374,4.35889894,3.88853947,0.68582758,3.88853947,3.88813579,3.88813579
72.625866,3.87298335,3.88842389,-0.124259981,3.88842389,3.88803566,3.88803566
72.636357,3.87298335,3.88830956,-0.123799072,3.88830956,3.8879358,3.8879358
72.646849,3.60555128,3.88819638,-0.531643772,3.88819638,3.88783619,3.88783619
72.65734,4.12310563,3.8880843,0.484789985,3.8880843,3.88773686,3.88773686
72.667832,4,3.88797323,0.334703997,3.88797323,3.88763777,3.88763777
72.678324,3.87298335,3.88786314,-0.121982763,3.88786314,3.88753895,3.88753895
72.688815,4,3.88775397,0.335031382,3.88775397,3.8874404,3.8874404
72.699307,4.24264069,3.88764566,0.595814589,3.88764566,3.88734209,3.88734209
72.709798,3.74165739,3.88753819,-0.381943451,3.88753819,3.88724405,3.88724405
72.72029,3.87298335,3.88743148,-0.1202004,3.88743148,3.88714626,3.88714626
72.730782,3.46410162,3.88732552,-0.650556615,3.88732552,3.88704872,3.88704872
72.741273,3.87298335,3.88722029,-0.119318661,3.88722029,3.88695145,3.88695145
72.751765,4.35889894,3.88711572,0.686864775,3.88711572,3.88685441,3.88685441
72.762256,3.74165739,3.88701182,-0.381253768,3.88701182,3.88675764,3.88675764
72.772748,3.60555128,3.88690854,-0.530431203,3.88690854,3.88666111,3.88666111
72.78324,4.58257569,3.88680585,0.834128193,3.88680585,3.88656483,3.88656483
72.793731,3.46410162,3.88670376,-0.650078566,3.88670376,3.88646881,3.88646881
72.804223,3.87298335,3.88660221,-0.116699893,3.88660221,3.88637303,3.88637303
72.814714,3,3.88650121,-0.941541934,3.88650121,3.8862775,3.8862775
72.825206,2.82842712,3.88640073,-1.02857844,3.88640073,3.88618221,3.88618221
72.835698,3.60555128,3.88630075,-0.529857972,3.88630075,3.88608716,3.88608716
72.846189,3,3.88620126,-0.941382634,3.88620126,3.88599236,3.88599236
72.856681,3.60555128,3.88610224,-0.529670623,3.88610224,3.8858978,3.8858978
72.867172,4.35889894,3.8860037,0.687673794,3.8860037,3.88580348,3.88580348
72.877664,3.31662479,3.88590559,-0.75450699,3.88590559,3.8857094,3.8857094
72.888156,4,3.88580792,0.337923191,3.88580792,3.88561556,3.88561556
72.898647,3.87298335,3.88571068,-0.112815486,3.88571068,3.88552196,3.88552196
72.909139,2.82842712,3.88561385,-1.02819586,3.88561385,3.88542859,3.88542859
72.91963,3.60555128,3.88551743,-0.529118284,3.88551743,3.88533547,3.88533547
72.930122,4,3.88542141,0.338494601,3.88542141,3.88524257,3.88524257
72.940614,3.87298335,3.88532576,-0.111096439,3.88532576,3.88514991,3.88514991
72.951105,4.24264069,3.88523051,0.597837916,3.88523051,3.88505748,3.88505748
72.961597,3.16227766,3.88513563,-0.850210542,3.88513563,3.88496528,3.88496528
72.972088,3.31662479,3.88504111,-0.753933898,3.88504111,3.88487332,3.88487332
72.98258,4.12310563,3.88494695,0.488015037,3.88494695,3.88478158,3.88478158
72.993072,3.46410162,3.88485314,-0.648653623,3.88485314,3.88469007,3.88469007
73.003563,4.58257569,3.88475968,0.835353826,3.88475968,3.88459879,3.88459879
73.014055,4.12310563,3.88466656,0.488302232,3.88466656,3.88450773,3.88450773
73.024546,3.74165739,3.88457378,-0.37804284,3.88457378,3.88441691,3.88441691
73.035038,3.74165739,3.88448132,-0.377920533,3.88448132,3.8843263,3.8843263
73.04553,4.24264069,3.88438918,0.598541147,3.88438918,3.88423591,3.88423591
73.056021,4,3.88429738,0.340150882,3.88429738,3.88414576,3.88414576
73.066513,4,3.88420588,0.340285349,3.88420588,3.88405581,3.88405581
73.077004,4.24264069,3.88411471,0.598770392,3.88411471,3.8839661,3.8839661
73.087496,4,3.88402383,0.340552743,3.88402383,3.88387659,3.88387659
73.097988,3.60555128,3.88393326,-0.527619165,3.88393326,3.88378731,3.88378731
73.108479,3.87298335,3.883843,-0.10420965,3.883843,3.88369825,3.88369825
73.118971,4.24264069,3.88375303,0.599072334,3.88375303,3.88360939,3.88360939
73.129462,3.87298335,3.88366336,-0.103344139,3.88366336,3.88352076,3.88352076
73.139954,4.47213595,3.88357397,0.767177934,3.88357397,3.88343234,3.88343234
73.150446,3.87298335,3.88348488,-0.102476974,3.88348488,3.88334412,3.88334412
73.160937,3.46410162,3.88339608,-0.647529505,3.88339608,3.88325613,3.88325613
73.171429,3.31662479,3.88330755,-0.752783341,3.88330755,3.88316834,3.88316834
73.18192,3.31662479,3.88321931,-0.752724733,3.88321931,3.88308077,3.88308077
73.192412,3.46410162,3.88313135,-0.64732506,3.88313135,3.8829934,3.8829934
73.202904,3.16227766,3.88304366,-0.848979387,3.88304366,3.88290623,3.88290623
73.213395,3.31662479,3.88295626,-0.752549975,3.88295626,3.88281928,3.88281928
73.223887,3.60555128,3.88286911,-0.52660976,3.88286911,3.88273253,3.88273253
73.234378,4,3.88278225,0.342370772,3.88278225,3.88264599,3.88264599
73.24487,3.31662479,3.88269565,-0.75237681,3.88269565,3.88255965,3.88255965
73.255362,4.24264069,3.88260932,0.600026136,3.88260932,3.88247351,3.88247351
73.265853,3.16227766,3.88252327,-0.84867285,3.88252327,3.88238757,3.88238757
73.276345,4.47213595,3.88243747,0.767918282,3.88243747,3.88230183,3.88230183
73.286836,3.46410162,3.88235194,-0.646722757,3.88235194,3.8822163,3.8822163
73.297328,3.87298335,3.88226667,-0.0963499877,3.88226667,3.88213096,3.88213096
73.30782,4.12310563,3.88218165,0.490840066,3.88218165,3.88204581,3.88204581
73.318311,4,3.88209691,0.34337019,3.88209691,3.88196087,3.88196087
73.328803,4.35889894,3.88201242,0.690569708,3.88201242,3.88187612,3.88187612
73.339294,3.60555128,3.8819282,-0.525715629,3.8819282,3.88179157,3.88179157
73.349786,4.47213595,3.88184423,0.768304451,3.88184423,3.8817072,3.8817072
73.360278,4.12310563,3.88176051,0.491268883,3.88176051,3.88162303,3.88162303
73.370769,4,3.88167706,0.343981016,3.88167706,3.88153906,3.88153906
73.381261,4.12310563,3.88159386,0.491438466,3.88159386,3.88145526,3.88145526
73.391752,4.35889894,3.88151092,0.690932717,3.88151092,3.88137167,3.88137167
73.402244,4.79583152,3.88142824,0.956244365,3.88142824,3.88128825,3.88128825
73.412736,4.79583152,3.88134581,0.956287464,3.88134581,3.88120503,3.88120503
73.423227,3.74165739,3.88126364,-0.373639208,3.88126364,3.88112199,3.88112199
73.433719,3.87298335,3.88118173,-0.0905449228,3.88118173,3.88103914,3.88103914
73.44421,3.60555128,3.88110008,-0.524927428,3.88110008,3.88095647,3.88095647
73.454702,3.74165739,3.88101868,-0.373311256,3.88101868,3.88087398,3.88087398
73.465194,4.69041576,3.88093754,0.899710075,3.88093754,3.88079168,3.88079168
73.475685,3.60555128,3.88085667,-0.524695523,3.88085667,3.88070956,3.88070956
73.486177,3.31662479,3.88077605,-0.751100031,3.88077605,3.88062761,3.88062761
73.496668,4.12310563,3.8806957,0.492351429,3.8806957,3.88054586,3.88054586
73.50716,3.60555128,3.8806156,-0.524465752,3.8806156,3.88046427,3.88046427
73.517652,4.47213595,3.88053577,0.769155502,3.88053577,3.88038286,3.88038286
73.528143,3,3.88045621,-0.938326282,3.88045621,3.88030163,3.88030163
73.538635,3.46410162,3.88037691,-0.645194,3.88037691,3.88022057,3.88022057
73.549126,4,3.88029789,0.345979923,3.88029789,3.88013969,3.88013969
73.559618,3.60555128,3.88021914,-0.524087646,3.88021914,3.88005898,3.88005898
73.57011,2.82842712,3.88014065,-1.02553085,3.88014065,3.87997844,3.87997844
73.580601,4.12310563,3.88006246,0.492994086,3.88006246,3.87989808,3.87989808
73.591093,4.12310563,3.87998453,0.493073112,3.87998453,3.87981788,3.87981788
73.601584,4,3.8799069,0.346544518,3.8799069,3.87973786,3.87973786
73.612076,4.24264069,3.87982954,0.602338066,3.87982954,3.879658,3.879658
73.622568,4.24264069,3.87975248,0.602402035,3.87975248,3.8795783,3.8795783
73.633059,5.19615242,3.87967571,1.14737819,3.87967571,3.87949878,3.87949878
73.643551,4.47213595,3.87959924,0.769764066,3.87959924,3.87941942,3.87941942
73.654042,3.31662479,3.87952308,-0.750265476,3.87952308,3.87934023,3.87934023
73.664534,3.46410162,3.87944721,-0.644473117,3.87944721,3.8792612,3.8792612
73.675026,3.46410162,3.87937167,-0.644414503,3.87937167,3.87918232,3.87918232
73.685517,3.60555128,3.87929645,-0.523206624,3.87929645,3.87910362,3.87910362
73.696009,4,3.87922155,0.347531947,3.87922155,3.87902507,3.87902507
73.7065,4.35889894,3.87914699,0.69264129,3.87914699,3.87894668,3.87894668
73.716992,3.74165739,3.87907276,-0.370695797,3.87907276,3.87886845,3.87886845
73.727484,4.35889894,3.87899888,0.692748193,3.87899888,3.87879038,3.87879038
73.737975,4.24264069,3.87892537,0.603088148,3.87892537,3.87871246,3.87871246
73.748467,3.60555128,3.87885222,-0.522781931,3.87885222,3.8786347,3.8786347
73.758958,4.47213595,3.87877946,0.77029637,3.87877946,3.8785571,3.8785571
73.76945,4.35889894,3.87870707,0.692958778,3.87870707,3.87847964,3.87847964
73.779942,3.74165739,3.87863509,-0.370104994,3.87863509,3.87840234,3.87840234
73.790433,3.74165739,3.87856353,-0.370008306,3.87856353,3.8783252,3.8783252
73.800925,4.12310563,3.87849239,0.494583897,3.87849239,3.87824819,3.87824819
73.811416,3.74165739,3.87842171,-0.369816603,3.87842171,3.87817135,3.87817135
73.821908,4.12310563,3.87835147,0.494726342,3.87835147,3.87809465,3.87809465
73.8324,3.60555128,3.87828172,-0.522236001,3.87828172,3.87801809,3.87801809
73.842891,4.35889894,3.87821246,0.69331557,3.87821246,3.87794169,3.87794169
73.853383,3.46410162,3.87814372,-0.643461039,3.87814372,3.87786543,3.87786543
73.863874,2.82842712,3.87807553,-1.0245235,3.87807553,3.87778932,3.87778932
73.874366,3,3.8780079,-0.937020758,3.8780079,3.87771335,3.87771335
73.884858,4.12310563,3.87794086,0.495141155,3.87794086,3.87763752,3.87763752
73.895349,4.35889894,3.87787445,0.693559291,3.87787445,3.87756183,3.87756183
73.905841,4.35889894,3.87780869,0.693606697,3.87780869,3.87748629,3.87748629
73.916332,4.35889894,3.87774363,0.693653597,3.87774363,3.87741089,3.87741089
73.926824,4,3.87767929,0.349743777,3.87767929,3.87733562,3.87733562
73.937316,4.47213595,3.87761572,0.771051383,3.87761572,3.87726049,3.87726049
73.947807,3.74165739,3.87755297,-0.368640186,3.87755297,3.8771855,3.8771855
73.958299,3.46410162,3.87749109,-0.642953709,3.87749109,3.87711064,3.87711064
73.96879,3.87298335,3.87743013,-0.0666842134,3.87743013,3.87703593,3.87703593
73.979282,4.12310563,3.87734479,0.495742716,3.87734479,3.87696134,3.87696134
73.989774,4.79583152,3.87728614,0.958407731,3.87728614,3.87688689,3.87688689
74.000265,4.12310563,3.87722863,0.495859857,3.87722863,3.87681257,3.87681257
74.010757,4.47213595,3.87717231,0.771338865,3.87717231,3.87673838,3.87673838
74.021248,4.12310563,3.87711729,0.495972112,3.87711729,3.87666433,3.87666433
74.03174,4.24264069,3.87706366,0.604629662,3.87706366,3.8765904,3.8765904
74.042232,4.69041576,3.87701154,0.901889253,3.87701154,3.8765166,3.8765166
74.052723,3.31662479,3.87696105,-0.748556116,3.87696105,3.87644293,3.87644293
74.063215,3.16227766,3.87691233,-0.845360673,3.87691233,3.87636938,3.87636938
74.073706,4.58257569,3.87686554,0.840065567,3.87686554,3.87629597,3.87629597
74.084198,4.24264069,3.87682085,0.604830422,3.87682085,3.87622268,3.87622268
74.09469,3.60555128,3.87677846,-0.520794758,3.87677846,3.8761495,3.8761495
74.105181,4.69041576,3.87673859,0.90204056,3.87673859,3.87607646,3.87607646
74.115673,4,3.87670149,0.351138878,3.87670149,3.87600353,3.87600353
74.126164,4.12310563,3.87666745,0.496425396,3.87666745,3.87593074,3.87593074
74.136656,3.87298335,3.8766368,-0.0604437835,3.8766368,3.87585805,3.87585805
74.147148,3,3.87660991,-0.936274483,3.87660991,3.87578548,3.87578548
74.157639,4.12310563,3.87658723,0.496506188,3.87658723,3.87571304,3.87571304
74.168131,3,3.87656929,-0.93625279,3.87656929,3.87564071,3.87564071
74.178622,3.87298335,3.87655673,-0.0597777455,3.87655673,3.87556851,3.87556851
74.189114,3.31662479,3.87655035,-0.748281735,3.87655035,3.87549641,3.87549641
74.199606,5.19615242,3.87655119,1.14873898,3.87655119,3.87542443,3.87542443
74.210097,3,3.87656063,-0.936248165,3.87656063,3.87535256,3.87535256
74.220589,4,3.87658056,0.351311035,3.87658056,3.87528081,3.87528081
74.23108,4.35889894,3.87661361,0.69446766,3.87661361,3.87520917,3.87520917
74.241572,3.16227766,3.87666355,-0.845213516,3.87666355,3.87513764,3.87513764
74.252064,4.12310563,3.87673569,0.496356665,3.87673569,3.87506621,3.87506621
74.262555,4.35889894,3.87683756,0.694306406,3.87683756,3.8749949,3.8749949
74.273047,3.60555128,3.87697973,-0.520987959,3.87697973,3.8749237,3.8749237
74.283538,4.79583152,3.87717663,0.958464864,3.87717663,3.87485261,3.87485261
74.29403,4.12310563,3.87744763,0.495638973,3.87744763,3.87478162,3.87478162
74.304522,4.12310563,3.87781784,0.495265367,3.87781784,3.87471073,3.87471073
74.315013,3.46410162,3.87831866,-0.643596957,3.87831866,3.87463995,3.87463995
74.325505,4.47213595,3.87898801,0.770160987,3.87898801,3.87456928,3.87456928
74.335996,3.46410162,3.87986908,-0.644800332,3.87986908,3.87449871,3.87449871
74.346488,4,3.88100881,0.34495099,3.88100881,3.87442823,3.87442823
74.35698,3.87298335,3.88245383,-0.0973163993,3.88245383,3.87435786,3.87435786
74.367471,4.12310563,3.8842456,0.488733078,3.8842456,3.8742876,3.8742876
74.377963,4.12310563,3.88641485,0.486508761,3.88641485,3.87421742,3.87421742
74.388454,3.87298335,3.88897304,-0.126450347,3.88897304,3.87414736,3.87414736
74.398946,4.12310563,3.89190671,0.480831485,3.89190671,3.87407738,3.87407738
74.409438,4.35889894,3.89516902,0.68097718,3.89516902,3.8740075,3.8740075
74.419929,3.46410162,3.89867482,-0.659221667,3.89867482,3.87393772,3.87393772
74.430421,2.82842712,3.90229822,-1.03627752,3.90229822,3.87386803,3.87386803
74.440912,4.58257569,3.90586957,0.822621498,3.90586957,3.87379844,3.87379844
74.451404,4.24264069,3.90918204,0.577458787,3.90918204,3.87372894,3.87372894
74.461896,4,3.91200109,0.296646101,3.91200109,3.87365952,3.87365952
74.472387,4.12310563,3.91408945,0.457182865,3.91408945,3.87359021,3.87359021
74.482879,3.31662479,3.9152443,-0.773705052,3.9152443,3.87352098,3.87352098
74.49337,3.87298335,3.91533888,-0.205804597,3.91533888,3.87345185,3.87345185
74.503862,5.19615242,3.91435536,1.13216477,3.91435536,3.8733828,3.8733828
74.514354,3.60555128,3.91238962,-0.553929908,3.91238962,3.87331383,3.87331383
74.524845,4.12310563,3.90962657,0.462037941,3.90962657,3.87324496,3.87324496
74.535337,4.24264069,3.90629727,0.579951215,3.90629727,3.87317617,3.87317617
74.545828,4.12310563,3.90264087,0.469536747,3.90264087,3.87310747,3.87310747
74.55632,5,3.89887405,1.04934549,3.89887405,3.87303885,3.87303885
74.566812,3,3.89517849,-0.946138725,3.89517849,3.87297031,3.87297031
74.577303,3.87298335,3.89169388,-0.136786459,3.89169388,3.87290186,3.87290186
74.587795,4.89897949,3.88851662,1.00521782,3.88851662,3.87283348,3.87283348
74.598286,3,3.88570483,-0.941118924,3.88570483,3.87276519,3.87276519
74.608778,3.74165739,3.88328102,-0.376329153,3.88328102,3.87269698,3.87269698
74.61927,3.31662479,3.88124052,-0.751409161,3.88124052,3.87262884,3.87262884
74.629761,3.87298335,3.87955782,-0.0810831023,3.87955782,3.87256079,3.87256079
74.640253,4.69041576,3.87819356,0.90123371,3.87819356,3.87249281,3.87249281
74.650744,4.24264069,3.87710217,0.604597813,3.87710217,3.87242491,3.87242491
74.661236,4.12310563,3.87623623,0.49685953,3.87623623,3.87235708,3.87235708
74.671728,3.46410162,3.87555118,-0.641443347,3.87555118,3.87228933,3.87228933
74.682219,4.35889894,3.87500742,0.695623118,3.87500742,3.87222165,3.87222165
74.692711,3.87298335,3.87457144,-0.0398508789,3.87457144,3.87215405,3.87215405
74.703202,3.46410162,3.87421635,-0.640402008,3.87421635,3.87208652,3.87208652
74.713694,4.24264069,3.8739211,0.607222849,3.8739211,3.87201905,3.87201905
74.724186,4.12310563,3.87366992,0.49943539,3.87366992,3.87195166,3.87195166
74.734677,3.74165739,3.87345121,-0.363034194,3.87345121,3.87188434,3.87188434
74.745169,3,3.8732566,-0.934481997,3.8732566,3.87181708,3.87181708
74.75566,4.12310563,3.87308022,0.50002541,3.87308022,3.8717499,3.8717499
74.766152,3.74165739,3.87291786,-0.362298875,3.87291786,3.87168278,3.87168278
74.776644,3.16227766,3.87276663,-0.84290508,3.87276663,3.87161572,3.87161572
74.787135,4.24264069,3.87262446,0.608289588,3.87262446,3.87154874,3.87154874
74.797627,4.24264069,3.87248982,0.608400256,3.87248982,3.87148181,3.87148181
74.808118,3.46410162,3.87236159,-0.638952247,3.87236159,3.87141495,3.87141495
74.81861,4.58257569,3.87223889,0.842814809,3.87223889,3.87134815,3.87134815
74.829102,3.87298335,3.87212106,0.0293647718,3.87212106,3.87128141,3.87128141
74.839593,4.47213595,3.87200753,0.774679564,3.87200753,3.87121474,3.87121474
74.850085,3.60555128,3.87189782,-0.516087731,3.87189782,3.87114812,3.87114812
74.860576,4.12310563,3.87179156,0.501312347,3.87179156,3.87108157,3.87108157
74.871068,4.12310563,3.87168837,0.501415252,3.87168837,3.87101507,3.87101507
74.88156,4.35889894,3.87158797,0.698076621,3.87158797,3.87094863,3.87094863
74.892051,3.60555128,3.87149011,-0.515692582,3.87149011,3.87088225,3.87088225
74.902543,4.58257569,3.87139454,0.843315573,3.87139454,3.87081592,3.87081592
74.913034,4.12310563,3.87130106,0.501801318,3.87130106,3.87074965,3.87074965
74.923526,4.58257569,3.87120948,0.843425285,3.87120948,3.87068343,3.87068343
74.934018,4.24264069,3.87125411,0.609414949,3.87125411,3.87061726,3.87061726
74.944509,3.31662479,3.87116717,-0.744676021,3.87116717,3.87055116,3.87055116
74.955001,3.31662479,3.8710817,-0.744618635,3.8710817,3.87048509,3.87048509
74.965492,3.46410162,3.87099761,-0.637884001,3.87099761,3.87041909,3.87041909
74.975984,3.87298335,3.87091478,0.0454815035,3.87091478,3.87035313,3.87035313
74.986476,3.87298335,3.87083311,0.0463706232,3.87083311,3.87028721,3.87028721
74.996967,4.47213595,3.87075253,0.775489151,3.87075253,3.87022136,3.87022136
75.007459,3.74165739,3.87067295,-0.359187363,3.87067295,3.87015554,3.87015554
75.01795,4.58257569,3.8705943,0.843789897,3.8705943,3.87008978,3.87008978
75.028442,3.74165739,3.87051652,-0.358969543,3.87051652,3.87002405,3.87002405
75.038934,4.47213595,3.87043954,0.775690924,3.87043954,3.86995838,3.86995838
75.049425,3.46410162,3.87036333,-0.637386632,3.87036333,3.86989275,3.86989275
75.059917,4.47213595,3.87028782,0.775788717,3.87028782,3.86982716,3.86982716
75.070408,4.24264069,3.87021298,0.610268554,3.87021298,3.86976162,3.86976162
75.0809,3.31662479,3.87013875,-0.743985189,3.87013875,3.86969611,3.86969611
75.091392,4.24264069,3.87006511,0.610389694,3.87006511,3.86963065,3.86963065
75.101883,4,3.86999202,0.360566191,3.86999202,3.86956523,3.86956523
75.112375,3.46410162,3.86991945,-0.637038328,3.86991945,3.86949985,3.86949985
75.122866,4,3.86984737,0.360766729,3.86984737,3.86943451,3.86943451
75.133358,4,3.86977574,0.360865982,3.86977574,3.8693692,3.8693692
75.14385,3.16227766,3.86970456,-0.841086735,3.86970456,3.86930393,3.86930393
75.154341,4,3.86963379,0.361062613,3.86963379,3.86923871,3.86923871
75.164833,4.58257569,3.86956341,0.844400548,3.86956341,3.86917351,3.86917351
75.175324,4.58257569,3.86949341,0.844441997,3.86949341,3.86910835,3.86910835
75.185816,4.47213595,3.86942376,0.776345412,3.86942376,3.86904322,3.86904322
75.196308,4.35889894,3.86935444,0.699674568,3.86935444,3.86897812,3.86897812
75.206799,4,3.86928546,0.361544662,3.86928546,3.86891307,3.86891307
75.217291,3.74165739,3.86921677,-0.35715457,3.86921677,3.86884803,3.86884803
75.227782,3.60555128,3.86914839,-0.513417096,3.86914839,3.86878304,3.86878304
75.238274,3.74165739,3.86908028,-0.356963435,3.86908028,3.86871807,3.86871807
75.248766,3.74165739,3.86901244,-0.356868399,3.86901244,3.86865313,3.86865313
75.259257,4,3.86894487,0.362015378,3.86894487,3.86858822,3.86858822
75.269749,4.12310563,3.86887753,0.504210365,3.86887753,3.86852333,3.86852333
75.28024,4.47213595,3.86881045,0.77674031,3.86881045,3.86845848,3.86845848
75.290732,3.87298335,3.86874358,0.0651134876,3.86874358,3.86839365,3.86839365
75.301224,3,3.86867694,-0.932028399,3.86867694,3.86832884,3.86832884
75.311715,3.74165739,3.86861051,-0.35630482,3.86861051,3.86826406,3.86826406
75.322207,4.12310563,3.86854429,0.504540721,3.86854429,3.8681993,3.8681993
75.332698,4.12310563,3.86847827,0.504606142,3.86847827,3.86813457,3.86813457
75.34319,4.24264069,3.86841243,0.611741982,3.86841243,3.86806986,3.86806986
75.353682,3.31662479,3.86834679,-0.742779912,3.86834679,3.86800517,3.86800517
75.364173,3,3.86828133,-0.931816145,3.86828133,3.8679405,3.8679405
75.374665,4.12310563,3.86821604,0.50486591,3.86821604,3.86787585,3.86787585
75.385156,3.87298335,3.86815093,0.0695156084,3.86815093,3.86781122,3.86781122
75.395648,2,3.86808597,-1.36677942,3.86808597,3.86774661,3.86774661
75.40614,4.24264069,3.86802118,0.612061682,3.86802118,3.86768201,3.86768201
75.416631,3,3.86795656,-0.931641862,3.86795656,3.86761744,3.86761744
75.427123,3.74165739,3.86789208,-0.355295221,3.86789208,3.86755288,3.86755288
75.437614,3.74165739,3.86782776,-0.355204692,3.86782776,3.86748833,3.86748833
75.448106,3.46410162,3.86776358,-0.635343975,3.86776358,3.8674238,3.8674238
75.458598,4.35889894,3.86769955,0.700856188,3.86769955,3.86735928,3.86735928
75.469089,4.12310563,3.86763566,0.505440366,3.86763566,3.86729478,3.86729478
75.479581,4,3.86757191,0.363906706,3.86757191,3.86723029,3.86723029
75.490072,3.87298335,3.8675083,0.0739935497,3.8675083,3.86716581,3.86716581
75.500564,3.46410162,3.86744482,-0.635093069,3.86744482,3.86710134,3.86710134
75.511056,3.16227766,3.86738147,-0.8397046,3.86738147,3.86703688,3.86703688
75.521547,4.89897949,3.86731827,1.01570725,3.86731827,3.86697243,3.86697243
75.532039,4.12310563,3.86725518,0.505816612,3.86725518,3.86690799,3.86690799
75.54253,4.47213595,3.86719223,0.777781283,3.86719223,3.86684356,3.86684356
75.553022,4.24264069,3.8671294,0.612789757,3.8671294,3.86677913,3.86677913
75.563514,4.24264069,3.8670667,0.612840917,3.8670667,3.86671471,3.86671471
75.574005,3.46410162,3.86700413,-0.634746021,3.86700413,3.8666503,3.8666503
75.584497,3.46410162,3.86694167,-0.634696824,3.86694167,3.86658588,3.86658588
75.594988,4.58257569,3.86687935,0.845988383,3.86687935,3.86652148,3.86652148
75.60548,3,3.86681715,-0.931030153,3.86681715,3.86645708,3.86645708
75.615972,4.12310563,3.86675506,0.506310737,3.86675506,3.86639268,3.86639268
75.626463,3.16227766,3.86669311,-0.839294615,3.86669311,3.86632828,3.86632828
75.636955,4.24264069,3.86663127,0.613196064,3.86663127,3.86626389,3.86626389
75.647446,4.58257569,3.86656957,0.846171452,3.86656957,3.8661995,3.8661995
75.657938,3.60555128,3.86650798,-0.510839215,3.86650798,3.8661351,3.8661351
75.66843,3.74165739,3.86644651,-0.353255046,3.86644651,3.8660707,3.8660707
75.678921,2.82842712,3.86638518,-1.01880226,3.86638518,3.8660063,3.8660063
75.689413,5.29150262,3.86632396,1.19380847,3.86632396,3.8659419,3.8659419
75.699904,3.87298335,3.86626288,0.0819784395,3.86626288,3.8658775,3.8658775
75.710396,2.64575131,3.86620192,-1.10474006,3.86620192,3.86581309,3.86581309
75.720888,4.12310563,3.86614109,0.506916698,3.86614109,3.86574868,3.86574868
75.731379,4.69041576,3.86608039,0.907929166,3.86608039,3.86568426,3.86568426
75.741871,4.12310563,3.86601982,0.507036299,3.86601982,3.86561984,3.86561984
75.752362,3.46410162,3.86595938,-0.633922526,3.86595938,3.86555541,3.86555541
75.762854,3.87298335,3.86589908,0.084168086,3.86589908,3.86549097,3.86549097
75.773346,4.58257569,3.86583891,0.846603085,3.86583891,3.86542653,3.86542653
75.783837,3.87298335,3.86577889,0.0848790755,3.86577889,3.86536208,3.86536208
75.794329,4.58257569,3.865719,0.8466739,3.865719,3.86529761,3.86529761
75.80482,3.31662479,3.86565926,-0.740968604,3.86565926,3.86523314,3.86523314
75.815312,3,3.86559967,-0.930376088,3.86559967,3.86516865,3.86516865
75.825804,4.35889894,3.86554022,0.702394993,3.86554022,3.86510415,3.86510415
75.836295,3.87298335,3.86548093,0.0866165017,3.86548093,3.86503965,3.86503965
75.846787,4,3.86542179,0.366849031,3.86542179,3.86497513,3.86497513
75.857278,3.46410162,3.86536281,-0.633451812,3.86536281,3.86491059,3.86491059
75.86777,3.60555128,3.865304,-0.509659416,3.865304,3.86484604,3.86484604
75.878262,3.74165739,3.86524535,-0.351550791,3.86524535,3.86478147,3.86478147
75.888753,4.35889894,3.86518687,0.702646477,3.86518687,3.8647169,3.8647169
75.899245,4.35889894,3.86512857,0.702687964,3.86512857,3.8646523,3.8646523
75.909736,3.87298335,3.86507045,0.0889544523,3.86507045,3.86458769,3.86458769
75.920228,3.46410162,3.86501251,-0.633175252,3.86501251,3.86452305,3.86452305
75.93072,4.12310563,3.86495477,0.508085483,3.86495477,3.8644584,3.8644584
75.941211,4.24264069,3.86489722,0.614608382,3.86489722,3.86439373,3.86439373
75.951703,4.58257569,3.86483988,0.847192906,3.86483988,3.86432904,3.86432904
75.962194,4.47213595,3.86478274,0.779328694,3.86478274,3.86426433,3.86426433
75.972686,4.35889894,3.86472582,0.702974484,3.86472582,3.8641996,3.8641996
75.983178,3.74165739,3.86466912,-0.35073028,3.86466912,3.86413484,3.86413484
75.993669,4.24264069,3.86461265,0.614839848,3.86461265,3.86407007,3.86407007
76.004161,4,3.86455641,0.368026611,3.86455641,3.86400527,3.86400527
76.014652,3.74165739,3.86450043,-0.350489718,3.86450043,3.86394045,3.86394045
76.025144,3.31662479,3.86444469,-0.740148568,3.86444469,3.8638756,3.8638756
76.035636,3.46410162,3.86438922,-0.632682863,3.86438922,3.86381072,3.86381072
76.046127,3.74165739,3.86433403,-0.35025225,3.86433403,3.86374582,3.86374582
76.056619,4.35889894,3.86427911,0.703292141,3.86427911,3.86368089,3.86368089
76.06711,3.31662479,3.86422449,-0.739999796,3.86422449,3.86361594,3.86361594
76.077602,3.60555128,3.86417017,-0.508545862,3.86417017,3.86355096,3.86355096
76.088094,3.31662479,3.86411617,-0.739926601,3.86411617,3.86348595,3.86348595
76.098585,3.16227766,3.8640625,-0.837725991,3.8640625,3.86342091,3.86342091
76.109077,3.60555128,3.86400916,-0.508387537,3.86400916,3.86335584,3.86335584
76.119568,4.35889894,3.86395619,0.703521679,3.86395619,3.86329074,3.86329074
76.13006,4.12310563,3.86390358,0.509118887,3.86390358,3.86322561,3.86322561
76.140552,4.35889894,3.86385136,0.703596176,3.86385136,3.86316044,3.86316044
76.151043,3.46410162,3.86379955,-0.632216684,3.86379955,3.86309525,3.86309525
76.161535,4.24264069,3.86374815,0.615542472,3.86374815,3.86303002,3.86303002
76.172026,4,3.8636972,0.369192096,3.8636972,3.86296476,3.86296476
76.182518,4.24264069,3.86364669,0.615624881,3.86364669,3.86289946,3.86289946
76.19301,4,3.86359667,0.369328219,3.86359667,3.86283412,3.86283412
76.203501,4,3.86354714,0.369395256,3.86354714,3.86276875,3.86276875
76.213993,5.19615242,3.86349814,1.15440646,3.86349814,3.86270335,3.86270335
76.224484,4.12310563,3.86344969,0.50956446,3.86344969,3.86263791,3.86263791
76.234976,4.58257569,3.8634018,0.848041211,3.8634018,3.86257242,3.86257242
76.245468,4.89897949,3.86335451,1.01765661,3.86335451,3.8625069,3.8625069
76.255959,4.69041576,3.86330786,0.909454728,3.86330786,3.86244135,3.86244135
76.266451,5.29150262,3.86326186,1.19509027,3.86326186,3.86237575,3.86237575
76.276942,3.31662479,3.86321655,-0.739318444,3.86321655,3.86231011,3.86231011
76.287434,4.58257569,3.86317197,0.848176707,3.86317197,3.86224443,3.86224443
76.297926,4.12310563,3.86312815,0.509879867,3.86312815,3.86217871,3.86217871
76.308417,4.58257569,3.86308513,0.848227896,3.86308513,3.86211295,3.86211295
76.318909,4.58257569,3.86304295,0.848252757,3.86304295,3.86204714,3.86204714
76.3294,3,3.86300167,-0.928978831,3.86300167,3.86198129,3.86198129
76.339892,4,3.86296131,0.370187366,3.86296131,3.8619154,3.8619154
76.350384,4.35889894,3.86292194,0.704256345,3.86292194,3.86184946,3.86184946
76.360875,3.87298335,3.86288362,0.100497406,3.86288362,3.86178348,3.86178348
76.371367,4.47213595,3.86284638,0.78057003,3.86284638,3.86171745,3.86171745
76.381858,4,3.86281031,0.370391267,3.86281031,3.86165137,3.86165137
76.39235,3.46410162,3.86277545,-0.63140624,3.86277545,3.86158525,3.86158525
76.402842,3.87298335,3.86274189,0.101200058,3.86274189,3.86151907,3.86151907
76.413333,4.24264069,3.86270971,0.616385416,3.86270971,3.86145286,3.86145286
76.423825,3.31662479,3.86267896,-0.738954784,3.86267896,3.86138659,3.86138659
76.434316,3.60555128,3.86264976,-0.5070488,3.86264976,3.86132027,3.86132027
76.444808,4.24264069,3.86262218,0.616456408,3.86262218,3.8612539,3.8612539
76.4553,4.24264069,3.86259634,0.616477371,3.86259634,3.86118748,3.86118748
76.465791,4.24264069,3.86257233,0.616496841,3.86257233,3.86112101,3.86112101
76.476283,4,3.86255028,0.370742123,3.86255028,3.86105449,3.86105449
76.486774,4,3.86253031,0.370769058,3.86253031,3.86098791,3.86098791
76.497266,3.31662479,3.86251255,-0.738842172,3.86251255,3.86092128,3.86092128
76.507758,4.12310563,3.86249715,0.510498264,3.86249715,3.8608546,3.8608546
76.518249,4,3.86248427,0.370831131,3.86248427,3.86078786,3.86078786
76.528741,4.47213595,3.86247409,0.78080847,3.86247409,3.86072107,3.86072107
76.539232,5.29150262,3.86246678,1.19542287,3.86246678,3.86065422,3.86065422
76.549724,4,3.86246256,0.370860407,3.86246256,3.86058732,3.86058732
76.560216,4.12310563,3.86246164,0.510533043,3.86246164,3.86052035,3.86052035
76.570707,3.31662479,3.86246426,-0.738809493,3.86246426,3.86045334,3.86045334
76.581199,3.60555128,3.86247068,-0.506872181,3.86247068,3.86038626,3.86038626
76.59169,4,3.8624812,0.370835275,3.8624812,3.86031913,3.86031913
76.602182,4.24264069,3.86249612,0.616558649,3.86249612,3.86025193,3.86025193
76.612674,4.58257569,3.86251579,0.848563438,3.86251579,3.86018467,3.86018467
76.623165,4.47213595,3.86251797,0.780780368,3.86251797,3.86011736,3.86011736
76.633657,3.60555128,3.86254852,-0.506948959,3.86254852,3.86004998,3.86004998
76.644148,4,3.86258506,0.37069521,3.86258506,3.85998255,3.85998255
76.65464,4,3.8626281,0.370637158,3.8626281,3.85991505,3.85991505
76.665132,3.87298335,3.86267818,0.101514348,3.86267818,3.85984748,3.85984748
76.675623,3.74165739,3.86273593,-0.347963422,3.86273593,3.85977986,3.85977986
76.686115,3.60555128,3.86280203,-0.50719893,3.86280203,3.85971217,3.85971217
76.696606,3.74165739,3.86287723,-0.348166402,3.86287723,3.85964442,3.85964442
76.707098,3,3.86296239,-0.92895769,3.86296239,3.8595766,3.8595766
76.71759,3.74165739,3.86305845,-0.34842655,3.86305845,3.85950871,3.85950871
76.728081,4.69041576,3.86316645,0.909532469,3.86316645,3.85944076,3.85944076
76.738573,3.31662479,3.8632876,-0.73936649,3.8632876,3.85937274,3.85937274
76.749064,4.24264069,3.8634232,0.615806367,3.8634232,3.85930466,3.85930466
76.759556,3.87298335,3.8635748,0.0969976389,3.8635748,3.85923651,3.85923651
76.770048,3.74165739,3.86374409,-0.349409079,3.86374409,3.85916829,3.85916829
76.780539,4,3.863933,0.368872609,3.863933,3.8591,3.8591
76.791031,3.60555128,3.8641438,-0.508519936,3.8641438,3.85903164,3.85903164
76.801522,3.87298335,3.86437907,0.0927592572,3.86437907,3.85896321,3.85896321
76.812014,3.31662479,3.86464191,-0.740281787,3.86464191,3.85889471,3.85889471
76.822506,3.31662479,3.86493603,-0.740480412,3.86493603,3.85882614,3.85882614
76.832997,4,3.86526596,0.367061354,3.86526596,3.8587575,3.8587575
76.843489,3.74165739,3.8656376,-0.352108236,3.8656376,3.85868878,3.85868878
76.85398,3.87298335,3.86605852,0.0832155294,3.86605852,3.85862,3.85862
76.864472,3,3.86653917,-0.93088086,3.86653917,3.85855114,3.85855114
76.874964,3,3.86709387,-0.931178756,3.86709387,3.8584822,3.8584822
76.885455,3.31662479,3.86774276,-0.742373203,3.86774276,3.8584132,3.8584132
76.895947,4,3.86851456,0.362609205,3.86851456,3.85834411,3.85834411
76.906438,3.74165739,3.86944953,-0.357480268,3.86944953,3.85827495,3.85827495
76.91693,4,3.87060424,0.35971622,3.87060424,3.85820572,3.85820572
76.927422,3.87298335,3.87205605,0.0304516128,3.87205605,3.8581364,3.8581364
76.937913,4.47213595,3.87390852,0.773451635,3.87390852,3.85806702,3.85806702
76.948405,3.60555128,3.87629711,-0.520332429,3.87629711,3.85799755,3.85799755
76.958896,4.24264069,3.87939146,0.602701611,3.87939146,3.85792801,3.85792801
76.969388,3.16227766,3.88339791,-0.849187993,3.88339791,3.85785838,3.85785838
76.97988,4.35889894,3.88855401,0.685816979,3.88855401,3.85778868,3.85778868
76.990371,3.60555128,3.89511886,-0.538114846,3.89511886,3.8577189,3.8577189
77.000863,4,3.90335774,0.310873386,3.90335774,3.85764904,3.85764904
77.011354,4.58257569,3.91351222,0.817963002,3.91351222,3.8575791,3.8575791
77.021846,4.47213595,3.9257735,0.739163345,3.9257735,3.85750907,3.85750907
77.032338,4.35889894,3.94023896,0.647039396,3.94023896,3.85743896,3.85743896
77.042829,3.31662479,3.95687506,-0.800156402,3.95687506,3.85736878,3.85736878
77.053321,3.46410162,3.97548655,-0.715111835,3.97548655,3.8572985,3.8572985
77.063812,4.58257569,3.99567551,0.76609411,3.99567551,3.85722815,3.85722815
77.074304,4.47213595,4.01683379,0.674760819,4.01683379,3.85715771,3.85715771
77.084796,4,4.03812028,-0.195244165,4.03812028,3.85708719,3.85708719
77.095287,4.12310563,4.05847254,0.254230383,4.05847254,3.85701658,3.85701658
77.105779,4,4.07664856,-0.276854769,4.07664856,3.85694589,3.85694589
77.11627,4.89897949,4.09130276,0.898708366,4.09130276,3.85687511,3.85687511
77.126762,4.47213595,4.10116596,0.609073063,4.10116596,3.85680425,3.85680425
77.137254,3.87298335,4.10526771,-0.481958884,4.10526771,3.85673329,3.85673329
77.147745,4.79583152,4.10317353,0.832260774,4.10317353,3.85666226,3.85666226
77.158237,3.87298335,4.09510012,-0.471292662,4.09510012,3.85659113,3.85659113
77.168728,4.12310563,4.08185535,0.203101634,4.08185535,3.85651991,3.85651991
77.17922,4.58257569,4.06462985,0.719684548,4.06462985,3.85644861,3.85644861
77.189712,4.35889894,4.04476196,0.560479248,4.04476196,3.85637721,3.85637721
77.200203,4.47213595,4.02354436,0.669769808,4.02354436,3.85630573,3.85630573
77.210695,4.24264069,4.0021031,0.49044631,4.0021031,3.85623415,3.85623415
77.221186,4.24264069,3.98136016,0.511156068,3.98136016,3.85616249,3.85616249
77.231678,4.35889894,3.96200254,0.629997147,3.96200254,3.85609074,3.85609074
77.24217,3.16227766,3.94450132,-0.884434091,3.94450132,3.85601888,3.85601888
77.252661,3.87298335,3.9291223,-0.23693661,3.9291223,3.85594695,3.85594695
77.263153,4.24264069,3.91594914,0.571569371,3.91594914,3.85587491,3.85587491
77.273644,4.47213595,3.904928,0.753132099,3.904928,3.85580279,3.85580279
77.284136,3.16227766,3.89589533,-0.856514842,3.89589533,3.85573057,3.85573057
77.294628,4,3.88862463,0.333729491,3.88862463,3.85565825,3.85565825
77.305119,3.60555128,3.88285683,-0.526598097,3.88285683,3.85558585,3.85558585
77.315611,3.46410162,3.87832752,-0.643603838,3.87832752,3.85551334,3.85551334
77.326102,3.74165739,3.87479098,-0.364874769,3.87479098,3.85544075,3.85544075
77.336594,3.60555128,3.87202896,-0.516214765,3.87202896,3.85536805,3.85536805
77.347086,4.35889894,3.86985919,0.69931377,3.86985919,3.85529525,3.85529525
77.357577,3.16227766,3.86813475,-0.840153015,3.86813475,3.85522237,3.85522237
77.368069,3.16227766,3.86674098,-0.839323134,3.86674098,3.85514938,3.85514938
77.37856,3.74165739,3.86559205,-0.352043552,3.86559205,3.8550763,3.8550763
77.389052,3.46410162,3.86462442,-0.632868712,3.86462442,3.85500311,3.85500311
77.399544,4.47213595,3.86379263,0.77996367,3.86379263,3.85492983,3.85492983
77.410035,4.12310563,3.86306433,0.509942441,3.86306433,3.85485645,3.85485645
77.420527,3.46410162,3.86241649,-0.631121921,3.86241649,3.85478297,3.85478297
77.431018,3.60555128,3.86183302,-0.506242774,3.86183302,3.85470939,3.85470939
77.44151,3.16227766,3.86130217,-0.836076856,3.86130217,3.85463571,3.85463571
77.452002,4.24264069,3.86081548,0.617920066,3.86081548,3.85456192,3.85456192
77.462493,3.46410162,3.86036658,-0.6294958,3.86036658,3.85448804,3.85448804
77.472985,4.24264069,3.8599504,0.618619663,3.8599504,3.85441405,3.85441405
77.483476,4,3.85956304,0.374749202,3.85956304,3.85433997,3.85433997
77.493968,4,3.85920113,0.375231757,3.85920113,3.85426577,3.85426577
77.50446,3.31662479,3.85886196,-0.736367547,3.85886196,3.85419147,3.85419147
77.514951,3.60555128,3.85854318,-0.502983007,3.85854318,3.85411708,3.85411708
77.525443,3.60555128,3.8582427,-0.502684215,3.8582427,3.85404257,3.85404257
77.535934,3.87298335,3.85795877,0.122574791,3.85795877,3.85396797,3.85396797
77.546426,4.24264069,3.85768976,0.620444134,3.85768976,3.85389325,3.85389325
77.556918,3.60555128,3.85743432,-0.501879513,3.85743432,3.85381843,3.85381843
77.567409,3.16227766,3.85719122,-0.833614758,3.85719122,3.85374351,3.85374351
77.577901,3.87298335,3.85695933,0.126586018,3.85695933,3.85366847,3.85366847
77.588392,3.87298335,3.85673769,0.127458458,3.85673769,3.85359334,3.85359334
77.598884,4.12310563,3.85652539,0.51631409,3.85652539,3.85351809,3.85351809
77.609376,3.46410162,3.85632165,-0.62627473,3.85632165,3.85344274,3.85344274
77.619867,4,3.8561258,0.379307531,3.8561258,3.85336728,3.85336728
77.630359,3.46410162,3.85593714,-0.625967672,3.85593714,3.85329171,3.85329171
77.64085,4.89897949,3.85575514,1.02138354,3.85575514,3.85321603,3.85321603
77.651342,4.47213595,3.85557925,0.785211249,3.85557925,3.85314024,3.85314024
77.661834,4.35889894,3.855409,0.709570252,3.855409,3.85306434,3.85306434
77.672325,4.12310563,3.85524398,0.517553516,3.85524398,3.85298834,3.85298834
77.682817,3.31662479,3.85508378,-0.733797647,3.85508378,3.85291222,3.85291222
77.693308,4.12310563,3.85492805,0.51785864,3.85492805,3.85283599,3.85283599
77.7038,3.46410162,3.85477646,-0.625039876,3.85477646,3.85275965,3.85275965
77.714292,3.87298335,3.85462872,0.135479253,3.85462872,3.85268319,3.85268319
77.724783,3.74165739,3.85448457,-0.335897571,3.85448457,3.85260663,3.85260663
77.735275,3,3.85434373,-0.92430716,3.85434373,3.85252995,3.85252995
77.745766,3.60555128,3.854206,-0.498652909,3.854206,3.85245316,3.85245316
77.756258,4.24264069,3.85407115,0.623353462,3.85407115,3.85237625,3.85237625
77.76675,3.87298335,3.85393899,0.138001274,3.85393899,3.85229923,3.85229923
77.777241,4,3.85380937,0.382348832,3.85380937,3.8522221,3.8522221
77.787733,3.87298335,3.85368209,0.138928969,3.85368209,3.85214485,3.85214485
77.798224,3.60555128,3.85355702,-0.49800175,3.85355702,3.85206749,3.85206749
77.808716,4.35889894,3.853434,0.710960579,3.853434,3.85199001,3.85199001
77.819208,3.74165739,3.85331291,-0.334148953,3.85331291,3.85191241,3.85191241
77.829699,3.16227766,3.85319364,-0.83121356,3.85319364,3.85183471,3.85183471
77.840191,4.12310563,3.85307606,0.519643689,3.85307606,3.85175688,3.85175688
77.850682,3.16227766,3.85296009,-0.831073058,3.85296009,3.85167894,3.85167894
77.861174,4.12310563,3.8528456,0.519865393,3.8528456,3.85160087,3.85160087
77.871666,3.60555128,3.85273252,-0.497173253,3.85273252,3.85152269,3.85152269
77.882157,3.16227766,3.85262077,-0.83086889,3.85262077,3.85144439,3.85144439
77.892649,4.79583152,3.85251026,0.971247272,3.85251026,3.85136598,3.85136598
77.90314,4,3.85240093,0.384186245,3.85240093,3.85128744,3.85128744
77.913632,3.60555128,3.85229269,-0.496730729,3.85229269,3.85120879,3.85120879
77.924124,4.24264069,3.85218549,0.624864139,3.85218549,3.85113001,3.85113001
77.934615,3.60555128,3.85207929,-0.496515872,3.85207929,3.85105112,3.85105112
77.945107,5.09901951,3.85197399,1.11671192,3.85197399,3.8509721,3.8509721
77.955598,3.16227766,3.85186958,-0.830416713,3.85186958,3.85089297,3.85089297
77.96609,4.24264069,3.85176597,0.625199738,3.85176597,3.85081371,3.85081371
77.976582,4.24264069,3.85166315,0.625281969,3.85166315,3.85073433,3.85073433
77.987073,4.69041576,3.85156106,0.915890114,3.85156106,3.85065483,3.85065483
77.997565,4,3.85145965,0.385409326,3.85145965,3.8505752,3.8505752
78.008056,3.87298335,3.8513589,0.147052513,3.8513589,3.85049546,3.85049546
78.018548,3.87298335,3.85125876,0.147392616,3.85125876,3.85041559,3.85041559
78.02904,3.31662479,3.8511592,-0.731118603,3.8511592,3.8503356,3.8503356
78.039531,4,3.8510602,0.385927198,3.8510602,3.85025548,3.85025548
78.050023,4.35889894,3.8509617,0.71269716,3.8509617,3.85017524,3.85017524
78.060514,4.58257569,3.8508637,0.855401656,3.8508637,3.85009488,3.85009488
78.071006,4.12310563,3.85076616,0.521861543,3.85076616,3.85001439,3.85001439
78.081498,3.87298335,3.85066904,0.149379729,3.85066904,3.84993377,3.84993377
78.091989,3.31662479,3.85057235,-0.730717154,3.85057235,3.84985303,3.84985303
78.102481,4,3.85047603,0.386683288,3.85047603,3.84977216,3.84977216
78.112972,3.87298335,3.85038009,0.15034378,3.85038009,3.84969118,3.84969118
78.123464,4.35889894,3.85028449,0.713172108,3.85028449,3.84961005,3.84961005
78.133956,5,3.85018921,1.07229231,3.85018921,3.84952881,3.84952881
78.144447,4.12310563,3.85009424,0.522504915,3.85009424,3.84944744,3.84944744
78.154939,2.23606798,3.84999955,-1.27040607,3.84999955,3.84936593,3.84936593
78.16543,3.60555128,3.84990514,-0.494321622,3.84990514,3.84928431,3.84928431
78.175922,4.24264069,3.84981098,0.626761286,3.84981098,3.84920255,3.84920255
78.186414,3.31662479,3.84971705,-0.730131674,3.84971705,3.84912066,3.84912066
78.196905,4.79583152,3.84962336,0.972732318,3.84962336,3.84903865,3.84903865
78.207397,4.12310563,3.84952987,0.523044698,3.84952987,3.8489565,3.8489565
78.217888,4.12310563,3.84943659,0.523133865,3.84943659,3.84887423,3.84887423
78.22838,4.35889894,3.84934348,0.71383154,3.84934348,3.84879183,3.84879183
78.238872,3.46410162,3.84925054,-0.620603676,3.84925054,3.84870929,3.84870929
78.249363,3.60555128,3.84915777,-0.493565086,3.84915777,3.84862663,3.84862663
78.259855,4.47213595,3.84906514,0.789348347,3.84906514,3.84854383,3.84854383
78.270346,4.12310563,3.84897266,0.523577085,3.84897266,3.84846091,3.84846091
78.280838,4,3.8488803,0.388741171,3.8488803,3.84837785,3.84837785
78.29133,4.47213595,3.84878806,0.78952384,3.84878806,3.84829466,3.84829466
78.301821,4.24264069,3.84869594,0.62765018,3.84869594,3.84821134,3.84821134
78.312313,3.31662479,3.84860391,-0.729368986,3.84860391,3.84812788,3.84812788
78.322804,4.47213595,3.84851198,0.789698662,3.84851198,3.8480443,3.8480443
78.333296,3.87298335,3.84842012,0.156726581,3.84842012,3.84796058,3.84796058
78.343788,4.35889894,3.84832835,0.714542228,3.84832835,3.84787672,3.84787672
78.354279,4.69041576,3.84823665,0.917703172,3.84823665,3.84779274,3.84779274
78.364771,3.46410162,3.848145,-0.619712343,3.848145,3.84770861,3.84770861
78.375262,3.74165739,3.84805342,-0.326184049,3.84805342,3.84762436,3.84762436
78.385754,3.31662479,3.84796188,-0.728928726,3.84796188,3.84753997,3.84753997
78.396246,4.35889894,3.84787038,0.71486262,3.84787038,3.84745544,3.84745544
78.406737,3.74165739,3.84777892,-0.325763004,3.84777892,3.84737078,3.84737078
78.417229,4.58257569,3.84768749,0.857256209,3.84768749,3.84728598,3.84728598
78.42772,4.58257569,3.84759609,0.857309517,3.84759609,3.84720106,3.84720106
78.438212,4.12310563,3.8475047,0.524977075,3.8475047,3.84711598,3.84711598
78.448704,3.46410162,3.84741332,-0.61912172,3.84741332,3.84703078,3.84703078
78.459195,3.74165739,3.84732196,-0.325060876,3.84732196,3.84694544,3.84694544
78.469687,3.60555128,3.8472306,-0.49160891,3.8472306,3.84685996,3.84685996
78.480178,3,3.84713924,-0.920401673,3.84713924,3.84677435,3.84677435
78.49067,3,3.84704787,-0.920352036,3.84704787,3.84668859,3.84668859
78.501162,4.58257569,3.84695649,0.85768246,3.84695649,3.84660269,3.84660269
78.511653,4,3.84686511,0.391324535,3.84686511,3.84651667,3.84651667
78.522145,3.74165739,3.8467737,-0.324216457,3.8467737,3.8464305,3.8464305
78.532636,3.74165739,3.84668228,-0.324075436,3.84668228,3.8463442,3.8463442
78.543128,3.46410162,3.84659082,-0.618457115,3.84659082,3.84625775,3.84625775
78.55362,4,3.84649933,0.391791612,3.84649933,3.84617116,3.84617116
78.564111,3.46410162,3.84640782,-0.618309152,3.84640782,3.84608444,3.84608444
78.574603,4.35889894,3.84631627,0.715948793,3.84631627,3.84599757,3.84599757
78.585094,3.74165739,3.84622469,-0.323368673,3.84622469,3.84591057,3.84591057
78.595586,3.60555128,3.84613305,-0.490491361,3.84613305,3.84582342,3.84582342
78.606078,4.47213595,3.84604137,0.791261389,3.84604137,3.84573614,3.84573614
78.616569,3.60555128,3.84594965,-0.49030437,3.84594965,3.84564871,3.84564871
78.627061,4,3.84585787,0.392609385,3.84585787,3.84556114,3.84556114
78.637552,4,3.84576605,0.392726308,3.84576605,3.84547344,3.84547344
78.648044,3.46410162,3.84567416,-0.617715583,3.84567416,3.84538558,3.84538558
78.658536,3.46410162,3.84558221,-0.617641153,3.84558221,3.84529759,3.84529759
78.669027,3.87298335,3.84549021,0.165810552,3.84549021,3.84520946,3.84520946
78.679519,4.35889894,3.84539813,0.716589709,3.84539813,3.84512118,3.84512118
78.69001,3.31662479,3.845306,-0.727104677,3.845306,3.84503276,3.84503276
78.700502,3.60555128,3.84521379,-0.489553385,3.84521379,3.8449442,3.8449442
78.710994,4.58257569,3.84512151,0.858751526,3.84512151,3.84485549,3.84485549
78.721485,4.12310563,3.84502917,0.527329554,3.84502917,3.84476664,3.84476664
78.731977,4,3.84493674,0.393780727,3.84493674,3.84467764,3.84467764
78.742468,3.46410162,3.84484424,-0.617043457,3.84484424,3.84458851,3.84458851
78.75296,4.12310563,3.84475166,0.527592615,3.84475166,3.84449923,3.84449923
78.763452,4,3.84465899,0.394133236,3.84465899,3.8444098,3.8444098
78.773943,3.87298335,3.84456625,0.168573702,3.84456625,3.84432023,3.84432023
78.784435,4.89897949,3.84447342,1.02689146,3.84447342,3.84423051,3.84423051
78.794926,4.12310563,3.84438051,0.527944236,3.84438051,3.84414065,3.84414065
78.805418,3.46410162,3.8442875,-0.616592156,3.8442875,3.84405064,3.84405064
78.81591,3.87298335,3.8441944,0.169673044,3.8441944,3.84396049,3.84396049
78.826401,4.24264069,3.84410122,0.63129982,3.84410122,3.8438702,3.8438702
78.836893,4.24264069,3.84400794,0.631373697,3.84400794,3.84377975,3.84377975
78.847384,2.82842712,3.84391457,-1.00771397,3.84391457,3.84368916,3.84368916
78.857876,3.74165739,3.8438211,-0.319630593,3.8438211,3.84359842,3.84359842
78.868368,3.16227766,3.84372753,-0.825499771,3.84372753,3.84350753,3.84350753
78.878859,4.58257569,3.84363387,0.859617253,3.84363387,3.84341651,3.84341651
78.889351,3.60555128,3.8435401,-0.487840987,3.8435401,3.84332533,3.84332533
78.899842,4,3.84344624,0.395668747,3.84344624,3.843234,3.843234
78.910334,4.35889894,3.84335227,0.71801579,3.84335227,3.84314253,3.84314253
78.920826,3.74165739,3.84325819,-0.318748812,3.84325819,3.8430509,3.8430509
78.931317,3.46410162,3.84316402,-0.615680439,3.84316402,3.84295914,3.84295914
78.941809,3.87298335,3.84306973,0.172955536,3.84306973,3.84286722,3.84286722
78.9523,4.47213595,3.84297534,0.793196454,3.84297534,3.84277515,3.84277515
78.962792,3.46410162,3.84288083,-0.61545042,3.84288083,3.84268294,3.84268294
78.973284,4.24264069,3.84278622,0.632340469,3.84278622,3.84259057,3.84259057
78.983775,4.58257569,3.8426915,0.860165213,3.8426915,3.84249806,3.84249806
78.994267,3.31662479,3.84259666,-0.725239182,3.84259666,3.84240539,3.84240539
79.004758,4.47213595,3.84250172,0.793494951,3.84250172,3.84231259,3.84231259
79.01525,3.46410162,3.84240665,-0.615065067,3.84240665,3.84221962,3.84221962
79.025742,4.69041576,3.84231147,0.920925779,3.84231147,3.8421265,3.8421265
79.036233,3.74165739,3.84221618,-0.317110065,3.84221618,3.84203325,3.84203325
79.046725,3.74165739,3.84212077,-0.316959585,3.84212077,3.84193983,3.84193983
79.057216,4.24264069,3.84202524,0.632941898,3.84202524,3.84184627,3.84184627
79.067708,3.60555128,3.84192959,-0.486187529,3.84192959,3.84175255,3.84175255
79.0782,4,3.84183382,0.397701123,3.84183382,3.84165868,3.84165868
79.088691,3.74165739,3.84173793,-0.316355096,3.84173793,3.84156467,3.84156467
79.099183,4.47213595,3.84164192,0.794036545,3.84164192,3.8414705,3.8414705
79.109674,4.12310563,3.84154579,0.530622119,3.84154579,3.84137618,3.84137618
79.120166,4.79583152,3.84144953,0.976924762,3.84144953,3.84128171,3.84128171
79.130658,3.31662479,3.84135315,-0.724381363,3.84135315,3.84118708,3.84118708
79.141149,4.12310563,3.84125665,0.530894505,3.84125665,3.84109231,3.84109231
79.151641,3.74165739,3.84116002,-0.315440374,3.84116002,3.84099738,3.84099738
79.162132,4.35889894,3.84106327,0.719608003,3.84106327,3.8409023,3.8409023
79.172624,3.46410162,3.84096638,-0.613893121,3.84096638,3.84080707,3.84080707
79.183116,3.60555128,3.84086936,-0.485095958,3.84086936,3.84071168,3.84071168
79.193607,3.46410162,3.84077223,-0.613734972,3.84077223,3.84061614,3.84061614
79.204099,4.79583152,3.84067496,0.977321116,3.84067496,3.84052045,3.84052045
79.21459,3.87298335,3.84057757,0.180016052,3.84057757,3.84042461,3.84042461
79.225082,4,3.84048004,0.399399505,3.84048004,3.8403286,3.8403286
79.235574,4.24264069,3.84038237,0.634238373,3.84038237,3.84023245,3.84023245
79.246065,4.12310563,3.84028459,0.531809211,3.84028459,3.84013615,3.84013615
79.256557,4.35889894,3.84018666,0.72021683,3.84018666,3.84003968,3.84003968
79.267048,3.87298335,3.84008861,0.181369054,3.84008861,3.83994307,3.83994307
79.27754,4,3.83999042,0.400011975,3.83999042,3.8398463,3.8398463
79.288032,3.74165739,3.83989209,-0.313424165,3.83989209,3.83974937,3.83974937
79.298523,3.87298335,3.83979364,0.182180415,3.83979364,3.8396523,3.8396523
79.309015,4,3.83969505,0.40038101,3.83969505,3.83955506,3.83955506
79.319506,4.35889894,3.83959633,0.720626546,3.83959633,3.83945767,3.83945767
79.329998,3.60555128,3.83949746,-0.483679835,3.83949746,3.83936013,3.83936013
79.34049,3.74165739,3.83939845,-0.312635679,3.83939845,3.83926242,3.83926242
79.350981,4.58257569,3.83929932,0.862134776,3.83929932,3.83916457,3.83916457
79.361473,3.87298335,3.83906656,0.184165107,3.83906656,3.83906656,3.83906656
79.371964,3.87298335,3.8389684,0.184431417,3.8389684,3.8389684,3.8389684
79.382456,4.47213595,3.83887007,0.795780047,3.83887007,3.83887007,3.83887007
79.392948,4.79583152,3.83877159,0.9782944,3.83877159,3.83877159,3.83877159
79.403439,3.74165739,3.83867296,-0.311473232,3.83867296,3.83867296,3.83867296
79.413931,4.35889894,3.83857417,0.721335413,3.83857417,3.83857417,3.83857417
79.424422,5.09901951,3.83853984,1.12271086,3.83853984,3.83847522,3.83847522
79.434914,3.74165739,3.83844132,-0.311101169,3.83844132,3.83837612,3.83837612
79.445406,4.69041576,3.83834266,0.923078055,3.83834266,3.83827685,3.83827685
79.455897,3.60555128,3.83824387,-0.482382204,3.83824387,3.83817744,3.83817744
79.466389,4,3.83814491,0.402312181,3.83814491,3.83807786,3.83807786
79.47688,3.16227766,3.83804581,-0.822051187,3.83804581,3.83797813,3.83797813
79.487372,3.60555128,3.83794656,-0.482073941,3.83794656,3.83787824,3.83787824
79.497864,3.74165739,3.83784716,-0.310144759,3.83784716,3.83777819,3.83777819
79.508355,3.74165739,3.83774762,-0.309984243,3.83774762,3.83767799,3.83767799
79.518847,4.12310563,3.83764792,0.534282422,3.83764792,3.83757762,3.83757762
79.529338,4.79583152,3.83754808,0.978919527,3.83754808,3.83747711,3.83747711
79.53983,4.47213595,3.83744809,0.796672999,3.83744809,3.83737643,3.83737643
79.550322,3.74165739,3.83734794,-0.309338905,3.83734794,3.83727559,3.83727559
79.560813,3.60555128,3.83724766,-0.48134851,3.83724766,3.8371746,3.8371746
79.571305,4.12310563,3.83714722,0.534750784,3.83714722,3.83707344,3.83707344
79.581796,3.87298335,3.83704665,0.189569771,3.83704665,3.83697214,3.83697214
79.592288,4.58257569,3.83694591,0.86349857,3.83694591,3.83687066,3.83687066
79.60278,3.46410162,3.83684503,-0.610527163,3.83684503,3.83676903,3.83676903
79.613271,3.16227766,3.83674401,-0.821259004,3.83674401,3.83666725,3.83666725
79.623763,2.82842712,3.83664284,-1.00409945,3.83664284,3.8365653,3.8365653
79.634254,3.74165739,3.83654152,-0.308032683,3.83654152,3.8364632,3.8364632
79.644746,4.12310563,3.83644005,0.535411595,3.83644005,3.83636093,3.83636093
79.655238,3.74165739,3.83633843,-0.307702851,3.83633843,3.8362585,3.8362585
79.665729,4.47213595,3.83623668,0.797432931,3.83623668,3.83615593,3.83615593
79.676221,3.60555128,3.83613476,-0.480191096,3.83613476,3.83605318,3.83605318
79.686712,4.24264069,3.83603272,0.637658194,3.83603272,3.83595029,3.83595029
79.697204,3.31662479,3.83593051,-0.720628698,3.83593051,3.83584722,3.83584722
79.707696,2.82842712,3.83582816,-1.0036937,3.83582816,3.835744,3.835744
79.718187,3.87298335,3.83572567,0.19302247,3.83572567,3.83564062,3.83564062
79.728679,4,3.83562303,0.405434298,3.83562303,3.83553708,3.83553708
79.73917,3.31662479,3.83552025,-0.720343988,3.83552025,3.83543338,3.83543338
79.749662,4.12310563,3.83541732,0.536365834,3.83541732,3.83532952,3.83532952
79.760154,4,3.83531424,0.405814935,3.83531424,3.83522549,3.83522549
79.770645,4.47213595,3.83521102,0.798075768,3.83521102,3.83512132,3.83512132
79.781137,3.46410162,3.83510766,-0.609102652,3.83510766,3.83501697,3.83501697
79.791628,3.60555128,3.83500415,-0.479012398,3.83500415,3.83491248,3.83491248
79.80212,4.47213595,3.8349005,0.798270292,3.8349005,3.83480781,3.83480781
79.812612,3.60555128,3.83479669,-0.478795801,3.83479669,3.83470298,3.83470298
79.823103,4.12310563,3.83469276,0.537040842,3.83469276,3.83459801,3.83459801
79.833595,3.74165739,3.83458867,-0.30484633,3.83458867,3.83449286,3.83449286
79.844086,3.87298335,3.83448445,0.196211354,3.83448445,3.83438756,3.83438756
79.854578,3,3.83438008,-0.913444075,3.83438008,3.83428209,3.83428209
79.86507,3.31662479,3.83427556,-0.719479514,3.83427556,3.83417646,3.83417646
79.875561,4.58257569,3.83417091,0.865103913,3.83417091,3.83407067,3.83407067
79.886053,4.12310563,3.83406611,0.537623949,3.83406611,3.83396472,3.83396472
79.896544,4,3.83396118,0.407478608,3.83396118,3.83385862,3.83385862
79.907036,4,3.8338561,0.407607528,3.8338561,3.83375234,3.83375234
79.917528,3.60555128,3.83375088,-0.477702424,3.83375088,3.8336459,3.8336459
79.928019,3,3.83364553,-0.91304191,3.83364553,3.83353932,3.83353932
79.938511,4,3.83354003,0.407995063,3.83354003,3.83343256,3.83343256
79.949002,3.31662479,3.8334344,-0.718894713,3.8334344,3.83332564,3.83332564
79.959494,3.16227766,3.83332862,-0.819177001,3.83332862,3.83321856,3.83321856
79.969986,4.58257569,3.8332227,0.865651773,3.8332227,3.83311132,3.83311132
79.980477,4.69041576,3.83311666,0.925904477,3.83311666,3.83300392,3.83300392
79.990969,4.12310563,3.83301047,0.538604826,3.83301047,3.83289635,3.83289635
80.00146,4.79583152,3.83290415,0.981288629,3.83290415,3.83278863,3.83278863
80.011952,4.58257569,3.83279769,0.865897228,3.83279769,3.83268074,3.83268074
80.022444,3.46410162,3.83269109,-0.607115699,3.83269109,3.83257269,3.83257269
80.032935,4.89897949,3.83258436,1.03266409,3.83258436,3.83246448,3.83246448
80.043427,3,3.8324775,-0.912402047,3.8324775,3.83235611,3.83235611
80.053918,4,3.8323705,0.409425812,3.8323705,3.83224758,3.83224758
80.06441,3.31662479,3.83226337,-0.718079787,3.83226337,3.83213888,3.83213888
80.074902,2.82842712,3.8321561,-1.00186275,3.8321561,3.83203001,3.83203001
80.085393,5.38516481,3.83204872,1.24624078,3.83204872,3.831921,3.831921
80.095885,4.69041576,3.83194119,0.926539028,3.83194119,3.83181181,3.83181181
80.106376,3.87298335,3.83183354,0.202854144,3.83183354,3.83170247,3.83170247
80.116868,3.74165739,3.83172576,-0.300113927,3.83172576,3.83159296,3.83159296
80.12736,4.35889894,3.83161784,0.726141241,3.83161784,3.83148328,3.83148328
80.137851,4.24264069,3.83150981,0.641194882,3.83150981,3.83137345,3.83137345
80.148343,4.89897949,3.83140164,1.03323659,3.83140164,3.83126345,3.83126345
80.158834,4.47213595,3.83129336,0.800526449,3.83129336,3.8311533,3.8311533
80.169326,4.58257569,3.83118494,0.866827983,3.83118494,3.83104298,3.83104298
80.179818,3.60555128,3.8310764,-0.474894858,3.8310764,3.83093249,3.83093249
80.190309,4,3.83096775,0.41113532,3.83096775,3.83082185,3.83082185
80.200801,3.60555128,3.83085896,-0.474665871,3.83085896,3.83071104,3.83071104
80.211292,3.46410162,3.83075007,-0.605515033,3.83075007,3.83060008,3.83060008
80.221784,4,3.83064105,0.411532445,3.83064105,3.83048894,3.83048894
80.232276,4.12310563,3.83053191,0.540900841,3.83053191,3.83037764,3.83037764
80.242767,3.74165739,3.83042266,-0.297935013,3.83042266,3.83026619,3.83026619
80.253259,4.12310563,3.83031329,0.541102891,3.83031329,3.83015457,3.83015457
80.26375,4.89897949,3.83020381,1.03381607,3.83020381,3.83004279,3.83004279
80.274242,4.12310563,3.83009421,0.541305287,3.83009421,3.82993084,3.82993084
80.284734,4.89897949,3.8299845,1.03392214,3.8299845,3.82981873,3.82981873
80.295225,4.35889894,3.82987469,0.727340532,3.82987469,3.82970646,3.82970646
80.305717,4.12310563,3.82976477,0.541609506,3.82976477,3.82959402,3.82959402
80.316208,4.35889894,3.82965475,0.727491716,3.82965475,3.82948143,3.82948143
80.3267,4.35889894,3.82954461,0.727567409,3.82954461,3.82936867,3.82936867
80.337192,4.35889894,3.82943437,0.727643164,3.82943437,3.82925575,3.82925575
80.347683,3.60555128,3.82932404,-0.47304626,3.82932404,3.82914267,3.82914267
80.358175,4,3.8292136,0.413263113,3.8292136,3.82902942,3.82902942
80.368666,3.46410162,3.82910307,-0.604153506,3.82910307,3.82891601,3.82891601
80.379158,4.12310563,3.82899244,0.542322029,3.82899244,3.82880244,3.82880244
80.38965,4.12310563,3.82888172,0.542424103,3.82888172,3.8286887,3.8286887
80.400141,4.35889894,3.82877091,0.728098914,3.82877091,3.82857481,3.82857481
80.410633,3.87298335,3.82866001,0.210531077,3.82866001,3.82846074,3.82846074
80.421124,4.35889894,3.82854903,0.728251268,3.82854903,3.82834653,3.82834653
80.431616,3.87298335,3.82843796,0.211057774,3.82843796,3.82823214,3.82823214
80.442108,2.64575131,3.82832681,-1.08746287,3.82832681,3.82811759,3.82811759
80.452599,3.46410162,3.82821559,-0.603418574,3.82821559,3.82800288,3.82800288
80.463091,3.46410162,3.82810429,-0.603326338,3.82810429,3.827888,3.827888
80.473582,4.12310563,3.82799292,0.54324277,3.82799292,3.82777298,3.82777298
80.484074,4.58257569,3.82788147,0.868731387,3.82788147,3.82765777,3.82765777
80.494566,4.35889894,3.82776996,0.728785965,3.82776996,3.82754241,3.82754241
80.505057,3.60555128,3.8276584,-0.471282423,3.8276584,3.82742689,3.82742689
80.515549,4.35889894,3.82754676,0.728939078,3.82754676,3.8273112,3.8273112
80.52604,3.87298335,3.82743509,0.213420382,3.82743509,3.82719536,3.82719536
80.536532,3.60555128,3.82732335,-0.470926822,3.82732335,3.82707935,3.82707935
80.547024,3.60555128,3.82721156,-0.470808119,3.82721156,3.82696317,3.82696317
80.557515,3.46410162,3.82709974,-0.602493258,3.82709974,3.82684684,3.82684684
80.568007,3.46410162,3.82698787,-0.602400413,3.82698787,3.82673034,3.82673034
80.578498,3.31662479,3.82687598,-0.714318689,3.82687598,3.82661368,3.82661368
80.58899,4.58257569,3.82676405,0.869374285,3.82676405,3.82649686,3.82649686
80.599482,4.12310563,3.82665209,0.544475467,3.82665209,3.82637987,3.82637987
80.609973,3.46410162,3.82654013,-0.602028663,3.82654013,3.82626273,3.82626273
80.620465,3.31662479,3.82642814,-0.714005145,3.82642814,3.82614542,3.82614542
80.630956,4.12310563,3.82631615,0.544783879,3.82631615,3.82602795,3.82602795
80.641448,4.69041576,3.82620415,0.929629823,3.82620415,3.82591031,3.82591031
80.65194,3.16227766,3.82609216,-0.814748119,3.82609216,3.82579252,3.82579252
80.662431,3.74165739,3.82598018,-0.29038388,3.82598018,3.82567457,3.82567457
80.672923,4.12310563,3.82586822,0.545194833,3.82586822,3.82555644,3.82555644
80.683414,5.09901951,3.82575629,1.12838966,3.82575629,3.82543817,3.82543817
80.693906,3.87298335,3.82564439,0.217575185,3.82564439,3.82531972,3.82531972
80.704398,4.12310563,3.82553252,0.545502617,3.82553252,3.82520111,3.82520111
80.714889,3.87298335,3.82542072,0.218088583,3.82542072,3.82508235,3.82508235
80.725381,3.46410162,3.82530896,-0.601005279,3.82530896,3.82496342,3.82496342
80.735872,4.35889894,3.82519728,0.730548876,3.82519728,3.82484434,3.82484434
80.746364,3.74165739,3.82508567,-0.288839553,3.82508567,3.82472508,3.82472508
80.756856,3.74165739,3.82497415,-0.28864644,3.82497415,3.82460566,3.82460566
80.767347,4,3.82486274,0.418494033,3.82486274,3.8244861,3.8244861
80.777839,3.46410162,3.82475144,-0.600541273,3.82475144,3.82436636,3.82436636
80.78833,5,3.82464026,1.08414009,3.82464026,3.82424647,3.82424647
80.798822,3.16227766,3.82452921,-0.813788396,3.82452921,3.8241264,3.8241264
80.809314,3.87298335,3.82441832,0.22037475,3.82441832,3.82400618,3.82400618
80.819805,2.82842712,3.82430759,-0.997938109,3.82430759,3.82388581,3.82388581
80.830297,4.12310563,3.82419704,0.546725326,3.82419704,3.82376526,3.82376526
80.840788,3.31662479,3.8240867,-0.712363608,3.8240867,3.82364456,3.82364456
80.85128,4.24264069,3.82397656,0.6470426,3.82397656,3.8235237,3.8235237
80.861772,3.87298335,3.82386665,0.221622859,3.82386665,3.82340267,3.82340267
80.872263,4,3.82375701,0.41981304,3.82375701,3.82328149,3.82328149
80.882755,4.58257569,3.82364763,0.871164775,3.82364763,3.82316014,3.82316014
80.893246,3.60555128,3.82353856,-0.466891079,3.82353856,3.82303864,3.82303864
80.903738,3.16227766,3.82342979,-0.813112617,3.82342979,3.82291697,3.82291697
80.91423,4.12310563,3.82332136,0.54752558,3.82332136,3.82279513,3.82279513
80.924721,4.35889894,3.82321332,0.731905473,3.82321332,3.82267315,3.82267315
80.935213,3.74165739,3.82310567,-0.285391451,3.82310567,3.822551,3.822551
80.945704,3.46410162,3.82299845,-0.599079991,3.82299845,3.8224287,3.8224287
80.956196,3.60555128,3.82289169,-0.466197824,3.82289169,3.82230622,3.82230622
80.966688,3.31662479,3.82278542,-0.711449665,3.82278542,3.82218359,3.82218359
80.977179,4.12310563,3.82267969,0.548111244,3.82267969,3.82206081,3.82206081
80.987671,2.64575131,3.82257452,-1.08481483,3.82257452,3.82193785,3.82193785
80.998162,4.12310563,3.82246998,0.548302509,3.82246998,3.82181475,3.82181475
81.008654,4.69041576,3.82236609,0.93169183,3.82236609,3.82169148,3.82169148
81.019146,3.16227766,3.82226291,-0.812394763,3.82226291,3.82156805,3.82156805
81.029637,3.74165739,3.8221605,-0.283730705,3.8221605,3.82144447,3.82144447
81.040129,3.31662479,3.8220589,-0.71093889,3.8220589,3.82132071,3.82132071
81.05062,4.12310563,3.82195818,0.548769027,3.82195818,3.82119682,3.82119682
81.061112,3.46410162,3.8218584,-0.598127733,3.8218584,3.82107275,3.82107275
81.071604,3.60555128,3.82175963,-0.464982106,3.82175963,3.82094852,3.82094852
81.082095,3.31662479,3.82166197,-0.710659679,3.82166197,3.82082414,3.82082414
81.092587,4,3.82156547,0.422415117,3.82156547,3.82069959,3.82069959
81.103078,3.60555128,3.82147024,-0.464670816,3.82147024,3.8205749,3.8205749
81.11357,3.31662479,3.82137637,-0.710458709,3.82137637,3.82045003,3.82045003
81.124062,4.12310563,3.82128396,0.549382986,3.82128396,3.82032501,3.82032501
81.134553,3.31662479,3.82119314,-0.71032975,3.82119314,3.82019984,3.82019984
81.145045,3.87298335,3.82110403,0.22777032,3.82110403,3.8200745,3.8200745
81.155536,3.31662479,3.82101676,-0.710205585,3.82101676,3.81994901,3.81994901
81.166028,4,3.82093148,0.42316488,3.82093148,3.81982336,3.81982336
81.17652,3.31662479,3.82084836,-0.710087017,3.82084836,3.81969754,3.81969754
81.187011,4,3.82076759,0.423358494,3.82076759,3.81957158,3.81957158
81.197503,3.87298335,3.82068933,0.228678843,3.82068933,3.81944545,3.81944545
81.207994,4,3.82061384,0.423540037,3.82061384,3.81931917,3.81931917
81.218486,4.47213595,3.82054132,0.807214119,3.82054132,3.81919273,3.81919273
81.228978,3.60555128,3.82047205,-0.46359549,3.82047205,3.81906613,3.81906613
81.239469,4.79583152,3.82040633,0.987636163,3.82040633,3.81893938,3.81893938
81.249961,3.31662479,3.82034447,-0.709732117,3.82034447,3.81881246,3.81881246
81.260452,3.16227766,3.82028683,-0.811177642,3.82028683,3.8186854,3.8186854
81.270944,3.74165739,3.8202338,-0.280314839,3.8202338,3.81855817,3.81855817
81.281436,3.74165739,3.82018582,-0.280229254,3.82018582,3.81843078,3.81843078
81.291927,3.46410162,3.8201434,-0.596692373,3.8201434,3.81830325,3.81830325
81.302419,3.16227766,3.82010709,-0.811066844,3.82010709,3.81817554,3.81817554
81.31291,2.82842712,3.83758429,-1.00456815,3.83758429,3.8180477,3.8180477
81.323402,4.89897949,3.83771256,1.0301781,3.83771256,3.81791968,3.81791968
81.333894,3.16227766,3.83785095,-0.821932653,3.83785095,3.81779151,3.81779151
81.344385,2.82842712,3.83800036,-1.00477522,3.83800036,3.8176632,3.8176632
81.354877,4.47213595,3.83816189,0.796224881,3.83816189,3.81753472,3.81753472
81.365368,3.60555128,3.83833671,-0.482478426,3.83833671,3.81740609,3.81740609
81.37586,4.24264069,3.83852623,0.635699977,3.83852623,3.8172773,3.8172773
81.386352,3.46410162,3.83873207,-0.61207063,3.83873207,3.81714835,3.81714835
81.396843,3.74165739,3.83895617,-0.311927525,3.83895617,3.81701926,3.81701926
81.407335,3,3.83920094,-0.916079114,3.83920094,3.81689,3.81689
81.417826,4,3.83946935,0.40066276,3.83946935,3.8167606,3.8167606
81.428318,4.69041576,3.83976533,0.922307123,3.83976533,3.81663103,3.81663103
81.43881,4.12310563,3.84009403,0.531988337,3.84009403,3.81650131,3.81650131
81.449301,4.89897949,3.8404625,1.02884254,3.8404625,3.81637144,3.81637144
81.459793,3.46410162,3.84088062,-0.61382327,3.84088062,3.81624141,3.81624141
81.470284,4.24264069,3.84136204,0.633465588,3.84136204,3.81611123,3.81611123
81.480776,4.35889894,3.84192599,0.71900831,3.84192599,3.81598089,3.81598089
81.491268,3.87298335,3.84259896,0.174311184,3.84259896,3.8158504,3.8158504
81.501759,3.74165739,3.84341691,-0.318997682,3.84341691,3.81571976,3.81571976
81.512251,3.46410162,3.844428,-0.616706077,3.844428,3.81558896,3.81558896
81.522742,3.87298335,3.84569423,0.165194163,3.84569423,3.81545802,3.81545802
81.533234,4,3.84729387,0.390776317,3.84729387,3.81532691,3.81532691
81.543726,5,3.84932115,1.072697,3.84932115,3.81519565,3.81519565
81.554217,4.69041576,3.85188505,0.915713223,3.85188505,3.81506425,3.81506425
81.564709,3.60555128,3.85510621,-0.499554741,3.85510621,3.81493268,3.81493268
81.5752,4,3.85910808,0.375355724,3.85910808,3.81480097,3.81480097
81.585692,2.64575131,3.86400898,-1.1037471,3.86400898,3.8146691,3.8146691
81.596184,3.87298335,3.86990637,0.0554704735,3.86990637,3.81453708,3.81453708
81.606675,4,3.87686193,0.350910343,3.87686193,3.81440491,3.81440491
81.617167,4,3.88488708,0.339282945,3.88488708,3.81427258,3.81427258
81.627658,3.87298335,3.8939215,-0.144700229,3.8939215,3.81414012,3.81414012
81.63815,4.12310563,3.90382291,0.468276323,3.90382291,3.81400748,3.81400748
81.648642,3.87298335,3.91434578,-0.203377564,3.91434578,3.8138747,3.8138747
81.659133,4.24264069,3.92512802,0.563482622,3.92512802,3.81374178,3.81374178
81.669625,4.24264069,3.93568054,0.554039846,3.93568054,3.8136087,3.8136087
81.680116,4,3.94537663,0.233716432,3.94537663,3.81347547,3.81347547
81.690608,4.47213595,3.95348692,0.720172924,3.95348692,3.81334209,3.81334209
81.7011,4.69041576,3.95925663,0.855078438,3.95925663,3.81320855,3.81320855
81.711591,4.35889894,3.96205898,0.62995235,3.96205898,3.81307488,3.81307488
81.722083,3.87298335,3.96156751,-0.297630925,3.96156751,3.81294104,3.81294104
81.732574,4,3.95786066,0.205278694,3.95786066,3.81280706,3.81280706
81.743066,4.35889894,3.95139444,0.638360795,3.95139444,3.81267293,3.81267293
81.753558,4.24264069,3.94286189,0.547520595,3.94286189,3.81253864,3.81253864
81.764049,3.74165739,3.93302189,-0.437452288,3.93302189,3.81240422,3.81240422
81.774541,3.87298335,3.92256975,-0.22268005,3.92256975,3.81226963,3.81226963
81.785032,3.60555128,3.9120837,-0.553653707,3.9120837,3.81213491,3.81213491
81.795524,4.12310563,3.90200409,0.470214353,3.90200409,3.81200003,3.81200003
81.806016,4.58257569,3.89264886,0.830618343,3.89264886,3.811865,3.811865
81.816507,4.24264069,3.88422509,0.59867821,3.88422509,3.81172984,3.81172984
81.826999,3.87298335,3.87684229,-0.0621203635,3.87684229,3.81159451,3.81159451
81.83749,3.31662479,3.87053374,-0.744250598,3.87053374,3.81145905,3.81145905
81.847982,3.46410162,3.86526719,-0.633376328,3.86526719,3.81132343,3.81132343
81.858474,3.46410162,3.86096628,-0.629971953,3.86096628,3.81118766,3.81118766
81.868965,4,3.85752481,0.37745886,3.85752481,3.81105175,3.81105175
81.879457,3.74165739,3.85482102,-0.336398032,3.85482102,3.81091569,3.81091569
81.889948,3.16227766,3.8527321,-0.830935882,3.8527321,3.81077949,3.81077949
81.90044,3.46410162,3.85114109,-0.622124964,3.85114109,3.81064313,3.81064313
81.910932,4.89897949,3.84994436,1.02422416,3.84994436,3.81050663,3.81050663
81.921423,4.12310563,3.84905381,0.523499585,3.84905381,3.81036999,3.81036999
81.931915,3.74165739,3.84839735,-0.326710829,3.84839735,3.8102332,3.8102332
81.942406,4.89897949,3.84791855,1.02521263,3.84791855,3.81009627,3.81009627
81.952898,4.47213595,3.84757412,0.790292244,3.84757412,3.80995918,3.80995918
81.96339,3.87298335,3.84733201,0.16016035,3.84733201,3.80982195,3.80982195
81.973881,3.60555128,3.84716882,-0.491546071,3.84716882,3.80968458,3.80968458
81.984373,5,3.84706772,1.07374684,3.84706772,3.80954706,3.80954706
81.994864,4.24264069,3.84701678,0.628986414,3.84701678,3.8094094,3.8094094
82.005356,3.31662479,3.84700748,-0.728273776,3.84700748,3.80927159,3.80927159
82.015848,4.24264069,3.84703374,0.628972932,3.84703374,3.80913364,3.80913364
82.026339,4.12310563,3.84709109,0.525370856,3.84709109,3.80899555,3.80899555
82.036831,4,3.84717624,0.390926801,3.84717624,3.80885731,3.80885731
82.047322,4.69041576,3.84728663,0.918220631,3.84728663,3.80871893,3.80871893
82.057814,3.60555128,3.84742031,-0.491801826,3.84742031,3.8085804,3.8085804
82.068306,3.16227766,3.84757567,-0.827827285,3.84757567,3.80844173,3.80844173
82.078797,3.87298335,3.8477514,0.158845673,3.8477514,3.80830292,3.80830292
82.089289,4.12310563,3.84794644,0.524556177,3.84794644,3.80816397,3.80816397
82.09978,3.87298335,3.84815987,0.157554663,3.84815987,3.80802488,3.80802488
82.110272,4.12310563,3.84839098,0.524132275,3.84839098,3.80788563,3.80788563
82.120764,3.87298335,3.84863913,0.156026338,3.84863913,3.80774625,3.80774625
82.131255,4.12310563,3.84890376,0.523642877,3.84890376,3.80760674,3.80760674
82.141747,4.58257569,3.84918452,0.856382613,3.84918452,3.80746707,3.80746707
82.152238,4.12310563,3.84948099,0.523091422,3.84948099,3.80732727,3.80732727
82.16273,4,3.84979297,0.387565518,3.84979297,3.80718732,3.80718732
82.173222,4.58257569,3.85012022,0.855836125,3.85012022,3.80704723,3.80704723
82.183713,3.46410162,3.85046257,-0.6215794,3.85046257,3.80690701,3.80690701
82.194205,3.87298335,3.85081997,0.148873697,3.85081997,3.80676664,3.80676664
82.204696,3.31662479,3.85119231,-0.731141247,3.85119231,3.80662614,3.80662614
82.215188,4.58257569,3.85157966,0.854983058,3.85157966,3.80648549,3.80648549
82.22568,4.69041576,3.85198202,0.915660274,3.85198202,3.8063447,3.8063447
82.236171,3.46410162,3.85239942,-0.62313546,3.85239942,3.80620378,3.80620378
82.246663,3,3.85283203,-0.923489053,3.85283203,3.80606272,3.80606272
82.257154,4.89897949,3.85327992,1.02259453,3.85327992,3.80592152,3.80592152
82.267646,3.74165739,3.85374334,-0.334792407,3.85374334,3.80578018,3.80578018
82.278138,4.12310563,3.85422245,0.518539466,3.85422245,3.80563869,3.80563869
82.288629,3.16227766,3.85471741,-0.83212965,3.85471741,3.80549709,3.80549709
82.299121,4.69041576,3.85522859,0.913885754,3.85522859,3.80535533,3.80535533
82.309612,3.46410162,3.85575615,-0.625823088,3.85575615,3.80521344,3.80521344
82.320104,3.46410162,3.85630051,-0.626257849,3.85630051,3.80507141,3.80507141
82.330596,4,3.85686194,0.378335914,3.85686194,3.80492924,3.80492924
82.341087,4,3.85744073,0.377570214,3.85744073,3.80478695,3.80478695
82.351579,3.74165739,3.85803739,-0.341145133,3.85803739,3.8046445,3.8046445
82.36207,4.12310563,3.85865219,0.514250362,3.85865219,3.80450194,3.80450194
82.372562,3.31662479,3.85928568,-0.736655207,3.85928568,3.80435922,3.80435922
82.383054,4,3.85993826,0.374248228,3.85993826,3.80421637,3.80421637
82.393545,4.69041576,3.86061034,0.91093656,3.86061034,3.8040734,3.8040734
82.404037,4.58257569,3.86130255,0.849278012,3.86130255,3.80393028,3.80393028
82.414528,4.24264069,3.86201529,0.616948454,3.86201529,3.80378704,3.80378704
82.42502,4.12310563,3.86274925,0.510251284,3.86274925,3.80364365,3.80364365
82.435512,4.35889894,3.86350495,0.703842307,3.86350495,3.80350013,3.80350013
82.446003,4.12310563,3.86428292,0.508746205,3.86428292,3.80335648,3.80335648
82.456495,4.69041576,3.86508396,0.908477736,3.86508396,3.80321269,3.80321269
82.466986,4.58257569,3.86590859,0.846561934,3.86590859,3.80306878,3.80306878
82.477478,3.46410162,3.86675765,-0.634551841,3.86675765,3.80292472,3.80292472
82.48797,3.87298335,3.86763182,0.0731541084,3.86763182,3.80278053,3.80278053
82.498461,4.79583152,3.86853178,0.962964043,3.86853178,3.80263623,3.80263623
82.508953,3.16227766,3.86945849,-0.840940442,3.86945849,3.80249177,3.80249177
82.519444,4.69041576,3.87041262,0.905540248,3.87041262,3.8023472,3.8023472
82.529936,3.74165739,3.87139524,-0.360191406,3.87139524,3.80220248,3.80220248
82.540428,4,3.87240716,0.357201398,3.87240716,3.80205763,3.80205763
82.550919,3.87298335,3.87344926,-0.0215849291,3.87344926,3.80191267,3.80191267
82.561411,3.31662479,3.87452272,-0.746925651,3.87452272,3.80176756,3.80176756
82.571902,4.24264069,3.8756284,0.605815394,3.8756284,3.80162233,3.80162233
82.582394,3,3.87676759,-0.936358687,3.87676759,3.80147696,3.80147696
82.592886,5,3.87794135,1.0592727,3.87794135,3.80133146,3.80133146
82.603377,4.69041576,3.87915074,0.900702514,3.87915074,3.80118584,3.80118584
82.613869,4,3.88039726,0.345836291,3.88039726,3.80104008,3.80104008
82.62436,4.24264069,3.88168198,0.600798395,3.88168198,3.80089421,3.80089421
82.634852,3.31662479,3.8830065,-0.75258336,3.8830065,3.80074819,3.80074819
82.645344,3.46410162,3.88437216,-0.648282765,3.88437216,3.80060205,3.80060205
82.655835,4.35889894,3.88578031,0.687836199,3.88578031,3.80045579,3.80045579
82.666327,4.24264069,3.88723279,0.596160964,3.88723279,3.80030939,3.80030939
82.676818,4.47213595,3.88873098,0.763809513,3.88873098,3.80016288,3.80016288
82.68731,3.31662479,3.8902769,-0.757398247,3.8902769,3.80001622,3.80001622
82.697802,3.87298335,3.8918722,-0.137436724,3.8918722,3.79986944,3.79986944
82.708293,3.46410162,3.89351863,-0.655299183,3.89351863,3.79972254,3.79972254
82.718785,3.74165739,3.89521851,-0.391868757,3.89521851,3.79957551,3.79957551
82.729276,3.31662479,3.89697359,-0.761806274,3.89697359,3.79942836,3.79942836
82.739768,3.87298335,3.89878641,-0.160633312,3.89878641,3.79928108,3.79928108
82.75026,3.87298335,3.9006591,-0.166360324,3.9006591,3.79913367,3.79913367
82.760751,3.16227766,3.90259392,-0.860416327,3.90259392,3.79898615,3.79898615
82.771243,4,3.90459376,0.308879002,3.90459376,3.79883849,3.79883849
82.781734,3.46410162,3.90666094,-0.665251324,3.90666094,3.79869072,3.79869072
82.792226,3.60555128,3.90879866,-0.550679025,3.90879866,3.79854281,3.79854281
82.802718,4,3.91100971,0.298312403,3.91100971,3.79839478,3.79839478
82.813209,5,3.91329698,1.04245049,3.91329698,3.79824664,3.79824664
82.823701,4,3.91566422,0.290406234,3.91566422,3.79809836,3.79809836
82.834192,3.31662479,3.91811444,-0.775557635,3.91811444,3.79794997,3.79794997
82.844684,4.24264069,3.92065177,0.567440675,3.92065177,3.79780145,3.79780145
82.855176,4.12310563,3.92327985,0.44701876,3.92327985,3.7976528,3.7976528
82.865667,4.24264069,3.92600251,0.562706115,3.92600251,3.79750405,3.79750405
82.876159,4.58257569,3.92882459,0.808548767,3.92882459,3.79735516,3.79735516
82.88665,4.12310563,3.93175009,0.437442033,3.93175009,3.79720617,3.79720617
82.897142,4.47213595,3.93478442,0.733042655,3.93478442,3.79705704,3.79705704
82.907634,3.16227766,3.9379324,-0.880712633,3.9379324,3.79690779,3.79690779
82.918125,4.47213595,3.94119913,0.728654116,3.94119913,3.79675843,3.79675843
82.928617,3.46410162,3.94459097,-0.693173396,3.94459097,3.79660894,3.79660894
82.939108,4.69041576,3.94811335,0.861569736,3.94811335,3.79645935,3.79645935
82.9496,2.82842712,3.95177339,-1.05988031,3.95177339,3.79630962,3.79630962
82.960092,3.60555128,3.95557762,-0.591630241,3.95557762,3.79615977,3.79615977
82.970583,3.74165739,3.95953292,-0.466771396,3.95953292,3.79600982,3.79600982
82.981075,4.35889894,3.9636478,0.628690019,3.9636478,3.79585974,3.79585974
82.991566,3.87298335,3.96792971,-0.308133675,3.96792971,3.79570956,3.79570956
83.002058,3.31662479,3.97238822,-0.809792214,3.97238822,3.79555924,3.79555924
83.01255,3.87298335,3.97703229,-0.32256618,3.97703229,3.7954088,3.7954088
83.023041,3.46410162,3.9818714,-0.719562217,3.9818714,3.79525827,3.79525827
83.033533,4.58257569,3.98691711,0.771789207,3.98691711,3.7951076,3.7951076
83.044024,4.79583152,3.99217983,0.896466227,3.99217983,3.79495683,3.79495683
83.054516,4.24264069,3.99767268,0.494942429,3.99767268,3.79480593,3.79480593
83.065008,3,4.00340817,-1.00170263,4.00340817,3.79465492,3.79465492
83.075499,3.16227766,4.00939962,-0.920392285,4.00939962,3.7945038,3.7945038
83.085991,4.24264069,4.01566307,0.476421677,4.01566307,3.79435256,3.79435256
83.096482,4.12310563,4.02221332,0.317635493,4.02221332,3.79420122,3.79420122
83.106974,4.24264069,4.02906877,0.46213842,4.02906877,3.79404974,3.79404974
83.117466,4.89897949,4.03624725,0.928833805,4.03624725,3.79389816,3.79389816
83.127957,4,4.04376786,-0.209207695,4.04376786,3.79374648,3.79374648
83.138449,4.12310563,4.05165339,0.267305504,4.05165339,3.79359467,3.79359467
83.14894,4.58257569,4.05992535,0.722945601,4.05992535,3.79344276,3.79344276
83.159432,3.87298335,4.06861015,-0.442297185,4.06861015,3.79329072,3.79329072
83.169924,5.29150262,4.07773382,1.10171176,4.07773382,3.79313858,3.79313858
83.180415,3.87298335,4.08732442,-0.462969836,4.08732442,3.79298633,3.79298633
83.190907,4.89897949,4.09741515,0.895301255,4.09741515,3.79283396,3.79283396
83.201398,4.12310563,4.10803808,0.122749935,4.10803808,3.7926815,3.7926815
83.21189,4.89897949,4.11923211,0.883033053,4.11923211,3.79252891,3.79252891
83.222382,3.87298335,4.13103632,-0.507989143,4.13103632,3.79237621,3.79237621
83.232873,5.09901951,4.14349302,0.977510355,4.14349302,3.79222341,3.79222341
83.243365,4.79583152,4.15665202,0.799487024,4.15665202,3.7920705,3.7920705
83.253856,4.47213595,4.17056249,0.549157051,4.17056249,3.79191748,3.79191748
83.264348,4.69041576,4.1852835,0.710726572,4.1852835,3.79176435,3.79176435
83.27484,4.24264069,4.20087544,0.204365474,4.20087544,3.79161111,3.79161111
83.285331,4.69041576,4.21740419,0.68775837,4.21740419,3.79145777,3.79145777
83.295823,4.35889894,4.23494689,0.352068245,4.23494689,3.79130431,3.79130431
83.306314,4.12310563,4.25358142,-0.361214333,4.25358142,3.79115076,3.79115076
83.316806,4.58257569,4.2734006,0.556035155,4.2734006,3.79099709,3.79099709
83.327298,4.12310563,4.29450107,-0.41399933,4.29450107,3.79084331,3.79084331
83.337789,5,4.31698913,0.826444715,4.31698913,3.79068944,3.79068944
83.348281,4.58257569,4.34098909,0.491514598,4.34098909,3.79053546,3.79053546
83.358772,5.09901951,4.36662945,0.85579791,4.36662945,3.79038138,3.79038138
83.369264,4.24264069,4.39406327,-0.389130549,4.39406327,3.79022718,3.79022718
83.379756,5,4.42345401,0.759306259,4.42345401,3.79007288,3.79007288
83.390247,3.87298335,4.45498545,-0.762890623,4.45498545,3.78991848,3.78991848
83.400739,4.58257569,4.48887652,0.306103214,4.48887652,3.78976397,3.78976397
83.41123,5,4.52536667,0.688936374,4.52536667,3.78960938,3.78960938
83.421722,5.38516481,4.56711223,0.904462592,4.56475254,3.79229679,3.78945466
83.432214,4.89897949,4.60972893,0.537820189,4.60737999,3.79215555,3.78929984
83.442705,5,4.65601361,0.58650353,4.65367699,3.79201431,3.78914494
83.453197,5.09901951,4.70652593,0.626493084,4.7042034,3.79187306,3.78898992
83.463688,5.09901951,4.76197602,0.580554469,4.7596696,3.79173181,3.78883481
83.47418,4.35889894,4.82333451,-0.6814951,4.82104656,3.79159056,3.78867959
83.484672,5.91607978,4.89189235,1.01202146,4.88962566,3.7914493,3.78852426
83.495163,5.29150262,4.96939663,0.567543824,4.96715458,3.79130806,3.78836885
83.505655,6.08276253,5.05822462,1.0121946,5.05601136,3.79116681,3.78821333
83.516146,5.91607978,5.16149308,0.868669504,5.15931364,3.79102557,3.78805772
83.526638,6,5.28328623,0.846589492,5.28114675,3.79088433,3.787902
83.53713,6.70820393,5.42870608,1.13114891,5.42661383,3.79074309,3.78774618
83.547621,6.78232998,5.6039142,1.08554861,5.60187754,3.79060188,3.78759028
83.558113,6.70820393,5.81606304,0.944532105,5.81409112,3.79046067,3.78743427
83.568604,6.92820323,6.07283723,0.924859989,6.07093949,3.79031948,3.78727817
83.579096,7.54983444,6.3820713,1.0806309,6.38025668,3.79017828,3.78712196
83.589588,8.1240384,6.75085768,1.17182794,6.7491338,3.79003711,3.78696566
83.600079,7.41619849,7.18478248,0.481057179,7.18315476,3.78989596,3.78680927
83.610571,9.38083152,7.68731084,1.3013534,7.68578205,3.78975482,3.78665277
83.621062,8.66025404,8.25888141,0.633539758,8.2574514,3.78961371,3.7864962
83.631554,8.94427191,8.89694045,0.217557951,8.89560642,3.7894726,3.78633951
83.642046,10.5356538,9.59546883,0.969631331,9.59422579,3.78933152,3.78618273
83.652537,10.9087121,10.3452234,0.750658851,10.3440647,3.78919048,3.78602587
83.663029,11.7046999,11.1342083,0.755308977,11.1331263,3.78904945,3.7858689
83.67352,12.083046,11.9474272,0.36826449,11.9464139,3.78890845,3.78571186
83.684012,12.6885775,12.7676967,-0.281281341,12.7667437,3.78876748,3.7855547
83.694504,13.96424,13.5751863,0.623741708,13.5742855,3.78862653,3.78539746
83.704995,14.9666295,14.3475832,0.786795002,14.3467265,3.78848563,3.78524013
83.715487,15.0996689,15.0601666,0.198751844,15.0593463,3.78834475,3.7850827
83.725978,16.2480768,15.6854174,0.75010624,15.6846259,3.78820392,3.7849252
83.73647,16.6132477,16.1944814,0.647121565,16.1937109,3.78806311,3.78476759
83.746962,16.8226038,16.5591178,0.513308956,16.5583603,3.78792234,3.78460989
83.757453,17.3205081,16.7559279,0.751385519,16.7551755,3.78778162,3.78445211
83.767945,17.8325545,16.7709982,1.03031854,16.7702427,3.78764093,3.78429423
83.778436,16.5529454,16.6031883,-0.224149476,16.6024213,3.7875003,3.78413628
83.788928,16.1864141,16.2644378,-0.279327334,16.2636507,3.7873597,3.78397822
83.79942,16.8226038,15.7769094,1.02259202,15.7760938,3.78721915,3.78382007
83.809911,16.3095064,15.1683966,1.06822742,15.1675439,3.78707866,3.78366185
83.820403,15.0665192,14.4678646,0.773727698,14.466966,3.78693821,3.78350353
83.830894,13.6381817,13.7032074,-0.255001402,13.7022537,3.78679783,3.78334514
83.841386,13.7113092,12.8995878,0.900955853,12.8985693,3.78665749,3.78318665
83.851878,13.114877,12.0797391,1.01741727,12.0786459,3.7865172,3.78302807
83.862369,11.9582607,11.2638858,0.833291647,11.2627072,3.78637699,3.78286942
83.872861,11.1803399,10.4696058,0.843050444,10.4683312,3.78623682,3.78271066
83.883352,10.8627805,9.71231182,1.07259903,9.71093049,3.78609673,3.78255184
83.893844,9.48683298,9.00446121,0.694529893,9.00296339,3.78595669,3.78239292
83.904336,9.43398113,8.35580009,1.03835497,8.35417742,3.78581672,3.78223392
83.914827,8.77496439,7.77288184,1.00104073,7.77112819,3.78567682,3.78207485
83.925319,8.1240384,7.25880006,0.93018189,7.25691216,3.78553699,3.78191568
83.93581,6.8556546,6.81361962,0.205024341,6.8115976,3.78539724,3.78175644
83.946302,7.34846923,6.43430449,0.956119623,6.43215176,3.78525756,3.78159711
83.956794,7.21110255,6.11558411,1.04667017,6.11330698,3.78511795,3.78143769
83.967285,6,5.85054971,0.38658801,5.84815655,3.78497843,3.78127821
83.977777,5.74456265,5.63142067,0.336365834,5.62892092,3.78483898,3.78111863
83.988268,6.55743852,5.45045752,1.05213165,5.44786075,3.78469963,3.78095899
83.99876,5.29150262,5.30037894,-0.0942142084,5.2976941,3.78456035,3.78079925
[truncated: 387,962 more chars]
