# Supplementary material for: Phase Stability of Iron Nitride Fe4N at High Pressure—Pressure-Dependent Evolution of Phase Equilibria in the Fe–N System
Source: Materials (Basel). 2021 Jul 15;14(14):3963. doi: 10.3390/ma14143963 (PMC8307547; doi:10.3390/ma14143963)
Supplement: Supplementary file 1 [file materials-14-03963-s001.zip › xrd_data/6-400_riet.txt]

'y-axis saved as Sqrt(y)
'x,Yobs,Ycalc,Diff,epsilon,gamma,Bkg
20,19.8242276,0,0,0,0,0
20.010492,19.7230829,0,0,0,0,0
20.020983,20.1990099,0,0,0,0,0
20.031475,20.3960781,0,0,0,0,0
20.041966,20.2977831,0,0,0,0,0
20.052458,20.4694895,0,0,0,0,0
20.06295,20.2484567,0,0,0,0,0
20.073441,20.1246118,0,0,0,0,0
20.083933,20.6397674,0,0,0,0,0
20.094424,20.3224014,0,0,0,0,0
20.104916,21.0950231,0,0,0,0,0
20.115408,19.4679223,0,0,0,0,0
20.125899,21,0,0,0,0,0
20.136391,21.1187121,0,0,0,0,0
20.146882,20.880613,0,0,0,0,0
20.157374,21.5174348,0,0,0,0,0
20.167866,19.5703858,0,0,0,0,0
20.178357,20.6155281,0,0,0,0,0
20.188849,20.3715488,0,0,0,0,0
20.19934,20.7123152,0,0,0,0,0
20.209832,20.2484567,0,0,0,0,0
20.220324,21.0475652,0,0,0,0,0
20.230815,20.4450483,0,0,0,0,0
20.241307,20.904545,0,0,0,0,0
20.251798,20.1494417,0,0,0,0,0
20.26229,20.2484567,0,0,0,0,0
20.272782,21.1423745,0,0,0,0,0
20.283273,20.6881609,0,0,0,0,0
20.293765,19.9749844,0,0,0,0,0
20.304256,20.7605395,0,0,0,0,0
20.314748,20.0249844,0,0,0,0,0
20.32524,20.6881609,0,0,0,0,0
20.335731,20.1494417,0,0,0,0,0
20.346223,20.0997512,0,0,0,0,0
20.356714,21.0475652,0,0,0,0,0
20.367206,20.9523268,0,0,0,0,0
20.377698,20.4694895,0,0,0,0,0
20.388189,21.0475652,0,0,0,0,0
20.398681,20.9284495,0,0,0,0,0
20.409172,20.880613,0,0,0,0,0
20.419664,21.023796,0,0,0,0,0
20.430156,20.3715488,0,0,0,0,0
20.440647,21.3072758,0,0,0,0,0
20.451139,20.2977831,0,0,0,0,0
20.46163,21.4476106,0,0,0,0,0
20.472122,20.6881609,0,0,0,0,0
20.482614,20.808652,0,0,0,0,0
20.493105,20.808652,0,0,0,0,0
20.503597,20.6155281,0,0,0,0,0
20.514088,20.3715488,0,0,0,0,0
20.52458,21.3775583,0,0,0,0,0
20.535072,20.0997512,0,0,0,0,0
20.545563,20.7123152,0,0,0,0,0
20.556055,20.9523268,0,0,0,0,0
20.566546,20.4205779,0,0,0,0,0
20.577038,20.7364414,0,0,0,0,0
20.58753,19.9749844,0,0,0,0,0
20.598021,20.6639783,0,0,0,0,0
20.608513,20.4939015,0,0,0,0,0
20.619004,19.6723156,0,0,0,0,0
20.629496,20.8326667,0,0,0,0,0
20.639988,21.7485632,0,0,0,0,0
20.650479,21.0713075,0,0,0,0,0
20.660971,21.0475652,0,0,0,0,0
20.671462,20.6155281,0,0,0,0,0
20.681954,21.0475652,0,0,0,0,0
20.692446,21,0,0,0,0,0
20.702937,20.4450483,0,0,0,0,0
20.713429,20.5426386,0,0,0,0,0
20.72392,20.5426386,0,0,0,0,0
20.734412,20.2237484,0,0,0,0,0
20.744904,21.5174348,0,0,0,0,0
20.755395,20.3224014,0,0,0,0,0
20.765887,21.2602916,0,0,0,0,0
20.776378,21.6794834,0,0,0,0,0
20.78687,21.2602916,0,0,0,0,0
20.797362,21.7715411,0,0,0,0,0
20.807853,21.4009346,0,0,0,0,0
20.818345,20.9523268,0,0,0,0,0
20.828836,20.2731349,0,0,0,0,0
20.839328,21.3541565,0,0,0,0,0
20.84982,21.4941853,0,0,0,0,0
20.860311,20.4939015,0,0,0,0,0
20.870803,21.7025344,0,0,0,0,0
20.881294,20.2237484,0,0,0,0,0
20.891786,20.7605395,0,0,0,0,0
20.902278,20.3715488,0,0,0,0,0
20.912769,21.0950231,0,0,0,0,0
20.923261,21.330729,0,0,0,0,0
20.933752,21.0475652,0,0,0,0,0
20.944244,20.5182845,0,0,0,0,0
20.954736,20.3715488,0,0,0,0,0
20.965227,20.6881609,0,0,0,0,0
20.975719,20.4205779,0,0,0,0,0
20.98621,21.2602916,0,0,0,0,0
20.996702,19.8494332,0,0,0,0,0
21.007194,21.4009346,0,0,0,0,0
21.017685,21.2837967,0,0,0,0,0
21.028177,21,0,0,0,0,0
21.038668,21.1896201,0,0,0,0,0
21.04916,20.5912603,0,0,0,0,0
21.059652,20.9284495,0,0,0,0,0
21.070143,21.8174242,0,0,0,0,0
21.080635,20.7605395,0,0,0,0,0
21.091126,20.6881609,0,0,0,0,0
21.101618,20.6639783,0,0,0,0,0
21.11211,20.808652,0,0,0,0,0
21.122601,20.2977831,0,0,0,0,0
21.133093,21.4941853,0,0,0,0,0
21.143584,20.6881609,0,0,0,0,0
21.154076,20.8326667,0,0,0,0,0
21.164568,21.3072758,0,0,0,0,0
21.175059,20.0748599,0,0,0,0,0
21.185551,20.6397674,0,0,0,0,0
21.196042,20.1246118,0,0,0,0,0
21.206534,21.3541565,0,0,0,0,0
21.217026,21.0950231,0,0,0,0,0
21.227517,21.725561,0,0,0,0,0
21.238009,20.7123152,0,0,0,0,0
21.2485,21.1660105,0,0,0,0,0
21.258992,20.7364414,0,0,0,0,0
21.269484,21.6101828,0,0,0,0,0
21.279975,21.0713075,0,0,0,0,0
21.290467,21.2132034,0,0,0,0,0
21.300958,22.0227155,0,0,0,0,0
21.31145,19.8494332,0,0,0,0,0
21.321942,20.2977831,0,0,0,0,0
21.332433,21.1187121,0,0,0,0,0
21.342925,21.3775583,0,0,0,0,0
21.353416,20.3469899,0,0,0,0,0
21.363908,20.5669638,0,0,0,0,0
21.3744,20.880613,0,0,0,0,0
21.384891,20.8566536,0,0,0,0,0
21.395383,21.3541565,0,0,0,0,0
21.405874,20.0748599,0,0,0,0,0
21.416366,20.976177,0,0,0,0,0
21.426858,21.5638587,0,0,0,0,0
21.437349,21.0713075,0,0,0,0,0
21.447841,21.4476106,0,0,0,0,0
21.458332,21.5638587,0,0,0,0,0
21.468824,21.9317122,0,0,0,0,0
21.479316,21.3541565,0,0,0,0,0
21.489807,20.9284495,0,0,0,0,0
21.500299,21.4941853,0,0,0,0,0
21.51079,21.023796,0,0,0,0,0
21.521282,20.3224014,0,0,0,0,0
21.531774,20.6155281,0,0,0,0,0
21.542265,21.7025344,0,0,0,0,0
21.552757,20.0997512,0,0,0,0,0
21.563248,19.7484177,0,0,0,0,0
21.57374,20.4939015,0,0,0,0,0
21.584232,20.9523268,0,0,0,0,0
21.594723,20.6881609,0,0,0,0,0
21.605215,20.976177,0,0,0,0,0
21.615706,21.4009346,0,0,0,0,0
21.626198,21.1423745,0,0,0,0,0
21.63669,21.0713075,0,0,0,0,0
21.647181,21.2837967,0,0,0,0,0
21.657673,21.6794834,0,0,0,0,0
21.668164,22.0227155,0,0,0,0,0
21.678656,20.1494417,0,0,0,0,0
21.689148,21.1423745,0,0,0,0,0
21.699639,19.2353841,0,0,0,0,0
21.710131,20.4939015,0,0,0,0,0
21.720622,21.0475652,0,0,0,0,0
21.731114,20.976177,0,0,0,0,0
21.741606,21.0475652,0,0,0,0,0
21.752097,20.7605395,0,0,0,0,0
21.762589,20.7364414,0,0,0,0,0
21.77308,20.2484567,0,0,0,0,0
21.783572,20.9284495,0,0,0,0,0
21.794064,20.2237484,0,0,0,0,0
21.804555,21.1423745,0,0,0,0,0
21.815047,20.6155281,0,0,0,0,0
21.825538,20.976177,0,0,0,0,0
21.83603,20.8566536,0,0,0,0,0
21.846522,21.6794834,0,0,0,0,0
21.857013,21.0475652,0,0,0,0,0
21.867505,21.1187121,0,0,0,0,0
21.877996,19.8494332,0,0,0,0,0
21.888488,21.5406592,0,0,0,0,0
21.89898,21.023796,0,0,0,0,0
21.909471,20.7846097,0,0,0,0,0
21.919963,21.3072758,0,0,0,0,0
21.930454,19.9248588,0,0,0,0,0
21.940946,21.2367606,0,0,0,0,0
21.951438,20.8326667,0,0,0,0,0
21.961929,20.2731349,0,0,0,0,0
21.972421,20.5182845,0,0,0,0,0
21.982912,21.3775583,0,0,0,0,0
21.993404,20.7364414,0,0,0,0,0
22.003896,21.6794834,0,0,0,0,0
22.014387,21.1896201,0,0,0,0,0
22.024879,21.6333077,0,0,0,0,0
22.03537,21.1660105,0,0,0,0,0
22.045862,20.6397674,0,0,0,0,0
22.056354,20.5426386,0,0,0,0,0
22.066845,20.4450483,0,0,0,0,0
22.077337,21.1660105,0,0,0,0,0
22.087828,20.904545,0,0,0,0,0
22.09832,20.3469899,0,0,0,0,0
22.108812,22.3383079,0,0,0,0,0
22.119303,20.8326667,0,0,0,0,0
22.129795,20.8566536,0,0,0,0,0
22.140286,20.3224014,0,0,0,0,0
22.150778,21.0950231,0,0,0,0,0
22.16127,20.6881609,0,0,0,0,0
22.171761,20.808652,0,0,0,0,0
22.182253,20.6639783,0,0,0,0,0
22.192744,19.6723156,0,0,0,0,0
22.203236,20.9523268,0,0,0,0,0
22.213728,21.2132034,0,0,0,0,0
22.224219,19.9499373,0,0,0,0,0
22.234711,21.1187121,0,0,0,0,0
22.245202,19.8997487,0,0,0,0,0
22.255694,22,0,0,0,0,0
22.266186,21.0950231,0,0,0,0,0
22.276677,21.330729,0,0,0,0,0
22.287169,20.8326667,0,0,0,0,0
22.29766,20.8326667,0,0,0,0,0
22.308152,20.3224014,0,0,0,0,0
22.318644,20.174241,0,0,0,0,0
22.329135,20.7846097,0,0,0,0,0
22.339627,20.4694895,0,0,0,0,0
22.350118,20.0748599,0,0,0,0,0
22.36061,20.3960781,0,0,0,0,0
22.371102,20.6639783,0,0,0,0,0
22.381593,20.808652,0,0,0,0,0
22.392085,20.6881609,0,0,0,0,0
22.402576,20.4939015,0,0,0,0,0
22.413068,20.1246118,0,0,0,0,0
22.42356,20.8326667,0,0,0,0,0
22.434051,21.7025344,0,0,0,0,0
22.444543,20.8326667,0,0,0,0,0
22.455034,20.3469899,0,0,0,0,0
22.465526,20.4450483,0,0,0,0,0
22.476018,21.023796,0,0,0,0,0
22.486509,20.5182845,0,0,0,0,0
22.497001,20.2977831,0,0,0,0,0
22.507492,20.4939015,0,0,0,0,0
22.517984,19.9248588,0,0,0,0,0
22.528476,20.3469899,0,0,0,0,0
22.538967,19.8746069,0,0,0,0,0
22.549459,20.1494417,0,0,0,0,0
22.55995,21.023796,0,0,0,0,0
22.570442,20.2977831,0,0,0,0,0
22.580934,20.976177,0,0,0,0,0
22.591425,20.2484567,0,0,0,0,0
22.601917,21.0475652,0,0,0,0,0
22.612408,19.3649167,0,0,0,0,0
22.6229,21.2132034,0,0,0,0,0
22.633392,20.4205779,0,0,0,0,0
22.643883,20.2977831,0,0,0,0,0
22.654375,20.6639783,0,0,0,0,0
22.664866,21.6564078,0,0,0,0,0
22.675358,20.5182845,0,0,0,0,0
22.68585,20.6397674,0,0,0,0,0
22.696341,20.8566536,0,0,0,0,0
22.706833,20,0,0,0,0,0
22.717324,20.976177,0,0,0,0,0
22.727816,19.6214169,0,0,0,0,0
22.738308,20.1246118,0,0,0,0,0
22.748799,20.0249844,0,0,0,0,0
22.759291,20.3224014,0,0,0,0,0
22.769782,20.5426386,0,0,0,0,0
22.780274,20.7364414,0,0,0,0,0
22.790766,20.0997512,0,0,0,0,0
22.801257,20.2731349,0,0,0,0,0
22.811749,21.0950231,0,0,0,0,0
22.82224,20.904545,0,0,0,0,0
22.832732,20.6155281,0,0,0,0,0
22.843224,19.8242276,0,0,0,0,0
22.853715,20.6397674,0,0,0,0,0
22.864207,20.4450483,0,0,0,0,0
22.874698,20.174241,0,0,0,0,0
22.88519,20.808652,0,0,0,0,0
22.895682,19.9248588,0,0,0,0,0
22.906173,20.8326667,0,0,0,0,0
22.916665,20.6639783,0,0,0,0,0
22.927156,20.6155281,0,0,0,0,0
22.937648,20.2484567,0,0,0,0,0
22.94814,21.330729,0,0,0,0,0
22.958631,19.8494332,0,0,0,0,0
22.969123,20.3224014,0,0,0,0,0
22.979614,20.7605395,0,0,0,0,0
22.990106,20.3224014,0,0,0,0,0
23.000598,19.9248588,0,0,0,0,0
23.011089,20.6397674,0,0,0,0,0
23.021581,20.4939015,0,0,0,0,0
23.032072,19.6977156,0,0,0,0,0
23.042564,21.1660105,0,0,0,0,0
23.053056,19.9499373,0,0,0,0,0
23.063547,20.3960781,0,0,0,0,0
23.074039,20.4450483,0,0,0,0,0
23.08453,20,0,0,0,0,0
23.095022,20.6639783,0,0,0,0,0
23.105514,20,0,0,0,0,0
23.116005,20.808652,0,0,0,0,0
23.126497,20.3715488,0,0,0,0,0
23.136988,21.023796,0,0,0,0,0
23.14748,20.2731349,0,0,0,0,0
23.157972,20.7364414,0,0,0,0,0
23.168463,20.7846097,0,0,0,0,0
23.178955,20.6639783,0,0,0,0,0
23.189446,20.4205779,0,0,0,0,0
23.199938,20.2484567,0,0,0,0,0
23.21043,20.5182845,0,0,0,0,0
23.220921,20.6639783,0,0,0,0,0
23.231413,19.9248588,0,0,0,0,0
23.241904,20.4939015,0,0,0,0,0
23.252396,19.8997487,0,0,0,0,0
23.262888,20.880613,0,0,0,0,0
23.273379,20.3960781,0,0,0,0,0
23.283871,19.7230829,0,0,0,0,0
23.294362,20.0499377,0,0,0,0,0
23.304854,19.4164878,0,0,0,0,0
23.315346,19.5192213,0,0,0,0,0
23.325837,20,0,0,0,0,0
23.336329,20.2977831,0,0,0,0,0
23.34682,20.2977831,0,0,0,0,0
23.357312,19.6723156,0,0,0,0,0
23.367804,19.2353841,0,0,0,0,0
23.378295,19.8997487,0,0,0,0,0
23.388787,20.1990099,0,0,0,0,0
23.399278,19.8494332,0,0,0,0,0
23.40977,20.4205779,0,0,0,0,0
23.420262,19.3907194,0,0,0,0,0
23.430753,20.1990099,0,0,0,0,0
23.441245,20.3469899,0,0,0,0,0
23.451736,20.0748599,0,0,0,0,0
23.462228,20.4450483,0,0,0,0,0
23.47272,19.7989899,0,0,0,0,0
23.483211,19.8494332,0,0,0,0,0
23.493703,19.3390796,0,0,0,0,0
23.504194,20.2977831,0,0,0,0,0
23.514686,20.0499377,0,0,0,0,0
23.525178,20.5426386,0,0,0,0,0
23.535669,20.5426386,0,0,0,0,0
23.546161,20.0748599,0,0,0,0,0
23.556652,20.6881609,0,0,0,0,0
23.567144,20.2977831,0,0,0,0,0
23.577636,20.0748599,0,0,0,0,0
23.588127,19.8997487,0,0,0,0,0
23.598619,20.1494417,0,0,0,0,0
23.60911,20.1246118,0,0,0,0,0
23.619602,20.4205779,0,0,0,0,0
23.630094,19.9499373,0,0,0,0,0
23.640585,19.8746069,0,0,0,0,0
23.651077,19.078784,0,0,0,0,0
23.661568,20.5669638,0,0,0,0,0
23.67206,20.0499377,0,0,0,0,0
23.682552,19.6468827,0,0,0,0,0
23.693043,19.4422221,0,0,0,0,0
23.703535,19.8494332,0,0,0,0,0
23.714026,19.4422221,0,0,0,0,0
23.724518,19.3132079,0,0,0,0,0
23.73501,19.4422221,0,0,0,0,0
23.745501,19.1572441,0,0,0,0,0
23.755993,19.4935887,0,0,0,0,0
23.766484,19.7484177,0,0,0,0,0
23.776976,20.4450483,0,0,0,0,0
23.787468,20,0,0,0,0,0
23.797959,20.3960781,0,0,0,0,0
23.808451,19.3132079,0,0,0,0,0
23.818942,20.8326667,0,0,0,0,0
23.829434,19.7230829,0,0,0,0,0
23.839926,18.761663,0,0,0,0,0
23.850417,19.1311265,0,0,0,0,0
23.860909,19.5448203,0,0,0,0,0
23.8714,19.4164878,0,0,0,0,0
23.881892,20.4450483,0,0,0,0,0
23.892384,18.8679623,0,0,0,0,0
23.902875,19.0525589,0,0,0,0,0
23.913367,19.4935887,0,0,0,0,0
23.923858,20.1246118,0,0,0,0,0
23.93435,19.2353841,0,0,0,0,0
23.944842,20.1494417,0,0,0,0,0
23.955333,19.7484177,0,0,0,0,0
23.965825,19.6977156,0,0,0,0,0
23.976316,19.1572441,0,0,0,0,0
23.986808,20.808652,0,0,0,0,0
23.9973,20.174241,0,0,0,0,0
24.007791,19.8242276,0,0,0,0,0
24.018283,20.4694895,0,0,0,0,0
24.028774,19.4164878,0,0,0,0,0
24.039266,20.1494417,0,0,0,0,0
24.049758,20,0,0,0,0,0
24.060249,20.1246118,0,0,0,0,0
24.070741,19.6723156,0,0,0,0,0
24.081232,18.8148877,0,0,0,0,0
24.091724,20.3224014,0,0,0,0,0
24.102216,19.8746069,0,0,0,0,0
24.112707,20.1494417,0,0,0,0,0
24.123199,18.8148877,0,0,0,0,0
24.13369,20,0,0,0,0,0
24.144182,19.078784,0,0,0,0,0
24.154674,19.4935887,0,0,0,0,0
24.165165,19.8997487,0,0,0,0,0
24.175657,19.7484177,0,0,0,0,0
24.186148,19.1833261,0,0,0,0,0
24.19664,19.2873015,0,0,0,0,0
24.207132,18.9208879,0,0,0,0,0
24.217623,19.7989899,0,0,0,0,0
24.228115,18.761663,0,0,0,0,0
24.238606,19.6723156,0,0,0,0,0
24.249098,19.6468827,0,0,0,0,0
24.25959,19.5192213,0,0,0,0,0
24.270081,19.5192213,0,0,0,0,0
24.280573,18.5741756,0,0,0,0,0
24.291064,19.0525589,0,0,0,0,0
24.301556,19.3649167,0,0,0,0,0
24.312048,19.1833261,0,0,0,0,0
24.322539,18.2482876,0,0,0,0,0
24.333031,19.8494332,0,0,0,0,0
24.343522,19.0262976,0,0,0,0,0
24.354014,19.1049732,0,0,0,0,0
24.364506,18.0554701,0,0,0,0,0
24.374997,19.078784,0,0,0,0,0
24.385489,18.9472953,0,0,0,0,0
24.39598,19.6214169,0,0,0,0,0
24.406472,18.5202592,0,0,0,0,0
24.416964,18.1107703,0,0,0,0,0
24.427455,19.6977156,0,0,0,0,0
24.437947,19.2093727,0,0,0,0,0
24.448438,18.3575598,0,0,0,0,0
24.45893,20,0,0,0,0,0
24.469422,18.8414437,0,0,0,0,0
24.479913,19.2093727,0,0,0,0,0
24.490405,18.6815417,0,0,0,0,0
24.500896,18.7082869,0,0,0,0,0
24.511388,18.6010752,0,0,0,0,0
24.52188,18.7082869,0,0,0,0,0
24.532371,19.6723156,0,0,0,0,0
24.542863,19.5448203,0,0,0,0,0
24.553354,18.734994,0,0,0,0,0
24.563846,18.1659021,0,0,0,0,0
24.574338,17.9164729,0,0,0,0,0
24.584829,18.9208879,0,0,0,0,0
24.595321,19.1311265,0,0,0,0,0
24.605812,18.6547581,0,0,0,0,0
24.616304,18.8414437,0,0,0,0,0
24.626796,19.2613603,0,0,0,0,0
24.637287,18.8148877,0,0,0,0,0
24.647779,18.4390889,0,0,0,0,0
24.65827,18.3575598,0,0,0,0,0
24.668762,19.2613603,0,0,0,0,0
24.679254,19.9749844,0,0,0,0,0
24.689745,19.8997487,0,0,0,0,0
24.700237,19.2093727,0,0,0,0,0
24.710728,19.7230829,0,0,0,0,0
24.72122,18.1659021,0,0,0,0,0
24.731712,18.4661853,0,0,0,0,0
24.742203,19.1049732,0,0,0,0,0
24.752695,19.1049732,0,0,0,0,0
24.763186,18.1934054,0,0,0,0,0
24.773678,18.8414437,0,0,0,0,0
24.78417,19.1049732,0,0,0,0,0
24.794661,19.6977156,0,0,0,0,0
24.805153,18.3575598,0,0,0,0,0
24.815644,18.9472953,0,0,0,0,0
24.826136,19.1833261,0,0,0,0,0
24.836628,18.5741756,0,0,0,0,0
24.847119,19.5448203,0,0,0,0,0
24.857611,19.3907194,0,0,0,0,0
24.868102,18.973666,0,0,0,0,0
24.878594,19.5192213,0,0,0,0,0
24.889086,18.9208879,0,0,0,0,0
24.899577,18.8679623,0,0,0,0,0
24.910069,19.3390796,0,0,0,0,0
24.92056,17.8605711,0,0,0,0,0
24.931052,18.9472953,0,0,0,0,0
24.941544,18.5202592,0,0,0,0,0
24.952035,17.7482393,0,0,0,0,0
24.962527,18.493242,0,0,0,0,0
24.973018,18.8148877,0,0,0,0,0
24.98351,18.761663,0,0,0,0,0
24.994002,19.1572441,0,0,0,0,0
25.004493,18.0277564,0,0,0,0,0
25.014985,18.7882942,0,0,0,0,0
25.025476,18.4390889,0,0,0,0,0
25.035968,18.5202592,0,0,0,0,0
25.04646,18.9472953,0,0,0,0,0
25.056951,18.2482876,0,0,0,0,0
25.067443,18.4119526,0,0,0,0,0
25.077934,18.547237,0,0,0,0,0
25.088426,18.4390889,0,0,0,0,0
25.098918,18.547237,0,0,0,0,0
25.109409,16.8226038,0,0,0,0,0
25.119901,17.7763888,0,0,0,0,0
25.130392,18.4661853,0,0,0,0,0
25.140884,19.078784,0,0,0,0,0
25.151376,18.7082869,0,0,0,0,0
25.161867,18.4661853,0,0,0,0,0
25.172359,18.4661853,0,0,0,0,0
25.18285,17.691806,0,0,0,0,0
25.193342,18.5202592,0,0,0,0,0
25.203834,18.6547581,0,0,0,0,0
25.214325,18.8944436,0,0,0,0,0
25.224817,18.5202592,0,0,0,0,0
25.235308,18.0831413,0,0,0,0,0
25.2458,18.7882942,0,0,0,0,0
25.256292,17.8605711,0,0,0,0,0
25.266783,17.8044938,0,0,0,0,0
25.277275,18.5741756,0,0,0,0,0
25.287766,19.1572441,0,0,0,0,0
25.298258,18.7082869,0,0,0,0,0
25.30875,18.0831413,0,0,0,0,0
25.319241,18.627936,0,0,0,0,0
25.329733,18.3030052,0,0,0,0,0
25.340224,18.1659021,0,0,0,0,0
25.350716,19.2613603,0,0,0,0,0
25.361208,19.1049732,0,0,0,0,0
25.371699,17.8605711,0,0,0,0,0
25.382191,17.8605711,0,0,0,0,0
25.392682,18.0554701,0,0,0,0,0
25.403174,18.3303028,0,0,0,0,0
25.413666,18.6010752,0,0,0,0,0
25.424157,18.2482876,0,0,0,0,0
25.434649,17.6068169,0,0,0,0,0
25.44514,17.5783958,0,0,0,0,0
25.455632,18.547237,0,0,0,0,0
25.466124,18.3575598,0,0,0,0,0
25.476615,17.8885438,0,0,0,0,0
25.487107,18.7882942,0,0,0,0,0
25.497598,17.9164729,0,0,0,0,0
25.50809,17.4928557,0,0,0,0,0
25.518582,18.2756669,0,0,0,0,0
25.529073,18.0554701,0,0,0,0,0
25.539565,17.5783958,0,0,0,0,0
25.550056,18.3030052,0,0,0,0,0
25.560548,17.3493516,0,0,0,0,0
25.57104,18.6815417,0,0,0,0,0
25.581531,17.9722008,0,0,0,0,0
25.592023,18.1659021,0,0,0,0,0
25.602514,17.2626765,0,0,0,0,0
25.613006,16.881943,0,0,0,0,0
25.623498,18.2208672,0,0,0,0,0
25.633989,18.3575598,0,0,0,0,0
25.644481,17.4068952,0,0,0,0,0
25.654972,17.4928557,0,0,0,0,0
25.665464,18.4661853,0,0,0,0,0
25.675956,18.3303028,0,0,0,0,0
25.686447,17.2626765,0,0,0,0,0
25.696939,19.078784,0,0,0,0,0
25.70743,18,0,0,0,0,0
25.717922,17.6068169,0,0,0,0,0
25.728414,17.9443584,0,0,0,0,0
25.738905,17.3493516,0,0,0,0,0
25.749397,17.7763888,0,0,0,0,0
25.759888,17.4068952,0,0,0,0,0
25.77038,17.4068952,0,0,0,0,0
25.780872,17.3781472,0,0,0,0,0
25.791363,18.8944436,0,0,0,0,0
25.801855,17.3493516,0,0,0,0,0
25.812346,17.8885438,0,0,0,0,0
25.822838,18.0554701,0,0,0,0,0
25.83333,17.0880075,0,0,0,0,0
25.843821,17.6068169,0,0,0,0,0
25.854313,16.3095064,0,0,0,0,0
25.864804,17.5499288,0,0,0,0,0
25.875296,18.3030052,0,0,0,0,0
25.885788,17.4068952,0,0,0,0,0
25.896279,18.7882942,0,0,0,0,0
25.906771,17.0880075,0,0,0,0,0
25.917262,17.6068169,0,0,0,0,0
25.927754,17.2916165,0,0,0,0,0
25.938246,17.8044938,0,0,0,0,0
25.948737,17.175564,0,0,0,0,0
25.959229,17.7763888,0,0,0,0,0
25.96972,17.2626765,0,0,0,0,0
25.980212,17.691806,0,0,0,0,0
25.990704,17,0,0,0,0,0
26.001195,17.4355958,0,0,0,0,0
26.011687,17.4928557,0,0,0,0,0
26.022178,17.5499288,0,0,0,0,0
26.03267,17.7763888,0,0,0,0,0
26.043162,17.6635217,0,0,0,0,0
26.053653,17.4928557,0,0,0,0,0
26.064145,17.4355958,0,0,0,0,0
26.074636,17.1464282,0,0,0,0,0
26.085128,17.0880075,0,0,0,0,0
26.09562,16.7630546,0,0,0,0,0
26.106111,18.493242,0,0,0,0,0
26.116603,17.691806,0,0,0,0,0
26.127094,17.0293864,0,0,0,0,0
26.137586,16.7032931,0,0,0,0,0
26.148078,18.4661853,0,0,0,0,0
26.158569,16.9115345,0,0,0,0,0
26.169061,16.4012195,0,0,0,0,0
26.179552,17.4355958,0,0,0,0,0
26.190044,16.3707055,0,0,0,0,0
26.200536,16.7332005,0,0,0,0,0
26.211027,17.3493516,0,0,0,0,0
26.221519,16.3401346,0,0,0,0,0
26.23201,17.175564,0,0,0,0,0
26.242502,16.4924225,0,0,0,0,0
26.252994,18.3575598,0,0,0,0,0
26.263485,16.673332,0,0,0,0,0
26.273977,18.3030052,0,0,0,0,0
26.284468,17.1464282,0,0,0,0,0
26.29496,17,0,0,0,0,0
26.305452,17.0880075,0,0,0,0,0
26.315943,17.8044938,0,0,0,0,0
26.326435,17.0587221,0,0,0,0,0
26.336926,17.3781472,0,0,0,0,0
26.347418,18,0,0,0,0,0
26.35791,18.1934054,0,0,0,0,0
26.368401,17.2626765,0,0,0,0,0
26.378893,17.0880075,0,0,0,0,0
26.389384,17.3493516,0,0,0,0,0
26.399876,17.6635217,0,0,0,0,0
26.410368,17.6635217,0,0,0,0,0
26.420859,17.4642492,0,0,0,0,0
26.431351,17.2046505,0,0,0,0,0
26.441842,16.9115345,0,0,0,0,0
26.452334,16.7928556,0,0,0,0,0
26.462826,16.583124,0,0,0,0,0
26.473317,17.4642492,0,0,0,0,0
26.483809,17.7763888,0,0,0,0,0
26.4943,16.9410743,0,0,0,0,0
26.504792,16.9705627,0,0,0,0,0
26.515284,16.7032931,0,0,0,0,0
26.525775,17.175564,0,0,0,0,0
26.536267,17.1172428,0,0,0,0,0
26.546758,16.9705627,0,0,0,0,0
26.55725,17,0,0,0,0,0
26.567742,16.4316767,0,0,0,0,0
26.578233,17.2046505,0,0,0,0,0
26.588725,16.2480768,0,0,0,0,0
26.599216,16.1554944,0,0,0,0,0
26.609708,16.7928556,0,0,0,0,0
26.6202,16.3707055,0,0,0,0,0
26.630691,17.4642492,0,0,0,0,0
26.641183,16.0623784,0,0,0,0,0
26.651674,16.0623784,0,0,0,0,0
26.662166,16.6132477,0,0,0,0,0
26.672658,17.1172428,0,0,0,0,0
26.683149,17.4642492,0,0,0,0,0
26.693641,17.4928557,0,0,0,0,0
26.704132,16.4924225,0,0,0,0,0
26.714624,15.8745079,0,0,0,0,0
26.725116,16.5529454,0,0,0,0,0
26.735607,16.0312195,0,0,0,0,0
26.746099,16.5227116,0,0,0,0,0
26.75659,16.7332005,0,0,0,0,0
26.767082,16.4316767,0,0,0,0,0
26.777574,17.175564,0,0,0,0,0
26.788065,16.1554944,0,0,0,0,0
26.798557,16.7332005,0,0,0,0,0
26.809048,17,0,0,0,0,0
26.81954,15.9687194,0,0,0,0,0
26.830032,16.7032931,0,0,0,0,0
26.840523,15.7797338,0,0,0,0,0
26.851015,16.4620776,0,0,0,0,0
26.861506,17.1172428,0,0,0,0,0
26.871998,17.2916165,0,0,0,0,0
26.88249,16.9410743,0,0,0,0,0
26.892981,15.6524758,0,0,0,0,0
26.903473,15.6843871,0,0,0,0,0
26.913964,16.4316767,0,0,0,0,0
26.924456,16.5529454,0,0,0,0,0
26.934948,16.8226038,0,0,0,0,0
26.945439,16.4316767,0,0,0,0,0
26.955931,16.9705627,0,0,0,0,0
26.966422,16.4012195,0,0,0,0,0
26.976914,16.0623784,0,0,0,0,0
26.987406,15.7480157,0,0,0,0,0
26.997897,15.7162336,0,0,0,0,0
27.008389,15.2970585,0,0,0,0,0
27.01888,16.8522995,0,0,0,0,0
27.029372,16.1554944,0,0,0,0,0
27.039864,16.673332,0,0,0,0,0
27.050355,16.3707055,0,0,0,0,0
27.060847,15.7797338,0,0,0,0,0
27.071338,17.0587221,0,0,0,0,0
27.08183,16.3707055,0,0,0,0,0
27.092322,16.6132477,0,0,0,0,0
27.102813,16.1245155,0,0,0,0,0
27.113305,15.7480157,0,0,0,0,0
27.123796,15.0665192,0,0,0,0,0
27.134288,15.1657509,0,0,0,0,0
27.14478,16.9410743,0,0,0,0,0
27.155271,16.8522995,0,0,0,0,0
27.165763,17,0,0,0,0,0
27.176254,16.2788206,0,0,0,0,0
27.186746,15.8429795,0,0,0,0,0
27.197238,15.5884573,0,0,0,0,0
27.207729,16.2480768,0,0,0,0,0
27.218221,14.8660687,0,0,0,0,0
27.228712,16.2788206,0,0,0,0,0
27.239204,15.8745079,0,0,0,0,0
27.249696,16.7630546,0,0,0,0,0
27.260187,16.2480768,0,0,0,0,0
27.270679,16.5529454,0,0,0,0,0
27.28117,16.3095064,0,0,0,0,0
27.291662,15.5884573,0,0,0,0,0
27.302154,16.0623784,0,0,0,0,0
27.312645,16.9115345,0,0,0,0,0
27.323137,16.583124,0,0,0,0,0
27.333628,16.3401346,0,0,0,0,0
27.34412,15.7162336,0,0,0,0,0
27.354612,16.1554944,0,0,0,0,0
27.365103,16.0312195,0,0,0,0,0
27.375595,16.2788206,0,0,0,0,0
27.386086,14.2478068,0,0,0,0,0
27.396578,16.4924225,0,0,0,0,0
27.40707,16.673332,0,0,0,0,0
27.417561,16.4012195,0,0,0,0,0
27.428053,15.7162336,0,0,0,0,0
27.438544,15.5884573,0,0,0,0,0
27.449036,15.7797338,0,0,0,0,0
27.459528,15.6843871,0,0,0,0,0
27.470019,15.8745079,0,0,0,0,0
27.480511,16.673332,0,0,0,0,0
27.491002,15.2970585,0,0,0,0,0
27.501494,16.1864141,0,0,0,0,0
27.511986,15.8745079,0,0,0,0,0
27.522477,15.6843871,0,0,0,0,0
27.532969,16.583124,0,0,0,0,0
27.54346,15.9373775,0,0,0,0,0
27.553952,15.5241747,0,0,0,0,0
27.564444,15.5884573,0,0,0,0,0
27.574935,15.132746,0,0,0,0,0
27.585427,15.8745079,0,0,0,0,0
27.595918,15.5884573,0,0,0,0,0
27.60641,15.4596248,0,0,0,0,0
27.616902,16.2788206,0,0,0,0,0
27.627393,16.0312195,0,0,0,0,0
27.637885,15.5884573,0,0,0,0,0
27.648376,16.6132477,0,0,0,0,0
27.658868,15.5563492,0,0,0,0,0
27.66936,15.2970585,0,0,0,0,0
27.679851,14.3178211,0,0,0,0,0
27.690343,15.6204994,0,0,0,0,0
27.700834,15.132746,0,0,0,0,0
27.711326,16.1245155,0,0,0,0,0
27.721818,15,0,0,0,0,0
27.732309,15.7797338,0,0,0,0,0
27.742801,15.5563492,0,0,0,0,0
27.753292,14.5602198,0,0,0,0,0
27.763784,15.4596248,0,0,0,0,0
27.774276,15.3948043,0,0,0,0,0
27.784767,15.3297097,0,0,0,0,0
27.795259,14.4568323,0,0,0,0,0
27.80575,15.5241747,0,0,0,0,0
27.816242,15.8429795,0,0,0,0,0
27.826734,15.1657509,0,0,0,0,0
27.837225,14.8996644,0,0,0,0,0
27.847717,15.6204994,0,0,0,0,0
27.858208,16,0,0,0,0,0
27.8687,15.7480157,0,0,0,0,0
27.879192,15.5241747,0,0,0,0,0
27.889683,15.7162336,0,0,0,0,0
27.900175,15.2643375,0,0,0,0,0
27.910666,15.0996689,0,0,0,0,0
27.921158,15.2970585,0,0,0,0,0
27.93165,15.3297097,0,0,0,0,0
27.942141,15.4596248,0,0,0,0,0
27.952633,15.2315462,0,0,0,0,0
27.963124,15.3622915,0,0,0,0,0
27.973616,14.7648231,0,0,0,0,0
27.984108,14.6969385,0,0,0,0,0
27.994599,15.7480157,0,0,0,0,0
28.005091,16.4316767,0,0,0,0,0
28.015582,15.6204994,0,0,0,0,0
28.026074,14.9331845,0,0,0,0,0
28.036566,15,0,0,0,0,0
28.047057,14.832397,0,0,0,0,0
28.057549,15.132746,0,0,0,0,0
28.06804,15.132746,0,0,0,0,0
28.078532,15.1986842,0,0,0,0,0
28.089024,15.5884573,0,0,0,0,0
28.099515,14.2126704,0,0,0,0,0
28.110007,15.3622915,0,0,0,0,0
28.120498,16.0623784,0,0,0,0,0
28.13099,15.1986842,0,0,0,0,0
28.141482,15.7797338,0,0,0,0,0
28.151973,14.106736,0,0,0,0,0
28.162465,15.5884573,0,0,0,0,0
28.172956,13.8564065,0,0,0,0,0
28.183448,15.132746,0,0,0,0,0
28.19394,15.1657509,0,0,0,0,0
28.204431,14.4222051,0,0,0,0,0
28.214923,14.7648231,0,0,0,0,0
28.225414,14.7309199,0,0,0,0,0
28.235906,15.2315462,0,0,0,0,0
28.246398,15.1657509,0,0,0,0,0
28.256889,14.5945195,0,0,0,0,0
28.267381,14.4222051,0,0,0,0,0
28.277872,14.7986486,0,0,0,0,0
28.288364,15.2643375,0,0,0,0,0
28.298856,14.5945195,0,0,0,0,0
28.309347,14.8660687,0,0,0,0,0
28.319839,13.96424,0,0,0,0,0
28.33033,15.0665192,0,0,0,0,0
28.340822,14.7648231,0,0,0,0,0
28.351314,15.132746,0,0,0,0,0
28.361805,15.2970585,0,0,0,0,0
28.372297,15.2315462,0,0,0,0,0
28.382788,14.1421356,0,0,0,0,0
28.39328,14.7309199,0,0,0,0,0
28.403772,15.1986842,0,0,0,0,0
28.414263,14.5602198,0,0,0,0,0
28.424755,14.5945195,0,0,0,0,0
28.435246,14.6628783,0,0,0,0,0
28.445738,14.832397,0,0,0,0,0
28.45623,14.2478068,0,0,0,0,0
28.466721,15.0665192,0,0,0,0,0
28.477213,14.1774469,0,0,0,0,0
28.487704,15.0665192,0,0,0,0,0
28.498196,14.2478068,0,0,0,0,0
28.508688,14.0356688,0,0,0,0,0
28.519179,13.7840488,0,0,0,0,0
28.529671,14.2478068,0,0,0,0,0
28.540162,14.7309199,0,0,0,0,0
28.550654,15.4596248,0,0,0,0,0
28.561146,14.2828569,0,0,0,0,0
28.571637,14.5945195,0,0,0,0,0
28.582129,14.3874946,0,0,0,0,0
28.59262,14.2126704,0,0,0,0,0
28.603112,14.4222051,0,0,0,0,0
28.613604,14.5602198,0,0,0,0,0
28.624095,15.0665192,0,0,0,0,0
28.634587,14.4568323,0,0,0,0,0
28.645078,14.525839,0,0,0,0,0
28.65557,14.1421356,0,0,0,0,0
28.666062,15.2643375,0,0,0,0,0
28.676553,14.3178211,0,0,0,0,0
28.687045,14.1421356,0,0,0,0,0
28.697536,14.2828569,0,0,0,0,0
28.708028,13.7840488,0,0,0,0,0
28.71852,14.3527001,0,0,0,0,0
28.729011,13.820275,0,0,0,0,0
28.739503,14.4568323,0,0,0,0,0
28.749994,14.832397,0,0,0,0,0
28.760486,14.4913767,0,0,0,0,0
28.770978,15.6204994,0,0,0,0,0
28.781469,14.7648231,0,0,0,0,0
28.791961,15.1657509,0,0,0,0,0
28.802452,13.892444,0,0,0,0,0
28.812944,14.1774469,0,0,0,0,0
28.823436,14.3527001,0,0,0,0,0
28.833927,14.6969385,0,0,0,0,0
28.844419,14,0,0,0,0,0
28.85491,14.7648231,0,0,0,0,0
28.865402,14.0356688,0,0,0,0,0
28.875894,13.96424,0,0,0,0,0
28.886385,14.5602198,0,0,0,0,0
28.896877,14.3874946,0,0,0,0,0
28.907368,14.7309199,0,0,0,0,0
28.91786,14.525839,0,0,0,0,0
28.928352,12.6095202,0,0,0,0,0
28.938843,14.106736,0,0,0,0,0
28.949335,13.3416641,0,0,0,0,0
28.959826,14.0712473,0,0,0,0,0
28.970318,14.8996644,0,0,0,0,0
28.98081,14.2478068,0,0,0,0,0
28.991301,14.7648231,0,0,0,0,0
29.001793,14.4913767,0,0,0,0,0
29.012284,14.2828569,0,0,0,0,0
29.022776,14.2478068,0,0,0,0,0
29.033268,14,0,0,0,0,0
29.043759,14,0,0,0,0,0
29.054251,13.892444,0,0,0,0,0
29.064742,13.820275,0,0,0,0,0
29.075234,14.3178211,0,0,0,0,0
29.085726,14.2828569,0,0,0,0,0
29.096217,13.9283883,0,0,0,0,0
29.106709,15.0665192,0,0,0,0,0
29.1172,14.4913767,0,0,0,0,0
29.127692,14.1774469,0,0,0,0,0
29.138184,14.5945195,0,0,0,0,0
29.148675,14.1421356,0,0,0,0,0
29.159167,13,0,0,0,0,0
29.169658,13.7840488,0,0,0,0,0
29.18015,14.3178211,0,0,0,0,0
29.190642,14.7648231,0,0,0,0,0
29.201133,13.820275,0,0,0,0,0
29.211625,13.7840488,0,0,0,0,0
29.222116,13.6381817,0,0,0,0,0
29.232608,13.453624,0,0,0,0,0
29.2431,13.892444,0,0,0,0,0
29.253591,13.0766968,0,0,0,0,0
29.264083,14.1421356,0,0,0,0,0
29.274574,14.6628783,0,0,0,0,0
29.285066,14.4913767,0,0,0,0,0
29.295558,14.7986486,0,0,0,0,0
29.306049,13.820275,0,0,0,0,0
29.316541,13.3790882,0,0,0,0,0
29.327032,15.0332964,0,0,0,0,0
29.337524,14.3874946,0,0,0,0,0
29.348016,13.892444,0,0,0,0,0
29.358507,14.525839,0,0,0,0,0
29.368999,13.56466,0,0,0,0,0
29.37949,13.7840488,0,0,0,0,0
29.389982,14.106736,0,0,0,0,0
29.400474,13.7477271,0,0,0,0,0
29.410965,13.2664992,0,0,0,0,0
29.421457,14.4222051,0,0,0,0,0
29.431948,13.6747943,0,0,0,0,0
29.44244,14.3527001,0,0,0,0,0
29.452932,13.9283883,0,0,0,0,0
29.463423,13.4907376,0,0,0,0,0
29.473915,14.106736,0,0,0,0,0
29.484406,13.7113092,0,0,0,0,0
29.494898,13.1529464,0,0,0,0,0
29.50539,13.0766968,0,0,0,0,0
29.515881,12.8452326,0,0,0,0,0
29.526373,13.3416641,0,0,0,0,0
29.536864,13.4907376,0,0,0,0,0
29.547356,13.6381817,0,0,0,0,0
29.557848,14.5945195,0,0,0,0,0
29.568339,12.2474487,0,0,0,0,0
29.578831,13.2664992,0,0,0,0,0
29.589322,13.4907376,0,0,0,0,0
29.599814,14.1774469,0,0,0,0,0
29.610306,14.0712473,0,0,0,0,0
29.620797,12.9614814,0,0,0,0,0
29.631289,13.4907376,0,0,0,0,0
29.64178,13.4907376,0,0,0,0,0
29.652272,13.4164079,0,0,0,0,0
29.662764,13.2664992,0,0,0,0,0
29.673255,13.190906,0,0,0,0,0
29.683747,14.8660687,0,0,0,0,0
29.694238,13.4164079,0,0,0,0,0
29.70473,13.7113092,0,0,0,0,0
29.715222,12.1655251,0,0,0,0,0
29.725713,12.922848,0,0,0,0,0
29.736205,13.4907376,0,0,0,0,0
29.746696,13,0,0,0,0,0
29.757188,13.6747943,0,0,0,0,0
29.76768,14.106736,0,0,0,0,0
29.778171,14.106736,0,0,0,0,0
29.788663,12.922848,0,0,0,0,0
29.799154,13.190906,0,0,0,0,0
29.809646,13,0,0,0,0,0
29.820138,13.2287566,0,0,0,0,0
29.830629,13.5277493,0,0,0,0,0
29.841121,13.2664992,0,0,0,0,0
29.851612,13.4164079,0,0,0,0,0
29.862104,13.4907376,0,0,0,0,0
29.872596,13.3416641,0,0,0,0,0
29.883087,13.820275,0,0,0,0,0
29.893579,13.56466,0,0,0,0,0
29.90407,12.8062485,0,0,0,0,0
29.914562,13.9283883,0,0,0,0,0
29.925054,13.9283883,0,0,0,0,0
29.935545,13.6014705,0,0,0,0,0
29.946037,13.6381817,0,0,0,0,0
29.956528,12.6095202,0,0,0,0,0
29.96702,13.3416641,0,0,0,0,0
29.977512,14.3178211,0,0,0,0,0
29.988003,12.7671453,0,0,0,0,0
29.998495,12.7671453,13.1066015,-0.582628667,13.1063948,13.1065634,13.1063567
30.008986,12.922848,13.0988065,-0.419474092,13.0985994,13.0987683,13.0985612
30.019478,12.6491106,13.0910198,-0.664762512,13.0908124,13.0909814,13.090774
30.02997,13.5277493,13.0832423,0.666713581,13.0830345,13.0832037,13.0829959
30.040461,12.9614814,13.0754745,-0.337628641,13.0752665,13.0754357,13.0752277
30.050953,13.56466,13.0677151,0.704943191,13.0675067,13.0676761,13.0674677
30.061444,13.114877,13.0599654,0.234332271,13.0597567,13.0599263,13.0597176
30.071936,13.1529464,13.0522241,0.317367778,13.0520151,13.0521848,13.0519758
30.082428,13.2664992,13.0444919,0.471176481,13.0442825,13.0444524,13.044243
30.092919,12.8452326,13.0367694,-0.43764923,13.0365598,13.0367297,13.0365201
30.103411,12.6491106,13.0290553,-0.616396497,13.0288453,13.0290154,13.0288054
30.113902,13.7113092,13.0213509,0.830637277,13.0211406,13.0213108,13.0211005
30.124394,13,13.0136549,-0.116853977,13.0134442,13.0136146,13.0134039
30.134886,12.5698051,13.0059678,-0.660426176,13.0057568,13.0059274,13.0057164
30.145377,12.4498996,12.9982906,-0.74053424,12.9980793,12.9982499,12.9980386
30.155869,13.7477271,12.9906216,0.870118094,12.99041,12.9905807,12.9903691
30.16636,13.114877,12.9829624,0.36320061,12.9827504,12.9829213,12.9827094
30.176852,13.114877,12.9753114,0.373584821,12.9750991,12.9752702,12.9750579
30.187344,12.922848,12.9676695,-0.211710945,12.9674569,12.9676281,12.9674154
30.197835,13.190906,12.9600373,0.480487918,12.9598244,12.9599957,12.9597827
30.208327,13.0384048,12.9524134,0.29324291,12.9522001,12.9523716,12.9521583
30.218818,14.0356688,12.9447992,1.04444705,12.9445856,12.9447572,12.9445435
30.22931,12.489996,12.9371933,-0.668728119,12.9369793,12.937151,12.9369371
30.239802,13.56466,12.9295964,0.796908781,12.9293821,12.9295539,12.9293396
30.250293,12.0415946,12.9220091,-0.938304085,12.9217945,12.9219665,12.9217518
30.260785,13.6381817,12.9144302,0.850735877,12.9142152,12.9143873,12.9141723
30.271276,13.4907376,12.9068609,0.764118232,12.9066456,12.9068178,12.9066025
30.281768,13.3416641,12.8992999,0.665104652,12.8990842,12.8992566,12.8990409
30.29226,13.453624,12.8917478,0.749584045,12.8915318,12.8917043,12.8914883
30.302751,12.6095202,12.8842054,-0.524104202,12.8839891,12.8841617,12.8839454
30.313243,13,12.8766713,0.351181884,12.8764546,12.8766274,12.8764107
30.323734,12.5698051,12.8691468,-0.547121303,12.8689298,12.8691027,12.8688857
30.334226,13.7113092,12.8616306,0.921780144,12.8614132,12.8615862,12.8613689
30.344718,13.3416641,12.8541233,0.698241219,12.8539056,12.8540787,12.853861
30.355209,12.3693169,12.8466256,-0.690875341,12.8464076,12.8465808,12.8463628
30.365701,13.3790882,12.8391362,0.734814247,12.8389178,12.8390912,12.8388728
30.376192,13.0766968,12.8316564,0.495015595,12.8314377,12.8316112,12.8313925
30.386684,13.0384048,12.8241848,0.462839065,12.8239658,12.8241394,12.8239203
30.397176,13.9283883,12.8167221,1.05435579,12.8165028,12.8166765,12.8164571
30.407667,12.4498996,12.8092691,-0.599474363,12.8090494,12.8092232,12.8090035
30.418159,12.5299641,12.8018243,-0.521402133,12.8016042,12.8017781,12.8015581
30.42865,12.6095202,12.794389,-0.429963756,12.7941686,12.7943427,12.7941223
30.439142,12.6885775,12.786962,-0.313662986,12.7867413,12.7869154,12.7866946
30.449634,12.8840987,12.7795439,0.323349436,12.7793228,12.779497,12.7792759
30.460125,12.2882057,12.7721353,-0.695650485,12.7719139,12.7720883,12.7718668
30.470617,12.7279221,12.764735,-0.191866879,12.7645132,12.7646876,12.7644659
30.481108,12.328828,12.7573442,-0.654611469,12.757122,12.7572966,12.7570745
30.4916,13.0766968,12.7499616,0.571607609,12.7497391,12.7499138,12.7496913
30.502092,12.6885775,12.7425878,-0.23240115,12.742365,12.7425398,12.742317
30.512583,12.7279221,12.7352237,-0.0854494283,12.7350005,12.7351754,12.7349522
30.523075,13.0766968,12.7278677,0.590617621,12.7276441,12.7278191,12.7275956
30.533566,13.4907376,12.7205212,0.877619712,12.7202973,12.7204724,12.7202485
30.544058,12.1655251,12.7131829,-0.740039082,12.7129587,12.7131339,12.7129096
30.55455,12.7279221,12.7058534,0.14855508,12.7056289,12.7058042,12.7055796
30.565041,13.892444,12.6985335,1.09266209,12.6983086,12.698484,12.6982591
30.575533,13.2664992,12.6912218,0.758470434,12.6909965,12.691172,12.6909467
30.586024,12.5299641,12.6839195,-0.392371546,12.6836939,12.6838695,12.6836438
30.596516,12.083046,12.6766254,-0.770441061,12.6763994,12.6765751,12.6763491
30.607008,12.8452326,12.6693401,0.419395358,12.6691138,12.6692896,12.6690632
30.617499,12.3693169,12.6620643,-0.541061416,12.6618376,12.6620135,12.6617868
30.627991,12.922848,12.6547967,0.517736719,12.6545696,12.6547456,12.6545185
30.638482,12.5698051,12.6475385,-0.278807146,12.6473111,12.6474872,12.6472597
30.648974,12.5698051,12.6402885,-0.265487056,12.6400607,12.6402369,12.6400091
30.659466,12.6095202,12.6330472,-0.153385153,12.6328191,12.6329953,12.6327672
30.669957,12.5299641,12.6258155,-0.309598718,12.625587,12.6257633,12.6255348
30.680449,13,12.6185918,0.617582556,12.6183629,12.6185394,12.6183105
30.69094,12.328828,12.6113776,-0.531553935,12.6111484,12.6113249,12.6110957
30.701432,11.2694277,12.6041715,-1.15531114,12.6039419,12.6041185,12.6038889
30.711924,12.5698051,12.5969742,-0.164830428,12.5967442,12.5969209,12.596691
30.722415,12.8840987,12.5897863,0.542505706,12.589556,12.5897327,12.5895025
30.732907,12.7279221,12.5826065,0.381202795,12.5823758,12.5825527,12.582322
30.743398,13.3041347,12.5754361,0.853638423,12.5752051,12.575382,12.575151
30.75389,11.9163753,12.5682739,-0.807402359,12.5680425,12.5682195,12.5679881
30.764382,12.083046,12.5611203,-0.69142921,12.5608886,12.5610656,12.5608339
30.774873,12.7279221,12.5539762,0.41706815,12.5537441,12.5539212,12.5536891
30.785365,12,12.5468402,-0.739486425,12.5466077,12.5467849,12.5465524
30.795856,12.9614814,12.5397135,0.649436569,12.5394807,12.539658,12.5394251
30.806348,12.4096736,12.532595,-0.350601357,12.5323618,12.5325391,12.5323059
30.81684,13.3790882,12.5254851,0.923906413,12.5252515,12.5254289,12.5251954
30.827331,12.7671453,12.5183846,0.498759156,12.5181507,12.5183282,12.5180942
30.837823,12.4096736,12.5112922,-0.318776677,12.5110579,12.5112354,12.5110011
30.848314,12.5299641,12.5042092,0.160483357,12.5039745,12.5041521,12.5039174
30.858806,13.4907376,12.4971342,0.996796566,12.4968991,12.4970768,12.4968417
30.869298,12.6885775,12.4900679,0.44554425,12.4898325,12.4900102,12.4897747
30.879789,12.4096736,12.4830109,-0.270808559,12.4827751,12.4829529,12.4827171
30.890281,12.6095202,12.475962,0.365456173,12.4757258,12.4759037,12.4756675
30.900772,13.3416641,12.4689224,0.934206419,12.4686859,12.4688638,12.4686273
30.911264,13.3041347,12.4618909,0.917738428,12.461654,12.4618319,12.461595
30.921756,12.1243557,12.454868,-0.574902023,12.4546307,12.4548087,12.4545714
30.932247,12.9614814,12.4478544,0.716677719,12.4476168,12.4477948,12.4475572
30.942739,13.1529464,12.4408623,0.843850771,12.4406109,12.4408024,12.4405509
30.95323,13.0384048,12.4338661,0.777520872,12.4336143,12.4338058,12.433554
30.963722,12.1243557,12.4268779,-0.550020208,12.4266257,12.4268173,12.4265651
30.974214,12.489996,12.4198983,0.264759677,12.4196457,12.4198374,12.4195848
30.984705,11.4017543,12.4130298,-1.00562196,12.4127768,12.4128667,12.4126138
30.995197,12.1243557,12.4060677,-0.530765532,12.4058143,12.4059041,12.4056507
31.005688,12.5299641,12.3991149,0.361730793,12.3988612,12.3989508,12.398697
31.01618,12.922848,12.3921701,0.72847641,12.391916,12.3920054,12.3917513
31.026672,12.2474487,12.3852339,-0.371194286,12.3849794,12.3850687,12.3848141
31.037163,12.4498996,12.378307,0.267567931,12.3780521,12.3781412,12.3778862
31.047655,12.8452326,12.371388,0.688363665,12.3711327,12.3712217,12.3709663
31.058146,11.61895,12.3644784,-0.863439816,12.3642226,12.3643114,12.3640557
31.068638,12.8062485,12.3575766,0.669829728,12.3573205,12.3574091,12.357153
31.07913,11.5325626,12.3506835,-0.904500344,12.350427,12.3505154,12.3502589
31.089621,12.083046,12.3437996,-0.510640382,12.3435427,12.3436309,12.343374
31.100113,12.8840987,12.3369236,0.739712859,12.3366663,12.3367544,12.3364971
31.110604,12.1243557,12.3300569,-0.453542983,12.3297992,12.3298871,12.3296294
31.121096,11.5758369,12.3231981,-0.864500543,12.32294,12.3230277,12.3227696
31.131588,11.5758369,12.3163479,-0.860529468,12.3160894,12.3161769,12.3159184
31.142079,12.6095202,12.3095069,0.547734744,12.309248,12.3093353,12.3090764
31.152571,12.7279221,12.3026738,0.652110643,12.3024145,12.3025016,12.3022423
31.163062,12.1655251,12.2958499,-0.361005299,12.2955902,12.2956771,12.2954174
31.173554,12.328828,12.2890339,0.199484588,12.2887738,12.2888605,12.2886004
31.184046,12.7671453,12.2822265,0.696361159,12.281966,12.2820524,12.2817919
31.194537,12.5299641,12.2754282,0.504515468,12.2751673,12.2752536,12.2749927
31.205029,12.922848,12.2686379,0.808832559,12.2683766,12.2684626,12.2682013
31.21552,12.4096736,12.2618567,0.384469694,12.261595,12.2616808,12.2614191
31.226012,12,12.2550834,-0.505057824,12.2548213,12.2549069,12.2546448
31.236504,12.7279221,12.2483186,0.692534063,12.2480561,12.2481415,12.247879
31.246995,13.2287566,12.241563,0.993576134,12.2413001,12.2413852,12.2411223
31.257487,11.9163753,12.2348153,-0.564304872,12.234552,12.2346369,12.2343735
31.267978,12,12.2280767,-0.477573744,12.227813,12.2278976,12.2276339
31.27847,12.8062485,12.2213459,0.764789207,12.2210818,12.2211662,12.2209021
31.288962,11.7473401,12.2146237,-0.683581434,12.2143592,12.2144434,12.2141788
31.299453,11.4017543,12.2079106,-0.897862094,12.2076456,12.2077296,12.2074646
31.309945,12.2474487,12.2012053,0.215042762,12.20094,12.2010237,12.2007583
31.320436,12.3693169,12.1945092,0.418100108,12.1942434,12.1943269,12.1940611
31.330928,12.8062485,12.1878209,0.786401685,12.1875547,12.1876379,12.1873717
31.34142,12.6095202,12.181141,0.654506829,12.1808744,12.1809574,12.1806908
31.351911,12.1243557,12.1744703,-0.223862969,12.1742033,12.174286,12.1740189
31.362403,11.8321596,12.1678074,-0.579351186,12.1675399,12.1676224,12.1673549
31.372894,12,12.1611535,-0.401439325,12.1608857,12.1609678,12.1607
31.383386,12.1243557,12.1545075,-0.173642915,12.1542393,12.1543211,12.1540529
31.393878,13.2664992,12.1478699,1.05765269,12.1476013,12.1476829,12.1474142
31.404369,12.6095202,12.1412414,0.684308977,12.1409724,12.1410537,12.1407846
31.414861,12.489996,12.1346207,0.596133595,12.1343512,12.1344323,12.1341628
31.425352,12.1243557,12.1280091,-0.0604436474,12.1277392,12.1278199,12.12755
31.435844,11.8743421,12.1214052,-0.497054469,12.1211349,12.1212153,12.120945
31.446336,10.6770783,12.1148098,-1.19905444,12.1145391,12.1146192,12.1143484
31.456827,11.4017543,12.1082234,-0.840517189,12.1079522,12.1080321,12.1077609
31.467319,12.0415946,12.1016448,-0.245051413,12.1013732,12.1014527,12.1011811
31.47781,11.3137085,12.0950752,-0.883949478,12.0948032,12.0948824,12.0946104
31.488302,11.7473401,12.0885134,-0.584100359,12.0882409,12.0883198,12.0880474
31.498794,11.9163753,12.0819599,-0.406920913,12.0816871,12.0817657,12.0814928
31.509285,11.8321596,12.0754155,-0.493209817,12.0751422,12.0752205,12.0749472
31.519777,12.083046,12.0688788,0.119025865,12.0686051,12.0686831,12.0684094
31.530268,12.6095202,12.0623511,0.739708776,12.062077,12.0621546,12.0618805
31.54076,12.328828,12.0558312,0.522490954,12.0555567,12.0556339,12.0553594
31.551252,13.3041347,12.0493196,1.12018528,12.0490447,12.0491216,12.0488466
31.561743,11.5758369,12.0428171,-0.683359458,12.0425417,12.0426183,12.0423429
31.572235,11.6619038,12.0363222,-0.61189738,12.0360464,12.0361226,12.0358468
31.582726,12.1655251,12.0298413,0.368352789,12.0295601,12.0296409,12.0293597
31.593218,11.9582607,12.0233631,-0.255151669,12.0230815,12.023162,12.0228803
31.60371,11.61895,12.0168933,-0.630827432,12.0166112,12.0166913,12.0164093
31.614201,11.9582607,12.0104324,-0.228411165,12.0101499,12.0102297,12.0099471
31.624693,12,12.0039792,-0.0630811294,12.0036963,12.0037757,12.0034927
31.635184,12.328828,11.997535,0.575580592,11.9972516,11.9973306,11.9970472
31.645676,12.4096736,11.9910984,0.646973878,11.9908146,11.9908933,11.9906095
31.656168,12.2474487,11.9846702,0.512619253,11.984386,11.9844642,11.98418
31.666659,12.2882057,11.9782509,0.55673587,11.9779662,11.9780441,11.9777594
31.677151,11.3578167,11.9718393,-0.783595926,11.9715541,11.9716316,11.9713465
31.687642,11.9582607,11.9654365,-0.084710071,11.965151,11.9652281,11.9649425
31.698134,11.9163753,11.9590415,-0.206557982,11.9587555,11.9588322,11.9585461
31.708626,11.8743421,11.9526547,-0.27984394,11.9523683,11.9524445,11.9521581
31.719117,11.5325626,11.9462768,-0.643206216,11.9459899,11.9460658,11.9457789
31.729609,11.2249722,11.9399066,-0.845537964,11.9396193,11.9396947,11.9394074
31.7401,13.190906,11.9335453,1.12132096,11.9332575,11.9333325,11.9330447
31.750592,12.2474487,11.9271916,0.565912676,11.9269033,11.9269779,11.9266897
31.761084,12.489996,11.9208461,0.754420231,11.9205575,11.9206316,11.9203429
31.771575,11.7473401,11.9145095,-0.408863541,11.9142204,11.9142941,11.914005
31.782067,11.8321596,11.9081806,-0.275719061,11.907891,11.9079642,11.9076747
31.792558,12.5698051,11.9018605,0.8172788,11.9015705,11.9016432,11.9013532
31.80305,11.1803399,11.895548,-0.845699759,11.8952575,11.8953298,11.8950394
31.813542,12,11.8892437,0.332800672,11.8889528,11.8890247,11.8887338
31.824033,12.0415946,11.8829483,0.398304283,11.8826569,11.8827283,11.882437
31.834525,12.2882057,11.8766605,0.641517942,11.8763687,11.8764395,11.8761477
31.845016,11.4891253,11.8703814,-0.617459433,11.8700892,11.8701596,11.8698673
31.855508,10.8166538,11.86411,-1.02345308,11.8638174,11.8638872,11.8635945
31.866,12,11.8578468,0.377032052,11.8575537,11.8576231,11.8573299
31.876491,12.5299641,11.8515924,0.823633215,11.8512988,11.8513677,11.8510741
31.886983,12.2065556,11.8453456,0.601007511,11.8450515,11.8451199,11.8448259
31.897474,12.4096736,11.8391075,0.755358264,11.838813,11.8388809,11.8385864
31.907966,11.9163753,11.8328771,0.28896058,11.8325821,11.8326494,11.8323545
31.918458,12.083046,11.8266548,0.506350865,11.8263594,11.8264261,11.8261307
31.928949,11.8321596,11.8204412,0.108251236,11.8201454,11.8202116,11.8199157
31.939441,12.5698051,11.8142353,0.869235195,11.813939,11.8140046,11.8137083
31.949932,11.8743421,11.808038,0.257495724,11.8077413,11.8078064,11.8075096
31.960424,12.328828,11.8018484,0.72593363,11.8015511,11.8016157,11.8013184
31.970916,12.1655251,11.7956668,0.608159695,11.7953692,11.7954331,11.7951354
31.981407,11.6619038,11.789494,-0.357197785,11.7891959,11.7892593,11.7889611
31.991899,12.2882057,11.7833288,0.710546927,11.7830302,11.783093,11.7827944
32.00239,12.1655251,11.7771722,0.623179598,11.7768732,11.7769354,11.7766363
32.012882,12.0415946,11.7710232,0.520164722,11.7707237,11.7707853,11.7704858
32.023374,11.7046999,11.7648823,-0.24532109,11.7645824,11.7646433,11.7643433
32.033865,11.61895,11.7587501,-0.37389853,11.7584497,11.75851,11.7582096
32.044357,11.5758369,11.7526255,-0.420462325,11.7523246,11.7523843,11.7520834
32.054848,11.4017543,11.7465095,-0.587158598,11.7462081,11.7462672,11.7459658
32.06534,12.1243557,11.740401,0.61964076,11.7400991,11.7401576,11.7398557
32.075832,11.7898261,11.7343006,0.235638586,11.7339983,11.734056,11.7337537
32.086323,12.0415946,11.7282088,0.559808663,11.7279061,11.7279632,11.7276604
32.096815,11.1355287,11.7221246,-0.765895468,11.7218214,11.7218778,11.7215745
32.107306,11.6619038,11.716049,-0.232691229,11.7157453,11.715801,11.7154973
32.117798,12,11.7099809,0.538534227,11.7096767,11.7097318,11.7094276
32.12829,11.3578167,11.7039208,-0.588306164,11.7036162,11.7036705,11.7033659
32.138781,11.3578167,11.6978694,-0.583140395,11.6975643,11.6976179,11.6973128
32.149273,12.2882057,11.6918255,0.772256607,11.6915199,11.6915728,11.6912672
32.159764,11.4891253,11.6857901,-0.443469088,11.6854841,11.6855363,11.6852302
32.170256,11.7473401,11.6797623,0.259957447,11.6794557,11.6795072,11.6792006
32.180748,11.6619038,11.6737424,-0.108805406,11.6734354,11.6734861,11.6731791
32.191239,12.1655251,11.6677312,0.705545109,11.6674237,11.6674736,11.6671661
32.201731,11.9163753,11.6617274,0.504626524,11.6614194,11.6614686,11.6611606
32.212222,12.2882057,11.6557321,0.795282079,11.6554237,11.6554721,11.6551637
32.222714,11.7473401,11.6497444,0.312403204,11.6494355,11.6494831,11.6491741
32.233206,12.1243557,11.6437646,0.693246759,11.6434552,11.643502,11.6431926
32.243697,10.7238053,11.6377934,-0.956027237,11.6374835,11.6375295,11.6372196
32.254189,11.1803399,11.6318296,-0.671929828,11.6315192,11.6315644,11.631254
32.26468,10.9087121,11.6258743,-0.846854313,11.6255635,11.6256078,11.625297
32.275172,12.4096736,11.6199265,0.888677181,11.6196152,11.6196587,11.6193474
32.285664,11.7046999,11.6139867,0.301186405,11.6136749,11.6137175,11.6134057
32.296155,11,11.6080553,-0.779779032,11.6077431,11.6077848,11.6074725
32.306647,10.6301458,11.6021314,-0.985893301,11.6018187,11.6018595,11.6015468
32.317138,11.9163753,11.596216,0.565826192,11.5959028,11.5959427,11.5956295
32.32763,12.3693169,11.590308,0.882614801,11.5899943,11.5900333,11.5897196
32.338122,10.8627805,11.5844079,-0.849486565,11.5840937,11.5841319,11.5838176
32.348613,12.1655251,11.5785163,0.766164942,11.5782016,11.5782389,11.5779242
32.359105,11.2249722,11.5726321,-0.589626984,11.572317,11.5723532,11.572038
32.369596,11.2249722,11.5667564,-0.584623182,11.5664408,11.5664761,11.5661604
32.380088,11.1803399,11.5608881,-0.616885877,11.5605719,11.5606063,11.5602901
32.39058,11.7898261,11.5550276,0.484560097,11.554711,11.5547443,11.5544277
32.401071,10.4880885,11.5491757,-1.03009086,11.5488585,11.5488909,11.5485737
32.411563,11.9582607,11.543331,0.64415037,11.5430134,11.5430448,11.5427271
32.422054,12.2882057,11.5374949,0.866435717,11.5371767,11.5372071,11.5368889
32.432546,11.2694277,11.531666,-0.512092155,11.5313474,11.5313767,11.5310581
32.443038,11.1355287,11.5258451,-0.624753052,11.525526,11.5255542,11.5252351
32.453529,11.5325626,11.5200326,0.111937486,11.519713,11.5197401,11.5194205
32.464021,12.0415946,11.5142274,0.726200503,11.5139073,11.5139334,11.5136133
32.474512,11.5325626,11.5084306,0.15534462,11.50811,11.508135,11.5078144
32.485004,12.1243557,11.5026412,0.78848872,11.5023201,11.502344,11.5020229
32.495496,11.3578167,11.4968596,-0.372884574,11.496538,11.4965607,11.4962391
32.505987,12.083046,11.4910864,0.769389087,11.4907643,11.4907859,11.4904638
32.516479,10.8166538,11.4853205,-0.81772042,11.4849979,11.4850183,11.4846957
32.52697,11.8743421,11.479563,0.628314476,11.4792399,11.4792592,11.4789361
32.537462,11.7046999,11.4738128,0.480507152,11.4734892,11.4735072,11.4731836
32.547954,11.4017543,11.4680859,-0.257549236,11.4677463,11.4677786,11.467439
32.558445,10.7238053,11.4623519,-0.859387316,11.4620118,11.4620429,11.4617028
32.568937,10.0995049,11.4566251,-1.16495501,11.4562845,11.4563144,11.4559738
32.579428,11.8321596,11.4509067,0.61745674,11.4505656,11.4505942,11.4502531
32.58992,12.1243557,11.4451956,0.824111661,11.444854,11.4448813,11.4445397
32.600412,11.8321596,11.4394923,0.626631678,11.4391502,11.4391762,11.438834
32.610903,11.4455231,11.4337973,0.108285798,11.4334547,11.4334794,11.4331367
32.621395,11.1803399,11.4281096,-0.497764712,11.4277664,11.4277898,11.4274466
32.631886,10.5830052,11.4224302,-0.916201366,11.4220865,11.4221085,11.4217648
32.642378,12,11.416758,0.763702811,11.4164138,11.4164345,11.4160902
32.65287,11.7046999,11.4110936,0.541854495,11.4107489,11.4107682,11.4104234
32.663361,11.2694277,11.4054375,-0.368795138,11.4050922,11.4051101,11.4047649
32.673853,11.61895,11.3997887,0.468146759,11.3994429,11.3994593,11.3991135
32.684344,11.2249722,11.3941481,-0.411309992,11.3938017,11.3938168,11.3934704
32.694836,10.6770783,11.3885147,-0.843466922,11.3881678,11.3881814,11.3878345
32.705328,12.9614814,11.3828891,1.25642044,11.3825417,11.3825537,11.3822064
32.715819,11.2694277,11.3772717,-0.328396177,11.3769238,11.3769344,11.3765864
32.726311,10.5830052,11.3716616,-0.888063239,11.3713131,11.3713221,11.3709737
32.736802,10.9087121,11.3660597,-0.676274757,11.3657107,11.3657181,11.3653692
32.747294,12,11.3604649,0.799709354,11.3601155,11.3601213,11.3597718
32.757786,11.7473401,11.354878,0.626468015,11.3545279,11.3545322,11.3541821
32.768277,11.5758369,11.3492992,0.475959779,11.3489486,11.3489513,11.3486007
32.778769,11.7046999,11.3437276,0.60080971,11.3433765,11.3433775,11.3430264
32.78926,11.8321596,11.3381642,0.702848009,11.3378126,11.3378119,11.3374603
32.799752,10.3923048,11.332608,-0.969692321,11.3322559,11.3322535,11.3319013
32.810244,11.9163753,11.3270595,0.767669043,11.3267068,11.3267027,11.32635
32.820735,11.5758369,11.3215192,0.504299198,11.321166,11.3211601,11.3208068
32.831227,11.5758369,11.3159861,0.509755669,11.3156323,11.3156246,11.3152708
32.841718,11.2694277,11.3104611,-0.202567086,11.3101068,11.3100973,11.309743
32.85221,11.5758369,11.3049433,0.520474437,11.3045884,11.3045771,11.3042222
32.862702,11.4455231,11.2994331,0.382217284,11.2990777,11.2990645,11.2987091
32.873193,11.3578167,11.2939311,0.252756006,11.2935752,11.2935601,11.2932041
32.883685,11.7898261,11.2884362,0.708088911,11.2880797,11.2880627,11.2877062
32.894176,10.5830052,11.2829495,-0.836626714,11.2825925,11.2825735,11.2822165
32.904668,10.9544512,11.2774699,-0.568347385,11.2771123,11.2770914,11.2767338
32.91516,11.9163753,11.2719979,0.802731189,11.2716398,11.2716168,11.2712587
32.925651,10.9087121,11.2665341,-0.598182231,11.2661754,11.2661504,11.2657917
32.936143,11.1803399,11.2610774,-0.284143403,11.2607182,11.260691,11.2603318
32.946634,11.4455231,11.2556288,0.435768729,11.255269,11.2552398,11.25488
32.957126,11.5758369,11.2501872,0.570657221,11.2498269,11.2497956,11.2494352
32.967618,11.7898261,11.2447533,0.738290459,11.2443925,11.2443589,11.243998
32.978109,10.4403065,11.2393275,-0.893879749,11.2389661,11.2389303,11.2385689
32.988601,11.4891253,11.2339088,0.505189581,11.2335468,11.2335088,11.2331468
32.999092,10.5356538,11.2284981,-0.832372748,11.2281356,11.2280953,11.2277328
33.009584,11.1355287,11.2230946,-0.295915265,11.2227315,11.2226889,11.2223258
33.020076,11.7046999,11.2176986,0.697854815,11.217335,11.2172899,11.2169263
33.030567,11.5758369,11.2123106,0.602931387,11.2119465,11.2118991,11.2115349
33.041059,10.8166538,11.2069298,-0.624720692,11.206565,11.2065152,11.2061505
33.05155,10.9544512,11.201557,-0.497097386,11.2011917,11.2011393,11.200774
33.062042,11.1355287,11.1961912,-0.246297514,11.1958254,11.1957705,11.1954046
33.072534,11.1355287,11.190833,-0.235168534,11.1904666,11.1904091,11.1900427
33.083025,11.1355287,11.1854828,-0.223504057,11.1851158,11.1850558,11.1846888
33.093517,10.9544512,11.1801396,-0.475066823,11.1797721,11.1797094,11.1793419
33.104008,11.7473401,11.1748045,0.756660825,11.1744364,11.1743711,11.174003
33.1145,11.9582607,11.1694764,0.888135308,11.1691078,11.1690397,11.168671
33.124992,11.2249722,11.1641558,0.246609669,11.1637866,11.1637157,11.1633465
33.135483,11.0905365,11.1588433,-0.261355614,11.1584735,11.1583998,11.15803
33.145975,11.5758369,11.1535377,0.649845526,11.1531674,11.1530908,11.1527204
33.156466,10.2469508,11.1482401,-0.94936261,11.1478692,11.1477897,11.1474188
33.166958,11.045361,11.1429496,-0.312391648,11.1425781,11.1424956,11.1421241
33.17745,10.5356538,11.1376665,-0.775894789,11.1372944,11.1372089,11.1368368
33.187941,11.3578167,11.1323914,0.474789755,11.1320188,11.1319302,11.1315575
33.198433,11.2249722,11.1271233,0.312808087,11.1267501,11.1266583,11.1262851
33.208924,11.7898261,11.1218631,0.817290038,11.1214894,11.1213944,11.1210207
33.219416,10.2469508,11.1166099,-0.932555186,11.1162356,11.1161374,11.1157631
33.229908,11.4455231,11.1113642,0.578064802,11.1109893,11.1108879,11.1105129
33.240399,11.2694277,11.1061265,0.404105429,11.105751,11.1056462,11.1052707
33.250891,10.8627805,11.1008957,-0.487970469,11.1005196,11.1004114,11.1000353
33.261382,11.045361,11.0956728,-0.224302912,11.0952962,11.0951845,11.0948078
33.271874,10.4403065,11.0904569,-0.806319039,11.0900797,11.0899644,11.0895872
33.282366,11.4891253,11.0852484,0.635513072,11.0848707,11.0847518,11.084374
33.292857,11.61895,11.0800479,0.734099552,11.0796695,11.079547,11.0791686
33.303349,11.2249722,11.0748543,0.387450493,11.0744753,11.0743491,11.0739701
33.31384,10.7238053,11.0696686,-0.588101426,11.0692891,11.069159,11.0687795
33.324332,10.8627805,11.0644898,-0.449120609,11.0641097,11.0639758,11.0635957
33.334824,10.4880885,11.0593185,-0.755797575,11.0589378,11.0587999,11.0584192
33.345315,10.9087121,11.054155,-0.381369749,11.0537737,11.0536318,11.0532506
33.355807,11.0905365,11.0489985,0.203808861,11.0486166,11.0484706,11.0480888
33.366298,10.7238053,11.0438498,-0.565724759,11.0434674,11.0433172,11.0429348
33.37679,11.4455231,11.0388759,0.637689013,11.0384928,11.0381706,11.0377876
33.387282,11.6619038,11.0337418,0.792566701,11.0333582,11.0330314,11.0326477
33.397773,11.4455231,11.0286156,0.64568375,11.0282314,11.0278999,11.0275157
33.408265,11.2694277,11.0234964,0.495914628,11.0231116,11.0227752,11.0223904
33.418756,11.1355287,11.0183849,0.34226276,11.0179996,11.0176583,11.0172729
33.429248,10.8627805,11.0132804,-0.387943165,11.0128944,11.0125482,11.0121622
33.43974,11.2694277,11.0081832,0.511120778,11.0077967,11.0074454,11.0070588
33.450231,10.2956301,11.0030939,-0.841108647,11.0027067,11.0023503,11.0019631
33.460723,11,10.9980114,0.0445932041,10.9976237,10.997262,10.9968743
33.471214,10.5830052,10.9929368,-0.640259002,10.9925485,10.9921815,10.9917931
33.481706,10.3923048,10.9878691,-0.771728088,10.9874801,10.9871077,10.9867187
33.492198,11.7473401,10.9828087,0.874374884,10.9824191,10.9820412,10.9816516
33.502689,10.5830052,10.9777561,-0.628292024,10.977366,10.9769823,10.9765922
33.513181,10.4403065,10.9727104,-0.729660117,10.9723197,10.9719303,10.9715395
33.523672,11.1355287,10.9676725,0.409702615,10.9672811,10.9668859,10.9664945
33.534164,11.1803399,10.9626414,0.466581662,10.9622495,10.9618483,10.9614563
33.544656,10.9544512,10.9576177,-0.0562722398,10.9572252,10.9568178,10.9564253
33.555147,10.8627805,10.9526018,-0.299702018,10.9522086,10.9517951,10.9514019
33.565639,11.4891253,10.9475927,0.735888976,10.9471989,10.9467791,10.9463853
33.57613,11.2249722,10.9425914,0.531395092,10.9421971,10.9417707,10.9413763
33.586622,10.9544512,10.937597,0.129823682,10.937202,10.9367691,10.9363741
33.597114,11.8321596,10.9326098,0.948445966,10.9322142,10.9317746,10.931379
33.607605,11.1803399,10.9276305,0.502702134,10.9272343,10.9267878,10.9263916
33.618097,10.2956301,10.9226579,-0.791850854,10.9222611,10.9218077,10.9214108
33.628588,11,10.9176932,0.2868917,10.9172957,10.9168352,10.9164377
33.63908,10.5356538,10.9127352,-0.61406959,10.9123372,10.9118693,10.9114713
33.649572,11.2249722,10.9077846,0.563194096,10.9073859,10.9069107,10.906512
33.660063,10.6770783,10.9028417,-0.475145702,10.9024424,10.9019596,10.9015603
33.670555,10.5356538,10.8979056,-0.601873637,10.8975058,10.8970152,10.8966153
33.681046,11.1803399,10.8929773,0.53606209,10.8925768,10.8920784,10.8916778
33.691538,11.2694277,10.8880558,0.617553103,10.8876547,10.8871482,10.886747
33.70203,10.6770783,10.8831416,-0.453942042,10.8827399,10.8822251,10.8818234
33.712521,10.2469508,10.8782352,-0.794534083,10.8778328,10.8773096,10.8769073
33.723013,10.6301458,10.8733355,-0.493142703,10.8729326,10.8724008,10.8719978
33.733504,11.4891253,10.8684436,0.787833513,10.8680401,10.8674995,10.8670959
33.743996,11.0905365,10.8635586,0.476422015,10.8631544,10.8626048,10.8622006
33.754488,10.198039,10.8586808,-0.812798709,10.8582759,10.8577172,10.8573123
33.764979,10.8166538,10.8538107,-0.192761201,10.8534052,10.8528371,10.8524316
33.775471,11.2249722,10.8489475,0.613208532,10.8485414,10.8479637,10.8475575
33.785962,11.5758369,10.8440919,0.855420925,10.8436852,10.8430977,10.842691
33.796454,12.0415946,10.8392432,1.09651782,10.8388359,10.8382384,10.837831
33.806946,10.9087121,10.8344018,0.27259915,10.8339938,10.8333861,10.832978
33.817437,11.4891253,10.8295681,0.812131248,10.8291595,10.8285412,10.8281326
33.827929,11.7473401,10.8247413,0.960520104,10.824332,10.823703,10.8232937
33.83842,11.4017543,10.8199221,0.762779218,10.8195122,10.8188722,10.8184623
33.848912,11.6619038,10.8151098,0.920214102,10.8146993,10.814048,10.8136375
33.859404,10.7238053,10.8103048,-0.294107906,10.8098936,10.8092308,10.8088197
33.869895,10.2469508,10.8055075,-0.747366501,10.8050957,10.8044211,10.8040093
33.880387,10.9544512,10.800717,0.392089496,10.8003046,10.7996179,10.7992055
33.890878,11.5758369,10.7959342,0.883120977,10.7955212,10.7948222,10.7944091
33.90137,11.0905365,10.7911583,0.547154608,10.7907447,10.7900329,10.7896192
33.911862,10.9544512,10.7863897,0.409952946,10.7859754,10.7852507,10.7848363
33.922353,10.7238053,10.7816289,-0.240465335,10.7812139,10.7804759,10.7800609
33.932845,10.8627805,10.7768749,0.293096609,10.7764593,10.7757076,10.7752919
33.943336,10.5356538,10.7721286,-0.486286823,10.7717124,10.7709467,10.7705304
33.953828,10.9544512,10.7673892,0.432506539,10.7669723,10.7661923,10.7657753
33.96432,10.0498756,10.7626572,-0.844263913,10.7622396,10.7614448,10.7610272
33.974811,10.0995049,10.7579329,-0.81143573,10.7575147,10.7567047,10.7562865
33.985303,10.1488916,10.7532155,-0.777382725,10.7527966,10.7519711,10.7515522
33.995794,11.4455231,10.7485058,0.834875624,10.7480863,10.7472449,10.7468254
34.006286,10.9544512,10.7438031,0.458964107,10.743383,10.7425251,10.7421049
34.016778,9.69535971,10.7391077,-1.02163986,10.7386869,10.7378123,10.7373914
34.027269,11.0905365,10.7344201,0.596754862,10.7339987,10.7331068,10.7326853
34.037761,10.8166538,10.7297395,0.294812371,10.7293174,10.7284077,10.7279856
34.048252,10.7238053,10.7250667,-0.0355158604,10.7246439,10.723716,10.7232932
34.058744,11.2694277,10.7204008,0.740963475,10.7199774,10.7190307,10.7186073
34.069236,10,10.7157423,-0.846015564,10.7153183,10.7143523,10.7139282
34.079727,11.61895,10.7110917,0.952815988,10.710667,10.7096812,10.7092565
34.090219,10.2956301,10.7064481,-0.640950841,10.7060227,10.7050166,10.7045911
34.10071,10.4880885,10.7018124,-0.462302845,10.7013864,10.7003592,10.6999331
34.111202,10.0995049,10.6971837,-0.773096869,10.696757,10.6957082,10.6952814
34.121694,9.94987437,10.6925625,-0.861793552,10.6921351,10.6910641,10.6906366
34.132185,10.8166538,10.6879492,0.35875423,10.6875212,10.6864272,10.6859991
34.142677,11.5758369,10.6833431,0.944718925,10.6829143,10.6817967,10.681368
34.153168,10.9087121,10.6787449,0.479548986,10.6783155,10.6771735,10.6767441
34.16366,10.7238053,10.6741538,0.22282605,10.6737238,10.6725567,10.6721266
34.174152,11.2694277,10.6695704,0.774504531,10.6691397,10.6679466,10.6675158
34.184643,10.9544512,10.664995,0.538011279,10.6645636,10.6633438,10.6629124
34.195135,10.7703296,10.6604268,0.331515876,10.6599948,10.6587474,10.6583153
34.205626,10.7703296,10.6558668,0.338323572,10.6554341,10.6541581,10.6537254
34.216118,10.9087121,10.651314,0.50734419,10.6508806,10.6495753,10.6491418
34.22661,11.5758369,10.6467689,0.963881714,10.6463349,10.6449991,10.644565
34.237101,10.9544512,10.6422321,0.558765636,10.6417974,10.6404302,10.6399954
34.247593,11.1355287,10.6377027,0.705567896,10.6372672,10.6358676,10.6354321
34.258084,10.6770783,10.6331815,0.209515476,10.6327454,10.6313122,10.6308761
34.268576,11.1803399,10.6286678,0.742746289,10.6282311,10.6267631,10.6263263
34.279068,10.8627805,10.6241621,0.488485805,10.6237246,10.6222208,10.6217832
34.289559,10.6301458,10.6196648,0.102376767,10.6192267,10.6176856,10.6172474
34.300051,10.0498756,10.6151751,-0.751864028,10.6147363,10.6131567,10.6127178
34.310542,11.61895,10.610694,1.00411953,10.6102545,10.6086349,10.6081953
34.321034,9.43398113,10.6062206,-1.08270009,10.6057804,10.6041194,10.6036792
34.331526,10,10.6017555,-0.775728987,10.6013146,10.5996107,10.5991697
34.342017,11,10.597299,0.634587235,10.5968575,10.595109,10.5946674
34.352509,11,10.5928506,0.638082612,10.5924083,10.5906136,10.5901713
34.363,9.94987437,10.5884111,-0.799084921,10.5879681,10.5861253,10.5856823
34.373492,11,10.5839797,0.644996344,10.5835361,10.5816433,10.5811996
34.383984,10.5356538,10.579557,-0.209531005,10.5791127,10.5771679,10.5767235
34.394475,11.3137085,10.5751434,0.85939808,10.5746984,10.5726996,10.5722545
34.404967,11.5758369,10.5707383,1.00254605,10.5702926,10.5682376,10.5677918
34.415458,10.2469508,10.5663426,-0.565147592,10.5658962,10.5637826,10.5633361
34.42595,9.8488578,10.5619555,-0.844451115,10.5615084,10.5593338,10.5588866
34.436442,9.64365076,10.5575776,-0.955995221,10.5571298,10.5548917,10.5544438
34.446933,10.7703296,10.5532095,0.465961462,10.552761,10.5504566,10.550008
34.457425,10.5356538,10.5488505,-0.114877209,10.5484013,10.5460277,10.5455784
34.467916,10.9544512,10.5445016,0.640273024,10.5440517,10.5416058,10.5411558
34.478408,10.3923048,10.5401621,-0.384522128,10.5397115,10.5371902,10.5367394
34.4889,10.8166538,10.5358327,0.529925632,10.5353813,10.5327811,10.5323297
34.499391,11.3137085,10.5315138,0.884417697,10.5310618,10.528379,10.5279269
34.509883,10.3440804,10.5272051,-0.42793064,10.5267523,10.5239831,10.5235303
34.520374,11.0905365,10.5229074,0.753411647,10.522454,10.5195942,10.5191406
34.530866,10.198039,10.5186203,-0.56619894,10.5181661,10.5152114,10.5147572
34.541358,10.7238053,10.5143444,0.457669016,10.5138895,10.5108352,10.5103803
34.551849,10.2469508,10.5100804,-0.512961633,10.5096249,10.506466,10.5060103
34.562341,10.9087121,10.5058279,0.634731615,10.5053716,10.5021029,10.5016465
34.572832,11.4891253,10.5015882,0.993749016,10.5011312,10.4977468,10.4972896
34.583324,9.8488578,10.4973608,-0.805296834,10.4969031,10.4933968,10.4929389
34.593816,10.5830052,10.4931465,0.299764537,10.4926881,10.4890533,10.4885947
34.604307,10.198039,10.4889461,-0.539357996,10.488487,10.4847167,10.4842574
34.614799,10.5356538,10.4847593,0.225597928,10.4842995,10.4803863,10.4799262
34.62529,11.0905365,10.4805876,0.780992269,10.480127,10.4760627,10.475602
34.635782,11.0905365,10.4764307,0.783649061,10.4759694,10.4717453,10.4712838
34.646274,11.045361,10.4722896,0.757014793,10.4718276,10.4674343,10.4669721
34.656765,11.3137085,10.4681656,0.919534061,10.4677029,10.4631302,10.4626673
34.667257,10.4403065,10.4640587,-0.1541173,10.4635952,10.4588322,10.4583686
34.677748,11.8743421,10.4599704,1.18927358,10.4595063,10.4545411,10.4540767
34.68824,10.5356538,10.4559012,0.28240501,10.4554363,10.4502561,10.449791
34.698732,10.0498756,10.4518523,-0.634016343,10.4513868,10.4459775,10.4455116
34.709223,9.94987437,10.4478256,-0.705656581,10.4473593,10.4417057,10.4412391
34.719715,10.1488916,10.4438215,-0.543074495,10.4433544,10.43744,10.4369727
34.730206,11.2249722,10.4398423,0.88607554,10.4393745,10.4331811,10.4327131
34.740698,10.3923048,10.435889,-0.208768184,10.4354205,10.4289283,10.4284595
34.75119,9.94987437,10.4319639,-0.694326646,10.4314947,10.4246818,10.4242123
34.761681,10.3440804,10.4280694,-0.289808488,10.4275995,10.4204422,10.419972
34.772173,10,10.4242073,-0.651311948,10.4237366,10.4162086,10.4157376
34.782664,10.5830052,10.4203814,0.403266449,10.41991,10.4119818,10.4115101
34.793156,10.7703296,10.4165948,0.594756077,10.4161227,10.407761,10.4072885
34.803648,11.0905365,10.4128506,0.823216822,10.4123777,10.4035466,10.4030733
34.814139,10.2956301,10.4091531,-0.336931615,10.4086795,10.3993389,10.3988649
34.824631,10.7703296,10.4055062,0.604006129,10.4050319,10.3951372,10.3946625
34.835122,10.4403065,10.4019161,0.195934823,10.4014411,10.3909423,10.3904668
34.845614,10.1488916,10.398388,-0.499496222,10.3979123,10.3867534,10.3862771
34.856106,9.32737905,10.3949296,-1.03322339,10.3944532,10.3825707,10.3820937
34.866597,10.5356538,10.3915494,0.379610848,10.3910722,10.3783949,10.3779171
34.877089,10.7238053,10.3882563,0.57926595,10.3877784,10.3742249,10.3737464
34.88758,10.8166538,10.3850622,0.65695631,10.3845837,10.3700617,10.3695825
34.898072,9.32737905,10.38198,-1.02693766,10.3815007,10.3659045,10.3654244
34.908564,10.5356538,10.3790257,0.395762672,10.3785457,10.3617535,10.3612727
34.919055,10.2469508,10.3762183,-0.35953789,10.3757376,10.3576092,10.3571277
34.929547,9.05538514,10.3735798,-1.14812659,10.3730984,10.3534709,10.3529885
34.940038,10.6770783,10.3711379,0.553118714,10.3706559,10.3493392,10.3488561
34.95053,10,10.3689252,-0.607392135,10.3684425,10.3452134,10.3447296
34.961022,10.8166538,10.3669822,0.670575608,10.3664988,10.3410939,10.3406093
34.971513,10.4880885,10.3653588,0.350328025,10.3648747,10.3369811,10.3364957
34.982005,9.79795897,10.3641165,-0.752434428,10.3636319,10.3328741,10.3323879
34.992496,10.6301458,10.3633345,0.516537798,10.3628492,10.3287738,10.3282869
35.002988,10.7238053,10.3631434,0.600551347,10.3626575,10.3246793,10.3241916
35.01348,10.9544512,10.3636652,0.768626018,10.3631788,10.3205911,10.3201026
35.023971,10.0995049,10.3651078,-0.515366757,10.3646209,10.3165095,10.3160203
35.034463,10.7703296,10.3678065,0.634447083,10.3673191,10.3124337,10.3119437
35.044954,10.8166538,10.3723474,0.666563138,10.3718596,10.3083646,10.3078738
35.055446,10.5356538,10.3798055,0.394776257,10.3793175,10.3043013,10.3038097
35.065938,10.3440804,10.3921288,-0.219199287,10.3916408,10.3002442,10.2997518
35.076429,10.4880885,10.4126669,0.274629901,10.4121793,10.2961936,10.2957005
35.086921,10.198039,10.4467076,-0.498666793,10.446221,10.2921489,10.291655
35.097412,10.5356538,10.5016377,0.18443452,10.501153,10.2881107,10.287616
35.107904,10.8166538,10.5862802,0.47997251,10.5857989,10.2840784,10.2835829
35.118396,9.32737905,10.7088452,-1.17535788,10.7083688,10.2800522,10.2795559
35.128887,10.5830052,10.873613,-0.539080498,10.8731433,10.2760326,10.2755355
35.139379,11.1355287,11.0771034,0.241713371,11.0766417,10.2720187,10.2715208
35.14987,11.7046999,11.3044318,0.632667456,11.3039789,10.2680113,10.2675127
35.160362,12.3693169,11.5266299,0.917979822,11.5261852,10.2640098,10.2635103
35.170854,11.4455231,11.6997583,-0.504217345,11.6993196,10.2600143,10.2595141
35.181345,11.7473401,11.7742838,-0.164145278,11.7738474,10.2560254,10.2555243
35.191837,12.1655251,11.7221803,0.665841367,11.7217414,10.2520422,10.2515403
35.202328,11.7898261,11.5596939,0.479720961,11.5592483,10.2480655,10.2475628
35.21282,10.9087121,11.3337637,-0.651959838,11.3333087,10.2440945,10.243591
35.223312,11.8743421,11.0949755,0.882817437,11.0945101,10.2401296,10.2396254
35.233803,10.6301458,10.8760262,-0.495863306,10.8755509,10.2361712,10.2356661
35.244295,10.7703296,10.6941698,0.275970705,10.6936858,10.2322185,10.2317126
35.254786,11.3137085,10.5548307,0.871135943,10.5543397,10.2282722,10.2277656
35.265278,10.1488916,10.4548431,-0.553128896,10.4543468,10.2243317,10.2238242
35.27577,10.7238053,10.3864296,0.580840518,10.3859294,10.2203972,10.2198889
35.286261,8.94427191,10.3406614,-1.18168926,10.3401584,10.2164691,10.21596
35.296753,10.4403065,10.3097492,0.361327217,10.309244,10.2125467,10.2120368
35.307244,9.64365076,10.2879842,-0.802703802,10.2874774,10.2086307,10.20812
35.317736,9.32737905,10.2716568,-0.971739555,10.2711486,10.2047204,10.2042088
35.328228,10.0995049,10.2585786,-0.398840382,10.2580691,10.2008161,10.2003037
35.338719,11.2694277,10.24753,1.01088952,10.2470194,10.1969182,10.196405
35.349211,11,10.2378415,0.873016881,10.2373298,10.1930259,10.1925119
35.359702,9.64365076,10.2291379,-0.76517132,10.2286251,10.18914,10.1886252
35.370194,9.89949494,10.2211876,-0.567179574,10.2206737,10.1852598,10.1847441
35.380686,9.94987437,10.2138375,-0.513773444,10.2133227,10.1813855,10.180869
35.391177,10.198039,10.2069768,-0.0945396057,10.2064609,10.1775176,10.1770002
35.401669,9.69535971,10.2005189,-0.710745543,10.2000022,10.1736552,10.1731371
35.41216,10.5830052,10.1943985,0.623383282,10.1938808,10.1697992,10.1692803
35.422652,10.5830052,10.1885646,0.628045101,10.1880459,10.1659489,10.165429
35.433144,9.89949494,10.1829759,-0.532429335,10.1824563,10.1621044,10.1615838
35.443635,9.8488578,10.1775906,-0.573352259,10.1770701,10.1582663,10.1577448
35.454127,9.38083152,10.1723794,-0.889689757,10.171858,10.1544337,10.1539114
35.464618,9.74679434,10.1673198,-0.648479355,10.1667975,10.1506075,10.1500843
35.47511,10.6301458,10.1623914,0.683925706,10.1618682,10.1467868,10.1462628
35.485602,10.198039,10.1575784,0.201148384,10.1570543,10.142972,10.1424471
35.496093,10.5356538,10.1528672,0.618697481,10.1523422,10.1391635,10.1386378
35.506585,9.59166305,10.1482453,-0.746044402,10.1477194,10.1353605,10.1348339
35.517076,10.0995049,10.1437036,-0.210234756,10.1431768,10.1315638,10.1310364
35.527568,10.2469508,10.1392326,0.328204398,10.138705,10.1277726,10.1272443
35.53806,9.8488578,10.1348255,-0.534759487,10.134297,10.1239873,10.1234582
35.548551,10.7238053,10.1304763,0.770278547,10.1299468,10.1202082,10.1196782
35.559043,9.43398113,10.1261785,-0.831984008,10.1256482,10.1164346,10.1159038
35.569534,11,10.1219283,0.937054787,10.1213972,10.1126672,10.1121356
35.580026,9.59166305,10.1177207,-0.725298289,10.1171886,10.1089054,10.1083729
35.590518,9.94987437,10.1135522,-0.404571207,10.1130193,10.1051494,10.104616
35.601009,11.4891253,10.1094202,1.17460848,10.1088864,10.1013995,10.1008653
35.611501,10.5356538,10.1053209,0.65599757,10.1047863,10.0976552,10.0971201
35.621992,10.3923048,10.1012527,0.539492515,10.1007171,10.093917,10.093381
35.632484,9.59166305,10.0972124,-0.711019926,10.0966759,10.0901843,10.0896474
35.642976,10.2469508,10.0931993,0.392111545,10.092662,10.0864574,10.0859197
35.653467,10.9087121,10.089211,0.905262986,10.0886728,10.0827366,10.082198
35.663959,9.89949494,10.0852453,-0.430987614,10.0847062,10.0790213,10.0784818
35.67445,9.38083152,10.0813013,-0.836940726,10.0807613,10.0753121,10.0747718
35.684942,10.1488916,10.0773771,0.267421833,10.0768363,10.0716083,10.0710671
35.695434,10.3440804,10.073472,0.520200398,10.0729302,10.0679103,10.0673683
35.705925,11.045361,10.0695852,0.987813666,10.0690425,10.0642184,10.0636755
35.716417,10.3440804,10.065715,0.527603437,10.0651715,10.060532,10.0599882
35.726908,9.74679434,10.0618615,-0.561308402,10.061317,10.0568516,10.0563069
35.7374,11.2249722,10.0580229,1.08025424,10.0574776,10.0531766,10.052631
35.747892,10,10.0541991,-0.232806993,10.0536529,10.0495074,10.0489609
35.758383,10.9087121,10.0503897,0.926456923,10.0498426,10.0458442,10.0452968
35.768875,10.4403065,10.0465934,0.627465642,10.0460454,10.0421864,10.0416381
35.779366,10.5830052,10.0428104,0.734979513,10.0422615,10.0385346,10.0379855
35.789858,9.94987437,10.0390394,-0.298605167,10.0384896,10.0348882,10.0343382
35.80035,9.94987437,10.0352805,-0.292243193,10.0347298,10.0312475,10.0306966
35.810841,10.6301458,10.0315334,0.773700459,10.0309818,10.0276129,10.0270611
35.821333,9.74679434,10.0277972,-0.530097016,10.0272447,10.0239836,10.0234309
35.831824,9.74679434,10.0240721,-0.526571745,10.0235188,10.0203602,10.0198067
35.842316,9.11043358,10.0203572,-0.953899189,10.0198029,10.0167423,10.0161878
35.852808,9.2736185,10.0166527,-0.861994294,10.0160975,10.0131299,10.0125745
35.863299,9.74679434,10.0129584,-0.515910881,10.0124023,10.0095236,10.0089673
35.873791,10.3440804,10.010025,0.577975325,10.009468,10.0059226,10.0053654
35.884282,10.2469508,10.006351,0.49050973,10.0057931,10.0023275,10.0017694
35.894774,9.64365076,10.0026858,-0.599195328,10.002127,9.99873778,9.99817876
35.905266,9.64365076,9.99902959,-0.596136589,9.99846988,9.99515365,9.99459371
35.915757,9.48683298,9.9953825,-0.713126579,9.99482187,9.99157547,9.99101462
35.926249,10.198039,9.99174364,0.454197521,9.99118209,9.98800256,9.9874408
35.93674,10.2469508,9.98811354,0.508760478,9.98755108,9.98443559,9.98387291
35.947232,9.74679434,9.98449135,-0.487541803,9.98392797,9.98087387,9.98031028
35.957724,11.3578167,9.98087728,1.17343062,9.98031297,9.97731774,9.97675323
35.968215,9.64365076,9.97727151,-0.577599124,9.97670627,9.97376752,9.97320209
35.978707,10,9.97367324,0.162255243,9.97310708,9.97022254,9.96965619
35.989198,9.89949494,9.97008302,-0.265684182,9.96951593,9.96668346,9.96611618
35.99969,10.2956301,9.96650006,0.573698595,9.96593205,9.9631496,9.96258139
36.010182,9.21954446,9.9629246,-0.862194954,9.96235565,9.95962129,9.95905215
36.020673,10.198039,9.95935686,0.488551092,9.95878698,9.95609886,9.95552879
36.031165,9.48683298,9.95579607,-0.684808798,9.95522525,9.95258162,9.95201062
36.041656,10.2469508,9.95224282,0.542870099,9.95167107,9.94907025,9.94849831
36.052148,9.69535971,9.94869635,-0.503325573,9.94812366,9.94556406,9.94499119
36.06264,10.198039,9.94515693,0.502873842,9.9445833,9.94206338,9.94148957
36.073131,10.0995049,9.94162484,0.397341292,9.94105026,9.93856855,9.9379938
36.083623,8.88819442,9.93809928,-1.02464866,9.93752377,9.93507887,9.93450318
36.094114,10,9.93458087,0.255771631,9.93400441,9.93159502,9.93101839
36.104606,9.48683298,9.93106887,-0.666510229,9.93049146,9.92811632,9.92753874
36.115098,10.4880885,9.92756354,0.748682139,9.92698518,9.92464309,9.92406457
36.125589,9.94987437,9.92406516,0.160652458,9.92348585,9.92117567,9.92059619
36.136081,9.8488578,9.92057301,-0.267796949,9.91999275,9.91771337,9.91713294
36.146572,10.5830052,9.9170877,0.816037713,9.91650648,9.91425685,9.91367547
36.157064,9.89949494,9.9136085,-0.11880054,9.91302633,9.91080546,9.91022312
36.167556,10.0498756,9.91013572,0.373818005,9.90955259,9.9073595,9.9067762
36.178047,9.48683298,9.90666962,-0.647948026,9.90608553,9.9039193,9.90333504
36.188539,10.2469508,9.90320951,0.586294512,9.90262446,9.90048419,9.89989898
36.19903,9.94987437,9.899756,0.223871335,9.89916998,9.89705483,9.89646865
36.209522,9.2736185,9.89630838,-0.789107018,9.8957214,9.89363055,9.8930434
36.220014,9.43398113,9.89286695,-0.677411118,9.892279,9.89021167,9.88962356
36.230505,10.5830052,9.88943201,0.832810446,9.88884308,9.88679851,9.88620943
36.240997,10.1488916,9.88600284,0.512726752,9.88541295,9.88339041,9.88280036
36.251488,9.79795897,9.88258008,-0.290897084,9.88198922,9.87998801,9.87939699
36.26198,9.32737905,9.87916305,-0.742821642,9.8785712,9.87659067,9.87599867
36.272472,10.0995049,9.87575202,0.473025285,9.8751592,9.87319868,9.87260571
36.282963,10.2956301,9.87234732,0.65060189,9.87175352,9.86981238,9.86921843
36.293455,10.0995049,9.86894825,0.480163188,9.86835347,9.8664311,9.86583617
36.303946,9.48683298,9.86555542,-0.615404291,9.86495966,9.86305549,9.86245957
36.314438,10.0995049,9.86216816,0.487172226,9.86157141,9.85968489,9.85908799
36.32493,9.89949494,9.85878676,0.201762667,9.85818903,9.85631962,9.85572173
36.335421,10,9.85541152,0.380247913,9.8548128,9.85295998,9.85236111
36.345913,9.8488578,9.85204178,-0.056426716,9.85144206,9.84960534,9.84900548
36.356404,10.5356538,9.84867814,0.828839923,9.84807743,9.84625633,9.84565547
36.366896,9.38083152,9.84531994,-0.681533871,9.84471823,9.84291229,9.84231044
36.377388,10.198039,9.84196748,0.59671731,9.84136478,9.83957354,9.83897069
36.387879,10,9.83862106,0.40171998,9.83801736,9.83624039,9.83563655
36.398371,9.2736185,9.83528001,-0.749440803,9.83467531,9.83291221,9.83230736
36.408862,9.11043358,9.83194496,-0.84941826,9.83133926,9.8295896,9.82898375
36.419354,9.53939201,9.82861524,-0.537794782,9.82800853,9.82627194,9.82566509
36.429846,9.59166305,9.82529116,-0.48335092,9.82468344,9.82295953,9.82235167
36.440337,9.05538514,9.821973,-0.875550036,9.82136428,9.81965269,9.81904382
36.450829,10.8627805,9.81866013,1.02182208,9.81805039,9.81635077,9.81574089
36.46132,10.0995049,9.81535314,0.533058903,9.81474239,9.81305439,9.8124435
36.471812,8.71779789,9.8120514,-1.04606573,9.81143964,9.80976292,9.80915101
36.482304,9.8488578,9.8087552,0.200256341,9.80814242,9.80647667,9.80586374
36.492795,9.94987437,9.80546484,0.380012537,9.80485104,9.80319594,9.80258199
36.503287,10.0995049,9.80217968,0.545275395,9.80156486,9.7999201,9.79930513
36.513778,9.53939201,9.79890032,-0.509419579,9.79828447,9.79664976,9.79603377
36.52427,9.05538514,9.79562612,-0.860372584,9.79500925,9.7933843,9.79276728
36.534762,10.5356538,9.79235738,0.862146377,9.79173947,9.79012402,9.78950597
36.545253,10,9.78909438,0.459244614,9.78847545,9.78686922,9.78625014
36.555745,10.198039,9.78583651,0.64203,9.78521654,9.78361927,9.78299917
36.566236,10.0498756,9.78258435,0.517002198,9.78196335,9.78037479,9.77975365
36.576728,10,9.77933728,0.469747511,9.77871524,9.77713515,9.77651298
36.58722,9.53939201,9.77609559,-0.486521912,9.77547251,9.77390066,9.77327744
36.597711,10.1488916,9.77285957,0.613214477,9.77223546,9.7706716,9.77004735
36.608203,9.11043358,9.7696286,-0.811908259,9.76900344,9.76744737,9.76682207
36.618694,9.69535971,9.76640328,-0.266539982,9.76577707,9.76422856,9.76360221
36.629186,9.48683298,9.76318297,-0.525690015,9.76255572,9.76101455,9.76038716
36.639678,10.1488916,9.75996798,0.623637382,9.75933968,9.75780566,9.75717722
36.650169,9.11043358,9.7567586,-0.803943417,9.75612924,9.75460216,9.75397267
36.660661,9.38083152,9.7535557,-0.610511412,9.7529253,9.75140345,9.75077291
36.671152,10.3923048,9.75035688,0.801216552,9.74972542,9.74821013,9.74757853
36.681644,10.2956301,9.74716302,0.740585663,9.7465305,9.74502158,9.74438892
36.692136,9.53939201,9.7439744,-0.452307847,9.74334082,9.74183809,9.74120437
36.702627,9.59166305,9.74079133,-0.386171315,9.74015669,9.73865997,9.73802519
36.713119,11.045361,9.73761319,1.14356803,9.73697748,9.7354866,9.73485076
36.72361,9.79795897,9.73444056,0.252028593,9.73380379,9.73231858,9.73168167
36.734102,9.64365076,9.73127283,-0.296010254,9.73063499,9.72915529,9.72851731
36.744594,9.89949494,9.72811029,0.413986283,9.72747138,9.72599704,9.72535799
36.755085,10.7703296,9.72495324,1.02243649,9.72431325,9.72284411,9.72220398
36.765577,10.8166538,9.72180105,1.04635213,9.72115998,9.71969589,9.71905469
36.776068,9.8488578,9.71865431,0.360837205,9.71801217,9.71655299,9.71591071
36.78656,9.32737905,9.71551243,-0.623003509,9.7148692,9.71341478,9.71277142
36.797052,9.64365076,9.71237567,-0.262154368,9.71173137,9.71028157,9.70963713
36.807543,8.77496439,9.70924434,-0.966581583,9.70859895,9.70715365,9.70650812
36.818035,9.32737905,9.70611783,-0.615417563,9.70547135,9.7040304,9.70338378
36.828526,9.2736185,9.70299672,-0.655269579,9.70234915,9.70091242,9.70026472
36.839018,9.48683298,9.6998804,-0.461570599,9.69923174,9.69779911,9.69715032
36.84951,9.79795897,9.69676916,0.318103455,9.69611941,9.69469076,9.69404087
36.860001,8.71779789,9.6936633,-0.987859002,9.69301245,9.69158765,9.69093667
36.870493,9.69535971,9.69056219,0.0692641377,9.68991025,9.68848919,9.68783711
36.880984,9.64365076,9.68746644,-0.20932195,9.68681339,9.68539596,9.68474277
36.891476,10.2956301,9.68437543,0.7818278,9.68372128,9.68230736,9.68165307
36.901968,9.79795897,9.68128946,0.341569194,9.6806342,9.67922369,9.67856829
36.912459,10.4403065,9.6782088,0.87298208,9.67755243,9.67614521,9.67548871
36.922951,9.64365076,9.67513286,-0.177431959,9.67447538,9.67307135,9.67241373
36.933442,9.05538514,9.67206222,-0.785287898,9.67140363,9.67000268,9.66934395
36.943934,9.69535971,9.66899628,0.162368209,9.66833657,9.66693861,9.66627876
36.954426,9.48683298,9.66593532,-0.423204847,9.6652745,9.66387942,9.66321845
36.964917,9.89949494,9.66287963,0.486431193,9.66221769,9.66082539,9.66016331
36.975409,9.38083152,9.65982861,-0.528201754,9.65916555,9.65777595,9.65711274
36.9859,9.43398113,9.65678284,-0.472018758,9.65611865,9.65473165,9.65406732
36.996392,9,9.65374172,-0.808542963,9.6530764,9.65169192,9.65102646
37.006884,9.43398113,9.65070554,-0.465536691,9.65003909,9.64865703,9.64799045
37.017375,9.8488578,9.64767458,0.448534528,9.647007,9.64562728,9.64495955
37.027867,9.38083152,9.64464824,-0.513630923,9.64397953,9.64260206,9.6419332
37.038358,10.1488916,9.64162711,0.712225005,9.64095726,9.63958195,9.63891196
37.04885,9.53939201,9.63861058,-0.314989791,9.63793959,9.63656638,9.63589525
37.059342,9.8488578,9.63559895,0.461799581,9.63492682,9.63355561,9.63288334
37.069833,9.69535971,9.63259248,0.250533891,9.63191921,9.63054993,9.62987651
37.080325,9.48683298,9.62959061,-0.377832802,9.62891618,9.62754876,9.62687419
37.090816,10.5830052,9.62659388,0.977962865,9.62591831,9.62455266,9.62387695
37.101308,9.59166305,9.62360172,-0.178713948,9.622925,9.62156106,9.62088419
37.1118,9.11043358,9.62061441,-0.71426944,9.61993653,9.61857423,9.6178962
37.122291,10.3440804,9.61763222,0.852319311,9.61695319,9.61559244,9.61491326
37.132783,9.53939201,9.61465458,-0.274340244,9.61397439,9.61261513,9.61193479
37.143274,10,9.61168205,0.623151628,9.61100069,9.60964285,9.60896135
37.153766,9.59166305,9.60871404,-0.130579462,9.60803152,9.60667504,9.60599237
37.164258,9.64365076,9.60575084,0.19467902,9.60506715,9.60371195,9.60302812
37.174749,9.2736185,9.60279272,-0.573737065,9.60210786,9.60075388,9.60006888
37.185241,9.48683298,9.59983909,-0.33616382,9.59915307,9.59780025,9.59711407
37.195732,9.69535971,9.59689053,0.313797995,9.59620333,9.59485161,9.59416426
37.206224,9.38083152,9.59394646,-0.461643738,9.59325808,9.59190739,9.59121887
37.216716,9.43398113,9.59100715,-0.396265085,9.59031759,9.58896788,9.58827817
37.227207,9.11043358,9.58807287,-0.691114529,9.58738213,9.58603333,9.58534244
37.237699,9.38083152,9.58514306,-0.452008338,9.58445113,9.58310319,9.58241111
37.24819,9.53939201,9.58221826,-0.206945026,9.58152514,9.580178,9.57948474
37.258682,9.53939201,9.57929791,-0.199764597,9.5786036,9.5772572,9.57656275
37.269174,9.79795897,9.57638228,0.470719336,9.57568678,9.57434107,9.57364542
37.279665,9.69535971,9.57347164,0.349124731,9.57277495,9.57142986,9.57073302
37.290157,10.0995049,9.57056542,0.727282281,9.56986753,9.56852303,9.56782499
37.300648,9,9.56766418,-0.753434919,9.56696509,9.56562111,9.56492187
37.31114,9.64365076,9.56476734,0.280861919,9.56406705,9.56272355,9.56202311
37.321632,9,9.56187519,-0.749583343,9.56117369,9.55983061,9.55912896
37.332123,9.94987437,9.55898798,0.625209079,9.55828527,9.55694257,9.55623971
37.342615,9.38083152,9.55610516,-0.418656945,9.55540124,9.55405886,9.55335479
37.353106,10.4403065,9.55322727,0.941848843,9.55252213,9.55118002,9.55047474
37.363598,9.32737905,9.55035375,-0.472201961,9.5496474,9.54830551,9.54759901
37.37409,8.94427191,9.54748486,-0.776667853,9.5467773,9.54543559,9.54472787
37.384581,9.32737905,9.54462088,-0.466092085,9.5439121,9.54257052,9.54186158
37.395073,9.79795897,9.54176126,0.506159773,9.54105124,9.53970975,9.53899958
37.405564,9.89949494,9.53890651,0.600490154,9.53819527,9.53685382,9.53614242
37.416056,9.38083152,9.5360561,-0.393985511,9.53534363,9.53400217,9.53328955
37.426548,9.21954446,9.53321029,-0.560058777,9.53249659,9.53115508,9.53044122
37.437039,9.64365076,9.53036934,0.336573054,9.5296544,9.5283128,9.52759771
37.447531,9.38083152,9.5275327,-0.383015903,9.52681652,9.52547479,9.52475845
37.458022,9.53939201,9.52470091,0.121206878,9.52398349,9.52264157,9.521924
37.468514,9.11043358,9.52187341,-0.641435756,9.52115475,9.51981261,9.51909379
37.479006,9.8488578,9.51905047,0.574288545,9.51833056,9.51698816,9.5162681
37.489497,8.83176087,9.51623235,-0.827327917,9.51551119,9.51416849,9.51344718
37.499989,10.2469508,9.5134185,0.856464981,9.51269609,9.51135305,9.51063049
37.51048,9.53939201,9.51060946,0.16965422,9.5098858,9.50854237,9.50781855
37.520972,8.88819442,9.50780468,-0.787153263,9.50707975,9.50573591,9.50501083
37.531464,9.74679434,9.50500441,0.491721398,9.50427823,9.50293393,9.50220759
37.541955,10,9.50220893,0.705543106,9.50148148,9.50013668,9.49940908
37.552447,9.59166305,9.49941768,0.303719227,9.49868897,9.49734363,9.49661476
37.562938,9.8488578,9.49663119,0.593486824,9.49590121,9.49455531,9.49382517
37.57343,9.53939201,9.49384893,0.213408259,9.49311768,9.49177116,9.49103975
37.583922,8.66025404,9.49107115,-0.911491695,9.49033862,9.48899146,9.48825877
37.594413,9.74679434,9.4882981,0.508425257,9.4875643,9.48621645,9.48548249
37.604905,9.94987437,9.48552926,0.681428729,9.48479417,9.48344561,9.48271037
37.615396,9.05538514,9.48276514,-0.653743067,9.48202877,9.48067946,9.47994292
37.625888,9.89949494,9.4800052,0.647680274,9.47926754,9.47791745,9.47717963
37.63638,9.79795897,9.47724971,0.566311986,9.47651076,9.47515984,9.47442073
37.646871,9.11043358,9.47449891,-0.603378263,9.47375867,9.4724069,9.4716665
37.657363,9,9.47175227,-0.686842249,9.47101074,9.46965808,9.46891638
37.667854,8.88819442,9.46901032,-0.76211279,9.46826749,9.46691391,9.46617091
37.678346,9.38083152,9.46627252,-0.292302925,9.46552839,9.46417385,9.46342956
37.688838,9.32737905,9.46353912,-0.368998738,9.46279369,9.46143816,9.46069256
37.699329,8.83176087,9.46081038,-0.793126417,9.46006364,9.4587071,9.45796019
37.709821,9.79795897,9.45808577,0.582986453,9.45733772,9.45598012,9.4552319
37.720312,9.43398113,9.45536579,-0.146234953,9.45461643,9.45325775,9.45250822
37.730804,10.0498756,9.45264994,0.772803782,9.45189925,9.45053947,9.44978862
37.741296,10.3923048,9.44993844,0.970755583,9.44918644,9.44782551,9.44707334
37.751787,9.21954446,9.44723157,-0.477165705,9.44647825,9.44511614,9.44436265
37.762279,8.30662386,9.44452878,-1.06672626,9.44377414,9.44241083,9.44165601
37.77277,9.38083152,9.4418306,-0.246979924,9.44107463,9.43971008,9.43895394
37.783262,10,9.4391365,0.748908206,9.43837919,9.43701338,9.43625591
37.793754,8.60232527,9.43644673,-0.913302501,9.43568809,9.43432098,9.43356217
37.804245,10.0498756,9.43376153,0.784929355,9.43300155,9.43163312,9.43087297
37.814737,9.43398113,9.43108039,0.0538585526,9.43031907,9.42894929,9.4281878
37.825228,9.74679434,9.42840381,0.564261053,9.42764115,9.42626998,9.42550715
37.83572,9.53939201,9.42573127,0.337136086,9.42496727,9.42359469,9.42283051
37.846212,10.0498756,9.42306303,0.791714969,9.42229767,9.42092366,9.42015813
37.856703,10,9.42039932,0.761315098,9.41963261,9.41825713,9.41749025
37.867195,8.94427191,9.41773964,-0.688089911,9.41697157,9.41559459,9.41482635
37.877686,8.18535277,9.41508447,-1.10893269,9.41431505,9.41293655,9.41216695
37.888178,10.0995049,9.41243332,0.828897836,9.41166253,9.41028248,9.40951152
37.89867,9.43398113,9.40978641,0.155546514,9.40901426,9.40763264,9.40686031
37.909161,9.8488578,9.40714401,0.664615522,9.40637049,9.40498726,9.40421356
37.919653,9.94987437,9.40450559,0.738490879,9.4037307,9.40234584,9.40157077
37.930144,9.64365076,9.40187166,0.491710385,9.40109539,9.39970888,9.39893243
37.940636,9.05538514,9.3992417,-0.586392836,9.39846405,9.39707585,9.39629803
37.951128,9.32737905,9.39661595,-0.263129051,9.39583693,9.39444702,9.39366781
37.961619,8.83176087,9.39399466,-0.749822511,9.39321425,9.39182261,9.39104202
37.972111,9.48683298,9.39137733,0.308958978,9.39059553,9.38920213,9.38842015
37.982602,9.38083152,9.38876444,-0.0890669439,9.38798125,9.38658606,9.38580269
37.993094,9.53939201,9.38615549,0.391454373,9.38537091,9.3839739,9.38318913
38.003586,9.53939201,9.38355072,0.394767397,9.38276474,9.38136589,9.38057973
38.014077,9.05538514,9.38095036,-0.570583234,9.38016298,9.37876227,9.37797471
38.024569,9.38083152,9.37835393,0.0497753895,9.37756515,9.37616255,9.37537358
38.03506,9.64365076,9.3757619,0.517579811,9.37497171,9.3735672,9.37277682
38.045552,9.21954446,9.37317377,-0.391955759,9.37238217,9.37097572,9.37018393
38.056044,8.88819442,9.37058979,-0.694546884,9.36979677,9.36838836,9.36759516
38.066535,9.11043358,9.36801019,-0.507520059,9.36721575,9.36580535,9.36501073
38.077027,10.2956301,9.36543447,0.964466521,9.36463862,9.3632262,9.36243016
38.087518,9.53939201,9.36286312,0.42015342,9.36206584,9.36065139,9.35985392
38.09801,10,9.36029563,0.799815208,9.35949693,9.35808042,9.35728152
38.108502,9.79795897,9.35773226,0.663495829,9.35693212,9.35551352,9.35471319
38.118993,10.2956301,9.35517322,0.969771581,9.35437165,9.35295095,9.35214918
38.129485,8.36660027,9.35261804,-0.992984275,9.35181503,9.35039219,9.34958899
38.139976,9.48683298,9.35006718,0.369818609,9.34926273,9.34783773,9.34703309
38.150468,10.1488916,9.34752015,0.895193506,9.34671426,9.34528709,9.344481
38.16096,8.71779789,9.3449772,-0.791946533,9.34416986,9.34274048,9.34193294
38.171451,10.1488916,9.34243855,0.898027291,9.34162976,9.34019815,9.33938917
38.181943,8.18535277,9.33990371,-1.07450032,9.33909347,9.33765961,9.33684917
38.192434,9.11043358,9.33737317,-0.47638177,9.33656146,9.33512534,9.33431344
38.202926,9.32737905,9.33484642,-0.086413954,9.33403326,9.33259484,9.33178147
38.213418,9.79795897,9.33232371,0.682374719,9.33150908,9.33006834,9.32925351
38.223909,8.83176087,9.32980527,-0.705722611,9.32898917,9.32754608,9.32672978
38.234401,9.48683298,9.32729061,0.399427558,9.32647303,9.32502758,9.32420981
38.244892,8.48528137,9.32478019,-0.916241682,9.32396114,9.32251331,9.32169406
38.255384,8.42614977,9.32227355,-0.946638143,9.32145302,9.32000277,9.31918204
38.265876,9.59166305,9.3197709,0.521432783,9.31894889,9.31749621,9.31667399
38.276367,9.79795897,9.31727248,0.693315578,9.31644898,9.31499384,9.31417014
38.286859,9.59166305,9.31477781,0.52619886,9.31395282,9.3124952,9.31167001
38.29735,8.71779789,9.31228735,-0.771031425,9.31146086,9.31000075,9.30917406
38.307842,9.16515139,9.30980062,-0.38032779,9.30897264,9.30751,9.30668181
38.318334,9.32737905,9.30731785,0.141637569,9.30648837,9.30502318,9.3041935
38.328825,9.53939201,9.30483928,0.484306449,9.30400829,9.30254054,9.30170935
38.339317,9.43398113,9.30236441,0.362790184,9.30153192,9.30006158,9.29922888
38.349808,8.94427191,9.29989373,-0.596340354,9.29905972,9.29758677,9.29675255
38.3603,9.64365076,9.29742674,0.588408041,9.29659122,9.29511563,9.2942799
38.370792,9.11043358,9.29496368,-0.429569665,9.29412663,9.29264839,9.29181114
38.381283,9.38083152,9.29250477,0.29719817,9.2916662,9.29018528,9.28934651
38.391775,9.2736185,9.29004954,-0.128183622,9.28920945,9.28772582,9.28688552
38.402266,9.11043358,9.28759844,-0.420909569,9.28675682,9.28527048,9.28442864
38.412758,9.38083152,9.28515102,0.309322652,9.28430786,9.28281877,9.2819754
38.42325,9.11043358,9.28270748,-0.415058913,9.28186279,9.28037093,9.27952602
38.433741,8.71779789,9.28026806,-0.749980115,9.27942183,9.27792718,9.27708073
38.444233,9.89949494,9.27783228,0.788455866,9.2769845,9.27548705,9.27463905
38.454724,9.89949494,9.27540061,0.789996409,9.27455128,9.27305099,9.27220145
38.465216,10.0498756,9.27297257,0.881421043,9.27212168,9.27061854,9.26976744
38.475708,9.59166305,9.27054838,0.566669805,9.26969594,9.26818992,9.26733727
38.486199,9.05538514,9.26812827,-0.461240861,9.26727427,9.26576535,9.26491114
38.496691,8.88819442,9.26571177,-0.614424409,9.26485621,9.26334437,9.26248859
38.507182,8.94427191,9.26329934,-0.56482513,9.26244221,9.26092743,9.26007008
38.517674,9.21954446,9.2608905,-0.203337264,9.2600318,9.25851406,9.25765513
38.528166,8.24621125,9.25848548,-1.0061184,9.2576252,9.25610448,9.25524398
38.538657,9.48683298,9.25608451,0.480362854,9.25522265,9.25369892,9.25283684
38.549149,9.05538514,9.25368711,-0.445311097,9.25282367,9.25129691,9.25043325
38.55964,10.0498756,9.25129374,0.893634087,9.25042871,9.24889891,9.24803365
38.570132,9.32737905,9.24890393,0.280134109,9.24803731,9.24650444,9.24563759
38.580624,9.2736185,9.24651791,0.164622547,9.24564969,9.24411373,9.24324528
38.591115,9.79795897,9.2441359,0.744192902,9.24326608,9.241727,9.24085696
38.601607,8.77496439,9.24175742,-0.683222538,9.240886,9.23934379,9.23847214
38.612098,9.11043358,9.23938294,-0.359095201,9.23850991,9.23696454,9.23609129
38.62259,9.48683298,9.23701199,0.499820957,9.23613735,9.2345888,9.23371393
38.633082,9.16515139,9.23464479,-0.263616009,9.23376853,9.23221678,9.2313403
38.643573,9.21954446,9.23228156,-0.112858765,9.23140368,9.22984871,9.2289706
38.654065,9.94987437,9.22992184,0.848500167,9.22904234,9.22748412,9.22660439
38.664556,9.21954446,9.22756749,-0.0895714085,9.22668637,9.22512346,9.2242421
38.675048,8.94427191,9.22521523,-0.530040863,9.22433247,9.22276627,9.22188328
38.68554,9.59166305,9.22286667,0.607286071,9.22198228,9.22041277,9.21952814
38.696031,8.60232527,9.22052205,-0.786254912,9.21963602,9.21806318,9.21717691
38.706523,9.64365076,9.21818091,0.6522805,9.21729323,9.21571704,9.21482912
38.717014,9.21954446,9.21584369,0.0608339717,9.21495436,9.21337479,9.21248522
38.727506,9.11043358,9.21350992,-0.32105505,9.21261895,9.21103598,9.21014476
38.737998,9.48683298,9.21117984,0.525026796,9.21028721,9.20870082,9.20780795
38.748489,9.11043358,9.20885366,-0.313719746,9.20795936,9.20636953,9.205475
38.758981,9.16515139,9.20653092,-0.203419587,9.20563496,9.20404167,9.20314546
38.769472,9.69535971,9.20421206,0.700819275,9.20331443,9.20171765,9.20081978
38.779964,10.0995049,9.20189663,0.947421927,9.20099733,9.19939704,9.1984975
38.790456,9.21954446,9.19958485,0.141278477,9.19868387,9.19708006,9.19617883
38.800947,9.38083152,9.19727693,0.428432717,9.19637426,9.1947669,9.19386399
38.811439,9.11043358,9.19497242,-0.290755632,9.19406807,9.19245713,9.19155254
38.82193,9.74679434,9.19267175,0.744394112,9.19176571,9.19015118,9.18924489
38.832422,8.94427191,9.19037448,-0.496087265,9.18946675,9.1878486,9.18694062
38.842914,9.74679434,9.18808083,0.747471414,9.1871714,9.18554961,9.18463993
38.853405,9.38083152,9.185791,0.441633922,9.18487986,9.18325441,9.18234303
38.863897,9.38083152,9.18350455,0.444215008,9.1825917,9.18096257,9.18004948
38.874388,8.24621125,9.1812219,-0.966959488,9.18030735,9.17867451,9.1777597
38.88488,9.94987437,9.17894263,0.878027189,9.17802636,9.17638979,9.17547326
38.895372,10,9.17666693,0.907377029,9.17574894,9.17410862,9.17319037
38.905863,9.38083152,9.17439502,0.45435284,9.1734753,9.17183121,9.17091123
38.916355,9.48683298,9.17212645,0.560987102,9.17120501,9.16955712,9.16863541
38.926846,9.74679434,9.16986166,0.75956085,9.16893848,9.16728677,9.16636334
38.937338,9.38083152,9.1676002,0.461769768,9.16667528,9.16501974,9.16409456
38.94783,9.79795897,9.16534229,0.795372042,9.16441562,9.16275622,9.16182929
38.958321,8.94427191,9.16308812,-0.467777953,9.16215971,9.16049642,9.15956775
38.968813,9.2736185,9.16083727,0.335829155,9.15990711,9.15823991,9.15730949
38.979304,9.53939201,9.15859016,0.617091445,9.15765824,9.15598711,9.15505493
38.989796,8.48528137,9.15634635,-0.819185558,9.15541267,9.15373759,9.15280364
39.000288,9.21954446,9.15410605,0.255809315,9.15317061,9.15149155,9.15055583
39.010779,9.64365076,9.15186947,0.701271199,9.15093225,9.14924919,9.14831171
39.021271,9.21954446,9.14963616,0.264401764,9.14869718,9.14701009,9.14607083
39.031762,9.48683298,9.14740656,0.582603138,9.1464658,9.14477467,9.14383363
39.042254,9.05538514,9.14518023,-0.299658296,9.14423768,9.14254248,9.14159966
39.052746,9.59166305,9.14295738,0.669854962,9.14201304,9.14031375,9.13936913
39.063237,9.38083152,9.1407382,0.489993182,9.13979207,9.13808866,9.13714226
39.073729,9.2736185,9.13852228,0.367554374,9.13757435,9.1358668,9.13491859
39.08422,9.89949494,9.13631002,0.873604554,9.13536029,9.13364858,9.13269857
39.094712,9.74679434,9.134101,0.782747307,9.13314946,9.13143356,9.13048175
39.105204,9.79795897,9.13189542,0.816127166,9.13094207,9.12922196,9.12826833
39.115695,8.60232527,9.12969349,-0.726201225,9.12873832,9.12701398,9.12605853
39.126187,9.05538514,9.12749477,-0.26853237,9.12653778,9.12480919,9.12385192
39.136678,9.21954446,9.12529969,0.30699311,9.12434087,9.122608,9.1216489
39.14717,8.60232527,9.12310781,-0.721652647,9.12214716,9.12040998,9.11944905
39.157662,9.2736185,9.12091934,0.390767393,9.11995685,9.11821535,9.11725258
39.168153,8.60232527,9.11873448,-0.718616179,9.11777015,9.1160243,9.11505968
39.178645,8.71779789,9.11655281,-0.631470442,9.11558664,9.1138364,9.11286994
39.189136,8.24621125,9.11437473,-0.931752906,9.11340671,9.11165207,9.11068376
39.199628,9.74679434,9.11219983,0.796614411,9.11122995,9.10947089,9.10850072
39.21012,9.2736185,9.1100283,0.404462852,9.10905656,9.10729305,9.10632102
39.220611,8.48528137,9.10786034,-0.789036735,9.10688674,9.10511876,9.10414486
39.231103,8.77496439,9.10569555,-0.575092304,9.10472007,9.10294759,9.10197182
39.241594,9.05538514,9.10353431,-0.219429191,9.10255696,9.10077996,9.09980231
39.252086,8.42614977,9.10137621,-0.821721632,9.10039699,9.09861543,9.09763591
39.262578,9.89949494,9.09922146,0.894580056,9.09824035,9.09645422,9.09547281
39.273069,9.2736185,9.09707025,0.420176448,9.09608725,9.09429652,9.09331322
39.283561,9.8488578,9.09492216,0.868294675,9.09393726,9.09214191,9.09115672
39.294052,9.38083152,9.0927776,0.536706551,9.0917908,9.0899908,9.0890037
39.304544,8.54400375,9.09063615,-0.739345928,9.08964744,9.08784277,9.08685377
39.315036,9.21954446,9.088498,0.362003388,9.08750739,9.08569802,9.0847071
39.325527,8.30662386,9.08636337,-0.883028598,9.08537084,9.08355674,9.08256391
39.336019,9.2736185,9.08423182,0.435185789,9.08323738,9.08141853,9.08042377
39.34651,9.79795897,9.08210377,0.846082265,9.0811074,9.07928378,9.07828709
39.357002,9.94987437,9.0799788,0.932681924,9.07898049,9.07715207,9.07615345
39.367494,9.64365076,9.0778571,0.752192567,9.07685686,9.07502361,9.07402306
39.377985,9.21954446,9.07573888,0.379217061,9.0747367,9.07289859,9.07189609
39.388477,9.64365076,9.07362371,0.755001356,9.07261958,9.0707766,9.06977215
39.398968,8.24621125,9.07151201,-0.908460652,9.07050593,9.06865803,9.06765164
39.40946,9.16515139,9.06940335,0.309431803,9.06839531,9.06654249,9.06553413
39.419952,9.53939201,9.06729793,0.687091027,9.06628793,9.06443015,9.06341983
39.430443,9.48683298,9.06519596,0.649335833,9.06418399,9.06232122,9.06130893
39.440935,8.42614977,9.06309701,-0.798089742,9.06208307,9.06021528,9.05920102
39.451426,7.81024968,9.06100148,-1.11837016,9.05998557,9.05811274,9.0570965
39.461918,8.48528137,9.05890898,-0.757382072,9.05789108,9.05601318,9.05499496
39.47241,8.60232527,9.05681968,-0.67416201,9.05579979,9.05391681,9.05289659
39.482901,9.32737905,9.05473379,0.522154444,9.0537119,9.0518238,9.05080158
39.493393,8.24621125,9.0526509,-0.898019847,9.05162701,9.04973375,9.04870954
39.503884,8.88819442,9.05057139,-0.402960266,9.0495455,9.04764707,9.04662085
39.514376,9.05538514,9.04849488,0.0830076007,9.04746698,9.04556334,9.0445351
39.524868,8.94427191,9.04642154,-0.319608555,9.04539162,9.04348275,9.0424525
39.535359,9.38083152,9.04435157,0.580068918,9.04331963,9.0414055,9.04037322
39.545851,8.60232527,9.04228457,-0.66329428,9.0412506,9.03933118,9.03829688
39.556342,8.94427191,9.04022093,-0.30975638,9.03918493,9.03726019,9.03622385
39.566834,9.16515139,9.03816024,0.356358181,9.0371222,9.03519212,9.03415374
39.577326,9,9.03610269,-0.190007091,9.03506261,9.03312715,9.03208673
39.587817,9.59166305,9.03404849,0.746735936,9.03300636,9.0310655,9.03002302
39.598309,9.38083152,9.03199722,0.590621961,9.03095303,9.02900674,9.02796221
39.6088,8.30662386,9.02994927,-0.850485396,9.02890302,9.02695127,9.02590468
39.619292,8.30662386,9.02790425,-0.849282278,9.02685594,9.02489869,9.02385003
39.629784,9.53939201,9.02586234,0.716609845,9.02481196,9.0228492,9.02179846
39.640275,7.74596669,9.02382374,-1.13042339,9.02277127,9.02080297,9.01975015
39.650767,7.74596669,9.02178804,-1.12952262,9.02073349,9.01875961,9.0177047
39.661258,8.60232527,9.01975563,-0.646088514,9.018699,9.0167195,9.01566251
39.67175,9,9.01772612,-0.133139482,9.01666739,9.01468225,9.01362316
39.682242,8.77496439,9.01569969,-0.490647841,9.01463886,9.01264805,9.01158686
39.692733,8.36660027,9.01367653,-0.804410507,9.01261359,9.01061709,9.00955378
39.703225,8.88819442,9.01165625,-0.351371354,9.01059119,9.00858896,9.00752354
39.713716,9.05538514,9.00963922,0.213882959,9.00857204,9.00656405,9.00549652
39.724208,8.18535277,9.00762505,-0.906792304,9.00655576,9.00454198,9.00347231
39.7347,9.59166305,9.00561394,0.76553844,9.00454251,9.00252291,9.00145111
39.745191,8.71779789,9.00360607,-0.534610307,9.0025325,9.00050705,8.99943311
39.755683,9.32737905,9.00160104,0.570769668,9.00052533,8.99849399,8.99741791
39.766174,9.38083152,8.99959923,0.617440107,8.99852138,8.99648412,8.99540589
39.776666,9.53939201,8.99760026,0.736065046,8.99652025,8.99447705,8.99339666
39.787158,9.69535971,8.99560431,0.836513839,8.99452214,8.99247295,8.9913904
39.797649,9.69535971,8.99361156,0.837704095,8.99252722,8.99047203,8.98938731
39.808141,8.42614977,8.99162163,-0.751978629,8.99053512,8.98847388,8.98738699
39.818632,8.54400375,8.98963489,-0.667556099,8.9885462,8.98647888,8.98538981
39.829124,8.83176087,8.98765096,-0.39482919,8.98656008,8.98448665,8.98339539
39.839616,9.05538514,8.98567001,0.264036229,8.98457694,8.98249737,8.98140392
39.850107,9.32737905,8.98369223,0.58624809,8.98259697,8.98051122,8.97941557
39.860599,8.66025404,8.98171724,-0.566977251,8.98061977,8.97852782,8.97742996
39.87109,9,8.97974541,0.142318625,8.97864573,8.97654754,8.97544747
39.881582,9.74679434,8.97777635,0.876936709,8.97667446,8.97456999,8.9734677
39.892074,8.36660027,8.97581025,-0.78051905,8.97470614,8.97259536,8.97149085
39.902565,8.71779789,8.97384729,-0.506013246,8.97274095,8.97062383,8.96951708
39.913057,9.32737905,8.97188709,0.596231469,8.97077851,8.96865501,8.96754603
39.923548,8.60232527,8.96993001,-0.606304169,8.96881919,8.96668928,8.96557806
39.93404,9.64365076,8.96797568,0.821994574,8.96686261,8.96472625,8.96361278
39.944532,8.71779789,8.96602428,-0.498223233,8.96490895,8.96276611,8.96165038
39.955023,8.60232527,8.96407598,-0.601457157,8.96295839,8.96080904,8.95969104
39.965515,9.43398113,8.96213041,0.686913913,8.96101055,8.95885465,8.95773438
39.976006,10.2469508,8.96018793,1.13435569,8.9590658,8.95690331,8.95578077
39.986498,9.32737905,8.95824817,0.607561421,8.95712376,8.95495465,8.95382982
39.99699,9.16515139,8.95631131,0.456990242,8.95518461,8.95300883,8.95188172
40.007481,9.8488578,8.95437752,0.945769678,8.95324853,8.95106606,8.94993665
40.017973,8.77496439,8.95244643,-0.421286174,8.95131514,8.94912593,8.94799422
40.028464,8.42614977,8.9505184,-0.724133016,8.9493848,8.94718883,8.94605481
40.038956,8.77496439,8.94859306,-0.416687736,8.94745715,8.94525436,8.94411803
40.049448,8.30662386,8.94667058,-0.800029198,8.94553235,8.94332272,8.94218407
40.059939,8.94427191,8.94475115,-0.0218914699,8.94361059,8.94139408,8.9402531
40.070431,9.2736185,8.94283438,0.575138342,8.94169149,8.93946807,8.93832475
40.080922,9.38083152,8.94092065,0.663257771,8.93977542,8.93754504,8.93639937
40.091414,8.18535277,8.93900957,-0.868134092,8.937862,8.93562462,8.93447661
40.101906,8.36660027,8.93710133,-0.755315211,8.9359514,8.93370699,8.93255662
40.112397,8.83176087,8.9351961,-0.321613493,8.93404381,8.93179233,8.9306396
40.122889,8.83176087,8.93329352,-0.318641886,8.93213886,8.92988027,8.92872516
40.13338,8.54400375,8.93139393,-0.622406767,8.93023689,8.92797115,8.92681368
40.143872,9.64365076,8.92949697,0.845076204,8.92833755,8.92606462,8.92490476
40.154364,8.71779789,8.92760282,-0.458044683,8.92644101,8.92416085,8.9229986
40.164855,8.83176087,8.92571165,-0.306513914,8.92454744,8.92226001,8.92109536
40.175347,8.36660027,8.92382309,-0.74647359,8.92265648,8.92036174,8.91919469
40.185838,9.11043358,8.92193749,0.434161359,8.92076848,8.91846639,8.91729692
40.19633,8.42614977,8.9200545,-0.702783558,8.91888307,8.91657359,8.9154017
40.206822,9.21954446,8.91817429,0.548971921,8.91700043,8.91468352,8.9135092
40.217313,9.16515139,8.91629702,0.498853054,8.91512074,8.91279635,8.9116196
40.227805,9.11043358,8.91442234,0.442731567,8.91324362,8.91091171,8.90973252
40.238296,8.77496439,8.91255059,-0.370926145,8.91136942,8.90902996,8.90784833
40.248788,9.16515139,8.91068142,0.504450166,8.9094978,8.90715074,8.90596664
40.25928,9.11043358,8.90881499,0.449019583,8.90762891,8.90527421,8.90408765
40.269771,9.16515139,8.90695148,0.508133748,8.90576294,8.90340055,8.90221152
40.280263,8.1240384,8.90509053,-0.883771535,8.90389951,8.90152939,8.90033789
40.290754,8.66025404,8.90323248,-0.49292844,8.90203898,8.89966109,8.89846711
40.301246,9.05538514,8.90137698,0.392438728,8.90018099,8.89779528,8.89659881
40.311738,8.36660027,8.8995242,-0.730016393,8.89832571,8.89593214,8.89473317
40.322229,8.1240384,8.8976743,-0.879565743,8.89647331,8.89407184,8.89287036
40.332721,9.43398113,8.89582693,0.73358994,8.89462343,8.89221401,8.89101001
40.343212,9.11043358,8.89398244,0.465243098,8.89277642,8.890359,8.88915249
40.353704,7.93725393,8.89214046,-0.977182957,8.89093191,8.88850646,8.88729741
40.364196,9.69535971,8.89030118,0.897250543,8.88909009,8.88665655,8.88544497
40.374687,8.36660027,8.88846475,-0.722401884,8.88725112,8.88480945,8.88359532
40.385179,7.87400787,8.88663082,-1.00629168,8.88541464,8.88296479,8.88174811
40.39567,8.60232527,8.88479974,-0.531483272,8.883581,8.88112292,8.87990369
40.406162,8.24621125,8.88297114,-0.797972362,8.88174984,8.87928349,8.87806169
40.416654,8.83176087,8.88114521,-0.222225877,8.87992134,8.87744666,8.87622228
40.427145,9.16515139,8.8793221,0.534630051,8.87809565,8.87561261,8.87438565
40.437637,9.43398113,8.87750146,0.745975648,8.87627243,8.87378097,8.87255142
40.448128,8.24621125,8.87568365,-0.793392963,8.87445201,8.87195209,8.87071994
40.45862,8.71779789,8.87386829,-0.395057466,8.87263405,8.87012562,8.86889086
40.469112,8.94427191,8.87205556,0.268730995,8.87081871,8.86830172,8.86706434
40.479603,8.94427191,8.87024563,0.272077704,8.86900616,8.86648056,8.86524056
40.490095,9.21954446,8.86843815,0.592542241,8.86719605,8.86466179,8.86341916
40.500586,8.88819442,8.86663345,0.146836523,8.86538872,8.86284574,8.86160048
40.511078,8.36660027,8.86483119,-0.705854749,8.86358382,8.86103207,8.85978416
40.52157,9.74679434,8.86303153,0.940086599,8.86178151,8.85922095,8.85797038
40.532061,8.54400375,8.86123464,-0.563232541,8.85998195,8.85741253,8.8561593
40.542553,8.24621125,8.85944017,-0.783089342,8.85818481,8.85560647,8.85435058
40.553044,9.32737905,8.85764845,0.685368953,8.85639042,8.85380311,8.85254454
40.563536,9.05538514,8.85585915,0.446683324,8.85459843,8.8520021,8.85074083
40.574028,8.71779789,8.85407241,-0.369153799,8.85280901,8.8502036,8.84893964
40.584519,8.30662386,8.85228842,-0.738691112,8.85102231,8.84840777,8.84714111
40.595011,9.16515139,8.85050682,0.560931875,8.84923801,8.84661428,8.8453449
40.605502,9.48683298,8.84872795,0.798814767,8.84745642,8.84482345,8.84355136
40.615994,9.2736185,8.84695146,0.653197549,8.8456772,8.84303494,8.84176012
40.626486,7.93725393,8.84517751,-0.95285024,8.84390052,8.84124891,8.83997135
40.636977,7.93725393,8.84340628,-0.951920347,8.84212654,8.83946553,8.83818523
40.647469,8.1240384,8.84163741,-0.847112157,8.84035492,8.83768445,8.83640139
40.65796,8.60232527,8.83987124,-0.487386884,8.838586,8.835906,8.83462018
40.668452,8.71779789,8.83810743,-0.346856657,8.83681941,8.83412985,8.83284125
40.678944,8.83176087,8.83634613,-0.0677145925,8.83505534,8.83235614,8.83106477
40.689435,7.87400787,8.83458752,-0.980091651,8.83329394,8.83058506,8.82929089
40.699927,7.68114575,8.83283124,-1.07316611,8.83153487,8.82881624,8.82751928
40.710418,8.83176087,8.83107764,0.026138587,8.82977847,8.82705003,8.82575026
40.72091,9.89949494,8.82932637,1.03448952,8.82802438,8.82528607,8.82398349
40.731402,9.32737905,8.82757758,0.706966384,8.82627278,8.82352455,8.82221914
40.741893,8.36660027,8.82583146,-0.677665987,8.82452382,8.8217656,8.82045737
40.752385,7.87400787,8.82408764,-0.974720353,8.82277717,8.8200089,8.81869783
40.762876,8.77496439,8.82234647,-0.217674254,8.82103315,8.81825477,8.81694085
40.773368,7.61577311,8.8206076,-1.09764953,8.81929143,8.81650288,8.81518609
40.78386,8.71779789,8.8188712,-0.317920291,8.81755216,8.81475338,8.81343372
40.794351,9.38083152,8.81713742,0.750795643,8.81581551,8.81300643,8.8116839
40.804843,9.48683298,8.81540711,0.819405805,8.81408231,8.8112617,8.80993628
40.815334,8.18535277,8.81367823,-0.792669832,8.81235055,8.80951951,8.8081912
40.825826,8.66025404,8.81195164,-0.389483766,8.81062105,8.80777952,8.80644831
40.836318,9.21954446,8.81022749,0.639778845,8.80889399,8.8060419,8.80470777
40.846809,7.41619849,8.80850593,-1.17996078,8.80716951,8.8043068,8.80296975
40.857301,8.71779789,8.80678664,-0.29830982,8.80544729,8.80257389,8.80123391
40.867792,9.32737905,8.80506993,0.722709571,8.80372765,8.80084349,8.79950057
40.878284,8.54400375,8.80335547,-0.509265873,8.80201024,8.79911527,8.79776939
40.888776,8.66025404,8.80164343,-0.376017813,8.80029525,8.79738938,8.79604054
40.899267,9.05538514,8.79993396,0.50542178,8.79858281,8.79566599,8.79431418
40.909759,9.32737905,8.79822673,0.727428569,8.7968726,8.79394475,8.79258997
40.92025,8.24621125,8.79652206,-0.741829364,8.79516494,8.792226,8.79086822
40.930742,8.36660027,8.79481961,-0.654384708,8.7934595,8.7905094,8.78914862
40.941234,9.16515139,8.79311955,0.609944125,8.79175644,8.7887951,8.78743131
40.951725,7.41619849,8.79142204,-1.17269926,8.79005591,8.78708326,8.78571646
40.962217,9.32737905,8.78972674,0.733247785,8.78835759,8.78537356,8.78400373
40.972708,8.18535277,8.78803397,-0.776325447,8.78666179,8.7836663,8.78229344
40.9832,9.05538514,8.78634341,0.518692327,8.78496818,8.78196117,8.78058526
40.993692,9.16515139,8.78465521,0.616843726,8.78327693,8.78025831,8.77887934
41.004183,8.42614977,8.78296952,-0.597343914,8.78158818,8.77855789,8.77717586
41.014675,8.88819442,8.78128603,0.326968479,8.77990162,8.77685957,8.77547446
41.025166,9.48683298,8.77960504,0.840968451,8.77821755,8.77516368,8.77377548
41.035658,8.42614977,8.77792624,-0.593107465,8.77653565,8.77346987,8.77207858
41.04615,8.42614977,8.77624977,-0.591692483,8.77485608,8.77177831,8.77038391
41.056641,9.48683298,8.77457579,0.843953312,8.77317898,8.77008916,8.76869165
41.067133,8.54400375,8.77290397,-0.478435187,8.77150405,8.76840209,8.76700144
41.077624,9.11043358,8.77123464,0.58240788,8.76983158,8.7667174,8.76531362
41.088116,8.30662386,8.76956746,-0.680399589,8.76816126,8.76503478,8.76362785
41.098608,8.36660027,8.7679026,-0.633484279,8.76649324,8.76335439,8.7619443
41.109099,8.83176087,8.7662402,0.255970058,8.76482768,8.76167636,8.76026311
41.119591,8.54400375,8.76457994,-0.469655397,8.76316424,8.76000038,8.75858395
41.130082,8.36660027,8.76292213,-0.629540997,8.76150326,8.75832677,8.75690715
41.140574,9.48683298,8.76126646,0.851801925,8.75984439,8.75665519,8.75523237
41.151066,9.38083152,8.75961308,0.788174119,8.7581878,8.75498581,8.75355978
41.161557,7.48331477,8.75796213,-1.12900282,8.75653364,8.75331877,8.75188952
41.172049,7.81024968,8.75631331,-0.972658024,8.75488159,8.75165375,8.75022127
41.18254,8.30662386,8.75466691,-0.669360179,8.75323196,8.74999107,8.74855535
41.193032,8.77496439,8.75302263,0.148127512,8.75158442,8.74833039,8.74689142
41.203524,8.1240384,8.75138061,-0.792049369,8.74993915,8.74667188,8.74522965
41.214015,7.93725393,8.749741,-0.901380646,8.74829627,8.74501569,8.74357018
41.224507,8.06225775,8.7481035,-0.828158045,8.74665549,8.74336149,8.74191269
41.234998,8.42614977,8.74646839,-0.565966977,8.74501709,8.74170959,8.7402575
41.24549,9.32737905,8.74483538,0.763245488,8.74338077,8.74005968,8.73860428
41.255982,8.60232527,8.7432046,-0.375338961,8.74174669,8.7384119,8.73695319
41.266473,8.88819442,8.74157622,0.382907561,8.74011498,8.73676641,8.73530437
41.276965,7.68114575,8.73994991,-1.0289821,8.73848533,8.73512289,8.73365751
41.287456,8.94427191,8.73832598,0.453812664,8.73685806,8.73348164,8.73201291
41.297948,9.21954446,8.73670411,0.694867142,8.73523283,8.73184235,8.73037025
41.30844,8.48528137,8.73508446,-0.499803051,8.73360982,8.73020517,8.7287297
41.318931,9.16515139,8.73346718,0.657026794,8.73198916,8.72857024,8.72709139
41.329423,7.93725393,8.73185195,-0.891402277,8.73037054,8.72693726,8.72545501
41.339914,8.83176087,8.73023908,0.318624836,8.72875426,8.72530652,8.72382086
41.350406,9.16515139,8.72862825,0.660698977,8.72714002,8.72367771,8.72218863
41.360898,8.94427191,8.72701962,0.466103307,8.72552796,8.72205098,8.72055848
41.371389,9.05538514,8.72541333,0.57443173,8.72391823,8.72042649,8.71893054
41.381881,9.38083152,8.72380907,0.810569216,8.72231052,8.7188039,8.7173045
41.392372,8.30662386,8.72220714,-0.644657487,8.72070513,8.71718354,8.71568066
41.402864,7.81024968,8.72060724,-0.954126595,8.71910176,8.71556507,8.71405872
41.413356,8.48528137,8.71900951,-0.483454373,8.71750055,8.71394866,8.71243882
41.423847,9.38083152,8.7174141,0.814504403,8.71590164,8.71233445,8.71082111
41.434339,9.79795897,8.7158207,1.04025875,8.71430474,8.71072213,8.70920528
41.44483,7.48331477,8.71422961,-1.10946602,8.71271013,8.709112,8.70759162
41.455322,8.94427191,8.71264053,0.48128098,8.71111752,8.70750374,8.70597983
41.465814,8.48528137,8.7110536,-0.475154945,8.70952704,8.70589751,8.70437005
41.476305,8.71779789,8.70946896,0.0912629585,8.70793885,8.70429346,8.70276243
41.486797,8.36660027,8.70788631,-0.584196926,8.70635263,8.70269126,8.70115667
41.497288,8.66025404,8.70630596,-0.214597109,8.7047687,8.70109123,8.69955305
41.50778,8.88819442,8.70472758,0.428330287,8.70318673,8.69949304,8.69795126
41.518272,9.16515139,8.70315134,0.679705857,8.70160688,8.69789686,8.69635147
41.528763,9.2736185,8.70157737,0.756334005,8.70002929,8.69630282,8.69475381
41.539255,8.54400375,8.70000537,-0.394970408,8.69845367,8.69471061,8.69315797
41.549746,8.83176087,8.69843564,0.365137275,8.69688029,8.69312054,8.69156425
41.560238,8.60232527,8.69686787,-0.307477805,8.69530887,8.6915323,8.68997234
41.57073,8.36660027,8.69530221,-0.573325337,8.69373954,8.68994602,8.68838239
41.581221,9.38083152,8.6937388,0.82891056,8.69217246,8.68836186,8.68679455
41.591713,8.06225775,8.69217735,-0.793674745,8.69060731,8.68677951,8.6852085
41.602204,9.05538514,8.69061814,0.603959433,8.6890444,8.68519927,8.68362455
41.612696,8.54400375,8.68906088,-0.380863667,8.68748342,8.68362083,8.68204238
41.623188,9.32737905,8.6875057,0.799920839,8.68592451,8.68204433,8.68046214
41.633679,9,8.68595277,0.560399171,8.68436783,8.68046992,8.67888398
41.644171,9.43398113,8.68440177,0.865782516,8.68281307,8.67889729,8.67730759
41.654662,8.30662386,8.68285299,-0.613375193,8.68126053,8.67732674,8.67573327
41.665154,8.06225775,8.68130614,-0.786796284,8.67970989,8.67575797,8.6741607
41.675646,9.21954446,8.67976136,0.734699323,8.67816132,8.67419111,8.67259004
41.686137,8.18535277,8.6782188,-0.702044176,8.67661494,8.67262632,8.67102143
41.696629,8.83176087,8.67667815,0.393805433,8.67507047,8.67106328,8.66945456
41.70712,8.18535277,8.6751397,-0.699847792,8.67352819,8.66950229,8.66788973
41.717612,8.18535277,8.67360317,-0.698749166,8.6719878,8.66794305,8.66632663
41.728104,9.11043358,8.67206869,0.662091302,8.67044946,8.66638571,8.66476542
41.738595,8.48528137,8.6705364,-0.430412621,8.66891329,8.6648304,8.66320622
41.749087,8.60232527,8.66900601,-0.258226145,8.66737901,8.66327682,8.66164874
41.759578,8.06225775,8.66747781,-0.777958905,8.6658469,8.66172526,8.66009327
41.77007,9.43398113,8.6659515,0.876373,8.66431667,8.66017543,8.65853951
41.780562,8.83176087,8.66442722,0.409064354,8.66278847,8.65862746,8.65698761
41.791053,8.54400375,8.66290512,-0.344820789,8.66126242,8.6570815,8.65543769
41.801545,9.16515139,8.66138491,0.709765091,8.65973824,8.65553724,8.65388947
41.812036,8.36660027,8.65986686,-0.541540943,8.65821622,8.65399499,8.65234323
41.822528,9.16515139,8.65835069,0.711899363,8.65669606,8.65245443,8.65079867
41.83302,9.05538514,8.65683653,0.631307061,8.6551779,8.65091571,8.64925594
41.843511,8.48528137,8.65532454,-0.41236291,8.6536619,8.64937897,8.64771518
41.854003,8.30662386,8.65381442,-0.589228784,8.65214774,8.64784391,8.64617608
41.864494,8.66025404,8.65230645,0.0891492252,8.65063573,8.64631082,8.64463894
41.874986,8.83176087,8.65080035,0.425394547,8.64912556,8.64477941,8.64310346
41.885478,8.54400375,8.64929624,-0.324488052,8.64761738,8.64324981,8.64156977
41.895969,8.48528137,8.64779428,-0.403128893,8.64611133,8.64172216,8.64003803
41.906461,9.32737905,8.64629417,0.825278671,8.64460711,8.64019617,8.63850792
41.916952,8.66025404,8.64479619,0.124329574,8.64310502,8.63867212,8.63697975
41.927444,8.71779789,8.64330007,0.272942886,8.64160476,8.63714972,8.63545321
41.937936,8.66025404,8.64180593,0.135823817,8.64010647,8.63562911,8.63392844
41.948427,8.36660027,8.64031392,-0.5231765,8.63861029,8.63411043,8.63240558
41.958919,8.30662386,8.63882374,-0.576367833,8.63711593,8.63259338,8.63088434
41.96941,8.88819442,8.63733569,0.500857993,8.63562369,8.63107824,8.629365
41.979902,9.11043358,8.63584947,0.688900654,8.63413326,8.62956473,8.62784727
41.990394,7.93725393,8.63436522,-0.834931907,8.63264478,8.62805298,8.62633129
42.000885,9.16515139,8.63288309,0.729567202,8.63115841,8.62654314,8.62481719
42.011377,8.54400375,8.63140278,-0.29563328,8.62967385,8.6250349,8.62330468
42.021868,8.18535277,8.62992458,-0.666762183,8.62819137,8.62352855,8.62179405
42.03236,8.88819442,8.6284482,0.509653034,8.62671071,8.6220238,8.62028501
42.042852,9.11043358,8.62697378,0.695312732,8.62523199,8.62052078,8.61877768
42.053343,8.71779789,8.62550147,0.303803256,8.62375535,8.61901964,8.61727221
42.063835,9.05538514,8.62403097,0.656775582,8.62228052,8.61752009,8.61576831
42.074326,8.83176087,8.62256257,0.457382002,8.62080777,8.6160224,8.61426626
42.084818,9.38083152,8.62109598,0.871628097,8.61933681,8.61452628,8.61276577
42.09531,8.60232527,8.61963134,-0.131552542,8.61786778,8.61303188,8.61126697
42.105801,9.05538514,8.61816878,0.661223377,8.61640083,8.61153932,8.60977001
42.116293,8.60232527,8.61670804,-0.119928179,8.61493566,8.61004833,8.60827459
42.126784,8.83176087,8.61524937,0.465307961,8.61347257,8.60855917,8.60678099
42.137276,8.66025404,8.6137925,0.21554938,8.61201125,8.60707157,8.60528892
42.147768,8.48528137,8.61233758,-0.356449438,8.61055186,8.60558565,8.60379853
42.158259,7.93725393,8.61088473,-0.82075014,8.60909453,8.60410155,8.60230994
42.168751,8.83176087,8.60943367,0.471515849,8.60763897,8.60261899,8.60082287
42.179242,8.83176087,8.60798469,0.473049869,8.60618547,8.60113825,8.5993376
42.189734,8.06225775,8.6065375,-0.737753177,8.60473375,8.59965902,8.59785384
42.200226,9.53939201,8.60509224,0.966591835,8.60328394,8.59818147,8.59637172
42.210717,8.24621125,8.60364904,-0.597861015,8.60183618,8.59670571,8.59489138
42.221209,7.74596669,8.60220764,-0.925332885,8.6003902,8.59523146,8.59341254
42.2317,7.87400787,8.6007683,-0.852502449,8.59894625,8.593759,8.59193546
42.242192,8.48528137,8.59933075,-0.337711965,8.59750408,8.59228804,8.59045988
42.252684,8.48528137,8.59789511,-0.335579706,8.59606381,8.59081872,8.58898591
42.263175,8.83176087,8.59646154,0.485076617,8.59462559,8.58935117,8.5875137
42.273667,8.42614977,8.59502976,-0.410950105,8.59318914,8.58788511,8.58604295
42.284158,9.16515139,8.59360004,0.756010153,8.59175473,8.58642081,8.58457396
42.29465,7.87400787,8.5921721,-0.847445705,8.59032208,8.58495799,8.58310642
42.305142,7.28010989,8.59074607,-1.1448302,8.58889133,8.58349679,8.58164048
42.315633,8.48528137,8.5893221,-0.322553449,8.58746262,8.58203733,8.58017627
42.326125,7.81024968,8.58789991,-0.881844791,8.58603567,8.58057934,8.5787135
42.336616,7.81024968,8.58647977,-0.881039212,8.58461075,8.57912308,8.57725246
42.347108,8.18535277,8.58506141,-0.632225146,8.58318759,8.57766828,8.57579285
42.3576,8.83176087,8.58364496,0.498112345,8.58176633,8.57621507,8.57433481
42.368091,8.36660027,8.58223056,-0.464360089,8.58034709,8.57476359,8.57287848
42.378583,7.74596669,8.58081793,-0.913701943,8.57892962,8.57331354,8.57142357
42.389074,8,8.57940736,-0.761188122,8.57751417,8.57186521,8.56997035
42.399566,8.18535277,8.57799856,-0.626614543,8.57610048,8.5704183,8.56851855
42.410058,8.24621125,8.57659167,-0.574787281,8.57468869,8.56897297,8.56706829
42.420549,8.42614977,8.57518683,-0.386053176,8.57327892,8.56752933,8.56561971
42.431041,8.48528137,8.57378376,-0.297493512,8.57187091,8.56608711,8.56417254
42.441532,8.54400375,8.57238275,-0.168460679,8.57046492,8.56464658,8.56272703
42.452024,9,8.57098351,0.654993507,8.5690607,8.56320746,8.56128291
42.462516,8.36660027,8.56958618,-0.450539579,8.56765837,8.56176988,8.55984031
42.473007,8.30662386,8.56819089,-0.511436244,8.56625806,8.56033397,8.55839936
42.483499,9.05538514,8.5667974,0.69899051,8.56485953,8.55889946,8.5569598
42.49399,8.77496439,8.56540596,0.457775517,8.56346303,8.55746661,8.55552187
42.504482,8.36660027,8.5640163,-0.444315247,8.56206829,8.55603515,8.55408531
42.514974,9.32737905,8.56262856,0.874500138,8.56067544,8.5546052,8.55265025
42.525465,9,8.56124287,0.662387449,8.55928463,8.55317691,8.55121682
42.535957,8.60232527,8.55985896,0.206073547,8.55789558,8.55174999,8.54978474
42.546448,8.36660027,8.5584771,-0.438037484,8.55650856,8.55032471,8.54835429
42.55694,8.24621125,8.55709703,-0.557571325,8.55512331,8.54890079,8.54692517
42.567432,8.1240384,8.55571889,-0.657023957,8.55373996,8.54747836,8.54549753
42.577923,9.05538514,8.55434279,0.707843448,8.55235864,8.54605757,8.54407149
42.588415,8.71779789,8.55296849,0.405991868,8.5509791,8.54463812,8.54264678
42.598906,8.54400375,8.55159625,-0.0871349554,8.54960159,8.54322029,8.54122367
42.609398,7.61577311,8.5502258,-0.966670933,8.54822586,8.54180379,8.53980188
42.61989,8.30662386,8.54885728,-0.492172143,8.54685203,8.54038877,8.53838153
42.630381,8.71779789,8.54749083,0.41268276,8.54548025,8.53897535,8.53696277
42.640873,8.18535277,8.54612618,-0.600644159,8.54411025,8.53756326,8.53554532
42.651364,8.36660027,8.54476359,-0.422093981,8.5427423,8.53615276,8.53412943
42.661856,8.24621125,8.54340282,-0.545152795,8.54137614,8.53474358,8.53271484
42.672348,8.71779789,8.54204399,0.419230125,8.54001189,8.53333585,8.53130168
42.682839,9.59166305,8.54068723,1.02517111,8.5386497,8.5319297,8.52989008
42.693331,7.61577311,8.5393323,-0.961019874,8.53728932,8.53052485,8.52847975
42.703822,8.83176087,8.53797947,0.542016052,8.535931,8.52912157,8.52707098
42.714314,8.42614977,8.53662845,-0.332383334,8.53457449,8.52771958,8.52566348
42.724806,8.94427191,8.5352794,0.639525221,8.53321992,8.52631902,8.52425738
42.735297,8.66025404,8.53393244,0.355417497,8.53186742,8.52492002,8.52285281
42.745789,8.66025404,8.53258732,0.357304799,8.53051673,8.5235223,8.52144951
42.75628,8.30662386,8.53124429,-0.47394138,8.52916811,8.52212613,8.52004773
42.766772,8.18535277,8.52990312,-0.58698411,8.52782133,8.52073123,8.51864719
42.777264,8.71779789,8.52856392,0.435010309,8.52647649,8.51933773,8.51724804
42.787755,8.24621125,8.52722683,-0.530109026,8.52513375,8.51794576,8.5158504
42.798247,9.2736185,8.5258916,0.864712028,8.52379284,8.51655506,8.514454
42.808738,8.94427191,8.5245585,0.647852925,8.52245403,8.51516588,8.51305909
42.81923,6.8556546,8.52322726,-1.29134529,8.52111707,8.51377795,8.51166542
42.829722,8.1240384,8.52189803,-0.630761149,8.51978209,8.5123914,8.5102731
42.840213,9.89949494,8.52057094,1.17427595,8.51844923,8.51100636,8.50888226
42.850705,8.77496439,8.51924573,0.505686323,8.51711823,8.50962256,8.50749264
42.861196,8.83176087,8.51792267,0.560212632,8.51578935,8.50824025,8.5061045
42.871688,8.71779789,8.51660152,0.448549184,8.51446235,8.50685918,8.50471757
42.88218,8.24621125,8.5152824,-0.51872068,8.51313736,8.50547947,8.50333196
42.892671,8.36660027,8.51396544,-0.38388172,8.51181452,8.50410124,8.50194782
42.903163,8.54400375,8.51265041,0.177068725,8.51049357,8.50272424,8.50056488
42.913654,8.60232527,8.51133759,0.301641639,8.50917481,8.5013487,8.49918338
42.924146,8.48528137,8.5100267,-0.157306485,8.50785796,8.49997438,8.49780307
42.934638,9.32737905,8.50871789,0.904798961,8.50654316,8.4986014,8.49642407
42.945129,8.54400375,8.50741129,0.191291557,8.50523054,8.49722987,8.49504651
42.955621,8.77496439,8.50610664,0.518514941,8.50391986,8.49585955,8.49367013
42.966112,8.60232527,8.50480422,0.312283595,8.50261137,8.49449068,8.49229517
42.976604,8.24621125,8.50350378,-0.507240114,8.50130484,8.493123,8.49092137
42.987096,8.1240384,8.50220546,-0.61495289,8.50000041,8.49175663,8.48954886
42.997587,8.60232527,8.50090939,0.3184586,8.49869819,8.4903917,8.48817777
43.008079,8.48528137,8.49961532,-0.119724475,8.49739796,8.48902795,8.48680782
43.01857,8.54400375,8.49832353,0.213729305,8.49609998,8.48766563,8.48543929
43.029062,8.88819442,8.49703377,0.625428373,8.494804,8.48630448,8.48407189
43.039554,8.66025404,8.49574617,0.405595692,8.49351016,8.48494462,8.48270576
43.050045,8.36660027,8.49446088,-0.357576023,8.4922186,8.48358618,8.48134103
43.060537,8.54400375,8.49317765,0.225446434,8.49092908,8.4822289,8.47997742
43.071028,8.54400375,8.49189675,0.22826957,8.48964185,8.48087302,8.47861519
43.08152,8.42614977,8.49061794,-0.253905821,8.48835669,8.47951829,8.47725408
43.092012,9.16515139,8.48934136,0.822076659,8.48707374,8.47816483,8.47589422
43.102503,8.54400375,8.48806714,0.236509214,8.48579312,8.47681277,8.47453573
43.112995,7.87400787,8.48679505,-0.782807241,8.4845146,8.47546185,8.47317835
43.123486,8.48528137,8.48552539,-0.0156208726,8.48323848,8.47411231,8.47182232
43.133978,8.30662386,8.48425789,-0.421466524,8.4819645,8.4727639,8.47046739
43.14447,8,8.4829927,-0.694976763,8.4806928,8.47141673,8.46911369
43.154961,8,8.48172995,-0.694067681,8.4794235,8.47007095,8.46776133
43.165453,8.24621125,8.4804694,-0.484002222,8.47815639,8.46872628,8.46641006
43.175944,8.06225775,8.47921133,-0.645719428,8.47689172,8.46738297,8.46506013
43.186436,8.48528137,8.4779555,0.0855913287,8.47562927,8.46604077,8.46371127
43.196928,8.88819442,8.47670205,0.641476706,8.47436917,8.4646998,8.46236361
43.207419,9.16515139,8.47545113,0.830481946,8.47311157,8.46336018,8.46101728
43.217911,9,8.4742025,0.725118955,8.47185623,8.46202166,8.45967201
43.228402,8.71779789,8.47295643,0.494814564,8.47060343,8.46068448,8.45832806
43.238894,8.24621125,8.47171271,-0.474869936,8.46935294,8.45934839,8.45698516
43.249386,7.81024968,8.47047146,-0.812540328,8.46810489,8.4580135,8.45564345
43.259877,8.48528137,8.46923283,0.126682838,8.46685944,8.45667995,8.45430303
43.270369,8.18535277,8.46799661,-0.531642585,8.46561636,8.45534747,8.45296366
43.28086,9,8.46676305,0.730230751,8.46437592,8.45401631,8.45162559
43.291352,7.81024968,8.46553194,-0.809495069,8.4631379,8.45268622,8.45028854
43.301844,7.68114575,8.46430343,-0.884961966,8.46190244,8.45135732,8.44895266
43.312335,8.88819442,8.46307765,0.652009792,8.46066969,8.45002973,8.44761805
43.322827,7.74596669,8.46185439,-0.846101472,8.45943943,8.44870319,8.44628447
43.333318,9.05538514,8.46063395,0.77120113,8.45821196,8.44737796,8.44495216
43.34381,8.66025404,8.45941613,0.448149425,8.45698707,8.44605377,8.44362087
43.354302,9.2736185,8.45820104,0.903004685,8.45576488,8.44473075,8.44229071
43.364793,9.53939201,8.45698881,1.04038608,8.45454553,8.44340902,8.4409618
43.375285,8.94427191,8.45577926,0.698922493,8.45332882,8.44208832,8.43963391
43.385776,8.24621125,8.45457264,-0.456466197,8.45211501,8.44076891,8.43830726
43.396268,8.18535277,8.45336875,-0.517702601,8.4509039,8.43945052,8.4369816
43.40676,9.59166305,8.45216775,1.06747145,8.44969564,8.43813328,8.43565706
43.417251,7.81024968,8.45096978,-0.800449936,8.44849038,8.43681731,8.43433376
43.427743,8.94427191,8.44977464,0.703205001,8.44728793,8.43550235,8.43301144
43.438234,7.81024968,8.4485826,-0.798957396,8.44608854,8.43418866,8.43169034
43.448726,8.36660027,8.44739347,-0.284241449,8.44489203,8.43287597,8.43037022
43.459218,8.24621125,8.4462074,-0.447209287,8.44369854,8.43156441,8.4290512
43.469709,7.68114575,8.44502454,-0.874001598,8.44250824,8.4302541,8.42773339
43.480201,8.1240384,8.44384471,-0.5655142,8.44132093,8.42894478,8.42641654
43.490692,7.87400787,8.44266818,-0.75409569,8.44013689,8.42763671,8.4251009
43.501184,9,8.44149477,0.747332075,8.43895593,8.42632962,8.42378621
43.511676,8.88819442,8.44032463,0.669230746,8.43777821,8.42502364,8.4224726
43.522167,8.1240384,8.43915791,-0.561355063,8.43660388,8.42371889,8.42116018
43.532659,8.36660027,8.43799445,-0.267196906,8.43543277,8.42241511,8.4198487
43.54315,9.38083152,8.43683453,0.971595075,8.43426517,8.42111256,8.4185384
43.553642,8.48528137,8.43567805,0.222718029,8.43310098,8.41981097,8.41722904
43.564134,8.30662386,8.4345251,-0.357632826,8.43194028,8.41851048,8.41592073
43.574625,7.93725393,8.43337584,-0.704359215,8.43078323,8.41721119,8.4146136
43.585117,8.83176087,8.4322301,0.632084463,8.42962967,8.41591286,8.41330739
43.595608,7.68114575,8.43108816,-0.865992156,8.42847988,8.41461573,8.41200234
43.6061,8.77496439,8.42994987,0.587379363,8.42733369,8.41331955,8.4106982
43.616592,9.11043358,8.4288154,0.82560171,8.42619129,8.41202445,8.4093951
43.627083,7.61577311,8.42768491,-0.901061485,8.42505284,8.41073053,8.40809315
43.637575,9.05538514,8.42655825,0.792986056,8.42391819,8.40943754,8.4067921
43.648066,8.1240384,8.42543572,-0.548996646,8.42278762,8.40814574,8.4054922
43.658558,8.30662386,8.42431717,-0.343064579,8.421661,8.40685488,8.40419319
43.66905,8.42614977,8.42320277,0.0542862775,8.4205385,8.40556506,8.40289519
43.679541,8.1240384,8.42209272,-0.545943507,8.4194203,8.40427641,8.40159832
43.690033,8.24621125,8.42098687,-0.41806174,8.41830627,8.40298868,8.40030234
43.700524,8.77496439,8.41988552,0.595884945,8.41719671,8.40170211,8.39900748
43.711016,8.60232527,8.41878854,0.428411861,8.41609148,8.40041646,8.39771349
43.721508,8.77496439,8.41769613,0.597719209,8.41499077,8.39913184,8.39642049
43.731999,7.81024968,8.41660848,-0.778690444,8.41389479,8.39784836,8.39512861
43.742491,8.18535277,8.41552548,-0.479763175,8.41280342,8.39656579,8.39383759
43.752982,8.06225775,8.41444742,-0.593455701,8.41171696,8.39528436,8.39254767
43.763474,8.24621125,8.41337433,-0.408855821,8.41063543,8.39400383,8.3912586
43.773966,8.36660027,8.41230635,-0.213789807,8.40955896,8.39272431,8.38997051
43.784457,8.54400375,8.41124363,0.36436262,8.40848772,8.39144592,8.38868351
43.794949,8.71779789,8.41018608,0.554627626,8.40742161,8.39016842,8.38739735
43.80544,8,8.40913404,-0.639635862,8.40636097,8.38889204,8.38611228
43.815932,8.77496439,8.4080874,0.605703711,8.40530569,8.38761654,8.38482804
43.826424,8.1240384,8.40704641,-0.531984965,8.40425602,8.38634203,8.38354475
43.836915,9.11043358,8.40601128,0.839298696,8.40321217,8.38506863,8.38226253
43.847407,8.1240384,8.40498195,-0.53004108,8.40217408,8.3837961,8.38098114
43.857898,7.74596669,8.40395876,-0.811167103,8.4011421,8.38252468,8.37970081
43.86839,7.61577311,8.40294166,-0.887225199,8.40011616,8.38125411,8.3784213
43.878882,8.83176087,8.40193089,0.655614196,8.39909651,8.37998453,8.37714272
43.889373,8.36660027,8.40092671,-0.185273973,8.39808341,8.37871603,8.37586519
43.899865,8.30662386,8.39992908,-0.305459035,8.39707682,8.37744838,8.37458846
43.910356,8.06225775,8.39893837,-0.580241868,8.39607711,8.37618182,8.37331278
43.920848,8.60232527,8.39795456,0.452073781,8.39508425,8.37491611,8.37203789
43.93134,8.18535277,8.39697793,-0.460027345,8.39409853,8.37365135,8.37076392
43.941831,8.77496439,8.39600875,0.615593724,8.39312023,8.37238766,8.36949098
43.952323,7.14142843,8.39504705,-1.11965111,8.39214935,8.37112481,8.36821883
43.962814,8.18535277,8.3940932,-0.456881192,8.39118629,8.36986302,8.3669477
43.973306,7.93725393,8.39314737,-0.675198811,8.39023121,8.36860206,8.36567735
43.983798,8,8.39220993,-0.626266662,8.38928448,8.36734204,8.36440789
43.994289,8.42614977,8.39128103,0.186731728,8.38834624,8.36608308,8.36313944
44.004781,8.94427191,8.39036074,0.744252086,8.38741657,8.36482493,8.36187177
44.015272,8.30662386,8.38944948,-0.287794399,8.38649588,8.36356784,8.36060509
44.025764,8.42614977,8.38854734,0.193913476,8.38558426,8.36231155,8.35933918
44.036256,8.30662386,8.38765467,-0.284659113,8.38468209,8.36105618,8.35807414
44.046747,7.54983444,8.38677186,-0.914842839,8.38378971,8.35980186,8.35681009
44.057239,8,8.38589901,-0.621207705,8.38290727,8.35854833,8.35554679
44.06773,9.2736185,8.38503662,0.942646208,8.38203523,8.35729583,8.35428448
44.078222,7.74596669,8.38418484,-0.798885568,8.38117376,8.35604413,8.3530229
44.088714,9,8.38334409,0.785274414,8.38032328,8.35479333,8.35176219
44.099205,8.54400375,8.38251481,0.40185686,8.37948422,8.35354355,8.35050245
44.109697,8.94427191,8.3816972,0.750049806,8.37865679,8.35229455,8.34924343
44.120188,8.71779789,8.3808918,0.580436114,8.37784152,8.35104657,8.34798539
44.13068,7.93725393,8.38009888,-0.66546596,8.37703868,8.34979936,8.34672806
44.141172,7.74596669,8.37931892,-0.795834295,8.37624877,8.34855304,8.34547158
44.151663,8.71779789,8.37855244,0.582447809,8.37547229,8.34730773,8.34421605
44.162155,8.30662386,8.37779975,-0.266788102,8.37470955,8.34606318,8.34296123
44.172646,9.38083152,8.3770615,1.00188324,8.3739612,8.34481963,8.34170735
44.183138,8.54400375,8.37633809,0.409469969,8.37322766,8.34357683,8.34045418
44.19363,8.24621125,8.37563069,-0.359749128,8.37251007,8.34233491,8.33920183
44.204121,7.93725393,8.37493935,-0.661577977,8.37180851,8.34109398,8.33795042
44.214613,8.88819442,8.37426455,0.716889021,8.37112343,8.33985379,8.3366997
44.225104,9.53939201,8.37360702,1.07971524,8.37045558,8.33861459,8.33544991
44.235596,8.88819442,8.3729673,0.717793228,8.36980548,8.33737612,8.33420081
44.246088,8.48528137,8.37234613,0.336058399,8.36917389,8.33613852,8.3329525
44.256579,9,8.37174428,0.79262584,8.36856158,8.33490188,8.33170512
44.267071,8.60232527,8.37116239,0.480794004,8.36796919,8.33366598,8.33045841
44.277562,8.1240384,8.37060138,-0.496551079,8.36739762,8.33243104,8.3292126
44.288054,9.11043358,8.37006197,0.860448496,8.36684761,8.33119683,8.32796747
44.298546,7.81024968,8.36954509,-0.747860559,8.36632009,8.32996345,8.32672312
44.309037,8.71779789,8.36905173,0.590547336,8.36581604,8.32873103,8.32547967
44.319529,9.11043358,8.36858277,0.861307614,8.36533635,8.32749933,8.32423688
44.33002,8.71779789,8.36813934,0.591319328,8.36488213,8.32626857,8.32299498
44.340512,7.41619849,8.36772244,-0.975460893,8.3644544,8.32503853,8.32175373
44.351004,8.83176087,8.36733328,0.681489245,8.36405437,8.3238093,8.32051324
44.361495,9,8.3669731,0.795629879,8.36368327,8.32258102,8.31927364
44.371987,8.54400375,8.36664312,0.421142047,8.36334233,8.32135344,8.31803467
44.382478,8.71779789,8.36634479,0.592834802,8.36303299,8.32012678,8.31679658
44.39297,8.1240384,8.36607947,-0.491976694,8.36275662,8.31890083,8.31555912
44.403462,8.36660027,8.36584992,0.0273923697,8.36251598,8.31767568,8.31432241
44.413953,8.77496439,8.36565713,0.639771257,8.36231204,8.31645145,8.31308656
44.424445,8.48528137,8.36550241,0.346090981,8.36214614,8.31522791,8.31185134
44.434936,8.60232527,8.36538764,0.486762392,8.36202015,8.31400528,8.31061697
44.445428,9.16515139,8.36531477,0.894335856,8.361936,8.31278334,8.30938321
44.45592,7.74596669,8.36528589,-0.786968357,8.36189581,8.31156218,8.30815019
44.466411,7.61577311,8.36530321,-0.865754068,8.36190179,8.31034194,8.30691801
44.476903,7.93725393,8.36536911,-0.654305111,8.36195629,8.30912236,8.30568643
44.487394,8.71779789,8.36548609,0.593558588,8.36206184,8.30790369,8.3044557
44.497886,8.36660027,8.36565686,0.0307148703,8.36222114,8.30668568,8.30322556
44.508378,8.88819442,8.36588429,0.722710266,8.36243706,8.30546844,8.30199613
44.518869,8.71779789,8.36617141,0.592981009,8.36271264,8.3042521,8.30076753
44.529361,7.74596669,8.36652156,-0.787753051,8.36305122,8.30303641,8.29953952
44.539852,8.24621125,8.36693819,-0.347457823,8.36345623,8.30182161,8.29831233
44.550344,8.77496439,8.36742514,0.638388008,8.36393153,8.30060746,8.29708572
44.560836,8.24621125,8.36798641,-0.348962977,8.36448113,8.29939407,8.29585981
44.571327,8.18535277,8.36862628,-0.42810455,8.36510929,8.29818155,8.2946347
44.581819,8.48528137,8.36934951,0.340487681,8.3658208,8.29696968,8.29341017
44.59231,8.54400375,8.370161,0.416944539,8.36662052,8.29575868,8.29218643
44.602802,8.1240384,8.37106627,-0.497018978,8.36751401,8.29454831,8.29096327
44.613294,8.18535277,8.37207299,-0.432111354,8.36850893,8.29333869,8.28974078
44.623785,8.24621125,8.37318861,-0.356338832,8.36961274,8.29212993,8.28851908
44.634277,8.54400375,8.37441758,0.411808415,8.37082986,8.2909218,8.28729794
44.644768,9.05538514,8.37576705,0.824389527,8.37216749,8.28971452,8.28607758
44.65526,8.83176087,8.37724532,0.674177682,8.3736339,8.28850787,8.28485777
44.665752,8.36660027,8.37886099,-0.110728137,8.37523771,8.28730195,8.28363862
44.676243,8.88819442,8.38062332,0.712440238,8.37698818,8.28609688,8.28242025
44.686735,8.94427191,8.38254297,0.749485787,8.37889597,8.28489242,8.28120241
44.697226,9.21954446,8.38463075,0.913736127,8.3809719,8.2836888,8.27998534
44.707718,8.24621125,8.3868993,-0.375084052,8.38322861,8.28248579,8.27876881
44.71821,9.43398113,8.38936178,1.02206622,8.38567928,8.28128349,8.27755292
44.728701,8.88819442,8.39203254,0.704387592,8.38833826,8.28008203,8.27633778
44.739193,9.79795897,8.39492809,1.18449604,8.39122206,8.27888117,8.27512317
44.749684,7.93725393,8.39806547,-0.678831008,8.39434773,8.27768114,8.2739093
44.760176,9.16515139,8.40146457,0.873891764,8.39773518,8.2764817,8.27269596
44.770668,8.83176087,8.4051464,0.653157306,8.40140541,8.27528296,8.27148324
44.781159,8.30662386,8.40913404,-0.320172104,8.40538153,8.27408505,8.27027126
44.791651,7.61577311,8.41345418,-0.893129932,8.40969023,8.27288771,8.26905978
44.802142,8.54400375,8.41813476,0.354780196,8.41435947,8.2716912,8.26784904
44.812634,8.83176087,8.42320853,0.639180987,8.41942202,8.27049526,8.2666388
44.823126,8.60232527,8.42871194,0.416669329,8.42491434,8.26930001,8.26542917
44.833617,8.94427191,8.43470434,0.713840014,8.43089581,8.26810557,8.26422026
44.844109,8.42614977,8.44121359,-0.122734742,8.4373943,8.26691171,8.26301185
44.8546,8.18535277,8.4482886,-0.51277269,8.44445874,8.26571864,8.26180415
44.865092,8.60232527,8.45598719,0.382541605,8.45214698,8.26452614,8.26059693
44.875584,8.42614977,8.46437223,-0.195505651,8.46052194,8.26333432,8.25939031
44.886075,8.42614977,8.4735146,-0.217634613,8.46965449,8.2621433,8.25818439
44.896567,8.30662386,8.48349736,-0.420563307,8.47962777,8.26095283,8.25697895
44.907058,7.93725393,8.49441094,-0.746429508,8.49053225,8.25976315,8.25577421
44.91755,8.54400375,8.50636272,0.194012955,8.50247532,8.25857402,8.25456994
44.928042,9.38083152,8.51947203,0.928094545,8.51557642,8.25738557,8.25336624
44.938533,7.87400787,8.53387553,-0.812322383,8.52997222,8.25619789,8.25216324
44.949025,8.71779789,8.54973487,0.409954892,8.54582449,8.25501075,8.25096069
44.959516,7.61577311,8.5672307,-0.975426876,8.56331393,8.25382439,8.24975883
44.970008,8.30662386,8.58657932,-0.529108169,8.58265695,8.25263858,8.24855742
44.9805,8.24621125,8.60802729,-0.601511458,8.60410023,8.25145341,8.24735657
44.990991,8.06225775,8.63186249,-0.754721629,8.62793176,8.25026902,8.2461564
45.001483,8.54400375,8.65843028,-0.338269913,8.65449706,8.24908515,8.24495666
45.011974,7.87400787,8.68812814,-0.902286134,8.68419379,8.24790205,8.2437576
45.022466,8.77496439,8.72143897,0.231355603,8.71750503,8.24671948,8.24255897
45.032958,8.83176087,8.75892992,0.26987209,8.75499818,8.24553756,8.24136089
45.043449,8.60232527,8.8014734,-0.446260162,8.79754601,8.24435638,8.24016347
45.053941,9.21954446,8.84987092,0.60800784,8.84595036,8.24317573,8.23896647
45.064432,9.48683298,8.90511002,0.762707647,8.90119914,8.24199583,8.23777013
45.074924,9.64365076,8.9685607,0.821638646,8.96466284,8.24081645,8.2365742
45.085416,9.21954446,9.04205016,0.421300715,9.03816939,8.2396377,8.23537881
45.095907,10.0498756,9.1282163,0.960030895,9.12435762,8.23845969,8.23418406
45.106399,9.16515139,9.23118769,-0.256975287,9.22735758,8.2372822,8.23298972
45.11689,9.59166305,9.35767928,0.483718683,9.3538866,8.23610544,8.23179602
45.127382,10.3923048,9.51894311,0.934538249,9.51520049,8.23492919,8.23060272
45.137874,10.8166538,9.73326603,1.04085916,9.72959188,8.23375356,8.22940994
45.148365,10.6301458,10.0287244,0.775513673,10.0251448,8.23257865,8.22821779
45.158857,10.7238053,10.4446726,0.528330081,10.4412225,8.23140425,8.22702603
45.169348,11.4891253,11.0290714,0.678272758,11.0257916,8.23023058,8.22583489
45.17984,11.9582607,11.8303741,0.35761248,11.8273047,8.2290574,8.22464415
45.190332,13.892444,12.8833951,1.00451424,12.8805658,8.22788483,8.2234539
45.200823,14.7648231,14.1949489,0.754900112,14.1923711,8.22671298,8.22226426
45.211315,15.7797338,15.7352686,0.21086783,15.7329342,8.22554162,8.22107501
45.221806,17.2046505,17.4358599,-0.480842376,17.433745,8.22437097,8.21988636
45.232298,17.9164729,19.1937558,-1.13016942,19.1918271,8.22320081,8.21869808
45.24279,20.0997512,20.8717955,-0.878660471,20.8700149,8.22203125,8.21751029
45.253281,22.4053565,22.2887904,0.34141774,22.2871166,8.22086239,8.2163231
45.263773,23.0217289,23.2198283,-0.445083646,23.2182153,8.21969402,8.21513627
45.274264,23.2594067,23.4906,-0.480825613,23.4889993,8.21852635,8.21395003
45.284756,22.8035085,23.0450725,-0.491491628,23.0434344,8.21735916,8.21276416
45.295248,22.6053091,21.98531,0.787400196,21.9835862,8.21619255,8.21157875
45.305739,20.9284495,20.5059749,0.649980503,20.5041194,8.21502665,8.21039392
45.316231,18.1383571,18.8068767,-0.817630472,18.8048456,8.21386122,8.20920945
45.326722,17.4355958,17.0553117,0.616671757,17.053063,8.21269647,8.20802555
45.337214,16.2172747,15.3818306,0.914026346,15.3793272,8.2115322,8.20684199
45.347706,13.6747943,13.8837834,-0.457153201,13.8809988,8.2103685,8.20565889
45.358197,12.4096736,12.6226766,-0.461522471,12.6196015,8.20920549,8.20447636
45.368689,12,11.6210981,0.615550047,11.6177445,8.20804294,8.20329416
45.37918,9.43398113,10.8661087,-1.19671531,10.8625076,8.20688108,8.20211253
45.389672,9.64365076,10.3188757,-0.821720709,10.3150682,8.20571967,8.20093122
45.400164,9.43398113,9.9301228,-0.704373244,9.92615026,8.20455883,8.19975036
45.410655,10,9.65296078,0.589100348,9.64885759,8.20339867,8.19857004
45.421147,9.2736185,9.45013978,-0.420144366,9.44593148,8.20223896,8.19739005
45.431638,8.83176087,9.29572557,-0.681149548,9.29142994,8.20107992,8.1962106
45.44213,8.77496439,9.17307121,-0.630957069,9.16870036,8.19992134,8.19503147
45.452622,7.93725393,9.07211458,-1.06529839,9.06767701,8.19876331,8.19385277
45.463113,8.77496439,8.98685926,-0.460320407,8.98236123,8.19760595,8.1926746
45.473605,8.36660027,8.91399701,-0.73986265,8.90944357,8.19644904,8.19149674
45.484096,8.71779789,8.85054823,-0.364349203,8.84594326,8.19529279,8.19031941
45.494588,8.66025404,8.7948595,-0.366886169,8.79020624,8.19413698,8.18914238
45.50508,8.94427191,8.74569014,0.445625144,8.74099136,8.19298172,8.18796577
45.515571,8.54400375,8.70205649,-0.397558478,8.69731456,8.19182713,8.18678967
45.526063,8,8.66314803,-0.814339013,8.658365,8.19067297,8.18561388
45.536554,8.83176087,8.62830994,0.451055343,8.6234876,8.18951947,8.18443859
45.547046,7.74596669,8.59698416,-0.922506079,8.59212403,8.1883664,8.1832636
45.557538,8.71779789,8.56871145,0.386117134,8.56381487,8.18721388,8.182089
45.568029,8.71779789,8.54310388,0.417964128,8.53817202,8.186062,8.18091491
45.578521,8.06225775,8.51982576,-0.676437734,8.51485963,8.18491056,8.1797411
45.589012,7.93725393,8.49859979,-0.749230175,8.49360027,8.18375976,8.17856779
45.599504,8.71779789,8.47918084,0.488484443,8.4741487,8.18260939,8.17739475
45.609996,8.06225775,8.46136389,-0.631748478,8.4562998,8.18145955,8.1762221
45.620487,8.77496439,8.44497179,0.574449824,8.43987633,8.18031036,8.17504994
45.630979,9,8.42984664,0.755085001,8.42472032,8.17916159,8.17387805
45.64147,7.54983444,8.41585692,-0.930603291,8.41070018,8.17801346,8.17270665
45.651962,8.88819442,8.4028826,0.696643247,8.39769582,8.17686575,8.1715355
45.662454,9.43398113,8.39082244,1.0213514,8.38560594,8.17571856,8.17036473
45.672945,7.93725393,8.37958737,-0.665081527,8.37434144,8.17457202,8.16919443
45.683437,8.24621125,8.36911711,-0.350579323,8.363842,8.17342589,8.16802439
45.693928,8.18535277,8.35932701,-0.41710219,8.35402292,8.17228039,8.16685482
45.70442,8.71779789,8.35014375,0.606344903,8.34481085,8.1711353,8.1656855
45.714912,7.93725393,8.34151385,-0.635814371,8.33615227,8.16999075,8.16451653
45.725403,8.48528137,8.33338955,0.389733011,8.32799941,8.16884682,8.16334803
45.735895,8.83176087,8.32572604,0.711361252,8.32030741,8.1677033,8.16217977
45.746386,8,8.31848591,-0.564345559,8.31303887,8.16656041,8.16101197
45.756878,8.06225775,8.31163299,-0.499374846,8.30615757,8.16541793,8.1598444
45.76737,8.60232527,8.30513664,0.5451501,8.29963286,8.16427597,8.15867717
45.777861,7.34846923,8.2989692,-0.974935879,8.29343709,8.16313462,8.1575104
45.788353,8.71779789,8.29310399,0.651685426,8.28754354,8.16199369,8.15634385
45.798844,8.48528137,8.28751907,0.444704738,8.28193025,8.16085337,8.15517774
45.809336,7.93725393,8.28219244,-0.587314658,8.27657522,8.15971346,8.15401186
45.819828,7.87400787,8.27710565,-0.634899812,8.27145998,8.15857405,8.15284631
45.830319,8,8.27224186,-0.521768009,8.26656769,8.15743527,8.15168119
45.840811,8.48528137,8.26758438,0.4665801,8.26188165,8.15629689,8.15051628
45.851302,7.81024968,8.26311975,-0.672956218,8.25738837,8.15515912,8.14935181
45.861794,7.74596669,8.25883393,-0.716147498,8.25307382,8.15402175,8.14818755
45.872286,8.30662386,8.25471534,0.227834421,8.24892641,8.15288488,8.1470236
45.882777,8.66025404,8.25075331,0.639922441,8.24493545,8.15174863,8.14586007
45.893269,8.1240384,8.24693909,-0.350571939,8.24109221,8.15061278,8.14469675
45.90376,9.11043358,8.24326539,0.931218659,8.23738936,8.14947754,8.14353384
45.914252,8.54400375,8.2397188,0.55162029,8.23381351,8.14834269,8.14237113
45.924744,8.77496439,8.23629185,0.733943145,8.23035715,8.14720835,8.14120872
45.935235,8,8.2329776,-0.482677529,8.22701337,8.14607462,8.14004672
45.945727,8.36660027,8.22976876,0.369907425,8.22377485,8.14494129,8.1388849
45.956218,7.74596669,8.22665974,-0.693320307,8.220636,8.14380856,8.1377235
45.96671,8,8.22364419,-0.472910344,8.21759048,8.14267623,8.13656227
45.977202,8.42614977,8.2207171,0.453246816,8.21463325,8.14154439,8.13540133
45.987693,8.06225775,8.21787378,-0.394481976,8.21175963,8.14041316,8.13424079
45.998185,8.1240384,8.2151091,-0.301779216,8.20896449,8.13928232,8.13308043
46.008676,8.71779789,8.21241932,0.710899832,8.20624408,8.13815209,8.13192046
46.019168,8.66025404,8.20979993,0.671158776,8.20359389,8.13702225,8.13076065
46.02966,8.24621125,8.2072475,0.19739237,8.20101047,8.1358929,8.12960113
46.040151,8.60232527,8.2047588,0.630528723,8.1984906,8.13476416,8.12844198
46.050643,7.34846923,8.20233011,-0.924045929,8.19603055,8.1336358,8.127283
46.061134,8.48528137,8.19995888,0.53415587,8.19362778,8.13250805,8.1261244
46.071626,8.77496439,8.19764183,0.759817448,8.19127899,8.13138069,8.12496596
46.082118,8.42614977,8.19537655,0.480388618,8.18898177,8.13025382,8.12380777
46.092609,8.1240384,8.19316076,-0.262911307,8.18673384,8.12912755,8.12264996
46.103101,8.88819442,8.19099174,0.834986634,8.18453247,8.12800167,8.1214923
46.113592,8.71779789,8.18886952,0.727274616,8.18237769,8.1268764,8.12033501
46.124084,8.1240384,8.18678967,-0.250502021,8.18026507,8.12575151,8.11917786
46.134576,8.24621125,8.18475047,0.24791284,8.17819288,8.12462712,8.11802096
46.145067,8.36660027,8.18275034,0.428777241,8.17615954,8.12350333,8.11686442
46.155559,9,8.18078722,0.905103739,8.17416297,8.12237994,8.11570802
46.16605,8.06225775,8.17885991,-0.341470583,8.17220199,8.12125715,8.11455197
46.176542,8.42614977,8.1769665,0.499182603,8.17027468,8.12013474,8.11339605
46.187034,8.06225775,8.17510578,-0.335928611,8.16837983,8.11901283,8.11224037
46.197525,8.54400375,8.17327658,0.608873683,8.16651626,8.11789152,8.11108504
46.208017,7.68114575,8.17147731,-0.700236789,8.16468237,8.1167706,8.10992983
46.218508,9.16515139,8.16970712,0.997719536,8.16287733,8.11565029,8.10877497
46.229,7.87400787,8.16796455,-0.542177716,8.16109966,8.11453036,8.10762022
46.239492,8.24621125,8.16624872,0.282776464,8.15934847,8.11341092,8.1064657
46.249983,9.59166305,8.1645588,1.19461469,8.15762294,8.1122921,8.10531151
46.260475,7.74596669,8.16289351,-0.645698704,8.15592179,8.11117366,8.10415744
46.270966,8.94427191,8.16125229,0.884883959,8.15424444,8.11005582,8.1030037
46.281458,8.42614977,8.15963397,0.516251685,8.15258973,8.10893838,8.10185006
46.29195,7.68114575,8.15803792,-0.690573797,8.15095702,8.10782143,8.10069664
46.302441,8.24621125,8.15646352,0.29957926,8.14934569,8.10670509,8.09954354
46.312933,7.81024968,8.15490976,-0.587077578,8.14775472,8.10558915,8.09839054
46.323424,8.24621125,8.15337677,0.304687519,8.14618425,8.10447381,8.09723786
46.333916,7.21110255,8.15186331,-0.969928222,8.14463303,8.10335886,8.09608527
46.344408,8.42614977,8.15036866,0.525148663,8.14310033,8.10224442,8.09493289
46.354899,7.74596669,8.14889239,-0.634764288,8.14158573,8.1011306,8.09378081
46.365391,8.54400375,8.14743369,0.629738083,8.14008838,8.10001717,8.09262883
46.375882,8,8.1459924,-0.382089519,8.13860816,8.09890436,8.09147715
46.386374,8.54400375,8.14456767,0.632009553,8.13714419,8.09779195,8.09032555
46.396866,9.05538514,8.14315918,0.955105208,8.13569617,8.09668004,8.08917414
46.407357,9.53939201,8.14176662,1.18221208,8.13426377,8.09556874,8.08802304
46.417849,8.1240384,8.14038932,-0.127870708,8.13284632,8.09445785,8.08687201
46.42834,8.60232527,8.13902715,0.680660061,8.13144368,8.09334758,8.08572127
46.438832,7.54983444,8.13767947,-0.76671053,8.13005522,8.09223771,8.0845706
46.449324,8.94427191,8.13634607,0.898846949,8.12868072,8.09112835,8.08342012
46.459815,8.60232527,8.13502675,0.683592365,8.12731996,8.09001962,8.08226992
46.470307,6.92820323,8.13372092,-1.0979607,8.12597239,8.08891129,8.08111978
46.480798,8.48528137,8.13242857,0.594014144,8.12463795,8.08780358,8.07996993
46.49129,9.2736185,8.13114915,1.06886357,8.12331611,8.08669629,8.07882014
46.501782,8.48528137,8.12988253,0.59615337,8.12200672,8.08558952,8.07767052
46.512273,8.42614977,8.12862858,0.545455033,8.12070966,8.08448337,8.07652117
46.522765,7.74596669,8.12738682,-0.617592203,8.11942445,8.08337764,8.07537187
46.533256,7.54983444,8.1261574,-0.759159378,8.11815122,8.08227254,8.07422285
46.543748,8.77496439,8.12493998,0.806240912,8.11688964,8.08116787,8.07307387
46.55424,8.48528137,8.12373424,0.601287898,8.11563937,8.08006372,8.07192505
46.564731,7.21110255,8.12254012,-0.954692394,8.11440036,8.07896021,8.0707765
46.575223,8.36660027,8.12135723,0.495220193,8.11317219,8.07785714,8.06962799
46.585714,7.81024968,8.12018572,-0.556719,8.11195504,8.07675471,8.06847973
46.596206,8.24621125,8.11902519,0.356631543,8.11074849,8.07565272,8.06733152
46.606698,9.21954446,8.11787558,1.04960415,8.10955247,8.07455126,8.06618345
46.617189,8.30662386,8.11673686,0.435760262,8.10836696,8.07345045,8.06503563
46.627681,8.06225775,8.11560871,-0.230978264,8.10719163,8.07235007,8.06388784
46.638172,8.06225775,8.11449124,-0.228546477,8.10602659,8.07125035,8.0627403
46.648664,7.87400787,8.11338415,-0.489260953,8.10487152,8.07015107,8.06159279
46.659156,8.18535277,8.11228747,0.270305934,8.10372646,8.06905234,8.06044541
46.669647,8.30662386,8.11120123,0.442066321,8.10259143,8.06795428,8.05929827
46.680139,7.93725393,8.11012516,-0.415777853,8.10146615,8.06685666,8.05815116
46.69063,8.30662386,8.10905941,0.444482231,8.10035078,8.06575971,8.05700428
46.701122,8.54400375,8.10800374,0.660302966,8.09924506,8.06466321,8.05585741
46.711614,8.54400375,8.10695821,0.661094198,8.09814905,8.06356728,8.05471067
46.722105,7.34846923,8.10592289,-0.870318137,8.09706283,8.06247203,8.05356416
46.732597,7.93725393,8.10489756,-0.409443073,8.09598615,8.06137724,8.05241766
46.743088,8.66025404,8.10388242,0.745903223,8.09491922,8.06028313,8.05127139
46.75358,8.88819442,8.10287746,0.886181111,8.09386201,8.05918949,8.05012512
46.764072,7.87400787,8.10188258,-0.477362234,8.09281444,8.05809643,8.04897896
46.774563,8.54400375,8.10089789,0.665661966,8.09177659,8.05700407,8.04783302
46.785055,8.30662386,8.09992325,0.454643387,8.09074831,8.05591221,8.04668708
46.795546,8.24621125,8.09895894,0.383734689,8.08972989,8.05482104,8.04554136
46.806038,9.11043358,8.09800491,1.00619515,8.08872126,8.05373037,8.04439563
46.81653,8.30662386,8.09706113,0.457780222,8.08772242,8.05264029,8.04325
46.827021,8.1240384,8.09612777,0.167064776,8.08673349,8.05155093,8.04210458
46.837513,8.66025404,8.0952047,0.751697639,8.08575437,8.05046206,8.04095915
46.848004,8.30662386,8.09429218,0.46079462,8.0847853,8.04937392,8.03981392
46.858496,8.1240384,8.09339013,0.175066498,8.08382619,8.04828628,8.03866868
46.868988,8.42614977,8.09249871,0.577625362,8.0828772,8.04719927,8.03752353
46.879479,8.24621125,8.09161813,0.393183315,8.08193853,8.04611298,8.03637858
46.889971,8.88819442,8.09074832,0.892998372,8.08101011,8.04502723,8.0352336
46.900462,8.06225775,8.08988958,-0.166228258,8.08009223,8.0439422,8.03408882
46.910954,8.36660027,8.08904188,0.526838104,8.07918484,8.04285772,8.03294401
46.921446,8.71779789,8.08820543,0.793468627,8.07828817,8.04177388,8.03179928
46.931937,7.68114575,8.08738045,-0.637365442,8.07740243,8.04069079,8.03065475
46.942429,7.28010989,8.08656697,-0.898029554,8.07652761,8.03960825,8.02951017
46.95292,8.54400375,8.08576529,0.676933121,8.07566405,8.03852647,8.02836578
46.963412,8.06225775,8.08497553,-0.150724205,8.07481182,8.03744525,8.02722136
46.973904,8.48528137,8.08419792,0.633311497,8.07397117,8.03636471,8.02607701
46.984395,7.61577311,8.08343269,-0.683856407,8.07314232,8.03528494,8.02493283
46.994887,8.60232527,8.08267994,0.720864294,8.07232533,8.03420577,8.02378861
47.005378,8.24621125,8.08194001,0.405303884,8.07152057,8.0331274,8.02264456
47.01587,7.68114575,8.08121344,-0.632509045,8.07072855,8.03204962,8.02150047
47.026362,9.05538514,8.08050016,0.987362637,8.06994921,8.03097254,8.02035644
47.036853,8.48528137,8.07980049,0.636773807,8.06918287,8.02989626,8.01921257
47.047345,8.60232527,8.07911459,0.723333034,8.06842966,8.0288206,8.01806865
47.057836,8.06225775,8.07844287,-0.127220772,8.06769001,8.02774576,8.0169249
47.068328,7.81024968,8.07778553,-0.517238684,8.06696408,8.02667154,8.01578109
47.07882,7.93725393,8.07714296,-0.374017413,8.06625227,8.02559805,8.01463732
47.089311,8.94427191,8.07651555,0.931534409,8.06555498,8.02452541,8.01349372
47.099803,8.06225775,8.07590356,-0.116815302,8.06487242,8.02345341,8.01235005
47.110294,8.94427191,8.07530748,0.932182617,8.0642051,8.02238226,8.01120654
47.120786,8.71779789,8.0747276,0.801916633,8.0635533,8.02131178,8.01006296
47.131278,7.87400787,8.07416439,-0.447388551,8.06291747,8.02024206,8.00891942
47.141769,8.18535277,8.07361833,0.334267018,8.0622981,8.01917323,8.00777603
47.152261,8.24621125,8.07308978,0.41607868,8.06169553,8.01810507,8.00663257
47.162752,7.74596669,8.07257932,-0.571500332,8.06111033,8.01703781,8.00548925
47.173244,8.71779789,8.07208738,0.803561143,8.06054291,8.01597125,8.00434585
47.183736,8.42614977,8.07161455,0.595428605,8.05999388,8.0149055,8.00320248
47.194227,7.87400787,8.07116139,-0.444019721,8.05946377,8.01384067,8.00205925
47.204719,7.68114575,8.07072839,-0.624165561,8.05895305,8.01277657,8.00091594
47.21521,8.77496439,8.07031627,0.839433213,8.05846243,8.01171344,7.99977277
47.225702,8.36660027,8.06992607,0.544678067,8.05799295,8.01065105,7.9986295
47.236194,7.68114575,8.06955837,-0.623227587,8.0575452,8.00958952,7.99748626
47.246685,8.24621125,8.06921359,0.420710905,8.05711957,8.00852895,7.99634315
47.257177,8.1240384,8.06889238,0.234831904,8.05671671,8.00746916,7.99519995
47.267668,8.36660027,8.06873555,0.545769836,8.05647763,8.00641035,7.99405687
47.27816,7.68114575,8.06846409,-0.622349048,8.05612288,8.00535234,7.99291369
47.288652,8.30662386,8.06821868,0.488267535,8.05579336,8.00429523,7.99177053
47.299143,7.34846923,8.06800024,-0.848251741,8.05548998,8.00323914,7.99062748
47.309635,9,8.06780969,0.965500033,8.05521361,8.00218388,7.98948434
47.320126,8.1240384,8.06764803,0.237466575,8.05496529,8.00112965,7.9883413
47.330618,7.87400787,8.0675163,-0.439895923,8.05474601,8.00007628,7.98719817
47.34111,8.83176087,8.06741559,0.874268422,8.05455688,7.99902386,7.98605503
47.351601,8.36660027,8.06734707,0.547040401,8.05439905,7.99797252,7.98491201
47.362093,8.24621125,8.06731191,0.422964939,8.05427367,7.99692207,7.98376888
47.372584,8.94427191,8.06731141,0.936461689,8.05418205,7.99587271,7.98262585
47.383076,9.38083152,8.06734691,1.14607356,8.05412549,7.99482427,7.98148271
47.393568,8.83176087,8.06741987,0.874265976,8.05410545,7.99377684,7.98033956
47.404059,7.81024968,8.06753172,-0.507229771,8.05412336,7.99273056,7.97919651
47.414551,8.71779789,8.06768405,0.806296373,8.05418079,7.99168523,7.97805334
47.425042,8.94427191,8.06787853,0.936158843,8.05427937,7.9906411,7.97691027
47.435534,8.1240384,8.06811739,0.236476256,8.05442134,7.98959796,7.97576707
47.446026,7.68114575,8.06840353,-0.622300394,8.0546096,7.9885559,7.97462386
47.456517,8.88819442,8.06873749,0.9052386,8.0548447,7.98751506,7.97348074
47.467009,7.74596669,8.06912143,-0.568467004,8.05512874,7.98647524,7.9723375
47.4775,7.81024968,8.06955745,-0.509222717,8.05546386,7.98543666,7.97119434
47.487992,8.60232527,8.07004798,0.729573359,8.05585244,7.98439913,7.97005104
47.498484,8.77496439,8.07059544,0.839266912,8.05629691,7.98336277,7.96890773
47.508975,9.16515139,8.07120238,1.04592017,8.05679982,7.9823277,7.96776449
47.519467,8.24621125,8.07187169,0.417539893,8.05736402,7.98129373,7.96662112
47.529958,8.66025404,8.07260618,0.76658193,8.05799235,7.98026108,7.96547783
47.54045,7.48331477,8.07340913,-0.768175994,8.05868803,7.97922957,7.9643344
47.550942,8.54400375,8.0742838,0.685361182,8.05945434,7.97819932,7.96319093
47.561433,8.42614977,8.0752336,0.592381783,8.06029469,7.97717043,7.96204753
47.571925,8.66025404,8.07626247,0.764193411,8.06121299,7.97614275,7.96090399
47.582416,8.06225775,8.07737422,-0.122949066,8.06221305,7.97511646,7.95976053
47.592908,8.18535277,8.07857332,0.326771246,8.06329933,7.97409141,7.95861691
47.6034,7.87400787,8.07986425,-0.453713977,8.06447629,7.97306772,7.95747324
47.613891,9.16515139,8.0812517,1.04110503,8.06574865,7.97204548,7.95632965
47.624383,7.61577311,8.08274112,-0.683350578,8.06712181,7.97102455,7.9551859
47.634874,7.87400787,8.08433782,-0.458617424,8.06860106,7.97000516,7.95404221
47.645366,9,8.086048,0.95600837,8.0701926,7.96898714,7.95289836
47.655858,7.74596669,8.0878828,-0.584735926,8.07190759,7.96797056,7.95175446
47.666349,8.18535277,8.08983447,0.309060347,8.07373829,7.96695557,7.95061062
47.676841,8.24621125,8.0919315,0.392784608,8.07571317,7.96594198,7.94946661
47.687332,8,8.09417075,-0.306872531,8.07782911,7.96493001,7.94832266
47.697824,9,8.09656118,0.950493985,8.08009505,7.9639195,7.94717854
47.708316,8.42614977,8.09911178,0.571872356,8.08251997,7.96291056,7.94603436
47.718807,8.36660027,8.10183218,0.514556202,8.08511354,7.96190332,7.94489023
47.729299,8.48528137,8.10473359,0.616885551,8.08788695,7.96089761,7.94374593
47.73979,8.18535277,8.107827,0.278434495,8.09085121,7.95989364,7.94260168
47.750282,8.66025404,8.1111255,0.741032076,8.0940194,7.95889126,7.94145724
47.760774,8.42614977,8.11464235,0.558128504,8.0974048,7.95789058,7.94031275
47.771265,7.61577311,8.11839181,-0.708956069,8.10102171,7.95689173,7.93916829
47.781757,8.60232527,8.12239054,0.692773218,8.10488676,7.95589455,7.93802365
47.792248,8.77496439,8.12665506,0.805176582,8.10901655,7.95489925,7.93687904
47.80274,8.30662386,8.13120503,0.418830315,8.11343071,7.95390568,7.93573426
47.813232,8,8.1360606,-0.368863931,8.11814945,7.95291396,7.9345894
47.823723,8.60232527,8.1412437,0.679029874,8.12319475,7.95192422,7.93344457
47.834215,8.06225775,8.14677979,-0.290726741,8.12859207,7.9509363,7.93229955
47.844706,7.68114575,8.1526947,-0.686694219,8.1343673,7.94995045,7.93115456
47.855198,8.83176087,8.15901899,0.820208435,8.14055099,7.94896655,7.93000938
47.86569,8.06225775,8.16579582,-0.321773327,8.14718646,7.94798467,7.92886411
47.876181,8.77496439,8.17306133,0.775824117,8.15430994,7.94700493,7.92771887
47.886673,8.60232527,8.18084731,0.649213335,8.16195326,7.94602719,7.92657343
47.897164,9.16515139,8.18919615,0.987904468,8.17015892,7.94505167,7.92542802
47.907656,7.41619849,8.19815808,-0.884284793,8.17897724,7.94407822,7.9242824
47.918148,9.16515139,8.20778624,0.97845038,8.1884615,7.94310697,7.92313669
47.928639,7.21110255,8.21813956,-1.00351233,8.19867077,7.94213806,7.921991
47.939131,7.87400787,8.22928681,-0.596052798,8.20967396,7.94117133,7.92084511
47.949622,8.18535277,8.24130043,-0.236532569,8.22154372,7.94020702,7.91969923
47.960114,8.42614977,8.25426617,0.41458847,8.23436598,7.93924498,7.91855314
47.970606,8.36660027,8.2682766,0.313566046,8.24823354,7.93828535,7.91740695
47.981097,8.48528137,8.28343551,0.449272596,8.26325048,7.93732826,7.91626076
47.991589,7.81024968,8.2998645,-0.699724823,8.27953868,7.93637357,7.91511437
48.00208,7.48331477,8.3176947,-0.913443994,8.29722964,7.93542153,7.91396798
48.012572,7.87400787,8.33708167,-0.680495261,8.31647927,7.93447198,7.91282138
48.023064,7.61577311,8.35819688,-0.861640164,8.33745952,7.93352507,7.91167467
48.033555,8.30662386,8.38123551,-0.273151321,8.36036608,7.93258094,7.91052796
48.044047,8.48528137,8.40642769,0.280808984,8.38542965,7.93163945,7.90938103
48.054538,9.11043358,8.434028,0.822438801,8.41290549,7.93070086,7.9082341
48.06503,8.30662386,8.46434029,-0.397135282,8.44309809,7.92976514,7.90708695
48.075522,9.21954446,8.49773539,0.849593472,8.47637934,7.92883233,7.90593968
48.086013,8.71779789,8.53474069,0.427851845,8.513278,7.92790258,7.9047924
48.096505,8.71779789,8.5757221,0.376929421,8.55416084,7.92697575,7.9036449
48.106996,8.36660027,8.62123035,-0.504608842,8.59957999,7.92605208,7.90249739
48.117488,8,8.67193263,-0.819714967,8.65020421,7.92513147,7.90134964
48.12798,8.83176087,8.72860428,0.321179989,8.70681069,7.92421406,7.90020178
48.138471,9.48683298,8.79216948,0.833464755,8.77032576,7.92329999,7.8990539
48.148963,8.71779789,8.86376546,-0.382057033,8.84188916,7.92238917,7.89790579
48.159454,8.60232527,8.94476618,-0.585184514,8.92287785,7.92148183,7.89675766
48.169946,9.11043358,9.03696029,0.271059572,9.01508422,7.92057786,7.89560929
48.180438,9.69535971,9.14272607,0.74339333,9.12089143,7.91967743,7.89446079
48.190929,9.21954446,9.26547807,-0.214321284,9.24372083,7.91878069,7.89331227
48.201421,9.11043358,9.41048826,-0.547772476,9.38885462,7.91788755,7.89216351
48.211912,10.5356538,9.58612517,0.974437574,9.56467709,7.91699824,7.89101472
48.222404,10.5356538,9.8059933,0.854201648,9.78481707,7.91611269,7.88986569
48.232896,10.9087121,10.0914753,0.904011516,10.0706921,7.91523104,7.88871653
48.243387,11.045361,10.4743636,0.755643686,10.4541389,7.91435347,7.88756733
48.253879,11.7898261,10.9979798,0.889857458,10.9785237,7.9134799,7.88641789
48.26437,12.5299641,11.7139684,0.903324792,11.6955166,7.91261058,7.88526841
48.274862,12.6885775,12.6740504,0.120528584,12.6568228,7.91174555,7.88411868
48.285354,14.3178211,13.9163174,0.633643135,13.9004672,7.91088494,7.88296881
48.295845,15.1657509,15.4681509,-0.549909117,15.4537441,7.91002886,7.8818189
48.306337,16.3401346,17.2898599,-0.974538488,17.2768374,7.90917724,7.88066874
48.316828,18.4119526,19.3090666,-0.947160992,19.2972842,7.90833034,7.87951854
48.32732,21.330729,21.4236056,-0.304756576,21.4128744,7.9074881,7.87836807
48.337812,23.2379001,23.4992436,-0.511217659,23.4893567,7.9066507,7.87721746
48.348303,24.8596058,25.3681686,-0.713135866,25.3589124,7.90581833,7.87606681
48.358795,25.8263431,26.8287895,-1.00122245,26.8199434,7.90499095,7.87491589
48.369286,27.5862284,27.669109,-0.287889898,27.660439,7.90416882,7.87376493
48.379778,28.7054002,27.7376723,0.983731622,27.7289296,7.9033519,7.8726137
48.39027,28.6530976,27.0216166,1.27729441,27.012544,7.90254039,7.87146231
48.400761,27.1293199,25.6547919,1.21430147,25.6451308,7.90173449,7.87031088
48.411253,24.0831892,23.8446152,0.488440334,23.8341054,7.90093418,7.86915917
48.421744,22.9128785,21.7972594,1.05622871,21.785634,7.90013972,7.86800741
48.432236,19.6977156,19.6851752,0.111983802,19.6721577,7.89935111,7.86685538
48.442728,16.673332,17.6470164,-0.986754474,17.6323308,7.89856856,7.86570319
48.453219,14.8660687,15.7898619,-0.961141609,15.7732615,7.89779229,7.86455094
48.463711,13.114877,14.1869061,-1.03538834,14.1682171,7.89702228,7.86339841
48.474202,11.8743421,12.8748781,-1.00026798,12.8540458,7.89625884,7.86224583
48.484694,10.8166538,11.8522264,-1.01763086,11.8293322,7.89550207,7.86109296
48.495186,10.4880885,11.0867116,-0.773707393,11.061949,7.89475233,7.85993992
48.505677,9.74679434,10.5314838,-0.885826981,10.5051079,7.89400965,7.85878683
48.516169,10.4403065,10.1296741,0.557344111,10.1019268,7.89327404,7.85763344
48.52666,8.66025404,9.83072981,-1.08188529,9.80179814,7.89254583,7.85648
48.537152,9.53939201,9.60117134,-0.248554474,9.57119319,7.89182506,7.85532626
48.547644,8.18535277,9.4183286,-1.11039445,9.38740053,7.89111198,7.85417235
48.558135,9.16515139,9.26772755,-0.32027513,9.23591638,7.89040684,7.85301837
48.568627,9.2736185,9.14036222,0.365042843,9.10771498,7.88970971,7.8518641
48.579118,9.05538514,9.03065957,0.157243662,8.99721096,7.88902092,7.85070976
48.58961,8.1240384,8.9349699,-0.900517351,8.90074639,7.88834055,7.84955513
48.600102,8.48528137,8.85079972,-0.604581128,8.8158223,7.88766887,7.84840031
48.610593,7.61577311,8.77630961,-1.077282,8.74059521,7.88700618,7.84724542
48.621085,8.54400375,8.71004903,-0.407486543,8.67361107,7.88635258,7.84609023
48.631576,8.18535277,8.65087123,-0.682289128,8.61372047,7.88570841,7.84493497
48.642068,9.16515139,8.59780765,0.753222236,8.55995226,7.88507382,7.8437794
48.65256,8.60232527,8.55006354,0.228608248,8.51150954,7.88444909,7.84262364
48.663051,8.54400375,8.50696738,0.192448333,8.46771894,7.88383457,7.84146781
48.673543,9.16515139,8.46793762,0.834993278,8.42799699,7.88323038,7.84031167
48.684034,7.61577311,8.43249313,-0.903725634,8.39186114,7.88263693,7.83915545
48.694526,9.48683298,8.40020831,1.04241291,8.35888421,7.88205439,7.83799892
48.705018,9.21954446,8.37072721,0.921312786,8.32870854,7.88148359,7.83684219
48.715509,8.48528137,8.34375133,0.376204788,8.30103494,7.88092447,7.83568538
48.726001,8.1240384,8.3190762,-0.441630832,8.2756581,7.8803772,7.83452826
48.736492,9.11043358,8.29637386,0.90225258,8.25224866,7.87984221,7.83337105
48.746984,8.48528137,8.2754392,0.45808533,8.23060041,7.87931974,7.83221353
48.757476,8.83176087,8.25609832,0.758724288,8.21053862,7.87881019,7.8310558
48.767967,8.71779789,8.23819808,0.692531451,8.19190937,7.87831396,7.82989799
48.778459,8.66025404,8.22159873,0.66231058,8.17457196,7.87783134,7.82873985
48.78895,8.88819442,8.20618288,0.825839898,8.15840835,7.87736281,7.82758162
48.799442,8.66025404,8.1918408,0.684407219,8.14330791,7.87690867,7.82642308
48.809934,9.21954446,8.17847909,1.02032611,8.12917658,7.87646939,7.82526432
48.820425,8.24621125,8.16601443,0.283190438,8.11593041,7.87604543,7.82410547
48.830917,7.93725393,8.15436905,-0.465956133,8.10349077,7.87563716,7.8229463
48.841408,9.64365076,8.14347766,1.22481554,8.09179183,7.87524512,7.82178702
48.8519,8.66025404,8.13327771,0.725931354,8.08077017,7.87486971,7.82062742
48.862392,8.83176087,8.12371594,0.841454057,8.07037195,7.87451147,7.81946761
48.872883,8.06225775,8.11474431,-0.229099462,8.06054852,7.87417094,7.81830769
48.883375,9.05538514,8.10631704,0.97420126,8.05125324,7.87384858,7.81714745
48.893866,8.36660027,8.09839598,0.517884434,8.04244742,7.87354502,7.81598709
48.904358,8.06225775,8.09094359,-0.169368947,8.03409266,7.87326077,7.81482641
48.91485,8.60232527,8.08392858,0.719997698,8.02615652,7.87299698,7.81366551
48.925341,9.16515139,8.07732191,1.04299064,8.01860943,7.8727542,7.8125045
48.935833,7.93725393,8.07110623,-0.365858306,8.01143354,7.87253265,7.81134316
48.946324,8.66025404,8.06524927,0.77136552,8.00459596,7.87233304,7.8101817
48.956816,8.66025404,8.05972378,0.774938871,7.99806844,7.87215603,7.80901991
48.967308,8.60232527,8.05451028,0.74014525,7.99183079,7.87200236,7.80785789
48.977799,9.21954446,8.0495909,1.08164392,7.98586444,7.8718728,7.80669576
48.988291,9,8.04494801,0.977267615,7.9801507,7.87176811,7.80553329
48.998782,7.68114575,8.04056721,-0.599517692,7.9746745,7.87168912,7.8043707
49.009274,9.53939201,8.03643371,1.225952,7.96941996,7.87163667,7.80320777
49.019766,8.77496439,8.03253516,0.861643329,7.96437388,7.87161164,7.80204461
49.030257,8.66025404,8.02886022,0.79460293,7.95952409,7.87161496,7.80088132
49.040749,9.53939201,8.02539762,1.2304448,7.9548581,7.87164759,7.7997177
49.05124,9,8.02213811,0.988868994,7.95036585,7.87171051,7.79855395
49.061732,9.05538514,8.01907213,1.0179946,7.94603648,7.87180479,7.79738985
49.072224,8.48528137,8.01619183,0.684901118,7.94186114,7.8719315,7.79622552
49.082715,8.88819442,8.01349,0.935256337,7.93783159,7.87209176,7.79506106
49.093207,8.66025404,8.01095932,0.805788259,7.93393905,7.87228678,7.79389625
49.103698,8.06225775,8.00859409,0.231654186,7.93017684,7.87251776,7.79273131
49.11419,8.66025404,8.00638822,0.808619702,7.9265373,7.87278603,7.79156603
49.124682,9.69535971,8.00433724,1.3003932,7.92301433,7.87309332,7.79040049
49.135173,8.88819442,8.00243779,0.941146441,7.91960225,7.87344207,7.78923483
49.145665,8.1240384,8.00068571,0.35121602,7.91629646,7.87383249,7.78806882
49.156156,9.05538514,7.99907833,1.02776788,7.91309305,7.87426604,7.78690267
49.166648,8.71779789,7.99760932,0.848639246,7.90998372,7.87474443,7.78573616
49.17714,8.1240384,7.99627598,0.357438706,7.90696425,7.87526931,7.7845694
49.187631,8.60232527,7.99507592,0.77926205,7.90403063,7.8758424,7.78340251
49.198123,7.74596669,7.9940068,-0.498036255,7.90117833,7.87646567,7.78223526
49.208614,9.05538514,7.99306701,1.03068818,7.89840413,7.87714096,7.78106787
49.219106,8.30662386,7.9922549,0.560686155,7.89570401,7.87787043,7.77990012
49.229598,7.81024968,7.99156939,-0.42581653,7.89307492,7.87865616,7.77873211
49.240089,7.21110255,7.99100968,-0.88312351,7.89051402,7.87950033,7.77756397
49.250581,8.24621125,7.99057525,0.505604592,7.88801805,7.88040547,7.77639546
49.261072,8,7.9902658,0.0986620359,7.88558466,7.88137387,7.7752268
49.271564,8,7.99008126,0.0995928911,7.88321075,7.88240834,7.77405778
49.282056,8.1240384,7.99002194,0.366082592,7.88089413,7.88351152,7.7728885
49.292547,8.42614977,7.99008842,0.660349415,7.87863275,7.8846862,7.77171908
49.303039,8.88819442,7.99028157,0.947582631,7.876424,7.88593562,7.77054928
49.31353,8.36660027,7.9906025,0.613186563,7.8742663,7.88726276,7.76937934
49.324022,8.18535277,7.99105269,0.440794827,7.8721573,7.88867124,7.76820902
49.334514,8.88819442,7.99163383,0.946868832,7.87009542,7.89016448,7.76703844
49.345005,8.48528137,7.99235138,0.702089731,7.86807914,7.89174965,7.76586771
49.355497,8.83176087,7.99320522,0.915726842,7.86610652,7.89342836,7.76469661
49.365988,8.88819442,7.99419875,0.94551344,7.86417792,7.89520393,7.76352535
49.37648,8.60232527,7.99533348,0.779096774,7.86228988,7.89708114,7.76235371
49.386972,7.93725393,7.99661263,-0.243636395,7.86044122,7.89906453,7.76118181
49.397463,9.05538514,7.99803968,1.02827305,7.85863084,7.90115886,7.76000975
49.407955,8.1240384,7.99961892,0.352731457,7.85685721,7.9033698,7.75883731
49.418446,7.87400787,8.00135443,-0.356856495,7.85511953,7.90570249,7.75766472
49.428938,7.87400787,8.00325131,-0.35950443,7.85341639,7.90816329,7.75649174
49.43943,8.71779789,8.00531458,0.844087264,7.85174696,7.91075825,7.75531849
49.449921,8.42614977,8.00754963,0.646993152,7.85011043,7.91349375,7.75414508
49.460413,9.32737905,8.0099631,1.14778742,7.84850571,7.91637738,7.75297129
49.470904,8.24621125,8.01256113,0.483373686,7.84693229,7.9194161,7.75179733
49.481396,8.48528137,8.01535144,0.685514355,7.84538923,7.92261846,7.75062299
49.491888,8.42614977,8.01834085,0.638599191,7.8438753,7.92599269,7.74944837
49.502379,7.34846923,8.02153755,-0.820407414,7.84239024,7.9295475,7.74827358
49.512871,8.42614977,8.02495102,0.633402521,7.84093309,7.93329319,7.74709841
49.523362,9.11043358,8.02859014,1.04011703,7.8395035,7.93723937,7.74592307
49.533854,8.60232527,8.03246585,0.754890334,7.83810058,7.94139775,7.74474734
49.544346,8.42614977,8.03658885,0.624148156,7.83672392,7.94577973,7.74357133
49.554837,7.61577311,8.04097619,-0.652075979,7.83537311,7.95040307,7.74239515
49.565329,8.42614977,8.0456424,0.616852798,7.8340474,7.95528302,7.74121857
49.57582,9.16515139,8.05059566,1.05572522,7.83274708,7.96042781,7.74004182
49.586312,7.81024968,8.05585159,-0.495582394,7.83147118,7.96585404,7.73886468
49.596804,8.24621125,8.06142559,0.429867031,7.83021915,7.97157793,7.73768726
49.607295,7.93725393,8.06733445,-0.360666765,7.82899074,7.97761686,7.73650966
49.617787,8.66025404,8.07359805,0.765934713,7.82778536,7.98399134,7.73533166
49.628278,7.87400787,8.08023542,-0.454122837,7.82660292,7.99072096,7.73415348
49.63877,7.41619849,8.08726969,-0.81918936,7.82544288,7.99782944,7.73297491
49.649262,8,8.09472387,-0.307772437,7.8243051,8.00534037,7.73179604
49.659753,8.30662386,8.10262276,0.451664817,7.82318941,8.01327912,7.730617
49.670245,8.24621125,8.11099558,0.367716833,7.82209542,8.02167548,7.72943756
49.680736,8.88819442,8.1198711,0.87654054,7.82102346,8.03055848,7.72825794
49.691228,8.77496439,8.12928321,0.80354289,7.81997278,8.03996296,7.72707791
49.70172,7.28010989,8.13926648,-0.926907005,7.8189433,8.04992411,7.72589759
49.712211,8.83176087,8.14985838,0.825773874,7.81793497,8.06048004,7.72471709
49.722703,8.36660027,8.16110277,0.453318317,7.81694747,8.07167528,7.72353618
49.733194,7.93725393,8.17304322,-0.485581386,7.81598087,8.08355407,7.72235508
49.743686,8.18535277,8.18573179,-0.0194683893,7.8150349,8.09616921,7.72117358
49.754178,8.60232527,8.19922187,0.634904241,7.81410958,8.10957483,7.71999178
49.764669,8.94427191,8.21357758,0.854806604,7.81320492,8.12383593,7.7188098
49.775161,8.88819442,8.2289007,0.811969038,7.81232072,8.1390555,7.7176274
49.785652,8,8.24522752,-0.495204521,7.81145724,8.15527028,7.71644482
49.796144,8.71779789,8.26264117,0.674653032,7.81061444,8.17256424,7.71526183
49.806636,8.66025404,8.28122778,0.615651085,7.80979214,8.19102483,7.71407853
49.817127,9.48683298,8.30108235,1.08892177,7.80899045,8.21074822,7.71289504
49.827619,7.61577311,8.32231594,-0.840561024,7.80820924,8.23184669,7.71171114
49.83811,8.1240384,8.34504309,-0.470111353,7.80744872,8.25443614,7.71052705
49.848602,8.48528137,8.36939978,0.340413851,7.80670884,8.27865401,7.70934254
49.859094,8.30662386,8.39553014,-0.298171557,7.80598974,8.30464605,7.70815772
49.869585,9.11043358,8.42359416,0.828757755,7.80529161,8.33257403,7.70697272
49.880077,9.21954446,8.45377876,0.875080394,7.80461442,8.36262679,7.70578729
49.890568,8.36660027,8.48628156,-0.345949846,7.80395897,8.39500363,7.70460167
49.90106,8.06225775,8.52133569,-0.677552907,7.80332493,8.42994034,7.70341562
49.911552,8.94427191,8.55919324,0.620547071,7.80271241,8.46769176,7.70222927
49.922043,8.42614977,8.60013749,-0.417118347,7.80212164,8.50854405,7.70104272
49.932535,7.81024968,8.64450036,-0.913373243,7.80155271,8.5528323,7.69985575
49.943026,9.16515139,8.69264085,0.687394019,7.80100595,8.60091908,7.69866858
49.953518,8.66025404,8.74498581,-0.291087231,7.8004815,8.65323517,7.69748099
49.96401,8.30662386,8.80200897,-0.703835997,7.79997965,8.7102587,7.69629308
49.974501,9.21954446,8.86425498,0.596061638,7.79950073,8.77253927,7.69510497
49.984993,8.71779789,8.93262612,-0.463495671,7.79904493,8.84098738,7.69391644
49.995484,8.18535277,9.0077563,-0.906864672,7.79861264,8.91624215,7.6927277
50.005976,9.79795897,9.09051765,0.841095308,7.79820431,8.99918251,7.69153854
50.016468,9.05538514,9.18201634,-0.355852778,7.79782012,9.09092372,7.69034906
50.026959,9.74679434,9.28360913,0.680577121,7.79746044,9.19283313,7.68915937
50.037451,9.79795897,9.39701406,0.633202113,7.79712559,9.30664155,7.68796926
50.047942,9.74679434,9.52433277,0.47165832,7.79681602,9.43446581,7.68677894
50.058434,10.4403065,9.66825039,0.878667238,7.7965321,9.57900927,7.68558818
50.068926,9.48683298,9.83206833,-0.587567314,7.7962743,9.74359449,7.68439711
50.079417,10.6301458,10.0198389,0.781221408,7.79604308,9.93229763,7.68320583
50.089909,10.4403065,10.2364972,0.451452484,7.7958389,10.1500794,7.68201412
50.1004,11.2249722,10.4877282,0.85862913,7.79566278,10.4026494,7.68082219
50.110892,10.8166538,10.780027,0.191381257,7.79551535,10.6965246,7.67962983
50.121384,10.3923048,11.1202972,-0.853224698,7.7953966,11.0386231,7.67843715
50.131875,11.9582607,11.5155097,0.665395372,7.79530711,11.4359185,7.67724426
50.142367,12.8840987,11.9722985,0.954882313,7.79524746,11.8950328,7.67605093
50.152858,12.7279221,12.4960599,0.481520645,7.7952183,12.4213333,7.67485739
50.16335,13.0384048,13.0906055,-0.228474798,7.79522026,13.0185869,7.67366341
50.173842,12.6885775,13.7571376,-1.03371176,7.79525402,13.6879374,7.6724691
50.184333,13.6747943,14.4936009,-0.904879314,7.79532029,14.4272625,7.67127458
50.194825,14.6628783,15.2957849,-0.795554272,7.7954198,15.2322877,7.67007962
50.205316,16.6132477,16.1513803,0.679608259,7.79555331,16.0906253,7.66888444
50.215808,17.4642492,17.0369109,0.653711147,7.79572172,16.9787075,7.66768882
50.2263,18.0554701,17.9202492,0.367723937,7.79592582,17.8643216,7.66649288
50.236791,18.8414437,18.7554669,0.29321795,7.79616637,18.7014465,7.66529671
50.247283,19.5448203,19.4828193,0.249000038,7.79644434,19.4302376,7.6641001
50.257774,19.8746069,20.0337244,-0.398895353,7.79676059,19.98201,7.66290327
50.268266,19.6723156,20.3445454,-0.819896248,7.79711616,20.2930344,7.661706
50.278758,20.3224014,20.3743503,-0.227922839,7.79751203,20.3223115,7.66050839
50.289249,20.0748599,20.1193878,-0.211016362,7.79794921,20.0660607,7.65931057
50.299741,20.1246118,19.6142341,0.714407212,7.79842886,19.5588694,7.65811229
50.310232,19.9499373,18.9196141,1.0150484,7.7989523,18.8615076,7.6569138
50.320724,18.6547581,18.1039141,0.742188661,7.79952226,18.0424258,7.65571485
50.331216,17.5499288,17.2291318,0.566389391,7.80013833,17.1636952,7.65451557
50.341707,17.1172428,16.3438775,0.879411869,7.80080172,16.2739999,7.65331607
50.352199,16.0623784,15.4824909,0.761503469,7.8015139,15.4077508,7.65211612
50.36269,14.2126704,14.6680332,-0.674805738,7.80227613,14.5880842,7.65091594
50.373182,14.6287388,13.9145598,0.845091167,7.80309002,13.8291324,7.64971531
50.383674,12.9614814,13.2300575,-0.518243238,7.80395698,13.1389667,7.64851434
50.394165,11.8743421,12.6178076,-0.862244444,7.80487852,12.5209559,7.64731315
50.404657,11.5325626,12.0775809,-0.738253578,7.80585644,11.9749567,7.6461115
50.415148,11.61895,11.6094254,0.0975943149,7.80689226,11.5011232,7.64490963
50.42564,10.8627805,11.2039428,-0.584091008,7.80798797,11.090082,7.6437073
50.436132,10.5830052,10.8547476,-0.521289132,7.80914538,10.7354865,7.64250462
50.446623,10,10.5548869,-0.744907306,7.81036624,10.4304031,7.64130173
50.457115,10.4880885,10.2973323,0.436756466,7.81165278,10.1678039,7.64009837
50.467606,10.9087121,10.0755786,0.912761469,7.81300685,9.94117306,7.63889478
50.478098,9.16515139,9.88372193,-0.847685404,7.81443091,9.74458561,7.63769074
50.48859,9.64365076,9.71673759,-0.270345761,7.81592712,9.57299308,7.63648635
50.499081,9.64365076,9.57042513,0.27060234,7.8174977,9.42217035,7.63528173
50.509573,8.88819442,9.44131702,-0.743722128,7.81914544,9.2886252,7.63407666
50.520064,9.8488578,9.32666992,0.722625687,7.82087262,9.16959367,7.63287135
50.530556,9.05538514,9.22425272,-0.410935015,7.82268535,9.0628225,7.63166557
50.541048,9,9.13230787,-0.363741485,7.82458419,8.96654007,7.63045946
50.551539,9.59166305,9.04942178,0.736370333,7.82657122,8.87931982,7.6292531
50.562031,8.36660027,8.97442449,-0.779630826,7.82864996,8.79997869,7.62804629
50.572522,8.94427191,8.90638088,0.194656188,7.83082325,8.72757151,7.62683924
50.583014,8.54400375,8.84448483,-0.548161548,7.83309492,8.66128137,7.62563173
50.593506,8.30662386,8.7880726,-0.693865075,7.83546835,8.60043576,7.62442387
50.603997,7.48331477,8.73657516,-1.11949113,7.83794701,8.54445732,7.62321577
50.614489,8.88819442,8.68948658,0.445766577,7.84053529,8.49283092,7.6220072
50.62498,9.53939201,8.64650083,0.944929194,7.8432368,8.44524608,7.6207984
50.635472,9,8.60713791,0.626787116,7.84605636,8.4012119,7.61958914
50.645964,8.30662386,8.57102136,-0.514195973,7.84899825,8.3603433,7.61837952
50.656455,8.36660027,8.5378656,-0.413842165,7.85206687,8.32234754,7.61716966
50.666947,8.36660027,8.50740903,-0.375244943,7.85526774,8.28695443,7.61595934
50.677438,8.83176087,8.4794307,0.593574065,7.85860547,8.25393626,7.61474877
50.68793,8.42614977,8.45372387,-0.166054503,7.86208615,8.22307762,7.61353774
50.698422,8.60232527,8.4301119,0.414985982,7.86571523,8.19419447,7.61232635
50.708913,8.71779789,8.40843686,0.556202328,7.86949837,8.16712147,7.61111472
50.719405,8.24621125,8.38855195,-0.377280665,7.87344264,8.14170269,7.60990262
50.729896,9.43398113,8.37033355,1.03133291,7.87755399,8.11780727,7.60869028
50.740388,8.77496439,8.3536681,0.64907341,7.88184423,8.09530825,7.60747747
50.75088,8.42614977,8.33845627,0.296130895,7.88632111,8.07409741,7.6062643
50.761371,9.48683298,8.32460457,1.07806698,7.89098797,8.05407655,7.60505089
50.771863,8.54400375,8.31202907,0.481637494,7.89585403,8.03515113,7.60383701
50.782354,7.81024968,8.30065962,-0.700292756,7.90092707,8.01724243,7.60262288
50.792846,8.77496439,8.2904293,0.696085546,7.90621732,8.00027209,7.60140828
50.803338,9.2736185,8.28128165,0.996161055,7.91173405,7.98417363,7.60019332
50.813829,7.07106781,8.27316627,-1.09640251,7.91748699,7.96888626,7.59897811
50.824321,7.81024968,8.26603631,-0.675119719,7.92348815,7.95435012,7.59776243
50.834812,9.21954446,8.25986334,0.979633152,7.92974791,7.94052639,7.5965465
50.845304,9.11043358,8.25461775,0.925103147,7.93627967,7.92737148,7.5953301
50.855796,8.48528137,8.25024999,0.48480035,7.94309578,7.91482228,7.59411334
50.866287,8.71779789,8.24673479,0.686340368,7.95020927,7.90284011,7.59289633
50.876779,8.71779789,8.24404985,0.688293571,7.957636,7.89138611,7.59167884
50.88727,8.18535277,8.24217774,-0.238379886,7.96538997,7.88042869,7.5904611
50.897762,7.87400787,8.24110376,-0.605884384,7.97348903,7.86993466,7.58924288
50.908254,8,8.2408171,-0.490731189,7.98194987,7.85987631,7.58802431
50.918745,8.18535277,8.2413099,-0.236552601,7.99079016,7.85022796,7.58680548
50.929237,8.77496439,8.24257761,0.729648396,8.00003126,7.84096314,7.58558617
50.939728,8.71779789,8.24461839,0.687880441,8.00969241,7.83206083,7.58436661
50.95022,7.54983444,8.24743751,-0.83522636,8.01980139,7.82349814,7.58314658
50.960712,8.06225775,8.25105447,-0.434507442,8.03039684,7.81525629,7.58192617
50.971203,8.18535277,8.25545978,-0.264777273,8.0414863,7.80731774,7.58070552
50.981695,9.05538514,8.26066487,0.891470847,8.05309937,7.79966397,7.57948438
50.992186,7.61577311,8.26668232,-0.806789451,8.06526314,7.79228062,7.578263
51.002678,8.06225775,8.27353003,-0.45964365,8.07801138,7.78515148,7.57704113
51.01317,8.54400375,8.28122737,0.512617183,8.09137661,7.7782635,7.57581889
51.023661,8.54400375,8.28979671,0.504189481,8.10539355,7.77160444,7.5745964
51.034153,8.94427191,8.2992664,0.803122349,8.12010362,7.76516098,7.57337342
51.044644,9.16515139,8.30966495,0.924925097,8.13554562,7.75892311,7.5721502
51.055136,8.42614977,8.32103628,0.324212118,8.15176724,7.75288742,7.57092649
51.065628,8.88819442,8.33340919,0.744839064,8.16881523,7.74703562,7.5697024
51.076119,9.21954446,8.34682485,0.934194628,8.18673974,7.74135891,7.56847807
51.086611,8.06225775,8.36133302,-0.546877751,8.20560014,7.73584759,7.56725325
51.097102,9.11043358,8.3769831,0.856417232,8.22545328,7.73049458,7.56602817
51.107594,9.53939201,8.39383557,1.0703067,8.24636824,7.72529126,7.56480261
51.118086,8.88819442,8.41195231,0.690102967,8.26841386,7.72023095,7.56357667
51.128577,7.93725393,8.43140103,-0.702955969,8.29166451,7.71530737,7.56235048
51.139069,8.83176087,8.45226179,0.616034966,8.31620758,7.71051322,7.56112381
51.14956,8.66025404,8.47461459,0.430858962,8.34212867,7.7058434,7.55989687
51.160052,9.11043358,8.49855568,0.782226245,8.36953068,7.70129137,7.55866945
51.170544,8.88819442,8.52425163,0.603276711,8.39858655,7.69685222,7.55744165
51.181035,10.4880885,8.55176638,1.39151791,8.42936462,7.69252133,7.5562136
51.191527,9.32737905,8.58121731,0.863806541,8.46198791,7.68829308,7.55498506
51.202018,9.53939201,8.61273444,0.96263055,8.4965908,7.68416378,7.55375626
51.21251,8.60232527,8.64647332,-0.210114386,8.53333422,7.68012836,7.55252697
51.223002,7.54983444,8.6825956,-1.06431253,8.5723841,7.67618317,7.5512973
51.233493,9.48683298,8.72127891,0.874959466,8.61392223,7.67232475,7.55006738
51.243985,8.94427191,8.76273107,0.426076096,8.65816122,7.66854873,7.54883696
51.254476,9.11043358,8.80716553,0.550697785,8.70531811,7.66485238,7.54760629
51.264968,9.74679434,8.85483774,0.944434542,8.75565105,7.66123382,7.54637512
51.27546,9.89949494,8.90601439,0.996734943,8.80943128,7.65768924,7.54514358
51.285951,7.87400787,8.96099071,-1.04258469,8.86695866,7.65421475,7.54391177
51.296443,8.88819442,9.02011269,-0.363205549,8.92858335,7.65080689,7.54267948
51.306934,9.21954446,9.08374298,0.368512516,8.99467108,7.64746366,7.54144692
51.317426,9.21954446,9.15231094,0.259294273,9.06565517,7.64418191,7.54021387
51.327918,9.16515139,9.2262776,-0.247237162,9.14199987,7.64095955,7.53898044
51.338409,9.74679434,9.30615852,0.663804058,9.22422387,7.6377946,7.53774675
51.348901,9.11043358,9.39255625,-0.531152209,9.31293351,7.63468428,7.53651257
51.359392,9.2736185,9.48611637,-0.460974915,9.40877718,7.6316271,7.53527812
51.369884,9.2736185,9.58760283,-0.560343047,9.51252248,7.62862049,7.53404318
51.380376,9.8488578,9.69811199,0.388259983,9.62527071,7.62566287,7.53280786
51.390867,10.0498756,9.81865317,0.480855957,9.74803428,7.62275269,7.53157228
51.401359,9.69535971,9.95015109,-0.504768634,9.8817398,7.6198877,7.5303362
51.41185,10.7703296,10.0938521,0.822482503,10.0276363,7.61706677,7.52909986
51.422342,10.198039,10.251244,-0.230661987,10.1872148,7.61428781,7.52786302
51.432834,11.0905365,10.4239935,0.816420882,10.362145,7.61154959,7.5266258
51.443325,11.1355287,10.6140272,0.722150635,10.554356,7.60885091,7.52538832
51.453817,11.2249722,10.8236556,0.633495481,10.7661616,7.60618988,7.52415034
51.464308,11.3137085,11.0555347,0.508108048,11.0002201,7.60356571,7.52291209
51.4748,11.4017543,11.3129922,0.297929545,11.2598629,7.60097704,7.52167335
51.485292,10.8166538,11.6001724,-0.885165823,11.5492376,7.59842359,7.52043423
51.495783,11.8743421,11.922637,-0.219761124,11.8739134,7.59590325,7.51919484
51.506275,13.453624,12.2884643,1.07942565,12.2419794,7.59341444,7.51795495
51.516766,13.5277493,12.7097231,0.904447973,12.6655218,7.59095657,7.5167148
51.527258,14.8996644,13.205421,1.30163106,13.1635761,7.58852817,7.51547414
51.53775,15,13.8049405,1.09318777,13.7655634,7.58612849,7.51423311
51.548241,16,14.5523094,1.20320016,14.5155567,7.58375682,7.51299181
51.558733,17.8605711,15.5095221,1.53331307,15.4755892,7.58141181,7.51175001
51.569224,18.8679623,16.7552123,1.45353019,16.7243002,7.57909304,7.51050794
51.579716,20,18.377659,1.2737115,18.3499191,7.57679925,7.50926537
51.590208,22.2485955,20.4660076,1.33513589,20.4414864,7.57452985,7.50802242
51.600699,24.2693222,23.1029233,1.07999948,23.0815361,7.5722843,7.5067792
51.611191,27,26.2724169,0.852984812,26.2538973,7.57006143,7.50553548
51.621682,29.9833287,29.925904,0.239634615,29.9098913,7.56786095,7.50429149
51.632174,33.763886,33.9611154,-0.44410511,33.9472168,7.56568177,7.503047
51.642666,37.4299345,38.2242992,-0.891271377,38.2121342,7.56352343,7.50180213
51.653157,41.1582313,42.5153692,-1.16496265,42.504593,7.56138551,7.50055699
51.663649,44.855323,46.5873408,-1.31606146,46.5776499,7.55926698,7.49931134
51.67414,48.2182538,50.135563,-1.38466936,50.1266883,7.55716768,7.49806543
51.684632,52.7636238,52.8039548,-0.200825706,52.7956495,7.55508662,7.49681902
51.695124,54.0925133,54.2360824,-0.378905083,54.2281114,7.55302421,7.49557222
51.705615,53.4509121,54.1985939,-0.864685988,54.1907299,7.5509794,7.49432515
51.716107,53.6656315,52.6974875,0.983943086,52.6895125,7.54895123,7.49307758
51.726598,50.7937004,49.9750881,0.90477194,49.9667955,7.5469396,7.49182974
51.73709,47.0106371,46.3892698,0.788268536,46.3804591,7.54494365,7.49058139
51.747582,43.1045241,42.2953215,0.899556914,42.2857899,7.54296312,7.48933266
51.758073,37.6031914,37.9950092,-0.625953587,37.9845426,7.54099777,7.48808366
51.768565,34,33.7331365,0.516588365,33.7215058,7.53904678,7.48683415
51.779056,29.0344623,29.7083641,-0.820915257,29.6953337,7.53711014,7.48558438
51.789548,25.0599282,26.0713773,-1.00570827,26.0567252,7.53518707,7.4843341
51.80004,22.7156334,22.9234371,-0.455854912,22.906991,7.53327737,7.48308343
51.810531,19.5192213,20.3415925,-0.906846832,20.3232995,7.53138087,7.4818325
51.821023,17.9722008,18.2774613,-0.5525039,18.2573646,7.52949684,7.48058106
51.831514,17.0880075,16.6687523,0.647499188,16.6469976,7.52762529,7.47932935
51.842006,15.3948043,15.4327642,-0.19483284,15.4095652,7.52576554,7.47807713
51.852498,13.8564065,14.4818457,-0.790847148,14.4574349,7.52391744,7.47682452
51.862989,13.9283883,13.737884,0.436467925,13.7124735,7.52208086,7.47557165
51.873481,12.2474487,13.1396157,-0.944545904,13.1133785,7.52025514,7.47431826
51.883972,11.4017543,12.6436986,-1.11442558,12.6167692,7.51844034,7.47306461
51.894464,11,12.2211068,-1.10503699,12.193588,7.51663583,7.47181045
51.904956,10.9544512,11.8532869,-0.948069493,11.8252598,7.51484177,7.47055591
51.915447,10.7238053,11.5283373,-0.896957068,11.4998686,7.513058,7.46930109
51.925939,10.6770783,11.2383073,-0.749152207,11.2094547,7.5112837,7.46804576
51.93643,9.64365076,10.9777378,-1.15502688,10.9485528,7.50951897,7.46679017
51.946922,9.32737905,10.7424648,-1.18957378,10.712994,7.50776322,7.46553406
51.957414,9.43398113,10.5292662,-1.04655867,10.4995525,7.5060164,7.46427757
51.967905,9.21954446,10.3354884,-1.05638247,10.3055715,7.50427844,7.46302081
51.978397,8,10.1588398,-1.46929908,10.1287562,7.50254879,7.46176353
51.988888,9.69535971,9.99742544,-0.549605064,9.96720878,7.50082757,7.46050599
51.99938,8.54400375,9.84954633,-1.14260343,9.81922748,7.49911425,7.45924794
52.009872,9.05538514,9.71377057,-0.811409532,9.6833779,7.49740878,7.4579895
52.020363,8.18535277,9.58912533,-1.18480908,9.55868574,7.49571115,7.45673079
52.030855,8.54400375,9.47434624,-0.964542634,9.44388399,7.49402082,7.45547157
52.041346,9.79795897,9.36825368,0.655519103,9.33779025,7.49233795,7.45421207
52.051838,8.42614977,9.26998754,-0.918606426,9.23954252,7.49066203,7.45295207
52.06233,8.77496439,9.1788146,-0.635492101,9.14840584,7.48899305,7.45169168
52.072821,8.1240384,9.0940834,-0.984908622,9.06372714,7.487331,7.45043102
52.083313,7.93725393,9.01519228,-1.0382381,8.98490328,7.48567541,7.44916985
52.093804,8.24621125,8.94163419,-0.833920223,8.91142582,7.48402642,7.4479084
52.104296,8.94427191,8.87292916,0.267100631,8.84281354,7.48238358,7.44664645
52.114788,8.60232527,8.80866729,-0.454248855,8.77865532,7.48074694,7.44538411
52.125279,8.24621125,8.74848009,-0.70870928,8.71858144,7.47911669,7.44412149
52.135771,8.88819442,8.69201966,0.442916193,8.66224324,7.47749213,7.44285837
52.146262,7.93725393,8.63899403,-0.83769929,8.60934782,7.47587344,7.44159497
52.156754,8.36660027,8.58911986,-0.471719826,8.55961104,7.47426018,7.44033107
52.167246,8.77496439,8.54215544,0.482502798,8.51279041,7.47265236,7.43906677
52.177737,9.53939201,8.49788133,1.02054431,8.46866578,7.47105003,7.4378022
52.188229,8.24621125,8.45608617,-0.458121076,8.42702518,7.46945274,7.43653712
52.19872,8.66025404,8.41659384,0.493619488,8.38769187,7.46786069,7.43527177
52.209212,8.1240384,8.37922899,-0.505163922,8.35049,7.46627345,7.43400591
52.219704,8.71779789,8.34384275,0.611518714,8.31527017,7.46469106,7.43273966
52.230195,8.36660027,8.3103179,0.237239037,8.28191478,7.46311357,7.43147313
52.240687,8.24621125,8.27855738,-0.179850289,8.2503265,7.46154056,7.4302061
52.251178,8.71779789,8.24838452,0.685137479,8.22032804,7.45997224,7.42893879
52.26167,8.83176087,8.21968797,0.782350878,8.19180772,7.45840819,7.42767098
52.272162,8,8.19237352,-0.438604061,8.16467102,7.45684848,7.42640277
52.282653,7.81024968,8.16635433,-0.59674505,8.13883078,7.45529314,7.42513429
52.293145,7.21110255,8.14154338,-0.964593608,8.11419976,7.4537418,7.4238653
52.303636,7.68114575,8.11786971,-0.66085094,8.09070673,7.45219466,7.42259604
52.314128,8.1240384,8.0952591,0.169644643,8.06827728,7.45065132,7.42132626
52.32462,8.18535277,8.07364958,0.334220276,8.04684923,7.44911186,7.4200561
52.335111,7.68114575,8.05298387,-0.609785305,8.02636495,7.44757648,7.41878566
52.345603,8.42614977,8.03320278,0.626854841,8.00676526,7.44604469,7.41751472
52.356094,8.1240384,8.01425927,0.33132934,7.98800294,7.44451666,7.4162435
52.366586,7.68114575,7.99610271,-0.561210262,7.97002726,7.44299203,7.41497177
52.377078,8.36660027,7.97869285,0.622822141,7.95279784,7.44147085,7.41369965
52.387569,8.30662386,7.96198819,0.58705679,7.93627305,7.43995321,7.41242725
52.398061,8.06225775,7.9459497,0.341039655,7.92041379,7.43843874,7.41115435
52.408552,7.68114575,7.93054606,-0.499399952,7.9051886,7.43692766,7.40988117
52.419044,7.41619849,7.9157425,-0.706784279,7.8905627,7.4354196,7.40860749
52.429536,8,7.90151124,0.313829183,7.87650818,7.43391465,7.40733341
52.440027,7.61577311,7.88782663,-0.521587503,7.86299932,7.43241289,7.40605906
52.450519,7.81024968,7.8746813,-0.253833853,7.85002881,7.43091396,7.4047842
52.46101,7.54983444,7.86203513,-0.558749226,7.83755637,7.42941809,7.40350907
52.471502,7.07106781,7.84986349,-0.882494009,7.82555735,7.42792492,7.40223342
52.481994,8.36660027,7.83814946,0.726946217,7.81401479,7.42643455,7.40095739
52.492485,8.1240384,7.8268781,0.54512412,7.8029137,7.42494705,7.39968108
52.502977,8,7.81603343,0.428913248,7.79223812,7.42346209,7.39840427
52.513468,7.61577311,7.80560595,-0.435698106,7.7819785,7.42197988,7.39712718
52.52396,7.68114575,7.7955846,-0.338288123,7.77212381,7.4205001,7.39584958
52.534452,7.87400787,7.78596432,0.296721343,7.76266897,7.41902284,7.39457159
52.544943,7.68114575,7.77674716,-0.309194787,7.75361599,7.41754823,7.39329333
52.555435,7,7.76793043,-0.8763164,7.74496222,7.41607596,7.39201456
52.565926,8.24621125,7.75952442,0.697629434,7.73671803,7.41460618,7.39073552
52.576418,7.87400787,7.75154665,0.3499446,7.72890105,7.41313857,7.38945596
52.58691,7.34846923,7.7440342,-0.628939565,7.72154846,7.41167322,7.38817602
52.597401,7.81024968,7.73705265,0.270549498,7.71472603,7.41021023,7.3868958
52.607893,8.60232527,7.73071246,0.93360206,7.70854459,7.40874926,7.38561508
52.618384,7.93725393,7.7252002,0.46049292,7.70319121,7.40729055,7.38433408
52.628876,7.54983444,7.7208086,-0.41349022,7.69895946,7.40583378,7.38305258
52.639368,7.54983444,7.71797945,-0.41005489,7.69629235,7.40437906,7.38177068
52.649859,8.30662386,7.71733459,0.767651792,7.69581338,7.40292647,7.38048851
52.660351,7.48331477,7.7196917,-0.486186108,7.69834244,7.40147569,7.37920583
52.670842,8.36660027,7.72601801,0.800363829,7.70484919,7.40002698,7.37792289
52.681334,7.74596669,7.73733798,0.0928908434,7.71636069,7.39858,7.37663943
52.691826,7.87400787,7.75456013,0.345612125,7.73378747,7.39713486,7.37535558
52.702317,8.1240384,7.77823124,0.588053711,7.75767723,7.39569166,7.37407146
52.712809,6.63324958,7.80826732,-1.08398235,7.78794515,7.39425009,7.37278683
52.7233,8.24621125,7.8436586,0.634470373,7.82357817,7.39281039,7.37150193
52.733792,8.48528137,7.88222498,0.776567056,7.86239013,7.39137225,7.37021652
52.744284,8.66025404,7.92033968,0.860182749,7.9007449,7.38993577,7.36893072
52.754775,8.60232527,7.95242234,0.806165573,7.93304864,7.38850107,7.36764466
52.765267,8.06225775,7.97194647,0.300518357,7.95275988,7.3870679,7.36635808
52.775758,7.34846923,7.97368786,-0.79070768,7.9546431,7.38563643,7.36507123
52.78625,7.61577311,7.95601027,-0.583298522,7.93705921,7.38420636,7.36378388
52.796742,8.36660027,7.92187795,0.666875036,7.90297993,7.38277779,7.36249613
52.807233,8.71779789,7.87709895,0.916896362,7.85822708,7.38135082,7.36120812
52.817725,7.61577311,7.82773237,-0.460390335,7.80887412,7.37992516,7.35991959
52.828216,7.41619849,7.77863952,-0.602030757,7.75979397,7.37850105,7.3586308
52.838708,7.93725393,7.7331267,0.451804418,7.71430101,7.37707818,7.3573415
52.8492,8.18535277,7.69313638,0.701581354,7.67434259,7.37565668,7.35605181
52.859691,7.28010989,7.65948102,-0.615931106,7.64073331,7.37423663,7.35476186
52.870183,8.48528137,7.6321008,0.923677744,7.61341331,7.37281776,7.35347139
52.880674,8.1240384,7.61036279,0.716711667,7.59174814,7.3714003,7.35218065
52.891166,8.18535277,7.59330727,0.769444934,7.57477569,7.36998396,7.35088941
52.901658,7.68114575,7.57990223,0.318187858,7.5614614,7.36856885,7.34959778
52.912149,7.68114575,7.56919462,0.334590983,7.5508498,7.36715508,7.34830588
52.922641,7.61577311,7.56039553,0.235324401,7.54215004,7.36574235,7.34701347
52.933132,7.93725393,7.55291168,0.619953426,7.53476736,7.36433091,7.3457208
52.943624,7,7.54632183,-0.73913587,7.52827951,7.36292047,7.34442762
52.954116,7.54983444,7.54034675,0.0974047577,7.52240656,7.36151114,7.34313405
52.964607,8.30662386,7.53481158,0.878528474,7.51697323,7.36010304,7.34184021
52.975099,7.68114575,7.52960251,0.389285543,7.51186542,7.35869591,7.34054587
52.98559,7.48331477,7.52464286,-0.203293093,7.50700627,7.35728999,7.33925126
52.996082,7.81024968,7.51988774,0.538852421,7.50235087,7.35588495,7.33795614
53.006574,7.48331477,7.51530742,-0.178864885,7.49786939,7.35448091,7.33666063
53.017065,7.74596669,7.51088022,0.484857169,7.49354011,7.353078,7.33536487
53.027557,8.42614977,7.50658827,0.958937697,7.48934515,7.35167592,7.33406859
53.038048,7.74596669,7.50241869,0.493505829,7.48527159,7.35027491,7.33277205
53.04854,8.1240384,7.49835934,0.790998776,7.48130731,7.3488747,7.331475
53.059032,7.48331477,7.49440104,-0.10529136,7.4774431,7.3474754,7.33017756
53.069523,7.34846923,7.49053596,-0.376917411,7.47367112,7.34607712,7.32887986
53.080015,7.54983444,7.48675627,0.251153665,7.46998355,7.34467958,7.32758165
53.090506,8,7.48305839,0.718986515,7.4663768,7.34328303,7.32628319
53.100998,7.93725393,7.47943434,0.676623674,7.4628429,7.34188719,7.32498421
53.11149,7.74596669,7.47587958,0.519699061,7.45937731,7.34049217,7.32368484
53.121981,7.61577311,7.47239021,0.378659342,7.45597612,7.33909809,7.32238522
53.132473,7.07106781,7.46896178,-0.630788372,7.45263491,7.33770467,7.32108509
53.142964,8.94427191,7.46559156,1.21601001,7.44935093,7.33631215,7.3197847
53.153456,7.93725393,7.46227583,0.689186549,7.44612049,7.33492027,7.31848379
53.163948,7.41619849,7.45901216,-0.206914647,7.44294115,7.33352912,7.31718251
53.174439,8.24621125,7.45579831,0.889051708,7.43981067,7.33213884,7.31588096
53.184931,8.24621125,7.45263189,0.890830712,7.43672668,7.33074915,7.31457891
53.195422,8.36660027,7.44951096,0.9576478,7.43368719,7.32936033,7.3132766
53.205914,8.18535277,7.44643264,0.859604635,7.43068941,7.32797206,7.31197378
53.216406,6.78232998,7.44339561,-0.813059423,7.42773199,7.32658446,7.31067057
53.226897,8.36660027,7.44039847,0.962393783,7.42481356,7.32519765,7.30936711
53.237389,7.07106781,7.43743911,-0.605286132,7.42193201,7.32381136,7.30806314
53.24788,7.81024968,7.43451665,0.612970653,7.41908645,7.32242582,7.30675892
53.258372,8,7.43162918,0.753903718,7.41627501,7.32104078,7.30545418
53.268864,7.28010989,7.42877571,-0.385572072,7.41349669,7.31965634,7.30414907
53.279355,7.48331477,7.42595532,0.239498348,7.41075058,7.31827263,7.3028437
53.289847,7.14142843,7.42316633,-0.530789885,7.40803502,7.31688937,7.30153782
53.300338,7.21110255,7.42040894,-0.457500149,7.40535019,7.31550681,7.30023168
53.31083,7.93725393,7.41768128,0.720813882,7.40269427,7.31412469,7.29892504
53.321322,7.93725393,7.41498224,0.722683678,7.40006612,7.3127431,7.29761802
53.331813,8.06225775,7.41231115,0.806192655,7.3974651,7.31136219,7.29631074
53.342305,7.07106781,7.40966666,-0.581892474,7.39488986,7.30998167,7.29500295
53.352796,7.93725393,7.40704846,0.728152095,7.3923401,7.3086018,7.29369491
53.363288,7.61577311,7.40445526,0.459693205,7.38981454,7.3072223,7.29238637
53.37378,7.54983444,7.40188658,0.3846399,7.38731271,7.30584329,7.29107744
53.384271,8.36660027,7.39934195,0.983492916,7.38483413,7.3044649,7.28976826
53.394763,8.48528137,7.39682027,1.04329339,7.38237773,7.30308686,7.28845858
53.405254,7.48331477,7.39432136,0.29831764,7.37994329,7.30170944,7.28714864
53.415746,6.244998,7.39184405,-1.07090899,7.3775297,7.30033235,7.2858382
53.426238,7.34846923,7.389388,-0.202283884,7.3751366,7.2989557,7.28452738
53.436729,8,7.38695284,0.782973279,7.37276365,7.29757961,7.28321631
53.447221,7.07106781,7.38453758,-0.55988371,7.37040986,7.29620383,7.28190473
53.457712,7.54983444,7.38214213,0.409502504,7.36807515,7.29482859,7.2805929
53.468204,8.36660027,7.37976554,0.993395553,7.36575857,7.29345362,7.27928057
53.478696,8.06225775,7.37740754,0.827556772,7.36345986,7.29207906,7.27796786
53.489187,8.77496439,7.37506787,1.18317222,7.36117877,7.29070502,7.27665489
53.499679,7.54983444,7.37274565,0.420819187,7.35891442,7.28933124,7.27534143
53.51017,7.48331477,7.37044107,0.335966821,7.35666701,7.28795796,7.27402772
53.520662,8,7.36815353,0.794887706,7.35443597,7.28658492,7.2727135
53.531154,7.61577311,7.36588235,0.49989074,7.35222059,7.28521223,7.2713989
53.541645,7.81024968,7.36362734,0.668298087,7.3500207,7.28384003,7.27008406
53.552137,7.68114575,7.36138769,0.565471535,7.3478355,7.28246805,7.26876872
53.562628,8,7.35916345,0.800522672,7.34566505,7.28109653,7.26745312
53.57312,7.93725393,7.35695385,0.761774303,7.34350857,7.27972521,7.26613703
53.583612,6.63324958,7.35475873,-0.849416949,7.34136594,7.27835421,7.26482056
53.594103,7.74596669,7.35257799,0.627207064,7.33923702,7.27698366,7.26350384
53.604595,7.54983444,7.35041088,0.446568641,7.3371211,7.27561328,7.26218662
53.615086,7.34846923,7.34825754,0.0145495649,7.33501828,7.27424336,7.26086915
53.625578,7.74596669,7.34611721,0.63233653,7.33292785,7.27287361,7.25955119
53.63607,8.24621125,7.34398979,0.949853391,7.33084971,7.27150415,7.25823285
53.646561,8,7.34187519,0.811248919,7.32878376,7.27013511,7.25691426
53.657053,6.8556546,7.33977274,-0.695785986,7.32672936,7.2687662,7.25559518
53.667544,6.8556546,7.33768256,-0.694282332,7.32468661,7.2673977,7.25427585
53.678036,7.61577311,7.33560399,0.529310042,7.32265488,7.26602933,7.25295602
53.688528,7,7.33353697,-0.577526593,7.32063411,7.26466122,7.25163581
53.699019,7.34846923,7.33148145,0.130337183,7.31862424,7.2632935,7.25031537
53.709511,7.34846923,7.3294368,0.137958083,7.31662465,7.26192589,7.24899442
53.720002,8.06225775,7.32740317,0.857236596,7.31463551,7.26055865,7.24767323
53.730494,7.54983444,7.32538038,0.473765825,7.31265663,7.25919152,7.24635155
53.740986,7.07106781,7.32336796,-0.502294882,7.31068755,7.25782461,7.24502949
53.751477,7.21110255,7.32136588,-0.332059222,7.30872824,7.25645807,7.24370719
53.761969,7.68114575,7.31937354,0.601475029,7.30677812,7.25509161,7.2423844
53.77246,6.8556546,7.31739112,-0.67951197,7.30483735,7.2537255,7.24106136
53.782952,6.92820323,7.31541804,-0.622265867,7.30290538,7.25235947,7.23973782
53.793444,7.28010989,7.3134543,-0.182604521,7.3009822,7.25099364,7.23841392
53.803935,7.68114575,7.3114999,0.607985074,7.29906781,7.24962815,7.23708977
53.814427,7.81024968,7.30955428,0.707598333,7.29716167,7.24826272,7.23576513
53.824918,7.68114575,7.30761764,0.611169455,7.29526397,7.24689761,7.23444025
53.83541,7.41619849,7.30568946,0.332428981,7.29337418,7.24553258,7.23311488
53.845902,7.07106781,7.30376972,-0.482391861,7.29149231,7.24416774,7.23178914
53.856393,7.41619849,7.30185844,0.338142051,7.28961837,7.24280319,7.23046315
53.866885,8.30662386,7.2999551,1.00332884,7.28775186,7.2414387,7.22913668
53.877376,7.61577311,7.2980599,0.563660546,7.28589297,7.2400745,7.22780996
53.887868,7.14142843,7.29617232,-0.393375002,7.2840412,7.23871034,7.22648276
53.89836,7.74596669,7.2942924,0.672067175,7.28219659,7.23734634,7.22515518
53.908851,6.63324958,7.29242018,-0.81189322,7.28035916,7.23598263,7.22382737
53.919343,7.81024968,7.29055515,0.720898414,7.27852843,7.23461894,7.22249907
53.929834,6.70820393,7.28869754,-0.761901308,7.27670461,7.23325553,7.22117053
53.940326,7.68114575,7.28684704,0.627932089,7.27488743,7.23189215,7.2198415
53.950818,7,7.28500361,-0.533857291,7.27307682,7.2305289,7.21851211
53.961309,7.87400787,7.28316718,0.768661627,7.27127272,7.22916593,7.21718247
53.971801,7.41619849,7.28133728,0.367234545,7.26947468,7.22780296,7.21585235
53.982292,7.93725393,7.27951413,0.811011592,7.26768291,7.22644025,7.214522
53.992784,7.87400787,7.27769727,0.7722115,7.26589696,7.22507755,7.21319115
54.003276,7.54983444,7.27588676,0.523400107,7.26411688,7.22371497,7.21185994
54.013767,7.81024968,7.27408266,0.732234264,7.26234274,7.22235265,7.2105285
54.024259,7.48331477,7.2722845,0.459380311,7.26057408,7.22099031,7.20919657
54.03475,7.93725393,7.27049254,0.816554589,7.25881115,7.21962823,7.20786441
54.045242,7.41619849,7.26870633,0.384047078,7.2570535,7.21826614,7.20653175
54.055734,6.92820323,7.26692593,-0.581998882,7.2553012,7.21690417,7.20519874
54.066225,6.8556546,7.2651514,-0.639919372,7.25355433,7.21554244,7.2038655
54.076717,7.74596669,7.26338231,0.694682933,7.25181244,7.21418068,7.20253177
54.087208,8.18535277,7.26161891,0.961110746,7.25007577,7.21281916,7.20119781
54.0977,8.24621125,7.25986074,0.993151805,7.24834392,7.21145761,7.19986336
54.108192,7.74596669,7.25810791,0.698468885,7.24661694,7.21009616,7.19852855
54.118683,7.54983444,7.25636048,0.541732369,7.24489493,7.20873493,7.19719351
54.129175,7.93725393,7.25461803,0.826217833,7.24317746,7.20737367,7.19585799
54.139666,7.28010989,7.25288081,0.165012365,7.24146478,7.20601264,7.19452224
54.150158,6.92820323,7.25114848,-0.568282718,7.23975656,7.20465156,7.19318601
54.16065,8.1240384,7.24942118,0.93520972,7.23805294,7.20329058,7.19184941
54.171141,6.55743852,7.24769887,-0.830819079,7.23635387,7.2019298,7.19051259
54.181633,7.61577311,7.24598112,0.60810524,7.23465895,7.20056899,7.18917529
54.192124,7.68114575,7.2442682,0.660967129,7.23296842,7.19920838,7.18783776
54.202616,7.28010989,7.2425597,0.1937787,7.23128189,7.19784773,7.18649975
54.213108,6.92820323,7.24085572,-0.559153371,7.22959946,7.19648715,7.18516138
54.223599,7.54983444,7.23915635,0.557385044,7.22792122,7.19512678,7.18382279
54.234091,7.14142843,7.23746119,-0.309891526,7.22624677,7.19376635,7.18248372
54.244582,8.30662386,7.2357705,1.03482045,7.22457638,7.19240613,7.18114442
54.255074,6.70820393,7.2340839,-0.72517582,7.22290967,7.19104585,7.17980464
54.265566,7.93725393,7.2324015,0.839554904,7.22124672,7.18968565,7.1784645
54.276057,7.68114575,7.23072337,0.671135142,7.21958765,7.18832565,7.17712415
54.286549,7.41619849,7.22904914,0.432607613,7.21793206,7.18696559,7.17578331
54.29704,7.21110255,7.22737907,-0.127579453,7.21628023,7.18560572,7.17444225
54.307532,7.48331477,7.22571278,0.507545069,7.21463177,7.18424578,7.17310072
54.318024,7.21110255,7.22405037,-0.113788484,7.21298679,7.18288591,7.17175883
54.328515,7.74596669,7.22239195,0.723584647,7.2113454,7.18152623,7.17041672
54.339007,6.8556546,7.22073715,-0.604220613,7.20970723,7.18016648,7.16907414
54.349498,7.54983444,7.21908623,0.575107123,7.20807254,7.17880692,7.16773133
54.35999,6.78232998,7.21743884,-0.659627814,7.20644097,7.17744729,7.16638805
54.370482,7.34846923,7.21579521,0.364244444,7.20481277,7.17608772,7.16504442
54.380973,6.55743852,7.21415532,-0.810380648,7.20318791,7.17472833,7.16370057
54.391465,7.74596669,7.21251879,0.730375176,7.20156603,7.17336887,7.16235624
54.401956,7.61577311,7.21088591,0.636307473,7.19994739,7.1720096,7.1610117
54.412448,6.244998,7.2092563,-0.981966547,7.19833163,7.17065025,7.15966668
54.42294,7.48331477,7.20763008,0.525056844,7.19671889,7.16929095,7.15832131
54.433431,7.14142843,7.20600738,-0.254123887,7.19510925,7.16793183,7.15697573
54.443923,7.28010989,7.20438783,0.275176412,7.19350239,7.16657264,7.15562968
54.454414,7.74596669,7.20277171,0.737017625,7.19189857,7.16521363,7.15428341
54.464906,7.14142843,7.20115868,-0.244397736,7.19029745,7.16385454,7.15293666
54.475398,8,7.19954887,0.894679344,7.18869915,7.16249551,7.15158958
54.485889,7.34846923,7.19794238,0.387977894,7.18710379,7.16113666,7.15024227
54.496381,7.48331477,7.19633887,0.535701316,7.18551103,7.15977772,7.1488945
54.506872,7.14142843,7.19473862,-0.230889998,7.18392113,7.15841897,7.14754652
54.517364,8,7.19314128,0.898253147,7.18233378,7.15706013,7.14619806
54.527856,6.4807407,7.19154699,-0.843093288,7.18074908,7.15570135,7.14484926
54.538347,7.34846923,7.18995586,0.398137369,7.17916716,7.15434274,7.14350025
54.548839,7.34846923,7.18836757,0.400127051,7.1775877,7.15298405,7.14215077
54.55933,7.28010989,7.18678239,0.30549549,7.17601097,7.15162554,7.14080108
54.569822,8.88819442,7.18520001,1.30498828,7.17443665,7.15026695,7.13945092
54.580314,7.34846923,7.18362062,0.40601553,7.17286494,7.14890841,7.13810042
54.590805,7.14142843,7.1820443,-0.201533808,7.17129593,7.14755004,7.13674972
54.601297,6.8556546,7.18047071,-0.56992641,7.16972926,7.1461916,7.13539854
54.611788,7.21110255,7.17890013,0.179450338,7.16816522,7.14483333,7.13404716
54.62228,6.70820393,7.17733223,-0.684929411,7.16660348,7.14347498,7.13269531
54.632772,7,7.17576716,-0.41924594,7.1650442,7.14211669,7.13134313
54.643263,7.21110255,7.17420505,0.192087231,7.16348749,7.14075857,7.12999073
54.653755,6.92820323,7.17264559,-0.494411121,7.16193306,7.13940036,7.12863788
54.664246,7.54983444,7.17108907,0.615422918,7.16038119,7.13804234,7.12728481
54.674738,7.68114575,7.16953518,0.715269574,7.15883157,7.13668424,7.12593129
54.68523,7.41619849,7.1679841,0.498211183,7.15728437,7.1353262,7.12457743
54.695721,7.41619849,7.16643596,0.49976247,7.15573973,7.13396834,7.12322336
54.706213,6.4807407,7.16489045,-0.827133453,7.15419734,7.1326104,7.12186883
54.716704,7.21110255,7.16334786,0.218528471,7.1526575,7.13125265,7.1205141
54.727196,7.68114575,7.16180791,0.720650985,7.15111991,7.12989481,7.11915891
54.737688,7.54983444,7.16027074,0.624150379,7.14958473,7.12853704,7.11780338
54.748179,6.8556546,7.15873652,-0.550528762,7.14805211,7.12717944,7.11644766
54.758671,7.14142843,7.15720496,-0.125604663,7.14652178,7.12582177,7.11509147
54.769162,7.41619849,7.15567637,0.510413671,7.14499403,7.12446429,7.11373508
54.779654,7.21110255,7.15415049,0.238646313,7.1434686,7.12310674,7.11237823
54.790146,7.54983444,7.1526275,0.630243553,7.14194568,7.12174926,7.11102106
54.800637,7.07106781,7.1511076,-0.282913032,7.14042547,7.12039196,7.10966368
54.811129,7.48331477,7.14959046,0.577688766,7.13890764,7.11903459,7.10830585
54.82162,7.48331477,7.14807642,0.578997712,7.13739253,7.11767741,7.10694782
54.832112,7.07106781,7.14656522,-0.274767925,7.13587987,7.11632017,7.10558933
54.842604,6.8556546,7.14505705,-0.537961387,7.13436985,7.11496299,7.10423052
54.853095,7.93725393,7.1435521,0.89089945,7.13286267,7.113606,7.1028715
54.863587,7.81024968,7.14205046,0.817434532,7.13135841,7.11224896,7.10151204
54.874078,7.21110255,7.14055183,0.265613864,7.12985677,7.11089211,7.10015238
54.88457,6.4807407,7.1390563,-0.811366503,7.12835785,7.1095352,7.09879226
54.895062,6.92820323,7.13756413,-0.457559719,7.12686189,7.10817836,7.09743182
54.905553,7.68114575,7.13607556,0.738288686,7.12536915,7.10682174,7.09607119
54.916045,7.34846923,7.13459036,0.462470393,7.12387938,7.10546505,7.0947101
54.926536,7.48331477,7.13310891,0.59178194,7.12239297,7.10410857,7.09334882
54.937028,6.8556546,7.13163102,-0.525334583,7.12090973,7.10275204,7.09198709
54.94752,7.48331477,7.13015697,0.594270815,7.11942993,7.10139559,7.09062504
54.958011,6.08276253,7.12868702,-1.0227045,7.11795384,7.10003935,7.08926279
54.968503,6.78232998,7.12722105,-0.587274266,7.11648132,7.09868306,7.0879001
54.978994,8,7.12575948,0.935008301,7.11501282,7.09732699,7.08653721
54.989486,7.81024968,7.12430223,0.828219446,7.11354823,7.09597088,7.08517388
54.999978,6.8556546,7.12284962,-0.516909102,7.11208788,7.09461487,7.08381023
55.010469,7.48331477,7.12140207,0.601591806,7.11063218,7.09325907,7.08244639
55.020961,7.28010989,7.11995948,0.400187971,7.10918104,7.09190324,7.0810821
55.031452,7.68114575,7.11852237,0.750082246,7.10773499,7.09054764,7.07971763
55.041944,7.93725393,7.11709077,0.9056286,7.10629403,7.089192,7.0783527
55.052436,7.14142843,7.11566513,0.160509482,7.10485863,7.08783646,7.07698747
55.062927,7.61577311,7.11424595,0.708185821,7.10342928,7.08648116,7.07562204
55.073419,7,7.11283334,-0.335906736,7.10200609,7.08512583,7.07425618
55.08391,7.81024968,7.111428,0.835955546,7.10058977,7.08377073,7.07289012
55.094402,6.8556546,7.11003016,-0.504356584,7.09918054,7.08241562,7.07152363
55.104894,7,7.1086405,-0.329606585,7.09777906,7.08106063,7.07015682
55.115385,6.70820393,7.10726008,-0.631708909,7.09638641,7.07970588,7.06878983
55.125877,6.63324958,7.10588907,-0.687487809,7.09500276,7.07835112,7.06742239
55.136368,7.28010989,7.10452847,0.419024362,7.09362911,7.07699661,7.06605478
55.14686,7,7.1031789,-0.321214723,7.09226606,7.0756421,7.06468672
55.157352,7,7.10184145,-0.319126064,7.09091471,7.07428771,7.06331835
55.167843,6.70820393,7.10051734,-0.626349269,7.0895763,7.07293358,7.0619498
55.178335,6.8556546,7.09920757,-0.493510865,7.0882518,7.07157946,7.06058082
55.188826,6.70820393,7.09791381,-0.624267476,7.0869429,7.0702256,7.05921165
55.199318,6.40312424,7.09663743,-0.832774393,7.08565094,7.06887176,7.05784205
55.20981,7.28010989,7.09538038,0.429801709,7.0843779,7.06751806,7.05647214
55.220301,7.34846923,7.09414493,0.504305762,7.08312603,7.06616465,7.05510205
55.230793,6.8556546,7.09293323,-0.487112547,7.08189751,7.06481125,7.05373152
55.241284,8.06225775,7.09174832,0.985144371,7.08069534,7.06345814,7.05236082
55.251776,6.8556546,7.09059319,-0.484704641,7.07952256,7.06210505,7.05098969
55.262268,7.54983444,7.08947174,0.678500328,7.07838304,7.06075212,7.04961825
55.272759,7.07106781,7.08838848,-0.131607999,7.0772813,7.05939949,7.04824663
55.283251,6.92820323,7.08734837,-0.398929993,7.07622232,7.05804689,7.04687458
55.293742,7.28010989,7.08635774,0.440172865,7.07521243,7.0566946,7.04550236
55.304234,6.70820393,7.08542369,-0.614182187,7.07425873,7.05534235,7.04412971
55.314726,7,7.08455515,-0.290783689,7.07337016,7.05399029,7.04275675
55.325217,7.68114575,7.08376532,0.772903891,7.07255995,7.05263854,7.04138363
55.335709,6.78232998,7.08306862,-0.548396419,7.07184252,7.05128685,7.04001007
55.3462,6.55743852,7.08248284,-0.724599416,7.07123571,7.04993548,7.03863634
55.356692,7.41619849,7.08203497,0.578068785,7.07076654,7.04858417,7.03726219
55.367184,6.4807407,7.08176534,-0.775257791,7.07047541,7.04723307,7.03588773
55.377675,6.244998,7.08173618,-0.914733938,7.07042463,7.04588231,7.03451311
55.388167,7.61577311,7.08204533,0.730566751,7.07071221,7.04453162,7.03313806
55.398658,8.06225775,7.08284596,0.989652359,7.07149157,7.04318128,7.03176284
55.40915,7.28010989,7.08437289,0.442421748,7.07299788,7.04183103,7.03038719
55.419642,6.78232998,7.08697208,-0.551943925,7.07557767,7.04048102,7.02901125
55.430133,7,7.09112824,-0.301874552,7.07971646,7.03913137,7.02763515
55.440625,8,7.0974815,0.950009735,7.08605538,7.03778183,7.02625862
55.451116,7.74596669,7.10681156,0.799471784,7.09537541,7.03643265,7.02488192
55.461608,7.41619849,7.11998711,0.544253047,7.10854662,7.03508359,7.02350481
55.4721,7,7.13785057,-0.371282331,7.12641277,7.03373478,7.02212739
55.482591,6.92820323,7.16105494,-0.482547111,7.14962783,7.03238636,7.02074982
55.493083,8.06225775,7.18986929,0.934017377,7.17846118,7.03103807,7.01937183
55.503574,7.74596669,7.22394725,0.722509131,7.21256578,7.02969017,7.01799367
55.514066,8.1240384,7.26214116,0.92838421,7.250792,7.02834242,7.0166151
55.524558,7.68114575,7.3022865,0.615515435,7.29097178,7.02699495,7.01523623
55.535049,7.41619849,7.34097437,0.27427015,7.32969095,7.02564789,7.01385721
55.545541,7.74596669,7.37318613,0.610557582,7.36192323,7.024301,7.01247777
55.556032,7.14142843,7.39366054,-0.502227155,7.38239957,7.02295453,7.01109817
55.566524,7.41619849,7.39814739,0.134354376,7.38686341,7.02160824,7.00971815
55.577016,7.87400787,7.38543735,0.698978199,7.37410348,7.02026225,7.00833785
55.587507,7.48331477,7.35801458,0.353977675,7.34660728,7.01891672,7.00695739
55.597999,7.21110255,7.32069059,-0.331040836,7.30919318,7.01757137,7.00557651
55.60849,6.40312424,7.27862987,-0.935684578,7.2670333,7.01622649,7.00419548
55.618982,7.21110255,7.23608928,-0.158071902,7.22439103,7.01488181,7.00281404
55.629474,8.06225775,7.19611089,0.930670115,7.18431334,7.01353749,7.00143231
55.639965,7.34846923,7.16059392,0.433445855,7.14870278,7.01219366,7.00005043
55.650457,7.28010989,7.1304681,0.386835606,7.11849089,7.01085006,6.99866814
55.660948,8.30662386,7.10591264,1.09576969,7.09385748,7.00950695,6.9972857
55.67144,7.68114575,7.08654292,0.771104939,7.07441752,7.00816409,6.99590284
55.681932,7.48331477,7.07164295,0.641616574,7.059454,7.00682161,6.99451971
55.692423,7,7.06035176,-0.24566596,7.04810464,7.00547965,6.99313643
55.702915,7.34846923,7.05181377,0.54466087,7.03951243,7.00413795,6.99175273
55.713406,7.74596669,7.04528245,0.837068842,7.03292963,7.00279679,6.99036889
55.723898,6.92820323,7.04015709,-0.334595061,7.02775449,7.00145591,6.98898465
55.73439,7.74596669,7.03599209,0.842599906,7.02354068,7.00011546,6.98760012
55.744881,6.92820323,7.03247481,-0.322911097,7.01997499,6.99877556,6.98621545
55.755373,6.63324958,7.02940694,-0.629410328,7.01685876,6.99743598,6.98483037
55.765864,7.48331477,7.02663778,0.675778804,7.01404104,6.99609698,6.98344515
55.776356,7.07106781,7.02408247,0.216761021,7.0114368,6.9947583,6.98205952
55.786848,6.92820323,7.02168898,-0.305754388,7.00899392,6.99342009,6.98067362
55.797339,7.48331477,7.01942307,0.68109596,7.00667809,6.99208248,6.97928758
55.807831,7.07106781,7.01726063,0.231963749,7.00446515,6.99074524,6.97790114
55.818322,6.63324958,7.01518492,-0.618009172,7.00233832,6.98940861,6.97651455
55.828814,7.41619849,7.01318247,0.634835425,7.00028411,6.98807236,6.97512756
55.839306,7.41619849,7.01124316,0.636361003,6.99829233,6.98673664,6.9737403
55.849797,7.61577311,7.00935873,0.778726122,6.99635473,6.98540159,6.97235291
55.860289,7.41619849,7.00752184,0.639278221,6.99446394,6.98406695,6.97096511
55.87078,7,7.00572695,-0.0756766246,6.9926144,6.98273299,6.96957718
55.881272,6.55743852,7.00396873,-0.668229158,6.99080077,6.98139945,6.96818884
55.891764,6.70820393,7.00224311,-0.542253798,6.98901897,6.98006648,6.96680024
55.902255,7,7.00065739,-0.0256396755,6.98737648,6.97873423,6.96541151
55.912747,7.28010989,6.99898669,0.530210528,6.98564797,6.97740243,6.96402238
55.923238,6.63324958,6.99733927,-0.603398449,6.98394193,6.97607137,6.96263311
55.93373,7,6.99571248,0.0654791456,6.98225567,6.9747408,6.96124345
55.944222,7.34846923,6.99410444,0.595285466,6.98058731,6.97341085,6.95985352
55.954713,7.54983444,6.99251352,0.746539293,6.97893518,6.97208167,6.95846347
55.965205,6.55743852,6.99093814,-0.658406876,6.97729771,6.97075302,6.95707302
55.975696,5.83095189,6.98937714,-1.07630165,6.97567372,6.96942517,6.95568244
55.986188,6.78232998,6.98782873,-0.453319699,6.9740614,6.96809787,6.95429147
55.99668,6.55743852,6.986292,-0.654869049,6.97245981,6.96677126,6.95290024
56.007171,7.07106781,6.98476614,0.293771458,6.97086817,6.96544548,6.95150888
56.017663,7.48331477,6.98325005,0.707152545,6.96928532,6.96412029,6.95011713
56.028154,6.8556546,6.98174327,-0.355089663,6.96771081,6.96279597,6.94872525
56.038646,6.40312424,6.98024485,-0.759684547,6.96614367,6.96147227,6.94733298
56.049138,6.63324958,6.97875435,-0.587796538,6.96458342,6.96014934,6.94594046
56.059629,7.61577311,6.97727141,0.799063014,6.96302969,6.95882735,6.94454782
56.070121,7,6.97579523,0.155578812,6.96148168,6.95750603,6.94315478
56.080612,7,6.97432569,0.160232054,6.95993926,6.95618565,6.94176163
56.091104,7.14142843,6.97286209,0.410568308,6.9584017,6.95486597,6.94036808
56.101596,6.92820323,6.97140424,-0.207848519,6.9568688,6.95354713,6.93897429
56.112087,7.41619849,6.96995194,0.668016873,6.95534037,6.95222927,6.93758037
56.122579,7.14142843,6.96850465,0.415841048,6.95381581,6.95091217,6.93618607
56.13307,6.244998,6.96706238,-0.849743713,6.95229514,6.94959608,6.93479165
56.143562,8,6.96562461,1.01704247,6.95077782,6.94828079,6.93339685
56.154054,7.74596669,6.96419128,0.884180644,6.94926376,6.94696642,6.9320018
56.164545,7.28010989,6.96276233,0.563336101,6.94775289,6.94565312,6.93060664
56.175037,6.4807407,6.96133732,-0.693250764,6.94624476,6.94434067,6.92921109
56.185528,7.28010989,6.95991644,0.565856382,6.94473953,6.94302933,6.92781543
56.19602,6.8556546,6.95849918,-0.320693908,6.94323667,6.94171887,6.92641938
56.206512,7.48331477,6.95708554,0.725416593,6.94173616,6.94040944,6.9250231
56.217003,6.78232998,6.95567553,-0.416347872,6.94023801,6.93910117,6.92362669
56.227495,8.60232527,6.95426879,1.28376652,6.93874181,6.93779385,6.92222992
56.237986,7.68114575,6.95286547,0.853393392,6.93724771,6.93648774,6.92083303
56.248478,7.07106781,6.95146522,0.345836074,6.93575534,6.93518261,6.91943576
56.25897,6.4807407,6.9500681,-0.685074744,6.93426473,6.93387862,6.91803825
56.269461,7.81024968,6.94867423,0.928210883,6.93277592,6.93257596,6.91664064
56.279953,7.54983444,6.94728322,0.776241725,6.93128854,6.93127435,6.91524265
56.290444,7.48331477,6.94589529,0.733089003,6.92980282,6.92997407,6.91384455
56.300936,7.14142843,6.9445101,0.443754806,6.92831838,6.92867489,6.91244608
56.311428,7.21110255,6.94312775,0.517662829,6.92683528,6.92737697,6.91104737
56.321919,6.55743852,6.94174831,-0.619927244,6.92535361,6.92608044,6.90964856
56.332411,7.54983444,6.9403715,0.780681073,6.92387301,6.92478509,6.90824937
56.342902,7.54983444,6.93899753,0.781560555,6.92239371,6.92349119,6.90685008
56.353394,7.14142843,6.93762613,0.45144468,6.92091537,6.92219852,6.90545043
56.363886,6.92820323,6.93625739,-0.0897449701,6.91943809,6.92090723,6.90405054
56.374377,6.78232998,6.93489143,-0.390591145,6.91796196,6.91961747,6.90265054
56.384869,7.14142843,6.93352796,0.455961039,6.91648664,6.91832903,6.90125018
56.39536,7.74596669,6.93216726,0.902108324,6.91501241,6.91704218,6.89984972
56.405852,7,6.93080905,0.263041734,6.91353893,6.9157567,6.8984489
56.416344,7,6.92945342,0.265606061,6.91206628,6.91447275,6.89704784
56.426835,6.55743852,6.92810051,-0.608820159,6.91059457,6.91319048,6.89564669
56.437327,6.70820393,6.92675006,-0.467489169,6.90912349,6.91190967,6.89424517
56.447818,6.63324958,6.92540231,-0.540511548,6.90765329,6.91063061,6.89284356
56.45831,7.28010989,6.92405703,0.596701648,6.90618366,6.90935309,6.89144158
56.468802,7.14142843,6.92271434,0.467668777,6.90471471,6.90807725,6.89003938
56.479293,7.74596669,6.92137444,0.908070619,6.90324655,6.90680332,6.88863708
56.489785,7.34846923,6.92003705,0.654547307,6.90177888,6.90553105,6.88723443
56.500276,6.4807407,6.91870242,-0.661786768,6.90031197,6.90426071,6.88583168
56.510768,6.08276253,6.91737031,-0.913568707,6.8988455,6.90299207,6.88442857
56.52126,6.32455532,6.91604086,-0.769080968,6.89737959,6.90172532,6.88302524
56.531751,7.54983444,6.9147142,0.796944313,6.89591437,6.90046059,6.88162182
56.542243,7,6.91339011,0.294295588,6.89444952,6.8991977,6.88021805
56.552734,6.63324958,6.91206886,-0.528033403,6.89298532,6.89793693,6.87881418
56.563226,6.63324958,6.91075022,-0.526783292,6.89152146,6.89667807,6.87740997
56.573718,7.74596669,6.90943434,0.914621424,6.89005807,6.89542129,6.87600553
56.584209,7.21110255,6.90812138,0.550437251,6.88859527,6.89416675,6.874601
56.594701,8.30662386,6.90681112,1.18313682,6.88713277,6.89291426,6.87319613
56.605192,6.92820323,6.90550384,0.15066317,6.88567084,6.89166411,6.87179117
56.615684,6.63324958,6.90419933,-0.520528333,6.88420919,6.8904161,6.87038586
56.626176,7.34846923,6.90289773,0.667511422,6.88274793,6.8891704,6.86898033
56.636667,6.78232998,6.90159921,-0.345353773,6.88128719,6.88792717,6.86757472
56.647159,7.48331477,6.90030356,0.763551709,6.87982669,6.88668624,6.86616876
56.65765,7.07106781,6.89901107,0.414797236,6.87836669,6.88544789,6.86476272
56.668142,6.55743852,6.89772152,-0.583337805,6.8769069,6.88421193,6.86335634
56.678634,6.4807407,6.89643509,-0.644743664,6.87544744,6.88297855,6.86194974
56.689125,7.48331477,6.895152,0.766917712,6.87398846,6.88174795,6.86054307
56.699617,7.28010989,6.89387207,0.621480347,6.87252966,6.88052,6.85913605
56.710108,6.70820393,6.89259553,-0.429408426,6.87107131,6.87929492,6.85772895
56.7206,6.78232998,6.89132219,-0.330139678,6.86961314,6.87807252,6.85632151
56.731092,6.164414,6.89005222,-0.85184401,6.86815526,6.87685299,6.85491387
56.741583,7.07106781,6.88878579,0.426944985,6.8666978,6.87563651,6.85350614
56.752075,7.07106781,6.88752272,0.428421625,6.86524049,6.87442292,6.85209808
56.762566,7.07106781,6.88626331,0.429888939,6.86378358,6.8732125,6.85068995
56.773058,7.21110255,6.88500738,0.571047433,6.86232681,6.8720051,6.84928147
56.78355,6.8556546,6.88375511,-0.167632069,6.86087029,6.87080091,6.84787279
56.794041,6.40312424,6.88250669,-0.692374502,6.85941416,6.86960011,6.84646405
56.804533,7.54983444,6.88126194,0.817662824,6.85795814,6.86840254,6.84505496
56.815024,6.4807407,6.88002118,-0.631886447,6.8565025,6.86720852,6.84364581
56.825516,7.21110255,6.87878424,0.576470561,6.85504697,6.86601789,6.84223632
56.836008,6.70820393,6.87755132,-0.41151839,6.85359166,6.86483084,6.84082663
56.846499,6.78232998,6.8763226,-0.306582148,6.85213672,6.86364758,6.83941687
56.856991,7,6.87509793,0.353414876,6.85068186,6.86246795,6.83800679
56.867482,7.07106781,6.87387762,0.444061024,6.84922735,6.86129228,6.83659663
56.877974,7.41619849,6.87266153,0.73724959,6.84777291,6.86012043,6.83518615
56.888466,7.48331477,6.87144986,0.782217946,6.84631869,6.8589526,6.83377547
56.898957,7.34846923,6.87024284,0.691539148,6.8448648,6.85778902,6.83236473
56.909449,6.78232998,6.86904047,-0.294466452,6.84341098,6.85662972,6.83095365
56.91994,6.8556546,6.86784294,-0.110400793,6.84195749,6.85547485,6.82954252
56.930432,7.81024968,6.8666501,0.971390539,6.84050406,6.85432429,6.82813106
56.940924,7.61577311,6.86546217,0.866204905,6.83905083,6.85317827,6.82671941
56.951415,7.14142843,6.86427937,0.526449487,6.83759792,6.852037,6.8253077
56.961907,7.07106781,6.86310157,0.456033156,6.83614506,6.85090038,6.82389567
56.972398,6.4807407,6.86192912,-0.617404588,6.83469252,6.84976873,6.82248358
56.98289,6.78232998,6.86076191,-0.280057013,6.83324001,6.84864196,6.82107116
56.993382,6.92820323,6.85960017,0.261921856,6.83178768,6.84752031,6.81965856
57.003873,6.92820323,6.85844413,0.264119478,6.83033567,6.846404,6.8182459
57.014365,6.4807407,6.8572937,-0.613639146,6.82888369,6.84529295,6.81683292
57.024856,7.14142843,6.85614923,0.534115346,6.82743201,6.84418751,6.81541989
57.035348,6.70820393,6.85501063,-0.383153623,6.82598037,6.8430876,6.81400654
57.04584,6.92820323,6.85387816,0.272626243,6.8245289,6.84199347,6.81259301
57.056331,7.34846923,6.85275207,0.704071843,6.82307773,6.84090538,6.81117943
57.066823,7.14142843,6.85163228,0.538327175,6.82162659,6.83982326,6.80976553
57.077314,6.8556546,6.85051917,0.0716619135,6.82017574,6.83874747,6.80835158
57.087806,6.4807407,6.84941268,-0.607183648,6.81872492,6.83767798,6.80693732
57.098298,6.244998,6.84831308,-0.776733598,6.81727426,6.83661505,6.80552287
57.108789,6.244998,6.84722065,-0.776030056,6.8158239,6.83555894,6.80410838
57.119281,6.8556546,6.8461356,0.0975653815,6.81437355,6.8345099,6.80269358
57.129772,7.28010989,6.84505814,0.65958453,6.81292351,6.83346812,6.80127874
57.140264,7.41619849,6.8439882,0.756445826,6.81147349,6.83243354,6.79986358
57.150756,7.28010989,6.84292607,0.661198773,6.81002363,6.83140644,6.79844824
57.161247,7.61577311,6.84187205,0.879716461,6.80857407,6.83038712,6.79703287
57.171739,6.92820323,6.84082615,0.295596145,6.80712453,6.82937559,6.79561719
57.18223,6.32455532,6.83978877,-0.717797638,6.80567529,6.82837227,6.79420146
57.192722,8.24621125,6.83875994,1.18636053,6.80422606,6.82737718,6.79278543
57.203214,7.28010989,6.83773998,0.665108947,6.802777,6.82639064,6.79136923
57.213705,6.40312424,6.83672922,-0.658486892,6.80132823,6.82541299,6.78995299
57.224197,6.70820393,6.83572773,-0.357104737,6.79987948,6.82444427,6.78853645
57.234688,7.74596669,6.83473593,0.95458408,6.79843104,6.82348494,6.78711987
57.24518,7.61577311,6.8337539,0.884318499,6.79698261,6.82253506,6.78570299
57.255672,6.40312424,6.83278201,-0.655482851,6.79553436,6.82159501,6.78428594
57.266163,6.4807407,6.83182062,-0.592519975,6.7940864,6.82066513,6.78286885
57.276655,6.244998,6.83086984,-0.765422657,6.79263848,6.81974555,6.78145147
57.287146,6.40312424,6.82993016,-0.65330385,6.79119085,6.81883674,6.78003406
57.297638,7.21110255,6.82900169,0.618143071,6.78974327,6.81793884,6.77861634
57.30813,6.40312424,6.82808486,-0.651890042,6.78829585,6.81705225,6.77719847
57.318621,7.68114575,6.82718009,0.924102624,6.78684874,6.8161774,6.77578056
57.329113,7.54983444,6.82628782,0.850615435,6.78540168,6.81531473,6.77436236
57.339604,5.83095189,6.82540859,-0.997224496,6.78395493,6.81446478,6.77294413
57.350096,6.55743852,6.82454236,-0.516820892,6.78250822,6.8136275,6.77152561
57.360588,6.4807407,6.82368959,-0.585618384,6.78106171,6.81280335,6.77010692
57.371079,7,6.82285077,0.420890997,6.77961553,6.81199281,6.76868822
57.381571,6.55743852,6.82202615,-0.514380813,6.7781694,6.81119615,6.76726922
57.392062,6.40312424,6.82121631,-0.646600395,6.77672361,6.81041393,6.7658502
57.402554,6.78232998,6.82042155,-0.195170621,6.77527788,6.80964647,6.76443088
57.413046,6.92820323,6.81964243,0.329485666,6.77383235,6.80889429,6.76301142
57.423537,6.55743852,6.81887948,-0.511312974,6.77238717,6.80815796,6.76159193
57.434029,7.74596669,6.81813308,0.963241203,6.77094207,6.80743782,6.76017216
57.44452,7.54983444,6.81740388,0.855821567,6.76949732,6.80673455,6.75875236
57.455012,7.34846923,6.8166923,0.729230369,6.76805266,6.80604854,6.75733228
57.465504,6.4807407,6.81599897,-0.579014911,6.76660823,6.80538042,6.75591205
57.475995,6.08276253,6.81532454,-0.855898361,6.76516417,6.80473084,6.75449181
57.486487,6.55743852,6.81466949,-0.507179423,6.76372022,6.80410029,6.75307128
57.496978,6.164414,6.8140346,-0.805990443,6.76227665,6.80348952,6.75165074
57.50747,7,6.8134204,0.431948611,6.76083321,6.80289907,6.75022991
57.517962,5.74456265,6.81282764,-1.03356906,6.75939002,6.80232969,6.74880894
57.528453,6.55743852,6.81225712,-0.504795594,6.75794725,6.80178214,6.74738796
57.538945,7.21110255,6.81170968,0.631975376,6.75650461,6.80125729,6.7459667
57.549436,6.4807407,6.81118685,-0.574844457,6.75506241,6.80075666,6.74454542
57.559928,7.07106781,6.81068857,0.510273694,6.75362037,6.80028017,6.74312388
57.57042,6.63324958,6.81021575,-0.420673473,6.75217864,6.79982872,6.74170218
57.580911,6.40312424,6.80976934,-0.637687304,6.75073737,6.79940324,6.74028049
57.591403,7.07106781,6.80935017,0.511583466,6.74929631,6.79900457,6.73885851
57.601894,7.07106781,6.80895931,0.511965337,6.74785572,6.79863377,6.73743654
57.612386,8.24621125,6.80859769,1.19900524,6.74641535,6.79829176,6.73601429
57.622878,7.07106781,6.80826644,0.512641566,6.74497535,6.79797965,6.7345919
57.633369,6.32455532,6.80796668,-0.695277902,6.74353587,6.79769857,6.73316951
57.643861,6.4807407,6.80769954,-0.57180315,6.74209666,6.79744961,6.73174684
57.654352,5.83095189,6.80746629,-0.988187427,6.74065799,6.79723405,6.73032418
57.664844,6.244998,6.80726816,-0.749846757,6.73921961,6.79705309,6.72890125
57.675336,6.63324958,6.80710652,-0.416961554,6.73778169,6.79690811,6.72747818
57.685827,5.91607978,6.80698279,-0.943876583,6.73634436,6.79680048,6.72605512
57.696319,6.92820323,6.80689841,0.348288414,6.73490739,6.79673165,6.72463179
57.70681,6.4807407,6.80685496,-0.571064145,6.73347106,6.79670317,6.72320847
57.717302,7.07106781,6.80685403,0.514017296,6.73203512,6.79671663,6.72178488
57.727794,6.40312424,6.80689735,-0.635431438,6.73059974,6.79677371,6.72036116
57.738285,6.8556546,6.80698669,0.220608048,6.72916507,6.79687618,6.71893745
57.748777,6.164414,6.80712394,-0.801691924,6.72773086,6.7970259,6.71751348
57.759268,6.92820323,6.80731316,0.347692496,6.72629743,6.79722691,6.71608951
57.76976,6.4807407,6.80755472,-0.571676503,6.72486452,6.79747956,6.71466528
57.780252,6.92820323,6.80785064,0.346918708,6.72343231,6.79778583,6.71324093
57.790743,6.55743852,6.8082032,-0.50076409,6.72200098,6.79814796,6.7118166
57.801235,6.70820393,6.80861492,-0.316876922,6.7205703,6.79856843,6.710392
57.811726,6.92820323,6.80908827,0.345130358,6.71914057,6.7990497,6.70896742
57.822218,6.40312424,6.80962605,-0.637574949,6.71771154,6.79959455,6.70754258
57.83271,7.21110255,6.8102311,0.633144102,6.71628341,6.80020575,6.70611762
57.843201,7.74596669,6.81090635,0.966985182,6.71485636,6.80088621,6.70469267
57.853693,7.07106781,6.81165513,0.509325708,6.71343016,6.80163921,6.70326748
57.864184,7.07106781,6.81248068,0.508514632,6.71200515,6.80246794,6.7018423
57.874676,6.244998,6.81338671,-0.753915588,6.71058111,6.80337607,6.70041687
57.885168,7.68114575,6.81437693,0.931004199,6.70915823,6.80436724,6.69899132
57.895659,7.28010989,6.81545523,0.681655825,6.70773672,6.80544529,6.6975658
57.906151,7.14142843,6.81662604,0.569914373,6.70631639,6.80661459,6.69614002
57.916642,6.40312424,6.81789363,-0.644025925,6.70489758,6.80787935,6.69471427
57.927134,5.91607978,6.819263,-0.950359522,6.7034801,6.80924448,6.69328827
57.937626,6.8556546,6.8207391,0.186856892,6.70206418,6.81071485,6.69186216
57.948117,6.70820393,6.82232714,-0.337821265,6.70065005,6.8122956,6.69043608
57.958609,7.74596669,6.82403312,0.96017372,6.69923755,6.81399263,6.68900975
57.9691,6.63324958,6.82586635,-0.438881271,6.69782706,6.81581517,6.68758344
57.979592,6.8556546,6.82783277,0.16679877,6.69641844,6.81776902,6.6861569
57.990084,7.54983444,6.82993705,0.848467672,6.69501196,6.81985875,6.68473025
58.000575,6.92820323,6.83218635,0.309865905,6.69360789,6.8220914,6.68330362
58.011067,7.54983444,6.83458913,0.845721768,6.69220625,6.82447516,6.68187676
58.021558,7.14142843,6.83715324,0.551611446,6.69080736,6.82701784,6.68044993
58.03205,6,6.83988821,-0.91645415,6.68941115,6.82972881,6.67902286
58.042542,7.07106781,6.84280343,0.477770216,6.68801797,6.83261726,6.67759569
58.053033,7.07106781,6.84590893,0.474509092,6.68662817,6.83569305,6.67616856
58.063525,6.55743852,6.84921637,-0.540164649,6.68524174,6.83896759,6.67474119
58.074016,6.63324958,6.85273698,-0.468494826,6.68385921,6.8424519,6.67331385
58.084508,6.63324958,6.85648418,-0.472477087,6.68248062,6.84615911,6.67188628
58.095,6.40312424,6.86047132,-0.676274417,6.68110644,6.85010232,6.67045862
58.105491,7,6.86471274,0.36781417,6.67973715,6.85429551,6.66903099
58.115983,6.78232998,6.86922507,-0.294779721,6.6783729,6.85875499,6.66760313
58.126474,7.21110255,6.87402455,0.58058419,6.67701439,6.8634966,6.66617531
58.136966,6.08276253,6.87913052,-0.892394524,6.67566187,6.86853925,6.66474727
58.147458,6.63324958,6.88456244,-0.501311136,6.67431601,6.87390192,6.66331913
58.157949,6.55743852,6.89034128,-0.576977262,6.67297755,6.87960506,6.66189103
58.168441,6.70820393,6.89649142,-0.433921061,6.67164692,6.88567243,6.66046271
58.178932,7.61577311,6.90304294,0.844233477,6.67032515,6.89213348,6.65903444
58.189424,6.244998,6.91003303,-0.815496802,6.66901284,6.89902465,6.65760594
58.199916,7.34846923,6.91747907,0.656498407,6.66771109,6.90636246,6.65617735
58.210407,7.61577311,6.92541299,0.830879124,6.66642112,6.91417792,6.65474881
58.220899,6.4807407,6.93387242,-0.673150596,6.66514437,6.92250713,6.65332005
58.23139,7.61577311,6.94289453,0.820291763,6.66388234,6.93138622,6.65189134
58.241882,6.70820393,6.95252352,-0.494286953,6.66263625,6.94085815,6.65046241
58.252374,6.63324958,6.96280531,-0.574069447,6.66140808,6.95096722,6.64903339
58.262865,7.41619849,6.9737902,0.665137795,6.66020007,6.96176195,6.64760443
58.273357,6.55743852,6.985537,-0.654292351,6.65901446,6.97329901,6.64617525
58.283848,8.18535277,6.99810626,1.08960842,6.65785431,6.98563656,6.64474613
58.29434,6.40312424,7.01157023,-0.780029481,6.6567227,6.99884404,6.64331679
58.304832,7.07106781,7.02600598,0.212277713,6.65562359,7.01299526,6.64188737
58.315323,7.14142843,7.04150019,0.316114277,6.6545616,7.02817313,6.64045801
58.325815,7,7.05815602,-0.241155593,6.65354187,7.04447625,6.63902844
58.336306,7.34846923,7.07608538,0.52190406,6.65257104,7.06201121,6.63759893
58.346798,6.63324958,7.09542518,-0.679834976,6.6516568,7.08090828,6.63616921
58.35729,7.41619849,7.11633065,0.547601899,6.65080915,7.10131443,6.63473941
58.367781,6.164414,7.13898626,-0.987204263,6.65004117,7.12340329,6.63330967
58.378273,7.48331477,7.16362123,0.565414485,6.64937055,7.14738898,6.63187973
58.388764,7.48331477,7.19050808,0.541116155,6.64882305,7.17352242,6.63044986
58.399256,7.74596669,7.22011967,0.725153102,6.64843683,7.20224402,6.62901977
58.409748,7,7.25278901,-0.502781274,6.64827048,7.23383662,6.62758962
58.420239,8.06225775,7.28905909,0.879317156,6.6484138,7.2687665,6.62615953
58.430731,8,7.32963628,0.818757422,6.64901434,7.30761342,6.62472925
58.441222,8.42614977,7.37539892,1.02506139,6.65029721,7.3510643,6.62329903
58.451714,5.74456265,7.42743024,-1.29725387,6.65254909,7.39996314,6.62186861
58.462206,7.87400787,7.48705026,0.622059171,6.65617235,7.4552996,6.62043812
58.472697,8.30662386,7.55582408,0.866487035,6.66167548,7.51823254,6.61900771
58.483189,8,7.63556685,0.603682987,6.66965686,7.5901176,6.6175771
58.49368,8.54400375,7.72823841,0.903197287,6.68075117,7.67245906,6.61614656
58.504172,8.60232527,7.83590754,0.875452869,6.69555233,7.76694866,6.61471583
58.514664,7.68114575,7.9605555,-0.528592233,6.7144906,7.87537928,6.61328504
58.525155,8.83176087,8.10393247,0.853128593,6.73769796,7.99961032,6.61185432
58.535647,9,8.26743365,0.855900902,6.76487539,8.14153657,6.61042341
58.546138,9.05538514,8.45183699,0.776883611,6.79514251,8.30291333,6.60899258
58.55663,8.83176087,8.65727816,0.417711274,6.82693215,8.48535988,6.60756156
58.567122,9.53939201,8.88301479,0.810171106,6.85785813,8.69014923,6.60613048
58.577613,10.0498756,9.12743902,0.960435629,6.88469846,8.91813464,6.60469949
58.588105,9.05538514,9.38837124,-0.577049482,6.9036878,9.16971982,6.6032683
58.598596,9.79795897,9.66352499,0.3666524,6.91137486,9.44462107,6.6018372
58.609088,9.74679434,9.9525046,-0.45355292,6.90596085,9.74296724,6.60040591
58.61958,10.7238053,10.2543652,0.685156951,6.88818174,10.0623767,6.59897458
58.630071,10.7703296,10.5689451,0.448758866,6.8609545,10.3998789,6.59754333
58.640563,11.61895,10.8959742,0.850279836,6.82808296,10.7521268,6.59611189
58.651054,11.3137085,11.233591,0.28305031,6.79318283,11.114677,6.59468054
58.661546,11.3578167,11.578177,-0.469425465,6.75912747,11.48213,6.59324902
58.672038,12.4498996,11.9238768,0.725274303,6.72774298,11.8477158,6.59181744
58.682529,12.6095202,12.2628354,0.588799455,6.70011969,12.2032256,6.59038596
58.693021,13.0384048,12.5853492,0.673094078,6.67672898,12.5390041,6.5889543
58.703512,12,12.8798651,-0.938011249,6.65756981,12.8437979,6.58752273
58.714004,12.2065556,13.1337619,-0.96291552,6.64229072,13.105429,6.58609098
58.724496,12.5299641,13.3341259,-0.896750703,6.63034225,13.3114692,6.5846592
58.734987,12.5299641,13.4692732,-0.969179583,6.62109415,13.4506995,6.58322751
58.745479,13.4164079,13.5304112,-0.337643733,6.6139287,13.514733,6.58179564
58.75597,13.4164079,13.5130147,-0.310816373,6.60830618,13.499372,6.58036388
58.766462,12.8062485,13.4176716,-0.781935516,6.60378682,13.4054562,6.57893194
58.776954,13.6381817,13.2499077,0.62311632,6.60003801,13.2386955,6.57749997
58.787445,13.96424,13.0191623,0.97215109,6.59682035,13.0086594,6.57606809
58.797937,12,12.7371313,-0.858563521,6.59396823,12.7271339,6.57463605
58.808428,13.0384048,12.4163357,0.788713564,6.59137241,12.4067004,6.57320411
58.81892,11.7898261,12.0685864,-0.527977518,6.58896075,12.0592106,6.57177201
58.829412,11.8743421,11.7052279,0.411235005,6.58668698,11.6960369,6.57033987
58.839903,11.2694277,11.3356851,-0.257405108,6.5845207,11.3266232,6.56890784
58.850395,10.7238053,10.9673268,-0.493478936,6.58244064,10.9583515,6.56747564
58.860886,9.69535971,10.6063093,-0.954436801,6.58043441,10.5973869,6.56604356
58.871378,9.89949494,10.2574801,-0.598318647,6.57848862,10.2485857,6.56461131
58.88187,10.5830052,9.92477367,0.811314722,6.57659418,9.91588928,6.56317903
58.892361,9.69535971,9.61121664,0.290074257,6.57474444,9.60233007,6.56174686
58.902853,9.16515139,9.31892472,-0.392139433,6.57293337,9.31002856,6.56031454
58.913344,9.11043358,9.04936245,0.247125745,6.57115654,9.04045352,6.55888233
58.923836,9.11043358,8.80317698,0.554307316,6.56940956,8.79425568,6.55744996
58.934328,8.66025404,8.58044282,0.282508787,6.56768912,8.57151241,6.55601757
58.944819,7.93725393,8.38065138,-0.665880955,6.56599241,8.37171725,6.55458529
58.955311,8,8.20275417,-0.450282318,6.5643165,8.19382311,6.55315286
58.965802,7.87400787,8.04539669,-0.413991328,6.56265949,8.03647626,6.55172055
58.976294,7.54983444,7.90689039,-0.597541589,6.5610191,7.89798823,6.55028809
58.986786,7.54983444,7.7854334,-0.485385377,6.55939379,7.77655683,6.54885561
58.997277,7.74596669,7.6791569,0.258475896,6.55778221,7.67031254,6.54742325
59.007769,8.18535277,7.58618501,0.774059273,6.55618275,7.57737855,6.54599074
59.01826,7.81024968,7.50477192,0.552700423,6.55459454,7.49600801,6.54455836
59.028752,7.93725393,7.43332351,0.709880566,6.55301626,7.42460584,6.54312582
59.039244,7.21110255,7.37062142,-0.399398138,6.55144715,7.36195296,6.54169328
59.049735,8,7.31499698,0.82764909,6.54988654,7.30637935,6.54026086
59.060227,7.68114575,7.26535611,0.64481752,6.54833342,7.25679022,6.53882829
59.070718,7.68114575,7.22078927,0.678495743,6.54678756,7.2122753,6.53739586
59.08121,7.21110255,7.18051913,0.174881169,6.5452481,7.17205677,6.53596328
59.091702,7.54983444,7.1439122,0.637120266,6.54371448,7.13550094,6.53453069
59.102193,6.55743852,7.11044655,-0.743645092,6.5421864,7.1020856,6.53309824
59.112685,6.92820323,7.07968536,-0.389207055,6.54066314,7.07137374,6.53166564
59.123176,7.14142843,7.0512817,0.30024444,6.53914463,7.04301829,6.53023318
59.133668,6.32455532,7.02494051,-0.836890188,6.53763022,7.01672412,6.52880058
59.14416,6.70820393,7.0004255,-0.540575222,6.53611975,6.99225491,6.52736798
59.154651,7,6.97754011,0.149866232,6.53461308,6.96941406,6.52593552
59.165143,6.92820323,6.95611328,-0.167063009,6.53310968,6.94803053,6.52450292
59.175634,7.41619849,6.93600784,0.692957897,6.53160958,6.92796718,6.52307046
59.186126,6.63324958,6.91709882,-0.532775041,6.5301123,6.90909907,6.52163787
59.196618,6.8556546,6.89928329,-0.208874819,6.52861777,6.89132329,6.52020528
59.207109,7.81024968,6.88247096,0.963212704,6.52712597,6.8745496,6.51877283
59.217601,6.164414,6.86657743,-0.837951924,6.52563644,6.85869364,6.51734025
59.228092,7.07106781,6.85153352,0.468544862,6.52414932,6.84368628,6.51590781
59.238584,7,6.83727152,0.403396186,6.52266418,6.82945983,6.51447525
59.249076,6,6.82376026,-0.907612395,6.52118103,6.81598321,6.51304269
59.259567,6.164414,6.81092373,-0.804058284,6.51969991,6.8031804,6.51161028
59.270059,6.78232998,6.79870624,-0.127969746,6.5182205,6.79099568,6.51017775
59.28055,7.14142843,6.78706655,0.595283023,6.51674282,6.77938799,6.50874536
59.291042,5.83095189,6.77596295,-0.97211679,6.51526663,6.76831554,6.50731285
59.301534,7,6.76536014,0.484396389,6.51379192,6.7577431,6.50588036
59.312025,6.40312424,6.75522569,-0.593381374,6.51231875,6.7476383,6.50444801
59.322517,6,6.74552702,-0.863439064,6.51084677,6.73796856,6.50301555
59.333008,6.32455532,6.73623771,-0.641624807,6.50937618,6.72870752,6.50158324
59.3435,7.21110255,6.72732998,0.695537614,6.50790665,6.71982739,6.50015081
59.353992,5.47722558,6.71878069,-1.11425092,6.50643826,6.71130508,6.4987184
59.364483,6.244998,6.71056841,-0.682327199,6.50497108,6.70311919,6.49728614
59.374975,6.40312424,6.70267102,-0.547308674,6.50350479,6.69524761,6.49585378
59.385466,6,6.69507103,-0.8337092,6.50203962,6.68767287,6.49442157
59.395958,6.08276253,6.68774934,-0.777808982,6.50057524,6.68037589,6.49298924
59.40645,6.244998,6.68069034,-0.660069949,6.49911175,6.67334109,6.49155694
59.416941,6.164414,6.67387946,-0.71376849,6.49764926,6.66655392,6.49012481
59.427433,5.91607978,6.66730127,-0.866730345,6.49618744,6.65999896,6.48869256
59.437924,6.244998,6.6609439,-0.644938677,6.49472653,6.65366435,6.48726047
59.448416,7.07106781,6.65479385,0.645192964,6.49326624,6.64753663,6.48582828
59.458908,6.55743852,6.64884484,-0.302334774,6.49180666,6.64160952,6.48439612
59.469399,7.21110255,6.6430856,0.753668995,6.4903479,6.63587177,6.48296412
59.479891,6.92820323,6.63750093,0.53916816,6.48888967,6.63030819,6.48153202
59.490382,7.07106781,6.63208266,0.66255955,6.48743221,6.62491062,6.48010009
59.500874,6.164414,6.62682114,-0.68000525,6.48597524,6.61966943,6.47866805
59.511366,5.74456265,6.62170881,-0.936560815,6.48451887,6.61457704,6.47723605
59.521857,6.8556546,6.61673853,0.488790417,6.48306319,6.60962637,6.47580422
59.532349,5.91607978,6.61190226,-0.834159742,6.48160793,6.60480936,6.47437229
59.54284,6.164414,6.60719424,-0.665417341,6.48015332,6.60012029,6.47294053
59.553332,6.78232998,6.60260731,0.423937105,6.47869909,6.59555199,6.47150868
59.563824,6.164414,6.59794478,-0.658430544,6.47705052,6.59109904,6.47007687
59.574315,7.34846923,6.59358418,0.868841208,6.47559764,6.58675631,6.46864523
59.584807,6.40312424,6.58932806,-0.431513405,6.47414508,6.58251777,6.4672135
59.595298,7,6.5851723,0.644071191,6.4726931,6.57837932,6.46578194
59.60579,6.4807407,6.58111149,-0.316813499,6.47124142,6.57433554,6.4643503
59.616282,6.4807407,6.57714166,-0.310485041,6.46979015,6.57038247,6.4629187
59.626773,6.63324958,6.57325905,0.244929648,6.46833944,6.56651637,6.46148728
59.637265,6.63324958,6.56945902,0.252567933,6.46688898,6.56273261,6.46005577
59.647756,6.40312424,6.56573862,-0.40325474,6.46543905,6.55902823,6.45862444
59.658248,6.92820323,6.56209366,0.605069885,6.46398935,6.55539905,6.45719303
59.66874,7,6.55852194,0.664438156,6.46254003,6.55184288,6.45576167
59.679231,6.244998,6.55502221,-0.556798177,6.46109119,6.54835848,6.45433049
59.689723,6.55743852,6.55158834,0.076486501,6.45964257,6.54493973,6.45289923
59.700214,6.92820323,6.5482182,0.616429254,6.45819443,6.5415845,6.45146816
59.710706,7.93725393,6.54490853,1.17997686,6.45674649,6.53828952,6.45003701
59.721198,6.92820323,6.54165714,0.621728306,6.45529888,6.53505262,6.44860591
59.731689,6.40312424,6.53846196,-0.367882757,6.45385172,6.53187173,6.447175
59.742181,5.91607978,6.53532012,-0.786918253,6.45240474,6.52874399,6.44574402
59.752672,6.244998,6.53223008,-0.53594037,6.4509582,6.52566787,6.44431323
59.763164,6.08276253,6.52918921,-0.668151689,6.44951182,6.52264073,6.44288236
59.773656,7.21110255,6.52619587,0.827590888,6.44806573,6.51966095,6.44145155
59.784147,6.08276253,6.5232485,-0.663691171,6.44662007,6.51672696,6.44002094
59.794639,5.91607978,6.52034478,-0.777344836,6.44517456,6.51383645,6.43859025
59.80513,6.08276253,6.51748358,-0.659333794,6.44372946,6.51098831,6.43715977
59.815622,6.32455532,6.51466278,-0.436013136,6.4422845,6.50818039,6.43572921
59.826114,5.47722558,6.51188111,-1.01718019,6.44083981,6.50541146,6.43429872
59.836605,5.74456265,6.50913741,-0.874399657,6.43939551,6.50268032,6.43286843
59.847097,5.65685425,6.50642975,-0.921724197,6.43795135,6.49998509,6.43143807
59.857588,6.63324958,6.50375733,0.359850317,6.43650757,6.49732495,6.43000791
59.86808,6.55743852,6.50111839,0.237318641,6.43506392,6.49469813,6.42857769
59.878572,6.8556546,6.49851197,0.597614116,6.43362051,6.4921037,6.42714754
59.889063,5.83095189,6.49593845,-0.815467077,6.43217749,6.48954203,6.4257176
59.899555,6.63324958,6.49339496,0.373971413,6.43073458,6.48701026,6.4242876
59.910046,6,6.49088085,-0.700628895,6.42929204,6.48450772,6.4228578
59.920538,5.74456265,6.48839463,-0.862456943,6.42784961,6.48203294,6.42142794
59.93103,5.56776436,6.48593558,-0.95821251,6.42640742,6.4795852,6.41999816
59.941521,5.83095189,6.48350301,-0.807806361,6.42496559,6.47716382,6.41856859
59.952013,6.4807407,6.48109559,-0.0188384619,6.42352387,6.47476745,6.41713896
59.962504,6.8556546,6.47871291,0.613955769,6.42208251,6.47239572,6.41570955
59.972996,5.83095189,6.47635373,-0.803369054,6.42064123,6.47004736,6.41428008
59.983488,6,6.4740175,-0.688489285,6.41920019,6.46772182,6.41285069
59.993979,6.4807407,6.47170368,0.0950632459,6.4177595,6.46541858,6.41142152
60.004471,6.08276253,6.46941112,-0.621810738,6.4163189,6.4631365,6.4099923
60.014962,6,6.46713959,-0.683476105,6.41487865,6.46087532,6.4085633
60.025454,6.63324958,6.46488797,0.41031891,6.41343849,6.45863395,6.40713424
60.035946,7.07106781,6.46265587,0.780007655,6.41199854,6.45641198,6.40570528
60.046437,5.47722558,6.46044288,-0.991573146,6.41055894,6.45420902,6.40427653
60.056929,6.4807407,6.45824799,0.149975679,6.40911942,6.45202406,6.40284774
60.06742,6.70820393,6.45607107,0.502128329,6.40768026,6.44985697,6.40141917
60.077912,6.32455532,6.45391116,-0.35966073,6.40624116,6.44770677,6.39999056
60.088404,6,6.45176795,-0.672136851,6.40480228,6.44557318,6.39856204
60.098895,6.32455532,6.44964158,-0.353675362,6.40336374,6.44345633,6.39713375
60.109387,5.56776436,6.44753096,-0.93795874,6.40192528,6.44135513,6.39570541
60.119878,5.09901951,6.44543575,-1.16035177,6.40048716,6.43926925,6.39427731
60.13037,5.91607978,6.44335512,-0.726137269,6.39904911,6.43719784,6.39284916
60.140862,6.40312424,6.44128883,-0.195357593,6.39761127,6.43514069,6.39142112
60.151353,5.91607978,6.43934389,-0.723369965,6.39628172,6.43309756,6.3899933
60.161845,7.07106781,6.43730517,0.796092109,6.39484439,6.43106768,6.38856545
60.172336,5.56776436,6.43527978,-0.931405079,6.3934074,6.42905106,6.38713784
60.182828,7.28010989,6.43326699,0.920240674,6.39197047,6.42704693,6.38571018
60.19332,6.164414,6.43126662,-0.516577796,6.39053375,6.42505514,6.38428264
60.203811,6.8556546,6.42927852,0.652974791,6.38909736,6.42307553,6.38285533
60.214303,6.55743852,6.42730198,0.360744428,6.38766105,6.4211074,6.38142798
60.224794,6.244998,6.42533706,-0.424663464,6.38622507,6.41915079,6.38000088
60.235286,6.92820323,6.42338306,0.71050698,6.38478916,6.41720503,6.37857375
60.245778,5.38516481,6.42143989,-1.01797597,6.38335345,6.41527001,6.37714673
60.256269,6,6.41950743,-0.64769393,6.38191808,6.41334563,6.37571995
60.266761,6.40312424,6.41758504,-0.120253057,6.38048278,6.41143123,6.37429315
60.277252,6.32455532,6.41567281,-0.301856734,6.37904781,6.40952691,6.37286659
60.287744,5.09901951,6.41377012,-1.14662575,6.3776129,6.40763205,6.37144
60.298236,6.244998,6.4118769,-0.408508144,6.3761782,6.40574659,6.37001353
60.308727,5.74456265,6.40999322,-0.815739283,6.37474384,6.40387058,6.36858731
60.319219,5.74456265,6.40811861,-0.814589447,6.37330954,6.40200357,6.36716107
60.32971,6.40312424,6.40625292,-0.0559346569,6.37187558,6.4001454,6.36573508
60.340202,5.38516481,6.40439558,-1.0095696,6.37044169,6.3982955,6.36430907
60.350694,4.79583152,6.40254655,-1.26756263,6.369008,6.39645384,6.36288318
60.361185,5.56776436,6.4007058,-0.912656252,6.36757464,6.39462039,6.36145754
60.371677,6.63324958,6.39887278,0.484124782,6.36614136,6.39279459,6.36003188
60.382168,5.74456265,6.39704764,-0.807765432,6.36470841,6.3909766,6.35860649
60.39266,5.83095189,6.39522986,-0.751184372,6.36327552,6.38916589,6.35718108
60.403152,6.78232998,6.39341941,0.623626947,6.36184284,6.38736245,6.35575579
60.413643,6.244998,6.39161631,-0.382907709,6.3604105,6.38556628,6.35433076
60.424135,5.83095189,6.38982004,-0.747574839,6.35897823,6.38377687,6.35290573
60.434626,6.40312424,6.38803076,0.122855508,6.35754629,6.38199439,6.35148095
60.445118,6.55743852,6.38624799,0.41375178,6.35611443,6.38021834,6.35005617
60.45561,6.244998,6.38447173,-0.373461826,6.35468276,6.37844874,6.34863151
60.466101,6.40312424,6.38270201,0.142906348,6.35325144,6.37668561,6.34720712
60.476593,5.83095189,6.38093834,-0.741610713,6.35182019,6.37492846,6.34578273
60.487084,6.40312424,6.37918092,0.154736283,6.35038927,6.37317749,6.3443586
60.497576,6.32455532,6.37742927,-0.229943361,6.34895843,6.37143223,6.34293447
60.508068,7.21110255,6.37568343,0.91401265,6.34752779,6.36969271,6.34151047
60.518559,6.244998,6.37394343,-0.359089732,6.3460975,6.36795897,6.34008675
60.529051,6.40312424,6.37220906,0.175827124,6.34466727,6.36623078,6.33866302
60.539542,6.78232998,6.37048027,0.641755182,6.34323739,6.36450812,6.33723957
60.550034,6.8556546,6.36875661,0.697780758,6.34180758,6.36279053,6.33581612
60.560526,6.55743852,6.36703815,0.436348917,6.34037798,6.36107805,6.3343928
60.571017,6,6.36532492,-0.604421142,6.33894873,6.35937076,6.33296977
60.581509,6.70820393,6.36361649,0.58701571,6.33751955,6.3576682,6.33154674
60.592,6.8556546,6.36191308,0.70266743,6.33609071,6.3559706,6.33012399
60.602492,6.40312424,6.36021427,0.207147208,6.33466195,6.35427753,6.32870124
60.612984,6.8556546,6.35853015,0.705070531,6.33324347,6.35258906,6.32727864
60.623475,6.55743852,6.35684072,0.44788146,6.33181528,6.35090525,6.32585632
60.633967,6.40312424,6.3551556,0.219017431,6.33038716,6.34922568,6.32443402
60.644458,7.07106781,6.35347502,0.84710849,6.32895939,6.34755059,6.32301199
60.65495,6.4807407,6.35179856,0.359085143,6.3275317,6.34587956,6.32158998
60.665442,6,6.3501263,-0.59171471,6.32610422,6.34421268,6.32016812
60.675933,5.74456265,6.34845831,-0.777107242,6.32467709,6.34255,6.31874655
60.686425,5.91607978,6.3467942,-0.656288363,6.32325004,6.34089114,6.31732499
60.696916,6,6.3451342,-0.58748123,6.32182335,6.33923633,6.31590372
60.707408,6.70820393,6.34347791,0.603925511,6.32039673,6.33758518,6.31448247
60.7179,6.63324958,6.34182542,0.539837159,6.31897034,6.33593777,6.31306137
60.728391,6.32455532,6.34017682,-0.124985989,6.3175443,6.33429419,6.31164057
60.738883,6.4807407,6.33853182,0.37710592,6.31611834,6.33265415,6.31021979
60.749374,6,6.3368906,-0.58042278,6.31469273,6.33101784,6.3087993
60.759866,6.244998,6.33525274,-0.300424266,6.31326721,6.32938481,6.30737884
60.770358,5.47722558,6.33361832,-0.925414902,6.31184192,6.32775518,6.30595853
60.780849,6,6.33198743,-0.576183503,6.31041698,6.32612902,6.30453853
60.791341,5.38516481,6.3303597,-0.972211343,6.30899213,6.32450597,6.30311855
60.801832,6.08276253,6.32873538,-0.495956505,6.30756764,6.32288627,6.30169887
60.812324,6.78232998,6.32711411,0.674696877,6.30614323,6.32126955,6.30027922
60.822816,7.14142843,6.32549597,0.903289799,6.30471906,6.31965591,6.29885974
60.833307,6.164414,6.32388106,-0.399333268,6.30329524,6.31804545,6.29744056
60.843799,6.08276253,6.32226903,-0.48939401,6.30187152,6.31643781,6.29602141
60.85429,6.164414,6.32066012,-0.395279793,6.30044816,6.31483324,6.29460257
60.864782,6.8556546,6.31905397,0.732530292,6.29902489,6.31323137,6.29318376
60.875274,6.8556546,6.31745069,0.733623818,6.29760185,6.31163232,6.29176512
60.885765,5.65685425,6.31585039,-0.81178577,6.29617917,6.31003619,6.29034679
60.896257,5.65685425,6.31425269,-0.810801113,6.2947566,6.30844261,6.2889285
60.906748,5.83095189,6.31265788,-0.694050416,6.29333438,6.30685185,6.28751052
60.91724,5.74456265,6.31106558,-0.75266389,6.29191227,6.30526357,6.28609258
60.927732,6.40312424,6.30947591,0.306020141,6.29049039,6.30367785,6.28467482
60.938223,7.14142843,6.30788898,0.912983816,6.28906888,6.30209482,6.28325736
60.948715,6.08276253,6.30630448,-0.472802235,6.28764747,6.30051417,6.28183996
60.959206,5.38516481,6.3047227,-0.95893581,6.28622643,6.29893618,6.28042287
60.969698,6.08276253,6.30314321,-0.469447207,6.28480549,6.29736043,6.27900582
60.98019,5.38516481,6.30156614,-0.957288533,6.28338479,6.29578705,6.27758896
60.990681,5.65685425,6.2999916,-0.801958447,6.28196447,6.29421614,6.27617241
61.001173,6.4807407,6.29841925,0.426991162,6.28054425,6.29264736,6.27475592
61.011664,6.08276253,6.29684934,-0.46269516,6.2791244,6.29108098,6.27333974
61.022156,6.63324958,6.29528155,0.581350178,6.27770466,6.28951666,6.27192362
61.032648,6.32455532,6.29371599,0.175611306,6.27628517,6.28795452,6.27050768
61.043139,6.164414,6.29215277,-0.357405607,6.27486605,6.28639467,6.26909207
61.053631,6.32455532,6.29059156,0.184292585,6.27344704,6.28483678,6.26767652
61.064122,5.47722558,6.28903263,-0.901003361,6.27202842,6.28328111,6.26626128
61.074614,5.65685425,6.28747565,-0.794116739,6.2706099,6.28172733,6.26484611
61.085106,6.4807407,6.28592072,0.44138416,6.26919163,6.28017556,6.26343113
61.095597,6,6.28436798,-0.533261641,6.26777375,6.27862593,6.26201648
61.106089,6.244998,6.28281709,-0.194471308,6.26635597,6.27707809,6.26060189
61.11658,6.55743852,6.28126832,0.525518988,6.26493859,6.27553232,6.25918762
61.127072,6.164414,6.27972134,-0.339569345,6.26352131,6.2739883,6.25777343
61.137564,5.65685425,6.27817628,-0.788239832,6.2621043,6.27244614,6.25635943
61.148055,5.74456265,6.27663326,-0.729431704,6.26068766,6.27090596,6.25494576
61.158547,6.63324958,6.27509196,0.598462718,6.25927115,6.26936745,6.25353216
61.169038,5.83095189,6.2735527,-0.665282497,6.25785503,6.26783094,6.2521189
61.17953,6.55743852,6.2720151,0.534250343,6.25643903,6.26629603,6.25070571
61.190022,5.38516481,6.27047928,-0.94091151,6.25502328,6.26476285,6.24929272
61.200513,5.91607978,6.26894536,-0.594024896,6.25360793,6.26323152,6.24788007
61.211005,5.91607978,6.26741303,-0.592733706,6.2521927,6.26170173,6.24646749
61.221496,6.08276253,6.26588255,-0.427925254,6.25077787,6.26017374,6.24505525
61.231988,5.74456265,6.26435362,-0.720965305,6.24936316,6.25864724,6.24364309
61.24248,6.55743852,6.26282634,0.54278189,6.24794872,6.25712235,6.24223113
61.252971,6.08276253,6.26130086,-0.42253796,6.24653467,6.2555992,6.24081952
61.263463,5.65685425,6.25977685,-0.776480905,6.24512075,6.25407747,6.23940799
61.273954,6.78232998,6.25825458,0.723930526,6.24370723,6.25255744,6.23799681
61.284446,6.63324958,6.25673374,0.613608865,6.24229385,6.25103878,6.2365857
61.294938,5.09901951,6.25521446,-1.07526506,6.24088073,6.24952163,6.23517481
61.305429,6.08276253,6.25369687,-0.413442061,6.23946801,6.24800612,6.23376427
61.315921,6.70820393,6.25218065,0.675294963,6.23805543,6.24649193,6.23235381
61.326412,6.63324958,6.25066607,0.618533356,6.23664325,6.24497933,6.23094371
61.336904,6.244998,6.24915283,-0.0644579587,6.23523121,6.24346801,6.22953369
61.347396,5.91607978,6.24764105,-0.575813568,6.23381944,6.24195811,6.22812389
61.357887,5.74456265,6.24613086,-0.708214807,6.23240807,6.24044975,6.22671444
61.368379,6.92820323,6.24462195,0.826789742,6.23099685,6.23894262,6.22530509
61.37887,6.8556546,6.24311465,0.782649318,6.22958604,6.23743704,6.22389609
61.389362,5.65685425,6.2416086,-0.764692321,6.22817537,6.23593266,6.22248718
61.399854,6.40312424,6.24010392,0.403757744,6.22676497,6.23442961,6.2210785
61.410345,5.29150262,6.23860075,-0.973189668,6.225355,6.23292802,6.21967018
61.420837,6.8556546,6.23709878,0.786483195,6.22394516,6.23142757,6.21826195
61.431328,6.4807407,6.23559829,0.495118581,6.22253574,6.22992855,6.21685409
61.44182,7.07106781,6.23409896,0.914860015,6.22112647,6.22843065,6.21544632
61.452312,6.244998,6.23260094,0.111342076,6.21971748,6.22693399,6.21403878
61.462803,7.14142843,6.23110434,0.954109052,6.21830891,6.22543872,6.21263161
61.473295,7.14142843,6.22960888,0.954892429,6.21690049,6.22394452,6.21122454
61.483786,6.4807407,6.22811481,0.502619027,6.21549249,6.22245167,6.20981784
61.494278,6.32455532,6.22662185,0.312943242,6.21408464,6.22095988,6.20841124
61.50477,6,6.22513059,-0.47447928,6.21267756,6.21946926,6.20700488
61.515261,7.41619849,6.22364021,1.09204316,6.21127042,6.21797996,6.20559888
61.525753,6.244998,6.2221509,0.151152551,6.20986345,6.21649166,6.204193
61.536244,6,6.22066293,-0.469747731,6.20845689,6.21500465,6.20278748
61.546736,5.83095189,6.219176,-0.62307632,6.2070505,6.21351863,6.20138208
61.557228,5.38516481,6.21769023,-0.91242831,6.2056444,6.21203373,6.19997691
61.567719,6.4807407,6.21620576,0.5143296,6.20423873,6.21055008,6.19857212
61.578211,6,6.2147223,-0.463381374,6.20283322,6.20906738,6.19716745
61.588702,6.4807407,6.21324013,0.51720457,6.20142814,6.20758592,6.19576315
61.599194,7.68114575,6.21175896,1.21218265,6.20002323,6.20610541,6.19435897
61.609686,6.244998,6.21027891,0.186330594,6.19861861,6.20462597,6.19295503
61.620177,6.4807407,6.2088001,0.521479245,6.19721443,6.20314772,6.19155148
61.630669,6.8556546,6.20732223,0.805190888,6.19581042,6.20167036,6.19014804
61.64116,6.63324958,6.20584559,0.653761415,6.19440685,6.20019418,6.18874498
61.651652,6.32455532,6.20436988,0.346677714,6.19300344,6.19871887,6.18734205
61.662144,6,6.20289523,-0.450438935,6.19160034,6.19724458,6.18593937
61.672635,6.4807407,6.20142178,0.528506311,6.19019768,6.19577142,6.18453707
61.683127,6.244998,6.19994922,0.212246966,6.1887952,6.19429912,6.1831349
61.693618,6.63324958,6.19847784,0.659372229,6.18739315,6.19282794,6.18173312
61.70411,7,6.19700735,0.896098572,6.18599129,6.19135759,6.18033146
61.714602,5.83095189,6.19553787,-0.603809552,6.18458973,6.18988821,6.17893006
61.725093,6.08276253,6.19406954,-0.333627048,6.18318862,6.18841992,6.17752905
61.735585,5.83095189,6.19260206,-0.601373569,6.18178769,6.18695244,6.17612817
61.746076,6.8556546,6.19113572,0.815180274,6.18038721,6.18548604,6.17472769
61.756568,5.74456265,6.18967022,-0.667163829,6.1789869,6.18402043,6.17332734
61.76706,6.08276253,6.18820569,-0.324720132,6.17758692,6.18255574,6.17192725
61.777551,5.47722558,6.18674228,-0.842328143,6.17618739,6.18109211,6.17052755
61.788043,5.56776436,6.18527967,-0.785821425,6.17478804,6.17962924,6.16912799
61.798534,6.164414,6.18381817,-0.13929885,6.17338914,6.17816742,6.16772884
61.809026,6.55743852,6.1823575,0.612438591,6.17199044,6.17670637,6.16632981
61.819518,6.244998,6.18089776,0.253180253,6.17059205,6.17524621,6.16493106
61.830009,6.40312424,6.17943909,0.472953644,6.16919413,6.17378707,6.16353271
61.840501,5.91607978,6.1779812,-0.511763049,6.16779639,6.17232865,6.1621345
61.850992,5.74456265,6.17652437,-0.65723795,6.16639912,6.17087124,6.1607367
61.861484,5.29150262,6.17506831,-0.939981748,6.16500204,6.16941455,6.15933903
61.871976,6.164414,6.17361315,-0.0959121842,6.16360528,6.1679587,6.15794164
61.882467,6.55743852,6.17215903,0.620708867,6.16220899,6.16650384,6.15654466
61.892959,6.55743852,6.17070565,0.621878501,6.1608129,6.16504967,6.15514783
61.90345,6.08276253,6.16925331,-0.294093143,6.15941727,6.16359648,6.1537514
61.913942,6.164414,6.1678017,-0.058203915,6.15802185,6.16214397,6.15235513
61.924434,5.09901951,6.16635096,-1.03311735,6.15662676,6.16069228,6.15095913
61.934925,5.91607978,6.16490123,-0.498820056,6.15523213,6.15924154,6.14956355
61.945417,5.74456265,6.16345222,-0.647216793,6.15383772,6.15779148,6.14816812
61.955908,6.55743852,6.16200421,0.628835682,6.15244377,6.15634235,6.1467731
61.9664,5.56776436,6.16055691,-0.76993022,6.15105003,6.15489388,6.14537824
61.976892,4.58257569,6.15911045,-1.25560135,6.14965663,6.1534462,6.14398366
61.987383,6.32455532,6.15766497,0.408522155,6.1482637,6.15199944,6.1425895
61.997875,6.55743852,6.15622019,0.633417981,6.14687099,6.15055333,6.1411955
62.008366,5.74456265,6.15477637,-0.640479292,6.14547875,6.14910813,6.13980192
62.018858,4.69041576,6.15333326,-1.20951127,6.14408672,6.14766358,6.1384085
62.02935,6.70820393,6.15189097,0.745863901,6.14269504,6.1462198,6.13701537
62.039841,5.74456265,6.15044964,-0.637092609,6.14130384,6.14477691,6.13562266
62.050333,5.65685425,6.14900898,-0.701537403,6.13991286,6.14333465,6.13423012
62.060824,6.4807407,6.14756926,0.577210048,6.13852236,6.14189327,6.132838
62.071316,6.164414,6.1461302,0.135217599,6.13713209,6.1404525,6.13144605
62.081808,5.47722558,6.14469195,-0.816986151,6.13574216,6.13901247,6.13005439
62.092299,5.56776436,6.14325462,-0.758610741,6.13435272,6.13757332,6.12866317
62.102791,6,6.14181794,-0.376587232,6.1329635,6.13613476,6.12727211
62.113282,6.55743852,6.14038219,0.645798989,6.13157478,6.13469707,6.12588148
62.123774,6.244998,6.13894708,0.325654598,6.13018628,6.13325996,6.12449103
62.134266,6,6.13751275,-0.370827116,6.12879814,6.13182358,6.12310087
62.144757,5.91607978,6.13607933,-0.469041091,6.12741049,6.13038805,6.12171115
62.155249,5.91607978,6.13464654,-0.467511236,6.12602307,6.1289531,6.12032161
62.16574,6.32455532,6.13321465,0.437425043,6.12463615,6.12751899,6.1189325
62.176232,6,6.13178339,-0.363019822,6.12324946,6.12608545,6.11754357
62.186724,5.56776436,6.13035289,-0.750059015,6.12186313,6.12465261,6.11615494
62.197215,6.164414,6.12892328,0.18838982,6.12047731,6.12322061,6.11476676
62.207707,5.47722558,6.12749428,-0.806392404,6.11909172,6.12178916,6.11337876
62.218198,5.74456265,6.12606636,-0.617659865,6.11770681,6.12035855,6.11199119
62.22869,5.83095189,6.12463887,-0.541928936,6.11632196,6.11892849,6.11060381
62.239182,6.4807407,6.12321213,0.59793693,6.11493748,6.11749913,6.10921674
62.249673,6.244998,6.12178626,0.351015295,6.11355351,6.11607058,6.10783012
62.260165,6.4807407,6.120361,0.600316335,6.11216978,6.11464257,6.10644369
62.270656,5.74456265,6.1189366,-0.611861058,6.11078656,6.11321538,6.1050577
62.281148,6.32455532,6.1175128,0.455019253,6.10940358,6.11178872,6.10367189
62.29164,5.74456265,6.11608973,-0.609530213,6.10802099,6.11036272,6.10228641
62.302131,5.56776436,6.11466751,-0.739529006,6.1066389,6.10893753,6.10090138
62.312623,5.47722558,6.11324589,-0.797508817,6.10525707,6.10751287,6.09951654
62.323114,6.70820393,6.11182512,0.772255667,6.10387575,6.106089,6.09813215
62.333606,6.32455532,6.11040493,0.46276386,6.10249468,6.10466565,6.09674795
62.344098,7,6.10898546,0.943935667,6.101114,6.10324296,6.09536408
62.354589,6.244998,6.10756683,0.370717098,6.09973383,6.10182105,6.09398067
62.365081,6.164414,6.10614878,0.241381901,6.09835393,6.10039966,6.09259745
62.375572,6.40312424,6.10473157,0.546253297,6.09697454,6.09897905,6.09121469
62.386064,5.91607978,6.10331494,-0.432706774,6.09559541,6.09755895,6.08983213
62.396556,5.47722558,6.101899,-0.790362844,6.09421668,6.09613949,6.0884499
62.407047,5.29150262,6.1004839,-0.899433866,6.09283846,6.0947208,6.08706813
62.417539,7,6.09906937,0.949173658,6.09146052,6.09330262,6.08568656
62.42803,5.19615242,6.09765566,-0.949475245,6.09008309,6.09188521,6.08430546
62.438522,5.29150262,6.09624253,-0.897072964,6.08870594,6.09046829,6.08292455
62.449014,6.32455532,6.09483009,0.479296601,6.08732918,6.08905202,6.08154399
62.459505,6.63324958,6.09341848,0.734731995,6.08595296,6.08763651,6.08016389
62.469997,6.244998,6.09200742,0.3911401,6.084577,6.08622149,6.078784
62.480488,6.4807407,6.09059719,0.624614692,6.08320158,6.08480723,6.07740458
62.49098,5.38516481,6.0891875,-0.839060602,6.08182644,6.08339345,6.07602537
62.501472,6.70820393,6.0877785,0.78767089,6.0804517,6.0819803,6.0746465
62.511963,6.32455532,6.08637032,0.48804201,6.07907749,6.0805679,6.0732681
62.522455,5.74456265,6.08496268,-0.583438114,6.07770357,6.07915597,6.07188992
62.532946,6.32455532,6.08355585,0.490916965,6.07633018,6.0777448,6.07051221
62.543438,5.65685425,6.08214957,-0.652146705,6.07495708,6.0763341,6.06913471
62.55393,5.47722558,6.08074397,-0.776864464,6.07358438,6.07492402,6.06775756
62.564421,6.55743852,6.07933918,0.691447286,6.07221224,6.07351467,6.06638089
62.574913,6.78232998,6.07793492,0.83928247,6.07084038,6.0721058,6.06500444
62.585404,5.47722558,6.07653147,-0.774148496,6.06946906,6.07069767,6.06362847
62.595896,5.83095189,6.07512855,-0.494142347,6.06809803,6.06929001,6.06225272
62.606388,5.74456265,6.07372631,-0.573727865,6.06672743,6.06788295,6.06087732
62.616879,5.83095189,6.07232487,-0.491297233,6.06535737,6.06647663,6.05950241
62.627371,6.164414,6.07092396,0.305761422,6.0639876,6.06507077,6.05812771
62.637862,5.83095189,6.06952384,-0.488438276,6.06261839,6.06366564,6.05675351
62.648354,6.32455532,6.06812426,0.506390221,6.06124948,6.06226097,6.05537953
62.658846,5.91607978,6.06672536,-0.388130874,6.05988099,6.06085691,6.05400591
62.669337,6.244998,6.06532725,0.423875866,6.05851306,6.05945358,6.05263277
62.679829,6.40312424,6.06392967,0.582404131,6.05714543,6.0580507,6.05125987
62.69032,6.164414,6.06253288,0.31918823,6.05577836,6.05664855,6.04988746
62.700812,5.83095189,6.06113661,-0.479775697,6.05441159,6.05524685,6.04851528
62.711304,7.07106781,6.05974101,1.00564745,6.05304525,6.05384574,6.04714346
62.721795,5.56776436,6.0583462,-0.700415472,6.05167948,6.05244535,6.04577213
62.732287,6.32455532,6.05695191,0.517303987,6.05031402,6.05104542,6.04440105
62.742778,5.38516481,6.0555584,-0.81877567,6.04894913,6.0496462,6.04303045
62.75327,5.65685425,6.05416543,-0.630326247,6.04758455,6.04824743,6.0416601
62.763762,5.47722558,6.0527731,-0.758648489,6.04622041,6.04684924,6.04029011
62.774253,6,6.05138157,-0.226675028,6.04485684,6.04545177,6.03892063
62.784745,6.40312424,6.04999055,0.594250524,6.04349358,6.04405474,6.03755138
62.795236,5.74456265,6.04860032,-0.551396115,6.0421309,6.04265842,6.03618264
62.805728,5.83095189,6.04721061,-0.465036252,6.04076854,6.04126256,6.03481414
62.81622,6.63324958,6.04582155,0.766438537,6.03940663,6.03986726,6.03344601
62.826711,6.164414,6.04444239,0.346369182,6.03805443,6.03847268,6.03207839
62.837203,5.74456265,6.04305464,-0.546344208,6.03669342,6.03707854,6.03071101
62.847694,5.38516481,6.04166767,-0.810248643,6.035333,6.0356851,6.02934415
62.858186,5.19615242,6.04028122,-0.91876482,6.0339729,6.03429211,6.02797753
62.868678,5.83095189,6.03889542,-0.456008252,6.03261326,6.0328997,6.02661129
62.879169,5.83095189,6.03751041,-0.454487086,6.03125421,6.03150799,6.02524556
62.889661,6,6.03612594,-0.190068263,6.02989552,6.03011672,6.02388008
62.900152,6.08276253,6.03474223,0.219135356,6.02853739,6.02872615,6.02251511
62.910644,5.09901951,6.03335902,-0.966612388,6.02717959,6.02733602,6.0211504
62.921136,6.32455532,6.03197647,0.540905586,6.02582225,6.02594646,6.01978608
62.931627,6.8556546,6.03059469,0.908328085,6.02446551,6.02455759,6.01842227
62.942119,6.08276253,6.02921343,0.231406791,6.02310911,6.02316917,6.01705872
62.95261,5.56776436,6.02783294,-0.678283554,6.0217533,6.02178144,6.01569568
62.963102,6.40312424,6.02645297,0.6137355,6.02039784,6.02039414,6.01433291
62.973594,4.89897949,6.02507365,-1.06117584,6.01904284,6.01900742,6.01297052
62.984085,6.63324958,6.02369511,0.780739695,6.01768845,6.01762138,6.01160866
62.994577,5.19615242,6.02231708,-0.908936003,6.01633441,6.01623578,6.01024706
63.005068,6.164414,6.02093983,0.378779849,6.01498097,6.01485088,6.00888598
63.01556,6.55743852,6.01956309,0.733399913,6.01362788,6.0134664,6.00752517
63.026052,6.244998,6.018187,0.476246782,6.01227527,6.01208249,6.00616475
63.036543,6.78232998,6.01681169,0.874939024,6.01092327,6.01069927,6.00480487
63.047035,6.78232998,6.01543689,0.875724326,6.00957163,6.00931649,6.00344525
63.057526,5.74456265,6.01406287,-0.519134105,6.00822059,6.00793439,6.00208615
63.068018,5.19615242,6.01268936,-0.903624333,6.00686992,6.00655273,6.00072733
63.07851,4.89897949,6.0113165,-1.05467389,6.00551973,6.00517162,5.99936891
63.089001,5.19615242,6.00994442,-0.902104207,6.00417016,6.00379122,5.99801103
63.099493,6.244998,6.00857286,0.48623568,6.00282095,6.00241124,5.99665341
63.109984,6.244998,6.00720208,0.48764323,6.00147236,6.00103195,5.99529634
63.120476,5.09901951,6.00583181,-0.952266925,6.00012414,5.99965309,5.99393953
63.130968,5.65685425,6.00446219,-0.589582853,5.99877641,5.99827478,5.99258314
63.141459,6.08276253,6.00309335,0.282257299,5.99742931,5.99689717,5.99122728
63.151951,6.244998,6.00172502,0.493227105,5.99608258,5.99551998,5.9898717
63.162442,6,6.00035747,-0.0189069665,5.99473648,5.99414348,5.98851666
63.172934,5.29150262,5.99899044,-0.841122953,5.99339076,5.99276741,5.9871619
63.183426,6.08276253,5.99762406,0.291784964,5.99204554,5.9913919,5.98580756
63.193917,5.38516481,5.99625847,-0.781724797,5.99070095,5.99001707,5.98445376
63.204409,4.69041576,5.99489339,-1.14213731,5.98935675,5.98864266,5.98310024
63.2149,5.29150262,5.99352908,-0.837870194,5.98801318,5.98726895,5.98174727
63.225392,6.08276253,5.9921653,0.300993732,5.98666999,5.98589566,5.98039458
63.235884,6.164414,5.99080217,0.416667528,5.98532732,5.98452292,5.97904232
63.246375,6.08276253,5.98943982,0.305487652,5.98398529,5.98315088,5.9776906
63.256867,5.91607978,5.988078,-0.268324829,5.98264364,5.98177925,5.97633917
63.267358,6,5.98671695,0.115252111,5.98130264,5.98040832,5.97498829
63.27785,5.38516481,5.98535643,-0.77472035,5.97996204,5.9790378,5.97363771
63.288342,6.8556546,5.98399656,0.933626286,5.97862195,5.97766785,5.97228755
63.298833,5.29150262,5.98263748,-0.831345209,5.97728252,5.97629858,5.97093794
63.309325,5,5.98127892,-0.990595236,5.97594348,5.97492974,5.96958863
63.319816,6.4807407,5.97992115,0.707686052,5.9746051,5.97356159,5.96823987
63.330308,5.83095189,5.9785639,-0.384203083,5.97326712,5.97219386,5.96689142
63.3408,4.89897949,5.97720731,-1.0383775,5.97192967,5.97082668,5.96554339
63.351291,6.08276253,5.97585151,0.326972506,5.97059288,5.96946019,5.96419592
63.361783,5.74456265,5.97449624,-0.479513909,5.96925649,5.96809412,5.96284875
63.372274,5.83095189,5.97314175,-0.377080697,5.96792077,5.96672874,5.96150214
63.382766,6.244998,5.97147792,0.522991466,5.96627532,5.96536378,5.96015584
63.393258,5.19615242,5.97012499,-0.879757108,5.96494091,5.96399938,5.95880997
63.403749,5.56776436,5.96877285,-0.633252308,5.96360718,5.96263566,5.95746467
63.414241,5.91607978,5.96742124,-0.226586525,5.96227385,5.96127237,5.95611967
63.424732,6,5.96607041,0.184199852,5.9609412,5.95990976,5.95477524
63.435224,6,5.96472013,0.187829373,5.95960897,5.95854758,5.95343112
63.445716,5.83095189,5.9633705,-0.363893675,5.95827728,5.95718595,5.95208744
63.456207,5.83095189,5.96202167,-0.362035598,5.95694627,5.95582501,5.95074433
63.466699,4.89897949,5.96076049,-1.03042758,5.95570288,5.95446449,5.94940153
63.47719,5.91607978,5.95941306,-0.208166456,5.95437304,5.95310466,5.9480593
63.487682,6.32455532,5.95806616,0.605383483,5.95304363,5.95174525,5.94671739
63.498174,6.164414,5.95671993,0.455734653,5.95171478,5.9503864,5.94537592
63.508665,6.244998,5.9553745,0.538166793,5.95038661,5.94902824,5.94403503
63.519157,6.78232998,5.95402961,0.910110086,5.94905888,5.94767051,5.94269445
63.529648,4.69041576,5.95268553,-1.1235078,5.94773184,5.94631346,5.94135446
63.54014,6.164414,5.95134198,0.461597248,5.94640523,5.94495684,5.94001478
63.550632,6.40312424,5.94999911,0.673145693,5.9450792,5.94360077,5.93867556
63.561123,6.08276253,5.94865704,0.366204159,5.94375386,5.94224539,5.93733691
63.571615,6,5.94731552,0.229530994,5.94242896,5.94089044,5.93599859
63.582106,6.08276253,5.9459748,0.369848247,5.94110476,5.93953617,5.93466085
63.592598,5.83095189,5.94463464,-0.337168713,5.93978101,5.93818234,5.93332344
63.60309,6.08276253,5.94329515,0.37345332,5.93845784,5.93682906,5.93198648
63.613581,7,5.94195647,1.02861243,5.93713538,5.93547646,5.93065011
63.624073,5.65685425,5.94061834,-0.532695124,5.93581337,5.9341243,5.92931406
63.634564,6.08276253,5.93928103,0.378789522,5.93449208,5.93277282,5.92797861
63.645056,5.47722558,5.93794427,-0.67876262,5.93317124,5.93142177,5.92664349
63.655548,6.70820393,5.93660819,0.878405225,5.93185099,5.93007128,5.92530882
63.666039,6.08276253,5.93527293,0.384043746,5.93053145,5.92872148,5.92397475
63.676531,5.65685425,5.93393823,-0.52638767,5.92921238,5.92737211,5.92264102
63.687022,5.19615242,5.93260434,-0.858167769,5.92789403,5.92602342,5.92130787
63.697514,6.32455532,5.93127102,0.627123833,5.92657615,5.92467517,5.91997507
63.708006,5.91607978,5.92993838,-0.117722562,5.92525886,5.92332748,5.91864273
63.718497,6.40312424,5.92860657,0.688852426,5.9239423,5.92198048,5.91731098
63.728989,5.65685425,5.92727533,-0.52002027,5.92262622,5.92063391,5.91597958
63.73948,6.78232998,5.92594491,0.925410759,5.92131087,5.91928803,5.91464878
63.749972,5.09901951,5.92461506,-0.908622884,5.919996,5.91794259,5.91331831
63.760464,6.164414,5.92328591,0.491047957,5.91868174,5.91659771,5.91198833
63.770955,5.65685425,5.92195758,-0.514881861,5.91736821,5.91525351,5.91065894
63.781447,5.91607978,5.92062983,-0.0674540232,5.91605517,5.91390975,5.90932989
63.791938,5.74456265,5.91930291,-0.418019448,5.91474287,5.91256669,5.90800145
63.80243,5.47722558,5.91797656,-0.663890793,5.91343107,5.91122405,5.90667336
63.812922,5.74456265,5.91665092,-0.414835237,5.91211988,5.90988199,5.90534575
63.823413,6,5.91532612,0.290987766,5.91080944,5.90854061,5.90401874
63.833905,6.244998,5.9140019,0.575322602,5.90949951,5.90719967,5.90269209
63.844396,5.83095189,5.91267852,-0.285878691,5.90819033,5.90585942,5.90136604
63.854888,5.38516481,5.91135573,-0.725390184,5.90688165,5.90451961,5.90004035
63.86538,5.74456265,5.91003364,-0.406781265,5.9055736,5.90318036,5.89871514
63.875871,6.92820323,5.9087124,1.00969838,5.90426631,5.90184181,5.89739054
63.886363,6.08276253,5.90739176,0.418772939,5.90295953,5.9005037,5.8960663
63.896854,6.32455532,5.90607195,0.646902905,5.90165351,5.89916628,5.89474267
63.907346,5.91607978,5.90475274,0.106428569,5.90034801,5.8978293,5.8934194
63.917838,6.8556546,5.90343426,0.975817782,5.89904316,5.89649289,5.89209662
63.928329,6.70820393,5.90211662,0.897823653,5.89773907,5.89515718,5.89077446
63.938821,5.29150262,5.90079959,-0.780574766,5.89643551,5.89382191,5.88945266
63.949312,5.19615242,5.89948341,-0.838648309,5.89513272,5.89248733,5.88813147
63.959804,6.164414,5.89816783,0.515990475,5.89383046,5.8911532,5.88681066
63.970296,5.74456265,5.89685299,-0.390243953,5.89252885,5.88981964,5.88549034
63.980787,5.09901951,5.89553901,-0.892479407,5.89122803,5.88848678,5.88417063
63.991279,4.89897949,5.89422563,-0.997620241,5.88992774,5.88715436,5.8828513
64.00177,6,5.89291312,0.32724132,5.88862824,5.88582263,5.88153259
64.012262,5.91607978,5.89160122,0.156456264,5.88732928,5.88449136,5.88021425
64.022754,6.244998,5.89029006,0.595573618,5.88603099,5.88316065,5.87889642
64.033245,4.89897949,5.88897978,-0.994987585,5.8847335,5.88183065,5.8775792
64.043737,6,5.88767012,0.335156502,5.88343656,5.88050109,5.87626236
64.054228,6,5.88636133,0.337103352,5.88214042,5.87917223,5.87494615
64.06472,5.56776436,5.88505317,-0.563283946,5.88084483,5.87784382,5.87363032
64.075212,5.38516481,5.88381875,-0.706154335,5.87962298,5.87651599,5.87231499
64.085703,6,5.88251227,0.342764831,5.87832893,5.87518886,5.8710003
64.096195,6,5.88120642,0.344664443,5.87703545,5.87386217,5.86968598
64.106686,5.91607978,5.87990146,0.190206014,5.87574278,5.87253619,5.8683723
64.117178,5.56776436,5.87859712,-0.557523777,5.87445068,5.87121066,5.86705899
64.12767,5.19615242,5.87729356,-0.82531275,5.87315927,5.86988571,5.8657462
64.138161,5.09901951,5.87599088,-0.881459792,5.87186868,5.86856146,5.86443405
64.148653,6.08276253,5.87468885,0.456150944,5.87057867,5.86723767,5.86312228
64.159144,6,5.87338771,0.355826211,5.86928949,5.86591459,5.86181115
64.169636,5.09901951,5.87208722,-0.879242687,5.86800089,5.86459196,5.8605004
64.180128,6.70820393,5.8707875,0.915104602,5.866713,5.8632699,5.85919018
64.190619,6.40312424,5.86948868,0.73050363,5.86542594,5.86194856,5.85788059
64.201111,5.56776436,5.86819052,-0.548111449,5.86413948,5.86062767,5.8565714
64.211602,5.29150262,5.86691809,-0.758561448,5.8628787,5.85930749,5.85526284
64.222094,6.244998,5.86562151,0.615935456,5.86159368,5.85798777,5.85395469
64.232586,5.83095189,5.86432572,-0.182685038,5.8603094,5.85666863,5.85264705
64.243077,4.89897949,5.86303086,-0.981861178,5.85902598,5.8553502,5.85134006
64.253569,6.244998,5.86173665,0.619081049,5.85774315,5.85403222,5.85003346
64.26406,5.38516481,5.86044337,-0.689404496,5.85646118,5.85271496,5.84872752
64.274552,5.19615242,5.85915075,-0.814247094,5.85517983,5.85139816,5.84742197
64.285044,5.74456265,5.85785894,-0.336595145,5.85389921,5.85008195,5.84611695
64.295535,5.47722558,5.85656805,-0.615907846,5.85261946,5.84876645,5.84481258
64.306027,6.70820393,5.85527784,0.923539977,5.85134033,5.84745141,5.84350861
64.316518,6.08276253,5.85398857,0.478303212,5.85006207,5.84613708,5.8422053
64.32701,5.91607978,5.85269998,0.251753458,5.84878444,5.84482322,5.84090239
64.337502,6,5.8514122,0.385470874,5.84750756,5.84350994,5.83960002
64.347993,5.47722558,5.85012537,-0.610655217,5.84623156,5.84219739,5.83829829
64.358485,5.91607978,5.84883923,0.259307832,5.84495621,5.8408853,5.83699698
64.368976,5.29150262,5.84755404,-0.745688552,5.84368174,5.83957392,5.83569633
64.379468,5.65685425,5.84626955,-0.43521868,5.84240791,5.83826302,5.83439608
64.38996,5.56776436,5.84498589,-0.526518304,5.84113486,5.83695271,5.83309637
64.400451,5.19615242,5.84370318,-0.804705385,5.8398627,5.83564311,5.83179733
64.410943,6.32455532,5.84242118,0.694358796,5.8385912,5.83433399,5.8304987
64.421434,5.47722558,5.84114014,-0.603253321,5.83732061,5.83302558,5.82920073
64.431926,6.164414,5.83985982,0.569696567,5.83605068,5.83171764,5.82790317
64.442418,6.40312424,5.83858035,0.751361357,5.83478153,5.8304103,5.82660616
64.452909,5.29150262,5.83730184,-0.738782254,5.8335133,5.82910369,5.82530981
64.463401,5,5.83602407,-0.914343519,5.83224576,5.82779754,5.82401389
64.473892,6.63324958,5.83474728,0.893589562,5.83097913,5.82649212,5.82271863
64.484384,6.32455532,5.83347122,0.700773933,5.82971319,5.82518717,5.82142379
64.494876,4.69041576,5.83219601,-1.06854118,5.82844805,5.82388282,5.8201295
64.505367,5.29150262,5.8309218,-0.734451616,5.82718385,5.82257919,5.81883588
64.515859,5.38516481,5.82964833,-0.666695973,5.82592034,5.82127604,5.81754269
64.52635,6.244998,5.82837585,0.645462741,5.82465777,5.81997362,5.81625017
64.536842,5.91607978,5.82710412,0.298287884,5.8233959,5.81867167,5.81495808
64.547334,5.47722558,5.82583327,-0.590430094,5.82213486,5.81737033,5.81366654
64.557825,6.08276253,5.82456342,0.508132962,5.82087477,5.81606972,5.81237567
64.568317,5.65685425,5.82329434,-0.407970696,5.81961539,5.81476958,5.81108524
64.578808,5,5.82202626,-0.906656641,5.81835697,5.81347018,5.80979548
64.5893,6.164414,5.82075896,0.586220984,5.81709927,5.81217126,5.80850615
64.599792,5.38516481,5.81949255,-0.659035466,5.81584242,5.81087294,5.80721739
64.610283,5.47722558,5.81822717,-0.583953414,5.81458654,5.80957535,5.8059293
64.620775,6.244998,5.81696256,0.654244174,5.81333139,5.80827825,5.80464165
64.631266,5.56776436,5.81569898,-0.497930335,5.81207722,5.80698188,5.80335469
64.641758,5.91607978,5.81443619,0.318815918,5.8108238,5.805686,5.80206816
64.65225,4.69041576,5.81317432,-1.05960302,5.80957124,5.80439072,5.80078219
64.662741,6.40312424,5.81191349,0.768902303,5.80831968,5.80309618,5.79949691
64.673233,5.38516481,5.81065346,-0.652294916,5.80706888,5.80180213,5.79821207
64.683724,5.09901951,5.80939449,-0.842837457,5.80581908,5.80050881,5.79692792
64.694216,5.56776436,5.80813633,-0.490277443,5.80457005,5.79921599,5.79564421
64.704708,6.08276253,5.80687911,0.525246057,5.80332191,5.79792377,5.79436107
64.715199,5.65685425,5.80562295,-0.385705453,5.80207478,5.79663229,5.79307862
64.725691,5.56776436,5.80436761,-0.486418795,5.80082844,5.79534131,5.79179662
64.736182,6.08276253,5.80311334,0.528818678,5.79958311,5.79405106,5.79051531
64.746674,5.83095189,5.8018599,0.17056376,5.79833858,5.79276131,5.78923445
64.757166,5.65685425,5.80060742,-0.379147952,5.79709496,5.79147217,5.78795417
64.767657,5.19615242,5.79937503,-0.77667407,5.7958714,5.79018378,5.78667457
64.778149,6,5.7981245,0.449305579,5.79462963,5.78889588,5.78539544
64.78864,5,5.79687505,-0.892678583,5.79338891,5.78760872,5.78411699
64.799132,6.92820323,5.79562646,1.0642259,5.79214901,5.78632206,5.78283901
64.809624,4.69041576,5.79437886,-1.05069648,5.79091004,5.78503602,5.7815616
64.820115,5.19615242,5.79313236,-0.772644766,5.78967213,5.78375073,5.78028489
64.830607,6.08276253,5.79188673,0.539329029,5.78843506,5.78246594,5.77900864
64.841098,5.83095189,5.79064221,0.200772709,5.78719906,5.78118189,5.77773309
64.85159,5.56776436,5.78939858,-0.470780436,5.7859639,5.77989834,5.77645801
64.862082,5.38516481,5.78815596,-0.634815838,5.7847297,5.77861542,5.7751835
64.872573,5.74456265,5.78691446,-0.20579556,5.78349659,5.77733324,5.7739097
64.883065,5.74456265,5.78567387,-0.202759019,5.78226435,5.77605157,5.77263637
64.893556,5.19615242,5.78443442,-0.766995438,5.78103321,5.77477065,5.77136374
64.904048,6.63324958,5.78319589,0.921983562,5.77980295,5.77349023,5.77009158
64.91454,5.47722558,5.78195894,-0.552026598,5.77857422,5.77221044,5.76882
64.925031,6.55743852,5.7807226,0.881314885,5.77734606,5.7709314,5.76754914
64.935523,5.56776436,5.77948768,-0.460134016,5.77611929,5.76965287,5.76627874
64.946014,6.164414,5.77825343,0.621418191,5.77489316,5.7683751,5.76500906
64.956506,5.56776436,5.77702012,-0.457444818,5.77366791,5.76709783,5.76373985
64.966998,5.74456265,5.77578788,-0.176706619,5.7724437,5.76582119,5.76247123
64.977489,5.09901951,5.77455681,-0.82191076,5.77122062,5.76454531,5.76120332
64.987981,5.91607978,5.7733267,0.377826785,5.76999847,5.76326994,5.75993589
64.998472,4.89897949,5.77209779,-0.934407999,5.76877747,5.76199533,5.75866918
65.008964,6.40312424,5.77086985,0.795144254,5.7675574,5.76072123,5.75740295
65.019456,5.09901951,5.769643,-0.818916046,5.76633839,5.75944777,5.75613731
65.029947,5.65685425,5.76841737,-0.334010659,5.76512056,5.75817507,5.75487239
65.040439,5.56776436,5.76719272,-0.446574026,5.76390368,5.75690288,5.75360795
65.05093,6.78232998,5.76596931,1.00814715,5.76268798,5.75563146,5.75234424
65.061422,5.65685425,5.76474689,-0.328470149,5.76147326,5.75436055,5.751081
65.071914,6.40312424,5.7635256,0.799749112,5.76025962,5.75309028,5.74981837
65.082405,6.63324958,5.76230555,0.933243821,5.75904719,5.75182077,5.74855647
65.092897,5.19615242,5.76108653,-0.751620985,5.75783575,5.75055178,5.74729504
65.103388,6.164414,5.75986879,0.636038691,5.75662555,5.74928356,5.74603435
65.11388,6.08276253,5.75865208,0.569306989,5.75541636,5.74801586,5.74477414
65.124372,5.29150262,5.75743654,-0.682593523,5.75420829,5.7467488,5.74351454
65.134863,6.08276253,5.75622228,0.571437006,5.75300147,5.74548251,5.74225567
65.145355,5.09901951,5.75500908,-0.809931826,5.75179567,5.74421674,5.7409973
65.155846,6,5.75379717,0.496188299,5.75059114,5.74295174,5.73973965
65.166338,5.83095189,5.75258634,0.279938481,5.74938765,5.74168727,5.73848249
65.17683,5.65685425,5.75137671,-0.307445051,5.74818532,5.74042344,5.73722595
65.187321,5.29150262,5.7501684,-0.67724868,5.74698427,5.73916038,5.73597015
65.197813,6.8556546,5.74896118,1.05199497,5.74578429,5.73789785,5.73471483
65.208304,5.47722558,5.74775531,-0.520124727,5.74458562,5.7366361,5.73346026
65.218796,5,5.74655055,-0.864031565,5.74338802,5.73537487,5.73220618
65.229288,4.79583152,5.74534702,-0.974430859,5.74219163,5.7341143,5.73095272
65.239779,6.40312424,5.74414486,0.811775448,5.74099657,5.7328545,5.72970001
65.250271,5.83095189,5.74294384,0.296661519,5.73980262,5.73159523,5.72844779
65.260762,5.29150262,5.74174419,-0.671000426,5.73861001,5.73033674,5.72719631
65.271254,6,5.74054571,0.509366559,5.73741852,5.72907878,5.72594534
65.281746,5.91607978,5.7393485,0.420394194,5.73622829,5.72782148,5.72469498
65.292237,6.244998,5.73815271,0.71193068,5.73503943,5.72656496,5.72344538
65.302729,5.56776436,5.73695809,-0.411331654,5.73385173,5.72530897,5.72219628
65.31322,6.164414,5.73576492,0.654712977,5.73266543,5.72405376,5.72094792
65.323712,5.83095189,5.73457296,0.310449562,5.73148032,5.72279909,5.71970008
65.334204,5.56776436,5.73338234,-0.406961883,5.73029651,5.72154508,5.71845286
65.344695,5.38516481,5.73219316,-0.589091126,5.72911411,5.72029185,5.71720639
65.355187,6.92820323,5.73100522,1.09416544,5.72793293,5.71903916,5.71596043
65.365678,5.74456265,5.72981876,0.121424422,5.72675318,5.71778726,5.71471523
65.37617,6.244998,5.72863355,0.718585035,5.72557466,5.71653589,5.71347053
65.386662,6.08276253,5.72744972,0.596081214,5.7243975,5.7152852,5.71222648
65.397153,5.09901951,5.72626739,-0.791989821,5.7232218,5.71403528,5.71098317
65.407645,6.08276253,5.72508635,0.598060346,5.72204736,5.71278592,5.70974038
65.418136,5.09901951,5.72390684,-0.790498152,5.72087442,5.71153733,5.70849835
65.428628,5.83095189,5.72272864,0.328973027,5.71970277,5.7102893,5.70725683
65.43912,6,5.72155188,0.527681837,5.71853252,5.70904194,5.70601596
65.449611,6.08276253,5.72037667,0.60198493,5.71736379,5.70779536,5.70477584
65.460103,5,5.71920282,-0.848058262,5.71619639,5.70654934,5.70353624
65.470594,6.32455532,5.71803054,0.778797008,5.71503054,5.7053041,5.7022974
65.481086,6,5.71685964,0.532109353,5.71386603,5.70405942,5.70105909
65.491578,6,5.71569023,0.533207064,5.71270299,5.70281541,5.69982142
65.502069,5.19615242,5.71452244,-0.719979176,5.71154154,5.70157219,5.69858452
65.512561,6.32455532,5.71335606,0.781792341,5.71038148,5.70032952,5.69734814
65.523052,4.89897949,5.71219133,-0.901782594,5.70922304,5.69908765,5.69611253
65.533544,4.69041576,5.71102807,-1.01025359,5.70806603,5.69784634,5.69487744
65.544036,5.38516481,5.70986637,-0.569825905,5.70691056,5.6966057,5.69364301
65.554527,6.244998,5.70870635,0.73231936,5.70575675,5.69536586,5.69240934
65.565019,6.4807407,5.70754782,0.87931387,5.70460439,5.69412657,5.6911762
65.57551,6.164414,5.70639099,0.676773973,5.70345371,5.69288809,5.68994383
65.586002,5.47722558,5.70523568,-0.477504032,5.70230452,5.69165016,5.688712
65.596494,6.8556546,5.70408199,1.07311351,5.70115693,5.69041292,5.68748082
65.606985,5.47722558,5.70293006,-0.475083665,5.70001107,5.68917648,5.68625042
65.617477,5.83095189,5.70177969,0.35940535,5.69886674,5.68794059,5.68502055
65.627968,5.29150262,5.7006311,-0.639631519,5.69772416,5.68670552,5.68379145
65.63846,5.74456265,5.6994841,0.212317089,5.69658315,5.685471,5.6825629
65.648952,6.40312424,5.69833881,0.839514996,5.69544382,5.68423717,5.681335
65.659443,6,5.69719535,0.550276884,5.6943063,5.68300415,5.68010788
65.669935,5.47722558,5.69605353,-0.467790501,5.69317039,5.68177169,5.67888131
65.680426,6,5.69491357,0.552346292,5.69203632,5.68054004,5.67765551
65.690918,5.47722558,5.69377529,-0.465349021,5.6909039,5.67930896,5.67643025
65.70141,6.164414,5.69263879,0.686858944,5.68977324,5.67807857,5.67520566
65.711901,5.65685425,5.69150422,-0.186145033,5.68864448,5.67684898,5.67398185
65.722393,4.79583152,5.69037137,-0.945801168,5.68751742,5.67561997,5.67275859
65.732884,5,5.68924048,-0.830205084,5.68639229,5.67439177,5.67153611
65.743376,6.40312424,5.6881114,0.845584317,5.68526894,5.67316414,5.67031419
65.753868,6.4807407,5.68698421,0.890930127,5.68414746,5.6719372,5.66909293
65.764359,5.09901951,5.68585903,-0.766054513,5.68302797,5.67071108,5.66787245
65.774851,5.29150262,5.68473568,-0.627082972,5.68191028,5.66948553,5.66665253
65.785342,4.89897949,5.68361438,-0.88579619,5.68079462,5.66826079,5.6654334
65.795834,5.91607978,5.68249494,0.48330616,5.6796808,5.66703664,5.66421482
65.806326,6.08276253,5.68137749,0.633549554,5.67856895,5.66581318,5.66299692
65.816817,5.91607978,5.68026217,0.485610561,5.67745919,5.66459053,5.6617798
65.827309,6.4807407,5.67914877,0.895316666,5.67635134,5.66336847,5.66056325
65.8378,4.69041576,5.67803753,-0.993791613,5.67524563,5.66214722,5.65934748
65.848292,5.38516481,5.67692827,-0.540151332,5.67414187,5.66092656,5.65813228
65.858784,5.83095189,5.67582111,0.393866454,5.67304019,5.6597066,5.65691775
65.869275,5.91607978,5.67471619,0.491287693,5.67194071,5.65848746,5.65570402
65.879767,6.08276253,5.67361331,0.639647734,5.67084327,5.6572689,5.65449086
65.890258,5.56776436,5.67251271,-0.32364849,5.66974808,5.65605117,5.65327849
65.90075,5.83095189,5.67141421,0.399421693,5.66865496,5.65483402,5.65206668
65.911242,5.91607978,5.67031793,0.495743736,5.66756405,5.65361758,5.65085556
65.921733,5.09901951,5.66922401,-0.755118866,5.66647547,5.65240196,5.64964524
65.932225,5.47722558,5.66813227,-0.436928711,5.66538905,5.65118693,5.64843548
65.942716,6,5.66704294,0.577024311,5.66430502,5.64997273,5.64722653
65.953208,5.29150262,5.6659559,-0.611925872,5.66322325,5.64875912,5.64601815
65.9637,5.74456265,5.66487124,0.282296672,5.66214384,5.64754621,5.64481045
65.974191,5.91607978,5.66378907,0.502285485,5.66106692,5.64633414,5.64360356
65.984683,5.19615242,5.66270924,-0.683049642,5.65999229,5.64512266,5.64239724
65.995174,5.74456265,5.66163196,0.287976892,5.6589202,5.643912,5.64119173
66.005666,5.47722558,5.66055706,-0.428172262,5.65785048,5.64270195,5.63998679
66.016158,5.47722558,5.65948468,-0.426918153,5.65678325,5.64149261,5.63878255
66.026649,5.74456265,5.65841496,0.29350926,5.65571865,5.64028409,5.63757911
66.037141,5.38516481,5.65734772,-0.521711523,5.65465652,5.63907618,5.63637626
66.047632,5.74456265,5.6562832,0.297118576,5.65359708,5.6378691,5.63517421
66.058124,5.09901951,5.65522123,-0.745789323,5.65254018,5.63666262,5.63397274
66.068616,5.47722558,5.65416195,-0.420638053,5.65148594,5.63545686,5.63277198
66.079107,5.74456265,5.65310549,0.302418843,5.65043451,5.63425194,5.63157202
66.089599,6.40312424,5.65205169,0.866644416,5.64938572,5.63304762,5.63037265
66.10009,5.47722558,5.6510008,-0.416863551,5.64833981,5.63184413,5.62917409
66.110582,5.38516481,5.64995263,-0.514575385,5.64729661,5.63064125,5.62797612
66.121074,5.65685425,5.64890735,0.0891453874,5.64625627,5.62943909,5.62677885
66.131565,6.70820393,5.64786508,1.02972756,5.64521893,5.62823777,5.62558239
66.142057,5.65685425,5.64682567,0.100142796,5.64418443,5.62703706,5.62438653
66.152548,6.40312424,5.64578936,0.870249895,5.643153,5.62583719,5.62319148
66.16304,4.89897949,5.64475602,-0.863583545,5.64212454,5.62463793,5.62199703
66.173532,4.58257569,5.64372585,-1.03012143,5.64109921,5.6234394,5.62080328
66.184023,6,5.6426989,0.597746681,5.6400771,5.6222417,5.61961035
66.194515,6.164414,5.64167505,0.723006886,5.63905805,5.62104462,5.61841802
66.205006,5.38516481,5.64065451,-0.505459895,5.63804231,5.61984839,5.61722651
66.215498,5.83095189,5.63963716,0.437395398,5.63702973,5.61865276,5.61603559
66.22599,5.29150262,5.63862313,-0.589169341,5.63602046,5.61745787,5.61484539
66.236481,5.29150262,5.63761258,-0.588311108,5.63501465,5.61626383,5.61365601
66.246973,5.29150262,5.63660536,-0.587454458,5.63401215,5.6150704,5.61246724
66.257464,5.83095189,5.63560172,0.441984359,5.63301321,5.61387782,5.61127928
66.267956,5.91607978,5.63460152,0.53054525,5.63201769,5.61268586,5.61009193
66.278448,5.74456265,5.63360491,0.333103186,5.63102575,5.61149463,5.6089053
66.288939,5.38516481,5.63261205,-0.497440693,5.63003753,5.61030426,5.6077195
66.299431,5.74456265,5.6316228,0.336065242,5.62905291,5.6091145,5.6065343
66.309922,5.83095189,5.63063741,0.447565061,5.62807213,5.6079256,5.60534993
66.320414,5.19615242,5.62965576,-0.658409701,5.62709507,5.60673732,5.60416616
66.330906,5.83095189,5.62867799,0.449748709,5.62612189,5.60554978,5.60298312
66.341397,5.91607978,5.62770428,0.537006056,5.62515273,5.60436309,5.60180091
66.351889,6.08276253,5.62673449,0.67529848,5.62418749,5.60317703,5.60061932
66.36238,6.164414,5.62576889,0.73392446,5.62322641,5.60199183,5.59943855
66.372872,5.47722558,5.62480735,-0.384163736,5.62226938,5.60080725,5.5982584
66.383364,6.92820323,5.6238502,1.14208276,5.62131672,5.59962342,5.59707897
66.393855,5.19615242,5.62289744,-0.65325724,5.62036844,5.59844044,5.59590039
66.404347,5.56776436,5.62194898,-0.232775902,5.61942444,5.59725809,5.59472241
66.414838,5.56776436,5.62100507,-0.230739484,5.61848498,5.5960766,5.59354528
66.42533,6.164414,5.62006561,0.737799697,5.61754994,5.59489575,5.59236876
66.435822,6.164414,5.61913077,0.738432958,5.61661951,5.59371564,5.59119297
66.446313,5.19615242,5.61820072,-0.649652443,5.61569386,5.5925364,5.59001802
66.456805,5.47722558,5.61727537,-0.374232274,5.61477289,5.59135779,5.5888437
66.467296,5.91607978,5.61635498,0.547471278,5.61385686,5.59018004,5.58767021
66.477788,6.244998,5.61543947,0.793447241,5.6129457,5.58900293,5.58649735
66.48828,6.4807407,5.61452902,0.930704934,5.61203958,5.58782657,5.58532522
66.498771,5.74456265,5.61362381,0.361854714,5.61113869,5.58665107,5.58415394
66.509263,5.74456265,5.61272376,0.363096244,5.61024294,5.58547622,5.58298329
66.519754,6.08276253,5.61182915,0.686245859,5.60935261,5.58430223,5.58181348
66.530246,6.08276253,5.6109399,0.68689346,5.60846764,5.58312888,5.58064429
66.540738,5.19615242,5.61005622,-0.643353552,5.60758821,5.58195629,5.57947585
66.551229,6.08276253,5.60917828,0.68817458,5.60671451,5.58078457,5.57830826
66.561721,6.244998,5.60830603,0.797929801,5.60584649,5.57961349,5.57714129
66.572212,5.09901951,5.60743976,-0.713035937,5.60498443,5.57844328,5.57597518
66.582704,4.79583152,5.60657942,-0.9004154,5.60412828,5.57727372,5.5748097
66.593196,5,5.60572536,-0.7782836,5.60327841,5.57610492,5.57364496
66.603687,5.19615242,5.60487773,-0.639316284,5.60243495,5.57493698,5.57248108
66.614179,5.65685425,5.60403642,0.229821299,5.6015978,5.5737697,5.57131783
66.62467,6.08276253,5.60320171,0.692503299,5.60076723,5.57260329,5.57015544
66.635162,6.32455532,5.60237359,0.849812764,5.59994323,5.57143754,5.56899368
66.645654,5.29150262,5.60155226,-0.556821014,5.59912602,5.57027254,5.56783267
66.656145,6.08276253,5.60073797,0.694279889,5.59831583,5.56910843,5.56667252
66.666637,6.8556546,5.59993069,1.12059088,5.59751263,5.56794496,5.56551301
66.677128,6.40312424,5.59913073,0.896656851,5.59671675,5.56678237,5.56435436
66.68762,5.47722558,5.5983381,-0.348012252,5.59592819,5.56562044,5.56319635
66.698112,5.83095189,5.59755304,0.483113704,5.59514717,5.56445928,5.5620391
66.708603,5.47722558,5.59677579,-0.34576035,5.59437396,5.563299,5.5608827
66.719095,5.47722558,5.59600638,-0.344645909,5.59360856,5.56213937,5.55972695
66.729586,5.38516481,5.59524512,-0.458345187,5.59285131,5.56098063,5.55857206
66.740078,5.83095189,5.59449205,0.486271368,5.59210224,5.55982254,5.55741782
66.75057,5.83095189,5.59374744,0.487036397,5.59136162,5.55866523,5.55626434
66.761061,5.29150262,5.59301155,-0.549098289,5.5906297,5.5575088,5.55511172
66.771553,5.74456265,5.59228444,0.390228397,5.58990655,5.55635303,5.55395976
66.782044,5.83095189,5.59156646,0.489270306,5.58919252,5.55519815,5.55280866
66.792536,6,5.59085768,0.639642335,5.58848768,5.55404393,5.55165821
66.803028,5.38516481,5.59015852,-0.452762317,5.58779244,5.55289048,5.55050852
66.813519,5.47722558,5.58946943,-0.335028136,5.58710726,5.55173793,5.5493597
66.824011,5.65685425,5.58879024,0.260890799,5.58643198,5.55058604,5.54821154
66.834502,6.08276253,5.58812134,0.703307326,5.58576696,5.54943504,5.54706425
66.844994,4.89897949,5.58746284,-0.829748969,5.58511235,5.5482847,5.54591761
66.855486,6.164414,5.58681507,0.7599993,5.58446845,5.54713515,5.54477174
66.865977,6.08276253,5.58617836,0.704687288,5.5838356,5.54598649,5.54362674
66.876469,5.19615242,5.58555286,-0.624019582,5.58321395,5.5448385,5.54248241
66.88696,5.47722558,5.58493899,-0.328197216,5.58260391,5.5436914,5.54133895
66.897452,6.164414,5.58433691,0.76162792,5.58200567,5.54254497,5.54019614
66.907944,5.29150262,5.58374701,-0.540596325,5.58141958,5.54139933,5.53905411
66.918435,5.74456265,5.58316964,0.401737482,5.58084602,5.54025459,5.53791296
66.928927,6.08276253,5.58260503,0.70721814,5.58028521,5.53911051,5.53677247
66.939418,4.79583152,5.58205363,-0.886691663,5.5797376,5.53796734,5.53563286
66.94991,5.91607978,5.58151568,0.578415168,5.57920343,5.53682484,5.53449392
66.960402,5.19615242,5.5809916,-0.62035407,5.57868312,5.53568313,5.53335575
66.970893,6.40312424,5.58048181,0.906996377,5.57817709,5.53454232,5.53221846
66.981385,6,5.57998661,0.648084398,5.57768565,5.53340218,5.53108184
66.991876,5.47722558,5.57950651,-0.3198139,5.57720929,5.53226295,5.52994611
67.002368,5.74456265,5.57904182,0.406842513,5.57674834,5.5311244,5.52881104
67.01286,5.47722558,5.57859303,-0.318382556,5.57630328,5.52998664,5.52767676
67.023351,6,5.57816133,0.649491085,5.5758753,5.52884978,5.52654336
67.033843,6.70820393,5.57774646,1.06322974,5.57546415,5.52771361,5.52541063
67.044334,5.29150262,5.57734898,-0.534646015,5.57507038,5.52657834,5.52427879
67.054826,6,5.57696932,0.650408085,5.57469442,5.52544375,5.52314762
67.065318,4.58257569,5.57660805,-0.997011712,5.57433684,5.52430996,5.52201724
67.075809,5.38516481,5.57626574,-0.437150924,5.57399821,5.52317708,5.52088775
67.086301,5.56776436,5.57594289,-0.0904352245,5.57367905,5.52204488,5.51975893
67.096792,5.38516481,5.57564017,-0.436434828,5.57338,5.52091359,5.51863101
67.107284,5.19615242,5.57535811,-0.615796794,5.57310161,5.519783,5.51750377
67.117776,5.38516481,5.5750974,-0.435812571,5.57284457,5.5186532,5.51637731
67.128267,4.79583152,5.57485872,-0.882625175,5.57260954,5.51752431,5.51525175
67.138759,5.29150262,5.57464271,-0.532109098,5.57239719,5.51639611,5.51412687
67.14925,5.47722558,5.57445014,-0.311808538,5.57220826,5.51526883,5.51300288
67.159742,6.08276253,5.57428171,0.713078413,5.57204347,5.51414223,5.51187958
67.170234,6.08276253,5.57413822,0.713179018,5.57190363,5.51301645,5.51075707
67.180725,6.08276253,5.57402049,0.713261548,5.57178954,5.51189157,5.50963546
67.191217,5,5.57392936,-0.757581254,5.57170203,5.51076739,5.50851453
67.201708,5,5.57386571,-0.757539244,5.57164202,5.50964413,5.50739451
67.2122,4.79583152,5.57383045,-0.882042474,5.57161039,5.50852156,5.50627517
67.222692,5.65685425,5.57382455,0.288148743,5.57160812,5.50739981,5.50515663
67.233183,6.164414,5.57384989,0.768481691,5.57163708,5.50627896,5.50403899
67.243675,6.78232998,5.5739072,1.09928285,5.57169801,5.50515882,5.50292204
67.254166,6.244998,5.57399709,0.819146454,5.57179152,5.5040396,5.50180599
67.264658,5.29150262,5.57412072,-0.531618378,5.57191878,5.50292108,5.50069064
67.27515,5.91607978,5.5742793,0.584637056,5.57208098,5.50180337,5.49957609
67.285641,6.244998,5.57447404,0.818855274,5.57227935,5.50068658,5.49846244
67.296133,5.65685425,5.5747063,0.286614636,5.57251523,5.4995705,5.49734949
67.306624,5.38516481,5.5749774,-0.435674873,5.57278996,5.49845534,5.49623744
67.317116,5.47722558,5.57528883,-0.313150537,5.57310502,5.49734088,5.49512609
67.327608,5.65685425,5.57564207,0.284977504,5.57346189,5.49622725,5.49401555
67.338099,6.08276253,5.57603865,0.711845404,5.5738621,5.49511453,5.49290592
67.348591,6,5.57648029,0.650783916,5.57430739,5.49400252,5.49179698
67.359082,5.47722558,5.57696865,-0.315821269,5.57479938,5.49289144,5.49068896
67.369574,5.38516481,5.57750562,-0.438566772,5.57534,5.49178107,5.48958164
67.380066,4.69041576,5.57809307,-0.942166285,5.57593111,5.49067152,5.48847512
67.390557,6.244998,5.57873293,0.816250616,5.57657463,5.4895629,5.48736952
67.401049,5.65685425,5.57942742,0.278256761,5.57727279,5.48845499,5.48626463
67.41154,5.09901951,5.58017863,-0.693656337,5.57802767,5.48734801,5.48516065
67.422032,6.08276253,5.580989,0.708359746,5.57884173,5.48624174,5.48405737
67.432524,5.38516481,5.58186092,-0.443504349,5.57971734,5.4851363,5.48295491
67.443015,5.38516481,5.58279777,-0.444559291,5.5806579,5.48403178,5.48185336
67.453507,4.69041576,5.58380373,-0.945192026,5.58166758,5.48292799,5.48075253
67.463998,4.58257569,5.5848795,-1.00115124,5.58274708,5.48182513,5.47965261
67.47449,5.38516481,5.58602832,-0.448177997,5.58389966,5.48072298,5.4785534
67.484982,5.47722558,5.58725329,-0.331704258,5.58512838,5.47962167,5.47745501
67.495473,5.09901951,5.58855763,-0.699670008,5.58643651,5.47852128,5.47635754
67.505965,5.65685425,5.58994516,0.258667907,5.58782783,5.47742162,5.47526078
67.516456,6.40312424,5.59141937,0.900946652,5.58930585,5.4763229,5.47416494
67.526948,5.91607978,5.5929845,0.568414709,5.59087482,5.4752249,5.47306982
67.53744,5.56776436,5.59330166,-0.159803943,5.59119533,5.47412773,5.47197552
67.547931,5.09901951,5.59506326,-0.704303733,5.59296081,5.47303149,5.47088215
67.558423,5.74456265,5.5969292,0.384230984,5.59483065,5.47193599,5.46978949
67.568914,6.32455532,5.59890411,0.851851636,5.5968095,5.47084142,5.46869776
67.579406,6.78232998,5.60099367,1.08689296,5.59890302,5.46974758,5.46760674
67.589898,6.244998,5.60320332,0.801120889,5.60111666,5.46865457,5.46651655
67.600389,5.74456265,5.6055388,0.372859018,5.60345616,5.46756251,5.46542729
67.610881,5,5.6080069,-0.77974797,5.60592831,5.46647117,5.46433875
67.621372,4.58257569,5.61061389,-1.01392219,5.6085394,5.46538078,5.46325114
67.631864,5.83095189,5.61336746,0.466459469,5.6112971,5.46429112,5.46216426
67.642356,5.29150262,5.616275,-0.569888042,5.61420882,5.4632023,5.4610782
67.652847,4.89897949,5.61934438,-0.848743129,5.61728241,5.46211442,5.45999307
67.663339,5.56776436,5.62259277,-0.234154667,5.62053507,5.46102728,5.45890867
67.67383,5.38516481,5.62602199,-0.49077203,5.6239686,5.45994108,5.4578252
67.684322,5.56776436,5.62964252,-0.248753209,5.6275935,5.45885562,5.45674247
67.694814,5.65685425,5.63346473,0.152936313,5.63142014,5.457771,5.45566056
67.705305,4.69041576,5.63749968,-0.97318237,5.63545957,5.45668732,5.45457959
67.715797,5.47722558,5.64176043,-0.405628959,5.63972487,5.45560439,5.45349934
67.726288,5,5.6462593,-0.803902547,5.64422836,5.4545224,5.45242004
67.73678,5,5.65101131,-0.806852719,5.64898505,5.45344116,5.45134147
67.747272,5.65685425,5.65603121,0.0286887119,5.65400972,5.45236076,5.45026373
67.757763,5.47722558,5.6613348,-0.429079514,5.65931816,5.45128131,5.44918693
67.768255,5.91607978,5.66694069,0.499138346,5.66492899,5.45020261,5.44811087
67.778746,4.89897949,5.67286675,-0.879708625,5.67086007,5.44912485,5.44703575
67.789238,6.8556546,5.67913454,1.0846751,5.67713298,5.44804784,5.44596136
67.79973,6,5.68576558,0.560566163,5.68376926,5.44697168,5.44488781
67.810221,5.56776436,5.69278306,-0.353579825,5.69079208,5.44589648,5.44381521
67.820713,5,5.70021412,-0.836787981,5.69822862,5.44482202,5.44274334
67.831204,5.83095189,5.70808537,0.350523212,5.70610546,5.44374851,5.44167242
67.841696,6,5.71642864,0.532514187,5.71445446,5.44267576,5.44060224
67.852188,6.55743852,5.7252762,0.912229317,5.72330789,5.44160386,5.4395329
67.862679,6.4807407,5.73466303,0.863757879,5.73270075,5.44053291,5.43846451
67.873171,6.32455532,5.7446482,0.761516333,5.74269213,5.43946272,5.43739686
67.883662,5.47722558,5.75526798,-0.527297266,5.75331831,5.43839348,5.43633016
67.894154,5.91607978,5.76656184,0.386675503,5.76461875,5.437325,5.43526421
67.904646,6.32455532,5.77858029,0.738901235,5.77664399,5.43625737,5.4341991
67.915137,6.08276253,5.7913785,0.539799986,5.78944922,5.4351907,5.43313494
67.925629,6.244998,5.80502094,0.663307668,5.8030989,5.43412479,5.43207152
67.93612,6.32455532,5.81957303,0.710621062,5.8176585,5.43305984,5.43100906
67.946612,6.4807407,5.83511255,0.803509892,5.83320581,5.43199565,5.42994735
67.957104,6.32455532,5.85172082,0.687629627,5.84982215,5.43093231,5.42888649
67.967595,5.38516481,5.86948738,-0.695932879,5.86759711,5.42986994,5.42782658
67.978087,5.65685425,5.88851666,-0.481313211,5.88663513,5.42880833,5.42676742
67.988578,4.89897949,5.90891699,-1.00495647,5.90704457,5.42774769,5.42570922
67.99907,5.65685425,5.93081659,-0.523414124,5.92895368,5.4266878,5.42465177
68.009562,5,5.95435199,-0.976909406,5.95249901,5.42562878,5.42359517
68.020053,6.164414,5.97967494,0.429812828,5.97783236,5.42457073,5.42253953
68.030545,6,6.00696251,-0.0834416687,6.00513084,5.42351343,5.42148465
68.041036,5.09901951,6.03640256,-0.968185438,6.03458233,5.42245711,5.42043072
68.051528,6.32455532,6.06821721,0.506298437,6.06640902,5.42140155,5.41937755
68.06202,6.32455532,6.10264792,0.471070483,6.1008524,5.42034686,5.41832524
68.072511,6.40312424,6.13996727,0.512988273,6.1381851,5.41929314,5.41727389
68.083003,6.244998,6.18054848,0.253869093,6.17878043,5.41824018,5.41622329
68.093494,5.09901951,6.22484057,-1.06104715,6.2230875,5.41718819,5.41517366
68.103986,6,6.273174,-0.5226605,6.2714368,5.41613698,5.41412479
68.114478,6.244998,6.32605882,-0.28471183,6.32433849,5.41508663,5.41307678
68.124969,7,6.38412047,0.784779928,6.38241808,5.41403726,5.41202974
68.135461,5.74456265,6.4481724,-0.838814496,6.44648921,5.41298866,5.41098346
68.145952,7.41619849,6.51925929,0.947068739,6.51759669,5.41194103,5.40993814
68.156444,7.68114575,6.59883686,1.04034075,6.59719653,5.41089418,5.40889359
68.166936,6.92820323,6.68891575,0.489170194,6.68729968,5.4098482,5.4078499
68.177427,6.92820323,6.79234457,0.368590097,6.79075524,5.40880319,5.40680718
68.187919,7.21110255,6.91319349,0.545810462,6.91163403,5.40775896,5.40576523
68.19841,7.87400787,7.05709784,0.903830753,7.05557222,5.40671571,5.40472424
68.208902,6.78232998,7.23178592,-0.670414747,7.23029913,5.40567323,5.40368403
68.219394,8.24621125,7.44733268,0.893800074,7.44589085,5.40463163,5.40264468
68.229885,9.21954446,7.71627192,1.22608015,7.71488219,5.40359101,5.4016063
68.240377,9.11043358,8.05331732,1.02816159,8.05198752,5.40255117,5.4005687
68.250868,9.48683298,8.47418657,1.00630334,8.47292448,5.40151231,5.39953206
68.26136,8.94427191,8.9942158,-0.223481289,8.99302825,5.40047423,5.3984962
68.271852,10.9544512,9.62603837,1.15256791,9.62493024,5.39943703,5.39746121
68.282343,11.2249722,10.3775382,0.920561756,10.3765117,5.39840081,5.39642719
68.292835,11.3578167,11.2503828,0.327771135,11.2494371,5.39736537,5.39539395
68.303326,12.6095202,12.2467484,0.602305423,12.2458808,5.39633092,5.39436169
68.313818,13.7477271,13.3442904,0.635166627,13.3434953,5.39529725,5.3933302
68.32431,14.6628783,14.5205079,0.377320025,14.5197781,5.39426447,5.39229958
68.334801,15.3948043,15.7467006,-0.593208495,15.7460285,5.39323267,5.39126994
68.345293,15.6843871,16.9886909,-1.14206119,16.9880687,5.39220166,5.39024109
68.355784,18.1659021,18.2061662,-0.200659104,18.2055864,5.39117163,5.3892132
68.366276,18.9472953,19.3532065,-0.637111581,19.3526617,5.39014239,5.3881861
68.376768,20.1494417,20.3768566,-0.476880372,20.3763398,5.38911404,5.38715988
68.387259,21,21.2182353,-0.467156633,21.2177397,5.38808667,5.38613464
68.397751,22.3606798,21.8172011,0.737210064,21.8167197,5.3870601,5.38511018
68.408242,23.0217289,22.1218672,0.948610404,22.121393,5.38603452,5.3840867
68.418734,22.3606798,22.1024124,0.508200159,22.1019384,5.38500972,5.38306401
68.429226,22.6053091,21.7605522,0.919106558,21.7600714,5.38398582,5.3820422
68.439717,22.2261108,21.1291685,1.0473501,21.128674,5.38296291,5.38102137
68.450209,21.7944947,20.2615057,1.23813935,20.2609906,5.3819408,5.38000133
68.4607,20.0499377,19.2183052,0.911938836,19.2177629,5.38091967,5.37898227
68.471192,18.627936,18.0577203,0.755126285,18.0571438,5.37989934,5.37796401
68.481684,17.8325545,16.8319899,1.00028228,16.8313722,5.37887991,5.37694662
68.492175,15.3622915,15.5867459,-0.473766157,15.5860796,5.37786146,5.37593023
68.502667,14.525839,14.3612592,0.405684363,14.3605371,5.37684382,5.37491462
68.513158,12.9614814,13.1946639,-0.482889736,13.1938788,5.37582717,5.3739
68.52365,11.8743421,12.1137234,-0.489266138,12.1128694,5.37481132,5.37288617
68.534142,10.3923048,11.135997,-0.86237589,11.1350691,5.37379637,5.37187324
68.544633,9.21954446,10.2743368,-1.02703082,10.2733323,5.37278241,5.37086129
68.555125,9.69535971,9.53375716,0.4019982,9.53267597,5.37176926,5.36985013
68.565616,9.05538514,8.91222508,0.378364985,8.91106989,5.3707571,5.36883997
68.576108,7.74596669,8.40118452,-0.809455265,8.39996055,5.36974575,5.3678306
68.5866,7.93725393,7.98772536,-0.224658476,7.9864396,5.36873529,5.36682212
68.597091,8,7.65650764,0.586082211,7.65516788,5.36772584,5.36581464
68.607583,7.41619849,7.39175652,0.156339281,7.39037045,5.36671719,5.36480795
68.618074,6.4807407,7.17904179,-0.83564412,7.17761638,5.36570954,5.36380226
68.628566,6.8556546,7.00600317,-0.387748069,7.0045443,5.3647027,5.36279737
68.639058,6.70820393,6.86282246,-0.393215626,6.86133495,5.36369676,5.36179337
68.649549,6.32455532,6.74203123,-0.646123754,6.74051888,5.36269182,5.36079037
68.660041,6.40312424,6.6381299,-0.484773825,6.63659572,5.3616877,5.35978817
68.670532,6.08276253,6.54722994,-0.681518458,6.54567632,5.36068457,5.35878696
68.681024,4.79583152,6.46655799,-1.29256585,6.46498686,5.35968226,5.35778656
68.691516,6.244998,6.39417964,-0.386240397,6.39259262,5.35868085,5.35678706
68.702007,6.08276253,6.32870982,-0.495930729,6.32710828,5.35768045,5.35578855
68.712499,5.91607978,6.2691129,-0.594165898,6.26749805,5.35668086,5.35479086
68.72299,7.14142843,6.21468546,0.962674902,6.2130584,5.35568227,5.35379415
68.733482,5.74456265,6.1648643,-0.64830676,6.16322602,5.3546845,5.35279826
68.743974,5.38516481,6.11898713,-0.856634302,6.11733851,5.35368764,5.35180327
68.754465,5.91607978,6.07664378,-0.400704377,6.07498562,5.35269179,5.35080928
68.764957,6,6.03747046,-0.19357287,6.03580349,5.35169675,5.3498161
68.775448,5.83095189,6.0011644,-0.412568178,5.9994893,5.35070272,5.34882392
68.78594,5.56776436,5.96744627,-0.632204011,5.96576367,5.34970951,5.34783255
68.796432,5.19615242,5.9360786,-0.860189615,5.93438907,5.34871721,5.34684209
68.806923,4.89897949,5.90685002,-1.00392755,5.9051541,5.34772592,5.34585263
68.817415,5.29150262,5.87956435,-0.766851831,5.87786254,5.34673546,5.34486399
68.827906,4.89897949,5.8540565,-0.977280416,5.85234924,5.345746,5.34387634
68.838398,5.65685425,5.83016912,-0.416311027,5.82845684,5.34475736,5.34288952
68.84889,5.91607978,5.80776789,0.329107723,5.80605098,5.34376964,5.3419036
68.859381,5.74456265,5.78673176,-0.205351199,5.78501058,5.34278294,5.34091869
68.869873,6.32455532,5.76694591,0.746732491,5.76522079,5.34179705,5.33993459
68.880364,6.55743852,5.74831417,0.899513398,5.74658544,5.34081218,5.3389515
68.890856,5.47722558,5.73074258,-0.503504718,5.72901052,5.33982813,5.33796923
68.901348,6.08276253,5.71414854,0.607135892,5.71241342,5.33884501,5.33698787
68.911839,6.78232998,5.69846444,1.04108863,5.69672652,5.3378629,5.33600752
68.922331,5.83095189,5.6836172,0.383842014,5.6818767,5.33688161,5.33502799
68.932822,6.40312424,5.66954833,0.856490462,5.66780547,5.33590134,5.33404947
68.943314,5.19615242,5.65622885,-0.678289337,5.65448385,5.3349219,5.33307178
68.953806,5.83095189,5.64357678,0.432868478,5.64182983,5.33394338,5.33209499
68.964297,6.244998,5.63154535,0.783232177,5.62979663,5.33296588,5.33111922
68.974789,6.40312424,5.62009004,0.884892198,5.6183397,5.33198921,5.33014427
68.98528,5.65685425,5.60917418,0.218357662,5.60742239,5.33101356,5.32917034
68.995772,6.32455532,5.5987601,0.851936158,5.597007,5.33003874,5.32819723
69.006264,5.19615242,5.58881609,-0.626628808,5.58706181,5.32906485,5.32722504
69.016755,5.91607978,5.57931283,0.580316249,5.57755751,5.32809197,5.32625386
69.027247,5,5.57022073,-0.755129613,5.56846448,5.32711993,5.32528351
69.037738,5.29150262,5.56151584,-0.519627957,5.55975877,5.32614891,5.32431417
69.04823,5.19615242,5.55317276,-0.597511789,5.55141498,5.32517873,5.32334566
69.058722,5.56776436,5.5451704,0.150312869,5.54341201,5.32420947,5.32237808
69.069213,6.8556546,5.53748916,1.14811386,5.53573025,5.32324124,5.32141151
69.079705,4.89897949,5.5301087,-0.794436412,5.52834936,5.32227384,5.32044577
69.090196,4.58257569,5.52301296,-0.969761446,5.52125327,5.32130747,5.31948105
69.100688,5.09901951,5.51618432,-0.645882965,5.51442435,5.32034193,5.31851716
69.11118,6.244998,5.50960836,0.857548622,5.5078482,5.31937733,5.3175542
69.121671,5.74456265,5.50327161,0.491213838,5.50151132,5.31841375,5.31659225
69.132163,6.164414,5.49715975,0.816856326,5.49539939,5.31745101,5.31563114
69.142654,5.38516481,5.49126171,-0.325725203,5.48950136,5.3164893,5.31467105
69.153146,4.69041576,5.48557034,-0.891714406,5.48381004,5.31552843,5.3137118
69.163638,6.32455532,5.48007284,0.918957276,5.47831266,5.31456849,5.31275347
69.174129,4.89897949,5.47475626,-0.758799559,5.47299623,5.31360958,5.31179616
69.184621,4.79583152,5.46961032,-0.820840298,5.4678505,5.31265152,5.3108397
69.195112,6.55743852,5.46462733,1.0453761,5.46286777,5.31169448,5.30988425
69.205604,5.09901951,5.45979822,-0.600648568,5.45803896,5.31073829,5.30892964
69.216096,5.29150262,5.45511583,-0.404491292,5.45335692,5.30978303,5.30797597
69.226587,5.83095189,5.45057342,0.616748307,5.44881489,5.30882881,5.30702331
69.237079,6,5.4461634,0.744201989,5.44440529,5.30787543,5.3060715
69.24757,5.29150262,5.44188027,-0.387785568,5.44012261,5.30692308,5.30512072
69.258062,5,5.43771725,-0.661602036,5.43596009,5.30597158,5.30417077
69.268554,5,5.43366915,-0.658535614,5.4319125,5.30502103,5.30322176
69.279045,5.83095189,5.42973105,0.633419958,5.42797495,5.3040715,5.30227378
69.289537,5.47722558,5.4258972,0.22655766,5.42414167,5.30312282,5.30132664
69.300028,5.09901951,5.42216363,-0.568457667,5.42040871,5.30217518,5.30038052
69.31052,6.70820393,5.41852518,1.13564024,5.41677088,5.30122839,5.29943526
69.321012,5.74456265,5.41497802,0.574094617,5.41322437,5.30028254,5.29849093
69.331503,6.164414,5.41151849,0.867695519,5.40976551,5.29933772,5.29754762
69.341995,5.19615242,5.40814218,-0.460423455,5.4063899,5.29839376,5.29660517
69.352486,5.29150262,5.40484618,-0.336665355,5.40309462,5.29745083,5.29566374
69.362978,4.47213595,5.40162741,-0.964101374,5.39987658,5.29650876,5.29472317
69.37347,5,5.39848432,-0.631256144,5.39673424,5.29556763,5.29378353
69.383961,5.47722558,5.39541168,0.286031291,5.39366237,5.29462754,5.29284493
69.394453,5.74456265,5.39240605,0.593427835,5.39065753,5.29368831,5.29190717
69.404944,5,5.38946531,-0.624071556,5.38771759,5.29275012,5.29097045
69.415436,5.38516481,5.38658632,-0.0377029052,5.38483942,5.29181278,5.29003458
69.425928,6.08276253,5.38376692,0.836059576,5.38202085,5.29087639,5.28909965
69.436419,5.09901951,5.38100504,-0.531023097,5.37925982,5.28994104,5.28816576
69.446911,5.29150262,5.37829796,-0.294610491,5.37655359,5.28900655,5.28723272
69.457402,4.69041576,5.37564409,-0.827785195,5.37390059,5.28807309,5.28630071
69.467894,5.47722558,5.37304091,0.322776489,5.37129829,5.2871405,5.28536956
69.478386,5.19615242,5.37048678,-0.417533663,5.36874505,5.28620886,5.28443935
69.488877,4.89897949,5.36798012,-0.684836208,5.36623928,5.28527827,5.28351018
69.499369,5.74456265,5.36551871,0.615665445,5.36377878,5.28434853,5.28258187
69.50986,4.12310563,5.36310137,-1.11355096,5.36136236,5.28341984,5.28165459
69.520352,5.29150262,5.36072606,-0.263103474,5.35898798,5.28249201,5.28072817
69.530844,5.19615242,5.35839151,-0.402789139,5.35665436,5.28156513,5.2798027
69.541335,5.29150262,5.35609651,-0.254153267,5.35436029,5.2806393,5.27887827
69.551827,4.89897949,5.35383922,-0.674432902,5.35210396,5.27971433,5.2779547
69.562318,5.47722558,5.35161879,0.354410475,5.34988448,5.27879041,5.27703216
69.57281,5.09901951,5.34943352,-0.500413836,5.34770017,5.27786735,5.27611049
69.583302,6.244998,5.34728381,0.947477804,5.34555143,5.27694525,5.27518977
69.593793,5.56776436,5.34516732,0.471801909,5.34343591,5.2760242,5.27427009
69.604285,4.69041576,5.34308247,-0.807877906,5.34135204,5.27510401,5.27335127
69.614776,5.47722558,5.3410286,0.369048737,5.33929915,5.27418487,5.27243349
69.625268,6.63324958,5.33900433,1.137649,5.33727586,5.2732666,5.27151658
69.63576,5.19615242,5.33700888,-0.37530848,5.3352814,5.27234929,5.27060062
69.646251,5.38516481,5.33504152,0.223882316,5.33331503,5.27143303,5.2696857
69.656743,4.47213595,5.33310098,-0.927882011,5.33137549,5.27051764,5.26877165
69.667234,5.74456265,5.3311868,0.642943114,5.32946231,5.26960329,5.26785864
69.677726,4.58257569,5.32929779,-0.864130829,5.3275743,5.26868982,5.2669465
69.688218,6,5.32743334,0.820101613,5.32571086,5.26777731,5.26603532
69.698709,6.92820323,5.3255929,1.26594247,5.32387142,5.26686585,5.26512518
69.709201,4.58257569,5.32377538,-0.860929545,5.32205491,5.26595527,5.26421591
69.719692,5.65685425,5.32198043,0.578682831,5.32026098,5.26504573,5.26330768
69.730184,5.29150262,5.32020705,-0.16942382,5.31848861,5.26413708,5.26240033
69.740676,6.08276253,5.31845477,0.874246965,5.31673735,5.26322938,5.26149393
69.751167,5.83095189,5.31672314,0.717097449,5.31500673,5.26232274,5.26058858
69.761659,4.79583152,5.31501124,-0.720541263,5.31329584,5.26141697,5.2596841
69.77215,4.79583152,5.31331881,-0.719365891,5.31160444,5.26051226,5.25878067
69.782642,6,5.31164499,0.829671628,5.30993164,5.25960842,5.25787811
69.793134,6.08276253,5.30998987,0.879074887,5.30827754,5.25870555,5.25697652
69.803625,5.56776436,5.30835292,0.509324501,5.3066416,5.25780374,5.25607597
69.814117,5.19615242,5.306733,-0.332536583,5.30502271,5.2569028,5.25517629
69.824608,5.47722558,5.30512997,0.414844074,5.3034207,5.25600292,5.25427767
69.8351,4.69041576,5.30354306,-0.783024457,5.30183481,5.25510392,5.25337992
69.845592,5.29150262,5.30197199,-0.102319922,5.30026476,5.25420589,5.25248314
69.856083,5.56776436,5.30041648,0.517056943,5.29871028,5.25330892,5.25158741
69.866575,5.74456265,5.29887583,0.667597793,5.29717065,5.25241283,5.25069255
69.877066,5.47722558,5.29734995,0.424117471,5.29564578,5.25151779,5.24979875
69.887558,5.65685425,5.29583815,0.600846153,5.29413501,5.25062364,5.24890582
69.89805,5,5.29434022,-0.542531312,5.2926381,5.24973046,5.24801386
69.908541,5.19615242,5.29285596,-0.310971918,5.29115485,5.24883833,5.24712296
69.919033,5.47722558,5.29138472,0.431092627,5.28968463,5.2479471,5.24623293
69.929524,6,5.28992647,0.842658608,5.2882274,5.24705692,5.24534396
69.940016,5.65685425,5.28848061,0.606937923,5.28678255,5.24616763,5.24445587
69.950508,5.56776436,5.28704696,0.52982771,5.28534992,5.24527931,5.24356875
69.960999,5.38516481,5.28562537,0.315498711,5.28392934,5.24439205,5.24268268
69.971491,4.89897949,5.28421528,-0.620673658,5.28252026,5.24350568,5.2417975
69.981982,5.09901951,5.28281667,-0.428715702,5.28112266,5.24262037,5.24091337
69.992474,5.74456265,5.28142901,0.680539226,5.27973601,5.24173595,5.24003012
70.002966,5.38516481,5.28005229,0.324210609,5.2783603,5.2408525,5.23914785
70.013457,4.47213595,5.27868658,-0.898081634,5.27699559,5.23997012,5.23826663
70.023949,6.63324958,5.27733104,1.16443915,5.27564106,5.23908862,5.2373863
70.03444,5,5.2759857,-0.525343412,5.27429672,5.23820819,5.23650703
70.044932,5.47722558,5.27465007,0.450083883,5.2729621,5.23732865,5.23562864
70.055424,5.09901951,5.27332407,-0.417497967,5.27163709,5.23645009,5.23475123
70.065915,5,5.27200759,-0.521543469,5.27032161,5.23557259,5.23387487
70.076407,5.47722558,5.27070019,0.454450645,5.2690152,5.23469599,5.23299941
70.086898,3.87298335,5.2694019,-1.18170155,5.26771791,5.23382045,5.232125
70.09739,5.83095189,5.2681123,0.750226365,5.26642929,5.2329458,5.23125148
70.107882,4.69041576,5.2668313,-0.759220352,5.26514929,5.23207214,5.23037894
70.118373,5.83095189,5.26555886,0.751926216,5.26387783,5.23119954,5.22950746
70.128865,5.29150262,5.26429455,0.164948706,5.2626145,5.23032783,5.22863687
70.139356,5.47722558,5.26303843,0.462803569,5.26135937,5.22945719,5.22776734
70.149848,5.83095189,5.26179011,0.754428119,5.26011202,5.22858745,5.2268987
70.16034,5.09901951,5.26054953,-0.401907974,5.25887242,5.22771869,5.22603105
70.170831,5.74456265,5.25931667,0.696595995,5.25764053,5.226851,5.22516445
70.181323,4.79583152,5.25809112,-0.679896755,5.25641596,5.2259842,5.22429875
70.191814,5.38516481,5.25687298,0.358178484,5.25519879,5.22511848,5.2234341
70.202306,4.79583152,5.25566187,-0.678107916,5.25398864,5.22425365,5.22257036
70.212798,5.09901951,5.25445776,-0.394256577,5.2527855,5.22338981,5.22170759
70.223289,4.89897949,5.25326088,-0.595215421,5.25158958,5.22252703,5.22084589
70.233781,5.74456265,5.25207063,0.701777752,5.25040029,5.22166516,5.21998509
70.244272,5.38516481,5.25088709,0.366439235,5.2492177,5.22080436,5.21912534
70.254764,5.19615242,5.24970992,-0.231424917,5.24804148,5.21994445,5.2182665
70.265256,4.58257569,5.24853909,-0.816065802,5.2468716,5.21908554,5.21740864
70.275747,4.47213595,5.24737461,-0.880476377,5.24570807,5.21822769,5.21655184
70.286239,5.47722558,5.24621613,0.480634416,5.24455054,5.21737075,5.21569595
70.29673,5.56776436,5.24506378,0.568067412,5.24339913,5.21651488,5.21484111
70.307222,5.47722558,5.24391721,0.483020042,5.2422535,5.21565992,5.21398718
70.317714,5,5.24277645,-0.492723499,5.24111367,5.21480594,5.21313424
70.328205,5.56776436,5.24164148,0.571071698,5.23997963,5.21395303,5.21228236
70.338697,5.09901951,5.240512,-0.376154867,5.23885108,5.21310103,5.21143138
70.349188,4.89897949,5.23938812,-0.583445485,5.23772813,5.2122501,5.21058147
70.35968,5.83095189,5.23826954,0.769858661,5.23661047,5.21140008,5.20973246
70.370172,4.58257569,5.23715627,-0.809061537,5.23549812,5.21055105,5.20888444
70.380663,5.47722558,5.23604832,0.491098009,5.23439109,5.2097031,5.20803749
70.391155,5.09901951,5.2349454,-0.368681287,5.23328909,5.20885605,5.20719144
70.401646,5.47722558,5.23384764,0.493333489,5.23219224,5.20801007,5.20634646
70.412138,5.47722558,5.23275474,0.494439916,5.23110025,5.20716501,5.20550238
70.42263,5.91607978,5.23166673,0.827292602,5.23001315,5.20632093,5.2046593
70.433121,5.83095189,5.23058374,0.774834279,5.22893105,5.20547794,5.20381728
70.443613,5.38516481,5.22950543,0.394536913,5.22785365,5.20463585,5.20297617
70.454104,4.79583152,5.22843188,-0.657723619,5.22678099,5.20379484,5.20213613
70.464596,4.24264069,5.22736281,-0.992331661,5.22571282,5.20295474,5.201297
70.475088,4.58257569,5.22629825,-0.802323225,5.22464915,5.20211563,5.20045886
70.485579,4.89897949,5.22523824,-0.571190643,5.22359002,5.2012776,5.19962178
70.496071,5.56776436,5.22418249,0.58615857,5.22253516,5.20044048,5.19878562
70.506562,5.56776436,5.22313116,0.587054684,5.2214847,5.19960444,5.19795053
70.517054,5.38516481,5.22208398,0.403832677,5.22043839,5.19876932,5.19711635
70.527546,5.19615242,5.22104098,-0.157761063,5.21939627,5.19793519,5.19628317
70.538037,5.65685425,5.2200022,0.660947842,5.21835836,5.19710214,5.19545105
70.548529,5.38516481,5.21896739,0.407673172,5.21732442,5.19627,5.19461985
70.55902,5.09901951,5.21793669,-0.3448437,5.21629458,5.19543894,5.19378972
70.569512,5.38516481,5.21690985,0.410188934,5.2152686,5.1946088,5.1929605
70.580004,5.83095189,5.2158869,0.784260795,5.21424651,5.19377966,5.19213228
70.590495,5.29150262,5.2148679,0.276829777,5.21322836,5.19295159,5.19130513
70.600987,5.65685425,5.21385259,0.665583697,5.2122139,5.19212444,5.19047889
70.611478,5.09901951,5.21284113,-0.337374589,5.21120328,5.19129837,5.18965373
70.62197,6,5.21183326,0.887787553,5.21019626,5.19047322,5.18882949
70.632462,5.19615242,5.21082904,-0.121147094,5.20919288,5.18964908,5.18800624
70.642953,5.09901951,5.20982855,-0.332879908,5.20819322,5.188826,5.18718406
70.653445,5.19615242,5.2088316,-0.112601832,5.20719711,5.18800386,5.1863628
70.663936,6.08276253,5.20783825,0.935373875,5.20620459,5.18718279,5.18554262
70.674428,5.09901951,5.20684827,-0.328372885,5.20521543,5.18636264,5.18472335
70.68492,5.83095189,5.20586171,0.790626453,5.2042297,5.18554349,5.18390509
70.695411,5.29150262,5.20487862,0.294319556,5.20324743,5.18472543,5.18308789
70.705903,5.65685425,5.20389878,0.673019663,5.20226841,5.18390829,5.18227162
70.716394,5.47722558,5.20292234,0.523739667,5.20129277,5.18309222,5.18145642
70.726886,6,5.20194906,0.893336968,5.20032031,5.18227709,5.18064215
70.737378,5.56776436,5.20097901,0.605628064,5.19935106,5.18146295,5.17982887
70.747869,4.69041576,5.20001224,-0.713860268,5.1983851,5.1806499,5.17901667
70.758361,5.83095189,5.19904854,0.794923493,5.19742219,5.17983777,5.17820539
70.768852,5.74456265,5.19808804,0.739239208,5.19646249,5.17902673,5.17739519
70.779344,5.65685425,5.19713054,0.678029284,5.19550578,5.17821661,5.17658591
70.789836,5.38516481,5.19617609,0.434728324,5.19455212,5.17740749,5.17577764
70.800327,4.58257569,5.19522476,-0.782719018,5.19360157,5.17659946,5.17497044
70.810819,5.91607978,5.19427632,0.849590174,5.19265392,5.17579236,5.17416416
70.82131,5.91607978,5.19333094,0.850146369,5.19170931,5.17498634,5.17335896
70.831802,5.83095189,5.19238839,0.799101686,5.19076754,5.17418125,5.17255469
70.842294,5.19615242,5.19144875,0.0685833352,5.18982867,5.17337716,5.17175142
70.852785,5,5.19051207,-0.436476885,5.18889276,5.17257416,5.17094923
70.863277,5.83095189,5.18957822,0.800858084,5.18795968,5.17177209,5.17014797
70.873768,4.69041576,5.18864729,-0.705855177,5.18702951,5.1709711,5.16934778
70.88426,5,5.18771907,-0.433265584,5.18610204,5.17017104,5.16854852
70.894752,5.09901951,5.18679361,-0.296266937,5.18517734,5.16937199,5.16775027
70.905243,5.56776436,5.18587099,0.617975221,5.18425547,5.16857403,5.16695309
70.915735,4.89897949,5.184951,-0.534763046,5.18333622,5.16777699,5.16615685
70.926226,4.69041576,5.1840338,-0.702579561,5.18241977,5.16698104,5.16536168
70.936718,4.69041576,5.18311919,-0.701928364,5.1815059,5.16618603,5.16456745
70.94721,4.58257569,5.18220723,-0.774358791,5.18059468,5.16539202,5.16377422
70.957701,5.91607978,5.181298,0.857194134,5.17968618,5.1645991,5.16298207
70.968193,6.32455532,5.1803913,1.06965603,5.1787802,5.16380712,5.16219085
70.978684,5.56776436,5.17948728,0.623118837,5.17787691,5.16301622,5.16140071
70.989176,5.38516481,5.17858575,0.454509688,5.17697611,5.16222625,5.1606115
70.999668,4.47213595,5.17768679,-0.839970732,5.17607786,5.1614373,5.15982331
71.010159,5.47722558,5.17679045,0.548119625,5.17518224,5.16064943,5.15903619
71.020651,4.89897949,5.17589656,-0.526229109,5.17428906,5.1598625,5.15825
71.031142,5.65685425,5.17500527,0.694153428,5.17339848,5.15907665,5.1574649
71.041634,5.38516481,5.17411639,0.459400064,5.17251031,5.15829174,5.15668073
71.052126,5.65685425,5.17322999,0.695430985,5.17162461,5.15750785,5.15589757
71.062617,5.74456265,5.17234616,0.756449925,5.17074148,5.15672504,5.15511549
71.073109,4.89897949,5.17146473,-0.522001191,5.16986074,5.15594317,5.15433435
71.0836,5.38516481,5.17058585,0.463226676,5.16898256,5.15516239,5.15355429
71.094092,5.47722558,5.16970934,0.554541467,5.16810673,5.15438254,5.15277517
71.104584,5.19615242,5.16883525,0.165279076,5.16723333,5.15360371,5.15199705
71.115075,5.09901951,5.16796366,-0.262572182,5.16636242,5.15282597,5.15122002
71.125567,6.08276253,5.16709441,0.956905494,5.16549384,5.15204917,5.15044393
71.136058,5.74456265,5.16622763,0.760483408,5.16462774,5.15127345,5.14966892
71.14655,5.38516481,5.16536317,0.46883007,5.16376395,5.15049868,5.14889485
71.157042,5.47722558,5.1645011,0.559217731,5.16290255,5.14972492,5.14812178
71.167533,4.35889894,5.16364151,-0.897074447,5.16204362,5.14895225,5.14734981
71.178025,5.09901951,5.16278421,-0.252516725,5.16118698,5.14818053,5.14657877
71.188516,5.74456265,5.16192938,0.763304179,5.16033281,5.14740989,5.14580881
71.199008,5.91607978,5.16107684,0.868909051,5.15948093,5.14664019,5.1450398
71.2095,6.32455532,5.16022669,1.0790406,5.15863143,5.14587151,5.1442718
71.219991,5.65685425,5.15937901,0.705319248,5.15778439,5.14510393,5.14350488
71.230483,4.89897949,5.15853363,-0.509464564,5.15693965,5.14433728,5.14273891
71.240974,5.56776436,5.15769072,0.640369928,5.15609738,5.14357172,5.14197402
71.251466,5.65685425,5.15685013,0.707109697,5.15525743,5.14280711,5.14121007
71.261958,5.38516481,5.15601194,0.478699142,5.15441988,5.14204352,5.14044713
71.272449,5.38516481,5.15517625,0.479571226,5.15358481,5.14128102,5.13968528
71.282941,5.29150262,5.15434291,0.370350797,5.1527521,5.14051946,5.13892437
71.293432,6.08276253,5.15351212,0.963976353,5.15192194,5.13975899,5.13816455
71.303924,5.74456265,5.15268371,0.769336686,5.15109415,5.13899947,5.13740567
71.314416,5.38516481,5.15185779,0.483018647,5.15026885,5.13824097,5.13664781
71.324907,6.92820323,5.15103445,1.33310494,5.14944612,5.13748356,5.13589103
71.335399,5.65685425,5.15021354,0.71178698,5.14862582,5.13672709,5.1351352
71.34589,5.38516481,5.14939526,0.485561065,5.14780814,5.13597172,5.13438046
71.356382,6.164414,5.14857947,1.00788617,5.14699296,5.1352173,5.13362666
71.366874,5.29150262,5.14776628,0.379125759,5.14618037,5.13446389,5.13287387
71.377365,5,5.14695581,-0.383348161,5.1453705,5.13371158,5.13212217
71.387857,5.65685425,5.14614795,0.714637182,5.14456323,5.13296021,5.13137142
71.398348,5.74456265,5.14534288,0.774092864,5.14375876,5.13220994,5.13062176
71.40884,5.74456265,5.14454052,0.774610953,5.14295698,5.13146062,5.12987304
71.419332,5.83095189,5.14374098,0.828981853,5.14215803,5.13071232,5.12912534
71.429823,5.56776436,5.14294441,0.651782135,5.14136204,5.12996511,5.12837873
71.440315,5.09901951,5.14215072,-0.20768054,5.14056892,5.12921885,5.12763306
71.450806,6.08276253,5.14136013,0.970258932,5.13977891,5.12847368,5.12688849
71.461298,5.38516481,5.14057259,0.494562657,5.13899194,5.12772947,5.12614486
71.47179,5.38516481,5.13978824,0.495354994,5.13820816,5.12698628,5.12540225
71.482281,6.164414,5.13900726,1.01262369,5.13742775,5.12624418,5.12466073
71.492773,5.47722558,5.13822963,0.582233587,5.13665067,5.12550303,5.12392015
71.503264,5.47722558,5.13745562,0.582897892,5.13587723,5.12476297,5.12318067
71.513756,5.83095189,5.13668521,0.833226669,5.13510738,5.12402387,5.12244214
71.524248,5.38516481,5.1359187,0.499245542,5.13434142,5.12328579,5.12170462
71.534739,4.58257569,5.13515627,-0.743357636,5.13357954,5.12254881,5.1209682
71.545231,6,5.13439795,0.930377369,5.13282177,5.12181277,5.12023272
71.555722,5,5.13364409,-0.365573652,5.13206846,5.12107784,5.11949834
71.566214,5.74456265,5.13289478,0.782091978,5.1313197,5.12034385,5.1187649
71.576706,5.47722558,5.13215035,0.587431038,5.1305758,5.11961089,5.11803249
71.587197,5.74456265,5.13141115,0.783039908,5.12983714,5.11887902,5.11730116
71.597689,5.29150262,5.13067736,0.401030246,5.12910389,5.11814811,5.11657079
71.60818,5.09901951,5.12994949,-0.175869211,5.12837656,5.1174183,5.11584151
71.618672,5.29150262,5.1292278,0.402833487,5.1276554,5.11668943,5.11511318
71.629164,5.65685425,5.12851282,0.726870982,5.12694095,5.1159616,5.11438587
71.639655,6.244998,5.12780514,1.05697344,5.12623379,5.11523486,5.11365965
71.650147,5.83095189,5.1271052,0.838955719,5.12553438,5.11450907,5.11293438
71.660638,5.09901951,5.1264138,-0.165512197,5.12484351,5.11378438,5.11221021
71.67113,5.47722558,5.12573158,0.592869286,5.12416182,5.11306064,5.11148699
71.681622,5.09901951,5.1250595,-0.161369094,5.12349026,5.11233794,5.11076479
71.692113,4.79583152,5.12439864,-0.573207742,5.12282992,5.11161632,5.11004368
71.702605,4.35889894,5.12375011,-0.874557696,5.12218191,5.11089567,5.10932353
71.713096,5.29150262,5.12311553,0.410349959,5.12154786,5.11017611,5.10860447
71.723588,5.56776436,5.12249664,0.667283836,5.1209295,5.1094575,5.10788636
71.73408,5.65685425,5.12189624,0.731408234,5.12032963,5.10873993,5.10716927
71.744571,5.19615242,5.12131794,0.273558922,5.11975185,5.10802345,5.10645328
71.755063,6.78232998,5.12076566,1.28901681,5.1192001,5.10730793,5.10573824
71.765554,5.91607978,5.12024576,0.892095298,5.11868075,5.1065935,5.1050243
71.776046,5.65685425,5.11976699,0.732862375,5.11820252,5.10588003,5.10431131
71.786538,5.56776436,5.11934191,0.66964353,5.117778,5.10516759,5.10359934
71.797029,6.08276253,5.11898812,0.981720126,5.1174248,5.10445625,5.10288847
71.807521,4.58257569,5.11872994,-0.732225544,5.11716722,5.10374587,5.10217856
71.818012,5.91607978,5.11860045,0.893016983,5.11703837,5.10303658,5.10146973
71.828504,5.83095189,5.11864332,0.843983754,5.11708192,5.10232825,5.10076186
71.838996,4.58257569,5.11891458,-0.732351613,5.11735394,5.10162096,5.10005502
71.849487,6.32455532,5.11948348,1.09775764,5.11792368,5.10091475,5.09934927
71.859979,5.83095189,5.12043246,0.84292315,5.11887361,5.10020951,5.09864448
71.87047,5.38516481,5.12185457,0.513137643,5.12029681,5.09950537,5.09794078
71.880962,5.83095189,5.12384975,0.840893656,5.12229326,5.09880219,5.09723804
71.891454,5.74456265,5.12651691,0.786158852,5.12496187,5.09810003,5.09653632
71.901945,5.56776436,5.12994411,0.661679871,5.12839076,5.09739897,5.0958357
71.912437,5.65685425,5.13419775,0.72294986,5.13264632,5.09669888,5.09513604
71.922928,4.35889894,5.13930659,-0.883406843,5.13775735,5.09599988,5.09443746
71.93342,5.65685425,5.14525092,0.715264514,5.1437041,5.09530184,5.09373985
71.943912,4.79583152,5.1519481,-0.596755038,5.15040391,5.09460484,5.09304327
71.954403,5.56776436,5.15924809,0.639152775,5.15770672,5.09390893,5.09234777
71.964895,5.56776436,5.16686157,0.633168847,5.16532309,5.09321398,5.09165324
71.975386,5.19615242,5.17442762,0.147393348,5.172892,5.09252013,5.0909598
71.985878,5.74456265,5.18148355,0.750385965,5.17995062,5.09182725,5.09026732
71.99637,6,5.18747284,0.901402884,5.18594229,5.09113539,5.08957587
72.006861,4.89897949,5.19179862,-0.541127653,5.19026995,5.09044463,5.08888551
72.017353,5.91607978,5.19392659,0.849795973,5.19239913,5.08975484,5.08819612
72.027844,5.56776436,5.19351761,0.611757099,5.19199063,5.08906614,5.08750781
72.038336,5,5.19053464,-0.43650274,5.18900737,5.08837841,5.08682047
72.048828,5.65685425,5.18525439,0.686731287,5.18372615,5.08769171,5.08613415
72.059319,5.91607978,5.17817838,0.859011874,5.17664863,5.08700611,5.08544893
72.069811,5.65685425,5.16989595,0.697823975,5.16836433,5.08632147,5.08476467
72.080302,4.47213595,5.16097741,-0.829964732,5.15944372,5.08563793,5.0840815
72.090794,5.09901951,5.15190667,-0.229972088,5.15037085,5.08495535,5.0833993
72.101286,5.65685425,5.14306728,0.716789345,5.14152939,5.08427381,5.08271812
72.111777,3.87298335,5.13474173,-1.12328019,5.13320191,5.08359336,5.08203804
72.122269,5,5.12711854,-0.356536867,5.12557699,5.08291388,5.08135892
72.13276,5.19615242,5.12030899,0.275396868,5.11876595,5.08223549,5.0806809
72.143252,4.58257569,5.11435325,-0.729230796,5.11280898,5.08155808,5.08000383
72.153744,5.38516481,5.10923824,0.525287132,5.10769297,5.08088169,5.0793278
72.164235,4.69041576,5.10493216,-0.643829482,5.10338614,5.0802064,5.07865286
72.174727,4.89897949,5.10132943,-0.449833244,5.09978287,5.07953208,5.07797888
72.185218,5.47722558,5.09832328,0.615550398,5.09677635,5.07885886,5.077306
72.19571,5.29150262,5.09581261,0.442368633,5.09426546,5.0781866,5.07663408
72.206202,5.47722558,5.09370237,0.619292502,5.09215512,5.07751538,5.07596319
72.216693,5.09901951,5.09190759,0.0843322165,5.09036032,5.07684525,5.0752934
72.227185,4.69041576,5.09035561,-0.632407974,5.0888084,5.0761761,5.07462457
72.237676,6.244998,5.08898776,1.07517917,5.08744066,5.07550804,5.07395683
72.248168,5.38516481,5.08775747,0.545350659,5.08621052,5.07484094,5.07329006
72.25866,6.164414,5.08662956,1.03816398,5.08508279,5.07417488,5.07262431
72.269151,6.164414,5.08557798,1.03867032,5.0840314,5.07350992,5.07195966
72.279643,4.89897949,5.08458352,-0.430817861,5.08303715,5.07284593,5.07129598
72.290134,5.65685425,5.08363281,0.757113891,5.08208666,5.07218303,5.07063339
72.300626,5.29150262,5.08271606,0.456931687,5.08117013,5.0715211,5.06997177
72.311118,5.09901951,5.08182656,0.131121918,5.08028086,5.07086021,5.06931117
72.321609,5.47722558,5.08095953,0.62949666,5.07941407,5.07020041,5.06865167
72.332101,6.164414,5.08011128,1.04129858,5.07856605,5.06954159,5.06799314
72.342592,6.164414,5.07927932,1.04169798,5.07773433,5.06888386,5.0673357
72.353084,5.47722558,5.07846149,0.631477703,5.07691673,5.0682271,5.06667922
72.363576,6,5.07765623,0.960387303,5.07611171,5.06757137,5.06602378
72.374067,4.58257569,5.07686246,-0.703055305,5.07531818,5.06691674,5.06536943
72.384559,5.19615242,5.07607895,0.34651619,5.07453491,5.06626308,5.06471604
72.39505,5.29150262,5.07530467,0.464970916,5.07376086,5.06561052,5.06406375
72.405542,5.83095189,5.07453866,0.869720204,5.07299509,5.06495892,5.06341243
72.416034,4.35889894,5.07378031,-0.845506571,5.07223696,5.06430837,5.06276214
72.426525,5,5.07302906,-0.270238892,5.07148595,5.06365891,5.06211294
72.437017,5.09901951,5.07228424,0.163509253,5.07074136,5.06301041,5.06146471
72.447508,6.244998,5.0715455,1.08326012,5.07000285,5.06236302,5.06081757
72.458,5.83095189,5.07081229,0.871859854,5.06926986,5.0617166,5.0601714
72.468492,5.38516481,5.07008169,0.561322648,5.06853949,5.06107121,5.05952626
72.478983,5,5.06935863,-0.263360259,5.06781664,5.06042692,5.05888221
72.489475,5.29150262,5.06864005,0.472083222,5.06709829,5.0597836,5.05823914
72.499966,6.244998,5.06792584,1.08492956,5.06638429,5.05914137,5.05759715
72.510458,4,5.0672156,-1.03306127,5.06567426,5.05850012,5.05695613
72.52095,5.19615242,5.06650917,0.360060068,5.06496805,5.05785991,5.05631615
72.531441,5.56776436,5.06580643,0.708489897,5.06426552,5.05722078,5.05567726
72.541933,5.56776436,5.06510705,0.708983292,5.06356635,5.05658263,5.05503933
72.552424,5.47722558,5.06441101,0.642506467,5.06287051,5.05594558,5.0544025
72.562916,5.91607978,5.06371803,0.923234399,5.06217773,5.0553095,5.05376664
72.573408,5.29150262,5.06302803,0.477990161,5.06148793,5.05467445,5.05313181
72.583899,5.56776436,5.06234095,0.710931368,5.06080105,5.0540405,5.05249807
72.594391,5,5.06165661,-0.24830749,5.0601169,5.05340753,5.0518653
72.604882,4.79583152,5.06097496,-0.514920805,5.05943544,5.05277564,5.05123362
72.615374,2.82842712,5.06029577,-1.49394399,5.05875644,5.05214474,5.05060292
72.625866,5.38516481,5.05961904,0.570566185,5.05807988,5.05151486,5.04997324
72.636357,4.89897949,5.05894472,-0.399956545,5.05740575,5.05088608,5.04934466
72.646849,6,5.05827264,0.970426382,5.05673385,5.05025828,5.04871704
72.65734,5.56776436,5.05760284,0.714255925,5.05606422,5.04963157,5.04809052
72.667832,5.65685425,5.05693513,0.77454446,5.05539669,5.04900583,5.04746497
72.678324,5.65685425,5.05626952,0.774974017,5.05473125,5.04838113,5.04684045
72.688815,5.38516481,5.05560602,0.574072107,5.05406791,5.04775752,5.04621702
72.699307,4.89897949,5.05494446,-0.394924006,5.05340651,5.04713489,5.04559456
72.709798,4.47213595,5.0542849,-0.762986857,5.05274711,5.04651335,5.0449732
72.72029,6.244998,5.05362718,1.09149934,5.05208956,5.04589279,5.0443528
72.730782,5.29150262,5.05297133,0.48839665,5.05143386,5.04527326,5.04373344
72.741273,5.29150262,5.05231737,0.48906569,5.05078005,5.04465482,5.04311516
72.751765,5.47722558,5.05166514,0.652349932,5.05012797,5.04403736,5.04249786
72.762256,6.08276253,5.05101473,1.01574987,5.0494777,5.04342099,5.04188165
72.772748,5.19615242,5.05036598,0.381819904,5.04882909,5.0428056,5.04126641
72.78324,5.19615242,5.04971894,0.382666276,5.04818219,5.04219124,5.0406522
72.793731,6.32455532,5.04907364,1.12937225,5.04753702,5.04157798,5.04003908
72.804223,5.74456265,5.04842993,0.834345681,5.04689345,5.04096569,5.03942693
72.814714,5.56776436,5.04778791,0.721093927,5.04625156,5.04035449,5.03881587
72.825206,4.58257569,5.04714743,-0.681594994,5.0456112,5.03974427,5.03820579
72.835698,5.65685425,5.04650853,0.781246262,5.04497242,5.03913509,5.03759673
72.846189,4.89897949,5.04587124,-0.383264605,5.04433526,5.03852699,5.03698877
72.856681,4.79583152,5.04523544,-0.499403559,5.04369957,5.03791987,5.03638177
72.867172,5.09901951,5.04460122,0.233277299,5.04306546,5.03731385,5.03577587
72.877664,4.58257569,5.04396844,-0.679258967,5.04243279,5.0367088,5.03517094
72.888156,5,5.04333715,-0.208175774,5.04180161,5.03610478,5.03456704
72.898647,4.89897949,5.0427074,-0.379114648,5.04117197,5.03550186,5.03396423
72.909139,4.47213595,5.04207905,-0.754945758,5.04054372,5.03489991,5.03336239
72.91963,5.38516481,5.04145221,0.58627007,5.03991697,5.03429906,5.03276164
72.930122,6.08276253,5.04082675,1.02075256,5.0392916,5.03369918,5.03216186
72.940614,4.79583152,5.04020271,-0.494339137,5.03866765,5.03310033,5.03156311
72.951105,5.19615242,5.03958014,0.395692161,5.03804517,5.03250258,5.03096545
72.961597,4.24264069,5.03895891,-0.892366642,5.03742403,5.0319058,5.03036877
72.972088,4.89897949,5.03833913,-0.373309052,5.03680433,5.03131012,5.02977317
72.98258,6,5.03772068,0.980958368,5.03618596,5.03071541,5.02917855
72.993072,5.65685425,5.0371036,0.787242431,5.03556896,5.03012173,5.02858495
73.003563,4.69041576,5.03648795,-0.588279009,5.03495338,5.02952914,5.02799244
73.014055,5.38516481,5.0358736,0.591008636,5.03433909,5.02893753,5.02740091
73.024546,5.29150262,5.03526066,0.506203482,5.03372621,5.02834701,5.02681046
73.035038,5.29150262,5.034649,0.506807288,5.03311461,5.02775747,5.02622099
73.04553,4.58257569,5.03403866,-0.671909942,5.03250434,5.02716896,5.02563254
73.056021,5.47722558,5.03342972,0.666180049,5.03189545,5.02658154,5.02504519
73.066513,4.79583152,5.03282203,-0.486816707,5.03128781,5.0259951,5.0244588
73.077004,5.47722558,5.03221571,0.667090597,5.03068155,5.02540975,5.0238735
73.087496,5.74456265,5.03161064,0.844364854,5.03007652,5.02482537,5.02328918
73.097988,4.69041576,5.03100687,-0.583601842,5.02947279,5.02424203,5.02270589
73.108479,5.09901951,5.03040445,0.261944773,5.02887041,5.02365978,5.02212368
73.118971,5.38516481,5.02980326,0.59612209,5.02826926,5.0230785,5.02154244
73.129462,5.47722558,5.02920341,0.669344576,5.02766944,5.02249831,5.02096229
73.139954,6,5.02860479,0.985593838,5.02707085,5.0219191,5.02038312
73.150446,4.69041576,5.02800743,-0.581026396,5.02647352,5.02134092,5.01980497
73.160937,4.69041576,5.02741141,-0.58051326,5.02587752,5.02076383,5.01922791
73.171429,5.65685425,5.02681659,0.793749119,5.02528272,5.02018771,5.01865182
73.18192,4.69041576,5.02622308,-0.579488846,5.02468923,5.01961269,5.01807681
73.192412,5.38516481,5.02563078,0.599611565,5.02409694,5.01903864,5.01750278
73.202904,5.29150262,5.02503973,0.516200439,5.0235059,5.01846562,5.01692978
73.213395,5.47722558,5.02444999,0.672886014,5.02291616,5.01789369,5.01635786
73.223887,6.164414,5.02386143,1.06796656,5.02232761,5.01732274,5.01578692
73.234378,5.09901951,5.02327418,0.275218697,5.02174036,5.01675287,5.01521706
73.24487,5.83095189,5.02268811,0.899034918,5.02115429,5.01618398,5.01464817
73.255362,5.47722558,5.02210328,0.674627527,5.02056945,5.01561613,5.01408031
73.265853,4.89897949,5.02151973,-0.350057481,5.01998589,5.01504936,5.01351354
73.276345,5.29150262,5.02093735,0.520158893,5.0194035,5.01448356,5.01294774
73.286836,5.29150262,5.02035625,0.52071717,5.01882238,5.01391885,5.01238302
73.297328,5.83095189,5.01977632,0.900652859,5.01824244,5.01335512,5.01181927
73.30782,5.29150262,5.01919761,0.521828526,5.0176637,5.01279242,5.01125655
73.318311,5.19615242,5.01862017,0.42134576,5.01708624,5.01223081,5.01069492
73.328803,5,5.01804389,-0.134327564,5.01650993,5.01167017,5.01013425
73.339294,5.83095189,5.01746888,0.901932931,5.01593489,5.01111062,5.00957467
73.349786,5.19615242,5.01689502,0.423387999,5.01536099,5.01055204,5.00901607
73.360278,6.244998,5.01632237,1.10845641,5.0147883,5.00999449,5.00845849
73.370769,5.29150262,5.01575098,0.525120594,5.01421687,5.00943803,5.00790199
73.381261,4.89897949,5.01518074,-0.340883053,5.01364658,5.00888255,5.00734646
73.391752,4.47213595,5.01461175,-0.736529564,5.01307755,5.00832815,5.00679202
73.402244,5.09901951,5.01404391,0.291505749,5.01250965,5.00777472,5.00623854
73.412736,5.29150262,5.01347727,0.527281098,5.01194295,5.00722233,5.0056861
73.423227,5.29150262,5.01291187,0.527816965,5.0113775,5.00667102,5.00513473
73.433719,3.46410162,5.01234762,-1.24428534,5.01081319,5.00612068,5.00458434
73.44421,5.19615242,5.01178462,0.429380725,5.01025012,5.00557143,5.00403503
73.454702,5.38516481,5.01122275,0.611508021,5.00968818,5.00502316,5.00348669
73.465194,4.79583152,5.01066207,-0.46349816,5.00912743,5.00447591,5.00293938
73.475685,4.24264069,5.01010263,-0.876049052,5.00856791,5.00392975,5.00239314
73.486177,5.29150262,5.00954432,0.530997459,5.00800953,5.00338456,5.00184788
73.496668,5.74456265,5.00898725,0.857656922,5.00745238,5.00284046,5.00130369
73.50716,5.56776436,5.00843131,0.747885722,5.00689635,5.00229733,5.00076048
73.517652,5.65685425,5.00787655,0.80559152,5.00634151,5.00175523,5.0002183
73.528143,5.38516481,5.00732303,0.614688359,5.00578789,5.00121421,4.99967719
73.538635,4.12310563,5.00677063,-0.940034577,5.0052354,5.00067416,4.99913706
73.549126,5.83095189,5.00621947,0.908147801,5.00468414,5.0001352,4.998598
73.559618,5.09901951,5.00566943,0.305532465,5.00413399,4.99959721,4.99805991
73.57011,4.58257569,5.00512056,-0.650034513,5.00358503,4.99906025,4.99752285
73.580601,5.65685425,5.00457293,0.807639351,5.00303728,4.99852437,4.99698687
73.591093,5,5.00402642,-0.0634540599,5.00249066,4.99798947,4.99645186
73.601584,4.69041576,5.00348113,-0.559522452,5.00194526,4.99745564,4.99591792
73.612076,4.69041576,5.00293697,-0.559035967,5.00140098,4.99692279,4.99538496
73.622568,5,5.00239399,-0.0489283746,5.00085788,4.99639097,4.99485302
73.633059,5.47722558,5.00185223,0.68947324,5.00031599,4.99586023,4.99432215
73.643551,4.69041576,5.00131159,-0.557580337,4.99977523,4.99533046,4.99379226
73.654042,4.79583152,5.00077218,-0.452703721,4.99923569,4.99480177,4.99326344
73.664534,4,5.0002339,-1.00011694,4.99869727,4.99427406,4.99273559
73.675026,5.19615242,4.99969678,0.443233166,4.99816002,4.99374737,4.99220877
73.685517,4.58257569,4.9991609,-0.645434118,4.99762399,4.99322176,4.99168302
73.696009,5.83095189,4.99862613,0.912318893,4.99708908,4.99269712,4.99115824
73.7065,5,4.99809259,0.0436738637,4.99655539,4.99217356,4.99063454
73.716992,4.89897949,4.99756018,-0.313975628,4.99602283,4.99165097,4.9901118
73.727484,4.69041576,4.99702895,-0.553726634,4.99549144,4.99112942,4.98959009
73.737975,5.91607978,4.99649894,0.958947779,4.99496128,4.99060893,4.98906945
73.748467,5.19615242,4.99597006,0.447417435,4.99443224,4.99008942,4.98854979
73.758958,4.79583152,4.99544242,-0.446778347,4.99390443,4.98957099,4.98803119
73.76945,4.47213595,4.9949159,-0.723035231,4.99337774,4.98905353,4.98751357
73.779942,5.74456265,4.99439057,0.866124747,4.99285224,4.98853709,4.98699696
73.790433,5,4.99386648,0.0783168181,4.99232797,4.98802173,4.98648143
73.800925,4.69041576,4.99334352,-0.550388737,4.99180484,4.98750735,4.98596687
73.811416,5.19615242,4.99282181,0.450921961,4.99128295,4.98699403,4.98545337
73.821908,5,4.99230124,0.0877425769,4.9907622,4.98648169,4.98494085
73.8324,4.89897949,4.99178187,-0.30463484,4.99024264,4.98597038,4.98442935
73.842891,5.56776436,4.99126376,0.759276371,4.98972433,4.98546014,4.98391892
73.853383,5.19615242,4.9907468,0.453216971,4.98920718,4.98495087,4.98340946
73.863874,5.29150262,4.99023111,0.54888206,4.98869129,4.98444267,4.98290107
73.874366,5.19615242,4.98971658,0.454352111,4.98817657,4.98393545,4.98239365
73.884858,4.35889894,4.98920328,-0.793917086,4.98766306,4.98342925,4.98188724
73.895349,5.29150262,4.98869126,0.550282981,4.98715083,4.98292412,4.98138191
73.905841,5.38516481,4.98818043,0.630066959,4.98663979,4.98241996,4.98087754
73.916332,6,4.9876709,1.00614566,4.98613005,4.98191688,4.98037424
73.926824,5.38516481,4.98716258,0.630874176,4.98562151,4.98141477,4.97987191
73.937316,5.65685425,4.98665553,0.818656654,4.98511424,4.98091367,4.9793706
73.947807,4.47213595,4.98614982,-0.716947601,4.9846083,4.98041365,4.97887036
73.958299,5.09901951,4.98564535,0.336710796,4.98410361,4.9799146,4.97837108
73.96879,5.56776436,4.98514225,0.763296871,4.98360027,4.97941662,4.97787287
73.979282,4,4.98464043,-0.992290497,4.98309822,4.97891962,4.97737563
73.989774,4.79583152,4.98413996,-0.433945202,4.98259751,4.97842363,4.97687941
74.000265,5.29150262,4.98364092,0.554852869,4.98209822,4.97792871,4.97638425
74.010757,4.69041576,4.98283983,-0.540762493,4.98160029,4.97713103,4.97589006
74.021248,5.29150262,4.98234386,0.556020471,4.98110383,4.97663839,4.97539693
74.03174,5.29150262,4.9818493,0.556465023,4.98060878,4.97614672,4.97490478
74.042232,5.19615242,4.98135625,0.463461081,4.98011524,4.97565607,4.97441363
74.052723,5.09901951,4.9808648,0.343736401,4.97962329,4.97516648,4.97392355
74.063215,5.09901951,4.98037492,0.344448245,4.97913291,4.97467787,4.97343444
74.073706,5.91607978,4.97988677,0.967570675,4.97864427,4.97419032,4.97294639
74.084198,5.65685425,4.97940036,0.823075872,4.97815735,4.97370375,4.97245931
74.09469,4.89897949,4.97891585,-0.282730189,4.97767233,4.97321819,4.97197324
74.105181,4.79583152,4.97843344,-0.42731946,4.97718942,4.97273369,4.97148824
74.115673,5.65685425,4.97795329,0.823954465,4.97670875,4.97225017,4.9710042
74.126164,5.56776436,4.97747579,0.768302399,4.97623073,4.97176771,4.97052122
74.136656,5.56776436,4.97700128,0.768611137,4.97575571,4.97128622,4.97003921
74.147148,5.29150262,4.97653044,0.561223826,4.97528434,4.97080574,4.96955821
74.157639,5.29150262,4.97606433,0.561638935,4.97481771,4.97032633,4.96907827
74.168131,5.19615242,4.97560392,0.469625915,4.97435678,4.96984789,4.9685993
74.178622,5.29150262,4.97515086,0.562451564,4.97390319,4.96937051,4.96812139
74.189114,5.65685425,4.97470704,0.825922033,4.97345884,4.9688941,4.96764444
74.199606,4.79583152,4.974275,-0.422425706,4.97302627,4.9684187,4.9671685
74.210097,5.09901951,4.97385775,0.353782086,4.97260849,4.96794437,4.96669363
74.220589,4.47213595,4.97345865,-0.708041453,4.97220887,4.96747101,4.96621971
74.23108,5.38516481,4.97308157,0.641937094,4.97183126,4.9669987,4.96574686
74.241572,5.19615242,4.97273037,0.472675422,4.97147954,4.96652736,4.96527497
74.252064,5.09901951,4.97240885,0.355823924,4.9711575,4.96605704,4.96480409
74.262555,4.89897949,4.97212028,-0.270445548,4.97086842,4.96558778,4.96433427
74.273047,5.83095189,4.97186685,0.926868406,4.97061448,4.96511948,4.96386541
74.283538,6.40312424,4.97164937,1.19644259,4.9703965,4.96465224,4.9633976
74.29403,5.65685425,4.97146656,0.827881447,4.97021319,4.96418598,4.96293076
74.304522,5.19615242,4.97131473,0.474170531,4.97006086,4.96372072,4.96246493
74.315013,4.35889894,4.97118726,-0.782488539,4.9699329,4.96325652,4.96200016
74.325505,5.56776436,4.97107412,0.772457275,4.96981927,4.96279329,4.96153635
74.335996,4.47213595,4.97096159,-0.706275891,4.96970625,4.96233111,4.96107359
74.346488,4.89897949,4.97083189,-0.268052997,4.96957605,4.9618699,4.96061179
74.35698,5.38516481,4.97066359,0.643817687,4.96940724,4.9614097,4.960151
74.367471,4.89897949,4.97043043,-0.267303094,4.96917354,4.96095056,4.95969127
74.377963,5.47722558,4.97010986,0.712120576,4.96885241,4.96049238,4.95923249
74.388454,4.89897949,4.96968754,-0.265909859,4.9684295,4.96003526,4.95877477
74.398946,5.19615242,4.96915915,0.476438115,4.96790049,4.95957911,4.95831801
74.409438,5.47722558,4.9685329,0.713226946,4.96727359,4.95912396,4.95786226
74.419929,5.91607978,4.96782684,0.973782801,4.96656686,4.95866987,4.95740756
74.430421,4.79583152,4.96706374,-0.413802142,4.96580306,4.95821674,4.95695382
74.440912,5.19615242,4.96626697,0.479463716,4.96500559,4.95776466,4.95650112
74.451404,5.09901951,4.96545704,0.365461996,4.96419496,4.95731355,4.95604939
74.461896,5.29150262,4.96465092,0.571709459,4.96338812,4.95686345,4.95559867
74.472387,6,4.96386159,1.01790884,4.96259808,4.9564144,4.95514899
74.482879,4.79583152,4.96309818,-0.408982461,4.96183396,4.95596631,4.95470027
74.49337,4.79583152,4.9623668,-0.408087344,4.96110188,4.95551927,4.9542526
74.503862,5.83095189,4.96167048,0.932352622,4.96040486,4.9550732,4.95380589
74.514354,5,4.96101006,0.197458706,4.95974374,4.95462814,4.95336019
74.524845,5,4.96038448,0.199036489,4.95911747,4.95418412,4.95291553
74.535337,4.79583152,4.95979111,-0.404919234,4.95852342,4.95374107,4.95247183
74.545828,5.09901951,4.95922668,0.373888803,4.95795831,4.95329906,4.95202917
74.55632,5.29150262,4.95868722,0.576901554,4.95741817,4.95285802,4.95158748
74.566812,5.29150262,4.95816886,0.57735064,4.95689914,4.95241798,4.95114678
74.577303,5.19615242,4.95766809,0.48834858,4.95639769,4.95197899,4.95070713
74.587795,5.47722558,4.95718151,0.72114081,4.95591043,4.95154096,4.95026844
74.598286,5.29150262,4.9567059,0.578616214,4.95543415,4.95110398,4.94983079
74.608778,4.89897949,4.95623886,-0.239289306,4.95496643,4.95066796,4.9493941
74.61927,5.47722558,4.95577859,0.722112863,4.95450548,4.95023294,4.94895841
74.629761,4.79583152,4.95532372,-0.399364737,4.95404993,4.94979897,4.94852376
74.640253,5.09901951,4.95487309,0.379666204,4.95359861,4.94936596,4.94809007
74.650744,5.29150262,4.954426,0.580583004,4.95315084,4.948934,4.94765742
74.661236,4.58257569,4.95398179,-0.609430961,4.95270594,4.94850299,4.94722573
74.671728,5.29150262,4.9535401,0.581345442,4.95226355,4.94807299,4.94679503
74.682219,5.19615242,4.95310067,0.493002794,4.95182343,4.94764402,4.94636537
74.692711,6,4.9526632,1.02339474,4.95138526,4.94721602,4.94593667
74.703202,5.56776436,4.95222763,0.784561491,4.95094899,4.94678906,4.94550901
74.713694,5.65685425,4.95179375,0.839678806,4.9505144,4.94636306,4.94508231
74.724186,5.56776436,4.95136152,0.785113267,4.95008146,4.94593806,4.9446566
74.734677,4.79583152,4.95093091,-0.393826593,4.94965013,4.9455141,4.94423193
74.745169,4.79583152,4.95050177,-0.393281388,4.94922028,4.9450911,4.94380821
74.75566,5.38516481,4.95007415,0.659614019,4.94879194,4.94466914,4.94338553
74.766152,5.38516481,4.94964792,0.65993703,4.94836499,4.94424814,4.9429638
74.776644,4,4.94922309,-0.974280808,4.94793943,4.94382813,4.94254307
74.787135,5.19615242,4.94879967,0.497345705,4.94751528,4.94340917,4.94212337
74.797627,4.35889894,4.94837756,-0.76777511,4.94709244,4.94299116,4.94170463
74.808118,5.65685425,4.94795681,0.841960472,4.94667095,4.94257418,4.94128692
74.81861,5.19615242,4.94753732,0.498613179,4.94625072,4.94215817,4.94087017
74.829102,5.29150262,4.94711911,0.586841985,4.94583176,4.94174315,4.9404544
74.839593,5.19615242,4.9467022,0.499449924,4.9454141,4.94132917,4.94003967
74.850085,4.89897949,4.94628649,-0.217501745,4.94499765,4.94091614,4.9396259
74.860576,4.58257569,4.94587207,-0.602740719,4.94458247,4.94050415,4.93921315
74.871068,5.38516481,4.94545883,0.663103294,4.94416847,4.94009311,4.93880136
74.88156,4.89897949,4.9450468,-0.214632985,4.94375569,4.93968307,4.93839055
74.892051,4.69041576,4.94463602,-0.504202601,4.94334414,4.93927406,4.93798078
74.902543,4.35889894,4.9442264,-0.765066962,4.94293375,4.93886601,4.93757196
74.913034,4.58257569,4.94381801,-0.601034367,4.94252458,4.93845899,4.93716417
74.923526,4.58257569,4.94341076,-0.600695481,4.94211656,4.93805293,4.93675732
74.934018,5.29150262,4.94300468,0.59033714,4.94170971,4.93764785,4.93635147
74.944509,4.24264069,4.94259982,-0.836635604,4.94130406,4.93724381,4.93594664
74.955001,4.89897949,4.94219609,-0.207886027,4.94089954,4.93684072,4.93554277
74.965492,5.65685425,4.94179355,0.845612617,4.94049621,4.93643866,4.93513992
74.975984,5.09901951,4.94139213,0.397023146,4.94009401,4.93603756,4.93473802
74.986476,4.69041576,4.94099187,-0.500575782,4.93969295,4.93563744,4.93433711
74.996967,5.09901951,4.9405928,0.398028533,4.93929307,4.93523836,4.93393722
75.007459,4.12310563,4.94019484,-0.903929873,4.93889431,4.93484022,4.93353828
75.01795,4.69041576,4.93979807,-0.499381923,4.93849673,4.93444312,4.93314036
75.028442,5.65685425,4.93940239,0.847025298,4.93810024,4.93404696,4.9327434
75.038934,5.09901951,4.93900786,0.400014562,4.9377049,4.93365179,4.93234741
75.049425,5.56776436,4.93861451,0.793189671,4.93731073,4.93325765,4.93195245
75.059917,5.56776436,4.93822225,0.793436896,4.93691765,4.93286446,4.93155844
75.070408,6,4.93783117,1.03061575,4.93652574,4.9324723,4.93116545
75.0809,5,4.93744119,0.250117593,4.93613493,4.93208109,4.9307734
75.091392,4.79583152,4.93705234,-0.375793582,4.93574524,4.93169086,4.93038234
75.101883,5.09901951,4.93666466,0.402932817,4.93535673,4.93130166,4.9299923
75.112375,4.79583152,4.93627807,-0.374761991,4.9349693,4.9309134,4.9296032
75.122866,5.47722558,4.93589266,0.7357533,4.93458304,4.93052617,4.92921513
75.133358,4.79583152,4.93550834,-0.373733611,4.93419787,4.93013989,4.92882799
75.14385,5.29150262,4.93512515,0.596973598,4.93381383,4.92975459,4.92844184
75.154341,5.38516481,4.93474312,0.671134625,4.93343095,4.92937031,4.92805671
75.164833,5.38516481,4.93436219,0.671418359,4.93304916,4.92898698,4.92767252
75.175324,6.08276253,4.93398243,1.0718116,4.93266854,4.92860467,4.92728934
75.185816,5,4.93360377,0.257674663,4.93228901,4.92822331,4.92690711
75.196308,5,4.93322623,0.258406205,4.9319106,4.92784293,4.92652586
75.206799,4.89897949,4.93284987,-0.184039075,4.93153336,4.92746356,4.92614562
75.217291,4.79583152,4.9324746,-0.369652644,4.93115722,4.92708515,4.92576632
75.227782,4.47213595,4.9321005,-0.678206863,4.93078224,4.92670775,4.92538804
75.238274,4.79583152,4.93172751,-0.368640723,4.93040835,4.9263313,4.9250107
75.248766,4.89897949,4.93135564,-0.179933758,4.9300356,4.92595582,4.92463434
75.259257,5.74456265,4.93098495,0.901985419,4.92966402,4.92558137,4.92425899
75.269749,4.89897949,4.93061536,-0.177864766,4.92929353,4.92520786,4.92388457
75.28024,5.29150262,4.93024694,0.601045488,4.92892421,4.92483536,4.92351117
75.290732,5.29150262,4.92987963,0.601350971,4.928556,4.9244638,4.92313871
75.301224,5.38516481,4.92951346,0.675019516,4.92818892,4.92409323,4.92276723
75.311715,4.35889894,4.92914847,-0.755148676,4.92782301,4.92372367,4.92239675
75.322207,5.09901951,4.92878458,0.41259536,4.92745821,4.92335505,4.92202721
75.332698,4.69041576,4.92842188,-0.487858708,4.92709459,4.92298744,4.92165868
75.34319,4.79583152,4.92806029,-0.363632734,4.92673207,4.92262078,4.92129109
75.353682,4.47213595,4.92769985,-0.674954734,4.92637071,4.92225509,4.92092447
75.364173,4.58257569,4.9273406,-0.587166842,4.92601052,4.92189041,4.92055886
75.374665,5.47722558,4.92698246,0.741783738,4.92565145,4.92152667,4.92019419
75.385156,4.12310563,4.92662552,-0.896392711,4.92529357,4.92116394,4.91983052
75.395648,5.29150262,4.9262697,0.604345036,4.92493681,4.92080215,4.91946778
75.40614,4.79583152,4.92591504,-0.360670927,4.9245812,4.92044134,4.91910602
75.416631,5.19615242,4.92556158,0.52018347,4.92422679,4.92008153,4.91874526
75.427123,4.89897949,4.92520926,-0.161956078,4.92387352,4.91972267,4.91838543
75.437614,4.35889894,4.92485814,-0.752302595,4.92352144,4.9193648,4.91802661
75.448106,5.19615242,4.92450816,0.521195034,4.9231705,4.91900788,4.91766872
75.458598,4.35889894,4.92415936,-0.751838023,4.92282073,4.91865193,4.9173118
75.469089,5.09901951,4.92381177,0.418578246,4.92247217,4.91829699,4.91695589
75.479581,5.19615242,4.92346532,0.522194503,4.92212475,4.91794298,4.9166009
75.490072,5.29150262,4.9231201,0.606945237,4.92177855,4.91758997,4.91624692
75.500564,5.29150262,4.92277604,0.607228611,4.9214335,4.91723791,4.91589386
75.511056,4.58257569,4.92243317,-0.582972959,4.92108965,4.91688681,4.91554177
75.521547,5.09901951,4.92209153,0.420628088,4.92074702,4.91653671,4.91519068
75.532039,5.74456265,4.92175106,0.907089627,4.92040555,4.91618755,4.91484053
75.54253,3.31662479,4.92141182,-1.26680189,4.92006532,4.91583939,4.91449137
75.553022,5.19615242,4.92107377,0.524479408,4.91972627,4.91549217,4.91414314
75.563514,5.09901951,4.92073694,0.422235212,4.91938843,4.91514591,4.91379587
75.574005,5,4.92040136,0.282132311,4.91905184,4.91480065,4.9134496
75.584497,5.29150262,4.92006697,0.609455205,4.91871644,4.91445633,4.91310425
75.594988,5.29150262,4.91973385,0.609728438,4.91838231,4.914113,4.9127599
75.60548,4.24264069,4.91940194,-0.822655002,4.91804937,4.91377061,4.91241648
75.615972,5.56776436,4.91907127,0.805414857,4.91771767,4.91342918,4.91207402
75.626463,4.69041576,4.91874188,-0.477834827,4.91738726,4.91308874,4.91173256
75.636955,4.47213595,4.91841372,-0.668040244,4.91705806,4.91274924,4.91139202
75.647446,5.38516481,4.91808687,0.683431006,4.91673017,4.91241074,4.91105247
75.657938,5.74456265,4.91776125,0.909286201,4.91640351,4.91207316,4.91071385
75.66843,4.24264069,4.91743691,-0.821459815,4.91607813,4.91173655,4.91037618
75.678921,6.244998,4.91711389,1.15233854,4.91575406,4.91140093,4.91003951
75.689413,5.19615242,4.91679214,0.528545441,4.91543125,4.91106624,4.90970376
75.699904,5.29150262,4.91647172,0.612397669,4.91510977,4.91073254,4.909369
75.710396,5.29150262,4.91615258,0.61265818,4.91478956,4.91039978,4.90903517
75.720888,5.38516481,4.91583476,0.685076675,4.91447068,4.91006797,4.90870228
75.731379,5.29150262,4.9155183,0.613175607,4.91415315,4.90973715,4.90837039
75.741871,4.69041576,4.91520315,-0.474117484,4.91383692,4.90940726,4.90803942
75.752362,3.87298335,4.91488938,-1.02073799,4.91352208,4.90907836,4.90770943
75.762854,5.47722558,4.91457695,0.75009908,4.91320856,4.90875038,4.90738037
75.773346,4.89897949,4.91426588,-0.123638172,4.91289641,4.90842337,4.90705226
75.783837,4.89897949,4.91395624,-0.122379534,4.91258567,4.90809734,4.90672513
75.794329,5.38516481,4.91364796,0.686670846,4.9122763,4.90777223,4.90639893
75.80482,5.47722558,4.91334112,0.750922404,4.91196836,4.90744812,4.90607371
75.815312,4.47213595,4.91303567,-0.664002799,4.91166181,4.90712492,4.9057494
75.825804,4.79583152,4.91273167,-0.341906628,4.91135669,4.90680269,4.90542605
75.836295,4.47213595,4.91242914,-0.663545917,4.91105305,4.90648143,4.90510368
75.846787,5,4.91212805,0.296432028,4.91075085,4.9061611,4.90478223
75.857278,5.65685425,4.9118285,0.863148742,4.91045018,4.90584176,4.90446175
75.86777,5.09901951,4.91153042,0.433000106,4.91015097,4.90552333,4.9041422
75.878262,4.89897949,4.91123386,-0.110699499,4.90985329,4.90520586,4.90382359
75.888753,5.38516481,4.91093887,0.688640641,4.90955717,4.90488937,4.90350596
75.899245,5.29150262,4.91064542,0.617136295,4.90926257,4.9045738,4.90318924
75.909736,5.19615242,4.91035356,0.53460159,4.90896957,4.90425921,4.90287351
75.920228,5.74456265,4.91006328,0.913509367,4.90867815,4.90394555,4.90255868
75.93072,5.56776436,4.90977463,0.811165665,4.90838834,4.90363283,4.90224481
75.941211,5,4.90948764,0.300852714,4.90810021,4.90332109,4.9019319
75.951703,5.09901951,4.90920231,0.435680166,4.90781371,4.90301027,4.90161992
75.962194,4.35889894,4.90891869,-0.741633164,4.90752893,4.90270042,4.9013089
75.972686,6,4.90863678,1.04468331,4.90724585,4.9023915,4.9009988
75.983178,5.65685425,4.90835662,0.865157576,4.90696452,4.90208352,4.90068964
75.993669,4.89897949,4.90807827,-0.0953875389,4.90668499,4.90177652,4.90038145
76.004161,5.09901951,4.90780171,0.437284581,4.90640726,4.90147043,4.90007417
76.014652,5,4.90752703,0.304093693,4.90613139,4.90116532,4.89976787
76.025144,5.74456265,4.9072542,0.915045597,4.90585738,4.90086112,4.89946247
76.035636,4.79583152,4.9069833,-0.333394324,4.90558528,4.90055787,4.89915802
76.046127,5.09901951,4.90671438,0.438526089,4.90531517,4.90025559,4.89885453
76.056619,5.47722558,4.90644744,0.755498597,4.90504703,4.89995422,4.89855195
76.06711,5.91607978,4.9061826,1.00493641,4.90478098,4.89965383,4.89825034
76.077602,5.91607978,4.90591986,1.00506713,4.90451703,4.89935435,4.89794964
76.088094,4.58257569,4.90565925,-0.568404397,4.90425521,4.89905581,4.89764987
76.098585,5.09901951,4.90540087,0.440021184,4.90399561,4.89875824,4.89735107
76.109077,4.79583152,4.90514472,-0.330625458,4.90373823,4.89846158,4.89705318
76.119568,4.35889894,4.9048909,-0.738912682,4.90348319,4.89816589,4.89675625
76.13006,5,4.90463942,0.308805084,4.90323048,4.89787111,4.89646023
76.140552,4.69041576,4.90439038,-0.462573909,4.90298021,4.89757727,4.89616514
76.151043,4.79583152,4.90414387,-0.32910841,4.90273246,4.8972844,4.89587101
76.161535,5.09901951,4.90389991,0.441723447,4.90248725,4.89699244,4.89557779
76.172026,5.83095189,4.90365863,0.962960677,4.90224473,4.89670144,4.89528552
76.182518,4.58257569,4.90342006,-0.566431254,4.90200491,4.89641135,4.89499417
76.19301,4.89897949,4.90318432,-0.0648446741,4.90176791,4.89612219,4.89470374
76.203501,5,4.90295151,0.311526062,4.90153384,4.895834,4.89441427
76.213993,4.69041576,4.9027217,-0.46076669,4.90130277,4.89554672,4.8941257
76.224484,5.65685425,4.90249503,0.868538551,4.90107483,4.89526039,4.89383809
76.234976,4.89897949,4.90227158,-0.0573767544,4.9008501,4.89497498,4.89355138
76.245468,5.38516481,4.90205147,0.695063547,4.90062872,4.89469049,4.8932656
76.255959,5,4.90183487,0.313313151,4.90041084,4.89440697,4.89298078
76.266451,4.58257569,4.90162186,-0.564841718,4.90019655,4.89412435,4.89269685
76.276942,5.19615242,4.90141266,0.542899404,4.89998606,4.89384269,4.89241388
76.287434,5.09901951,4.90120747,0.444760656,4.89977958,4.89356193,4.89213181
76.297926,5.19615242,4.90100638,0.543273447,4.8995772,4.89328211,4.89185066
76.308417,4.89897949,4.9008096,-0.0427798111,4.89937911,4.89300324,4.89157046
76.318909,5,4.90061727,0.31525027,4.89918548,4.89272527,4.89129117
76.3294,4.79583152,4.90042964,-0.323416319,4.89899654,4.89244825,4.89101282
76.339892,5.29150262,4.9002469,0.625504374,4.89881249,4.89217214,4.89073536
76.350384,5.19615242,4.90006931,0.544135197,4.89863359,4.89189696,4.89045884
76.360875,5.56776436,4.89989715,0.817231434,4.8984601,4.89162273,4.89018325
76.371367,5.74456265,4.89973066,0.919147426,4.89829229,4.8913494,4.88990857
76.381858,4.24264069,4.89957017,-0.810511866,4.89813048,4.89107702,4.88963483
76.39235,5.47722558,4.89941599,0.76013787,4.89797498,4.89080554,4.88936198
76.402842,4.89897949,4.89926638,-0.0169380163,4.89782403,4.89053498,4.88909005
76.413333,6.32455532,4.89912595,1.19391347,4.89768227,4.89026537,4.88881907
76.423825,5.19615242,4.89899299,0.545123323,4.89754796,4.88999666,4.88854898
76.434316,4.79583152,4.89886796,-0.320992891,4.8974216,4.8897289,4.88827984
76.444808,5.74456265,4.89875134,0.919680002,4.89730364,4.88946204,4.88801158
76.4553,5.19615242,4.89864368,0.545443621,4.89719463,4.88919609,4.88774424
76.465791,4.89897949,4.89854557,0.0208306601,4.89709517,4.8889311,4.88747784
76.476283,4.24264069,4.89845763,-0.809825255,4.89700588,4.88866699,4.88721234
76.486774,5.83095189,4.89838058,0.965697321,4.89692748,4.88840384,4.88694777
76.497266,4.79583152,4.89831559,-0.320131333,4.89686114,4.88814157,4.88668409
76.507758,5.19615242,4.89826326,0.545792238,4.89680745,4.88788023,4.88642132
76.518249,5,4.89822442,0.319022848,4.89676725,4.88761982,4.88615949
76.528741,5.38516481,4.89820012,0.697828553,4.89674159,4.88736031,4.88589855
76.539232,5,4.89819148,0.319074473,4.8967316,4.88710175,4.88563855
76.549724,5.91607978,4.89819977,1.0089004,4.89673853,4.88684407,4.88537943
76.560216,5.74456265,4.89822638,0.919965363,4.89676378,4.8865873,4.88512122
76.570707,5.09901951,4.89827285,0.448047617,4.89680889,4.88633148,4.88486394
76.581199,5.56776436,4.8983409,0.818183022,4.89687559,4.88607655,4.88460755
76.59169,4.47213595,4.89843246,-0.652913856,4.89696579,4.88582255,4.88435209
76.602182,5.29150262,4.89854967,0.626859596,4.89708164,4.88556945,4.88409752
76.612674,5,4.89869494,0.318284557,4.89722557,4.88531725,4.88384385
76.623165,4.79583152,4.89887097,-0.320997585,4.89740025,4.88506599,4.88359111
76.633657,4.69041576,4.89908088,-0.456798776,4.89760882,4.88481562,4.88333926
76.644148,5,4.89932815,0.317288269,4.89785476,4.88456618,4.88308833
76.65464,4.47213595,4.89961692,-0.653820282,4.89814219,4.88431763,4.88283828
76.665132,5,4.89995193,0.316303757,4.89847589,4.88406999,4.88258914
76.675623,5.56776436,4.9003389,0.816961117,4.89886154,4.88382328,4.88234093
76.686115,4,4.90078488,-0.949096876,4.89930623,4.88357745,4.88209359
76.696606,5.65685425,4.90129859,0.869227045,4.89981866,4.88333256,4.88184718
76.707098,5,4.9018934,0.313219733,4.90041221,4.88308854,4.88160164
76.71759,4.12310563,4.90258576,-0.882881719,4.90110332,4.88284544,4.88135701
76.728081,6.08276253,4.90339466,1.08598705,4.90191102,4.88260326,4.8811133
76.738573,4.58257569,4.904349,-0.567250657,4.9028642,4.88236196,4.88087047
76.749064,5.47722558,4.90548815,0.756133203,4.90400223,4.8821216,4.88062856
76.759556,4.89897949,4.90686668,-0.0888098949,4.90537971,4.88188211,4.88038752
76.770048,4.69041576,4.90855849,-0.467057526,4.90707056,4.88164352,4.88014738
76.780539,5,4.91066273,0.298893406,4.90917396,4.88140586,4.87990816
76.791031,5.56776436,4.91331078,0.808983052,4.91182133,4.88116908,4.87966981
76.801522,5,4.91667087,0.288667858,4.91518094,4.88093322,4.87943238
76.812014,5.19615242,4.9209554,0.524592247,4.91946528,4.88069824,4.87919583
76.822506,5.19615242,4.92642194,0.519355837,4.92493197,4.88046416,4.87896016
76.832997,5.47722558,4.93337305,0.737463577,4.93188368,4.880231,4.87872542
76.843489,4.89897949,4.94215273,-0.207781715,4.94066451,4.87999872,4.87849154
76.85398,4,4.95312863,-0.976283069,4.9516422,4.87976736,4.87825858
76.864472,5.19615242,4.96667796,0.479034926,4.96519409,4.87953687,4.87802648
76.874964,4.79583152,4.98315202,-0.432805374,4.98167154,4.87930728,4.87779528
76.885455,3.74165739,5.0028419,-1.12302472,5.00136574,4.8790786,4.87756499
76.895947,5.47722558,5.0259438,0.671775093,5.02447292,4.8788508,4.87733557
76.906438,4.89897949,5.05250261,-0.391820275,5.05103797,4.87862392,4.87710706
76.91693,5.83095189,5.08240164,0.86518799,5.08094411,4.87839791,4.87687941
76.927422,4.89897949,5.1153648,-0.465172351,5.11391517,4.87817279,4.87665265
76.937913,4.89897949,5.15060393,-0.501621809,5.14916272,4.87794858,4.8764268
76.948405,6.164414,5.18719748,0.988542625,5.18576496,4.87772525,4.87620182
76.958896,5.38516481,5.22390595,0.401570484,5.22248202,4.87750283,4.87597774
76.969388,5.74456265,5.25918796,0.696688373,5.2577721,4.87728127,4.87575452
76.97988,5.56776436,5.29119429,0.525899299,5.28978553,4.87706061,4.87553219
76.990371,5.38516481,5.31786922,0.259413937,5.31646605,4.87684086,4.87531076
77.000863,4.89897949,5.33716328,-0.661954524,5.33576371,4.87662197,4.8750902
77.011354,5.09901951,5.34735198,-0.498329674,5.3459536,4.876404,4.87487053
77.021846,5.38516481,5.34743061,0.194252919,5.34603078,4.87618689,4.87465173
77.032338,6.08276253,5.33737152,0.863360299,5.33596756,4.87597066,4.87443381
77.042829,6.164414,5.31813779,0.919932724,5.31672724,4.87575535,4.87421679
77.053321,5.47722558,5.29141804,0.431053977,5.28999886,4.8755409,4.87400062
77.063812,5.19615242,5.25926116,-0.251214528,5.25783177,4.87532735,4.87378536
77.074304,4.69041576,5.22371854,-0.730275822,5.22227787,4.87511467,4.87357095
77.084796,5.65685425,5.18665064,0.685713941,5.18519812,4.87490287,4.87335742
77.095287,5.47722558,5.14962468,0.572364299,5.14816013,4.87469197,4.87314479
77.105779,3.60555128,5.113882,-1.22814117,5.11240561,4.87448193,4.87293302
77.11627,4.79583152,5.08037313,-0.533424412,5.07888539,4.8742728,4.87272213
77.126762,5.56776436,5.04975117,0.719731331,5.04825278,4.87406452,4.87251211
77.137254,5,5.02253907,-0.150130179,5.02103091,4.87385713,4.87230295
77.147745,4.89897949,4.99882875,-0.315989335,4.99731178,4.87365064,4.87209469
77.158237,4.58257569,4.97853452,-0.629252589,4.97700969,4.873445,4.87188728
77.168728,5.74456265,4.96147339,0.884923305,4.95994164,4.87324026,4.87168077
77.17922,5.19615242,4.94735313,0.498797848,4.94581531,4.87303638,4.8714751
77.189712,5.29150262,4.93582511,0.596387048,4.934282,4.87283337,4.8712703
77.200203,6.164414,4.92651517,1.11260902,4.92496742,4.87263126,4.8710664
77.210695,4.69041576,4.91905134,-0.478158528,4.91749952,4.87243001,4.87086334
77.221186,4.69041576,4.91309056,-0.471884306,4.91153513,4.87222965,4.87066117
77.231678,4.69041576,4.90832623,-0.46680881,4.90676754,4.87203014,4.87045985
77.24217,4.69041576,4.90449871,-0.462690985,4.90293706,4.87183151,4.87025939
77.252661,4.35889894,4.90139416,-0.736542744,4.89982977,4.87163377,4.87005982
77.263153,4.47213595,4.8988411,-0.653226721,4.89727414,4.87143688,4.8698611
77.273644,4,4.89670725,-0.946946277,4.89513783,4.87124088,4.86966325
77.284136,4.79583152,4.89489129,-0.314737623,4.89331951,4.87104574,4.86946626
77.294628,6.32455532,4.89331823,1.19634321,4.89174416,4.87085146,4.86927012
77.305119,4.79583152,4.89193291,-0.310002235,4.8903566,4.87065807,4.86907487
77.315611,5.29150262,4.89069478,0.633093865,4.88911628,4.87046553,4.86888046
77.326102,5.09901951,4.88957484,0.45765126,4.88799417,4.87027387,4.86868693
77.336594,4.12310563,4.88855151,-0.874897643,4.8869687,4.87008306,4.86849425
77.347086,4.58257569,4.8876103,-0.552299381,4.88602536,4.86989312,4.86830242
77.357577,5.65685425,4.88673964,0.877561743,4.88515259,4.86970407,4.86811147
77.368069,4.24264069,4.88592826,-0.8020521,4.88433911,4.86951586,4.86792135
77.37856,4.69041576,4.88516924,-0.441308827,4.88357801,4.86932853,4.86773212
77.389052,5.19615242,4.88445666,0.558297196,4.88286335,4.86914205,4.86754372
77.399544,5.29150262,4.88378577,0.638527096,4.88219038,4.86895642,4.86735618
77.410035,5,4.88315251,0.341829626,4.88155505,4.86877168,4.86716951
77.420527,4.58257569,4.8825532,-0.547702023,4.88095368,4.86858779,4.86698368
77.431018,4.35889894,4.88198486,-0.72324679,4.88038328,4.86840477,4.86679871
77.44151,5.29150262,4.88144465,0.640357691,4.879841,4.86822259,4.86661459
77.452002,5.09901951,4.88093019,0.467000348,4.87932448,4.86804127,4.86643131
77.462493,4.89897949,4.88043937,0.136162108,4.8788316,4.86786083,4.86624891
77.472985,4.58257569,4.87997016,-0.545338852,4.87836033,4.86768123,4.86606734
77.483476,5.09901951,4.87952092,0.468506767,4.87790904,4.8675025,4.86588663
77.493968,5.09901951,4.87909002,0.46896641,4.87747607,4.86732461,4.86570676
77.50446,5.19615242,4.87867609,0.563450381,4.87706008,4.86714758,4.86552774
77.514951,5.19615242,4.87827791,0.563803616,4.87665983,4.86697141,4.86534958
77.525443,4.79583152,4.87789424,-0.286465916,4.8762741,4.86679609,4.86517225
77.535934,4.79583152,4.87752414,-0.285819208,4.87590193,4.86662163,4.86499578
77.546426,5.65685425,4.87716659,0.882999241,4.8755423,4.86644801,4.86482014
77.556918,4.58257569,4.87682077,-0.542443614,4.8751944,4.86627525,4.86464535
77.567409,4.89897949,4.87648634,0.149977156,4.87485788,4.86610335,4.86447142
77.577901,4.24264069,4.87616206,-0.795940556,4.87453152,4.86593228,4.86429831
77.588392,4.89897949,4.87584734,0.152092559,4.87421471,4.86576208,4.86412607
77.598884,5.91607978,4.87554154,1.02006776,4.87390681,4.86559272,4.86395464
77.609376,4.69041576,4.87524415,-0.429916725,4.87360732,4.8654242,4.86378406
77.619867,4.58257569,4.8749547,-0.540720819,4.87331577,4.86525654,4.86361434
77.630359,5.38516481,4.87467268,0.714487321,4.87303163,4.86508972,4.86344544
77.64085,5.09901951,4.87439772,0.473942821,4.87275456,4.86492376,4.8632774
77.651342,4.58257569,4.87412938,-0.539957113,4.8724841,4.86475862,4.86311017
77.661834,5.38516481,4.87386734,0.715050678,4.87221993,4.86459433,4.86294379
77.672325,4.47213595,4.87361128,-0.633620805,4.87196174,4.86443091,4.86277825
77.682817,5.29150262,4.87336086,0.646638822,4.87170918,4.8642683,4.86261354
77.693308,3.87298335,4.87311583,-1.00006624,4.87146201,4.86410656,4.86244967
77.7038,4.79583152,4.8728759,-0.277568682,4.87121992,4.86394564,4.86228663
77.714292,4.69041576,4.87264083,-0.426878291,4.8709827,4.86378557,4.86212442
77.724783,5.47722558,4.87241044,0.777698615,4.87075014,4.86362635,4.86196305
77.735275,5.19615242,4.87218445,0.569181842,4.87052199,4.86346795,4.86180251
77.745766,4.89897949,4.87196273,0.164367751,4.87029809,4.86331041,4.86164281
77.756258,4.79583152,4.87174504,-0.275524069,4.87007821,4.86315369,4.86148392
77.76675,5.29150262,4.87153123,0.648051998,4.86986222,4.86299781,4.86132587
77.777241,5.19615242,4.87132125,0.569939624,4.86965004,4.86284278,4.86116865
77.787733,5,4.87111485,0.359005774,4.86944144,4.86268857,4.86101225
77.798224,4.35889894,4.87091191,-0.715550813,4.86923629,4.86253521,4.8608567
77.808716,4.89897949,4.87071224,0.168128648,4.86903441,4.86238266,4.86070195
77.819208,5.19615242,4.87051576,0.570645833,4.8688357,4.86223096,4.86054803
77.829699,5.09901951,4.87032235,0.478222921,4.86864006,4.8620801,4.86039495
77.840191,4.89897949,4.87013189,0.169845808,4.86844736,4.86193006,4.86024268
77.850682,4.58257569,4.8699443,-0.536067723,4.86825753,4.86178086,4.86009125
77.861174,5.65685425,4.86975946,0.88718363,4.86807043,4.86163248,4.85994063
77.871666,5.47722558,4.86957729,0.779517982,4.86788601,4.86148493,4.85979083
77.882157,4.69041576,4.86939773,-0.423062613,4.86770418,4.86133822,4.85964186
77.892649,4.89897949,4.86922067,0.172507423,4.86752485,4.86119233,4.8594937
77.90314,5.09901951,4.86904607,0.479555463,4.86734796,4.86104727,4.85934637
77.913632,5.47722558,4.86887382,0.779969071,4.86717343,4.86090304,4.85919985
77.924124,5.19615242,4.86870388,0.572231196,4.86700119,4.86075962,4.85905415
77.934615,5.09901951,4.8685362,0.480086778,4.8668312,4.86061705,4.85890927
77.945107,5.09901951,4.86837068,0.480259128,4.86666337,4.86047529,4.8587652
77.955598,4.69041576,4.86820731,-0.421653354,4.86649768,4.86033436,4.85862196
77.96609,5.09901951,4.868046,0.48059704,4.86633404,4.86019424,4.85847952
77.976582,5.09901951,4.86788671,0.48076273,4.86617242,4.86005495,4.85833789
77.987073,5,4.86772943,0.363690212,4.86601279,4.85991649,4.85819709
77.997565,5,4.8675741,0.363903701,4.86585511,4.85977884,4.85805709
78.008056,4.35889894,4.86742067,-0.71310709,4.86569932,4.85964202,4.85791792
78.018548,5.56776436,4.86726907,0.83695597,4.86554535,4.85950601,4.85777954
78.02904,6.32455532,4.86711928,1.20724316,4.86539319,4.85937081,4.85764197
78.039531,5.29150262,4.86697128,0.6515607,4.8652428,4.85923645,4.85750523
78.050023,5.19615242,4.866825,0.573870564,4.86509413,4.85910289,4.85736928
78.060514,5.29150262,4.86668044,0.651783846,4.86494718,4.85897016,4.85723415
78.071006,4.79583152,4.86653754,-0.265906036,4.86480187,4.85883823,4.85709981
78.081498,6.32455532,4.86639629,1.20754256,4.8646582,4.85870712,4.85696628
78.091989,4.89897949,4.86625667,0.180894484,4.86451616,4.85857683,4.85683357
78.102481,4.89897949,4.86611863,0.181275642,4.86437568,4.85844735,4.85670165
78.112972,5.29150262,4.86598216,0.652319294,4.86423678,4.85831869,4.85657055
78.123464,5.19615242,4.86584722,0.574721847,4.86409939,4.85819083,4.85644023
78.133956,5.91607978,4.8657138,1.02487364,4.86396351,4.85806377,4.85631072
78.144447,4.58257569,4.86558189,-0.531983266,4.86382913,4.85793755,4.85618203
78.154939,5.19615242,4.86545144,0.575066068,4.8636962,4.85781211,4.85605412
78.16543,5.74456265,4.86532246,0.937678085,4.86356474,4.8576875,4.85592702
78.175922,4.89897949,4.86519489,0.183805858,4.86343468,4.85756369,4.85580071
78.186414,5.56776436,4.86506874,0.838269419,4.86330603,4.85744068,4.85567519
78.196905,5.38516481,4.86494401,0.721263338,4.86317878,4.85731849,4.85555049
78.207397,4.24264069,4.86482065,-0.788783853,4.86305291,4.85719709,4.85542657
78.217888,5.74456265,4.86469868,0.938010644,4.86292841,4.85707651,4.85530346
78.22838,5.38516481,4.86457804,0.721516991,4.86280523,4.85695672,4.85518113
78.238872,5.47722558,4.86445873,0.782794254,4.86268338,4.85683773,4.8550596
78.249363,5.47722558,4.86434075,0.782869607,4.86256285,4.85671956,4.85493887
78.259855,5.09901951,4.86422407,0.484556956,4.8624436,4.85660218,4.85481892
78.270346,4.69041576,4.86410869,-0.416764837,4.86232565,4.85648561,4.85469977
78.280838,4.89897949,4.86399458,0.187042534,4.86220896,4.85636983,4.8545814
78.29133,5.19615242,4.86388173,0.57642926,4.86209352,4.85625484,4.85446383
78.301821,5.38516481,4.86377015,0.722076627,4.86197934,4.85614067,4.85434705
78.312313,4.35889894,4.86365981,-0.710465245,4.86186639,4.85602729,4.85423105
78.322804,5.47722558,4.86355071,0.783374027,4.86175467,4.85591471,4.85411585
78.333296,6.32455532,4.86344282,1.20876486,4.86164416,4.85580291,4.85400142
78.343788,5.83095189,4.86333615,0.983674612,4.86153485,4.85569192,4.85388778
78.354279,4.58257569,4.8632307,-0.529768823,4.86142676,4.85558172,4.85377494
78.364771,5.47722558,4.86312643,0.783644779,4.86131984,4.85547231,4.85366287
78.375262,4.69041576,4.86302337,-0.415460716,4.8612141,4.85536371,4.85355159
78.385754,4.89897949,4.86292147,0.189889491,4.86110953,4.85525588,4.85344109
78.396246,4.24264069,4.86282074,-0.787515112,4.86100612,4.85514885,4.85333136
78.406737,5.56776436,4.86272118,0.839668494,4.86090387,4.85504262,4.85322243
78.417229,4.69041576,4.86262278,-0.414978336,4.86080277,4.85493716,4.85311427
78.42772,5,4.86252554,0.370775487,4.86070281,4.85483251,4.85300689
78.438212,5.19615242,4.86242943,0.577687626,4.86060398,4.85472863,4.85290029
78.448704,5.65685425,4.86233446,0.891358398,4.86050628,4.85462554,4.85279446
78.459195,4.24264069,4.86224062,-0.787146703,4.8604097,4.85452325,4.85268942
78.469687,5.56776436,4.8621479,0.840009802,4.86031423,4.85442173,4.85258514
78.480178,6.244998,4.8620563,1.17598542,4.86021987,4.85432101,4.85248165
78.49067,4.12310563,4.8619658,-0.859569762,4.8601266,4.85422106,4.85237893
78.501162,4.79583152,4.86187641,-0.256991999,4.86003443,4.8541219,4.85227698
78.511653,5.47722558,4.86178813,0.784498213,4.85994336,4.85402353,4.8521758
78.522145,5.74456265,4.86170093,0.939607211,4.85985336,4.85392593,4.8520754
78.532636,5.38516481,4.86161484,0.723567528,4.85976446,4.85382912,4.85197577
78.543128,5.38516481,4.86152982,0.723626275,4.85967662,4.85373308,4.8518769
78.55362,5,4.86144588,0.37222858,4.85958985,4.85363782,4.8517788
78.564111,4.89897949,4.86136304,0.193949603,4.85950416,4.85354335,4.85168148
78.574603,5.83095189,4.86128126,0.984718558,4.85941953,4.85344965,4.85158492
78.585094,4.24264069,4.86120055,-0.786485768,4.85933597,4.85335673,4.85148913
78.595586,5.19615242,4.8611209,0.578819073,4.85925345,4.85326458,4.8513941
78.606078,4.89897949,4.86104232,0.194774659,4.85917198,4.8531732,4.85129983
78.616569,5.09901951,4.8609648,0.487908513,4.85909157,4.85308261,4.85120634
78.627061,4.47213595,4.86088832,-0.623500096,4.85901219,4.85299279,4.8511136
78.637552,5,4.86081291,0.373077855,4.85893387,4.85290374,4.85102164
78.648044,4.69041576,4.86073854,-0.412701811,4.85885658,4.85281546,4.85093042
78.658536,3.74165739,4.86066522,-1.05783167,4.85878032,4.85272795,4.85083997
78.669027,5,4.86059294,0.373372544,4.8587051,4.85264122,4.85075028
78.679519,4.79583152,4.8605217,-0.254342635,4.8586309,4.85255525,4.85066135
78.69001,5,4.8604515,0.373561913,4.85855773,4.85247006,4.85057318
78.700502,5.47722558,4.86038232,0.785393693,4.85848558,4.85238563,4.85048576
78.710994,4.69041576,4.86031418,-0.412187358,4.85841445,4.85230196,4.85039909
78.721485,4.89897949,4.86024707,0.196805529,4.85834434,4.85221907,4.85031319
78.731977,4.47213595,4.86018098,-0.622932601,4.85827524,4.85213694,4.85022804
78.742468,4.69041576,4.86011592,-0.411946796,4.85820716,4.85205558,4.85014365
78.75296,5.19615242,4.86005188,0.57974179,4.85814009,4.85197498,4.85006
78.763452,5.19615242,4.85998886,0.579796141,4.85807402,4.85189514,4.84997711
78.773943,5.65685425,4.85992686,0.892707896,4.85800897,4.85181607,4.84989497
78.784435,5,4.85986588,0.374344921,4.85794493,4.85173775,4.84981358
78.794926,4.89897949,4.85980592,0.197923134,4.85788189,4.85166021,4.84973294
78.805418,4.89897949,4.85974696,0.198072011,4.85781985,4.85158341,4.84965305
78.81591,4.79583152,4.85968902,-0.25270041,4.85775881,4.85150737,4.8495739
78.826401,5.19615242,4.85963209,0.580103724,4.85769877,4.8514321,4.84949551
78.836893,4.24264069,4.85957617,-0.785452405,4.85763972,4.85135758,4.84941786
78.847384,5.65685425,4.85952126,0.892935044,4.85758168,4.85128383,4.84934096
78.857876,5.29150262,4.85946735,0.657293904,4.85752462,4.85121082,4.84926479
78.868368,4.24264069,4.85941444,-0.785349447,4.85746856,4.85113857,4.84918937
78.878859,4.89897949,4.85936254,0.199040054,4.8574135,4.85106708,4.8491147
78.889351,4.89897949,4.85931164,0.19916788,4.85735942,4.85099633,4.84904076
78.899842,5.56776436,4.85926175,0.841725975,4.85730633,4.85092635,4.84896758
78.910334,4.79583152,4.85921284,-0.251756472,4.85725423,4.85085711,4.84889512
78.920826,5,4.85916494,0.375279973,4.85720311,4.85078862,4.8488234
78.931317,4.12310563,4.85911804,-0.85791166,4.85715299,4.85072089,4.84875243
78.941809,4.89897949,4.85907214,0.199768241,4.85710384,4.8506539,4.84868219
78.9523,4.69041576,4.85902723,-0.410623269,4.85705569,4.85058767,4.84861269
78.962792,4.58257569,4.85898331,-0.525744823,4.85700851,4.85052218,4.84854393
78.973284,5.83095189,4.85894039,0.985906436,4.85696232,4.85045743,4.84847589
78.983775,5.29150262,4.85889847,0.6577265,4.85691711,4.85039344,4.8484086
78.994267,4.69041576,4.85885755,-0.410416606,4.85687289,4.85033018,4.84834203
79.004758,5,4.85881762,0.375742433,4.85682965,4.85026768,4.8482762
79.01525,5,4.85877869,0.375794243,4.85678739,4.85020591,4.8482111
79.025742,5.19615242,4.85874074,0.580871483,4.85674611,4.85014489,4.84814673
79.036233,4.35889894,4.85870379,-0.706968776,4.85670582,4.85008462,4.84808309
79.046725,5.83095189,4.85866783,0.986044654,4.8566665,4.85002508,4.84802017
79.057216,5.74456265,4.85863287,0.941238426,4.85662816,4.84996628,4.84795799
79.067708,5.09901951,4.8585989,0.490327051,4.85659081,4.84990822,4.84789653
79.0782,5.38516481,4.85856591,0.725671339,4.85655443,4.8498509,4.8478358
79.088691,4.47213595,4.85853393,-0.621609179,4.85651903,4.84979433,4.8477758
79.099183,4.35889894,4.85850293,-0.7068267,4.85648461,4.84973848,4.84771651
79.109674,4,4.85847292,-0.926538138,4.85645117,4.84968337,4.84765795
79.120166,4.35889894,4.8584439,-0.706784947,4.8564187,4.849629,4.84760011
79.130658,5,4.85841588,0.376276655,4.85638721,4.84957536,4.847543
79.141149,4.35889894,4.85838885,-0.706745997,4.85635671,4.84952246,4.84748661
79.151641,4.47213595,4.85836281,-0.621471521,4.85632718,4.84947029,4.84743093
79.162132,4.79583152,4.85833776,-0.250012473,4.85629863,4.84941885,4.84737598
79.172624,5.38516481,4.8583137,0.725845096,4.85627106,4.84936814,4.84732173
79.183116,4.12310563,4.85829064,-0.857429306,4.85624447,4.84931816,4.84726821
79.193607,5.29150262,4.85826857,0.658205173,4.85621887,4.84926892,4.84721541
79.204099,5.74456265,4.8582475,0.941443118,4.85619424,4.8492204,4.84716332
79.21459,4.79583152,4.85822743,-0.249791731,4.85617061,4.84917261,4.84711195
79.225082,4.89897949,4.85820835,0.201918625,4.85614795,4.84912555,4.84706128
79.235574,5.91607978,4.85819027,1.02853756,4.85612627,4.84907921,4.84701133
79.246065,4.47213595,4.85817319,-0.621318945,4.85610558,4.8490336,4.8469621
79.256557,4.35889894,4.8581571,-0.706582022,4.85608587,4.84898871,4.84691357
79.267048,5.38516481,4.85814201,0.725963361,4.85606715,4.84894455,4.84686576
79.27754,4.69041576,4.85812791,-0.409526742,4.85604941,4.84890111,4.84681865
79.288032,5.09901951,4.85811482,0.490820431,4.85603265,4.84885839,4.84677225
79.298523,4.47213595,4.85810272,-0.621262239,4.85601688,4.84881639,4.84672656
79.309015,4.89897949,4.85809163,0.202207457,4.8560021,4.84877512,4.84668157
79.319506,5.47722558,4.85808154,0.786857063,4.8559883,4.84873456,4.84663729
79.329998,4.47213595,4.85807245,-0.62123787,4.85597549,4.84869472,4.84659371
79.34049,4.35889894,4.85806436,-0.706516394,4.85596368,4.8486556,4.84655084
79.350981,4.79583152,4.85805728,-0.249450903,4.85595285,4.8486172,4.84650867
79.361473,3.74165739,4.8580512,-1.05659539,4.85594301,4.84857951,4.84646721
79.371964,4.79583152,4.85804613,-0.249428558,4.85593417,4.84854255,4.84642644
79.382456,5.19615242,4.85804207,0.581472576,4.85592631,4.84850629,4.84638637
79.392948,4.69041576,4.85803901,-0.409418188,4.85591946,4.84847075,4.84634701
79.403439,4.24264069,4.85803697,-0.784471977,4.8559136,4.84843592,4.84630834
79.413931,5.56776436,4.85803594,0.842453809,4.85590874,4.8484018,4.84627037
79.424422,4.47213595,4.85803594,-0.621208484,4.85590488,4.8483684,4.84623309
79.434914,4.69041576,4.85803694,-0.409415661,4.85590203,4.8483357,4.84619651
79.445406,5.09901951,4.85803897,0.490897695,4.85590018,4.84830371,4.84616063
79.455897,4.58257569,4.85804201,-0.524848848,4.85589933,4.84827244,4.84612544
79.466389,3.87298335,4.85804607,-0.99250326,4.85589948,4.84824187,4.84609094
79.47688,4.58257569,4.85805115,-0.524857555,4.85590064,4.84821201,4.84605714
79.487372,5.29150262,4.85805725,0.658365681,4.85590281,4.84818285,4.84602402
79.497864,4.89897949,4.85806438,0.202274827,4.85590598,4.8481544,4.84599159
79.508355,5.65685425,4.85807253,0.89374589,4.85591017,4.84812666,4.84595986
79.518847,4.79583152,4.85808171,-0.249499881,4.85591537,4.84809962,4.84592881
79.529338,4.12310563,4.85809192,-0.857313419,4.85592158,4.84807328,4.84589845
79.53983,5.74456265,4.85810316,0.941519772,4.85592881,4.84804764,4.84586878
79.550322,5.09901951,4.85811544,0.490819798,4.85593706,4.84802271,4.84583979
79.560813,4.58257569,4.85812875,-0.524931475,4.85594632,4.84799848,4.84581149
79.571305,4.89897949,4.8581431,0.202080158,4.85595661,4.84797494,4.84578387
79.581796,5.09901951,4.85815848,0.49077595,4.85596792,4.84795211,4.84575693
79.592288,5.09901951,4.85817491,0.490759212,4.85598026,4.84792997,4.84573067
79.60278,5.29150262,4.85819238,0.658263048,4.85599362,4.84790853,4.8457051
79.613271,5.29150262,4.8582109,0.658248983,4.85600802,4.84788778,4.84568021
79.623763,5.09901951,4.85823047,0.490702606,4.85602344,4.84786773,4.84565599
79.634254,4.69041576,4.8582511,-0.409677112,4.85603992,4.84784838,4.84563246
79.644746,5.09901951,4.85827278,0.490659488,4.85605743,4.84782972,4.8456096
79.655238,4.58257569,4.85829552,-0.525090303,4.85607599,4.84781175,4.84558741
79.665729,4.58257569,4.85831932,-0.525112963,4.85609558,4.84779448,4.84556591
79.676221,5.19615242,4.85834418,0.581212736,4.85611622,4.84777789,4.84554507
79.686712,4.69041576,4.8583701,-0.409822327,4.8561379,4.847762,4.84552492
79.697204,4.69041576,4.85839709,-0.409855255,4.85616064,4.8477468,4.84550543
79.707696,4.12310563,4.85842515,-0.85750774,4.85618443,4.84773228,4.84548662
79.718187,4.58257569,4.85845428,-0.525241452,4.85620927,4.84771845,4.84546847
79.728679,4.58257569,4.85848448,-0.525270206,4.85623517,4.84770531,4.845451
79.73917,5.09901951,4.85851577,0.490411815,4.85626214,4.84769286,4.8454342
79.749662,4.89897949,4.85854813,0.201075495,4.85629016,4.84768109,4.84541806
79.760154,5.09901951,4.85858158,0.490344709,4.85631926,4.84767001,4.84540259
79.770645,4.24264069,4.85861611,-0.784841019,4.85634942,4.84765961,4.84538779
79.781137,4.79583152,4.85865174,-0.250639614,4.85638066,4.84764989,4.84537365
79.791628,4.79583152,4.85868846,-0.25071285,4.85641297,4.84764085,4.84536018
79.80212,4.79583152,4.85872627,-0.25078826,4.85644636,4.8476325,4.84534737
79.812612,4.35889894,4.85876519,-0.707012199,4.85648084,4.84762483,4.84533522
79.823103,4.47213595,4.85880521,-0.621827354,4.8565164,4.84761783,4.84532374
79.833595,5.09901951,4.85884634,0.490074657,4.85655305,4.84761152,4.84531291
79.844086,5.83095189,4.8588886,0.985932705,4.85659081,4.84760588,4.84530275
79.854578,5.65685425,4.85893197,0.893264953,4.85662968,4.84760092,4.84529324
79.86507,4.12310563,4.85897647,-0.857829145,4.85666964,4.84759664,4.84528439
79.875561,5,4.85902208,0.375470262,4.85671071,4.84759303,4.8452762
79.886053,5.19615242,4.85906883,0.580589006,4.85675289,4.84759009,4.84526867
79.896544,4.58257569,4.8591167,-0.525871664,4.85679618,4.84758783,4.84526179
79.907036,5.65685425,4.85916571,0.893134108,4.85684059,4.84758625,4.84525556
79.917528,4.69041576,4.85921587,-0.410852903,4.85688612,4.84758533,4.84524999
79.928019,5.65685425,4.85926716,0.893077314,4.85693277,4.84758509,4.84524507
79.938511,4.79583152,4.85931961,-0.251968418,4.85698056,4.84758551,4.8452408
79.949002,4.12310563,4.8593732,-0.858060357,4.85702948,4.84758661,4.84523718
79.959494,5.38516481,4.85942796,0.725077133,4.85707954,4.84758837,4.84523422
79.969986,5.19615242,4.85948388,0.580231458,4.85713075,4.8475908,4.8452319
79.980477,4.58257569,4.85954096,-0.526274895,4.8571831,4.8475939,4.84523022
79.990969,4.47213595,4.85959922,-0.622465472,4.8572366,4.84759767,4.8452292
80.00146,5.38516481,4.85965865,0.724918034,4.85729126,4.8476021,4.84522882
80.011952,5.19615242,4.85971927,0.580028579,4.85734709,4.84760719,4.84522909
80.022444,5.19615242,4.85978108,0.579975296,4.85740409,4.84761295,4.84523
80.032935,4.58257569,4.85984407,-0.526562797,4.85746225,4.84761938,4.84523155
80.043427,5.09901951,4.85990827,0.488990019,4.85752161,4.84762646,4.84523374
80.053918,5.47722558,4.85997368,0.785653799,4.85758215,4.84763421,4.84523658
80.06441,4.79583152,4.86004032,-0.253394547,4.85764389,4.84764261,4.84524005
80.074902,4.89897949,4.86010817,0.19715809,4.85770684,4.84765168,4.84524417
80.085393,4.79583152,4.86017724,-0.253664579,4.85777098,4.8476614,4.84524892
80.095885,5.38516481,4.86024755,0.72451174,4.85783634,4.84767178,4.84525431
80.106376,5.19615242,4.86031908,0.579511299,4.8579029,4.84768282,4.84526034
80.116868,5.91607978,4.86039185,1.02746675,4.85797069,4.84769452,4.84526701
80.12736,4.69041576,4.86046588,-0.412371339,4.85803971,4.84770687,4.8452743
80.137851,5.56776436,4.86054115,0.840965641,4.85810995,4.84771987,4.84528223
80.148343,4.58257569,4.86061769,-0.527296879,4.85818144,4.84773353,4.8452908
80.158834,4.47213595,4.86069549,-0.62334544,4.85825417,4.84774784,4.84529999
80.169326,5.38516481,4.86077457,0.724147936,4.85832816,4.8477628,4.84530982
80.179818,4.89897949,4.86085494,0.195255086,4.85840341,4.84777842,4.84532028
80.190309,4.24264069,4.86093658,-0.786317934,4.85847993,4.84779468,4.84533136
80.200801,5.74456265,4.86101953,0.939969743,4.85855772,4.8478116,4.84534308
80.211292,5.29150262,4.86110377,0.656047901,4.85863679,4.84782916,4.84535541
80.221784,4.89897949,4.86118934,0.194396882,4.85871716,4.84784737,4.84536838
80.232276,4.79583152,4.86127622,-0.255821615,4.85879882,4.84786623,4.84538197
80.242767,4.24264069,4.86136443,-0.786589944,4.85888179,4.84788573,4.84539619
80.253259,4.47213595,4.86145398,-0.623953542,4.85896608,4.84790588,4.84541103
80.26375,4.79583152,4.86154487,-0.256346141,4.85905169,4.84792668,4.84542649
80.274242,4.89897949,4.86163715,0.193241661,4.85913866,4.84794812,4.84544257
80.284734,5.83095189,4.86173079,0.984490278,4.85922698,4.8479702,4.84545928
80.295225,4.89897949,4.86182579,0.19275293,4.85931663,4.84799292,4.8454766
80.305717,5.09901951,4.86192219,0.486926405,4.85940766,4.84801629,4.84549454
80.316208,5.74456265,4.86201997,0.939437427,4.85950005,4.84804029,4.8455131
80.3267,4.58257569,4.86211916,-0.528718698,4.85959382,4.84806493,4.84553227
80.337192,5,4.86221976,0.371187612,4.85968898,4.84809022,4.84555206
80.347683,5.38516481,4.86232177,0.72307886,4.85978553,4.84811614,4.84557247
80.358175,5.19615242,4.86242522,0.577691267,4.85988351,4.8481427,4.84559349
80.368666,4.79583152,4.86253011,-0.258260693,4.85998289,4.84816989,4.84561512
80.379158,6.164414,4.86263646,1.14095466,4.86008371,4.84819772,4.84563737
80.38965,5.47722558,4.86274427,0.783888577,4.86018597,4.84822619,4.84566022
80.400141,5,4.86285356,0.370332883,4.86028968,4.84825529,4.84568369
80.410633,4.79583152,4.86296434,-0.259100006,4.86039486,4.84828502,4.84570776
80.421124,4.79583152,4.86307661,-0.25931657,4.86050151,4.84831538,4.84573244
80.431616,5.09901951,4.8631904,0.485622396,4.86060966,4.84834638,4.84575773
80.442108,5.56776436,4.86330572,0.839320344,4.86071931,4.84837801,4.84578363
80.452599,5.29150262,4.86342257,0.654278267,4.86083047,4.84841026,4.84581013
80.463091,4.79583152,4.86354099,-0.260210427,4.86094317,4.84844315,4.84583723
80.473582,4.35889894,4.86366096,-0.710466058,4.8610574,4.84847666,4.84586494
80.484074,5.56776436,4.86378256,0.839036237,4.86117323,4.8485108,4.84589325
80.494566,5.29150262,4.86390575,0.653908914,4.86129064,4.84854557,4.84592216
80.505057,4.12310563,4.86403055,-0.860769962,4.86140962,4.84858096,4.84595168
80.515549,4.47213595,4.86415699,-0.626115831,4.86153022,4.84861698,4.84598179
80.52604,4.58257569,4.86428506,-0.530762999,4.86165243,4.84865362,4.8460125
80.536532,4.24264069,4.86441479,-0.788526542,4.86177628,4.84869089,4.84604381
80.547024,4.89897949,4.86454621,0.18556206,4.86190178,4.84872877,4.84607571
80.557515,5.91607978,4.8646793,1.02537821,4.86202893,4.84876728,4.84610821
80.568007,4.58257569,4.86481412,-0.531261163,4.86215779,4.84880641,4.84614131
80.578498,5.38516481,4.86495065,0.72125873,4.86228833,4.84884616,4.84617499
80.58899,4.89897949,4.86508894,0.184093837,4.86242061,4.84888653,4.84620928
80.599482,6.08276253,4.86522901,1.10341902,4.86255463,4.84892752,4.84624415
80.609973,4.69041576,4.86537084,-0.418276319,4.8626904,4.84896912,4.84627961
80.620465,5.38516481,4.86551449,0.72086775,4.86282797,4.84901135,4.84631567
80.630956,4.89897949,4.86565996,0.182536358,4.86296732,4.84905418,4.84635231
80.641448,5.29150262,4.8658073,0.652453311,4.86310851,4.84909764,4.84638954
80.65194,4.89897949,4.86595651,0.181722253,4.86325155,4.84914171,4.84642736
80.662431,5.38516481,4.8661076,0.720456249,4.86339645,4.84918638,4.84646577
80.672923,4.24264069,4.86626064,-0.789696112,4.86354326,4.84923168,4.84650476
80.683414,4.79583152,4.86641561,-0.265676654,4.86369198,4.84927758,4.84654433
80.693906,4.69041576,4.86657259,-0.419710409,4.86384269,4.8493241,4.84658449
80.704398,6,4.8667316,1.0645508,4.86399539,4.84937123,4.84662523
80.714889,5.38516481,4.86689262,0.719911234,4.86415009,4.84941897,4.84666655
80.725381,4.79583152,4.86705572,-0.266878618,4.86430683,4.84946732,4.84670845
80.735872,5.83095189,4.86722089,0.98169802,4.86446562,4.84951627,4.84675093
80.746364,5.29150262,4.8673882,0.65124068,4.86462651,4.84956583,4.84679399
80.756856,4.69041576,4.86755766,-0.420882287,4.86478953,4.849616,4.84683762
80.767347,5.19615242,4.86772929,0.573082135,4.86495469,4.84966677,4.84688183
80.777839,5.38516481,4.86790316,0.719209044,4.86512207,4.84971815,4.84692662
80.78833,4.35889894,4.86807927,-0.713568724,4.86529166,4.84977013,4.84697198
80.798822,6.40312424,4.86825769,1.23889731,4.86546353,4.84982271,4.84701792
80.809314,4.69041576,4.86843845,-0.421927353,4.86563771,4.8498759,4.84706443
80.819805,5.19615242,4.86862157,0.572303111,4.86581422,4.84992969,4.84711151
80.830297,5,4.86880713,0.362205561,4.86599314,4.84998408,4.84715916
80.840788,5.38516481,4.86899514,0.718449488,4.86617449,4.85003906,4.84720738
80.85128,4.69041576,4.86918568,-0.422811925,4.86635834,4.85009466,4.84725617
80.861772,5.19615242,4.86937879,0.571641172,4.86654472,4.85015085,4.84730553
80.872263,4.47213595,4.8695745,-0.630427272,4.86673367,4.85020763,4.84735545
80.882755,5,4.86977291,0.360869907,4.8669253,4.85026501,4.84740595
80.893246,5.38516481,4.86997406,0.717767896,4.86711963,4.85032299,4.847457
80.903738,4.58257569,4.87017802,-0.536285673,4.86731676,4.85038157,4.84750862
80.91423,5.19615242,4.8703849,0.570760474,4.86751677,4.85044074,4.8475608
80.924721,4.47213595,4.8705947,-0.631235887,4.86771967,4.8505005,4.84761354
80.935213,5.74456265,4.87080752,0.934748698,4.86792555,4.85056085,4.84766685
80.945704,4.69041576,4.8710234,-0.424979571,4.86813447,4.8506218,4.84772071
80.956196,3.46410162,4.87124245,-1.18622967,4.86834653,4.85068334,4.84777514
80.966688,6.70820393,4.87146476,1.35526351,4.86856182,4.85074547,4.84783012
80.977179,5,4.87169037,0.358203331,4.86878038,4.85080819,4.84788566
80.987671,4.58257569,4.87191945,-0.537906825,4.86900237,4.8508715,4.84794176
80.998162,4.58257569,4.87215204,-0.538122979,4.86922785,4.85093539,4.84799841
81.008654,4.79583152,4.87238829,-0.27668894,4.86945696,4.85099988,4.84805561
81.019146,4.89897949,4.87262832,0.162330435,4.86968981,4.85106495,4.84811337
81.029637,4.47213595,4.87287221,-0.633037322,4.86992649,4.8511306,4.84817168
81.040129,4.58257569,4.87312015,-0.539021753,4.8701672,4.85119685,4.84823055
81.05062,4.58257569,4.87337223,-0.53925554,4.87041202,4.85126367,4.84828995
81.061112,4.58257569,4.87362867,-0.539493259,4.87066115,4.85133108,4.84834992
81.071604,4.69041576,4.87388961,-0.428338472,4.87091476,4.85139908,4.84841043
81.082095,5.29150262,4.87415519,0.646024325,4.87117298,4.85146766,4.84847149
81.092587,5.83095189,4.87442568,0.978021581,4.87143607,4.85153682,4.84853309
81.103078,5.91607978,4.87470135,1.02047951,4.87170431,4.85160655,4.84859524
81.11357,4.89897949,4.87498238,0.154909992,4.87197789,4.85167687,4.84865794
81.124062,5.09901951,4.87526907,0.473022672,4.87225708,4.85174777,4.84872118
81.134553,5.19615242,4.87556162,0.566207388,4.87254211,4.85181925,4.84878496
81.145045,4.69041576,4.87586037,-0.4306328,4.87283331,4.8518913,4.84884928
[truncated: 429,217 more chars]
