# Supplementary material for: Phase Stability of Iron Nitride Fe4N at High Pressure—Pressure-Dependent Evolution of Phase Equilibria in the Fe–N System
Source: Materials (Basel). 2021 Jul 15;14(14):3963. doi: 10.3390/ma14143963 (PMC8307547; doi:10.3390/ma14143963)
Supplement: Supplementary file 1 [file materials-14-03963-s001.zip › xrd_data/8-400_riet.txt]

'y-axis saved as Sqrt(y)
'x,Yobs,Ycalc,Diff,epsilon,gamma,Bkg
20,21.0713075,0,0,0,0,0
20.010492,21.4709106,0,0,0,0,0
20.020983,20.174241,0,0,0,0,0
20.031475,21.1187121,0,0,0,0,0
20.041966,21.4476106,0,0,0,0,0
20.052458,20.6881609,0,0,0,0,0
20.06295,20.1990099,0,0,0,0,0
20.073441,21.1660105,0,0,0,0,0
20.083933,21.023796,0,0,0,0,0
20.094424,20.9523268,0,0,0,0,0
20.104916,20.7605395,0,0,0,0,0
20.115408,21.330729,0,0,0,0,0
20.125899,21.4709106,0,0,0,0,0
20.136391,20.7364414,0,0,0,0,0
20.146882,20.174241,0,0,0,0,0
20.157374,20.5426386,0,0,0,0,0
20.167866,21,0,0,0,0,0
20.178357,20.9284495,0,0,0,0,0
20.188849,20.6639783,0,0,0,0,0
20.19934,20.7123152,0,0,0,0,0
20.209832,19.8494332,0,0,0,0,0
20.220324,19.9248588,0,0,0,0,0
20.230815,21.4009346,0,0,0,0,0
20.241307,21.4941853,0,0,0,0,0
20.251798,21.5870331,0,0,0,0,0
20.26229,21.6564078,0,0,0,0,0
20.272782,21.6794834,0,0,0,0,0
20.283273,20.2237484,0,0,0,0,0
20.293765,20.9284495,0,0,0,0,0
20.304256,20.3715488,0,0,0,0,0
20.314748,20.1494417,0,0,0,0,0
20.32524,21.4941853,0,0,0,0,0
20.335731,21.4009346,0,0,0,0,0
20.346223,21.2367606,0,0,0,0,0
20.356714,21.1896201,0,0,0,0,0
20.367206,20.2484567,0,0,0,0,0
20.377698,20.5182845,0,0,0,0,0
20.388189,20.5669638,0,0,0,0,0
20.398681,21.2132034,0,0,0,0,0
20.409172,20.976177,0,0,0,0,0
20.419664,20.7846097,0,0,0,0,0
20.430156,20.8566536,0,0,0,0,0
20.440647,21.6333077,0,0,0,0,0
20.451139,20.1990099,0,0,0,0,0
20.46163,21.5174348,0,0,0,0,0
20.472122,21.4709106,0,0,0,0,0
20.482614,21.023796,0,0,0,0,0
20.493105,20.7605395,0,0,0,0,0
20.503597,20.976177,0,0,0,0,0
20.514088,20.5182845,0,0,0,0,0
20.52458,21.330729,0,0,0,0,0
20.535072,20.4450483,0,0,0,0,0
20.545563,21.1187121,0,0,0,0,0
20.556055,21.7025344,0,0,0,0,0
20.566546,21.1187121,0,0,0,0,0
20.577038,21.2367606,0,0,0,0,0
20.58753,20.808652,0,0,0,0,0
20.598021,20.8326667,0,0,0,0,0
20.608513,20.976177,0,0,0,0,0
20.619004,20.808652,0,0,0,0,0
20.629496,21.8632111,0,0,0,0,0
20.639988,21.3072758,0,0,0,0,0
20.650479,21.2367606,0,0,0,0,0
20.660971,21.330729,0,0,0,0,0
20.671462,21.0950231,0,0,0,0,0
20.681954,21.2602916,0,0,0,0,0
20.692446,21.5174348,0,0,0,0,0
20.702937,20.7123152,0,0,0,0,0
20.713429,20.8566536,0,0,0,0,0
20.72392,21.2602916,0,0,0,0,0
20.734412,22.0227155,0,0,0,0,0
20.744904,21.7485632,0,0,0,0,0
20.755395,20.4450483,0,0,0,0,0
20.765887,21.9317122,0,0,0,0,0
20.776378,20.2237484,0,0,0,0,0
20.78687,21.2837967,0,0,0,0,0
20.797362,20.2977831,0,0,0,0,0
20.807853,22.3830293,0,0,0,0,0
20.818345,21.0713075,0,0,0,0,0
20.828836,21.2837967,0,0,0,0,0
20.839328,21.4242853,0,0,0,0,0
20.84982,21.9317122,0,0,0,0,0
20.860311,20.4939015,0,0,0,0,0
20.870803,20.6397674,0,0,0,0,0
20.881294,21.5638587,0,0,0,0,0
20.891786,21.6564078,0,0,0,0,0
20.902278,21.4709106,0,0,0,0,0
20.912769,21.3541565,0,0,0,0,0
20.923261,21.977261,0,0,0,0,0
20.933752,21.3072758,0,0,0,0,0
20.944244,20.1494417,0,0,0,0,0
20.954736,20.7364414,0,0,0,0,0
20.965227,22.2934968,0,0,0,0,0
20.975719,20.3224014,0,0,0,0,0
20.98621,21.3072758,0,0,0,0,0
20.996702,21.2602916,0,0,0,0,0
21.007194,21.2132034,0,0,0,0,0
21.017685,21.9317122,0,0,0,0,0
21.028177,21.4242853,0,0,0,0,0
21.038668,21.5406592,0,0,0,0,0
21.04916,21.2367606,0,0,0,0,0
21.059652,20.7605395,0,0,0,0,0
21.070143,20.9523268,0,0,0,0,0
21.080635,21.2132034,0,0,0,0,0
21.091126,20.8326667,0,0,0,0,0
21.101618,21.1660105,0,0,0,0,0
21.11211,19.9499373,0,0,0,0,0
21.122601,21.2602916,0,0,0,0,0
21.133093,20.7364414,0,0,0,0,0
21.143584,21.1423745,0,0,0,0,0
21.154076,20.9523268,0,0,0,0,0
21.164568,22.1133444,0,0,0,0,0
21.175059,21.8860686,0,0,0,0,0
21.185551,22.1359436,0,0,0,0,0
21.196042,21.5638587,0,0,0,0,0
21.206534,21.1187121,0,0,0,0,0
21.217026,21.9317122,0,0,0,0,0
21.227517,21.8632111,0,0,0,0,0
21.238009,22.3830293,0,0,0,0,0
21.2485,20.9284495,0,0,0,0,0
21.258992,21.3541565,0,0,0,0,0
21.269484,21.6794834,0,0,0,0,0
21.279975,22.3606798,0,0,0,0,0
21.290467,21.8403297,0,0,0,0,0
21.300958,21.725561,0,0,0,0,0
21.31145,21.1187121,0,0,0,0,0
21.321942,21.7485632,0,0,0,0,0
21.332433,21.5638587,0,0,0,0,0
21.342925,20.8566536,0,0,0,0,0
21.353416,20.9523268,0,0,0,0,0
21.363908,22,0,0,0,0,0
21.3744,21.2837967,0,0,0,0,0
21.384891,20.3224014,0,0,0,0,0
21.395383,22.0227155,0,0,0,0,0
21.405874,21.5174348,0,0,0,0,0
21.416366,21.3541565,0,0,0,0,0
21.426858,21.4709106,0,0,0,0,0
21.437349,20.8326667,0,0,0,0,0
21.447841,20.880613,0,0,0,0,0
21.458332,20.6397674,0,0,0,0,0
21.468824,21.5406592,0,0,0,0,0
21.479316,21.330729,0,0,0,0,0
21.489807,20.6155281,0,0,0,0,0
21.500299,22.2934968,0,0,0,0,0
21.51079,21.1660105,0,0,0,0,0
21.521282,21,0,0,0,0,0
21.531774,21.0475652,0,0,0,0,0
21.542265,21.3541565,0,0,0,0,0
21.552757,22.0227155,0,0,0,0,0
21.563248,21.4709106,0,0,0,0,0
21.57374,21.8403297,0,0,0,0,0
21.584232,21.9544984,0,0,0,0,0
21.594723,21.7025344,0,0,0,0,0
21.605215,21.4709106,0,0,0,0,0
21.615706,21.1660105,0,0,0,0,0
21.626198,20.808652,0,0,0,0,0
21.63669,21.3541565,0,0,0,0,0
21.647181,21.2602916,0,0,0,0,0
21.657673,21.1423745,0,0,0,0,0
21.668164,21.6564078,0,0,0,0,0
21.678656,20.0499377,0,0,0,0,0
21.689148,21.4009346,0,0,0,0,0
21.699639,21.2367606,0,0,0,0,0
21.710131,21.6564078,0,0,0,0,0
21.720622,21.3072758,0,0,0,0,0
21.731114,21.7485632,0,0,0,0,0
21.741606,20.5426386,0,0,0,0,0
21.752097,19.9248588,0,0,0,0,0
21.762589,21.8403297,0,0,0,0,0
21.77308,21.725561,0,0,0,0,0
21.783572,21.8403297,0,0,0,0,0
21.794064,21.7485632,0,0,0,0,0
21.804555,21.2367606,0,0,0,0,0
21.815047,20.5669638,0,0,0,0,0
21.825538,21.5174348,0,0,0,0,0
21.83603,21.5174348,0,0,0,0,0
21.846522,21.1423745,0,0,0,0,0
21.857013,21.5174348,0,0,0,0,0
21.867505,21.7485632,0,0,0,0,0
21.877996,21.7944947,0,0,0,0,0
21.888488,22.0227155,0,0,0,0,0
21.89898,20.8566536,0,0,0,0,0
21.909471,20.2731349,0,0,0,0,0
21.919963,21.2132034,0,0,0,0,0
21.930454,20.5182845,0,0,0,0,0
21.940946,21.4941853,0,0,0,0,0
21.951438,22.3383079,0,0,0,0,0
21.961929,21.1423745,0,0,0,0,0
21.972421,21.6101828,0,0,0,0,0
21.982912,20.808652,0,0,0,0,0
21.993404,20.9284495,0,0,0,0,0
22.003896,20.6881609,0,0,0,0,0
22.014387,21.4009346,0,0,0,0,0
22.024879,22.0454077,0,0,0,0,0
22.03537,21.1660105,0,0,0,0,0
22.045862,21.6564078,0,0,0,0,0
22.056354,21.330729,0,0,0,0,0
22.066845,21.2367606,0,0,0,0,0
22.077337,21.725561,0,0,0,0,0
22.087828,20.976177,0,0,0,0,0
22.09832,20.904545,0,0,0,0,0
22.108812,22.2036033,0,0,0,0,0
22.119303,21.1896201,0,0,0,0,0
22.129795,21.725561,0,0,0,0,0
22.140286,21.2837967,0,0,0,0,0
22.150778,21.0950231,0,0,0,0,0
22.16127,20.3960781,0,0,0,0,0
22.171761,21.2837967,0,0,0,0,0
22.182253,20.6881609,0,0,0,0,0
22.192744,21.4476106,0,0,0,0,0
22.203236,20.6397674,0,0,0,0,0
22.213728,20.3224014,0,0,0,0,0
22.224219,21.7025344,0,0,0,0,0
22.234711,21.5638587,0,0,0,0,0
22.245202,21.7025344,0,0,0,0,0
22.255694,21.6794834,0,0,0,0,0
22.266186,21.2367606,0,0,0,0,0
22.276677,21.0475652,0,0,0,0,0
22.287169,21.6101828,0,0,0,0,0
22.29766,21.5870331,0,0,0,0,0
22.308152,21.7944947,0,0,0,0,0
22.318644,22.090722,0,0,0,0,0
22.329135,20.9523268,0,0,0,0,0
22.339627,21.4476106,0,0,0,0,0
22.350118,22.090722,0,0,0,0,0
22.36061,21.5406592,0,0,0,0,0
22.371102,20.6397674,0,0,0,0,0
22.381593,21.1423745,0,0,0,0,0
22.392085,20.6881609,0,0,0,0,0
22.402576,21.1187121,0,0,0,0,0
22.413068,21.3072758,0,0,0,0,0
22.42356,21.0475652,0,0,0,0,0
22.434051,21.4476106,0,0,0,0,0
22.444543,20.6881609,0,0,0,0,0
22.455034,21.023796,0,0,0,0,0
22.465526,19.7230829,0,0,0,0,0
22.476018,21.2602916,0,0,0,0,0
22.486509,20.5426386,0,0,0,0,0
22.497001,21.0475652,0,0,0,0,0
22.507492,21.3072758,0,0,0,0,0
22.517984,21.4242853,0,0,0,0,0
22.528476,22.0227155,0,0,0,0,0
22.538967,20.3469899,0,0,0,0,0
22.549459,20.9284495,0,0,0,0,0
22.55995,21.4941853,0,0,0,0,0
22.570442,21.5406592,0,0,0,0,0
22.580934,21.5638587,0,0,0,0,0
22.591425,21.2602916,0,0,0,0,0
22.601917,20.880613,0,0,0,0,0
22.612408,20.7364414,0,0,0,0,0
22.6229,21.7485632,0,0,0,0,0
22.633392,20,0,0,0,0,0
22.643883,21.1660105,0,0,0,0,0
22.654375,20.4694895,0,0,0,0,0
22.664866,21.330729,0,0,0,0,0
22.675358,21.2367606,0,0,0,0,0
22.68585,20.6397674,0,0,0,0,0
22.696341,21.5870331,0,0,0,0,0
22.706833,21.5638587,0,0,0,0,0
22.717324,21.5638587,0,0,0,0,0
22.727816,20.5669638,0,0,0,0,0
22.738308,21.4709106,0,0,0,0,0
22.748799,20.8326667,0,0,0,0,0
22.759291,21.3072758,0,0,0,0,0
22.769782,21.2132034,0,0,0,0,0
22.780274,21,0,0,0,0,0
22.790766,20.880613,0,0,0,0,0
22.801257,21.2367606,0,0,0,0,0
22.811749,21,0,0,0,0,0
22.82224,20.1494417,0,0,0,0,0
22.832732,21.8174242,0,0,0,0,0
22.843224,20.6397674,0,0,0,0,0
22.853715,20.6155281,0,0,0,0,0
22.864207,20.2731349,0,0,0,0,0
22.874698,21.330729,0,0,0,0,0
22.88519,21.725561,0,0,0,0,0
22.895682,21.5174348,0,0,0,0,0
22.906173,20.6881609,0,0,0,0,0
22.916665,21.2367606,0,0,0,0,0
22.927156,20.5669638,0,0,0,0,0
22.937648,20.7605395,0,0,0,0,0
22.94814,19.7484177,0,0,0,0,0
22.958631,20.1990099,0,0,0,0,0
22.969123,21.7485632,0,0,0,0,0
22.979614,20.8566536,0,0,0,0,0
22.990106,21.2602916,0,0,0,0,0
23.000598,20.904545,0,0,0,0,0
23.011089,21.0950231,0,0,0,0,0
23.021581,21.3541565,0,0,0,0,0
23.032072,20.0249844,0,0,0,0,0
23.042564,20.4205779,0,0,0,0,0
23.053056,20.3469899,0,0,0,0,0
23.063547,20.3469899,0,0,0,0,0
23.074039,20.6397674,0,0,0,0,0
23.08453,20.6397674,0,0,0,0,0
23.095022,19.8746069,0,0,0,0,0
23.105514,22,0,0,0,0,0
23.116005,20.6639783,0,0,0,0,0
23.126497,21.2367606,0,0,0,0,0
23.136988,21.5174348,0,0,0,0,0
23.14748,20.2731349,0,0,0,0,0
23.157972,20.6155281,0,0,0,0,0
23.168463,20.5669638,0,0,0,0,0
23.178955,20.0249844,0,0,0,0,0
23.189446,20.7846097,0,0,0,0,0
23.199938,21.2602916,0,0,0,0,0
23.21043,20.6639783,0,0,0,0,0
23.220921,20.3224014,0,0,0,0,0
23.231413,20.6881609,0,0,0,0,0
23.241904,20.174241,0,0,0,0,0
23.252396,21.1896201,0,0,0,0,0
23.262888,21.1423745,0,0,0,0,0
23.273379,20.0997512,0,0,0,0,0
23.283871,20.3960781,0,0,0,0,0
23.294362,20.1494417,0,0,0,0,0
23.304854,20.808652,0,0,0,0,0
23.315346,20.6881609,0,0,0,0,0
23.325837,20.0499377,0,0,0,0,0
23.336329,20.0997512,0,0,0,0,0
23.34682,20.174241,0,0,0,0,0
23.357312,19.8997487,0,0,0,0,0
23.367804,20.4450483,0,0,0,0,0
23.378295,20.1494417,0,0,0,0,0
23.388787,21.2132034,0,0,0,0,0
23.399278,20.4939015,0,0,0,0,0
23.40977,20.5912603,0,0,0,0,0
23.420262,20.2484567,0,0,0,0,0
23.430753,20.4694895,0,0,0,0,0
23.441245,21.5174348,0,0,0,0,0
23.451736,20.5426386,0,0,0,0,0
23.462228,20.7364414,0,0,0,0,0
23.47272,20.2237484,0,0,0,0,0
23.483211,20.2731349,0,0,0,0,0
23.493703,20.1246118,0,0,0,0,0
23.504194,19.9499373,0,0,0,0,0
23.514686,20.5182845,0,0,0,0,0
23.525178,21,0,0,0,0,0
23.535669,20.4939015,0,0,0,0,0
23.546161,20.1990099,0,0,0,0,0
23.556652,20.808652,0,0,0,0,0
23.567144,20.6397674,0,0,0,0,0
23.577636,20.9523268,0,0,0,0,0
23.588127,20.4450483,0,0,0,0,0
23.598619,20.5669638,0,0,0,0,0
23.60911,20.4450483,0,0,0,0,0
23.619602,20.3715488,0,0,0,0,0
23.630094,19.7737199,0,0,0,0,0
23.640585,20.174241,0,0,0,0,0
23.651077,19.6977156,0,0,0,0,0
23.661568,20.7846097,0,0,0,0,0
23.67206,20.0748599,0,0,0,0,0
23.682552,20.7123152,0,0,0,0,0
23.693043,19.7737199,0,0,0,0,0
23.703535,20.5669638,0,0,0,0,0
23.714026,20,0,0,0,0,0
23.724518,20.4694895,0,0,0,0,0
23.73501,20.3960781,0,0,0,0,0
23.745501,20.7846097,0,0,0,0,0
23.755993,19.5959179,0,0,0,0,0
23.766484,20.1494417,0,0,0,0,0
23.776976,20.3715488,0,0,0,0,0
23.787468,20,0,0,0,0,0
23.797959,20.7605395,0,0,0,0,0
23.808451,19.9499373,0,0,0,0,0
23.818942,20.4694895,0,0,0,0,0
23.829434,19.8242276,0,0,0,0,0
23.839926,19.1833261,0,0,0,0,0
23.850417,20.5912603,0,0,0,0,0
23.860909,20.3224014,0,0,0,0,0
23.8714,20.4450483,0,0,0,0,0
23.881892,20.0249844,0,0,0,0,0
23.892384,20.0499377,0,0,0,0,0
23.902875,20.174241,0,0,0,0,0
23.913367,20.4205779,0,0,0,0,0
23.923858,20.7123152,0,0,0,0,0
23.93435,19.4935887,0,0,0,0,0
23.944842,20.8326667,0,0,0,0,0
23.955333,20.3715488,0,0,0,0,0
23.965825,20.6155281,0,0,0,0,0
23.976316,19.1049732,0,0,0,0,0
23.986808,19.8494332,0,0,0,0,0
23.9973,19.4422221,0,0,0,0,0
24.007791,18.7882942,0,0,0,0,0
24.018283,19.6214169,0,0,0,0,0
24.028774,18.4119526,0,0,0,0,0
24.039266,19.2093727,0,0,0,0,0
24.049758,19.4679223,0,0,0,0,0
24.060249,20.5182845,0,0,0,0,0
24.070741,19.8242276,0,0,0,0,0
24.081232,20.174241,0,0,0,0,0
24.091724,19.3390796,0,0,0,0,0
24.102216,19.6468827,0,0,0,0,0
24.112707,20.3469899,0,0,0,0,0
24.123199,19.7989899,0,0,0,0,0
24.13369,19.3907194,0,0,0,0,0
24.144182,19.078784,0,0,0,0,0
24.154674,19.3132079,0,0,0,0,0
24.165165,20.3224014,0,0,0,0,0
24.175657,20.3224014,0,0,0,0,0
24.186148,19.9499373,0,0,0,0,0
24.19664,19.7989899,0,0,0,0,0
24.207132,18.9208879,0,0,0,0,0
24.217623,19,0,0,0,0,0
24.228115,19.7230829,0,0,0,0,0
24.238606,19.7230829,0,0,0,0,0
24.249098,19.7484177,0,0,0,0,0
24.25959,20.3469899,0,0,0,0,0
24.270081,20.2237484,0,0,0,0,0
24.280573,19.4422221,0,0,0,0,0
24.291064,19.7230829,0,0,0,0,0
24.301556,19.3132079,0,0,0,0,0
24.312048,19.6977156,0,0,0,0,0
24.322539,18.8679623,0,0,0,0,0
24.333031,20.1246118,0,0,0,0,0
24.343522,19.3649167,0,0,0,0,0
24.354014,20.0249844,0,0,0,0,0
24.364506,19.8242276,0,0,0,0,0
24.374997,19.8494332,0,0,0,0,0
24.385489,19.8997487,0,0,0,0,0
24.39598,19.8242276,0,0,0,0,0
24.406472,19.0262976,0,0,0,0,0
24.416964,19.5448203,0,0,0,0,0
24.427455,19.2873015,0,0,0,0,0
24.437947,20.3469899,0,0,0,0,0
24.448438,19.1572441,0,0,0,0,0
24.45893,19.8997487,0,0,0,0,0
24.469422,20.6155281,0,0,0,0,0
24.479913,18.4119526,0,0,0,0,0
24.490405,19.6214169,0,0,0,0,0
24.500896,19.6214169,0,0,0,0,0
24.511388,19.4164878,0,0,0,0,0
24.52188,19.9499373,0,0,0,0,0
24.532371,19,0,0,0,0,0
24.542863,19.7230829,0,0,0,0,0
24.553354,19.1572441,0,0,0,0,0
24.563846,20.0249844,0,0,0,0,0
24.574338,19.4422221,0,0,0,0,0
24.584829,19.6468827,0,0,0,0,0
24.595321,19.4422221,0,0,0,0,0
24.605812,19.3132079,0,0,0,0,0
24.616304,18.4390889,0,0,0,0,0
24.626796,19.2353841,0,0,0,0,0
24.637287,20.0997512,0,0,0,0,0
24.647779,18.2482876,0,0,0,0,0
24.65827,18.5202592,0,0,0,0,0
24.668762,19.3132079,0,0,0,0,0
24.679254,19.0262976,0,0,0,0,0
24.689745,20.2731349,0,0,0,0,0
24.700237,19.3390796,0,0,0,0,0
24.710728,19.2873015,0,0,0,0,0
24.72122,19.4164878,0,0,0,0,0
24.731712,19.7484177,0,0,0,0,0
24.742203,19.4935887,0,0,0,0,0
24.752695,19.078784,0,0,0,0,0
24.763186,19.6723156,0,0,0,0,0
24.773678,19.4164878,0,0,0,0,0
24.78417,18.8414437,0,0,0,0,0
24.794661,19.7230829,0,0,0,0,0
24.805153,19.7484177,0,0,0,0,0
24.815644,18.627936,0,0,0,0,0
24.826136,18.2756669,0,0,0,0,0
24.836628,19.4422221,0,0,0,0,0
24.847119,19.4935887,0,0,0,0,0
24.857611,19.5448203,0,0,0,0,0
24.868102,18.6547581,0,0,0,0,0
24.878594,19.5192213,0,0,0,0,0
24.889086,19.7230829,0,0,0,0,0
24.899577,19.3132079,0,0,0,0,0
24.910069,19.3132079,0,0,0,0,0
24.92056,17.8885438,0,0,0,0,0
24.931052,18.3847763,0,0,0,0,0
24.941544,19.4935887,0,0,0,0,0
24.952035,18.9208879,0,0,0,0,0
24.962527,20.3715488,0,0,0,0,0
24.973018,19.3390796,0,0,0,0,0
24.98351,18.4661853,0,0,0,0,0
24.994002,19.1311265,0,0,0,0,0
25.004493,19.9499373,0,0,0,0,0
25.014985,18.1383571,0,0,0,0,0
25.025476,18.6010752,0,0,0,0,0
25.035968,17.9722008,0,0,0,0,0
25.04646,20,0,0,0,0,0
25.056951,18.761663,0,0,0,0,0
25.067443,18.9472953,0,0,0,0,0
25.077934,18.2756669,0,0,0,0,0
25.088426,18.8944436,0,0,0,0,0
25.098918,18.4119526,0,0,0,0,0
25.109409,19.1311265,0,0,0,0,0
25.119901,18.7082869,0,0,0,0,0
25.130392,18.8148877,0,0,0,0,0
25.140884,18.2208672,0,0,0,0,0
25.151376,19.4679223,0,0,0,0,0
25.161867,18.7882942,0,0,0,0,0
25.172359,19.1572441,0,0,0,0,0
25.18285,18.4119526,0,0,0,0,0
25.193342,17.7763888,0,0,0,0,0
25.203834,18.6010752,0,0,0,0,0
25.214325,17.6351921,0,0,0,0,0
25.224817,19.078784,0,0,0,0,0
25.235308,18.2482876,0,0,0,0,0
25.2458,19.1311265,0,0,0,0,0
25.256292,18.8679623,0,0,0,0,0
25.266783,18.0277564,0,0,0,0,0
25.277275,18,0,0,0,0,0
25.287766,19,0,0,0,0,0
25.298258,18.493242,0,0,0,0,0
25.30875,18.1659021,0,0,0,0,0
25.319241,18.5741756,0,0,0,0,0
25.329733,18.547237,0,0,0,0,0
25.340224,18.2208672,0,0,0,0,0
25.350716,18.8148877,0,0,0,0,0
25.361208,18.9472953,0,0,0,0,0
25.371699,18.0277564,0,0,0,0,0
25.382191,16.8226038,0,0,0,0,0
25.392682,18.0277564,0,0,0,0,0
25.403174,19.1572441,0,0,0,0,0
25.413666,18.1383571,0,0,0,0,0
25.424157,18.547237,0,0,0,0,0
25.434649,18.973666,0,0,0,0,0
25.44514,18.4661853,0,0,0,0,0
25.455632,18.1107703,0,0,0,0,0
25.466124,19.0262976,0,0,0,0,0
25.476615,18.5202592,0,0,0,0,0
25.487107,18.3030052,0,0,0,0,0
25.497598,18.6010752,0,0,0,0,0
25.50809,17.9164729,0,0,0,0,0
25.518582,18.4390889,0,0,0,0,0
25.529073,18.5202592,0,0,0,0,0
25.539565,18.493242,0,0,0,0,0
25.550056,18.7082869,0,0,0,0,0
25.560548,18.1659021,0,0,0,0,0
25.57104,18.627936,0,0,0,0,0
25.581531,18.0831413,0,0,0,0,0
25.592023,17.6068169,0,0,0,0,0
25.602514,18.0277564,0,0,0,0,0
25.613006,17.9722008,0,0,0,0,0
25.623498,18.761663,0,0,0,0,0
25.633989,18.2208672,0,0,0,0,0
25.644481,19.2613603,0,0,0,0,0
25.654972,18.3847763,0,0,0,0,0
25.665464,17.8885438,0,0,0,0,0
25.675956,18.6815417,0,0,0,0,0
25.686447,18.1659021,0,0,0,0,0
25.696939,17.4355958,0,0,0,0,0
25.70743,17.8605711,0,0,0,0,0
25.717922,19.2353841,0,0,0,0,0
25.728414,18.3575598,0,0,0,0,0
25.738905,18.2756669,0,0,0,0,0
25.749397,18.1383571,0,0,0,0,0
25.759888,18.3847763,0,0,0,0,0
25.77038,18.8148877,0,0,0,0,0
25.780872,18.2208672,0,0,0,0,0
25.791363,17.4642492,0,0,0,0,0
25.801855,17.0880075,0,0,0,0,0
25.812346,18.493242,0,0,0,0,0
25.822838,16.9410743,0,0,0,0,0
25.83333,18.3030052,0,0,0,0,0
25.843821,18.493242,0,0,0,0,0
25.854313,18.4661853,0,0,0,0,0
25.864804,18.1659021,0,0,0,0,0
25.875296,18.3847763,0,0,0,0,0
25.885788,17.4642492,0,0,0,0,0
25.896279,17.8885438,0,0,0,0,0
25.906771,17.5499288,0,0,0,0,0
25.917262,17.4068952,0,0,0,0,0
25.927754,16.8226038,0,0,0,0,0
25.938246,16.8522995,0,0,0,0,0
25.948737,17.5214155,0,0,0,0,0
25.959229,18.493242,0,0,0,0,0
25.96972,17.7200451,0,0,0,0,0
25.980212,18.1383571,0,0,0,0,0
25.990704,18.7082869,0,0,0,0,0
26.001195,18.0831413,0,0,0,0,0
26.011687,18.4390889,0,0,0,0,0
26.022178,17.5499288,0,0,0,0,0
26.03267,17.2046505,0,0,0,0,0
26.043162,18.4661853,0,0,0,0,0
26.053653,17.9443584,0,0,0,0,0
26.064145,17.1464282,0,0,0,0,0
26.074636,18.7882942,0,0,0,0,0
26.085128,17.7482393,0,0,0,0,0
26.09562,17.4068952,0,0,0,0,0
26.106111,17.8885438,0,0,0,0,0
26.116603,17.8044938,0,0,0,0,0
26.127094,18.7082869,0,0,0,0,0
26.137586,18.1107703,0,0,0,0,0
26.148078,17.3205081,0,0,0,0,0
26.158569,17.7482393,0,0,0,0,0
26.169061,17.1172428,0,0,0,0,0
26.179552,17.8044938,0,0,0,0,0
26.190044,16.6132477,0,0,0,0,0
26.200536,17.0293864,0,0,0,0,0
26.211027,17.9164729,0,0,0,0,0
26.221519,18.2208672,0,0,0,0,0
26.23201,17.2916165,0,0,0,0,0
26.242502,17.7763888,0,0,0,0,0
26.252994,17.2046505,0,0,0,0,0
26.263485,17,0,0,0,0,0
26.273977,17.2916165,0,0,0,0,0
26.284468,17.8044938,0,0,0,0,0
26.29496,17.8605711,0,0,0,0,0
26.305452,17.6635217,0,0,0,0,0
26.315943,17.9443584,0,0,0,0,0
26.326435,18.0277564,0,0,0,0,0
26.336926,17.6351921,0,0,0,0,0
26.347418,17.3781472,0,0,0,0,0
26.35791,17.4068952,0,0,0,0,0
26.368401,17.8325545,0,0,0,0,0
26.378893,16.9705627,0,0,0,0,0
26.389384,16.881943,0,0,0,0,0
26.399876,17.0587221,0,0,0,0,0
26.410368,16.3401346,0,0,0,0,0
26.420859,18.3575598,0,0,0,0,0
26.431351,17.3205081,0,0,0,0,0
26.441842,17.4355958,0,0,0,0,0
26.452334,17.4928557,0,0,0,0,0
26.462826,17.7200451,0,0,0,0,0
26.473317,17.4068952,0,0,0,0,0
26.483809,16.7928556,0,0,0,0,0
26.4943,16.583124,0,0,0,0,0
26.504792,16.7928556,0,0,0,0,0
26.515284,17.6068169,0,0,0,0,0
26.525775,16.9410743,0,0,0,0,0
26.536267,18.493242,0,0,0,0,0
26.546758,16.4316767,0,0,0,0,0
26.55725,16.8522995,0,0,0,0,0
26.567742,16.9410743,0,0,0,0,0
26.578233,17,0,0,0,0,0
26.588725,17.3781472,0,0,0,0,0
26.599216,17.2336879,0,0,0,0,0
26.609708,17.4355958,0,0,0,0,0
26.6202,16.9410743,0,0,0,0,0
26.630691,17.3205081,0,0,0,0,0
26.641183,16.7032931,0,0,0,0,0
26.651674,16.4012195,0,0,0,0,0
26.662166,16.673332,0,0,0,0,0
26.672658,17.2916165,0,0,0,0,0
26.683149,16.8522995,0,0,0,0,0
26.693641,17.691806,0,0,0,0,0
26.704132,17,0,0,0,0,0
26.714624,17.6635217,0,0,0,0,0
26.725116,17,0,0,0,0,0
26.735607,16.9410743,0,0,0,0,0
26.746099,17.2916165,0,0,0,0,0
26.75659,16.4012195,0,0,0,0,0
26.767082,16.4316767,0,0,0,0,0
26.777574,15.3622915,0,0,0,0,0
26.788065,17.4928557,0,0,0,0,0
26.798557,17.0880075,0,0,0,0,0
26.809048,17.175564,0,0,0,0,0
26.81954,17.1172428,0,0,0,0,0
26.830032,16.7630546,0,0,0,0,0
26.840523,16.583124,0,0,0,0,0
26.851015,16.9705627,0,0,0,0,0
26.861506,17.2336879,0,0,0,0,0
26.871998,17.0293864,0,0,0,0,0
26.88249,16.673332,0,0,0,0,0
26.892981,16.7928556,0,0,0,0,0
26.903473,17.4355958,0,0,0,0,0
26.913964,16.2788206,0,0,0,0,0
26.924456,16.1245155,0,0,0,0,0
26.934948,16.3095064,0,0,0,0,0
26.945439,16.4316767,0,0,0,0,0
26.955931,16.8522995,0,0,0,0,0
26.966422,16.2172747,0,0,0,0,0
26.976914,16.4012195,0,0,0,0,0
26.987406,16.2480768,0,0,0,0,0
26.997897,16.5529454,0,0,0,0,0
27.008389,16.8522995,0,0,0,0,0
27.01888,16.8226038,0,0,0,0,0
27.029372,17.3205081,0,0,0,0,0
27.039864,16.0934769,0,0,0,0,0
27.050355,16.9410743,0,0,0,0,0
27.060847,16.7928556,0,0,0,0,0
27.071338,15.9059737,0,0,0,0,0
27.08183,16.3095064,0,0,0,0,0
27.092322,17.5783958,0,0,0,0,0
27.102813,16.4924225,0,0,0,0,0
27.113305,16.4316767,0,0,0,0,0
27.123796,16.2172747,0,0,0,0,0
27.134288,16.7032931,0,0,0,0,0
27.14478,15.9687194,0,0,0,0,0
27.155271,17.175564,0,0,0,0,0
27.165763,15.9373775,0,0,0,0,0
27.176254,16.9410743,0,0,0,0,0
27.186746,15.9373775,0,0,0,0,0
27.197238,16.4924225,0,0,0,0,0
27.207729,16.4620776,0,0,0,0,0
27.218221,16.1554944,0,0,0,0,0
27.228712,16.1864141,0,0,0,0,0
27.239204,16.5227116,0,0,0,0,0
27.249696,17.0293864,0,0,0,0,0
27.260187,16.583124,0,0,0,0,0
27.270679,15.7797338,0,0,0,0,0
27.28117,16.8522995,0,0,0,0,0
27.291662,15.6204994,0,0,0,0,0
27.302154,15.6524758,0,0,0,0,0
27.312645,16.4316767,0,0,0,0,0
27.323137,16.5529454,0,0,0,0,0
27.333628,16.0623784,0,0,0,0,0
27.34412,15.9687194,0,0,0,0,0
27.354612,15.8113883,0,0,0,0,0
27.365103,15.9687194,0,0,0,0,0
27.375595,16.3707055,0,0,0,0,0
27.386086,16.8226038,0,0,0,0,0
27.396578,16.4620776,0,0,0,0,0
27.40707,15.6843871,0,0,0,0,0
27.417561,16.2788206,0,0,0,0,0
27.428053,15.8745079,0,0,0,0,0
27.438544,16.4924225,0,0,0,0,0
27.449036,16.2172747,0,0,0,0,0
27.459528,15.6204994,0,0,0,0,0
27.470019,16.0623784,0,0,0,0,0
27.480511,15.6843871,0,0,0,0,0
27.491002,16.3401346,0,0,0,0,0
27.501494,16.0312195,0,0,0,0,0
27.511986,16.4012195,0,0,0,0,0
27.522477,15.6843871,0,0,0,0,0
27.532969,15.8113883,0,0,0,0,0
27.54346,16.1864141,0,0,0,0,0
27.553952,14.8996644,0,0,0,0,0
27.564444,15.6843871,0,0,0,0,0
27.574935,15.0332964,0,0,0,0,0
27.585427,15.0996689,0,0,0,0,0
27.595918,15.4596248,0,0,0,0,0
27.60641,16.2788206,0,0,0,0,0
27.616902,15.9059737,0,0,0,0,0
27.627393,15.8113883,0,0,0,0,0
27.637885,15.9687194,0,0,0,0,0
27.648376,15.5563492,0,0,0,0,0
27.658868,15.3948043,0,0,0,0,0
27.66936,16.3401346,0,0,0,0,0
27.679851,15.9373775,0,0,0,0,0
27.690343,15.4272486,0,0,0,0,0
27.700834,15.2643375,0,0,0,0,0
27.711326,15.7162336,0,0,0,0,0
27.721818,14.6287388,0,0,0,0,0
27.732309,16.1554944,0,0,0,0,0
27.742801,15.9059737,0,0,0,0,0
27.753292,14.8660687,0,0,0,0,0
27.763784,16.1245155,0,0,0,0,0
27.774276,15.7162336,0,0,0,0,0
27.784767,14.9666295,0,0,0,0,0
27.795259,16.2172747,0,0,0,0,0
27.80575,15.0996689,0,0,0,0,0
27.816242,15.8113883,0,0,0,0,0
27.826734,15.4272486,0,0,0,0,0
27.837225,15.7797338,0,0,0,0,0
27.847717,15.5563492,0,0,0,0,0
27.858208,15.8113883,0,0,0,0,0
27.8687,15,0,0,0,0,0
27.879192,15.6204994,0,0,0,0,0
27.889683,16.1245155,0,0,0,0,0
27.900175,16,0,0,0,0,0
27.910666,15.9687194,0,0,0,0,0
27.921158,16.0623784,0,0,0,0,0
27.93165,15.3622915,0,0,0,0,0
27.942141,15.5884573,0,0,0,0,0
27.952633,15.9059737,0,0,0,0,0
27.963124,16.3707055,0,0,0,0,0
27.973616,15.6524758,0,0,0,0,0
27.984108,15.6524758,0,0,0,0,0
27.994599,16.4620776,0,0,0,0,0
28.005091,15.6843871,0,0,0,0,0
28.015582,15.9059737,0,0,0,0,0
28.026074,15.5563492,0,0,0,0,0
28.036566,15.3622915,0,0,0,0,0
28.047057,15.5884573,0,0,0,0,0
28.057549,15.0665192,0,0,0,0,0
28.06804,16.0934769,0,0,0,0,0
28.078532,15.3297097,0,0,0,0,0
28.089024,15.3622915,0,0,0,0,0
28.099515,15.6524758,0,0,0,0,0
28.110007,15.0996689,0,0,0,0,0
28.120498,15.7162336,0,0,0,0,0
28.13099,15.3622915,0,0,0,0,0
28.141482,15.1986842,0,0,0,0,0
28.151973,15.132746,0,0,0,0,0
28.162465,14.3874946,0,0,0,0,0
28.172956,15.3622915,0,0,0,0,0
28.183448,15.5884573,0,0,0,0,0
28.19394,15.3948043,0,0,0,0,0
28.204431,15.7797338,0,0,0,0,0
28.214923,15.4596248,0,0,0,0,0
28.225414,15.0996689,0,0,0,0,0
28.235906,14.7986486,0,0,0,0,0
28.246398,15.5563492,0,0,0,0,0
28.256889,14.6287388,0,0,0,0,0
28.267381,15.1657509,0,0,0,0,0
28.277872,15.4919334,0,0,0,0,0
28.288364,15.5241747,0,0,0,0,0
28.298856,15.1986842,0,0,0,0,0
28.309347,14.525839,0,0,0,0,0
28.319839,15.1657509,0,0,0,0,0
28.33033,15.132746,0,0,0,0,0
28.340822,15.5563492,0,0,0,0,0
28.351314,15.6204994,0,0,0,0,0
28.361805,15,0,0,0,0,0
28.372297,13.892444,0,0,0,0,0
28.382788,14.4568323,0,0,0,0,0
28.39328,16.0934769,0,0,0,0,0
28.403772,15,0,0,0,0,0
28.414263,14.1774469,0,0,0,0,0
28.424755,15.7797338,0,0,0,0,0
28.435246,15.4272486,0,0,0,0,0
28.445738,13.5277493,0,0,0,0,0
28.45623,15.3297097,0,0,0,0,0
28.466721,14.8996644,0,0,0,0,0
28.477213,15.1657509,0,0,0,0,0
28.487704,14.6969385,0,0,0,0,0
28.498196,15.1657509,0,0,0,0,0
28.508688,15.3622915,0,0,0,0,0
28.519179,15.2643375,0,0,0,0,0
28.529671,14.832397,0,0,0,0,0
28.540162,15.0332964,0,0,0,0,0
28.550654,14.7648231,0,0,0,0,0
28.561146,14.4222051,0,0,0,0,0
28.571637,15.132746,0,0,0,0,0
28.582129,14.5945195,0,0,0,0,0
28.59262,15.5241747,0,0,0,0,0
28.603112,14.8996644,0,0,0,0,0
28.613604,14.2478068,0,0,0,0,0
28.624095,14.525839,0,0,0,0,0
28.634587,15.5563492,0,0,0,0,0
28.645078,14.0356688,0,0,0,0,0
28.65557,14.8996644,0,0,0,0,0
28.666062,14.4913767,0,0,0,0,0
28.676553,14.525839,0,0,0,0,0
28.687045,15.6204994,0,0,0,0,0
28.697536,14.525839,0,0,0,0,0
28.708028,16,0,0,0,0,0
28.71852,13.96424,0,0,0,0,0
28.729011,13.8564065,0,0,0,0,0
28.739503,14.3178211,0,0,0,0,0
28.749994,14.9666295,0,0,0,0,0
28.760486,15.4272486,0,0,0,0,0
28.770978,14.6628783,0,0,0,0,0
28.781469,15.7480157,0,0,0,0,0
28.791961,14.4568323,0,0,0,0,0
28.802452,14,0,0,0,0,0
28.812944,14.2828569,0,0,0,0,0
28.823436,13.8564065,0,0,0,0,0
28.833927,14.6969385,0,0,0,0,0
28.844419,15.132746,0,0,0,0,0
28.85491,14.3527001,0,0,0,0,0
28.865402,15.9373775,0,0,0,0,0
28.875894,15.7480157,0,0,0,0,0
28.886385,13.6747943,0,0,0,0,0
28.896877,15.4919334,0,0,0,0,0
28.907368,14.106736,0,0,0,0,0
28.91786,14.4913767,0,0,0,0,0
28.928352,14.3874946,0,0,0,0,0
28.938843,14.6969385,0,0,0,0,0
28.949335,14.0356688,0,0,0,0,0
28.959826,14.7648231,0,0,0,0,0
28.970318,15.3948043,0,0,0,0,0
28.98081,14.6628783,0,0,0,0,0
28.991301,14.3527001,0,0,0,0,0
29.001793,14,0,0,0,0,0
29.012284,14.1774469,0,0,0,0,0
29.022776,14.6969385,0,0,0,0,0
29.033268,14.5945195,0,0,0,0,0
29.043759,14.7309199,0,0,0,0,0
29.054251,14.2828569,0,0,0,0,0
29.064742,14,0,0,0,0,0
29.075234,14.2828569,0,0,0,0,0
29.085726,14.4222051,0,0,0,0,0
29.096217,14.832397,0,0,0,0,0
29.106709,14.3874946,0,0,0,0,0
29.1172,14.7309199,0,0,0,0,0
29.127692,13.9283883,0,0,0,0,0
29.138184,14.0712473,0,0,0,0,0
29.148675,14.5945195,0,0,0,0,0
29.159167,13.892444,0,0,0,0,0
29.169658,14.1421356,0,0,0,0,0
29.18015,14,0,0,0,0,0
29.190642,14.0712473,0,0,0,0,0
29.201133,14.0712473,0,0,0,0,0
29.211625,14.6969385,0,0,0,0,0
29.222116,14.0712473,0,0,0,0,0
29.232608,13.6014705,0,0,0,0,0
29.2431,13.7477271,0,0,0,0,0
29.253591,14.4568323,0,0,0,0,0
29.264083,15.2970585,0,0,0,0,0
29.274574,14.6628783,0,0,0,0,0
29.285066,14.7986486,0,0,0,0,0
29.295558,14.3178211,0,0,0,0,0
29.306049,14.7648231,0,0,0,0,0
29.316541,14.4222051,0,0,0,0,0
29.327032,14,0,0,0,0,0
29.337524,14.3874946,0,0,0,0,0
29.348016,14.2478068,0,0,0,0,0
29.358507,14.3178211,0,0,0,0,0
29.368999,14.1421356,0,0,0,0,0
29.37949,14.1774469,0,0,0,0,0
29.389982,14.525839,0,0,0,0,0
29.400474,13.4164079,0,0,0,0,0
29.410965,13.4907376,0,0,0,0,0
29.421457,13.9283883,0,0,0,0,0
29.431948,13.4164079,0,0,0,0,0
29.44244,14.4222051,0,0,0,0,0
29.452932,13.6381817,0,0,0,0,0
29.463423,13.96424,0,0,0,0,0
29.473915,14.6287388,0,0,0,0,0
29.484406,13.2287566,0,0,0,0,0
29.494898,14.4568323,0,0,0,0,0
29.50539,14.5602198,0,0,0,0,0
29.515881,13.453624,0,0,0,0,0
29.526373,14.2126704,0,0,0,0,0
29.536864,14.0356688,0,0,0,0,0
29.547356,14.0356688,0,0,0,0,0
29.557848,13.3416641,0,0,0,0,0
29.568339,13.6014705,0,0,0,0,0
29.578831,13.4164079,0,0,0,0,0
29.589322,14.2478068,0,0,0,0,0
29.599814,13.6381817,0,0,0,0,0
29.610306,13.56466,0,0,0,0,0
29.620797,14.3527001,0,0,0,0,0
29.631289,14.4222051,0,0,0,0,0
29.64178,13.3790882,0,0,0,0,0
29.652272,14.1774469,0,0,0,0,0
29.662764,14.1774469,0,0,0,0,0
29.673255,13.3041347,0,0,0,0,0
29.683747,13.892444,0,0,0,0,0
29.694238,13.4907376,0,0,0,0,0
29.70473,13.96424,0,0,0,0,0
29.715222,12.9614814,0,0,0,0,0
29.725713,14.4568323,0,0,0,0,0
29.736205,13.96424,0,0,0,0,0
29.746696,14.2478068,0,0,0,0,0
29.757188,13.2287566,0,0,0,0,0
29.76768,14,0,0,0,0,0
29.778171,13.3790882,0,0,0,0,0
29.788663,13.7113092,0,0,0,0,0
29.799154,13,0,0,0,0,0
29.809646,13.96424,0,0,0,0,0
29.820138,13.3041347,0,0,0,0,0
29.830629,13.6747943,0,0,0,0,0
29.841121,14.4222051,0,0,0,0,0
29.851612,13.7477271,0,0,0,0,0
29.862104,14.2478068,0,0,0,0,0
29.872596,12.8062485,0,0,0,0,0
29.883087,14.106736,0,0,0,0,0
29.893579,14.4913767,0,0,0,0,0
29.90407,13.190906,0,0,0,0,0
29.914562,13,0,0,0,0,0
29.925054,13.820275,0,0,0,0,0
29.935545,13.7113092,0,0,0,0,0
29.946037,13.7113092,0,0,0,0,0
29.956528,12.6095202,0,0,0,0,0
29.96702,13.9283883,0,0,0,0,0
29.977512,13.8564065,0,0,0,0,0
29.988003,13.7113092,0,0,0,0,0
29.998495,14.0712473,13.3504122,0.849020062,13.3498654,13.3502101,13.3496633
30.008986,14.0712473,13.3425268,0.853651286,13.3419792,13.342324,13.3417764
30.019478,14.6969385,13.3346497,1.16717128,13.3341012,13.3344463,13.3338979
30.02997,13.0766968,13.3267817,-0.500084816,13.3262324,13.3265777,13.3260285
30.040461,13.2287566,13.3189235,-0.300278093,13.3183735,13.3187189,13.3181689
30.050953,14.106736,13.3110737,0.891999058,13.3105228,13.3108684,13.3103176
30.061444,13.6014705,13.3032337,0.546110654,13.302682,13.3030278,13.3024761
30.071936,13.3790882,13.295402,0.289285612,13.2948495,13.2951955,13.294643
30.082428,13.96424,13.2875794,0.822593851,13.2870261,13.2873723,13.286819
30.092919,13.820275,13.2797666,0.735192724,13.2792125,13.2795588,13.2790047
30.103411,13.3790882,13.2719622,0.32730109,13.2714073,13.2717537,13.2711988
30.113902,13.7477271,13.2641675,0.69538449,13.2636118,13.2639584,13.2634027
30.124394,13.5277493,13.2563811,0.520930045,13.2558246,13.2561714,13.2556149
30.134886,12.7671453,13.2486038,-0.693872116,13.2480465,13.2483935,13.2478361
30.145377,13.114877,13.2408363,-0.354907432,13.2402782,13.2406253,13.2400671
30.155869,13.3790882,13.2330771,0.38211391,13.2325181,13.2328654,13.2323064
30.16636,12.9614814,13.2253277,-0.513659697,13.2247679,13.2251153,13.2245555
30.176852,12.8062485,13.2175865,-0.641356421,13.2170259,13.2173735,13.2168128
30.187344,13.0766968,13.2098544,-0.364907637,13.209293,13.2096407,13.2090792
30.197835,14.106736,13.2021321,0.951106686,13.2015698,13.2019176,13.2013553
30.208327,14.2126704,13.194418,1.00908495,13.1938549,13.1942029,13.1936397
30.218818,13.2287566,13.1867136,0.205043704,13.1861497,13.1864979,13.1859339
30.22931,14.1774469,13.1790176,0.999214344,13.1784528,13.1788011,13.1782363
30.239802,13.3416641,13.1713305,0.412714853,13.1707649,13.1711134,13.1705477
30.250293,13.6747943,13.1636532,0.714941358,13.1630867,13.1634353,13.1628689
30.260785,14.1421356,13.1559841,0.993051613,13.1554168,13.1557656,13.1551983
30.271276,13.7840488,13.1483248,0.79732301,13.1477567,13.1481055,13.1475374
30.281768,14,13.1406737,0.926998557,13.1401047,13.1404537,13.1398848
30.29226,12.2474487,13.1330316,-0.941054114,13.1324618,13.1328109,13.1322411
30.302751,13.7477271,13.1253991,0.788877645,13.1248285,13.1251778,13.1246071
30.313243,13.0384048,13.117775,-0.281727111,13.1172035,13.1175529,13.1169814
30.323734,12.5698051,13.1101605,-0.735088705,13.1095882,13.1099377,13.1093654
30.334226,12.7671453,13.1025542,-0.579144985,13.1019811,13.1023307,13.1017575
30.344718,12.8452326,13.094957,-0.499724304,13.094383,13.0947327,13.0941587
30.355209,13.2664992,13.0873693,0.423237309,13.0867945,13.0871443,13.0865695
30.365701,12.6491106,13.0797899,-0.656261615,13.0792143,13.0795642,13.0789885
30.376192,12.922848,13.0722202,-0.386487041,13.0716437,13.0719937,13.0714172
30.386684,12.6095202,13.0646587,-0.674639523,13.0640813,13.0644315,13.0638541
30.397176,13.7840488,13.0571061,0.852609312,13.0565279,13.0568781,13.0562999
30.407667,13.0766968,13.0495632,0.164722968,13.0489841,13.0493344,13.0487553
30.418159,13.4907376,13.0420284,0.669857541,13.0414485,13.041799,13.041219
30.42865,13.56466,13.0345033,0.728118556,13.0339225,13.0342731,13.0336923
30.439142,14.1421356,13.0269864,1.05600625,13.0264048,13.0267554,13.0261738
30.449634,13.453624,13.0194784,0.658897275,13.0188959,13.0192467,13.0186641
30.460125,13.3416641,13.01198,0.574181172,13.0113967,13.0117475,13.0111641
30.470617,13,13.0044898,-0.0670063108,13.0039056,13.0042565,13.0036723
30.481108,12.8452326,12.9970093,-0.389585258,12.9964242,12.9967752,12.99619
30.4916,12.8452326,12.9895368,-0.379873998,12.9889509,12.9893019,12.988716
30.502092,13.4907376,12.9820733,0.713207029,12.9814865,12.9818376,12.9812508
30.512583,12.8840987,12.9746194,-0.300866455,12.9740317,12.9743829,12.9737952
30.523075,13.56466,12.9671736,0.772972444,12.966585,12.9669363,12.9663477
30.533566,13,12.9597374,0.200655526,12.9591479,12.9594993,12.9589098
30.544058,13.190906,12.9523093,0.488463561,12.951719,12.9520704,12.9514801
30.55455,13,12.9448901,0.234754946,12.9442989,12.9446504,12.9440592
30.565041,13.3790882,12.9374805,0.664535686,12.9368884,12.93724,12.9366479
30.575533,12.5698051,12.930079,-0.600228209,12.9294861,12.9298377,12.9292447
30.586024,12.2065556,12.9226871,-0.846245494,12.9220933,12.9224449,12.9218511
30.596516,13.1529464,12.9153032,0.487486609,12.9147086,12.9150603,12.9144656
30.607008,12.6491106,12.9079283,-0.508741222,12.9073327,12.9076845,12.9070889
30.617499,12.6885775,12.9005628,-0.460418604,12.8999664,12.9003182,12.8997217
30.627991,12.5698051,12.8932055,-0.56868306,12.8926082,12.89296,12.8923627
30.638482,11.8743421,12.8858577,-1.00574133,12.8852595,12.8856114,12.8850132
30.648974,12.922848,12.878518,0.210546797,12.8779189,12.8782708,12.8776717
30.659466,13.820275,12.8711872,0.974211376,12.8705872,12.8709391,12.8703391
30.669957,13,12.8638658,0.368963707,12.8632649,12.8636169,12.863016
30.680449,13.2664992,12.8565525,0.640270762,12.8559508,12.8563027,12.855701
30.69094,13.1529464,12.8492487,0.551087747,12.8486461,12.8489981,12.8483954
30.701432,12.922848,12.841953,0.28442035,12.8413495,12.8417015,12.841098
30.711924,12.6491106,12.8346661,-0.430761542,12.8340617,12.8344137,12.8338093
30.722415,12.6095202,12.8273887,-0.466763866,12.8267834,12.8271354,12.8265301
30.732907,13.0384048,12.8201194,0.46721027,12.8195132,12.8198652,12.819259
30.743398,13.3041347,12.8128595,0.70091027,12.8122524,12.8126044,12.8119973
30.75389,13.892444,12.8056077,1.04251442,12.8049997,12.8053517,12.8047437
30.764382,13.1529464,12.7983646,0.595467725,12.7977557,12.7981077,12.7974988
30.774873,13.3416641,12.791131,0.74197914,12.7905212,12.7908732,12.7902634
30.785365,13.1529464,12.7839055,0.607487419,12.7832948,12.7836467,12.783036
30.795856,12.9614814,12.7766894,0.429874443,12.7760777,12.7764297,12.7758181
30.806348,12,12.7694813,-0.877200831,12.7688688,12.7692207,12.7686082
30.81684,13.56466,12.762282,0.895755544,12.7616685,12.7620204,12.761407
30.827331,12.7279221,12.7550921,-0.164833244,12.7544777,12.7548296,12.7542152
30.837823,12.1655251,12.7479102,-0.763141617,12.7472949,12.7476468,12.7470315
30.848314,12.489996,12.7407377,-0.500741173,12.7401216,12.7404733,12.7398572
30.858806,13,12.7335733,0.516165399,12.7329562,12.7333079,12.7326909
30.869298,12.0415946,12.7264176,-0.827540316,12.7257996,12.7261512,12.7255333
30.879789,12.922848,12.7192712,0.451194827,12.7186523,12.7190039,12.718385
30.890281,12.5299641,12.7121329,-0.426812373,12.7115131,12.7118646,12.7112448
30.900772,12.6095202,12.7050039,-0.309004409,12.7043832,12.7047347,12.704114
30.911264,13.0384048,12.697883,0.583542469,12.6972613,12.6976128,12.6969911
30.921756,13.8564065,12.6907707,1.07964611,12.6901482,12.6904995,12.6898769
30.932247,11.8321596,12.6836678,-0.922772061,12.6830443,12.6833956,12.6827721
30.942739,13.3416641,12.6765729,0.815531191,12.6759485,12.6762997,12.6756753
30.95323,12.8452326,12.6694874,0.419219747,12.668862,12.6692131,12.6685878
30.963722,12.6885775,12.6624098,0.16176442,12.6617835,12.6621346,12.6615083
30.974214,13,12.6553409,0.587076739,12.6547137,12.6550646,12.6544374
30.984705,12.4096736,12.6482813,-0.488474844,12.6476532,12.648004,12.6473759
30.995197,12.6885775,12.6412297,0.217595565,12.6406006,12.6409514,12.6403223
31.005688,12.5299641,12.6341874,-0.322836384,12.6335574,12.633908,12.633278
31.01618,12.5698051,12.6271531,-0.239474426,12.6265222,12.6268726,12.6262417
31.026672,12.2882057,12.6201274,-0.576126436,12.6194955,12.6198459,12.619214
31.037163,12.8062485,12.613111,0.439474087,12.6124782,12.6128284,12.6121956
31.047655,12.2474487,12.6061026,-0.598877154,12.6054688,12.6058189,12.6051851
31.058146,12.2065556,12.5991034,-0.626536341,12.5984687,12.5988187,12.598184
31.068638,13.3041347,12.5921122,0.84381426,12.5914766,12.5918264,12.5911907
31.07913,12.922848,12.5851296,0.581135437,12.584493,12.5848427,12.5842061
31.089621,13.7113092,12.5781563,1.06449657,12.5775187,12.5778682,12.5772307
31.100113,12,12.5711908,-0.755771689,12.5705524,12.5709017,12.5702632
31.110604,11.61895,12.5642347,-0.972257506,12.5635953,12.5639445,12.563305
31.121096,13.190906,12.5572865,0.796002191,12.5566461,12.5569951,12.5563547
31.131588,12.6491106,12.5503468,0.314267108,12.5497055,12.5500543,12.549413
31.142079,12.489996,12.5434164,-0.231128583,12.5427742,12.5431228,12.5424805
31.152571,12,12.5364939,-0.732457454,12.5358507,12.5361991,12.5355559
31.163062,12.5698051,12.5295806,0.200560315,12.5289365,12.5292847,12.5286405
31.173554,12.922848,12.5226753,0.632592051,12.5220301,12.5223782,12.521733
31.184046,12.5299641,12.5157785,0.119103402,12.5151324,12.5154802,12.5148341
31.194537,12.1243557,12.5088909,-0.620109027,12.5082438,12.5085914,12.5079444
31.205029,12.2882057,12.5020111,-0.462390973,12.5013631,12.5017105,12.5010625
31.21552,12.328828,12.4951406,-0.40781443,12.4944916,12.4948388,12.4941898
31.226012,12.489996,12.488278,0.0414490746,12.487628,12.487975,12.487325
31.236504,13.5277493,12.4814239,1.02290048,12.4807729,12.4811196,12.4804687
31.246995,12.7279221,12.4745789,0.503332041,12.473927,12.4742735,12.4736216
31.257487,12.5299641,12.4677418,0.24944386,12.467089,12.4674352,12.4667823
31.267978,11.8321596,12.4609139,-0.792940334,12.4602601,12.4606061,12.4599522
31.27847,12.4096736,12.4540939,-0.210761108,12.4534391,12.4537848,12.45313
31.288962,12.6491106,12.4472823,0.449253042,12.4466266,12.446972,12.4463162
31.299453,12.7671453,12.4404799,0.57154649,12.4398232,12.4401683,12.4395116
31.309945,12.5299641,12.4336854,0.310288087,12.4330277,12.4333725,12.4327148
31.320436,13.7477271,12.4269,1.14927243,12.4262413,12.4265858,12.4259271
31.330928,12.4096736,12.4201224,-0.102219058,12.4194627,12.4198069,12.4191472
31.34142,12.328828,12.4133533,-0.290732294,12.4126926,12.4130365,12.4123758
31.351911,12.5698051,12.4065933,0.403994815,12.4059316,12.4062752,12.4056136
31.362403,12.2474487,12.3998411,-0.390374684,12.3991785,12.3995217,12.3988591
31.372894,12.6491106,12.3932468,0.505829901,12.3925831,12.3927773,12.3921137
31.383386,13.0384048,12.3865118,0.80739894,12.3858472,12.3860408,12.3853761
31.393878,12.5299641,12.3797852,0.387529177,12.3791196,12.3793126,12.378647
31.404369,13.114877,12.3730678,0.861283506,12.3724012,12.3725935,12.3719269
31.414861,12.328828,12.3663581,-0.193726897,12.3656905,12.3658823,12.3652147
31.425352,12.1243557,12.3596575,-0.485079255,12.358989,12.35918,12.3585115
31.435844,11.61895,12.3529647,-0.856746584,12.3522952,12.3524856,12.351816
31.446336,12.328828,12.3462804,-0.132107443,12.3456098,12.3457996,12.345129
31.456827,12.083046,12.3396051,-0.506516633,12.3389335,12.3391226,12.338451
31.467319,12.6491106,12.3329375,0.562292718,12.332265,12.3324534,12.3317808
31.47781,12.6491106,12.3262791,0.568182708,12.3256055,12.3257932,12.3251196
31.488302,12,12.3196283,-0.565356816,12.3189538,12.3191408,12.3184662
31.498794,12.6491106,12.312986,0.579762568,12.3123104,12.3124968,12.3118212
31.509285,12.5299641,12.3063527,0.47287565,12.3056761,12.3058617,12.3051851
31.519777,12.7279221,12.2997272,0.654366029,12.2990496,12.2992344,12.2985568
31.530268,11.9582607,12.2931106,-0.578662151,12.292432,12.2926162,12.2919375
31.54076,11.7898261,12.2865018,-0.704752238,12.2858222,12.2860056,12.285326
31.551252,12.1655251,12.2799014,-0.338195745,12.2792208,12.2794034,12.2787228
31.561743,11.8321596,12.27331,-0.664191563,12.2726284,12.2728102,12.2721286
31.572235,13.3041347,12.2667263,1.01853247,12.2660436,12.2662247,12.2655421
31.582726,12.2474487,12.2601516,-0.112707062,12.2594679,12.2596482,12.2589645
31.593218,12.6491106,12.2535846,0.628908605,12.2528999,12.2530794,12.2523947
31.60371,12.2065556,12.247026,-0.201172428,12.2463402,12.2465189,12.2458332
31.614201,11.61895,12.2404763,-0.788369355,12.2397895,12.2399674,12.2392806
31.624693,13,12.2339343,0.87525179,12.2332465,12.2334236,12.2327358
31.635184,13.114877,12.2274013,0.942059323,12.2267125,12.2268887,12.2261999
31.645676,12.328828,12.220876,0.328560573,12.2201861,12.2203615,12.2196716
31.656168,11.8321596,12.2143589,-0.61822276,12.2136681,12.2138426,12.2131517
31.666659,13.0766968,12.2078509,0.932119069,12.207159,12.2073326,12.2066407
31.677151,13.190906,12.2013505,0.994764032,12.2006576,12.2008303,12.2001373
31.687642,11.7046999,12.194859,-0.700113631,12.194165,12.1943369,12.1936429
31.698134,12.5299641,12.1883752,0.58445605,12.1876802,12.1878511,12.1871561
31.708626,12.489996,12.1818997,0.555064223,12.1812037,12.1813736,12.1806776
31.719117,11.6619038,12.1754331,-0.716609593,12.174736,12.1749051,12.174208
31.729609,12.4096736,12.1689742,0.490611344,12.168276,12.1684441,12.167746
31.7401,13.4164079,12.1625241,1.11976951,12.1618249,12.1619921,12.1612929
31.750592,11.61895,12.1560817,-0.732892664,12.1553815,12.1555476,12.1548474
31.761084,11.7473401,12.1496476,-0.634277092,12.1489463,12.1491115,12.1484102
31.771575,13,12.1432223,0.925622881,12.14252,12.1426841,12.1419818
31.782067,12.7279221,12.1368046,0.768841604,12.1361013,12.1362644,12.1355611
31.792558,12.328828,12.1303959,0.445457219,12.1296915,12.1298536,12.1291491
31.80305,11.9582607,12.1239947,-0.407104387,12.1232893,12.1234503,12.1227448
31.813542,12,12.1176018,-0.342931206,12.1168953,12.1170553,12.1163488
31.824033,12.3693169,12.1112177,0.508034585,12.1105102,12.1106691,12.1099615
31.834525,12.3693169,12.1048413,0.514271911,12.1041326,12.1042905,12.1035818
31.845016,12.2065556,12.0984736,0.328758227,12.097764,12.0979207,12.097211
31.855508,11.8321596,12.0921136,-0.509856891,12.0914029,12.0915585,12.0908477
31.866,11.9582607,12.0857618,-0.357072894,12.08505,12.0852045,12.0844926
31.876491,10.9544512,12.0794188,-1.06064491,12.0787059,12.0788593,12.0781463
31.886983,12.2474487,12.0730834,0.41757078,12.0723694,12.0725216,12.0718076
31.897474,11.8321596,12.0667567,-0.484352313,12.0660417,12.0661927,12.0654777
31.907966,12.5299641,12.0604377,0.685219967,12.0597216,12.0598714,12.0591553
31.918458,11.0905365,12.0541268,-0.98162636,12.0534097,12.0535583,12.0528411
31.928949,12.7279221,12.0478247,0.824680141,12.0471065,12.0472539,12.0465356
31.939441,11.5758369,12.0415302,-0.682417249,12.0408109,12.0409571,12.0402377
31.949932,11.1803399,12.0352444,-0.924610489,12.034524,12.034669,12.0339485
31.960424,12.6095202,12.0289662,0.761940923,12.0282448,12.0283884,12.0276669
31.970916,11.1355287,12.0226962,-0.941895678,12.0219736,12.022116,12.0213934
31.981407,11.8743421,12.0164349,-0.376951988,12.0157112,12.0158523,12.0151286
31.991899,12.1243557,12.0101811,0.337897212,12.0094564,12.0095961,12.0088714
32.00239,11.3578167,12.0039361,-0.803815529,12.0032103,12.0033487,12.0026228
32.012882,12.1243557,11.9976986,0.3558891,11.9969717,11.9971087,11.9963818
32.023374,11.7473401,11.9914692,-0.494094229,11.9907412,11.9908769,11.9901489
32.033865,11.7898261,11.9852486,-0.442066115,11.9845195,11.9846537,11.9839246
32.044357,11.8321596,11.9790354,-0.383243877,11.9783053,11.9784381,11.9777079
32.054848,11.5758369,11.972831,-0.630074674,11.9720997,11.9722311,11.9714998
32.06534,10.8166538,11.9666341,-1.07237132,11.9659017,11.9660316,11.9652992
32.075832,12.2882057,11.9604452,0.572503701,11.9597118,11.9598402,11.9591067
32.086323,10.8166538,11.9542651,-1.06658861,11.9535305,11.9536575,11.9529229
32.096815,12.3693169,11.9480924,0.649018057,11.9473568,11.9474822,11.9467465
32.107306,12.2065556,11.9419285,0.514419248,11.9411917,11.9413156,11.9405788
32.117798,12,11.935772,0.253432522,11.9350341,11.9351565,11.9344185
32.12829,11.4455231,11.9296235,-0.69577323,11.9288845,11.9290053,11.9282663
32.138781,11.7473401,11.9234838,-0.419694684,11.9227436,11.9228629,11.9221227
32.149273,11.2249722,11.9173514,-0.832093316,11.9166102,11.9167278,11.9159866
32.159764,12.5299641,11.9112278,0.786597933,11.9104854,11.9106014,11.909859
32.170256,11.9163753,11.9051116,0.106130649,11.9043681,11.9044824,11.9037389
32.180748,11.8743421,11.8990034,-0.15703924,11.8982588,11.8983715,11.8976268
32.191239,12.5299641,11.8929039,0.798160524,11.8921582,11.8922691,11.8915234
32.201731,12.3693169,11.8868118,0.694625878,11.886065,11.8861741,11.8854273
32.212222,10.8627805,11.8807283,-1.00893398,11.8799803,11.8800878,11.8793398
32.222714,12.1655251,11.8746522,0.539326282,11.8739032,11.8740088,11.8732597
32.233206,12.2065556,11.8685842,0.581353104,11.867834,11.8679378,11.8671876
32.243697,12.3693169,11.8625247,0.711893352,11.8617734,11.8618754,11.8611241
32.254189,11.8743421,11.8564727,0.13367641,11.8557203,11.8558204,11.8550679
32.26468,12.3693169,11.8504293,0.72033855,11.8496757,11.849774,11.8490203
32.275172,11.61895,11.8443932,-0.474808565,11.8436385,11.8437349,11.8429801
32.285664,11.61895,11.8383652,-0.468417678,11.8376093,11.8377038,11.8369479
32.296155,11.8743421,11.8323457,0.204930292,11.8315887,11.8316812,11.8309242
32.306647,12,11.8263336,0.416733049,11.8255754,11.825666,11.8249078
32.317138,11.6619038,11.82033,-0.398027916,11.8195708,11.8196593,11.8188999
32.32763,11.4455231,11.8143338,-0.607297874,11.8135734,11.8136599,11.8128995
32.338122,11.4455231,11.8083456,-0.602347495,11.8075841,11.8076685,11.8069069
32.348613,11.61895,11.802366,-0.428270859,11.8016033,11.8016856,11.8009228
32.359105,12.328828,11.7963937,0.729680986,11.7956298,11.79571,11.7949461
32.369596,12,11.7904299,0.457788299,11.7896649,11.7897429,11.7889779
32.380088,11.7473401,11.7844734,-0.19270009,11.7837073,11.7837831,11.7830169
32.39058,11.8743421,11.778525,0.309543423,11.7777577,11.7778313,11.7770639
32.401071,11.61895,11.772585,-0.391962902,11.7718165,11.7718879,11.7711194
32.411563,11.7473401,11.7666523,-0.138968281,11.7658827,11.7659518,11.7651821
32.422054,12.0415946,11.7607281,0.529968338,11.7599574,11.7600242,11.7592533
32.432546,12.083046,11.7548113,0.572917672,11.7540394,11.7541038,11.7533318
32.443038,12.3693169,11.7489024,0.78766394,11.7481293,11.7481914,11.7474182
32.453529,12.5299641,11.7430019,0.887108873,11.7422277,11.7422873,11.741513
32.464021,11,11.7371088,-0.858550408,11.7363334,11.7363906,11.7356151
32.474512,11.5325626,11.7312241,-0.445714624,11.7304475,11.7305023,11.7297256
32.485004,11.9582607,11.7253468,0.48261163,11.724569,11.7246212,11.7238434
32.495496,11.3137085,11.7194773,-0.636999822,11.7186983,11.718748,11.717969
32.505987,10.8627805,11.7136162,-0.922407569,11.7128361,11.7128832,11.712103
32.516479,12.0415946,11.7077625,0.577782065,11.7069812,11.7070257,11.7062443
32.52697,11.61895,11.7019171,-0.288040088,11.7011346,11.7011765,11.7003939
32.537462,11.7046999,11.6960791,0.0928483507,11.6952954,11.6953346,11.6945509
32.547954,11.7473401,11.6902489,0.238937683,11.6894641,11.6895005,11.6887156
32.558445,11.8321596,11.6844271,0.384359787,11.6836411,11.6836747,11.6828886
32.568937,11.9582607,11.6786126,0.52881767,11.6778254,11.6778562,11.6770689
32.579428,11.2694277,11.6728065,-0.635121111,11.6720181,11.6720461,11.6712576
32.58992,11.045361,11.6670076,-0.788445706,11.666218,11.6662431,11.6654535
32.600412,11.7898261,11.6612166,0.358621663,11.6604258,11.660448,11.6596571
32.610903,12.489996,11.655434,0.913543665,11.654642,11.6546611,11.6538691
32.621395,11.5758369,11.6496586,-0.271701433,11.6488654,11.6488815,11.6480883
32.631886,11.5758369,11.6438915,-0.260872817,11.6430971,11.6431102,11.6423158
32.642378,11.6619038,11.6381317,0.15418188,11.6373361,11.6373461,11.6365504
32.65287,11.7046999,11.6323797,0.268924097,11.6315829,11.6315897,11.6307929
32.663361,11.4891253,11.6266361,-0.370824471,11.6258381,11.6258417,11.6250436
32.673853,11.7473401,11.6208997,0.355584683,11.6201005,11.6201008,11.6193015
32.684344,11.3137085,11.6151716,-0.549056518,11.6143711,11.6143682,11.6135677
32.694836,10.7238053,11.6094507,-0.941087346,11.6086491,11.6086427,11.6078411
32.705328,11.1355287,11.6037376,-0.68425789,11.6029347,11.602925,11.6021221
32.715819,11.61895,11.5980328,0.144627971,11.5972287,11.5972156,11.5964114
32.726311,11.2249722,11.5923352,-0.606104814,11.5915299,11.5915133,11.5907079
32.736802,11.045361,11.5866459,-0.735720668,11.5858394,11.5858192,11.5850126
32.747294,11.9163753,11.5809638,0.579147177,11.5801561,11.5801323,11.5793245
32.757786,11.7046999,11.5752895,0.35973659,11.5744806,11.5744531,11.5736441
32.768277,11.8743421,11.5696234,0.552013272,11.5688133,11.568782,11.5679718
32.778769,11.2249722,11.5639646,-0.582230541,11.5631532,11.5631182,11.5623067
32.78926,11.3137085,11.558314,-0.494576039,11.5575013,11.5574625,11.5566498
32.799752,12.1243557,11.5526705,0.756098617,11.5518567,11.551814,11.551
32.810244,11.0905365,11.5470348,-0.675646595,11.5462197,11.5461731,11.5453579
32.820735,12.4498996,11.5414074,0.953148588,11.540591,11.5405404,11.539724
32.831227,11.61895,11.5357871,0.28837989,11.5349695,11.5349147,11.5340971
32.841718,11.9582607,11.530175,0.6542826,11.5293562,11.5292973,11.5284785
32.85221,10.9087121,11.5245701,-0.784766216,11.5237501,11.523687,11.5228669
32.862702,11.9163753,11.5189729,0.630398574,11.5181516,11.5180843,11.5172629
32.873193,11.7473401,11.5133839,0.483690173,11.5125614,11.5124897,11.5116671
32.883685,11.0905365,11.5078021,-0.645960987,11.5069783,11.5069022,11.5060784
32.894176,12.328828,11.5022285,0.909175193,11.5014034,11.5013229,11.5004978
32.904668,10.3923048,11.496662,-1.05088398,11.4958357,11.4957506,11.4949242
32.91516,11.045361,11.4911032,-0.66763923,11.4902756,11.4901859,11.4893583
32.925651,12.0415946,11.4855525,0.745682275,11.4847237,11.4846293,11.4838004
32.936143,11.9163753,11.480009,0.660580254,11.479179,11.4790798,11.4782497
32.946634,11.2694277,11.4744737,-0.452820071,11.4736424,11.4735383,11.472707
32.957126,11.8321596,11.4689455,0.602672457,11.4681129,11.468004,11.4671713
32.967618,12.2474487,11.4634249,0.885451186,11.4625911,11.4624771,11.4616432
32.978109,11.9582607,11.4579125,0.707352978,11.4570774,11.4569584,11.4561232
32.988601,11.8743421,11.4524072,0.649565143,11.4515708,11.4514466,11.4506102
32.999092,11.3137085,11.4469101,-0.364967902,11.4460724,11.445943,11.4451053
33.009584,11.7473401,11.44142,0.553100444,11.4405811,11.4404463,11.4396074
33.020076,12.5299641,11.4359376,1.04595721,11.4350974,11.4349572,11.434117
33.030567,10.7703296,11.4304633,-0.812486118,11.4296218,11.4294761,11.4286346
33.041059,11.2694277,11.4249961,-0.394421644,11.4241534,11.4240021,11.4231592
33.05155,11.4455231,11.419537,0.161202103,11.418693,11.418536,11.4176919
33.062042,11.0905365,11.414085,-0.568813255,11.4132397,11.4130769,11.4122315
33.072534,11.1355287,11.4086406,-0.522601089,11.407794,11.4076254,11.4067787
33.083025,11.5758369,11.4032043,0.415490759,11.4023564,11.4021818,11.4013338
33.093517,11.8743421,11.3977751,0.690338307,11.3969259,11.3967452,11.3958959
33.104008,11.8321596,11.392354,0.663178393,11.3915035,11.3913166,11.390466
33.1145,10.8166538,11.3869399,-0.755172893,11.3860882,11.3858949,11.3850431
33.124992,12,11.3815334,0.78642645,11.3806804,11.3804808,11.3796276
33.135483,10.8627805,11.376135,-0.716487646,11.3752807,11.3750746,11.3742201
33.145975,11.3578167,11.3707437,-0.113696953,11.369888,11.3696753,11.3688195
33.156466,11.1355287,11.3653604,-0.479407645,11.3645035,11.364284,11.3634269
33.166958,11.4455231,11.3599842,0.292470433,11.3591259,11.3588996,11.3580412
33.17745,11.2694277,11.3546155,-0.291869574,11.3537559,11.3535226,11.352663
33.187941,10.5830052,11.3492549,-0.87535688,11.348394,11.3481536,11.3472926
33.198433,10.198039,11.3439013,-1.07044959,11.3430391,11.3427915,11.3419292
33.208924,10.6301458,11.3385558,-0.841670966,11.3376923,11.3374373,11.3365737
33.219416,10.9544512,11.3332173,-0.615439837,11.3323525,11.33209,11.3312251
33.229908,11.4017543,11.3278864,0.271786415,11.3270202,11.3267502,11.3258839
33.240399,10.2956301,11.3225635,-1.0133772,11.321696,11.3214182,11.3205506
33.250891,11.0905365,11.3172476,-0.476141888,11.3163788,11.3160931,11.3152242
33.261382,12.4498996,11.3119398,1.06675201,11.3110696,11.3107759,11.3099057
33.271874,12.2065556,11.3066389,0.948639393,11.3057675,11.3054655,11.304594
33.282366,11.7898261,11.3013456,0.698913814,11.3004728,11.3001626,11.2992897
33.292857,11.4455231,11.2960603,0.386604231,11.2951862,11.2948674,11.2939932
33.303349,11.61895,11.290782,0.572859503,11.2899066,11.2895792,11.2887037
33.31384,10.198039,11.2855118,-1.04281961,11.284635,11.2842988,11.2834219
33.324332,11.6619038,11.2802485,0.61778256,11.2793704,11.2790252,11.278147
33.334824,11.4891253,11.2749927,0.462744584,11.2741133,11.273759,11.2728794
33.345315,10.6301458,11.269745,-0.799749447,11.2688642,11.2685006,11.2676197
33.355807,10.4880885,11.2645042,-0.881144573,11.2636221,11.263249,11.2623668
33.366298,10.8627805,11.2592715,-0.629675311,11.258388,11.2580053,11.2571217
33.37679,10.4880885,11.2540457,-0.875189838,11.2531609,11.2527683,11.2518834
33.387282,11.3137085,11.2488275,0.254717537,11.2479413,11.2475387,11.2466524
33.397773,11.5758369,11.2436172,0.576385018,11.2427297,11.2423168,11.2414292
33.408265,10.8627805,11.2384139,-0.612889433,11.237525,11.2371018,11.2362128
33.418756,11.4017543,11.2332187,0.410530856,11.2323284,11.2318945,11.2310041
33.429248,11.3137085,11.2280304,0.29270825,11.2271387,11.226694,11.2258023
33.43974,10.0498756,11.2228496,-1.08303922,11.2219566,11.2215008,11.2206077
33.450231,12.6491106,11.2176768,1.19642546,11.2167824,11.2163153,11.2154209
33.460723,11.1803399,11.2125109,-0.179362878,11.2116152,11.2111366,11.2102408
33.471214,10.2956301,11.2073531,-0.954841838,11.206456,11.2059657,11.2050685
33.481706,11.2249722,11.2022022,0.150897133,11.2013037,11.2008015,11.1999029
33.492198,11.2694277,11.1970588,0.269014556,11.196159,11.1956445,11.1947445
33.502689,10.8166538,11.1919234,-0.612592529,11.1910222,11.1904953,11.1895939
33.513181,11.5758369,11.186795,0.623732219,11.1858924,11.1853528,11.18445
33.523672,11.9582607,11.1816746,0.881241262,11.1807706,11.180218,11.1793139
33.534164,10.4403065,11.1765611,-0.858052812,11.1756558,11.1750899,11.1741844
33.544656,11.4017543,11.1714552,0.479894858,11.1705484,11.169969,11.1690621
33.555147,10.9544512,11.1663572,-0.460332528,11.165449,11.1648558,11.1639476
33.565639,11.2694277,11.1612662,0.328879116,11.1603566,11.1597494,11.1588397
33.57613,10.9544512,11.1561832,-0.449145888,11.1552722,11.1546506,11.1537395
33.586622,10.8627805,11.1511072,-0.536960589,11.1501948,11.1495584,11.148646
33.597114,10.9544512,11.1460386,-0.437707086,11.1451249,11.1444735,11.1435596
33.607605,10.8627805,11.1409781,-0.52744442,11.140063,11.1393962,11.1384809
33.618097,10.4880885,11.1359246,-0.804882667,11.135008,11.1343256,11.1334089
33.628588,10.5356538,11.1308791,-0.771508456,11.1299611,11.1292626,11.1283445
33.63908,11.2249722,11.1258405,0.314851754,11.1249212,11.1242063,11.1232868
33.649572,10.5830052,11.1208095,-0.733351401,11.1198887,11.1191571,11.1182362
33.660063,12.083046,11.1157865,0.983493505,11.1148643,11.1141156,11.1131932
33.670555,9.74679434,11.1107705,-1.1678939,11.1098469,11.1090807,11.1081569
33.681046,11,11.1057625,-0.325211501,11.1048375,11.1040533,11.1031282
33.691538,10.198039,11.1007616,-0.950117123,11.0998351,11.0990327,11.0981061
33.70203,11.6619038,11.0957682,0.75241985,11.0948403,11.0940191,11.0930911
33.712521,11.8321596,11.0907828,0.861032411,11.0898535,11.0890131,11.0880836
33.723013,11.5325626,11.0858044,0.668399717,11.0848737,11.0840137,11.0830828
33.733504,11.4455231,11.0808341,0.603894898,11.0799019,11.0790219,11.0780896
33.743996,11.5325626,11.0758709,0.675789713,11.0749373,11.0740366,11.0731029
33.754488,10.9544512,11.0709152,-0.341268275,11.0699802,11.0690585,11.0681233
33.764979,10.5830052,11.0659676,-0.6949549,11.0650311,11.0640879,11.0631513
33.775471,10.8627805,11.061027,-0.445248858,11.0600891,11.0591239,11.0581858
33.785962,10.7238053,11.0560946,-0.576445386,11.0551552,11.0541674,11.0532279
33.796454,10.6301458,11.0511693,-0.648863188,11.0502285,11.0492175,11.0482765
33.806946,10.7238053,11.0462515,-0.567843499,11.0453093,11.0442746,11.0433322
33.817437,11.1803399,11.0413419,0.372824311,11.0403982,11.0393392,11.0383953
33.827929,12.1655251,11.0364395,1.06258438,11.0354944,11.0344104,11.0334651
33.83842,11.2694277,11.0315452,0.487731985,11.0305986,11.029489,11.0285423
33.848912,10.7238053,11.0266581,-0.550320609,11.02571,11.0245742,11.023626
33.859404,10.7703296,11.0217786,-0.501446928,11.0208291,11.0196665,11.0187168
33.869895,10.3923048,11.0169074,-0.790317986,11.0159564,11.0147661,11.013815
33.880387,11.61895,11.0120433,0.779042167,11.0110909,11.0098723,11.0089197
33.890878,10.8166538,11.0071875,-0.436501643,11.0062336,11.004986,11.0040319
33.90137,11.1355287,11.002339,0.364951721,11.0013836,11.0001062,10.9991506
33.911862,10.8627805,10.9974982,-0.367039102,10.9965414,10.9952333,10.9942763
33.922353,10.7238053,10.9926657,-0.51851748,10.9917074,10.9903679,10.9894094
33.932845,11.1355287,10.9878405,0.384302256,10.9868807,10.9855089,10.9845489
33.943336,10.5356538,10.9830236,-0.668857141,10.9820624,10.9806574,10.9796959
33.953828,11.1355287,10.9782142,0.396629007,10.9772514,10.9758124,10.9748494
33.96432,10.7703296,10.9734126,-0.450647268,10.9724483,10.9709743,10.9700098
33.974811,11.2694277,10.9686194,0.548459939,10.9676536,10.9661436,10.9651776
33.985303,10.5830052,10.9638336,-0.617112956,10.9628664,10.9613193,10.9603519
33.995794,10.8627805,10.9590564,-0.310283523,10.9580876,10.9565025,10.9555335
34.006286,10.4880885,10.9542866,-0.682787039,10.9533164,10.9516921,10.9507216
34.016778,10.6301458,10.9495249,-0.565136375,10.9485532,10.9468886,10.9459166
34.027269,11.4891253,10.9447718,0.737803164,10.9437986,10.9420924,10.941119
34.037761,11.045361,10.9400264,0.324553019,10.9390516,10.9373027,10.9363277
34.048252,9.64365076,10.9352895,-1.13650287,10.9343133,10.9325203,10.9315438
34.058744,11.1355287,10.9305605,0.452734177,10.9295828,10.9277443,10.9267664
34.069236,10.0995049,10.9258397,-0.909029569,10.9248605,10.9229752,10.9219958
34.079727,10.6301458,10.9211277,-0.539427328,10.9201469,10.9182135,10.9172325
34.090219,11.7898261,10.9164235,0.93456011,10.9154413,10.9134581,10.9124756
34.10071,12.1243557,10.9117283,1.10119363,10.9107445,10.90871,10.907726
34.111202,10.9087121,10.907041,0.0408792191,10.9060557,10.9039684,10.9029828
34.121694,10.7703296,10.9023623,-0.363363007,10.9013755,10.8992335,10.8982464
34.132185,10.8627805,10.8976926,-0.186847868,10.8967043,10.894506,10.8935173
34.142677,10.7703296,10.8930312,-0.350287813,10.8920413,10.8897848,10.8887946
34.153168,10.9087121,10.8883789,0.142594586,10.8873875,10.8850708,10.8840791
34.16366,11.4891253,10.883735,0.778068306,10.8827421,10.8803633,10.87937
34.174152,10.4403065,10.8791,-0.662414902,10.8781055,10.8756625,10.8746677
34.184643,11.1803399,10.8744744,0.553051031,10.8734784,10.870969,10.8699727
34.195135,10.6301458,10.8698575,-0.489603618,10.86886,10.8662818,10.8652839
34.205626,11.7473401,10.8652502,0.939196423,10.8642511,10.8616019,10.8606024
34.216118,11.1355287,10.8606517,0.52428713,10.8596511,10.8569282,10.8559273
34.22661,10.7703296,10.8560627,-0.292802045,10.8550605,10.8522614,10.8512589
34.237101,10.3440804,10.8514835,-0.712322318,10.8504798,10.8476017,10.8465977
34.247593,11.61895,10.8469137,0.878655999,10.8459084,10.8429484,10.8419428
34.258084,11,10.8423541,0.397046495,10.8413472,10.8383022,10.837295
34.268576,11.2249722,10.837804,0.622228403,10.8367956,10.8336624,10.8326536
34.279068,10.0498756,10.8332639,-0.885092267,10.832254,10.8290293,10.8280189
34.289559,11.3137085,10.8287346,0.696400691,10.8277231,10.8244033,10.8233914
34.300051,9.89949494,10.8242152,-0.961623757,10.8232021,10.8197836,10.8187701
34.310542,11.1803399,10.8197068,0.600527327,10.8186922,10.8151711,10.814156
34.321034,10.3923048,10.8152088,-0.650310664,10.8141926,10.8105649,10.8095482
34.331526,9.8488578,10.8107218,-0.98074665,10.809704,10.8059653,10.8049471
34.342017,11.0905365,10.8062464,0.533188596,10.8052271,10.8013729,10.8003531
34.352509,11.8743421,10.8017821,1.03564472,10.8007612,10.7967867,10.7957653
34.363,12.0415946,10.7973299,1.11546612,10.7963074,10.7922076,10.7911846
34.373492,11.5325626,10.7928893,0.860042613,10.7918652,10.7876348,10.7866102
34.383984,11.045361,10.788461,0.506853079,10.7874353,10.7830686,10.7820424
34.394475,10.198039,10.7840457,-0.765510712,10.7830184,10.7785095,10.7774818
34.404967,10.4403065,10.7796429,-0.582525879,10.7786141,10.7739567,10.7729273
34.415458,11.3137085,10.7752539,0.733794677,10.7742234,10.7694109,10.7683799
34.42595,10.4880885,10.7708781,-0.531779694,10.7698461,10.7648713,10.7638387
34.436442,11.2694277,10.7665165,0.709162294,10.7654829,10.7603384,10.7593041
34.446933,11.4891253,10.7621699,0.85261679,10.7611347,10.7558125,10.7547766
34.457425,10.5830052,10.7578381,-0.418130197,10.7568013,10.7512927,10.7502553
34.467916,10.9544512,10.7535226,0.448250513,10.7524842,10.7467801,10.745741
34.478408,10.8627805,10.749223,0.33698294,10.748183,10.7422736,10.7412329
34.4889,9.94987437,10.7449402,-0.891664658,10.7438986,10.7377737,10.7367313
34.499391,11.3578167,10.7406755,0.785583376,10.7396322,10.7332808,10.7322368
34.509883,10.5830052,10.7364286,-0.391692903,10.7353837,10.728794,10.7277484
34.520374,11.2249722,10.7322012,0.701976452,10.7311548,10.7243143,10.723267
34.530866,11.5325626,10.7279935,0.896977775,10.7269454,10.7198407,10.7187918
34.541358,10.5830052,10.7238067,-0.375235164,10.722757,10.7153736,10.7143231
34.551849,11.4455231,10.7196423,0.851986418,10.718591,10.7109136,10.7098614
34.562341,10.2469508,10.7155007,-0.684507043,10.7144477,10.7064596,10.7054058
34.572832,10.3440804,10.7113838,-0.606055607,10.7103293,10.7020126,10.7009572
34.583324,10.7238053,10.7072924,0.128502509,10.7062363,10.6975717,10.6965146
34.593816,11.7898261,10.7032283,1.04240005,10.7021705,10.6931374,10.6920786
34.604307,10.6301458,10.6991935,-0.262769225,10.6981341,10.68871,10.6876496
34.614799,10.5356538,10.6951891,-0.399418758,10.6941281,10.6842887,10.6832266
34.62529,11.3137085,10.6912179,0.788980727,10.6901553,10.6798743,10.6788105
34.635782,10.8166538,10.6872814,0.359683789,10.6862172,10.6754659,10.6744005
34.646274,10.1488916,10.6833824,-0.731088816,10.6823166,10.6710641,10.669997
34.656765,10.7238053,10.6795241,0.210430968,10.6784566,10.6666692,10.6656004
34.667257,11.1355287,10.6757088,0.678100241,10.6746397,10.6622803,10.6612099
34.677748,10.3923048,10.6719425,-0.528807805,10.6708718,10.6578983,10.6568262
34.68824,10.1488916,10.6682269,-0.72064924,10.6671546,10.6535224,10.6524486
34.698732,10.9544512,10.6645666,0.538409321,10.6634926,10.6491529,10.6480774
34.709223,10.2956301,10.6609667,-0.604430811,10.6598912,10.6447902,10.6437131
34.719715,10.4403065,10.6574323,-0.465967585,10.6563552,10.6404336,10.6393548
34.730206,10.4403065,10.6539701,-0.462237597,10.6528914,10.6360839,10.6350033
34.740698,10.3440804,10.6505866,-0.553629959,10.6495062,10.6317401,10.6306579
34.75119,10.9087121,10.64729,0.511294517,10.6462081,10.6274028,10.6263188
34.761681,10.2469508,10.64409,-0.630189805,10.6430064,10.6230723,10.6219866
34.772173,10.9544512,10.6409962,0.559870477,10.6399111,10.6187478,10.6176604
34.782664,10.9544512,10.6380214,0.56252092,10.6369347,10.6144301,10.613341
34.793156,10.4403065,10.6351787,-0.441443345,10.6340905,10.6101184,10.6090276
34.803648,9.59166305,10.6324846,-1.02020663,10.6313948,10.605813,10.6047205
34.814139,10.8166538,10.6299579,0.43208328,10.6288666,10.6015145,10.6004202
34.824631,10.0498756,10.6276197,-0.760094793,10.6265269,10.5972219,10.5961259
34.835122,10.2469508,10.6254962,-0.61526042,10.6244018,10.5929361,10.5918384
34.845614,10.9544512,10.623617,0.575181838,10.6225212,10.5886562,10.5875568
34.856106,11.4891253,10.6220188,0.931185544,10.6209215,10.5843827,10.5832815
34.866597,10.7238053,10.6207459,0.321028653,10.6196472,10.5801159,10.579013
34.877089,9.74679434,10.6198537,-0.934376436,10.6187536,10.575855,10.5747504
34.88758,10.5356538,10.6194307,-0.289442483,10.6183293,10.5716009,10.5704945
34.898072,10.2956301,10.6195768,-0.569163093,10.6184741,10.5673527,10.5662446
34.908564,10.3440804,10.6204321,-0.525691587,10.6193282,10.5631108,10.562001
34.919055,10.9544512,10.6222151,0.576399236,10.6211101,10.5588756,10.557764
34.929547,10.9087121,10.6252585,0.532403643,10.6241525,10.5546463,10.553533
34.940038,11.0905365,10.6300676,0.678578612,10.6289608,10.5504238,10.5493086
34.95053,11.045361,10.6374022,0.638716572,10.6362948,10.546207,10.5450902
34.961022,10.198039,10.6483665,-0.671064413,10.647259,10.5419966,10.540878
34.971513,10.3440804,10.6645008,-0.566056891,10.6633937,10.5377928,10.5366724
34.982005,10.9544512,10.6878503,0.516334033,10.6867443,10.5335949,10.5324727
34.992496,10.6301458,10.7209442,-0.301327691,10.7198403,10.5294037,10.5282797
35.002988,10.0995049,10.7666903,-0.816814145,10.7655898,10.5252183,10.5240926
35.01348,10.6770783,10.8280746,-0.388582484,10.826979,10.5210391,10.5199116
35.023971,10.5830052,10.9077156,-0.569833605,10.9066267,10.5168666,10.5157373
35.034463,11.045361,11.0073062,0.195076517,11.0062259,10.5126999,10.5115688
35.044954,10.6301458,11.1269066,-0.704812595,11.1258367,10.5085399,10.507407
35.055446,10.6301458,11.264383,-0.796390117,11.2633249,10.5043856,10.5032509
35.065938,11.0905365,11.4147551,-0.569401982,11.4137097,10.5002375,10.4991011
35.076429,11.8321596,11.5696644,0.512342783,11.5686318,10.4960961,10.4949578
35.086921,10.8627805,11.7169009,-0.92418634,11.71588,10.4919604,10.4908203
35.097412,12.0415946,11.839668,0.449362462,11.8386564,10.4878313,10.4866894
35.107904,12.2882057,11.9180605,0.608395619,11.9170544,10.483708,10.4825643
35.118396,11.7046999,11.938211,-0.483229865,11.9372055,10.4795909,10.4784454
35.128887,11.6619038,11.8956795,-0.483503544,11.8946691,10.4754803,10.474333
35.139379,12.328828,11.7983023,0.72837195,11.7972824,10.4713755,10.4702263
35.14987,12.083046,11.6621981,0.648727887,11.661165,10.4672772,10.4661263
35.160362,12.0415946,11.5052692,0.732342422,11.5042208,10.4631847,10.4620319
35.170854,10.5830052,11.3429593,-0.871753448,11.3418946,10.4590983,10.4579437
35.181345,11.7898261,11.1868004,0.776547335,11.1857195,10.4550185,10.453862
35.191837,10.6301458,11.0444917,-0.64369705,11.0433956,10.4509443,10.449786
35.202328,10.7703296,10.9205217,-0.387546258,10.9194119,10.4468767,10.4457165
35.21282,10.4880885,10.8166132,-0.573170802,10.8154914,10.4428148,10.4416527
35.223312,10.9544512,10.7323945,0.47122891,10.7312624,10.4387589,10.4375951
35.233803,9.43398113,10.6659951,-1.10996123,10.6648546,10.4347096,10.4335439
35.244295,10.9544512,10.6146808,0.582898229,10.6135335,10.430666,10.4294984
35.254786,10.5356538,10.5754637,-0.199524251,10.5743107,10.4266288,10.4254593
35.265278,10.8166538,10.545483,0.520740648,10.5443254,10.4225973,10.421426
35.27577,10.3923048,10.5222898,-0.360534324,10.5211282,10.4185718,10.4173987
35.286261,10.0995049,10.5039345,-0.635947766,10.5027695,10.4145528,10.4133778
35.296753,10.2469508,10.4889564,-0.491940669,10.4877883,10.4105395,10.4093626
35.307244,10.8166538,10.4763258,0.583376389,10.4751549,10.4065326,10.4053538
35.317736,10.3923048,10.4653884,-0.270339772,10.4642149,10.4025313,10.4013506
35.328228,9.89949494,10.4564916,-0.746322079,10.4553156,10.3985361,10.3973535
35.338719,10.198039,10.4475686,-0.499529373,10.4463902,10.3945473,10.3933628
35.349211,10.0498756,10.4393103,-0.624047017,10.4381295,10.390564,10.3893777
35.359702,10.1488916,10.4315863,-0.531690465,10.4304032,10.3865872,10.385399
35.370194,11.1355287,10.4243018,0.843342702,10.4231164,10.382616,10.3814259
35.380686,10.6301458,10.4173883,0.461256445,10.4162007,10.3786508,10.3774588
35.391177,10.9087121,10.4107929,0.705633941,10.4096031,10.374692,10.373498
35.401669,11.0905365,10.4044713,0.828290507,10.4032794,10.3707387,10.3695429
35.41216,10.7703296,10.3983898,0.609868722,10.3971956,10.3667918,10.3655941
35.422652,9.74679434,10.3925175,-0.80356902,10.3913213,10.3628505,10.3616508
35.433144,9.74679434,10.3868303,-0.80002249,10.385632,10.3589151,10.3577135
35.443635,10.4880885,10.3813075,0.326773561,10.380107,10.3549861,10.3537826
35.454127,10.4880885,10.3759299,0.334900918,10.3747273,10.3510626,10.3498572
35.464618,10.9087121,10.3706827,0.733504881,10.3694781,10.3471454,10.3459381
35.47511,10.3440804,10.3655515,-0.146530108,10.3643448,10.3432338,10.3420245
35.485602,11.3578167,10.360525,0.99864493,10.3593162,10.3393281,10.3381169
35.496093,10.4403065,10.3555934,0.291055205,10.3543825,10.3354287,10.3342155
35.506585,9.8488578,10.3507467,-0.708441193,10.3495338,10.3315348,10.3303197
35.517076,10.5356538,10.3459781,0.435517692,10.3447632,10.3276472,10.3264301
35.527568,10.2469508,10.3412813,-0.307132756,10.3400643,10.3237651,10.322546
35.53806,9.2736185,10.3366496,-1.03103399,10.3354306,10.3198889,10.3186679
35.548551,10.6301458,10.332077,0.545956797,10.3308559,10.3160189,10.3147959
35.559043,10.7238053,10.3275579,0.629481876,10.3263348,10.3121544,10.3109295
35.569534,9.74679434,10.3230888,-0.759140627,10.3218637,10.3082962,10.3070693
35.580026,9.79795897,10.3186653,-0.721599823,10.3174381,10.3044434,10.3032145
35.590518,9.59166305,10.3142842,-0.850071273,10.313055,10.3005965,10.2993656
35.601009,10.8166538,10.309943,0.711836216,10.3087118,10.2967558,10.2955229
35.611501,10.2956301,10.3056381,-0.100040025,10.3044049,10.2929205,10.2916857
35.621992,11.1355287,10.3013679,0.913324037,10.3001326,10.2890915,10.2878547
35.632484,9.94987437,10.2971293,-0.589283429,10.295892,10.2852679,10.2840291
35.642976,9.11043358,10.2929207,-1.08742226,10.2916813,10.2814501,10.2802093
35.653467,11.045361,10.2887407,0.869839227,10.2874993,10.2776384,10.2763957
35.663959,10.8166538,10.2845869,0.729429213,10.2833434,10.2738322,10.2725874
35.67445,10.2956301,10.2804584,0.123173762,10.2792128,10.2700322,10.2687854
35.684942,10.8166538,10.2763531,0.735051502,10.2751055,10.2662376,10.2649887
35.695434,10.3440804,10.2722702,0.267974244,10.2710206,10.2624487,10.2611979
35.705925,10.1488916,10.268209,-0.345423508,10.2669573,10.258666,10.2574131
35.716417,10.5356538,10.2641675,0.521043457,10.2629137,10.2548886,10.2536338
35.726908,9.89949494,10.2601456,-0.600541935,10.2588898,10.2511174,10.2498605
35.7374,10.0995049,10.2561417,-0.395773636,10.2548839,10.2473516,10.2460927
35.747892,10.0995049,10.2521557,-0.39070546,10.2508958,10.2435915,10.2423305
35.758383,10.6770783,10.2481867,0.654898099,10.2469248,10.2398375,10.2385745
35.768875,9.94987437,10.2442334,-0.542548619,10.2429693,10.2360888,10.2348238
35.779366,11.3578167,10.2402957,1.05712864,10.2390296,10.2323462,10.2310791
35.789858,10.3440804,10.2363725,0.328188885,10.2351043,10.228609,10.2273399
35.80035,10.4880885,10.2324634,0.505593744,10.2311932,10.2248775,10.2236063
35.810841,10.8627805,10.2285685,0.79637429,10.2272961,10.221152,10.2198788
35.821333,10.1488916,10.2246864,-0.275308575,10.223412,10.2174319,10.2161565
35.831824,10.0995049,10.2208174,-0.348299435,10.2195409,10.2137178,10.2124404
35.842316,10.8627805,10.2169605,0.803629255,10.2156819,10.210009,10.2087295
35.852808,9.74679434,10.2131156,-0.682877185,10.2118349,10.2063058,10.2050243
35.863299,10.2469508,10.2092827,0.19408264,10.2079999,10.2026087,10.2013251
35.873791,10.4880885,10.2054608,0.531627436,10.2041759,10.1989169,10.1976312
35.884282,10.1488916,10.2016502,-0.229692437,10.2003632,10.195231,10.1939433
35.894774,10.1488916,10.19785,-0.221265459,10.1965609,10.1915505,10.1902606
35.905266,10.8166538,10.1940602,0.789046019,10.192769,10.1878756,10.1865836
35.915757,10.5356538,10.190281,0.587684229,10.1889877,10.1842066,10.1829125
35.926249,10.4403065,10.1865114,0.503780825,10.185216,10.1805429,10.1792468
35.93674,10,10.1827519,-0.427494876,10.1814543,10.1768852,10.1755869
35.947232,10.0498756,10.1790015,-0.35934091,10.1777019,10.1732327,10.1719323
35.957724,10.2469508,10.1752606,0.267750142,10.1739588,10.1695858,10.1682833
35.968215,10.198039,10.1715292,0.162818295,10.1702253,10.1659449,10.1646402
35.978707,10,10.1678064,-0.409641822,10.1665004,10.1623091,10.1610024
35.989198,10.9544512,10.1640927,0.889021036,10.1627846,10.1586793,10.1573704
35.99969,10.4880885,10.1603873,0.572451865,10.159077,10.1550547,10.1537437
36.010182,10.0995049,10.1566904,-0.239134853,10.1553779,10.1514357,10.1501225
36.020673,10.5830052,10.1530022,0.655746192,10.1516876,10.1478225,10.1465072
36.031165,9.74679434,10.1493218,-0.634450506,10.148005,10.1442145,10.1428971
36.041656,9.53939201,10.1456498,-0.778625594,10.1443309,10.1406125,10.1392929
36.052148,9.38083152,10.1419855,-0.872441381,10.1406644,10.1370156,10.1356938
36.06264,10,10.138329,-0.371926043,10.1370057,10.1334242,10.1321003
36.073131,10.6301458,10.1346806,0.703892921,10.1333551,10.1298386,10.1285126
36.083623,11.3137085,10.1310394,1.08750589,10.1297118,10.1262583,10.12493
36.094114,9.53939201,10.1274062,-0.766820838,10.1260764,10.1226837,10.1213533
36.104606,9.69535971,10.1237801,-0.654538284,10.1224481,10.1191144,10.1177818
36.115098,9.64365076,10.1201613,-0.690297435,10.1188272,10.1155505,10.1142157
36.125589,10.5830052,10.1165502,0.68297517,10.1152138,10.1119924,10.1106554
36.136081,10.1488916,10.1129459,0.189593506,10.1116073,10.1084394,10.1071003
36.146572,10.4403065,10.109349,0.575289033,10.1080083,10.1048922,10.1035509
36.157064,9.48683298,10.1057589,-0.786718459,10.104416,10.1013502,10.1000067
36.167556,10.6301458,10.1021758,0.726615444,10.1008307,10.0978136,10.0964679
36.178047,10.5830052,10.0986,0.695992286,10.0972526,10.0942828,10.0929348
36.188539,10.7238053,10.0950307,0.792953111,10.0936811,10.090757,10.0894069
36.19903,10.6301458,10.0914685,0.733946425,10.0901167,10.087237,10.0858847
36.209522,10.4880885,10.0879126,0.63259453,10.0865586,10.0837221,10.0823676
36.220014,10.7703296,10.0843635,0.828230715,10.0830073,10.0802127,10.0788559
36.230505,9.69535971,10.0808213,-0.620855531,10.0794628,10.0767089,10.0753499
36.240997,9.8488578,10.0772853,-0.477940937,10.0759246,10.0732102,10.0718489
36.251488,10.3440804,10.0737562,0.519927116,10.0723933,10.0697172,10.0683537
36.26198,10.4403065,10.0702332,0.608336473,10.068868,10.0662293,10.0648636
36.272472,10.3923048,10.0667167,0.57060333,10.0653492,10.0627467,10.0613788
36.282963,10.6301458,10.0632068,0.752953502,10.0618371,10.0592699,10.0578996
36.293455,10.2469508,10.059703,0.432721362,10.058331,10.055798,10.0544255
36.303946,10.1488916,10.0562058,0.304443421,10.0548315,10.0523319,10.0509571
36.314438,9.16515139,10.0527145,-0.942105663,10.051338,10.0488708,10.0474937
36.32493,10.7238053,10.0492294,0.821325701,10.0478506,10.0454149,10.0440356
36.335421,10.4880885,10.0457508,0.665084705,10.0443698,10.0419648,10.0405832
36.345913,10.6301458,10.0422781,0.766725345,10.0408947,10.0385196,10.0371358
36.356404,10.8166538,10.0388117,0.881953562,10.0374261,10.0350801,10.033694
36.366896,9.53939201,10.0353512,-0.704243676,10.0339633,10.0316456,10.0302572
36.377388,10.8627805,10.0318967,0.9115283,10.0305064,10.0282163,10.0268256
36.387879,9.21954446,10.0284485,-0.899390927,10.027056,10.0247927,10.0233997
36.398371,10.3440804,10.025006,0.564866743,10.0236112,10.021374,10.0199787
36.408862,10.5356538,10.0215698,0.716996499,10.0201727,10.017961,10.0165634
36.419354,9.2736185,10.0181391,-0.862856101,10.0167397,10.0145529,10.0131529
36.429846,9.74679434,10.0147144,-0.517609961,10.0133127,10.01115,10.0097478
36.440337,10.7238053,10.0112959,0.844102727,10.0098918,10.0077527,10.0063482
36.450829,8.71779789,10.0078829,-1.13581908,10.0064765,10.0043604,10.0029535
36.46132,10.4880885,10.004476,0.695422529,10.0030673,10.0009736,9.99956436
36.471812,10.8166538,10.0010746,0.903094261,9.99966351,9.9975917,9.99618014
36.482304,9.89949494,9.99767895,-0.313343277,9.99626554,9.99421504,9.99280114
36.492795,9.94987437,9.99428938,-0.210748683,9.99287362,9.99084392,9.98942768
36.503287,9.69535971,9.99090521,-0.543640963,9.9894871,9.9874777,9.9860591
36.513778,9.89949494,9.98752707,-0.296702092,9.9861066,9.98411699,9.98269604
36.52427,9.74679434,9.98415428,-0.487195995,9.98273146,9.98076116,9.97933785
36.534762,9.64365076,9.98078716,-0.580634476,9.97936196,9.97741052,9.97598485
36.545253,9.8488578,9.97742599,-0.35856406,9.97599842,9.97406538,9.97263734
36.555745,10.1488916,9.97407012,0.418116549,9.97264018,9.9707251,9.96929468
36.566236,10.6301458,9.97072016,0.812050275,9.96928785,9.9673903,9.96595751
36.576728,9.8488578,9.96737547,-0.344263952,9.96594077,9.96406034,9.96262516
36.58722,10.6301458,9.96403634,0.8161553,9.96259925,9.96073554,9.95929797
36.597711,9.21954446,9.96070308,-0.8609057,9.95926359,9.9574162,9.95597623
36.608203,9.48683298,9.95737503,-0.685960678,9.95593314,9.95410167,9.95265931
36.618694,9.89949494,9.95405281,-0.233576261,9.95260851,9.9507926,9.94934783
36.629186,10.6770783,9.95073575,0.852257297,9.94928905,9.94748833,9.94604115
36.639678,10.0498756,9.94742417,0.320080386,9.94597505,9.94418917,9.94273958
36.650169,10.198039,9.94411835,0.50390542,9.94266682,9.94089544,9.93944343
36.660661,10.0995049,9.94081874,0.398354365,9.93936478,9.9376065,9.93615206
36.671152,10.3923048,9.93752379,0.674374568,9.9360674,9.93432296,9.9328661
36.681644,9.48683298,9.93423393,-0.66888037,9.9327751,9.9310442,9.9295849
36.692136,10.0995049,9.93094946,0.41055508,9.9294882,9.92777051,9.92630878
36.702627,9.48683298,9.92767069,-0.663956104,9.92620698,9.92450221,9.92303803
36.713119,10.1488916,9.92439696,0.473808615,9.9229308,9.92123866,9.91977203
36.72361,10.198039,9.92112889,0.526222514,9.91966028,9.91798048,9.9165114
36.734102,10.4403065,9.91786585,0.722800569,9.91639477,9.91472704,9.91325549
36.744594,10.5830052,9.91460812,0.81755558,9.91313458,9.91147864,9.91000463
36.755085,10,9.911356,0.297731416,9.90987999,9.90823558,9.9067591
36.765577,9.74679434,9.90810887,-0.401639797,9.90663038,9.90499725,9.90351829
36.776068,9.74679434,9.90486733,-0.397583929,9.90338636,9.90176424,9.9002828
36.78656,10.0995049,9.90163073,0.444830533,9.90014728,9.89853593,9.89705202
36.797052,10.8627805,9.8983994,0.982029071,9.89691345,9.89531264,9.89382623
36.807543,9.32737905,9.89517361,-0.753521436,9.89368517,9.89209465,9.89060574
36.818035,10.6770783,9.89195274,0.886073084,9.8904618,9.88888134,9.88738993
36.828526,9.48683298,9.88873739,-0.633959315,9.88724394,9.88567332,9.88417941
36.839018,10,9.88552694,0.338338677,9.88403098,9.88246998,9.88097355
36.84951,10.4403065,9.88232167,0.746983825,9.88082319,9.8792716,9.87777266
36.860001,10.0498756,9.87912189,0.413223588,9.87762088,9.87607849,9.87457703
36.870493,9.11043358,9.87592696,-0.874924786,9.87442343,9.87289003,9.87138604
36.880984,9.05538514,9.87273749,-0.904075411,9.87123142,9.86970682,9.8682003
36.891476,9.48683298,9.86955285,-0.618643573,9.86804425,9.86652825,9.86501919
36.901968,9.69535971,9.86637334,-0.413537941,9.8648622,9.86335461,9.861843
36.912459,9.79795897,9.86319925,-0.255421776,9.86168556,9.8601862,9.85867204
36.922951,9.89949494,9.86002997,0.198657916,9.85851372,9.85702241,9.85550569
36.933442,9.69535971,9.85686608,-0.401878544,9.85534727,9.85386382,9.85234455
36.943934,10.4880885,9.85370697,0.796480703,9.85218559,9.85070984,9.849188
36.954426,10.2956301,9.85055293,0.667141069,9.84902898,9.84756076,9.84603635
36.964917,10.2956301,9.84740426,0.669496737,9.84587773,9.84441686,9.84288987
36.975409,10.1488916,9.84426034,0.551934081,9.84273123,9.84127755,9.83974798
36.9859,9.32737905,9.84112175,-0.716758465,9.83959005,9.83814341,9.83661125
36.996392,9.48683298,9.83798789,-0.592583255,9.8364536,9.83501384,9.83347909
37.006884,9.48683298,9.83485906,-0.58993735,9.83332217,9.83188913,9.83035178
37.017375,9.16515139,9.83173553,-0.816446042,9.83019604,9.82876957,9.82722961
37.027867,9.74679434,9.82861671,-0.286046081,9.8270746,9.82565455,9.82411199
37.038358,9.74679434,9.82550317,-0.280550924,9.82395845,9.82254468,9.82099949
37.04885,10.0498756,9.82239431,0.476950013,9.82084697,9.81943933,9.81789153
37.059342,9.21954446,9.81929042,-0.774432668,9.81774045,9.81633881,9.81478838
37.069833,10.3923048,9.81619178,0.759021126,9.81463918,9.8132434,9.81169034
37.080325,9.32737905,9.81309779,-0.696935245,9.81154255,9.8101525,9.8085968
37.090816,9.21954446,9.81000903,-0.768416929,9.80845115,9.8070667,9.80550836
37.101308,9.2736185,9.80692491,-0.730278315,9.80536438,9.8039854,9.80242441
37.1118,9.79795897,9.80384571,-0.0767250828,9.80228252,9.80090889,9.79934524
37.122291,10.1488916,9.80077171,0.590016828,9.79920586,9.79783745,9.79627114
37.132783,9.94987437,9.79770231,0.390092373,9.7961338,9.79477049,9.79320151
37.143274,10.2956301,9.7946381,0.707807915,9.79306691,9.79170859,9.79013693
37.153766,10.0498756,9.79157847,0.508229428,9.79000461,9.78865115,9.78707682
37.164258,9.05538514,9.78852371,-0.856235117,9.78694717,9.78559846,9.78402145
37.174749,10.2956301,9.78547411,0.714252078,9.78389487,9.78255081,9.7809711
37.185241,9.69535971,9.78242907,-0.295075162,9.78084713,9.7795076,9.7779252
37.195732,9.32737905,9.77938916,-0.672316966,9.77780452,9.77646941,9.77488431
37.206224,10.5356538,9.77635379,0.871378198,9.77476645,9.77343566,9.77184784
37.216716,9.8488578,9.77332325,0.274835508,9.77173319,9.77040662,9.76881609
37.227207,9.74679434,9.77029781,-0.153308388,9.76870503,9.76738257,9.76578932
37.237699,9.74679434,9.76727689,-0.143117241,9.76568139,9.76436293,9.76276696
37.24819,10.2469508,9.76426106,0.694758741,9.76266283,9.76134828,9.75974957
37.258682,10.0498756,9.76124973,0.537239142,9.75964876,9.75833802,9.75673658
37.269174,10.3440804,9.75824317,0.765400065,9.75663947,9.75533244,9.75372825
37.279665,9.94987437,9.75524168,0.441171954,9.75363522,9.75233182,9.75072488
37.290157,10.3440804,9.75224466,0.769308634,9.75063545,9.74933557,9.74772588
37.300648,9.2736185,9.74925268,-0.689662367,9.7476407,9.74634427,9.74473181
37.31114,9.8488578,9.74626515,0.320300872,9.74465041,9.74335733,9.74174211
37.321632,10.1488916,9.74328237,0.636874555,9.74166485,9.74037503,9.73875703
37.332123,9.38083152,9.74030459,-0.599560731,9.7386843,9.73739765,9.73577687
37.342615,9.32737905,9.73733125,-0.640275092,9.73570817,9.73442461,9.73280105
37.353106,10.4403065,9.7343629,0.840204506,9.73273703,9.73145648,9.72983013
37.363598,10.2956301,9.73139897,0.751153231,9.7297703,9.72849268,9.72686352
37.37409,9.21954446,9.72843973,-0.713368957,9.72680825,9.72553348,9.72390152
37.384581,9.32737905,9.72548545,-0.630956733,9.72385117,9.72257916,9.72094439
37.395073,9.48683298,9.72253557,-0.485492114,9.72089848,9.71962915,9.71799156
37.405564,10,9.71959064,0.529536929,9.71795072,9.71668401,9.7150436
37.416056,9.05538514,9.71665009,-0.81318199,9.71500734,9.71374316,9.71209992
37.426548,10.198039,9.71371418,0.69593451,9.7120686,9.71080688,9.7091608
37.437039,9.8488578,9.7107832,0.371583905,9.70913478,9.70787544,9.70622652
37.447531,10.198039,9.70785658,0.700130309,9.70620531,9.70494828,9.70329651
37.458022,9.64365076,9.70493486,-0.24755625,9.70328073,9.70202594,9.70037132
37.468514,9.74679434,9.70201748,0.211605454,9.70036049,9.69910787,9.69745039
37.479006,9.53939201,9.6991047,-0.399640702,9.69744485,9.69619433,9.69453398
37.489497,10.2469508,9.69619681,0.742127991,9.69453408,9.69328559,9.69162237
37.499989,10.5830052,9.69329323,0.943245468,9.69162763,9.6903811,9.68871499
37.51048,9.64365076,9.69039451,-0.216203036,9.68872602,9.68748139,9.6858124
37.520972,9.11043358,9.6875001,-0.759648943,9.68582871,9.68458591,9.68291402
37.531464,10.6301458,9.68461025,0.972386531,9.68293596,9.68169493,9.68002014
37.541955,9.11043358,9.68172523,-0.755838378,9.68004804,9.67880871,9.67713101
37.552447,9.05538514,9.6788445,-0.789594426,9.6771644,9.6759267,9.67424609
37.562938,9.59166305,9.67596858,-0.290354146,9.67428556,9.67304944,9.67136591
37.57343,9.21954446,9.67309692,-0.673463038,9.67141098,9.67017637,9.66848992
37.583922,9.74679434,9.67022979,0.276703005,9.66854092,9.66730777,9.66561838
37.594413,9.79795897,9.66736746,0.36137448,9.66567564,9.66444389,9.66275156
37.604905,9.2736185,9.66450936,-0.625212656,9.6628146,9.66158418,9.65988891
37.615396,10,9.66165604,0.581673413,9.65995833,9.65872919,9.65703097
37.625888,9.53939201,9.65880695,-0.345564655,9.65710628,9.65587836,9.65417717
37.63638,9.05538514,9.65596234,-0.774969161,9.65425871,9.65303195,9.6513278
37.646871,9.48683298,9.65312248,-0.407786099,9.65141588,9.65019023,9.64848311
37.657363,9.89949494,9.65028683,0.499207478,9.64857725,9.64735265,9.64564255
37.667854,9.21954446,9.64745591,-0.654149415,9.64574335,9.64451975,9.64280666
37.678346,9.89949494,9.64462919,0.504842303,9.64291363,9.64169097,9.63997488
37.688838,9.48683298,9.64180691,-0.393667278,9.64008835,9.63886658,9.63714749
37.699329,10.5830052,9.63898934,0.97160481,9.63726777,9.63604684,9.63432475
37.709821,8.77496439,9.63617593,-0.928014841,9.63445136,9.6332312,9.6315061
37.720312,9.59166305,9.63336722,-0.204216004,9.63163963,9.63042021,9.62869208
37.730804,9.89949494,9.63056266,0.518586804,9.62883204,9.6276133,9.62588215
37.741296,9.16515139,9.62776251,-0.680155221,9.62602886,9.62481075,9.62307656
37.751787,9.48683298,9.62496703,-0.3716639,9.62323034,9.62201281,9.62027559
37.762279,9.59166305,9.62217568,-0.174678669,9.62043594,9.61921894,9.61747867
37.77277,9.59166305,9.61938899,-0.16651108,9.61764619,9.61642968,9.61468635
37.783262,9.69535971,9.6166064,0.280630205,9.61486055,9.61364447,9.61189807
37.793754,8.66025404,9.61382819,-0.976511216,9.61207927,9.61086357,9.60911411
37.804245,9.69535971,9.61105461,0.290353414,9.60930261,9.60808726,9.60633472
37.814737,9.21954446,9.60828512,-0.623490708,9.60653004,9.60531498,9.60355936
37.825228,10.4403065,9.60552024,0.913666386,9.60376208,9.60254726,9.60078855
37.83572,9.89949494,9.60275945,0.544734331,9.60099818,9.59978356,9.59802176
37.846212,10.0995049,9.60000298,0.706754524,9.59823861,9.59702415,9.59525924
37.856703,9.43398113,9.59725111,-0.404066795,9.59548363,9.59426928,9.59250125
37.867195,10.3440804,9.59450329,0.865781233,9.59273269,9.59151841,9.58974726
37.877686,10.4880885,9.59176005,0.946746237,9.58998633,9.58877206,9.58699779
37.888178,9.32737905,9.58902084,-0.511509327,9.58724399,9.5860297,9.5842523
37.89867,9.53939201,9.58628594,-0.216550056,9.58450595,9.58329159,9.58151105
37.909161,10.1488916,9.58355559,0.751888275,9.58177245,9.58055798,9.57877429
37.919653,10,9.58082925,0.647433971,9.57904296,9.57782835,9.57604149
37.930144,10.198039,9.57810745,0.787357336,9.576318,9.57510319,9.57331318
37.940636,9.69535971,9.57538966,0.346366936,9.57359704,9.57238199,9.57058881
37.951128,9.32737905,9.57267613,-0.495274747,9.57088033,9.56966501,9.56786865
37.961619,9.74679434,9.5699671,0.420508312,9.56816813,9.56695248,9.56515294
37.972111,10.1488916,9.56726207,0.762646378,9.5654599,9.5642439,9.56244116
37.982602,8.71779789,9.56456152,-0.920197608,9.56275616,9.56153976,9.55973382
37.993094,9.38083152,9.56186495,-0.42548024,9.56005638,9.55883954,9.5570304
38.003586,9.21954446,9.55917261,-0.582776242,9.55736082,9.5561435,9.55433114
38.014077,9.59166305,9.55648473,0.18755884,9.55466972,9.55345189,9.5516363
38.024569,9.74679434,9.5538008,0.439310304,9.55198257,9.55076418,9.54894536
38.03506,9.48683298,9.55112133,-0.253551474,9.54929986,9.54808087,9.54625882
38.045552,9.53939201,9.5484458,-0.0951513667,9.54662108,9.54540146,9.54357617
38.056044,9.64365076,9.54577445,0.312851902,9.54394648,9.54272619,9.54089764
38.066535,9.11043358,9.54310753,-0.657779562,9.54127631,9.54005531,9.5382235
38.077027,9.05538514,9.54044453,-0.696462055,9.53861004,9.53738829,9.53555322
38.087518,10.5830052,9.53778595,1.02235967,9.53594819,9.53472565,9.5328873
38.09801,9.48683298,9.53513127,-0.219768721,9.53329023,9.53206687,9.53022523
38.108502,9.79795897,9.53248074,0.515245796,9.53063641,9.52941219,9.52756726
38.118993,9.64365076,9.5298346,0.337366502,9.52798697,9.52676186,9.52491363
38.129485,9.8488578,9.52719235,0.56715558,9.52534141,9.52411537,9.52226383
38.139976,10.6770783,9.52455447,1.0735566,9.52270022,9.52147321,9.51961836
38.150468,9.64365076,9.52192047,0.34889869,9.52006289,9.51883487,9.5169767
38.16096,9.89949494,9.51929057,0.616607141,9.51742967,9.51620061,9.5143391
38.171451,8.54400375,9.51666503,-0.986235917,9.51480079,9.51357066,9.51170581
38.181943,10.0995049,9.51404334,0.765154626,9.51217576,9.51094451,9.50907632
38.192434,9.53939201,9.51142598,0.167230468,9.50955505,9.50832266,9.50645111
38.202926,9.59166305,9.50881247,0.287837767,9.50693817,9.5057046,9.50382969
38.213418,10.0498756,9.50620302,0.737341574,9.50432536,9.50309057,9.50121229
38.223909,9.43398113,9.5035979,-0.263849897,9.50171686,9.50048082,9.49859916
38.234401,10.0498756,9.50099659,0.740863707,9.49911217,9.49787484,9.4959898
38.244892,8.88819442,9.49839958,-0.781156299,9.49651176,9.49527312,9.49338468
38.255384,8.83176087,9.49580637,-0.814889873,9.49391515,9.49267516,9.49078332
38.265876,9.32737905,9.4932172,-0.407232304,9.49132258,9.49008119,9.48818594
38.276367,9.69535971,9.49063231,0.452468122,9.48873427,9.48749147,9.4855928
38.286859,10.0498756,9.48805121,0.749549475,9.48614974,9.48490548,9.48300338
38.29735,8.71779789,9.48547436,-0.876171487,9.48356946,9.48232372,9.48041818
38.307842,10.0498756,9.48290128,0.752976983,9.48099294,9.47974568,9.4778367
38.318334,9.11043358,9.48033221,-0.608192924,9.47842042,9.4771716,9.47525917
38.328825,8.77496439,9.47776738,-0.838333463,9.47585213,9.47460173,9.47268584
38.339317,8.88819442,9.4752063,-0.766167006,9.47328758,9.47203556,9.4701162
38.349808,9.8488578,9.47264944,0.613358265,9.47072725,9.46947357,9.46755074
38.3603,9.89949494,9.47009632,0.655285144,9.46817064,9.46691528,9.46498896
38.370792,8.66025404,9.46754716,-0.898494921,9.46561799,9.46436092,9.4624311
38.381283,9.21954446,9.46500221,-0.495436932,9.46306954,9.46181072,9.4598774
38.391775,9.2736185,9.46246097,-0.434560097,9.46052479,9.45926419,9.45732736
38.402266,8.71779789,9.45992393,-0.861467375,9.45798423,9.45672181,9.45478146
38.412758,9.43398113,9.45739058,-0.153001452,9.45544735,9.45418309,9.45223921
38.42325,9.48683298,9.45486116,0.178806652,9.45291441,9.45164827,9.44970085
38.433741,9.43398113,9.45233591,-0.135479823,9.45038562,9.44911757,9.44716661
38.444233,10.1488916,9.44981435,0.836108377,9.4478605,9.44659051,9.44463599
38.454724,9.21954446,9.44729693,-0.477234192,9.44533952,9.44406757,9.44210948
38.465216,9.43398113,9.44478318,-0.10393291,9.4428222,9.44154824,9.43958659
38.475708,9.11043358,9.44227333,-0.576055338,9.44030877,9.43903278,9.43706755
38.486199,9.89949494,9.43976761,0.67803195,9.43779947,9.43652141,9.43455259
38.496691,10,9.43726554,0.750156292,9.4352938,9.43401365,9.43204123
38.507182,8.88819442,9.43476758,-0.739305866,9.43279224,9.43150996,9.42953393
38.517674,9.64365076,9.43227326,0.459758094,9.4302943,9.42900986,9.42703022
38.528166,8.1240384,9.4297828,-1.14269173,9.42780022,9.42651359,9.42453032
38.538657,9,9.42729643,-0.65367915,9.42531022,9.42402137,9.42203447
38.549149,10.5830052,9.42481368,1.07619309,9.42282383,9.42153273,9.41954218
38.55964,9.89949494,9.422335,0.690767639,9.4203415,9.41904812,9.41705393
38.570132,8.66025404,9.41985993,-0.871553724,9.41786277,9.41656708,9.41456922
38.580624,10.198039,9.41738869,0.883544192,9.41538786,9.41408983,9.4120883
38.591115,8.60232527,9.4149215,-0.901441198,9.412917,9.41161659,9.40961138
38.601607,10.1488916,9.41245789,0.858157136,9.41044971,9.40914689,9.407138
38.612098,8.88819442,9.40999833,-0.722359961,9.40798645,9.4066812,9.40466861
38.62259,9.16515139,9.40754233,-0.492332149,9.40552675,9.40421903,9.40220274
38.633082,9.21954446,9.40509013,-0.430750131,9.40307084,9.40176062,9.39974061
38.643573,10.1488916,9.40264195,0.863857403,9.40061893,9.3993062,9.39728246
38.654065,9.64365076,9.40019732,0.493410014,9.39817057,9.39685527,9.3948278
38.664556,9.21954446,9.39775669,-0.422151911,9.3957262,9.39440832,9.39237711
38.675048,8.94427191,9.3953196,-0.671600842,9.39328536,9.39196486,9.38992989
38.68554,10.3923048,9.39288627,0.999709245,9.39084827,9.38952512,9.38748639
38.696031,9.48683298,9.39045692,0.310444934,9.38841516,9.38708933,9.38504683
38.706523,9.32737905,9.38803109,-0.246276347,9.38598555,9.38465701,9.38261073
38.717014,9.38083152,9.38560923,-0.0691209968,9.3835599,9.38222863,9.38017856
38.727506,9.79795897,9.38319087,0.64402492,9.38113774,9.3798037,9.37774983
38.737998,9.21954446,9.38077624,-0.40153678,9.37871931,9.37738246,9.37532478
38.748489,8.94427191,9.37836556,-0.658857838,9.37630481,9.37496514,9.37290364
38.758981,9.69535971,9.37595836,0.565156043,9.37389378,9.37255125,9.37048592
38.769472,9.16515139,9.3735551,-0.456512549,9.37148668,9.37014126,9.36807209
38.779964,9.59166305,9.3711553,0.469582521,9.36908304,9.3677347,9.36566168
38.790456,9.38083152,9.3687592,0.109874109,9.36668309,9.36533179,9.36325492
38.800947,9.38083152,9.36636701,0.120268487,9.36428703,9.36293276,9.36085202
38.811439,9,9.36397827,-0.603306118,9.36189442,9.36053713,9.35845251
38.82193,8.88819442,9.36159343,-0.688039981,9.3595057,9.35814537,9.35605686
38.832422,10.1488916,9.35921203,0.888639147,9.3571204,9.355757,9.3536646
38.842914,9.11043358,9.35683429,-0.496387661,9.35473876,9.35337225,9.35127594
38.853405,10.2469508,9.35446042,0.94471707,9.35236098,9.35099134,9.34889111
38.863897,9.8488578,9.35208998,0.704817583,9.34998661,9.34861381,9.34650965
38.874388,9.21954446,9.34972339,-0.360803182,9.34761609,9.3462401,9.34413201
38.88488,10.0498756,9.34736022,0.83816192,9.34524897,9.34386975,9.34175771
38.895372,8.71779789,9.34500066,-0.791961348,9.34288546,9.34150299,9.339387
38.905863,8.54400375,9.34264495,-0.89366728,9.34052579,9.33914003,9.33702007
38.916355,9.43398113,9.34029263,0.306085776,9.33816949,9.33678042,9.33465648
38.926846,7.74596669,9.33794414,-1.26173588,9.33581701,9.33442459,9.33229667
38.937338,9.64365076,9.33559901,0.555024095,9.3334679,9.3320721,9.32994018
38.94783,9,9.33325749,-0.57728458,9.33112237,9.32972316,9.32758723
38.958321,10.1488916,9.33091977,0.904417934,9.32878063,9.32737798,9.32523804
38.968813,8.94427191,9.3285854,-0.619930229,9.32644224,9.32503612,9.32289215
38.979304,9.43398113,9.32625483,0.328216858,9.32410763,9.32269801,9.32055
38.989796,9.74679434,9.3239276,0.650282053,9.32177635,9.32036321,9.31821114
39.000288,9.43398113,9.32160392,0.3352271,9.31944863,9.31803191,9.31587579
39.010779,8.88819442,9.31928402,-0.656574144,9.31712466,9.31570435,9.31354416
39.021271,8.71779789,9.31696745,-0.774060437,9.31480401,9.31338008,9.3112158
39.031762,8.88819442,9.31465463,-0.653039212,9.3124871,9.31105951,9.30889115
39.042254,9.2736185,9.31234512,-0.19679082,9.31017349,9.30874222,9.30656975
39.052746,9.05538514,9.31003914,-0.504632542,9.3078634,9.30642841,9.30425183
39.063237,10,9.3077369,0.8320235,9.30555704,9.3041183,9.30193759
39.073729,9.38083152,9.30543794,0.274578907,9.30325396,9.30181143,9.2996266
39.08422,9.59166305,9.30314272,0.537140886,9.30095459,9.29950825,9.29731927
39.094712,9.79795897,9.30085077,0.705059008,9.29865849,9.29720831,9.29501517
39.105204,9.11043358,9.29856231,-0.433738089,9.29636587,9.29491181,9.29271451
39.115695,8.83176087,9.29627755,-0.681554612,9.29407694,9.29261898,9.2904175
39.126187,9.89949494,9.29399606,0.778138082,9.29179126,9.29032936,9.28812369
39.136678,9.53939201,9.29171826,0.497668319,9.28950927,9.28804339,9.28583352
39.14717,9.05538514,9.2894437,-0.483795996,9.2872305,9.28576062,9.28354655
39.157662,9.38083152,9.28717261,0.306037434,9.28495519,9.28348127,9.28126298
39.168153,9.16515139,9.28490518,-0.34605461,9.28268354,9.28120555,9.27898302
39.178645,9.53939201,9.28264099,0.506706056,9.2804151,9.27893301,9.27670624
39.189136,9.59166305,9.28038045,0.557927057,9.27815031,9.27666409,9.27443306
39.199628,9.74679434,9.27812312,0.684595664,9.27588873,9.27439834,9.27216304
39.21012,9.05538514,9.27586923,-0.469557331,9.27363056,9.27213597,9.2698964
39.220611,9.53939201,9.27361896,0.515531814,9.27137601,9.26987719,9.26763333
39.231103,8.94427191,9.2713719,-0.57192656,9.26912465,9.26762157,9.26537341
39.241594,9.05538514,9.26912846,-0.462323826,9.2668769,9.26536952,9.26311705
39.252086,10.3923048,9.2668882,1.06085656,9.26463233,9.26312062,9.26086383
39.262578,9.64365076,9.26465134,0.615629287,9.26239114,9.26087506,9.25861394
39.273069,8.94427191,9.26241808,-0.564044476,9.26015354,9.25863307,9.2563676
39.283561,9.64365076,9.26018799,0.61924371,9.25791909,9.25639419,9.25412436
39.294052,8.71779789,9.25796148,-0.734958228,9.25568822,9.25415886,9.25188466
39.304544,9.32737905,9.25573814,0.267658211,9.2534605,9.25192664,9.24964806
39.315036,7.87400787,9.25351815,-1.17452555,9.25123612,9.24969773,9.24741476
39.325527,8.88819442,9.25130173,-0.602583862,9.2490153,9.24747235,9.24518498
39.336019,8.71779789,9.24908845,-0.728896809,9.24679761,9.24525005,9.24295827
39.34651,9,9.24687872,-0.496868913,9.24458346,9.24303127,9.24073506
39.357002,9.8488578,9.24467211,0.777293823,9.24237242,9.24081556,9.23851491
39.367494,9,9.24246884,-0.492411254,9.24016471,9.23860314,9.23629804
39.377985,9.8488578,9.2402691,0.78012095,9.23796051,9.23639421,9.23408464
39.388477,9.2736185,9.23807247,0.188536526,9.23575941,9.23418833,9.23187429
39.398968,8.83176087,9.23587936,-0.635703151,9.23356182,9.23198593,9.22966741
39.40946,8.30662386,9.23368935,-0.962842399,9.23136731,9.22978658,9.22746355
39.419952,9.05538514,9.23150263,-0.419663546,9.22917608,9.22759048,9.22526294
39.430443,10.0995049,9.22931941,0.932837352,9.22698835,9.22539783,9.22306577
39.440935,9,9.22713927,-0.476591307,9.22480368,9.22320821,9.22087161
39.451426,9.21954446,9.22496262,-0.0736081758,9.22262248,9.22102203,9.21868089
39.461918,9.53939201,9.22278903,0.562674844,9.22044434,9.21883886,9.21649316
39.47241,9.69535971,9.22061871,0.689014515,9.21826945,9.21665892,9.21430865
39.482901,9.8488578,9.21845186,0.793981072,9.21609802,9.21448239,9.21212753
39.493393,10.2469508,9.21628805,1.0152156,9.21392962,9.21230886,9.20994941
39.503884,10.3440804,9.2141277,1.06299235,9.21176466,9.21013874,9.20777468
39.514376,9.48683298,9.21197038,0.5242734,9.20960273,9.2079716,9.20560292
39.524868,8.36660027,9.2098163,-0.918267954,9.20744401,9.20580765,9.20343433
39.535359,8.71779789,9.20766565,-0.69990554,9.20528872,9.20364708,9.20126911
39.545851,9.48683298,9.20551802,0.530391326,9.20313644,9.20148948,9.19910685
39.556342,9.05538514,9.20337381,-0.38469296,9.20098756,9.19933525,9.19694795
39.566834,9.79795897,9.20123261,0.772480655,9.19884168,9.19718398,9.19479199
39.577326,9.74679434,9.19909461,0.740067386,9.19669898,9.19503586,9.19263917
39.587817,8.77496439,9.19696001,-0.649611903,9.19455968,9.19289109,9.19048969
39.598309,8.94427191,9.1948284,-0.500556184,9.19242335,9.19074925,9.18834314
39.6088,9.48683298,9.19270018,0.542340113,9.1902904,9.18861076,9.1861999
39.619292,8.88819442,9.19057494,-0.549891372,9.18816041,9.18647519,9.18405958
39.629784,9.11043358,9.18845287,-0.279319329,9.18603358,9.18434274,9.18192237
39.640275,8.94427191,9.18633416,-0.491998225,9.18391011,9.1822136,9.17978846
39.650767,8.71779789,9.18421842,-0.682949876,9.18178958,9.18008737,9.17765744
39.661258,9.16515139,9.18210603,-0.130209993,9.17967239,9.17796445,9.17552971
39.67175,9.16515139,9.17999659,-0.121840886,9.17755814,9.17584442,9.17340487
39.682242,9.05538514,9.17789029,-0.350007364,9.17544702,9.17372748,9.17128309
39.692733,8.77496439,9.17578733,-0.633105792,9.17333922,9.17161382,9.16916459
39.703225,9.53939201,9.1736873,0.604735244,9.17123434,9.16950304,9.16704895
39.713716,8.83176087,9.17159059,-0.582949161,9.16913276,9.16739552,9.16493657
39.724208,8.66025404,9.1694968,-0.713612473,9.1670341,9.16529087,9.16282704
39.7347,9.21954446,9.16740612,0.228338208,9.16493852,9.16318928,9.16072055
39.745191,9,9.16531875,-0.40659408,9.16284625,9.16109094,9.15861729
39.755683,8.18535277,9.16323427,-0.98887891,9.16075685,9.15899544,9.15651687
39.766174,8.88819442,9.16115309,-0.522454468,9.15867074,9.15690318,9.15441967
39.776666,9.21954446,9.1590748,0.245905798,9.1565875,9.15481375,9.15232529
39.787158,9.64365076,9.15699959,0.697603882,9.15450733,9.15272734,9.15023392
39.797649,9.2736185,9.15492765,0.344515382,9.15243042,9.15064416,9.14814576
39.808141,9.89949494,9.15285858,0.86408122,9.15035636,9.14856378,9.14606039
39.818632,9.05538514,9.15079278,-0.308881269,9.14828556,9.14648662,9.14397822
39.829124,9.2736185,9.14872983,0.353395903,9.14621759,9.14441225,9.14189883
39.839616,9.2736185,9.14666994,0.356298412,9.14415267,9.14234088,9.13982242
39.850107,8.42614977,9.14461328,-0.847622269,9.14209097,9.14027269,9.13774918
39.860599,9.11043358,9.14255947,-0.179236982,9.14003211,9.13820728,9.13567871
39.87109,9.21954446,9.14050889,0.281132643,9.13797645,9.13614505,9.1336114
39.881582,9.21954446,9.13846115,0.284751315,9.13592362,9.13408559,9.13154684
39.892074,9.69535971,9.13641642,0.747625104,9.13387379,9.13202909,9.12948523
39.902565,9,9.1343749,-0.366571824,9.13182716,9.12997574,9.12742676
39.913057,8.94427191,9.1323362,-0.433663798,9.12978332,9.12792514,9.12537103
39.923548,10.2469508,9.1303007,1.05671665,9.12774267,9.12587768,9.12331842
39.93404,8.54400375,9.12826799,-0.7643718,9.12570481,9.12383297,9.12126854
39.944532,9.94987437,9.12623828,0.907543986,9.12366993,9.12179118,9.11922158
39.955023,9.79795897,9.12421175,0.820821063,9.12163821,9.11975252,9.11717772
39.965515,8.18535277,9.12218801,-0.967902494,9.11960926,9.11771657,9.11513656
39.976006,9.21954446,9.12016743,0.315241216,9.11758347,9.11568374,9.1130985
39.986498,9.21954446,9.11814963,0.318425543,9.11556043,9.11365361,9.11106313
39.99699,9.11043358,9.11613479,-0.0755063852,9.11354035,9.11162639,9.10903065
40.007481,9.21954446,9.1141231,0.324686546,9.11152339,9.10960224,9.10700124
40.017973,8.83176087,9.11211417,-0.529484001,9.10950918,9.1075808,9.10497451
40.028464,9.53939201,9.11010838,0.655197401,9.1074981,9.10556242,9.10295084
40.038956,9.21954446,9.10810533,0.33382499,9.10548974,9.10354673,9.10092983
40.049448,9.21954446,9.10610522,0.336807419,9.1034843,9.10153391,9.09891168
40.059939,9.53939201,9.10410822,0.659760403,9.10148197,9.09952414,9.09689656
40.070431,8.48528137,9.10211396,-0.785386902,9.09948235,9.09751704,9.09488409
40.080922,9.53939201,9.1001228,0.662773877,9.09748582,9.09551297,9.09287465
40.091414,9.69535971,9.09813436,0.772803565,9.095492,9.09351156,9.09086785
40.101906,8.66025404,9.09614883,-0.66022329,9.09350106,9.09151298,9.08886386
40.112397,9.05538514,9.09416638,-0.196929547,9.0915132,9.08951743,9.08686288
40.122889,9.38083152,9.09218664,0.537256807,9.08952802,9.08752451,9.08486452
40.13338,9.53939201,9.09020998,0.670210443,9.08754591,9.0855346,9.08286916
40.143872,9.53939201,9.088236,0.671681481,9.08556647,9.08354731,9.0808764
40.154364,9.2736185,9.0862649,0.432843611,9.08358989,9.08156283,9.07888643
40.164855,10.0995049,9.08429686,1.00757534,9.08161635,9.07958133,9.07689943
40.175347,9.21954446,9.0823315,0.370422675,9.07964548,9.07760245,9.07491502
40.185838,9.05538514,9.08036918,-0.158063413,9.07767763,9.07562654,9.07293358
40.19633,8.77496439,9.07840953,-0.550858549,9.07571243,9.07365322,9.07095471
40.206822,9.32737905,9.07645278,0.500925415,9.07375013,9.07168268,9.0689786
40.217313,8.71779789,9.07449901,-0.597244606,9.07179077,9.06971509,9.06700543
40.227805,9.16515139,9.07254788,0.304308247,9.06983405,9.06775008,9.06503482
40.238296,8.36660027,9.07059977,-0.839046784,9.06788034,9.06578802,9.06306714
40.248788,8.30662386,9.0686543,-0.872943549,9.06592924,9.06382852,9.061102
40.25928,9.16515139,9.06671165,0.313751077,9.06398094,9.06187176,9.0591396
40.269771,9.11043358,9.064772,0.213685702,9.06203563,9.05991793,9.0571801
40.280263,9.16515139,9.06283497,0.319869378,9.06009293,9.05796665,9.05522313
40.290754,9.43398113,9.06090093,0.610802916,9.05815319,9.05601828,9.05326906
40.301246,9.32737905,9.0589695,0.518082573,9.05621605,9.05407245,9.05131751
40.311738,8.88819442,9.05704086,-0.410909292,9.05428169,9.05212933,9.04936866
40.322229,9.74679434,9.0551152,0.831672501,9.05235028,9.0501891,9.04742268
40.332721,8.71779789,9.05319213,-0.579132315,9.05042145,9.04825139,9.0454792
40.343212,8.18535277,9.05127201,-0.930547817,9.04849555,9.04631657,9.04353859
40.353704,9.8488578,9.04935449,0.894149493,9.04657223,9.04438425,9.04160046
40.364196,9.2736185,9.04743972,0.475582561,9.04465166,9.04245461,9.03966501
40.374687,8.88819442,9.0455279,-0.396652851,9.04273401,9.04052784,9.0377324
40.385179,9.11043358,9.04361865,0.258485838,9.04081891,9.03860355,9.03580226
40.39567,9.53939201,9.04171233,0.705464163,9.03890672,9.03668212,9.03387495
40.406162,9.16515139,9.03980857,0.354037883,9.03699708,9.03476316,9.0319501
40.416654,9.59166305,9.03790754,0.744147501,9.03509015,9.03284686,9.03002789
40.427145,8.77496439,9.03600943,-0.510925676,9.03318613,9.03093339,9.02810849
40.437637,9.8488578,9.03411387,0.902631671,9.03128463,9.02902237,9.02619154
40.448128,8.60232527,9.03222121,-0.655664502,9.02938601,9.02711418,9.02427738
40.45862,7.54983444,9.03033108,-1.21675661,9.02748991,9.02520844,9.02236566
40.469112,9.2736185,9.02844451,0.495150471,9.02559735,9.02330532,9.02045654
40.479603,8.06225775,9.02655997,-0.981988913,9.02370681,9.021405,9.01855021
40.490095,9.74679434,9.02467796,0.849774314,9.02181877,9.01950711,9.01664628
40.500586,8.77496439,9.02279882,-0.497829723,9.01993359,9.01761202,9.01474513
40.511078,8.83176087,9.02092219,-0.434926803,9.01805089,9.01571934,9.01284638
40.52157,9.32737905,9.01904824,0.555275435,9.01617087,9.01382925,9.01095021
40.532061,9.38083152,9.01717715,0.603037615,9.01429368,9.01194194,9.00905679
40.542553,8.94427191,9.01530856,-0.266527014,9.01241896,9.01005703,9.00716575
40.553044,9.16515139,9.01344281,0.389497857,9.01054708,9.00817487,9.00527745
40.563536,9.16515139,9.01157954,0.391882438,9.00867766,9.00629511,9.00339152
40.574028,8.42614977,9.00971894,-0.763916987,9.00681088,9.00441791,9.00150814
40.584519,8.60232527,9.00786116,-0.636816999,9.00494691,9.00254345,8.99962748
40.595011,9.05538514,9.00600585,0.222214513,9.00308539,9.00067137,8.99774917
40.605502,8.42614977,9.00415336,-0.760265469,9.00122666,8.99880201,8.99587358
40.615994,9.11043358,9.00230333,0.328831649,8.99937038,8.99693502,8.99400032
40.626486,9.21954446,9.00045593,0.468068938,8.99751671,8.99507056,8.99212959
40.636977,8.24621125,8.99861133,-0.867409984,8.99566583,8.99320881,8.99026154
40.647469,9.2736185,8.99676918,0.526164721,8.99381738,8.99134941,8.98839582
40.65796,8.77496439,8.99492982,-0.469004729,8.99197169,8.9894927,8.98653278
40.668452,9.32737905,8.9930929,0.578174845,8.99012842,8.98763833,8.98467205
40.678944,8.06225775,8.99125859,-0.963846895,8.98828774,8.98578646,8.98281381
40.689435,8.60232527,8.98942705,-0.622175038,8.98644981,8.98393728,8.98095823
40.699927,8.83176087,8.98759793,-0.394762029,8.98461429,8.98209041,8.97910494
40.710418,8.54400375,8.98577157,-0.664656172,8.98278151,8.98024621,8.9772543
40.72091,9.11043358,8.98394763,0.355648632,8.98095112,8.97840431,8.97540595
40.731402,8.18535277,8.98212627,-0.892621699,8.9791233,8.97656489,8.97356006
40.741893,8.77496439,8.98030766,-0.453148176,8.9772982,8.97472812,8.9717168
40.752385,9.05538514,8.97849144,0.277297124,8.97547548,8.97289365,8.9698758
40.762876,9.48683298,8.97667797,0.714251365,8.97365548,8.9710618,8.96803742
40.773368,8.60232527,8.97486688,-0.610361871,8.97183784,8.96923224,8.9662013
40.78386,8.94427191,8.97305835,-0.16966567,8.97002275,8.96740513,8.96436761
40.794351,8.83176087,8.97125254,-0.373485844,8.96821035,8.96558063,8.96253651
40.804843,8.88819442,8.96944911,-0.285052085,8.96640031,8.9637584,8.96070766
40.815334,7.74596669,8.96764839,-1.10529711,8.96459296,8.96193877,8.95888139
40.825826,8.77496439,8.96585003,-0.436904618,8.96278796,8.96012139,8.95705736
40.836318,8.1240384,8.96405421,-0.916523761,8.96098546,8.95830644,8.95523572
40.846809,9.16515139,8.96226109,0.450433463,8.95918565,8.95649407,8.95341665
40.857301,8.71779789,8.96047031,-0.492617933,8.95738817,8.95468394,8.9515998
40.867792,9.53939201,8.95868223,0.762043163,8.95559335,8.95287638,8.94978549
40.878284,8.66025404,8.95689649,-0.544648928,8.95380086,8.95107105,8.9479734
40.888776,9.05538514,8.95511326,0.31665735,8.95201085,8.94926811,8.94616367
40.899267,9.53939201,8.9533327,0.765545108,8.95022349,8.94746773,8.94435648
40.909759,8.77496439,8.95155447,-0.420226231,8.94843844,8.94566955,8.94255147
40.92025,7.87400787,8.94977891,-1.03719383,8.94665604,8.94387393,8.940749
40.930742,9.38083152,8.94800566,0.657895022,8.94487593,8.9420805,8.93894869
40.941234,8.71779789,8.9462349,-0.477950847,8.94309828,8.94028943,8.93715073
40.951725,9.64365076,8.94446679,0.836172215,8.94132326,8.9385009,8.93535527
40.962217,8.83176087,8.94270098,-0.333076742,8.93955053,8.93671454,8.93356198
40.972708,8.71779789,8.94093782,-0.472376893,8.93778041,8.9349307,8.93177117
40.9832,9.11043358,8.93917695,0.413831646,8.93601257,8.93314903,8.92998252
40.993692,7.74596669,8.93741854,-1.09153646,8.93424717,8.9313697,8.92819618
41.004183,8.88819442,8.93566276,-0.217872308,8.93248437,8.92959286,8.92641231
41.014675,8.83176087,8.93390926,-0.319606629,8.93072383,8.92781818,8.92463058
41.025166,9.21954446,8.93215838,0.536084019,8.92896589,8.92604599,8.92285131
41.035658,8.83176087,8.93040978,-0.314084242,8.9272102,8.92427594,8.92107417
41.04615,9.69535971,8.92866361,0.875611845,8.92545693,8.9225082,8.9192993
41.056641,8.30662386,8.92692005,-0.787588844,8.92370623,8.92074293,8.91752689
41.067133,8.71779789,8.92517875,-0.455390895,8.92195778,8.91897978,8.91575658
41.077624,9.21954446,8.92344005,0.544154764,8.9202119,8.9172191,8.9139887
41.088116,8.88819442,8.9217036,-0.183055145,8.91846826,8.91546053,8.91222292
41.098608,8.60232527,8.91996957,-0.563599421,8.916727,8.91370424,8.91045939
41.109099,8.48528137,8.91823812,-0.657994491,8.91498831,8.91195039,8.90869828
41.119591,9.43398113,8.91650892,0.719355416,8.91325183,8.91019865,8.90693925
41.130082,8.88819442,8.91478228,-0.163057848,8.91151789,8.90844933,8.90518262
41.140574,9.48683298,8.91305788,0.757479441,8.90978617,8.9067021,8.90342806
41.151066,9.69535971,8.91133587,0.885451208,8.90805683,8.90495713,8.90167573
41.161557,8.66025404,8.90961642,-0.499361979,8.90633001,8.90321456,8.89992579
41.172049,8.48528137,8.9078992,-0.650090628,8.9046054,8.90147407,8.89817789
41.18254,9.74679434,8.90618452,0.916847765,8.9028833,8.89973598,8.89643237
41.193032,9.21954446,8.90447206,0.561313101,8.9011634,8.89799996,8.8946889
41.203524,8.94427191,8.90276197,0.203739874,8.89944585,8.89626616,8.89294762
41.214015,9.32737905,8.90105442,0.652935396,8.89773081,8.89453474,8.8912087
41.224507,7.68114575,8.89934907,-1.10372249,8.89601795,8.89280538,8.8894718
41.234998,8.06225775,8.89764625,-0.913995899,8.89430759,8.89107838,8.88773726
41.24549,9.05538514,8.89594563,0.399298775,8.89259941,8.88935342,8.88600472
41.255982,8.24621125,8.89424736,-0.805006898,8.89089355,8.88763066,8.88427436
41.266473,8.83176087,8.8925516,-0.246557769,8.88919018,8.88591025,8.88254632
41.276965,8.30662386,8.89085803,-0.764352125,8.88748898,8.88419187,8.88082029
41.287456,9.32737905,8.88916697,0.661975891,8.88579026,8.88247583,8.87909657
41.297948,9,8.88747809,0.335442856,8.88409368,8.8807618,8.87737484
41.30844,8,8.88579154,-0.941164993,8.88239942,8.87904994,8.87565525
41.318931,7.93725393,8.88410749,-0.973064006,8.88070763,8.87734041,8.87393796
41.329423,8.88819442,8.88242561,0.0759526857,8.87901798,8.87563288,8.87222264
41.339914,8.88819442,8.88074621,0.086303019,8.87733079,8.87392766,8.87050962
41.350406,8.88819442,8.87906897,0.0955272266,8.87564573,8.87222443,8.86879855
41.360898,8.42614977,8.87739404,-0.671747178,8.87396297,8.87052334,8.8670896
41.371389,8.42614977,8.8757216,-0.670501172,8.87228265,8.86882455,8.86538292
41.381881,10.198039,8.8740513,1.15064666,8.87060445,8.86712772,8.86367819
41.392372,9.11043358,8.87238346,0.487903797,8.8689287,8.86543319,8.86197572
41.402864,9.11043358,8.87071777,0.489607807,8.86725506,8.86374062,8.86027518
41.413356,8,8.86905438,-0.932230864,8.86558369,8.86205016,8.85857672
41.423847,8.88819442,8.86739345,0.14422541,8.86391475,8.86036198,8.85688052
41.434339,8.71779789,8.86573465,-0.384625478,8.86224792,8.85867573,8.85518623
41.44483,9.43398113,8.86407829,0.754919097,8.86058351,8.85699175,8.85349418
41.455322,8.42614977,8.86242406,-0.660510626,8.85892119,8.85530971,8.85180403
41.465814,9.11043358,8.86077211,0.499661352,8.85726114,8.85362975,8.85011594
41.476305,8.1240384,8.8591226,-0.857370513,8.85560349,8.85195204,8.84843007
41.486797,8.77496439,8.85747521,-0.287246974,8.85394793,8.85027624,8.84674609
41.497288,9.11043358,8.85583025,0.504582328,8.85229478,8.84860268,8.84506432
41.50778,8.54400375,8.85418741,-0.556941345,8.85064371,8.84693103,8.84338442
41.518272,8,8.85254683,-0.923334623,8.84899488,8.84526144,8.84170656
41.528763,8.36660027,8.85090867,-0.695922697,8.84734844,8.84359407,8.84003089
41.539255,8.83176087,8.84927261,-0.132331934,8.84570407,8.84192859,8.83835709
41.549746,9.16515139,8.84763896,0.563482413,8.84406209,8.84026532,8.83668546
41.560238,9.53939201,8.84600741,0.832697186,8.84242217,8.83860393,8.83501569
41.57073,8.54400375,8.84437811,-0.5480642,8.84078448,8.83694458,8.83334792
41.581221,9.79795897,8.84275122,0.977347305,8.83914916,8.83528741,8.83168232
41.591713,9.11043358,8.84112641,0.518948138,8.83751591,8.83363212,8.83001855
41.602204,8.36660027,8.839504,-0.687679964,8.83588502,8.831979,8.82835694
41.612696,9.38083152,8.83788367,0.73684995,8.83425618,8.83032775,8.82669715
41.623188,8.30662386,8.83626558,-0.727764876,8.83262955,8.8286785,8.82503934
41.633679,8.1240384,8.83464987,-0.842977739,8.83100527,8.82703142,8.82338367
41.644171,7.81024968,8.83303624,-1.01132911,8.82938305,8.82538618,8.82172981
41.654662,8.1240384,8.83142499,-0.841062774,8.82776317,8.82374309,8.82007807
41.665154,9.59166305,8.82981582,0.872838605,8.82614534,8.82210183,8.81842814
41.675646,7.41619849,8.82820886,-1.18828043,8.82452969,8.82046256,8.81678016
41.686137,8.42614977,8.82660427,-0.632814745,8.82291639,8.81882543,8.81513429
41.696629,8.88819442,8.82500176,0.251381505,8.82130512,8.81719011,8.8134902
41.70712,8.66025404,8.82340161,-0.403915305,8.8196962,8.81555692,8.81184821
41.717612,9.21954446,8.82180353,0.630667053,8.81808931,8.81392554,8.810208
41.728104,9.43398113,8.82020765,0.783436968,8.81648459,8.81229612,8.80856971
41.738595,9.53939201,8.81861413,0.848986384,8.8148822,8.8106688,8.80693351
41.749087,7.68114575,8.81702267,-1.06577527,8.81328184,8.80904328,8.80529906
41.759578,8.71779789,8.81543356,-0.312467079,8.81168379,8.80741987,8.80366668
41.77007,8.71779789,8.8138465,-0.309917112,8.81008777,8.80579823,8.80203606
41.780562,8.88819442,8.81226164,0.275559023,8.80849391,8.80417853,8.80040734
41.791053,7.74596669,8.81067913,-1.03184904,8.80690237,8.80256091,8.79878067
41.801545,8.54400375,8.80909866,-0.514873688,8.80531284,8.80094506,8.79715573
41.812036,8.42614977,8.80752053,-0.617552232,8.80372562,8.79933128,8.79553284
41.822528,8.48528137,8.80594445,-0.5662712,8.80214041,8.79771927,8.79391167
41.83302,8.48528137,8.80437055,-0.564879787,8.80055735,8.79610916,8.79229238
41.843511,8.88819442,8.80279899,0.292224968,8.7989766,8.79450111,8.79067512
41.854003,9.05538514,8.80122946,0.504138552,8.79739785,8.7928948,8.78905956
41.864494,9.05538514,8.79966226,0.505690493,8.79582141,8.79129054,8.78744602
41.874986,8.42614977,8.7980971,-0.609874846,8.79424695,8.78968802,8.78583418
41.885478,9.11043358,8.79653412,0.560267312,8.79267465,8.78808738,8.7842242
41.895969,8.77496439,8.79497346,-0.141453436,8.79110464,8.78648877,8.78261621
41.906461,9.38083152,8.79341483,0.766431136,8.78953663,8.78489188,8.7810099
41.916952,8.83176087,8.79185854,0.199755667,8.78797091,8.78329701,8.77940559
41.927444,9,8.79030427,0.457925461,8.78640719,8.78170385,8.77780295
41.937936,8.83176087,8.78875218,0.207385361,8.78484561,8.78011255,8.77620214
41.948427,9.69535971,8.7872024,0.95297288,8.78328631,8.77852326,8.77460329
41.958919,8.94427191,8.78565465,0.398267819,8.781729,8.77693567,8.77300611
41.96941,8.54400375,8.78410922,-0.490005587,8.78017397,8.77535007,8.77141089
41.979902,9.38083152,8.78256581,0.773476381,8.77862093,8.77376616,8.76981733
41.990394,8.36660027,8.78102456,-0.64375795,8.77707003,8.77218408,8.76822556
42.000885,9.43398113,8.77948563,0.809008961,8.7755214,8.77060398,8.76663573
42.011377,9.32737905,8.77794872,0.741235678,8.77397476,8.76902556,8.76504755
42.021868,9.21954446,8.77641412,0.665680354,8.77243039,8.7674491,8.7634613
42.03236,8.1240384,8.77488154,-0.806748498,8.77088801,8.76587431,8.76187667
42.042852,8.88819442,8.77335113,0.338885365,8.76934775,8.76430133,8.76029382
42.053343,9,8.77182302,0.477678742,8.76780977,8.7627303,8.75871289
42.063835,9.11043358,8.77029693,0.583212354,8.76627377,8.76116093,8.75713358
42.074326,9.69535971,8.76877315,0.962593667,8.76474005,8.7595935,8.75555617
42.084818,9,8.76725138,0.482440273,8.7632083,8.7580277,8.75398036
42.09531,8.66025404,8.76573178,-0.324773371,8.76167868,8.7564637,8.7524063
42.105801,9.21954446,8.76421448,0.674781426,8.76015133,8.75490162,8.75083414
42.116293,8.66025404,8.76269921,-0.320070568,8.75862596,8.75334117,8.74926356
42.126784,8.71779789,8.76118624,-0.208298718,8.75710286,8.75178264,8.74769487
42.137276,8.36660027,8.7596753,-0.626956968,8.75558176,8.75022572,8.74612775
42.147768,9.11043358,8.75816653,0.593520892,8.75406278,8.74867057,8.74456236
42.158259,8.77496439,8.75666006,0.135293477,8.75254607,8.74711732,8.74299884
42.168751,8.88819442,8.75515562,0.364744843,8.75103134,8.74556568,8.74143688
42.179242,9.16515139,8.75365348,0.64148103,8.74951888,8.74401593,8.73987678
42.189734,9.21954446,8.75215336,0.683660073,8.74800841,8.74246778,8.73831823
42.200226,8.94427191,8.75065541,0.440018747,8.74650006,8.74092136,8.73676138
42.210717,9.16515139,8.74915977,0.644974122,8.74499399,8.73937682,8.73520638
42.221209,8.66025404,8.74766616,-0.295655408,8.7434899,8.73783387,8.73365291
42.2317,9.38083152,8.74617486,0.796653415,8.74198809,8.73629278,8.73210128
42.242192,9.32737905,8.74468558,0.763343613,8.74048827,8.73475326,8.73055117
42.252684,8.66025404,8.74319848,-0.288000767,8.73899057,8.73321546,8.72900274
42.263175,8.66025404,8.74171815,-0.285419191,8.73749962,8.73167952,8.72745613
42.273667,8.71779789,8.7402354,-0.149791562,8.73600619,8.73014513,8.72591103
42.284158,9.05538514,8.73875496,0.56269901,8.73451505,8.72861258,8.72436774
42.29465,8.77496439,8.73727656,0.194133521,8.7330259,8.72708159,8.72282596
42.305142,8.83176087,8.73580034,0.309774955,8.73153889,8.72555229,8.72128582
42.315633,9.43398113,8.73432645,0.836453636,8.73005416,8.72402481,8.71974748
42.326125,7.93725393,8.73285459,-0.891964494,8.72857143,8.72249888,8.71821063
42.336616,8.60232527,8.73138507,-0.359248941,8.727091,8.72097476,8.71667556
42.347108,8.71779789,8.72991761,-0.110089609,8.72561258,8.71945217,8.71514198
42.3576,8.1240384,8.72845234,-0.777440633,8.72413632,8.71793125,8.71361002
42.368091,8.60232527,8.72698941,-0.353078095,8.72266235,8.71641213,8.71207982
42.378583,8.36660027,8.72552853,-0.599106225,8.7211904,8.71489453,8.7105511
42.389074,8.54400375,8.72407,-0.424342143,8.71972074,8.71337873,8.70902413
42.399566,8.83176087,8.72261353,0.33037454,8.7182531,8.71186443,8.70749862
42.410058,8.24621125,8.72115927,-0.689164722,8.71678763,8.71035177,8.70597471
42.420549,7.93725393,8.71970735,-0.884563971,8.71532447,8.7088409,8.70445254
42.431041,8.88819442,8.71825751,0.412234041,8.71386334,8.70733152,8.70293182
42.441532,9.43398113,8.71681003,0.846859552,8.71240452,8.70582391,8.70141283
42.452024,8.18535277,8.71536463,-0.728019135,8.71094774,8.70431778,8.69989528
42.462516,8.36660027,8.71392146,-0.589339627,8.70949315,8.70281328,8.69837931
42.473007,8.36660027,8.71248066,-0.588115967,8.70804088,8.70131053,8.69686505
42.483499,8.30662386,8.71104195,-0.635938743,8.70659066,8.69980925,8.69535221
42.49399,8.83176087,8.70960562,0.349507155,8.70514277,8.69830973,8.69384108
42.504482,8.66025404,8.70817139,-0.218900324,8.70369694,8.69681166,8.69233137
42.514974,8.60232527,8.70673941,-0.323131778,8.70225332,8.69531519,8.69082321
42.525465,8.83176087,8.70530983,0.35559955,8.70081205,8.69382046,8.68931674
42.535957,9.11043358,8.70388236,0.637613689,8.69937285,8.69232718,8.68781166
42.546448,9.32737905,8.7024573,0.790519926,8.69793601,8.69083562,8.68630828
42.55694,8.48528137,8.7010344,-0.46449222,8.69650128,8.6893455,8.68480628
42.567432,9.43398113,8.69961377,0.856952366,8.69506878,8.68785696,8.68330581
42.577923,9.21954446,8.69819557,0.722044934,8.69363866,8.68637013,8.68180701
42.588415,8.06225775,8.69677952,-0.796568751,8.69221065,8.68488473,8.68030959
42.598906,8.66025404,8.69536591,-0.187381618,8.69078502,8.68340103,8.67881382
42.609398,8.48528137,8.69395446,-0.456807496,8.68936151,8.68191875,8.67731943
42.61989,9.8488578,8.69254533,1.07531971,8.68794027,8.68043802,8.67582654
42.630381,8,8.69113865,-0.831347489,8.68652144,8.67895898,8.67433529
42.640873,9.21954446,8.68973416,0.72788069,8.68510475,8.67748135,8.67284539
42.651364,8.18535277,8.68833214,-0.709210383,8.68369048,8.6760054,8.67135714
42.661856,8.36660027,8.68693233,-0.565978855,8.68227837,8.67453084,8.66987022
42.672348,8.60232527,8.68553487,-0.288460748,8.68086856,8.67305782,8.66838479
42.682839,9,8.6841399,0.562014321,8.6794612,8.67158646,8.66690098
42.693331,8.83176087,8.68274717,0.386022919,8.67805603,8.67011648,8.6654185
42.703822,9.21954446,8.68135695,0.73361264,8.67665331,8.66864817,8.66393763
42.714314,9.94987437,8.67996899,1.12690079,8.6752528,8.66718123,8.66245808
42.724806,8.66025404,8.67858342,-0.135386035,8.67385464,8.6657158,8.66098
42.735297,9.2736185,8.67720039,0.772281107,8.67245897,8.66425201,8.65950351
42.745789,9.79795897,8.67581964,1.05931078,8.67106553,8.66278959,8.65802833
42.75628,8.88819442,8.67444146,0.462334248,8.66967461,8.6613288,8.65655473
42.766772,9.11043358,8.67306561,0.661338017,8.66828596,8.65986937,8.65508244
42.777264,8.60232527,8.67169222,-0.263376072,8.66689973,8.65841143,8.65361158
42.787755,8.77496439,8.67032143,0.323485631,8.66551605,8.6569551,8.65214229
42.798247,8.71779789,8.66895299,0.22100881,8.66413466,8.65550012,8.65067429
42.808738,7.61577311,8.66758717,-1.02557987,8.66275584,8.65404676,8.64920786
42.81923,9.43398113,8.66622372,0.876217671,8.66137933,8.65259473,8.6477427
42.829722,8.54400375,8.66486279,-0.347647879,8.66000529,8.65114417,8.64627896
42.840213,9.05538514,8.66350452,0.626003688,8.65863386,8.6496952,8.64481677
42.850705,7.74596669,8.66214866,-0.95717395,8.65726479,8.64824756,8.64335584
42.861196,9,8.6607955,0.582412658,8.65589836,8.64680151,8.64189645
42.871688,9.21954446,8.65944477,0.748398079,8.65453432,8.64535677,8.64043832
42.88218,7.34846923,8.65809664,-1.14438954,8.65317281,8.64391348,8.63898157
42.892671,8.54400375,8.65675124,-0.335778938,8.65181399,8.64247177,8.63752636
42.903163,8.94427191,8.65540833,0.537460302,8.6504576,8.64103136,8.63607239
42.913654,8.94427191,8.65406819,0.538705593,8.64910393,8.63959252,8.63461993
42.924146,9.43398113,8.65273058,0.883883788,8.64775272,8.63815497,8.63316871
42.934638,8,8.65139564,-0.807090852,8.64640414,8.63671885,8.63171886
42.945129,8.60232527,8.65006353,-0.218490865,8.64505832,8.63528429,8.63027051
42.955621,8.1240384,8.64873399,-0.724358741,8.64371503,8.633851,8.62882338
42.966112,8.60232527,8.64740731,-0.212325331,8.64237454,8.63241927,8.62737775
42.976604,9.21954446,8.64608327,0.757272201,8.64103662,8.6309888,8.62593333
42.987096,8.42614977,8.64476205,-0.467559914,8.63970147,8.62955975,8.62449025
42.997587,8.60232527,8.64344374,-0.202776912,8.63836918,8.62813223,8.62304866
43.008079,8.94427191,8.64212813,0.549676068,8.63703953,8.62670596,8.62160826
43.01857,8.1240384,8.64081548,-0.718872089,8.63571278,8.62528123,8.62016934
43.029062,9.11043358,8.63950558,0.686241941,8.63438872,8.62385776,8.61873161
43.039554,8.18535277,8.63819856,-0.672938173,8.63306748,8.62243566,8.6172952
43.050045,8.94427191,8.63689457,0.554416215,8.63174922,8.62101509,8.61586025
43.060537,8.88819442,8.6355934,0.502594289,8.63043371,8.61959575,8.61442648
43.071028,9,8.63429531,0.60473522,8.62912123,8.61817792,8.61299415
43.08152,8.36660027,8.6330001,-0.516139352,8.62781156,8.61676132,8.611563
43.092012,8.30662386,8.6317079,-0.57016141,8.62650484,8.61534609,8.61013315
43.102503,8.1240384,8.63041886,-0.711604145,8.62520124,8.61393235,8.60870473
43.112995,8.36660027,8.62913278,-0.512379273,8.62390052,8.61251984,8.60727747
43.123486,8.60232527,8.62784993,-0.159764407,8.62260297,8.61110881,8.60585164
43.133978,8.1240384,8.62657009,-0.708894695,8.62130838,8.60969899,8.60442696
43.14447,9.38083152,8.62529342,0.869216945,8.62001689,8.60829052,8.60300355
43.154961,9,8.62402007,0.61317202,8.61872866,8.60688352,8.60158156
43.165453,8.88819442,8.62274984,0.51521314,8.61744348,8.60547773,8.60016071
43.175944,9.74679434,8.62148299,1.06080694,8.61616163,8.6040734,8.59874126
43.186436,8.24621125,8.62021933,-0.611561998,8.61488289,8.60267026,8.59732294
43.196928,9.53939201,8.61895908,0.95939196,8.61360751,8.60126845,8.59590587
43.207419,8.66025404,8.61770235,0.206280609,8.61233559,8.5998681,8.5944902
43.217911,8.42614977,8.61644892,-0.436232903,8.6110669,8.59846893,8.59307565
43.228402,9.05538514,8.61519907,0.663465196,8.60980173,8.5970712,8.59166247
43.238894,8.54400375,8.61395261,-0.264478479,8.60853988,8.59567465,8.5902504
43.249386,9,8.6127097,0.622326524,8.60728151,8.59427941,8.58883957
43.259877,8.71779789,8.61147049,0.326078815,8.60602678,8.5928856,8.58743011
43.270369,8.66025404,8.61023481,0.223649794,8.60477551,8.59149296,8.58602174
43.28086,9,8.60900292,0.62529759,8.60352797,8.59010174,8.58461474
43.291352,8.71779789,8.60777466,0.331697499,8.60228399,8.58871168,8.58320881
43.301844,8.42614977,8.60655017,-0.424735679,8.60104371,8.5873229,8.58180411
43.312335,8.30662386,8.60532963,-0.546539815,8.59980732,8.58593554,8.58040075
43.322827,8.24621125,8.60411286,-0.598248787,8.59857463,8.58454933,8.57899847
43.333318,9.64365076,8.60290015,1.02017185,8.59734593,8.58316452,8.57759753
43.34381,8,8.60169131,-0.775687639,8.59612104,8.58178085,8.57619765
43.354302,8.77496439,8.60048653,0.417705467,8.59490013,8.58039845,8.57479896
43.364793,8.66025404,8.59928597,0.24691712,8.59368338,8.57901744,8.5734016
43.375285,9.21954446,8.59808948,0.78832416,8.59247062,8.57763756,8.5720053
43.385776,9.38083152,8.59689733,0.885400582,8.59126214,8.57625907,8.57061031
43.396268,7.87400787,8.59570937,-0.849530163,8.59005778,8.5748817,8.56921637
43.40676,8.94427191,8.59452585,0.59139332,8.58885779,8.57350557,8.5678236
43.417251,8.71779789,8.59334695,0.352776041,8.58766235,8.57213083,8.56643214
43.427743,8.71779789,8.59217246,0.354436778,8.58647124,8.57075719,8.56504171
43.438234,8.30662386,8.59100267,-0.533271791,8.58528476,8.56938492,8.56365258
43.448726,8.83176087,8.58983743,0.491857128,8.58410276,8.56801375,8.56226447
43.459218,8.06225775,8.58867694,-0.725547515,8.58292544,8.56664382,8.56087751
43.469709,8.83176087,8.58752139,0.4942059,8.58175299,8.56527524,8.55949184
43.480201,8.83176087,8.58637065,0.495368772,8.58058526,8.56390775,8.55810718
43.490692,8.60232527,8.58522501,0.13076796,8.57942257,8.56254162,8.5567238
43.501184,7.87400787,8.58408435,-0.842660356,8.57826479,8.56117656,8.55534142
43.511676,7.61577311,8.58294887,-0.983450949,8.57711211,8.55981272,8.55396017
43.522167,8.66025404,8.58181878,0.280062948,8.57596475,8.55845022,8.55258019
43.532659,8.71779789,8.58069396,0.370275475,8.57482257,8.55708879,8.5512012
43.54315,8.42614977,8.57957472,-0.391694967,8.57368591,8.55572869,8.54982346
43.553642,9.21954446,8.57846096,0.800676901,8.57255465,8.55436966,8.54844671
43.564134,8.66025404,8.57735289,0.287925597,8.571429,8.55301183,8.54707107
43.574625,7.68114575,8.57625073,-0.946099879,8.57030919,8.55165531,8.54569667
43.585117,7.87400787,8.57515439,-0.837344919,8.56919512,8.55029985,8.54432325
43.595608,8.71779789,8.57406419,0.37912227,8.56808712,8.54894571,8.54295106
43.6061,9.11043358,8.57298006,0.733112215,8.5669851,8.54759261,8.54157983
43.616592,7.87400787,8.57190226,-0.835400735,8.56588934,8.54624069,8.5402097
43.627083,8.24621125,8.57083119,-0.569754282,8.56480023,8.54489007,8.53884079
43.637575,7.93725393,8.5697666,-0.795306651,8.56371752,8.54354049,8.53747283
43.648066,8.88819442,8.56870884,0.565230553,8.56264156,8.54219221,8.53610608
43.658558,7.93725393,8.56765785,-0.793979797,8.5615723,8.54084496,8.53474028
43.66905,8.36660027,8.56661389,-0.447228832,8.56050998,8.53949887,8.53337556
43.679541,9.11043358,8.56557722,0.738143859,8.55945487,8.53815406,8.53201203
43.690033,8.60232527,8.56454781,0.194364245,8.55840693,8.53681028,8.53064944
43.700524,8.66025404,8.56352602,0.311011289,8.55736654,8.53546777,8.52928804
43.711016,9.16515139,8.56251183,0.776298625,8.55633367,8.53412629,8.52792756
43.721508,9.2736185,8.56150554,0.843867852,8.55530862,8.53278594,8.52656814
43.731999,8.94427191,8.56050743,0.619487274,8.55429166,8.53144686,8.5252099
43.742491,9.05538514,8.5595175,0.704178701,8.5532828,8.53010878,8.52385258
43.752982,8.77496439,8.55853614,0.465218493,8.55228243,8.52877197,8.52249642
43.763474,8.1240384,8.55756339,-0.658426144,8.55129059,8.52743616,8.52114117
43.773966,9.21954446,8.55659956,0.814214281,8.55030758,8.52610147,8.51978696
43.784457,8.18535277,8.55564498,-0.608516396,8.54933373,8.52476803,8.51843391
43.794949,8.48528137,8.55469969,-0.263473555,8.5483691,8.52343558,8.51708175
43.80544,8.18535277,8.55376413,-0.606968992,8.54741411,8.52210437,8.51573074
43.815932,7.21110255,8.55283838,-1.15833321,8.54646885,8.52077414,8.51438063
43.826424,8.71779789,8.55192279,0.407277661,8.54553366,8.51944503,8.51303152
43.836915,8.77496439,8.55101809,0.473229648,8.54460927,8.51811715,8.51168356
43.847407,9.05538514,8.55012413,0.710817142,8.54369554,8.51679024,8.51033647
43.857898,9.05538514,8.54924132,0.711437853,8.54279288,8.51546455,8.50899052
43.86839,9.2736185,8.54836981,0.851615339,8.54190143,8.51413984,8.50764543
43.878882,9.05538514,8.54751001,0.712653579,8.5410216,8.51281622,8.50630134
43.889373,8.18535277,8.54666235,-0.601090328,8.54015382,8.51149382,8.50495837
43.899865,8.54400375,8.54582702,-0.0426998739,8.53929828,8.51017237,8.50361626
43.910356,9.11043358,8.54500456,0.751950147,8.53845552,8.50885214,8.50227526
43.920848,8.42614977,8.54419519,-0.343577374,8.53762577,8.50753285,8.50093511
43.93134,8.42614977,8.54339939,-0.342417317,8.53680951,8.50621465,8.49959594
43.941831,8.1240384,8.54261767,-0.646977023,8.53600724,8.50489764,8.49825786
43.952323,8.71779789,8.54185032,0.419461048,8.53521923,8.50358157,8.49692063
43.962814,9.11043358,8.54109793,0.754543339,8.53444612,8.5022667,8.49558449
43.973306,8.94427191,8.54036085,0.635539977,8.53368821,8.50095277,8.49424918
43.983798,8.36660027,8.53963964,-0.415980022,8.5329461,8.4996399,8.49291482
43.994289,8.94427191,8.53893491,0.636660821,8.53222037,8.49832821,8.49158155
44.004781,8.24621125,8.53824706,-0.540403373,8.53151142,8.49701744,8.4902491
44.015272,8.54400375,8.53757679,0.080168304,8.53081998,8.49570786,8.48891772
44.025764,9.2736185,8.53692458,0.858308756,8.5301465,8.4943992,8.48758716
44.036256,8.71779789,8.53629111,0.426036123,8.52949168,8.49309158,8.48625754
44.046747,8.18535277,8.53567751,-0.591882367,8.52885664,8.49178513,8.48492897
44.057239,8.48528137,8.53508442,-0.223165951,8.52824201,8.49047959,8.48360121
44.06773,7.48331477,8.53451225,-1.02527922,8.52764823,8.48917522,8.4822745
44.078222,8.42614977,8.53396166,-0.328347209,8.52707593,8.48787175,8.48094859
44.088714,7.54983444,8.53343351,-0.991765634,8.52652597,8.48656932,8.4796236
44.099205,8.71779789,8.53292866,0.429964213,8.52599923,8.48526803,8.47829965
44.109697,9.05538514,8.53244791,0.72314399,8.5254965,8.48396765,8.47697649
44.120188,7.54983444,8.53199226,-0.991038758,8.52501878,8.48266842,8.47565436
44.13068,8.83176087,8.53156259,0.547903529,8.52456695,8.48137008,8.474333
44.141172,8.83176087,8.53115997,0.548270826,8.52414208,8.48007275,8.47301255
44.151663,8.83176087,8.5307855,0.548612222,8.52374528,8.47877656,8.47169312
44.162155,8.36660027,8.53044022,-0.404771489,8.52337759,8.47748126,8.47037446
44.172646,7.28010989,8.53012554,-1.11804099,8.5230404,8.47618708,8.46905682
44.183138,9.05538514,8.52984235,0.7249433,8.52273462,8.47489379,8.46773993
44.19363,8.36660027,8.52959215,-0.403722531,8.52246174,8.4736015,8.46642393
44.204121,9.69535971,8.52937633,1.0798071,8.52222316,8.47231032,8.46510893
44.214613,7.54983444,8.52919632,-0.989627145,8.52202031,8.47102003,8.46379469
44.225104,8.30662386,8.5290537,-0.471624677,8.52185476,8.46973084,8.46248143
44.235596,8.1240384,8.52895006,-0.63632669,8.52172811,8.46844253,8.46116893
44.246088,9,8.52888715,0.686376611,8.5216421,8.4671552,8.45985728
44.256579,8.48528137,8.52886705,-0.208771833,8.52159883,8.46586898,8.45854662
44.267071,8.06225775,8.52889319,-0.683107193,8.52160172,8.46458361,8.4572367
44.277562,9.21954446,8.52896601,0.8310105,8.52165121,8.46329935,8.45592775
44.288054,9.32737905,8.52908771,0.893471513,8.52174951,8.46201594,8.45461952
44.298546,8.06225775,8.5292606,-0.683376066,8.52189891,8.46073351,8.45331215
44.309037,8.30662386,8.52948709,-0.472083922,8.52210186,8.45945217,8.45200574
44.319529,8.06225775,8.52976984,-0.68374856,8.52236098,8.45817168,8.45070004
44.33002,7.93725393,8.53011155,-0.769972477,8.52267899,8.45689228,8.44939531
44.340512,8.1240384,8.53051522,-0.637555344,8.5230589,8.45561371,8.44809128
44.351004,8.48528137,8.53098396,-0.213781624,8.52350381,8.45433611,8.44678808
44.361495,8,8.53152103,-0.729054886,8.52401699,8.45305958,8.44548583
44.371987,9,8.53213008,0.684010177,8.52460209,8.45178389,8.44418428
44.382478,8.30662386,8.53281478,-0.475595325,8.52526279,8.45050928,8.44288367
44.39297,7.54983444,8.53357929,-0.991839126,8.52600325,8.44923549,8.44158375
44.403462,10.0995049,8.53442786,1.2510304,8.52682772,8.44796264,8.44028464
44.413953,8,8.53536503,-0.731686427,8.52774074,8.44669087,8.43898647
44.424445,8.66025404,8.53639588,0.351934871,8.52874741,8.44541991,8.43768897
44.434936,9.53939201,8.53752553,1.00093281,8.52985283,8.44415002,8.43639239
44.445428,9.16515139,8.53875983,0.791449022,8.53106288,8.44288094,8.43509649
44.45592,8.66025404,8.54010478,0.346625525,8.53238355,8.4416128,8.43380139
44.466411,9.69535971,8.54156676,1.07414755,8.53382123,8.4403457,8.43250719
44.476903,8.30662386,8.54315774,-0.486347488,8.5353879,8.43907942,8.43121366
44.487394,9.11043358,8.54488211,0.752031561,8.53708796,8.43781419,8.42992104
44.497886,8.77496439,8.54674731,0.477720709,8.53892885,8.43654975,8.42862907
44.508378,9.2736185,8.54876205,0.851385014,8.54091929,8.43528625,8.42733788
44.518869,8.48528137,8.5509357,-0.256231008,8.54306866,8.43402379,8.42604758
44.529361,8.30662386,8.55327904,-0.496643916,8.54538774,8.43276212,8.42475793
44.539852,8.36660027,8.55580283,-0.434974214,8.54788732,8.43150149,8.42346917
44.550344,9.05538514,8.55851973,0.704886809,8.55058005,8.43024165,8.42218105
44.560836,9,8.5614427,0.662236592,8.55347892,8.42898273,8.42089369
44.571327,8.60232527,8.56458578,0.194266538,8.55659799,8.42772483,8.4196072
44.581819,8.42614977,8.56796519,-0.376583879,8.55995348,8.42646772,8.41832135
44.59231,8.71779789,8.5715973,0.382361847,8.56356179,8.42521163,8.41703637
44.602802,9.05538514,8.57550138,0.692736424,8.56744219,8.42395632,8.415752
44.613294,8,8.5796974,-0.76137862,8.57161467,8.42270192,8.41446839
44.623785,8.77496439,8.58420715,0.436757645,8.57610106,8.42144853,8.41318563
44.634277,8.71779789,8.58905583,0.358806428,8.58092659,8.42019591,8.41190348
44.644768,9.05538514,8.59426932,0.679055096,8.58611713,8.41894431,8.41062219
44.65526,8.77496439,8.599878,0.418433251,8.59170314,8.41769348,8.40934151
44.665752,8.60232527,8.60591387,-0.0599049223,8.5977166,8.41644353,8.40806155
44.676243,8.18535277,8.6124121,-0.653497766,8.60419276,8.41519459,8.40678243
44.686735,8.54400375,8.6194248,-0.274628937,8.61118375,8.41394642,8.40550391
44.697226,8.48528137,8.62699978,-0.376455058,8.61873745,8.41269925,8.40422623
44.707718,9.21954446,8.63517556,0.764440251,8.6268924,8.41145283,8.40294914
44.71821,8.06225775,8.64400644,-0.762724518,8.63570296,8.4102073,8.40167276
44.728701,8.30662386,8.65355287,-0.589006799,8.64522965,8.40896276,8.4003972
44.739193,8.24621125,8.66388541,-0.64627715,8.65554307,8.40771899,8.39912222
44.749684,8.54400375,8.67507903,-0.362043207,8.66671831,8.4064762,8.39784807
44.760176,9.32737905,8.68722246,0.800097867,8.67884415,8.40523416,8.39657448
44.770668,9.38083152,8.70041218,0.824875349,8.69201718,8.40399299,8.39530159
44.781159,8.94427191,8.71475694,0.479077204,8.70634626,8.40275281,8.39402951
44.791651,8.66025404,8.7303843,-0.26482119,8.72195906,8.40151337,8.392758
44.802142,8.48528137,8.74743304,-0.512007486,8.73899451,8.40027491,8.39148728
44.812634,8.83176087,8.76606796,0.256306274,8.75761755,8.3990372,8.39021713
44.823126,9,8.78647218,0.462090705,8.77801148,8.39780034,8.38894765
44.833617,9.74679434,8.80885528,0.968472541,8.80038608,8.39656445,8.38767896
44.844109,8.83176087,8.83346507,-0.0412820525,8.82498938,8.39532931,8.38641082
44.8546,9.38083152,8.86057825,0.721285844,8.85209834,8.39409513,8.38514347
44.865092,8.83176087,8.89052598,-0.242415164,8.88204441,8.39286168,8.38387666
44.875584,8.94427191,8.92368572,0.143478896,8.91520538,8.39162909,8.38261051
44.886075,9.69535971,8.96049893,0.857240213,8.95202312,8.39039746,8.38134514
44.896567,8.71779789,9.00152363,-0.532659127,8.9930561,8.38916656,8.3800803
44.907058,8.36660027,9.04759355,-0.825223171,9.03913877,8.38793662,8.37881623
44.91755,9.05538514,9.09933493,-0.209642049,9.09089787,8.3867074,8.37755269
44.928042,9.38083152,9.15773152,0.47233463,9.14931793,8.38547903,8.37628979
44.938533,9.38083152,9.22408567,0.395911418,9.21570233,8.38425161,8.37502765
44.949025,9.32737905,9.30020629,0.164841642,9.29186137,8.38302492,8.37376603
44.959516,9.11043358,9.38865622,-0.527468142,9.38035984,8.38179918,8.37250516
44.970008,8.71779789,9.49326889,-0.880608314,9.48503403,8.38057416,8.3712448
44.9805,9.05538514,9.61974554,-0.751239243,9.61158927,8.37934997,8.36998507
44.990991,9.48683298,9.77651632,-0.538222389,9.7684615,8.37812673,8.36872609
45.001483,9.38083152,9.97571284,-0.771285498,9.96778996,8.3769042,8.3674676
45.011974,10.5356538,10.2337545,0.549453634,10.226003,8.37568262,8.36620986
45.022466,11.0905365,10.5715071,0.720436976,10.5639758,8.37446175,8.36495261
45.032958,11.7046999,11.0128332,0.831785274,11.0055771,8.3732417,8.36369597
45.043449,12,11.58163,0.64681529,11.5747049,8.37202259,8.36244006
45.053941,12.2882057,12.2975155,-0.09648733,12.2909696,8.37080419,8.36118463
45.064432,13.453624,13.1703927,0.532194832,13.1642581,8.36958672,8.35992993
45.074924,13.7477271,14.1968165,-0.670141376,14.1911044,8.36836996,8.35867571
45.085416,14.525839,15.3572573,-0.911821388,15.3519572,8.36715402,8.35742209
45.095907,16.5529454,16.6159131,-0.250933815,16.6109963,8.36593901,8.35616917
45.106399,17.0880075,17.9213127,-0.912855542,17.916737,8.3647247,8.35491673
45.11689,18.6815417,19.2033007,-0.722328877,19.1990144,8.36351132,8.353665
45.127382,20.0249844,20.3637631,-0.582047008,20.3597059,8.36229863,8.35241373
45.137874,22,21.2887572,0.843352103,21.2848617,8.36108676,8.35116304
45.148365,21.5406592,21.8589541,-0.564176252,21.8551458,8.35987581,8.34991305
45.158857,23.1732605,21.9845241,1.09029187,21.9807232,8.35866557,8.34866351
45.169348,22.2934968,21.6450197,0.805280769,21.6411445,8.35745625,8.34741466
45.17984,21.4009346,20.8996034,0.708047393,20.8955747,8.35624763,8.34616627
45.190332,20.7123152,19.8575849,0.924516259,19.8533284,8.35503981,8.34491844
45.200823,18.761663,18.6372314,0.352748679,18.6326788,8.35383291,8.34367129
45.211315,18.1659021,17.3408225,0.908338929,17.3359107,8.3526267,8.34242459
45.221806,16.4316767,16.0499361,0.617851612,16.0446087,8.3514214,8.34117856
45.232298,13.8564065,14.8268171,-0.98509422,14.8210278,8.3502168,8.33993296
45.24279,13.6014705,13.7175016,-0.340633394,13.7112198,8.34901299,8.33868792
45.253281,12.5299641,12.751794,-0.470988243,12.7450101,8.3478101,8.33744354
45.263773,11.2694277,11.9428309,-0.820611505,11.9355591,8.3466079,8.33619959
45.274264,11.045361,11.2886888,-0.493282705,11.2809654,8.34540661,8.33495629
45.284756,10.6770783,10.7747878,-0.312585292,10.7666642,8.344206,8.33371342
45.295248,10.5830052,10.3791199,0.451536648,10.3706534,8.34300619,8.33247109
45.305739,10.2956301,10.0770857,0.467487317,10.0683311,8.34180729,8.3312294
45.316231,9.64365076,9.84551417,-0.449292122,9.83651829,8.34060907,8.32998813
45.326722,9.38083152,9.66595493,-0.533969485,9.65675573,8.33941175,8.3287475
45.337214,9.2736185,9.52324927,-0.499630639,9.51387528,8.33821512,8.32750728
45.347706,8.48528137,9.40602536,-0.959554057,9.39649693,8.33701928,8.32626758
45.358197,9.48683298,9.30743529,0.423553644,9.29776769,8.33582435,8.32502852
45.368689,8.94427191,9.22285786,-0.527812415,9.21306277,8.3346301,8.32378985
45.37918,9.48683298,9.14921402,0.581049882,9.13930071,8.33343677,8.32255182
45.389672,9.21954446,9.08436383,0.367669183,9.07433986,8.33224411,8.32131417
45.400164,8.94427191,9.02679723,-0.287272198,9.01666894,8.33105224,8.32007704
45.410655,10.0995049,8.97538637,1.06024458,8.96515919,8.32986127,8.31884052
45.421147,9,8.92923951,0.266008449,8.91891813,8.32867098,8.31760439
45.431638,8.71779789,8.88765426,-0.412136356,8.87724281,8.32748159,8.31636887
45.44213,9.59166305,8.8500351,0.86117823,8.83953716,8.32629288,8.31513373
45.452622,8.83176087,8.81589259,0.125969347,8.80531133,8.32510496,8.31389908
45.463113,9.43398113,8.78481055,0.805711225,8.77414878,8.32391793,8.31266504
45.473605,9.38083152,8.75642468,0.790194181,8.74568485,8.32273158,8.31143137
45.484096,9.59166305,8.73043237,0.928025148,8.71961668,8.32154614,8.3101983
45.494588,8.48528137,8.70656252,-0.470405302,8.69567289,8.32036136,8.30896559
45.50508,8.77496439,8.68458704,0.300628247,8.67362517,8.31917738,8.30773337
45.515571,8.48528137,8.66430712,-0.423114345,8.65327452,8.31799429,8.30650173
45.526063,8.42614977,8.64554357,-0.468394914,8.63444156,8.31681188,8.30527045
45.536554,9.21954446,8.6281515,0.769020778,8.61698127,8.31563037,8.30403975
45.547046,9.16515139,8.61203352,0.743718947,8.60079615,8.31444953,8.30280941
45.557538,8.06225775,8.59701769,-0.73127282,8.58571408,8.31326947,8.30157952
45.568029,7.93725393,8.58300186,-0.803584426,8.57163282,8.31209032,8.30035022
45.578521,8.88819442,8.56989175,0.564183184,8.55845796,8.31091184,8.29912126
45.589012,8.77496439,8.5576083,0.466214637,8.54611035,8.30973428,8.29789287
45.599504,8.71779789,8.54607653,0.414392751,8.53451494,8.30855739,8.29666481
45.609996,8.48528137,8.53523273,-0.223497998,8.52360795,8.30738129,8.29543721
45.620487,8,8.5250197,-0.724582434,8.51333212,8.30620608,8.29421017
45.630979,8.60232527,8.51538339,0.294859083,8.50363332,8.30503155,8.29298346
45.64147,8.94427191,8.50627869,0.661810565,8.49446642,8.30385793,8.2917573
45.651962,8.83176087,8.49766159,0.578013213,8.48578734,8.30268498,8.29053147
45.662454,8.18535277,8.48949482,-0.551490752,8.47755875,8.30151282,8.28930607
45.672945,8.30662386,8.48174457,-0.41847426,8.46974683,8.30034156,8.28808122
45.683437,8,8.47437805,-0.688751083,8.46231874,8.29917097,8.28685669
45.693928,9,8.46736828,0.729816224,8.45524745,8.29800129,8.2856327
45.70442,8.77496439,8.46068805,0.560603546,8.44850573,8.29683229,8.28440902
45.714912,8.88819442,8.45431452,0.658695605,8.44207071,8.29566408,8.28318577
45.725403,8.48528137,8.44822677,0.192495731,8.43592144,8.29449678,8.28196304
45.735895,9.16515139,8.44240399,0.850145517,8.43003709,8.29333015,8.28074062
45.746386,8,8.43682934,-0.660930666,8.4244008,8.29216443,8.27951873
45.756878,9.38083152,8.43149251,0.974340293,8.41900223,8.2909994,8.27829714
45.76737,7.87400787,8.42637312,-0.743212784,8.41382097,8.28983516,8.27707595
45.777861,8.18535277,8.4214552,-0.485903719,8.40884105,8.28867182,8.27585529
45.788353,7.41619849,8.41672516,-1.0002633,8.40404885,8.28750917,8.27463491
45.798844,7.74596669,8.41217224,-0.816214153,8.39943357,8.28634745,8.27341505
45.809336,8.88819442,8.40778477,0.693115896,8.39498355,8.28518641,8.27219548
45.819828,8.1240384,8.40355324,-0.528691623,8.39068925,8.28402618,8.2709763
45.830319,9.43398113,8.39946879,1.0171098,8.38654182,8.28286686,8.26975762
45.840811,9.79795897,8.39552217,1.18424525,8.38253197,8.28170823,8.26853923
45.851302,9.2736185,8.39170617,0.939101873,8.37865249,8.28055051,8.26732133
45.861794,7.87400787,8.3880127,-0.716941302,8.37489528,8.27939349,8.26610371
45.872286,8.60232527,8.38443531,0.466786839,8.37125387,8.27823728,8.26488646
45.882777,8.30662386,8.38096797,-0.272661158,8.36772222,8.27708198,8.26366971
45.893269,8.94427191,8.37760409,0.752773415,8.36429373,8.27592739,8.26245323
45.90376,8.54400375,8.37433882,0.411904023,8.36096354,8.27477371,8.26123723
45.914252,8.54400375,8.37116638,0.415737133,8.35772586,8.27362073,8.26002149
45.924744,8.54400375,8.36808229,0.419429912,8.3545762,8.27246857,8.25880612
45.935235,8.30662386,8.36508236,-0.241781916,8.35151036,8.27131734,8.25759123
45.945727,8.36660027,8.3621618,0.0666217915,8.34852354,8.27016681,8.25637659
45.956218,9,8.35931727,0.800426596,8.3456124,8.26901721,8.25516243
45.96671,8.77496439,8.35654573,0.646852888,8.34277388,8.26786832,8.25394851
45.977202,8.36660027,8.35384441,0.112941824,8.3400052,8.26672025,8.25273495
45.987693,8.1240384,8.35120847,-0.476623607,8.33730152,8.26557312,8.25152185
45.998185,8.36660027,8.34863439,0.134036836,8.33465932,8.26442671,8.25030899
46.008676,8.24621125,8.34611985,-0.316083215,8.33207624,8.26328124,8.2490966
46.019168,8.88819442,8.34366171,0.737924596,8.32954914,8.2621365,8.24788444
46.02966,7.61577311,8.34125769,-0.85175383,8.32707574,8.2609926,8.24667262
46.040151,9.21954446,8.33890567,0.938423565,8.32465393,8.25984964,8.24546126
46.050643,8,8.33660301,-0.580174982,8.32228103,8.25870741,8.24425012
46.061134,8.48528137,8.33434806,0.388501374,8.31995541,8.25756613,8.24303943
46.071626,7.61577311,8.33213839,-0.846383649,8.31767463,8.25642559,8.24182896
46.082118,9.05538514,8.32997235,0.851711683,8.31543702,8.25528588,8.24061882
46.092609,8.24621125,8.32784838,-0.28572212,8.31324103,8.25414714,8.23940912
46.103101,8.42614977,8.32576442,0.316836469,8.31108457,8.25300913,8.23819964
46.113592,7.68114575,8.32371931,-0.801606862,8.30896649,8.25187209,8.23699059
46.124084,8.24621125,8.32171116,-0.274772471,8.30688489,8.2507358,8.23578175
46.134576,8.66025404,8.31973878,0.583536854,8.30483856,8.24960036,8.23457323
46.145067,8.83176087,8.31780102,0.716909932,8.30282637,8.24846589,8.23336514
46.155559,7.74596669,8.31589625,-0.754936791,8.30084666,8.24733218,8.23215725
46.16605,8.71779789,8.31402366,0.635432316,8.29889862,8.24619945,8.23094978
46.176542,8.54400375,8.31218183,0.481478885,8.29698083,8.24506747,8.22974251
46.187034,8.18535277,8.31037089,-0.353579008,8.2950934,8.24393638,8.22853554
46.197525,7.34846923,8.30858882,-0.979856924,8.29323432,8.24280626,8.227329
46.208017,9,8.30683434,0.83256571,8.29140229,8.24167692,8.22612264
46.218508,9.2736185,8.30510687,0.98412988,8.28959673,8.24054857,8.22491669
46.229,7.81024968,8.30340527,-0.702250376,8.28781645,8.23942103,8.22371092
46.239492,8.60232527,8.30172885,0.548266743,8.28606079,8.23829438,8.22250545
46.249983,8.42614977,8.30007699,0.355067287,8.28432915,8.23716873,8.22130039
46.260475,7.87400787,8.29844869,-0.651491225,8.28262048,8.23604387,8.2200955
46.270966,8.54400375,8.29684362,0.497152018,8.28093446,8.23492003,8.21889101
46.281458,8.24621125,8.29526073,-0.221471176,8.27927004,8.23379698,8.21768669
46.29195,8.77496439,8.29369957,0.693732528,8.27762675,8.23267485,8.21648265
46.302441,8.24621125,8.29215967,-0.214355818,8.27600413,8.23155373,8.21527901
46.312933,8.48528137,8.29064018,0.441181589,8.2744013,8.23043343,8.21407553
46.323424,8.77496439,8.28914086,0.697010422,8.27281804,8.22931416,8.21287244
46.333916,8.24621125,8.28766091,-0.2035919,8.27125352,8.22819571,8.21166951
46.344408,8.83176087,8.28620001,0.738620917,8.26970741,8.2270782,8.21046685
46.354899,8.24621125,8.28475782,-0.196332811,8.2681794,8.22596173,8.20926457
46.365391,9,8.28333366,0.846561483,8.26666875,8.22484609,8.20806244
46.375882,9.59166305,8.28192737,1.14443684,8.26517533,8.22373151,8.20686068
46.386374,8.88819442,8.2805383,0.779523004,8.26369847,8.22261778,8.20565908
46.396866,7.93725393,8.27916663,-0.584733017,8.26223834,8.221505,8.20445773
46.407357,8.30662386,8.27781187,0.169740968,8.26079445,8.22039328,8.20325676
46.417849,8.83176087,8.27647326,0.745176226,8.25936603,8.21928244,8.20205592
46.42834,8.30662386,8.27515076,0.177406607,8.25795303,8.21817266,8.20085545
46.438832,8,8.27384385,-0.523300914,8.25655489,8.21706379,8.19965511
46.449324,8.48528137,8.27255237,0.461225549,8.25517147,8.2159559,8.19845502
46.459815,9,8.27127618,0.853653223,8.25380263,8.21484911,8.19725529
46.470307,8,8.27001479,-0.519629471,8.25244787,8.21374322,8.19605569
46.480798,8.66025404,8.26876836,0.625688166,8.25110734,8.21263843,8.19485644
46.49129,8.42614977,8.26753634,0.398263026,8.24978047,8.21153454,8.19365731
46.501782,9.59166305,8.26631863,1.15123604,8.24846716,8.21043166,8.19245842
46.512273,9.48683298,8.26511515,1.10531345,8.24716735,8.20932992,8.19125988
46.522765,9.59166305,8.26392551,1.15227494,8.24588059,8.20822909,8.19006146
46.533256,8.94427191,8.26274978,0.825543539,8.24460698,8.2071294,8.18886337
46.543748,8.54400375,8.26158758,0.53142842,8.24334611,8.20603064,8.1876654
46.55424,8.30662386,8.2604389,0.214906862,8.24209798,8.20493294,8.18646765
46.564731,7.48331477,8.25930373,-0.880902356,8.24086256,8.20383639,8.18527024
46.575223,8,8.25818175,-0.508115881,8.2396395,8.20274079,8.18407294
46.585714,7.68114575,8.25707306,-0.758898751,8.23842894,8.20164637,8.18287596
46.596206,8.60232527,8.25597738,0.588513286,8.23723055,8.20055292,8.18167909
46.606698,8.48528137,8.25489484,0.47998597,8.23604446,8.19946055,8.18048243
46.617189,9.11043358,8.25382555,0.925531212,8.23487079,8.19836937,8.17928609
46.627681,8.71779789,8.25276907,0.681930217,8.23370906,8.19727919,8.17808985
46.638172,8.24621125,8.25172554,-0.0742582368,8.23255942,8.19619022,8.17689393
46.648664,8.88819442,8.25069475,0.798435765,8.23142163,8.19510226,8.1756981
46.659156,8.36660027,8.24967679,0.341940746,8.23029577,8.19401546,8.17450247
46.669647,8.42614977,8.24867173,0.421281432,8.22918191,8.1929299,8.17330716
46.680139,8.36660027,8.24767936,0.344849101,8.22807983,8.19184536,8.17211192
46.69063,9,8.24670003,0.867928554,8.22698988,8.19076208,8.170917
46.701122,8.94427191,8.24573356,0.835786067,8.22591186,8.18967986,8.16972216
46.711614,7.87400787,8.24477997,-0.608910585,8.22484578,8.1885988,8.16852751
46.722105,8.54400375,8.24383938,0.547872581,8.22379176,8.18751902,8.16733316
46.732597,9.11043358,8.24291165,0.931408574,8.22274964,8.18644032,8.16613888
46.743088,8.42614977,8.24199701,0.429130239,8.22171965,8.18536291,8.1649449
46.75358,8,8.24109537,-0.491014629,8.22070166,8.18428661,8.16375099
46.764072,8.71779789,8.24020688,0.691079595,8.21969584,8.18321152,8.16255726
46.774563,8.18535277,8.23933172,-0.232333708,8.21870236,8.18213776,8.16136382
46.785055,8.66025404,8.23846983,0.649449156,8.21772111,8.18106512,8.16017045
46.795546,8.36660027,8.23762148,0.359136171,8.2167524,8.17999384,8.15897736
46.806038,8.83176087,8.23678662,0.771345739,8.21579612,8.1789237,8.15778433
46.81653,8.1240384,8.23596547,-0.334555033,8.21485252,8.17785483,8.15659146
46.827021,8.48528137,8.23515842,0.500122934,8.21392196,8.17678734,8.15539888
46.837513,8.36660027,8.2343653,0.363641266,8.21300424,8.17572104,8.15420636
46.848004,9,8.2335864,0.875450511,8.21209968,8.17465614,8.15301411
46.858496,8.54400375,8.23282178,0.557836865,8.21120827,8.17359244,8.1518219
46.868988,8,8.23207172,-0.481738232,8.21033029,8.17253011,8.15062986
46.879479,9.16515139,8.23133648,0.96634099,8.209466,8.17146923,8.14943808
46.889971,9.38083152,8.23061611,1.07248096,8.20861543,8.17040959,8.14824635
46.900462,8.77496439,8.22991105,0.738277274,8.20777904,8.16935141,8.14705488
46.910954,8.36660027,8.22922175,0.370646078,8.20695722,8.16829451,8.14586346
46.921446,9.32737905,8.22854815,1.04825135,8.20614994,8.16723899,8.14467217
46.931937,8.1240384,8.22789059,-0.322261048,8.20535751,8.16618497,8.14348115
46.942429,9.32737905,8.22724921,1.04887075,8.20458004,8.16513227,8.14229017
46.95292,8.71779789,8.22662443,0.70083768,8.20381798,8.16408109,8.14109943
46.963412,8.42614977,8.22601646,0.447362618,8.20307148,8.16303125,8.13990873
46.973904,8.06225775,8.22542568,-0.403940507,8.20234092,8.16198287,8.13871816
46.984395,8.48528137,8.2248525,0.510322328,8.20162671,8.16093605,8.13752784
46.994887,8.94427191,8.22429716,0.848513259,8.20092906,8.15989062,8.13633755
47.005378,8.1240384,8.22376016,-0.315787521,8.20024848,8.15884679,8.1351475
47.01587,9.48683298,8.2232418,1.12409572,8.19958521,8.15780437,8.13395746
47.026362,7.74596669,8.22274256,-0.690489583,8.19893974,8.15676348,8.13276756
47.036853,8.60232527,8.22226298,0.616491918,8.19831261,8.15572424,8.13157789
47.047345,8,8.22180345,-0.470960133,8.19770417,8.15468646,8.13038824
47.057836,8.83176087,8.22136441,0.781278731,8.19711487,8.15365035,8.12919882
47.068328,8.77496439,8.22094634,0.744323889,8.19654514,8.15261574,8.12800941
47.07882,8.30662386,8.22054983,0.293383762,8.19599555,8.15158278,8.12682012
47.089311,8.30662386,8.22017549,0.294021036,8.19546669,8.15055157,8.12563106
47.099803,7.21110255,8.2198238,-1.00435116,8.19495903,8.14952192,8.12444199
47.110294,8.77496439,8.21949543,0.745297897,8.19447326,8.14849403,8.12325316
47.120786,8.1240384,8.21919171,-0.308469289,8.19401066,8.14746773,8.12206432
47.131278,8.18535277,8.21891282,-0.183194013,8.19357142,8.14644313,8.12087559
47.141769,9.53939201,8.21865934,1.14923134,8.19315611,8.14542035,8.11968708
47.152261,8.36660027,8.21843196,0.384926367,8.19276536,8.14439921,8.11849857
47.162752,7.93725393,8.21823148,-0.530073153,8.1924,8.14337994,8.11731026
47.173244,9.43398113,8.21805869,1.10268873,8.19206077,8.14236234,8.11612195
47.183736,8.71779789,8.21791445,0.707024354,8.19174852,8.14134655,8.11493374
47.194227,7.93725393,8.21779967,-0.529665684,8.19146416,8.14033268,8.11374573
47.204719,8.48528137,8.21771526,0.517267929,8.19120856,8.13932056,8.11255771
47.21521,8.54400375,8.21766223,0.571263089,8.19098272,8.13831039,8.11136989
47.225702,8.42614977,8.21764158,0.456626969,8.19078763,8.13730202,8.11018206
47.236194,7.87400787,8.21765442,-0.586213736,8.19062436,8.13629556,8.10899431
47.246685,8.24621125,8.21770188,0.16884717,8.19049406,8.13529113,8.10780676
47.257177,8.18535277,8.2177852,-0.180090059,8.19039791,8.13428855,8.10661919
47.267668,7.87400787,8.21790556,-0.586427902,8.19033711,8.13328805,8.10543181
47.27816,7.61577311,8.21806429,-0.776074215,8.19031294,8.13228946,8.1042444
47.288652,7.21110255,8.21826278,-1.00357373,8.19032677,8.13129291,8.10305707
47.299143,9,8.21850253,0.884023455,8.19038004,8.13029858,8.10186993
47.309635,8.30662386,8.21878503,0.296376165,8.19047426,8.12930624,8.10068276
47.320126,8.06225775,8.21911184,-0.396048094,8.190611,8.1283161,8.09949577
47.330618,7.21110255,8.21948564,-1.0041828,8.19079289,8.12732801,8.09830874
47.34111,8.77496439,8.2199084,0.745020798,8.19102191,8.12634207,8.09712179
47.351601,8.18535277,8.220381,-0.187158296,8.19129893,8.12535841,8.09593501
47.362093,9.05538514,8.22090551,0.913498567,8.19162596,8.12437688,8.09474819
47.372584,7.87400787,8.22148392,-0.589470984,8.19200503,8.12339768,8.09356155
47.383076,9.48683298,8.22211856,1.12459523,8.1924384,8.12242067,8.09237486
47.393568,8.30662386,8.22281172,0.289503262,8.19292836,8.12144596,8.09118823
47.404059,8.83176087,8.22356581,0.779868613,8.19347732,8.12047368,8.09000177
47.414551,7.93725393,8.22438359,-0.535844803,8.19408798,8.11950367,8.08881526
47.425042,8.24621125,8.22526765,0.144719029,8.19476298,8.11853615,8.08762891
47.435534,8.30662386,8.22622111,0.283553785,8.19550535,8.11757096,8.08644251
47.446026,9,8.22724699,0.879063715,8.19631813,8.11660824,8.08525616
47.456517,8.06225775,8.22834845,-0.407542267,8.19720449,8.1156481,8.08406998
47.467009,8.66025404,8.22952924,0.656296273,8.19816812,8.1146904,8.08288373
47.4775,8.36660027,8.23079279,0.368520665,8.19921248,8.11373535,8.08169764
47.487992,9.16515139,8.23214325,0.965923467,8.20034165,8.11278282,8.08051148
47.498484,7.87400787,8.23358468,-0.599647232,8.20155972,8.11183291,8.07932537
47.508975,8.66025404,8.23512144,0.652021931,8.20287098,8.11088585,8.07813941
47.519467,8.71779789,8.2367585,0.693570033,8.20428036,8.10994144,8.07695338
47.529958,8.24621125,8.23850053,0.0878107371,8.20579263,8.10899988,8.0757675
47.54045,9,8.24035387,0.871576807,8.20741407,8.10806101,8.07458155
47.550942,7.28010989,8.24232807,-0.980927202,8.20915426,8.10712497,8.07339563
47.561433,8,8.24442491,-0.494393477,8.21101498,8.10619189,8.07220985
47.571925,8.24621125,8.24665137,-0.0209788923,8.21300316,8.10526163,8.071024
47.582416,8.54400375,8.24901399,0.543129591,8.21512541,8.10433441,8.06983828
47.592908,7.93725393,8.25152075,-0.56059506,8.21738963,8.1034101,8.06865249
47.6034,9,8.25417946,0.863609018,8.21980368,8.10248883,8.06746671
47.613891,8.18535277,8.25699846,-0.267667121,8.22237591,8.10157074,8.06628108
47.624383,8.60232527,8.25998753,0.585096348,8.22511609,8.10065568,8.06509536
47.634874,8.36660027,8.26315604,0.321627468,8.22803363,8.09974389,8.06390977
47.645366,8.77496439,8.26651527,0.713056184,8.23113978,8.09883523,8.06272408
47.655858,8.66025404,8.27007642,0.624641992,8.23444581,8.09792985,8.06153842
47.666349,8.83176087,8.27385152,0.746933294,8.23796377,8.09702788,8.06035288
47.676841,8.18535277,8.27785467,-0.304141252,8.24170776,8.09612919,8.05916724
47.687332,8.48528137,8.28209954,0.45075696,8.24569152,8.09523401,8.05798173
47.697824,8.42614977,8.28660251,0.373560258,8.24993145,8.09434222,8.05679612
47.708316,8.48528137,8.29138009,0.440342239,8.25444411,8.09345396,8.05561052
47.718807,8.24621125,8.29645014,-0.224140331,8.25924741,8.09256942,8.05442504
47.729299,8.94427191,8.30183355,0.801522528,8.26436218,8.09168855,8.05323945
47.73979,9.59166305,8.30755078,1.13318678,8.26980913,8.09081147,8.05205398
47.750282,7.81024968,8.31362638,-0.709490455,8.27561283,8.08993806,8.0508684
47.760774,8.30662386,8.32010004,-0.116086938,8.28181317,8.08906847,8.04968282
47.771265,7.93725393,8.32699059,-0.624288919,8.28842907,8.08820285,8.04849735
47.781757,8.1240384,8.33432669,-0.458572007,8.29548926,8.08734109,8.04731177
47.792248,8.77496439,8.34214067,0.65789339,8.30302627,8.08648342,8.04612629
47.80274,8.66025404,8.35047112,0.556581457,8.31107878,8.08562974,8.0449407
47.813232,8.66025404,8.359358,0.548539918,8.31968698,8.0847802,8.0437551
47.823723,7.61577311,8.36884516,-0.86779724,8.32889494,8.08393494,8.04256961
47.834215,9,8.37898379,0.788045815,8.33875405,8.08309388,8.04138399
47.844706,9.64365076,8.38982647,1.11974296,8.34931718,8.08225725,8.04019847
47.855198,9.38083152,8.40143556,0.98964436,8.36064696,8.08142495,8.03901283
47.86569,8.36660027,8.41387692,-0.217431949,8.37280958,8.08059714,8.03782717
47.876181,9.16515139,8.42722347,0.859027308,8.38587838,8.07977398,8.03664161
47.886673,8.48528137,8.44156039,0.209095623,8.3999389,8.07895538,8.03545591
47.897164,8.06225775,8.45697712,-0.628266959,8.41508111,8.07814159,8.03427031
47.907656,8.24621125,8.47357955,-0.476831525,8.43141138,8.07733251,8.03308458
47.918148,8.30662386,8.49148172,-0.42995099,8.44904436,8.07652832,8.03189882
47.928639,8.54400375,8.51081137,0.182187759,8.46810853,8.07572918,8.03071315
47.939131,8.60232527,8.53171823,0.265719841,8.48875413,8.07493522,8.02952735
47.949622,8.71779789,8.55436298,0.404270835,8.5111429,8.0741465,8.02834162
47.960114,8.42614977,8.5789362,-0.390879043,8.5354664,8.07336295,8.02715576
47.970606,8.24621125,8.60569751,-0.599571732,8.56198562,8.07258473,8.02596986
47.981097,9.2736185,8.63491344,0.799190248,8.59096852,8.071812,8.02478405
47.991589,8.48528137,8.66681539,-0.426068089,8.62264764,8.07104473,8.02359809
48.00208,8.71779789,8.70171819,0.12680573,8.65733949,8.07028314,8.0224122
48.012572,8.36660027,8.73999824,-0.611062988,8.69542231,8.06952721,8.02122617
48.023064,9.2736185,8.78207894,0.701098819,8.73732166,8.0687771,8.02004009
48.033555,8.66025404,8.8284501,-0.41011713,8.78352981,8.06803298,8.0188541
48.044047,9.21954446,8.8796963,0.58296497,8.8346341,8.06729483,8.01766794
48.054538,8.42614977,8.93648114,-0.714374811,8.89130134,8.0665629,8.01648186
48.06503,9.11043358,8.99960962,0.33290232,8.95434019,8.06583716,8.01529562
48.075522,8.24621125,9.07002302,-0.907640771,9.02469618,8.06511778,8.01410933
48.086013,8.60232527,9.14886087,-0.73928046,9.10351384,8.06440497,8.01292311
48.096505,9.53939201,9.23756548,0.549387418,9.19224154,8.06369871,8.01173673
48.106996,8.66025404,9.33796142,-0.823229845,9.29271136,8.06299925,8.0105504
48.117488,9.32737905,9.45255155,-0.353797253,9.40743609,8.06230658,8.00936392
48.12798,10,9.58483428,0.644333548,9.53992775,8.06162091,8.00817738
48.138471,9.21954446,9.7399252,-0.721374203,9.69532121,8.06094243,8.0069909
48.148963,8.88819442,9.92548293,-1.01847362,9.88130252,8.06027131,8.00580425
48.159454,9.48683298,10.152744,-0.816033739,10.1091462,8.05960783,8.00461765
48.169946,10.6301458,10.4378959,0.438463167,10.3950888,8.05895184,8.00343089
48.180438,10.0498756,10.8034798,-0.868103805,10.7617299,8.05830355,8.00224406
48.190929,10,11.2833215,-1.13283782,11.2429679,8.05766318,8.00105728
48.201421,11.7898261,11.905606,-0.340264358,11.8669977,8.05703076,7.99987033
48.211912,12.1243557,12.7003025,-0.7589116,12.6637646,8.05640656,7.99868342
48.222404,13.4907376,13.6894257,-0.445744439,13.6552027,8.05579063,7.99749634
48.232896,15.0996689,14.8799765,0.468713499,14.848188,8.05518319,7.99630919
48.243387,14.6969385,16.2596456,-1.25008286,16.2302718,8.05458448,7.99512208
48.253879,16.5227116,17.7956347,-1.1282389,17.7685334,8.05399454,7.99393478
48.26437,19.2613603,19.4337103,-0.415150565,19.4086485,8.05341368,7.99274753
48.274862,19.8242276,21.0987024,-1.12892641,21.0753888,8.05284196,7.99156009
48.285354,23.2163735,22.6897947,0.725657537,22.6678986,8.05227962,7.99037258
48.295845,24.1246762,24.0760267,0.220566281,24.0551831,8.05172692,7.98918511
48.306337,24.657656,25.1006003,-0.665540592,25.0804042,8.05118395,7.98799744
48.316828,26.8514432,25.6101148,1.11414915,25.5901178,8.05065101,7.9868098
48.32732,26.5518361,25.5129489,1.01925815,25.4926687,8.05012821,7.98562198
48.337812,25.96151,24.8258341,1.06568093,24.804776,8.04961581,7.98443407
48.348303,24.0416306,23.6652748,0.613478446,23.6429527,8.04911408,7.98324619
48.358795,22.2036033,22.1911781,0.111468462,22.1671221,8.04862321,7.98205811
48.369286,21.330729,20.5555203,0.880459381,20.5292738,8.04814391,7.98087006
48.379778,18.3847763,18.8801569,-0.703832774,18.8512747,8.0476759,7.97968181
48.39027,17.7482393,17.258372,0.699905257,17.2264338,8.04721947,7.97849348
48.400761,14.1774469,15.7700209,-1.26197228,15.7346869,8.04677492,7.97730516
48.411253,12.8452326,14.4562799,-1.26927039,14.4173104,8.04634242,7.97611664
48.421744,13.453624,13.3386379,0.339096081,13.2959345,8.04592231,7.97492814
48.432236,11.7898261,12.4207507,-0.79430763,12.3743792,8.0455148,7.97373943
48.442728,10.9087121,11.6892249,-0.883466322,11.6393979,8.04512019,7.97255063
48.453219,11.045361,11.1186119,-0.270649078,11.0656368,8.04473882,7.97136185
48.463711,9.16515139,10.6779151,-1.2299446,10.6221289,8.0443709,7.97017285
48.474202,9.69535971,10.3367913,-0.800894226,10.2785092,8.04401681,7.96898386
48.484694,9.74679434,10.0690268,-0.56765524,10.0085122,8.0436768,7.96779467
48.495186,9.69535971,9.85428744,-0.398657398,9.79174567,8.04335122,7.96660537
48.505677,8.60232527,9.6778227,-1.03706192,9.61340763,8.04304043,7.96541608
48.516169,10.0498756,9.52940141,0.721438985,9.46322639,8.04274471,7.96422657
48.52666,9.43398113,9.40218432,0.178316596,9.33433419,8.04246447,7.96303707
48.537152,8.24621125,9.29152556,-1.02240614,9.22206481,8.04220001,7.96184735
48.547644,9.43398113,9.19425928,0.489613986,9.12323868,8.04195174,7.96065752
48.558135,9.38083152,9.10811866,0.522219171,9.03557912,8.04172006,7.9594677
48.568627,9.05538514,9.03138119,0.154932082,8.95735573,8.04150531,7.95827765
48.579118,9.64365076,8.96272693,0.82518109,8.88724223,8.04130851,7.9570876
48.58961,9.11043358,8.90105999,0.457573589,8.82413757,8.04112972,7.95589732
48.600102,8.77496439,8.84549002,-0.265566622,8.76714723,8.04096918,7.95470693
48.610593,8.66025404,8.79536115,-0.367569193,8.71561235,8.04082735,7.95351654
48.621085,8.36660027,8.7500162,-0.619205887,8.66887188,8.04070464,7.95232591
48.631576,8,8.70878295,-0.84189248,8.62624943,8.04060157,7.95113528
48.642068,8.24621125,8.67118992,-0.651903881,8.58727033,8.04051858,7.94994442
48.65256,7.87400787,8.63683995,-0.873402586,8.55153492,8.04045621,7.94875343
48.663051,8.54400375,8.60538778,-0.247758012,8.51869561,8.04041496,7.94756244
48.673543,8.42614977,8.57652447,-0.387781769,8.48844096,8.04039535,7.94637121
48.684034,8.77496439,8.54999078,0.474313831,8.4605099,8.04039795,7.94517997
48.694526,8.42614977,8.52554979,-0.315277682,8.4346633,8.04042332,7.94398848
48.705018,8.30662386,8.50300033,-0.443143846,8.41069831,8.04047205,7.94279688
48.715509,9,8.48216476,0.719607698,8.3884357,8.04054472,7.94160525
48.726001,8.71779789,8.4628805,0.504893442,8.36771101,8.04064198,7.94041338
48.736492,8.66025404,8.44501076,0.463943188,8.34838617,8.04076446,7.9392215
48.746984,8.06225775,8.42842737,-0.605119509,8.33033126,8.04091283,7.93802937
48.757476,8.83176087,8.41302108,0.647101067,8.31343576,8.04108778,7.9368371
48.767967,9.69535971,8.39869418,1.13871223,8.29760072,8.04129,7.93564482
48.778459,9.2736185,8.38535537,0.942477125,8.28273323,8.04152024,7.93445228
48.78895,7.68114575,8.37292835,-0.831734696,8.26875558,8.04177966,7.93325973
48.799442,9.16515139,8.36134004,0.896555269,8.25559261,8.04206961,7.93206692
48.809934,8.83176087,8.35052684,0.693710333,8.24318044,8.04238998,7.93087397
48.820425,7.81024968,8.34043462,-0.728137998,8.23146389,8.0427416,7.92968099
48.830917,9.32737905,8.33103066,0.998172528,8.22040898,8.0431254,7.92848776
48.841408,8.71779789,8.32224219,0.628932186,8.20994165,8.04354221,7.9272945
48.8519,8.54400375,8.31402556,0.479560413,8.2000167,8.04399303,7.92610098
48.862392,9.43398113,8.3063434,1.06190288,8.19059568,8.04447879,7.92490732
48.872883,8.66025404,8.29916177,0.600909532,8.18164357,8.04500044,7.92371362
48.883375,9.8488578,8.29244787,1.24756159,8.17312597,8.04555912,7.92251967
48.893866,9.94987437,8.28617434,1.28984496,8.16501457,8.04615577,7.92132567
48.904358,8.36660027,8.28031394,0.29374534,8.15728049,8.04679164,7.92013142
48.91485,8.66025404,8.27484352,0.620814402,8.14989942,8.0474678,7.91893701
48.925341,9.48683298,8.26974187,1.10321852,8.142849,8.04818539,7.91774257
48.935833,8.06225775,8.26498825,-0.450256044,8.13610673,8.04894578,7.91654786
48.946324,8.06225775,8.26056552,-0.445317613,8.12965442,8.04975009,7.9153531
48.956816,9.05538514,8.25645635,0.893828164,8.12347291,8.05059982,7.91415808
48.967308,9.21954446,8.25264611,0.983309893,8.11754627,8.05149628,7.9129629
48.977799,8.94427191,8.24912138,0.833756877,8.11185976,8.05244079,7.91176768
48.988291,8.24621125,8.24586892,0.0185021905,8.10639814,8.05343503,7.91057219
48.998782,8.48528137,8.24287791,0.492344863,8.1011494,8.05448035,7.90937665
49.009274,8.77496439,8.24013954,0.731317201,8.09610038,8.05558082,7.90818083
49.019766,8.06225775,8.23764269,-0.418789857,8.09124037,8.05673606,7.90698486
49.030257,8.88819442,8.23537878,0.807970072,8.08655937,8.05794752,7.90578883
49.040749,9,8.23334469,0.875588548,8.08205203,8.05921726,7.90459253
49.05124,8.71779789,8.23152968,0.697329336,8.07770609,8.0605469,7.90339617
49.061732,9.48683298,8.22992539,1.1211189,8.07351065,8.06193867,7.90219953
49.072224,9.38083152,8.22852611,1.07345489,8.06945821,8.06339447,7.90100273
49.082715,9.16515139,8.22732686,0.968413409,8.06554186,8.06491628,7.89980587
49.093207,9.11043358,8.22632288,0.940271611,8.0617541,8.0665066,7.89860873
49.103698,8.77496439,8.22551035,0.741251672,8.05808932,8.06816744,7.89741153
49.11419,8.94427191,8.22488561,0.848166433,8.05454092,8.0699015,7.89621405
49.124682,8.1240384,8.22444573,-0.316871155,8.0511037,8.07171113,7.89501639
49.135173,9.11043358,8.22418815,0.941406089,8.0477728,8.07359876,7.89381867
49.145665,8.06225775,8.22411069,-0.402309506,8.04454272,8.07556747,7.89262067
49.156156,8.60232527,8.22421163,0.614909458,8.04140952,8.07761972,7.8914226
49.166648,8.18535277,8.22448967,-0.19783047,8.03836834,8.07975887,7.89022424
49.17714,7.81024968,8.22494388,-0.643967547,8.03541545,8.08198781,7.88902571
49.187631,9.43398113,8.22557364,1.0992759,8.03254737,8.08430955,7.88782711
49.198123,8.83176087,8.22637886,0.778062981,8.02975998,8.08672791,7.88662821
49.208614,8.60232527,8.22735959,0.612344413,8.02705051,8.08924597,7.88542925
49.219106,9.16515139,8.22851906,0.967797669,8.02441529,8.09187047,7.88422999
49.229598,9.05538514,8.22985801,0.908585236,8.02185163,8.09460498,7.88303055
49.240089,8.71779789,8.23137538,0.697439968,8.019357,8.09745111,7.88183104
49.250581,8.77496439,8.23307409,0.736131985,8.01692935,8.10041365,7.88063123
49.261072,7.74596669,8.23495606,-0.699277744,8.01456699,8.1034965,7.87943135
49.271564,8.94427191,8.23702267,0.840981116,8.01226585,8.10670492,7.87823116
49.282056,8.77496439,8.23927622,0.73190721,8.01002378,8.11004351,7.87703079
49.292547,8.30662386,8.24171943,0.254763478,8.00783888,8.11351708,7.87583034
49.303039,7.74596669,8.24435616,-0.705967041,8.00570879,8.11713166,7.87462959
49.31353,8.48528137,8.24718964,0.487946449,8.0036321,8.12089223,7.87342877
49.324022,8.42614977,8.25022456,0.419434403,8.00160669,8.12480544,7.87222763
49.334514,9.11043358,8.25346517,0.925725881,7.99963114,8.12887718,7.87102631
49.345005,8.60232527,8.25691608,0.587715223,7.99770408,8.13311359,7.8698249
49.355497,8,8.26058329,-0.510473596,7.9958237,8.13752238,7.86862319
49.365988,7.81024968,8.26447189,-0.673960095,7.993989,8.14210997,7.86742139
49.37648,8.94427191,8.26858883,0.821999439,7.99219833,8.14688485,7.86621928
49.386972,9.53939201,8.27294048,1.12536729,7.99045067,8.15185466,7.86501698
49.397463,8.18535277,8.2775336,-0.303612953,7.98874502,8.15702736,7.86381459
49.407955,8.24621125,8.28237675,-0.190172279,7.98707998,8.16241286,7.86261188
49.418446,8.71779789,8.28747728,0.655988265,7.98545484,8.16801957,7.86140909
49.428938,8.66025404,8.29284655,0.606141479,7.98386833,8.17386007,7.86020599
49.43943,8.83176087,8.29850182,0.730245883,7.98231972,8.17995278,7.85900268
49.449921,9.38083152,8.30444373,1.0374911,7.98080829,8.18629918,7.85779928
49.460413,8.42614977,8.31068434,0.339802056,7.97933303,8.19291233,7.85659557
49.470904,9.16515139,8.31723488,0.920823819,7.97789443,8.19980343,7.85539176
49.481396,7.74596669,8.32410811,-0.760356115,7.97649065,8.20698704,7.85418764
49.491888,8.48528137,8.33131655,0.392383515,7.97512117,8.21447652,7.8529833
49.502379,8.94427191,8.33887323,0.778073697,7.9737853,8.22228595,7.85177887
49.512871,8.83176087,8.34679453,0.696395247,7.9724822,8.23043259,7.85057412
49.523362,8.06225775,8.35509482,-0.541144223,7.97121159,8.23893157,7.84936928
49.533854,8.60232527,8.36379265,0.488398008,7.96997274,8.24780225,7.84816411
49.544346,8.94427191,8.37290534,0.755887935,7.96876531,8.25706271,7.84695873
49.554837,8.42614977,8.38245124,0.209041938,7.96758899,8.26673203,7.84575325
49.565329,8.60232527,8.39245276,0.458118443,7.96644318,8.27683339,7.84454744
49.57582,8.77496439,8.40292997,0.609946243,7.96532773,8.28738757,7.84334153
49.586312,8.60232527,8.41390832,0.434070209,7.9642421,8.29842075,7.8421353
49.596804,9.21954446,8.42541192,0.891141141,7.96318611,8.30995777,7.84092884
49.607295,9.21954446,8.43746643,0.884351755,7.96215959,8.32202499,7.83972229
49.617787,8.77496439,8.45010278,0.569966324,7.96116211,8.33465407,7.8385154
49.628278,8.71779789,8.46334928,0.504428993,7.96019365,8.34787405,7.83730841
49.63877,7.87400787,8.47724128,-0.776681018,7.95925384,8.36172101,7.83610109
49.649262,8.18535277,8.49183683,-0.553610021,7.95834262,8.37625407,7.83489354
49.659753,8.83176087,8.50715939,0.56973808,7.95745995,8.39149728,7.83368589
49.670245,8.42614977,8.52324528,-0.311601527,7.95660555,8.40748764,7.8324779
49.680736,9.2736185,8.54013576,0.856436068,7.95577992,8.42426682,7.83126981
49.691228,8.54400375,8.55788119,-0.117802559,7.95498266,8.44188619,7.83006137
49.70172,7.74596669,8.57653119,-0.911353116,7.95421419,8.4603959,7.82885272
49.712211,8.83176087,8.5961381,0.485409891,7.95347397,8.47984976,7.82764395
49.722703,9.21954446,8.61676478,0.776388873,7.95276189,8.50031152,7.82643484
49.733194,9.11043358,8.63847099,0.686995334,7.95207811,8.52184198,7.82522562
49.743686,9.05538514,8.66132976,0.627738306,7.95142258,8.54451516,7.82401605
49.754178,8.83176087,8.68541349,0.382553762,7.95079545,8.56840457,7.82280626
49.764669,9.43398113,8.71080026,0.850400422,7.95019688,8.59358948,7.82159635
49.775161,9.05538514,8.73758214,0.563740184,7.9496269,8.62016315,7.8203861
49.785652,9.21954446,8.76584868,0.673569434,7.94908576,8.64821645,7.81917574
49.796144,7.93725393,8.79570791,-0.926527913,7.94857354,8.6778588,7.81796502
49.806636,9.79795897,8.82726886,0.985236071,7.9480905,8.70920072,7.81675408
49.817127,8.94427191,8.86064976,0.289174955,7.94763689,8.74236207,7.81554301
49.827619,9.05538514,8.89598913,0.399244296,7.94721288,8.77748303,7.8143316
49.83811,9.53939201,8.93342459,0.778439095,7.94681881,8.81470311,7.81312007
49.848602,10.2469508,8.97312059,1.12864085,7.9464549,8.85418867,7.81190818
49.859094,8.88819442,9.01529063,-0.356505564,7.9461215,8.89615599,7.81069606
49.869585,9.38083152,9.06016797,0.56627162,7.94581897,8.94084124,7.80948382
49.880077,10.1488916,9.10789586,1.02029197,7.94554763,8.98838914,7.80827122
49.890568,9.16515139,9.15869485,0.0803526278,7.94530802,9.03902286,7.80705851
49.90106,9.79795897,9.21282751,0.764938859,7.94510058,9.09300778,7.80584543
49.911552,10,9.27056784,0.854068005,7.94492651,9.15062038,7.80463212
49.922043,10.5356538,9.33221571,1.09701324,7.9447856,9.21216451,7.80341868
49.932535,9.11043358,9.39812128,-0.536365265,7.9446781,9.2779941,7.80220488
49.943026,9.89949494,9.46864588,0.656390935,7.94460455,9.34847438,7.80099096
49.953518,8.94427191,9.54421708,-0.774561277,7.94456548,9.42403711,7.79977668
49.96401,10.2469508,9.62528722,0.788456433,7.94456145,9.50513909,7.79856216
49.974501,9.53939201,9.71235695,-0.415890531,7.94459307,9.59228578,7.7973475
49.984993,9.43398113,9.80600857,-0.60994052,7.94466097,9.68606462,7.79613249
49.995484,10.1488916,9.90685364,0.491973503,7.94476579,9.78709261,7.79491734
50.005976,10.5356538,10.0156121,0.721139151,7.94490824,9.89609552,7.79370183
50.016468,10.4880885,10.1330562,0.595845896,7.94508902,10.0138517,7.79248608
50.026959,10,10.2600455,-0.509946613,7.94530888,10.1412274,7.79127019
50.037451,10.7238053,10.3975775,0.571163529,7.94556862,10.2792265,7.79005394
50.047942,10.5830052,10.5467142,0.190502158,7.94586902,10.4289182,7.78883755
50.058434,10.4880885,10.7086985,-0.46969141,7.94621099,10.5915529,7.7876208
50.068926,11.3578167,10.8848754,0.687707263,7.94659539,10.7684826,7.78640379
50.079417,11,11.0776463,-0.278650833,7.94702312,10.9621258,7.78518665
50.089909,11.2249722,11.2880779,-0.251208516,7.94749521,11.173549,7.78396915
50.1004,10.4880885,11.5180172,-1.01485406,7.94801259,11.404606,7.7827515
50.110892,12.0415946,11.7696396,0.521493054,7.94857659,11.6574787,7.78153349
50.121384,12.2065556,12.0452738,0.401599105,7.94918899,11.9345012,7.78031522
50.131875,12.2065556,12.3474629,-0.375376172,7.94985107,12.2382211,7.77909681
50.142367,12.6095202,12.6790526,-0.26369,7.95056312,12.5714879,7.77787803
50.152858,13.2664992,13.0429491,0.47281084,7.95132624,12.9372083,7.77665911
50.16335,13.4164079,13.4423138,-0.160953296,7.95214187,13.3385421,7.77543982
50.173842,14.1774469,13.8802197,0.545185437,7.95302341,13.7785492,7.77422027
50.184333,14.6969385,14.3595267,0.580871551,7.95394791,14.2600932,7.77300057
50.194825,14.832397,14.8827846,-0.224471856,7.95492913,14.7857009,7.7717805
50.205316,15.8429795,15.451436,0.62573442,7.9559684,15.3567916,7.77056029
50.215808,15.5884573,16.0655825,-0.69074254,7.95706748,15.973436,7.7693397
50.2263,15.6843871,16.7227374,-1.01899473,7.95822793,16.6331063,7.76811885
50.236791,17.4642492,17.4168125,0.217799744,7.95945133,17.3296622,7.76689786
50.247283,17.3493516,18.1369338,-0.887458309,7.9607397,18.0521667,7.76567648
50.257774,18.9208879,18.8655055,0.235334799,7.96209463,18.7829472,7.76445496
50.268266,19.2873015,19.5775478,-0.538745072,7.96351832,19.4969367,7.76323306
50.278758,20.0249844,20.2399367,-0.463629535,7.96501265,20.1609133,7.76201089
50.289249,21.0475652,20.8100379,0.48736769,7.96657955,20.7321279,7.76078858
50.299741,21.3541565,21.2436167,0.332475233,7.96822151,21.1662363,7.75956589
50.310232,21.7944947,21.5052203,0.537842394,7.96994048,21.4277025,7.75834304
50.320724,22.3159136,21.5708248,0.863185293,7.97173923,21.492435,7.75711981
50.331216,21.725561,21.4346449,0.539366354,7.97362049,21.3546086,7.75589632
50.341707,21.6794834,21.1105892,0.754250719,7.97558949,21.0281216,7.75467267
50.352199,20.880613,20.6285826,0.502026324,7.9776462,20.5429196,7.75344864
50.36269,20.2484567,20.0281146,0.469406164,7.979793,19.9385371,7.75222446
50.373182,19.6214169,19.3505303,0.520467618,7.98203327,19.2563799,7.75099988
50.383674,18.761663,18.6336554,0.357781524,7.98436985,18.5343456,7.74977504
50.394165,18.0277564,17.9083787,0.345510759,7.9868057,17.8033983,7.74855005
50.404657,17.6351921,17.1974577,0.661614954,7.98934464,17.0863678,7.74732467
50.415148,16.881943,16.5165578,0.604471059,7.99198965,16.3989888,7.74609913
50.42564,16.7928556,15.8750114,0.958041863,7.99474489,15.750654,7.7448732
50.436132,15,15.2777578,-0.52702735,7.99761393,15.1463568,7.743647
50.446623,15.5563492,14.7264715,0.91097624,8.00060044,14.5878179,7.74242064
50.457115,14.4913767,14.2205044,0.52045399,8.00370916,14.074426,7.74119389
50.467606,13.3790882,13.7580695,-0.615614598,8.00694386,13.6044263,7.73996698
50.478098,13.4907376,13.3364226,0.392829409,8.01030971,13.1750977,7.73873968
50.48859,13.114877,12.9525887,0.402850261,8.01381117,12.7834846,7.73751211
50.499081,12.2065556,12.6037826,-0.630259467,8.0174529,12.426821,7.73628437
50.509573,12.5299641,12.2878041,0.492097509,8.02124081,12.1029303,7.73505624
50.520064,11.8743421,12.0001872,-0.354746503,8.02517967,11.8073315,7.73382796
50.530556,11.2694277,11.738191,-0.684662918,8.02927601,11.537285,7.73259927
50.541048,11.5325626,11.4993739,0.182177729,8.03353552,11.2903496,7.73137031
50.551539,10.0498756,11.2815128,-1.10979152,8.03797022,11.0642962,7.73014118
50.562031,9.79795897,11.0825339,-1.13339092,8.04258371,10.8570475,7.72891166
50.572522,10.7238053,10.9006454,-0.420523609,8.04738046,10.6668086,7.72768197
50.583014,10.7703296,10.7341732,0.190148495,8.05236875,10.4918964,7.72645189
50.593506,10.0498756,10.5816664,-0.729239885,8.05755589,10.3308521,7.72522152
50.603997,10.2956301,10.4418246,-0.382353901,8.06294951,10.1823663,7.72399099
50.614489,10.3923048,10.3134477,0.280815208,8.06855923,10.0452266,7.72276006
50.62498,9.64365076,10.1955116,-0.742873338,8.07439299,9.91839924,7.72152897
50.635472,10.3923048,10.0870568,0.552492542,8.08046142,9.80091077,7.72029747
50.645964,9.53939201,9.98725782,-0.669227769,8.08677401,9.69192344,7.71906569
50.656455,10.6301458,9.89555716,0.857081476,8.09356433,9.59068432,7.71783374
50.666947,10.8627805,9.81090302,1.02561078,8.10039754,9.4964896,7.71660139
50.677438,9.59166305,9.73289318,-0.375805973,8.10750767,9.40874305,7.71536888
50.68793,9.69535971,9.66097504,0.185431049,8.11490849,9.32687475,7.71413596
50.698422,9.79795897,9.5946748,0.450870462,8.12261244,9.25039569,7.71290275
50.708913,9.38083152,9.53356615,-0.390812783,8.13063262,9.17886383,7.71166937
50.719405,9.48683298,9.47740484,0.09709863,8.13898521,9.11202168,7.71043559
50.729896,9.2736185,9.42571277,-0.389992665,8.14768415,9.04936983,7.70920164
50.740388,9.74679434,9.37812526,0.607181262,8.15674749,8.99052076,7.70796728
50.75088,9.53939201,9.33437047,0.452793043,8.1661919,8.93518383,7.70673264
50.761371,9.16515139,9.29421065,-0.359248188,8.17604323,8.88309436,7.70549782
50.771863,9.05538514,9.25741847,-0.449481178,8.18632674,8.83399758,7.70426259
50.782354,9,9.22379155,-0.473066117,8.19705103,8.78767961,7.7030272
50.792846,9.64365076,9.19314428,0.671197798,8.20824043,8.74392826,7.70179139
50.803338,9.05538514,9.16531957,-0.331563611,8.21991758,8.70256224,7.70055529
50.813829,8.77496439,9.14017665,-0.604327945,8.23210648,8.66341535,7.69931902
50.824321,9.43398113,9.11758367,0.562492192,8.24483627,8.62632474,7.69808234
50.834812,8.48528137,9.09743242,-0.782400823,8.25813308,8.59115505,7.69684549
50.845304,9.11043358,9.07962013,0.175537614,8.27202992,8.55776889,7.69560822
50.855796,8.36660027,9.06406242,-0.835141996,8.28655805,8.52604968,7.69437066
50.866287,9.16515139,9.05068586,0.338327545,8.3017507,8.49588983,7.69313293
50.876779,9.38083152,9.03942426,0.584300658,8.31764789,8.46718193,7.69189478
50.88727,8.83176087,9.03022667,-0.445495014,8.33428628,8.43983784,7.69065645
50.897762,9.48683298,9.02304805,0.681017569,8.35171152,8.41376584,7.68941772
50.908254,9.32737905,9.01785572,0.556348213,8.36996762,8.3888888,7.68817868
50.918745,9.05538514,9.01462549,0.201890189,8.38910158,8.36513514,7.68693947
50.929237,9.32737905,9.013358,0.560375811,8.40916943,8.34245013,7.68569985
50.939728,8.88819442,9.01405285,-0.354765323,8.43022373,8.32078139,7.68446005
50.95022,9.38083152,9.01668468,0.603445804,8.45232903,8.30003636,7.68321983
50.960712,9.16515139,9.02126488,0.379323751,8.47554866,8.28016311,7.68197931
50.971203,8.36660027,9.02781806,-0.813152996,8.49995606,8.26111322,7.68073862
50.981695,9.11043358,9.03642456,0.272045991,8.52568469,8.24283637,7.67949751
50.992186,8.54400375,9.04707377,-0.709274293,8.55276126,8.22529252,7.67825621
51.002678,8.54400375,9.05981659,-0.718201114,8.58128059,8.20843783,7.6770145
51.01317,8.42614977,9.0747108,-0.805332869,8.61133709,8.19223614,7.67577249
51.023661,8.83176087,9.09182399,-0.509963846,8.64303273,8.1766536,7.6745303
51.034153,9.16515139,9.11124004,0.232188186,8.67648771,8.16165425,7.67328769
51.044644,8.88819442,9.13304763,-0.494826444,8.71181956,8.14721007,7.6720449
51.055136,9.21954446,9.15735625,0.24937563,8.74916997,8.13328942,7.67080169
51.065628,8.88819442,9.18428301,-0.544140234,8.78868264,8.11986666,7.66955818
51.076119,8.1240384,9.21395901,-1.04399263,8.83051381,8.10691763,7.66831448
51.086611,9.38083152,9.24654026,0.366457721,8.87484667,8.09441606,7.66707037
51.097102,8.42614977,9.28218875,-0.925223744,8.92186443,8.08234201,7.66582607
51.107594,9.48683298,9.32109901,0.407104377,8.97178602,8.07067218,7.66458134
51.118086,9.89949494,9.3634772,0.732132323,9.02483759,8.05938802,7.66333632
51.128577,8.66025404,9.40955214,-0.86562007,9.08126698,8.04847201,7.66209111
51.139069,9.48683298,9.45959228,0.165047573,9.14136367,8.03790456,7.66084548
51.14956,9.2736185,9.51389001,-0.490174979,9.20542385,8.02768595,7.65959966
51.160052,8.94427191,9.5727642,-0.792775057,9.27379917,8.01778277,7.65835342
51.170544,8.77496439,9.63656947,-0.928226847,9.34685975,8.00818142,7.65710687
51.181035,9.05538514,9.7057003,-0.806421207,9.42501495,7.99886904,7.65586014
51.191527,10.3923048,9.7808416,0.781961156,9.50897281,7.98983093,7.65461298
51.202018,9.43398113,9.86238144,-0.654522964,9.59913066,7.98105657,7.65336564
51.21251,9.43398113,9.95083837,-0.718927837,9.69602055,7.9725327,7.65211787
51.223002,9.48683298,10.0468462,-0.748340283,9.80028881,7.96424921,7.65086979
51.233493,9.64365076,10.151116,-0.712365957,9.91265874,7.95619649,7.64962153
51.243985,9.64365076,10.264482,-0.787928426,10.0339783,7.94836319,7.64837284
51.254476,10.0498756,10.3878412,-0.581348043,10.1651549,7.94074148,7.64712396
51.264968,10.7238053,10.5222587,0.448939434,10.3072665,7.93332108,7.64587465
51.27546,10.1488916,10.6689053,-0.721119747,10.4614942,7.92609434,7.64462504
51.285951,10.9087121,10.8291108,0.282136972,10.6291773,7.91905398,7.64337524
51.296443,10.5830052,11.0044427,-0.649182173,10.8118947,7.91219109,7.64212501
51.306934,10.7238053,11.1966277,-0.687620846,11.0113809,7.90549982,7.64087459
51.317426,11.2694277,11.4077265,-0.371885508,11.2297068,7.89897205,7.63962374
51.327918,10.4880885,11.6400613,-1.07329995,11.4692021,7.89260195,7.63837258
51.338409,11.2249722,11.8963305,-0.819364577,11.7325721,7.88638392,7.63712123
51.348901,11.5758369,12.1797883,-0.777143106,12.0230797,7.8803109,7.63586945
51.359392,11.7473401,12.494231,-0.864228477,12.344525,7.87438218,7.63461748
51.369884,12.0415946,12.8444674,-0.896031685,12.7017283,7.86858967,7.63336508
51.380376,13,13.2365887,-0.486403891,13.1007943,7.86292632,7.63211236
51.390867,12.8452326,13.6788392,-0.913020592,13.5499858,7.85738781,7.63085946
51.401359,13.892444,14.1848902,-0.540782977,14.0630221,7.85196851,7.62960613
51.41185,14.4568323,14.7746734,-0.563773965,14.6598972,7.84666504,7.6283526
51.422342,15.8113883,15.4733225,0.581434258,15.365795,7.8414722,7.62709864
51.432834,16.9410743,16.3198207,0.788196453,16.2197749,7.8363865,7.62584437
51.443325,17.9164729,17.366986,0.741273819,17.274712,7.83140456,7.6245899
51.453817,19.7737199,18.6807299,1.04546161,18.5965175,7.82652178,7.62333501
51.464308,22.2036033,20.332959,1.36771498,20.2569933,7.82173558,7.62207991
51.4748,23.8746728,22.3908001,1.21814314,22.3230542,7.81704169,7.62082439
51.485292,26.6645833,24.9004046,1.32822388,24.8405675,7.81243737,7.61956855
51.495783,29.9499583,27.8733804,1.4410336,27.8208628,7.80791997,7.61831252
51.506275,33.0302891,31.2789706,1.32337393,31.2329818,7.80348569,7.61705606
51.516766,36.2767143,35.0386584,1.11267959,34.9983073,7.79913254,7.61579939
51.527258,39.3573373,39.0276016,0.574226147,38.9919883,7.79485699,7.6145423
51.53775,42.1663373,43.0669221,-0.948991479,43.0351897,7.79065688,7.61328489
51.548241,47.1274867,46.9094729,0.466919442,46.8808229,7.7865301,7.61202728
51.558733,49.0509939,50.2205812,-1.08147459,50.1942595,7.78247347,7.61076924
51.569224,50.7740091,52.5834559,-1.34515681,52.5587257,7.77848612,7.60951101
51.579716,52.2876658,53.5946889,-1.14325108,53.5708157,7.77456675,7.60825233
51.590208,52.3641098,53.0408506,-0.822642526,53.0171126,7.77071114,7.60699335
51.600699,50.6655702,51.0273878,-0.601512753,51.0031027,7.76691765,7.60573416
51.611191,48.6929153,47.9146299,0.882204844,47.8891718,7.76318361,7.60447454
51.621682,44.9332839,44.1434756,0.888711565,44.1162708,7.75950786,7.60321472
51.632174,41.0852772,40.1098193,0.987652712,40.0803383,7.75588791,7.60195447
51.642666,37.3496988,36.0780607,1.12766932,36.0457835,7.75232239,7.6006939
51.653157,32.8937684,32.2395511,0.808837035,32.2039746,7.74880996,7.59943313
51.663649,29.7825452,28.7296649,1.02609956,28.6903371,7.74534837,7.59817192
51.67414,27.1108834,25.6372521,1.21393216,25.5938305,7.74193671,7.59691052
51.684632,23.194827,23.0035664,0.437333499,22.9558802,7.73857287,7.59564868
51.695124,19.3649167,20.8266985,-1.20904166,20.7747899,7.73525575,7.59438652
51.705615,19.2353841,19.0679915,0.409136313,19.0121081,7.73198427,7.59312416
51.716107,17.2916165,17.664494,-0.610637023,17.6050286,7.72875649,7.59186136
51.726598,15.7797338,16.5450035,-0.874796915,16.4824108,7.72557174,7.59059836
51.73709,15.2315462,15.6417361,-0.640460694,15.5764571,7.72242818,7.58933493
51.747582,13.9283883,14.898729,-0.985058731,14.8311487,7.71932493,7.58807118
51.758073,13,14.2737137,-1.12858927,14.2041495,7.71626113,7.58680722
51.768565,12.8062485,13.7366596,-0.964578235,13.665368,7.71323509,7.58554283
51.779056,11.5758369,13.2673102,-1.30056654,13.1945026,7.71024631,7.58427824
51.789548,11.3578167,12.8518097,-1.22229008,12.7776646,7.70729451,7.58301321
51.80004,11.2694277,12.4807027,-1.1005794,12.4053779,7.70437789,7.58174786
51.810531,10.4880885,12.1471683,-1.28805272,12.0708068,7.70149545,7.58048231
51.821023,10.4880885,11.8459362,-1.16526722,11.7686693,7.69864571,7.57921632
51.831514,10.1488916,11.5739061,-1.19373974,11.4958626,7.69582833,7.57795013
51.842006,10.2956301,11.3267383,-1.01543495,11.2480327,7.6930419,7.57668349
51.852498,9.69535971,11.1012075,-1.18568454,11.0219439,7.69028586,7.57541654
51.862989,9.05538514,10.8949189,-1.35629413,10.8151941,7.68755965,7.57414939
51.873481,10,10.7057472,-0.840087628,10.625651,7.68486197,7.57288179
51.883972,11.3137085,10.5319128,0.884192122,10.4515283,7.68219258,7.571614
51.894464,9.21954446,10.3717984,-1.07343092,10.2912023,7.67955023,7.57034576
51.904956,9.38083152,10.2240321,-0.918259542,10.1432953,7.67693447,7.5690772
51.915447,10,10.0874056,-0.295644326,10.0065932,7.67434486,7.56780845
51.925939,9.32737905,9.96081678,-0.795888009,9.87998861,7.67178024,7.56653925
51.93643,10.2469508,9.84333836,0.635304972,9.7625493,7.66924045,7.56526984
51.946922,9.69535971,9.73410447,-0.196836863,9.65340473,7.66672439,7.564
51.957414,8.94427191,9.632377,-0.829520999,9.55181249,7.66423169,7.56272983
51.967905,9.64365076,9.53749687,0.325812657,9.45710944,7.661762,7.56145947
51.978397,9.94987437,9.44884938,0.707831189,9.36867716,7.65931429,7.56018866
51.988888,8.54400375,9.36591785,-0.906594786,9.28599549,7.65688847,7.55891764
51.99938,8.77496439,9.28820768,-0.71641,9.20856631,7.65448394,7.55764619
52.009872,9.05538514,9.21529676,-0.399889514,9.13596443,7.65210053,7.55637441
52.020363,8.54400375,9.1468034,-0.776401737,9.06780584,7.64973742,7.55510243
52.030855,8.18535277,9.08236449,-0.947107027,9.00372495,7.64739365,7.55383001
52.041346,8,9.02173981,-1.01081146,8.9434797,7.64506921,7.55255738
52.051838,8.88819442,8.96465684,-0.276518397,8.8867957,7.64276319,7.55128432
52.06233,9.38083152,8.91074931,0.685625416,8.8333037,7.64047538,7.55001092
52.072821,8.71779789,8.8597886,-0.376816549,8.78277321,7.63820555,7.54873733
52.083313,8.36660027,8.81155271,-0.667047557,8.73498066,7.63595287,7.54746329
52.093804,8.94427191,8.76585685,0.422392073,8.68973965,7.63371734,7.54618905
52.104296,9,8.72251529,0.52676817,8.64686313,7.63149814,7.54491437
52.114788,8.77496439,8.68137038,0.305931384,8.6061921,7.62929512,7.54363936
52.125279,8.71779789,8.6422772,0.274810275,8.56758042,7.6271081,7.54236415
52.135771,7.41619849,8.60509224,-1.09036405,8.53088358,7.6249363,7.5410885
52.146262,7.87400787,8.56969735,-0.834080016,8.49598232,7.62277979,7.53981264
52.156754,9.74679434,8.53597066,1.10037434,8.46275396,7.62063781,7.53853634
52.167246,8.71779789,8.50380963,0.46258865,8.43109506,7.61851024,7.53725971
52.177737,7.07106781,8.47311943,-1.18408261,8.40090998,7.61639695,7.53598289
52.188229,8.94427191,8.44380403,0.707437545,8.37210207,7.61429722,7.53470561
52.19872,8.1240384,8.41578579,-0.540136453,8.34459294,7.61221115,7.53342814
52.209212,8.48528137,8.38898235,0.310320836,8.31829973,7.61013807,7.53215022
52.219704,9.32737905,8.36332573,0.981862171,8.29315336,7.60807842,7.53087197
52.230195,9.11043358,8.33875175,0.878454227,8.26908964,7.60603154,7.52959352
52.240687,8.54400375,8.31519454,0.478340048,8.24604237,7.60399676,7.52831463
52.251178,8,8.2926033,-0.54092818,8.22396022,7.60197419,7.52703553
52.26167,7.61577311,8.27095852,-0.809435244,8.20282375,7.5999632,7.52575599
52.272162,8.60232527,8.2501707,0.593426125,8.18254268,7.59796373,7.52447613
52.282653,8.06225775,8.23019691,-0.409803809,8.16307375,7.59597571,7.52319606
52.293145,7.74596669,8.21099187,-0.681927545,8.1443715,7.59399854,7.52191554
52.303636,8.18535277,8.19252073,-0.0846637719,8.12640074,7.59203234,7.52063483
52.314128,7.54983444,8.17474439,-0.790512461,8.10912225,7.59007653,7.51935366
52.32462,7.68114575,8.15763174,-0.690279644,8.09250466,7.58813106,7.51807218
52.335111,8,8.14115401,-0.375704691,8.07651902,7.58619591,7.51679049
52.345603,7.93725393,8.12528095,-0.433620822,8.06113499,7.5842705,7.51550835
52.356094,8.18535277,8.10999046,0.27452197,8.04633027,7.58235498,7.51422601
52.366586,8.30662386,8.09525628,0.459747306,8.03207857,7.5804488,7.51294323
52.377078,8.06225775,8.08105953,-0.137119602,8.0183609,7.57855193,7.51166012
52.387569,7.28010989,8.06738371,-0.887284522,8.00516062,7.57666438,7.5103768
52.398061,8.66025404,8.05421112,0.778487584,7.9924601,7.57478559,7.50909305
52.408552,8.24621125,8.04153219,0.452414696,7.98024965,7.57291574,7.50780908
52.419044,7.07106781,8.0293359,-0.978911688,7.96851833,7.57105431,7.50652468
52.429536,8.42614977,8.01761945,0.639163769,7.95726312,7.56920154,7.50523994
52.440027,8.60232527,8.00638534,0.771971457,7.94648666,7.56735732,7.50395501
52.450519,8.24621125,7.99564132,0.500569611,7.93619706,7.56552099,7.50266963
52.46101,7.07106781,7.98541258,-0.956213766,7.92641966,7.56369275,7.50138405
52.471502,7.81024968,7.97575068,-0.406818152,7.91720656,7.5618721,7.50009802
52.481994,7.54983444,7.9667262,-0.645671561,7.90862883,7.56005904,7.49881166
52.492485,7.21110255,7.95845953,-0.864498105,7.90080774,7.55825362,7.49752511
52.502977,8.54400375,7.95114158,0.769975434,7.89393571,7.55645533,7.4962381
52.513468,8.30662386,7.94505452,0.601306363,7.8882968,7.55466438,7.4949509
52.52396,9.05538514,7.94057957,1.05584353,7.88427498,7.5528803,7.49366325
52.534452,8.24621125,7.93819768,0.554989704,7.88235444,7.55110311,7.49237527
52.544943,8.66025404,7.93845452,0.849587851,7.88308439,7.54933285,7.49108709
52.555435,7.34846923,7.94191752,-0.77035595,7.88703596,7.54756906,7.48979847
52.565926,8.60232527,7.94912148,0.808210239,7.89474705,7.54581195,7.48850964
52.576418,8.42614977,7.96007605,0.68269592,7.90622681,7.54406106,7.48722037
52.58691,8.66025404,7.97441768,0.828152378,7.92110848,7.54231643,7.48593077
52.597401,8.24621125,7.99103575,0.505148988,7.93827339,7.54057812,7.48464097
52.607893,7.93725393,8.00773566,-0.26548394,7.95551219,7.53884569,7.48335073
52.618384,8.66025404,8.02100009,0.799533584,7.96928482,7.53711933,7.48206028
52.628876,8.06225775,8.02649265,0.189116637,7.97522804,7.53539863,7.48076939
52.639368,8.1240384,8.02079348,0.321317486,7.9699016,7.5336837,7.47947817
52.649859,8.1240384,8.00347721,0.34721923,7.95287879,7.53197474,7.47818675
52.660351,7.28010989,7.9773828,-0.835028687,7.92701776,7.5302711,7.47689489
52.670842,8.18535277,7.94679553,0.488423219,7.89663125,7.52857302,7.47560282
52.681334,8.30662386,7.91546381,0.625427893,7.86549162,7.52688006,7.47431031
52.691826,8.54400375,7.88587537,0.811251118,7.83610242,7.52519231,7.47301747
52.702317,7.81024968,7.85935746,-0.221602766,7.80979934,7.52350982,7.47172444
52.712809,8.77496439,7.83641937,0.968785329,7.78709495,7.52183219,7.47043095
52.7233,7.54983444,7.81704517,-0.516924299,7.76797307,7.52015964,7.46913727
52.733792,8.54400375,7.80088118,0.862045568,7.75207778,7.51849177,7.46784314
52.744284,8.66025404,7.7874105,0.93426096,7.73888872,7.51682865,7.46654869
52.754775,8.54400375,7.77607059,0.876317951,7.72783969,7.51517035,7.46525404
52.765267,7.93725393,7.7663374,0.413420524,7.71840331,7.51351648,7.46395894
52.775758,7.28010989,7.75780766,-0.691156836,7.71017369,7.51186728,7.46266364
52.78625,8.1240384,7.75010912,0.611497577,7.70277629,7.51022234,7.46136789
52.796742,9.16515139,7.74300851,1.19253632,7.69597639,7.50858175,7.46007183
52.807233,7.14142843,7.73635259,-0.771313268,7.68961975,7.5069456,7.45877556
52.817725,7.81024968,7.73003802,0.283216628,7.68360254,7.50531348,7.45747885
52.828216,7.81024968,7.72399856,0.29368541,7.67785805,7.50368565,7.45618193
52.838708,8.1240384,7.7181876,0.637064207,7.67233952,7.50206173,7.45488458
52.8492,7.34846923,7.7125739,-0.603410867,7.6670155,7.50044179,7.45358689
52.859691,7.93725393,7.70713472,0.479707429,7.66186299,7.49882609,7.45228902
52.870183,8.42614977,7.7018508,0.851057559,7.65686285,7.49721411,7.45099069
52.880674,8.66025404,7.69670865,0.981603476,7.65200152,7.49560607,7.44969217
52.891166,8.06225775,7.69169529,0.608738413,7.64726604,7.49400159,7.4483932
52.901658,8.48528137,7.68680419,0.893575504,7.64264987,7.49240077,7.44709391
52.912149,8.36660027,7.68202389,0.827391307,7.63814149,7.49080371,7.44579442
52.922641,7.41619849,7.677346,-0.511025942,7.63373257,7.48921003,7.44449449
52.933132,7.74596669,7.67276519,0.270557759,7.62941773,7.48761998,7.44319436
52.943624,7.34846923,7.66827422,-0.565513037,7.6251898,7.4860332,7.44189378
52.954116,7.28010989,7.66385715,-0.619473371,7.62103275,7.48444979,7.44059288
52.964607,7.21110255,7.65953302,-0.669649514,7.61696576,7.48286984,7.43929179
52.975099,7.68114575,7.65528533,0.16081176,7.61297232,7.48129299,7.43799025
52.98559,8.24621125,7.65111149,0.771427097,7.60904983,7.4797195,7.43668851
52.996082,8.77496439,7.64700726,1.06205326,7.6051941,7.478149,7.43538633
53.006574,8.06225775,7.64296962,0.647524612,7.60140214,7.47658161,7.43408383
53.017065,8.36660027,7.63899616,0.852997129,7.59767151,7.47501742,7.43278113
53.027557,8.77496439,7.63508353,1.06765203,7.59399894,7.47345608,7.43147799
53.038048,8.54400375,7.63123008,0.955391893,7.59038276,7.47189784,7.43017465
53.04854,8.1240384,7.62743284,0.704702466,7.58682009,7.47034236,7.42887087
53.059032,8.60232527,7.62369011,0.989259903,7.58330922,7.46878974,7.42756677
53.069523,7.93725393,7.62000036,0.563252675,7.57984856,7.46724015,7.42626247
53.080015,8.30662386,7.61636106,0.830820562,7.57643566,7.46569325,7.42495773
53.090506,8,7.61277111,0.622277179,7.57306947,7.46414923,7.42365279
53.100998,8.06225775,7.60922822,0.673074682,7.56974775,7.46260774,7.42234741
53.11149,7.93725393,7.60573233,0.575779131,7.56647048,7.46106888,7.42104172
53.121981,8.66025404,7.60228169,1.02857783,7.5632359,7.45953278,7.41973582
53.132473,7.48331477,7.59887367,-0.339939551,7.56004146,7.45799908,7.41842949
53.142964,7.28010989,7.59550762,-0.561602821,7.55688646,7.45646806,7.41712296
53.153456,7.48331477,7.59218164,-0.329949793,7.55376911,7.45493937,7.41581598
53.163948,8.48528137,7.58889487,0.946776901,7.55068854,7.45341312,7.41450869
53.174439,7.54983444,7.58564649,-0.189240742,7.54764393,7.45188942,7.41320121
53.184931,7.74596669,7.5824348,0.404390768,7.54463366,7.45036795,7.41189328
53.195422,7.81024968,7.57925938,0.480614498,7.54165728,7.44884895,7.41058516
53.205914,7.14142843,7.5761187,-0.659310454,7.53871334,7.44733211,7.4092766
53.216406,8.77496439,7.57301203,1.09633588,7.5358011,7.44581753,7.40796772
53.226897,7.48331477,7.56993872,-0.294319471,7.53291995,7.44430532,7.40665865
53.237389,8.18535277,7.56689734,0.786419376,7.53006848,7.44279517,7.40534914
53.24788,7.81024968,7.5638876,0.496348748,7.52724641,7.44128732,7.40403943
53.258372,7.87400787,7.56090812,0.559553177,7.52445242,7.43978146,7.40272929
53.268864,8.36660027,7.5579584,0.899245163,7.52168602,7.4382777,7.40141882
53.279355,7.48331477,7.55503798,-0.267811887,7.51894674,7.43677616,7.40010817
53.289847,7.48331477,7.55214565,-0.262356399,7.51623335,7.43527661,7.39879708
53.300338,8.48528137,7.54928117,0.967471033,7.51354569,7.43377921,7.39748579
53.31083,8.60232527,7.54644332,1.02756116,7.51088259,7.43228365,7.39617407
53.321322,7.81024968,7.54363203,0.516350309,7.50824401,7.43079004,7.39486202
53.331813,7.81024968,7.5408473,0.519039856,7.50562993,7.42929849,7.39354979
53.342305,8.1240384,7.53808726,0.765474458,7.50303854,7.42780869,7.39223712
53.352796,8.42614977,7.53535183,0.943820926,7.50046975,7.4263209,7.39092426
53.363288,8.18535277,7.53263993,0.807906457,7.49792254,7.42483482,7.38961096
53.37378,6.4807407,7.52995126,-1.0243098,7.49539661,7.42335054,7.38829735
53.384271,7.61577311,7.52728553,0.297468617,7.49289168,7.4218682,7.38698355
53.394763,8,7.52464172,0.689462314,7.49040678,7.42038748,7.3856693
53.405254,7.68114575,7.52201983,0.398905907,7.48794189,7.41890864,7.38435487
53.415746,8.06225775,7.51941888,0.736775994,7.4854961,7.41743137,7.38304
53.426238,7.54983444,7.51683865,0.181647421,7.48306918,7.41595579,7.38172482
53.436729,7.41619849,7.5142789,-0.313177927,7.48066089,7.41448203,7.38040945
53.447221,7.81024968,7.5117387,0.546361578,7.47827036,7.41300976,7.37909365
53.457712,7.93725393,7.5092181,0.654244471,7.47589763,7.41153926,7.37777765
53.468204,7.87400787,7.50671621,0.606045929,7.47354185,7.41007021,7.37646122
53.478696,7.74596669,7.50423284,0.491664371,7.47120284,7.40860275,7.37514447
53.489187,7.54983444,7.50176784,0.219240952,7.46888045,7.40713698,7.37382754
53.499679,7.87400787,7.4993204,0.612117203,7.46657386,7.40567266,7.37251018
53.51017,7.48331477,7.49689059,-0.116515326,7.46428317,7.40421002,7.37119262
53.520662,8.71779789,7.49447756,1.10603812,7.46200759,7.40274873,7.36987464
53.531154,7,7.49208118,-0.701484979,7.45974699,7.40128892,7.36855634
53.541645,7.48331477,7.48970195,-0.0799198437,7.4575019,7.3998307,7.36723785
53.552137,8.24621125,7.48733847,0.871133043,7.45527093,7.39837377,7.36591893
53.562628,7.14142843,7.48499083,-0.586141967,7.45305417,7.39691841,7.36459983
53.57312,8.71779789,7.48265827,1.11136835,7.4508509,7.39546431,7.36328029
53.583612,8.24621125,7.4803407,0.875140305,7.44866103,7.39401158,7.36196044
53.594103,8.1240384,7.47803803,0.803741484,7.44648449,7.39256036,7.3606404
53.604595,8.36660027,7.47574954,0.943848888,7.44432059,7.39111034,7.35931994
53.615086,8.1240384,7.47347538,0.806574872,7.44216947,7.38966179,7.35799929
53.625578,7.54983444,7.47121484,0.280391863,7.44003045,7.38821441,7.3566782
53.63607,7.41619849,7.46896786,-0.229715861,7.4379035,7.38676832,7.35535681
53.646561,7.48331477,7.4667344,0.128764805,7.43578855,7.38532365,7.35403523
53.657053,8,7.46451376,0.731769254,7.43368495,7.38388011,7.35271323
53.667544,7.93725393,7.46230612,0.689164577,7.43159288,7.38243795,7.35139104
53.678036,7.48331477,7.46011081,0.152328465,7.4295117,7.38099688,7.35006842
53.688528,6,7.45792781,-1.20744681,7.42744138,7.37955703,7.34874549
53.699019,7.93725393,7.45575709,0.693899736,7.42538191,7.37811852,7.34742238
53.709511,8.06225775,7.45359802,0.780166473,7.42333267,7.37668107,7.34609884
53.720002,8.30662386,7.45145083,0.924755663,7.42129385,7.37524498,7.34477512
53.730494,7.61577311,7.44931483,0.40799298,7.41926486,7.3738099,7.34345096
53.740986,8.71779789,7.44719004,1.12721242,7.41724569,7.37237597,7.34212651
53.751477,7.81024968,7.44507671,0.604295428,7.41523662,7.37094331,7.34080187
53.761969,7.93725393,7.44297412,0.70305036,7.41323694,7.36951163,7.3394768
53.77246,7.28010989,7.44088232,-0.400964377,7.41124669,7.36808119,7.33815156
53.782952,7.93725393,7.43880071,0.7060122,7.40926532,7.36665171,7.33682588
53.793444,8.06225775,7.43672973,0.790903291,7.40729327,7.36522331,7.3354999
53.803935,7.61577311,7.43466854,0.425563825,7.40532968,7.36379611,7.33417375
53.814427,8.71779789,7.43261699,1.13365819,7.40337445,7.36236983,7.33284716
53.824918,7.54983444,7.4305753,0.34533916,7.4014278,7.36094472,7.3315204
53.83541,7.87400787,7.42854292,0.667431612,7.39948918,7.35952052,7.33019321
53.845902,7.28010989,7.42651987,-0.382635577,7.39755864,7.35809733,7.32886572
53.856393,7.74596669,7.42450619,0.566974867,7.3956362,7.35667528,7.32753805
53.866885,7,7.42250133,-0.650001026,7.39372135,7.3552541,7.32620995
53.877376,7.74596669,7.42050552,0.570492042,7.3918143,7.35383404,7.32488168
53.887868,7.48331477,7.41851823,0.254551653,7.38991456,7.35241482,7.32355298
53.89836,7.28010989,7.4165395,-0.369363787,7.38802217,7.35099657,7.32222398
53.908851,7.93725393,7.41456937,0.722969271,7.38613716,7.34957941,7.32089481
53.919343,7.81024968,7.41260732,0.630588893,7.38425906,7.34816306,7.31956521
53.929834,7.61577311,7.41065364,0.45290116,7.38238809,7.34674782,7.31823544
53.940326,7.34846923,7.40870779,-0.245435445,7.38052376,7.34533337,7.31690524
53.950818,6.8556546,7.4067698,-0.742371335,7.37866613,7.34391985,7.31557474
53.961309,6.4807407,7.40483982,-0.961300746,7.37681535,7.34250736,7.31424407
53.971801,7.07106781,7.40291749,-0.576063951,7.37497107,7.34109564,7.31291298
53.982292,7.87400787,7.40100282,0.687753626,7.37313331,7.33968495,7.31158171
53.992784,6.70820393,7.39909534,-0.831198779,7.37130159,7.33827501,7.31025002
54.003276,7.54983444,7.3971951,0.39069084,7.369476,7.33686594,7.30891804
54.013767,7.81024968,7.39530217,0.64416419,7.36765658,7.33545787,7.30758588
54.024259,7.14142843,7.39341608,-0.501983713,7.3658429,7.33405052,7.3062533
54.03475,6.92820323,7.39153707,-0.680686298,7.36403519,7.33264415,7.30492055
54.045242,8.36660027,7.38966467,0.988400522,7.36223301,7.33123849,7.30358738
54.055734,7.28010989,7.38779898,-0.328160155,7.36043643,7.32983366,7.30225391
54.066225,7.81024968,7.38594005,0.651390535,7.35864553,7.32842979,7.30092028
54.076717,6.78232998,7.38408743,-0.775730265,7.35685987,7.32702661,7.29958622
54.087208,7.87400787,7.38224137,0.701260652,7.35507971,7.32562437,7.298252
54.0977,7.93725393,7.38040143,0.746225501,7.3533046,7.3242228,7.29691735
54.108192,8.24621125,7.3785677,0.931473862,7.35153464,7.32282203,7.29558241
54.118683,7.93725393,7.37674024,0.748674627,7.3497699,7.32142218,7.29424731
54.129175,6.92820323,7.37491862,-0.668367703,7.34800996,7.32002298,7.29291178
54.139666,7.61577311,7.37310312,0.492615459,7.34625508,7.31862471,7.29157609
54.150158,7.41619849,7.3712933,0.211908441,7.34450484,7.3172271,7.29023998
54.16065,7.48331477,7.36948924,0.337380401,7.34275934,7.31583026,7.28890358
54.171141,7.41619849,7.36769102,0.220244105,7.34101865,7.3144343,7.28756701
54.181633,7.54983444,7.36589843,0.428877616,7.33928257,7.31303897,7.28623003
54.192124,8,7.36411152,0.797426158,7.33755117,7.31164452,7.28489288
54.202616,7.74596669,7.36232988,0.619384218,7.33582403,7.31025069,7.28355531
54.213108,7.87400787,7.36066297,0.716480917,7.33421101,7.30885759,7.28221746
54.223599,7.28010989,7.35889223,-0.280681919,7.33249278,7.30746536,7.28087944
54.234091,7.81024968,7.35712652,0.673144228,7.33077859,7.30607372,7.27954101
54.244582,7.87400787,7.35536612,0.720167866,7.32906872,7.30468294,7.27820241
54.255074,7.07106781,7.35361061,-0.531547549,7.32736276,7.30329274,7.2768634
54.265566,7.81024968,7.3518601,0.677044741,7.32566083,7.30190326,7.2755241
54.276057,8.30662386,7.35011468,0.978012876,7.32396303,7.30051461,7.27418464
54.286549,7.21110255,7.34837395,-0.370501557,7.32226895,7.29912654,7.27284477
54.29704,8.06225775,7.3466382,0.845942994,7.32057888,7.2977393,7.27150474
54.307532,7.14142843,7.34490701,-0.451086007,7.31889243,7.29635262,7.27016429
54.318024,6.40312424,7.34318051,-0.969564989,7.3172097,7.29496663,7.26882356
54.328515,7.41619849,7.34145878,0.273385638,7.3155308,7.29358146,7.26748267
54.339007,7.34846923,7.33974145,0.0934225872,7.31385535,7.29219684,7.26614136
54.349498,7.81024968,7.33802879,0.687183302,7.31218362,7.29081304,7.2647999
54.35999,7,7.33632043,-0.579931404,7.31051524,7.28942981,7.26345803
54.370482,7,7.33461647,-0.578460435,7.30885032,7.28804725,7.26211588
54.380973,8.36660027,7.33291702,1.01670214,7.30718897,7.2866655,7.26077356
54.391465,7.54983444,7.33122179,0.467560316,7.30553092,7.28528428,7.25943084
54.401956,8.1240384,7.32953102,0.891351439,7.3038764,7.28390385,7.25808796
54.412448,6.63324958,7.32784428,-0.833423484,7.30222499,7.28252397,7.25674468
54.42294,7.14142843,7.32616169,-0.429806072,7.3005768,7.28114474,7.25540111
54.433431,8.1240384,7.32448334,0.894178428,7.29893193,7.2797663,7.25405738
54.443923,7.68114575,7.32280889,0.598612447,7.29729005,7.27838838,7.25271325
54.454414,7.54983444,7.32113859,0.478221544,7.29565141,7.27701124,7.25136897
54.464906,8.1240384,7.3194721,0.896976203,7.29401566,7.27563462,7.25002427
54.475398,6.63324958,7.31780952,-0.827381374,7.29238293,7.27425865,7.2486793
54.485889,7.54983444,7.31615098,0.483408167,7.29075333,7.27288345,7.24733418
54.496381,7.74596669,7.31449612,0.656864195,7.28912651,7.27150876,7.24598865
54.506872,7.07106781,7.31284522,-0.491708665,7.28750275,7.27013484,7.24464297
54.517364,6.40312424,7.31119793,-0.952929008,7.2858817,7.26876143,7.24329688
54.527856,8.30662386,7.30955437,0.998533671,7.28426348,7.26738866,7.24195051
54.538347,7.48331477,7.30791466,0.418807964,7.28264822,7.26601665,7.240604
54.548839,7.14142843,7.30627846,-0.406017282,7.28103557,7.26464515,7.23925708
54.55933,7.74596669,7.30464605,0.664319685,7.27942582,7.26327441,7.23791002
54.569822,7.61577311,7.3030171,0.559245928,7.27781862,7.26190418,7.23656255
54.580314,6.78232998,7.30139173,-0.720459398,7.27621411,7.2605346,7.2352148
54.590805,7.34846923,7.29977006,0.220678884,7.27461241,7.25916577,7.23386691
54.601297,7.07106781,7.29815179,-0.476533289,7.27301323,7.25779744,7.23251862
54.611788,7.14142843,7.29653726,-0.393838586,7.2714169,7.25642987,7.23117018
54.62228,7.81024968,7.29492606,0.717860441,7.269823,7.25506281,7.22982134
54.632772,8.24621125,7.29331832,0.976162351,7.26823167,7.25369638,7.22847222
54.643263,8,7.29171415,0.841597202,7.26664303,7.2523307,7.22712296
54.653755,7.74596669,7.29011324,0.675169202,7.26505677,7.25096552,7.2257733
54.664246,7.14142843,7.28851588,-0.383519814,7.26347317,7.2496011,7.2244235
54.674738,7.48331477,7.28692174,0.44316254,7.26189191,7.24823717,7.2230733
54.68523,7.48331477,7.28533096,0.444953718,7.26031314,7.24687387,7.22172283
54.695721,6.70820393,7.28374369,-0.758643368,7.25873699,7.24551133,7.22037221
54.706213,7.34846923,7.28215961,0.257506531,7.25716315,7.24414928,7.2190212
54.716704,7.48331477,7.28057902,0.450261868,7.25559191,7.24278798,7.21767005
54.727196,6.78232998,7.279002,-0.704749614,7.25402337,7.24142719,7.21631849
54.737688,6.78232998,7.27742792,-0.70363196,7.25245688,7.24006702,7.21496667
54.748179,6.92820323,7.27585731,-0.589621983,7.25089298,7.23870761,7.21361472
54.758671,7.48331477,7.27428989,0.457192397,7.24933138,7.2373487,7.21226236
54.769162,6.32455532,7.27272594,-0.973740531,7.24777238,7.23599055,7.21090987
54.779654,7.61577311,7.2711652,0.587033143,7.24621569,7.23463291,7.20955698
54.790146,6.63324958,7.26960781,-0.797720649,7.24466146,7.23327592,7.20820383
54.800637,7.14142843,7.26805395,-0.355844797,7.24310987,7.23191969,7.20685054
54.811129,7.54983444,7.26650332,0.532288567,7.24156062,7.23056396,7.20549685
54.82162,7.41619849,7.26495635,0.388898616,7.24001415,7.229209,7.20414304
54.832112,7.41619849,7.2634127,0.390878229,7.2384701,7.22785456,7.20278882
54.842604,7.87400787,7.26187251,0.782390799,7.23692861,7.22650077,7.20143435
54.853095,7.07106781,7.26033597,-0.435049607,7.23538988,7.22514775,7.20007974
54.863587,7.68114575,7.25880283,0.649879159,7.23385365,7.22379524,7.19872474
54.874078,7.28010989,7.25727341,0.151117429,7.23232025,7.22244351,7.1973696
54.88457,7.68114575,7.25574749,0.652225618,7.23078946,7.2210923,7.19601408
54.895062,7.61577311,7.25422527,0.601288478,7.22926147,7.21974174,7.19465829
54.905553,8.60232527,7.25270697,1.16173074,7.22773649,7.21839196,7.19330237
54.916045,7.81024968,7.25119236,0.747701355,7.22621432,7.21704271,7.19194607
54.926536,7.68114575,7.24968183,0.656859132,7.22469531,7.21569425,7.19058963
54.937028,7.41619849,7.24817518,0.409906459,7.22317929,7.21434632,7.18923281
54.94752,7.87400787,7.24667267,0.792044949,7.2216665,7.21299905,7.18787572
54.958011,7,7.24517456,-0.49515105,7.22015719,7.21165258,7.18651851
54.968503,7.61577311,7.2436807,0.609993772,7.21865123,7.21030664,7.18516091
54.978994,7,7.24219153,-0.492129589,7.21714904,7.20896151,7.18380319
54.989486,7.61577311,7.24070693,0.612426462,7.21565051,7.20761693,7.18244508
54.999978,7.48331477,7.23922726,0.494052139,7.21415597,7.20627305,7.18108671
55.010469,7,7.23775284,-0.487599059,7.21266577,7.20492998,7.17972822
55.020961,7.54983444,7.23628365,0.55995606,7.21117986,7.20358746,7.17836934
55.031452,6.164414,7.23482035,-1.03460444,7.20969894,7.20224577,7.17701034
55.041944,8,7.23336298,0.875578106,7.208223,7.20090465,7.17565095
55.052436,6.70820393,7.23191193,-0.723676721,7.20675243,7.19956425,7.17429131
55.062927,8.06225775,7.23046771,0.912025238,7.20528777,7.19822468,7.17293155
55.073419,6.63324958,7.22904076,-0.771875109,7.20383947,7.19688569,7.1715714
55.08391,6.8556546,7.22761133,-0.609882553,7.20238772,7.19554754,7.17021114
55.094402,7.14142843,7.22618997,-0.291138348,7.2009431,7.19420998,7.16885049
55.104894,7.61577311,7.22477746,0.625296444,7.1995064,7.19287315,7.1674896
55.115385,6.40312424,7.22337469,-0.905676795,7.19807849,7.19153717,7.16612858
55.125877,7.07106781,7.22198225,-0.38847707,7.19665995,7.19020179,7.16476718
55.136368,6.8556546,7.22060136,-0.604108234,7.19525204,7.18886728,7.16340566
55.14686,7.74596669,7.2192329,0.725764282,7.1938556,7.18753339,7.16204377
55.157352,6.8556546,7.21787831,-0.601850237,7.19247208,7.18620024,7.16068163
55.167843,7.93725393,7.21653923,0.848949175,7.19110314,7.18486798,7.15931937
55.178335,6.92820323,7.21521719,-0.535736835,7.18975028,7.18353635,7.15795673
55.188826,7.93725393,7.21391451,0.850493637,7.18841585,7.18220561,7.15659398
55.199318,7.28010989,7.21263339,0.25976239,7.18710204,7.18087552,7.15523085
55.20981,7.48331477,7.21137687,0.521476657,7.18581189,7.17954621,7.15386748
55.220301,7.68114575,7.21014851,0.686292386,7.18454896,7.17821782,7.15250399
55.230793,7.48331477,7.20895219,0.523796316,7.18331716,7.17689009,7.15114013
55.241284,7.07106781,7.20779357,-0.36976446,7.18212215,7.17556329,7.14977615
55.251776,7.21110255,7.20667983,0.0665035647,7.18097114,7.17423717,7.1484118
55.262268,7,7.20561743,-0.453450586,7.17987058,7.17291189,7.14704721
55.272759,7.28010989,7.20461586,0.27476177,7.17883,7.17158755,7.14568251
55.283251,7.61577311,7.20368683,0.641939464,7.17786117,7.17026392,7.14431744
55.293742,7.28010989,7.20284604,0.277963751,7.17697983,7.16894124,7.14295225
55.304234,7.28010989,7.20211437,0.279276777,7.17620692,7.16761928,7.1415867
55.314726,7.07106781,7.20152178,-0.361184115,7.17557252,7.16629818,7.1402209
55.325217,6.92820323,7.20111271,-0.522407389,7.17512122,7.16497805,7.138855
55.335709,6.55743852,7.20095529,-0.802194967,7.17492139,7.16365866,7.13748873
55.3462,6.78232998,7.20115514,-0.647167023,7.17507905,7.16234028,7.13612235
55.356692,7.21110255,7.20187316,0.096069698,7.17575566,7.16102265,7.1347556
55.367184,7.93725393,7.20334483,0.856684951,7.17718756,7.15970591,7.13338862
55.377675,6.92820323,7.20589431,-0.526964023,7.17970012,7.15839019,7.13202153
55.388167,7.74596669,7.20993491,0.732141911,7.18370814,7.15707526,7.13065408
55.398658,7.93725393,7.2159397,0.849302205,7.18968644,7.15576138,7.12928652
55.40915,7.14142843,7.22438083,-0.288014582,7.19810888,7.15444829,7.12791859
55.419642,8.42614977,7.23562182,1.09111317,7.20934029,7.15313615,7.12655044
55.430133,7.34846923,7.24976813,0.314167313,7.22348648,7.15182508,7.12518218
55.440625,7.81024968,7.26645407,0.737424983,7.24018036,7.15051485,7.12381355
55.451116,6.63324958,7.2844961,-0.806998461,7.25823404,7.14920571,7.12244483
55.461608,5.91607978,7.30126209,-1.17693768,7.27500585,7.14789743,7.12107574
55.4721,6.92820323,7.31273294,-0.620104595,7.28646222,7.14659016,7.11970642
55.482591,8,7.31506228,0.827609643,7.28874297,7.14528403,7.118337
55.493083,7.07106781,7.30700238,-0.485730962,7.28059568,7.14397878,7.11696723
55.503574,7.07106781,7.29088735,-0.468849168,7.26436249,7.14267468,7.11559735
55.514066,7,7.27078767,-0.520372622,7.24412824,7.14137149,7.11422711
55.524558,7.21110255,7.25022147,-0.197785037,7.22342376,7.14006935,7.11285665
55.535049,7.41619849,7.23132252,0.429972053,7.20439072,7.13876839,7.11148609
55.545541,7,7.21506584,-0.463751914,7.18800793,7.13746837,7.11011517
55.556032,6.78232998,7.20170259,-0.647589846,7.1745277,7.13616956,7.10874416
55.566524,8,7.19105598,0.899413156,7.16377271,7.13487173,7.10737279
55.577016,7.93725393,7.18273194,0.868632254,7.15534758,7.13357499,7.1060012
55.587507,7.41619849,7.17625418,0.489841101,7.14877427,7.13227951,7.10462951
55.597999,8.18535277,7.17115883,1.00707197,7.1435872,7.13098503,7.10325747
55.60849,7.87400787,7.16705393,0.840805535,7.13939295,7.12969183,7.10188534
55.618982,6.32455532,7.163636,-0.916013472,7.13588689,7.12839966,7.10051285
55.629474,7.34846923,7.16068947,0.433335615,7.13285261,7.12710868,7.09914014
55.639965,7,7.15806893,-0.397578834,7.13014414,7.12581901,7.09776734
55.650457,7.61577311,7.15567905,0.67830233,7.12766578,7.12453043,7.09639419
55.660948,6.70820393,7.1534593,-0.667274585,7.12535675,7.12324319,7.09502095
55.67144,7.34846923,7.1513718,0.443956559,7.12317901,7.12195706,7.09364736
55.681932,6.8556546,7.1493881,-0.541971865,7.12110397,7.1206722,7.09227355
55.692423,7.61577311,7.14748714,0.68431423,7.11911047,7.11938877,7.09089966
55.702915,7.21110255,7.14565449,0.255828182,7.11718403,7.11810651,7.08952541
55.713406,7.07106781,7.14387958,-0.269836563,7.11531403,7.11682566,7.08815108
55.723898,7.48331477,7.14215337,0.584090237,7.11349137,7.11554602,7.0867764
55.73439,7.68114575,7.14046897,0.735307268,7.11170913,7.1142677,7.08540151
55.744881,7.68114575,7.13882076,0.736427176,7.10996166,7.11299087,7.08402654
55.755373,7.54983444,7.13720367,0.642363423,7.10824382,7.11171528,7.08265121
55.765864,8.1240384,7.13561403,0.99419534,7.10655195,7.1104412,7.08127581
55.776356,7.21110255,7.13404823,0.277586599,7.10488237,7.10916841,7.07990006
55.786848,7.54983444,7.13250369,0.646011416,7.10323249,7.10789704,7.0785241
55.797339,7.61577311,7.13105886,0.696214227,7.10168108,7.10662725,7.07714806
55.807831,7.81024968,7.12955,0.825045258,7.10006369,7.10535879,7.07577167
55.818322,7.54983444,7.12805641,0.649444397,7.09845994,7.10409194,7.07439521
55.828814,7,7.12657634,-0.355775693,7.09686802,7.10282648,7.07301841
55.839306,7.07106781,7.12510868,-0.232466912,7.09528682,7.10156254,7.07164139
55.849797,7.54983444,7.12365246,0.652826141,7.09371537,7.10030027,7.0702643
55.860289,7.41619849,7.12220649,0.542210293,7.09215239,7.09903946,7.06888687
55.87078,8,7.12077019,0.93767255,7.09059734,7.09778036,7.06750936
55.881272,7.07106781,7.11934264,-0.219715339,7.08904924,7.09652275,7.06613152
55.891764,7.41619849,7.11792351,0.546145563,7.08750774,7.09526678,7.06475347
55.902255,7.54983444,7.11655837,0.658237091,7.08601853,7.09401266,7.06337535
55.912747,7,7.11515408,-0.339343607,7.08448811,7.0927601,7.06199688
55.923238,7.48331477,7.11375665,0.607912924,7.08296265,7.09150938,7.06061835
55.93373,8.42614977,7.11236543,1.14620432,7.08144149,7.09026026,7.05923948
55.944222,7.81024968,7.11098023,0.836223321,7.0799244,7.08901291,7.05786041
55.954713,7.07106781,7.10960089,-0.196298452,7.07841121,7.08776746,7.05648127
55.965205,6.70820393,7.1082269,-0.632473686,7.07690136,7.0865237,7.0551018
55.975696,7.34846923,7.10685827,0.491539375,7.07539488,7.08528189,7.05372226
55.986188,7,7.10549456,-0.324799256,7.07389124,7.08404183,7.05234238
55.99668,7.81024968,7.1041357,0.840305881,7.07239039,7.08280366,7.05096231
56.007171,6.70820393,7.10278168,-0.628154236,7.07089227,7.08156753,7.04958217
56.017663,7.68114575,7.10143208,0.761389302,7.06939644,7.08033323,7.04820169
56.028154,7.61577311,7.10008704,0.718112849,7.06790302,7.07910103,7.04682116
56.038646,7,7.0987462,-0.314239074,7.06641158,7.07787071,7.04544029
56.049138,7.34846923,7.09740957,0.501058538,7.06492214,7.07664244,7.04405923
56.059629,6.244998,7.0960772,-0.922539542,7.06343473,7.07541635,7.04267811
56.070121,7.07106781,7.09474878,-0.153886203,7.06194894,7.07419225,7.04129666
56.080612,7.93725393,7.09342446,0.918601911,7.06046497,7.0729704,7.03991514
56.091104,7.41619849,7.09210395,0.569293014,7.05898244,7.07175059,7.0385333
56.101596,6.4807407,7.09078738,-0.781054852,7.05750146,7.07053299,7.03715127
56.112087,6.32455532,7.08947485,-0.874596781,7.05602205,7.06931781,7.03576918
56.122579,7.34846923,7.08816601,0.510199191,7.05454385,7.06810481,7.03438676
56.13307,7.14142843,7.08691788,0.233474939,7.05312415,7.06689424,7.03300429
56.143562,6.32455532,7.08561659,-0.872388255,7.05164847,7.06568589,7.03162149
56.154054,8,7.08431901,0.956912214,7.05017396,7.06447992,7.03023851
56.164545,6.70820393,7.08302527,-0.612226542,7.04870069,7.06327649,7.02885547
56.175037,7.74596669,7.0817351,0.815004045,7.04722834,7.0620754,7.02747211
56.185528,7,7.08044874,-0.283634865,7.04575715,7.06087692,7.02608869
56.19602,7.74596669,7.07916611,0.816578584,7.04428695,7.05968086,7.02470495
56.206512,7.87400787,7.07789338,0.892252483,7.04282394,7.05848738,7.02332103
56.217003,7.34846923,7.07661809,0.521393462,7.04135554,7.05729663,7.02193706
56.227495,7.14142843,7.07534637,0.257064311,7.03988787,7.05610843,7.02055277
56.237986,7.61577311,7.07407848,0.735999066,7.03842117,7.05492305,7.01916842
56.248478,7.21110255,7.0728142,0.371871422,7.03695512,7.0537403,7.01778377
56.25897,7.28010989,7.07155365,0.456679579,7.03548984,7.05256036,7.01639893
56.269461,6.92820323,7.07029698,-0.376953252,7.03402545,7.05138337,7.01501404
56.279953,6.92820323,7.06904398,-0.375287558,7.03256163,7.05020915,7.01362883
56.290444,7.14142843,7.0677949,0.27135498,7.03109865,7.04903799,7.01224358
56.300936,7.14142843,7.06654954,0.273640077,7.0296362,7.04786971,7.01085802
56.311428,7.28010989,7.06530805,0.463467197,7.02817441,7.04670447,7.00947228
56.321919,6.8556546,7.06407064,-0.456526055,7.02671341,7.04554248,7.00808649
56.332411,5.91607978,7.06283712,-1.07086756,7.02525289,7.04438361,7.00670039
56.342902,6.164414,7.06160767,-0.947203078,7.02379309,7.04322805,7.00531425
56.353394,7.07106781,7.06038211,0.103371668,7.02233373,7.04207563,7.0039278
56.363886,6.244998,7.05916059,-0.902309585,7.02087493,7.04092652,7.00254117
56.374377,7,7.05794326,-0.240714054,7.01941681,7.0397809,7.00115451
56.384869,6.08276253,7.05672993,-0.986897869,7.01795908,7.03863859,6.99976753
56.39536,6.63324958,7.05552089,-0.649824064,7.01650201,7.03749987,6.99838052
56.405852,6.40312424,7.05431596,-0.80696451,7.01504531,7.0363646,6.9969932
56.416344,7.87400787,7.05311529,0.906031229,7.01358909,7.03523294,6.99560571
56.426835,6.32455532,7.05191905,-0.852856217,7.01213349,7.03410506,6.99421817
56.437327,7.07106781,7.05072706,0.142620994,7.01067823,7.03298081,6.99283034
56.447818,7.81024968,7.04953962,0.872186938,7.00922356,7.03186048,6.99144247
56.45831,6.55743852,7.04835655,-0.700655425,7.0077692,7.03074391,6.9900543
56.468802,7.68114575,7.04717802,0.796220903,7.00631528,7.02963129,6.98866596
56.479293,7.21110255,7.04600421,0.406322951,7.00486193,7.0285228,6.98727758
56.489785,7.28010989,7.04483496,0.485051473,7.00340886,7.02741828,6.98588891
56.500276,7.34846923,7.04367055,0.552085749,7.00195634,7.02631805,6.9845002
56.510768,7,7.04251084,-0.206181573,7.00050409,7.02522194,6.9831112
56.52126,7.21110255,7.041356,0.412003092,6.99905224,7.02413016,6.98172203
56.531751,6.63324958,7.04020626,-0.637931564,6.99760094,7.0230429,6.98033282
56.542243,7.87400787,7.0390616,0.913753944,6.99614989,7.0219602,6.97894333
56.552734,7.74596669,7.03792215,0.841453825,6.99469934,7.02088217,6.9775538
56.563226,6.70820393,7.03678777,-0.573222331,6.99324903,7.01980869,6.97616398
56.573718,6.8556546,7.03565865,-0.424268843,6.99179908,7.01873996,6.974774
56.584209,6.4807407,7.03453498,-0.744173556,6.99034963,7.01767616,6.97338399
56.594701,6.63324958,7.03341663,-0.632587582,6.9889004,7.01661718,6.97199369
56.605192,6.4807407,7.0323039,-0.742673012,6.98745165,7.01556333,6.97060336
56.615684,7.07106781,7.03119667,0.199677586,6.9860031,7.01451449,6.96921274
56.626176,7.34846923,7.03009515,0.564246474,6.98455489,7.01347087,6.96782197
56.636667,7,7.02899952,-0.170292445,6.98310715,7.01243266,6.96643117
56.647159,6.63324958,7.02790968,-0.628219784,6.98165961,7.01139978,6.96504008
56.65765,6.40312424,7.02682594,-0.78974787,6.98021253,7.01037251,6.96364897
56.668142,7.34846923,7.02574819,0.568085417,6.97876563,7.00935078,6.96225757
56.678634,6.8556546,7.02467665,-0.411122908,6.97731905,7.0083348,6.96086602
56.689125,6.70820393,7.02361152,-0.561611599,6.97587292,7.00732477,6.95947445
56.699617,6.63324958,7.02255272,-0.623941615,6.97442697,7.00632062,6.9580826
56.710108,7.21110255,7.02150057,0.435433101,6.97298146,7.00532266,6.95669072
56.7206,6.70820393,7.02045497,-0.558794272,6.97153612,7.00433082,6.95529857
56.731092,6.32455532,7.01941616,-0.833583133,6.97009108,7.00334533,6.95390626
56.741583,6.78232998,7.01838437,-0.485854283,6.9686465,7.0023664,6.95251394
56.752075,7.68114575,7.01735976,0.814730625,6.96720207,7.00139422,6.95112133
56.762566,7.28010989,7.01634247,0.513582919,6.96575808,7.00042893,6.94972871
56.773058,7.21110255,7.01533241,0.442459196,6.96431424,6.99947045,6.94833582
56.78355,7.48331477,7.0143298,0.684824775,6.9628707,6.99851899,6.94694277
56.794041,7.81024968,7.01333488,0.892700842,6.96142758,6.9975748,6.94554972
56.804533,6.55743852,7.01234761,-0.674469488,6.9599846,6.99663785,6.94415638
56.815024,6.63324958,7.01136834,-0.614913616,6.95854206,6.99570847,6.94276304
56.825516,6.40312424,7.01039701,-0.779277086,6.95709965,6.99478664,6.94136942
56.836008,7.14142843,7.00943391,0.363310504,6.95565753,6.99387261,6.93997565
56.846499,8.1240384,7.00847926,1.05620033,6.95421583,6.99296663,6.93858188
56.856991,7,7.00753307,-0.0867932866,6.95277427,6.99206871,6.93718784
56.867482,6.8556546,7.00659569,-0.38851138,6.95133313,6.99117918,6.93579379
56.877974,7.34846923,7.00566712,0.58549305,6.94989213,6.99029806,6.93439947
56.888466,7.68114575,7.00474762,0.822434269,6.94845141,6.98942562,6.933005
56.898957,6.8556546,7.00383748,-0.384945299,6.94701111,6.98856214,6.93161054
56.909449,6.32455532,7.00293672,-0.82363912,6.94557095,6.98770763,6.9302158
56.91994,7.41619849,7.0020457,0.643547034,6.94413121,6.98686246,6.92882106
56.930432,7.87400787,7.00116447,0.934260888,6.9426916,6.98602669,6.92742606
56.940924,7.93725393,7.00029331,0.967967264,6.94125228,6.9852006,6.92603091
56.951415,6.40312424,6.99943253,-0.772210006,6.93981337,6.98438449,6.92463577
56.961907,7.61577311,6.99858242,0.785614844,6.93837462,6.98357865,6.92324036
56.972398,6.63324958,6.99774338,-0.603733217,6.93693628,6.98278347,6.92184496
56.98289,6.8556546,6.99691525,-0.375846582,6.93549809,6.98199883,6.92044928
56.993382,6.78232998,6.99609837,-0.462350937,6.93406017,6.98122504,6.91905348
57.003873,7.48331477,6.99529306,0.698585509,6.93262268,6.98046242,6.91765768
57.014365,6,6.99449942,-0.997245919,6.93118533,6.97971109,6.91626162
57.024856,7.28010989,6.99371788,0.535156065,6.9297484,6.97897146,6.91486557
57.035348,7,6.99294854,0.0839729453,6.92831163,6.97824365,6.91346925
57.04584,6.164414,6.99219178,-0.90982294,6.92687514,6.97752802,6.91207281
57.056331,7.28010989,6.99144796,0.53727268,6.92543908,6.97682492,6.91067637
57.066823,7.54983444,6.99071722,0.747741412,6.92400317,6.97613452,6.90927968
57.077314,7.54983444,6.99000001,0.748220839,6.9225677,6.97545726,6.90788299
57.087806,7,6.98929652,0.103457618,6.92113239,6.97479332,6.90648605
57.098298,7,6.98860714,0.106737334,6.91969738,6.97414309,6.90508899
57.108789,7.21110255,6.98793228,0.472409009,6.91826281,6.97350697,6.90369193
57.119281,6.70820393,6.98727215,-0.528269072,6.91682842,6.97288518,6.90229463
57.129772,7.07106781,6.98662722,0.290586626,6.91539447,6.9722782,6.90089733
57.140264,6.70820393,6.98599777,-0.527061508,6.9139607,6.97168627,6.89949978
57.150756,6.8556546,6.98538421,-0.360179964,6.91252725,6.97110984,6.89810212
57.161247,6.32455532,6.984787,-0.812546416,6.91109425,6.97054934,6.89670447
57.171739,6.32455532,6.98420659,-0.812189184,6.90966146,6.97000522,6.89530657
57.18223,6.92820323,6.98364396,-0.235458549,6.90822914,6.96947846,6.89390868
57.192722,7.07106781,6.98309886,0.29659561,6.90679701,6.96896882,6.89251055
57.203214,7.54983444,6.98257178,0.753168409,6.90536523,6.96847677,6.8911123
57.213705,6.78232998,6.98206325,-0.446915277,6.90393393,6.96800284,6.88971407
57.224197,6.8556546,6.98157363,-0.354850714,6.90250284,6.96754739,6.8883156
57.234688,7.07106781,6.98110351,0.299940492,6.90107225,6.96711101,6.88691715
57.24518,7.07106781,6.98065332,0.30069003,6.89964189,6.96669411,6.88551845
57.255672,7.34846923,6.98022361,0.606832445,6.8982119,6.96629725,6.88411964
57.266163,6.40312424,6.97981498,-0.759401567,6.89678243,6.96592101,6.88272085
57.276655,7.61577311,6.9794279,0.797712485,6.89535321,6.96556587,6.88132183
57.287146,5.91607978,6.97906302,-1.03101079,6.89392452,6.96523247,6.87992282
57.297638,7.41619849,6.97872089,0.661420894,6.8924961,6.96492134,6.87852358
57.30813,7.41619849,6.97840214,0.661661805,6.8910681,6.96463313,6.87712423
57.318621,6.164414,6.97810747,-0.902049591,6.88964066,6.96436849,6.87572491
57.329113,7.68114575,6.97783747,0.838634773,6.88821352,6.96412803,6.87432535
57.339604,6.164414,6.97759287,-0.901764309,6.88678697,6.96391247,6.87292581
57.350096,6.92820323,6.97737435,-0.221745625,6.88536073,6.96372247,6.87152605
57.360588,7.07106781,6.97718267,0.306406831,6.88393496,6.96355879,6.87012617
57.371079,6.70820393,6.97701859,-0.518473391,6.88250981,6.96342219,6.86872634
57.381571,7.68114575,6.97688289,0.839203706,6.88108502,6.96331341,6.86732626
57.392062,6.63324958,6.97677757,-0.58611261,6.87966088,6.96323447,6.86592622
57.402554,6.70820393,6.9767025,-0.518168477,6.87823713,6.96318521,6.86452595
57.413046,7.48331477,6.97665844,0.711797957,6.87681391,6.96316639,6.86312558
57.423537,7.28010989,6.97664631,0.550875289,6.87539138,6.96317889,6.86172524
57.434029,8.06225775,6.97666704,1.04191684,6.87396929,6.96322367,6.86032468
57.44452,6.78232998,6.97672163,-0.440898679,6.87254792,6.96330168,6.85892415
57.455012,6.40312424,6.9768111,-0.757421195,6.87112702,6.96341394,6.85752339
57.465504,6.32455532,6.97693653,-0.807701185,6.86970675,6.9635615,6.85612254
57.475995,6.40312424,6.97709898,-0.757611206,6.86828727,6.96374541,6.85472173
57.486487,6.63324958,6.97729963,-0.586557801,6.86686832,6.96396685,6.85332069
57.496978,7.48331477,6.97753965,0.711178685,6.8654502,6.96422693,6.8519197
57.50747,6.63324958,6.97782031,-0.587001472,6.86403267,6.96452692,6.85051848
57.517962,6.78232998,6.97814287,-0.442507499,6.86261588,6.96486807,6.84911717
57.528453,7.61577311,6.97850864,0.798288459,6.86120001,6.96525164,6.8477159
57.538945,7.21110255,6.9789191,0.481854177,6.85978484,6.96567907,6.84631441
57.549436,6.4807407,6.9793756,-0.706140851,6.85837064,6.9661517,6.84491297
57.559928,6.78232998,6.97987972,-0.44446568,6.85695718,6.96667111,6.84351131
57.57042,6.55743852,6.980433,-0.650380256,6.85554462,6.96723877,6.84210956
57.580911,7.41619849,6.98103701,0.659667704,6.85413315,6.96785623,6.84070786
57.591403,7.07106781,6.98169355,0.298955278,6.85272254,6.96852528,6.83930594
57.601894,6.8556546,6.98240574,-0.356021263,6.85131309,6.96924896,6.83790408
57.612386,6.164414,6.98317523,-0.904854258,6.84990458,6.97002891,6.83650199
57.622878,7.28010989,6.98400292,0.544157116,6.8484972,6.97086599,6.83509983
57.633369,7.07106781,6.98489074,0.293559312,6.84709112,6.97176207,6.83369771
57.643861,7.07106781,6.98584097,0.291936366,6.84568614,6.97271939,6.83229539
57.654352,7.74596669,6.98685562,0.871269804,6.84428258,6.97373991,6.83089312
57.664844,7.07106781,6.98793719,0.288323816,6.84288023,6.97482606,6.82949063
57.675336,7.81024968,6.98908798,0.906179728,6.8414793,6.97598011,6.82808807
57.685827,7.14142843,6.99031037,0.388739059,6.84007999,6.97720436,6.82668557
57.696319,7.28010989,6.99160723,0.537124433,6.8386821,6.97850162,6.82528285
57.70681,6.55743852,6.99298105,-0.659956457,6.83728599,6.97987429,6.8238802
57.717302,6.8556546,6.99443495,-0.372532353,6.83589148,6.98132545,6.82247733
57.727794,6.78232998,6.99597182,-0.462214062,6.83449879,6.98285787,6.8210744
57.738285,7.07106781,6.99759464,0.271059351,6.83310815,6.98447445,6.81967152
57.748777,6.92820323,6.99930708,-0.266653049,6.83171949,6.98617871,6.81826844
57.759268,6.40312424,7.00111222,-0.773296829,6.83033312,6.98797367,6.81686542
57.76976,7,7.00301402,-0.0549000477,6.82894891,6.98986317,6.8154622
57.780252,6.8556546,7.00501609,-0.386473141,6.8275671,6.99185074,6.81405891
57.790743,7.34846923,7.00712223,0.584249092,6.82618799,6.99394002,6.81265569
57.801235,6.78232998,7.009337,-0.476452538,6.82481146,6.99613544,6.81125226
57.811726,7.74596669,7.01166587,0.856913547,6.82343795,6.99844231,6.80984891
57.822218,7.14142843,7.01411636,0.356808161,6.82206738,7.00086802,6.80844535
57.83271,7.14142843,7.01668961,0.353183832,6.82070008,7.00341349,6.80704173
57.843201,6.244998,7.01939047,-0.879995722,6.81933639,7.00608341,6.80563817
57.853693,7.14142843,7.02222488,0.345258671,6.81797628,7.00888349,6.80423443
57.864184,7.21110255,7.02519798,0.431166518,6.81662027,7.01181866,6.80283075
57.874676,7.34846923,7.02831636,0.565820523,6.81526838,7.01489525,6.80142688
57.885168,8.48528137,7.03158607,1.20569287,6.81392104,7.01811903,6.80002294
57.895659,6.78232998,7.03501343,-0.502676288,6.8125787,7.02149606,6.79861909
57.906151,6.244998,7.03860617,-0.890846885,6.81124148,7.0250337,6.79721503
57.916642,5.74456265,7.04237103,-1.13921393,6.80991002,7.02873838,6.79581106
57.927134,7.48331477,7.04631661,0.661058368,6.8085845,7.03261828,6.79440689
57.937626,7.48331477,7.05045086,0.657923939,6.80726553,7.03668094,6.79300267
57.948117,7.28010989,7.05478219,0.47468695,6.80595377,7.04093429,6.79159853
57.958609,6.70820393,7.05932088,-0.592551218,6.80464968,7.04538794,6.7901942
57.9691,7.07106781,7.06407605,0.0836167839,6.80335427,7.05005035,6.78878995
57.979592,6.78232998,7.06905889,-0.535470735,6.80206782,7.05493225,6.78738551
57.990084,6.40312424,7.07428011,-0.819241034,6.80079124,7.06004363,6.78598102
58.000575,6.70820393,7.079751,-0.609546612,6.79952555,7.06539499,6.78457662
58.011067,7.14142843,7.08548518,0.236523262,6.79827151,7.07099904,6.78317203
58.021558,7.74596669,7.09149494,0.808994284,6.79703046,7.07686711,6.78176752
58.03205,7.21110255,7.09780864,0.336591611,6.79580343,7.08302643,6.78036284
58.042542,7.21110255,7.10442955,0.326608327,6.79459192,7.08947902,6.7789581
58.053033,7.54983444,7.11137303,0.662164181,6.79339764,7.09623885,6.77755346
58.063525,7.68114575,7.11865789,0.749991906,6.79222214,7.10332308,6.77614863
58.074016,8.30662386,7.12630139,1.08642647,6.79106767,7.11074723,6.77474389
58.084508,7.21110255,7.13432504,0.277087553,6.78993633,7.1185307,6.77333898
58.095,6.78232998,7.14274959,-0.600349567,6.78883086,7.12669191,6.77193402
58.105491,6.63324958,7.15159725,-0.719963655,6.78775437,7.13525044,6.77052916
58.115983,6.63324958,7.16089456,-0.726391752,6.78671013,7.14422969,6.76912412
58.126474,7.41619849,7.17066653,0.495511812,6.78570232,7.15365118,6.76771917
58.136966,6.78232998,7.18094398,-0.631358849,6.7847354,7.16354157,6.76631405
58.147458,7.41619849,7.19175735,0.473752188,6.78381483,7.17392657,6.76490889
58.157949,7.61577311,7.2031396,0.642365556,6.78294701,7.18483361,6.76350383
58.168441,6.32455532,7.21513015,-0.943702722,6.78213934,7.19629533,6.7620986
58.178932,7.74596669,7.22777023,0.719858643,6.78140386,7.20834241,6.76069346
58.189424,6.40312424,7.24110452,-0.915412632,6.78074846,7.22101249,6.75928816
58.199916,7.21110255,7.25518114,-0.209949023,6.78018587,7.23434263,6.75788282
58.210407,7.21110255,7.27005326,-0.242797661,6.7797313,7.24837273,6.75647759
58.220899,8.60232527,7.28578451,1.1474061,6.77940306,7.26315016,6.75507218
58.23139,7.87400787,7.30244022,0.756020935,6.77922363,7.2787208,6.75366688
58.241882,7.07106781,7.32012898,-0.499060285,6.77922052,7.29516907,6.75226142
58.252374,7.41619849,7.33892762,0.277976381,6.77942783,7.31254214,6.75085593
58.262865,7.28010989,7.358923,-0.280736733,6.77988817,7.3308899,6.74945054
58.273357,7.14142843,7.38023759,-0.48868104,6.78065562,7.35028757,6.74804499
58.283848,6.78232998,7.40300716,-0.787830676,6.78179959,7.37081098,6.74663954
58.29434,8.06225775,7.42740456,0.796776749,6.7834122,7.3925529,6.74523394
58.304832,7.41619849,7.45363628,-0.193488485,6.78561925,7.41561093,6.74382831
58.315323,7.93725393,7.4819679,0.674748867,6.78860075,7.44009467,6.74242279
58.325815,7.48331477,7.51276594,-0.171613427,6.79262741,7.46613533,6.74101712
58.336306,8.24621125,7.54653067,0.836469117,6.79811612,7.49387125,6.73961155
58.346798,6.55743852,7.58399437,-1.01319092,6.80571671,7.52347051,6.73820584
58.35729,7.68114575,7.62618963,0.234427214,6.81641185,7.5551157,6.7368001
58.367781,8.71779789,7.67453612,1.02140187,6.83161086,7.58901419,6.73539447
58.378273,7.61577311,7.73087536,-0.339267225,6.85318393,7.62541195,6.73398869
58.388764,8.36660027,7.79763791,0.754295935,6.88368617,7.66457408,6.73258303
58.399256,8.54400375,7.87694222,0.816738346,6.92531259,7.70681588,6.73117722
58.409748,9.16515139,7.97018436,1.09314548,6.97944833,7.75248107,6.72977139
58.420239,8.42614977,8.07722238,0.590700764,7.04570302,7.80195456,6.72836568
58.430731,8.66025404,8.19445627,0.682493788,7.11964837,7.85568005,6.72695982
58.441222,9.69535971,8.31216171,1.17609439,7.18969256,7.91412856,6.72555408
58.451714,8.83176087,8.41431946,0.646097058,7.2365295,7.97794345,6.7241482
58.462206,9.11043358,8.48611769,0.790136628,7.24169551,8.04781359,6.7227423
58.472697,9.21954446,8.52646946,0.83251126,7.2024007,8.12419044,6.72133653
58.483189,9.32737905,8.55018502,0.881586089,7.13414053,8.20775062,6.71993061
58.49368,8.54400375,8.57570583,-0.178050787,7.05727303,8.29916885,6.71852482
58.504172,10.2469508,8.61539896,1.27732212,6.98560407,8.39917385,6.71711889
58.514664,9.11043358,8.6747835,0.660037934,6.9252097,8.5084746,6.71571295
58.525155,8.94427191,8.75524785,0.434768972,6.877347,8.62776817,6.71430714
58.535647,9.38083152,8.85626048,0.724272766,6.84090763,8.75776084,6.71290119
58.546138,8.88819442,8.97650334,-0.29716817,6.81383958,8.89906582,6.71149537
58.55663,9.74679434,9.11457379,0.795122981,6.79388863,9.05228328,6.71008941
58.567122,9.2736185,9.26922378,0.0662926447,6.77904866,9.21788709,6.70868345
58.577613,10.4403065,9.43949422,1.00040606,6.76774065,9.39623918,6.70727762
58.588105,9.2736185,9.62474006,-0.592555115,6.75883142,9.58762399,6.70587166
58.598596,11.1803399,9.82442667,1.16443687,6.75158297,9.79210646,6.70446583
58.609088,10.6770783,10.0381297,0.799342548,6.74550724,10.009655,6.70305987
58.61958,10.0498756,10.2652952,-0.464133157,6.74026016,10.2399875,6.70165392
58.630071,10.3923048,10.50526,-0.336088024,6.73564563,10.4825994,6.70024809
58.640563,10.6301458,10.7572303,-0.356489079,6.73152683,10.7368075,6.69884214
58.651054,11.6619038,11.0200685,0.801146244,6.727806,11.0015539,6.69743633
58.661546,11.2249722,11.292464,-0.259791892,6.72440828,11.2755886,6.69603039
58.672038,11.4455231,11.573103,-0.357183208,6.72127669,11.5576446,6.69462446
58.682529,12.2882057,11.8590193,0.655123226,6.71836633,11.8447908,6.69321867
58.693021,11.5758369,12.1474693,-0.756063729,6.71564059,12.1343125,6.69181275
58.703512,12.7279221,12.434996,0.541226466,6.71307094,12.4227754,6.69040698
58.714004,11.7046999,12.7175848,-1.00642181,6.71063327,12.7061835,6.68900108
58.724496,12.6095202,12.9904368,-0.617184429,6.70830846,12.9797525,6.6875952
58.734987,12.6095202,13.2480798,-0.79909925,6.70608075,13.2380221,6.68618946
58.745479,13.3041347,13.4845448,-0.424747152,6.70393644,13.4750331,6.6847836
58.75597,12.8840987,13.6934189,-0.899622234,6.70186485,13.6843805,6.68337789
58.766462,13.0384048,13.8683597,-0.911018613,6.69985627,13.8597286,6.68197206
58.776954,12.5299641,14.0033967,-1.21385033,6.69790301,13.9951127,6.68056625
58.787445,13.56466,14.0935138,-0.727223365,6.69599856,14.0855217,6.67916059
58.797937,14.4222051,14.1351535,0.535771934,6.69413684,14.1274027,6.67775481
58.808428,13.8564065,14.1265546,-0.519757809,6.69231329,14.1189988,6.67634919
58.81892,13.4907376,14.0679899,-0.759771209,6.69052463,14.0605864,6.67494345
58.829412,14.7986486,13.9617235,0.914836083,6.68876589,13.9544344,6.67353773
58.839903,15.0665192,13.8117772,1.12015267,6.68703404,13.8045685,6.67213217
58.850395,12.7279221,13.6234437,-0.946320034,6.68532602,13.6162853,6.6707265
58.860886,13.190906,13.4028802,-0.460406572,6.68363976,13.3957455,6.66932098
58.871378,12.489996,13.1564745,-0.816381362,6.68197285,13.1493405,6.66791535
58.88187,12.1243557,12.8902905,-0.875177039,6.68032361,12.883137,6.66650975
58.892361,12,12.610851,-0.781569544,6.67869055,12.603661,6.66510432
58.902853,13.7113092,12.3234135,1.17808985,6.6770719,12.3161728,6.66369877
58.913344,12.4498996,12.0324847,0.646076526,6.67546669,12.0251813,6.66229339
58.923836,11.5758369,11.7417667,-0.407344766,6.67387347,11.7343907,6.6608879
58.934328,11,11.4543992,-0.674091388,6.67229135,11.4469426,6.65948244
58.944819,11.3137085,11.1729468,0.375182198,6.67071957,11.1654034,6.65807715
58.955311,10.4403065,10.8993963,-0.677561643,6.66915701,10.8917612,6.65667175
58.965802,11.1355287,10.6354125,0.707188996,6.66760321,10.6276826,6.65526653
58.976294,10.6770783,10.3821938,0.543032676,6.66605722,10.3743673,6.6538612
58.986786,10.6301458,10.1407008,0.699603442,6.66451857,10.1327773,6.65245591
58.997277,9.94987437,9.91161807,0.195592189,6.66298687,9.9035981,6.65105078
59.007769,9.38083152,9.69532605,-0.560798115,6.66146131,9.68721149,6.64964556
59.01826,10.0498756,9.49207975,0.746857331,6.65994176,9.48387345,6.64824051
59.028752,8.77496439,9.30186644,-0.725880195,6.65842762,9.29357205,6.64683537
59.039244,9.21954446,9.12456746,0.308183381,6.65691862,9.11618941,6.64543027
59.049735,9.05538514,8.95991529,0.308981953,6.65541445,8.95145872,6.64402534
59.060227,9.11043358,8.80747164,0.550419782,6.65391452,8.79894215,6.64262032
59.070718,8.24621125,8.66675831,-0.648495995,6.65241883,8.65816182,6.64121547
59.08121,8.36660027,8.53715837,-0.41298681,6.65092684,8.52850099,6.63981054
59.091702,8.1240384,8.41826335,-0.542425057,6.64943845,8.40955145,6.63840565
59.102193,7.81024968,8.30939034,-0.70649888,6.64795358,8.30063024,6.63700093
59.112685,7.48331477,8.20950788,-0.852169645,6.64647175,8.20070539,6.63559614
59.123176,7.74596669,8.11792379,-0.609882857,6.64499304,8.10908449,6.63419152
59.133668,7.68114575,8.0339221,-0.593949793,6.64351701,8.02505122,6.63278681
59.14416,7.28010989,7.95683573,-0.822633479,6.64204363,7.94793814,6.63138216
59.154651,8.30662386,7.88602754,0.648533983,6.64057289,7.87710773,6.62997769
59.165143,7.61577311,7.82087995,-0.452887229,6.63910438,7.81194201,6.62857314
59.175634,8.06225775,7.76084454,0.549011119,6.63763825,7.75189217,6.62716877
59.186126,7,7.70539524,-0.839878109,6.63617411,7.69643176,6.62576432
59.196618,7.93725393,7.65406986,0.532150426,6.63471197,7.64509823,6.62435993
59.207109,7.68114575,7.60645069,0.273303959,6.63325188,7.59747354,6.62295572
59.217601,7.21110255,7.56215074,-0.592493201,6.63179346,7.55317038,6.62155144
59.228092,7.68114575,7.52084219,0.400379273,6.63033691,7.51186066,6.62014734
59.238584,8.88819442,7.48221917,1.18573827,6.62888187,7.47323826,6.61874318
59.249076,6.8556546,7.4460229,-0.768354278,6.62742844,7.43704414,6.61733907
59.259567,8.36660027,7.4120251,0.977023627,6.62597663,7.40304989,6.61593515
59.270059,6.40312424,7.38001577,-0.988378236,6.6245261,7.37104533,6.61453116
59.28055,7.61577311,7.34982245,0.515704036,6.62307705,7.34085785,6.61312737
59.291042,8.36660027,7.32128211,1.02240802,6.62162917,7.31232429,6.6117235
59.301534,7.34846923,7.29426867,0.232810137,6.62018252,7.28531848,6.6103197
59.312025,6.78232998,7.26870448,-0.697405546,6.61873719,7.25976272,6.6089161
59.322517,6.55743852,7.24441609,-0.828841099,6.61729287,7.2354834,6.60751242
59.333008,8.06225775,7.22131315,0.917030316,6.61584977,7.2123901,6.60610895
59.3435,6.70820393,7.19930646,-0.70078708,6.61440757,7.19039357,6.60470542
59.353992,7.74596669,7.17832203,0.753421971,6.61296639,7.16941973,6.60330195
59.364483,7.07106781,7.15829291,-0.295338962,6.6115263,7.14940163,6.60189868
59.374975,7.14142843,7.13915303,0.0477011794,6.61008701,7.1302731,6.60049535
59.385466,6.63324958,7.12084927,-0.698283385,6.60864875,7.11198103,6.59909223
59.395958,7.14142843,7.10332634,0.195197572,6.60721122,7.09447007,6.59768904
59.40645,7,7.08653847,-0.294174209,6.60577452,7.07769443,6.59628593
59.416941,6.8556546,7.07044341,-0.46345314,6.60433876,7.06161183,6.59488302
59.427433,7.28010989,7.05499774,0.474459852,6.60290364,7.04617882,6.59348006
59.437924,7.14142843,7.04016704,0.318215951,6.60146941,7.03136095,6.59207731
59.448416,7.61577311,7.02591382,0.768022972,6.60003576,7.01712072,6.5906745
59.458908,6.55743852,7.01220735,-0.6743655,6.59860285,7.00342736,6.58927176
59.469399,7.21110255,6.99901888,0.460525432,6.59717075,6.99025211,6.58786924
59.479891,6.92820323,6.9863179,-0.241069846,6.59573917,6.97756447,6.58646667
59.490382,7.81024968,6.97408077,0.914422715,6.59430837,6.96534076,6.58506431
59.500874,6.4807407,6.96228074,-0.693930859,6.59287805,6.95355421,6.5836619
59.511366,6.32455532,6.95089615,-0.791416977,6.59144833,6.94218318,6.58225958
59.521857,6.8556546,6.93992123,-0.29028715,6.59001934,6.93122188,6.58085747
59.532349,6.4807407,6.92932061,-0.669761089,6.58859079,6.92063493,6.57945531
59.54284,6.4807407,6.91907458,-0.662067881,6.58716292,6.91040258,6.57805337
59.553332,7,6.90916366,0.301390681,6.58573546,6.90050537,6.57665138
59.563824,7.28010989,6.89957235,0.616877247,6.58430853,6.89092778,6.57524949
59.574315,7.21110255,6.89028602,0.566406682,6.58288225,6.88165517,6.57384781
59.584807,7.74596669,6.88128831,0.929880841,6.58145633,6.87267118,6.57244609
59.595298,7.21110255,6.87256719,0.581837914,6.58003104,6.86396376,6.5710446
59.60579,5.91607978,6.86410805,-0.973667433,6.57860609,6.8555183,6.56964306
59.616282,5.38516481,6.85589951,-1.21273851,6.57718161,6.84732342,6.56824162
59.626773,7.21110255,6.84793078,0.602637342,6.57575773,6.83936833,6.5668404
59.637265,6.55743852,6.84018947,-0.531743311,6.57433415,6.83164062,6.56543914
59.647756,6.8556546,6.83266677,0.151617378,6.57291116,6.82413149,6.56403812
59.658248,6.244998,6.82535152,-0.761809374,6.57148845,6.81682976,6.56263705
59.66874,7.54983444,6.81823526,0.855335707,6.57006618,6.80972698,6.56123609
59.679231,5.56776436,6.81130995,-1.11514375,6.56864446,6.80281509,6.55983536
59.689723,6.92820323,6.80456602,0.35162083,6.56722301,6.79608453,6.55843459
59.700214,6.63324958,6.79799696,-0.40589085,6.5658021,6.78952878,6.55703405
59.710706,6.32455532,6.79159412,-0.683402369,6.56438144,6.7831392,6.55563349
59.721198,6.8556546,6.78535112,0.265148043,6.56296117,6.7769094,6.55423303
59.731689,6.4807407,6.77926545,-0.546374191,6.56154141,6.77083688,6.5528328
59.742181,6.92820323,6.77332889,0.393540777,6.56012189,6.7649134,6.55143254
59.752672,6.8556546,6.76753324,0.296852429,6.55870288,6.75913077,6.55003253
59.763164,6.40312424,6.76187174,-0.598955346,6.55728409,6.75348223,6.54863248
59.773656,6.164414,6.75633958,-0.769366999,6.55586566,6.74796296,6.54723255
59.784147,6.70820393,6.75093214,-0.206708024,6.55444771,6.74256833,6.54583285
59.794639,7.28010989,6.74564352,0.73107207,6.55302998,6.73729246,6.54443314
59.80513,6.8556546,6.74047008,0.339388447,6.55161272,6.7321317,6.54303366
59.815622,6.4807407,6.73540644,-0.504644168,6.55019567,6.72708065,6.54163417
59.826114,5.74456265,6.73044886,-0.992918031,6.54877895,6.72213561,6.54023478
59.836605,7.07106781,6.72559381,0.587770365,6.5473627,6.71729301,6.53883565
59.847097,7.28010989,6.72083653,0.747845815,6.54594664,6.7125481,6.53743649
59.857588,5.74456265,6.71617427,-0.985703618,6.54453104,6.70789815,6.53603758
59.86808,6.70820393,6.71160266,-0.0582986438,6.54311562,6.70333877,6.53463866
59.878572,6.78232998,6.70711884,0.274246507,6.54170052,6.6988671,6.53323985
59.889063,6.40312424,6.70272003,-0.547353443,6.54028587,6.69448036,6.53184129
59.899555,6.70820393,6.69840236,0.0990028941,6.53887139,6.69017468,6.53044272
59.910046,6.78232998,6.69416375,0.296927989,6.53745736,6.68594799,6.52904441
59.920538,6.40312424,6.69000062,-0.535608424,6.5360435,6.68179669,6.52764608
59.93103,6.4807407,6.68591072,-0.452956976,6.53462994,6.67771855,6.52624787
59.941521,6.32455532,6.68189258,-0.597776934,6.53321681,6.67371209,6.52484993
59.952013,6.78232998,6.67794464,0.323087209,6.53180385,6.66977575,6.52345197
59.962504,7,6.67406279,0.570909108,6.53039132,6.66590543,6.52205427
59.972996,7.07106781,6.67024408,0.63310641,6.52897895,6.66209817,6.52065656
59.983488,6,6.66648677,-0.816386407,6.52756686,6.65835222,6.51925898
59.993979,6.4807407,6.66278914,-0.426671354,6.5261552,6.65466589,6.51786166
60.004471,7,6.65914856,0.583824838,6.52474369,6.65103652,6.51646434
60.014962,5.56776436,6.65556383,-1.04297625,6.5233326,6.64746292,6.51506728
60.025454,6.70820393,6.65203247,0.237005197,6.52192166,6.64394262,6.51367022
60.035946,6.40312424,6.6485531,-0.495407772,6.52051101,6.64047422,6.51227329
60.046437,7.28010989,6.64512438,0.796859781,6.51910076,6.6370564,6.51087663
60.056929,7.07106781,6.64174406,0.655228012,6.51769067,6.63368691,6.50947997
60.06742,6.70820393,6.63841127,0.264183015,6.51628098,6.63036486,6.50808358
60.077912,6.70820393,6.63512388,0.270333226,6.51487144,6.62708814,6.50668719
60.088404,6.08276253,6.63188081,-0.741025152,6.51346217,6.62385565,6.50529093
60.098895,6.55743852,6.62868099,-0.266912849,6.51205331,6.62066635,6.50389495
60.109387,6.32455532,6.62552252,-0.548604772,6.5106446,6.6175183,6.50249898
60.119878,6.40312424,6.62240472,-0.468273939,6.50923629,6.61441086,6.50110327
60.13037,6.55743852,6.61932579,-0.24877152,6.50782811,6.61134221,6.49970758
60.140862,7.07106781,6.61628487,0.674375964,6.50642021,6.60831149,6.49831203
60.151353,6.63324958,6.61328112,0.141309822,6.50501271,6.60531786,6.49691675
60.161845,6.40312424,6.61031432,-0.455181374,6.50360535,6.60236112,6.49552149
60.172336,6.8556546,6.60738261,0.498268997,6.50219839,6.59943938,6.4941265
60.182828,6.08276253,6.60448428,-0.722303084,6.50079156,6.59655094,6.49273153
60.19332,6.164414,6.60161864,-0.661214517,6.499385,6.59369513,6.4913367
60.203811,7.21110255,6.59878504,0.782507196,6.49797884,6.59087128,6.48994216
60.214303,7.28010989,6.59598203,0.827120218,6.49657281,6.58807795,6.48854763
60.224794,5.65685425,6.59320929,-0.967654403,6.49516718,6.58531481,6.48715338
60.235286,6.08276253,6.59046545,-0.712532752,6.49376168,6.58258049,6.48575916
60.245778,5.83095189,6.58774997,-0.86994142,6.49235644,6.57987446,6.48436508
60.256269,6.70820393,6.58506232,0.350915392,6.49095161,6.57719619,6.48297129
60.266761,6.244998,6.58240124,-0.580864219,6.4895469,6.57454442,6.48157752
60.277252,6.8556546,6.57976651,0.525250505,6.48814259,6.57191892,6.48018404
60.287744,6.55743852,6.57715692,-0.140422204,6.48673841,6.56931849,6.47879059
60.298236,7.07106781,6.57457205,0.704624554,6.48533449,6.56674271,6.47739729
60.308727,6.08276253,6.57201149,-0.699463334,6.48393097,6.56419116,6.47600428
60.319219,6.92820323,6.5694741,0.598940001,6.48252758,6.56166272,6.4746113
60.32971,6.70820393,6.56695978,0.375824635,6.48112459,6.55915726,6.47321861
60.340202,7.28010989,6.56446743,0.845956537,6.47972172,6.55667371,6.47182595
60.350694,6.78232998,6.56199672,0.469396697,6.47831912,6.55421173,6.47043345
60.361185,6.8556546,6.55954734,0.544157381,6.47691691,6.55177101,6.46904125
60.371677,6.55743852,6.55711884,0.0178797479,6.47551484,6.54935109,6.46764908
60.382168,6.40312424,6.55471092,-0.389341339,6.47411316,6.54695168,6.46625721
60.39266,7.21110255,6.55232225,0.811652821,6.47271161,6.54457145,6.46486537
60.403152,7.07106781,6.54995258,0.721883115,6.47131032,6.54221016,6.46347369
60.413643,6.40312424,6.54760166,-0.380101863,6.46990942,6.53986755,6.46208232
60.424135,6.32455532,6.5452686,-0.469801314,6.46850866,6.53754272,6.46069099
60.434626,6.70820393,6.54295338,0.406510216,6.46710829,6.53523566,6.45929996
60.445118,6.8556546,6.54065514,0.561248129,6.46570805,6.53294552,6.45790896
60.45561,6,6.53837369,-0.733739522,6.46430808,6.5306721,6.45651814
60.466101,6.63324958,6.53610883,0.311674107,6.4629085,6.52841521,6.45512763
60.476593,5.56776436,6.53385975,-0.982901517,6.46150905,6.52617402,6.45373716
60.487084,5.83095189,6.5316265,-0.837063085,6.46011,6.5239486,6.45234699
60.497576,6.78232998,6.52940829,0.502913211,6.45871108,6.52173814,6.45095687
60.508068,6.63324958,6.52720496,0.325644934,6.45731242,6.5195425,6.44956693
60.518559,7.34846923,6.52501638,0.907443027,6.45591416,6.51736154,6.44817729
60.529051,6.55743852,6.52284181,0.186001931,6.45451604,6.51519452,6.44678771
60.539542,7.68114575,6.52068132,1.07724855,6.45311831,6.51304152,6.44539843
60.550034,6.70820393,6.51853419,0.435510901,6.45172072,6.51090181,6.44400921
60.560526,6,6.51640032,-0.718609989,6.45032339,6.50877529,6.44262017
60.571017,6.78232998,6.51427961,0.517735818,6.44892647,6.50666187,6.44123144
60.581509,6.55743852,6.51217153,0.212760413,6.44752967,6.50456102,6.43984277
60.592,6.40312424,6.51007642,-0.327035443,6.44613328,6.50247306,6.43845441
60.602492,5.83095189,6.5079932,-0.822825195,6.44473702,6.50039693,6.43706611
60.612984,6.32455532,6.5059218,-0.425871433,6.44334104,6.49833256,6.435678
60.623475,6.63324958,6.50386216,0.359704626,6.44194545,6.49627988,6.4342902
60.633967,6.32455532,6.50181365,-0.421020578,6.44055,6.49423826,6.43290247
60.644458,6.92820323,6.4997764,0.654543224,6.43915495,6.49220784,6.43151505
60.65495,6.92820323,6.49774979,0.656089506,6.43776004,6.490188,6.4301277
60.665442,5.91607978,6.49573379,-0.761350119,6.4363654,6.4881787,6.42874054
60.675933,6.70820393,6.49372836,0.463115079,6.43497116,6.4861799,6.4273537
60.686425,7.34846923,6.4917329,0.925600525,6.43357706,6.48419102,6.42596693
60.696916,6.4807407,6.48974758,-0.0949045666,6.43218337,6.4822122,6.42458048
60.707408,5.74456265,6.48777181,-0.862095796,6.43078982,6.48024288,6.4231941
60.7179,6.244998,6.48580558,-0.490721496,6.42939654,6.47828304,6.42180791
60.728391,6.08276253,6.48384889,-0.633313796,6.42800366,6.47633267,6.42042206
60.738883,6.63324958,6.48190117,0.389035225,6.42661093,6.4743912,6.41903628
60.749374,6.164414,6.47996261,-0.561737134,6.42521861,6.47245883,6.41765082
60.759866,6.40312424,6.47803265,-0.273694014,6.42382643,6.470535,6.41626544
60.770358,6.55743852,6.47611131,0.285179275,6.42243453,6.46861972,6.41488026
60.780849,6,6.47419859,-0.688620785,6.42104304,6.466713,6.41349541
60.791341,5.83095189,6.47229396,-0.80083835,6.41965169,6.46481431,6.41211064
60.801832,6.08276253,6.47039798,-0.622603765,6.41826076,6.46292421,6.41072621
60.812324,6,6.46850976,-0.684477728,6.41686997,6.4610418,6.40934185
60.822816,6.78232998,6.46662933,0.561872454,6.41547946,6.45916712,6.4079577
60.833307,6.92820323,6.46475671,0.680769065,6.41408937,6.4573002,6.40657388
60.843799,7,6.4628914,0.732876932,6.41269942,6.45544052,6.40519015
60.85429,6.244998,6.46103362,-0.464796322,6.41130989,6.4535883,6.40380676
60.864782,7.34846923,6.45918287,0.94301981,6.40992051,6.45174306,6.40242345
60.875274,5.91607978,6.45733919,-0.735703338,6.40853141,6.44990482,6.40104035
60.885765,7.28010989,6.45550262,0.90807889,6.40714272,6.44807363,6.3996576
60.896257,6.70820393,6.45367269,0.504510898,6.40575419,6.44624902,6.39827493
60.906748,6.4807407,6.45184961,0.169973781,6.40436608,6.44443121,6.39689261
60.91724,6.244998,6.45003293,-0.452807826,6.40297812,6.44261972,6.39551038
60.927732,6.92820323,6.44822268,0.692806286,6.40159045,6.44081462,6.39412836
60.938223,5.56776436,6.44641893,-0.93736576,6.4002032,6.43901594,6.39274669
60.948715,7.07106781,6.44462122,0.791483791,6.3988161,6.43722325,6.39136511
60.959206,6.32455532,6.44282978,-0.343910539,6.39742943,6.43543676,6.38998389
60.969698,6.244998,6.44104416,-0.442771,6.39604291,6.43365604,6.38860275
60.98019,6.8556546,6.43926442,0.645283026,6.39465669,6.43188113,6.38722184
60.990681,6.8556546,6.43749063,0.646655993,6.39327089,6.43011211,6.38584128
61.001173,6.92820323,6.43572235,0.701769824,6.39188525,6.42834855,6.38446082
61.011664,6.63324958,6.43395998,0.446418642,6.39050003,6.42659083,6.38308071
61.022156,6.78232998,6.43220299,0.591715297,6.38911498,6.42483844,6.3817007
61.032648,6.164414,6.43045138,-0.515788117,6.38773022,6.42309136,6.38032092
61.043139,5.38516481,6.42870523,-1.02153826,6.38634589,6.42134968,6.3789415
61.053631,6.08276253,6.42696411,-0.586686953,6.38496173,6.41961297,6.37756218
61.064122,6.78232998,6.42522827,0.597579884,6.38357799,6.41788148,6.37618322
61.074614,6.32455532,6.42349728,-0.314550406,6.38219442,6.41615479,6.37480436
61.085106,6.244998,6.42177123,-0.42044409,6.38081115,6.41443297,6.37342573
61.095597,6.8556546,6.42005021,0.660003328,6.37942831,6.41271612,6.37204747
61.106089,6.244998,6.4183338,-0.41633616,6.37804564,6.41100383,6.37066932
61.11658,6.08276253,6.41662225,-0.577805952,6.37666341,6.40929633,6.36929153
61.127072,6.244998,6.41491516,-0.412210095,6.37528134,6.40759324,6.36791385
61.137564,5.83095189,6.41321262,-0.763060106,6.37389958,6.40589464,6.3665364
61.148055,6.244998,6.41151472,-0.408064603,6.37251825,6.40420061,6.36515933
61.158547,6,6.40982106,-0.640172678,6.3711371,6.40251077,6.36378237
61.169038,7.21110255,6.40813189,0.896086301,6.36975638,6.40082536,6.36240578
61.17953,6,6.40644683,-0.637531827,6.36837584,6.39914399,6.3610293
61.190022,6.40312424,6.40476597,-0.0405182563,6.36699561,6.39746676,6.35965306
61.200513,6.70820393,6.40308939,0.552371739,6.36561582,6.39579377,6.3582772
61.211005,6.8556546,6.40141673,0.673971712,6.36423621,6.39412463,6.35690145
61.221496,7.34846923,6.3997483,0.974023065,6.36285704,6.39245965,6.35552609
61.231988,6,6.39808375,-0.630938784,6.36147805,6.3907985,6.35415083
61.24248,6,6.39642308,-0.629621378,6.36009937,6.38914117,6.35277583
61.252971,6.08276253,6.39476639,-0.558573055,6.35872114,6.38748776,6.35140121
61.263463,6.8556546,6.3931133,0.680103889,6.35734309,6.3858379,6.35002671
61.273954,6.32455532,6.39146408,-0.258667268,6.35596549,6.38419184,6.34865259
61.284446,6,6.38981835,-0.624354343,6.35458807,6.38254921,6.34727859
61.294938,5.65685425,6.38817621,-0.855173645,6.35321097,6.38091012,6.34590484
61.305429,7.21110255,6.38653778,0.908055489,6.35183432,6.37927468,6.34453149
61.315921,6.164414,6.38490268,-0.469562223,6.35045785,6.37764251,6.34315825
61.326412,5.47722558,6.38327119,-0.951864282,6.34908184,6.37601388,6.34178541
61.336904,7,6.38164293,0.786356836,6.34770602,6.37438843,6.34041269
61.347396,6.55743852,6.38001801,0.421213147,6.34633051,6.37276626,6.33904023
61.357887,5.83095189,6.37839654,-0.739895026,6.34495547,6.37114749,6.33766816
61.368379,7.21110255,6.37677818,0.913413584,6.34358061,6.36953175,6.33629622
61.37887,5.83095189,6.37516317,-0.737706765,6.34220622,6.36791931,6.33492467
61.389362,6.63324958,6.37355116,0.50960614,6.34083201,6.36630982,6.33355326
61.399854,6.164414,6.37194228,-0.455552711,6.33945814,6.36470338,6.33218211
61.410345,5.65685425,6.37033661,-0.844678853,6.33808472,6.36310012,6.33081136
61.420837,6.164414,6.36873383,-0.452017511,6.3367115,6.36149967,6.32944074
61.431328,6.92820323,6.3671342,0.749045411,6.33533874,6.35990232,6.32807052
61.44182,5.83095189,6.36553748,-0.7311536,6.33396618,6.35830781,6.32670043
61.452312,6.244998,6.36394367,-0.344885008,6.33259396,6.35671615,6.32533062
61.462803,6.40312424,6.36235287,0.201919204,6.3312222,6.35512745,6.32396121
61.473295,6.70820393,6.36076476,0.589439714,6.32985064,6.35354137,6.32259193
61.483786,6.164414,6.35917958,-0.441322536,6.32847954,6.35195818,6.32122306
61.494278,6.244998,6.35759702,-0.335557773,6.32710865,6.35037753,6.31985434
61.50477,6.32455532,6.35601717,-0.17737489,6.3257381,6.34879954,6.31848588
61.515261,6.55743852,6.35444016,0.450553395,6.32436802,6.34722433,6.31711784
61.525753,7.41619849,6.35286565,1.03118031,6.32299814,6.34565156,6.31574993
61.536244,5.38516481,6.35129391,-0.982918668,6.32162874,6.3440815,6.31438244
61.546736,6.78232998,6.34972461,0.657727431,6.32025954,6.34251382,6.3130151
61.557228,6.164414,6.34815786,-0.428653536,6.31889069,6.34094862,6.31164803
61.567719,6.32455532,6.34659377,-0.148453542,6.31752231,6.33938604,6.31028138
61.578211,6.78232998,6.34503203,0.661285074,6.31615415,6.33782574,6.30891487
61.588702,5.83095189,6.3434729,-0.715905724,6.31478646,6.33626799,6.30754878
61.599194,6.55743852,6.34191605,0.464243982,6.31341899,6.33471246,6.30618284
61.609686,5.83095189,6.3403616,-0.713729432,6.31205186,6.33315926,6.30481719
61.620177,6.32455532,6.33880966,-0.11939156,6.31068522,6.33160853,6.30345195
61.630669,5.65685425,6.33725993,-0.824867067,6.30931879,6.33005993,6.30208687
61.64116,5.09901951,6.33571265,-1.11206706,6.30795285,6.32851373,6.30072221
61.651652,6.08276253,6.33416759,-0.501403089,6.30658712,6.32696969,6.2993577
61.662144,6,6.3326248,-0.576736337,6.30522175,6.32542786,6.29799349
61.672635,6.40312424,6.3310844,0.268402386,6.30385686,6.32388835,6.2966297
61.683127,5.56776436,6.32954605,-0.872801059,6.3024922,6.32235084,6.29526606
61.693618,6.32455532,6.32801003,-0.0587768052,6.30112802,6.32081559,6.29390285
61.70411,5.19615242,6.32647603,-1.06316678,6.29976407,6.3192823,6.29253981
61.714602,6.63324958,6.32494415,0.555252581,6.29840048,6.31775108,6.29117706
61.725093,6.55743852,6.32341453,0.483760262,6.29703738,6.31622205,6.28981473
61.735585,5.91607978,6.32188685,-0.637029882,6.29567451,6.3146949,6.28845258
61.746076,5.47722558,6.32036138,-0.918224268,6.29431213,6.3131699,6.28709085
61.756568,6.4807407,6.31883781,0.402371585,6.29294998,6.31164673,6.28572929
61.76706,5.91607978,6.31731625,-0.633432289,6.2915882,6.31012552,6.28436802
61.777551,5.83095189,6.31579683,-0.696308075,6.29022691,6.30860638,6.28300719
61.788043,5.83095189,6.31427924,-0.695217483,6.28886585,6.30708902,6.28164654
61.798534,6.40312424,6.31276376,0.300600199,6.2875053,6.30557369,6.28028631
61.809026,6.244998,6.31125006,-0.257394759,6.28614498,6.30406009,6.27892626
61.819518,7,6.30973828,0.83081991,6.28478503,6.30254834,6.27756652
61.830009,6.8556546,6.30822853,0.73988247,6.28342558,6.30103857,6.27620721
61.840501,6,6.30672052,-0.553823542,6.28206638,6.29953047,6.27484808
61.850992,6.244998,6.3052145,-0.245390509,6.28070767,6.2980243,6.27348938
61.861484,4.89897949,6.30371021,-1.18521337,6.27934921,6.29651979,6.27213087
61.871976,6.63324958,6.30220777,0.575362329,6.27799113,6.29501708,6.27077266
61.882467,5.83095189,6.30070727,-0.685387029,6.27663355,6.29351624,6.2694149
61.892959,5.83095189,6.29920842,-0.684292715,6.27527622,6.29201697,6.26805732
61.90345,5.56776436,6.29771146,-0.854369416,6.27391939,6.29051955,6.26670018
61.913942,6,6.29621611,-0.544257396,6.27256282,6.28902367,6.26534323
61.924434,5.47722558,6.29472249,-0.904155361,6.27120663,6.28752946,6.26398659
61.934925,6.32455532,6.29323073,0.17698755,6.26985095,6.28603704,6.2626304
61.945417,6,6.29174052,-0.540130093,6.26849552,6.2845461,6.2612744
61.955908,6.40312424,6.29025213,0.335964445,6.26714061,6.28305693,6.25991884
61.9664,5.91607978,6.28876526,-0.610479714,6.26578595,6.28156922,6.25856348
61.976892,6,6.28728005,-0.535985121,6.26443168,6.28008309,6.25720843
61.987383,5.91607978,6.28579661,-0.608043442,6.26307792,6.27859867,6.25585384
61.997875,6.40312424,6.28431465,0.344687666,6.26172442,6.27711567,6.25449944
62.008366,5.83095189,6.28283444,-0.672222094,6.26037145,6.27563434,6.25314549
62.018858,6.08276253,6.28135568,-0.445637909,6.25901874,6.27415441,6.25179174
62.02935,6.244998,6.27987849,-0.186763201,6.25766642,6.27267598,6.25043831
62.039841,5.56776436,6.27840301,-0.84299386,6.25631462,6.2711992,6.24908534
62.050333,5.29150262,6.27692894,-0.992686414,6.25496309,6.26972375,6.24773257
62.060824,6,6.27545654,-0.524839541,6.25361208,6.26824992,6.24638026
62.071316,6.63324958,6.27398554,0.599386387,6.25226134,6.26677742,6.24502814
62.081808,6.32455532,6.27251609,0.228121086,6.250911,6.2653064,6.24367636
62.092299,6.78232998,6.27104828,0.715039653,6.24956119,6.26383695,6.24232504
62.102791,7.07106781,6.26958181,0.895257507,6.24821166,6.26236878,6.24097392
62.113282,6,6.26811695,-0.517800107,6.24686265,6.26090215,6.23962327
62.123774,6.32455532,6.26665341,0.24062815,6.24551391,6.25943677,6.23827282
62.134266,7.07106781,6.26519132,0.897706236,6.24416559,6.25797278,6.23692271
62.144757,6.32455532,6.26373081,0.246626253,6.24281779,6.2565103,6.23557306
62.155249,6.63324958,6.26227158,0.60907963,6.24147028,6.25504903,6.23422362
62.16574,5.83095189,6.26081391,-0.655638632,6.2401233,6.25358925,6.23287465
62.176232,7,6.2593575,0.860605891,6.2387766,6.25213067,6.2315259
62.186724,5.91607978,6.25790248,-0.584656052,6.23743031,6.25067341,6.23017748
62.197215,6.164414,6.25644899,-0.303372679,6.23608456,6.2492176,6.22882953
62.207707,6.164414,6.25499672,-0.300969629,6.2347391,6.24776295,6.2274818
62.218198,5.47722558,6.25354596,-0.88109045,6.23339418,6.24630974,6.22613454
62.22869,6.70820393,6.25209641,0.675357333,6.23204955,6.24485767,6.2247875
62.239182,6.4807407,6.2506482,0.479679583,6.23070534,6.24340687,6.2234408
62.249673,6.4807407,6.24920146,0.481185247,6.22936167,6.24195747,6.22209458
62.260165,6.55743852,6.2477559,0.556491352,6.22801829,6.24050918,6.22074858
62.270656,7.48331477,6.24631179,1.11220636,6.22667547,6.23906228,6.21940306
62.281148,5.65685425,6.24486885,-0.766821103,6.22533293,6.23761647,6.21805776
62.29164,7.68114575,6.24342724,1.199049,6.22399082,6.23617191,6.21671281
62.302131,5.74456265,6.24198706,-0.705283215,6.22264927,6.23472872,6.21536834
62.312623,5.83095189,6.24054802,-0.639996969,6.22130801,6.23328659,6.2140241
62.323114,6.08276253,6.23911037,-0.395408452,6.2199673,6.23184579,6.21268034
62.333606,5.83095189,6.23767386,-0.637747568,6.2186269,6.23040604,6.2113368
62.344098,5.83095189,6.23623859,-0.636621309,6.21728693,6.22896747,6.20999362
62.354589,5.91607978,6.2348047,-0.564557272,6.21594751,6.22753021,6.20865093
62.365081,5.65685425,6.2333719,-0.759287596,6.2146084,6.22609397,6.20730847
62.375572,6.32455532,6.23194047,0.304326875,6.21326985,6.22465902,6.2059665
62.386064,5.74456265,6.23051013,-0.697099332,6.21193161,6.22322508,6.20462476
62.396556,6.164414,6.22908099,-0.254297041,6.21059381,6.22179228,6.20328338
62.407047,5.65685425,6.22765319,-0.75551237,6.20925657,6.22036074,6.20194249
62.417539,6.164414,6.22622645,-0.248621097,6.20791964,6.21893019,6.20060184
62.42803,6.164414,6.22480104,-0.245737741,6.20658328,6.21750089,6.19926168
62.438522,5,6.22337668,-1.10606359,6.20524723,6.21607256,6.19792175
62.449014,6.40312424,6.22195349,0.425641576,6.20391163,6.21464533,6.1965822
62.459505,5.38516481,6.2205316,-0.913984022,6.2025766,6.21321933,6.19524314
62.469997,7,6.21911074,0.883679388,6.20124189,6.21179427,6.19390432
62.480488,6.164414,6.21769117,-0.230818468,6.19990775,6.21037043,6.192566
62.49098,5.83095189,6.21627261,-0.620742068,6.19857394,6.20894753,6.19122792
62.501472,6.164414,6.21485521,-0.224591205,6.19724057,6.20752571,6.18989021
62.511963,4.24264069,6.2134391,-1.40385128,6.19590778,6.2061051,6.18855301
62.522455,5.56776436,6.21202398,-0.802657845,6.19457532,6.2046854,6.18721605
62.532946,6.40312424,6.21061012,0.43876431,6.19324344,6.20326688,6.18587959
62.543438,5.65685425,6.20919724,-0.743197812,6.19191189,6.20184927,6.18454338
62.55393,6.55743852,6.20778547,0.591314685,6.19058079,6.20043269,6.18320755
62.564421,6.08276253,6.20617721,-0.351304262,6.18905201,6.19901727,6.18187222
62.574913,6.244998,6.20476784,0.200574564,6.18772202,6.19760273,6.18053715
62.585404,6.70820393,6.2033597,0.710523915,6.18639263,6.19618934,6.17920258
62.595896,5.74456265,6.20195251,-0.676306042,6.18506356,6.19477683,6.17786827
62.606388,6.63324958,6.2005464,0.657801778,6.18373497,6.19336532,6.17653433
62.616879,5.83095189,6.19914151,-0.606786298,6.18240696,6.19195494,6.17520091
62.627371,5.56776436,6.19773755,-0.793708502,6.18107929,6.19054541,6.17386775
62.637862,6.55743852,6.19633479,0.600919072,6.17975222,6.18913701,6.1725351
62.648354,6.244998,6.19493297,0.223752163,6.17842549,6.18772945,6.1712027
62.658846,6.164414,6.1935322,-0.170640552,6.17709923,6.18632287,6.1698707
62.669337,5.47722558,6.19213262,-0.845521759,6.17577357,6.1849174,6.16853921
62.679829,6.4807407,6.19073395,0.538522742,6.17444825,6.18351275,6.16720798
62.69032,5.19615242,6.18933647,-0.996586194,6.17312354,6.1821092,6.16587727
62.700812,6.08276253,6.18793988,-0.324310579,6.17179917,6.18070647,6.16454682
62.711304,5.56776436,6.18654434,-0.786625691,6.17047529,6.17930469,6.16321677
62.721795,6.32455532,6.18514998,0.373370244,6.16915201,6.17790402,6.16188723
62.732287,5.91607978,6.18375651,-0.517374846,6.16782908,6.17650415,6.16055796
62.742778,5.83095189,6.1823642,-0.592800394,6.16650676,6.17510535,6.15922922
62.75327,5.65685425,6.18097277,-0.723960306,6.1651848,6.17370734,6.15790074
62.763762,6.244998,6.17958236,0.255764813,6.16386333,6.17231027,6.15657267
62.774253,6.4807407,6.17819309,0.550043283,6.16254246,6.17091424,6.15524511
62.784745,5.56776436,6.17680468,-0.780410355,6.16122196,6.16951901,6.15391783
62.795236,5.47722558,6.17541742,-0.835578747,6.15990207,6.16812482,6.15259108
62.805728,6.40312424,6.17403102,0.478636836,6.15858255,6.1667314,6.1512646
62.81622,6.08276253,6.17264561,-0.299805069,6.15726352,6.16533889,6.14993853
62.826711,6.70820393,6.17126132,0.732763678,6.15594511,6.16394742,6.14861298
62.837203,6,6.16987789,-0.412162462,6.15462707,6.16255671,6.14728771
62.847694,6.40312424,6.16849558,0.484384823,6.15330965,6.16116702,6.14596298
62.858186,6.78232998,6.16711412,0.784356977,6.1519926,6.15977809,6.14463852
62.868678,6.8556546,6.16573363,0.830614815,6.15067606,6.15839004,6.14331447
62.879169,6.55743852,6.16435425,0.626964334,6.14936014,6.15700301,6.14199096
62.889661,5,6.16297571,-1.07841351,6.1480446,6.15561673,6.14066773
62.900152,5.91607978,6.16159826,-0.495498214,6.14672969,6.15423145,6.13934504
62.910644,6.32455532,6.16022165,0.405380891,6.14541516,6.15284691,6.13802263
62.921136,5.83095189,6.15884601,-0.572620389,6.14410114,6.15146324,6.13670064
62.931627,6,6.15747147,-0.396826746,6.14278776,6.15008058,6.13537918
62.942119,6.08276253,6.15609775,-0.270804768,6.14147476,6.14869865,6.13405801
62.95261,5.74456265,6.15472512,-0.640439284,6.14016239,6.14731771,6.13273739
62.963102,6,6.15335331,-0.391603513,6.13885042,6.14593749,6.13141705
62.973594,6.08276253,6.15198245,-0.263096782,6.13753896,6.14455812,6.13009714
62.984085,5.47722558,6.15061266,-0.820601659,6.13622814,6.14317973,6.12877777
62.994577,6.63324958,6.14924368,0.695705326,6.13491772,6.14180205,6.12745869
63.005068,6.244998,6.14787577,0.311644393,6.13360794,6.14042534,6.12614016
63.01556,5.65685425,6.14650867,-0.699753113,6.13229856,6.13904934,6.12482192
63.026052,5.38516481,6.1451425,-0.871766995,6.1309897,6.13767417,6.12350411
63.036543,6.78232998,6.1437774,0.799094855,6.12968149,6.13629996,6.12218685
63.047035,6.164414,6.14241309,0.148327044,6.12837369,6.13492646,6.12086988
63.057526,6.8556546,6.14104984,0.845342982,6.12706654,6.1335539,6.11955347
63.068018,5.65685425,6.13968739,-0.694861959,6.12575979,6.13218204,6.11823736
63.07851,6.63324958,6.13832587,0.703508148,6.12445358,6.130811,6.11692167
63.089001,5.74456265,6.13696539,-0.626420582,6.12314802,6.12944091,6.11560654
63.099493,5.83095189,6.13560571,-0.551954539,6.12184288,6.12807151,6.11429172
63.109984,6.4807407,6.13424707,0.588637094,6.1205384,6.12670304,6.11297745
63.120476,5.91607978,6.13288922,-0.465628001,6.11923433,6.12533525,6.11166349
63.130968,5.29150262,6.13153228,-0.916531319,6.1179308,6.12396828,6.11034996
63.141459,6.244998,6.1301764,0.338853364,6.11662794,6.12260224,6.10903699
63.151951,6.08276253,6.1288213,-0.214613067,6.1153255,6.12123689,6.10772433
63.162442,5.91607978,6.12746724,-0.459768915,6.11402373,6.11987246,6.10641223
63.172934,6.08276253,6.12611395,-0.208210049,6.11272238,6.1185087,6.10510044
63.183426,6,6.12476158,-0.353216048,6.11142158,6.11714573,6.10378909
63.193917,6.32455532,6.12341023,0.448492018,6.11012145,6.11578369,6.10247831
63.204409,7.21110255,6.12205966,1.04357218,6.10882175,6.11442231,6.10116783
63.2149,5.29150262,6.12071011,-0.910608308,6.10752273,6.11306184,6.09985793
63.225392,6.40312424,6.11936134,0.532694002,6.10622415,6.11170203,6.09854834
63.235884,5.65685425,6.11801346,-0.679087043,6.10492612,6.110343,6.0972392
63.246375,6.4807407,6.11666661,0.603385523,6.10362877,6.10898489,6.09593062
63.256867,6.55743852,6.11532052,0.664919544,6.10233186,6.10762742,6.09462236
63.267358,6.08276253,6.11397546,-0.176671814,6.10103564,6.10627086,6.09331468
63.27785,6.4807407,6.11263116,0.606720313,6.09973986,6.10491495,6.09200732
63.288342,5.74456265,6.11128776,-0.605578326,6.09844464,6.10355981,6.0907004
63.298833,6.244998,6.10994537,0.367495072,6.09715012,6.10220557,6.08939406
63.309325,6.244998,6.10860375,0.369315925,6.09585605,6.10085197,6.08808804
63.319816,7.41619849,6.10726314,1.14408712,6.09456268,6.09949926,6.0867826
63.330308,6.70820393,6.10592329,0.776067422,6.09326975,6.0981472,6.08547749
63.3408,7.48331477,6.10458433,1.17419353,6.0919774,6.09679589,6.08417283
63.351291,7.48331477,6.10324638,1.17476312,6.09068575,6.09544549,6.08286875
63.361783,5.74456265,6.1019092,-0.597784708,6.08939456,6.09409572,6.081565
63.372274,6.63324958,6.10057304,0.729846932,6.08810407,6.09274684,6.08026183
63.382766,6.4807407,6.09923763,0.61765935,6.08681405,6.09139859,6.07895899
63.393258,6,6.0979031,-0.312894704,6.0855246,6.09005109,6.07765661
63.403749,5.74456265,6.09656957,-0.593301717,6.08423587,6.08870448,6.07635481
63.414241,6.244998,6.09523681,0.386989912,6.08294761,6.08735848,6.07505335
63.424732,6.32455532,6.09390505,0.480260632,6.08166006,6.08601337,6.07375247
63.435224,6.32455532,6.09257404,0.481644353,6.08037298,6.08466888,6.07245194
63.445716,6.32455532,6.09124391,0.483023201,6.07908649,6.08332513,6.07115186
63.456207,6.08276253,6.08991478,-0.0845709934,6.07780073,6.08198226,6.06985237
63.466699,6.164414,6.08858641,0.275368105,6.07651544,6.08064001,6.06855323
63.47719,5.91607978,6.08725904,-0.413738151,6.07523087,6.07929862,6.06725467
63.487682,5.38516481,6.08593242,-0.837118638,6.07394679,6.07795785,6.06595646
63.498174,6.164414,6.08460668,0.282501896,6.07266331,6.07661782,6.06465872
63.508665,6.92820323,6.08328195,0.919195998,6.07138057,6.07527865,6.06336156
63.519157,6.08276253,6.08195796,0.0283648763,6.07009831,6.0739401,6.06206476
63.529648,5.65685425,6.08063498,-0.650984434,6.06881679,6.07260241,6.06076855
63.54014,6.8556546,6.07931275,0.881102633,6.06753575,6.07126532,6.05947268
63.550632,6.08276253,6.07799139,0.0690734107,6.06625534,6.06992897,6.0581773
63.561123,5.74456265,6.07667104,-0.576288464,6.06497566,6.06859348,6.0568825
63.571615,5.56776436,6.07535145,-0.712451461,6.06369648,6.06725861,6.05558806
63.582106,6.32455532,6.07403286,0.500522192,6.06241804,6.06592459,6.05429422
63.592598,6.164414,6.07271501,0.302818409,6.06114011,6.06459117,6.05300073
63.60309,6.4807407,6.07139805,0.639798914,6.0598628,6.06325848,6.05170772
63.613581,7,6.07008208,0.964322518,6.05858625,6.06192665,6.05041532
63.624073,5.74456265,6.06876687,-0.569389339,6.0573102,6.06059541,6.04912327
63.634564,6.32455532,6.06745265,0.507052926,6.05603491,6.05926502,6.04783182
63.645056,6.32455532,6.06613919,0.508346471,6.05476013,6.05793523,6.04654073
63.655548,6.40312424,6.0648266,0.581633596,6.05348598,6.05660616,6.04525013
63.666039,6.40312424,6.06351501,0.582760008,6.0522126,6.05527794,6.04396013
63.676531,5.19615242,6.06220417,-0.930619015,6.05093974,6.05395031,6.04267049
63.687022,5.91607978,6.06089434,-0.380545079,6.04966764,6.05262353,6.04138147
63.697514,5.47722558,6.05958526,-0.763124946,6.04839607,6.05129734,6.0400928
63.708006,5.83095189,6.05827705,-0.476786282,6.04712515,6.04997187,6.03880463
63.718497,6.40312424,6.05696986,0.588348859,6.045855,6.04864724,6.03751706
63.728989,6.4807407,6.05566342,0.65197951,6.04458539,6.0473232,6.03622987
63.73948,5.56776436,6.05435798,-0.697562625,6.04331655,6.046,6.03494328
63.749972,5.47722558,6.0530533,-0.758833131,6.04204825,6.04467739,6.03365707
63.760464,4.89897949,6.05174949,-1.07367127,6.04078061,6.04335549,6.03237135
63.770955,7.07106781,6.05044669,1.01025795,6.03951376,6.04203443,6.03108625
63.781447,6.164414,6.04914466,0.33951339,6.03824745,6.04071396,6.02980151
63.791938,5.91607978,6.04784364,-0.362992911,6.03698193,6.03939433,6.0285174
63.80243,5.74456265,6.04654337,-0.549527729,6.03571695,6.03807529,6.02723366
63.812922,7.07106781,6.04524399,1.01282961,6.03445265,6.03675695,6.02595042
63.823413,5.74456265,6.04394561,-0.547158997,6.03318915,6.03543945,6.0246678
63.833905,5.91607978,6.042648,-0.355764272,6.0319262,6.03412253,6.02338555
63.844396,5,6.0413514,-1.02046626,6.03066405,6.03280644,6.02210393
63.854888,6.4807407,6.04005556,0.663841203,6.02940247,6.03149094,6.02082269
63.86538,6.70820393,6.0387606,0.818195167,6.02814156,6.03017613,6.01954195
63.875871,6,6.03746666,-0.193563063,6.02688147,6.02886216,6.01826184
63.886363,6,6.03617348,-0.190193279,6.02562195,6.02754877,6.01698211
63.896854,6.244998,6.03488132,0.458384857,6.02436324,6.02623621,6.01570301
63.907346,5.83095189,6.03358993,-0.450153343,6.0231051,6.02492422,6.01442429
63.917838,5.38516481,6.03229943,-0.804446778,6.02184767,6.02361294,6.01314608
63.928329,7.28010989,6.03100995,1.1176314,6.02059105,6.02230249,6.0118685
63.938821,5.91607978,6.02972124,-0.337107488,6.01933503,6.02099261,6.01059131
63.949312,6.164414,6.02843356,0.368755268,6.01807983,6.01968355,6.00931475
63.959804,6.70820393,6.02714664,0.825261951,6.01682522,6.01837507,6.00803858
63.970296,5.47722558,6.02586063,-0.740699033,6.01557132,6.0170673,6.00676293
63.980787,5.47722558,6.02457564,-0.739831107,6.01431826,6.01576034,6.0054879
63.991279,5.29150262,6.02329144,-0.855446558,6.01306579,6.01445397,6.00421327
64.00177,5.91607978,6.02200826,-0.325466551,6.01181417,6.01314842,6.00293928
64.012262,5.09901951,6.02072586,-0.96005539,6.01056314,6.01184345,6.00166568
64.022754,5.29150262,6.01944438,-0.853195027,6.00931285,6.01053917,6.0003926
64.033245,5.56776436,6.01816392,-0.671118136,6.0080634,6.00923571,5.99912016
64.043737,5.47722558,6.01688424,-0.734614639,6.00681456,6.00793283,5.99784812
64.054228,6.244998,6.0156056,0.478949264,6.00556658,6.00663077,5.99657672
64.06472,6.32455532,6.01432775,0.556980764,6.00431922,6.00532928,5.99530572
64.075212,5.74456265,6.01305081,-0.518158436,6.00307259,6.00402848,5.99403524
64.085703,4.47213595,6.01177491,-1.24082189,6.00182683,6.00272851,5.99276541
64.096195,5.56776436,6.0104998,-0.66538368,6.0005817,6.0014291,5.99149598
64.106686,5.19615242,6.00922574,-0.901705781,5.99933743,6.00013051,5.99022719
64.117178,5.74456265,6.00795247,-0.513215183,5.9980938,5.9988325,5.98895881
64.12767,6.32455532,6.00668013,0.563804216,5.99685092,5.99753517,5.98769096
64.138161,6.244998,6.00540883,0.489478467,5.99560893,5.99623867,5.98642376
64.148653,6.40312424,6.00413834,0.631653302,5.99436758,5.99494273,5.98515696
64.159144,6.40312424,6.00286891,0.632657356,5.99312712,5.99364762,5.98389082
64.169636,5.74456265,6.00160028,-0.506988792,5.99188731,5.99235307,5.98262508
64.180128,5.91607978,6.00033259,-0.290263335,5.99064827,5.99105921,5.98135988
64.190619,5.09901951,5.99906595,-0.948707771,5.98941013,5.98976617,5.98009533
64.201111,6.63324958,5.99780012,0.797150836,5.98817264,5.9884737,5.9788312
64.211602,5.29150262,5.99653537,-0.839662281,5.98693606,5.98718205,5.97756772
64.222094,6.164414,5.99527143,0.411269463,5.98570014,5.98589097,5.97630465
64.232586,5.74456265,5.99400844,-0.499445485,5.98446502,5.98460058,5.97504213
64.243077,6,5.99274651,0.0851674158,5.9832308,5.983311,5.97378026
64.253569,6.164414,5.99148541,0.415846837,5.98199726,5.98202199,5.97251881
64.26406,5.47722558,5.99022538,-0.716240048,5.98076463,5.9807338,5.97125802
64.274552,6.8556546,5.98896618,0.930961018,5.9795327,5.97944617,5.96999764
64.285044,6,5.98770794,0.110869563,5.97830156,5.97815924,5.96873782
64.295535,6.32455532,5.98645077,0.581467579,5.97707136,5.97687312,5.96747865
64.306027,6.70820393,5.98519445,0.850299643,5.97584185,5.97558756,5.96621991
64.316518,6.40312424,5.98393921,0.647445003,5.97461328,5.97430282,5.96496183
64.32701,5.83095189,5.98268481,-0.389529091,5.97338541,5.97301865,5.96370417
64.337502,6.8556546,5.98143138,0.934999049,5.97215836,5.97173516,5.96244707
64.347993,5.56776436,5.98017904,-0.642195201,5.97093226,5.97045249,5.96119063
64.358485,5.56776436,5.97892756,-0.641220087,5.96970689,5.96917039,5.95993462
64.368976,6.92820323,5.97767718,0.974949253,5.96848247,5.9678891,5.95867928
64.379468,5.19615242,5.97642767,-0.883331899,5.96725877,5.96660837,5.95742437
64.38996,5.56776436,5.97517913,-0.638290505,5.96603592,5.96532834,5.95617001
64.400451,6.4807407,5.9739317,0.711905189,5.96481403,5.96404912,5.95491632
64.410943,5,5.97268514,-0.986248011,5.96359288,5.96277046,5.95366306
64.421434,6,5.97143969,0.168997949,5.9623727,5.96149263,5.95241048
64.431926,5.65685425,5.97019512,-0.559768591,5.96115327,5.96021536,5.95115834
64.442418,5.83095189,5.96895155,-0.371483054,5.9599347,5.95893878,5.94990675
64.452909,6.08276253,5.9677091,0.339195265,5.95871712,5.95766301,5.94865584
64.463401,5.91607978,5.96646754,-0.224472168,5.95750029,5.95638781,5.94740536
64.473892,6,5.9652271,0.186474936,5.95628445,5.95511342,5.94615557
64.484384,5.19615242,5.96398755,-0.876262021,5.95506939,5.9538396,5.94490621
64.494876,5.83095189,5.96274902,-0.363038737,5.9538552,5.95256647,5.94365742
64.505367,6.32455532,5.96151162,0.602531075,5.95264203,5.95129415,5.9424093
64.515859,5.74456265,5.96027513,-0.464448582,5.95142963,5.9500224,5.94116163
64.52635,5.09901951,5.95903978,-0.927372778,5.95021825,5.94875146,5.93991464
64.536842,6.55743852,5.95780534,0.774359852,5.94900766,5.94748109,5.9386681
64.547334,4.69041576,5.95657194,-1.12523606,5.94779797,5.9462114,5.93742213
64.557825,5.29150262,5.95533969,-0.814761969,5.94658932,5.94494253,5.93617684
64.568317,5.74456265,5.95410837,-0.457761642,5.94538147,5.94367423,5.93493199
64.578808,6.244998,5.95287822,0.540481066,5.94417467,5.94240674,5.93368784
64.5893,5.74456265,5.951649,-0.455067411,5.94296868,5.94113982,5.93244413
64.599792,6.92820323,5.95042083,0.988828803,5.94176363,5.93987359,5.931201
64.610283,5.91607978,5.94919383,-0.181972666,5.94055963,5.93860817,5.92995855
64.620775,5.38516481,5.94796778,-0.750201958,5.93935646,5.93734332,5.92871656
64.631266,6,5.94674292,0.230774955,5.93815435,5.93607929,5.92747526
64.641758,7.07106781,5.94551901,1.06091885,5.93695308,5.93481583,5.92623442
64.65225,5.65685425,5.94429618,-0.536136109,5.93575276,5.93355306,5.92499415
64.662741,6,5.94307454,0.238590575,5.93455353,5.9322911,5.92375458
64.673233,6.244998,5.94185386,0.550585265,5.93335515,5.93102971,5.92251546
64.683724,5.47722558,5.94063439,-0.680741375,5.93215786,5.92976913,5.92127704
64.694216,5.09901951,5.9394159,-0.916731361,5.93096143,5.92850913,5.92003908
64.704708,6.08276253,5.9381985,0.380215762,5.92976599,5.92724981,5.9188017
64.715199,6.40312424,5.93698233,0.682745862,5.92857166,5.92599131,5.91756502
64.725691,5.91607978,5.93576714,-0.140311635,5.9273782,5.92473338,5.9163288
64.736182,5.83095189,5.93455318,-0.321871531,5.92618587,5.92347627,5.91509329
64.746674,5.47722558,5.93334022,-0.675362601,5.92499442,5.92221972,5.91385824
64.757166,5.19615242,5.93212838,-0.857890411,5.92380399,5.92096387,5.91262377
64.767657,5.38516481,5.93091778,-0.738750957,5.9226147,5.91970883,5.91139
64.778149,6.4807407,5.92970821,0.742315628,5.92142632,5.91845437,5.91015671
64.78864,5.74456265,5.9284999,-0.428879066,5.9202391,5.91720072,5.90892412
64.799132,5.65685425,5.92729262,-0.520036895,5.9190528,5.91594764,5.907692
64.809624,5.38516481,5.92608649,-0.735473782,5.91786755,5.91469526,5.90646047
64.820115,5.56776436,5.92488163,-0.597592896,5.91668347,5.91344369,5.90522964
64.830607,5.56776436,5.92367782,-0.596584826,5.91550033,5.91219269,5.90399929
64.841098,5.91607978,5.92247528,-0.0799718784,5.91431836,5.91094251,5.90276965
64.85159,5.65685425,5.92127381,-0.514217429,5.91313736,5.90969291,5.90154049
64.862082,5.83095189,5.92007352,-0.298532454,5.91195743,5.908444,5.90031192
64.872573,5.74456265,5.91887453,-0.417506742,5.9107787,5.90719591,5.89908406
64.883065,5.91607978,5.91767661,-0.0399602895,5.90960094,5.9059484,5.89785668
64.893556,6.08276253,5.91648,0.40777755,5.9084244,5.9047017,5.89663001
64.904048,5.74456265,5.91528448,-0.413184988,5.90724885,5.90345558,5.89540382
64.91454,6.70820393,5.91409017,0.891130608,5.90607441,5.90221015,5.89417823
64.925031,4.79583152,5.91289719,-1.05691327,5.9049012,5.90096554,5.89295336
64.935523,5.91607978,5.91170532,0.0661397179,5.90372901,5.89972151,5.89172897
64.946014,6.08276253,5.91051479,0.415027394,5.90255806,5.89847829,5.8905053
64.956506,5.83095189,5.90932539,-0.279952662,5.90138814,5.89723565,5.88928211
64.966998,6.164414,5.90813723,0.506237866,5.90021937,5.89599371,5.88805953
64.977489,6.40312424,5.90695043,0.704396061,5.89905187,5.89475259,5.88683767
64.987981,5.65685425,5.90576477,-0.498909334,5.89788542,5.89351205,5.88561629
64.998472,5.83095189,5.90458052,-0.271345942,5.89672027,5.89227232,5.88439564
65.008964,7,5.90339742,1.04718794,5.8955562,5.89103318,5.88317548
65.019456,5.65685425,5.90221561,-0.495339644,5.89439332,5.88979473,5.88195592
65.029947,5.56776436,5.9010352,-0.577296145,5.89323175,5.8885571,5.88073709
65.040439,6.40312424,5.89985598,0.709414027,5.89207127,5.88732006,5.87951876
65.05093,6.08276253,5.89867817,0.429050539,5.89091212,5.88608383,5.87830115
65.061422,4.79583152,5.89750156,-1.0496047,5.88975408,5.88484819,5.87708403
65.071914,5.29150262,5.89632627,-0.77770409,5.88859727,5.88361325,5.87586753
65.082405,6.164414,5.89515243,0.518904205,5.88744181,5.88237914,5.87465176
65.092897,6.8556546,5.89397981,0.980650188,5.8862875,5.8811456,5.87343648
65.103388,5.19615242,5.89280865,-0.834659346,5.88513455,5.87991289,5.87222194
65.11388,6.4807407,5.89163873,0.767529785,5.88398276,5.87868076,5.87100789
65.124372,5.83095189,5.89047017,-0.24396368,5.88283225,5.87744933,5.86979446
65.134863,5.29150262,5.8893031,-0.77317558,5.88168314,5.87621872,5.86858177
65.145355,5.29150262,5.8881373,-0.772421307,5.88053521,5.8749887,5.86736958
65.155846,5.38516481,5.886973,-0.708384212,5.8793887,5.8737595,5.86615812
65.166338,6.32455532,5.88580999,0.662378541,5.8782434,5.87253089,5.86494717
65.17683,6,5.88464839,0.339634525,5.87709942,5.87130299,5.86373684
65.187321,5.74456265,5.88348832,-0.372727345,5.8759569,5.8700759,5.86252725
65.197813,6.08276253,5.88232957,0.447697398,5.87481561,5.8688494,5.86131816
65.208304,5.38516481,5.88117238,-0.704278053,5.8736758,5.86762373,5.86010981
65.218796,5.56776436,5.88001656,-0.558795305,5.87253727,5.86639865,5.85890198
65.229288,7,5.87886219,1.05883795,5.87140012,5.86517427,5.85769477
65.239779,5.91607978,5.87770941,0.195883574,5.87026448,5.86395072,5.8564883
65.250271,6.164414,5.876558,0.536522137,5.86913013,5.86272776,5.85528234
65.260762,5.74456265,5.87540819,-0.361725791,5.86799731,5.86150562,5.85407713
65.271254,5.74456265,5.87394616,-0.359699197,5.86655178,5.86028408,5.85287243
65.281746,5.65685425,5.8727996,-0.464699203,5.86542204,5.85906325,5.85166837
65.292237,5.09901951,5.87165468,-0.878996679,5.86429386,5.85784324,5.85046505
65.302729,6,5.87051118,0.359845546,5.86316704,5.85662383,5.84926224
65.31322,6,5.86936935,0.361428621,5.8620418,5.85540524,5.84806018
65.323712,6.32455532,5.86822898,0.675519314,5.86091794,5.85418724,5.84685865
65.334204,5.56776436,5.86709018,-0.547106768,5.85979558,5.85296996,5.84565775
65.344695,5.91607978,5.86595308,0.223889941,5.85867485,5.85175351,5.84445759
65.355187,5.56776436,5.86481747,-0.545025786,5.85755553,5.85053765,5.84325796
65.365678,6.8556546,5.86368359,0.995977416,5.85643787,5.84932262,5.84205909
65.37617,6.32455532,5.86255123,0.679708831,5.85532165,5.84810819,5.84086073
65.386662,6.40312424,5.86142051,0.736005252,5.854207,5.84689447,5.83966302
65.397153,5.83095189,5.86029155,-0.171288227,5.85309405,5.84568157,5.83846606
65.407645,6.32455532,5.85916416,0.682195838,5.85198258,5.84446928,5.83726962
65.418136,6.4807407,5.85803856,0.789114782,5.85087284,5.84325782,5.83607395
65.428628,4.89897949,5.85691459,-0.978741594,5.84976465,5.84204696,5.8348788
65.43912,6,5.85579234,0.379746832,5.84865812,5.84083681,5.83368429
65.449611,6.92820323,5.85467193,1.03611355,5.84755335,5.83962749,5.83249055
65.460103,5.65685425,5.85355316,-0.443507508,5.84645015,5.83841878,5.83129733
65.470594,6.32455532,5.85243625,0.687109209,5.84534875,5.83721089,5.83010488
65.481086,6.244998,5.85132102,0.62743683,5.84424895,5.83600361,5.82891296
65.491578,5.56776436,5.85020759,-0.531453878,5.84315088,5.83479705,5.82772169
65.502069,6.32455532,5.84909607,0.689535533,5.84205466,5.83359132,5.82653118
65.512561,5.56776436,5.84798627,-0.529359906,5.84096009,5.8323862,5.8253412
65.523052,5.74456265,5.84687843,-0.31986838,5.83986741,5.83118191,5.824152
65.533544,6.40312424,5.84577234,0.746560044,5.83877641,5.82997823,5.82296332
65.544036,5.91607978,5.84466813,0.26722959,5.83768723,5.82877526,5.82177531
65.554527,6.08276253,5.84356592,0.4890773,5.83659999,5.82757313,5.82058806
65.565019,5.83095189,5.84246553,-0.107301615,5.83551449,5.82637161,5.81940135
65.57551,6.40312424,5.84136718,0.749504542,5.83443097,5.82517093,5.8182154
65.586002,6.08276253,5.84027068,0.492434618,5.83334923,5.82397085,5.81703001
65.596494,5.09901951,5.83917615,-0.860323565,5.83226941,5.82277149,5.81584526
65.606985,6.4807407,5.83808372,0.80165889,5.83119161,5.82157297,5.81466129
65.617477,6.164414,5.83699321,0.572206952,5.83011567,5.82037506,5.81347787
65.627968,6.164414,5.83590483,0.573157198,5.82904181,5.81917799,5.81229522
65.63846,5.47722558,5.83481844,-0.597990692,5.82796987,5.81798153,5.81111311
65.648952,5.83095189,5.83373416,-0.0527471631,5.82689997,5.81678579,5.80993167
65.659443,5.74456265,5.83265208,-0.296798641,5.82583221,5.8155909,5.808751
65.669935,5.47722558,5.83157202,-0.595270063,5.82476642,5.81439661,5.80757088
65.680426,6.164414,5.83049422,0.577857928,5.82370281,5.81320317,5.80639154
65.690918,5.56776436,5.82941848,-0.511521376,5.82264121,5.81201034,5.80521275
65.70141,4.89897949,5.82834494,-0.964036025,5.82158175,5.81081824,5.80403463
65.711901,5.74456265,5.82727373,-0.287595343,5.82052455,5.80962698,5.80285728
65.722393,5.38516481,5.82620466,-0.66410831,5.81946944,5.80843634,5.80168049
65.732884,6.164414,5.82513795,0.582474076,5.81841663,5.80724654,5.80050449
65.743376,5,5.82407345,-0.907784912,5.81736596,5.80605736,5.79932903
65.753868,6.164414,5.82301126,0.584296792,5.81631756,5.8048689,5.79815425
65.764359,6.164414,5.82195153,0.585202935,5.81527154,5.80368129,5.79698025
65.774851,5.47722558,5.82089407,-0.586232457,5.81422775,5.8024943,5.79580682
65.785342,6.08276253,5.81983912,0.512760583,5.8131864,5.80130815,5.79463416
65.795834,5.47722558,5.81878649,-0.584432134,5.81214732,5.80012263,5.79346207
65.806326,5.38516481,5.81773634,-0.657701702,5.81111066,5.79893783,5.79229065
65.816817,6.70820393,5.81668877,0.944200806,5.81007653,5.79775388,5.79112002
65.827309,5.29150262,5.81564363,-0.723975832,5.80904476,5.79657056,5.78994995
65.8378,6.164414,5.81460114,0.591449799,5.80801559,5.79538808,5.78878067
65.848292,5.09901951,5.81356115,-0.845305649,5.80698888,5.79420622,5.78761196
65.858784,5.38516481,5.81252385,-0.653727042,5.80596479,5.7930251,5.78644393
65.869275,5.47722558,5.8114893,-0.578155453,5.80494339,5.79184482,5.78527669
65.879767,5.56776436,5.81045734,-0.492638792,5.80392454,5.79066517,5.78411001
65.890258,5.91607978,5.8094282,0.326575535,5.80290845,5.78948637,5.78294413
65.90075,6.08276253,5.80840172,0.523794623,5.80189496,5.7883082,5.78177882
65.911242,6,5.80737804,0.438887184,5.80088422,5.78713076,5.7806142
65.921733,5.65685425,5.80635729,-0.386656225,5.79987635,5.78595418,5.77945036
65.932225,5,5.8053393,-0.897406989,5.7988712,5.78477822,5.7782871
65.942716,5.65685425,5.80432432,-0.384018326,5.797869,5.78360312,5.77712464
65.953208,6.164414,5.8033122,0.600917471,5.7968696,5.78242864,5.77596276
65.9637,6.32455532,5.80230305,0.722670233,5.79587314,5.78125491,5.77480156
65.974191,5.91607978,5.80129704,0.338796023,5.79487974,5.78008203,5.77364116
65.984683,5.09901951,5.800294,-0.837421329,5.79388928,5.77890978,5.77248133
65.995174,4.58257569,5.79929416,-1.10304962,5.79290197,5.77773838,5.77132231
66.005666,5.83095189,5.79829739,0.180705572,5.79191767,5.77656762,5.77016387
66.016158,6.55743852,5.79730382,0.871857042,5.79093652,5.77539759,5.76900612
66.026649,6.32455532,5.7963136,0.726802396,5.78995867,5.77422843,5.76784917
66.037141,6.78232998,5.79532657,0.993480452,5.78898397,5.7730599,5.7666928
66.047632,5.56776436,5.79434299,-0.476002759,5.78801266,5.77189222,5.76553724
66.058124,5.65685425,5.7933627,-0.369470506,5.7870446,5.77072518,5.76438226
66.068616,6.40312424,5.79238597,0.781497454,5.78608004,5.76955889,5.76322798
66.079107,6.4807407,5.79141284,0.830257707,5.78511904,5.76839345,5.76207451
66.089599,6.40312424,5.79044317,0.782739463,5.78416146,5.76722865,5.76092162
66.10009,6.63324958,5.7894772,0.918570834,5.78320752,5.76606471,5.75976954
66.110582,5.65685425,5.78851481,-0.362850599,5.78225711,5.76490141,5.75861805
66.121074,5.56776436,5.78755613,-0.468819548,5.78131037,5.76373885,5.75746726
66.131565,5.65685425,5.78660133,-0.360204218,5.78036746,5.76257716,5.75631728
66.142057,5.91607978,5.78565027,0.36115026,5.77942825,5.76141611,5.75516789
66.152548,6.32455532,5.78470321,0.734746292,5.77849298,5.76025593,5.75401931
66.16304,5.47722558,5.78376001,-0.553655523,5.77756154,5.75909638,5.75287133
66.173532,6.08276253,5.78282085,0.54766932,5.77663408,5.75793758,5.75172405
66.184023,5.38516481,5.78188586,-0.629857963,5.77571076,5.75677965,5.75057759
66.194515,5.09901951,5.78095495,-0.82579382,5.77479146,5.75562236,5.74943172
66.205006,5.47722558,5.78002835,-0.550275181,5.77387644,5.75446594,5.74828666
66.215498,6.164414,5.77910596,0.620731857,5.77296558,5.75331015,5.74714221
66.22599,5,5.77818795,-0.88214962,5.77205905,5.75215513,5.74599846
66.236481,5.19615242,5.77727447,-0.762313618,5.77115702,5.75100097,5.74485553
66.246973,5.83095189,5.77636543,0.233637459,5.77025937,5.74984745,5.7437132
66.257464,5.38516481,5.77546108,-0.624736962,5.76936637,5.74869481,5.74257169
66.267956,6.32455532,5.77456132,0.741615803,5.76847793,5.74754281,5.74143079
66.278448,5.74456265,5.77366642,-0.170598269,5.76759429,5.74639156,5.74029059
66.288939,5.56776436,5.77277654,-0.452782705,5.76671565,5.74524119,5.73915122
66.299431,6.78232998,5.77189152,1.00520568,5.76584182,5.74409147,5.73801245
66.309922,5.38516481,5.77101163,-0.621165693,5.76497307,5.74294261,5.73687451
66.320414,6.164414,5.77013677,0.627914991,5.76410931,5.74179441,5.73573717
66.330906,6.08276253,5.76926713,0.559906602,5.76325074,5.74064696,5.73460055
66.341397,5.47722558,5.76840289,-0.53960848,5.76239752,5.73950039,5.73346475
66.351889,5.29150262,5.76754398,-0.689957504,5.76154959,5.73835448,5.73232956
66.36238,5,5.76669067,-0.875608743,5.76070722,5.73720943,5.7311952
66.372872,5.65685425,5.7658429,-0.330134292,5.75987036,5.73606504,5.73006146
66.383364,5.56776436,5.76500086,-0.444113158,5.75903918,5.73492141,5.72892843
66.393855,5.65685425,5.76416474,-0.327582796,5.75821388,5.73377865,5.72779623
66.404347,6.164414,5.76333449,0.633308388,5.75739442,5.73263656,5.72666464
66.414838,5.56776436,5.76251039,-0.441300381,5.75658106,5.73149533,5.72553389
66.42533,6.4807407,5.7616924,0.847967157,5.75577378,5.73035476,5.72440375
66.435822,5.91607978,5.76088072,0.393953119,5.75497278,5.72921496,5.72327433
66.446313,4.79583152,5.76007556,-0.981959286,5.75417825,5.72807604,5.72214575
66.456805,6.164414,5.7592769,0.636503815,5.75339019,5.72693777,5.72101779
66.467296,5.47722558,5.75848501,-0.530338981,5.75260886,5.72580038,5.71989066
66.477788,5.38516481,5.75769989,-0.610356521,5.75183427,5.72466366,5.71876415
66.48828,4.47213595,5.75692179,-1.13348394,5.75106665,5.7235277,5.71763837
66.498771,6.08276253,5.75615114,0.571499246,5.75030646,5.72239262,5.71651342
66.509263,5.09901951,5.75538772,-0.810165541,5.74955346,5.7212582,5.7153891
66.519754,5.09901951,5.75463181,-0.809698895,5.74880793,5.72012466,5.71426562
66.530246,5.83095189,5.75388345,0.277612044,5.74806992,5.71899179,5.71314276
66.540738,5.56776436,5.75314286,-0.430556028,5.74733964,5.71785969,5.71202063
66.551229,5.19615242,5.75241028,-0.745826962,5.74661734,5.71672847,5.71089934
66.561721,5.19615242,5.75168575,-0.745341083,5.74590306,5.71559792,5.70977868
66.572212,6.08276253,5.75096959,0.576014703,5.74519711,5.71446825,5.70865886
66.582704,5.29150262,5.75026185,-0.67731767,5.74449955,5.71333924,5.70753967
66.593196,6,5.74956278,0.500437029,5.74381063,5.71221102,5.70642121
66.603687,5.83095189,5.74887265,0.286494755,5.74313061,5.71108367,5.7053036
66.614179,5.47722558,5.74819153,-0.520543904,5.74245958,5.709957,5.70418662
66.62467,5.47722558,5.74751976,-0.519898247,5.74179786,5.70883121,5.70307049
66.635162,5.91607978,5.74685743,0.411366444,5.74114555,5.70770609,5.70195499
66.645654,5.56776436,5.74620483,-0.422422139,5.74050293,5.70658175,5.70084023
66.656145,5.56776436,5.74556224,-0.421660855,5.73987031,5.70545829,5.69972631
66.666637,6.78232998,5.74492978,1.01852845,5.73924778,5.70433551,5.69861303
66.677128,6.92820323,5.74430783,1.08806958,5.73863572,5.70321362,5.6975006
66.68762,5.91607978,5.7436965,0.415190655,5.73803427,5.7020924,5.69638881
66.698112,6.08276253,5.74309613,0.582809057,5.73744374,5.70097196,5.69527776
66.708603,4.58257569,5.7425074,-1.07700125,5.73686482,5.69985241,5.69416756
66.719095,5.38516481,5.74193025,-0.597298452,5.73629746,5.69873353,5.693058
66.729586,5.47722558,5.74136497,-0.513944935,5.73574194,5.69761555,5.6919493
66.740078,6.32455532,5.74081176,0.764031126,5.73519846,5.69649824,5.69084123
66.75057,6,5.74027097,0.509636171,5.73466738,5.69538172,5.68973392
66.761061,6,5.73974299,0.510153912,5.73414907,5.69426609,5.68862745
66.771553,6.63324958,5.73922803,0.945527129,5.73364377,5.69315114,5.68752163
66.782044,5.29150262,5.73872654,-0.668748022,5.7331519,5.69203708,5.68641667
66.792536,5.56776436,5.73823878,-0.412885475,5.73267374,5.6909237,5.68531235
66.803028,5.09901951,5.73776516,-0.799215645,5.7322097,5.68981111,5.68420879
66.813519,5.19615242,5.73730611,-0.735631488,5.73176021,5.68869942,5.68310608
66.824011,5.56776436,5.73686193,-0.411214746,5.73132556,5.6875884,5.68200402
66.834502,6.08276253,5.73643312,0.588497591,5.73090625,5.68647828,5.68090282
66.844994,5.29150262,5.73602001,-0.66672137,5.73050263,5.68536885,5.67980227
66.855486,6,5.73562308,0.51417596,5.73011517,5.68426021,5.67870247
66.865977,4.89897949,5.73524283,-0.914474355,5.72974436,5.68315246,5.67760354
66.876469,6.244998,5.73487965,0.714225696,5.7293906,5.6820454,5.67650526
66.88696,5.47722558,5.7345341,-0.507255881,5.72905445,5.68093923,5.67540784
66.897452,5.56776436,5.73420662,-0.407973356,5.72873635,5.67983376,5.67431107
66.907944,5.56776436,5.73389777,-0.407594659,5.72843686,5.67872908,5.67321507
66.918435,6.164414,5.73360842,0.656357813,5.72815686,5.67762529,5.67211993
66.928927,6.164414,5.73333935,0.656562753,5.72789712,5.6765222,5.67102544
66.939418,5.65685425,5.73309068,-0.276109462,5.72765776,5.67542,5.66993182
66.94991,5.74456265,5.73286298,0.108164978,5.72743936,5.6743185,5.66883886
66.960402,5.91607978,5.73265691,0.428278963,5.72724256,5.67321779,5.66774666
66.970893,5.83095189,5.73247315,0.31381323,5.72706806,5.67211799,5.66665533
66.981385,6.32455532,5.73231235,0.769573236,5.72691652,5.67101888,5.66556466
66.991876,6.32455532,5.73217527,0.769662297,5.72678866,5.66992067,5.66447486
67.002368,6.4807407,5.73206261,0.865261859,5.72668523,5.66882316,5.66338573
67.01286,6.4807407,5.73197518,0.865312383,5.726607,5.66772644,5.66229735
67.023351,5.56776436,5.73191378,-0.405153568,5.7265548,5.66663063,5.66120986
67.033843,5.38516481,5.73187924,-0.588824618,5.72652945,5.66553552,5.66012302
67.044334,5.83095189,5.73187245,0.314768881,5.72653183,5.66444131,5.65903706
67.054826,5.29150262,5.73189431,-0.663620141,5.72656287,5.6633478,5.65795176
67.065318,5.91607978,5.73194579,0.429108366,5.72662351,5.66225509,5.65686724
67.075809,6.08276253,5.73202787,0.592228554,5.72671474,5.66116329,5.65578359
67.086301,5.19615242,5.7321416,-0.732112815,5.72683762,5.66007218,5.6547006
67.096792,5.38516481,5.73228803,-0.589171642,5.7269932,5.65898199,5.6536185
67.107284,5.56776436,5.73246833,-0.405837365,5.72718263,5.65789249,5.65253706
67.117776,6,5.73268366,0.517026441,5.7274071,5.65680381,5.6514564
67.128267,5,5.73293523,-0.856116363,5.7276678,5.65571603,5.65037662
67.138759,5.65685425,5.73322605,-0.276354485,5.72796777,5.65462895,5.64929751
67.14925,6.08276253,5.73355586,0.590937108,5.72830672,5.65354278,5.64821928
67.159742,5.19615242,5.73392614,-0.733330565,5.72868613,5.65245732,5.64714172
67.170234,5.38516481,5.73433833,-0.590909062,5.72910746,5.65137267,5.64606494
67.180725,5.83095189,5.73479393,0.310093479,5.72957221,5.65028893,5.64498904
67.191217,5.65685425,5.73529466,-0.280072152,5.7300821,5.64920589,5.64391382
67.201708,6.32455532,5.73584212,0.767276481,5.73063872,5.64812377,5.64283948
67.2122,5.09901951,5.73643821,-0.798385052,5.73124397,5.64704236,5.64176582
67.222692,6.32455532,5.73708473,0.766466303,5.73189968,5.64596176,5.64069294
67.233183,6.55743852,5.73778358,0.905347969,5.73260772,5.64488207,5.63962095
67.243675,5.29150262,5.73853696,-0.668606262,5.73337031,5.64380309,5.63854964
67.254166,5.83095189,5.73934687,0.302663214,5.73418945,5.64272503,5.63747921
67.264658,4.58257569,5.74021576,-1.07593683,5.73506757,5.64164768,5.63640946
67.27515,5.19615242,5.74114592,-0.738236747,5.736007,5.64057114,5.6353405
67.285641,5.83095189,5.74213977,0.298013633,5.73701013,5.63949552,5.63427243
67.296133,6,5.74320014,0.50675424,5.73807981,5.63842061,5.63320504
67.306624,5.09901951,5.74432961,-0.803311954,5.73921862,5.63734662,5.63213855
67.317116,6.40312424,5.74553131,0.810921034,5.74042969,5.63627335,5.63107273
67.327608,5.38516481,5.74680824,-0.601367964,5.741716,5.63520089,5.63000771
67.338099,5.65685425,5.7481635,-0.302174199,5.74308069,5.63412935,5.62894358
67.348591,5.38516481,5.74960314,-0.603687277,5.7445298,5.63305853,5.62788013
67.359082,6,5.75112985,0.498868874,5.74606602,5.63198862,5.62681758
67.369574,5.83095189,5.75274639,0.279652463,5.74769212,5.63091944,5.62575572
67.380066,5.38516481,5.7544567,-0.607693915,5.74941203,5.62985107,5.62469465
67.390557,5.74456265,5.75626489,-0.108176905,5.75122987,5.62878363,5.62363447
67.401049,5.09901951,5.75817586,-0.81188444,5.75315054,5.62771691,5.62257499
67.41154,5.56776436,5.76019405,-0.438668087,5.75517849,5.62665111,5.6215164
67.422032,5.56776436,5.76232497,-0.441090248,5.75731923,5.62558603,5.62045851
67.432524,6.244998,5.76457383,0.693126376,5.75957797,5.62452178,5.61940141
67.443015,5.83095189,5.76694613,0.252993612,5.76196022,5.62345845,5.61834521
67.453507,5.56776436,5.76944842,-0.449092481,5.76447254,5.62239584,5.6172897
67.463998,5.29150262,5.77208669,-0.693241713,5.76712092,5.62133416,5.6162351
67.47449,6.244998,5.77486833,0.685660022,5.76991275,5.6202732,5.61518119
67.484982,6.40312424,5.7778004,0.790774199,5.77285511,5.61921307,5.61412808
67.495473,5.65685425,5.7808904,-0.352187658,5.77595548,5.61815386,5.61307587
67.505965,6.244998,5.78414719,0.678859932,5.77922275,5.61709539,5.61202436
67.516456,6.32455532,5.78757902,0.73278667,5.78266516,5.61603783,5.61097375
67.526948,6.244998,5.79119596,0.673648308,5.78629281,5.61498101,5.60992385
67.53744,6.164414,5.79500777,0.607787983,5.79011545,5.61392502,5.60887475
67.547931,5.83095189,5.79902485,0.178681412,5.79414348,5.61286995,5.60782655
67.558423,5.91607978,5.80326202,0.335883552,5.79839175,5.61181562,5.60677905
67.568914,6,5.80773679,0.438478291,5.80287777,5.61076221,5.60573246
67.579406,5.47722558,5.81245594,-0.578990818,5.80760834,5.60970954,5.60468657
67.589898,5.91607978,5.81743337,0.31408027,5.81259734,5.60865769,5.6036415
67.600389,5.65685425,5.8226839,-0.407221868,5.81785963,5.60760678,5.60259732
67.610881,6.08276253,5.82822507,0.504517058,5.82341275,5.6065566,5.60155386
67.621372,6.08276253,5.83407357,0.498687242,5.8292734,5.60550736,5.6005113
67.631864,5.65685425,5.84024965,-0.428246892,5.83546186,5.60445885,5.59946945
67.642356,5.74456265,5.8467734,-0.319704171,5.84199821,5.60341117,5.59842841
67.652847,6.08276253,5.85366642,0.478639859,5.84890407,5.60236443,5.59738828
67.663339,6.164414,5.86095406,0.550871981,5.85620483,5.60131843,5.59634886
67.67383,6,5.86866098,0.362407258,5.86392514,5.60027336,5.59531035
67.684322,5.47722558,5.87681681,-0.632132296,5.87209466,5.59922902,5.59427256
67.694814,5.91607978,5.88545142,0.175009606,5.88074327,5.59818553,5.59323558
67.705305,5.83095189,5.89459709,-0.252279999,5.88990329,5.59714297,5.59219951
67.715797,5.74456265,5.90429162,-0.399661078,5.89961254,5.59610115,5.59116415
67.726288,5.65685425,5.91457244,-0.507659526,5.90990846,5.59506027,5.59012971
67.73678,6.32455532,5.92548427,0.631720708,5.9208358,5.59402012,5.58909599
67.747272,4.69041576,5.93707286,-1.116538,5.93244036,5.59298082,5.58806308
67.757763,5.47722558,5.94938808,-0.687140818,5.94477202,5.59194246,5.58703109
67.768255,5.83095189,5.96248809,-0.362679186,5.95788899,5.59090484,5.58599981
67.778746,4.24264069,5.97646858,-1.31674899,5.97188701,5.58986816,5.58496945
67.789238,5.47722558,5.9913742,-0.717041577,5.98681076,5.58883222,5.58393982
67.79973,5.38516481,6.00727359,-0.788738729,6.00272892,5.58779713,5.582911
67.810221,5.83095189,6.02424766,-0.43965414,6.01972244,5.58676298,5.5818831
67.820713,7.81024968,6.04239091,1.3296085,6.03788588,5.58572957,5.58085592
67.831204,5.47722558,6.06180071,-0.764575134,6.05731666,5.58469711,5.57982966
67.841696,5.74456265,6.08106744,-0.580090333,6.07660411,5.58366539,5.57880413
67.852188,5.19615242,6.10337132,-0.95248039,6.09893076,5.58263452,5.57777942
67.862679,7.41619849,6.12731573,1.13528973,6.12289894,5.5816046,5.57675563
67.873171,6.08276253,6.15305927,-0.265135316,6.14866733,5.58057542,5.57573256
67.883662,6.164414,6.18076904,-0.127886801,6.17640311,5.57954719,5.57471042
67.894154,5.47722558,6.21064294,-0.856397898,6.20630427,5.57851971,5.57368901
67.904646,6.164414,6.24289457,-0.28014384,6.23858453,5.57749307,5.57266842
67.915137,6.63324958,6.27776367,0.596226392,6.27348372,5.57646738,5.57164875
67.925629,6.63324958,6.31553088,0.563665416,6.31128262,5.57544245,5.57062982
67.93612,6.244998,6.35649888,-0.333917482,6.35228404,5.57441846,5.56961181
67.946612,6.4807407,6.40102638,0.282337249,6.39684683,5.57339523,5.56859453
67.957104,6.4807407,6.4495086,0.176726057,6.44536638,5.57237284,5.56757808
67.967595,7.34846923,6.50239495,0.91982296,6.49829226,5.57135141,5.56656256
67.978087,7.34846923,6.56021449,0.887837113,6.55615373,5.57033072,5.56554777
67.988578,7.14142843,6.62370555,0.719529626,6.6196894,5.56931099,5.5645339
67.99907,7,6.6936248,0.553511697,6.68965622,5.56829202,5.56352078
68.009562,8.18535277,6.77063958,1.18941717,6.76672167,5.5672739,5.56250848
68.020053,7.21110255,6.85568608,0.596168155,6.85182223,5.56625673,5.56149711
68.030545,6.55743852,6.94989434,-0.626462942,6.94608822,5.56524032,5.56048649
68.041036,7.61577311,7.05457797,0.749129588,7.05083358,5.56422486,5.55947679
68.051528,7.81024968,7.17139002,0.799286965,7.16771178,5.56321016,5.55846783
68.06202,7.48331477,7.30238715,0.42535588,7.29877994,5.56219632,5.5574597
68.072511,7.41619849,7.45027298,-0.184592777,7.4467423,5.56118343,5.55645251
68.083003,8.88819442,7.61879384,1.12667678,7.61534606,5.5601713,5.55544606
68.093494,8.42614977,7.81315214,0.782941652,7.8097948,5.55916012,5.55444054
68.103986,9.11043358,8.04084597,1.03420869,8.03758822,5.55814971,5.55343576
68.114478,9.59166305,8.31239227,1.13104853,8.30924531,5.55714016,5.55243182
68.124969,9.8488578,8.64216654,1.098495,8.63914384,5.55613156,5.55142881
68.135461,10.8166538,9.04890783,1.32956609,9.046025,5.55512373,5.55042655
68.145952,10.3923048,9.55497105,0.915059448,9.55224466,5.55411686,5.54942523
68.156444,12.489996,10.1847255,1.51831172,10.1821712,5.55311075,5.54842465
68.166936,12.6885775,10.9608555,1.3144284,10.9584854,5.5521055,5.54742491
68.177427,13.7840488,11.9000675,1.37258195,11.8978874,5.55110121,5.54642611
68.187919,15.132746,13.0091165,1.45726782,13.0071249,5.55009768,5.54542806
68.19841,16.3095064,14.2825885,1.42369867,14.280777,5.54909512,5.54443094
68.208902,16.3095064,15.7067075,0.776401292,15.7050625,5.54809332,5.54343457
68.219394,18.1107703,17.2301391,0.938419533,17.2286415,5.54709239,5.54243905
68.229885,19.0262976,18.7940087,0.48196353,18.7926377,5.54609242,5.54144447
68.240377,20.0249844,20.3165224,-0.539942598,20.3152558,5.54509322,5.54045064
68.250868,21.4941853,21.6848975,-0.436706108,21.6837124,5.54409498,5.53945775
68.26136,22.3606798,22.7562845,-0.628971191,22.7551567,5.54309751,5.53846561
68.271852,21.7715411,23.3795023,-1.26805412,23.378406,5.54210091,5.53747432
68.282343,22.5610283,23.4471426,-0.941336423,23.4460509,5.54110527,5.53648397
68.292835,22.0454077,22.9473184,-0.949689785,22.9462044,5.54011041,5.53549438
68.303326,22.0680765,21.9700484,0.313094373,21.9688864,5.53911651,5.53450573
68.313818,20.1494417,20.6612904,-0.715436047,20.6600564,5.53812338,5.53351783
68.32431,19.3390796,19.1684155,0.413115068,19.1670872,5.53713112,5.53253079
68.334801,18.6547581,17.6109072,1.0216902,17.6094633,5.53613983,5.53154469
68.345293,16.4924225,16.0764436,0.644964288,16.0748638,5.53514931,5.53055935
68.355784,15.5884573,14.6284123,0.979818863,14.6266784,5.53415976,5.52957495
68.366276,14.9331845,13.3105148,1.27384053,13.3086117,5.53317099,5.52859131
68.376768,14.0356688,12.1504368,1.37303751,12.1483547,5.53218309,5.52760853
68.387259,12.8452326,11.1602859,1.29805496,11.1580219,5.53119615,5.52662669
68.397751,11.5325626,10.3375089,1.09318514,10.3350678,5.53021,5.52564562
68.408242,12.328828,9.66818276,1.63114844,9.66557602,5.52922481,5.52466549
68.418734,8.94427191,9.13486385,-0.436568374,9.13210842,5.5282404,5.52368613
68.429226,9.69535971,8.70753116,0.993895648,8.70464415,5.52725687,5.52270762
68.439717,9.11043358,8.36134327,0.865500037,8.35834053,5.52627431,5.52173006
68.450209,8.1240384,8.07675212,0.217454088,8.0736475,5.52529253,5.52075327
68.4607,7.54983444,7.83858502,-0.537355178,7.8353901,5.52431171,5.51977742
68.471192,7.28010989,7.6355683,-0.596203328,7.63229255,5.52333169,5.51880234
68.481684,7.61577311,7.4597298,0.395023174,7.45638105,5.52235254,5.51782813
68.492175,6.78232998,7.30546808,-0.723282861,7.3020529,5.52137436,5.51685486
68.502667,7.48331477,7.16877963,0.560834332,7.16530369,5.52039696,5.51588236
68.513158,6,7.04680197,-1.02313341,7.04327027,5.51942054,5.51491082
68.52365,7.28010989,6.9373333,0.585471258,6.93375034,5.51844491,5.51394004
68.534142,6.63324958,6.83867669,-0.453240673,6.83504657,5.51747015,5.51297012
68.544633,6.78232998,6.7494537,0.181318182,6.74578016,5.51649637,5.51200116
68.555125,6.92820323,6.6684934,0.509617341,6.66477986,5.51552337,5.51103297
68.565616,6.08276253,6.59483477,-0.715592227,6.59108439,5.51455135,5.51006574
68.576108,6.78232998,6.52762723,0.50468084,6.52384292,5.51358012,5.50909928
68.5866,6.63324958,6.4661569,0.408769719,6.46234131,5.51260977,5.50813368
68.597091,5.56776436,6.40980361,-0.917626964,6.4059592,5.51164039,5.50716904
68.607583,6.32455532,6.35801183,-0.182911218,6.35414086,5.51067181,5.50620517
68.618074,5.74456265,6.31031458,-0.752164833,6.30641912,5.5097042,5.50524227
68.628566,6.4807407,6.26634958,0.463023888,6.26243157,5.50873738,5.50428013
68.639058,6.164414,6.22577179,-0.247705032,6.22183305,5.50777145,5.50331887
68.649549,6.70820393,6.18815674,0.721142975,6.18419888,5.5068065,5.50235856
68.660041,6.4807407,6.15321689,0.572296962,6.14924138,5.50584234,5.50139903
68.670532,6,6.1207099,-0.347433303,6.11671811,5.50487915,5.50044046
68.681024,5.91607978,6.09040852,-0.41752693,6.08640171,5.50391677,5.49948267
68.691516,5.83095189,6.06211878,-0.480798172,6.05809812,5.50295527,5.49852575
68.702007,5.83095189,6.03566707,-0.452454606,6.03163364,5.50199475,5.49756979
68.712499,5.38516481,6.01089087,-0.791028487,6.00684568,5.50103502,5.49661461
68.72299,6.244998,5.98765363,0.507291209,5.98359759,5.50007628,5.4956604
68.733482,5.74456265,5.96582395,-0.470384206,5.96175792,5.49911833,5.49470696
68.743974,5.74456265,5.94528976,-0.4480258,5.94121456,5.49816127,5.4937544
68.754465,5.47722558,5.92594972,-0.669868749,5.92186606,5.4972052,5.4928028
68.764957,5.74456265,5.90770686,-0.403911146,5.90361545,5.49624992,5.49185199
68.775448,5.38516481,5.89048028,-0.710855449,5.88638175,5.49529562,5.49090214
68.78594,6,5.87419006,0.35469697,5.87008502,5.49434213,5.48995307
68.796432,6.164414,5.85876832,0.552852317,5.85465732,5.49338953,5.48900488
68.806923,5,5.84415309,-0.918778043,5.84003665,5.49243791,5.48805766
68.817415,5.38516481,5.83028381,-0.667172394,5.82616241,5.49148709,5.48711122
68.827906,5.91607978,5.81711046,0.314593898,5.81298455,5.49053725,5.48616575
68.838398,5.65685425,5.8045824,-0.384354205,5.80045241,5.48958822,5.48522106
68.84889,5.65685425,5.79268271,-0.368549124,5.78854904,5.48864009,5.48427726
68.859381,6.4807407,5.78134257,0.836300263,5.7772056,5.48769293,5.48333442
68.869873,5.91607978,5.7705231,0.38151891,5.76638318,5.48674659,5.48239237
68.880364,6.70820393,5.76019253,0.973658772,5.75604996,5.48580123,5.4814513
68.890856,5.91607978,5.75031775,0.407138839,5.74617285,5.48485667,5.48051101
68.901348,5.65685425,5.74087103,-0.289856486,5.73672408,5.48391301,5.4795716
68.911839,5.65685425,5.73182669,-0.273810957,5.72767796,5.48297034,5.47863316
68.922331,5.56776436,5.72315849,-0.394200624,5.71900823,5.48202848,5.47769552
68.932822,5.74456265,5.7148454,0.172386898,5.71069384,5.4810876,5.47675884
68.943314,5.74456265,5.70686482,0.194159286,5.70271218,5.48014753,5.47582296
68.953806,5.29150262,5.69919805,-0.638510316,5.69504454,5.47920836,5.47488797
68.964297,6.08276253,5.69182768,0.625247833,5.68767351,5.47827018,5.47395394
68.974789,5.19615242,5.68473548,-0.698987168,5.68058083,5.47733281,5.47302071
68.98528,5.19615242,5.67790717,-0.694085549,5.67375221,5.47639643,5.47208846
68.995772,5.09901951,5.67132686,-0.75650998,5.66717175,5.47546086,5.471157
69.006264,5.83095189,5.66498164,0.407394471,5.66082654,5.47452619,5.47022642
69.016755,6,5.65885941,0.58407242,5.65470447,5.47359251,5.46929682
69.027247,4.89897949,5.65294715,-0.868313117,5.64879251,5.47265964,5.46836802
69.037738,6,5.64723496,0.593940265,5.64308074,5.47172777,5.4674402
69.04823,6.32455532,5.64171138,0.826343717,5.63755771,5.47079671,5.46651317
69.058722,5.47722558,5.6363722,-0.398931855,5.6322192,5.46986655,5.46558703
69.069213,5.19615242,5.63120617,-0.659586045,5.62705396,5.46893738,5.46466187
69.079705,4.89897949,5.62620086,-0.852772758,5.62204953,5.46800903,5.46373751
69.090196,5.91607978,5.62134929,0.54289087,5.61719894,5.46708168,5.46281413
69.100688,5.65685425,5.61664309,0.200527213,5.61249382,5.46615514,5.46189154
69.11118,5.56776436,5.61207573,-0.21050265,5.60792762,5.4652295,5.46096985
69.121671,6.164414,5.60764104,0.746172205,5.60349419,5.46430486,5.46004914
69.132163,5.47722558,5.60333199,-0.355114655,5.59918646,5.46338104,5.45912923
69.142654,5.29150262,5.59914356,-0.554653886,5.59499943,5.46245821,5.4582103
69.153146,5.56776436,5.59506943,-0.165242453,5.59092677,5.4615362,5.45729218
69.163638,5.91607978,5.59110483,0.570065745,5.58696371,5.4606151,5.45637495
69.174129,4.89897949,5.58724521,-0.82961782,5.5831057,5.45969499,5.4554587
69.184621,5.56776436,5.58348521,-0.12538282,5.57934736,5.45877571,5.45454325
69.195112,5.56776436,5.57982118,-0.109803527,5.57568505,5.45785742,5.45362879
69.205604,5.38516481,5.57624826,-0.437130937,5.57211391,5.45693995,5.45271513
69.216096,5.91607978,5.57276291,0.585932482,5.56863038,5.45602339,5.45180237
69.226587,5.83095189,5.56936173,0.511458858,5.56523108,5.45510783,5.4508906
69.237079,5.19615242,5.56604056,-0.608184299,5.56191183,5.45419309,5.44997963
69.24757,4.89897949,5.56279672,-0.814749797,5.55866995,5.45327935,5.44906964
69.258062,4.79583152,5.55962641,-0.873953594,5.55550164,5.45236644,5.44816047
69.268554,4.69041576,5.55652775,-0.930651377,5.55240502,5.45145444,5.44725219
69.279045,5.83095189,5.55349951,0.526737494,5.54937887,5.45054343,5.4463449
69.289537,5.19615242,5.55053607,-0.595301305,5.54641755,5.44963325,5.44543842
69.300028,5.38516481,5.54763543,-0.403076449,5.54351906,5.44872407,5.44453292
69.31052,6.164414,5.54479463,0.787159055,5.54068044,5.44781572,5.44362824
69.321012,6,5.54201162,0.67674839,5.53789964,5.44690828,5.44272446
69.331503,6.244998,5.53928446,0.840067577,5.53517473,5.44600184,5.44182166
69.341995,5.83095189,5.53661056,0.542532339,5.53250309,5.44509623,5.44091968
69.352486,5.56776436,5.5339884,0.183782366,5.52988323,5.44419162,5.44001868
69.362978,5.83095189,5.53141561,0.547299081,5.52731275,5.44328784,5.4391185
69.37347,5.56776436,5.52889061,0.197164273,5.52479008,5.44238498,5.43821923
69.383961,5.47722558,5.52641191,-0.221779932,5.52231374,5.44148312,5.43732094
69.394453,5,5.52397739,-0.723862826,5.5198816,5.44058209,5.43642346
69.404944,6.40312424,5.52158593,0.938902714,5.51749253,5.43968206,5.43552698
69.415436,5.56776436,5.51923557,0.220292512,5.51514459,5.43878286,5.43463132
69.425928,6.08276253,5.5169251,0.75222166,5.51283655,5.43788458,5.43373656
69.436419,5.65685425,5.51465337,0.37709532,5.51056726,5.43698731,5.43284278
69.446911,5.91607978,5.51241861,0.635343348,5.50833496,5.43609087,5.43194983
69.457402,5.83095189,5.51022001,0.56633196,5.50613883,5.43519543,5.43105787
69.467894,5,5.50805592,-0.712780416,5.50397723,5.43430082,5.43016673
69.478386,6.08276253,5.50592542,0.759497934,5.50184923,5.43340714,5.4292765
69.488877,4.58257569,5.50382882,-0.959819319,5.49975513,5.43251446,5.42838726
69.499369,5.38516481,5.50176351,-0.341465529,5.49769235,5.43162262,5.42749884
69.50986,5.19615242,5.49972872,-0.550977583,5.49566008,5.43073178,5.42661141
69.520352,5.47722558,5.49772308,-0.143169496,5.49365698,5.42984178,5.42572481
69.530844,5.83095189,5.49574586,0.578969805,5.49168231,5.4289527,5.42483911
69.541335,5.56776436,5.49379635,0.271970603,5.48973536,5.42806462,5.42395441
69.551827,5.38516481,5.49187333,-0.326662712,5.4878149,5.42717739,5.42307053
69.562318,5.47722558,5.48997635,-0.112919312,5.48592047,5.42629116,5.42218765
69.57281,5.91607978,5.48810424,0.654198399,5.48405094,5.42540577,5.42130559
69.583302,5.29150262,5.48625644,-0.441309203,5.48220571,5.4245213,5.42042445
69.593793,5.56776436,5.48443238,0.288672796,5.48038424,5.42363785,5.4195443
69.604285,5,5.48263102,-0.694716506,5.47858547,5.42275523,5.41866497
69.614776,6.08276253,5.48085204,0.775828906,5.47680907,5.42187362,5.41778664
69.625268,5.65685425,5.47909443,0.42161572,5.47505406,5.42099285,5.41690914
69.63576,5.29150262,5.47735776,-0.431109193,5.47331998,5.42011301,5.41603255
69.646251,5.38516481,5.47564157,-0.300793563,5.4716064,5.41923417,5.41515696
69.656743,5.09901951,5.47394498,-0.612311573,5.4699124,5.41835618,5.4142822
69.667234,6.164414,5.47226773,0.831953287,5.46823775,5.4174792,5.41340844
69.677726,5.91607978,5.47060898,0.667435991,5.4665816,5.41660306,5.4125355
69.688218,5.47722558,5.46896837,0.0908691549,5.4649436,5.41572785,5.41166348
69.698709,5.56776436,5.46734594,0.316888667,5.46332377,5.41485365,5.41079246
69.709201,5.74456265,5.46574084,0.528035801,5.46172127,5.4139803,5.40992227
69.719692,5.09901951,5.46415255,-0.604262393,5.46013559,5.41310795,5.40905308
69.730184,4.69041576,5.46258033,-0.878728952,5.45856597,5.41223646,5.40818473
69.740676,5.65685425,5.46102389,0.442527236,5.45701214,5.41136589,5.40731729
69.751167,5.29150262,5.45948298,-0.409854064,5.45547382,5.41049633,5.40645085
69.761659,5.56776436,5.45795688,0.331372117,5.45395032,5.40962762,5.40558524
69.77215,5.38516481,5.45644552,-0.266984477,5.45244156,5.40875992,5.40472063
69.782642,5.09901951,5.45494822,-0.59659761,5.45094685,5.40789307,5.40385686
69.793134,5.29150262,5.45346478,-0.40244522,5.449466,5.40702715,5.40299401
69.803625,5.65685425,5.45199498,0.452613823,5.44799879,5.40616225,5.40213216
69.814117,4.89897949,5.4505382,-0.742669993,5.44654461,5.40529819,5.40127115
69.824608,4.35889894,5.44909441,-1.04412426,5.4451034,5.40443515,5.40041113
69.8351,5.19615242,5.447663,-0.501508307,5.44367458,5.40357296,5.39955196
69.845592,5,5.44624382,-0.668014837,5.44225797,5.4027117,5.39869371
69.856083,5.38516481,5.4448367,-0.244278318,5.44085343,5.40185145,5.39783645
69.866575,5.38516481,5.44344109,-0.241404819,5.43946039,5.40099206,5.39698004
69.877066,6.164414,5.44205698,0.849915889,5.43807885,5.40013368,5.39612463
69.887558,5.83095189,5.44068384,0.624714376,5.43670827,5.39927615,5.39527006
69.89805,5.47722558,5.43932155,0.194689571,5.43534853,5.39841956,5.39441642
69.908541,5.65685425,5.43797003,0.46785064,5.43399957,5.39756398,5.39356377
69.919033,5.74456265,5.43662909,0.554917611,5.43266118,5.39670926,5.39271197
69.929524,5.65685425,5.43529838,0.470697219,5.43133301,5.39585555,5.39186118
69.940016,6.32455532,5.43397741,0.943704357,5.43001458,5.39500269,5.39101122
69.950508,5.74456265,5.43266608,0.558477002,5.4287058,5.39415078,5.39016219
69.960999,5.29150262,5.43136432,-0.373980884,5.42740657,5.39329988,5.38931417
69.971491,5.47722558,5.43007167,0.217149499,5.42611644,5.39244983,5.38846698
69.981982,4.69041576,5.42878817,-0.859285988,5.42483545,5.3916008,5.38762081
69.992474,5.91607978,5.42751338,0.698975252,5.42356318,5.39075263,5.38677548
70.002966,4.58257569,5.42624724,-0.918515948,5.42229955,5.3899054,5.38593107
70.013457,5.38516481,5.42498969,-0.199561717,5.4210445,5.38905918,5.38508767
70.023949,6.55743852,5.4237403,1.06475266,5.41979761,5.38821383,5.38424512
70.03444,5.29150262,5.42249915,-0.361934419,5.41855894,5.38736949,5.38340357
70.044932,5.47722558,5.42126582,0.236558137,5.4173281,5.38652601,5.38256287
70.055424,5.09901951,5.42004029,-0.566586951,5.41610505,5.38568346,5.3817231
70.065915,5.74456265,5.41882249,0.570736499,5.41488973,5.38484194,5.38088434
70.076407,4.69041576,5.41761206,-0.852758057,5.41368176,5.38400128,5.38004642
70.086898,5.74456265,5.41640907,0.572846902,5.41248123,5.38316163,5.37920951
70.09739,6,5.41521315,0.764713573,5.41128776,5.38232285,5.37837346
70.107882,5.83095189,5.41402427,0.645699329,5.41010133,5.38148501,5.37753833
70.118373,4.89897949,5.41284241,-0.716842329,5.40892191,5.38064818,5.37670421
70.128865,5.74456265,5.41166741,0.576970742,5.40774934,5.37981222,5.37587094
70.139356,4.79583152,5.41049922,-0.784007457,5.40658357,5.37897728,5.37503868
70.149848,6.164414,5.40933742,0.868951427,5.4054242,5.3781432,5.37420727
70.16034,5.47722558,5.40818201,0.262761418,5.4042712,5.37731007,5.37337679
70.170831,5.74456265,5.40703298,0.580973032,5.40312457,5.37647795,5.37254732
70.181323,5.38516481,5.40589,-0.143962466,5.40198399,5.3756467,5.3717187
70.191814,5.38516481,5.40475317,-0.139958416,5.40084955,5.37481647,5.3708911
70.202306,5.38516481,5.40362216,-0.135857832,5.39972092,5.37398711,5.37006434
70.212798,4.89897949,5.40249698,-0.709589665,5.39859812,5.37315869,5.36923852
70.223289,4.69041576,5.40137763,-0.843185549,5.39748114,5.37233129,5.36841371
70.233781,5.29150262,5.4002638,-0.329789596,5.39636967,5.37150475,5.36758976
70.244272,4.58257569,5.3991556,-0.90364811,5.39526383,5.37067924,5.36676682
70.254764,6.164414,5.39805273,0.875420626,5.3941633,5.3698546,5.36594473
70.265256,4.89897949,5.3969552,-0.705673942,5.39306811,5.3690309,5.36512358
70.275747,5.47722558,5.39586302,0.285241224,5.39197826,5.36820822,5.36430343
70.286239,6.08276253,5.3947759,0.829449596,5.39089346,5.36738641,5.36348415
70.29673,5,5.39369395,-0.62745036,5.38981383,5.36656563,5.36266588
70.307222,5.91607978,5.3926169,0.723507348,5.38873909,5.36574571,5.36184846
70.317714,5.65685425,5.39154476,0.515082025,5.38766925,5.36492674,5.36103198
70.328205,5.29150262,5.39047755,-0.314602806,5.38660433,5.36410879,5.36021652
70.338697,4.58257569,5.38941506,-0.898242374,5.38554412,5.36329171,5.35940191
70.349188,5.09901951,5.38835745,-0.537901416,5.38448879,5.36247566,5.35858831
70.35968,6.244998,5.38730434,0.926117521,5.38343795,5.36166047,5.35777558
70.370172,6.08276253,5.38625575,0.834569816,5.38239163,5.36084623,5.35696378
70.380663,5.91607978,5.38521173,0.728606927,5.38134986,5.36003302,5.356153
70.391155,4.89897949,5.384172,-0.696557615,5.38031237,5.35922068,5.35534307
70.401646,5.56776436,5.38313669,0.429683225,5.3792793,5.35840937,5.35453417
70.412138,5.56776436,5.38210554,0.430881446,5.37825038,5.35759893,5.35372612
70.42263,5.91607978,5.38107859,0.731437755,5.37722566,5.35678943,5.35291901
70.433121,5.56776436,5.38005588,0.433253371,5.37620515,5.35598096,5.35211292
70.443613,5.65685425,5.37903714,0.527083585,5.37518862,5.35517337,5.35130768
70.454104,5.91607978,5.37802252,0.733523865,5.3741762,5.3543668,5.35050347
70.464596,5.19615242,5.37701177,-0.425275609,5.37316763,5.3535611,5.34970012
70.475088,4.89897949,5.37600491,-0.690670275,5.37216296,5.35275636,5.3488977
70.485579,6.32455532,5.37500201,0.97445026,5.37116223,5.35195264,5.34809631
70.496071,6.08276253,5.37400281,0.841878686,5.37016519,5.35114979,5.34729577
70.506562,5.19615242,5.37300603,-0.420539657,5.36917056,5.35034797,5.34649626
70.517054,6.32455532,5.37201427,0.975982097,5.36818095,5.34954703,5.34569761
70.527546,5.74456265,5.37102616,0.611176318,5.36719498,5.34874704,5.3448999
70.538037,5.38516481,5.37004173,0.122975901,5.36621269,5.34794808,5.3441032
70.548529,5.09901951,5.36906077,-0.519654943,5.36523385,5.34714999,5.34330738
70.55902,5.19615242,5.36808352,-0.414645753,5.36425872,5.34635293,5.34251257
70.569512,5.91607978,5.36710964,0.740925196,5.36328694,5.34555674,5.34171862
70.580004,5.19615242,5.36613916,-0.412294483,5.36231856,5.34476151,5.34092562
70.590495,4.89897949,5.36517215,-0.68278303,5.36135364,5.34396731,5.34013364
70.600987,6.08276253,5.36420838,0.847675735,5.36039195,5.34317399,5.33934252
70.611478,5.47722558,5.36324798,0.337605675,5.35943363,5.34238169,5.33855243
70.62197,5.83095189,5.36229075,0.684588307,5.35847845,5.34159027,5.3377632
70.632462,4.69041576,5.36133672,-0.819097648,5.35752648,5.34079981,5.33697491
70.642953,4.89897949,5.36038595,-0.679269067,5.35657776,5.34001038,5.33618765
70.653445,6.244998,5.35943823,0.941041854,5.35563208,5.33922182,5.33540125
70.663936,5.56776436,5.35849369,0.457461111,5.35468958,5.33843429,5.33461587
70.674428,5.91607978,5.35755213,0.747347074,5.35375004,5.33764765,5.33383137
70.68492,5.09901951,5.3566136,-0.507537277,5.35281352,5.33686196,5.3330478
70.695411,6.164414,5.35567815,0.89929742,5.35188008,5.33607729,5.33226526
70.705903,5.38516481,5.35474558,0.174411091,5.3509495,5.33529351,5.33148359
70.716394,4.47213595,5.35381602,-0.938978204,5.35002194,5.33451076,5.33070294
70.726886,4.89897949,5.35288928,-0.673728276,5.34909717,5.33372889,5.32992315
70.737378,6.4807407,5.3519654,1.06243838,5.34817526,5.33294798,5.32914432
70.747869,6.32455532,5.35104445,0.986666547,5.34725628,5.3321681,5.32836651
70.758361,5.38516481,5.35012621,0.187185984,5.34634,5.33138909,5.32758956
70.768852,5.83095189,5.3492109,0.694075638,5.34542664,5.33061112,5.32681364
70.779344,5.83095189,5.34829828,0.694732762,5.34451596,5.32983404,5.32603859
70.789836,5.65685425,5.34738839,0.556296556,5.34360799,5.32905791,5.32526449
70.800327,6.164414,5.34648128,0.90439633,5.3427028,5.32828281,5.32449141
70.810819,4.79583152,5.34557676,-0.741448065,5.34180019,5.32750859,5.32371921
70.82131,5.47722558,5.34467496,0.364075006,5.3409003,5.32673541,5.32294803
70.831802,6.32455532,5.34377571,0.990343178,5.34000295,5.32596311,5.32217772
70.842294,5.09901951,5.34287905,-0.493821363,5.33910818,5.32519176,5.32140835
70.852785,5.56776436,5.34198506,0.4751624,5.33821606,5.32442145,5.32064002
70.863277,5.38516481,5.34109353,0.209931605,5.3373264,5.32365203,5.31987255
70.873768,5.38516481,5.34020462,0.212038183,5.33643935,5.32288363,5.31910611
70.88426,6.08276253,5.33931813,0.86223222,5.33555472,5.32211613,5.31834054
70.894752,5,5.33843413,-0.581750919,5.33467257,5.32134958,5.31757593
70.905243,5.74456265,5.33755269,0.637973321,5.33379296,5.32058406,5.31681233
70.915735,5.74456265,5.33667361,0.638661911,5.33291571,5.31981943,5.31604962
70.926226,5.09901951,5.33579705,-0.486597918,5.33204097,5.31905583,5.31528792
70.936718,6.164414,5.33492281,0.910764069,5.33116855,5.31829312,5.31452711
70.94721,6.08276253,5.33405098,0.865281199,5.33029851,5.31753137,5.31376724
70.957701,6.244998,5.3331816,0.954890778,5.32943093,5.31677065,5.3130084
70.968193,5.74456265,5.33231451,0.642065527,5.32856562,5.31601082,5.31225043
70.978684,4.89897949,5.33144985,-0.657624794,5.32770275,5.31525202,5.31149349
70.989176,5.91607978,5.3305875,0.765174677,5.32684216,5.31449411,5.31073743
70.999668,5.47722558,5.32972746,0.384054836,5.32598388,5.31373717,5.30998232
71.010159,5.09901951,5.3288698,-0.479427044,5.32512798,5.31298125,5.30922823
71.020651,6.40312424,5.32801436,1.03687505,5.32427428,5.31222622,5.30847502
71.031142,5.56776436,5.32716127,0.490513087,5.32342293,5.31147223,5.30772284
71.041634,6.244998,5.32631037,0.958481937,5.32257376,5.31071913,5.30697154
71.052126,5.19615242,5.32546173,-0.359596034,5.32172684,5.30996699,5.30622119
71.062617,5.74456265,5.32461541,0.648033358,5.32088223,5.30921588,5.30547186
71.073109,5.83095189,5.32377125,0.712166162,5.32003977,5.30846566,5.30472341
71.0836,5.19615242,5.3229294,-0.35605755,5.31919962,5.30771648,5.30397599
71.094092,5.29150262,5.32208969,-0.174891593,5.31836159,5.30696818,5.30322945
71.104584,5.29150262,5.3212522,-0.17248065,5.31752577,5.30622085,5.30248386
71.115075,5.74456265,5.32041699,0.651264658,5.31669224,5.30547455,5.3017393
71.125567,5.65685425,5.31958391,0.580749806,5.31586082,5.30472915,5.30099562
71.136058,5.91607978,5.31875311,0.772869115,5.31503167,5.30398478,5.30025297
71.14655,5.47722558,5.31792444,0.399125466,5.31420464,5.3032413,5.2995112
71.157042,4.69041576,5.31709796,-0.791632616,5.3133798,5.30249878,5.29877038
71.167533,5.65685425,5.31627376,0.583592743,5.31255723,5.3017573,5.29803059
71.178025,6.164414,5.31545168,0.921391513,5.31173677,5.30101671,5.29729168
71.188516,5.19615242,5.31463189,-0.344208464,5.31091859,5.30027716,5.29655379
71.199008,6,5.31381427,0.828363286,5.31010257,5.29953849,5.29581679
71.2095,5,5.31299887,-0.559463022,5.30928877,5.2988008,5.29508075
71.219991,5.29150262,5.31218579,-0.143816434,5.30847727,5.29806413,5.29434573
71.230483,5.19615242,5.31137486,-0.339444313,5.30766793,5.29732837,5.29361159
71.240974,6.32455532,5.31056627,1.00697023,5.3068609,5.29659363,5.29287848
71.251466,5.74456265,5.30975986,0.659395771,5.30605606,5.29585979,5.29214626
71.261958,5,5.30895574,-0.555837875,5.3052535,5.29512692,5.29141499
71.272449,5.29150262,5.30815401,-0.129040253,5.30445331,5.29439508,5.29068475
71.282941,5.83095189,5.30735453,0.723600279,5.30365537,5.29366413,5.28995539
71.293432,4.24264069,5.30655749,-1.03146343,5.30285986,5.29293422,5.28922706
71.303924,5.29150262,5.30576277,-0.119415874,5.30206666,5.29220521,5.28849962
71.314416,5.65685425,5.30497049,0.593197911,5.30127589,5.29147716,5.28777313
71.324907,5.74456265,5.30418076,0.663612757,5.30048767,5.29075014,5.28704767
71.335399,5.19615242,5.30339347,-0.327476796,5.29970188,5.29002402,5.2863231
71.34589,5.65685425,5.30260885,0.595185181,5.29891875,5.28929894,5.28559955
71.356382,5.19615242,5.3018268,-0.32507595,5.29813818,5.28857475,5.28487689
71.366874,5.83095189,5.30104746,0.727945352,5.29736032,5.28785153,5.28415518
71.377365,5.47722558,5.30027099,0.420659699,5.29658532,5.28712935,5.28343451
71.387857,5.19615242,5.29949734,-0.321473046,5.29581313,5.28640806,5.28271472
71.398348,6,5.29872676,0.837420589,5.295044,5.2856878,5.28199596
71.40884,5.56776436,5.29795923,0.519427702,5.29427792,5.28496845,5.28127808
71.419332,5,5.29719498,-0.545155921,5.29351511,5.28425006,5.28056117
71.429823,4.79583152,5.29643426,-0.707532851,5.29275582,5.2835327,5.27984528
71.440315,5.19615242,5.29567705,-0.315475245,5.29200004,5.28281625,5.27913028
71.450806,5.91607978,5.2949237,0.788134556,5.29124811,5.28210083,5.2784163
71.461298,6,5.2941743,0.840134334,5.29050012,5.2813863,5.27770322
71.47179,5.83095189,5.29342918,0.73315941,5.2897564,5.28067275,5.27699109
71.482281,5.47722558,5.2926887,0.42957755,5.28901732,5.27996023,5.27627999
71.492773,4.79583152,5.29195309,-0.704358979,5.28828311,5.27924861,5.27556979
71.503264,6,5.29122289,0.84188901,5.28755429,5.27853802,5.2748606
71.513756,6.244998,5.29049844,0.976984933,5.28683122,5.27782834,5.27415231
71.524248,5.29150262,5.28978036,0.0415001537,5.28611452,5.27711962,5.27344498
71.534739,6.164414,5.28906939,0.935598533,5.28540492,5.27641194,5.27273867
71.545231,4.89897949,5.2883662,-0.624008582,5.2847031,5.27570516,5.27203326
71.555722,6.08276253,5.28767192,0.891678535,5.28401019,5.27499941,5.27132887
71.566214,5.56776436,5.2869877,0.529883628,5.28332733,5.27429456,5.27062538
71.576706,5.47722558,5.28631529,0.436932819,5.28265628,5.27359068,5.26992284
71.587197,5,5.285657,-0.5344689,5.28199936,5.27288784,5.26922133
71.597689,5.65685425,5.28501588,0.609785508,5.2813596,5.2721859,5.26852071
71.60818,5.47722558,5.2843965,0.439123075,5.28074159,5.27148499,5.26782112
71.618672,5,5.28380506,-0.532733574,5.28015153,5.27078498,5.26712242
71.629164,6.63324958,5.28325058,1.16189458,5.27959845,5.27008595,5.26642469
71.639655,5.74456265,5.28274823,0.679569285,5.27909753,5.26938794,5.26572798
71.650147,6.32455532,5.28231399,1.02090221,5.27866475,5.26869084,5.26503216
71.660638,5.83095189,5.28197062,0.740932708,5.27832289,5.26799478,5.26433737
71.67113,5.38516481,5.28174663,0.321586962,5.27810049,5.26729961,5.26364347
71.681622,6.164414,5.28167611,0.939541319,5.27803166,5.26660542,5.26295053
71.692113,5.09901951,5.28179722,-0.427525095,5.27815458,5.26591226,5.26225862
71.702605,6.164414,5.28214972,0.939289245,5.27850903,5.26522001,5.2615676
71.713096,5.38516481,5.28277079,0.319990653,5.27913224,5.26452878,5.26087761
71.723588,5.09901951,5.28369006,-0.42973311,5.28005383,5.26383847,5.26018852
71.73408,4.58257569,5.28492283,-0.838061535,5.28128914,5.26314912,5.25950038
71.744571,4.89897949,5.28646285,-0.622481618,5.2828319,5.2624608,5.25881328
71.755063,4.79583152,5.28827449,-0.701742806,5.28464644,5.26177339,5.25812706
71.765554,5.56776436,5.29028148,0.526766437,5.28665647,5.26108702,5.25744188
71.776046,5.91607978,5.29235588,0.789761931,5.28873393,5.26040155,5.25675758
71.786538,6,5.29430459,0.84005679,5.29068562,5.25971704,5.25607425
71.797029,5.47722558,5.29586857,0.425860316,5.29225229,5.25903357,5.25539195
71.807521,5.56776436,5.29675202,0.520588454,5.29313797,5.25835101,5.25471054
71.818012,5.19615242,5.29669529,-0.317084958,5.2930828,5.25766948,5.25403016
71.828504,6,5.29557336,0.839301282,5.2919617,5.25698886,5.25335068
71.838996,6.164414,5.29345382,0.933252476,5.28984231,5.2563092,5.25267215
71.849487,5.19615242,5.29055528,-0.307250472,5.28694336,5.25563058,5.25199465
71.859979,5.83095189,5.28719823,0.737396545,5.2835856,5.25495287,5.25131805
71.87047,5.65685425,5.28366923,0.610888716,5.28005574,5.25427619,5.25064248
71.880962,5.47722558,5.2801743,0.443904573,5.27655998,5.25360041,5.2499678
71.891454,5.19615242,5.27685394,-0.284080133,5.2732389,5.25292561,5.24929408
71.901945,5.19615242,5.27379362,-0.278641702,5.27017801,5.25225184,5.24862139
71.912437,5.83095189,5.27103581,0.74827541,5.26741984,5.25157897,5.2479496
71.922928,5.56776436,5.26859246,0.546966091,5.26497633,5.25090714,5.24727883
71.93342,5.91607978,5.26645158,0.805995163,5.2628355,5.25023621,5.24660896
71.943912,5.47722558,5.26458634,0.461128221,5.26097048,5.24956626,5.24594005
71.954403,6.32455532,5.26296082,1.03033708,5.25934535,5.24889734,5.24527217
71.964895,5.47722558,5.26153521,0.464424765,5.25792025,5.24822932,5.24460518
71.975386,5.74456265,5.26027109,0.695910593,5.25665674,5.24756234,5.24393922
71.985878,5.38516481,5.25913322,0.355009278,5.25551955,5.24689627,5.24327416
71.99637,5.56776436,5.25809198,0.556482154,5.25447905,5.24623116,5.24261006
72.006861,5.65685425,5.25712345,0.632242676,5.25351131,5.24556709,5.24194699
72.017353,5.38516481,5.25620331,0.359112097,5.25259199,5.24490393,5.24128482
72.027844,6.164414,5.25532912,0.953459431,5.25171863,5.24424179,5.24062367
72.038336,5.29150262,5.25448508,0.192399424,5.25087544,5.24358057,5.23996342
72.048828,5.47722558,5.2536642,0.472822777,5.25005541,5.24292032,5.23930413
72.059319,5.83095189,5.25286165,0.760322459,5.24925372,5.2422611,5.23864586
72.069811,6.55743852,5.252074,1.1425255,5.24846693,5.24160278,5.2379885
72.080302,4.79583152,5.25129838,-0.674882844,5.24769216,5.2409455,5.23733216
72.090794,5,5.25053286,-0.500532574,5.2469275,5.24028913,5.23667672
72.101286,5.74456265,5.24977617,0.703410605,5.24617166,5.23963373,5.23602224
72.111777,5.38516481,5.24902732,0.368968143,5.24542366,5.23897936,5.23536879
72.122269,5.65685425,5.24828531,0.639193975,5.2446825,5.2383259,5.23471624
72.13276,4.69041576,5.24754959,-0.746413982,5.24394762,5.23767347,5.23406471
72.143252,6,5.24681943,0.867859766,5.2432183,5.23702195,5.23341408
72.153744,5.09901951,5.24609438,-0.383503417,5.24249408,5.2363714,5.23276441
72.164235,5.19615242,5.2453741,-0.221859592,5.24177463,5.23572188,5.23211577
72.174727,5,5.24465807,-0.494629223,5.24105941,5.23507327,5.23146803
72.185218,5.47722558,5.2439461,0.482990143,5.24034826,5.23442569,5.23082131
72.19571,5.19615242,5.24323777,-0.21699158,5.23964074,5.23377903,5.23017549
72.206202,5.47722558,5.2425329,0.484450898,5.23893667,5.23313333,5.22953063
72.216693,5.38516481,5.24183135,0.378594056,5.23823591,5.23248866,5.2288868
72.227185,4.69041576,5.24113278,-0.742103105,5.23753813,5.2318449,5.22824387
72.237676,5.91607978,5.24043715,0.821974835,5.23684329,5.23120218,5.22760196
72.248168,5.09901951,5.23974419,-0.375132884,5.2361511,5.23056036,5.22696095
72.25866,5.47722558,5.23905383,0.488028428,5.23546151,5.22991951,5.22632091
72.269151,6.32455532,5.23836601,1.04220406,5.23477445,5.22927969,5.22568189
72.279643,5.29150262,5.23768054,0.231995869,5.23408973,5.22864079,5.22504377
72.290134,5.09901951,5.2369974,-0.371453745,5.23340734,5.22800291,5.22440667
72.300626,5.38516481,5.23631637,0.385808811,5.23272705,5.22736594,5.22377047
72.311118,5.09901951,5.23563744,-0.36961862,5.23204885,5.22672995,5.22313524
72.321609,4.79583152,5.2349606,-0.662668149,5.23137274,5.22609498,5.22250103
72.332101,4.89897949,5.23428566,-0.57905628,5.23069852,5.22546092,5.22186772
72.342592,5.29150262,5.23361269,0.24060326,5.23002626,5.2248279,5.22123543
72.353084,6,5.23294152,0.87581875,5.22935579,5.22419578,5.22060404
72.363576,5,5.23227215,-0.481946206,5.22868711,5.22356464,5.21997362
72.374067,5.09901951,5.2316046,-0.364122353,5.22802026,5.22293452,5.21934422
72.384559,4.89897949,5.23093872,-0.576159032,5.22735505,5.22230531,5.21871572
72.39505,6.244998,5.23027458,1.00733481,5.22669159,5.22167713,5.21808824
72.405542,5,5.22961203,-0.479178497,5.22602971,5.22104987,5.21746166
72.416034,5.38516481,5.22895111,0.395238791,5.22536944,5.22042357,5.21683605
72.426525,5,5.22829183,-0.477798947,5.22471082,5.2197983,5.21621146
72.437017,6,5.22763407,0.878843521,5.22405369,5.21917394,5.21558776
72.447508,5,5.2269779,-0.476421977,5.22339816,5.21855061,5.21496509
72.458,4.47213595,5.22632319,-0.868439541,5.22274409,5.2179282,5.21434333
72.468492,5.74456265,5.22566998,0.720342047,5.2220915,5.21730675,5.21372252
72.478983,5.74456265,5.22501832,0.720794234,5.22144045,5.21668632,5.21310273
72.489475,5.74456265,5.22436806,0.721245163,5.22079079,5.21606681,5.21248385
72.499966,6,5.22371931,0.881067923,5.22014265,5.21544833,5.21186599
72.510458,5.29150262,5.22307193,0.261592605,5.21949585,5.21483076,5.21124903
72.52095,4.69041576,5.22242596,-0.729390293,5.21885047,5.21421416,5.21063303
72.531441,5.83095189,5.22178145,0.78049372,5.21820653,5.21359858,5.21001805
72.541933,5.29150262,5.22113826,0.265262819,5.21756391,5.21298392,5.20940397
72.552424,5.65685425,5.2204965,0.6605738,5.21692271,5.21237028,5.20879091
72.562916,5.47722558,5.21985605,0.507316001,5.21628281,5.21175755,5.20817876
72.573408,5.47722558,5.21921695,0.507945497,5.21564425,5.2111458,5.20756757
72.583899,5.38516481,5.21857925,0.408148945,5.21500709,5.21053507,5.20695739
72.594391,5.91607978,5.21794282,0.83554591,5.21437119,5.20992525,5.20634812
72.604882,5.74456265,5.21730777,0.726123184,5.21373666,5.20931645,5.20573987
72.615374,5.38516481,5.21667397,0.410476349,5.21310338,5.20870857,5.20513252
72.625866,5.38516481,5.21604149,0.411246058,5.2124714,5.20810166,5.20452613
72.636357,5,5.21541036,-0.464123215,5.21184078,5.20749577,5.20392076
72.646849,5.65685425,5.21478046,0.664886296,5.21121137,5.20689079,5.20331629
72.65734,5.65685425,5.21415191,0.665358804,5.2105833,5.20628684,5.20271284
72.667832,5.38516481,5.21352458,0.414294857,5.20995645,5.2056838,5.20211029
72.678324,5.47722558,5.21289852,0.51412747,5.20933086,5.20508173,5.2015087
72.688815,4.89897949,5.21227379,-0.55972699,5.20870659,5.20448068,5.20090813
72.699307,5.19615242,5.21165027,-0.124490341,5.20808352,5.20388054,5.20030847
72.709798,5.91607978,5.21102806,0.839673578,5.20746176,5.20328143,5.19970982
72.72029,4.24264069,5.21040705,-0.983751171,5.20684119,5.20268323,5.19911207
72.730782,5.47722558,5.20978729,0.517144356,5.20622186,5.202086,5.19851528
72.741273,5.38516481,5.20916883,0.419518749,5.20560382,5.20148979,5.19791951
72.751765,6.08276253,5.20855154,0.934992507,5.20498695,5.20089449,5.19732465
72.762256,5.91607978,5.20793555,0.841513061,5.20437136,5.20030022,5.1967308
72.772748,5.19615242,5.20732073,-0.105680216,5.20375694,5.19970686,5.19613785
72.78324,6.164414,5.20670714,0.978624987,5.20314374,5.19911446,5.19554586
72.793731,4.79583152,5.20609483,-0.640517995,5.20253182,5.19852309,5.19495488
72.804223,5.09901951,5.20548367,-0.326288463,5.20192104,5.19793263,5.19436481
72.814714,5.19615242,5.2048738,-0.0933883101,5.20131154,5.19734319,5.19377576
72.825206,4.47213595,5.20426508,-0.855645443,5.20070318,5.19675466,5.19318761
72.835698,4.79583152,5.20365757,-0.638612595,5.20009602,5.1961671,5.19260041
72.846189,6.244998,5.20305133,1.02075789,5.19949013,5.19558056,5.19201424
72.856681,6.32455532,5.20244623,1.05929651,5.19888537,5.19499493,5.19142896
72.867172,5.74456265,5.2018424,0.736695492,5.19828187,5.19441032,5.1908447
72.877664,5.09901951,5.20123971,-0.319718929,5.1976795,5.19382663,5.19026134
72.888156,5.38516481,5.20063822,0.429565584,5.19707833,5.1932439,5.18967894
72.898647,4.79583152,5.20003798,-0.63577233,5.1964784,5.19266219,5.18909755
72.909139,5.56776436,5.19943889,0.606898241,5.19587961,5.19208139,5.18851707
72.91963,4.89897949,5.19884105,-0.547596167,5.19528206,5.19150162,5.1879376
72.930122,4.79583152,5.19824434,-0.634360165,5.19468564,5.19092275,5.18735903
72.940614,5.19615242,5.19764883,-0.038683377,5.19409041,5.19034485,5.18678142
72.951105,4.79583152,5.19705456,-0.633421686,5.19349641,5.18976797,5.18620482
72.961597,3.31662479,5.19646142,-1.37107134,5.19290353,5.189192,5.18562912
72.972088,6.164414,5.19586952,0.984146577,5.19231189,5.18861705,5.18505444
72.98258,5.47722558,5.19527875,0.530986653,5.19172136,5.18804301,5.18448066
72.993072,4.24264069,5.19468916,-0.975729715,5.19113202,5.18746993,5.18390784
73.003563,5.09901951,5.19410082,-0.308352563,5.1905439,5.18689788,5.18333602
73.014055,5.74456265,5.1935136,0.742326781,5.18995691,5.18632673,5.18276511
73.024546,5.74456265,5.19292761,0.74272137,5.18937114,5.18575661,5.18219521
73.035038,5.47722558,5.19234275,0.533744153,5.18878649,5.18518739,5.18162622
73.04553,5.38516481,5.19175908,0.439779185,5.18820302,5.18461914,5.18105818
73.056021,5.09901951,5.19117663,-0.303573909,5.18762077,5.1840519,5.18049115
73.066513,5.09901951,5.19059531,-0.302614936,5.18703964,5.18348558,5.17992502
73.077004,5.38516481,5.19001523,0.441757374,5.18645973,5.18292027,5.1793599
73.087496,4.89897949,5.18943627,-0.538940427,5.18588094,5.18235587,5.17879569
73.097988,5,5.18885849,-0.434578519,5.18530333,5.18179244,5.17823243
73.108479,4.79583152,5.18828195,-0.626458636,5.18472694,5.18123002,5.17767017
73.118971,5.19615242,5.18770653,0.0919015295,5.18415167,5.18066852,5.17710883
73.129462,5.38516481,5.18713236,0.445008372,5.18357764,5.18010803,5.17654848
73.139954,5.47722558,5.18655931,0.53913474,5.18300472,5.17954844,5.17598905
73.150446,5.19615242,5.18598744,0.100821532,5.18243298,5.17898983,5.17543056
73.160937,5.83095189,5.18541681,0.803451979,5.18186247,5.17843222,5.17487309
73.171429,5.65685425,5.18484731,0.687027609,5.18129309,5.17787553,5.17431651
73.18192,5.74456265,5.18427906,0.748520936,5.18072493,5.17731985,5.17376094
73.192412,4.58257569,5.18371193,-0.775329758,5.1801579,5.17676508,5.17320628
73.202904,5.09901951,5.18314599,-0.290045648,5.17959205,5.17621127,5.17265257
73.213395,5.19615242,5.1825813,0.116495169,5.17902744,5.17565848,5.17209986
73.223887,4.79583152,5.18201774,-0.621438831,5.17846395,5.1751066,5.17154806
73.234378,5.09901951,5.18145544,-0.287116567,5.17790171,5.17455573,5.17099726
73.24487,6.32455532,5.18089427,1.06942089,5.1773406,5.17400577,5.17044736
73.255362,5.38516481,5.18033431,0.452582035,5.17678069,5.17345677,5.16989842
73.265853,4.69041576,5.1797756,-0.699542593,5.17622202,5.17290878,5.16935048
73.276345,4.69041576,5.17921804,-0.699143965,5.1756645,5.1723617,5.16880344
73.286836,5.38516481,5.17866175,0.454426076,5.17510823,5.17181563,5.16825741
73.297328,5.83095189,5.17810661,0.807988417,5.17455312,5.17127048,5.16771228
73.30782,4.58257569,5.17755269,-0.771347521,5.17399921,5.17072628,5.1671681
73.318311,5.56776436,5.17700005,0.625111441,5.17344657,5.17018309,5.16662492
73.328803,5.29150262,5.17644858,0.339196167,5.1728951,5.16964081,5.16608265
73.339294,5.83095189,5.1758984,0.80935375,5.17234491,5.16909955,5.16554138
73.349786,5,5.17534941,-0.418747425,5.1717959,5.16855919,5.16500101
73.360278,4.89897949,5.17480165,-0.525187743,5.17124811,5.16801979,5.16446159
73.370769,5.19615242,5.1742552,0.147977114,5.17070163,5.1674814,5.16392317
73.381261,5.56776436,5.17370994,0.62773754,5.17015633,5.16694392,5.16338565
73.391752,5.19615242,5.173166,0.151612727,5.16961234,5.16640745,5.16284913
73.402244,5.19615242,5.17262328,0.153392117,5.16906956,5.16587188,5.16231352
73.412736,5,5.17208184,-0.414827478,5.16852805,5.16533728,5.16177885
73.423227,5.29150262,5.17154173,0.346353711,5.16798788,5.16480368,5.16124519
73.433719,6.92820323,5.17100287,1.32559434,5.16744893,5.16427099,5.16071242
73.44421,4.79583152,5.17046536,-0.612073391,5.16691134,5.16373931,5.16018066
73.454702,5.38516481,5.16992912,0.463935005,5.166375,5.16320853,5.15964979
73.465194,5.19615242,5.16939421,0.163579391,5.16583999,5.16267872,5.15911987
73.475685,5.56776436,5.16886068,0.631588219,5.16530636,5.1621499,5.15859096
73.486177,4.79583152,5.16832847,-0.610325278,5.16477403,5.161622,5.15806294
73.496668,4.79583152,5.16779767,-0.609890276,5.16424311,5.1610951,5.15753592
73.50716,5.56776436,5.16726821,0.632847653,5.16371351,5.16056911,5.1570098
73.517652,4.79583152,5.16674015,-0.609022683,5.16318532,5.16004408,5.15648463
73.528143,5.09901951,5.16621356,-0.259218149,5.16265858,5.15952005,5.15596045
73.538635,5.91607978,5.16568838,0.866251351,5.16213324,5.15899693,5.15543718
73.549126,5,5.16516472,-0.406404621,5.16160942,5.15847481,5.1549149
73.559618,6.08276253,5.16464249,0.958185807,5.16108702,5.1579536,5.15439352
73.57011,5.91607978,5.16412178,0.867155123,5.16056613,5.15743334,5.15387309
73.580601,5.09901951,5.16360265,-0.254132123,5.16004682,5.15691409,5.15335365
73.591093,4.69041576,5.16308504,-0.687509479,5.15952902,5.15639575,5.15283511
73.601584,5.47722558,5.16256909,0.5609425,5.15901287,5.1558784,5.15231757
73.612076,5.47722558,5.16205472,0.5614008,5.15849829,5.15536196,5.15180092
73.622568,4.79583152,5.16154202,-0.604740024,5.15798538,5.15484648,5.15128522
73.633059,5,5.16103109,-0.401286788,5.15747423,5.154332,5.15077052
73.643551,4.69041576,5.16052186,-0.685642839,5.15696478,5.15381842,5.15025671
73.654042,5.83095189,5.16001449,0.819107686,5.15645717,5.15330585,5.14974389
73.664534,5.47722558,5.15950894,0.563663585,5.15595137,5.15279418,5.14923198
73.675026,5.19615242,5.1590053,0.192735886,5.15544749,5.15228346,5.148721
73.685517,6,5.15850369,0.917331077,5.15494562,5.15177375,5.14821103
73.696009,5.19615242,5.15800409,0.195315977,5.15444576,5.15126493,5.14770194
73.7065,5.83095189,5.15750667,0.820637087,5.15394806,5.15075712,5.14719385
73.716992,5.65685425,5.15701141,0.706995647,5.15345252,5.15025022,5.14668666
73.727484,5.09901951,5.15651845,-0.239789359,5.15295928,5.14974426,5.14618041
73.737975,3.74165739,5.15602795,-1.18927312,5.15246849,5.1492393,5.14567515
73.748467,5.74456265,5.15553997,0.767478131,5.15198021,5.14873525,5.14517078
73.758958,5.19615242,5.15505471,0.202725701,5.15149465,5.14823219,5.14466741
73.76945,5.19615242,5.15457221,0.203912258,5.15101184,5.14773004,5.14416493
73.779942,5.83095189,5.15409267,0.822714547,5.15053198,5.14722884,5.1436634
73.790433,5.74456265,5.1536163,0.768730348,5.15005528,5.14672864,5.14316285
73.800925,5.19615242,5.15314321,0.207386635,5.14958186,5.14622934,5.1426632
73.811416,4.89897949,5.1526737,-0.503680666,5.14911201,5.14573103,5.14216454
73.821908,4.69041576,5.15220793,-0.67955292,5.1486459,5.14523363,5.14166677
73.8324,5.29150262,5.15174622,0.37384007,5.14818385,5.14473718,5.14116994
73.842891,5.91607978,5.15128893,0.874523215,5.1477262,5.14424172,5.1406741
73.853383,5.47722558,5.15083631,0.571304877,5.14727322,5.14374716,5.14017916
73.863874,5,5.15038885,-0.387800018,5.1468254,5.1432536,5.1396852
73.874366,5.09901951,5.14994692,-0.225671023,5.1463831,5.14276094,5.13919214
73.884858,5.65685425,5.14951108,0.712280258,5.14594689,5.14226923,5.13870001
73.895349,5.19615242,5.14908197,0.21695726,5.1455174,5.14177852,5.13820888
73.905841,5.83095189,5.1486602,0.826009503,5.14509524,5.1412887,5.13771863
73.916332,6.40312424,5.14824666,1.12021318,5.14468132,5.14079988,5.13722937
73.926824,5.47722558,5.14784226,0.57391926,5.14427653,5.14031195,5.136741
73.937316,5.09901951,5.14744822,-0.22006523,5.14388211,5.13982498,5.13625357
73.947807,5.91607978,5.14706607,0.87693427,5.14349957,5.139339,5.13576713
73.958299,4.58257569,5.14669781,-0.751080629,5.14313092,5.13885391,5.13528158
73.96879,5.83095189,5.14634657,0.827408799,5.1427793,5.13836982,5.13479701
73.979282,5.19615242,5.14601544,0.223912902,5.14244779,5.13788663,5.13431333
73.989774,4.89897949,5.14570936,-0.496719107,5.14214134,5.13740438,5.13383059
74.000265,4.47213595,5.14543524,-0.820548161,5.14186687,5.13692312,5.13334883
74.010757,4.35889894,5.14520259,-0.886737642,5.14163388,5.13644276,5.13286796
74.021248,5.19615242,5.14502459,0.226114656,5.14145557,5.1359634,5.13238808
74.03174,4.79583152,5.14491893,-0.590836193,5.14134965,5.13548493,5.13190908
74.042232,5.38516481,5.144909,0.490158963,5.14133951,5.1350074,5.13143102
74.052723,5.56776436,5.14502461,0.650184401,5.14145499,5.13453086,5.13095395
74.063215,5.19615242,5.14530255,0.225499168,5.14173291,5.13405522,5.13047776
74.073706,5.74456265,5.14578622,0.773806455,5.14221669,5.13358057,5.13000255
74.084198,5,5.14652458,-0.382785292,5.14295533,5.13310682,5.12952823
74.09469,5.91607978,5.14756937,0.876647257,5.1440006,5.132634,5.12905484
74.105181,4.35889894,5.14897113,-0.888860049,5.14540308,5.13216218,5.12858244
74.115673,4.47213595,5.15077436,-0.823795126,5.14720731,5.13169125,5.12811092
74.126164,5.29150262,5.15301002,0.372145943,5.14944424,5.13122131,5.12764038
74.136656,6,5.15568943,0.91886374,5.15212523,5.13075226,5.12717073
74.147148,4.58257569,5.15879498,-0.759091094,5.15523265,5.13028415,5.12670201
74.157639,5.09901951,5.16227195,-0.251500369,5.15871172,5.12981703,5.12623426
74.168131,6.08276253,5.16601974,0.957466859,5.1624618,5.12935081,5.12576741
74.178622,4.89897949,5.16987363,-0.520474922,5.16631803,5.12888556,5.12530153
74.189114,5.56776436,5.1735843,0.627837611,5.17003093,5.12842122,5.12483654
74.199606,5.74456265,5.17683855,0.753474681,5.17328709,5.12795781,5.12437248
74.210097,4.79583152,5.17927361,-0.619227008,5.17572349,5.12749539,5.12390939
74.220589,6.08276253,5.1805407,0.949853585,5.1769911,5.12703386,5.12344719
74.23108,5.91607978,5.18040058,0.857717435,5.17685054,5.12657331,5.12298596
74.241572,5.74456265,5.17880846,0.752166329,5.17525696,5.12611366,5.12252562
74.252064,4.69041576,5.17593048,-0.696788864,5.17237663,5.12565494,5.12206621
74.262555,6.63324958,5.17208131,1.20878794,5.16852444,5.12519721,5.12160777
74.273047,4.58257569,5.1676245,-0.764884831,5.16406417,5.12474037,5.12115022
74.283538,5.56776436,5.16289635,0.636292393,5.15933236,5.1242845,5.12069364
74.29403,5.74456265,5.15816458,0.765766325,5.15459692,5.12382954,5.12023794
74.304522,5.47722558,5.15362524,0.568858803,5.15005401,5.1233755,5.11978318
74.315013,5.56776436,5.14940977,0.646803369,5.14583519,5.12292245,5.11932938
74.325505,5.38516481,5.14559555,0.489458123,5.14201789,5.12247029,5.11887646
74.335996,5.65685425,5.14221936,0.717380573,5.13863891,5.1220191,5.11842452
74.346488,5.19615242,5.1392836,0.238471851,5.13570065,5.12156881,5.11797346
74.35698,6.08276253,5.13676704,0.972622993,5.13318188,5.12111945,5.11752332
74.367471,5.19615242,5.13463144,0.248034247,5.13104431,5.12067107,5.11707416
74.377963,5.91607978,5.13282805,0.885015102,5.12923919,5.12022358,5.11662587
74.388454,5.47722558,5.13131031,0.588145616,5.12771989,5.11977707,5.11617856
74.398946,5.56776436,5.13002385,0.661619614,5.12643204,5.11933144,5.11573212
74.409438,5.91607978,5.12891668,0.887222125,5.12532359,5.11888675,5.11528661
74.419929,4.89897949,5.12794932,-0.478507924,5.12435503,5.11844303,5.11484207
74.430421,5.65685425,5.12708898,0.727849754,5.12349358,5.11800021,5.11439841
74.440912,5.29150262,5.12630999,0.406438968,5.1227135,5.11755835,5.11395571
74.451404,5,5.12559232,-0.354390061,5.12199478,5.11711739,5.11351389
74.461896,5.56776436,5.12492118,0.665464638,5.12132263,5.11667735,5.113073
74.472387,5.56776436,5.12428574,0.665941908,5.12068618,5.11623829,5.11263307
74.482879,5.19615242,5.12367799,0.269210757,5.12007744,5.11580012,5.11219402
74.49337,5.29150262,5.12309239,0.410378163,5.11949085,5.11536292,5.11175593
74.503862,4.58257569,5.12252472,-0.734812239,5.1189222,5.11492661,5.11131873
74.514354,5.83095189,5.12197207,0.842009397,5.11836857,5.11449122,5.11088244
74.524845,5.38516481,5.12143226,0.513548974,5.11782777,5.11405681,5.11044712
74.535337,4.35889894,5.12090348,-0.872928712,5.11729801,5.11362328,5.11001267
74.545828,4.69041576,5.1203845,-0.655720015,5.11677804,5.11319072,5.10957919
74.55632,5.09901951,5.11987413,-0.14441128,5.11626668,5.11275905,5.10914658
74.566812,5.38516481,5.11937154,0.515551423,5.1157631,5.11232831,5.10871489
74.577303,5,5.11887601,-0.344783998,5.11526657,5.11189853,5.10828416
74.587795,5.65685425,5.1183868,0.733803416,5.11477636,5.11146964,5.10785431
74.598286,3.74165739,5.11790347,-1.17313515,5.11429203,5.11104172,5.10742542
74.608778,5.56776436,5.11742557,0.671072865,5.11381312,5.11061468,5.1069974
74.61927,5,5.11695255,-0.341983254,5.11333907,5.11018856,5.1065703
74.629761,5.56776436,5.11648407,0.671773992,5.11286957,5.10976342,5.10614416
74.640253,5.29150262,5.11601972,0.418906796,5.11240419,5.10933915,5.10571889
74.650744,5.29150262,5.1155593,0.419455981,5.11194274,5.10891585,5.10529458
74.661236,5.29150262,5.11510247,0.420000176,5.11148487,5.10849344,5.10487115
74.671728,4.89897949,5.11464905,-0.464402374,5.11103039,5.10807195,5.10444863
74.682219,5.74456265,5.11419887,0.793954518,5.11057916,5.10765142,5.10402706
74.692711,4.69041576,5.11375166,-0.650642686,5.11013089,5.10723178,5.10360637
74.703202,4.69041576,5.11330736,-0.650301158,5.10968551,5.10681309,5.10318664
74.713694,4.58257569,5.11286571,-0.728210147,5.10924279,5.10639529,5.10276777
74.724186,5.47722558,5.11242664,0.603985869,5.10880263,5.10597841,5.10234982
74.734677,4.89897949,5.11199007,-0.461530702,5.10836497,5.1055625,5.10193282
74.745169,5.29150262,5.11155581,0.424201381,5.1079296,5.10514746,5.1015167
74.75566,4.35889894,5.11112384,-0.867308996,5.10749652,5.10473338,5.10110152
74.766152,5.47722558,5.11069399,0.605418523,5.10706556,5.10432019,5.10068722
74.776644,5.38516481,5.11026622,0.524307721,5.10663667,5.10390791,5.10027383
74.787135,5.56776436,5.1098405,0.676700716,5.10620982,5.10349659,5.09986139
74.797627,5.83095189,5.10941669,0.849432284,5.10578486,5.10308615,5.09944982
74.808118,6.32455532,5.1089948,1.10252461,5.10536182,5.10267667,5.0990392
74.81861,5,5.10857471,-0.329506774,5.10494058,5.10226807,5.09862945
74.829102,4.69041576,5.10815641,-0.646328595,5.10452112,5.10186039,5.09822061
74.839593,5.38516481,5.10773988,0.52671143,5.10410341,5.10145366,5.09781271
74.850085,6.164414,5.10732498,1.02814834,5.10368734,5.10104781,5.09740569
74.860576,4.58257569,5.10691178,-0.724110545,5.10327294,5.10064292,5.09699961
74.871068,5.19615242,5.10650014,0.299419911,5.10286011,5.1002389,5.0965944
74.88156,5.83095189,5.10609008,0.85138817,5.10244884,5.0998358,5.0961901
74.892051,5.19615242,5.1056816,0.300783675,5.10203915,5.09943366,5.09578674
74.902543,5,5.10527461,-0.324460491,5.10163094,5.09903239,5.09538425
74.913034,5.47722558,5.10486915,0.610210149,5.10122425,5.09863207,5.0949827
74.923526,5.74456265,5.10446512,0.800060951,5.10081898,5.09823263,5.09458202
74.934018,5.56776436,5.10406254,0.680956549,5.10041515,5.0978341,5.09418225
74.944509,6,5.10366143,0.946751589,5.10001278,5.09743652,5.09378342
74.955001,6.164414,5.10326169,1.03012247,5.09961178,5.09703982,5.09338545
74.965492,5.56776436,5.10286338,0.681836475,5.0992122,5.09664407,5.09298843
74.975984,5.74456265,5.10246642,0.801309071,5.09881395,5.09624919,5.09259227
74.986476,5.74456265,5.10207082,0.801555877,5.09841707,5.09585523,5.09219701
74.996967,5.47722558,5.10167662,0.612820495,5.09802156,5.09546221,5.0918027
75.007459,4.58257569,5.10128371,-0.72021387,5.09762735,5.09507007,5.09140925
75.01795,6.32455532,5.10089218,1.10619309,5.0972345,5.09467887,5.09101673
75.028442,4.89897949,5.10050192,-0.448912507,5.09684292,5.09428855,5.09062508
75.038934,5.56776436,5.10011299,0.683850404,5.09645265,5.09389914,5.09023433
75.049425,4.79583152,5.09972539,-0.551265696,5.09606372,5.09351067,5.08984452
75.059917,5,5.09933905,-0.315180978,5.09567602,5.09312307,5.08945557
75.070408,5.38516481,5.09895403,0.534986707,5.09528964,5.09273642,5.08906756
75.0809,5.65685425,5.09857025,0.747184044,5.0949045,5.09235064,5.08868041
75.091392,4.58257569,5.09818775,-0.718061319,5.09452062,5.09196577,5.08829416
75.101883,5.09901951,5.09780656,0.0348275282,5.09413804,5.09158184,5.08790884
75.112375,5.74456265,5.09742659,0.804447672,5.09375668,5.09119878,5.08752438
75.122866,4.58257569,5.09704792,-0.717267193,5.09337661,5.09081667,5.08714085
75.133358,6.08276253,5.09667047,0.99302168,5.09299775,5.09043542,5.08675819
75.14385,4.79583152,5.09629428,-0.548144831,5.09262013,5.09005508,5.08637642
75.154341,4.69041576,5.09591937,-0.636791657,5.0922438,5.08967568,5.08599559
75.164833,4.89897949,5.09554568,-0.443357868,5.09186867,5.08929714,5.08561561
75.175324,5.83095189,5.09517328,0.857775388,5.09149481,5.08891955,5.08523656
75.185816,6.63324958,5.09480209,1.24034168,5.09112216,5.08854282,5.08485837
75.196308,5.09901951,5.09443214,0.0677301374,5.09075075,5.088167,5.08448108
75.206799,5.83095189,5.09406349,0.858422045,5.09038062,5.08779212,5.08410471
75.217291,5.65685425,5.09369605,0.750438675,5.0900117,5.0874181,5.0837292
75.227782,4.79583152,5.09332989,-0.545434105,5.08964405,5.08704502,5.08335462
75.238274,4.69041576,5.09296494,-0.634467636,5.0892776,5.0866728,5.0829809
75.248766,6,5.09260125,0.9525748,5.0889124,5.08630149,5.08260806
75.259257,6.244998,5.09223885,1.07366622,5.08854848,5.08593111,5.08223616
75.269749,5.09901951,5.09187767,0.0845094583,5.08818576,5.08556159,5.08186511
75.28024,5.29150262,5.09151777,0.447196656,5.08782433,5.08519301,5.08149498
75.290732,6,5.09115911,0.953331472,5.08746412,5.0848253,5.08112571
75.301224,5.29150262,5.0908017,0.447996564,5.08710516,5.08445848,5.08075732
75.311715,5.91607978,5.0904456,0.908644148,5.08674749,5.0840926,5.08038986
75.322207,5.09901951,5.09009073,0.0944922626,5.08639104,5.08372757,5.08002326
75.332698,5.09901951,5.08973716,0.0963449462,5.0860359,5.08336348,5.07965757
75.34319,4.58257569,5.08938485,-0.711905298,5.08568199,5.08300025,5.07929274
75.353682,5.65685425,5.08903382,0.753538608,5.08532936,5.08263792,5.0789288
75.364173,5.83095189,5.08868411,0.861549644,5.08497803,5.08227652,5.07856577
75.374665,4.69041576,5.08833566,-0.630808923,5.08462796,5.08191598,5.0782036
75.385156,5.29150262,5.08798854,0.451125349,5.08427922,5.08155637,5.07784234
75.395648,5.29150262,5.0876427,0.451508496,5.08393174,5.08119761,5.07748194
75.40614,5,5.08729817,-0.295462643,5.08358557,5.08083975,5.07712242
75.416631,5.65685425,5.08695501,0.754916707,5.08324075,5.08048282,5.07676382
75.427123,4.89897949,5.08661316,-0.433167023,5.08289722,5.08012675,5.07640607
75.437614,5.56776436,5.08627267,0.693896027,5.08255506,5.0797716,5.07604923
75.448106,4.58257569,5.08593349,-0.70947713,5.0822142,5.07941731,5.07569325
75.458598,5,5.08559568,-0.29256739,5.08187469,5.07906392,5.07533814
75.469089,4.79583152,5.08525926,-0.537984887,5.08153657,5.07871144,5.07498395
75.479581,5.38516481,5.08492419,0.547942165,5.08119979,5.07835983,5.07463061
75.490072,5,5.08459054,-0.290844528,5.08086441,5.07800913,5.07427818
75.500564,5.65685425,5.08425826,0.75670073,5.0805304,5.0776593,5.07392659
75.511056,4.79583152,5.08392738,-0.536745618,5.08019778,5.07731035,5.07357589
75.521547,5.38516481,5.08359796,0.549151022,5.07986661,5.07696232,5.0732261
75.532039,4.89897949,5.08326995,-0.429290651,5.07953684,5.07661515,5.07287715
75.54253,5.09901951,5.08294342,0.12679155,5.07920854,5.0762689,5.07252911
75.553022,5.38516481,5.08261832,0.550042261,5.07888166,5.07592351,5.07218192
75.563514,5.65685425,5.0822947,0.757997065,5.07855626,5.075579,5.0718356
75.574005,5.74456265,5.08197261,0.813996338,5.07823237,5.07523541,5.0714902
75.584497,5.65685425,5.081652,0.758420894,5.07790995,5.07489267,5.07114563
75.594988,5.29150262,5.08133295,0.458442663,5.07758908,5.07455085,5.07080198
75.60548,6.244998,5.08101541,1.07888025,5.07726973,5.07420988,5.07045916
75.615972,5.47722558,5.08069945,0.629703204,5.07695193,5.07386979,5.07011722
75.626463,5.65685425,5.08038512,0.759255643,5.07663575,5.07353062,5.06977619
75.636955,5,5.08007238,-0.282970635,5.07632116,5.07319231,5.06943599
75.647446,4.89897949,5.0797613,-0.425184453,5.07600822,5.0728549,5.06909671
75.657938,5,5.07945186,-0.281872055,5.0756969,5.07251835,5.06875826
75.66843,5.09901951,5.07914409,0.140980234,5.07538725,5.07218268,5.06842068
75.678921,6.32455532,5.07883806,1.11611705,5.07507933,5.07184792,5.068084
75.689413,5,5.07853373,-0.280238701,5.0747731,5.07151401,5.06774817
75.699904,5,5.07823119,-0.279698398,5.07446865,5.07118101,5.06741323
75.710396,6,5.07793042,0.960244541,5.07416596,5.07084886,5.06707914
75.720888,5.47722558,5.07763147,0.632134562,5.07386508,5.07051759,5.06674591
75.731379,4.47213595,5.0773344,-0.777945017,5.07356608,5.07018722,5.06641358
75.741871,5.38516481,5.0770392,0.55509063,5.07326892,5.06985771,5.06608209
75.752362,5.56776436,5.07674595,0.700727061,5.07297372,5.0695291,5.0657515
75.762854,4.89897949,5.07645464,-0.421277996,5.07268044,5.06920134,5.06542174
75.773346,5.29150262,5.07616533,0.464044498,5.07238915,5.06887446,5.06509285
75.783837,5.09901951,5.07587809,0.152123053,5.07209993,5.06854848,5.06476485
75.794329,6.40312424,5.07559292,1.15218545,5.07181276,5.06822335,5.06443769
75.80482,5.19615242,5.07530991,0.347624097,5.07152775,5.06789912,5.06411143
75.815312,5.09901951,5.07502906,0.154888517,5.07124489,5.06757574,5.063786
75.825804,4.35889894,5.07475045,-0.846080083,5.07096426,5.06725323,5.06346143
75.836295,5.19615242,5.07447417,0.348824096,5.07068595,5.06693162,5.06313775
75.846787,4.79583152,5.07420027,-0.527606623,5.07041,5.06661086,5.06281491
75.857278,5.19615242,5.07392881,0.349604932,5.0701365,5.066291,5.06249296
75.86777,5.29150262,5.07365981,0.466736339,5.06986543,5.06597198,5.06217184
75.878262,4.69041576,5.07339336,-0.61885184,5.06959691,5.06565383,5.06185158
75.888753,6.08276253,5.07312956,1.00480494,5.06933103,5.06533658,5.06153221
75.899245,4.69041576,5.07286843,-0.618427575,5.06906781,5.06502017,5.06121367
75.909736,5.65685425,5.0726101,0.764358653,5.06880739,5.06470466,5.06089602
75.920228,5.83095189,5.07235461,0.870974903,5.0685498,5.06439,5.0605792
75.93072,5.29150262,5.07210208,0.468402111,5.06829516,5.0640762,5.06026323
75.941211,5.38516481,5.07185263,0.559742957,5.06804358,5.06376329,5.05994815
75.951703,6.32455532,5.07160631,1.11935205,5.06779512,5.06345123,5.0596339
75.962194,5.56776436,5.07136327,0.704557376,5.06754994,5.06314006,5.05932054
75.972686,5.29150262,5.07112358,0.469445461,5.06730811,5.06282973,5.059008
75.983178,4.24264069,5.0708874,-0.910080606,5.06706976,5.06252026,5.05869632
75.993669,6,5.07065486,0.964025486,5.06683506,5.06221169,5.05838552
76.004161,5.56776436,5.07042607,0.705222157,5.0666041,5.06190396,5.05807555
76.014652,4.89897949,5.07020122,-0.41378948,5.06637706,5.06159712,5.05776645
76.025144,6.244998,5.06998042,1.08398228,5.06615407,5.06129111,5.05745819
76.035636,6,5.06976385,0.964487505,5.0659353,5.06098597,5.05715077
76.046127,5.09901951,5.06955173,0.171661834,5.06572097,5.06068171,5.05684424
76.056619,6,5.06934434,0.964704959,5.06551137,5.06037829,5.05653852
76.06711,4.24264069,5.06914183,-0.909121082,5.06530663,5.06007576,5.05623369
76.077602,5.47722558,5.06894435,0.638968876,5.06510692,5.05977407,5.05592968
76.088094,4.79583152,5.06875216,-0.522418069,5.06491249,5.05947323,5.05562651
76.098585,6.244998,5.06856553,1.08463471,5.06472362,5.05917328,5.05532423
76.109077,5.09901951,5.0683847,0.175028029,5.06454053,5.05887417,5.05502276
76.119568,5,5.06821,-0.261170436,5.06436357,5.05857594,5.05472217
76.13006,5.91607978,5.0680417,0.920889834,5.064193,5.05827854,5.0544224
76.140552,4.89897949,5.06788016,-0.410975268,5.06402918,5.05798199,5.05412348
76.151043,5.56776436,5.06772576,0.707134079,5.0638725,5.05768634,5.05382543
76.161535,5.38516481,5.06757886,0.563547643,5.06372332,5.05739151,5.0535282
76.172026,5.29150262,5.06743993,0.473352614,5.06358209,5.05709756,5.05323184
76.182518,5.38516481,5.06730938,0.563786684,5.06344925,5.05680445,5.05293629
76.19301,4.58257569,5.06718774,-0.696140824,5.06332531,5.05651218,5.05264159
76.203501,5.56776436,5.06707555,0.707593675,5.06321082,5.0562208,5.05234776
76.213993,6.08276253,5.06697339,1.00786365,5.06310634,5.05593025,5.05205475
76.224484,6.08276253,5.06688189,1.00790904,5.06301253,5.05564057,5.0517626
76.234976,4.69041576,5.06680175,-0.613503046,5.06293007,5.05535173,5.05147127
76.245468,4.24264069,5.06673372,-0.907795698,5.06285972,5.05506373,5.05118078
76.255959,5.56776436,5.06667863,0.707874095,5.06280231,5.05477661,5.05089115
76.266451,4.47213595,5.06663769,-0.771039387,5.06275905,5.05449032,5.05060234
76.276942,4.58257569,5.06661195,-0.695727144,5.06273098,5.0542049,5.0503144
76.287434,5,5.06660222,-0.258074057,5.06271893,5.05392031,5.05002726
76.297926,4.24264069,5.06660969,-0.907727384,5.06272408,5.05363656,5.04974096
76.308417,4.69041576,5.06663569,-0.613367693,5.06274775,5.05335369,5.04945553
76.318909,4.89897949,5.06668167,-0.409514567,5.06279142,5.05307164,5.04917091
76.3294,6.244998,5.06674923,1.08547168,5.06285667,5.05279047,5.04888715
76.339892,4.79583152,5.06684016,-0.520584901,5.0629453,5.05251012,5.04860419
76.350384,4.89897949,5.06695643,-0.409849908,5.06305927,5.05223061,5.04832208
76.360875,5.38516481,5.06710021,0.563972159,5.06320076,5.05195197,5.04804082
76.371367,5,5.06727396,-0.25937224,5.06337223,5.05167416,5.04776037
76.381858,4.89897949,5.06748036,-0.410488578,5.06357636,5.05139721,5.04748078
76.39235,5.38516481,5.06772248,0.563420201,5.06381624,5.05112108,5.04720199
76.402842,4.58257569,5.06800372,-0.696726651,5.06409525,5.0508458,5.04692404
76.413333,4.69041576,5.06832786,-0.61474556,5.06441718,5.05057138,5.04664694
76.423825,5,5.06869929,-0.262105497,5.06478642,5.05029778,5.04637065
76.434316,5.74456265,5.06912284,0.82185145,5.06520781,5.05002505,5.04609521
76.444808,5.09901951,5.06960418,0.171508977,5.06568703,5.04975314,5.04582058
76.4553,5.74456265,5.07014974,0.821226467,5.0662305,5.04948206,5.04554677
76.465791,5,5.07076695,-0.26602059,5.06684568,5.04921185,5.04527382
76.476283,5.29150262,5.0714655,0.469081144,5.06754223,5.04894245,5.04500167
76.486774,5.65685425,5.07225938,0.76458804,5.06833418,5.04867392,5.04473037
76.497266,5,5.07315935,-0.270479843,5.06923229,5.0484062,5.04445987
76.507758,5.19615242,5.07418266,0.349241702,5.07025382,5.04813932,5.0441902
76.518249,5.65685425,5.07535177,0.762563098,5.07142126,5.0478733,5.04392138
76.528741,5,5.07669697,-0.276942183,5.07276492,5.04760809,5.04365335
76.539232,5.47722558,5.0782586,0.631638327,5.07432515,5.04734374,5.04338618
76.549724,5.56776436,5.08009226,0.698335236,5.07615762,5.0470802,5.0431198
76.560216,5.38516481,5.08227318,0.55035591,5.0783376,5.0468175,5.04285424
76.570707,5.47722558,5.08490311,0.626356502,5.08096693,5.04655565,5.04258954
76.581199,4.47213595,5.08811894,-0.784845832,5.08418259,5.04629462,5.04232562
76.59169,5.29150262,5.09209908,0.446546241,5.08816315,5.04603444,5.04206255
76.602182,5,5.09707404,-0.311567072,5.09313929,5.04577506,5.04180028
76.612674,4.79583152,5.10333038,-0.554525798,5.09939778,5.04551652,5.04153883
76.623165,4.79583152,5.1112143,-0.56158951,5.10728508,5.04525884,5.04127822
76.633657,4.69041576,5.12113165,-0.65628949,5.11720736,5.04500196,5.0410184
76.644148,6,5.13353193,0.930842668,5.12961441,5.04474594,5.04075942
76.65464,4.89897949,5.14889525,-0.499915761,5.14498673,5.04449072,5.04050124
76.665132,4.69041576,5.16769388,-0.690853183,5.16379688,5.04423633,5.04024387
76.675623,5.38516481,5.19035222,0.441375788,5.18646953,5.04398279,5.03998734
76.686115,4.58257569,5.21720348,-0.796635291,5.21333808,5.04373005,5.0397316
76.696606,5.74456265,5.24858373,0.704257707,5.24473875,5.04347817,5.0394767
76.707098,5.09901951,5.28431605,-0.430460836,5.28049439,5.04322708,5.03922259
76.71759,5,5.32401749,-0.569225345,5.32022166,5.04297682,5.03896929
76.728081,5.09901951,5.36701181,-0.517679725,5.36324373,5.04272742,5.03871683
76.738573,5.65685425,5.41225195,0.494572845,5.40851271,5.04247881,5.03846515
76.749064,5.56776436,5.45823369,0.330954189,5.45452331,5.04223104,5.03821431
76.759556,6.244998,5.50297832,0.861405639,5.49929548,5.04198408,5.03796426
76.770048,6,5.54399085,0.675284498,5.54033262,5.04173794,5.03771501
76.780539,5.38516481,5.57837824,-0.439560504,5.57473994,5.04149265,5.0374666
76.791031,5.91607978,5.60316642,0.559386599,5.59954158,5.04124815,5.03721897
76.801522,4.69041576,5.61582119,-0.961979955,5.61220188,5.0410045,5.03697217
76.812014,5.47722558,5.61490097,-0.371046351,5.6112784,5.04076164,5.03672616
76.822506,5.83095189,5.60047845,0.480076499,5.59684387,5.04051961,5.03648095
76.832997,5,5.57412727,-0.757711866,5.57047279,5.04027841,5.03623657
76.843489,5.91607978,5.53844503,0.614519941,5.53476425,5.04003801,5.03599297
76.85398,5.83095189,5.49643363,0.578375542,5.49272193,5.03979845,5.0357502
76.864472,4.69041576,5.4509502,-0.872086258,5.44720471,5.03955969,5.0355082
76.874964,5.74456265,5.40444535,0.583195758,5.40066477,5.03932174,5.03526702
76.885455,4.35889894,5.35886382,-0.999982438,5.35504817,5.03908463,5.03502665
76.895947,4.69041576,5.3156486,-0.790716664,5.311799,5.03884831,5.03478707
76.906438,5.09901951,5.27591437,-0.420588704,5.2720328,5.03861282,5.0345483
76.91693,4.47213595,5.24032121,-0.876461784,5.23641028,5.03837813,5.03431032
76.927422,5.74456265,5.20906195,0.731779134,5.20512451,5.03814426,5.03407314
76.937913,5.83095189,5.18215556,0.80547895,5.17819461,5.03791121,5.03383677
76.948405,5.56776436,5.15940752,0.639028047,5.15542603,5.03767896,5.03360118
76.958896,4.58257569,5.14048353,-0.746932282,5.13648427,5.03744754,5.03336641
76.969388,5.65685425,5.12494873,0.729318531,5.12093422,5.03721691,5.03313242
76.97988,4,5.11233069,-1.05467089,5.10830312,5.03698708,5.03289922
76.990371,5.38516481,5.10215418,0.531987435,5.0981154,5.03675809,5.03266684
77.000863,5.47722558,5.0939698,0.619076546,5.08992136,5.03652989,5.03243523
77.011354,5.56776436,5.08737974,0.693097843,5.08332285,5.03630251,5.03220444
77.021846,4.79583152,5.08204121,-0.534985684,5.07797683,5.03607592,5.03197442
77.032338,5.91607978,5.07767332,0.915645382,5.0736022,5.03585014,5.03174519
77.042829,5.65685425,5.07405151,0.763415185,5.06997423,5.03562519,5.03151678
77.053321,5.91607978,5.07100023,0.919282083,5.06691724,5.03540102,5.03128913
77.063812,4.79583152,5.06838723,-0.522068679,5.06429884,5.03517767,5.0310623
77.074304,5.19615242,5.06611274,0.360610153,5.06201921,5.03495511,5.03083623
77.084796,4.89897949,5.06410383,-0.406354954,5.06000537,5.03473335,5.03061096
77.095287,4.69041576,5.062307,-0.609828859,5.05820374,5.03451242,5.03038649
77.105779,5.91607978,5.06068246,0.924876923,5.05657454,5.03429226,5.03016279
77.11627,5.38516481,5.05920199,0.570931538,5.0550895,5.03407293,5.0299399
77.126762,5.65685425,5.05784665,0.773955812,5.05372968,5.03385438,5.02971778
77.137254,5.56776436,5.05659464,0.714961343,5.05247326,5.03363663,5.02949644
77.147745,6.08276253,5.05543307,1.01357262,5.05130732,5.0334197,5.0292759
77.158237,4.69041576,5.05435115,-0.603270581,5.0502211,5.03320355,5.02905613
77.168728,5.47722558,5.05334034,0.651064691,5.04920602,5.03298822,5.02883717
77.17922,5.29150262,5.05239303,0.488988337,5.04825448,5.03277366,5.02861896
77.189712,3.87298335,5.05150294,-1.08559642,5.04736018,5.0325599,5.02840154
77.200203,5.29150262,5.05066461,0.490752498,5.04651768,5.03234696,5.02818492
77.210695,5.19615242,5.04987304,0.382464884,5.04572195,5.03213479,5.02796906
77.221186,5.56776436,5.04912409,0.720166834,5.04496887,5.03192344,5.027754
77.231678,4.35889894,5.04841385,-0.830370344,5.04425451,5.03171286,5.0275397
77.24217,5.47722558,5.04773902,0.655352241,5.04357556,5.03150308,5.02732618
77.252661,4.69041576,5.04709664,-0.597227658,5.04292909,5.03129411,5.02711346
77.263153,5.83095189,5.0464839,0.885701979,5.04231226,5.03108591,5.02690149
77.273644,4.47213595,5.04589851,-0.757471161,5.04172279,5.03087853,5.02669033
77.284136,5.47722558,5.0453382,0.657181389,5.04115839,5.03067191,5.02647991
77.294628,5,5.04480105,-0.211662596,5.04061717,5.03046609,5.02627028
77.305119,4.35889894,5.04428537,-0.827880685,5.04009742,5.03026107,5.02606143
77.315611,4.79583152,5.04378946,-0.497953745,5.03959743,5.03005683,5.02585334
77.326102,5.38516481,5.04331196,0.584681835,5.03911585,5.02985339,5.02564605
77.336594,5.65685425,5.042852,0.783582959,5.03865181,5.02965072,5.0254395
77.347086,5.47722558,5.04240798,0.659407003,5.03820371,5.02944884,5.02523373
77.357577,4.89897949,5.04197871,-0.378152381,5.03777036,5.02924776,5.02502875
77.368069,5.09901951,5.04156312,0.239700623,5.03735068,5.02904745,5.02482452
77.37856,5.56776436,5.04116041,0.725674826,5.03694387,5.02884795,5.02462108
77.389052,5.09901951,5.04076967,0.241350041,5.03654903,5.02864921,5.02441838
77.399544,5.38516481,5.0403902,0.587175111,5.03616544,5.02845125,5.02421646
77.410035,5.38516481,5.04002133,0.587489131,5.03579246,5.0282541,5.02401532
77.420527,4.69041576,5.03966237,-0.590970901,5.03542937,5.02805771,5.02381493
77.431018,5.65685425,5.03931279,0.785838059,5.03507566,5.02786212,5.02361533
77.44151,5,5.03897201,-0.197413292,5.03473073,5.02766729,5.02341647
77.452002,5,5.03863955,-0.196569445,5.03439411,5.02747324,5.02321837
77.462493,5.29150262,5.03831498,0.503177541,5.03406539,5.02728,5.02302106
77.472985,5.47722558,5.03799783,0.662742591,5.03374406,5.02708751,5.02282449
77.483476,4.12310563,5.03768776,-0.956337878,5.0334298,5.02689582,5.02262871
77.493968,5.29150262,5.03738435,0.504101453,5.03312219,5.02670489,5.02243366
77.50446,5.47722558,5.03708728,0.663429194,5.03282091,5.02651473,5.02223938
77.514951,5.09901951,5.03679628,0.24944586,5.03252568,5.02632537,5.02204588
77.525443,5.56776436,5.03651099,0.728871302,5.03223616,5.02613677,5.02185311
77.535934,5.29150262,5.0362312,0.505243925,5.03195212,5.02594896,5.02166113
77.546426,5.19615242,5.03595668,0.400244607,5.03167334,5.02576191,5.02146988
77.556918,5.47722558,5.03568723,0.664483515,5.03139963,5.02557563,5.02127939
77.567409,5.09901951,5.03542256,0.252184365,5.03113067,5.02539014,5.02108968
77.577901,4.58257569,5.0351624,-0.672745648,5.03086621,5.02520541,5.0209007
77.588392,5.19615242,5.03490662,0.401554237,5.03060611,5.02502147,5.0207125
77.598884,5.09901951,5.03465498,0.253701662,5.03035015,5.02483828,5.02052503
77.609376,4.58257569,5.03440735,-0.67218424,5.03009817,5.02465586,5.02033831
77.619867,5.19615242,5.03416358,0.402478371,5.02985005,5.02447423,5.02015237
77.630359,5,5.0339235,-0.184183322,5.02960559,5.02429335,5.01996716
77.64085,5.56776436,5.03368699,0.730805974,5.0293647,5.02411325,5.01978272
77.651342,4.35889894,5.03345389,-0.821312942,5.0291272,5.02393391,5.01959901
77.661834,5,5.0332241,-0.182274799,5.028893,5.02375533,5.01941606
77.672325,5.38516481,5.03299753,0.593436836,5.02866199,5.02357754,5.01923386
77.682817,5.47722558,5.03277402,0.666672001,5.02843404,5.02340049,5.01905241
77.693308,5.38516481,5.03255351,0.593810828,5.02820907,5.02322423,5.01887171
77.7038,4.79583152,5.03233586,-0.486317117,5.02798694,5.02304871,5.01869174
77.714292,5,5.03212101,-0.17922335,5.0277676,5.02287396,5.01851253
77.724783,4.58257569,5.03190888,-0.670323197,5.02755096,5.02269999,5.01833407
77.735275,5.29150262,5.03169936,0.509708994,5.02733692,5.02252676,5.01815634
77.745766,4.69041576,5.03149241,-0.584017681,5.02712543,5.02235431,5.01797937
77.756258,5.19615242,5.03128792,0.406035098,5.02691638,5.02218261,5.01780313
77.76675,5.19615242,5.0310859,0.406283796,5.02670978,5.02201166,5.01762763
77.777241,4.79583152,5.03088623,-0.484824411,5.02650553,5.02184149,5.01745289
77.787733,4.79583152,5.03068882,-0.484620778,5.02630351,5.02167206,5.01727887
77.798224,4.79583152,5.03049365,-0.484419367,5.02610371,5.02150341,5.01710561
77.808716,4.69041576,5.03030061,-0.582996444,5.02590604,5.0213355,5.01693307
77.819208,5.47722558,5.03010969,0.668667246,5.02571046,5.02116835,5.01676128
77.829699,5.38516481,5.02992084,0.596023459,5.02551694,5.02100197,5.01659023
77.840191,5.74456265,5.02973399,0.845475402,5.0253254,5.02083632,5.01641991
77.850682,5,5.02954912,-0.171898579,5.02513582,5.02067145,5.01625034
77.861174,5.19615242,5.02936616,0.408394742,5.02494813,5.02050732,5.01608149
77.871666,5.09901951,5.02918508,0.264262061,5.0247623,5.02034394,5.01591337
77.882157,4.79583152,5.02900586,-0.482881286,5.02457833,5.02018132,5.015746
77.892649,4.69041576,5.02882843,-0.581732475,5.02439612,5.02001945,5.01557935
77.90314,5.38516481,5.02865279,0.597086269,5.02421569,5.01985834,5.01541345
77.913632,4.79583152,5.02847888,-0.482335312,5.02403696,5.01969796,5.01524827
77.924124,4.89897949,5.02830666,-0.359620881,5.02385991,5.01953834,5.01508381
77.934615,4.79583152,5.02813614,-0.481979895,5.02368454,5.01937948,5.01492011
77.945107,5.09901951,5.02796725,0.266556305,5.02351078,5.01922135,5.01475711
77.955598,4.69041576,5.02779999,-0.580847856,5.02333864,5.01906399,5.01459486
77.96609,4.89897949,5.02763431,-0.358684851,5.02316805,5.01890736,5.01443332
77.976582,4.47213595,5.02747021,-0.745207526,5.02299903,5.01875147,5.01427251
77.987073,5.47722558,5.02730768,0.670759194,5.02283156,5.01859634,5.01411245
77.997565,5.29150262,5.02714665,0.514155595,5.02266557,5.01844195,5.01395309
78.008056,5.65685425,5.02698712,0.793641687,5.02250107,5.01828831,5.01379447
78.018548,5.38516481,5.02682906,0.598611519,5.022338,5.0181354,5.01363656
78.02904,6.244998,5.02667244,1.10377786,5.02217637,5.01798324,5.01347938
78.039531,5.38516481,5.02651728,0.598871882,5.02201617,5.01783183,5.01332293
78.050023,4.89897949,5.02636351,-0.356908986,5.02185735,5.01768115,5.01316719
78.060514,5.19615242,5.02621115,0.412239334,5.02169993,5.01753122,5.01301218
78.071006,5.83095189,5.02606016,0.897157585,5.02154384,5.01738202,5.01285789
78.081498,5.38516481,5.02591053,0.599378238,5.0213891,5.01723356,5.01270431
78.091989,5.09901951,5.02576227,0.270660755,5.02123571,5.01708586,5.01255146
78.102481,4.58257569,5.02561532,-0.665612222,5.02108361,5.01693887,5.01239932
78.112972,4.58257569,5.02546971,-0.66550283,5.02093283,5.01679264,5.0122479
78.123464,5.38516481,5.02532539,0.599866168,5.02078332,5.01664713,5.0120972
78.133956,5.09901951,5.02518235,0.271729939,5.02063508,5.01650235,5.0119472
78.144447,4.69041576,5.02504061,-0.578467675,5.02048811,5.01635833,5.01179794
78.154939,3.74165739,5.02490012,-1.13280304,5.02034237,5.01621502,5.01164937
78.16543,5.38516481,5.0247609,0.600336499,5.02019788,5.01607247,5.01150153
78.175922,5.29150262,5.0246229,0.516604029,5.02005459,5.01593063,5.0113544
78.186414,5.47722558,5.02448614,0.672859149,5.01991253,5.01578952,5.01120797
78.196905,6.08276253,5.02435062,1.02879148,5.01977168,5.01564916,5.01106227
78.207397,4.35889894,5.0242163,-0.815669884,5.01963201,5.01550952,5.01091726
78.217888,5.19615242,5.0240832,0.414812278,5.01949354,5.01537062,5.01077298
78.22838,5.19615242,5.02395127,0.41497127,5.01935622,5.01523243,5.01062939
78.238872,5.09901951,5.02382052,0.274224349,5.01922006,5.01509498,5.01048651
78.249363,6.63324958,5.02369096,1.26868381,5.01908507,5.01495826,5.01034435
78.259855,5.38516481,5.02356255,0.601333731,5.01895121,5.01482226,5.01020288
78.270346,5.56776436,5.02343531,0.737786589,5.0188185,5.014687,5.01006213
78.280838,5.38516481,5.02330921,0.601544343,5.01868691,5.01455246,5.00992208
78.29133,5.56776436,5.02318425,0.737956714,5.01855644,5.01441864,5.00978272
78.301821,4.89897949,5.02306044,-0.352251265,5.01842709,5.01428555,5.00964409
78.312313,6.40312424,5.02293775,1.17481338,5.01829884,5.01415318,5.00950614
78.322804,6.08276253,5.02281619,1.02953695,5.01817171,5.01402154,5.00936891
78.333296,5.29150262,5.02269574,0.518465894,5.01804566,5.01389061,5.00923236
78.343788,5.29150262,5.0225764,0.518580974,5.0179207,5.01376041,5.00909651
78.354279,5,5.02245817,-0.149860493,5.01779683,5.01363094,5.00896138
78.364771,5.83095189,5.02234103,0.899227929,5.01767402,5.01350217,5.00882693
78.375262,4.58257569,5.02222499,-0.66306055,5.0175523,5.01337414,5.00869319
78.385754,4.69041576,5.02211003,-0.575929046,5.01743163,5.01324681,5.00856014
78.396246,5.47722558,5.02199615,0.67470692,5.01731203,5.0131202,5.00842778
78.406737,4.58257569,5.02188337,-0.66280289,5.0171935,5.01299432,5.00829613
78.417229,5.65685425,5.02177165,0.796920701,5.01707601,5.01286915,5.00816516
78.42772,5.19615242,5.02166101,0.417721698,5.01695957,5.0127447,5.0080349
78.438212,4.24264069,5.02155142,-0.882559194,5.01684417,5.01262096,5.00790532
78.448704,4.58257569,5.02144289,-0.662470524,5.0167298,5.01249793,5.00777643
78.459195,5.19615242,5.02133543,0.41811122,5.01661648,5.01237563,5.00764824
78.469687,4.58257569,5.02122901,-0.66230908,5.01650418,5.01225403,5.00752073
78.480178,4.69041576,5.02112365,-0.575072077,5.01639292,5.01213315,5.00739392
78.49067,5.19615242,5.02101933,0.418489058,5.01628266,5.01201298,5.00726779
78.501162,5.47722558,5.02091605,0.675506866,5.01617343,5.01189351,5.00714235
78.511653,5.65685425,5.02081382,0.797521431,5.01606522,5.01177477,5.00701761
78.522145,5.91607978,5.02071262,0.946238431,5.01595803,5.01165672,5.00689354
78.532636,4.47213595,5.02061246,-0.740591995,5.01585185,5.0115394,5.00677016
78.543128,5.09901951,5.02051332,0.280189565,5.01574667,5.01142277,5.00664746
78.55362,5.29150262,5.02041521,0.520660552,5.01564249,5.01130685,5.00652545
78.564111,5.65685425,5.02031814,0.797832133,5.01553933,5.01119165,5.00640413
78.574603,4.79583152,5.02022208,-0.473698799,5.01543715,5.01107714,5.00628348
78.585094,5.09901951,5.02012704,0.280878035,5.01533598,5.01096335,5.00616352
78.595586,4.79583152,5.02003302,-0.473499204,5.0152358,5.01085025,5.00604423
78.606078,6,5.01994001,0.989979792,5.01513661,5.01073786,5.00592562
78.616569,4.24264069,5.01984803,-0.881593638,5.01503842,5.01062617,5.0058077
78.627061,5.09901951,5.01975705,0.281535895,5.01494121,5.01051519,5.00569045
78.637552,5.09901951,5.01966709,0.281695614,5.014845,5.01040491,5.00557389
78.648044,5,5.01957814,-0.139921891,5.01474976,5.01029532,5.00545799
78.658536,5.38516481,5.01949018,0.604710364,5.0146555,5.01018644,5.00534277
78.669027,5.19615242,5.01940324,0.420415484,5.01456224,5.01007826,5.00522823
78.679519,4.89897949,5.0193173,-0.346897413,5.01446994,5.00997078,5.00511436
78.69001,4.79583152,5.01923237,-0.472652986,5.01437863,5.009864,5.00500117
78.700502,4.79583152,5.01914843,-0.472564181,5.01428829,5.00975791,5.00488865
78.710994,5.09901951,5.01906549,0.282761427,5.01419892,5.00965251,5.00477679
78.721485,4.69041576,5.01898356,-0.573208335,5.01411053,5.00954783,5.00466562
78.731977,4.79583152,5.01890262,-0.472304025,5.01402312,5.00944382,5.0045551
78.742468,4.89897949,5.01882268,-0.346183764,5.01393669,5.00934053,5.00444527
78.75296,4.69041576,5.01874374,-0.572999111,5.01385122,5.00923791,5.00433609
78.763452,4,5.01866579,-1.00928975,5.01376671,5.00913599,5.00422758
78.773943,4,5.01858885,-1.00925163,5.01368319,5.00903477,5.00411975
78.784435,4.12310563,5.01851289,-0.946259616,5.01360063,5.00893423,5.00401257
78.794926,4.89897949,5.01843793,-0.345627606,5.01351904,5.0088344,5.00390607
78.805418,4.89897949,5.01836395,-0.345520575,5.01343841,5.00873524,5.00380022
78.81591,5.47722558,5.01829097,0.677447123,5.01335875,5.00863678,5.00369504
78.826401,6,5.01821899,0.990848632,5.01328006,5.00853901,5.00359053
78.836893,5.65685425,5.01814799,0.799191002,5.01320233,5.00844192,5.00348667
78.847384,6.164414,5.01807799,1.07067082,5.01312558,5.00834553,5.00338348
78.857876,5.47722558,5.01800898,0.677655219,5.01304978,5.00824981,5.00328094
78.868368,5.38516481,5.01794095,0.605989977,5.01297495,5.00815478,5.00317906
78.878859,4.79583152,5.01787393,-0.471213757,5.01290108,5.00806045,5.00307785
78.889351,5.74456265,5.01780789,0.852499126,5.01282818,5.00796679,5.00297729
78.899842,5.38516481,5.01774284,0.606153417,5.01275624,5.00787383,5.00287739
78.910334,4.58257569,5.01767878,-0.659623443,5.01268527,5.00778154,5.00277814
78.920826,4.79583152,5.01761571,-0.470939688,5.01261525,5.00768993,5.00267955
78.931317,5.09901951,5.01755364,0.28542227,5.01254621,5.00759901,5.00258161
78.941809,4.58257569,5.01749256,-0.659482268,5.01247813,5.00750876,5.00248433
78.9523,4.24264069,5.01743248,-0.88022258,5.01241102,5.00741921,5.0023877
78.962792,5.38516481,5.01737339,0.606458095,5.01234488,5.00733032,5.00229172
78.973284,4.69041576,5.01731529,-0.571751281,5.0122797,5.00724211,5.00219638
78.983775,5.09901951,5.01725819,0.285939375,5.01221549,5.00715459,5.00210171
78.994267,4.89897949,5.01720208,-0.343835121,5.01215224,5.00706774,5.00200768
79.004758,5.65685425,5.01714696,0.799817032,5.01208997,5.00698158,5.0019143
79.01525,5.74456265,5.01709284,0.852918404,5.01202866,5.00689608,5.00182157
79.025742,6.70820393,5.01703972,1.3004477,5.01196831,5.00681125,5.00172948
79.036233,6.08276253,5.01698759,1.03236376,5.01190894,5.00672711,5.00163804
79.046725,4.58257569,5.01693647,-0.659060521,5.01185054,5.00664364,5.00154724
79.057216,5.83095189,5.01688634,0.902255814,5.01179311,5.00656084,5.0014571
79.067708,4.89897949,5.01683721,-0.343304129,5.01173665,5.00647871,5.00136759
79.0782,4.47213595,5.01678908,-0.738006183,5.01168115,5.00639726,5.00127872
79.088691,5.56776436,5.01674196,0.742308834,5.01162664,5.00631648,5.0011905
79.099183,5.91607978,5.01669583,0.948358556,5.0115731,5.00623636,5.00110291
79.109674,4.47213595,5.01665072,-0.737912436,5.01152053,5.00615692,5.00101598
79.120166,6,5.0166066,0.991661936,5.01146894,5.00607815,5.00092967
79.130658,5.19615242,5.0165635,0.423779335,5.01141833,5.00600004,5.000844
79.141149,4.79583152,5.0165214,-0.469776414,5.0113687,5.00592261,5.00075898
79.151641,5.65685425,5.01648031,0.800233676,5.01132004,5.00584583,5.00067458
79.162132,5.65685425,5.01644025,0.800258709,5.01127238,5.00576973,5.00059083
79.172624,4.35889894,5.0164012,-0.810865126,5.0112257,5.00569429,5.00050771
79.183116,5.19615242,5.01636316,0.424015644,5.01118001,5.00561951,5.00042522
79.193607,5,5.01632614,-0.127773772,5.0111353,5.0055454,5.00034337
79.204099,5,5.01629013,-0.127632799,5.01109158,5.00547195,5.00026215
79.21459,5,5.01625515,-0.12749568,5.01104885,5.00539917,5.00018157
79.225082,5.91607978,5.01622118,0.94860877,5.01100711,5.00532704,5.00010161
79.235574,6.164414,5.01618824,1.07155297,5.01096636,5.00525558,5.00002228
79.246065,6,5.01615633,0.991888941,5.01092661,5.00518478,4.99994358
79.256557,6,5.01612544,0.991904512,5.01088785,5.00511463,4.99986551
79.267048,5.19615242,5.01609558,0.424331049,5.0108501,5.00504515,4.99978807
79.27754,5.65685425,5.01606676,0.800492032,5.01081334,5.00497632,4.99971125
79.288032,5.65685425,5.01603896,0.800509393,5.01077758,5.00490815,4.99963506
79.298523,4.79583152,5.0160122,-0.469234143,5.01074283,5.00484064,4.99955949
79.309015,5.09901951,5.01598648,0.288154524,5.01070908,5.00477379,4.99948455
79.319506,4.79583152,5.01596181,-0.469180438,5.01067635,5.00470759,4.99941023
79.329998,5.38516481,5.01593817,0.607640219,5.01064462,5.00464204,4.99933653
79.34049,4.79583152,5.01591558,-0.469131172,5.01061391,5.00457715,4.99926346
79.350981,5.74456265,5.01589404,0.853620881,5.01058421,5.00451292,4.99919101
79.361473,5.19615242,5.01587355,0.424592602,5.01055553,5.00444933,4.99911917
79.371964,4.79583152,5.01585412,-0.469065658,5.01052789,5.0043864,4.99904795
79.382456,5.29150262,5.01583575,0.52503988,5.01050127,5.00432412,4.99897735
79.392948,5.09901951,5.01581844,0.288445969,5.01047567,5.00426249,4.99890737
79.403439,5.29150262,5.01580219,0.525071835,5.01045111,5.00420151,4.99883801
79.413931,4.58257569,5.01578701,-0.6581879,5.01042757,5.00414117,4.99876926
79.424422,5.29150262,5.01577289,0.525099734,5.01040508,5.00408149,4.99870112
79.434914,5.09901951,5.01575985,0.288547514,5.01038362,5.00402245,4.9986336
79.445406,5.09901951,5.01574787,0.288568258,5.01036319,5.00396406,4.99856669
79.455897,5.19615242,5.01573698,0.42475339,5.01034382,5.00390632,4.9985004
79.466389,5.65685425,5.01572717,0.800704117,5.01032549,5.00384922,4.99843471
79.47688,5.09901951,5.01571844,0.288619257,5.01030821,5.00379278,4.99836964
79.487372,5.09901951,5.0157108,0.288632497,5.01029198,5.00373697,4.99830517
79.497864,5.19615242,5.01570424,0.424791925,5.01027681,5.0036818,4.99824131
79.508355,5.74456265,5.01569879,0.85373524,5.0102627,5.00362728,4.99817806
79.518847,4.79583152,5.01569443,-0.468895407,5.01024965,5.0035734,4.99811542
79.529338,5.38516481,5.01569117,0.607843432,5.01023767,5.00352016,4.99805338
79.53983,5.09901951,5.01568902,0.288670219,5.01022676,5.00346756,4.99799195
79.550322,5.56776436,5.01568798,0.743018429,5.01021692,5.00341561,4.99793112
79.560813,4.24264069,5.01568805,-0.87923112,5.01020817,5.00336429,4.9978709
79.571305,4.79583152,5.01568924,-0.468889874,5.01020049,5.00331361,4.99781127
79.581796,5.19615242,5.01569155,0.424806863,5.0101939,5.00326357,4.99775226
79.592288,4.47213595,5.01569501,-0.737264574,5.01018842,5.00321417,4.99769383
79.60278,4.69041576,5.01569959,-0.570336597,5.01018404,5.0031654,4.99763601
79.613271,5.47722558,5.01570531,0.679352825,5.01018075,5.00311727,4.99757879
79.623763,4.12310563,5.01571217,-0.944778571,5.01017857,5.00306977,4.99752217
79.634254,5.47722558,5.01572018,0.679341885,5.01017749,5.00302292,4.99746615
79.644746,5.91607978,5.01572933,0.948867985,5.01017753,5.00297669,4.99741072
79.655238,5.56776436,5.01573964,0.742983665,5.01017868,5.00293109,4.99735588
79.665729,4.79583152,5.0157511,-0.468955836,5.01018095,5.00288613,4.99730165
79.676221,5.09901951,5.01576373,0.288540789,5.01018435,5.0028418,4.997248
79.686712,5.19615242,5.01577752,0.424705664,5.01018889,5.0027981,4.99719495
79.697204,5.09901951,5.01579249,0.288490939,5.01019455,5.00275503,4.99714249
79.707696,5.19615242,5.01580864,0.424669027,5.01020136,5.00271259,4.99709062
79.718187,6,5.01582597,0.992055457,5.01020932,5.00267078,4.99703934
79.728679,4.58257569,5.01584449,-0.658231568,5.01021843,5.0026296,4.99698865
79.73917,5.09901951,5.01586421,0.288366616,5.01022869,5.00258905,4.99693856
79.749662,5.47722558,5.01588513,0.679220469,5.01024012,5.00254912,4.99688904
79.760154,5.29150262,5.01590726,0.524971775,5.01025271,5.00250982,4.99684012
79.770645,4.58257569,5.0159306,-0.65829697,5.01026648,5.00247115,4.99679178
79.781137,6.08276253,5.01595515,1.03286368,5.01028143,5.0024331,4.99674402
79.791628,6,5.01598094,0.991977351,5.01029757,5.00239567,4.99669686
79.80212,5.47722558,5.01600797,0.679130034,5.01031492,5.00235887,4.99665027
79.812612,4.58257569,5.01603625,-0.658377214,5.01033347,5.00232269,4.99660426
79.823103,4.69041576,5.01606577,-0.570657524,5.01035323,5.00228714,4.99655884
79.833595,5.19615242,5.01609654,0.424329918,5.0103742,5.0022522,4.996514
79.844086,5.56776436,5.01612857,0.74272188,5.01039638,5.00221789,4.99646974
79.854578,5.09901951,5.01616187,0.287850039,5.01041979,5.00218419,4.99642606
79.86507,5,5.01619644,-0.127265227,5.01044444,5.00215112,4.99638295
79.875561,5.38516481,5.01623228,0.607398159,5.01047032,5.00211867,4.99634042
79.886053,4.89897949,5.01626942,-0.342476179,5.01049745,5.00208683,4.99629847
79.896544,4.35889894,5.01630785,-0.810807561,5.01052583,5.00205561,4.9962571
79.907036,4.24264069,5.01634758,-0.8796061,5.01055547,5.00202501,4.9962163
79.917528,5.19615242,5.01638862,0.423985616,5.01058639,5.00199502,4.99617607
79.928019,5.56776436,5.01643098,0.742518274,5.01061857,5.00196565,4.99613642
79.938511,5,5.01647466,-0.12835366,5.01065205,5.00193689,4.99609733
79.949002,4.12310563,5.01651968,-0.945205825,5.01068681,5.00190875,4.99605882
79.959494,5.09901951,5.01656605,0.287147119,5.01072288,5.00188122,4.99602088
79.969986,4.24264069,5.01661377,-0.879757397,5.01076026,5.00185431,4.99598351
79.980477,5.65685425,5.01666284,0.800119622,5.01079895,5.00182801,4.99594671
79.990969,5.74456265,5.01671329,0.853140877,5.01083898,5.00180232,4.99591047
80.00146,5,5.01676511,-0.129480167,5.01088034,5.00177724,4.9958748
80.011952,4.58257569,5.01681835,-0.658970905,5.01092306,5.00175277,4.9958397
80.022444,4.69041576,5.01687299,-0.571364363,5.01096715,5.00172891,4.99580516
80.032935,5.83095189,5.01692904,0.902232149,5.01101261,5.00170566,4.99577119
80.043427,4.24264069,5.01698652,-0.879969221,5.01105944,5.00168301,4.99573778
80.053918,4.89897949,5.01704541,-0.34360723,5.01110765,5.00166098,4.99570493
80.06441,4.58257569,5.01710575,-0.659188941,5.01115726,5.00163955,4.99567264
80.074902,5.09901951,5.01716755,0.28609783,5.01120828,5.00161873,4.99564092
80.085393,5.09901951,5.01723079,0.285987277,5.01126071,5.00159851,4.99560975
80.095885,5.19615242,5.01729551,0.422914776,5.01131457,5.0015789,4.99557914
80.106376,5.47722558,5.01736172,0.678132627,5.01136987,5.0015599,4.9955491
80.116868,5.19615242,5.01742942,0.422756437,5.01142662,5.00154149,4.9955196
80.12736,5.19615242,5.01749863,0.422674574,5.01148483,5.00152369,4.99549066
80.137851,5.19615242,5.01756935,0.422590906,5.01154451,5.0015065,4.99546228
80.148343,5.56776436,5.01764161,0.741702605,5.01160568,5.0014899,4.99543446
80.158834,5.19615242,5.01771541,0.422418059,5.01166834,5.00147391,4.99540718
80.169326,4.58257569,5.01779077,-0.659708327,5.01173253,5.00145851,4.99538046
80.179818,4.69041576,5.01786771,-0.572234175,5.01179824,5.00144372,4.99535429
80.190309,5.83095189,5.01794623,0.90166827,5.01186548,5.00142953,4.99532868
80.200801,6,5.01802635,0.990945837,5.01193428,5.00141594,4.99530361
80.211292,5,5.01810808,-0.13456625,5.01200464,5.00140294,4.99527909
80.221784,4.12310563,5.01819145,-0.946089754,5.01207659,5.00139054,4.99525512
80.232276,5.19615242,5.0182765,0.421753397,5.01215017,5.00137874,4.99523169
80.242767,5.09901951,5.01836319,0.284000567,5.01222536,5.00136753,4.99520882
80.253259,5.38516481,5.01845157,0.605568523,5.01230218,5.00135692,4.99518648
80.26375,5.29150262,5.01854163,0.522456688,5.01238063,5.00134691,4.9951647
80.274242,5.19615242,5.01863341,0.421330054,5.01246075,5.00133749,4.99514345
80.284734,4.47213595,5.01872691,-0.739317898,5.01254254,5.00132866,4.99512275
80.295225,5.47722558,5.01882214,0.677054971,5.01262602,5.00132043,4.9951026
80.305717,5.29150262,5.01891914,0.522095278,5.01271122,5.00131278,4.99508298
80.316208,5,5.01901791,-0.137905445,5.01279813,5.00130573,4.9950639
80.3267,5.19615242,5.01911849,0.420754009,5.01288681,5.00129927,4.99504536
80.337192,4.47213595,5.01922088,-0.739651892,5.01297724,5.0012934,4.99502736
80.347683,4.47213595,5.01932509,-0.739722337,5.01306946,5.00128813,4.9950099
80.358175,4.79583152,5.01943117,-0.472863243,5.01316348,5.00128344,4.99499298
80.368666,6.40312424,5.01953912,1.17625895,5.01325932,5.00127934,4.99497659
80.379158,4.89897949,5.01964897,-0.347375136,5.01335702,5.00127582,4.99496073
80.38965,4.69041576,5.01976075,-0.573885872,5.0134566,5.0012729,4.99494541
80.400141,4.89897949,5.01987447,-0.347699559,5.01355805,5.00127056,4.99493062
80.410633,5.09901951,5.01999016,0.281121599,5.01366143,5.00126881,4.99491637
80.421124,6.32455532,5.02010783,1.14212411,5.01376674,5.00126765,4.99490264
80.431616,5.74456265,5.02022752,0.8510788,5.01387402,5.00126707,4.99488945
80.442108,5.56776436,5.02034931,0.739875025,5.01398334,5.00126708,4.99487678
80.452599,5.47722558,5.02047315,0.675834612,5.01409466,5.00126767,4.99486465
80.463091,5.19615242,5.0205991,0.418990838,5.01420804,5.00126884,4.99485304
80.473582,5.19615242,5.02072716,0.418837993,5.01432347,5.0012706,4.99484196
80.484074,5.83095189,5.02085738,0.900052508,5.01444101,5.00127293,4.99483141
80.494566,5.09901951,5.02098978,0.279338034,5.01456067,5.00127585,4.99482137
80.505057,5.47722558,5.02112437,0.675352651,5.01468248,5.00127935,4.99481187
80.515549,6.244998,5.02126122,1.10622637,5.01480649,5.00128343,4.99480289
80.52604,5,5.02140033,-0.146288523,5.01493271,5.00128809,4.99479443
80.536532,4.47213595,5.02154176,-0.741219136,5.01506119,5.00129333,4.99478649
80.547024,4.58257569,5.02168554,-0.662653635,5.01519196,5.00129915,4.99477907
80.557515,5.19615242,5.02183167,0.417517366,5.01532503,5.00130555,4.99477217
80.568007,4.47213595,5.02198024,-0.741514857,5.01546048,5.00131252,4.99476579
80.578498,4.79583152,5.02213124,-0.4757097,5.01559832,5.00132007,4.99475993
80.58899,5.47722558,5.02228475,0.67449301,5.0157386,5.0013282,4.99475458
80.599482,5,5.02244082,-0.149802611,5.01588139,5.00133691,4.99474975
80.609973,4.79583152,5.02259946,-0.476201569,5.01602668,5.00134619,4.99474544
80.620465,4.69041576,5.02276073,-0.576493688,5.01617456,5.00135604,4.99474164
80.630956,4.47213595,5.02292466,-0.742151405,5.01632503,5.00136647,4.99473836
80.641448,4.89897949,5.02309133,-0.352295107,5.01647819,5.00137747,4.99473558
80.65194,4.89897949,5.02326081,-0.352535566,5.0166341,5.00138905,4.99473332
80.662431,4.79583152,5.02343313,-0.477076098,5.01679279,5.0014012,4.99473157
80.672923,5.09901951,5.02360834,0.274610953,5.01695432,5.00141392,4.99473033
80.683414,5.56776436,5.02378647,0.737548571,5.0171187,5.00142721,4.9947296
80.693906,5.19615242,5.02396761,0.414951576,5.01728605,5.00144107,4.99472937
80.704398,4.79583152,5.02415181,-0.477828726,5.01745639,5.00145551,4.99472966
80.714889,4.58257569,5.02433912,-0.664652863,5.01762978,5.00147051,4.99473045
80.725381,5.56776436,5.02452964,0.737044585,5.01780632,5.00148608,4.99473174
80.735872,5.29150262,5.02472341,0.516506743,5.01798605,5.00150222,4.99473354
80.746364,5.19615242,5.02492053,0.413801757,5.01816907,5.00151893,4.99473584
80.756856,4.47213595,5.02512107,-0.743629689,5.01835546,5.00153621,4.99473865
80.767347,5.38516481,5.02532509,0.599866415,5.01854526,5.00155405,4.99474195
80.777839,5.19615242,5.02553272,0.413061376,5.01873862,5.00157246,4.99474576
80.78833,4.79583152,5.02574401,-0.479491909,5.01893557,5.00159143,4.99475007
80.798822,5,5.0259591,-0.161118292,5.01913626,5.00161098,4.99475488
80.809314,5.47722558,5.02617811,0.671600675,5.01934081,5.00163109,4.99476018
80.819805,5.19615242,5.02640112,0.412008867,5.0195493,5.00165176,4.99476599
80.830297,5.19615242,5.02662826,0.411733124,5.01976185,5.001673,4.99477228
80.840788,5.29150262,5.02685961,0.514434651,5.01997856,5.0016948,4.99477908
80.85128,4.79583152,5.02709535,-0.480898982,5.0201996,5.00171716,4.99478637
80.861772,4,5.02733564,-1.01357567,5.02042511,5.00174009,4.99479415
80.872263,4.89897949,5.02758061,-0.358609993,5.02065526,5.00176357,4.99480243
80.882755,4.79583152,5.02783043,-0.481662644,5.02089018,5.00178763,4.99481119
80.893246,5,5.0280852,-0.167586385,5.02113,5.00181223,4.99482045
80.903738,4.79583152,5.02834515,-0.482196671,5.02137494,5.00183741,4.9948302
80.91423,5.56776436,5.02861046,0.734270999,5.02162517,5.00186314,4.99484044
80.924721,5.65685425,5.02888131,0.792447437,5.02188087,5.00188943,4.99485116
80.935213,4.58257569,5.02915796,-0.668268112,5.02214233,5.00191628,4.99486238
80.945704,5.74456265,5.02944062,0.84564888,5.02240971,5.00194368,4.99487408
80.956196,5.09901951,5.02972958,0.263229811,5.02268335,5.00197165,4.99488626
80.966688,5.09901951,5.03002511,0.262667865,5.02296348,5.00200018,4.99489893
80.977179,5,5.03032747,-0.174147837,5.02325039,5.00202926,4.99491209
80.987671,5.38516481,5.03063705,0.595422331,5.02354446,5.00205889,4.99492572
80.998162,5.29150262,5.03095416,0.510439478,5.02384599,5.00208909,4.99493984
81.008654,5.29150262,5.03127924,0.51012095,5.02415543,5.00211984,4.99495444
81.019146,5.19615242,5.03161272,0.405634941,5.02447321,5.00215114,4.99496952
81.029637,5.74456265,5.03195522,0.84416078,5.02479995,5.002183,4.99498508
81.040129,4.12310563,5.03230715,-0.953520594,5.02513605,5.00221542,4.99500112
81.05062,5.09901951,5.03266899,0.257585948,5.02548201,5.00224839,4.99501763
81.061112,5.65685425,5.03304145,0.789818203,5.02583852,5.00228191,4.99503463
81.071604,5.65685425,5.03342521,0.789575229,5.02620627,5.00231599,4.99505209
81.082095,5.29150262,5.03382113,0.507623377,5.02658613,5.00235062,4.99507003
81.092587,5.83095189,5.03423005,0.892592766,5.02697893,5.0023858,4.99508845
81.103078,5.19615242,5.0346529,0.401870031,5.0273856,5.00242153,4.99510734
81.11357,5.19615242,5.03509093,0.401324667,5.0278074,5.00245782,4.9951267
81.124062,5.09901951,5.03554549,0.251940523,5.02824567,5.00249465,4.99514653
81.134553,5.09901951,5.03601816,0.2510007,5.02870201,5.00253204,4.99516684
81.145045,5.19615242,5.03651107,0.399551439,5.02917853,5.00256997,4.99518761
81.155536,4.69041576,5.03702664,-0.588736678,5.02967766,5.00260846,4.99520885
81.166028,5.19615242,5.03756816,0.398226393,5.03020272,5.00264749,4.99523056
81.17652,4.69041576,5.03813974,-0.589681255,5.03075779,5.00268708,4.99525273
[truncated: 429,076 more chars]
