# Supplementary material for: Phase Stability of Iron Nitride Fe4N at High Pressure—Pressure-Dependent Evolution of Phase Equilibria in the Fe–N System
Source: Materials (Basel). 2021 Jul 15;14(14):3963. doi: 10.3390/ma14143963 (PMC8307547; doi:10.3390/ma14143963)
Supplement: Supplementary file 1 [file materials-14-03963-s001.zip › xrd_data/initial_1_fe4n_riet.txt]

'y-axis saved as Sqrt(y)
'x,G4_initial_Charge_2a_1_sum_all.xy,Ycalc,Diff,Roaldite,Roaldite,Iron,Bkg
20,35.2845575,35.5773846,-0.541135025,35.5773846,0,0,35.5773843
20.00918,35.7071421,35.5644885,0.377695177,35.5644885,0,0,35.5644882
20.01836,36.207734,35.5515959,0.810023526,35.5515959,0,0,35.5515955
20.027541,35.5527777,35.5387054,0.118626779,35.5387054,0,0,35.538705
20.036721,35.6089876,35.5258198,0.28838838,35.5258198,0,0,35.5258194
20.045901,35,35.5129377,-0.716196698,35.5129377,0,0,35.5129374
20.055081,36.4142829,35.5000592,0.956150479,35.5000592,0,0,35.5000588
20.064261,36.3042697,35.4871842,0.903927849,35.4871842,0,0,35.4871838
20.073441,36.0832371,35.4743127,0.780336095,35.4743127,0,0,35.4743123
20.082622,35.4118624,35.4614433,-0.222667714,35.4614433,0,0,35.461443
20.091802,35.6931366,35.4485789,0.49452774,35.4485789,0,0,35.4485786
20.100982,35.4400903,35.435718,0.0661231601,35.435718,0,0,35.4357177
20.110162,34.8568501,35.4228607,-0.752336727,35.4228607,0,0,35.4228603
20.119342,35.0428309,35.4100068,-0.60595042,35.4100068,0,0,35.4100065
20.128522,35.1567917,35.3971566,-0.490270234,35.3971566,0,0,35.3971562
20.137703,35.5105618,35.3843084,0.355321526,35.3843084,0,0,35.3843081
20.146883,35.2420204,35.3714652,-0.359784442,35.3714652,0,0,35.3714649
20.156063,35.3694784,35.3586256,0.104176831,35.3586256,0,0,35.3586252
20.165243,34.4673759,35.3457894,-0.937237193,35.3457894,0,0,35.3457891
20.174423,34.9141805,35.3329569,-0.647129322,35.3329569,0,0,35.3329565
20.183603,35.6791255,35.3201278,0.599164184,35.3201278,0,0,35.3201275
20.192784,34.6121366,35.307301,-0.833765165,35.307301,0,0,35.3073006
20.201964,34.9428104,35.294479,-0.593016524,35.294479,0,0,35.2944787
20.211144,35.0428309,35.2816606,-0.488702055,35.2816606,0,0,35.2816603
20.220324,35.9583092,35.2688458,0.830339322,35.2688458,0,0,35.2688454
20.229504,35.4118624,35.2560345,0.39475042,35.2560345,0,0,35.2560342
20.238684,35.8887169,35.2432268,0.803423978,35.2432268,0,0,35.2432264
20.247865,35.6230263,35.2304212,0.626582014,35.2304212,0,0,35.2304209
20.257045,35.1710108,35.2176206,-0.215893127,35.2176206,0,0,35.2176203
20.266225,35.5105618,35.2048236,0.552936005,35.2048236,0,0,35.2048232
20.275405,35.8329457,35.1920301,0.800572069,35.1920301,0,0,35.1920297
20.284585,35.2136337,35.1792402,0.185454987,35.1792402,0,0,35.1792398
20.293765,35.8468967,35.1664538,0.824889597,35.1664538,0,0,35.1664534
20.302946,34.8568501,35.1536696,-0.544811441,35.1536696,0,0,35.1536693
20.312126,35.5387113,35.1408904,0.630730444,35.1408904,0,0,35.14089
20.321306,35.0570963,35.1281147,-0.266492871,35.1281147,0,0,35.1281144
20.330486,34.9428104,35.1153426,-0.41536999,35.1153426,0,0,35.1153423
20.339666,35.6931366,35.1025741,0.76848062,35.1025741,0,0,35.1025738
20.348846,34.4673759,35.0898092,-0.788944428,35.0898092,0,0,35.0898088
20.358027,34.6121366,35.0770464,-0.681842968,35.0770464,0,0,35.0770461
20.367207,35.5527777,35.0642886,0.6989199,35.0642886,0,0,35.0642883
20.376387,35.6089876,35.0515344,0.746627885,35.0515344,0,0,35.0515341
20.385567,34.9284984,35.0387838,-0.332092465,35.0387838,0,0,35.0387834
20.394747,35.0428309,35.0260367,0.129592389,35.0260367,0,0,35.0260364
20.403927,34.3802269,35.0132933,-0.795654703,35.0132933,0,0,35.0132929
20.413108,35.7491259,35.000552,0.865201625,35.000552,0,0,35.0005516
20.422288,34.4818793,34.9878157,-0.711292076,34.9878157,0,0,34.9878153
20.431468,35.2278299,34.975083,0.502739394,34.975083,0,0,34.9750826
20.440648,35.0998575,34.9623539,0.370814856,34.9623539,0,0,34.9623535
20.449828,34.9714169,34.9496284,0.147609397,34.9496284,0,0,34.949628
20.459008,34.8425028,34.9369064,-0.307251774,34.9369064,0,0,34.936906
20.468189,35.5246393,34.9241867,0.774888784,34.9241867,0,0,34.9241863
20.477369,35.5527777,34.911472,0.800815648,34.911472,0,0,34.9114716
20.486549,34.6987031,34.8987608,-0.447278076,34.8987608,0,0,34.8987604
20.495729,35.3270435,34.8860533,0.66407092,34.8860533,0,0,34.8860529
20.504909,34.8137904,34.8733493,-0.244047055,34.8733493,0,0,34.8733489
20.51409,35.0998575,34.8606476,0.489090929,34.8606476,0,0,34.8606472
20.52327,34.2636834,34.8479509,-0.764373913,34.8479509,0,0,34.8479505
20.53245,35.6931366,34.8352577,0.926217494,34.8352577,0,0,34.8352574
20.54163,34.8711915,34.8225682,0.220506964,34.8225682,0,0,34.8225678
20.55081,34.7562944,34.8098823,-0.231490651,34.8098823,0,0,34.8098819
20.55999,35.2136337,34.7972,0.64531675,34.7972,0,0,34.7971996
20.569171,35.6230263,34.7845199,0.915699904,34.7845199,0,0,34.7845195
20.578351,34.8568501,34.7718449,0.291556583,34.7718449,0,0,34.7718445
20.587531,35.3411941,34.7591734,0.762902795,34.7591734,0,0,34.759173
20.596711,34.0734501,34.7465056,-0.820399602,34.7465056,0,0,34.7465052
20.605891,34,34.7338414,-0.856645413,34.7338414,0,0,34.733841
20.615071,34.394767,34.7211808,-0.571326284,34.7211808,0,0,34.7211804
20.624252,35.0570963,34.7085224,0.59040145,34.7085224,0,0,34.708522
20.633432,34.7850543,34.6958691,0.298638906,34.6958691,0,0,34.6958687
20.642612,35.2845575,34.6832193,0.775459983,34.6832193,0,0,34.6832189
20.651792,34.3656806,34.6705733,-0.552170894,34.6705733,0,0,34.6705728
20.660972,34.5108679,34.6579308,-0.383487854,34.6579308,0,0,34.6579304
20.670152,34.6842904,34.645292,0.197480217,34.645292,0,0,34.6452915
20.679333,35.2420204,34.6326554,0.780618339,34.6326554,0,0,34.632655
20.688513,35.3411941,34.6200238,0.849217449,34.6200238,0,0,34.6200234
20.697693,35.7491259,34.6073959,1.06851765,34.6073959,0,0,34.6073955
20.706873,33.9116499,34.5947716,-0.826511761,34.5947716,0,0,34.5947712
20.716053,34.7131099,34.582151,0.361882515,34.582151,0,0,34.5821505
20.725233,34.2198773,34.569534,-0.591317759,34.569534,0,0,34.5695335
20.734414,34.4818793,34.5569192,-0.27393416,34.5569192,0,0,34.5569188
20.743594,34.6265794,34.5443095,0.28682726,34.5443095,0,0,34.5443091
20.752774,35.3553391,34.5317034,0.907543727,34.5317034,0,0,34.531703
20.761954,34.4963766,34.519101,-0.150746159,34.519101,0,0,34.5191006
20.771134,34.423829,34.5065023,-0.287529657,34.5065023,0,0,34.5065018
20.780314,34.8281495,34.4939071,0.578136997,34.4939071,0,0,34.4939067
20.789495,34.6698716,34.4813143,0.434231885,34.4813143,0,0,34.4813139
20.798675,33.6154726,34.4687265,-0.923717428,34.4687265,0,0,34.4687261
20.807855,35.1283361,34.4561424,0.81987424,34.4561424,0,0,34.4561419
20.817035,35.4964787,34.4435619,1.02611735,34.4435619,0,0,34.4435615
20.826215,35.6510869,34.4309851,1.10458222,34.4309851,0,0,34.4309846
20.835395,35.39774,34.4184119,0.989610092,34.4184119,0,0,34.4184115
20.844576,35.0713558,34.405841,0.815790897,34.405841,0,0,34.4058406
20.853756,33.5261092,34.3932752,-0.931217478,34.3932752,0,0,34.3932748
20.862936,35.1140997,34.3807131,0.856379979,34.3807131,0,0,34.3807126
20.872116,34.4383507,34.3681546,0.264945536,34.3681546,0,0,34.3681541
20.881296,33.8526218,34.3555998,-0.709209423,34.3555998,0,0,34.3555993
20.890476,35.1425668,34.3430486,0.894157791,34.3430486,0,0,34.3430482
20.899657,33.9852909,34.3304998,-0.587544774,34.3304998,0,0,34.3304993
20.908837,34.5976878,34.317956,0.528896748,34.317956,0,0,34.3179556
20.918017,34.0734501,34.3054159,-0.481628316,34.3054159,0,0,34.3054155
20.927197,34.7275107,34.2928795,0.659265668,34.2928795,0,0,34.292879
20.936377,34.4673759,34.2803467,0.432468647,34.2803467,0,0,34.2803463
20.945558,34.2198773,34.2678163,-0.218949917,34.2678163,0,0,34.2678159
20.954738,35.0428309,34.255291,0.887434488,34.255291,0,0,34.2552905
20.963918,32.984845,34.2427693,-1.12157224,34.2427693,0,0,34.2427688
20.973098,34.4093011,34.2302513,0.423142724,34.2302513,0,0,34.2302508
20.982278,33.8230691,34.217737,-0.628226042,34.217737,0,0,34.2177365
20.991458,33.0756708,34.2052264,-1.06280553,34.2052264,0,0,34.2052259
21.000639,33.8526218,34.1927181,-0.583177836,34.1927181,0,0,34.1927177
21.009819,34.0440891,34.1802149,-0.368952415,34.1802149,0,0,34.1802145
21.018999,34.7994253,34.1677154,0.794801761,34.1677154,0,0,34.167715
21.028179,34.1174442,34.1552196,-0.194359008,34.1552196,0,0,34.1552192
21.037359,33.9411255,34.1427275,-0.449001168,34.1427275,0,0,34.1427271
21.046539,34.3656806,34.1302392,0.485223041,34.1302392,0,0,34.1302387
21.05572,34.6842904,34.1177531,0.752686707,34.1177531,0,0,34.1177526
21.0649,33.7194306,34.1052721,-0.621161444,34.1052721,0,0,34.1052717
21.07408,34.0734501,34.0927949,-0.139085598,34.0927949,0,0,34.0927944
21.08326,33.8821487,34.0803213,-0.445165855,34.0803213,0,0,34.0803209
21.09244,33.6154726,34.0678515,-0.672591161,34.0678515,0,0,34.067851
21.10162,34.5108679,34.0553854,0.674894415,34.0553854,0,0,34.0553849
21.110801,34.2490876,34.0429216,0.454055008,34.0429216,0,0,34.0429211
21.119981,33.6005952,34.030463,-0.655642983,34.030463,0,0,34.0304625
21.129161,32.9241553,34.018008,-1.04587415,34.018008,0,0,34.0180075
21.138341,34.4383507,34.0055568,0.657870763,34.0055568,0,0,34.0055563
21.147521,33.7934905,33.9931093,-0.446787171,33.9931093,0,0,33.9931088
21.156701,34.2344855,33.9806655,0.503805553,33.9806655,0,0,33.980665
21.165882,34.0734501,33.9682241,0.324385526,33.9682241,0,0,33.9682236
21.175062,33.7490741,33.9557878,-0.454657823,33.9557878,0,0,33.9557873
21.184242,34.394767,33.9433552,0.671871878,33.9433552,0,0,33.9433547
21.193422,34.176015,33.9309264,0.495064234,33.9309264,0,0,33.9309259
21.202602,33.6897611,33.9185013,-0.478267948,33.9185013,0,0,33.9185008
21.211782,34.5398321,33.9060799,0.796085518,33.9060799,0,0,33.9060794
21.220963,33.9852909,33.893661,0.302704442,33.893661,0,0,33.8936605
21.230143,35.1852242,33.8812471,1.14191816,33.8812471,0,0,33.8812466
21.239323,33.8230691,33.868837,-0.213934352,33.868837,0,0,33.8688365
21.248503,34.423829,33.8564306,0.753258506,33.8564306,0,0,33.8564301
21.257683,33.2716095,33.8440279,-0.756583393,33.8440279,0,0,33.8440274
21.266863,33.9411255,33.8316291,0.330902439,33.8316291,0,0,33.8316286
21.276044,34,33.8192326,0.425167497,33.8192326,0,0,33.8192321
21.285224,33.2716095,33.8068412,-0.731595321,33.8068412,0,0,33.8068407
21.294404,34.3074336,33.7944536,0.716226203,33.7944536,0,0,33.7944531
21.303584,33.3316666,33.7820698,-0.671120815,33.7820698,0,0,33.7820693
21.312764,33.4065862,33.7696897,-0.602580707,33.7696897,33.7696892,0,33.7696892
21.321944,33.286634,33.7573134,-0.686060791,33.7573134,33.7573128,0,33.7573128
21.331125,34.0293991,33.7449396,0.533347396,33.7449395,33.7449391,0,33.7449389
21.340305,32.7261363,33.7325716,-1.00321248,33.7325707,33.7325711,0,33.7325701
21.349485,33.6897611,33.7202085,-0.174491899,33.7202056,33.720208,0,33.7202051
21.358665,34.2344855,33.7078504,0.72569632,33.7078444,33.7078499,0,33.7078439
21.367845,33.808283,33.6954975,0.335835564,33.6954869,33.695497,0,33.6954864
21.377025,32.5576412,33.6831499,-1.06089996,33.6831332,33.6831494,0,33.6831327
21.386206,33.7934905,33.6708066,0.350262676,33.6707819,33.670806,0,33.6707814
21.395386,34.8425028,33.6584703,1.08813255,33.6584358,33.6584698,0,33.6584353
21.404566,34.6842904,33.6461405,1.01889641,33.6460934,33.64614,0,33.6460929
21.413746,34.1174442,33.6338173,0.695432904,33.6337549,33.6338168,0,33.6337543
21.422926,33.5559235,33.6215014,-0.256081959,33.6214201,33.6215009,0,33.6214195
21.432107,33.5410197,33.6091926,-0.261099508,33.6090877,33.6091921,0,33.6090872
21.441287,33.6303434,33.5968955,0.18288792,33.5967605,33.5968949,0,33.59676
21.450467,33.5111922,33.5846139,-0.27096445,33.5844371,33.5846133,0,33.5844365
21.459647,32.9089653,33.5723556,-0.814487744,33.5721175,33.5723551,0,33.5721169
21.468827,33.9263909,33.5601031,0.605217184,33.5598016,33.5601025,0,33.5598011
21.478007,33.6897611,33.5478246,0.376744534,33.5474896,33.5478241,0,33.547489
21.487188,33.346664,33.5355244,-0.434580711,33.53518,33.5355238,0,33.5351794
21.496368,34.0147027,33.5232213,0.701057366,33.5228756,33.5232207,0,33.522875
21.505548,33.7490741,33.5109219,0.488008394,33.5105749,33.5109213,0,33.5105744
21.514728,32.4653662,33.4986263,-1.01649403,33.4982781,33.4986257,0,33.4982775
21.523908,34.0587727,33.4863345,0.75659648,33.4859851,33.4863339,0,33.4859845
21.533088,32.7414111,33.4740465,-0.855941264,33.4736959,33.474046,0,33.4736953
21.542269,33.1511689,33.4617611,-0.557307944,33.4614091,33.4617605,0,33.4614086
21.551449,33.4813381,33.4494807,0.178486295,33.4491276,33.4494802,0,33.449127
21.560629,32.4191302,33.4372042,-1.00899657,33.4368498,33.4372037,0,33.4368492
21.569809,34.8137904,33.4249315,1.17849855,33.4245758,33.424931,0,33.4245753
21.578989,32.6036808,33.4126627,-0.899434223,33.4123057,33.4126621,0,33.4123051
21.588169,33.2565783,33.4003977,-0.379235251,33.4000394,33.4003971,0,33.4000388
21.59735,33.5559235,33.3881351,0.409619736,33.3877756,33.3881346,0,33.387775
21.60653,33.8526218,33.3758778,0.690466492,33.3755169,33.3758772,0,33.3755163
21.61571,33.8969025,33.3636243,0.730259034,33.3632621,33.3636237,0,33.3632615
21.62489,32.5115364,33.3513746,-0.916426841,33.3510111,33.351374,0,33.3510105
21.63407,33.5261092,33.3391287,0.43241243,33.3387639,33.3391281,0,33.3387633
21.64325,33.8821487,33.3268867,0.745159032,33.3265206,33.3268861,0,33.32652
21.652431,32.1714159,33.3146472,-1.06921996,33.3142798,33.3146466,0,33.3142792
21.661611,33.6600654,33.3024129,0.598040524,33.3020441,33.3024123,0,33.3020435
21.670791,32.969683,33.2901824,-0.566126641,33.2898123,33.2901818,0,33.2898117
21.679971,31.8590646,33.2779558,-1.19117217,33.2775843,33.2779552,0,33.2775837
21.689151,32.8024389,33.265733,-0.6806571,33.2653602,33.2657324,0,33.2653596
21.698331,33.763886,33.2535141,0.714403198,33.2531399,33.2535135,0,33.2531393
21.707512,32.9089653,33.2412977,-0.576482754,33.2409221,33.2412971,0,33.2409215
21.716692,33.3616546,33.2290865,0.364099067,33.2287095,33.2290859,0,33.2287089
21.725872,32.6802693,33.2168792,-0.732536609,33.2165008,33.2168786,0,33.2165002
21.735052,33.9411255,33.2046757,0.858166545,33.2042959,33.2046751,0,33.2042953
21.744232,32.6649659,33.1924761,-0.726298918,33.1920949,33.1924755,0,33.1920943
21.753412,32.249031,33.1802803,-0.965012598,33.1798977,33.1802797,0,33.1798971
21.762593,33.4962684,33.1680871,0.572871147,33.1677031,33.1680865,0,33.1677025
21.771773,32.9089653,33.1558991,-0.496924282,33.1555137,33.1558985,0,33.1555131
21.780953,32.7108545,33.1437149,-0.657921332,33.1433281,33.1437143,0,33.1433275
21.790133,33.2114438,33.1315347,0.282682028,33.1311464,33.1315341,0,33.1311458
21.799313,33.8526218,33.1193583,0.856308043,33.1189686,33.1193577,0,33.118968
21.808493,33.5559235,33.1071858,0.669878858,33.1067946,33.1071852,0,33.106794
21.817674,32.4191302,33.0950158,-0.822122667,33.0946232,33.0950152,0,33.0946226
21.826854,32.6496554,33.0828511,-0.658176008,33.082457,33.0828505,0,33.0824564
21.836034,32.8329103,33.0706902,-0.487626821,33.0702947,33.0706896,0,33.070294
21.845214,33.4065862,33.0585333,0.589960092,33.0581362,33.0585326,0,33.0581356
21.854394,33.4664011,33.0463802,0.648090173,33.0459816,33.0463796,0,33.045981
21.863575,32.2180074,33.0342297,-0.903450216,33.0338296,33.034229,0,33.033829
21.872755,33.7342556,33.0220844,0.843902363,33.0216828,33.0220837,0,33.0216822
21.881935,33.3166625,33.009943,0.553822629,33.0095399,33.0099424,0,33.0095393
21.891115,33.1360831,32.9978055,0.3718569,32.9974009,32.9978049,0,32.9974002
21.900295,33,32.9856719,0.119700032,32.9852658,32.9856713,0,32.9852651
21.909475,32.4653662,32.9735422,-0.712864678,32.9731345,32.9735416,0,32.9731339
21.918656,33.6452077,32.9614151,0.826917517,32.9610059,32.9614145,0,32.9610052
21.927836,32.8176782,32.9492932,-0.362787901,32.9488824,32.9492926,0,32.9488818
21.937016,33.6600654,32.9371753,0.850229442,32.9367629,32.9371746,0,32.9367622
21.946196,33,32.9250612,0.273749526,32.9246473,32.9250605,0,32.9246466
21.955376,33.286634,32.9129511,0.611296082,32.9125355,32.9129504,0,32.9125349
21.964556,32.3728281,32.9008448,-0.726647586,32.9004277,32.9008442,0,32.9004271
21.973737,32.5576412,32.8887412,-0.575412903,32.8883225,32.8887405,0,32.8883218
21.982917,33.2716095,32.8766428,0.628463766,32.8762225,32.8766421,0,32.8762218
21.992097,32.8633535,32.8645483,-0.0345673181,32.8641264,32.8645477,0,32.8641258
22.001277,32.8785644,32.8524578,0.161575478,32.8520343,32.8524571,0,32.8520336
22.010457,33.2565783,32.8403712,0.645141146,32.839946,32.8403705,0,32.8399453
22.019637,32.2955105,32.8282885,-0.729916428,32.8278617,32.8282878,0,32.827861
22.028818,32.4037035,32.8162084,-0.642265488,32.81578,32.8162078,0,32.8157793
22.037998,33.346664,32.8041336,0.736566608,32.8037035,32.804133,0,32.8037028
22.047178,32.8329103,32.7920628,0.202107809,32.7916309,32.7920621,0,32.7916302
22.056358,32.9241553,32.7799958,0.379683363,32.7795623,32.7799951,0,32.7795616
22.065538,33.18132,32.7679328,0.642951972,32.7674976,32.7679321,0,32.7674969
22.074718,32.8024389,32.7558737,0.215789675,32.7554369,32.7558731,0,32.7554362
22.083899,33.1511689,32.7438173,0.638241008,32.7433787,32.7438166,0,32.743378
22.093079,32.8481354,32.7317662,0.341129379,32.7313258,32.7317655,0,32.7313251
22.102259,33.346664,32.7197189,0.791798623,32.7192769,32.7197182,0,32.7192762
22.111439,33.0454233,32.7076757,0.581160569,32.7072319,32.707675,0,32.7072312
22.120619,32.3573794,32.6956364,-0.581598652,32.6951908,32.6956357,0,32.6951901
22.129799,32.7566787,32.683601,0.270328867,32.6831537,32.6836003,0,32.683153
22.13898,32.6649659,32.6715683,-0.0812549276,32.6711193,32.6715676,0,32.6711185
22.14816,32.2335229,32.6595409,-0.652700504,32.65909,32.6595402,0,32.6590893
22.15734,32.9393382,32.6475174,0.540204393,32.6470648,32.6475167,0,32.6470641
22.16652,33.3766385,32.6354979,0.860895258,32.6350435,32.6354972,0,32.6350428
22.1757,33.7490741,32.6234824,1.06093907,32.6230261,32.6234816,0,32.6230254
22.18488,33.2264955,32.6114708,0.784235086,32.6110128,32.6114701,0,32.611012
22.194061,33.3766385,32.5994619,0.881576236,32.599002,32.5994611,0,32.5990013
22.203241,32.4499615,32.5874583,-0.370805574,32.5869966,32.5874575,0,32.5869958
22.212421,32.249031,32.5754586,-0.57133844,32.5749951,32.5754579,0,32.5749943
22.221601,31.9061123,32.5634629,-0.810771652,32.5629975,32.5634622,0,32.5629968
22.230781,33.4065862,32.5514713,0.924724243,32.551004,32.5514705,0,32.5510033
22.239961,32.8024389,32.5394835,0.512791757,32.5390144,32.5394828,0,32.5390137
22.249142,31.4165561,32.5274985,-1.05401251,32.5270275,32.5274978,0,32.5270268
22.258322,32.3109888,32.5155188,-0.452249876,32.5150459,32.515518,0,32.5150451
22.267502,32.4653662,32.5035431,-0.195389078,32.5030682,32.5035423,0,32.5030675
22.276682,32.3109888,32.4915713,-0.424949953,32.4910945,32.4915706,0,32.4910938
22.285862,33.0907842,32.4796036,0.781780445,32.4791249,32.4796028,0,32.4791241
22.295043,32.7719392,32.4676385,0.551634593,32.4671579,32.4676377,0,32.4671571
22.304223,33.1963853,32.4556787,0.860643137,32.4551961,32.455678,0,32.4551954
22.313403,32.1091887,32.443723,-0.578389371,32.4432384,32.4437222,0,32.4432377
22.322583,33.2264955,32.4317712,0.891473063,32.4312847,32.4317705,0,32.4312839
22.331763,32.984845,32.4198235,0.751679134,32.419335,32.4198227,0,32.4193342
22.340943,32.6190129,32.4078797,0.459492235,32.4073892,32.407879,0,32.4073885
22.350124,32.0468407,32.3959387,-0.590845159,32.3954462,32.3959379,0,32.3954454
22.359304,32.249031,32.384003,-0.367385374,32.3835085,32.3840022,0,32.3835077
22.368484,31.8904374,32.3720713,-0.693998465,32.3715747,32.3720705,0,32.3715739
22.377664,31.2089731,32.3601436,-1.07292617,32.359645,32.3601428,0,32.3596442
22.386844,32.4345495,32.34822,0.293818846,32.3477193,32.3482192,0,32.3477185
22.396024,32.6343377,32.3363003,0.545928033,32.3357976,32.3362995,0,32.3357968
22.405205,32,32.3243834,-0.569546675,32.3238786,32.3243826,0,32.3238778
22.414385,32.2335229,32.3124718,-0.280978478,32.3119649,32.312471,0,32.3119641
22.423565,32.2955105,32.3005643,-0.0710897036,32.3000552,32.3005635,0,32.3000544
22.432745,32.5115364,32.2886607,0.472097099,32.2881496,32.2886599,0,32.2881488
22.441925,31.7490157,32.2767613,-0.726460954,32.2762479,32.2767604,0,32.2762471
22.451105,32.2180074,32.2648658,-0.216468025,32.2643503,32.264865,0,32.2643495
22.460286,32.2955105,32.2529731,0.206246078,32.2524555,32.2529723,0,32.2524546
22.469466,31.4006369,32.2410857,-0.916759928,32.2405659,32.2410849,0,32.2405651
22.478646,31.7804972,32.2292024,-0.669854612,32.2286804,32.2292015,0,32.2286796
22.487826,32.3419233,32.2173231,0.352987509,32.2167989,32.2173223,0,32.2167981
22.497006,33.436507,32.2054478,1.10953105,32.2049215,32.205447,0,32.2049206
22.506186,32.5883415,32.1935766,0.628303138,32.193048,32.1935758,0,32.1930472
22.515367,31.22499,32.1817082,-0.978119735,32.1811774,32.1817074,0,32.1811765
22.524547,32.4653662,32.1698451,0.543618468,32.169312,32.1698443,0,32.1693112
22.533727,31.8904374,32.1579861,-0.517251058,32.1574507,32.1579853,0,32.1574499
22.542907,32.5576412,32.1461311,0.641490503,32.1455935,32.1461303,0,32.1455927
22.552087,32.6955654,32.1342802,0.749189715,32.1337403,32.1342794,0,32.1337394
22.561267,31.8590646,32.1224334,-0.513194634,32.1218911,32.1224325,0,32.1218903
22.570448,32.6190129,32.1105893,0.713038254,32.1100448,32.1105885,0,32.1100439
22.579628,32.4191302,32.0987506,0.566020807,32.0982037,32.0987497,0,32.0982029
22.588808,32.1403174,32.086916,0.23108742,32.0863667,32.0869151,0,32.0863659
22.597988,30.9192497,32.0750854,-1.07509801,32.0745338,32.0750845,0,32.0745329
22.607168,31.6069613,32.0632589,-0.675498078,32.0627049,32.063258,0,32.0627041
22.616348,31.4483704,32.0514365,-0.776573315,32.0508801,32.0514356,0,32.0508793
22.625529,32.9393382,32.0396169,0.948536399,32.0390581,32.039616,0,32.0390572
22.634709,32.5576412,32.0278026,0.727900099,32.0272415,32.0278018,0,32.0272406
22.643889,31.22499,32.0159925,-0.889383205,32.0154289,32.0159916,0,32.015428
22.653069,32.4653662,32.0041864,0.679102171,32.0036203,32.0041855,0,32.0036194
22.662249,31.5119025,31.9923844,-0.693168022,31.9918159,31.9923835,0,31.991815
22.671429,31.5753068,31.9805865,-0.636615834,31.9800155,31.9805856,0,31.9800146
22.68061,31.5753068,31.9687914,-0.627283539,31.9682179,31.9687905,0,31.968217
22.68979,32.1558704,31.9570017,0.445946897,31.9564257,31.9570008,0,31.9564248
22.69897,31.4483704,31.9452161,-0.704872867,31.9446376,31.9452152,0,31.9446367
22.70815,31.638584,31.9334346,-0.543001481,31.9328536,31.9334337,0,31.9328526
22.71733,31.2409987,31.9216573,-0.825020332,31.9210736,31.9216563,0,31.9210727
22.72651,31.0805405,31.909884,-0.910682946,31.9092977,31.909883,0,31.9092968
22.735691,31.4324673,31.8981135,-0.682382745,31.8975247,31.8981126,0,31.8975238
22.744871,31.0161248,31.8863484,-0.932857757,31.885757,31.8863475,0,31.8857561
22.754051,31.0966236,31.8745875,-0.882022602,31.8739934,31.8745865,0,31.8739925
22.763231,31.638584,31.8628306,-0.473546834,31.862234,31.8628297,0,31.862233
22.772411,31.7490157,31.8510779,-0.319471737,31.8504786,31.851077,0,31.8504776
22.781592,31.1126984,31.839328,-0.852425758,31.838726,31.8393271,0,31.8387251
22.790772,32.3109888,31.8275836,0.695273523,31.8269789,31.8275826,0,31.8269779
22.799952,32.0468407,31.8158432,0.48062199,31.8152358,31.8158423,0,31.8152349
22.809132,31.5277655,31.804107,-0.525681899,31.8034969,31.804106,0,31.8034959
22.818312,31.701735,31.7923749,-0.301064677,31.791762,31.7923739,0,31.7917611
22.827492,32.0156212,31.7806469,0.484741413,31.7800313,31.780646,0,31.7800303
22.836673,31.4006369,31.7689218,-0.606864822,31.7683034,31.7689209,0,31.7683025
22.845853,31.9843712,31.7572022,0.476622513,31.756581,31.7572012,0,31.75658
22.855033,30.8544972,31.7454866,-0.943922336,31.7448626,31.7454856,0,31.7448616
22.864213,31.7175031,31.7337752,-0.127562386,31.7331484,31.7337742,0,31.7331474
22.873393,32.4961536,31.722068,0.879821379,31.7214383,31.722067,0,31.7214373
22.882573,31.3368792,31.7103648,-0.611134697,31.7097323,31.7103639,0,31.7097313
22.891754,31.3528308,31.6986646,-0.588076358,31.6980291,31.6986636,0,31.6980282
22.900934,31.7804972,31.6869698,0.305822426,31.6863314,31.6869688,0,31.6863304
22.910114,32.0780299,31.6752792,0.634626434,31.6746379,31.6752782,0,31.6746369
22.919294,31.5594677,31.6635927,-0.322684028,31.6629484,31.6635917,0,31.6629474
22.928474,32.4807635,31.6519103,0.910413761,31.6512631,31.6519093,0,31.6512621
22.937654,31.4801525,31.6402321,-0.400099573,31.639582,31.6402311,0,31.6395809
22.946835,30.9030743,31.6285569,-0.851752653,31.6279037,31.6285558,0,31.6279027
22.956015,31.8276609,31.616887,0.459101194,31.6162308,31.616886,0,31.6162298
22.965195,31.7962262,31.6052213,0.437041013,31.6045621,31.6052203,0,31.6045611
22.974375,32,31.5935598,0.637526594,31.5928975,31.5935588,0,31.5928965
22.983555,31.9374388,31.5819025,0.596268673,31.5812371,31.5819015,0,31.5812361
22.992735,31.4324673,31.5702494,-0.371190076,31.5695809,31.5702483,0,31.5695798
23.001916,32.8329103,31.5585991,1.12885393,31.5579275,31.5585981,0,31.5579264
23.011096,31.3687743,31.5469543,-0.422113786,31.5462796,31.5469533,0,31.5462785
23.020276,31.3687743,31.5353137,-0.408092442,31.5346358,31.5353127,0,31.5346347
23.029456,31.1126984,31.5236773,-0.641076385,31.5229962,31.5236762,0,31.5229951
23.038636,31.4960315,31.5120451,-0.126544755,31.5113607,31.512044,0,31.5113597
23.047816,31.0322413,31.500417,-0.684233682,31.4997295,31.500416,0,31.4997284
23.056997,31.1608729,31.4887919,-0.572642135,31.4881011,31.4887908,0,31.4881
23.066177,31.5119025,31.4771723,0.186360531,31.4764782,31.4771712,0,31.4764771
23.075357,32.3728281,31.4655568,0.9525079,31.4648594,31.4655557,0,31.4648584
23.084537,31.4801525,31.4539456,0.161885495,31.4532449,31.4539445,0,31.4532438
23.093717,30.8868904,31.4423385,-0.745283902,31.4416345,31.4423374,0,31.4416334
23.102897,31.638584,31.4307357,0.455903895,31.4300283,31.4307346,0,31.4300272
23.112078,31.0483494,31.4191358,-0.608922319,31.418425,31.4191347,0,31.4184239
23.121258,31.2889757,31.4075414,-0.344333659,31.4068272,31.4075403,0,31.4068261
23.130438,31.22499,31.3959512,-0.413474502,31.3952335,31.39595,0,31.3952324
23.139618,31.7332633,31.3843652,0.590676003,31.3836441,31.384364,0,31.383643
23.148798,31.4960315,31.3727834,0.351067092,31.3720588,31.3727823,0,31.3720577
23.157978,31.144823,31.3612058,-0.465169686,31.3604778,31.3612047,0,31.3604766
23.167159,32,31.3496313,0.80645443,31.3488997,31.3496301,0,31.3488985
23.176339,31.9530906,31.3380622,0.784237507,31.337327,31.338061,0,31.3373259
23.185519,31.2089731,31.3264973,-0.34281804,31.3257586,31.3264961,0,31.3257574
23.194699,30.7408523,31.3149366,-0.757683535,31.3141943,31.3149355,0,31.3141932
23.203879,31.0161248,31.3033802,-0.535962117,31.3026343,31.3033791,0,31.3026331
23.213059,31.1126984,31.2918281,-0.423237151,31.2910785,31.2918269,0,31.2910773
23.22224,30.6594194,31.2802789,-0.78794634,31.2795256,31.2802777,0,31.2795244
23.23142,31.3847097,31.2687352,0.340550255,31.2679782,31.268734,0,31.267977
23.2406,30.9192497,31.2571957,-0.581331284,31.256435,31.2571945,0,31.2564338
23.24978,31.3687743,31.2456605,0.350875698,31.244896,31.2456593,0,31.2448949
23.25896,31.1126984,31.2341296,-0.3484698,31.2333613,31.2341284,0,31.2333601
23.268141,30.6594194,31.2226016,-0.750454651,31.2218295,31.2226004,0,31.2218283
23.277321,31.4006369,31.2110792,0.435382324,31.2103033,31.211078,0,31.2103021
23.286501,31.0805405,31.199561,-0.344993391,31.1987812,31.1995598,0,31.19878
23.295681,30.6757233,31.188047,-0.715767938,31.1872634,31.1880458,0,31.1872622
23.304861,31.2569992,31.1765374,0.283657972,31.1757498,31.1765361,0,31.1757486
23.314041,30.9354166,31.165032,-0.479181978,31.1642404,31.1650307,0,31.1642392
23.323222,31.685959,31.1535296,0.729677643,31.1527341,31.1535283,0,31.1527328
23.332402,31.5277655,31.1420327,0.62107394,31.1412332,31.1420315,0,31.141232
23.341582,31.0322413,31.1305401,-0.313526401,31.1297366,31.1305389,0,31.1297353
23.350762,31.9687347,31.1190518,0.921782485,31.1182442,31.1190505,0,31.1182429
23.359942,30.2489669,31.1075677,-0.926607146,31.106756,31.1075665,0,31.1067548
23.369122,30.0499584,31.096088,-1.02280475,31.0952721,31.0960867,0,31.0952709
23.378303,30.4302481,31.0846112,-0.808927136,31.0837913,31.0846099,0,31.08379
23.387483,31.144823,31.07314,0.267736788,31.0723159,31.0731387,0,31.0723146
23.396663,31.0322413,31.0616731,-0.171556994,31.0608447,31.0616718,0,31.0608435
23.405843,30.8706981,31.0502105,-0.423689028,31.0493779,31.0502092,0,31.0493766
23.415023,30.6594194,31.0387521,-0.615899915,31.0379153,31.0387508,0,31.037914
23.424203,30.6594194,31.0272981,-0.606530021,31.0264569,31.0272968,0,31.0264556
23.433384,30.6431069,31.0158471,-0.610524545,31.0150016,31.0158458,0,31.0150003
23.442564,31.0966236,31.0044017,0.303680654,31.0035518,31.0044004,0,31.0035505
23.451744,31.2089731,30.9929605,0.464771488,30.9921062,30.9929592,0,30.9921049
23.460924,30.2654919,30.9815237,-0.846186621,30.980665,30.9815224,0,30.9806636
23.470104,30.7408523,30.9700912,-0.478788967,30.969228,30.9700898,0,30.9692266
23.479284,30.8544972,30.958663,-0.322747138,30.9577953,30.9586616,0,30.9577939
23.488465,30.4138127,30.9472378,-0.730359608,30.9463656,30.9472365,0,30.9463642
23.497645,30.4630924,30.9358182,-0.687550578,30.9349414,30.9358169,0,30.9349401
23.506825,31.3368792,30.924403,0.642243164,30.9235215,30.9244016,0,30.9235202
23.516005,31.3209195,30.912992,0.638692043,30.912106,30.9129906,0,30.9121046
23.525185,30.8706981,30.9015854,-0.175747817,30.9006947,30.901584,0,30.9006933
23.534365,30.2985148,30.8901831,-0.769199755,30.8892877,30.8901817,0,30.8892863
23.543546,31.2569992,30.8787839,0.614992153,30.8778837,30.8787825,0,30.8778823
23.552726,30.9354166,30.8673902,0.260818644,30.8664853,30.8673888,0,30.8664839
23.561906,30.4302481,30.8560009,-0.65249737,30.8550912,30.8559995,0,30.8550898
23.571086,30.3809151,30.844616,-0.680955871,30.8437013,30.8446145,0,30.8436999
23.580266,31.591138,30.8332353,0.870576054,30.8323158,30.8332339,0,30.8323144
23.589446,31.0161248,30.821859,0.440755933,30.8209346,30.8218576,0,30.8209332
23.598627,31.1126984,30.8104859,0.54973858,30.8095565,30.8104844,0,30.809555
23.607807,30.2820079,30.7991183,-0.719103895,30.7981839,30.7991168,0,30.7981824
23.616987,30.82207,30.787755,0.185243053,30.7868156,30.7877536,0,30.7868141
23.626167,30.5614136,30.7763961,-0.463662112,30.7754516,30.7763947,0,30.7754501
23.635347,31.591138,30.7650416,0.908898455,30.7640919,30.7650401,0,30.7640905
23.644527,29.866369,30.7536914,-0.941977905,30.7527366,30.7536899,0,30.7527351
23.653708,30.8544972,30.7423444,0.334892331,30.7413843,30.7423429,0,30.7413829
23.662888,30.3479818,30.7310029,-0.618886989,30.7300376,30.7310014,0,30.7300362
23.672068,30.9192497,30.7196658,0.44674807,30.7186953,30.7196643,0,30.7186938
23.681248,31.5436206,30.7083331,0.913940633,30.7073572,30.7083316,0,30.7073557
23.690428,30.1496269,30.6970048,-0.739849918,30.6960235,30.6970033,0,30.696022
23.699609,30.4959014,30.6856796,-0.435635391,30.6846929,30.685678,0,30.6846914
23.708789,29.5803989,30.67436,-1.04592593,30.6733679,30.6743584,0,30.6733663
23.717969,30.9354166,30.6630447,0.521892566,30.6620471,30.6630432,0,30.6620456
23.727149,30.6757233,30.6517339,0.154885083,30.6507308,30.6517324,0,30.6507292
23.736329,30.4466747,30.6404275,-0.440173564,30.6394187,30.6404259,0,30.6394172
23.745509,31.22499,30.6291254,0.771922659,30.628111,30.6291238,0,30.6281095
23.75469,31.6701752,30.6178265,1.02584051,30.6168065,30.6178249,0,30.6168049
23.76387,30.6104557,30.6065332,0.0626298905,30.6055075,30.6065316,0,30.6055059
23.77305,30.2158899,30.5952443,-0.615917599,30.5942128,30.5952428,0,30.5942112
23.78223,30.7733651,30.5839599,0.435207121,30.5829225,30.5839583,0,30.5829209
23.79141,30.3315018,30.5726798,-0.491098783,30.5716366,30.5726782,0,30.571635
23.80059,31.2889757,30.5614041,0.852978064,30.560355,30.5614025,0,30.5603534
23.809771,30.9354166,30.5501316,0.620713279,30.5490766,30.55013,0,30.5490749
23.818951,30.5941171,30.5388648,0.235058114,30.5378037,30.5388631,0,30.5378021
23.828131,30.4630924,30.5276023,-0.253987986,30.5265352,30.5276007,0,30.5265336
23.837311,29.9833287,30.5163443,-0.730079167,30.5152711,30.5163426,0,30.5152694
23.846491,29.9499583,30.5050907,-0.745072088,30.5040113,30.505089,0,30.5040097
23.855671,30.6431069,30.4938415,0.386348809,30.4927559,30.4938398,0,30.4927542
23.864852,30.4302481,30.4825955,-0.228795525,30.4815037,30.4825938,0,30.481502
23.874032,30.5122926,30.4713552,0.202330023,30.470257,30.4713535,0,30.4702553
23.883212,30.2654919,30.4601193,-0.44116591,30.4590148,30.4601176,0,30.4590131
23.892392,31.22499,30.4488878,0.88096663,30.4477769,30.4488861,0,30.4477752
23.901572,31.144823,30.4376608,0.840929399,30.4365434,30.437659,0,30.4365416
23.910752,29.7153159,30.4264382,-0.843280638,30.4253142,30.4264364,0,30.4253125
23.919933,29.3938769,30.4152188,-1.01061459,30.4140883,30.415217,0,30.4140865
23.929113,30.9838668,30.4040051,0.761486516,30.4028679,30.4040033,0,30.4028662
23.938293,29.6479342,30.3927958,-0.863053664,30.391652,30.392794,0,30.3916502
23.947473,29.5296461,30.381591,-0.923008585,30.3804404,30.3815892,0,30.3804387
23.956653,30.5941171,30.3703906,0.472997336,30.3692333,30.3703888,0,30.3692315
23.965833,30.5941171,30.3591947,0.484687932,30.3580305,30.3591929,0,30.3580287
23.975014,30.6594194,30.348002,0.558047859,30.3468309,30.3480002,0,30.3468291
23.984194,30.2985148,30.336815,-0.195704419,30.3356369,30.3368132,0,30.3356351
23.993374,31.0483494,30.3256325,0.850127567,30.3244474,30.3256307,0,30.3244455
24.002554,30.0832179,30.3144545,-0.480870612,30.3132622,30.3144526,0,30.3132604
24.011734,30.1827765,30.3032809,-0.347137332,30.3020815,30.303279,0,30.3020796
24.020914,30.8058436,30.2921118,0.716750891,30.2909051,30.2921099,0,30.2909033
24.030095,30.9838668,30.2809459,0.838403758,30.279732,30.280944,0,30.2797301
24.039275,30.3973683,30.2697858,0.357187003,30.2685645,30.2697839,0,30.2685626
24.048455,29.8328678,30.2586301,-0.652504634,30.2574014,30.2586282,0,30.2573995
24.057635,31.1126984,30.2474789,0.93017175,30.2462427,30.247477,0,30.2462408
24.066815,30.1330383,30.2363322,-0.321393588,30.2350885,30.2363303,0,30.2350866
24.075995,30.9838668,30.22519,0.871020549,30.2239387,30.2251881,0,30.2239367
24.085176,30.4138127,30.214051,0.446946985,30.2127921,30.2140491,0,30.2127901
24.094356,29.8998328,30.2029178,-0.550531611,30.2016511,30.2029159,0,30.2016492
24.103536,29.7993289,30.1917891,-0.626466491,30.1905146,30.1917872,0,30.1905126
24.112716,30.3809151,30.1806649,0.447493192,30.1793825,30.1806629,0,30.1793805
24.121896,30.4630924,30.1695452,0.541799985,30.1682548,30.1695432,0,30.1682528
24.131076,30.0665928,30.15843,-0.303046609,30.1571316,30.158428,0,30.1571296
24.140257,29.4448637,30.1473181,-0.838125517,30.1460116,30.1473161,0,30.1460096
24.149437,29.563491,30.1362119,-0.756783288,30.1348972,30.1362099,0,30.1348952
24.158617,30.5941171,30.1251103,0.684840702,30.1237874,30.1251083,0,30.1237853
24.167797,29.6310648,30.1140132,-0.69494488,30.1126819,30.1140111,0,30.1126799
24.176977,30.4630924,30.1029206,0.6001432,30.1015809,30.1029185,0,30.1015789
24.186158,30.724583,30.0918313,0.795456919,30.0904832,30.0918292,0,30.0904811
24.195338,30.2324329,30.0807477,0.389467814,30.0793911,30.0807457,0,30.079389
24.204518,30.0832179,30.0696687,0.116400935,30.0683034,30.0696666,0,30.0683013
24.213698,28.2311884,30.0585943,-1.35181576,30.0572203,30.0585922,0,30.0572182
24.222878,30.2158899,30.0475243,0.410323668,30.0461415,30.0475222,0,30.0461394
24.232058,30.5941171,30.036459,0.7467651,30.0350673,30.0364568,0,30.0350652
24.241239,30.82207,30.0253969,0.892565452,30.0239963,30.0253948,0,30.0239942
24.250419,29.2061637,30.0143406,-0.898986604,30.012931,30.0143385,0,30.0129288
24.259599,29.6984848,30.0032889,-0.55209067,30.0018701,30.0032868,0,30.001868
24.268779,29.4618397,29.9922417,-0.728287046,29.9908137,29.9922396,0,29.9908116
24.277959,30,29.9811991,0.137116247,29.9797618,29.9811969,0,29.9797597
24.287139,30.3315018,29.9701611,0.601116203,29.9687144,29.9701589,0,29.9687122
24.29632,29.3428015,29.9591264,-0.785063629,29.9576703,29.9591242,0,29.957668
24.3055,30.2654919,29.9480975,0.563377678,29.9466318,29.9480953,0,29.9466296
24.31468,29.9499583,29.9370732,0.113512562,29.9355978,29.9370709,0,29.9355956
24.32386,30.2654919,29.9260534,0.582613501,29.9245683,29.9260511,0,29.9245661
24.33304,29.9165506,29.9150382,0.0388891479,29.9135433,29.915036,0,29.913541
24.34222,29.866369,29.9040276,-0.194058246,29.9025228,29.9040254,0,29.9025205
24.351401,29.9499583,29.8930204,0.238616459,29.8915056,29.8930181,0,29.8915033
24.360581,29.6310648,29.882019,-0.50095335,29.880494,29.8820167,0,29.8804917
24.369761,29.6647939,29.8710222,-0.454123633,29.869487,29.8710199,0,29.8694847
24.378941,29.4618397,29.86003,-0.6310232,29.8584845,29.8600276,0,29.8584821
24.388121,30.9515751,29.8490424,1.05001557,29.8474864,29.84904,0,29.8474841
24.397301,29.2574777,29.8380594,-0.761959117,29.8364929,29.838057,0,29.8364905
24.406482,29.4618397,29.8270798,-0.604350929,29.8255027,29.8270774,0,29.8255003
24.415662,29.1719043,29.816106,-0.802621757,29.8145181,29.8161036,0,29.8145157
24.424842,29.291637,29.8051368,-0.716588984,29.8035381,29.8051344,0,29.8035357
24.434022,30.8382879,29.7941723,1.02181977,29.7925626,29.7941698,0,29.7925602
24.443202,29.5296461,29.7832123,-0.503553577,29.7815917,29.7832099,0,29.7815892
24.452382,30.2820079,29.772257,0.713968372,29.7706252,29.7722545,0,29.7706227
24.461563,29.4957624,29.7613052,-0.515308403,29.759662,29.7613027,0,29.7596595
24.470743,29.3938769,29.7503591,-0.597061308,29.7487046,29.7503566,0,29.7487021
24.479923,30,29.7394177,0.510472607,29.7377517,29.7394152,0,29.7377492
24.489103,29.563491,29.728481,-0.40618956,29.7268033,29.7284784,0,29.7268008
24.498283,29.7153159,29.7175488,-0.0472538239,29.7158595,29.7175463,0,29.7158569
24.507463,29.8496231,29.7066214,0.378155711,29.7049202,29.7066188,0,29.7049176
24.516644,29.5465734,29.6956974,-0.386165716,29.6939842,29.6956948,0,29.6939816
24.525824,29.7993289,29.6847792,0.338451837,29.6830539,29.6847766,0,29.6830513
24.535004,30.2158899,29.6738657,0.736222894,29.6721282,29.6738631,0,29.6721256
24.544184,29.8998328,29.6629569,0.486698974,29.661207,29.6629542,0,29.6612044
24.553364,29.6141858,29.6520527,-0.194594286,29.6502904,29.65205,0,29.6502877
24.562544,29.0860791,29.6411532,-0.745032949,29.6393783,29.6411505,0,29.6393756
24.571725,28.618176,29.6302572,-1.00602246,29.6284696,29.6302545,0,29.6284669
24.580905,29.866369,29.6193671,0.496992892,29.6175666,29.6193644,0,29.6175638
24.590085,31.0161248,29.6084817,1.18644139,29.6066681,29.6084789,0,29.6066654
24.599265,29.5296461,29.5976009,-0.260681383,29.5957742,29.5975981,0,29.5957714
24.608445,29.2745623,29.5867248,-0.558715043,29.5848849,29.586722,0,29.5848821
24.617626,29.5972972,29.5758523,0.146440757,29.5739989,29.5758495,0,29.5739961
24.626806,29.6310648,29.5649856,0.257058698,29.5631187,29.5649828,0,29.5631158
24.635986,28.8963666,29.5541236,-0.811022246,29.552243,29.5541208,0,29.5522401
24.645166,29.7489496,29.5432664,0.453523078,29.5413719,29.5432635,0,29.541369
24.654346,29.0172363,29.5324138,-0.717758725,29.5305054,29.5324109,0,29.5305025
24.663526,29.291637,29.521566,-0.479509118,29.5196434,29.5215631,0,29.5196405
24.672707,29.6647939,29.5107217,0.392520317,29.5087848,29.5107188,0,29.5087818
24.681887,29.5803989,29.4998834,0.283752599,29.497932,29.4998804,0,29.497929
24.691067,30.0665928,29.4890497,0.759962512,29.4870837,29.4890468,0,29.4870807
24.700247,30.2654919,29.4782208,0.887282971,29.47624,29.4782178,0,29.476237
24.709427,29.1547595,29.4673967,-0.559139686,29.4654009,29.4673936,0,29.4653979
24.718607,29.7825452,29.4565772,0.570936061,29.4545664,29.4565742,0,29.4545633
24.727788,29.6141858,29.4457614,0.410395427,29.4437353,29.4457583,0,29.4437322
24.736968,29.3257566,29.4349515,-0.330446459,29.4329099,29.4349484,0,29.4329068
24.746148,29.5296461,29.4241463,0.324807372,29.4220891,29.4241432,0,29.422086
24.755328,28.4429253,29.4133459,-0.985099274,29.4112729,29.4133427,0,29.4112698
24.764508,28.8617394,29.4025503,-0.735398452,29.4004614,29.4025471,0,29.4004582
24.773688,29.4278779,29.3917594,0.190048752,29.3896544,29.3917562,0,29.3896512
24.782869,28.6879766,29.3809722,-0.832463564,29.3788508,29.3809689,0,29.3788476
24.792049,28.4253408,29.3701909,-0.97203398,29.368053,29.3701876,0,29.3680497
24.801229,28.8790582,29.3594144,-0.693077341,29.3572598,29.3594111,0,29.3572565
24.810409,29.1032644,29.3486426,-0.495356657,29.3464712,29.3486394,0,29.3464679
24.819589,29.189039,29.3378757,-0.385793571,29.3356872,29.3378724,0,29.3356839
24.828769,30,29.3271136,0.820296534,29.3249078,29.3271103,0,29.3249044
24.83795,29.3087018,29.3163551,-0.0874833132,29.3141318,29.3163517,0,29.3141285
24.84713,29.0688837,29.3056026,-0.486537664,29.3033617,29.3055992,0,29.3033583
24.85631,29.0344623,29.2948549,-0.510286817,29.2925961,29.2948515,0,29.2925927
24.86549,28.618176,29.2841121,-0.816049024,29.2818352,29.2841086,0,29.2818317
24.87467,28.8617394,29.273374,-0.6415876,29.2710788,29.2733706,0,29.2710754
24.88385,28.6006993,29.2626408,-0.813597903,29.2603271,29.2626373,0,29.2603236
24.893031,28.7923601,29.2519113,-0.677902076,29.2495789,29.2519078,0,29.2495753
24.902211,29.189039,29.2411878,-0.228361071,29.2388364,29.2411843,0,29.2388328
24.911391,29.3087018,29.2304692,0.279700945,29.2280986,29.2304656,0,29.228095
24.920571,28.9827535,29.2197554,-0.486828376,29.2173654,29.2197517,0,29.2173617
24.929751,29.4448637,29.2090464,0.485610245,29.2066368,29.2090428,0,29.2066331
24.938931,29.189039,29.1983423,-0.096453641,29.1959128,29.1983387,0,29.1959092
24.948112,29.189039,29.187642,0.0373773115,29.1851923,29.1876383,0,29.1851886
24.957292,29.8328678,29.1769477,0.809888961,29.1744777,29.1769439,0,29.1744739
24.966472,29.6479342,29.1662582,0.694028783,29.1637676,29.1662544,0,29.1637639
24.975652,27.9105715,29.1555737,-1.11579666,29.1530622,29.1555699,0,29.1530584
24.984832,28.6006993,29.144894,-0.737695551,29.1423615,29.1448902,0,29.1423577
24.994012,28.1957444,29.1342193,-0.968749157,29.1316654,29.1342154,0,29.1316615
25.003193,29.240383,29.1235483,0.341810952,29.1209728,29.1235444,0,29.1209689
25.012373,29.291637,29.1128834,0.422792653,29.1102859,29.1128795,0,29.110282
25.021553,29.0516781,29.1022234,-0.224822886,29.0996038,29.1022195,0,29.0995998
25.030733,29.0344623,29.0915684,-0.238968801,29.0889263,29.0915644,0,29.0889223
25.039913,29.4448637,29.0809183,0.603278938,29.0782534,29.0809142,0,29.0782494
25.049093,29.6141858,29.0702731,0.737504383,29.0675852,29.070269,0,29.0675812
25.058274,29.0688837,29.0596317,0.0961874117,29.0569205,29.0596276,0,29.0569164
25.067454,28.6006993,29.0489964,-0.669549943,29.0462617,29.0489923,0,29.0462575
25.076634,29.1376046,29.0383661,0.315021364,29.0356075,29.0383619,0,29.0356033
25.085814,29.4278779,29.0277408,0.632563965,29.0249579,29.0277366,0,29.0249537
25.094994,28.5306852,29.0171204,-0.697449055,29.014313,29.0171162,0,29.0143088
25.104175,28.2311884,29.0065039,-0.880520009,29.0036717,29.0064996,0,29.0036674
25.113355,28.7402157,28.9958936,-0.505645955,28.9930361,28.9958893,0,28.9930318
25.122535,28.7576077,28.9852882,-0.477158793,28.9824053,28.9852839,0,28.9824009
25.131715,29.4448637,28.9746879,0.685693717,28.9717791,28.9746835,0,28.9717747
25.140895,27.6405499,28.9640925,-1.15045322,28.9611576,28.9640881,0,28.9611532
25.150075,28.4077454,28.9535022,-0.738753538,28.9505408,28.9534978,0,28.9505363
25.159256,29.9499583,28.9429158,1.00351506,28.9399275,28.9429113,0,28.939923
25.168436,29.0688837,28.9323355,0.369524239,28.9293201,28.932331,0,28.9293155
25.177616,29.1032644,28.9217604,0.426032941,28.9187173,28.9217558,0,28.9187127
25.186796,28.4604989,28.9111902,-0.671335445,28.9081192,28.9111856,0,28.9081146
25.195976,28.7576077,28.9006252,-0.378176496,28.8975258,28.9006205,0,28.8975212
25.205156,29.6141858,28.8900652,0.850952776,28.8869371,28.8900605,0,28.8869324
25.214337,29.3428015,28.8795091,0.680655835,28.876352,28.8795044,0,28.8763472
25.223517,28.2665881,28.8689594,-0.776125829,28.8657727,28.8689546,0,28.8657679
25.232697,28.4077454,28.8584147,-0.671319036,28.8551981,28.8584098,0,28.8551933
25.241877,28.7402157,28.8478751,-0.328114877,28.8446282,28.8478702,0,28.8446233
25.251057,28.8790582,28.8373406,0.204248644,28.834063,28.8373357,0,28.8340581
25.260237,28.1602557,28.8268113,-0.816428592,28.8235025,28.8268064,0,28.8234976
25.269418,29.1204396,28.816286,0.551501185,28.8129456,28.816281,0,28.8129406
25.278598,27.9105715,28.805767,-0.946147713,28.8023945,28.8057619,0,28.8023895
25.287778,28.7749891,28.7952531,-0.142351529,28.7918482,28.795248,0,28.7918431
25.296958,29.3428015,28.7847444,0.747032198,28.7813066,28.7847392,0,28.7813014
25.306138,28.3901391,28.7742409,-0.619759424,28.7707696,28.7742357,0,28.7707644
25.315318,29.1547595,28.7637425,0.625313462,28.7602374,28.7637373,0,28.7602322
25.324499,27.7128129,28.7532483,-1.02001736,28.7497088,28.753243,0,28.7497035
25.333679,28.6879766,28.7427605,-0.234059577,28.739186,28.7427551,0,28.7391807
25.342859,28.1957444,28.7322778,-0.732484446,28.728668,28.7322724,0,28.7286626
25.352039,28.618176,28.7218004,-0.321907411,28.7181547,28.721795,0,28.7181492
25.361219,27.8926514,28.7113283,-0.904807666,28.7076461,28.7113227,0,28.7076406
25.370399,28.8444102,28.7008614,0.378878367,28.6971423,28.7008558,0,28.6971367
25.37958,28.4077454,28.6903986,-0.5316514,28.686642,28.690393,0,28.6866364
25.38876,29.4788059,28.6799423,0.893791719,28.6761476,28.6799366,0,28.6761419
25.39794,28.1780056,28.6694913,-0.701060394,28.665658,28.6694855,0,28.6656522
25.40712,29.1547595,28.6590456,0.704069531,28.6551731,28.6590398,0,28.6551673
25.4163,28.0535203,28.6486052,-0.771417464,28.6446929,28.6485993,0,28.644687
25.42548,28.9654967,28.6381701,0.57212462,28.6342175,28.6381642,0,28.6342116
25.434661,28.9654967,28.6277394,0.581168963,28.6237457,28.6277334,0,28.6237397
25.443841,28.7054002,28.6173151,0.296791344,28.6132797,28.617309,0,28.6132737
25.453021,29.1032644,28.6068962,0.704534042,28.6028186,28.6068901,0,28.6028124
25.462201,28.8444102,28.5964827,0.497923166,28.5923621,28.5964765,0,28.5923559
25.471381,29.1204396,28.5860747,0.731002667,28.5819104,28.5860684,0,28.5819042
25.480561,29.3257566,28.575672,0.866074233,28.5714635,28.5756657,0,28.5714572
25.489742,28.8270706,28.5652737,0.511660936,28.5610202,28.5652673,0,28.5610139
25.498922,28.618176,28.554882,0.251583135,28.5505828,28.5548755,0,28.5505764
25.508102,27.513633,28.5444957,-1.01531411,28.5401502,28.5444892,0,28.5401437
25.517282,28.213472,28.534115,-0.566253481,28.5297223,28.5341084,0,28.5297157
25.526462,29.1719043,28.5237397,0.805086684,28.5192992,28.5237331,0,28.5192925
25.535643,28.3372546,28.5133689,-0.419659685,28.5088797,28.5133622,0,28.508873
25.544823,28.9136646,28.5030048,0.640827452,28.4984661,28.502998,0,28.4984593
25.554003,27.4954542,28.4926462,-0.998595052,28.4880573,28.4926394,0,28.4880505
25.563183,28.1780056,28.4822933,-0.551622799,28.4776533,28.4822864,0,28.4776464
25.572363,28.5657137,28.471946,0.306215143,28.467254,28.471939,0,28.467247
25.581543,28.6879766,28.4616043,0.475785945,28.4568596,28.4615972,0,28.4568525
25.590724,28.3372546,28.4512671,-0.33765739,28.4464687,28.45126,0,28.4464616
25.599904,28.2311884,28.4409368,-0.457982911,28.4360838,28.4409295,0,28.4360766
25.609084,28.6356421,28.4306121,0.45280242,28.4257037,28.4306048,0,28.4256964
25.618264,28.8444102,28.4202931,0.651242715,28.4153284,28.4202857,0,28.4153209
25.627444,27.8208555,28.4099799,-0.767544406,28.4049578,28.4099724,0,28.4049503
25.636624,28.3372546,28.3996724,-0.249835551,28.394592,28.3996648,0,28.3945844
25.645805,28.8444102,28.3893696,0.674566956,28.3842299,28.3893619,0,28.3842222
25.654985,28.3725219,28.3790738,-0.080943625,28.3738737,28.379066,0,28.373866
25.664165,28.8270706,28.3687838,0.676968808,28.3635223,28.368776,0,28.3635145
25.673345,29.1204396,28.3584998,0.872891628,28.3531758,28.3584918,0,28.3531678
25.682525,28.1424946,28.3482216,-0.453571395,28.342834,28.3482135,0,28.3428259
25.691705,28.9136646,28.3379493,0.75875905,28.332497,28.3379412,0,28.3324888
25.700886,28.4429253,28.3276818,0.339475277,28.3221637,28.3276736,0,28.3221554
25.710066,28.0356915,28.3174215,-0.530782391,28.3118363,28.3174131,0,28.311828
25.719246,28.4956137,28.3071671,0.434104331,28.3015137,28.3071587,0,28.3015053
25.728426,28.5657137,28.2969188,0.518454348,28.291196,28.2969103,0,28.2911874
25.737606,27.4226184,28.2866765,-0.929547277,28.280883,28.2866679,0,28.2808744
25.746786,28.3372546,28.2764404,0.246605467,28.2705749,28.2764316,0,28.2705661
25.755967,28.4956137,28.2662092,0.478961874,28.2602704,28.2662004,0,28.2602616
25.765147,28.4253408,28.2559854,0.41152817,28.2499719,28.2559764,0,28.249963
25.774327,28.213472,28.2457678,-0.179710506,28.2396782,28.2457587,0,28.2396692
25.783507,28.1069386,28.2355565,-0.358633339,28.2293894,28.2355473,0,28.2293802
25.792687,28.1247222,28.2253515,-0.317221157,28.2191053,28.2253422,0,28.219096
25.801867,28.5306852,28.2151528,0.561722772,28.2088261,28.2151433,0,28.2088167
25.811048,27.9642629,28.2049593,-0.490608171,28.1985506,28.2049497,0,28.1985411
25.820228,29.0172363,28.1947733,0.906897429,28.1882811,28.1947636,0,28.1882714
25.829408,28.3725219,28.1845938,0.433506802,28.1780163,28.184584,0,28.1780065
25.838588,28.9827535,28.1744207,0.899073293,28.1677565,28.1744108,0,28.1677465
25.847768,27.4772633,28.1642542,-0.828849103,28.1575014,28.1642441,0,28.1574913
25.856948,28.4077454,28.1540942,0.503638002,28.1472512,28.154084,0,28.147241
25.866129,28.3372546,28.1439397,0.439675922,28.1370047,28.1439294,0,28.1369944
25.875309,27.7128129,28.133793,-0.648829787,28.1267642,28.1337826,0,28.1267537
25.884489,28.5482048,28.1236532,0.651576277,28.1165285,28.1236426,0,28.1165179
25.893669,28.5131549,28.1135202,0.632166669,28.1062976,28.1135094,0,28.1062869
25.902849,28.0713377,28.1033939,-0.179042596,28.0960716,28.1033831,0,28.0960607
25.912029,28.4253408,28.0932746,0.576251851,28.0858505,28.0932636,0,28.0858394
25.92121,28.0713377,28.0831611,-0.10873553,28.075633,28.0831499,0,28.0756218
25.93039,28.1602557,28.0730557,0.295296416,28.0654216,28.0730444,0,28.0654102
25.93957,27.8926514,28.0629574,-0.412681473,28.055215,28.0629458,0,28.0552035
25.94875,28.7054002,28.0528661,0.807795802,28.0450133,28.0528545,0,28.0450016
25.95793,27.8926514,28.0427821,-0.387467059,28.0348164,28.0427702,0,28.0348046
25.967111,27.784888,28.0327042,-0.49781142,28.0246233,28.0326922,0,28.0246113
25.976291,27.6586334,28.0226347,-0.603325234,28.0144361,28.0226225,0,28.0144239
25.985471,29.3938769,28.0125726,1.17528903,28.0042538,28.0125603,0,28.0042415
25.994651,27.9284801,28.0025182,-0.272099458,27.9940764,28.0025057,0,27.9940639
26.003831,27.6043475,27.9924714,-0.622995907,27.9839039,27.9924587,0,27.9838911
26.013011,29.1204396,27.9824322,1.06677428,27.9737362,27.9824193,0,27.9737233
26.022192,27.9642629,27.9723996,-0.0902038546,27.9635723,27.9723865,0,27.9635592
26.031372,27.8747197,27.962376,-0.296067987,27.9534143,27.9623627,0,27.953401
26.040552,27.6224546,27.9523602,-0.574374076,27.9432613,27.9523467,0,27.9432478
26.049732,28.2488938,27.9423524,0.553661771,27.9331131,27.9423387,0,27.9330994
26.058912,27.0554985,27.9323527,-0.936404935,27.9229698,27.9323388,0,27.9229559
26.068092,27.5317998,27.9223612,-0.624949112,27.9128314,27.9223471,0,27.9128173
26.077273,27.5680975,27.9123768,-0.586753223,27.9026968,27.9123625,0,27.9026824
26.086453,27.8208555,27.902402,-0.285563473,27.8925681,27.9023874,0,27.8925535
26.095633,27.8567766,27.8924356,-0.188836063,27.8824444,27.8924208,0,27.8824296
26.104813,28.1780056,27.8824781,0.543624436,27.8723255,27.882463,0,27.8723105
26.113993,28.7228132,27.8725294,0.922108345,27.8622116,27.8725141,0,27.8621963
26.123173,27.9642629,27.8625897,0.318862422,27.8521025,27.8625741,0,27.8520869
26.132354,28.213472,27.8526578,0.600678066,27.8419972,27.852642,0,27.8419814
26.141534,27.676705,27.8427362,-0.407469256,27.8318979,27.8427201,0,27.8318819
26.150714,27.4408455,27.8328239,-0.626081779,27.8218036,27.8328075,0,27.8217872
26.159894,28.6879766,27.822921,0.930083665,27.8117141,27.8229044,0,27.8116975
26.169074,27.8747197,27.8130276,0.24837897,27.8016295,27.8130107,0,27.8016126
26.178254,27.8388218,27.803144,0.188885669,27.7915499,27.8031269,0,27.7915327
26.187435,27.8388218,27.7932692,0.213430482,27.781474,27.7932518,0,27.7814566
26.196615,27.6405499,27.7834056,-0.377962554,27.7714042,27.7833879,0,27.7713864
26.205795,28,27.7735522,0.475865284,27.7613392,27.7735342,0,27.7613212
26.214975,26.8514432,27.7637095,-0.955126352,27.7512792,27.7636911,0,27.7512608
26.224155,27.7128129,27.7538778,-0.202644628,27.7412241,27.7538591,0,27.7412054
26.233335,28.5131549,27.7440569,0.876982308,27.731174,27.7440379,0,27.7311549
26.242516,27.4590604,27.734246,-0.524581353,27.7211276,27.7342266,0,27.7211082
26.251696,28.0356915,27.7244475,0.557892453,27.7110873,27.7244278,0,27.7110675
26.260876,27.1108834,27.7146606,-0.777031004,27.7010519,27.7146405,0,27.7010318
26.270056,28.0356915,27.7048854,0.575157453,27.6910214,27.704865,0,27.6910009
26.279236,27.7308492,27.6951223,0.189015697,27.6809959,27.6951015,0,27.680975
26.288416,27.784888,27.6853715,0.315462349,27.6709752,27.6853502,0,27.670954
26.297597,27.1293199,27.6756322,-0.739129381,27.6609585,27.6756105,0,27.6609368
26.306777,26.5329983,27.6659068,-1.06438173,27.6509477,27.6658847,0,27.6509257
26.315957,28.0891438,27.6561946,0.65798878,27.6409419,27.6561721,0,27.6409194
26.325137,28.4956137,27.646496,0.921475805,27.6309411,27.6464731,0,27.6309181
26.334317,27.3313007,27.636812,-0.55273076,27.6209451,27.6367886,0,27.6209218
26.343497,27.5317998,27.6271423,-0.308775769,27.6109542,27.6271184,0,27.6109303
26.352678,28.1957444,27.6174861,0.760432955,27.6009671,27.6174618,0,27.6009427
26.361858,27.1661554,27.607846,-0.664598027,27.590986,27.6078211,0,27.5909611
26.371038,27.7488739,27.5982212,0.388139934,27.5810099,27.5981959,0,27.5809845
26.380218,27.513633,27.5886124,-0.273823663,27.5710387,27.5885865,0,27.5710128
26.389398,27.7488739,27.5790198,0.412133506,27.5610725,27.5789934,0,27.5610461
26.398578,27.8567766,27.569444,0.536034058,27.5511112,27.5694171,0,27.5510843
26.407759,27.2213152,27.5598845,-0.581867099,27.5411539,27.559857,0,27.5411263
26.416939,27.4590604,27.5503438,-0.302131367,27.5312025,27.5503157,0,27.5311744
26.426119,26.9814751,27.5408215,-0.747894597,27.5212562,27.5407927,0,27.5212274
26.435299,28.0713377,27.5313181,0.734860268,27.5113148,27.5312887,0,27.5112854
26.444479,28.0356915,27.5218357,0.716837377,27.5013784,27.5218057,0,27.5013483
26.45366,28.1424946,27.5123727,0.793802175,27.4914458,27.512342,0,27.4914151
26.46284,27.7128129,27.5029317,0.458127951,27.4815194,27.5029003,0,27.4814879
26.47202,27.8567766,27.4935125,0.602713887,27.4715979,27.4934804,0,27.4715657
26.4812,27.8926514,27.4841159,0.639167778,27.4616814,27.484083,0,27.4616485
26.49038,28.2311884,27.4747427,0.869738887,27.4517699,27.474709,0,27.4517362
26.49956,26.1916017,27.4653937,-1.12862395,27.4418633,27.4653593,0,27.4418289
26.508741,27.513633,27.456069,0.239925046,27.4319607,27.4560337,0,27.4319254
26.517921,26.6458252,27.4467714,-0.894955959,27.4220642,27.4467352,0,27.422028
26.527101,25.7293607,27.437501,-1.30695842,27.4121727,27.4374639,0,27.4121356
26.536281,26.6458252,27.4282589,-0.884552817,27.4022861,27.4282209,0,27.4022481
26.545461,26.3248932,27.4190463,-1.04601773,27.3924046,27.4190073,0,27.3923656
26.554641,27.3130006,27.4098665,-0.311232958,27.382528,27.4098266,0,27.3824881
26.563822,28.7576077,27.4007186,1.16485583,27.3726555,27.4006776,0,27.3726145
26.573002,27.1477439,27.3916054,-0.493823339,27.362789,27.3915634,0,27.3627469
26.582182,26.9629375,27.3825276,-0.647757696,27.3529275,27.3824844,0,27.3528843
26.591362,27.4954542,27.3734867,0.34923848,27.343071,27.3734423,0,27.3430267
26.600542,26.2488095,27.3644844,-1.05625515,27.3332196,27.3644389,0,27.333174
26.609722,27,27.3555228,-0.596257316,27.3233732,27.355476,0,27.3233264
26.618903,26.7581763,27.3466027,-0.767089561,27.3135308,27.3465546,0,27.3134826
26.628083,26.8886593,27.3377283,-0.670126093,27.3036944,27.3376788,0,27.3036449
26.637263,27.3130006,27.3289009,-0.12609634,27.2938631,27.32885,0,27.2938122
26.646443,26.925824,27.3201228,-0.627932154,27.2840369,27.3200705,0,27.2839845
26.655623,28.9654967,27.3113968,1.28611814,27.2742157,27.3113429,0,27.2741618
26.664803,26.3248932,27.3027289,-0.988855788,27.2643996,27.3026734,0,27.264344
26.673984,27.3861279,27.2941205,0.303327127,27.2545875,27.2940633,0,27.2545302
26.683164,26.7581763,27.285575,-0.726222223,27.2447815,27.285516,0,27.2447225
26.692344,26.9072481,27.2770951,-0.608150508,27.2349807,27.2770343,0,27.2349197
26.701524,27.5317998,27.2686847,0.512947425,27.2251849,27.2686219,0,27.225122
26.710704,26.8700577,27.2603481,-0.62473225,27.2153941,27.2602832,0,27.2153292
26.719884,26.8514432,27.2520897,-0.632966473,27.2056085,27.2520227,0,27.2055414
26.729065,27.0739727,27.2439138,-0.412239043,27.195827,27.2438445,0,27.1957576
26.738245,27.202941,27.2358274,-0.18134601,27.1860516,27.2357558,0,27.1859799
26.747425,27.0554985,27.2278356,-0.415134969,27.1762815,27.2277614,0,27.1762071
26.756605,27.9284801,27.2199447,0.841745466,27.1665165,27.2198678,0,27.1664394
26.765785,26.5706605,27.2121617,-0.800937671,27.1567567,27.2120818,0,27.1566767
26.774965,26.6645833,27.2044991,-0.734789662,27.1470023,27.204416,0,27.146919
26.784146,27.4043792,27.1969678,0.455424396,27.1372522,27.196881,0,27.1371652
26.793326,27.7308492,27.1895728,0.735714899,27.1275089,27.1894816,0,27.1274175
26.802506,26.6833281,27.1823239,-0.706396311,27.1177716,27.1822273,0,27.1176749
26.811686,27.4772633,27.1752328,0.54957307,27.1080408,27.1751294,0,27.1079372
26.820866,26.6082694,27.1683128,-0.748360455,27.0983173,27.1682003,0,27.0982046
26.830046,28.0356915,27.1615788,0.934939946,27.0886023,27.1614539,0,27.088477
26.839227,26.4575131,27.1550474,-0.835185157,27.0788965,27.1549045,0,27.0787533
26.848407,26.6270539,27.1487394,-0.722277978,27.069205,27.1485706,0,27.0690357
26.857587,26.0576284,27.142677,-1.04165666,27.0595306,27.1424703,0,27.0593232
26.866767,27.4772633,27.1368871,0.583417681,27.0498794,27.1366243,0,27.0496157
26.875947,26.8886593,27.1314015,-0.492688772,27.0402599,27.131056,0,27.0399132
26.885127,26.6270539,27.1262668,-0.706549984,27.0306855,27.1257987,0,27.0302157
26.894308,27.5499546,27.1215583,0.654519952,27.0211794,27.1209035,0,27.0205222
26.903488,27.676705,27.1173129,0.747925208,27.0117679,27.1163835,0,27.0108349
26.912668,26.9072481,27.1136069,-0.454267344,27.0024881,27.1122768,0,27.0011525
26.921848,27.8208555,27.1105364,0.842804287,26.993392,27.1086279,0,26.9914752
26.931028,26.7768557,27.1082219,-0.575644177,26.9845503,27.105487,0,26.9818029
26.940209,27.0185122,27.1068143,-0.297156791,26.9760562,27.1029117,26.9721346,26.9721346
26.949389,26.8141754,27.1065032,-0.540673478,26.9680354,27.1009686,26.9624724,26.9624724
26.958569,27.1293199,27.107524,0.147634387,26.9606481,27.0997336,26.9528152,26.9528152
26.967749,26.1533937,27.1101695,-0.978149207,26.9541006,27.099295,26.9431632,26.9431631
26.976929,26.5329983,27.1148005,-0.7627596,26.9486539,27.0997551,26.9335163,26.933516
26.986109,27.3313007,27.1218587,0.457648415,26.9446341,27.1012337,26.9238746,26.923874
26.99529,27.0739727,27.1318855,-0.240650618,26.9424438,27.1038736,26.9142371,26.9142359
27.00447,26.9814751,27.1459679,-0.405577133,26.9428677,27.1079889,26.904606,26.904604
27.01365,27.6405499,27.1646423,0.689860577,26.9463505,27.1136794,26.8949804,26.8949771
27.02283,27.0554985,27.188879,-0.36521288,26.953623,27.1211983,26.8853605,26.8853553
27.03201,27.0370117,27.2198099,-0.42754907,26.9655282,27.1308535,26.875747,26.8757385
27.04119,27.0739727,27.2587377,-0.429842972,26.9830192,27.1430226,26.866137,26.8661268
27.050371,27.4408455,27.3071576,0.365633498,27.007155,27.1581753,26.8565298,26.8565191
27.059551,27.6224546,27.3667433,0.505679126,27.0390731,27.176894,26.8469282,26.8469175
27.068731,27.0924344,27.4393866,-0.589026554,27.0799801,27.1999235,26.8373316,26.837321
27.077911,27.5317998,27.5271951,0.0678579119,27.1311072,27.2282204,26.8277402,26.8277295
27.087091,27.0739727,27.6325304,-0.747367155,27.1936665,27.2630421,26.8181538,26.8181431
27.096271,27.3130006,27.758098,-0.667156237,27.2687945,27.306103,26.8085724,26.8085617
27.105452,27.8926514,27.9072111,-0.120663652,27.3574976,27.3599113,26.7989951,26.7989844
27.114632,28.3725219,28.0877642,0.533626967,27.4617493,27.4307657,26.7894239,26.7894132
27.123812,27.1845544,28.3100747,-1.06090538,27.5811288,27.5300071,26.7798577,26.779847
27.132992,28.0891438,28.5994572,-0.714362219,27.7152988,27.684631,26.7702967,26.7702859
27.142172,28.7228132,29.0068621,-0.532962369,27.8637075,27.9490241,26.7607407,26.7607299
27.151352,29.3257566,29.6106204,-0.53372629,28.0252588,28.4077227,26.7511898,26.751179
27.160533,30.4795013,30.4968823,-0.131836964,28.1982971,29.155277,26.7416429,26.7416321
27.169713,31,31.7198354,-0.848431151,28.3805203,30.2538949,26.7321021,26.7320913
27.178893,32.3728281,33.2734673,-0.949020135,28.5691097,31.7021134,26.7225664,26.7225556
27.188073,34.190642,35.1006863,-0.953962418,28.7607037,33.4434631,26.7130358,26.713025
27.197253,35.0856096,37.1329035,-1.43083678,28.95149,35.4081918,26.7035102,26.7034994
27.206433,38.3275358,39.3256227,-0.999042982,29.1373084,37.5511623,26.6939898,26.6939789
27.215614,41.9285106,41.67105,0.507405784,29.313793,39.8652468,26.6844734,26.6844625
27.224794,45.1663592,44.2202333,0.972690011,29.475349,42.4050154,26.6749631,26.6749522
27.233974,49.1833305,47.0494653,1.46077556,29.6172787,45.2494693,26.6654579,26.665447
27.243154,52.5927752,50.2713963,1.52360719,29.7361031,48.5130537,26.6559578,26.6559469
27.252334,56.559703,54.0299844,1.59050892,29.8283395,52.3406361,26.6464627,26.6464518
27.261514,59.6322061,58.3427846,1.13552695,29.8911369,56.744406,26.6369728,26.6369619
27.270695,62.6976874,62.8444789,-0.38313386,29.9223915,61.3441188,26.6274869,26.627476
27.279875,64.691576,66.6146373,-1.38674488,29.9208233,65.19794,26.6180072,26.6179962
27.289055,66.0075753,68.3295343,-1.52379756,29.886055,66.9608976,26.6085325,26.6085216
27.298235,63.387696,66.7836052,-1.84279931,29.8186167,65.4095483,26.599063,26.599052
27.307415,60.2079729,61.5981935,-1.17907617,29.7199398,60.1503799,26.5895985,26.5895875
27.316595,54.1940956,53.7918035,0.634265017,29.5923109,52.1953627,26.5801391,26.5801282
27.325776,47.9895822,45.4542599,1.59226955,29.4387725,43.6514431,26.5706838,26.5706728
27.334956,41.7372735,38.7699212,1.72260046,29.2624272,36.773838,26.5612347,26.5612237
27.344136,36.6060104,34.5766672,1.4245502,29.0679902,32.4899103,26.5517906,26.5517796
27.353316,34.2198773,32.2119156,1.41702563,28.8612904,30.1517609,26.5423517,26.5423406
27.362496,32.2024844,30.9226264,1.13130808,28.6470277,28.9750096,26.5329178,26.5329068
27.371677,30.6757233,30.1503112,0.724853192,28.4297772,28.3598885,26.523488,26.523477
27.380857,30.2654919,29.604355,0.813103229,28.2139229,27.9890484,26.5140644,26.5140533
27.390037,28.8097206,29.1657285,-0.59666397,28.0033726,27.7298742,26.5046459,26.5046348
27.399217,29.2232784,28.7917691,0.65689369,27.8015368,27.532466,26.4952325,26.4952214
27.408397,27.2763634,28.4661195,-1.09075942,27.6112208,27.375868,26.4858242,26.485813
27.417577,28.6356421,28.1806411,0.674537622,27.434574,27.2487133,26.476421,26.4764098
27.426758,27.2213152,27.9301312,-0.841912144,27.2730599,27.1435905,26.4670219,26.4670107
27.435938,27.8388218,27.7108247,0.35776678,27.1275416,27.0553367,26.4576289,26.4576178
27.445118,27.1293199,27.5201412,-0.625157009,26.9985864,26.9804147,26.4482411,26.4482299
27.454298,27.6405499,27.3563826,0.533073486,26.8866622,26.9163726,26.4388583,26.4388472
27.463478,26.7581763,27.214788,-0.675730456,26.7896423,26.8603056,26.4294807,26.4294696
27.472658,27.3861279,27.0929449,0.541463752,26.7064074,26.8107517,26.4201082,26.4200971
27.481839,27.3313007,26.9885215,0.585473492,26.6356449,26.7665596,26.4107399,26.4107287
27.491019,27.5680975,26.8993295,0.817782349,26.5759656,26.7268318,26.4013776,26.4013664
27.500199,26.8514432,26.8232778,0.167825351,26.52593,26.6908379,26.3920205,26.3920093
27.509379,26.6645833,26.758445,-0.306368721,26.4841417,26.6579938,26.3826685,26.3826573
27.518559,26.6645833,26.7030854,-0.196219596,26.4492843,26.6278245,26.3733217,26.3733104
27.527739,26.5894716,26.65564,-0.25723216,26.4201539,26.599941,26.36398,26.3639687
27.53692,26.8700577,26.614737,0.505292704,26.3956752,26.57402,26.3546423,26.3546311
27.5461,26.7207784,26.5792043,0.376263372,26.3749203,26.5498003,26.3453109,26.3452996
27.55528,26.7581763,26.5480431,0.458402854,26.357099,26.5270582,26.3359845,26.3359732
27.56446,26.925824,26.5206672,0.636519335,26.3416987,26.5057109,26.3266633,26.326652
27.57364,27,26.4960132,0.709920308,26.3279402,26.485465,26.3173473,26.3173359
27.58282,26.4952826,26.4735581,0.147392454,26.3154236,26.4661924,26.3080363,26.308025
27.592001,26.5518361,26.4528779,0.314576144,26.3038326,26.447781,26.2987295,26.2987182
27.601181,25.845696,26.4336403,-0.766775303,26.2929255,26.4301397,26.2894289,26.2894175
27.610361,26.7207784,26.4155756,0.552451687,26.2825143,26.413184,26.2801334,26.280122
27.619541,26.7020598,26.398473,0.5509872,26.2724587,26.3968423,26.270843,26.2708316
27.628721,25.7875939,26.382167,-0.771085673,26.2626552,26.3810518,26.2615578,26.2615464
27.637901,25.845696,26.3665281,-0.721686977,26.2530282,26.365758,26.2522777,26.2522663
27.647082,25.7681975,26.3514526,-0.76371141,26.2435226,26.3509111,26.2430018,26.2429903
27.656262,27.1293199,26.3368635,0.890200238,26.2341022,26.3364719,26.233732,26.2337205
27.665442,26.6270539,26.3226953,0.551687072,26.2247395,26.3224013,26.2244673,26.2244559
27.674622,26.4952826,26.3089225,0.431694508,26.2154182,26.30869,26.2152078,26.2151964
27.683802,26.6458252,26.2954769,0.591902233,26.2061232,26.2952849,26.2059535,26.205942
27.692982,25.845696,26.2823198,-0.660775147,26.1968468,26.2821548,26.1967043,26.1966928
27.702163,26.4007576,26.2694221,0.362402362,26.1875834,26.2692754,26.1874592,26.1874477
27.711343,26.2106848,26.2567632,-0.214658806,26.1783317,26.2566293,26.1782204,26.1782088
27.720523,27.0185122,26.2443214,0.879881096,26.1690887,26.2441967,26.1689866,26.1689751
27.729703,25.3968502,26.2320788,-0.913908423,26.1598531,26.231961,26.1597581,26.1597465
27.738883,26.0768096,26.2200196,-0.378430955,26.1506241,26.2199073,26.1505346,26.1505231
27.748063,26.2297541,26.2081298,0.147052,26.1414012,26.2080221,26.1413164,26.1413048
27.757244,26.7581763,26.1963956,0.749520359,26.1321831,26.1962918,26.1321023,26.1320907
27.766424,25.8263431,26.1848081,-0.598719392,26.1229716,26.1847078,26.1228943,26.1228827
27.775604,25.4950976,26.1733558,-0.823564324,26.1137655,26.1732588,26.1136916,26.11368
27.784784,25.96151,26.1620362,-0.447801513,26.1045649,26.1619422,26.1044939,26.1044823
27.793964,25.5342907,26.1508369,-0.785204569,26.0953696,26.1507457,26.0953015,26.0952899
27.803144,26.5329983,26.1397458,0.627098486,26.0861797,26.1396573,26.0861142,26.0861026
27.812325,26.0384331,26.1287549,-0.300535746,26.076994,26.1286688,26.0769311,26.0769194
27.821505,25.8263431,26.1178601,-0.539923133,26.0678146,26.1177765,26.0677541,26.0677425
27.830685,25.5929678,26.1070546,-0.71699846,26.0586406,26.1069732,26.0585824,26.0585707
27.839865,25.9807621,26.0963329,-0.339956964,26.0494718,26.0962536,26.0494157,26.0494041
27.849045,26.925824,26.08569,0.91658825,26.0403082,26.0856128,26.0402543,26.0402426
27.858226,26.1342687,26.0751204,0.243204293,26.031149,26.0750451,26.031097,26.0310853
27.867406,26.5894716,26.064622,0.724465061,26.021996,26.0645486,26.0219459,26.0219342
27.876586,25.7681975,26.0541898,-0.534782523,26.0128482,26.0541182,26.0128,26.0127883
27.885766,26.0384331,26.0438202,-0.073396792,26.0037057,26.0437504,26.0036593,26.0036475
27.894946,25.5342907,26.033512,-0.706555948,25.9945685,26.0334438,25.9945237,25.9945119
27.904126,26.925824,26.0232624,0.950032456,25.9854365,26.0231957,25.9853933,25.9853815
27.913307,24.8797106,26.0130643,-1.06459087,25.9763088,26.0129992,25.9762671,25.9762553
27.922487,25.6515107,26.0029174,-0.592795713,25.9671873,26.0028537,25.9671471,25.9671353
27.931667,26.8328157,25.9928182,0.916513814,25.958071,25.9927558,25.9580322,25.9580204
27.940847,26.2678511,25.9827642,0.533935251,25.9489601,25.9827031,25.9489226,25.9489107
27.950027,25.5147016,25.9727535,-0.676795274,25.9398544,25.9726936,25.9398181,25.9398062
27.959207,25.019992,25.962784,-0.970974749,25.9307539,25.9627251,25.9307188,25.9307069
27.968388,25.9422435,25.9528527,-0.103000927,25.9216578,25.9527949,25.9216237,25.9216118
27.977568,25.8069758,25.9429602,-0.368760644,25.912568,25.9429032,25.9125347,25.9125229
27.986748,26.0384331,25.9331038,0.324544883,25.9034835,25.9330475,25.903451,25.9034391
27.995928,26.2868789,25.9232819,0.602990013,25.8944046,25.923226,25.8943724,25.8943605
28.005108,25.7099203,25.9134935,-0.451190962,25.8853308,25.913438,25.8852991,25.8852872
28.014288,26,25.9037382,0.31026083,25.8762618,25.9036835,25.8762309,25.876219
28.023469,26.4196896,25.8940117,0.725036512,25.8671969,25.8939579,25.8671669,25.867155
28.032649,25,25.8843151,-0.940380285,25.8581382,25.8842622,25.8581092,25.8580972
28.041829,25.5734237,25.8746462,-0.548837445,25.8490847,25.8745942,25.8490566,25.8490446
28.051009,26.4007576,25.8650041,0.731951796,25.8400364,25.8649529,25.8400092,25.8399972
28.060189,25.3771551,25.8553878,-0.691543694,25.8309934,25.8553374,25.830967,25.8309549
28.069369,26.2297541,25.8457962,0.619643363,25.8219556,25.8457466,25.8219299,25.8219179
28.07855,25.96151,25.8362275,0.353952594,25.812922,25.8361787,25.8128972,25.8128851
28.08773,25.5538647,25.826683,-0.522320146,25.8038946,25.8266349,25.8038705,25.8038585
28.09691,25.6515107,25.8171608,-0.407001398,25.7948725,25.8171134,25.7948491,25.7948371
28.10609,26.6270539,25.8076602,0.905203687,25.7858556,25.8076134,25.7858329,25.7858208
28.11527,26.0768096,25.7981805,0.527853337,25.7768439,25.7981344,25.7768219,25.7768098
28.12445,25.0798724,25.7887224,-0.841932281,25.7678374,25.7886769,25.7678161,25.767804
28.133631,24.8797106,25.7792827,-0.94845774,25.7588352,25.7792378,25.7588145,25.7588024
28.142811,26.2678511,25.7698629,0.705682764,25.7498392,25.7698187,25.7498191,25.749807
28.151991,25.2388589,25.7604614,-0.722220538,25.7408484,25.7604178,25.7408289,25.7408168
28.161171,24.9198716,25.7510777,-0.911705077,25.7318628,25.7510346,25.7318439,25.7318318
28.170351,25.2586619,25.7417113,-0.695017577,25.7228825,25.7416687,25.7228642,25.722852
28.179531,26.5706605,25.7323617,0.915586601,25.7139073,25.7323196,25.7138896,25.7138774
28.188712,26.1725047,25.7230274,0.670430658,25.7049365,25.7229858,25.7049193,25.7049071
28.197892,26.1151297,25.71371,0.633576908,25.6959718,25.713669,25.6959551,25.6959429
28.207072,25.8843582,25.7044081,0.424205221,25.6870123,25.7043676,25.6869962,25.686984
28.216252,25.9036677,25.6951214,0.456668723,25.6780581,25.6950813,25.6780425,25.6780302
28.225432,25.5342907,25.6858493,-0.389305358,25.6691091,25.6858097,25.6690939,25.6690817
28.234612,25.7681975,25.6765924,0.302663297,25.6601654,25.6765532,25.6601507,25.6601384
28.243793,26.2106848,25.6673486,0.737113482,25.6512259,25.6673098,25.6512116,25.6511993
28.252973,26.2868789,25.6581194,0.792943547,25.6422926,25.658081,25.6422787,25.6422664
28.262153,25.7293607,25.6489036,0.28364962,25.6333645,25.6488656,25.6333511,25.6333388
28.271333,26.0192237,25.6397008,0.616054296,25.6244416,25.6396632,25.6244287,25.6244163
28.280513,25.6320112,25.6305107,0.0387361217,25.615524,25.6304735,25.6155114,25.6154991
28.289694,25.6709953,25.6213322,0.22285213,25.6066107,25.6212954,25.6065985,25.6065861
28.298874,26.2297541,25.612167,0.785867119,25.5977035,25.6121305,25.5976917,25.5976794
28.308054,24.6779254,25.6030137,-0.961815132,25.5888016,25.6029776,25.5887902,25.5887778
28.317234,25.5929678,25.5938722,-0.0300737729,25.5799049,25.5938364,25.5798938,25.5798815
28.326414,25.1992063,25.5847423,-0.620915402,25.5710134,25.5847068,25.5710027,25.5709903
28.335594,25.3574447,25.5756237,-0.467096349,25.5621272,25.5755885,25.5621169,25.5621045
28.344775,25.2190404,25.5665155,-0.589470203,25.5532452,25.5664807,25.5532352,25.5532228
28.353955,25.7875939,25.5574195,0.479764918,25.5443695,25.557385,25.5443598,25.5443474
28.363135,26.0192237,25.5483342,0.686213832,25.535499,25.5483,25.5354896,25.5354772
28.372315,25.9229628,25.5392595,0.619437912,25.5266337,25.5392255,25.5266246,25.5266122
28.381495,26.7581763,25.5301951,1.10814316,25.5177736,25.5301614,25.5177649,25.5177524
28.390675,25.5538647,25.5211408,0.180897341,25.5089188,25.5211074,25.5089104,25.5088979
28.399856,26.1725047,25.5120957,0.812655522,25.5000683,25.5120625,25.5000601,25.5000476
28.409036,26.1725047,25.5030614,0.818195146,25.4912239,25.5030285,25.4912161,25.4912036
28.418216,24.8193473,25.4940368,-0.821394854,25.4823848,25.4940042,25.4823773,25.4823647
28.427396,25.7099203,25.4850218,0.474234571,25.473551,25.4849895,25.4735437,25.4735311
28.436576,25.1197134,25.4760163,-0.596911187,25.4647224,25.4759842,25.4647153,25.4647028
28.445756,26.1342687,25.4670202,0.816852809,25.455899,25.4669883,25.4558922,25.4558796
28.454937,25.2982213,25.4580324,-0.399763842,25.4470799,25.4580007,25.4470734,25.4470608
28.464117,25.8069758,25.4490549,0.598264888,25.438267,25.4490235,25.4382607,25.4382481
28.473297,25.6515107,25.4400864,0.459808966,25.4294593,25.4400552,25.4294533,25.4294407
28.482477,25.1197134,25.4311267,-0.558044199,25.4206569,25.4310957,25.4206512,25.4206385
28.491657,25.019992,25.4221758,-0.634179583,25.4118597,25.4221449,25.4118542,25.4118416
28.500837,25.6904652,25.4132334,0.526527988,25.4030678,25.4132028,25.4030625,25.4030499
28.510018,25.2784493,25.4042987,-0.354752542,25.3942802,25.4042683,25.3942751,25.3942624
28.519198,24.63737,25.3953734,-0.870633887,25.3854987,25.3953431,25.3854939,25.3854812
28.528378,24.8797106,25.3864564,-0.711860778,25.3767226,25.3864264,25.3767179,25.3767052
28.537558,25.1594913,25.3775477,-0.466965111,25.3679516,25.3775178,25.3679472,25.3679345
28.546738,25.2586619,25.3686471,-0.331640248,25.3591859,25.3686175,25.3591817,25.359169
28.555918,24.9198716,25.3597547,-0.663236846,25.3504255,25.3597252,25.3504215,25.3504087
28.565099,26.4764046,25.3508694,1.06091244,25.3416693,25.3508401,25.3416655,25.3416528
28.574279,25.9036677,25.3419932,0.749449474,25.3329194,25.341964,25.3329158,25.332903
28.583459,26.1725047,25.3331248,0.916176743,25.3241747,25.3330958,25.3241713,25.3241585
28.592639,25.4361947,25.3242643,0.33456003,25.3154353,25.3242354,25.315432,25.3154192
28.601819,25.2388589,25.3154114,-0.27668122,25.3067011,25.3153828,25.306698,25.3066852
28.610999,25.6904652,25.3065662,0.619595775,25.2979721,25.3065377,25.2979693,25.2979564
28.62018,25.6515107,25.2977277,0.594796613,25.2892475,25.2976993,25.2892448,25.289232
28.62936,25.8069758,25.2888976,0.719776501,25.2805291,25.2888694,25.2805265,25.2805137
28.63854,25.5147016,25.280075,0.484382764,25.2718159,25.2800469,25.2718135,25.2718007
28.64772,25.2586619,25.2712598,-0.112240391,25.2631079,25.2712318,25.2631058,25.2630929
28.6569,25.3574447,25.2624519,0.308208892,25.2544053,25.2624241,25.2544033,25.2543904
28.66608,25.5147016,25.2536514,0.510930757,25.2457079,25.2536237,25.245706,25.2456931
28.675261,25,25.2448572,-0.494830438,25.2370148,25.2448296,25.2370131,25.2370001
28.684441,25.6515107,25.2360713,0.644545895,25.2283279,25.2360439,25.2283263,25.2283134
28.693621,25.3377189,25.2272925,0.332304693,25.2196462,25.2272652,25.2196448,25.2196319
28.702801,24.63737,25.2185208,-0.762332512,25.2109698,25.2184937,25.2109686,25.2109556
28.711981,25.7875939,25.2097562,0.760156353,25.2022987,25.2097292,25.2022976,25.2022846
28.721162,24.6170673,25.2009977,-0.764153404,25.1936319,25.2009707,25.193631,25.193618
28.730342,24.5153013,25.192247,-0.822767091,25.1849713,25.1922202,25.1849705,25.1849575
28.739522,25,25.1835033,-0.428372862,25.176316,25.1834766,25.1763153,25.1763023
28.748702,25.6904652,25.1747665,0.718121639,25.1676659,25.1747399,25.1676654,25.1676523
28.757882,25.3377189,25.1660365,0.414345804,25.1590211,25.16601,25.1590207,25.1590076
28.767062,25.3179778,25.1573133,0.400829788,25.1503815,25.1572869,25.1503813,25.1503682
28.776243,25.3574447,25.1485959,0.456999729,25.1417463,25.1485696,25.1417462,25.1417331
28.785423,24.6170673,25.1398862,-0.723062224,25.1331172,25.13986,25.1331173,25.1331041
28.794603,25.9036677,25.1311834,0.878910879,25.1244935,25.1311573,25.1244936,25.1244805
28.803783,24.7184142,25.1224872,-0.635667358,25.115875,25.1224612,25.1158752,25.1158621
28.812963,25.3968502,25.1137976,0.532026854,25.1072617,25.1137717,25.1072621,25.107249
28.822143,25.6320112,25.1051147,0.725876413,25.0986538,25.1050889,25.0986543,25.0986411
28.831324,25.6904652,25.0964373,0.770732005,25.0900501,25.0964116,25.0900508,25.0900376
28.840504,25.6709953,25.0877675,0.76369354,25.0814527,25.0877419,25.0814534,25.0814402
28.849684,24.5153013,25.0791041,-0.750868029,25.0728605,25.0790786,25.0728614,25.0728482
28.858864,25.3574447,25.0704473,0.535721368,25.0642736,25.0704218,25.0642746,25.0642614
28.868044,24.9599679,25.0617969,-0.319106455,25.055692,25.0617715,25.0556931,25.0556798
28.877224,25,25.0531529,-0.230549134,25.0471156,25.0531276,25.0471168,25.0471036
28.886405,25.8843582,25.0445144,0.916429931,25.0385436,25.0444892,25.0385449,25.0385317
28.895585,25.0798724,25.0358832,0.209736041,25.0299778,25.0358581,25.0299792,25.0299659
28.904765,24.0831892,25.0272584,-0.971632273,25.0214172,25.0272334,25.0214188,25.0214055
28.913945,25.0998008,25.01864,0.284887282,25.012862,25.018615,25.0128636,25.0128503
28.923125,25.6515107,25.0100279,0.800926175,25.004312,25.010003,25.0043137,25.0043004
28.932305,25.1197134,25.0014221,0.343934946,24.9957672,25.0013973,24.9957691,24.9957557
28.941486,24.7588368,24.9928216,-0.48371979,24.9872269,24.9927969,24.9872288,24.9872154
28.950666,25.2784493,24.9842283,0.54242141,24.9786927,24.9842036,24.9786947,24.9786813
28.959846,24.7991935,24.9756412,-0.420056796,24.9701638,24.9756166,24.9701659,24.9701525
28.969026,25.3179778,24.9670604,0.592382849,24.9616401,24.9670358,24.9616423,24.9616289
28.978206,24.3310501,24.9584857,-0.792108287,24.9531218,24.9584611,24.9531241,24.9531107
28.987386,24.6779254,24.9499171,-0.521528296,24.9446087,24.9498927,24.9446111,24.9445977
28.996567,25.3179778,24.9413538,0.613696997,24.9361,24.9413294,24.9361025,24.936089
29.005747,25.5342907,24.9327975,0.775559884,24.9275974,24.9327732,24.9276,24.9275865
29.014927,25.1594913,24.9242474,0.485019414,24.9191002,24.9242231,24.9191029,24.9190894
29.024107,25.0798724,24.9157034,0.405177694,24.9106082,24.9156792,24.910611,24.9105975
29.033287,24.9599679,24.9071655,0.229787738,24.9021215,24.9071414,24.9021244,24.9021108
29.042467,25.4950976,24.8986337,0.77231073,24.8936401,24.8986096,24.893643,24.8936295
29.051648,25.1396102,24.890107,0.499502953,24.885163,24.8900829,24.885166,24.8851525
29.060828,25.1992063,24.8815872,0.563577078,24.8766922,24.8815632,24.8766953,24.8766817
29.070008,25.1396102,24.8730735,0.516271942,24.8682266,24.8730495,24.8682298,24.8682162
29.079188,25.4165301,24.8645657,0.742943028,24.8597663,24.8645418,24.8597696,24.859756
29.088368,25.019992,24.8560639,0.404880301,24.8513113,24.8560401,24.8513146,24.851301
29.097548,24.3515913,24.8475682,-0.704256228,24.8428615,24.8475444,24.842865,24.8428514
29.106729,24.1867732,24.8390774,-0.80765349,24.8344162,24.8390536,24.8344197,24.834406
29.115909,23.6643191,24.8305935,-1.07994185,24.825977,24.8305698,24.8259806,24.8259669
29.125089,25.019992,24.8221156,0.44483302,24.8175431,24.8220919,24.8175468,24.8175331
29.134269,24.5560583,24.8136436,-0.507528636,24.8091145,24.81362,24.8091183,24.8091046
29.143449,25.4165301,24.8051776,0.78189032,24.8006912,24.805154,24.800695,24.8006813
29.152629,24.4131112,24.7967174,-0.619359506,24.7922732,24.7966939,24.792277,24.7922633
29.16181,24.7991935,24.7882622,0.104552831,24.7838595,24.7882387,24.7838634,24.7838497
29.17099,24,24.7798138,-0.883070693,24.775452,24.7797904,24.7754561,24.7754423
29.18017,24.9198716,24.7713713,0.385357324,24.7670499,24.7713479,24.7670539,24.7670402
29.18935,25.5538647,24.7629346,0.889342471,24.758653,24.7629113,24.7586571,24.7586434
29.19853,25.0998008,24.7545038,0.587619757,24.7502614,24.7544805,24.7502656,24.7502518
29.207711,24.63737,24.7460779,-0.329708832,24.7418741,24.7460546,24.7418784,24.7418646
29.216891,24.6779254,24.7376587,-0.244404119,24.7334931,24.7376355,24.7334975,24.7334836
29.226071,25.4558441,24.7292454,0.852407618,24.7251173,24.7292221,24.7251218,24.7251079
29.235251,25.2784493,24.7208378,0.746733886,24.7167469,24.7208146,24.7167514,24.7167375
29.244431,25.2784493,24.7124361,0.752338488,24.7083817,24.712413,24.7083863,24.7083724
29.253611,23.9165215,24.7040402,-0.887422511,24.7000218,24.7040171,24.7000265,24.7000126
29.262792,24.63737,24.6956491,-0.241410758,24.6916663,24.695626,24.691671,24.6916571
29.271972,24.2487113,24.6872648,-0.662233693,24.683317,24.6872417,24.6833218,24.6833079
29.281152,25,24.6788862,0.566669077,24.674973,24.6788631,24.6749778,24.6749639
29.290332,25.1992063,24.6705133,0.727112812,24.6666343,24.6704903,24.6666392,24.6666252
29.299512,24.8797106,24.6621462,0.466438024,24.6583008,24.6621232,24.6583058,24.6582918
29.308692,24.8797106,24.6537848,0.475316537,24.6499727,24.6537619,24.6499777,24.6499637
29.317873,24.8394847,24.6454282,0.440518397,24.6416489,24.6454053,24.641654,24.64164
29.327053,24.4540385,24.6370783,-0.427831496,24.6333314,24.6370554,24.6333365,24.6333225
29.336233,24.9198716,24.6287341,0.539571582,24.6250191,24.6287112,24.6250243,24.6250103
29.345413,24.657656,24.6203956,0.193029586,24.6167121,24.6203728,24.6167174,24.6167033
29.354593,24.5967478,24.6120628,-0.123754058,24.6084104,24.61204,24.6084157,24.6084017
29.363773,24.0208243,24.6037357,-0.763486378,24.6001141,24.603713,24.6001194,24.6001053
29.372954,25.0599282,24.5954135,0.681553163,24.5918221,24.5953907,24.5918275,24.5918134
29.382134,24.4744765,24.5870978,-0.3355909,24.5835362,24.587075,24.5835417,24.5835276
29.391314,24.979992,24.5787877,0.633406876,24.5752557,24.578765,24.5752613,24.5752471
29.400494,24.8797106,24.5704834,0.556082053,24.5669805,24.5704607,24.5669861,24.5669719
29.409674,24.7386338,24.5621847,0.420058444,24.5587106,24.562162,24.5587162,24.5587021
29.418854,23.9165215,24.5538916,-0.798354636,24.550446,24.553869,24.5504516,24.5504375
29.428035,23.3880311,24.5456033,-1.07590529,24.5421857,24.5455807,24.5421915,24.5421773
29.437215,24.3721152,24.5373216,-0.406455834,24.5339317,24.5372989,24.5339375,24.5339233
29.446395,25.5734237,24.5290454,1.02194827,24.5256829,24.5290229,24.5256888,24.5256745
29.455575,25.3179778,24.520775,0.89286216,24.5174395,24.5207524,24.5174454,24.5174311
29.464755,25.8263431,24.5125101,1.14622555,24.5092013,24.5124876,24.5092073,24.509193
29.473935,23.7697286,24.5042509,-0.857042759,24.5009685,24.5042284,24.5009744,24.5009602
29.483116,25.5147016,24.4959965,1.00930926,24.49274,24.4959739,24.492746,24.4927318
29.492296,24.2074369,24.4877485,-0.529444632,24.4845177,24.487726,24.4845238,24.4845095
29.501476,25.9229628,24.4795061,1.20143941,24.4763008,24.4794836,24.4763069,24.4762926
29.510656,24.2899156,24.4712694,-0.425856513,24.4680891,24.4712469,24.4680953,24.4680809
29.519836,23.8327506,24.4630382,-0.793906566,24.4598827,24.4630158,24.4598889,24.4598746
29.529016,24.9599679,24.4548126,0.710742784,24.4516816,24.4547902,24.4516879,24.4516735
29.538197,24.6779254,24.4465918,0.480971506,24.4434849,24.4465693,24.4434913,24.4434769
29.547377,23.4946802,24.4383774,-0.971440747,24.4352945,24.438355,24.4353008,24.4352864
29.556557,24.6170673,24.4301686,0.432317814,24.4271093,24.4301462,24.4271157,24.4271013
29.565737,25.1793566,24.4219653,0.870282314,24.4189294,24.4219429,24.4189358,24.4189214
29.574917,24.0624188,24.4137677,-0.592746852,24.4107548,24.4137453,24.4107613,24.4107469
29.584097,24.3721152,24.4055756,-0.182921768,24.4025855,24.4055532,24.4025921,24.4025776
29.593278,25.4361947,24.3973882,1.01921857,24.3944206,24.3973658,24.3944272,24.3944127
29.602458,24.3515913,24.3892072,-0.193948209,24.3862619,24.3891849,24.3862686,24.3862541
29.611638,24.5560583,24.3810318,0.418361664,24.3781085,24.3810095,24.3781152,24.3781007
29.620818,23.727621,24.372862,-0.803268916,24.3699604,24.3728397,24.3699671,24.3699526
29.629998,25.5147016,24.3646977,1.07238237,24.3618176,24.3646754,24.3618244,24.3618098
29.639178,25.0998008,24.3565389,0.862126362,24.3536801,24.3565166,24.3536869,24.3536724
29.648359,24.1246762,24.3483848,-0.472978504,24.345547,24.3483625,24.3455539,24.3455393
29.657539,24.5560583,24.3402372,0.464565566,24.3374201,24.3402149,24.337427,24.3374124
29.666719,24.6779254,24.332095,0.588073424,24.3292985,24.3320727,24.3293055,24.3292909
29.675899,24.8797106,24.3239584,0.745487906,24.3211822,24.3239361,24.3211892,24.3211746
29.685079,23.1516738,24.3158273,-1.07895945,24.3130712,24.3158051,24.3130782,24.3130636
29.69426,23.8117618,24.3077009,-0.704229424,24.3049646,24.3076786,24.3049717,24.304957
29.70344,23.6008474,24.2995809,-0.835902755,24.2968642,24.2995586,24.2968713,24.2968567
29.71262,24.9399278,24.2914664,0.805271056,24.2887691,24.2914441,24.2887763,24.2887616
29.7218,23.8537209,24.2833574,-0.65546661,24.2806793,24.2833351,24.2806865,24.2806718
29.73098,25.0798724,24.2752539,0.897005312,24.2725948,24.2752317,24.2726021,24.2725873
29.74016,25.0798724,24.2671559,0.901507906,24.2645156,24.2671337,24.2645229,24.2645082
29.749341,24.0624188,24.2590626,-0.443445286,24.2564408,24.2590404,24.2564482,24.2564334
29.758521,24.3926218,24.2509756,0.376359204,24.2483722,24.2509534,24.2483796,24.2483648
29.767701,24.7790234,24.2428941,0.732208489,24.2403089,24.2428719,24.2403163,24.2403015
29.776881,25.1396102,24.2348181,0.951205571,24.2322509,24.234796,24.2322584,24.2322436
29.786061,23.3880311,24.2267477,-0.915814684,24.2241982,24.2267255,24.2242057,24.2241909
29.795241,24.7790234,24.2186827,0.748559092,24.2161508,24.2186605,24.2161584,24.2161435
29.804422,25.0399681,24.2106223,0.910684214,24.2081079,24.2106001,24.2081154,24.2081006
29.813602,23.7486842,24.2025683,-0.673709242,24.2000711,24.2025461,24.2000787,24.2000638
29.822782,23.6431808,24.1945198,-0.742522032,24.1920396,24.1944976,24.1920472,24.1920323
29.831962,23.8117618,24.1864768,-0.612139664,24.1840134,24.1864546,24.1840211,24.1840061
29.841142,23.6854386,24.1784392,-0.702140047,24.1759925,24.178417,24.1760002,24.1759853
29.850322,24.2899156,24.1704071,0.345699977,24.1679769,24.170385,24.1679847,24.1679697
29.859503,24.6170673,24.1623796,0.674305276,24.1599658,24.1623575,24.1599735,24.1599586
29.868683,24.8797106,24.1543585,0.851676055,24.1519608,24.1543364,24.1519686,24.1519536
29.877863,24.4948974,24.1463428,0.590385122,24.1439611,24.1463207,24.1439689,24.1439539
29.887043,24.3721152,24.1383326,0.483510687,24.1359667,24.1383105,24.1359746,24.1359596
29.896223,24.8193473,24.1303279,0.830071927,24.1279776,24.1303057,24.1279855,24.1279705
29.905403,24.0624188,24.1223286,-0.244764735,24.1199938,24.1223065,24.1200018,24.1199867
29.914584,23.7907545,24.1143339,-0.568840417,24.1120145,24.1143118,24.1120225,24.1120074
29.923764,23.1732605,24.1063456,-0.965963315,24.1040413,24.1063234,24.1040493,24.1040342
29.932944,23.8537209,24.0983627,-0.494612778,24.0960734,24.0983405,24.0960815,24.0960664
29.942124,24.1867732,24.0903852,0.310464174,24.0881109,24.0903631,24.0881189,24.0881038
29.951304,23.6854386,24.0824132,-0.630059271,24.0801536,24.0823911,24.0801617,24.0801466
29.960484,24.1246762,24.0744467,0.224119296,24.0722016,24.0744246,24.0722098,24.0721946
29.969665,23.8327506,24.0664847,-0.483460613,24.0642541,24.0664626,24.0642623,24.0642471
29.978845,24.8596058,24.0585291,0.895028884,24.0563127,24.0585069,24.0563209,24.0563057
29.988025,24.5764115,24.0505789,0.725143145,24.0483766,24.0505567,24.0483849,24.0483697
29.997205,24.0208243,24.0426341,-0.14768143,24.0404458,24.0426119,24.0404541,24.0404389
30.006385,24.2693222,24.0346948,0.484383555,24.0325204,24.0346726,24.0325287,24.0325135
30.015565,24,24.0267609,-0.163587514,24.0246002,24.0267387,24.0246086,24.0245933
30.024746,23.9791576,24.0188316,-0.199183186,24.0166845,24.0188094,24.0166929,24.0166776
30.033926,23.6008474,24.0109085,-0.640360134,24.0087749,24.0108864,24.0087833,24.008768
30.043106,24.1453929,24.002991,0.377361864,24.0008706,24.0029688,24.0008791,24.0008638
30.052286,25.0798724,23.9950788,1.04153425,23.9929717,23.9950566,23.9929802,23.9929648
30.061466,24.7790234,23.9871721,0.889860276,23.985078,23.9871499,23.9850865,23.9850712
30.070646,23.2163735,23.9792708,-0.873439889,23.9771896,23.9792486,23.9771982,23.9771828
30.079827,23.6220236,23.971374,-0.591058721,23.9693057,23.9713518,23.9693143,23.9692989
30.089007,23.8537209,23.9634836,-0.331304533,23.9614279,23.9634614,23.9614366,23.9614212
30.098187,24.8997992,23.9555985,0.971699879,23.9535555,23.9555763,23.9535641,23.9535487
30.107367,24.1453929,23.9477189,0.444605456,23.9456883,23.9476967,23.945697,23.9456815
30.116547,24.7386338,23.9398447,0.893749982,23.9378264,23.9398225,23.9378351,23.9378197
30.125728,23.3666429,23.9319751,-0.751885756,23.929969,23.9319529,23.9299777,23.9299623
30.134908,23.3023604,23.9241117,-0.788512092,23.9221177,23.9240895,23.9221265,23.922111
30.144088,25.2388589,23.9162538,1.15004572,23.9142718,23.9162315,23.9142806,23.9142651
30.153268,24.2487113,23.9084012,0.583361016,23.9064311,23.908379,23.9064399,23.9064244
30.162448,24.5560583,23.9005541,0.809632146,23.8985957,23.9005319,23.8986046,23.898589
30.171628,23.6220236,23.8927124,-0.520277581,23.8907657,23.8926901,23.8907745,23.890759
30.180809,23.6008474,23.8848752,-0.53294256,23.88294,23.884853,23.8829489,23.8829334
30.189989,24.7790234,23.8770443,0.949725793,23.8751205,23.8770221,23.8751295,23.8751139
30.199169,24.1039416,23.8692188,0.48448198,23.8673064,23.8691965,23.8673153,23.8672997
30.208349,23.9791576,23.8613987,0.343160203,23.8594975,23.8613764,23.8595065,23.8594909
30.217529,24.1453929,23.853584,0.540193437,23.8516939,23.8535617,23.8517029,23.8516873
30.226709,24.3926218,23.8457747,0.739491147,23.8438956,23.8457524,23.8439047,23.843889
30.23589,23.8537209,23.8379699,0.125502852,23.8361018,23.8379476,23.8361109,23.8360952
30.24507,24.0831892,23.8301714,0.5030087,23.8283141,23.8301491,23.8283232,23.8283075
30.25425,24.1660919,23.8223783,0.586270971,23.8205317,23.822356,23.8205408,23.8205251
30.26343,24.4948974,23.8145906,0.824807159,23.8127546,23.8145683,23.8127638,23.812748
30.27261,23.7907545,23.8068083,-0.126703372,23.8049828,23.8067859,23.804992,23.8049762
30.28179,24.2899156,23.7990313,0.70063135,23.7972163,23.799009,23.7972255,23.7972097
30.290971,25,23.7912589,1.09942761,23.7894542,23.7912366,23.7894635,23.7894477
30.300151,23.9165215,23.7834928,0.364731034,23.7816983,23.7834704,23.7817076,23.7816918
30.309331,23.0434372,23.775732,-0.855742216,23.7739477,23.7757096,23.773957,23.7739412
30.318511,23.3452351,23.7679766,-0.650185769,23.7662024,23.7679542,23.7662117,23.7661958
30.327691,23.7065392,23.7602266,-0.231705426,23.7584623,23.7602042,23.7584717,23.7584558
30.336871,24.1453929,23.752482,0.626826112,23.7507276,23.7524596,23.750737,23.7507211
30.346052,23.130067,23.7447419,-0.784012029,23.7429973,23.7447195,23.7430067,23.7429908
30.355232,23.6008474,23.737008,-0.368999412,23.7352732,23.7369856,23.7352826,23.7352667
30.364412,24.4335834,23.7292795,0.839228167,23.7275543,23.7292571,23.7275638,23.7275478
30.373592,24.0624188,23.7215564,0.583834226,23.7198407,23.721534,23.7198502,23.7198343
30.382772,23.9582971,23.7138387,0.494427346,23.7121325,23.7138163,23.712142,23.712126
30.391952,24.3310501,23.7061263,0.790521203,23.7044295,23.7061039,23.7044391,23.7044231
30.401133,23.0217289,23.6984185,-0.82261149,23.696731,23.6983961,23.6967406,23.6967245
30.410313,24.4131112,23.6907169,0.849937827,23.6890386,23.6906945,23.6890482,23.6890322
30.419493,24.657656,23.6830207,0.987236207,23.6813515,23.6829982,23.6813611,23.6813451
30.428673,23.1732605,23.6753298,-0.708568531,23.6736697,23.6753073,23.6736793,23.6736633
30.437853,24.4335834,23.6676443,0.875179485,23.6659932,23.6676218,23.6660029,23.6659868
30.447033,23.5372046,23.6599642,-0.350370644,23.6583219,23.6599417,23.6583317,23.6583155
30.456214,23.7907545,23.6522886,0.372110106,23.6506552,23.6522661,23.6506649,23.6506488
30.465394,23.9374184,23.6446192,0.541109263,23.6429945,23.6445966,23.6430043,23.6429881
30.474574,24.3926218,23.6369551,0.869290916,23.6353392,23.6369326,23.635349,23.6353328
30.483754,22.737634,23.6292965,-0.944278807,23.6276891,23.6292739,23.6276989,23.6276827
30.492934,23.515952,23.6216432,-0.325101712,23.6200443,23.6216206,23.6200542,23.620038
30.502114,23.6008474,23.6139952,-0.114663691,23.6124048,23.6139726,23.6124147,23.6123985
30.511295,23.4946802,23.6063518,-0.334172905,23.6047698,23.6063292,23.6047797,23.6047635
30.520475,23.7907545,23.5987145,0.438223645,23.5971409,23.5986919,23.5971508,23.5971346
30.529655,24.2487113,23.5910827,0.810943057,23.5895173,23.5910601,23.5895272,23.5895109
30.538835,24.7790234,23.5834561,1.09341998,23.5818989,23.5834335,23.5819089,23.5818926
30.548015,23.2808935,23.575835,-0.543085182,23.5742859,23.5758123,23.5742959,23.5742796
30.557195,23.2379001,23.5682191,-0.574733915,23.5666781,23.5681965,23.5666882,23.5666718
30.566376,24.1867732,23.5606079,0.79130613,23.5590748,23.5605852,23.5590849,23.5590685
30.575556,23.5372046,23.5530027,-0.125690674,23.5514776,23.5529801,23.5514877,23.5514713
30.584736,23.9165215,23.545403,0.609194971,23.5438857,23.5453803,23.5438958,23.5438794
30.593916,23.4733892,23.5378086,-0.253809718,23.5362991,23.5377859,23.5363092,23.5362928
30.603096,23.6220236,23.5302195,0.302991958,23.5287178,23.5301968,23.5287279,23.5287115
30.612277,24.4744765,23.5226349,0.975623673,23.5211409,23.5226122,23.5211511,23.5211346
30.621457,23.8956063,23.5150566,0.616887118,23.5135701,23.5150338,23.5135803,23.5135638
30.630637,23.0434372,23.5074835,-0.681209438,23.5060046,23.5074608,23.5060148,23.5059984
30.639817,24.8797106,23.4999159,1.17464665,23.4984444,23.4998931,23.4984547,23.4984382
30.648997,22.4499443,23.4923535,-1.02098442,23.4908895,23.4923307,23.4908998,23.4908832
30.658177,22.9346899,23.4847965,-0.741691724,23.4833398,23.4847737,23.4833501,23.4833336
30.667358,23.6431808,23.477244,0.407353448,23.4757947,23.4772212,23.475805,23.4757884
30.676538,23.10844,23.4696977,-0.601047133,23.4682556,23.4696748,23.4682659,23.4682493
30.685718,23.2163735,23.4621567,-0.495765213,23.4607218,23.4621338,23.4607321,23.4607155
30.694898,23.8327506,23.454621,0.614922396,23.4531933,23.4545982,23.4532036,23.453187
30.704078,22.737634,23.4470907,-0.842292528,23.44567,23.4470678,23.4456804,23.4456638
30.713258,24.2899156,23.4395657,0.922144177,23.438152,23.4395428,23.4381625,23.4381458
30.722439,23.430749,23.4320452,-0.0360030794,23.4306385,23.4320223,23.430649,23.4306323
30.731619,22.4944438,23.4245309,-0.964410271,23.4231311,23.424508,23.4231416,23.4231249
30.740799,24.1039416,23.4170219,0.828806158,23.415629,23.416999,23.4156395,23.4156228
30.749979,23.7697286,23.4095183,0.600175283,23.4081321,23.4094953,23.4081427,23.4081259
30.759159,23.1732605,23.4020199,-0.478288086,23.4006406,23.401997,23.4006511,23.4006344
30.768339,23.3238076,23.3945269,-0.265931119,23.3931543,23.394504,23.3931648,23.3931481
30.77752,23.3666429,23.3870384,-0.142812999,23.3856724,23.3870154,23.385683,23.3856662
30.7867,22.7815715,23.3795561,-0.773294633,23.3781967,23.3795331,23.3782073,23.3781905
30.79588,23.0867928,23.3720791,-0.534121987,23.3707262,23.372056,23.3707368,23.37072
30.80506,24.4744765,23.3646074,1.05350327,23.363261,23.3645843,23.3632716,23.3632548
30.81424,23.2808935,23.357141,-0.276129528,23.355801,23.3571179,23.3558117,23.3557949
30.82342,23.3023604,23.3496799,-0.217530488,23.3483464,23.3496568,23.3483571,23.3483402
30.832601,23.2379001,23.3422234,-0.322991142,23.3408962,23.3422003,23.3409069,23.34089
30.841781,23.6008474,23.3347729,0.515824108,23.333452,23.3347498,23.3334628,23.3334459
30.850961,22.7156334,23.3273278,-0.782108972,23.3260132,23.3273047,23.326024,23.326007
30.860141,23.7486842,23.319888,0.654825272,23.3185796,23.3198649,23.3185904,23.3185734
30.869321,23.1732605,23.3124536,-0.373085929,23.3111513,23.3124304,23.3111621,23.3111451
30.878501,21.6101828,23.3050244,-1.30186083,23.3037282,23.3050012,23.3037391,23.3037221
30.887682,22.9782506,23.2975997,-0.565109866,23.2963097,23.2975766,23.2963205,23.2963035
30.896862,23.558438,23.2901812,0.517935099,23.2888972,23.290158,23.2889081,23.288891
30.906042,23.4520788,23.282768,0.41147395,23.2814899,23.2827448,23.2815008,23.2814838
30.915222,23.3880311,23.2753601,0.335665091,23.2740879,23.2753368,23.2740989,23.2740818
30.924402,23.8746728,23.2679575,0.778919315,23.2666912,23.2679342,23.2667022,23.2666851
30.933582,23.4520788,23.2605602,0.437628404,23.2592998,23.2605369,23.2593108,23.2592936
30.942763,23.6431808,23.2531674,0.624510567,23.2519128,23.2531441,23.2519238,23.2519066
30.951943,23.4093998,23.2457807,0.404498597,23.2445319,23.2457574,23.2445429,23.2445257
30.961123,23.3452351,23.2383993,0.326857355,23.2371562,23.238376,23.2371673,23.2371501
30.970303,23.5372046,23.2310233,0.553336549,23.2297858,23.2309999,23.2297969,23.2297797
30.979483,23.430749,23.2236525,0.455078612,23.2224207,23.2236291,23.2224318,23.2224145
30.988663,22.9564806,23.216287,-0.509712122,23.2150608,23.2162636,23.2150719,23.2150547
30.997844,23.8117618,23.208926,0.776424985,23.2077054,23.2089026,23.2077165,23.2076992
31.007024,23.3452351,23.2015712,0.379030194,23.200356,23.2015477,23.2003672,23.2003499
31.016204,22.9564806,23.1942216,-0.487586949,23.1930119,23.1941982,23.1930231,23.1930058
31.025384,23.558438,23.1868773,0.609557754,23.1856731,23.1868539,23.1856843,23.185667
31.034564,24.3104916,23.1795383,1.06346284,23.1783395,23.1795149,23.1783507,23.1783334
31.043745,22.9128785,23.1722039,-0.509240013,23.1710104,23.1721804,23.1710216,23.1710043
31.052925,23.6220236,23.1648755,0.676127313,23.1636873,23.164852,23.1636986,23.1636812
31.062105,22.5610283,23.1575524,-0.772349686,23.1563695,23.1575288,23.1563808,23.1563634
31.071285,22.4053565,23.1502346,-0.863063194,23.1490569,23.150211,23.1490683,23.1490508
31.080465,22.8473193,23.1429221,-0.543693616,23.1417496,23.1428985,23.141761,23.1417435
31.089645,23.0434372,23.1356148,-0.303607637,23.1344476,23.1355912,23.1344589,23.1344415
31.098826,23.2808935,23.1283121,0.390616621,23.12715,23.1282885,23.1271614,23.1271439
31.108006,22.1585198,23.1210155,-0.981068629,23.1198584,23.1209918,23.1198698,23.1198523
31.117186,23.10844,23.1137241,-0.0726916822,23.1125721,23.1137004,23.1125836,23.112566
31.126366,23.6431808,23.106438,0.732627338,23.1052911,23.1064143,23.1053025,23.105285
31.135546,23.1732605,23.0991572,0.272219081,23.0980153,23.0991335,23.0980267,23.0980092
31.144726,22.7815715,23.0918817,-0.557054948,23.0907447,23.091858,23.0907562,23.0907386
31.153907,23.515952,23.0846107,0.656765816,23.0834786,23.084587,23.0834901,23.0834725
31.163087,23.1732605,23.0773457,0.309700989,23.0762186,23.077322,23.0762301,23.0762125
31.172267,23.0867928,23.0700861,0.129254317,23.0689637,23.0700623,23.0689753,23.0689576
31.181447,23.2379001,23.0628317,0.418411739,23.0617142,23.0628079,23.0617258,23.0617081
31.190627,23.3452351,23.0555826,0.538193718,23.0544699,23.0555588,23.0544815,23.0544637
31.199807,23.10844,23.0483387,0.245155605,23.0472308,23.0483149,23.0472424,23.0472247
31.208988,23.2808935,23.0410994,0.489687714,23.0399961,23.0410755,23.0400078,23.03999
31.218168,22.4722051,23.0338661,-0.749440495,23.0327675,23.0338422,23.0327792,23.0327614
31.227348,23.2163735,23.0266381,0.435586314,23.0255442,23.0266142,23.0255559,23.0255381
31.236528,23.4520788,23.0194154,0.657771577,23.0183261,23.0193914,23.0183378,23.01832
31.245708,22.8254244,23.0121979,-0.432172949,23.0111132,23.0121739,23.0111249,23.0111071
31.254888,22.7596134,23.0049857,-0.495350707,23.0039056,23.0049617,23.0039173,23.0038995
31.264069,23.0217289,22.997778,0.154760805,22.9967024,22.997754,22.9967141,22.9966963
31.273249,23.10844,22.9905763,0.343312847,22.9895052,22.9905523,22.989517,22.9894991
31.282429,23.1516738,22.9833801,0.410236118,22.9823133,22.9833561,22.9823251,22.9823072
31.291609,23.6008474,22.97619,0.790352748,22.9751266,22.9761659,22.9751384,22.9751205
31.300789,22.7596134,22.9690065,-0.457594958,22.9679451,22.9689824,22.967957,22.967939
31.309969,22.6715681,22.9618302,-0.538759779,22.9607689,22.9618061,22.9607808,22.9607628
31.31915,23.0434372,22.9546606,0.297954113,22.9535971,22.9546365,22.953609,22.953591
31.32833,22.6495033,22.9474996,-0.545890367,22.9464314,22.9474755,22.9464433,22.9464252
31.33751,22.2261108,22.9403469,-0.845124936,22.9392708,22.9403228,22.9392828,22.9392647
31.34669,23.8117618,22.9332035,0.937314389,22.9321155,22.9331794,22.9321275,22.9321094
31.35587,23.3023604,22.9260707,0.613424564,22.9249654,22.9260465,22.9249774,22.9249593
31.36505,23.5796522,22.9189506,0.812835535,22.9178206,22.9189264,22.9178326,22.9178145
31.374231,22.737634,22.9118496,-0.417391462,22.9106802,22.9118254,22.9106922,22.9106741
31.383411,23.3880311,22.9047775,0.695164428,22.9035458,22.9047533,22.9035579,22.9035397
31.392591,23.4733892,22.8976932,0.758746313,22.8964166,22.8976689,22.8964287,22.8964105
31.401771,23.5372046,22.8905817,0.804128681,22.8892927,22.8905573,22.8893048,22.8892866
31.410951,22.9564806,22.8834605,0.27022217,22.882174,22.8834362,22.8821861,22.8821679
31.420131,23.130067,22.8763438,0.503709485,22.8750605,22.8763194,22.8750726,22.8750544
31.429312,23.4520788,22.8692315,0.763444389,22.8679514,22.8692071,22.8679636,22.8679453
31.438492,23.5796522,22.8621252,0.84706969,22.8608484,22.8621008,22.8608605,22.8608422
31.447672,23.6008474,22.8550242,0.863610612,22.8537505,22.8549997,22.8537627,22.8537444
31.456852,22.8691933,22.8479284,0.145824839,22.8466579,22.8479039,22.8466701,22.8466518
31.466032,22.0227155,22.8408378,-0.904501124,22.8395705,22.8408134,22.8395827,22.8395644
31.475212,22.9564806,22.8337525,0.35032561,22.8324883,22.833728,22.8325006,22.8324822
31.484393,22.9782506,22.8266717,0.389331316,22.8254106,22.8266472,22.8254228,22.8254044
31.493573,21.5406592,22.8195969,-1.13090127,22.8183388,22.8195724,22.8183511,22.8183327
31.502753,22.8691933,22.8125273,0.238046035,22.8112722,22.8125028,22.8112846,22.8112661
31.511933,22.8473193,22.805463,0.204588143,22.8042109,22.8054384,22.8042233,22.8042048
31.521113,22.2261108,22.7984039,-0.756500594,22.7971548,22.7983793,22.7971672,22.7971487
31.530294,22.9564806,22.7913493,0.406363468,22.7901031,22.7913247,22.7901155,22.790097
31.539474,22.8691933,22.7843007,0.291363297,22.7830574,22.784276,22.7830698,22.7830513
31.548654,23.9165215,22.7772573,1.06736319,22.7760169,22.7772326,22.7760293,22.7760108
31.557834,22.7156334,22.7702191,-0.233635969,22.7689816,22.7701944,22.7689941,22.7689755
31.567014,22.8254244,22.7631862,0.249475829,22.7619515,22.7631615,22.761964,22.7619454
31.576194,24.4540385,22.7561585,1.30302724,22.7549267,22.7561338,22.7549392,22.7549205
31.585375,22.8910463,22.7491353,0.376710712,22.7479062,22.7491106,22.7479187,22.7479001
31.594555,23.10844,22.7421181,0.605245337,22.7408918,22.7420933,22.7409043,22.7408856
31.603735,21.725561,22.7351061,-1.00476122,22.7338825,22.7350813,22.733895,22.7338764
31.612915,22.7596134,22.7280993,0.177521905,22.7268784,22.7280745,22.726891,22.7268723
31.622095,22.2485955,22.7210978,-0.68738804,22.7198796,22.7210729,22.7198921,22.7198734
31.631275,22.9128785,22.7141015,0.445844167,22.7128859,22.7140766,22.7128985,22.7128797
31.640456,23.0434372,22.7071096,0.57993763,22.7058967,22.7070847,22.7059093,22.7058905
31.649636,22.8473193,22.7001237,0.3836608,22.6989134,22.7000988,22.698926,22.6989072
31.658816,22.1585198,22.693143,-0.731179348,22.6919353,22.6931181,22.691948,22.6919292
31.667996,23.0651252,22.6861676,0.615595311,22.6849624,22.6861426,22.6849751,22.6849563
31.677176,22.8035085,22.6791974,0.352577831,22.6779947,22.6791724,22.6780074,22.6779886
31.686356,22.7156334,22.6722324,0.208329112,22.6710322,22.6722073,22.671045,22.6710261
31.695537,22.6495033,22.6652718,-0.125572704,22.6640742,22.6652467,22.6640869,22.664068
31.704717,23.194827,22.6583172,0.73246828,22.657122,22.6582921,22.6571348,22.6571159
31.713897,22.9782506,22.6513679,0.571736588,22.6501751,22.6513427,22.6501879,22.6501689
31.723077,22.2485955,22.6444237,-0.629148822,22.6432334,22.6443986,22.6432462,22.6432272
31.732257,22.8254244,22.6374848,0.43352009,22.6362968,22.6374596,22.6363096,22.6362906
31.741437,22.6936114,22.630551,0.251118347,22.6293654,22.6305258,22.6293783,22.6293593
31.750618,22.6495033,22.6236217,0.16087754,22.6224385,22.6235965,22.6224514,22.6224323
31.759798,23.3238076,22.6166984,0.840897844,22.6155175,22.6166731,22.6155304,22.6155113
31.768978,22.6053091,22.6097803,-0.0668667283,22.6086017,22.609755,22.6086146,22.6085955
31.778158,22.627417,22.6028673,0.156683277,22.601691,22.6028421,22.6017039,22.6016848
31.787338,22.4722051,22.5959596,-0.351787683,22.5947855,22.5959343,22.5947985,22.5947794
31.796518,23.0434372,22.5890571,0.674077247,22.5878853,22.5890318,22.5878982,22.5878791
31.805699,22.6053091,22.582159,0.152151485,22.5809894,22.5821337,22.5810024,22.5809832
31.814879,21.7944947,22.5752669,-0.883613149,22.5740995,22.5752415,22.5741125,22.5740933
31.824059,22.4499443,22.56838,-0.344144837,22.5672147,22.5683546,22.5672277,22.5672085
31.833239,22.2036033,22.5614983,-0.598243218,22.5603351,22.5614728,22.5603482,22.5603289
31.842419,22.4722051,22.5546217,-0.287083034,22.5534607,22.5545962,22.5534738,22.5534545
31.851599,22.0454077,22.5477504,-0.708761379,22.5465915,22.5477249,22.5466045,22.5465852
31.86078,21.9317122,22.5408835,-0.780494251,22.5397266,22.5408579,22.5397397,22.5397204
31.86996,22.3383079,22.5340225,-0.442396438,22.5328677,22.533997,22.5328808,22.5328615
31.87914,22.5166605,22.5271667,-0.102499938,22.526014,22.5271412,22.5260271,22.5260078
31.88832,22.4944438,22.5203161,-0.16084896,22.5191654,22.5202905,22.5191786,22.5191592
31.8975,22.7596134,22.5134707,0.496127616,22.512322,22.5134451,22.5123352,22.5123158
31.90668,23.0867928,22.5066305,0.761683819,22.5054838,22.5066049,22.505497,22.5054775
31.915861,22.8691933,22.4997947,0.607781632,22.4986499,22.4997691,22.4986631,22.4986437
31.925041,22.7156334,22.4929649,0.471877631,22.491822,22.4929392,22.4918352,22.4918158
31.934221,21.9089023,22.4861402,-0.759761745,22.4849992,22.4861145,22.4850125,22.484993
31.943401,22.8473193,22.4793207,0.606628885,22.4781816,22.4792949,22.4781949,22.4781754
31.952581,22.9782506,22.4725064,0.711156938,22.4713692,22.4724806,22.4713825,22.4713629
31.961762,23.1732605,22.4656965,0.841168201,22.4645611,22.4656707,22.4645745,22.4645549
31.970942,23.6220236,22.4588925,1.07848555,22.457759,22.4588667,22.4577723,22.4577528
31.980122,22.9782506,22.4520937,0.725366694,22.450962,22.4520679,22.4509754,22.4509558
31.989302,23.8327506,22.4453001,1.17790087,22.4441702,22.4452742,22.4441836,22.4441639
31.998482,23.4520788,22.4385117,1.00676071,22.4373835,22.4384857,22.4373969,22.4373772
32.007662,23.6431808,22.4317284,1.10066001,22.430602,22.4317024,22.4306154,22.4305957
32.016843,24.7184142,22.4249495,1.51441892,22.4238248,22.4249235,22.4238383,22.4238186
32.026023,23.3880311,22.4181766,0.984811941,22.4170536,22.4181506,22.4170671,22.4170473
32.035203,23.7065392,22.4114088,1.13803796,22.4102875,22.4113827,22.410301,22.4102812
32.044383,23.1516738,22.4046462,0.864307613,22.4035265,22.4046201,22.40354,22.4035203
32.053563,22.3383079,22.3978887,-0.244091763,22.3967707,22.3978626,22.3967843,22.3967644
32.062743,22.9782506,22.3911364,0.766233774,22.3900201,22.3911103,22.3900336,22.3900138
32.071924,22.3159136,22.3843885,-0.261677101,22.3832738,22.3843624,22.3832874,22.3832675
32.081104,22.3606798,22.3776465,-0.130256467,22.3765334,22.3776203,22.376547,22.3765271
32.090284,23.4946802,22.3709097,1.06008045,22.3697982,22.3708835,22.3698118,22.3697918
32.099464,22.6053091,22.364178,0.491051014,22.363068,22.3641518,22.3630817,22.3630617
32.108644,22.7596134,22.3574515,0.634162335,22.356343,22.3574252,22.3563567,22.3563367
32.117824,22.7596134,22.3507301,0.639439787,22.3496232,22.3507038,22.3496369,22.3496169
32.127005,22.090722,22.3440132,-0.503280361,22.3429077,22.3439868,22.3429214,22.3429014
32.136185,22.5388553,22.3373021,0.448946833,22.3361981,22.3372757,22.3362118,22.3361918
32.145365,23.0217289,22.3305962,0.831343921,22.3294937,22.3305698,22.3295074,22.3294873
32.154545,22.3606798,22.3238954,0.191792614,22.3227943,22.323869,22.3228081,22.322788
32.163725,22.737634,22.3171997,0.648409032,22.3161001,22.3171733,22.3161139,22.3160938
32.172905,21.6794834,22.3105092,-0.794371351,22.309411,22.3104828,22.3094248,22.3094047
32.182086,22.6495033,22.3038231,0.58794571,22.3027264,22.3037966,22.3027402,22.30272
32.191266,22.3383079,22.2971429,0.20289153,22.2960475,22.2971164,22.2960613,22.2960412
32.200446,22.4722051,22.2904679,0.426306466,22.2893738,22.2904413,22.2893876,22.2893674
32.209626,22.8691933,22.2837979,0.765111328,22.2827052,22.2837713,22.282719,22.2826988
32.218806,22.4499443,22.2771331,0.415705691,22.2760417,22.2771065,22.2760556,22.2760353
32.227986,22.7815715,22.2704734,0.714911237,22.2693833,22.2704468,22.2693972,22.2693769
32.237167,22.627417,22.2638182,0.602991578,22.2627293,22.2637915,22.2627433,22.262723
32.246347,22.4722051,22.2571687,0.463720081,22.2560812,22.257142,22.2560951,22.2560748
32.255527,22.4499443,22.2505245,0.446564514,22.2494382,22.2504977,22.2494521,22.2494318
32.264707,21.5174348,22.2438853,-0.852320659,22.2428002,22.2438585,22.2428142,22.2427938
32.273887,22.4053565,22.2372513,0.410006386,22.2361674,22.2372245,22.2361814,22.236161
32.283067,22.7596134,22.2306224,0.727317672,22.2295397,22.2305955,22.2295537,22.2295333
32.292248,23.3023604,22.2239978,1.03844237,22.2229164,22.223971,22.2229304,22.22291
32.301428,21.2132034,22.2173792,-1.0020857,22.2162989,22.2173523,22.2163129,22.2162925
32.310608,21.8403297,22.2107656,-0.608634513,22.2096865,22.2107387,22.2097005,22.2096801
32.319788,22.5166605,22.2041572,0.559019936,22.2030792,22.2041303,22.2030933,22.2030727
32.328968,21.8860686,22.1975539,-0.558108653,22.196477,22.1975269,22.1964911,22.1964705
32.338148,21.6101828,22.1909557,-0.762084584,22.1898799,22.1909287,22.189894,22.1898734
32.347329,22.1585198,22.1843619,-0.160754742,22.1832871,22.1843349,22.1833013,22.1832807
32.356509,22.0680765,22.1777739,-0.33120602,22.1767002,22.1777469,22.1767144,22.1766938
32.365689,21.8860686,22.1711911,-0.533968562,22.1701184,22.171164,22.1701326,22.170112
32.374869,22.3159136,22.1646133,0.388973402,22.1635417,22.1645862,22.1635559,22.1635352
32.384049,23.194827,22.1580406,1.01822707,22.15697,22.1580135,22.1569843,22.1569636
32.39323,22.737634,22.1514724,0.765611922,22.1504028,22.1514452,22.150417,22.1503963
32.40241,21.5174348,22.1449099,-0.792133293,22.1438413,22.1448827,22.1438556,22.1438348
32.41159,21.7485632,22.1383526,-0.624331189,22.1372849,22.1383254,22.1372992,22.1372785
32.42077,22.2710575,22.1318004,0.37317166,22.1307336,22.1317731,22.1307479,22.1307272
32.42995,23,22.1252532,0.935278985,22.1241874,22.1252259,22.1242018,22.1241809
32.43913,22.1133444,22.1187112,-0.0732583566,22.1176463,22.1186838,22.1176606,22.1176398
32.448311,21.1896201,22.1121735,-0.96049644,22.1111095,22.1121461,22.1111239,22.111103
32.457491,21.3072758,22.1056417,-0.893513234,22.1045785,22.1056143,22.1045929,22.104572
32.466671,22.6936114,22.0991149,0.771036023,22.0980526,22.0990875,22.098067,22.0980461
32.475851,21.1423745,22.0925932,-0.974791618,22.0915318,22.0925657,22.0915462,22.0915253
32.485031,22.0454077,22.0860766,-0.201665408,22.0850161,22.0860491,22.0850305,22.0850095
32.494211,21.9089023,22.0795651,-0.413113569,22.0785054,22.0795376,22.0785198,22.0784988
32.503392,22.4944438,22.073058,0.649142328,22.071999,22.0730304,22.0720135,22.0719925
32.512572,23.1732605,22.0665567,1.0519999,22.0654985,22.0665291,22.065513,22.065492
32.521752,21.4941853,22.0600604,-0.752246737,22.059003,22.0600328,22.0590175,22.0589965
32.530932,22.7156334,22.0535692,0.81367324,22.0525126,22.0535416,22.0525271,22.052506
32.540112,22.2934968,22.0470831,0.496400706,22.0460272,22.0470555,22.0460418,22.0460207
32.549292,22.0680765,22.0406021,0.165753912,22.0395469,22.0405744,22.0395615,22.0395404
32.558473,21.3775583,22.0341255,-0.810288318,22.033071,22.0340977,22.0330856,22.0330644
32.567653,21.725561,22.0276546,-0.549630451,22.0266008,22.0276268,22.0266154,22.0265942
32.576833,22.181073,22.0211888,0.399855218,22.0201357,22.021161,22.0201503,22.0201291
32.586013,22.4276615,22.0147281,0.642598944,22.0136756,22.0147002,22.0136903,22.013669
32.595193,22.3383079,22.0082724,0.57448714,22.0072206,22.0082446,22.0072353,22.007214
32.604373,21.8860686,22.0018218,-0.340225231,22.0007706,22.0017939,22.0007853,22.000764
32.613554,22.0227155,21.9953756,0.165347936,21.994325,21.9953477,21.9943397,21.9943184
32.622734,21.4242853,21.9889351,-0.751431869,21.9878851,21.9889072,21.9878999,21.9878785
32.631914,21.8174242,21.9824997,-0.406294851,21.9814503,21.9824717,21.9814651,21.9814437
32.641094,21.6794834,21.9760694,-0.544597099,21.9750205,21.9760414,21.9750353,21.9750139
32.650274,21.1896201,21.9696441,-0.883189674,21.9685958,21.969616,21.9686106,21.9685891
32.659454,21.4476106,21.9632239,-0.718062168,21.9621761,21.9631958,21.9621909,21.9621694
32.668635,21.5870331,21.956808,-0.608091148,21.9557607,21.9567799,21.9557755,21.9557541
32.677815,21.3775583,21.9503979,-0.756861636,21.9493511,21.9503697,21.9493659,21.9493444
32.686995,21.6101828,21.9439928,-0.577762928,21.9429465,21.9439646,21.9429614,21.9429398
32.696175,22.1585198,21.9375928,0.470028773,21.9365469,21.9375645,21.9365618,21.9365403
32.705355,21.7485632,21.9311978,-0.427357703,21.9301524,21.9311695,21.9301673,21.9301457
32.714535,20.8566536,21.9248078,-1.03351547,21.9237629,21.9247795,21.9237778,21.9237562
32.723716,22.9128785,21.9184223,0.997224258,21.9173777,21.9183939,21.9173927,21.9173711
32.732896,22.7596134,21.9120424,0.920636165,21.9109983,21.912014,21.9110133,21.9109916
32.742076,21.6101828,21.9056676,-0.543585144,21.9046239,21.9056392,21.9046389,21.9046172
32.751256,22.2036033,21.8992978,0.551638913,21.8982545,21.8992694,21.8982695,21.8982478
32.760436,21.5638587,21.8929331,-0.573650095,21.8918901,21.8929046,21.8919052,21.8918834
32.769616,22,21.8865734,0.336788686,21.8855308,21.8865449,21.8855458,21.885524
32.778797,21.330729,21.880218,-0.741275259,21.8791757,21.8801895,21.8791908,21.879169
32.787977,21.4242853,21.8738684,-0.670509577,21.8728264,21.8738398,21.8728415,21.8728197
32.797157,21.9317122,21.8675238,0.253354362,21.8664821,21.8674952,21.8664972,21.8664754
32.806337,21.6794834,21.8611842,-0.426263761,21.8601428,21.8611555,21.8601579,21.8601361
32.815517,21.2837967,21.8548496,-0.755680468,21.8538085,21.854821,21.8538237,21.8538018
32.824697,21.7944947,21.8485201,-0.232433583,21.8474792,21.8484914,21.8474944,21.8474725
32.833878,22.090722,21.8421949,0.498524973,21.8411543,21.8421662,21.8411695,21.8411475
32.843058,21.7485632,21.8358754,-0.295486414,21.834835,21.8358466,21.8348502,21.8348282
32.852238,21.6101828,21.8295609,-0.468378191,21.8285207,21.8295321,21.828536,21.828514
32.861418,21.5638587,21.8232515,-0.509306196,21.8222115,21.8232226,21.8222267,21.8222047
32.870598,22.1359436,21.816947,0.564797852,21.8159072,21.8169181,21.8159225,21.8159004
32.879779,21.8174242,21.8106469,0.0823246217,21.8096073,21.810618,21.8096226,21.8096004
32.888959,21.7025344,21.8043525,-0.319089403,21.803313,21.8043235,21.8033283,21.8033062
32.898139,21.5174348,21.798063,-0.529743573,21.7970237,21.7980341,21.797039,21.7970169
32.907319,23.1516738,21.7917786,1.16614543,21.7907394,21.7917496,21.7907548,21.7907326
32.916499,22.2934968,21.7854992,0.71273949,21.7844601,21.7854702,21.7844755,21.7844533
32.925679,22.8254244,21.7792248,1.02283899,21.7781858,21.7791957,21.7782012,21.778179
32.93486,21.9089023,21.7729547,0.368710671,21.7719158,21.7729256,21.7719312,21.7719089
32.94404,20.7846097,21.7666903,-0.990999823,21.7656515,21.7666612,21.7656669,21.7656446
32.95322,21.9089023,21.7604309,0.385319824,21.7593921,21.7604017,21.7594075,21.7593852
32.9624,21.4009346,21.7541765,-0.594341622,21.7531377,21.7541473,21.7531532,21.7531308
32.97158,21.9089023,21.7479271,0.401217142,21.7468883,21.7478979,21.7469038,21.7468814
32.98076,22.5388553,21.7416827,0.892845261,21.7406439,21.7416534,21.7406594,21.740637
32.989941,21.9544984,21.7354426,0.468034016,21.7344038,21.7354132,21.7344193,21.7343969
32.999121,21.6333077,21.7292079,-0.309677724,21.7281693,21.7291786,21.7281848,21.7281624
33.008301,22.737634,21.7229776,1.00730157,21.7219398,21.7229482,21.7219553,21.7219329
33.017481,21.725561,21.7167506,0.0938638226,21.7157152,21.7167211,21.7157308,21.7157083
33.026661,20.6397674,21.7105266,-1.03477495,21.7094957,21.7104972,21.7095113,21.7094887
33.035841,20.880613,21.7043056,-0.907575109,21.703281,21.7042761,21.7032967,21.7032741
33.045022,21.5174348,21.6980865,-0.425031401,21.6970707,21.6980569,21.6970864,21.6970638
33.054202,21.6101828,21.6918702,-0.285810079,21.690866,21.6918406,21.6908817,21.6908591
33.063382,21.7025344,21.6856558,0.12991759,21.6846663,21.6856262,21.684682,21.6846594
33.072562,21.2132034,21.6794429,-0.682817333,21.6784715,21.6794133,21.6784873,21.6784646
33.081742,21.5406592,21.6732309,-0.364103888,21.6722817,21.6732012,21.6722975,21.6722747
33.090922,21.6794834,21.6670187,0.111645559,21.6660969,21.6669889,21.6661126,21.6660899
33.100103,21.6333077,21.6608042,-0.16582087,21.6599163,21.6607745,21.659932,21.6599093
33.109283,21.4242853,21.6545863,-0.479896907,21.6537413,21.6545565,21.6537571,21.6537343
33.118463,21.7485632,21.6483579,0.316552207,21.6475713,21.648328,21.6475871,21.6475643
33.127643,21.6794834,21.6421076,0.193328134,21.6414062,21.6420778,21.6414221,21.6413992
33.136823,21.4009346,21.6358422,-0.484672686,21.6352461,21.6358123,21.6352619,21.6352391
33.146003,21.5406592,21.629629,-0.298277929,21.6290909,21.629599,21.6291068,21.6290839
33.155184,21.3072758,21.6234641,-0.562306301,21.62294,21.6234342,21.6229559,21.6229329
33.164364,21.6794834,21.6173206,0.249324706,21.6167947,21.6172906,21.6168106,21.6167876
33.173544,21.6101828,21.6111818,-0.0316072113,21.6106543,21.6111518,21.6106702,21.6106472
33.182724,21.8174242,21.6050481,0.460842807,21.6045188,21.605018,21.6045348,21.6045118
33.191904,20.976177,21.5989194,-0.789140322,21.5983883,21.5988893,21.5984043,21.5983813
33.201084,20.8566536,21.5927956,-0.857987183,21.5922627,21.5927655,21.5922787,21.5922557
33.210265,21.8403297,21.5866761,0.503640314,21.5861414,21.5866459,21.5861574,21.5861343
33.219445,21.2602916,21.5805622,-0.565924514,21.5800257,21.5805319,21.5800417,21.5800186
33.228625,21.9544984,21.5744532,0.616478068,21.5739149,21.5744229,21.5739309,21.5739078
33.237805,21.3775583,21.5683491,-0.436796067,21.567809,21.5683188,21.567825,21.5678018
33.246985,21.8860686,21.56225,0.56905064,21.561708,21.5622197,21.5617241,21.5617009
33.256165,22.7156334,21.5561558,1.07679041,21.5556119,21.5561254,21.555628,21.5556048
33.265346,20.976177,21.5500658,-0.757554538,21.5495201,21.5500354,21.5495363,21.549513
33.274526,21.5174348,21.5439815,-0.162931536,21.5434339,21.543951,21.54345,21.5434267
33.283706,21.5870331,21.537902,0.221655394,21.5373526,21.5378715,21.5373687,21.5373454
33.292886,21.1660105,21.5318275,-0.604828087,21.5312761,21.531797,21.5312923,21.531269
33.302066,22.5388553,21.5257579,1.00652742,21.5252046,21.5257273,21.5252208,21.5251974
33.311246,21.8860686,21.5196932,0.605289551,21.519138,21.5196626,21.5191542,21.5191308
33.320427,21.4009346,21.5136327,-0.335705492,21.5130756,21.5136021,21.5130919,21.5130684
33.329607,21.5870331,21.5075779,0.281878149,21.5070188,21.5075472,21.5070351,21.5070116
33.338787,21.8860686,21.5015279,0.620113498,21.5009669,21.5014972,21.5009832,21.5009597
33.347967,21.7485632,21.4954828,0.503070933,21.4949199,21.495452,21.4949362,21.4949127
33.357147,21.2602916,21.4894426,-0.478697203,21.4888778,21.4894118,21.4888941,21.4888705
33.366328,21.5174348,21.4834067,0.184467014,21.4828399,21.4833759,21.4828562,21.4828326
33.375508,22.1359436,21.4773763,0.811521583,21.4768075,21.4773455,21.4768239,21.4768003
33.384688,21.9317122,21.4713509,0.678499323,21.4707801,21.4713199,21.4707965,21.4707728
33.393868,21.4476106,21.4653303,-0.133115359,21.4647575,21.4652993,21.4647739,21.4647502
33.403048,21.5870331,21.4593146,0.357377315,21.4587398,21.4592836,21.4587562,21.4587325
33.412228,21.3072758,21.4533038,-0.382136165,21.452727,21.4532728,21.4527435,21.4527197
33.421409,21.6101828,21.4472972,0.403590819,21.4467184,21.4472662,21.4467349,21.4467111
33.430589,21.0475652,21.4412962,-0.627479904,21.4407153,21.4412651,21.4407318,21.440708
33.439769,21.9544984,21.4353001,0.720554184,21.4347172,21.4352689,21.4347337,21.4347098
33.448949,21.4941853,21.4293088,0.254708566,21.4287238,21.4292776,21.4287404,21.4287165
33.458129,21.9089023,21.4233224,0.696835616,21.4227354,21.4232912,21.4227519,21.4227281
33.467309,21.6333077,21.4173409,0.464722211,21.4167518,21.4173096,21.4167684,21.4167445
33.47649,21.5174348,21.4113636,0.325685666,21.4107724,21.4113323,21.410789,21.4107651
33.48567,22.090722,21.4053919,0.827846696,21.4047986,21.4053605,21.4048152,21.4047912
33.49485,21.4709106,21.399425,0.267367833,21.3988296,21.3993936,21.3988462,21.3988222
33.50403,21.9089023,21.393463,0.71794103,21.3928654,21.3934315,21.3928821,21.3928581
33.51321,21.1896201,21.3875058,-0.444843483,21.3869062,21.3874744,21.3869228,21.3868988
33.52239,21.7025344,21.3815535,0.566551743,21.3809517,21.381522,21.3809684,21.3809443
33.531571,21.4709106,21.3756055,0.308715226,21.3750015,21.3755739,21.3750182,21.3749941
33.540751,22.7596134,21.3696629,1.1789616,21.3690568,21.3696313,21.3690735,21.3690493
33.549931,21.6794834,21.3637252,0.561923662,21.3631169,21.3636936,21.3631336,21.3631094
33.559111,21.2367606,21.3577923,-0.347896179,21.3571818,21.3577607,21.3571986,21.3571744
33.568291,20.2731349,21.3518643,-1.03861899,21.3512516,21.3518326,21.3512684,21.3512442
33.577471,20.7123152,21.3459412,-0.796006284,21.3453263,21.3459094,21.3453431,21.3453188
33.586652,21.7715411,21.3400222,0.656900921,21.3394051,21.3399904,21.339422,21.3393976
33.595832,22.0227155,21.3341088,0.829823332,21.3334894,21.3340769,21.3335063,21.3334819
33.605012,21.5870331,21.3282002,0.508756299,21.3275786,21.3281683,21.3275955,21.3275711
33.614192,22.0680765,21.3222964,0.863585598,21.3216726,21.3222645,21.3216895,21.321665
33.623372,20.904545,21.3163975,-0.641757367,21.3157714,21.3163655,21.3157883,21.3157638
33.632552,20.7364414,21.3105034,-0.757668816,21.309875,21.3104714,21.3098919,21.3098675
33.641733,20.2484567,21.3046135,-1.02769488,21.3039828,21.3045815,21.3039998,21.3039753
33.650913,21.0713075,21.2987291,-0.476887371,21.2980961,21.298697,21.2981131,21.2980885
33.660093,21.3775583,21.2928495,0.291047843,21.2922142,21.2928174,21.2922312,21.2922066
33.669273,21.0950231,21.2869747,-0.438122823,21.2863371,21.2869426,21.2863541,21.2863295
33.678453,22.2485955,21.2811048,0.983611041,21.2804648,21.2810726,21.2804818,21.2804572
33.687633,21.2367606,21.2752397,-0.196160875,21.2745973,21.2752074,21.2746144,21.2745897
33.696814,20.2977831,21.2693787,-0.985695497,21.268734,21.2693465,21.2687511,21.2687264
33.705994,20.976177,21.2635233,-0.53604693,21.2628762,21.2634909,21.2628933,21.2628686
33.715174,21.3541565,21.2576726,0.310618545,21.2570231,21.2576403,21.2570403,21.2570155
33.724354,21.4941853,21.2518268,0.49229917,21.2511749,21.2517944,21.2511921,21.2511673
33.733534,21.0950231,21.2459858,-0.388539128,21.2453315,21.2459533,21.2453486,21.2453238
33.742714,20.7364414,21.2401496,-0.709724029,21.2394928,21.2401171,21.23951,21.2394852
33.751895,20.904545,21.2343175,-0.574258262,21.2336583,21.234285,21.2336755,21.2336507
33.761075,20.5182845,21.2284909,-0.842737435,21.2278293,21.2284583,21.2278465,21.2278216
33.770255,20.4205779,21.2226691,-0.895595479,21.222005,21.2226365,21.2220223,21.2219973
33.779435,20.880613,21.2168521,-0.579861283,21.2161855,21.2168195,21.2162028,21.2161778
33.788615,21.0713075,21.2110399,-0.373808007,21.2103709,21.2110072,21.2103881,21.2103631
33.797796,20.976177,21.2052319,-0.478596844,21.2045603,21.2051992,21.2045776,21.2045526
33.806976,20.2977831,21.1994293,-0.94955051,21.1987552,21.1993965,21.1987725,21.1987475
33.816156,20.4939015,21.1936315,-0.836498631,21.1929548,21.1935987,21.1929722,21.1929471
33.825336,20.8326667,21.1878385,-0.595962932,21.1871593,21.1878056,21.1871766,21.1871515
33.834516,21.3775583,21.1820502,0.442162963,21.1813685,21.1820173,21.1813859,21.1813607
33.843696,21.9317122,21.1762668,0.869163624,21.1755825,21.1762338,21.1755999,21.1755747
33.852877,21.4476106,21.1704875,0.526424817,21.1698006,21.1704545,21.169818,21.1697928
33.862057,20.3960781,21.1647136,-0.876718635,21.1640241,21.1646806,21.1640415,21.1640163
33.871237,21.0950231,21.1589445,-0.252826829,21.1582524,21.1589114,21.1582698,21.1582445
33.880417,21.1660105,21.1531802,0.113270921,21.1524854,21.1531471,21.1525029,21.1524776
33.889597,20.3469899,21.1474206,-0.894667918,21.1467232,21.1473875,21.1467407,21.1467154
33.898777,21.1896201,21.1416658,0.218984592,21.1409657,21.1416326,21.1409833,21.1409579
33.907958,20.8326667,21.1359152,-0.550680081,21.1352124,21.1358819,21.13523,21.1352046
33.917138,22.3383079,21.13017,1.09915328,21.1294645,21.1301366,21.129482,21.1294566
33.926318,21.1187121,21.1244295,-0.0756134662,21.1237213,21.1243961,21.1237389,21.1237134
33.935498,21.1423745,21.1186938,0.153885523,21.1179828,21.1186604,21.1180005,21.1179749
33.944678,21.5638587,21.1129628,0.671487793,21.1122491,21.1129294,21.1122668,21.1122412
33.953858,20.7364414,21.1072366,-0.608929585,21.1065202,21.1072031,21.1065378,21.1065123
33.963039,22.3383079,21.1015145,1.11211213,21.1007953,21.101481,21.100813,21.1007874
33.972219,20.6155281,21.0957978,-0.693014932,21.0950759,21.0957642,21.0950935,21.0950679
33.981399,19.6977156,21.0900859,-1.1799874,21.0893611,21.0900523,21.0893788,21.0893532
33.990579,20.5182845,21.0843787,-0.752392284,21.0836511,21.084345,21.0836688,21.0836431
33.999759,21.4476106,21.0786762,0.607399675,21.0779458,21.0786425,21.0779636,21.0779378
34.008939,20.8566536,21.0729785,-0.465107405,21.0722452,21.0729448,21.072263,21.0722373
34.01812,20.3224014,21.0672849,-0.86306633,21.0665488,21.0672511,21.0665666,21.0665408
34.0273,20.2237484,21.0615967,-0.915340523,21.0608577,21.0615628,21.0608755,21.0608497
34.03648,21.4476106,21.0559132,0.625857328,21.0551713,21.0558793,21.0551891,21.0551633
34.04566,20.976177,21.0502344,-0.272135019,21.0494896,21.0502005,21.0495075,21.0494816
34.05484,20.6155281,21.0445604,-0.655005551,21.0438126,21.0445264,21.0438305,21.0438046
34.06402,21.4476106,21.0388911,0.639311733,21.0381404,21.0388571,21.0381583,21.0381323
34.073201,20.4694895,21.0332259,-0.750823822,21.0324722,21.0331918,21.0324901,21.0324641
34.082381,20.2237484,21.027566,-0.896558773,21.0268094,21.0275319,21.0268273,21.0268013
34.091561,21.8403297,21.0219109,0.904664994,21.0211513,21.0218768,21.0211692,21.0211432
34.100741,21.0475652,21.0162605,0.176931276,21.0154978,21.0162263,21.0155158,21.0154897
34.109921,21.7025344,21.0106148,0.831817052,21.0098491,21.0105806,21.0098671,21.009841
34.119101,21.2367606,21.0049738,0.481442374,21.0042051,21.0049395,21.0042231,21.0041969
34.128282,21.5638587,20.9993369,0.751346603,20.9985651,20.9993026,20.9985832,20.998557
34.137462,21.2602916,20.9937054,0.516319914,20.9929305,20.993671,20.9929485,20.9929223
34.146642,21,20.9880785,0.109185546,20.9873005,20.9880441,20.9873186,20.9872923
34.155822,20.7364414,20.9824564,-0.495999004,20.9816752,20.9824219,20.9816933,20.981667
34.165002,22.1133444,20.9768389,1.06607011,20.9760546,20.9768044,20.9760728,20.9760464
34.174182,20.0499377,20.9712262,-0.959837751,20.9704387,20.9711916,20.9704569,20.9704305
34.183363,20.0997512,20.9656175,-0.930519348,20.9648269,20.9655829,20.964845,20.9648187
34.192543,20.3960781,20.9600141,-0.75095678,20.9592203,20.9599795,20.9592385,20.9592121
34.201723,21.4009346,20.9544155,0.668220837,20.9536184,20.9543808,20.9536367,20.9536102
34.210903,20.6397674,20.9488215,-0.555926302,20.9480212,20.9487867,20.9480395,20.948013
34.220083,21.9317122,20.9432322,0.994223314,20.9424287,20.9431974,20.9424469,20.9424204
34.229264,20.904545,20.937647,-0.181939618,20.9368402,20.9376121,20.9368585,20.9368319
34.238444,20.3224014,20.9320671,-0.780810878,20.931257,20.9320322,20.9312753,20.9312487
34.247624,20.8326667,20.9264918,-0.306308924,20.9256784,20.9264569,20.9256967,20.9256701
34.256804,20.4694895,20.9209212,-0.671886712,20.9201045,20.9208862,20.9201229,20.9200962
34.265984,20.5182845,20.9153554,-0.630135558,20.9145353,20.9153203,20.9145536,20.9145269
34.275164,20.4205779,20.9097941,-0.69943997,20.9089707,20.909759,20.9089891,20.9089623
34.284345,20.7846097,20.904237,-0.345871768,20.9034101,20.9042018,20.9034285,20.9034018
34.293525,20.7605395,20.8986851,-0.371679423,20.8978548,20.8986499,20.8978733,20.8978464
34.302705,21.2367606,20.8931379,0.586193413,20.8923042,20.8931026,20.8923226,20.8922958
34.311885,21.0475652,20.8875953,0.399962342,20.8867582,20.88756,20.8867766,20.8867498
34.321065,21.1896201,20.8820574,0.554583353,20.8812168,20.8820221,20.8812353,20.8812084
34.330245,20.1246118,20.8765242,-0.867128805,20.8756801,20.8764888,20.8756986,20.8756716
34.339426,20.5182845,20.870995,-0.593894301,20.8701473,20.8709595,20.8701659,20.8701389
34.348606,21.4476106,20.865471,0.762980705,20.8646199,20.8654356,20.8646384,20.8646114
34.357786,20.4694895,20.8599517,-0.62486979,20.859097,20.8599162,20.8591156,20.8590886
34.366966,20.0748599,20.8544371,-0.882936693,20.8535788,20.8544015,20.8535974,20.8535703
34.376146,21.023796,20.8489271,0.418173328,20.8480652,20.8488915,20.8480838,20.8480567
34.385326,21.0475652,20.8434218,0.451822337,20.8425562,20.8433861,20.8425749,20.8425477
34.394507,20.8566536,20.8379204,0.136869181,20.8370513,20.8378847,20.8370699,20.8370427
34.403687,21.023796,20.8324244,0.437460487,20.8315515,20.8323886,20.8315702,20.831543
34.412867,19.9749844,20.8269329,-0.923010599,20.8260564,20.8268971,20.8260751,20.8260478
34.422047,21.6564078,20.8214461,0.913762398,20.8205659,20.8214102,20.8205846,20.8205573
34.431227,21.2132034,20.8159639,0.630269395,20.8150799,20.815928,20.8150987,20.8150714
34.440407,21.7485632,20.8104864,0.968543651,20.8095986,20.8104504,20.8096174,20.80959
34.449588,21.5406592,20.8050128,0.857698309,20.8041213,20.8049768,20.8041401,20.8041127
34.458768,19.7230829,20.7995445,-1.03752668,20.7986492,20.7995085,20.798668,20.7986406
34.467948,20.5426386,20.7940808,-0.501440175,20.7931817,20.7940447,20.7932005,20.793173
34.477128,20.7605395,20.7886218,-0.16757764,20.7877188,20.7885856,20.7877376,20.7877101
34.486308,21.5406592,20.7831673,0.870340125,20.7822604,20.7831311,20.7822793,20.7822517
34.495488,20.5669638,20.7777174,-0.459079127,20.7768067,20.7776812,20.7768255,20.776798
34.504669,20.5669638,20.7722716,-0.453109048,20.7713569,20.7722353,20.7713758,20.7713482
34.513849,20.8566536,20.766831,0.299704253,20.7659123,20.7667946,20.7659312,20.7659036
34.523029,21.3072758,20.7613949,0.738837472,20.7604723,20.7613585,20.7604912,20.7604636
34.532209,21.330729,20.7559635,0.758132901,20.7550369,20.755927,20.7550558,20.7550281
34.541389,20.3960781,20.7505367,-0.595364278,20.749606,20.7505002,20.749625,20.7495972
34.550569,20.7123152,20.7451144,-0.181105668,20.7441797,20.7450779,20.7441987,20.7441709
34.55975,20.6639783,20.7396962,-0.275168831,20.7387574,20.7396596,20.7387764,20.7387486
34.56893,20.7123152,20.7342832,-0.14821597,20.7333402,20.7342465,20.7333593,20.7333314
34.57811,21.1423745,20.7288747,0.643039522,20.7279276,20.728838,20.7279467,20.7279188
34.58729,20.6639783,20.7234708,-0.243910811,20.7225196,20.723434,20.7225387,20.7225108
34.59647,21.023796,20.7180715,0.552923625,20.7171161,20.7180347,20.7171352,20.7171073
34.60565,20.3469899,20.7126768,-0.604720466,20.7117172,20.7126399,20.7117363,20.7117083
34.614831,21.2367606,20.7072861,0.727649996,20.7063222,20.7072491,20.7063414,20.7063133
34.624011,20.3715488,20.7019005,-0.574762311,20.7009324,20.7018635,20.7009516,20.7009235
34.633191,21.4009346,20.6965195,0.839294376,20.6955471,20.6964825,20.6955663,20.6955382
34.642371,20.5912603,20.6911431,-0.316042412,20.6901664,20.691106,20.6901856,20.6901574
34.651551,20.1494417,20.6857712,-0.732345242,20.6847902,20.6857341,20.6848094,20.6847812
34.660731,21.0950231,20.6804039,0.643909284,20.6794185,20.6803668,20.6794378,20.6794095
34.669912,21,20.6750406,0.570052076,20.6740508,20.6750034,20.6740701,20.6740418
34.679092,20.5182845,20.6696825,-0.389098873,20.6686882,20.6696452,20.6687075,20.6686792
34.688272,20.2484567,20.6643288,-0.644881476,20.6633301,20.6642915,20.6633494,20.6633211
34.697452,20.904545,20.6589798,0.495545325,20.6579766,20.6589424,20.6579959,20.6579675
34.706632,19.5959179,20.6536353,-1.02845386,20.6526275,20.6535978,20.6526469,20.6526185
34.715813,20.5182845,20.6482947,-0.3605693,20.6472825,20.6482572,20.6473018,20.6472734
34.724993,20.6155281,20.6429593,-0.165623706,20.6419425,20.6429218,20.6419619,20.6419334
34.734173,20.2237484,20.6376285,-0.643335106,20.636607,20.6375909,20.6366264,20.6365979
34.743353,20.8326667,20.6323021,0.44762094,20.631276,20.6322645,20.6312955,20.6312669
34.752533,20.6881609,20.6269804,0.247346927,20.6259496,20.6269426,20.625969,20.6259404
34.761713,20.2977831,20.6216631,-0.569104544,20.6206276,20.6216253,20.6206471,20.6206185
34.770894,20.3960781,20.6163498,-0.469331186,20.6153096,20.616312,20.6153291,20.6153004
34.780074,19.7737199,20.6110416,-0.915052838,20.6099966,20.6110038,20.6100161,20.6099874
34.789254,19.7737199,20.605738,-0.912150227,20.6046882,20.6057,20.6047077,20.604679
34.798434,20.6397674,20.6004388,0.198314409,20.5993842,20.6004009,20.5994038,20.599375
34.807614,20.7605395,20.5951442,0.40668817,20.5940847,20.5951062,20.5941043,20.5940755
34.816794,19.8746069,20.5898541,-0.845722898,20.5887897,20.589816,20.5888093,20.5887805
34.825975,20.8566536,20.584568,0.521618277,20.5834987,20.5845298,20.5835183,20.5834894
34.835155,20.5912603,20.5792869,0.109422809,20.5782126,20.5792487,20.5782323,20.5782034
34.844335,20.880613,20.5740104,0.553717104,20.5729311,20.5739721,20.5729508,20.5729218
34.853515,21.0950231,20.5687384,0.725454863,20.567654,20.5687,20.5676737,20.5676447
34.862695,20.9284495,20.5634708,0.604134682,20.5623814,20.5634325,20.5624011,20.5623721
34.871875,20.880613,20.5582078,0.567807379,20.5571133,20.5581694,20.557133,20.557104
34.881056,20,20.5529487,-0.743605206,20.5518491,20.5529102,20.5518688,20.5518397
34.890236,20.4205779,20.5476947,-0.356534462,20.5465899,20.5476561,20.5466097,20.5465805
34.899416,20.3224014,20.5424452,-0.469088178,20.5413352,20.5424066,20.5413549,20.5413258
34.908596,19.5959179,20.5372001,-0.970196977,20.5360849,20.5371615,20.5361047,20.5360755
34.917776,20.9284495,20.5319596,0.629674489,20.5308391,20.5319209,20.5308589,20.5308296
34.926956,20.7846097,20.5267235,0.507824941,20.5255977,20.5266848,20.5256175,20.5255882
34.936137,20.4450483,20.5214914,-0.276483425,20.5203602,20.5214526,20.5203801,20.5203507
34.945317,20.904545,20.5162643,0.623121704,20.5151277,20.5162254,20.5151476,20.5151182
34.954497,21.1187121,20.5110417,0.779532156,20.5098997,20.5110028,20.5099196,20.5098902
34.963677,21.3072758,20.5058236,0.895238615,20.5046761,20.5057846,20.504696,20.5046666
34.972857,21.0950231,20.5006099,0.770981961,20.499457,20.5005709,20.4994769,20.4994474
34.982037,20.7364414,20.4954007,0.490958864,20.4942422,20.4953617,20.4942622,20.4942327
34.991218,21.330729,20.4901955,0.91680616,20.4890314,20.4901563,20.4890514,20.4890218
35.000398,21.2367606,20.4849952,0.867044029,20.4838255,20.484956,20.4838455,20.4838159
35.009578,19.7484177,20.4797995,-0.855208629,20.4786241,20.4797602,20.4786441,20.4786145
35.018758,20.4939015,20.4746081,0.138900641,20.4734271,20.4745688,20.4734471,20.4734174
35.027938,20.4205779,20.4694213,-0.221005503,20.4682345,20.4693819,20.4682546,20.4682248
35.037118,20.976177,20.4642389,0.715498478,20.4630463,20.4641995,20.4630664,20.4630366
35.046299,21.2602916,20.4590604,0.895115209,20.457862,20.4590209,20.4578821,20.4578523
35.055479,20.4205779,20.4538869,-0.18250765,20.4526826,20.4538473,20.4527028,20.4526729
35.064659,20.7846097,20.4487179,0.579561759,20.4475077,20.4486782,20.4475278,20.4474979
35.073839,19.9749844,20.4435533,-0.684520934,20.4423371,20.4435136,20.4423573,20.4423274
35.083019,21.330729,20.4383931,0.944635323,20.437171,20.4383534,20.4371912,20.4371612
35.092199,20.880613,20.4332374,0.668861431,20.4320092,20.4331976,20.4320295,20.4319995
35.10138,20.1246118,20.4280856,-0.550884537,20.4268513,20.4280457,20.4268716,20.4268415
35.11056,21.2367606,20.4229387,0.90212075,20.4216984,20.4228988,20.4217186,20.4216885
35.11974,20.904545,20.4177963,0.697673727,20.4165498,20.4177564,20.4165701,20.41654
35.12892,21.2602916,20.4126584,0.92067001,20.4114056,20.4126183,20.4114259,20.4113958
35.1381,20.9523268,20.4075248,0.738107057,20.4062658,20.4074847,20.4062861,20.4062559
35.147281,21.5406592,20.4023951,1.0668946,20.4011298,20.402355,20.4011502,20.4011199
35.156461,19.5192213,20.3972704,-0.937042765,20.3959988,20.3972302,20.3960191,20.3959889
35.165641,20.0997512,20.3921502,-0.540739236,20.3908721,20.3921099,20.3908925,20.3908622
35.174821,21.0950231,20.3870343,0.841420705,20.3857498,20.386994,20.3857702,20.3857399
35.184001,20.1246118,20.3819229,-0.507258382,20.3806319,20.3818825,20.3806523,20.3806219
35.193181,20.3960781,20.3768158,0.138788406,20.3755183,20.3767754,20.3755387,20.3755083
35.202362,20.6397674,20.3717127,0.517740075,20.3704085,20.3716722,20.370429,20.3703985
35.211542,20.3715488,20.3666144,0.0702449114,20.3653037,20.3665739,20.3653242,20.3652936
35.220722,20,20.3615206,-0.601265855,20.3602032,20.36148,20.3602237,20.3601931
35.229902,20.3224014,20.3564312,-0.18447164,20.355107,20.3563905,20.3551276,20.355097
35.239082,20.3715488,20.3513462,0.14213578,20.3500152,20.3513055,20.3500358,20.3500051
35.248262,19.9749844,20.3462656,-0.609328513,20.3449278,20.3462248,20.3449483,20.3449177
35.257443,20.3224014,20.3411888,-0.137067081,20.3398441,20.341148,20.3398647,20.339834
35.266623,20.2731349,20.336117,-0.250962265,20.3347653,20.3360761,20.3347859,20.3347552
35.275803,19.4422221,20.3310496,-0.942776462,20.3296909,20.3310086,20.3297115,20.3296807
35.284983,19.8997487,20.3259865,-0.652868868,20.3246208,20.3259455,20.3246414,20.3246106
35.294163,20.2484567,20.3209278,-0.269204571,20.319555,20.3208867,20.3195757,20.3195448
35.303343,20.7123152,20.3158735,0.629636112,20.3144936,20.3158324,20.3145143,20.3144833
35.312524,20.7364414,20.3108231,0.652394259,20.3094359,20.3107819,20.3094566,20.3094256
35.321704,21.1187121,20.3057775,0.901628822,20.3043831,20.3057363,20.3044038,20.3043728
35.330884,21.7485632,20.3007364,1.20325674,20.2993346,20.300695,20.2993554,20.2993243
35.340064,20.3960781,20.2956996,0.316825599,20.2942905,20.2956582,20.2943112,20.2942801
35.349244,19.8242276,20.2906672,-0.682963812,20.2892506,20.2906257,20.2892714,20.2892402
35.358424,19.8997487,20.2856391,-0.621200747,20.284215,20.2855976,20.2842358,20.2842047
35.367605,19.3390796,20.2806149,-0.970327398,20.2791832,20.2805733,20.2792041,20.2791728
35.376785,20.0997512,20.2755955,-0.419337918,20.2741563,20.2755539,20.2741771,20.2741459
35.385965,19.8997487,20.2705806,-0.608959617,20.2691336,20.2705388,20.2691545,20.2691232
35.395145,20.8326667,20.2655699,0.753058244,20.2641153,20.2655281,20.2641362,20.2641048
35.404325,20.2237484,20.2605637,-0.191873012,20.2591012,20.2605218,20.2591221,20.2590907
35.413505,20.0748599,20.2555618,-0.425090403,20.2540915,20.2555198,20.2541124,20.254081
35.422686,21.330729,20.2505636,1.03931005,20.2490854,20.2505216,20.2491064,20.2490749
35.431866,19.8242276,20.2455704,-0.649109241,20.2440842,20.2455284,20.2441052,20.2440737
35.441046,20,20.2405815,-0.490491105,20.2390873,20.2405394,20.2391083,20.2390767
35.450226,20.3224014,20.235597,0.294625956,20.2340946,20.2355548,20.2341156,20.234084
35.459406,20.8326667,20.2306168,0.775918736,20.2291063,20.2305745,20.2291273,20.2290956
35.468586,19.7737199,20.2256409,-0.67225067,20.2241222,20.2255986,20.2241432,20.2241115
35.477767,20.3224014,20.2206688,0.318955514,20.2191418,20.2206264,20.2191628,20.2191311
35.486947,19.5959179,20.2157016,-0.7872634,20.2141662,20.2156592,20.2141873,20.2141555
35.496127,19.6723156,20.2107387,-0.733773229,20.2091949,20.2106962,20.209216,20.2091842
35.505307,21.4009346,20.2057802,1.09323117,20.2042278,20.2057376,20.2042489,20.2042171
35.514487,20.3469899,20.2008259,0.382314026,20.199265,20.2007833,20.1992861,20.1992542
35.523667,20.2977831,20.195876,0.319228929,20.1943064,20.1958333,20.1943276,20.1942957
35.532848,20.4694895,20.1909299,0.527787462,20.1893516,20.1908871,20.1893727,20.1893408
35.542028,19.5703858,20.1859886,-0.784603602,20.1844015,20.1859458,20.1844227,20.1843907
35.551208,19.5959179,20.1810516,-0.764940318,20.1794557,20.1810087,20.1794769,20.1794448
35.560388,19.8242276,20.176119,-0.593204324,20.1745141,20.176076,20.1745353,20.1745032
35.569568,20.6639783,20.1711906,0.701988392,20.1695767,20.1711476,20.169598,20.1695658
35.578748,20.1990099,20.1662666,0.180951125,20.1646436,20.1662235,20.1646649,20.1646327
35.587929,19.8242276,20.1613463,-0.580619223,20.1597142,20.1613031,20.1597354,20.1597032
35.597109,20.0748599,20.1564308,-0.285606264,20.1547895,20.1563876,20.1548108,20.1547785
35.606289,19.5192213,20.1515197,-0.79517193,20.149869,20.1514764,20.1498903,20.149858
35.615469,19.9749844,20.1466128,-0.41428069,20.1449528,20.1465695,20.1449741,20.1449418
35.624649,19.6977156,20.1417103,-0.666329262,20.1400408,20.1416668,20.1400621,20.1400297
35.63383,20.4205779,20.1368115,0.532697256,20.1351324,20.136768,20.1351538,20.1351214
35.64301,19.7989899,20.1319175,-0.57699882,20.1302288,20.1318739,20.1302502,20.1302177
35.65219,20.4205779,20.1270278,0.541802582,20.1253294,20.1269842,20.1253508,20.1253183
35.66137,20.0249844,20.1221424,-0.311701804,20.1204342,20.1220987,20.1204556,20.1204231
35.67055,19.9499373,20.1172613,-0.409052486,20.1155432,20.1172175,20.1155647,20.1155321
35.67973,20.8326667,20.1123844,0.848694426,20.1106564,20.1123406,20.1106779,20.1106452
35.688911,19.3390796,20.1075113,-0.87660237,20.1057733,20.1074674,20.1057948,20.105762
35.698091,20.3715488,20.102643,0.518561248,20.1008948,20.102599,20.1009163,20.1008836
35.707271,20.2237484,20.097779,0.35492172,20.0960206,20.0977349,20.0960421,20.0960093
35.716451,19.6214169,20.0929192,-0.686660298,20.0911505,20.0928751,20.0911721,20.0911392
35.725631,19.5703858,20.0880637,-0.719498406,20.0862847,20.0880195,20.0863062,20.0862733
35.734811,20.6881609,20.0832125,0.777784251,20.081423,20.0831682,20.0814445,20.0814116
35.743992,19.7737199,20.078365,-0.551946648,20.0765649,20.0783207,20.0765865,20.0765535
35.753172,19.5703858,20.0735223,-0.709321185,20.0717115,20.0734779,20.0717331,20.0717001
35.762352,20.880613,20.0686839,0.9010711,20.0668623,20.0686394,20.0668839,20.0668509
35.771532,19.7230829,20.0638497,-0.583752326,20.0620173,20.0638051,20.0620389,20.0620058
35.780712,20.8326667,20.0590198,0.879571993,20.0571764,20.0589751,20.057198,20.0571649
35.789892,19.8242276,20.0541941,-0.479548203,20.0523397,20.0541494,20.0523613,20.0523281
35.799073,19.4422221,20.0493721,-0.779198321,20.0475066,20.0493273,20.0475283,20.047495
35.808253,20.0249844,20.0445549,-0.139894726,20.0426781,20.0445101,20.0426998,20.0426666
35.817433,19.6723156,20.039742,-0.606157083,20.0378539,20.0396971,20.0378756,20.0378422
35.826613,19.2093727,20.0349333,-0.90860364,20.0330337,20.0348883,20.0330554,20.0330221
35.835793,20.2484567,20.0301288,0.467255711,20.0282177,20.0300838,20.0282395,20.028206
35.844973,19.3907194,20.0253286,-0.796623616,20.0234058,20.0252835,20.0234276,20.0233941
35.854154,18.3030052,20.0205321,-1.3105445,20.0185976,20.0204869,20.0186194,20.0185859
35.863334,19.0262976,20.0157404,-0.99470738,20.013794,20.0156951,20.0138158,20.0137822
35.872514,19.2353841,20.0109528,-0.880663832,20.0089945,20.0109075,20.0090163,20.0089827
35.881694,18.7882942,20.0061696,-1.10357389,20.0041991,20.0061241,20.004221,20.0041873
35.890874,20.0249844,20.0013905,0.153603045,19.9994079,20.001345,19.9994297,19.999396
35.900054,19.4679223,19.9966157,-0.727113011,19.9946207,19.9965701,19.9946426,19.9946089
35.909235,20.5426386,19.9918445,0.742155005,19.9898372,19.9917989,19.9898591,19.9898253
35.918415,20.0997512,19.9870781,0.33566814,19.9850583,19.9870324,19.9850802,19.9850464
35.927595,20,19.982316,0.132981313,19.9802835,19.9822702,19.9803054,19.9802715
35.936775,19.8242276,19.977558,-0.391574286,19.9755128,19.9775121,19.9755347,19.9755008
35.945955,20.3715488,19.9728043,0.631462186,19.9707462,19.9727583,19.9707681,19.9707342
35.955135,20.0997512,19.9680548,0.362900073,19.9659837,19.9680087,19.9660056,19.9659716
35.964316,20.8326667,19.963309,0.932393531,19.9612247,19.9632628,19.9612467,19.9612126
35.973496,20.0997512,19.9585679,0.375743765,19.9564704,19.9585217,19.9564924,19.9564583
35.982676,19.7989899,19.953831,-0.393498546,19.9517201,19.9537847,19.9517421,19.951708
35.991856,20.5912603,19.9490983,0.801350101,19.946974,19.9490519,19.946996,19.9469618
36.001036,20.3224014,19.9443698,0.614842754,19.9422319,19.9443234,19.9422539,19.9422197
36.010216,19.7230829,19.9396455,-0.465362893,19.9374938,19.939599,19.9375159,19.9374816
36.019397,20.4939015,19.934925,0.74764736,19.9327594,19.9348784,19.9327814,19.9327471
36.028577,20.5426386,19.9302091,0.782578752,19.9280295,19.9301624,19.9280516,19.9280172
36.037757,19.7737199,19.9254974,-0.389586278,19.9233037,19.9254507,19.9233258,19.9232913
36.046937,20.5669638,19.9207899,0.803849413,19.9185819,19.9207431,19.918604,19.9185696
36.056117,20.0748599,19.9160866,0.398463619,19.9138642,19.9160397,19.9138863,19.9138518
36.065297,19.8997487,19.9113876,-0.107883338,19.9091506,19.9113406,19.9091727,19.9091381
36.074478,20.0748599,19.9066921,0.410082615,19.9044405,19.9066451,19.9044626,19.904428
36.083658,18.8414437,19.9020014,-1.02983385,19.8997349,19.9019543,19.8997571,19.8997224
36.092838,19.8746069,19.8973149,-0.150691752,19.8950334,19.8972677,19.8950556,19.8950209
36.102018,19.4164878,19.8926326,-0.690032422,19.8903359,19.8925853,19.8903581,19.8903234
36.111198,19.4422221,19.8879544,-0.667631885,19.8856425,19.887907,19.8856647,19.8856299
36.120379,19.9749844,19.8832799,0.302827354,19.8809526,19.8832325,19.8809748,19.88094
36.129559,20.3224014,19.8786102,0.666176608,19.8762672,19.8785626,19.8762894,19.8762545
36.138739,18.8944436,19.8739445,-0.989697388,19.8715859,19.8738969,19.8716081,19.8715732
36.147919,20.8326667,19.8692831,0.981521035,19.8669085,19.8692354,19.8669308,19.8668958
36.157099,20.6639783,19.8646259,0.89406513,19.8622352,19.8645781,19.8622575,19.8622225
36.166279,18.8148877,19.8599728,-1.02229402,19.8575659,19.8599249,19.8575882,19.8575531
36.17546,20,19.8553234,0.38036378,19.8529002,19.8552754,19.8529225,19.8528873
36.18464,19.6723156,19.8506787,-0.422330559,19.8482389,19.8506306,19.8482612,19.848226
36.19382,19.4422221,19.8460381,-0.635465206,19.8435816,19.84599,19.843604,19.8435687
36.203,19.9499373,19.8414017,0.329447416,19.8389284,19.8413535,19.8389507,19.8389154
36.21218,20.7364414,19.8367695,0.948510317,19.8342791,19.8367212,19.8343014,19.8342661
36.22136,20.4450483,19.8321415,0.782883652,19.8296338,19.8320931,19.8296562,19.8296208
36.230541,19.7484177,19.8275171,-0.281246242,19.824992,19.8274686,19.8250144,19.824979
36.239721,20.5669638,19.8228974,0.86259284,19.8203547,19.8228488,19.8203771,19.8203417
36.248901,19.5448203,19.8182818,-0.522935522,19.8157214,19.8182332,19.8157438,19.8157083
36.258081,20.2237484,19.8136705,0.640373294,19.8110921,19.8136217,19.8111145,19.811079
36.267261,19.7230829,19.8090632,-0.293224002,19.8064668,19.8090144,19.8064892,19.8064536
36.276441,19.1049732,19.8044602,-0.836353406,19.8018454,19.8044113,19.8018678,19.8018322
36.285622,19.2353841,19.7998608,-0.751316675,19.7972275,19.7998118,19.7972499,19.7972142
36.294802,19.6468827,19.7952661,-0.385205633,19.792614,19.795217,19.7926365,19.7926007
36.303982,19.6468827,19.7906755,-0.37920023,19.7880046,19.7906264,19.788027,19.7879912
36.313162,19.8242276,19.7860891,0.195290785,19.783399,19.7860399,19.7834215,19.7833857
36.322342,19.9749844,19.7815069,0.439860768,19.7787975,19.7814575,19.77882,19.7787841
36.331522,19.8494332,19.7769288,0.26926655,19.7741999,19.7768793,19.7742224,19.7741864
36.340703,20.3960781,19.7723543,0.789761815,19.7696057,19.7723048,19.7696282,19.7695922
36.349883,20.2237484,19.7677845,0.675250967,19.765016,19.7677349,19.7650385,19.7650025
36.359063,20,19.7632189,0.486601562,19.7604302,19.7631692,19.7604528,19.7604166
36.368243,20.0997512,19.7586574,0.584032359,19.7558484,19.7586077,19.7558709,19.7558348
36.377423,19.7737199,19.7541001,0.140070726,19.7512705,19.7540503,19.751293,19.7512568
36.386603,19.2613603,19.749547,-0.698703581,19.7466965,19.749497,19.7467191,19.7466828
36.395784,19.4422221,19.7449975,-0.550250302,19.742126,19.7449474,19.7421485,19.7421122
36.404964,19.5448203,19.7404527,-0.442303477,19.7375599,19.7404025,19.7375824,19.7375461
36.414144,20.1990099,19.735912,0.680512977,19.7329977,19.7358617,19.7330203,19.7329838
36.423324,19.5703858,19.7313754,-0.401235144,19.7284394,19.7313251,19.728462,19.7284255
36.432504,19.4422221,19.7268431,-0.533498787,19.723885,19.7267926,19.7239076,19.7238711
36.441684,20.2484567,19.7223148,0.725356401,19.7193346,19.7222643,19.7193572,19.7193206
36.450865,19.7737199,19.7177903,0.236494564,19.7147875,19.7177396,19.7148101,19.7147735
36.460045,19.4422221,19.7132703,-0.520622931,19.7102449,19.7132196,19.7102675,19.7102308
36.469225,18.761663,19.7087546,-0.973186273,19.7057061,19.7087038,19.7057288,19.705692
36.478405,19.8242276,19.7042429,0.346388016,19.7011713,19.7041921,19.7011939,19.7011572
36.487585,19.7484177,19.6997355,0.220640384,19.6966403,19.6996845,19.696663,19.6966262
36.496765,19.5448203,19.6952322,-0.387829733,19.6921133,19.6951811,19.6921359,19.692099
36.505946,19.7989899,19.6907326,0.329024782,19.6875896,19.6906814,19.6876122,19.6875753
36.515126,18.6010752,19.6862376,-1.04171126,19.6830703,19.6861863,19.6830929,19.683056
36.524306,21.0950231,19.6817468,1.188813,19.6785549,19.6816954,19.6785775,19.6785405
36.533486,19.4164878,19.6772601,-0.51065866,19.6740433,19.6772086,19.674066,19.6740289
36.542666,20.0748599,19.6727776,0.634099599,19.6695356,19.672726,19.6695583,19.6695212
36.551847,19.2353841,19.6682988,-0.657962536,19.6650313,19.6682471,19.665054,19.6650168
36.561027,20.4205779,19.6638246,0.869915678,19.6605314,19.6637728,19.6605541,19.6605168
36.570207,19.7484177,19.6593545,0.298434447,19.6560353,19.6593027,19.656058,19.6560207
36.579387,19.8997487,19.6548887,0.494833381,19.6515431,19.6548367,19.6515657,19.6515284
36.588567,19.4422221,19.650427,-0.45629471,19.6470547,19.6503749,19.6470774,19.64704
36.597747,18.973666,19.6459694,-0.819941126,19.6425702,19.6459172,19.6425928,19.6425554
36.606928,19.2353841,19.6415156,-0.637284472,19.638089,19.6414633,19.6381117,19.6380742
36.616108,19.5959179,19.6370664,-0.202850763,19.6336121,19.637014,19.6336348,19.6335973
36.625288,19.7989899,19.6326214,0.40788297,19.6291391,19.6325689,19.6291618,19.6291242
36.634468,18.973666,19.6281805,-0.809020733,19.62467,19.6281279,19.6246927,19.624655
36.643648,19.7230829,19.6237438,0.315181048,19.6202046,19.6236911,19.6202273,19.6201896
36.652828,20.174241,19.6193113,0.744936022,19.6157431,19.6192585,19.6157658,19.6157281
36.662009,19.4935887,19.6148825,-0.348272629,19.6112849,19.6148296,19.6113076,19.6112698
36.671189,20.9523268,19.6104584,1.15839047,19.6068311,19.6104054,19.6068538,19.6068159
36.680369,18.8944436,19.6060384,-0.843560762,19.602381,19.6059853,19.6024037,19.6023658
36.689549,19.8746069,19.6016226,0.522479014,19.5979348,19.6015694,19.5979575,19.5979195
36.698729,19.6977156,19.597211,0.317024633,19.5934924,19.5971577,19.5935151,19.593477
36.707909,19.5448203,19.5928036,-0.219050853,19.5890537,19.5927501,19.5890764,19.5890384
36.71709,19.5448203,19.5883999,-0.208757217,19.5846184,19.5883463,19.5846411,19.584603
36.72627,19.3390796,19.5840009,-0.494895191,19.5801874,19.5839472,19.5802101,19.5801719
36.73545,19.3649167,19.579606,-0.463345784,19.5757602,19.5795523,19.5757829,19.5757447
36.74463,19.1572441,19.5752154,-0.646507057,19.5713368,19.5751616,19.5713594,19.5713212
36.75381,19.9499373,19.570829,0.615717726,19.5669171,19.570775,19.5669398,19.5669015
36.76299,19.9749844,19.5664468,0.639169411,19.5625013,19.5663927,19.5625239,19.5624855
36.772171,19.8746069,19.5620683,0.55905149,19.5580887,19.5620141,19.5581114,19.5580729
36.781351,20.0997512,19.5576946,0.736244987,19.5536804,19.5576402,19.5537031,19.5536646
36.790531,19,19.553325,-0.743858179,19.5492759,19.5532706,19.5492985,19.54926
36.799711,19.2093727,19.5489596,-0.582740876,19.5448751,19.5489051,19.5448978,19.5448592
36.808891,19.5448203,19.5445985,0.0148920367,19.5404781,19.5445439,19.5405008,19.5404621
36.818071,19.5448203,19.5402416,0.067665891,19.5360849,19.5401868,19.5361075,19.5360688
36.827252,19.2873015,19.5358885,-0.498584954,19.5316949,19.5358336,19.5317176,19.5316788
36.836432,19.5192213,19.5315401,-0.11099008,19.5273092,19.5314851,19.5273318,19.527293
36.845612,18.9472953,19.527196,-0.761512068,19.5229272,19.5271408,19.5229498,19.522911
36.854792,20,19.5228561,0.690756066,19.518549,19.5228008,19.5185716,19.5185327
36.863972,19.3390796,19.5185204,-0.423604543,19.5141745,19.5184651,19.5141971,19.5141581
36.873152,19.8494332,19.514189,0.579002773,19.5098038,19.5141336,19.5098264,19.5097873
36.882333,19.0525589,19.5098614,-0.676241492,19.5054363,19.5098058,19.5054589,19.5054198
36.891513,18.9472953,19.5055386,-0.747156788,19.5010731,19.5054829,19.5010956,19.5010565
36.900693,19.7989899,19.50122,0.545682932,19.4967135,19.5011642,19.4967361,19.4966969
36.909873,19.078784,19.4969057,-0.646623296,19.4923577,19.4968498,19.4923802,19.492341
36.919053,19.7737199,19.4925957,0.530211493,19.4880056,19.4925396,19.4880281,19.4879888
36.928233,19.6723156,19.48829,0.428982029,19.4836572,19.4882338,19.4836798,19.4836404
36.937414,20.2237484,19.4839881,0.860093197,19.4793121,19.4839318,19.4793346,19.4792952
36.946594,18.973666,19.4796911,-0.711354412,19.4749712,19.4796346,19.4749936,19.4749542
36.955774,19.2353841,19.4753983,-0.48991251,19.4706339,19.4753417,19.4706564,19.4706169
36.964954,18.8679623,19.4711099,-0.776625816,19.4663004,19.4710532,19.4663228,19.4662833
36.974134,20.3469899,19.4668258,0.938170614,19.4619706,19.466769,19.461993,19.4619533
36.983314,18.7082869,19.4625461,-0.868480961,19.4576444,19.4624891,19.4576668,19.4576271
36.992495,19.3907194,19.4582703,-0.259905431,19.4533215,19.4582132,19.4533439,19.4533041
37.001675,19.4679223,19.4539992,0.117996182,19.4490027,19.453942,19.4490251,19.4489853
37.010855,19.9248588,19.4497326,0.689294039,19.4446877,19.4496752,19.44471,19.4446702
37.020035,19.5192213,19.4454703,0.27157137,19.4403763,19.4454128,19.4403986,19.4403587
37.029215,19.6468827,19.4412124,0.453508896,19.4360686,19.4411547,19.4360909,19.4360509
37.038396,19.7989899,19.4369584,0.6016905,19.4317641,19.4369006,19.4317863,19.4317463
37.047576,19.3649167,19.4327093,-0.260370088,19.4274637,19.4326514,19.4274859,19.4274458
37.056756,19.3907194,19.4284647,-0.194281382,19.423167,19.4284066,19.4231892,19.4231491
37.065936,19.1572441,19.4242245,-0.516701499,19.4188739,19.4241663,19.4188961,19.4188559
37.075116,19.2093727,19.4199888,-0.458929235,19.4145846,19.4199304,19.4146067,19.4145665
37.084296,19.8746069,19.4157575,0.677384272,19.4102988,19.415699,19.410321,19.4102807
37.093477,19.1311265,19.4115302,-0.529531588,19.4060163,19.4114716,19.4060384,19.405998
37.102657,18.8944436,19.4073078,-0.71614537,19.4017379,19.4072491,19.40176,19.4017195
37.111837,20.1990099,19.40309,0.892143442,19.3974631,19.4030311,19.3974852,19.3974447
37.121017,19.5703858,19.3988766,0.41413669,19.3931919,19.3988176,19.393214,19.3931734
37.130197,19.3649167,19.3946677,-0.172484824,19.3889244,19.3946086,19.3889464,19.3889058
37.139377,19.1833261,19.3904634,-0.455123428,19.3846606,19.3904041,19.3846825,19.3846419
37.148558,19.1572441,19.3862632,-0.478559439,19.3803998,19.3862037,19.3804218,19.3803811
37.157738,19.7230829,19.382068,0.583964846,19.3761432,19.3820084,19.3761651,19.3761244
37.166918,19.4164878,19.3778774,0.196495399,19.3718902,19.3778176,19.3719121,19.3718713
37.176098,18.8148877,19.3736914,-0.747531752,19.3676409,19.3736315,19.3676627,19.3676218
37.185278,19.7989899,19.3695101,0.655347064,19.3633951,19.36945,19.3634169,19.3633759
37.194458,19.1311265,19.3653334,-0.483949287,19.3591529,19.3652731,19.3591747,19.3591337
37.203639,18.1107703,19.3611609,-1.11820865,19.3549139,19.3611005,19.3549357,19.3548946
37.212819,19.9749844,19.3569934,0.786123977,19.350679,19.3569329,19.3507007,19.3506596
37.221999,18.8414437,19.3528307,-0.715113307,19.3464477,19.35277,19.3464693,19.3464281
37.231179,19.5703858,19.3486727,0.470864198,19.3422199,19.3486118,19.3422415,19.3422003
37.240359,19.8494332,19.3445194,0.710572901,19.3379958,19.3444584,19.3380173,19.337976
37.249539,17.6068169,19.3403708,-1.31664497,19.3337752,19.3403096,19.3337967,19.3337553
37.25872,19.4679223,19.3362266,0.362899098,19.3295577,19.3361652,19.3295792,19.3295378
37.2679,18.8148877,19.3320876,-0.719166073,19.3253443,19.332026,19.3253658,19.3253243
37.27708,19.2873015,19.3279534,-0.201623115,19.3211345,19.3278917,19.3211559,19.3211144
37.28626,19.5448203,19.3238241,0.470102263,19.3169283,19.3237623,19.3169496,19.316908
37.29544,19.2093727,19.3196998,-0.332155146,19.3127256,19.3196377,19.3127469,19.3127052
37.30462,20.1990099,19.3155802,0.939909375,19.3085265,19.315518,19.3085477,19.308506
37.313801,18.6010752,19.3114652,-0.842846343,19.3043305,19.3114028,19.3043516,19.3043099
37.322981,17.9722008,19.3073555,-1.15548898,19.3001385,19.307293,19.3001596,19.3001177
37.332161,19.3649167,19.3032508,0.248326189,19.29595,19.3031881,19.2959711,19.2959292
37.341341,18.9472953,19.2991511,-0.593174349,19.2917652,19.2990882,19.2917861,19.2917442
37.350521,19.4422221,19.2950564,0.383621754,19.2875838,19.2949933,19.2876047,19.2875627
37.359701,20.0499377,19.2909668,0.871189326,19.283406,19.2909035,19.2834269,19.2833848
37.368882,19.4422221,19.2868818,0.394132308,19.2792313,19.2868183,19.2792521,19.27921
37.378062,20.0748599,19.2828024,0.889976132,19.2750606,19.2827387,19.2750813,19.2750391
37.387242,18.8679623,19.2787281,-0.640910188,19.2708934,19.2786643,19.2709141,19.2708718
37.396422,18.734994,19.2746592,-0.734619083,19.2667297,19.2745951,19.2667503,19.266708
37.405602,20.0997512,19.2705955,0.910579905,19.2625696,19.2705312,19.2625901,19.2625477
37.414782,17.5783958,19.266537,-1.29928488,19.258413,19.2664726,19.2584334,19.258391
37.423963,20.1246118,19.2624834,0.928508677,19.2542594,19.2624188,19.2542798,19.2542373
37.433143,19.4422221,19.2584356,0.428703245,19.2501099,19.2583708,19.2501302,19.2500876
37.442323,19.1049732,19.2543932,-0.386548855,19.2459638,19.2543282,19.245984,19.2459414
37.451503,18.8148877,19.2503562,-0.659900342,19.2418212,19.2502909,19.2418413,19.2417987
37.460683,19.4164878,19.2463246,0.412508423,19.2376822,19.2462592,19.2377022,19.2376594
37.469864,19.8997487,19.2422982,0.810833259,19.2335461,19.2422325,19.2335661,19.2335233
37.479044,20.174241,19.2382777,0.967451968,19.2294141,19.2382118,19.2294339,19.2293911
37.488224,19.6214169,19.2342628,0.622217046,19.2252855,19.2341967,19.2253053,19.2252623
37.497404,19.4935887,19.2302536,0.513161853,19.2211604,19.2301873,19.2211801,19.2211371
37.506584,19.1311265,19.2262503,-0.308421523,19.2170388,19.2261838,19.2170584,19.2170153
37.515764,18.8944436,19.2222528,-0.572546199,19.2129207,19.222186,19.2129401,19.212897
37.524945,19.6468827,19.2182606,0.654692343,19.2088056,19.2181937,19.2088249,19.2087817
37.534125,18.9208879,19.2142748,-0.541652001,19.2046944,19.2142076,19.2047136,19.2046704
37.543305,19.0262976,19.2102949,-0.428949118,19.2005867,19.2102275,19.2006058,19.2005625
37.552485,19.8997487,19.2063211,0.832723056,19.1964824,19.2062534,19.1965015,19.1964581
37.561665,19.1572441,19.2023532,-0.212389208,19.1923816,19.2022853,19.1924006,19.1923571
37.570845,19.5959179,19.1983915,0.630496943,19.1882843,19.1983234,19.1883031,19.1882596
37.580026,19.3390796,19.1944356,0.380320893,19.18419,19.1943672,19.1842087,19.1841651
37.589206,18.1659021,19.1904864,-1.0122175,19.1800995,19.1904178,19.1801181,19.1800745
37.598386,19.7230829,19.1865435,0.732488507,19.1760126,19.1864746,19.176031,19.1759873
37.607566,18.6010752,19.182607,-0.762582322,19.171929,19.1825379,19.1719474,19.1719036
37.616746,18.761663,19.1786773,-0.645766416,19.1678489,19.1786079,19.1678671,19.1678233
37.625926,18.7082869,19.1747542,-0.682984097,19.1637723,19.1746845,19.1637903,19.1637464
37.635107,19.2093727,19.1708374,0.196304221,19.1596986,19.1707674,19.1597165,19.1596726
37.644287,18.6010752,19.1669277,-0.75223166,19.1556288,19.1668575,19.1556466,19.1556025
37.653467,18.6010752,19.1630249,-0.749633019,19.1515624,19.1629544,19.15158,19.151536
37.662647,19.8997487,19.159129,0.860592646,19.1474994,19.1590583,19.1475169,19.1474728
37.671827,19.078784,19.1552402,-0.276507127,19.1434399,19.1551692,19.1434572,19.143413
37.681007,19.3907194,19.1513585,0.489245222,19.1393838,19.1512872,19.1394009,19.1393567
37.690188,20.0997512,19.1474837,0.97584197,19.1353306,19.1474121,19.1353476,19.1353033
37.699368,19.8494332,19.1436166,0.840128933,19.1312813,19.1435447,19.1312981,19.1312537
37.708548,18.6547581,19.139757,-0.696418627,19.1272354,19.1396848,19.127252,19.1272076
37.717728,19.3649167,19.135905,0.478551713,19.1231928,19.1358325,19.1232093,19.1231648
37.726908,18.3575598,19.1320609,-0.880057497,19.1191537,19.1319881,19.11917,19.1191254
37.736088,19.7989899,19.1282249,0.819002414,19.115118,19.1281518,19.1151341,19.1150894
37.745269,19.3390796,19.1243965,0.463339122,19.1110852,19.124323,19.1111011,19.1110564
37.754449,18.6010752,19.1205766,-0.720764399,19.1070562,19.1205027,19.1070719,19.1070272
37.763629,18.973666,19.1167649,-0.378284234,19.1030306,19.1166908,19.1030462,19.1030013
37.772809,19.1833261,19.1129617,0.265262856,19.0990084,19.1128872,19.0990237,19.0989788
37.781989,17.691806,19.1091671,-1.19052974,19.0949896,19.1090922,19.0950047,19.0949597
37.791169,19.2093727,19.1053812,0.322477192,19.0909741,19.105306,19.090989,19.0909439
37.80035,18.6547581,19.1016038,-0.668465152,19.0869616,19.1015282,19.0869762,19.0869311
37.80953,18.761663,19.0978358,-0.579804112,19.0829528,19.0977599,19.0829672,19.082922
37.81871,18.8944436,19.0940772,-0.446803715,19.0789474,19.0940009,19.0789616,19.0789163
37.82789,19.3132079,19.090328,0.472101623,19.0749454,19.0902513,19.0749593,19.074914
37.83707,19.3649167,19.0865887,0.527568048,19.0709467,19.0865116,19.0709604,19.070915
37.84625,19.2613603,19.0828596,0.42249338,19.0669514,19.0827822,19.0669648,19.0669193
37.855431,18.3303028,19.0791403,-0.865353971,19.0629589,19.0790624,19.0629721,19.0629266
37.864611,19.6977156,19.0754317,0.788849759,19.0589703,19.0753534,19.0589831,19.0589376
37.873791,18.8148877,19.0717336,-0.50679966,19.054985,19.0716549,19.0549975,19.0549519
37.882971,19.078784,19.0680464,0.103622585,19.051003,19.0679673,19.0510152,19.0509695
37.892151,19.7230829,19.0643702,0.811611172,19.0470243,19.0642907,19.0470363,19.0469905
37.901331,19.0262976,19.0607054,-0.18549344,19.043049,19.0606254,19.0430606,19.0430148
37.910512,18.8944436,19.0570518,-0.40324704,19.0390765,19.0569714,19.0390879,19.0390419
37.919692,19.6468827,19.0534105,0.770371469,19.0351078,19.0533296,19.0351188,19.0350728
37.928872,19.1833261,19.0497814,0.365437653,19.0311424,19.0497,19.0311531,19.0311071
37.938052,18.6010752,19.0461649,-0.66715037,19.0271804,19.046083,19.0271907,19.0271446
37.947232,20.0997512,19.0425614,1.02819737,19.0232216,19.042479,19.0232316,19.0231854
37.956413,18.3030052,19.0389715,-0.85788479,19.0192657,19.0388887,19.0192753,19.019229
37.965593,18.4390889,19.0353957,-0.772209036,19.0153136,19.0353123,19.0153227,19.0152764
37.974773,19.0525589,19.0318339,0.143961633,19.0113647,19.03175,19.0113735,19.0113271
37.983953,18.547237,19.0282866,-0.6935774,19.0074191,19.0282021,19.0074275,19.007381
37.993133,18.8148877,19.0247541,-0.4581118,19.0034768,19.0246691,19.0034848,19.0034383
38.002313,19.2873015,19.021237,0.515814423,18.9995378,19.0211514,18.9995454,18.9994988
38.011494,18.9472953,19.0177353,-0.265405248,18.9956017,19.0176491,18.9956088,18.9955621
38.020674,18.1659021,19.0142502,-0.921058122,18.9916693,19.0141634,18.9916759,18.9916291
38.029854,19.2873015,19.0107819,0.525851332,18.9877401,19.0106945,18.9877462,18.9876994
38.039034,18.6815417,19.0073309,-0.570779507,18.9838142,19.0072429,18.9838199,18.983773
38.048214,19,19.0038979,-0.0624329395,18.9798916,19.0038092,18.9798967,18.9798498
38.057394,18.8414437,19.0004834,-0.398797838,18.9759723,19.0003941,18.9759769,18.9759298
38.066575,18.6815417,18.9970892,-0.56173615,18.9720558,18.9969992,18.9720598,18.9720127
38.075755,19.5448203,18.9937153,0.742364461,18.9681429,18.9936246,18.9681464,18.9680993
38.084935,18.2208672,18.990362,-0.877208568,18.9642334,18.9902706,18.9642363,18.964189
38.094115,20.0249844,18.9870301,1.0188004,18.9603271,18.986938,18.9603294,18.9602821
38.103295,19.4679223,18.9837204,0.695846176,18.956424,18.9836275,18.9564257,18.9563783
38.112475,18.4119526,18.9804337,-0.753976839,18.9525242,18.98034,18.9525252,18.9524778
38.121656,18.7082869,18.9771705,-0.518539848,18.9486272,18.977076,18.9486276,18.94858
38.130836,19.4935887,18.9739324,0.720871862,18.9447339,18.9738371,18.9447335,18.944686
38.140016,19.1572441,18.9707202,0.431884136,18.9408438,18.9706239,18.9408427,18.9407951
38.149196,18.7082869,18.9675347,-0.509163744,18.936957,18.9674375,18.9369552,18.9369074
38.158376,19.7737199,18.964377,0.899634871,18.9330734,18.964279,18.9330708,18.933023
38.167556,18.3575598,18.9612484,-0.776974062,18.929193,18.9611495,18.9291896,18.9291417
38.176737,19.4935887,18.9581522,0.731735263,18.9253154,18.9580522,18.9253112,18.9252632
38.185917,19.3132079,18.9550885,0.598430822,18.9214415,18.9549875,18.9214364,18.9213884
38.195097,19.0525589,18.952058,0.317018775,18.9175708,18.951956,18.9175648,18.9175167
38.204277,19.7989899,18.9490622,0.92191521,18.9137033,18.9489592,18.9136964,18.9136482
38.213457,19,18.9461028,0.232157791,18.9098391,18.9459986,18.9098312,18.9097829
38.222637,19.1049732,18.9431813,0.402233632,18.905978,18.943076,18.9059691,18.9059208
38.231818,19.4679223,18.9402992,0.726376682,18.9021198,18.9401927,18.9021098,18.9020614
38.240998,19.6468827,18.9374592,0.842272824,18.8982652,18.9373515,18.8982541,18.8982057
38.250178,18.9472953,18.9346628,0.112394406,18.8944138,18.9345538,18.8944016,18.8943531
38.259358,19.0262976,18.9319123,0.30722193,18.8905656,18.9318019,18.8905522,18.8905036
38.268538,18.2482876,18.9292099,-0.825180146,18.8867206,18.9290982,18.886706,18.8866574
38.277718,18.6815417,18.926558,-0.494991255,18.8828789,18.9264449,18.882863,18.8828142
38.286899,19.1049732,18.9239627,0.425453299,18.8790399,18.9238481,18.8790227,18.8789738
38.296079,18.5741756,18.9214258,-0.589279379,18.8752046,18.9213097,18.8751859,18.875137
38.305259,19.6723156,18.9189487,0.8679671,18.8713724,18.918831,18.8713523,18.8713033
38.314439,19.078784,18.9165346,0.402801967,18.8675435,18.9164152,18.8675218,18.8674728
38.323619,18.9208879,18.9141871,0.0818585996,18.8637177,18.914066,18.8636945,18.8636454
38.332799,19.4679223,18.91191,0.745662362,18.8598952,18.911787,18.8598703,18.8598211
38.34198,18.6010752,18.9097071,-0.555546446,18.8560755,18.9095823,18.8560488,18.8559996
38.35116,19.1833261,18.9075833,0.525112143,18.8522594,18.9074566,18.8522309,18.8521816
38.36034,19.4679223,18.9055432,0.749919423,18.8484465,18.9054144,18.8484161,18.8483667
38.36952,19.8997487,18.9035918,0.998076622,18.8446368,18.9034608,18.8446044,18.8445549
38.3787,20.0249844,18.9017347,1.05983476,18.8408303,18.9016015,18.8407958,18.8407462
38.387881,18.6010752,18.8999776,-0.546719648,18.8370266,18.8998421,18.8369899,18.8369402
38.397061,18.2208672,18.8983328,-0.823082993,18.8332265,18.8981948,18.8331875,18.8331378
38.406241,18.5741756,18.8968085,-0.568007814,18.8294297,18.8966679,18.8293882,18.8293384
38.415421,19.6468827,18.8954074,0.866876735,18.8256361,18.8952642,18.825592,18.8255422
38.424601,18.5202592,18.8941381,-0.611456397,18.8218457,18.893992,18.821799,18.821749
38.433781,20.0997512,18.8930098,1.09851783,18.8180586,18.8928607,18.818009,18.817959
38.442962,18.973666,18.8920326,0.285715523,18.8142743,18.8918804,18.8142216,18.8141716
38.452142,18.627936,18.8912178,-0.513109899,18.8104937,18.8910623,18.8104378,18.8103876
38.461322,19.2093727,18.8905774,0.56461965,18.8067163,18.8904183,18.8066571,18.8066068
38.470502,18.5202592,18.8901247,-0.60816567,18.8029423,18.8899619,18.8028794,18.8028291
38.479682,19.3907194,18.8898743,0.707704137,18.7991715,18.8897076,18.7991048,18.7990544
38.488862,19.4935887,18.8898423,0.777011177,18.7954042,18.8896713,18.7953332,18.7952828
38.498043,19.6468827,18.8900466,0.8699633,18.7916399,18.8898709,18.7915643,18.7915138
38.507223,19.2613603,18.8905146,0.608971007,18.7878797,18.8903336,18.7877989,18.7877483
38.516403,18.493242,18.8912829,-0.630904783,18.7841234,18.8910957,18.7840366,18.7839859
38.525583,18.8679623,18.8923591,-0.156195004,18.7803716,18.8921644,18.7802772,18.7802265
38.534763,18.627936,18.8937719,-0.515592717,18.7766249,18.8935675,18.776521,18.7764701
38.543943,18.493242,18.8955531,-0.634279979,18.7728848,18.8953356,18.7727677,18.7727168
38.553124,18.9208879,18.8977397,0.152145518,18.769153,18.8975034,18.7690171,18.7689661
38.562304,18.761663,18.9003731,-0.372437975,18.7654337,18.9001091,18.76527,18.7652189
38.571484,18.761663,18.9035022,-0.376615468,18.761732,18.9031961,18.7615259,18.7614747
38.580664,19.6723156,18.9071843,0.874717832,18.7580562,18.9068133,18.7577848,18.7577335
38.589844,18.4661853,18.911487,-0.667309282,18.7544192,18.9110158,18.7540467,18.7539954
38.599024,18.8679623,18.9164918,-0.220294178,18.7508402,18.915866,18.7503116,18.7502602
38.608205,18.5741756,18.9222984,-0.590019271,18.7473473,18.9214354,18.7465792,18.7465277
38.617385,18.3847763,18.9290387,-0.737741378,18.7439851,18.9278127,18.7428501,18.7427986
38.626565,19.5703858,18.9369726,0.795872607,18.740838,18.9351743,18.7391241,18.7390725
38.635745,19.1572441,18.9462258,0.459367265,18.7379914,18.9435617,18.7354011,18.7353494
38.644925,18.4390889,18.9570603,-0.719702309,18.7355802,18.9531044,18.7316811,18.7316293
38.654105,19.1572441,18.9698095,0.432937168,18.7337909,18.9639527,18.7279641,18.7279122
38.663286,18.0831413,18.9848979,-0.94960863,18.7328757,18.9762838,18.7242496,18.7241977
38.672466,18.8679623,19.0028568,-0.367279961,18.7331708,18.9903014,18.7205386,18.7204865
38.681646,19.3649167,19.0243588,0.583573452,18.735115,19.0062499,18.7168305,18.7167784
38.690826,19.8242276,19.0502389,0.879766305,18.739271,19.024418,18.7131254,18.7130732
38.700006,18.5202592,19.0815264,-0.749177726,18.7463469,19.0451499,18.7094233,18.709371
38.709186,18.4661853,19.1194759,-0.808263905,18.7572166,19.0688589,18.7057242,18.7056718
38.718367,19.8997487,19.1656029,0.856823085,18.7729386,19.0960474,18.7020276,18.7019752
38.727547,19.1572441,19.2216904,-0.253862816,18.7947585,19.1273159,18.6983344,18.6982819
38.736727,18.7082869,19.2912458,-0.763517416,18.8250033,19.1639558,18.6946441,18.6945915
38.745907,19.7989899,19.3760507,0.650337775,18.8648721,19.2066621,18.6909568,18.6909042
38.755087,19.8997487,19.4789378,0.648699422,18.9161267,19.256671,18.6872725,18.6872197
38.764267,19.0262976,19.6032218,-0.759555292,18.9806357,19.3156517,18.6835911,18.6835383
38.773448,19.1311265,19.752741,-0.788425359,19.0602402,19.3859018,18.6799123,18.6798593
38.782628,19.4679223,19.9321618,-0.681351188,19.1566006,19.4708393,18.6762368,18.6761838
38.791808,20.2977831,20.1480456,0.386959389,19.2711094,19.5762298,18.6725642,18.6725111
38.800988,18.7882942,20.4108801,-1.27380763,19.4047098,19.7125574,18.6688945,18.6688414
38.810168,20.1494417,20.738728,-0.767649847,19.5577523,19.8991436,18.6652278,18.6651746
38.819349,20.4694895,21.1622631,-0.832330203,19.7298733,20.169865,18.6615636,18.6615103
38.828529,21.7715411,21.7293689,0.205358493,19.9197974,20.5786418,18.6579028,18.6578494
38.837709,22.4053565,22.5067468,-0.318418368,20.1253729,21.2014121,18.6542448,18.6541913
38.846889,23.2808935,23.6044598,-0.568828906,20.3441724,22.1613554,18.6505898,18.6505362
38.856069,25.7487864,25.08852,0.812567779,20.5707017,23.5368721,18.6469377,18.646884
38.865249,26.3248932,26.9765689,-0.807264361,20.7993529,25.3513389,18.6432884,18.6432347
38.87443,28.2665881,29.2566257,-0.995006365,21.0243165,27.5927616,18.6396417,18.6395879
38.88361,31.0644491,31.9023613,-0.9153754,21.2393358,30.2315676,18.6359983,18.6359444
38.89279,34.7850543,34.8977245,-0.335663853,21.4381177,33.2478422,18.6323578,18.6323038
38.90197,37.7756535,38.2298528,-0.673943046,21.6145087,36.6245797,18.6287201,18.628666
38.91115,42.7901858,41.844904,0.972256054,21.7627933,40.3021908,18.6250853,18.6250312
38.92033,47.9270279,45.5801043,1.53196722,21.8779534,44.1095857,18.6214535,18.6213992
38.929511,49.8798557,49.1044812,0.880553506,21.9559049,47.7054257,18.6178241,18.6177697
38.938691,51.7010638,51.8977814,-0.443528503,21.9936706,50.5583077,18.6141979,18.6141435
38.947871,53.3197899,53.2943883,0.159378929,21.9895747,51.9913441,18.6105747,18.6105202
38.957051,53.4134814,52.5005764,0.95546067,21.9412206,51.1967581,18.6069543,18.6068997
38.966231,51.0587896,49.3263081,1.31623766,21.8504826,47.9762561,18.6033367,18.6032821
38.975411,46.8508271,44.5050062,1.5316073,21.7222898,43.067195,18.5997221,18.5996673
38.984592,40.0624512,39.0163604,1.02278581,21.5607838,37.4595809,18.5961098,18.596055
38.993772,34.9714169,33.7816264,1.0907752,21.3711352,32.0959478,18.5925009,18.5924459
39.002952,30.6920185,29.4531438,1.1130475,21.1592045,27.6643934,18.5888947,18.5888397
39.012132,26.6645833,26.3087731,0.596498234,20.931336,24.4834572,18.5852915,18.5852364
39.021312,24.2487113,24.2560243,-0.0855157758,20.6940563,22.4807892,18.581691,18.5816358
39.030492,22.627417,22.983084,-0.59637827,20.4537818,21.3308792,18.5780934,18.5780381
39.039673,23.0434372,22.165883,0.936778635,20.2165142,20.6791392,18.5744982,18.5744429
39.048853,20.4939015,21.5850186,-1.04456552,19.987691,20.2800316,18.5709062,18.5708508
39.058033,20.4939015,21.127719,-0.796126517,19.7718263,20.0049128,18.5673171,18.5672616
39.067213,20.174241,20.7476692,-0.757250452,19.5731393,19.7981304,18.5637308,18.5636752
39.076393,20.2977831,20.425776,-0.357760959,19.3949439,19.6347501,18.5601473,18.5600916
39.085573,19.4679223,20.1490328,-0.82529417,19.2370816,19.5002625,18.5565666,18.5565108
39.094754,20.1990099,19.9119128,0.535814379,19.099705,19.3880058,18.5529883,18.5529324
39.103934,19.7737199,19.7098774,0.252670779,18.9822404,19.2932733,18.5494132,18.5493572
39.113114,19.5448203,19.5387374,0.0779930626,18.883458,19.2125305,18.5458409,18.5457849
39.122294,18.3847763,19.3946038,-1.00490172,18.8017107,19.1430926,18.5422714,18.5422153
39.131474,18.6815417,19.2738247,-0.76959928,18.7350842,19.0828809,18.5387047,18.5386485
39.140654,19.4679223,19.1730014,0.543066205,18.6815465,19.0302673,18.5351408,18.5350845
39.149835,19.9248588,19.0890113,0.914246957,18.6390691,18.9839591,18.5315793,18.5315229
39.159015,18.8414437,19.0190701,-0.421457493,18.605739,18.9429373,18.5280209,18.5279644
39.168195,19.5959179,18.9606981,0.797006803,18.5797999,18.9063675,18.5244653,18.5244087
39.177375,19.4935887,18.9118593,0.76271188,18.5597635,18.8736219,18.5209125,18.5208558
39.186555,19.1049732,18.8711208,0.483582878,18.5445129,18.8443293,18.5173625,18.5173057
39.195735,18.8414437,18.8363189,0.0715874719,18.5325309,18.8177935,18.5138152,18.5137583
39.204916,19.5192213,18.8063892,0.844293874,18.5229993,18.7937399,18.5102703,18.5102133
39.214096,18.9472953,18.7804774,0.408433484,18.5152758,18.7719384,18.5067285,18.5066715
39.223276,18.6547581,18.7578844,-0.321132768,18.5088615,18.752175,18.5031895,18.5031323
39.232456,18.3575598,18.738088,-0.616869754,18.5033792,18.7342958,18.4996532,18.499596
39.241636,19,18.720771,0.528421231,18.4985492,18.7182571,18.4961197,18.4960624
39.250816,18.8148877,18.7057515,0.330357748,18.4941679,18.7040768,18.4925889,18.4925315
39.259997,18.8944436,18.6933661,0.448416733,18.4900898,18.6922342,18.4890604,18.4890029
39.269177,17.6351921,18.6840641,-1.02414452,18.4862142,18.6832783,18.4855351,18.4854775
39.278357,18.4119526,18.673781,-0.51169168,18.482471,18.6732131,18.4820125,18.4819548
39.287537,18.8679623,18.6619112,0.453928476,18.4788134,18.6614792,18.4784926,18.4784349
39.296717,18.4661853,18.6500472,-0.428791183,18.4752135,18.6496968,18.4749755,18.4749176
39.305898,18.9208879,18.6388177,0.531102876,18.471646,18.6385192,18.4714607,18.4714027
39.315078,18.8148877,18.6281645,0.432114772,18.4681002,18.6278995,18.4679489,18.4678909
39.324258,17.9164729,18.6180283,-0.837589031,18.4645686,18.6177853,18.4644399,18.4643818
39.333438,19.078784,18.6083588,0.685875508,18.4610468,18.6081309,18.4609336,18.4608754
39.342618,18.493242,18.5991129,-0.325378132,18.4575321,18.5988959,18.45743,18.4573717
39.351798,18.3575598,18.5902528,-0.48238263,18.4540226,18.5900439,18.4539291,18.4538706
39.360979,19,18.5817439,0.646727184,18.450517,18.5815418,18.4504304,18.4503719
39.370159,18.3303028,18.5735587,-0.493209836,18.4470156,18.5733622,18.4469349,18.4468763
39.379339,19.0262976,18.5656697,0.678695749,18.4435175,18.5654781,18.443442,18.4433834
39.388519,18.4119526,18.5580531,-0.382230871,18.4400226,18.557866,18.4399519,18.4398931
39.397699,17.7200451,18.5506876,-0.911395884,18.4365307,18.5505046,18.4364644,18.4364055
39.406879,18.4661853,18.5435697,-0.278180537,18.4330418,18.5433906,18.4329795,18.4329206
39.41606,17.8885438,18.5366675,-0.805061296,18.4295554,18.536492,18.429497,18.4294379
39.42524,18.6010752,18.5299618,0.266671024,18.4260723,18.5297896,18.4260175,18.4259583
39.43442,18.4119526,18.5234379,-0.333894087,18.4225921,18.5232689,18.4225407,18.4224814
39.4436,18.7082869,18.5170831,0.437268608,18.4191146,18.5169171,18.4190665,18.4190071
39.45278,17.9164729,18.5108858,-0.770981787,18.41564,18.5107226,18.415595,18.4155355
39.46196,18.8414437,18.5048353,0.580179582,18.4121682,18.5046749,18.4121261,18.4120665
39.471141,18.7082869,18.4989214,0.457564815,18.4086989,18.4987635,18.4086595,18.4085998
39.480321,17.8044938,18.4931362,-0.829844821,18.4052326,18.4929808,18.4051959,18.4051361
39.489501,18.547237,18.4874711,0.244470693,18.4017691,18.4873179,18.4017349,18.4016751
39.498681,18.1107703,18.4819183,-0.609219195,18.3983084,18.4817673,18.3982766,18.3982167
39.507861,19.1572441,18.476471,0.825089745,18.3948504,18.4763221,18.3948209,18.3947609
39.517041,18.7882942,18.4711277,0.5631754,18.3913952,18.4709808,18.3913678,18.3913077
39.526222,18.734994,18.4658798,0.518762157,18.3879422,18.4657347,18.387917,18.3878568
39.535402,17.7482393,18.4607191,-0.844085131,18.3844924,18.4605758,18.3844692,18.3844089
39.544582,18.5202592,18.4556399,0.254203269,18.3810453,18.4554983,18.381024,18.3809635
39.553762,18.4390889,18.4506377,-0.107465164,18.3776009,18.4504977,18.3775813,18.3775208
39.562942,18.3030052,18.4457082,-0.377760467,18.3741591,18.4455698,18.3741413,18.3740807
39.572122,17.5499288,18.4408474,-0.943884883,18.37072,18.4407105,18.3707039,18.3706432
39.581303,17.8885438,18.4360512,-0.73993744,18.3672832,18.4359157,18.3672688,18.367208
39.590483,18.6547581,18.4313171,0.472695422,18.3638495,18.4311829,18.3638365,18.3637756
39.599663,18.1383571,18.4266414,-0.536921119,18.3604183,18.4265085,18.3604069,18.3603459
39.608843,18.0831413,18.4220211,-0.582133825,18.3569899,18.4218894,18.3569799,18.3569188
39.618023,18.0831413,18.4174534,-0.578197237,18.353564,18.4173228,18.3535554,18.3534942
39.627203,17.8044938,18.4129372,-0.780027838,18.3501408,18.4128078,18.3501336,18.3500723
39.636384,19.3649167,18.4084705,0.977980666,18.3467199,18.4083422,18.3467139,18.3466525
39.645564,18.0554701,18.4040491,-0.590405808,18.3433019,18.4039218,18.3432972,18.3432357
39.654744,18.627936,18.3996703,0.477771598,18.3398866,18.3995439,18.339883,18.3398214
39.663924,18.493242,18.3953322,0.312905447,18.3364738,18.3952068,18.3364714,18.3364097
39.673104,18.761663,18.3910329,0.608794016,18.3330637,18.3909083,18.3330623,18.3330005
39.682284,18.3847763,18.3867707,-0.0446580764,18.3296561,18.386647,18.3296559,18.329594
39.691465,17.8044938,18.3825434,-0.760295739,18.3262508,18.3824205,18.3262515,18.3261895
39.700645,18.3303028,18.3783506,-0.219198096,18.3228485,18.3782284,18.3228502,18.322788
39.709825,18.5202592,18.3741902,0.382189681,18.3194489,18.3740686,18.3194513,18.3193891
39.719005,19.0525589,18.370061,0.826134307,18.3160518,18.3699399,18.316055,18.3159927
39.728185,18.1107703,18.3659616,-0.505164669,18.3126575,18.3658408,18.3126612,18.3125988
39.737365,17.8605711,18.3618914,-0.708039786,18.309266,18.3617707,18.30927,18.3092075
39.746546,18.8148877,18.3578504,0.676045371,18.305877,18.3577294,18.3058809,18.3058183
39.755726,18.761663,18.3538358,0.63861356,18.3024909,18.3537144,18.3024947,18.302432
39.764906,18.4390889,18.3498455,0.298736404,18.2991067,18.3497245,18.299111,18.2990482
39.774086,18.3847763,18.345879,0.197223926,18.2957248,18.3457586,18.2957299,18.2956669
39.783266,18.4390889,18.3419357,0.311694041,18.2923454,18.3418159,18.2923512,18.2922882
39.792447,17.6635217,18.3380143,-0.821274967,18.2889681,18.3378949,18.2889747,18.2889116
39.801627,18.2482876,18.3341148,-0.292962765,18.2855938,18.3339959,18.2856011,18.2855378
39.810807,18.1659021,18.3302359,-0.405381058,18.282222,18.3301175,18.2822299,18.2821666
39.819987,17.691806,18.326377,-0.796599656,18.2788527,18.326259,18.2788613,18.2787978
39.829167,18.2482876,18.3225374,-0.272488119,18.2754859,18.3224198,18.2754951,18.2754316
39.838347,18.2482876,18.3187163,-0.265384043,18.2721216,18.3185991,18.2721315,18.2720678
39.847528,18.0554701,18.3149127,-0.50935512,18.2687595,18.314796,18.2687699,18.2687062
39.856708,19.2093727,18.3111283,0.947757573,18.2654002,18.3110119,18.2654112,18.2653474
39.865888,18.3847763,18.3073605,0.278236934,18.2620434,18.3072445,18.262055,18.261991
39.875068,18.7082869,18.3036088,0.636143134,18.2586891,18.3034932,18.2587013,18.2586372
39.884248,18.4390889,18.2998728,0.373116806,18.2553373,18.2997574,18.25535,18.2552858
39.893428,18.5741756,18.2961518,0.527279661,18.2519879,18.2960368,18.2520012,18.2519369
39.902609,17.8885438,18.292445,-0.635532221,18.2486407,18.2923303,18.2486544,18.2485901
39.911789,17.7763888,18.2887529,-0.715796088,18.2452963,18.2886384,18.2453105,18.2452461
39.920969,17.7200451,18.2850745,-0.751684334,18.2419543,18.2849603,18.2419691,18.2419045
39.930149,18.3847763,18.2814094,0.321507175,18.2386149,18.2812956,18.2386301,18.2385654
39.939329,17.7482393,18.2777574,-0.727679891,18.2352778,18.2776437,18.2352936,18.2352287
39.948509,17.4355958,18.2741179,-0.915708533,18.2319433,18.2740045,18.2319594,18.2318945
39.95769,19.5192213,18.2704902,1.11746635,18.2286108,18.2703771,18.2286274,18.2285624
39.96687,18.3847763,18.2668756,0.343366721,18.2252811,18.2667626,18.2252982,18.225233
39.97605,17.2626765,18.2632726,-1.00029803,18.2219539,18.2631599,18.2219714,18.2219061
39.98523,18.627936,18.2596809,0.606840283,18.2186291,18.2595683,18.218647,18.2185816
39.99441,17.8605711,18.2561,-0.628910896,18.2153067,18.2559876,18.215325,18.2152596
40.00359,17.9443584,18.2525298,-0.555131804,18.2119868,18.2524176,18.2120055,18.2119399
40.012771,17.7200451,18.2489695,-0.727271837,18.2086689,18.2488574,18.208688,18.2086223
40.021951,18.1934054,18.2454197,-0.228066364,18.2053538,18.2453078,18.2053733,18.2053075
40.031131,18,18.2418797,-0.491812666,18.2020411,18.241768,18.202061,18.2019951
40.040311,18.4119526,18.2383493,0.416657306,18.1987309,18.2382377,18.1987511,18.198685
40.049491,17.8885438,18.2348283,-0.588459433,18.195423,18.2347169,18.1954435,18.1953774
40.058671,18.8148877,18.2313165,0.763918357,18.1921175,18.2312051,18.1921384,18.1920722
40.067852,18.734994,18.2278132,0.712166298,18.1888141,18.227702,18.1888353,18.188769
40.077032,18.9472953,18.2243193,0.850279954,18.1855134,18.2242082,18.185535,18.1854686
40.086212,17.7763888,18.2208342,-0.666667368,18.1822151,18.2207232,18.182237,18.1821705
40.095392,18.3847763,18.2173574,0.409168546,18.1789193,18.2172465,18.1789415,18.1788748
40.104572,17.3781472,18.2138887,-0.914189006,18.1756257,18.2137779,18.1756483,18.1755815
40.113752,18.0277564,18.210428,-0.427401023,18.1723346,18.2103173,18.1723574,18.1722905
40.122933,18.5741756,18.2069747,0.605971057,18.1690455,18.2068641,18.1690686,18.1690016
40.132113,18.4119526,18.2035294,0.456533943,18.1657591,18.2034188,18.1657825,18.1657154
40.141293,18.6010752,18.2000916,0.633232704,18.1624751,18.1999811,18.1624988,18.1624316
40.150473,17.9722008,18.1966611,-0.473772444,18.1591934,18.1965506,18.1592174,18.1591501
40.159653,17.9164729,18.1932378,-0.5260845,18.1559141,18.1931274,18.1559384,18.1558709
40.168833,18.7882942,18.1898215,0.773610195,18.1526371,18.1897112,18.1526617,18.1525941
40.178014,18.8148877,18.1864118,0.792764759,18.1493622,18.1863015,18.149387,18.1493193
40.187194,18.4119526,18.1830093,0.478480194,18.1460899,18.1828991,18.146115,18.1460472
40.196374,18.3847763,18.1796138,0.452948681,18.14282,18.1795036,18.1428453,18.1427774
40.205554,17.9443584,18.1762248,-0.481525003,18.1395524,18.1761146,18.139578,18.13951
40.214734,17.7763888,18.1728421,-0.629645381,18.1362871,18.172732,18.136313,18.1362449
40.223915,18.493242,18.1694654,0.569013694,18.1330239,18.1693553,18.13305,18.1329817
40.233095,17.9164729,18.1660953,-0.499622245,18.1297633,18.1659851,18.1297896,18.1297213
40.242275,17.8605711,18.1627312,-0.549690883,18.126505,18.162621,18.1265316,18.1264631
40.251455,17.2336879,18.1593731,-0.962125317,18.123249,18.1592629,18.1232759,18.1232073
40.260635,18.493242,18.1560208,0.580707469,18.1199954,18.1559107,18.1200225,18.1199537
40.269815,19.1833261,18.1526744,1.01521017,18.1167441,18.1525643,18.1167714,18.1167025
40.278996,18.4661853,18.1493333,0.562896093,18.1134947,18.1492231,18.1135222,18.1134533
40.288176,17.9164729,18.1459982,-0.479087985,18.1102479,18.145888,18.1102757,18.1102066
40.297356,17.7200451,18.1426686,-0.65009497,18.1070035,18.1425584,18.1070315,18.1069623
40.306536,18.4390889,18.1393447,0.547488987,18.1037614,18.1392345,18.1037896,18.1037203
40.315716,17.0880075,18.1360262,-1.02372784,18.1005215,18.1359159,18.1005499,18.1004805
40.324896,18.0277564,18.1327129,-0.323969929,18.097284,18.1326026,18.0973126,18.097243
40.334077,17.5783958,18.1294044,-0.742299544,18.0940483,18.1292942,18.0940772,18.0940075
40.343257,17.4928557,18.1261015,-0.795767424,18.0908153,18.1259912,18.0908444,18.0907746
40.352437,17.8885438,18.1228036,-0.48400387,18.0875846,18.1226932,18.0876138,18.0875439
40.361617,17.6068169,18.1195107,-0.716026393,18.0843562,18.1194003,18.0843856,18.0843156
40.370797,18.3030052,18.1162227,0.432183466,18.08113,18.1161122,18.0811596,18.0810894
40.379977,18.547237,18.1129395,0.659012484,18.077906,18.112829,18.0779358,18.0778656
40.389158,16.4316767,18.1096608,-1.29537026,18.074684,18.1095503,18.074714,18.0746436
40.398338,18.6547581,18.1063872,0.740520672,18.0714646,18.1062766,18.0714948,18.0714243
40.407518,18.0554701,18.1031183,-0.218284762,18.0682474,18.1030077,18.0682778,18.0682072
40.416698,17.8605711,18.0998542,-0.489165745,18.0650325,18.0997435,18.0650631,18.0649923
40.425878,17.8885438,18.0965947,-0.45612593,18.0618199,18.0964839,18.0618506,18.0617797
40.435058,18.1383571,18.0933396,0.212173284,18.0586094,18.0932288,18.0586403,18.0585693
40.444239,18.1107703,18.0900887,0.143810896,18.0554009,18.0899778,18.0554319,18.0553608
40.453419,18.1934054,18.0868425,0.326439708,18.0521949,18.0867315,18.0522262,18.0521549
40.462599,17.5499288,18.0836007,-0.730528512,18.0489912,18.0834896,18.0490226,18.0489512
40.471779,17.8325545,18.0803632,-0.497803849,18.0457897,18.080252,18.0458212,18.0457498
40.480959,17.5783958,18.0771299,-0.706211084,18.0425904,18.0770187,18.0426221,18.0425505
40.490139,18.0277564,18.0739009,-0.214812752,18.0393933,18.0737896,18.0394252,18.0393535
40.49932,17.3205081,18.0706757,-0.866122169,18.0361981,18.0705643,18.0362301,18.0361583
40.5085,19.4422221,18.067455,1.17250464,18.0330054,18.0673435,18.0330376,18.0329657
40.51768,18.6547581,18.0642383,0.768452851,18.0298149,18.0641268,18.0298473,18.0297752
40.52686,18.0831413,18.0610259,0.148712658,18.0266267,18.0609142,18.0266592,18.026587
40.53604,17.0293864,18.0578174,-1.01411591,18.0234406,18.0577057,18.0234733,18.023401
40.54522,18.0554701,18.054613,0.0292764619,18.0202568,18.0545011,18.0202896,18.0202172
40.554401,18.2208672,18.0514121,0.411649204,18.0170747,18.0513002,18.0171077,18.0170352
40.563581,18.5202592,18.0482155,0.687054384,18.0138952,18.0481034,18.0139284,18.0138557
40.572761,17.8605711,18.0450227,-0.429478252,18.0107179,18.0449105,18.0107512,18.0106784
40.581941,18.2482876,18.0418337,0.454371945,18.0075428,18.0417215,18.0075762,18.0075033
40.591121,17.8325545,18.0386486,-0.453975863,18.0043698,18.0385362,18.0044034,18.0043303
40.600301,17.7482393,18.0354672,-0.535936425,18.001199,18.0353547,18.0012328,18.0011596
40.609482,18.1107703,18.0322892,0.280144741,17.9980301,18.0321766,17.9980639,17.9979906
40.618662,17.8044938,18.0291152,-0.473942432,17.9948636,18.0290026,17.9948976,17.9948242
40.627842,17.9443584,18.025945,-0.285633524,17.9916993,18.0258322,17.9917335,17.9916599
40.637022,18.627936,18.0227784,0.777918779,17.9885371,18.0226655,17.9885714,17.9884977
40.646202,18.2208672,18.0196155,0.448610855,17.9853771,18.0195024,17.9854116,17.9853377
40.655383,17.2046505,18.0164558,-0.90100235,17.9822189,18.0163426,17.9822535,17.9821795
40.664563,18.4390889,18.0133,0.65252505,17.9790632,18.0131867,17.9790979,17.9790238
40.673743,17.9443584,18.0101477,-0.256494166,17.9759097,18.0100343,17.9759445,17.9758703
40.682923,17.8044938,18.0069989,-0.450005683,17.9727582,18.0068854,17.9727932,17.9727188
40.692103,17.7763888,18.0038536,-0.476932708,17.9696089,18.00374,17.969644,17.9695695
40.701283,18.761663,18.0007118,0.872325181,17.9664617,18.000598,17.966497,17.9664223
40.710464,17.9722008,17.9975731,-0.159286914,17.9633163,17.9974592,17.9633517,17.9632769
40.719644,18.4119526,17.9944381,0.646153665,17.9601734,17.994324,17.9602089,17.960134
40.728824,17.5783958,17.9913065,-0.642581226,17.9570326,17.9911923,17.9570682,17.9569932
40.738004,17.5499288,17.9881782,-0.6620041,17.9538939,17.9880639,17.9539296,17.9538545
40.747184,17.4355958,17.9850533,-0.741254038,17.9507573,17.9849389,17.9507931,17.9507179
40.756364,18.3303028,17.9819318,0.590229596,17.9476228,17.9818172,17.9476588,17.9475834
40.765545,17.4642492,17.9788132,-0.717331191,17.9444901,17.9786985,17.9445262,17.9444506
40.774725,18.1934054,17.9756983,0.46659096,17.9413598,17.9755834,17.941396,17.9413203
40.783905,16.9115345,17.9725866,-1.0300738,17.9382316,17.9724715,17.9382679,17.9381921
40.793085,18.1383571,17.9694781,0.410948979,17.9351055,17.9693629,17.9351419,17.935066
40.802265,18.3030052,17.9663728,0.580200306,17.9319814,17.9662575,17.932018,17.9319419
40.811445,16.9705627,17.9632708,-0.996347341,17.9288595,17.9631553,17.9288962,17.92882
40.820626,17.4068952,17.9601716,-0.7438255,17.9257393,17.9600559,17.9257761,17.9256997
40.829806,17.4355958,17.9570758,-0.722135768,17.9226215,17.95696,17.9226584,17.9225819
40.838986,17.8605711,17.9539833,-0.305634037,17.9195058,17.9538673,17.9195428,17.9194662
40.848166,17.4068952,17.9508938,-0.737562624,17.9163921,17.9507777,17.9164293,17.9163525
40.857346,18.6547581,17.9478075,0.84080356,17.9132805,17.9476912,17.9133178,17.9132409
40.866526,17.1464282,17.9447243,-0.893474171,17.910171,17.9446079,17.9102084,17.9101314
40.875707,18.4119526,17.9416438,0.685790637,17.9070632,17.9415273,17.9071007,17.9070235
40.884887,17.5214155,17.9385668,-0.645872521,17.9039578,17.93845,17.9039954,17.9039181
40.894067,17.7763888,17.9354928,-0.398878334,17.9008544,17.9353758,17.9008921,17.9008147
40.903247,17.6351921,17.9324218,-0.545187744,17.8977531,17.9323047,17.8977909,17.8977133
40.912427,18.547237,17.9293538,0.786055474,17.8946538,17.9292365,17.8946917,17.894614
40.921607,17.4928557,17.9262888,-0.658356391,17.8915565,17.9261714,17.8915945,17.8915167
40.930788,18.4661853,17.9232265,0.736857383,17.888461,17.9231089,17.8884991,17.8884211
40.939968,18.761663,17.9201675,0.91733066,17.8853678,17.9200497,17.885406,17.8853279
40.949148,17.7482393,17.9171114,-0.410940502,17.8822766,17.9169935,17.8823149,17.8822367
40.958328,17.2626765,17.9140583,-0.807082295,17.8791875,17.9139402,17.8792259,17.8791475
40.967508,18.493242,17.9110082,0.763042499,17.8761003,17.9108899,17.8761389,17.8760604
40.976688,17.4928557,17.9079609,-0.644286628,17.8730152,17.9078425,17.8730539,17.8729752
40.985869,18,17.9049163,0.308356443,17.8699318,17.9047977,17.8699706,17.8698917
40.995049,18.547237,17.9018749,0.803344326,17.8668507,17.9017561,17.8668896,17.8668106
41.004229,17.5214155,17.8988363,-0.614345893,17.8637716,17.8987174,17.8638106,17.8637315
41.013409,17.7482393,17.8958007,-0.384137109,17.8606945,17.8956815,17.8607336,17.8606544
41.022589,18.0554701,17.8927678,0.403363657,17.8576194,17.8926485,17.8576586,17.8575792
41.031769,18.3575598,17.8897379,0.683975043,17.8545463,17.8896184,17.8545856,17.8545061
41.04095,17.7200451,17.8867104,-0.408246613,17.8514749,17.8865907,17.8515142,17.8514346
41.05013,17.9443584,17.8836861,0.246317476,17.8484058,17.8835662,17.8484452,17.8483654
41.05931,17.3205081,17.8806647,-0.748436092,17.8453386,17.8805446,17.8453782,17.8452982
41.06849,18.7882942,17.877646,0.95427892,17.8422734,17.8775257,17.8423131,17.842233
41.07767,19.7989899,17.8746301,1.38721296,17.8392103,17.8745096,17.83925,17.8391698
41.08685,17.7482393,17.871617,-0.351251544,17.836149,17.8714963,17.8361889,17.8361085
41.096031,16.7630546,17.8686064,-1.05145221,17.8330894,17.8684855,17.8331294,17.8330488
41.105211,18.1107703,17.8655988,0.495147915,17.8300321,17.8654778,17.8300722,17.8299915
41.114391,19.2613603,17.862594,1.18269449,17.8269768,17.8624728,17.8270169,17.8269361
41.123571,17.4928557,17.859592,-0.605587547,17.8239234,17.8594705,17.8239636,17.8238827
41.132751,18,17.8565926,0.378691651,17.820872,17.856471,17.8209123,17.8208312
41.141932,17.8885438,17.8535957,0.186944109,17.8178222,17.8534739,17.8178626,17.8177813
41.151112,17.8885438,17.8506019,0.194786973,17.8147746,17.8504798,17.8148151,17.8147337
41.160292,17.4642492,17.8476107,-0.619161931,17.811729,17.8474885,17.8117696,17.8116881
41.169472,18.4661853,17.8446222,0.788392723,17.8086853,17.8444998,17.808726,17.8086443
41.178652,18.627936,17.8416364,0.88673534,17.8056436,17.8415138,17.8056844,17.8056025
41.187832,17.7482393,17.8386533,-0.3006892,17.8026038,17.8385305,17.8026447,17.8025627
41.197013,18.1383571,17.8356726,0.550167732,17.7995656,17.8355496,17.7996065,17.7995244
41.206193,18.1659021,17.8326949,0.577241062,17.7965296,17.8325716,17.7965707,17.7964884
41.215373,17.4068952,17.8297198,-0.650249656,17.7934956,17.8295963,17.7935367,17.7934543
41.224553,18.1383571,17.8267474,0.558220192,17.7904635,17.8266237,17.7905047,17.7904221
41.233733,17.9722008,17.8237776,0.385257303,17.7874333,17.8236537,17.7874746,17.7873918
41.242913,17.1464282,17.8208104,-0.821207768,17.784405,17.8206863,17.7844463,17.7843635
41.252094,17.8605711,17.8178455,0.206701607,17.7813782,17.8177212,17.7814197,17.7813367
41.261274,17.9722008,17.8148836,0.396632206,17.7783537,17.8147591,17.7783953,17.7783121
41.270454,18.0277564,17.8119244,0.464577245,17.7753311,17.8117996,17.7753728,17.7752894
41.279634,18.3575598,17.8089677,0.740670019,17.7723104,17.8088427,17.7723521,17.7722686
41.288814,18.4661853,17.8060136,0.812509527,17.7692916,17.8058884,17.7693334,17.7692498
41.297994,18.1107703,17.8030621,0.55471452,17.7662746,17.8029367,17.7663165,17.7662327
41.307175,18.0277564,17.8001128,0.477120035,17.7632592,17.7999872,17.7633012,17.7632173
41.316355,17.7200451,17.7971665,-0.277707377,17.7602461,17.7970407,17.7602881,17.760204
41.325535,18.3303028,17.7942228,0.732174839,17.7572347,17.7940967,17.7572769,17.7571927
41.334715,18.3847763,17.7912816,0.770386081,17.7542253,17.7911553,17.7542675,17.7541831
41.343895,17.9722008,17.788343,0.428786418,17.7512177,17.7882165,17.75126,17.7511755
41.353075,18.1383571,17.7854069,0.594096177,17.748212,17.7852801,17.7482544,17.7481697
41.362256,16.881943,17.782473,-0.948962598,17.7452078,17.7823461,17.7452503,17.7451655
41.371436,17.8605711,17.7795421,0.284656001,17.7422058,17.7794149,17.7422484,17.7421634
41.380616,18.8148877,17.7766136,1.01895736,17.7392057,17.7764862,17.7392483,17.7391632
41.389796,18.0554701,17.7736877,0.530831774,17.7362074,17.7735601,17.7362501,17.7361648
41.398976,18.6547581,17.7707643,0.940209436,17.733211,17.7706364,17.7332538,17.7331683
41.408156,19,17.7678434,1.11002547,17.7302163,17.7677153,17.7302592,17.7301736
41.417337,18.5741756,17.7649248,0.89958371,17.7272233,17.7647964,17.7272662,17.7271804
41.426517,18.973666,17.7620089,1.10075294,17.7242323,17.7618804,17.7242754,17.7241894
41.435697,17.8044938,17.7590956,0.213068581,17.7212432,17.7589668,17.7212863,17.7212002
41.444877,17.6635217,17.7561847,-0.304406005,17.7182559,17.7560557,17.7182991,17.7182129
41.454057,18.1934054,17.7532764,0.663422195,17.7152705,17.7531471,17.7153138,17.7152273
41.463237,17.8605711,17.7503705,0.331964734,17.7122868,17.750241,17.7123302,17.7122436
41.472418,18.627936,17.7474668,0.938333206,17.7093047,17.747337,17.7093481,17.7092614
41.481598,17.175564,17.7445659,-0.754322133,17.7063247,17.7444359,17.7063682,17.7062813
41.490778,18.3030052,17.7416675,0.749224744,17.7033465,17.7415372,17.7033901,17.703303
41.499958,17.6351921,17.7387715,-0.321837627,17.7003701,17.738641,17.7004137,17.7003265
41.509138,18.0277564,17.7358781,0.540257647,17.6973955,17.7357473,17.6974392,17.6973518
41.518318,18.1107703,17.732987,0.614640759,17.6944227,17.732856,17.6944665,17.694379
41.527499,18.0277564,17.7300981,0.545580668,17.6914514,17.7299669,17.6914953,17.6914075
41.536679,17.6635217,17.727212,-0.252369291,17.6884821,17.7270805,17.6885261,17.6884382
41.545859,17.2336879,17.7243283,-0.70045726,17.6855147,17.7241966,17.6855588,17.6854707
41.555039,18.1383571,17.7214471,0.645685742,17.6825491,17.7213151,17.6825932,17.682505
41.564219,18.3030052,17.7185683,0.764484766,17.6795852,17.718436,17.6796294,17.679541
41.5734,17.6068169,17.7156916,-0.329961671,17.6766228,17.7155591,17.6766671,17.6765785
41.58258,17.9443584,17.7128176,0.481186902,17.6736625,17.7126849,17.6737068,17.6736181
41.59176,18.5202592,17.7099461,0.900173909,17.6707039,17.7098131,17.6707484,17.6706595
41.60094,18.5202592,17.707077,0.901766124,17.6677471,17.7069438,17.6677917,17.6677026
41.61012,18.1383571,17.7042104,0.658898153,17.6647921,17.7040769,17.6648367,17.6647475
41.6193,18.1659021,17.7013461,0.681583455,17.6618389,17.7012124,17.6618835,17.6617942
41.628481,18.6815417,17.698484,0.991492679,17.658887,17.6983499,17.6589318,17.6588422
41.637661,17.6351921,17.6956245,-0.245830077,17.6559373,17.6954902,17.6559821,17.6558924
41.646841,18.1659021,17.6927675,0.68784783,17.6529893,17.6926329,17.6530342,17.6529443
41.656021,17.4642492,17.6899129,-0.475040693,17.650043,17.689778,17.650088,17.6499979
41.665201,18.2208672,17.6870606,0.730620655,17.6470985,17.6869255,17.6471435,17.6470533
41.674381,16.7928556,17.6842108,-0.944116064,17.6441557,17.6840754,17.6442008,17.6441104
41.683562,17.5783958,17.681363,-0.32088496,17.6412143,17.6812274,17.6412595,17.641169
41.692742,17.3493516,17.6785179,-0.57373019,17.638275,17.678382,17.6383202,17.6382295
41.701922,17.5499288,17.6756752,-0.354607465,17.6353374,17.6755391,17.6353827,17.6352918
41.711102,18.627936,17.6728349,0.977292723,17.6324015,17.6726985,17.6324469,17.6323559
41.720282,18,17.669997,0.574458849,17.6294674,17.6698604,17.6295128,17.6294216
41.729462,17.5214155,17.6671615,-0.38176697,17.6265349,17.6670245,17.6265805,17.6264891
41.738643,17.9443584,17.664328,0.529179026,17.6236039,17.6641908,17.6236495,17.6235579
41.747823,18.1934054,17.6614972,0.729320373,17.6206749,17.6613597,17.6207205,17.6206288
41.757003,18.1659021,17.6586688,0.712203181,17.6177475,17.658531,17.6177933,17.6177014
41.766183,16.9705627,17.6558427,-0.827816362,17.6148219,17.6557046,17.6148677,17.6147756
41.775363,17.5783958,17.653019,-0.273172338,17.611898,17.6528806,17.6119439,17.6118516
41.784543,18.0831413,17.6501976,0.657984597,17.6089758,17.650059,17.6090217,17.6089293
41.793724,17.4355958,17.6473783,-0.460198317,17.6060549,17.6472394,17.606101,17.6060083
41.802904,18.1383571,17.6445616,0.702705878,17.6031361,17.6444224,17.6031822,17.6030894
41.812084,17.4642492,17.6417473,-0.421305232,17.6002189,17.6416078,17.6002651,17.6001721
41.821264,17.5214155,17.6389354,-0.342811746,17.5973034,17.6387956,17.5973497,17.5972565
41.830444,18.0277564,17.6361258,0.625803971,17.5943896,17.6359858,17.5944359,17.5943426
41.839624,17.5783958,17.6333185,-0.234355887,17.5914775,17.6331782,17.5915239,17.5914304
41.848805,17.6351921,17.6305133,0.068401747,17.5885667,17.6303727,17.5886132,17.5885195
41.857985,17.8885438,17.6277107,0.510718234,17.5856579,17.6275698,17.5857044,17.5856106
41.867165,17.2336879,17.6249105,-0.625477834,17.5827508,17.6247693,17.5827974,17.5827033
41.876345,17.6635217,17.6221126,0.203492458,17.5798453,17.6219711,17.5798919,17.5797977
41.885525,18.0277564,17.619317,0.639092643,17.5769415,17.6191752,17.5769882,17.5768938
41.894705,18.4119526,17.6165237,0.891868222,17.5740393,17.6163817,17.5740861,17.5739915
41.903886,16.8226038,17.6137325,-0.889454123,17.5711385,17.6135901,17.5711853,17.5710906
41.913066,17.3781472,17.6109439,-0.482490072,17.5682396,17.6108012,17.5682865,17.5681916
41.922246,17.7482393,17.6081576,0.374274978,17.5653424,17.6080147,17.5653893,17.5652942
41.931426,17.691806,17.6053737,0.293993784,17.5624468,17.6052304,17.5624938,17.5623985
41.940606,18.493242,17.6025921,0.943742522,17.5595528,17.6024485,17.5595999,17.5595044
41.949786,18.1383571,17.5998128,0.733855828,17.5566605,17.599669,17.5567076,17.556612
41.958967,17.4642492,17.5970355,-0.364398536,17.5537695,17.5968914,17.5538167,17.5537208
41.968147,17.6351921,17.5942608,0.202314767,17.5508804,17.5941164,17.5509277,17.5508316
41.977327,17.7200451,17.5914885,0.35854801,17.5479929,17.5913437,17.5480403,17.5479441
41.986507,17.3781472,17.5887184,-0.458880418,17.5451071,17.5885734,17.5451545,17.5450581
41.995687,17.3205081,17.5859507,-0.515211248,17.5422228,17.5858054,17.5422703,17.5421737
42.004867,18.4390889,17.5831853,0.9251506,17.5393402,17.5830396,17.5393878,17.539291
42.014048,17.175564,17.5804219,-0.636284389,17.5364589,17.5802759,17.5365065,17.5364095
42.023228,17.8325545,17.577661,0.504869742,17.5335795,17.5775148,17.5336272,17.53353
42.032408,18.1934054,17.5749025,0.786449532,17.5307017,17.574756,17.5307494,17.5306521
42.041588,18.1107703,17.5721464,0.733910011,17.5278255,17.5719995,17.5278733,17.5277757
42.050768,18.1107703,17.5693925,0.735783777,17.5249508,17.5692453,17.5249987,17.524901
42.059949,17.6068169,17.5666406,0.200440052,17.5220775,17.5664931,17.5221254,17.5220275
42.069129,17.4928557,17.5638914,-0.266525227,17.5192061,17.5637436,17.519254,17.5191559
42.078309,17.7763888,17.5611444,0.463944418,17.5163362,17.5609963,17.5163842,17.516286
42.087489,17.4355958,17.5583997,-0.350433967,17.5134679,17.5582513,17.513516,17.5134175
42.096669,18.0554701,17.5556574,0.706974339,17.5106012,17.5555086,17.5106494,17.5105507
42.105849,17.8044938,17.5529173,0.501574044,17.5077361,17.5527682,17.5077843,17.5076854
42.11503,17.8605711,17.5501792,0.557128251,17.5048722,17.5500298,17.5049205,17.5048214
42.12421,17.6635217,17.5474437,0.340702236,17.5020102,17.547294,17.5020585,17.5019593
42.13339,17.691806,17.5447105,0.383530306,17.4991497,17.5445604,17.4991981,17.4990987
42.14257,18.1107703,17.5419796,0.754182121,17.4962908,17.5418292,17.4963393,17.4962397
42.15175,17.691806,17.539251,0.390582868,17.4934335,17.5391003,17.4934821,17.4933822
42.16093,17.3493516,17.5365248,-0.432635169,17.4905777,17.5363737,17.4906263,17.4905263
42.170111,18.3575598,17.5338005,0.90761185,17.4877232,17.5336491,17.4877719,17.4876716
42.179291,17.7200451,17.5310788,0.434702613,17.4848705,17.5309271,17.4849192,17.4848188
42.188471,18.1659021,17.5283594,0.79846274,17.4820194,17.5282073,17.4820681,17.4819675
42.197651,17.5783958,17.5256423,0.229681465,17.4791698,17.5254899,17.4792186,17.4791178
42.206831,17.3205081,17.5229274,-0.449910386,17.4763217,17.5227747,17.4763706,17.4762696
42.216011,18.0554701,17.5202149,0.731611367,17.4734751,17.5200618,17.4735241,17.4734229
42.225192,17.8325545,17.5175043,0.561293287,17.4706298,17.517351,17.4706788,17.4705774
42.234372,16.7928556,17.5147964,-0.84967097,17.4677863,17.5146427,17.4678354,17.4677338
42.243552,16.673332,17.5120907,-0.915837704,17.4649444,17.5119366,17.4649935,17.4648917
42.252732,17.4355958,17.5093873,-0.27164597,17.4621039,17.5092329,17.4621531,17.4620511
42.261912,17.9164729,17.5066862,0.640145783,17.459265,17.5065315,17.4593142,17.459212
42.271092,16.3095064,17.5039875,-1.09292317,17.4564275,17.5038324,17.4564768,17.4563744
42.280273,17.2336879,17.5012907,-0.517303373,17.4535913,17.5011353,17.4536407,17.4535381
42.289453,18.3847763,17.4985965,0.941371221,17.4507569,17.4984408,17.4508063,17.4507035
42.298633,18.0277564,17.4959046,0.729281661,17.447924,17.4957485,17.4479734,17.4478704
42.307813,17.3781472,17.493215,-0.33921649,17.4450926,17.4930585,17.4451421,17.4450389
42.316993,16.9115345,17.4905277,-0.760916014,17.4422626,17.4903709,17.4423122,17.4422088
42.326173,17.3205081,17.4878427,-0.40906552,17.4394342,17.4876855,17.4394838,17.4393802
42.335354,17.175564,17.4851596,-0.556413158,17.4366069,17.4850021,17.4366566,17.4365528
42.344534,18.1659021,17.4824792,0.826693982,17.4337815,17.4823213,17.4338312,17.4337272
42.353714,17.2916165,17.479801,-0.433802435,17.4309575,17.4796428,17.4310073,17.430903
42.362894,16.8226038,17.4771251,-0.809024906,17.428135,17.4769665,17.4281848,17.4280804
42.372074,17.9722008,17.4744516,0.70551341,17.4253139,17.4742926,17.4253639,17.4252592
42.381254,17.4928557,17.4717804,0.145173451,17.4224944,17.471621,17.4225443,17.4224395
42.390435,17.4928557,17.4691111,0.154092703,17.419676,17.4689514,17.419726,17.4196209
42.399615,16.5529454,17.4664445,-0.955771478,17.4168593,17.4662844,17.4169094,17.4168041
42.408795,16.3707055,17.4637801,-1.04550207,17.4140442,17.4636197,17.4140943,17.4139888
42.417975,17.1172428,17.4611181,-0.586408807,17.4112304,17.4609573,17.4112806,17.4111749
42.427155,17.7482393,17.4584583,0.538313158,17.4084182,17.4582971,17.4084684,17.4083625
42.436335,17.4928557,17.4558008,0.192496386,17.4056074,17.4556393,17.4056576,17.4055515
42.445516,17.1172428,17.4531454,-0.579571045,17.4027977,17.4529835,17.402848,17.4027417
42.454696,17.0587221,17.4504925,-0.625915634,17.3999898,17.4503302,17.4000401,17.3999336
42.463876,17.691806,17.4478419,0.493927222,17.3971833,17.4476793,17.3972337,17.3971269
42.473056,17.3493516,17.4451936,-0.309583689,17.3943782,17.4450306,17.3944287,17.3943217
42.482236,17.4068952,17.4425477,-0.188818671,17.3915746,17.4423843,17.3916251,17.3915179
42.491416,17.691806,17.4399041,0.501898337,17.3887724,17.4397403,17.388823,17.3887156
42.500597,17.7763888,17.4372625,0.58234556,17.3859714,17.4370983,17.386022,17.3859143
42.509777,16.8522995,17.4346235,-0.763101527,17.383172,17.434459,17.3832227,17.3831148
42.518957,17.1464282,17.4319868,-0.53437683,17.3803741,17.4318219,17.3804248,17.3803168
42.528137,18.2482876,17.4293524,0.904950374,17.3775776,17.4291871,17.3776284,17.3775201
42.537317,17.1172428,17.4267203,-0.556307082,17.3747825,17.4265546,17.3748333,17.3747248
42.546498,17.1172428,17.4240903,-0.553938194,17.3719885,17.4239242,17.3720394,17.3719307
42.555678,17.7763888,17.4214628,0.595756655,17.3691963,17.4212964,17.3692472,17.3691382
42.564858,17.2336879,17.4188377,-0.430290329,17.3664054,17.4186708,17.3664564,17.3663472
42.574038,18.7882942,17.4162149,1.17135791,17.3636159,17.4160476,17.3636669,17.3635576
42.583218,16.7928556,17.4135944,-0.787869758,17.3608279,17.4134267,17.3608789,17.3607693
42.592398,17.8885438,17.4109762,0.691062675,17.3580412,17.4108082,17.3580923,17.3579825
42.601579,17.2336879,17.4083601,-0.41793802,17.3552556,17.4081917,17.3553068,17.3551967
42.610759,17.6351921,17.4057467,0.479004618,17.3524717,17.4055778,17.3525229,17.3524126
42.619939,17.2916165,17.4031355,-0.333944694,17.3496892,17.4029663,17.3497404,17.3496299
42.629119,16.643317,17.4005267,-0.87017799,17.346908,17.4003571,17.3469593,17.3468486
42.638299,16.7332005,17.3979202,-0.815303439,17.3441283,17.3977502,17.3441796,17.3440687
42.647479,16.643317,17.3953161,-0.867178815,17.3413499,17.3951456,17.3414013,17.3412901
42.65666,18.0554701,17.392714,0.814098341,17.3385726,17.3925431,17.338624,17.3385126
42.66584,16.5529454,17.3901145,-0.914969474,17.3357969,17.3899432,17.3358484,17.3357368
42.67502,17.691806,17.3875174,0.551623658,17.3330227,17.3873457,17.3330742,17.3329623
42.6842,18.4661853,17.3849225,1.03983785,17.3302497,17.3847505,17.3303013,17.3301892
42.69338,16.7928556,17.3823301,-0.767772404,17.3274782,17.3821576,17.3275298,17.3274175
42.70256,17.2626765,17.37974,-0.342145392,17.324708,17.3795671,17.3247596,17.3246471
42.711741,16.4924225,17.377152,-0.940600604,17.3219388,17.3769787,17.3219905,17.3218777
42.720921,18.0554701,17.3745667,0.825168721,17.3191713,17.3743929,17.319223,17.31911
42.730101,16.9115345,17.3719837,-0.678564045,17.3164051,17.3718095,17.3164569,17.3163437
42.739281,16.9705627,17.3694031,-0.631538058,17.3136403,17.3692285,17.3136921,17.3135786
42.748461,16.9410743,17.3668248,-0.652495562,17.3108768,17.3666498,17.3109287,17.310815
42.757641,17.2046505,17.3642489,-0.399497646,17.3081147,17.3640735,17.3081666,17.3080526
42.766822,16.673332,17.3616751,-0.829664444,17.3053535,17.3614992,17.3054055,17.3052913
42.776002,17.5499288,17.3591039,0.436835036,17.302594,17.3589276,17.302646,17.3025316
42.785182,17.7482393,17.3565351,0.625862778,17.2998359,17.3563584,17.2998879,17.2997732
42.794362,16.673332,17.3539687,-0.825007098,17.297079,17.3537916,17.2971311,17.2970162
42.803542,17.5499288,17.3514047,0.445560441,17.2943235,17.3512271,17.2943756,17.2942605
42.812722,16.7630546,17.348843,-0.76536814,17.2915693,17.348665,17.2916214,17.2915061
42.821903,17.0293864,17.3462835,-0.562936183,17.2888161,17.3461051,17.2888683,17.2887527
42.831083,17.175564,17.3437267,-0.410076429,17.2860645,17.3435478,17.2861167,17.2860009
42.840263,17.2626765,17.3411723,-0.280171033,17.2833142,17.340993,17.2833665,17.2832504
42.849443,16.9115345,17.3386203,-0.653517998,17.2805652,17.3384405,17.2806175,17.2805012
42.858623,16.8226038,17.3360707,-0.716566009,17.2778176,17.3358905,17.2778699,17.2777533
42.867803,17.1464282,17.3335235,-0.432545114,17.2750712,17.3333428,17.2751235,17.2750067
42.876984,17.4928557,17.3309784,0.402339766,17.2723258,17.3307973,17.2723782,17.2722611
42.886164,17.4355958,17.328436,0.327352666,17.269582,17.3282544,17.2696344,17.2695171
42.895344,17.0880075,17.325896,-0.487738186,17.2668395,17.325714,17.2668919,17.2667744
42.904524,17.4355958,17.3233585,0.335018367,17.2640982,17.323176,17.2641507,17.2640329
42.913704,16.9115345,17.3208233,-0.639756831,17.2613583,17.3206404,17.2614108,17.2612928
42.922884,16.7032931,17.3182906,-0.784217779,17.2586196,17.3181072,17.2586722,17.2585539
42.932065,17.6635217,17.3157601,0.589713173,17.2558819,17.3155763,17.2559345,17.255816
42.941245,16.643317,17.3132324,-0.818483588,17.2531458,17.3130481,17.2531984,17.2530796
42.950425,16.881943,17.3107071,-0.654800762,17.2504109,17.3105223,17.2504636,17.2503445
42.959605,18,17.3081842,0.831754657,17.2476773,17.307999,17.24773,17.2476107
42.968785,16.9410743,17.3056638,-0.603812413,17.244945,17.3054781,17.2449977,17.2448782
42.977966,16.7630546,17.3031455,-0.734908788,17.2422136,17.3029594,17.2422664,17.2421466
42.987146,17.1172428,17.30063,-0.428237398,17.2394838,17.3004434,17.2395366,17.2394165
42.996326,17.7763888,17.298117,0.691572003,17.2367552,17.2979299,17.236808,17.2366877
43.005506,17.2916165,17.2956064,-0.0631661403,17.2340279,17.2954188,17.2340807,17.2339602
43.014686,17.3205081,17.2930983,0.1655589,17.2313018,17.2929103,17.2313547,17.2312339
43.023866,17.1464282,17.2905927,-0.379690008,17.228577,17.2904042,17.2286299,17.2285088
43.033047,17.3493516,17.2880893,0.247512195,17.2258531,17.2879003,17.225906,17.2257847
43.042227,16.3707055,17.2855887,-0.956495228,17.2231307,17.2853992,17.2231837,17.2230621
43.051407,16.2788206,17.2830906,-1.00213273,17.2204096,17.2829006,17.2204626,17.2203408
43.060587,17.8605711,17.2805951,0.761561578,17.2176897,17.2804046,17.2177427,17.2176206
43.069767,17.7200451,17.278102,0.664788036,17.2149711,17.277911,17.2150241,17.2149017
43.078947,16.643317,17.2756115,-0.795169478,17.2122536,17.27542,17.2123067,17.212184
43.088128,17.4355958,17.2731232,0.403078892,17.2095371,17.2729312,17.2095902,17.2094673
43.097308,16.5529454,17.2706377,-0.847167234,17.2068221,17.2704452,17.2068752,17.206752
43.106488,17.3781472,17.2681547,0.33165116,17.2041083,17.2679618,17.2041614,17.204038
43.115668,16.4924225,17.2656743,-0.879347349,17.2013957,17.2654808,17.2014488,17.2013252
43.124848,18.6010752,17.2631964,1.15666714,17.1986843,17.2630024,17.1987375,17.1986136
43.134028,17.4068952,17.260721,0.382327332,17.1959742,17.2605265,17.1960273,17.1959032
43.143209,16.8226038,17.2582479,-0.660033389,17.1932649,17.258053,17.1933181,17.1931937
43.152389,17.2046505,17.2557777,-0.226113112,17.1905571,17.2555822,17.1906104,17.1904856
43.161569,15.7162336,17.2533101,-1.23978888,17.1878506,17.2531141,17.1879038,17.1877788
43.170749,17.1172428,17.2508451,-0.365516536,17.1851452,17.2506486,17.1851984,17.1850732
43.179929,17.2336879,17.2483827,-0.121221882,17.182441,17.2481857,17.1824943,17.1823687
43.189109,17.6068169,17.2459228,0.600744552,17.179738,17.2457253,17.1797913,17.1796655
43.19829,17.2336879,17.2434653,-0.0988806788,17.1770359,17.2432673,17.1770892,17.1769631
43.20747,16.643317,17.2410107,-0.773106525,17.1743352,17.2408121,17.1743886,17.1742622
43.21665,17.3205081,17.2385586,0.286268137,17.1716358,17.2383595,17.1716891,17.1715625
43.22583,17.4928557,17.2361092,0.506701581,17.1689375,17.2359096,17.1689908,17.168864
43.23501,17.1172428,17.2336624,-0.341203172,17.1662404,17.2334622,17.1662937,17.1661666
43.24419,17.4642492,17.2312182,0.482732865,17.1635444,17.2310175,17.1635978,17.1634704
43.253371,16.7032931,17.2287763,-0.724902241,17.1608493,17.2285751,17.1609027,17.160775
43.262551,17.4642492,17.2263374,0.487762007,17.1581557,17.2261357,17.1582091,17.1580811
43.271731,16.3707055,17.2239013,-0.923685944,17.1554632,17.223699,17.1555167,17.1553884
43.280911,17.4068952,17.2214678,0.430612826,17.1527719,17.221265,17.1528254,17.1526968
43.290091,17.2916165,17.219037,0.269405847,17.1500818,17.2188336,17.1501352,17.1500064
43.299271,17.3493516,17.2166088,0.364338812,17.1473928,17.2164049,17.1474462,17.1473171
43.308452,17.6351921,17.2141831,0.648852082,17.1447046,17.2139786,17.1447581,17.1446287
43.317632,17.8885438,17.2117603,0.822668549,17.1420179,17.2115553,17.1420714,17.1419417
43.326812,17.8885438,17.2093402,0.824138114,17.1393323,17.2091346,17.1393858,17.1392559
43.335992,16.5529454,17.2069228,-0.80868872,17.1366479,17.2067167,17.1367014,17.1365712
43.345172,17.175564,17.2045081,-0.17012963,17.1339646,17.2043015,17.1340181,17.1338876
43.354352,17.2916165,17.2020962,0.299199419,17.1312824,17.2018889,17.1313359,17.1312051
43.363533,17.4355958,17.1996867,0.485704735,17.1286011,17.1994789,17.1286546,17.1285235
43.372713,17.2046505,17.1972802,0.0858506814,17.1259212,17.1970718,17.1259747,17.1258433
43.381893,17.175564,17.1948766,-0.138969493,17.1232424,17.1946676,17.1232959,17.1231642
43.391073,16.643317,17.1924757,-0.741052456,17.1205647,17.1922662,17.1206182,17.1204863
43.400253,16.8522995,17.1900776,-0.581186805,17.1178882,17.1898676,17.1179417,17.1178094
43.409433,17.4068952,17.1876824,0.4682017,17.1152127,17.1874717,17.1152662,17.1151337
43.418614,17.0293864,17.1852896,-0.394845812,17.1125381,17.1850784,17.1125916,17.1124588
43.427794,17,17.1828999,-0.427667936,17.1098649,17.1826881,17.1099184,17.1097853
43.436974,16.4620776,17.180513,-0.847605639,17.1071927,17.1803006,17.1072462,17.1071128
43.446154,17.9722008,17.1781289,0.891107122,17.1045217,17.1779159,17.1045752,17.1044415
43.455334,18.0831413,17.1757476,0.952572172,17.1018518,17.175534,17.1019053,17.1017713
43.464515,17.4355958,17.1733689,0.51208095,17.0991827,17.1731547,17.0992362,17.0991019
43.473695,16.2788206,17.1709933,-0.944548928,17.0965149,17.1707785,17.0965684,17.0964339
43.482875,17.0880075,17.1686205,-0.283924348,17.0938483,17.1684052,17.0939018,17.0937669
43.492055,16.1245155,17.1662507,-1.02065431,17.0911827,17.1660348,17.0912362,17.091101
43.501235,16.4620776,17.1638839,-0.83773877,17.0885183,17.1636674,17.0885717,17.0884363
43.510415,17.4642492,17.1615199,0.550208391,17.0858549,17.1613028,17.0859083,17.0857726
43.519596,16.4924225,17.1591586,-0.816539101,17.0831923,17.1589409,17.0832457,17.0831096
43.528776,17.7200451,17.1568005,0.750496297,17.080531,17.1565821,17.0805845,17.0804481
43.537956,17.4068952,17.1544452,0.50244399,17.0778709,17.1542263,17.0779243,17.0777876
43.547136,17.1464282,17.1520929,-0.0752643563,17.0752118,17.1518733,17.0752652,17.0751282
43.556316,17.691806,17.1497436,0.736248903,17.0725537,17.1495234,17.0726071,17.0724698
43.565496,16.8226038,17.1473972,-0.569906414,17.0698968,17.1471763,17.0699501,17.0698125
43.574677,17.9164729,17.1450535,0.878304845,17.0672406,17.144832,17.0672939,17.067156
43.583857,16.4316767,17.142713,-0.843229672,17.0645857,17.1424909,17.0646391,17.0645008
43.593037,17.0880075,17.1403755,-0.228840643,17.0619319,17.1401528,17.0619852,17.0618467
43.602217,17.0587221,17.1380411,-0.281636298,17.0592792,17.1378178,17.0593325,17.0591936
43.611397,18,17.1357098,0.929672073,17.0566275,17.1354859,17.0566808,17.0565416
43.620577,17.0880075,17.1333816,-0.213011966,17.0539768,17.133157,17.0540301,17.0538906
43.629758,17.0587221,17.1310561,-0.268949843,17.0513269,17.1308309,17.0513802,17.0512404
43.638938,17.4928557,17.128734,0.603424984,17.0486783,17.1285081,17.0487316,17.0485915
43.648118,16.881943,17.1264149,-0.494440967,17.0460308,17.1261884,17.046084,17.0459436
43.657298,16.643317,17.1240989,-0.693384382,17.0433843,17.1238717,17.0434375,17.0432968
43.666478,16.8226038,17.121786,-0.546975432,17.0407388,17.1215581,17.040792,17.040651
43.675658,18.1107703,17.1194762,0.995637544,17.0380944,17.1192477,17.0381475,17.0380062
43.684839,16.8522995,17.1171692,-0.514654905,17.0354507,17.1169401,17.0355038,17.0353621
43.694019,16.9410743,17.1148657,-0.416882857,17.0328083,17.1146359,17.0328614,17.0327194
43.703199,17.2626765,17.1125653,0.387441927,17.0301669,17.1123348,17.03022,17.0300777
43.712379,17.7200451,17.110268,0.780882268,17.0275266,17.1100369,17.0275796,17.0274369
43.721559,17.8044938,17.1079742,0.83457753,17.0248872,17.1077423,17.0249402,17.0247972
43.730739,17.3205081,17.1056835,0.463491737,17.0222489,17.105451,17.0223018,17.0221585
43.73992,16.3095064,17.1033958,-0.891004679,17.0196113,17.1031626,17.0196642,17.0195206
43.7491,16.6132477,17.1011115,-0.698472475,17.016975,17.1008777,17.0170278,17.0168839
43.75828,17.5499288,17.0988305,0.671638487,17.0143396,17.098596,17.0143925,17.0142482
43.76746,16.9705627,17.0965528,-0.354950724,17.0117053,17.0963175,17.0117581,17.0116135
43.77664,16.2172747,17.0942783,-0.936484672,17.009072,17.0940424,17.0091248,17.0089798
43.78582,16.7032931,17.0920071,-0.62346932,17.0064397,17.0917705,17.0064924,17.0063471
43.795001,16.9115345,17.0897389,-0.422142641,17.0038081,17.0895016,17.0038607,17.0037151
43.804181,16.3707055,17.0874744,-0.846621997,17.0011777,17.0872363,17.0012303,17.0010844
43.813361,16.583124,17.0852131,-0.708582491,16.9985483,17.0849744,16.9986009,16.9984547
43.822541,16.2788206,17.0829552,-0.896735522,16.99592,17.0827158,16.9959725,16.9958259
43.831721,17.1464282,17.0807009,0.25637344,16.9932926,17.0804607,16.993345,16.9931981
43.840901,17.7763888,17.0784499,0.835427379,16.9906661,17.0782091,16.9907186,16.9905713
43.850082,16.881943,17.0762022,-0.440748387,16.9880404,17.0759606,16.9880928,16.9879452
43.859262,16.5227116,17.0739581,-0.742459702,16.9854159,17.0737158,16.9854682,16.9853203
43.868442,17.4355958,17.0717174,0.603223336,16.9827924,17.0714744,16.9828447,16.9826964
43.877622,16.5227116,17.0694802,-0.739437979,16.9801699,17.0692364,16.9802221,16.9800734
43.886802,16.5529454,17.0672464,-0.717147871,16.9775483,17.0670019,16.9776004,16.9774515
43.895983,16.643317,17.0650159,-0.649383522,16.9749274,17.0647707,16.9749795,16.9748302
43.905163,16.673332,17.0627892,-0.624065058,16.9723077,17.0625432,16.9723597,16.9722101
43.914343,17.7482393,17.060566,0.829260733,16.969689,17.0603193,16.969741,16.969591
43.923523,16.583124,17.0583463,-0.689363743,16.9670712,17.0580989,16.9671231,16.9669728
43.932703,16.4924225,17.0561302,-0.750804716,16.9644544,17.055882,16.9645063,16.9643556
43.941883,16.2788206,17.0539179,-0.8803961,16.9618385,17.0536689,16.9618903,16.9617393
43.951064,16.3707055,17.051709,-0.825229331,16.9592233,17.0514593,16.959275,16.9591236
43.960244,16.881943,17.049504,-0.409342095,16.9566093,17.0492535,16.956661,16.9565092
43.969424,16.3095064,17.0473026,-0.858950616,16.9539963,17.0470513,16.9540479,16.9538958
43.978604,17.3493516,17.0451049,0.551585613,16.9513842,17.0448529,16.9514357,16.9512832
43.987784,16.7032931,17.0429109,-0.582767346,16.948773,17.0426581,16.9488244,16.9486716
43.996964,16.5529454,17.0407206,-0.698409054,16.9461627,17.040467,16.9462141,16.9460609
44.006145,18.3575598,17.0385338,1.14848857,16.9435531,17.0382794,16.9436044,16.9434509
44.015325,16.4620776,17.0363509,-0.757808224,16.9409447,17.0360958,16.9409959,16.940842
44.024505,17.175564,17.0341719,0.376021465,16.9383373,17.033916,16.9383884,16.9382341
44.033685,16.5227116,17.0319966,-0.713642073,16.9357307,17.0317399,16.9357817,16.9356271
44.042865,17.8044938,17.0298252,0.880152595,16.933125,17.0295677,16.933176,16.933021
44.052045,17.3781472,17.0276578,0.592021465,16.9305203,17.0273994,16.9305712,16.9304158
44.061226,16.643317,17.0254941,-0.618204764,16.9279162,17.025235,16.927967,16.9278113
44.070406,17.6068169,17.0233346,0.763860131,16.9253133,17.0230746,16.925364,16.9252079
44.079586,16.2480768,17.0211789,-0.879262261,16.9227113,17.0209182,16.9227619,16.9226054
44.088766,17.175564,17.0190272,0.395647309,16.9201102,17.0187657,16.9201607,16.9200039
44.097946,16.7032931,17.0168795,-0.559987884,16.91751,17.0166171,16.9175604,16.9174032
44.107126,16.8226038,17.0147358,-0.438328577,16.9149106,17.0144725,16.914961,16.9148034
44.116307,17.0293864,17.0125958,0.129578313,16.9123119,17.0123317,16.9123621,16.9122042
44.125487,16.4924225,17.0104601,-0.719748317,16.9097144,17.0101952,16.9097645,16.9096062
44.134667,17.2046505,17.0083285,0.443082401,16.9071178,17.0080628,16.9071678,16.9070091
44.143847,15.9373775,17.006201,-1.03383922,16.904522,17.0059344,16.9045719,16.9044128
44.153027,16.9705627,17.0040776,-0.183070526,16.9019271,17.0038101,16.9019769,16.9018175
44.162207,16.0934769,17.0019584,-0.95314293,16.8993331,17.0016901,16.8993828,16.899223
44.171388,16.9705627,16.9998434,-0.171115768,16.8967397,16.9995742,16.8967893,16.8966291
44.180568,16.8226038,16.9977328,-0.418484066,16.8941475,16.9974627,16.8941969,16.8940364
44.189748,17.4928557,16.9956264,0.70514488,16.8915561,16.9953555,16.8916055,16.8914445
44.198928,17,16.9935243,0.0804719497,16.8889656,16.9932525,16.8890148,16.8888535
44.208108,17.3493516,16.9914264,0.598268454,16.886376,16.9911538,16.8864251,16.8862634
44.217288,17.0587221,16.9893329,0.263418304,16.8837872,16.9890594,16.8838362,16.8836741
44.226469,16.4620776,16.9872435,-0.724683284,16.881199,16.9869691,16.8812479,16.8810854
44.235649,16.4012195,16.9851587,-0.764159155,16.878612,16.9848834,16.8786607,16.8784978
44.244829,16,16.9830783,-0.991503033,16.8760258,16.9828021,16.8760744,16.8759111
44.254009,16.3401346,16.9810023,-0.800542089,16.8734404,16.9807252,16.8734889,16.8733252
44.263189,17.1172428,16.9789307,0.371903248,16.8708559,16.9786527,16.8709043,16.8707402
44.272369,17.2626765,16.9768637,0.534614592,16.8682723,16.9765848,16.8683205,16.868156
44.28155,16.7630546,16.9748013,-0.460159457,16.8656892,16.9745215,16.8657373,16.8655724
44.29073,18.1383571,16.9727437,1.07963578,16.8631073,16.972463,16.8631552,16.8629899
44.29991,17.175564,16.9706907,0.452629364,16.8605261,16.970409,16.8605739,16.8604083
44.30909,16.4924225,16.9686423,-0.690086797,16.8579459,16.9683597,16.8579935,16.8578275
44.31827,15.9373775,16.9665985,-1.01450534,16.8553664,16.966315,16.8554139,16.8552475
44.32745,17.3205081,16.9645595,0.596614283,16.8527878,16.964275,16.8528352,16.8526683
44.336631,16.9705627,16.9625249,0.0896540072,16.8502098,16.9622395,16.850257,16.8500897
44.345811,16.0623784,16.9604953,-0.947690305,16.8476328,16.9602089,16.8476798,16.8475122
44.354991,16.5227116,16.9584705,-0.66012035,16.8450567,16.9581832,16.8451036,16.8449355
44.364171,16.9410743,16.9564505,-0.124000784,16.8424814,16.9561622,16.8425281,16.8423596
44.373351,17.2626765,16.9544354,0.555194632,16.8399069,16.9541461,16.8399534,16.8397845
44.382532,16.8226038,16.952425,-0.360307031,16.8373329,16.9521347,16.8373793,16.83721
44.391712,16.4316767,16.9504201,-0.720238439,16.8347601,16.9501288,16.8348064,16.8346366
44.400892,17.2046505,16.9484204,0.506191828,16.832188,16.9481279,16.8322343,16.8320639
44.410072,16.6132477,16.9464258,-0.577215768,16.8296168,16.946132,16.8296632,16.8294921
44.419252,16.7630546,16.9444365,-0.425889491,16.8270464,16.9441411,16.8270932,16.8269211
44.428432,16.5227116,16.9424523,-0.647873988,16.8244767,16.9421553,16.8245241,16.8243508
44.437613,16.7032931,16.9404726,-0.48701077,16.8219076,16.9401745,16.8219549,16.8217811
44.446793,15.2643375,16.9384981,-1.29389357,16.8193396,16.938199,16.8193867,16.8192125
44.455973,16.7332005,16.9365288,-0.450919378,16.8167724,16.9362287,16.8168192,16.8166447
44.465153,17.5499288,16.9345648,0.784451396,16.8142059,16.9342636,16.8142526,16.8140776
44.474333,17.8044938,16.932606,0.933749313,16.8116403,16.9323038,16.8116868,16.8115113
44.483513,17.1172428,16.9306526,0.431960826,16.8090754,16.9303494,16.8091217,16.8089459
44.492694,16.7032931,16.9287043,-0.474774958,16.8065111,16.9284,16.8065572,16.8063809
44.501874,16.3707055,16.926762,-0.745691948,16.8039478,16.9264567,16.8039937,16.8038169
44.511054,16.8226038,16.9248253,-0.319720889,16.8013853,16.9245189,16.801431,16.8012538
44.520234,16.5227116,16.9228941,-0.632599728,16.7988236,16.9225866,16.798869,16.7986914
44.529414,16.583124,16.9209684,-0.581243861,16.7962626,16.9206598,16.7963079,16.7961298
44.538594,17.0880075,16.9190483,0.411046467,16.7937024,16.9187387,16.7937475,16.793569
44.547775,16.4620776,16.9171336,-0.674578392,16.7911428,16.9168229,16.7911875,16.7910086
44.556955,16.3401346,16.9152249,-0.758347048,16.7885841,16.9149131,16.7886287,16.7884493
44.566135,17.4355958,16.9133219,0.72268521,16.7860262,16.913009,16.7860706,16.7858908
44.575315,16.4620776,16.9114246,-0.670333487,16.7834691,16.9111106,16.7835132,16.783333
44.584495,17.2916165,16.9095332,0.618128841,16.7809128,16.9092181,16.7809567,16.780776
44.593675,16.3707055,16.9076477,-0.732763343,16.7783572,16.9073315,16.7784008,16.7782197
44.602856,16.0312195,16.9057678,-0.935172872,16.7758021,16.9054505,16.7758455,16.7756639
44.612036,16.7032931,16.9038945,-0.447885445,16.773248,16.903576,16.7732911,16.7731091
44.621216,16.5227116,16.9020274,-0.615886119,16.7706947,16.9017078,16.7707375,16.7705551
44.630396,16.9410743,16.9001663,0.202257295,16.7681421,16.8998456,16.7681847,16.7680018
44.639576,16.0934769,16.8983115,-0.897125694,16.7655902,16.8979896,16.7656326,16.7654492
44.648756,17.7200451,16.8964628,0.9075144,16.7630391,16.8961397,16.7630813,16.7628974
44.657937,17.3493516,16.8946201,0.674337794,16.7604885,16.8942959,16.7605304,16.760346
44.667117,17.8044938,16.892784,0.954834985,16.7579389,16.8924586,16.7579805,16.7577957
44.676297,16,16.8909542,-0.943903688,16.75539,16.8906276,16.7554313,16.7552461
44.685477,16.6132477,16.8891308,-0.525245714,16.7528419,16.8888031,16.7528829,16.7526972
44.694657,17.175564,16.8873139,0.536889349,16.7502944,16.8869849,16.7503352,16.750149
44.703837,16.3095064,16.8855035,-0.758944684,16.7477478,16.8851733,16.7477882,16.7476016
44.713018,15.3622915,16.8836994,-1.23345367,16.7452015,16.8833681,16.7452417,16.7450546
44.722198,17.3205081,16.8819024,0.66227308,16.7426563,16.8815699,16.7426962,16.7425086
44.731378,16.673332,16.8801125,-0.454731273,16.7401118,16.8797788,16.7401513,16.7399633
44.740558,17,16.8783294,0.348813146,16.737568,16.8779944,16.7376072,16.7374187
44.749738,16.4924225,16.8765531,-0.619782684,16.7350249,16.8762169,16.7350639,16.7348748
44.758918,16.7032931,16.8747837,-0.4141142,16.7324825,16.8744462,16.7325212,16.7323317
44.768099,16.5529454,16.873021,-0.565752283,16.7299406,16.8726823,16.7299789,16.7297889
44.777279,16.7630546,16.8712656,-0.328954322,16.7273996,16.8709256,16.7274377,16.7272472
44.786459,16.5529454,16.8695172,-0.562647174,16.7248594,16.8691759,16.7248971,16.7247061
44.795639,17.0587221,16.867776,0.436973821,16.7223199,16.8674335,16.7223572,16.7221658
44.804819,16.4012195,16.866042,-0.681778942,16.719781,16.8656982,16.7198181,16.7196261
44.814,16.673332,16.8643151,-0.437016121,16.7172426,16.86397,16.7172793,16.7170869
44.82318,16.2172747,16.8625957,-0.803318733,16.7147052,16.8622493,16.7147415,16.7145486
44.83236,16.7032931,16.8608839,-0.396977043,16.7121685,16.8605361,16.7122044,16.712011
44.84154,16.643317,16.8591801,-0.46461068,16.7096324,16.858831,16.709668,16.7094741
44.85072,16.4620776,16.8574838,-0.62881333,16.7070971,16.8571335,16.7071323,16.7069379
44.8599,16.7630546,16.8557953,-0.304533492,16.7045624,16.8554436,16.7045973,16.7044024
44.869081,16.7332005,16.8541142,-0.347726465,16.7020281,16.8537612,16.7020626,16.7018673
44.878261,16.9705627,16.8524412,0.343688203,16.6994948,16.8520868,16.699529,16.6993331
44.887441,16.7928556,16.850776,-0.240666486,16.6969622,16.8504202,16.696996,16.6967996
44.896621,16.4620776,16.8491187,-0.622126281,16.6944303,16.8487616,16.6944636,16.6942667
44.905801,15.9373775,16.8474695,-0.953987463,16.691899,16.847111,16.691932,16.6917346
44.914981,16.7630546,16.8458284,-0.287704371,16.6893684,16.8454685,16.689401,16.6892031
44.924162,16.7032931,16.8441953,-0.375369454,16.6868382,16.843834,16.6868704,16.6866719
44.933342,17.0880075,16.8425707,0.495415823,16.684309,16.842208,16.6843407,16.6841418
44.942522,16.8522995,16.8409543,0.106513896,16.6817804,16.8405902,16.6818117,16.6816123
44.951702,16.4620776,16.8393471,-0.614222685,16.6792525,16.8389816,16.6792834,16.6790834
44.960882,16.583124,16.8377485,-0.50460339,16.6767252,16.8373816,16.6767557,16.6765552
44.970062,17.2046505,16.8361585,0.607035411,16.6741986,16.8357901,16.6742286,16.6740276
44.979243,17.1464282,16.8345771,0.558436309,16.6716724,16.8342072,16.671702,16.6715004
44.988423,17.1172428,16.8330046,0.533139917,16.6691471,16.8326333,16.6691762,16.6689742
44.997603,16.7032931,16.831441,-0.357977517,16.6666225,16.8310682,16.6666512,16.6664486
45.006783,16.3401346,16.8298864,-0.699822635,16.6640985,16.8295121,16.6641267,16.6639236
45.015963,17,16.8283408,0.414317761,16.6615752,16.827965,16.6616029,16.6613993
45.025143,17.1464282,16.8268044,0.565352822,16.6590525,16.8264271,16.6590797,16.6588756
45.034324,16.3707055,16.8252771,-0.674219197,16.6565302,16.8248983,16.6565569,16.6563522
45.043504,16.643317,16.8237593,-0.424784995,16.6540088,16.8233789,16.6540351,16.6538298
45.052684,16.1864141,16.8222509,-0.797393793,16.651488,16.8218691,16.6515138,16.651308
45.061864,17.2046505,16.8207527,0.619594865,16.6489679,16.8203693,16.6489932,16.6487868
45.071044,17.3781472,16.8192645,0.747584599,16.6464484,16.8188795,16.6464732,16.6462663
45.080224,16.5227116,16.817786,-0.543207439,16.6439295,16.8173994,16.6439538,16.6437464
45.089405,17.4068952,16.8163172,0.768490732,16.641411,16.8159291,16.6414348,16.6412268
45.098585,16.5227116,16.8148585,-0.540506151,16.6388934,16.8144688,16.6389166,16.6387081
45.107765,16.5529454,16.81341,-0.510357361,16.6363765,16.8130187,16.6363991,16.6361901
45.116945,16.8522995,16.8119716,0.200818083,16.6338601,16.8115787,16.6338822,16.6336726
45.126125,17.4068952,16.8105436,0.772238034,16.6313444,16.8101491,16.631366,16.6311558
45.135305,16.9115345,16.809126,0.320013343,16.6288293,16.8087298,16.6288503,16.6286395
45.144486,18.1659021,16.8077188,1.16541125,16.6263145,16.8073209,16.6263349,16.6261236
45.153666,17.5499288,16.8063223,0.862326189,16.6238006,16.8059228,16.6238205,16.6236086
45.162846,16.9410743,16.8049367,0.368968415,16.6212874,16.8045355,16.6213066,16.6210942
45.172026,17.0293864,16.8035624,0.475209393,16.6187747,16.8031595,16.6187934,16.6185804
45.181206,17.0587221,16.8021996,0.506480467,16.6162627,16.8017951,16.6162808,16.6160672
45.190386,16.5529454,16.8008481,-0.497898276,16.6137513,16.8004418,16.6137687,16.6135546
45.199567,17.3493516,16.7995076,0.741514654,16.6112402,16.7990996,16.611257,16.6110423
45.208747,16.3095064,16.7981787,-0.699050969,16.6087299,16.797769,16.6087461,16.6085308
45.217927,16.8226038,16.7968613,0.160444754,16.6062203,16.7964499,16.6062358,16.60602
45.227107,15.6204994,16.7955556,-1.08400013,16.6037113,16.7951424,16.6037262,16.6035097
45.236287,16.643317,16.7942617,-0.388516094,16.6012028,16.7938467,16.6012171,16.601
45.245468,17.0587221,16.7929796,0.515502156,16.5986947,16.7925628,16.5987083,16.5984907
45.254648,16.1864141,16.7917098,-0.778007518,16.5961875,16.7912912,16.5962004,16.5959822
45.263828,17.6068169,16.7904521,0.903529069,16.5936808,16.7900317,16.593693,16.5934742
45.273008,16.5529454,16.7892068,-0.48606729,16.5911747,16.7887845,16.5911862,16.5909668
45.282188,17.9443584,16.7879743,1.07535302,16.5886692,16.7875503,16.58868,16.5884601
45.291368,16.881943,16.7867553,0.308525019,16.5861643,16.7863294,16.5861744,16.5859538
45.300549,16.9115345,16.785549,0.354944362,16.5836597,16.7851212,16.5836691,16.5834479
45.309729,17.2626765,16.7843558,0.691607311,16.581156,16.7839262,16.5811646,16.5809428
45.318909,16.9705627,16.7831758,0.432882185,16.5786528,16.7827442,16.5786607,16.5784383
45.328089,15.9687194,16.782009,-0.90182568,16.5761502,16.7815755,16.5761573,16.5759343
45.337269,17.691806,16.7808556,0.954437203,16.5736482,16.7804202,16.5736545,16.5734309
45.346449,17.1464282,16.7797159,0.605567747,16.5711468,16.7792785,16.5711523,16.5709281
45.35563,17.6068169,16.7785898,0.910069805,16.5686456,16.7781505,16.5686503,16.5684255
45.36481,16.4924225,16.7774778,-0.53390568,16.5661453,16.7770365,16.5661492,16.5659238
45.37399,16.3707055,16.7763798,-0.636925664,16.5636455,16.7759366,16.5636487,16.5634226
45.38317,17.0880075,16.7752962,0.559205959,16.5611463,16.7748509,16.5611486,16.560922
45.39235,17.4928557,16.7742271,0.847719613,16.5586477,16.7737798,16.5586492,16.5584219
45.40153,16.673332,16.7731739,-0.315977734,16.5561496,16.7727246,16.5561502,16.5559223
45.410711,15.8429795,16.7721354,-0.963927346,16.5536518,16.7716841,16.5536516,16.553423
45.419891,17.4642492,16.7711121,0.832548552,16.5511549,16.7706586,16.5511537,16.5509246
45.429071,16.3401346,16.770104,-0.655720475,16.5486585,16.7696484,16.5486564,16.5484266
45.438251,16.7332005,16.7691113,-0.189501259,16.5461626,16.7686536,16.5461597,16.5459292
45.447431,17.7482393,16.7681341,0.990002634,16.5436673,16.7676744,16.5436635,16.5434324
45.456611,16.4924225,16.7671728,-0.52416629,16.5411725,16.7667109,16.5411678,16.540936
45.465792,16.3707055,16.7662274,-0.628905254,16.538678,16.7657633,16.5386723,16.53844
45.474972,15.1657509,16.7652982,-1.26473212,16.5361844,16.764832,16.5361777,16.5359447
45.484152,17.2626765,16.7643855,0.705897317,16.5336912,16.7639171,16.5336836,16.5334499
45.493332,17.691806,16.7634893,0.963491912,16.5311986,16.7630187,16.53119,16.5309557
45.502512,17.6635217,16.76261,0.94916368,16.5287066,16.7621372,16.528697,16.528462
45.511692,16.673332,16.7617493,-0.297350413,16.526215,16.7612742,16.5262044,16.5259688
45.520873,16.4924225,16.7609058,-0.518153769,16.5237238,16.7604285,16.5237121,16.5234758
45.530053,18.1107703,16.76008,1.16219201,16.5212333,16.7596004,16.5212206,16.5209837
45.539233,17.6068169,16.759272,0.920622013,16.5187434,16.75879,16.5187296,16.518492
45.548413,17.4068952,16.7584819,0.805241125,16.516254,16.7579977,16.5162391,16.5160009
45.557593,16.8226038,16.7577101,0.254742511,16.5137651,16.7572235,16.5137492,16.5135102
45.566773,17.6351921,16.7569567,0.937142115,16.5112767,16.7564678,16.5112597,16.5110201
45.575954,16.7928556,16.756222,0.19139903,16.5087886,16.7557307,16.5087705,16.5085302
45.585134,17.4355958,16.7555064,0.824675331,16.5063013,16.7550126,16.506282,16.5060411
45.594314,17.6635217,16.7548099,0.953263764,16.5038145,16.7543138,16.5037941,16.5035524
45.603494,17.0880075,16.754133,0.577818767,16.5013282,16.7536344,16.5013066,16.5010643
45.612674,17.6068169,16.7534757,0.923764648,16.4988424,16.7529747,16.4988197,16.4985766
45.621854,15.7797338,16.7528399,-0.986461388,16.4963572,16.7523363,16.4963332,16.4960895
45.631035,17.9164729,16.7522249,1.07900325,16.4938721,16.7517188,16.493847,16.4936026
45.640215,16.0312195,16.7516305,-0.848770264,16.4913879,16.7511219,16.4913615,16.4911164
45.649395,17.5214155,16.751057,0.877700648,16.4889042,16.7505459,16.4888765,16.4886307
45.658575,17.3493516,16.7505048,0.773851929,16.4864209,16.749991,16.486392,16.4861455
45.667755,17.3781472,16.749974,0.7925738,16.4839382,16.7494576,16.483908,16.4836608
45.676935,16,16.7494649,-0.865716437,16.481456,16.748946,16.4814244,16.4811765
45.686116,17.1172428,16.748978,0.606848259,16.478974,16.7484564,16.4789411,16.4786925
45.695296,17.8325545,16.7485134,1.04117294,16.4764927,16.7479892,16.4764585,16.4762092
45.704476,16.643317,16.7480716,-0.323658137,16.474012,16.7475446,16.4739764,16.4737264
45.713656,17.1172428,16.7476527,0.607939161,16.4715318,16.7471231,16.4714948,16.471244
45.722836,16.0312195,16.7472573,-0.846190126,16.469052,16.7467249,16.4690136,16.4687621
45.732017,16.5227116,16.7468866,-0.473471223,16.4665725,16.7463515,16.4665327,16.4662804
45.741197,16.9705627,16.7465412,0.473309142,16.4640937,16.7460032,16.4640524,16.4637995
45.750377,17.5499288,16.7462202,0.896497946,16.4616155,16.7456794,16.4615727,16.461319
45.759557,17.0587221,16.745924,0.559283568,16.4591377,16.7453804,16.4590934,16.458839
45.768737,16.7032931,16.7456529,-0.205815093,16.4566604,16.7451064,16.4566146,16.4563594
45.777917,17.0293864,16.7454074,0.532896772,16.4541835,16.744858,16.4541362,16.4538803
45.787098,17.3493516,16.7451877,0.77727978,16.4517069,16.7446354,16.451658,16.4514014
45.796278,16.3707055,16.7449943,-0.611791455,16.4492311,16.7444391,16.4491805,16.4489232
45.805458,17.8325545,16.7448276,1.04294147,16.4467557,16.7442693,16.4467035,16.4464454
45.814638,17.6068169,16.7446879,0.928509001,16.4442807,16.7441266,16.444227,16.4439681
45.823818,17.8325545,16.7445756,1.04306225,16.4418063,16.7440113,16.4417509,16.4414913
45.832998,16.5529454,16.7444913,-0.437659568,16.4393323,16.7439239,16.4392752,16.4390148
45.842179,17.6068169,16.744436,0.928644624,16.4368586,16.7438656,16.4367998,16.4365386
45.851359,16.4316767,16.7444114,-0.559226853,16.4343856,16.7438378,16.434325,16.4340631
45.860539,17.2046505,16.744416,0.678405881,16.431913,16.7438392,16.4318507,16.431588
45.869719,17.5783958,16.7444503,0.913206208,16.4294409,16.7438703,16.4293768,16.4291133
45.878899,16.7332005,16.7445146,-0.10636775,16.4269693,16.7439315,16.4269033,16.4266391
45.888079,17.2046505,16.7446096,0.678263189,16.4244981,16.7440232,16.4244303,16.4241653
45.89726,17.4642492,16.7447356,0.848241478,16.4220272,16.7441459,16.4219575,16.4216917
45.90644,16.3401346,16.7448931,-0.636206317,16.4195569,16.7443001,16.4194853,16.4192187
45.91562,16.643317,16.7450827,-0.319007325,16.4170871,16.7444863,16.4170136,16.4167462
45.9248,16.583124,16.7453047,-0.4027167,16.4146178,16.7447049,16.4145423,16.4142742
45.93398,16,16.7455597,-0.863458018,16.412149,16.7449566,16.4120715,16.4118025
45.94316,17.7200451,16.7458483,0.987014088,16.4096805,16.7452417,16.409601,16.4093313
45.952341,17.6635217,16.7461714,0.957784049,16.4072123,16.7455613,16.4071307,16.4068602
45.961521,17.5783958,16.7465321,0.912065648,16.4047448,16.7459185,16.4046611,16.4043898
45.970701,16.7332005,16.746928,-0.117164226,16.4022778,16.7463108,16.402192,16.4019198
45.979881,16.9705627,16.7473597,0.47244368,16.3998111,16.7467389,16.3997232,16.3994502
45.989061,16.9115345,16.7478279,0.404606812,16.397345,16.7472034,16.3972548,16.396981
45.998241,17.175564,16.748333,0.653629146,16.3948793,16.7477049,16.3947869,16.3945123
46.007422,17,16.7488757,0.50112299,16.3924137,16.7482439,16.3923191,16.3920437
46.016602,16.2788206,16.7494567,-0.686029202,16.3899489,16.7488211,16.389852,16.3895757
46.025782,16.643317,16.7500764,-0.326740597,16.3874845,16.749437,16.3873853,16.3871082
46.034962,15.7162336,16.7507356,-1.01710468,16.3850206,16.7500924,16.384919,16.384641
46.044142,17.6351921,16.7514349,0.940083623,16.3825571,16.7507878,16.3824531,16.3821743
46.053322,17.6351921,16.7521749,0.93968993,16.3800941,16.751524,16.3799876,16.3797079
46.062503,16.8226038,16.752957,0.263906973,16.3776312,16.752302,16.3775222,16.3772417
46.071683,16.7630546,16.7537923,0.0962410916,16.375169,16.7531333,16.3750575,16.3747762
46.080863,17.1172428,16.7547589,0.602066337,16.3727072,16.7540959,16.3725932,16.372311
46.090043,17.1172428,16.755938,0.601086316,16.3702459,16.755271,16.3701292,16.3698462
46.099223,16.2172747,16.7573772,-0.734916628,16.367785,16.756706,16.3676657,16.3673818
46.108403,16.9705627,16.7591416,0.459805582,16.3653246,16.7584663,16.3652026,16.3649178
46.117584,16.881943,16.7613509,0.347263686,16.3628643,16.7606715,16.3627395,16.3624539
46.126764,16.5227116,16.7643344,-0.491551418,16.3604047,16.7636508,16.3602772,16.3599907
46.135944,16.7032931,16.7685305,-0.255416066,16.3579456,16.7678426,16.3578152,16.3575278
46.145124,17.2626765,16.7726367,0.70002842,16.3554868,16.7719446,16.3553536,16.3550653
46.154304,16.5227116,16.7745922,-0.501877077,16.3530285,16.7738957,16.3528924,16.3526032
46.163484,17.5214155,16.775907,0.863428347,16.3505707,16.775206,16.3504315,16.3501415
46.172665,16.3095064,16.77727,-0.683932457,16.3481129,16.7765645,16.3479708,16.3476799
46.181845,17.3205081,16.7786886,0.736083885,16.3456559,16.7779785,16.3455107,16.3452189
46.191025,16.9115345,16.7801615,0.362454174,16.3431993,16.7794468,16.343051,16.3427583
46.200205,16.5529454,16.7816883,-0.478270825,16.3407431,16.780969,16.3405916,16.340298
46.209385,16.7032931,16.7832701,-0.282802036,16.3382874,16.782546,16.3381326,16.3378381
46.218566,16.9115345,16.7849079,0.355846375,16.3358318,16.784179,16.3356738,16.3353783
46.227746,16.5227116,16.7866024,-0.513702986,16.3333769,16.7858687,16.3332155,16.3329191
46.236926,16.5529454,16.7883548,-0.485190143,16.3309224,16.7876162,16.3307576,16.3304603
46.246106,17.2336879,16.7901662,0.665974253,16.3284683,16.7894226,16.3283001,16.3280019
46.255286,17.2046505,16.7920377,0.642349481,16.3260146,16.7912891,16.3258429,16.3255438
46.264466,16.9705627,16.7939703,0.420229084,16.3235614,16.7932166,16.3233861,16.3230861
46.273647,16.6132477,16.7959653,-0.427454815,16.3211083,16.7952065,16.3209294,16.3206284
46.282827,17.3493516,16.7980236,0.74251461,16.3186559,16.7972596,16.3184733,16.3181714
46.292007,16.881943,16.8001499,0.285994921,16.3162039,16.7993806,16.3160176,16.3157147
46.301187,16.7032931,16.8023452,-0.314725519,16.3137523,16.8015706,16.3135622,16.3132583
46.310367,16.8522995,16.8046079,0.218384225,16.3113012,16.8038278,16.3111071,16.3108023
46.319547,17.3781472,16.8069391,0.755783102,16.3088504,16.8061536,16.3086524,16.3083467
46.328728,17.2626765,16.8093405,0.673302327,16.3063998,16.8085494,16.3061978,16.3058911
46.337908,16.4316767,16.8118128,-0.616551781,16.3039499,16.8110162,16.3037438,16.3034361
46.347088,16.8226038,16.8143578,0.0908079502,16.3015004,16.8135554,16.3012901,16.3009815
46.356268,17.3493516,16.8169767,0.729640252,16.2990513,16.8161686,16.2988368,16.2985272
46.365448,16.7332005,16.819671,-0.29405863,16.2966026,16.8188571,16.2963838,16.2960732
46.374628,16.7032931,16.8224422,-0.345179856,16.2941543,16.8216224,16.2939312,16.2936196
46.383809,16.3095064,16.8252921,-0.718182221,16.2917062,16.8244663,16.2914786,16.291166
46.392989,17.0293864,16.8282217,0.448513897,16.2892588,16.8273898,16.2890266,16.288713
46.402169,16.8522995,16.8312354,0.145135027,16.2868117,16.8303974,16.286575,16.2862604
46.411349,17.2916165,16.8343379,0.676223764,16.2843651,16.8334937,16.2841236,16.283808
46.420529,17.2046505,16.8375255,0.605908411,16.2819189,16.836675,16.2816726,16.281356
46.429709,16.4316767,16.8407999,-0.639627371,16.2794731,16.839943,16.279222,16.2789043
46.43889,17.0293864,16.8441626,0.430376261,16.2770275,16.8432993,16.2767713,16.2764527
46.44807,18.0554701,16.8476139,1.09902512,16.2745825,16.8467439,16.2743213,16.2740017
46.45725,16.7630546,16.8511547,-0.296816603,16.272138,16.8502781,16.2718716,16.2715509
46.46643,16.7928556,16.8547867,-0.248859599,16.2696939,16.8539034,16.2694222,16.2691005
46.47561,16.9705627,16.8585115,0.334740608,16.2672501,16.8576213,16.2669732,16.2666504
46.48479,16.1554944,16.8623303,-0.840735336,16.2648068,16.8614333,16.2645244,16.2642006
46.493971,16.3095064,16.8662449,-0.746149086,16.2623637,16.8653408,16.2620757,16.2617509
46.503151,16.9115345,16.870255,0.203173572,16.2599212,16.8693438,16.2596276,16.2593017
46.512331,16.9115345,16.8743622,0.192801195,16.2574791,16.8734438,16.2571798,16.2568528
46.521511,17.6351921,16.8785702,0.86984014,16.2550375,16.8776445,16.2547323,16.2544043
46.530691,16.583124,16.8828619,-0.547483307,16.2525962,16.8819287,16.2522851,16.251956
46.539871,17.4355958,16.8872535,0.74050134,16.2501554,16.8863128,16.2498382,16.249508
46.549052,17.3493516,16.8918124,0.676416388,16.2477148,16.8908641,16.2473913,16.2470601
46.558232,17.6351921,16.8965202,0.859460235,16.2452748,16.8955641,16.2449451,16.2446127
46.567412,16.9705627,16.9013492,0.2630846,16.2428353,16.9003853,16.2424991,16.2421656
46.576592,17.0880075,16.9062999,0.426271768,16.2403962,16.9053279,16.2400534,16.2397189
46.585772,17.5499288,16.9113747,0.799095759,16.2379575,16.9103947,16.237608,16.2372724
46.594952,16.881943,16.9165766,-0.186100994,16.2355192,16.9155883,16.2351629,16.2348262
46.604133,17.2046505,16.9219088,0.531734613,16.2330811,16.9209122,16.2327178,16.23238
46.613313,17.1172428,16.9273732,0.435740279,16.2306437,16.9263681,16.2302733,16.2299344
46.622493,16.881943,16.9329732,-0.225898544,16.2282067,16.9319595,16.2278291,16.227489
46.631673,17.4068952,16.938725,0.684229598,16.2257701,16.9377026,16.2253852,16.225044
46.640853,17.6351921,16.9446204,0.831006441,16.223334,16.9435891,16.2229415,16.2225992
46.650034,17.9443584,16.9506622,0.996843137,16.2208981,16.9496219,16.2204979,16.2201545
46.659214,16.4316767,16.9568526,-0.72469016,16.2184628,16.9558031,16.2180549,16.2177103
46.668394,17.7482393,16.9631955,0.886026995,16.216028,16.9621368,16.2156121,16.2152663
46.677574,17.3205081,16.9696946,0.592295068,16.2135937,16.9686265,16.2131696,16.2128227
46.686754,17.3781472,16.9763535,0.633871954,16.2111598,16.9752758,16.2107273,16.2103793
46.695934,16.2480768,16.983176,-0.85737926,16.2087263,16.9820886,16.2082854,16.2079361
46.705115,17.2626765,16.9901666,0.522024763,16.206293,16.9890693,16.2058434,16.205493
46.714295,18.1934054,16.9973279,1.09365328,16.2038605,16.9962206,16.203402,16.2030505
46.723475,16.7032931,17.0046646,-0.548973177,16.2014284,17.0035471,16.2009609,16.2006081
46.732655,17,17.012181,-0.110367703,16.1989967,17.0110531,16.1985201,16.1981661
46.741835,17.8044938,17.0198953,0.885775664,16.1965655,17.0187568,16.1960795,16.1957243
46.751015,16.5529454,17.0278039,-0.689099812,16.1941348,17.0266547,16.1936391,16.1932828
46.760196,16.4924225,17.0359076,-0.737214392,16.1917043,17.0347475,16.1911988,16.1908413
46.769376,17.4068952,17.0442093,0.602234089,16.1892746,17.0430381,16.188759,16.1884003
46.778556,17.0587221,17.0527149,0.0775063109,16.1868453,17.0515324,16.1863195,16.1859595
46.787736,17.5783958,17.0614294,0.719003759,16.1844165,17.0602355,16.1838802,16.183519
46.796916,17,17.0703582,-0.265251127,16.1819881,17.0691526,16.1814412,16.1810788
46.806096,17.0880075,17.0795065,0.0922008791,16.1795603,17.0782891,16.1790025,16.1786388
46.815277,17.2916165,17.088881,0.45026153,16.1771327,17.0876515,16.1765637,16.1761988
46.824457,17.3205081,17.0984854,0.471192773,16.1747059,17.0972437,16.1741255,16.1737594
46.833637,17.3781472,17.1083267,0.519442482,16.1722795,17.1070725,16.1716875,16.1713201
46.842817,17.1172428,17.1184109,-0.034178023,16.1698537,17.117144,16.1692498,16.1688811
46.851997,17.6635217,17.1287582,0.731275295,16.1674284,17.1274783,16.1668123,16.1664424
46.861177,16.9705627,17.1393743,-0.41086688,16.1650037,17.1380813,16.1643751,16.1640039
46.870358,15.8429795,17.1502558,-1.14336183,16.1625792,17.1489493,16.1619379,16.1615654
46.879538,16.9115345,17.1614072,-0.499872662,16.1601555,17.1600871,16.1595011,16.1591273
46.888718,16.5529454,17.172837,-0.787331971,16.1577323,17.171503,16.1570646,16.1566896
46.897898,16.9115345,17.1845526,-0.522511356,16.1553097,17.1832044,16.1546284,16.154252
46.907078,17.8885438,17.1965619,0.831854503,16.1528877,17.1951993,16.1521924,16.1518147
46.916258,17.8885438,17.2088728,0.82442164,16.1504662,17.2074955,16.1497566,16.1493776
46.925439,17.1172428,17.2214949,-0.322881038,16.148045,17.2201027,16.1473208,16.1469405
46.934619,17.5214155,17.2344342,0.53570637,16.1456247,17.2330266,16.1448855,16.1445039
46.943799,17.6635217,17.2477006,0.644841914,16.143205,17.2462776,16.1424505,16.1420675
46.952979,17.4928557,17.2613035,0.481198665,16.1407858,17.2598647,16.1400157,16.1396314
46.962159,17.3781472,17.2752645,0.320753392,16.1383673,17.2738094,16.1375811,16.1371954
46.971339,17.6068169,17.2896065,0.56321428,16.1359494,17.288135,16.1351467,16.1347597
46.98052,16.9115345,17.3043185,-0.62672476,16.1335319,17.3028302,16.1327123,16.132324
46.9897,17.4928557,17.3194077,0.416470922,16.1311153,17.3179022,16.1302784,16.1298887
46.99888,17.4928557,17.3348867,0.397453101,16.1286993,17.3333638,16.1278448,16.1274537
47.00806,17.9443584,17.350767,0.770448841,16.1262841,17.3492263,16.1254113,16.1250188
47.01724,18.0831413,17.3670604,0.846215649,16.1238694,17.3655015,16.1229781,16.1225842
47.02642,18.1383571,17.383779,0.868664548,16.1214555,17.3822016,16.1205451,16.1201498
47.035601,16.5529454,17.4009376,-0.920864929,16.119042,17.3993412,16.1181121,16.1177154
47.044781,17.2046505,17.4185454,-0.462487645,16.1166295,17.4169297,16.1156795,16.1152814
47.053961,16.4620776,17.4366179,-0.987188047,16.1142177,17.4349825,16.1132472,16.1128477
47.063141,17.1172428,17.4551693,-0.581314448,16.1118067,17.4535137,16.110815,16.1104141
47.072321,17.4642492,17.4742214,-0.0998607821,16.1093965,17.4725453,16.1083831,16.1079808
47.081502,17.3493516,17.4938314,-0.38010504,16.1069868,17.4921343,16.1059512,16.1055474
47.090682,17.4068952,17.5139678,-0.327219542,16.1045781,17.5122493,16.1035197,16.1031144
47.099862,15.8745079,17.5346493,-1.28846476,16.1021703,17.5329088,16.1010884,16.1006817
47.109042,17.6068169,17.5558931,0.225662852,16.0997634,17.5541302,16.0986574,16.0982492
47.118222,17.5214155,17.5777173,-0.237280122,16.0973573,17.5759315,16.0962265,16.0958169
47.127402,17.2336879,17.6001405,-0.605353271,16.094952,17.5983313,16.0937958,16.0933847
47.136583,17.8325545,17.6231847,0.457569453,16.0925474,17.6213516,16.0913651,16.0909525
47.145763,18.0831413,17.646865,0.66051216,16.090144,17.6450074,16.0889349,16.0885208
47.154943,17.9443584,17.6712049,0.522640912,16.0877416,17.6693223,16.0865049,16.0860893
47.164123,17.0587221,17.6962263,-0.798438585,16.0853401,17.6943181,16.084075,16.0836579
47.173303,17.4068952,17.7219518,-0.561299057,16.0829396,17.7200175,16.0816454,16.0812268
47.182483,18.493242,17.7484052,0.863039299,16.0805402,17.7464441,16.079216,16.0787958
47.191664,18.1659021,17.7756901,0.624669506,16.0781416,17.7737016,16.0767864,16.0763647
47.200844,18,17.8037615,0.442988119,16.0757444,17.8017449,16.0743574,16.0739342
47.210024,17.1172428,17.8326447,-0.845814357,16.0733483,17.8305993,16.0719285,16.0715038
47.219204,18.1383571,17.862368,0.525346692,16.0709534,17.8602931,16.0694999,16.0690735
47.228384,18.0831413,17.892961,0.436096658,16.0685596,17.890856,16.0670714,16.0666435
47.237564,17.8605711,17.9244546,-0.252751907,16.0661672,17.9223187,16.0646431,16.0642136
47.246745,17.8885438,17.9568846,-0.2614207,16.0637757,17.954717,16.0622148,16.0617837
47.255925,17.2336879,17.9902775,-0.869821571,16.0613858,17.9880775,16.0597869,16.0593542
47.265105,17.8885438,18.0246719,-0.368955409,16.0589972,18.0224387,16.0573592,16.0569249
47.274285,17,18.0601045,-1.02961376,16.0566101,18.0578372,16.0549316,16.0544958
47.283465,18.1383571,18.0966136,0.204312465,16.0542244,18.0943113,16.0525043,16.0520668
47.292645,18.2208672,18.1342392,0.294326357,16.0518402,18.1319011,16.0500771,16.049638
47.301826,17.9443584,18.1731215,-0.478291847,16.0494574,18.1707467,16.0476499,16.0472091
47.311006,18.0554701,18.2132449,-0.397208833,16.0470766,18.2108323,16.0452231,16.0447806
47.320186,18.7082869,18.2546285,0.673541675,16.0446974,18.2521772,16.0427964,16.0423524
47.329366,17.7763888,18.2973213,-0.72175652,16.0423199,18.2948301,16.04037,16.0399242
47.338546,18.2482876,18.3413745,-0.30510153,16.0399443,18.3388425,16.0379437,16.0374963
47.347726,18.4390889,18.386842,0.228575856,16.0375705,18.384268,16.0355176,16.0350685
47.356907,18.493242,18.4337853,0.24383753,16.0351985,18.4311682,16.0330914,16.0326406
47.366087,17.5499288,18.4822533,-0.96556952,16.0328287,18.4795919,16.0306657,16.0302132
47.375267,18.6815417,18.5323131,0.386301186,16.030461,18.5296062,16.0282401,16.0277859
47.384447,17.2046505,18.5840298,-1.1744698,16.0280956,18.5812763,16.0258147,16.0253587
47.393627,18.2208672,18.6374719,-0.64544928,16.0257324,18.6346703,16.0233894,16.0229317
47.402807,18.3575598,18.6927112,-0.578922674,16.0233716,18.6898602,16.0209643,16.0205049
47.411988,18.0554701,18.7499435,-0.833350692,16.0210132,18.7470415,16.0185391,16.018078
47.421168,18.3030052,18.8092349,-0.711498228,16.0186577,18.8062805,16.0161144,16.0156515
47.430348,17.8885438,18.870585,-0.990979932,16.016305,18.8675767,16.0136898,16.0132251
47.439528,18.4119526,18.9340838,-0.72258645,16.0139552,18.9310199,16.0112654,16.0107989
47.448708,18.547237,18.9998262,-0.672747483,16.0116084,18.996705,16.0088411,16.0083728
47.457888,18.8944436,19.0679122,-0.416495526,16.0092647,19.0647321,16.006417,16.0059469
47.467069,20.1246118,19.1384551,0.993054207,16.006924,19.1352143,16.0039928,16.0035209
47.476249,19.1049732,19.2115512,-0.326462844,16.004587,19.2082478,16.001569,16.0010953
47.485429,18.547237,19.2873253,-0.860283876,16.0022537,19.2839575,15.9991453,15.9986698
47.494609,19.3907194,19.3659019,0.157535868,15.9999241,19.3624676,15.9967218,15.9962445
47.503789,18.547237,19.4474121,-0.94877556,15.9975985,19.4439092,15.9942985,15.9938193
47.512969,17.8885438,19.5319947,-1.28197147,15.9952771,19.5284211,15.9918753,15.9913942
47.52215,18.547237,19.619934,-1.03571089,15.99296,19.6162874,15.989452,15.9889691
47.53133,18.6547581,19.7115143,-1.02798649,15.9906481,19.7077921,15.9870291,15.9865443
47.54051,18.9472953,19.8066813,-0.927030727,15.9883411,19.802881,15.9846064,15.9841197
47.54969,19.2873015,19.9056146,-0.78632883,15.9860393,19.9017336,15.9821838,15.9816952
47.55887,19.1572441,20.0085049,-0.922637966,15.9837431,20.0045406,15.9797613,15.9792708
47.568051,18.6010752,20.1155668,-1.2306468,15.9814524,20.1115163,15.9773388,15.9768463
47.577231,20.5912603,20.2269926,0.603545917,15.9791681,20.2228531,15.9749166,15.9744222
47.586411,20.6639783,20.3430229,0.566529278,15.9768903,20.3387913,15.9724946,15.9719983
47.595591,20.1494417,20.4639017,-0.560767334,15.9746194,20.4595747,15.9700727,15.9695744
47.604771,20,20.5898889,-0.768042256,15.9723558,20.5854633,15.967651,15.9671507
47.613951,19.8997487,20.7212617,-0.906373498,15.9701,20.716734,15.9652294,15.9647271
47.623132,20.1990099,20.8583312,-0.811986008,15.9678521,20.8536977,15.9628077,15.9623034
47.632312,20.5182845,21.0014855,-0.695126569,15.9656134,20.9967425,15.9603863,15.9598801
47.641492,20.5912603,21.1516548,-0.748595034,15.9633849,21.1467977,15.9579651,15.9574569
47.650672,20.4694895,21.3086277,-0.916044872,15.9611664,21.3036523,15.9555441,15.9550338
47.659852,21.3072758,21.4728041,-0.406851754,15.9589587,21.467706,15.9531232,15.9526108
47.669032,20.3715488,21.6446132,-1.12830158,15.9567624,21.6393878,15.9507024,15.950188
47.678213,20.3960781,21.8245361,-1.19518117,15.9545782,21.8191784,15.9482815,15.947765
47.687393,21.725561,22.0130295,-0.536160927,15.9524074,22.0075345,15.9458609,15.9453424
47.696573,21.7944947,22.210646,-0.645097861,15.9502507,22.2050082,15.9434405,15.9429199
47.705753,22.1359436,22.4179601,-0.531052254,15.9481092,22.412174,15.9410202,15.9404975
47.714933,21.5638587,22.6355917,-1.0352454,15.9459839,22.6296514,15.9386001,15.9380752
47.724113,22.3830293,22.8642097,-0.693671675,15.9438762,22.8581088,15.9361801,15.9356531
47.733294,21.8403297,23.1045646,-1.12438204,15.9417872,23.0982967,15.9337599,15.9332308
47.742474,21.3541565,23.3573849,-1.4153545,15.939719,23.3509428,15.9313401,15.9308089
47.751654,22.2261108,23.6251851,-1.18282471,15.9376755,23.6185603,15.9289205,15.928387
47.760834,22.4944438,23.9076344,-1.18877696,15.9356575,23.9008183,15.9265009,15.9259653
47.770014,22.8254244,24.2056882,-1.17484626,15.9336683,24.1986709,15.9240815,15.9235437
47.779194,23.10844,24.5204897,-1.18829695,15.9317129,24.5132591,15.9216622,15.9211222
47.788375,23.4946802,24.8533268,-1.16560993,15.9297991,24.8458671,15.9192428,15.9187005
47.797555,23.6643191,25.2054999,-1.24144304,15.9279409,25.1977884,15.9168237,15.9162792
47.806735,23.9374184,25.5785534,-1.28106789,15.9261619,25.5705541,15.9144047,15.913858
47.815915,24.5153013,25.9741537,-1.2078296,15.9245042,25.9658079,15.9119859,15.9114369
47.825095,25.3377189,26.39415,-1.02782833,15.9230423,26.3853582,15.9095672,15.9090159
47.834275,24.9599679,26.840606,-1.37136356,15.9219062,26.831198,15.9071486,15.906595
47.843456,25.5734237,27.3158976,-1.32002797,15.9213197,27.3055838,15.9047298,15.904174
47.852636,26.5518361,27.8225504,-1.12725966,15.9216605,27.810844,15.9023114,15.9017533
47.861816,26.2678511,28.3673061,-1.44894964,15.9237668,28.3532831,15.8998931,15.8993326
47.870996,27.1661554,28.9524194,-1.33651186,15.9289012,28.9345229,15.8974749,15.8969121
47.880176,27.8747197,29.5813417,-1.30637743,15.939074,29.5570397,15.8950569,15.8944917
47.889356,28.1957444,30.2596546,-1.43663157,15.9575867,30.2248576,15.8926389,15.8920714
47.898537,29.189039,30.9943428,-1.34361594,15.9896211,30.9425952,15.8902208,15.8896509
47.907717,30.0499584,31.7938794,-1.32057603,16.0430823,31.715236,15.887803,15.8872307
47.916897,31.1608729,32.6691906,-1.22813587,16.1297229,32.5486866,15.8853854,15.8848106
47.926077,32.6036808,33.6339303,-1.01501208,16.2664633,33.4495955,15.8829678,15.8823906
47.935257,32.0156212,34.705196,-1.63999231,16.4768291,34.4255689,15.8805504,15.8799707
47.944437,33.1209903,35.9041813,-1.66828984,16.792223,35.4853438,15.878133,15.8775509
47.953618,36.152455,37.2569364,-1.05094313,17.2526604,36.6391354,15.8757155,15.8751309
47.962798,37.094474,38.7941464,-1.30371486,17.906006,37.8983519,15.8732983,15.8727113
47.971978,39.1279951,40.5716901,-1.20153862,18.8264027,39.2870977,15.8708813,15.8702917
47.981158,40.5339364,42.6405815,-1.45142864,20.0831514,40.8247082,15.8684643,15.8678722
47.990338,43.2666153,45.0370289,-1.33056889,21.7180461,42.5247477,15.8660475,15.8654528
47.999519,44.7325385,47.813827,-1.75535994,23.7750943,44.4131042,15.8636304,15.8630332
48.008699,48.5592422,51.0248047,-1.57021097,26.2827031,46.5219331,15.8612137,15.860614
48.017879,52.0672642,54.7272542,-1.63094757,29.2534298,48.8955257,15.8587972,15.8581948
48.027059,56.0802996,58.9859915,-1.70460901,32.6836148,51.5995635,15.8563807,15.8557757
48.036239,60.6382717,63.8865908,-1.80230936,36.5547715,54.7407966,15.8539642,15.8533567
48.045419,67.3275575,69.5589942,-1.49379943,40.834804,58.4996183,15.8515479,15.8509377
48.0546,73.3484833,76.2119641,-1.69218225,45.4794373,63.1746813,15.8491314,15.8485186
48.06378,82.07923,84.166043,-1.44458055,50.4305844,69.2225275,15.8467153,15.8460998
48.07296,92.6390846,93.8810239,-1.11442328,55.6199497,77.272702,15.8442992,15.843681
48.08214,106.183803,106.112934,0.26621147,60.9850619,88.2706235,15.8418833,15.8412623
48.09132,121.856473,121.858447,-0.0444344026,66.4307068,103.379358,15.8394674,15.8388437
48.1005,140.27473,141.453168,-1.08555849,71.8075481,122.896083,15.8370516,15.8364252
48.109681,164.465802,165.179829,-0.845001136,77.0044508,146.987708,15.8346356,15.8340064
48.118861,190.189379,192.912013,-1.65004059,81.9069833,175.376481,15.83222,15.831588
48.128041,222.029277,224.081768,-1.43265154,86.4040527,207.358436,15.8298044,15.8291697
48.137221,255.980468,257.636604,-1.2869096,90.3890057,241.778645,15.8273889,15.8267514
48.146401,290.860791,291.966358,-1.05145914,93.7635816,276.953307,15.8249735,15.8243331
48.155581,323.30481,324.819681,-1.23080116,96.4411871,310.575652,15.8225582,15.821915
48.164762,352.651386,353.283278,-0.794916343,98.350087,339.685989,15.8201427,15.8194966
48.173942,374.60646,373.867596,0.859571889,99.4354799,360.748838,15.8177275,15.8170785
48.183122,384.313674,382.816451,1.22361082,99.6628999,369.953813,15.8153125,15.8146605
48.192302,378.725494,376.590952,1.46100731,99.0070382,363.68717,15.8128974,15.8122426
48.201482,357.61991,353.655395,1.9911089,97.4274862,340.337999,15.8104825,15.8098247
48.210662,321.987577,319.174741,1.67715134,95.0415717,305.105667,15.8080676,15.8074069
48.219843,279.311654,278.570772,0.860745027,91.9129839,263.445355,15.8056526,15.8049888
48.229023,236.311235,236.884677,-0.757259016,88.1232219,220.45033,15.8032379,15.8025711
48.238203,197.987373,198.07767,-0.300493209,83.7666496,180.1875,15.8008232,15.8001534
48.247383,165.559657,164.805086,0.868660291,78.9483922,145.52462,15.7984086,15.7977358
48.256563,140.082119,138.282432,1.34152422,73.7806265,118.016612,15.7959941,15.7953182
48.265743,119.799833,118.305008,1.22263032,68.3791142,97.8251806,15.7935797,15.7929007
48.274924,103.956722,103.610192,0.588667442,62.859231,83.8636206,15.791165,15.790483
48.284104,91.5368778,92.5706225,-1.01673237,57.3351408,74.3723279,15.7887507,15.7880655
48.293284,81.3633824,83.8106429,-1.56437222,51.9133249,67.6638419,15.7863365,15.7856481
48.302464,73.1095069,76.4559298,-1.82932306,46.6924185,62.5652923,15.7839223,15.7832308
48.311644,66.5131566,70.1689974,-1.91202532,41.8433373,58.4964569,15.7815082,15.7808135
48.320824,60.4648658,64.6061401,-2.03501209,37.3655246,55.015513,15.7790942,15.7783962
48.330005,56.0267793,59.6832388,-1.9121871,33.3055567,51.9777671,15.7766799,15.7759787
48.339185,52.9339211,55.3506395,-1.55457982,29.7018702,49.2978217,15.774266,15.7735616
48.348365,48.4871117,51.5626456,-1.75372003,26.5769489,46.9156572,15.7718521,15.7711444
48.357545,46.8721666,48.2720846,-1.18318132,23.937944,44.786151,15.7694383,15.7687273
48.366725,44.0454311,45.4279697,-1.17581401,21.7746422,42.8732947,15.7670246,15.7663103
48.375905,41.2189277,42.9766897,-1.32580616,20.0586588,41.1475852,15.7646109,15.7638932
48.385086,39.484174,40.8641389,-1.17471907,18.7445149,39.5843707,15.762197,15.761476
48.394266,37.8417759,39.039043,-1.09419704,17.7741843,38.1634689,15.7597835,15.759059
48.403446,36.2491379,37.4537339,-1.09754087,17.0828777,36.8674152,15.75737,15.7566421
48.412626,34.7419055,36.0664405,-1.15088444,16.6068744,35.6815418,15.7549565,15.7542252
48.421806,34.0587727,34.853874,-0.891684513,16.2973364,34.6018161,15.7525431,15.7518083
48.430986,32.3728281,33.7732491,-1.18339383,16.0953013,33.6094288,15.7501298,15.7493915
48.440167,31.4960315,32.7981421,-1.14110063,15.9646131,32.6924012,15.7477162,15.7469744
48.449347,31.22499,31.9117734,-0.828723968,15.8816327,31.8434083,15.745303,15.7445577
48.458527,30.1827765,31.1005545,-0.95800726,15.829637,31.0557322,15.7428898,15.7421409
48.467707,29.4108823,30.3538457,-0.971063,15.7972523,30.3235552,15.7404767,15.7397242
48.476887,29.2061637,29.6632206,-0.676059813,15.7769759,29.6417398,15.7380636,15.7373075
48.486068,28.0713377,29.0218833,-0.974959289,15.7640003,29.0056698,15.7356503,15.7348906
48.495248,26.9629375,28.424526,-1.20896172,15.7553327,28.4114393,15.7332374,15.732474
48.504428,27,27.8665973,-0.930912099,15.7491542,27.8553757,15.7308245,15.7300573
48.513608,25.7487864,27.3443458,-1.26315455,15.7443898,27.3342619,15.7284116,15.7276408
48.522788,26.0384331,26.8545732,-0.903404714,15.7404194,26.8452158,15.7259988,15.7252242
48.531968,24.979992,26.3963561,-1.19011098,15.7369065,26.3874893,15.723586,15.7228076
48.541149,25.1396102,25.9664037,-0.909281857,15.73364,25.9579042,15.721173,15.7203908
48.550329,24.9198716,25.5610946,-0.800764019,15.7305141,25.552896,15.7187603,15.7179743
48.559509,24.3721152,25.1785375,-0.898010172,15.7274789,25.1705997,15.7163477,15.7155579
48.568689,24.3721152,24.8170662,-0.667046467,15.7245064,24.809364,15.7139351,15.7131414
48.577869,23.8117618,24.4751674,-0.814497175,15.7215808,24.4676834,15.7115226,15.7107249
48.587049,22.7156334,24.1514626,-1.19826092,15.7186929,24.1441838,15.7091101,15.7083085
48.59623,24.2487113,23.8446605,0.635649878,15.7158365,23.8375765,15.7066974,15.7058918
48.60541,22.8691933,23.5536755,-0.827334411,15.7130084,23.5467771,15.7042849,15.7034754
48.61459,22.3606798,23.2774172,-0.957464077,15.7102055,23.2706962,15.7018726,15.701059
48.62377,22.6715681,23.0149162,-0.585959159,15.7074258,23.0083648,15.6994603,15.6986426
48.63295,21.9089023,22.7652808,-0.925407194,15.7046672,22.7588919,15.697048,15.6962262
48.64213,22.3159136,22.5281546,-0.460696189,15.7019286,22.5219212,15.6946357,15.6938099
48.651311,21.1896201,22.3030232,-1.05517916,15.6992088,22.2969384,15.6922233,15.6913933
48.660491,21.7485632,22.0883335,-0.582898249,15.6965057,22.0823914,15.6898111,15.6889769
48.669671,21.330729,21.8834364,-0.743442958,15.693818,21.8776312,15.687399,15.6865606
48.678851,20.0249844,21.6877535,-1.28948404,15.6911445,21.6820798,15.6849869,15.6841443
48.688031,21.6794834,21.5007475,0.422771629,15.6884844,21.4952002,15.6825749,15.681728
48.697211,20.174241,21.3219192,-1.07129746,15.6858367,21.3164934,15.6801629,15.6793117
48.706392,20.5426386,21.1507859,-0.779838001,15.6832003,21.1454768,15.6777506,15.6768951
48.715572,21.0950231,20.9869518,0.328741935,15.680575,20.981755,15.6753387,15.6744788
48.724752,20.6397674,20.8299948,-0.436150593,15.6779599,20.8249059,15.6729268,15.6720625
48.733932,21.4476106,20.6795384,0.876397273,15.6753543,20.6745535,15.670515,15.6696462
48.743112,20.4939015,20.5352314,-0.20329747,15.6727577,20.5303465,15.6681032,15.6672299
48.752292,20,20.3968399,-0.629952275,15.6701695,20.3920511,15.6656914,15.6648136
48.761473,20,20.2644343,-0.514231733,15.6675896,20.2597379,15.6632794,15.6623971
48.770653,20.1494417,20.1372005,0.110640083,15.6650172,20.132593,15.6608676,15.6599808
48.779833,19.5448203,20.0148617,-0.685595682,15.6624517,20.01034,15.658456,15.6575645
48.789013,19.1833261,19.8971725,-0.844894309,15.6598928,19.8927333,15.6560443,15.6551482
48.798193,19.6723156,19.7839019,-0.334045465,15.6573399,19.7795425,15.6536327,15.6527319
48.807373,19.4679223,19.6748331,-0.454874448,15.6547928,19.6705505,15.6512211,15.6503156
48.816554,18.8679623,19.5697506,-0.837728075,15.652251,19.5655421,15.6488093,15.6478991
48.825734,19.1833261,19.468485,-0.534002748,15.6497145,19.464348,15.6463978,15.6454828
48.834914,19.4164878,19.3708437,0.213644899,15.647183,19.3667756,15.6439863,15.6430665
48.844094,18.8679623,19.2766559,-0.639291535,15.6446561,19.2726544,15.6415749,15.6406502
48.853274,20.1990099,19.1857608,1.00660275,15.6421336,19.1818236,15.6391635,15.6382338
48.862454,19.5703858,19.0980063,0.687298656,15.6396152,19.0941312,15.6367521,15.6358175
48.871635,18.761663,19.0135381,-0.501871599,15.6371009,19.0097226,15.6343405,15.6334009
48.880815,18.4661853,18.9319247,-0.682451036,15.6345906,18.9281669,15.6319291,15.6309846
48.889995,18.973666,18.8530157,0.347347409,15.6320838,18.8493135,15.6295178,15.6285682
48.899175,19.3390796,18.7766928,0.749924527,15.6295803,18.7730444,15.6271066,15.6261519
48.908355,18.6547581,18.7028438,-0.219284542,15.62708,18.6992474,15.6246953,15.6237355
48.917535,19.1311265,18.6313625,0.706939876,15.6245828,18.6278163,15.6222841,15.6213191
48.926716,18.6547581,18.5621406,0.304331197,15.6220881,18.558643,15.6198727,15.6189024
48.935896,18.973666,18.4950977,0.691786282,15.6195965,18.491647,15.6174615,15.616486
48.945076,18.1107703,18.4301353,-0.565123896,15.6171075,18.42673,15.6150504,15.6140696
48.954256,18.734994,18.3671672,0.606487225,15.6146211,18.3638058,15.6126393,15.6116532
48.963436,18.1659021,18.3061117,-0.374445675,15.612137,18.3027927,15.6102283,15.6092367
48.972617,18.8944436,18.2468846,0.804710518,15.6096549,18.2436066,15.607817,15.60682
48.981797,19.3132079,18.1895612,1.06002204,15.6071754,18.1863227,15.605406,15.6044035
48.990977,17.8885438,18.1339588,-0.495393727,15.604698,18.1307585,15.602995,15.601987
49.000157,18.1659021,18.0799646,0.293151104,15.6022226,18.0768012,15.600584,15.5995705
49.009337,18.8679623,18.0275161,0.916758511,15.5997491,18.0243885,15.5981731,15.5971539
49.018517,18.4119526,17.9765538,0.659847557,15.5972774,17.9734608,15.5957622,15.5947374
49.027698,17.7482393,17.9270157,-0.422819506,15.5948071,17.9239561,15.5933511,15.5923205
49.036878,17.7763888,17.8788583,-0.320108478,15.5923388,17.875831,15.5909402,15.5899039
49.046058,18,17.8320244,0.409848231,15.5898721,17.8290284,15.5885294,15.5874873
49.055238,18.5202592,17.7864648,0.856617981,15.5874069,17.7834991,15.5861186,15.5850706
49.064418,18.493242,17.7421323,0.866665852,15.5849431,17.7391958,15.5837078,15.582654
49.073598,17.2916165,17.6989819,-0.638251867,15.5824807,17.6960737,15.5812971,15.5802373
49.082779,18.3575598,17.6569662,0.837014688,15.5800194,17.6540853,15.5788861,15.5778203
49.091959,17.8325545,17.616115,0.465230635,15.5775598,17.6132605,15.5764754,15.5754036
49.101139,17.7482393,17.5763655,0.414576691,15.5751014,17.5735365,15.5740648,15.5729868
49.110319,17.0880075,17.5376286,-0.670537949,15.5726442,17.5348242,15.5716541,15.57057
49.119499,17.6351921,17.4998689,0.367862938,15.5701881,17.4970884,15.5692435,15.5681532
49.128679,17.3493516,17.4630526,-0.337195831,15.5677331,17.460295,15.5668329,15.5657364
49.13786,18.1659021,17.4271433,0.859510818,15.5652789,17.4244079,15.5644221,15.5633192
49.14704,17.3493516,17.3921177,-0.206799788,15.562826,17.3894039,15.5620115,15.5609023
49.15622,17.2336879,17.3579422,-0.352497108,15.560374,17.355249,15.559601,15.5584854
49.1654,18.734994,17.324588,1.18760516,15.557923,17.3219149,15.5571905,15.5560684
49.17458,18.1383571,17.2920278,0.919961622,15.5554728,17.289374,15.5547801,15.5536515
49.18376,17.9164729,17.2602352,0.810084973,15.5530235,17.2576001,15.5523696,15.5512344
49.192941,17.3781472,17.2291817,0.385960427,15.5505748,17.2265647,15.549959,15.5488171
49.202121,17.5783958,17.1988756,0.61605214,15.5481272,17.1962759,15.5475486,15.5464001
49.211301,17.5783958,17.1693078,0.639599906,15.5456804,17.1667248,15.5451382,15.5439829
49.220481,17.4355958,17.1404074,0.543312365,15.5432343,17.1378405,15.5427279,15.5415658
49.229661,18.1934054,17.1121534,1.03983268,15.540789,17.109602,15.5403176,15.5391486
49.238841,17.4355958,17.0845253,0.592511985,15.5383443,17.0819889,15.5379073,15.5367314
49.248022,18,17.0575007,0.970824026,15.5359,17.0549787,15.5354968,15.5343139
49.257202,16.7332005,17.0310667,-0.545771124,15.5334566,17.0285585,15.5330866,15.5318966
49.266382,16.7032931,17.005202,-0.549462415,15.5310139,17.0027072,15.5306764,15.5294793
49.275562,17.7200451,16.9798894,0.860323033,15.5285717,16.9774074,15.5282662,15.5270619
49.284742,17.4642492,16.955112,0.71353848,15.5261301,16.9526423,15.525856,15.5246446
49.293922,17.2916165,16.9308537,0.600635313,15.523689,16.9283957,15.5234459,15.5222271
49.303103,17.2626765,16.9070963,0.596305482,15.5212483,16.9046496,15.5210356,15.5198094
49.312283,17.3205081,16.8838375,0.660810514,15.5188083,16.8814017,15.5186255,15.5173919
49.321463,17.4642492,16.8610926,0.776631567,15.5163688,16.8586672,15.5162155,15.5149743
49.330643,16.8226038,16.8388046,-0.127282186,15.5139298,16.836389,15.5138055,15.5125568
49.339823,17.2626765,16.8169603,0.667619837,15.5114913,16.8145542,15.5113955,15.5101391
49.349003,17.7200451,16.7955468,0.961508373,15.5090532,16.7931498,15.5089855,15.5077215
49.358184,16.881943,16.7745496,0.327709326,15.5066153,16.7721612,15.5065753,15.5053035
49.367364,16.643317,16.7539614,-0.332632544,15.5041781,16.7515812,15.5041654,15.5028857
49.376544,17.6635217,16.7337683,0.964237229,15.5017412,16.7313959,15.5017556,15.500468
49.385724,16.9705627,16.7139593,0.506560455,15.4993048,16.7115943,15.4993457,15.4980501
49.394904,17.4642492,16.6945235,0.877340109,15.4968687,16.6921656,15.4969359,15.4956322
49.404085,17.4068952,16.6754487,0.855246433,15.4944327,16.6730974,15.4945259,15.4932141
49.413265,16.9705627,16.656729,0.560208705,15.4919973,16.6543839,15.4921161,15.4907961
49.422445,16.583124,16.6383525,-0.235007483,15.4895623,16.6360133,15.4897064,15.4883781
49.431625,16.5227116,16.6203419,-0.31245846,15.4871276,16.6180083,15.4872968,15.48596
49.440805,16.9410743,16.6026558,0.581737518,15.4846932,16.6003273,15.4848871,15.4835419
49.449985,16.881943,16.5852839,0.5446642,15.4822592,16.5829603,15.4824775,15.4811238
49.459166,17.3493516,16.5682161,0.883818691,15.4798251,16.5658969,15.4800676,15.4787053
49.468346,16.1864141,16.551448,-0.60418037,15.4773916,16.549133,15.4776581,15.4762871
49.477526,17.0587221,16.5349699,0.723707291,15.4749584,16.5326587,15.4752486,15.4738688
49.486706,16.583124,16.5187742,0.253672526,15.4725255,16.5164665,15.4728391,15.4714505
49.495886,17.3205081,16.5028537,0.904242454,15.4700927,16.5005491,15.4704296,15.4690321
49.505066,17.2046505,16.4872012,0.847023838,15.4676603,16.4848995,15.4680202,15.4666136
49.514247,17.5214155,16.4718082,1.02450345,15.4652278,16.469509,15.4656106,15.4641949
49.523427,16.0934769,16.4566713,-0.602656116,15.4627958,16.4543745,15.4632013,15.4617763
49.532607,16.3401346,16.4417826,-0.318822734,15.460364,16.4394876,15.460792,15.4593578
49.541787,17.4642492,16.4271539,1.01837874,15.4579325,16.4248606,15.4583827,15.4569391
49.550967,15.9687194,16.4127658,-0.666368027,15.4555011,16.4104738,15.4559735,15.4545204
49.560147,17.2046505,16.3986062,0.897799719,15.45307,16.3963153,15.4535643,15.4521017
49.569328,16.4924225,16.3846681,0.328259679,15.4506388,16.3823779,15.4511549,15.4496826
49.578508,16.673332,16.370949,0.549893603,15.448208,16.3686594,15.4487458,15.4472638
49.587688,17.2626765,16.3574422,0.951438025,15.4457774,16.3551527,15.4463368,15.4448449
49.596868,16.4924225,16.3441424,0.385071508,15.443347,16.3418529,15.4439278,15.4424259
49.606048,17.6635217,16.3310448,1.15432965,15.4409168,16.3287549,15.4415188,15.4400069
49.615228,16.3095064,16.3181444,-0.0929407786,15.4384867,16.3158539,15.4391099,15.4375878
49.624409,16.3707055,16.3054353,0.255480507,15.4360565,16.3031439,15.4367008,15.4351685
49.633589,17.4068952,16.2929155,1.05545236,15.4336267,16.290623,15.4342919,15.4327493
49.642769,17.1172428,16.2805793,0.91469309,15.431197,16.2782854,15.4318832,15.4303301
49.651949,17.5783958,16.2684324,1.14453633,15.4287675,16.2661368,15.4294744,15.4279108
49.661129,16.4012195,16.2564679,0.380462342,15.4263382,16.2541703,15.4270658,15.4254914
49.670309,16.5529454,16.2446735,0.55522236,15.4239089,16.2423737,15.4246571,15.423072
49.67949,16.9115345,16.2330441,0.823705296,15.4214795,16.2307419,15.4222483,15.4206523
49.68867,16.4012195,16.2215785,0.423840736,15.4190505,16.2192736,15.4198398,15.4182328
49.69785,16.3401346,16.2102717,0.360365031,15.4166217,16.2079638,15.4174313,15.4158132
49.70703,16.0312195,16.1991201,-0.409756692,15.4141929,16.196809,15.4150229,15.4133936
49.71621,16.1554944,16.1881202,-0.180626162,15.4117642,16.1858057,15.4126145,15.4109739
49.72539,16.0934769,16.1772687,-0.28946813,15.4093356,16.1749505,15.4102062,15.4085541
49.734571,15.7162336,16.1665612,-0.671064458,15.4069069,16.164239,15.4077977,15.4061341
49.743751,16.3401346,16.1559966,0.429113091,15.4044785,16.1536703,15.4053895,15.4037142
49.752931,16.5529454,16.1455708,0.638259024,15.4020502,16.14324,15.4029814,15.4012943
49.762111,16.3095064,16.1352855,0.417397784,15.399622,16.1329501,15.4005734,15.3988743
49.771291,16.0934769,16.1251413,-0.177944798,15.3971939,16.122801,15.3981654,15.3964542
49.780471,15.9687194,16.1151263,-0.382631541,15.3947658,16.1127808,15.3957574,15.3940341
49.789652,16.5227116,16.1052368,0.646122962,15.3923376,16.1028859,15.3933493,15.3916137
49.798832,16.583124,16.0954721,0.698320748,15.3899097,16.0931156,15.3909415,15.3891934
49.808012,16.5227116,16.0858286,0.660971302,15.3874818,16.0834662,15.3885338,15.3867731
49.817192,16,16.0763037,-0.276231228,15.3850541,16.0739352,15.3861261,15.3843527
49.826372,17.2916165,16.0668949,1.10667138,15.3826263,16.0645201,15.3837186,15.3819323
49.835552,16.1245155,16.0575999,0.258680529,15.3801987,16.0552185,15.3813111,15.3795118
49.844733,15.9059737,16.0484152,-0.377414182,15.3777708,16.0460269,15.3789034,15.377091
49.853913,17.2626765,16.0393405,1.10604519,15.3753433,16.0369452,15.376496,15.3746704
49.863093,17.0587221,16.0303727,1.01407565,15.3729158,16.0279701,15.3740888,15.3722497
49.872273,16.7032931,16.0215111,0.825700908,15.3704883,16.019101,15.3716816,15.3698289
49.881453,15.7162336,16.0127605,-0.5445428,15.3680609,16.0103426,15.3692745,15.3674081
49.890634,17.2336879,16.0041089,1.10886384,15.3656333,16.001683,15.3668672,15.364987
49.899814,16.7032931,15.9955562,0.84127097,15.3632059,15.9931221,15.3644602,15.362566
49.908994,16.2788206,15.9870995,0.540112076,15.3607786,15.9846569,15.3620534,15.360145
49.918174,16,15.9787369,0.14581867,15.3583514,15.9762855,15.3596466,15.3577239
49.927354,17.3781472,15.9704665,1.1864572,15.3559241,15.9680061,15.35724,15.3553027
49.936534,16.1554944,15.9622865,0.439554236,15.3534969,15.9598169,15.3548334,15.3528815
49.945715,16.2172747,15.9541942,0.512913728,15.3510695,15.9517152,15.3524267,15.35046
49.954895,16.2172747,15.9461898,0.520658185,15.3486423,15.9437011,15.3500203,15.3480386
49.964075,16.7630546,15.9382706,0.908176226,15.3462152,15.9357719,15.347614,15.3456172
49.973255,15.4272486,15.9304349,-0.709356236,15.3437881,15.927926,15.3452079,15.3431957
49.982435,15.9059737,15.9226812,-0.129257361,15.341361,15.9201619,15.3428018,15.3407741
49.991615,16.0312195,15.9150156,0.340887055,15.3389339,15.9124856,15.3403959,15.3383525
50.000796,16.9410743,15.907428,1.01668401,15.3365066,15.904887,15.3379897,15.3359306
50.009976,15.3948043,15.8999183,-0.710713689,15.3340796,15.8973662,15.335584,15.3335088
50.019156,15.9687194,15.8924842,0.27610734,15.3316525,15.8899206,15.3331784,15.3310869
50.028336,15.9687194,15.8851242,0.289128315,15.3292255,15.882549,15.3307729,15.328665
50.037516,16.0934769,15.8778371,0.464370338,15.3267985,15.87525,15.3283675,15.3262431
50.046696,15.8429795,15.8706215,-0.166258713,15.3243714,15.8680221,15.3259623,15.323821
50.055877,16.0623784,15.8634752,0.445985651,15.3219442,15.8608634,15.3235569,15.3213986
50.065057,16.7630546,15.8563986,0.952184874,15.3195171,15.8537741,15.3211519,15.3189764
50.074237,16.4316767,15.8493896,0.763077432,15.3170901,15.8467521,15.318747,15.3165542
50.083417,16.2480768,15.8424469,0.636890807,15.3146631,15.8397962,15.3163423,15.3141318
50.092597,16.0312195,15.8355694,0.442323533,15.3122361,15.8329052,15.3139377,15.3117094
50.101777,17.2626765,15.8287608,1.19746219,15.3098091,15.8260828,15.3115333,15.3092869
50.110958,15.5884573,15.8220156,-0.483278724,15.3073818,15.8193235,15.3091287,15.3068641
50.120138,17.2336879,15.8153326,1.19094724,15.3049547,15.8126262,15.3067246,15.3044415
50.129318,16.0934769,15.8087101,0.53363554,15.3025277,15.8059891,15.3043206,15.3020188
50.138498,16.4924225,15.8021468,0.830828312,15.3001006,15.7994109,15.3019167,15.299596
50.147678,15.4919334,15.7956419,-0.551097543,15.2976735,15.7928909,15.299513,15.2971732
50.156858,16.2788206,15.7891942,0.699733061,15.2952464,15.7864278,15.2971095,15.2947502
50.166039,15.7162336,15.7828022,-0.258008816,15.2928191,15.78002,15.2947059,15.292327
50.175219,15.6524758,15.7764662,-0.352122627,15.290392,15.773668,15.2923027,15.2899039
50.184399,16.583124,15.7701845,0.901631523,15.2879648,15.76737,15.2898997,15.2874808
50.193579,16.1245155,15.7639563,0.600465775,15.2855377,15.7611252,15.2874968,15.2850576
50.202759,16.3707055,15.7577807,0.782895181,15.2831105,15.7549326,15.2850942,15.2826343
50.211939,15.9687194,15.7516595,0.46589688,15.2806833,15.7487943,15.2826917,15.2802109
50.22112,16.1554944,15.7455906,0.640237326,15.2782558,15.7427078,15.2802891,15.2777872
50.2303,15.7480157,15.7395721,0.0918895959,15.2758286,15.7366714,15.277887,15.2753637
50.23948,16.1864141,15.7336024,0.672912805,15.2734013,15.7306837,15.2754851,15.2729401
50.24866,15.9059737,15.7276809,0.422247383,15.270974,15.7247437,15.2730834,15.2705164
50.25784,15.9059737,15.7218066,0.429146945,15.2685467,15.7188506,15.2706819,15.2680927
50.26702,15.7162336,15.7159789,0.0159609177,15.2661193,15.7130038,15.2682807,15.2656688
50.276201,15.9687194,15.7101963,0.508451687,15.2636917,15.7072018,15.2658793,15.2632447
50.285381,15.4272486,15.7044594,-0.526508093,15.2612643,15.7014451,15.2634785,15.2608207
50.294561,15.5241747,15.6987668,-0.417842166,15.2588369,15.6957324,15.2610779,15.2583967
50.303741,16.9115345,15.6931177,1.10381919,15.2564094,15.6900629,15.2586775,15.2559725
50.312921,15.9059737,15.6875116,0.467399351,15.2539819,15.6844359,15.2562774,15.2535483
50.322102,15.4272486,15.6819485,-0.504677996,15.2515541,15.6788517,15.2538772,15.2511238
50.331282,16.4316767,15.6764302,0.869049234,15.2491265,15.6733118,15.2514775,15.2486994
50.340462,16.3401346,15.6709525,0.818035514,15.2466989,15.6678123,15.2490781,15.246275
50.349642,16.583124,15.665515,0.957919071,15.2442713,15.6623525,15.246679,15.2438505
50.358822,15.7162336,15.6601169,0.236889656,15.2418436,15.6569319,15.2442801,15.2414259
50.368002,15.9373775,15.6547577,0.531619913,15.2394159,15.6515497,15.2418815,15.2390012
50.377183,16.4012195,15.6494362,0.867054377,15.2369879,15.6462047,15.2394829,15.2365762
50.386363,16.2788206,15.6441529,0.796660354,15.2345601,15.6408977,15.2370848,15.2341514
50.395543,15.6524758,15.6389067,0.116486687,15.2321323,15.6356273,15.234687,15.2317265
50.404723,15.8745079,15.633697,0.490724792,15.2297044,15.6303931,15.2322896,15.2293015
50.413903,15.4272486,15.6285234,-0.448636544,15.2272765,15.6251944,15.2298924,15.2268764
50.423083,16.5529454,15.6233851,0.96413704,15.2248486,15.6200308,15.2274956,15.2244513
50.432264,16.0312195,15.6182818,0.642602331,15.2224203,15.6149016,15.2250988,15.2220258
50.441444,16.0623784,15.6132162,0.670195641,15.2199923,15.6098098,15.2227026,15.2196005
50.450624,15.5884573,15.6081844,-0.140453311,15.2175642,15.6047513,15.2203067,15.2171751
50.459804,16.0623784,15.6031859,0.677637475,15.2151361,15.5997256,15.2179111,15.2147497
50.468984,16.2172747,15.5982201,0.786800262,15.2127079,15.5947323,15.2155159,15.2123242
50.478164,16.2172747,15.5932866,0.789929187,15.2102797,15.5897708,15.2131211,15.2098985
50.487345,15.9687194,15.5883845,0.616713038,15.2078511,15.5848402,15.2107263,15.2074726
50.496525,15.7797338,15.5835142,0.442966865,15.2054228,15.579941,15.2083322,15.2050468
50.505705,16.0934769,15.5786749,0.717497074,15.2029945,15.5750722,15.2059385,15.202621
50.514885,15.7797338,15.5738661,0.453726514,15.2005661,15.5702334,15.2035451,15.200195
50.524065,16.3401346,15.5690873,0.878092986,15.1981376,15.5654243,15.2011522,15.197769
50.533245,15.2970585,15.5643382,-0.516991002,15.1957091,15.5606442,15.1987597,15.1953429
50.542426,16.2480768,15.5596178,0.829734278,15.1932803,15.5558923,15.1963673,15.1929165
50.551606,16,15.5549295,0.667136063,15.1908517,15.551172,15.1939756,15.1904902
50.560786,16.3095064,15.5502696,0.871341991,15.188423,15.5464795,15.1915844,15.1880639
50.569966,16.7332005,15.5456376,1.08975361,15.1859943,15.5418145,15.1891935,15.1856375
50.579146,15.4919334,15.5410332,-0.221584726,15.1835655,15.5371764,15.1868032,15.183211
50.588326,15.0332964,15.5364559,-0.709337412,15.1811367,15.532565,15.1844133,15.1807844
50.597507,16,15.531905,0.684174661,15.1787076,15.5279794,15.1820236,15.1783575
50.606687,15.0665192,15.5273811,-0.678868107,15.1762787,15.5234201,15.1796347,15.1759308
50.615867,16.2480768,15.5228833,0.851582969,15.1738497,15.5188863,15.1772462,15.173504
50.625047,15.5241747,15.5184112,0.0759174833,15.1714207,15.5143777,15.1748584,15.1710771
50.634227,15.6843871,15.5139646,0.412822609,15.1689916,15.5098939,15.172471,15.1686501
50.643407,15.5563492,15.5095431,0.216347064,15.1665624,15.5054346,15.1700842,15.1662231
50.652588,15.6843871,15.5051459,0.423368885,15.164133,15.5009989,15.1676976,15.1637957
50.661768,16.0312195,15.5007755,0.728315924,15.1617037,15.4965893,15.1653119,15.1613684
50.670948,16.4620776,15.4964297,0.982673894,15.1592744,15.4922037,15.1629268,15.1589412
50.680128,16.583124,15.4921076,1.04451728,15.1568451,15.4878412,15.1605422,15.1565138
50.689308,15.7797338,15.487809,0.540300655,15.1544157,15.4835015,15.1581583,15.1540863
50.698488,16.3401346,15.4835336,0.925527414,15.1519862,15.4791842,15.1557749,15.1516588
50.707669,15.7480157,15.4792807,0.518396637,15.1495564,15.4748886,15.153392,15.1492309
50.716849,17.0293864,15.4750508,1.24672996,15.1471268,15.4706154,15.1510099,15.1468032
50.726029,15.1657509,15.4708432,-0.552351647,15.1446971,15.4663637,15.1486285,15.1443754
50.735209,15.9059737,15.4666578,0.662809109,15.1422674,15.4621334,15.1462479,15.1419476
50.744389,16.3095064,15.4624942,0.920332682,15.1398376,15.4579241,15.1438679,15.1395196
50.753569,15.3297097,15.4583521,-0.358667523,15.1374078,15.4537355,15.1414886,15.1370916
50.76275,14.9666295,15.4542309,-0.698284563,15.1349777,15.4495669,15.1391099,15.1346632
50.77193,15.1986842,15.4501323,-0.501446014,15.1325477,15.4454201,15.1367321,15.132235
50.78111,15.6204994,15.4460553,0.417664991,15.1301177,15.4412941,15.1343551,15.1298068
50.79029,16.5227116,15.4419989,1.03957337,15.1276876,15.4371878,15.1319789,15.1273784
50.79947,16.2788206,15.4379627,0.916983047,15.1252575,15.4331008,15.1296035,15.12495
50.808651,15.5563492,15.4339461,0.349861486,15.1228271,15.4290326,15.1272287,15.1225212
50.817831,16.4924225,15.4299498,1.03076315,15.1203968,15.4249836,15.1248549,15.1200927
50.827011,14.6628783,15.4259731,-0.873552998,15.1179665,15.4209533,15.122482,15.117664
50.836191,16.1864141,15.4220158,0.874298696,15.1155361,15.4169415,15.1201101,15.1152352
50.845371,15.6204994,15.4180778,0.449912788,15.1131057,15.4129478,15.1177391,15.1128064
50.854551,15.1986842,15.4141588,-0.464192481,15.1106752,15.4089721,15.1153691,15.1103775
50.863732,16.643317,15.4102582,1.11043182,15.1082444,15.4050137,15.1129997,15.1079482
50.872912,15.8429795,15.4063765,0.660759409,15.1058137,15.4010733,15.1106316,15.1055192
50.882092,14.5602198,15.4025139,-0.917765833,15.103383,15.3971508,15.1082646,15.10309
50.891272,15.7797338,15.3986706,0.6173032,15.1009523,15.3932465,15.1058985,15.1006608
50.900452,15.2970585,15.3948453,-0.312708727,15.0985215,15.389359,15.1035335,15.0982315
50.909632,15.5241747,15.3910378,0.364879295,15.0960906,15.3854882,15.1011697,15.0958021
50.918813,15.5563492,15.3872475,0.41121971,15.0936594,15.3816334,15.0988067,15.0933723
50.927993,15.3297097,15.3834752,-0.231873781,15.0912284,15.3777953,15.096445,15.0909428
50.937173,15.8429795,15.3797201,0.680631623,15.0887974,15.3739733,15.0940846,15.0885132
50.946353,16.0312195,15.3759822,0.809467314,15.0863662,15.370167,15.0917254,15.0860834
50.955533,15.5884573,15.3722614,0.464968661,15.083935,15.3663765,15.0893675,15.0836537
50.964713,16,15.3685575,0.794633568,15.0815038,15.3626015,15.087011,15.0812238
50.973894,14.9331845,15.3648699,-0.657027669,15.0790722,15.3588414,15.0846555,15.0787936
50.983074,15.7797338,15.3611992,0.646942503,15.0766408,15.3550968,15.0823016,15.0763635
50.992254,15.6204994,15.3575453,0.512790499,15.0742094,15.3513674,15.0799491,15.0739334
51.001434,14.5945195,15.3539088,-0.871429442,15.0717778,15.3476541,15.077598,15.0715032
51.010614,15.3948043,15.3502885,0.210987786,15.0693463,15.3439553,15.0752484,15.069073
51.019794,15.1986842,15.3466842,-0.384707678,15.0669146,15.340271,15.0729003,15.0666426
51.028975,15.9687194,15.3430953,0.790964038,15.0644827,15.3366005,15.0705535,15.0642119
51.038155,16.2480768,15.3395226,0.953181086,15.0620509,15.3329445,15.0682085,15.0617814
51.047335,15.8429795,15.3359656,0.712049109,15.0596191,15.3293025,15.0658652,15.0593508
51.056515,15.2315462,15.3324241,-0.317612755,15.0571872,15.3256743,15.0635235,15.0569201
51.065695,15.6204994,15.3288981,0.540001157,15.0547552,15.3220596,15.0611837,15.0544894
51.074875,16.2788206,15.3253875,0.976438972,15.0523232,15.3184585,15.0588457,15.0520586
51.084056,14.8996644,15.3218918,-0.649790269,15.0498908,15.3148703,15.0565093,15.0496274
51.093236,15.132746,15.3184116,-0.43088941,15.0474586,15.3112957,15.0541751,15.0471964
51.102416,14.5945195,15.3149465,-0.848779704,15.0450264,15.3077342,15.0518428,15.0447654
51.111596,15.2970585,15.3114976,-0.120162509,15.0425941,15.3041867,15.0495125,15.0423342
51.120776,14.2126704,15.3080636,-1.04661032,15.0401618,15.3006521,15.0471842,15.039903
51.129956,14.6628783,15.3046444,-0.801103027,15.0377293,15.2971301,15.0448581,15.0374717
51.139137,15.2970585,15.3012395,-0.064660232,15.0352966,15.2936202,15.0425339,15.0350401
51.148317,15.2643375,15.2978496,-0.183063128,15.032864,15.290123,15.0402122,15.0326086
51.157497,15.5884573,15.2944744,0.542201909,15.0304314,15.286638,15.0378928,15.0301771
51.166677,15.3297097,15.2911136,0.196458927,15.0279987,15.2831652,15.0355758,15.0277455
51.175857,15.0665192,15.2877674,-0.470370343,15.025566,15.2797042,15.0332614,15.0253138
51.185037,15.1986842,15.2844358,-0.292833872,15.0231332,15.2762552,15.0309496,15.022882
51.194218,15.7480157,15.2811183,0.683298975,15.0207001,15.2728174,15.0286402,15.0204499
51.203398,15.1986842,15.2778154,-0.281302767,15.0182671,15.2693916,15.0263337,15.018018
51.212578,14.4222051,15.2745269,-0.923212737,15.0158341,15.2659774,15.0240301,15.015586
51.221758,15.6204994,15.2712534,0.590970309,15.013401,15.2625753,15.0217293,15.013154
51.230938,15.7162336,15.2679946,0.669506584,15.0109679,15.2591848,15.0194314,15.0107218
51.240119,15.6204994,15.2647496,0.596447628,15.0085344,15.255805,15.0171364,15.0082893
51.249299,15,15.2615191,-0.511389419,15.0061012,15.2524366,15.0148447,15.005857
51.258479,15.5884573,15.2583029,0.574590613,15.0036678,15.2490791,15.0125564,15.0034247
51.267659,15.7162336,15.2551008,0.679067594,15.0012344,15.2457324,15.0102713,15.0009922
51.276839,15.7480157,15.251913,0.704345618,14.998801,15.2423964,15.0079897,14.9985597
51.286019,16.1554944,15.2487394,0.952236828,14.9963675,15.239071,15.0057118,14.9961271
51.2952,15.9687194,15.2455801,0.850376013,14.9939336,15.2357557,15.0034377,14.9936941
51.30438,15.0665192,15.2424353,-0.419423553,14.9915,15.2324512,15.0011676,14.9912614
51.31356,16.9410743,15.2393048,1.30451889,14.9890662,15.229157,14.9989015,14.9888286
51.32274,16.5227116,15.2361887,1.13424995,14.9866325,15.225873,14.9966395,14.9863957
51.33192,15.3297097,15.2330875,0.310841188,14.9841986,15.2225996,14.9943817,14.9839627
51.3411,15.3622915,15.2300012,0.363717394,14.9817647,15.2193367,14.9921284,14.9815297
51.350281,15.6843871,15.226929,0.676356544,14.9793305,15.2160834,14.9898793,14.9790963
51.359461,15.5563492,15.2238717,0.576608651,14.9768964,15.2128402,14.9876351,14.9766631
51.368641,15.8745079,15.2208289,0.808504128,14.9744623,15.2096068,14.9853959,14.9742298
51.377821,15.132746,15.2178009,-0.291641856,14.9720282,15.206383,14.9831616,14.9717965
51.387001,15.7162336,15.2147877,0.708128491,14.9695939,15.2031687,14.9809326,14.969363
51.396181,16.2480768,15.2117894,1.01798205,14.9671597,15.199964,14.978709,14.9669296
51.405362,15.6204994,15.2088062,0.641633164,14.964725,15.1967682,14.9764913,14.9644957
51.414542,16.0312195,15.2058386,0.908504788,14.9622906,15.1935822,14.9742797,14.9620621
51.423722,15.4596248,15.2028862,0.506693789,14.9598561,15.1904053,14.9720741,14.9596284
51.432902,15.0665192,15.1999493,-0.365280908,14.9574216,15.1872377,14.9698748,14.9571946
51.442082,15.6524758,15.1970283,0.674868556,14.954987,15.1840793,14.9676821,14.9547608
51.451262,15.3948043,15.1941236,0.447974027,14.9525523,15.1809306,14.965496,14.9523268
51.460443,16.1554944,15.1912345,0.981967367,14.9501173,15.1777905,14.9633168,14.9498926
51.469623,15.3297097,15.1883619,0.375962573,14.9476826,15.1746595,14.9611451,14.9474585
51.478803,15.7480157,15.1855055,0.750006816,14.9452477,15.1715373,14.958981,14.9450244
51.487983,15.6843871,15.1826657,0.70832296,14.9428128,15.1684238,14.9568247,14.9425902
51.497163,15.8429795,15.1798427,0.814332129,14.9403778,15.165319,14.9546766,14.9401559
51.506343,15.4272486,15.1770367,0.500211873,14.9379428,15.1622227,14.9525371,14.9377216
51.515524,15.1986842,15.1742485,0.156319181,14.9355074,15.1591345,14.9504069,14.9352869
51.524704,16.2788206,15.1714783,1.05230332,14.9330723,15.1560551,14.9482863,14.9328524
51.533884,15.1657509,15.1687261,-0.0545458925,14.930637,15.1529841,14.9461754,14.9304179
51.543064,14.3527001,15.1659923,-0.901827134,14.9282018,15.1499213,14.9440746,14.9279832
51.552244,15.8113883,15.1632772,0.805053484,14.9257664,15.1468669,14.9419842,14.9255485
51.561424,16.1864141,15.1605818,1.01283377,14.923331,15.1438214,14.9399048,14.9231138
51.570605,15.3297097,15.1579056,0.414492607,14.9208953,15.1407836,14.9378366,14.9206787
51.579785,14.4913767,15.1552495,-0.814783885,14.9184598,15.1377543,14.9357805,14.9182438
51.588965,15.5563492,15.1526138,0.635401784,14.9160242,15.1347329,14.9337367,14.9158088
51.598145,15.7797338,15.1499988,0.793558479,14.9135886,15.1317194,14.931706,14.9133738
51.607325,15.5563492,15.1474051,0.639487366,14.9111529,15.1287138,14.9296887,14.9109387
51.616505,14.7648231,15.1448333,-0.616449667,14.9087171,15.125716,14.9276856,14.9085036
51.625686,15.7162336,15.1422846,0.757594275,14.906281,15.1227257,14.9256981,14.9060681
51.634866,15.8113883,15.1397598,0.819529436,14.9038452,15.1197434,14.9237269,14.9036328
51.644046,15.0996689,15.1372589,-0.193881498,14.9014092,15.1167687,14.9217721,14.9011974
51.653226,15.4272486,15.1347826,0.540801301,14.8989732,15.1138017,14.9198343,14.898762
51.662406,15.1657509,15.1323316,0.182809531,14.8965372,15.1108422,14.9179145,14.8963265
51.671587,15.2970585,15.1299071,0.408841593,14.8941008,15.1078905,14.9160132,14.8938907
51.680767,15.6524758,15.1275099,0.724545306,14.8916647,15.1049468,14.9141319,14.891455
51.689947,15,15.1251407,-0.353752285,14.8892285,15.1020104,14.9122713,14.8890194
51.699127,15.5563492,15.1228003,0.65844431,14.8867922,15.0990813,14.9104324,14.8865836
51.708307,15.6843871,15.1204898,0.750931003,14.8843559,15.0961596,14.9086163,14.8841478
51.717487,15.8429795,15.1182103,0.851333807,14.8819195,15.0932451,14.9068242,14.8817119
51.726668,16.3095064,15.1159627,1.09249427,14.8794828,15.0903375,14.9050571,14.8792757
51.735848,15.1986842,15.1137501,0.291434438,14.8770463,15.0874374,14.903318,14.8768397
51.745028,15.4919334,15.111574,0.616732847,14.8746097,15.0845445,14.9016086,14.8744037
51.754208,15.4272486,15.1094344,0.563750131,14.8721731,15.0816586,14.899929,14.8719675
51.763388,15.5563492,15.107333,0.67008671,14.8697365,15.0787798,14.8982808,14.8695314
51.772568,14.5602198,15.1052714,-0.73827611,14.8672998,15.075908,14.8966658,14.8670951
51.781749,15.7162336,15.1032517,0.782931641,14.8648627,15.0730434,14.8950857,14.8646585
51.790929,15.0332964,15.101276,-0.26072901,14.8624259,15.0701862,14.8935428,14.8622222
51.800109,15.9687194,15.0993459,0.932402,14.859989,15.0673359,14.892039,14.8597857
51.809289,15.7162336,15.0974637,0.786619293,14.8575521,15.0644924,14.8905768,14.8573492
51.818469,15.2970585,15.0956318,0.448805921,14.8551151,15.0616558,14.8891585,14.8549127
51.827649,15.3622915,15.0938527,0.51811083,14.8526781,15.058826,14.8877868,14.8524761
51.83683,15.5884573,15.092129,0.704505726,14.8502408,15.0560025,14.8864643,14.8500392
51.84601,14.9331845,15.0904656,-0.396586726,14.8478036,15.0531862,14.885196,14.8476024
51.85519,15.4272486,15.0888683,0.581704667,14.8453664,15.0503765,14.883988,14.8451657
51.86437,15.7797338,15.0873371,0.832103776,14.8429292,15.0475734,14.88284,14.8427288
51.87355,14.0356688,15.0858759,-1.02479612,14.8404919,15.044777,14.8817562,14.8402919
51.88273,15.8745079,15.0844888,0.888830142,14.8380546,15.0419871,14.8807407,14.837855
51.891911,15.6204994,15.0831806,0.733020322,14.8356169,15.0392039,14.879798,14.8354177
51.901091,15.2315462,15.0819563,0.386768542,14.8331795,15.0364278,14.8789335,14.8329806
51.910271,15.0332964,15.0808209,-0.218001215,14.830742,15.0336582,14.8781523,14.8305435
51.919451,14.6628783,15.0797801,-0.645679371,14.8283045,15.030895,14.8774603,14.8281063
51.928631,15.5563492,15.0788403,0.691020161,14.8258669,15.0281384,14.876864,14.8256691
51.937811,15.1986842,15.0780083,0.347384315,14.8234293,15.0253881,14.8763704,14.8232318
51.946992,15.5563492,15.0772915,0.692139955,14.8209913,15.0226439,14.8759869,14.8207942
51.956172,14.9666295,15.0766994,-0.331767721,14.8185536,15.0199064,14.8757233,14.8183568
51.965352,14.9666295,15.0762521,-0.331092961,14.8161158,15.0171753,14.8755998,14.8159194
51.974532,14,15.0759494,-1.03727982,14.813678,15.0144504,14.8756165,14.8134819
51.983712,15.4272486,15.0758025,0.592828902,14.8112401,15.0117319,14.8757844,14.8110443
51.992892,15.6204994,15.0758236,0.738021509,14.8088022,15.0090196,14.8761161,14.8086067
52.002073,14.3874946,15.0760264,-0.829778189,14.806364,15.0063135,14.8766254,14.8061688
52.011253,14.7648231,15.0764261,-0.558214178,14.803926,15.0036143,14.8773273,14.8037311
52.020433,15.5563492,15.0770388,0.692322442,14.801488,15.0009214,14.8782385,14.8012933
52.029613,16.0312195,15.0778828,0.976389652,14.7990499,14.9982346,14.8793777,14.7988555
52.038793,14.8660687,15.0789783,-0.461421275,14.7966117,14.995554,14.8807655,14.7964177
52.047973,15.1986842,15.0803481,0.34400014,14.7941736,14.9928796,14.8824246,14.7939798
52.057154,14.4913767,15.0820173,-0.768531434,14.7917351,14.990211,14.8843809,14.7915416
52.066334,15.8429795,15.0840138,0.871186399,14.7892968,14.9875489,14.8866624,14.7891036
52.075514,15,15.0864042,-0.293945929,14.7868585,14.9848928,14.8893367,14.7866655
52.084694,15.4596248,15.0892008,0.608624671,14.7844202,14.9822428,14.8924162,14.7842274
52.093874,15.4919334,15.0924417,0.632053522,14.7819818,14.9795989,14.8959395,14.7817893
52.103054,14.832397,15.0961736,-0.513591874,14.7795434,14.9769611,14.8999539,14.7793511
52.112235,14.6628783,15.1004498,-0.661491904,14.7771046,14.9743291,14.9045135,14.7769126
52.121415,15.4272486,15.10533,0.567378768,14.7746661,14.9717039,14.9096779,14.7744743
52.130595,15.2315462,15.1108821,0.347367412,14.7722276,14.9690848,14.9155169,14.7720359
52.139775,15.2643375,15.1171839,0.383606105,14.769789,14.9664716,14.9221089,14.7695976
52.148955,15.3948043,15.124324,0.520077206,14.7673504,14.9638645,14.9295438,14.7671592
52.158136,14.8996644,15.132405,-0.482431956,14.7649115,14.9612631,14.9379254,14.7647204
52.167316,15.2970585,15.1415415,0.394356466,14.7624728,14.9586679,14.9473699,14.7622819
52.176496,15.1657509,15.1518682,0.117824726,14.760034,14.9560787,14.9580135,14.7598434
52.185676,15.3297097,15.1636491,0.407505416,14.7575953,14.9534955,14.9701235,14.7574048
52.194856,15.0332964,15.1770372,-0.379131633,14.7551564,14.9509182,14.983855,14.7549661
52.204036,16.3401346,15.1922128,1.07141114,14.7527176,14.9483469,14.9993904,14.7525275
52.213217,14.4222051,15.209432,-0.887258055,14.7502785,14.9457812,15.0169887,14.7500885
52.222397,15.2970585,15.2289866,0.260906034,14.7478395,14.9432218,15.0369455,14.7476497
52.231577,15.8113883,15.2512226,0.748442186,14.7454006,14.9406687,15.0596103,14.7452109
52.240757,15.5884573,15.2765388,0.55849663,14.7429616,14.9381217,15.0853869,14.7427721
52.249937,15.2643375,15.305397,-0.202631369,14.7405226,14.9355806,15.1147428,14.7403332
52.259117,15.4919334,15.3383289,0.391924017,14.7380836,14.9330454,15.1482158,14.7378943
52.268298,15.4272486,15.375946,0.226500747,14.7356442,14.9305158,15.1864241,14.7354551
52.277478,15.4272486,15.4189235,0.091242231,14.7332051,14.9279924,15.2300505,14.7330161
52.286658,15.3297097,15.4680213,-0.371902612,14.730766,14.9254749,15.2798631,14.7305771
52.295838,15.1657509,15.5244702,-0.598931792,14.7283268,14.9229634,15.3371062,14.728138
52.305018,15,15.5892093,-0.767599695,14.7258876,14.9204577,15.4027283,14.7256989
52.314198,16.1245155,15.6626484,0.67960806,14.7234484,14.917958,15.4771415,14.7232598
52.323379,15.2643375,15.7453222,-0.693530587,14.7210088,14.9154643,15.5608836,14.7208203
52.332559,16.0623784,15.8373334,0.47438909,14.7185695,14.9129781,15.6540541,14.7183811
52.341739,17.1172428,15.938169,1.08585165,14.7161302,14.9105005,15.7561293,14.7159419
52.350919,16.1864141,16.0464014,0.37418269,14.7136909,14.9080323,15.8656608,14.7135026
52.360099,15.5563492,16.159442,-0.776590506,14.7112515,14.9055749,15.9800266,14.7110633
52.369279,16.7332005,16.2733516,0.678121621,14.7088121,14.9031329,16.095238,14.708624
52.37846,15.5884573,16.3827877,-0.891252193,14.7063724,14.9007104,16.2058906,14.7061843
52.38764,16.881943,16.4810755,0.633140974,14.703933,14.8982761,16.3052693,14.7037449
52.39682,16.8522995,16.56078,0.539925478,14.7014935,14.8958335,16.3858609,14.7013055
52.406,17.0293864,16.6133612,0.645000116,14.699054,14.8933936,16.4390309,14.6988661
52.41518,17.0293864,16.6309905,0.631186043,14.6966145,14.8909598,16.4568708,14.6964266
52.42436,15.9687194,16.6129381,-0.802632331,14.6941749,14.8885318,16.4386455,14.693987
52.433541,16.8522995,16.5605826,0.540108298,14.6917351,14.8861096,16.3857461,14.6915472
52.442721,16.0312195,16.4788799,-0.669074238,14.6892955,14.8836936,16.3031749,14.6891077
52.451901,16.673332,16.3752398,0.545978251,14.6868559,14.8812838,16.1984126,14.686668
52.461081,15.1657509,16.2580453,-1.0451289,14.6844162,14.8788804,16.0799255,14.6842284
52.470261,16.643317,16.1352423,0.712793567,14.6819766,14.876483,15.9557421,14.6817888
52.479441,15.8113883,16.0133567,-0.449408943,14.6795369,14.8740915,15.8324594,14.6793491
52.488622,14.6969385,15.8970476,-1.09549494,14.6770969,14.8717059,15.7147903,14.6769091
52.497802,15.4272486,15.7891962,-0.601620769,14.6746572,14.8693265,15.6056523,14.6744694
52.506982,15.4272486,15.691158,-0.513721117,14.6722175,14.8669532,15.5064207,14.6720296
52.516162,15.1986842,15.6033763,-0.636154204,14.6697777,14.8645859,15.4175482,14.6695898
52.525342,15.9373775,15.5260874,0.641318982,14.667338,14.8622247,15.3392778,14.66715
52.534522,15.8429795,15.4575948,0.620793645,14.6648982,14.8598696,15.269896,14.6647102
52.543703,15.1657509,15.3969958,-0.480879299,14.6624581,14.8575204,15.2084916,14.6622701
52.552883,15.2970585,15.3434009,-0.215272828,14.6600183,14.8551775,15.1541664,14.6598302
52.562063,14.1421356,15.2959459,-1.07415559,14.6575785,14.8528409,15.1060469,14.6573903
52.571243,14.7648231,15.2538473,-0.699302674,14.6551387,14.8505109,15.0633408,14.6549504
52.580423,15.6204994,15.2164052,0.63568397,14.6526989,14.8481871,15.025341,14.6525105
52.589603,14.525839,15.1830051,-0.810657786,14.650259,14.8458695,14.9914258,14.6500706
52.598784,14.6287388,15.1531095,-0.724134434,14.6478189,14.8435579,14.9610517,14.6476303
52.607964,14,15.1262633,-1.06125553,14.645379,14.8412528,14.9337582,14.6451903
52.617144,15.5241747,15.1020661,0.64969884,14.6429391,14.8389539,14.9091401,14.6427503
52.626324,15.0332964,15.0801772,-0.216519691,14.6404992,14.8366613,14.8868527,14.6403103
52.635504,14.6628783,15.0604659,-0.630545509,14.6380592,14.834375,14.8667639,14.6378703
52.644685,15.0996689,15.0424821,0.239137486,14.635619,14.8320948,14.8484178,14.63543
52.653865,14.7986486,15.0260148,-0.476829285,14.6331791,14.8298211,14.8316008,14.6329899
52.663045,15.1657509,15.0108844,0.393530752,14.6307392,14.8275539,14.8161313,14.6305499
52.672225,15.0332964,14.9969377,0.190679417,14.6282992,14.8252931,14.801854,14.6281098
52.681405,15.2970585,14.984042,0.559478852,14.6258592,14.8230392,14.7886338,14.6256697
52.690585,15.0996689,14.9720809,0.357194603,14.6234193,14.8207918,14.7763537,14.6232296
52.699766,15.5884573,14.9609524,0.792152043,14.620979,14.8185507,14.7649103,14.6207892
52.708946,15.2970585,14.9505708,0.588632086,14.6185391,14.8163164,14.7542167,14.618349
52.718126,15.0996689,14.9408577,0.398511179,14.6160991,14.8140885,14.7441935,14.6159089
52.727306,14.6287388,14.9317454,-0.550460361,14.6136591,14.8118673,14.7347723,14.6134687
52.736486,13.9283883,14.9231745,-0.997389706,14.6112191,14.8096527,14.7258926,14.6110286
52.745666,15.0332964,14.9151245,0.34376131,14.6087791,14.8074446,14.717534,14.6085884
52.754847,15.0332964,14.9075189,0.354651275,14.6063389,14.805243,14.7096186,14.606148
52.764027,14.8660687,14.9003082,-0.185039124,14.6038989,14.8030484,14.7020965,14.6037078
52.773207,14.7648231,14.8934567,-0.358655268,14.6014589,14.8008605,14.6949314,14.6012676
52.782387,15.6524758,14.8869328,0.874953159,14.5990189,14.7986793,14.6880914,14.5988274
52.791567,15.2315462,14.8807091,0.592315025,14.5965789,14.7965054,14.6815481,14.5963872
52.800747,14.8660687,14.8747602,-0.0932279442,14.5941389,14.7943386,14.6752759,14.593947
52.809928,15.0665192,14.8690627,0.444360736,14.5916987,14.7921783,14.6692515,14.5915065
52.819108,16,14.8635976,1.06602175,14.5892587,14.7900253,14.6634555,14.5890663
52.828288,15.2643375,14.8583461,0.63717458,14.5868187,14.7878792,14.6578688,14.5866261
52.837468,14.9666295,14.8532916,0.33665705,14.5843788,14.78574,14.6524746,14.5841859
52.846648,15,14.8484192,0.389333727,14.5819388,14.783608,14.6472579,14.5817457
52.855828,14.6969385,14.8437239,-0.383125861,14.5794989,14.7814829,14.6422132,14.5793054
52.865009,15.3297097,14.839189,0.700371872,14.5770586,14.7793648,14.6373239,14.576865
52.874189,15.1657509,14.8347978,0.575285185,14.5746187,14.7772541,14.632573,14.5744248
52.883369,14.9666295,14.8305402,0.368902841,14.5721788,14.7751506,14.62795,14.5719845
52.892549,13.8564065,14.8264072,-0.984886162,14.5697388,14.7730543,14.623446,14.5695443
52.901729,14.3874946,14.8223909,-0.659466735,14.5672989,14.7709657,14.6190524,14.5671041
52.910909,15.9059737,14.818484,1.04282777,14.564859,14.7688847,14.6147618,14.5646639
52.92009,15.1986842,14.8146787,0.619681766,14.5624189,14.766811,14.6105667,14.5622235
52.92927,15.4272486,14.8109696,0.78503441,14.559979,14.7647449,14.6064615,14.5597833
52.93845,14.4568323,14.8073506,-0.592045836,14.5575391,14.7626863,14.60244,14.5573431
52.94763,14.8660687,14.8038163,0.249504469,14.5550993,14.7606352,14.5984967,14.5549029
52.95681,14.7309199,14.8003618,-0.263518402,14.5526594,14.7585918,14.5946266,14.5524627
52.96599,15.4919334,14.796985,0.833635624,14.5502196,14.756556,14.5908274,14.5500226
52.975171,15.0665192,14.7936824,0.522337802,14.5477796,14.7545277,14.5870955,14.5475821
52.984351,15.1986842,14.7904467,0.638934605,14.5453398,14.7525074,14.5834236,14.545142
52.993531,15.1657509,14.7872742,0.61520459,14.5429,14.7504948,14.5798078,14.5427019
53.002711,14.9331845,14.7841616,0.386034838,14.5404603,14.7484902,14.5762447,14.5402617
53.011891,14.4913767,14.7811063,-0.538265283,14.5380205,14.7464937,14.5727314,14.5378216
53.021071,15.0665192,14.7781057,0.537041431,14.5355808,14.7445057,14.5692649,14.5353815
53.030252,14.6969385,14.7751565,-0.279674813,14.5331409,14.7425256,14.5658423,14.5329412
53.039432,14.3874946,14.7722569,-0.620292114,14.5307012,14.7405538,14.5624618,14.5305011
53.048612,13.6747943,14.7694044,-1.04623614,14.5282616,14.7385902,14.5591207,14.528061
53.057792,15.1986842,14.766597,0.657333391,14.5258219,14.7366349,14.5558169,14.525621
53.066972,15.2315462,14.7638327,0.683895857,14.5233823,14.7346879,14.5525484,14.523181
53.076153,15,14.76111,0.488763758,14.5209425,14.732749,14.5493136,14.5207407
53.085333,14.6287388,14.7584296,-0.360126031,14.518503,14.7308188,14.5461131,14.5183007
53.094513,14.5602198,14.755787,-0.442229847,14.5160634,14.7288971,14.5429423,14.5158607
53.103693,14.9331845,14.7531808,0.424268414,14.5136239,14.7269839,14.5397997,14.5134208
53.112873,14.6628783,14.7506097,-0.296194927,14.5111845,14.7250795,14.5366839,14.5109809
53.122053,14.1774469,14.7480725,-0.755397687,14.508745,14.7231838,14.5335935,14.5085409
53.131234,14.6287388,14.7455686,-0.341803618,14.5063054,14.7212975,14.5305271,14.5061008
53.140414,15.2315462,14.7430965,0.698891806,14.503866,14.7194203,14.527484,14.5036609
53.149594,15.0996689,14.740655,0.599177688,14.5014267,14.717552,14.5244628,14.5012211
53.158774,15.2315462,14.7382431,0.70235537,14.4989873,14.7156928,14.5214626,14.4987812
53.167954,14.5602198,14.7358601,-0.419094644,14.4965481,14.7138427,14.5184823,14.4963414
53.177134,14.525839,14.733505,-0.455703801,14.4941088,14.7120019,14.5155211,14.4939017
53.186315,14.1774469,14.7311768,-0.744130326,14.4916693,14.7101701,14.5125776,14.4914617
53.195495,15.5241747,14.7288769,0.891794691,14.4892302,14.7083478,14.5096534,14.4890219
53.204675,15.0665192,14.7266026,0.583023606,14.486791,14.7065351,14.5067456,14.4865822
53.213855,14.6628783,14.7243534,-0.247941639,14.4843519,14.7047318,14.5038535,14.4841426
53.223035,14.9666295,14.7221285,0.494470512,14.4819129,14.7029382,14.5009763,14.4817029
53.232215,14.832397,14.7199274,0.335364773,14.4794739,14.7011543,14.4981135,14.4792633
53.241396,15.132746,14.7177503,0.644201555,14.4770346,14.6993808,14.4952641,14.4768235
53.250576,14.7648231,14.7155964,0.22187074,14.4745957,14.6976176,14.4924282,14.4743839
53.259756,15.0665192,14.713465,0.594183623,14.4721568,14.6958644,14.489605,14.4719444
53.268936,15.4596248,14.7113556,0.865025585,14.4697179,14.6941213,14.4867938,14.469505
53.278116,15.1657509,14.7092678,0.675635343,14.4672791,14.6923884,14.4839941,14.4670655
53.287296,15.0665192,14.7072012,0.599431349,14.4648403,14.6906658,14.4812057,14.4646261
53.296477,13.892444,14.7051554,-0.901505076,14.4624013,14.6889534,14.4784276,14.4621865
53.305657,14.2478068,14.7031311,-0.674777217,14.4599626,14.6872517,14.4756608,14.4597471
53.314837,14.5602198,14.7011273,-0.37537653,14.457524,14.6855606,14.472904,14.4573078
53.324017,14.4222051,14.6991435,-0.526249328,14.4550854,14.6838803,14.4701566,14.4548685
53.333197,15.9373775,14.6971793,1.11364184,14.4526469,14.6822108,14.4674182,14.4524293
53.342377,15.3622915,14.6952347,0.81673548,14.4502084,14.6805522,14.4646886,14.4499901
53.351558,15.1986842,14.6933098,0.710896883,14.4477697,14.6789052,14.461967,14.4475507
53.360738,15.6843871,14.6914046,0.996485109,14.4453313,14.6772699,14.4592537,14.4451116
53.369918,14,14.6895183,-0.830372382,14.442893,14.675646,14.4565482,14.4426725
53.379098,14.5602198,14.6876508,-0.356974799,14.4404547,14.6740334,14.4538502,14.4402335
53.388278,14.2126704,14.6858019,-0.687845547,14.4380165,14.6724324,14.4511594,14.4377945
53.397458,14.0712473,14.6839715,-0.78276703,14.4355783,14.6708431,14.4484755,14.4353556
53.406639,14.8996644,14.6821593,0.46637447,14.4331399,14.6692654,14.4457981,14.4329165
53.415819,14.2478068,14.6803659,-0.657692203,14.4307019,14.6676997,14.4431277,14.4304776
53.424999,14.3178211,14.6785909,-0.600641149,14.4282639,14.6661462,14.4404638,14.4280388
53.434179,15.8113883,14.6768339,1.06515465,14.425826,14.6646048,14.4378059,14.4256001
53.443359,15.132746,14.6750949,0.676499147,14.4233881,14.6630757,14.4351538,14.4231614
53.452539,15.6524758,14.6733738,0.989495872,14.4209503,14.6615591,14.4325072,14.4207227
53.46172,15.1657509,14.6716709,0.702908222,14.4185122,14.6600554,14.4298658,14.4182839
53.4709,15.2315462,14.6699868,0.749372694,14.4160745,14.6585654,14.4272298,14.4158453
53.48008,15.3948043,14.6683205,0.852340216,14.4136369,14.6570882,14.4245989,14.4134068
53.48926,14.2478068,14.666672,-0.647197919,14.4111994,14.6556241,14.4219729,14.4109684
53.49844,14.4568323,14.6650413,-0.456299285,14.4087619,14.6541732,14.4193515,14.40853
53.507621,14.1774469,14.6634283,-0.697123686,14.4063242,14.6527355,14.4167345,14.4060914
53.516801,15.3948043,14.6618333,0.856137268,14.4038868,14.6513114,14.4141222,14.4036531
53.525981,14.9666295,14.6602563,0.553509938,14.4014495,14.6499011,14.4115143,14.4012149
53.535161,15.4596248,14.6586974,0.894945503,14.3990123,14.6485045,14.4089108,14.3987767
53.544341,15.0332964,14.6571563,0.613302561,14.3965751,14.6471219,14.4063113,14.3963386
53.553521,15.0665192,14.6556332,0.641003847,14.3941381,14.6457535,14.4037157,14.3939005
53.562702,14.6628783,14.654128,0.0935432854,14.3917008,14.6443992,14.4011235,14.3914623
53.571882,15.3297097,14.6526412,0.822841715,14.3892639,14.64306,14.3985353,14.3890243
53.581062,14.5945195,14.6511737,-0.238021342,14.386827,14.6417364,14.3959506,14.3865865
53.590242,14.4568323,14.6497243,-0.439194775,14.3843902,14.6404278,14.3933693,14.3841487
53.599422,14.832397,14.6482933,0.429073028,14.3819535,14.6391342,14.3907914,14.3817109
53.608602,14.5945195,14.6468807,-0.228825579,14.3795169,14.6378559,14.3882167,14.3792732
53.617783,15.3948043,14.6454864,0.865631542,14.3770801,14.6365929,14.3856449,14.3768354
53.626963,15.2643375,14.6441108,0.787544757,14.3746436,14.6353456,14.3830763,14.3743978
53.636143,14.7648231,14.642754,0.349383884,14.3722072,14.6341142,14.3805109,14.3719603
53.645323,14.8996644,14.6414162,0.508181334,14.3697709,14.6328988,14.3779485,14.3695229
53.654503,14.4568323,14.6400973,-0.428094586,14.3673347,14.6316996,14.3753888,14.3670856
53.663683,15,14.6387974,0.601001309,14.3648986,14.6305168,14.3728319,14.3646483
53.672864,15,14.6375166,0.60206592,14.3624623,14.6293505,14.3702774,14.3622108
53.682044,14.106736,14.6362554,-0.72768084,14.3600263,14.6282014,14.3677257,14.3597737
53.691224,15.0665192,14.6350152,0.656889632,14.3575904,14.6270708,14.3651765,14.3573366
53.700404,15.4596248,14.6337947,0.908751986,14.3551546,14.6259576,14.3626297,14.3548996
53.709584,13.892444,14.632594,-0.860319699,14.352719,14.624862,14.3600852,14.3524627
53.718764,15.5884573,14.6314133,0.978286243,14.3502834,14.6237841,14.3575431,14.3500258
53.727945,14,14.6302527,-0.793884546,14.3478476,14.6227242,14.355003,14.3475888
53.737125,14.1421356,14.6291125,-0.697837314,14.3454122,14.6216826,14.3524653,14.3451521
53.746305,13.7113092,14.627993,-0.957436037,14.3429768,14.6206596,14.3499297,14.3427155
53.755485,14.5602198,14.6268943,-0.258214137,14.3405416,14.6196553,14.3473964,14.340279
53.764665,14.3874946,14.6258166,-0.48818238,14.3381065,14.6186701,14.3448651,14.3378425
53.773845,15.4919334,14.62476,0.931221429,14.3356715,14.6177041,14.3423358,14.3354061
53.783026,14.525839,14.6237247,-0.312866845,14.3332363,14.6167575,14.3398081,14.3329696
53.792206,14.6628783,14.6227111,0.200417589,14.3308014,14.6158309,14.3372825,14.3305334
53.801386,15.3297097,14.6217209,0.841420707,14.3283667,14.6149259,14.3347588,14.3280972
53.810566,14.8996644,14.6207531,0.528120536,14.3259321,14.6140417,14.3322369,14.3256612
53.819746,14.5945195,14.6198077,-0.159022508,14.3234976,14.6131782,14.3297166,14.3232252
53.828926,13.9283883,14.6188848,-0.830961213,14.3210632,14.6123356,14.3271981,14.3207893
53.838107,14.7986486,14.6179847,0.425045752,14.3186286,14.6115142,14.324681,14.3183533
53.847287,14.9666295,14.6171078,0.591203661,14.3161944,14.6107145,14.3221658,14.3159176
53.856467,15.1657509,14.6162542,0.741280416,14.3137603,14.6099367,14.3196521,14.313482
53.865647,14.6287388,14.6154244,0.115387993,14.3113263,14.609181,14.3171401,14.3110464
53.874827,15.2643375,14.6146186,0.806051433,14.3088925,14.6084479,14.3146296,14.308611
53.884007,15.5563492,14.613837,0.970830677,14.3064587,14.6077376,14.3121206,14.3061757
53.893188,14.6287388,14.6130798,0.125136143,14.3040248,14.6070504,14.3096128,14.3037402
53.902368,14.832397,14.6123475,0.469094331,14.3015913,14.6063868,14.3071066,14.301305
53.911548,15.132746,14.6116418,0.721875414,14.2991579,14.6057485,14.3046018,14.2988699
53.920728,15.4272486,14.6109625,0.903485538,14.2967246,14.6051353,14.3020984,14.296435
53.929908,15.3297097,14.610309,0.848174919,14.2942914,14.6045468,14.2995963,14.2940001
53.939088,14.4568323,14.6096817,-0.390959638,14.2918584,14.6039832,14.2970955,14.2915653
53.948269,14.5945195,14.6090809,-0.120670607,14.2894252,14.6034449,14.2945956,14.2891304
53.957449,14.7309199,14.6085071,0.34987542,14.2869924,14.6029325,14.2920973,14.2866958
53.966629,14.6969385,14.6079604,0.298291825,14.2845597,14.6024461,14.2896002,14.2842613
53.975809,14.2828569,14.6074415,-0.569723325,14.2821271,14.6019863,14.2871043,14.2818269
53.984989,15.8113883,14.6069506,1.09746875,14.2796947,14.6015535,14.2846097,14.2793927
53.99417,14.525839,14.6064881,-0.283987745,14.2772621,14.6011479,14.2821159,14.2769582
54.00335,15.1657509,14.6060544,0.748128679,14.27483,14.6007701,14.2796234,14.2745242
54.01253,15.6204994,14.6056498,1.0073974,14.2723979,14.6004206,14.2771321,14.2720902
54.02171,15.8745079,14.6052762,1.12660183,14.269966,14.6001009,14.2746419,14.2696564
54.03089,14.4568323,14.6049342,-0.38484006,14.2675343,14.5998119,14.2721527,14.2672226
54.04007,15.4596248,14.6046227,0.92466325,14.2651026,14.5995526,14.2696645,14.264789
54.049251,14.4913767,14.6043422,-0.336103379,14.2626709,14.5993233,14.267177,14.2623552
54.058431,14.6969385,14.6040932,0.304705116,14.2602395,14.5991246,14.2646909,14.2599217
54.067611,15.0665192,14.6038762,0.68017863,14.2578083,14.598957,14.2622057,14.2574884
54.076791,14.2478068,14.6036916,-0.596560746,14.2553772,14.5988209,14.2597214,14.2550552
54.085971,15.132746,14.6035399,0.727465512,14.2529463,14.5987169,14.2572382,14.2526221
54.095151,14.525839,14.6034216,-0.278536498,14.2505155,14.5986454,14.2547559,14.2501892
54.104332,14.4568323,14.6033373,-0.382759694,14.2480846,14.5986071,14.2522742,14.247756
54.113512,15.0665192,14.6032874,0.680611344,14.2456541,14.5986024,14.2497937,14.2453233
54.122692,14.4913767,14.6032724,-0.334508125,14.2432238,14.5986319,14.2473141,14.2428907
54.131872,15.7162336,14.6032939,1.0549596,14.2407936,14.5986971,14.2448353,14.2404582
54.141052,15.3622915,14.603354,0.871170166,14.2383636,14.5988002,14.2423573,14.2380258
54.150232,14.9666295,14.603451,0.602643,14.2359337,14.5989393,14.2398802,14.2355935
54.159413,14.7309199,14.6035853,0.35683974,14.2335037,14.5991151,14.2374037,14.2331611
54.168593,15,14.6037575,0.629477943,14.2310741,14.5993282,14.2349282,14.2307291
54.177773,14.3527001,14.6039684,-0.501266657,14.2286447,14.5995791,14.2324535,14.2282972
54.186953,14.7986486,14.6042184,0.440942383,14.2262154,14.5998686,14.2299796,14.2258654
54.196133,15.8745079,14.6045083,1.12694257,14.2237864,14.6001972,14.2275064,14.2234337
54.205313,15,14.6048388,0.628618492,14.2213574,14.6005658,14.2250341,14.2210022
54.214494,13.6381817,14.6052105,-0.983376222,14.2189284,14.6009749,14.2225622,14.2185705
54.223674,14.106736,14.605624,-0.706320071,14.2164998,14.6014252,14.2200914,14.2161393
54.232854,13.7840488,14.6060801,-0.90665946,14.2140714,14.6019175,14.2176212,14.2137081
54.242034,14.525839,14.6065798,-0.284149152,14.2116431,14.6024528,14.2151518,14.2112771
54.251214,13.7840488,14.6071275,-0.907236894,14.209215,14.6030355,14.212683,14.2088462
54.260394,14.832397,14.6077202,0.474000774,14.2067871,14.6036626,14.2102149,14.2064155
54.269575,14.2828569,14.6083588,-0.570527735,14.2043592,14.604335,14.2077473,14.2039846
54.278755,14.7309199,14.6090437,0.349107618,14.2019316,14.6050532,14.2052806,14.2015541
54.287935,15.2643375,14.6097761,0.809049728,14.1995042,14.6058182,14.2028145,14.1991237
54.297115,14.6287388,14.6105566,0.134841663,14.197077,14.6066309,14.2003491,14.1966935
54.306295,14.832397,14.6113861,0.470117932,14.19465,14.6074921,14.1978843,14.1942635
54.315475,15,14.6122656,0.622683234,14.1922232,14.6084026,14.1954202,14.1918335
54.324656,14.525839,14.613196,-0.295562058,14.1897963,14.6093636,14.1929565,14.1894035
54.333836,14.2828569,14.614178,-0.575604998,14.1873699,14.6103756,14.1904937,14.1869738
54.343016,14.4222051,14.6152126,-0.439326195,14.1849436,14.6114398,14.1880314,14.1845443
54.352196,15.3948043,14.6163009,0.882328431,14.1825176,14.612557,14.1855698,14.1821149
54.361376,15.4919334,14.6174483,0.935139067,14.1800917,14.613733,14.1831087,14.1796857
54.370556,15.7480157,14.6186523,1.06271512,14.177666,14.6149651,14.1806483,14.1772566
54.379737,15,14.6199133,0.616511719,14.1752403,14.6162537,14.1781881,14.1748274
54.388917,14.106736,14.6212321,-0.717283826,14.172815,14.6175996,14.1757288,14.1723986
54.398097,14.832397,14.6226098,0.458025265,14.17039,14.6190041,14.17327,14.16997
54.407277,13.820275,14.6240477,-0.896533738,14.1679651,14.6204682,14.1708118,14.1675415
54.416457,14.1774469,14.6255468,-0.669402683,14.1655405,14.6219931,14.1683542,14.1651131
54.425638,15,14.6271086,0.610648356,14.1631158,14.6235802,14.1658969,14.1626847
54.434818,14.7309199,14.6287338,0.319665561,14.1606916,14.6252302,14.1634403,14.1602566
54.443998,14.6287388,14.6304238,-0.041048778,14.1582676,14.6269447,14.1609843,14.1578287
54.453178,14.832397,14.63218,0.447456128,14.1558438,14.6287249,14.1585289,14.155401
54.462358,14.7309199,14.6340035,0.311313895,14.1534202,14.6305721,14.1560739,14.1529734
54.471538,14.8996644,14.6359003,0.513579706,14.1509969,14.6324921,14.1536195,14.150546
54.480719,14.5602198,14.6378699,-0.278657746,14.1485735,14.6344845,14.1511653,14.1481185
54.489899,14.3527001,14.6399111,-0.535920695,14.1461506,14.6365481,14.1487119,14.1456914
54.499079,15.2643375,14.6420255,0.788867585,14.1437279,14.6386844,14.146259,14.1432644
54.508259,15.1657509,14.6442145,0.722174761,14.1413055,14.6408951,14.1438066,14.1408376
54.517439,15.2643375,14.6464797,0.786039306,14.1388833,14.6431816,14.1413547,14.138411
54.526619,14.5602198,14.6488227,-0.297662422,14.1364614,14.6455454,14.1389033,14.1359845
54.5358,14.5602198,14.6512453,-0.301704313,14.1340394,14.6479884,14.1364521,14.133558
54.54498,15.132746,14.6537485,0.692096385,14.1316179,14.6505118,14.1340016,14.1311319
54.55416,14.2478068,14.6563344,-0.63916163,14.1291967,14.6531174,14.1315517,14.1287059
54.56334,14.6287388,14.6590047,-0.173970772,14.1267757,14.6558069,14.1291022,14.1262801
54.57252,15.3948043,14.661761,0.856179494,14.124355,14.6585823,14.1266531,14.1238545
54.5817,15.8113883,14.6646093,1.07087765,14.1219345,14.6614492,14.1242046,14.121429
54.590881,14.832397,14.6675528,0.406010101,14.119514,14.6644109,14.1217562,14.1190035
54.600061,14.3527001,14.670588,-0.563815476,14.1170941,14.6674641,14.1193085,14.1165783
54.609241,15.0996689,14.6737173,0.652649675,14.1146744,14.6706109,14.1168613,14.1141534
54.618421,14.832397,14.6769427,0.39427695,14.112255,14.6738535,14.1144146,14.1117286
54.627601,15.4596248,14.6802662,0.882812892,14.1098358,14.677194,14.1119683,14.109304
54.636781,14.3874946,14.6836901,-0.544238509,14.1074169,14.6806344,14.1095224,14.1068796
54.645962,15,14.6872169,0.559270114,14.1049981,14.6841774,14.1070767,14.1044551
54.655142,14.8660687,14.6908482,0.418593581,14.1025797,14.6878245,14.1046317,14.1020311
54.664322,15.7480157,14.6945865,1.02636703,14.1001617,14.6915783,14.1021872,14.0996072
54.673502,14.3527001,14.6984343,-0.587991646,14.097744,14.6954413,14.0997431,14.0971835
54.682682,14.1421356,14.702394,-0.748504085,14.0953265,14.6994159,14.0972994,14.09476
54.691862,15.5884573,14.7064713,0.93914108,14.0929093,14.7035077,14.0948561,14.0923366
54.701043,15.2643375,14.7106749,0.744085098,14.0904922,14.7077255,14.092413,14.0899132
54.710223,15.5884573,14.7149984,0.934590239,14.0880757,14.7120628,14.0899706,14.0874902
54.719403,15.3948043,14.7194449,0.821802542,14.0856594,14.716523,14.0875285,14.0850675
54.728583,14.525839,14.7240174,-0.445172251,14.0832435,14.7211087,14.0850869,14.0826449
54.737763,15.1657509,14.7287187,0.661084085,14.0808278,14.7258229,14.0826458,14.0802225
54.746943,14.7986486,14.7335519,0.255140453,14.0784125,14.7306688,14.080205,14.0778003
54.756124,15.132746,14.7385207,0.627873605,14.0759973,14.7356498,14.0777643,14.075378
54.765304,15.132746,14.7436271,0.623793928,14.0735826,14.7407681,14.0753244,14.0729561
54.774484,14.5945195,14.7488749,-0.392880927,14.0711683,14.7460276,14.0728848,14.0705345
54.783664,15.0665192,14.7542676,0.558794716,14.0687543,14.7514316,14.0704457,14.0681131
54.792844,14.2828569,14.7598087,-0.690616972,14.0663406,14.7569837,14.0680069,14.0656918
54.802024,15.9059737,14.7655028,1.06792835,14.0639273,14.7626885,14.0655685,14.0632708
54.811205,14.5945195,14.7713679,-0.420533413,14.0615141,14.768564,14.0631303,14.0608497
54.820385,16.0934769,14.7773927,1.14720716,14.0591016,14.7745988,14.0606927,14.058429
54.829565,15.132746,14.7835817,0.590901183,14.0566893,14.7807976,14.0582555,14.0560086
54.838745,16.0312195,14.7899392,1.11412762,14.0542775,14.7871645,14.0558187,14.0535883
54.847925,14.7648231,14.7964692,-0.177893733,14.051866,14.7937037,14.0533823,14.0511683
54.857105,14.2828569,14.8031762,-0.721331667,14.0494549,14.8004195,14.0509463,14.0487484
54.866286,15.4596248,14.8100654,0.805952491,14.0470439,14.8073171,14.0485104,14.0463285
54.875466,14.8660687,14.8171399,0.221198588,14.0446336,14.8143998,14.0460752,14.0439091
54.884646,15.8745079,14.8244053,1.02474513,14.0422236,14.821673,14.0436403,14.0414899
54.893826,14.7648231,14.8318664,-0.258927249,14.0398141,14.8291416,14.0412058,14.0390708
54.903006,15.2970585,14.8395283,0.676409803,14.037405,14.8368107,14.0387717,14.036652
54.912187,15.3297097,14.8473972,0.694487212,14.034996,14.8446865,14.0363377,14.0342332
54.921367,15.0332964,14.8554959,0.421663933,14.0325877,14.8527917,14.0339043,14.0318148
54.930547,15.9059737,14.8638156,1.02086147,14.0301799,14.8611176,14.0314714,14.0293966
54.939727,15.132746,14.8723595,0.510280763,14.0277725,14.8696674,14.0290387,14.0269787
54.948907,14.2828569,14.8811337,-0.773483587,14.0253655,14.8784472,14.0266065,14.0245609
54.958087,15.0332964,14.8901445,0.378354192,14.022959,14.8874632,14.0241746,14.0221434
54.967268,15.0665192,14.8993993,0.408803016,14.0205527,14.8967229,14.0217429,14.0197258
54.976448,15.1986842,14.9089027,0.538313502,14.0181471,14.9062309,14.0193118,14.0173087
54.985628,15.3622915,14.9186628,0.666054603,14.015742,14.9159951,14.016881,14.0148919
54.994808,15.6843871,14.9286865,0.869310445,14.0133374,14.9260227,14.0144506,14.0124752
55.003988,15.0332964,14.9389813,0.307107616,14.0109332,14.936321,14.0120206,14.0100588
55.013168,15.7480157,14.9495548,0.893566427,14.0085296,14.9468976,14.009591,14.0076426
55.022349,15.2970585,14.9604161,0.580208963,14.0061263,14.9577618,14.0071614,14.0052264
55.031529,16.0312195,14.9715919,1.02938215,14.0037237,14.96894,14.0047325,14.0028106
55.040709,14.9666295,14.9830824,-0.128268864,14.0013217,14.9804326,14.0023039,14.0003951
55.049889,15.3948043,14.9948871,0.632390091,13.9989202,14.9922389,13.9998758,13.9979798
55.059069,15.8429795,15.0070151,0.914310917,13.9965193,15.0043682,13.9974479,13.9955647
55.068249,16.2480768,15.0194759,1.10842271,13.9941189,15.01683,13.9950205,13.9931499
55.07743,14.7309199,15.0322809,-0.548963597,13.9917189,15.0296355,13.9925931,13.990735
55.08661,15.0996689,15.0454375,0.232876292,13.9893197,15.0427923,13.9901663,13.9883207
55.09579,15.1657509,15.0589577,0.326792227,13.9869211,15.0563123,13.9877399,13.9859065
55.10497,16.0934769,15.0728526,1.01025955,13.9845232,15.0702065,13.9853139,13.9834926
55.11415,15.4596248,15.0871335,0.610320707,13.9821258,15.0844863,13.9828883,13.981079
55.12333,16.2480768,15.1018123,1.07063745,13.9797292,15.0991637,13.980463,13.9786656
55.132511,14.7986486,15.1169029,-0.564140356,13.9773329,15.1142525,13.9780378,13.9762521
55.141691,15.7162336,15.1324366,0.764066127,13.9749376,15.1297838,13.9756132,13.9738392
55.150871,15.2315462,15.1484318,0.288295713,13.9725429,15.1457762,13.9731889,13.9714265
55.160051,15.0332964,15.1648804,-0.36274512,13.970149,15.1622216,13.9707651,13.969014
55.169231,15.9687194,15.181797,0.887086508,13.9677559,15.1791344,13.9683415,13.9666018
55.178411,14.2126704,15.1991966,-0.993240227,13.9653634,15.1965299,13.9659184,13.9641899
55.187592,15.2643375,15.2170969,0.217349107,13.9629715,15.2144256,13.9634953,13.9617779
55.196772,15.7797338,15.2355104,0.737715006,13.9605806,15.232834,13.9610729,13.9593664
55.205952,15.1986842,15.254456,-0.23616069,13.9581905,15.251774,13.9586508,13.9569552
55.215132,15.5884573,15.2739514,0.560808207,13.9558013,15.2712633,13.956229,13.9545442
55.224312,15.0332964,15.294015,-0.510606134,13.9534129,15.2913202,13.9538077,13.9521335
55.233492,16.1245155,15.3146659,0.899916424,13.9510253,15.311964,13.9513867,13.949723
55.242673,15.2643375,15.3359265,-0.267561239,13.9486384,15.3332169,13.9489657,13.9473126
55.251853,15,15.3578324,-0.598190964,13.9462527,15.3551145,13.9465454,13.9449026
55.261033,15.4272486,15.3804392,0.216354752,13.943868,15.3777124,13.9441255,13.9424929
55.270213,15.8429795,15.4037241,0.662763466,13.9414842,15.4009878,13.9417059,13.9400835
55.279393,15.3297097,15.427711,-0.313051553,13.9391015,15.4249646,13.9392866,13.9376743
55.288573,15.2970585,15.4524249,-0.394165414,13.9367198,15.4496678,13.9368677,13.9352654
55.297754,15.8745079,15.4778948,0.629772239,13.9343388,15.4751264,13.9344489,13.9328564
55.306934,16.1245155,15.5041424,0.787637689,13.9319593,15.501362,13.9320308,13.930448
55.316114,16.4012195,15.5311988,0.932748966,13.9295809,15.5284058,13.929613,13.9280399
55.325294,16.4012195,15.5590939,0.917673975,13.9272036,15.5562876,13.9271955,13.925632
55.334474,15.9687194,15.5878588,0.617139075,13.9248276,15.5850384,13.9247784,13.9232244
55.343654,16.2172747,15.6175259,0.774434553,13.9224527,15.6146907,13.9223616,13.9208171
55.352835,15.5884573,15.6481326,-0.244285386,13.920079,15.645282,13.919945,13.9184098
55.362015,16.3707055,15.6797178,0.831256708,13.9177068,15.6768509,13.917529,13.916003
55.371195,15.9687194,15.7124132,0.506266953,13.9153361,15.7095291,13.9151133,13.9135965
55.380375,16.3707055,15.7461667,0.790277731,13.9129668,15.7432646,13.912698,13.9111902
55.389555,15.4596248,15.7810199,-0.566917129,13.910599,15.778099,13.910283,13.9087842
55.398736,16,15.8170205,0.427761067,13.9082324,15.8140799,13.9078681,13.9063783
55.407916,15.5884573,15.8542065,-0.515508719,13.9058678,15.8512454,13.9054539,13.9039729
55.417096,15.7480157,15.8926299,-0.380281628,13.9035047,15.8896472,13.90304,13.9015677
55.426276,16.3707055,15.932341,0.662091044,13.9011434,15.9293359,13.9006264,13.8991628
55.435456,17.2626765,15.9733929,1.13546626,13.8987839,15.9703642,13.8982133,13.8967583
55.444636,16.7928556,16.0158411,0.881484251,13.8964262,16.012788,13.8958005,13.894354
55.453817,16.4924225,16.0597492,0.657779064,13.8940702,16.0566704,13.8933877,13.8919497
55.462997,16.7630546,16.1051689,0.811101568,13.8917165,16.1020634,13.8909756,13.8895459
55.472177,15.9373775,16.1521695,-0.463456645,13.8893648,16.1490362,13.8885639,13.8871425
55.481357,16.673332,16.2009858,0.687274495,13.8870155,16.1978233,13.8861525,13.8847393
55.490537,17.3493516,16.2515597,1.04775562,13.8846684,16.2483669,13.8837415,13.8823365
55.499717,17,16.3039507,0.834295691,13.8823238,16.3007262,13.8813309,13.8799339
55.508898,15.5563492,16.3582461,-0.895486978,13.8799814,16.3549886,13.8789203,13.8775313
55.518078,17,16.4145202,0.765166492,13.8776419,16.4112284,13.8765104,13.8751293
55.527258,15.9059737,16.4728696,-0.752924856,13.875305,16.4695419,13.8741008,13.8727276
55.536438,17.3205081,16.5333899,0.887196802,13.8729711,16.5300249,13.8716916,13.8703262
55.545618,17.8885438,16.5961826,1.13682068,13.8706401,16.5927788,13.8692828,13.8679251
55.554798,16.9705627,16.6613546,0.55606488,13.8683122,16.6579103,13.8668743,13.8655242
55.563979,16.7630546,16.7290269,0.184466127,13.8659874,16.7255404,13.8644659,13.8631235
55.573159,17.8325545,16.7993043,1.01648916,13.8636662,16.795774,13.8620582,13.8607232
55.582339,17.4928557,16.8723211,0.787740205,13.8613487,16.8687451,13.8596508,13.8583233
55.591519,17.9443584,16.9484463,0.997953984,13.8590352,16.9448225,13.8572438,13.8559237
55.600699,18.4119526,17.0277214,1.17653358,13.8567259,17.0240478,13.8548372,13.8535244
55.609879,17.5214155,17.110208,0.641254635,13.8544209,17.1064826,13.8524309,13.8511254
55.61906,16.643317,17.1960809,-0.743480947,13.8521201,17.1923014,13.8500247,13.8487264
55.62824,17.8044938,17.2854976,0.720413926,13.8498243,17.2816618,13.8476192,13.846328
55.63742,18.0554701,17.3786542,0.822688189,13.8475335,17.3747598,13.845214,13.8439299
55.6466,17.9722008,17.4757501,0.704592539,13.8452481,17.4717946,13.8428092,13.8415321
55.65578,17.3205081,17.5769976,-0.506447956,13.8429683,17.5729783,13.8404048,13.8391347
55.66496,17.6068169,17.6826232,-0.275329459,13.8406944,17.6785375,13.8380007,13.8367375
55.674141,18.493242,17.7928809,0.836875787,13.8384266,17.788726,13.8355968,13.8343404
55.683321,18.1383571,17.9080045,0.479950628,13.8361658,17.9037774,13.8331934,13.8319439
55.692501,18.3030052,18.0282816,0.524140814,13.8339121,18.0239792,13.8307905,13.8295477
55.701681,18.5741756,18.1543425,0.647945309,13.8316665,18.1499613,13.8283879,13.8271518
55.710861,17.9722008,18.2865652,-0.560682161,13.8294294,18.2821017,13.8259857,13.8247562
55.720041,19.078784,18.4249946,0.808572439,13.827201,18.420445,13.8235839,13.822361
55.729222,18.8414437,18.5700231,0.520980413,13.8249818,18.5653836,13.8211822,13.8199658
55.738402,19.6214169,18.7220244,0.948363046,13.8227728,18.7172911,13.8187811,13.8175712
55.747582,19.9749844,18.8814495,1.04572218,13.8205746,18.8766181,13.8163805,13.8151769
55.756762,18.7882942,19.0487678,-0.510366141,13.8183879,19.0438339,13.8139801,13.812783
55.765942,19.4935887,19.2244858,0.518751238,13.8162136,19.2194448,13.8115802,13.8103893
55.775122,19.2613603,19.4091502,-0.384434602,13.8140526,19.4039971,13.8091807,13.8079961
55.784303,19.5192213,19.6033741,-0.290090969,13.8119058,19.5981036,13.8067812,13.8056028
55.793483,20.3960781,19.8077536,0.767023089,13.8097747,19.8023604,13.8043824,13.8032102
55.802663,19.5192213,20.0230023,-0.709775313,13.8076603,20.0174805,13.801984,13.8008179
55.811843,20.0499377,20.2503373,-0.447660232,13.8055646,20.2446805,13.799586,13.7984259
55.821023,21.0950231,20.4913165,0.776985579,13.8034901,20.4855176,13.7971884,13.7960343
55.830204,20.4939015,20.7459426,-0.502036922,13.801437,20.7399946,13.7947909,13.7936427
55.839384,21.9317122,21.0151768,0.957358565,13.7994079,21.0090722,13.792394,13.7912518
55.848564,21.9089023,21.3001558,0.780222054,13.7974045,21.2938869,13.7899975,13.7888611
55.857744,22.3606798,21.6020971,0.870966506,13.7954295,21.5956554,13.7876014,13.7864709
55.866924,22.8254244,21.9223371,0.950309076,13.7934854,21.9157136,13.7852057,13.7840809
55.876104,22.9782506,22.2623456,0.846111658,13.7915757,22.2555307,13.7828104,13.7816913
55.885285,23.6220236,22.6237838,0.999119543,13.789704,22.6167666,13.7804152,13.7793018
55.894465,23.2808935,23.0083601,0.522047253,13.7878759,23.0011287,13.7780206,13.7769129
55.903645,23.3023604,23.4180916,-0.340192966,13.7860987,23.4106313,13.7756265,13.7745244
55.912825,24.5967478,23.8551723,0.861147766,13.7843844,23.8474636,13.7732327,13.7721362
55.922005,25.019992,24.3225221,0.835146664,13.782755,24.314536,13.7708394,13.7697483
55.931185,25.0798724,24.8266447,0.503217332,13.7812689,24.8183248,13.7684464,13.7673608
55.940366,26.2297541,25.3675337,0.92855824,13.7800164,25.3587789,13.7660536,13.7649734
55.949546,26.2488095,25.9488029,0.547728588,13.7791968,25.9394162,13.7636614,13.7625866
55.958726,27.3678644,26.5747958,0.890543954,13.7792072,26.5643915,13.7612696,13.7602001
55.967906,28.4253408,27.2505164,1.08389317,13.7808206,27.2383515,13.7588782,13.7578141
55.977086,28.9482297,27.981901,0.983020147,13.7854951,27.9665798,13.7564872,13.7554283
55.986266,31,28.7761292,1.49126482,13.7958942,28.755106,13.7540966,13.753043
55.995447,31.0644491,29.6421596,1.19259781,13.8167225,29.6109364,13.7517062,13.7506577
56.004627,32.8176782,30.5909329,1.49222827,13.855987,30.5418258,13.7493164,13.7482731
56.013807,33.2264955,31.6367287,1.26085952,13.9268416,31.5570373,13.746927,13.7458888
56.022987,35.3270435,32.7977807,1.5903656,14.050027,32.6672112,13.744538,13.7435049
56.032167,37.0809924,34.0975504,1.72726432,14.2568048,33.8847549,13.7421495,13.7411213
56.041347,38.6522962,35.5927956,1.74914281,14.6124234,35.2427154,13.7397613,13.7387381
56.050528,41.4125585,37.3131722,2.02469411,15.1798086,36.7492273,13.7373733,13.736355
56.059708,43.0929229,39.311752,1.94452329,16.0417097,38.4274845,13.7349859,13.7339726
56.068888,46.1735855,41.6578824,2.12501837,17.2885793,40.311451,13.732599,13.7315905
56.078068,49.608467,44.4388444,2.27368042,19.0044809,42.451198,13.7302124,13.7292088
56.087248,52.9055763,47.7675906,2.26671253,21.2541029,44.9266534,13.7278263,13.7268275
56.096428,57.9827561,51.7954184,2.48743596,24.0744562,47.8698138,13.7254406,13.7244466
56.105609,63.7965516,56.729947,2.65830861,27.4731095,51.4954666,13.723055,13.7220657
56.114789,69.555733,62.8502567,2.58949346,31.4282984,56.1303802,13.7206701,13.7196855
56.123969,78.0640762,70.5183118,2.74695549,35.8938414,62.2302341,13.7182857,13.7173057
56.133149,87.8806008,80.1645011,2.77778683,40.7995593,70.3549263,13.7159016,13.7149263
56.142329,99.8849338,92.248078,2.76348616,46.0525874,81.0979311,13.713518,13.7125473
56.151509,113.61778,107.617623,2.44952182,51.5848144,95.4384721,13.7111347,13.7101686
56.16069,131.575074,126.409084,2.27288124,57.1896758,113.562647,13.7087517,13.7077901
56.16987,150.598805,148.33455,1.50474399,62.6771521,135.138912,13.7063693,13.7054122
56.17905,172.722321,172.782051,-0.244398579,67.8745437,159.481756,13.7039873,13.7030347
56.18823,197.641089,198.64493,-1.0019188,72.6086041,185.406259,13.7016058,13.7006575
56.19741,222.795871,224.377903,-1.25778848,76.7137678,211.300871,13.6992247,13.6982808
56.20659,245.973576,248.09361,-1.45603368,80.0398776,235.226719,13.696844,13.6959045
56.215771,268.048503,267.670013,0.615215205,82.4597625,255.019824,13.6944634,13.6935283
56.224951,281.035585,280.876111,0.399341521,83.8749915,268.409757,13.6920836,13.6911528
56.234131,287.516956,285.633489,1.37239461,84.2230081,273.277025,13.6897042,13.6887776
56.243311,282.437604,280.487784,1.39635943,83.4801455,268.126378,13.6873252,13.6864029
56.252491,266.246127,265.389889,0.925331167,81.6643252,252.883291,13.6849466,13.6840285
56.261671,241.281993,242.17287,-0.943862981,78.797557,229.403153,13.6825685,13.6816546
56.270852,210.589648,214.689039,-2.02469522,75.0212076,201.619195,13.6801905,13.6792808
56.280032,181.749828,186.118807,-2.09021029,70.5252929,172.781441,13.6778133,13.6769076
56.289212,154.612419,158.685443,-2.01817341,65.4739943,145.193643,13.6754364,13.6745349
56.298392,131.802883,133.973959,-1.47345728,60.0421411,120.544044,13.67306,13.6721626
56.307572,113.079618,112.924225,0.394198968,54.407038,99.8929106,13.6706841,13.6697907
56.316753,96.7625961,95.8391089,0.960982394,48.7407037,83.6436048,13.6683083,13.6674189
56.325933,85.1704174,82.4693281,1.64349911,43.2061288,71.5620698,13.6659332,13.6650478
56.335113,75.1797845,72.1865585,1.73009422,37.9483608,62.9083922,13.6635586,13.6626771
56.344293,67.3275575,64.2423815,1.7564669,33.0928783,56.7320456,13.6611844,13.6603068
56.353473,62.1852072,57.9770787,2.05137236,28.7415945,52.1706601,13.6588106,13.657937
56.362653,56.2672196,52.9127856,1.8315114,24.9696593,48.6079187,13.6564373,13.6555675
56.371834,51.8555686,48.7717094,1.75609203,21.852194,45.6896863,13.6540642,13.6531982
56.381014,47.8748368,45.3633742,1.5847595,19.4113494,43.2129245,13.6516918,13.6508296
56.390194,45.0998891,42.4874976,1.61628945,17.53873,41.0345887,13.6493198,13.6484615
56.399374,42.3910368,40.0496273,1.5301665,16.1701119,39.0984996,13.6469482,13.6460937
56.408554,40.0499688,37.9695593,1.44236245,15.2192599,37.3656208,13.6445772,13.6437264
56.417734,37.9473319,36.1792737,1.32968351,14.5908376,35.8065759,13.6422065,13.6413594
56.426915,34.3802269,34.6221344,-0.491840941,14.1944572,34.3978007,13.6398361,13.6389927
56.436095,34.2052628,33.2528999,0.97589079,13.9547795,33.1202984,13.6374663,13.6366266
56.445275,32.249031,32.0355993,0.461986698,13.8149907,31.9577209,13.6350971,13.634261
56.454455,32.9393382,30.9427083,1.41302153,13.7357846,30.896364,13.6327283,13.6318958
56.463635,30.3973683,29.9532998,0.666384626,13.691718,29.9245475,13.6303602,13.629531
56.472815,28.7054002,29.0514734,-0.588279879,13.667224,29.0322621,13.627993,13.6271667
56.481996,28.0713377,28.2260804,-0.393373555,13.6532947,28.2119114,13.6256268,13.6248025
56.491176,27.8747197,27.4727334,0.63402394,13.6449665,27.4611438,13.623261,13.6224391
56.500356,27.3130006,26.7758083,0.732934023,13.639146,26.7656828,13.6208946,13.620076
56.509536,25.4950976,26.1294761,-0.79647882,13.6346393,26.120223,13.6185285,13.6177134
56.518716,25.9422435,25.5287661,0.643022126,13.6308159,25.5200792,13.6161629,13.6153513
56.527896,25.0399681,24.9693796,0.265684778,13.6273536,24.9611024,13.6137978,13.6129896
56.537077,23.1732605,24.4475022,-1.12882319,13.6240912,24.4395539,13.6114329,13.6106281
56.546257,23.3023604,23.9599306,-0.810907056,13.6209505,23.9522673,13.6090687,13.6082672
56.555437,23.430749,23.5036603,-0.270020955,13.6178926,23.4962558,13.606705,13.6059069
56.564617,22.737634,23.0760631,-0.5817466,13.6148975,23.0688994,13.6043417,13.603547
56.573797,22.7815715,22.6747847,0.326782538,13.6119544,22.6678479,13.6019789,13.6011875
56.582977,21.6101828,22.2977096,-0.829172366,13.6090562,22.2909879,13.5996166,13.5988284
56.592158,21.8174242,21.9428961,-0.35422007,13.6061976,21.9363789,13.5972545,13.5964696
56.601338,21.3775583,21.6108545,-0.483007378,13.6033784,21.6045306,13.5948931,13.5941115
56.610518,21.1896201,21.2975862,-0.328581977,13.6005914,21.2914467,13.5925322,13.5917538
56.619698,21.0713075,21.0015858,0.264048721,13.5978337,20.9956223,13.5901718,13.5893966
56.628878,20.6639783,20.7216229,-0.240092772,13.5951028,20.7158274,13.5878118,13.5870399
56.638058,19.5703858,20.4565733,-0.941375303,13.5923965,20.4509385,13.5854524,13.5846836
56.647239,19.3907194,20.2053816,-0.90258636,13.5897124,20.1999005,13.5830931,13.5823275
56.656419,19.9499373,19.9671599,-0.131234799,13.5870495,19.9618259,13.5807346,13.5799721
56.665599,19.2353841,19.741015,-0.711077284,13.5844056,19.7358218,13.5783766,13.5776172
56.674779,18.627936,19.5261519,-0.947742502,13.5817795,19.5210936,13.5760191,13.5752628
56.683959,19.4164878,19.3218393,0.307650058,13.5791697,19.3169104,13.5736621,13.5729088
56.693139,18.8944436,19.1274035,-0.482659167,13.5765751,19.1225987,13.5713055,13.5705553
56.70232,18.973666,18.942204,0.177375171,13.5739943,18.9375183,13.5689492,13.568202
56.7115,18.973666,18.766405,0.4552592,13.5714277,18.7618332,13.5665936,13.5658494
56.72068,18.0831413,18.5988844,-0.71815258,13.5688734,18.594422,13.5642385,13.5634973
56.72986,18.761663,18.4389064,0.568116758,13.5663304,18.4345491,13.5618839,13.5611457
56.73904,18.8679623,18.2860307,0.762844409,13.5637977,18.2817745,13.5595298,13.5587946
56.748221,17.7482393,18.1398323,-0.62577391,13.5612747,18.1356735,13.557176,13.5564436
56.757401,18.1934054,17.9999626,0.439821354,13.558761,17.9958975,13.5548228,13.5540934
56.766581,18.3303028,17.8660501,0.681360884,13.556256,17.8620754,13.5524702,13.5517437
56.775761,17.9164729,17.7377642,0.422739438,13.553759,17.7338765,13.5501181,13.5493945
56.784941,17.5214155,17.6147963,-0.305582785,13.5512697,17.6109925,13.5477665,13.5470457
56.794121,18.3030052,17.4968582,0.897856918,13.5487875,17.4931353,13.5454154,13.5446975
56.803302,17.0293864,17.3836687,-0.595216213,13.5463118,17.380024,13.5430645,13.5423494
56.812482,16.8226038,17.2750002,-0.672604157,13.5438428,17.2714308,13.5407144,13.5400021
56.821662,17.2626765,17.1708517,0.30302604,13.54138,17.167355,13.5383648,13.5376553
56.830842,16.1864141,17.0709194,-0.94048143,13.5389231,17.0674927,13.5360157,13.535309
56.840022,16.5227116,16.9747833,-0.672362713,13.5364715,16.9714243,13.5336672,13.5329632
56.849202,16.8522995,16.8822544,-0.173074781,13.534025,16.878961,13.5313191,13.5306179
56.858383,17.3781472,16.7931456,0.764853948,13.5315831,16.7899155,13.5289713,13.5282728
56.867563,15.9687194,16.7073093,-0.85941252,13.529146,16.7041405,13.5266242,13.5259284
56.876743,16,16.6245781,-0.790302526,13.5267132,16.6214686,13.5242777,13.5235846
56.885923,15.8745079,16.5448038,-0.818716008,13.5242845,16.5417518,13.5219316,13.5212412
56.895103,16.5227116,16.4678467,0.234232734,13.5218598,16.4648503,13.5195861,13.5188984
56.904283,15.6204994,16.393575,-0.879247232,13.5194389,16.3906327,13.5172412,13.516556
56.913464,16.4924225,16.3218571,0.412995698,13.5170213,16.318967,13.5148964,13.5142139
56.922644,15.8113883,16.2525907,-0.664230694,13.5146074,16.2497513,13.5125525,13.5118726
56.931824,16.4924225,16.1857424,0.553787086,13.5121969,16.1829521,13.510209,13.5095317
56.941004,16.643317,16.1212633,0.722532789,13.5097897,16.1185206,13.5078661,13.5071914
56.950184,16.0934769,16.0588904,0.185974673,13.5073855,16.0561937,13.5055238,13.5048516
56.959364,16.2172747,15.9985318,0.467699612,13.5049842,15.99588,13.5031819,13.5025123
56.968545,15.3622915,15.9400946,-0.760133606,13.5025854,15.9374863,13.5008403,13.5001732
56.977725,15.7797338,15.8835092,-0.322141867,13.5001895,15.8809432,13.4984995,13.497835
56.986905,15.5241747,15.8286911,-0.551830033,13.4977962,15.8261661,13.4961592,13.4954972
56.996085,15.5884573,15.7755661,-0.432560767,13.4954053,15.7730811,13.4938195,13.4931599
57.005265,15.7162336,15.7240639,-0.0884886196,13.4930168,15.7216177,13.4914803,13.4908232
57.014445,15.7162336,15.6741176,0.205221821,13.4906306,15.6717092,13.4891416,13.488487
57.023626,16.1245155,15.6256587,0.706297938,13.4882464,15.623287,13.4868032,13.486151
57.032806,15.3948043,15.5786353,-0.428755102,13.4858646,15.5762993,13.4844656,13.4838159
57.041986,15.3948043,15.5329782,-0.371717523,13.4834849,15.530677,13.4821286,13.4814812
57.051166,15.5884573,15.488593,0.316013026,13.4811073,15.4863256,13.479792,13.4791471
57.060346,15.5241747,15.4452201,0.280988682,13.4787316,15.4429854,13.477456,13.4768135
57.069526,15.6843871,15.4027582,0.530687275,13.4763578,15.4005554,13.4751206,13.4744804
57.078707,15.132746,15.361087,-0.477850497,13.4739856,15.3589154,13.4727855,13.4721476
57.087887,14.7986486,15.3200664,-0.722092691,13.4716154,15.317925,13.4704511,13.4698156
57.097067,14.832397,15.279456,-0.668624696,13.4692469,15.2773439,13.4681173,13.4674841
57.106247,14.9331845,15.2387046,-0.552738708,13.4668801,15.236621,13.465784,13.4651532
57.115427,15.9373775,15.1969849,0.860460665,13.4645149,15.1949288,13.4634513,13.4628228
57.124607,14.6628783,15.1556244,-0.701958749,13.4621514,15.153595,13.4611191,13.4604929
57.133788,15.7162336,15.1193199,0.772601925,13.4597891,15.1173171,13.4587873,13.4581633
57.142968,15.2315462,15.0857186,0.381873812,13.4574285,15.0837421,13.4564562,13.4558345
57.152148,15.6843871,15.0530072,0.79459421,13.4550695,15.0510563,13.4541257,13.4535063
57.161328,15.5884573,15.0212063,0.753160652,13.4527119,15.0192803,13.4517958,13.4511786
57.170508,14.4222051,14.9902029,-0.753656277,13.4503558,14.9883012,13.4494664,13.4488514
57.179688,15.1657509,14.9599657,0.453635537,13.448001,14.9580878,13.4471375,13.4465248
57.188869,15.1986842,14.9304651,0.517898691,13.4456473,14.9286105,13.444809,13.4441985
57.198049,15.4919334,14.9016823,0.768278014,13.4432952,14.8998504,13.4424813,13.4418729
57.207229,14.832397,14.8735897,-0.202959853,13.4409443,14.87178,13.4401542,13.439548
57.216409,14.5602198,14.846164,-0.534737552,13.4385947,14.8443761,13.4378276,13.4372235
57.225589,14.5602198,14.819383,-0.509080777,13.4362464,14.8176163,13.4355016,13.4348997
57.23477,14.1421356,14.7932224,-0.806899503,13.433899,14.7914764,13.4331759,13.4325761
57.24395,14.4222051,14.7676674,-0.587760401,13.4315531,14.7659417,13.430851,13.4302533
57.25313,14.4568323,14.7426953,-0.534661575,13.4292083,14.7409895,13.4285267,13.4279311
57.26231,15.7480157,14.7182872,1.01475541,13.4268647,14.7166008,13.4262029,13.4256095
57.27149,15,14.6944669,0.552750472,13.4245222,14.6927995,13.4238797,13.4232884
57.28067,14.8660687,14.6711846,0.441456879,13.4221809,14.6695358,13.4215571,13.4209679
57.289851,14.8996644,14.6484076,0.501255286,13.4198404,14.646777,13.4192349,13.4186477
57.299031,15.0996689,14.626125,0.688145243,13.4175012,14.6245122,13.4169134,13.4163283
57.308211,14.4222051,14.604319,-0.426748087,13.4151632,14.6027237,13.4145926,13.4140095
57.317391,14.1421356,14.582975,-0.663957326,13.4128261,14.5813967,13.4122723,13.4116912
57.326571,13.8564065,14.5620786,-0.840042935,13.4104901,14.5605171,13.4099526,13.4093736
57.335751,14.2126704,14.5416163,-0.573538059,13.4081551,14.5400713,13.4076335,13.4070565
57.344932,14.106736,14.5215728,-0.644078283,13.4058208,14.5200439,13.4053147,13.4047397
57.354112,15.4272486,14.5019398,0.961929736,13.4034879,14.5004266,13.4029967,13.4024237
57.363292,13.8564065,14.4827029,-0.791388923,13.4011558,14.4812052,13.4006793,13.4001083
57.372472,14.6287388,14.4638503,0.406064671,13.3988248,14.4623678,13.3983626,13.3977935
57.381652,15.3948043,14.445392,0.974377902,13.3964947,14.4439244,13.3960464,13.3954793
57.390832,14.8660687,14.4273102,0.662388533,13.3941656,14.4258571,13.3937308,13.3931656
57.400013,14.5945195,14.4095757,0.430050992,13.3918372,14.4081368,13.3914155,13.3908523
57.409193,14.0356688,14.3921824,-0.597087522,13.38951,14.3907576,13.3891011,13.3885398
57.418373,13.820275,14.3751186,-0.744878291,13.3871837,14.3737076,13.3867873,13.3862279
57.427553,14.0356688,14.3583752,-0.568072445,13.3848583,14.3569776,13.3844741,13.3839166
57.436733,14.8660687,14.3419429,0.723965352,13.3825338,14.3405586,13.3821615,13.3816059
57.445913,14.6628783,14.3258132,0.580573053,13.3802102,14.324442,13.3798494,13.3792957
57.455094,14.9666295,14.309976,0.810341633,13.3778872,14.3086175,13.3775378,13.3769859
57.464274,14.2828569,14.2944265,-0.107562285,13.3755654,14.2930806,13.375227,13.374677
57.473454,13.114877,14.2791552,-1.07901722,13.3732444,14.2778216,13.3729168,13.3723686
57.482634,14.5945195,14.2641545,0.574773884,13.3709243,14.262833,13.3706071,13.3700609
57.491814,13.6381817,14.2494268,-0.781821687,13.3686051,14.2481173,13.3682981,13.3677537
57.500994,14.6287388,14.2349709,0.627509303,13.3662868,14.233673,13.3659898,13.3654471
57.510175,14.2126704,14.2207612,-0.0899491082,13.363969,14.2194748,13.3636817,13.3631409
57.519355,13.4907376,14.2067944,-0.846201428,13.3616523,14.2055193,13.3613746,13.3608355
57.528535,13.9283883,14.1930625,-0.514465013,13.3593365,14.1917985,13.359068,13.3585308
57.537715,14.6969385,14.1795594,0.719290637,13.3570215,14.1783063,13.3567621,13.3562266
57.546895,13.6014705,14.1662792,-0.751537559,13.3547074,14.1650368,13.3544567,13.3539231
57.556075,13.9283883,14.1532161,-0.47416013,13.352394,14.1519842,13.352152,13.3516201
57.565256,14.0712473,14.1403632,-0.262899011,13.3500813,14.1391416,13.3498477,13.3493175
57.574436,13.6381817,14.1277178,-0.699668567,13.3477696,14.1265065,13.3475442,13.3470158
57.583616,14.3874946,14.1152734,0.521748217,13.3454587,14.1140721,13.3452414,13.3447147
57.592796,14.9666295,14.1030248,0.929303362,13.3431486,14.1018334,13.3429391,13.3424142
57.601976,13.6747943,14.0909705,-0.645117211,13.3408393,14.0897888,13.3406375,13.3401143
57.611156,13.453624,14.0791176,-0.790881535,13.3385308,14.0779455,13.3383366,13.3378151
57.620337,14.0712473,14.0674441,0.0616702425,13.3362229,14.0662813,13.336036,13.3355162
57.629517,14.6287388,14.0559479,0.756829515,13.3339161,14.0547944,13.3337362,13.3332181
57.638697,13.114877,14.0446237,-0.964233693,13.33161,14.0434792,13.3314372,13.3309207
57.647877,14.2478068,14.0334671,0.46296839,13.3293047,14.0323316,13.3291387,13.328624
57.657057,14.0712473,14.0224743,0.220846151,13.3270002,14.0213476,13.3268409,13.3263278
57.666238,14.1774469,14.01164,0.407193916,13.3246962,14.010522,13.3245434,13.324032
57.675418,14.2828569,14.0009629,0.530936883,13.3223933,13.9998535,13.3222469,13.3217371
57.684598,13.5277493,13.990438,-0.680212313,13.3200911,13.9893371,13.319951,13.3194428
57.693778,13.8564065,13.9800619,-0.351646762,13.3177897,13.9789692,13.3176557,13.3171492
57.702958,13.6381817,13.969831,-0.575889988,13.3154891,13.9687465,13.3153611,13.3148562
57.712138,13.114877,13.9597419,-0.919165289,13.3131893,13.9586654,13.3130671,13.3125638
57.721319,13.6747943,13.9498037,-0.5244134,13.3108899,13.9487352,13.3107735,13.3102718
57.730499,14.0356688,13.9400017,0.309301113,13.3085917,13.938941,13.3084808,13.3079807
57.739679,14.2828569,13.9303312,0.59373873,13.3062941,13.9292782,13.3061887,13.3056902
57.748859,14.832397,13.9207893,0.954781485,13.3039974,13.9197439,13.3038973,13.3034004
57.758039,13.4907376,13.9113731,-0.648564221,13.3017014,13.9103352,13.3016065,13.3011112
57.767219,12.489996,13.9020798,-1.18831133,13.2994061,13.9010493,13.2993164,13.2988227
57.7764,13.7840488,13.8929057,-0.329934757,13.2971114,13.8918825,13.2970267,13.2965345
57.78558,12.7671453,13.8838501,-1.05674251,13.2948177,13.882834,13.2947379,13.2942473
57.79476,13.7113092,13.8749093,-0.404475119,13.2925248,13.8739004,13.2924498,13.2919607
57.80394,13.7477271,13.866081,-0.344025976,13.2902326,13.865079,13.2901623,13.2896747
57.81312,13.190906,13.8573625,-0.816367904,13.2879411,13.8563674,13.2878754,13.2873894
57.8223,13.7840488,13.8487516,-0.254367549,13.2856504,13.8477633,13.2855893,13.2851048
57.831481,14.5602198,13.8402532,0.848508466,13.2833603,13.8392716,13.2833035,13.2828205
57.840661,13.0384048,13.8318604,-0.890761262,13.2810711,13.8308854,13.2810186,13.2805372
57.849841,12.8840987,13.823568,-0.969262219,13.2787827,13.8225995,13.2787345,13.2782545
57.859021,14,13.8153737,0.429681674,13.276495,13.8144116,13.2764509,13.2759724
57.868201,13.190906,13.8072754,-0.785092008,13.2742081,13.8063197,13.2741681,13.2736911
57.877381,12.9614814,13.7992712,-0.915308607,13.271922,13.7983218,13.2718859,13.2714104
57.886562,12.7671453,13.7913583,-1.01203408,13.2696363,13.7904151,13.2696041,13.2691301
57.895742,13.2664992,13.7835364,-0.719053045,13.2673517,13.7825993,13.2673233,13.2668507
57.904922,13.453624,13.7758029,-0.567608013,13.2650678,13.7748718,13.2650431,13.264572
57.914102,13.7477271,13.7681559,-0.142929337,13.2627846,13.7672307,13.2627637,13.2622939
57.923282,14.2126704,13.7605936,0.672366566,13.2605022,13.7596743,13.2604848,13.2600166
57.932462,14.1774469,13.7531144,0.651408111,13.2582206,13.7522009,13.2582067,13.2577398
57.941643,14.1421356,13.7457204,0.62961516,13.2559394,13.7448126,13.255929,13.2554636
57.950823,13.453624,13.73841,-0.533653371,13.2536593,13.7375078,13.2536522,13.2531882
57.960003,13.892444,13.7311773,0.401580217,13.2513799,13.7302808,13.2513761,13.2509135
57.969183,13.820275,13.7240209,0.310248411,13.2491013,13.7231299,13.2491007,13.2486395
57.978363,13.453624,13.7169392,-0.51314239,13.2468234,13.7160536,13.246826,13.2463662
57.987543,13.3790882,13.7099307,-0.575189112,13.2445462,13.7090505,13.2445519,13.2440935
57.996724,14.3178211,13.7029932,0.784109569,13.2422696,13.7021184,13.2422783,13.2418213
58.005904,13.4164079,13.696127,-0.528884794,13.2399939,13.6952574,13.2400057,13.23955
58.015084,14.106736,13.6893298,0.646069811,13.2377191,13.6884653,13.2377337,13.2372794
58.024264,13.96424,13.6826003,0.530697429,13.2354449,13.681741,13.2354624,13.2350095
58.033444,13.453624,13.6759372,-0.471500957,13.2331715,13.675083,13.2331918,13.2327403
58.042624,13.56466,13.6693393,-0.323541801,13.2308989,13.66849,13.2309219,13.2304717
58.051805,13.453624,13.662807,-0.457365224,13.2286267,13.6619627,13.2286525,13.2282036
58.060985,13.2664992,13.6563418,-0.62437381,13.2263556,13.6555024,13.226384,13.2259365
58.070165,13.3041347,13.6499379,-0.588050337,13.2240852,13.6491033,13.2241162,13.22367
58.079345,13.1529464,13.6435941,-0.700462453,13.2218156,13.6427643,13.2218491,13.2214043
58.088525,13.3790882,13.6373093,-0.508154616,13.2195467,13.6364842,13.2195827,13.2191392
58.097705,13.2287566,13.6310824,-0.634291584,13.2172786,13.630262,13.2173171,13.2168748
58.106886,13.8564065,13.6249116,0.481139091,13.215011,13.6240959,13.2150518,13.2146109
58.116066,13.56466,13.6187974,-0.232674474,13.2127444,13.6179862,13.2127876,13.2123479
58.125246,13.96424,13.6127379,0.592876161,13.2104785,13.6119312,13.210524,13.2100857
58.134426,13.190906,13.6067325,-0.64484611,13.2082134,13.6059302,13.2082612,13.2078241
58.143606,13.0766968,13.6007811,-0.723936648,13.2059491,13.5999833,13.205999,13.2055632
58.152787,13.3041347,13.5948831,-0.539210916,13.2036852,13.5940897,13.2037374,13.2033028
58.161967,14.106736,13.5890408,0.719510355,13.2014224,13.5882517,13.2014767,13.2010434
58.171147,13.453624,13.5832582,-0.360047462,13.1991603,13.5824734,13.1992167,13.1987847
58.180327,14.3874946,13.5775335,0.899978371,13.196899,13.5767529,13.1969574,13.1965267
58.189507,13.820275,13.5718571,0.498415385,13.1946385,13.5710806,13.1946989,13.1942694
58.198687,13.6381817,13.5662101,0.268275193,13.1923787,13.5654378,13.192441,13.1920128
58.207868,13.453624,13.5606052,-0.327079747,13.1901194,13.559837,13.1901837,13.1897567
58.217048,13.3416641,13.5550465,-0.461933394,13.1878611,13.5542824,13.1879273,13.1875015
58.226228,12.7671453,13.5495327,-0.884526614,13.1856036,13.5487725,13.1856716,13.1852471
58.235408,14.1774469,13.5440629,0.79585427,13.1833469,13.5433067,13.1834167,13.1829934
58.244588,12.6885775,13.5386364,-0.92198634,13.1810909,13.5378841,13.1811625,13.1807404
58.253768,13.4907376,13.5332524,-0.206191276,13.1788357,13.5325041,13.178909,13.1784881
58.262949,13.0766968,13.5279097,-0.671723819,13.176581,13.5271652,13.1766561,13.1762363
58.272129,13.6014705,13.5226087,0.280823366,13.1743273,13.5218681,13.174404,13.1739855
58.281309,12.922848,13.5173522,-0.771040982,13.1720744,13.5166153,13.1721528,13.1717355
58.290489,12.922848,13.5121352,-0.767650473,13.1698222,13.511402,13.1699023,13.1694861
58.299669,13.6747943,13.5069572,0.409679255,13.1675709,13.5062277,13.1676525,13.1672375
58.308849,13.2287566,13.5018176,-0.52255239,13.1653202,13.5010917,13.1654034,13.1649896
58.31803,12.922848,13.496715,-0.757540106,13.1630702,13.4959928,13.1631548,13.1627422
58.32721,13.2664992,13.4916501,-0.474500676,13.1608211,13.4909314,13.1609073,13.1604958
58.33639,12.922848,13.4866216,-0.750848576,13.1585728,13.4859065,13.1586605,13.1582502
58.34557,13.5277493,13.4816289,0.214756409,13.1563253,13.4809174,13.1564144,13.1560053
58.35475,13.2664992,13.4766716,-0.458445679,13.1540785,13.4759635,13.154169,13.1537611
58.36393,13.820275,13.471749,0.590360895,13.1518326,13.4710443,13.1519245,13.1515176
58.373111,13.3790882,13.46686,-0.296263082,13.1495871,13.4661587,13.1496804,13.1492747
58.382291,13.0384048,13.4620051,-0.65084584,13.1473427,13.4613073,13.1474373,13.1470327
58.391471,12.4096736,13.4571859,-1.02348048,13.1450991,13.4564914,13.145195,13.1447915
58.400651,12.2882057,13.4523998,-1.07897827,13.1428562,13.4517086,13.1429534,13.1425511
58.409831,13.6381817,13.4476457,0.436504317,13.1406142,13.4469578,13.1407126,13.1403114
58.419011,12.328828,13.4429229,-1.05550696,13.1383729,13.4422383,13.1384725,13.1380724
58.428192,13.56466,13.4382306,0.355569037,13.1361321,13.4375492,13.136233,13.135834
58.437372,12.922848,13.4335693,-0.714647676,13.1338924,13.432891,13.1339944,13.1335966
58.446552,13.6381817,13.4289379,0.457431709,13.1316535,13.4282629,13.1317567,13.1313599
58.455732,12.922848,13.4243361,-0.708158256,13.1294153,13.4236642,13.1295197,13.129124
58.464912,13.1529464,13.4197633,-0.516543225,13.127178,13.4190945,13.1272834,13.1268888
58.474092,13.7113092,13.4152192,0.544141514,13.1249414,13.4145535,13.1250479,13.1246544
58.483273,13.0384048,13.4107028,-0.610162258,13.1227054,13.4100401,13.122813,13.1224205
58.492453,13.1529464,13.4062146,-0.503257579,13.1204704,13.4055549,13.120579,13.1201877
58.501633,12.6491106,13.4017554,-0.867551032,13.1182362,13.4010987,13.1183459,13.1179556
58.510813,12.6885775,13.3973242,-0.841870902,13.1160028,13.3966704,13.1161135,13.1157243
58.519993,13.3790882,13.3929193,-0.117605989,13.1137701,13.3922685,13.1138819,13.1134937
58.529173,12.8452326,13.3885406,-0.737094281,13.1115383,13.3878927,13.111651,13.1112639
58.538354,12.1243557,13.384187,-1.12242208,13.1093071,13.383542,13.1094207,13.1090346
58.547534,13,13.3798592,-0.616327173,13.1070768,13.3792171,13.1071914,13.1068064
58.556714,12.922848,13.3755563,-0.672836031,13.1048474,13.374917,13.1049629,13.1045789
58.565894,13.3041347,13.371278,-0.25912024,13.1026188,13.3706415,13.1027352,13.1023522
58.575074,13.0384048,13.3670239,-0.573253064,13.100391,13.3663902,13.1005083,13.1001263
58.584255,12.489996,13.3627932,-0.934236146,13.0981637,13.3621623,13.0982819,13.097901
58.593435,12.922848,13.3585864,-0.660104879,13.0959375,13.3579583,13.0960565,13.0956766
58.602615,13.2287566,13.3544029,-0.354466242,13.0937121,13.3537774,13.0938319,13.0934531
58.611795,13.1529464,13.3502431,-0.444180845,13.0914875,13.3496203,13.0916081,13.0912303
58.620975,12.9614814,13.346107,-0.620181934,13.0892637,13.345487,13.0893851,13.0890083
58.630155,12.922848,13.3419931,-0.647414198,13.0870407,13.3413757,13.0871629,13.0867871
58.639336,13.2664992,13.3379006,-0.267210474,13.0848183,13.3372858,13.0849413,13.0845664
58.648516,13.6381817,13.33383,0.551680763,13.0825969,13.3332178,13.0827207,13.0823468
58.657696,13.56466,13.3297807,0.484643461,13.0803764,13.3291711,13.0805009,13.080128
58.666876,13.3790882,13.3257523,0.230945683,13.0781566,13.3251452,13.0782818,13.07791
58.676056,13.114877,13.3217445,-0.454826785,13.0759377,13.32114,13.0760636,13.0756927
58.685236,13.9283883,13.317757,0.781428996,13.0737196,13.317155,13.0738462,13.0734763
58.694417,13.4164079,13.3137892,0.320341499,13.0715021,13.3131897,13.0716294,13.0712604
58.703597,12.9614814,13.3098416,-0.590220473,13.0692856,13.3092446,13.0694136,13.0690456
58.712777,12.5698051,13.3059135,-0.85796763,13.06707,13.305319,13.0671986,13.0668316
58.721957,13.5277493,13.3020051,0.475125367,13.0648551,13.3014131,13.0649844,13.0646183
58.731137,13.5277493,13.2981172,0.479199423,13.0626411,13.2975275,13.062771,13.0624059
58.740317,12.2474487,13.2942479,-1.02313204,13.060428,13.2936606,13.0605584,13.0601943
58.749498,14.2126704,13.2903966,0.960350859,13.0582154,13.2898117,13.0583464,13.0579833
58.758678,13.453624,13.286564,0.40872981,13.0560039,13.2859815,13.0561355,13.0557733
58.767858,12.7671453,13.2827493,-0.718055687,13.0537932,13.2821691,13.0539254,13.0535641
58.777038,13.1529464,13.2789523,-0.3549731,13.0515833,13.2783745,13.0517161,13.0513557
58.786218,13,13.2751729,-0.524569217,13.0493743,13.2745973,13.0495076,13.0491482
58.795398,13.6014705,13.2714106,0.574508365,13.0471661,13.2708374,13.0472999,13.0469414
58.804579,12.2882057,13.2676651,-0.989676378,13.0449584,13.2670941,13.0450929,13.0447353
58.813759,13.3041347,13.2639367,0.200494387,13.0427519,13.263368,13.0428868,13.0425302
58.822939,12.6491106,13.2602249,-0.781737993,13.0405462,13.2596584,13.0406817,13.0403259
58.832119,12.6095202,13.2565296,-0.804368924,13.0383414,13.2559653,13.0384773,13.0381225
58.841299,13.6381817,13.2528519,0.620749368,13.0361373,13.2522898,13.0362738,13.0359198
58.850479,12.1655251,13.2491902,-1.04099237,13.0339342,13.2486303,13.034071,13.033718
58.85966,13.6381817,13.2455438,0.626608267,13.0317316,13.2449861,13.0318689,13.0315168
58.86884,12.6095202,13.2419133,-0.795231462,13.0295301,13.2413577,13.0296679,13.0293167
58.87802,12.7279221,13.2382981,-0.7144061,13.0273294,13.2377447,13.0274677,13.0271174
58.8872,13.3041347,13.2346981,0.263508204,13.0251296,13.2341468,13.0252683,13.0249189
58.89638,12.5299641,13.2311131,-0.837346387,13.0229307,13.2305639,13.0230698,13.0227212
58.90556,13.114877,13.2275428,-0.335657135,13.0207326,13.2269956,13.0208721,13.0205244
58.914741,13.0384048,13.2239867,-0.43079212,13.0185351,13.2234416,13.018675,13.0183282
58.923921,13.1529464,13.2204454,-0.259805536,13.0163387,13.2199024,13.016479,13.0161331
58.933101,13.4164079,13.2169183,0.446642574,13.0141431,13.2163773,13.0142838,13.0139388
58.942281,13.0384048,13.2134053,-0.418330544,13.0119484,13.2128664,13.0120895,13.0117453
58.951461,13.114877,13.2099072,-0.308269605,13.0097546,13.2093703,13.009896,13.0095527
58.960641,12.3693169,13.2064231,-0.91493507,13.0075616,13.2058882,13.0077034,13.007361
58.969822,13.3416641,13.2029521,0.372440604,13.0053692,13.2024192,13.0055114,13.0051698
58.979002,12.8452326,13.1994948,-0.595199308,13.0031779,13.1989639,13.0033205,13.0029797
58.988182,13.3416641,13.1960507,0.381593157,13.0009875,13.1955217,13.0011304,13.0007905
58.997362,13.2664992,13.1926197,0.271807769,12.998798,13.1920927,12.9989412,12.9986021
59.006542,13.0766968,13.1892016,-0.33541724,12.9966093,13.1886764,12.9967528,12.9964146
59.015722,12.9614814,13.1857961,-0.473618784,12.9944215,13.185273,12.9945653,12.994228
59.024903,13.2287566,13.182403,0.215298851,12.9922343,13.1818817,12.9923784,12.9920419
59.034083,12.6885775,13.1790226,-0.700317814,12.9900482,13.1785032,12.9901927,12.989857
59.043263,13.2287566,13.1756545,0.230438836,12.987863,13.175137,12.9880077,12.9876729
59.052443,12.922848,13.1722986,-0.499450284,12.9856787,13.1717829,12.9858237,12.9854896
59.061623,12.8452326,13.1689554,-0.568966413,12.9834952,13.1684415,12.9836405,12.9833073
59.070804,14.4568323,13.1656241,1.13631344,12.9813124,13.1651121,12.9814579,12.9811255
59.079984,13.3416641,13.1623048,0.423508242,12.9791306,13.1617947,12.9792765,12.9789449
59.089164,13.0384048,13.1589972,-0.347264131,12.9769498,13.1584888,12.9770959,12.9767651
59.098344,12.6491106,13.155701,-0.711751606,12.9747698,13.1551944,12.9749162,12.9745862
59.107524,13.3041347,13.1524161,0.389510699,12.9725908,13.1519113,12.9727373,12.9724082
59.116704,12.9614814,13.1491424,-0.433198603,12.9704126,13.1486394,12.9705594,12.970231
59.125885,13.96424,13.1458795,0.904632847,12.968235,13.1453782,12.9683821,12.9680545
59.135065,12.7671453,13.1426278,-0.612766231,12.9660586,13.1421283,12.9662058,12.9658791
59.144245,13.4164079,13.1393869,0.526327767,12.963883,13.1388892,12.9640305,12.9637045
59.153425,12.489996,13.1361568,-0.803841287,12.9617084,13.1356608,12.9618561,12.9615309
59.162605,13.3790882,13.1329373,0.496135964,12.9595346,13.132443,12.9596825,12.9593581
59.171785,13.2287566,13.1297286,0.314687058,12.9573617,13.129236,12.9575098,12.9571862
59.180966,13.6381817,13.1265305,0.715297975,12.9551895,13.1260396,12.9553378,12.9550149
59.190146,12.0415946,13.123343,-1.04007134,12.9530184,13.1228537,12.9531669,12.9528448
59.199326,13.1529464,13.1201656,0.181054928,12.9508482,13.119678,12.9509968,12.9506755
59.208506,13,13.1169981,-0.342049906,12.9486788,13.1165122,12.9488277,12.9485072
59.217686,12.9614814,13.1138406,-0.390332203,12.9465104,13.1133564,12.9466595,12.9463397
59.226866,12.6885775,13.1106929,-0.649704062,12.9443429,13.1102103,12.9444921,12.9441731
59.236047,12.2882057,13.1075545,-0.905178886,12.9421761,13.1070735,12.9423254,12.9420072
59.245227,12.4096736,13.1044261,-0.833518124,12.9400103,13.1039467,12.9401599,12.9398424
59.254407,12.7279221,13.1013072,-0.611052458,12.9378455,13.1008294,12.9379952,12.9376785
59.263587,12.083046,13.0981976,-1.00754734,12.9356816,13.0977214,12.9358314,12.9355155
59.272767,13.6747943,13.0950974,0.761378336,12.9335186,13.0946228,12.9336686,12.9333533
59.281947,12.5299641,13.0920065,-0.749694881,12.9313565,13.0915335,12.9315066,12.9311921
59.291128,14.0356688,13.088925,0.97300761,12.9291951,13.0884536,12.9293453,12.9290316
59.300308,12.9614814,13.0858529,-0.352663449,12.9270348,13.085383,12.9271852,12.9268722
59.309488,13.4164079,13.0827897,0.577596914,12.9248755,13.0823213,12.9250259,12.9247137
59.318668,11.61895,13.0797352,-1.20862947,12.922717,13.0792684,12.9228676,12.9225561
59.327848,13.2287566,13.0766895,0.389957708,12.9205595,13.0762242,12.9207102,12.9203994
59.337028,13.4164079,13.0736525,0.585453152,12.9184029,13.0731887,12.9185537,12.9182436
59.346209,13.453624,13.0706236,0.618870283,12.9162469,13.0701613,12.9163978,12.9160885
59.355389,13.0384048,13.0676036,-0.170876421,12.9140921,13.0671428,12.9142432,12.9139345
59.364569,12.8062485,13.0645919,-0.508274933,12.9119383,13.0641326,12.9120894,12.9117815
59.373749,12.3693169,13.0615885,-0.83202862,12.9097853,13.0611307,12.9099365,12.9096293
59.382929,13.4907376,13.0585933,0.657376778,12.9076333,13.058137,12.9077846,12.9074781
59.392109,13,13.0556063,-0.235809951,12.9054822,13.0551514,12.9056336,12.9053278
59.40129,13.1529464,13.0526278,0.316731245,12.9033318,13.0521743,12.9034833,12.9031782
59.41047,12.4096736,13.0496575,-0.799989889,12.9011826,13.0492055,12.9013341,12.9010297
59.41965,13.453624,13.0466951,0.637909854,12.8990342,13.0462445,12.8991859,12.8988822
59.42883,12.5698051,13.0437405,-0.68842965,12.8968869,13.0432913,12.8970386,12.8967356
59.43801,11.8743421,13.0407936,-1.08002386,12.8947404,13.0403459,12.8948922,12.8945899
59.44719,13.3416641,13.0378544,0.551189298,12.8925949,13.0374081,12.8927467,12.8924451
59.456371,13.114877,13.0349225,0.282762355,12.8904501,13.0344776,12.890602,12.8903011
59.465551,12.6095202,13.0319984,-0.649983233,12.8883064,13.0315549,12.8884584,12.8881582
59.474731,13.0766968,13.0290818,0.218208725,12.8861637,13.0286396,12.8863157,12.8860162
59.483911,13.3790882,13.0261725,0.594067025,12.884022,13.0257318,12.884174,12.8838752
59.493091,11.61895,13.0232706,-1.18504032,12.8818811,13.0228312,12.8820332,12.8817351
59.502272,12.3693169,13.0203756,-0.806882087,12.879741,13.0199375,12.8798931,12.8795957
59.511452,12.4096736,13.0174886,-0.779624876,12.8776021,13.0170519,12.8777542,12.8774574
59.520632,12.489996,13.0146088,-0.724301604,12.8754641,13.0141734,12.8756163,12.8753201
59.529812,11.7898261,13.0117361,-1.10540035,12.873327,13.011302,12.8734793,12.8731838
59.538992,12.5299641,13.0088703,-0.692030488,12.8711909,13.0084376,12.8713432,12.8710484
59.548172,12.6095202,13.0060114,-0.629675471,12.8690558,13.00558,12.8692081,12.8689139
59.557353,12.6885775,13.0031591,-0.560875689,12.8669214,13.002729,12.8670737,12.8667802
59.566533,12.9614814,13.0003138,-0.197059499,12.8647881,12.9998851,12.8649404,12.8646476
59.575713,12.6885775,12.9974753,-0.555785744,12.8626558,12.9970478,12.8628082,12.862516
59.584893,13.1529464,12.9946435,0.397873028,12.8605245,12.9942173,12.8606768,12.8603853
59.594073,13.1529464,12.9918183,0.401407747,12.8583941,12.9913933,12.8585465,12.8582556
59.603253,12,12.9889996,-0.994484579,12.8562647,12.9885759,12.8564171,12.8561269
59.612434,12.1655251,12.9861871,-0.905903982,12.854136,12.9857647,12.8542884,12.8539988
59.621614,12.8062485,12.9833817,-0.420871976,12.8520085,12.9829606,12.8521609,12.851872
59.630794,13.1529464,12.9805829,0.415166907,12.8498819,12.980163,12.8500343,12.8497461
59.639974,12.7671453,12.9777904,-0.458960828,12.8477564,12.9773717,12.8479088,12.8476211
59.649154,12.4096736,12.9750041,-0.751884628,12.8456318,12.9745867,12.8457842,12.8454972
59.658334,12.328828,12.9722241,-0.802119758,12.8435081,12.9718079,12.8436605,12.8433742
59.667515,11.5325626,12.9694499,-1.19870236,12.8413852,12.969035,12.8415376,12.8412519
59.676695,12.3693169,12.9666822,-0.772894109,12.8392635,12.9662685,12.8394159,12.8391308
59.685875,12.9614814,12.9639205,-0.049387028,12.8371428,12.963508,12.8372952,12.8370107
59.695055,12,12.9611648,-0.980390115,12.8350231,12.9607535,12.8351754,12.8348915
59.704235,11.7046999,12.958415,-1.11969421,12.8329043,12.9580049,12.8330566,12.8327734
59.713415,12.489996,12.9556712,-0.682403989,12.8307865,12.9552623,12.8309388,12.8306562
59.722596,12.4096736,12.9529329,-0.737061249,12.8286694,12.9525252,12.8288217,12.8285397
59.731776,13.1529464,12.950201,0.450272638,12.8265536,12.9497944,12.8267058,12.8264244
59.740956,12.4096736,12.9474751,-0.733349461,12.8244387,12.9470697,12.8245909,12.8243102
59.750136,12.922848,12.9447549,-0.148009776,12.8223248,12.9443506,12.822477,12.8221969
59.759316,13.1529464,12.9420403,0.45924514,12.8202119,12.9416372,12.8203641,12.8200846
59.768496,13.6747943,12.9393314,0.857591343,12.8181,12.9389295,12.8182521,12.8179732
59.777677,13.190906,12.9366278,0.504260029,12.8159889,12.936227,12.8161409,12.8158626
59.786857,12.489996,12.93393,-0.666283702,12.8138789,12.9335303,12.814031,12.8137532
59.796037,12.922848,12.9312376,-0.0915950847,12.81177,12.9308391,12.811922,12.8116449
59.805217,11.9163753,12.9285508,-1.00606932,12.809662,12.9281534,12.809814,12.8095375
59.814397,12,12.9258693,-0.962221017,12.8075551,12.925473,12.807707,12.807431
59.823577,13.3790882,12.9231932,0.675199962,12.8054491,12.922798,12.805601,12.8053256
59.832758,13.114877,12.9205221,0.440857076,12.8033439,12.920128,12.8034957,12.803221
59.841938,12.0415946,12.9178567,-0.936088728,12.8012399,12.9174637,12.8013917,12.8011175
59.851118,12.4498996,12.9151968,-0.682127,12.7991369,12.914805,12.7992887,12.7990151
59.860298,12.6095202,12.9125422,-0.550474324,12.797035,12.9121514,12.7971866,12.7969136
59.869478,13,12.9098927,0.300178782,12.794934,12.909503,12.7950856,12.7948132
59.878658,12.489996,12.9072483,-0.645950712,12.792834,12.9068597,12.7929856,12.7927137
59.887839,13,12.9046087,0.308854771,12.7907348,12.9042212,12.7908863,12.7906151
59.897019,12.8062485,12.9019745,-0.309396178,12.7886369,12.901588,12.7887883,12.7885176
59.906199,12.4096736,12.8993452,-0.699765366,12.7865399,12.8989598,12.7866913,12.7864212
59.915379,13.114877,12.8967209,0.467071862,12.784444,12.8963365,12.7845953,12.7843257
59.924559,12.6095202,12.8941016,-0.533461671,12.782349,12.8937182,12.7825003,12.7822313
59.93374,12.2065556,12.8914868,-0.827605708,12.7802549,12.8911045,12.7804061,12.7801377
59.94292,12.5698051,12.8888772,-0.564864705,12.778162,12.888496,12.7783131,12.7780452
59.9521,12.4096736,12.8862725,-0.690361376,12.7760701,12.8858923,12.7762211,12.7759538
59.96128,13.2287566,12.8836729,0.587438231,12.7739792,12.8832937,12.7741302,12.7738635
59.97046,12.4096736,12.881078,-0.686588954,12.7718893,12.8806999,12.7720402,12.7717741
59.97964,13.0766968,12.8784879,0.445206598,12.7698005,12.8781108,12.7699513,12.7696857
59.988821,12.8062485,12.8759022,-0.263919917,12.7677125,12.8755261,12.7678632,12.7675982
59.998001,13.3790882,12.8733214,0.711172796,12.7656257,12.8729463,12.7657763,12.7655118
60.007181,12.6095202,12.8707453,-0.511101792,12.7635399,12.8703711,12.7636905,12.7634265
60.016361,12.2474487,12.8681737,-0.78786101,12.7614551,12.8678005,12.7616056,12.7613423
60.025541,12.5299641,12.8656067,-0.579346692,12.7593714,12.8652345,12.7595218,12.759259
60.034721,12.7279221,12.8630442,-0.367589627,12.7572887,12.862673,12.7574391,12.7571768
60.043902,13.2664992,12.8604859,0.637191672,12.7552068,12.8601157,12.7553571,12.7550953
60.053082,12.4498996,12.8579324,-0.638774471,12.7531262,12.8575632,12.7532764,12.7530152
60.062262,13.2287566,12.8553834,0.611042719,12.7510466,12.8550151,12.7511967,12.750936
60.071442,11.3578167,12.852839,-1.22271104,12.748968,12.8524717,12.749118,12.7488579
60.080622,12.8062485,12.850299,-0.209882265,12.7468905,12.8499327,12.7470404,12.7467808
60.089802,12.2882057,12.8477634,-0.748035906,12.744814,12.8473981,12.7449638,12.7447048
60.098983,12.1655251,12.8452319,-0.824443347,12.7427383,12.8448675,12.7428881,12.7426295
60.108163,12.5698051,12.8427049,-0.522398141,12.7406639,12.8423414,12.7408136,12.7405556
60.117343,12.7671453,12.8401822,-0.270253311,12.7385906,12.8398197,12.7387401,12.7384826
60.126523,12.7671453,12.8376637,-0.265552948,12.7365182,12.8373021,12.7366677,12.7364107
60.135703,12.2882057,12.8351494,-0.739556423,12.7344469,12.8347888,12.7345963,12.7343399
60.144883,12.922848,12.8326393,0.300347535,12.7323767,12.8322796,12.732526,12.7322701
60.154064,12.5299641,12.8301331,-0.54787686,12.7303073,12.8297743,12.7304565,12.7302011
60.163244,12.6095202,12.8276313,-0.467023694,12.7282392,12.8272735,12.7283882,12.7281333
60.172424,12.5698051,12.8251337,-0.50530047,12.7261721,12.8247767,12.726321,12.7260667
60.181604,13.56466,12.8226403,0.861405663,12.724106,12.8222842,12.7242549,12.724001
60.190784,12.8452326,12.820151,0.158371625,12.722041,12.8197958,12.7221898,12.7219365
60.199964,12.2882057,12.8176658,-0.727640065,12.7199771,12.8173115,12.7201258,12.7198729
60.209145,12.489996,12.8151843,-0.57025285,12.717914,12.8148309,12.7180626,12.7178103
60.218325,12.2882057,12.8127071,-0.724224655,12.7158522,12.8123546,12.7160006,12.7157488
60.227505,12.5299641,12.8102338,-0.529405061,12.7137914,12.8098822,12.7139398,12.7136885
60.236685,11.8321596,12.8077645,-0.987727138,12.7117317,12.8074138,12.71188,12.7116292
60.245865,12.328828,12.805299,-0.690268811,12.7096731,12.8049492,12.7098212,12.7095709
60.255045,13,12.8028375,0.444029844,12.7076155,12.8024885,12.7077636,12.7075138
60.264226,12.2065556,12.8003796,-0.770599728,12.7055588,12.8000315,12.7057067,12.7054574
60.273406,11.9163753,12.7979257,-0.938909176,12.7035034,12.7975785,12.7036512,12.7034024
60.282586,12.1655251,12.7954757,-0.793694314,12.701449,12.7951294,12.7015967,12.7013484
60.291766,12.328828,12.7930296,-0.68132345,12.6993957,12.7926841,12.6995433,12.6992955
60.300946,12.5698051,12.7905875,-0.46987489,12.6973435,12.7902428,12.6974909,12.6972436
60.310126,12.9614814,12.7881491,0.416331943,12.6952923,12.7878053,12.6954397,12.6951928
60.319307,12.1243557,12.7857142,-0.81323953,12.693242,12.7853712,12.6933892,12.6931429
60.328487,12.9614814,12.7832832,0.422135231,12.691193,12.7829411,12.6913401,12.6910943
60.337667,12.328828,12.780856,-0.672330267,12.6891451,12.7805147,12.6892921,12.6890467
60.346847,12.489996,12.7784324,-0.537062772,12.6870982,12.778092,12.6872451,12.6870002
60.356027,12.5299641,12.7760125,-0.496032671,12.6850524,12.7756729,12.6851992,12.6849548
60.365207,12.1655251,12.7735962,-0.779789171,12.6830077,12.7732574,12.6831544,12.6829105
60.374388,12.9614814,12.7711833,0.436231724,12.6809639,12.7708453,12.6811105,12.680867
60.383568,11.7046999,12.7687742,-1.03153977,12.6789214,12.768437,12.6790678,12.6788248
60.392748,12.6095202,12.7663687,-0.396041039,12.67688,12.7660324,12.6770263,12.6767837
60.401928,12.7279221,12.7639669,-0.18985466,12.6748396,12.7636313,12.6749858,12.6747437
60.411108,12.922848,12.7615687,0.401595905,12.6728003,12.761234,12.6729464,12.6727048
60.420289,12.1243557,12.7591738,-0.796754781,12.6707619,12.7588399,12.6709079,12.6706668
60.429469,13.190906,12.7567827,0.658880292,12.6687249,12.7564496,12.6688707,12.66863
60.438649,12.6885775,12.7543951,-0.256549314,12.6666889,12.7540627,12.6668346,12.6665944
60.447829,11.2694277,12.7520109,-1.21761376,12.664654,12.7516794,12.6647996,12.6645598
60.457009,12,12.7496302,-0.865811885,12.6626202,12.7492995,12.6627656,12.6625264
60.466189,12.1243557,12.7472529,-0.789238426,12.6605875,12.746923,12.6607328,12.660494
60.47537,12.489996,12.7448788,-0.504859224,12.6585557,12.7445496,12.6587009,12.6584625
60.48455,12.7279221,12.7425084,-0.12077383,12.6565251,12.7421799,12.6566702,12.6564324
60.49373,12.2474487,12.7401413,-0.701920649,12.6544957,12.7398137,12.6546407,12.6544033
60.50291,12.7671453,12.7377776,0.171370126,12.6524674,12.7374507,12.6526123,12.6523753
60.51209,12.328828,12.7354173,-0.637643539,12.6504403,12.7350912,12.6505849,12.6503484
60.52127,12.328828,12.7330605,-0.635792815,12.6484142,12.7327351,12.6485587,12.6483227
60.530451,12.7279221,12.7307068,-0.0527706064,12.646389,12.7303822,12.6465334,12.6462978
60.539631,12.1243557,12.7283566,-0.77717501,12.6443651,12.7280328,12.6445094,12.6442742
60.548811,12.6885775,12.7260098,-0.193474155,12.6423423,12.7256867,12.6424865,12.6422518
60.557991,12.7671453,12.7236662,0.208516497,12.6403207,12.7233438,12.6404647,12.6402305
60.567171,12.8840987,12.7213259,0.403451167,12.6383002,12.7210043,12.6384441,12.6382102
60.576351,12.9614814,12.7189888,0.492435366,12.6362807,12.7186679,12.6364245,12.6361911
60.585532,12.489996,12.7166547,-0.476086876,12.6342622,12.7163346,12.6344059,12.6341729
60.594712,12.3693169,12.7143241,-0.587373144,12.632245,12.7140047,12.6323885,12.632156
60.603892,12.8062485,12.7119967,0.307004568,12.630229,12.711678,12.6303723,12.6301403
60.613072,11.2249722,12.7096724,-1.21848278,12.628214,12.7093545,12.6283573,12.6281256
60.622252,12.3693169,12.7073514,-0.581407362,12.6262002,12.7070342,12.6263433,12.6261121
60.631432,12.922848,12.7050337,0.466705767,12.6241875,12.7047172,12.6243305,12.6240997
60.640613,12.3693169,12.7027191,-0.577409922,12.6221757,12.7024031,12.6223187,12.6220882
60.649793,13,12.7004082,0.547349816,12.6201652,12.7000925,12.6203086,12.6200781
60.658973,11.5758369,12.6981005,-1.05936943,12.6181559,12.6977849,12.6182997,12.618069
60.668153,12.8452326,12.6957954,0.386571085,12.6161477,12.6954805,12.6162914,12.6160611
60.677333,12.489996,12.6934933,-0.451106782,12.6141406,12.6931791,12.6142842,12.6140543
60.686513,12.5698051,12.6911944,-0.348409634,12.6121347,12.6908809,12.6122782,12.6120487
60.695694,11.8743421,12.6888982,-0.902527639,12.6101297,12.6885854,12.610273,12.610044
60.704874,12.5299641,12.6866054,-0.395779381,12.608126,12.6862933,12.6082692,12.6080406
60.714054,12.8062485,12.6843156,0.349188831,12.6061235,12.6840042,12.6062665,12.6060383
60.723234,12.4498996,12.6820289,-0.481797995,12.6041221,12.6817182,12.604265,12.6040372
60.732414,12.6885775,12.6797452,0.0939804944,12.6021219,12.6794352,12.6022646,12.6020373
60.741594,11.4891253,12.6774647,-1.09010979,12.6001228,12.6771553,12.6002654,12.6000384
60.750775,12.8062485,12.6751869,0.362024243,12.5981246,12.6748782,12.598267,12.5980405
60.759955,12.489996,12.6729124,-0.427687313,12.5961277,12.6726044,12.5962701,12.596044
60.769135,12.489996,12.6706409,-0.425023452,12.5941321,12.6703336,12.5942743,12.5940486
60.778315,11.5325626,12.6683724,-1.06574378,12.5921375,12.6680657,12.5922796,12.5920543
60.787495,12.1243557,12.6661068,-0.736037487,12.5901441,12.6658008,12.5902861,12.5900612
60.796675,12.489996,12.6638442,-0.416951106,12.5881519,12.6635389,12.5882937,12.5880692
60.805856,12.7671453,12.6615843,0.324901568,12.5861606,12.6612796,12.5863022,12.5860782
60.815036,12.083046,12.6593276,-0.759132134,12.5841707,12.6590235,12.5843122,12.5840885
60.824216,12.0415946,12.6570738,-0.784524811,12.5821819,12.6567704,12.5823232,12.5821
60.833396,12.083046,12.6548229,-0.756159301,12.5801943,12.6545201,12.5803355,12.5801126
60.842576,11.4891253,12.6525749,-1.0786332,12.5782078,12.6522728,12.5783489,12.5781264
60.851757,12.6885775,12.6503296,0.19557078,12.5762223,12.6500282,12.5763632,12.5761411
60.860937,12.489996,12.6480876,-0.397607319,12.5742381,12.6477868,12.5743789,12.5741572
60.870117,12.7279221,12.6458484,0.286484973,12.5722551,12.6455483,12.5723958,12.5721745
60.879297,11.9582607,12.6436121,-0.827859523,12.5702733,12.6433126,12.5704138,12.5701929
60.888477,12.083046,12.6413787,-0.747216656,12.5682926,12.6410798,12.568433,12.5682125
60.897657,11.7046999,12.6391481,-0.966668617,12.5663131,12.6388499,12.5664533,12.5662332
60.906838,11.9582607,12.6369201,-0.823807868,12.5643346,12.6366225,12.5644746,12.5642549
60.916018,11.4891253,12.6346952,-1.07031302,12.5623574,12.6343982,12.5624973,12.562278
60.925198,12.1655251,12.6324732,-0.683336014,12.5603814,12.6321768,12.5605212,12.5603022
60.934378,13.6747943,12.6302539,1.0220276,12.5584066,12.6299582,12.5585462,12.5583277
60.943558,11.61895,12.6280375,-1.00453344,12.5564329,12.6277423,12.5565724,12.5563542
60.952738,12.5698051,12.6258238,-0.236682765,12.5544604,12.6255293,12.5545998,12.554382
60.961919,11.7046999,12.6236128,-0.95859943,12.5524889,12.6233189,12.5526281,12.5524107
60.971099,13,12.6214049,0.615300837,12.5505188,12.6211116,12.5506578,12.5504408
60.980279,12.6885775,12.6191998,0.263396611,12.5485498,12.6189071,12.5486887,12.5484721
60.989459,13.114877,12.6169974,0.705605856,12.546582,12.6167053,12.5467208,12.5465045
60.998639,13.4907376,12.6147979,0.93591651,12.5446154,12.6145064,12.544754,12.5445382
61.007819,12.5299641,12.612601,-0.287466431,12.54265,12.6123101,12.5427885,12.542573
61.017,12,12.6104067,-0.781285309,12.5406856,12.6101164,12.5408239,12.5406088
61.02618,11.61895,12.6082154,-0.994618208,12.5387225,12.6079257,12.5388607,12.538646
61.03536,11.8321596,12.6060268,-0.879697265,12.5367606,12.6057377,12.5368987,12.5366843
61.04454,12.2065556,12.603841,-0.630305789,12.5348,12.6035525,12.5349379,12.5347239
61.05372,12.5698051,12.6016579,-0.178473531,12.5328405,12.60137,12.5329782,12.5327646
61.0629,12.4498996,12.5994775,-0.386753027,12.5308822,12.5991901,12.5310198,12.5308065
61.072081,11.8743421,12.5972996,-0.850269086,12.5289249,12.5970128,12.5290623,12.5288494
61.081261,12.4096736,12.5951248,-0.430640389,12.526969,12.5948386,12.5271063,12.5268937
61.090441,12.7279221,12.5929527,0.367381778,12.5250142,12.5926671,12.5251514,12.5249392
61.099621,12.4498996,12.5907833,-0.375344763,12.5230607,12.5904982,12.5231977,12.5229859
61.108801,12.3693169,12.5886166,-0.468294464,12.5211084,12.5883321,12.5212452,12.5210338
61.117981,12.1655251,12.5864526,-0.64878926,12.5191573,12.5861686,12.519294,12.5190829
61.127162,12.1243557,12.584291,-0.678185331,12.5172071,12.5840076,12.5173437,12.517133
61.136342,12,12.5821323,-0.762975979,12.5152584,12.5818496,12.5153948,12.5151844
61.145522,11.8743421,12.5799764,-0.840020405,12.5133109,12.5796941,12.5134471,12.5132371
61.154702,11.9582607,12.5778231,-0.787122811,12.5113645,12.5775414,12.5115006,12.511291
61.163882,12.922848,12.5756724,0.589216055,12.5094194,12.5753913,12.5095554,12.5093461
61.173062,12.2882057,12.5735244,-0.534152339,12.5074755,12.5732439,12.5076113,12.5074024
61.182243,11.5325626,12.5713789,-1.01922338,12.5055326,12.5710989,12.5056683,12.5054597
61.191423,12.9614814,12.5692364,0.62629469,12.5035911,12.5689569,12.5037266,12.5035184
61.200603,13.114877,12.5670965,0.740121985,12.5016508,12.5668176,12.5017862,12.5015783
61.209783,13.114877,12.5649593,0.741564406,12.4997118,12.5646809,12.499847,12.4996394
61.218963,12.2065556,12.5628247,-0.596882814,12.4977739,12.5625469,12.497909,12.4977018
61.228143,13.1529464,12.5606928,0.769580184,12.4958373,12.5604155,12.4959722,12.4957653
61.237324,12.7279221,12.5585633,0.411532268,12.4939016,12.5582865,12.4940364,12.4938299
61.246504,12.3693169,12.5564366,-0.432573368,12.4919674,12.5561604,12.492102,12.4918959
61.255684,11.7046999,12.5543126,-0.921744357,12.4900344,12.5540369,12.4901689,12.4899631
61.264864,12.922848,12.5521912,0.608815908,12.4881027,12.551916,12.488237,12.4880315
61.274044,11.8743421,12.5500724,-0.822028173,12.4861721,12.5497978,12.4863063,12.4861012
61.283224,12.2474487,12.5479563,-0.548185687,12.4842428,12.5476821,12.4843768,12.484172
61.292405,12.083046,12.5458425,-0.680291508,12.4823145,12.5455689,12.4824483,12.4822439
61.301585,12.5299641,12.5437317,-0.117335448,12.4803876,12.5434586,12.4805213,12.4803172
61.310765,12.4096736,12.5416236,-0.363249099,12.478462,12.541351,12.4785955,12.4783918
61.319945,12.2882057,12.539518,-0.501310587,12.4765376,12.539246,12.4766709,12.4764675
61.329125,12.3693169,12.5374151,-0.409997863,12.4746144,12.5371436,12.4747476,12.4745445
61.338306,12.0415946,12.5353146,-0.702652136,12.4726922,12.5350436,12.4728253,12.4726225
61.347486,13.1529464,12.5332169,0.787229011,12.4707715,12.5329464,12.4709044,12.470702
61.356666,12.6885775,12.5311219,0.396806861,12.468852,12.5308518,12.4689847,12.4687827
61.365846,12.3693169,12.5290294,-0.399640491,12.4669337,12.5287599,12.4670663,12.4668646
61.375026,13.4907376,12.5269396,0.981732148,12.4650167,12.5266705,12.4651492,12.4649478
61.384206,12.7279221,12.5248523,0.450632603,12.4631009,12.5245838,12.4632332,12.4630322
61.393387,12.5698051,12.5227675,0.21688159,12.4611862,12.5224994,12.4613183,12.4611176
61.402567,12.2474487,12.5206855,-0.522720515,12.4592729,12.5204179,12.4594049,12.4592045
61.411747,12.3693169,12.5186061,-0.386379636,12.4573608,12.5183391,12.4574927,12.4572926
61.420927,12.7671453,12.5165294,0.500615514,12.45545,12.5162629,12.4555817,12.4553819
61.430107,12.083046,12.5144554,-0.656817649,12.4535405,12.5141893,12.453672,12.4534725
61.439287,12.4096736,12.512384,-0.320484505,12.4516321,12.5121184,12.4517635,12.4515644
61.448468,12.6095202,12.5103149,0.314968722,12.4497249,12.5100498,12.4498561,12.4496573
61.457648,11.5758369,12.5082487,-0.96561473,12.447819,12.5079841,12.4479501,12.4477516
61.466828,12.2474487,12.5061851,-0.508661382,12.4459145,12.505921,12.4460453,12.4458472
61.476008,11.8321596,12.5041241,-0.819734452,12.4440111,12.5038605,12.4441419,12.443944
61.485188,13,12.5020658,0.705644543,12.4421091,12.5018026,12.4422396,12.4420421
61.494368,12.2882057,12.50001,-0.460222024,12.4402082,12.4997473,12.4403387,12.4401415
61.503549,11.9163753,12.4979567,-0.76261485,12.4383085,12.4976944,12.4384387,12.4382418
61.512729,12.6885775,12.4959062,0.438943434,12.4364102,12.4956444,12.4365403,12.4363437
61.521909,12.7279221,12.4938584,0.483801299,12.4345131,12.493597,12.4346431,12.4344468
61.531089,11.8321596,12.4918133,-0.812190672,12.4326173,12.4915524,12.4327471,12.4325512
61.540269,12.8062485,12.4897708,0.562563498,12.4307228,12.4895104,12.4308524,12.4306568
61.549449,13.453624,12.487731,0.982798603,12.4288295,12.487471,12.428959,12.4287637
61.55863,12.0415946,12.4856935,-0.666407503,12.4269373,12.4854341,12.4270666,12.4268716
61.56781,11.9582607,12.483659,-0.724843601,12.4250466,12.4834,12.4251757,12.424981
61.57699,12.6095202,12.4816271,0.357621488,12.4231571,12.4813685,12.4232861,12.4230917
61.58617,13.114877,12.4795978,0.79704405,12.4212689,12.4793397,12.4213977,12.4212037
61.59535,12.8840987,12.4775712,0.637595086,12.419382,12.4773135,12.4195107,12.4193169
61.60453,12.328828,12.4755473,-0.38303954,12.4174963,12.4752901,12.4176248,12.4174314
61.613711,12.922848,12.4735258,0.670314987,12.4156117,12.473269,12.4157401,12.4155469
61.622891,12.4096736,12.4715072,-0.248663533,12.4137286,12.4712508,12.4138568,12.4136639
61.632071,12.922848,12.4694913,0.673317683,12.4118468,12.4692354,12.4119748,12.4117822
61.641251,12.1243557,12.4674782,-0.585766591,12.4099662,12.4672227,12.4100941,12.4099018
61.650431,12.328828,12.4654677,-0.369648116,12.4080869,12.4652127,12.4082146,12.4080226
61.659611,11.3578167,12.46346,-1.05149576,12.4062089,12.4632054,12.4063364,12.4061448
61.668792,12.083046,12.4614548,-0.615149466,12.404332,12.4612006,12.4044593,12.404268
61.677972,11.1803399,12.4594527,-1.13097869,12.4024567,12.4591987,12.4025837,12.4023926
61.687152,11.9582607,12.4574534,-0.7065357,12.4005829,12.4571995,12.4007094,12.4005186
61.696332,12.0415946,12.4554572,-0.643321567,12.3987107,12.4552031,12.3988363,12.3986458
61.705512,12.5698051,12.4534638,0.341088359,12.3968398,12.4532093,12.3969645,12.3967744
61.714692,12.1655251,12.4514725,-0.53474055,12.3949696,12.4512184,12.3950941,12.3949042
61.723873,12.328828,12.4494836,-0.347355205,12.3931004,12.4492299,12.3932247,12.3930351
61.733053,12.1655251,12.4474977,-0.531011002,12.3912326,12.4472444,12.3913567,12.3911675
61.742233,11.8743421,12.4455146,-0.755759567,12.3893662,12.4452617,12.3894901,12.3893011
61.751413,12.5698051,12.4435344,0.355345942,12.387501,12.4432818,12.3876248,12.3874361
61.760593,12.3693169,12.4415569,-0.268775097,12.3856372,12.4413048,12.3857608,12.3855723
61.769773,11.5758369,12.4395823,-0.929379041,12.3837746,12.4393306,12.383898,12.3837099
61.778954,12.6885775,12.4376103,0.500966332,12.3819131,12.437359,12.3820364,12.3818485
61.788134,12.9614814,12.4356413,0.725148342,12.3800531,12.4353904,12.3801762,12.3799887
61.797314,12.4096736,12.4336751,-0.154924073,12.3781944,12.4334246,12.3783174,12.3781301
61.806494,12.489996,12.4317118,0.241421216,12.3763371,12.4314617,12.3764598,12.3762728
61.815674,11.4891253,12.4297513,-0.969858771,12.374481,12.4295016,12.3746035,12.3744168
61.824855,12.8840987,12.4277935,0.675503669,12.372626,12.4275442,12.3727484,12.372562
61.834035,12.2474487,12.4258388,-0.422362515,12.3707725,12.4255899,12.3708947,12.3707086
61.843215,13.0384048,12.423887,0.783911869,12.3689203,12.4236384,12.3690424,12.3688565
61.852395,12.8452326,12.4219381,0.65061086,12.3670695,12.4216899,12.3671913,12.3670058
61.861575,12.1655251,12.4199922,-0.504447338,12.3652199,12.4197444,12.3653416,12.3651563
61.870755,12.4498996,12.4180493,0.178466503,12.3633716,12.4178019,12.3634932,12.3633081
61.879936,12.0415946,12.4161092,-0.611975983,12.3615245,12.4158621,12.3616458,12.3614611
61.889116,12.2065556,12.4141722,-0.455649682,12.3596788,12.4139256,12.3598,12.3596156
61.898296,12.1655251,12.4122383,-0.496702374,12.3578345,12.411992,12.3579555,12.3577713
61.907476,11.9163753,12.4103074,-0.702803026,12.3559915,12.4100614,12.3561123,12.3559284
61.916656,11.9163753,12.4083795,-0.701430108,12.3541498,12.4081339,12.3542704,12.3540868
61.925836,12.6095202,12.4064546,0.450627978,12.3523094,12.4062094,12.3524299,12.3522465
61.935017,11.5325626,12.4045327,-0.93379337,12.3504702,12.4042878,12.3505904,12.3504073
61.944197,12.4498996,12.402614,0.217452597,12.3486324,12.4023695,12.3487525,12.3485697
61.953377,11.9582607,12.4006984,-0.665159866,12.346796,12.4004543,12.3469159,12.3467333
61.962557,12.4096736,12.3987859,0.104344136,12.3449609,12.3985422,12.3450806,12.3448983
61.971737,12.6885775,12.3968767,0.540093366,12.3431271,12.3966333,12.3432466,12.3430646
61.980917,12.8452326,12.3949708,0.671015506,12.3412946,12.3947277,12.341414,12.3412323
61.990098,11.9163753,12.3930678,-0.690429256,12.3394633,12.3928251,12.3395825,12.339401
61.999278,11.2249722,12.3911684,-1.07990564,12.3376335,12.390926,12.3377525,12.3375713
62.008458,13.3790882,12.3892721,0.994894982,12.335805,12.3890301,12.3359238,12.3357429
62.017638,12.2882057,12.3873792,-0.314918186,12.3339778,12.3871375,12.3340965,12.3339158
62.026818,12.1655251,12.3854896,-0.46900373,12.332152,12.3852482,12.3322704,12.33209
62.035998,11.7898261,12.3836033,-0.770569364,12.3303275,12.3833623,12.3304458,12.3302656
62.045179,12.4096736,12.3817201,0.167193023,12.3285042,12.3814795,12.3286222,12.3284423
62.054359,12,12.3798406,-0.616312107,12.3266823,12.3796003,12.3268002,12.3266206
62.063539,12.1655251,12.3779645,-0.460911545,12.3248618,12.3777245,12.3249795,12.3248001
62.072719,12.4096736,12.3760919,0.183253276,12.3230426,12.3758522,12.3231601,12.322981
62.081899,12.2065556,12.3742228,-0.409471811,12.3212248,12.3739834,12.3213421,12.3211633
62.091079,12.4498996,12.3723574,0.278464044,12.3194083,12.3721184,12.3195254,12.3193469
62.10026,12.922848,12.3704954,0.743204283,12.317593,12.3702567,12.3177099,12.3175316
62.10944,11.8321596,12.3686372,-0.732446333,12.3157792,12.3683988,12.3158959,12.3157178
62.11862,12.1655251,12.3667827,-0.448617439,12.3139667,12.3665446,12.3140832,12.3139054
62.1278,12.6491106,12.3649318,0.533084245,12.3121556,12.3646941,12.3122719,12.3120944
62.13698,13.3041347,12.3630847,0.970077302,12.3103458,12.3628473,12.310462,12.3102847
62.14616,12.7279221,12.3612414,0.605541632,12.3085374,12.3610042,12.3086533,12.3084763
62.155341,11.3578167,12.3594017,-1.00079218,12.3067301,12.3591648,12.3068458,12.3066691
62.164521,12,12.357566,-0.597968257,12.3049244,12.3573295,12.3050399,12.3048634
62.173701,11.7473401,12.3557343,-0.779996268,12.30312,12.355498,12.3032353,12.303059
62.182881,11.9163753,12.3539065,-0.661461444,12.301317,12.3536705,12.3014321,12.301256
62.192061,12.2474487,12.3520828,-0.323471886,12.2995153,12.3518471,12.2996302,12.2994544
62.201241,12.7279221,12.3502633,0.614539505,12.297715,12.3500278,12.2978297,12.2976541
62.210422,11.8321596,12.3484478,-0.718531971,12.2959158,12.3482126,12.2960303,12.295855
62.219602,12.4096736,12.3466366,0.251071708,12.2941182,12.3464018,12.2942325,12.2940574
62.228782,12.6491106,12.3448298,0.551616598,12.292322,12.3445952,12.292436,12.2922612
62.237962,12.0415946,12.3430272,-0.549028798,12.2905271,12.3427929,12.2906409,12.2904663
62.247142,12.083046,12.341229,-0.508117134,12.2887336,12.3409949,12.2888471,12.2886728
62.256323,12.1243557,12.339435,-0.463766508,12.2869412,12.3392012,12.2870545,12.2868805
62.265503,12.3693169,12.3376458,0.177963831,12.2851504,12.3374122,12.2852635,12.2850897
62.274683,11.4891253,12.335861,-0.920182455,12.2833609,12.3356278,12.2834738,12.2833002
62.283863,12.2474487,12.334081,-0.294333585,12.2815728,12.333848,12.2816855,12.2815122
62.293043,12.2065556,12.3323056,-0.354612465,12.2797861,12.3320728,12.2798985,12.2797255
62.302223,12.7279221,12.330535,0.630386399,12.2780008,12.3303025,12.278113,12.2779401
62.311404,13,12.3287693,0.819286685,12.2762166,12.3285371,12.2763285,12.2761559
62.320584,12.2882057,12.327009,-0.196985337,12.274434,12.3267769,12.2745457,12.2743733
62.329764,12.1243557,12.3252536,-0.44821644,12.2726528,12.3250218,12.2727642,12.2725921
62.338944,12.8062485,12.3235035,0.694798544,12.2708729,12.3232719,12.2709841,12.2708122
62.348124,11.6619038,12.3217585,-0.812314433,12.2690944,12.3215272,12.2692054,12.2690337
62.357304,12.4096736,12.3200189,0.299423963,12.2673173,12.3197878,12.267428,12.2672566
62.366485,11.8743421,12.3182846,-0.666290108,12.2655413,12.3180537,12.2656518,12.2654806
62.375665,12.328828,12.316556,0.110779142,12.263767,12.3163253,12.2638772,12.2637062
62.384845,13.0384048,12.314833,0.850630224,12.261994,12.3146026,12.2621039,12.2619332
62.394025,12.3693169,12.3131158,0.237067574,12.2602224,12.3128856,12.2603321,12.2601616
62.403205,12.1655251,12.3114045,-0.381941715,12.2584522,12.3111745,12.2585616,12.2583913
62.412385,12.1243557,12.3096992,-0.430515478,12.2566833,12.3094694,12.2567925,12.2566225
62.421566,12.083046,12.308,-0.474293179,12.2549157,12.3077703,12.2550245,12.2548548
62.430746,12.2065556,12.3063076,-0.31583534,12.2531496,12.3060781,12.2532582,12.2530887
62.439926,12.6095202,12.3046216,0.552176259,12.2513849,12.3043923,12.2514932,12.2513239
62.449106,12.6885775,12.3029422,0.620995459,12.2496216,12.302713,12.2497297,12.2495606
62.458286,11.7898261,12.3012695,-0.715152688,12.2478597,12.3010405,12.2479675,12.2477986
62.467466,11.1355287,12.2996037,-1.07892305,12.2460992,12.2993749,12.2462066,12.246038
62.476647,12.3693169,12.2979447,0.267155679,12.2443399,12.2977161,12.244447,12.2442786
62.485827,12.0415946,12.2962932,-0.504676706,12.2425822,12.2960647,12.242689,12.2425208
62.495007,12.2065556,12.294649,-0.29680526,12.2408258,12.2944206,12.2409324,12.2407644
62.504187,11.7898261,12.2930124,-0.709356219,12.2390709,12.2927842,12.2391771,12.2390094
62.513367,12.1243557,12.2913835,-0.408690428,12.2373173,12.2911555,12.2374232,12.2372558
62.522547,12.8840987,12.2897626,0.770931968,12.2355652,12.2895347,12.2356708,12.2355035
62.531728,12.1243557,12.2881498,-0.404714843,12.2338142,12.2879219,12.2339195,12.2337525
62.540908,13,12.2865461,0.844661987,12.2320649,12.2863184,12.2321698,12.232003
62.550088,11.6619038,12.2849512,-0.789333496,12.2303169,12.2847236,12.2304216,12.230255
62.559268,11.2249722,12.2833651,-1.02878226,12.2285704,12.2831376,12.2286747,12.2285083
62.568448,12.083046,12.2817882,-0.445805112,12.2268253,12.2815608,12.2269292,12.226763
62.577628,12.6491106,12.2802207,0.607363132,12.2250815,12.2799934,12.2251851,12.2250192
62.586809,11.7898261,12.2786627,-0.699168474,12.223339,12.2784355,12.2234422,12.2232765
62.595989,11.7473401,12.2771148,-0.727856242,12.2215981,12.2768877,12.2217009,12.2215354
62.605169,12.1243557,12.2755773,-0.388872223,12.2198586,12.2753502,12.2199611,12.2197958
62.614349,11.7473401,12.2740503,-0.72574799,12.2181205,12.2738233,12.2182226,12.2180575
62.623529,11.9163753,12.2725342,-0.596790502,12.2163838,12.2723072,12.2164855,12.2163207
62.632709,12.2474487,12.2710294,-0.153559937,12.2146486,12.2708024,12.2147499,12.2145852
62.64189,12.2065556,12.269536,-0.250958957,12.2129145,12.2693091,12.2130154,12.212851
62.65107,11.4891253,12.2680557,-0.882570329,12.2111821,12.2678288,12.2112826,12.2111184
62.66025,11.5325626,12.266588,-0.856752831,12.2094511,12.2663611,12.2095512,12.2093872
62.66943,11.3137085,12.2651332,-0.975410034,12.2077215,12.2649064,12.2078211,12.2076574
62.67861,11.3137085,12.2636918,-0.974670867,12.2059933,12.2634649,12.2060925,12.205929
62.68779,12.3693169,12.2622642,0.327189106,12.2042666,12.2620373,12.2043653,12.204202
62.696971,11.5325626,12.2608507,-0.85339796,12.2025411,12.2606237,12.2026394,12.2024762
62.706151,11.8743421,12.2594521,-0.620572358,12.2008172,12.2592252,12.200915,12.2007521
62.715331,12.1243557,12.258069,-0.365668288,12.1990947,12.2578419,12.199192,12.1990293
62.724511,11.7046999,12.2567017,-0.742968211,12.1973737,12.2564746,12.1974705,12.197308
62.733691,11.9163753,12.2553509,-0.582216126,12.1956541,12.2551237,12.1957504,12.1955881
62.742872,12,12.2540171,-0.504001124,12.1939357,12.2537899,12.1940315,12.1938694
62.752052,11.5758369,12.2527013,-0.822717699,12.192219,12.2524739,12.1923142,12.1921524
62.761232,12.2065556,12.2514051,-0.211776933,12.1905037,12.2511776,12.1905984,12.1904367
62.770412,12.1243557,12.2501289,-0.354645223,12.1887898,12.2499012,12.188884,12.1887225
62.779592,12.922848,12.2488729,0.820959862,12.1870774,12.2486451,12.187171,12.1870097
62.788772,11.4017543,12.2476379,-0.919719347,12.1853664,12.2474099,12.1854594,12.1852983
62.797953,11.5758369,12.2464248,-0.818894291,12.1836567,12.2461966,12.1837491,12.1835882
62.807133,11.7473401,12.2452346,-0.705616375,12.1819486,12.2450062,12.1820403,12.1818797
62.816313,12.2065556,12.2440683,-0.193681859,12.180242,12.2438397,12.180333,12.1801726
62.825493,12.1243557,12.2429269,-0.344341714,12.1785368,12.242698,12.1786272,12.1784669
62.834673,11.5758369,12.2418115,-0.816072654,12.176833,12.2415823,12.1769227,12.1767627
62.843853,13,12.2407233,0.871364855,12.1751308,12.2404938,12.1752197,12.1750599
62.853034,11.7046999,12.2396634,-0.73141201,12.1734297,12.2394337,12.173518,12.1733584
62.862214,12.489996,12.2386335,0.501360657,12.1717304,12.2384034,12.1718179,12.1716584
62.871394,12.2065556,12.2376361,-0.176296456,12.1700324,12.2374056,12.1701192,12.1699599
[truncated: 676,781 more chars]
