# Supplementary material for: Phase Stability of Iron Nitride Fe4N at High Pressure—Pressure-Dependent Evolution of Phase Equilibria in the Fe–N System
Source: Materials (Basel). 2021 Jul 15;14(14):3963. doi: 10.3390/ma14143963 (PMC8307547; doi:10.3390/ma14143963)
Supplement: Supplementary file 1 [file materials-14-03963-s001.zip › xrd_data/initial_2_fe+fe4n_riet.txt]

'y-axis saved as Sqrt(y)
'x,AG16_Pulver_sum_all.xy,Ycalc,Diff,Roaldite,Iron,Bkg
20,33.5410197,33.9170538,-0.613216209,0,0,33.9170538
20.010492,34.2052628,33.901759,0.550911713,0,0,33.901759
20.020983,34.4818793,33.8864745,0.771624772,0,0,33.8864745
20.031475,34.6698716,33.8711973,0.89368583,0,0,33.8711973
20.041966,34.4673759,33.8559303,0.78194988,0,0,33.8559303
20.052458,34.176015,33.8406705,0.579089321,0,0,33.8406705
20.06295,33.5708207,33.8254196,-0.504577939,0,0,33.8254196
20.073441,33.015148,33.8101788,-0.89164496,0,0,33.8101788
20.083933,34.2052628,33.7949453,0.640560287,0,0,33.7949453
20.094424,33.9558537,33.779722,0.419680519,0,0,33.779722
20.104916,34.2052628,33.7645059,0.663895201,0,0,33.7645059
20.115408,33.8821487,33.7492986,0.364486064,0,0,33.7492986
20.125899,34.278273,33.7341015,0.737679839,0,0,33.7341015
20.136391,34,33.7189116,0.530177724,0,0,33.7189116
20.146882,34.4673759,33.7037319,0.873867275,0,0,33.7037319
20.157374,33.8378486,33.6885594,0.386379631,0,0,33.6885594
20.167866,34.1320963,33.6733957,0.67727444,0,0,33.6733957
20.178357,33.1209903,33.6582421,-0.732974583,0,0,33.6582421
20.188849,33.3016516,33.6430957,-0.584332185,0,0,33.6430957
20.19934,34.0587727,33.6279595,0.656363643,0,0,33.6279595
20.209832,34.2344855,33.6128305,0.788451015,0,0,33.6128305
20.220324,33.286634,33.5977103,-0.557742143,0,0,33.5977103
20.230815,33.4664011,33.5826001,-0.340879792,0,0,33.5826001
20.241307,34.2490876,33.5674972,0.825584888,0,0,33.5674972
20.251798,33.2264955,33.5524044,-0.570884323,0,0,33.5524044
20.26229,33.0454233,33.5373188,-0.701352621,0,0,33.5373188
20.272782,33.0907842,33.5222419,-0.656854364,0,0,33.5222419
20.283273,33.436507,33.5071751,-0.265834649,0,0,33.5071751
20.293765,32.9089653,33.4921155,-0.763642664,0,0,33.4921155
20.304256,34.0440891,33.477066,0.753009366,0,0,33.477066
20.314748,33.3016516,33.4620237,-0.400464799,0,0,33.4620237
20.32524,33.763886,33.44699,0.562935175,0,0,33.44699
20.335731,33.4215499,33.4319665,-0.102061337,0,0,33.4319665
20.346223,32.4961536,33.4169501,-0.959581402,0,0,33.4169501
20.356714,33.7490741,33.4019438,0.589177627,0,0,33.4019438
20.367206,33.1209903,33.3869447,-0.515707631,0,0,33.3869447
20.377698,32.3882695,33.3719542,-0.991808816,0,0,33.3719542
20.388189,33.3766385,33.3569738,0.140231068,0,0,33.3569738
20.398681,33.2415403,33.3420005,-0.316954684,0,0,33.3420005
20.409172,33.6749165,33.3270374,0.58981279,0,0,33.3270374
20.419664,33.5410197,33.3120813,0.478474993,0,0,33.3120813
20.430156,33.0302891,33.2971339,-0.516570236,0,0,33.2971339
20.440647,33.5111922,33.2821966,0.478534848,0,0,33.2821966
20.451139,33.3316666,33.2672664,0.253772082,0,0,33.2672664
20.46163,33.3616546,33.2523462,0.330618312,0,0,33.2523462
20.472122,33.1058907,33.2374331,-0.362687789,0,0,33.2374331
20.482614,33.4514574,33.2225287,0.478464893,0,0,33.2225287
20.493105,32.4807635,33.2076343,-0.852567149,0,0,33.2076343
20.503597,34.4673759,33.192747,1.12899463,0,0,33.192747
20.514088,34.0587727,33.1778697,0.938564331,0,0,33.1778697
20.52458,32.5576412,33.1629996,-0.778047819,0,0,33.1629996
20.535072,33.5559235,33.148138,0.638580795,0,0,33.148138
20.545563,32.8937684,33.1332865,-0.489405812,0,0,33.1332865
20.556055,34.0587727,33.118442,0.969706511,0,0,33.118442
20.566546,32.6496554,33.1036075,-0.673759681,0,0,33.1036075
20.577038,32.4345495,33.0887802,-0.808845305,0,0,33.0887802
20.58753,33.5708207,33.0739614,0.704882433,0,0,33.0739614
20.598021,33.6303434,33.0591526,0.755771696,0,0,33.0591526
20.608513,33.2415403,33.0443509,0.44406013,0,0,33.0443509
20.619004,33.9558537,33.0295591,0.962441986,0,0,33.0295591
20.629496,33.286634,33.0147745,0.521401458,0,0,33.0147745
20.639988,34.0734501,32.9999984,1.03607515,0,0,32.9999984
20.650479,33.0605505,32.9852322,0.274441859,0,0,32.9852322
20.660971,33.1662479,32.9704731,0.442464462,0,0,32.9704731
20.671462,31.8119474,32.955724,-1.06947488,0,0,32.955724
20.681954,32.4961536,32.9409819,-0.666954486,0,0,32.9409819
20.692446,32.5729949,32.9262484,-0.594351256,0,0,32.9262484
20.702937,32.9241553,32.9115247,0.112385648,0,0,32.9115247
20.713429,33.2565783,32.8968082,0.599808387,0,0,32.8968082
20.72392,31.5594677,32.8821016,-1.15005821,0,0,32.8821016
20.734412,33.6600654,32.867402,0.890316435,0,0,32.867402
20.744904,33.2114438,32.8527109,0.598943127,0,0,32.8527109
20.755395,33.2114438,32.8380298,0.611076141,0,0,32.8380298
20.765887,33.1058907,32.8233557,0.531540266,0,0,32.8233557
20.776378,32.2335229,32.8086914,-0.758398649,0,0,32.8086914
20.78687,32.7566787,32.7940343,-0.193275892,0,0,32.7940343
20.797362,33.1209903,32.7793856,0.584469615,0,0,32.7793856
20.807853,33.3766385,32.7647468,0.782235112,0,0,32.7647468
20.818345,32.1558704,32.750115,-0.770872636,0,0,32.750115
20.828836,33.3016516,32.7354931,0.752435061,0,0,32.7354931
20.839328,32.4653662,32.7208782,-0.50548202,0,0,32.7208782
20.84982,33.0605505,32.7062718,0.595213141,0,0,32.7062718
20.860311,32.6955654,32.6916753,0.062371426,0,0,32.6916753
20.870803,32.7414111,32.6770857,0.253624442,0,0,32.6770857
20.881294,31.9530906,32.662506,-0.842268018,0,0,32.662506
20.891786,31.6543836,32.6479334,-0.996769679,0,0,32.6479334
20.902278,32.984845,32.6333691,0.592853994,0,0,32.6333691
20.912769,32.2335229,32.6188147,-0.620718783,0,0,32.6188147
20.923261,33.2716095,32.6042673,0.816910138,0,0,32.6042673
20.933752,32.2800248,32.5897298,-0.556511438,32.5897298,0,32.5897298
20.944244,32.3728281,32.5751992,-0.44985678,32.5751992,0,32.5751992
20.954736,32.2955105,32.5606773,-0.514943511,32.5606773,0,32.5606771
20.965227,32.249031,32.5461657,-0.545100608,32.5461657,0,32.5461647
20.975719,33.0756708,32.5316615,0.737569862,32.5316615,0,32.5316594
20.98621,32.5883415,32.5171677,0.266784099,32.5171677,0,32.5171638
20.996702,32.8633535,32.5026816,0.600559621,32.5026816,0,32.5026752
21.007194,32.1714159,32.4882046,-0.562839885,32.4882046,0,32.4881951
21.017685,32.3882695,32.4737383,-0.292350535,32.4737383,0,32.4737247
21.028177,31.9061123,32.4592801,-0.743752536,32.4592801,0,32.4592613
21.038668,32.3264598,32.444833,-0.344054112,32.444833,0,32.4448076
21.04916,32.2335229,32.4303946,-0.443702212,32.4303946,0,32.430361
21.059652,32.1091887,32.4159668,-0.553875553,32.4159668,0,32.4159227
21.070143,33.1662479,32.4015522,0.874468802,32.4015522,0,32.4014942
21.080635,32.4037035,32.3871503,0.128659043,32.3871503,0,32.3870726
21.091126,32.5729949,32.3727719,0.447462918,32.3727719,0,32.3726608
21.101618,32.2955105,32.3584173,-0.250812256,32.3584173,0,32.3582559
21.11211,32.4961536,32.3440433,0.390013266,32.3440433,0,32.3438594
21.122601,32.5883415,32.3296572,0.508610136,32.3296572,0,32.3294726
21.133093,32.8937684,32.3152781,0.760585497,32.3152781,0,32.3150928
21.143584,31.7804972,32.3009087,-0.721395565,32.3009087,0,32.3007227
21.154076,31.9061123,32.2865463,-0.616793354,32.2865463,0,32.2863596
21.164568,31.4960315,32.2721922,-0.880999847,32.2721922,0,32.2720048
21.175059,32.2955105,32.2578478,0.194068761,32.2578478,0,32.2576597
21.185551,32.4653662,32.2435104,0.471015658,32.2435104,0,32.2433215
21.196042,31.685959,32.2291827,-0.737037065,32.2291827,0,32.228993
21.206534,31.5119025,32.2148619,-0.838426722,32.2148619,0,32.2146715
21.217026,32.7108545,32.2005494,0.714356397,32.2005494,0,32.2003583
21.227517,32.2180074,32.1862466,0.178215552,32.1862466,0,32.1860547
21.238009,32.969683,32.1719507,0.893158608,32.1719507,0,32.1717581
21.2485,32.0624391,32.1576645,-0.308586235,32.1576645,0,32.1574711
21.258992,31.7332633,32.1433853,-0.640407669,32.1433853,0,32.1431911
21.269484,32.5422802,32.1291143,0.642779797,32.1291143,0,32.1289194
21.279975,31.8904374,32.114853,-0.473725204,32.114853,0,32.1146573
21.290467,32.1247568,32.1005986,0.155429054,32.1005986,0,32.1004021
21.300958,32.6496554,32.0863539,0.750534187,32.0863539,0,32.0861566
21.31145,32.2180074,32.072116,0.381957258,32.072116,0,32.071918
21.321942,32.3264598,32.0578865,0.518240547,32.0578865,0,32.0576876
21.332433,31.7175031,32.0436666,-0.571107262,32.0436666,0,32.0434669
21.342925,32.5576412,32.0294535,0.726765196,32.0294535,0,32.0292531
21.353416,32.0624391,32.0152501,0.217230157,32.0152501,0,32.0150489
21.363908,31.5594677,32.0010536,-0.664519354,32.0010536,0,32.0008516
21.3744,31.685959,31.9868654,-0.548549335,31.9868654,0,31.9866625
21.384891,31.8904374,31.9726868,-0.286791446,31.9726868,0,31.9724831
21.395383,31.8904374,31.958515,-0.26091683,31.958515,0,31.9583105
21.405874,32.4191302,31.9443529,0.689040835,31.9443529,0,31.9441475
21.416366,32.3264598,31.9301976,0.629493548,31.9301976,0,31.9299914
21.426858,32.6343377,31.9160506,0.847518226,31.9160506,0,31.9158436
21.437349,31.7804972,31.9019132,-0.348447978,31.9019132,0,31.9017053
21.447841,31.7332633,31.8877826,-0.393089416,31.8877826,0,31.8875739
21.458332,31.3528308,31.8736616,-0.721686072,31.8736616,0,31.873452
21.468824,32.0156212,31.8595475,0.395061649,31.8595475,0,31.8593371
21.479316,31.3209195,31.8454416,-0.724238945,31.8454416,0,31.8452303
21.489807,31.1608729,31.8313452,-0.818823746,31.8313452,0,31.8311331
21.500299,30.9192497,31.8172557,-0.947631826,31.8172557,0,31.8170427
21.51079,30.7896086,31.8031758,-1.00676073,31.8031758,0,31.8029619
21.521282,32.0624391,31.7891027,0.522815794,31.7891027,0,31.788888
21.531774,31.701735,31.7750378,-0.270745045,31.7750378,0,31.7748222
21.542265,31.2409987,31.7609825,-0.721099019,31.7609825,0,31.760766
21.552757,31.2569992,31.746934,-0.699953414,31.746934,0,31.7467166
21.563248,31.1929479,31.732895,-0.734810927,31.732895,0,31.7326767
21.57374,31.8119474,31.7188629,0.305097617,31.7188629,0,31.7186436
21.584232,31.9217794,31.7048389,0.465768689,31.7048389,0,31.7046188
21.594723,31.8747549,31.6908245,0.428871102,31.6908245,0,31.6906034
21.605215,31.7804972,31.6768169,0.321994255,31.6768169,0,31.6765949
21.615706,31.7490157,31.6628187,0.29359323,31.6628187,0,31.6625958
21.626198,32.2800248,31.6488275,0.794479278,31.6488275,0,31.6486036
21.63669,30.9677251,31.6348443,-0.81677365,31.6348443,0,31.6346195
21.647181,31.8904374,31.6208707,0.519198183,31.6208707,0,31.620645
21.657673,31.2409987,31.6069039,-0.604900946,31.6069039,0,31.6066772
21.668164,31.2569992,31.5929465,-0.579609602,31.5929465,0,31.5927189
21.678656,31.2089731,31.578996,-0.608295076,31.578996,0,31.5787674
21.689148,31.5594677,31.5650536,-0.0747388236,31.5650536,0,31.564824
21.699639,30.6104557,31.5511206,-0.969878807,31.5511206,0,31.5508901
21.710131,31.7175031,31.5371945,0.424627555,31.5371945,0,31.536963
21.720622,32.2645316,31.5232778,0.860960974,31.5232778,0,31.5230453
21.731114,31.6069613,31.5093679,0.312399318,31.5093679,0,31.5091344
21.741606,30.5450487,31.4954662,-0.974893563,31.4954662,0,31.4952317
21.752097,30.7896086,31.4815738,-0.831844452,31.4815738,0,31.4813383
21.762589,31.4960315,31.4676883,0.168354416,31.4676883,0,31.4674518
21.77308,31.5594677,31.4538122,0.325046922,31.4538122,0,31.4535747
21.783572,31.5119025,31.4399428,0.268252996,31.4399428,0,31.4397043
21.794064,31.144823,31.4260816,-0.530338201,31.4260816,0,31.4258421
21.804555,31.3687743,31.4122298,-0.20845986,31.4122298,0,31.4119892
21.815047,31.9374388,31.3983848,0.734203033,31.3983848,0,31.3981431
21.825538,31.8119474,31.3845491,0.653757086,31.3845491,0,31.3843065
21.83603,31.6069613,31.3707202,0.486046313,31.3707202,0,31.3704765
21.846522,29.8998328,31.3568994,-1.20709017,31.3568994,0,31.3566547
21.857013,31.5753068,31.343088,0.481890817,31.343088,0,31.3428422
21.867505,30.8382879,31.3292834,-0.70071072,31.3292834,0,31.3290365
21.877996,31.0322413,31.3154881,-0.532209399,31.3154881,0,31.3152402
21.888488,31.3687743,31.3016996,0.258987743,31.3016996,0,31.3014506
21.89898,31.6701752,31.2879192,0.618268601,31.2879192,0,31.287669
21.909471,30.7083051,31.2741481,-0.752225388,31.2741481,0,31.2738969
21.919963,30.8058436,31.2603838,-0.674195935,31.2603838,0,31.2601314
21.930454,31.0644491,31.2466288,-0.426825076,31.2466288,0,31.2463753
21.940946,30.6431069,31.2328805,-0.767967214,31.2328805,0,31.232626
21.951438,30.8706981,31.2191403,-0.590289969,31.2191403,0,31.2188846
21.961929,31.0322413,31.2054095,-0.4161348,31.2054095,0,31.2051527
21.972421,31.0161248,31.1916853,-0.418999401,31.1916853,0,31.1914274
21.982912,31.3368792,31.1779705,0.39863353,31.1779705,0,31.1777114
21.993404,30.9515751,31.1642625,-0.461180422,31.1642625,0,31.1640022
22.003896,30.3809151,31.1505624,-0.877295472,31.1505624,0,31.150301
22.014387,30.8706981,31.1368717,-0.515920143,31.1368717,0,31.1366091
22.024879,31.6543836,31.1231877,0.728831895,31.1231877,0,31.1229239
22.03537,31.7332633,31.1095129,0.789778679,31.1095129,0,31.109248
22.045862,31.0966236,31.0958449,0.0279047329,31.0958449,0,31.0955788
22.056354,31.1126984,31.0821849,0.174680961,31.0821849,0,31.0819176
22.066845,31.3209195,31.0685342,0.502379633,31.0685342,0,31.0682657
22.077337,31.1769145,31.0548902,0.349319787,31.0548902,0,31.0546205
22.087828,30.82207,31.0412555,-0.4681725,31.0412555,0,31.0409846
22.09832,32.3109888,31.0276275,1.1328554,31.0276275,0,31.0273553
22.108812,31.7175031,31.0140074,0.838746461,31.0140074,0,31.013734
22.119303,31.5594677,31.0003967,0.747710517,31.0003967,0,31.000122
22.129795,31.6227766,30.9867926,0.797486071,30.9867926,0,30.9865167
22.140286,30.5614136,30.9731977,-0.64170411,30.9731977,0,30.9729206
22.150778,30.5450487,30.9596096,-0.643864035,30.9596096,0,30.9593312
22.16127,30.1993377,30.9460294,-0.864113226,30.9460294,0,30.9457497
22.171761,30.6920185,30.9324585,-0.490346785,30.9324585,0,30.9321775
22.182253,29.6310648,30.9188942,-1.13482573,30.9188942,0,30.9186119
22.192744,29.9833287,30.9053392,-0.960213769,30.9053392,0,30.9050556
22.203236,31.2729915,30.8917908,0.61741455,30.8917908,0,30.891506
22.213728,30.8382879,30.8782504,-0.199906238,30.8782504,0,30.8779642
22.224219,31.0805405,30.8647192,0.464565746,30.8647192,0,30.8644317
22.234711,31.3847097,30.8511947,0.730421106,30.8511947,0,30.8509058
22.245202,31.7490157,30.8376793,0.954639405,30.8376793,0,30.8373892
22.255694,30.9515751,30.8241707,0.35693756,30.8241707,0,30.8238791
22.266186,31.0966236,30.8106699,0.534746393,30.8106699,0,30.810377
22.276677,31.5277655,30.7971784,0.854743927,30.7971784,0,30.7968841
22.287169,30.9354166,30.7836934,0.389516558,30.7836934,0,30.7833978
22.29766,31.0644491,30.7702177,0.54243101,30.7702177,0,30.7699207
22.308152,31.4483704,30.7567486,0.831637987,30.7567486,0,30.7564502
22.318644,30.3809151,30.7432875,-0.601973756,30.7432875,0,30.7429876
22.329135,31.1608729,30.7298355,0.65653441,30.7298355,0,30.7295342
22.339627,30.2654919,30.7163901,-0.671489531,30.7163901,0,30.7160874
22.350118,30.6104557,30.7029539,-0.304135099,30.7029539,0,30.7026498
22.36061,29.9666481,30.6895243,-0.850221247,30.6895243,0,30.6892188
22.371102,30.9354166,30.6761026,0.509228832,30.6761026,0,30.6757956
22.381593,30.5614136,30.6626901,-0.318239646,30.6626901,0,30.6623816
22.392085,30.7408523,30.6492841,0.302602355,30.6492841,0,30.6489742
22.402576,30.9677251,30.6358873,0.576053651,30.6358873,0,30.6355759
22.413068,30.6594194,30.6224971,0.192151759,30.6224971,0,30.6221843
22.42356,30.1496269,30.6091148,-0.677855405,30.6091148,0,30.6088004
22.434051,30.4466747,30.5957416,-0.386091874,30.5957416,0,30.5954257
22.444543,31.22499,30.582375,0.801632682,30.582375,0,30.5820576
22.455034,31.1769145,30.5690176,0.779677476,30.5690176,0,30.5686986
22.465526,30.5777697,30.5556667,0.148670842,30.5556667,0,30.5553462
22.476018,31.1126984,30.5423236,0.75523157,30.5423236,0,30.5420016
22.486509,30.724583,30.5289897,0.44225927,30.5289897,0,30.5286661
22.497001,30.2158899,30.5156624,-0.54751486,30.5156624,0,30.5153372
22.507492,30.8058436,30.5023441,0.550907851,30.5023441,0,30.5020174
22.517984,32.1403174,30.4890325,1.2850233,30.4890325,0,30.4887041
22.528476,30.0998339,30.4757286,-0.613102549,30.4757286,0,30.4753986
22.538967,30.3315018,30.4624339,-0.361845403,30.4624339,0,30.4621023
22.549459,30.9838668,30.4491457,0.731246259,30.4491457,0,30.4488125
22.55995,30.3973683,30.4358666,-0.196209739,30.4358666,0,30.4355317
22.570442,30.7083051,30.422594,0.534519463,30.422594,0,30.4222575
22.580934,30.1496269,30.4093293,-0.509610045,30.4093293,0,30.4089911
22.591425,29.3428015,30.3960736,-1.02629045,30.3960736,0,30.3957337
22.601917,30.4630924,30.3828244,0.283316032,30.3828244,0,30.3824829
22.612408,30.2489669,30.3695844,-0.347300233,30.3695844,0,30.3692411
22.6229,30.7896086,30.3563508,0.658223214,30.3563508,0,30.3560059
22.633392,30.4138127,30.3431251,0.265871322,30.3431251,0,30.3427784
22.643883,30.2820079,30.3299084,-0.218861909,30.3299084,0,30.32956
22.654375,30.8868904,30.3166982,0.75511072,30.3166982,0,30.3163481
22.664866,29.9332591,30.3034971,-0.608471854,30.3034971,0,30.3031452
22.675358,30.6104557,30.2903025,0.565820865,30.2903025,0,30.2899488
22.68585,30.4302481,30.2771156,0.39132144,30.2771156,0,30.2767602
22.696341,29.9499583,30.2639378,-0.560338794,30.2639378,0,30.2635806
22.706833,29.8998328,30.2507665,-0.592396616,30.2507665,0,30.2504074
22.717324,30.1164407,30.2376042,-0.348085548,30.2376042,0,30.2372433
22.727816,30.5941171,30.2244485,0.6080038,30.2244485,0,30.2240857
22.738308,30.5122926,30.2113004,0.548627532,30.2113004,0,30.2109358
22.748799,30.0665928,30.1981614,-0.362723941,30.1981614,0,30.197795
22.759291,31.3209195,30.1850289,1.0657817,30.1850289,0,30.1846606
22.769782,29.8831056,30.1719054,-0.537400931,30.1719054,0,30.1715351
22.780274,30.9030743,30.1587883,0.862720098,30.1587883,0,30.1584162
22.790766,31,30.145679,0.924294862,30.145679,0,30.145305
22.801257,30.3150128,30.1325787,0.42712305,30.1325787,0,30.1322027
22.811749,30.7083051,30.1194848,0.767346224,30.1194848,0,30.1191069
22.82224,31.0322413,30.1064,0.962206492,30.1064,0,30.1060201
22.832732,30.4138127,30.0933216,0.56611932,30.0933216,0,30.0929397
22.843224,29.8831056,30.0802509,-0.444010463,30.0802509,0,30.079867
22.853715,30.3150128,30.0671892,0.497818861,30.0671892,0,30.0668033
22.864207,30.0665928,30.0541339,0.111619217,30.0541339,0,30.053746
22.874698,29.7153159,30.0410876,-0.570764123,30.0410876,0,30.0406977
22.88519,30.0832179,30.0280478,0.234883291,30.0280478,0,30.0276558
22.895682,29.8998328,30.0150156,-0.339385958,30.0150156,0,30.0146216
22.906173,30.8544972,30.0019924,0.923311892,30.0019924,0,30.0015963
22.916665,29.8831056,29.9889756,-0.325376757,29.9889756,0,29.9885774
22.927156,29.6141858,29.9759678,-0.601483171,29.9759678,0,29.9755675
22.937648,30.2985148,29.9629664,0.579265407,29.9629664,0,29.962564
22.94814,30,29.9499727,0.223667848,29.9499727,0,29.9495681
22.958631,30.6920185,29.9369879,0.868924973,29.9369879,0,29.9365811
22.969123,29.4618397,29.9240095,-0.679830723,29.9240095,0,29.9236006
22.979614,30.1827765,29.9110401,0.521283477,29.9110401,0,29.910629
22.990106,29.8998328,29.8980771,0.0419013123,29.8980771,0,29.8976637
23.000598,29.563491,29.8851217,-0.567124936,29.8851217,0,29.8847061
23.011089,29.4957624,29.8721752,-0.613524907,29.8721752,0,29.8717574
23.021581,30.1496269,29.8592352,0.538880039,29.8592352,0,29.8588151
23.032072,29.816103,29.846304,-0.173784252,29.846304,0,29.8458816
23.042564,30.1330383,29.8333792,0.547411274,29.8333792,0,29.8329546
23.053056,29.0172363,29.8204621,-0.896228696,29.8204621,0,29.8200352
23.063547,30.016662,29.8075539,0.457283444,29.8075539,0,29.8071246
23.074039,28.2311884,29.7946521,-1.25038539,29.7946521,0,29.7942204
23.08453,30.3150128,29.7817591,0.730242221,29.7817591,0,29.7813251
23.095022,30.2158899,29.7688725,0.668593564,29.7688725,0,29.7684361
23.105514,29.0344623,29.7559936,-0.849429969,29.7559936,0,29.7555547
23.116005,30.4302481,29.7431235,0.828929826,29.7431235,0,29.7426822
23.126497,29.9666481,29.7302597,0.486197888,29.7302597,0,29.7298161
23.136988,29.6141858,29.7174049,-0.321277261,29.7174049,0,29.7169587
23.14748,29.0344623,29.7045564,-0.818592755,29.7045564,0,29.7041078
23.157972,30.016662,29.6917155,0.570040824,29.6917155,0,29.6912644
23.168463,29.6479342,29.6788834,-0.175924083,29.6788834,0,29.6784298
23.178955,29.1204396,29.6660578,-0.738659737,29.6660578,0,29.6656016
23.189446,30.4302481,29.6532409,0.881480123,29.6532409,0,29.6527821
23.199938,29.8831056,29.6404304,0.492620732,29.6404304,0,29.6399691
23.21043,29.1719043,29.6276275,-0.675072747,29.6276275,0,29.6271636
23.220921,29.1204396,29.6148334,-0.703131459,29.6148334,0,29.6143668
23.231413,29.7153159,29.6020457,0.336556457,29.6020457,0,29.6015765
23.241904,30.3644529,29.5892667,0.880446578,29.5892667,0,29.5887948
23.252396,29.7321375,29.5764941,0.394516613,29.5764941,0,29.5760196
23.262888,29.6310648,29.5637291,0.259491157,29.5637291,0,29.5632518
23.273379,28.6530976,29.5509729,-0.947562832,29.5509729,0,29.5504929
23.283871,29.2232784,29.538223,-0.561199255,29.538223,0,29.5377402
23.294362,29.7489496,29.5254819,0.472723683,29.5254819,0,29.5249963
23.304854,29.8496231,29.5127471,0.580410205,29.5127471,0,29.5122588
23.315346,29.7321375,29.5000199,0.481785854,29.5000199,0,29.4995287
23.325837,29.816103,29.4873014,0.57341225,29.4873014,0,29.4868074
23.336329,28.5482048,29.4745893,-0.962488674,29.4745893,0,29.4740924
23.34682,29.6647939,29.4618859,0.450453139,29.4618859,0,29.4613861
23.357312,29.3428015,29.4491889,-0.326170761,29.4491889,0,29.4486862
23.367804,29.0860791,29.4364994,-0.591963011,29.4364994,0,29.4359937
23.378295,29.5127091,29.4238186,0.298145188,29.4238186,0,29.42331
23.388787,28.9136646,29.4111441,-0.705322284,29.4111441,0,29.4106325
23.399278,29.0172363,29.3984784,-0.617448077,29.3984784,0,29.3979637
23.40977,29.189039,29.385819,-0.443598838,29.385819,0,29.3853013
23.420262,29.8328678,29.3731671,0.678012325,29.3731671,0,29.3726463
23.430753,29,29.3605239,-0.600436412,29.3605239,0,29.36
23.441245,30.8868904,29.347887,1.24056577,29.347887,0,29.34736
23.451736,29.3768616,29.3352588,0.203967666,29.3352588,0,29.3347287
23.462228,29.6647939,29.322637,0.584941866,29.322637,0,29.3221037
23.47272,29.6647939,29.3100226,0.595626864,29.3100226,0,29.3094861
23.483211,29.4108823,29.2974169,0.3368463,29.2974169,0,29.2968772
23.493703,28.2665881,29.2848175,-1.00907357,29.2848175,0,29.2842745
23.504194,29.240383,29.2722268,-0.178448272,29.2722268,0,29.2716805
23.514686,29.5127091,29.2596424,0.503057376,29.2596424,0,29.2590928
23.525178,29.6141858,29.2470655,0.605904549,29.2470655,0,29.2465125
23.535669,30.2489669,29.2344972,1.00720888,29.2344972,0,29.2339409
23.546161,29.3938769,29.2219352,0.414658526,29.2219352,0,29.2213755
23.556652,29.0172363,29.2093819,-0.438344207,29.2093819,0,29.2088188
23.567144,30.0998339,29.1968349,0.950262614,29.1968349,0,29.1962682
23.577636,29.3087018,29.1842953,0.352713076,29.1842953,0,29.1837252
23.588127,28.6879766,29.1717643,-0.69554853,29.1717643,0,29.1711907
23.598619,27.9463772,29.1592397,-1.10130034,29.1592397,0,29.1586625
23.60911,29.3768616,29.1467236,0.479727012,29.1467236,0,29.1461429
23.619602,30.2820079,29.1342139,1.07135148,29.1342139,0,29.1336295
23.630094,29.3938769,29.1217115,0.521694709,29.1217115,0,29.1211235
23.640585,29.2061637,29.1092179,0.311361333,29.1092179,0,29.1086261
23.651077,28.9136646,29.0967304,-0.427861918,29.0967304,0,29.096135
23.661568,29.563491,29.0842516,0.692271194,29.0842516,0,29.0836524
23.67206,28.3372546,29.071779,-0.857043981,29.071779,0,29.071176
23.682552,29.6310648,29.0593139,0.756142123,29.0593139,0,29.0587071
23.693043,28.8963666,29.0468573,-0.387931412,29.0468573,0,29.0462467
23.703535,28.7054002,29.034407,-0.573591182,29.034407,0,29.0337925
23.714026,29.4448637,29.0219653,0.650306384,29.0219653,0,29.0213469
23.724518,29.2574777,29.0095299,0.49794358,29.0095299,0,29.0089074
23.73501,28.8617394,28.9971018,-0.367916337,28.9971018,0,28.9964754
23.745501,28.618176,28.9846823,-0.60539764,28.9846823,0,28.9840519
23.755993,28.8790582,28.9722691,-0.305304674,28.9722691,0,28.9716346
23.766484,29.2061637,28.9598644,0.496285496,28.9598644,0,28.9592258
23.776976,28.7576077,28.947466,-0.435727327,28.947466,0,28.9468232
23.787468,29.189039,28.9350749,0.503948506,28.9350749,0,28.934428
23.797959,29.0860791,28.9226925,0.404211186,28.9226925,0,28.9220413
23.808451,29.5972972,28.9103162,0.828843161,28.9103162,0,28.9096607
23.818942,29.3938769,28.8979485,0.704221865,28.8979485,0,28.8972887
23.829434,28.7054002,28.885587,-0.424484136,28.885587,0,28.8849228
23.839926,28.4780617,28.8732328,-0.628626367,28.8732328,0,28.8725643
23.850417,28.9309523,28.8608873,0.26469798,28.8608873,0,28.8602143
23.860909,28.9827535,28.8485479,0.366340845,28.8485479,0,28.8478705
23.8714,28.2665881,28.836217,-0.754737693,28.836217,0,28.8355351
23.881892,29.1032644,28.8238924,0.528556561,28.8238924,0,28.8232059
23.892384,29.240383,28.8115751,0.654834286,28.8115751,0,28.810884
23.902875,28.5306852,28.7992663,-0.518248103,28.7992663,0,28.7985706
23.913367,28.7749891,28.7869638,-0.109428575,28.7869638,0,28.7862633
23.923858,28.4604989,28.7746697,-0.560509372,28.7746697,0,28.7739645
23.93435,29.5465734,28.7623818,0.885545926,28.7623818,0,28.7616719
23.944842,29.3598365,28.7501013,0.780855447,28.7501013,0,28.7493865
23.955333,29.4788059,28.7378293,0.860800026,28.7378293,0,28.7371096
23.965825,28.1602557,28.7255634,-0.751869487,28.7255634,0,28.7248388
23.976316,29.6479342,28.7133061,0.966761659,28.7133061,0,28.7125765
23.986808,28.0356915,28.7010549,-0.815698063,28.7010549,0,28.7003203
23.9973,28.6356421,28.688811,-0.230583788,28.688811,0,28.6880714
24.007791,28.7054002,28.6765756,0.169777929,28.6765756,0,28.6758309
24.018283,28.7923601,28.6643464,0.357789972,28.6643464,0,28.6635965
24.028774,29.8328678,28.6521257,1.08661956,28.6521257,0,28.6513705
24.039266,28.1957444,28.6399111,-0.666458381,28.6399111,0,28.6391507
24.049758,28.9827535,28.6277039,0.595860403,28.6277039,0,28.6269381
24.060249,28.6879766,28.6155051,0.269205296,28.6155051,0,28.6147339
24.070741,28.6356421,28.6033124,0.17980458,28.6033124,0,28.6025358
24.081232,28.4604989,28.5911283,-0.361426782,28.5911283,0,28.5903461
24.091724,29.0172363,28.5789502,0.662031749,28.5789502,0,28.5781626
24.102216,28.4253408,28.5667795,-0.376083331,28.5667795,0,28.5659862
24.112707,28.8617394,28.5546172,0.554186059,28.5546172,0,28.5538182
24.123199,28.6356421,28.542461,0.30525578,28.542461,0,28.5416564
24.13369,28.4604989,28.5303133,-0.264224119,28.5303133,0,28.5295029
24.144182,28.8444102,28.5181717,0.57117288,28.5181717,0,28.5173554
24.154674,28.7576077,28.5060374,0.501567785,28.5060374,0,28.5052152
24.165165,28.6879766,28.4939116,0.440528084,28.4939116,0,28.4930834
24.175657,28.3019434,28.4817918,-0.424085421,28.4817918,0,28.4809576
24.186148,29.189039,28.4696805,0.848150053,28.4696805,0,28.4688402
24.19664,28.213472,28.4575753,-0.494068182,28.4575753,0,28.4567289
24.207132,27.3130006,28.4454774,-1.06417895,28.4454774,0,28.4446247
24.217623,28.213472,28.4333879,-0.468951944,28.4333879,0,28.4325289
24.228115,28.6879766,28.4213045,0.516403034,28.4213045,0,28.4204391
24.238606,27.8567766,28.4092295,-0.743271778,28.4092295,0,28.4083577
24.249098,27.7308492,28.3971606,-0.816278969,28.3971606,0,28.3962823
24.25959,28.7576077,28.385099,0.610334925,28.385099,0,28.3842141
24.270081,28.1780056,28.3730457,-0.441633477,28.3730457,0,28.3721543
24.280573,29.0860791,28.3609986,0.851516614,28.3609986,0,28.3601004
24.291064,28.8963666,28.3489599,0.739869378,28.3489599,0,28.3480549
24.301556,28.6879766,28.3369272,0.59249419,28.3369272,0,28.3360154
24.312048,28.3019434,28.3249018,-0.151520318,28.3249018,0,28.3239831
24.322539,28.1069386,28.3128848,-0.453812883,28.3128848,0,28.311959
24.333031,27.8567766,28.3008738,-0.666406248,28.3008738,0,28.299941
24.343522,28.9654967,28.2888713,0.822572449,28.2888713,0,28.2879313
24.354014,28.7923601,28.2768748,0.717973044,28.2768748,0,28.2759276
24.364506,28.5832119,28.2648856,0.564204129,28.2648856,0,28.263931
24.374997,29.1547595,28.2529047,0.949660361,28.2529047,0,28.2519427
24.385489,28.3372546,28.2409299,0.310362307,28.2409299,0,28.2399604
24.39598,28.3725219,28.2289634,0.378891138,28.2289634,0,28.2279864
24.406472,28.7923601,28.2170031,0.758522935,28.2170031,0,28.2160184
24.416964,28.0535203,28.2050499,-0.389268057,28.2050499,0,28.2040575
24.427455,28,28.1931051,-0.439437245,28.1931051,0,28.1921048
24.437947,28.3372546,28.1811664,0.395080087,28.1811664,0,28.1801582
24.448438,29,28.169236,0.911462581,28.169236,0,28.1682197
24.45893,27.9642629,28.1573116,-0.439373108,28.1573116,0,28.1562873
24.469422,28.0535203,28.1453945,-0.303107626,28.1453945,0,28.144362
24.479913,27.6224546,28.1334857,-0.714864383,28.1334857,0,28.1324449
24.490405,27.7488739,28.121583,-0.610499091,28.121583,0,28.1205338
24.500896,27.513633,28.1096886,-0.772046376,28.1096886,0,28.1086309
24.511388,28.1780056,28.0978002,0.283205508,28.0978002,0,28.0967339
24.52188,28,28.0859191,-0.293119591,28.0859191,0,28.0848441
24.532371,28.6356421,28.0740463,0.749397001,28.0740463,0,28.0729625
24.542863,28.1602557,28.0621795,0.313171197,28.0621795,0,28.0610868
24.553354,27.676705,28.050321,-0.611241368,28.050321,0,28.0492193
24.563846,28.5832119,28.0384686,0.738067243,28.0384686,0,28.0373578
24.574338,28.0713377,28.0266234,0.211457631,28.0266234,0,28.0255033
24.584829,27.8567766,28.0147864,-0.397504567,28.0147864,0,28.013657
24.595321,27.8028775,28.0029556,-0.447300797,28.0029556,0,28.0018167
24.605812,28.4604989,27.991133,0.685102892,27.991133,0,27.9899845
24.616304,27.676705,27.9793164,-0.550101285,27.9793164,0,27.9781583
24.626796,28.0713377,27.9675071,0.322227613,27.9675071,0,27.9663391
24.637287,27.8208555,27.955706,-0.367219957,27.955706,0,27.9545281
24.647779,28.1424946,27.9439109,0.445627212,27.9439109,0,27.9427231
24.65827,27.9821372,27.9321242,0.223635778,27.9321242,0,27.9309261
24.668762,28.5657137,27.9203435,0.80334938,27.9203435,0,27.9191351
24.679254,28.1247222,27.9085699,0.464921803,27.9085699,0,27.9073512
24.689745,28.0891438,27.8968047,0.438564866,27.8968047,0,27.8955753
24.700237,27.0924344,27.8850454,-0.89028707,27.8850454,0,27.8838054
24.710728,28,27.8732945,0.355957192,27.8732945,0,27.8720436
24.72122,28.1602557,27.8615496,0.546540142,27.8615496,0,27.8602877
24.731712,27.6043475,27.8498118,-0.495443538,27.8498118,0,27.8485389
24.742203,28.7228132,27.8380823,0.940601377,27.8380823,0,27.8367981
24.752695,28.2488938,27.8263588,0.650026901,27.8263588,0,27.8250632
24.763186,27.8926514,27.8146436,0.279298683,27.8146436,0,27.8133365
24.773678,27.4954542,27.8029344,-0.55450903,27.8029344,0,27.8016156
24.78417,28.3019434,27.7912324,0.714640461,27.7912324,0,27.7899018
24.794661,28.4604989,27.7795386,0.825203188,27.7795386,0,27.778196
24.805153,27.5862284,27.7678509,-0.426171859,27.7678509,0,27.7664961
24.815644,28.9654967,27.7561714,1.09969327,27.7561714,0,27.7548043
24.826136,27.6947648,27.744498,-0.223009235,27.744498,0,27.7431184
24.836628,27.5862284,27.7328317,-0.382887983,27.7328317,0,27.7314394
24.847119,27.6586334,27.7211736,-0.250080435,27.7211736,0,27.7197685
24.857611,28.2488938,27.7095216,0.734419648,27.7095216,0,27.7081035
24.868102,27.2763634,27.6978778,-0.649241393,27.6978778,0,27.6964466
24.878594,28.2665881,27.68624,0.761805765,27.68624,0,27.6847955
24.889086,28.0891438,27.6746094,0.64384346,27.6746094,0,27.6731513
24.899577,27.784888,27.662987,0.349143153,27.662987,0,27.6615153
24.910069,28.6705424,27.6513707,1.00954033,27.6513707,0,27.649885
24.92056,27.2580263,27.6397626,-0.617848083,27.6397626,0,27.6382628
24.931052,27.2580263,27.6281605,-0.608386541,27.6281605,0,27.6266465
24.941544,27.9821372,27.6165656,0.604625148,27.6165656,0,27.615037
24.952035,27.5862284,27.6049789,-0.136932275,27.6049789,0,27.6034357
24.962527,28,27.5933982,0.637653328,27.5933982,0,27.5918401
24.973018,27.6586334,27.5818258,0.277141771,27.5818258,0,27.5802526
24.98351,28.5306852,27.5702594,0.980013171,27.5702594,0,27.5686709
24.994002,27.4408455,27.5587002,-0.343299722,27.5587002,0,27.5570961
25.004493,27.4772633,27.5471492,-0.26435927,27.5471492,0,27.5455293
25.014985,28.1780056,27.5356042,0.801499491,27.5356042,0,27.5339684
25.025476,28.5306852,27.5240674,1.00330345,27.5240674,0,27.5224154
25.035968,26.9629375,27.5125367,-0.741349582,27.5125367,0,27.5108682
25.04646,27.4408455,27.5010132,-0.245291045,27.5010132,0,27.499328
25.056951,26.795522,27.4894978,-0.833052114,27.4894978,0,27.4877957
25.067443,27.676705,27.4779886,0.445776232,27.4779886,0,27.4762693
25.077934,27.6405499,27.4664875,0.417207872,27.4664875,0,27.4647508
25.088426,27.7668868,27.4549925,0.55847492,27.4549925,0,27.4532381
25.098918,27.2946881,27.4435047,-0.385767468,27.4435047,0,27.4417323
25.109409,27.8388218,27.4320251,0.637806206,27.4320251,0,27.4302344
25.119901,27.4043792,27.4205515,-0.127170314,27.4205515,0,27.4187424
25.130392,27.513633,27.4090862,0.323336971,27.4090862,0,27.4072583
25.140884,28.6879766,27.3976269,1.13593558,27.3976269,0,27.3957799
25.151376,26.7394839,27.3861748,-0.804170951,27.3861748,0,27.3843085
25.161867,28.0178515,27.374731,0.801947925,27.374731,0,27.372845
25.172359,27.6405499,27.3632932,0.526551736,27.3632932,0,27.3613872
25.18285,27.4043792,27.3518637,0.229162729,27.3518637,0,27.3499374
25.193342,27.1108834,27.3404402,-0.47912083,27.3404402,0,27.3384933
25.203834,28.0356915,27.3290239,0.84063526,27.3290239,0,27.3270561
25.214325,27.202941,27.3176159,-0.33863674,27.3176159,0,27.3156268
25.224817,25.9036677,27.3062139,-1.18429144,27.3062139,0,27.3042033
25.235308,27.202941,27.2948202,-0.303115813,27.2948202,0,27.2927877
25.2458,27.0370117,27.2834326,-0.496408044,27.2834326,0,27.2813778
25.256292,28,27.2720522,0.85319857,27.2720522,0,27.2699747
25.266783,27.4226184,27.2606801,0.402415637,27.2606801,0,27.2585796
25.277275,27.784888,27.249314,0.731829187,27.249314,0,27.2471902
25.287766,26.3628527,27.2379563,-0.935469726,27.2379563,0,27.2358086
25.298258,27.8388218,27.2266046,0.782443092,27.2266046,0,27.2244328
25.30875,26.8886593,27.2152602,-0.571490041,27.2152602,0,27.2130638
25.319241,27.0185122,27.203924,-0.430594785,27.203924,0,27.2017027
25.329733,26.8886593,27.192594,-0.551302741,27.192594,0,27.1903474
25.340224,27.1477439,27.1812723,-0.183107622,27.1812723,0,27.1789998
25.350716,27.3861279,27.1699568,0.464942055,27.1699568,0,27.167658
25.361208,27.7308492,27.1586484,0.756439565,27.1586484,0,27.156323
25.371699,26,27.1473484,-1.07114351,27.1473484,0,27.1449959
25.382191,27.6405499,27.1360546,0.710278358,27.1360546,0,27.1336744
25.392682,27.513633,27.1247691,0.623589547,27.1247691,0,27.1223608
25.403174,27.3495887,27.1134897,0.485900125,27.1134897,0,27.1110529
25.413666,27.6224546,27.1022177,0.721274543,27.1022177,0,27.0997517
25.424157,26.4007576,27.090954,-0.830780591,27.090954,0,27.0884584
25.434649,27.513633,27.0796965,0.658738592,27.0796965,0,27.0771708
25.44514,26.4575131,27.0684473,-0.781622801,27.0684473,0,27.065891
25.455632,26.7394839,27.0572044,-0.563667003,27.0572044,0,27.0546169
25.466124,26.7394839,27.0459688,-0.553610777,27.0459688,0,27.0433496
25.476615,27.784888,27.0347416,0.866109912,27.0347416,0,27.03209
25.487107,27.2946881,27.0235207,0.520737435,27.0235207,0,27.0208362
25.497598,26.6458252,27.0123081,-0.605378333,27.0123081,0,27.0095901
25.50809,26.3818119,27.0011019,-0.786949773,27.0011019,0,26.9983497
25.518582,27.1845544,26.989903,0.44119323,26.989903,0,26.987116
25.529073,27.0924344,26.9787125,0.337226694,26.9787125,0,26.9758902
25.539565,25.96151,26.9675284,-1.0030047,26.9675284,0,26.96467
25.550056,27.1293199,26.9563527,0.415893247,26.9563527,0,26.9534575
25.560548,26.3248932,26.9451834,-0.787585086,26.9451834,0,26.9422507
25.57104,27.1845544,26.9340215,0.500532607,26.9340215,0,26.9310507
25.581531,27.6947648,26.9228682,0.878576506,26.9228682,0,26.9198584
25.592023,26.925824,26.9117212,0.1187554,26.9117212,0,26.9086717
25.602514,27.9821372,26.9005827,1.03997808,26.9005827,0,26.8974928
25.613006,26.7581763,26.8894507,-0.362318103,26.8894507,0,26.8863196
25.623498,27.5862284,26.8783262,0.841369258,26.8783262,0,26.875153
25.633989,26.3818119,26.8672103,-0.696705374,26.8672103,0,26.8639942
25.644481,27.1477439,26.8561009,0.540039876,26.8561009,0,26.852841
25.654972,27.5680975,26.845,0.850351381,26.845,0,26.8416956
25.665464,26.9814751,26.8339057,0.384147615,26.8339057,0,26.8305557
25.675956,27.2580263,26.822819,0.659702431,26.822819,0,26.8194226
25.686447,26.3818119,26.811741,-0.655689801,26.811741,0,26.8082972
25.696939,26.6833281,26.8006696,-0.342551432,26.8006696,0,26.7971774
25.70743,26.3058929,26.7896069,-0.695495536,26.7896069,0,26.7860653
25.717922,27.6224546,26.7785509,0.918642353,26.7785509,0,26.7749588
25.728414,26.795522,26.7675025,0.167390228,26.7675025,0,26.7638589
25.738905,26.9072481,26.756463,0.388310578,26.756463,0,26.7527668
25.749397,26.8141754,26.7454302,0.262193023,26.7454302,0,26.7416803
25.759888,27.1477439,26.7344062,0.642913454,26.7344062,0,26.7306014
25.77038,26.0959767,26.723389,-0.792093637,26.723389,0,26.7195282
25.780872,27.0924344,26.7123797,0.61648573,26.7123797,0,26.7084616
25.791363,27.6224546,26.7013793,0.959726678,26.7013793,0,26.6974027
25.801855,27.0185122,26.6903858,0.572823123,26.6903858,0,26.6863493
25.812346,26.2297541,26.6794014,-0.670557424,26.6794014,0,26.6753037
25.822838,26.2488095,26.6684238,-0.647776447,26.6684238,0,26.6642636
25.83333,26.0768096,26.6574543,-0.762000462,26.6574543,0,26.6532301
25.843821,26.7768557,26.6464939,0.361056408,26.6464939,0,26.6422043
25.854313,27.0554985,26.6355406,0.648041568,26.6355406,0,26.631184
25.864804,27.4226184,26.6245965,0.893320693,26.6245965,0,26.6201714
25.875296,26.0192237,26.6136596,-0.770996717,26.6136596,0,26.6091644
25.885788,27.1293199,26.6027309,0.725664539,26.6027309,0,26.598164
25.896279,25.5734237,26.5918116,-1.00915205,26.5918116,0,26.5871712
25.906771,26.0384331,26.5808995,-0.73652317,26.5808995,0,26.5761839
25.917262,27.4772633,26.5699969,0.952505338,26.5699969,0,26.5652043
25.927754,26.2868789,26.5591017,-0.521749811,26.5591017,0,26.5542302
25.938246,26.4007576,26.548215,-0.38400193,26.548215,0,26.5432628
25.948737,27.2396769,26.537338,0.838056658,26.537338,0,26.5323029
25.959229,26.7768557,26.5264685,0.500387013,26.5264685,0,26.5213485
25.96972,26.2297541,26.5156088,-0.5346538,26.5156088,0,26.5104018
25.980212,27.0185122,26.5047568,0.716767319,26.5047568,0,26.4994606
25.990704,26.7768557,26.4939136,0.531922979,26.4939136,0,26.488526
26.001195,26.6833281,26.4830804,0.447490472,26.4830804,0,26.477599
26.011687,26.8141754,26.4722551,0.584739437,26.4722551,0,26.4666774
26.022178,26.3438797,26.46144,-0.342870594,26.46144,0,26.4557635
26.03267,27.1661554,26.450633,0.845885606,26.450633,0,26.4448551
26.043162,26.7581763,26.4398352,0.564217294,26.4398352,0,26.4339532
26.053653,27.7308492,26.4290477,1.14096516,26.4290477,0,26.4230589
26.064145,26.8514432,26.4182687,0.658159892,26.4182687,0,26.4121701
26.074636,26.1916017,26.4075003,-0.464648852,26.4075003,0,26.4012889
26.085128,26.3058929,26.3967404,-0.301409262,26.3967404,0,26.3904132
26.09562,26.0384331,26.3859903,-0.589539817,26.3859903,0,26.379544
26.106111,25.3771551,26.3752511,-0.999047571,26.3752511,0,26.3686823
26.116603,26.5141472,26.3645209,0.386815546,26.3645209,0,26.3578262
26.127094,26.4764046,26.3538018,0.350146794,26.3538018,0,26.3469776
26.137586,26.4764046,26.343092,0.365120024,26.343092,0,26.3361344
26.148078,26.2678511,26.3323925,-0.254050049,26.3323925,0,26.3252978
26.158569,25.8843582,26.3217046,-0.661321704,26.3217046,0,26.3144687
26.169061,26.2488095,26.3110264,-0.249433155,26.3110264,0,26.3036451
26.179552,26.2297541,26.3003601,-0.265717838,26.3003601,0,26.292829
26.190044,25.2982213,26.2897038,-0.995732132,26.2897038,0,26.2820184
26.200536,26.7768557,26.2790587,0.70554731,26.2790587,0,26.2712142
26.211027,26.3058929,26.268426,0.1935636,26.268426,0,26.2604176
26.221519,26.4196896,26.2578039,0.4023502,26.2578039,0,26.2496265
26.23201,27.3313007,26.2471947,1.04120412,26.2471947,0,26.2388428
26.242502,27.0185122,26.2365965,0.884259946,26.2365965,0,26.2280646
26.252994,26.7581763,26.2260106,0.729496888,26.2260106,0,26.2172928
26.263485,26.6270539,26.2154382,0.641572811,26.2154382,0,26.2065286
26.273977,26.925824,26.2048777,0.849085614,26.2048777,0,26.1957698
26.284468,25.2784493,26.1943311,-0.957017151,26.1943311,0,26.1850184
26.29496,26.1916017,26.183797,0.0883442666,26.183797,0,26.1742725
26.305452,26.0192237,26.1732765,-0.392495683,26.1732765,0,26.1635331
26.315943,26.5329983,26.1627711,0.60846304,26.1627711,0,26.1528011
26.326435,25.8069758,26.1522789,-0.587624989,26.1522789,0,26.1420746
26.336926,25.96151,26.1418025,-0.4246087,26.1418025,0,26.1313555
26.347418,26.4007576,26.1313402,0.519054281,26.1313402,0,26.1206418
26.35791,26.8141754,26.1208934,0.832635526,26.1208934,0,26.1099346
26.368401,27.5862284,26.1104636,1.21481062,26.1104636,0,26.0992348
26.378893,26.1342687,26.1000492,0.184985085,26.1000492,0,26.0885404
26.389384,26.2297541,26.0896527,0.374301185,26.0896527,0,26.0778535
26.399876,25.7681975,26.0792727,-0.557741189,26.0792727,0,26.067172
26.410368,25.9807621,26.0689107,-0.296898212,26.0689107,0,26.0564968
26.420859,25.3968502,26.0585682,-0.813460527,26.0585682,0,26.0458291
26.431351,25.4950976,26.048244,-0.743738179,26.048244,0,26.0351669
26.441842,25.8650343,26.0379408,-0.415820223,26.0379408,0,26.024512
26.452334,26.2678511,26.0276572,0.490095821,26.0276572,0,26.0138625
26.462826,26.4764046,26.017395,0.677502486,26.017395,0,26.0032194
26.473317,25.6515107,26.007156,-0.596360071,26.007156,0,25.9925837
26.483809,25.8069758,25.9969392,-0.435847925,25.9969392,0,25.9819534
26.4943,26.8700577,25.9867475,0.93984584,25.9867475,0,25.9713305
26.504792,26.0576284,25.9765799,0.284690267,25.9765799,0,25.960713
26.515284,25.845696,25.9664385,-0.347480286,25.9664385,0,25.9501018
26.525775,25.2784493,25.9563255,-0.823332357,25.9563255,0,25.9394981
26.536267,25.6515107,25.9462402,-0.542889935,25.9462402,0,25.9288996
26.546758,25.3968502,25.9361858,-0.734394723,25.9361858,0,25.9183086
26.55725,25.5929678,25.926162,-0.577229775,25.926162,0,25.9077229
26.567742,25.5929678,25.9161713,-0.568509886,25.9161713,0,25.8971436
26.578233,25.7487864,25.9062163,-0.396774404,25.9062163,0,25.8865717
26.588725,26.4007576,25.8962971,0.710253833,25.8962971,0,25.8760051
26.599216,25.6320112,25.8864174,-0.504386952,25.8864174,0,25.8654458
26.609708,25.1992063,25.8765777,-0.823025761,25.8765777,0,25.8548919
26.6202,24.63737,25.8667813,-1.10878822,25.8667813,0,25.8443444
26.630691,25.0399681,25.8570316,-0.903915684,25.8570316,0,25.8338042
26.641183,26.1725047,25.8473297,0.570241176,25.8473297,0,25.8232693
26.651674,26.2678511,25.8376803,0.655874015,25.8376803,0,25.8127417
26.662166,26.0768096,25.8280852,0.498722777,25.8280852,0,25.8022195
26.672658,25.3771551,25.8185489,-0.664374721,25.8185489,0,25.7917036
26.683149,25.5147016,25.8090762,-0.542562949,25.8090762,0,25.781195
26.693641,25.9229628,25.7996699,0.351130896,25.7996699,0,25.7706918
26.704132,25.1594913,25.7903366,-0.794257729,25.7903366,0,25.7601958
26.714624,24.6779254,25.7810799,-1.05031165,25.7810799,0,25.7497052
26.725116,25.5147016,25.7719067,-0.507153879,25.7719067,0,25.7392209
26.735607,25.1594913,25.7628244,-0.776745226,25.7628244,0,25.7287438
26.746099,24.9399278,25.7538386,-0.902170028,25.7538386,0,25.7182721
26.75659,26.2488095,25.7449591,0.709824197,25.7449591,0,25.7078077
26.767082,25.6320112,25.7361933,-0.322772525,25.7361933,0,25.6973485
26.777574,25.8650343,25.7275523,0.370785712,25.7275523,0,25.6868957
26.788065,25.8650343,25.7190481,0.38208148,25.7190481,0,25.6764501
26.798557,26.3438797,25.7106919,0.795731043,25.7106919,0,25.6660098
26.809048,25.6904652,25.7024996,-0.109701753,25.7024996,0,25.6555768
26.81954,24.7790234,25.6944861,-0.956798164,25.6944861,0,25.6451491
26.830032,25.1594913,25.6866705,-0.726071132,25.6866705,0,25.6347276
26.840523,26.2678511,25.6790746,0.767317695,25.6790746,0,25.6243134
26.851015,26.5141472,25.671721,0.917837794,25.671721,0,25.6139045
26.861506,26.0384331,25.6646384,0.611387527,25.6646384,0,25.6035028
26.871998,25.845696,25.6578574,0.433403436,25.6578574,0,25.5931064
26.88249,25.6515107,25.6514153,0.00976418439,25.6514153,0,25.5827162
26.892981,26.1533937,25.6453554,0.71276806,25.6453554,0,25.5723333
26.903473,25.5734237,25.6397262,-0.257492687,25.6397262,0,25.5619556
26.913964,25.9036677,25.6345874,0.518729458,25.6345874,0,25.5515852
26.924456,25.9229628,25.6300074,0.541253535,25.6300074,0,25.54122
26.934948,26.1725047,25.626069,0.73921289,25.626069,0,25.530861
26.945439,24.3104916,25.6228711,-1.14559135,25.6228711,0,25.5205093
26.955931,25.1992063,25.6205326,-0.649096461,25.6205326,0,25.5101628
26.966422,25.3771551,25.6191991,-0.491979663,25.6191991,0,25.4998235
26.976914,25.8263431,25.6190494,0.455295222,25.6190494,0,25.4894894
26.987406,25.9807621,25.6203064,0.60037965,25.6203064,0,25.4791616
26.997897,25.6320112,25.6232502,0.0936001924,25.6232502,0,25.4688409
27.008389,25.2586619,25.6282404,-0.607929711,25.6282404,0,25.4585255
27.01888,25.1396102,25.6357423,-0.704366488,25.6357423,0,25.4482173
27.029372,26.5329983,25.6463777,0.941605323,25.6463777,0,25.4379143
27.039864,25.1197134,25.6610008,-0.735722383,25.6610008,0,25.4276175
27.050355,25.8069758,25.6808898,0.355085873,25.6808898,0,25.4173278
27.060847,26.1151297,25.7083337,0.637805619,25.7083337,0,25.4070434
27.071338,25.5929678,25.7483182,-0.394145159,25.7483182,0,25.3967661
27.08183,26.1725047,25.8124434,0.60005105,25.8124434,0,25.386494
27.092322,26.0576284,25.9245753,0.364764443,25.9245753,0,25.3762282
27.102813,26.5329983,26.1233153,0.640064891,26.1233153,0,25.3659694
27.113305,26.0959767,26.4526916,-0.597256159,26.4526916,0,25.3557159
27.123796,27.7488739,26.9396684,0.899558469,26.9396684,0,25.3454695
27.134288,26.0576284,27.5804949,-1.23404475,27.5804949,0,25.3352283
27.14478,27.0370117,28.3552056,-1.14812625,28.3552056,0,25.3249933
27.155271,26.9629375,29.2505605,-1.512489,29.2505605,0,25.3147654
27.165763,28.9654967,30.2707221,-1.14246461,30.2707221,0,25.3045427
27.176254,30,31.4375221,-1.19896711,31.4375221,0,25.2943271
27.186746,31.8590646,32.7933096,-0.966563498,32.7933096,0,25.2841166
27.197238,34.4093011,34.4114015,-0.0458310056,34.4114015,0,25.2739123
27.207729,37.4032084,36.4184451,0.992352429,36.4184451,0,25.2637152
27.218221,40.7553677,39.0006182,1.3246696,39.0006182,0,25.2535232
27.228712,45.3651849,42.29425,1.75240832,42.29425,0,25.2433383
27.239204,48.5077313,46.0708979,1.56103602,46.0708979,0,25.2331585
27.249696,50.1796772,49.3776001,0.895587533,49.3776001,0,25.2229849
27.260187,51.0196041,50.6087229,0.641000174,50.6087229,0,25.2128184
27.270679,49.989999,48.3511196,1.28018724,48.3511196,0,25.202657
27.28117,45.508241,42.8350893,1.63497759,42.8350893,0,25.1925027
27.291662,40.5709256,36.3841072,2.04617162,36.3841072,0,25.1823536
27.302154,35.0998575,31.2965839,1.95019835,31.2965839,0,25.1722105
27.312645,31.0966236,28.3576669,1.65497938,28.3576669,0,25.1620745
27.323137,29.7993289,27.0141894,1.66887371,27.0141894,0,25.1519437
27.333628,28.2842712,26.4268632,1.36286756,26.4268632,0,25.1418199
27.34412,27.202941,26.1178229,1.04169003,26.1178229,0,25.1317013
27.354612,27.2946881,25.9149781,1.1746106,25.9149781,0,25.1215887
27.365103,25.9807621,25.7657243,0.463721743,25.7657243,0,25.1114832
27.375595,26.4196896,25.6504183,0.877081116,25.6504183,0,25.1013828
27.386086,25.7293607,25.5587132,0.413094938,25.5587132,0,25.0912895
27.396578,25.96151,25.484024,0.691003576,25.484024,0,25.0812012
27.40707,25.1992063,25.4219334,-0.471939724,25.4219334,0,25.0711191
27.417561,24.8193473,25.3693689,-0.741634447,25.3693689,0,25.0610439
27.428053,25.1594913,25.3241293,-0.40575612,25.3241293,0,25.0509739
27.438544,25.845696,25.2846277,0.749044935,25.2846277,0,25.0409109
27.449036,25.3968502,25.2496738,0.383635777,25.2496738,0,25.030853
27.459528,25.2388589,25.218379,0.143107977,25.218379,0,25.0208011
27.470019,26.0576284,25.1900624,0.931432231,25.1900624,0,25.0107563
27.480511,24.8997992,25.1641883,-0.514187803,25.1641883,0,25.0007165
27.491002,25.2982213,25.1403445,0.397337115,25.1403445,0,24.9906838
27.501494,25.0599282,25.1181953,-0.241385854,25.1181953,0,24.9806561
27.511986,24.8997992,25.097477,-0.444609672,25.097477,0,24.9706345
27.522477,25.1793566,25.0779756,0.318403828,25.0779756,0,24.9606198
27.532969,24.9198716,25.0595115,-0.373684182,25.0595115,0,24.9506102
27.54346,25.1992063,25.0419427,0.396564754,25.0419427,0,24.9406076
27.553952,24.657656,25.0251457,-0.606209253,25.0251457,0,24.9306101
27.564444,25.8263431,25.0090213,0.904058558,25.0090213,0,24.9206186
27.574935,24.5764115,24.9934863,-0.645813311,24.9934863,0,24.9106341
27.585427,25.4558441,24.9784662,0.690925404,24.9784662,0,24.9006546
27.595918,24.7991935,24.963903,-0.405844093,24.963903,0,24.890682
27.60641,25.6320112,24.9497417,0.825996061,24.9497417,0,24.8807146
27.616902,25.7681975,24.9359392,0.912281885,24.9359392,0,24.8707531
27.627393,24.979992,24.922458,0.239862347,24.922458,0,24.8607986
27.637885,24.0208243,24.9092622,-0.942569864,24.9092622,0,24.8508491
27.648376,24.8997992,24.8963252,0.0589405121,24.8963252,0,24.8409065
27.658868,25.4754784,24.8836191,0.769323943,24.8836191,0,24.830969
27.66936,24.8596058,24.8711228,-0.107317317,24.8711228,0,24.8210375
27.679851,24.4131112,24.8588179,-0.667612684,24.8588179,0,24.8111129
27.690343,24.5560583,24.8466848,-0.539097882,24.8466848,0,24.8011933
27.700834,25.0798724,24.8347105,0.495138235,24.8347105,0,24.7912807
27.711326,24.7386338,24.8228791,-0.290250566,24.8228791,0,24.7813731
27.721818,24.3515913,24.8111797,-0.677929485,24.8111797,0,24.7714714
27.732309,24.7790234,24.7996025,-0.143454305,24.7996025,0,24.7615766
27.742801,24.5764115,24.7881357,-0.460135052,24.7881357,0,24.7516869
27.753292,24.8797106,24.7767728,0.320839215,24.7767728,0,24.741804
27.763784,25.019992,24.7655038,0.504468216,24.7655038,0,24.7319262
27.774276,24.63737,24.7543228,-0.341983684,24.7543228,0,24.7220543
27.784767,24.5764115,24.7432245,-0.408427557,24.7432245,0,24.7121893
27.795259,24.8193473,24.7322011,0.295205419,24.7322011,0,24.7023293
27.80575,24.3926218,24.7212493,-0.573260383,24.7212493,0,24.6924762
27.816242,24.657656,24.7103625,-0.229578843,24.7103625,0,24.682628
27.826734,24.979992,24.6995373,0.529579779,24.6995373,0,24.6727858
27.837225,24.7790234,24.6887708,0.300420718,24.6887708,0,24.6629505
27.847717,24.8394847,24.6780574,0.401780156,24.6780574,0,24.6531201
27.858208,24.3515913,24.6673959,-0.561964905,24.6673959,0,24.6432966
27.8687,24.2074369,24.6567812,-0.670331481,24.6567812,0,24.6334781
27.879192,24.5356883,24.6462115,-0.332450351,24.6462115,0,24.6236655
27.889683,23.7907545,24.6356854,-0.919201238,24.6356854,0,24.6138597
27.900175,24.5560583,24.6251985,-0.262945231,24.6251985,0,24.6040589
27.910666,24.3926218,24.6147506,-0.471305422,24.6147506,0,24.5942649
27.921158,23.7697286,24.6043378,-0.91356947,24.6043378,0,24.5844759
27.93165,24.1453929,24.5939592,-0.669750925,24.5939592,0,24.5746928
27.942141,24.8596058,24.5836142,0.525349057,24.5836142,0,24.5649165
27.952633,23.9582971,24.573299,-0.784220596,24.573299,0,24.5551452
27.963124,24.8997992,24.5630144,0.580331624,24.5630144,0,24.5453807
27.973616,23.8746728,24.5527569,-0.823458647,24.5527569,0,24.5356211
27.984108,23.4733892,24.5425263,-1.03399087,24.5425263,0,24.5258674
27.994599,25.2388589,24.5323224,0.840557284,24.5323224,0,24.5161205
28.005091,23.9582971,24.5221421,-0.750896127,24.5221421,0,24.5063786
28.015582,24.3104916,24.5119864,-0.448881732,24.5119864,0,24.4966434
28.026074,24.4540385,24.5018523,-0.218663685,24.5018523,0,24.4869132
28.036566,25.0599282,24.49174,0.753782547,24.49174,0,24.4771888
28.047057,24.2899156,24.4816497,-0.437874466,24.4816497,0,24.4674713
28.057549,23.4733892,24.4715784,-0.99909422,24.4715784,0,24.4577586
28.06804,24.0831892,24.4615276,-0.615092245,24.4615276,0,24.4480527
28.078532,23.6431808,24.4514946,-0.899062709,24.4514946,0,24.4383518
28.089024,24.8997992,24.4414797,0.676993014,24.4414797,0,24.4286566
28.099515,24.1039416,24.4314832,-0.572312489,24.4314832,0,24.4189683
28.110007,25,24.4215027,0.76059012,24.4215027,0,24.4092848
28.120498,23.727621,24.4115395,-0.826993642,24.4115395,0,24.3996081
28.13099,23.727621,24.4015913,-0.820956932,24.4015913,0,24.3899364
28.141482,23.9165215,24.3916586,-0.689301868,24.3916586,0,24.3802704
28.151973,23.10844,24.3817417,-1.12840671,24.3817417,0,24.3706112
28.162465,23.0867928,24.3718385,-1.13359858,24.3718385,0,24.3609568
28.172956,24.4540385,24.3619504,0.303460278,24.3619504,0,24.3513092
28.183448,23.3666429,24.3520751,-0.992689393,24.3520751,0,24.3416665
28.19394,24.4744765,24.3422133,0.363680076,24.3422133,0,24.3320296
28.204431,24.63737,24.3323655,0.552272091,24.3323655,0,24.3223995
28.214923,24.1246762,24.3225296,-0.444807189,24.3225296,0,24.3127742
28.225414,23.8537209,24.3127071,-0.67748521,24.3127071,0,24.3031556
28.235906,23.6854386,24.3028959,-0.785784505,24.3028959,0,24.2935419
28.246398,23.9582971,24.2930965,-0.578618565,24.2930965,0,24.2839339
28.256889,25.3574447,24.2833098,1.03640476,24.2833098,0,24.2743327
28.267381,24.3310501,24.2735336,0.239825935,24.2735336,0,24.2647364
28.277872,23.8117618,24.2637696,-0.672315231,24.2637696,0,24.2551467
28.288364,24.2693222,24.2540155,0.123720054,24.2540155,0,24.2455619
28.298856,23.9374184,24.2442723,-0.55394394,24.2442723,0,24.2359829
28.309347,24.1453929,24.2345405,-0.298575965,24.2345405,0,24.2264105
28.319839,24.4540385,24.2248182,0.478769546,24.2248182,0,24.216843
28.33033,23.2379001,24.2151071,-0.988537805,24.2151071,0,24.2072822
28.340822,24.1246762,24.205405,-0.284128204,24.205405,0,24.1977262
28.351314,23.727621,24.1957128,-0.684172317,24.1957128,0,24.188176
28.361805,23.9165215,24.1860312,-0.519143268,24.1860312,0,24.1786324
28.372297,24.3721152,24.1763583,0.442444274,24.1763583,0,24.1690937
28.382788,23.8537209,24.1666957,-0.559441498,24.1666957,0,24.1595616
28.39328,24.0416306,24.1570414,-0.339721745,24.1570414,0,24.1500343
28.403772,23.8327506,24.1473963,-0.560932926,24.1473963,0,24.1405128
28.414263,24.657656,24.1377612,0.721037343,24.1377612,0,24.130998
28.424755,22.9782506,24.128134,-1.07232616,24.128134,0,24.1214879
28.435246,24.6981781,24.1185165,0.761355079,24.1185165,0,24.1119845
28.445738,24.1039416,24.1089068,-0.0704642941,24.1089068,0,24.1024859
28.45623,24.3721152,24.0993057,0.522311735,24.0993057,0,24.092993
28.466721,23.558438,24.0897139,-0.728886779,24.0897139,0,24.0835067
28.477213,23.9791576,24.0801296,-0.317760931,24.0801296,0,24.0740253
28.487704,23.0434372,24.0705545,-1.01346795,24.0705545,0,24.0645505
28.498196,23.9165215,24.0609867,-0.380085822,24.0609867,0,24.0550804
28.508688,25.1396102,24.051427,1.04316018,24.051427,0,24.0456161
28.519179,24.4131112,24.0418762,0.609290559,24.0418762,0,24.0361583
28.529671,24.1660919,24.0323325,0.365731367,24.0323325,0,24.0267054
28.540162,23.3023604,24.0227976,-0.848785702,24.0227976,0,24.017259
28.550654,24.0416306,24.0132695,0.168407421,24.0132695,0,24.0078175
28.561146,23.4093998,24.0037492,-0.770940559,24.0037492,0,23.9983816
28.571637,23.6220236,23.9942374,-0.610093254,23.9942374,0,23.9889523
28.582129,24.3926218,23.9847323,0.638662284,23.9847323,0,23.9795277
28.59262,23.8746728,23.9752357,-0.317116553,23.9752357,0,23.9701098
28.603112,23.4946802,23.9657456,-0.686342012,23.9657456,0,23.9606966
28.613604,23.3666429,23.9562629,-0.767867212,23.9562629,0,23.9512891
28.624095,23.9165215,23.9467885,-0.17397431,23.9467885,0,23.9418881
28.634587,23.515952,23.9373205,-0.649129043,23.9373205,0,23.9324919
28.645078,24.7386338,23.9278607,0.900429372,23.9278607,0,23.9231023
28.65557,24.8193473,23.9184072,0.949178666,23.9184072,0,23.9137174
28.666062,22.7815715,23.9089608,-1.06178588,23.9089608,0,23.9043382
28.676553,25.3377189,23.8995224,1.19924833,23.8995224,0,23.8949655
28.687045,23.0217289,23.8900901,-0.931859036,23.8900901,0,23.8855975
28.697536,24.1660919,23.8806658,0.534252879,23.8806658,0,23.8762361
28.708028,24.1246762,23.8712476,0.503416927,23.8712476,0,23.8668794
28.71852,24.4540385,23.8618362,0.769546799,23.8618362,0,23.8575284
28.729011,23.4946802,23.8524327,-0.598124125,23.8524327,0,23.8481839
28.739503,23.2594067,23.8430351,-0.763955788,23.8430351,0,23.8388441
28.749994,24.1867732,23.8336453,0.594245708,23.8336453,0,23.8295108
28.760486,22.9782506,23.8242613,-0.91978841,23.8242613,0,23.8201823
28.770978,23.4733892,23.8148841,-0.584375635,23.8148841,0,23.8108594
28.781469,24.5356883,23.8055144,0.854502109,23.8055144,0,23.8015429
28.791961,22.6715681,23.7961506,-1.06046334,23.7961506,0,23.7922312
28.802452,22.6053091,23.7867943,-1.08696144,23.7867943,0,23.782926
28.812944,23.9165215,23.7774437,0.372931357,23.7774437,0,23.7736255
28.823436,24.2487113,23.7680997,0.693261583,23.7680997,0,23.7643306
28.833927,23.7697286,23.7587631,0.104716413,23.7587631,0,23.7550422
28.844419,23.6643191,23.7494322,-0.29174143,23.7494322,0,23.7457584
28.85491,24.1867732,23.7401087,0.668329702,23.7401087,0,23.7364812
28.865402,23.6643191,23.7307907,-0.257820801,23.7307907,0,23.7272086
28.875894,24.0416306,23.7214792,0.565819206,23.7214792,0,23.7179417
28.886385,23.7065392,23.712175,-0.07507196,23.712175,0,23.7086812
28.896877,23.9165215,23.7028763,0.462217699,23.7028763,0,23.6994253
28.907368,23.727621,23.6935848,0.184488998,23.6935848,0,23.690176
28.91786,23,23.6842989,-0.82722359,23.6842989,0,23.6809313
28.928352,24.0624188,23.6750192,0.622414344,23.6750192,0,23.6716922
28.938843,23.6431808,23.6657467,-0.150219555,23.6657467,0,23.6624595
28.949335,24.1867732,23.6564797,0.728212581,23.6564797,0,23.6532315
28.959826,23.3023604,23.6472198,-0.587247274,23.6472198,0,23.6440099
28.970318,24.3721152,23.6379652,0.856825551,23.6379652,0,23.634793
28.98081,23.3880311,23.6287168,-0.490597303,23.6287168,0,23.6255817
28.991301,23.0867928,23.6194756,-0.729851227,23.6194756,0,23.6163767
29.001793,23.9791576,23.6102396,0.60738621,23.6102396,0,23.6071765
29.012284,22.9564806,23.6010107,-0.802826332,23.6010107,0,23.5979826
29.022776,24.0416306,23.591787,0.67070376,23.591787,0,23.5887934
29.033268,24.5356883,23.5825695,0.976278033,23.5825695,0,23.5796097
29.043759,23.3666429,23.573359,-0.45466038,23.573359,0,23.5704325
29.054251,23.4520788,23.5641536,-0.334775784,23.5641536,0,23.5612598
29.064742,23.0867928,23.5549552,-0.684224004,23.5549552,0,23.5520936
29.075234,24.6779254,23.5457621,1.06403163,23.5457621,0,23.542932
29.085726,22.9128785,23.5365749,-0.789744539,23.5365749,0,23.5337759
29.096217,24.0208243,23.5273947,0.702445463,23.5273947,0,23.5246262
29.106709,23.4946802,23.5182196,-0.153425286,23.5182196,0,23.5154812
29.1172,22.3383079,23.5090513,-1.08200898,23.5090513,0,23.5063425
29.127692,22.9782506,23.4998882,-0.722244858,23.4998882,0,23.4972084
29.138184,24.1039416,23.4907311,0.78307759,23.4907311,0,23.4880799
29.148675,23.727621,23.4815808,0.496024473,23.4815808,0,23.4789577
29.159167,23.10844,23.4724355,-0.603320392,23.4724355,0,23.4698401
29.169658,23.3238076,23.4632971,-0.373482916,23.4632971,0,23.4607288
29.18015,24,23.4541637,0.73880737,23.4541637,0,23.4516222
29.190642,22.737634,23.4450362,-0.84107204,23.4450362,0,23.4425211
29.201133,23.7486842,23.4359154,0.5592573,23.4359154,0,23.4334263
29.211625,23.6220236,23.4267997,0.441841482,23.4267997,0,23.4243361
29.222116,25.1594913,23.4176907,1.3197729,23.4176907,0,23.4152522
29.232608,23.1516738,23.4085867,-0.506865802,23.4085867,0,23.4061729
29.2431,23.4733892,23.3994886,0.271846635,23.3994886,0,23.3970991
29.253591,23.6220236,23.3903971,0.481275885,23.3903971,0,23.3880316
29.264083,22.6715681,23.3813106,-0.842462196,23.3813106,0,23.3789688
29.274574,23.2379001,23.3722308,-0.3665116,23.3722308,0,23.3699122
29.285066,23.6854386,23.3631559,0.567699408,23.3631559,0,23.3608602
29.295558,23.515952,23.3540869,0.402324719,23.3540869,0,23.3518136
29.306049,23.2163735,23.3450244,-0.358679342,23.3450244,0,23.3427734
29.316541,22.9346899,23.3359669,-0.633464266,23.3359669,0,23.3337377
29.327032,23.0651252,23.3269159,-0.51165491,23.3269159,0,23.3247083
29.337524,22.7596134,23.3178699,-0.747165676,23.3178699,0,23.3156835
29.348016,23.6008474,23.3088296,0.540386747,23.3088296,0,23.3066641
29.358507,23.4733892,23.2997959,0.416645276,23.2997959,0,23.297651
29.368999,23.1732605,23.2907671,-0.342792366,23.2907671,0,23.2886425
29.37949,23.3666429,23.2817448,0.291372794,23.2817448,0,23.2796402
29.389982,22.9782506,23.2727274,-0.542657139,23.2727274,0,23.2706425
29.400474,23.4733892,23.2637156,0.457901264,23.2637156,0,23.2616502
29.410965,23.4946802,23.2547104,0.489867146,23.2547104,0,23.2526642
29.421457,21.9089023,23.2457101,-1.15620403,23.2457101,0,23.2436827
29.431948,23.130067,23.2367162,-0.326571878,23.2367162,0,23.2347075
29.44244,22.9564806,23.2277272,-0.520813392,23.2277272,0,23.2257368
29.452932,22.2036033,23.2187438,-1.00754178,23.2187438,0,23.2167715
29.463423,22.737634,23.2097669,-0.687119247,23.2097669,0,23.2078125
29.473915,23.430749,23.2007947,0.47953549,23.2007947,0,23.1988579
29.484406,22.3606798,23.1918291,-0.911673916,23.1918291,0,23.1899097
29.494898,23.0434372,23.1828682,-0.373404587,23.1828682,0,23.1809659
29.50539,23.6008474,23.173913,0.653402231,23.173913,0,23.1720275
29.515881,22.6053091,23.1649642,-0.748100962,23.1649642,0,23.1630954
29.526373,22.2710575,23.1560201,-0.940724532,23.1560201,0,23.1541677
29.536864,23.3023604,23.1470825,0.394053198,23.1470825,0,23.1452463
29.547356,23.4733892,23.1381496,0.5789988,23.1381496,0,23.1363294
29.557848,22.627417,23.1292223,-0.708382142,23.1292223,0,23.1274179
29.568339,22.3606798,23.1203014,-0.871562722,23.1203014,0,23.1185125
29.578831,22.5610283,23.1113852,-0.741860373,23.1113852,0,23.1096117
29.589322,22.6495033,23.1024754,-0.67303199,23.1024754,0,23.1007171
29.599814,23.7486842,23.0935703,0.809391071,23.0935703,0,23.0918269
29.610306,23,23.0846707,-0.29098232,23.0846707,0,23.0829421
29.620797,22.5831796,23.0757775,-0.701853226,23.0757775,0,23.0740635
29.631289,22.7156334,23.066889,-0.592668244,23.066889,0,23.0651894
29.64178,22.4944438,23.0580069,-0.750708423,23.0580069,0,23.0563214
29.652272,23.7486842,23.0491294,0.836393896,23.0491294,0,23.047458
29.662764,23.3666429,23.0402575,0.571301524,23.0402575,0,23.0385998
29.673255,22.7156334,23.0313918,-0.561923887,23.0313918,0,23.0297479
29.683747,22.7596134,23.0225309,-0.512754826,23.0225309,0,23.0209004
29.694238,22.6936114,23.0136762,-0.565742686,23.0136762,0,23.0120591
29.70473,23.3238076,23.0048262,0.564784352,23.0048262,0,23.0032222
29.715222,23.3023604,22.9959817,0.553514871,22.9959817,0,22.9943906
29.725713,22.3606798,22.9871435,-0.79149459,22.9871435,0,22.9855652
29.736205,21.8174242,22.9783099,-1.07744403,22.9783099,0,22.9767443
29.746696,22.737634,22.9694826,-0.481506544,22.9694826,0,22.9679295
29.757188,21.9544984,22.9606599,-1.003076,22.9606599,0,22.9591191
29.76768,23.0217289,22.9518426,0.264360099,22.9518426,0,22.9503141
29.778171,22.7815715,22.9430316,-0.401821018,22.9430316,0,22.9415152
29.788663,22.8254244,22.9342252,-0.329849706,22.9342252,0,22.9327207
29.799154,23.3023604,22.9254251,0.613950537,22.9254251,0,22.9239323
29.809646,22.5831796,22.9166296,-0.577451313,22.9166296,0,22.9151484
29.820138,23.0651252,22.9078395,0.396592621,22.9078395,0,22.9063698
29.830629,22.6936114,22.8990556,-0.453259502,22.8990556,0,22.8975972
29.841121,23.3023604,22.8902763,0.641937759,22.8902763,0,22.8888291
29.851612,23.3023604,22.8815032,0.648735041,22.8815032,0,22.8800671
29.862104,22.8035085,22.8727347,-0.263108778,22.8727347,0,22.8713096
29.872596,23.3023604,22.8639716,0.662109346,22.8639716,0,22.8625573
29.883087,22.3159136,22.8552147,-0.734371227,22.8552147,0,22.853811
29.893579,22.3159136,22.8464623,-0.728387766,22.8464623,0,22.8450692
29.90407,23.2163735,22.8377162,0.6153514,22.8377162,0,22.8363335
29.914562,21.8632111,22.8289746,-0.982732647,22.8289746,0,22.8276022
29.925054,23,22.8202383,0.423983132,22.8202383,0,22.8188762
29.935545,23.4733892,22.8115082,0.813560666,22.8115082,0,22.8101562
29.946037,22.4499443,22.8027827,-0.594001986,22.8027827,0,22.8014406
29.956528,22.1359436,22.7940633,-0.811245761,22.7940633,0,22.7927311
29.96702,22.6053091,22.7853484,-0.424310418,22.7853484,0,22.7840259
29.977512,22.8254244,22.7766389,0.220874415,22.7766389,0,22.775326
29.988003,22.6936114,22.7679355,-0.272624488,22.7679355,0,22.7666322
29.998495,22.0454077,22.7592367,-0.844884012,22.7592367,0,22.7579427
30.008986,23.4093998,22.750544,0.811699367,22.750544,0,22.7492593
30.019478,22.737634,22.7418557,-0.0649748087,22.7418557,0,22.7405803
30.02997,22.4944438,22.7331728,-0.488599069,22.7331728,0,22.7319065
30.040461,22.6053091,22.724496,-0.345234577,22.724496,0,22.7232387
30.050953,22.3383079,22.7158237,-0.614423153,22.7158237,0,22.7145753
30.061444,23.727621,22.7071575,1.01017994,22.7071575,0,22.7059179
30.071936,21.7715411,22.6984958,-0.962784894,22.6984958,0,22.6972649
30.082428,22.8254244,22.6898394,0.368218744,22.6898394,0,22.6886171
30.092919,21.9544984,22.6811891,-0.852461527,22.6811891,0,22.6799753
30.103411,22.6715681,22.6725432,-0.0312264062,22.6725432,0,22.6713379
30.113902,22.5831796,22.6639034,-0.2841194,22.6639034,0,22.6627064
30.124394,22.9346899,22.6552681,0.528603625,22.6552681,0,22.6540794
30.134886,22.627417,22.646638,-0.138639936,22.646638,0,22.6454575
30.145377,22.2485955,22.6380141,-0.624034126,22.6380141,0,22.6368416
30.155869,22.6715681,22.6293945,0.205362092,22.6293945,0,22.62823
30.16636,23.4946802,22.620781,0.934825765,22.620781,0,22.6196245
30.176852,22.7156334,22.612172,0.321654148,22.612172,0,22.6110232
30.187344,22.5831796,22.6035682,-0.142788683,22.6035682,0,22.6024272
30.197835,23.2594067,22.5949704,0.815129594,22.5949704,0,22.5938371
30.208327,23.1516738,22.5863771,0.75186215,22.5863771,0,22.5852513
30.218818,21.7715411,22.5777898,-0.897913566,22.5777898,0,22.5766715
30.22931,23.10844,22.569207,0.734324903,22.569207,0,22.5680961
30.239802,22.4944438,22.5606293,-0.257265501,22.5606293,0,22.5595258
30.250293,21.7025344,22.5520577,-0.92169586,22.5520577,0,22.5509614
30.260785,22.3159136,22.5434904,-0.477050145,22.5434904,0,22.5424014
30.271276,22.4944438,22.5349292,-0.201210044,22.5349292,0,22.5338473
30.281768,22.2485955,22.5263724,-0.527045502,22.5263724,0,22.5252976
30.29226,22.7596134,22.5178208,0.491724058,22.5178208,0,22.5167529
30.302751,23.1516738,22.5092752,0.801497729,22.5092752,0,22.5082142
30.313243,22.7815715,22.500734,0.52994107,22.500734,0,22.4996798
30.323734,21.9089023,22.4921987,-0.763738456,22.4921987,0,22.4911514
30.334226,22.5831796,22.4836679,0.315454777,22.4836679,0,22.4826272
30.344718,22.7596134,22.4751422,0.533358392,22.4751422,0,22.4741082
30.355209,22.3159136,22.4666225,-0.388212408,22.4666225,0,22.465595
30.365701,22.4276615,22.4581071,-0.174486801,22.4581071,0,22.4570862
30.376192,21.8860686,22.4495978,-0.750685781,22.4495978,0,22.4485833
30.386684,22.9346899,22.4410928,0.702564679,22.4410928,0,22.4400846
30.397176,22.2934968,22.4325929,-0.372955877,22.4325929,0,22.4315911
30.407667,22.1359436,22.424099,-0.536801062,22.424099,0,22.4231035
30.418159,21.7715411,22.4156094,-0.802538715,22.4156094,0,22.4146201
30.42865,21.1187121,22.4071258,-1.13508315,22.4071258,0,22.4061426
30.439142,22.1359436,22.3986466,-0.512545562,22.3986466,0,22.3976694
30.449634,22.4722051,22.3901724,0.286413357,22.3901724,0,22.3892013
30.460125,22.7815715,22.3817043,0.632350574,22.3817043,0,22.3807391
30.470617,22.2934968,22.3732404,-0.282389045,22.3732404,0,22.3722811
30.481108,23.7697286,22.3647824,1.18530427,22.3647824,0,22.363829
30.4916,22.1133444,22.3563288,-0.492934512,22.3563288,0,22.3553812
30.502092,22.3830293,22.3478803,0.187480586,22.3478803,0,22.3469384
30.512583,22.1133444,22.3394377,-0.475492735,22.3394377,0,22.3385015
30.523075,21.9544984,22.3309994,-0.61359681,22.3309994,0,22.3300689
30.533566,22.3830293,22.3225671,0.245890654,22.3225671,0,22.3216421
30.544058,21.7485632,22.314139,-0.752047755,22.314139,0,22.3132195
30.55455,22.4944438,22.305716,0.434428061,22.305716,0,22.304802
30.565041,22.2485955,22.2972989,-0.220688639,22.2972989,0,22.2963904
30.575533,22.9782506,22.2888861,0.830279738,22.2888861,0,22.287983
30.586024,21.4242853,22.2804792,-0.92530749,22.2804792,0,22.2795814
30.596516,22.2934968,22.2720766,0.146356412,22.2720766,0,22.271184
30.607008,22,22.2636791,-0.513496897,22.2636791,0,22.2627917
30.617499,21.3072758,22.2552874,-0.973658892,22.2552874,0,22.2544052
30.627991,22.4722051,22.2469,0.474663107,22.2469,0,22.2460229
30.638482,22.8910463,22.2385185,0.807791948,22.2385185,0,22.2376465
30.648974,22.1585198,22.2301412,-0.267621702,22.2301412,0,22.2292742
30.659466,21.8403297,22.221769,-0.617607725,22.221769,0,22.220907
30.669957,21.8403297,22.2134026,-0.610796974,22.2134026,0,22.2125456
30.680449,21.9089023,22.2050405,-0.54418582,22.2050405,0,22.2041884
30.69094,22.6053091,22.1966842,0.639237721,22.1966842,0,22.195837
30.701432,21.8632111,22.1883322,-0.570193937,22.1883322,0,22.1874898
30.711924,21.9317122,22.1799853,-0.498270072,22.1799853,0,22.1791476
30.722415,22.4722051,22.1716441,0.548234375,22.1716441,0,22.1708112
30.732907,21.8403297,22.1633072,-0.568311143,22.1633072,0,22.162479
30.743398,23.130067,22.1549761,0.987466894,22.1549761,0,22.1541526
30.75389,21.2837967,22.1466493,-0.92889862,22.1466493,0,22.1458303
30.764382,21.4709106,22.1383275,-0.816955888,22.1383275,0,22.1375131
30.774873,22.4053565,22.1300115,0.524733302,22.1300115,0,22.1292016
30.785365,21.6333077,22.1216997,-0.6988505,22.1216997,0,22.1208943
30.795856,21.4941853,22.1133937,-0.786897977,22.1133937,0,22.1125928
30.806348,22.0454077,22.1050919,-0.244303559,22.1050919,0,22.1042954
30.81684,22,22.0967951,-0.311119183,22.0967951,0,22.096003
30.827331,21.977261,22.0885042,-0.333531397,22.0885042,0,22.0877164
30.837823,21.4941853,22.0802174,-0.765527359,22.0802174,0,22.0794339
30.848314,22.3606798,22.0719364,0.53734846,22.0719364,0,22.0711572
30.858806,22.3159136,22.0636596,0.502248928,22.0636596,0,22.0628846
30.869298,21.1423745,22.0553878,-0.955517296,22.0553878,0,22.054617
30.879789,22,22.0471218,-0.21707552,22.0471218,0,22.0463551
30.890281,21.6101828,22.0388599,-0.654734414,22.0388599,0,22.0380974
30.900772,23.194827,22.0306039,1.07899173,22.0306039,0,22.0298454
30.911264,22.0680765,22.022352,0.213832951,22.022352,0,22.0215975
30.921756,22.5166605,22.014105,0.708911469,22.014105,0,22.0133546
30.932247,22.4053565,22.0058639,0.632054262,22.0058639,0,22.0051174
30.942739,22.5388553,21.9976275,0.73568189,21.9976275,0,21.9968844
30.95323,21.023796,21.9893979,-0.982650405,21.9893979,0,21.988657
30.963722,20.880613,21.9811736,-1.04907607,21.9811736,0,21.9804338
30.974214,22,21.9729558,0.164451064,21.9729558,0,21.9722155
30.984705,21.9544984,21.9647458,-0.101229575,21.9647458,0,21.9640029
30.995197,21.5174348,21.9565428,-0.662652247,21.9565428,0,21.9557945
31.005688,22.4053565,21.9483499,0.676022609,21.9483499,0,21.9475917
31.01618,22.4722051,21.9401703,0.729407144,21.9401703,0,21.9393931
31.026672,22.1359436,21.9320136,0.451586091,21.9320136,0,21.9311993
31.037163,23.0651252,21.9238674,1.06829667,21.9238674,0,21.9230112
31.047655,21.6794834,21.9156803,-0.486000915,21.9156803,0,21.9148273
31.058146,23.2808935,21.9074988,1.1719192,21.9074988,0,21.906649
31.068638,22.0227155,21.8993215,0.351274831,21.8993215,0,21.8984748
31.07913,22.6053091,21.8911492,0.845079851,21.8911492,0,21.8903055
31.089621,22.181073,21.8829825,0.545976692,21.8829825,0,21.8821419
31.100113,21.9089023,21.8748199,0.184614181,21.8748199,0,21.8739824
31.110604,22.0454077,21.866663,0.422782044,21.866663,0,21.8658285
31.121096,21.8403297,21.8585103,-0.134835491,21.8585103,0,21.8576787
31.131588,21.1660105,21.8503624,-0.827255666,21.8503624,0,21.8495338
31.142079,21.6564078,21.8422202,-0.431059647,21.8422202,0,21.8413946
31.152571,20.7123152,21.8340822,-1.05913503,21.8340822,0,21.8332594
31.163062,20.2731349,21.8259498,-1.24611992,21.8259498,0,21.8251299
31.173554,22.5166605,21.8178215,0.835965909,21.8178215,0,21.8170044
31.184046,21.4476106,21.8096981,-0.601737071,21.8096981,0,21.8088838
31.194537,22.0454077,21.8015803,0.493788766,21.8015803,0,21.8007688
31.205029,22.5610283,21.7934667,0.876105962,21.7934667,0,21.7926579
31.21552,21.7485632,21.7853587,-0.19182156,21.7853587,0,21.7845527
31.226012,21.725561,21.7772548,-0.227362681,21.7772548,0,21.7764514
31.236504,21.3072758,21.7691557,-0.67961752,21.7691557,0,21.7683551
31.246995,21.2132034,21.7610623,-0.740174897,21.7610623,0,21.7602643
31.257487,21.9544984,21.752973,0.448915818,21.752973,0,21.7521776
31.267978,21.3072758,21.7448893,-0.661523648,21.7448893,0,21.7440965
31.27847,21.2602916,21.7368097,-0.690302865,21.7368097,0,21.7360194
31.288962,22.4499443,21.7287349,0.849240495,21.7287349,0,21.7279472
31.299453,21.5406592,21.7206657,-0.42427175,21.7206657,0,21.7198806
31.309945,21.9089023,21.7126007,0.443059406,21.7126007,0,21.711818
31.320436,21.023796,21.7045412,-0.825072812,21.7045412,0,21.703761
31.330928,21,21.6964858,-0.834557234,21.6964858,0,21.695708
31.34142,22.0454077,21.6884352,0.597471746,21.6884352,0,21.6876599
31.351911,21.1187121,21.6803902,-0.749451888,21.6803902,0,21.6796173
31.362403,21.6101828,21.6723493,-0.249332117,21.6723493,0,21.6715787
31.372894,21.2367606,21.664314,-0.653875654,21.664314,0,21.6635457
31.383386,22.3830293,21.6562827,0.852494351,21.6562827,0,21.6555168
31.393878,22.0454077,21.6482562,0.630199563,21.6482562,0,21.6474926
31.404369,21.3072758,21.6402353,-0.577026472,21.6402353,0,21.639474
31.414861,21.3541565,21.6322185,-0.527315794,21.6322185,0,21.6314594
31.425352,21.330729,21.6242072,-0.541736247,21.6242072,0,21.6234503
31.435844,21.7485632,21.6161999,0.3638176,21.6161999,0,21.6154453
31.446336,22.5388553,21.6081975,0.9647061,21.6081975,0,21.607445
31.456827,21.4476106,21.6002006,-0.390627701,21.6002006,0,21.5994503
31.467319,21.4009346,21.5922077,-0.437347885,21.5922077,0,21.5914596
31.47781,21.4009346,21.5842204,-0.428118983,21.5842204,0,21.5834744
31.488302,22.090722,21.5762371,0.717276026,21.5762371,0,21.5754932
31.498794,21.4941853,21.5682586,-0.272164239,21.5682586,0,21.5675168
31.509285,21.1423745,21.5602857,-0.646460483,21.5602857,0,21.5595459
31.519777,21.4476106,21.5523167,-0.323583264,21.5523167,0,21.551579
31.530268,21.4941853,21.5443533,-0.223982231,21.5443533,0,21.5436176
31.54076,21.6794834,21.5363939,0.378271725,21.5363939,0,21.5356602
31.551252,20.7123152,21.5284392,-0.903395855,21.5284392,0,21.5277075
31.561743,21.5870331,21.5204901,0.25795934,21.5204901,0,21.5197603
31.572235,22.2036033,21.512545,0.83129917,21.512545,0,21.5118171
31.582726,21.3072758,21.5046054,-0.444218008,21.5046054,0,21.5038794
31.593218,20.5426386,21.4966698,-0.976745204,21.4966698,0,21.4959457
31.60371,20.3224014,21.4887389,-1.07997105,21.4887389,0,21.4880167
31.614201,21.4941853,21.4808135,0.115636118,21.4808135,0,21.4800932
31.624693,21.6564078,21.4728922,0.428387273,21.4728922,0,21.4721737
31.635184,21.6564078,21.4649763,0.4375289,21.4649763,0,21.4642596
31.645676,20.5182845,21.4570644,-0.968906528,21.4570644,0,21.4563495
31.656168,21.6794834,21.4491572,0.479923085,21.4491572,0,21.4484441
31.666659,20.7846097,21.4412555,-0.810336872,21.4412555,0,21.4405442
31.677151,20.4205779,21.4333578,-1.0063697,21.4333578,0,21.4326482
31.687642,21.8860686,21.4254656,0.678677419,21.4254656,0,21.4247577
31.698134,21.3775583,21.4175773,-0.20004748,21.4175773,0,21.4168711
31.708626,21.6794834,21.4096938,0.519412764,21.4096938,0,21.4089893
31.719117,21.2602916,21.4018157,-0.376196833,21.4018157,0,21.4011128
31.729609,20.880613,21.3939416,-0.716469495,21.3939416,0,21.3932404
31.7401,20.5669638,21.3860729,-0.905046454,21.3860729,0,21.3853733
31.750592,20.0997512,21.3782082,-1.1306887,21.3782082,0,21.3775102
31.761084,21.7025344,21.3703482,0.576356018,21.3703482,0,21.3696518
31.771575,21.5870331,21.3624936,0.473856053,21.3624936,0,21.3617988
31.782067,20.4205779,21.354643,-0.966470437,21.354643,0,21.3539497
31.792558,22.090722,21.3467978,0.862510438,21.3467978,0,21.3461061
31.80305,21.8860686,21.3389565,0.739670259,21.3389565,0,21.3382664
31.813542,21.6333077,21.33112,0.549715996,21.33112,0,21.3304313
31.824033,21.3072758,21.3232888,-0.126542853,21.3232888,0,21.3226017
31.834525,20.7364414,21.3154616,-0.76093383,21.3154616,0,21.3147759
31.845016,21.7025344,21.3076399,0.628406353,21.3076399,0,21.3069556
31.855508,21.4476106,21.299822,0.384432791,21.299822,0,21.2991392
31.866,21.6794834,21.2920088,0.622474539,21.2920088,0,21.2913275
31.876491,20.8566536,21.2842011,-0.653871127,21.2842011,0,21.2835211
31.886983,21.5174348,21.2763972,0.490955782,21.2763972,0,21.2757186
31.897474,21.1660105,21.2685988,-0.32029404,21.2685988,0,21.2679215
31.907966,20.8566536,21.2608042,-0.635728408,21.2608042,0,21.2601284
31.918458,20.6155281,21.2530143,-0.798427336,21.2530143,0,21.2523398
31.928949,21.4709106,21.2452298,0.475058636,21.2452298,0,21.2445567
31.939441,21.1187121,21.2374493,-0.344582612,21.2374493,0,21.2367774
31.949932,21.9317122,21.2296741,0.837877165,21.2296741,0,21.2290035
31.960424,22.4053565,21.2219028,1.0878666,21.2219028,0,21.2212334
31.970916,21.3775583,21.2141361,0.404255166,21.2141361,0,21.213468
31.981407,21.977261,21.2063748,0.878001242,21.2063748,0,21.205708
31.991899,21.7485632,21.1986174,0.74158329,21.1986174,0,21.1979518
32.00239,20.976177,21.1908654,-0.463344795,21.1908654,0,21.190201
32.012882,20.976177,21.1831172,-0.45490686,21.1831172,0,21.1824541
32.023374,20.1246118,21.1753737,-1.02506677,21.1753737,0,21.1747117
32.033865,21.5870331,21.1676355,0.64760916,21.1676355,0,21.1669747
32.044357,21.8632111,21.1599012,0.838635725,21.1599012,0,21.1592416
32.054848,21.2132034,21.1521723,0.24704483,21.1521723,0,21.1515138
32.06534,20.6397674,21.1444472,-0.710408177,21.1444472,0,21.1437898
32.075832,20.0997512,21.1367268,-1.01831995,21.1367268,0,21.1360705
32.086323,20.7605395,21.1290116,-0.607019059,21.1290116,0,21.1283564
32.096815,21.6101828,21.1213004,0.699201269,21.1213004,0,21.1206463
32.107306,21.2367606,21.1135944,0.350950338,21.1135944,0,21.1129414
32.117798,20.6639783,21.1058924,-0.664766164,21.1058924,0,21.1052404
32.12829,21.1896201,21.0981949,0.302366014,21.0981949,0,21.0975439
32.138781,21,21.0905027,-0.300836727,21.0905027,0,21.0898528
32.149273,20.6155281,21.0828144,-0.683583427,21.0828144,0,21.0821655
32.159764,22.090722,21.0751314,1.00776515,21.0751314,0,21.0744835
32.170256,20.8566536,21.0674523,-0.459128169,21.0674523,0,21.0668053
32.180748,20.7605395,21.0597777,-0.547026715,21.0597777,0,21.0591317
32.191239,21.1660105,21.0521085,0.33749376,21.0521085,0,21.0514634
32.201731,21.6564078,21.044443,0.782281796,21.044443,0,21.0437989
32.212222,20.3960781,21.0367829,-0.800440398,21.0367829,0,21.0361397
32.222714,20.0499377,21.0291266,-0.989539756,21.0291266,0,21.0284843
32.233206,21.1896201,21.0214748,0.410055188,21.0214748,0,21.0208335
32.243697,20.7605395,21.0138284,-0.503278149,21.0138284,0,21.0131879
32.254189,21.5406592,21.0061858,0.731076927,21.0061858,0,21.0055461
32.26468,20.3715488,20.9985484,-0.791833073,20.9985484,0,20.9979096
32.275172,20.976177,20.9909149,-0.121399783,20.9909149,0,20.990277
32.285664,20.4205779,20.9832859,-0.750138671,20.9832859,0,20.9826488
32.296155,20.5669638,20.9756622,-0.639295207,20.9756622,0,20.9750259
32.306647,21.4709106,20.9680423,0.709132075,20.9680423,0,20.9674068
32.317138,20.6881609,20.9604276,-0.521791856,20.9604276,0,20.9597929
32.32763,20.8326667,20.9528168,-0.346626759,20.9528168,0,20.9521829
32.338122,20.6639783,20.9452105,-0.530313242,20.9452105,0,20.9445773
32.348613,20.6397674,20.9376094,-0.545748984,20.9376094,0,20.936977
32.359105,20.4939015,20.9300121,-0.660386705,20.9300121,0,20.9293805
32.369596,20.7605395,20.9224201,-0.402343909,20.9224201,0,20.9217892
32.380088,20.9284495,20.9148319,0.11669468,20.9148319,0,20.9142017
32.39058,21.023796,20.9072482,0.341391072,20.9072482,0,20.9066186
32.401071,21.7944947,20.8996697,0.945951911,20.8996697,0,20.8990408
32.411563,21.9317122,20.892095,1.0196162,20.892095,0,20.8914668
32.422054,20.0997512,20.8845255,-0.885874879,20.8845255,0,20.883898
32.432546,20.7364414,20.8769599,-0.374857979,20.8769599,0,20.876333
32.443038,20.5426386,20.8693987,-0.571629327,20.8693987,0,20.8687724
32.453529,19.8494332,20.8618427,-1.0061856,20.8618427,0,20.8612171
32.464021,20.0499377,20.8542905,-0.896857207,20.8542905,0,20.8536655
32.474512,20.904545,20.8467435,0.240419308,20.8467435,0,20.8461191
32.485004,20.976177,20.8392003,0.37010359,20.8392003,0,20.8385764
32.495496,20.3715488,20.8316616,-0.67831613,20.8316616,0,20.8310383
32.505987,21.8174242,20.824128,0.996642467,20.824128,0,20.8235053
32.516479,20.8326667,20.8165982,0.12676124,20.8165982,0,20.8159761
32.52697,20.8326667,20.8090737,0.153600124,20.8090737,0,20.808452
32.537462,20.1494417,20.8015528,-0.807533991,20.8015528,0,20.8009317
32.547954,21.5406592,20.7940365,0.864073356,20.7940365,0,20.7934158
32.558445,21.023796,20.7865253,0.487104463,20.7865253,0,20.7859052
32.568937,21.2602916,20.7790178,0.693738983,20.7790178,0,20.7783982
32.579428,21.0950231,20.7715156,0.568777214,20.7715156,0,20.7708964
32.58992,20.6639783,20.7640171,-0.316289035,20.7640171,0,20.7633984
32.600412,21.3775583,20.756523,0.78805794,20.756523,0,20.7559047
32.610903,21.3072758,20.7490341,0.747155701,20.7490341,0,20.7484163
32.621395,20.2977831,20.7415489,-0.666157501,20.7415489,0,20.7409315
32.631886,20.3224014,20.7340689,-0.641613207,20.7340689,0,20.7334519
32.642378,20.5669638,20.7265927,-0.399535807,20.7265927,0,20.725976
32.65287,21.6101828,20.7191208,0.943960784,20.7191208,0,20.7185046
32.663361,21.2132034,20.7116541,0.708201457,20.7116541,0,20.7110383
32.673853,19.8494332,20.7041912,-0.92453119,20.7041912,0,20.7035757
32.684344,20.8566536,20.6967333,0.399900339,20.6967333,0,20.6961182
32.694836,20.0748599,20.6892792,-0.783849042,20.6892792,0,20.6886644
32.705328,20.9523268,20.6818295,0.520093556,20.6818295,0,20.681215
32.715819,20.6397674,20.674385,-0.186057879,20.674385,0,20.6737708
32.726311,21,20.6669441,0.577109933,20.6669441,0,20.6663302
32.736802,21.7944947,20.6595084,1.06535737,20.6595084,0,20.6588948
32.747294,20.0499377,20.6520764,-0.775975981,20.6520764,0,20.6514631
32.757786,20.904545,20.6446488,0.509800151,20.6446488,0,20.6440357
32.768277,20.3960781,20.6372263,-0.491068441,20.6372263,0,20.6366135
32.778769,20.6639783,20.6298075,0.184853602,20.6298075,0,20.6291949
32.78926,20.6397674,20.6223938,0.131809219,20.6223938,0,20.6217814
32.799752,21,20.6149838,0.620496764,20.6149838,0,20.6143717
32.810244,20.5182845,20.6075782,-0.298820393,20.6075782,0,20.6069662
32.820735,21.2367606,20.6001776,0.797861478,20.6001776,0,20.5995659
32.831227,20.1990099,20.5927808,-0.627511703,20.5927808,0,20.5921693
32.841718,20.1990099,20.5853891,-0.621594078,20.5853891,0,20.5847777
32.85221,19.7989899,20.578001,-0.882616078,20.578001,0,20.5773898
32.862702,21.1187121,20.5706173,0.740334214,20.5706173,0,20.5700063
32.873193,20.6639783,20.5632387,0.317395001,20.5632387,0,20.5626278
32.883685,20.2484567,20.5558638,-0.554443029,20.5558638,0,20.555253
32.894176,20.976177,20.5484939,0.653974782,20.5484939,0,20.5478833
32.904668,21.0475652,20.5411278,0.711644169,20.5411278,0,20.5405172
32.91516,19.0262976,20.5337659,-1.22779002,20.5337659,0,20.5331554
32.925651,20.976177,20.5264092,0.670647294,20.5264092,0,20.5257987
32.936143,20.904545,20.5190561,0.620877518,20.5190561,0,20.5184457
32.946634,20.6397674,20.511708,0.357853907,20.511708,0,20.5110977
32.957126,21.1187121,20.5043636,0.783803836,20.5043636,0,20.5037534
32.967618,19.6977156,20.4970236,-0.894040259,20.4970236,0,20.4964133
32.978109,20.2977831,20.4896886,-0.438070157,20.4896886,0,20.4890784
32.988601,20.0249844,20.4823572,-0.676293464,20.4823572,0,20.481747
32.999092,20.7364414,20.4750309,0.51128311,20.4750309,0,20.4744207
33.009584,20.4205779,20.4677083,-0.217095396,20.4677083,0,20.467098
33.020076,21.1660105,20.4603899,0.840012233,20.4603899,0,20.4597797
33.030567,20.4694895,20.4530766,0.128112666,20.4530766,0,20.4524663
33.041059,19.1049732,20.445767,-1.15792651,20.445767,0,20.4451566
33.05155,20.1246118,20.4384623,-0.56022364,20.4384623,0,20.4378519
33.062042,20.0748599,20.4311613,-0.596909883,20.4311613,0,20.4305508
33.072534,20.3469899,20.4238646,-0.277262811,20.4238646,0,20.423254
33.083025,20.5912603,20.4165729,0.417956153,20.4165729,0,20.4159622
33.093517,20.4450483,20.4092849,0.189112194,20.4092849,0,20.4086741
33.104008,19.3907194,20.4020018,-1.00562538,20.4020018,0,20.4013909
33.1145,19.8494332,20.3947224,-0.738436965,20.3947224,0,20.3941113
33.124992,20.4205779,20.3874473,0.182018106,20.3874473,0,20.386836
33.135483,19.8242276,20.3801771,-0.745620235,20.3801771,0,20.3795657
33.145975,19.3907194,20.3729106,-0.991055592,20.3729106,0,20.372299
33.156466,20.808652,20.3656491,0.665584676,20.3656491,0,20.3650373
33.166958,20.2977831,20.3583912,-0.246186982,20.3583912,0,20.3577792
33.17745,20.1246118,20.3511375,-0.475947193,20.3511375,0,20.3505254
33.187941,19.2093727,20.3438889,-1.06513669,20.3438889,0,20.3432765
33.198433,19.9749844,20.3366438,-0.601381298,20.3366438,0,20.3360312
33.208924,19.7230829,20.3294037,-0.77866605,20.3294037,0,20.3287909
33.219416,20.2731349,20.3221673,-0.221432428,20.3221673,0,20.3215541
33.229908,21.2602916,20.314935,0.972294494,20.314935,0,20.3143217
33.240399,20.0249844,20.3077078,-0.53171741,20.3077078,0,20.3070941
33.250891,20.3715488,20.3004841,0.266579536,20.3004841,0,20.2998702
33.261382,20.3960781,20.2932654,0.320644067,20.2932654,0,20.2926512
33.271874,19.9749844,20.2860503,-0.557732874,20.2860503,0,20.2854358
33.282366,18.9472953,20.2788394,-1.15392551,20.2788394,0,20.2782246
33.292857,20.4205779,20.2716331,0.38593367,20.2716331,0,20.2710183
33.303349,20.3224014,20.2644296,0.240773428,20.2644296,0,20.2638156
33.31384,20.4205779,20.2572302,0.404162849,20.2572302,0,20.2566179
33.324332,20.4205779,20.2500336,0.412970092,20.2500336,0,20.2494237
33.334824,20.7605395,20.2428401,0.719513318,20.2428401,0,20.2422337
33.345315,20.9284495,20.2356503,0.832345612,20.2356503,0,20.2350487
33.355807,19.8242276,20.2284627,-0.635794851,20.2284627,0,20.2278672
33.366298,20.2977831,20.2212783,0.276595094,20.2212783,0,20.2206906
33.37679,20.0997512,20.2140953,-0.338148002,20.2140953,0,20.2135175
33.387282,19.9499373,20.2069139,-0.506928519,20.2069139,0,20.2063487
33.397773,20.808652,20.1997337,0.780332219,20.1997337,0,20.1991848
33.408265,20.7364414,20.1925516,0.737488787,20.1925516,0,20.1920244
33.418756,19.2613603,20.1853652,-0.961251729,20.1853652,0,20.184869
33.429248,19.9248588,20.1781595,-0.503289859,20.1781595,0,20.177717
33.43974,20.8566536,20.170992,0.828046869,20.170992,0,20.1705693
33.450231,20.2484567,20.1637605,0.291026152,20.1637605,0,20.1634264
33.460723,20.5426386,20.1566226,0.621301854,20.1566226,0,20.1562871
33.471214,19.9499373,20.1494896,-0.446712678,20.1494896,0,20.1491527
33.481706,20.2237484,20.1423601,0.285286452,20.1423601,0,20.1420217
33.492198,19.9248588,20.1352348,-0.458667541,20.1352348,0,20.134895
33.502689,20.4694895,20.1281143,0.584273182,20.1281143,0,20.1277731
33.513181,19.6977156,20.1209974,-0.650601136,20.1209974,0,20.1206548
33.523672,20.2237484,20.1138854,0.331455878,20.1138854,0,20.1135413
33.534164,20.1494417,20.1067769,0.206554524,20.1067769,0,20.1064313
33.544656,19.6977156,20.0996726,-0.634000778,20.0996726,0,20.0993256
33.555147,19.8242276,20.0925731,-0.518020786,20.0925731,0,20.0922246
33.565639,19.7989899,20.0854772,-0.535245101,20.0854772,0,20.0851272
33.57613,19.5703858,20.0783861,-0.712741407,20.0783861,0,20.0780346
33.586622,19.5448203,20.0712985,-0.725588199,20.0712985,0,20.0709455
33.597114,19.9248588,20.0642151,-0.373304526,20.0642151,0,20.0638606
33.607605,19.9749844,20.0571366,-0.286622053,20.0571366,0,20.0567805
33.618097,19.3132079,20.0500615,-0.858401759,20.0500615,0,20.0497039
33.628588,19.8494332,20.0429913,-0.439952311,20.0429913,0,20.0426321
33.63908,20.0499377,20.0359246,0.118376959,20.0359246,0,20.0355638
33.649572,19.5448203,20.028862,-0.695731056,20.028862,0,20.0284997
33.660063,19.9248588,20.0218043,-0.311360585,20.0218043,0,20.0214404
33.670555,20.5912603,20.01475,0.759282732,20.01475,0,20.0143846
33.681046,20.2977831,20.0077006,0.538593105,20.0077006,0,20.0073336
33.691538,19.5703858,20.0006547,-0.655948831,20.0006547,0,20.000286
33.70203,19.6723156,19.9936129,-0.566830927,19.9936129,0,19.9932426
33.712521,19.6723156,19.9865759,-0.56058927,19.9865759,0,19.986204
33.723013,19.3390796,19.9795424,-0.800289198,19.9795424,0,19.9791689
33.733504,19.9248588,19.9725137,-0.21829997,19.9725137,0,19.9721386
33.743996,19.2353841,19.9654885,-0.854461494,19.9654885,0,19.9651117
33.754488,20.7846097,19.9584674,0.908923684,19.9584674,0,19.9580889
33.764979,20.174241,19.9514511,0.472006199,19.9514511,0,19.951071
33.775471,20.0748599,19.9444383,0.361139261,19.9444383,0,19.9440565
33.785962,19.1833261,19.9374303,-0.868391744,19.9374303,0,19.9370468
33.796454,20.2731349,19.9304258,0.585413683,19.9304258,0,19.9300405
33.806946,18.973666,19.9234253,-0.974555977,19.9234253,0,19.9230383
33.817437,20.4694895,19.9164297,0.743679924,19.9164297,0,19.9160409
33.827929,19.6214169,19.9094375,-0.536675497,19.9094375,0,19.909047
33.83842,20.1494417,19.90245,0.496982537,19.90245,0,19.9020578
33.848912,19.9248588,19.8954661,0.171443234,19.8954661,0,19.8950721
33.859404,20.0997512,19.8884862,0.459635775,19.8884862,0,19.8880904
33.869895,19.8242276,19.8815111,-0.239339718,19.8815111,0,19.8811136
33.880387,18.6815417,19.8745394,-1.09224437,19.8745394,0,19.8741401
33.890878,19.9499373,19.8675726,0.28699266,19.8675726,0,19.8671714
33.90137,20.3469899,19.8606091,0.697410101,19.8606091,0,19.8602061
33.911862,19.9499373,19.8536497,0.310302436,19.8536497,0,19.8532449
33.922353,20.0499377,19.8466951,0.450824264,19.8466951,0,19.8462885
33.932845,19.6214169,19.839744,-0.467254847,19.839744,0,19.8393355
33.943336,18.761663,19.8327975,-1.03495628,19.8327975,0,19.8323872
33.953828,18.9208879,19.8258545,-0.951297328,19.8258545,0,19.8254423
33.96432,19.8242276,19.8189156,0.0728833731,19.8189156,0,19.8185015
33.974811,19.2353841,19.8119814,-0.759340092,19.8119814,0,19.8115654
33.985303,20.1246118,19.8050507,0.565297375,19.8050507,0,19.8046327
33.995794,19.3390796,19.7981246,-0.677528628,19.7981246,0,19.7977047
34.006286,20.2237484,19.791202,0.657682586,19.791202,0,19.7907802
34.016778,20.5182845,19.7842835,0.856738607,19.7842835,0,19.7838597
34.027269,19.4935887,19.7773697,-0.53271097,19.7773697,0,19.7769439
34.037761,19.6214169,19.7704593,-0.386060077,19.7704593,0,19.7700315
34.048252,20.0748599,19.7635536,0.557948332,19.7635536,0,19.7631238
34.058744,19.1833261,19.7566513,-0.75718239,19.7566513,0,19.7562195
34.069236,19.7989899,19.749753,0.221893772,19.749753,0,19.7493192
34.079727,19.3649167,19.7428595,-0.614770502,19.7428595,0,19.7424237
34.090219,19.6723156,19.7359694,-0.252297038,19.7359694,0,19.7355315
34.10071,19.5192213,19.7290839,-0.458107678,19.7290839,0,19.728644
34.111202,19.2613603,19.7222019,-0.678853164,19.7222019,0,19.7217599
34.121694,18.973666,19.7153239,-0.86119565,19.7153239,0,19.7148798
34.132185,19.8746069,19.7084506,0.407622748,19.7084506,0,19.7080044
34.142677,20.1990099,19.7015807,0.705286596,19.7015807,0,19.7011323
34.153168,20.1494417,19.6947155,0.674333902,19.6947155,0,19.694265
34.16366,20.4939015,19.6878536,0.897801711,19.6878536,0,19.687401
34.174152,19.8746069,19.6809958,0.440012626,19.6809958,0,19.680541
34.184643,20.0249844,19.6741427,0.59231894,19.6741427,0,19.6736857
34.195135,19.8494332,19.6672929,0.426779026,19.6672929,0,19.6668337
34.205626,18.7882942,19.6604478,-0.933891636,19.6604478,0,19.6599864
34.216118,18.7882942,19.6536061,-0.930221407,19.6536061,0,19.6531425
34.22661,19.2353841,19.6467684,-0.641392492,19.6467684,0,19.6463025
34.237101,18.8679623,19.6399354,-0.878619991,19.6399354,0,19.6394673
34.247593,19.8997487,19.6331057,0.516374928,19.6331057,0,19.6326353
34.258084,18.6010752,19.6262807,-1.01252428,19.6262807,0,19.625808
34.268576,19.5192213,19.619459,-0.316603387,19.619459,0,19.618984
34.279068,19.5192213,19.6126413,-0.305646937,19.6126413,0,19.6121641
34.289559,19.7737199,19.6058283,0.409745764,19.6058283,0,19.6053487
34.300051,20.6155281,19.5990187,1.00822093,19.5990187,0,19.5985367
34.310542,19.7484177,19.5922137,0.395226487,19.5922137,0,19.5917294
34.321034,19.9499373,19.585412,0.603759326,19.585412,0,19.5849253
34.331526,19.5703858,19.5786144,-0.0907114086,19.5786144,0,19.5781252
34.342017,19.2613603,19.5718213,-0.557190303,19.5718213,0,19.5713298
34.352509,20.2237484,19.5650316,0.811613696,19.5650316,0,19.5645377
34.363,19.2873015,19.5582466,-0.520523813,19.5582466,0,19.5577501
34.373492,19.3649167,19.5514648,-0.431912148,19.5514648,0,19.5509659
34.383984,19.2873015,19.5446871,-0.507331809,19.5446871,0,19.5441857
34.394475,19.7484177,19.537914,0.458806819,19.537914,0,19.5374101
34.404967,19.0525589,19.5311442,-0.691798584,19.5311442,0,19.5306378
34.415458,20.2731349,19.524379,0.865306853,19.524379,0,19.52387
34.42595,19.5448203,19.5176171,0.164933801,19.5176171,0,19.5171056
34.436442,19.4164878,19.5108592,-0.307199282,19.5108592,0,19.5103452
34.446933,18.6010752,19.504106,-0.950279285,19.504106,0,19.5035893
34.457425,20.5182845,19.497356,1.01041008,19.497356,0,19.4968367
34.467916,19.2873015,19.4906106,-0.450898115,19.4906106,0,19.4900887
34.478408,19.1311265,19.4838686,-0.593920967,19.4838686,0,19.483344
34.4889,19.3649167,19.4771305,-0.334983224,19.4771305,0,19.4766032
34.499391,20.5182845,19.470397,1.02366378,19.470397,0,19.469867
34.509883,19.3907194,19.4636668,-0.270087708,19.4636668,0,19.4631341
34.520374,19.7989899,19.4569412,0.584849278,19.4569412,0,19.4564058
34.530866,18.1934054,19.4502189,-1.12107694,19.4502189,0,19.4496808
34.541358,19.1833261,19.4435005,-0.510072978,19.4435005,0,19.4429596
34.551849,19.5448203,19.4367868,0.328684544,19.4367868,0,19.4362431
34.562341,18.8414437,19.4300763,-0.767223952,19.4300763,0,19.4295298
34.572832,19.7230829,19.4233704,0.547460097,19.4233704,0,19.422821
34.583324,19.3907194,19.4166677,-0.161084821,19.4166677,0,19.4161155
34.593816,19.3649167,19.4099691,-0.212255347,19.4099691,0,19.409414
34.604307,19.1049732,19.4032749,-0.54617009,19.4032749,0,19.402717
34.614799,19.6977156,19.3965841,0.548754495,19.3965841,0,19.3960232
34.62529,19.1833261,19.3898978,-0.454501639,19.3898978,0,19.389334
34.635782,18.8148877,19.3832148,-0.753874737,19.3832148,0,19.382648
34.646274,18.5202592,19.3765358,-0.925352143,19.3765358,0,19.375966
34.656765,19.6977156,19.3698612,0.572585679,19.3698612,0,19.3692884
34.667257,19,19.36319,-0.602652468,19.36319,0,19.3626142
34.677748,18.627936,19.3565233,-0.853573245,19.3565233,0,19.3559444
34.68824,18.0277564,19.3498599,-1.14982759,19.3498599,0,19.3492779
34.698732,19.2093727,19.3432003,-0.365824591,19.3432003,0,19.3426153
34.709223,19.7737199,19.3365454,0.661191784,19.3365454,0,19.3359572
34.719715,19.6214169,19.3298936,0.539928914,19.3298936,0,19.3293023
34.730206,19.8494332,19.3232465,0.725387339,19.3232465,0,19.3226519
34.740698,19.3390796,19.3166025,0.149923585,19.3166025,0,19.3160048
34.75119,19.5448203,19.3099625,0.484621288,19.3099625,0,19.3093616
34.761681,18.493242,19.303327,-0.900047207,19.303327,0,19.3027228
34.772173,19.3390796,19.2966947,0.205875869,19.2966947,0,19.2960873
34.782664,19.4164878,19.290067,0.355557085,19.290067,0,19.2894562
34.793156,19.8997487,19.2834425,0.785051734,19.2834425,0,19.2828284
34.803648,19.9749844,19.2768219,0.835561152,19.2768219,0,19.2762045
34.814139,17.7482393,19.2702058,-1.23368005,19.2702058,0,19.269585
34.824631,19.4164878,19.263593,0.391017718,19.263593,0,19.2629688
34.835122,19.0262976,19.2569846,-0.480298921,19.2569846,0,19.256357
34.845614,18.1107703,19.2503795,-1.06752483,19.2503795,0,19.2497484
34.856106,19.1311265,19.2437783,-0.335636486,19.2437783,0,19.2431437
34.866597,19.8997487,19.2371816,0.81398228,19.2371816,0,19.2365435
34.877089,18.6547581,19.2305881,-0.758834627,19.2305881,0,19.2299465
34.88758,18.3303028,19.2239991,-0.945355126,19.2239991,0,19.2233539
34.898072,19,19.2174133,-0.466276018,19.2174133,0,19.2167645
34.908564,19.6723156,19.2108314,0.679326254,19.2108314,0,19.210179
34.919055,18.761663,19.204254,-0.665275091,19.204254,0,19.2035979
34.929547,19.5703858,19.1976798,0.610496524,19.1976798,0,19.19702
34.940038,19.2353841,19.1911101,0.210413879,19.1911101,0,19.1904466
34.95053,18.8944436,19.1845436,-0.538609258,19.1845436,0,19.1838763
34.961022,19.2613603,19.1779809,0.288754873,19.1779809,0,19.1773099
34.971513,18.7082869,19.1714227,-0.680540807,19.1714227,0,19.1707479
34.982005,19.1049732,19.1648678,-0.2447337,19.1648678,0,19.1641891
34.992496,19.2613603,19.1583173,0.321003157,19.1583173,0,19.1576347
35.002988,19.4679223,19.15177,0.562274278,19.15177,0,19.1510835
35.01348,19.5703858,19.1452265,0.652042386,19.1452265,0,19.1445362
35.023971,20.3469899,19.1386875,1.0992281,19.1386875,0,19.1379932
35.034463,19.1572441,19.1321517,0.158405569,19.1321517,0,19.1314534
35.044954,18.493242,19.1256204,-0.795222228,19.1256204,0,19.1249181
35.055446,18.9208879,19.1190923,-0.445201462,19.1190923,0,19.1183859
35.065938,19.1311265,19.112568,0.136229604,19.112568,0,19.1118574
35.076429,18.4390889,19.1060481,-0.816675693,19.1060481,0,19.1053335
35.086921,19.3132079,19.0995314,0.462251529,19.0995314,0,19.0988126
35.097412,19.3649167,19.0930192,0.521437931,19.0930192,0,19.0922962
35.107904,17.9164729,19.0865102,-1.08168263,19.0865102,0,19.0857829
35.118396,18.3847763,19.080005,-0.83380373,19.080005,0,19.0792734
35.128887,19.078784,19.0735042,0.0726625165,19.0735042,0,19.0727683
35.139379,19.7230829,19.0670066,0.809985389,19.0670066,0,19.0662664
35.14987,18.8944436,19.0605134,-0.407516622,19.0605134,0,19.0597688
35.160362,18.9472953,19.0540234,-0.326692702,19.0540234,0,19.0532744
35.170854,19.1572441,19.0475373,0.331220162,19.0475373,0,19.0467838
35.181345,19.5192213,19.0410555,0.69149533,19.0410555,0,19.0402975
35.191837,19.2873015,19.0345769,0.502717213,19.0345769,0,19.0338144
35.202328,18.7082869,19.0281028,-0.565522614,19.0281028,0,19.0273357
35.21282,19.3907194,19.0216318,0.607525848,19.0216318,0,19.0208601
35.223312,18.973666,19.0151646,-0.203712095,19.0151646,0,19.0143882
35.233803,19.1572441,19.0087018,0.385411819,19.0087018,0,19.0079207
35.244295,19.1311265,19.0022422,0.35900459,19.0022422,0,19.0014564
35.254786,18.6010752,18.995787,-0.628260871,18.995787,0,18.9949964
35.265278,18.1659021,18.9893349,-0.907431975,18.9893349,0,18.9885395
35.27577,19.1833261,18.9828866,0.447704639,18.9828866,0,18.9820864
35.286261,19.0262976,18.9764428,0.223281907,18.9764428,0,18.9756376
35.296753,18.8414437,18.9700021,-0.358550406,18.9700021,0,18.969192
35.307244,18.4390889,18.9635658,-0.724207736,18.9635658,0,18.9627506
35.317736,18.761663,18.9571326,-0.442119401,18.9571326,0,18.9563125
35.328228,19.3132079,18.9507032,0.602083628,18.9507032,0,18.949878
35.338719,19,18.9442782,0.236054612,18.9442782,0,18.9434479
35.349211,18.6010752,18.9378564,-0.580328474,18.9378564,0,18.9370208
35.359702,18.8679623,18.9314389,-0.251945716,18.9314389,0,18.9305981
35.370194,19.4422221,18.9250246,0.719164447,18.9250246,0,18.9241785
35.380686,18.6815417,18.918614,-0.486900758,18.918614,0,18.9177627
35.391177,17.7763888,18.9122079,-1.06574811,18.9122079,0,18.9113511
35.401669,19.5192213,18.9058048,0.783209085,18.9058048,0,18.9049427
35.41216,18.8148877,18.8994062,-0.290720543,18.8994062,0,18.8985385
35.422652,19.3132079,18.8930106,0.648226259,18.8930106,0,18.8921375
35.433144,19.4679223,18.8866189,0.762432601,18.8866189,0,18.8857402
35.443635,19.4679223,18.8802315,0.766609994,18.8802315,0,18.8793471
35.454127,18.7882942,18.8738472,-0.292494362,18.8738472,0,18.8729572
35.464618,19.5703858,18.8674673,0.838402366,18.8674673,0,18.8665715
35.47511,19.7989899,18.8610905,0.968452058,18.8610905,0,18.860189
35.485602,18.761663,18.8547174,-0.305048207,18.8547174,0,18.8538101
35.496093,19.0262976,18.8483488,0.421839816,18.8483488,0,18.8474355
35.506585,19.4422221,18.8419832,0.774750857,18.8419832,0,18.841064
35.517076,19.5448203,18.835622,0.842139117,18.835622,0,18.8346968
35.527568,18,18.8292639,-0.910639287,18.8292639,0,18.8283327
35.53806,17.9722008,18.8229096,-0.922338771,18.8229096,0,18.8219722
35.548551,18.6815417,18.8165596,-0.367447768,18.8165596,0,18.8156161
35.559043,18.4661853,18.8102127,-0.586538453,18.8102127,0,18.8092629
35.569534,18.6815417,18.8038701,-0.349754809,18.8038701,0,18.8029141
35.580026,18.547237,18.7975307,-0.500293613,18.7975307,0,18.7965683
35.590518,19.2613603,18.791195,0.685686005,18.791195,0,18.7902262
35.601009,17.9443584,18.7848636,-0.916790688,18.7848636,0,18.7838884
35.611501,18.0554701,18.7785354,-0.850332446,18.7785354,0,18.7775536
35.621992,18.5741756,18.7722114,-0.445012133,18.7722114,0,18.771223
35.632484,18.734994,18.7658906,-0.175774304,18.7658906,0,18.7648956
35.642976,19.1311265,18.7595735,0.60955145,18.7595735,0,18.7585717
35.653467,18.4119526,18.7532607,-0.584215779,18.7532607,0,18.7522521
35.663959,17.4928557,18.746951,-1.11986399,18.746951,0,18.7459356
35.67445,18.8944436,18.7406457,0.392170808,18.7406457,0,18.7396233
35.684942,17.5214155,18.7343434,-1.10133009,18.7343434,0,18.7333141
35.695434,18.0831413,18.7280449,-0.803058887,18.7280449,0,18.7270085
35.705925,19.2093727,18.7217507,0.698299398,18.7217507,18.7207071,18.7207071
35.716417,18.5202592,18.7154614,-0.44181697,18.7154595,18.7144106,18.7144087
35.726908,18.761663,18.7091984,0.229051688,18.7091727,18.7081403,18.7081146
35.7374,19.2613603,18.7030189,0.747222461,18.702889,18.7019535,18.7018236
35.747892,18.3847763,18.6969716,-0.558744431,18.696609,18.6958988,18.6955361
35.758383,18.761663,18.6911314,0.265577868,18.6903333,18.6900511,18.6892529
35.768875,18.1107703,18.6857114,-0.758248691,18.6840606,18.6846235,18.6829727
35.779366,19.1833261,18.6811246,0.708661795,18.6777923,18.6800291,18.6766967
35.789858,18.761663,18.6767628,0.291376476,18.6715271,18.6756597,18.6704237
35.80035,18.627936,18.6705096,-0.206333783,18.6652656,18.6693988,18.6641544
35.810841,19.078784,18.6642608,0.643834786,18.6590083,18.663142,18.6578892
35.821333,19,18.6580151,0.584794778,18.6527542,18.6568883,18.6516271
35.831824,17.8885438,18.6517736,-0.873630254,18.6465043,18.6506388,18.6453692
35.842316,19.1833261,18.6455353,0.733342191,18.6402575,18.6443924,18.6391143
35.852808,18.5741756,18.6393007,-0.255196186,18.6340145,18.6381495,18.6328629
35.863299,18.6010752,18.6330704,-0.17887192,18.6277757,18.6319109,18.6266158
35.873791,19.3132079,18.6268432,0.828471314,18.6215399,18.6256753,18.6203717
35.884282,18.973666,18.6206203,0.594176466,18.6153085,18.6194439,18.6141318
35.894774,19.2873015,18.6144005,0.820305453,18.6090802,18.6132155,18.6078948
35.905266,17.5783958,18.6081844,-1.01478498,18.6028555,18.6069907,18.6016615
35.915757,18.6547581,18.6019726,0.22975103,18.5966351,18.6007701,18.5954324
35.926249,17.7763888,18.5957639,-0.905193365,18.5904178,18.5945526,18.5892062
35.93674,18.4390889,18.5895594,-0.387905308,18.5842048,18.5883392,18.5829842
35.947232,18.3847763,18.5833581,-0.445625195,18.5779949,18.5821288,18.5767652
35.957724,18.627936,18.5771605,0.225334213,18.5717886,18.575922,18.5705498
35.968215,18.5202592,18.5709672,-0.225184338,18.5655866,18.5697194,18.5643385
35.978707,19.1572441,18.5647769,0.769718867,18.5593877,18.5635199,18.5581302
35.989198,18.4119526,18.558591,-0.382933845,18.553193,18.5573244,18.5519261
35.99969,17.691806,18.5524081,-0.927686423,18.5470014,18.551132,18.545725
36.010182,18.3575598,18.5462289,-0.434360674,18.5408135,18.5449432,18.5395274
36.020673,18.2756669,18.5400541,-0.514185933,18.5346299,18.5387585,18.533334
36.031165,19.1311265,18.5338823,0.772815763,18.5284493,18.5325769,18.5271435
36.041656,17.8605711,18.5277148,-0.816788621,18.522273,18.5263994,18.5209572
36.052148,18.6547581,18.5215503,0.3649764,18.5160998,18.5202248,18.5147739
36.06264,18.761663,18.5153896,0.496259445,18.5099302,18.5140539,18.5085941
36.073131,18.4661853,18.5092331,-0.20747971,18.5037649,18.5078871,18.5024185
36.083623,18.4661853,18.5030798,-0.192079327,18.4976027,18.5017233,18.4962458
36.094114,17.7200451,18.4969307,-0.881411108,18.4914447,18.4955636,18.4900773
36.104606,18.4661853,18.4907847,-0.156841894,18.4852898,18.489407,18.4839117
36.115098,18.3303028,18.4846424,-0.392860789,18.4791386,18.4832538,18.4777497
36.125589,18.973666,18.4785043,0.703677218,18.4729916,18.4771049,18.4715917
36.136081,17.9443584,18.4723694,-0.726643613,18.4668477,18.4709588,18.4654368
36.146572,18.2208672,18.4662387,-0.495349919,18.4607081,18.464817,18.4592859
36.157064,18.1934054,18.4601111,-0.516435587,18.4545715,18.4586781,18.453138
36.167556,18.6010752,18.4539872,0.383520574,18.4484386,18.4525427,18.4469936
36.178047,18.1383571,18.4478676,-0.556336604,18.4423099,18.4464115,18.4408534
36.188539,18.1383571,18.441751,-0.55081201,18.4361843,18.4402832,18.4347161
36.19903,17.175564,18.4356387,-1.12253049,18.4300629,18.4341591,18.4285829
36.209522,17.8325545,18.4295295,-0.772641602,18.4239447,18.4280379,18.4224526
36.220014,18.8414437,18.423424,0.646544387,18.4178301,18.4219203,18.4163258
36.230505,17.691806,18.4173228,-0.851772726,18.4117197,18.4158067,18.4102032
36.240997,18.1383571,18.4112246,-0.522367202,18.4056124,18.4096962,18.4040834
36.251488,18.2208672,18.4051308,-0.429259354,18.3995093,18.4035897,18.3979678
36.26198,18.1659021,18.39904,-0.48284349,18.3934094,18.3974862,18.3918551
36.272472,18.1659021,18.3929528,-0.476498399,18.3873131,18.3913862,18.3857459
36.282963,17.6635217,18.38687,-0.850498832,18.381221,18.3852903,18.3796408
36.293455,18.493242,18.3807902,0.335338284,18.375132,18.3791973,18.3735386
36.303946,17.4928557,18.3747148,-0.939073515,18.3690472,18.3731085,18.3674405
36.314438,18.6547581,18.3686424,0.534897885,18.3629656,18.3670226,18.3613453
36.32493,18.973666,18.3625736,0.781723937,18.3568876,18.3609402,18.3552535
36.335421,18.973666,18.3565092,0.785593257,18.3508138,18.3548618,18.3491659
36.345913,18.7882942,18.3504478,0.661699615,18.3447431,18.3487865,18.3430812
36.356404,18.1107703,18.3443908,-0.483343028,18.3386766,18.3427152,18.3370005
36.366896,18.7082869,18.3383368,0.608235282,18.3326133,18.3366468,18.3309228
36.377388,17.9722008,18.3322865,-0.600071429,18.3265536,18.3305819,18.3248485
36.387879,18.5202592,18.3262404,0.440475585,18.3204981,18.3245211,18.3187783
36.398371,17.5499288,18.3201975,-0.877649549,18.3144458,18.3184632,18.312711
36.408862,17.6068169,18.3141588,-0.84103625,18.3083976,18.3124094,18.3066477
36.419354,17.2336879,18.3081233,-1.03654973,18.3023526,18.3063586,18.3005873
36.429846,19.0262976,18.3020914,0.851003045,18.2963112,18.3003112,18.2945304
36.440337,18.6010752,18.2960638,0.552278405,18.2902741,18.2942678,18.2884776
36.450829,17.9443584,18.2900393,-0.587946311,18.2842401,18.2882274,18.2824276
36.46132,17.9164729,18.2840191,-0.6062559,18.2782103,18.2821911,18.2763817
36.471812,18.734994,18.278002,0.676011849,18.2721836,18.2761576,18.2703387
36.482304,18.2208672,18.2719886,-0.226100428,18.2661606,18.2701276,18.2642991
36.492795,17.9722008,18.2659794,-0.542013524,18.2601418,18.2641017,18.2582635
36.503287,17.7200451,18.2599734,-0.7347981,18.2541262,18.2580787,18.2522309
36.513778,18.3303028,18.2539716,0.2762809,18.2481148,18.2520597,18.2462022
36.52427,18.3030052,18.247973,0.23458942,18.2421065,18.2460436,18.2401765
36.534762,18.1659021,18.2419781,-0.275818739,18.2361018,18.240031,18.2341541
36.545253,17.3781472,18.2359875,-0.926196663,18.2301015,18.2340224,18.2281358
36.555745,17.8885438,18.2299999,-0.584342473,18.2241042,18.2280168,18.2221204
36.566236,18.6010752,18.2240167,0.614050913,18.2181112,18.2220151,18.216109
36.576728,17.8325545,18.2180366,-0.620872066,18.2121214,18.2160163,18.2101004
36.58722,18.1934054,18.2120602,-0.136582741,18.2061352,18.210021,18.2040953
36.597711,18.1383571,18.2060881,-0.260251805,18.2001533,18.2040298,18.1980942
36.608203,17.9722008,18.2001192,-0.477408051,18.1941745,18.1980414,18.1920959
36.618694,18.2756669,18.1941545,0.285503656,18.1881999,18.192057,18.1861017
36.629186,18.2756669,18.188193,0.295759768,18.1822285,18.1860755,18.1801103
36.639678,18.3303028,18.1822353,0.38479542,18.1762609,18.1800974,18.1741223
36.650169,18.8679623,18.1762818,0.831673301,18.1702974,18.1741234,18.1681383
36.660661,17.9164729,18.1703315,-0.503843825,18.1643372,18.1681522,18.1621572
36.671152,17.4642492,18.1643855,-0.836741451,18.1583812,18.162185,18.15618
36.681644,19.1049732,18.1584426,0.972898024,18.1524283,18.1562207,18.1502057
36.692136,18.8944436,18.1525035,0.861359459,18.1464792,18.1502599,18.1442348
36.702627,17.8325545,18.1465687,-0.560369717,18.1405344,18.144303,18.1382679
36.713119,18.3575598,18.1406371,0.465749542,18.1345927,18.138349,18.1323039
36.72361,18.1383571,18.1347098,0.0603930423,18.1286554,18.132399,18.1263438
36.734102,19.0525589,18.1287857,0.961131183,18.1227212,18.1264518,18.1203865
36.744594,17.4068952,18.1228654,-0.846150232,18.1167907,18.1205081,18.1144326
36.755085,18.1107703,18.1169494,-0.0786073907,18.1108646,18.1145684,18.1084827
36.765577,17.175564,18.1110366,-0.967198307,18.1049416,18.1086315,18.1025357
36.776068,17.691806,18.1051281,-0.64290134,18.099023,18.1026986,18.0965926
36.78656,18,18.0992229,-0.314996676,18.0931075,18.0967685,18.0906523
36.797052,18.734994,18.0933215,0.801044658,18.0871958,18.0908418,18.0847154
36.807543,17.8044938,18.0874244,-0.53191215,18.0812885,18.0849192,18.0787824
36.818035,17.9443584,18.0815305,-0.370367437,18.0753843,18.0789993,18.0728523
36.828526,17.7763888,18.075641,-0.547039436,18.0694845,18.0730835,18.0669261
36.839018,17.6635217,18.0697547,-0.637364095,18.0635879,18.0671704,18.0610028
36.84951,18.2208672,18.0638723,0.396225794,18.0576952,18.0612608,18.0550828
36.860001,19.1311265,18.0579942,1.03592097,18.0518067,18.0553552,18.0491668
36.870493,17.4355958,18.0521194,-0.785190197,18.0459215,18.0494523,18.0432535
36.880984,17.1464282,18.046249,-0.948588855,18.0400407,18.0435534,18.0373442
36.891476,17.4068952,18.0403819,-0.795918782,18.0341632,18.0376574,18.0314377
36.901968,17.4068952,18.0345186,-0.792226882,18.0282894,18.0317647,18.0255346
36.912459,17.1464282,18.0286598,-0.939271823,18.0224201,18.025876,18.0196354
36.922951,17.4928557,18.0228042,-0.727975628,18.016554,18.0199902,18.013739
36.933442,18.1659021,18.0169531,0.385939183,18.0106924,18.0141082,18.0078465
36.943934,17.4068952,18.0111053,-0.777309513,18.004834,18.0082291,18.0019569
36.954426,18.1107703,18.0052613,0.324821383,17.9989795,18.0023534,17.9960705
36.964917,18.0554701,17.9994219,0.236745023,17.9931295,17.9964815,17.9901881
36.975409,17.8044938,17.9935858,-0.434847039,17.9872827,17.9906126,17.9843085
36.9859,17.5499288,17.9877541,-0.661683717,17.9814405,17.9847475,17.9784328
36.996392,18.3030052,17.9819258,0.566638667,17.9756015,17.9788852,17.9725599
37.006884,17.4355958,17.9761015,-0.735190944,17.9697665,17.9730264,17.9666903
37.017375,17.2626765,17.9702817,-0.841192698,17.9639359,17.9671714,17.9608246
37.027867,18.3303028,17.9644652,0.604845074,17.9581088,17.9613193,17.9549617
37.038358,18.627936,17.9586533,0.818097006,17.9522861,17.955471,17.9491027
37.04885,17.7482393,17.9528448,-0.452333346,17.9464668,17.9496256,17.9432465
37.059342,17.5499288,17.9470403,-0.630167857,17.9406515,17.9437835,17.9373936
37.069833,17.7763888,17.9412404,-0.406019116,17.9348407,17.9379453,17.9315445
37.080325,18.1107703,17.9354439,0.418719955,17.9290334,17.93211,17.9256983
37.090816,17.0880075,17.929652,-0.91741184,17.9232306,17.9262785,17.919856
37.101308,18.2756669,17.9238636,0.593130102,17.9174313,17.9204498,17.9140164
37.1118,16.7032931,17.9180792,-1.10217336,17.9116361,17.9146245,17.9081801
37.122291,17.691806,17.9122995,-0.469567323,17.9058454,17.9088031,17.9023477
37.132783,18.761663,17.9065233,0.924737665,17.9000582,17.9029844,17.8965181
37.143274,17.2336879,17.9007517,-0.816739745,17.8942757,17.8971697,17.8906923
37.153766,17.9164729,17.8949838,0.146591572,17.8884967,17.8913577,17.8848693
37.164258,18.2208672,17.8892199,0.575888198,17.8827218,17.8855491,17.8790496
37.174749,17.7200451,17.8834608,-0.40424703,17.8769516,17.8797443,17.8732338
37.185241,17.4642492,17.8777053,-0.64300552,17.871185,17.8739424,17.8674207
37.195732,18.2482876,17.8719545,0.613459917,17.8654231,17.8681443,17.8616115
37.206224,18.3030052,17.8662074,0.66090681,17.8596649,17.862349,17.855805
37.216716,17.5783958,17.8604645,-0.531101392,17.8539108,17.856557,17.8500019
37.227207,18.1659021,17.8547264,0.557831242,17.8481616,17.8507689,17.8442025
37.237699,17.7482393,17.8489921,-0.317415679,17.842416,17.8449835,17.8384059
37.24819,16.9705627,17.8432625,-0.934184021,17.8366752,17.839202,17.8326132
37.258682,17.8044938,17.8375368,-0.181777221,17.8309382,17.8334233,17.8268232
37.269174,17.5214155,17.8318154,-0.557135426,17.8252055,17.8276479,17.8210365
37.279665,18.1383571,17.8260988,0.558800779,17.8194777,17.8218764,17.8152536
37.290157,17.7482393,17.8203862,-0.268601592,17.8137537,17.8161076,17.8094735
37.300648,18.2482876,17.8146785,0.658490045,17.8080346,17.8103427,17.8036972
37.31114,18.0277564,17.8089746,0.467741106,17.8023194,17.8045805,17.7979236
37.321632,17.0587221,17.8032753,-0.862874949,17.7966086,17.7988216,17.7921533
37.332123,18.2756669,17.797581,0.691437561,17.7909029,17.7930666,17.7863868
37.342615,17.3493516,17.7918907,-0.665236114,17.7852011,17.7873143,17.7806231
37.353106,17.8044938,17.7862054,0.135234515,17.7795044,17.7815659,17.7748631
37.363598,16.8226038,17.7805243,-0.978734095,17.7738117,17.7758202,17.7691059
37.37409,17.6068169,17.7748477,-0.40991568,17.7681236,17.7700779,17.763352
37.384581,17.9443584,17.7691764,0.418547563,17.7624407,17.7643393,17.7576018
37.395073,17.1172428,17.7635092,-0.803906976,17.756762,17.7586035,17.7518544
37.405564,17.3493516,17.7578473,-0.639136688,17.7510884,17.7528715,17.7461108
37.416056,17.0293864,17.7521896,-0.850178352,17.7454191,17.7471423,17.7403699
37.426548,17.7200451,17.7465367,-0.162762336,17.7397546,17.7414163,17.7346322
37.437039,17.6351921,17.7408892,-0.325110993,17.7340954,17.7356942,17.7288984
37.447531,17.4642492,17.7352461,-0.520573654,17.7284406,17.7299748,17.7231672
37.458022,17.9443584,17.7296085,0.46341122,17.7227912,17.7242592,17.7174399
37.468514,18,17.7239753,0.525380532,17.7171463,17.7185464,17.7117152
37.479006,17.6068169,17.7183471,-0.3339615,17.7115063,17.7128368,17.7059938
37.489497,17.3781472,17.7127246,-0.578426677,17.705872,17.707131,17.7002762
37.499989,18.1383571,17.7071067,0.656696623,17.7002422,17.701428,17.6945613
37.51048,17.8885438,17.7014945,0.432491991,17.6946181,17.6957288,17.6888502
37.520972,17.7482393,17.695887,0.22880632,17.6889988,17.6900322,17.6831417
37.531464,17.7763888,17.6902848,0.29343481,17.6833847,17.684339,17.6774365
37.541955,17.2916165,17.6846886,-0.626954635,17.6777765,17.6786495,17.671735
37.552447,17.8325545,17.6790972,0.391736247,17.6721731,17.6729628,17.6660363
37.562938,17.3205081,17.6735119,-0.594141231,17.6665758,17.6672798,17.6603413
37.57343,17.8325545,17.6679316,0.405737502,17.6609835,17.6615996,17.654649
37.583922,17.5783958,17.6623569,-0.289760401,17.6553968,17.6559226,17.6489599
37.594413,18.4119526,17.6567885,0.869001802,17.6498163,17.6502494,17.6432746
37.604905,17.8605711,17.6512254,0.457543161,17.644241,17.6445789,17.637592
37.615396,18.0554701,17.6456686,0.640157387,17.6386721,17.6389122,17.6319131
37.625888,18.8148877,17.6401173,1.08386828,17.6331086,17.6332482,17.6262369
37.63638,17.6351921,17.634572,0.0249014764,17.6275512,17.6275875,17.6205639
37.646871,18.1934054,17.6290334,0.751246968,17.6220004,17.6219305,17.6148946
37.657363,17.0293864,17.6235005,-0.770787983,17.6164552,17.6162762,17.609228
37.667854,16.9410743,17.6179744,-0.822739377,17.6109169,17.6106257,17.6035652
37.678346,17.7763888,17.6124543,0.404888317,17.6053845,17.6049779,17.597905
37.688838,17.7200451,17.6069407,0.336310068,17.5998585,17.5993333,17.5922481
37.699329,17.3493516,17.6014343,-0.502078374,17.5943398,17.5936924,17.5865948
37.709821,16.7630546,17.5959341,-0.912622312,17.5888272,17.5880543,17.5809442
37.720312,17.2626765,17.5904414,-0.572507511,17.5833221,17.5824199,17.5752974
37.730804,16.3401346,17.5849551,-1.11571523,17.5778234,17.5767882,17.5696532
37.741296,17.6351921,17.579476,0.236042489,17.5723319,17.5711597,17.5640122
37.751787,17.8605711,17.5740048,0.535318895,17.5668482,17.565535,17.5583749
37.762279,17.6068169,17.5685405,0.195643561,17.5613714,17.559913,17.5527403
37.77277,17.0587221,17.5630843,-0.710184593,17.5559026,17.5542947,17.5471094
37.783262,17.8605711,17.5576353,0.550396019,17.5504411,17.548679,17.5414812
37.793754,16.9115345,17.5521943,-0.800412264,17.5449875,17.5430666,17.5358561
37.804245,17.0587221,17.5467619,-0.698598483,17.5395426,17.537458,17.5302347
37.814737,18.2756669,17.5413374,0.856930286,17.5341053,17.531852,17.524616
37.825228,17.5214155,17.5359218,-0.120442248,17.5286771,17.5262497,17.519001
37.83572,17.8885438,17.5305144,0.598355573,17.523257,17.5206501,17.5133886
37.846212,17.8325545,17.525116,0.554471391,17.5178459,17.5150537,17.5077794
37.856703,17.4068952,17.5197272,-0.335904753,17.5124443,17.509461,17.5021739
37.867195,16.6132477,17.5143473,-0.949262634,17.5070516,17.503871,17.496571
37.877686,17.1172428,17.5089775,-0.625887162,17.5016691,17.4982848,17.4909719
37.888178,17.2046505,17.5036171,-0.546778383,17.4962959,17.4927011,17.4853753
37.89867,17.4068952,17.4982669,-0.30227761,17.4909328,17.4871207,17.4797819
37.909161,18,17.4929277,0.712090075,17.4855807,17.481544,17.4741922
37.919653,17.2336879,17.4875988,-0.503895665,17.4802389,17.4759699,17.4686051
37.930144,17.7482393,17.4822814,0.515711065,17.4749086,17.4703996,17.4630217
37.940636,17.3205081,17.4769751,-0.395559069,17.4695893,17.4648319,17.457441
37.951128,18,17.4716805,0.726855924,17.4642817,17.4592674,17.4518633
37.961619,16.7332005,17.4663986,-0.85626984,17.4589868,17.4537066,17.4462894
37.972111,16.8226038,17.4611288,-0.799077543,17.4537039,17.4481484,17.4407181
37.982602,17.175564,17.4558725,-0.529441624,17.4484346,17.4425939,17.4351504
37.993094,17.9164729,17.4506291,0.682527452,17.4431782,17.4370421,17.4295853
38.003586,16.7928556,17.4453998,-0.807802042,17.4379357,17.4314935,17.4240234
38.014077,17.0587221,17.4401853,-0.617627085,17.4327081,17.4259485,17.4184652
38.024569,16.9410743,17.4349854,-0.702788038,17.427495,17.4204062,17.4129095
38.03506,17.8325545,17.4298015,0.634628268,17.4222979,17.4148675,17.4073575
38.045552,17.5214155,17.4246332,0.311098474,17.4171164,17.4093315,17.4018081
38.056044,17.0880075,17.4194817,-0.575738006,17.4119517,17.4037987,17.3962619
38.066535,17.0293864,17.4143482,-0.620452954,17.4068049,17.3982695,17.3907193
38.077027,17.2916165,17.4092324,-0.342951832,17.4016758,17.392743,17.3851793
38.087518,17.8605711,17.4041361,0.675599764,17.3965662,17.3872202,17.3796429
38.09801,17.3493516,17.399059,-0.22295158,17.3914758,17.3816999,17.3741091
38.108502,17.4068952,17.3940025,0.113545749,17.386406,17.3761829,17.3685785
38.118993,17.6068169,17.3889682,0.466742637,17.3813582,17.3706695,17.3630515
38.129485,18.0831413,17.3839559,0.83617309,17.3763325,17.3651587,17.3575271
38.139976,17.5499288,17.3789677,0.413474396,17.3713309,17.3596516,17.3520063
38.150468,17.8044938,17.3740038,0.656117379,17.3663535,17.3541471,17.3464881
38.16096,18.3030052,17.3690659,0.96640537,17.3614022,17.3486457,17.340973
38.171451,17.7763888,17.3641557,0.64205384,17.3564785,17.343148,17.3354615
38.181943,18.2482876,17.3592737,0.942875318,17.351583,17.3376529,17.3299526
38.192434,17.5214155,17.3544224,0.408647877,17.3467181,17.3321615,17.3244474
38.202926,17.3205081,17.3496023,-0.170570433,17.3418845,17.3266727,17.3189447
38.213418,17.2916165,17.3448158,-0.230649859,17.3370845,17.321187,17.3134451
38.223909,17.7482393,17.3400651,0.638885145,17.3323202,17.315705,17.3079491
38.234401,17.5214155,17.3353513,0.431351512,17.3275928,17.3102255,17.3024557
38.244892,16.8522995,17.3306776,-0.691648759,17.3229054,17.3047497,17.2969659
38.255384,17.0293864,17.3260452,-0.544663966,17.3182594,17.2992765,17.2914787
38.265876,17.4928557,17.3214573,0.414002911,17.3136578,17.2938065,17.2859945
38.276367,17.6351921,17.3169169,0.564158795,17.3091038,17.28834,17.280514
38.286859,17.4642492,17.3124263,0.389644557,17.3045996,17.2828762,17.275036
38.29735,16.643317,17.3079895,-0.815274498,17.300149,17.277416,17.2695617
38.307842,18.7082869,17.3036091,1.18519105,17.295755,17.2719584,17.2640898
38.318334,17.3781472,17.2992895,0.280816202,17.2914216,17.2665039,17.2586211
38.328825,17.7763888,17.2950351,0.693796612,17.2871536,17.261053,17.253156
38.339317,17.3493516,17.2908498,0.241871449,17.2829546,17.2556047,17.2476934
38.349808,17.4355958,17.2867393,0.385819247,17.2788304,17.25016,17.2422344
38.3603,17.1172428,17.2827083,-0.406774547,17.2747857,17.2447179,17.2367779
38.370792,17.5499288,17.2787632,0.520735583,17.270827,17.239279,17.2313245
38.381283,17,17.274911,-0.524319584,17.2669611,17.2338436,17.2258747
38.391775,17.175564,17.2711582,-0.309183111,17.2631947,17.2284108,17.2204275
38.402266,17.8885438,17.2675136,0.788054712,17.2595364,17.2229816,17.2149838
38.412758,17.2916165,17.2639853,0.166226311,17.2559944,17.217555,17.2095426
38.42325,16.9705627,17.2605835,-0.538535741,17.2525791,17.2121315,17.2041045
38.433741,17.6068169,17.2573195,0.591183048,17.2493015,17.2067116,17.19867
38.444233,17.4928557,17.2542047,0.488519134,17.2461732,17.2012943,17.193238
38.454724,16.5227116,17.2512535,-0.853546629,17.2432085,17.1958805,17.1878096
38.465216,18.4661853,17.2484803,1.1034967,17.2404219,17.1904694,17.1823837
38.475708,17.3205081,17.2459026,0.273140024,17.2378308,17.1850613,17.1769609
38.486199,17.2626765,17.2435397,0.13833594,17.2354546,17.1796568,17.1715416
38.496691,17.6068169,17.2414127,0.604486706,17.2333144,17.1742549,17.1661249
38.507182,17.4642492,17.2395465,0.474028166,17.231435,17.1688565,17.1607117
38.517674,17.3205081,17.2379685,0.287297066,17.229844,17.1634608,17.155301
38.528166,17.0587221,17.2367104,-0.421886568,17.228573,17.1580681,17.1498934
38.538657,16.9705627,17.2358084,-0.515020032,17.2276582,17.1526789,17.1444893
38.549149,17.6635217,17.2353036,0.654383745,17.2271409,17.1472924,17.1390877
38.55964,17.7200451,17.2352439,0.696276705,17.2270687,17.1419094,17.1336897
38.570132,17.2046505,17.2356842,-0.176163621,17.2274968,17.1365289,17.1282942
38.580624,16.4012195,17.2366884,-0.914039879,17.228489,17.1311516,17.1229017
38.591115,17.9443584,17.2383309,0.84025445,17.2301198,17.1257778,17.1175127
38.601607,16.673332,17.2406995,-0.753237983,17.232477,17.1204065,17.1121263
38.612098,17.5783958,17.2438966,0.5783591,17.2356631,17.1150388,17.1067434
38.62259,16.7928556,17.2480449,-0.6746772,17.2398009,17.1096737,17.101363
38.633082,17.4928557,17.2532899,0.48945457,17.2450358,17.1043116,17.0959856
38.643573,17.691806,17.2598056,0.657267386,17.251542,17.0989531,17.0906117
38.654065,16.7032931,17.2678046,-0.751339786,17.2595322,17.0935971,17.0852404
38.664556,17.4355958,17.2775428,0.397558764,17.2692624,17.0882447,17.0798725
38.675048,17.2626765,17.2893386,-0.163285271,17.2810512,17.0828948,17.0745072
38.68554,17.175564,17.3035836,-0.357798176,17.2952903,17.0775479,17.0691448
38.696031,17.691806,17.3207678,0.609129082,17.3124701,17.0722046,17.063786
38.706523,17.1172428,17.3415174,-0.473576451,17.3332169,17.0668638,17.0584297
38.717014,17.3493516,17.3666281,-0.131440127,17.3583268,17.0615266,17.0530769
38.727506,17.5783958,17.3971466,0.425733709,17.3888472,17.0561919,17.0477265
38.737998,16.6132477,17.4344622,-0.906208825,17.4261678,17.0508603,17.0423792
38.748489,15.9373775,17.4805134,-1.24223022,17.4722281,17.0455321,17.0370354
38.758981,18.0831413,17.5382766,0.738149553,17.5300059,17.0402065,17.031694
38.769472,17.2916165,17.6128991,-0.566818029,17.6046508,17.0348845,17.0263562
38.779964,17.1464282,17.7143642,-0.753615296,17.7061505,17.0295649,17.0210208
38.790456,17.8044938,17.8622359,-0.240295794,17.8540776,17.0242484,17.0156884
38.800947,17.6068169,18.0920575,-0.696592164,18.0839905,17.0189354,17.0103595
38.811439,17.6351921,18.4599177,-0.908144075,18.4519993,17.013625,17.0050331
38.82193,18.9472953,19.0392458,-0.303233382,19.0315565,17.008318,16.9997102
38.832422,19.2353841,19.9062519,-0.819065213,19.8988863,17.0030136,16.9943897
38.842914,20.6397674,21.1210948,-0.693777599,21.1141422,16.9977122,16.9890722
38.853405,22.2485955,22.7274046,-0.691960389,22.7209336,16.9924143,16.9837582
38.863897,25.2586619,24.7676353,0.700732896,24.7616882,16.9871189,16.9784467
38.874388,27.4772633,27.2691683,0.456174381,27.2637584,16.981827,16.9731387
38.88488,30.7733651,30.1812002,0.769522518,30.1763048,16.9765377,16.9678331
38.895372,34.423829,33.2524837,1.08228704,33.2480336,16.9712513,16.9625304
38.905863,37.7624152,35.9686749,1.33930589,35.9645545,16.9659685,16.9572313
38.916355,39.0128184,37.6016944,1.18790739,37.5977469,16.9606881,16.9519346
38.926846,38.2099463,37.4318104,0.88212017,37.4278387,16.9554113,16.9466414
38.937338,37.2021505,35.2039953,1.41356118,35.1997656,16.9501369,16.9413506
38.94783,32.8024389,31.4813632,1.14938059,31.4766259,16.9448656,16.9360628
38.958321,29.1376046,27.3353246,1.34249022,27.3298602,16.9395977,16.9307784
38.968813,24.6779254,23.7158693,0.980844586,23.7095608,16.9343324,16.9254965
38.979304,21.7944947,21.1174732,0.822813196,21.1103772,16.9290705,16.920218
38.989796,21.4009346,19.5419279,1.36345395,19.5342475,16.9238111,16.914942
39.000288,20.0249844,18.6879175,1.15631607,18.6798735,16.9185547,16.909669
39.010779,18.4390889,18.228765,0.458610879,18.2205053,16.9133018,16.9043994
39.021271,17.8605711,17.9558187,-0.308622078,17.9474202,16.9080514,16.8991322
39.031762,18.547237,17.7701497,0.881525553,17.76165,16.9028045,16.8938685
39.042254,17.1464282,17.6311531,-0.696221872,17.6225729,16.89756,16.8886072
39.052746,17.175564,17.5217785,-0.588399957,17.5131312,16.8923186,16.8833488
39.063237,18.8944436,17.4333899,1.20874056,17.424685,16.8870806,16.8780939
39.073729,18.4390889,17.3606338,1.03848696,17.3518786,16.8818451,16.8728414
39.08422,17.2336879,17.2998489,-0.257217668,17.291049,16.876613,16.8675924
39.094712,17.3205081,17.2483716,0.268582345,17.2395315,16.8713835,16.8623458
39.105204,17.4642492,17.2042491,0.509902055,17.1953723,16.8661569,16.8571021
39.115695,17.3205081,17.1660124,0.393059429,17.1571017,16.8609338,16.8518618
39.126187,18,17.132531,0.931380139,17.1235889,16.8557131,16.846624
39.136678,18.0554701,17.1029435,0.975974709,17.0939716,16.8504959,16.8413896
39.14717,16.673332,17.0765645,-0.635005906,17.0675645,16.8452812,16.8361576
39.157662,17.4068952,17.0528595,0.595009004,17.0438327,16.8400694,16.8309285
39.168153,17.2046505,17.0314004,0.41623325,17.0223479,16.8348611,16.8257029
39.178645,16.6132477,17.0118363,-0.631338713,17.0027589,16.8296553,16.8204796
39.189136,17.0880075,16.9938885,0.306788237,16.9847871,16.8244529,16.8152598
39.199628,16.881943,16.9773217,-0.30883444,16.9681969,16.819253,16.8100424
39.21012,17.4068952,16.9619462,0.667044938,16.9527986,16.814056,16.8048279
39.220611,15.9059737,16.9476038,-1.0206028,16.9384338,16.8088625,16.7996168
39.231103,16.3095064,16.934158,-0.790349031,16.9249661,16.8036714,16.7944081
39.241594,16.643317,16.9214988,-0.527429495,16.9122854,16.7984838,16.7892028
39.252086,16.8226038,16.9095284,-0.294829681,16.9002936,16.7932986,16.7839999
39.262578,17.9722008,16.8981665,1.03635624,16.8889108,16.7881164,16.7788
39.273069,16.673332,16.8873445,-0.462614893,16.878068,16.7829376,16.7736034
39.283561,17.3781472,16.8770005,0.707917153,16.8677034,16.7777613,16.7684092
39.294052,16.7630546,16.8670846,-0.322536766,16.8577671,16.7725884,16.7632184
39.304544,17.1464282,16.8575499,0.537473954,16.8482123,16.7674179,16.75803
39.315036,16.7032931,16.8483584,-0.380874446,16.8390006,16.7622504,16.7528445
39.325527,16.5227116,16.8394766,-0.562818801,16.8300989,16.7570863,16.7476624
39.336019,16.3095064,16.8308729,-0.722057089,16.8214752,16.7519246,16.7424826
39.34651,16.7928556,16.8225223,-0.17224025,16.8131048,16.7467664,16.7373063
39.357002,17.3493516,16.8144001,0.731403778,16.8049629,16.7416106,16.7321323
39.367494,15.5884573,16.8064863,-1.10364352,16.7970294,16.7364577,16.7269612
39.377985,16.3095064,16.7987633,-0.699468983,16.7892868,16.7313083,16.7217935
39.388477,16.4620776,16.7912133,-0.57370344,16.7817172,16.7261613,16.7166282
39.398968,16.583124,16.7838231,-0.44799455,16.7743074,16.7210177,16.7114663
39.40946,17,16.7765782,0.472675156,16.767043,16.7158765,16.7063067
39.419952,17.1172428,16.7694676,0.589724627,16.759913,16.7107382,16.70115
39.430443,16.881943,16.7624815,0.345632081,16.7529073,16.7056034,16.6959966
39.440935,16.583124,16.7556089,-0.415313064,16.7460153,16.700471,16.6908457
39.451426,16.3095064,16.7488426,-0.662824378,16.7392295,16.695342,16.6856981
39.461918,16.1245155,16.7421735,-0.785912204,16.732541,16.6902154,16.6805529
39.47241,16.0934769,16.7355952,-0.801322816,16.7259432,16.6850917,16.6754105
39.482901,16.4316767,16.7291019,-0.545367013,16.7194305,16.6799714,16.6702715
39.493393,17.175564,16.7226865,0.672961734,16.7129956,16.6748536,16.6651348
39.503884,16.5529454,16.716345,-0.404227229,16.7066346,16.6697391,16.6600016
39.514376,16.7630546,16.7100712,0.230181188,16.7003414,16.664627,16.6548706
39.524868,17.0587221,16.7038614,0.595701882,16.694112,16.6595179,16.6497426
39.535359,17.0293864,16.6977119,0.575911818,16.687943,16.6544121,16.6446178
39.545851,17.4068952,16.691618,0.845740601,16.6818296,16.6493088,16.6394954
39.556342,16.8226038,16.6855773,0.370170915,16.6757693,16.6442088,16.6343764
39.566834,16.7928556,16.6795856,0.336556171,16.6697579,16.6391113,16.6292597
39.577326,16,16.6736404,-0.820755982,16.6637931,16.6340166,16.6241459
39.587817,17.2916165,16.6677396,0.789858734,16.6578727,16.6289254,16.6190354
39.598309,16.673332,16.6618798,0.107015182,16.6519932,16.6238365,16.6139273
39.6088,16.583124,16.6560595,-0.270065847,16.6461532,16.618751,16.6088224
39.619292,15.9373775,16.6502757,-0.844333016,16.6403497,16.6136679,16.60372
39.629784,17.2336879,16.6445269,0.767568283,16.6345811,16.6085877,16.5986203
39.640275,16.583124,16.6388118,-0.235982635,16.6288461,16.6035108,16.593524
39.650767,17.1172428,16.6331276,0.695783885,16.6231421,16.5984364,16.5884301
39.661258,16.3707055,16.6274738,-0.506723021,16.6174684,16.5933653,16.5833394
39.67175,16.8522995,16.6218478,0.480053868,16.6118226,16.5882967,16.5782511
39.682242,16.9410743,16.6162489,0.569934583,16.6062037,16.5832309,16.5731656
39.692733,17.2916165,16.6106763,0.825191006,16.6006111,16.5781684,16.5680835
39.703225,15.7162336,16.6051276,-0.942811742,16.5950424,16.5731084,16.5630036
39.713716,16.5227116,16.5996029,-0.277292767,16.5894976,16.5680517,16.5579271
39.724208,17,16.5941001,0.637102777,16.5839746,16.5629974,16.5528529
39.7347,16.7928556,16.5886186,0.451925947,16.578473,16.5579459,16.5477815
39.745191,17.4928557,16.5831581,0.953780705,16.5729923,16.5528979,16.5427135
39.755683,16.2788206,16.5777166,-0.546713836,16.5675306,16.5478522,16.5376477
39.766174,16.2788206,16.5722945,-0.541732294,16.5620881,16.5428098,16.5325853
39.776666,17.9722008,16.5668898,1.1854581,16.5566632,16.5377698,16.5275252
39.787158,17.175564,16.5615025,0.783620785,16.5512555,16.5327327,16.5224678
39.797649,16.1245155,16.5561323,-0.6569755,16.5458648,16.527699,16.5174138
39.808141,16.5227116,16.5507776,-0.167528936,16.5404896,16.5226676,16.5123621
39.818632,15.8429795,16.5454388,-0.838128421,16.5351303,16.5176395,16.5073137
39.829124,18.1107703,16.5401143,1.25325816,16.5297852,16.5126139,16.5022676
39.839616,16.9115345,16.5348041,0.613783729,16.5244544,16.507591,16.4972243
39.850107,16.7332005,16.5295081,0.451322927,16.5191379,16.5025715,16.4921843
39.860599,16.3095064,16.524225,-0.463377396,16.513834,16.4975544,16.4871466
39.87109,16.8226038,16.5189553,0.551043137,16.5085435,16.4925406,16.4821122
39.881582,16.583124,16.5136975,0.263489001,16.5032649,16.4875292,16.4770801
39.892074,16.7928556,16.5084517,0.533295317,16.4979983,16.4825206,16.4720508
39.902565,16.1245155,16.5032181,-0.615388182,16.4927438,16.4775154,16.4670247
39.913057,16.643317,16.4979953,0.381210825,16.4875,16.4725125,16.462001
39.923548,16.7928556,16.4927839,0.547788027,16.4822676,16.4675129,16.4569805
39.93404,17.1172428,16.4875826,0.793511264,16.4770453,16.4625157,16.4519623
39.944532,17.0293864,16.4823917,0.739590881,16.4718332,16.4575214,16.4469469
39.955023,17.1172428,16.4772113,0.800019693,16.4666316,16.4525303,16.4419348
39.965515,15.7480157,16.4720401,-0.850896187,16.4614392,16.4475416,16.436925
39.976006,16.5529454,16.4668788,0.293370952,16.4562567,16.4425562,16.4319184
39.986498,16.7928556,16.4617263,0.575438338,16.4510829,16.4375732,16.4269141
39.99699,17.5499288,16.4565828,1.04563184,16.445918,16.432593,16.4219126
40.007481,16.4620776,16.4514485,0.103097483,16.4407623,16.4276161,16.4169144
40.017973,16.3707055,16.4463223,-0.274985018,16.4356146,16.4226416,16.4119184
40.028464,17.0880075,16.4412049,0.804240396,16.4304756,16.4176703,16.4069257
40.038956,16.4012195,16.4360951,-0.186750149,16.4253442,16.4127014,16.4019352
40.049448,16.8226038,16.4309932,0.625787993,16.4202207,16.4077353,16.3969476
40.059939,16.2480768,16.4258996,-0.421690413,16.4151054,16.4027726,16.3919632
40.070431,17.0587221,16.4208131,0.798692066,16.4099972,16.3978121,16.386981
40.080922,17.7763888,16.4157345,1.1664709,16.4048967,16.392855,16.3820021
40.091414,17.2626765,16.4106626,0.923045976,16.399803,16.3879002,16.3770255
40.101906,16.583124,16.4055979,0.421338416,16.3947163,16.3829482,16.3720516
40.112397,16.1554944,16.4005406,-0.495021391,16.3896371,16.3779995,16.367081
40.122889,16.3095064,16.3954897,-0.293228955,16.3845641,16.3730532,16.3621126
40.13338,17.0293864,16.3904459,0.799337532,16.3794982,16.3681101,16.3571475
40.143872,16.0312195,16.3854082,-0.5951375,16.3744384,16.3631694,16.3521846
40.154364,16.9705627,16.3803769,0.768235515,16.3693849,16.3582314,16.3472245
40.164855,16.583124,16.3753525,0.455819532,16.3643382,16.3532968,16.3422676
40.175347,17.5783958,16.3703338,1.09911875,16.3592972,16.3483645,16.337313
40.185838,17.5499288,16.3653217,1.08839656,16.3542627,16.3434354,16.3323616
40.19633,16.3095064,16.3603151,-0.225407827,16.3492337,16.3385087,16.3274125
40.206822,16.6132477,16.3553144,0.507871319,16.3442105,16.3335848,16.3224661
40.217313,16.4924225,16.3503201,0.376964763,16.3391936,16.3286641,16.3175229
40.227805,16.7630546,16.3453309,0.646315462,16.3341818,16.3237458,16.312582
40.238296,16.1554944,16.3403479,-0.429945924,16.3291761,16.3188308,16.3076442
40.248788,15.8429795,16.33537,-0.701705393,16.3241754,16.313918,16.3027088
40.25928,16.1554944,16.3303975,-0.418214163,16.3191802,16.3090081,16.297776
40.269771,16.8522995,16.3254309,0.725857176,16.3141907,16.3041014,16.2928465
40.280263,16.4316767,16.3204692,0.333477994,16.309206,16.2991971,16.2879192
40.290754,16.2172747,16.3155131,-0.313430022,16.304227,16.294296,16.2829951
40.301246,17.1464282,16.3105618,0.914257298,16.2992526,16.2893972,16.2780733
40.311738,16.7630546,16.3056156,0.676342395,16.2942833,16.2845012,16.2731542
40.322229,16.3401346,16.3006749,0.198644789,16.2893194,16.2796084,16.2682383
40.332721,16.2480768,16.2957387,-0.218316055,16.28436,16.274718,16.2633246
40.343212,16.1245155,16.2908079,-0.407789692,16.279406,16.2698308,16.2584141
40.353704,17.3493516,16.2858816,1.03124683,16.2744562,16.2649459,16.2535059
40.364196,15.5884573,16.28096,-0.832167483,16.2695112,16.2600638,16.2486004
40.374687,16.643317,16.2760437,0.606030794,16.2645714,16.255185,16.243698
40.385179,16,16.2711316,-0.520702951,16.2596358,16.2503084,16.2387979
40.39567,16.7332005,16.2662246,0.683356371,16.2547052,16.2454351,16.233901
40.406162,15.3297097,16.2613218,-0.965200532,16.2497787,16.2405641,16.2290063
40.416654,16.5227116,16.2564235,0.516031111,16.2448567,16.2356959,16.2241143
40.427145,16.7928556,16.2515303,0.735748157,16.2399397,16.2308309,16.2192255
40.437637,16.9410743,16.246641,0.83332666,16.2350266,16.2259682,16.2143389
40.448128,16.2480768,16.2417567,0.0794992453,16.2301183,16.2211087,16.2094555
40.45862,16.583124,16.2368763,0.588428148,16.2252139,16.2162516,16.2045744
40.469112,15.9373775,16.2320002,-0.542791636,16.2203138,16.2113972,16.1996959
40.479603,16.3095064,16.2271289,0.287014788,16.2154184,16.206546,16.1948205
40.490095,16.0312195,16.2222615,-0.437083459,16.2105267,16.2016971,16.1899474
40.500586,15.4919334,16.2173988,-0.85174255,16.2056397,16.1968515,16.1850775
40.511078,17.1464282,16.2125398,0.966379029,16.2007564,16.1920081,16.1802098
40.52157,15.7797338,16.207685,-0.65417974,16.1958772,16.1871675,16.1753448
40.532061,16.1864141,16.2028348,-0.128143378,16.1910026,16.1823301,16.1704829
40.542553,15.9687194,16.1979883,-0.478820246,16.1861315,16.177495,16.1656232
40.553044,16.2480768,16.1931463,0.234372648,16.1812649,16.1726631,16.1607667
40.563536,15.7480157,16.1883079,-0.663545133,16.1764019,16.1678335,16.1559124
40.574028,16.583124,16.1834735,0.632179094,16.1715428,16.1630067,16.1510608
40.584519,15.5884573,16.1786437,-0.7682359,16.1666881,16.158183,16.1462123
40.595011,16.4620776,16.1738173,0.536898805,16.1618369,16.1533617,16.1413661
40.605502,15.8429795,16.1689954,-0.57097797,16.15699,16.1485435,16.136523
40.615994,16.3095064,16.1641769,0.381221125,16.1521465,16.1437277,16.131682
40.626486,16.1554944,16.1593623,-0.0621923896,16.1473069,16.1389145,16.1268438
40.636977,16.2172747,16.1545521,0.250444911,16.1424715,16.1341046,16.1220087
40.647469,17.1172428,16.1497453,0.983614512,16.1376395,16.129297,16.1171758
40.65796,16.643317,16.1449427,0.705956264,16.1328116,16.1244925,16.112346
40.668452,17.2046505,16.1401436,1.03174947,16.1279871,16.1196903,16.1075185
40.678944,16.1864141,16.1353482,0.225977586,16.1231663,16.1148909,16.1026935
40.689435,16.643317,16.130557,0.716072573,16.1183497,16.1100946,16.0978718
40.699927,16.3707055,16.1257692,0.494910431,16.1135363,16.1053007,16.0930522
40.710418,16.3095064,16.1209856,0.434189895,16.108727,16.1005099,16.0882357
40.72091,17.0293864,16.1162052,0.955605137,16.1039209,16.0957214,16.0834214
40.731402,16.583124,16.1114285,0.686800873,16.0991184,16.0909356,16.0786098
40.741893,16.2480768,16.106656,0.376059611,16.09432,16.086153,16.0738013
40.752385,15.0665192,16.1018867,-1.01753009,16.0895248,16.0813727,16.068995
40.762876,16.9705627,16.0971214,0.934580816,16.0847336,16.0765955,16.0641918
40.773368,16.3707055,16.0923594,0.527585182,16.0799455,16.0718206,16.0593908
40.78386,16.7928556,16.087601,0.839794386,16.0751609,16.0670484,16.0545924
40.794351,16.1554944,16.0828467,0.269532471,16.0703803,16.0622795,16.0497972
40.804843,16.5227116,16.0780955,0.666795454,16.0656028,16.0575127,16.0450041
40.815334,16.0312195,16.0733483,-0.20525289,16.0608293,16.0527492,16.0402141
40.825826,16.4316767,16.0686042,0.602554972,16.0560588,16.0479879,16.0354263
40.836318,16.3401346,16.0638637,0.525614797,16.0512918,16.0432293,16.0306412
40.846809,16.1245155,16.0591272,0.255711339,16.0465286,16.0384739,16.0258591
40.857301,15.9687194,16.0543938,-0.292701802,16.0417685,16.0337207,16.0210792
40.867792,15.6843871,16.0496643,-0.604381627,16.0370123,16.0289707,16.0163024
40.878284,16.1554944,16.0449379,0.332500452,16.0322591,16.024223,16.0115278
40.888776,16,16.0402149,-0.200536633,16.0275092,16.019478,16.0067558
40.899267,16,16.0354959,-0.188403667,16.0227632,16.0147361,16.0019869
40.909759,15.7162336,16.03078,-0.560844289,16.0180202,16.0099965,15.9972202
40.92025,16.5227116,16.0260679,0.704729558,16.013281,16.00526,15.9924565
40.930742,16.6132477,16.0213588,0.769343165,16.0085447,16.0005258,15.987695
40.941234,17.4068952,16.0166532,1.17908524,16.0038118,15.9957943,15.9829362
40.951725,15.132746,16.0119514,-0.937659578,15.9990827,15.991066,15.9781804
40.962217,17.3493516,16.0072527,1.15848993,15.9943565,15.9863398,15.9734268
40.972708,15.3948043,16.0025577,-0.77958541,15.989634,15.9816169,15.9686762
40.9832,15.6524758,15.9978658,-0.587698833,15.9849144,15.9768962,15.9639278
40.993692,16.2172747,15.9931772,0.473389432,15.9801982,15.9721781,15.9591821
41.004183,16.673332,15.9884924,0.827550336,15.9754857,15.9674633,15.9544394
41.014675,16.4316767,15.9838106,0.669227986,15.970776,15.9627506,15.9496988
41.025166,16.3401346,15.9791326,0.600834427,15.9660701,15.9580411,15.9449613
41.035658,16.4012195,15.9744575,0.653270175,15.961367,15.9533339,15.940226
41.04615,16.7332005,15.9697858,0.873736067,15.9566672,15.9486293,15.9354933
41.056641,16.1864141,15.9651179,0.47042128,15.9519711,15.9439279,15.9307636
41.067133,16.2172747,15.9604528,0.506775995,15.9472778,15.9392287,15.9260361
41.077624,15.7162336,15.9557916,-0.489446541,15.9425882,15.9345326,15.9213117
41.088116,16.1554944,15.9511332,0.452063322,15.9379014,15.9298388,15.9165893
41.098608,16.7332005,15.9464781,0.886973745,15.9332179,15.9251477,15.9118696
41.109099,15.9687194,15.9418268,0.163989726,15.928538,15.9204596,15.907153
41.119591,16.7032931,15.9371783,0.87527981,15.9238609,15.9157739,15.9024385
41.130082,16.7630546,15.9325336,0.911329237,15.9191874,15.9110912,15.897727
41.140574,16.583124,15.9278918,0.809464127,15.9145167,15.9064108,15.8930176
41.151066,15.2643375,15.9232532,-0.81173622,15.9098493,15.901733,15.8883109
41.161557,16.2788206,15.9186184,0.600168498,15.9051854,15.8970584,15.8836072
41.172049,16.7928556,15.9139864,0.937480271,15.9005243,15.892386,15.8789056
41.18254,16.1864141,15.9093581,0.526361078,15.8958669,15.8877167,15.8742071
41.193032,15.6843871,15.9047326,-0.469409698,15.8912122,15.8830496,15.8695107
41.203524,15.8745079,15.9001104,-0.160007923,15.8865606,15.8783852,15.8648169
41.214015,17.4355958,15.8954919,1.24100922,15.8819127,15.8737239,15.8601261
41.224507,16.673332,15.8908762,0.884565315,15.8772675,15.8690649,15.8554375
41.234998,16.3095064,15.8862642,0.650570697,15.8726259,15.8644089,15.8507519
41.24549,16.7928556,15.881655,0.954568293,15.867987,15.8597552,15.8460684
41.255982,16.2480768,15.877049,0.60912049,15.8633513,15.8551041,15.8413874
41.266473,16.0934769,15.8724468,0.470138477,15.8587192,15.8504562,15.8367095
41.276965,16.0312195,15.8678473,0.404193374,15.8540897,15.8458104,15.8320338
41.287456,16.1554944,15.8632514,0.540595033,15.8494639,15.8411678,15.827361
41.297948,16.583124,15.8586584,0.851155427,15.8448407,15.8365274,15.8226904
41.30844,16.2480768,15.8540686,0.627700756,15.8402207,15.8318896,15.8180223
41.318931,16.4012195,15.8494824,0.742790053,15.8356042,15.8272549,15.8133573
41.329423,15.7797338,15.844899,-0.255274705,15.8309905,15.8226225,15.8086943
41.339914,17.4355958,15.8403193,1.26304256,15.8263802,15.8179931,15.8040344
41.350406,16.7032931,15.8357423,0.931424067,15.8217727,15.813366,15.7993766
41.360898,17,15.8311685,1.0811251,15.8171683,15.8087415,15.7947213
41.371389,16.7032931,15.8265984,0.936319761,15.8125674,15.8041201,15.7900691
41.381881,15.7480157,15.822031,-0.272057486,15.8079692,15.7995009,15.785419
41.392372,15.7797338,15.8174673,-0.194250985,15.8033745,15.7948848,15.7807718
41.402864,16.4316767,15.8129063,0.786619619,15.7987825,15.7902709,15.7761268
41.413356,16.643317,15.8083485,0.913766091,15.7941936,15.7856596,15.7714843
41.423847,16.4620776,15.8037943,0.811346595,15.7896082,15.7810514,15.7668448
41.434339,17.0880075,15.7992429,1.13523767,15.7850255,15.7764455,15.7622075
41.44483,15.5241747,15.7946951,-0.520115769,15.7804463,15.7718426,15.7575731
41.455322,15.9373775,15.7901501,0.383702227,15.7758697,15.7672419,15.7529408
41.465814,16.3095064,15.7856082,0.723808164,15.7712963,15.7626438,15.7483111
41.476305,16.1245155,15.7810699,0.586042316,15.7667263,15.7580489,15.7436843
41.486797,15.3297097,15.7765344,-0.66844944,15.762159,15.7534561,15.7390596
41.497288,15.9059737,15.7720024,0.366020869,15.7575952,15.7488664,15.734438
41.50778,16.9410743,15.7674733,1.08332871,15.7530341,15.7442789,15.7298184
41.518272,15.3297097,15.7629472,-0.65820781,15.748476,15.739694,15.7252014
41.528763,15.8745079,15.7584248,0.340709626,15.7439214,15.7351122,15.7205873
41.539255,16.1245155,15.7539051,0.608777764,15.7393695,15.7305326,15.7159753
41.549746,16.5529454,15.749389,0.896413029,15.734821,15.7259561,15.7113663
41.560238,16.0312195,15.7448757,0.535111076,15.7302752,15.7213818,15.7067594
41.57073,16.3401346,15.7403655,0.774447648,15.7257325,15.71681,15.7021551
41.581221,15.6843871,15.7358589,-0.226873814,15.7211932,15.7122414,15.6975537
41.591713,16.4924225,15.731355,0.872391836,15.7166566,15.7076749,15.6929543
41.602204,17.1464282,15.7268547,1.19145856,15.7121234,15.7031115,15.688358
41.612696,16.2480768,15.7223571,0.725065296,15.7075929,15.6985503,15.6837637
41.623188,17.0587221,15.7178627,1.15795483,15.7030655,15.6939917,15.679172
41.633679,16.0312195,15.7133719,0.563779795,15.6985415,15.6894362,15.6745832
41.644171,16.1554944,15.7088838,0.668289339,15.6940201,15.6848829,15.6699965
41.654662,16.2480768,15.7043993,0.737344935,15.6895023,15.6803326,15.6654127
41.665154,15,15.6999175,-0.836610696,15.684987,15.6757845,15.660831
41.675646,16.1864141,15.6954388,0.700696259,15.6804748,15.671239,15.6562519
41.686137,16.1554944,15.6909637,0.681564878,15.6759661,15.6666965,15.6516756
41.696629,16.8522995,15.6864914,1.07972596,15.67146,15.6621563,15.6471015
41.70712,15.9059737,15.6820226,0.473234721,15.6669574,15.6576191,15.6425303
41.717612,15.5241747,15.6775566,-0.391639982,15.6624573,15.653084,15.6379612
41.728104,16.5529454,15.6730937,0.938004096,15.6579604,15.6485516,15.6333946
41.738595,15.9373775,15.6686343,0.518404382,15.6534669,15.6440223,15.6288309
41.749087,15.6843871,15.6641777,0.142159755,15.648976,15.6394951,15.6242693
41.759578,15.6524758,15.6597247,-0.0851403167,15.6444886,15.6349709,15.6197106
41.77007,16.2480768,15.6552744,0.76993662,15.6400038,15.6304489,15.615154
41.780562,15.9059737,15.6508273,0.50512025,15.635522,15.6259296,15.6105999
41.791053,16.673332,15.6463837,1.01338459,15.6310438,15.6214132,15.6060488
41.801545,15.4272486,15.6419428,-0.46335104,15.6265681,15.6168991,15.6014997
41.812036,16,15.6375055,0.602075147,15.6220959,15.6123879,15.5969535
41.822528,16.1245155,15.633071,0.701031058,15.6176263,15.607879,15.5924094
41.83302,16.3401346,15.6286395,0.84350169,15.6131598,15.6033726,15.5878678
41.843511,16.0934769,15.6242117,0.685029376,15.6086967,15.5988693,15.5833291
41.854003,15.6204994,15.6197866,0.0266978468,15.6042362,15.5943682,15.5787924
41.864494,16.881943,15.615365,1.12542347,15.5997792,15.58987,15.5742587
41.874986,16,15.6109462,0.623741762,15.5953248,15.5853741,15.569727
41.885478,15.8745079,15.6065305,0.517665256,15.5908735,15.5808807,15.5651978
41.895969,15.4919334,15.6021185,-0.331941367,15.5864256,15.5763904,15.5606716
41.906461,15.8113883,15.5977091,0.462254483,15.5819803,15.5719022,15.5561473
41.916952,16.2172747,15.5933033,0.789918626,15.5775385,15.5674171,15.551626
41.927444,15.7480157,15.5889002,0.398892842,15.5730993,15.5629341,15.5471068
41.937936,15.8113883,15.5845003,0.476327569,15.5686632,15.5584537,15.54259
41.948427,15.7797338,15.580104,0.446799527,15.5642305,15.5539763,15.5380761
41.958919,16.5529454,15.5757104,0.988551934,15.5598005,15.5495011,15.5335643
41.96941,16.2788206,15.5713204,0.841130299,15.5553739,15.5450289,15.5290554
41.979902,16.4012195,15.5669331,0.913392755,15.5509499,15.5405589,15.5245485
41.990394,15.7162336,15.562549,0.392026299,15.546529,15.5360914,15.5200441
42.000885,16.5227116,15.5581685,0.982111579,15.5421115,15.531627,15.5155426
42.011377,15.7480157,15.5537907,0.440709715,15.5376967,15.5271647,15.5110431
42.021868,15.8745079,15.5494165,0.570167857,15.5332853,15.5227055,15.5065465
42.03236,15.9373775,15.545045,0.62636446,15.5288766,15.5182484,15.502052
42.042852,15.7797338,15.5406767,0.488934684,15.5244709,15.5137938,15.4975599
42.053343,16.2480768,15.536312,0.843661553,15.5200686,15.5093423,15.4930707
42.063835,16,15.53195,0.684141778,15.515669,15.504893,15.4885835
42.074326,15.3948043,15.5275916,-0.364399955,15.5112729,15.5004466,15.4840993
42.084818,16.9705627,15.523236,1.20304893,15.5068794,15.4960024,15.479617
42.09531,15.5563492,15.5188836,0.193560377,15.502489,15.4915608,15.4751372
42.105801,17.175564,15.5145347,1.28880927,15.498102,15.4871221,15.4706603
42.116293,16.673332,15.5101886,1.07849126,15.4937177,15.4826857,15.4661854
42.126784,15.5563492,15.5058461,0.224728939,15.4893368,15.4782522,15.4617135
42.137276,15.8429795,15.5015063,0.584357059,15.4849586,15.4738209,15.4572435
42.147768,16.2480768,15.4971698,0.866548918,15.4805834,15.4693921,15.4527759
42.158259,16.673332,15.4928368,1.08650595,15.4762118,15.4649663,15.4483113
42.168751,15.6204994,15.4885066,0.363308036,15.4718427,15.4605427,15.4438487
42.179242,16,15.48418,0.718206078,15.4674772,15.4561221,15.4393889
42.189734,16.3401346,15.4798562,0.927511955,15.4631143,15.4517036,15.4349312
42.200226,16.3707055,15.4755356,0.946134217,15.4587544,15.4472877,15.4304759
42.210717,15.5241747,15.4712186,0.230121985,15.4543981,15.4428748,15.4260234
42.221209,15.2315462,15.4669043,-0.48513722,15.4500444,15.4384641,15.421573
42.2317,15.0332964,15.4625937,-0.655207852,15.4456942,15.4340563,15.4171254
42.242192,15.1657509,15.4582859,-0.540865034,15.4413466,15.4296506,15.4126799
42.252684,15.7797338,15.4539812,0.570747402,15.4370021,15.4252476,15.4082368
42.263175,16.1864141,15.4496802,0.858332006,15.4326611,15.4208475,15.4037965
42.273667,14.7648231,15.445382,-0.824959966,15.4283228,15.4164495,15.3993583
42.284158,16.1554944,15.4410874,0.845226013,15.423988,15.4120546,15.3949229
42.29465,15.7480157,15.4367956,0.557871073,15.4196558,15.4076617,15.3904895
42.305142,16.0312195,15.432507,0.773765149,15.4153268,15.4032715,15.3860585
42.315633,15.3622915,15.4282221,-0.256769524,15.4110012,15.3988842,15.3816304
42.326125,16.4316767,15.4239399,1.00386094,15.4066783,15.394499,15.3772043
42.336616,16.9115345,15.4196614,1.22142257,15.4023589,15.3901169,15.3727811
42.347108,15.5563492,15.4153858,0.375450971,15.3980422,15.3857368,15.3683598
42.3576,15.5884573,15.4111133,0.421122274,15.3937286,15.3813593,15.363941
42.368091,15.5563492,15.4068445,0.386658381,15.3894185,15.3769848,15.359525
42.378583,16.7032931,15.4025785,1.14048875,15.3851111,15.3726125,15.355111
42.389074,15.132746,15.3983162,-0.515335041,15.3808072,15.3682431,15.3506998
42.399566,16,15.3940567,0.778423631,15.376506,15.3638758,15.3462906
42.410058,15.0665192,15.3898004,-0.568578243,15.3722079,15.3595111,15.3418839
42.420549,15.0996689,15.3855478,-0.53467646,15.3679134,15.3551494,15.33748
42.431041,15.2315462,15.381298,-0.386977801,15.3636215,15.3507897,15.333078
42.441532,16.3707055,15.3770519,0.996821754,15.3593332,15.3464331,15.3286789
42.452024,15.3948043,15.3728087,0.148309227,15.3550476,15.3420786,15.3242818
42.462516,15.4596248,15.3685687,0.301755069,15.3507651,15.3377266,15.3198871
42.473007,15.9687194,15.3643324,0.777423321,15.3464861,15.3333776,15.3154953
42.483499,15.9059737,15.360099,0.738833378,15.3422099,15.3290308,15.3111054
42.49399,15.3622915,15.3558692,0.0801392639,15.3379372,15.3246868,15.3067183
42.504482,15.3948043,15.3516423,0.207754701,15.3336672,15.3203451,15.3023332
42.514974,15.3297097,15.3474187,-0.133075074,15.3294004,15.3160058,15.2979505
42.525465,15.6524758,15.3431988,0.55612685,15.3251371,15.3116696,15.2935706
42.535957,14.7986486,15.3389817,-0.735073565,15.3208766,15.3073354,15.2891928
42.546448,15.5241747,15.3347684,0.435208346,15.3166196,15.3030042,15.2848177
42.55694,15.4272486,15.3305579,0.310951241,15.3123653,15.2986751,15.2804446
42.567432,15.9059737,15.3263508,0.761329704,15.3081143,15.2943486,15.2760739
42.577923,14.9666295,15.3221474,-0.596253148,15.3038668,15.2900251,15.271706
42.588415,15,15.3179468,-0.563867746,15.299622,15.2857036,15.2673401
42.598906,16.4316767,15.31375,1.05732053,15.2953808,15.2813851,15.262977
42.609398,16.7032931,15.3095561,1.18056637,15.2911424,15.2770687,15.2586158
42.61989,15.7162336,15.3053656,0.640989934,15.2869072,15.2727549,15.2542571
42.630381,15.4919334,15.3011787,0.436754715,15.2826755,15.268444,15.2499011
42.640873,14.6628783,15.2969948,-0.796314317,15.2784466,15.2641353,15.2455471
42.651364,16.0934769,15.2928146,0.894797367,15.2742213,15.2598294,15.2411959
42.661856,15,15.2886374,-0.537249826,15.2699988,15.2555258,15.2368467
42.672348,16.0623784,15.2844635,0.881994852,15.2657795,15.2512246,15.2324999
42.682839,15.7797338,15.2802933,0.706711039,15.2615638,15.2469264,15.2281558
42.693331,15.0665192,15.2761262,-0.457828559,15.2573509,15.2426303,15.2238137
42.703822,15.0665192,15.2719627,-0.453258828,15.2531416,15.2383371,15.2194744
42.714314,15.8429795,15.2678023,0.758404401,15.2489351,15.2340461,15.2151371
42.724806,15.7480157,15.2636452,0.695967348,15.2447319,15.2297576,15.2108021
42.735297,14.525839,15.2594919,-0.85653537,15.2405322,15.225472,15.20647
42.745789,14.7986486,15.2553416,-0.675790629,15.2363354,15.2211886,15.2021398
42.75628,15,15.251195,-0.501193593,15.2321422,15.2169081,15.1978123
42.766772,15.6524758,15.2470515,0.636729434,15.2279519,15.2126297,15.1934868
42.777264,15.7797338,15.2429113,0.732681729,15.2237648,15.2083539,15.1891637
42.787755,15.2643375,15.238775,0.159882929,15.2195813,15.2040809,15.1848434
42.798247,15.6524758,15.2346416,0.646400964,15.2154007,15.1998101,15.180525
42.808738,14,15.2305121,-1.1092845,15.2112237,15.1955423,15.1762094
42.81923,15.3297097,15.2263856,0.321440676,15.2070496,15.1912765,15.1718958
42.829722,15.7162336,15.2222625,0.702830784,15.2028788,15.1870133,15.1675845
42.840213,14.1421356,15.2181433,-1.03730789,15.1987116,15.182753,15.1632759
42.850705,14.8660687,15.2140271,-0.589879934,15.1945473,15.1784948,15.1589694
42.861196,16.1554944,15.2099147,0.972409226,15.1903867,15.1742395,15.1546655
42.871688,15.0996689,15.2058054,-0.325786035,15.186229,15.1699864,15.1503637
42.88218,14.5945195,15.2016996,-0.779217584,15.1820746,15.1657358,15.1460642
42.892671,15.3948043,15.1975976,0.444079668,15.1779238,15.1614881,15.1417674
42.903163,15.1986842,15.1934987,0.0720104359,15.173776,15.1572425,15.1374726
42.913654,15.0665192,15.1894036,-0.350548753,15.1696319,15.1529999,15.1331806
42.924146,15.5884573,15.1853116,0.634937495,15.1654907,15.1487593,15.1288904
42.934638,15.5241747,15.1812232,0.585620626,15.1613528,15.1445213,15.1246027
42.945129,14.6969385,15.1771386,-0.692964747,15.1572186,15.1402862,15.1203177
42.955621,15.7480157,15.1730571,0.758260256,15.1530874,15.1360532,15.1160346
42.966112,16.0312195,15.1689796,0.928568779,15.1489599,15.1318232,15.1117543
42.976604,14.4913767,15.1649051,-0.820687748,15.1448354,15.1275952,15.1074759
42.987096,15.0665192,15.1608342,-0.307107536,15.1407142,15.1233698,15.1031998
42.997587,15.3622915,15.1567672,0.453347855,15.1365968,15.1191473,15.0989265
43.008079,15.2315462,15.1527034,0.280789666,15.1324823,15.1149269,15.0946552
43.01857,15.1986842,15.1486435,0.22369776,15.1283716,15.1107094,15.0903865
43.029062,15.6524758,15.1445867,0.712663398,15.1242639,15.106494,15.0861199
43.039554,15.4919334,15.1405335,0.592789879,15.1201596,15.1022811,15.0818555
43.050045,15.0332964,15.1364843,-0.321228798,15.116059,15.0980712,15.0775939
43.060537,16.0623784,15.1324383,0.964334029,15.1119615,15.0938633,15.0733342
43.071028,15.9059737,15.1283962,0.881803549,15.1078678,15.0896584,15.0690772
43.08152,15.2643375,15.1243574,0.374139219,15.1037771,15.0854556,15.0648222
43.092012,15.1657509,15.1203221,0.213140271,15.0996898,15.0812553,15.0605695
43.102503,15.9687194,15.1162909,0.923270583,15.0956063,15.0770579,15.0563195
43.112995,15,15.1122628,-0.335056452,15.0915259,15.0728627,15.0520714
43.123486,15.8429795,15.1082388,0.857170175,15.0874493,15.0686703,15.0478261
43.133978,15.1986842,15.104218,0.307353397,15.0833758,15.06448,15.0435827
43.14447,14.6287388,15.1002009,-0.686630965,15.0793057,15.0602923,15.0393416
43.154961,15.4272486,15.0961878,0.575378822,15.0752395,15.0561074,15.0351032
43.165453,15.132746,15.092178,0.201414817,15.0711763,15.0519247,15.0308668
43.175944,16.2480768,15.0881723,1.07698865,15.0671171,15.0477449,15.0266331
43.186436,15.132746,15.0841698,0.220399974,15.0630609,15.0435672,15.0224012
43.196928,14.7309199,15.080171,-0.590974759,15.0590083,15.039392,15.0181717
43.207419,15.6843871,15.0761763,0.779878714,15.0549595,15.0352197,15.013945
43.217911,15.5884573,15.072185,0.718520914,15.0509139,15.0310495,15.0097201
43.228402,15.1986842,15.0681977,0.361229101,15.0468722,15.0268822,15.0054979
43.238894,14.9331845,15.0642138,-0.361979612,15.0428336,15.022717,15.0012777
43.249386,14.7309199,15.0602336,-0.573858613,15.0387986,15.0185543,14.9970597
43.259877,15.5563492,15.0562575,0.707171608,15.0347675,15.0143945,14.9928445
43.270369,14.6969385,15.0522848,-0.596109348,15.0307396,15.0102369,14.9886312
43.28086,15.0665192,15.0483163,0.134918156,15.0267156,15.0060821,14.9844206
43.291352,15.2643375,15.0443511,0.469027087,15.0226948,15.0019294,14.9802118
43.301844,14.7309199,15.0403898,-0.556300178,15.0186777,14.9977793,14.9760054
43.312335,15.3297097,15.0364326,0.541550696,15.0146645,14.993632,14.9718017
43.322827,14.8660687,15.0324788,-0.407933883,15.0106545,14.9894869,14.9675999
43.333318,15.2643375,15.0285292,0.485600955,15.0066485,14.9853446,14.9634008
43.34381,15.1986842,15.0245831,0.417254158,15.0026458,14.9812045,14.9592036
43.354302,14.5602198,15.0206408,-0.678543344,14.9986467,14.9770669,14.9550086
43.364793,14.7986486,15.0167028,-0.466962754,14.9946516,14.9729321,14.9508164
43.375285,15.5241747,15.0127682,0.715126881,14.9906599,14.9687995,14.9466261
43.385776,14.7986486,15.0088379,-0.458464111,14.9866721,14.9646697,14.9424384
43.396268,14.3874946,15.0049111,-0.785758587,14.9826877,14.9605421,14.9382527
43.40676,15.5563492,15.0009882,0.745225445,14.978707,14.956417,14.9340692
43.417251,15.3948043,14.9970696,0.630662126,14.9747303,14.9522947,14.9298885
43.427743,14.3527001,14.9931545,-0.80028397,14.970757,14.9481746,14.9257096
43.438234,15.7162336,14.9892438,0.85263702,14.9667878,14.9440574,14.9215334
43.448726,15.9373775,14.9853366,0.975725827,14.9628219,14.9399422,14.9173591
43.459218,15.132746,14.9814333,0.388989238,14.9588598,14.9358296,14.913187
43.469709,14.0712473,14.9775344,-0.951991149,14.9549018,14.9317199,14.9090177
43.480201,15.3297097,14.9736391,0.596716494,14.9509472,14.9276123,14.9048502
43.490692,14.4913767,14.9697482,-0.69164404,14.9469968,14.9235075,14.9006855
43.501184,15.3948043,14.9658609,0.654937687,14.9430497,14.9194049,14.8965226
43.511676,15.0996689,14.9619777,0.371067627,14.9391065,14.9153048,14.8923619
43.522167,15,14.9580988,0.204697741,14.9351675,14.9112075,14.888204
43.532659,15.6843871,14.9542237,0.854496038,14.931232,14.9071124,14.8840479
43.54315,14.4913767,14.9503529,-0.677477805,14.9273006,14.9030201,14.8798945
43.553642,15.4596248,14.9464859,0.716337172,14.9233728,14.89893,14.875743
43.564134,14.7309199,14.9426229,-0.460112037,14.9194488,14.8948424,14.8715937
43.574625,15.0332964,14.9387645,0.3074604,14.915529,14.8907576,14.8674471
43.585117,15.6843871,14.9349098,0.865723614,14.9116128,14.886675,14.8633024
43.595608,14.7309199,14.9310596,-0.447369744,14.9077009,14.8825952,14.8591604
43.6061,15.0332964,14.9272131,0.325704254,14.9037925,14.8785176,14.8550202
43.616592,15.0665192,14.9233708,0.378349474,14.8998881,14.8744424,14.8508823
43.627083,15.1986842,14.9195331,0.52834745,14.895988,14.8703702,14.8467471
43.637575,14.7986486,14.9156992,-0.34212665,14.8920914,14.8663,14.8426137
43.648066,15.5563492,14.9118699,0.802794665,14.8881993,14.8622328,14.8384829
43.658558,15.0665192,14.9080445,0.398088834,14.8843107,14.8581676,14.8343541
43.66905,14.3527001,14.9042232,-0.742646041,14.8804262,14.854105,14.8302275
43.679541,15.6524758,14.9004066,0.867219234,14.876546,14.8500452,14.8261035
43.690033,15.4272486,14.896594,0.728460474,14.8726696,14.8459875,14.8219815
43.700524,16,14.8927859,1.0522424,14.8687975,14.8419328,14.817862
43.711016,14.9331845,14.8889818,0.210244336,14.8649292,14.8378801,14.8137445
43.721508,15.3297097,14.8851821,0.666729057,14.8610649,14.8338299,14.8096291
43.731999,14.8996644,14.881387,0.135193943,14.8572051,14.8297826,14.8055165
43.742491,15.2315462,14.877596,0.59493718,14.8533491,14.8257375,14.8014057
43.752982,15.6204994,14.8738096,0.864112094,14.8494976,14.8216952,14.7972975
43.763474,15.6843871,14.8700274,0.902418855,14.8456498,14.817655,14.7931912
43.773966,15,14.8662495,0.365719188,14.8418062,14.8136173,14.7890871
43.784457,15.3948043,14.8624764,0.729608065,14.8379672,14.8095825,14.7849857
43.794949,16,14.8587074,1.06831297,14.834132,14.8055498,14.7808861
43.80544,14.8996644,14.8549432,0.211473877,14.8303014,14.80152,14.7767892
43.815932,15.6843871,14.8511832,0.912800064,14.8264747,14.7974924,14.7726941
43.826424,14.6287388,14.8474277,-0.467641756,14.8226522,14.7934672,14.7686012
43.836915,15.132746,14.843677,0.537651328,14.8188344,14.7894449,14.764511
43.847407,15,14.8399305,0.400086819,14.8150205,14.7854247,14.7604227
43.857898,15.3297097,14.836189,0.702510299,14.8112113,14.7814074,14.7563369
43.86839,15.4919334,14.8324517,0.812084786,14.807406,14.7773922,14.752253
43.878882,15,14.828719,0.413861112,14.8036051,14.7733795,14.7481714
43.889373,14.7309199,14.8249913,-0.306710605,14.799809,14.7693697,14.7440924
43.899865,14.4913767,14.8212678,-0.574361456,14.7960168,14.765362,14.7400152
43.910356,14.6628783,14.8175494,-0.393282498,14.7922294,14.7613571,14.7359406
43.920848,15.2643375,14.8138354,0.671194585,14.7884461,14.7573544,14.7318679
43.93134,14.5945195,14.810126,-0.464334444,14.7846673,14.7533542,14.7277974
43.941831,14.4222051,14.8064217,-0.619852099,14.7808933,14.7493569,14.7237295
43.952323,15.8745079,14.8027219,1.03527098,14.7771234,14.7453617,14.7196635
43.962814,15.1986842,14.7990271,0.632184327,14.7733584,14.7413694,14.7156001
43.973306,15.7162336,14.7953368,0.959633679,14.7695976,14.7373792,14.7115385
43.983798,14.525839,14.7916514,-0.515569924,14.7658413,14.7333915,14.7074792
43.994289,15.1986842,14.7879711,0.640868953,14.76209,14.7294067,14.7034224
44.004781,15.0996689,14.7842954,0.561581217,14.7583429,14.725424,14.6993675
44.015272,14.9331845,14.7806249,0.390588786,14.7546008,14.7214442,14.6953152
44.025764,15.4919334,14.776959,0.845561572,14.750863,14.7174665,14.6912647
44.036256,15.0332964,14.773298,0.509900313,14.7471298,14.7134913,14.6872165
44.046747,14.8996644,14.7696424,0.360585661,14.7434017,14.709519,14.6831708
44.057239,14.6628783,14.7659914,-0.32111231,14.739678,14.7055488,14.679127
44.06773,15.1657509,14.7623458,0.635141792,14.7359594,14.7015815,14.6750858
44.078222,15.3622915,14.7587049,0.776908374,14.7322452,14.6976163,14.6710464
44.088714,15,14.755069,0.494905009,14.7285358,14.6936536,14.6670093
44.099205,15.3622915,14.7514386,0.781570761,14.7248316,14.6896938,14.6629747
44.109697,15.3297097,14.747813,0.762821528,14.7211318,14.6857361,14.6589419
44.120188,16,14.7441929,1.12062798,14.7174373,14.6817814,14.6549118
44.13068,15.7480157,14.7405777,1.00371215,14.7137473,14.6778287,14.6508835
44.141172,15.0332964,14.7369676,0.544360871,14.7100623,14.6738785,14.6468573
44.151663,14.1421356,14.7333632,-0.768913218,14.7063826,14.6699313,14.6428338
44.162155,14.3178211,14.7297636,-0.64182752,14.7027075,14.6659861,14.6388121
44.172646,14.4222051,14.7261697,-0.551329884,14.6990377,14.6620439,14.634793
44.183138,16.1864141,14.7225808,1.20988975,14.6953727,14.6581037,14.6307757
44.19363,15.5241747,14.7189973,0.897316769,14.6917127,14.6541661,14.6267606
44.204121,15.3622915,14.7154195,0.804283521,14.6880582,14.6502314,14.622748
44.214613,14.6969385,14.7118468,-0.122099713,14.6844084,14.6462988,14.6187373
44.225104,14.7309199,14.7082799,0.150465899,14.6807641,14.642369,14.6147292
44.235596,14.6628783,14.7047181,-0.204547806,14.6771247,14.6384415,14.6107229
44.246088,14.7986486,14.7011619,0.312228659,14.6734905,14.6345164,14.6067188
44.256579,14.8660687,14.6976115,0.410435447,14.6698619,14.6305942,14.6027173
44.267071,14.832397,14.6940664,0.371928213,14.6662383,14.6266741,14.5987175
44.277562,15.0665192,14.6905272,0.613181824,14.6626202,14.622757,14.5947204
44.288054,15.8745079,14.6869934,1.08973138,14.6590072,14.6188419,14.590725
44.298546,14.7986486,14.6834652,0.339386723,14.6553996,14.6149294,14.5867319
44.309037,14.8996644,14.6799432,0.468744359,14.6517977,14.6110198,14.5827413
44.319529,14.8996644,14.6764265,0.472480621,14.648201,14.6071123,14.5787526
44.33002,15.0996689,14.672916,0.65326328,14.64461,14.6032077,14.5747663
44.340512,14.7986486,14.6694109,0.359496403,14.6410242,14.5993052,14.570782
44.351004,15.5241747,14.6659118,0.926424814,14.637444,14.5954053,14.5667997
44.361495,15.3297097,14.6624188,0.816878741,14.6338697,14.5915082,14.5628201
44.371987,15.0996689,14.6589315,0.663880516,14.6303007,14.5876133,14.5588422
44.382478,15.3297097,14.6554505,0.821132862,14.6267377,14.5837213,14.554867
44.39297,15.132746,14.6519752,0.693376312,14.6231801,14.5798314,14.5508935
44.403462,15.8745079,14.648506,1.10724968,14.6196282,14.575944,14.5469222
44.413953,14.4222051,14.6450432,-0.472057311,14.6160824,14.5720596,14.5429534
44.424445,15.0665192,14.6415862,0.651868813,14.6125421,14.5681772,14.5389865
44.434936,14.9331845,14.6381358,0.543183916,14.609008,14.5642978,14.5350221
44.445428,14.7648231,14.6346912,0.360737952,14.6054794,14.5604205,14.5310595
44.45592,15.1657509,14.6312529,0.731093696,14.6019568,14.5565458,14.5270991
44.466411,14.8660687,14.6278212,0.488106035,14.5984405,14.5526739,14.5231412
44.476903,13.96424,14.6243956,-0.81249959,14.5949299,14.5488042,14.5191851
44.487394,15.5241747,14.6209767,0.950367274,14.5914257,14.5449374,14.5152316
44.497886,14.525839,14.617564,-0.302861242,14.5879273,14.5410728,14.5112798
44.508378,14.2828569,14.6141577,-0.5755874,14.584435,14.5372106,14.5073303
44.518869,15.2643375,14.6107583,0.80844246,14.5809492,14.5333514,14.5033832
44.529361,14.8996644,14.6073652,0.540647064,14.5774694,14.5294943,14.499438
44.539852,15.132746,14.603979,0.727163631,14.5739962,14.5256402,14.4954953
44.550344,14.3527001,14.6005992,-0.497894668,14.570529,14.5217881,14.4915544
44.560836,14.9331845,14.5972261,0.579619186,14.5670682,14.5179387,14.4876157
44.571327,14.0356688,14.5938602,-0.747122017,14.5636141,14.5140921,14.4836795
44.581819,14.6628783,14.5905007,0.269030837,14.5601662,14.5102477,14.479745
44.59231,15,14.5871485,0.642535239,14.5567251,14.5064062,14.4758131
44.602802,14.7986486,14.5838028,0.463514552,14.5532903,14.5025668,14.471883
44.613294,14.8996644,14.5804642,0.564978055,14.5498622,14.49873,14.4679551
44.623785,14,14.577133,-0.759692678,14.546441,14.4948961,14.4640297
44.634277,15.0332964,14.5738085,0.677855358,14.5430263,14.4910644,14.460106
44.644768,14.832397,14.5704915,0.511767017,14.5396187,14.4872355,14.4561849
44.65526,13.9283883,14.5671814,-0.799245344,14.5362176,14.4834089,14.4522656
44.665752,15.5241747,14.5638786,0.979947001,14.5328234,14.4795848,14.4483484
44.676243,15.3622915,14.5605834,0.895381542,14.5294365,14.4757636,14.4444338
44.686735,15.6524758,14.5572953,1.04650875,14.5260563,14.4719445,14.4405209
44.697226,14.7648231,14.5540149,0.45913845,14.5226835,14.4681284,14.4366106
44.707718,15.1657509,14.5507418,0.784225152,14.5193175,14.4643145,14.432702
44.71821,15.5563492,14.5474762,1.00442668,14.5159587,14.4605031,14.4287956
44.728701,14.4568323,14.5442186,-0.295611752,14.5126075,14.4566946,14.4248917
44.739193,15.8429795,14.5409684,1.14105703,14.5092632,14.4528883,14.4209895
44.749684,15.0332964,14.5377262,0.703967456,14.5059267,14.4490849,14.4170899
44.760176,14.1774469,14.5344916,-0.597532155,14.5025973,14.4452837,14.413192
44.770668,14.832397,14.5312648,0.548755107,14.4992754,14.4414851,14.4092963
44.781159,14.106736,14.5280463,-0.649084238,14.4959614,14.4376893,14.4054031
44.791651,15.0996689,14.5248356,0.758177615,14.4926547,14.4338958,14.4015117
44.802142,14.5602198,14.5216332,0.196434592,14.489356,14.4301052,14.3976228
44.812634,14.5602198,14.5184388,0.204404077,14.4860648,14.4263168,14.3937356
44.823126,14.3178211,14.5152525,-0.444332596,14.4827815,14.4225309,14.3898506
44.833617,15.4272486,14.5120749,0.95664712,14.4795063,14.418748,14.3859681
44.844109,14.832397,14.5089054,0.568763208,14.4762389,14.4149672,14.3820874
44.8546,14.0356688,14.5057446,-0.685620732,14.4729798,14.4111894,14.3782091
44.865092,13.892444,14.5025921,-0.781119797,14.4697286,14.4074138,14.3743326
44.875584,14.8660687,14.4994482,0.605491953,14.4664855,14.4036408,14.3704583
44.886075,14.0712473,14.4963134,-0.651970918,14.4632511,14.3998706,14.3665864
44.896567,13.820275,14.493187,-0.820312133,14.4600247,14.3961027,14.3627164
44.907058,14.7648231,14.4900697,0.524169193,14.4568071,14.3923378,14.3588488
44.91755,14.9666295,14.4869611,0.692580984,14.4535977,14.388575,14.3549829
44.928042,14.5945195,14.4838616,0.332652896,14.450397,14.3848148,14.3511192
44.938533,15.4596248,14.4807714,0.989370208,14.4472052,14.3810575,14.347258
44.949025,15,14.4776902,0.722710046,14.4440219,14.3773025,14.3433985
44.959516,14.5945195,14.4746185,0.346267208,14.4408478,14.3735504,14.3395416
44.970008,14.3527001,14.471556,-0.34475482,14.4376823,14.3698005,14.3356863
44.9805,14.7648231,14.4685029,0.544352977,14.4345259,14.3660532,14.3318333
44.990991,14.525839,14.4654597,0.245722152,14.4313789,14.3623088,14.3279826
45.001483,13.56466,14.4624258,-0.947505066,14.4282408,14.3585667,14.3241338
45.011974,15.1986842,14.459402,0.859815181,14.4251124,14.3548275,14.3202874
45.022466,15.2970585,14.4563878,0.916881002,14.421993,14.3510905,14.3164428
45.032958,13.6381817,14.4533835,-0.902885258,14.4188832,14.3473561,14.3126003
45.043449,15.6204994,14.4503895,1.08171614,14.4157833,14.3436247,14.3087603
45.053941,14.5602198,14.4474055,0.335878404,14.4126928,14.3398955,14.304922
45.064432,14.6969385,14.444432,0.50250025,14.4096125,14.3361693,14.3010862
45.074924,13.96424,14.4414685,-0.690817254,14.4065417,14.3324452,14.2972521
45.085416,14.6287388,14.4385156,0.43614593,14.403481,14.3287238,14.2934202
45.095907,14.8660687,14.4355735,0.656121382,14.4004307,14.3250054,14.2895907
45.106399,15.2643375,14.4326418,0.911973526,14.3973904,14.3212892,14.285763
45.11689,13.7840488,14.4297212,-0.80353748,14.3943607,14.3175759,14.2819377
45.127382,14.2126704,14.4268113,-0.462753611,14.3913412,14.3138649,14.2781142
45.137874,13.96424,14.4239124,-0.677991434,14.3883323,14.3101565,14.2742928
45.148365,14.6628783,14.421025,0.491785836,14.3853343,14.3064511,14.2704739
45.158857,15,14.4181486,0.762791869,14.3823469,14.3027479,14.2666567
45.169348,14.4568323,14.4152838,0.203834419,14.3793707,14.2990477,14.262842
45.17984,15.0665192,14.4124303,0.808757581,14.3764053,14.2953498,14.259029
45.190332,13.820275,14.4095885,-0.767667622,14.3734511,14.2916545,14.2552181
45.200823,14.3527001,14.4067588,-0.232505269,14.3705085,14.2879621,14.2514096
45.211315,14.525839,14.4039407,0.349139423,14.367577,14.284272,14.2476029
45.221806,14.6287388,14.401135,0.477078486,14.3646575,14.2805849,14.2437987
45.232298,14.9666295,14.3983411,0.753849063,14.3617493,14.2769001,14.2399962
45.24279,14.6628783,14.3955597,0.517028662,14.358853,14.2732179,14.2361958
45.253281,14.4568323,14.3927909,0.253063948,14.355969,14.2695387,14.2323979
45.263773,14.7648231,14.3900346,0.612199715,14.3530969,14.2658617,14.2286016
45.274264,15.0996689,14.3872912,0.84402466,14.3502373,14.2621877,14.2248079
45.284756,14.7986486,14.3845606,0.643496699,14.3473898,14.2585161,14.2210158
45.295248,14.5945195,14.381843,0.461168638,14.344555,14.254847,14.2172259
45.305739,14.106736,14.3791389,-0.521922353,14.3417331,14.251181,14.2134384
45.316231,15,14.376448,0.789653104,14.3389239,14.2475172,14.2096526
45.326722,14.5945195,14.3737708,0.469838994,14.3361279,14.2438565,14.2058693
45.337214,15.0996689,14.3711072,0.853558259,14.333345,14.240198,14.2020877
45.347706,14.525839,14.3684574,0.396713573,14.3305754,14.2365422,14.1983082
45.358197,14,14.3658219,-0.60483214,14.3278196,14.2328894,14.1945312
45.368689,15.0332964,14.3632004,0.818593885,14.3250773,14.2292389,14.1907558
45.37918,14.1774469,14.3605936,-0.427956448,14.3223491,14.2255914,14.1869829
45.389672,13.7113092,14.3580011,-0.804171569,14.3196347,14.2219462,14.1832118
45.400164,14.3527001,14.3554234,-0.0521853185,14.3169346,14.2183037,14.1794427
45.410655,14.6969385,14.3528609,0.586581247,14.3142492,14.2146642,14.175676
45.421147,14.525839,14.3503133,0.418957927,14.3115781,14.211027,14.1719111
45.431638,14.2126704,14.3477813,-0.367574335,14.3089221,14.2073928,14.1681486
45.44213,13.820275,14.3452646,-0.724561683,14.3062809,14.203761,14.1643878
45.452622,13.2664992,14.3427636,-1.03743167,14.3036549,14.2001318,14.1606291
45.463113,14.3527001,14.3402789,0.111450505,14.3010445,14.1965056,14.1568728
45.473605,15.1657509,14.33781,0.909912547,14.2984495,14.1928818,14.1531183
45.484096,14.0712473,14.3353578,-0.513916864,14.2958706,14.1892611,14.1493662
45.494588,14.106736,14.332922,-0.475590142,14.2933075,14.1856426,14.1456158
45.50508,15.4596248,14.3305029,1.06260148,14.2907607,14.1820269,14.1418674
45.515571,15.2970585,14.3281012,0.984356329,14.2882306,14.1784142,14.1381215
45.526063,13.6381817,14.3257164,-0.829177149,14.285717,14.1748038,14.1343773
45.536554,15.2315462,14.3233495,0.952993572,14.2832206,14.1711965,14.1306355
45.547046,13.9283883,14.321,-0.626587374,14.2807411,14.1675915,14.1268955
45.557538,14.2126704,14.3186686,-0.325573587,14.2782791,14.1639893,14.1231575
45.568029,14.2828569,14.3163556,-0.183026576,14.275835,14.16039,14.1194219
45.578521,14.832397,14.314085,0.719938834,14.2734328,14.1567932,14.115688
45.589012,14.3874946,14.3119645,0.274827386,14.2711805,14.1531994,14.1119566
45.599504,14.6628783,14.3100749,0.593972558,14.2691591,14.149608,14.1082268
45.609996,14.1774469,14.3085848,-0.362129652,14.2675377,14.1460193,14.1044991
45.620487,14.5945195,14.3080804,0.535200076,14.2669043,14.1424337,14.1007739
45.630979,15.8113883,14.3087523,1.22582055,14.2674499,14.1388504,14.0970503
45.64147,14.6628783,14.3068869,0.596650137,14.2654504,14.1352703,14.0933292
45.651962,15.5884573,14.3047426,1.13301133,14.2631704,14.1316925,14.0896097
45.662454,14.7648231,14.3026191,0.679855869,14.2609106,14.1281174,14.0858923
45.672945,14.8660687,14.3005168,0.752031878,14.2586716,14.1245455,14.0821773
45.683437,15.4272486,14.2984357,1.06245606,14.2564531,14.1209759,14.0784641
45.693928,14.0356688,14.2963766,-0.510595481,14.2542559,14.1174094,14.0747532
45.70442,15.2315462,14.2943393,0.96809448,14.25208,14.1138454,14.071044
45.714912,14.7648231,14.2923244,0.687385408,14.2499259,14.110284,14.0673369
45.725403,14.7648231,14.2903323,0.688832869,14.247794,14.1067258,14.0636322
45.735895,14.3178211,14.2883632,0.171632966,14.2456845,14.10317,14.0599292
45.746386,14.8660687,14.2864176,0.761348216,14.2435979,14.0996173,14.0562285
45.756878,14.0712473,14.2844957,-0.461788274,14.2415343,14.0960671,14.0525296
45.76737,14.6287388,14.2825979,0.588337445,14.2394943,14.0925196,14.0488327
45.777861,14.6628783,14.2807248,0.618185652,14.2374783,14.0889752,14.0451383
45.788353,14.832397,14.2788764,0.743989603,14.2354865,14.0854332,14.0414455
45.798844,15.1657509,14.2770536,0.942707437,14.2335195,14.0818944,14.0377551
45.809336,14,14.2752563,-0.524648693,14.2315774,14.078358,14.0340664
45.819828,14.0356688,14.2734851,-0.487664033,14.2296609,14.0748244,14.0303797
45.830319,13.8564065,14.2717406,-0.644464211,14.2277704,14.071294,14.0266955
45.840811,14.2478068,14.2700229,-0.149050562,14.2259062,14.067766,14.0230129
45.851302,15.0332964,14.2683328,0.874621938,14.2240689,14.0642411,14.0193327
45.861794,13.9283883,14.2666705,-0.581620329,14.2222586,14.0607187,14.0156542
45.872286,14.5945195,14.2650365,0.574006147,14.2204761,14.0571991,14.0119778
45.882777,14.3874946,14.2634314,0.352226016,14.2187219,14.0536827,14.0083037
45.893269,14.525839,14.2618555,0.513793308,14.2169961,14.0501687,14.0046313
45.90376,14.5945195,14.2603095,0.578109006,14.2152997,14.0466579,14.0009613
45.914252,14.4913767,14.2587937,0.482268693,14.2136328,14.0431496,13.997293
45.924744,14.4913767,14.2573086,0.483805875,14.211996,14.0396442,13.9936267
45.935235,14.7648231,14.2558551,0.71341993,14.2103901,14.0361419,13.9899628
45.945727,14.3178211,14.2544332,0.251769372,14.2088152,14.0326421,13.9863006
45.956218,14.9331845,14.253044,0.824706328,14.2072723,14.0291454,13.9826408
45.96671,14.106736,14.2516876,-0.380725138,14.2057615,14.0256513,13.9789826
45.977202,14.3527001,14.2503648,0.31989887,14.2042837,14.0221601,13.9753265
45.987693,14.0356688,14.2490763,-0.461960447,14.2028395,14.018672,13.9716727
45.998185,13.7113092,14.2478225,-0.732470653,14.2014293,14.0151865,13.9680207
46.008676,14.5602198,14.2466041,0.560013966,14.200054,14.0117041,13.964371
46.019168,15.7162336,14.2454217,1.21277034,14.1987139,14.0082243,13.960723
46.02966,13.7477271,14.2442761,-0.704662307,14.1974099,14.0047474,13.957077
46.040151,15.0996689,14.2431678,0.925473412,14.1961427,14.0012737,13.9534333
46.050643,14.832397,14.2420976,0.768309449,14.1949127,13.9978025,13.9497914
46.061134,14.106736,14.2410662,-0.366510809,14.193721,13.9943346,13.9461518
46.071626,14.7648231,14.2400741,0.724395569,14.1925679,13.9908692,13.9425139
46.082118,14.106736,14.2391223,-0.363849319,14.1914544,13.9874067,13.938878
46.092609,13.7113092,14.2382116,-0.725880398,14.1903812,13.9839475,13.9352445
46.103101,14.832397,14.2373425,0.771397765,14.1893491,13.9804908,13.9316126
46.113592,14.525839,14.236516,0.537887581,14.1883588,13.9770374,13.9279831
46.124084,14.3874946,14.2357328,0.389566115,14.1874112,13.9735866,13.9243553
46.134576,15.1657509,14.2349938,0.964757514,14.1865071,13.9701387,13.9207295
46.145067,15.0332964,14.2343,0.893865994,14.1856474,13.966694,13.917106
46.155559,14.3874946,14.233652,0.392227743,14.184833,13.963252,13.9134843
46.16605,15.0665192,14.2330509,0.912944854,14.1840647,13.9598132,13.9098648
46.176542,14.9331845,14.2324975,0.837070516,14.1833434,13.9563771,13.9062471
46.187034,15.132746,14.2319928,0.949080161,14.1826702,13.9529439,13.9026313
46.197525,14.0712473,14.2315379,-0.400363056,14.182046,13.949514,13.8990179
46.208017,14.6969385,14.2311336,0.682499007,14.1814718,13.9460867,13.8954062
46.218508,14.0712473,14.230781,-0.399416753,14.1809486,13.9426627,13.8917968
46.229,14.1421356,14.2304812,-0.297229875,14.1804775,13.9392414,13.8881891
46.239492,15.4272486,14.2302353,1.09408105,14.1800595,13.9358231,13.8845834
46.249983,13.3790882,14.2300443,-0.922472859,14.1796959,13.932408,13.8809801
46.260475,14.1421356,14.2299095,-0.296266538,14.1793876,13.9289957,13.8773784
46.270966,14.525839,14.2298319,0.544065359,14.179136,13.9255866,13.873779
46.281458,13.5277493,14.2298129,-0.83789236,14.1789422,13.9221803,13.8701813
46.29195,14.5602198,14.2298535,0.574774946,14.1788074,13.9187769,13.8665856
46.302441,14.0712473,14.2299552,-0.398381644,14.1787329,13.9153769,13.8629923
46.312933,14.6969385,14.2301192,0.683241713,14.1787201,13.9119796,13.8594006
46.323424,15.1657509,14.2303469,0.967162871,14.1787702,13.9085856,13.8558113
46.333916,14.7309199,14.2306396,0.707304934,14.1788847,13.9051944,13.8522236
46.344408,14.0356688,14.2309988,-0.441961478,14.179065,13.9018062,13.8486379
46.354899,14.3874946,14.2314259,0.395055277,14.1793125,13.8984213,13.8450545
46.365391,15.2315462,14.2319225,0.999811844,14.1796288,13.8950392,13.8414728
46.375882,13.9283883,14.23249,-0.551454209,14.1800154,13.8916605,13.8378935
46.386374,14.9331845,14.2331302,0.836692489,14.1804739,13.8882845,13.8343158
46.396866,14.7986486,14.2338446,0.75153441,14.181006,13.8849116,13.83074
46.407357,13.3416641,14.2346349,-0.944971332,14.1816133,13.8815421,13.8271666
46.417849,15.3297097,14.2355029,1.04604342,14.1822977,13.8781754,13.8235949
46.42834,14.106736,14.2364503,-0.360158677,14.1830607,13.8748121,13.8200255
46.438832,15.6204994,14.237479,1.17601885,14.1839045,13.8714515,13.8164578
46.449324,15.3948043,14.238591,1.07527362,14.1848308,13.8680941,13.812892
46.459815,15.5241747,14.239788,1.13330787,14.1858415,13.8647401,13.8093285
46.470307,15.1657509,14.2410723,0.961602114,14.1869388,13.8613889,13.8057668
46.480798,15.0665192,14.2424457,0.907784941,14.1881246,13.8580412,13.8022073
46.49129,14.4568323,14.2439106,0.461434373,14.1894012,13.8546963,13.7986495
46.501782,14.7986486,14.2454692,0.743760327,14.1907709,13.8513545,13.7950936
46.512273,14.2478068,14.2471234,0.0261421494,14.1922356,13.8480162,13.7915401
46.522765,15.0996689,14.2488761,0.922384285,14.1937981,13.8446807,13.7879882
46.533256,14.9666295,14.2507292,0.846108919,14.1954605,13.8413488,13.7844387
46.543748,14.2828569,14.2526857,0.173698408,14.1972255,13.8380197,13.7808908
46.55424,14.106736,14.2547479,-0.384723222,14.1990957,13.8346937,13.7773449
46.564731,14.4222051,14.2569183,0.406554738,14.2010735,13.8313713,13.7738013
46.575223,15.2315462,14.2592001,0.986076113,14.2031621,13.8280518,13.7702593
46.585714,15,14.2615956,0.859304583,14.2053638,13.8247358,13.7667196
46.596206,14.8660687,14.2641083,0.775861098,14.2076821,13.8214226,13.7631816
46.606698,14.525839,14.2667409,0.509016816,14.2101197,13.8181128,13.7596456
46.617189,14.2828569,14.2694964,0.115587608,14.2126797,13.8148064,13.7561118
46.627681,14.5945195,14.2723784,0.567574798,14.2153656,13.811503,13.7525798
46.638172,13.7840488,14.2753897,-0.700957191,14.2181804,13.8082031,13.74905
46.648664,14.6287388,14.2785345,0.591780653,14.221128,13.8049062,13.7455218
46.659156,15.9059737,14.2818159,1.27442449,14.2242118,13.8016126,13.7419957
46.669647,15.3948043,14.2852374,1.05335981,14.2274351,13.7983225,13.7384718
46.680139,14.4568323,14.2888034,0.40991323,14.2308025,13.7950355,13.7349496
46.69063,14.5945195,14.2925172,0.549547338,14.2343172,13.791752,13.7314296
46.701122,14.525839,14.2963836,0.479015034,14.237984,13.7884715,13.7279113
46.711614,14.8660687,14.3004065,0.752105189,14.2418069,13.7851943,13.724395
46.722105,15.7162336,14.3045899,1.18812615,14.2457898,13.7819208,13.720881
46.732597,14.0712473,14.3089391,-0.487536461,14.2499381,13.7786502,13.7173686
46.743088,15.7162336,14.3134573,1.18438858,14.2542551,13.7753834,13.7138585
46.75358,14.7648231,14.3181495,0.668336414,14.2587456,13.7721195,13.71035
46.764072,14.2828569,14.32302,-0.200407332,14.2634141,13.768859,13.7068435
46.774563,15.4272486,14.328073,1.04841575,14.2682648,13.7656022,13.7033393
46.785055,14.2828569,14.3333145,-0.224627814,14.2733036,13.7623485,13.6998367
46.795546,14.3178211,14.338748,-0.14466135,14.2785341,13.7590985,13.6963365
46.806038,14.832397,14.3443784,0.698583286,14.2839612,13.7558515,13.6928378
46.81653,14.2828569,14.3502066,-0.259518286,14.2895859,13.752608,13.6893411
46.827021,14.4222051,14.3562218,0.256872123,14.2953972,13.7493681,13.6858467
46.837513,14.525839,14.3625141,0.404134778,14.3014856,13.7461314,13.6823539
46.848004,14.7309199,14.3689508,0.601638624,14.307718,13.7428985,13.6788634
46.858496,14.9666295,14.3757075,0.768714561,14.3142705,13.7396687,13.6753746
46.868988,14.6287388,14.3827065,0.496016508,14.3210652,13.7364423,13.6718876
46.879479,15,14.3899547,0.781053949,14.3281092,13.7332197,13.668403
46.889971,15.2643375,14.3974616,0.931061723,14.3354118,13.7300003,13.66492
46.900462,15.0665192,14.4052339,0.813194511,14.3429797,13.7267847,13.6614393
46.910954,14.3178211,14.4132816,-0.308966907,14.3508232,13.7235723,13.6579602
46.921446,14.2478068,14.4216131,-0.416900712,14.3589504,13.7203634,13.654483
46.931937,14.7648231,14.4302366,0.578434451,14.36737,13.7171583,13.6510082
46.942429,15.3948043,14.4391637,0.977568713,14.3760932,13.7139565,13.6475349
46.95292,14.6969385,14.4484027,0.498533617,14.3851285,13.7107585,13.6440639
46.963412,14.8996644,14.4579658,0.664604105,14.3944882,13.7075638,13.6405946
46.973904,14.0356688,14.4678632,-0.657414891,14.4041825,13.7043726,13.6371272
46.984395,14.525839,14.4781053,0.218480624,14.4142219,13.7011854,13.633662
46.994887,14.9666295,14.4887059,0.691320205,14.4246202,13.6980014,13.6301985
47.005378,14.8660687,14.4996756,0.605304192,14.4353881,13.6948213,13.6267373
47.01587,14.2828569,14.5110293,-0.477674026,14.4465406,13.6916446,13.6232776
47.026362,14.9666295,14.5227797,0.66622056,14.4580903,13.6884715,13.61982
47.036853,14.9666295,14.5349397,0.657031075,14.4700503,13.6853023,13.6163645
47.047345,15.0332964,14.5475265,0.696971955,14.4824379,13.6821365,13.6129107
47.057836,14.3178211,14.5605531,-0.492678394,14.4952661,13.6789746,13.6094592
47.068328,15.132746,14.5740382,0.747467579,14.5085537,13.6758162,13.6060093
47.07882,14.6287388,14.5879975,0.201844814,14.5223165,13.6726614,13.6025613
47.089311,14.6287388,14.6024474,0.162146311,14.5365709,13.6695106,13.5991156
47.099803,14.7986486,14.6174092,0.42572219,14.5513384,13.6663633,13.5956715
47.110294,14.6969385,14.6328995,0.253059257,14.5666356,13.66322,13.5922296
47.120786,14.5945195,14.6489415,-0.233285291,14.5824859,13.6600802,13.5887894
47.131278,15.5884573,14.6655553,0.960677845,14.5989094,13.6569441,13.5853511
47.141769,14.6969385,14.6827616,0.119066599,14.6159269,13.6538121,13.581915
47.152261,14.8660687,14.7005871,0.406794342,14.6335654,13.6506835,13.5784806
47.162752,14.5945195,14.7190531,-0.352893217,14.6518461,13.6475591,13.5750484
47.173244,16.3707055,14.7381891,1.27769965,14.6707987,13.6444382,13.5716179
47.183736,14.832397,14.7580206,0.272720314,14.6904488,13.6413212,13.5681892
47.194227,14.5602198,14.7785742,-0.467284049,14.7108232,13.6382083,13.5647628
47.204719,15.2643375,14.7998838,0.681508388,14.731956,13.6350989,13.561338
47.21521,15.3948043,14.8219772,0.756853407,14.753875,13.6319937,13.5579155
47.225702,15.7162336,14.8448919,0.933456868,14.7766179,13.6288922,13.5544946
47.236194,15.4596248,14.8686609,0.768741762,14.800218,13.6257945,13.5510756
47.246685,15.4596248,14.8933189,0.752533015,14.8247099,13.6227011,13.5476588
47.257177,14.3527001,14.9189095,-0.75246889,14.8501376,13.6196113,13.5442437
47.267668,15.132746,14.9454691,0.432754963,14.8765376,13.6165257,13.5408308
47.27816,15.8745079,14.9730461,0.949453394,14.9039586,13.6134439,13.5374195
47.288652,14.9666295,15.001684,-0.18722833,14.9324442,13.610366,13.5340101
47.299143,15.2970585,15.0314283,0.51539328,14.9620402,13.6072924,13.530603
47.309635,15.6524758,15.062336,0.768205597,14.9928038,13.6042225,13.5271975
47.320126,15.9373775,15.0944554,0.918107869,15.0247835,13.601157,13.5237942
47.330618,14.3527001,15.12785,-0.88042599,15.0580432,13.5980953,13.5203925
47.34111,15.5563492,15.1625777,0.627512157,15.0926408,13.5950376,13.5169927
47.351601,15.9373775,15.1986993,0.859463875,15.1286377,13.5919843,13.5135952
47.362093,14.6969385,15.2362901,-0.734405664,15.1661093,13.5889348,13.5101993
47.372584,14.9331845,15.2754155,-0.585005132,15.2051214,13.5858897,13.5068056
47.383076,14.6969385,15.31616,-0.786906308,15.2457587,13.5828485,13.5034135
47.393568,14.6287388,15.3586017,-0.854320141,15.2880999,13.5798114,13.5000233
47.404059,16.3095064,15.4028235,0.952198984,15.332228,13.5767788,13.4966353
47.414551,15.8429795,15.4489265,0.627736448,15.3782445,13.5737501,13.493249
47.425042,14.4568323,15.4970004,-1.01988633,15.4262398,13.5707259,13.4898648
47.435534,16.0934769,15.5471598,0.739132692,15.4763285,13.5677057,13.4864823
47.446026,15.2970585,15.5995123,-0.549957964,15.528619,13.5646897,13.4831017
47.456517,15.7480157,15.6541724,0.306338639,15.5832261,13.5616783,13.4797233
47.467009,16.2172747,15.7112785,0.711334121,15.6402887,13.5586709,13.4763465
47.4775,15.3297097,15.7709566,-0.664264161,15.6999334,13.555668,13.4729719
47.487992,15.8113883,15.8333646,-0.148243889,15.7623185,13.5526692,13.4695989
47.498484,15.9059737,15.8986537,0.0855569055,15.827596,13.5496748,13.4662279
47.508975,15.3948043,15.9669857,-0.756426735,15.8959281,13.546685,13.462859
47.519467,16.3095064,16.0385542,0.520530737,15.967509,13.5436994,13.4594917
47.529958,15.9687194,16.1135394,-0.380552164,16.0425198,13.5407184,13.4561267
47.54045,15.7797338,16.1921643,-0.642207468,16.121184,13.5377416,13.4527633
47.550942,15.6843871,16.2746464,-0.768283345,16.2037201,13.5347692,13.4494017
47.561433,15.7162336,16.3612194,-0.803110045,16.2903622,13.5318016,13.4460424
47.571925,15.5884573,16.4521608,-0.929356497,16.3813888,13.5288383,13.4426846
47.582416,16.8226038,16.547735,0.524279309,16.4770653,13.5258797,13.4393291
47.592908,17.2626765,16.6482654,0.783843794,16.5777157,13.5229254,13.4359752
47.6034,16.0934769,16.754073,-0.812770591,16.6836622,13.5199756,13.4326231
47.613891,16.7332005,16.8655045,-0.363736188,16.7952525,13.5170307,13.4292733
47.624383,16.0623784,16.9829698,-0.95947452,16.9128972,13.5140902,13.4259251
47.634874,16.2172747,17.106868,-0.943182522,17.0369969,13.5111545,13.422579
47.645366,16.0934769,17.2376823,-1.06967536,17.1680358,13.5082233,13.4192346
47.655858,16,17.3759017,-1.17298835,17.306504,13.5052967,13.415892
47.666349,16.5529454,17.5220581,-0.984435242,17.4529347,13.5023751,13.4125517
47.676841,17.5783958,17.676777,-0.313657676,17.6079547,13.499458,13.4092129
47.687332,17.4355958,17.8406826,-0.636464334,17.7721897,13.4965458,13.4058764
47.697824,17.6351921,18.0145241,-0.615899328,17.9463902,13.4936382,13.4025414
47.708316,17.6351921,18.1990746,-0.750921118,18.1313308,13.4907354,13.3992083
47.718807,17.5783958,18.395183,-0.903762802,18.327862,13.4878377,13.3958774
47.729299,16.881943,18.6038447,-1.3122125,18.5369806,13.4849446,13.3925481
47.73979,17.0587221,18.8260779,-1.32941934,18.7597067,13.4820567,13.389221
47.750282,16.8226038,19.0630982,-1.49682809,18.9972576,13.4791734,13.3858955
47.760774,17.691806,19.316187,-1.27451207,19.2509165,13.476295,13.3825719
47.771265,18.7882942,19.5867669,-0.893572999,19.5221076,13.4734218,13.3792505
47.781757,17.8044938,19.876507,-1.43944892,19.8125022,13.4705534,13.3759306
47.792248,18.2756669,20.1871606,-1.38256779,20.1238552,13.4676903,13.372613
47.80274,18.973666,20.5208174,-1.24384543,20.4582587,13.4648319,13.3692969
47.813232,19.0262976,20.8797334,-1.36140949,20.8179704,13.4619786,13.3659827
47.823723,19.6468827,21.2664494,-1.27262196,21.2055332,13.4591307,13.3626707
47.834215,20.1246118,21.6839618,-1.24873938,21.6239458,13.4562876,13.3593602
47.844706,20.1990099,22.1355124,-1.39158275,22.0764517,13.45345,13.356052
47.855198,20.1246118,22.6249807,-1.58125548,22.5669328,13.4506173,13.3527454
47.86569,21.7715411,23.1566724,-1.17691602,23.0996967,13.4477898,13.3494406
47.876181,22.2485955,23.7355352,-1.21940138,23.6796932,13.4449678,13.346138
47.886673,21.7715411,24.3674725,-1.61118944,24.3128277,13.4421509,13.342837
47.897164,23.4093998,25.0590976,-1.28440562,25.0057154,13.4393395,13.3395381
47.907656,24.1453929,25.8184236,-1.29345687,25.7663713,13.4365332,13.3362409
47.918148,24.4948974,26.6546606,-1.46961327,26.6040072,13.4337323,13.3329455
47.928639,24.1453929,27.578702,-1.85291906,27.529518,13.4309371,13.3296523
47.939131,27.0924344,28.6038388,-1.22939189,28.5561963,13.428147,13.3263607
47.949622,27.3678644,29.7456465,-1.54200587,29.6996186,13.4253627,13.3230712
47.960114,28.6006993,31.0235105,-1.55653822,30.9791717,13.4225836,13.3197833
47.970606,30.3479818,32.4609139,-1.45359281,32.4183394,13.4198101,13.3164973
47.981097,32.3419233,34.0873754,-1.32115559,34.0466413,13.4170424,13.3132135
47.991589,34.2928564,35.9422516,-1.28428782,35.9034373,13.4142801,13.3099312
48.00208,37.0405184,38.0807864,-1.01993531,38.0439784,13.4115236,13.3066512
48.012572,39.2045916,40.5917652,-1.17778334,40.5570702,13.4087726,13.3033727
48.023064,42.4264069,43.6290456,-1.09664887,43.5966123,13.4060273,13.300096
48.033555,48.908077,47.467641,1.20018168,47.4376883,13.403288,13.2968215
48.044047,54.5068803,52.5749925,1.38992366,52.5478203,13.4005543,13.2935486
48.054538,62.6817358,59.6520708,1.74059329,59.6280075,13.3978266,13.2902779
48.06503,71.9166184,69.5906651,1.52510764,69.5699392,13.3951045,13.2870087
48.075522,85.2467008,83.2919087,1.39813879,83.2745086,13.3923884,13.2837414
48.086013,101.720204,101.394289,0.570890221,101.379926,13.3896784,13.2804763
48.096505,123.190909,123.987225,-0.892365768,123.975422,13.3869742,13.2772127
48.106996,148.057421,150.355227,-1.51585138,150.345446,13.3842762,13.2739514
48.117488,176.281026,178.858861,-1.60556387,178.850599,13.3815841,13.2706915
48.12798,207.089353,206.882938,0.454328895,206.87576,13.3788981,13.2674335
48.138471,234.258404,230.90232,1.83196189,230.895857,13.3762184,13.2641777
48.148963,251.624721,246.727048,2.21306861,246.720969,13.3735447,13.2609235
48.159454,256.444926,250.265487,2.4858478,250.259464,13.3708775,13.2576714
48.169946,243.474845,239.351165,2.03068465,239.344836,13.3682163,13.2544209
48.180438,217.492529,215.737807,1.32465908,215.73075,13.3655614,13.2511722
48.190929,183.21572,184.645552,-1.19575598,184.637266,13.3629131,13.2479257
48.201421,149.405489,151.780019,-1.54095115,151.769888,13.3602709,13.2446807
48.211912,122.633601,121.476667,1.07560844,121.463945,13.3576355,13.241438
48.222404,101.72512,96.4486314,2.29706082,96.4325265,13.3550063,13.2381967
48.232896,85.0529247,77.7700942,2.69867199,77.7500193,13.3523837,13.2349573
48.243387,71.1125868,64.9437546,2.48371338,64.9195917,13.3497678,13.2317201
48.253879,61.7980582,56.4582549,2.31080145,56.4303173,13.3471584,13.2284845
48.26437,54.405882,50.6772628,1.93096329,50.6459777,13.3445559,13.2252509
48.274862,49.6789694,46.4245623,1.80399752,46.3902348,13.3419599,13.222019
48.285354,44.7883914,43.0499654,1.3184938,43.012755,13.3393706,13.2187889
48.295845,40.4598566,40.238027,0.470987937,40.1980092,13.3367884,13.2155609
48.306337,36.9323706,37.8333473,-0.949197925,37.7905639,13.3342129,13.2123345
48.316828,34.525353,35.7488142,-1.10610179,35.7032991,13.3316446,13.2091103
48.32732,32.3419233,33.9253361,-1.25833731,33.8771227,13.3290829,13.2058876
48.337812,30.6757233,32.3192394,-1.2819969,32.2683623,13.3265312,13.2026667
48.348303,28.7402157,30.8962353,-1.46833905,30.8427001,13.3240622,13.199448
48.358795,26.6645833,29.6284813,-1.72159752,29.5722439,13.3217793,13.1962309
48.369286,27.1661554,28.4936326,-1.15216198,28.4347858,13.3193741,13.1930159
48.379778,25.5929678,27.4730532,-1.37116206,27.4116961,13.3168486,13.1898024
48.39027,24,26.5516634,-1.59739268,26.4878389,13.3143304,13.1865908
48.400761,24.3104916,25.7168142,-1.18588477,25.6505659,13.3118198,13.1833813
48.411253,23.3880311,24.9576561,-1.25284673,24.8890269,13.3093165,13.1801734
48.421744,22.737634,24.2652809,-1.23598015,24.1943145,13.3068208,13.1769676
48.432236,20.808652,23.6318518,-1.680238,23.5585908,13.3043324,13.1737634
48.442728,21.7944947,23.0508331,-1.12086503,22.97532,13.3018517,13.170561
48.453219,20.6397674,22.5165862,-1.36997037,22.4388629,13.2993788,13.1673608
48.463711,21.023796,22.0240896,-1.00014675,21.9441969,13.2969134,13.1641621
48.474202,21.725561,21.5691561,0.395480606,21.4871344,13.294456,13.1609655
48.484694,19.8746069,21.1479628,-1.12843074,21.0638511,13.2920063,13.1577705
48.495186,19.4422221,20.7572764,-1.14675815,20.6711127,13.2895645,13.1545773
48.505677,19.3390796,20.3942442,-1.02721207,20.3060659,13.2871308,13.1513862
48.516169,18.973666,20.0562499,-1.04047296,19.9660925,13.284705,13.1481967
48.52666,19.3649167,19.7410985,-0.613336549,19.6489968,13.2822875,13.1450094
48.537152,18.8414437,19.4467224,-0.777996626,19.3527099,13.279878,13.1418235
48.547644,19.1833261,19.1713616,0.109382323,19.0754703,13.2774767,13.1386395
48.558135,17.8325545,18.913438,-1.03965548,18.8156991,13.275084,13.1354576
48.568627,17.691806,18.6714675,-0.989778517,18.5719105,13.2726994,13.1322773
48.579118,18.0277564,18.4442054,-0.645328607,18.3428589,13.2703235,13.1290991
48.58961,17.2626765,18.2304463,-0.983752911,18.1273374,13.2679558,13.1259225
48.600102,17.7482393,18.0291624,-0.530021771,17.9243171,13.2655968,13.1227476
48.610593,17.5214155,17.8394211,-0.563919908,17.7328644,13.2632467,13.1195749
48.621085,17.3205081,17.6603253,-0.582938481,17.5520806,13.2609052,13.1164038
48.631576,16.4316767,17.4911263,-1.02929569,17.3812162,13.2585726,13.1132347
48.642068,17,17.33108,-0.575395517,17.2195257,13.2562488,13.1100672
48.65256,16.8226038,17.1795532,-0.597452379,17.0663749,13.2539339,13.1069015
48.663051,16.7032931,17.0359658,-0.576777909,16.9211828,13.2516284,13.103738
48.673543,16.9410743,16.8997482,0.203288223,16.7833784,13.2493317,13.100576
48.684034,16.4620776,16.7704289,-0.555293829,16.6524894,13.2470445,13.0974161
48.694526,16.1554944,16.647527,-0.701450369,16.5280339,13.2447664,13.0942577
48.705018,15.4272486,16.5306359,-1.05042243,16.4096041,13.2424977,13.0911012
48.715509,16.5529454,16.4193797,0.365466299,16.2968237,13.2402387,13.0879467
48.726001,16.3095064,16.313382,-0.0622539961,16.1893147,13.237989,13.0847939
48.736492,15.2643375,16.2123346,-0.973651395,16.0867685,13.2357492,13.0816431
48.746984,16.1245155,16.1159153,0.092737427,15.9888618,13.2335189,13.0784938
48.757476,15.4272486,16.0238535,-0.772401996,15.8953233,13.2312985,13.0753464
48.767967,16.881943,15.9358976,0.972648655,15.8059008,13.2290882,13.0722011
48.778459,15.1986842,15.8517904,-0.808149889,15.7203359,13.2268877,13.0690574
48.78895,16.0623784,15.7713243,0.539494277,15.6384206,13.2246976,13.0659157
48.799442,16.673332,15.6942767,0.989472252,15.5599312,13.2225174,13.0627756
48.809934,14.4568323,15.6204621,-1.07871675,15.4846819,13.2203476,13.0596372
48.820425,15.8745079,15.5497075,0.569912586,15.4124988,13.2181883,13.056501
48.830917,15.3948043,15.481832,-0.295004594,15.3432004,13.2160394,13.0533664
48.841408,15.9373775,15.4166923,0.721585155,15.2766429,13.2139013,13.0502338
48.8519,14.1774469,15.3541302,-1.08475037,15.2126672,13.2117737,13.0471027
48.862392,15.5884573,15.2940158,0.542624586,15.1511429,13.2096569,13.0439735
48.872883,14.832397,15.236227,-0.635476205,15.0919475,13.2075512,13.0408464
48.883375,15.4272486,15.1806335,0.496603572,15.0349499,13.2054564,13.0377208
48.893866,15.4596248,15.1271342,0.576620003,14.9800488,13.2033729,13.0345973
48.904358,15.7797338,15.0756142,0.83911837,14.9271283,13.2013004,13.0314753
48.91485,15.1986842,15.0259804,0.415576468,14.8760951,13.1992394,13.0283552
48.925341,14.9331845,14.9781448,-0.212038426,14.8268608,13.19719,13.0252371
48.935833,14.6287388,14.9320118,-0.550702275,14.779329,13.195152,13.0221206
48.946324,15.0332964,14.8875086,0.381821662,14.7334267,13.1931259,13.0190062
48.956816,15.1657509,14.84455,0.566745911,14.689068,13.1911115,13.0158933
48.967308,14.7986486,14.803068,-0.0664783222,14.6461847,13.189109,13.0127822
48.977799,15.2970585,14.7629982,0.730794309,14.6047119,13.1871188,13.0096732
48.988291,14.8996644,14.724269,0.418802388,14.5645774,13.1851406,13.0065657
48.998782,15.1986842,14.686827,0.715441911,14.5257278,13.1831749,13.0034603
49.009274,14.9331845,14.6506081,0.531579195,14.488098,13.1812215,13.0003564
49.019766,15.1986842,14.6155617,0.763624523,14.4516375,13.1792807,12.9972544
49.030257,14.3527001,14.5816401,-0.478476762,14.4162981,13.1773528,12.9941544
49.040749,14.3874946,14.5487885,-0.401614127,14.3820244,13.1754376,12.991056
49.05124,14.5602198,14.5169674,0.207972092,14.3487768,13.1735356,12.9879596
49.061732,14.8660687,14.4861276,0.616393699,14.3165056,13.1716465,12.9848648
49.072224,14.3874946,14.4562311,-0.262176439,14.2851724,13.1697707,12.9817717
49.082715,14.3874946,14.4272417,-0.199366928,14.2547411,13.1679086,12.9786808
49.093207,14.6287388,14.3991173,0.479188425,14.2251685,13.1660598,12.9755913
49.103698,13.7113092,14.3718281,-0.812723126,14.1964251,13.1642249,12.972504
49.11419,15.2315462,14.3453358,0.941387513,14.1684718,13.1624037,12.9694182
49.124682,14.1421356,14.3196114,-0.421278793,14.1412797,13.1605966,12.9663341
49.135173,14.1421356,14.2946275,-0.3905021,14.1148208,13.1588038,12.9632522
49.145665,14.7648231,14.2703508,0.703187235,14.0890614,13.1570252,12.9601718
49.156156,13.1529464,14.2467587,-1.04585482,14.063979,13.1552612,12.9570934
49.166648,14.2828569,14.2238212,0.24297252,14.0395428,13.1535118,12.9540166
49.17714,13.7840488,14.2015159,-0.646116982,14.0157304,13.1517772,12.9509415
49.187631,14.2828569,14.1798215,0.320991204,13.9925201,13.1500578,12.9478686
49.198123,14.4568323,14.1587116,0.546004257,13.9698852,13.1483533,12.9447971
49.208614,13.892444,14.1381691,-0.495706708,13.9478084,13.1466644,12.9417278
49.219106,14.4913767,14.1181698,0.610906625,13.9262649,13.1449909,12.9386599
49.229598,13.96424,14.0986965,-0.366683004,13.9052374,13.143333,12.9355938
49.240089,14.6287388,14.0797324,0.740949702,13.884709,13.1416913,12.9325299
49.250581,14.2828569,14.0612564,0.470744568,13.8646579,13.1400654,12.9294674
49.261072,13.0766968,14.0432553,-0.983137049,13.845071,13.138456,12.926407
49.271564,14.2478068,14.0257096,0.471271969,13.8259282,13.1368629,12.9233481
49.282056,13.6747943,14.0086057,-0.57776411,13.8072157,13.1352864,12.920291
49.292547,15,13.9919306,1.00402661,13.7889203,13.1337269,12.917236
49.303039,14.4913767,13.975667,0.718129327,13.7710243,13.1321844,12.9141824
49.31353,14.6628783,13.9598048,0.83849481,13.7535174,13.1306593,12.911131
49.324022,14.6628783,13.944328,0.847673488,13.7363831,13.1291515,12.908081
49.334514,14.2828569,13.9292259,0.59466879,13.7196106,13.1276614,12.9050329
49.345005,14.525839,13.9144882,0.78188929,13.7031894,13.1261893,12.9019868
49.355497,14.106736,13.9001008,0.45457141,13.6871048,13.1247352,12.8989422
49.365988,14.3178211,13.8860557,0.657088527,13.6713488,13.1232997,12.8958997
49.37648,14.6628783,13.87234,0.889122229,13.6559079,13.1218825,12.8928587
49.386972,13.453624,13.858945,-0.636648183,13.6407733,13.1204842,12.8898195
49.397463,13.8564065,13.8458625,0.102683977,13.6259366,13.1191051,12.8867823
49.407955,14.4222051,13.8330809,0.767544263,13.6113856,13.1177451,12.8837466
49.418446,14,13.820594,0.42356346,13.5971141,13.1164048,12.8807131
49.428938,14.4222051,13.808391,0.783462894,13.5831107,13.1150841,12.877681
49.43943,14,13.7964651,0.451148447,13.5693684,13.1137835,12.8746506
49.449921,14.1774469,13.7848096,0.62660773,13.5558805,13.1125033,12.8716224
49.460413,14.4568323,13.7734151,0.826690537,13.5426367,13.1112435,12.8685956
49.470904,14.0712473,13.7622764,0.555851492,13.5296321,13.1100047,12.8655709
49.481396,15.0665192,13.7513847,1.14679311,13.516857,13.1087869,12.8625478
49.491888,14.1774469,13.7407346,0.66084209,13.504306,13.1075904,12.8595263
49.502379,14.0712473,13.7303207,0.5838892,13.4919734,13.1064157,12.856507
49.512871,14.2126704,13.7201349,0.701808707,13.4798506,13.1052628,12.8534891
49.523362,14.525839,13.7101735,0.90314203,13.4679338,13.1041323,12.8504733
49.533854,13.96424,13.7004289,0.513625446,13.4562147,13.1030241,12.847459
49.544346,14.1774469,13.6908968,0.697531408,13.4446889,13.1019389,12.8444465
49.554837,13.8564065,13.6815728,0.418131098,13.4333518,13.1008768,12.841436
49.565329,12.9614814,13.6724503,-0.843189731,13.4221961,13.0998381,12.838427
49.57582,13.7840488,13.6635262,0.347163573,13.4112186,13.0988233,12.8354201
49.586312,14.106736,13.6547942,0.672266126,13.4004125,13.0978325,12.8324147
49.596804,14.1774469,13.6462509,0.728831953,13.389774,13.0968661,12.829411
49.607295,14.7309199,13.6378926,1.04547942,13.3792994,13.0959246,12.8264094
49.617787,14.1421356,13.6297139,0.715836364,13.3689824,13.0950081,12.8234093
49.628278,13.96424,13.6217123,0.58525866,13.3588206,13.0941171,12.8204112
49.63877,14.2478068,13.6138826,0.79619358,13.3488079,13.0932519,12.8174146
49.649262,13.7113092,13.6062219,0.324171653,13.3389414,13.0924128,12.8144198
49.659753,13.3790882,13.5987275,-0.468656949,13.3292179,13.0916004,12.811427
49.670245,13.7840488,13.5913945,0.438923923,13.3196321,13.0908149,12.8084358
49.680736,14.3874946,13.5842213,0.896255159,13.310182,13.0900567,12.8054466
49.691228,13.96424,13.5772032,0.622122847,13.3008624,13.0893261,12.8024588
49.70172,14.1774469,13.5703381,0.779171849,13.2916707,13.0886237,12.7994728
49.712211,14.1421356,13.5636237,0.760599682,13.2826047,13.0879499,12.7964889
49.722703,14.1421356,13.5570561,0.764904899,13.2736593,13.0873049,12.7935065
49.733194,14.0712473,13.5506338,0.72153547,13.2648332,13.0866893,12.7905261
49.743686,15.0665192,13.5443532,1.23376091,13.2561217,13.0861034,12.7875472
49.754178,15.2643375,13.5382123,1.31382083,13.2475229,13.0855478,12.78457
49.764669,13.892444,13.5322096,0.60019532,13.2390347,13.0850229,12.7815949
49.775161,13.7840488,13.5263415,0.507648764,13.2306529,13.084529,12.7786213
49.785652,13.6381817,13.5206071,0.342891551,13.2223763,13.0840669,12.7756497
49.796144,14.1421356,13.5150032,0.791916912,13.214201,13.0836367,12.7726796
49.806636,14.2126704,13.5095285,0.838535559,13.2061252,13.0832391,12.7697113
49.817127,13.9283883,13.5041816,0.651311517,13.1981473,13.0828746,12.766745
49.827619,13.6014705,13.4989596,0.320173213,13.1902634,13.0825436,12.7637802
49.83811,13.7113092,13.4938619,0.46631244,13.1824729,13.0822467,12.7608174
49.848602,14.2126704,13.4888858,0.850755286,13.1747721,13.0819843,12.7578561
49.859094,13.7840488,13.4840304,0.547739341,13.1671596,13.0817571,12.7548965
49.869585,14.3874946,13.4792944,0.952995355,13.159634,13.0815656,12.751939
49.880077,14.1774469,13.4746757,0.838314482,13.1521921,13.0814103,12.748983
49.890568,13.4907376,13.4701737,0.143400893,13.1448332,13.0812919,12.746029
49.90106,14.1774469,13.4657864,0.843599708,13.137554,13.0812108,12.7430765
49.911552,13.9283883,13.4615129,0.68328278,13.1303536,13.0811677,12.7401257
49.922043,14.2828569,13.4573525,0.908572697,13.1232307,13.0811632,12.737177
49.932535,14.5945195,13.4533033,1.06827721,13.1161823,13.0811979,12.7342297
49.943026,14.6287388,13.4493651,1.08598976,13.1092082,13.0812724,12.7312845
49.953518,13.7477271,13.4455361,0.549719033,13.1023052,13.0813874,12.7283407
49.96401,13.892444,13.4418158,0.671288466,13.0954726,13.0815436,12.7253987
49.974501,14.1421356,13.4382037,0.839006507,13.0887094,13.0817415,12.7224588
49.984993,13.3790882,13.4346984,-0.235818139,13.082013,13.081982,12.7195203
49.995484,14.3527001,13.4312997,0.959896053,13.075383,13.0822656,12.7165838
50.005976,14.1774469,13.4280063,0.865702361,13.0688168,13.0825932,12.7136488
50.016468,14.3178211,13.424818,0.944988408,13.0623138,13.0829655,12.7107156
50.026959,14.6287388,13.4217344,1.09863754,13.0558731,13.0833831,12.7077843
50.037451,14.5945195,13.4187544,1.08432702,13.0494923,13.0838469,12.7048546
50.047942,14.1421356,13.4158782,0.852207373,13.0431714,13.0843576,12.7019269
50.058434,14.0356688,13.4131048,0.789027305,13.0369078,13.0849162,12.6990006
50.068926,13.453624,13.410434,0.207822224,13.030701,13.0855232,12.6960761
50.079417,14.4913767,13.4078658,1.04091834,13.0245505,13.0861796,12.6931536
50.089909,14.4568323,13.4053994,1.02539403,13.0184539,13.0868863,12.6902326
50.1004,14.8996644,13.4030351,1.22336804,13.0124113,13.0876441,12.6873136
50.110892,14.3178211,13.4007722,0.957626681,13.0064204,13.0884539,12.684396
50.121384,13.4907376,13.3986109,0.303523784,13.0004809,13.0893167,12.6814803
50.131875,13.5277493,13.3965512,0.362212729,12.9945922,13.0902332,12.6785665
50.142367,14.3527001,13.3945927,0.978829582,12.9887523,13.0912046,12.6756542
50.152858,13.7477271,13.3927359,0.595811368,12.9829612,13.0922317,12.6727439
50.16335,13.820275,13.3909804,0.655205764,12.977217,13.0933157,12.6698351
50.173842,13.5277493,13.3893264,0.372052176,12.9715193,13.0944574,12.666928
50.184333,14.3178211,13.3877744,0.964389271,12.9658676,13.0956579,12.6640229
50.194825,14.7309199,13.3863242,1.15956703,12.9602602,13.0969184,12.6611193
50.205316,14.4568323,13.3849762,1.03530482,12.9546972,13.0982398,12.6582177
50.215808,14.1421356,13.3837307,0.870864497,12.9491766,13.0996234,12.6553176
50.2263,14.525839,13.3825879,1.06922923,12.9436983,13.1010703,12.6524192
50.236791,13.4164079,13.3815484,0.186706807,12.938262,13.1025815,12.6495228
50.247283,13.7113092,13.3806125,0.575062343,12.9328658,13.1041585,12.6466279
50.257774,14.3874946,13.3797808,1.0038495,12.9275101,13.1058022,12.643735
50.268266,13.5277493,13.3790536,0.385610811,12.9221931,13.1075141,12.6408436
50.278758,13.96424,13.3784316,0.765381258,12.9169145,13.1092955,12.6379539
50.289249,13.96424,13.3779155,0.765718347,12.9116743,13.1111474,12.6350662
50.299741,14.6287388,13.3775058,1.11858529,12.9064707,13.1130716,12.6321799
50.310232,13.56466,13.3772033,0.432962607,12.901304,13.115069,12.6292957
50.320724,13.4907376,13.3770089,0.337236865,12.8961726,13.1171415,12.6264129
50.331216,14,13.3769232,0.789352158,12.8910764,13.1192904,12.6235319
50.341707,14.4913767,13.3769471,1.05566548,12.8860152,13.1215169,12.6206528
50.352199,14.525839,13.3770817,1.07180099,12.8809875,13.1238229,12.6177753
50.36269,13.8564065,13.3773278,0.69215511,12.8759937,13.1262096,12.6148997
50.373182,14.106736,13.3776864,0.85384398,12.8710321,13.1286791,12.6120256
50.383674,14.2828569,13.3781588,0.951156186,12.8661029,13.1312327,12.6091532
50.394165,13.4164079,13.3787458,0.194067121,12.8612057,13.133872,12.6062828
50.404657,13.7477271,13.3794489,0.606859285,12.8563392,13.136599,12.6034138
50.415148,13.892444,13.3802691,0.715663952,12.8515039,13.1394152,12.6005469
50.42564,13.3041347,13.3812079,-0.277620596,12.8466981,13.1423228,12.5976814
50.436132,14.1421356,13.3822666,0.87170469,12.841922,13.1453235,12.5948177
50.446623,14.0712473,13.3834464,0.829337621,12.8371755,13.1484188,12.5919559
50.457115,13.4164079,13.3847491,0.177929099,12.8324572,13.1516113,12.5890956
50.467606,13.453624,13.386176,0.25970767,12.8277675,13.1549025,12.5862373
50.478098,13.56466,13.3877289,0.420631759,12.8231051,13.1582949,12.5833805
50.48859,13.114877,13.3894094,-0.523958333,12.8184699,13.1617905,12.5805253
50.499081,13.8564065,13.391219,0.682046518,12.8138621,13.1653911,12.5776722
50.509573,13.6014705,13.3931599,0.456410554,12.8092802,13.1690996,12.5748205
50.520064,13.190906,13.3952336,-0.452026151,12.8047247,13.1729176,12.5719708
50.530556,13.7477271,13.3974424,0.591848529,12.8001945,13.1768482,12.5691226
50.541048,13.2287566,13.3997881,-0.413559662,12.7956894,13.1808934,12.5662761
50.551539,13.3041347,13.4022727,-0.313269824,12.7912095,13.1850553,12.5634315
50.562031,13.4164079,13.4048986,0.107281072,12.7867536,13.1893374,12.5605885
50.572522,14.5602198,13.4076678,1.07356975,12.7823223,13.1937414,12.5577474
50.583014,12.8452326,13.4105829,-0.75189782,12.7779141,13.1982708,12.5549077
50.593506,14.0712473,13.4136462,0.810926042,12.7735293,13.2029281,12.5520698
50.603997,12.9614814,13.4168599,-0.674817391,12.7691679,13.2077156,12.5492339
50.614489,13.7840488,13.4202271,0.603176276,12.7648287,13.2126372,12.5463994
50.62498,12.8840987,13.4237499,-0.734609558,12.7605122,13.217695,12.5435669
50.635472,12.7671453,13.4274317,-0.812580093,12.7562173,13.222893,12.5407358
50.645964,13.4164079,13.4312751,-0.121931269,12.751944,13.228234,12.5379065
50.656455,12.922848,13.4352826,-0.715845362,12.7476924,13.2337207,12.5350791
50.666947,13.3416641,13.439458,-0.312720176,12.7434615,13.2393577,12.5322532
50.677438,13.7840488,13.4438037,0.583305299,12.7392517,13.2451471,12.5294293
50.68793,13.2664992,13.4483238,-0.426409004,12.7350619,13.2510939,12.5266068
50.698422,13.3790882,13.4530213,-0.2719065,12.7308922,13.2572012,12.523786
50.708913,13.453624,13.4578992,-0.0653847867,12.7267428,13.263472,12.5209673
50.719405,14.8996644,13.4629621,1.19862518,12.7226126,13.2699116,12.5181499
50.729896,14.0356688,13.4682127,0.753296852,12.7185021,13.2765228,12.5153345
50.740388,13.7477271,13.4736559,0.523518069,12.7144102,13.283311,12.5125206
50.75088,13.820275,13.4792952,0.583934687,12.7103371,13.2902798,12.5097084
50.761371,12.6885775,13.4851342,-0.892500254,12.7062829,13.297433,12.5068982
50.771863,14.6287388,13.4911783,1.06656482,12.7022465,13.3047765,12.5040894
50.782354,13.7840488,13.4974307,0.535367191,12.6982286,13.3123135,12.5012826
50.792846,12.8452326,13.5038972,-0.811581573,12.6942281,13.3200505,12.4984772
50.803338,13.7113092,13.510582,0.448025928,12.6902451,13.3279916,12.4956735
50.813829,14.4568323,13.5174892,0.969197162,12.6862799,13.3361412,12.4928718
50.824321,13.9283883,13.5246252,0.635423563,12.6823313,13.3445062,12.4900716
50.834812,14.0356688,13.5319939,0.709700626,12.6784,13.3530905,12.4872733
50.845304,13.0766968,13.5396021,-0.680371396,12.674485,13.3619013,12.4844764
50.855796,14.3527001,13.5474547,0.897354687,12.6705863,13.3709438,12.4816813
50.866287,12.6095202,13.5555566,-0.972644041,12.6667043,13.3802229,12.4788881
50.876779,13.0384048,13.5639156,-0.724921198,12.662838,13.3897468,12.4760964
50.88727,14.4913767,13.572536,0.958561825,12.6589878,13.3995201,12.4733066
50.897762,13.453624,13.581426,-0.357493948,12.6551529,13.4095511,12.4705183
50.908254,13.8564065,13.5905914,0.515572602,12.6513335,13.419846,12.4677317
50.918745,14.7986486,13.6000381,1.09481072,12.6475296,13.4304108,12.464947
50.929237,12.922848,13.609775,-0.828810617,12.6437404,13.4412548,12.4621638
50.939728,12.7279221,13.6198077,-0.944396975,12.6399665,13.4523835,12.4593825
50.95022,14.2126704,13.6301457,0.763233082,12.6362069,13.4638069,12.4566027
50.960712,13.96424,13.6407958,0.568721558,12.6324618,13.4755321,12.4538246
50.971203,14.832397,13.6517653,1.08656876,12.6287314,13.4875663,12.4510484
50.981695,13.7477271,13.6630647,0.290968077,12.6250149,13.4999205,12.4482737
50.992186,13.7113092,13.6747005,0.191334025,12.6213127,13.5126012,12.4455009
51.002678,14,13.6866841,0.559746266,12.617624,13.5256203,12.4427296
51.01317,14.106736,13.6990239,0.638523391,12.613949,13.5389862,12.43996
51.023661,13.3790882,13.7117282,-0.576749582,12.6102879,13.5527075,12.4371923
51.034153,14.0356688,13.7248098,0.557547324,12.6066399,13.5667972,12.434426
51.044644,14.7986486,13.7382766,1.02974365,12.6030054,13.5812633,12.4316618
51.055136,14.5602198,13.7521421,0.898931429,12.5993837,13.5961197,12.4288989
51.065628,14.525839,13.7664162,0.871448697,12.5957749,13.6113765,12.4261377
51.076119,13.6014705,13.7811094,-0.423838236,12.5921792,13.6270442,12.4233785
51.086611,13.6747943,13.7962365,-0.348485526,12.5885959,13.643138,12.4206208
51.097102,13.2664992,13.8118073,-0.738449852,12.5850254,13.6596679,12.417865
51.107594,14.0712473,13.827838,0.493365229,12.581467,13.6766503,12.4151106
51.118086,12.8452326,13.8443407,-0.999553965,12.5779208,13.6940974,12.4123579
51.128577,12.7279221,13.8613279,-1.06461534,12.5743872,13.712022,12.4096071
51.139069,13.6381817,13.8788175,-0.490546461,12.5708651,13.7304423,12.4068578
51.14956,13.453624,13.8968216,-0.665730829,12.5673553,13.7493704,12.4041105
51.160052,13.5277493,13.9153594,-0.622583452,12.563857,13.7688259,12.4013645
51.170544,14.7309199,13.9344458,0.892453928,12.5603702,13.7888239,12.3986203
51.181035,13.190906,13.9540962,-0.87360759,12.5568953,13.8093798,12.395878
51.191527,14.2828569,13.9743321,0.555450065,12.5534315,13.8305156,12.3931371
51.202018,13.820275,13.9951683,-0.418202505,12.5499793,13.8522461,12.3903982
51.21251,14.0712473,14.0166282,0.233707202,12.546538,13.8745951,12.3876607
51.223002,13.2287566,14.0387301,-0.899985296,12.5431078,13.8975809,12.3849249
51.233493,13.892444,14.0614927,-0.411155354,12.5396888,13.9212226,12.382191
51.243985,14.7309199,14.0849424,0.803727231,12.5362804,13.9455467,12.3794586
51.254476,13.4164079,14.1090975,-0.832279774,12.532883,13.9705717,12.3767281
51.264968,14.0712473,14.1339864,-0.250477876,12.529496,13.9963265,12.3739991
51.27546,13.8564065,14.1596318,-0.550659037,12.5261195,14.0228337,12.3712717
51.285951,13.7113092,14.186057,-0.689019451,12.5227539,14.0501169,12.3685462
51.296443,14.9331845,14.2132941,0.848463573,12.5193983,14.0782085,12.3658222
51.306934,14.3178211,14.2413661,0.276504925,12.5160532,14.1071317,12.3631001
51.317426,14,14.2703079,-0.519911438,12.512718,14.1369217,12.3603795
51.327918,14.3527001,14.3001477,0.229243121,12.509393,14.1676069,12.3576605
51.338409,14.2126704,14.3309146,-0.343866587,12.5060782,14.1992166,12.3549435
51.348901,13.7477271,14.3626483,-0.784169143,12.502773,14.2317907,12.3522279
51.359392,14.2126704,14.3953779,-0.427442938,12.499478,14.2653585,12.3495142
51.369884,14.6628783,14.4291464,0.483458292,12.4961924,14.2999636,12.346802
51.380376,13.892444,14.4639893,-0.756006162,12.4929165,14.3356414,12.3440914
51.390867,14.2828569,14.4999435,-0.465925571,12.4896505,14.3724292,12.3413828
51.401359,14.0356688,14.5370581,-0.708088474,12.4863937,14.4103763,12.3386755
51.41185,14.6287388,14.5753704,0.231016183,12.4831466,14.4495202,12.3359703
51.422342,13.4907376,14.614934,-1.06028129,12.4799085,14.4899151,12.3332664
51.432834,14.3874946,14.655794,-0.517976325,12.4766797,14.5316061,12.3305642
51.443325,15.0665192,14.6979975,0.607059859,12.4734605,14.5746404,12.327864
51.453817,14.5602198,14.7416061,-0.42589472,12.47025,14.6190803,12.3251651
51.464308,14.4913767,14.7866677,-0.543406795,12.467049,14.6649737,12.3224682
51.4748,14.4568323,14.8332501,-0.61352899,12.4638566,14.7123889,12.3197727
51.485292,14.3178211,14.8814112,-0.750726438,12.4606731,14.7613841,12.3170789
51.495783,13.820275,14.9312116,-1.05400977,12.4574988,14.8120198,12.314387
51.506275,14.1774469,14.9827294,-0.897375339,12.454333,14.8643749,12.3116966
51.516766,14.5945195,15.0360271,-0.664460392,12.4511762,14.918512,12.309008
51.527258,14.7309199,15.0911913,-0.600226141,12.4480278,14.9745181,12.3063209
51.53775,14.3527001,15.1482971,-0.891962422,12.444888,15.0324686,12.3036355
51.548241,14.3178211,15.2074233,-0.943187261,12.441757,15.0924426,12.3009519
51.558733,15.0996689,15.2686706,-0.411098178,12.4386342,15.1545412,12.2982698
51.569224,13.892444,15.3321213,-1.19986555,12.4355202,15.2188471,12.2955896
51.579716,14.1421356,15.3978872,-1.12060322,12.4324142,15.2854723,12.2929109
51.590208,14.6287388,15.4660673,-0.915056514,12.4293165,15.3545164,12.2902337
51.600699,14.4222051,15.5367656,-1.05572747,12.4262274,15.4260835,12.2875586
51.611191,14.3527001,15.6101133,-1.12134439,12.4231462,15.5003055,12.2848848
51.621682,14.3874946,15.6862206,-1.13961663,12.4200735,15.5772927,12.282213
51.632174,14.832397,15.7652338,-0.9658348,12.4170086,15.657192,12.2795425
51.642666,14.0356688,15.8472853,-1.34596302,12.4139517,15.7401361,12.2768737
51.653157,14.7309199,15.9325146,-1.09617276,12.4109031,15.8262649,12.2742069
51.663649,14.4568323,16.0210952,-1.25070498,12.4078622,15.9157525,12.2715415
51.67414,15.0996689,16.1131768,-1.00673133,12.4048294,16.0087489,12.2688779
51.684632,14.2126704,16.2089544,-1.41289916,12.4018043,16.1054495,12.2662158
51.695124,14.5602198,16.3086078,-1.32226623,12.398787,16.2060347,12.2635554
51.705615,14.5945195,16.4123273,-1.34826101,12.3957778,16.310695,12.2608969
51.716107,15.3297097,16.5203473,-1.09116341,12.3927769,16.4196649,12.2582397
51.726598,15.132746,16.6328762,-1.22479806,12.389787,16.5331516,12.2555845
51.73709,15.6843871,16.7501819,-1.03237338,12.3868115,16.6514206,12.2529307
51.747582,14.6969385,16.8725166,-1.47498412,12.3838555,16.774721,12.2502786
51.758073,15.7162336,17.0001316,-1.13309223,12.380901,16.9033182,12.2476284
51.768565,14.9331845,17.1333413,-1.48329254,12.3779374,17.0375343,12.2449796
51.779056,15.5884573,17.2724495,-1.29768726,12.3749815,17.1776615,12.2423327
51.789548,16.0623784,17.4178239,-1.16423602,12.3720328,17.3240681,12.2396872
51.80004,16.5529454,17.5698168,-1.00840044,12.3690915,17.477107,12.2370433
51.810531,15.7480157,17.728805,-1.40740516,12.3661578,17.6371553,12.2344014
51.821023,16.583124,17.8952416,-1.14547702,12.3632313,17.8046667,12.2317609
51.831514,16.5529454,18.0695484,-1.2315044,12.3603123,17.9800637,12.2291223
51.842006,16.3095064,18.2522493,-1.39382312,12.3574004,18.1638707,12.2264851
51.852498,16.1864141,18.4438562,-1.50247866,12.3544957,18.3566,12.2238495
51.862989,16.9410743,18.6449201,-1.30531443,12.3515985,18.5588033,12.2212159
51.873481,17.4928557,18.856098,-1.16757968,12.3487082,18.771138,12.2185836
51.883972,16.4012195,19.078018,-1.63609246,12.3458253,18.9942329,12.2159533
51.894464,17.1464282,19.3114494,-1.47140111,12.3429494,19.2288578,12.2133243
51.904956,17.0293864,19.5571603,-1.58989747,12.3400805,19.4757813,12.2106971
51.915447,18,19.8159835,-1.3475843,12.337219,19.7358365,12.2080717
51.925939,17.9722008,20.0889051,-1.45488981,12.3343642,20.0100105,12.2054477
51.93643,18.1383571,20.3768937,-1.49617399,12.3315168,20.2992721,12.2028256
51.946922,18.8148877,20.6811231,-1.36610227,12.3286761,20.6047956,12.200205
51.957414,18.8679623,21.0027906,-1.46110519,12.3258424,20.9277789,12.197586
51.967905,19.4679223,21.3432067,-1.36941021,12.3230159,21.2695326,12.1949688
51.978397,19.078784,21.7039167,-1.62022613,12.3201961,21.6316029,12.1923531
51.988888,20.2977831,22.0864807,-1.33742199,12.3173834,22.01555,12.1897393
51.99938,20.0997512,22.492775,-1.54694011,12.3145774,22.4232507,12.1871269
52.009872,20.880613,22.9247584,-1.42973613,12.3117783,22.8566642,12.1845161
52.020363,21.3775583,23.3845996,-1.41670086,12.3089863,23.3179592,12.1819072
52.030855,21.0950231,23.8748539,-1.66728244,12.3062008,23.8096915,12.1792998
52.041346,21.977261,24.3981756,-1.55592886,12.3034225,24.3345156,12.1766942
52.051838,22.737634,24.9577465,-1.49000419,12.3006506,24.8956135,12.17409
52.06233,22.9128785,25.5569731,-1.62606723,12.2978856,25.4963917,12.1714875
52.072821,23.6008474,26.1996818,-1.61209007,12.2951276,26.1406766,12.1688868
52.083313,25.4361947,26.8903959,-1.20590267,12.2923761,26.8329916,12.1662876
52.093804,26.2106848,27.6339638,-1.19301255,12.2896316,27.5781847,12.1636903
52.104296,25.2190404,28.4362068,-1.79364611,12.2868935,28.3820774,12.1610943
52.114788,28.6006993,29.3035435,-0.838358072,12.2841622,29.2510879,12.1585
52.125279,28.0713377,30.2433378,-1.47377072,12.2814378,30.1925795,12.1559076
52.135771,30.3150128,31.2644153,-0.974372906,12.2787199,31.2153777,12.1533165
52.146262,31.5119025,32.3766796,-0.929933914,12.2760089,32.3293855,12.1507274
52.156754,32.8176782,33.5923519,-0.880155507,12.2733043,33.546824,12.1481397
52.167246,34.5398321,34.9258745,-0.621323114,12.2706064,34.8821358,12.1455536
52.177737,35.8329457,36.3952172,-0.749847618,12.2679154,36.3532913,12.1429694
52.188229,39.5727179,38.0239826,1.24448192,12.2652307,37.983896,12.1403866
52.19872,40.6939799,39.8427623,0.922614551,12.262553,39.8045453,12.1378056
52.209212,43.2087954,41.8938913,1.14669267,12.2598816,41.8575817,12.1352261
52.219704,45.1995575,44.2345977,0.982323703,12.2572168,44.2002423,12.1326482
52.230195,49.4974747,46.9421681,1.59853265,12.254559,46.9098239,12.1300722
52.240687,53.1695402,50.1186591,1.74667715,12.2519074,50.0883914,12.1274976
52.251178,56.6038868,53.8892271,1.64762244,12.2492628,53.8611006,12.1249248
52.26167,62.0564259,58.3991368,1.91240402,12.2466244,58.373203,12.1223535
52.272162,66.6408283,63.7973912,1.68624942,12.2439927,63.7736695,12.1197838
52.282653,72.5258575,70.2157428,1.51990615,12.2413679,70.1942046,12.1172159
52.293145,79.5801483,77.7441772,1.35498009,12.2387493,77.7247376,12.1146495
52.303636,86.510115,86.3976651,0.335335479,12.2361377,86.3801834,12.1120849
52.314128,94.6572765,96.0950618,-1.19907686,12.2335323,96.0793532,12.1095218
52.32462,105.347046,106.626286,-1.13103527,12.2309336,106.612137,12.1069602
52.335111,115.913761,117.627718,-1.30918189,12.2283417,117.614898,12.1044006
52.345603,127.373467,128.561144,-1.08980602,12.2257562,128.549419,12.1018423
52.356094,139.660302,138.690449,0.984811071,12.2231775,138.679585,12.0992859
52.366586,147.526269,147.097653,0.654687632,12.2206051,147.087414,12.0967309
52.377078,155.386615,152.749635,1.62387802,12.2180394,152.739777,12.0941776
52.387569,155.248188,154.71077,0.733088175,12.2154806,154.70104,12.0916261
52.398061,154.240073,152.491674,1.32227029,12.2129281,152.481805,12.089076
52.408552,145.279042,146.350833,-1.03527358,12.2103824,146.340552,12.0865277
52.419044,135.259011,137.246127,-1.40965121,12.2078432,137.235165,12.0839809
52.429536,122.86985,126.425772,-1.88571534,12.2053106,126.413873,12.0814357
52.440027,111.664677,114.997789,-1.82568147,12.2027849,114.984709,12.0788923
52.450519,102.19589,103.751257,-1.24714336,12.2002656,103.736758,12.0763504
52.46101,92.6876475,93.1927208,-0.710685072,12.1977532,93.1765792,12.0738103
52.471502,84.7053717,83.6199439,1.04183866,12.1952472,83.6019531,12.0712716
52.481994,78.0640762,75.1879668,1.69590962,12.192748,75.167956,12.0687345
52.492485,71.3792687,67.9384263,1.85495079,12.1902556,67.9162764,12.0661993
52.502977,66.4680374,61.8205266,2.15580862,12.1877697,61.7961795,12.0636655
52.513468,61.3188389,56.7195782,2.14458868,12.1852908,56.6930347,12.0611335
52.52396,57.0175412,52.4815037,2.12979753,12.1828184,52.452808,12.0586029
52.534452,53.2165388,48.9446483,2.06685521,12.1803527,48.9138684,12.056074
52.544943,49.8698306,45.9602028,1.97727786,12.1778941,45.9274115,12.0535469
52.555435,46.5403051,43.4038361,1.7710079,12.1754419,43.3690986,12.0510212
52.565926,43.9317653,41.1804388,1.65871229,12.1729968,41.1438085,12.0484974
52.576418,41.0609303,39.219302,1.35706608,12.1705583,39.1808202,12.0459749
52.58691,38.6134692,37.4700757,1.06929576,12.1681266,37.429775,12.0434541
52.597401,36.7014986,35.8964791,0.897228767,12.165702,35.8543864,12.0409351
52.607893,34.6410162,34.4714039,0.411840029,12.1632841,34.4275428,12.0384175
52.618384,33.4514574,33.174643,0.526131494,12.1608732,33.1290361,12.0359018
52.628876,31.144823,31.9897428,-0.91919517,12.1584691,31.942412,12.0333874
52.639368,29.0688837,30.9035503,-1.35449866,12.1560718,30.8545181,12.0308747
52.649859,28.5657137,29.9050216,-1.15728471,12.1536818,29.8543108,12.0283638
52.660351,27.0924344,28.9844877,-1.37551928,12.1512985,28.9321213,12.0258543
52.670842,26.7768557,28.1339445,-1.16494157,12.1489224,28.0799463,12.0233467
52.681334,25,27.3461427,-1.53171235,12.1465531,27.2905363,12.0208405
52.691826,25.5929678,26.6149717,-1.01094209,12.1441909,26.5577812,12.0183358
52.702317,24.1660919,25.9350642,-1.33002715,12.141836,25.8763138,12.015833
52.712809,23.0434372,25.3015186,-1.50269136,12.139488,25.2412324,12.0133316
52.7233,22.4944438,24.7102327,-1.48855264,12.1371473,24.6484349,12.0108321
52.733792,22.0454077,24.1573582,-1.45325515,12.1348136,24.0940727,12.0083339
52.744284,21.2132034,23.639626,-1.55769785,12.132487,23.5748766,12.0058374
52.754775,21.5870331,23.1541138,-1.25183093,12.1301679,23.0879243,12.0033427
52.765267,21.0475652,22.6980795,-1.28472344,12.1278559,22.630473,12.0008493
52.775758,20.4694895,22.2692284,-1.34154347,12.1255513,22.2002281,11.9983579
52.78625,19.4935887,21.8653416,-1.54004966,12.1232539,21.7949701,11.9958678
52.796742,20.1494417,21.4845311,-1.15546071,12.1209638,21.4128107,11.9933793
52.807233,19.2613603,21.125086,-1.3651834,12.1186814,21.0520385,11.9908926
52.817725,19.3132079,20.7853608,-1.21332308,12.1164061,20.7110077,11.9884074
52.828216,17.9164729,20.4639857,-1.59609297,12.1141386,20.3883479,11.985924
52.838708,17.4642492,20.1595973,-1.64175154,12.1118783,20.0826953,11.9834419
52.8492,18,19.8710384,-1.36785904,12.1096256,19.792892,11.9809615
52.859691,17.8885438,19.5972486,-1.30717436,12.1073806,19.5178775,11.9784829
52.870183,16.9410743,19.3371849,-1.54793752,12.1051431,19.2566078,11.9760057
52.880674,17.2046505,19.0899863,-1.37307531,12.1029135,19.0082217,11.9735303
52.891166,16.1554944,18.8547722,-1.64294789,12.1006914,18.7718377,11.9710563
52.901658,16.1864141,18.6307986,-1.56345278,12.098477,18.5467117,11.968584
52.912149,16.4620776,18.4173785,-1.39832075,12.0962706,18.3321559,11.9661134
52.922641,15.5241747,18.2138206,-1.640014,12.0940719,18.1274783,11.9636442
52.933132,15.6204994,18.0195613,-1.54889055,12.0918813,17.932115,11.9611769
52.943624,15.8113883,17.8340081,-1.42218837,12.0896985,17.7454727,11.958711
52.954116,15.0996689,17.6566645,-1.59906085,12.0875236,17.5670546,11.9562466
52.964607,15.9059737,17.4870685,-1.25741592,12.085357,17.3963981,11.9537841
52.975099,15.5563492,17.3247454,-1.3298106,12.0831983,17.2330277,11.951323
52.98559,14.8996644,17.1693138,-1.50653556,12.0810479,17.0765617,11.9488637
52.996082,15.5884573,17.0203616,-1.19662207,12.0789055,16.9265874,11.9464057
53.006574,15.1657509,16.877547,-1.30835626,12.0767715,16.7827623,11.9439494
53.017065,14.1774469,16.7405499,-1.6009694,12.0746459,16.6447661,11.9414949
53.027557,14.8660687,16.6090344,-1.32021423,12.0725285,16.512262,11.9390418
53.038048,14.5602198,16.4827352,-1.38654803,12.0704198,16.3849846,11.9365905
53.04854,15.0665192,16.3613578,-1.13790976,12.0683193,16.2626385,11.9341406
53.059032,14.3178211,16.2446605,-1.38810642,12.0662274,16.1449816,11.9316923
53.069523,14,16.132416,-1.46027944,12.0641444,16.0317863,11.9292458
53.080015,14.6287388,16.0243807,-1.18137287,12.0620698,15.9228082,11.9268007
53.090506,15,15.9203657,-0.959356941,12.0600042,15.8178583,11.9243574
53.100998,14.0712473,15.8201555,-1.32246293,12.0579473,15.7167202,11.9219155
53.11149,14.9666295,15.7235754,-0.870026347,12.0558992,15.6192191,11.9194752
53.121981,13.8564065,15.6304606,-1.33193624,12.0538603,15.5251897,11.9170367
53.132473,14.7309199,15.5406305,-0.899839206,12.0518302,15.4344506,11.9145995
53.142964,14.3874946,15.453948,-1.03269234,12.0498095,15.3468648,11.9121643
53.153456,14.4913767,15.3702522,-0.937483562,12.0477977,15.2622704,11.9097303
53.163948,14.5945195,15.2894145,-0.833603589,12.0457952,15.1805388,11.907298
53.174439,13.8564065,15.2113131,-1.16400457,12.0438023,15.1015477,11.9048675
53.184931,13.820275,15.1358116,-1.14696845,12.0418186,15.0251601,11.9024384
53.195422,14.1421356,15.062809,-0.959517264,12.0398445,14.9512749,11.900011
53.205914,14.1421356,14.9921828,-0.921980008,12.0378799,14.8797689,11.8975851
53.216406,13.892444,14.9238368,-1.01557512,12.035925,14.8105457,11.8951607
53.226897,14.4568323,14.8576797,-0.633125139,12.03398,14.7435136,11.8927382
53.237389,13,14.7936067,-1.33925604,12.0320447,14.6785674,11.890317
53.24788,13.892444,14.7315423,-0.916023101,12.0301195,14.6156312,11.8878977
53.258372,13.3790882,14.6713918,-1.13679532,12.0282042,14.5546099,11.8854797
53.268864,13.190906,14.6130822,-1.19255031,12.026299,14.4954303,11.8830633
53.279355,14.3527001,14.5565441,-0.451490851,12.0244042,14.4380225,11.8806487
53.289847,13.6381817,14.5016957,-0.929254565,12.0225195,14.3823045,11.8782355
53.300338,14.5602198,14.44848,0.334275019,12.0206455,14.3282188,11.8758242
53.31083,13.4907376,14.3968226,-0.951885011,12.0187818,14.2756908,11.8734141
53.321322,13.7477271,14.3466677,-0.773912543,12.0169288,14.2246643,11.8710057
53.331813,12.2065556,14.2979616,-1.44616942,12.0150866,14.1750853,11.8685991
53.342305,13.6014705,14.2506399,-0.805710476,12.0132552,14.126889,11.8661938
53.352796,13.4907376,14.2046587,-0.844938556,12.0114349,14.0800314,11.8637904
53.363288,12.2882057,14.1599593,-1.36812045,12.0096255,14.0344532,11.8613883
53.37378,13.4907376,14.1164981,-0.791050277,12.0078272,13.9901106,11.8589878
53.384271,13.96424,14.0742334,-0.331652496,12.0060405,13.9469618,11.8565891
53.394763,13.4164079,14.0331137,-0.785306229,12.004265,13.9049547,11.8541918
53.405254,13,13.9931052,-0.996546649,12.0025013,13.8640554,11.8517963
53.415746,14.1774469,13.9541606,0.472531729,12.0007491,13.8242161,11.8494021
53.426238,13.4164079,13.9162459,-0.706992238,11.9990087,13.7854026,11.8470095
53.436729,13.7477271,13.8793281,-0.362768609,11.9972803,13.7475819,11.8446188
53.447221,12.922848,13.8433658,-0.959436209,11.995564,13.7107119,11.8422294
53.457712,13.6747943,13.8083326,-0.365428819,11.9938599,13.674766,11.8398418
53.468204,12.5698051,13.77419,-1.09744474,11.9921681,13.6397056,11.8374556
53.478696,13.5277493,13.7409113,-0.461694757,11.9904888,13.6055035,11.8350709
53.489187,13.453624,13.7084703,-0.504823003,11.9888222,13.5721335,11.8326881
53.499679,13.114877,13.6768331,-0.749637303,11.9871683,13.5395611,11.8303066
53.51017,13,13.6459791,-0.803728252,11.9855275,13.5077656,11.8279269
53.520662,12.6885775,13.6158769,-0.962963825,11.9838997,13.4767151,11.8255486
53.531154,12.489996,13.5865049,-1.04714321,11.9822851,13.4463881,11.8231719
53.541645,12.8840987,13.5578424,-0.820818909,11.980684,13.4167634,11.8207969
53.552137,13.7113092,13.5298615,0.425966817,11.9790964,13.3878128,11.8184233
53.562628,12.7279221,13.5025458,-0.880127102,11.9775227,13.3595197,11.8160516
53.57312,13.6014705,13.4758694,0.3544024,11.9759628,13.3318579,11.8136811
53.583612,12.8840987,13.4498152,-0.752141255,11.9744169,13.3048099,11.8113123
53.594103,13.0766968,13.4243663,-0.589635014,11.9728855,13.2783587,11.8089452
53.604595,13.0384048,13.3994996,-0.600911596,11.9713684,13.2524808,11.8065796
53.615086,12.489996,13.3752021,-0.940853914,11.9698661,13.2271631,11.8042157
53.625578,12.5299641,13.3514523,-0.906359889,11.9683784,13.2023837,11.8018531
53.63607,12.922848,13.3282363,-0.636701151,11.9669058,13.1781283,11.7994922
53.646561,14.106736,13.3055406,0.895095206,11.9654486,13.1543832,11.797133
53.657053,12.4498996,13.2833456,-0.912932656,11.9640066,13.1311286,11.7947752
53.667544,13.2664992,13.2616413,0.0696985024,11.9625804,13.1083541,11.7924192
53.678036,12.7671453,13.2404095,-0.68794195,11.96117,13.0860413,11.7900645
53.688528,12.922848,13.2196388,-0.544785138,11.9597756,13.0641785,11.7877114
53.699019,13.5277493,13.1993184,0.573088902,11.9583976,13.0427545,11.7853601
53.709511,13.4164079,13.1794318,0.486801862,11.957036,13.0217526,11.7830102
53.720002,12.2065556,13.1599709,-0.976429887,11.9556913,13.0011645,11.780662
53.730494,12.7279221,13.1409206,-0.642649585,11.9543635,12.9809744,11.7783152
53.740986,13.0766968,13.1222714,-0.213481991,11.9530528,12.9611729,11.77597
53.751477,12.3693169,13.1040145,-0.85714502,11.9517598,12.9417509,11.7736266
53.761969,12.0415946,13.086136,-1.0220281,11.9504843,12.9226939,11.7712845
53.77246,13.3041347,13.0686295,0.485288821,11.949227,12.9039954,11.7689442
53.782952,12.922848,13.0514819,-0.358655744,11.9479878,12.8856419,11.7666052
53.793444,11.8743421,13.0346858,-1.07719254,11.946767,12.8676257,11.7642678
53.803935,13.5277493,13.0182338,0.713803485,11.9455652,12.8499391,11.7619323
53.814427,12.7671453,13.0021142,-0.484735894,11.9443824,12.8325699,11.759598
53.824918,12.8062485,12.9863217,-0.424350403,11.943219,12.8155127,11.7572656
53.83541,13.4164079,12.9708454,0.667504639,11.9420751,12.7987561,11.7549344
53.845902,13.3416641,12.9556791,0.621276912,11.9409512,12.7822935,11.7526049
53.856393,13.820275,12.9408166,0.937794407,11.9398477,12.7661187,11.7502772
53.866885,13.0766968,12.9262481,0.387877231,11.9387646,12.750221,11.7479507
53.877376,13,12.9119693,0.29669967,11.9377025,12.7345963,11.7456261
53.887868,13.3790882,12.8979709,0.693626172,11.9366615,12.7192345,11.7433028
53.89836,13.190906,12.8842478,0.553767278,11.9356421,12.7041302,11.7409811
53.908851,12.922848,12.8707949,0.228151373,11.9346447,12.6892783,11.7386612
53.919343,13.453624,12.8576039,0.772023432,11.9336695,12.6746695,11.7363426
53.929834,12.4096736,12.8446713,-0.659543482,11.932717,12.6603004,11.7340258
53.940326,13.2287566,12.831989,0.629894841,11.9317873,12.6461623,11.7317103
53.950818,12.5698051,12.8195531,-0.499747925,11.930881,12.6322508,11.7293964
53.961309,12.8452326,12.8073593,0.194610641,11.9299986,12.6185614,11.7270843
53.971801,13.2287566,12.7954003,0.658297995,11.9291402,12.6050862,11.7247735
53.982292,12.3693169,12.7836736,-0.643705436,11.9283065,12.5918223,11.7224646
53.992784,12.6095202,12.7721722,-0.403301303,11.9274976,12.5787622,11.7201569
54.003276,11.7898261,12.7608927,-0.985427088,11.9267142,12.5659022,11.7178508
54.013767,12.5698051,12.7498318,-0.42429552,11.9259566,12.5532386,11.7155465
54.024259,12.489996,12.7389832,-0.498986162,11.9252252,12.5407643,11.7132435
54.03475,13.2664992,12.7283449,0.733589993,11.9245207,12.5284772,11.7109423
54.045242,12.9614814,12.7179109,0.493528575,11.9238432,12.5163705,11.7086424
54.055734,13.4164079,12.7076786,0.841860594,11.9231934,12.5044411,11.7063441
54.066225,13.3041347,12.6976452,0.778774374,11.9225719,12.492686,11.7040476
54.076717,12.8062485,12.6878052,0.344155835,11.921979,12.4810989,11.7017524
54.087208,12.489996,12.6781573,-0.43377562,11.9214153,12.4696781,11.699459
54.0977,12.6095202,12.6686962,-0.243261232,11.9208812,12.4584176,11.6971669
54.108192,12.922848,12.6594199,0.513252466,11.9203774,12.4473149,11.6948764
54.118683,13.453624,12.6503261,0.89626892,11.9199045,12.4363673,11.6925877
54.129175,12.3693169,12.6414102,-0.52162562,11.9194629,12.4255694,11.6903003
54.139666,13.7113092,12.6326711,1.03857505,11.9190533,12.4149198,11.6880146
54.150158,12.5299641,12.6241045,-0.306823028,11.9186762,12.4044131,11.6857303
54.16065,12.9614814,12.6157086,0.588024498,11.9183323,12.3940472,11.6834476
54.171141,12.2882057,12.6074818,-0.56504516,11.9180222,12.3838199,11.6811666
54.181633,11.9163753,12.5994201,-0.826465225,11.9177466,12.3737263,11.6788869
54.192124,12.3693169,12.5915227,-0.471387159,11.917506,12.3637654,11.6766091
54.202616,13.0384048,12.5837861,0.674254175,11.9173012,12.3539323,11.6743325
54.213108,12,12.5762089,-0.759084249,11.9171329,12.3442254,11.6720575
54.223599,12.328828,12.5687898,-0.48985893,11.9170019,12.3346426,11.6697843
54.234091,11.6619038,12.5615255,-0.948483882,11.9169087,12.3251797,11.6675124
54.244582,12.5299641,12.5544155,-0.156369562,11.9168542,12.3158358,11.6652423
54.255074,13,12.5474569,0.672713235,11.9168392,12.3066067,11.6629735
54.265566,12.8452326,12.5406486,0.551891232,11.9168645,12.2974908,11.6607062
54.276057,12.6095202,12.5339898,0.274827912,11.9169308,12.2884866,11.6584408
54.286549,12.7671453,12.5274777,0.489558573,11.917039,12.2795901,11.6561766
54.29704,12,12.5211122,-0.721881027,11.9171899,12.2708008,11.6539142
54.307532,12.8062485,12.5148908,0.539775608,11.9173846,12.2621147,11.6516532
54.318024,12.4498996,12.5088128,-0.242720378,11.9176238,12.2535306,11.6493937
54.328515,12.7671453,12.5028777,0.514069711,11.9179085,12.2450473,11.6471359
54.339007,12.7279221,12.4970832,0.480456881,11.9182396,12.236661,11.6448795
54.349498,13.0384048,12.4914296,0.739577704,11.9186182,12.2283714,11.6426248
54.35999,12.3693169,12.4859148,-0.341464445,11.9190452,12.2201751,11.6403715
54.370482,12.5698051,12.4805386,0.298774989,11.9195218,12.2120709,11.6381197
54.380973,12.3693169,12.4753006,-0.325551444,11.9200489,12.2040577,11.6358697
54.391465,12.7279221,12.4701992,0.507664076,11.9206277,12.1961323,11.633621
54.401956,13.56466,12.4652348,1.04853475,11.9212592,12.1882944,11.6313741
54.412448,12.5698051,12.4604059,0.33075545,11.9219448,12.1805409,11.6291285
54.42294,11.3137085,12.4557125,-1.06864588,11.9226856,12.1728708,11.6268844
54.433431,13,12.4511547,0.740840952,11.9234827,12.1652832,11.6246421
54.443923,11.9163753,12.4467312,-0.728255415,11.9243376,12.1577752,11.6224011
54.454414,12.7671453,12.4424428,0.56982677,11.9252513,12.1503467,11.6201618
54.464906,12.9614814,12.4382884,0.723320832,11.9262256,12.1429946,11.6179239
54.475398,13,12.4342683,0.752151369,11.9272615,12.1357183,11.6156876
54.485889,12.6095202,12.430383,0.423246063,11.9283605,12.1285171,11.613453
54.496381,12.3693169,12.4266317,-0.239405158,11.9295243,12.1213881,11.6112197
54.506872,11.9163753,12.4230153,-0.711786523,11.930754,12.1143313,11.6089881
54.517364,12.0415946,12.4195334,-0.61476732,11.9320517,12.1073442,11.6067579
54.527856,12.7279221,12.4161866,0.558332716,11.9334186,12.100426,11.6045292
54.538347,12.489996,12.4129756,0.277525436,11.9348564,12.0935762,11.6023023
54.548839,13,12.4099003,0.768179492,11.9363671,12.0867921,11.6000767
54.55933,12.6491106,12.4069617,0.492086339,11.9379521,12.080074,11.5978528
54.569822,12.5299641,12.4041599,0.354688816,11.9396135,12.0734193,11.5956303
54.580314,12.1655251,12.401496,-0.485768425,11.9413532,12.0668276,11.5934093
54.590805,13.56466,12.398971,1.07967078,11.9431728,12.0602982,11.5911901
54.601297,12.6491106,12.3965852,0.502519053,11.9450746,12.053829,11.5889721
54.611788,12.4498996,12.3943402,0.235710394,11.9470605,12.04742,11.586756
54.62228,12.8452326,12.3922365,0.673049833,11.9491329,12.0410689,11.5845411
54.632772,13.3790882,12.3902755,0.994390599,11.9512938,12.0347754,11.5823278
54.643263,12.2474487,12.3884586,-0.375512843,11.9535453,12.028539,11.5801162
54.653755,12.7671453,12.3867868,0.616732114,11.9558902,12.0223576,11.5779059
54.664246,13.0384048,12.3852619,0.808172553,11.9583304,12.0162314,11.5756974
54.674738,13.1529464,12.3838852,0.876961387,11.960869,12.0101582,11.5734902
54.68523,12.6885775,12.3826583,0.553099649,11.9635083,12.0041377,11.5712845
54.695721,12.8062485,12.3815833,0.651663428,11.9662506,11.9981697,11.5690806
54.706213,12.6491106,12.3806616,0.51812066,11.9690994,11.992252,11.566878
54.716704,12.1655251,12.3798956,-0.463001641,11.9720569,11.986385,11.5646771
54.727196,13.3041347,12.3792871,0.961689981,11.9751266,11.9805667,11.5624775
54.737688,12.9614814,12.3788384,0.76331055,11.9783114,11.9747968,11.5602795
54.748179,12.4096736,12.3785519,0.176413534,11.9816142,11.969075,11.5580832
54.758671,12.083046,12.37843,-0.543492451,11.9850387,11.9633996,11.5558883
54.769162,12.9614814,12.3784753,0.763548333,11.9885879,11.9577707,11.553695
54.779654,12.489996,12.3786906,0.333624606,11.9922659,11.9521866,11.5515031
54.790146,13.7477271,12.3790787,1.16989245,11.9960759,11.9466471,11.5493127
54.800637,12.0415946,12.3796426,-0.581419005,12.0000215,11.9411519,11.5471241
54.811129,12.083046,12.3803856,-0.545288588,12.0041073,11.9356994,11.5449367
54.82162,12.3693169,12.3813109,-0.109517014,12.0083366,11.9302897,11.5427511
54.832112,13.2664992,12.382422,0.940253765,12.0127144,11.9249214,11.5405668
54.842604,12.7279221,12.3837227,0.586685068,12.0172447,11.9195941,11.538384
54.853095,12.5698051,12.3852166,0.429637675,12.0219316,11.9143077,11.536203
54.863587,11.8321596,12.3869079,-0.744814313,12.0267807,11.9090607,11.5340233
54.874078,11.9163753,12.3888007,-0.687332082,12.031796,11.9038533,11.5318453
54.88457,13.3416641,12.3908996,0.975071522,12.0369835,11.8986839,11.5296686
54.895062,12.2065556,12.3932091,-0.432034128,12.042348,11.8935525,11.5274934
54.905553,12.8062485,12.3957338,0.640714197,12.0478944,11.888459,11.52532
54.916045,12.8840987,12.3984792,0.696864065,12.0536296,11.8834018,11.5231479
54.926536,12.3693169,12.4014501,-0.17925738,12.0595583,11.8783813,11.5209775
54.937028,12.6885775,12.4046526,0.532846121,12.0656878,11.8733959,11.5188084
54.94752,12.6885775,12.4080921,0.52960875,12.072024,11.8684457,11.5166409
54.958011,12.8062485,12.4117745,0.628071667,12.0785729,11.8635305,11.5144751
54.968503,13.2287566,12.4157066,0.901692813,12.0853427,11.858649,11.5123105
54.978994,12.1655251,12.4198945,-0.5043505,12.0923394,11.8538014,11.5101477
54.989486,13.3416641,12.4243458,0.957767343,12.0995717,11.8489865,11.5079863
54.999978,12.6095202,12.4290674,0.424797418,12.1070468,11.8442041,11.5058263
55.010469,11.9582607,12.4340663,-0.689786626,12.1147722,11.8394543,11.503668
55.020961,12.4096736,12.4393516,-0.172272862,12.1227579,11.8347356,11.5015111
55.031452,12.083046,12.4449304,-0.601568312,12.1310112,11.8300485,11.4993559
55.041944,12.0415946,12.4508126,-0.639701487,12.1395428,11.8253916,11.497202
55.052436,12.328828,12.4570067,-0.358020457,12.1483618,11.820765,11.4950496
55.062927,12.7279221,12.4635215,0.514198914,12.1574773,11.8161686,11.4928989
55.073419,12.8062485,12.4703685,0.579551563,12.1669015,11.8116011,11.4907496
55.08391,12.6095202,12.4775565,0.363268038,12.1766437,11.8070631,11.4886019
55.094402,12.7671453,12.4850981,0.531081169,12.1867172,11.8025531,11.4864556
55.104894,12.7279221,12.493004,0.484683466,12.1971331,11.7980713,11.4843108
55.115385,12.5698051,12.5012854,0.261762728,12.2079029,11.7936176,11.4821676
55.125877,12.4096736,12.5099564,-0.316674561,12.2190418,11.7891908,11.4800258
55.136368,13.1529464,12.5190287,0.796189502,12.2305614,11.7847914,11.4778858
55.14686,12.8062485,12.5285179,0.527001541,12.2424783,11.7804182,11.475747
55.157352,12.7671453,12.5384375,0.47823406,12.2548065,11.7760712,11.4736097
55.167843,12.5299641,12.548802,-0.13725114,12.2675606,11.7717504,11.4714742
55.178335,12.1655251,12.5596292,-0.627777145,12.2807595,11.7674547,11.4693399
55.188826,12.3693169,12.570934,-0.449017937,12.294418,11.7631846,11.4672074
55.199318,12.3693169,12.5827362,-0.461973258,12.3085571,11.7589388,11.4650761
55.20981,12.7671453,12.5950533,0.414839804,12.3231945,11.7547175,11.4629464
55.220301,11.7898261,12.6079036,-0.904476338,12.3383489,11.7505208,11.4608184
55.230793,12.9614814,12.6213101,0.583242065,12.3540441,11.7463474,11.4586917
55.241284,13,12.6352919,0.603910697,12.3702995,11.7421979,11.4565667
55.251776,13.453624,12.6498744,0.896520873,12.3871414,11.7380712,11.454443
55.262268,13.3041347,12.6650802,0.799408813,12.4045927,11.7339673,11.4523208
55.272759,12.922848,12.6809332,0.491848349,12.4226776,11.7298864,11.4502003
55.283251,13.3416641,12.6974629,0.802621448,12.4414267,11.7258273,11.4480811
55.293742,12.4498996,12.7146942,-0.514581959,12.460865,11.7217906,11.4459637
55.304234,13.0384048,12.7326601,0.552941891,12.4810265,11.7177752,11.4438475
55.314726,13.3790882,12.7513902,0.792273938,12.5019411,11.7137812,11.4417328
55.325217,13.0766968,12.7709156,0.552974932,12.5236403,11.7098087,11.4396198
55.335709,12.2065556,12.7912749,-0.764669394,12.5461639,11.7058566,11.4375082
55.3462,12.8452326,12.8125011,0.180918331,12.5695448,11.7019255,11.4353982
55.356692,14.3527001,12.8346374,1.23209688,12.5938274,11.6980143,11.4332895
55.367184,12.7671453,12.8577229,-0.300961102,12.6190511,11.6941232,11.4311824
55.377675,13.2664992,12.8817991,0.620241945,12.645258,11.6902523,11.4290769
55.388167,12.2474487,12.9069169,-0.812076454,12.6724999,11.6864005,11.4269728
55.398658,13.4907376,12.9331205,0.746737589,12.7008214,11.6825684,11.4248703
55.40915,12.7671453,12.9604672,-0.439683865,12.7302807,11.678755,11.4227691
55.419642,13.6747943,12.9890098,0.828121078,12.7609312,11.6749604,11.4206695
55.430133,12.6491106,13.0188041,-0.608024206,12.7928292,11.6711848,11.4185715
55.440625,13.3790882,13.0499182,0.57373331,12.8260441,11.6674272,11.4164748
55.451116,12.8062485,13.0824127,-0.525513324,12.8606365,11.6636881,11.4143799
55.461608,12.7279221,13.1163645,-0.623251516,12.8966847,11.6599665,11.4122862
55.4721,13.7113092,13.1518458,0.747972828,12.9342614,11.6562626,11.410194
55.482591,13.7477271,13.1889334,0.74752507,12.973444,11.6525766,11.4081035
55.493083,14.2478068,13.2277199,1.00999356,13.0143264,11.6489074,11.4060144
55.503574,12.9614814,13.2682893,-0.553902415,13.056993,11.6452557,11.4039269
55.514066,12.7279221,13.3107472,-0.763429836,13.1015508,11.6416205,11.4018407
55.524558,13.7840488,13.3551942,0.654869889,13.1481009,11.638002,11.399756
55.535049,13.0766968,13.4017375,-0.570123376,13.1967514,11.6344002,11.397673
55.545541,13.114877,13.4505059,-0.579334851,13.2476325,11.6308144,11.3955912
55.556032,14.106736,13.5016184,0.777893054,13.3008636,11.6272449,11.3935112
55.566524,13.5277493,13.5552226,-0.165750803,13.3565939,11.623691,11.3914325
55.577016,14.5945195,13.6114617,0.991492709,13.4149674,11.6201529,11.3893553
55.587507,13.3041347,13.6704891,-0.605272146,13.4761384,11.6166305,11.3872797
55.597999,14.6287388,13.7324873,0.946705601,13.5402911,11.6131232,11.3852054
55.60849,13.96424,13.797629,0.408180162,13.6075986,11.6096313,11.3831329
55.618982,13.2664992,13.8661257,-0.774355563,13.6782744,11.6061541,11.3810616
55.629474,13.6014705,13.9381861,-0.580272037,13.7525282,11.6026917,11.3789918
55.639965,14.0712473,14.014035,0.239190834,13.8305858,11.5992443,11.3769237
55.650457,13.7113092,14.0939384,-0.618570306,13.9127149,11.595811,11.3748569
55.660948,14.525839,14.1781531,0.589649033,13.9991734,11.5923924,11.3727918
55.67144,14.0356688,14.2669908,-0.480959365,14.0902749,11.5889876,11.370728
55.681932,13.7113092,14.3607644,-0.805887859,14.1863335,11.5855968,11.3686656
55.692423,13.6381817,14.4598133,-0.906438941,14.2876899,11.5822202,11.366605
55.702915,14.6969385,14.5645367,0.363870544,14.3947455,11.5788569,11.3645456
55.713406,14.832397,14.675329,0.396318071,14.5078957,11.5755075,11.3624879
55.723898,14.4568323,14.7926648,-0.579510531,14.6276174,11.5721711,11.3604315
55.73439,14.6628783,14.9170293,-0.504133897,14.7543972,11.568848,11.3583766
55.744881,15.6204994,15.0489526,0.756007128,14.8887668,11.5655383,11.3563233
55.755373,15.3948043,15.1890568,0.453593999,15.0313507,11.5622413,11.3542714
55.765864,15.4272486,15.3379703,0.298794697,15.1827786,11.5589573,11.3522211
55.776356,15.4596248,15.496445,-0.191885839,15.3438047,11.5556857,11.3501722
55.786848,16.583124,15.6652645,0.95804984,15.5152145,11.5524267,11.3481247
55.797339,16.3095064,15.845293,0.68133213,15.6978739,11.5491804,11.3460788
55.807831,15.5884573,16.0375441,-0.670139378,15.8927991,11.545946,11.3440343
55.818322,16.2788206,16.2430667,0.189087087,16.1010405,11.5427242,11.3419915
55.828814,16.7928556,16.4631115,0.574233493,16.3238513,11.539514,11.3399499
55.839306,16.3095064,16.6990104,-0.624102558,16.5625653,11.5363157,11.3379098
55.849797,15.4919334,16.9522502,-1.20843568,16.8186709,11.5331295,11.3358714
55.860289,16,17.2245784,-1.10660669,17.0939184,11.5299546,11.3338342
55.87078,16.5227116,17.5178523,-0.997567359,17.3901665,11.5267915,11.3317988
55.881272,17.0293864,17.8342882,-0.897163192,17.7096339,11.5236396,11.3297646
55.891764,17.8044938,18.1763038,-0.609762246,18.05474,11.5204989,11.3277319
55.902255,17.7763888,18.5466419,-0.877640596,18.4282289,11.5173697,11.3257009
55.912747,18.8148877,18.9485493,-0.365597513,18.8333498,11.5142513,11.3236712
55.923238,18.7082869,19.3855825,-0.822979695,19.2736601,11.5111441,11.3216431
55.93373,19.3390796,19.8620139,-0.723141939,19.7534339,11.5080475,11.3196163
55.944222,19.8242276,20.3826413,-0.74727086,20.2774701,11.5049616,11.317591
55.954713,19.7230829,20.9530286,-1.10902916,20.8513327,11.5018866,11.3155673
55.965205,21.8860686,21.5798581,0.553362954,21.4817055,11.4988219,11.313545
55.975696,20.808652,22.2707205,-1.20916024,22.1761786,11.4957678,11.3115243
55.986188,22,23.0348784,-1.01728974,22.944015,11.4927238,11.3095049
55.99668,23.8537209,23.8831277,-0.171484234,23.7960097,11.4896899,11.3074869
56.007171,24.657656,24.8284009,-0.413212842,24.7450934,11.4866665,11.3054707
56.017663,24.9599679,25.8866911,-0.962664615,25.8072588,11.4836528,11.3034557
56.028154,27.1661554,27.0772668,0.298141937,27.0017716,11.4806493,11.3014423
56.038646,28.9136646,28.425172,0.698922454,28.3536762,11.4776553,11.2994303
56.049138,30.82207,29.9638013,0.926427933,29.8963711,11.4746711,11.2974197
56.059629,32.2180074,31.7426763,0.689442628,31.6793935,11.4716968,11.2954108
56.070121,36.1109402,33.8442027,1.50556881,33.7851921,11.4687317,11.2934032
56.080612,39.4588393,36.4132346,1.7451661,36.3587029,11.4657763,11.2913972
56.091104,43.451122,39.7082025,1.93466261,39.6584828,11.4628301,11.2893925
56.101596,48.846699,44.1549102,2.16605373,44.1104534,11.4598931,11.2873892
56.112087,55.1815186,50.3649747,2.19466261,50.3262217,11.4569656,11.2853877
56.122579,64.0234332,59.0540059,2.22922123,59.0211425,11.4540469,11.2833874
56.13307,74.2832417,70.825262,1.85956438,70.798015,11.4511375,11.2813887
56.143562,88.2213126,85.9142893,1.51888884,85.8919534,11.4482367,11.2793914
56.154054,103.667738,103.969453,-0.549285582,103.951099,11.4453448,11.2773955
56.164545,121.88109,123.946483,-1.43714778,123.931172,11.442462,11.2754013
56.175037,141.148858,144.123441,-1.72469795,144.110346,11.4395875,11.2734083
56.185528,161.993827,162.209746,-0.464670815,162.198175,11.436722,11.271417
56.19602,175.316856,175.559093,-0.492175397,175.54846,11.4338647,11.269427
56.206512,182.510274,181.51032,0.99997693,181.500092,11.4310158,11.2674384
56.217003,178.843507,178.262675,0.762123491,178.252317,11.4281757,11.2654515
56.227495,164.484042,166.151657,-1.29136169,166.140604,11.4253435,11.2634658
56.237986,143.652358,147.843422,-2.04720871,147.831067,11.4225199,11.2614818
56.248478,121.486625,126.729091,-2.28964332,126.714756,11.4197041,11.2594991
56.25897,100.826584,105.613246,-2.18784413,105.596136,11.4168965,11.2575179
56.269461,84.9588136,86.5005595,-1.24167064,86.4797799,11.4140971,11.2555383
56.279953,71.2249956,70.6360295,0.767441307,70.6107172,11.4113054,11.2535599
56.290444,59.8999165,58.4867349,1.18877315,58.4563249,11.4085219,11.2515833
56.300936,51.4490039,49.775552,1.2936197,49.7400061,11.4057459,11.2496079
56.311428,46.1735855,43.7354959,1.5614383,43.6952512,11.4029776,11.2476339
56.321919,41.024383,39.4884965,1.23930889,39.4441542,11.4002173,11.2456616
56.332411,37.4966665,36.336982,1.07688648,36.2890431,11.3974643,11.2436906
56.342902,34.8137904,33.8446372,0.984455798,33.7934333,11.3947192,11.2417212
56.353394,31.7647603,31.7735838,-0.0939333872,31.7193228,11.3919812,11.2397531
56.363886,29.4108823,30.000638,-0.767955526,29.9434649,11.3892507,11.2377864
56.374377,27.3130006,28.4577544,-1.06993169,28.3977895,11.3865278,11.2358214
56.384869,26.925824,27.1016658,-0.419334886,27.0390212,11.383812,11.2338576
56.39536,25.7487864,25.90181,-0.391182302,25.8365965,11.3811036,11.2318955
56.405852,24.0624188,24.8341052,-0.878456788,24.7664324,11.3784022,11.2299347
56.416344,22,23.8794612,-1.37093443,23.8094386,11.3757079,11.2279753
56.426835,21.6333077,23.0222215,-1.1785219,22.9499575,11.3730209,11.2260176
56.437327,21.0475652,22.2492099,-1.09619555,22.1748109,11.3703406,11.2240611
56.447818,20,21.5496963,-1.24486799,21.4732674,11.3676676,11.2221063
56.45831,20.1246118,20.9144153,-0.88870888,20.8360587,11.3650012,11.2201527
56.468802,18.8944436,20.3356977,-1.20052241,20.2555133,11.3623416,11.2182006
56.479293,18.1934054,19.8070032,-1.2702747,19.7250883,11.3596891,11.2162501
56.489785,18.1659021,19.3225965,-1.07549725,19.239045,11.357043,11.2143009
56.500276,17.7763888,18.8777117,-1.0494393,18.792615,11.3544039,11.2123533
56.510768,17.3493516,18.4680686,-1.0576942,18.3815145,11.3517711,11.210407
56.52126,17.4068952,18.0900601,-0.826537896,18.0021334,11.3491449,11.2084622
56.531751,16.9410743,17.7405322,-0.894124048,17.6513146,11.3465254,11.2065189
56.542243,16.4012195,17.4166306,-1.00767612,17.3262005,11.3439122,11.204577
56.552734,16.2172747,17.1159611,-0.947990714,17.0243936,11.3413057,11.2026366
56.563226,16.1245155,16.8363027,-0.843674841,16.7436698,11.3387052,11.2006976
56.573718,15,16.5757661,-1.25529521,16.4821367,11.3361111,11.19876
56.584209,15.9687194,16.3326692,-0.603282481,16.2381093,11.3335235,11.196824
56.594701,15.4272486,16.1054498,-0.823529695,16.0100223,11.3309419,11.1948893
56.605192,15.6843871,15.8927942,-0.456516219,15.7965592,11.3283667,11.1929562
56.615684,14.4568323,15.693449,-1.11203269,15.5964638,11.3257974,11.1910243
56.626176,15.1986842,15.5063441,-0.554670993,15.4086631,11.3232341,11.189094
56.636667,14.4568323,15.3305138,-0.934709295,15.2321891,11.3206772,11.1871652
56.647159,14.106736,15.1650404,-1.02873926,15.0661216,11.3181259,11.1852377
56.65765,14.5602198,15.0091546,-0.670025978,14.9096886,11.3155809,11.1833118
56.668142,13.7840488,14.8621025,-1.03829369,14.7621341,11.3130416,11.1813872
56.678634,14.3178211,14.7232412,-0.63672611,14.6228128,11.3105081,11.1794641
56.689125,14.1421356,14.5919842,-0.670707512,14.4911364,11.3079806,11.1775425
56.699617,14.1774469,14.4677623,-0.538809245,14.3665334,11.3054587,11.1756223
56.710108,13.96424,14.3501014,-0.621177366,14.2485278,11.3029428,11.1737036
56.7206,14.525839,14.2385252,0.536016661,14.1366416,11.3004323,11.1717862
56.731092,13.0766968,14.1326289,-1.02758557,14.0304682,11.2979275,11.1698702
56.741583,14.0712473,14.0320403,0.198007408,13.9296335,11.2954285,11.1679559
56.752075,13.190906,13.9363906,-0.863414504,13.8337673,11.2929349,11.1660428
56.762566,13.0384048,13.8453755,-0.898315464,13.7425638,11.290447,11.1641314
56.773058,12.6095202,13.7586818,-1.07198954,13.6557082,11.2879644,11.1622212
56.78355,13.5277493,13.6760449,-0.385091717,13.5729347,11.2854872,11.1603124
56.794041,13.2287566,13.5972197,-0.607011685,13.4939968,11.2830157,11.1584053
56.804533,12.5299641,13.5219586,-0.995989206,13.4186456,11.2805493,11.1564994
56.815024,13.1529464,13.4500598,-0.545081065,13.3466782,11.2780885,11.1545951
56.825516,13.1529464,13.3813102,-0.477874252,13.2778805,11.2756328,11.1526921
56.836008,12.9614814,13.3155315,-0.595021066,13.2120728,11.2731824,11.1507905
56.846499,13.820275,13.2525572,0.753470448,13.149088,11.2707374,11.1488906
56.856991,12.7279221,13.192216,-0.681391182,13.0887534,11.2682974,11.1469919
56.867482,12.8840987,13.1343703,-0.500271542,13.0309309,11.2658627,11.1450948
56.877974,13.3041347,13.078871,0.474619509,12.9754702,11.263433,11.143199
56.888466,12.7671453,13.0255945,-0.508378949,12.9222471,11.2610084,11.1413046
56.898957,13.1529464,12.9744251,0.422517909,12.871145,11.258589,11.1394118
56.909449,12.8062485,12.9252407,-0.344952543,12.8220412,11.2561744,11.1375202
56.91994,12.8452326,12.8779457,-0.180867596,12.7748392,11.2537651,11.1356303
56.930432,12.2882057,12.8324327,-0.73771743,12.7294312,11.2513605,11.1337416
56.940924,13.3416641,12.7886144,0.743673069,12.685729,11.2489608,11.1318544
56.951415,12.2065556,12.7464084,-0.734746761,12.6436498,11.2465663,11.1299688
56.961907,12.6491106,12.705726,-0.23793974,12.6031041,11.2441764,11.1280844
56.972398,12.8062485,12.6664988,0.373831048,12.5640232,11.2417915,11.1262016
56.98289,11.9582607,12.6286484,-0.81877205,12.526328,11.2394112,11.1243201
56.993382,12.8840987,12.5921115,0.540358417,12.4899548,11.2370357,11.12244
57.003873,12.7279221,12.5568284,0.413634725,12.4548435,11.2346652,11.1205615
57.014365,12.8840987,12.5227331,0.601136919,12.4209276,11.2322991,11.1186843
57.024856,12.5698051,12.4897763,0.282893521,12.3881573,11.2299379,11.1168086
57.035348,13,12.4578992,0.73627493,12.3564735,11.2275812,11.1149342
57.04584,12.8062485,12.4270553,0.615786638,12.3258292,11.2252291,11.1130613
57.056331,12.7671453,12.3972005,0.608230935,12.2961801,11.2228818,11.1111899
57.066823,12.7671453,12.3682849,0.631553964,12.267476,11.2205389,11.1093198
57.077314,13.114877,12.3402723,0.880116315,12.2396801,11.2182007,11.1074513
57.087806,12,12.3131179,-0.559569381,12.2127476,11.2158668,11.1055841
57.098298,12.489996,12.2867869,0.45078716,12.1866432,11.2135373,11.1037182
57.108789,12.6095202,12.2612464,0.590147257,12.1613338,11.2112126,11.101854
57.119281,12.1243557,12.2364581,-0.334817002,12.1367807,11.208892,11.099991
57.129772,12.9614814,12.2123948,0.865497895,12.1129567,11.2065761,11.0981296
57.140264,12.2065556,12.1890219,0.13241478,12.0898268,11.2042644,11.0962695
57.150756,11.8743421,12.1663133,-0.540343573,12.0673646,11.2019569,11.0944108
57.161247,11.6619038,12.1442437,-0.69450695,12.0455448,11.1996541,11.0925536
57.171739,12.083046,12.1227833,-0.199342329,12.0243373,11.1973553,11.0906978
57.18223,12.4498996,12.1019118,0.589904926,12.0037215,11.195061,11.0888435
57.192722,12.0415946,12.0816018,-0.200018134,11.9836699,11.1927707,11.0869904
57.203214,12.1243557,12.0618334,0.250044538,11.9641624,11.1904846,11.0851388
57.213705,12.3693169,12.0425872,0.571602756,11.9451794,11.188203,11.0832888
57.224197,11.8743421,12.0238395,-0.386648998,11.9266972,11.1859253,11.08144
57.234688,11.5325626,12.0055749,-0.687758928,11.9087,11.183652,11.0795928
57.24518,11.9582607,11.9877718,-0.17178771,11.8911661,11.1813826,11.0777469
57.255672,12.8062485,11.9704144,0.914239608,11.8740798,11.1791173,11.0759023
57.266163,11.4891253,11.9534879,-0.681441596,11.8574259,11.1768563,11.0740594
57.276655,12.2474487,11.9369734,0.557203124,11.8411855,11.1745991,11.0722177
57.287146,12.1655251,11.9208588,0.494637478,11.8253464,11.1723462,11.0703776
57.297638,11.2694277,11.9051268,-0.797307447,11.8098911,11.170097,11.0685387
57.30813,11.61895,11.8897652,-0.520399066,11.7948072,11.1678519,11.0667013
57.318621,11.5758369,11.8747623,-0.546740682,11.7800831,11.1656109,11.0648654
57.329113,11.2249722,11.8601026,-0.796950722,11.7657032,11.1633737,11.0630308
57.339604,12.1655251,11.845777,0.565462692,11.7516581,11.1611406,11.0611977
57.350096,11.0905365,11.8317713,-0.860949921,11.7379336,11.1589112,11.0593659
57.360588,12.6491106,11.8180758,0.911611126,11.7245201,11.1566857,11.0575355
57.371079,11.8743421,11.8046813,0.263933299,11.711408,11.1544643,11.0557067
57.381571,11.9582607,11.7915752,0.408271382,11.6985849,11.1522465,11.0538792
57.392062,11.3137085,11.7787514,-0.681940522,11.6860444,11.1500327,11.0520532
57.402554,11.1355287,11.7661927,-0.794143527,11.6737694,11.1478225,11.0502284
57.413046,12.0415946,11.7538112,0.536454435,11.6616712,11.1456161,11.0484051
57.423537,11.7473401,11.7414906,0.0764824045,11.6496325,11.1434136,11.0465833
57.434029,11.9582607,11.7291298,0.478676291,11.6375515,11.1412147,11.0447628
57.44452,12.7279221,11.7166116,1.00563933,11.6253102,11.1390197,11.0429438
57.455012,11.5325626,11.7036382,-0.413612861,11.6126083,11.1368282,11.0411261
57.465504,12.1655251,11.6892407,0.690133608,11.5984694,11.1346404,11.0393098
57.475995,12.083046,11.6769264,0.637275102,11.5864284,11.1324564,11.0374951
57.486487,10.8166538,11.6599587,-0.918316321,11.5696959,11.1302759,11.0356816
57.496978,10.7238053,11.6495016,-0.962131121,11.5595232,11.1280992,11.0338697
57.50747,12.0415946,11.63924,0.634314232,11.5495458,11.1259259,11.032059
57.517962,11.4017543,11.6291691,-0.476880332,11.5397587,11.1237562,11.0302498
57.528453,12.1655251,11.619284,0.739081214,11.5301572,11.1215903,11.0284421
57.538945,12.3693169,11.6095774,0.871630366,11.5207338,11.1194277,11.0266356
57.549436,12.7279221,11.6000458,1.06201521,11.5114849,11.1172689,11.0248307
57.559928,12.2474487,11.5906822,0.810411311,11.5024038,11.1151134,11.023027
57.57042,11.4891253,11.5814828,-0.303903735,11.4934863,11.1129614,11.0212248
57.580911,11.4455231,11.5724435,-0.356258897,11.4847286,11.110813,11.0194241
57.591403,11.6619038,11.5635582,0.313600954,11.4761242,11.108668,11.0176246
57.601894,11.3137085,11.5548241,-0.491035281,11.4676706,11.1065265,11.0158267
57.612386,11.7473401,11.5462354,0.448447052,11.4593616,11.1043883,11.0140301
57.622878,11.0905365,11.5377886,-0.668769123,11.4511942,11.1022536,11.0122348
57.633369,11.7473401,11.5294808,0.466753999,11.443165,11.1001224,11.0104411
57.643861,11.7473401,11.5213065,0.475429927,11.4352687,11.0979944,11.0086487
57.654352,11.1803399,11.5132636,-0.5769954,11.427503,11.09587,11.0068578
57.664844,11.5325626,11.5053469,0.164971668,11.4198631,11.0937487,11.0050681
57.675336,11.2249722,11.497554,-0.522093661,11.412346,11.0916308,11.0032798
57.685827,12.5698051,11.489882,1.03919347,11.4049492,11.0895164,11.0014931
57.696319,11.4891253,11.4823265,0.0824549413,11.3976682,11.087405,10.9997077
57.70681,11.9582607,11.4748857,0.695251801,11.390501,11.0852972,10.9979238
57.717302,12.1655251,11.4675552,0.835445903,11.3834435,11.0831925,10.9961411
57.727794,12.4096736,11.4603329,0.974341194,11.3764933,11.081091,10.9943598
57.738285,12.6095202,11.4532166,1.07531559,11.3696483,11.0789929,10.9925801
57.748777,11.4455231,11.4462023,-0.0260603495,11.3629045,11.0768979,10.9908016
57.759268,12.2065556,11.4392887,0.875937757,11.3562605,11.0748063,10.9890246
57.76976,11.0905365,11.4324719,-0.584752399,11.3497125,11.0727177,10.9872489
57.780252,12.1243557,11.4257501,0.835826245,11.3432587,11.0706323,10.9854746
57.790743,11.4891253,11.4191217,0.264581889,11.3368973,11.0685503,10.9837018
57.801235,11.1803399,11.412583,-0.48191612,11.3306249,11.0664712,10.9819303
57.811726,12.0415946,11.4061331,0.797158364,11.3244402,11.0643954,10.9801603
57.822218,11.3578167,11.3997686,-0.204821616,11.3183401,11.0623226,10.9783915
57.83271,12,11.393488,0.778788829,11.312323,11.0602529,10.9766241
57.843201,11.8743421,11.3872898,0.697891307,11.3063874,11.0581865,10.9748583
57.853693,11.9163753,11.381171,0.731576587,11.3005302,11.056123,10.9730937
57.864184,11.61895,11.3751308,0.493780602,11.2947507,11.0540628,10.9713307
57.874676,11.5758369,11.3691661,0.454610586,11.2890458,11.0520054,10.9695689
57.885168,10.8627805,11.3632759,-0.707456978,11.2834144,11.0499511,10.9678084
57.895659,11.1803399,11.3574588,-0.420855001,11.2778552,11.0479,10.9660495
57.906151,11.4455231,11.3517122,0.306285758,11.2723655,11.0458518,10.9642919
57.916642,11.2249722,11.3460354,-0.347941441,11.2669447,11.0438067,10.9625358
57.927134,11.4891253,11.3404258,0.385615687,11.2615901,11.0417645,10.9607809
57.937626,11.0905365,11.3348825,-0.494313628,11.2563008,11.0397253,10.9590274
57.948117,12.2065556,11.3294043,0.936563549,11.2510757,11.0376892,10.9572754
57.958609,12.1243557,11.3239889,0.894632171,11.2459124,11.0356558,10.9555247
57.9691,10.9087121,11.3186359,-0.640252898,11.2408105,11.0336257,10.9537755
57.979592,12.4498996,11.3133428,1.06609418,11.2357676,11.0315982,10.9520275
57.990084,11.4017543,11.3081089,0.306015321,11.2307828,11.0295737,10.9502809
58.000575,11.61895,11.3029333,0.56215367,11.2258554,11.0275523,10.9485359
58.011067,11.8743421,11.2978138,0.759294596,11.2209831,11.0255336,10.9467921
58.021558,11.4017543,11.2927502,0.33015765,11.2161656,11.023518,10.9450498
58.03205,11.4455231,11.2877403,0.397218946,11.2114009,11.0215051,10.9433087
58.042542,12.2065556,11.2827834,0.961130718,11.2066882,11.0194951,10.941569
58.053033,11.1803399,11.2778788,-0.312312272,11.2020269,11.0174881,10.9398309
58.063525,11.6619038,11.2730247,0.62360173,11.197415,11.0154837,10.9380939
58.074016,11.1803399,11.2682207,-0.296447003,11.1928523,11.0134824,10.9363586
58.084508,11.1803399,11.263465,-0.288314281,11.1883368,11.0114837,10.9346244
58.095,11.4891253,11.258757,0.479966945,11.1838681,11.0094878,10.9328916
58.105491,11.6619038,11.2540962,0.638598132,11.1794456,11.0074949,10.9311603
58.115983,11.5325626,11.2494807,0.532054374,11.1750674,11.0055046,10.9294303
58.126474,10.8627805,11.2449105,-0.61816669,11.1707335,11.0035173,10.9277018
58.136966,11.5325626,11.2403839,0.540535594,11.1664421,11.0015325,10.9259745
58.147458,11.8321596,11.2359003,0.772178291,11.1621928,10.9995506,10.9242485
58.157949,11.8321596,11.2314593,0.775048574,11.1579851,10.9975715,10.9225242
58.168441,11.4891253,11.2270592,0.511923872,11.1538175,10.995595,10.920801
58.178932,11.1803399,11.2227002,-0.205816181,11.1496897,10.9936214,10.9190793
58.189424,11.9582607,11.2183805,0.860162926,11.1456004,10.9916504,10.9173589
58.199916,10.4403065,11.2140998,-0.879655197,11.1415491,10.989682,10.9156398
58.210407,11.9582607,11.2098577,0.865102901,11.1375354,10.9877165,10.9139223
58.220899,11.61895,11.2056528,0.642882015,11.1335579,10.9857536,10.912206
58.23139,11.9582607,11.201485,0.869928594,11.1296166,10.9837935,10.9104912
58.241882,11.6619038,11.1973529,0.681579694,11.12571,10.9818359,10.9087776
58.252374,11.3137085,11.1932563,0.347062312,11.1218379,10.9798809,10.9070654
58.262865,11.4891253,11.1891947,0.547659167,11.1179999,10.9779288,10.9053548
58.273357,11.8321596,11.1851669,0.804358529,11.1141946,10.9759791,10.9036453
58.283848,11.7898261,11.181173,0.780162261,11.1104223,10.9740322,10.9019373
58.29434,11.2249722,11.1772115,0.218542153,11.1066814,10.9720878,10.9002306
58.304832,11.5325626,11.1732823,0.599399978,11.1029719,10.970146,10.8985252
58.315323,11,11.1693851,-0.411564181,11.0992934,10.968207,10.8968214
58.325815,12.328828,11.1655186,1.07856822,11.0956448,10.9662704,10.8951188
58.336306,11.9163753,11.161683,0.868730247,11.092026,10.9643365,10.8934177
58.346798,11.4891253,11.1578771,0.575541647,11.088436,10.9624051,10.8917177
58.35729,11.7898261,11.1541006,0.797323961,11.0848744,10.9604762,10.8900192
58.367781,11.2249722,11.1503534,0.273164283,11.0813412,10.95855,10.8883222
58.378273,10.5356538,11.1466343,-0.781652457,11.0778351,10.9566263,10.8866264
58.388764,10.7703296,11.1429435,-0.610421059,11.0743564,10.9547052,10.8849321
58.399256,11.2694277,11.1392797,0.360760206,11.0709039,10.9527865,10.883239
58.409748,11.4455231,11.135643,0.55666881,11.0674774,10.9508703,10.8815472
58.420239,11.5325626,11.1320331,0.632874021,11.0640768,10.9489568,10.879857
58.430731,10.3440804,11.1284489,-0.885645776,11.060701,10.9470456,10.878168
58.441222,11.045361,11.1248906,-0.282009957,11.0573502,10.9451371,10.8764805
58.451714,10.7238053,11.1213572,-0.630517202,11.0540234,10.943231,10.8747942
58.462206,12.5698051,11.1178486,1.20497157,11.0507204,10.9413273,10.8731093
58.472697,12.2474487,11.1143647,1.06446421,11.0474412,10.9394262,10.8714259
58.483189,10.5830052,11.1109043,-0.726566635,11.0441847,10.9375275,10.8697437
58.49368,11.5325626,11.1074679,0.651992893,11.0409512,10.9356313,10.868063
58.504172,10.5830052,11.1040542,-0.721837238,11.0377396,10.9337375,10.8663835
58.514664,9.48683298,11.1006634,-1.27036626,11.0345499,10.9318461,10.8647053
58.525155,11.1803399,11.0972953,0.288174538,11.0313821,10.9299573,10.8630287
58.535647,11.3578167,11.093949,0.513680564,11.0282351,10.9280707,10.8613533
58.546138,10.4403065,11.0906246,-0.806423047,11.0251092,10.9261868,10.8596794
58.55663,10.4880885,11.0873214,-0.77410133,11.0220036,10.924305,10.8580066
58.567122,10.4403065,11.0840391,-0.802329468,11.018918,10.9224257,10.8563353
58.577613,10.9544512,11.0807778,-0.355424632,11.0158526,10.920549,10.8546654
58.588105,10.3923048,11.0775366,-0.827787269,11.0128064,10.9186744,10.8529967
58.598596,10.7238053,11.0743158,-0.592039239,11.0097796,10.9168024,10.8513296
58.609088,11.61895,11.0711143,0.740159243,11.0067715,10.9149327,10.8496636
58.61958,11.1355287,11.0679323,0.259993032,11.0037819,10.9130652,10.847999
58.630071,12.328828,11.0647698,1.12430343,11.0008109,10.9112004,10.8463359
58.640563,10.5356538,11.0616258,-0.725239306,10.9978576,10.9093377,10.844674
58.651054,11.8321596,11.0585007,0.879578822,10.9949223,10.9074775,10.8430136
58.661546,11.5758369,11.0553935,0.72141763,10.9920041,10.9056194,10.8413544
58.672038,10.4880885,11.0523044,-0.751143048,10.9891032,10.9037637,10.8396965
58.682529,11.5325626,11.0492332,0.69521892,10.9862194,10.9019106,10.8380402
58.693021,11.3578167,11.0461793,0.558244902,10.983352,10.9000595,10.836385
58.703512,11.3137085,11.0431429,0.520159201,10.9805012,10.8982109,10.8347313
58.714004,11.2249722,11.0401232,0.429940684,10.9776663,10.8963645,10.8330789
58.724496,12.2474487,11.0371202,1.10014933,10.9748473,10.8945204,10.8314277
58.734987,10.4403065,11.0341339,-0.770601973,10.9720443,10.8926787,10.8297781
58.745479,10.2469508,11.0311636,-0.885557935,10.9692564,10.8908391,10.8281297
58.75597,11,11.0282096,-0.167957221,10.966484,10.889002,10.8264827
58.766462,10.3440804,11.0252711,-0.825342779,10.9637263,10.887167,10.824837
58.776954,11.3578167,11.0223482,0.579196415,10.9609834,10.8853342,10.8231926
58.787445,10.1488916,11.0194409,-0.933032329,10.9582553,10.8835039,10.8215497
58.797937,11.3137085,11.0165484,0.545123902,10.9555412,10.8816756,10.8199079
58.808428,10.3923048,11.0136712,-0.78826792,10.9528415,10.8798498,10.8182677
58.81892,10.8166538,11.0108083,-0.44062966,10.9501555,10.878026,10.8166287
58.829412,10.4403065,11.00796,-0.753427825,10.9474832,10.8762045,10.814991
58.839903,10.9087121,11.0051263,-0.310506258,10.9448248,10.8743853,10.8133548
58.850395,12,11.0023063,0.99884616,10.9421794,10.8725682,10.8117197
58.860886,11.4455231,10.9995006,0.667849162,10.9395474,10.8707535,10.8100862
58.871378,10.5830052,10.9967084,-0.6431976,10.9369281,10.8689408,10.8084539
58.88187,11.1355287,10.9939297,0.376296447,10.9343216,10.8671304,10.8068229
58.892361,11.6619038,10.9911647,0.818986648,10.931728,10.8653223,10.8051934
58.902853,11.1803399,10.9884125,0.438095135,10.9291465,10.8635162,10.803565
58.913344,11.1803399,10.9856737,0.441209907,10.9265776,10.8617124,10.8019382
58.923836,11.3578167,10.9829475,0.612265654,10.9240205,10.8599107,10.8003125
58.934328,10.8166538,10.9802339,-0.404450337,10.9214754,10.8581112,10.7986882
58.944819,11.3137085,10.9775331,0.579806328,10.9189423,10.8563139,10.7970654
58.955311,10.7703296,10.9748444,-0.452233156,10.9164206,10.8545187,10.7954437
58.965802,11.9163753,10.9721682,0.971703179,10.9139106,10.8527258,10.7938236
58.976294,11,10.9695038,0.174631649,10.9114117,10.8509349,10.7922046
58.986786,11.5758369,10.9668512,0.780375328,10.9089239,10.8491461,10.7905869
58.997277,11.1803399,10.9642107,0.464896955,10.9064474,10.8473596,10.7889707
59.007769,10.5356538,10.9615815,-0.652631412,10.9039816,10.8455751,10.7873558
59.01826,10.2956301,10.958964,-0.814453116,10.9015267,10.8437929,10.7857422
59.028752,10.9087121,10.9563576,-0.218278428,10.8990822,10.8420126,10.7841299
59.039244,11.9163753,10.9537623,0.981128412,10.8966481,10.8402345,10.7825189
59.049735,10.2469508,10.9511783,-0.839182687,10.8942246,10.8384586,10.7809094
59.060227,11.3578167,10.948605,0.639696543,10.8918111,10.8366847,10.7793011
59.070718,11.7473401,10.9460427,0.895152171,10.8894079,10.834913,10.7776942
59.08121,11.0905365,10.9434908,0.383465393,10.8870144,10.8331433,10.7760885
59.091702,10.5356538,10.9409494,-0.63662834,10.8846307,10.8313756,10.7744841
59.102193,11.3137085,10.9384186,0.612609075,10.8822569,10.8296102,10.7728813
59.112685,10.9544512,10.9358979,0.136210433,10.8798925,10.8278467,10.7712796
59.123176,9.89949494,10.9333875,-1.01680508,10.8775378,10.8260855,10.7696793
59.133668,10.0498756,10.9308869,-0.938622018,10.8751922,10.8243261,10.7680803
59.14416,11.3137085,10.9283962,0.62073526,10.8728559,10.8225688,10.7664825
59.154651,11.045361,10.9259156,0.34560878,10.8705289,10.8208138,10.7648863
59.165143,11.4455231,10.9234444,0.722550177,10.8682106,10.8190606,10.7632912
59.175634,10.9087121,10.920983,-0.110773957,10.8659016,10.8173096,10.7616976
59.186126,11.045361,10.9185308,0.356132289,10.863601,10.8155606,10.7601052
59.196618,10.0498756,10.916088,-0.930705307,10.8613092,10.8138135,10.758514
59.207109,10.8627805,10.9136546,-0.225553003,10.8590262,10.8120687,10.7569244
59.217601,10.5830052,10.9112302,-0.572909221,10.8567515,10.8103257,10.7553359
59.228092,11,10.9088151,0.301968435,10.8544854,10.8085849,10.7537489
59.238584,10.1488916,10.9064086,-0.870354557,10.8522274,10.806846,10.7521631
59.249076,11.5325626,10.904011,0.792812445,10.8499776,10.8051091,10.7505786
59.259567,10.0498756,10.9016224,-0.922901282,10.8477361,10.8033743,10.7489955
59.270059,12.083046,10.8992422,1.08802747,10.8455024,10.8016414,10.7474136
59.28055,10.9087121,10.8968708,0.10881789,10.8432769,10.7999107,10.7458332
59.291042,10.5356538,10.8945076,-0.599044116,10.841059,10.7981818,10.744254
59.301534,10.3923048,10.8921528,-0.706999264,10.8388488,10.7964548,10.742676
59.312025,10.4880885,10.8898065,-0.633812301,10.8366466,10.7947301,10.7410996
59.322517,11,10.8874682,0.3354576,10.8344517,10.7930071,10.7395243
59.333008,11.0905365,10.8851382,0.453208881,10.8322645,10.7912863,10.7379504
59.3435,11.045361,10.882816,0.403168671,10.8300845,10.7895673,10.7363778
59.353992,11,10.8805018,0.345685107,10.8279118,10.7878503,10.7348064
59.364483,11.3578167,10.8781957,0.692546776,10.8257466,10.7861354,10.7332365
59.374975,10.4403065,10.8758971,-0.659992845,10.8235884,10.7844223,10.7316678
59.385466,11.1803399,10.8736064,0.553835261,10.8214375,10.7827113,10.7301005
59.395958,10.8166538,10.8713231,-0.233814662,10.8192934,10.7810021,10.7285344
59.40645,10.9087121,10.8690474,0.199160025,10.8171563,10.7792949,10.7269696
59.416941,10.198039,10.8667794,-0.817765452,10.8150263,10.7775897,10.7254063
59.427433,11.1803399,10.8645185,0.561979881,10.8129028,10.7758864,10.7238441
59.437924,11.5325626,10.8622652,0.818716934,10.8107863,10.7741851,10.7222834
59.448416,10.5356538,10.8600189,-0.569530624,10.8086763,10.7724856,10.7207238
59.458908,10,10.8577798,-0.926164008,10.8065729,10.770788,10.7191656
59.469399,11.3137085,10.855548,0.67687556,10.8044762,10.7690925,10.7176088
59.479891,11.045361,10.853323,0.43822142,10.8023858,10.7673988,10.7160531
59.490382,11.7046999,10.8511052,0.923901887,10.8003019,10.7657072,10.714499
59.500874,10.7238053,10.8488941,-0.353678979,10.7982243,10.7640172,10.7129459
59.511366,11.4017543,10.8466899,0.745026442,10.7961528,10.7623292,10.7113942
59.521857,10.2956301,10.8444926,-0.740852501,10.7940878,10.7606433,10.709844
59.532349,11.3578167,10.8423018,0.717993668,10.7920288,10.7589591,10.7082949
59.54284,10.5830052,10.8401179,-0.507062724,10.789976,10.757277,10.7067472
59.553332,10.2469508,10.8379403,-0.768758431,10.7879291,10.7555965,10.7052007
59.563824,10.5830052,10.8357693,-0.502756409,10.7858882,10.753918,10.7036555
59.574315,11.045361,10.8336049,0.460169685,10.7838533,10.7522415,10.7021117
59.584807,10.0995049,10.8314467,-0.85553595,10.7818242,10.7505667,10.7005691
59.595298,11.9163753,10.8292951,1.04263139,10.779801,10.748894,10.699028
59.60579,12.2065556,10.8271495,1.1744812,10.7777834,10.747223,10.697488
59.616282,11.4455231,10.8250102,0.787726445,10.7757714,10.7455538,10.6959493
59.626773,11.1803399,10.8228772,0.5978818,10.7737654,10.7438867,10.6944121
59.637265,10.9544512,10.8207502,0.3656514,10.7717647,10.7422213,10.692876
59.647756,9.64365076,10.8186294,-1.08396433,10.7697697,10.7405578,10.6913413
59.658248,11.2249722,10.8165145,0.639106952,10.76778,10.7388961,10.6898078
59.66874,10.7238053,10.8144055,-0.300998603,10.7657958,10.7372362,10.6882756
59.679231,10.5830052,10.8123025,-0.47884998,10.7638171,10.7355783,10.6867448
59.689723,10.3440804,10.8102053,-0.682733374,10.7618436,10.7339222,10.6852152
59.700214,10.2956301,10.808114,-0.715879806,10.7598756,10.732268,10.6836871
59.710706,9.79795897,10.8060283,-1.00402658,10.7579126,10.7306154,10.68216
59.721198,11.1355287,10.8039483,0.575830173,10.7559548,10.7289647,10.6806343
59.731689,11.1803399,10.8018742,0.615195657,10.7540024,10.727316,10.67911
59.742181,11.5758369,10.7998055,0.880926472,10.7520549,10.725669,10.6775869
59.752672,10.8627805,10.7977425,0.255025527,10.7501126,10.7240239,10.6760652
59.763164,10.7703296,10.7956848,-0.159233139,10.7481751,10.7223805,10.6745446
59.773656,10.8166538,10.7936326,0.151727444,10.7462427,10.7207389,10.6730253
59.784147,9.74679434,10.791586,-1.02215052,10.7443153,10.7190993,10.6715075
59.794639,10.5356538,10.7895446,-0.503875856,10.7423927,10.7174613,10.6699908
59.80513,10.0995049,10.7875088,-0.829459959,10.740475,10.7158253,10.6684756
59.815622,10,10.785478,-0.886271961,10.7385621,10.7141909,10.6669615
59.826114,10.0995049,10.7834525,-0.8270112,10.7366538,10.7125584,10.6654487
59.836605,11.045361,10.7814323,0.513739895,10.7347505,10.7109277,10.6639373
59.847097,11.2249722,10.7794172,0.667499046,10.7328517,10.7092987,10.662427
59.857588,11.0905365,10.7774073,0.559579451,10.7309577,10.7076717,10.6609182
59.86808,10.4880885,10.7754024,-0.536016712,10.7290682,10.7060463,10.6594106
59.878572,10.8627805,10.7734025,0.298961531,10.7271832,10.7044226,10.6579042
59.889063,10.3923048,10.7720212,-0.616211283,10.7253029,10.7034182,10.6563992
59.899555,10.7703296,10.7700333,0.0172139242,10.723427,10.7018002,10.6548954
59.910046,10,10.7682022,-0.876471452,10.7215557,10.7003367,10.653393
59.920538,10.0498756,10.7662204,-0.846371534,10.7196887,10.6987184,10.6518918
59.93103,10.7238053,10.7642457,-0.201097944,10.717826,10.6971041,10.6503918
59.941521,10.5830052,10.762276,-0.423403731,10.7159679,10.6954917,10.6488933
59.952013,11.1355287,10.7603108,0.612550311,10.714114,10.693881,10.6473959
59.962504,10.8627805,10.7583507,0.32315606,10.7122645,10.6922721,10.6458999
59.972996,11.2249722,10.756395,0.684526973,10.7104191,10.6906649,10.6444051
59.983488,10.7703296,10.754444,0.126038185,10.7085779,10.6890594,10.6429115
59.993979,11.7473401,10.7524978,0.997417817,10.7067411,10.6874558,10.6414194
60.004471,10.8166538,10.7505561,0.257094829,10.7049083,10.6858538,10.6399284
60.014962,11.045361,10.7486191,0.544740242,10.7030798,10.6842536,10.6384388
60.025454,10.8627805,10.7466865,0.340725754,10.7012552,10.6826551,10.6369504
60.035946,11,10.7447583,0.505214484,10.6994347,10.6810583,10.6354632
60.046437,10.5830052,10.7428349,-0.399786961,10.6976184,10.6794633,10.6339775
60.056929,11.1803399,10.7409157,0.662890818,10.695806,10.67787,10.6324929
60.06742,11.1803399,10.739001,0.664333386,10.6939977,10.6762785,10.6310097
60.077912,10.6301458,10.7370906,-0.327024181,10.6921932,10.6746886,10.6295276
60.088404,10.6770783,10.7351846,-0.241052515,10.6903926,10.6731004,10.6280468
60.098895,11.0905365,10.733283,0.597706866,10.6885961,10.6715141,10.6265674
60.109387,10.6301458,10.7313856,-0.318181943,10.6868033,10.6699293,10.6250892
60.119878,10.8166538,10.7294926,0.295230874,10.6850145,10.6683464,10.6236124
60.13037,10.0498756,10.7276036,-0.823242361,10.6832294,10.6667651,10.6221367
60.140862,10.4403065,10.7257189,-0.534239976,10.681448,10.6651854,10.6206623
60.151353,10.2469508,10.7238385,-0.690570565,10.6796706,10.6636076,10.6191892
60.161845,10.3923048,10.7219621,-0.574157824,10.6778967,10.6620314,10.6177174
60.172336,10.3923048,10.7200899,-0.572525186,10.6761268,10.660457,10.6162469
60.182828,9.89949494,10.7182217,-0.904835231,10.6743603,10.6588841,10.6147776
60.19332,10.9544512,10.7163576,0.487948309,10.6725976,10.657313,10.6133095
60.203811,10.2469508,10.7144977,-0.683774025,10.6708386,10.6557436,10.6118428
60.214303,11.1355287,10.7126416,0.650297715,10.6690831,10.6541758,10.6103773
60.224794,10.2956301,10.7107897,-0.644328765,10.6673313,10.6526099,10.6089131
60.235286,10.8627805,10.7089416,0.392223042,10.6655829,10.6510454,10.6074501
60.245778,11.1355287,10.7070974,0.65454666,10.6638381,10.6494827,10.6059884
60.256269,10.5356538,10.7052573,-0.411829518,10.662097,10.6479217,10.6045281
60.266761,10.7238053,10.7034209,0.142773825,10.6603592,10.6463623,10.6030689
60.277252,10.5830052,10.7015886,-0.344359334,10.658625,10.6448047,10.6016111
60.287744,11.4455231,10.6997599,0.863575829,10.6568942,10.6432486,10.6001544
60.298236,10.3923048,10.6979351,-0.552838346,10.6551668,10.6416942,10.598699
60.308727,10.8166538,10.6961142,0.347188164,10.6534429,10.6401416,10.5972449
60.319219,10.2956301,10.6942969,-0.631400655,10.6517223,10.6385905,10.595792
60.32971,10.5830052,10.6924836,-0.330875096,10.6500052,10.6370412,10.5943405
60.340202,10.7238053,10.6906738,0.182020658,10.6482913,10.6354934,10.5928902
60.350694,11.3578167,10.6888677,0.81789303,10.6465808,10.6339472,10.5914411
60.361185,10.2956301,10.6870654,-0.625647908,10.6448737,10.6324029,10.5899933
60.371677,10.2469508,10.6852667,-0.662054329,10.6431697,10.63086,10.5885467
60.382168,10.4403065,10.6834718,-0.493117896,10.6414692,10.629319,10.5871016
60.39266,10.3440804,10.6816803,-0.581033435,10.6397718,10.6277794,10.5856575
60.403152,10.0995049,10.6798924,-0.761831651,10.6380776,10.6262415,10.5842146
60.413643,11.4017543,10.6781083,0.850673839,10.6363867,10.6247053,10.5827732
60.424135,10.7703296,10.6763275,0.306597599,10.6346989,10.6231706,10.5813329
60.434626,10.2956301,10.6745505,-0.615565066,10.6330145,10.6216377,10.579894
60.445118,10.7238053,10.6727768,0.22589486,10.631333,10.6201063,10.5784562
60.45561,11,10.6710066,0.573579442,10.6296547,10.6185765,10.5770197
60.466101,11.6619038,10.6692401,0.996325098,10.6279797,10.6170485,10.5755845
60.476593,11.0905365,10.6674768,0.650430364,10.6263076,10.6155219,10.5741505
60.487084,10.6770783,10.6657172,0.106588147,10.6246388,10.6139972,10.5727178
60.497576,10.6301458,10.6639608,-0.183888646,10.6229729,10.6124738,10.5712863
60.508068,10.0498756,10.6622079,-0.78251662,10.6213101,10.6109521,10.569856
60.518559,9.94987437,10.6604585,-0.842961507,10.6196504,10.6094322,10.5684271
60.529051,11.3578167,10.6587123,0.836124646,10.6179936,10.6079137,10.5669993
60.539542,10.7238053,10.6569696,0.258526039,10.61634,10.606397,10.5655729
60.550034,10.6770783,10.6552301,0.147811319,10.6146892,10.6048817,10.5641476
60.560526,10.8627805,10.6534939,0.457478548,10.6130414,10.603368,10.5627236
60.571017,10.7238053,10.6517611,0.268410422,10.6113967,10.6018561,10.5613009
60.581509,10.0498756,10.6500315,-0.774697302,10.6097549,10.6003456,10.5598794
60.592,10.4403065,10.6483054,-0.456068906,10.6081161,10.5988368,10.5584592
60.602492,10,10.6465823,-0.804103394,10.60648,10.5973295,10.5570402
60.612984,10.9087121,10.6448624,0.513663019,10.6048469,10.5958238,10.5556224
60.623475,11.1803399,10.643146,0.732935151,10.6032168,10.5943198,10.554206
60.633967,11.0905365,10.6414325,0.670152206,10.6015894,10.5928173,10.5527906
60.644458,10.5830052,10.6397225,-0.238153755,10.5999651,10.5913165,10.5513767
60.65495,10.8166538,10.6380154,0.422656399,10.5983434,10.5898171,10.5499639
60.665442,10.9544512,10.6363115,0.564038701,10.5967246,10.5883193,10.5485523
60.675933,11.2694277,10.6346109,0.796753896,10.5951087,10.5868232,10.5471421
60.686425,10.3923048,10.6329133,-0.490518529,10.5934955,10.5853286,10.545733
60.696916,10,10.6312189,-0.794492872,10.5918853,10.5838356,10.5443252
60.707408,11.1355287,10.6295275,0.711337622,10.5902777,10.5823441,10.5429186
60.7179,9.79795897,10.6278392,-0.910977618,10.5886728,10.5808542,10.5415132
60.728391,10.8166538,10.6261541,0.436462741,10.5870709,10.5793659,10.5401092
60.738883,11.0905365,10.6244719,0.682689237,10.5854715,10.5778791,10.5387063
60.749374,10.6301458,10.6227929,0.0857489645,10.5838751,10.576394,10.5373048
60.759866,9.8488578,10.6211168,-0.878782689,10.5822812,10.5749103,10.5359044
60.770358,10.8166538,10.6194437,0.44408344,10.58069,10.5734282,10.5345052
60.780849,10.0995049,10.6177738,-0.719908924,10.5791017,10.5719477,10.5331073
60.791341,10.6301458,10.6161067,0.118486737,10.5775159,10.5704687,10.5317106
60.801832,10,10.6144428,-0.783863989,10.5759329,10.5689913,10.5303153
60.812324,11.045361,10.6127816,0.65770769,10.5743524,10.5675154,10.528921
60.822816,10.0498756,10.6111234,-0.749164738,10.5727746,10.566041,10.527528
60.833307,10.9087121,10.6094683,0.547031785,10.5711996,10.5645683,10.5261363
60.843799,9.94987437,10.607816,-0.811136031,10.5696271,10.563097,10.5247458
60.85429,10.4880885,10.6061668,-0.343625257,10.5680573,10.5616273,10.5233566
60.864782,10.5830052,10.6045203,-0.146680177,10.56649,10.5601591,10.5219685
60.875274,10.7238053,10.6028767,0.347747838,10.5649253,10.5586924,10.5205816
60.885765,11.0905365,10.6012362,0.699500044,10.5633634,10.5572274,10.5191961
60.896257,10.8166538,10.5995984,0.465892104,10.5618038,10.5557638,10.5178117
60.906748,11.2249722,10.5979636,0.791838739,10.560247,10.5543018,10.5164287
60.91724,11.045361,10.5963315,0.670096672,10.5586926,10.5528412,10.5150467
60.927732,10.7703296,10.5947022,0.419079239,10.5571408,10.5513822,10.513666
60.938223,10.3440804,10.5930759,-0.498994488,10.5555917,10.5499248,10.5122866
60.948715,11.045361,10.5914523,0.673727462,10.5540449,10.5484688,10.5109084
60.959206,10.2469508,10.5898317,-0.585560345,10.5525008,10.5470144,10.5095314
60.969698,11.0905365,10.5882137,0.708747357,10.5509591,10.5455614,10.5081556
60.98019,10.0498756,10.5865985,-0.732613724,10.5494199,10.54411,10.506781
60.990681,10.1488916,10.5849862,-0.660374636,10.5478833,10.5426602,10.5054078
61.001173,10.7703296,10.5833766,0.43238066,10.5463491,10.5412117,10.5040356
61.011664,10.3440804,10.5817699,-0.487534018,10.5448176,10.5397649,10.5026649
61.022156,10.6770783,10.5801657,0.31130777,10.5432883,10.5383195,10.5012952
61.032648,10.8627805,10.5785643,0.533119262,10.5417615,10.5368756,10.4999267
61.043139,11.2249722,10.5769659,0.804988391,10.5402374,10.5354333,10.4985595
61.053631,11.0905365,10.5753699,0.717751051,10.5387155,10.5339924,10.4971935
61.064122,10.2956301,10.5737769,-0.527396198,10.5371962,10.5325532,10.4958288
61.074614,11,10.5721864,0.654074609,10.5356792,10.5311152,10.4944652
61.085106,10.7703296,10.5705986,0.446912732,10.5341647,10.5296788,10.4931028
61.095597,10.2956301,10.5690137,-0.522860926,10.5326527,10.528244,10.4917418
61.106089,10.1488916,10.5674313,-0.646946462,10.531143,10.5268106,10.4903818
61.11658,11.1355287,10.5658517,0.754769505,10.5296359,10.5253788,10.4890232
61.127072,11.1355287,10.5642747,0.755813504,10.528131,10.5239484,10.4876657
61.137564,10.2956301,10.5627003,-0.516788301,10.5266285,10.5225194,10.4863094
61.148055,9.64365076,10.5611287,-0.957850694,10.5251286,10.5210921,10.4849545
61.158547,10.7703296,10.5595596,0.459096913,10.5236309,10.5196661,10.4836006
61.169038,10.6770783,10.5579934,0.345086795,10.5221357,10.5182417,10.4822481
61.17953,10.1488916,10.5564296,-0.638387027,10.5206428,10.5168186,10.4808966
61.190022,10.2469508,10.5548684,-0.554903262,10.5191522,10.5153971,10.4795464
61.200513,10.3440804,10.55331,-0.45741619,10.5176642,10.5139771,10.4781975
61.211005,11.1803399,10.5517541,0.792834035,10.5161783,10.5125585,10.4768497
61.221496,10.5830052,10.5502009,0.18111965,10.514695,10.5111415,10.4755032
61.231988,9.69535971,10.5486502,-0.923737244,10.5132139,10.5097259,10.4741578
61.24248,10.6770783,10.5471021,0.36052205,10.5117351,10.5083117,10.4728136
61.252971,9.8488578,10.5455567,-0.834684933,10.5102588,10.5068991,10.4714708
61.263463,10.198039,10.5440138,-0.588196216,10.5087847,10.5054878,10.470129
61.273954,11.3137085,10.5424736,0.878199793,10.5073131,10.5040781,10.4687886
61.284446,10.1488916,10.5409359,-0.626134407,10.5058436,10.5026698,10.4674493
61.294938,10.3440804,10.5394007,-0.441950496,10.5043765,10.5012629,10.4661111
61.305429,9.48683298,10.5378682,-1.02520009,10.5029119,10.4998576,10.4647743
61.315921,10.1488916,10.5363381,-0.622452073,10.5014494,10.4984536,10.4634386
61.326412,11,10.5348108,0.682047799,10.4999894,10.4970512,10.4621042
61.336904,9.79795897,10.5332859,-0.857512036,10.4985315,10.4956502,10.4607708
61.347396,9.74679434,10.5317635,-0.885984838,10.497076,10.4942506,10.4594387
61.357887,10.198039,10.5302438,-0.576372066,10.4956229,10.4928525,10.4581079
61.368379,10.6770783,10.5287265,0.385164586,10.494172,10.4914558,10.4567782
61.37887,11.4017543,10.5272119,0.935169698,10.4927235,10.4900607,10.4554498
61.389362,10.2956301,10.5256997,-0.479655641,10.4912772,10.4886669,10.4541225
61.399854,10.8166538,10.52419,0.54079925,10.4898332,10.4872745,10.4527964
61.410345,10.9544512,10.522683,0.657090674,10.4883916,10.4858837,10.4514716
61.420837,10.3923048,10.5211784,-0.358989604,10.4869522,10.4844942,10.4501479
61.431328,11.1803399,10.5196764,0.812812064,10.4855152,10.4831062,10.4488255
61.44182,10.7703296,10.5181769,0.502148126,10.4840804,10.4817196,10.4475041
61.452312,10.2469508,10.5166798,-0.519354473,10.4826478,10.4803344,10.446184
61.462803,11.1355287,10.5151855,0.787618731,10.4812177,10.4789508,10.4448652
61.473295,10.7238053,10.5136935,0.458379573,10.4797898,10.4775684,10.4435475
61.483786,10.5830052,10.5122041,0.266084797,10.4783642,10.4761877,10.4422311
61.494278,11.0905365,10.5107172,0.761458694,10.4769409,10.4748082,10.4409157
61.50477,10,10.5092327,-0.713605437,10.4755198,10.4734301,10.4396016
61.515261,10.7703296,10.5077509,0.512424318,10.4741011,10.4720536,10.4382887
61.525753,10.198039,10.5062715,-0.555186899,10.4726846,10.4706784,10.436977
61.536244,10.198039,10.5047948,-0.553855339,10.4712705,10.4693048,10.4356665
61.546736,10.0498756,10.5033204,-0.673383072,10.4698586,10.4679324,10.4343571
61.557228,9.43398113,10.5018485,-1.03337669,10.4684489,10.4665615,10.4330489
61.567719,11.045361,10.5003793,0.738228763,10.4670417,10.4651921,10.431742
61.578211,10.3440804,10.4989125,-0.393487036,10.4656367,10.4638239,10.4304362
61.588702,9.69535971,10.4974483,-0.89559399,10.4642341,10.4624574,10.4291317
61.599194,10.4403065,10.4959865,-0.23596612,10.4628337,10.4610921,10.4278283
61.609686,10.3440804,10.4945273,-0.387874745,10.4614355,10.4597282,10.426526
61.620177,10.8627805,10.4930706,0.608037701,10.4600399,10.4583659,10.4252251
61.630669,10.5830052,10.4916164,0.302305831,10.4586463,10.4570048,10.4239252
61.64116,10.3923048,10.4901649,-0.312825884,10.4572553,10.4556453,10.4226267
61.651652,11.0905365,10.4887157,0.775771089,10.4558664,10.454287,10.4213292
61.662144,10.8166538,10.4872691,0.573920484,10.4544799,10.4529301,10.4200328
61.672635,9.89949494,10.4858252,-0.765722029,10.4530958,10.4515748,10.4187378
61.683127,10.7238053,10.4843836,0.489307336,10.4517139,10.4502208,10.4174439
61.693618,11.5758369,10.4829448,1.04541481,10.4503344,10.4488682,10.4161512
61.70411,10.1488916,10.4815083,-0.576729375,10.4489572,10.447517,10.4148596
61.714602,10.9087121,10.4800745,0.654704252,10.4475824,10.4461671,10.4135692
61.725093,11.1355287,10.4786433,0.8104847,10.44621,10.4448187,10.4122801
61.735585,10.9544512,10.4772145,0.690823147,10.4448399,10.4434716,10.4109921
61.746076,10.2956301,10.4757885,-0.424450648,10.4434722,10.4421261,10.4097053
61.756568,10.7703296,10.4743649,0.544026389,10.4421068,10.4407818,10.4084196
61.76706,9.38083152,10.4729439,-1.04504181,10.4407438,10.4394388,10.4071351
61.777551,10.198039,10.4715256,-0.522959466,10.4393833,10.4380974,10.4058519
61.788043,11.0905365,10.4701098,0.787671681,10.4380251,10.4367573,10.4045697
61.798534,10.3923048,10.4686968,-0.276390899,10.4366695,10.4354186,10.4032889
61.809026,10.2469508,10.4672862,-0.469399022,10.4353161,10.4340813,10.4020091
61.819518,10.2956301,10.4658783,-0.412611356,10.4339651,10.4327452,10.4007304
61.830009,10.1488916,10.4644731,-0.561766452,10.4326167,10.4314107,10.3994531
61.840501,11.6619038,10.4630705,1.09491247,10.4312707,10.4300775,10.3981768
61.850992,10.6301458,10.4616706,0.410457296,10.4299272,10.4287457,10.3969018
61.861484,11.5325626,10.4602733,1.03551402,10.4285861,10.4274152,10.3956279
61.871976,10.4880885,10.4588787,0.17090871,10.4272475,10.4260861,10.3943551
61.882467,10.3440804,10.4574869,-0.336758777,10.4259115,10.4247584,10.3930836
61.892959,10.9544512,10.4560977,0.705941536,10.4245779,10.423432,10.3918132
61.90345,11.1355287,10.4547113,0.825116584,10.423247,10.4221071,10.3905441
61.913942,9.74679434,10.4533276,-0.84055533,10.4219185,10.4207835,10.389276
61.924434,10.5356538,10.4519466,0.289321841,10.4205926,10.4194612,10.3880091
61.934925,10.6770783,10.4505685,0.475930359,10.4192693,10.4181404,10.3867434
61.945417,10.1488916,10.4491931,-0.547997774,10.4179486,10.4168208,10.3854788
61.955908,11.3137085,10.4478206,0.930530954,10.4166306,10.4155027,10.3842155
61.9664,11.2249722,10.4464509,0.882338543,10.4153151,10.4141858,10.3829533
61.976892,10.2956301,10.4450839,-0.386592514,10.4140022,10.4128703,10.3816922
61.987383,10.6301458,10.44372,0.431770595,10.4126922,10.4115563,10.3804324
61.997875,10.6770783,10.4423588,0.484478561,10.4113847,10.4102435,10.3791737
62.008366,10,10.4410006,-0.664078778,10.4100801,10.4089322,10.3779162
62.018858,10.2469508,10.4396453,-0.438969825,10.4087781,10.4076221,10.3766597
62.02935,10.0995049,10.4382929,-0.582054928,10.4074789,10.4063134,10.3754045
62.039841,9.79795897,10.4369436,-0.799365136,10.4061826,10.4050061,10.3741505
62.050333,10.3923048,10.4355972,-0.208068107,10.404889,10.4037001,10.3728975
62.060824,10.9544512,10.4342539,0.721246986,10.4035984,10.4023955,10.3716459
62.071316,10.5830052,10.4329136,0.3874166,10.4023106,10.4010922,10.3703952
62.081808,10.2469508,10.4315764,-0.429680853,10.4010256,10.3997902,10.3691458
62.092299,10.4403065,10.4302424,0.100319887,10.3997438,10.3984897,10.3678976
62.102791,10.198039,10.4289115,-0.480491891,10.3984647,10.3971904,10.3666504
62.113282,10.8166538,10.4275839,0.623754736,10.3971888,10.3958925,10.3654046
62.123774,10.8166538,10.4262593,0.624815576,10.3959159,10.3945959,10.3641597
62.134266,10.0995049,10.424938,-0.570467449,10.394646,10.3933006,10.362916
62.144757,10.8627805,10.4236202,0.662691702,10.3933794,10.3920067,10.3616736
62.155249,10.1488916,10.4223056,-0.522890043,10.3921158,10.3907141,10.3604322
62.16574,11.2249722,10.4209944,0.896648053,10.3908555,10.3894229,10.3591921
62.176232,11.2249722,10.4196866,0.897377049,10.3895984,10.3881329,10.3579531
62.186724,8.71779789,10.4183822,-1.30406454,10.3883446,10.3868443,10.3567152
62.197215,10.4880885,10.4170815,0.266471363,10.3870942,10.3855571,10.3554785
62.207707,10.198039,10.4157842,-0.466631736,10.3858471,10.3842711,10.3542429
62.218198,10.7238053,10.4144907,0.556160627,10.3846036,10.3829866,10.3530086
62.22869,10.6301458,10.4132006,0.465773731,10.3833634,10.3817032,10.3517752
62.239182,10.4403065,10.4119144,0.168499696,10.3821269,10.3804212,10.3505431
62.249673,11.3137085,10.410632,0.950303381,10.380894,10.3791407,10.3493122
62.260165,10.5356538,10.4093533,0.355387714,10.3796647,10.3778613,10.3480823
62.270656,11.4455231,10.4080787,1.01855017,10.3784393,10.3765834,10.3468537
62.281148,10.6301458,10.4068079,0.472586388,10.3772175,10.3753066,10.3456261
62.29164,10.0995049,10.4055412,-0.553205428,10.3759997,10.3740312,10.3443997
62.302131,9.79795897,10.4042787,-0.778665341,10.3747859,10.3727572,10.3431746
62.312623,10.1488916,10.4030203,-0.504111782,10.373576,10.3714844,10.3419504
62.323114,11.045361,10.4017662,0.802243606,10.3723704,10.3702131,10.3407275
62.333606,11.0905365,10.4005164,0.830674486,10.3711688,10.3689429,10.3395057
62.344098,10.8166538,10.399271,0.646051693,10.3699715,10.3676741,10.338285
62.354589,11.4017543,10.3980303,1.00186024,10.3687787,10.3664067,10.3370655
62.365081,9.79795897,10.3967941,-0.773844382,10.3675902,10.3651404,10.3358471
62.375572,9.89949494,10.3955627,-0.704320798,10.3664065,10.3638756,10.33463
62.386064,10.4880885,10.3943361,0.306190178,10.3652272,10.362612,10.3334138
62.396556,11.2249722,10.3931143,0.912062407,10.3640528,10.3613497,10.3321988
62.407047,10.198039,10.3918978,-0.440293918,10.3628834,10.3600888,10.3309851
62.417539,10.8627805,10.3906862,0.687091146,10.3617189,10.3588291,10.3297723
62.42803,10.1488916,10.3894801,-0.490498297,10.3605596,10.3575708,10.3285609
62.438522,10.2469508,10.3882793,-0.375936941,10.3594055,10.3563136,10.3273504
62.449014,10.0498756,10.3870841,-0.580696561,10.3582568,10.3550578,10.3261411
62.459505,10.5830052,10.3858947,0.443971327,10.3571138,10.3538034,10.324933
62.469997,10.4403065,10.384711,0.235786921,10.3559763,10.3525502,10.323726
62.480488,10.2956301,10.3835335,-0.296485004,10.3548449,10.3512984,10.3225202
62.49098,10.4403065,10.382362,0.240716591,10.3537194,10.3500477,10.3213154
62.501472,10.7238053,10.3811969,0.585327575,10.3526001,10.3487984,10.3201118
62.511963,10.7703296,10.3800385,0.624732855,10.3514873,10.3475504,10.3189094
62.522455,10.0995049,10.3788867,-0.528565712,10.350381,10.3463037,10.317708
62.532946,10.0498756,10.3777419,-0.572596069,10.3492816,10.3450583,10.3165079
62.543438,10.5356538,10.3766042,0.398810224,10.3481891,10.3438141,10.3153087
62.55393,10.1488916,10.3754738,-0.476006572,10.3471039,10.3425712,10.3141107
62.564421,10.6301458,10.3743512,0.505761402,10.3460262,10.3413297,10.312914
62.574913,11.3578167,10.3732364,0.992260203,10.3449562,10.3400893,10.3117183
62.585404,10.7238053,10.3721298,0.593022347,10.3438943,10.3388504,10.3105238
62.595896,9.8488578,10.3710315,-0.722615885,10.3428406,10.3376126,10.3093303
62.606388,10,10.369942,-0.608228546,10.3417955,10.3363761,10.3081379
62.616879,11.4017543,10.3688615,1.01631329,10.3407594,10.335141,10.3069468
62.627371,10.7703296,10.3677904,0.634459795,10.3397324,10.333907,10.3057567
62.637862,9.69535971,10.366729,-0.819371295,10.338715,10.3326744,10.3045679
62.648354,10.4880885,10.3656777,0.34987257,10.3377076,10.331443,10.30338
62.658846,10.0498756,10.3646368,-0.561035784,10.3367105,10.3302129,10.3021933
62.669337,9.79795897,10.3636069,-0.752095668,10.3357242,10.3289841,10.3010078
62.679829,10.0498756,10.3625882,-0.55920709,10.3347491,10.3277566,10.2998233
62.69032,10.3440804,10.3615814,-0.132291251,10.3337857,10.3265304,10.29864
62.700812,10.7238053,10.3605868,0.602676092,10.3328344,10.3253053,10.2974578
62.711304,11.8321596,10.3596051,1.21348857,10.3318958,10.3240815,10.2962767
62.721795,10.0995049,10.3586368,-0.509049928,10.3309706,10.3228591,10.2950968
62.732287,10.2956301,10.3576824,-0.249102831,10.3300591,10.3216378,10.2939179
62.742778,10.8166538,10.3567427,0.678167509,10.3291623,10.320418,10.2927402
62.75327,10,10.3558182,-0.596504946,10.3282805,10.3191992,10.2915636
62.763762,10.3923048,10.3549097,0.193378358,10.3274146,10.3179818,10.290388
62.774253,10.4403065,10.354018,0.293749012,10.3265655,10.3167657,10.2892137
62.784745,10.1488916,10.3531439,-0.451942861,10.3257338,10.3155507,10.2880404
62.795236,10.4403065,10.3522884,0.296678519,10.3249206,10.3143371,10.2868684
62.805728,10.0995049,10.3514522,-0.501943442,10.3241266,10.3131247,10.2856973
62.81622,9.69535971,10.3506364,-0.809491609,10.3233529,10.3119135,10.2845273
62.826711,10.5356538,10.3498422,0.431058655,10.3226008,10.3107037,10.2833586
62.837203,10.2956301,10.3490706,-0.231171905,10.3218711,10.309495,10.2821908
62.847694,10.4880885,10.348323,0.37385225,10.3211654,10.3082877,10.2810243
62.858186,9.89949494,10.3476005,-0.669406906,10.3204847,10.3070815,10.2798588
62.868678,10.6770783,10.3469048,0.574607215,10.3198307,10.3058766,10.2786944
62.879169,11.1355287,10.3462374,0.888420712,10.3192049,10.304673,10.2775312
62.889661,9.69535971,10.3455998,-0.806374644,10.3186089,10.3034706,10.276369
62.900152,9.89949494,10.344994,-0.667457144,10.3180446,10.3022695,10.275208
62.910644,10.2956301,10.3444218,-0.220888314,10.3175138,10.3010696,10.274048
62.921136,10.3440804,10.3438854,0.0139657426,10.3170188,10.2998709,10.2728892
62.931627,9.74679434,10.3433871,-0.772394184,10.3165619,10.2986735,10.2717315
62.942119,9.79795897,10.3429294,-0.738221102,10.3161455,10.2974773,10.2705748
62.95261,10.8166538,10.3425149,0.688577452,10.3157723,10.2962824,10.2694194
62.963102,10.5830052,10.3421466,0.490773482,10.3154453,10.2950887,10.2682649
62.973594,10.4403065,10.3418278,0.313813244,10.3151676,10.2938962,10.2671116
62.984085,10.8627805,10.3415618,0.721954768,10.3149429,10.292705,10.2659595
62.994577,10.2469508,10.3413525,-0.307248721,10.3147749,10.291515,10.2648083
63.005068,10.6770783,10.3412042,0.579546427,10.3146678,10.2903263,10.2636584
63.01556,9.89949494,10.3411213,-0.664549746,10.3146262,10.2891388,10.2625094
63.026052,9.69535971,10.3411089,-0.803585223,10.3146551,10.2879524,10.2613616
63.036543,9.48683298,10.3411726,-0.924304932,10.3147602,10.2867674,10.2602149
63.047035,11,10.3413184,0.811592015,10.3149474,10.2855836,10.2590693
63.057526,11.045361,10.3415531,0.83893262,10.3152236,10.284401,10.2579249
63.068018,10.2469508,10.3418841,-0.308112554,10.3155962,10.2832196,10.2567814
63.07851,10.3923048,10.3423198,0.223573457,10.3160736,10.2820394,10.255639
63.089001,10.6301458,10.3428691,0.535981978,10.3166649,10.2808606,10.2544979
63.099493,10.7238053,10.3435426,0.616654458,10.3173804,10.2796828,10.2533577
63.109984,10.2469508,10.3443514,-0.312090691,10.3182314,10.2785064,10.2522188
63.120476,9.8488578,10.3453084,-0.704592526,10.319231,10.2773311,10.2510808
63.130968,10.4403065,10.346428,0.306395964,10.3203933,10.2761571,10.2499439
63.141459,11.1803399,10.3477261,0.912476719,10.3217345,10.2749843,10.2488082
63.151951,10.4880885,10.3492211,0.372649076,10.3232729,10.2738127,10.2476735
63.162442,9.79795897,10.3509334,-0.743622477,10.3250289,10.2726424,10.24654
63.172934,10.7703296,10.3528864,0.64609846,10.3270262,10.2714732,10.2454075
63.183426,10.198039,10.3551066,-0.39631756,10.3292912,10.2703052,10.244276
63.193917,10.4880885,10.3576241,0.361198493,10.331854,10.2691385,10.2431458
63.204409,10.3440804,10.3604741,-0.128037652,10.33475,10.267973,10.2420165
63.2149,10.8627805,10.3636959,0.706459226,10.3380185,10.2668087,10.2408885
63.225392,10,10.3673362,-0.606082658,10.3417065,10.2656456,10.2397614
63.235884,10.4403065,10.3714483,0.262408556,10.3458672,10.2644837,10.2386354
63.246375,11.045361,10.3760939,0.818087501,10.3505626,10.2633231,10.2375106
63.256867,10.6770783,10.3813467,0.543812062,10.3558665,10.2621636,10.2363868
63.267358,9.8488578,10.3872914,-0.733780334,10.3618639,10.2610054,10.2352641
63.27785,10.0498756,10.3940302,-0.586646906,10.3686571,10.2598483,10.2341425
63.288342,10.8627805,10.4016829,0.679041683,10.3763661,10.2586924,10.2330219
63.298833,10.0995049,10.4103922,-0.557572647,10.3851342,10.2575378,10.2319025
63.309325,11.0905365,10.4203326,0.818659847,10.3951361,10.2563843,10.2307841
63.319816,10.8627805,10.4317112,0.656558646,10.4065795,10.2552322,10.2296669
63.330308,11,10.4447854,0.745127254,10.4197222,10.2540811,10.2285506
63.3408,10.6301458,10.4598673,0.412648123,10.4348772,10.2529312,10.2274354
63.351291,10.3923048,10.4773438,-0.291614385,10.4524321,10.2517826,10.2263214
63.361783,10.1488916,10.4977048,-0.590604121,10.472878,10.2506351,10.2252084
63.372274,10.1488916,10.5215662,-0.610470821,10.496832,10.2494889,10.2240966
63.382766,10.3923048,10.5497428,-0.396784516,10.5251109,10.2483438,10.2229857
63.393258,9.94987437,10.5833422,-0.795906897,10.5588244,10.2471999,10.2218759
63.403749,10.4880885,10.6239938,-0.368653423,10.5996056,10.2460573,10.2207673
63.414241,11.1803399,10.6743393,0.711337156,10.6501016,10.2449158,10.2196597
63.424732,11.1355287,10.7389678,0.6297308,10.7149112,10.2437756,10.2185532
63.435224,10.4880885,10.8262298,-0.581499239,10.802402,10.2426364,10.2174477
63.445716,11.7898261,10.9510055,0.915871532,10.9274837,10.2414985,10.2163433
63.456207,11.7046999,11.1381886,0.752669427,11.1150963,10.2403618,10.2152401
63.466699,12.2065556,11.4252195,0.883932205,11.4027408,10.2392262,10.2141378
63.47719,12.922848,11.85992,1.03098398,11.8382978,10.2380919,10.2130367
63.487682,14.0712473,12.4903269,1.25734655,12.4698272,10.2369587,10.2119366
63.498174,13,13.3452732,-0.587599566,13.3261162,10.2358267,10.2108375
63.508665,16.0623784,14.412802,1.28435838,14.3950909,10.234696,10.2097396
63.519157,16.2788206,15.6259883,0.807980407,15.609677,10.2335663,10.2086427
63.529648,18.3575598,16.859488,1.22395742,16.8443926,10.2324379,10.2075469
63.54014,19.1049732,17.9392717,1.07967658,17.9251057,10.2313106,10.2064521
63.550632,20.6881609,18.66607,1.42200242,18.6524752,10.2301845,10.2053584
63.561123,20.2731349,18.8687169,1.18508144,18.8552872,10.2290597,10.2042658
63.571615,20.1246118,18.483489,1.28106315,18.4697985,10.2279359,10.2031742
63.582106,18.1934054,17.6011432,0.769585761,17.586786,10.2268134,10.2020837
63.592598,17.4642492,16.4202988,1.02173893,16.4049297,10.225692,10.2009943
63.60309,15.6843871,15.1526845,0.72917945,15.1360516,10.2245717,10.1999058
63.613581,14,13.9640642,0.189567273,13.946039,10.2234527,10.1988186
63.624073,13.7840488,12.9596313,0.907974378,12.9402341,10.2223348,10.1977323
63.634564,12.7279221,12.1850046,0.736829335,12.1644009,10.2212182,10.1966472
63.645056,12.0415946,11.6330998,0.639135965,11.6115467,10.2201026,10.195563
63.655548,11.4891253,11.2629262,0.475603944,11.2406942,10.2189882,10.1944799
63.666039,11.8321596,11.0222244,0.899963979,10.9995373,10.2178751,10.1933979
63.676531,11.5758369,10.8647282,0.843272588,10.8417433,10.216763,10.1923169
63.687022,11.7898261,10.7573762,1.01609543,10.7341933,10.2156522,10.1912371
63.697514,10.8627805,10.6796101,0.427984148,10.65629,10.2145425,10.1901582
63.708006,11,10.6198374,0.616573306,10.5964178,10.2134339,10.1890803
63.718497,10.2956301,10.5717829,-0.525502417,10.5482889,10.2123266,10.1880037
63.728989,10.1488916,10.5319862,-0.618946351,10.5084353,10.2112204,10.1869279
63.73948,10.7703296,10.4984157,0.521453632,10.4748215,10.2101154,10.1858534
63.749972,10.198039,10.4697343,-0.521243976,10.4461074,10.2090114,10.1847797
63.760464,10,10.4449971,-0.667081051,10.4213462,10.2079086,10.1837072
63.770955,10.0995049,10.4234907,-0.569197454,10.3998229,10.2068071,10.1826357
63.781447,10.7238053,10.4046535,0.564935234,10.3809748,10.2057067,10.1815653
63.791938,10.5356538,10.3880469,0.384196336,10.3643622,10.2046074,10.1804959
63.80243,11.4017543,10.3733128,1.01412103,10.3496262,10.2035093,10.1794276
63.812922,11.0905365,10.360165,0.854617756,10.33648,10.2024123,10.1783603
63.823413,10.3923048,10.3483696,0.209607416,10.3246893,10.2013165,10.1772941
63.833905,8.94427191,10.3377309,-1.18044863,10.3140578,10.2002218,10.1762288
63.844396,10.7238053,10.3280907,0.629058512,10.304427,10.1991284,10.1751648
63.854888,10.8166538,10.3193135,0.705223567,10.2956611,10.198036,10.1741016
63.86538,10.9087121,10.3112883,0.772931955,10.2876488,10.1969447,10.1730395
63.875871,10.1488916,10.303921,-0.393737837,10.2802959,10.1958547,10.1719786
63.886363,10.8627805,10.2971301,0.752097307,10.2735206,10.1947657,10.1709186
63.896854,11.1355287,10.2908485,0.919064885,10.2672556,10.193678,10.1698597
63.907346,10.3923048,10.2850163,0.327549368,10.261441,10.1925913,10.1688018
63.917838,9.74679434,10.2795837,-0.729924227,10.2560269,10.1915058,10.1677449
63.928329,11.045361,10.2745078,0.87798249,10.2509701,10.1904215,10.1666892
63.938821,10,10.2697496,-0.519374268,10.2462317,10.1893383,10.1656344
63.949312,10.7238053,10.2652773,0.677146937,10.2417798,10.1882563,10.1645807
63.959804,10.7238053,10.2610612,0.680252949,10.2375846,10.1871753,10.163528
63.970296,10.6301458,10.2570765,0.610793971,10.2336212,10.1860955,10.1624763
63.980787,10.198039,10.2533014,-0.235079562,10.2298678,10.1850169,10.1614257
63.991279,8.36660027,10.2497156,-1.37226649,10.226304,10.1839393,10.1603761
64.00177,10.7703296,10.2463023,0.723897295,10.222913,10.182863,10.1593276
64.012262,9.2736185,10.2430456,-0.9845949,10.2196789,10.1817877,10.1582801
64.022754,9.8488578,10.2399321,-0.625359317,10.2165882,10.1807135,10.1572336
64.033245,10.7238053,10.2369498,0.697750344,10.213629,10.1796406,10.1561882
64.043737,10.7703296,10.2340871,0.732285799,10.2107896,10.1785687,10.1551438
64.054228,11.2694277,10.2313349,1.01886837,10.2080607,10.177498,10.1541004
64.06472,11.3578167,10.2286838,1.06260666,10.2054331,10.1764284,10.1530581
64.075212,10.5830052,10.226126,0.59739369,10.202899,10.1753599,10.1520167
64.085703,11.3137085,10.2236547,1.04405641,10.2004514,10.1742926,10.1509765
64.096195,10.8166538,10.2212629,0.77161582,10.1980834,10.1732263,10.1499372
64.106686,10.2469508,10.218945,0.167349112,10.1957895,10.1721613,10.148899
64.117178,9.89949494,10.2166955,-0.563205593,10.1935639,10.1710973,10.1478618
64.12767,10.4403065,10.2145095,0.475181003,10.191402,10.1700344,10.1468256
64.138161,10.0995049,10.2123829,-0.335973224,10.1892995,10.1689727,10.1457905
64.148653,10.198039,10.2103113,-0.110780257,10.1872519,10.1679121,10.1447563
64.159144,10.9087121,10.2082913,0.836911498,10.185256,10.1668527,10.1437233
64.169636,10.2956301,10.2063191,0.298849573,10.1833079,10.1657943,10.1426912
64.180128,10.2469508,10.2043918,0.206298192,10.1814048,10.164737,10.1416601
64.190619,10.3440804,10.2025068,0.376262681,10.179544,10.1636809,10.1406301
64.201111,11.045361,10.2006611,0.919075575,10.1777224,10.1626259,10.1396011
64.211602,9.89949494,10.1988526,-0.547135864,10.175938,10.1615721,10.1385732
64.222094,10.3440804,10.1970787,0.383408041,10.1741882,10.1605192,10.1375462
64.232586,11.4891253,10.1953376,1.1374479,10.1724712,10.1594675,10.1365202
64.243077,10.6301458,10.1936274,0.660695374,10.1707851,10.158417,10.1354953
64.253569,9.43398113,10.1919462,-0.870611903,10.1691279,10.1573676,10.1344714
64.26406,10.2469508,10.1902926,0.23802976,10.1674983,10.1563193,10.1334486
64.274552,10.1488916,10.1886648,-0.199432163,10.1658944,10.155272,10.1324267
64.285044,9.53939201,10.1870614,-0.804779108,10.164315,10.1542259,10.1314058
64.295535,9.8488578,10.1854815,-0.580192779,10.162759,10.1531809,10.130386
64.306027,10.7703296,10.1839233,0.765771686,10.1612247,10.152137,10.1293671
64.316518,10.4880885,10.1823862,0.552903485,10.1597114,10.1510943,10.1283494
64.32701,10.3923048,10.1808687,0.459821811,10.1582177,10.1500525,10.1273326
64.337502,10.3923048,10.1793701,0.461448545,10.1567427,10.1490119,10.1263167
64.347993,9.43398113,10.1778894,-0.862501198,10.1552858,10.1479725,10.125302
64.358485,9.74679434,10.1764257,-0.655462694,10.1538456,10.1469341,10.1242882
64.368976,10.0498756,10.1749783,-0.353698538,10.1524217,10.1458969,10.1232755
64.379468,9.59166305,10.1735462,-0.762812645,10.1510131,10.1448607,10.1222638
64.38996,9.32737905,10.1721288,-0.919102698,10.1496192,10.1438256,10.121253
64.400451,10.2469508,10.1707257,0.276088924,10.1482394,10.1427916,10.1202433
64.410943,10.8166538,10.1693358,0.804560745,10.1468729,10.1417587,10.1192346
64.421434,9.74679434,10.167959,-0.648971987,10.1455193,10.140727,10.1182269
64.431926,10.2469508,10.1665943,0.283472148,10.1441778,10.1396963,10.1172202
64.442418,10.2469508,10.1652414,0.285848482,10.1428481,10.1386667,10.1162145
64.452909,9.74679434,10.1638999,-0.645837121,10.1415296,10.1376382,10.1152098
64.463401,9.69535971,10.1625692,-0.683527202,10.1402219,10.1366108,10.1142061
64.473892,10.4880885,10.1612489,0.571698871,10.1389245,10.1355845,10.1132035
64.484384,9.74679434,10.1599385,-0.64276288,10.137637,10.1345593,10.1122018
64.494876,10,10.1586376,-0.3982934,10.1363589,10.1335351,10.1112011
64.505367,10.6770783,10.1573461,0.720924484,10.1350901,10.1325121,10.1102015
64.515859,10.5830052,10.1560634,0.653407876,10.13383,10.1314901,10.1092027
64.52635,10.2956301,10.1547893,0.375287673,10.1325785,10.1304693,10.1082051
64.536842,10.0498756,10.1535233,-0.321943624,10.1313351,10.1294495,10.1072084
64.547334,10.5830052,10.1522653,0.656307841,10.1300995,10.1284308,10.1062127
64.557825,11.2694277,10.151015,1.05755033,10.1288715,10.1274132,10.1052181
64.568317,10.1488916,10.1497719,-0.0296711873,10.1276508,10.1263967,10.1042244
64.578808,9.64365076,10.1485362,-0.710552884,10.1264372,10.1253813,10.1032317
64.5893,10.9087121,10.1473071,0.872585219,10.1252304,10.1243669,10.10224
64.599792,10,10.1460848,-0.382210409,10.1240301,10.1233536,10.1012493
64.610283,10.198039,10.144869,0.230586266,10.1228363,10.1223414,10.1002596
64.620775,10.5830052,10.1436593,0.662831743,10.1216486,10.1213303,10.0992709
64.631266,9.79795897,10.1424558,-0.586938524,10.1204669,10.1203203,10.0982832
64.641758,10.1488916,10.141258,0.0873701876,10.1192909,10.1193113,10.0972965
64.65225,10.4403065,10.1400659,0.547942157,10.1181205,10.1183034,10.0963107
64.662741,9.59166305,10.1388794,-0.739740736,10.1169556,10.1172966,10.095326
64.673233,9.89949494,10.1376981,-0.488060648,10.1157959,10.1162909,10.0943422
64.683724,10.198039,10.1365222,0.248025941,10.1146414,10.1152863,10.0933595
64.694216,10.3923048,10.1353511,0.50690604,10.1134918,10.1142826,10.0923777
64.704708,9.69535971,10.134185,-0.662438863,10.112347,10.1132801,10.0913969
64.715199,9.74679434,10.1330237,-0.621473522,10.111207,10.1122787,10.0904171
64.725691,10.198039,10.1318669,0.257239383,10.1100714,10.1112783,10.0894383
64.736182,10.0995049,10.1307148,-0.176663104,10.1089404,10.110279,10.0884605
64.746674,10,10.1295669,-0.359954075,10.1078135,10.1092808,10.0874836
64.757166,10,10.1284234,-0.358362052,10.1066909,10.1082836,10.0865077
64.767657,10.5830052,10.1272841,0.67507124,10.1055725,10.1072875,10.0855329
64.778149,10.4880885,10.1261487,0.60161429,10.104458,10.1062924,10.084559
64.78864,10.0995049,10.1250175,-0.159726417,10.1033474,10.1052985,10.0835861
64.799132,10.2469508,10.12389,0.35080022,10.1022406,10.1043056,10.0826141
64.809624,9.69535971,10.1227663,-0.65376337,10.1011375,10.1033137,10.0816432
64.820115,10,10.1216463,-0.348778363,10.100038,10.102323,10.0806732
64.830607,9.94987437,10.1205299,-0.413104791,10.0989421,10.1013332,10.0797042
64.841098,8.71779789,10.1194172,-1.18390003,10.0978496,10.1003446,10.0787363
64.85159,10.3923048,10.1183077,0.523447324,10.0967605,10.099357,10.0777692
64.862082,9.69535971,10.1172017,-0.649493637,10.0956746,10.0983704,10.0768031
64.872573,9.89949494,10.1160991,-0.465407488,10.0945921,10.0973849,10.0758381
64.883065,10.1488916,10.1149996,0.184097794,10.0935127,10.0964005,10.0748739
64.893556,10.3923048,10.1139033,0.52763766,10.0924364,10.0954172,10.0739108
64.904048,9.89949494,10.1128101,-0.461860575,10.0913631,10.0944348,10.0729486
64.91454,10.2469508,10.11172,0.367737416,10.0902927,10.0934535,10.0719874
64.925031,11.2249722,10.1106329,1.0556227,10.0892254,10.0924733,10.0710272
64.935523,9.21954446,10.1095486,-0.943400327,10.0881608,10.0914942,10.070068
64.946014,10.1488916,10.1084674,0.201057695,10.0870991,10.0905161,10.0691097
64.956506,9.43398113,10.1073888,-0.820614217,10.0860401,10.089539,10.0681524
64.966998,10.4880885,10.1063131,0.617879783,10.0849837,10.088563,10.067196
64.977489,10.6301458,10.1052401,0.72450376,10.0839302,10.0875881,10.0662407
64.987981,10,10.1041698,-0.322753389,10.0828791,10.0866141,10.0652863
64.998472,10,10.1031021,-0.32109519,10.0818306,10.0856413,10.0643329
65.008964,10.0995049,10.102037,-0.0503193935,10.0807846,10.0846694,10.0633804
65.019456,10.6770783,10.1009744,0.759015063,10.0797411,10.0836986,10.0624289
65.029947,10.4880885,10.0999144,0.623036181,10.0787001,10.082729,10.0614784
65.040439,9.8488578,10.0988568,-0.499998976,10.0776614,10.0817602,10.0605288
65.05093,10.7238053,10.0978017,0.791203899,10.0766251,10.0807927,10.0595803
65.061422,10.7238053,10.0967489,0.791868935,10.075591,10.079826,10.0586326
65.071914,9.8488578,10.0956984,-0.496830593,10.0745593,10.0788604,10.0576859
65.082405,9.16515139,10.0946504,-0.964105299,10.0735298,10.077896,10.0567402
65.092897,9.11043358,10.0936046,-0.991549799,10.0725025,10.0769324,10.0557954
65.103388,10.3440804,10.0925611,0.501517028,10.0714775,10.0759701,10.0548517
65.11388,10,10.0915198,-0.302522314,10.0704545,10.0750086,10.0539088
65.124372,9.32737905,10.0904806,-0.873556832,10.0694337,10.0740482,10.0529669
65.134863,10.4403065,10.0894437,0.592336738,10.068415,10.0730889,10.052026
65.145355,10.1488916,10.0884088,0.245932356,10.0673983,10.0721306,10.051086
65.155846,10.0498756,10.0873762,-0.193650645,10.0663837,10.0711734,10.0501471
65.166338,11.6619038,10.0863455,1.25521244,10.065371,10.0702171,10.049209
65.17683,10.0995049,10.0853169,0.119113447,10.0643603,10.0692619,10.0482718
65.187321,10.5830052,10.0842904,0.706197419,10.0633517,10.0683078,10.0473357
65.197813,10.3440804,10.0832659,0.510700056,10.0623449,10.0673546,10.0464005
65.208304,11.045361,10.0822434,0.981385559,10.0613401,10.0664026,10.0454663
65.218796,9.69535971,10.0812228,-0.621178775,10.0603371,10.0654514,10.044533
65.229288,10,10.0802041,-0.283203296,10.059336,10.0645014,10.0436006
65.239779,10.3440804,10.0791874,0.514677557,10.0583368,10.0635524,10.0426693
65.250271,9.94987437,10.0781726,-0.358187398,10.0573394,10.0626044,10.0417388
65.260762,10.0995049,10.0771597,0.149483253,10.0563438,10.0616574,10.0408094
65.271254,9.74679434,10.0761486,-0.573893914,10.0553499,10.0607115,10.0398808
65.281746,10.9544512,10.0751393,0.937716305,10.0543578,10.0597665,10.0389532
65.292237,10.5356538,10.0741319,0.679353989,10.0533676,10.0588226,10.0380266
65.302729,10.6301458,10.0731262,0.746337435,10.0523789,10.0578797,10.0371009
65.31322,10.7238053,10.0721225,0.807268749,10.0513921,10.0569379,10.0361762
65.323712,9.64365076,10.0711203,-0.653811584,10.0504069,10.055997,10.0352523
65.334204,10.4403065,10.07012,0.608429553,10.0494233,10.0550572,10.0343294
65.344695,9.89949494,10.0691215,-0.411857403,10.0484415,10.0541184,10.0334076
65.355187,9.69535971,10.0681245,-0.610544704,10.0474613,10.0531806,10.0324866
65.365678,9.79795897,10.0671294,-0.518816414,10.0464827,10.0522439,10.0315666
65.37617,10.198039,10.0661359,0.363184661,10.0455057,10.0513081,10.0306474
65.386662,9.21954446,10.0651441,-0.919564916,10.0445303,10.0503734,10.0297293
65.397153,10.5830052,10.064154,0.72031329,10.0435566,10.0494397,10.0288121
65.407645,10.3440804,10.0631655,0.530014108,10.0425844,10.0485069,10.0278958
65.418136,9.8488578,10.0621787,-0.461866728,10.0416138,10.0475753,10.0269805
65.428628,9.94987437,10.0611934,-0.333645066,10.0406447,10.0466446,10.026066
65.43912,10.2469508,10.0602097,0.432135432,10.0396771,10.0457149,10.0251525
65.449611,10,10.0592278,-0.243367534,10.0387111,10.0447863,10.0242401
65.460103,9.74679434,10.0582473,-0.558079676,10.0377466,10.0438586,10.0233284
65.470594,9.8488578,10.0572684,-0.456520148,10.0367836,10.042932,10.0224178
65.481086,10.1488916,10.0562911,0.304303257,10.035822,10.0420063,10.0215081
65.491578,10.198039,10.0553153,0.377787955,10.0348619,10.0410816,10.0205992
65.502069,10.0498756,10.0543411,-0.0668243486,10.0339034,10.0401581,10.0196914
65.512561,10.6770783,10.0533684,0.789753047,10.0329462,10.0392354,10.0187845
65.523052,10.6301458,10.0523972,0.760097733,10.0319906,10.0383138,10.0178785
65.533544,10.0498756,10.0514275,-0.039394343,10.0310363,10.0373932,10.0169734
65.544036,11.4017543,10.0504593,1.16245212,10.0300834,10.0364736,10.0160692
65.554527,10.6770783,10.0494927,0.792202984,10.0291321,10.035555,10.0151661
65.565019,10.3440804,10.0485274,0.543647861,10.028182,10.0346373,10.0142637
65.57551,9.89949494,10.0475637,-0.384797105,10.0272335,10.0337208,10.0133624
65.586002,10.1488916,10.0466014,0.31982829,10.0262862,10.0328051,10.012462
65.596494,10.5830052,10.0456406,0.733051623,10.0253404,10.0318905,10.0115624
65.606985,10.8166538,10.0446812,0.878619711,10.0243959,10.0309769,10.0106639
65.617477,10.2956301,10.0437232,0.501903278,10.0234528,10.0300643,10.0097662
65.627968,10.6301458,10.0427668,0.766406579,10.0225111,10.0291527,10.0088695
65.63846,10.2956301,10.0418116,0.503804046,10.0215707,10.028242,10.0079736
65.648952,10.0995049,10.0408579,0.242171526,10.0206316,10.0273324,10.0070787
65.659443,9.74679434,10.0399056,-0.541397548,10.0196939,10.0264238,10.0061848
65.669935,10.198039,10.0389547,0.398853749,10.0187575,10.0255161,10.0052917
65.680426,9.8488578,10.0380053,-0.434910859,10.0178224,10.0246095,10.0043996
65.690918,9.79795897,10.0370571,-0.488976604,10.0168886,10.0237038,10.0035084
65.70141,10.6301458,10.0361103,0.770736995,10.0159561,10.0227991,10.002618
65.711901,9.8488578,10.035165,-0.431633132,10.015025,10.0218954,10.0017287
65.722393,10.7703296,10.0342209,0.857967784,10.014095,10.0209927,10.0008402
65.732884,9.94987437,10.0332783,-0.288797339,10.0131665,10.0200911,9.99995272
65.743376,9.74679434,10.0323369,-0.534361829,10.0122391,10.0191903,9.99906606
65.753868,10.3440804,10.0313969,0.55918114,10.011313,10.0182905,9.9981803
65.764359,10.0498756,10.0304583,0.139346102,10.0103882,10.0173918,9.99729555
65.774851,10.0498756,10.0295209,0.142669889,10.0094647,10.016494,9.99641162
65.785342,10.8166538,10.028585,0.887732421,10.0085424,10.0155973,9.99552869
65.795834,9.59166305,10.0276503,-0.660293273,10.0076214,10.0147014,9.99464659
65.806326,10.7703296,10.0267168,0.862329851,10.0067015,10.0138066,9.99376539
65.816817,10.6770783,10.0257848,0.807027525,10.005783,10.0129128,9.99288519
65.827309,9.79795897,10.024854,-0.476335017,10.0048656,10.0120199,9.99200582
65.8378,9.79795897,10.0239246,-0.475358418,10.0039496,10.0111281,9.99112744
65.848292,10.7703296,10.0229964,0.864484378,10.0030346,10.0102371,9.99024988
65.858784,9.38083152,10.0220694,-0.800773324,10.0021209,10.0093472,9.98937323
65.869275,9.8488578,10.0211439,-0.415073564,10.0012085,10.0084583,9.98849756
65.879767,10.2469508,10.0202195,0.476163088,10.0002972,10.0075702,9.98762272
65.890258,10.3440804,10.0192965,0.56989822,9.99938717,10.0066833,9.98674887
65.90075,10.8627805,10.0183746,0.918915607,9.99847826,10.0057972,9.98587584
65.911242,10.198039,10.017454,0.424952964,9.99757054,10.0049121,9.98500371
65.921733,10.4403065,10.0165348,0.650977537,9.99666409,10.0040281,9.98413256
65.932225,10.0995049,10.0156167,0.289634721,9.99575873,10.003145,9.98326223
65.942716,10.0498756,10.0146999,0.187551886,9.99485464,10.0022629,9.98239289
65.953208,9.59166305,10.0137843,-0.649708599,9.99395163,10.0013817,9.98152437
65.9637,10.8166538,10.0128699,0.896539949,9.99304979,10.0005015,9.98065674
65.974191,10.5830052,10.0119569,0.755677407,9.9921492,9.99962228,9.97979009
65.984683,10.1488916,10.011045,0.371276942,9.99124968,9.99874398,9.97892426
65.995174,10.5830052,10.0101344,0.756882315,9.9903514,9.99786674,9.97805941
66.005666,9.8488578,10.0092249,-0.400458668,9.98945419,9.99699038,9.97719538
66.016158,9.74679434,10.0083167,-0.511392569,9.98855813,9.99611498,9.97633224
66.026649,9.48683298,10.0074098,-0.72151007,9.98766329,9.99524063,9.97547007
66.037141,10.7703296,10.0065039,0.873971209,9.98676951,9.99436716,9.97460872
66.047632,9.69535971,10.0055994,-0.556991648,9.98587695,9.99349474,9.97374834
66.058124,10.0498756,10.004696,0.212554994,9.98498543,9.9926232,9.97288877
66.068616,10.5356538,10.0037938,0.729287306,9.98409504,9.99175262,9.9720301
66.079107,11.4017543,10.0028928,1.18273472,9.98320587,9.99088308,9.9711724
66.089599,9.8488578,10.001993,-0.391324936,9.98231773,9.99001442,9.9703155
66.10009,9.59166305,10.0010944,-0.639868268,9.98143079,9.9891468,9.96945958
66.110582,11.3137085,10.000197,1.1460853,9.98054488,9.98828006,9.96860446
66.121074,9.69535971,9.9993007,-0.551308432,9.97966009,9.98741427,9.96775024
66.131565,10,9.99840568,0.0399289136,9.97877649,9.98654952,9.96689698
66.142057,10.0995049,9.99751175,0.319363724,9.9778939,9.98568565,9.96604452
66.152548,9.79795897,9.99661907,-0.445713027,9.97701251,9.98482281,9.96519304
66.16304,10.2956301,9.99572748,0.547633693,9.97613212,9.98396085,9.96434235
66.173532,10.8627805,9.99483705,0.931634822,9.97525284,9.98309984,9.96349255
66.184023,9.59166305,9.99394786,-0.634259267,9.97437472,9.98223986,9.96264372
66.194515,10.0498756,9.99305975,0.238360794,9.97349762,9.98138075,9.96179569
66.205006,9.53939201,9.99217288,-0.672889937,9.97262168,9.98052268,9.96094862
66.215498,10.2956301,9.99128708,0.551672968,9.97174675,9.97966547,9.96010235
66.22599,10.7238053,9.99040242,0.856389439,9.9708729,9.97880922,9.95925696
66.236481,10.7703296,9.989519,0.883634888,9.9700002,9.97795399,9.95841253
66.246973,10.4880885,9.98863663,0.706719073,9.9691285,9.97709963,9.9575689
66.257464,9.53939201,9.98775549,-0.669599492,9.96825796,9.9762463,9.95672622
66.267956,10.3440804,9.98687541,0.597666315,9.9673884,9.97539384,9.95588435
66.278448,9.8488578,9.98599646,-0.370322368,9.9665199,9.97454231,9.95504335
66.288939,9.53939201,9.98511872,-0.667627673,9.96565256,9.97369182,9.95420331
66.299431,10.2469508,9.98424204,0.512551196,9.9647862,9.97284219,9.95336406
66.309922,10.2956301,9.98336656,0.558805494,9.96392097,9.97199358,9.95252577
66.320414,9.94987437,9.98249213,-0.180603864,9.96305672,9.97114583,9.95168827
66.330906,10.7238053,9.98161881,0.861502455,9.96219353,9.97029903,9.95085164
66.341397,10.0498756,9.98074671,0.262923781,9.96133147,9.96945324,9.95001597
66.351889,9.16515139,9.97987563,-0.902620763,9.96047038,9.96860832,9.94918109
66.36238,10.0498756,9.97900576,0.266213945,9.95961041,9.96776442,9.94834715
66.372872,10.2956301,9.97813691,0.563465376,9.95875141,9.96692137,9.94751401
66.383364,10.2956301,9.97726918,0.564234849,9.95789345,9.96607926,9.94668174
66.393855,9.38083152,9.97640263,-0.771732539,9.95703662,9.96523817,9.94585041
66.404347,9.16515139,9.97553711,-0.900214264,9.95618074,9.96439793,9.94501988
66.414838,10.0995049,9.97467278,0.353315951,9.95532597,9.96355871,9.94419029
66.42533,9.89949494,9.97380946,-0.272606907,9.95447216,9.96272035,9.94336148
66.435822,10.7703296,9.97294725,0.892962691,9.95361938,9.96188292,9.94253354
66.446313,11.7898261,9.97208621,1.34823585,9.95276771,9.9610465,9.94170655
66.456805,9.32737905,9.97122619,-0.802400857,9.95191699,9.96021093,9.94088034
66.467296,9.43398113,9.97036734,-0.732383921,9.95106738,9.95937638,9.94005507
66.477788,10.6770783,9.9695095,0.841171059,9.9502187,9.95854267,9.93923059
66.48828,9.38083152,9.96865275,-0.766695006,9.94937105,9.9577099,9.93840696
66.498771,10.198039,9.96779717,0.47983524,9.9485245,9.95687813,9.93758428
66.509263,9.89949494,9.96694259,-0.259706865,9.94767888,9.95604721,9.93676238
66.519754,10.1488916,9.96608918,0.427553957,9.94683436,9.9552173,9.93594141
66.530246,9.05538514,9.96523677,-0.95386143,9.94599077,9.95438824,9.93512123
66.540738,10.3923048,9.96438543,0.654155497,9.94514819,9.95356011,9.9343019
66.551229,10,9.96353526,0.190957442,9.9443067,9.95273297,9.93348351
66.561721,10.0995049,9.96268607,0.369890341,9.94346614,9.95190669,9.9326659
66.572212,9.89949494,9.96183805,-0.249686024,9.94262667,9.9510814,9.93184922
66.582704,10.2469508,9.96099101,0.53475205,9.94178812,9.95025697,9.93103332
66.593196,10.5356538,9.96014505,0.758622902,9.94095057,9.94943345,9.93021827
66.603687,10.4880885,9.95930023,0.727178282,9.9401141,9.94861093,9.92940415
66.614179,10.0498756,9.9584564,0.302356121,9.93927855,9.94778926,9.92859081
66.62467,10.198039,9.95761371,0.490331842,9.93844408,9.94696858,9.92777839
66.635162,10.0498756,9.95677201,0.305128846,9.93761052,9.94614874,9.92696675
66.645654,9.53939201,9.95593137,-0.6453986,9.93677796,9.94532983,9.92615596
66.656145,10.9544512,9.95509187,0.999679591,9.93594647,9.94451191,9.9253461
66.666637,9.79795897,9.95425334,-0.395340828,9.93511588,9.94369482,9.92453701
66.677128,10.1488916,9.95341595,0.442126239,9.93428637,9.94287874,9.92372884
66.68762,9.48683298,9.95257954,-0.682456271,9.93345777,9.94206349,9.92292144
66.698112,10.6770783,9.95174418,0.851665468,9.93263014,9.94124915,9.92211489
66.708603,9.79795897,9.95090996,-0.391089484,9.93180359,9.94043581,9.92130927
66.719095,10.6301458,9.9500767,0.82466303,9.93097793,9.9396233,9.92050441
66.729586,10.8166538,9.94924457,0.931348085,9.93015334,9.93881178,9.91970047
66.740078,10.2956301,9.94841363,0.589250806,9.92932986,9.93800109,9.91889729
66.75057,9.89949494,9.94757271,-0.219266433,9.92849632,9.93719132,9.91809497
66.761061,9.89949494,9.94664593,-0.21714279,9.92757668,9.93638253,9.91729355
66.771553,9.53939201,9.94548503,-0.637254279,9.92642241,9.93557458,9.91649291
66.782044,10.5830052,9.94393783,0.79941692,9.92488102,9.93476761,9.91569318
66.792536,9.64365076,9.94156421,-0.545814485,9.92251156,9.93396147,9.91489421
66.803028,9.2736185,9.93888594,-0.815639286,9.91983679,9.93315624,9.91409608
66.813519,10.4403065,9.93378467,0.711703476,9.9147343,9.932352,9.91329887
66.824011,10.4403065,9.93297858,0.712269564,9.91393516,9.93154858,9.91250242
66.834502,9.53939201,9.93217355,-0.626722852,9.91313702,9.93074614,9.91170688
66.844994,9.43398113,9.93136942,-0.705257607,9.91233972,9.92994454,9.9109121
66.855486,9.94987437,9.93056629,0.138953532,9.91154334,9.92914383,9.91011815
66.865977,10.2469508,9.92976421,0.563193179,9.91074795,9.92834411,9.90932512
66.876469,9.94987437,9.92896304,0.144607519,9.90995339,9.9275452,9.90853284
66.88696,9.74679434,9.92816292,-0.425873898,9.90915982,9.92674728,9.90774147
66.897452,9.94987437,9.92736371,0.150035532,9.90836709,9.92595018,9.90695086
66.907944,9.48683298,9.92656548,-0.66312329,9.90757527,9.92515399,9.90616108
66.918435,10.3440804,9.9257683,0.646770541,9.90678444,9.92435876,9.9053722
66.928927,10.0995049,9.92497202,0.417771368,9.90599444,9.92356436,9.90458408
66.939418,11.1803399,9.9241768,1.12078682,9.90520542,9.92277093,9.90379686
66.94991,10.6770783,9.92338247,0.868156542,9.90441723,9.92197833,9.9030104
66.960402,9.64365076,9.92258912,-0.528146152,9.90362995,9.92118662,9.90222476
66.970893,10.2469508,9.92179682,0.57022272,9.90284365,9.92039588,9.90144003
66.981385,9.43398113,9.92100541,-0.697871247,9.90205817,9.91960596,9.90065604
66.991876,9.16515139,9.92021505,-0.868943991,9.90127368,9.91881701,9.89987296
67.002368,10.4403065,9.91942558,0.721720808,9.90049001,9.91802887,9.89909062
67.01286,10,9.91863709,0.285241845,9.89970724,9.91724163,9.89830911
67.023351,9.64365076,9.91784964,-0.523640026,9.89892544,9.91645536,9.8975285
67.033843,9.74679434,9.91706308,-0.412636323,9.89814447,9.9156699,9.89674863
67.044334,10.2469508,9.91627756,0.575041914,9.89736448,9.91488541,9.89596966
67.054826,9.64365076,9.91549294,-0.521384864,9.8965853,9.91410173,9.89519144
67.065318,9.48683298,9.91470928,-0.65412254,9.89580702,9.91331894,9.89441403
67.075809,11.045361,9.91392666,1.06368903,9.89502972,9.91253711,9.89363752
67.086301,9.69535971,9.91314493,-0.46667463,9.89425323,9.9117561,9.89286175
67.096792,9.74679434,9.91236423,-0.406902797,9.89347771,9.91097605,9.89208688
67.107284,9.8488578,9.91158443,-0.250452837,9.89270301,9.91019681,9.89131274
67.117776,10.2469508,9.91080558,0.57978029,9.8919292,9.90941845,9.89053943
67.128267,11.045361,9.91002777,1.06552018,9.89115636,9.90864106,9.889767
67.138759,10.0995049,9.90925085,0.436181258,9.89038433,9.90786447,9.88899531
67.14925,9.74679434,9.90847496,-0.402095279,9.88961327,9.90708884,9.88822451
67.159742,10.3923048,9.90769995,0.696135685,9.88884303,9.90631402,9.88745445
67.170234,9.48683298,9.90692591,-0.64814576,9.88807367,9.90554008,9.8866852
67.180725,10.8166538,9.90615289,0.954201726,9.88730528,9.90476709,9.88591684
67.191217,10.6301458,9.90538076,0.851331341,9.88653769,9.90399492,9.88514921
67.201708,9.43398113,9.90460966,-0.686023706,9.88577107,9.90322369,9.88438247
67.2122,10.8166538,9.90383944,0.955413203,9.88500527,9.90245327,9.88361646
67.222692,9.32737905,9.90307017,-0.758743119,9.88424034,9.90168373,9.88285126
67.233183,10.0995049,9.90230194,0.444075446,9.88347638,9.90091514,9.88208694
67.243675,9.69535971,9.90153458,-0.454064826,9.88271323,9.90014735,9.88132335
67.254166,9.79795897,9.90076825,-0.320638863,9.88195103,9.89938051,9.88056065
67.264658,10.3440804,9.9000028,0.6663915,9.88118964,9.89861448,9.87979867
67.27515,10.1488916,9.89923831,0.499653139,9.88042914,9.89784932,9.87903751
67.285641,9.59166305,9.89847483,-0.553905937,9.87966959,9.8970851,9.87827721
67.296133,10.5356538,9.89771224,0.798712409,9.87891085,9.89632169,9.87751765
67.306624,9.8488578,9.89695067,-0.219300866,9.87815306,9.89555922,9.87675896
67.317116,9.53939201,9.89618998,-0.597325679,9.87739608,9.89479755,9.876001
67.327608,10.8627805,9.89543024,0.983539654,9.87663999,9.89403675,9.87524384
67.338099,10.3440804,9.89467152,0.670379677,9.87588484,9.89327689,9.87448756
67.348591,10.0995049,9.89391368,0.453421722,9.8751305,9.89251784,9.873732
67.359082,9.79795897,9.89315686,-0.308541552,9.87437711,9.89175972,9.87297731
67.369574,10,9.89240092,0.328022991,9.87362453,9.8910024,9.87222335
67.380066,10.7703296,9.89164592,0.937381295,9.87287282,9.89024594,9.87147018
67.390557,10.4880885,9.89089195,0.772784921,9.87212207,9.88949043,9.87071788
67.401049,8.94427191,9.89013885,-0.972556908,9.87137211,9.88873571,9.86996631
67.41154,9.94987437,9.88938677,0.245942271,9.87062311,9.88798193,9.8692156
67.422032,10.0995049,9.88863557,0.459205152,9.86987491,9.88722894,9.86846561
67.432524,10.3440804,9.88788531,0.675422181,9.86912759,9.88647681,9.86771642
67.443015,9.89949494,9.88713607,0.111170428,9.86838122,9.88572562,9.86696809
67.453507,9.89949494,9.88638771,0.114486797,9.86763565,9.88497522,9.86622048
67.463998,10,9.88564036,0.338171015,9.86689103,9.88422576,9.86547373
67.47449,10.0498756,9.8848939,0.406179426,9.86614721,9.88347708,9.8647277
67.484982,10.7238053,9.88414837,0.916327956,9.86540426,9.88272927,9.86398246
67.495473,10,9.88340386,0.341461763,9.86466226,9.88198238,9.86323808
67.505965,10.0498756,9.88266023,0.408919782,9.86392106,9.88123629,9.86249442
67.516456,10.4403065,9.88191762,0.747254234,9.86318081,9.88049113,9.86175161
67.526948,10.3923048,9.88117588,0.714932841,9.86244136,9.87974675,9.86100952
67.53744,10.5830052,9.88043508,0.838194584,9.86170279,9.87900323,9.86026821
67.547931,9.8488578,9.87969531,-0.175606105,9.86096516,9.87826063,9.85952776
67.558423,9.53939201,9.8789564,-0.582721536,9.86022833,9.87751883,9.85878803
67.568914,10.8166538,9.87821852,0.968728708,9.85949245,9.87677794,9.85804914
67.579406,10.198039,9.87748151,0.566177995,9.85875737,9.87603785,9.85731097
67.589898,9.64365076,9.87674544,-0.482798797,9.85802316,9.8752986,9.85657358
67.600389,9.64365076,9.87601039,-0.482036959,9.8572899,9.87456028,9.85583704
67.610881,10.9087121,9.87527622,1.01658049,9.85655744,9.87382275,9.85510121
67.621372,10.3440804,9.87454306,0.685227972,9.85582593,9.87308613,9.85436623
67.631864,9.8488578,9.87381078,-0.157965112,9.85509521,9.8723503,9.85363196
67.642356,9.79795897,9.87307944,-0.274081143,9.85436538,9.87161531,9.85289847
67.652847,10.3440804,9.87234913,0.686826985,9.85363648,9.87088125,9.85216582
67.663339,10.3440804,9.87161968,0.687357802,9.85290839,9.87014797,9.85143388
67.67383,9.64365076,9.87089126,-0.476697492,9.85218124,9.8694156,9.85070278
67.684322,10.8627805,9.87016371,0.99630155,9.8514549,9.86868402,9.84997239
67.694814,10.6301458,9.86943711,0.87218616,9.85072943,9.86795328,9.84924277
67.705305,10,9.86871153,0.362337504,9.8500049,9.86722345,9.848514
67.715797,10.3440804,9.86798683,0.689995364,9.84928118,9.86649441,9.84778593
67.726288,10.4880885,9.86726315,0.787924702,9.84855841,9.86576628,9.8470587
67.73678,10.6770783,9.86654034,0.900298789,9.84783644,9.86503892,9.84633217
67.747272,10.2469508,9.86581849,0.617359116,9.84711535,9.86431241,9.84560641
67.757763,10.3923048,9.86509765,0.726090348,9.8463952,9.86358681,9.84488149
67.768255,10.3923048,9.8643777,0.726585954,9.84567586,9.86286198,9.84415726
67.778746,9.64365076,9.86365876,-0.469050106,9.84495746,9.86213807,9.84343388
67.789238,9.11043358,9.86294071,-0.86747169,9.84423987,9.86141493,9.84271119
67.79973,10.2956301,9.86222361,0.658336182,9.84352317,9.86069263,9.84198927
67.810221,10.0995049,9.86150753,0.487849776,9.8428074,9.85997124,9.84126818
67.820713,10.3923048,9.86079234,0.729049041,9.84209245,9.85925062,9.84054779
67.831204,9.8488578,9.86007817,-0.105926245,9.84137844,9.8585309,9.83982824
67.841696,10,9.85936489,0.375013483,9.84066525,9.85781196,9.83910937
67.852188,10,9.85870921,0.375886665,9.8400097,9.85709385,9.83839127
67.862679,10.0498756,9.85870786,0.437227358,9.84000963,9.85637665,9.837674
67.873171,10.6301458,9.8602285,0.877449324,9.84153438,9.85566022,9.83695742
67.883662,10.7238053,9.85952334,0.929667657,9.84082902,9.85494469,9.83624167
67.894154,10.4880885,9.85881909,0.79326502,9.84012449,9.85422993,9.83552661
67.904646,10.5830052,9.8581158,0.851404393,9.83942085,9.85351601,9.83481231
67.915137,10.5830052,9.85741356,0.851816699,9.83871817,9.85280298,9.83409883
67.925629,9.53939201,9.85671221,-0.563311812,9.83801632,9.85209072,9.83338605
67.93612,9.43398113,9.8560119,-0.649638956,9.83731543,9.85137936,9.83267408
67.946612,10.7238053,9.8553125,0.931929606,9.83661537,9.85066877,9.83196281
67.957104,10.7238053,9.85461408,0.932304252,9.83591621,9.84995901,9.83125229
67.967595,9.69535971,9.85391669,-0.398192136,9.83521801,9.84925014,9.83054259
67.978087,9.74679434,9.85322022,-0.326229784,9.83452065,9.84854204,9.82983358
67.988578,10.5830052,9.85252478,0.854681496,9.83382425,9.84783484,9.82912538
67.99907,10.3923048,9.85183027,0.735169762,9.83312869,9.84712839,9.82841787
68.009562,10.7703296,9.85113673,0.958745476,9.83243403,9.84642278,9.82771111
68.020053,10.4880885,9.85044424,0.798526296,9.83174035,9.84571806,9.82700517
68.030545,10.5356538,9.84975266,0.828191457,9.8310475,9.8450141,9.82629991
68.041036,10.4403065,9.84906214,0.768924163,9.83035562,9.84431103,9.82559547
68.051528,10.0995049,9.84837254,0.501131121,9.82966459,9.84360873,9.82489171
68.06202,10,9.84768392,0.390276923,9.82897447,9.84290724,9.82418869
68.072511,9.94987437,9.84699636,0.320746015,9.82828532,9.84220665,9.82348649
68.083003,9.2736185,9.84630973,-0.75676366,9.82759703,9.84150682,9.82278496
68.093494,9.74679434,9.84562416,-0.314372093,9.82690971,9.84080788,9.82208425
68.103986,10.3440804,9.84493951,0.706499058,9.82622324,9.84010969,9.82138422
68.114478,9.69535971,9.84425587,-0.385870641,9.8255377,9.83941232,9.82068492
68.124969,9.94987437,9.84357328,0.326038474,9.82485314,9.83871585,9.81998644
68.135461,10.9544512,9.84289164,1.05430523,9.82416943,9.83802013,9.81928863
68.145952,10.0498756,9.84221106,0.455702273,9.82348672,9.83732529,9.81859163
68.156444,9.2736185,9.84153142,-0.753599978,9.82280486,9.83663121,9.8178953
68.166936,9.11043358,9.84085279,-0.854645666,9.82212394,9.83593795,9.81719971
68.177427,10.9544512,9.84017524,1.05559268,9.82144401,9.83524557,9.81650493
68.187919,9.79795897,9.83949863,-0.20381281,9.82076494,9.83455394,9.81581082
68.19841,9.64365076,9.83882311,-0.441783143,9.82008688,9.8338632,9.81511751
68.208902,9.89949494,9.83814853,0.247682062,9.81940969,9.83317321,9.81442487
68.219394,9.2736185,9.83747498,-0.750903779,9.81873344,9.83248404,9.81373297
68.229885,9.79795897,9.83680251,-0.197087655,9.8180582,9.83179574,9.81304186
68.240377,9.05538514,9.83613101,-0.883598253,9.81738384,9.8311082,9.81235143
68.250868,9.48683298,9.8354606,-0.590446966,9.81671049,9.83042154,9.81166179
68.26136,9,9.83479116,-0.913669064,9.81603802,9.82973562,9.81097282
68.271852,10.0498756,9.83412275,0.464492057,9.81536651,9.82905052,9.81028459
68.282343,10.7238053,9.83345544,0.943583515,9.81469602,9.8283663,9.80959714
68.292835,10.4880885,9.83278912,0.80950563,9.81402643,9.82768282,9.80891037
68.303326,8.94427191,9.8321239,-0.942258981,9.81335786,9.82700022,9.80822439
68.313818,9.64365076,9.83145966,-0.433369243,9.8126902,9.82631837,9.80753907
68.32431,10.2956301,9.83079648,0.681787109,9.8120235,9.82563733,9.80685448
68.334801,10.3440804,9.83013441,0.716900285,9.81135785,9.82495716,9.80617068
68.345293,10.198039,9.82947335,0.607096105,9.8106931,9.82427773,9.80548754
68.355784,10.0498756,9.8288134,0.470172539,9.8100294,9.82359918,9.80480519
68.366276,9.89949494,9.82815447,0.267096367,9.80936662,9.82292138,9.8041235
68.376768,10.9544512,9.8274966,1.06158116,9.80870483,9.82224438,9.80344254
68.387259,10.4403065,9.82683987,0.783241109,9.80804409,9.82156825,9.80276236
68.397751,10.3923048,9.82618416,0.752409916,9.80738429,9.82089287,9.80208284
68.408242,9.32737905,9.8255296,-0.705797809,9.80672555,9.82021836,9.80140411
68.418734,9.43398113,9.82487606,-0.625215909,9.80606775,9.81954458,9.80072604
68.429226,9.89949494,9.82422362,0.27435618,9.80541096,9.81887162,9.80004868
68.439717,9.59166305,9.82357234,-0.481569617,9.80475525,9.81819952,9.79937211
68.450209,10.4403065,9.8229221,0.785738127,9.8041005,9.81752816,9.79869619
68.4607,9.38083152,9.82227304,-0.664410654,9.80344683,9.81685767,9.79802105
68.471192,9.59166305,9.82162502,-0.479543508,9.80279413,9.81618792,9.79734657
68.481684,10.2956301,9.82097813,0.688949934,9.80214246,9.81551897,9.7966728
68.492175,10.3440804,9.82033242,0.723704366,9.8014919,9.81485088,9.79599982
68.502667,9.53939201,9.81968779,-0.529429668,9.80084232,9.81418353,9.79532748
68.513158,10.0995049,9.81904435,0.529585296,9.80019386,9.81351705,9.79465592
68.52365,9.16515139,9.818402,-0.808239203,9.79954639,9.8128513,9.79398501
68.534142,8.71779789,9.8177608,-1.04879117,9.79889999,9.81218636,9.79331481
68.544633,9.69535971,9.81712081,-0.348942832,9.79825472,9.81152227,9.79264539
68.555125,10.4403065,9.81648193,0.789825661,9.79761047,9.81085892,9.79197662
68.565616,9.53939201,9.81584429,-0.525787289,9.79696736,9.81019644,9.79130862
68.576108,9.53939201,9.81520776,-0.52518163,9.79632528,9.80953468,9.79064126
68.5866,9.2736185,9.81457242,-0.735495697,9.7956843,9.80887373,9.78997461
68.597091,9.59166305,9.81393833,-0.471460794,9.79504448,9.80821363,9.78930874
68.607583,9.94987437,9.81330538,0.36955242,9.79440572,9.80755427,9.78864351
68.618074,10.2956301,9.8126737,0.694950673,9.79376815,9.80689576,9.78797904
68.628566,10.5356538,9.81204319,0.850653024,9.79313164,9.80623799,9.78731522
68.639058,8.94427191,9.8114139,-0.931204588,9.79249627,9.80558101,9.78665211
68.649549,10.4880885,9.8107859,0.822983949,9.79186211,9.80492489,9.78598976
68.660041,10.2469508,9.81015909,0.660902165,9.79122904,9.8042695,9.78532805
68.670532,9.38083152,9.8095336,-0.654753451,9.7905972,9.80361496,9.78466711
68.681024,8.48528137,9.80890931,-1.1504903,9.78996648,9.80296116,9.7840068
68.691516,9.53939201,9.8082863,-0.518550179,9.78933694,9.80230814,9.7833472
68.702007,11.7046999,9.80766464,1.37732904,9.78870866,9.80165598,9.78268836
68.712499,9.94987437,9.80704421,0.377928781,9.78808152,9.80100455,9.78203016
68.72299,9.59166305,9.80642515,-0.463424319,9.78745566,9.80035397,9.78137271
68.733482,10.3923048,9.80580734,0.765831248,9.78683097,9.79970412,9.78071591
68.743974,9.38083152,9.80519088,-0.651428704,9.78620752,9.79905506,9.7800598
68.754465,9.59166305,9.80457581,-0.461424709,9.78558538,9.79840685,9.77940444
68.764957,9.59166305,9.80396204,-0.460759149,9.78496445,9.79775937,9.77874973
68.775448,10.0498756,9.8033497,0.496513767,9.78434485,9.79711273,9.77809576
68.78594,10.1488916,9.80273868,0.588347585,9.78372649,9.79646682,9.77744243
68.796432,10.2469508,9.80212907,0.666949548,9.78310943,9.7958217,9.7767898
68.806923,9,9.80152092,-0.895277006,9.78249375,9.79517743,9.77613791
68.817415,9.89949494,9.80091414,0.313975791,9.78187934,9.79453388,9.77548666
68.827906,10.1488916,9.80030886,0.590408931,9.78126634,9.79389118,9.77483616
68.838398,9.53939201,9.79970498,-0.510208749,9.78065465,9.7932492,9.77418629
68.84889,10.2956301,9.79910258,0.70464712,9.78004434,9.79260801,9.77353711
68.859381,10.4880885,9.79850172,0.830413607,9.77943548,9.79196766,9.77288868
68.869873,9.64365076,9.79790232,-0.392748723,9.77882798,9.79132804,9.77224087
68.880364,10,9.7973045,0.450217166,9.77822197,9.79068926,9.77159381
68.890856,10.0995049,9.79670818,0.550269718,9.77761736,9.7900512,9.77094738
68.901348,10.4880885,9.79611341,0.831850388,9.77701422,9.78941393,9.77030163
68.911839,9.53939201,9.7955203,-0.506091179,9.77641262,9.78877749,9.76965663
68.922331,8.88819442,9.79492873,-0.952225977,9.77581248,9.78814178,9.76901225
68.932822,9.32737905,9.79433885,-0.683344564,9.77521393,9.78750691,9.76836862
68.943314,9.38083152,9.79374918,-0.642586698,9.77461688,9.78687139,9.76772561
68.953806,10.6301458,9.79313468,0.914883125,9.7740214,9.78621011,9.76708328
68.964297,9.59166305,9.79237985,-0.448014287,9.77342758,9.78540748,9.76644169
68.974789,9.69535971,9.79139605,-0.309897304,9.77283534,9.78437478,9.76580072
68.98528,10.0498756,9.79006333,0.509717856,9.7722448,9.78299192,9.76516049
68.995772,9.89949494,9.78806224,0.333815362,9.77165589,9.7809392,9.76452088
69.006264,9.74679434,9.78485486,-0.19509105,9.77106868,9.77767826,9.76388194
69.016755,10.3440804,9.77972998,0.751232624,9.77048326,9.77249732,9.76324375
69.027247,9.74679434,9.77916778,-0.179926197,9.76989955,9.77188132,9.76260617
69.037738,9.74679434,9.77860751,-0.178362461,9.76931769,9.77126613,9.76196932
69.04823,9.8488578,9.7780491,0.266099053,9.7687376,9.77065164,9.76133309
69.058722,9.48683298,9.77749262,-0.539128591,9.76815937,9.77003791,9.76069754
69.069213,10.4403065,9.77693817,0.814474273,9.76758309,9.76942499,9.76006271
69.079705,9.32737905,9.77638568,-0.670079564,9.76700869,9.76881276,9.7594285
69.090196,9.38083152,9.77583528,-0.628493248,9.76643631,9.76820135,9.75879502
69.100688,10.0995049,9.77528692,0.569401454,9.76586588,9.76759063,9.75816216
69.11118,9.43398113,9.77474069,-0.583746142,9.76529749,9.76698067,9.75752996
69.121671,9.59166305,9.77419668,-0.42723955,9.76473125,9.76637151,9.75689849
69.132163,10.0995049,9.77365483,0.57083282,9.76416708,9.76576305,9.75626763
69.142654,10.5830052,9.77311529,0.899938862,9.76360515,9.7651554,9.7556375
69.153146,8.88819442,9.772578,-0.940416708,9.76304538,9.76454845,9.75500798
69.163638,10.6301458,9.77204307,0.926338352,9.76248788,9.76394224,9.75437912
69.174129,9.11043358,9.7715106,-0.813066429,9.76193276,9.76333685,9.75375099
69.184621,10.198039,9.77098053,0.653497128,9.76137997,9.76273214,9.75312346
69.195112,10.1488916,9.77045303,0.615173581,9.76082965,9.76212825,9.75249666
69.205604,9.69535971,9.76992805,-0.273072037,9.76028177,9.76152505,9.75187046
69.216096,10.7703296,9.76940571,1.00046185,9.75973645,9.76092259,9.75124492
69.226587,9.69535971,9.76888611,-0.271157511,9.75919378,9.76032095,9.7506201
69.237079,10.5356538,9.76836923,0.875947788,9.75865374,9.75971999,9.74999589
69.24757,10.0498756,9.76785522,0.531055931,9.7581165,9.75911984,9.74937239
69.258062,9.79795897,9.76734407,0.174971151,9.75758202,9.75852039,9.7487495
69.268554,10.2469508,9.76683589,0.692903221,9.75705043,9.75792168,9.74812726
69.279045,9.64365076,9.76633082,-0.350257133,9.75652186,9.75732377,9.74750574
69.289537,10.4880885,9.76582884,0.849858603,9.75599628,9.75672656,9.74688482
69.300028,10.1488916,9.76533012,0.619323374,9.75547389,9.75613015,9.74626462
69.31052,10,9.76483467,0.484938478,9.75495468,9.75553443,9.74564501
69.321012,10.2956301,9.76434263,0.728894721,9.75443878,9.75493946,9.74502605
69.331503,9.48683298,9.76385413,-0.526327985,9.75392634,9.75434529,9.74440781
69.341995,9.89949494,9.76336919,0.368952231,9.75341737,9.75375181,9.74379017
69.352486,10.0498756,9.762888,0.535712252,9.75291207,9.75315913,9.74317323
69.362978,9,9.7624106,-0.873161266,9.75241045,9.75256714,9.74255689
69.37347,9.16515139,9.76193713,-0.772519088,9.75191268,9.7519759,9.7419412
69.383961,9.16515139,9.76146777,-0.772215244,9.75141893,9.75138546,9.74132622
69.394453,9.79795897,9.76100256,0.192240496,9.75092924,9.75079571,9.74071183
69.404944,9.79795897,9.76054173,0.193435378,9.75044383,9.75020675,9.74009814
69.415436,9.8488578,9.76008532,0.29794712,9.74996275,9.74961849,9.73948505
69.425928,10.3440804,9.75963353,0.764491273,9.7494862,9.74903097,9.7388726
69.436419,10.0995049,9.75918656,0.583368135,9.74901439,9.74844425,9.73826086
69.446911,9.48683298,9.75874449,-0.52145135,9.74854738,9.74785822,9.73764971
69.457402,9.94987437,9.75830758,0.437683434,9.74808544,9.74727299,9.73703925
69.467894,9.89949494,9.75787593,0.376323003,9.74762866,9.74668844,9.73642939
69.478386,10.7703296,9.75744978,1.00641931,9.74717728,9.74610464,9.73582017
69.488877,10.3440804,9.75702936,0.766192581,9.74673155,9.74552163,9.73521165
69.499369,10.4403065,9.75661482,0.826856512,9.74629159,9.74493931,9.73460371
69.50986,9.8488578,9.75620645,0.304386847,9.74585772,9.74435779,9.73399647
69.520352,9.59166305,9.75580442,-0.405143645,9.74543009,9.74377696,9.73338981
69.530844,9.11043358,9.75540902,-0.80310363,9.745009,9.74319687,9.7327838
69.541335,10.7238053,9.75502055,0.984268633,9.74459474,9.74261757,9.73217848
69.551827,9.38083152,9.75463923,-0.611398158,9.74418753,9.74203897,9.73157374
69.562318,10.3923048,9.75426541,0.798773705,9.74378774,9.74146115,9.7309697
69.57281,10.198039,9.75389936,0.666438047,9.74339561,9.74088403,9.73036623
69.583302,9.59166305,9.75354143,-0.402341124,9.74301151,9.74030764,9.7297634
69.593793,9.16515139,9.75319201,-0.766838068,9.74263583,9.73973205,9.72916126
69.604285,10.2469508,9.75285142,0.702922003,9.74226888,9.73915715,9.7285597
69.614776,9.59166305,9.75252012,-0.401069915,9.74191112,9.73858304,9.72795884
69.625268,9.59166305,9.75219848,-0.400668727,9.74156292,9.73800961,9.72735854
69.63576,10.7238053,9.75188696,0.985859185,9.74122475,9.73743693,9.72675888
69.646251,10.2956301,9.75158609,0.737593418,9.74089714,9.73686504,9.72615991
69.656743,9.64365076,9.75129632,-0.328093824,9.74058052,9.73629383,9.72556151
69.667234,10,9.75101824,0.498980717,9.74027551,9.73572342,9.7249638
69.677726,9.74679434,9.7507524,-0.0629130443,9.73998263,9.73515369,9.72436665
69.688218,9.53939201,9.75049942,-0.459464262,9.73970253,9.73458471,9.72377014
69.698709,9.64365076,9.75026001,-0.326510715,9.73943589,9.73401651,9.72317431
69.709201,10.3440804,9.75003482,0.770743547,9.73918338,9.733449,9.72257905
69.719692,9.48683298,9.74982465,-0.512827135,9.7389458,9.73288229,9.72198448
69.730184,9.11043358,9.74963028,-0.799497782,9.73872392,9.73231625,9.72139047
69.740676,10.0995049,9.7494526,0.591652207,9.73851864,9.73175096,9.72079709
69.751167,9.8488578,9.74929257,0.315539593,9.73833091,9.73118646,9.72020439
69.761659,10.3923048,9.74915114,0.801968641,9.7381617,9.73062264,9.71961225
69.77215,9.74679434,9.74902944,-0.0472768451,9.73801213,9.73005961,9.71902079
69.782642,10.9544512,9.74892861,1.0979629,9.73788332,9.72949727,9.7184299
69.793134,9.53939201,9.74884991,-0.457665698,9.73777655,9.72893567,9.71783963
69.803625,8.42614977,9.74879469,-1.15006301,9.73769319,9.72837486,9.71725003
69.814117,10.198039,9.74876442,0.670279502,9.73763468,9.72781473,9.716661
69.824608,10.198039,9.74876067,0.670282296,9.73760262,9.72725539,9.71607264
69.8351,9.32737905,9.74878517,-0.649158004,9.7375987,9.72669674,9.71548484
69.845592,9.89949494,9.74883976,0.388143238,9.73762481,9.72613882,9.71489766
69.856083,9.69535971,9.74892647,-0.231444922,9.73768294,9.7255817,9.71431115
69.866575,9.32737905,9.74904749,-0.649360019,9.73777531,9.72502525,9.7137252
69.877066,10.1488916,9.74920519,0.632207543,9.73790429,9.7244696,9.71313992
69.887558,10.198039,9.7494022,0.669803572,9.7380725,9.72391464,9.7125552
69.89805,10.5830052,9.74964136,0.912887663,9.73828279,9.7233604,9.7119711
69.908541,9.59166305,9.74992574,-0.397822438,9.73853823,9.72280696,9.71138766
69.919033,9.79795897,9.7502588,0.218403689,9.73884229,9.72225421,9.71080477
69.929524,9.69535971,9.75064422,-0.235126563,9.73919864,9.72170224,9.71022255
69.940016,9.21954446,9.75108617,-0.72906907,9.73961148,9.72115096,9.70964089
69.950508,9.48683298,9.75158914,-0.514544613,9.74008528,9.72060041,9.70905984
69.960999,9.11043358,9.75215807,-0.801077081,9.740625,9.72005066,9.70847945
69.971491,10.0995049,9.75279857,0.588817768,9.74123626,9.71950158,9.70789961
69.981982,9.69535971,9.75351664,-0.241157476,9.74192505,9.7189533,9.70732044
69.992474,10.198039,9.75431919,0.66612299,9.74269829,9.7184057,9.70674181
70.002966,10.1488916,9.75521369,0.627437547,9.74356348,9.71785884,9.70616379
70.013457,9.8488578,9.75620845,0.304383566,9.74452892,9.71731277,9.70558643
70.023949,9.05538514,9.75731304,-0.837811379,9.74560421,9.71676738,9.70500962
70.03444,9.48683298,9.75853779,-0.521253115,9.74679967,9.71622278,9.70443347
70.044932,10.3440804,9.75989473,0.764320416,9.74812736,9.71567886,9.70385787
70.055424,9.79795897,9.76139707,0.191211657,9.74960049,9.71513568,9.70328286
70.065915,9.48683298,9.76305966,-0.52557272,9.75123396,9.71459329,9.70270852
70.076407,10.5830052,9.76489985,0.90449179,9.7530451,9.71405159,9.70213471
70.086898,9.8488578,9.7669366,0.286218804,9.75505293,9.71351067,9.70156157
70.09739,9.79795897,9.76919235,0.169607263,9.75727991,9.71297044,9.70098896
70.107882,9.32737905,9.77169212,-0.666568123,9.75975107,9.71243095,9.70041696
70.118373,10.3923048,9.77446455,0.786028175,9.76249513,9.71189224,9.6998456
70.128865,9.89949494,9.77754352,0.349215428,9.76554596,9.71135423,9.69927479
70.139356,9.94987437,9.78096697,0.41098345,9.76894159,9.71081699,9.69870463
70.149848,9.64365076,9.78478035,-0.375672181,9.7727275,9.71028045,9.69813501
70.16034,10.1488916,9.78903558,0.599879979,9.77695568,9.70974464,9.69756598
70.170831,10.3923048,9.79379341,0.77363521,9.78168699,9.70920962,9.6969976
70.181323,10.0498756,9.79912688,0.500748177,9.78699453,9.70867529,9.69642976
70.191814,9.38083152,9.80512037,-0.651374586,9.79296279,9.70814175,9.69586256
70.202306,9.69535971,9.8118767,-0.341345844,9.79969473,9.70760889,9.69529591
70.212798,9.16515139,9.81951713,-0.80892876,9.80731175,9.70707677,9.69472984
70.223289,10.0995049,9.82818757,0.52088134,9.81595997,9.70654544,9.69416441
70.233781,8.60232527,9.83806783,-1.11163958,9.82581941,9.7060148,9.69359952
70.244272,10,9.8493739,0.388105782,9.83710634,9.70548494,9.69303528
70.254764,9.69535971,9.86237714,-0.408677656,9.85009245,9.70495578,9.69247156
70.265256,9.32737905,9.87741385,-0.741643311,9.86511446,9.70442735,9.69190843
70.275747,10.198039,9.89491479,0.550567194,9.88260368,9.70389971,9.69134595
70.286239,10.3440804,9.91546011,0.654691017,9.90314094,9.70337276,9.69078399
70.29673,10.2956301,9.93986298,0.596462203,9.92754045,9.7028466,9.69022267
70.307222,9.59166305,9.96938003,-0.61458684,9.95706032,9.70232113,9.68966188
70.317714,10.5830052,10.0060761,0.75955849,9.99376795,9.7017964,9.68910168
70.328205,9.69535971,10.0535197,-0.598464652,10.0412359,9.70127245,9.68854211
70.338697,10.6301458,10.1179202,0.715699364,10.1056811,9.7007492,9.68798307
70.349188,9.94987437,10.2096277,-0.509659999,10.1974651,9.70022674,9.68742466
70.35968,10.3923048,10.3447645,0.21803744,10.3327278,9.69970497,9.68686677
70.370172,10.4403065,10.5458182,-0.324825682,10.5339786,9.69918393,9.68630947
70.380663,11.2249722,10.839815,0.620610311,10.8282648,9.69866369,9.6857528
70.391155,11.4455231,11.2527623,0.439045427,11.2416054,9.69814414,9.68519665
70.401646,12,11.8000981,0.447103847,11.7894297,9.69762538,9.68464114
70.412138,13.7477271,12.4767004,1.1273982,12.4665828,9.69710732,9.68408614
70.42263,14.2126704,13.2488086,0.981764645,13.2392544,9.69658999,9.68353172
70.433121,16.7332005,14.0505305,1.63788583,14.0414967,9.69607346,9.68297793
70.443613,16.5529454,14.7843987,1.32986716,14.7757895,9.69555762,9.68242466
70.454104,16.8522995,15.3293221,1.23408974,15.3209957,9.69504257,9.68187202
70.464596,17.7200451,15.5691302,1.46659979,15.5609091,9.69452821,9.68131989
70.475088,18.0277564,15.4412486,1.60826236,15.432936,9.6940146,9.68076834
70.485579,16.881943,14.9749884,1.38092529,14.9663926,9.69350178,9.68021741
70.496071,15.2970585,14.2768694,1.01004413,14.2678276,9.69298965,9.679667
70.506562,14.7648231,13.4761864,1.13518133,13.4665799,9.69247832,9.67911721
70.517054,13.6381817,12.6816263,0.978036517,12.6713884,9.69196768,9.67856794
70.527546,13.2287566,11.968847,1.12245694,11.957968,9.69145779,9.67801923
70.538037,12.9614814,11.3804498,1.25739079,11.3689753,9.69094869,9.67747114
70.548529,11.3578167,10.9289072,0.654911837,10.916924,9.69044029,9.67692357
70.55902,11.0905365,10.6033446,0.697991342,10.5909577,9.68993268,9.67637661
70.569512,10.4403065,10.3791364,0.247325827,10.3664454,9.68942577,9.67583017
70.580004,11,10.2283123,0.878457563,10.215397,9.68891961,9.67528429
70.590495,10.5830052,10.1264347,0.675700021,10.1133518,9.68841425,9.67473903
70.600987,9.11043358,10.0554442,-0.972116586,10.0422309,9.68790958,9.67419428
70.611478,11.1803399,10.0035336,1.08480704,9.99021329,9.68740571,9.67365014
70.62197,10.198039,9.96356595,0.484224203,9.95015353,9.68690253,9.67310651
70.632462,10,9.93144869,0.261823045,9.9179539,9.68640011,9.67256344
70.642953,10.1488916,9.9048411,0.494014639,9.89127078,9.68589849,9.67202098
70.653445,9.8488578,9.88234443,-0.182993524,9.86870367,9.68539756,9.67147903
70.663936,9.53939201,9.8630699,-0.568926958,9.84936269,9.68489744,9.67093769
70.674428,10,9.84639259,0.391927818,9.83262211,9.68439801,9.67039686
70.68492,10.5356538,9.83185263,0.838928557,9.81802149,9.68389934,9.66985658
70.695411,9.2736185,9.81909288,-0.738562375,9.80520323,9.68340147,9.66931691
70.705903,9.05538514,9.80782592,-0.867433447,9.79387955,9.6829043,9.66877774
70.716394,10.3923048,9.79782371,0.77102603,9.7838221,9.68240793,9.66823918
70.726886,10.4403065,9.78889651,0.807099747,9.7748409,9.68191227,9.66770112
70.737378,9.94987437,9.7808908,0.41107611,9.76678223,9.68141736,9.66716361
70.747869,10.198039,9.77367924,0.651429034,9.75951858,9.68092325,9.66662671
70.758361,10,9.76715377,0.482541429,9.75294173,9.68042985,9.66609031
70.768852,9.11043358,9.76122615,-0.806717154,9.74696335,9.67993726,9.66555451
70.779344,10.2956301,9.75581979,0.734717874,9.74150673,9.67944537,9.66501921
70.789836,10.0498756,9.75087129,0.546812889,9.73650838,9.67895423,9.66448445
70.800327,10.3440804,9.74632652,0.773145466,9.73191412,9.67846391,9.6639503
70.810819,9.38083152,9.74213796,-0.601087714,9.72767634,9.67797429,9.66341664
70.82131,10.6301458,9.73826625,0.944393757,9.72375563,9.67748548,9.66288358
70.831802,8.88819442,9.73467598,-0.920044326,9.72011653,9.67699738,9.66235102
70.842294,8.88819442,9.73133747,-0.918228214,9.71672933,9.67651004,9.661819
70.852785,9.94987437,9.72822483,0.470796704,9.7135681,9.6760235,9.66128758
70.863277,9.59166305,9.72531462,-0.365583882,9.71060936,9.67553769,9.66075665
70.873768,9.59166305,9.72258734,-0.361834627,9.70783358,9.67505268,9.66022632
70.88426,10.3923048,9.72002486,0.819926816,9.70522261,9.67456838,9.65969647
70.894752,10.2469508,9.71761189,0.727556785,9.70276113,9.67408485,9.65916717
70.905243,9.32737905,9.71533488,-0.622861001,9.70043559,9.67360213,9.65863846
70.915735,9.21954446,9.71318119,-0.702592865,9.69823331,9.67312012,9.65811024
70.926226,9.94987437,9.71114037,0.488604137,9.69614383,9.67263893,9.65758261
70.936718,9.2736185,9.70920233,-0.659987755,9.69415705,9.67215846,9.65705547
70.94721,9.38083152,9.70735862,-0.571425495,9.6922645,9.67167876,9.65652887
70.957701,10.4403065,9.70560161,0.857149288,9.69045854,9.67119986,9.65600285
70.968193,9.2736185,9.70392399,-0.655976751,9.68873186,9.67072169,9.65547732
70.978684,9.48683298,9.70231981,-0.464205585,9.68707848,9.67024434,9.65495238
70.989176,9.21954446,9.70078307,-0.693713635,9.68549239,9.66976771,9.65442792
70.999668,9.21954446,9.6993088,-0.692650229,9.68396864,9.66929185,9.65390399
71.010159,10.0498756,9.69789248,0.593281668,9.68250268,9.66881681,9.65338065
71.020651,10.2956301,9.69652964,0.774015829,9.68109002,9.66834249,9.65285779
71.031142,9.38083152,9.69521668,-0.560700597,9.67972709,9.667869,9.65233552
71.041634,9.89949494,9.69394987,0.453370787,9.67841011,9.66739623,9.65181372
71.052126,10.0995049,9.69272614,0.637792132,9.67713604,9.66692424,9.65129246
71.062617,9.64365076,9.69154268,-0.218842226,9.67590205,9.66645307,9.65077178
71.073109,10.3440804,9.69039661,0.808507156,9.67470525,9.66598263,9.65025157
71.0836,9.74679434,9.6892857,0.239809607,9.67354341,9.66551301,9.64973194
71.094092,9.79795897,9.68820748,0.331287623,9.67241406,9.66504413,9.6492128
71.104584,10.3440804,9.68716001,0.810506277,9.67131524,9.66457603,9.64869417
71.115075,9.43398113,9.68614147,-0.50215569,9.67024515,9.66410875,9.64817613
71.125567,9.89949494,9.68514992,0.462974101,9.66920182,9.66364221,9.64765856
71.136058,9.89949494,9.68418393,0.464016172,9.66818383,9.6631765,9.64714156
71.14655,8.71779789,9.68324182,-0.982570064,9.6671895,9.66271153,9.64662504
71.157042,10.0995049,9.6823223,0.645896771,9.66621752,9.66224734,9.64610905
71.167533,9.48683298,9.68142417,-0.441124916,9.66526671,9.66178398,9.64559362
71.178025,9.48683298,9.68054608,-0.440128502,9.66433569,9.66132137,9.64507867
71.188516,9.8488578,9.67968708,0.411303685,9.66342353,9.66085959,9.64456429
71.199008,8.83176087,9.67884599,-0.920372275,9.66252902,9.66039855,9.64405037
71.2095,9.16515139,9.67802193,-0.716149806,9.66165131,9.65993831,9.64353698
71.219991,10.0498756,9.6772141,0.610460089,9.66078957,9.6594789,9.64302416
71.230483,10.0498756,9.67642151,0.611108922,9.65994281,9.65902024,9.6425118
71.240974,9.59166305,9.67564353,-0.289793862,9.65911042,9.65856241,9.64200002
71.251466,10.0498756,9.6748793,0.612369434,9.65829151,9.65810534,9.6414887
71.261958,10.4880885,9.67412821,0.902197467,9.65748548,9.65764907,9.64097789
71.272449,9.64365076,9.67338971,-0.17244984,9.65669178,9.65719363,9.64046765
71.282941,10.3923048,9.67266306,0.848317033,9.65590965,9.65673895,9.63995788
71.293432,9.48683298,9.67194784,-0.430249762,9.6551387,9.65628512,9.63944866
71.303924,9.79795897,9.6712434,0.355971309,9.65437824,9.65583204,9.63893992
71.314416,10.3440804,9.67054932,0.820689415,9.65362786,9.65537977,9.63843168
71.324907,9.8488578,9.6698652,0.423075175,9.65288718,9.65492834,9.637924
71.335399,9.32737905,9.66919048,-0.584646413,9.65215561,9.65447767,9.63741679
71.34589,8.36660027,9.66852489,-1.14101912,9.65143288,9.65402786,9.63691014
71.356382,8.60232527,9.66786791,-1.03225125,9.65071848,9.65357881,9.63640394
71.366874,9.69535971,9.66721926,0.16775118,9.65001211,9.65313057,9.63589826
71.377365,10.198039,9.66657864,0.729013297,9.64931349,9.65268318,9.63539313
71.387857,9.16515139,9.66594562,-0.707668165,9.64862217,9.65223656,9.63488846
71.398348,9.74679434,9.66532002,0.285437079,9.64793797,9.6517908,9.63438434
71.40884,8.94427191,9.66470143,-0.848781196,9.64726048,9.65134582,9.63388069
71.419332,10.4880885,9.66408964,0.90774382,9.64658949,9.65090164,9.63337753
71.429823,8.71779789,9.66348445,-0.972464172,9.6459248,9.65045833,9.63287493
71.440315,10.7703296,9.66288551,1.0523517,9.64526604,9.6500158,9.63237279
71.450806,9.2736185,9.6622927,-0.623437414,9.64461311,9.64957413,9.63187119
71.461298,9,9.6617057,-0.813452948,9.64396567,9.64913324,9.63137005
71.47179,10.3923048,9.66112435,0.85509093,9.64332356,9.64869318,9.63086942
71.482281,9.74679434,9.66054851,0.293676415,9.64268665,9.64825398,9.63036933
71.492773,9.48683298,9.65997789,-0.416106846,9.64205464,9.64781558,9.62986969
71.503264,9.05538514,9.65941242,-0.77719192,9.64142746,9.64737804,9.6293706
71.513756,9.79795897,9.65885183,0.372970701,9.64080482,9.64694129,9.62887196
71.524248,10.198039,9.65829601,0.734672048,9.64018663,9.64650537,9.62837381
71.534739,8.71779789,9.65774487,-0.969508628,9.63957278,9.64607033,9.62787622
71.545231,8.77496439,9.65719815,-0.939272997,9.63896303,9.64563609,9.62737907
71.555722,10,9.65665583,0.585955777,9.63835733,9.64520272,9.62688246
71.566214,9.89949494,9.65611767,0.493332819,9.63775546,9.64477016,9.6263863
71.576706,10,9.6555836,0.586870006,9.63715733,9.64433843,9.62589064
71.587197,9.64365076,9.65505355,-0.10678383,9.63656288,9.64390759,9.62539551
71.597689,9.2736185,9.65452731,-0.617178104,9.63597189,9.64347756,9.62490083
71.60818,8.24621125,9.65400487,-1.18650479,9.63538435,9.64304841,9.62440669
71.618672,9.74679434,9.65348604,0.305464088,9.63480006,9.64262007,9.623913
71.629164,9.16515139,9.65297075,-0.698440666,9.63421896,9.64219258,9.62341979
71.639655,9.74679434,9.65245898,0.307140625,9.63364103,9.64176599,9.62292713
71.650147,9.89949494,9.65195053,0.497538345,9.63306604,9.64134021,9.6224349
71.660638,10,9.65144542,0.590385114,9.63249403,9.64091533,9.62194321
71.67113,9.43398113,9.65094346,-0.465792152,9.63192481,9.64049127,9.62145196
71.681622,9.74679434,9.65044463,0.310402498,9.63135834,9.64006807,9.62096119
71.692113,9,9.64994891,-0.806194089,9.63079461,9.63964577,9.62047096
71.702605,9.38083152,9.64945612,-0.518290074,9.63023344,9.6392243,9.61998117
71.713096,9.94987437,9.6489663,0.548550886,9.62967485,9.63880374,9.61949191
71.723588,9.2736185,9.64847928,-0.612258753,9.62911868,9.638384,9.61900309
71.73408,10.2956301,9.64799505,0.804757786,9.62856491,9.63796514,9.61851475
71.744571,10.198039,9.64751359,0.741974011,9.62801354,9.63754719,9.61802694
71.755063,9.16515139,9.64703477,-0.694178204,9.6274644,9.63713008,9.61753956
71.765554,9.53939201,9.64655861,-0.327363092,9.62691753,9.63671389,9.61705271
71.776046,9.48683298,9.64608497,-0.399063891,9.62637279,9.63629854,9.6165663
71.786538,9.38083152,9.64561385,-0.514570043,9.62583015,9.63588408,9.61608036
71.797029,10.0498756,9.64514524,0.636184234,9.62528964,9.63547054,9.61559495
71.807521,10.6301458,9.64467901,0.992706804,9.62475109,9.63505784,9.61510998
71.818012,9.64365076,9.64421521,-0.0237581567,9.62421456,9.63464608,9.61462552
71.828504,9.48683298,9.6437537,-0.396132201,9.6236799,9.63423517,9.6141415
71.838996,9.74679434,9.64329449,0.321713936,9.62314712,9.63382516,9.61365795
71.849487,10.9087121,9.64283758,1.1251109,9.62261623,9.63341609,9.61317493
71.859979,9.38083152,9.64238284,-0.511420888,9.62208709,9.63300788,9.61269233
71.87047,8.66025404,9.64193034,-0.990795792,9.62155976,9.63260061,9.61221025
71.880962,9.16515139,9.64147994,-0.690165599,9.62103409,9.63219421,9.6117286
71.891454,8.88819442,9.64103167,-0.867661944,9.62051011,9.63178871,9.61124742
71.901945,9.48683298,9.64058552,-0.392112915,9.61998783,9.63138417,9.61076676
71.912437,9.94987437,9.64014138,0.556536599,9.61946712,9.6309805,9.61028653
71.922928,8.71779789,9.63969932,-0.960156984,9.61894804,9.63057779,9.60980681
71.93342,9.21954446,9.63925921,-0.647853963,9.61843046,9.63017596,9.60932751
71.943912,10.2956301,9.63882108,0.810437573,9.6179144,9.62977505,9.60884869
71.954403,8.66025404,9.63838494,-0.989005005,9.61739988,9.62937511,9.60837038
71.964895,10.2956301,9.63795068,0.810974393,9.61688678,9.62897606,9.60789249
71.975386,9.53939201,9.63751835,-0.31325124,9.61637516,9.62857797,9.60741511
71.985878,10.198039,9.63708787,0.748966728,9.61586491,9.62818079,9.60693815
71.99637,10.198039,9.63665924,0.749252823,9.61535603,9.62778454,9.60646166
72.006861,10.0498756,9.63623248,0.643150949,9.61484857,9.62738927,9.60598567
72.017353,10.198039,9.63580749,0.749821001,9.61434239,9.6269949,9.60551011
72.027844,9.16515139,9.63538434,-0.685735339,9.61383758,9.62660152,9.60503506
72.038336,8.88819442,9.63496293,-0.86415769,9.61333401,9.62620905,9.60456042
72.048828,10.0995049,9.63454328,0.681880973,9.6128317,9.62581754,9.60408624
72.059319,10.0995049,9.6341254,0.682187317,9.61233069,9.62542702,9.60361257
72.069811,10.0995049,9.63370922,0.682492288,9.61183087,9.62503742,9.60313932
72.080302,10.3440804,9.63329478,0.84308105,9.61133229,9.62464882,9.60266656
72.090794,9.32737905,9.63288199,-0.552723204,9.61083486,9.62426115,9.60219423
72.101286,10.4880885,9.63247089,0.924995995,9.6103386,9.62387446,9.60172235
72.111777,10.2469508,9.63206149,0.784148757,9.60984354,9.62348877,9.60125097
72.122269,9.43398113,9.63165371,-0.444603845,9.60934956,9.62310402,9.60078001
72.13276,10.4403065,9.63124761,0.899477015,9.60885676,9.62272029,9.60030955
72.143252,9.64365076,9.6308431,0.11317095,9.608365,9.6223375,9.59983949
72.153744,9.59166305,9.6304402,-0.196919163,9.60787433,9.62195571,9.59936989
72.164235,9.94987437,9.63003895,0.565539934,9.60738478,9.62157494,9.5989008
72.174727,10.2956301,9.62963926,0.816082641,9.60689624,9.62119513,9.5984321
72.185218,9.74679434,9.6292412,0.342860245,9.60640879,9.62081636,9.59796391
72.19571,10.6301458,9.62884467,1.00065036,9.60592232,9.62043855,9.59749612
72.206202,9.69535971,9.62844971,0.258669683,9.60543686,9.62006175,9.59702879
72.216693,9.59166305,9.62805635,-0.190770281,9.60495245,9.61968599,9.59656195
72.227185,9.21954446,9.6276645,-0.638842735,9.60446898,9.61931122,9.59609551
72.237676,9.59166305,9.62727423,-0.188709251,9.60398653,9.6189375,9.59562957
72.248168,10.0498756,9.62688546,0.65037694,9.603505,9.61856476,9.59516403
72.25866,9.74679434,9.62649822,0.346837323,9.60302442,9.61819305,9.59469894
72.269151,10.4880885,9.62611253,0.928426598,9.60254483,9.61782241,9.59423434
72.279643,10.7238053,9.62572833,1.04789168,9.60206612,9.61745277,9.59377014
72.290134,9.2736185,9.62534567,-0.593065914,9.60158837,9.6170842,9.59330643
72.300626,9.69535971,9.62496448,0.265320995,9.60111148,9.61671664,9.59284313
72.311118,10.1488916,9.6245848,0.724090305,9.60063549,9.61635013,9.59238026
72.321609,9.32737905,9.62420664,-0.544818854,9.60016043,9.61598471,9.59191789
72.332101,9.32737905,9.62382993,-0.544473028,9.5996862,9.6156203,9.59145591
72.342592,9.21954446,9.62345475,-0.63553937,9.59921289,9.615257,9.59099442
72.353084,9.64365076,9.62308101,0.143421584,9.59874039,9.61489472,9.59053332
72.363576,9.69535971,9.62270875,0.269538428,9.59826873,9.61453352,9.59007267
72.374067,9.64365076,9.622338,0.145988904,9.59779797,9.61417343,9.5896125
72.384559,9.69535971,9.62196869,0.270907784,9.59732798,9.61381438,9.58915272
72.39505,9.94987437,9.62160088,0.572951563,9.59685887,9.61345645,9.58869343
72.405542,9.74679434,9.6212345,0.354344247,9.59639053,9.61309958,9.58823453
72.416034,8.94427191,9.62086959,-0.822555576,9.595923,9.6127438,9.58777607
72.426525,8.94427191,9.62050617,-0.822334638,9.5954563,9.61238916,9.58731809
72.437017,10.0995049,9.62014418,0.69235884,9.59499036,9.61203559,9.5868605
72.447508,9.94987437,9.61978368,0.574535199,9.59452525,9.61168316,9.58640339
72.458,9.05538514,9.6194246,-0.751025606,9.59406087,9.61133181,9.58594667
72.468492,9.43398113,9.61906698,-0.430216048,9.59359726,9.61098159,9.58549038
72.478983,9.79795897,9.61871085,0.423377044,9.59313445,9.61063252,9.58503457
72.489475,10.2469508,9.61835614,0.792839596,9.59267236,9.61028455,9.58457914
72.499966,10.198039,9.61800292,0.761601016,9.59221107,9.60993775,9.5841242
72.510458,10.6770783,9.61765112,1.02928477,9.59175047,9.60959206,9.58366964
72.52095,9.69535971,9.61730077,0.279390302,9.59129062,9.60924752,9.58321551
72.531441,10.0995049,9.61695192,0.694660364,9.59083153,9.60890417,9.58276185
72.541933,10.6301458,9.61660448,1.0067479,9.59037313,9.60856194,9.58230858
72.552424,9.48683298,9.61625854,-0.359757633,9.5899155,9.60822091,9.58185577
72.562916,9.79795897,9.61591401,0.426667268,9.58945853,9.60788102,9.58140336
72.573408,9.79795897,9.61557095,0.427069106,9.58900228,9.6075423,9.58095137
72.583899,9.48683298,9.61522938,-0.35832443,9.58854677,9.6072048,9.58049984
72.594391,9.53939201,9.61488923,-0.274767575,9.58809191,9.60686846,9.5800487
72.604882,10,9.61455059,0.620845724,9.58763779,9.60653335,9.57959803
72.615374,9.2736185,9.61421337,-0.583605068,9.58718432,9.60619941,9.57914774
72.625866,9.21954446,9.61387762,-0.627959524,9.58673153,9.60586667,9.57869787
72.636357,8.94427191,9.61354337,-0.818090132,9.58627946,9.60553518,9.57824847
72.646849,10,9.61321057,0.621923978,9.58582802,9.60520488,9.57779944
72.65734,10.0498756,9.61287926,0.661057001,9.58537729,9.60487584,9.57735088
72.667832,9.59166305,9.61254941,-0.144521135,9.58492718,9.604548,9.5769027
72.678324,10.7238053,9.61222103,1.05431697,9.58447773,9.60422141,9.57645494
72.688815,10.6301458,9.61189416,1.00908456,9.58402898,9.60389609,9.57600763
72.699307,10.3923048,9.61156876,0.883592716,9.58358084,9.603572,9.57556071
72.709798,9.05538514,9.61124487,-0.745560013,9.58313339,9.6032492,9.57511424
72.72029,9.48683298,9.61092245,-0.352263348,9.58268654,9.60292763,9.57466815
72.730782,9.05538514,9.61060152,-0.745128434,9.58224033,9.60260735,9.57422247
72.741273,9.8488578,9.61041624,0.488304789,9.58179479,9.6024226,9.57377725
72.751765,9.8488578,9.61013405,0.488593642,9.58134984,9.60214065,9.57333241
72.762256,10.0995049,9.60987912,0.699732678,9.58090556,9.60188576,9.57288802
72.772748,9.53939201,9.60959192,-0.264952646,9.58046187,9.60159838,9.572444
72.78324,9.69535971,9.60930075,0.293358075,9.58002768,9.60129794,9.57200039
72.793731,9.59166305,9.60900192,-0.131677172,9.57959328,9.6009905,9.57155724
72.804223,9.74679434,9.60869245,0.371620635,9.57915145,9.60068019,9.57111446
72.814714,10.198039,9.60838382,0.767890099,9.57871027,9.60037052,9.57067213
72.825206,9.94987437,9.60807672,0.584634627,9.57826966,9.60006219,9.57023017
72.835698,9.32737905,9.60777117,-0.529520649,9.57782965,9.59975521,9.56978861
72.846189,9,9.6074672,-0.779401821,9.57739029,9.59944962,9.56934751
72.856681,9.21954446,9.60716476,-0.622591598,9.57695147,9.59914538,9.56890677
72.867172,8.88819442,9.6068639,-0.847743763,9.5765133,9.59884254,9.56846649
72.877664,10.6770783,9.60656459,1.0346563,9.57607567,9.59854106,9.56802656
72.888156,9.2736185,9.60626686,-0.576756765,9.57563862,9.59824098,9.56758705
72.898647,9.94987437,9.60597074,0.586432973,9.57520221,9.59794233,9.56714798
72.909139,9.53939201,9.60567618,-0.257457112,9.57476633,9.59764506,9.56670927
72.91963,10.0995049,9.60538324,0.702937903,9.57433107,9.59734925,9.56627101
72.930122,10.3923048,9.60509188,0.887250225,9.57389635,9.59705485,9.56583311
72.940614,10.2469508,9.60480213,0.80134177,9.5734622,9.59676188,9.56539561
72.951105,10.0498756,9.60451403,0.667354171,9.57302866,9.5964704,9.56495855
72.961597,8.71779789,9.60422753,-0.941503925,9.57259565,9.59618035,9.56452186
72.972088,8.88819442,9.60394268,-0.84601907,9.57216324,9.59589179,9.5640856
72.98258,10.0498756,9.60365946,0.667994136,9.57173136,9.59560469,9.56364971
72.993072,9.74679434,9.60337788,0.378703668,9.57130003,9.59531908,9.56321421
73.003563,9.16515139,9.60309798,-0.661775334,9.57086931,9.595035,9.56277915
73.014055,9.43398113,9.60281973,-0.410899741,9.57043909,9.5947524,9.56234445
73.024546,9.38083152,9.60254318,-0.470862673,9.57000947,9.59447135,9.56191019
73.035038,10.0995049,9.60226828,0.705150095,9.56958036,9.59419181,9.56147628
73.04553,9.21954446,9.60199508,-0.618425925,9.5691518,9.59391381,9.56104277
73.056021,9.89949494,9.60172361,0.545684275,9.56872383,9.59363739,9.56060969
73.066513,9.16515139,9.60145382,-0.660531931,9.56829635,9.5933625,9.56017697
73.077004,9.43398113,9.60118578,-0.408906651,9.56786946,9.59308922,9.55974468
73.087496,9.48683298,9.60091945,-0.33776688,9.56744307,9.59281749,9.55931274
73.097988,9.48683298,9.60065485,-0.337374971,9.56701721,9.59254737,9.5588812
73.108479,9.2736185,9.60039203,-0.571641092,9.56659193,9.59227888,9.55845009
73.118971,9.8488578,9.60013095,0.498725225,9.56616714,9.59201199,9.55801932
73.129462,9.32737905,9.59987167,-0.52200825,9.56574292,9.59174675,9.55758899
73.139954,9.74679434,9.59961414,0.383640727,9.56531919,9.59148313,9.55715901
73.150446,9.38083152,9.5993584,-0.46746859,9.56489599,9.59122117,9.55672942
73.160937,9.59166305,9.5991045,-0.0862638367,9.56447335,9.59096091,9.55630025
73.171429,10.2469508,9.59885238,0.80504558,9.56405119,9.5907023,9.55587143
73.18192,9.59166305,9.59860212,-0.0833010778,9.5636296,9.59044541,9.55544304
73.192412,9.53939201,9.59835367,-0.242820205,9.56320848,9.59019021,9.555015
73.202904,9.8488578,9.59810707,0.500750172,9.56278788,9.58993672,9.55458734
73.213395,10.5830052,9.59786235,0.992543647,9.56236784,9.58968499,9.5541601
73.223887,10.1488916,9.59761949,0.742476986,9.56194827,9.58943499,9.55373321
73.234378,10.5356538,9.59737854,0.968646073,9.56152925,9.58918677,9.55330674
73.24487,9.79795897,9.59713946,0.448128898,9.5611107,9.5889403,9.55288062
73.255362,9.38083152,9.5969023,-0.464834141,9.56069266,9.58869561,9.55245487
73.265853,9.74679434,9.59666708,0.387462593,9.56027517,9.58845276,9.55202955
73.276345,9.16515139,9.59643379,-0.656720942,9.55985814,9.5882117,9.55160457
73.286836,11.1803399,9.59620246,1.25862521,9.55944166,9.58797249,9.55118001
73.297328,9.69535971,9.59597308,0.315256455,9.55902564,9.5877351,9.55075579
73.30782,10.5830052,9.59574568,0.99360936,9.55861011,9.58749958,9.55033194
73.318311,9.43398113,9.5955203,-0.401919355,9.55819513,9.58726595,9.54990852
73.328803,8.66025404,9.5952969,-0.966976146,9.5577806,9.58703419,9.54948543
73.339294,9.74679434,9.59507555,0.389510964,9.55736661,9.58680437,9.54906276
73.349786,9.05538514,9.59485622,-0.734486952,9.55695307,9.58657644,9.54864042
73.360278,10.1488916,9.59463894,0.744481446,9.55654003,9.58635045,9.54821846
73.370769,10.3923048,9.59442375,0.893241901,9.55612751,9.58612644,9.54779692
73.381261,9.16515139,9.59421063,-0.655026134,9.55571545,9.58590437,9.54737571
73.391752,9.64365076,9.59399962,0.222825357,9.55530391,9.58568432,9.54695491
73.402244,8.88819442,9.59379071,-0.839997795,9.55489283,9.58546625,9.54653444
73.412736,10.0498756,9.59358394,0.675493658,9.55448222,9.5852502,9.54611435
73.423227,9.05538514,9.59337933,-0.733480876,9.55407214,9.58503622,9.54569467
73.433719,9.8488578,9.59317688,0.505649015,9.55366251,9.58482426,9.54527532
73.44421,9.48683298,9.59297662,-0.325796932,9.55325339,9.58461441,9.54485638
73.454702,10.1488916,9.59277855,0.745729854,9.55284471,9.58440663,9.54443776
73.465194,10.0498756,9.5925827,0.676234371,9.55243652,9.58420096,9.54401952
73.475685,9.53939201,9.5923891,-0.23021096,9.55202884,9.58399744,9.54360168
73.486177,10,9.59219774,0.638593971,9.55162159,9.58379605,9.54318418
73.496668,9.53939201,9.59200867,-0.229383216,9.55121487,9.58359684,9.54276707
73.50716,10,9.59182188,0.638888189,9.55080857,9.58339981,9.5423503
73.517652,10.3923048,9.5916374,0.894800225,9.55040275,9.58320498,9.54193389
73.528143,9.64365076,9.59145527,0.228463319,9.54999744,9.5830124,9.54151788
73.538635,9.74679434,9.59127548,0.394358805,9.54959256,9.58282205,9.5411022
73.549126,10.2956301,9.59109807,0.839364087,9.54918818,9.58263399,9.54068692
73.559618,10.0995049,9.59092304,0.713149282,9.54878424,9.5824482,9.54027197
73.57011,10.6770783,9.59075042,1.04227052,9.54838076,9.58226472,9.53985737
73.580601,9.79795897,9.59058025,0.455388534,9.54797779,9.58208359,9.53944318
73.591093,9.59166305,9.59041253,0.0353626998,9.54757524,9.5819048,9.53902931
73.601584,10.2469508,9.59024729,0.81037243,9.54717319,9.58172841,9.53861584
73.612076,9.43398113,9.59008454,-0.395099238,9.54677157,9.58155439,9.53820269
73.622568,9.05538514,9.58992431,-0.731121859,9.54637041,9.5813828,9.5377899
73.633059,9.05538514,9.58976664,-0.731014024,9.54596975,9.58121367,9.5373775
73.643551,9.38083152,9.58961153,-0.456924507,9.5455695,9.581047,9.53696542
73.654042,9.48683298,9.58945901,-0.320352984,9.54516976,9.58088283,9.53655374
73.664534,10.0498756,9.58930911,0.678650511,9.54477043,9.58072116,9.53614238
73.675026,10.1488916,9.58916184,0.748150874,9.54437155,9.58056204,9.53573137
73.685517,9.2736185,9.58901724,-0.561603728,9.54397317,9.5804055,9.53532075
73.696009,10.1488916,9.58887533,0.748342327,9.54357521,9.58025154,9.53491045
73.7065,9.79795897,9.58873614,0.457408824,9.54317774,9.58010021,9.53450054
73.716992,8.88819442,9.58859968,-0.836902181,9.54278067,9.57995152,9.53409095
73.727484,9.64365076,9.58846598,0.234914404,9.54238406,9.57980549,9.53368171
73.737975,9.89949494,9.5883351,0.557817032,9.54198794,9.57966218,9.53327286
73.748467,10,9.58820702,0.641710982,9.54159223,9.57952157,9.53286432
73.758958,10.3440804,9.5880818,0.869481821,9.54119701,9.57938374,9.53245617
73.76945,9.74679434,9.58795944,0.398540969,9.54080219,9.57924868,9.53204833
73.779942,9.38083152,9.58783999,-0.454981835,9.54040782,9.57911642,9.53164084
73.790433,9.48683298,9.58772348,-0.317632654,9.54001393,9.57898702,9.53123374
73.800925,8.60232527,9.58760993,-0.992615062,9.53962045,9.57886048,9.53082694
73.811416,10.1488916,9.58749938,0.749261095,9.53922745,9.57873684,9.53042053
73.821908,9.94987437,9.58739184,0.602065224,9.53883485,9.57861613,9.53001443
73.8324,10.0995049,9.58728735,0.71569378,9.5384427,9.57849838,9.52960868
73.842891,8.66025404,9.58718596,-0.962773038,9.53805102,9.57838363,9.5292033
73.853383,9.79795897,9.58708768,0.459207247,9.53765975,9.57827189,9.52879824
73.863874,10.0498756,9.58699255,0.680355107,9.53726895,9.57816323,9.52839355
73.874366,9.69535971,9.58690059,0.329331323,9.53687855,9.57805764,9.52798917
73.884858,10.4880885,9.58681186,0.949355901,9.53648859,9.57795518,9.52758514
73.895349,8.66025404,9.58672637,-0.96253433,9.53609911,9.57785589,9.52718148
73.905841,9.64365076,9.58664417,0.238760539,9.53571002,9.57775977,9.52677813
73.916332,9.53939201,9.58656528,-0.217194085,9.5353214,9.5776669,9.52637515
73.926824,9.38083152,9.58648975,-0.453495568,9.53493318,9.57757728,9.52597248
73.937316,9.48683298,9.5864176,-0.315570315,9.5345454,9.57749096,9.52557014
73.947807,9.38083152,9.58634889,-0.453340239,9.53415808,9.57740799,9.52516818
73.958299,8.77496439,9.58628364,-0.900732618,9.53377116,9.57732838,9.52476653
73.96879,10.5830052,9.58622189,0.998390382,9.5333847,9.57725219,9.52436524
73.979282,9.74679434,9.58616368,0.400787559,9.53299864,9.57717945,9.52396426
73.989774,10.4403065,9.58610904,0.924228037,9.53261301,9.57711019,9.52356361
74.000265,9.8488578,9.58605804,0.512639996,9.53222784,9.57704448,9.52316334
74.010757,9.53939201,9.58601068,-0.215913568,9.53184307,9.57698233,9.52276336
74.021248,9.69535971,9.58596704,0.330745642,9.53145876,9.57692379,9.52236375
74.03174,9.38083152,9.58592713,-0.452874824,9.53107484,9.57686891,9.52196444
74.042232,10.0995049,9.585891,0.716668637,9.53069134,9.57681773,9.52156546
74.052723,10.198039,9.58585871,0.782419527,9.53030831,9.57677029,9.52116685
74.063215,10.2469508,9.58583029,0.813093153,9.52992566,9.57672663,9.52076854
74.073706,9.79795897,9.58580579,0.460600893,9.52954347,9.5766868,9.52037059
74.084198,9.43398113,9.58578525,-0.389620477,9.52916167,9.57665085,9.51997294
74.09469,10.3440804,9.58576872,0.870810953,9.52878029,9.57661882,9.51957562
74.105181,11,9.58575625,1.18921981,9.52839937,9.57659076,9.51917866
74.115673,9.89949494,9.58574788,0.560131289,9.52801884,9.57656671,9.51878199
74.126164,9.89949494,9.58574366,0.560135052,9.52763876,9.57654674,9.51838569
74.136656,9.94987437,9.58574365,0.603432452,9.52725906,9.57653087,9.51798968
74.147148,9.69535971,9.58574789,0.33107677,9.52687979,9.57651918,9.51759399
74.157639,9.94987437,9.58575643,0.603421859,9.52650096,9.5765117,9.51719867
74.168131,9.43398113,9.58576933,-0.389600052,9.52612252,9.57650849,9.51680364
74.178622,9.38083152,9.58578664,-0.452719695,9.52574453,9.5765096,9.51640896
74.189114,10.198039,9.58580842,0.782451667,9.52536693,9.57651509,9.51601458
74.199606,9.2736185,9.58583471,-0.558763111,9.52498974,9.57652502,9.51562051
74.210097,10.198039,9.58586558,0.78241514,9.52461299,9.57653943,9.51522681
74.220589,8.94427191,9.58590108,-0.801017581,9.52423663,9.57655838,9.51483339
74.23108,8.94427191,9.58594126,-0.801042664,9.52386072,9.57658194,9.51444033
74.241572,9.05538514,9.5859862,-0.728423681,9.52348519,9.57661016,9.51404756
74.252064,10.198039,9.58603594,0.78230626,9.52311006,9.5766431,9.5136551
74.262555,9.11043358,9.58609055,-0.689678891,9.52273539,9.57668083,9.513263
74.273047,9.53939201,9.5861501,-0.216236174,9.52236109,9.5767234,9.51287118
74.283538,9.05538514,9.58621463,-0.728580464,9.52198724,9.57677087,9.51247972
74.29403,9.05538514,9.58628423,-0.728628226,9.52161376,9.57682332,9.51208853
74.304522,9.32737905,9.58635895,-0.508900677,9.5212407,9.57688081,9.51169767
74.315013,10.198039,9.58643886,0.782048699,9.52086808,9.5769434,9.51130715
74.325505,9.48683298,9.58652403,-0.315738897,9.52049583,9.57701117,9.51091692
74.335996,9.74679434,9.58661452,0.400224714,9.52012402,9.57708417,9.51052704
74.346488,9.21954446,9.58671042,-0.605942212,9.51975259,9.57716249,9.51013743
74.35698,9.38083152,9.58681179,-0.453850494,9.51938156,9.57724619,9.50974814
74.367471,9.8488578,9.58691869,0.511799873,9.51901098,9.57733535,9.5093592
74.377963,10.3440804,9.58703122,0.87008575,9.51864077,9.57743004,9.50897053
74.388454,10.0498756,9.58714943,0.680239804,9.518271,9.57753033,9.50858222
74.398946,9.8488578,9.58727342,0.511453205,9.5179016,9.57763631,9.50819418
74.409438,8.94427191,9.58740326,-0.801954706,9.5175326,9.57774806,9.50780644
74.419929,9.38083152,9.58753902,-0.454650961,9.51716404,9.57786564,9.50741906
74.430421,10.0995049,9.58768079,0.71541886,9.51679585,9.57798915,9.50703195
74.440912,9.69535971,9.58782865,0.327919296,9.5164281,9.57811865,9.50664518
74.451404,9.05538514,9.5879827,-0.72979282,9.51606072,9.57825426,9.50625868
74.461896,9.64365076,9.58814301,0.235600832,9.51569374,9.57839605,9.50587249
74.472387,9.59166305,9.58830966,0.0579084667,9.51532719,9.57854409,9.50548665
74.482879,10.6301458,9.58848276,1.02061896,9.51496102,9.5786985,9.50510107
74.49337,9.69535971,9.58866238,0.326645583,9.51459527,9.57885934,9.50471584
74.503862,9.16515139,9.58884864,-0.650920308,9.5142299,9.57902673,9.50433088
74.514354,9.48683298,9.58904162,-0.319700855,9.51386492,9.57920075,9.50394622
74.524845,9.79795897,9.58924139,0.456856189,9.51350038,9.57938149,9.5035619
74.535337,9.74679434,9.5894481,0.396668931,9.5131362,9.57956908,9.50317784
74.545828,9.8488578,9.58966181,0.509112948,9.51277245,9.57976357,9.50279413
74.55632,9.79795897,9.58988265,0.456153835,9.51240907,9.57996511,9.50241068
74.566812,8.94427191,9.59011071,-0.803640966,9.51204609,9.58017379,9.50202753
74.577303,10.0498756,9.59034608,0.677886082,9.51168354,9.58038969,9.50164472
74.587795,9.94987437,9.59058891,0.599404258,9.51132135,9.58061296,9.50126217
74.598286,10.5830052,9.59083926,0.996075292,9.51095959,9.58084367,9.50087996
74.608778,9.89949494,9.59109729,0.555335618,9.51059819,9.58108197,9.50049801
74.61927,9.94987437,9.59136309,0.598758112,9.51023719,9.58132796,9.50011636
74.629761,9,9.59163677,-0.769179281,9.50987662,9.58158173,9.49973505
74.640253,9.59166305,9.59191847,-0.0159821212,9.50951641,9.58184345,9.49935399
74.650744,9.59166305,9.59220829,-0.0233504331,9.50915662,9.5821132,9.49897327
74.661236,10.0498756,9.59250639,0.67629079,9.5087972,9.58239113,9.4985928
74.671728,9.69535971,9.59281287,0.320229357,9.50843817,9.58267737,9.49821263
74.682219,9.79795897,9.59312784,0.452582731,9.50807957,9.58297201,9.4978328
74.692711,9.05538514,9.59345149,-0.733530061,9.50772133,9.58327523,9.49745322
74.703202,9,9.59378388,-0.770573737,9.50736351,9.58358713,9.49707396
74.713694,9.69535971,9.59412523,0.318173668,9.50700605,9.58390788,9.49669497
74.724186,9.38083152,9.59447564,-0.462216529,9.50664899,9.58423761,9.49631627
74.734677,9,9.59483522,-0.771255611,9.50629235,9.58457642,9.49593789
74.745169,9.8488578,9.59520418,0.503640371,9.50593606,9.58492453,9.49555977
74.75566,9.79795897,9.5955826,0.449862608,9.5055802,9.58528202,9.49518198
74.766152,9.2736185,9.59597072,-0.56776071,9.5052247,9.5856491,9.49480444
74.776644,10.198039,9.59636864,0.775674148,9.50486959,9.58602592,9.49442719
74.787135,9,9.5967765,-0.772513105,9.5045149,9.58641257,9.49405026
74.797627,8.88819442,9.59719452,-0.842021439,9.50416057,9.58680931,9.49367358
74.808118,9.48683298,9.5976228,-0.33285105,9.50380666,9.58721622,9.49329723
74.81861,9.32737905,9.59806159,-0.520271599,9.5034531,9.58763354,9.49292113
74.829102,9.79795897,9.59851102,0.446595961,9.50309994,9.58806143,9.49254532
74.839593,9.43398113,9.59897122,-0.406189722,9.50274719,9.5885,9.49216982
74.850085,9.94987437,9.59944247,0.59197289,9.5023948,9.58894952,9.49179458
74.860576,9.89949494,9.59992485,0.547329959,9.50204284,9.5894101,9.49141965
74.871068,8.94427191,9.60041866,-0.810028855,9.50169122,9.58988201,9.49104497
74.88156,10.4880885,9.60092403,0.941894079,9.50133999,9.5903654,9.49067058
74.892051,9.53939201,9.60144111,-0.249096561,9.50098919,9.59086042,9.4902965
74.902543,9,9.60197021,-0.775867392,9.50063873,9.59136736,9.48992267
74.913034,10,9.60251143,0.630466945,9.5002887,9.59188635,9.48954916
74.923526,10.2469508,9.60306509,0.802424874,9.49993902,9.59241767,9.48917589
74.934018,10.5356538,9.60363134,0.965413077,9.49958972,9.59296151,9.4888029
74.944509,9.21954446,9.60421036,-0.620214403,9.49924084,9.59351804,9.48843023
74.955001,10.0995049,9.60480248,0.703350875,9.49889232,9.59408757,9.4880578
74.965492,8.88819442,9.60540783,-0.84688453,9.49854421,9.59467024,9.48768568
74.975984,8.94427191,9.60602674,-0.813483144,9.49819645,9.59526638,9.4873138
74.986476,8.83176087,9.6066594,-0.880283213,9.49784908,9.5958762,9.4869422
74.996967,9.94987437,9.60730601,0.5852934,9.49750213,9.59649987,9.48657092
75.007459,9.74679434,9.60796693,0.372595513,9.49715552,9.59713777,9.48619987
75.01795,10.6301458,9.6086423,1.01069457,9.49680934,9.59779004,9.48582914
75.028442,9.94987437,9.60933251,0.583559645,9.4964635,9.59845706,9.48545864
75.038934,9,9.61003778,-0.78104915,9.49611805,9.59913904,9.48508842
75.049425,10.5356538,9.6107583,0.961714852,9.49577301,9.5998362,9.4847185
75.059917,10.0498756,9.6114945,0.66210356,9.49542833,9.60054895,9.48434883
75.070408,9.8488578,9.61224653,0.486427048,9.49508406,9.60127744,9.48397946
75.0809,9.64365076,9.61301483,0.175031225,9.49474014,9.60202212,9.48361033
75.091392,9.53939201,9.61379964,-0.272777611,9.4943966,9.60278321,9.48324146
75.101883,9.8488578,9.61460119,0.484000633,9.49405347,9.60356097,9.48287291
75.112375,9.21954446,9.61541995,-0.629186375,9.4937107,9.60435585,9.48250459
75.122866,9.8488578,9.6162561,0.482287986,9.49336834,9.60516803,9.48213657
75.133358,10.2469508,9.61711013,0.793624998,9.49302633,9.60599801,9.48176879
75.14385,9.59166305,9.6179823,-0.162232111,9.4926847,9.60684604,9.48140127
75.154341,8.88819442,9.61887289,-0.85479733,9.49234348,9.60771241,9.48103406
75.164833,10.2469508,9.61978243,0.791939606,9.49200261,9.60859764,9.48066708
75.175324,9.48683298,9.6207111,-0.365893592,9.49166216,9.60950192,9.4803004
75.185816,9.53939201,9.62165947,-0.286823046,9.49132205,9.61042581,9.47993395
75.196308,9.2736185,9.62262785,-0.590770135,9.49098233,9.61136963,9.47956776
75.206799,9.21954446,9.62361653,-0.635666633,9.49064302,9.61233366,9.47920188
75.217291,9.89949494,9.62462611,0.524279343,9.49030405,9.61331851,9.47883622
75.227782,10.2469508,9.62565682,0.788222016,9.4899655,9.61432441,9.47847086
75.238274,9.2736185,9.62670929,-0.594214433,9.4896273,9.61535198,9.47810573
75.248766,9.8488578,9.62778386,0.470185008,9.48928947,9.61640158,9.47774086
75.259257,9.32737905,9.62888088,-0.549091823,9.48895206,9.61747354,9.47737629
75.269749,9.8488578,9.63000103,0.467821303,9.488615,9.61856854,9.47701195
75.28024,10,9.63114457,0.607334695,9.48827834,9.61968685,9.4766479
75.290732,8.77496439,9.6323122,-0.925930784,9.48794204,9.62082918,9.47628407
75.301224,9.32737905,9.63350433,-0.553285893,9.48760611,9.62199591,9.47592051
75.311715,9.38083152,9.63472135,-0.50387482,9.4872706,9.62318747,9.47555723
75.322207,9.94987437,9.63596403,0.56027702,9.48693543,9.62440459,9.47519418
75.332698,9.8488578,9.63723267,0.460027312,9.48660068,9.6256476,9.47483143
75.34319,9.48683298,9.63852797,-0.389480409,9.48626616,9.6269173,9.47446889
75.353682,9.59166305,9.63984887,-0.219512687,9.48593037,9.62821413,9.47410661
75.364173,9.53939201,9.64119311,-0.319062846,9.48559058,9.62953857,9.47374462
75.374665,9.53939201,9.64255515,-0.321190182,9.48524021,9.63089148,9.47338286
75.385156,9.2736185,9.6439554,-0.608553126,9.48489971,9.63227322,9.47302138
75.395648,8.83176087,9.64535457,-0.901994292,9.48452812,9.6336847,9.47266012
75.40614,10.6301458,9.64682263,0.991626532,9.48419611,9.63512644,9.47229911
75.416631,9.43398113,9.64832158,-0.462969161,9.48386451,9.636599,9.47193839
75.427123,9.59166305,9.64985238,-0.241224652,9.48353325,9.63810333,9.47157789
75.437614,9.69535971,9.65141547,0.209628825,9.48320241,9.63963988,9.47121768
75.448106,8.83176087,9.65301188,-0.906229009,9.48287191,9.64120967,9.47085768
75.458598,9.59166305,9.65464223,-0.250956536,9.48254179,9.64281333,9.47049793
75.469089,9.59166305,9.65630713,-0.254252011,9.48221208,9.64445146,9.47013847
75.479581,9.05538514,9.65800771,-0.776287686,9.48188272,9.6461252,9.46977922
75.490072,9.53939201,9.65974447,-0.346918509,9.48155377,9.64783506,9.46942026
75.500564,9.2736185,9.66151858,-0.622816256,9.48122516,9.6495822,9.4690615
75.511056,9.43398113,9.66333078,-0.478904631,9.48089693,9.65136734,9.468703
75.521547,9.48683298,9.66518177,-0.422313618,9.48056912,9.65319122,9.46834478
75.532039,10.3923048,9.66707285,0.85160554,9.48024165,9.65505511,9.46798677
75.54253,9.2736185,9.66900461,-0.628797354,9.47991458,9.65695963,9.46762904
75.553022,9.89949494,9.6709784,0.47803403,9.47958787,9.6589061,9.46727152
75.563514,9.69535971,9.67299507,0.149548137,9.47926153,9.66089539,9.46691425
75.574005,9.79795897,9.67505546,0.350575969,9.47893561,9.66292834,9.46655725
75.584497,8.94427191,9.67716105,-0.856089445,9.47861003,9.66500642,9.46620046
75.594988,9.38083152,9.67931255,-0.546334171,9.47828486,9.66713036,9.46584395
75.60548,10.0498756,9.68151151,0.606930067,9.47796004,9.6693017,9.46548765
75.615972,9.48683298,9.68375894,-0.443763401,9.47763559,9.67152143,9.4651316
75.626463,9.05538514,9.68605582,-0.794147768,9.47731156,9.67379057,9.46477581
75.636955,9.11043358,9.68840385,-0.76024356,9.47698787,9.67611081,9.46442024
75.647446,10.2956301,9.6908039,0.777705756,9.47666459,9.67848301,9.46406493
75.657938,9,9.69325776,-0.832621017,9.47634167,9.68090897,9.46370984
75.66843,10.3923048,9.6957666,0.83458867,9.47601912,9.68338985,9.46335498
75.678921,9.79795897,9.6983316,0.315638036,9.47569698,9.68592686,9.46300039
75.689413,9,9.70095474,-0.837230398,9.47537519,9.68852195,9.46264601
75.699904,9.79795897,9.70363704,0.307118753,9.4750538,9.69117616,9.4622919
75.710396,9.69535971,9.7063806,-0.104980417,9.47473277,9.69389158,9.461938
75.720888,9.38083152,9.7091868,-0.573022934,9.47441212,9.6966696,9.46158433
75.731379,10.2469508,9.71205706,0.73136428,9.47409188,9.69951164,9.46123093
75.741871,9.59166305,9.71499365,-0.351184578,9.47377198,9.70241998,9.46087773
75.752362,10.1488916,9.71799785,0.656424952,9.4734525,9.70539589,9.4605248
75.762854,10.1488916,9.72107207,0.654079117,9.47313337,9.70844179,9.46017206
75.773346,10.4880885,9.72421799,0.873996851,9.47281461,9.71155935,9.45981957
75.783837,9.53939201,9.72743728,-0.433641859,9.47249627,9.71475026,9.45946734
75.794329,9.69535971,9.73073263,-0.188076875,9.47217828,9.71801721,9.4591153
75.80482,8.88819442,9.73410556,-0.919734276,9.4718607,9.72136171,9.45876354
75.815312,9.43398113,9.73755892,-0.55097894,9.47154347,9.72478664,9.45841197
75.825804,9.32737905,9.74109472,-0.643207326,9.47122662,9.72829397,9.45806063
75.836295,9.2736185,9.74471497,-0.686364682,9.47091018,9.73188576,9.45770956
75.846787,9.89949494,9.74842285,0.388679934,9.47059409,9.73556515,9.45735868
75.857278,10.2469508,9.75222019,0.703370863,9.47027842,9.73933401,9.45700806
75.86777,9.69535971,9.75611039,-0.246476528,9.46996309,9.74319572,9.45665764
75.878262,10.0995049,9.76009584,0.582588273,9.46964815,9.74715268,9.45630745
75.888753,9,9.76417901,-0.874173327,9.46933362,9.75120736,9.45595751
75.899245,10.3440804,9.76836362,0.758760049,9.46901944,9.7553635,9.45560778
75.909736,10.0995049,9.77265197,0.57171056,9.46870568,9.75962339,9.4552583
75.920228,9.16515139,9.77704807,-0.78223825,9.46839227,9.76399105,9.45490901
75.93072,10.6770783,9.78155483,0.946320995,9.46807924,9.76846938,9.45455995
75.941211,9.69535971,9.78617525,-0.301356157,9.46776663,9.77306142,9.45421114
75.951703,9.74679434,9.79091379,-0.210046292,9.46745437,9.7777716,9.45386253
75.962194,9.64365076,9.79577328,-0.390028863,9.46714252,9.78260276,9.45351417
75.972686,9.53939201,9.8007585,-0.511240141,9.46683103,9.7875597,9.45316601
75.983178,9.64365076,9.80587302,-0.402768248,9.46651992,9.792646,9.45281806
75.993669,10.0995049,9.81112054,0.537014338,9.46620923,9.79786534,9.45247037
76.004161,10.4403065,9.81650639,0.789810176,9.46589889,9.80322308,9.45212287
76.014652,9.05538514,9.82203411,-0.875584929,9.46558896,9.80872275,9.45177562
76.025144,9.38083152,9.82770944,-0.668489283,9.4652794,9.81437011,9.45142856
76.035636,8.60232527,9.8335368,-1.10959972,9.46497022,9.82016958,9.45108172
76.046127,9.05538514,9.83952074,-0.885514317,9.46466145,9.82612572,9.45073513
76.056619,9,9.84566774,-0.919601945,9.46435304,9.832245,9.45038873
76.06711,9.48683298,9.85198219,-0.60427577,9.46404505,9.83853185,9.45004258
76.077602,10.198039,9.8584711,0.582724575,9.46373742,9.84499327,9.44969661
76.088094,10.0498756,9.86513994,0.42980889,9.46343017,9.85163474,9.44935086
76.098585,10.4880885,9.87199438,0.784916622,9.46312335,9.85846194,9.44900536
76.109077,10.0498756,9.87904232,0.413319857,9.46281688,9.86548278,9.44866004
76.119568,9.94987437,9.88628931,0.252160775,9.46251083,9.87270283,9.44831497
76.13006,10.5830052,9.89374395,0.83021762,9.46220513,9.88013067,9.44797008
76.140552,9.94987437,9.90141307,0.220139275,9.46189983,9.88777317,9.44762541
76.151043,10.4880885,9.9093038,0.760778997,9.46159495,9.89563746,9.44728098
76.161535,9.32737905,9.91742586,-0.768145044,9.46129043,9.90373328,9.44693674
76.172026,9.21954446,9.92578634,-0.840381983,9.46098633,9.91206771,9.44659273
76.182518,10.0995049,9.93439582,0.406336211,9.46068259,9.92065138,9.44624891
76.19301,9.74679434,9.94326299,-0.443247835,9.46037924,9.92949296,9.4459053
76.203501,9.94987437,9.95239685,-0.0502242746,9.46007632,9.93860148,9.44556193
76.213993,9.94987437,9.9618095,-0.109248034,9.45977375,9.94798906,9.44521875
76.224484,9.64365076,9.97151004,-0.572589976,9.45947161,9.95766479,9.4448758
76.234976,9.05538514,9.9815117,-0.962354697,9.45916984,9.96764195,9.44453303
76.245468,9.2736185,9.99182555,-0.847470973,9.45886845,9.97793159,9.44419047
76.255959,10.2469508,10.0024631,0.494456923,9.45856749,9.9885453,9.44384815
76.266451,9.94987437,10.0134396,-0.252121499,9.4582669,9.99949828,9.443506
76.276942,9.32737905,10.0247668,-0.835097474,9.45796673,10.0108024,9.4431641
76.287434,9.64365076,10.0364615,-0.626746156,9.45766693,10.0224742,9.44282237
76.297926,10.6770783,10.0485379,0.792805382,9.45736753,10.0345283,9.44248084
76.308417,10.3923048,10.0610109,0.575581402,9.45706855,10.0469794,9.44213955
76.318909,10.9087121,10.0738999,0.913680588,9.45676993,10.0598469,9.44179844
76.3294,9.43398113,10.0872203,-0.808232145,9.45647175,10.0731463,9.44145756
76.339892,9.38083152,10.1009936,-0.84862362,9.45617393,10.0868991,9.44111686
76.350384,10.7703296,10.1152382,0.809377152,9.45587652,10.1011238,9.44077635
76.360875,9.94987437,10.1299739,-0.424381347,9.45557953,10.1158401,9.44043609
76.371367,9.8488578,10.1452255,-0.544396599,9.45528292,10.1310728,9.44009599
76.381858,9.89949494,10.1610134,-0.511388763,9.45498673,10.1468426,9.43975613
76.39235,10.2956301,10.1773654,0.343896395,9.45469092,10.1631771,9.43941644
76.402842,9.89949494,10.1943061,-0.542965179,9.4543955,10.180101,9.43907694
76.413333,9.74679434,10.2118615,-0.681958299,9.45410052,10.1976403,9.43873768
76.423825,9.11043358,10.230064,-1.0581259,9.45380592,10.2158275,9.43839859
76.434316,10.0995049,10.2489412,-0.386569896,9.45351174,10.2346902,9.43805973
76.444808,9.8488578,10.2685295,-0.64782075,9.45321795,10.2542648,9.43772104
76.4553,10.3440804,10.2888619,0.234986137,9.45292455,10.2745845,9.43738254
76.465791,10.2956301,10.3099734,-0.119763233,9.4526316,10.2956841,9.43704428
76.476283,11,10.331907,0.817369568,9.45233902,10.3176069,9.43670618
76.486774,10.6301458,10.3547003,0.524829043,9.45204687,10.3403905,9.4363683
76.497266,10.2469508,10.3784019,-0.362561845,9.45175511,10.3640834,9.4360306
76.507758,10.5830052,10.4030567,0.424203433,9.45146375,10.3887307,9.43569308
76.518249,10.4403065,10.4287125,0.107675609,9.45117283,10.4143802,9.4353558
76.528741,10.198039,10.4554275,-0.507334656,9.45088229,10.4410902,9.43501868
76.539232,10.0995049,10.4832536,-0.619474528,9.45059219,10.4689128,9.43468178
76.549724,10.9544512,10.512257,0.664976833,9.45030248,10.4979139,9.43434505
76.560216,10.0498756,10.5424998,-0.70187192,9.45001317,10.528156,9.4340085
76.570707,11.2249722,10.5740485,0.806798397,9.44972431,10.5597056,9.43367219
76.581199,10.6770783,10.6069832,0.264754743,9.44943583,10.5926429,9.43333603
76.59169,9.94987437,10.641377,-0.831566368,9.4491478,10.627041,9.4330001
76.602182,11.7046999,10.6773215,1.01359677,9.44886015,10.6629917,9.43266432
76.612674,11,10.7149047,0.533943143,9.44857292,10.7005831,9.43232874
76.623165,10.7703296,10.7542207,0.126920891,9.44828613,10.7399093,9.43199338
76.633657,11.1803399,10.795382,0.620449779,9.44799974,10.7810829,9.43165817
76.644148,11.3578167,10.8384937,0.7206407,9.44771379,10.8242093,9.43132319
76.65464,10.4403065,10.8836855,-0.665867118,9.44742823,10.8694182,9.43098836
76.665132,9.89949494,10.9310845,-1.01567196,9.44714309,10.9168367,9.43065372
76.675623,11.4017543,10.9808268,0.648789235,9.4468584,10.9666014,9.4303193
76.686115,10.4403065,11.0330741,-0.769914044,9.44657411,11.0188738,9.42998504
76.696606,10.7238053,11.0879811,-0.603469843,9.44629026,11.0738089,9.42965099
76.707098,12.328828,11.145736,1.08770034,9.44600681,11.131595,9.4293171
76.71759,11.045361,11.2065261,-0.401453726,9.44572379,11.1924196,9.42898339
76.728081,12,11.270554,0.854076128,9.44544122,11.2564855,9.4286499
76.738573,12.1243557,11.3380579,0.886734341,9.44515904,11.3240311,9.42831656
76.749064,11.045361,11.4092708,-0.603249348,9.44487733,11.3952896,9.42798344
76.759556,11.4455231,11.4844734,-0.197358283,9.44459601,11.4705418,9.42765047
76.770048,12.6491106,11.5639503,1.04171031,9.44431512,11.5500726,9.42731768
76.780539,11.2249722,11.6480105,-0.650413998,9.4440347,11.6341913,9.4269851
76.791031,12.8452326,11.7370167,1.05271834,9.44375467,11.7232606,9.42665268
76.801522,12.4498996,11.8313314,0.786491096,9.44347511,11.8176435,9.42632047
76.812014,12.6491106,11.9313886,0.847184756,9.44319595,11.9177742,9.42598841
76.822506,12.8062485,12.0376382,0.876704222,9.44291722,12.0241028,9.42565652
76.832997,12.4498996,12.1505755,0.547105162,9.44263896,12.137125,9.42532485
76.843489,12.9614814,12.2707846,0.831081703,9.44236111,12.2574251,9.42499333
76.85398,13.3041347,12.398872,0.951452943,9.44208372,12.38561,9.42466202
76.864472,13.96424,12.5355717,1.19526913,9.44180675,12.5224142,9.42433085
76.874964,13.2664992,12.6816816,0.764733684,9.44153021,12.6686356,9.42399986
76.885455,14.106736,12.8381203,1.1263284,9.44125414,12.8251937,9.42366909
76.895947,13.56466,13.0060102,0.747428794,9.44097849,12.993211,9.42333845
76.906438,14.4568323,13.1866161,1.12703869,9.44070331,13.1739533,9.42300803
76.91693,14.1421356,13.3815315,0.872126184,9.44042854,13.3690146,9.42267774
76.927422,15.0332964,13.5926378,1.20027438,9.44015422,13.5802771,9.42234764
76.937913,15.0665192,13.8222404,1.11547246,9.43988038,13.8100473,9.42201774
[truncated: 461,810 more chars]
